# Supplementary material for: Genomic Signature of Sexual Reproduction in the Bdelloid Rotifer Macrotrachella quadricornifera
Source: bioRxiv or medRxiv preprint supplement (doi:10.1101/2020.08.06.239590), 2021-11-08

CR1 vs CR2  
Number of differences: 214

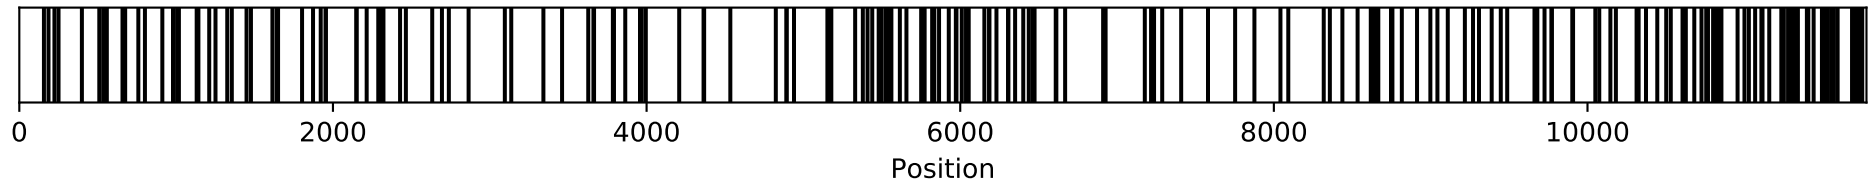

CR1 vs MA1  
Number of differences: 208

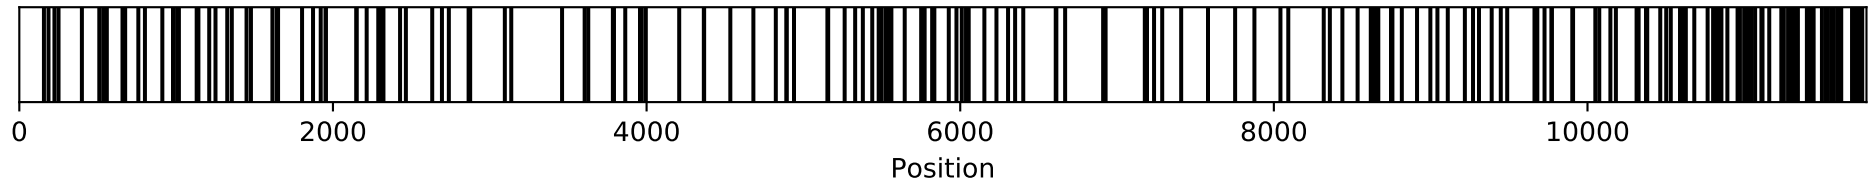

CR1 vs MA2  
Number of differences: 77

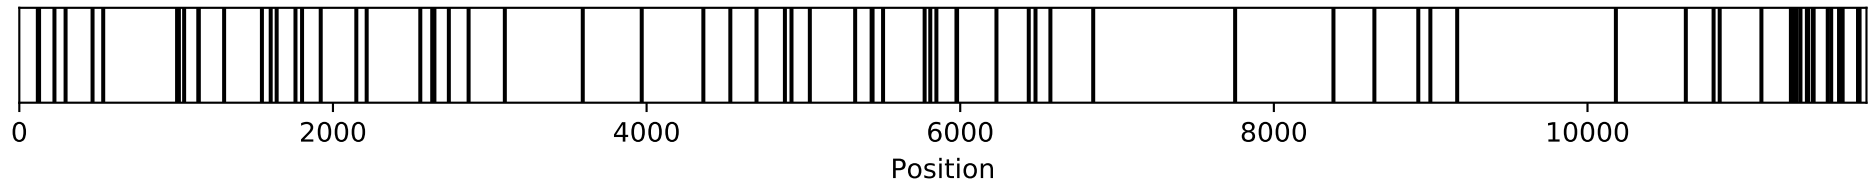

CR2 vs MA1  
Number of differences: 49

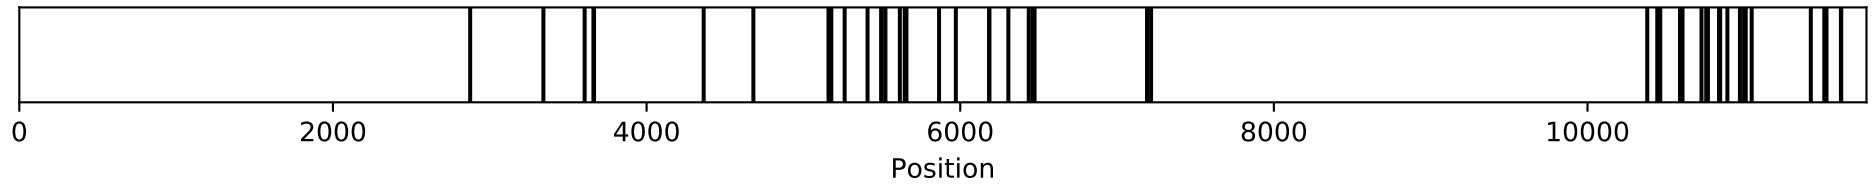

CR2 vs MA2  
Number of differences: 217

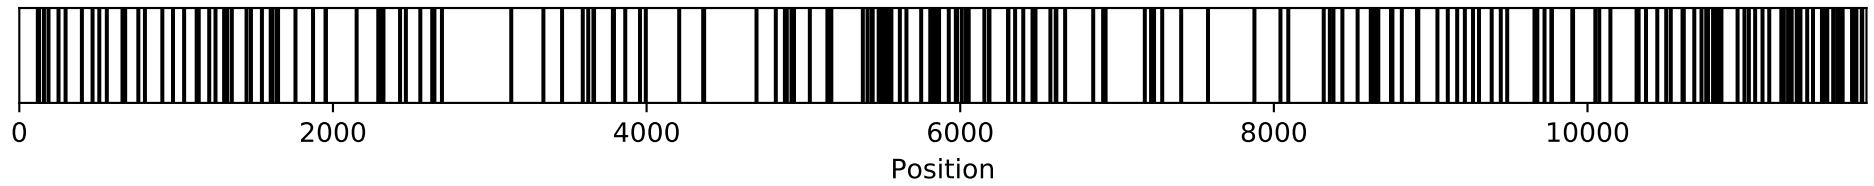

MA1 vs MA2  
Number of differences: 214

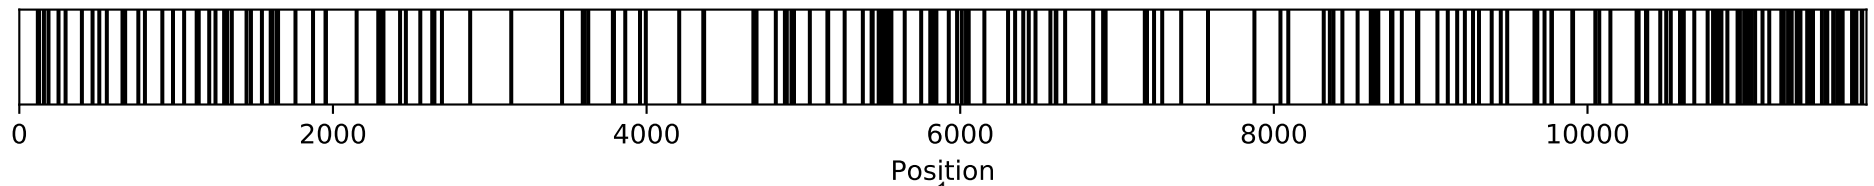

CR1 vs CR2  
Number of differences: 263

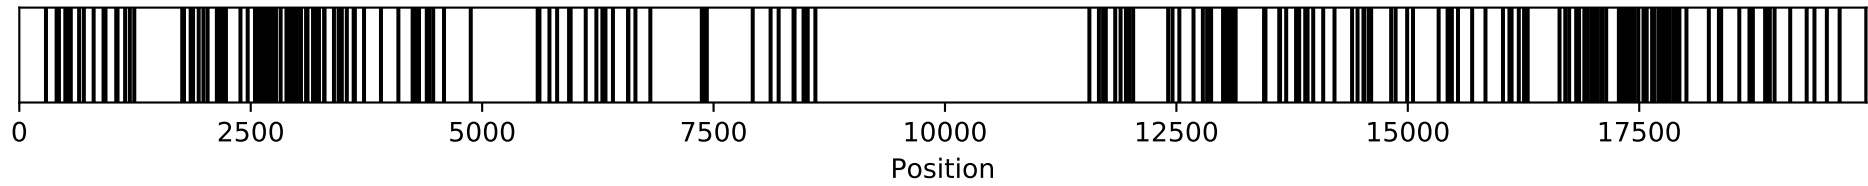

CR1 vs MA1  
Number of differences: 275

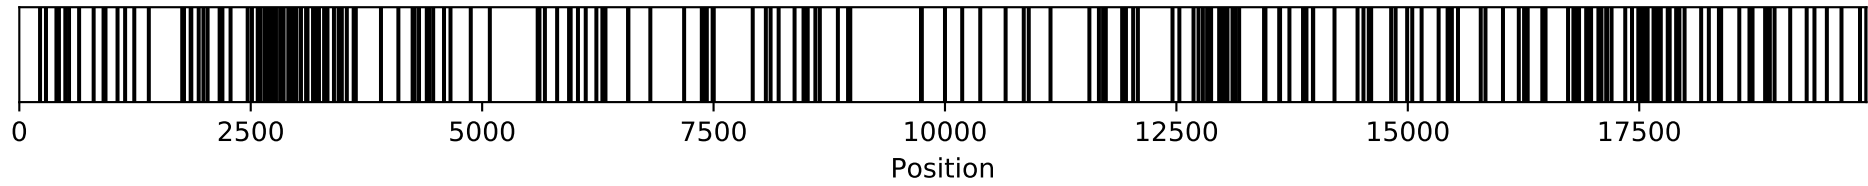

CR1 vs MA2  
Number of differences: 96

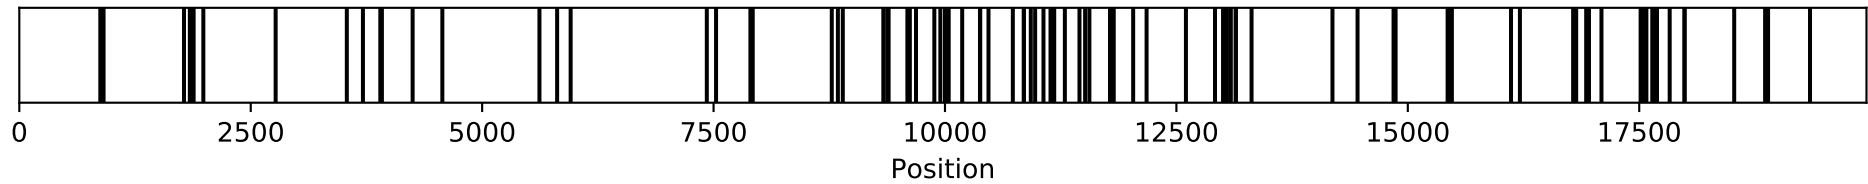

CR2 vs MA1  
Number of differences: 168

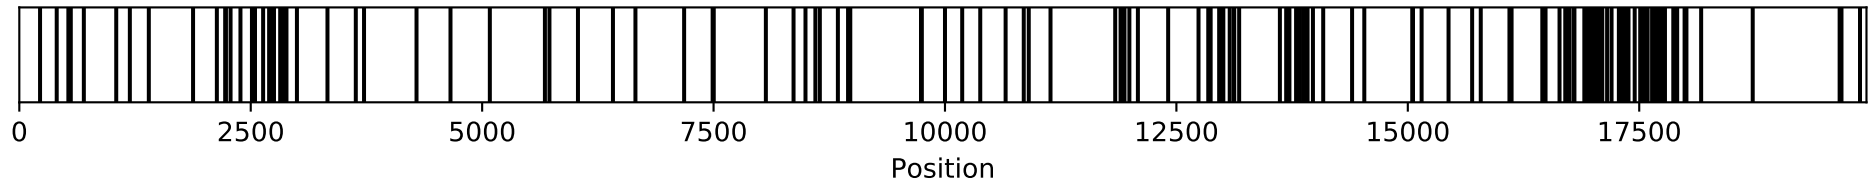

CR2 vs MA2  
Number of differences: 302

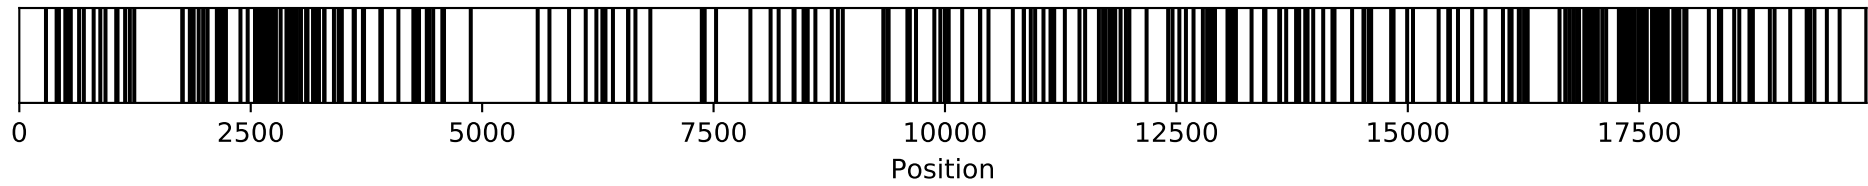

MA1 vs MA2  
Number of differences: 295

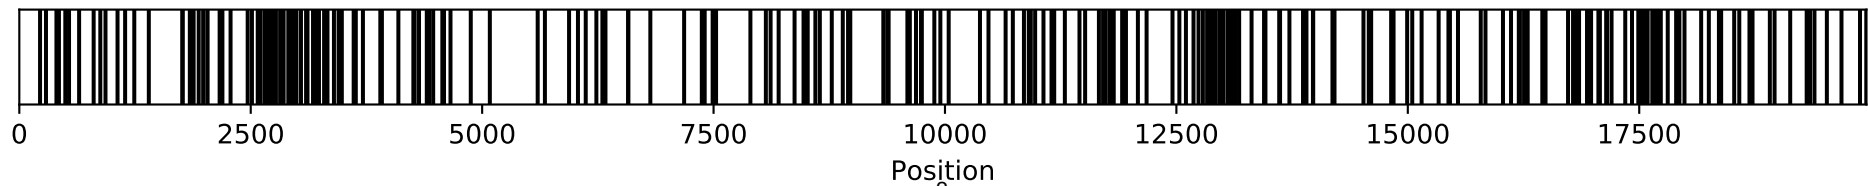

CR1 vs CR2  
Number of differences: 143

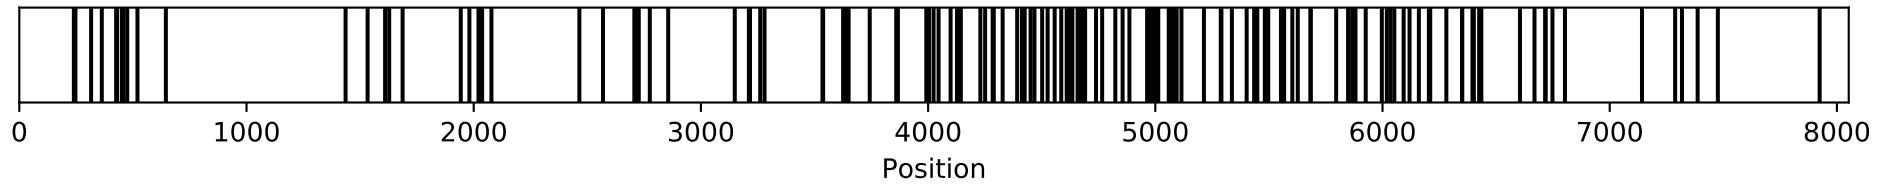

CR1 vs MA1  
Number of differences: 143

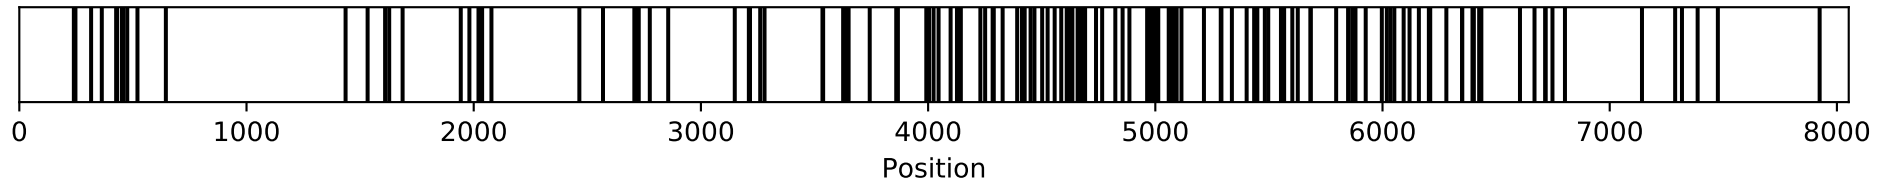

CR1 vs MA2  
Number of differences: 96

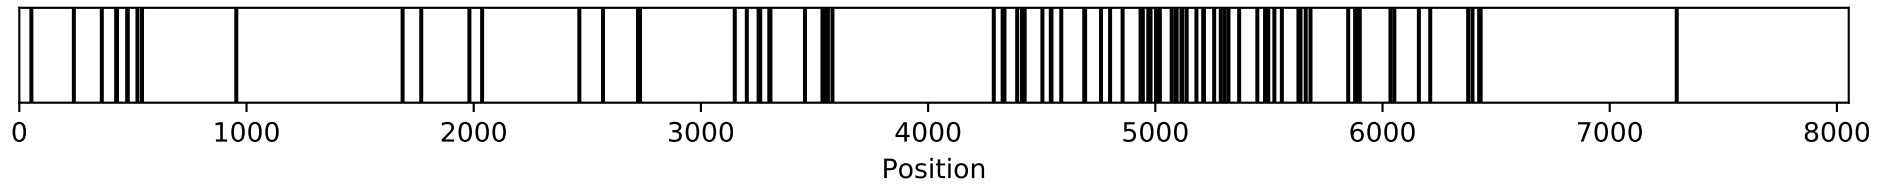

CR2 vs MA1  
Number of differences: 0

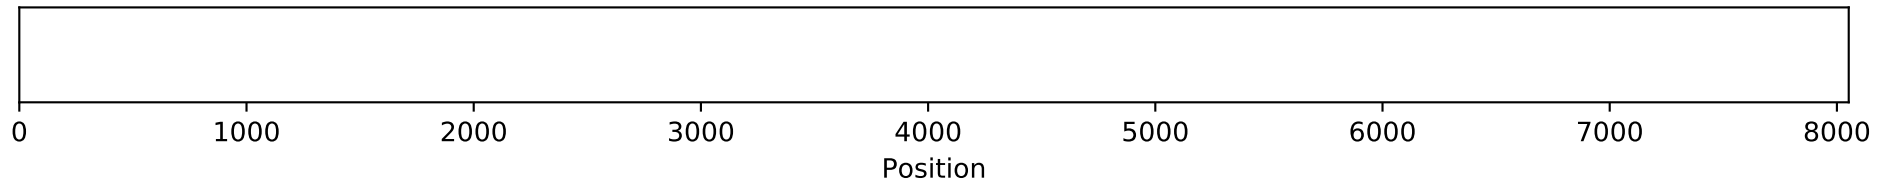

CR2 vs MA2  
Number of differences: 146

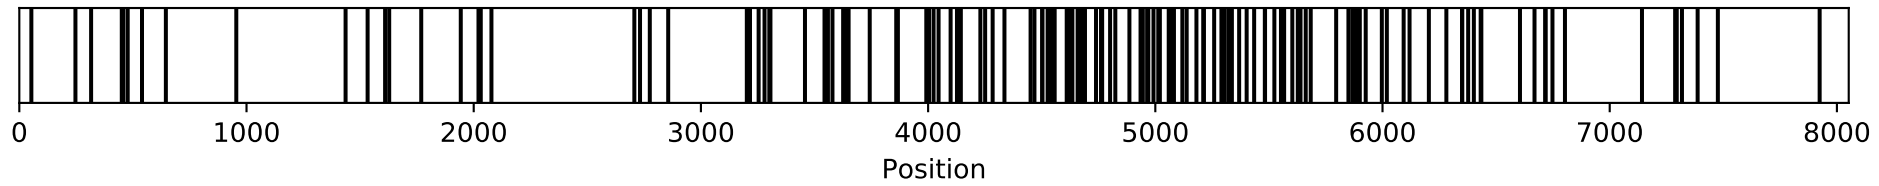

MA1 vs MA2  
Number of differences: 146

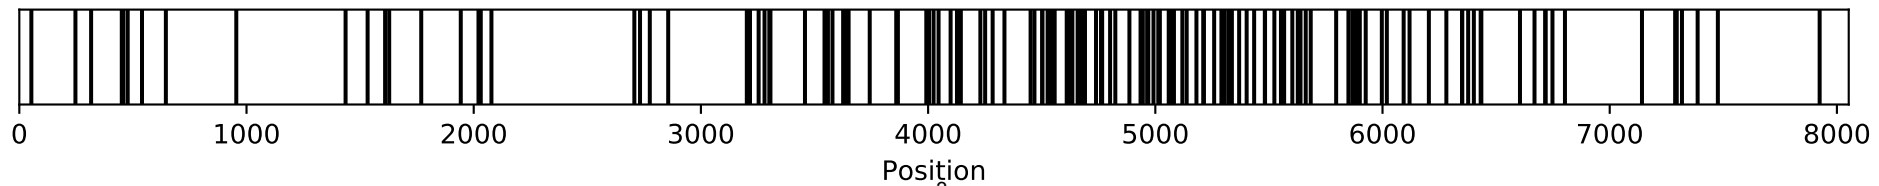

CR1 vs CR2  
Number of differences: 146

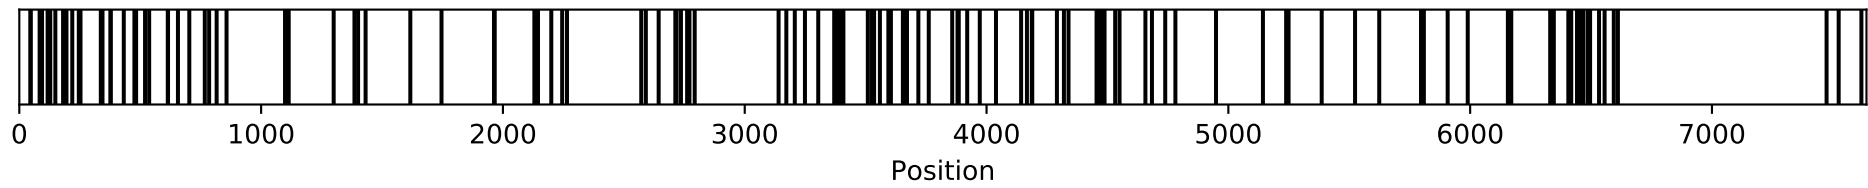

CR1 vs MA1  
Number of differences: 149

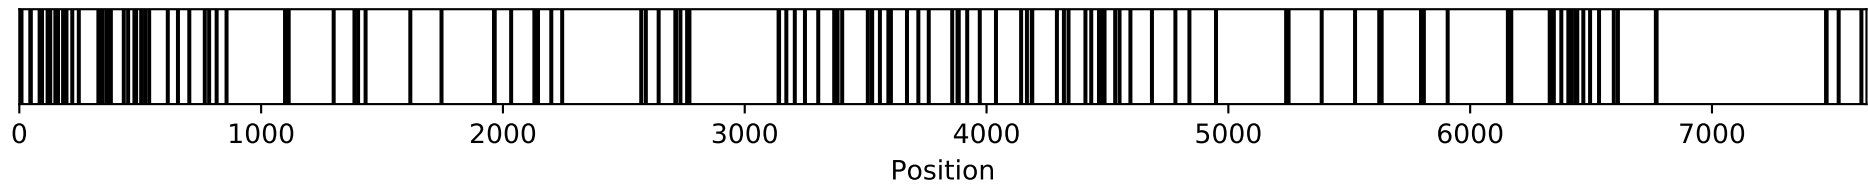

CR1 vs MA2  
Number of differences: 84

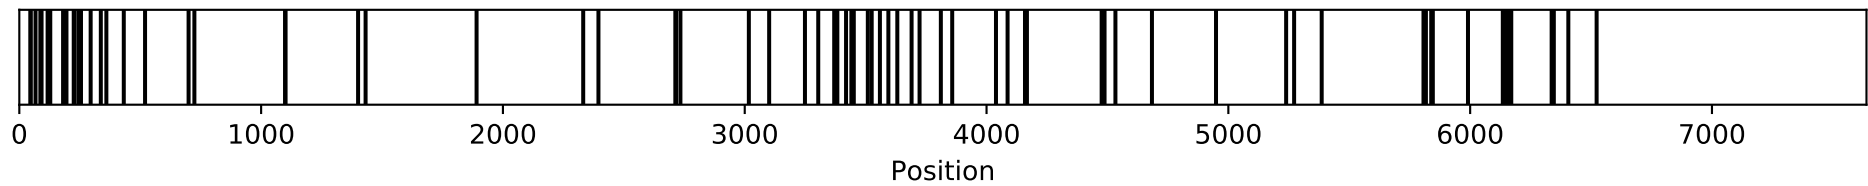

CR2 vs MA1  
Number of differences: 41

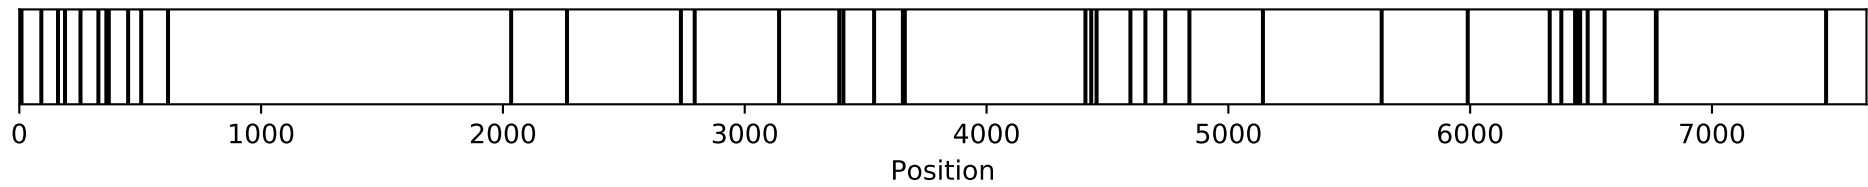

CR2 vs MA2  
Number of differences: 149

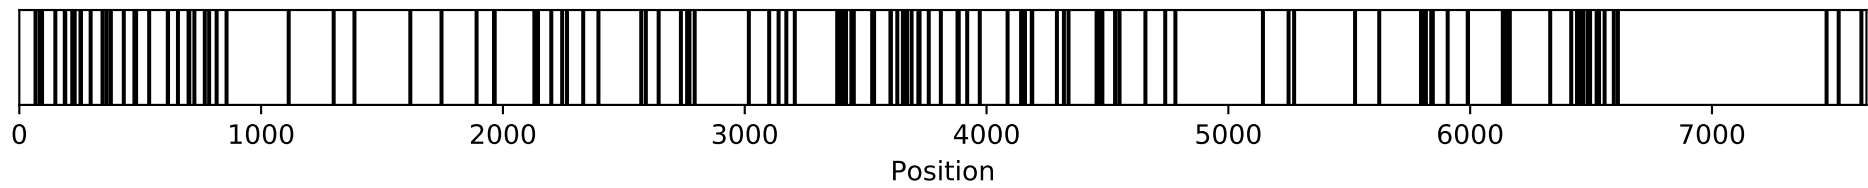

MA1 vs MA2  
Number of differences: 150

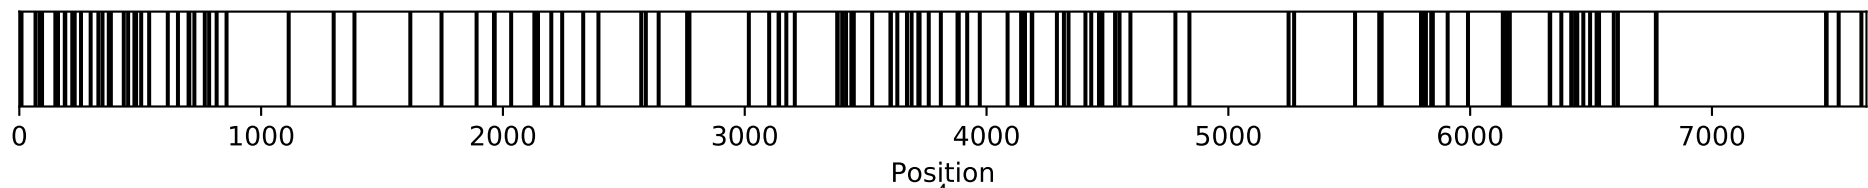

CR1 vs CR2  
Number of differences: 52

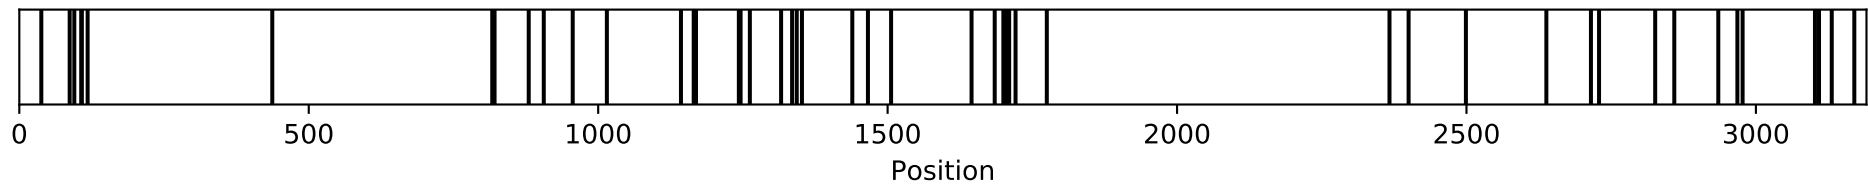

CR1 vs MA1  
Number of differences: 27

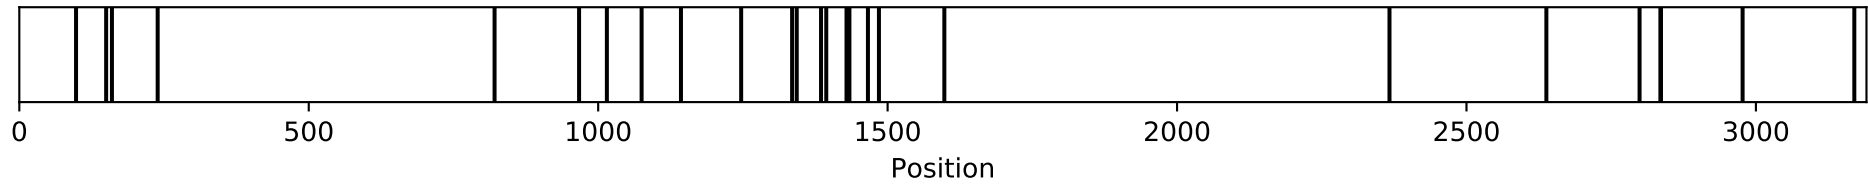

CR1 vs MA2  
Number of differences: 63

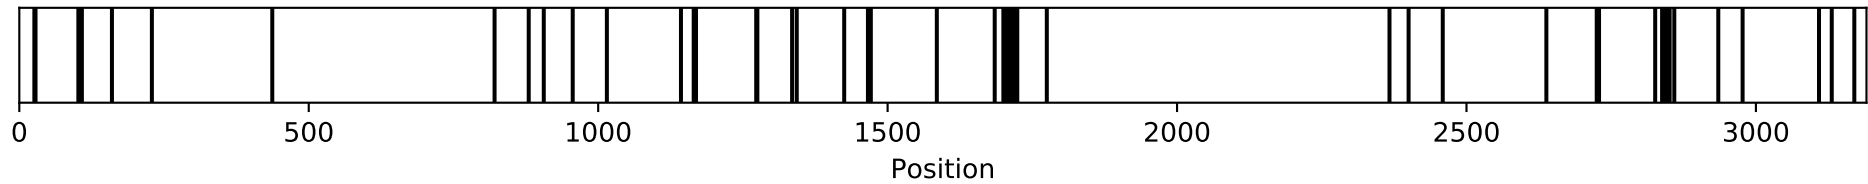

CR2 vs MA1  
Number of differences: 59

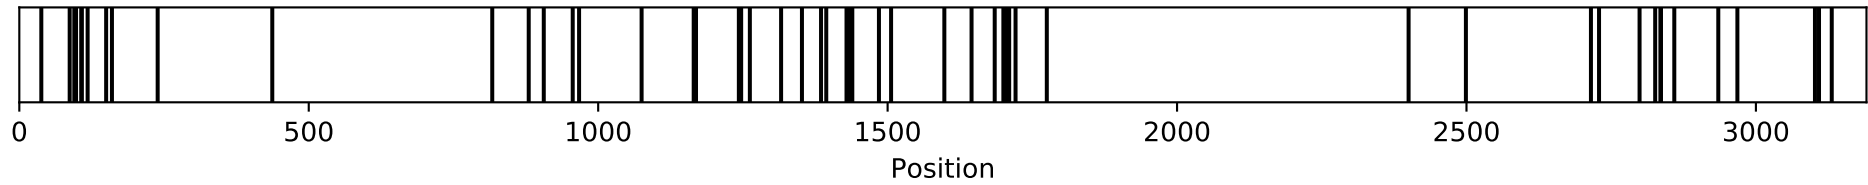

CR2 vs MA2  
Number of differences: 45

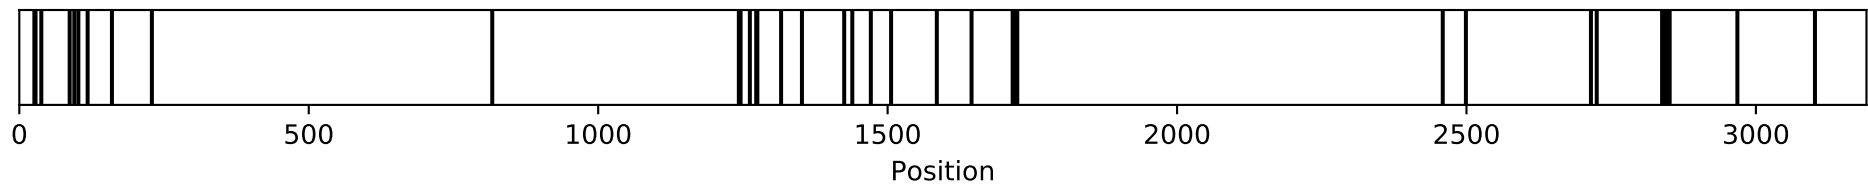

MA1 vs MA2  
Number of differences: 68

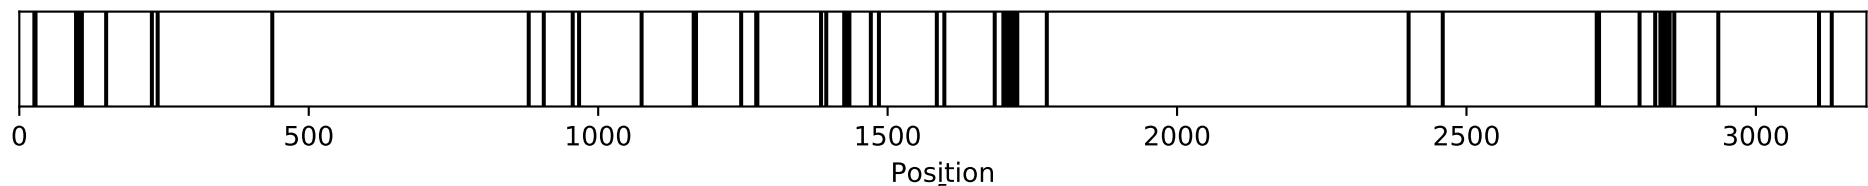

CR1 vs CR2  
Number of differences: 129

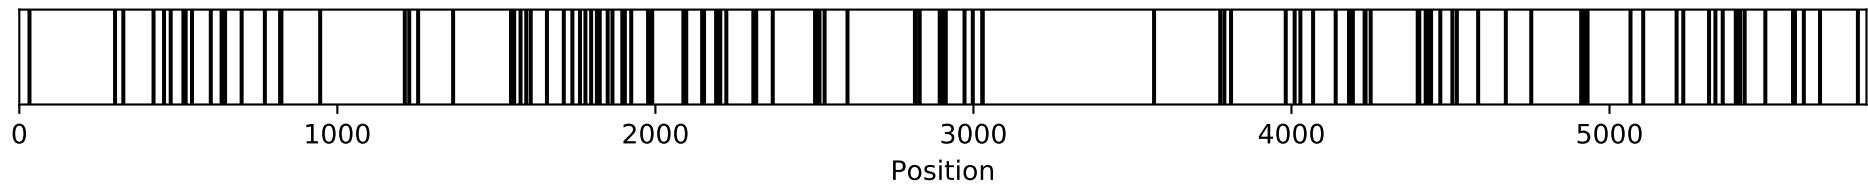

CR1 vs MA1  
Number of differences: 85

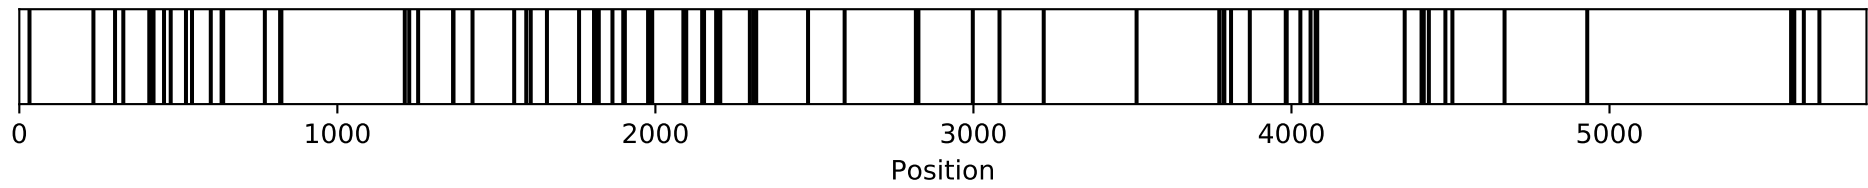

CR1 vs MA2  
Number of differences: 69

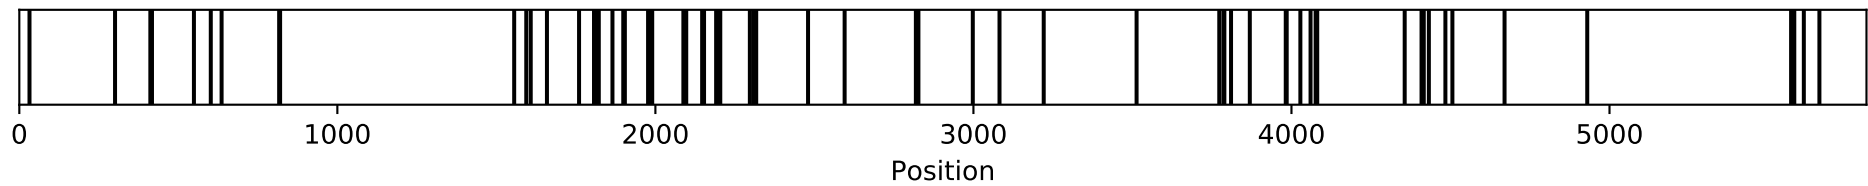

CR2 vs MA1  
Number of differences: 116

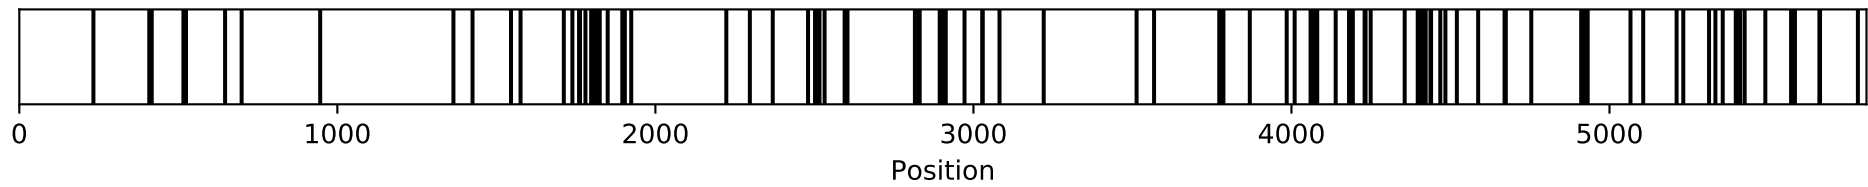

CR2 vs MA2  
Number of differences: 126

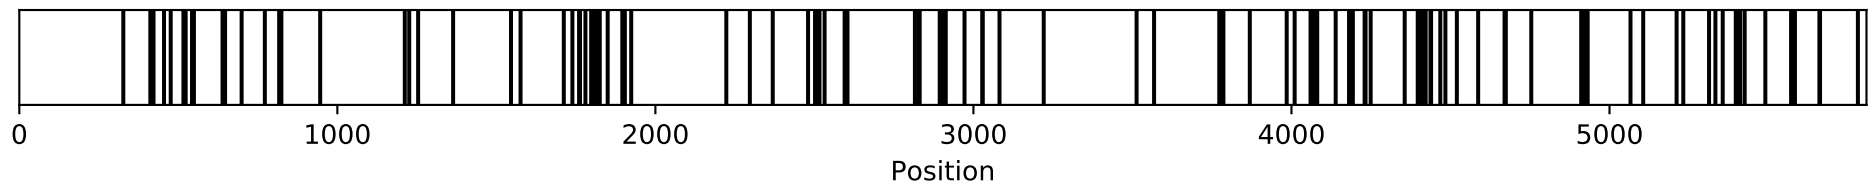

MA1 vs MA2  
Number of differences: 24

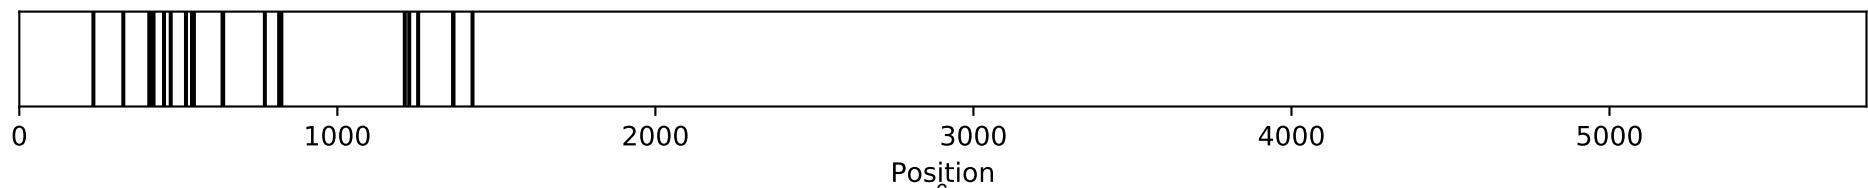

CR1 vs CR2  
Number of differences: 238

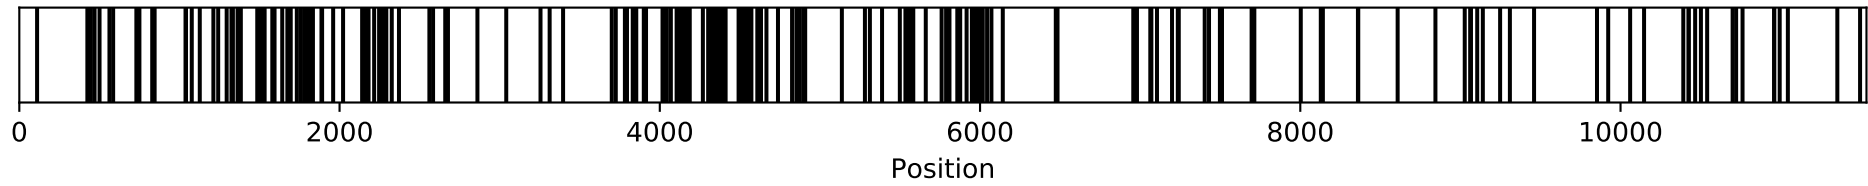

CR1 vs MA1  
Number of differences: 69

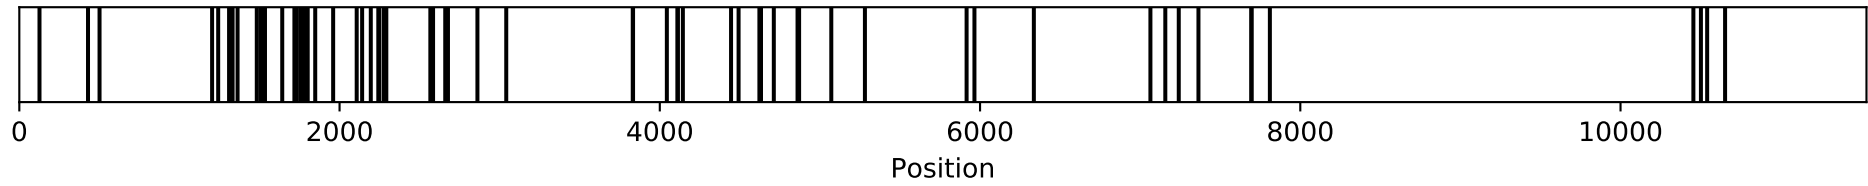

CR1 vs MA2  
Number of differences: 237

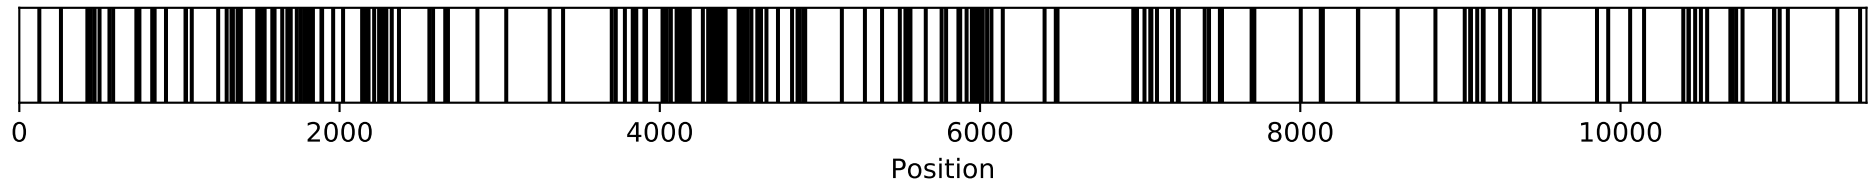

CR2 vs MA1  
Number of differences: 223

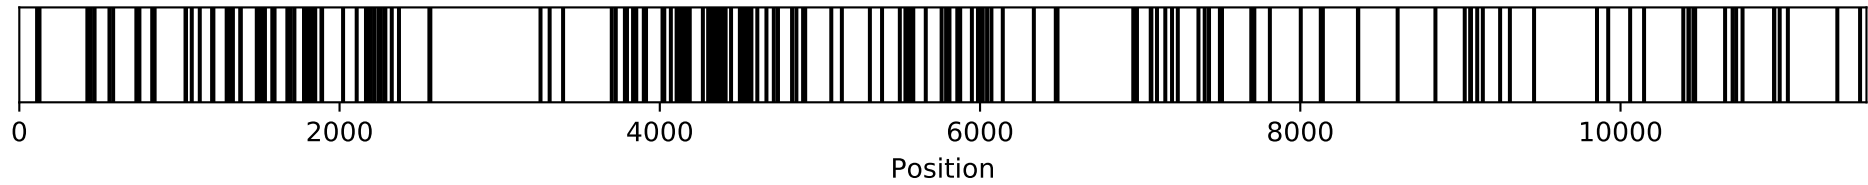

CR2 vs MA2  
Number of differences: 25

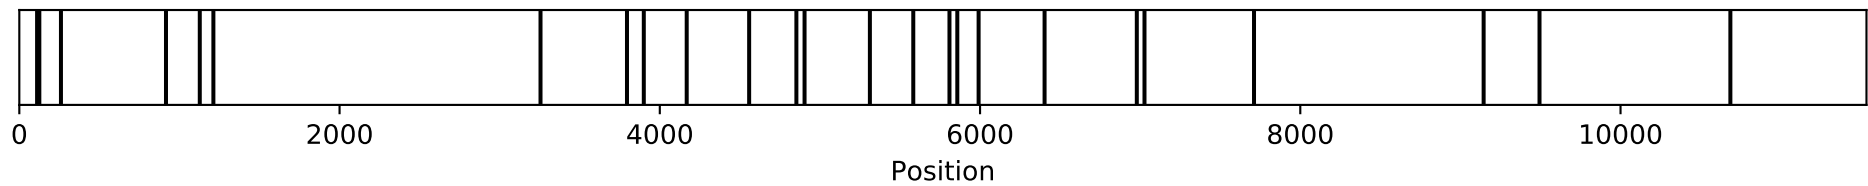

MA1 vs MA2  
Number of differences: 222

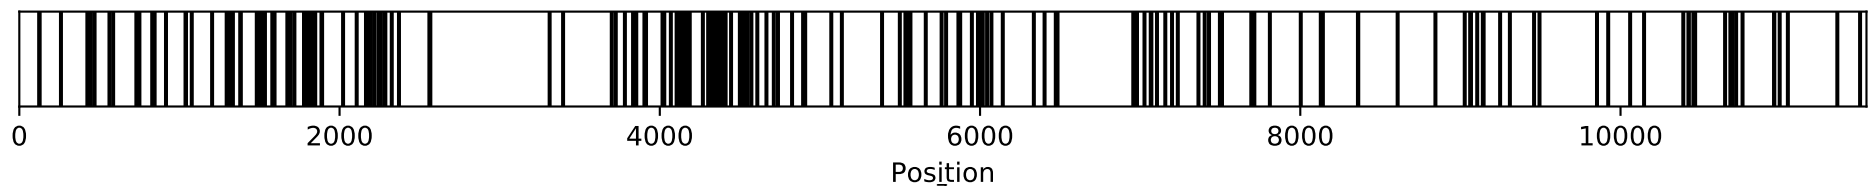

CR1 vs CR2  
Number of differences: 162

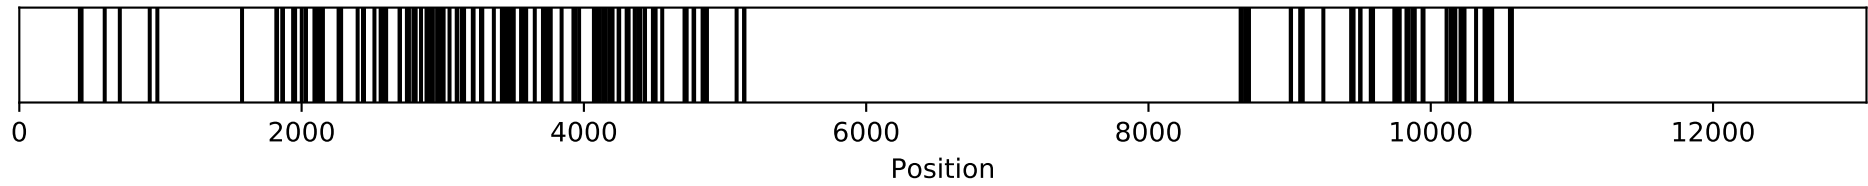

CR1 vs MA1  
Number of differences: 221

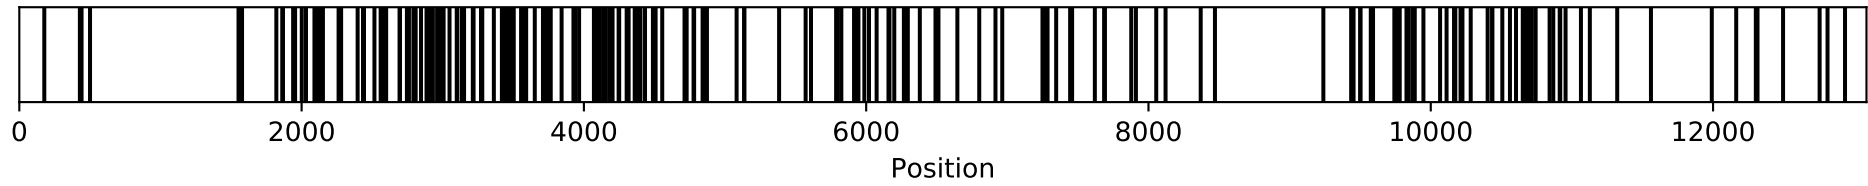

CR1 vs MA2  
Number of differences: 102

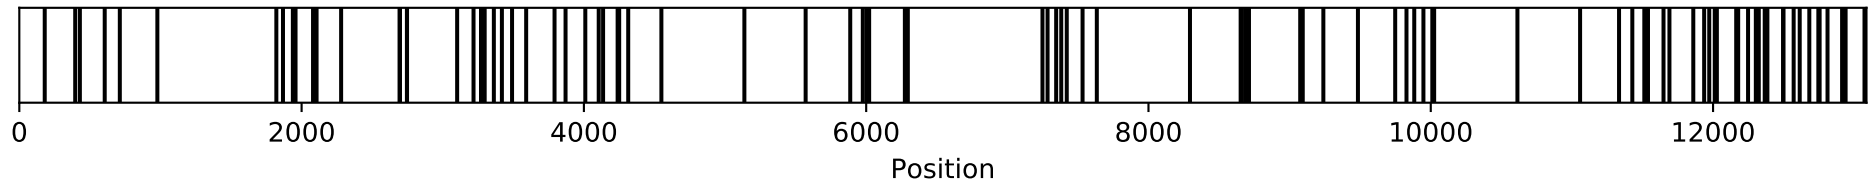

CR2 vs MA1  
Number of differences: 105

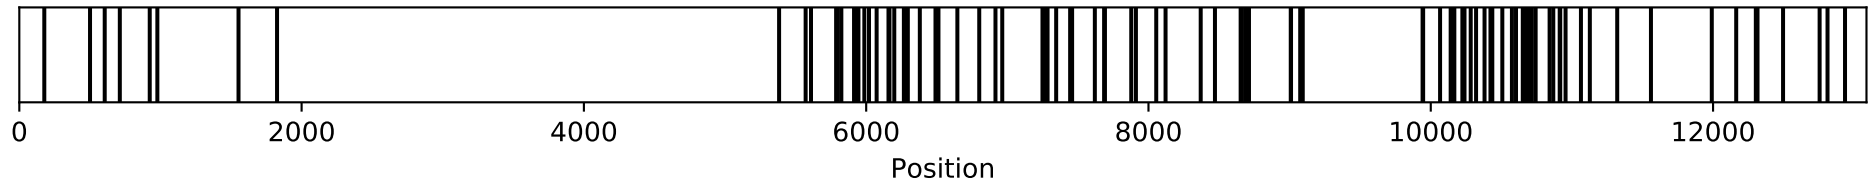

CR2 vs MA2  
Number of differences: 192

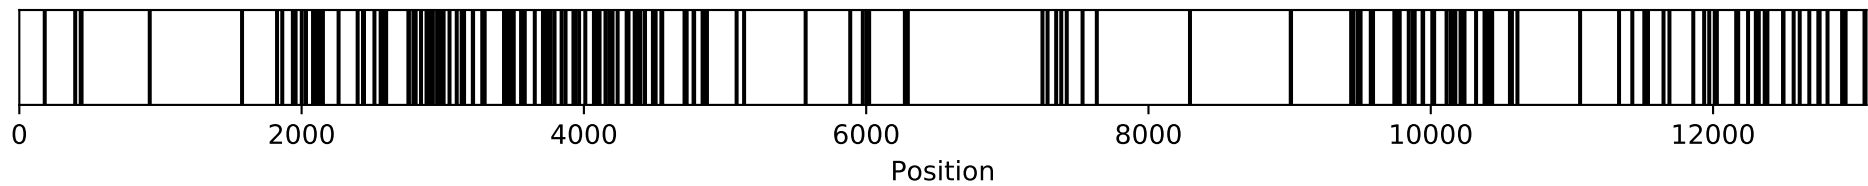

MA1 vs MA2  
Number of differences: 245

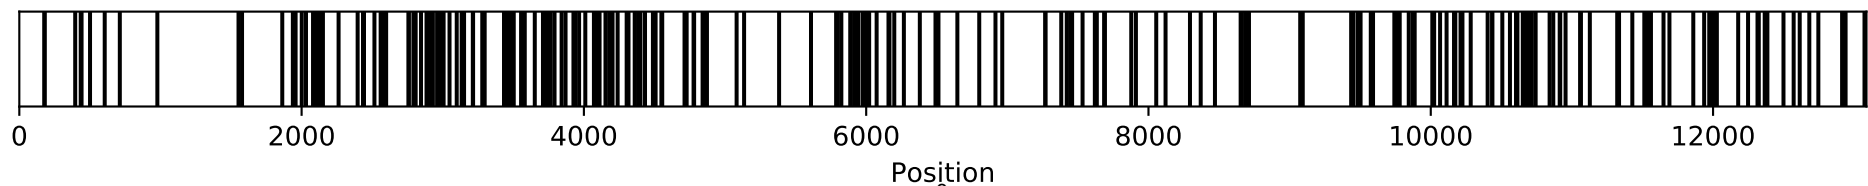



CR1 vs CR2  
Number of differences: 549

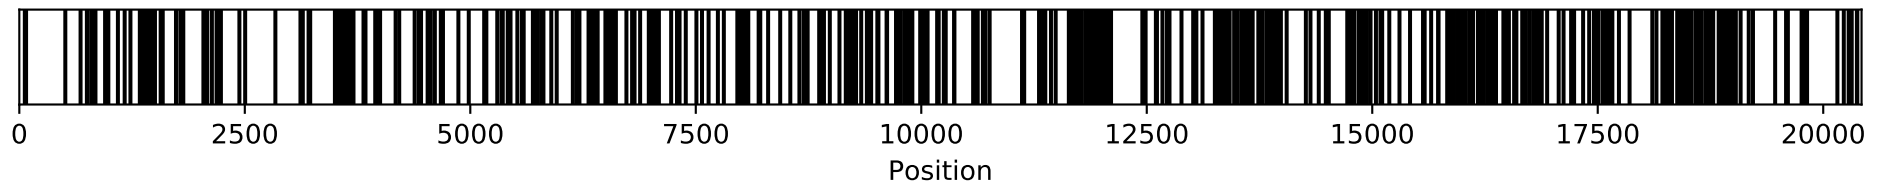

CR1 vs MA1  
Number of differences: 192

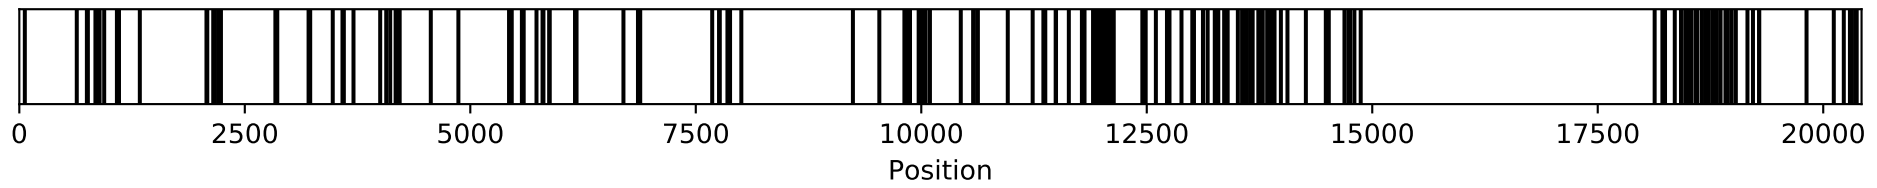

CR1 vs MA2  
Number of differences: 537

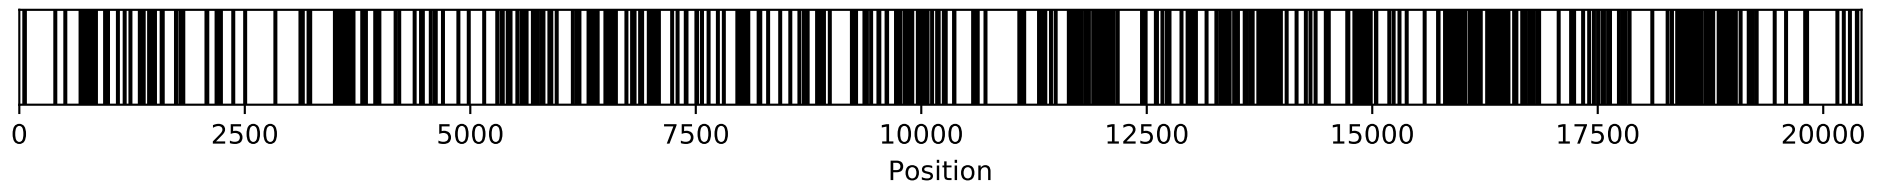

CR2 vs MA1  
Number of differences: 553

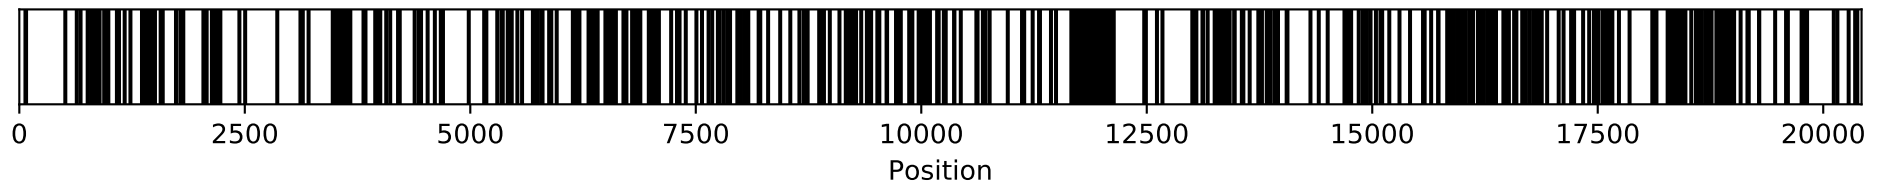

CR2 vs MA2  
Number of differences: 205

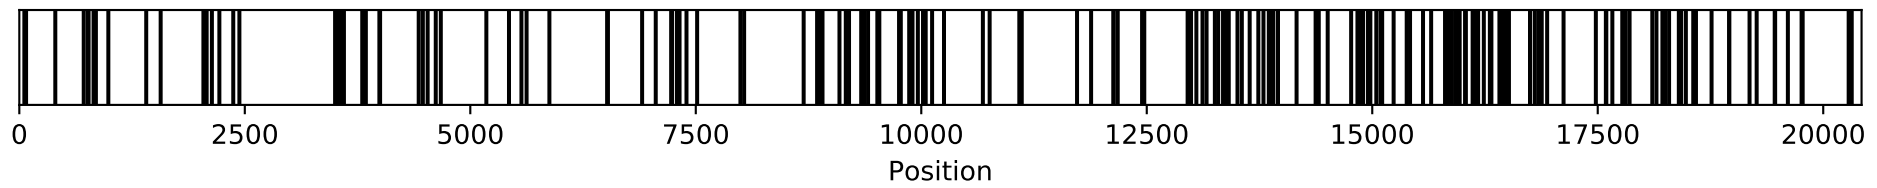

MA1 vs MA2  
Number of differences: 548

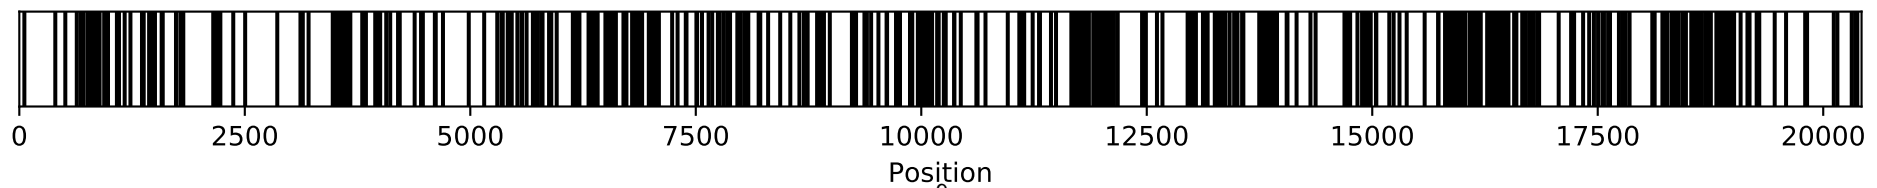

CR1 vs CR2  
Number of differences: 281

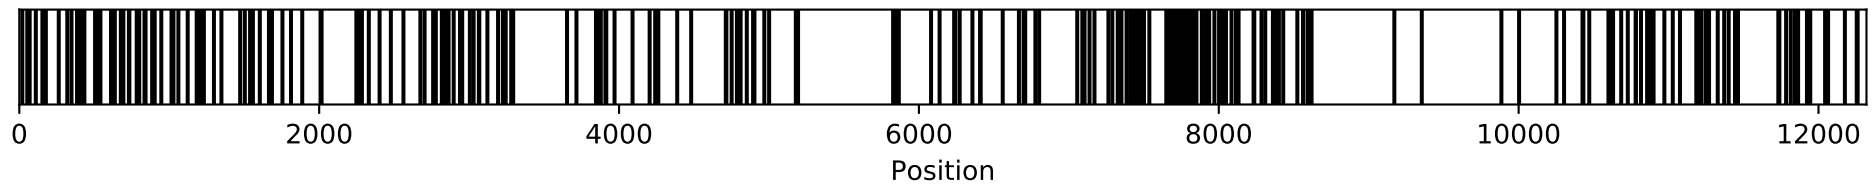

CR1 vs MA1  
Number of differences: 274

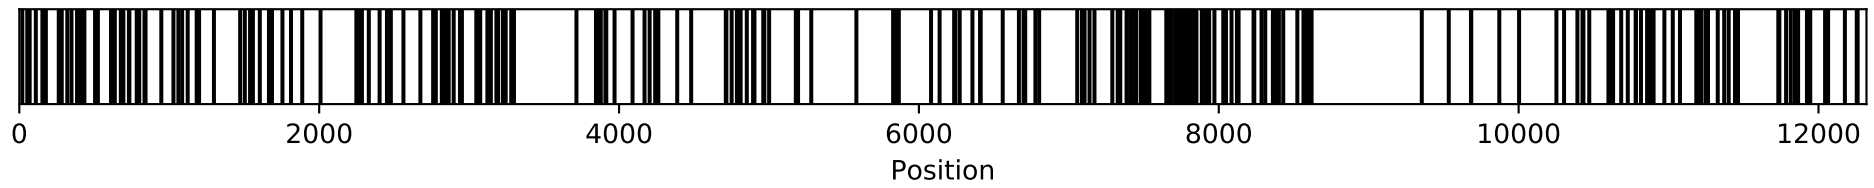

CR1 vs MA2  
Number of differences: 117

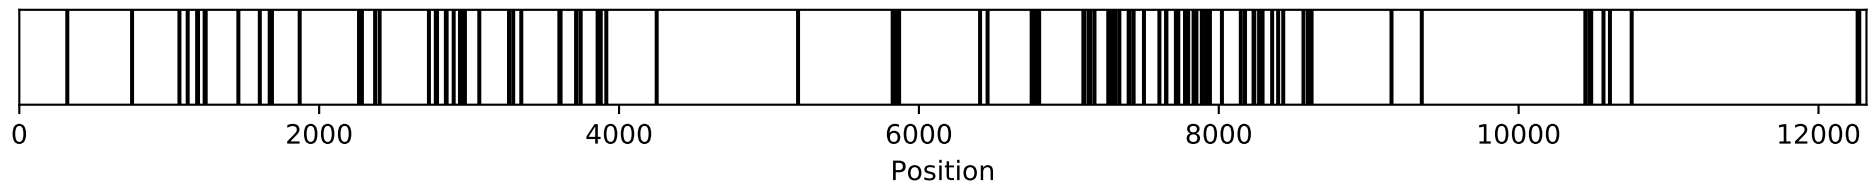

CR2 vs MA1  
Number of differences: 65

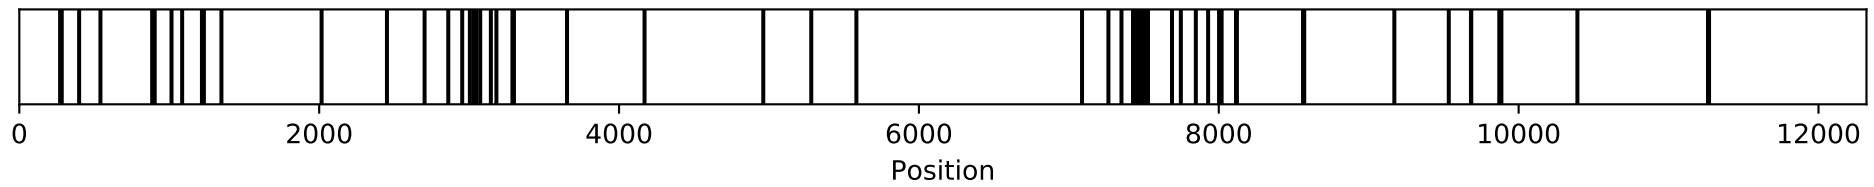

CR2 vs MA2  
Number of differences: 292

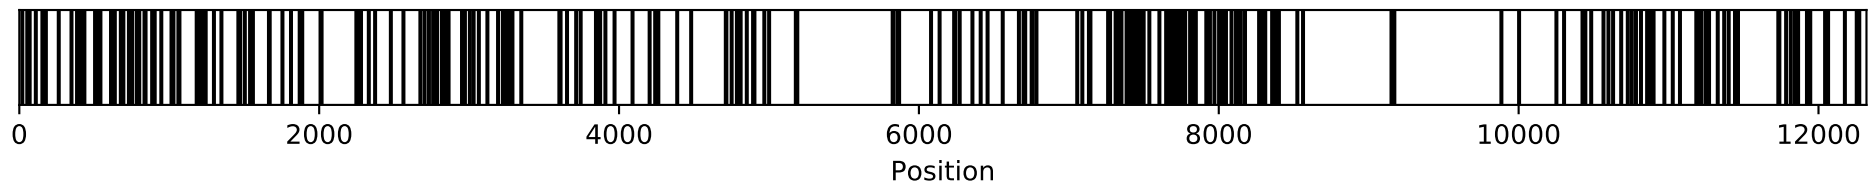

MA1 vs MA2  
Number of differences: 285

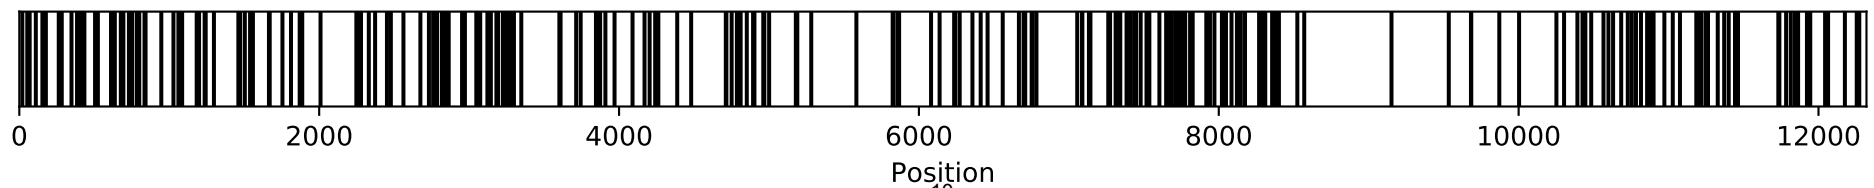

CR1 vs CR2  
Number of differences: 61

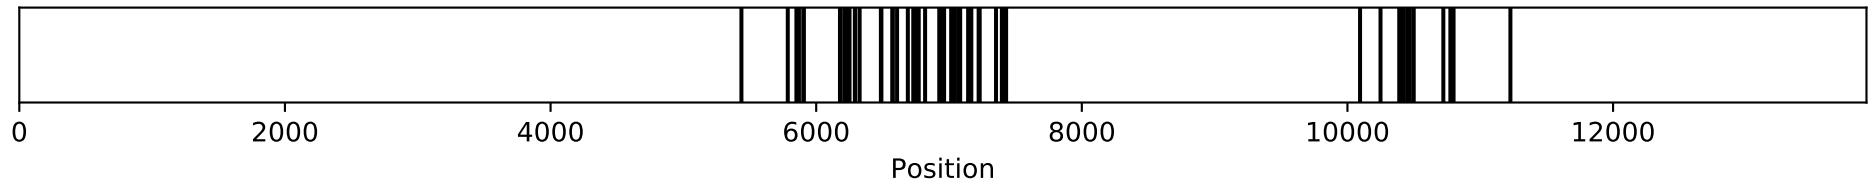

CR1 vs MA1  
Number of differences: 212

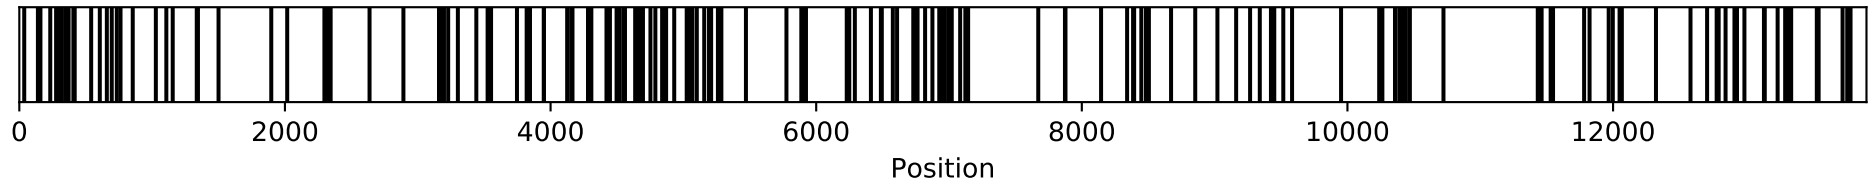

CR1 vs MA2  
Number of differences: 223

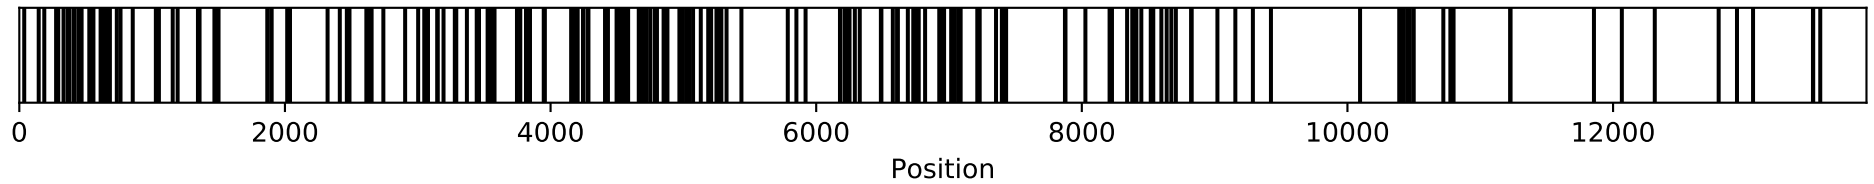

CR2 vs MA1  
Number of differences: 224

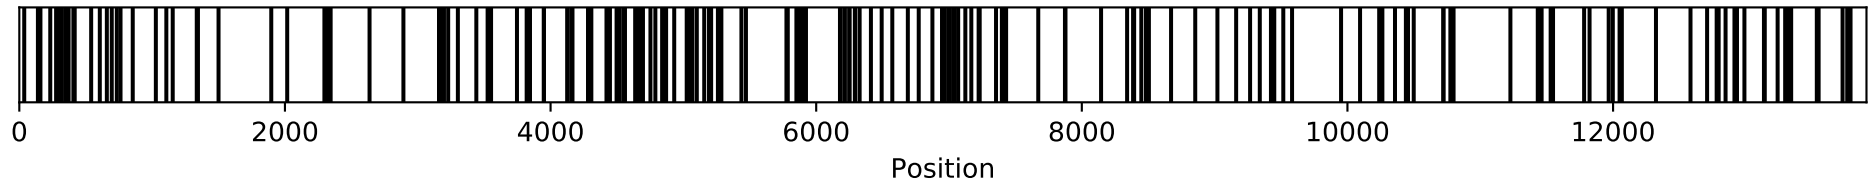

CR2 vs MA2  
Number of differences: 185

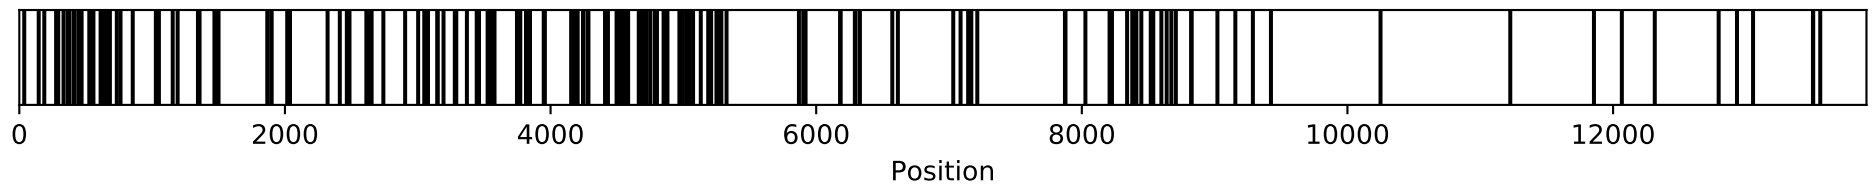

MA1 vs MA2  
Number of differences: 266

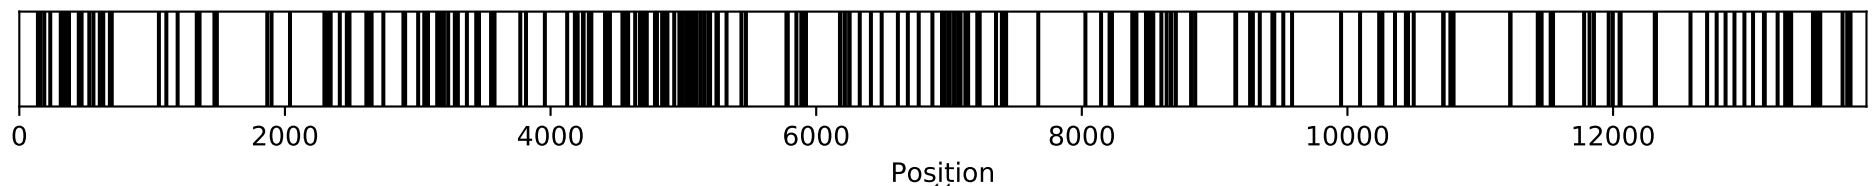

CR1 vs CR2  
Number of differences: 144

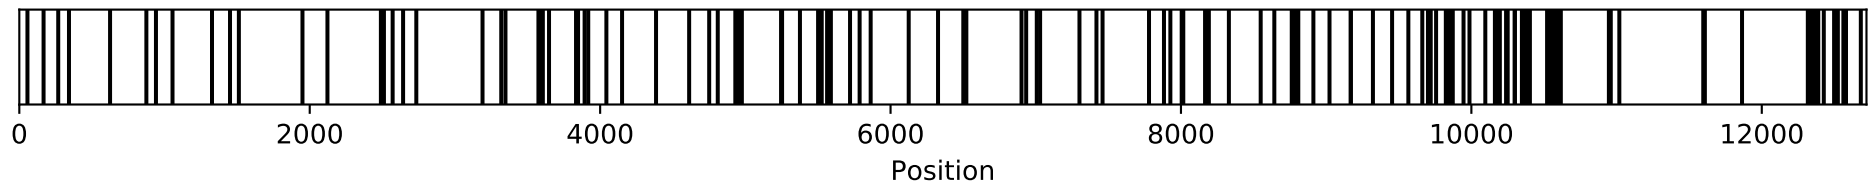

CR1 vs MA1  
Number of differences: 48

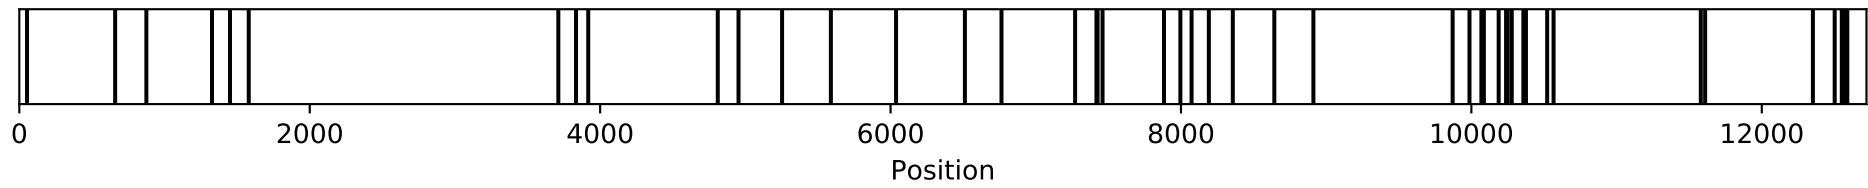

CR1 vs MA2  
Number of differences: 152

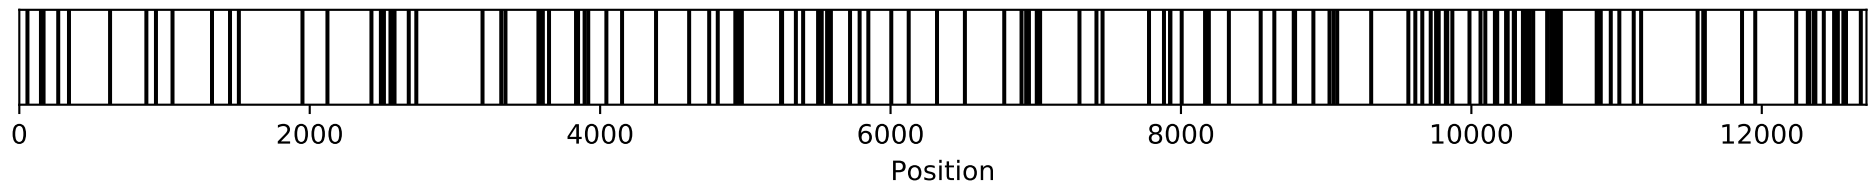

CR2 vs MA1  
Number of differences: 145

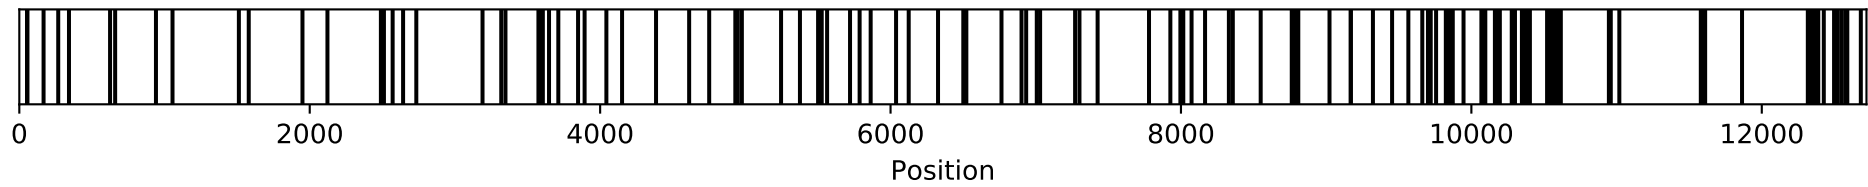

CR2 vs MA2  
Number of differences: 62

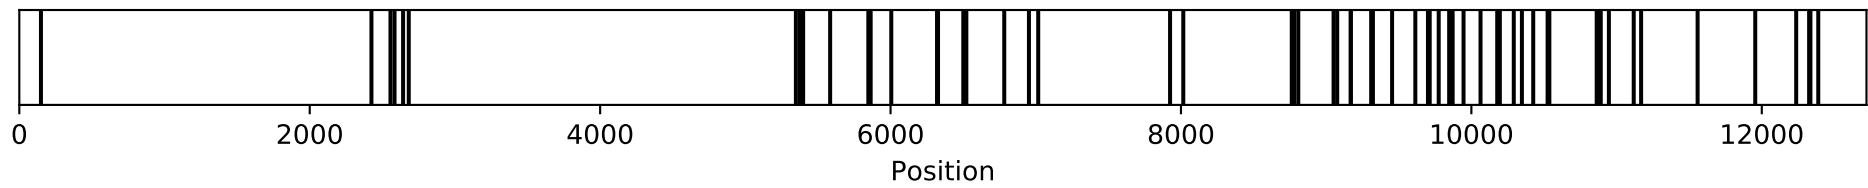

MA1 vs MA2  
Number of differences: 154

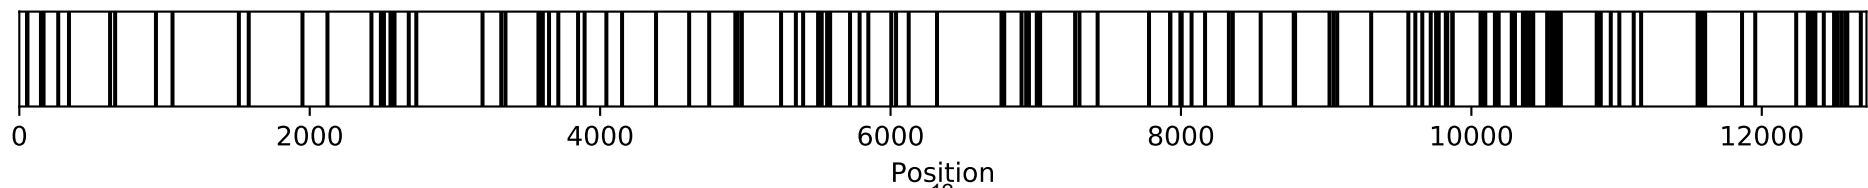

CR1 vs CR2  
Number of differences: 141

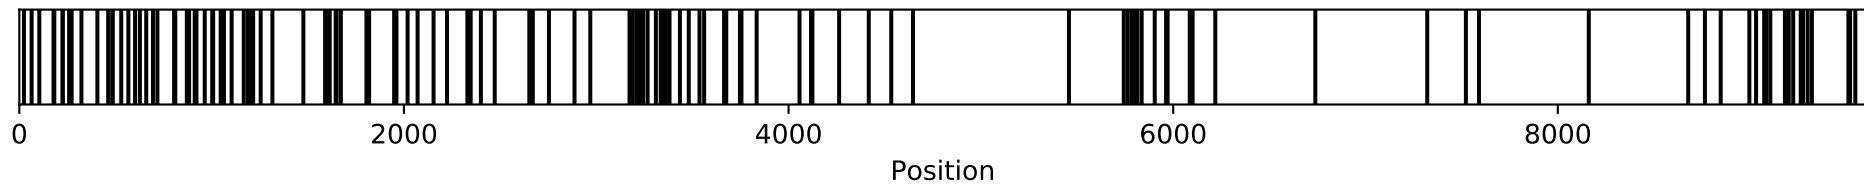

CR1 vs MA1  
Number of differences: 147

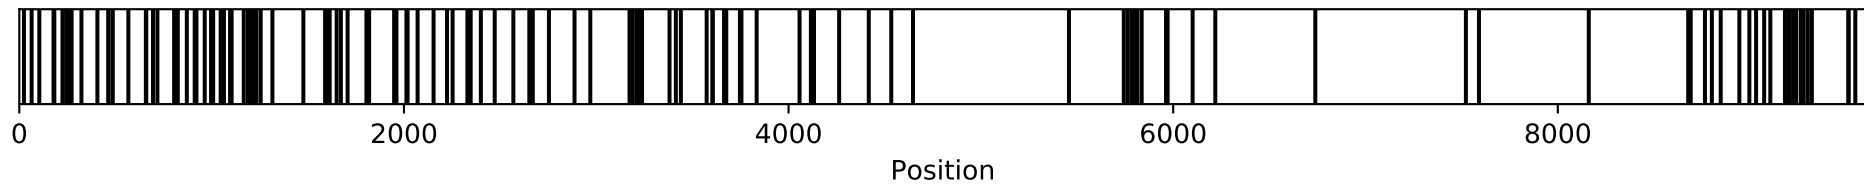

CR1 vs MA2  
Number of differences: 40

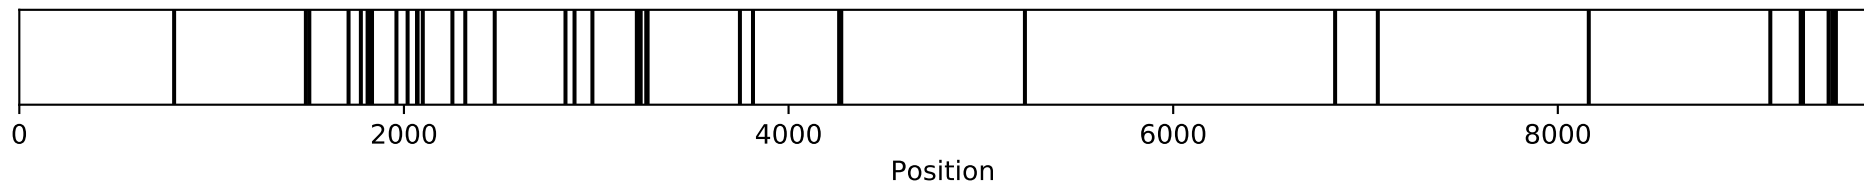

CR2 vs MA1  
Number of differences: 55

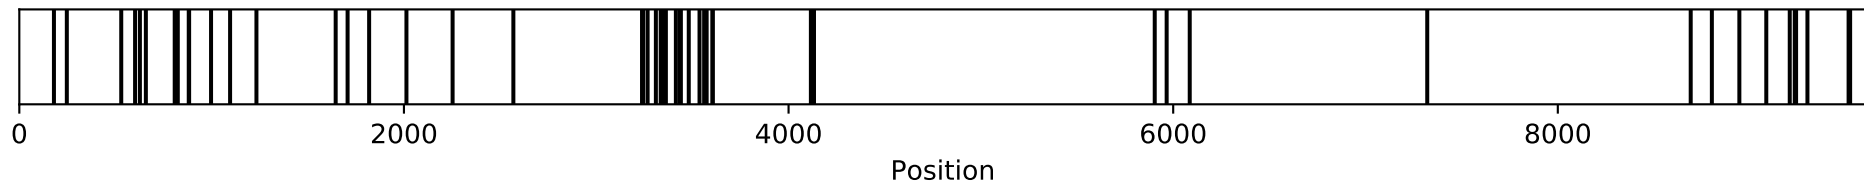

CR2 vs MA2  
Number of differences: 147

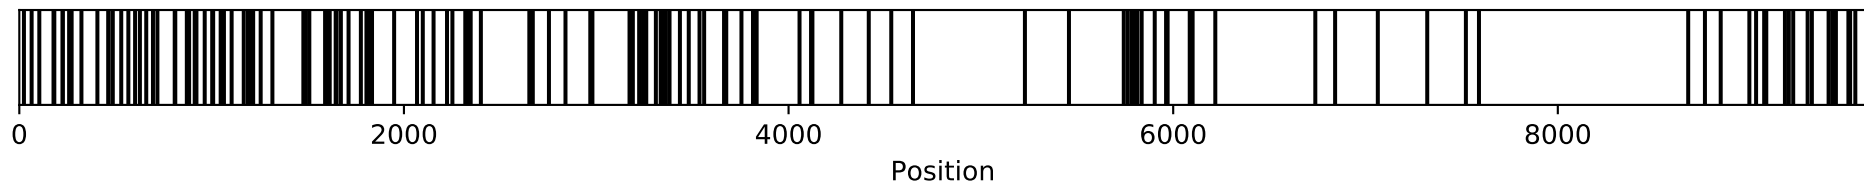

MA1 vs MA2  
Number of differences: 154

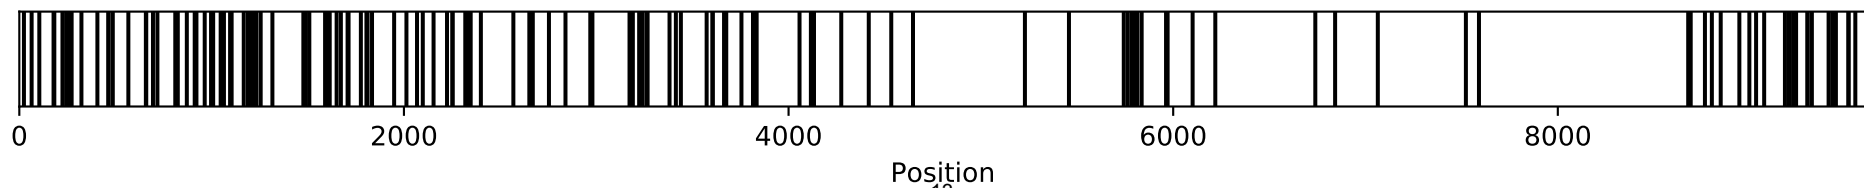

CR1 vs CR2  
Number of differences: 56

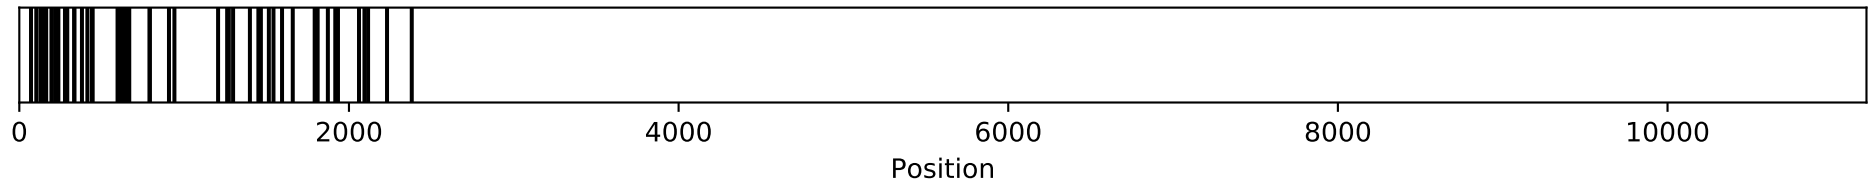

CR1 vs MA1  
Number of differences: 130

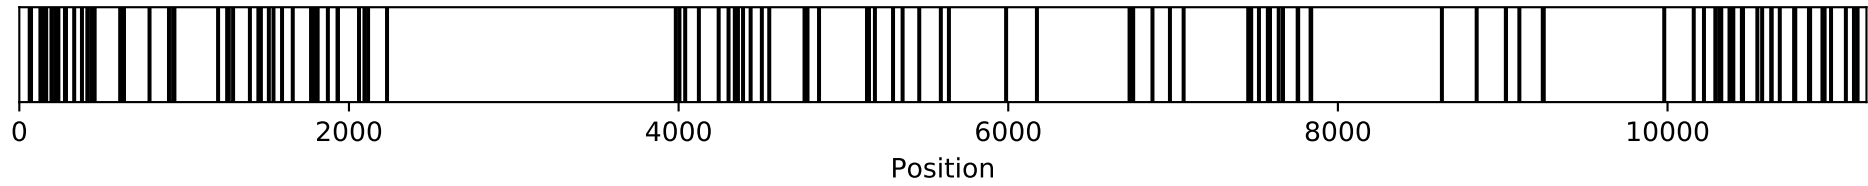

CR1 vs MA2  
Number of differences: 283

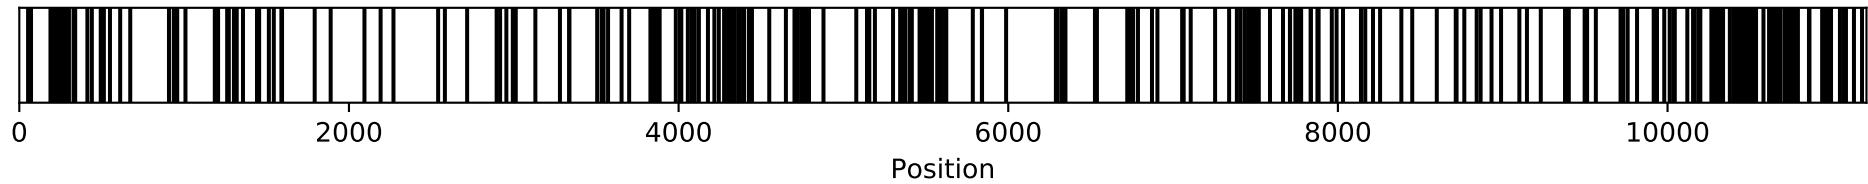

CR2 vs MA1  
Number of differences: 97

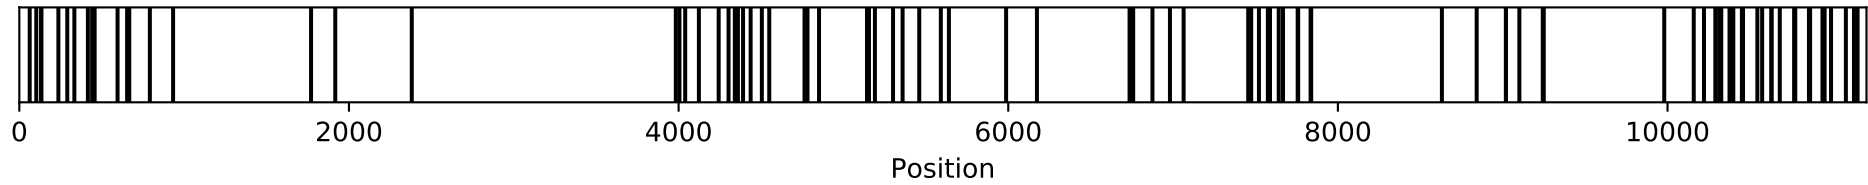

CR2 vs MA2  
Number of differences: 299

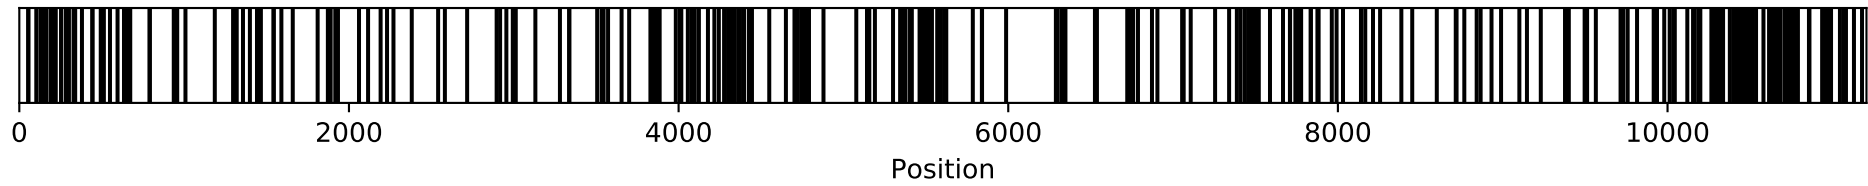

MA1 vs MA2  
Number of differences: 296

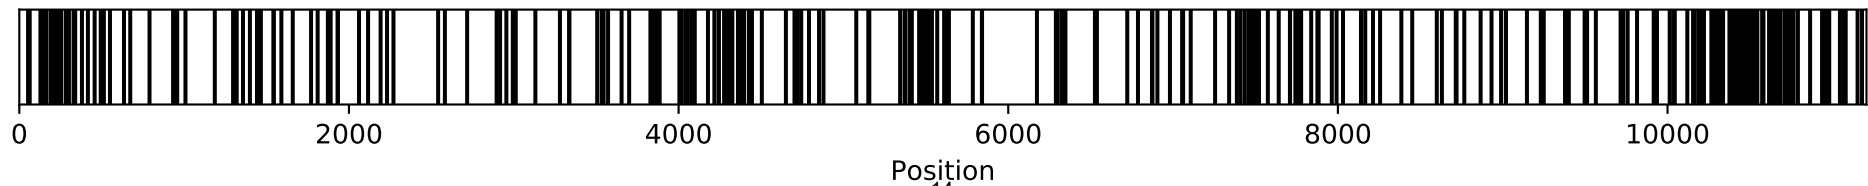

CR1 vs CR2  
Number of differences: 227

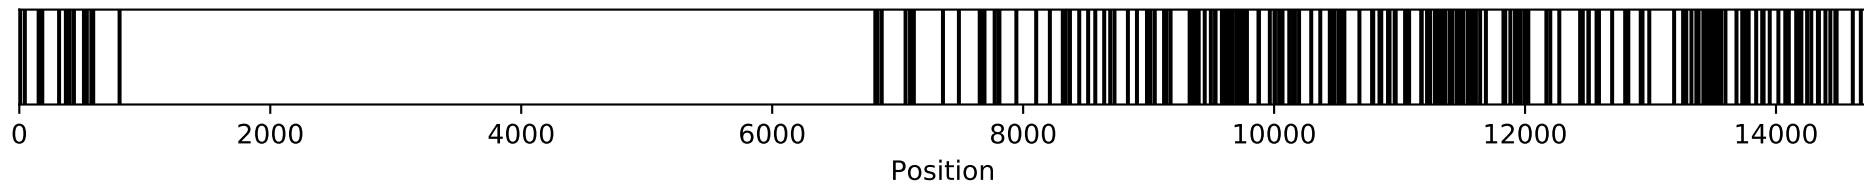

CR1 vs MA1  
Number of differences: 288

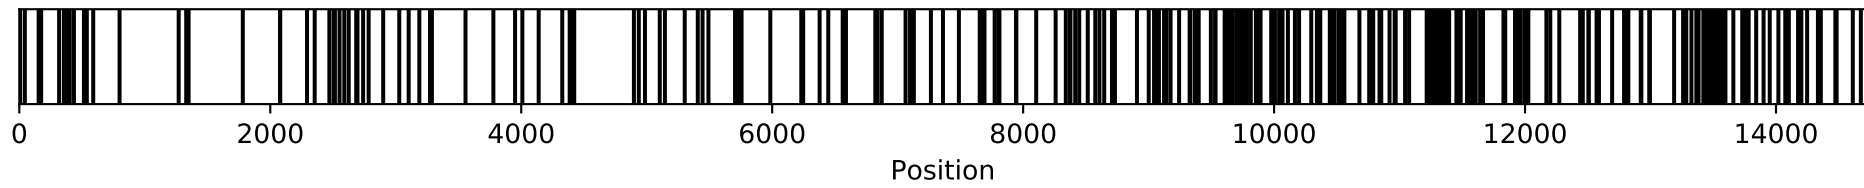

CR1 vs MA2  
Number of differences: 297

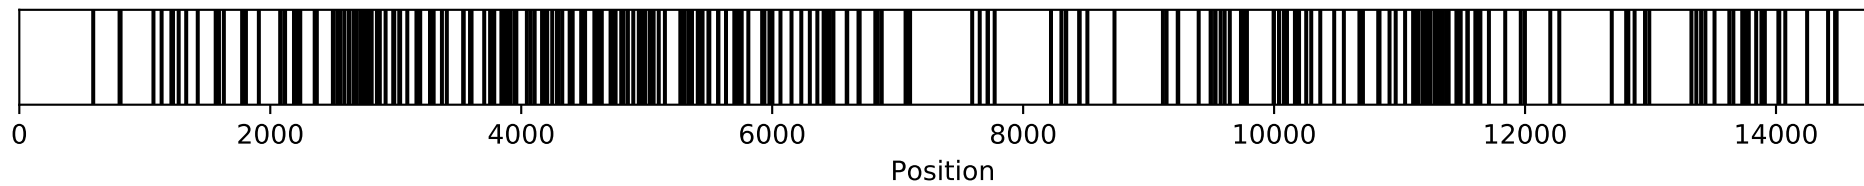

CR2 vs MA1  
Number of differences: 155

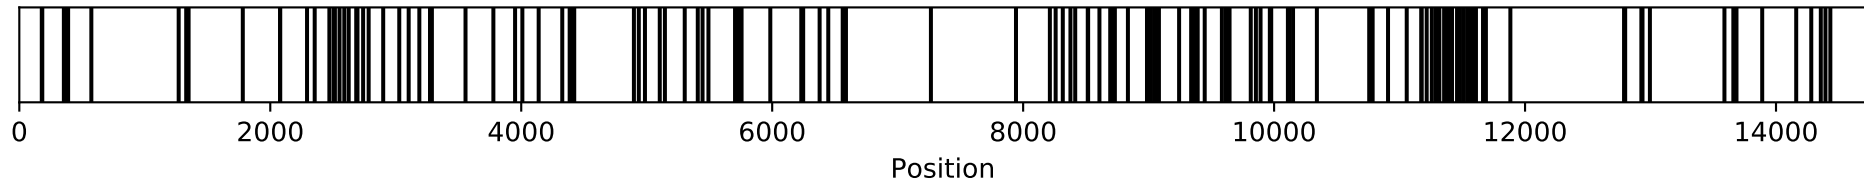

CR2 vs MA2  
Number of differences: 390

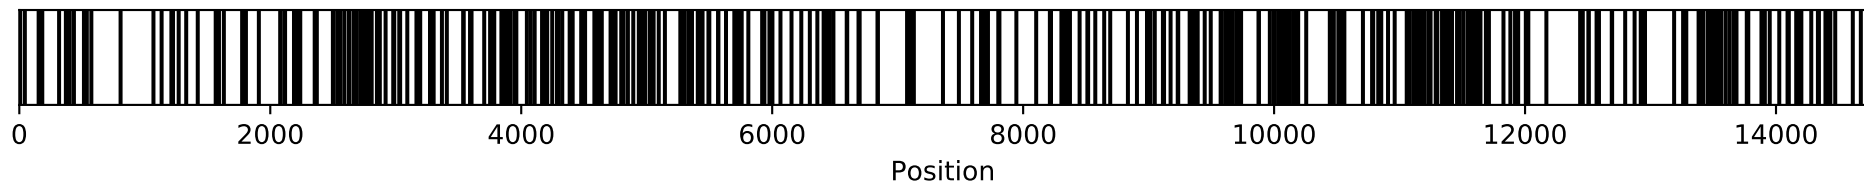

MA1 vs MA2  
Number of differences: 388

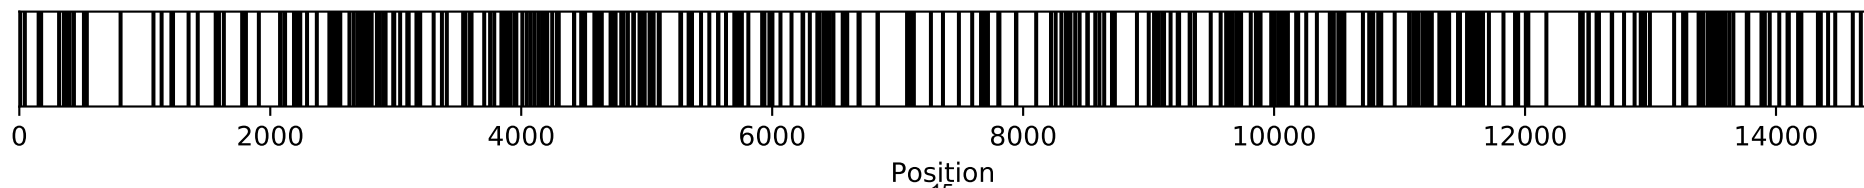

CR1 vs CR2  
Number of differences: 212

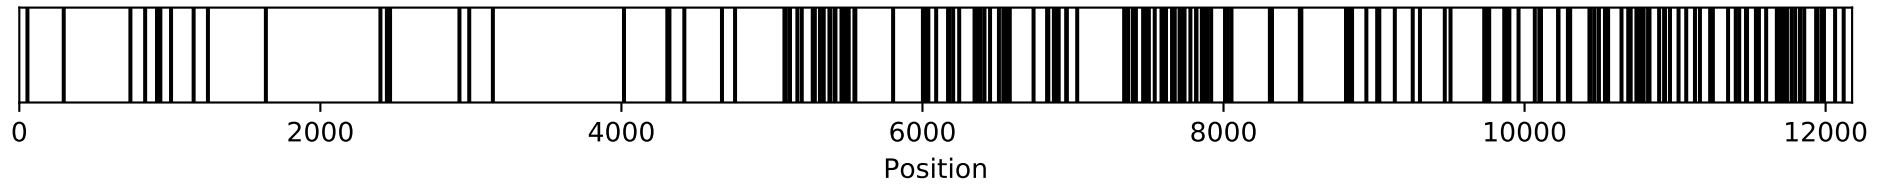

CR1 vs MA1  
Number of differences: 165

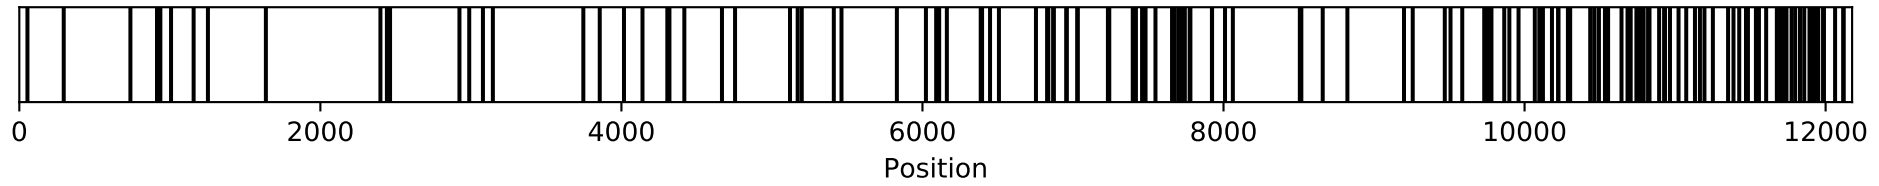

CR1 vs MA2  
Number of differences: 133

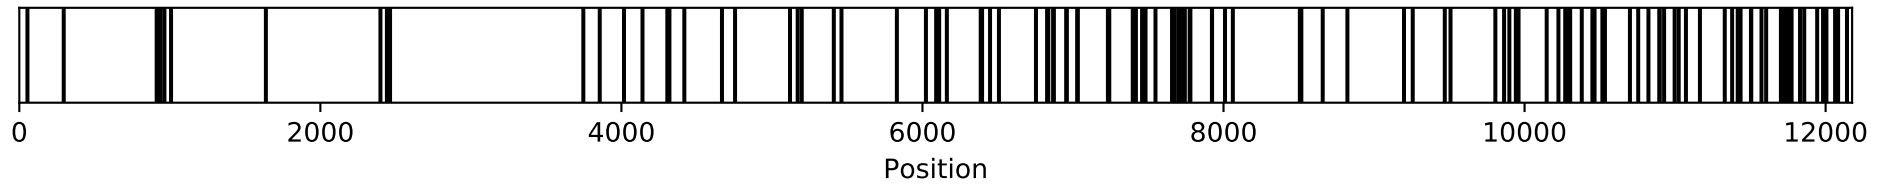

CR2 vs MA1  
Number of differences: 134

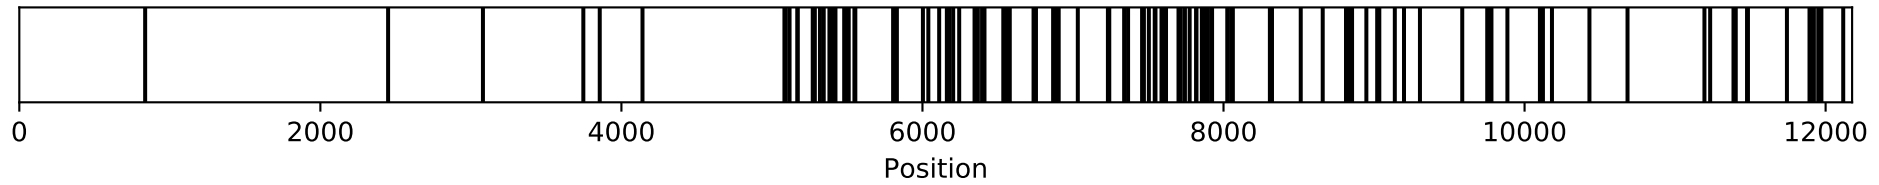

CR2 vs MA2  
Number of differences: 203

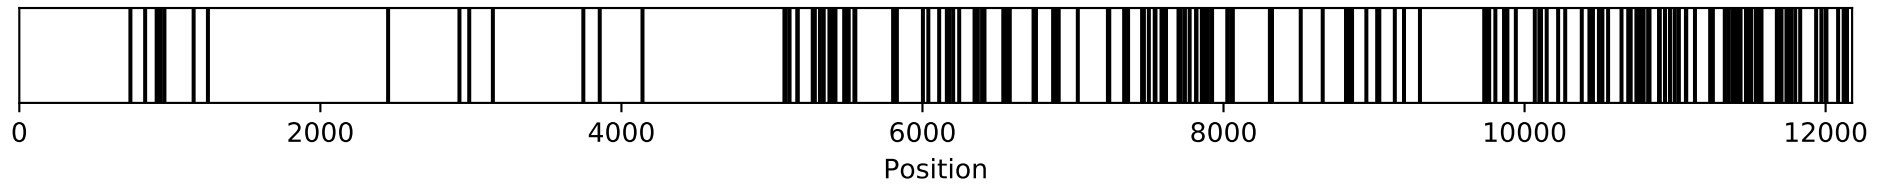

MA1 vs MA2  
Number of differences: 101

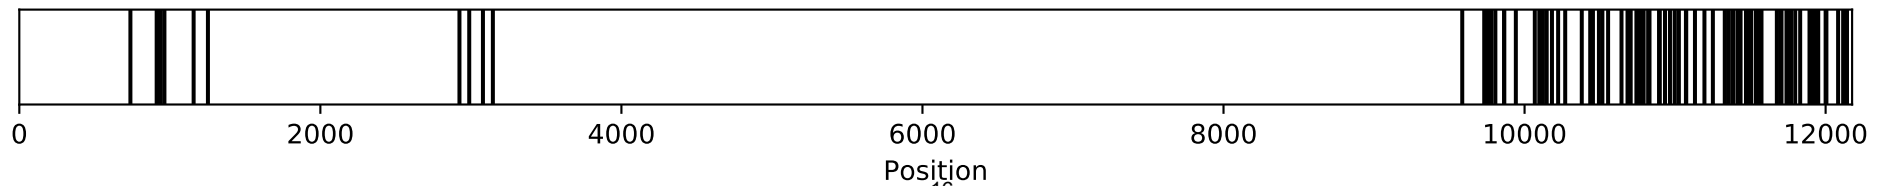



CR1 vs CR2  
Number of differences: 133

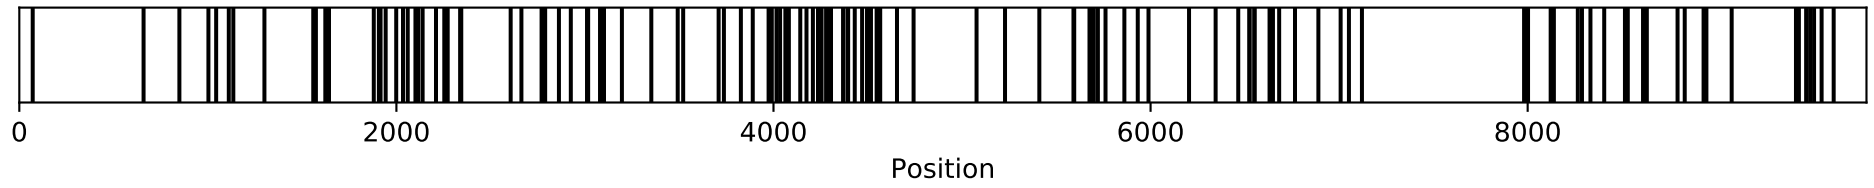

CR1 vs MA1  
Number of differences: 91

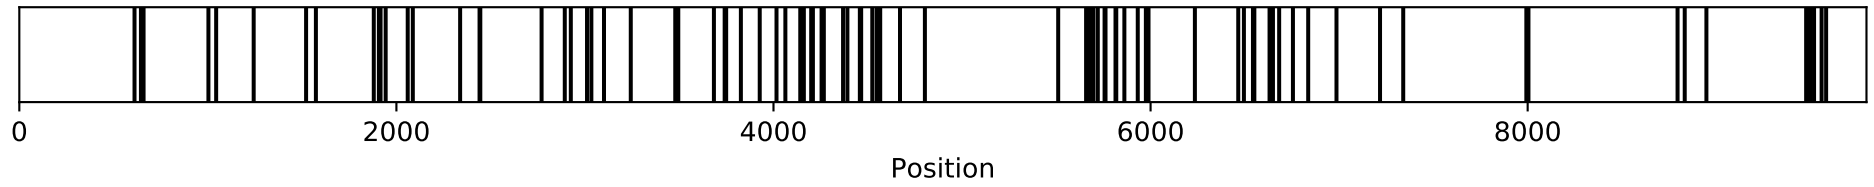

CR1 vs MA2  
Number of differences: 134

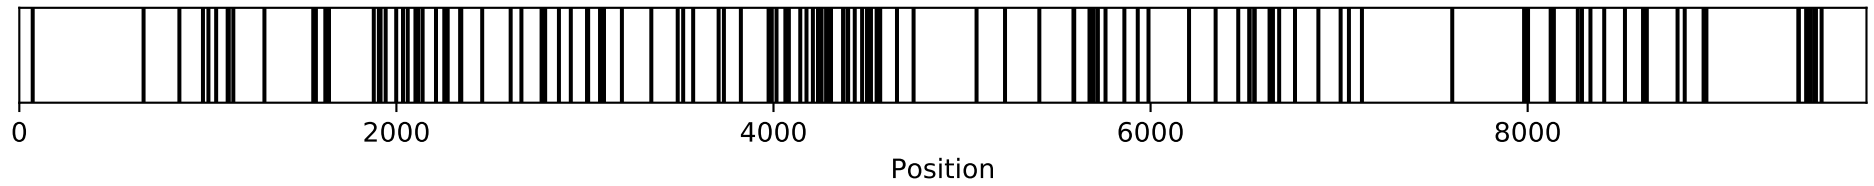

CR2 vs MA1  
Number of differences: 133

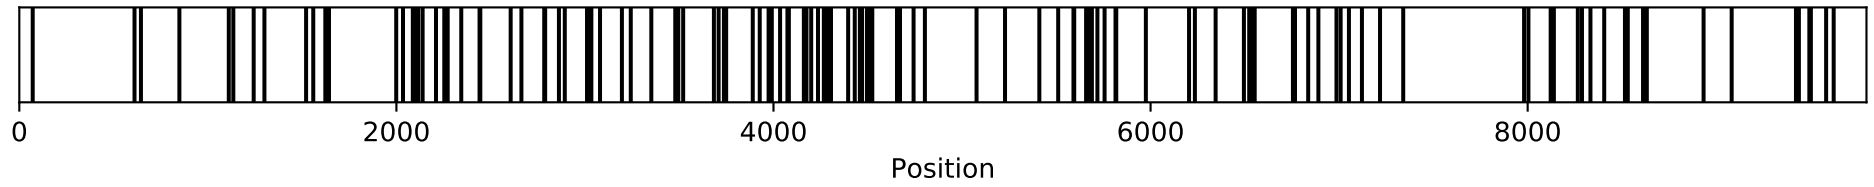

CR2 vs MA2  
Number of differences: 13

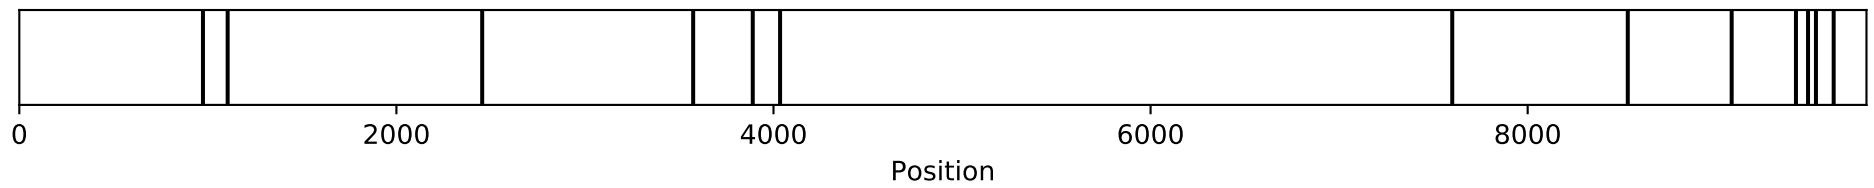

MA1 vs MA2  
Number of differences: 134

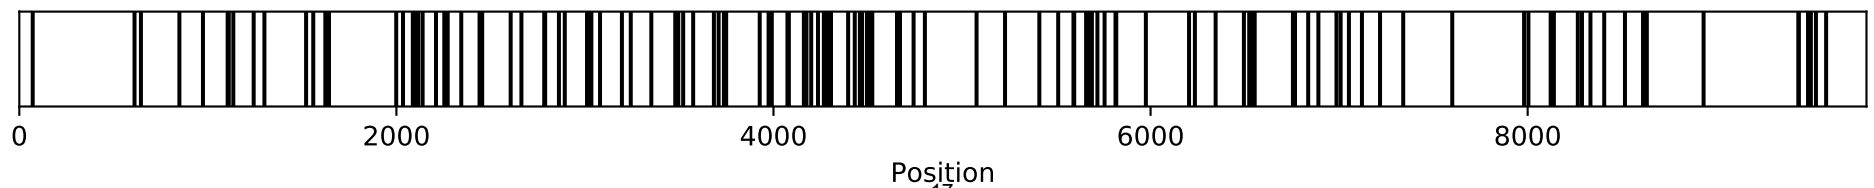

CR1 vs CR2  
Number of differences: 65

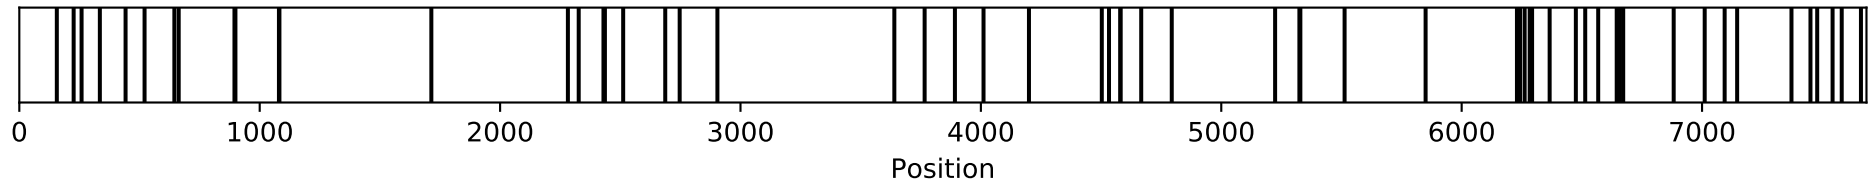

CR1 vs MA1  
Number of differences: 75

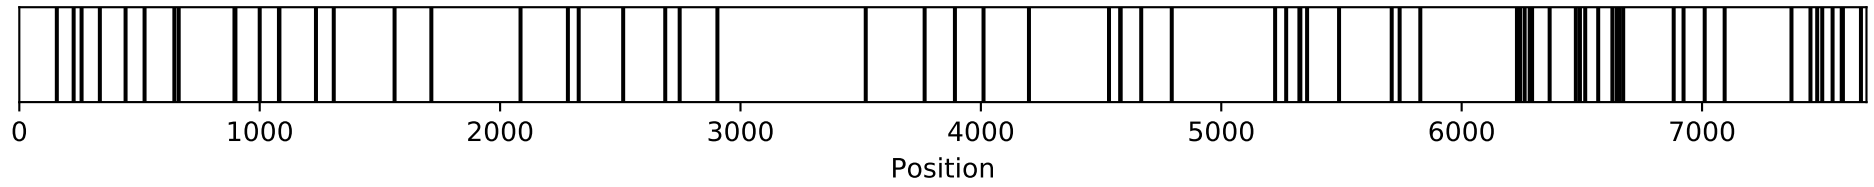

CR1 vs MA2  
Number of differences: 24

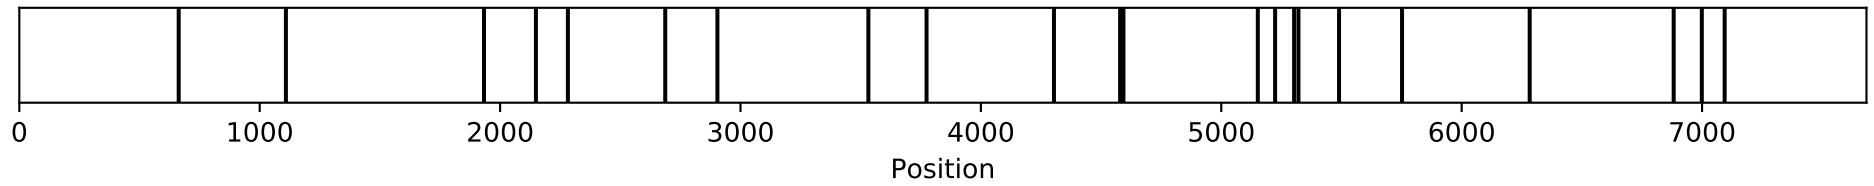

CR2 vs MA1  
Number of differences: 26

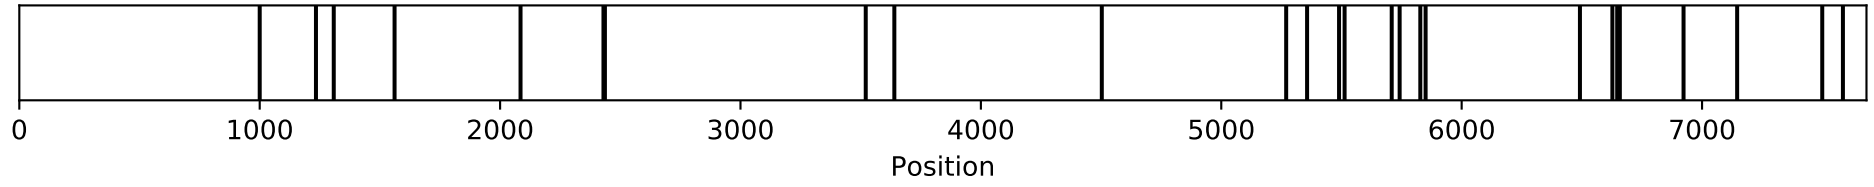

CR2 vs MA2  
Number of differences: 69

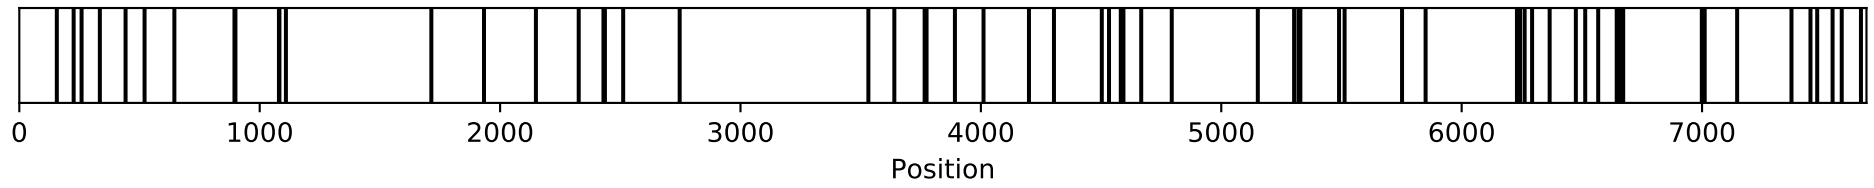

MA1 vs MA2  
Number of differences: 77

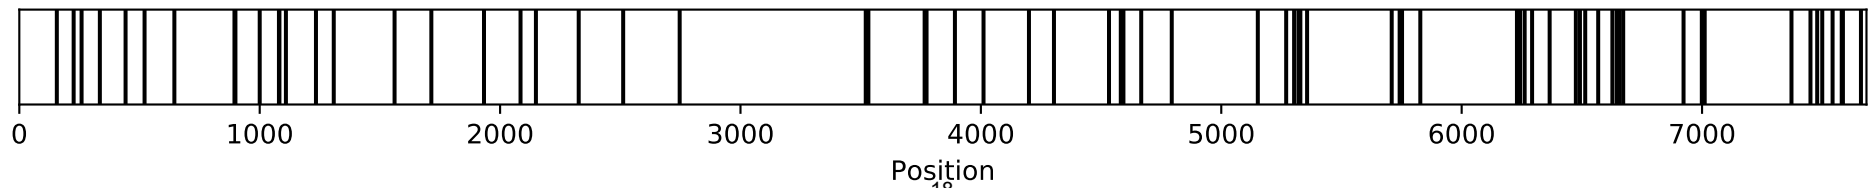

CR1 vs CR2  
Number of differences: 307

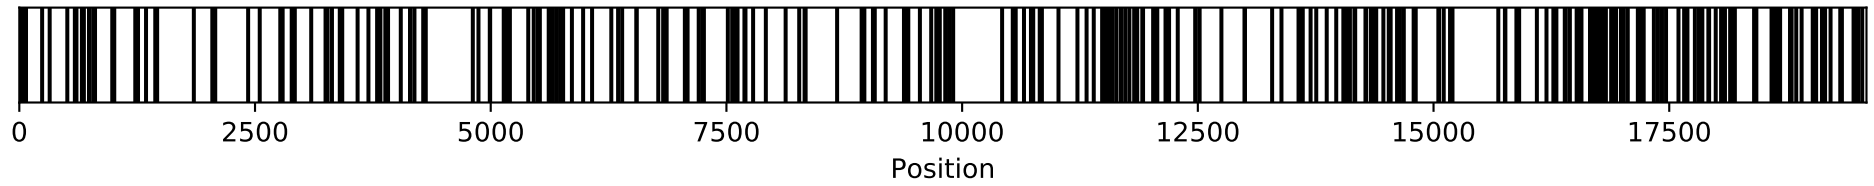

CR1 vs MA1  
Number of differences: 311

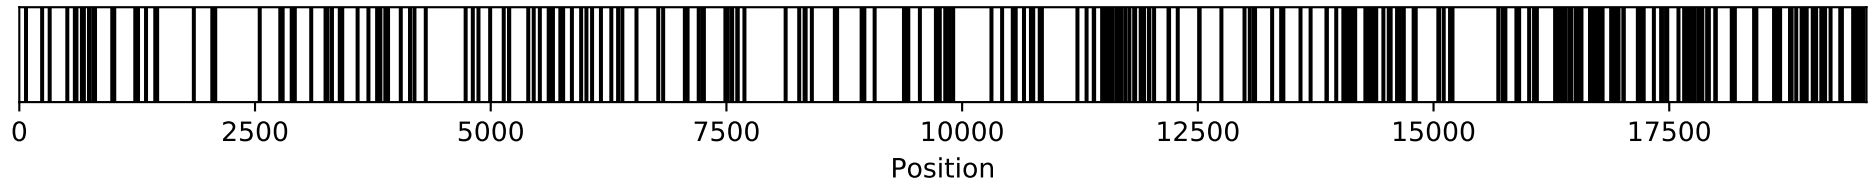

CR1 vs MA2  
Number of differences: 64

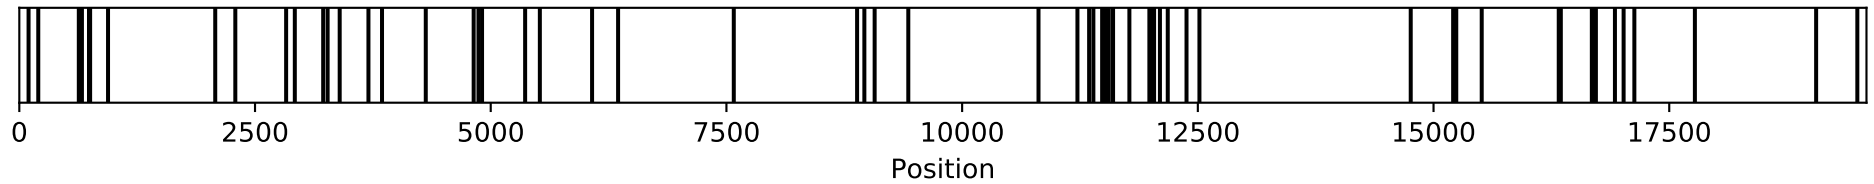

CR2 vs MA1  
Number of differences: 119

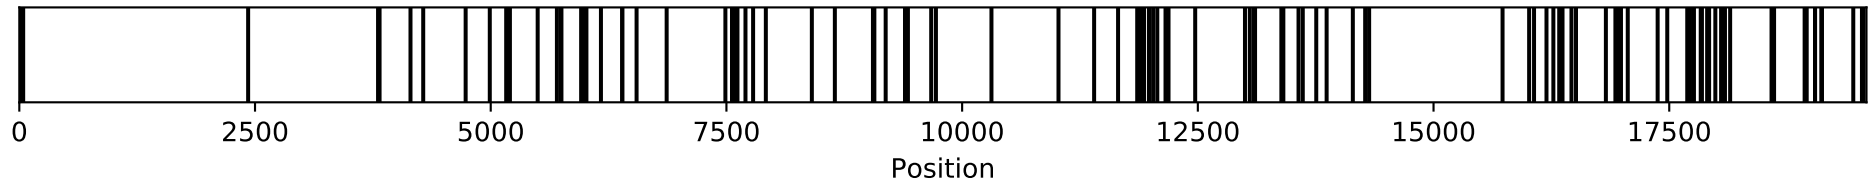

CR2 vs MA2  
Number of differences: 318

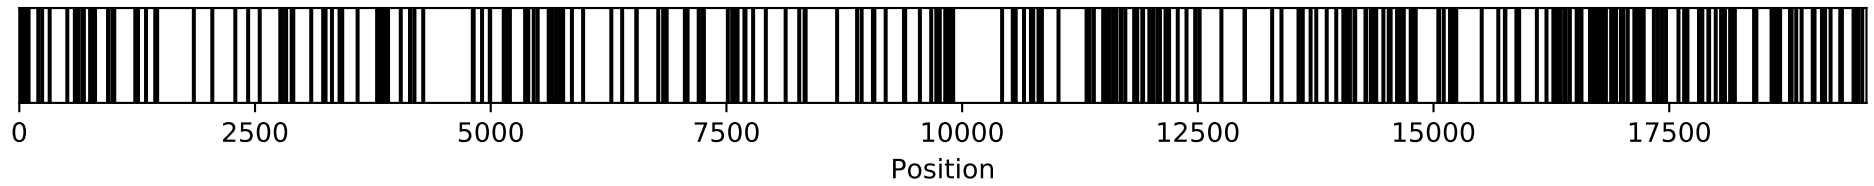

MA1 vs MA2  
Number of differences: 320

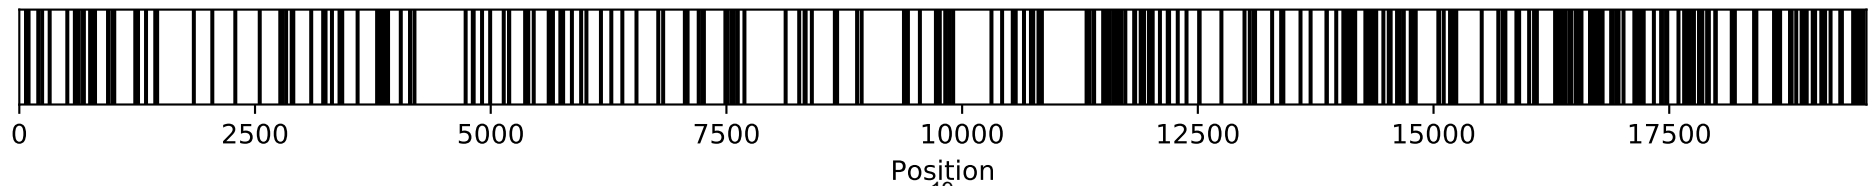

CR1 vs CR2  
Number of differences: 81

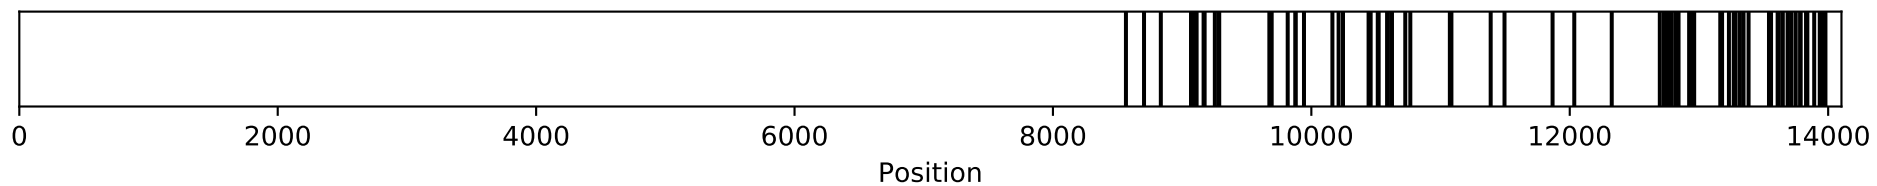

CR1 vs MA1  
Number of differences: 246

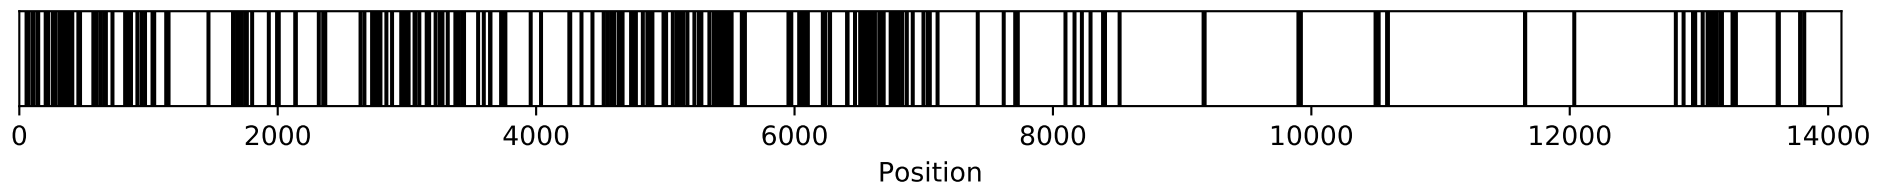

CR1 vs MA2  
Number of differences: 128

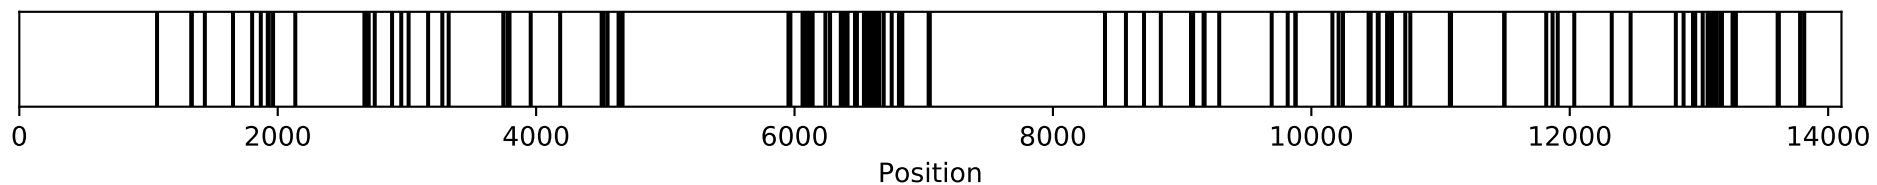

CR2 vs MA1  
Number of differences: 302

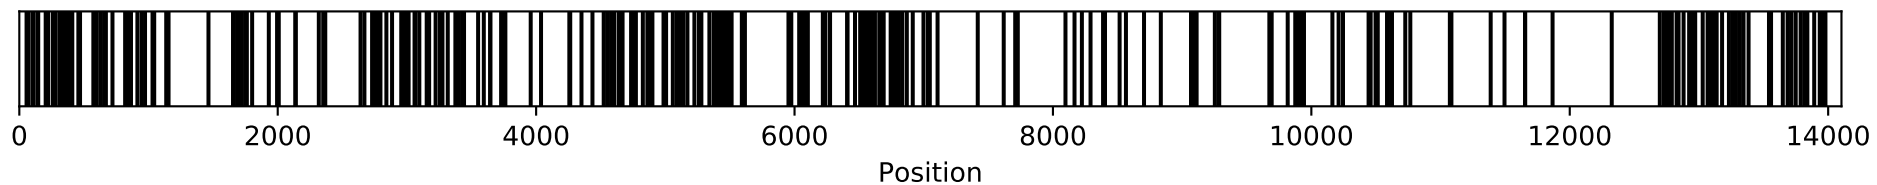

CR2 vs MA2  
Number of differences: 126

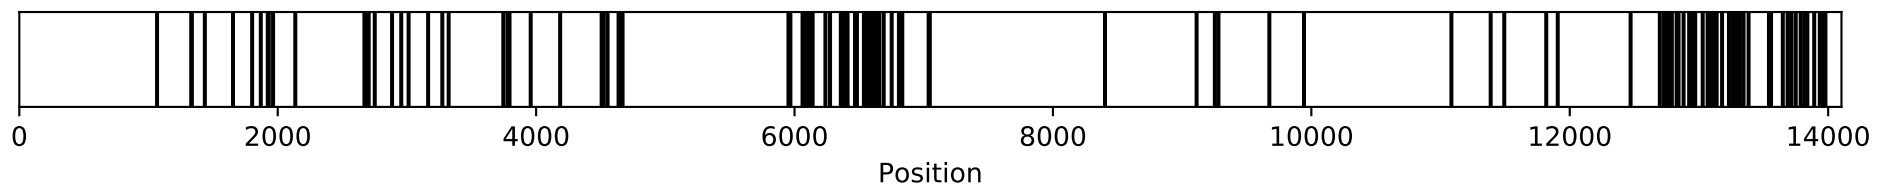

MA1 vs MA2  
Number of differences: 248

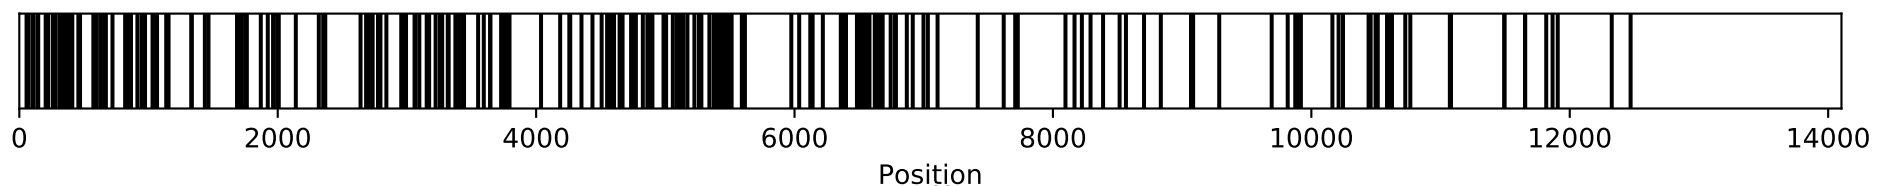

CR1 vs CR2  
Number of differences: 104

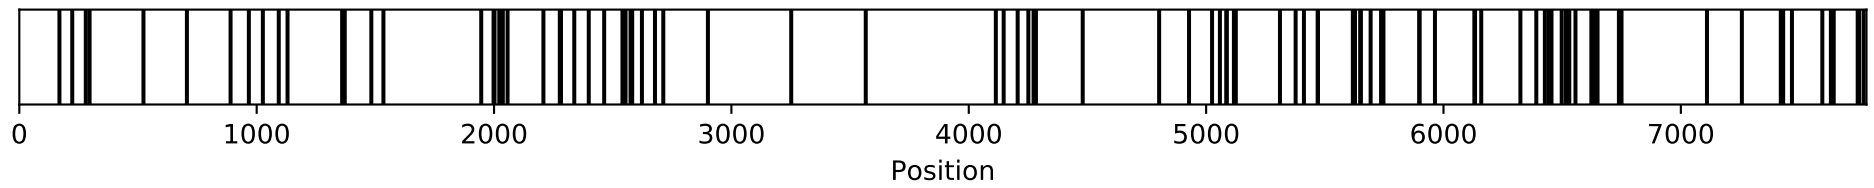

CR1 vs MA1  
Number of differences: 36

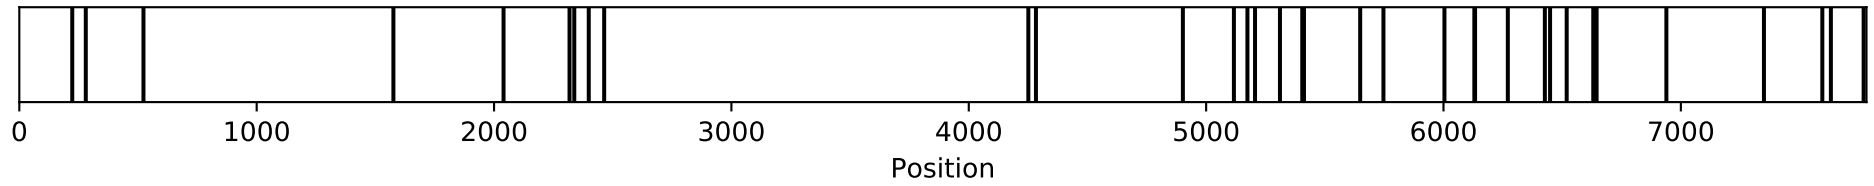

CR1 vs MA2  
Number of differences: 60

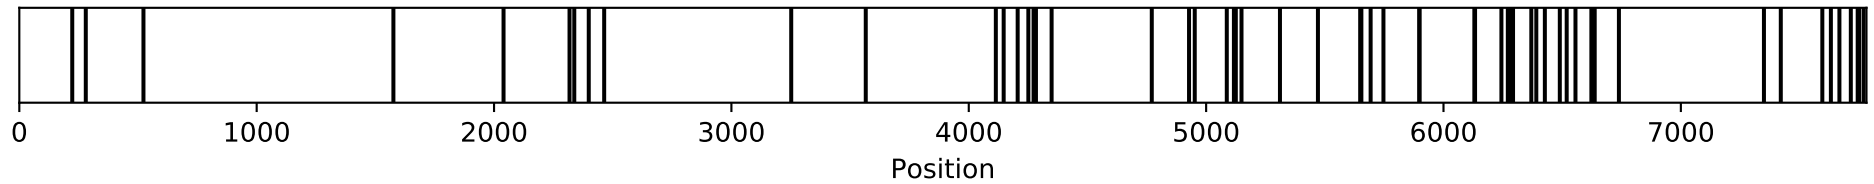

CR2 vs MA1  
Number of differences: 96

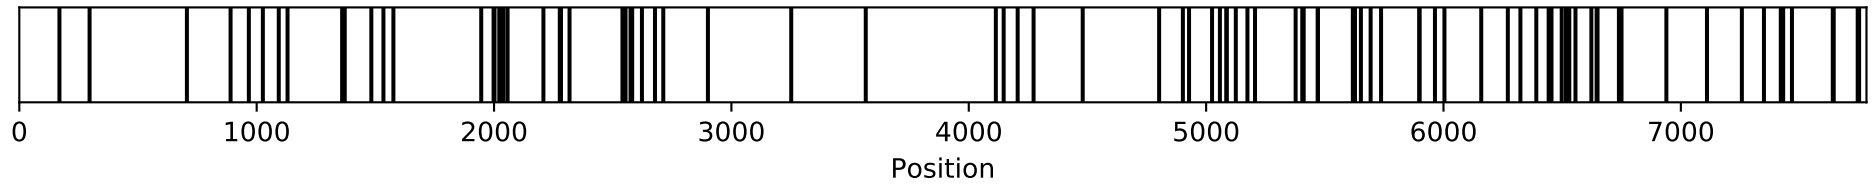

CR2 vs MA2  
Number of differences: 84

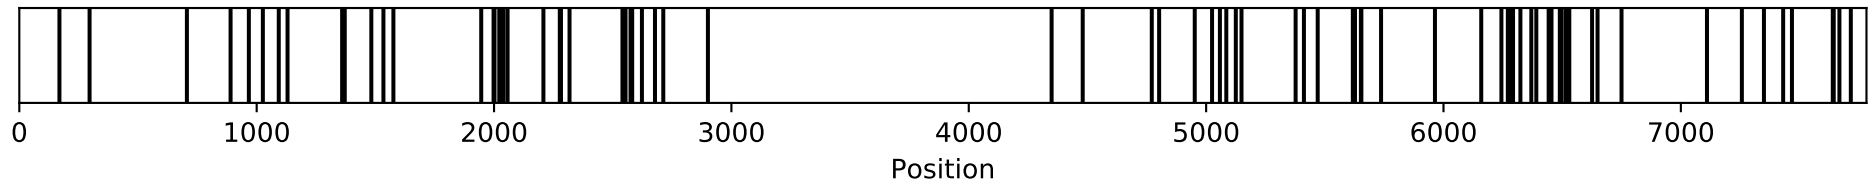

MA1 vs MA2  
Number of differences: 44

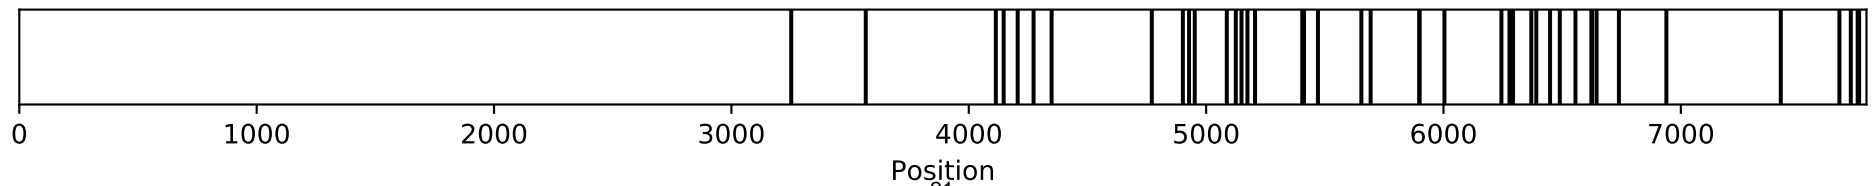

CR1 vs CR2  
Number of differences: 104

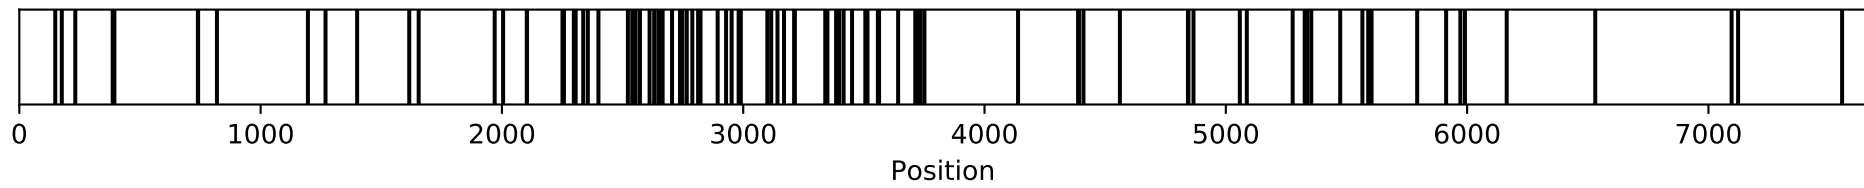

CR1 vs MA1  
Number of differences: 65

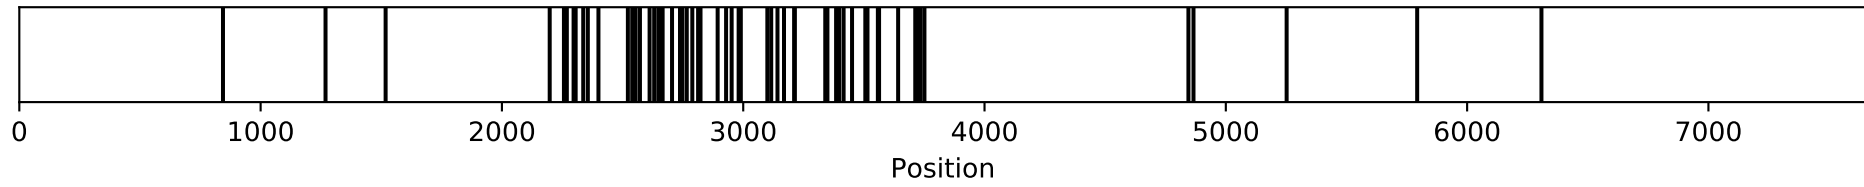

CR1 vs MA2  
Number of differences: 105

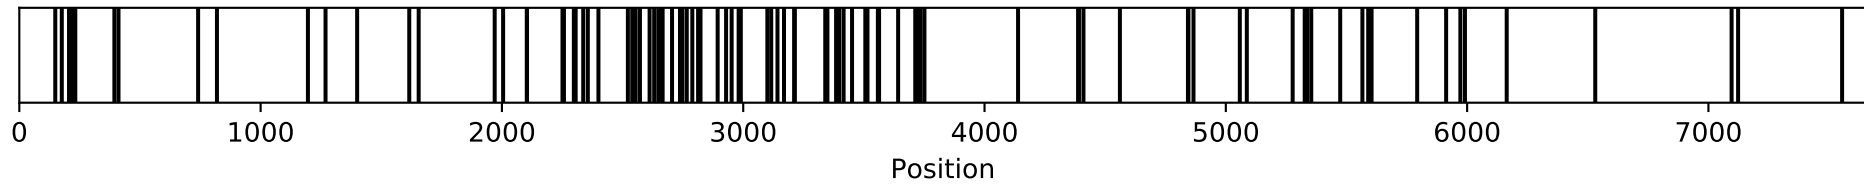

CR2 vs MA1  
Number of differences: 53

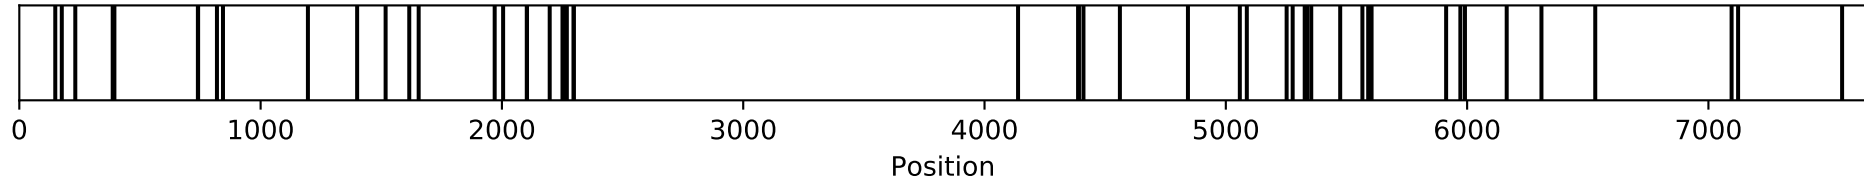

CR2 vs MA2  
Number of differences: 6

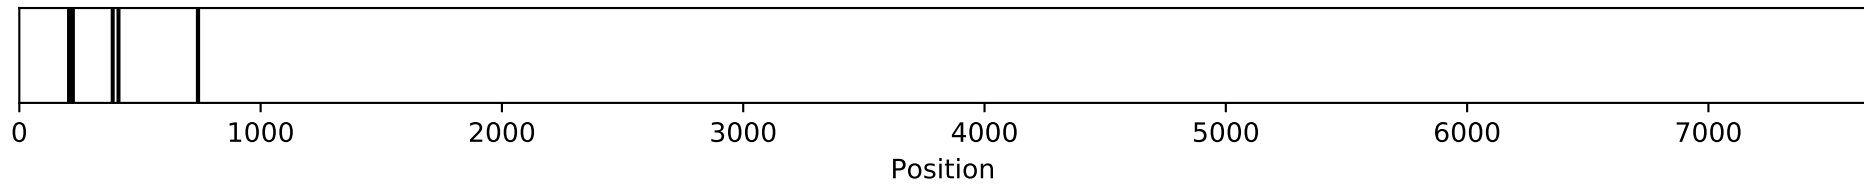

MA1 vs MA2  
Number of differences: 54

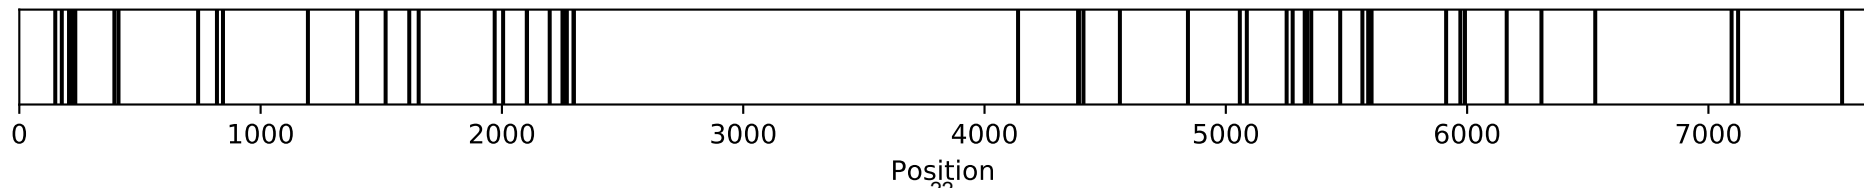

CR1 vs CR2  
Number of differences: 570

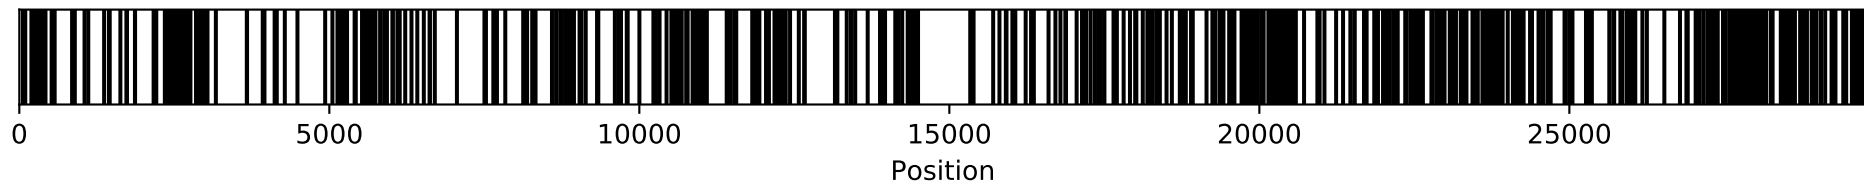

CR1 vs MA1  
Number of differences: 568

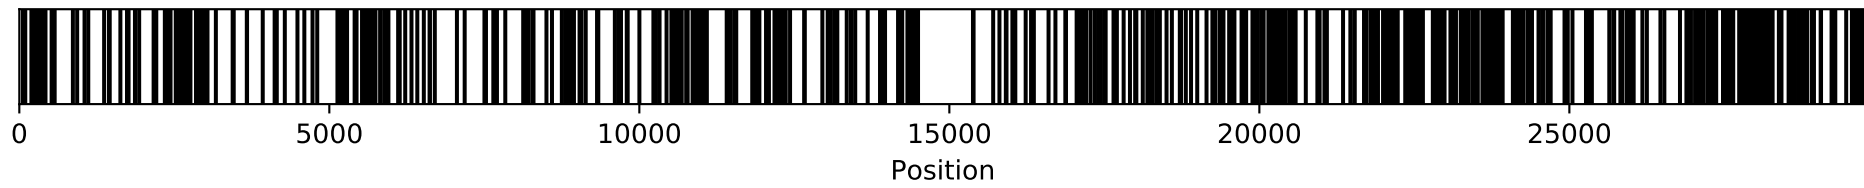

CR1 vs MA2  
Number of differences: 90

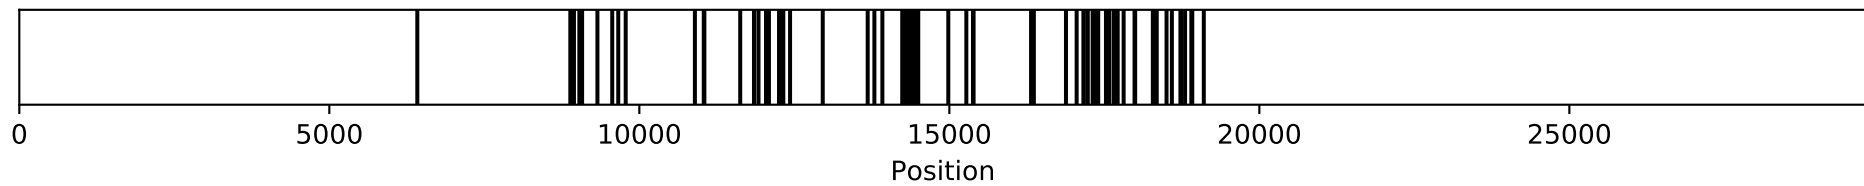

CR2 vs MA1  
Number of differences: 161

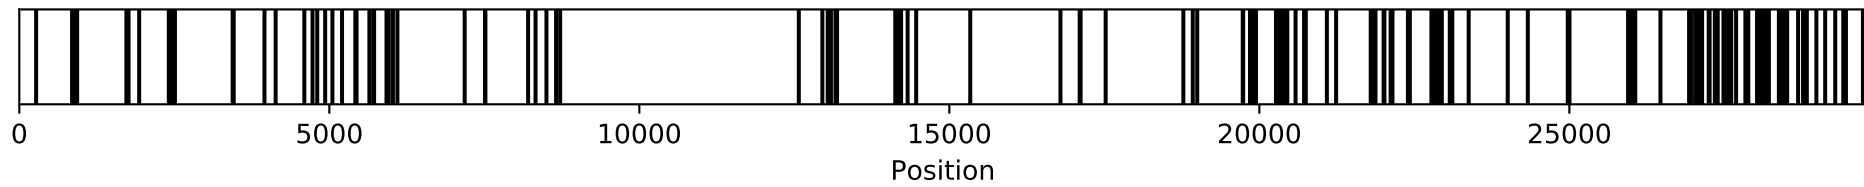

CR2 vs MA2  
Number of differences: 567

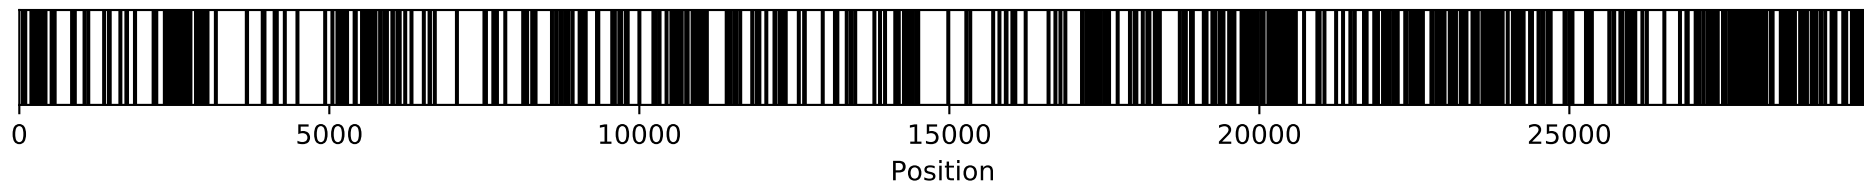

MA1 vs MA2  
Number of differences: 565

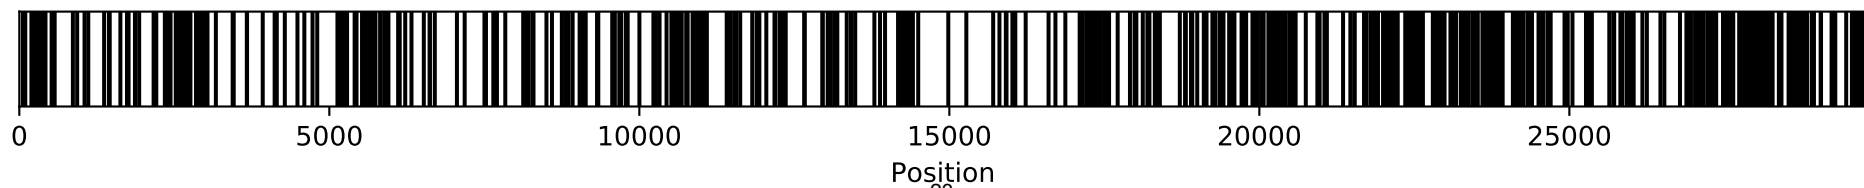

CR1 vs CR2  
Number of differences: 216

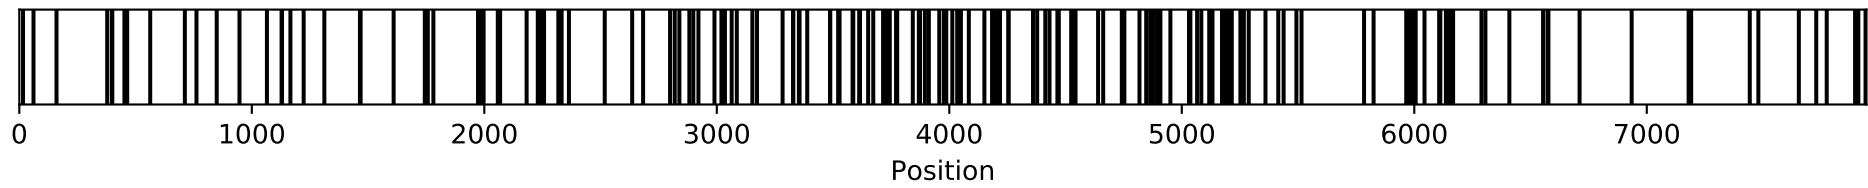

CR1 vs MA1  
Number of differences: 109

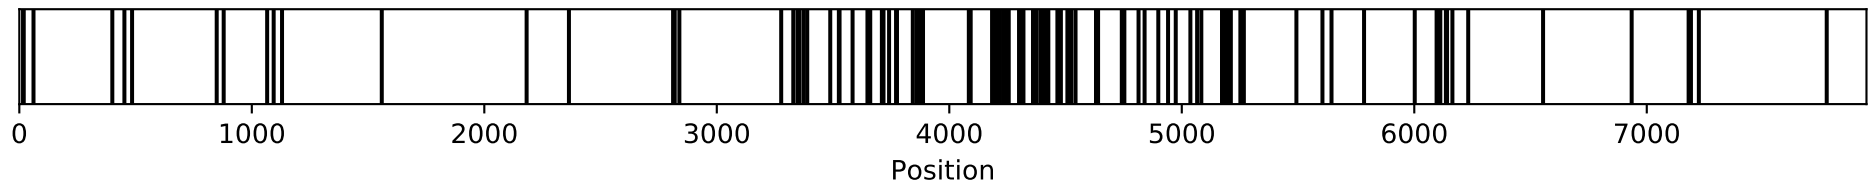

CR1 vs MA2  
Number of differences: 195

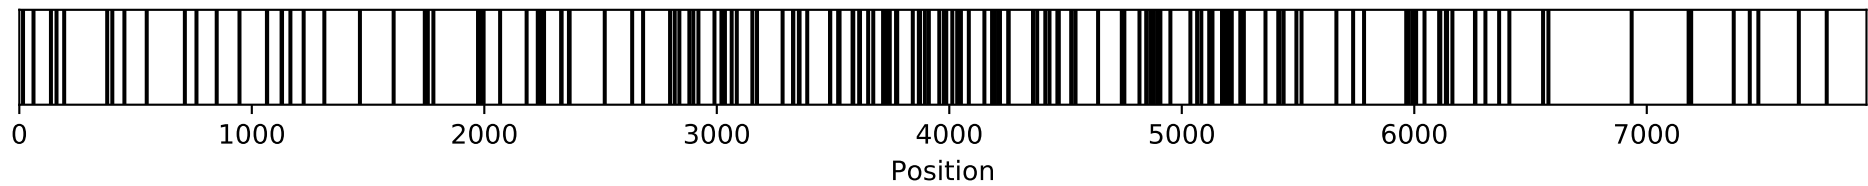

CR2 vs MA1  
Number of differences: 204

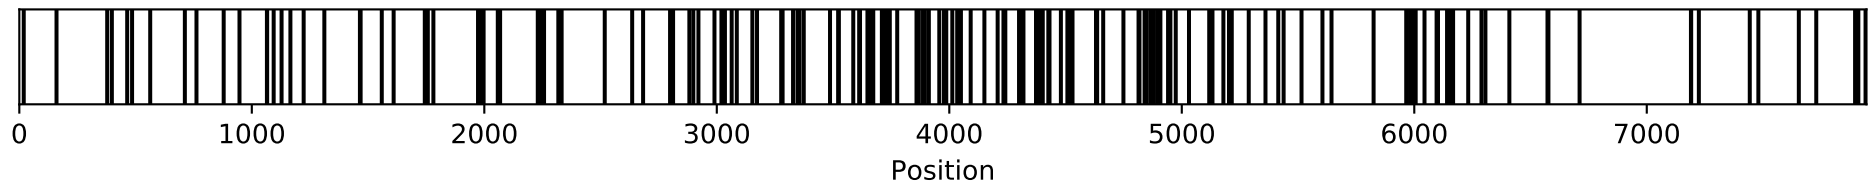

CR2 vs MA2  
Number of differences: 55

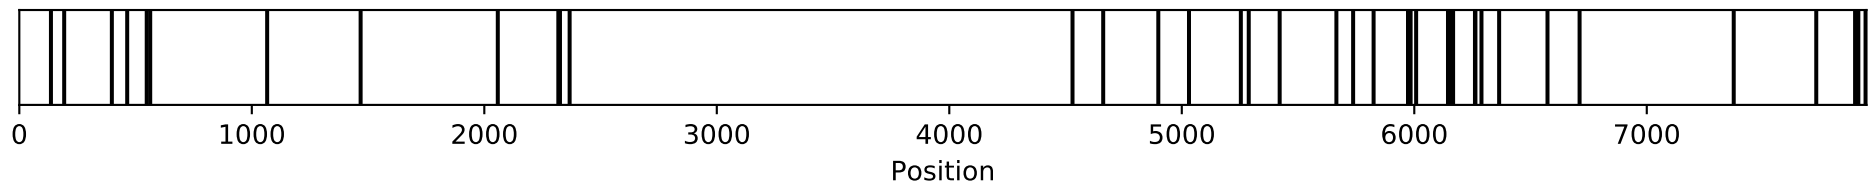

MA1 vs MA2  
Number of differences: 183

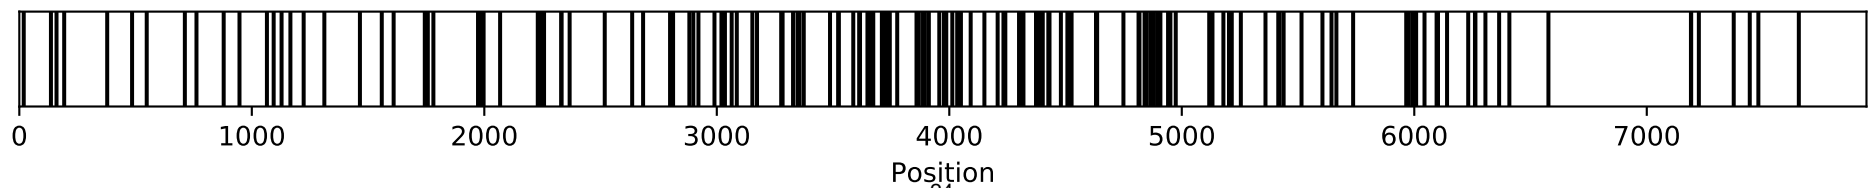



CR1 vs CR2  
Number of differences: 207

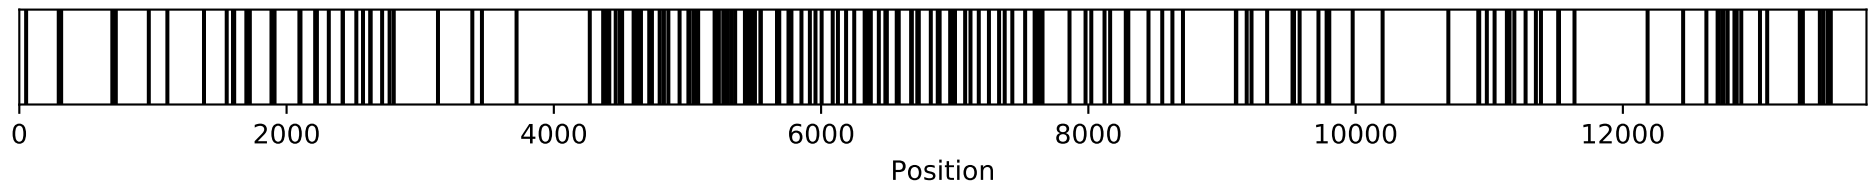

CR1 vs MA1  
Number of differences: 61

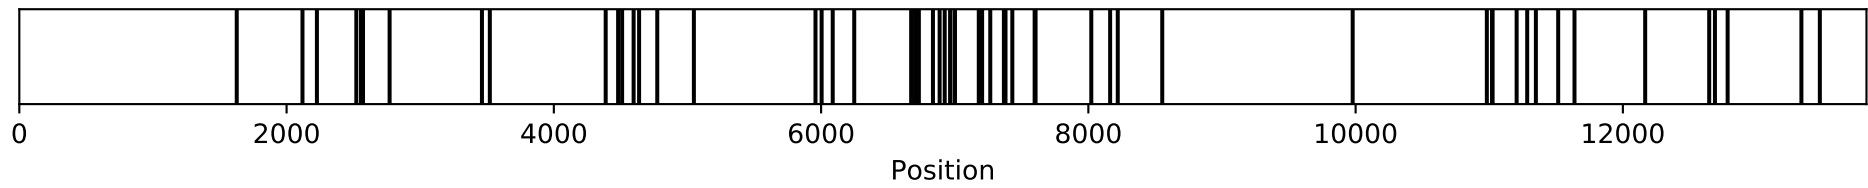

CR1 vs MA2  
Number of differences: 233

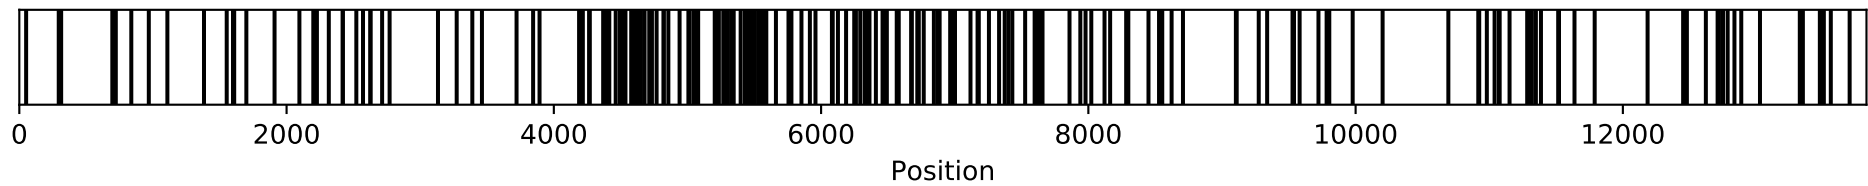

CR2 vs MA1  
Number of differences: 198

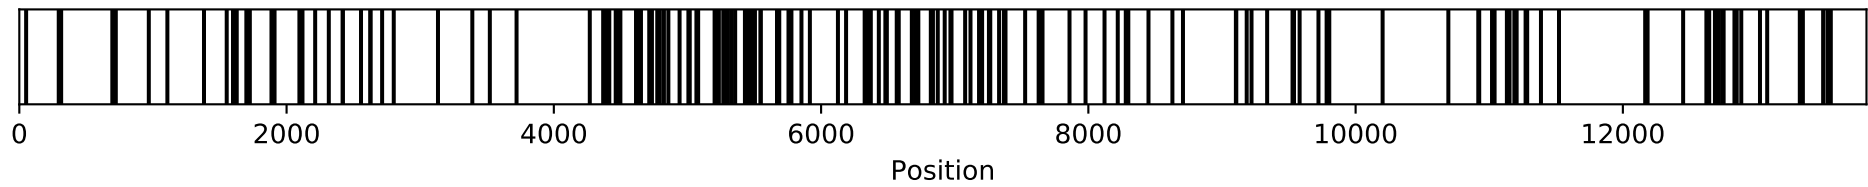

CR2 vs MA2  
Number of differences: 102

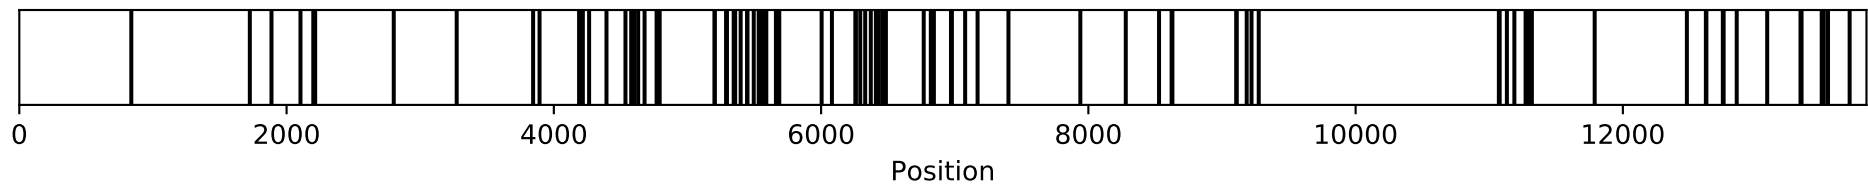

MA1 vs MA2  
Number of differences: 226

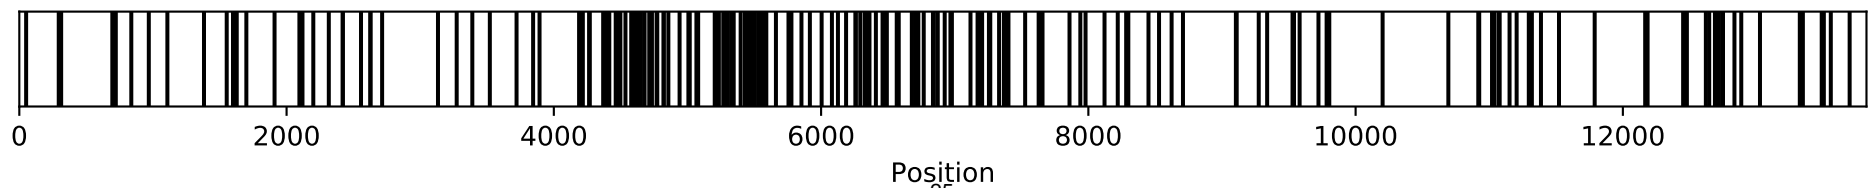

CR1 vs CR2  
Number of differences: 162

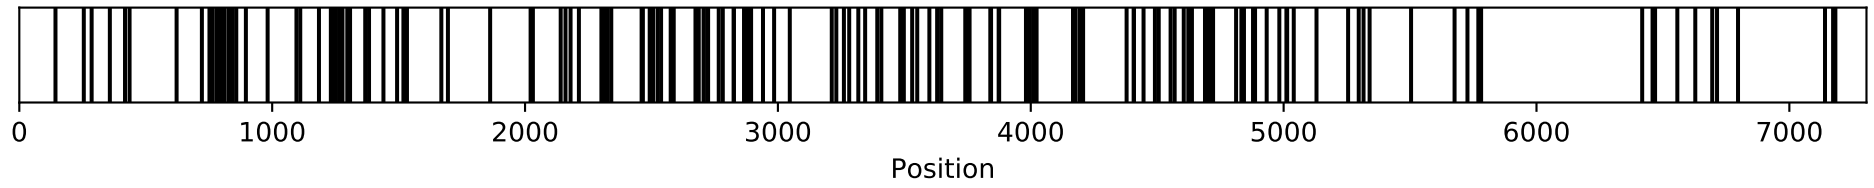

CR1 vs MA1  
Number of differences: 133

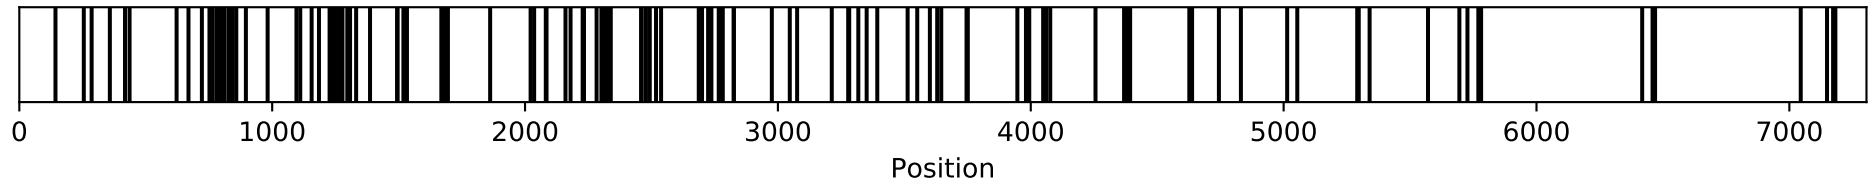

CR1 vs MA2  
Number of differences: 112

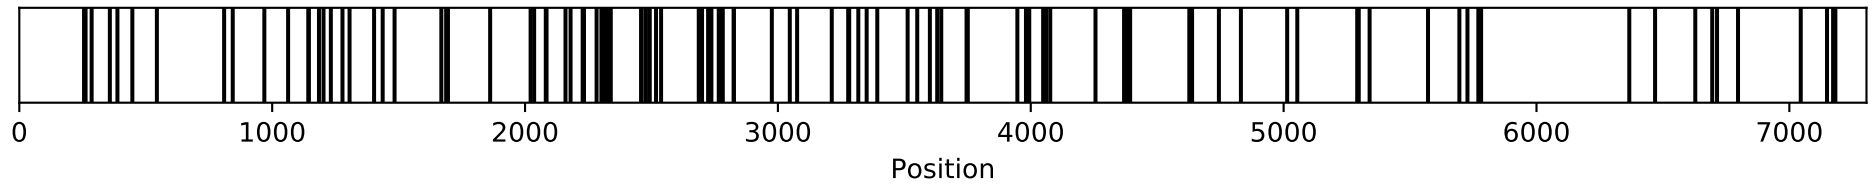

CR2 vs MA1  
Number of differences: 135

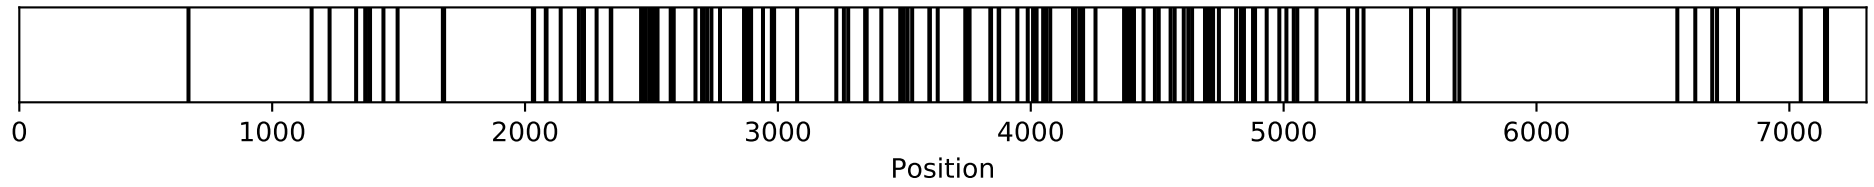

CR2 vs MA2  
Number of differences: 172

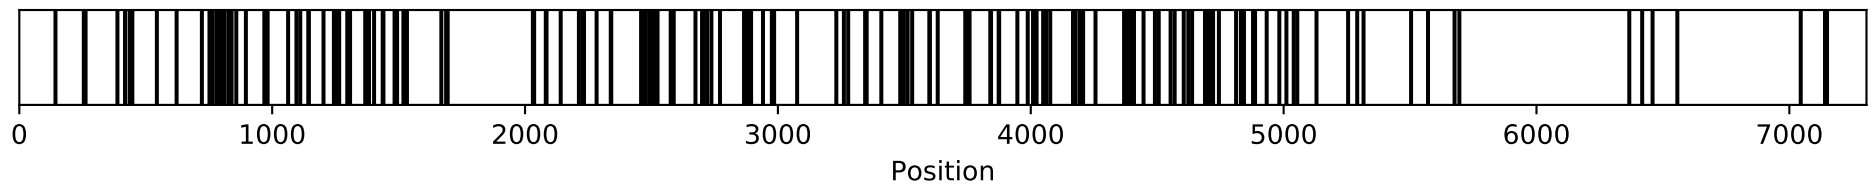

MA1 vs MA2  
Number of differences: 65

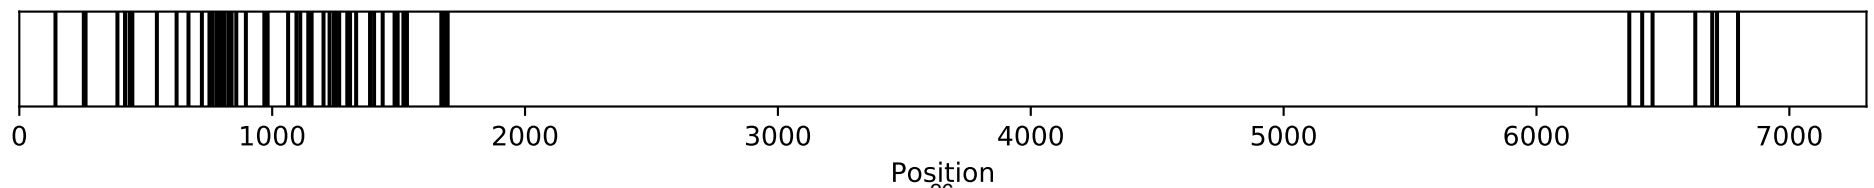

CR1 vs CR2  
Number of differences: 140

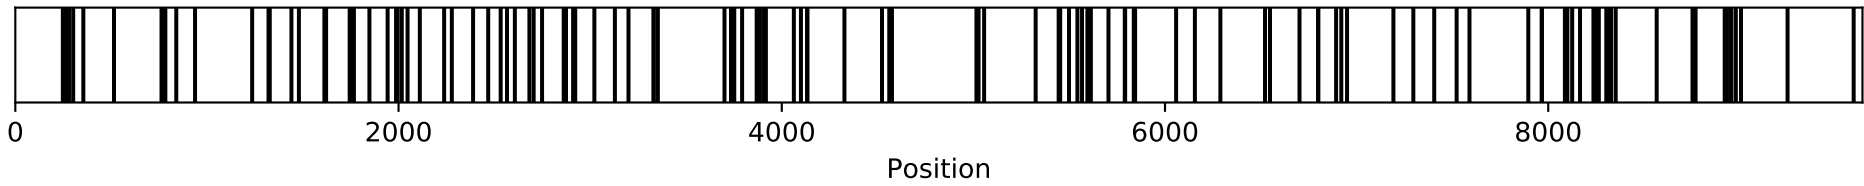

CR1 vs MA1  
Number of differences: 142

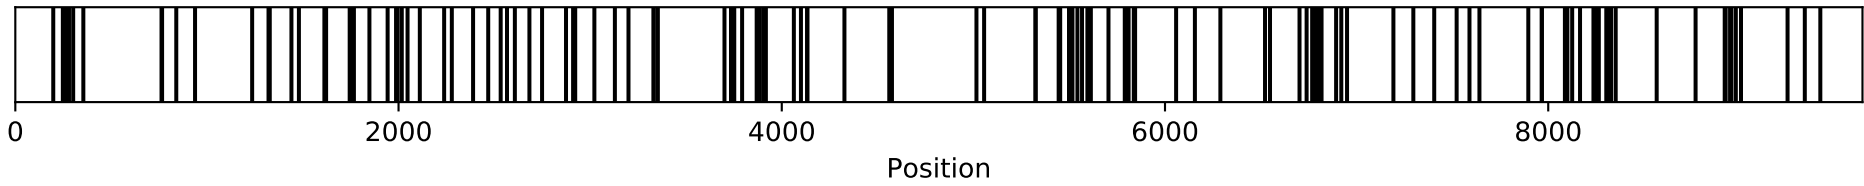

CR1 vs MA2  
Number of differences: 60

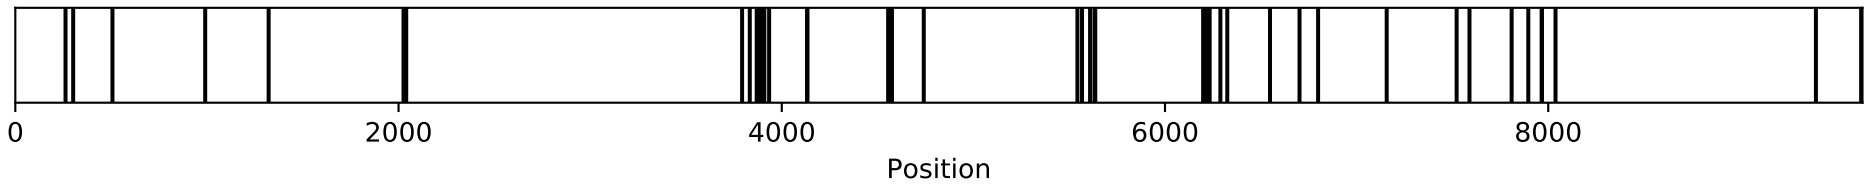

CR2 vs MA1  
Number of differences: 20

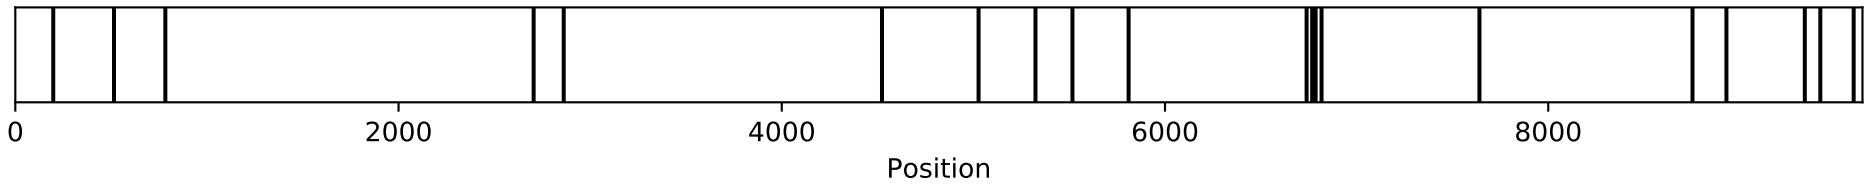

CR2 vs MA2  
Number of differences: 154

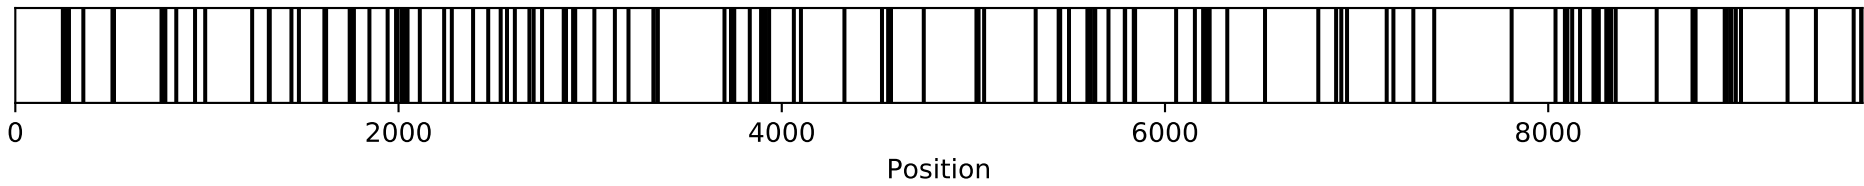

MA1 vs MA2  
Number of differences: 156

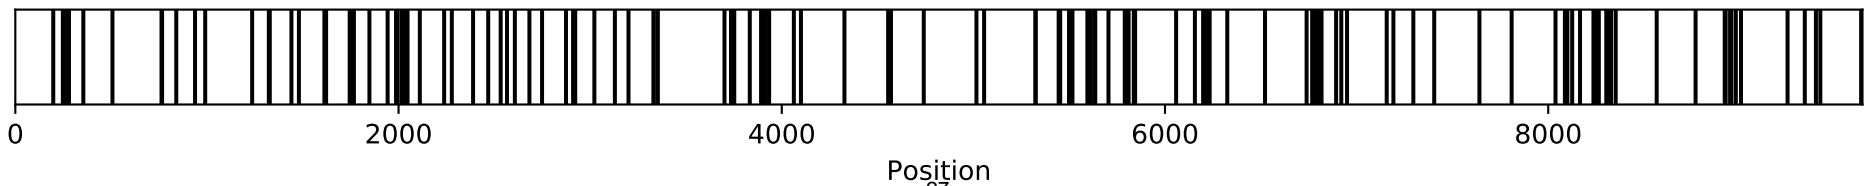

CR1 vs CR2  
Number of differences: 557

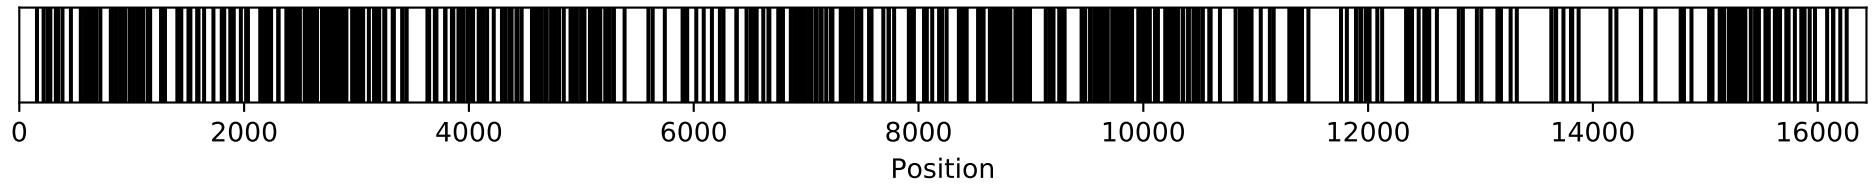

CR1 vs MA1  
Number of differences: 552

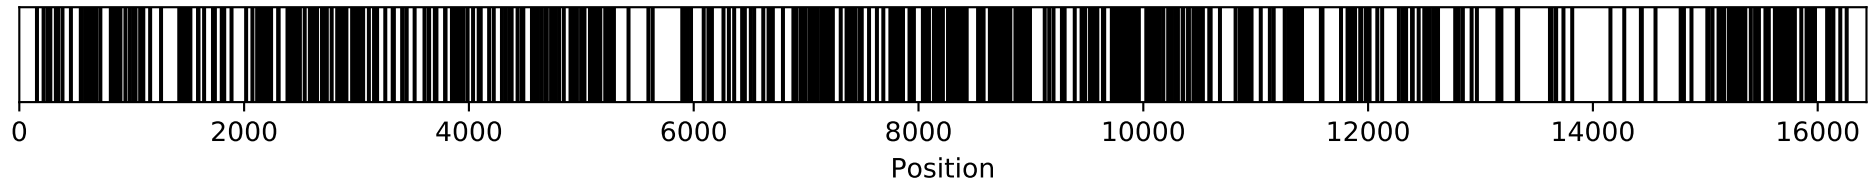

CR1 vs MA2  
Number of differences: 442

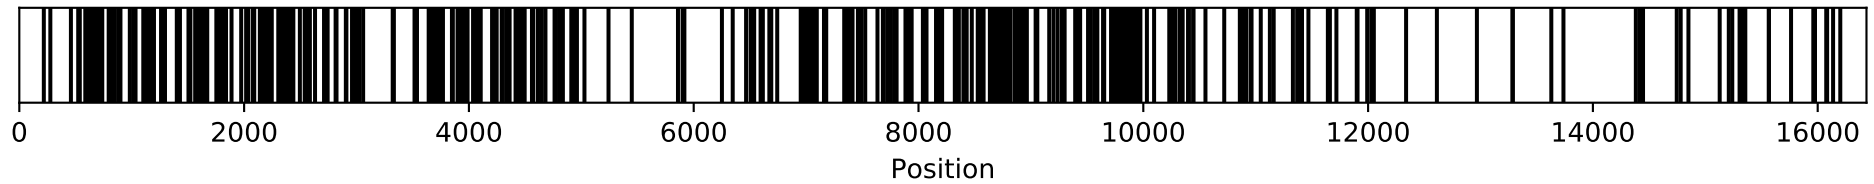

CR2 vs MA1  
Number of differences: 270

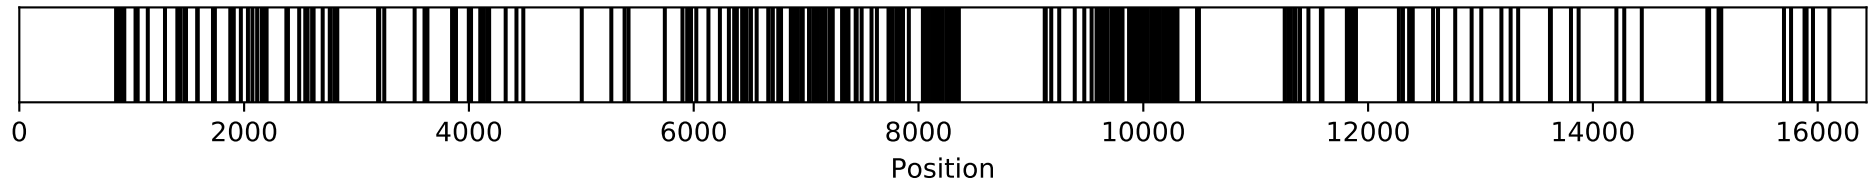

CR2 vs MA2  
Number of differences: 521

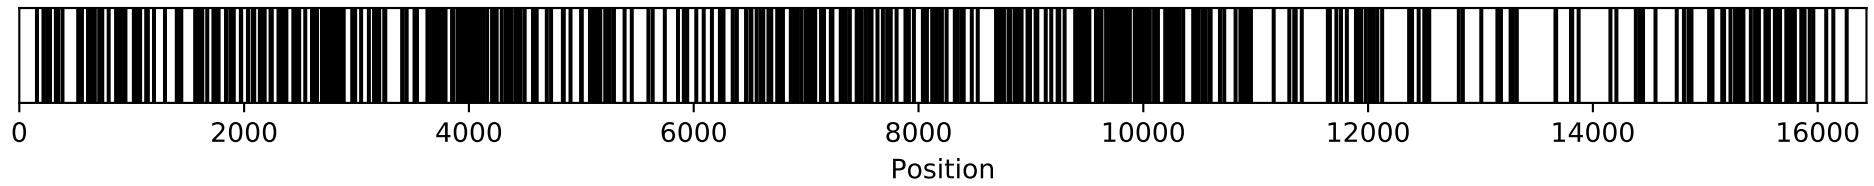

MA1 vs MA2  
Number of differences: 520

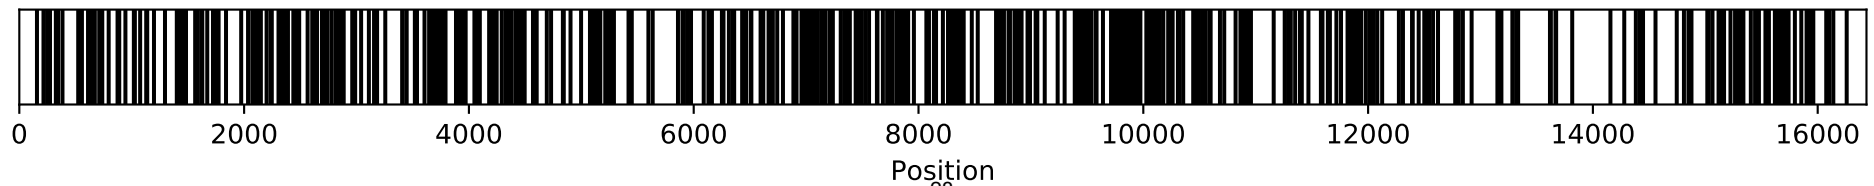

CR1 vs CR2  
Number of differences: 360

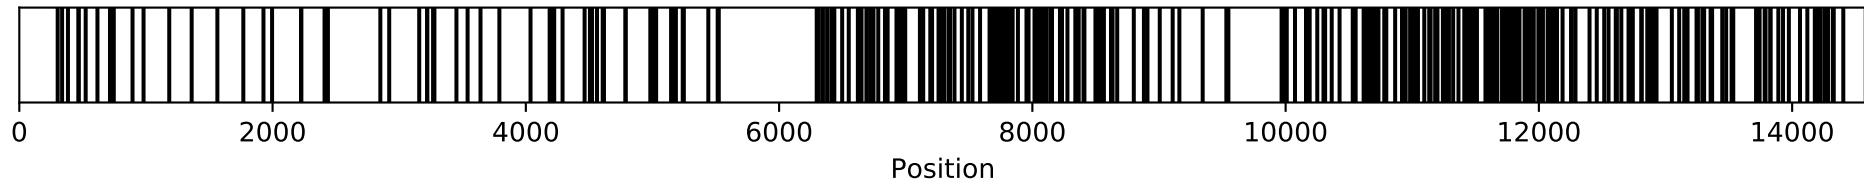

CR1 vs MA1  
Number of differences: 333

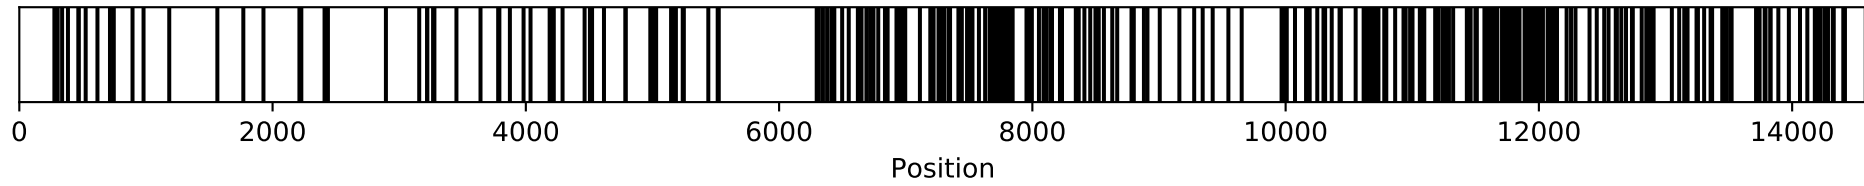

CR1 vs MA2  
Number of differences: 283

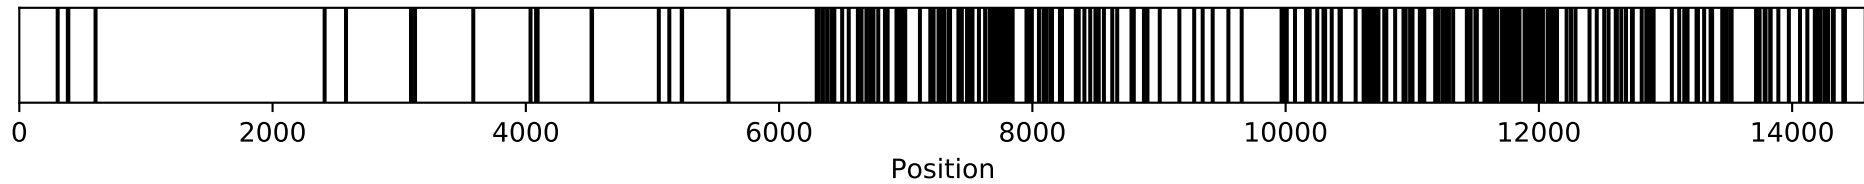

CR2 vs MA1  
Number of differences: 109

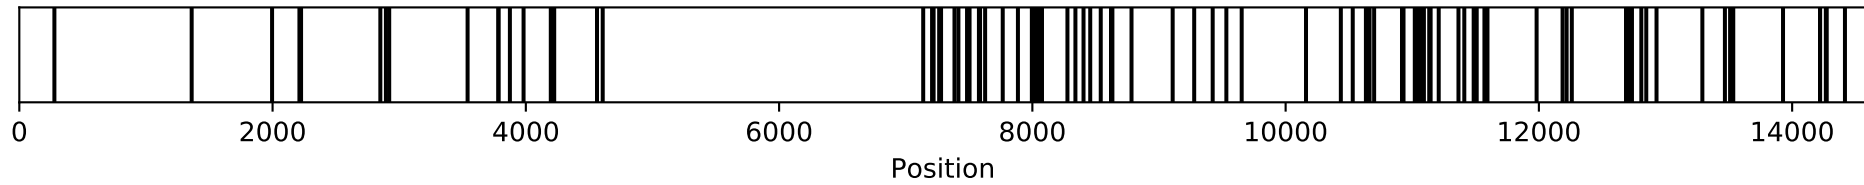

CR2 vs MA2  
Number of differences: 172

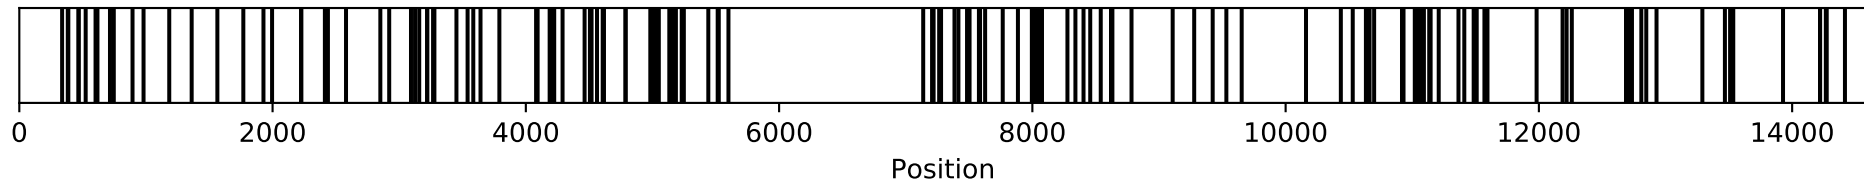

MA1 vs MA2  
Number of differences: 79

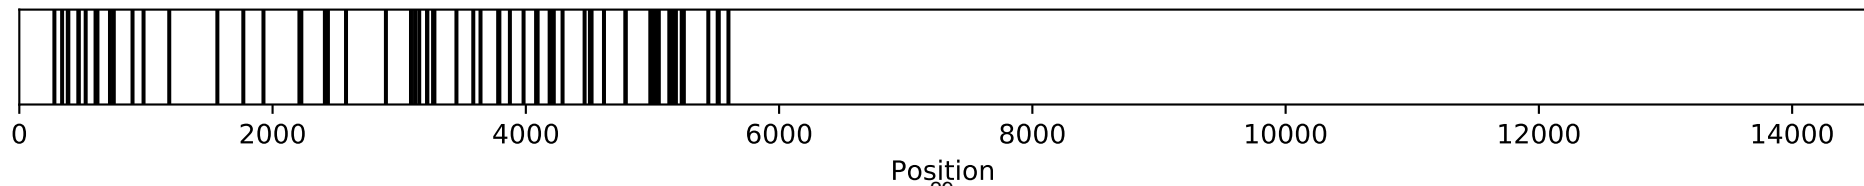

CR1 vs CR2  
Number of differences: 21

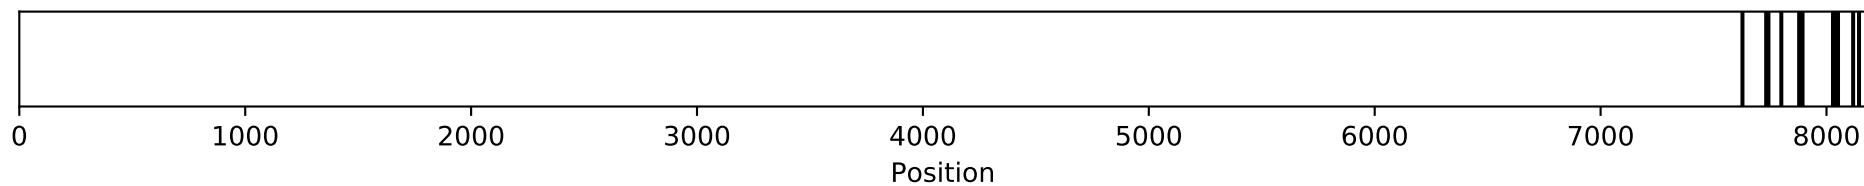

CR1 vs MA1  
Number of differences: 156

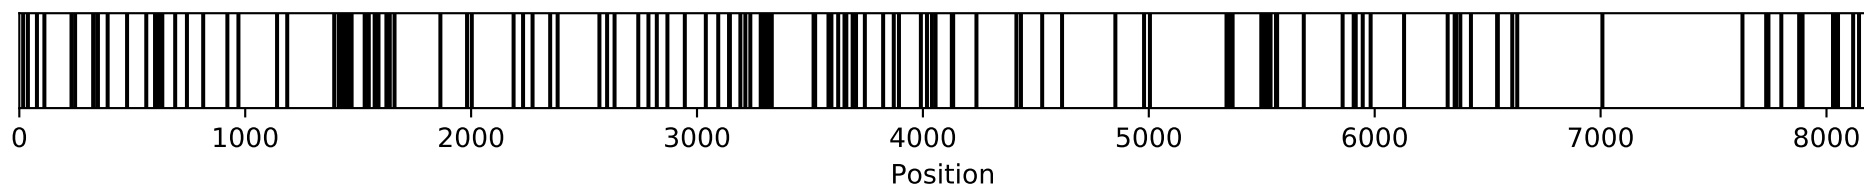

CR1 vs MA2  
Number of differences: 111

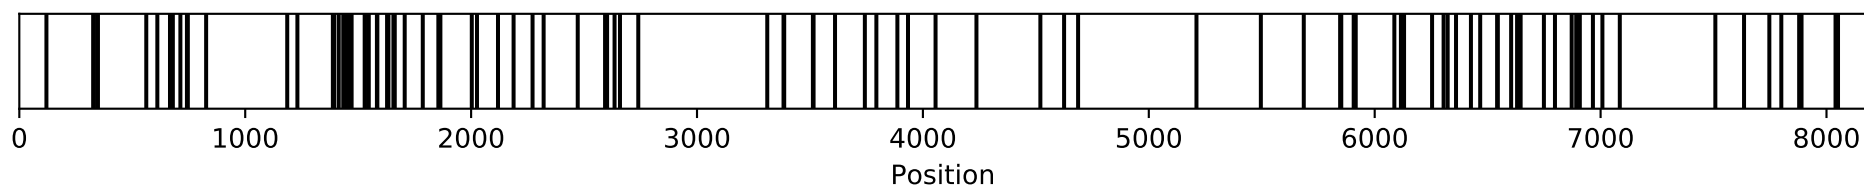

CR2 vs MA1  
Number of differences: 135

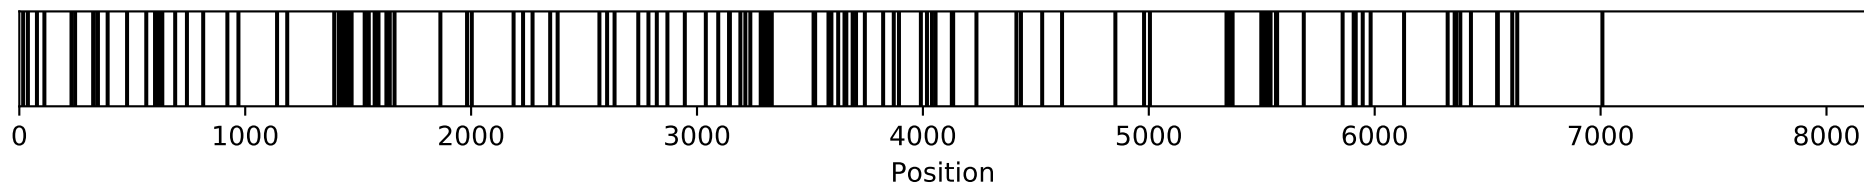

CR2 vs MA2  
Number of differences: 114

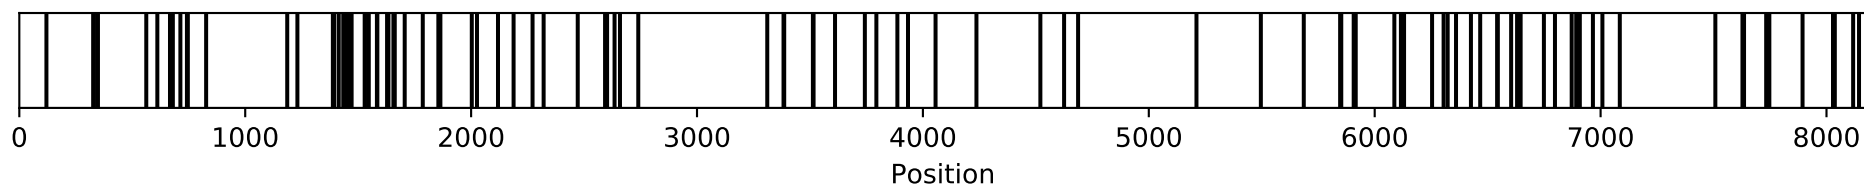

MA1 vs MA2  
Number of differences: 167

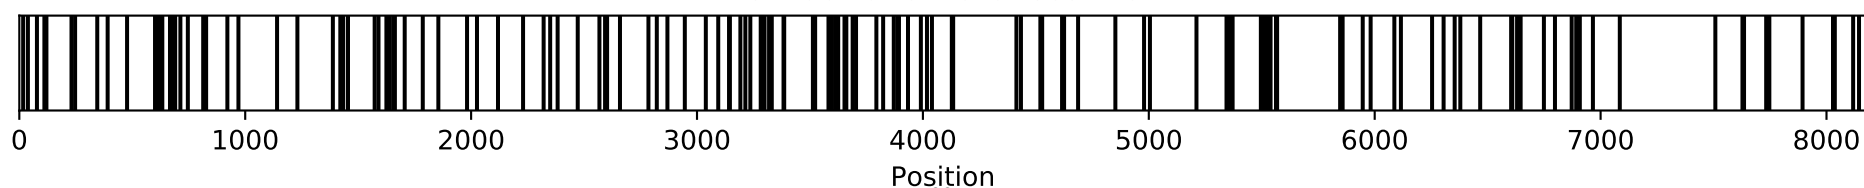

CR1 vs CR2  
Number of differences: 451

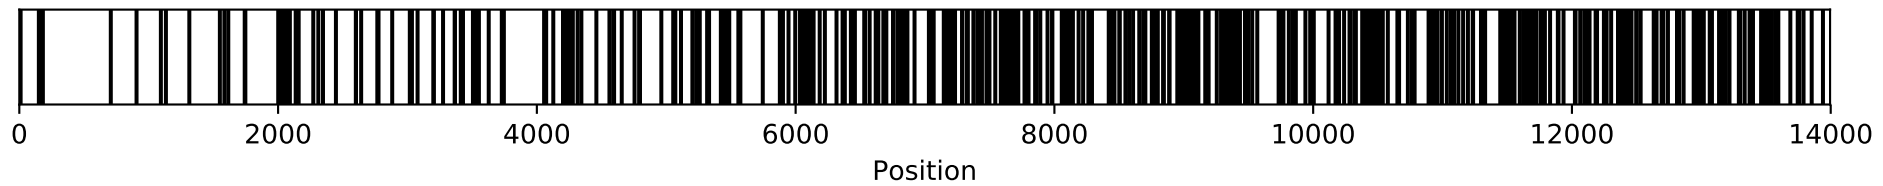

CR1 vs MA1  
Number of differences: 271

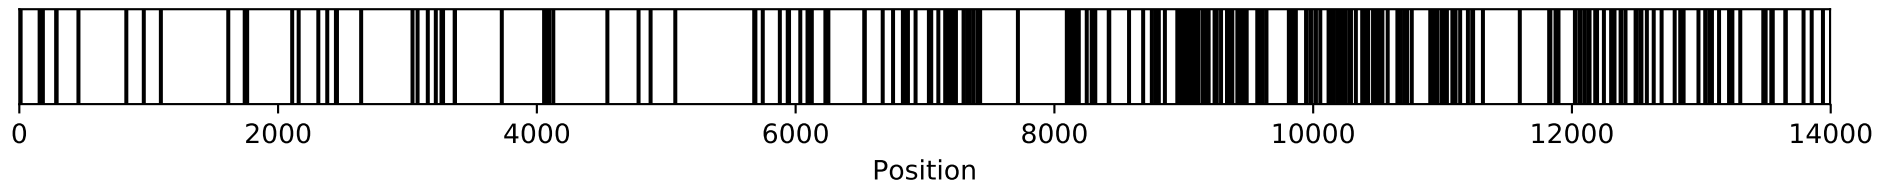

CR1 vs MA2  
Number of differences: 440

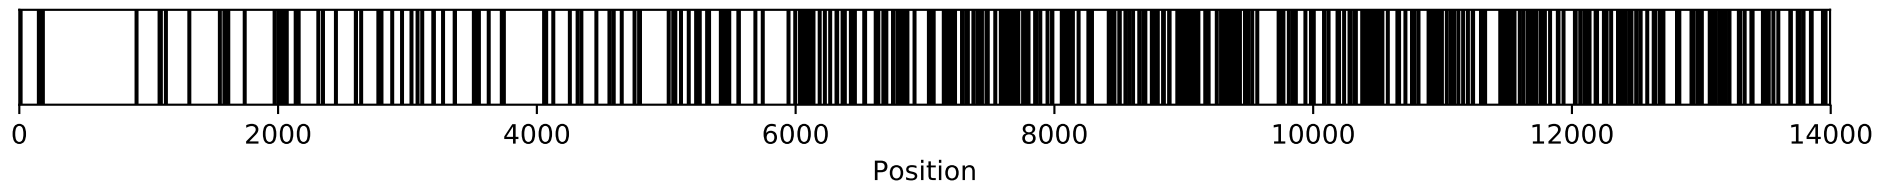

CR2 vs MA1  
Number of differences: 456

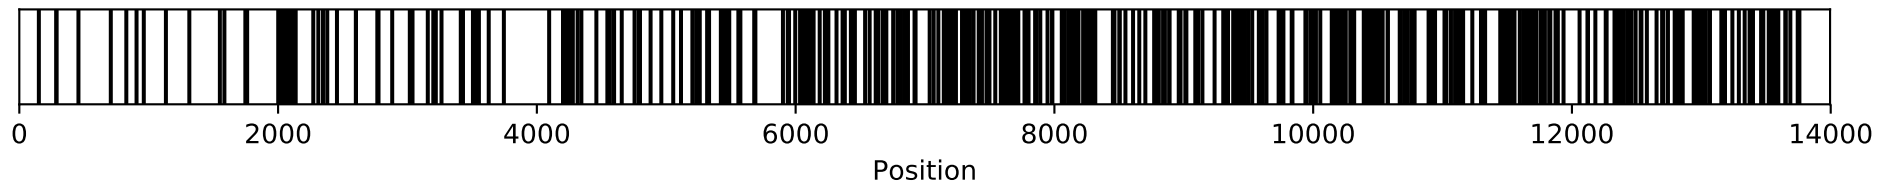

CR2 vs MA2  
Number of differences: 91

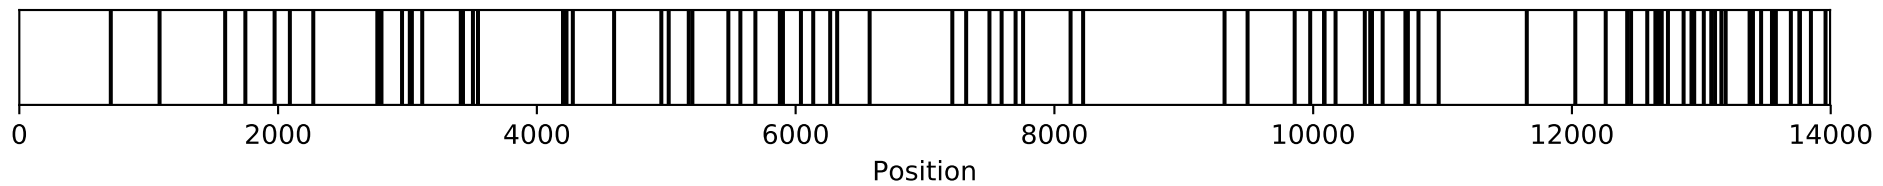

MA1 vs MA2  
Number of differences: 450

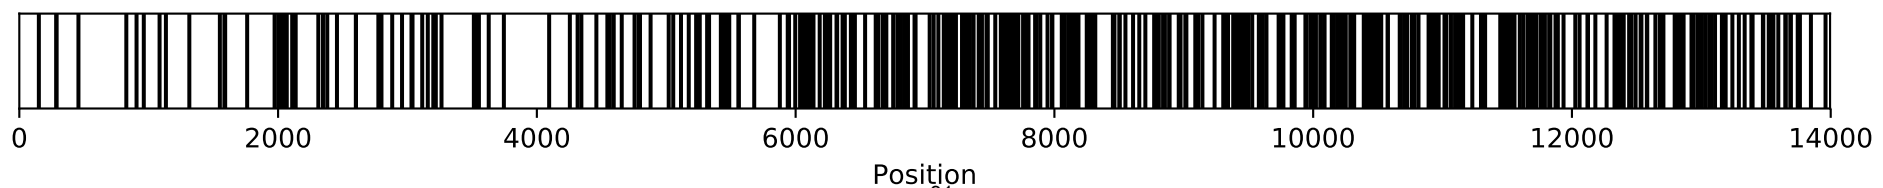

CR1 vs CR2  
Number of differences: 103

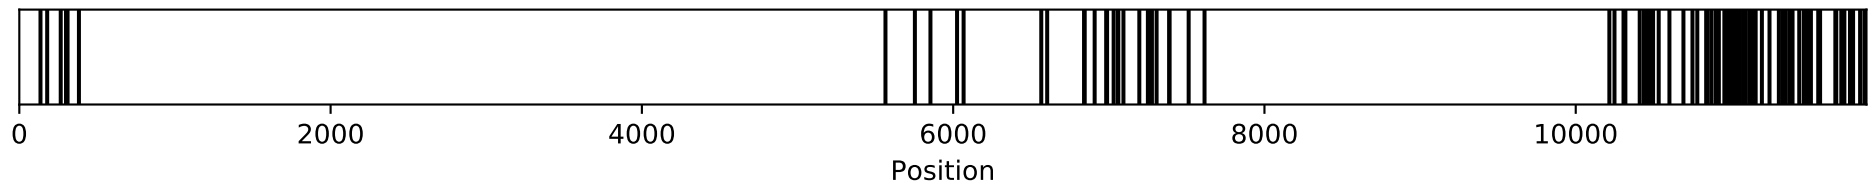

CR1 vs MA1  
Number of differences: 196

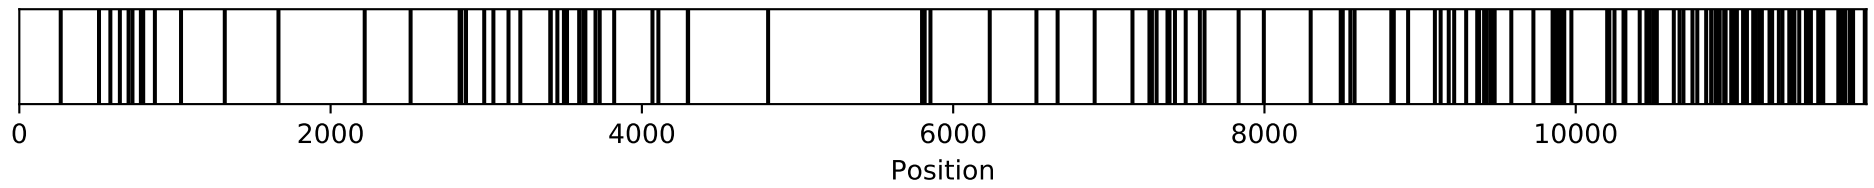

CR1 vs MA2  
Number of differences: 190

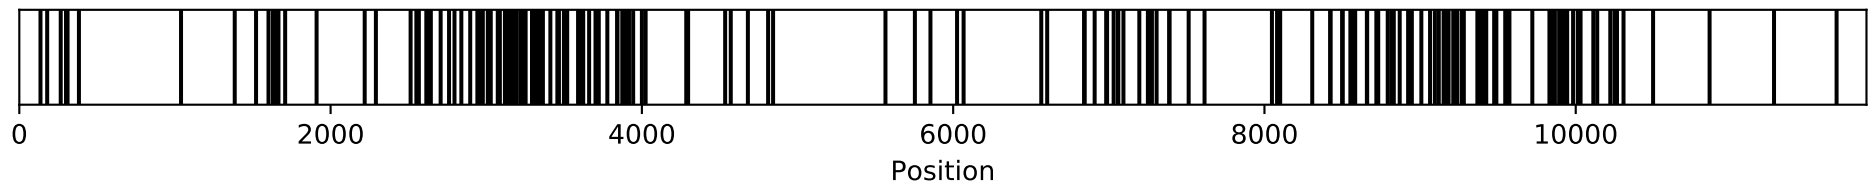

CR2 vs MA1  
Number of differences: 196

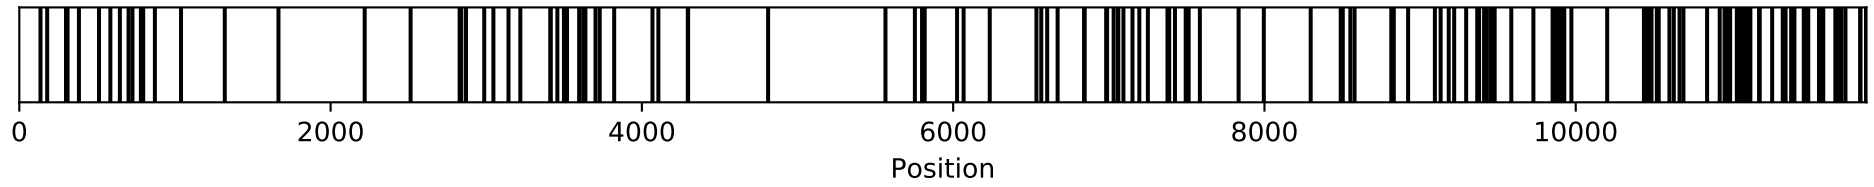

CR2 vs MA2  
Number of differences: 225

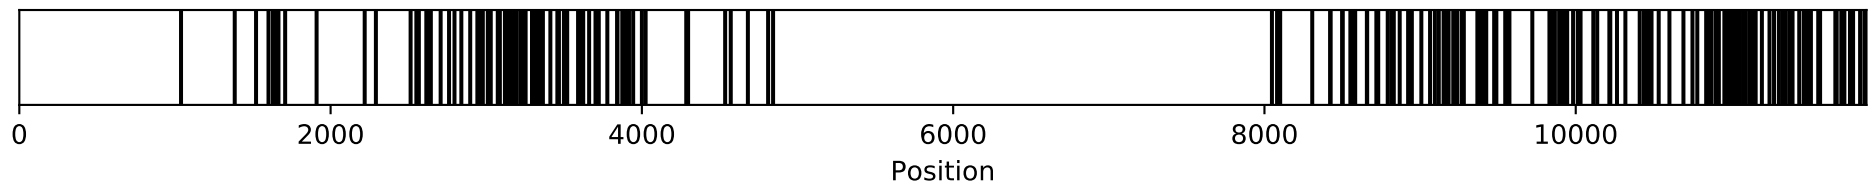

MA1 vs MA2  
Number of differences: 304

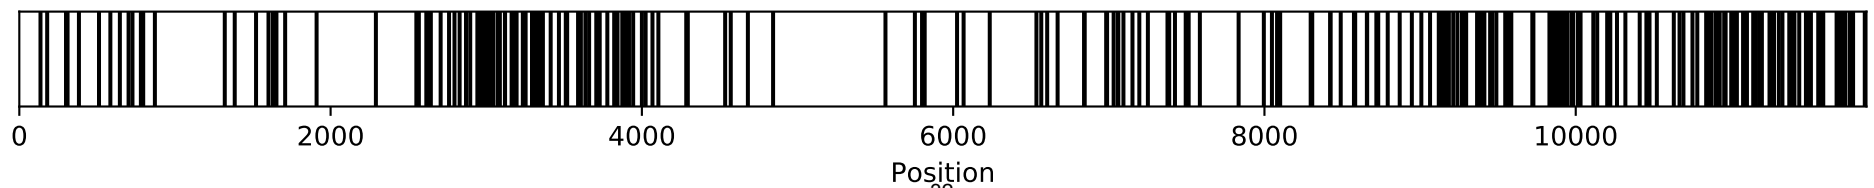



CR1 vs CR2  
Number of differences: 299

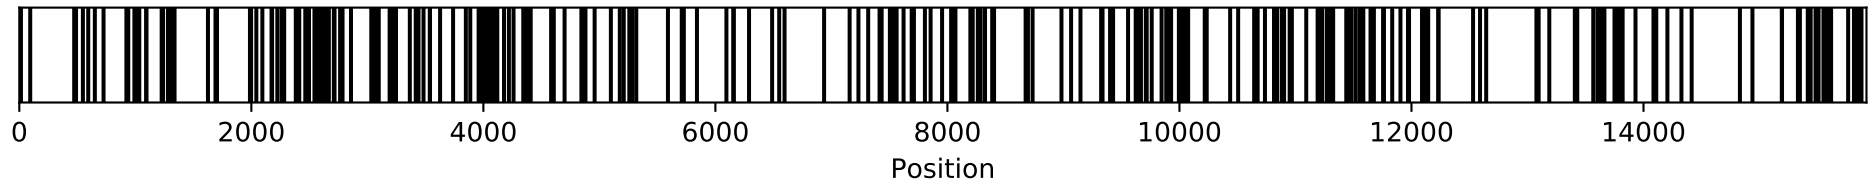

CR1 vs MA1  
Number of differences: 301

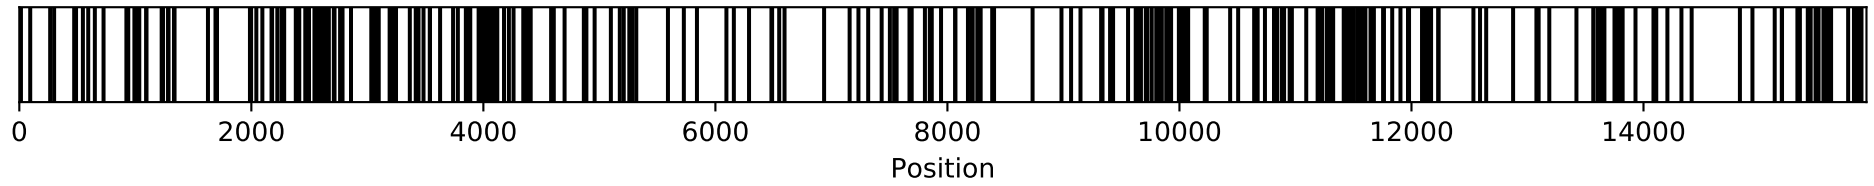

CR1 vs MA2  
Number of differences: 129

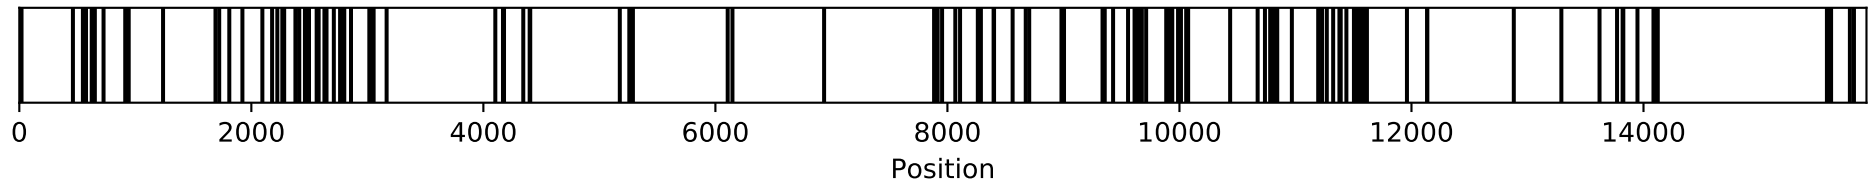

CR2 vs MA1  
Number of differences: 64

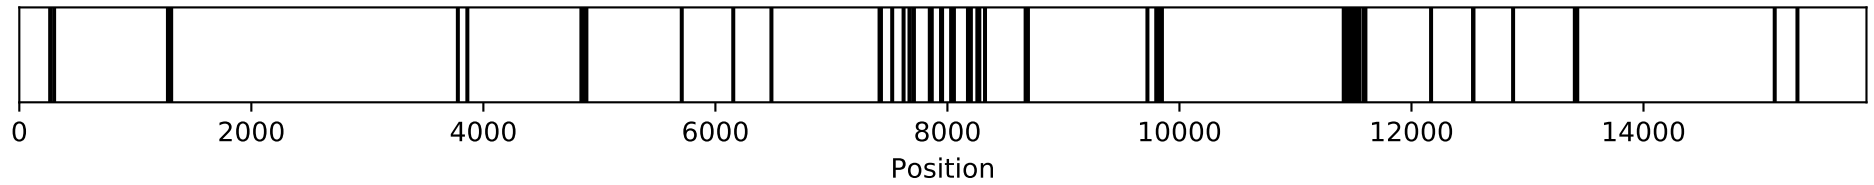

CR2 vs MA2  
Number of differences: 280

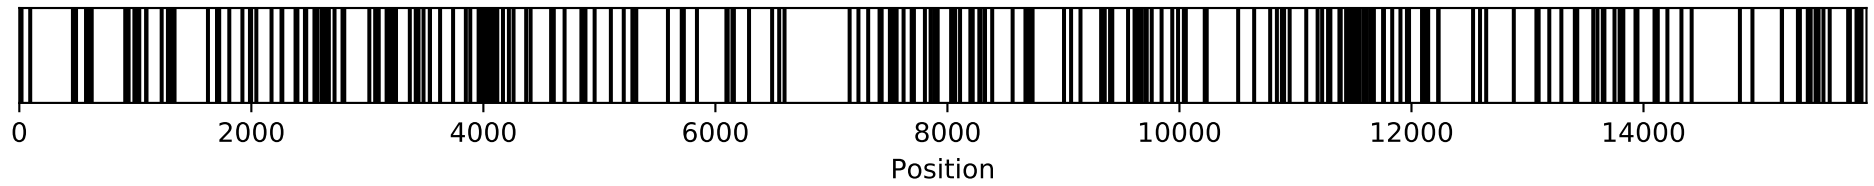

MA1 vs MA2  
Number of differences: 279

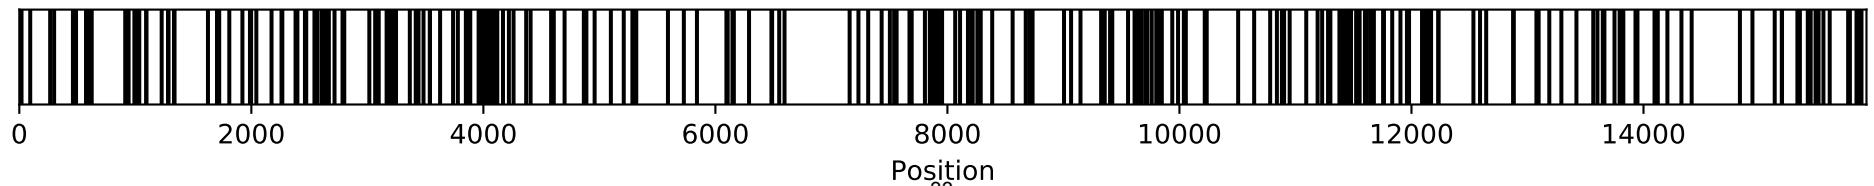

CR1 vs CR2  
Number of differences: 143

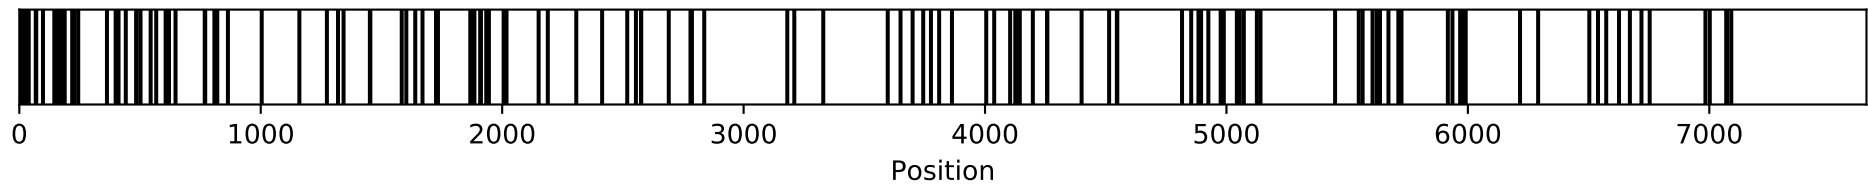

CR1 vs MA1  
Number of differences: 139

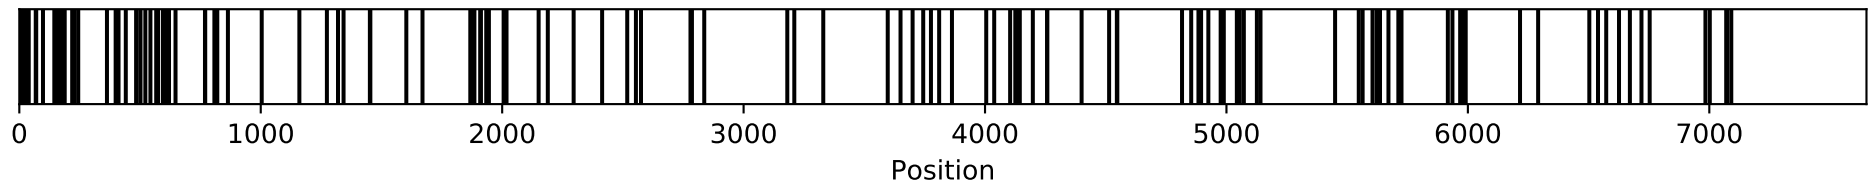

CR1 vs MA2  
Number of differences: 59

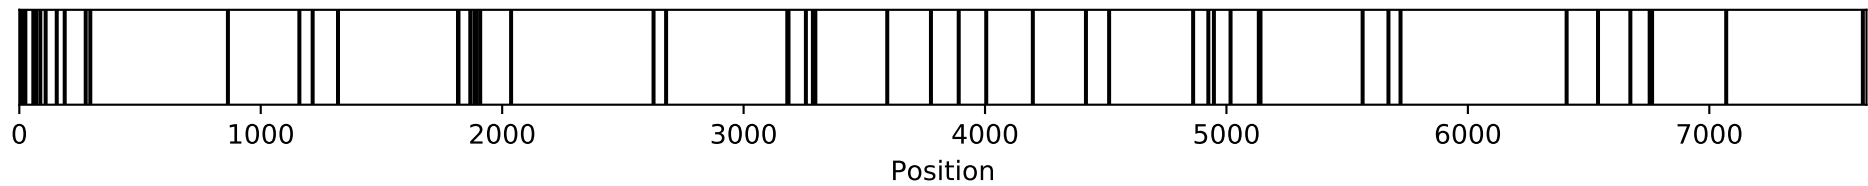

CR2 vs MA1  
Number of differences: 16

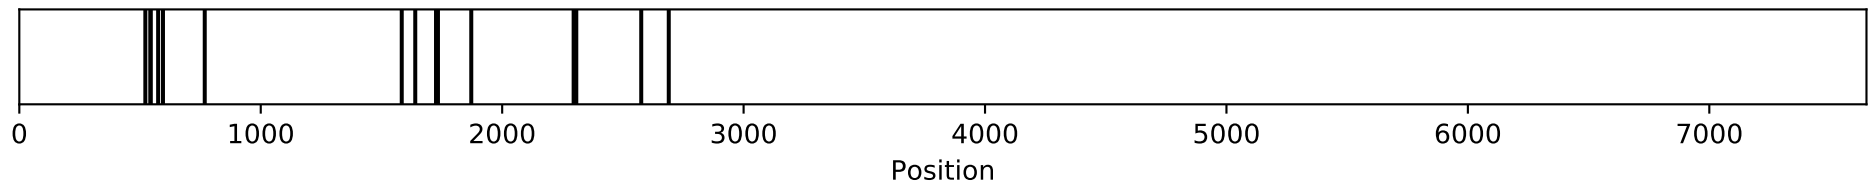

CR2 vs MA2  
Number of differences: 152

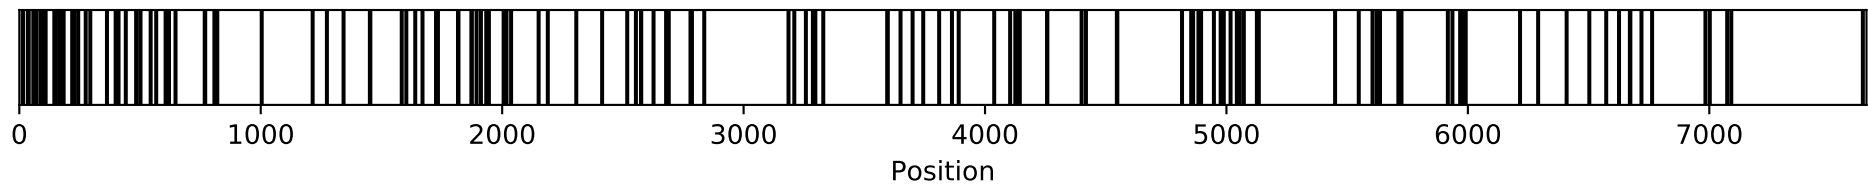

MA1 vs MA2  
Number of differences: 148

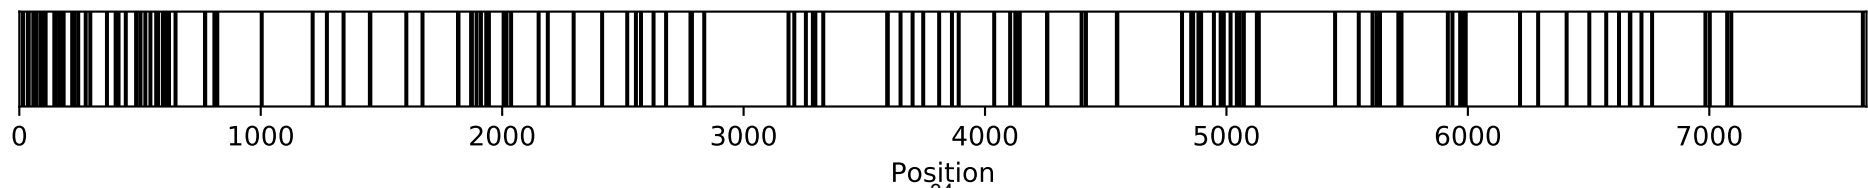

CR1 vs CR2  
Number of differences: 178

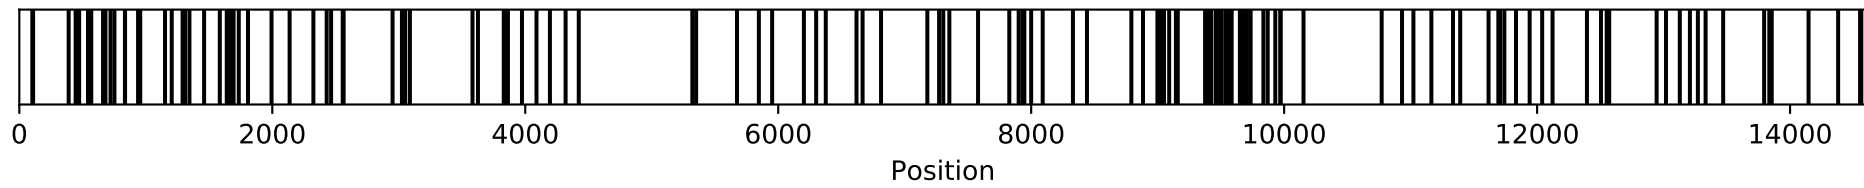

CR1 vs MA1  
Number of differences: 132

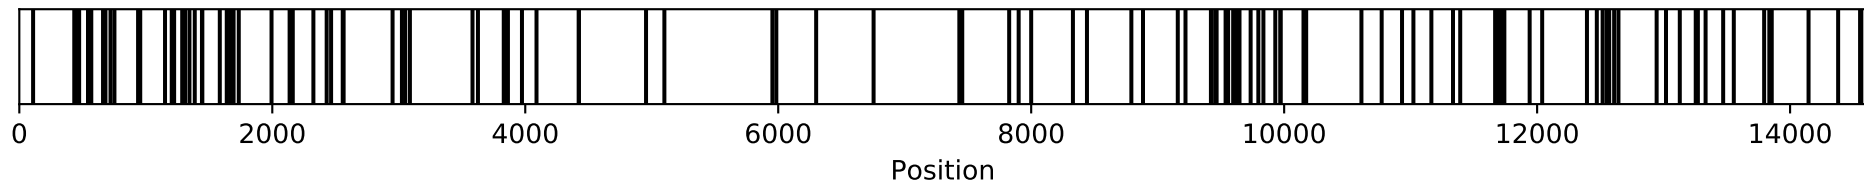

CR1 vs MA2  
Number of differences: 88

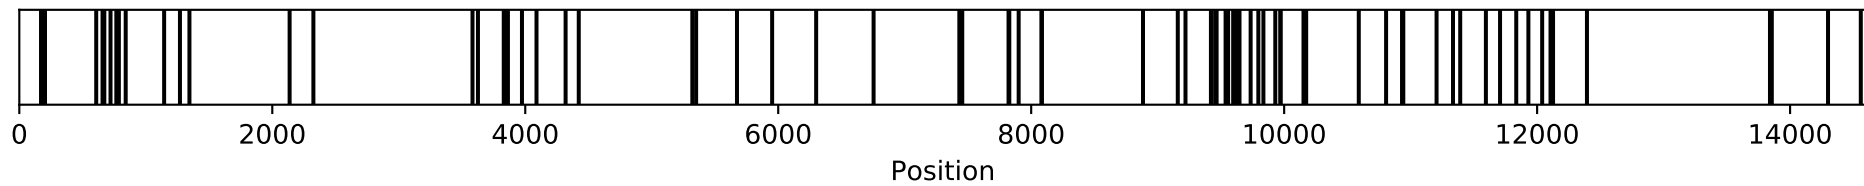

CR2 vs MA1  
Number of differences: 120

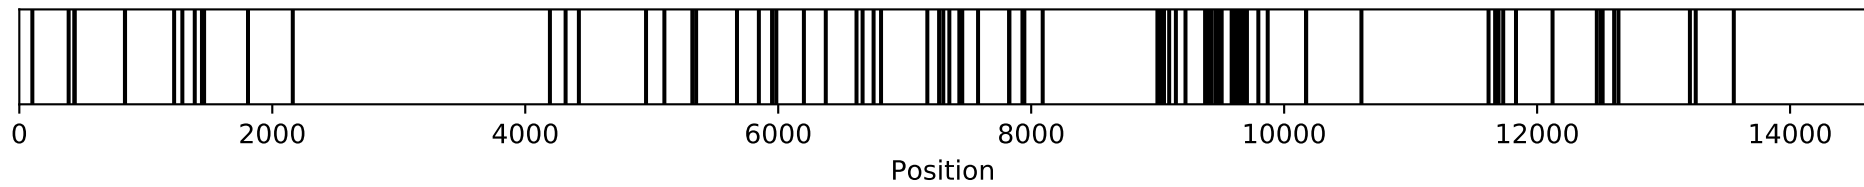

CR2 vs MA2  
Number of differences: 180

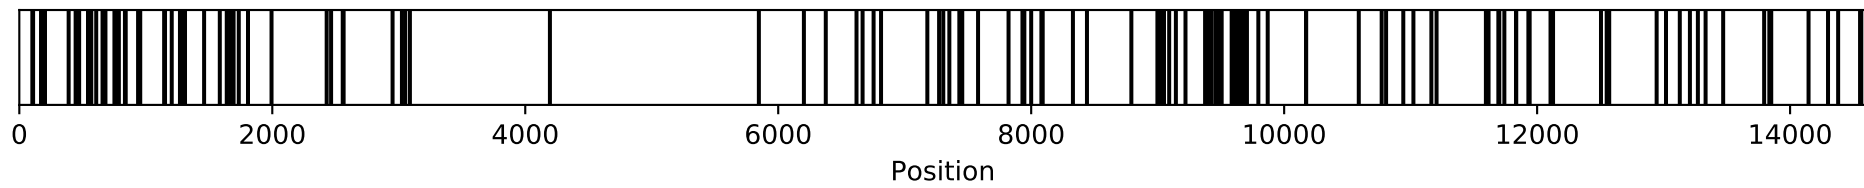

MA1 vs MA2  
Number of differences: 118

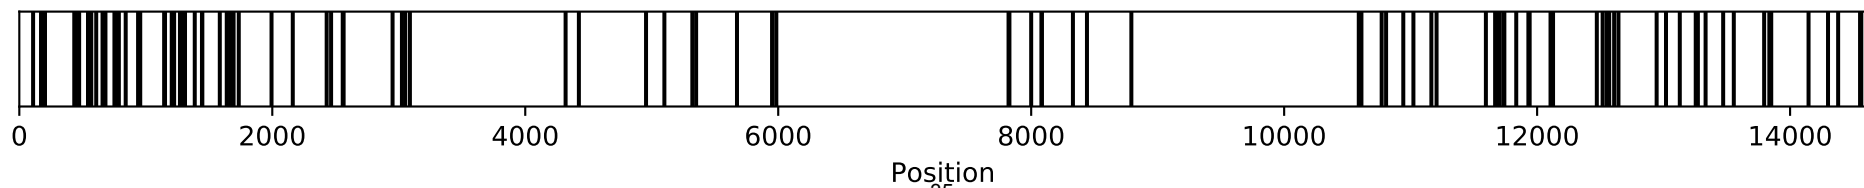

CR1 vs CR2  
Number of differences: 429

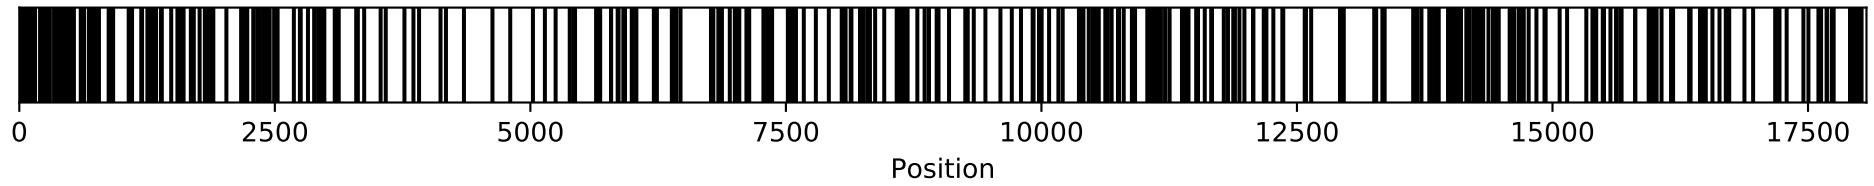

CR1 vs MA1  
Number of differences: 423

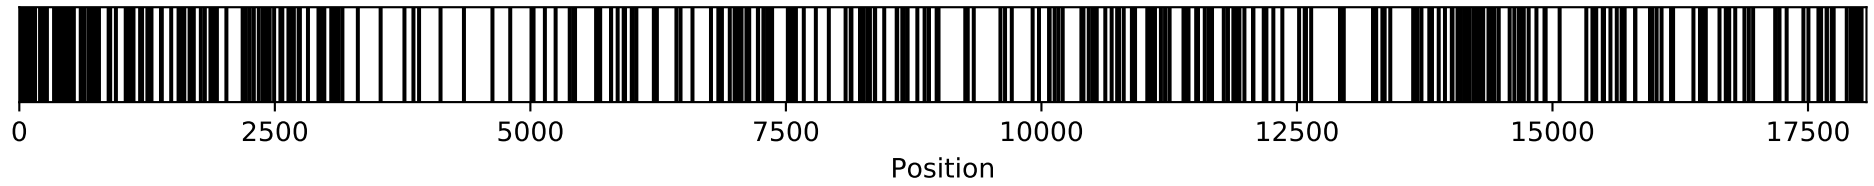

CR1 vs MA2  
Number of differences: 204

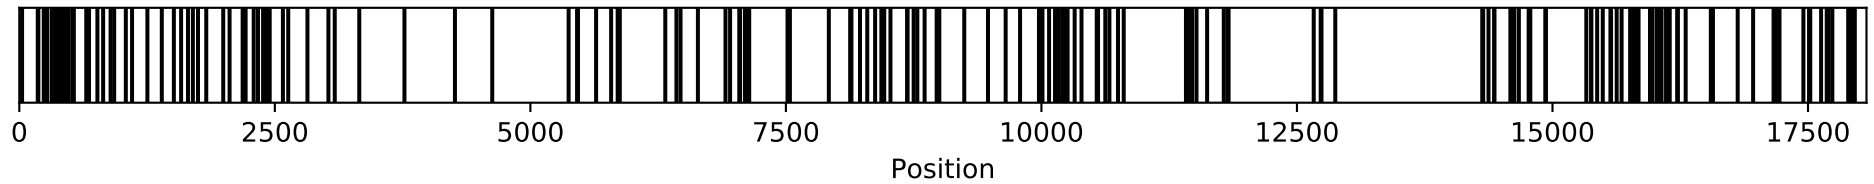

CR2 vs MA1  
Number of differences: 137

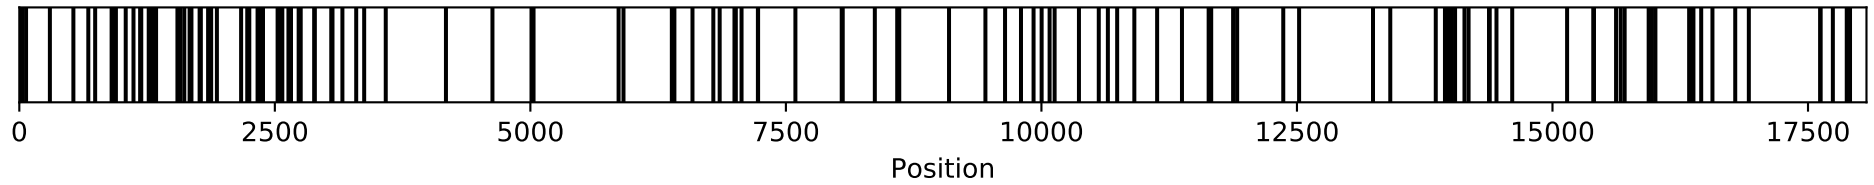

CR2 vs MA2  
Number of differences: 461

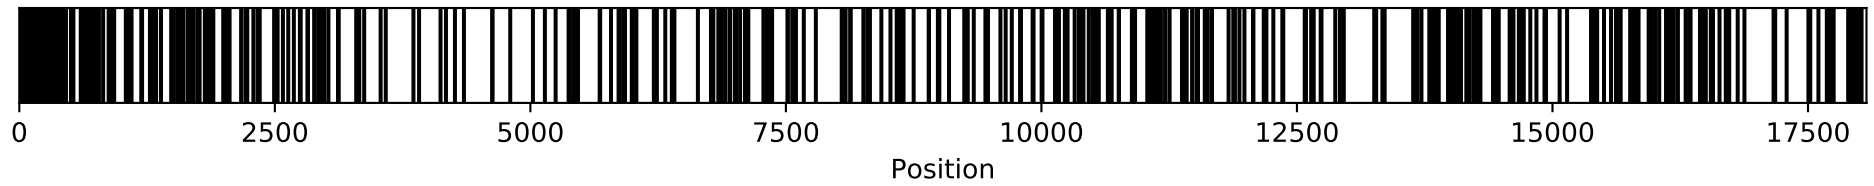

MA1 vs MA2  
Number of differences: 455

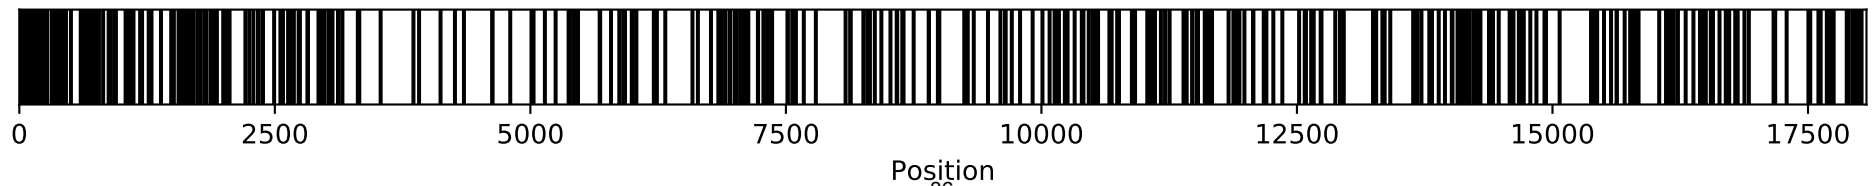

CR1 vs CR2  
Number of differences: 510

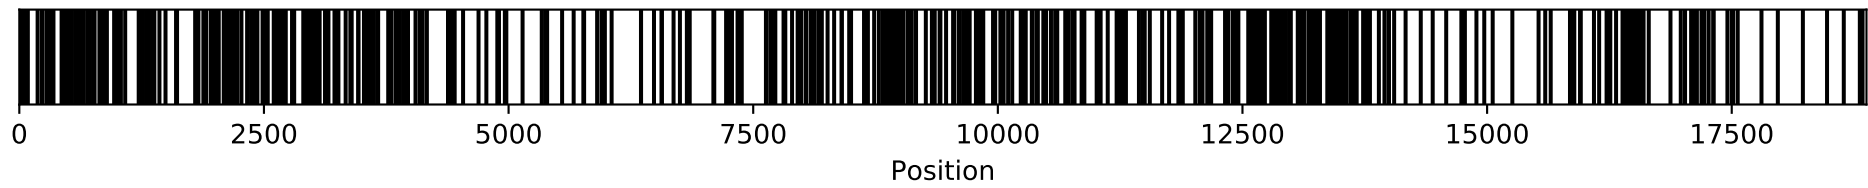

CR1 vs MA1  
Number of differences: 503

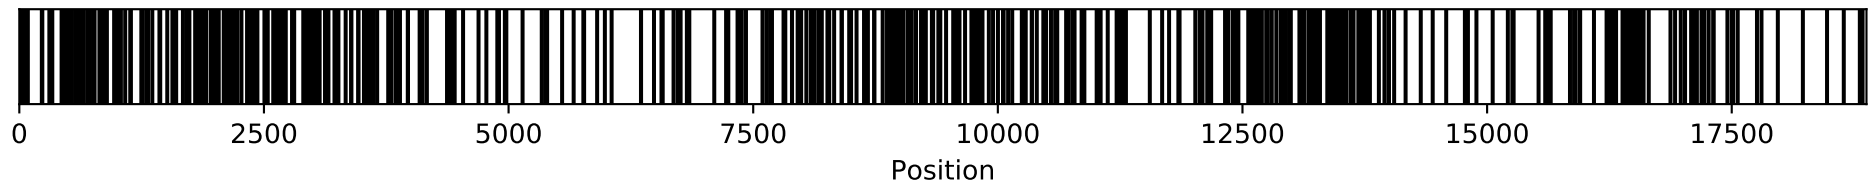

CR1 vs MA2  
Number of differences: 317

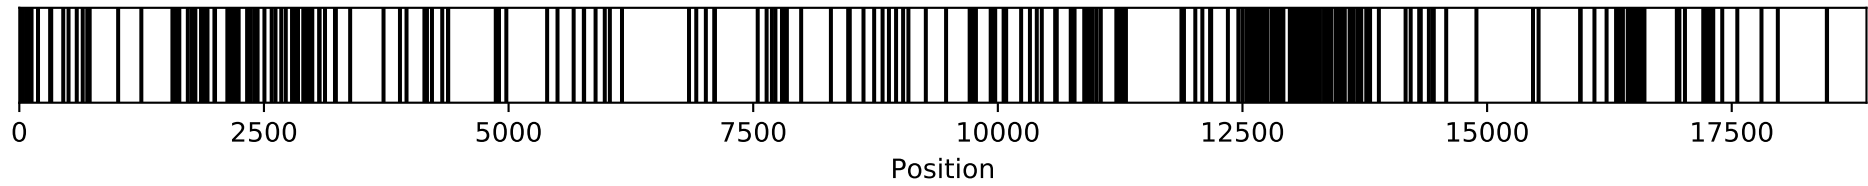

CR2 vs MA1  
Number of differences: 164

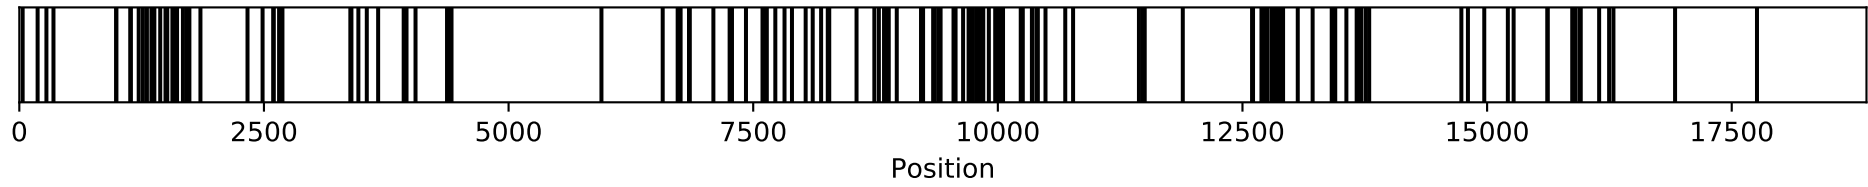

CR2 vs MA2  
Number of differences: 538

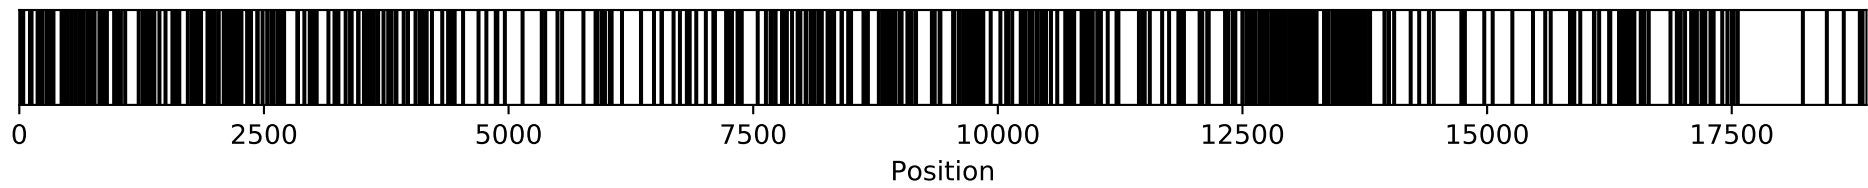

MA1 vs MA2  
Number of differences: 526

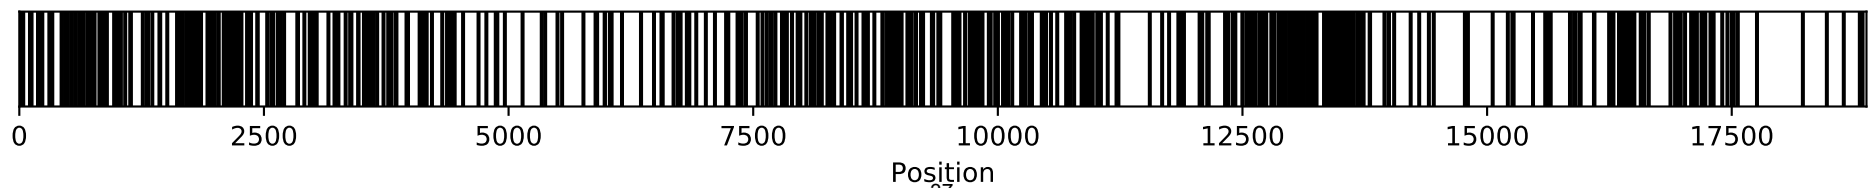

CR1 vs CR2  
Number of differences: 319

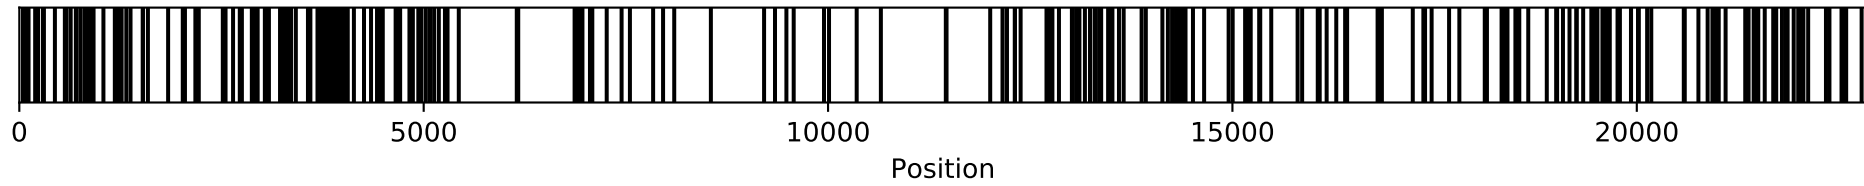

CR1 vs MA1  
Number of differences: 328

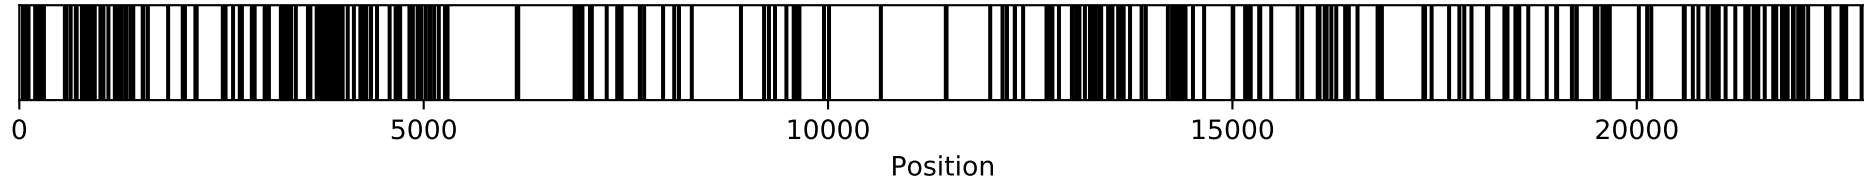

CR1 vs MA2  
Number of differences: 98

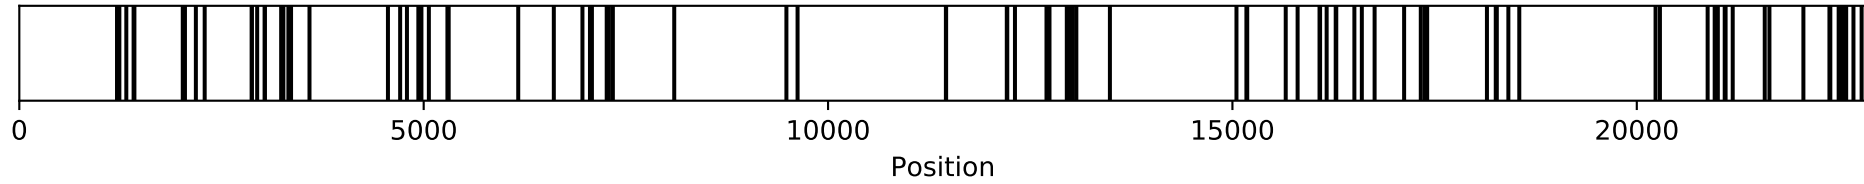

CR2 vs MA1  
Number of differences: 89

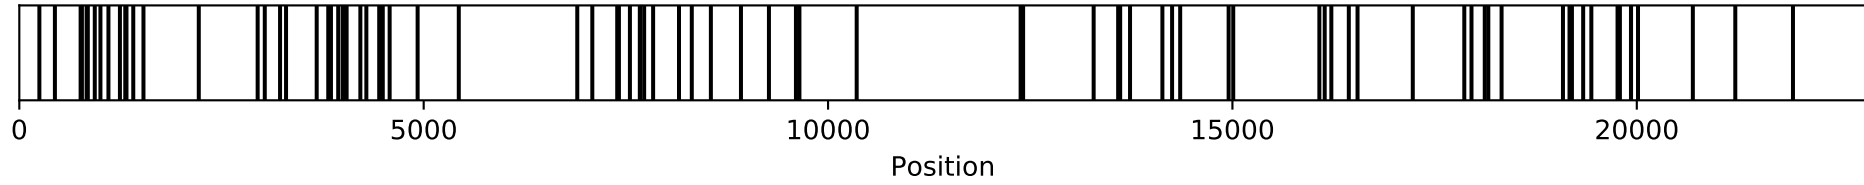

CR2 vs MA2  
Number of differences: 317

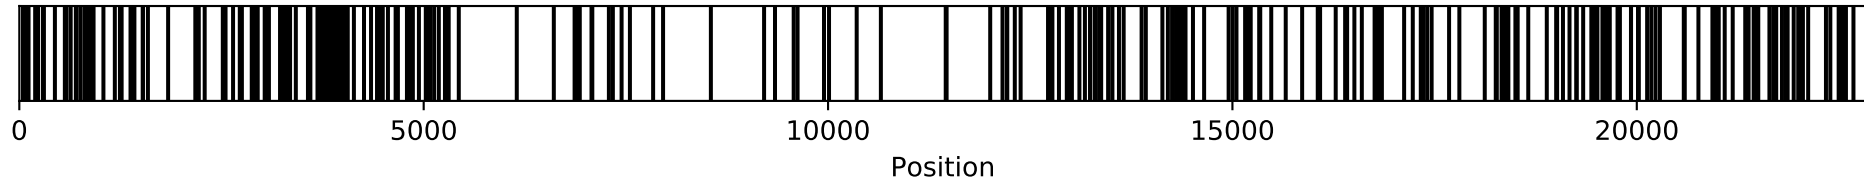

MA1 vs MA2  
Number of differences: 327

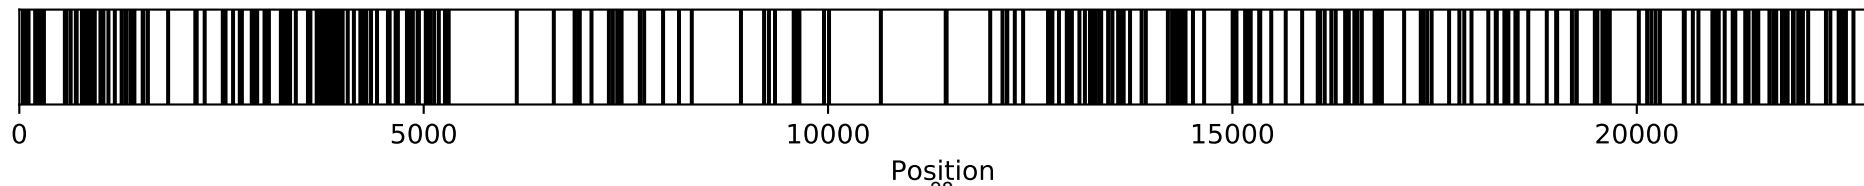

CR1 vs CR2  
Number of differences: 183

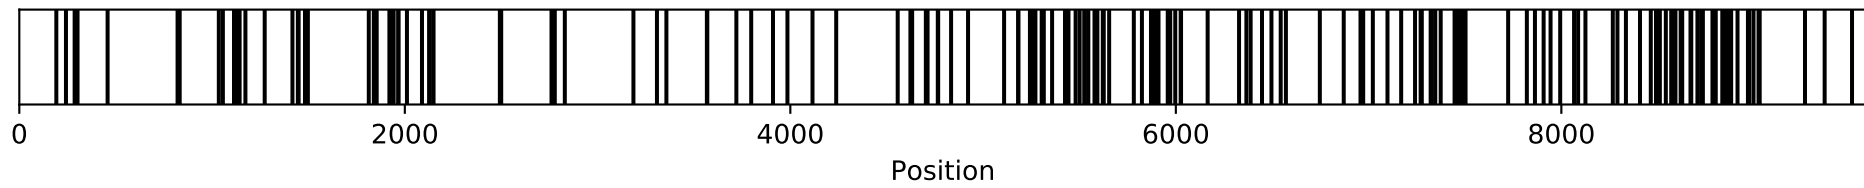

CR1 vs MA1  
Number of differences: 84

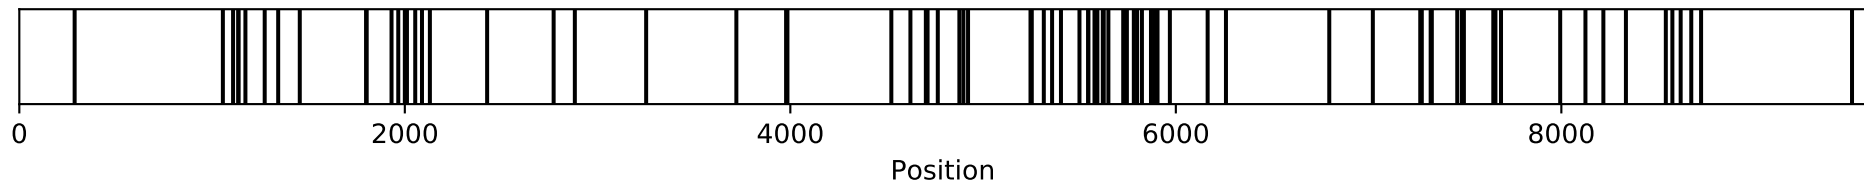

CR1 vs MA2  
Number of differences: 184

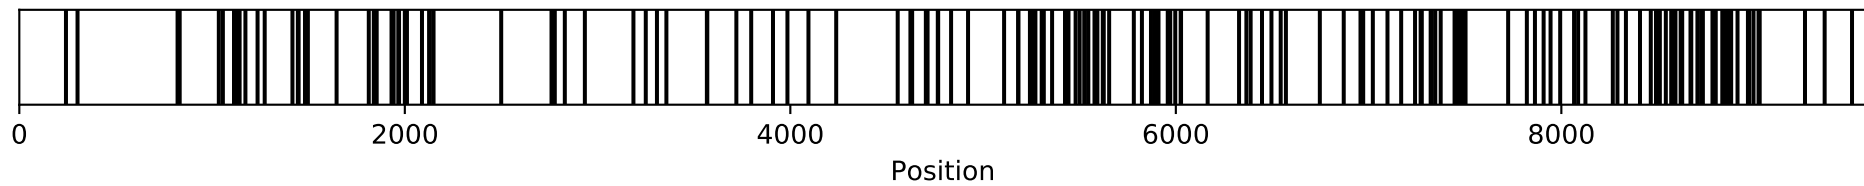

CR2 vs MA1  
Number of differences: 174

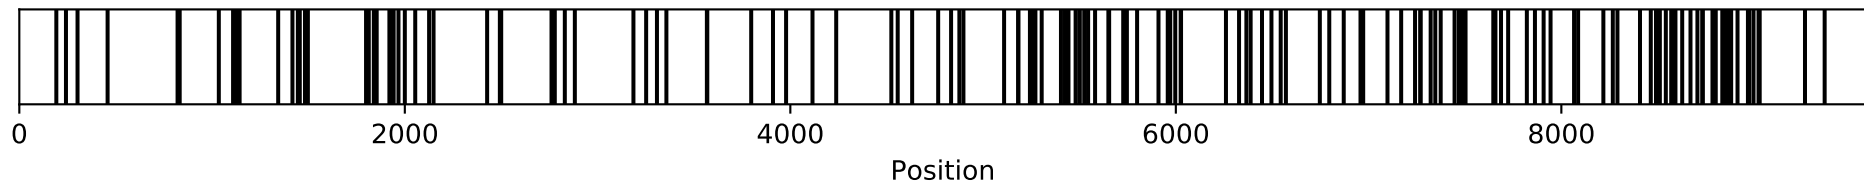

CR2 vs MA2  
Number of differences: 17

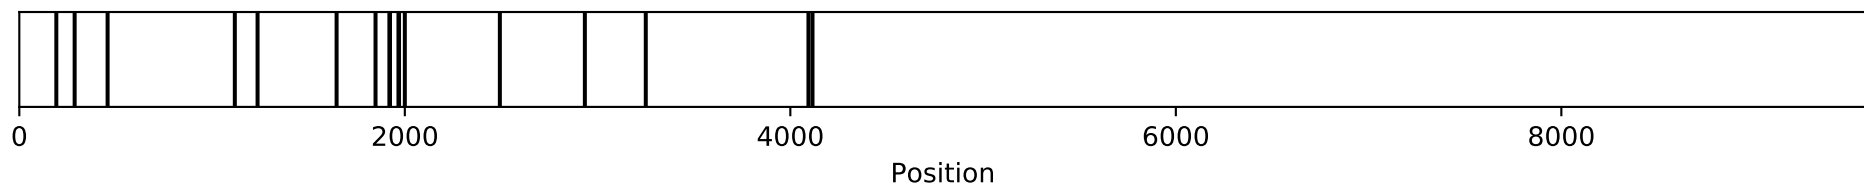

MA1 vs MA2  
Number of differences: 175

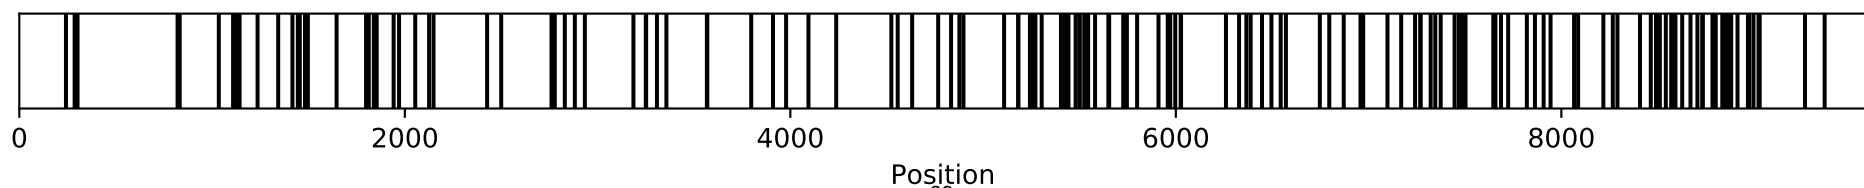

CR1 vs CR2  
Number of differences: 226

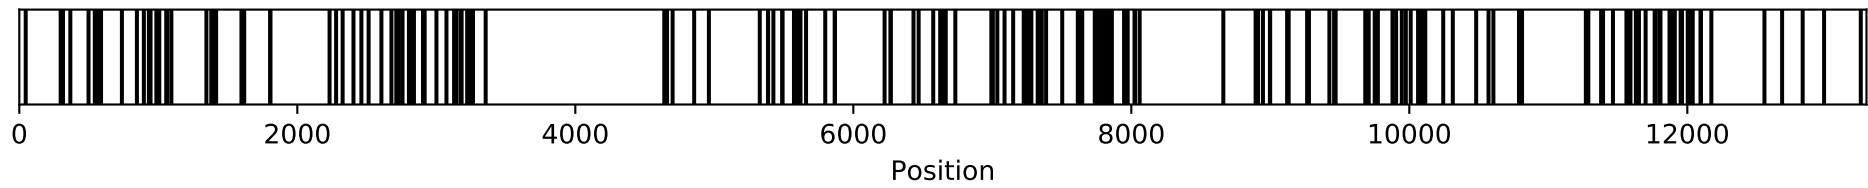

CR1 vs MA1  
Number of differences: 234

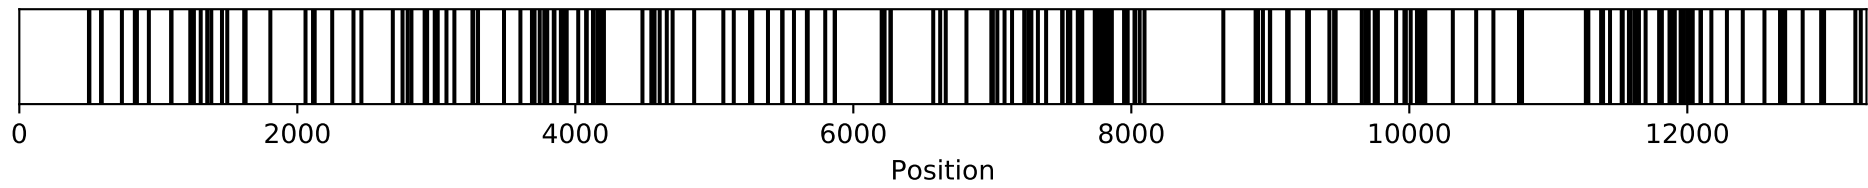

CR1 vs MA2  
Number of differences: 176

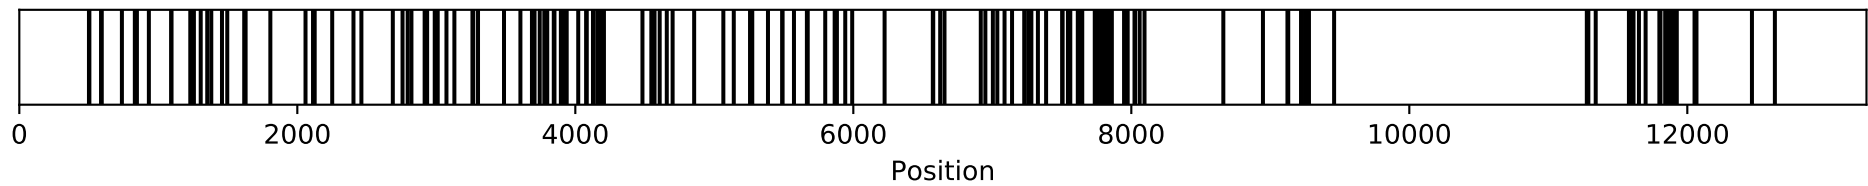

CR2 vs MA1  
Number of differences: 182

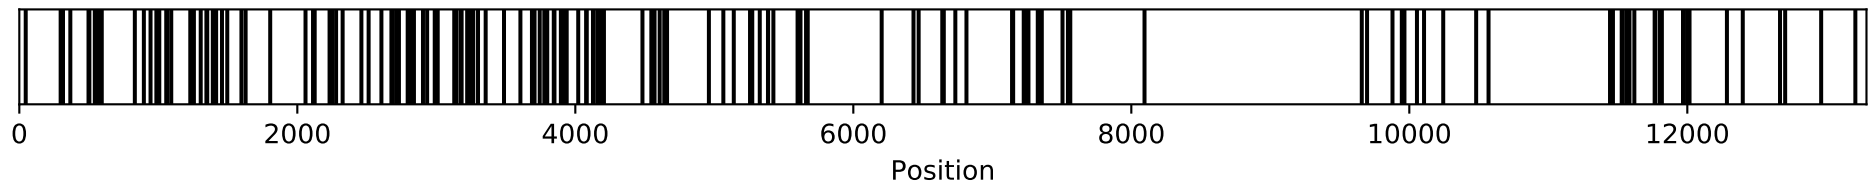

CR2 vs MA2  
Number of differences: 249

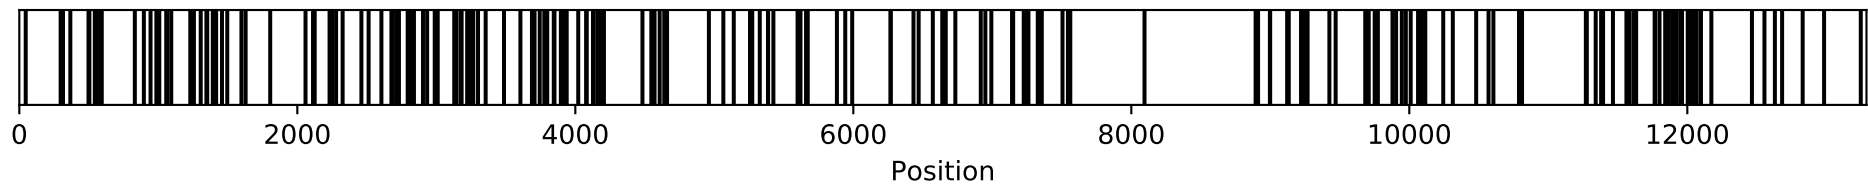

MA1 vs MA2  
Number of differences: 112

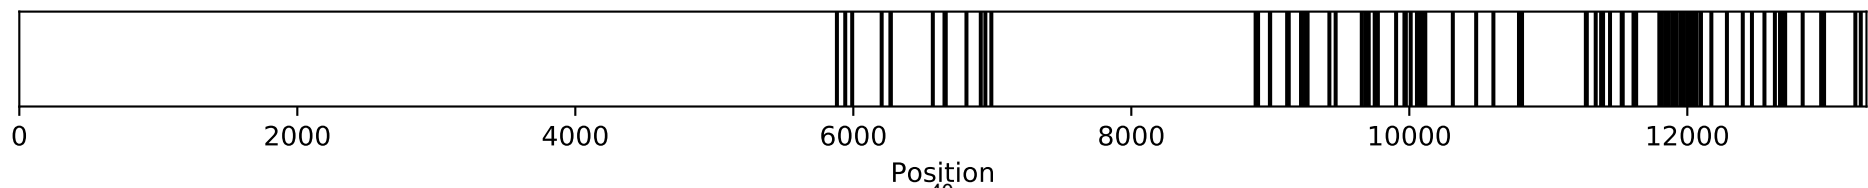



CR1 vs CR2  
Number of differences: 69

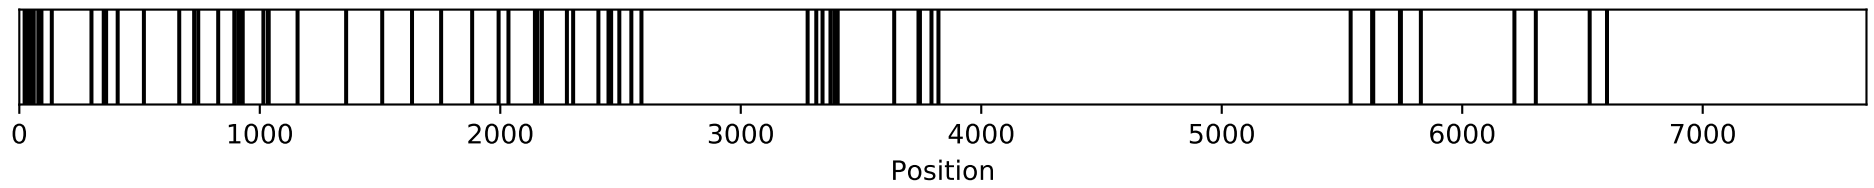

CR1 vs MA1  
Number of differences: 88

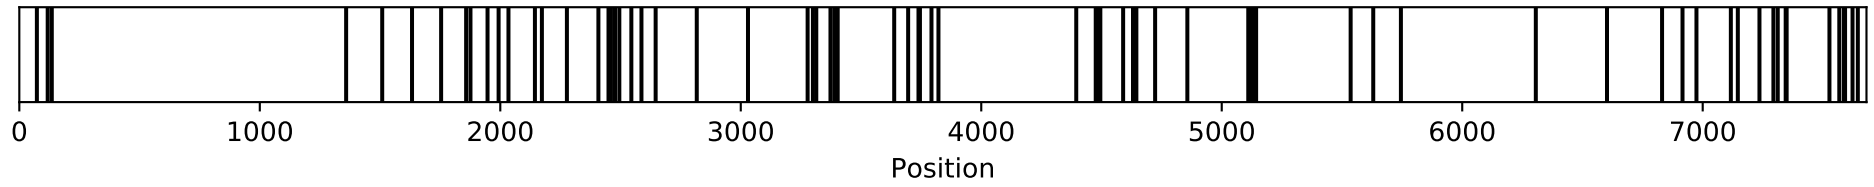

CR1 vs MA2  
Number of differences: 51

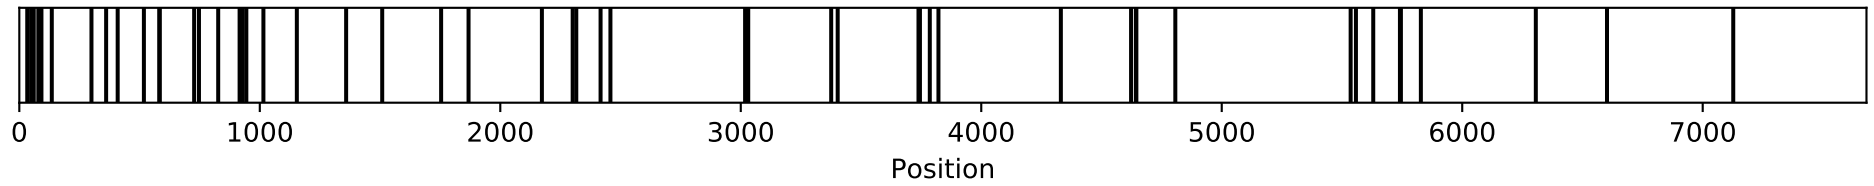

CR2 vs MA1  
Number of differences: 93

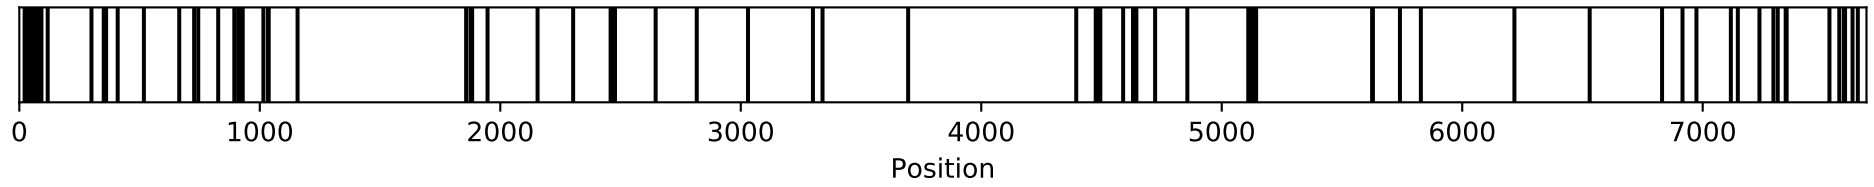

CR2 vs MA2  
Number of differences: 59

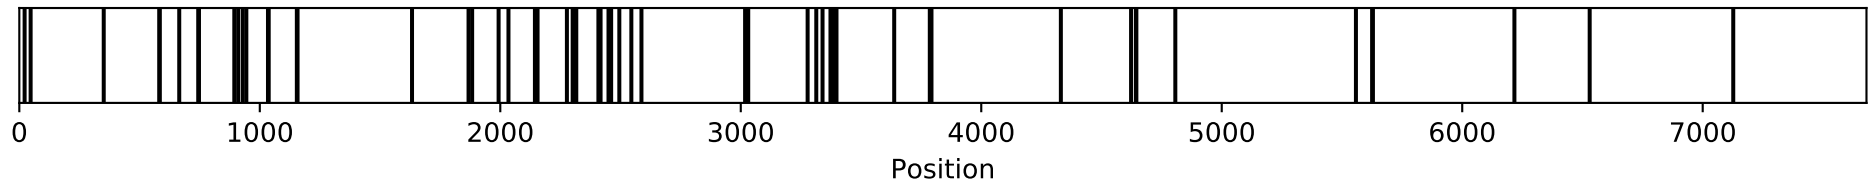

MA1 vs MA2  
Number of differences: 105

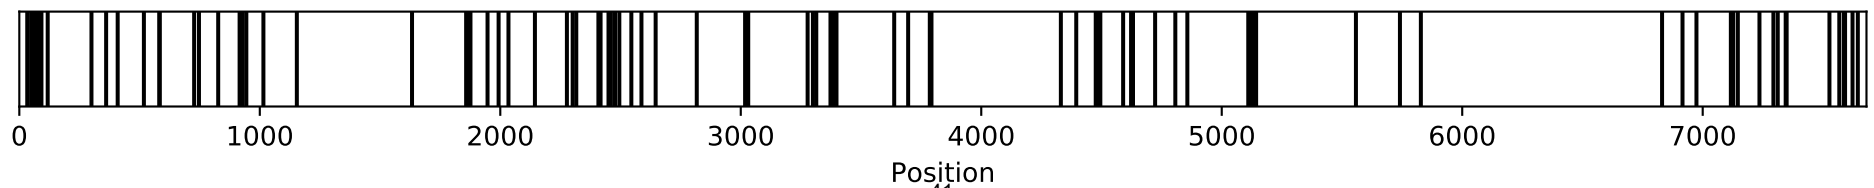

CR1 vs CR2  
Number of differences: 331

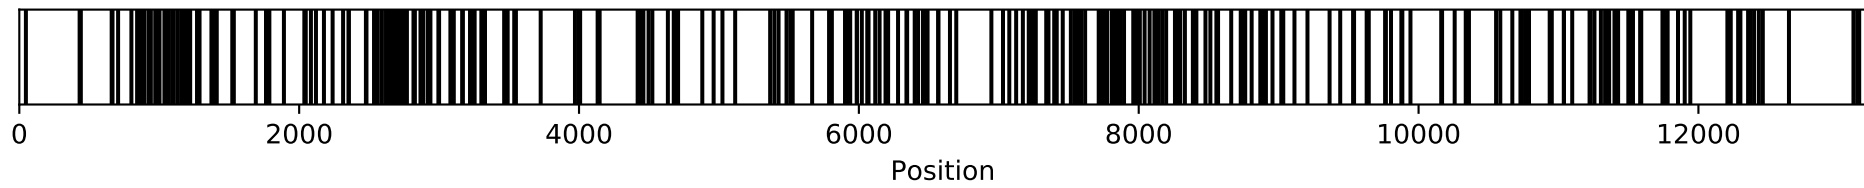

CR1 vs MA1  
Number of differences: 351

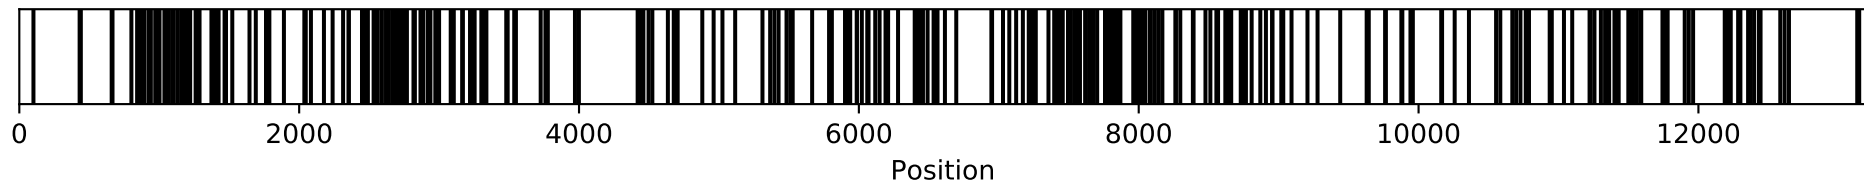

CR1 vs MA2  
Number of differences: 122

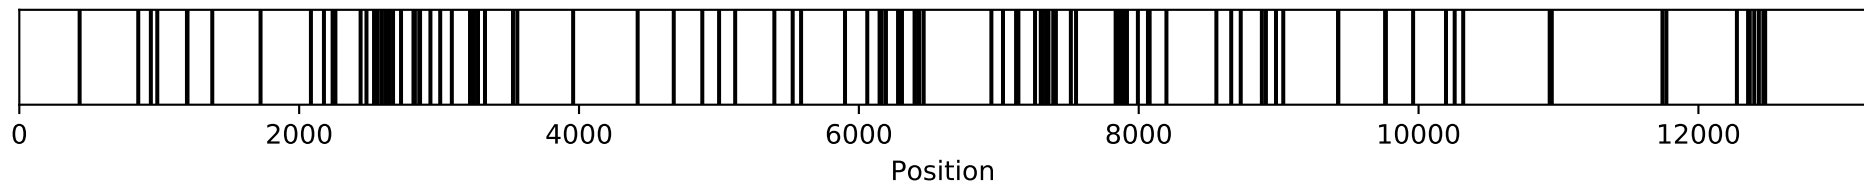

CR2 vs MA1  
Number of differences: 144

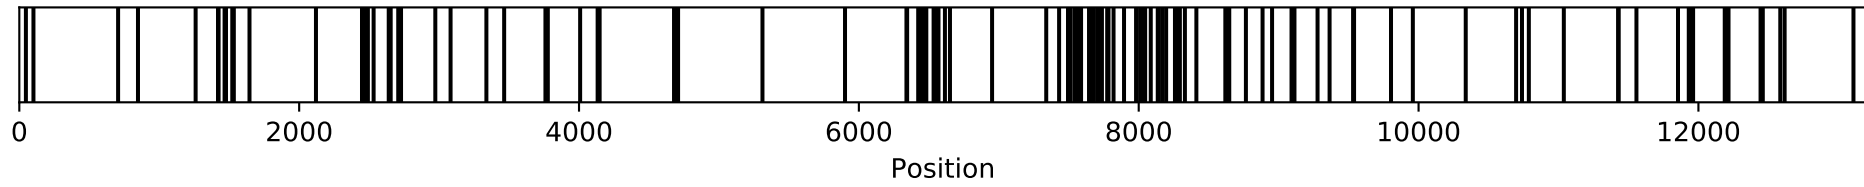

CR2 vs MA2  
Number of differences: 311

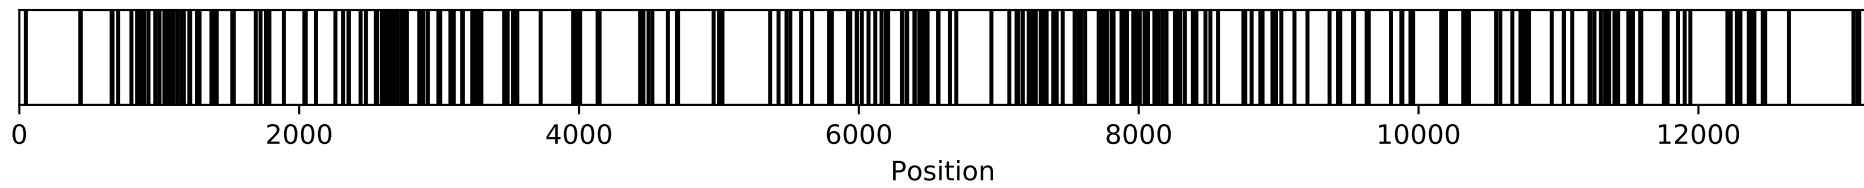

MA1 vs MA2  
Number of differences: 334

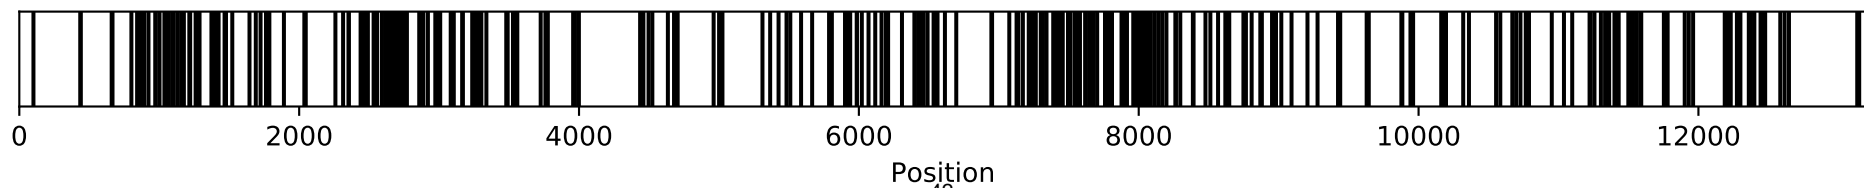

CR1 vs CR2  
Number of differences: 240

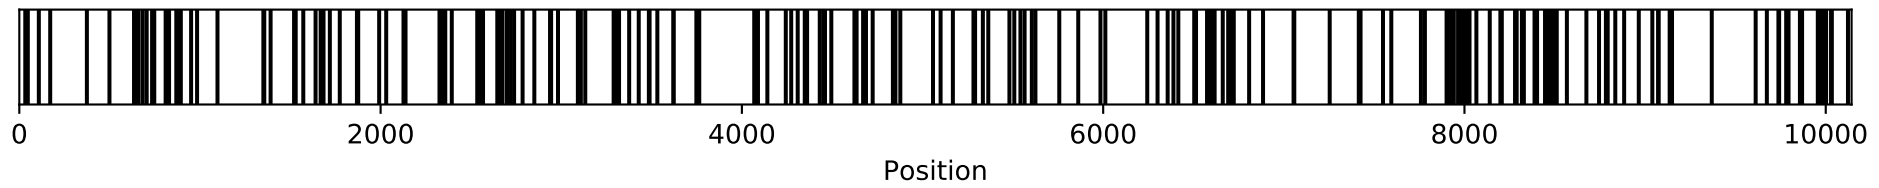

CR1 vs MA1  
Number of differences: 230

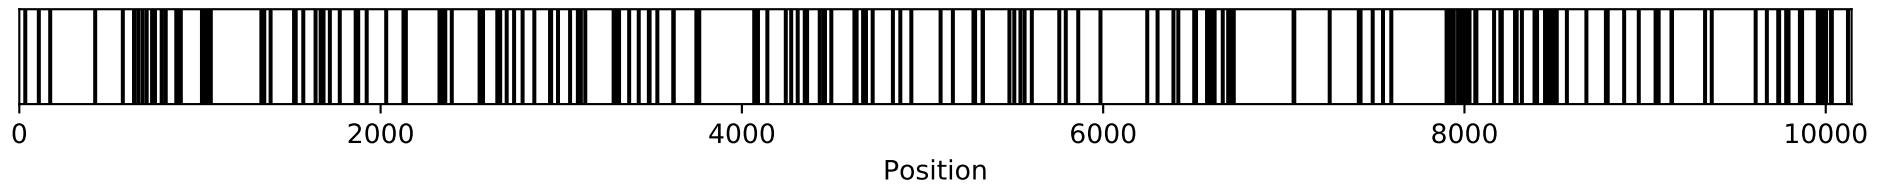

CR1 vs MA2  
Number of differences: 110

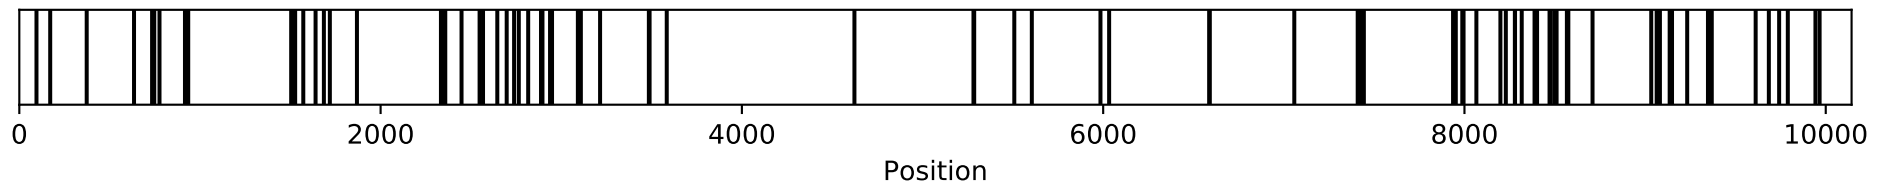

CR2 vs MA1  
Number of differences: 59

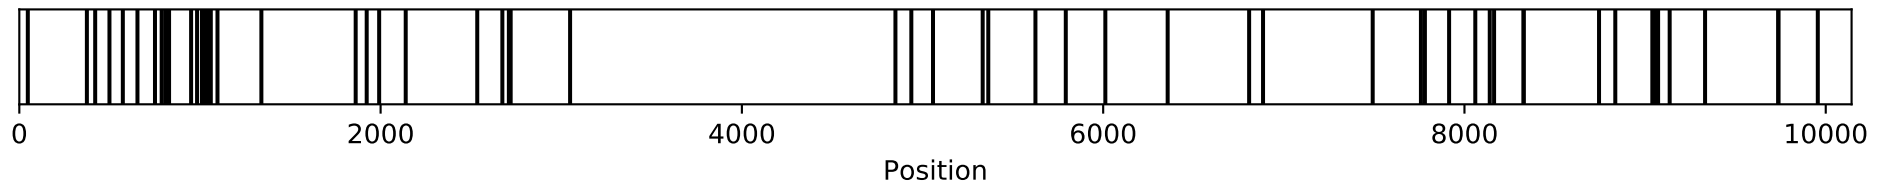

CR2 vs MA2  
Number of differences: 235

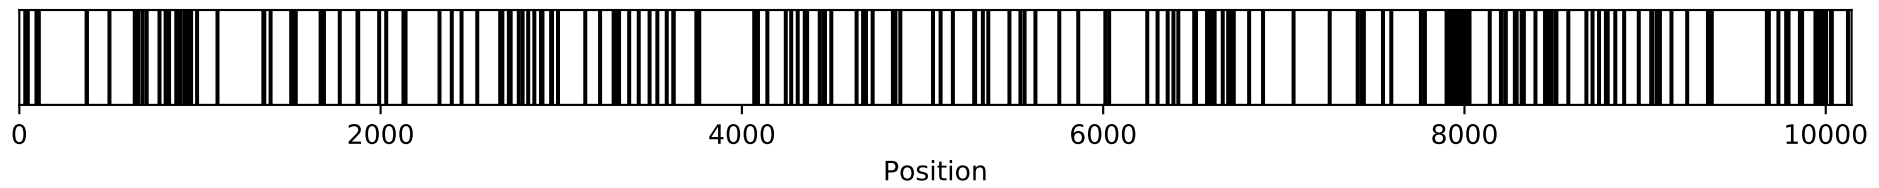

MA1 vs MA2  
Number of differences: 227

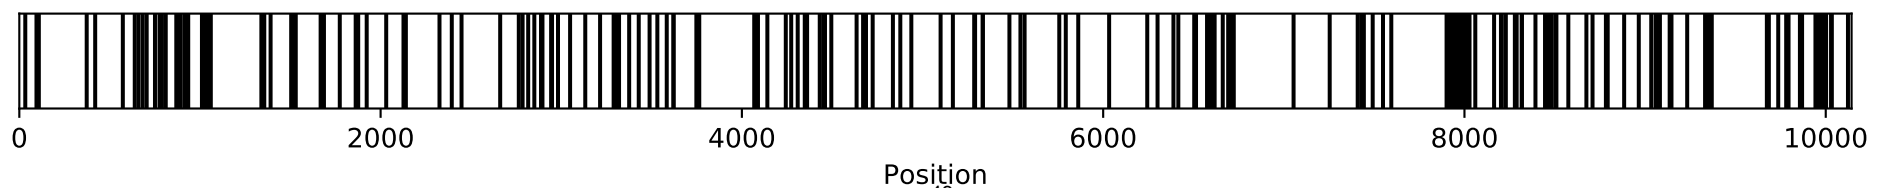

CR1 vs CR2  
Number of differences: 150

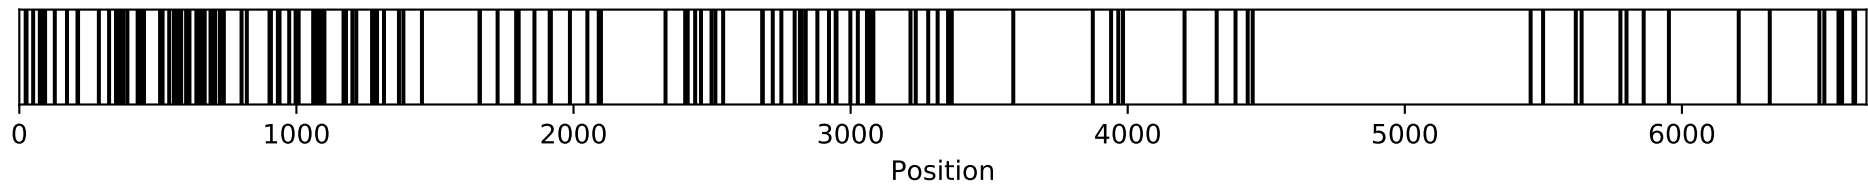

CR1 vs MA1  
Number of differences: 166

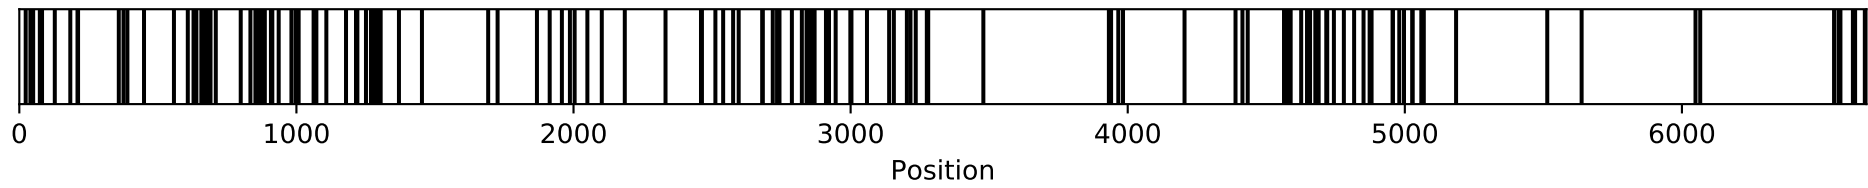

CR1 vs MA2  
Number of differences: 226

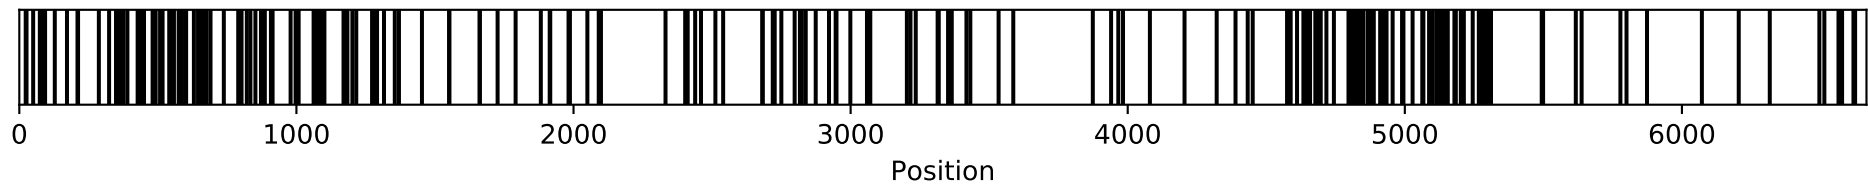

CR2 vs MA1  
Number of differences: 198

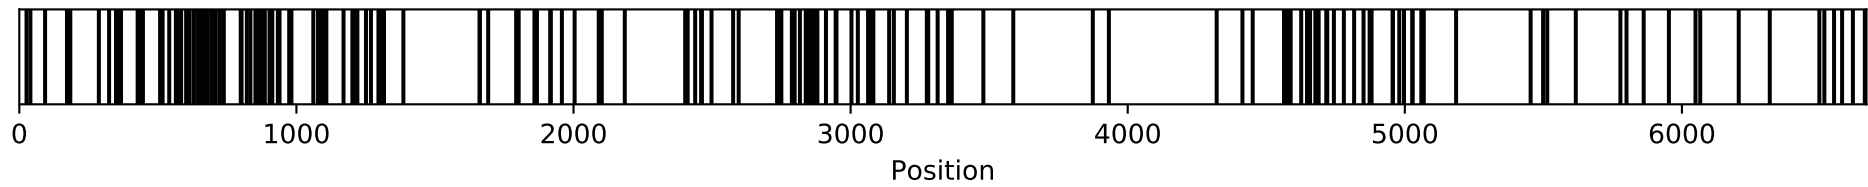

CR2 vs MA2  
Number of differences: 132

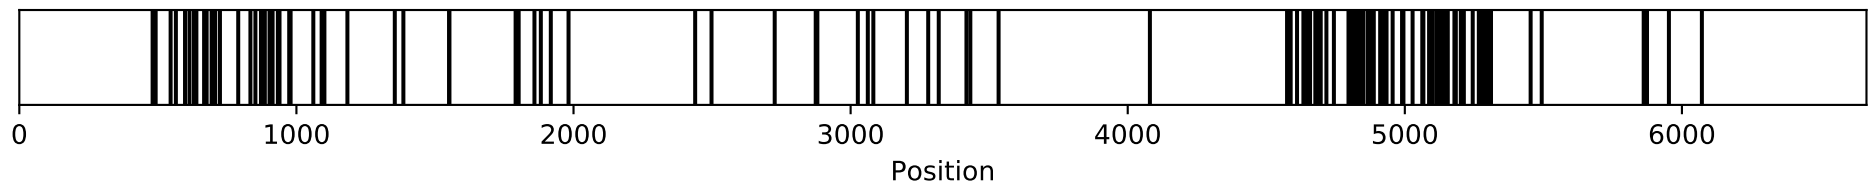

MA1 vs MA2  
Number of differences: 236

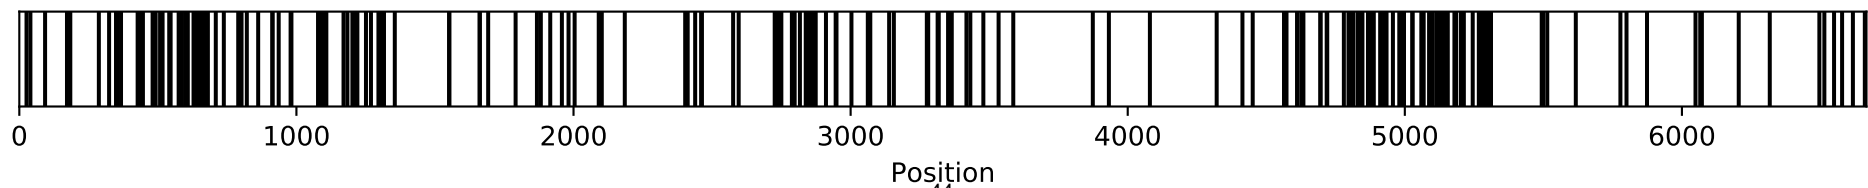

CR1 vs CR2  
Number of differences: 352

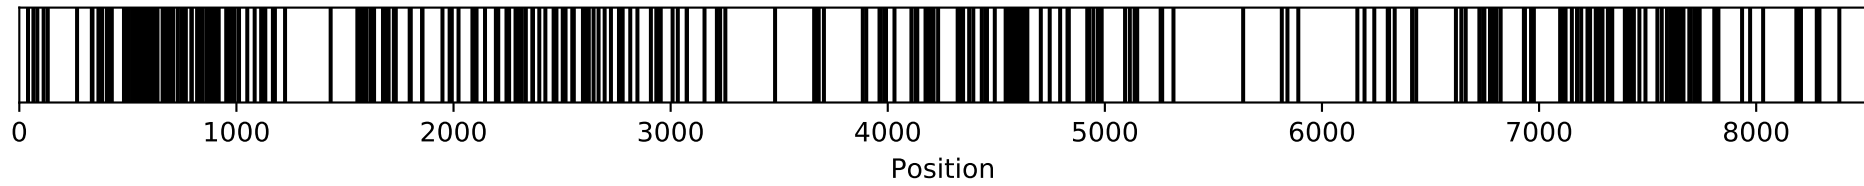

CR1 vs MA1  
Number of differences: 153

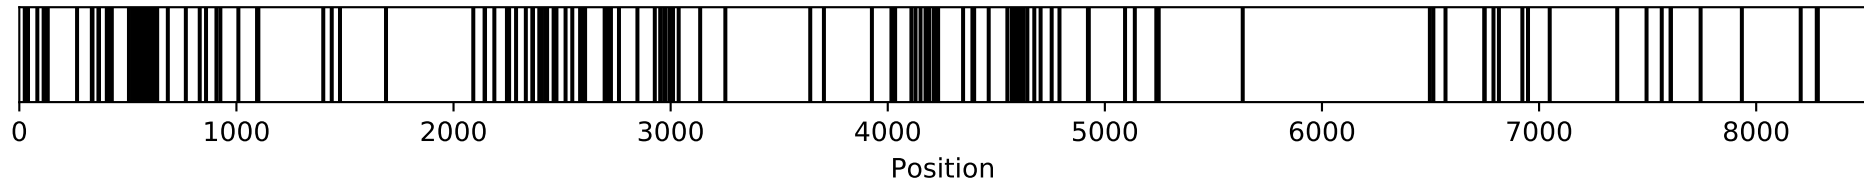

CR1 vs MA2  
Number of differences: 328

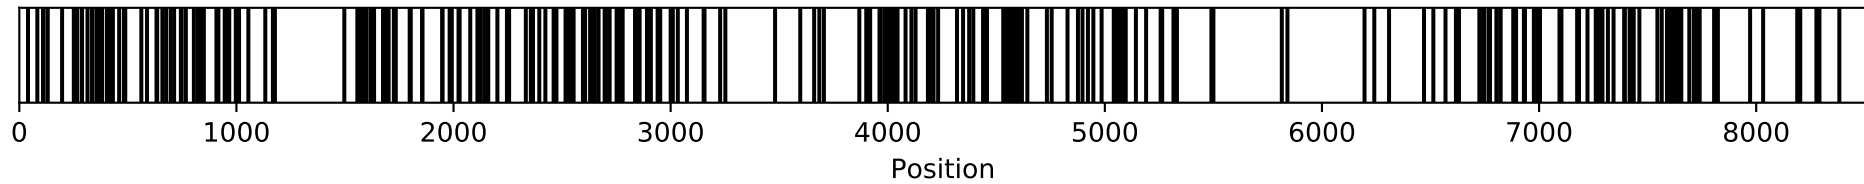

CR2 vs MA1  
Number of differences: 334

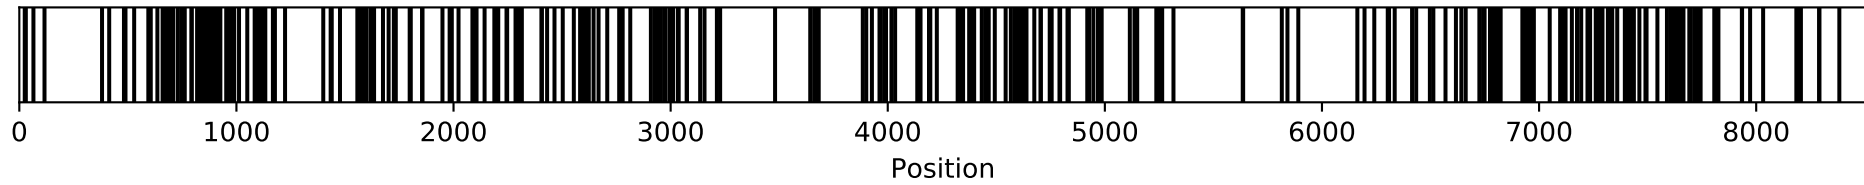

CR2 vs MA2  
Number of differences: 320

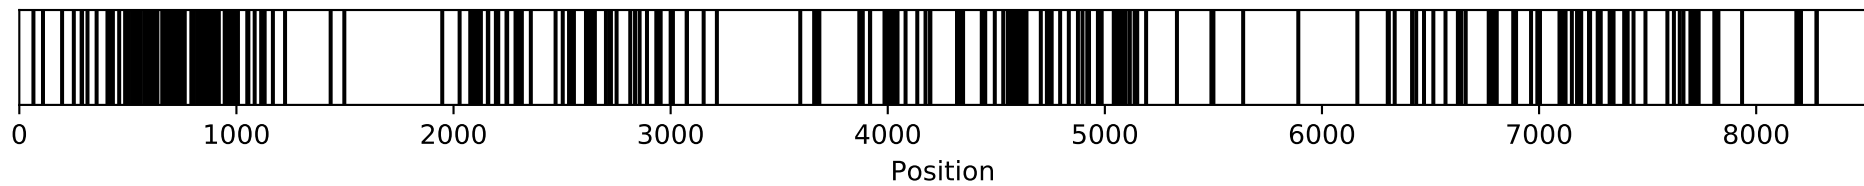

MA1 vs MA2  
Number of differences: 349

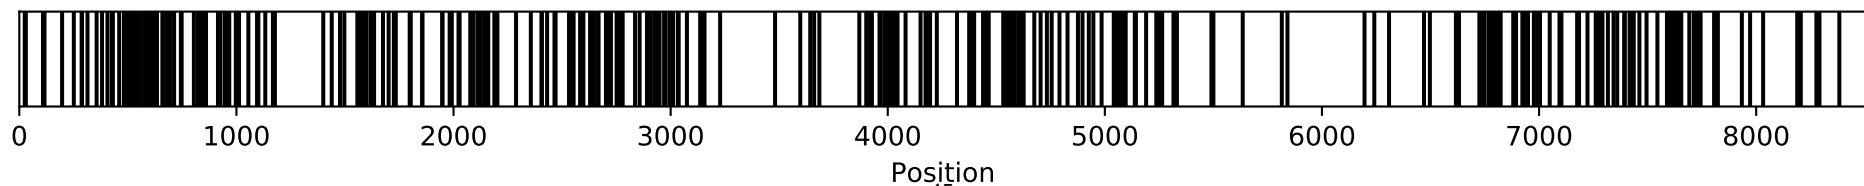

CR1 vs CR2  
Number of differences: 203

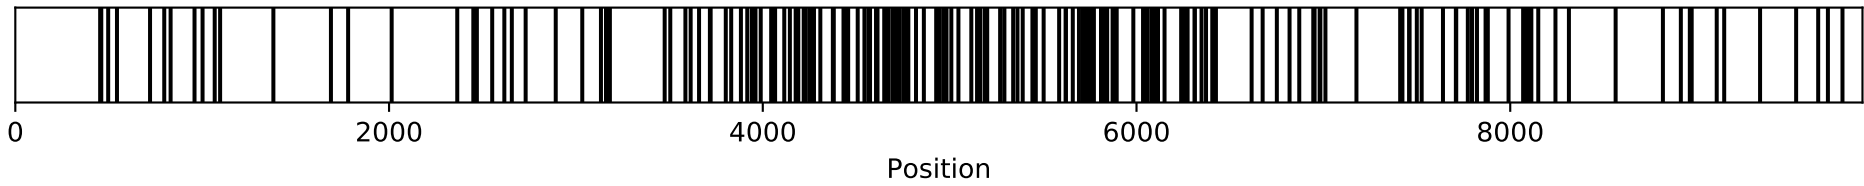

CR1 vs MA1  
Number of differences: 217

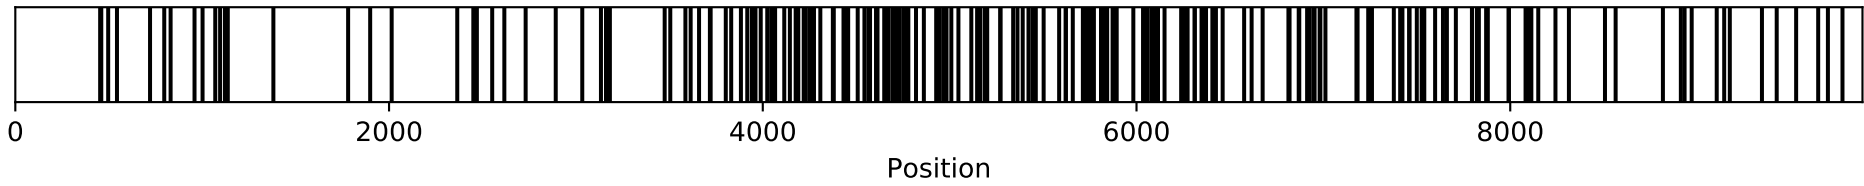

CR1 vs MA2  
Number of differences: 102

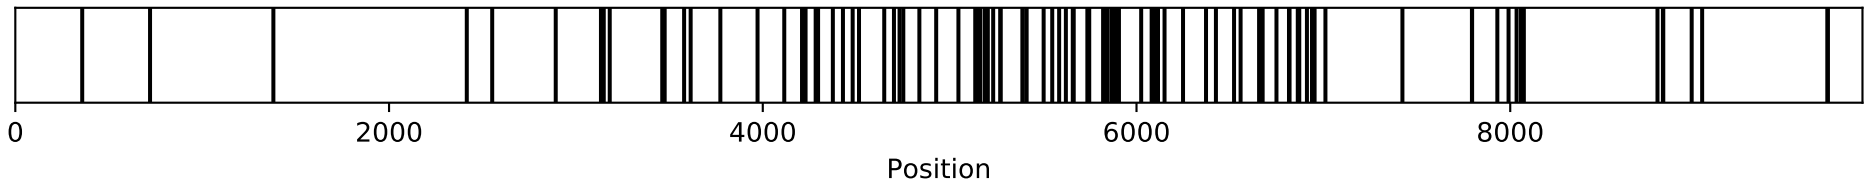

CR2 vs MA1  
Number of differences: 44

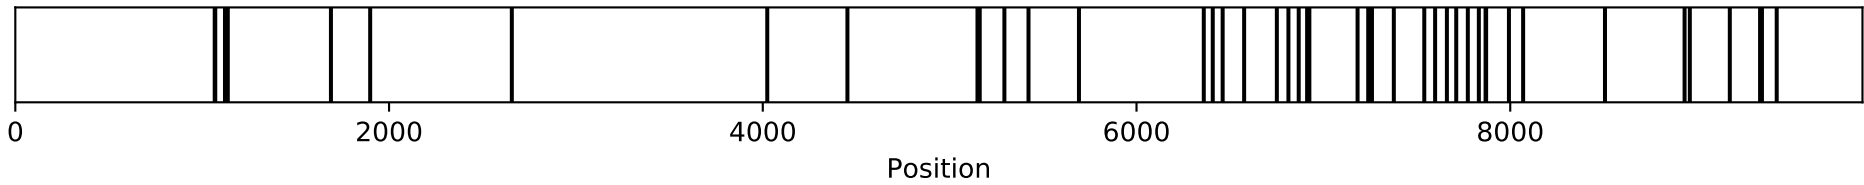

CR2 vs MA2  
Number of differences: 193

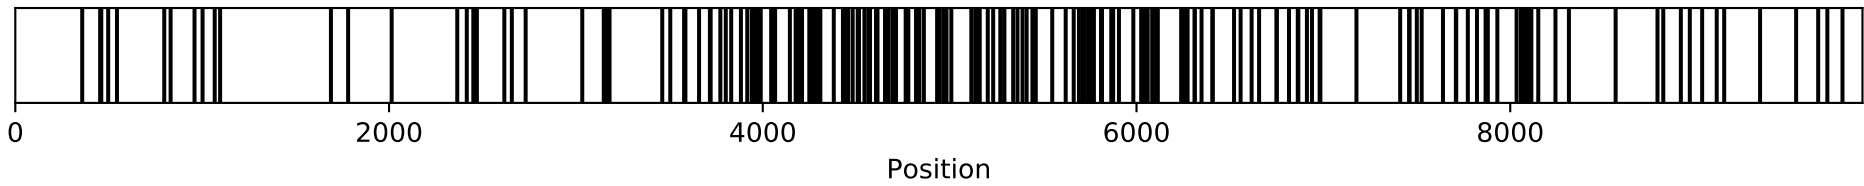

MA1 vs MA2  
Number of differences: 207

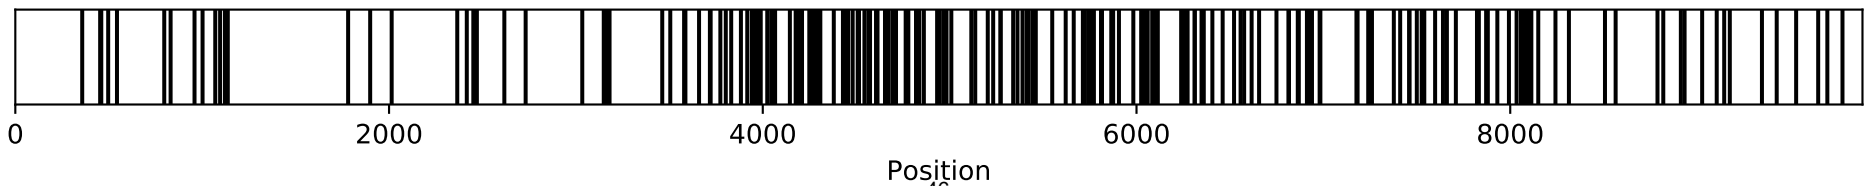

CR1 vs CR2  
Number of differences: 176

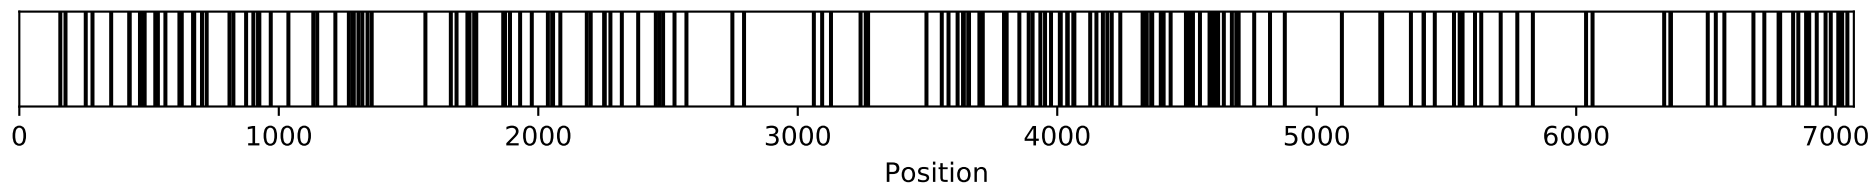

CR1 vs MA1  
Number of differences: 65

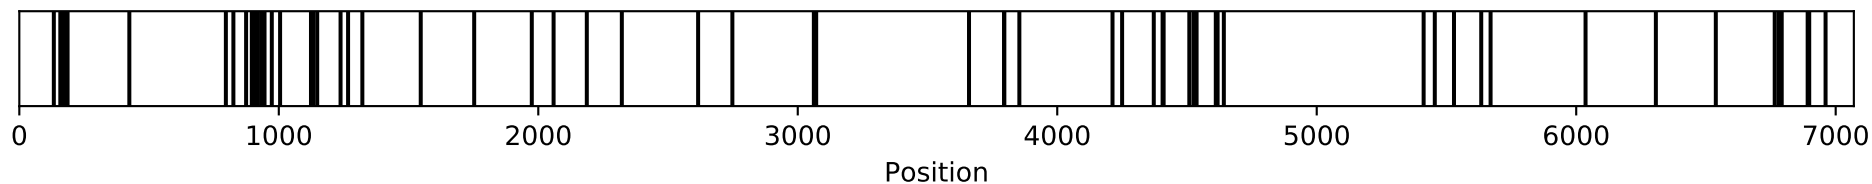

CR1 vs MA2  
Number of differences: 177

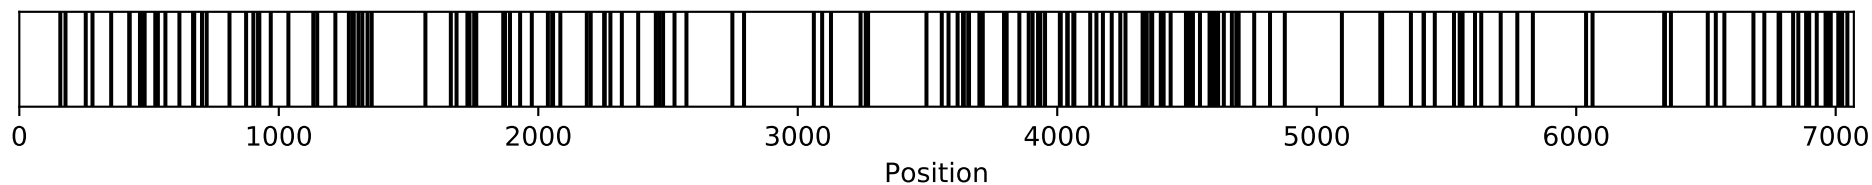

CR2 vs MA1  
Number of differences: 178

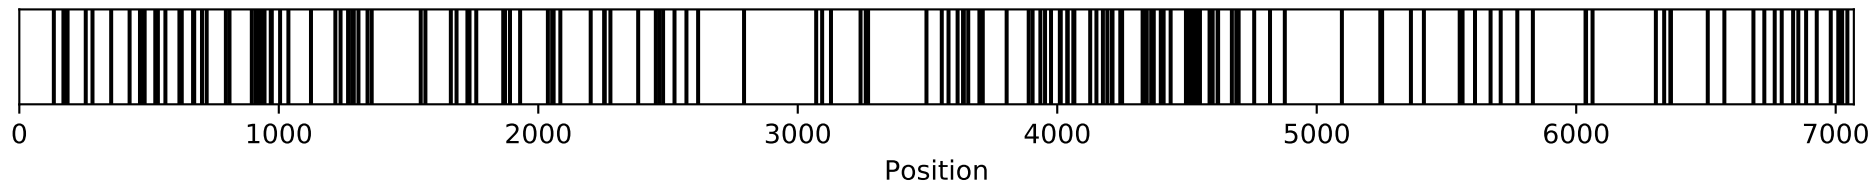

CR2 vs MA2  
Number of differences: 11

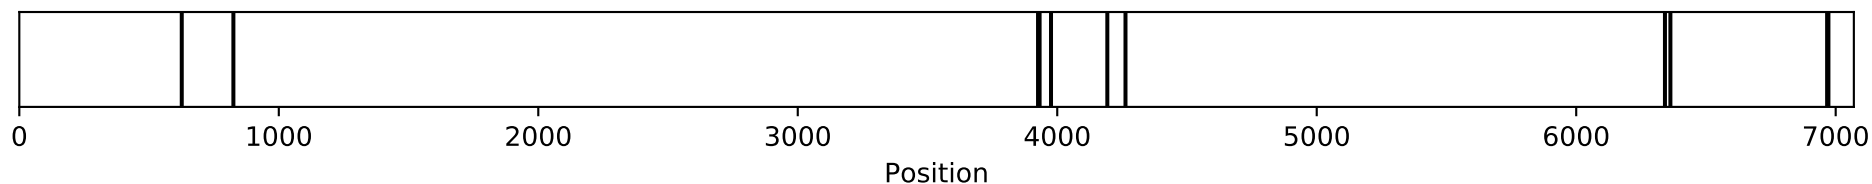

MA1 vs MA2  
Number of differences: 181

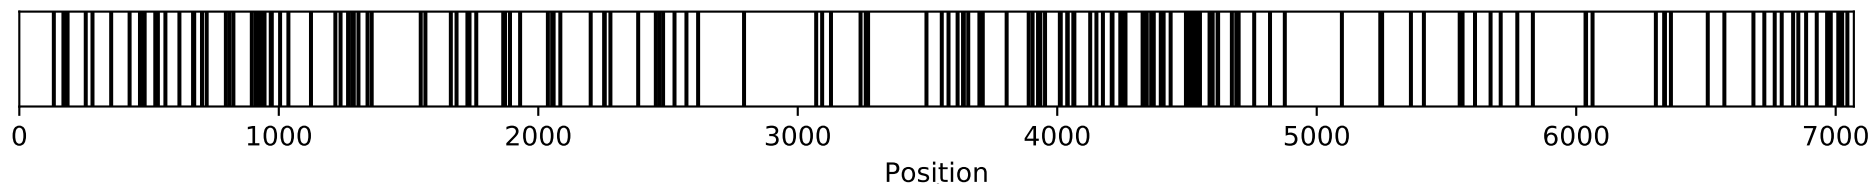

CR1 vs CR2  
Number of differences: 322

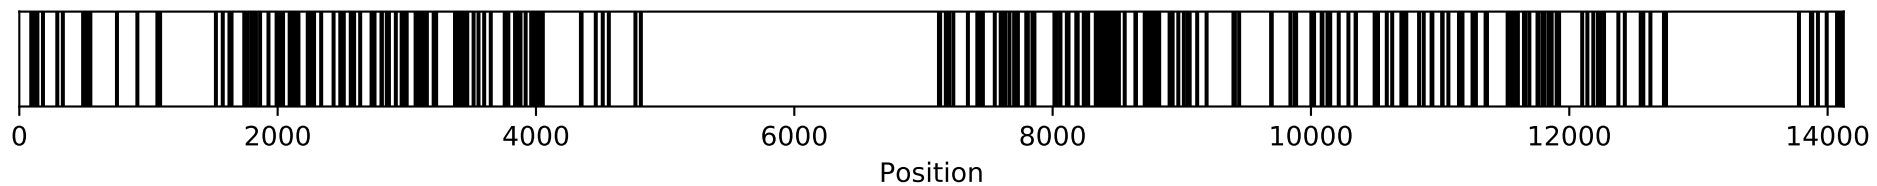

CR1 vs MA1  
Number of differences: 248

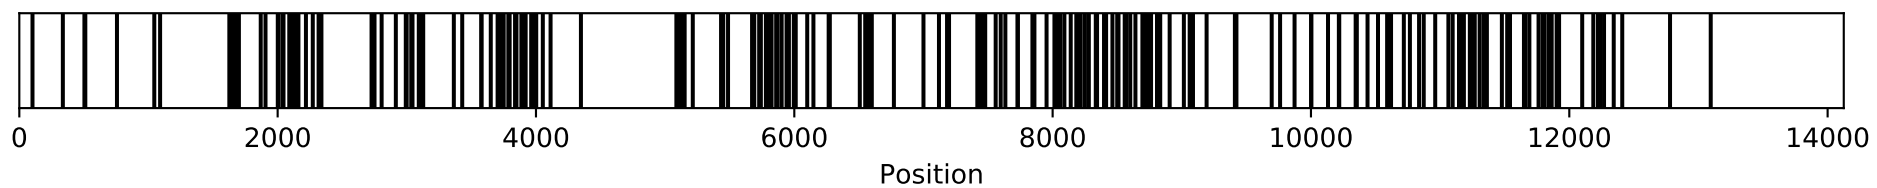

CR1 vs MA2  
Number of differences: 232

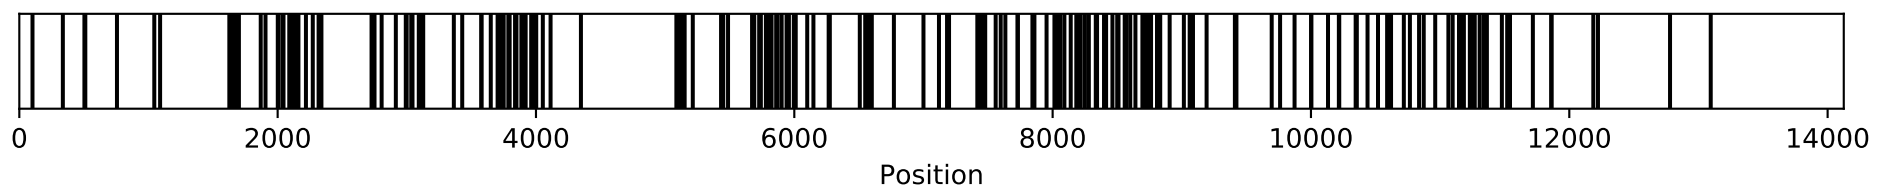

CR2 vs MA1  
Number of differences: 323

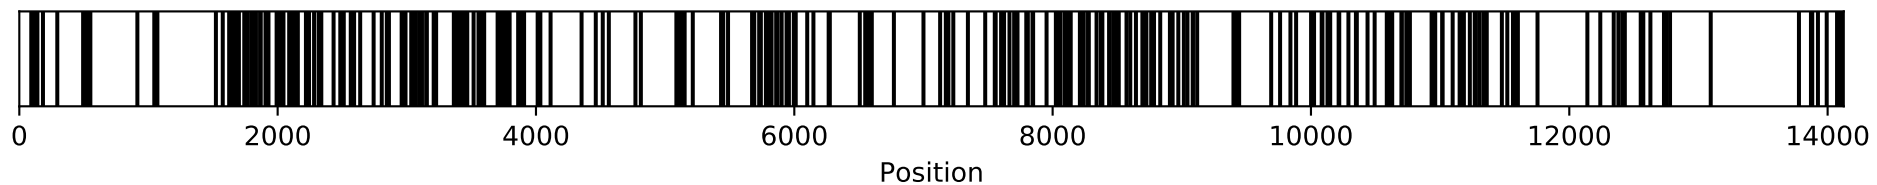

CR2 vs MA2  
Number of differences: 336

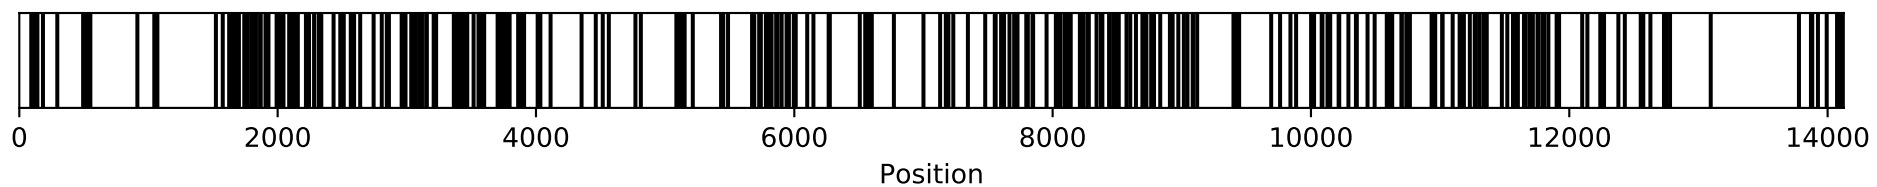

MA1 vs MA2  
Number of differences: 18

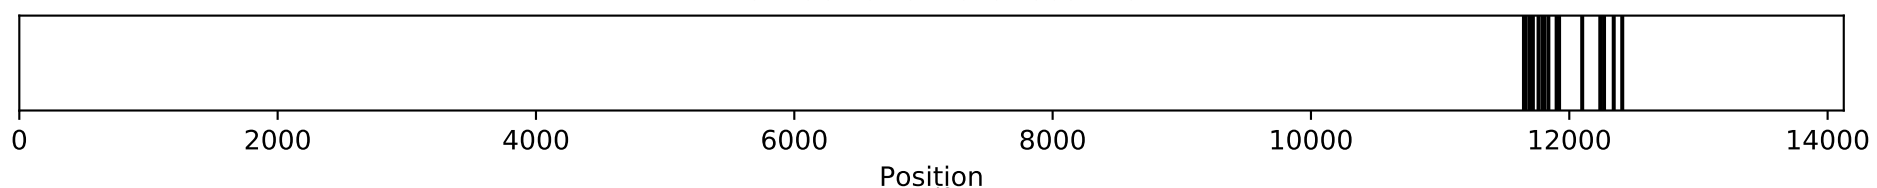



CR1 vs CR2  
Number of differences: 125

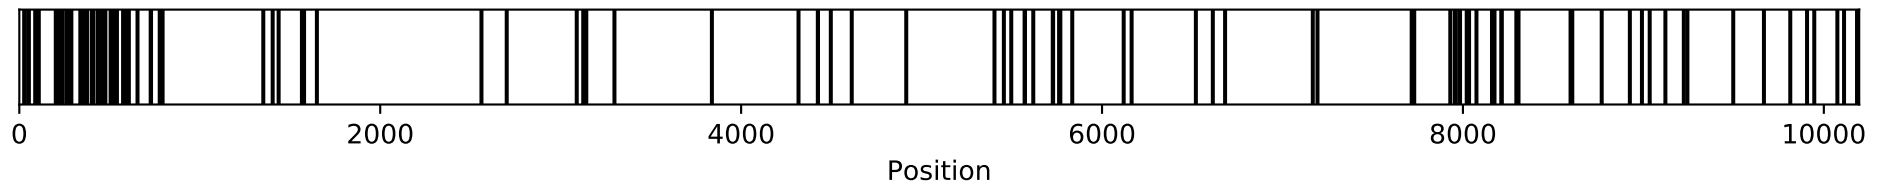

CR1 vs MA1  
Number of differences: 119

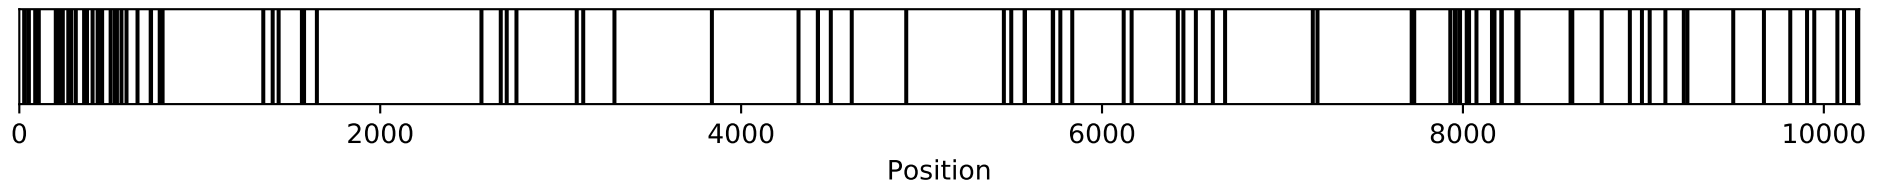

CR1 vs MA2  
Number of differences: 65

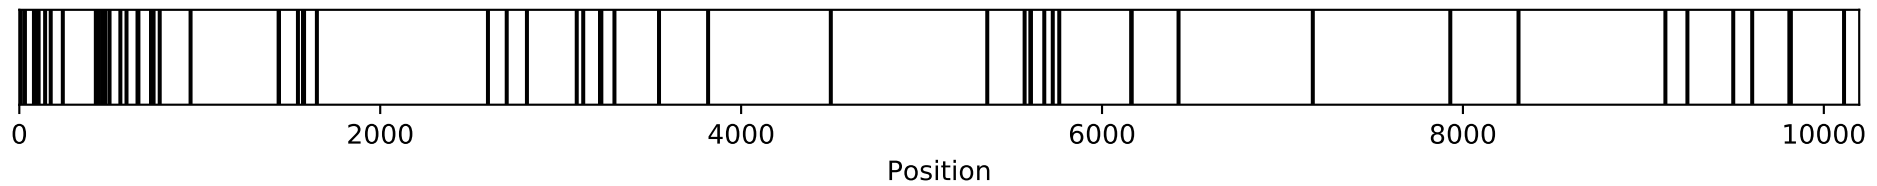

CR2 vs MA1  
Number of differences: 24

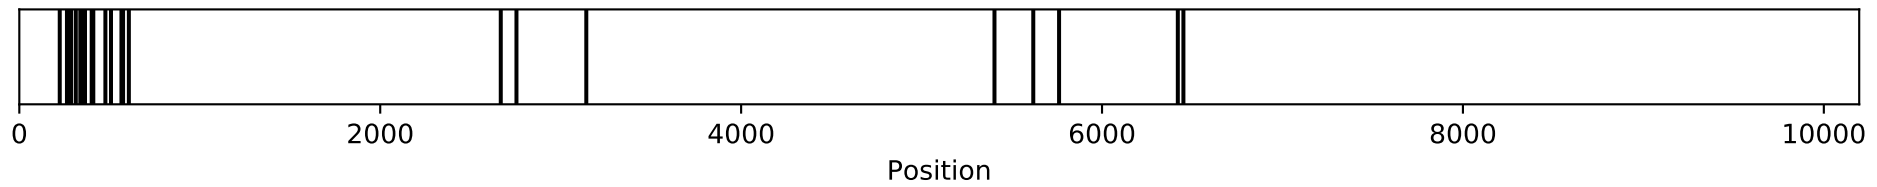

CR2 vs MA2  
Number of differences: 125

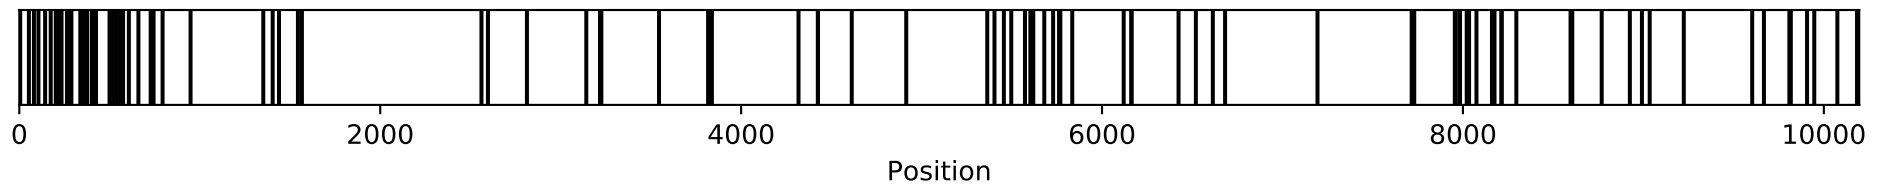

MA1 vs MA2  
Number of differences: 121

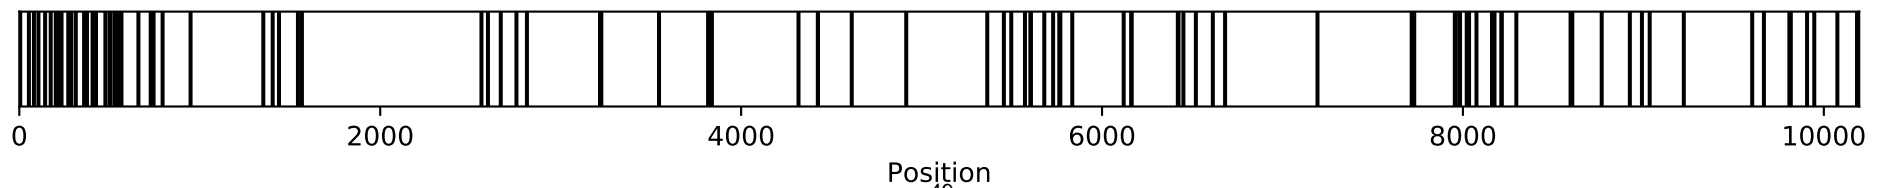

CR1 vs CR2  
Number of differences: 185

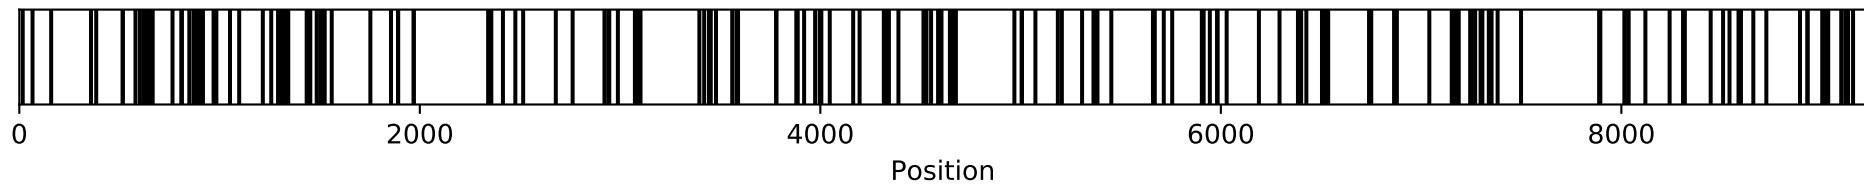

CR1 vs MA1  
Number of differences: 178

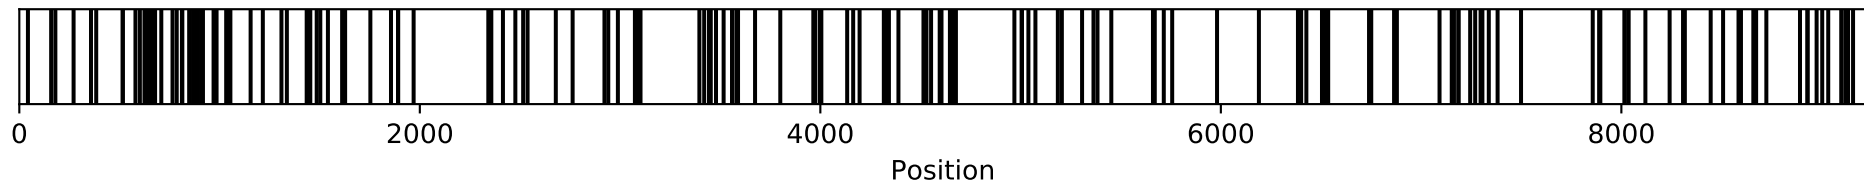

CR1 vs MA2  
Number of differences: 105

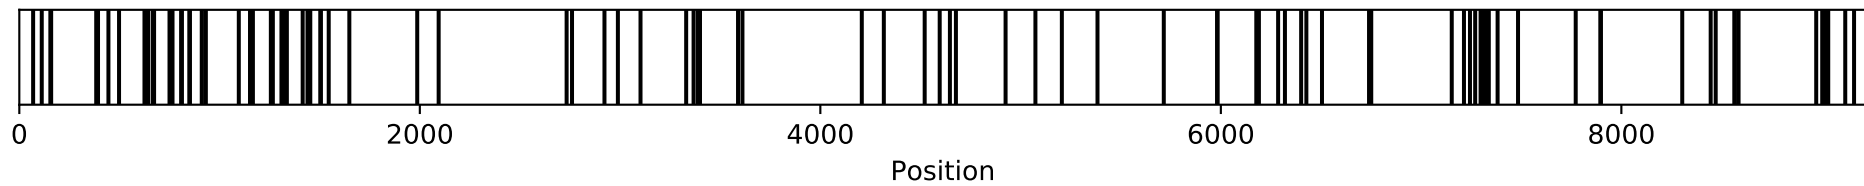

CR2 vs MA1  
Number of differences: 72

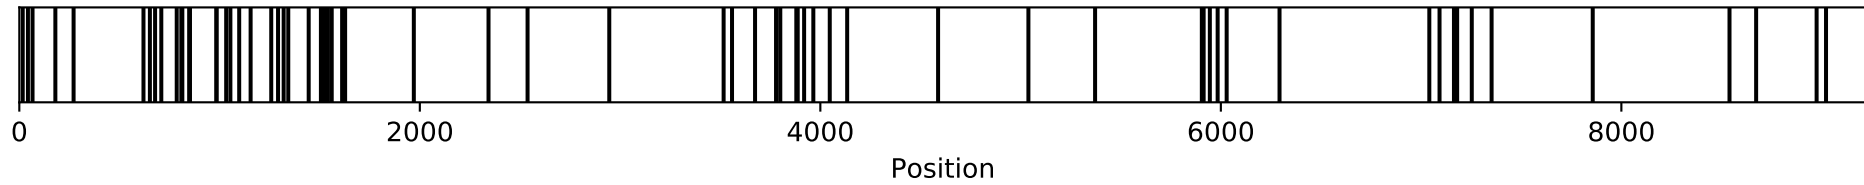

CR2 vs MA2  
Number of differences: 187

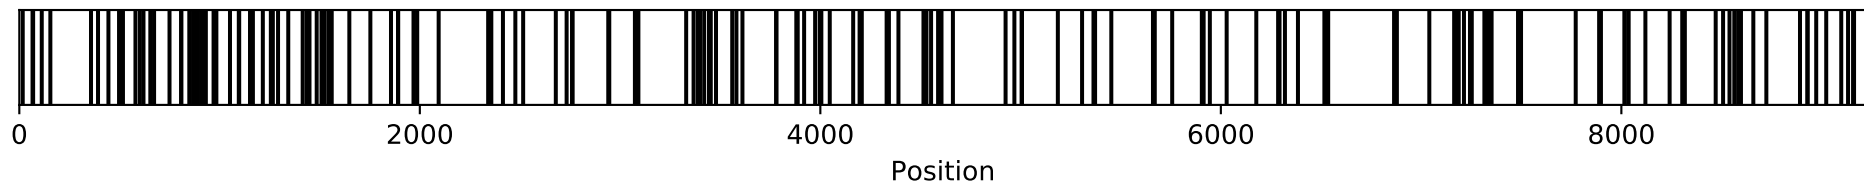

MA1 vs MA2  
Number of differences: 185

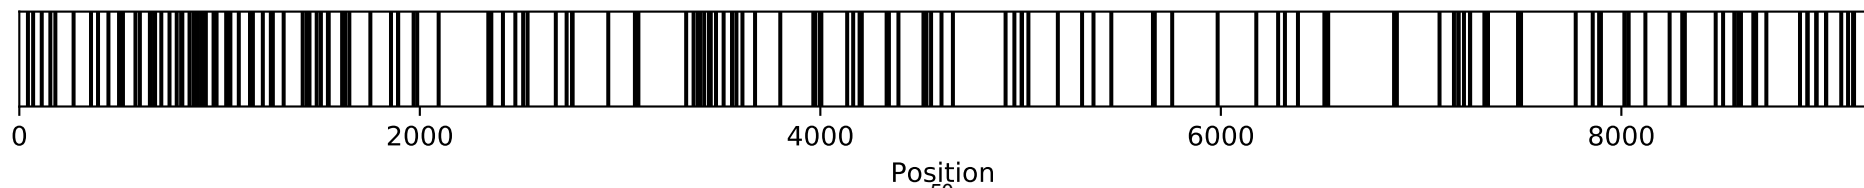

CR1 vs CR2  
Number of differences: 145

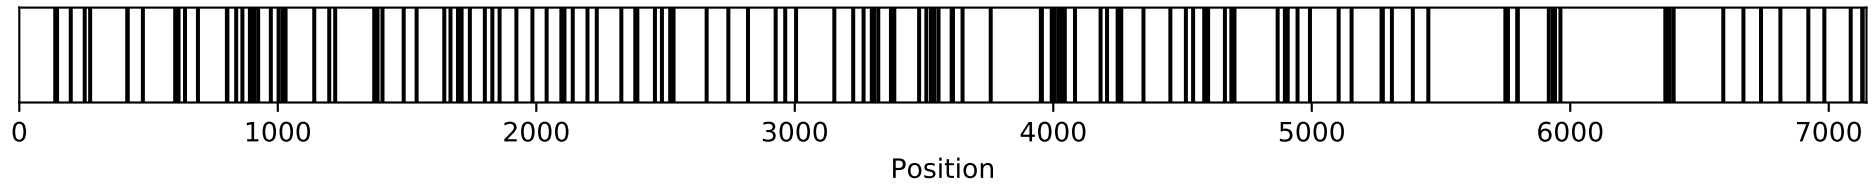

CR1 vs MA1  
Number of differences: 78

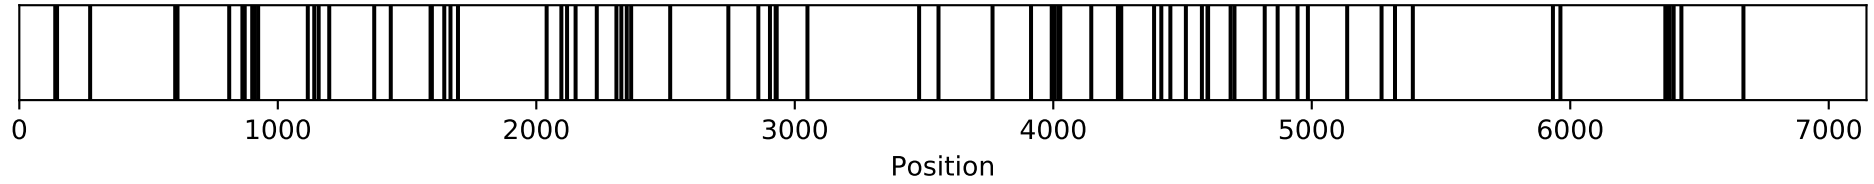

CR1 vs MA2  
Number of differences: 147

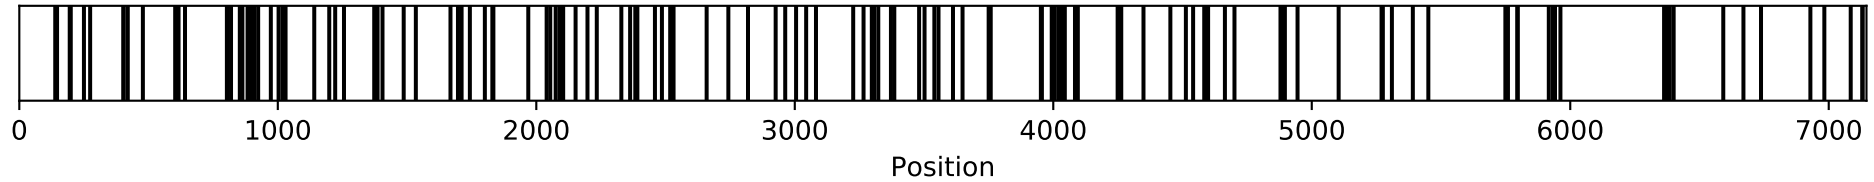

CR2 vs MA1  
Number of differences: 135

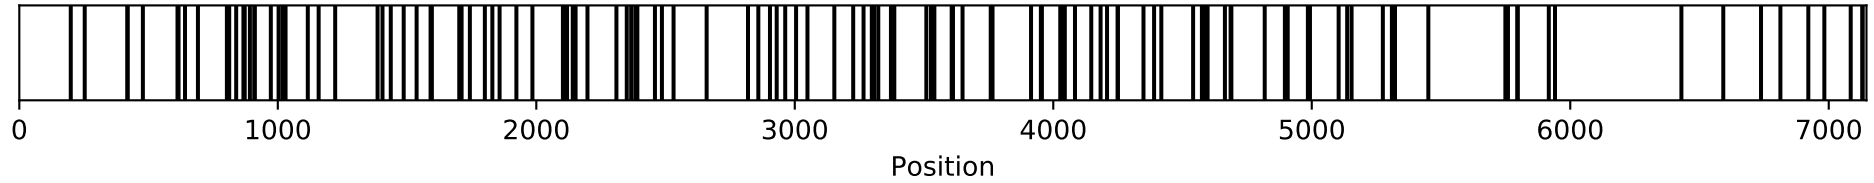

CR2 vs MA2  
Number of differences: 50

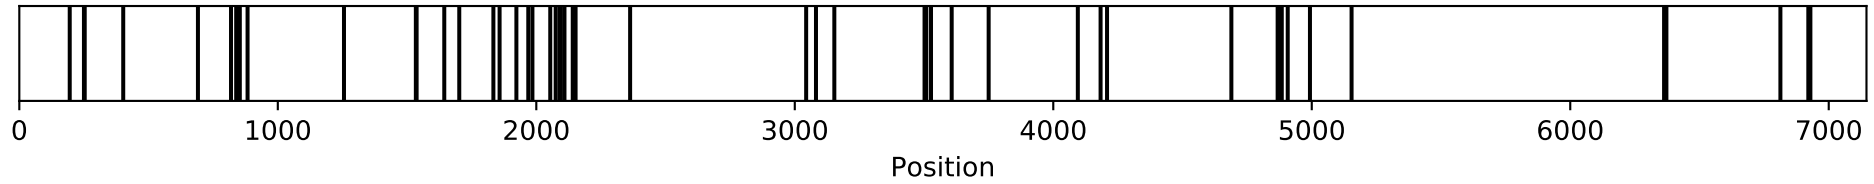

MA1 vs MA2  
Number of differences: 139

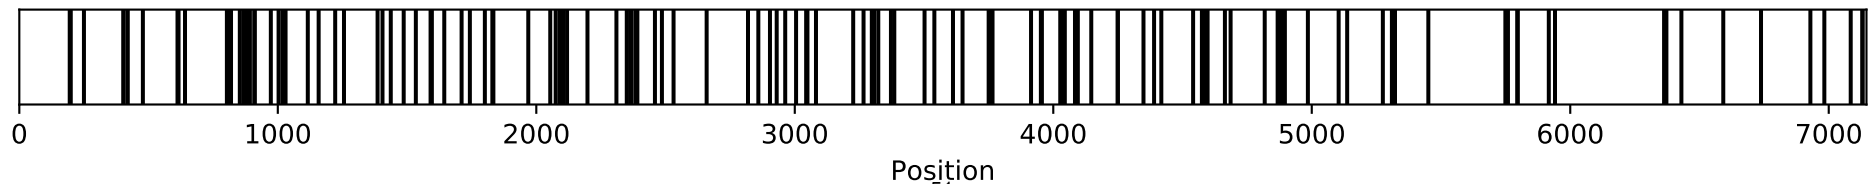

CR1 vs CR2  
Number of differences: 271

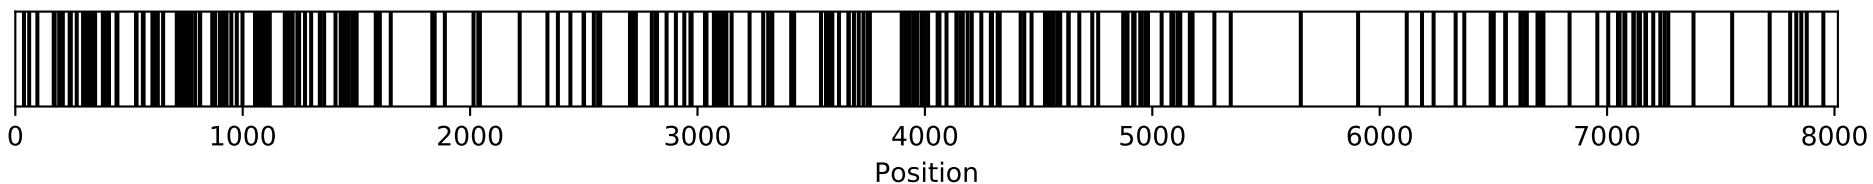

CR1 vs MA1  
Number of differences: 157

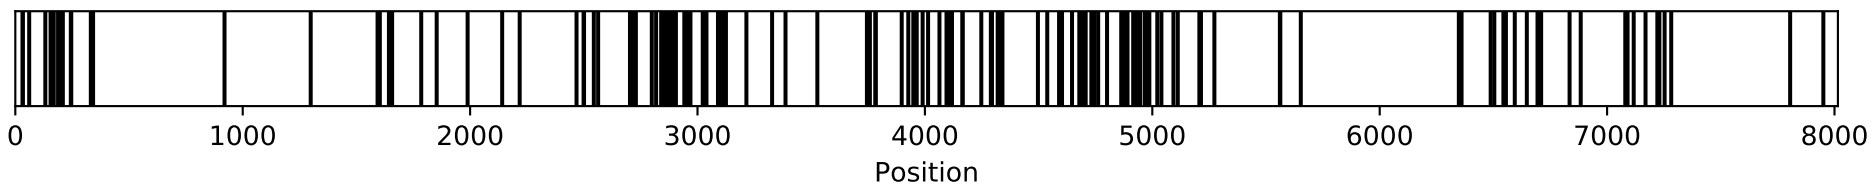

CR1 vs MA2  
Number of differences: 180

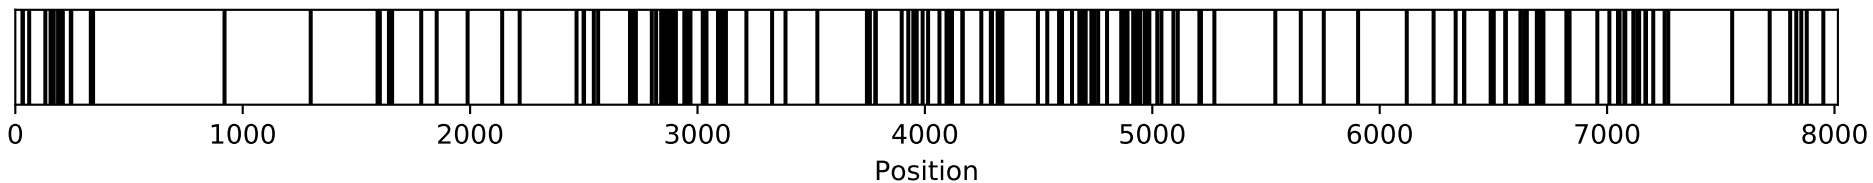

CR2 vs MA1  
Number of differences: 282

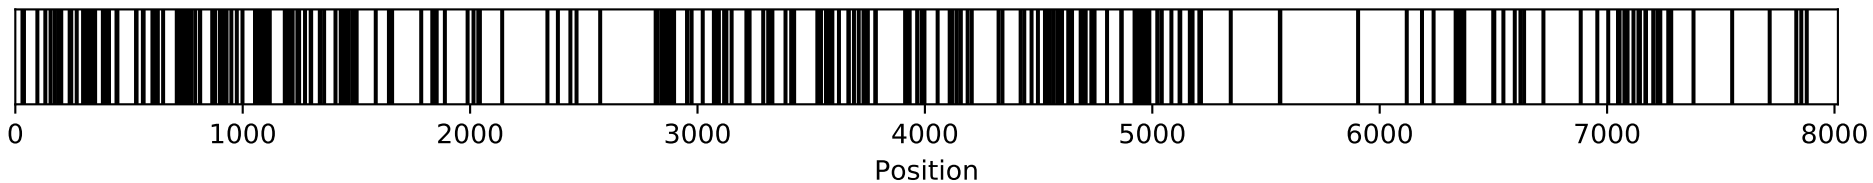

CR2 vs MA2  
Number of differences: 256

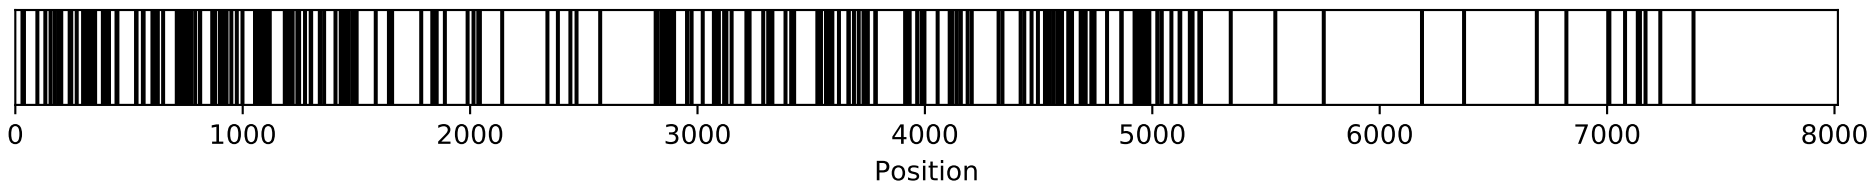

MA1 vs MA2  
Number of differences: 48

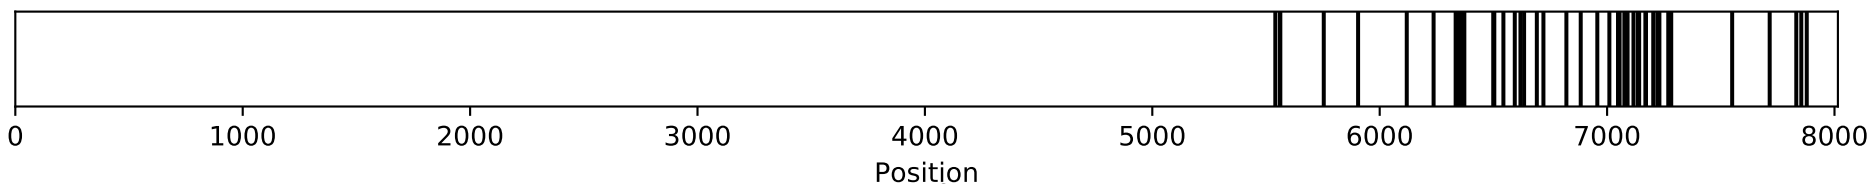

CR1 vs CR2  
Number of differences: 255

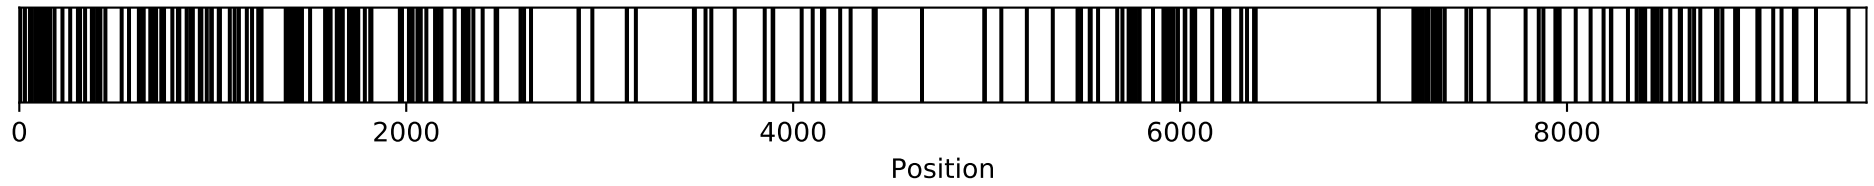

CR1 vs MA1  
Number of differences: 263

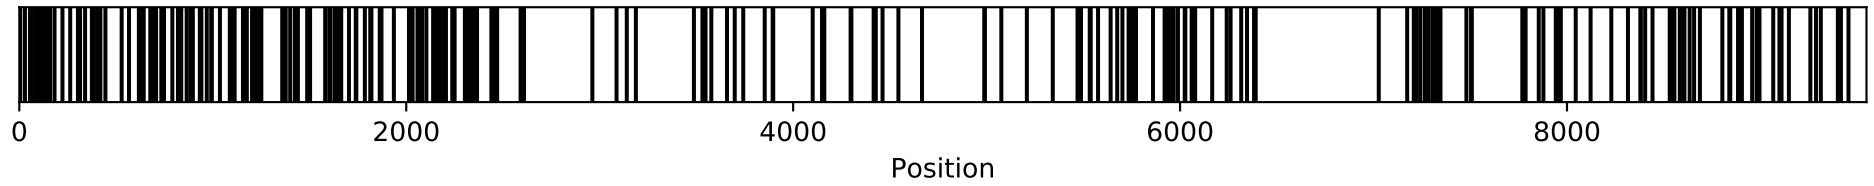

CR1 vs MA2  
Number of differences: 61

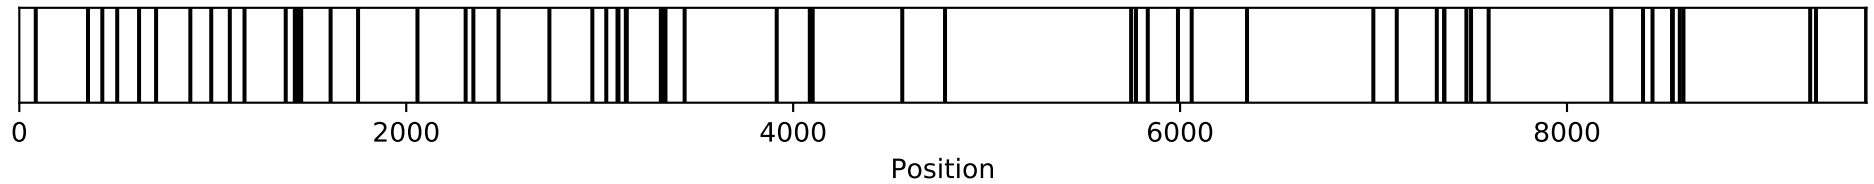

CR2 vs MA1  
Number of differences: 131

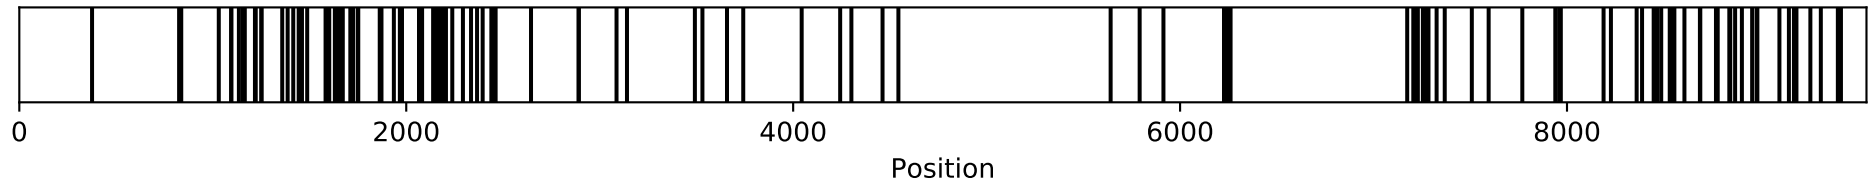

CR2 vs MA2  
Number of differences: 258

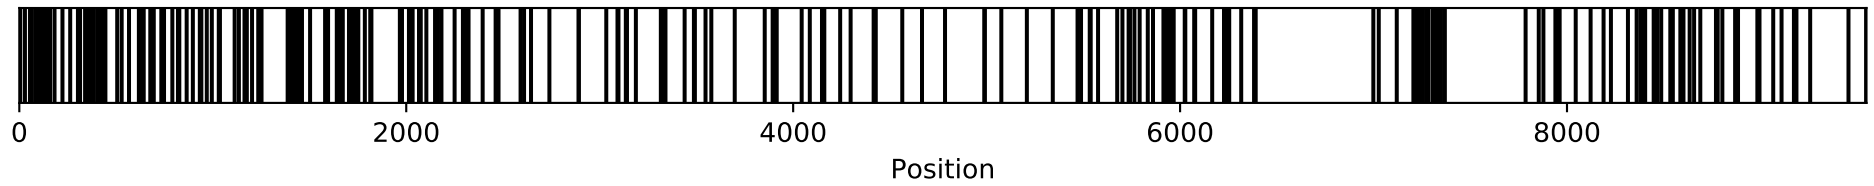

MA1 vs MA2  
Number of differences: 266

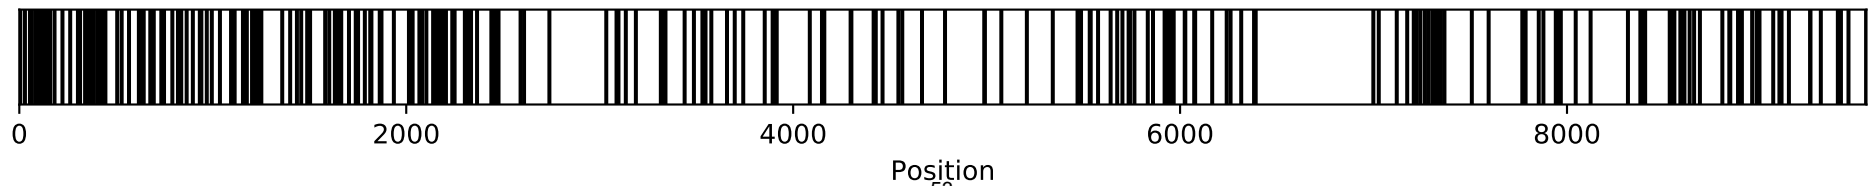

CR1 vs CR2  
Number of differences: 184

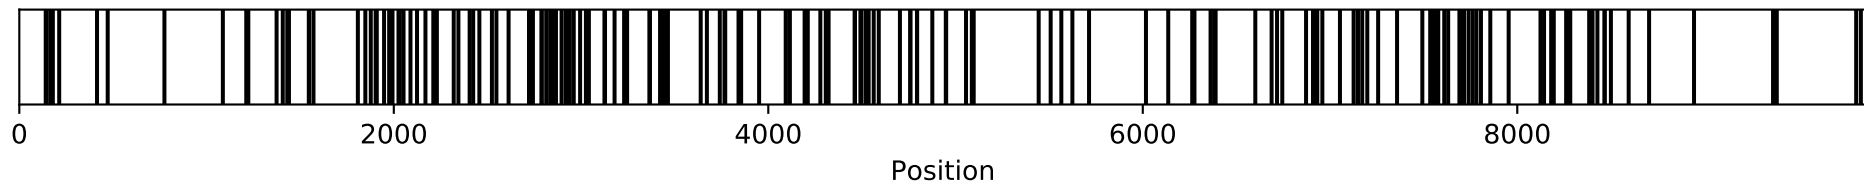

CR1 vs MA1  
Number of differences: 28

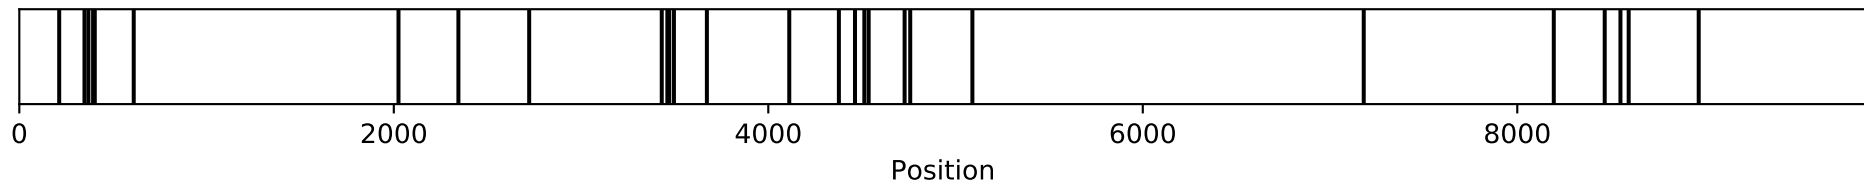

CR1 vs MA2  
Number of differences: 197

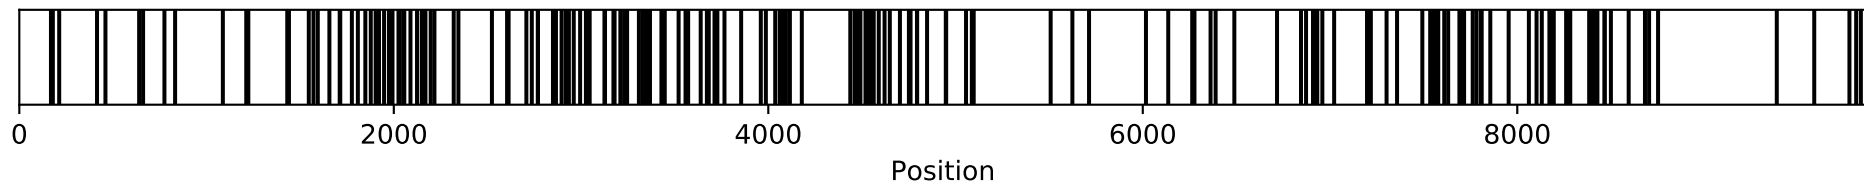

CR2 vs MA1  
Number of differences: 186

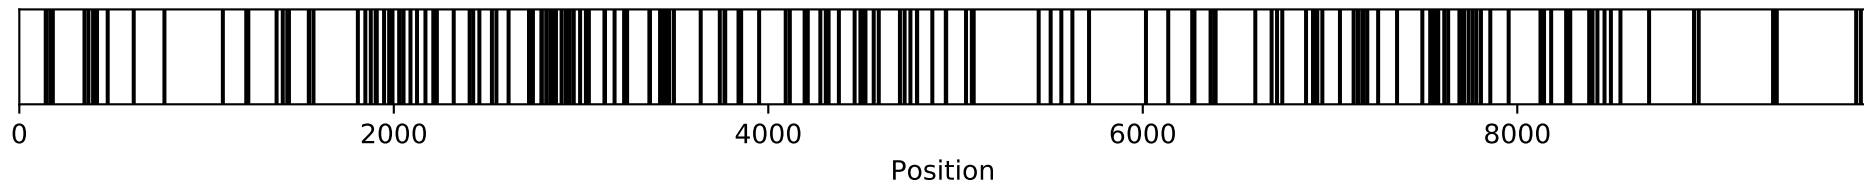

CR2 vs MA2  
Number of differences: 129

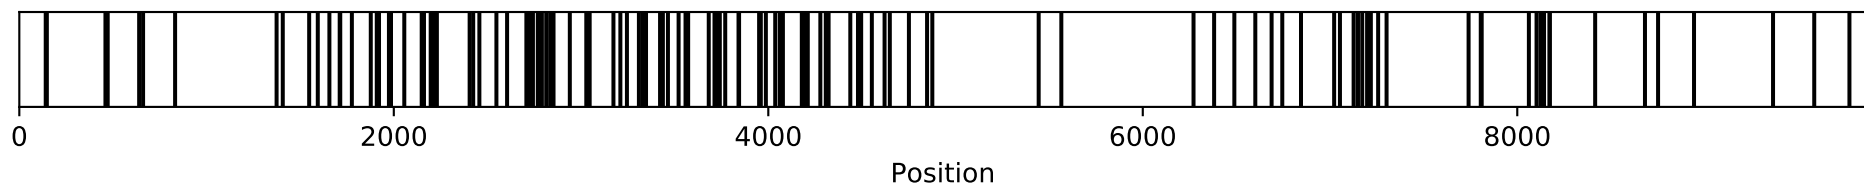

MA1 vs MA2  
Number of differences: 199

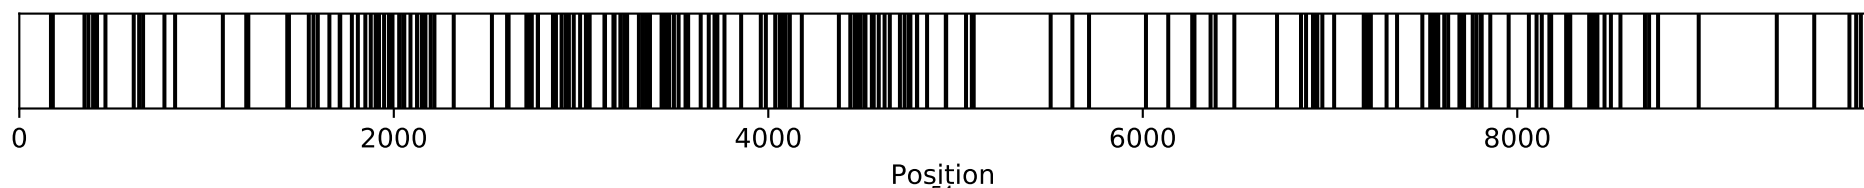

CR1 vs CR2  
Number of differences: 172

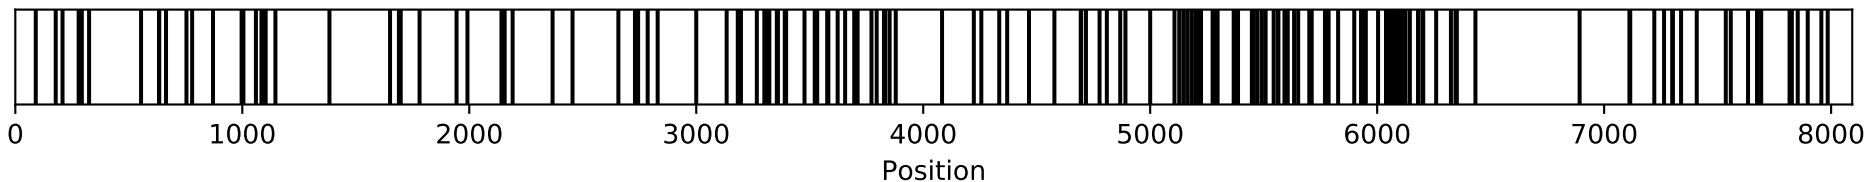

CR1 vs MA1  
Number of differences: 179

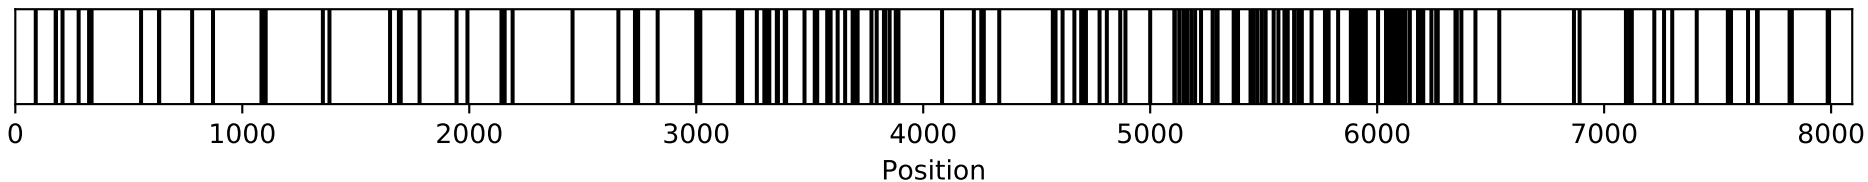

CR1 vs MA2  
Number of differences: 67

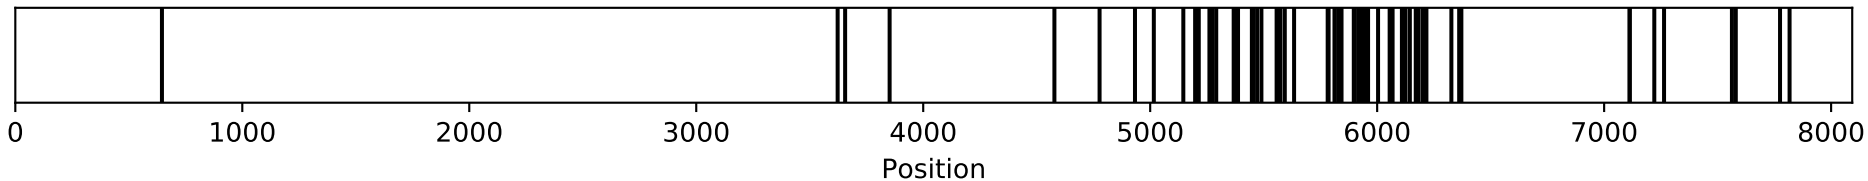

CR2 vs MA1  
Number of differences: 74

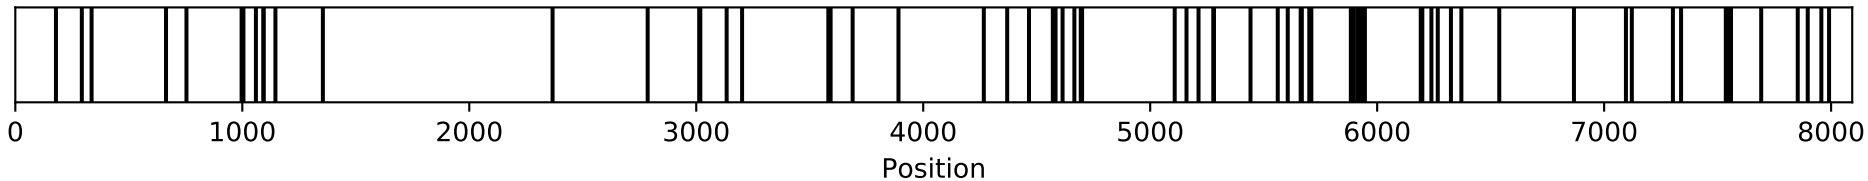

CR2 vs MA2  
Number of differences: 157

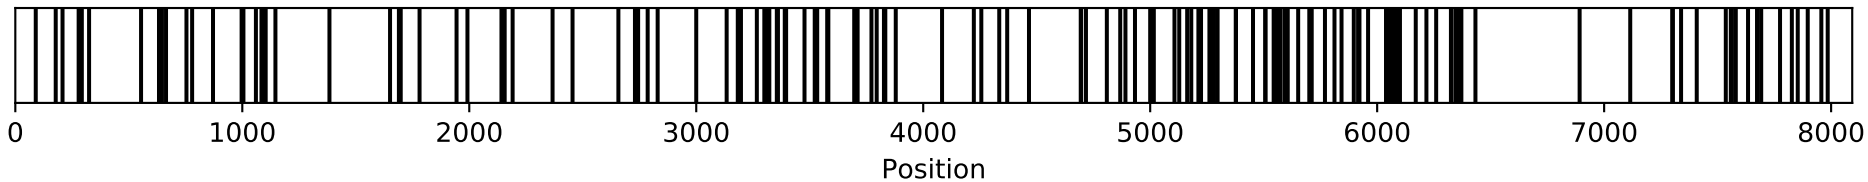

MA1 vs MA2  
Number of differences: 164

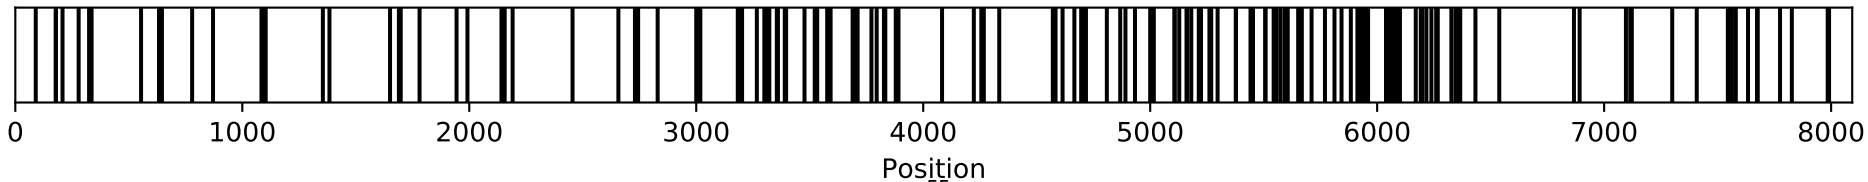

CR1 vs CR2  
Number of differences: 214

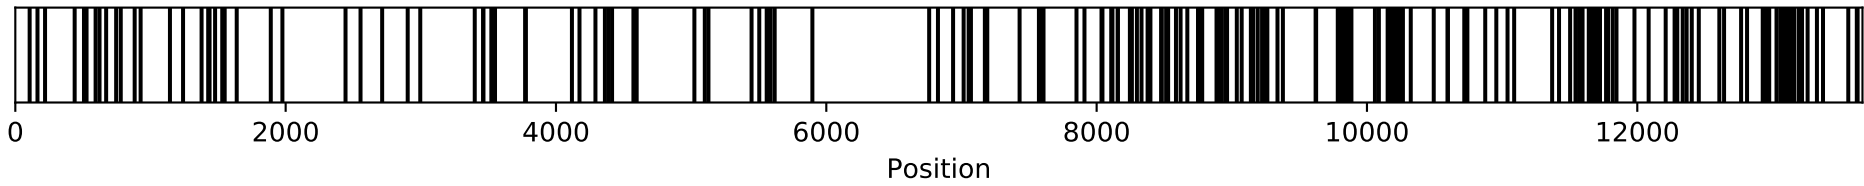

CR1 vs MA1  
Number of differences: 133

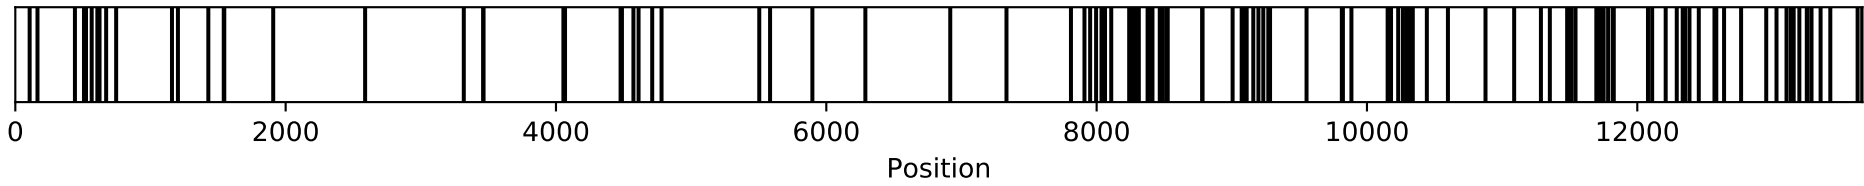

CR1 vs MA2  
Number of differences: 231

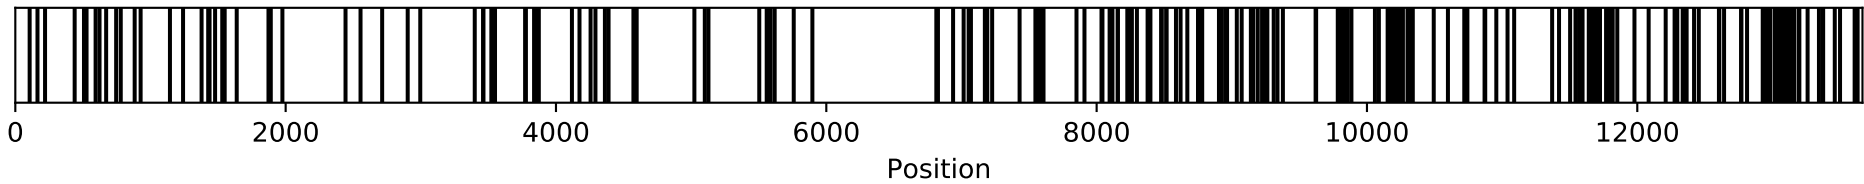

CR2 vs MA1  
Number of differences: 228

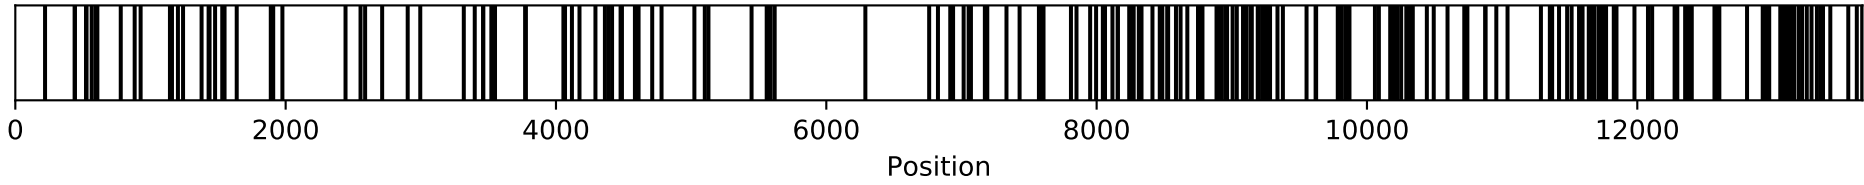

CR2 vs MA2  
Number of differences: 55

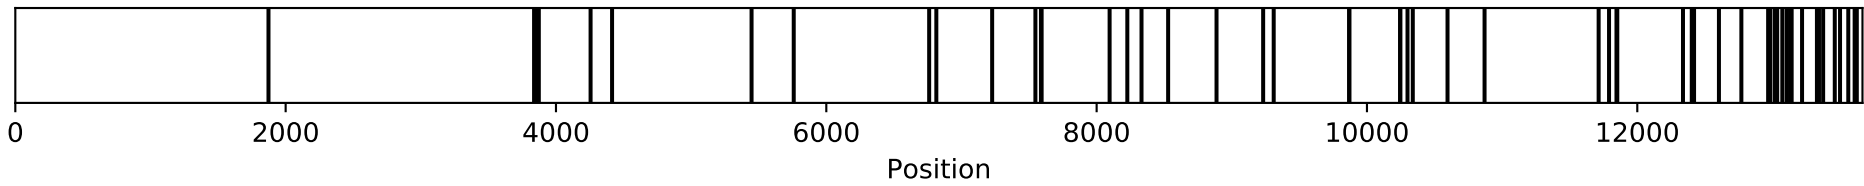

MA1 vs MA2  
Number of differences: 241

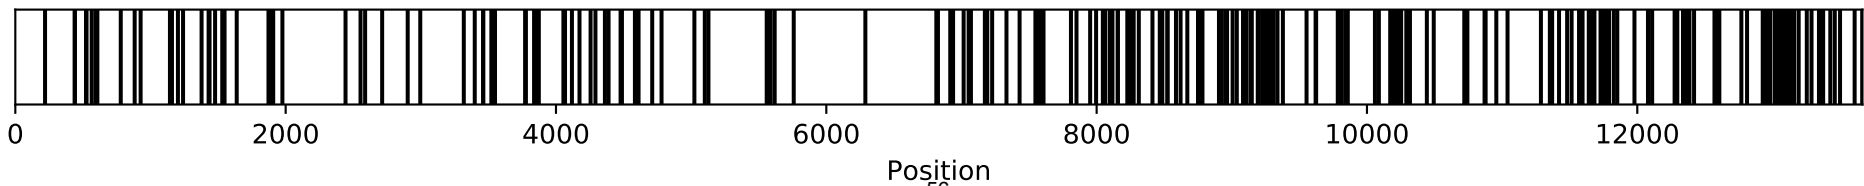



CR1 vs CR2  
Number of differences: 182

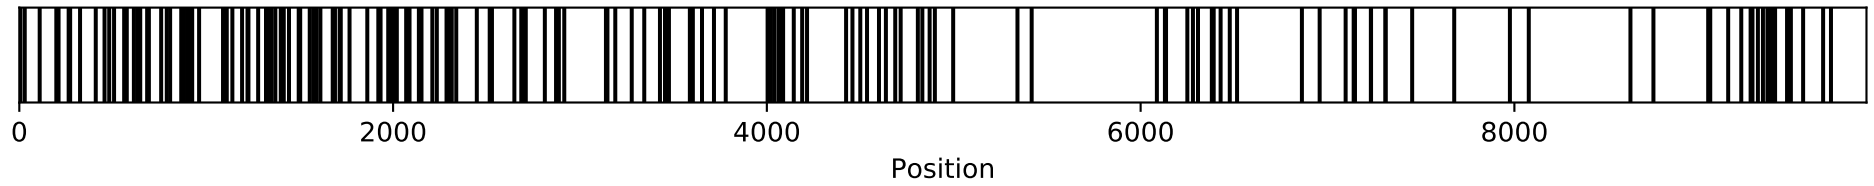

CR1 vs MA1  
Number of differences: 183

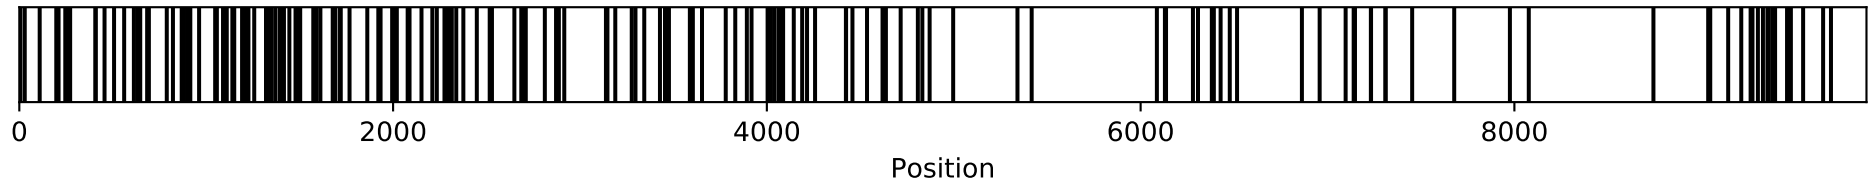

CR1 vs MA2  
Number of differences: 13

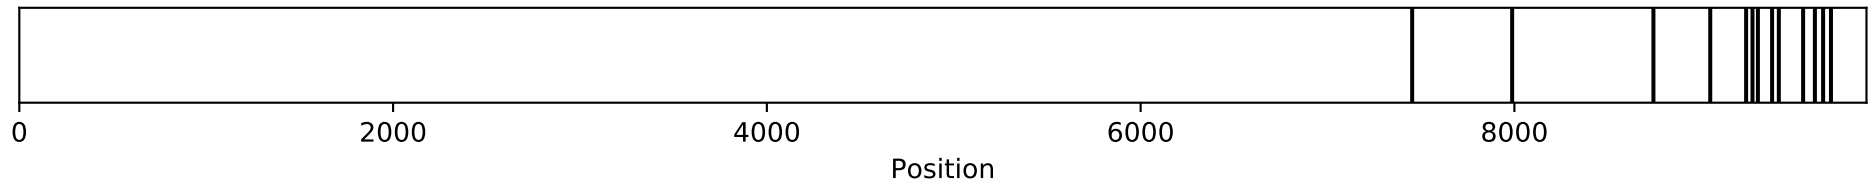

CR2 vs MA1  
Number of differences: 54

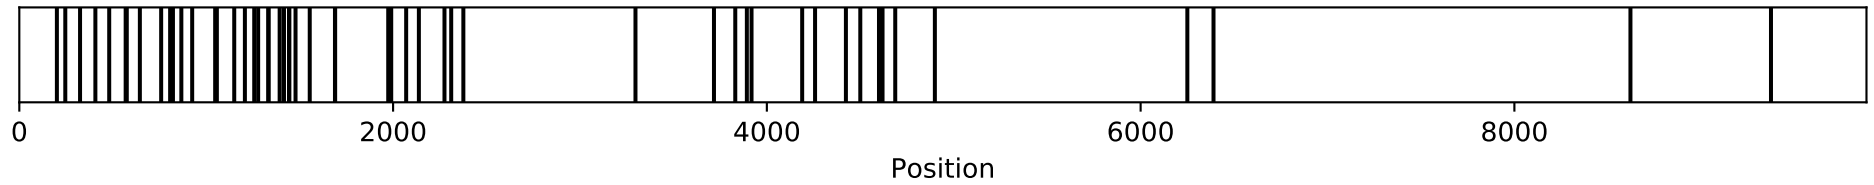

CR2 vs MA2  
Number of differences: 177

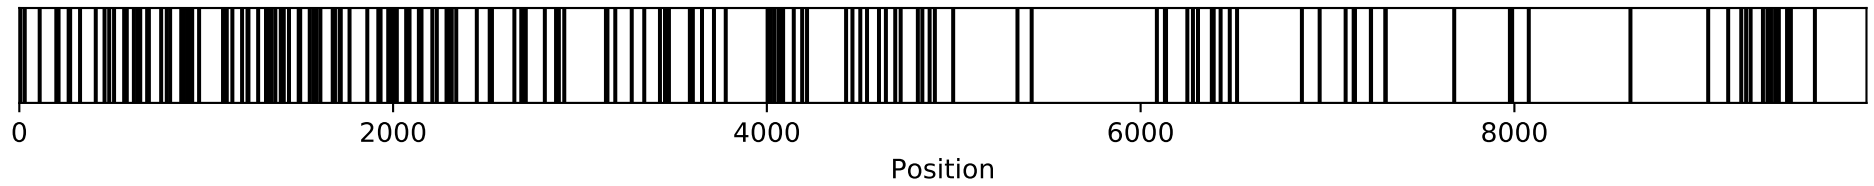

MA1 vs MA2  
Number of differences: 178

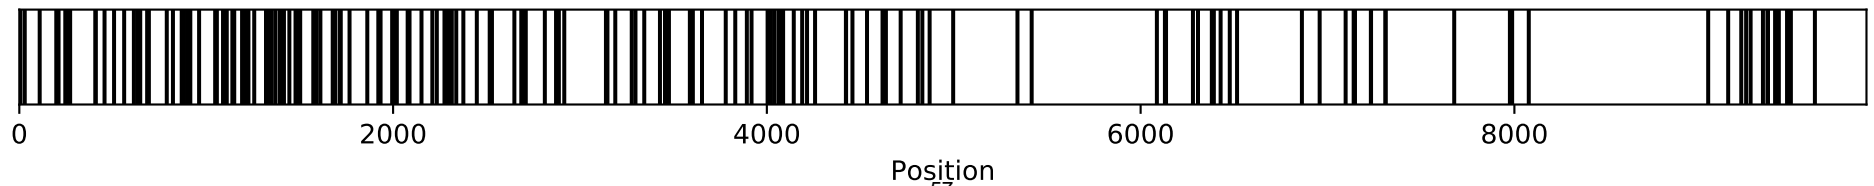

CR1 vs CR2  
Number of differences: 135

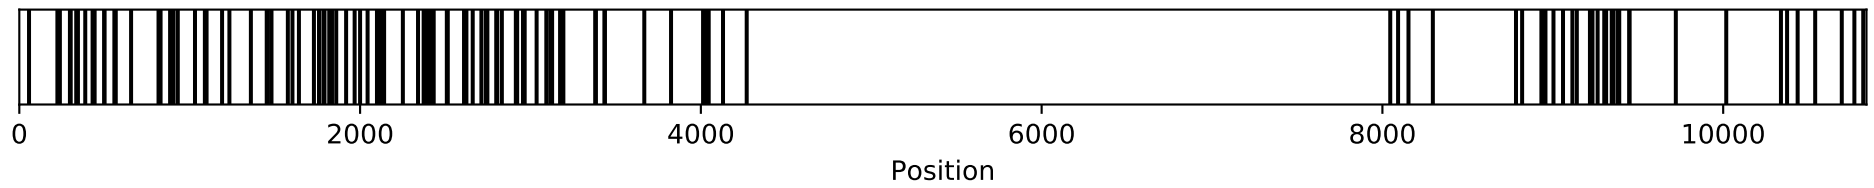

CR1 vs MA1  
Number of differences: 159

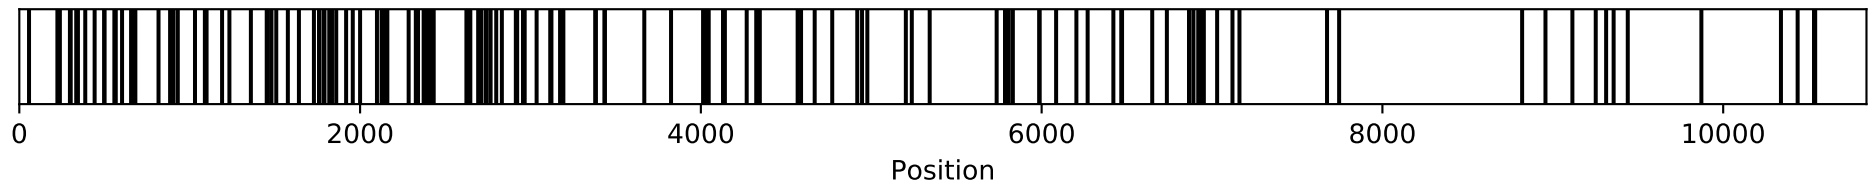

CR1 vs MA2  
Number of differences: 79

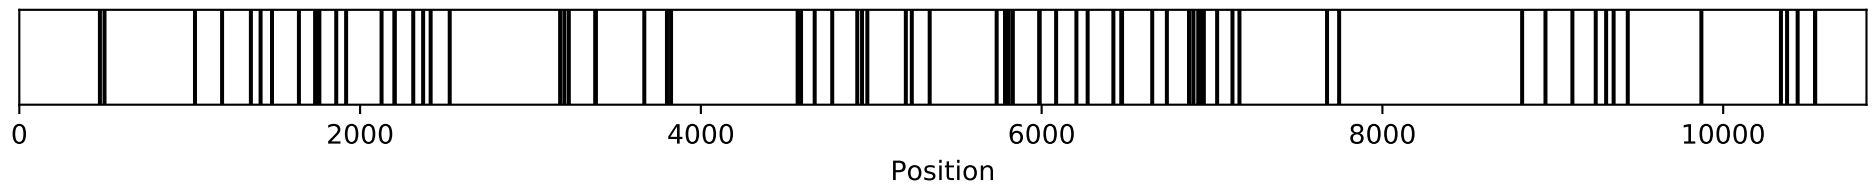

CR2 vs MA1  
Number of differences: 113

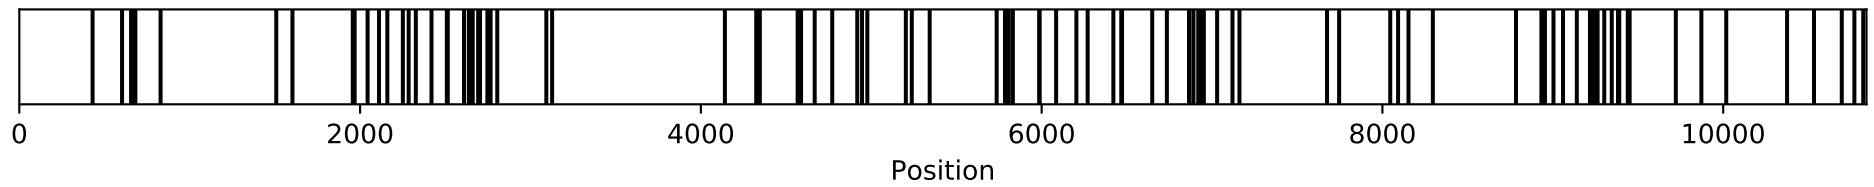

CR2 vs MA2  
Number of differences: 166

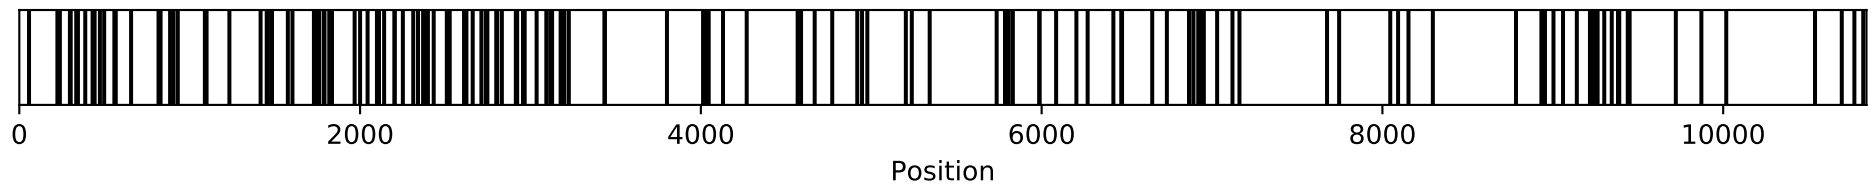

MA1 vs MA2  
Number of differences: 110

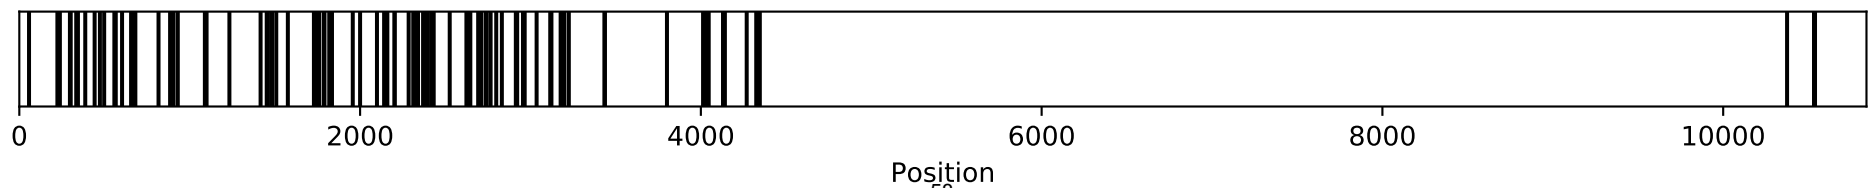

CR1 vs CR2  
Number of differences: 193

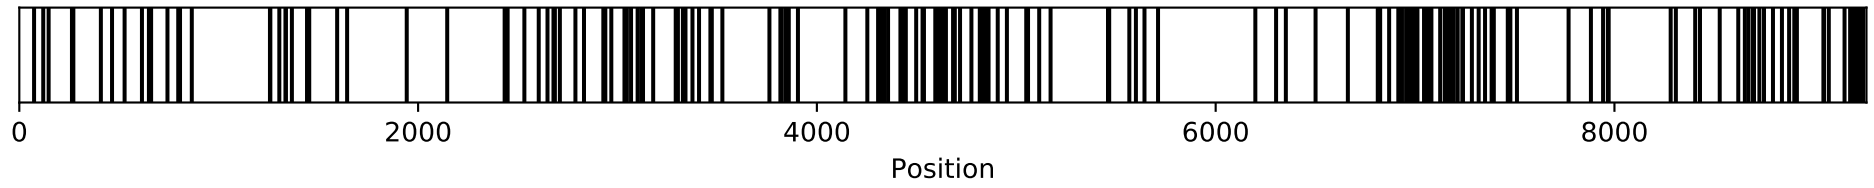

CR1 vs MA1  
Number of differences: 110

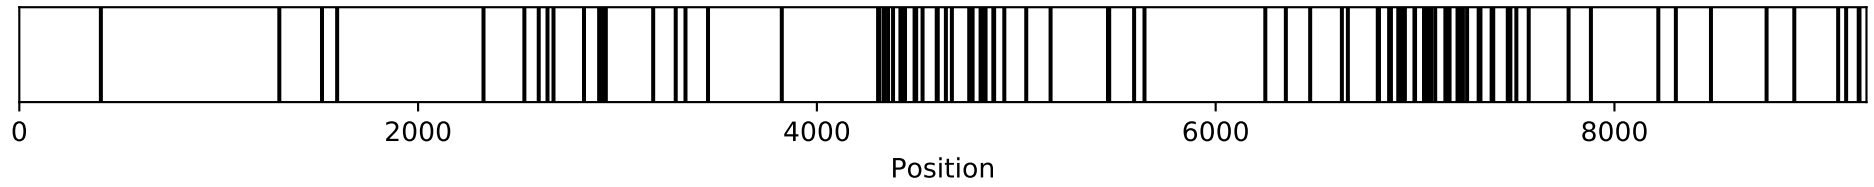

CR1 vs MA2  
Number of differences: 194

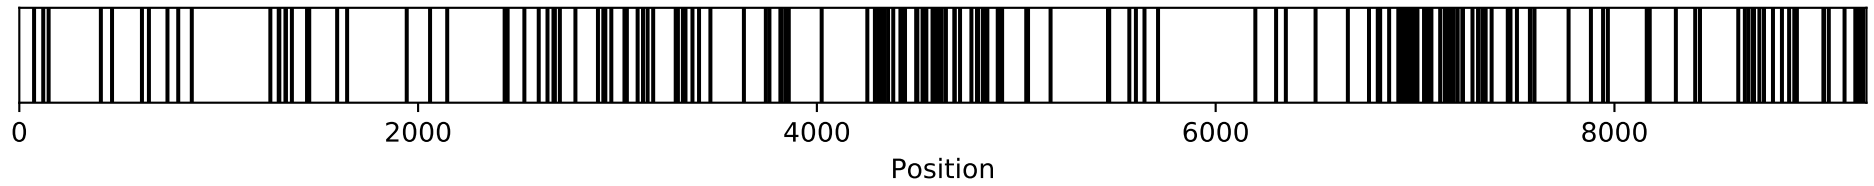

CR2 vs MA1  
Number of differences: 193

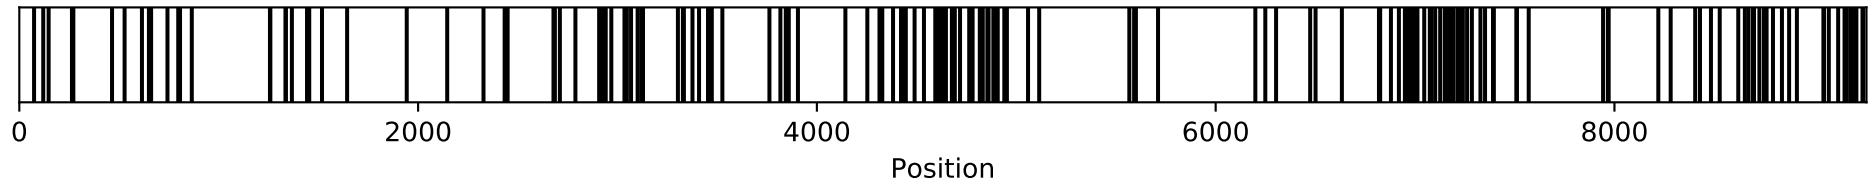

CR2 vs MA2  
Number of differences: 71

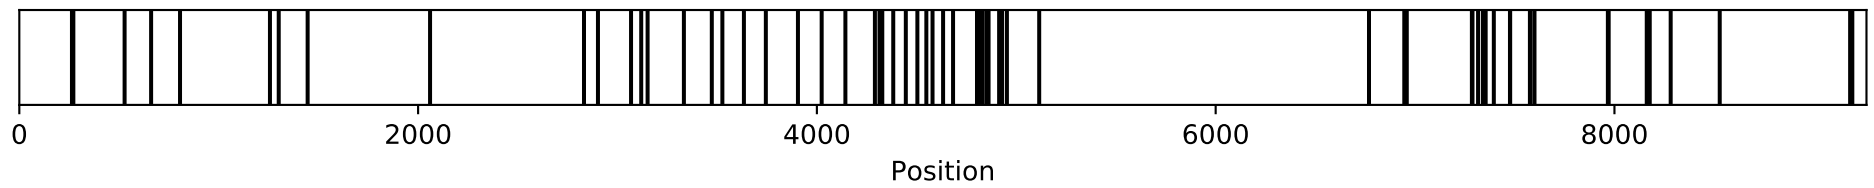

MA1 vs MA2  
Number of differences: 195

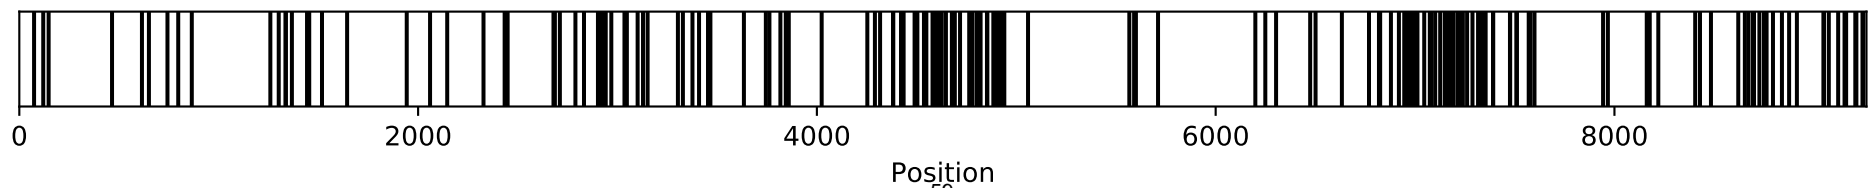

CR1 vs CR2  
Number of differences: 247

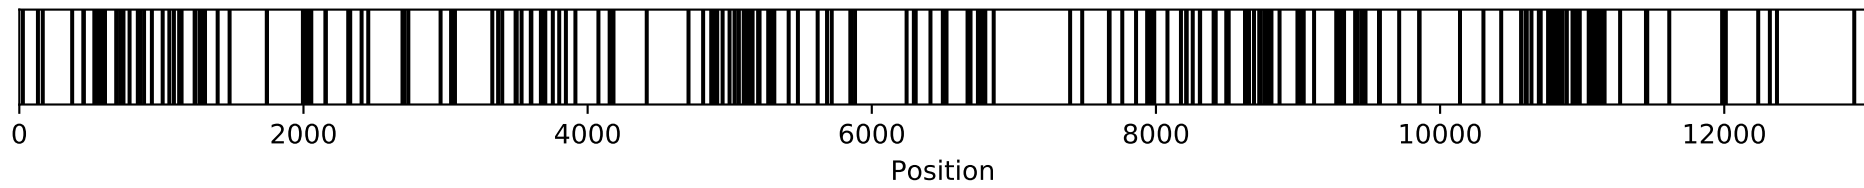

CR1 vs MA1  
Number of differences: 100

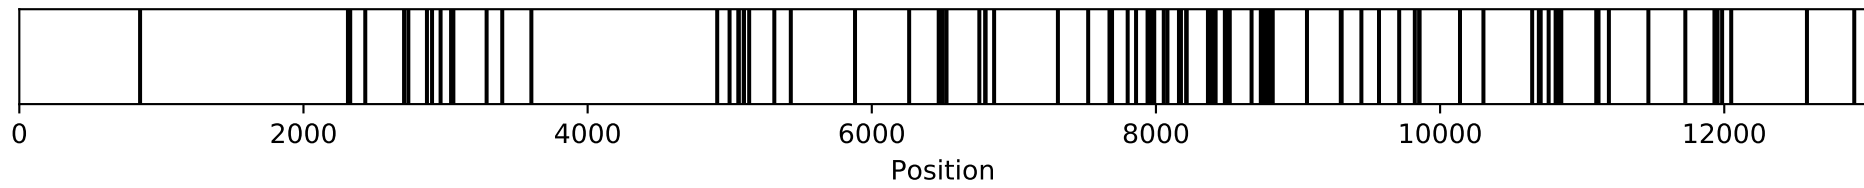

CR1 vs MA2  
Number of differences: 243

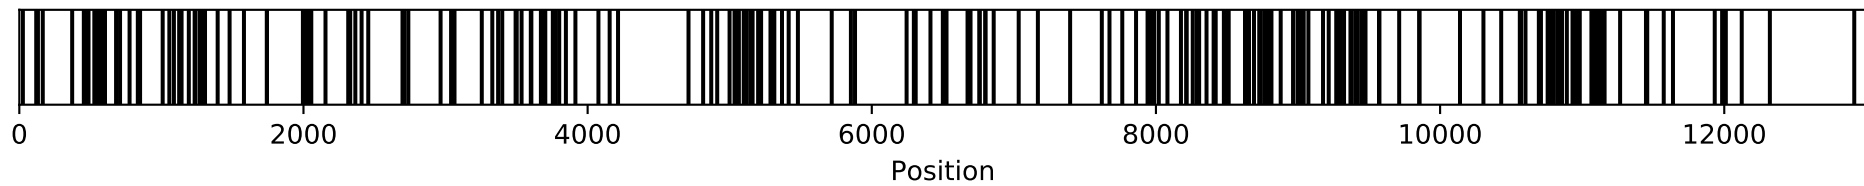

CR2 vs MA1  
Number of differences: 243

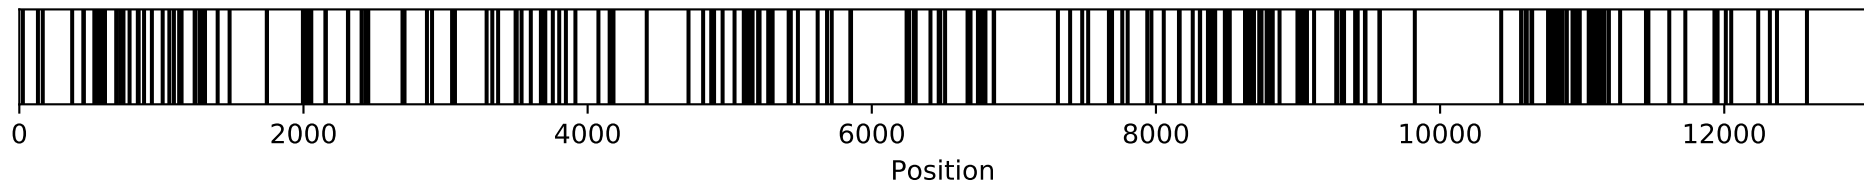

CR2 vs MA2  
Number of differences: 90

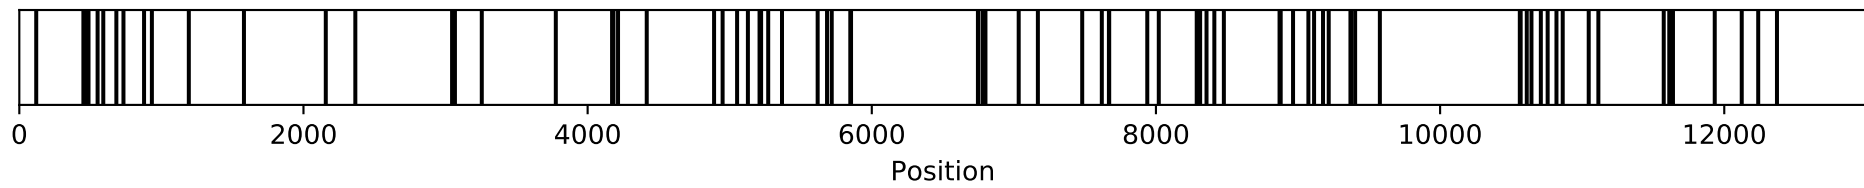

MA1 vs MA2  
Number of differences: 237

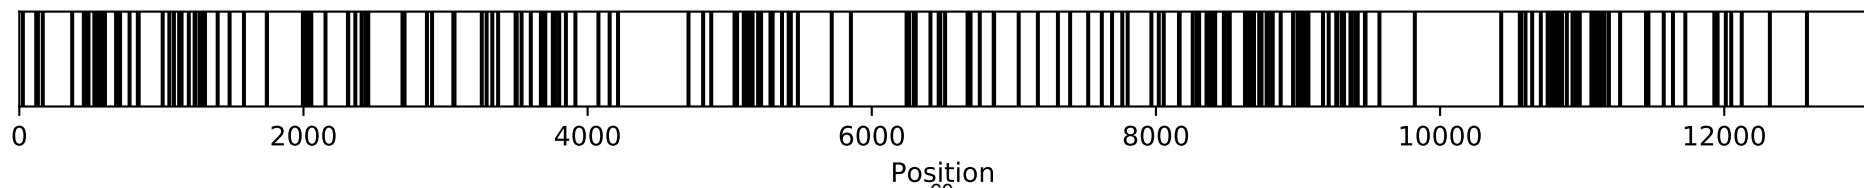

CR1 vs CR2  
Number of differences: 271

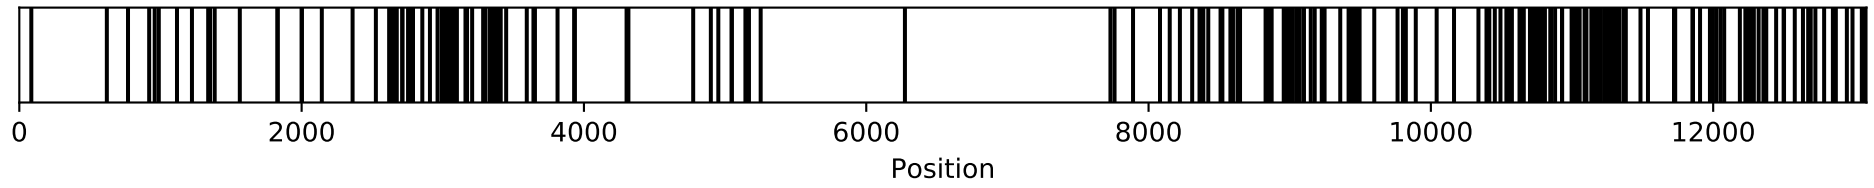

CR1 vs MA1  
Number of differences: 158

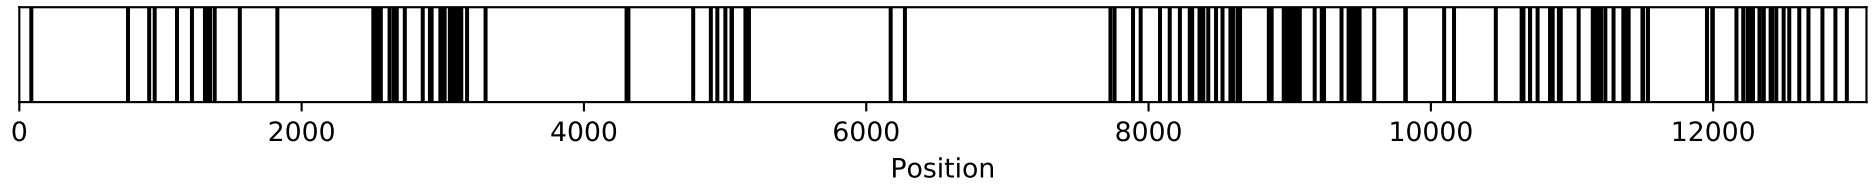

CR1 vs MA2  
Number of differences: 270

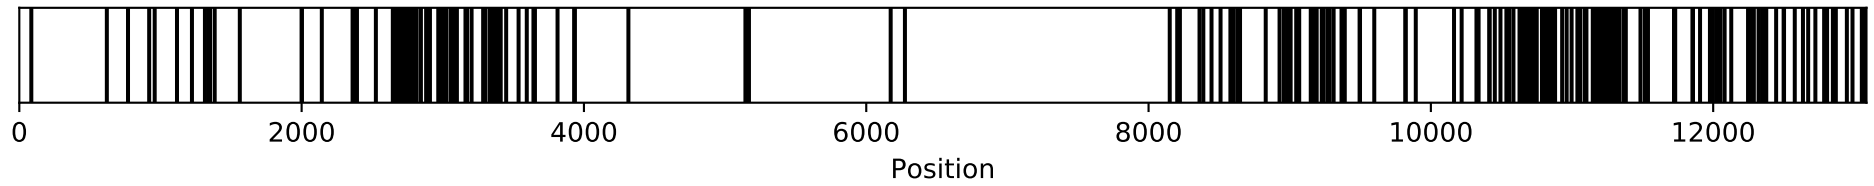

CR2 vs MA1  
Number of differences: 241

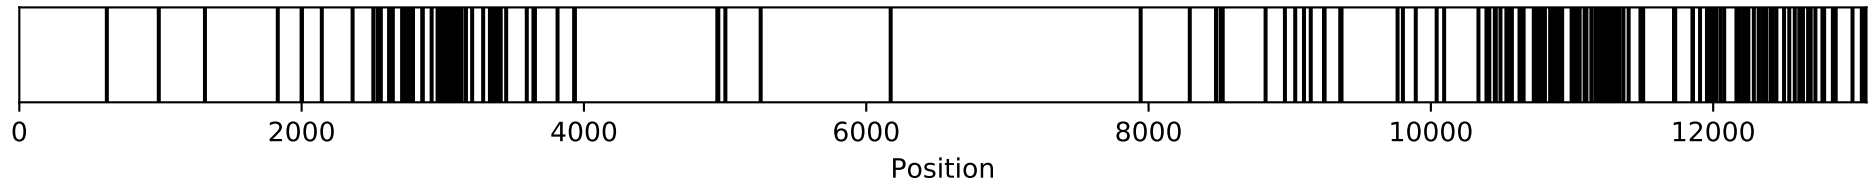

CR2 vs MA2  
Number of differences: 127

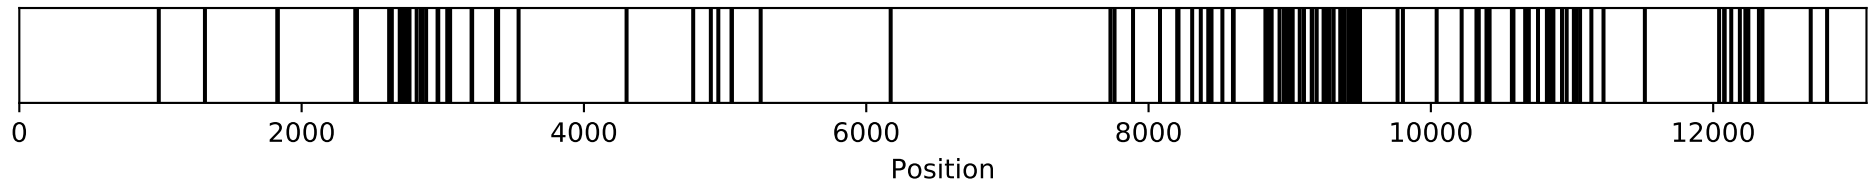

MA1 vs MA2  
Number of differences: 286

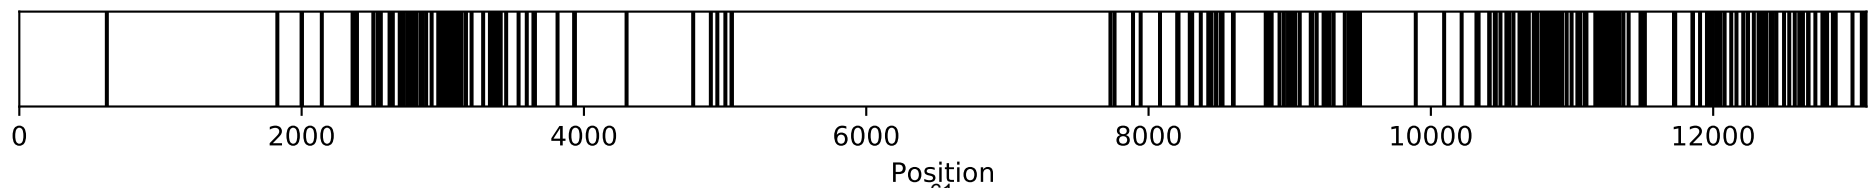

CR1 vs CR2  
Number of differences: 152

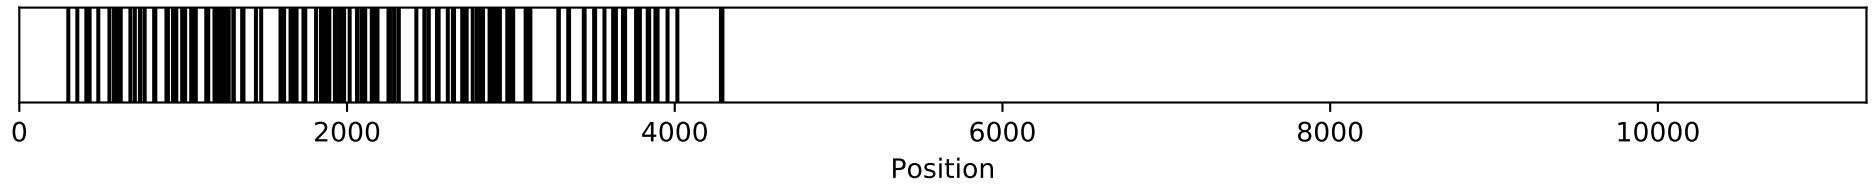

CR1 vs MA1  
Number of differences: 259

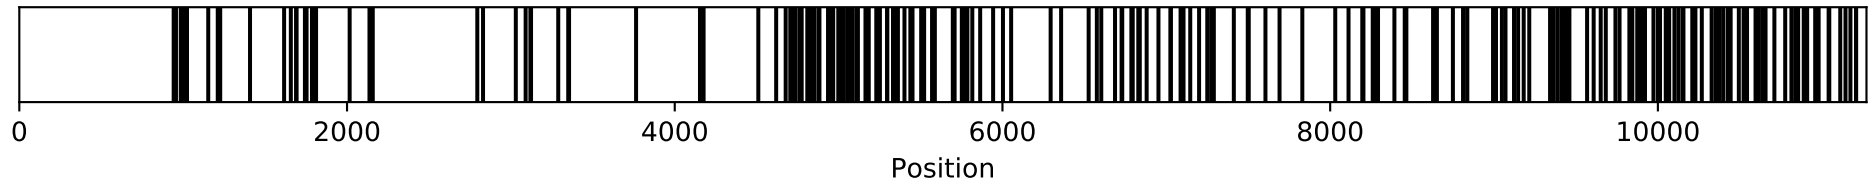

CR1 vs MA2  
Number of differences: 279

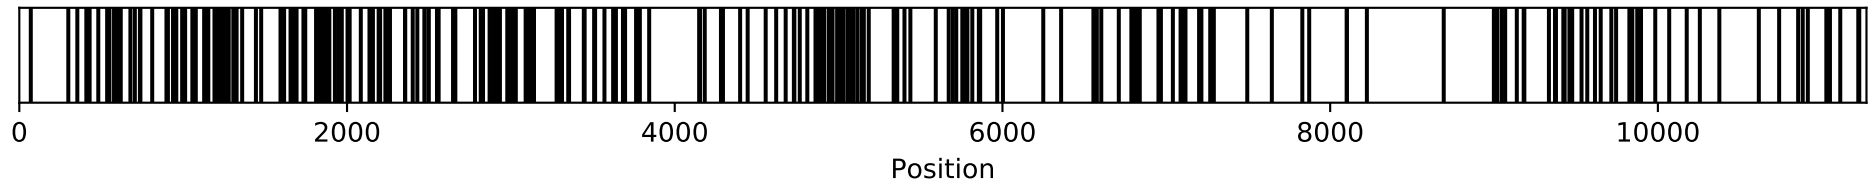

CR2 vs MA1  
Number of differences: 375

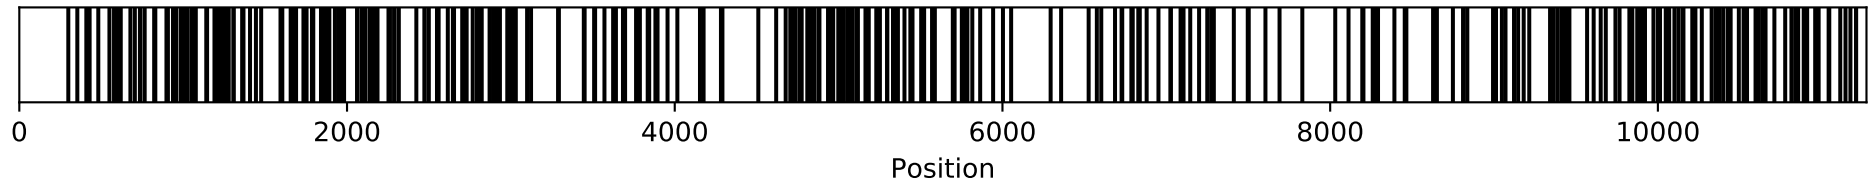

CR2 vs MA2  
Number of differences: 203

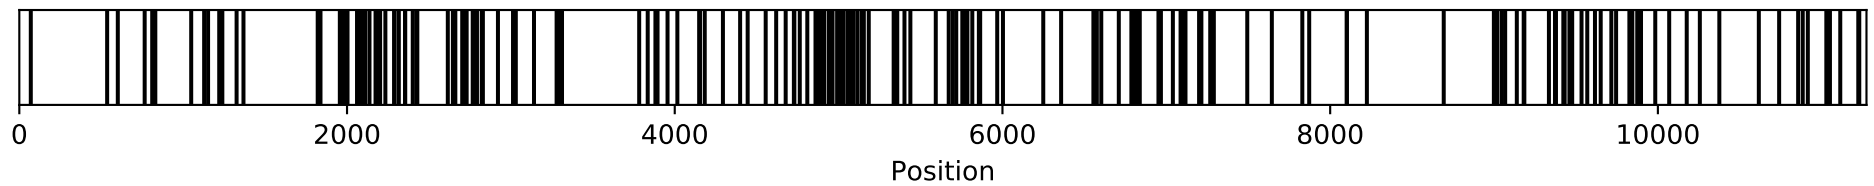

MA1 vs MA2  
Number of differences: 375

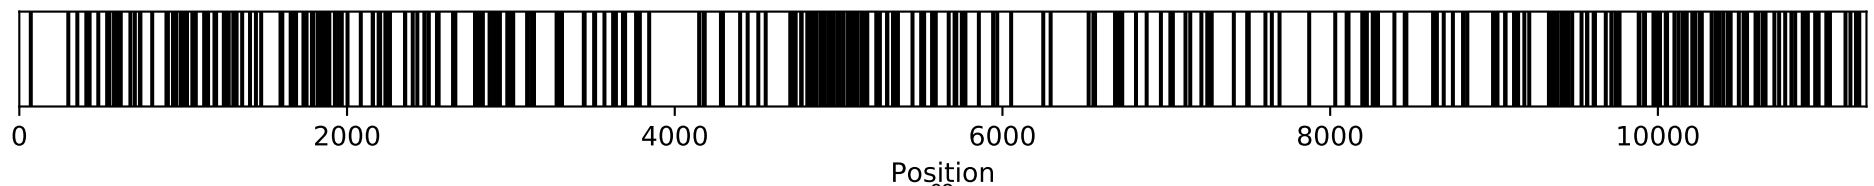

CR1 vs CR2  
Number of differences: 156

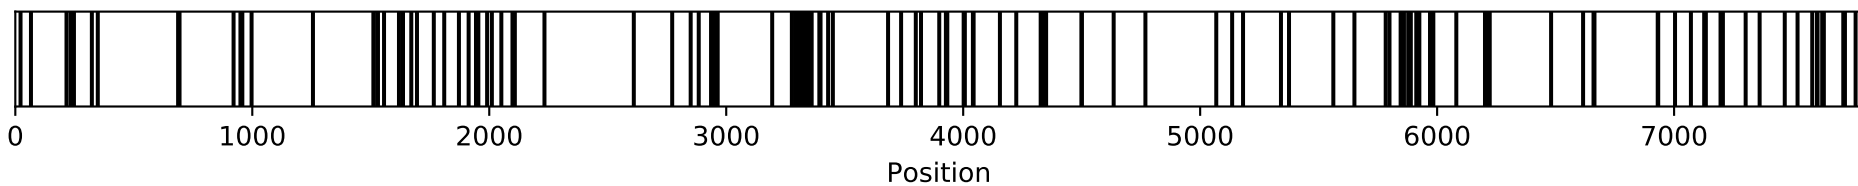

CR1 vs MA1  
Number of differences: 62

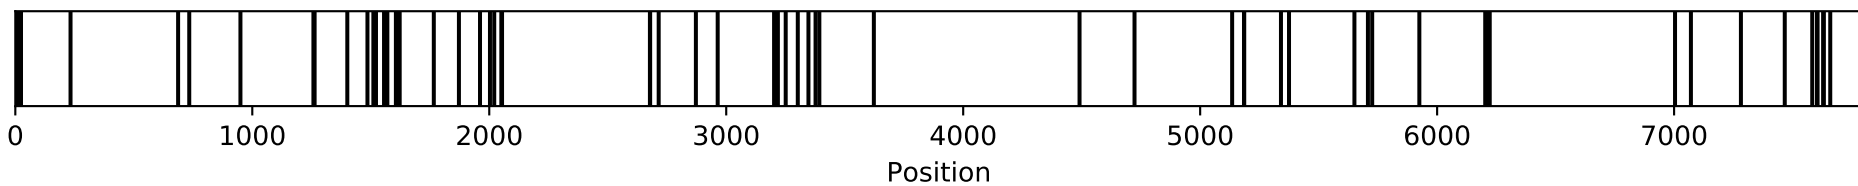

CR1 vs MA2  
Number of differences: 161

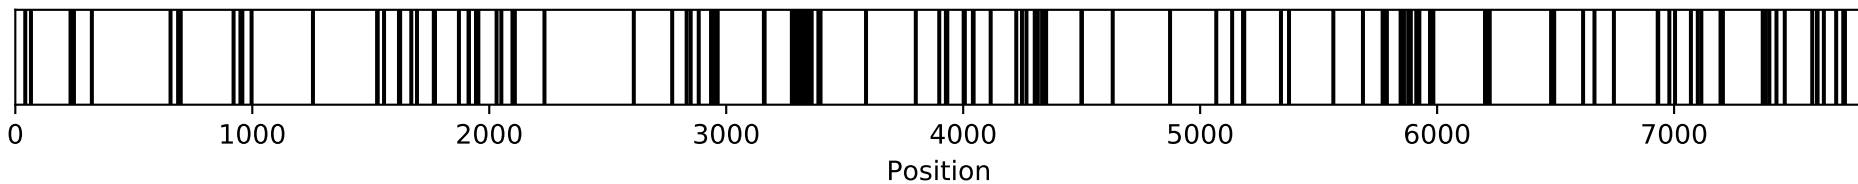

CR2 vs MA1  
Number of differences: 167

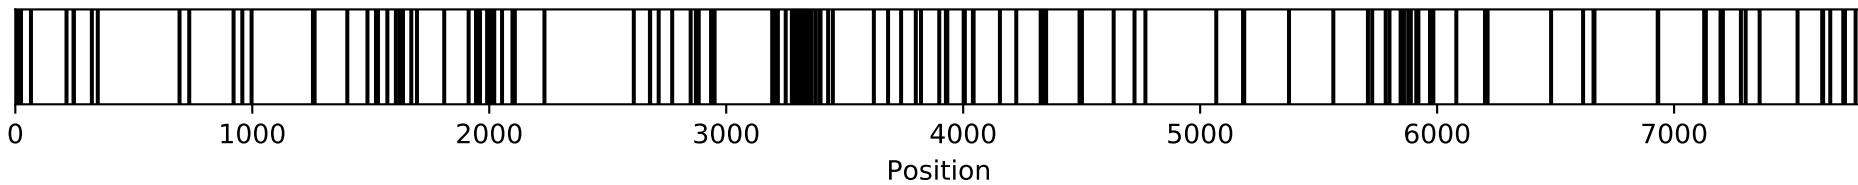

CR2 vs MA2  
Number of differences: 70

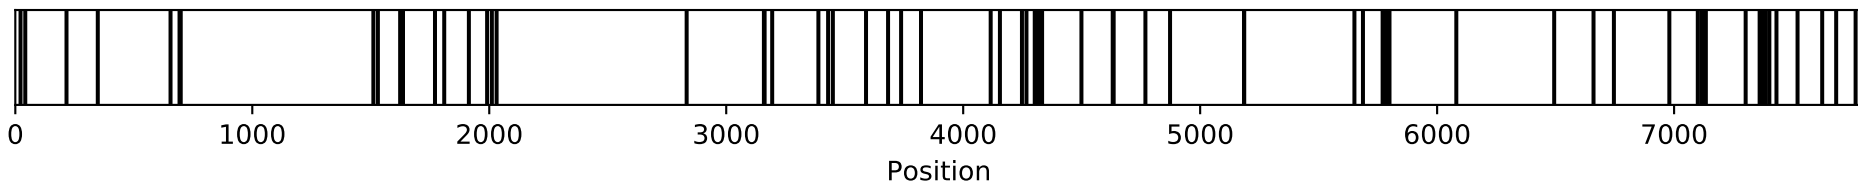

MA1 vs MA2  
Number of differences: 172

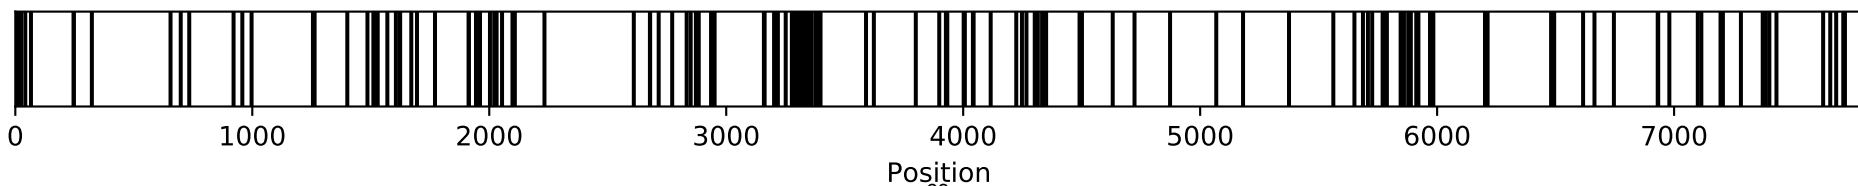

CR1 vs CR2  
Number of differences: 130

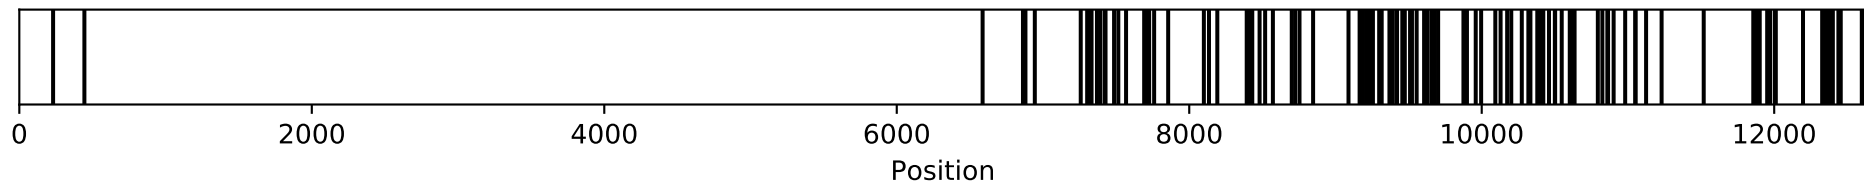

CR1 vs MA1  
Number of differences: 194

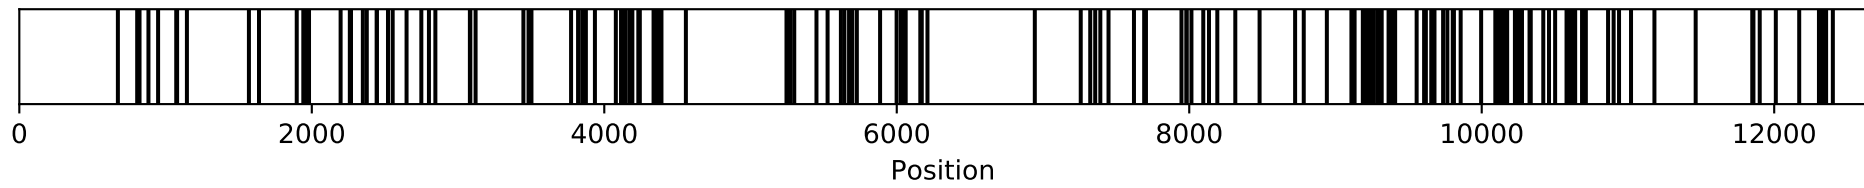

CR1 vs MA2  
Number of differences: 156

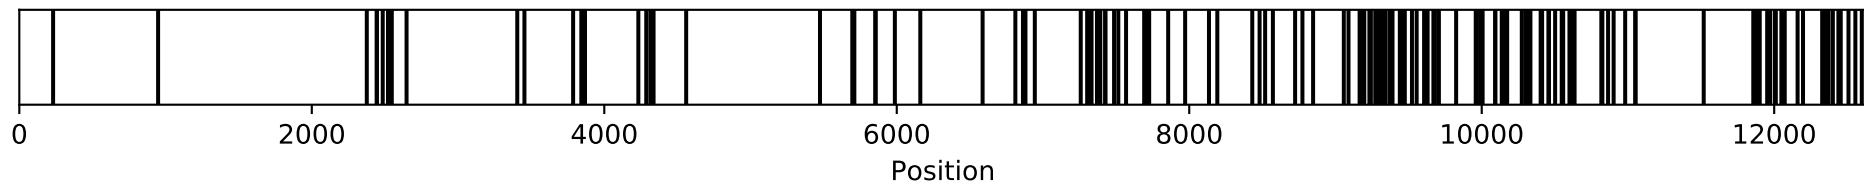

CR2 vs MA1  
Number of differences: 240

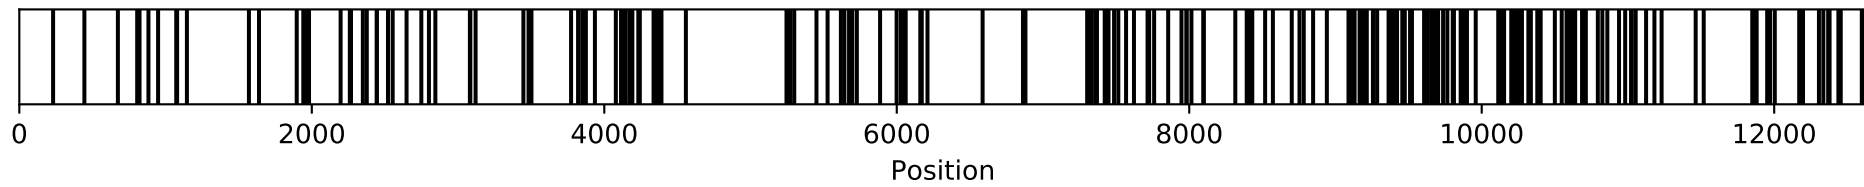

CR2 vs MA2  
Number of differences: 102

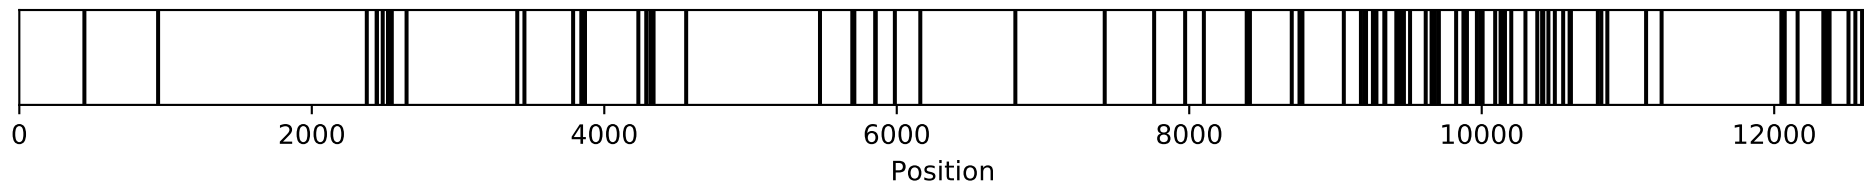

MA1 vs MA2  
Number of differences: 241

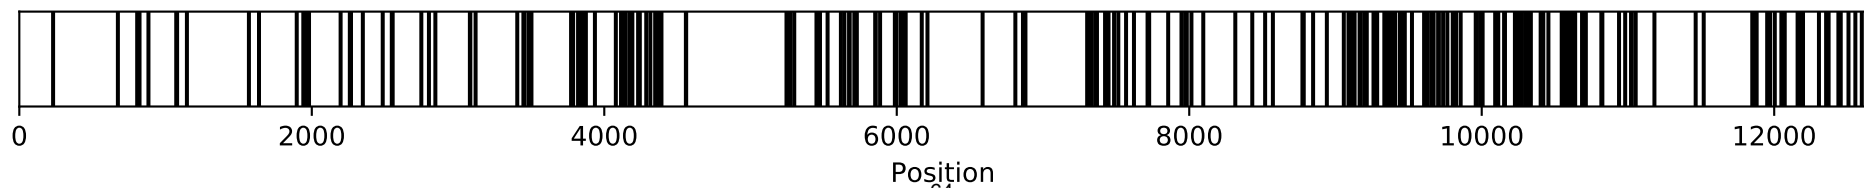



CR1 vs CR2  
Number of differences: 271

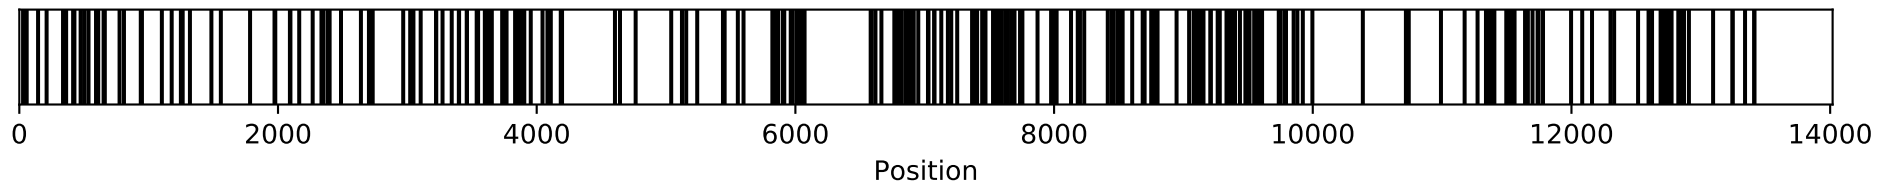

CR1 vs MA1  
Number of differences: 237

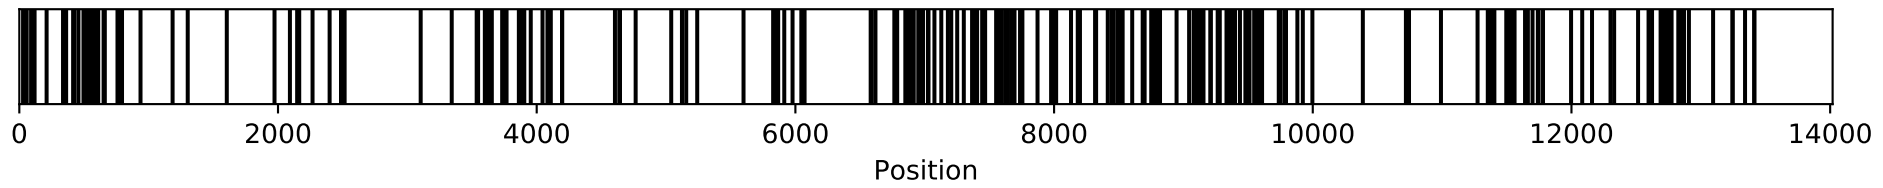

CR1 vs MA2  
Number of differences: 144

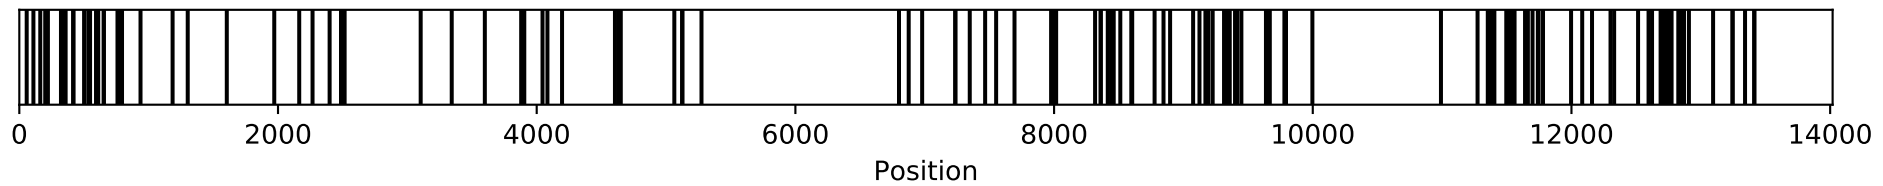

CR2 vs MA1  
Number of differences: 94

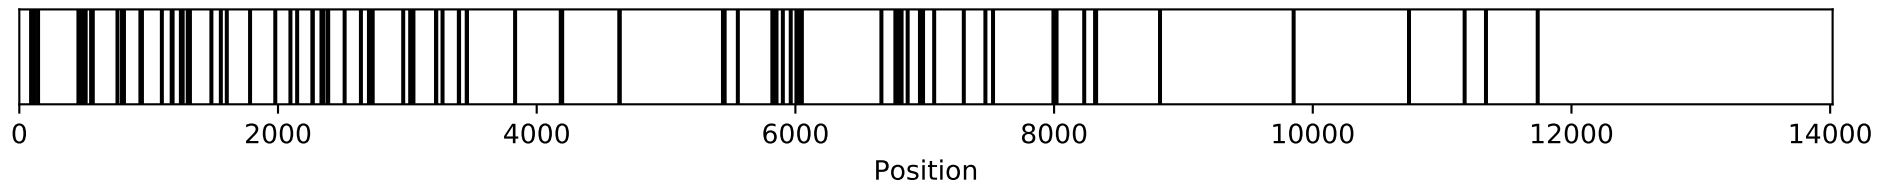

CR2 vs MA2  
Number of differences: 231

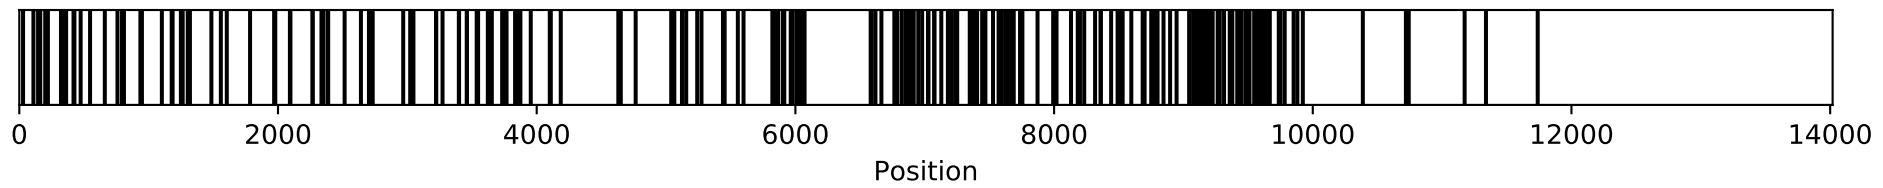

MA1 vs MA2  
Number of differences: 182

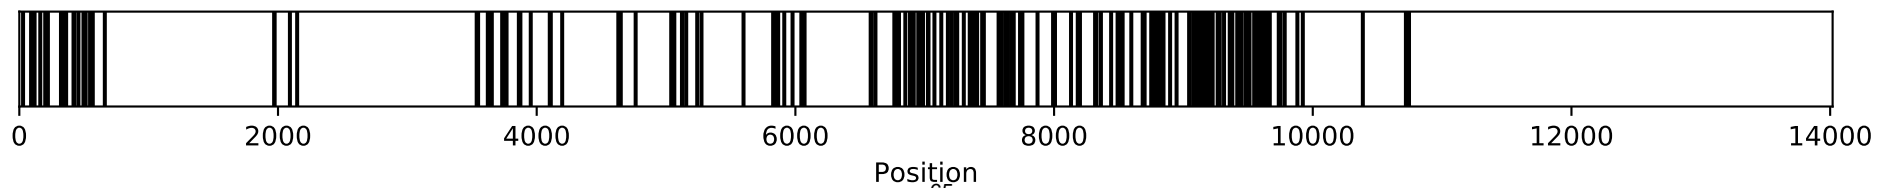

CR1 vs CR2  
Number of differences: 476

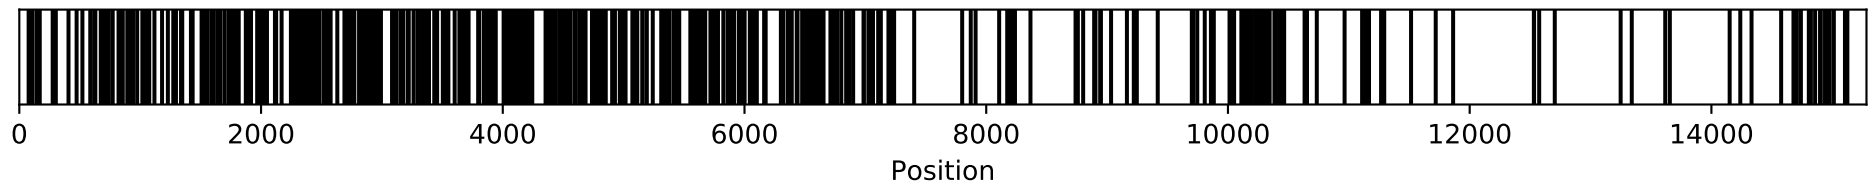

CR1 vs MA1  
Number of differences: 221

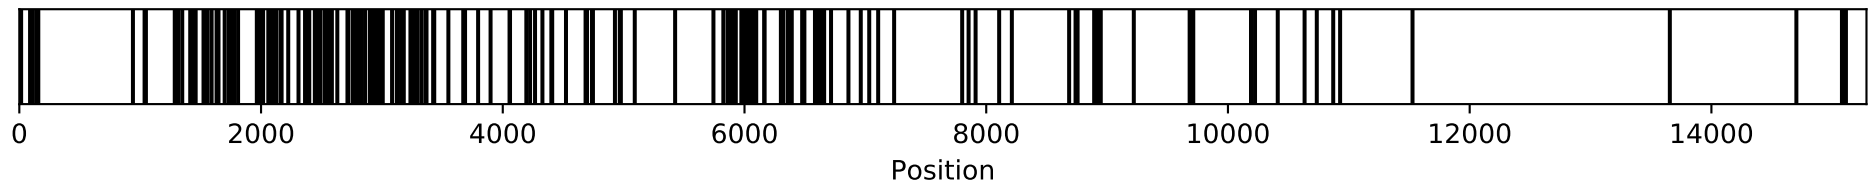

CR1 vs MA2  
Number of differences: 476

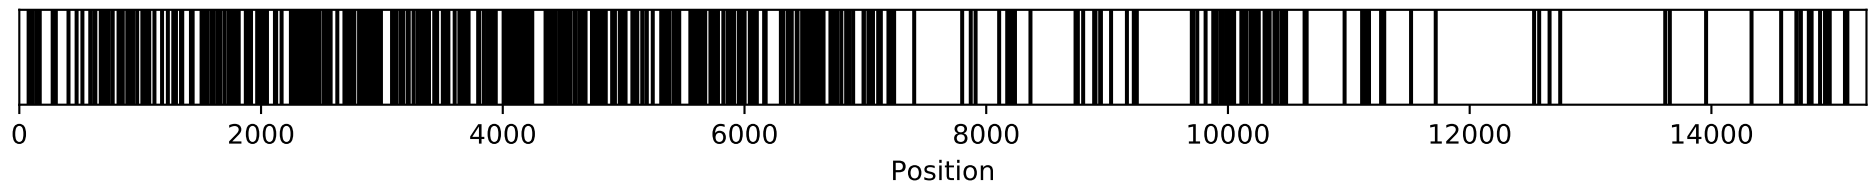

CR2 vs MA1  
Number of differences: 471

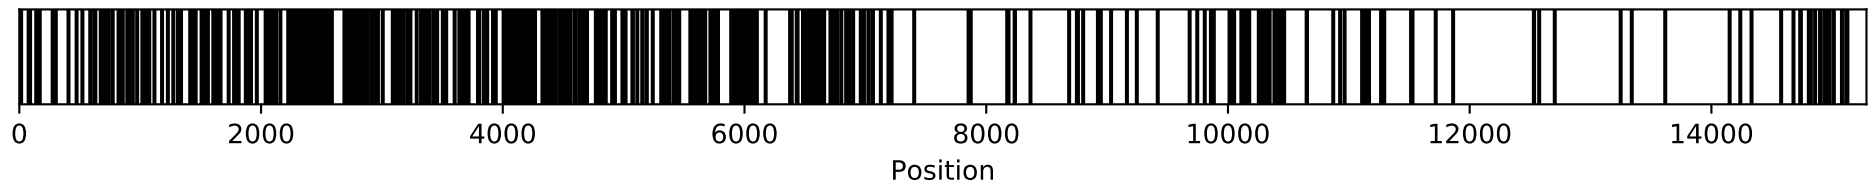

CR2 vs MA2  
Number of differences: 44

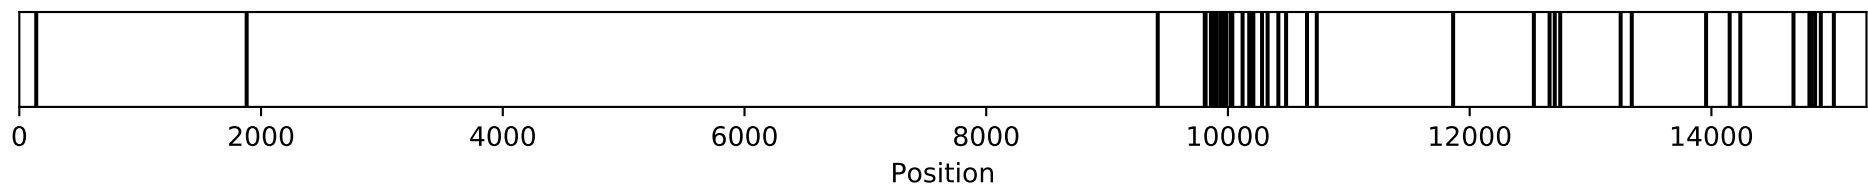

MA1 vs MA2  
Number of differences: 471

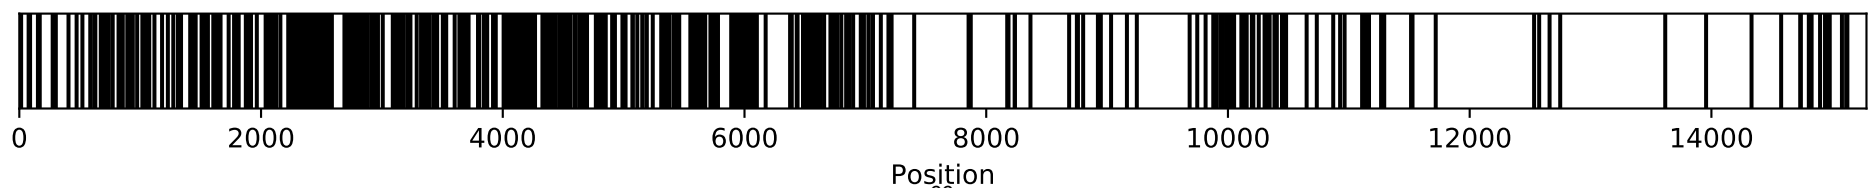

CR1 vs CR2  
Number of differences: 57

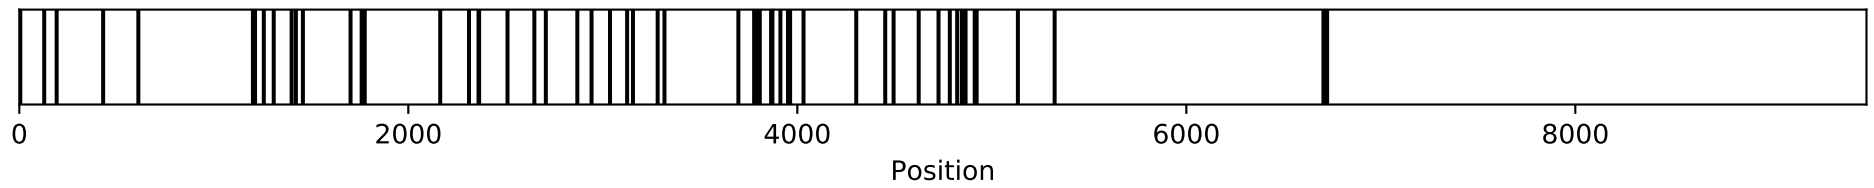

CR1 vs MA1  
Number of differences: 163

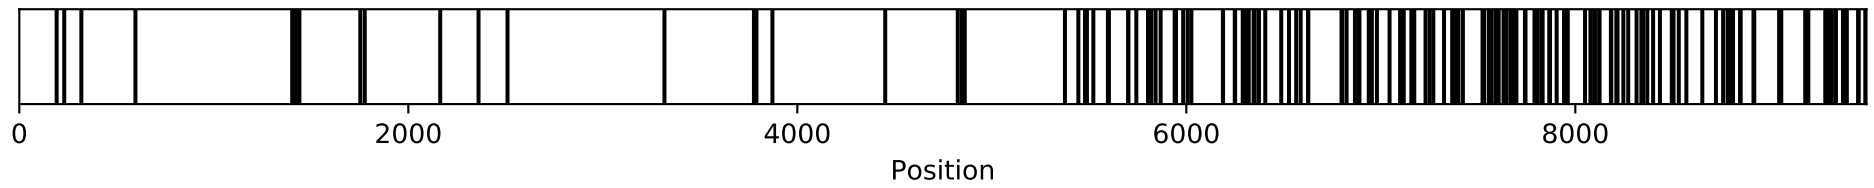

CR1 vs MA2  
Number of differences: 116

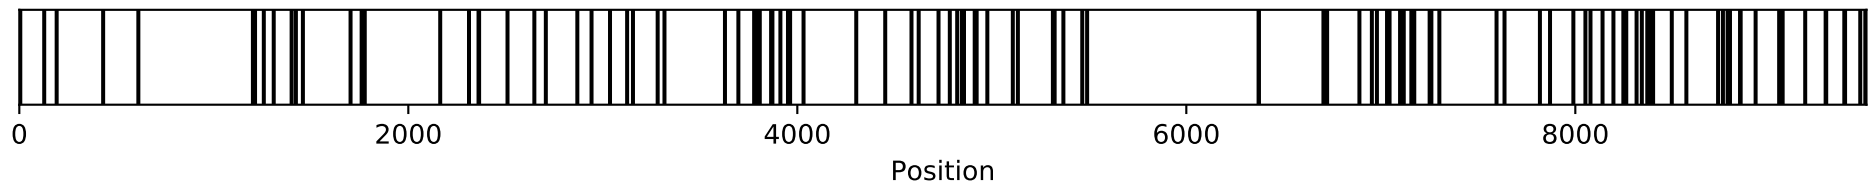

CR2 vs MA1  
Number of differences: 194

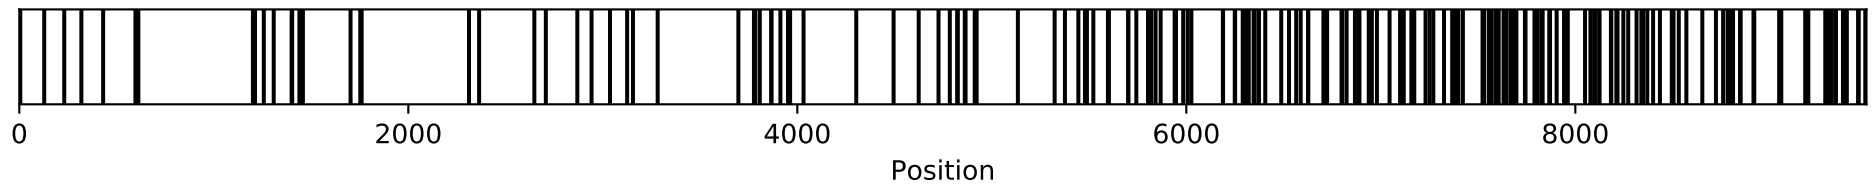

CR2 vs MA2  
Number of differences: 63

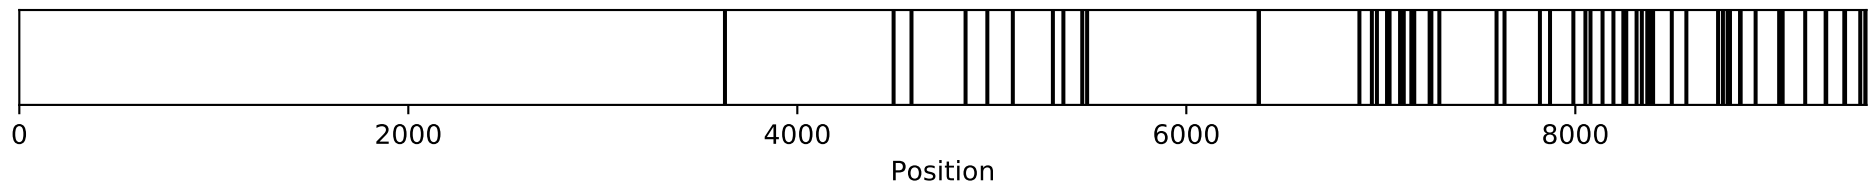

MA1 vs MA2  
Number of differences: 189

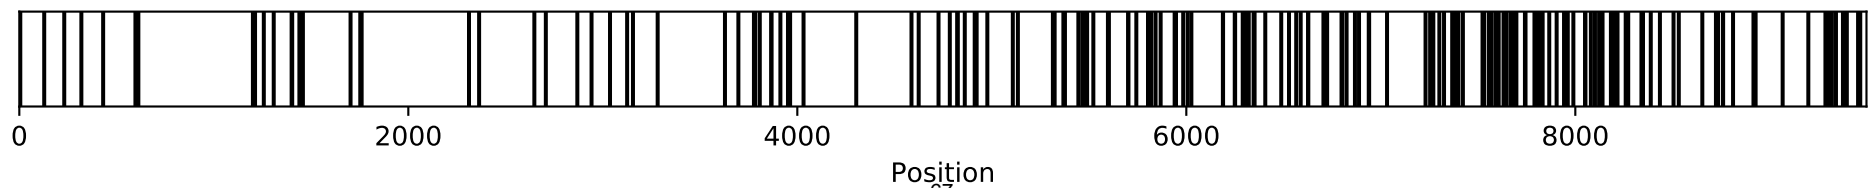

CR1 vs CR2  
Number of differences: 142

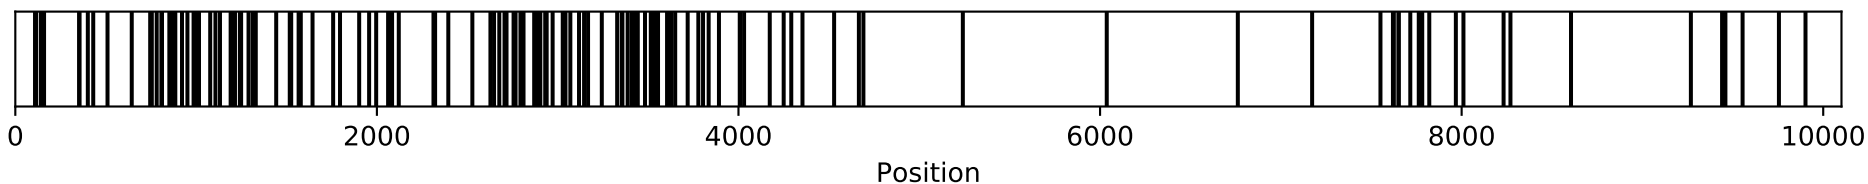

CR1 vs MA1  
Number of differences: 107

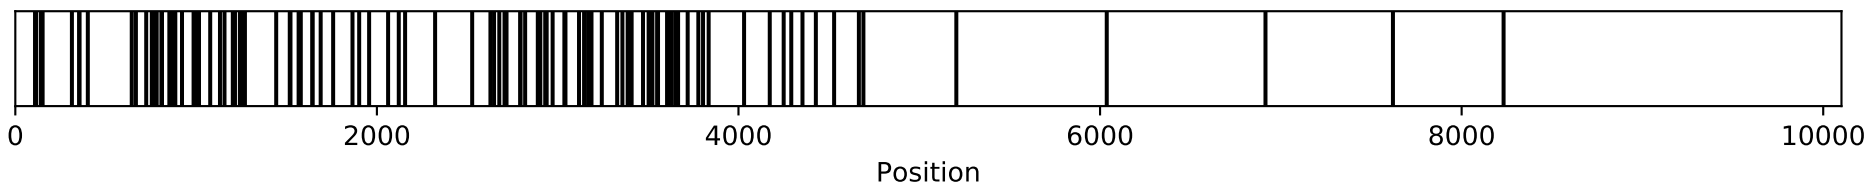

CR1 vs MA2  
Number of differences: 62

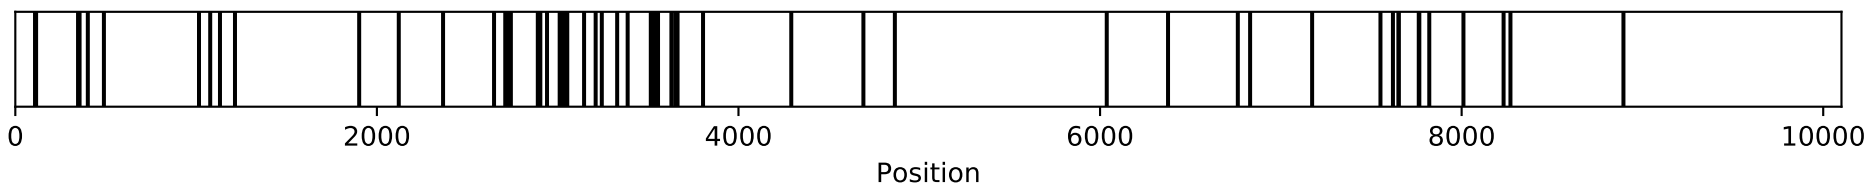

CR2 vs MA1  
Number of differences: 84

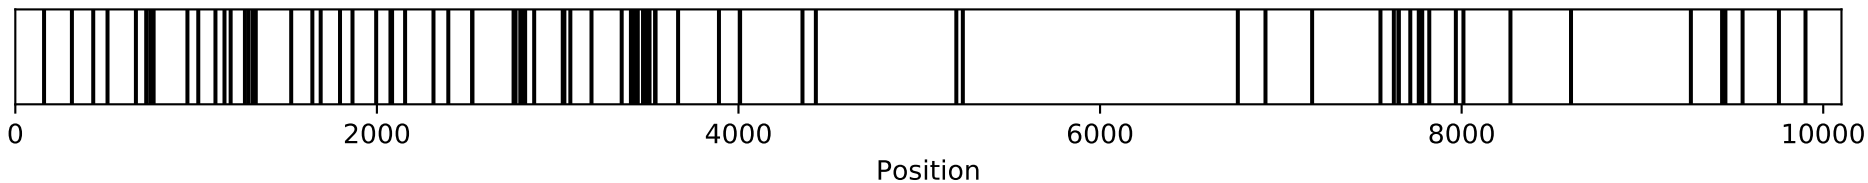

CR2 vs MA2  
Number of differences: 114

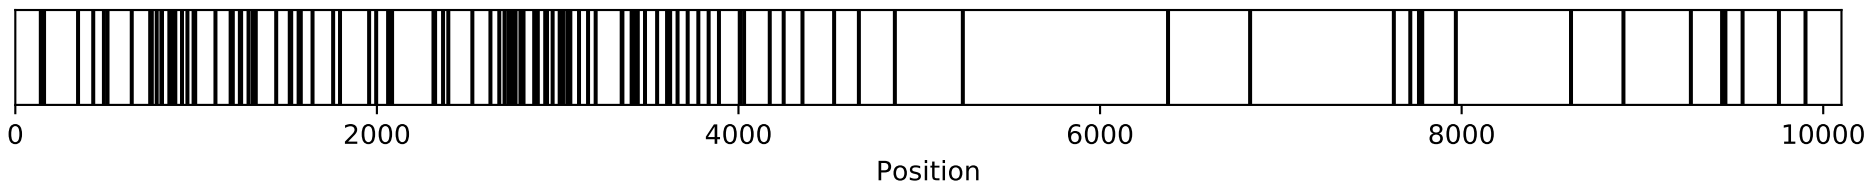

MA1 vs MA2  
Number of differences: 104

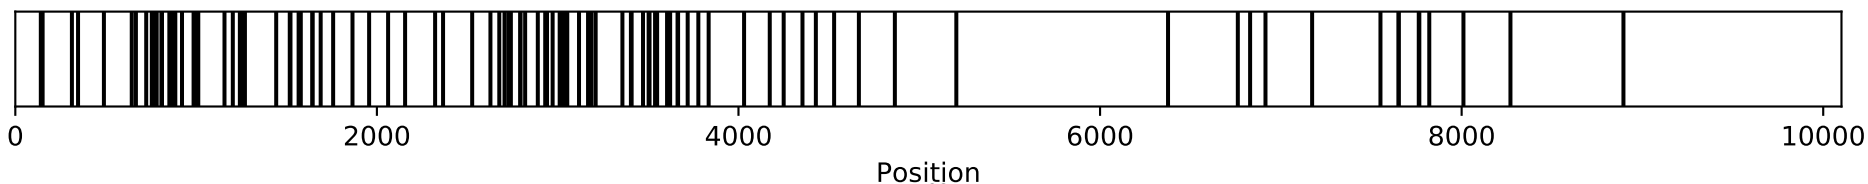

CR1 vs CR2  
Number of differences: 1

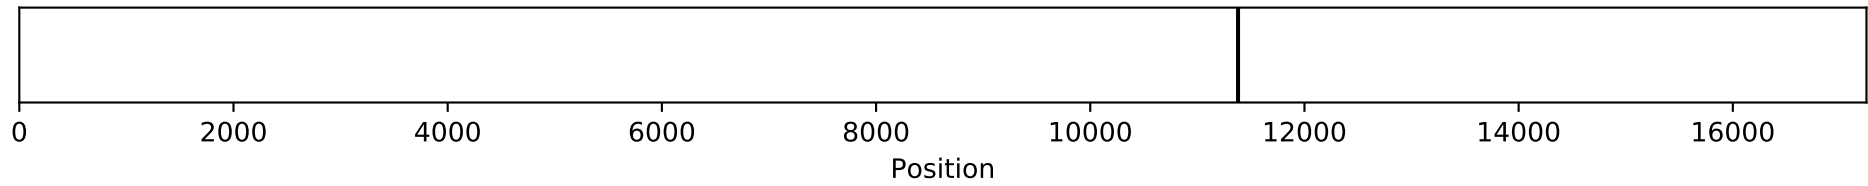

CR1 vs MA1  
Number of differences: 353

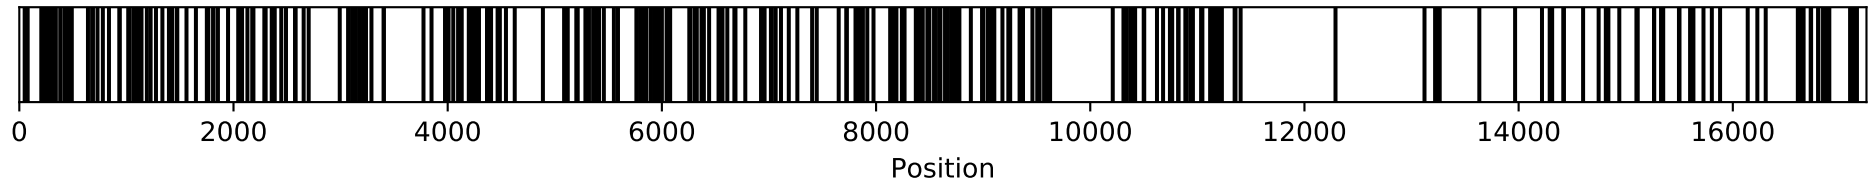

CR1 vs MA2  
Number of differences: 331

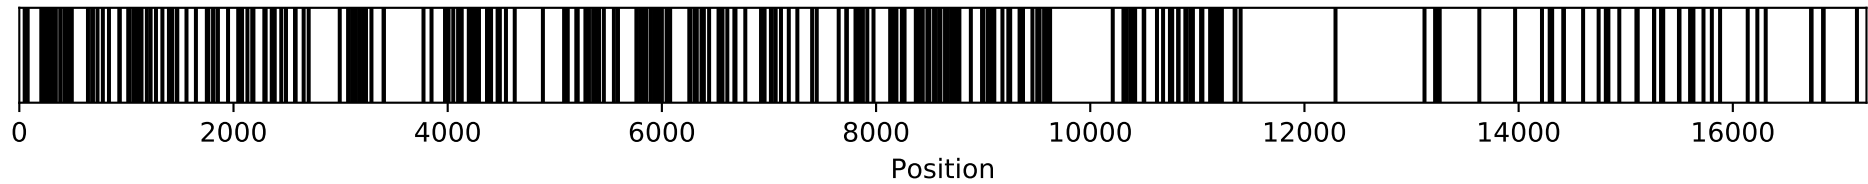

CR2 vs MA1  
Number of differences: 354

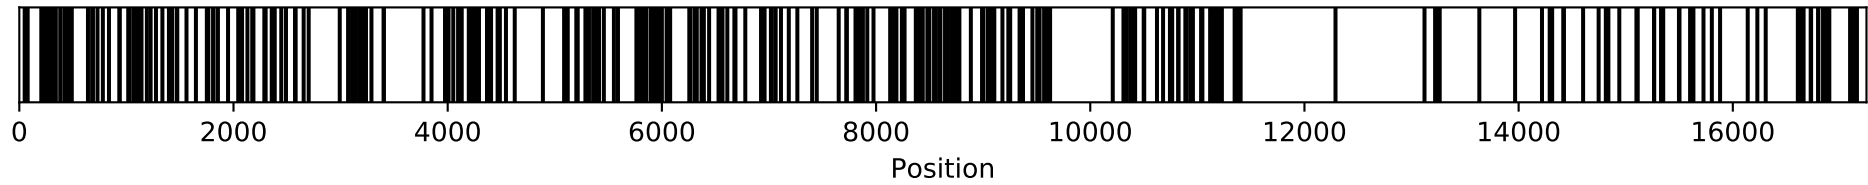

CR2 vs MA2  
Number of differences: 332

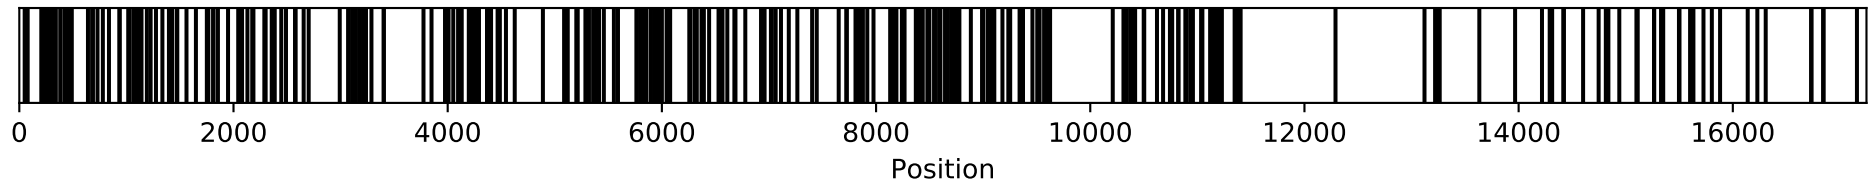

MA1 vs MA2  
Number of differences: 26

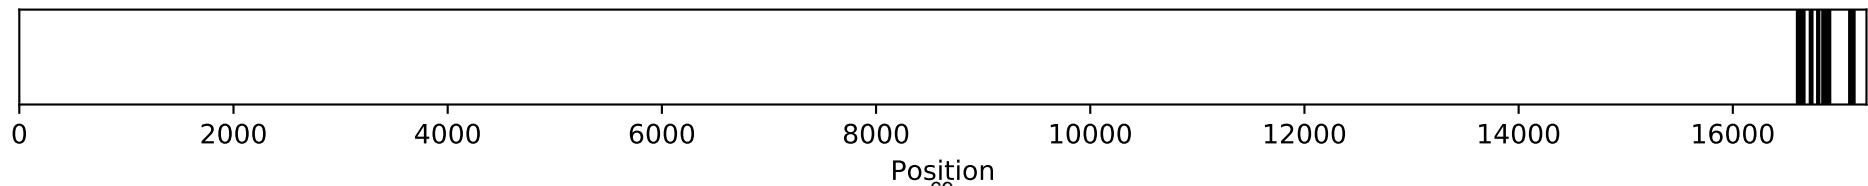

CR1 vs CR2  
Number of differences: 216

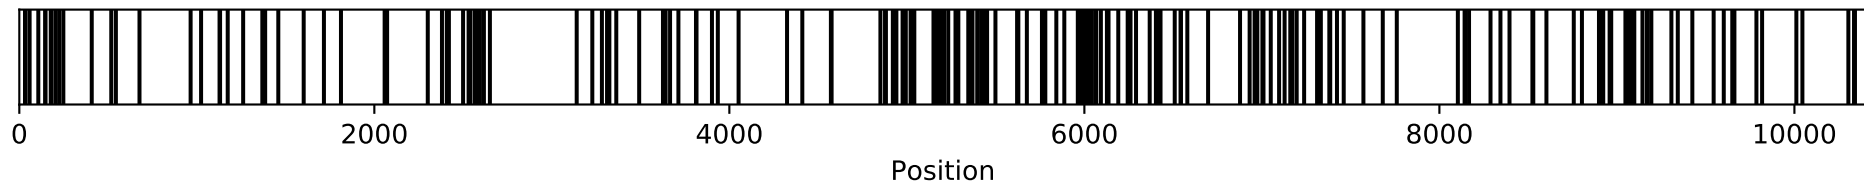

CR1 vs MA1  
Number of differences: 228

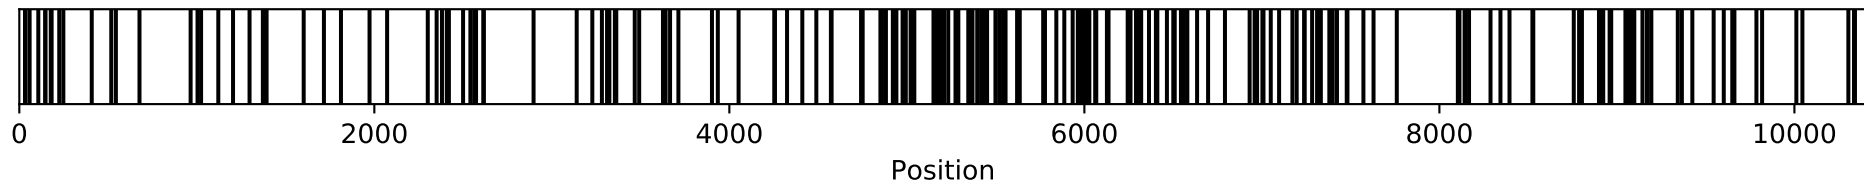

CR1 vs MA2  
Number of differences: 73

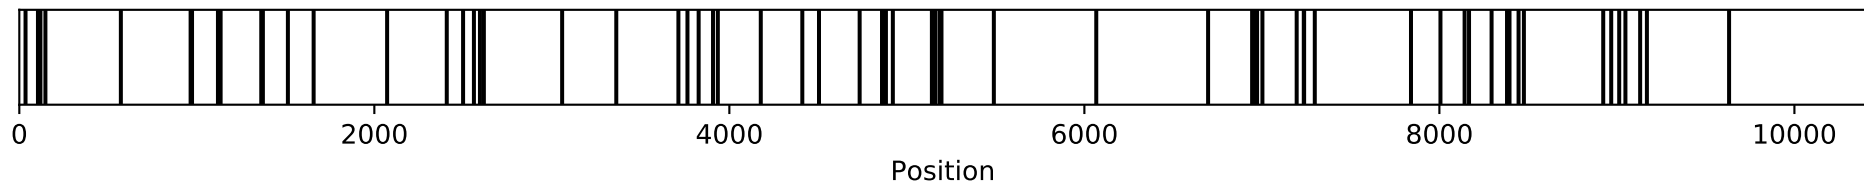

CR2 vs MA1  
Number of differences: 84

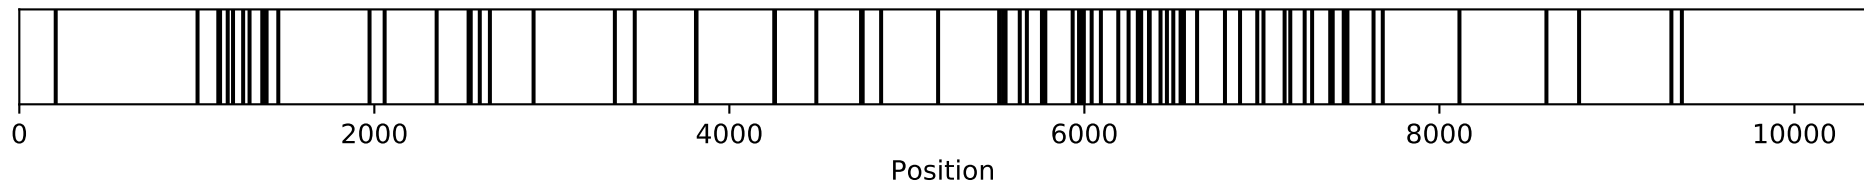

CR2 vs MA2  
Number of differences: 227

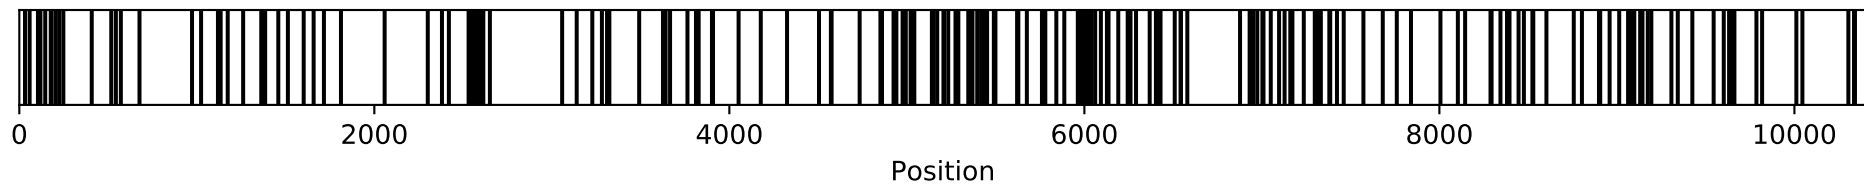

MA1 vs MA2  
Number of differences: 237

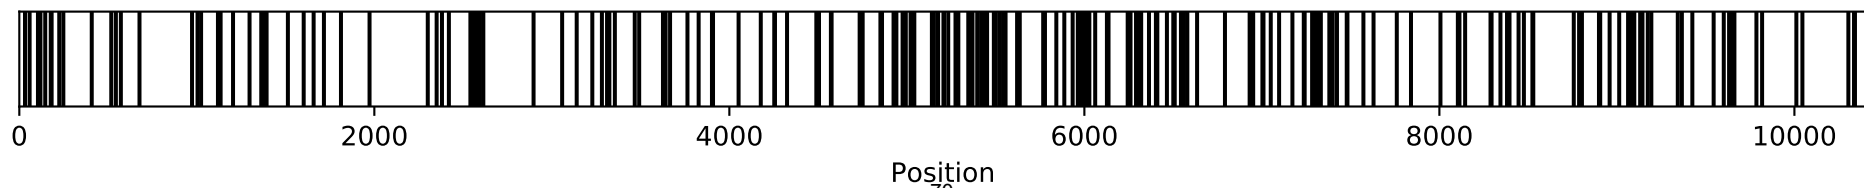

CR1 vs CR2  
Number of differences: 16

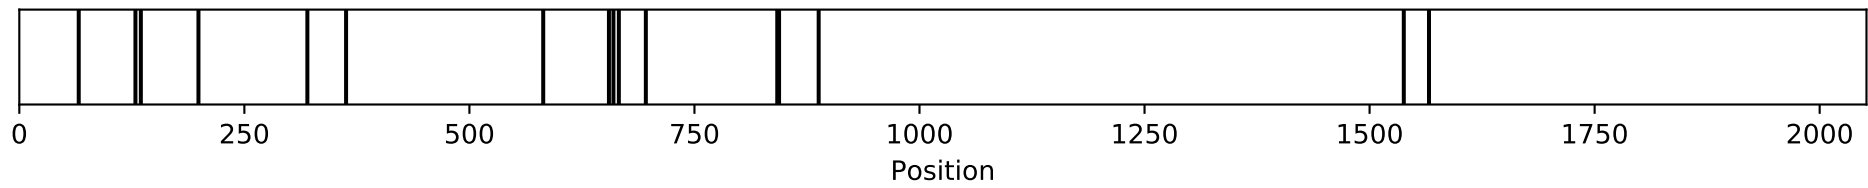

CR1 vs MA1  
Number of differences: 6

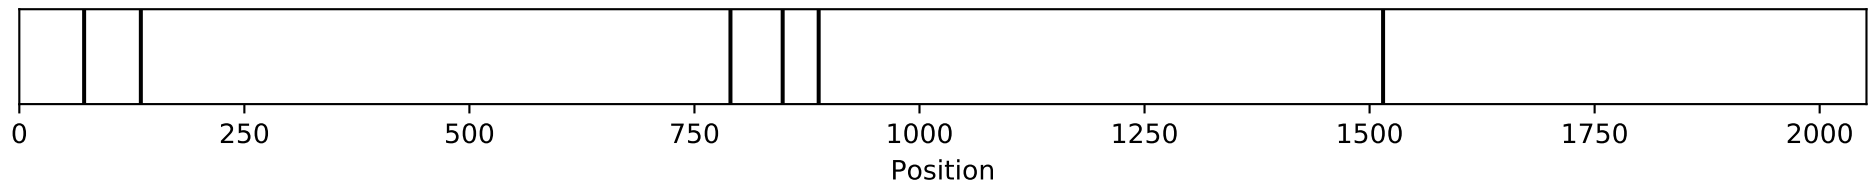

CR1 vs MA2  
Number of differences: 14

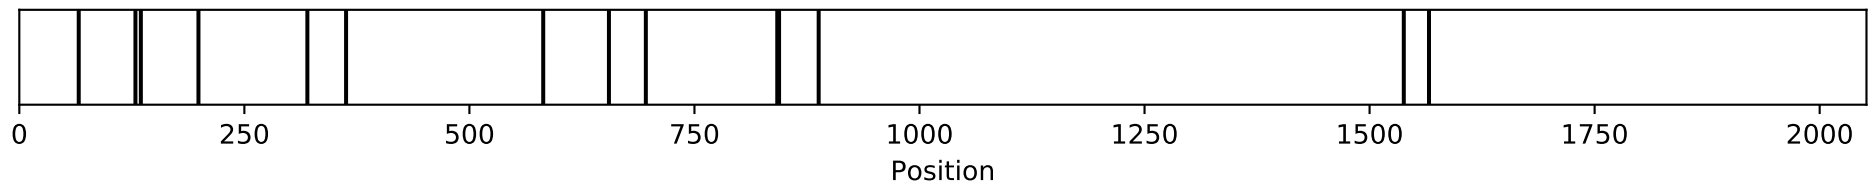

CR2 vs MA1  
Number of differences: 18

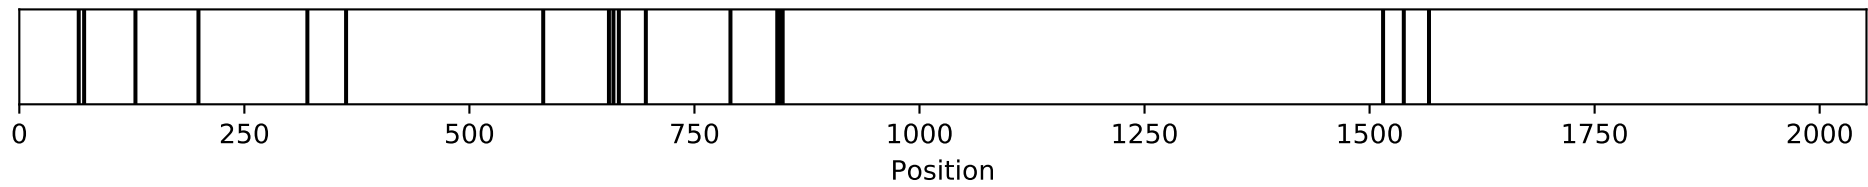

CR2 vs MA2  
Number of differences: 2

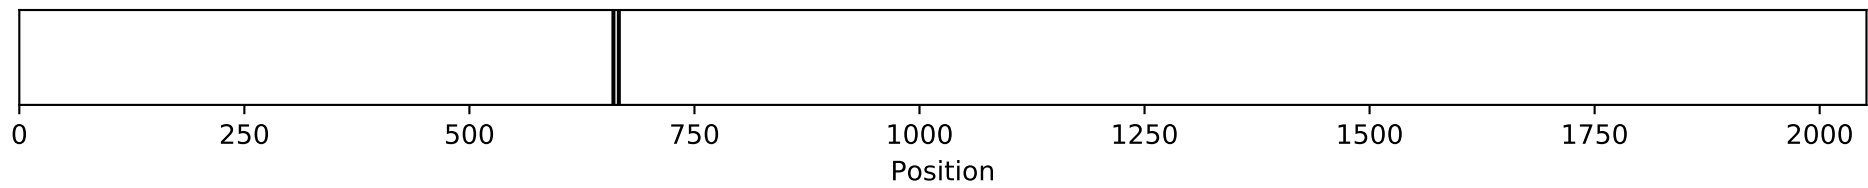

MA1 vs MA2  
Number of differences: 16

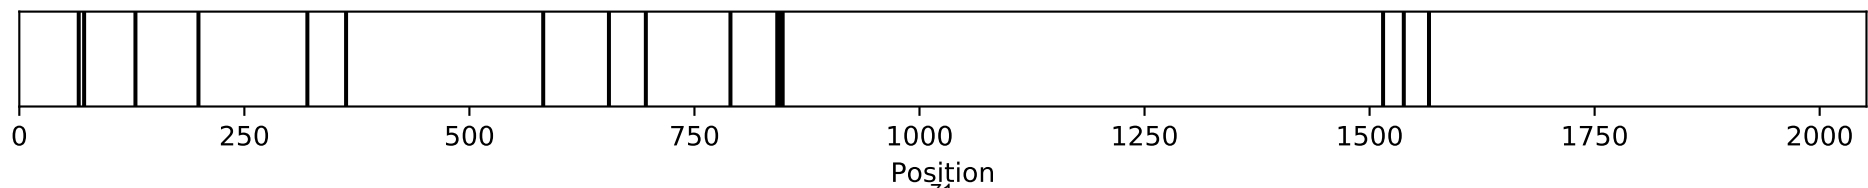

CR1 vs CR2  
Number of differences: 238

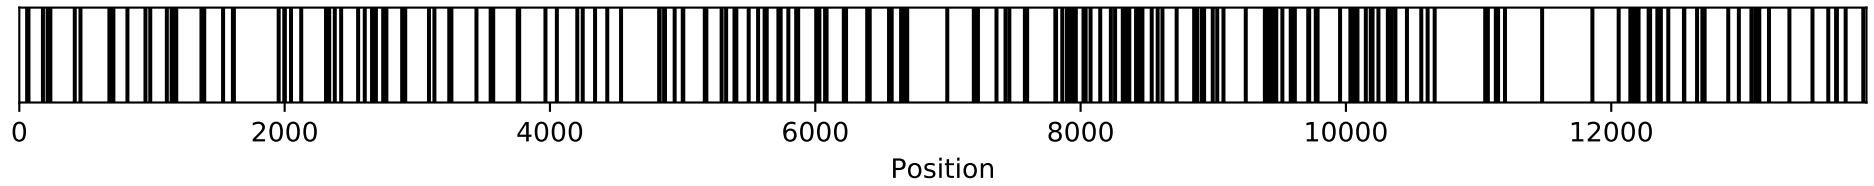

CR1 vs MA1  
Number of differences: 67

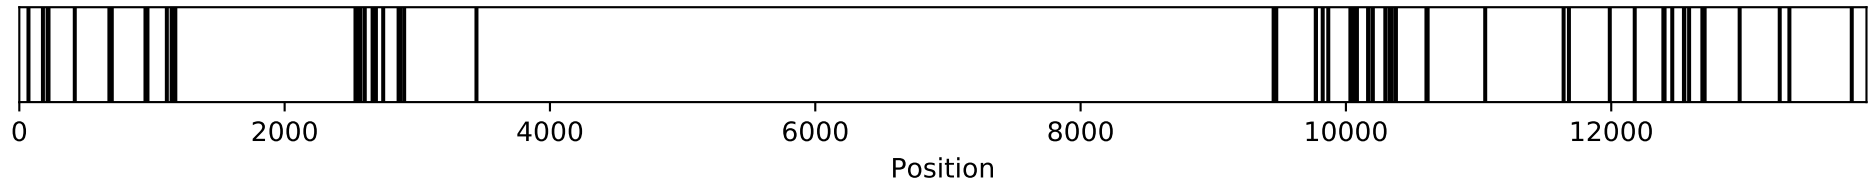

CR1 vs MA2  
Number of differences: 239

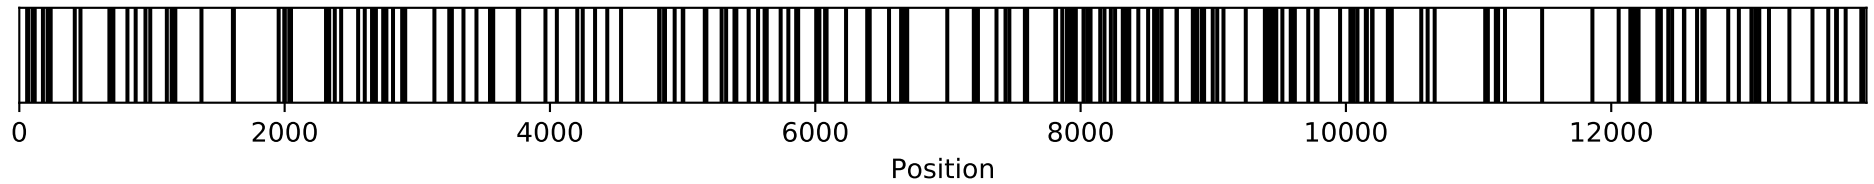

CR2 vs MA1  
Number of differences: 227

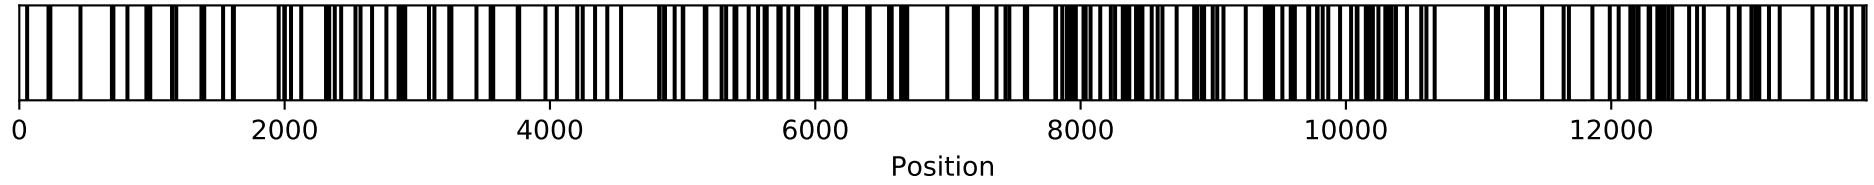

CR2 vs MA2  
Number of differences: 56

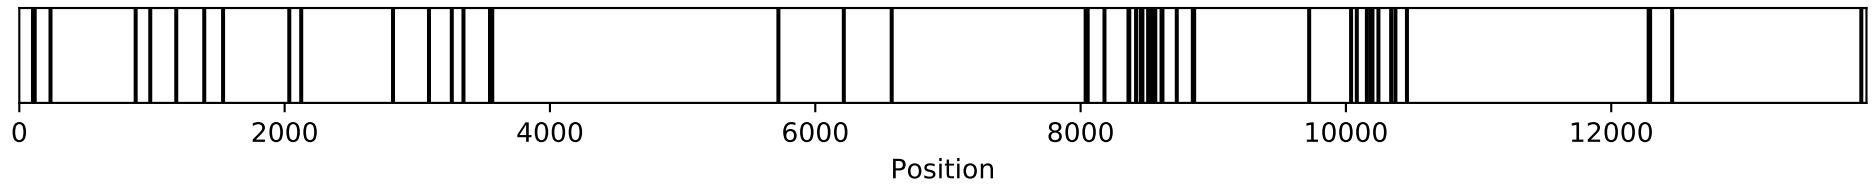

MA1 vs MA2  
Number of differences: 227

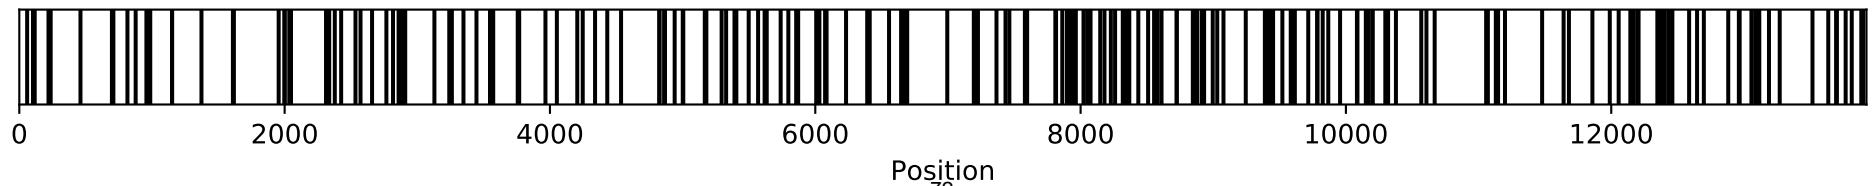



CR1 vs CR2  
Number of differences: 148

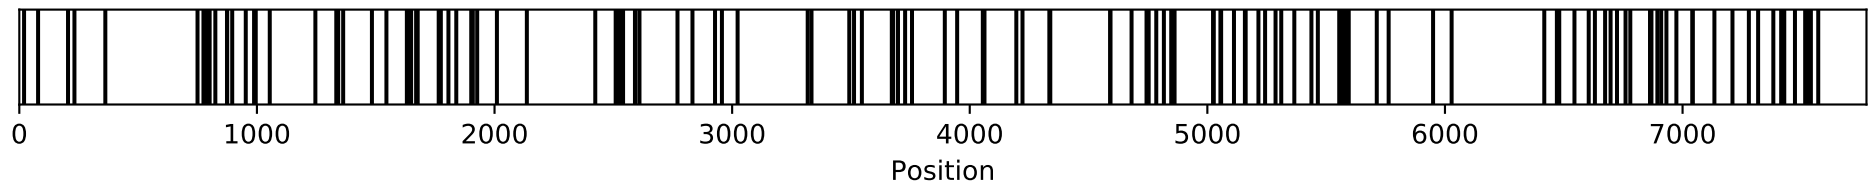

CR1 vs MA1  
Number of differences: 91

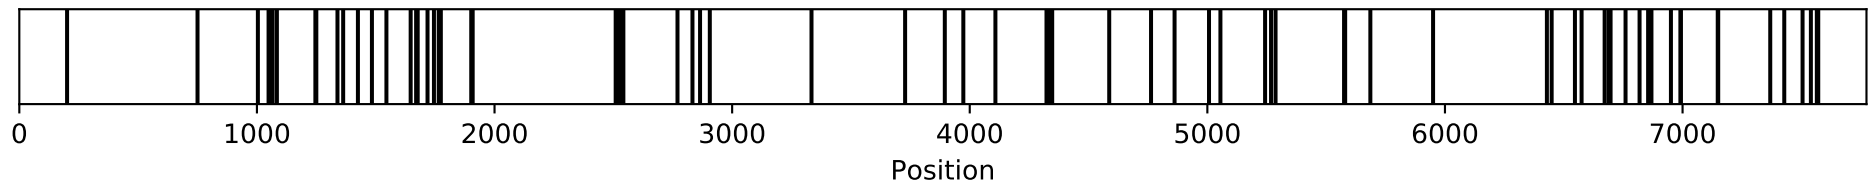

CR1 vs MA2  
Number of differences: 153

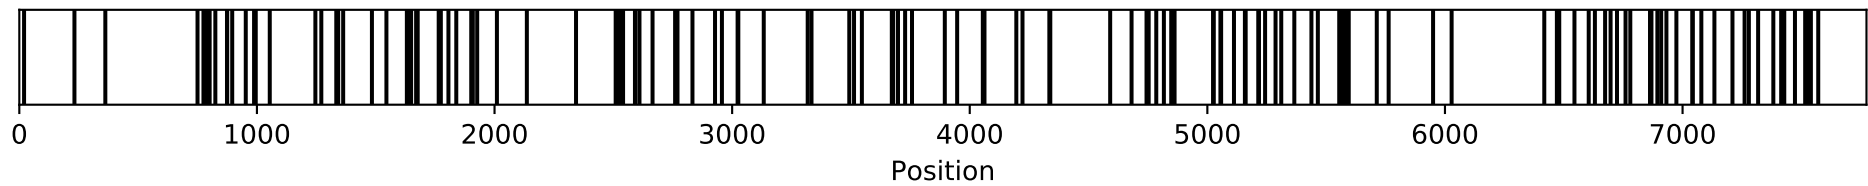

CR2 vs MA1  
Number of differences: 144

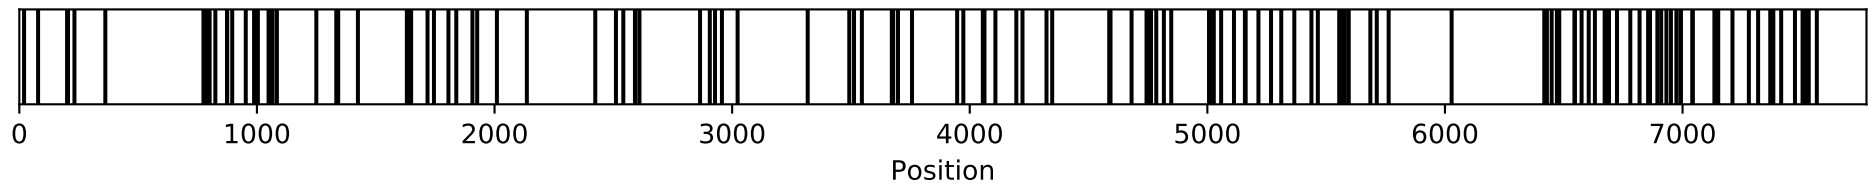

CR2 vs MA2  
Number of differences: 15

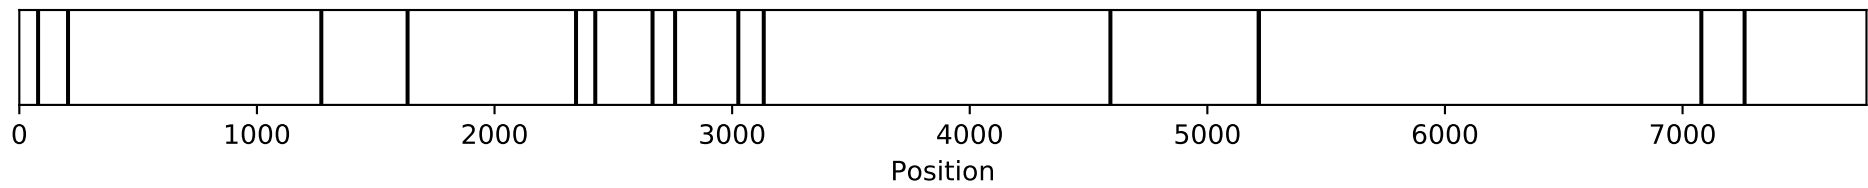

MA1 vs MA2  
Number of differences: 149

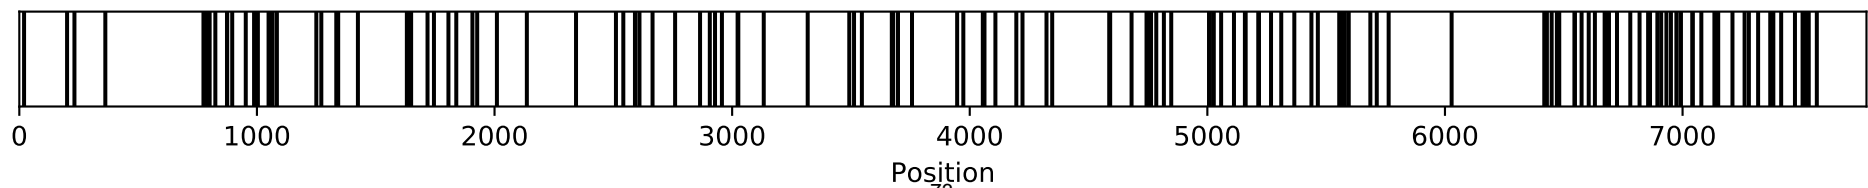

CR1 vs CR2  
Number of differences: 84

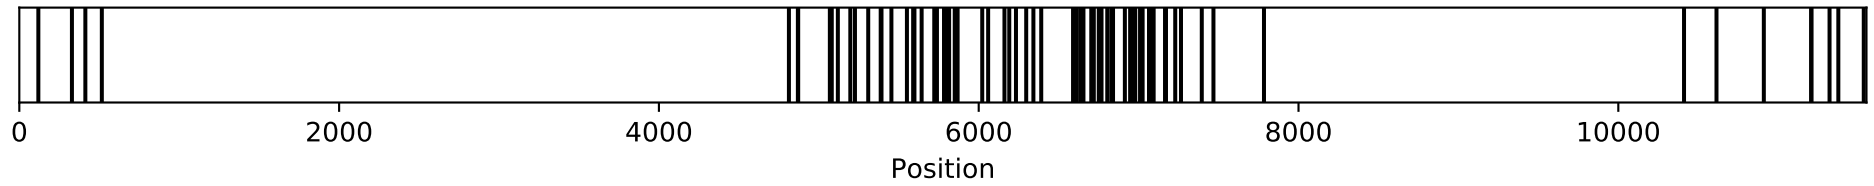

CR1 vs MA1  
Number of differences: 145

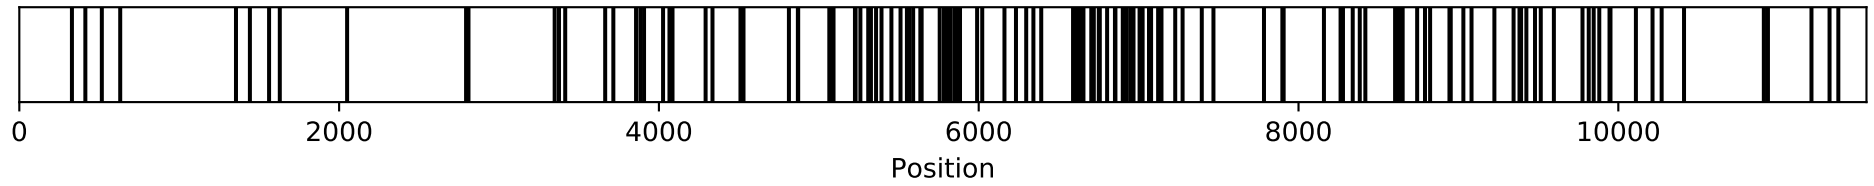

CR1 vs MA2  
Number of differences: 73

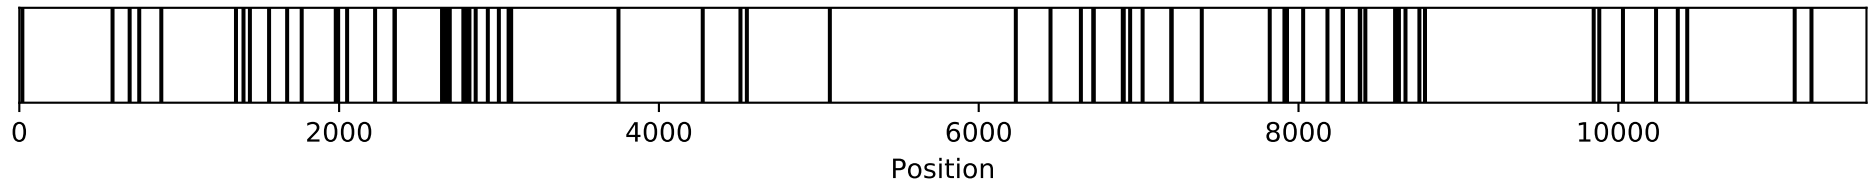

CR2 vs MA1  
Number of differences: 125

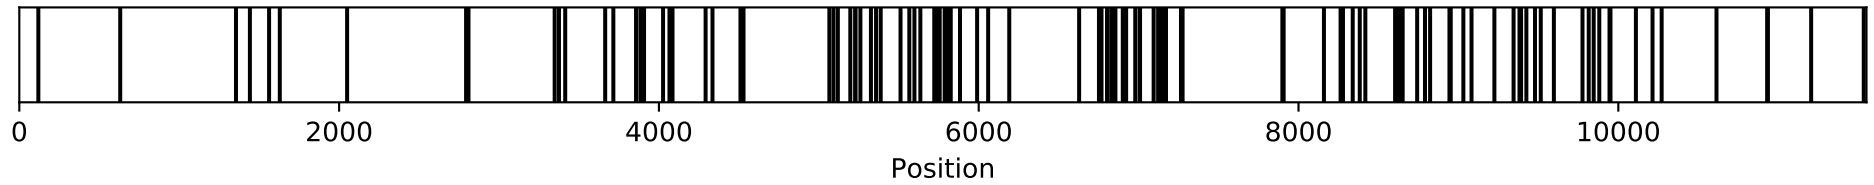

CR2 vs MA2  
Number of differences: 141

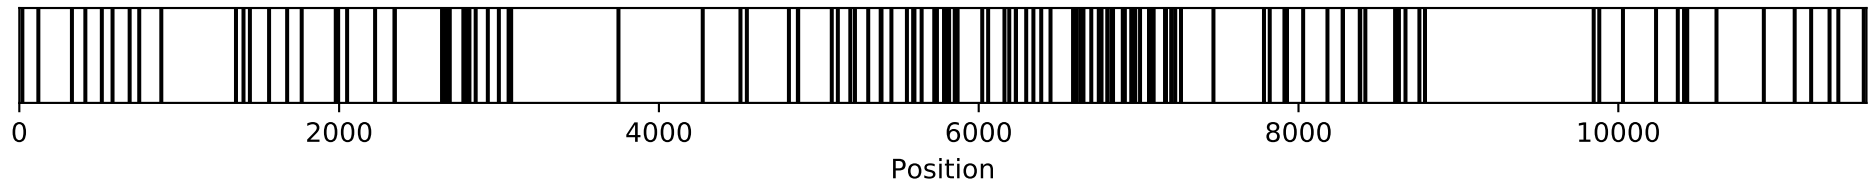

MA1 vs MA2  
Number of differences: 172

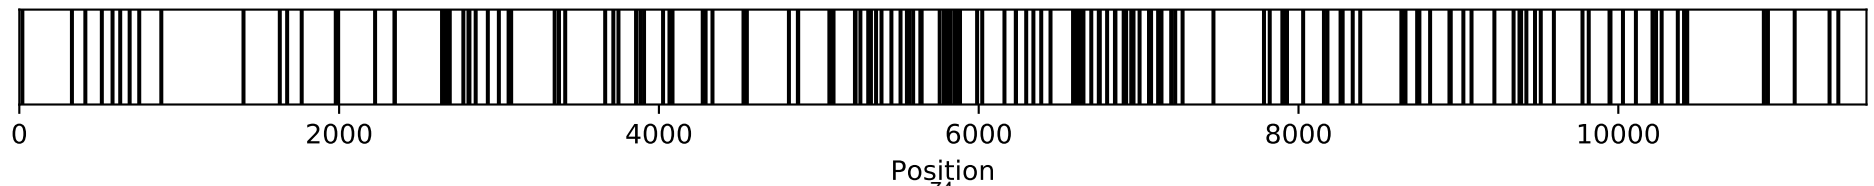

CR1 vs CR2  
Number of differences: 226

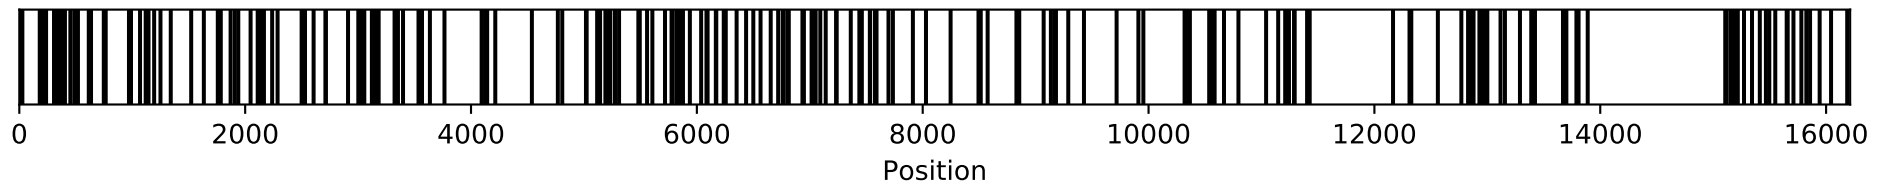

CR1 vs MA1  
Number of differences: 114

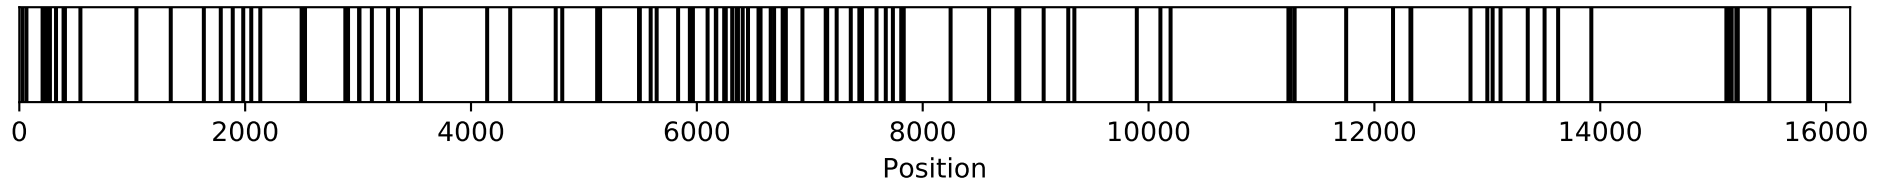

CR1 vs MA2  
Number of differences: 241

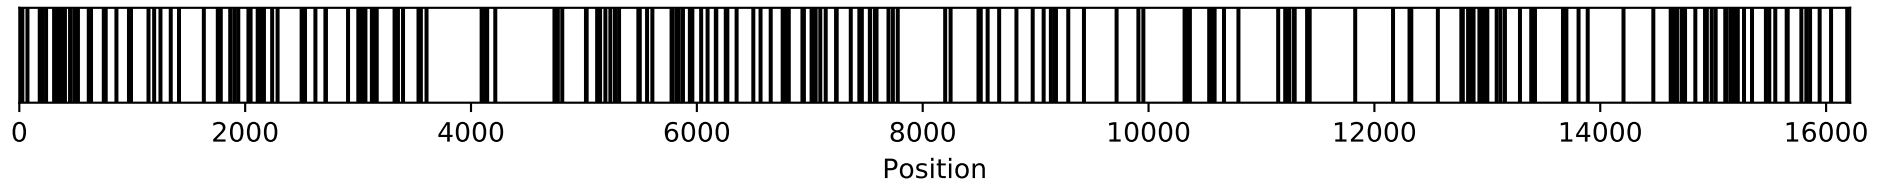

CR2 vs MA1  
Number of differences: 218

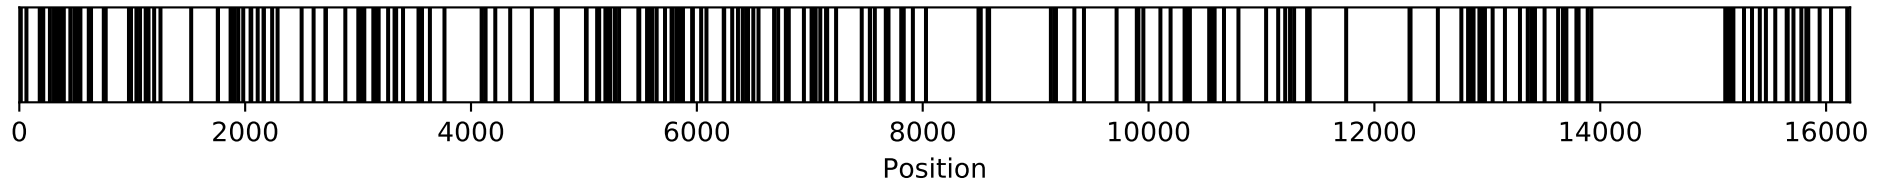

CR2 vs MA2  
Number of differences: 70

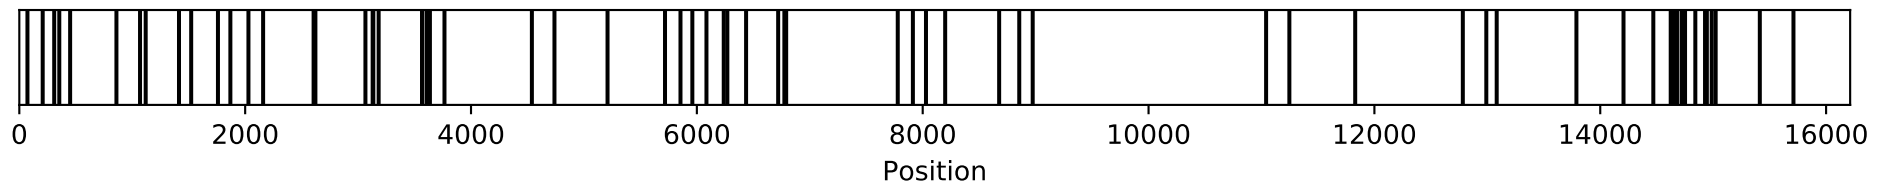

MA1 vs MA2  
Number of differences: 234

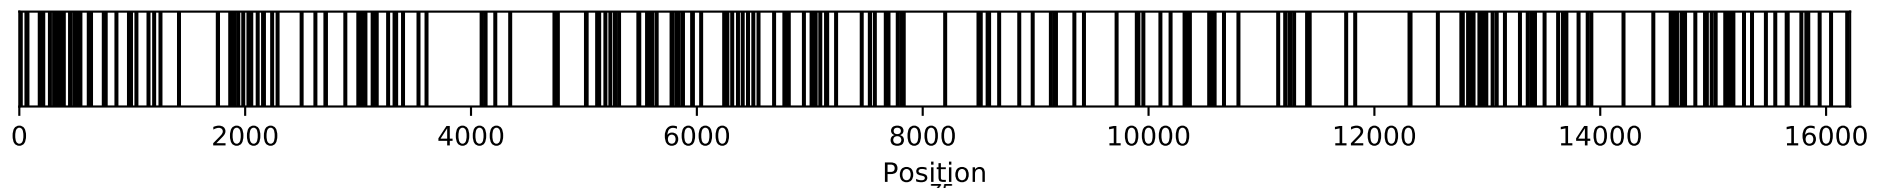

CR1 vs CR2  
Number of differences: 556

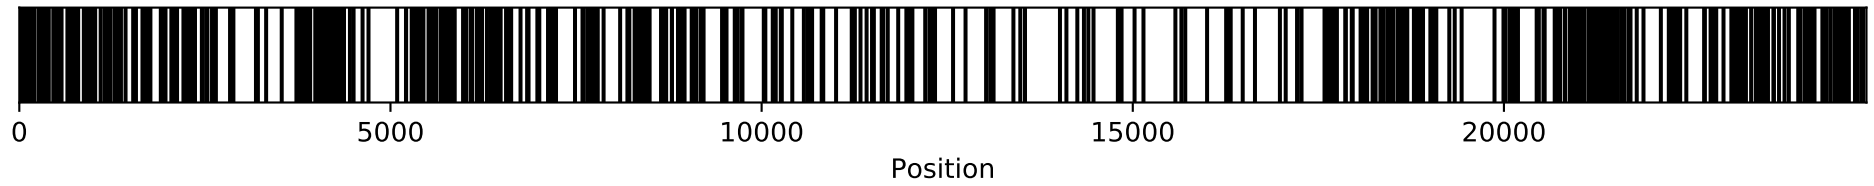

CR1 vs MA1  
Number of differences: 295

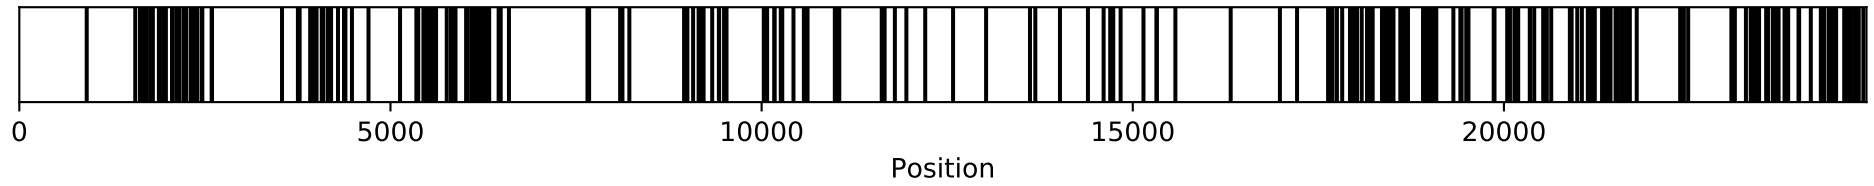

CR1 vs MA2  
Number of differences: 556

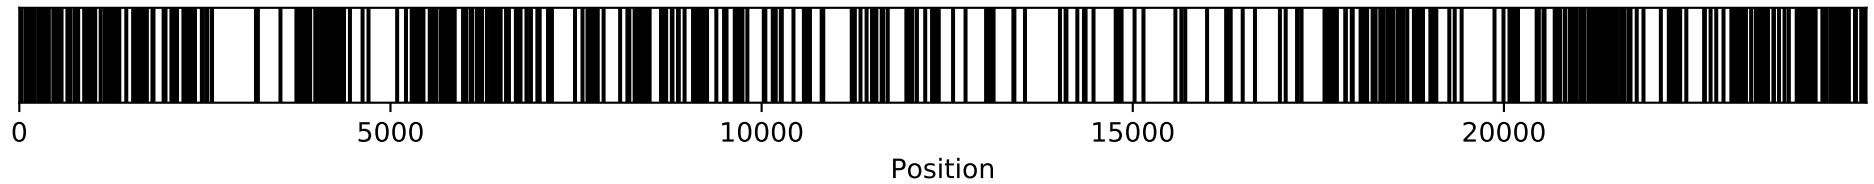

CR2 vs MA1  
Number of differences: 587

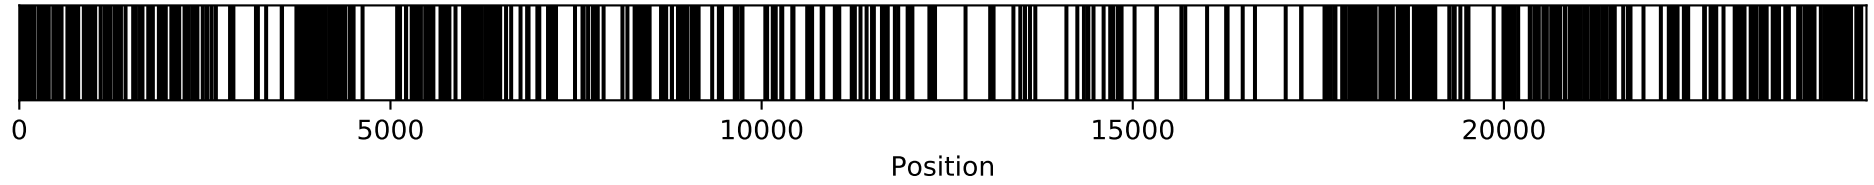

CR2 vs MA2  
Number of differences: 141

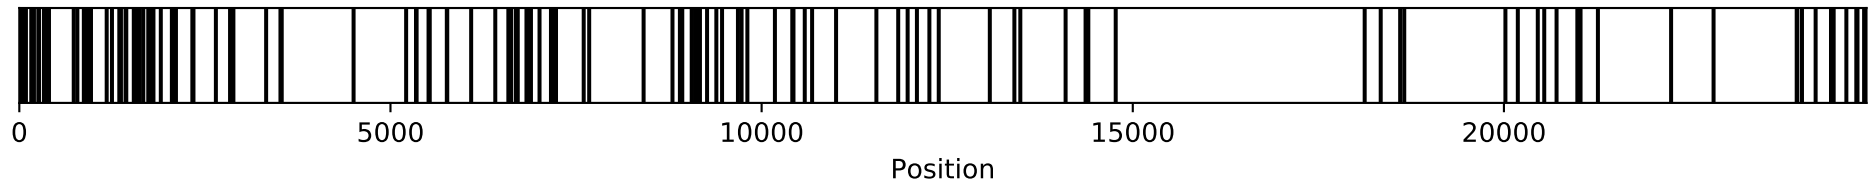

MA1 vs MA2  
Number of differences: 587

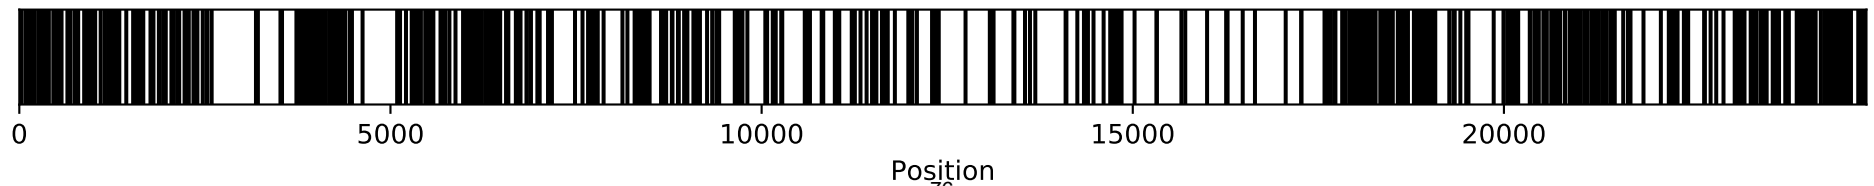

CR1 vs CR2  
Number of differences: 96

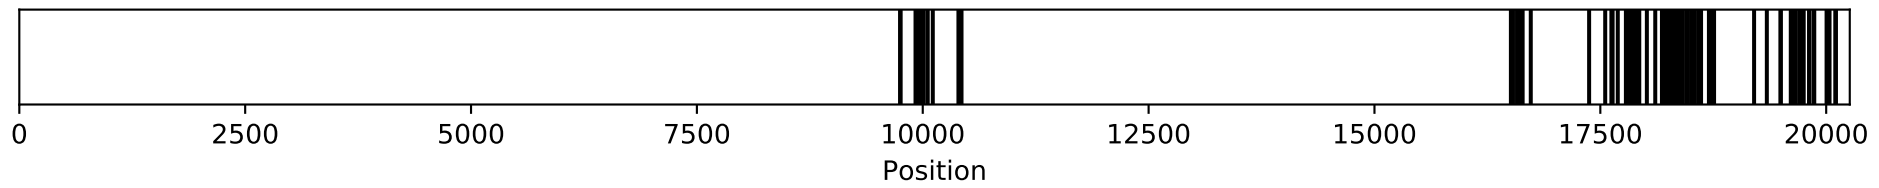

CR1 vs MA1  
Number of differences: 474

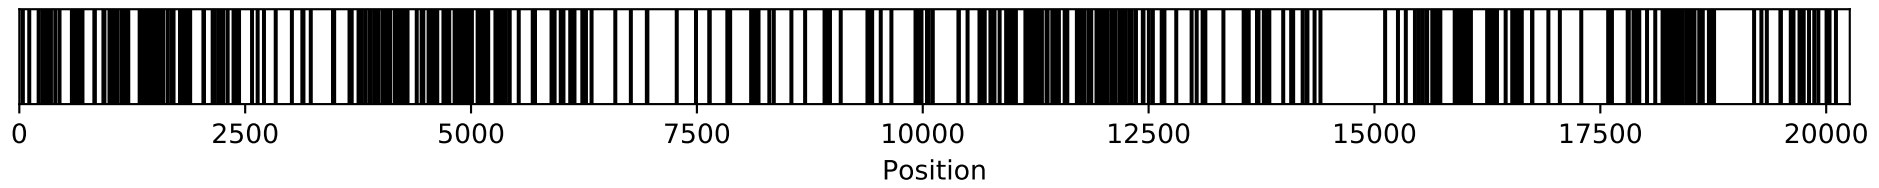

CR1 vs MA2  
Number of differences: 426

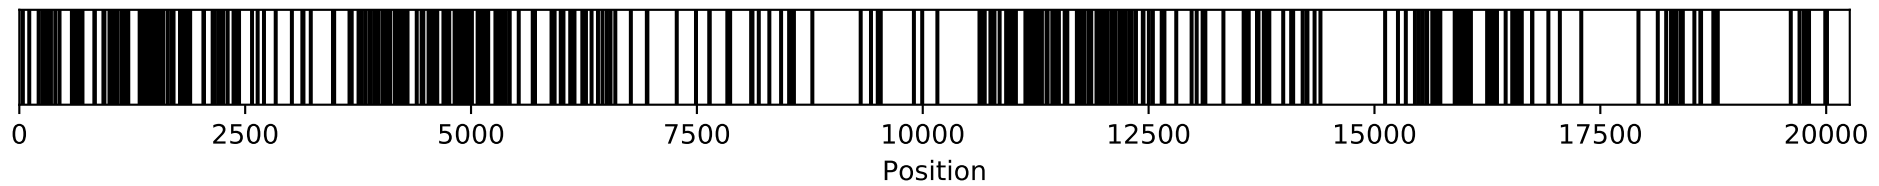

CR2 vs MA1  
Number of differences: 437

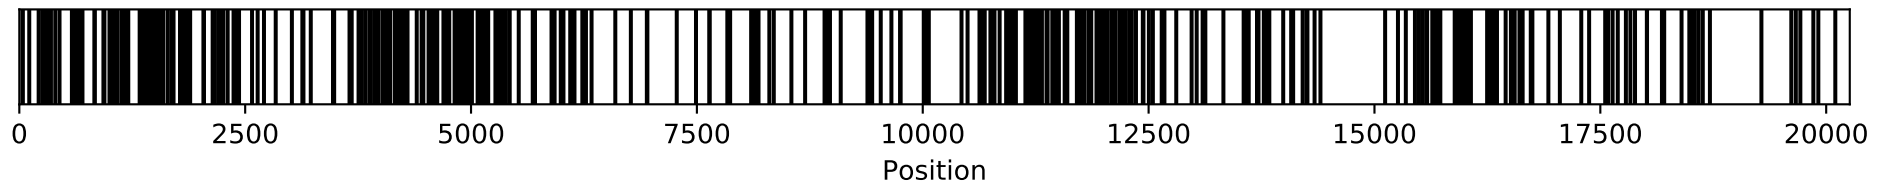

CR2 vs MA2  
Number of differences: 486

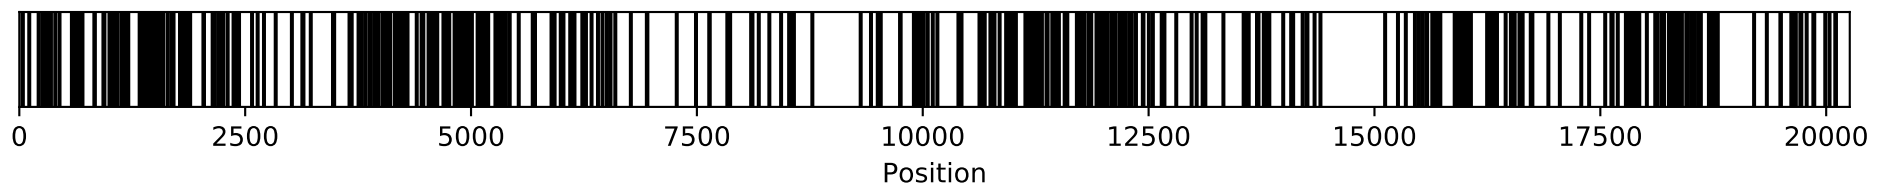

MA1 vs MA2  
Number of differences: 99

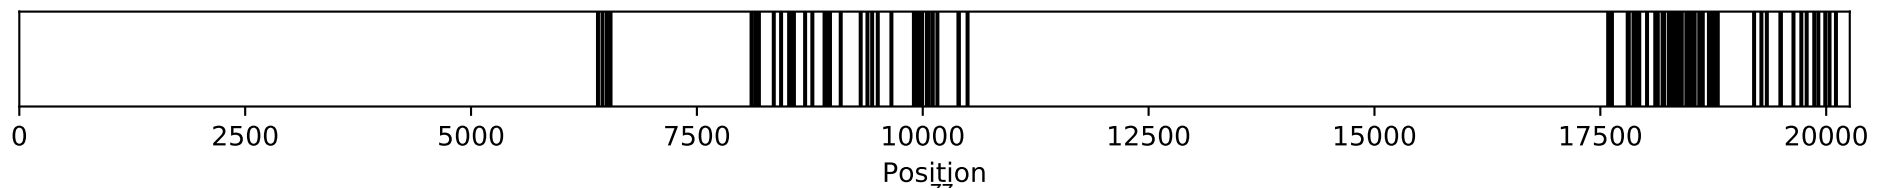

CR1 vs CR2  
Number of differences: 301

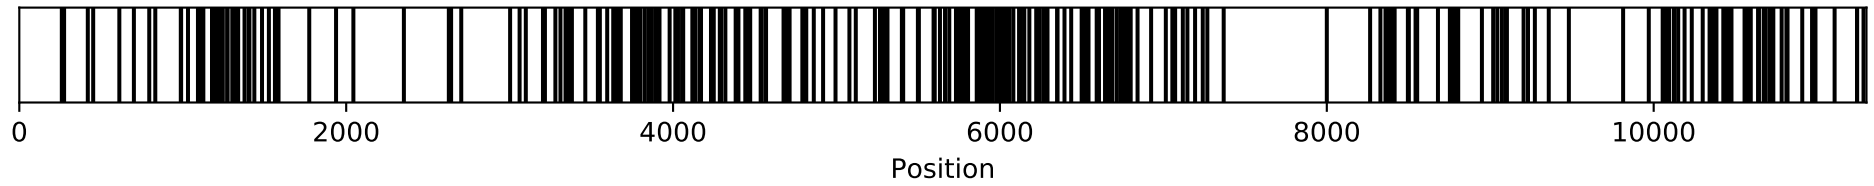

CR1 vs MA1  
Number of differences: 138

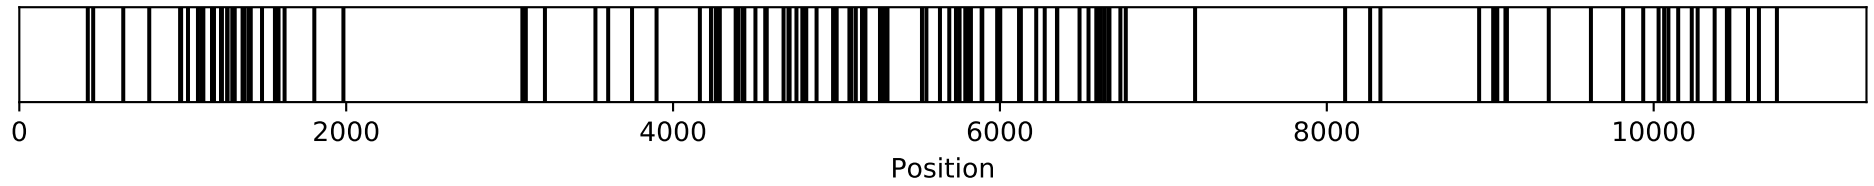

CR1 vs MA2  
Number of differences: 300

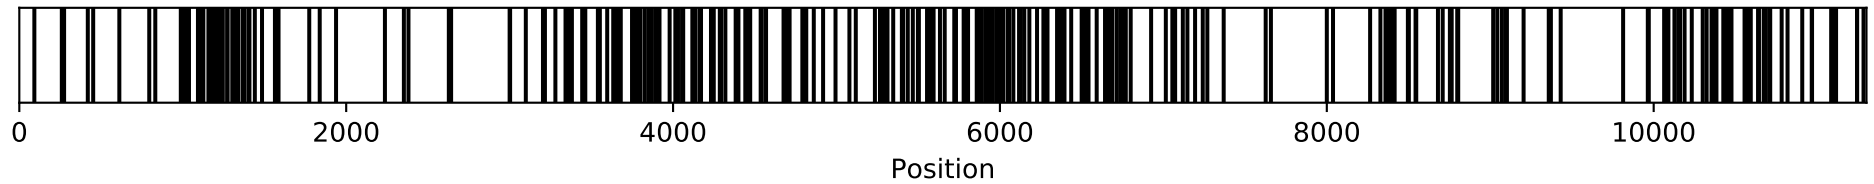

CR2 vs MA1  
Number of differences: 279

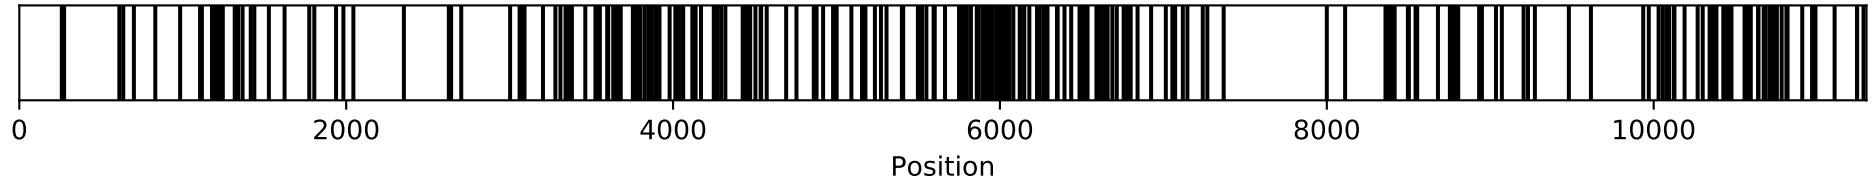

CR2 vs MA2  
Number of differences: 86

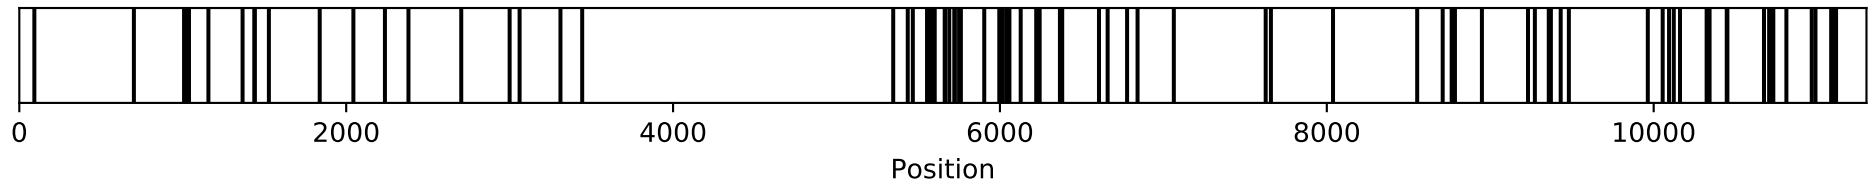

MA1 vs MA2  
Number of differences: 283

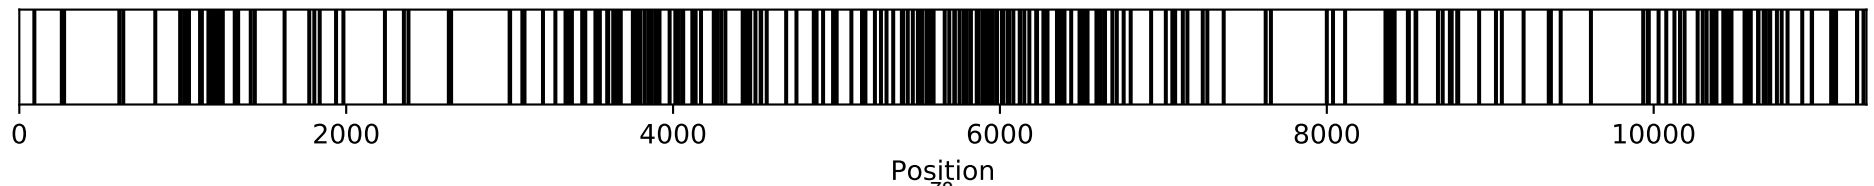

CR1 vs CR2  
Number of differences: 136

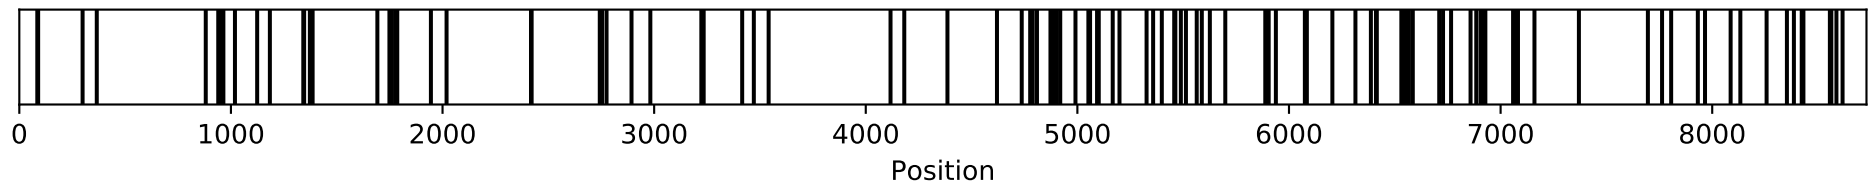

CR1 vs MA1  
Number of differences: 45

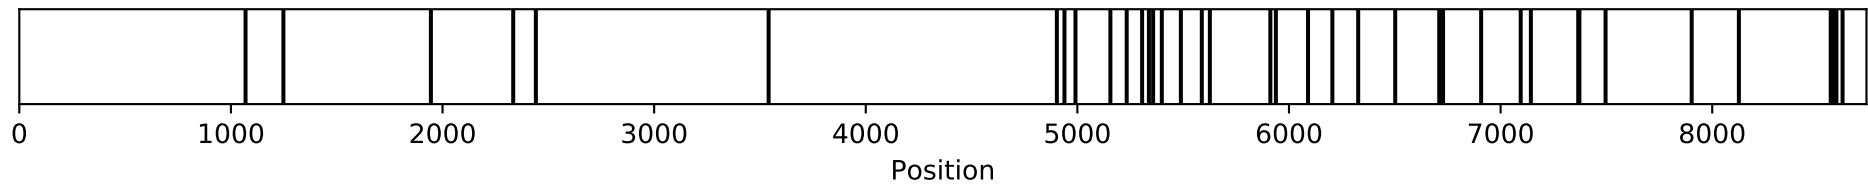

CR1 vs MA2  
Number of differences: 83

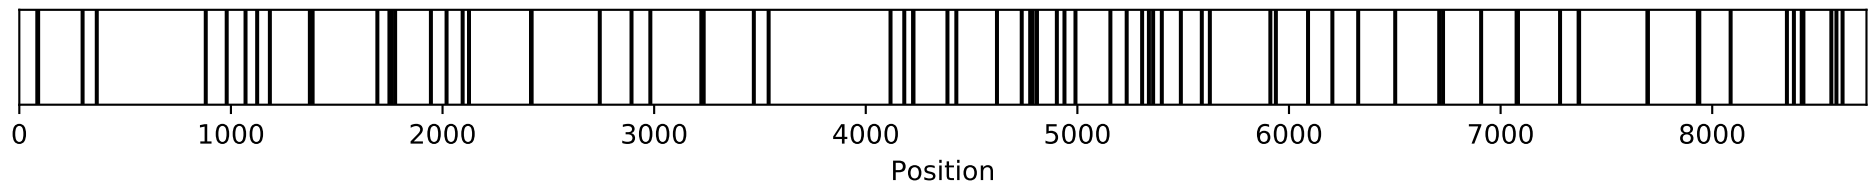

CR2 vs MA1  
Number of differences: 145

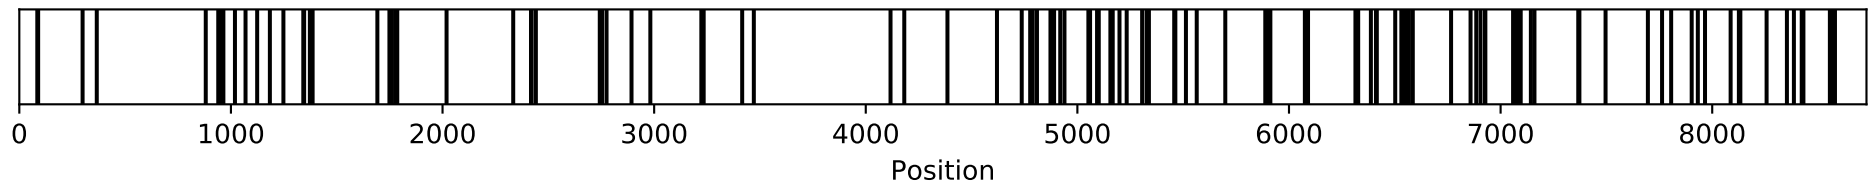

CR2 vs MA2  
Number of differences: 97

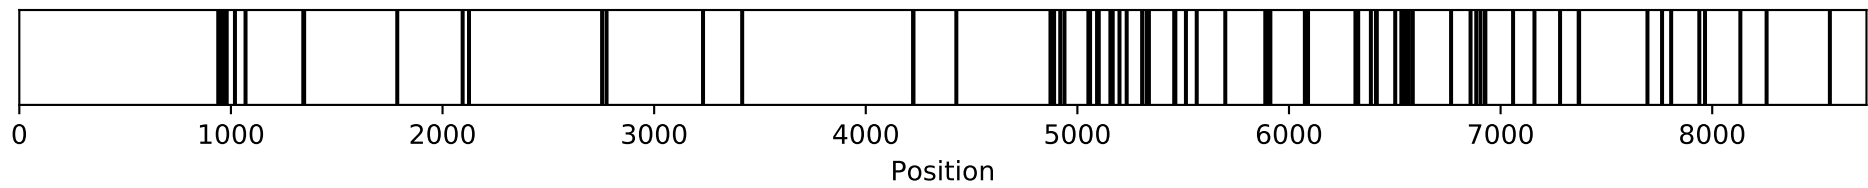

MA1 vs MA2  
Number of differences: 70

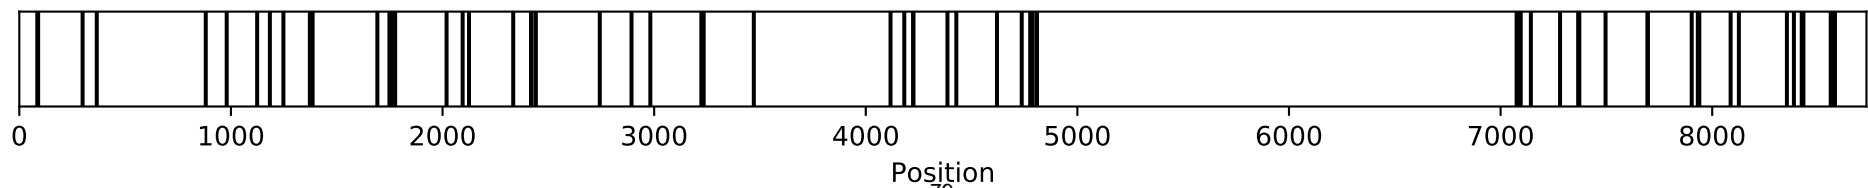

CR1 vs CR2  
Number of differences: 68

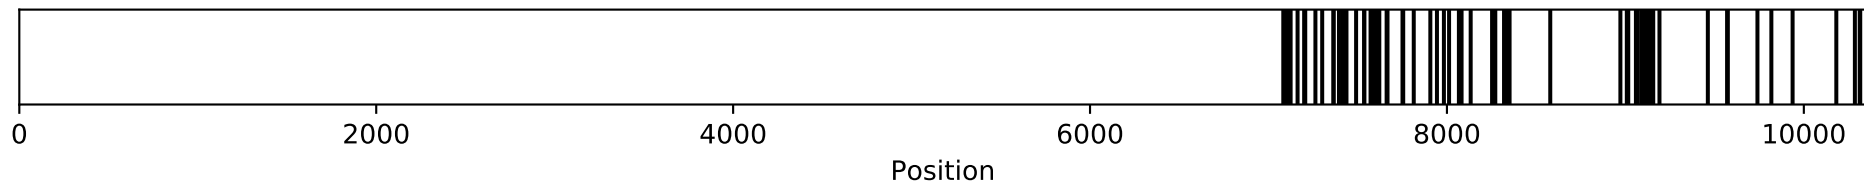

CR1 vs MA1  
Number of differences: 142

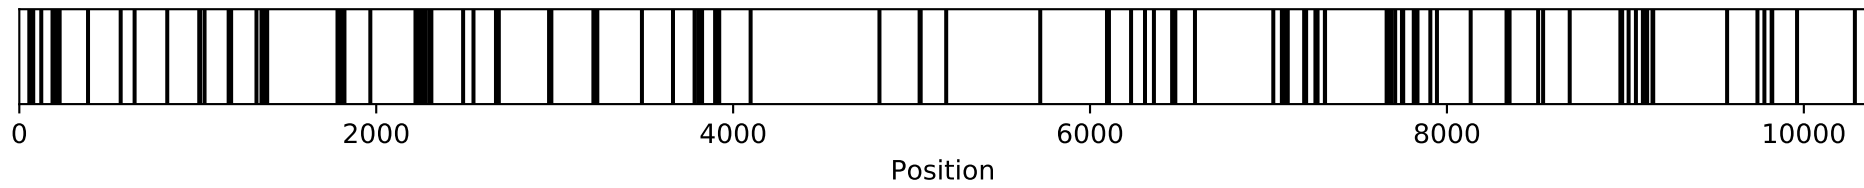

CR1 vs MA2  
Number of differences: 158

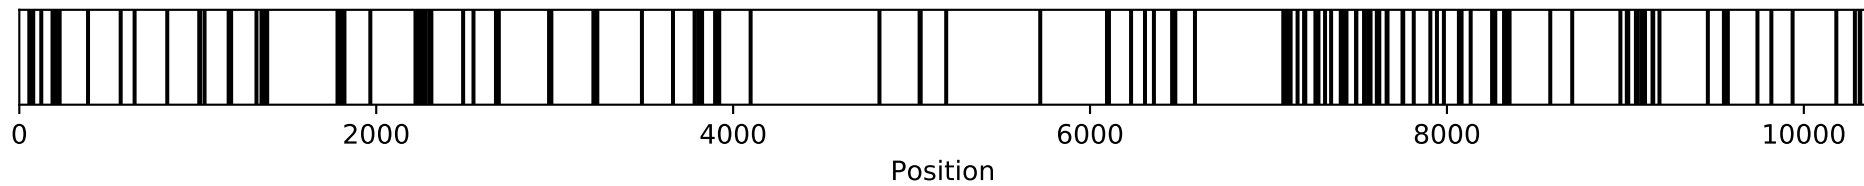

CR2 vs MA1  
Number of differences: 166

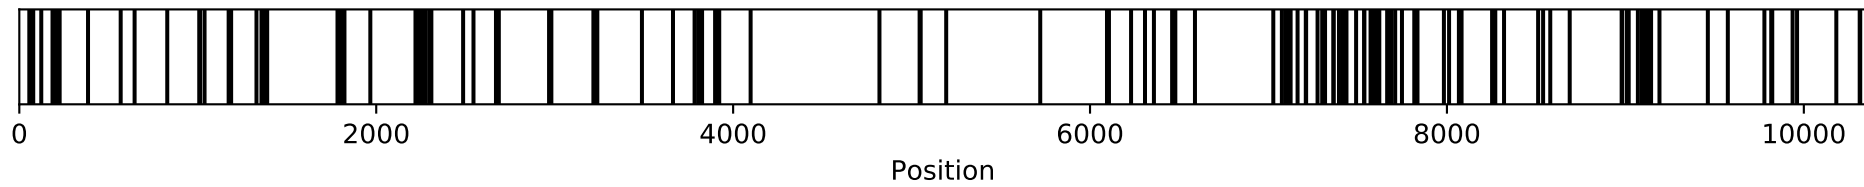

CR2 vs MA2  
Number of differences: 116

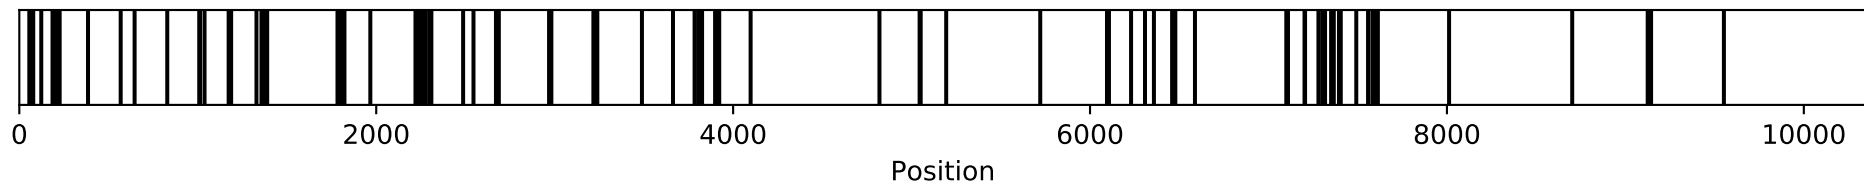

MA1 vs MA2  
Number of differences: 74

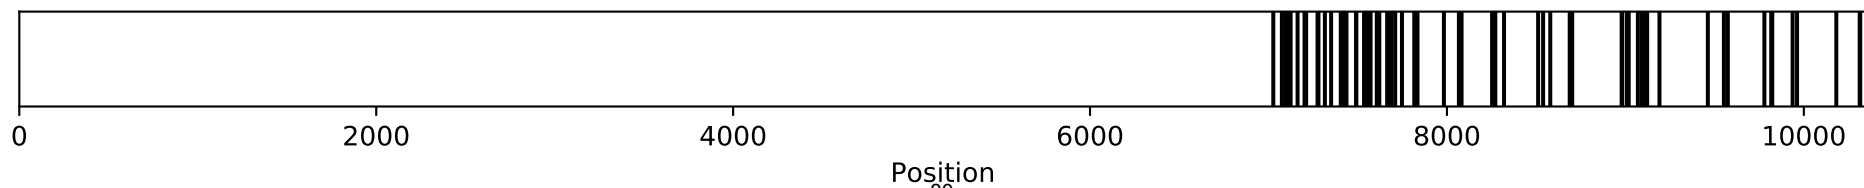



CR1 vs CR2  
Number of differences: 166

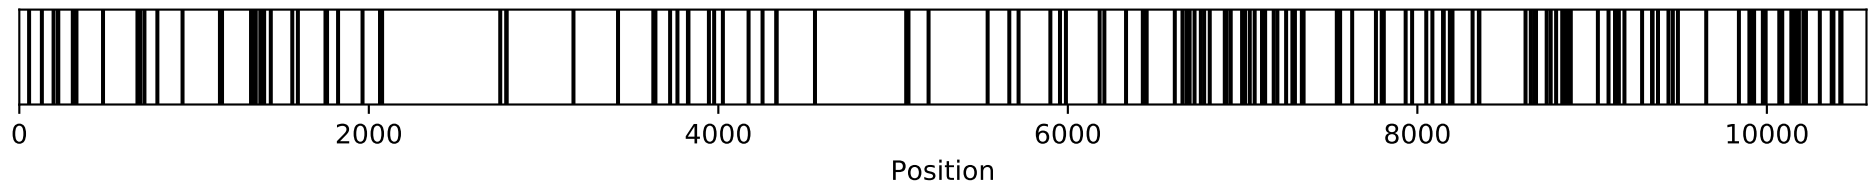

CR1 vs MA1  
Number of differences: 77

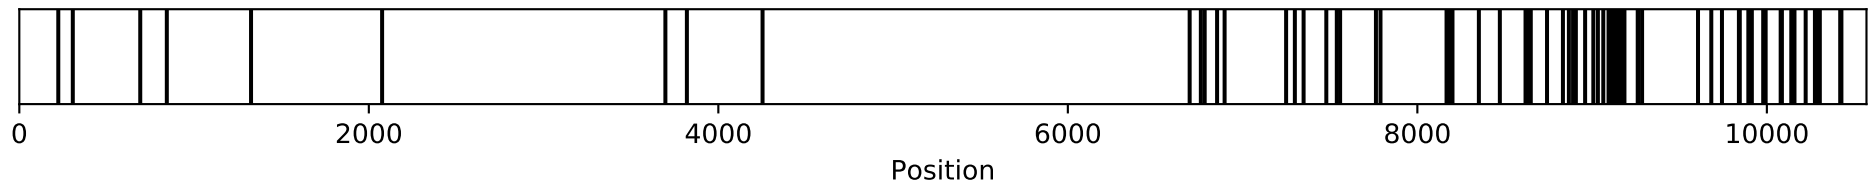

CR1 vs MA2  
Number of differences: 166

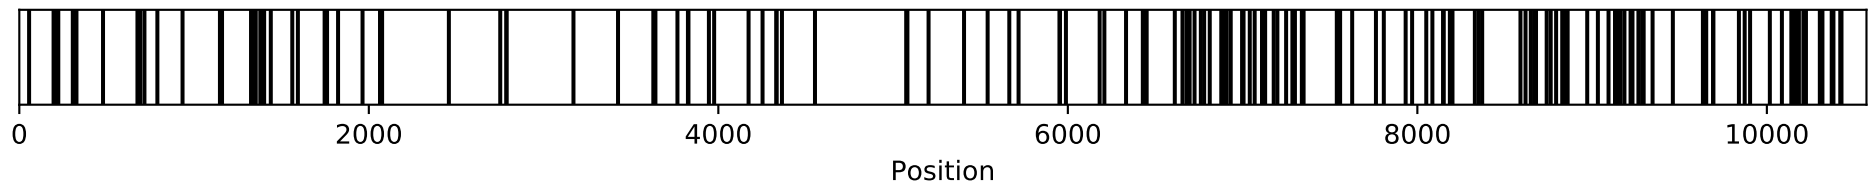

CR2 vs MA1  
Number of differences: 180

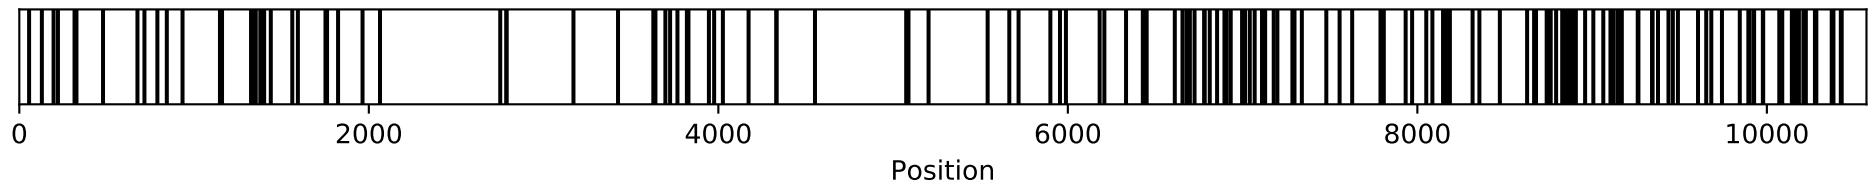

CR2 vs MA2  
Number of differences: 48

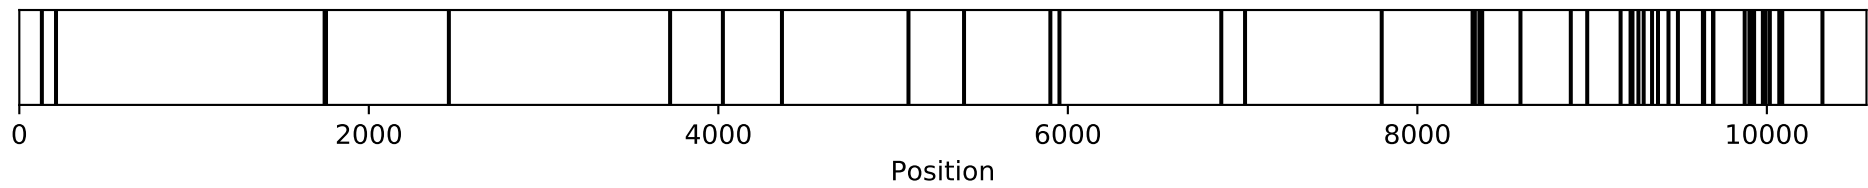

MA1 vs MA2  
Number of differences: 182

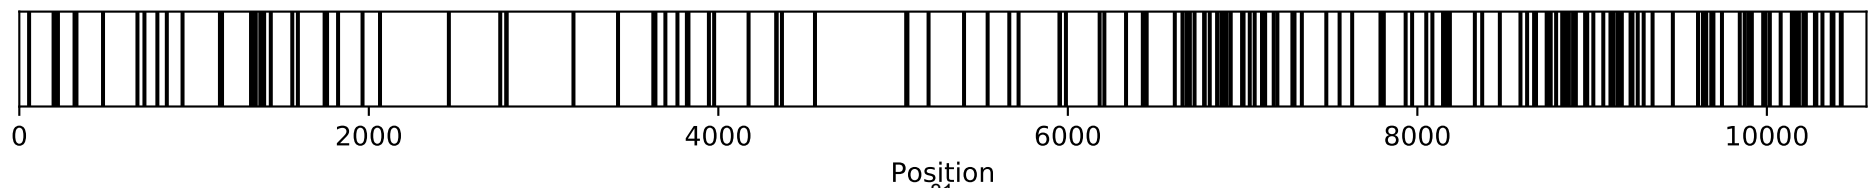

CR1 vs CR2  
Number of differences: 167

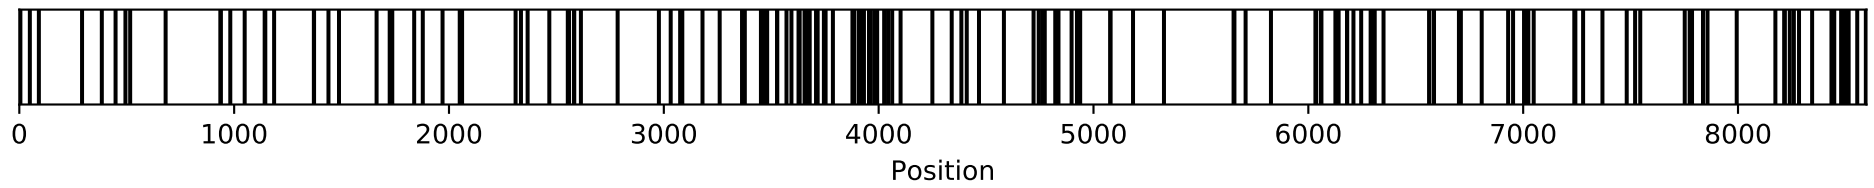

CR1 vs MA1  
Number of differences: 148

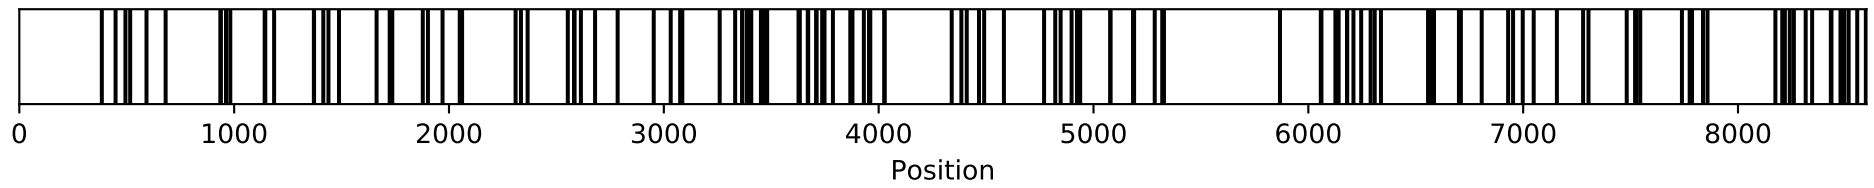

CR1 vs MA2  
Number of differences: 48

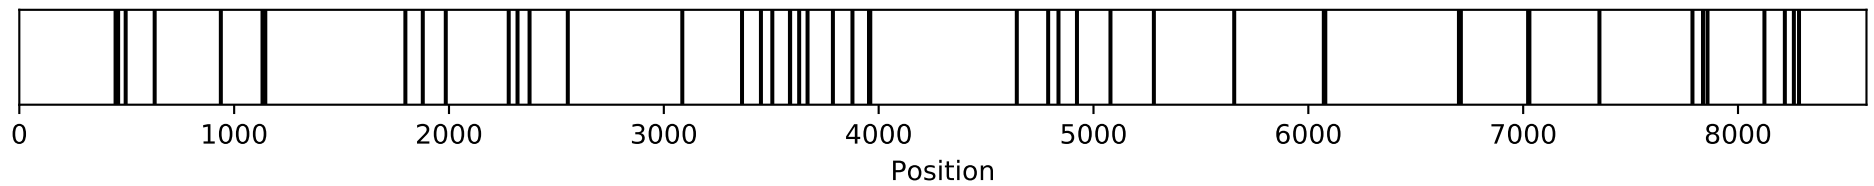

CR2 vs MA1  
Number of differences: 103

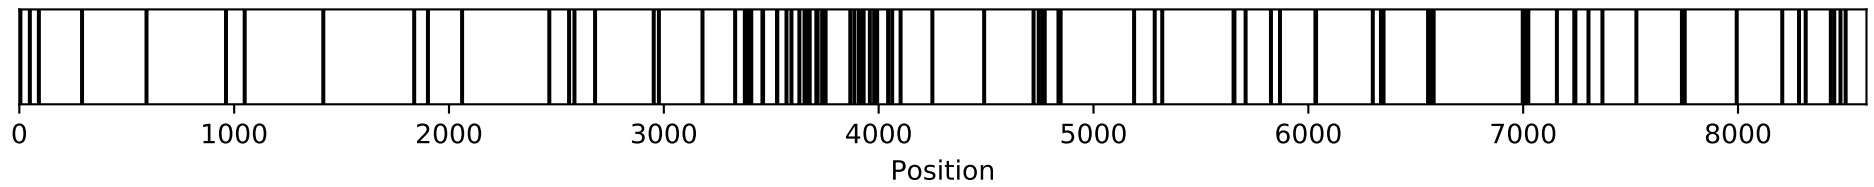

CR2 vs MA2  
Number of differences: 168

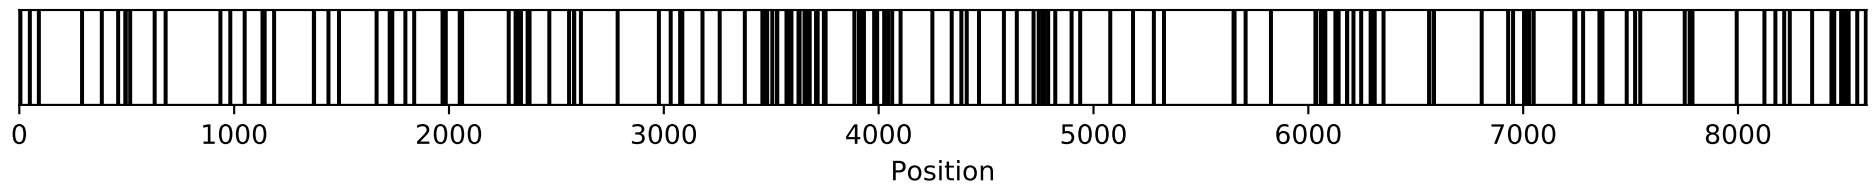

MA1 vs MA2  
Number of differences: 155

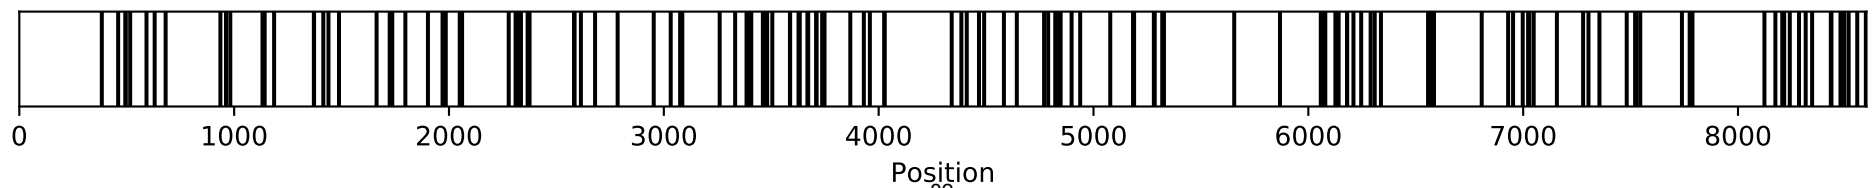

CR1 vs CR2  
Number of differences: 317

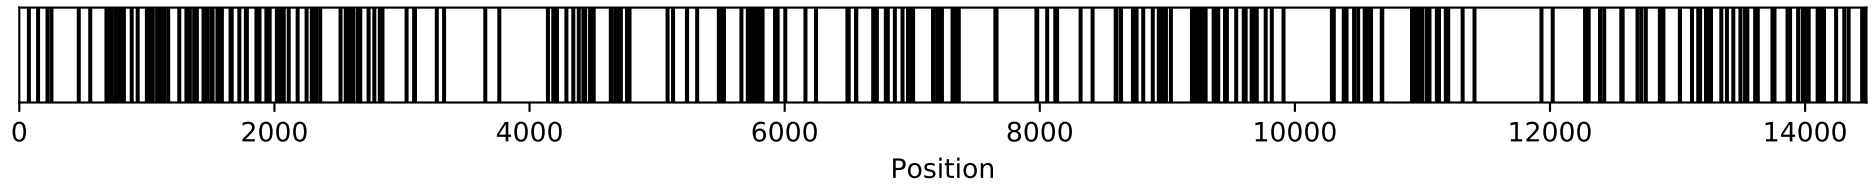

CR1 vs MA1  
Number of differences: 114

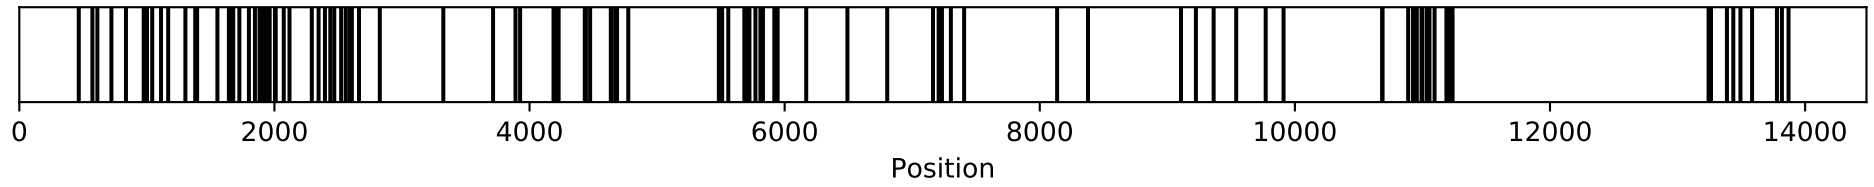

CR1 vs MA2  
Number of differences: 306

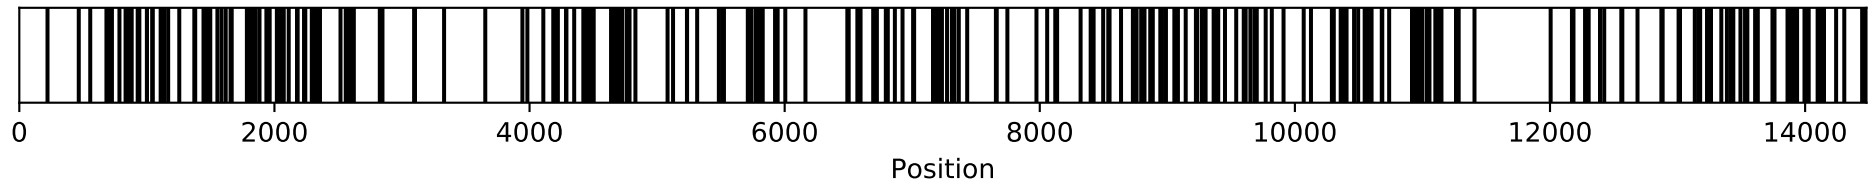

CR2 vs MA1  
Number of differences: 314

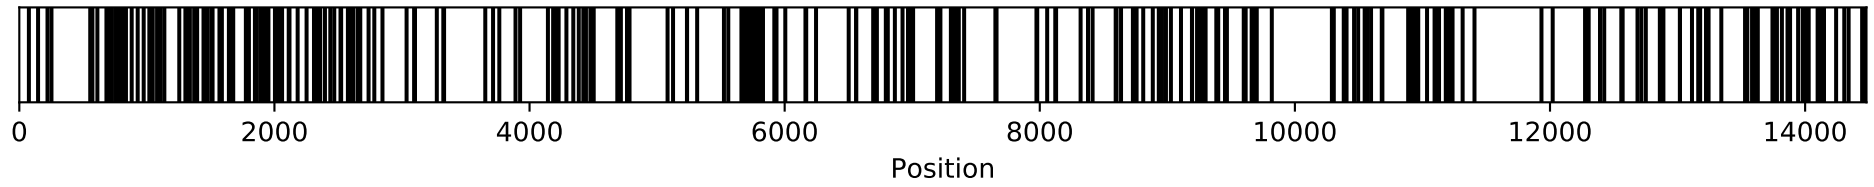

CR2 vs MA2  
Number of differences: 180

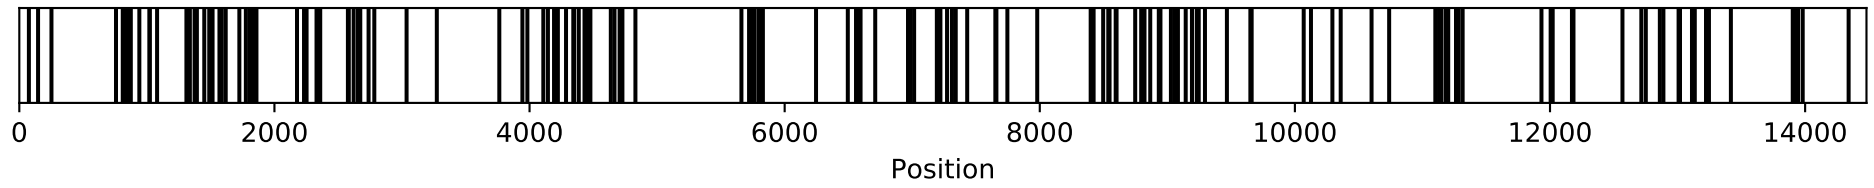

MA1 vs MA2  
Number of differences: 306

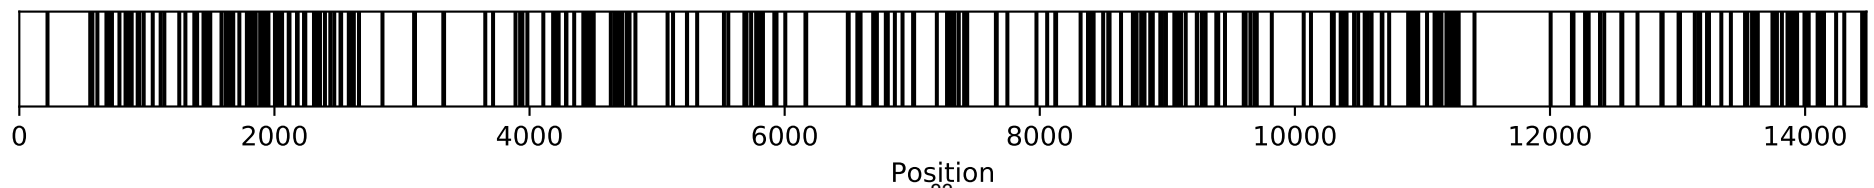

CR1 vs CR2  
Number of differences: 82

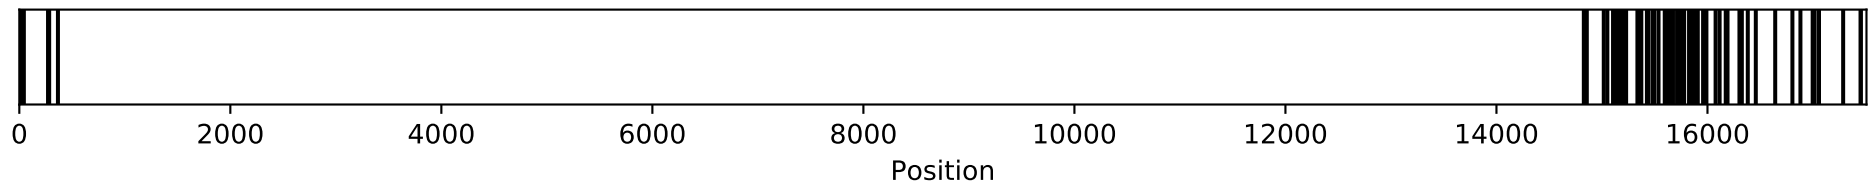

CR1 vs MA1  
Number of differences: 251

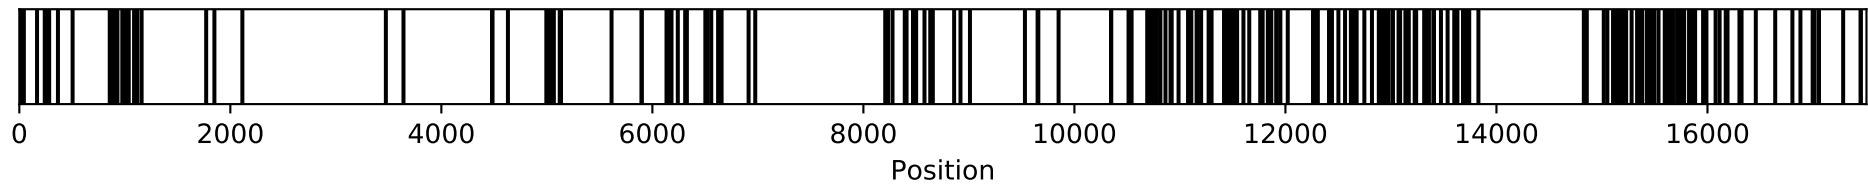

CR1 vs MA2  
Number of differences: 441

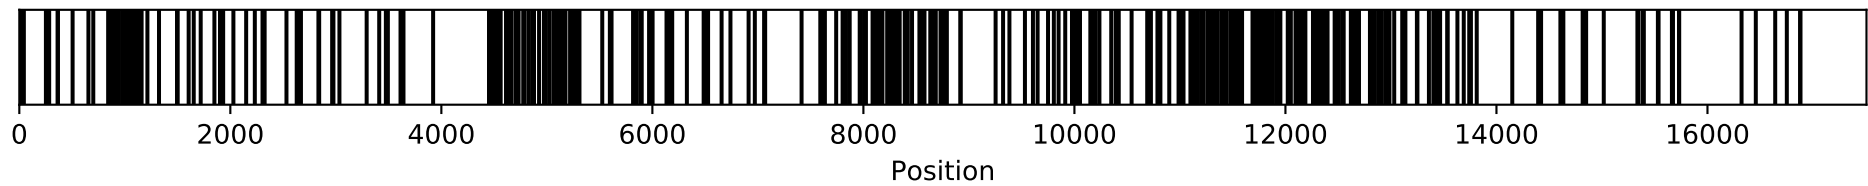

CR2 vs MA1  
Number of differences: 181

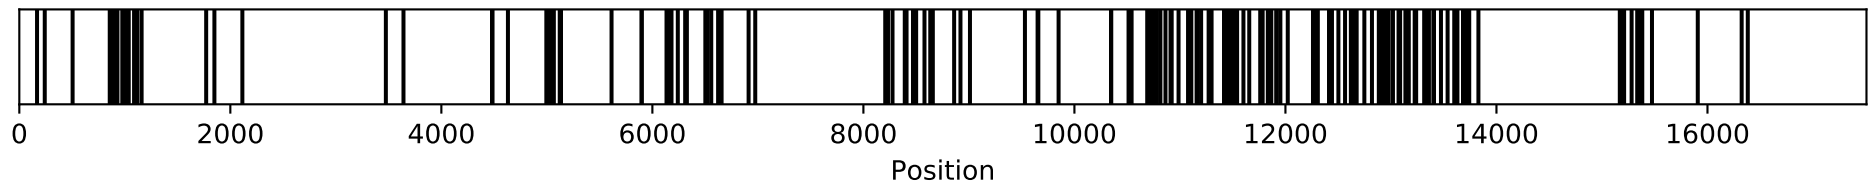

CR2 vs MA2  
Number of differences: 485

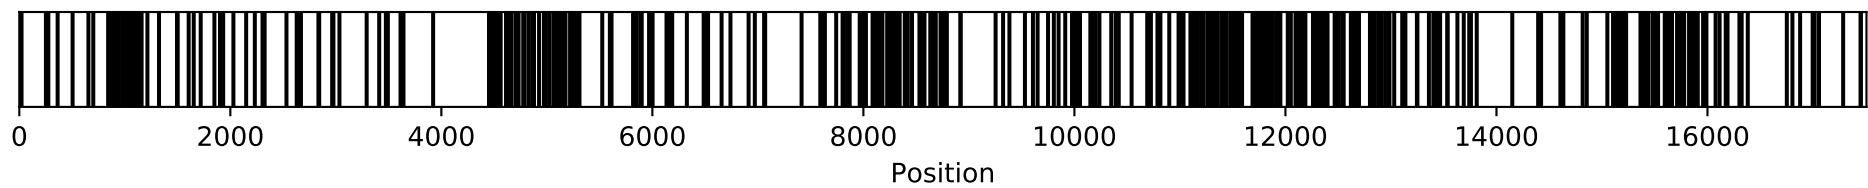

MA1 vs MA2  
Number of differences: 499

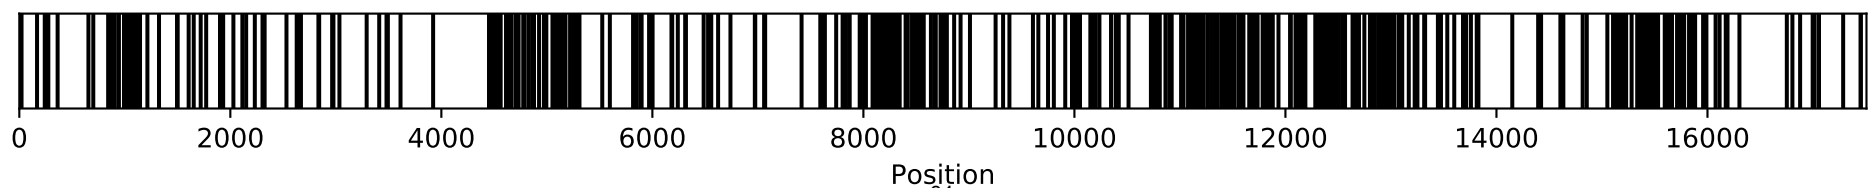

CR1 vs CR2  
Number of differences: 133

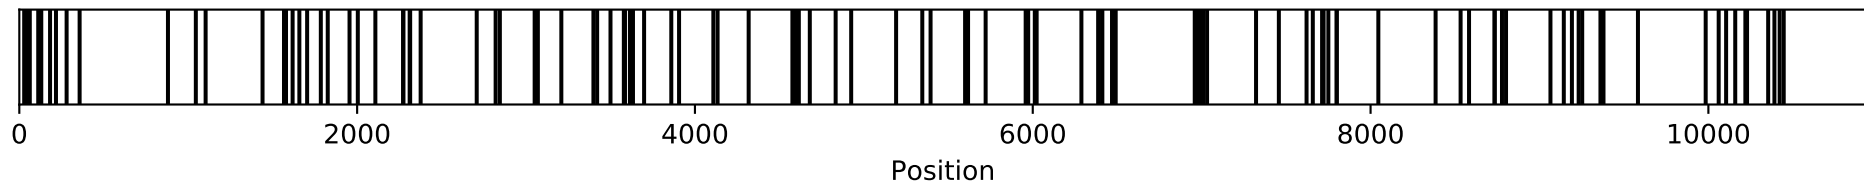

CR1 vs MA1  
Number of differences: 118

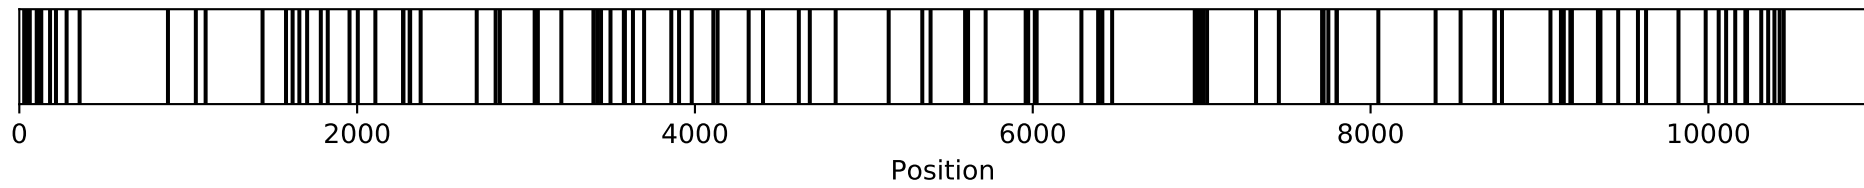

CR1 vs MA2  
Number of differences: 41

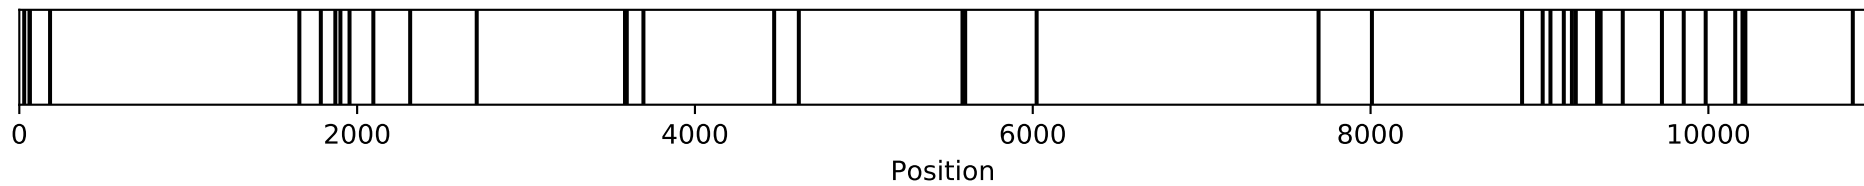

CR2 vs MA1  
Number of differences: 50

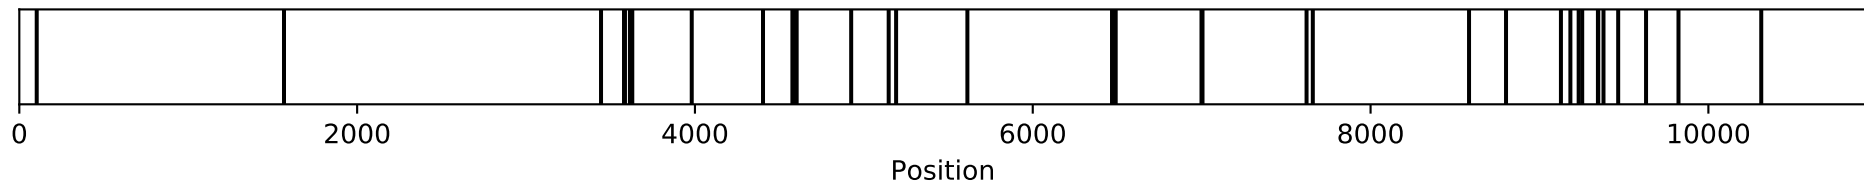

CR2 vs MA2  
Number of differences: 140

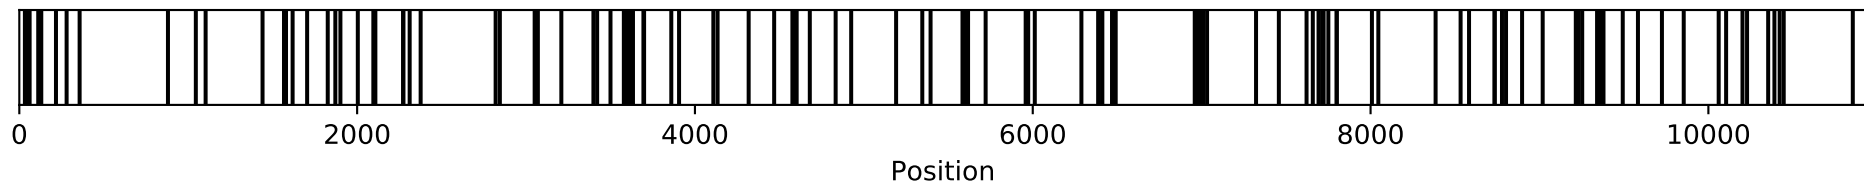

MA1 vs MA2  
Number of differences: 125

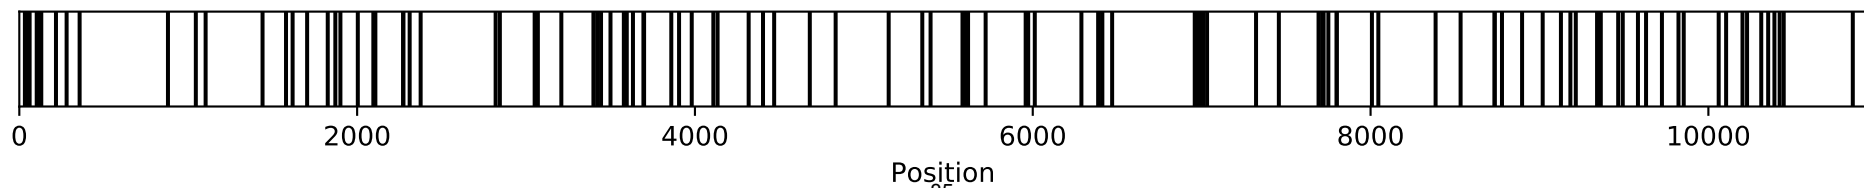

CR1 vs CR2  
Number of differences: 369

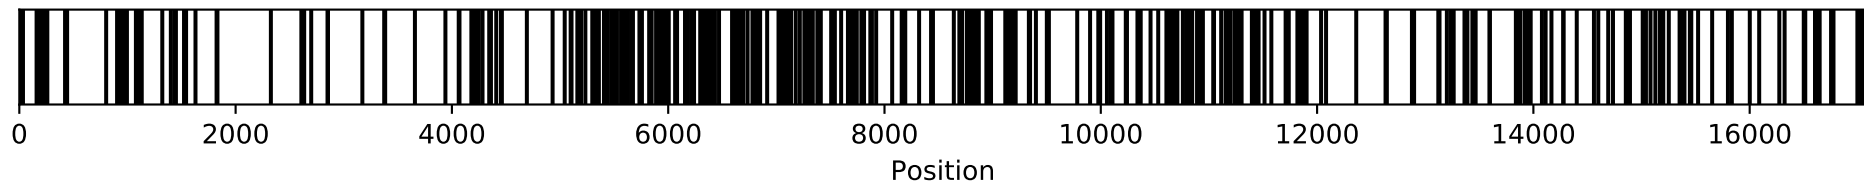

CR1 vs MA1  
Number of differences: 338

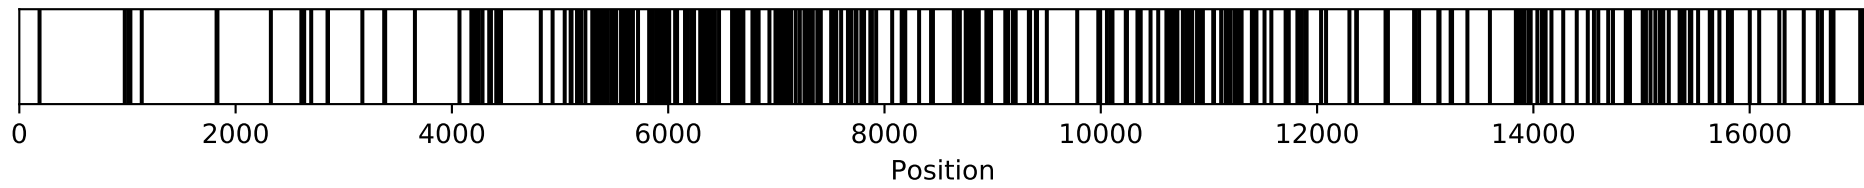

CR1 vs MA2  
Number of differences: 187

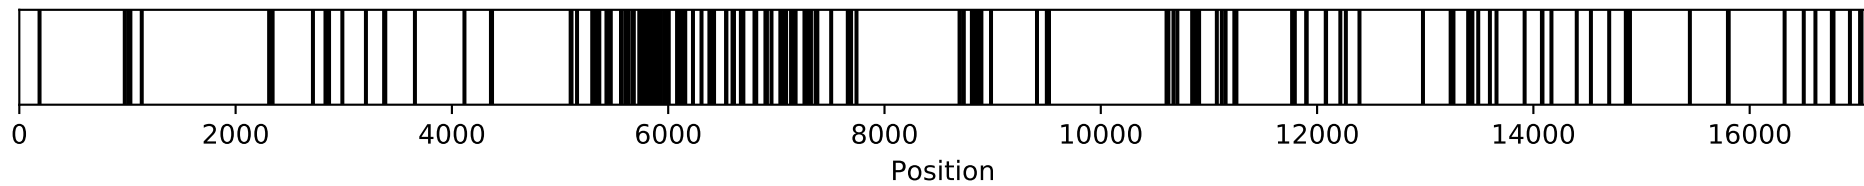

CR2 vs MA1  
Number of differences: 119

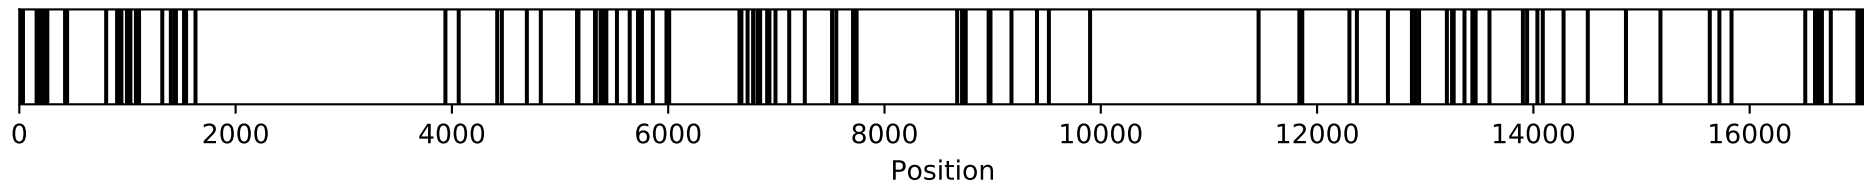

CR2 vs MA2  
Number of differences: 370

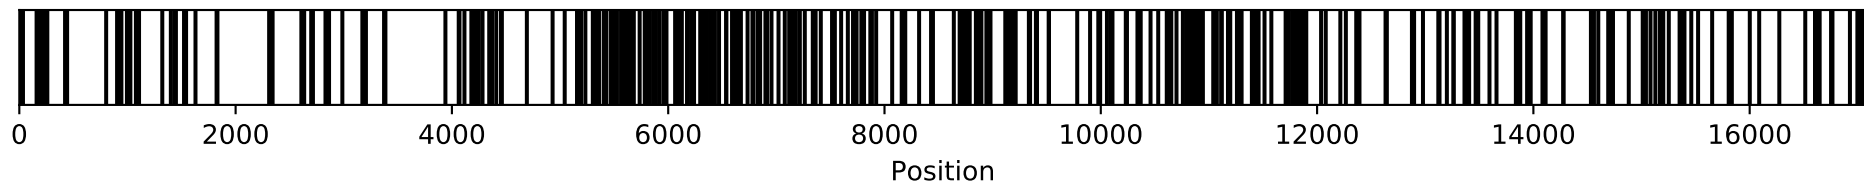

MA1 vs MA2  
Number of differences: 339

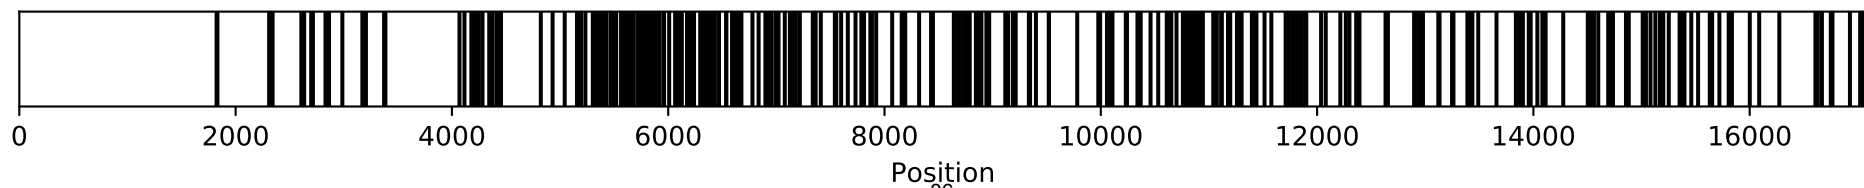

CR1 vs CR2  
Number of differences: 59

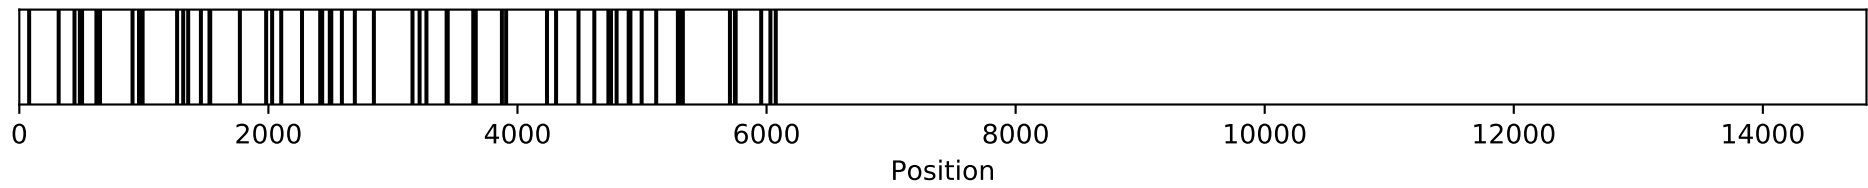

CR1 vs MA1  
Number of differences: 140

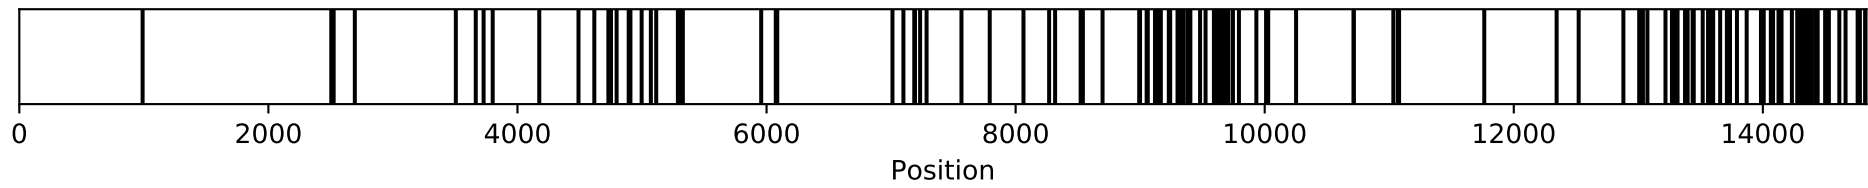

CR1 vs MA2  
Number of differences: 137

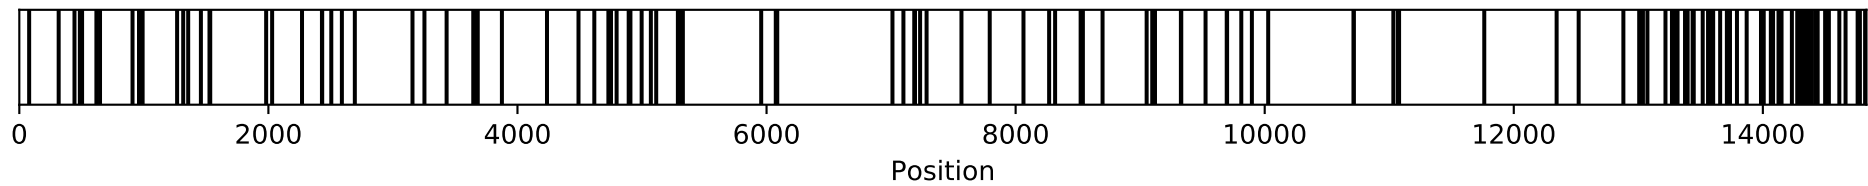

CR2 vs MA1  
Number of differences: 164

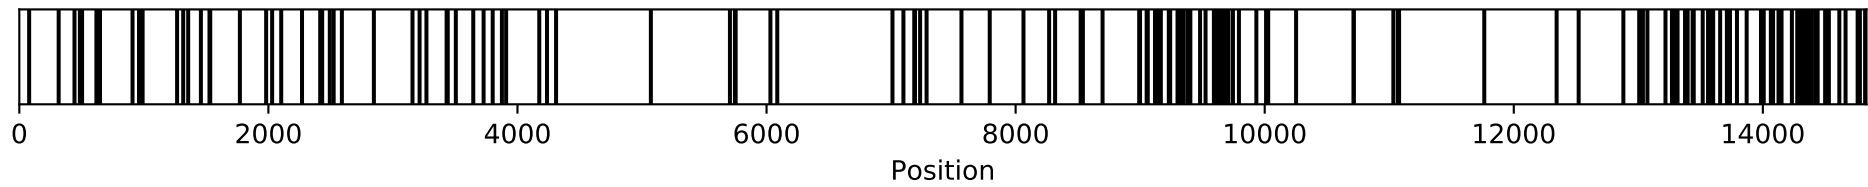

CR2 vs MA2  
Number of differences: 106

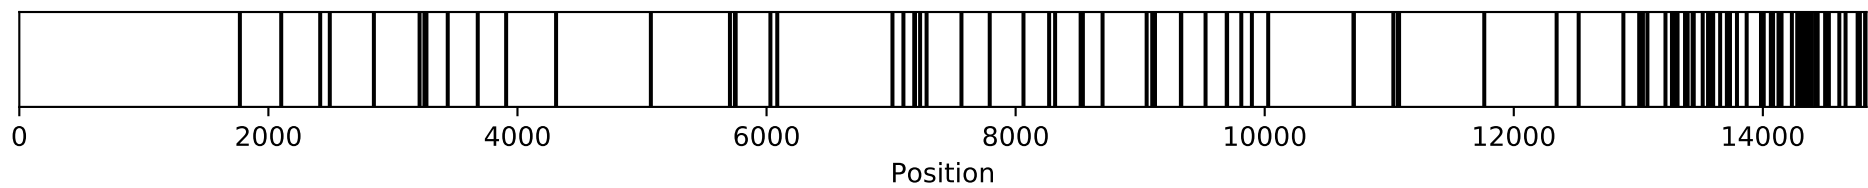

MA1 vs MA2  
Number of differences: 74

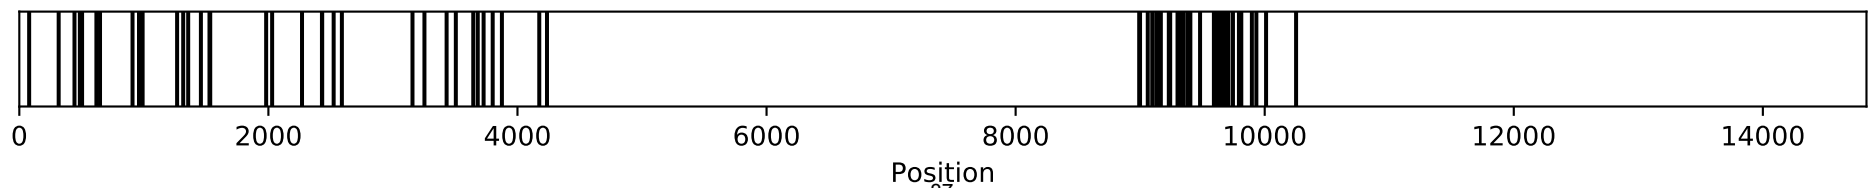

CR1 vs CR2  
Number of differences: 213

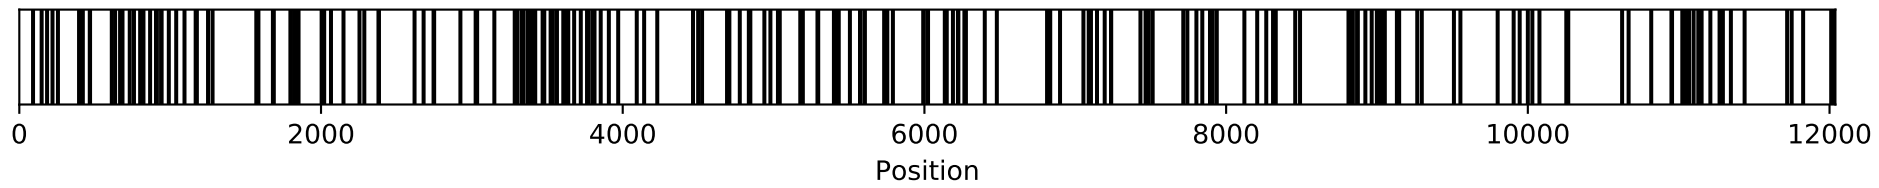

CR1 vs MA1  
Number of differences: 64

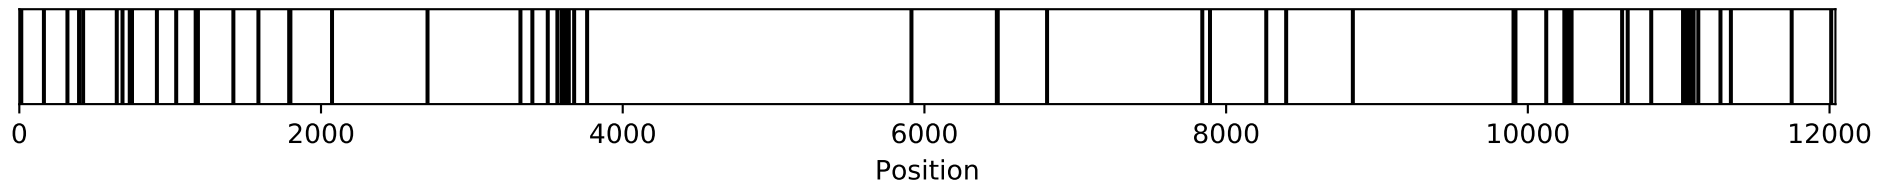

CR1 vs MA2  
Number of differences: 216

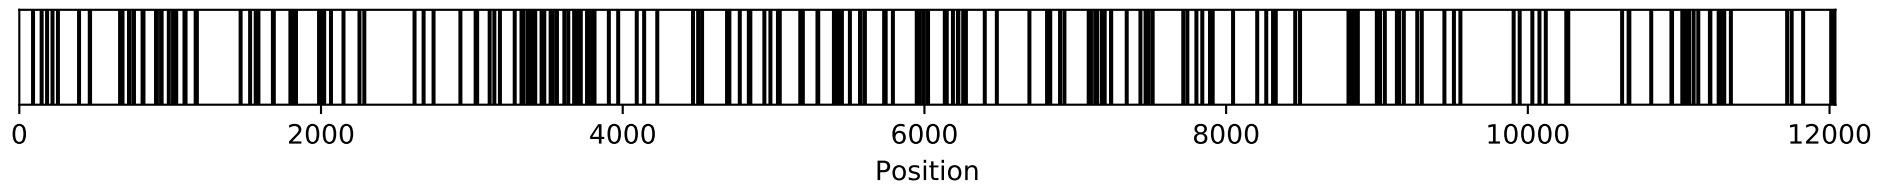

CR2 vs MA1  
Number of differences: 211

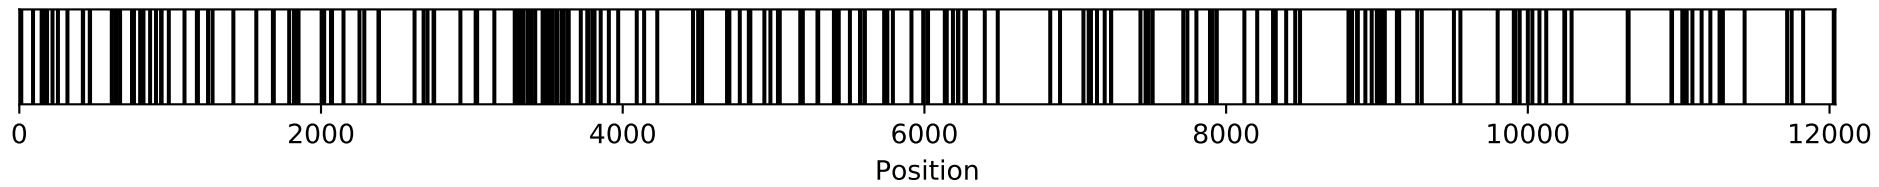

CR2 vs MA2  
Number of differences: 68

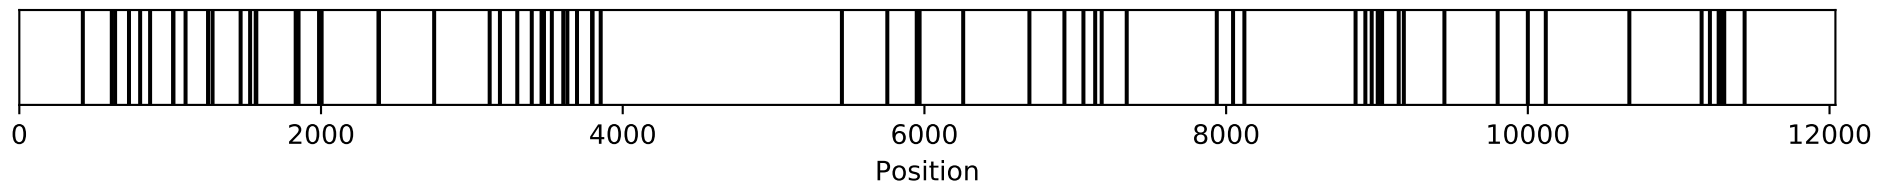

MA1 vs MA2  
Number of differences: 214

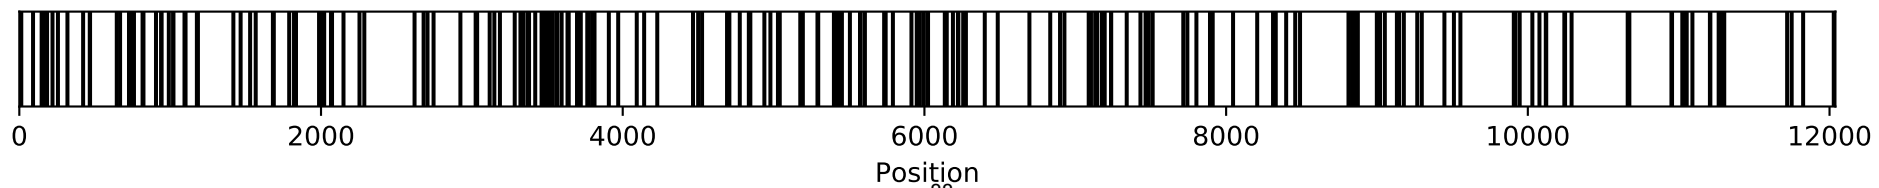



CR1 vs CR2  
Number of differences: 144

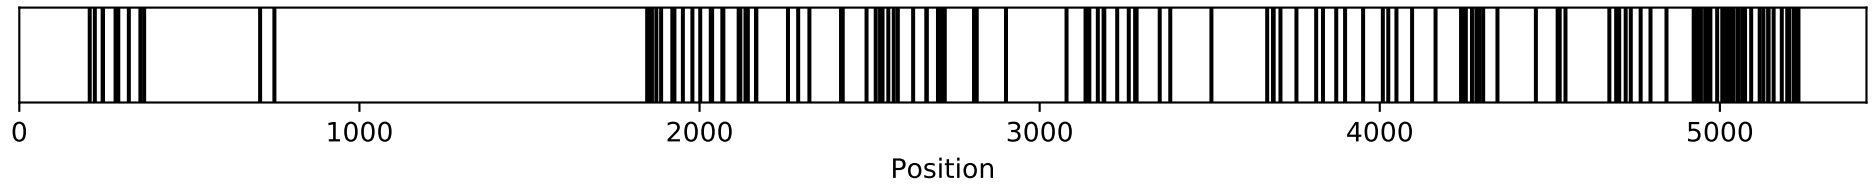

CR1 vs MA1  
Number of differences: 219

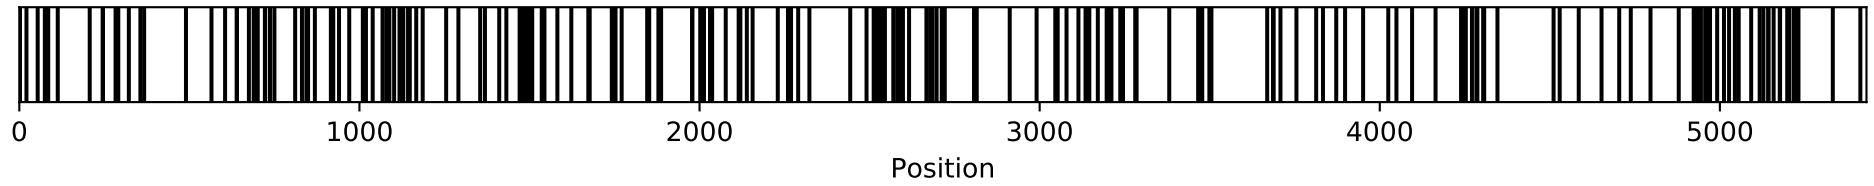

CR1 vs MA2  
Number of differences: 219

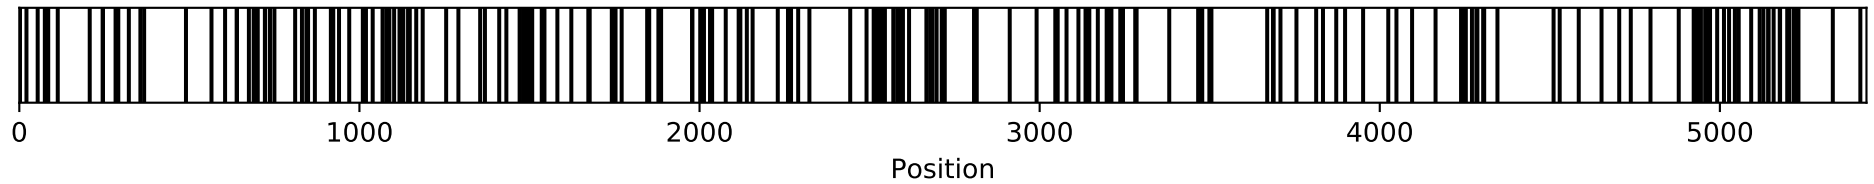

CR2 vs MA1  
Number of differences: 179

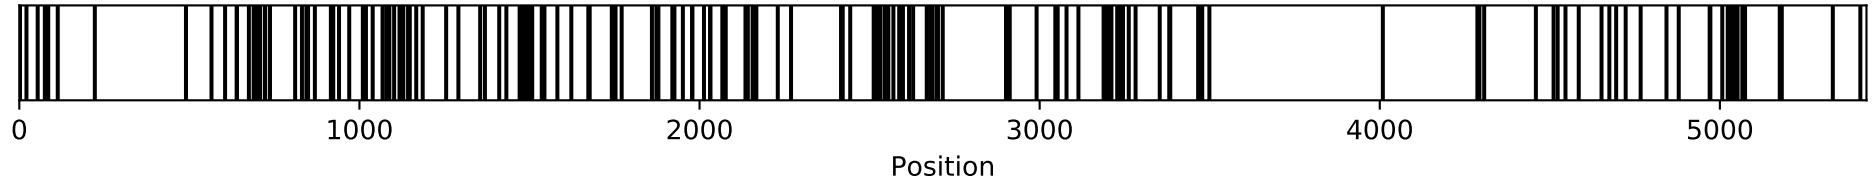

CR2 vs MA2  
Number of differences: 179

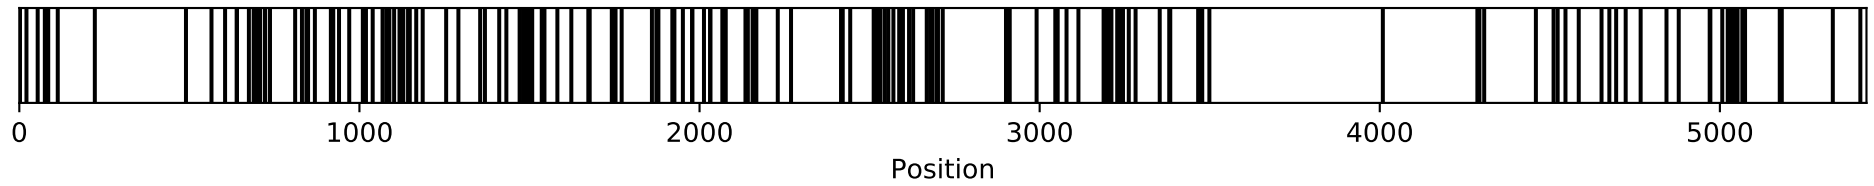

MA1 vs MA2  
Number of differences: 0

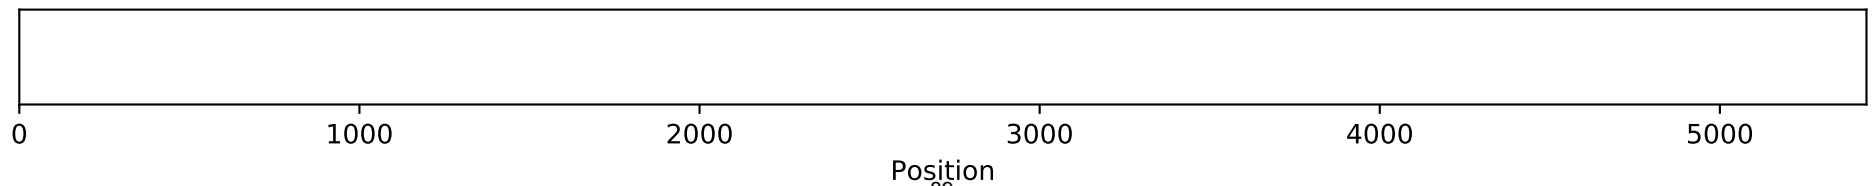

CR1 vs CR2  
Number of differences: 204

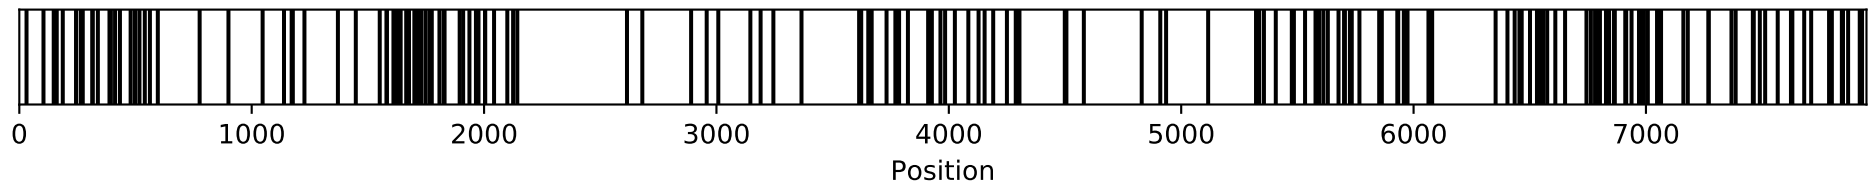

CR1 vs MA1  
Number of differences: 199

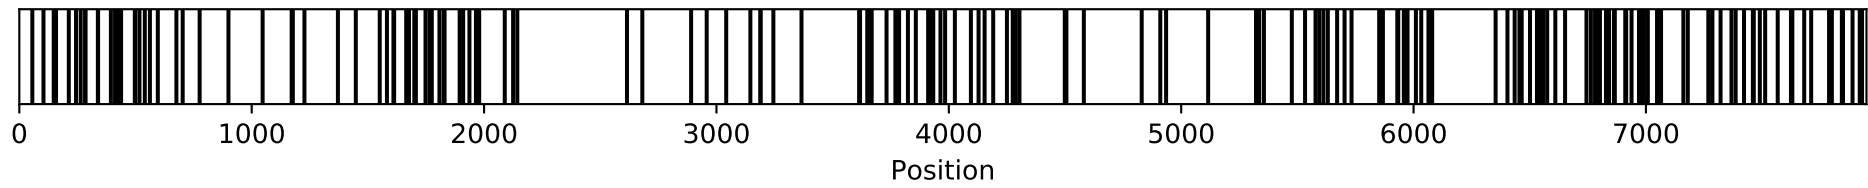

CR1 vs MA2  
Number of differences: 117

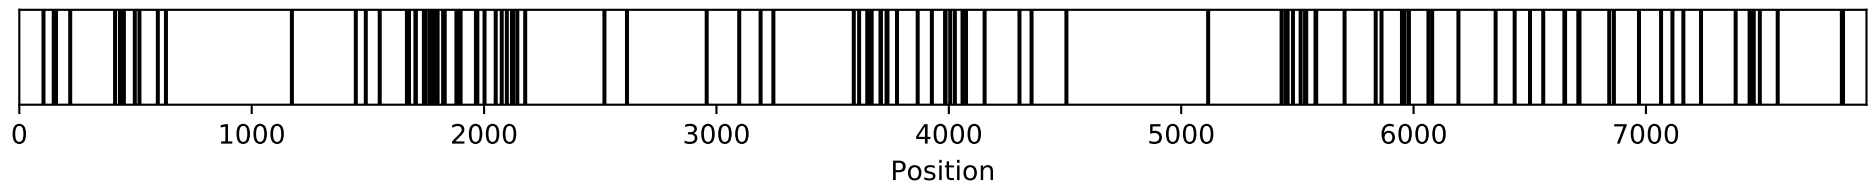

CR2 vs MA1  
Number of differences: 63

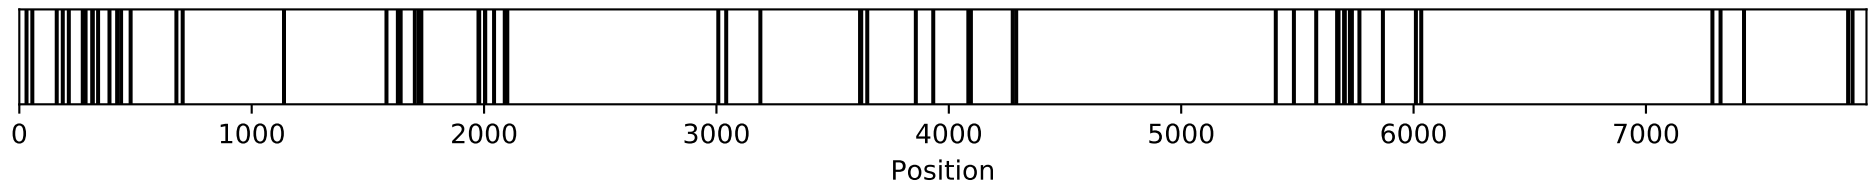

CR2 vs MA2  
Number of differences: 196

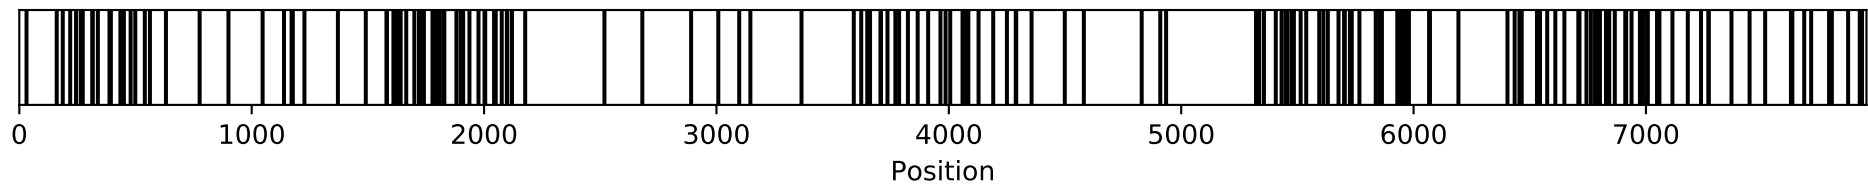

MA1 vs MA2  
Number of differences: 191

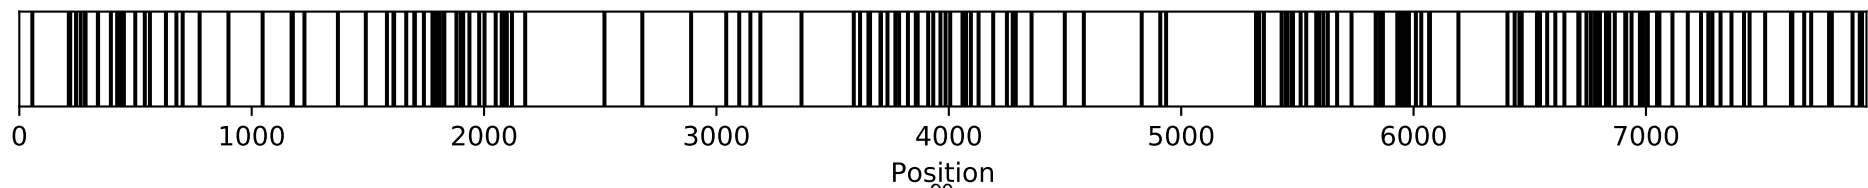

CR1 vs CR2  
Number of differences: 216

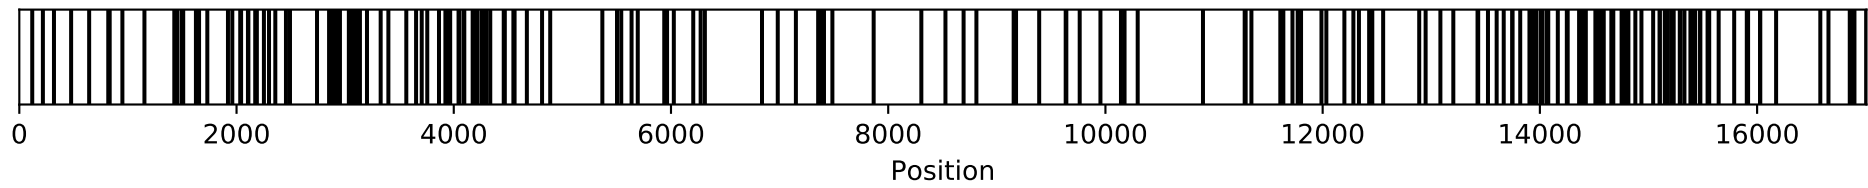

CR1 vs MA1  
Number of differences: 119

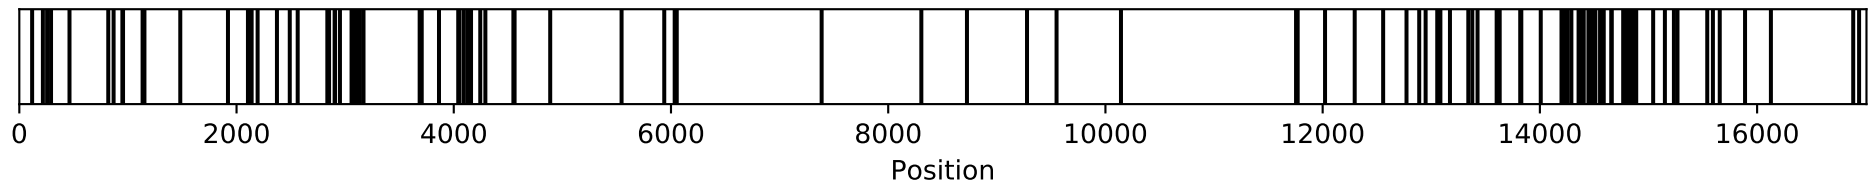

CR1 vs MA2  
Number of differences: 218

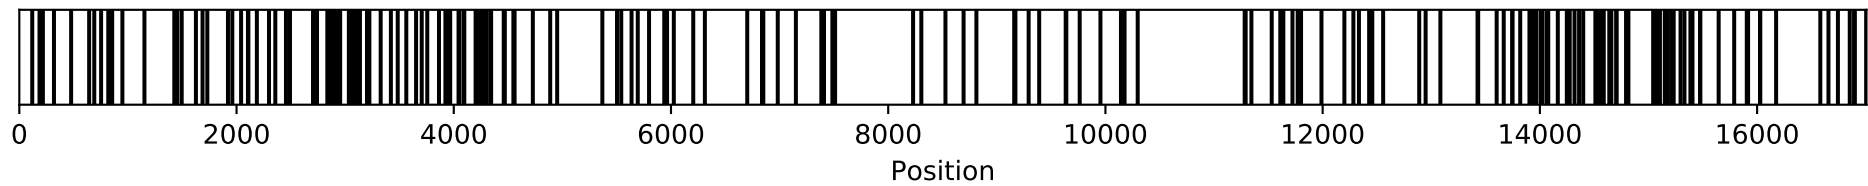

CR2 vs MA1  
Number of differences: 233

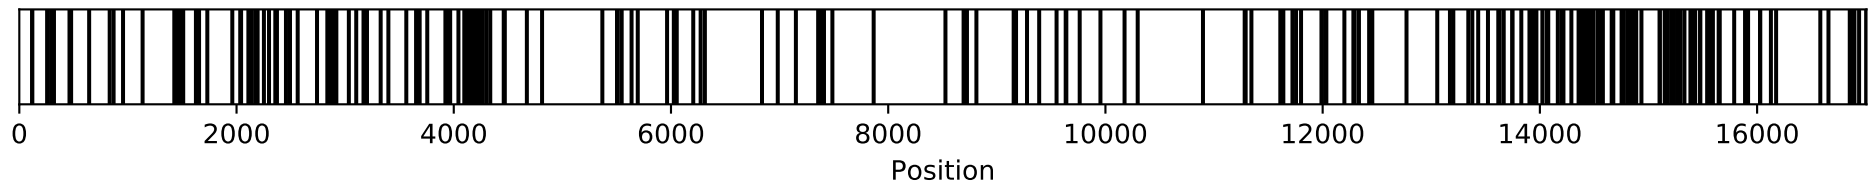

CR2 vs MA2  
Number of differences: 81

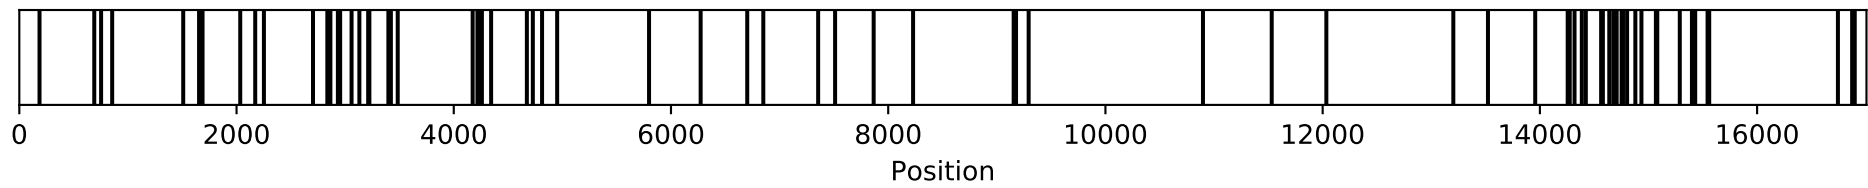

MA1 vs MA2  
Number of differences: 238

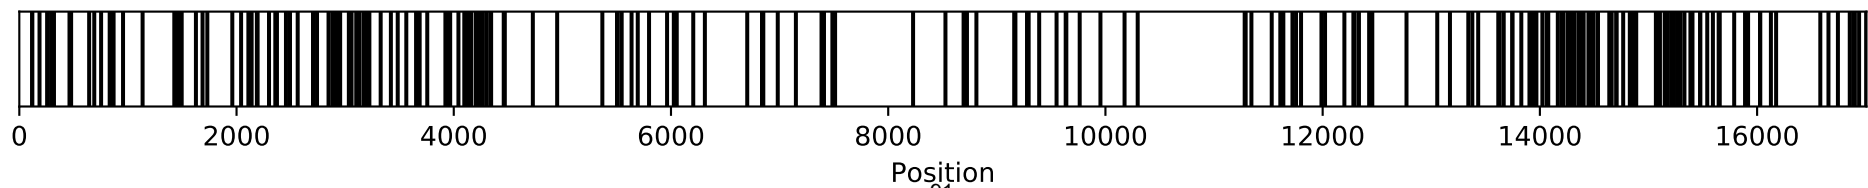

CR1 vs CR2  
Number of differences: 145

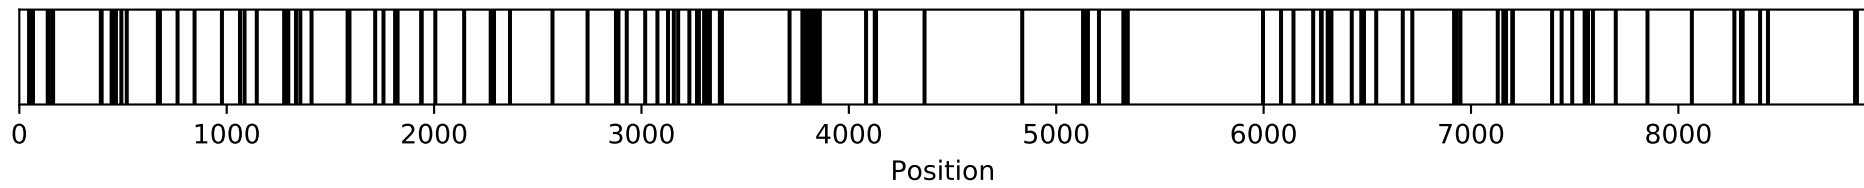

CR1 vs MA1  
Number of differences: 94

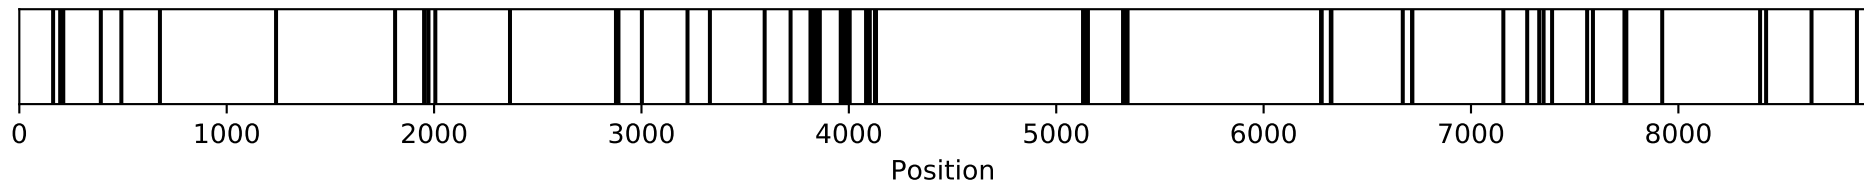

CR1 vs MA2  
Number of differences: 158

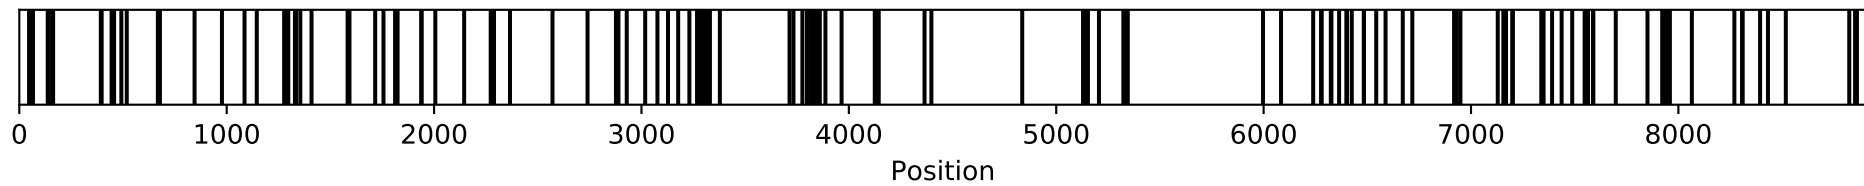

CR2 vs MA1  
Number of differences: 150

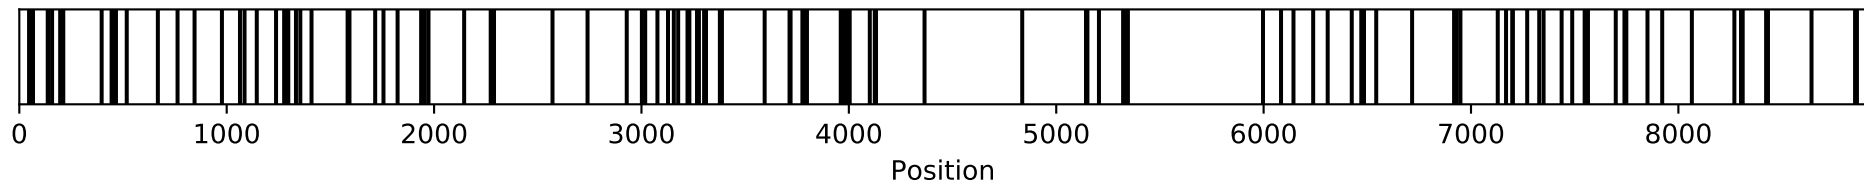

CR2 vs MA2  
Number of differences: 48

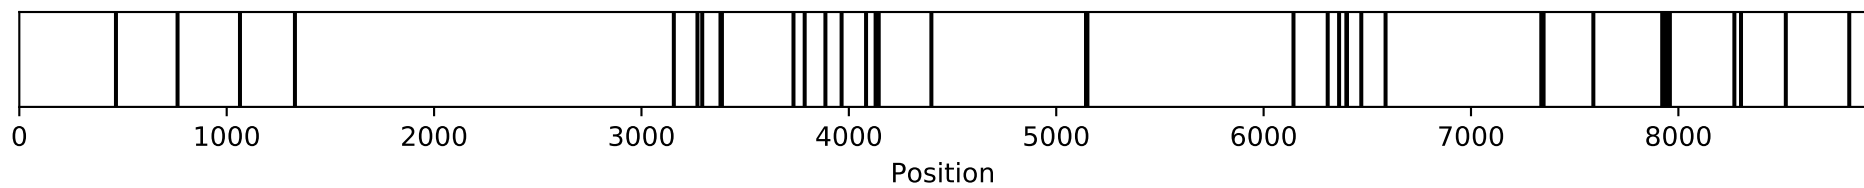

MA1 vs MA2  
Number of differences: 155

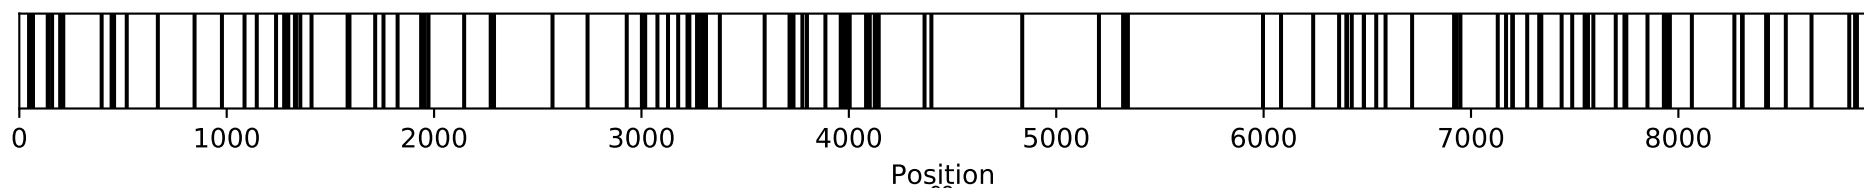

CR1 vs CR2  
Number of differences: 303

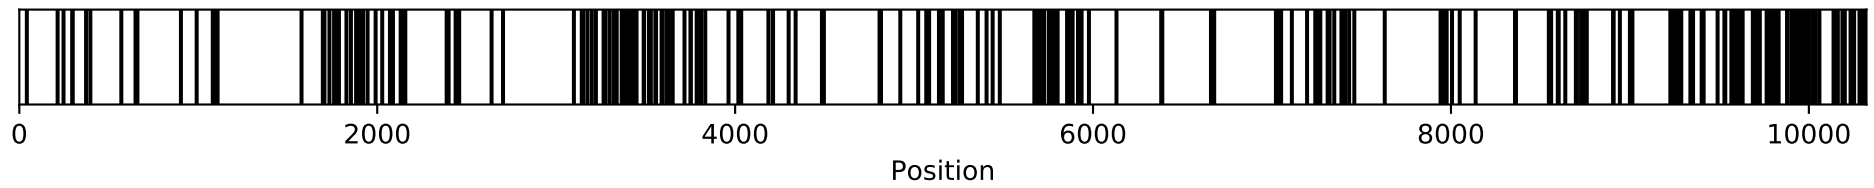

CR1 vs MA1  
Number of differences: 312

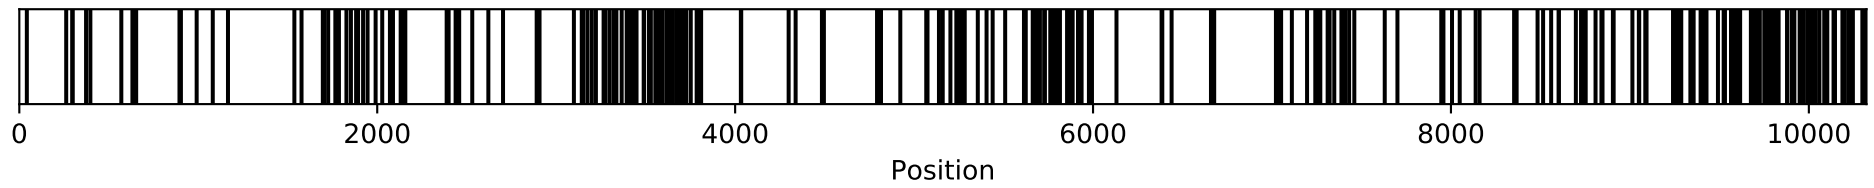

CR1 vs MA2  
Number of differences: 99

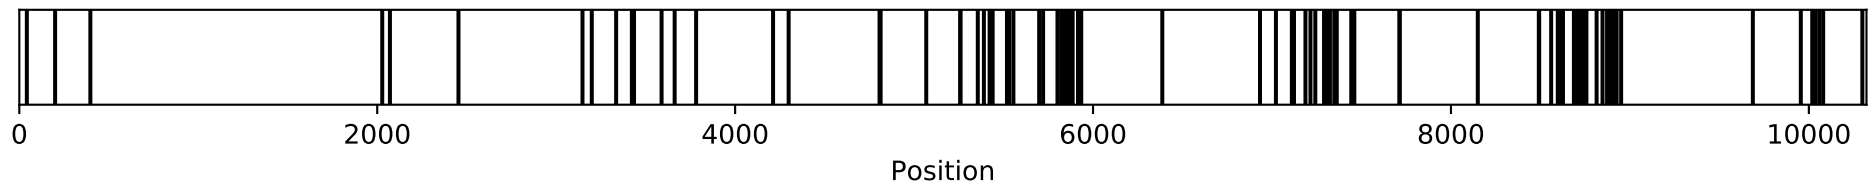

CR2 vs MA1  
Number of differences: 174

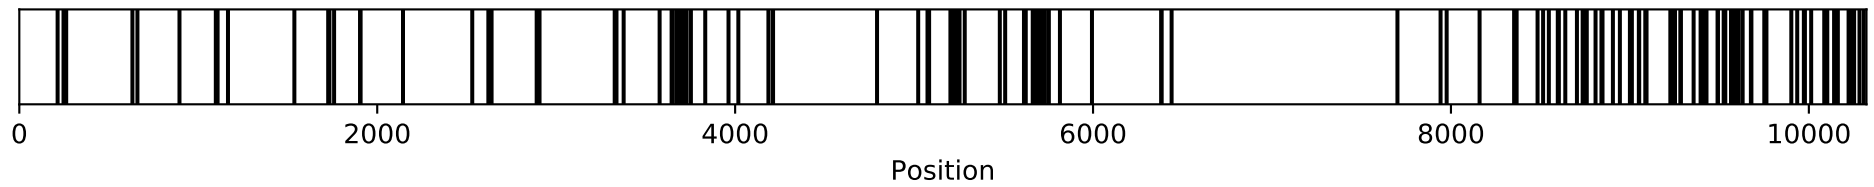

CR2 vs MA2  
Number of differences: 318

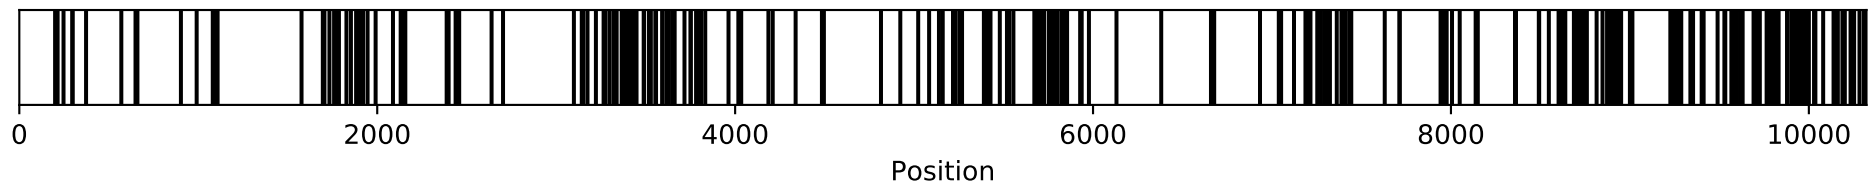

MA1 vs MA2  
Number of differences: 329

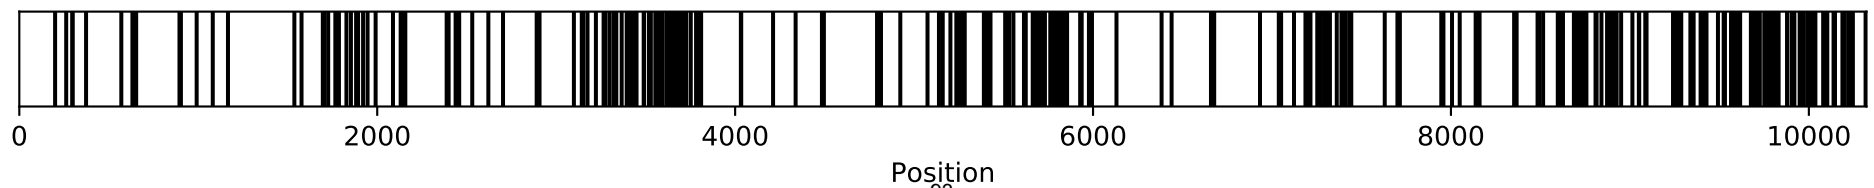

CR1 vs CR2  
Number of differences: 392

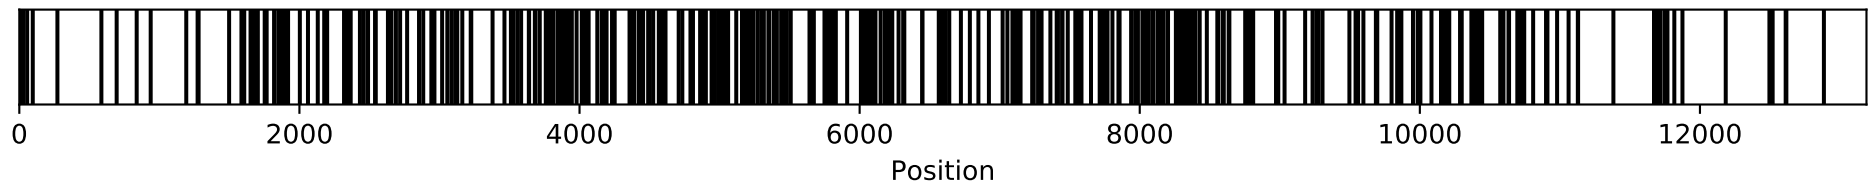

CR1 vs MA1  
Number of differences: 408

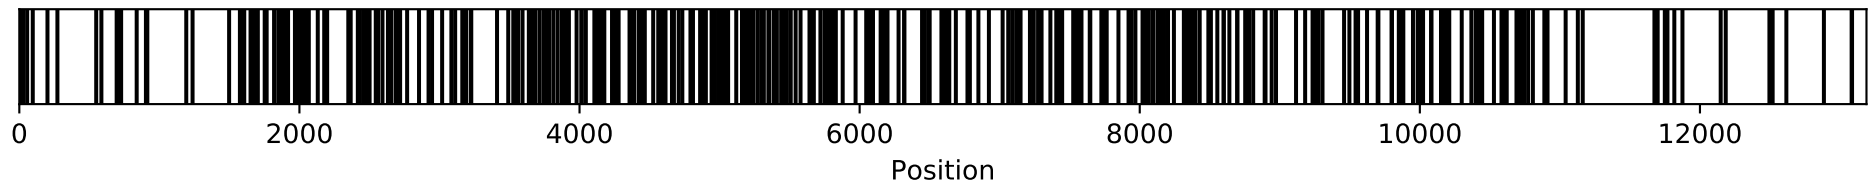

CR1 vs MA2  
Number of differences: 173

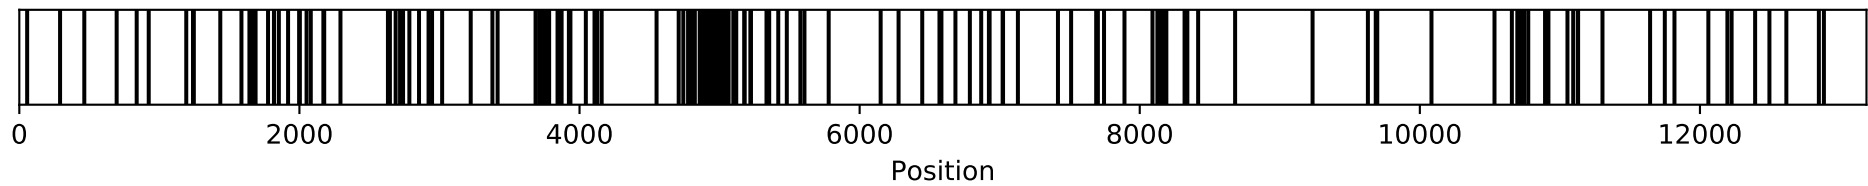

CR2 vs MA1  
Number of differences: 254

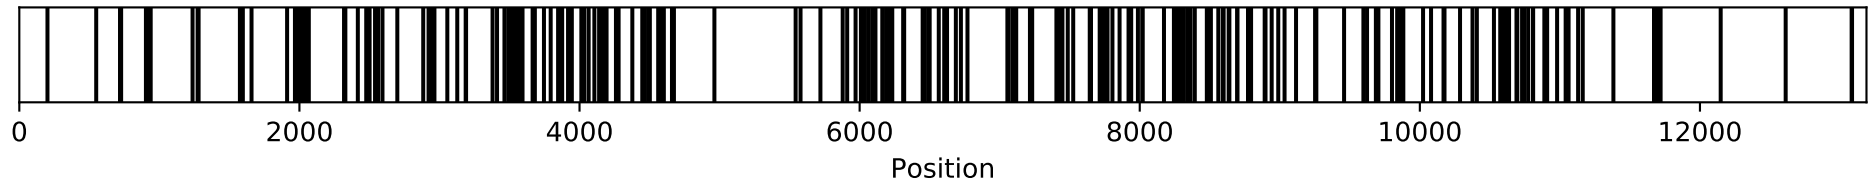

CR2 vs MA2  
Number of differences: 392

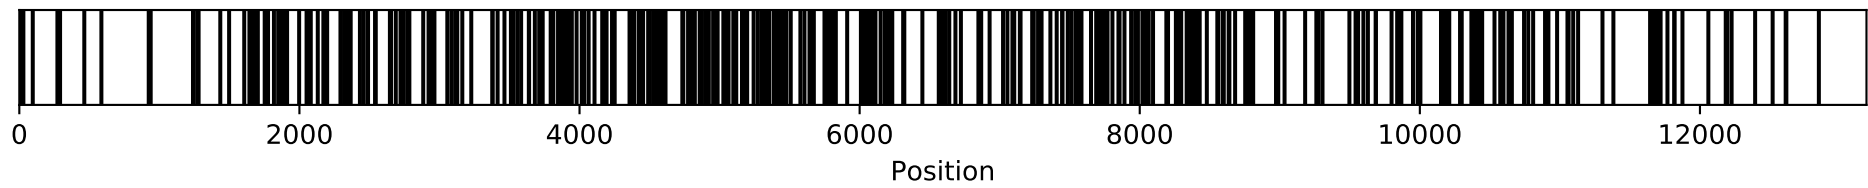

MA1 vs MA2  
Number of differences: 409

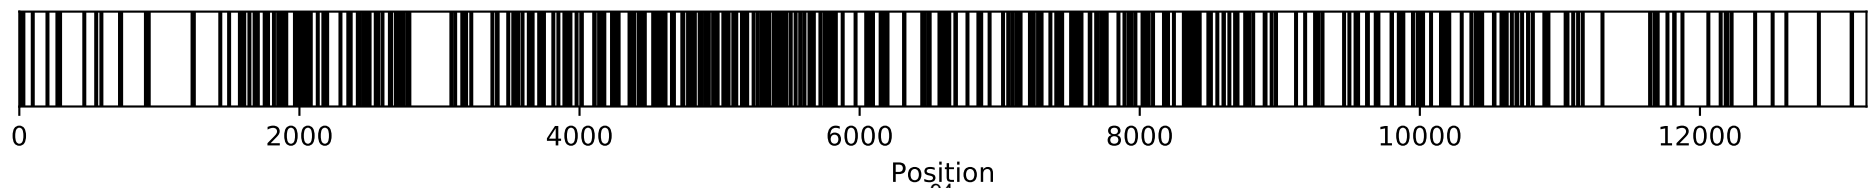

CR1 vs CR2  
Number of differences: 204

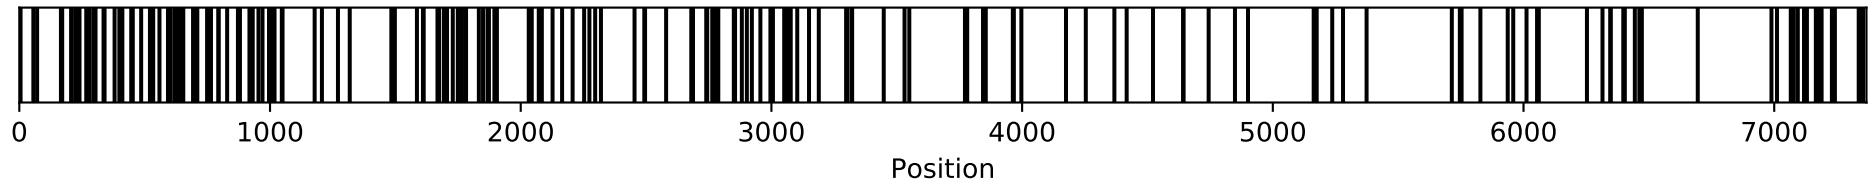

CR1 vs MA1  
Number of differences: 104

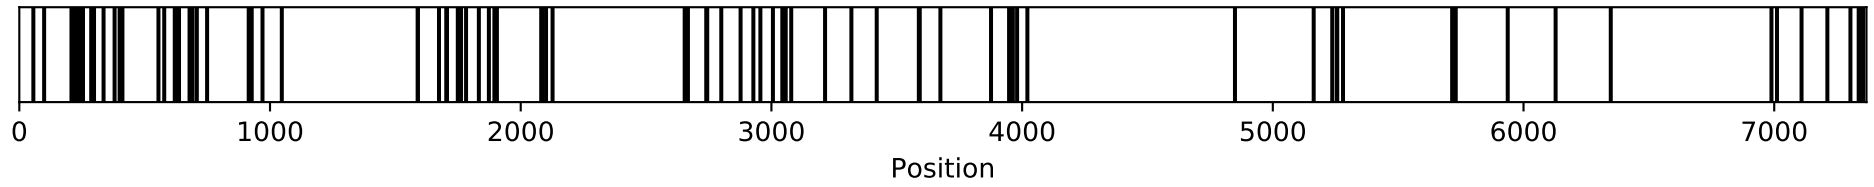

CR1 vs MA2  
Number of differences: 209

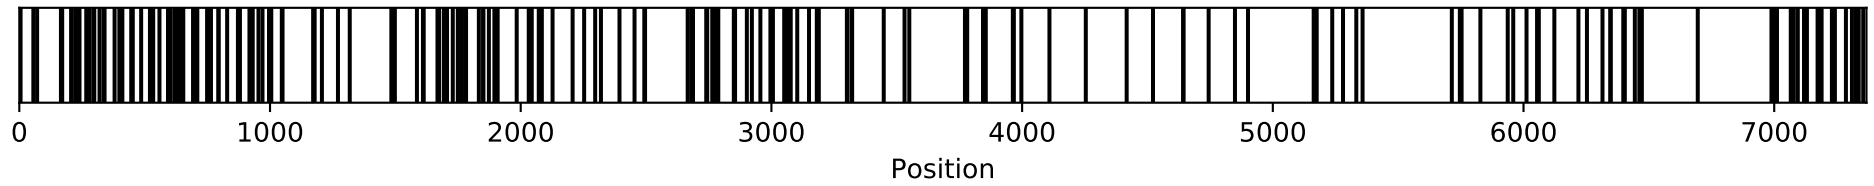

CR2 vs MA1  
Number of differences: 217

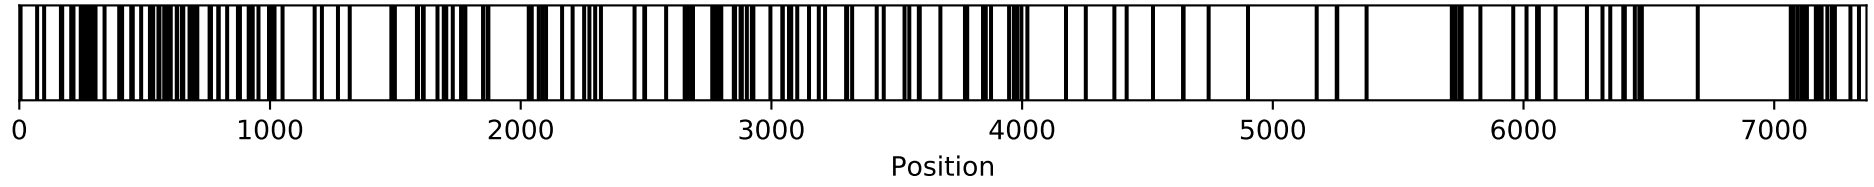

CR2 vs MA2  
Number of differences: 36

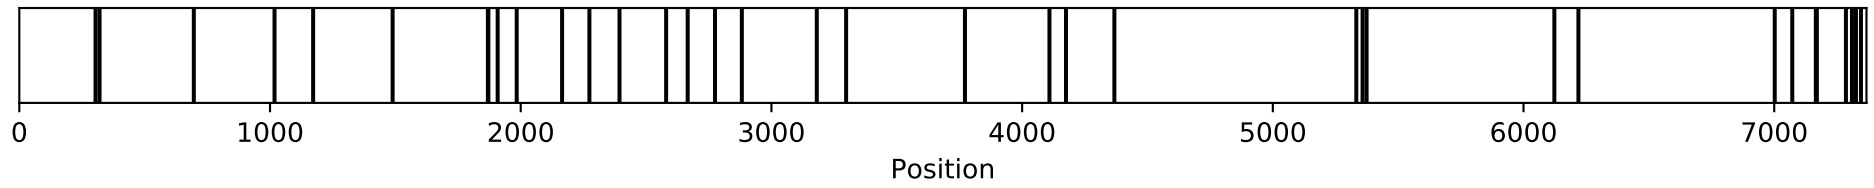

MA1 vs MA2  
Number of differences: 224

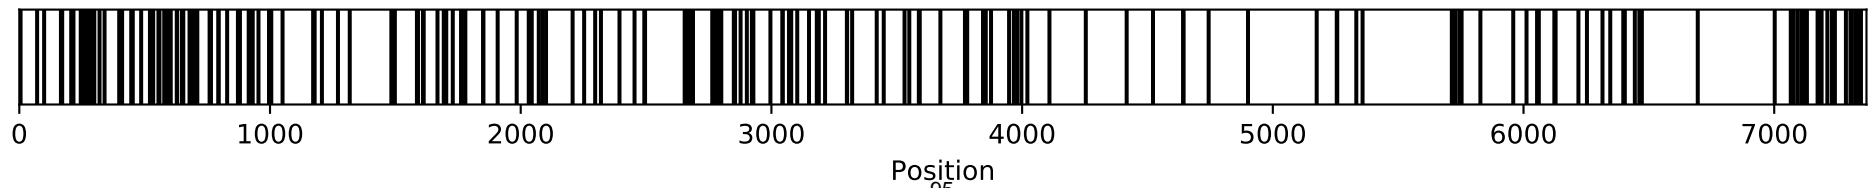

CR1 vs CR2  
Number of differences: 127

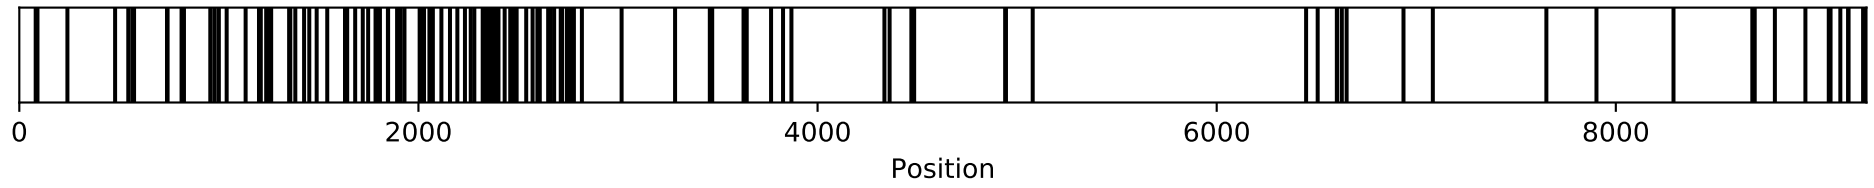

CR1 vs MA1  
Number of differences: 119

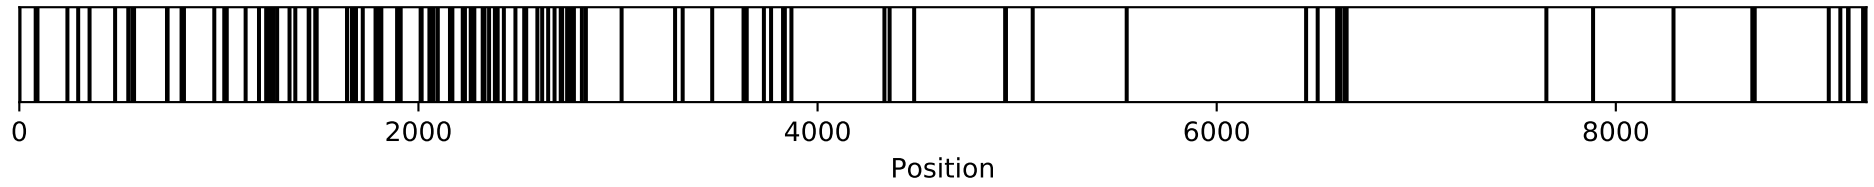

CR1 vs MA2  
Number of differences: 21

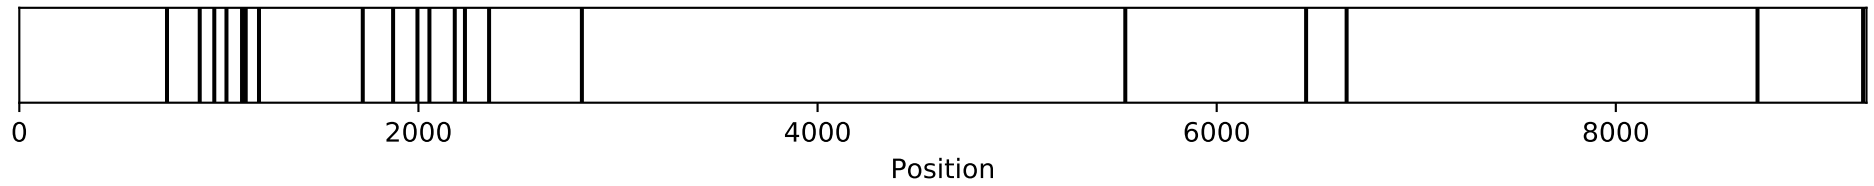

CR2 vs MA1  
Number of differences: 83

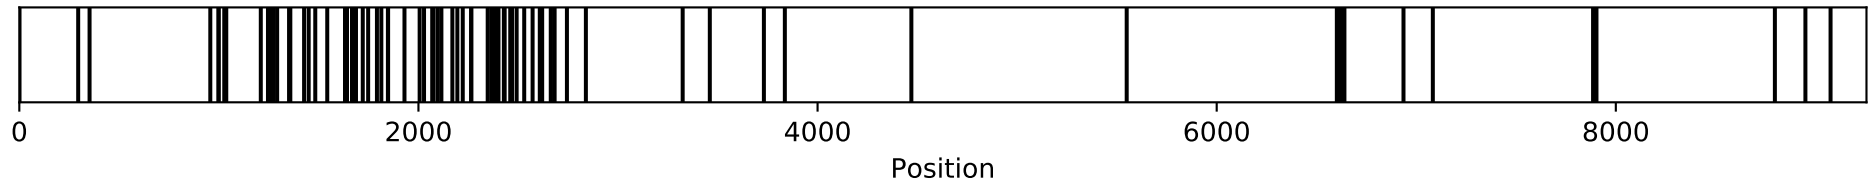

CR2 vs MA2  
Number of differences: 125

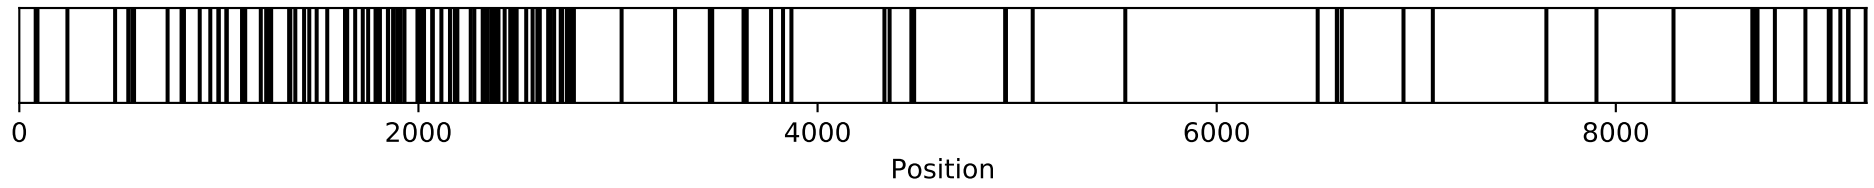

MA1 vs MA2  
Number of differences: 116

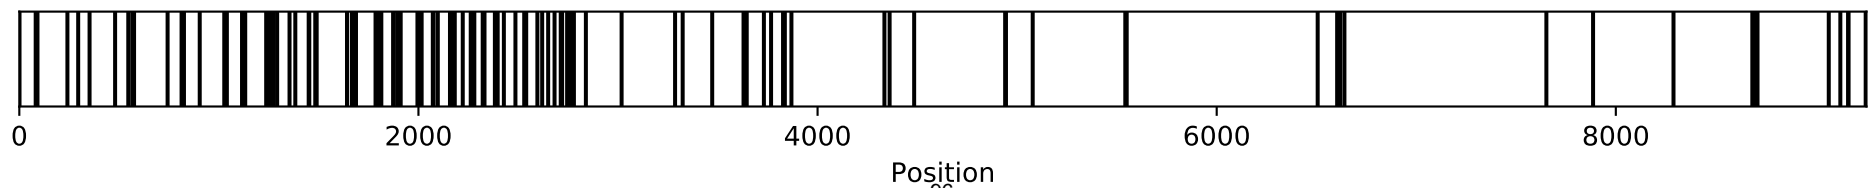



CR1 vs CR2  
Number of differences: 133

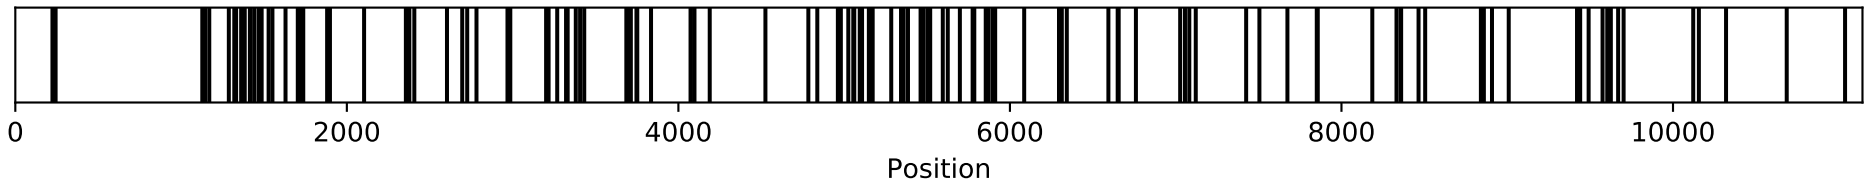

CR1 vs MA1  
Number of differences: 107

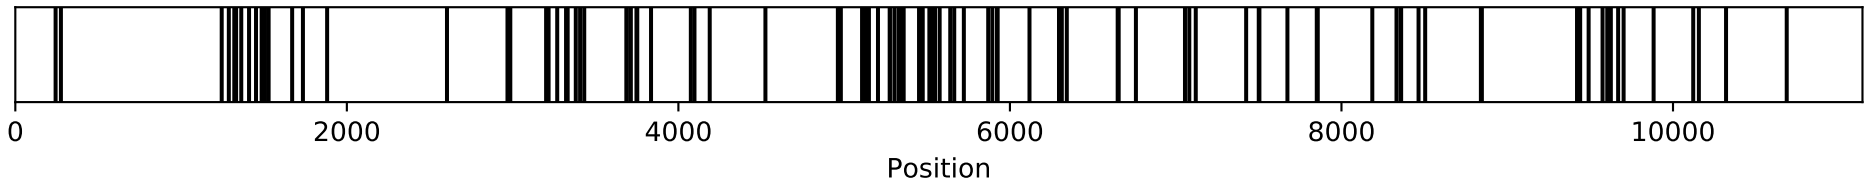

CR1 vs MA2  
Number of differences: 114

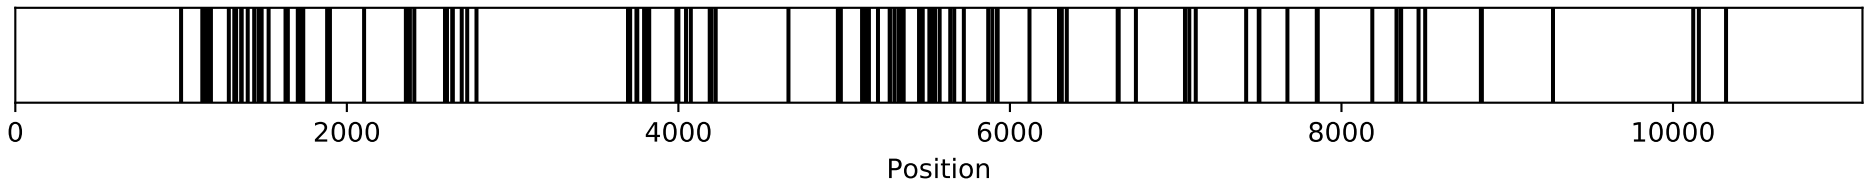

CR2 vs MA1  
Number of differences: 94

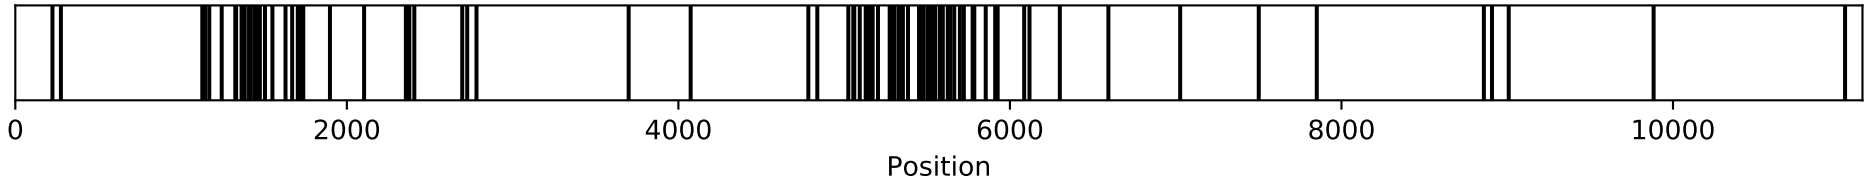

CR2 vs MA2  
Number of differences: 115

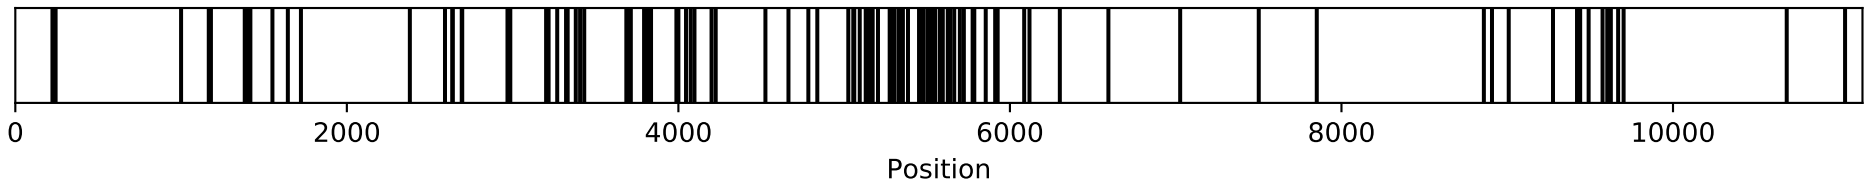

MA1 vs MA2  
Number of differences: 80

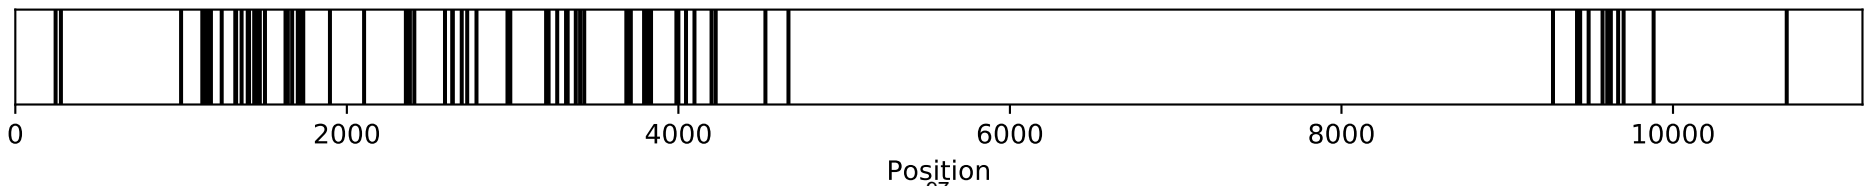

CR1 vs CR2  
Number of differences: 360

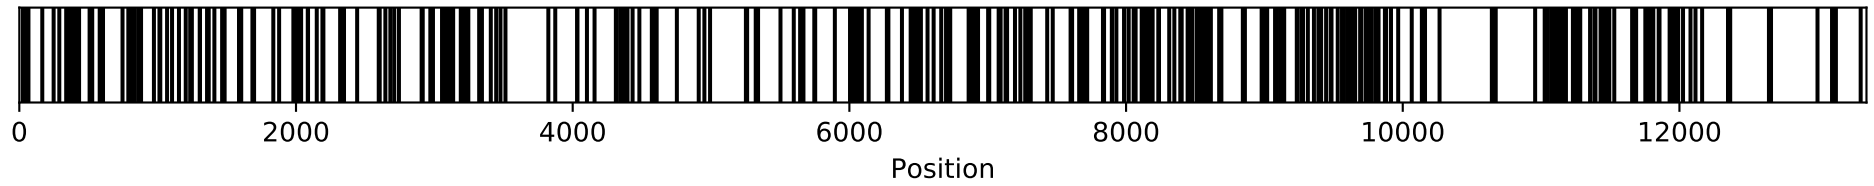

CR1 vs MA1  
Number of differences: 224

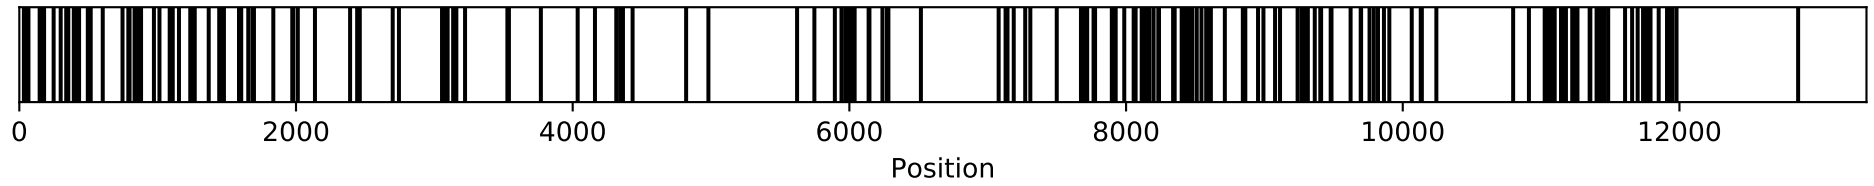

CR1 vs MA2  
Number of differences: 294

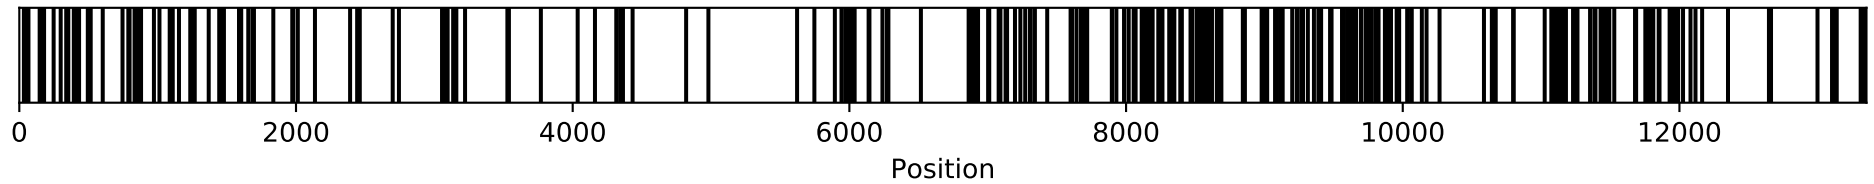

CR2 vs MA1  
Number of differences: 326

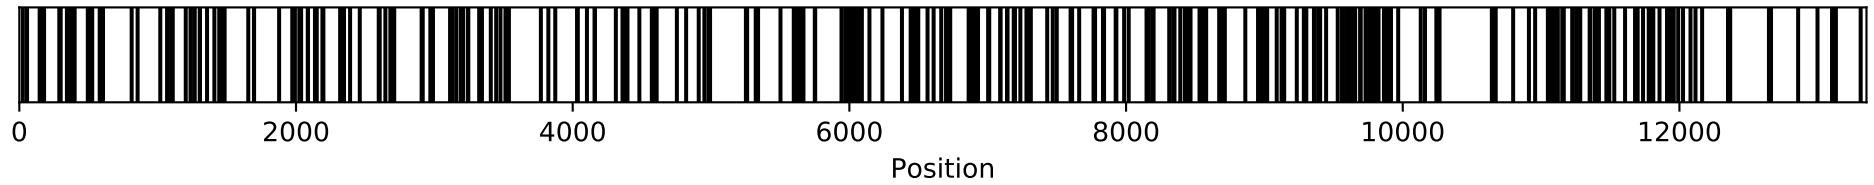

CR2 vs MA2  
Number of differences: 207

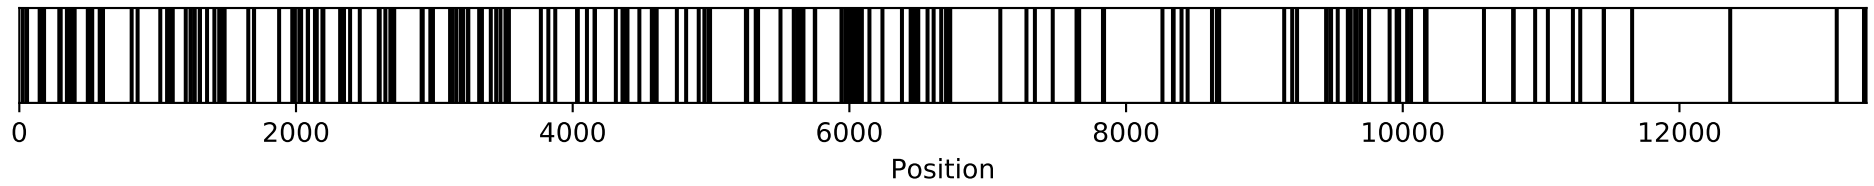

MA1 vs MA2  
Number of differences: 180

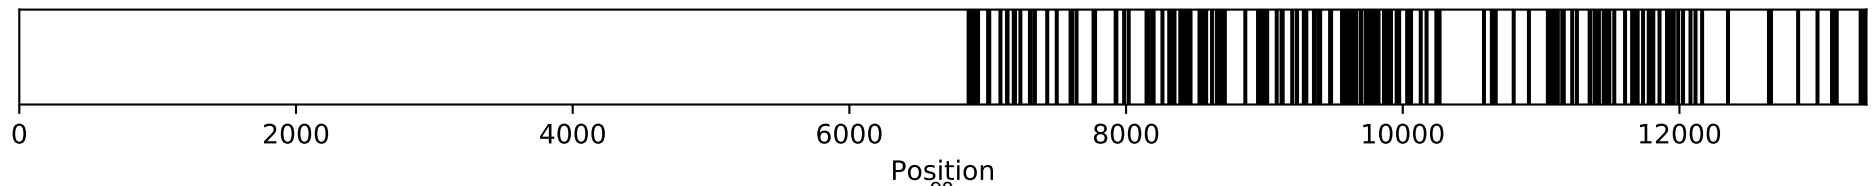

CR1 vs CR2  
Number of differences: 199

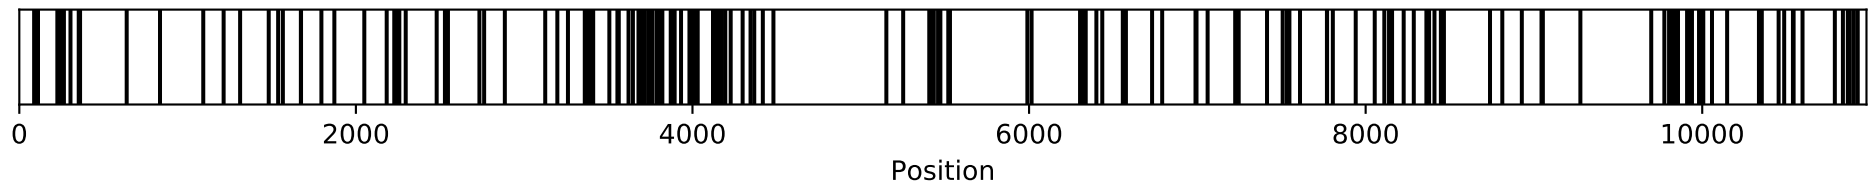

CR1 vs MA1  
Number of differences: 217

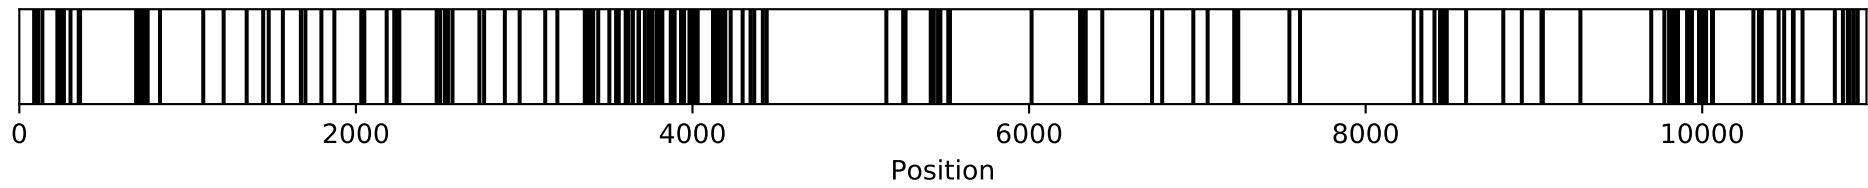

CR1 vs MA2  
Number of differences: 102

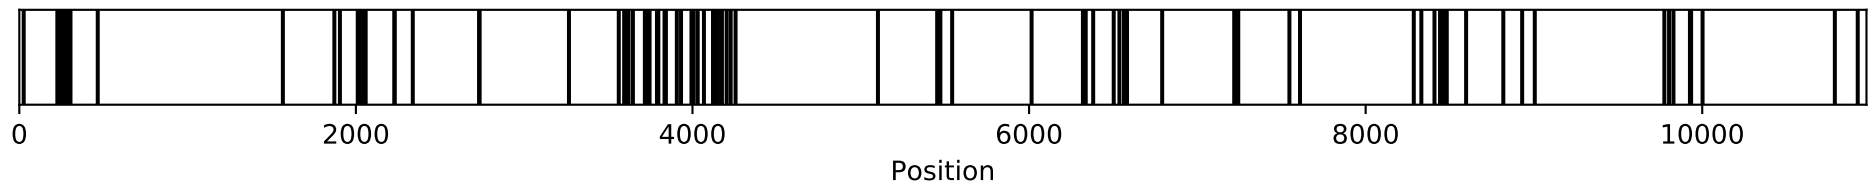

CR2 vs MA1  
Number of differences: 103

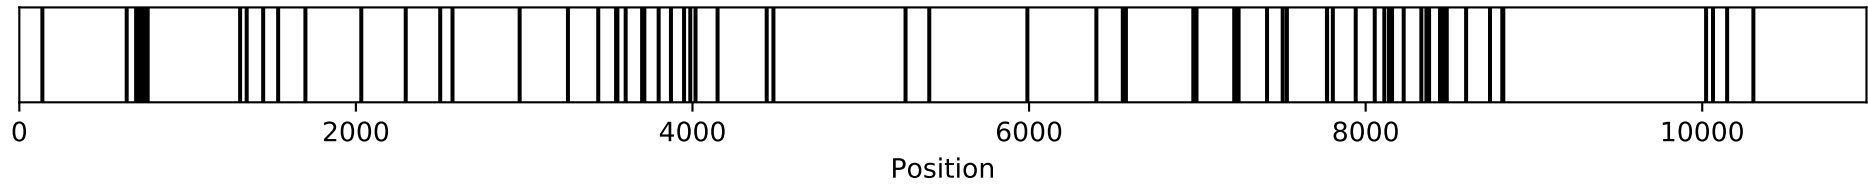

CR2 vs MA2  
Number of differences: 190

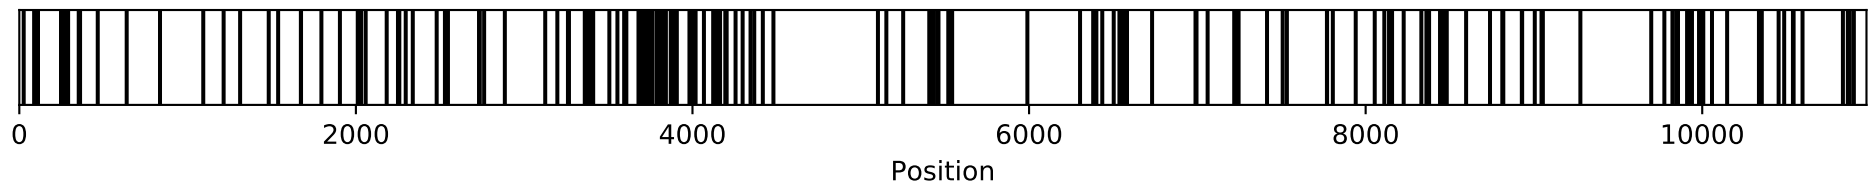

MA1 vs MA2  
Number of differences: 196

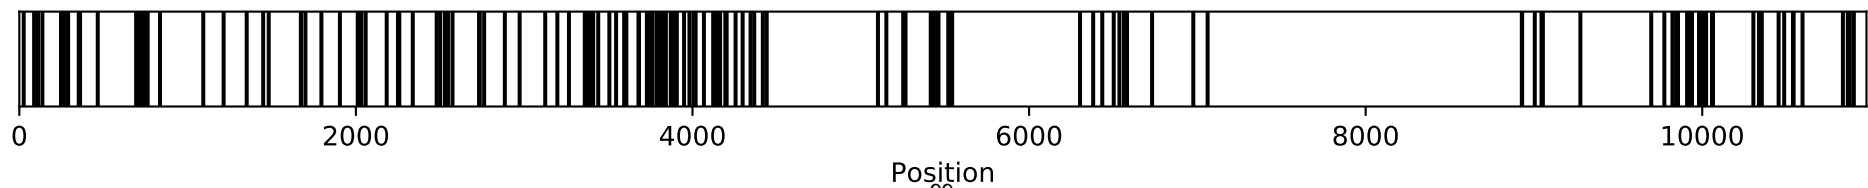

CR1 vs CR2  
Number of differences: 289

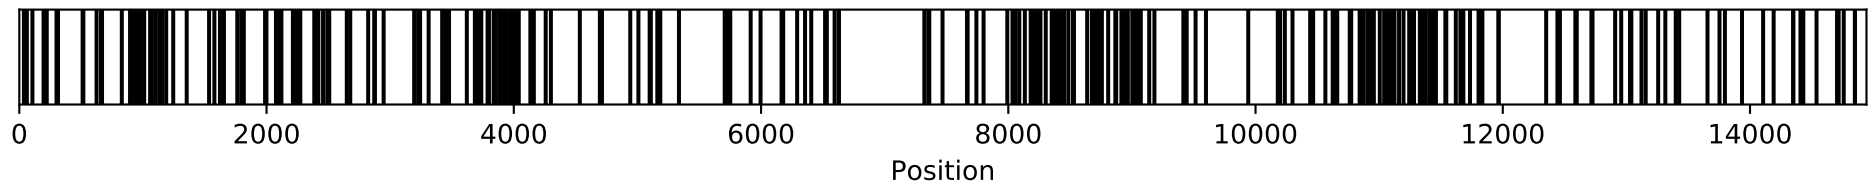

CR1 vs MA1  
Number of differences: 72

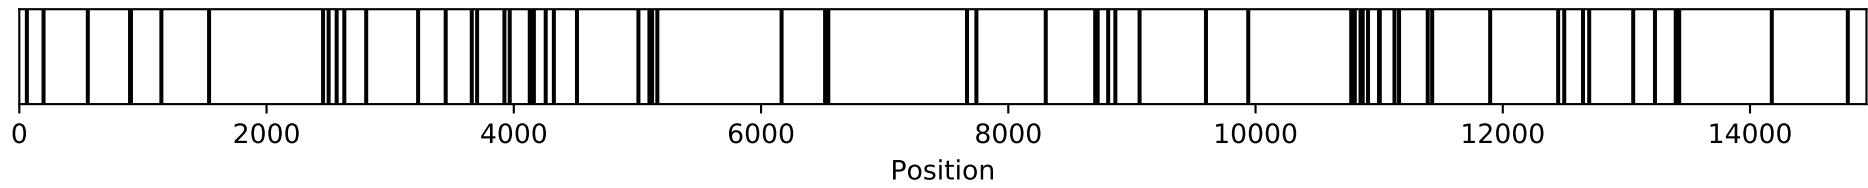

CR1 vs MA2  
Number of differences: 279

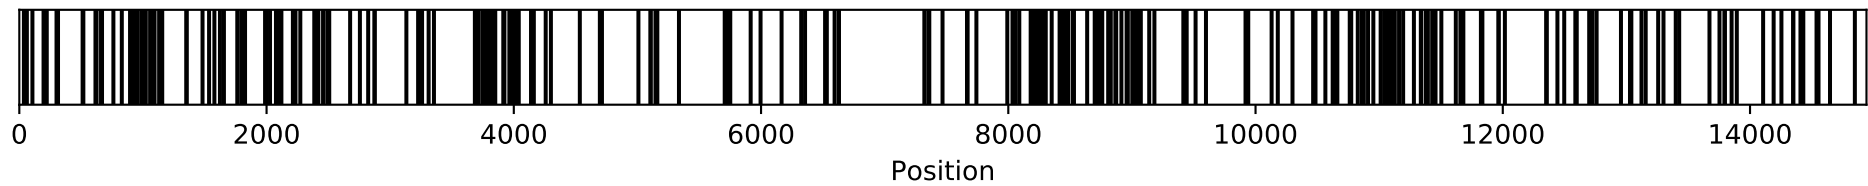

CR2 vs MA1  
Number of differences: 282

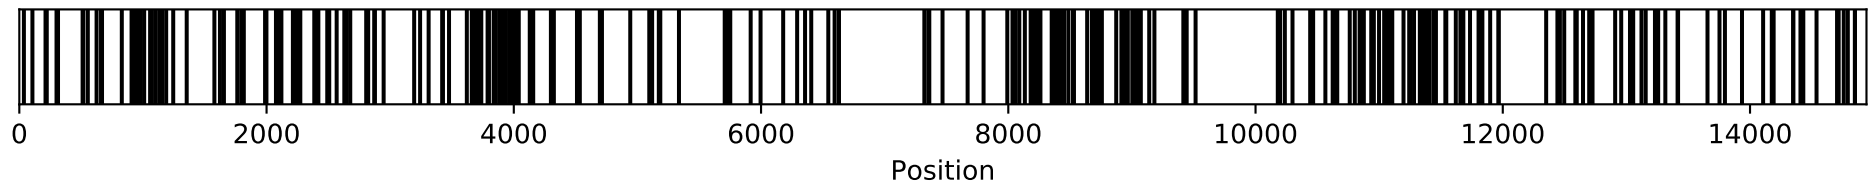

CR2 vs MA2  
Number of differences: 162

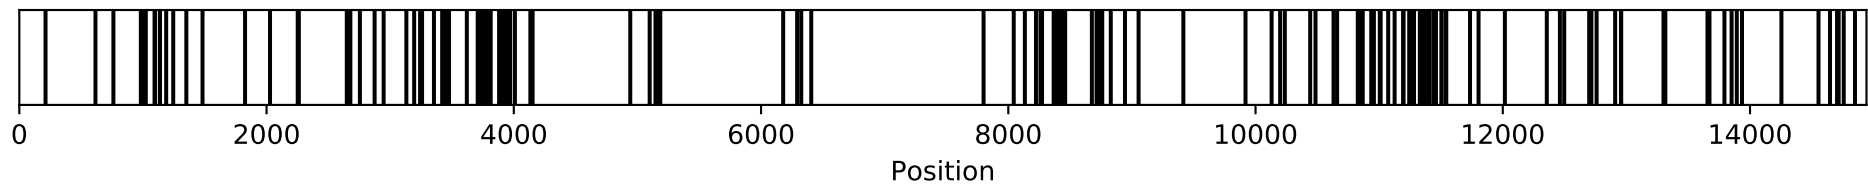

MA1 vs MA2  
Number of differences: 270

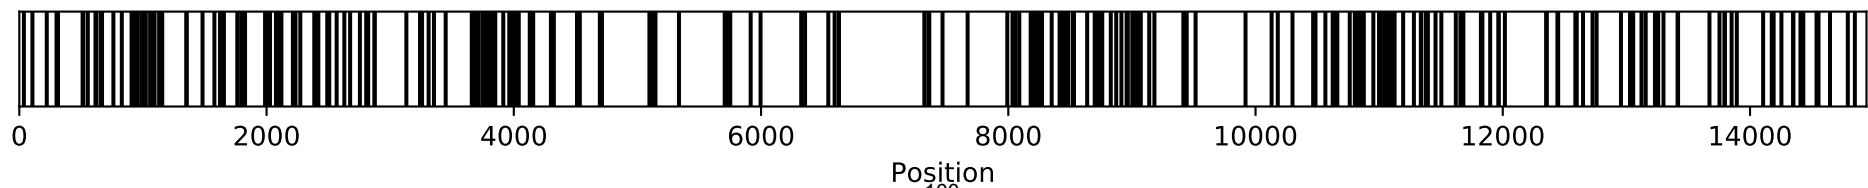

CR1 vs CR2  
Number of differences: 308

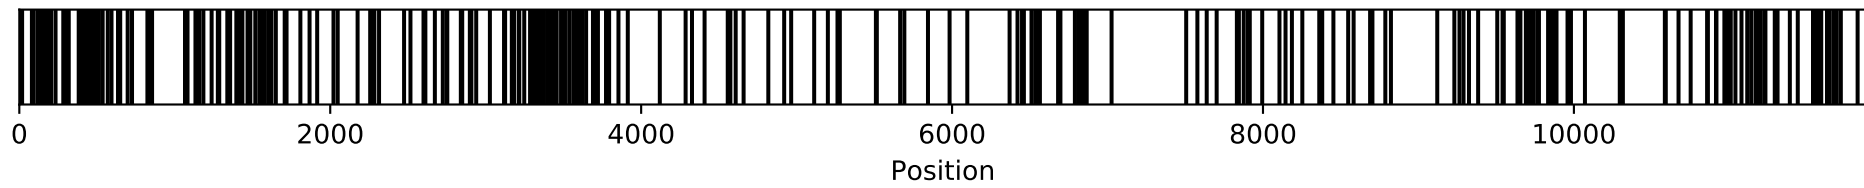

CR1 vs MA1  
Number of differences: 155

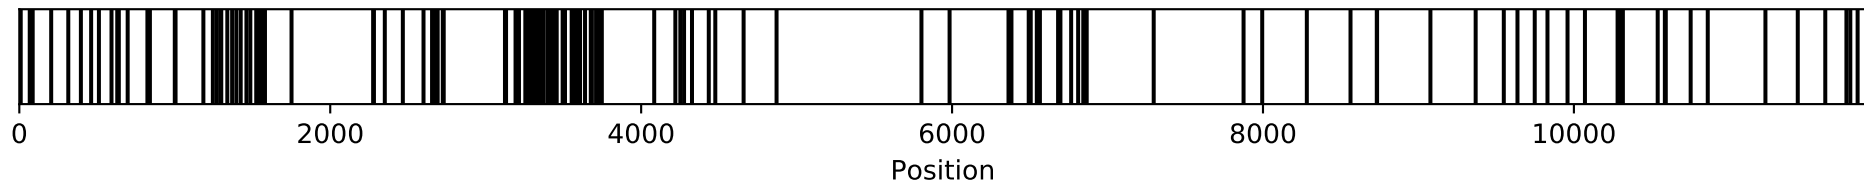

CR1 vs MA2  
Number of differences: 291

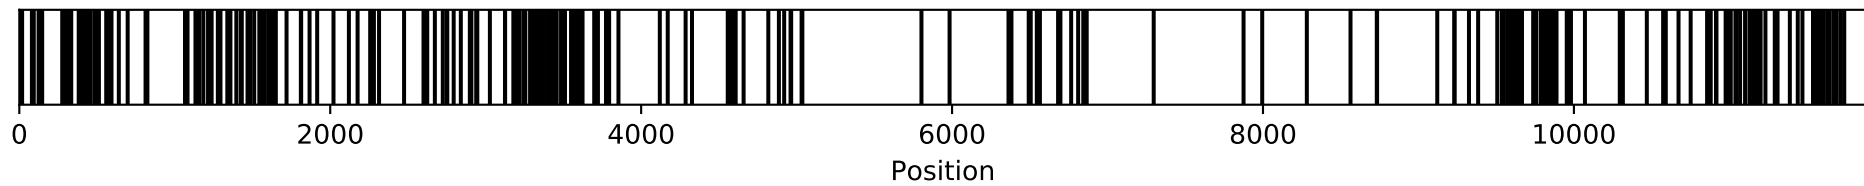

CR2 vs MA1  
Number of differences: 304

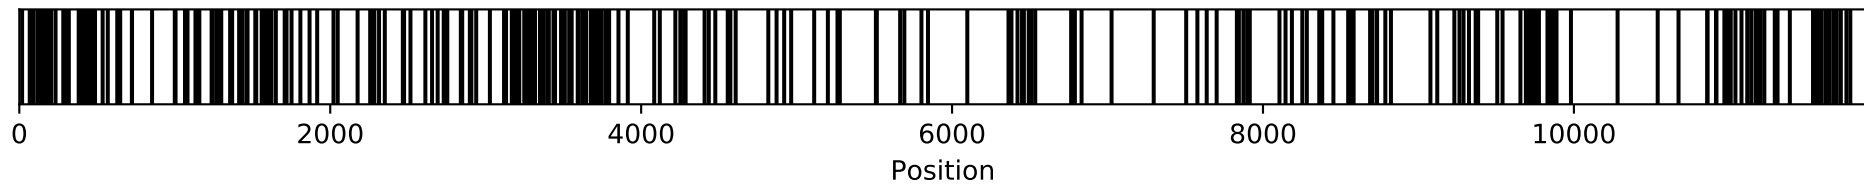

CR2 vs MA2  
Number of differences: 205

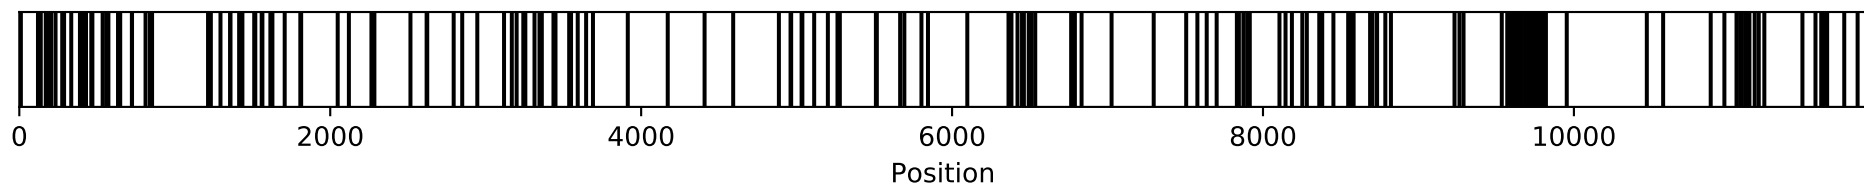

MA1 vs MA2  
Number of differences: 268

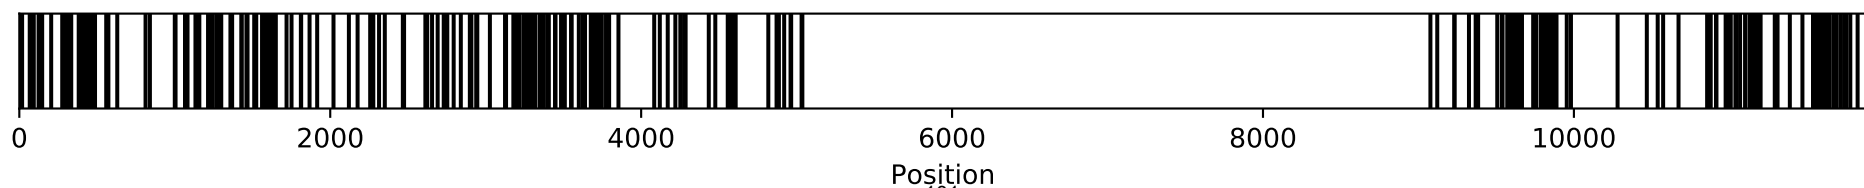

CR1 vs CR2  
Number of differences: 179

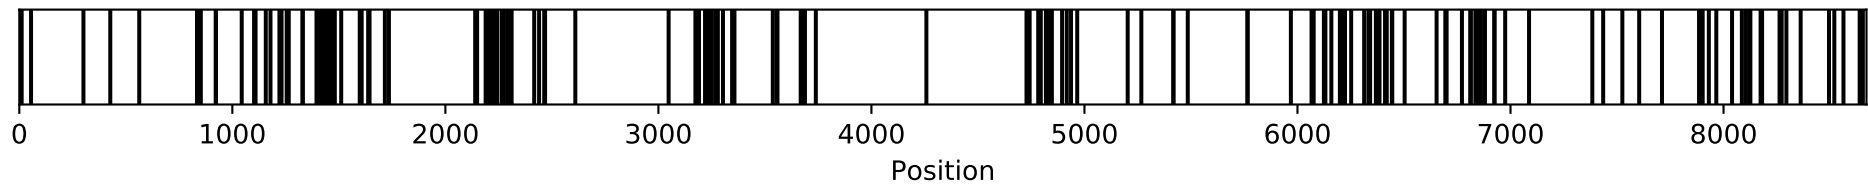

CR1 vs MA1  
Number of differences: 113

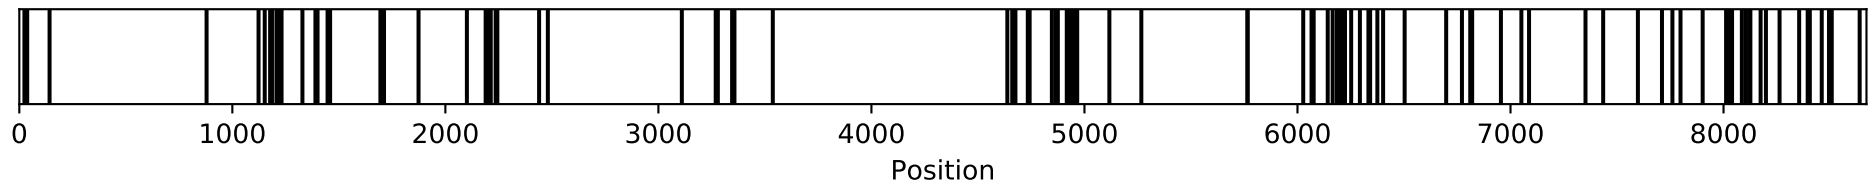

CR1 vs MA2  
Number of differences: 120

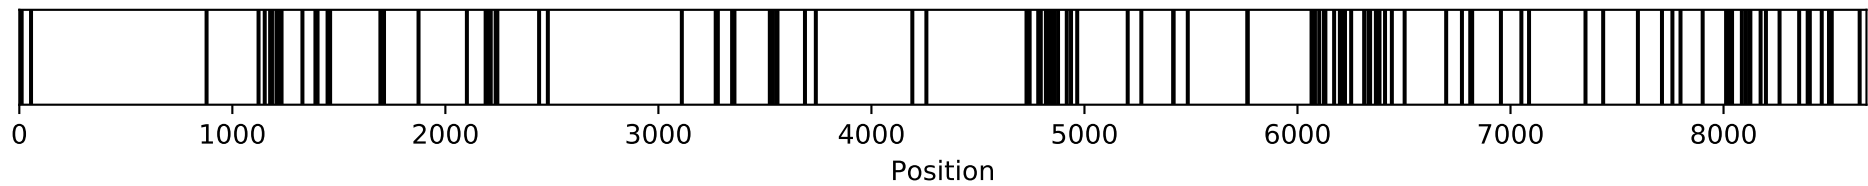

CR2 vs MA1  
Number of differences: 190

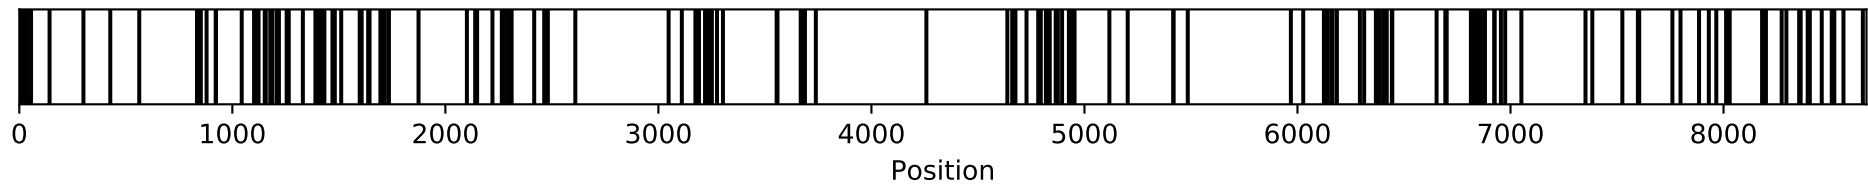

CR2 vs MA2  
Number of differences: 144

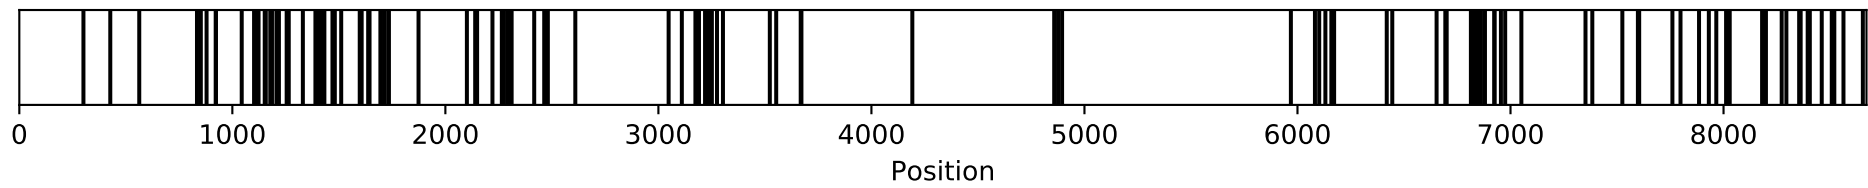

MA1 vs MA2  
Number of differences: 63

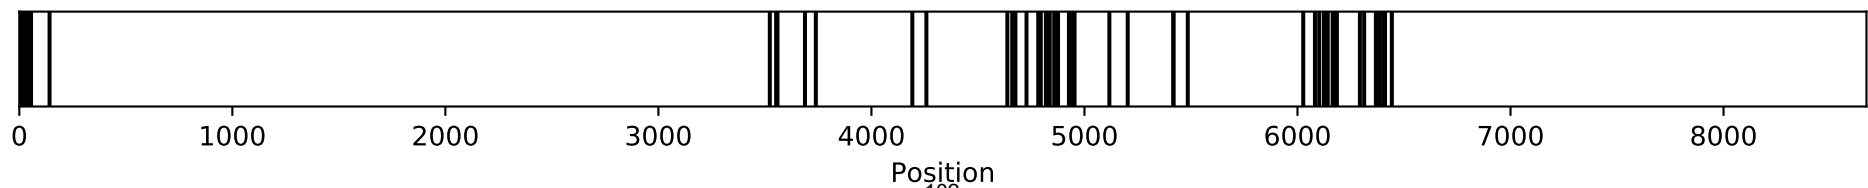

CR1 vs CR2  
Number of differences: 236

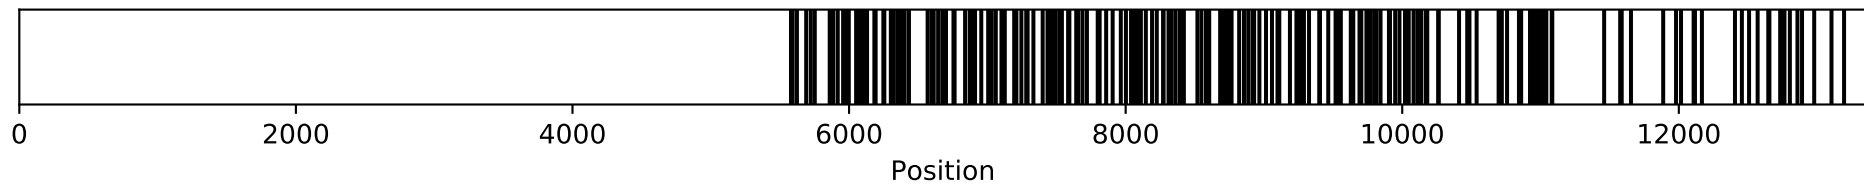

CR1 vs MA1  
Number of differences: 271

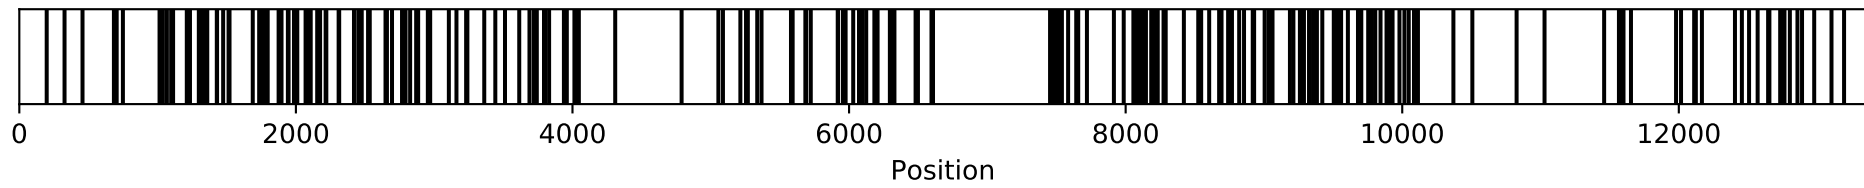

CR1 vs MA2  
Number of differences: 393

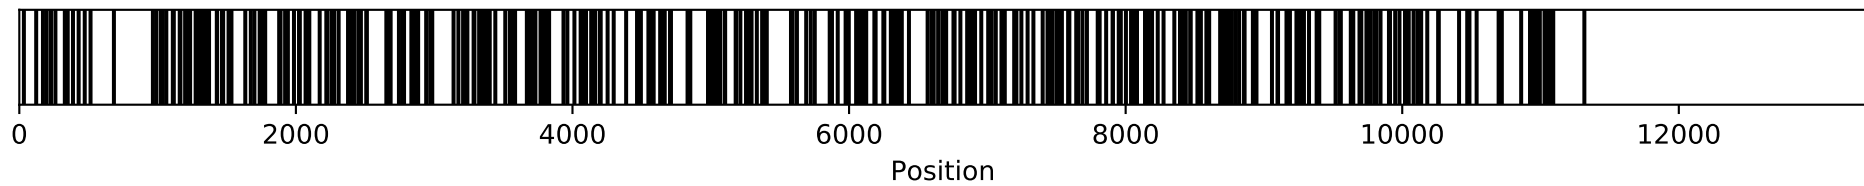

CR2 vs MA1  
Number of differences: 340

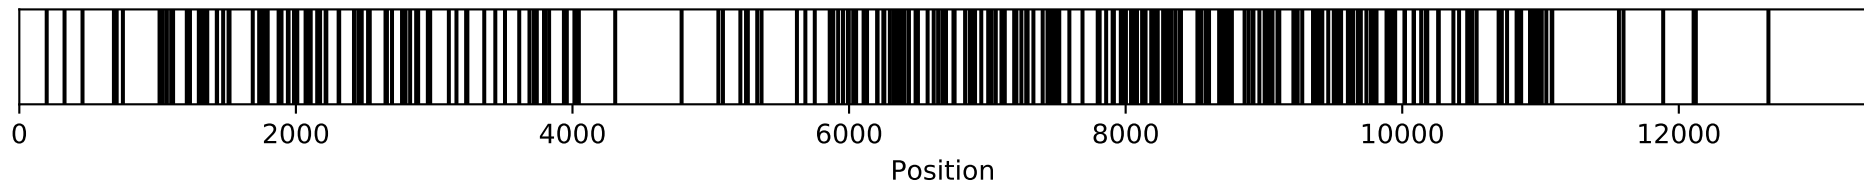

CR2 vs MA2  
Number of differences: 293

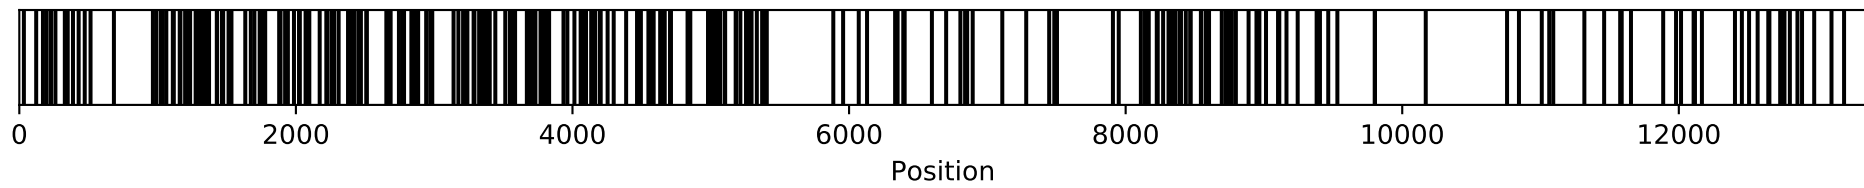

MA1 vs MA2  
Number of differences: 435

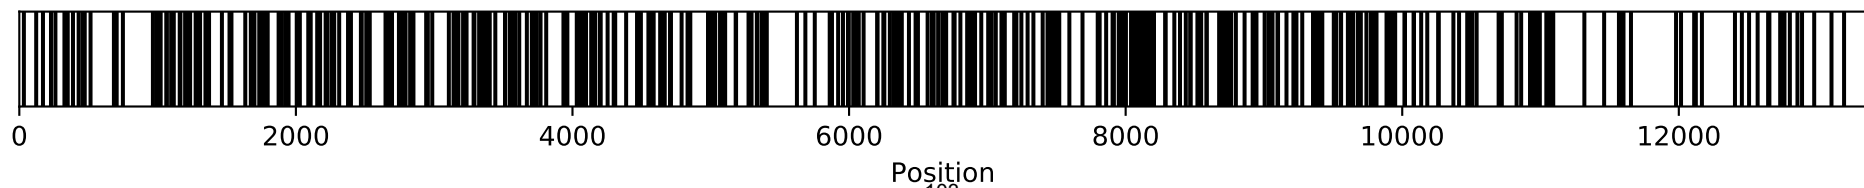

CR1 vs CR2  
Number of differences: 118

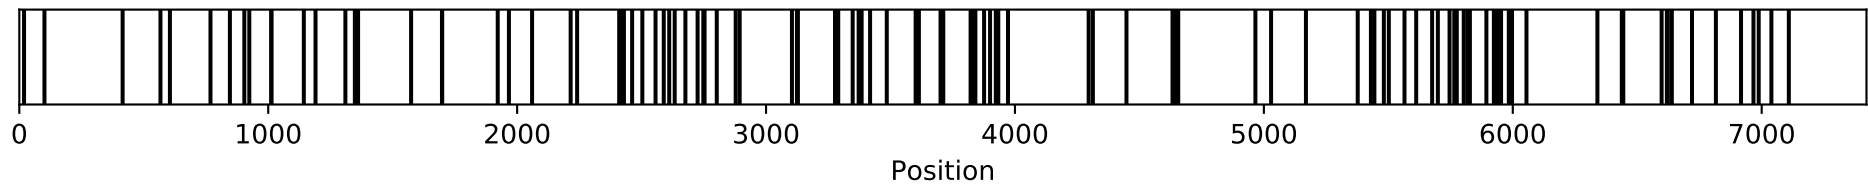

CR1 vs MA1  
Number of differences: 96

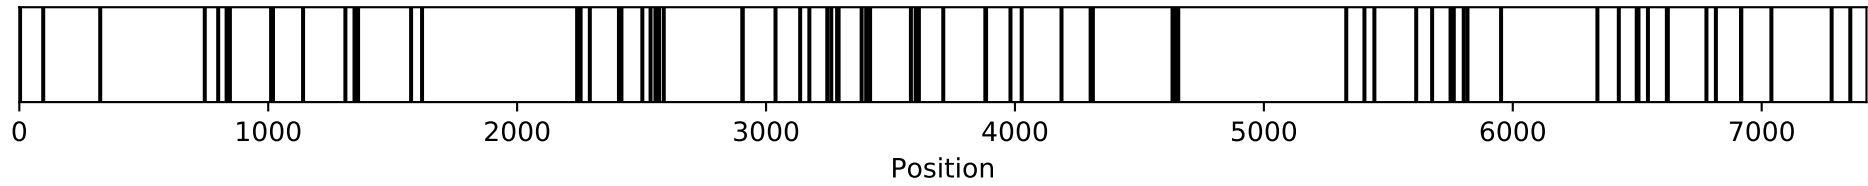

CR1 vs MA2  
Number of differences: 122

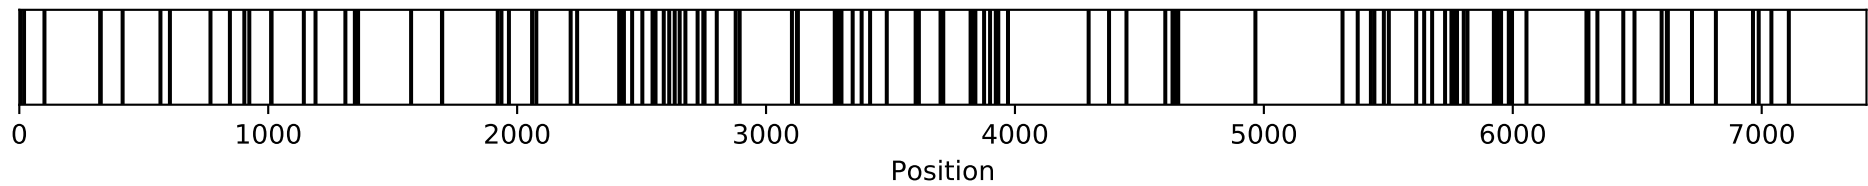

CR2 vs MA1  
Number of differences: 137

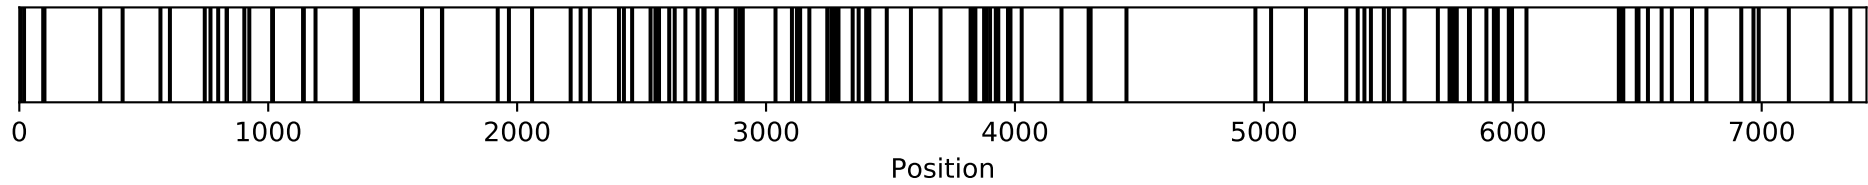

CR2 vs MA2  
Number of differences: 44

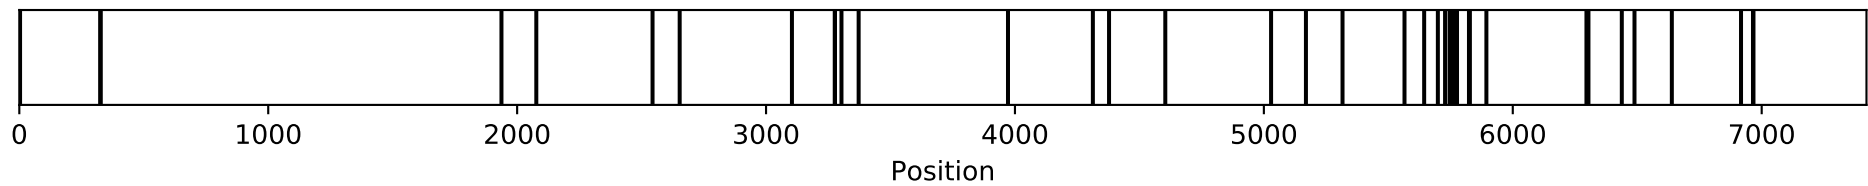

MA1 vs MA2  
Number of differences: 140

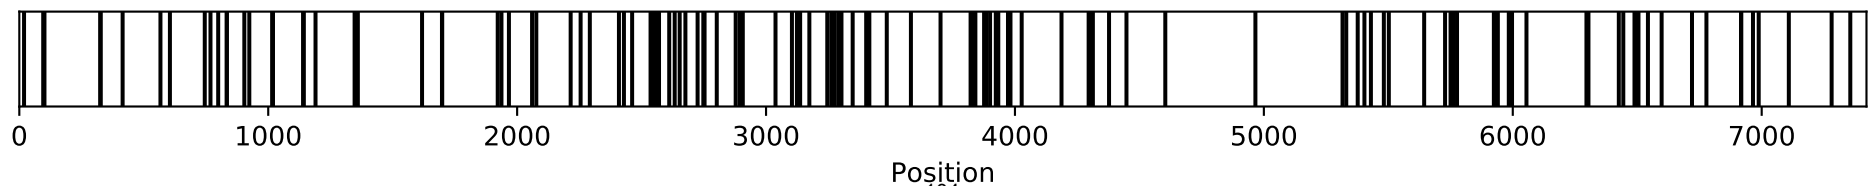



CR1 vs CR2  
Number of differences: 211

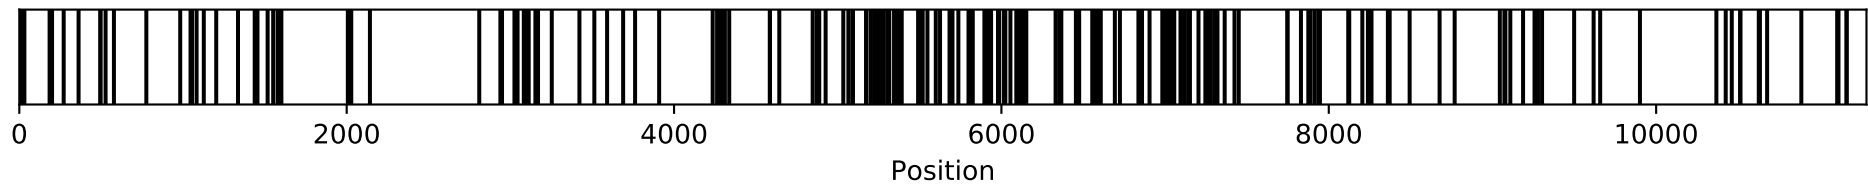

CR1 vs MA1  
Number of differences: 217

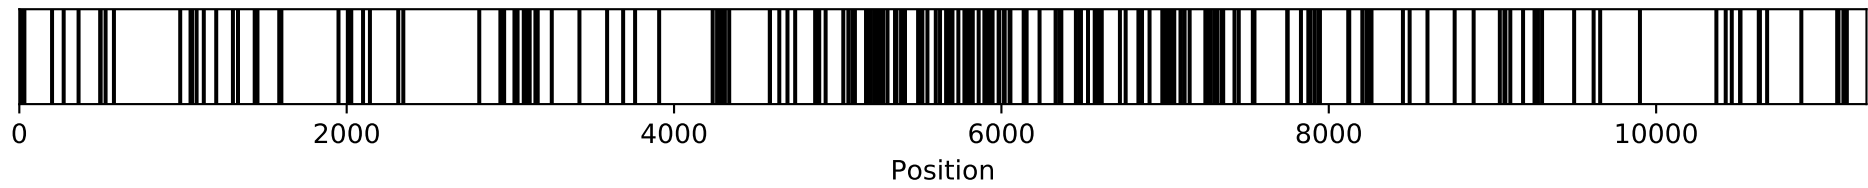

CR1 vs MA2  
Number of differences: 124

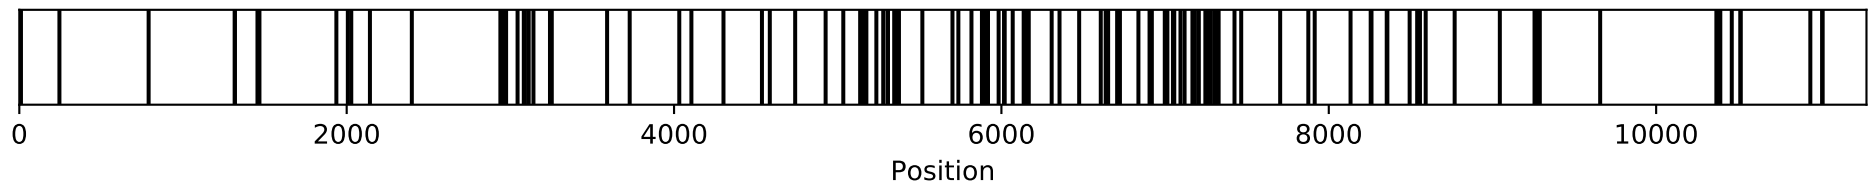

CR2 vs MA1  
Number of differences: 76

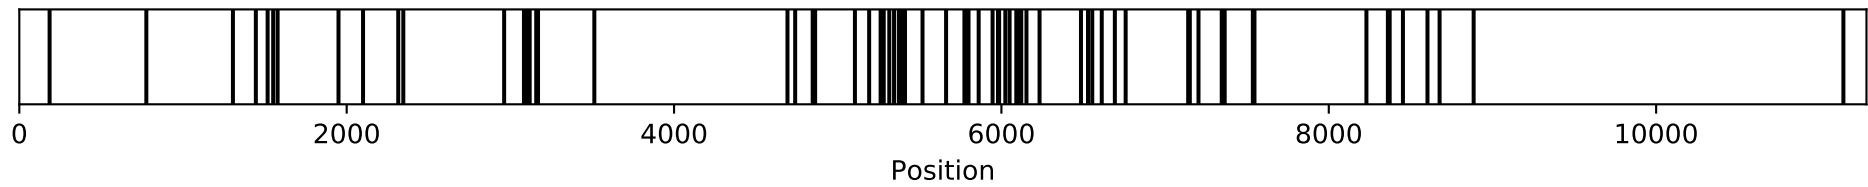

CR2 vs MA2  
Number of differences: 202

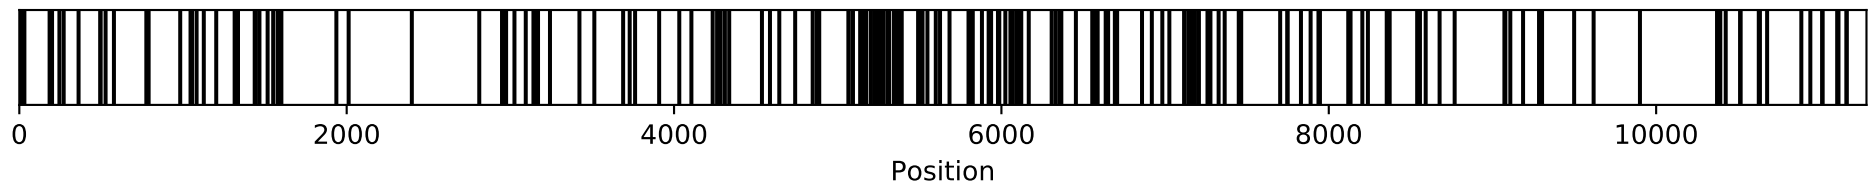

MA1 vs MA2  
Number of differences: 210

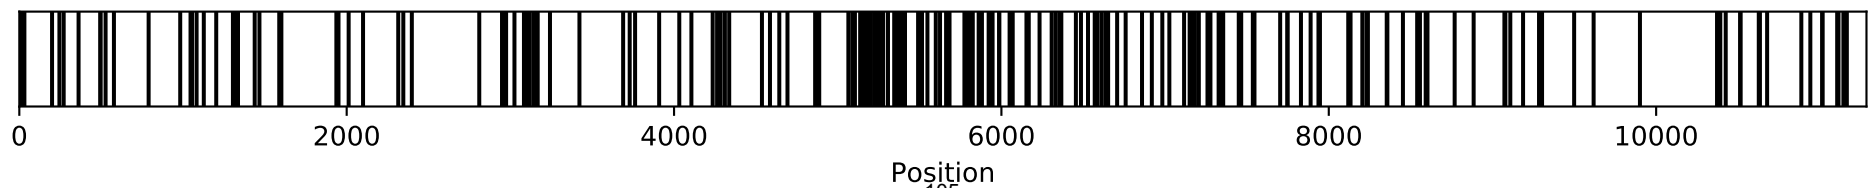

CR1 vs CR2  
Number of differences: 289

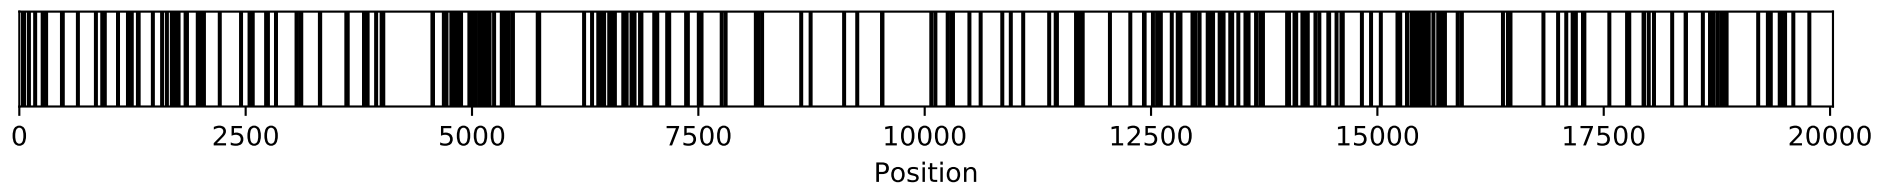

CR1 vs MA1  
Number of differences: 43

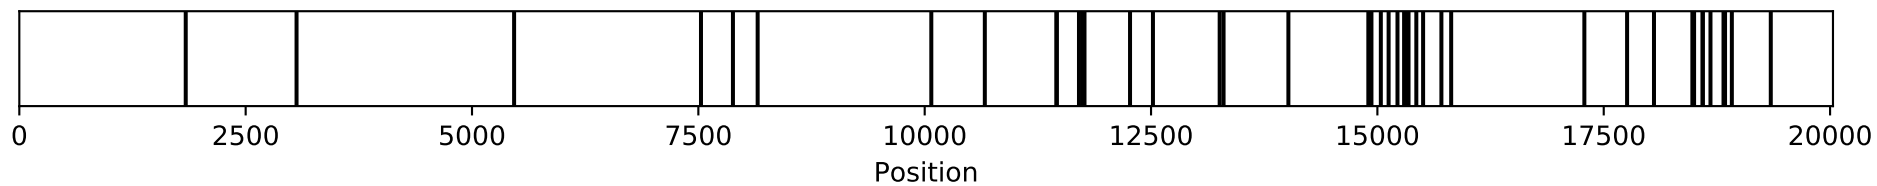

CR1 vs MA2  
Number of differences: 294

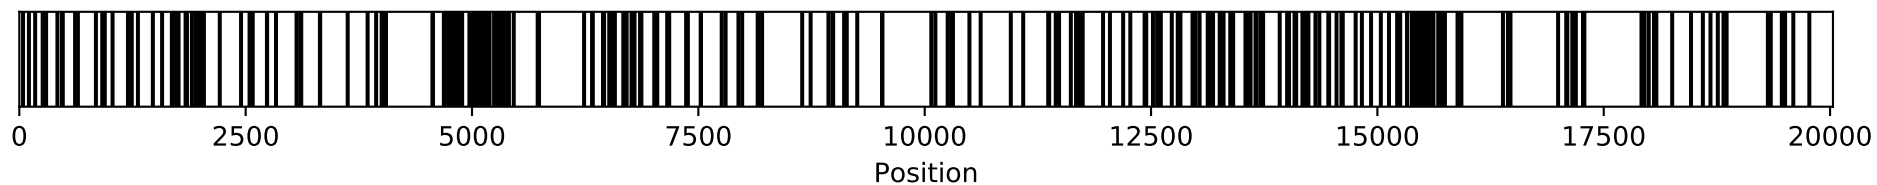

CR2 vs MA1  
Number of differences: 276

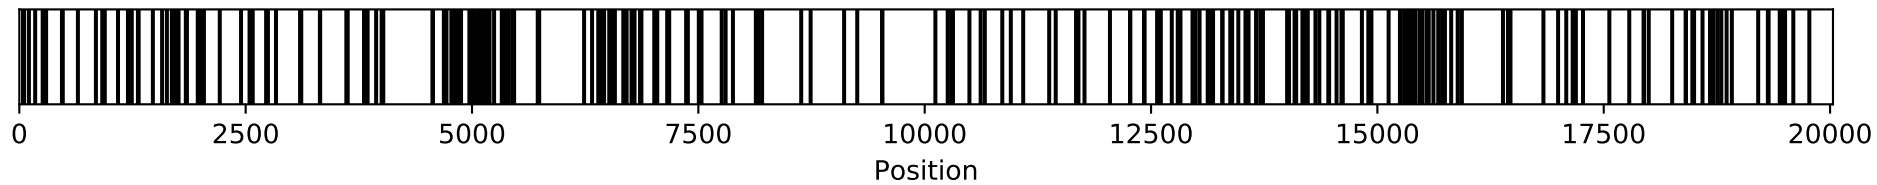

CR2 vs MA2  
Number of differences: 128

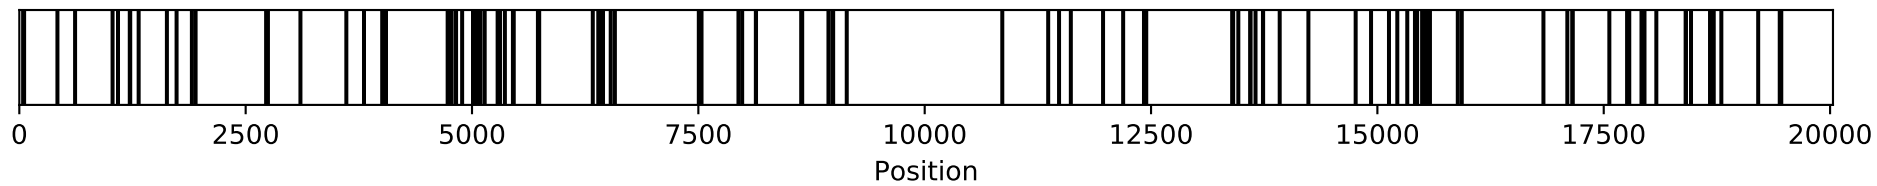

MA1 vs MA2  
Number of differences: 284

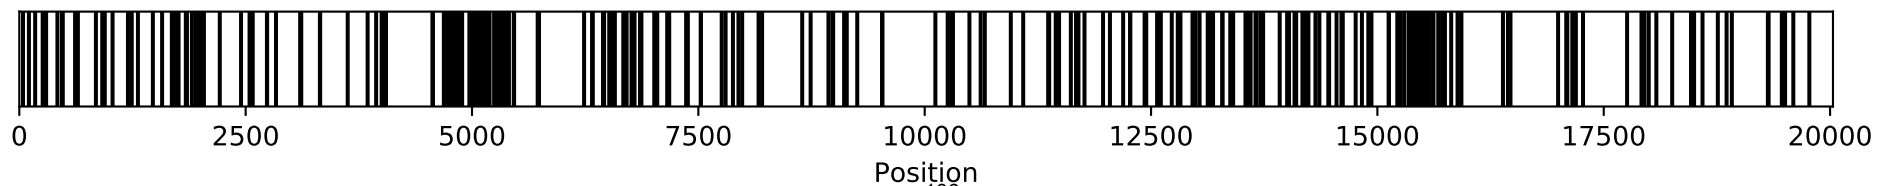

CR1 vs CR2  
Number of differences: 184

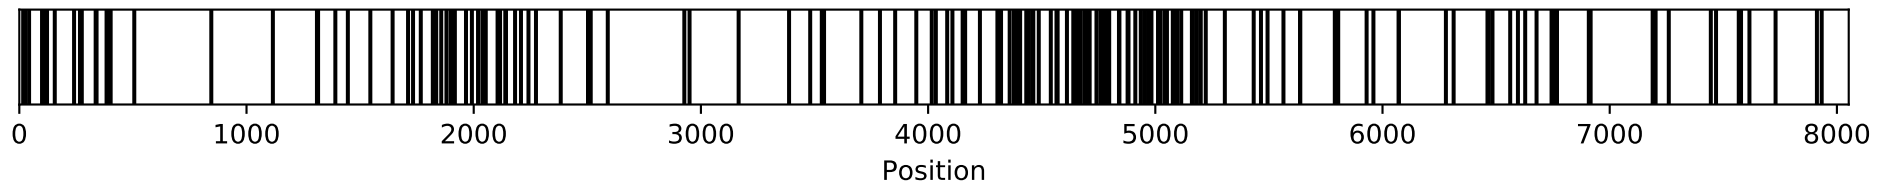

CR1 vs MA1  
Number of differences: 174

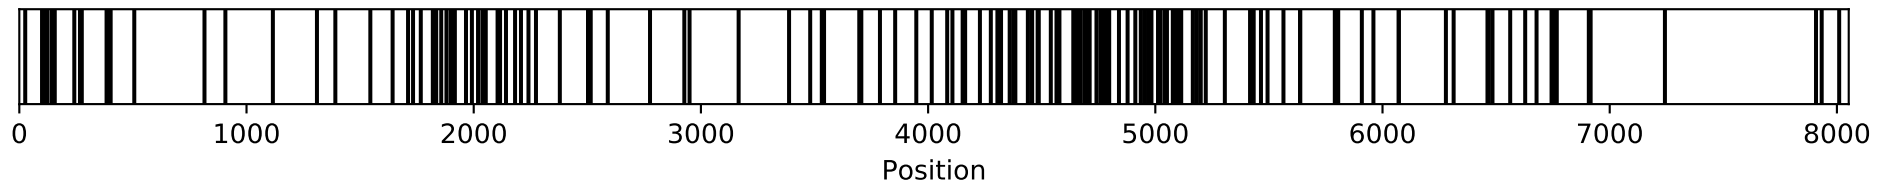

CR1 vs MA2  
Number of differences: 114

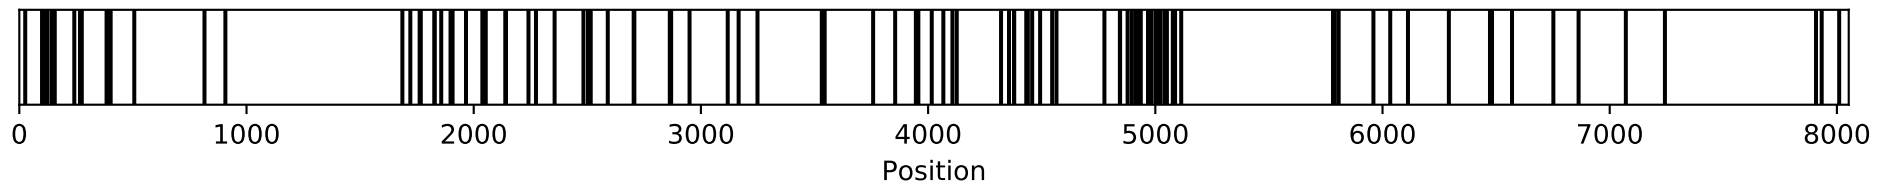

CR2 vs MA1  
Number of differences: 63

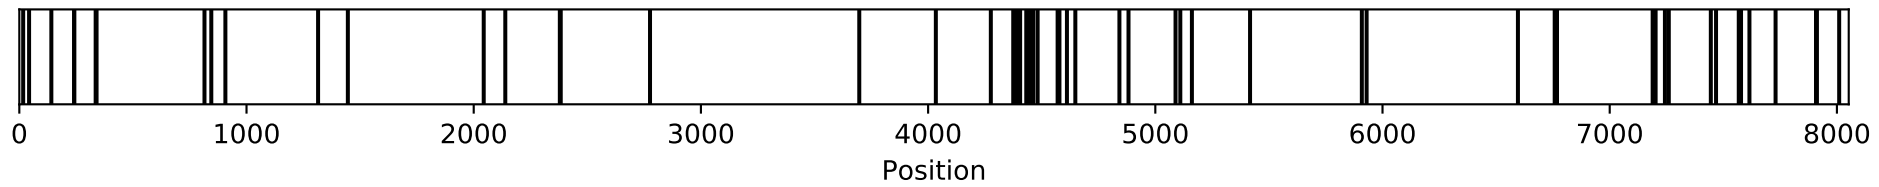

CR2 vs MA2  
Number of differences: 171

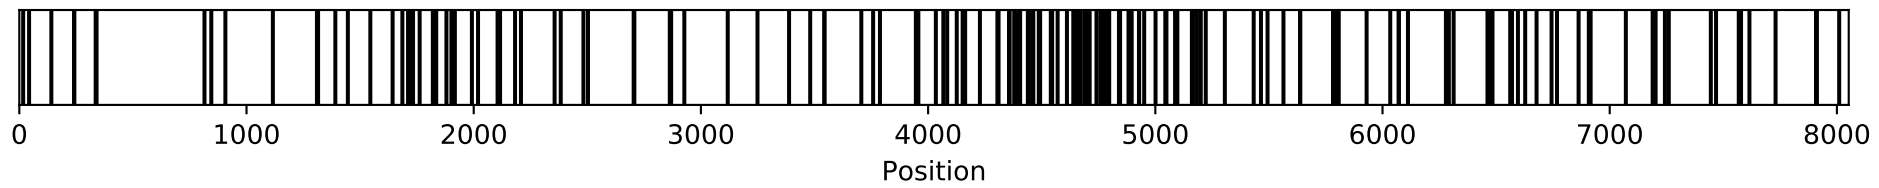

MA1 vs MA2  
Number of differences: 150

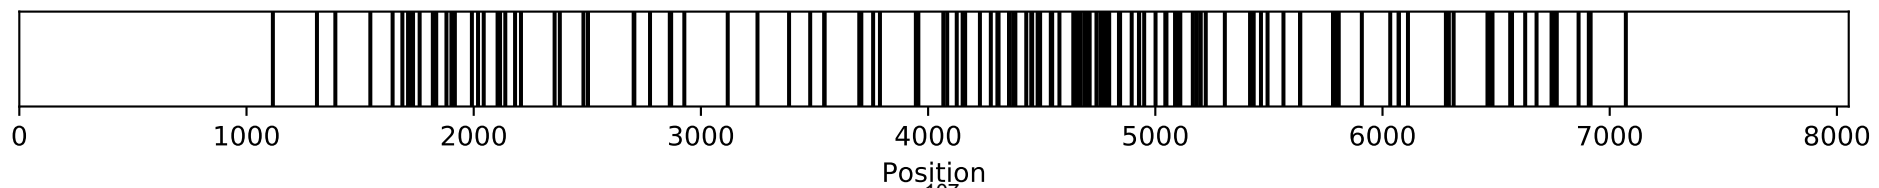

CR1 vs CR2  
Number of differences: 191

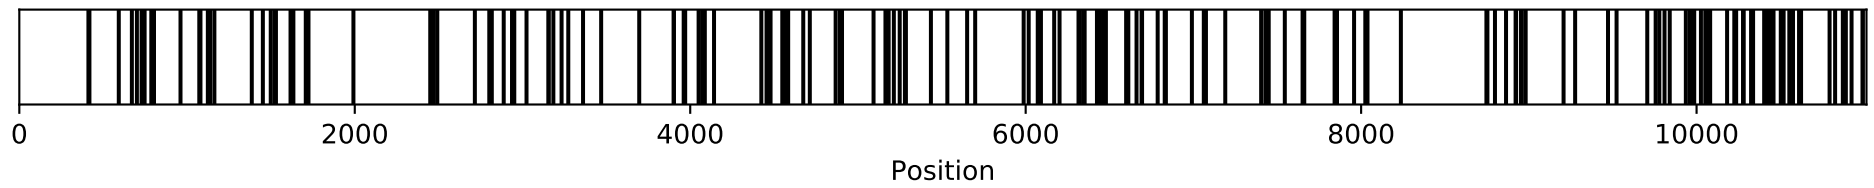

CR1 vs MA1  
Number of differences: 180

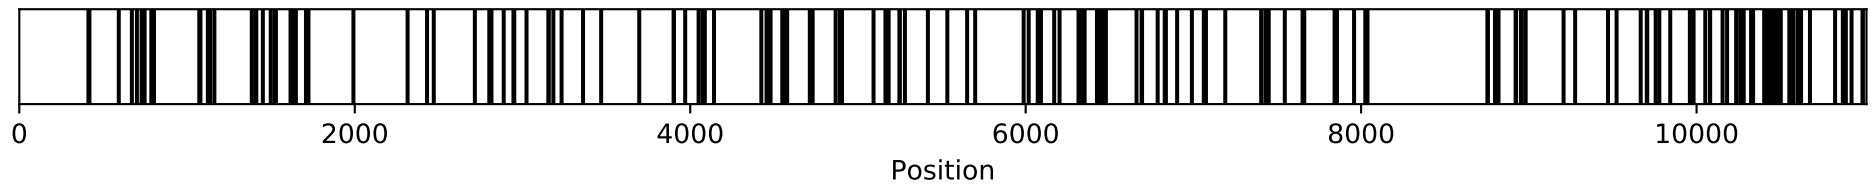

CR1 vs MA2  
Number of differences: 48

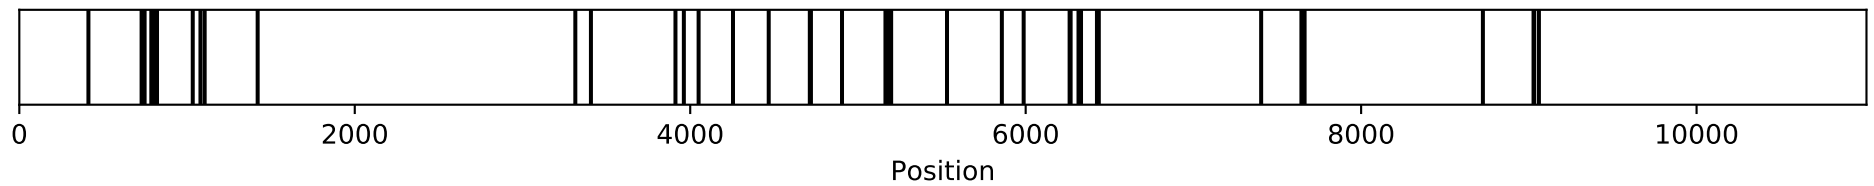

CR2 vs MA1  
Number of differences: 54

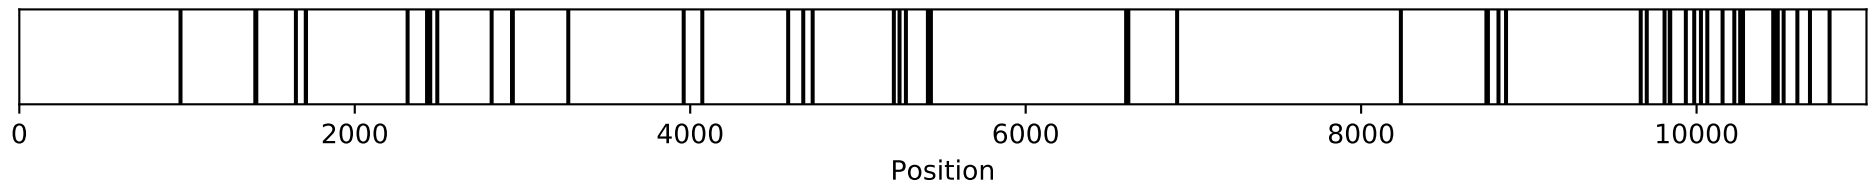

CR2 vs MA2  
Number of differences: 202

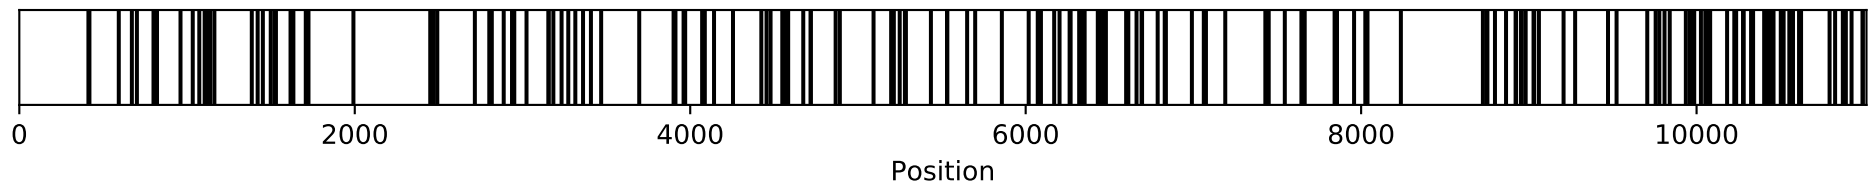

MA1 vs MA2  
Number of differences: 191

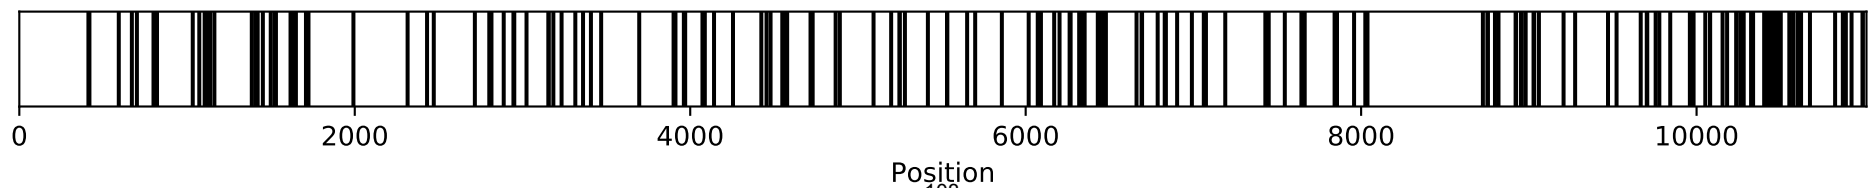

CR1 vs CR2  
Number of differences: 275

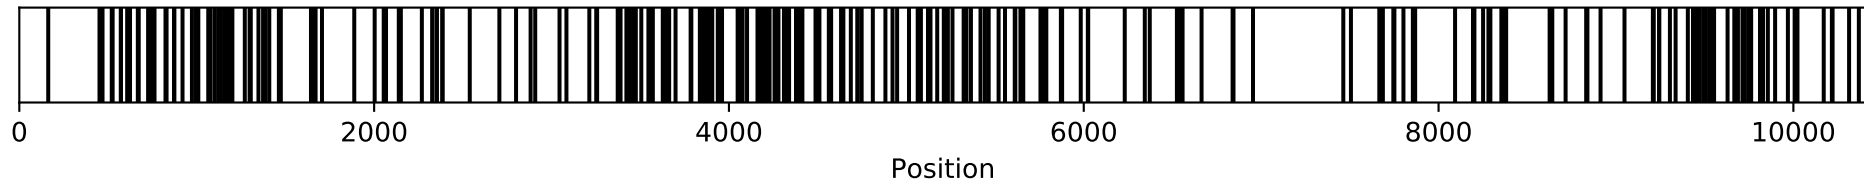

CR1 vs MA1  
Number of differences: 291

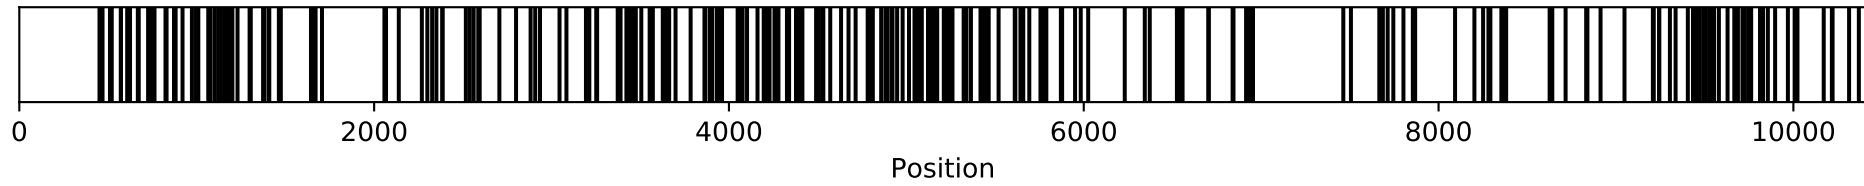

CR1 vs MA2  
Number of differences: 131

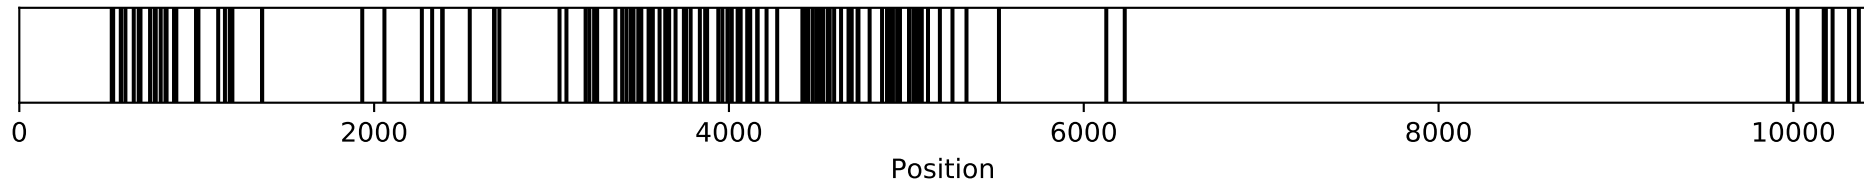

CR2 vs MA1  
Number of differences: 101

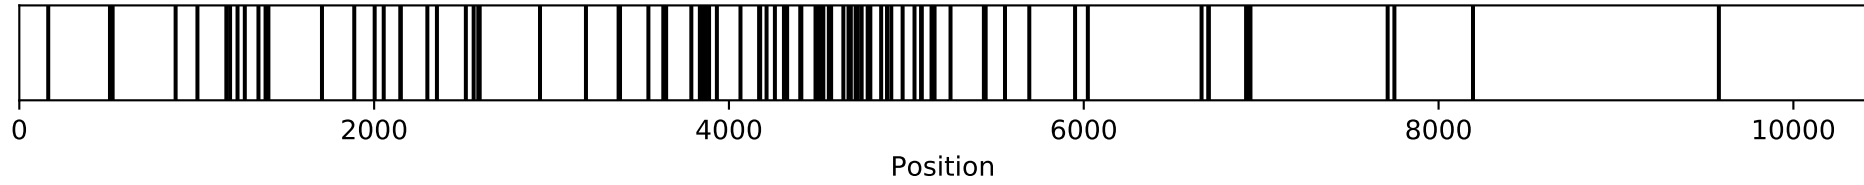

CR2 vs MA2  
Number of differences: 281

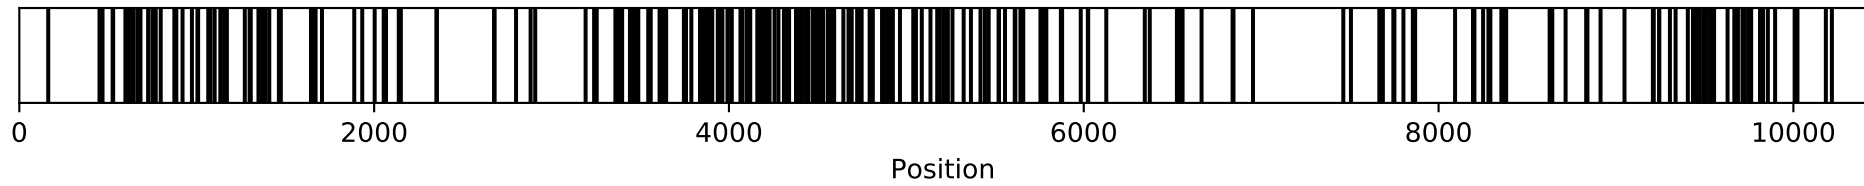

MA1 vs MA2  
Number of differences: 293

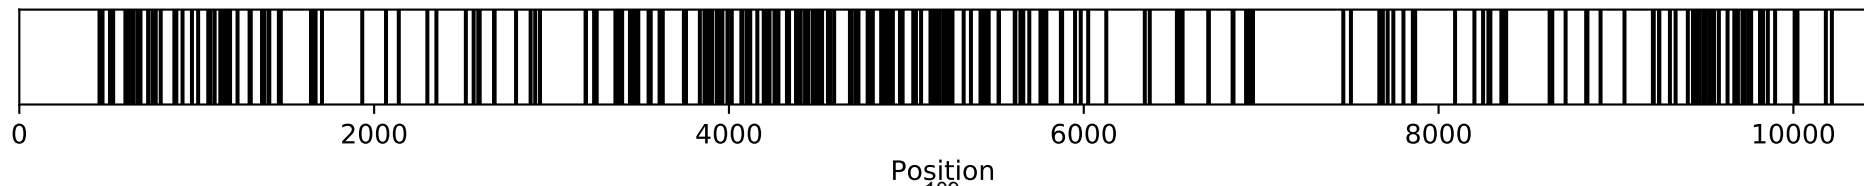

CR1 vs CR2  
Number of differences: 116

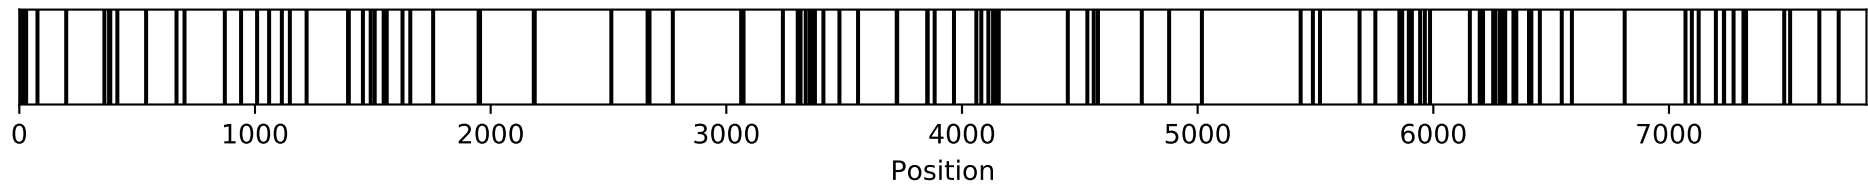

CR1 vs MA1  
Number of differences: 91

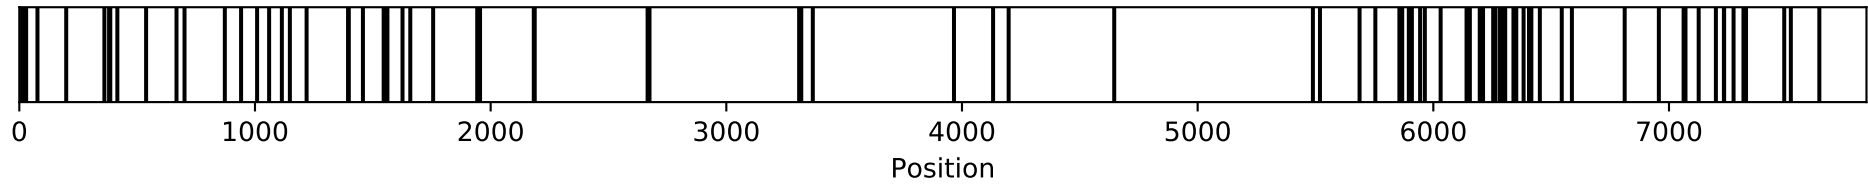

CR1 vs MA2  
Number of differences: 29

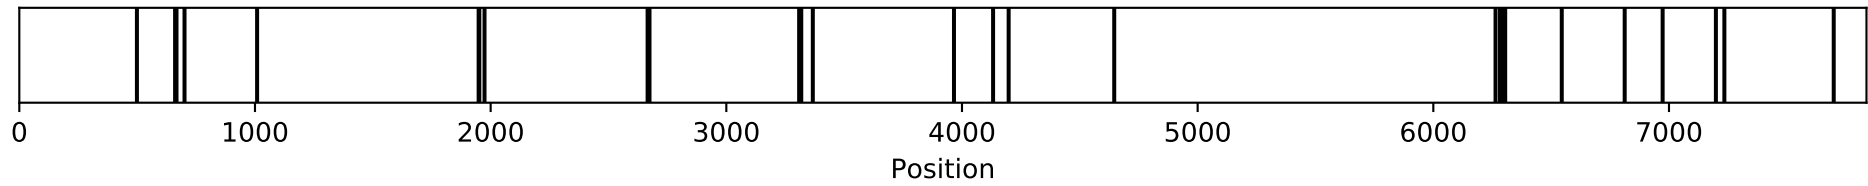

CR2 vs MA1  
Number of differences: 53

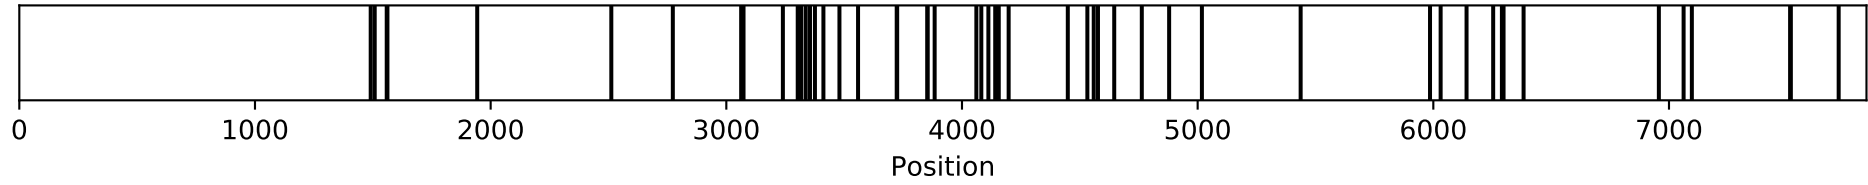

CR2 vs MA2  
Number of differences: 111

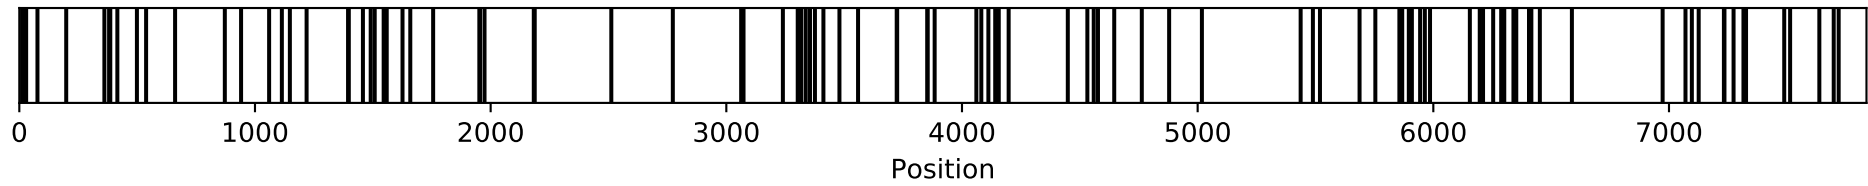

MA1 vs MA2  
Number of differences: 80

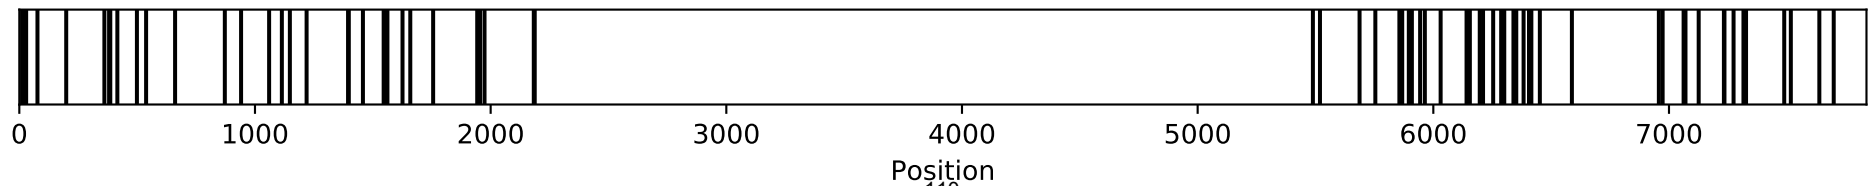

MA1 vs MA2  
Number of differences: 526

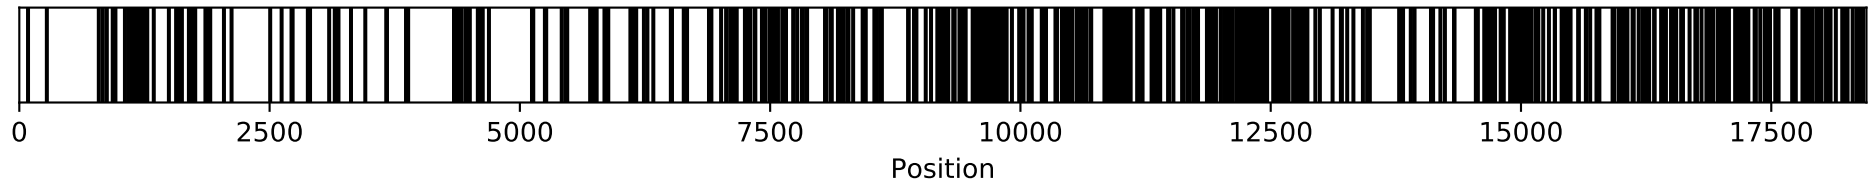

MA1 vs MM1  
Number of differences: 525

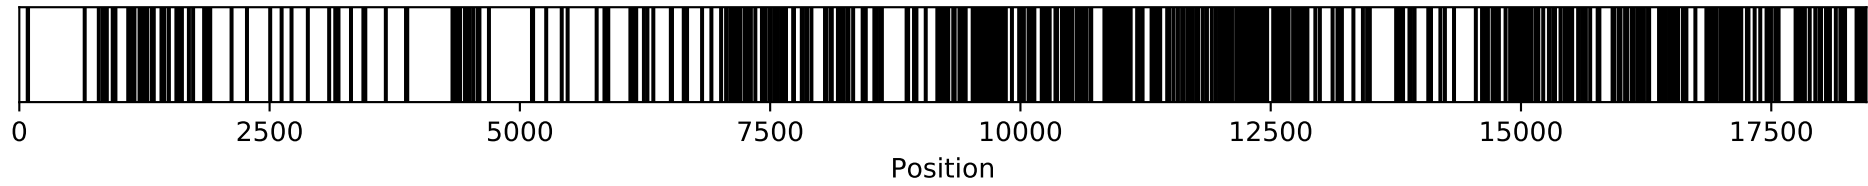

MA1 vs MM2  
Number of differences: 538

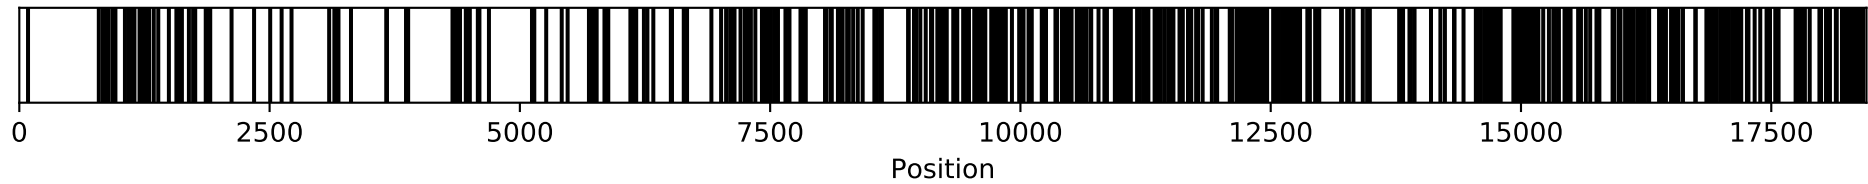

MA2 vs MM1  
Number of differences: 201

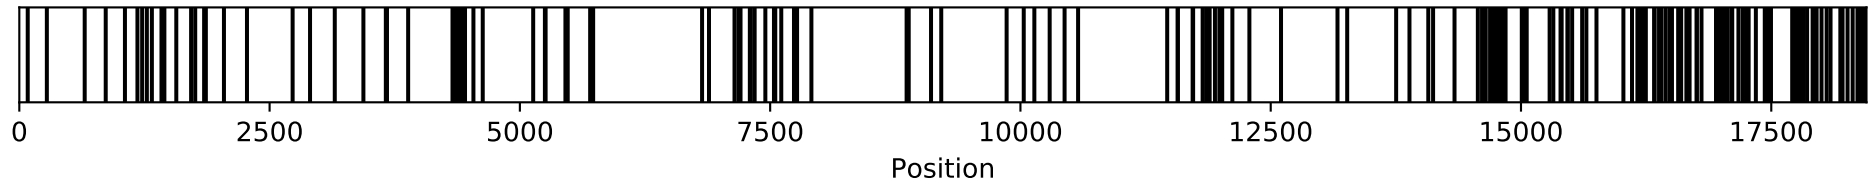

MA2 vs MM2  
Number of differences: 297

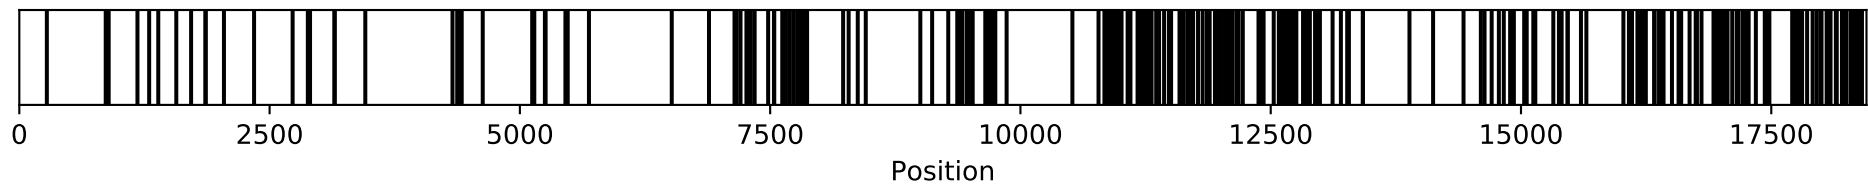

MM1 vs MM2  
Number of differences: 286

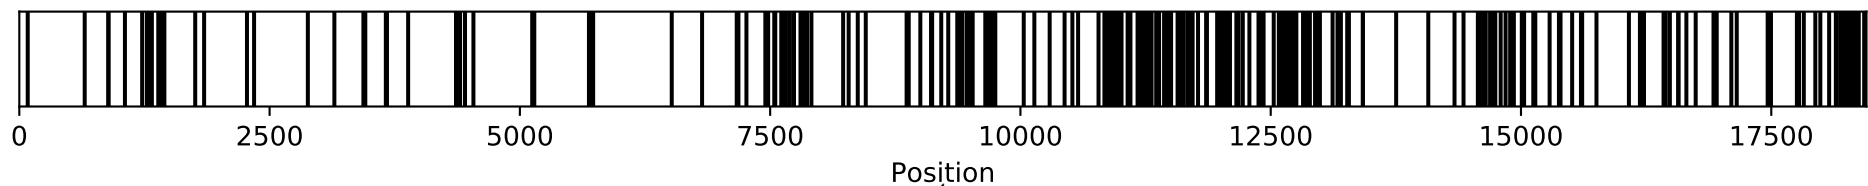

MA1 vs MA2  
Number of differences: 87

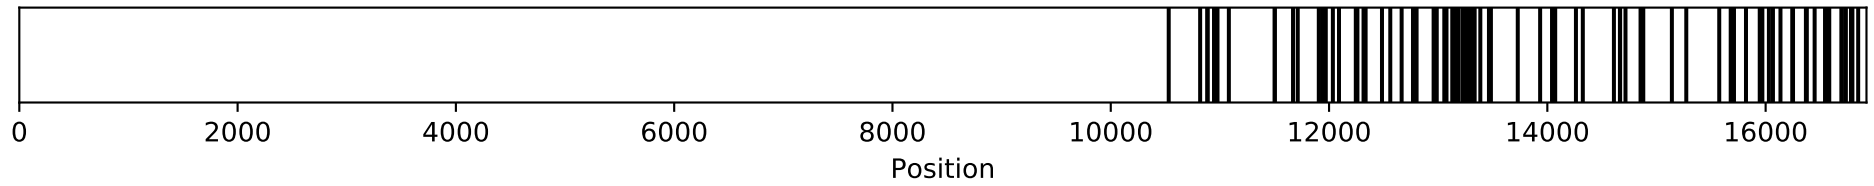

MA1 vs MM1  
Number of differences: 88

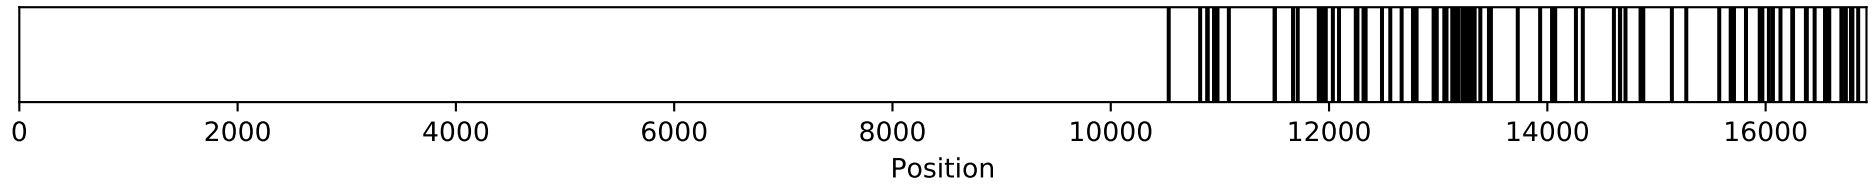

MA1 vs MM2  
Number of differences: 87

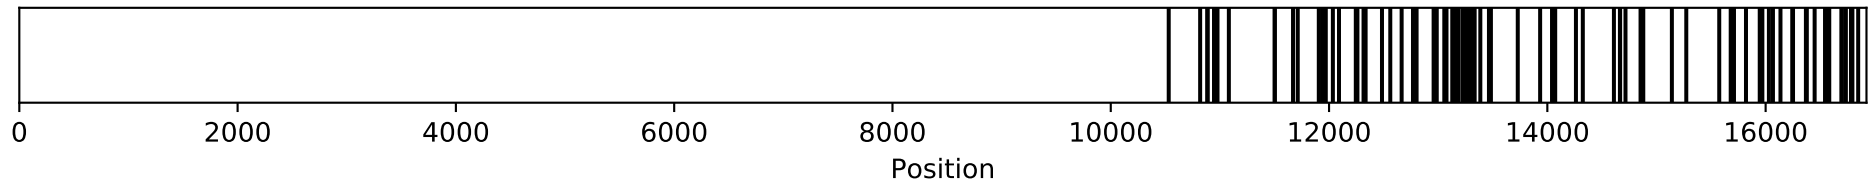

MA2 vs MM1  
Number of differences: 1

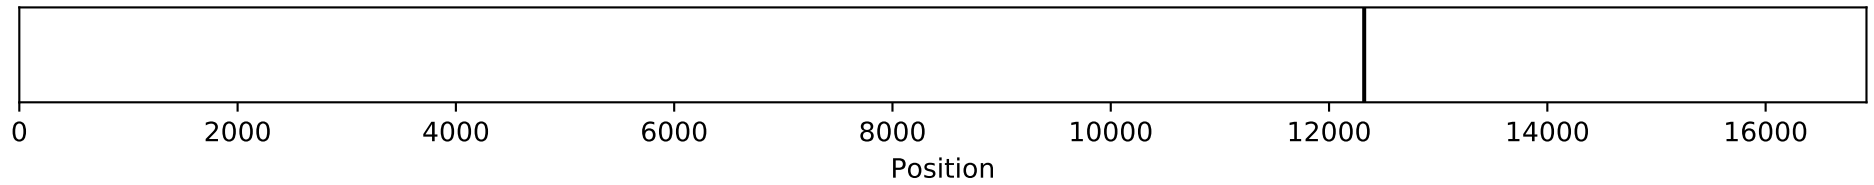

MA2 vs MM2  
Number of differences: 0

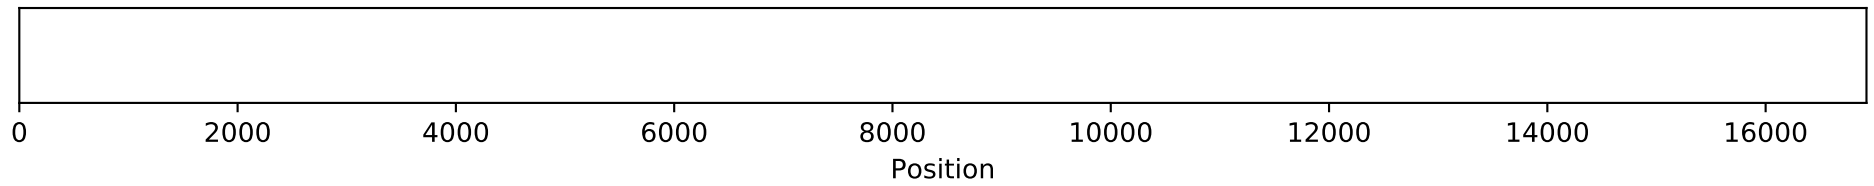

MM1 vs MM2  
Number of differences: 1

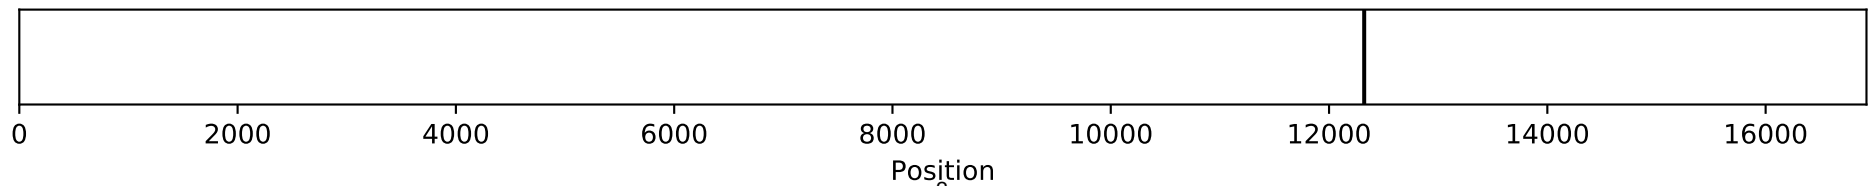



MA1 vs MA2  
Number of differences: 192

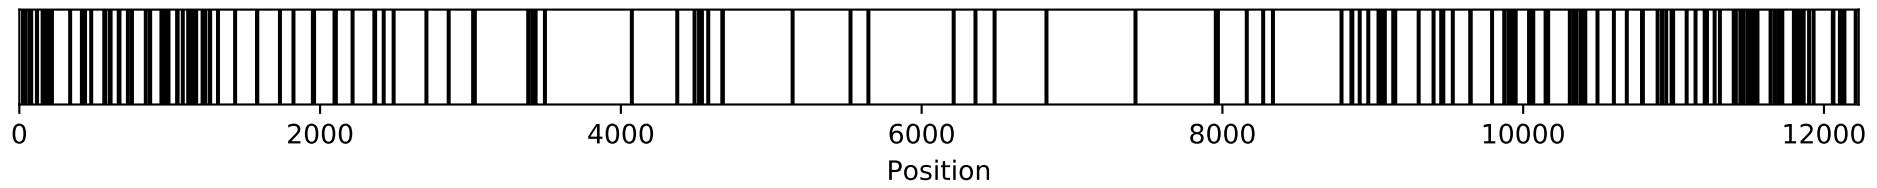

MA1 vs MM1  
Number of differences: 0

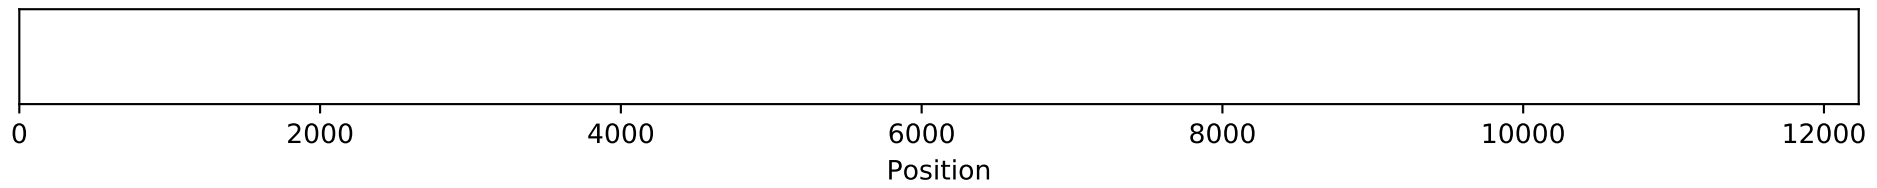

MA1 vs MM2  
Number of differences: 80

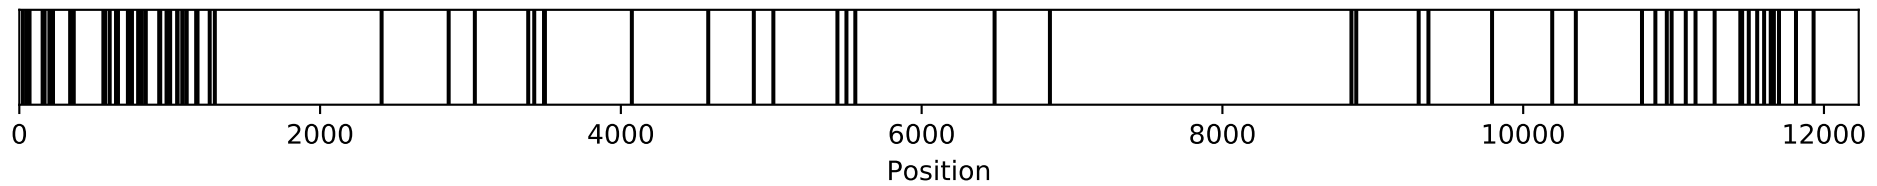

MA2 vs MM1  
Number of differences: 192

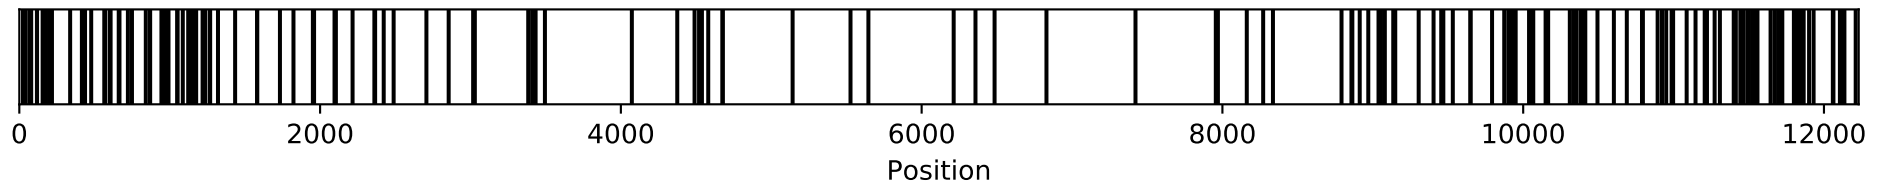

MA2 vs MM2  
Number of differences: 191

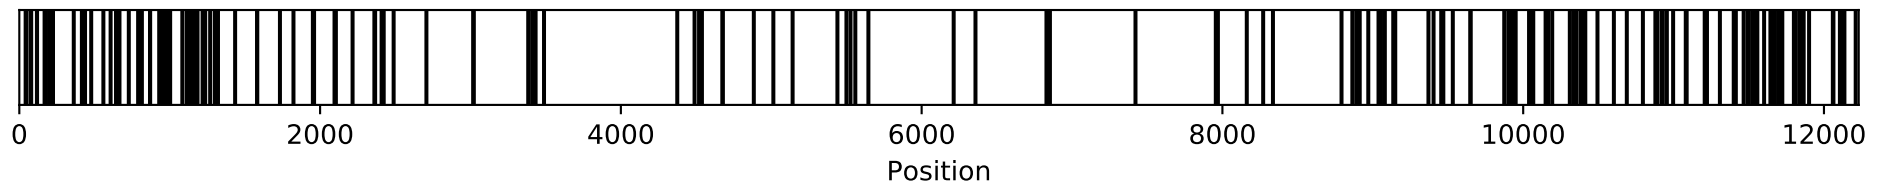

MM1 vs MM2  
Number of differences: 80

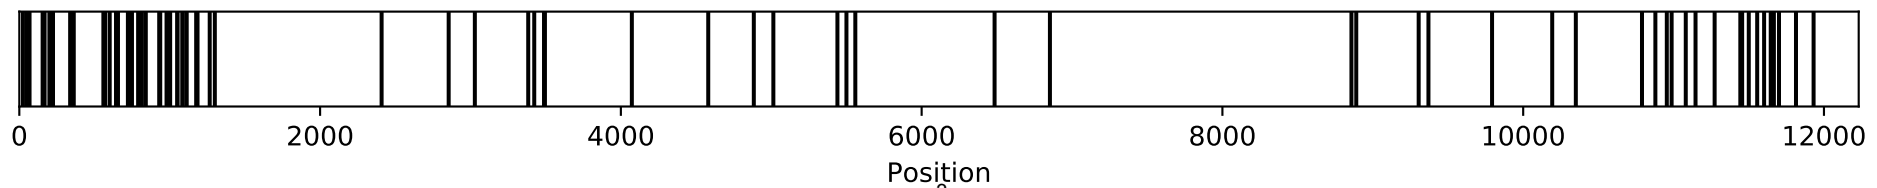

MA1 vs MA2  
Number of differences: 59

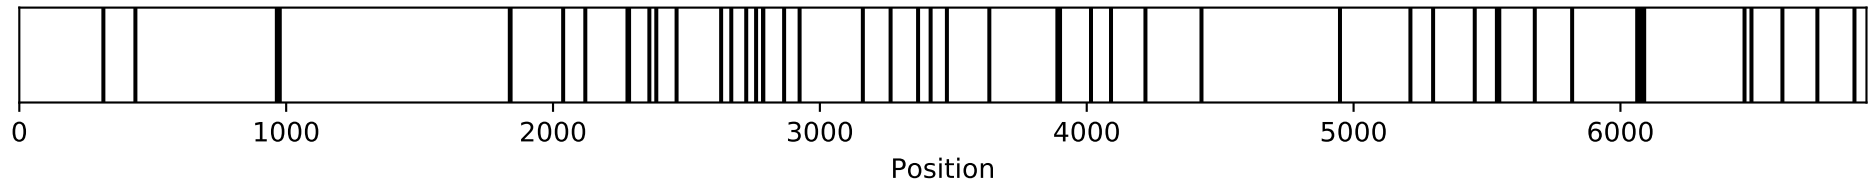

MA1 vs MM1  
Number of differences: 62

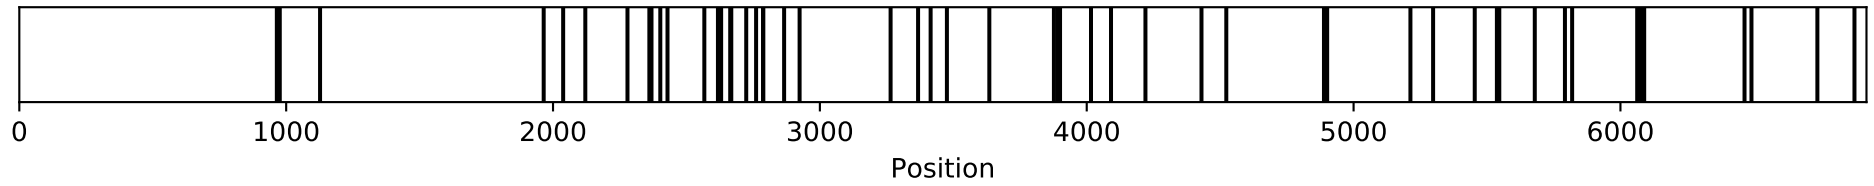

MA1 vs MM2  
Number of differences: 59

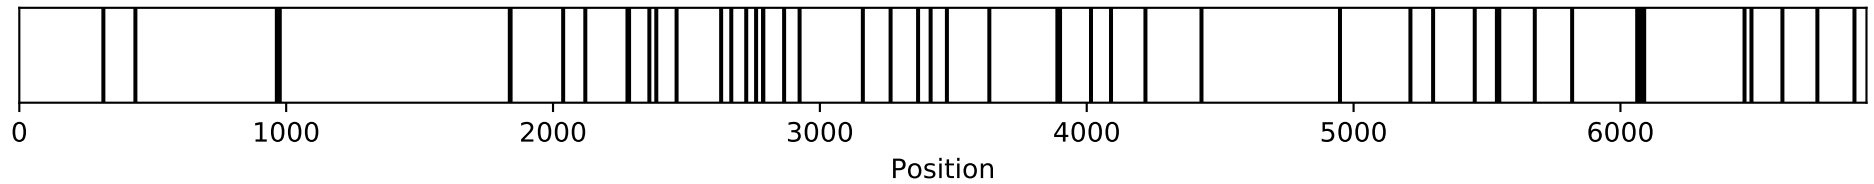

MA2 vs MM1  
Number of differences: 24

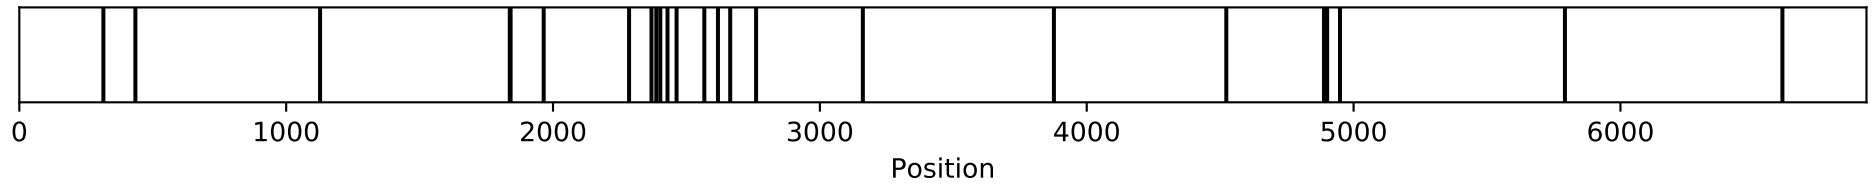

MA2 vs MM2  
Number of differences: 0

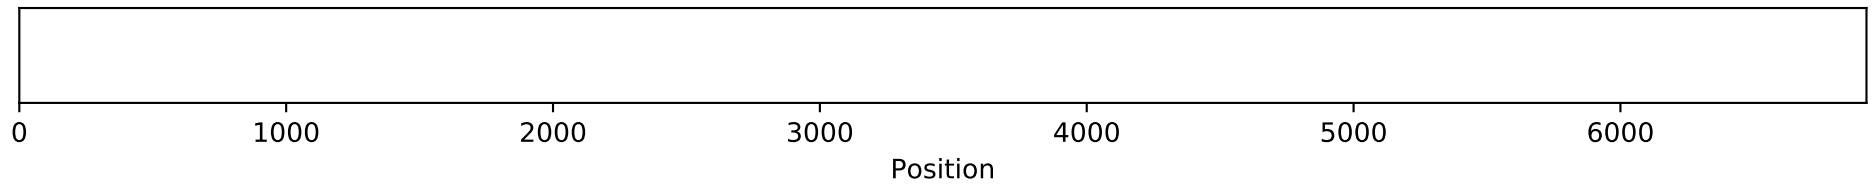

MM1 vs MM2  
Number of differences: 24

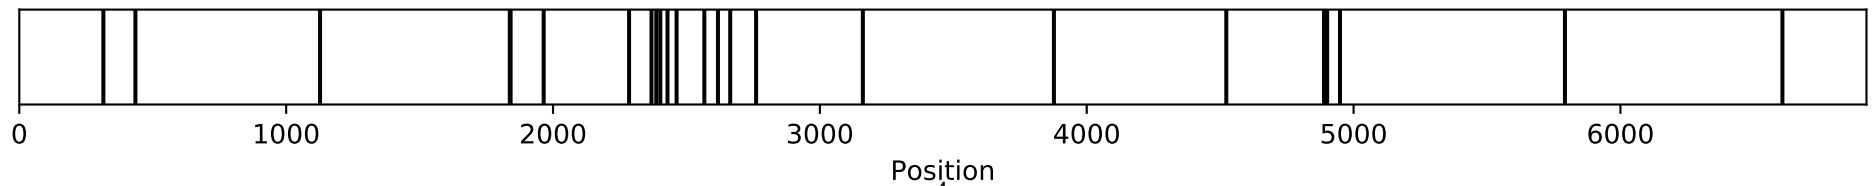

MA1 vs MA2  
Number of differences: 193

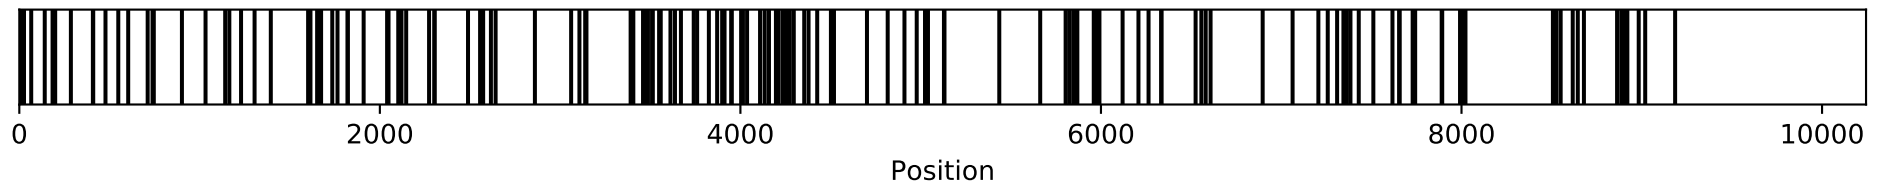

MA1 vs MM1  
Number of differences: 193

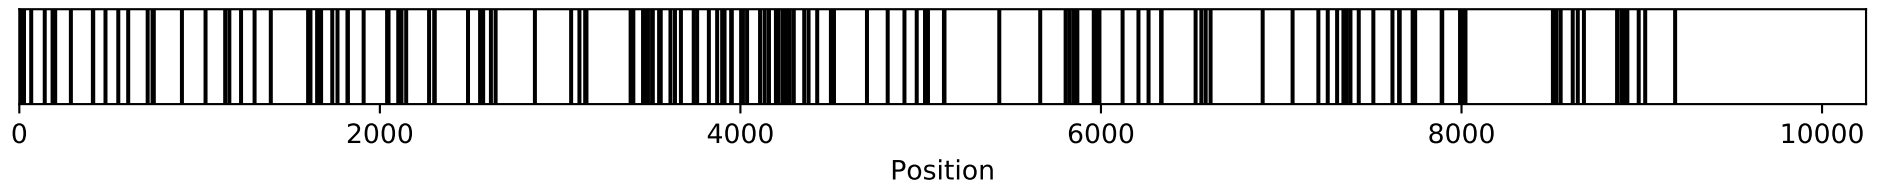

MA1 vs MM2  
Number of differences: 235

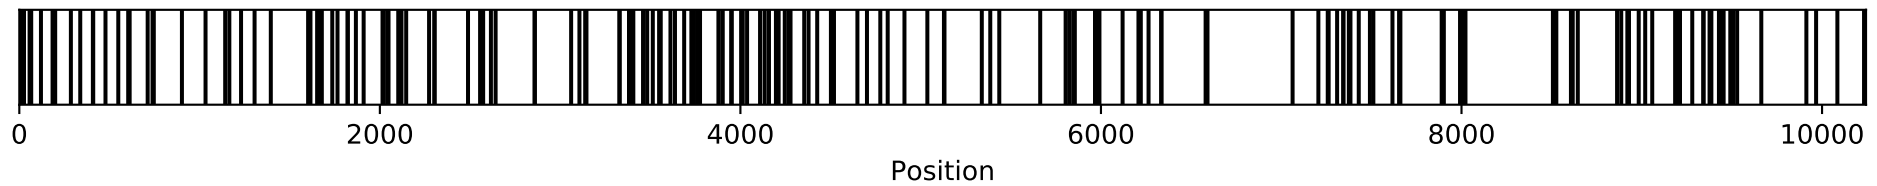

MA2 vs MM1  
Number of differences: 0

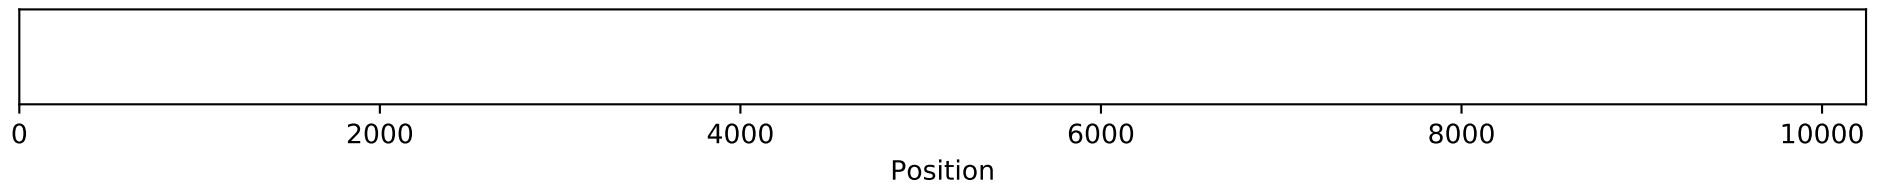

MA2 vs MM2  
Number of differences: 117

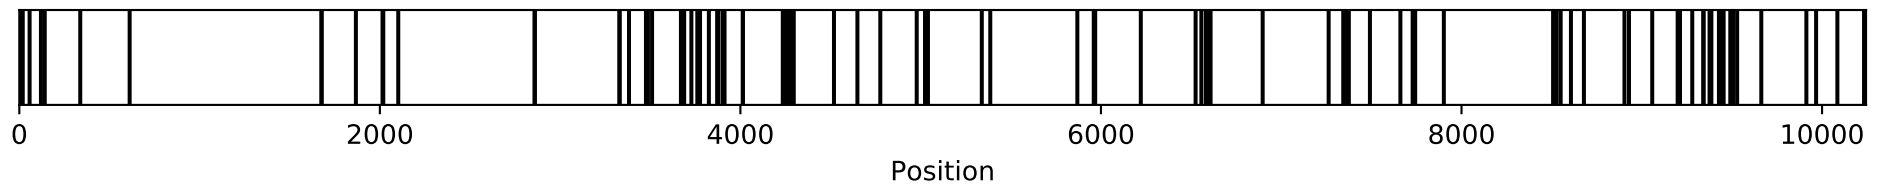

MM1 vs MM2  
Number of differences: 117

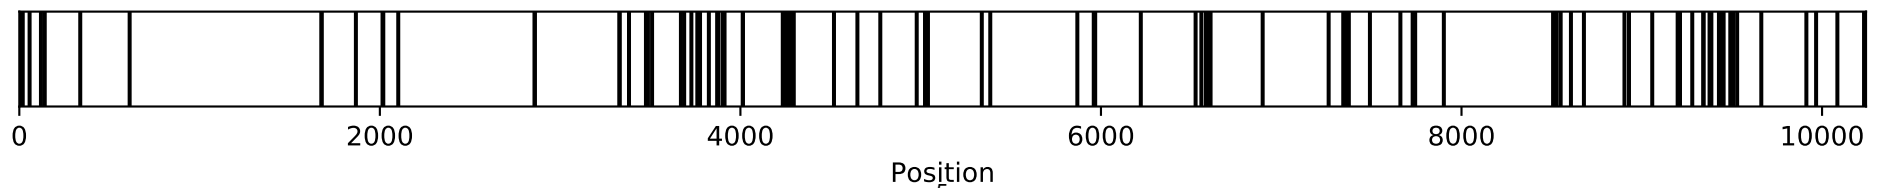

MA1 vs MA2  
Number of differences: 188

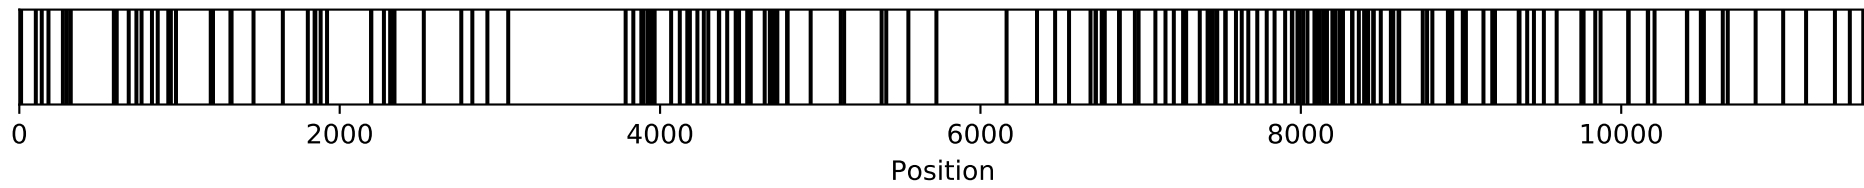

MA1 vs MM1  
Number of differences: 7

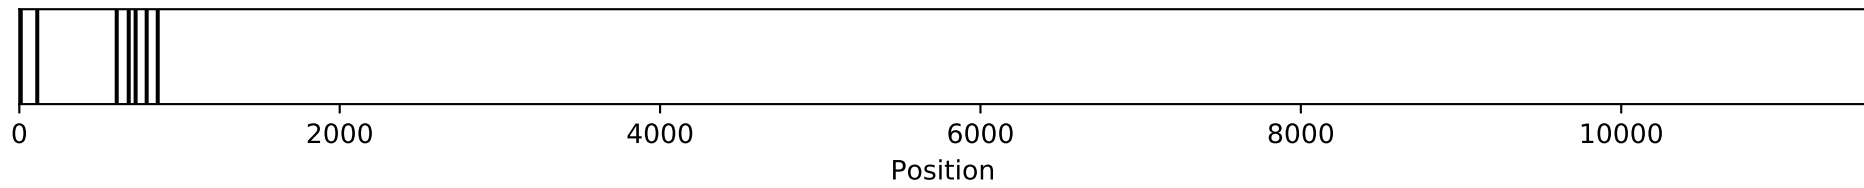

MA1 vs MM2  
Number of differences: 7

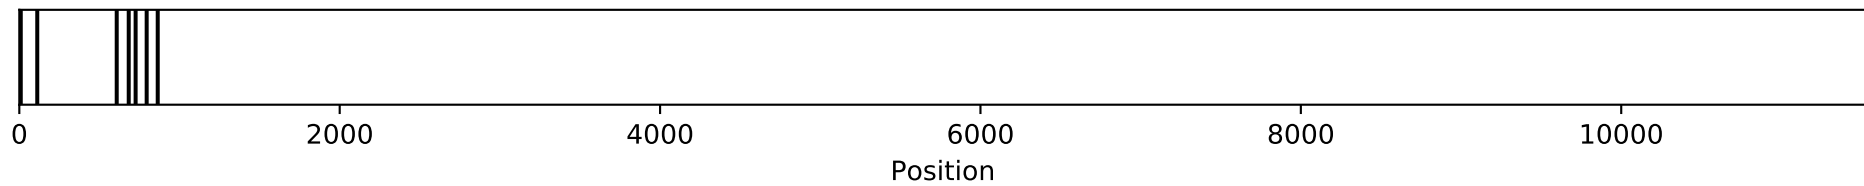

MA2 vs MM1  
Number of differences: 187

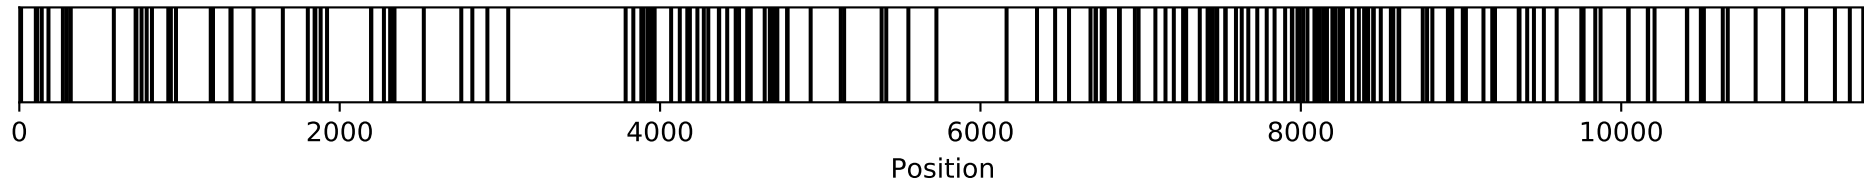

MA2 vs MM2  
Number of differences: 187

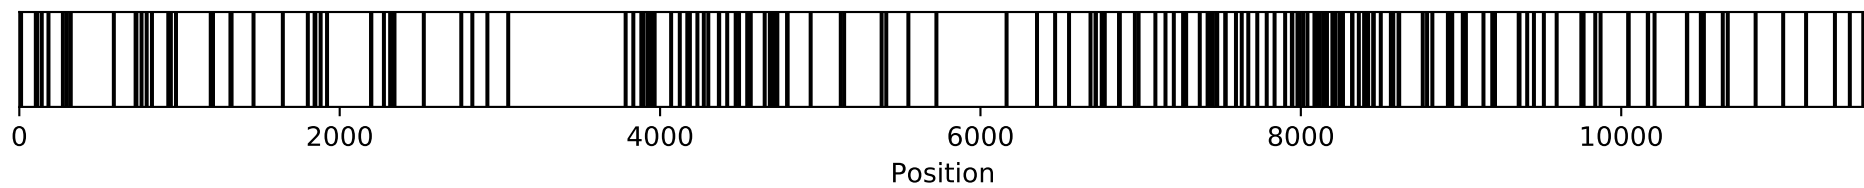

MM1 vs MM2  
Number of differences: 0

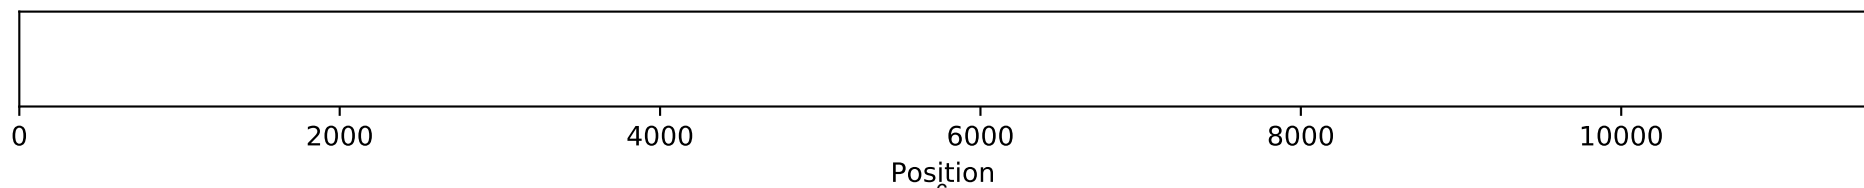

MA1 vs MA2  
Number of differences: 96

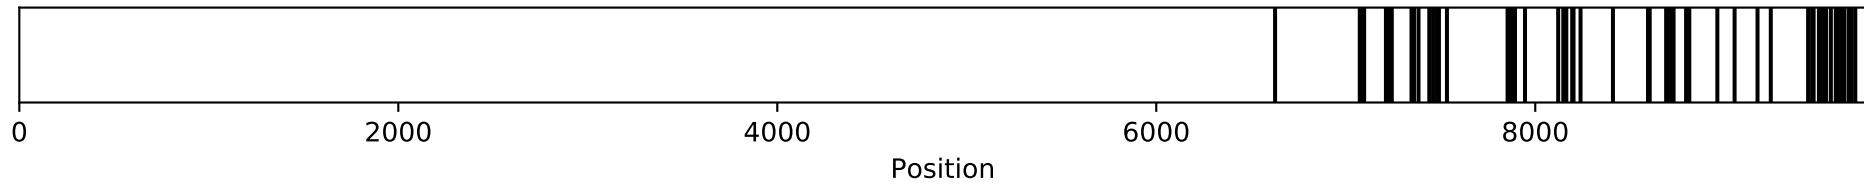

MA1 vs MM1  
Number of differences: 232

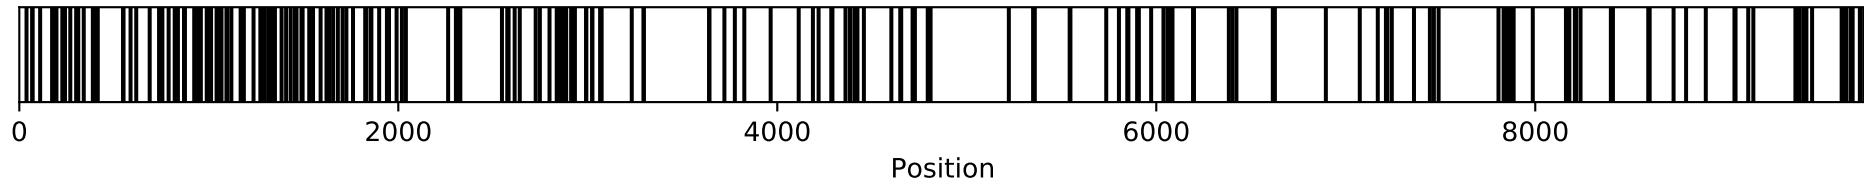

MA1 vs MM2  
Number of differences: 153

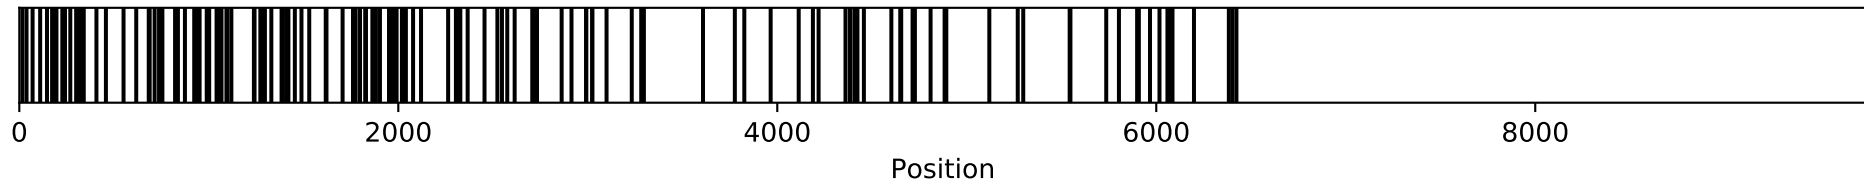

MA2 vs MM1  
Number of differences: 286

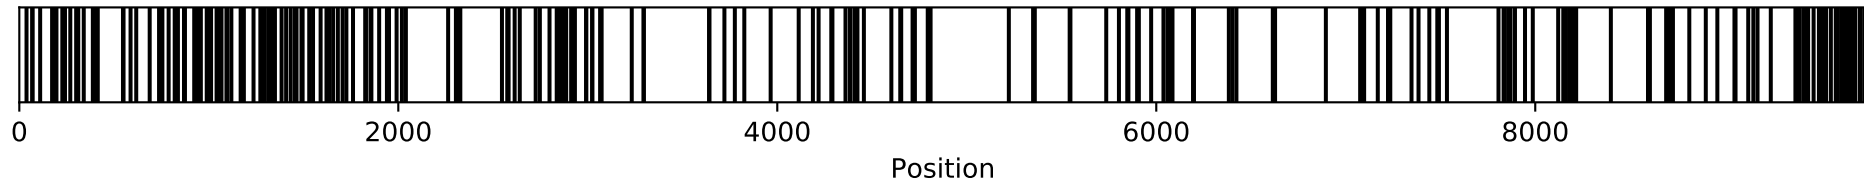

MA2 vs MM2  
Number of differences: 249

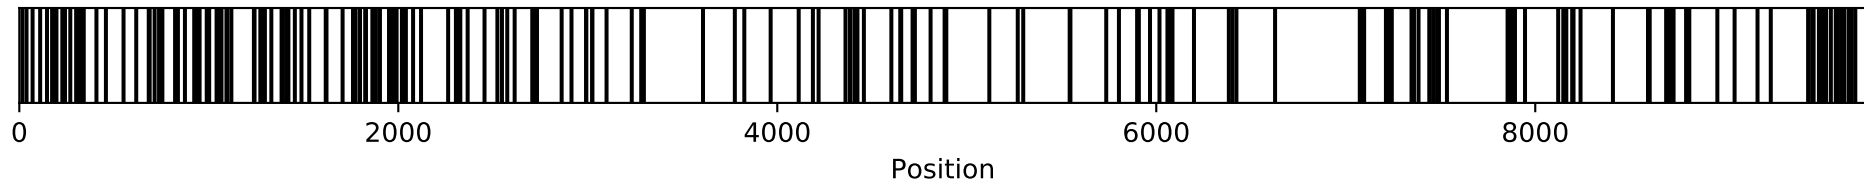

MM1 vs MM2  
Number of differences: 177

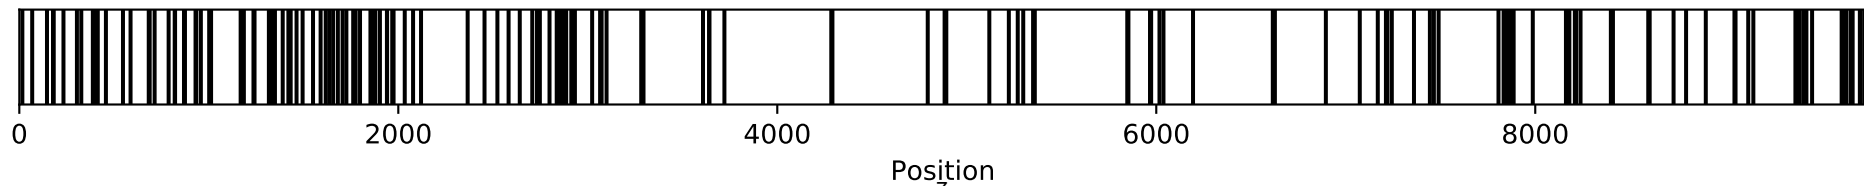

MA1 vs MA2  
Number of differences: 0

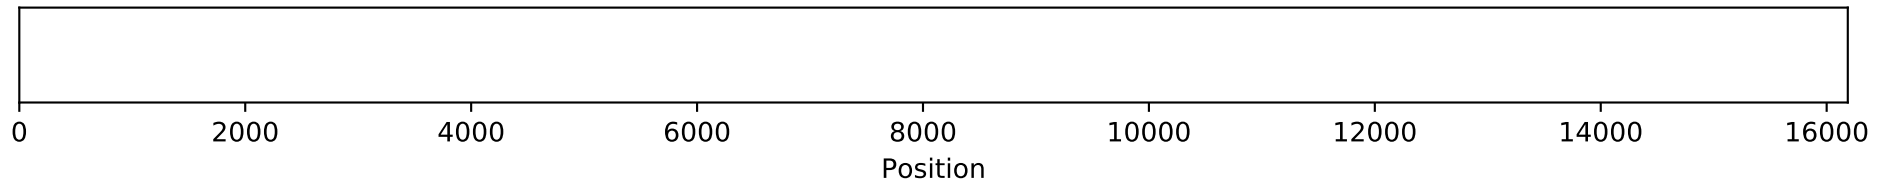

MA1 vs MM1  
Number of differences: 384

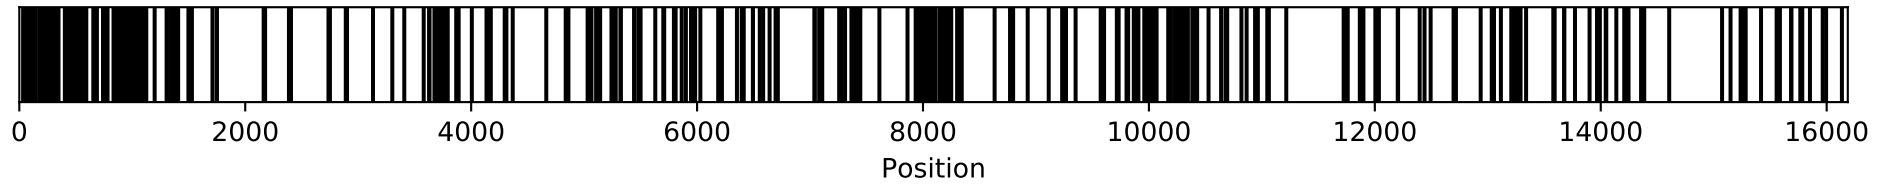

MA1 vs MM2  
Number of differences: 384

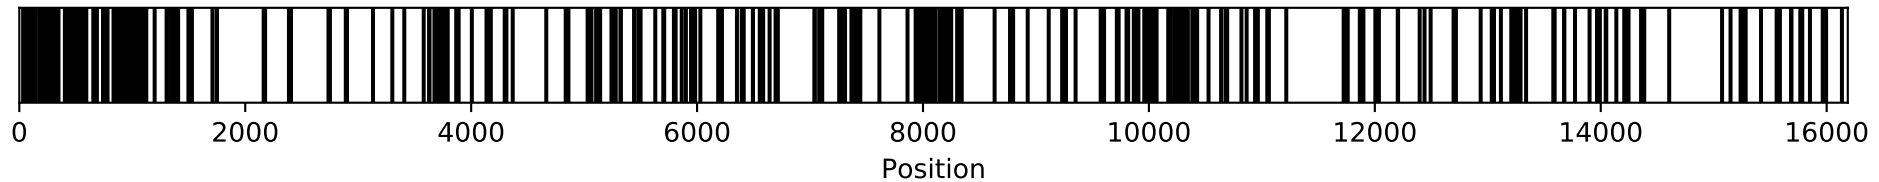

MA2 vs MM1  
Number of differences: 384

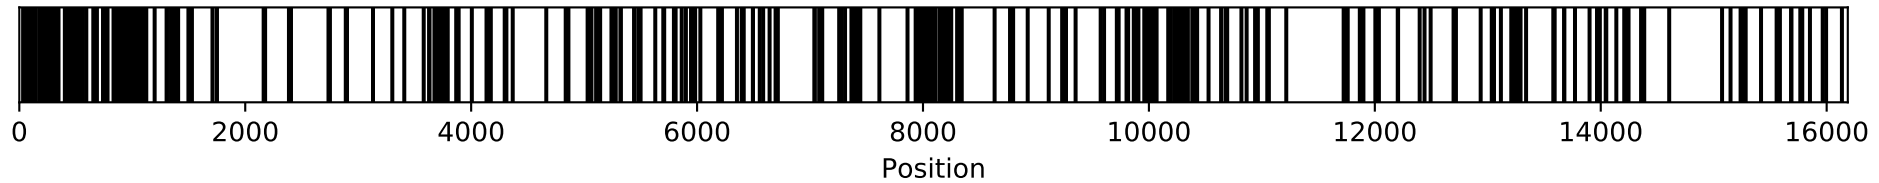

MA2 vs MM2  
Number of differences: 384

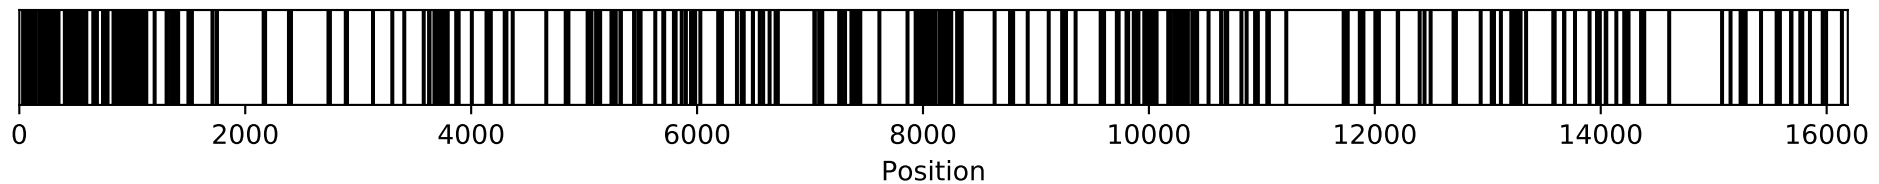

MM1 vs MM2  
Number of differences: 0

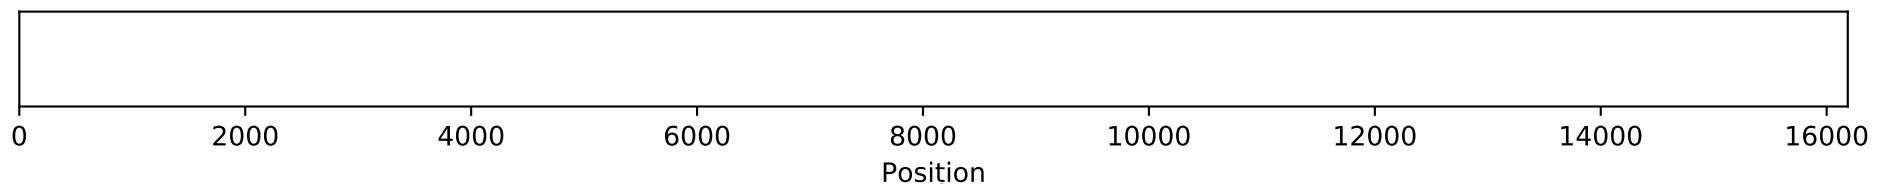

MA1 vs MA2  
Number of differences: 295

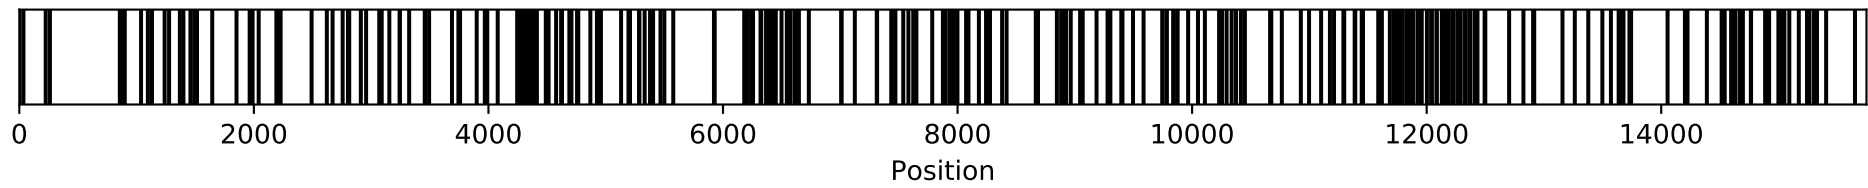

MA1 vs MM1  
Number of differences: 295

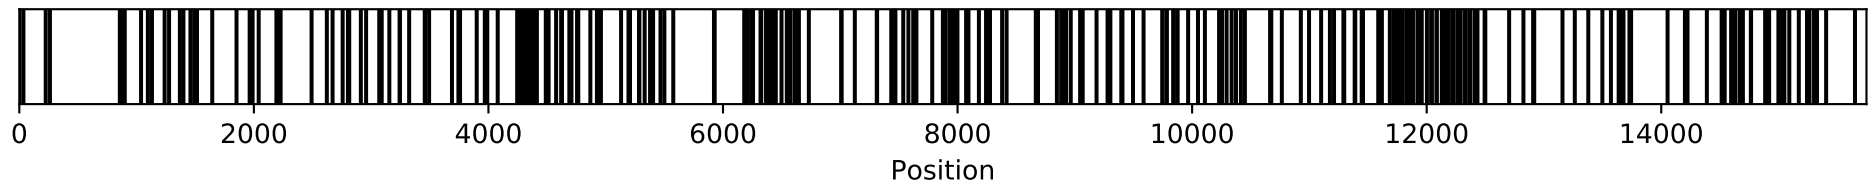

MA1 vs MM2  
Number of differences: 311

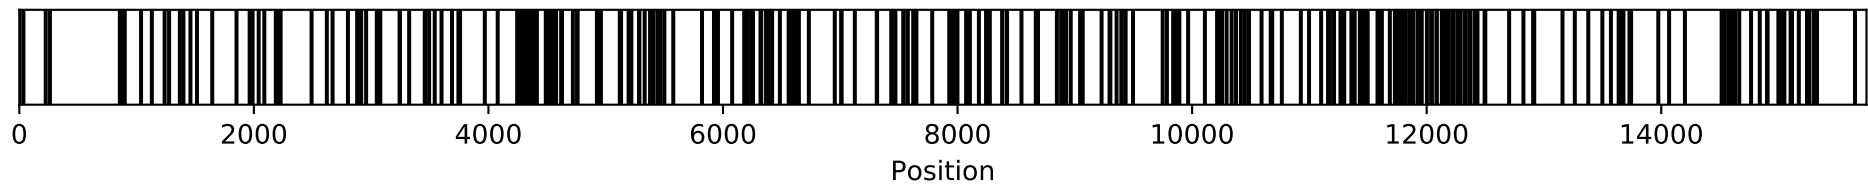

MA2 vs MM1  
Number of differences: 0

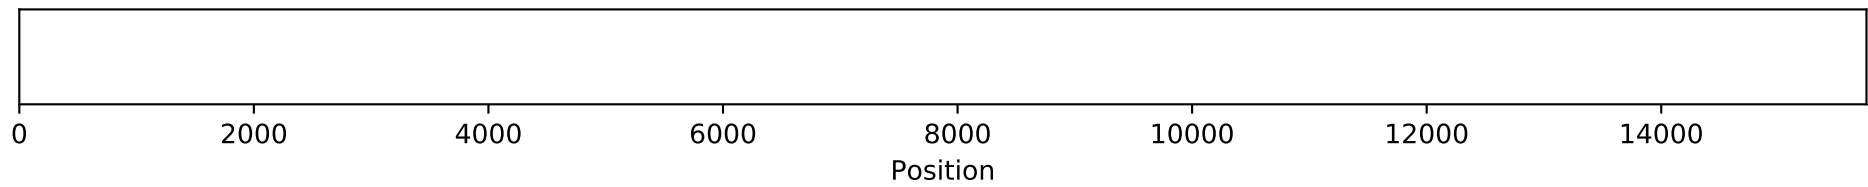

MA2 vs MM2  
Number of differences: 118

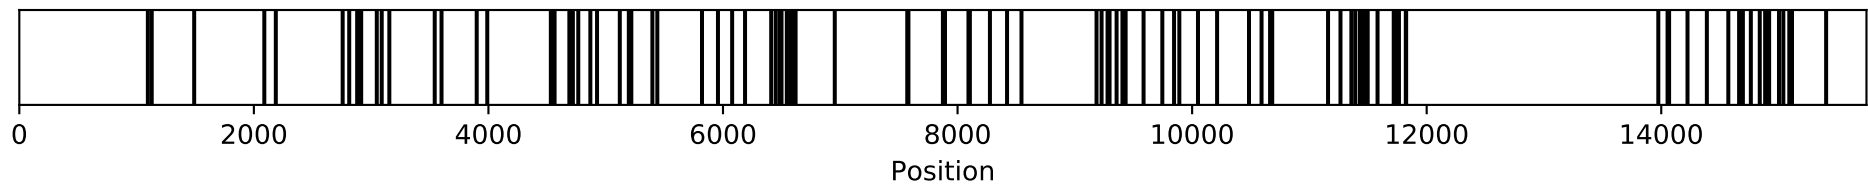

MM1 vs MM2  
Number of differences: 118

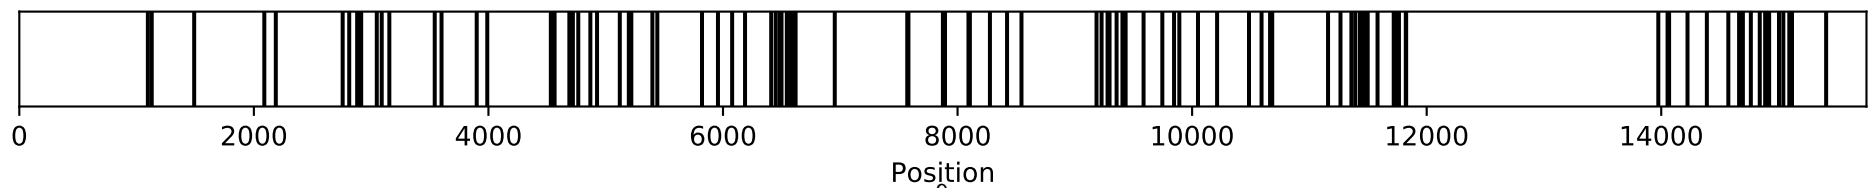

MA1 vs MA2  
Number of differences: 115

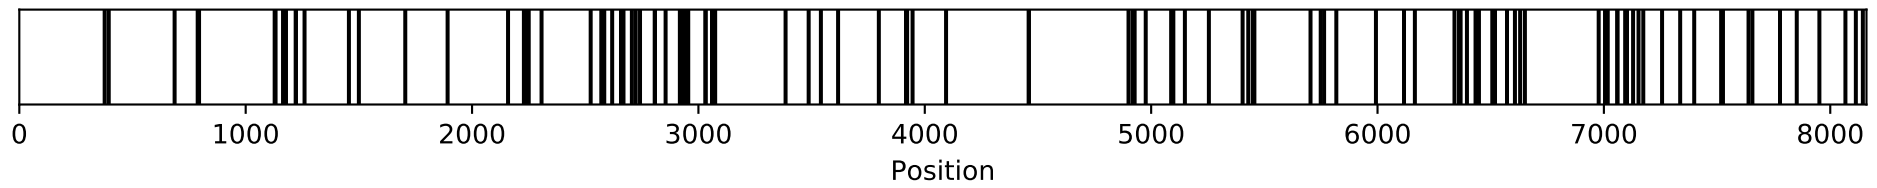

MA1 vs MM1  
Number of differences: 57

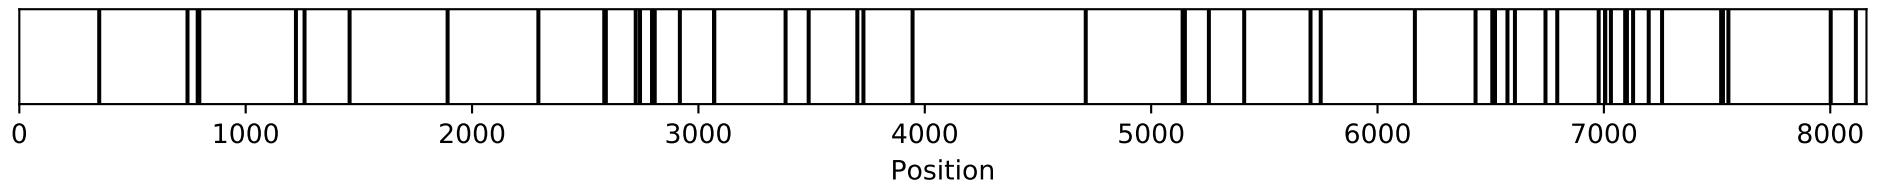

MA1 vs MM2  
Number of differences: 0

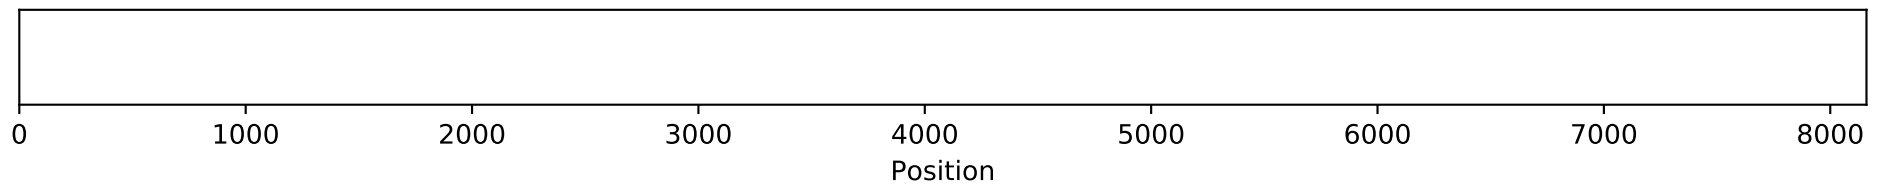

MA2 vs MM1  
Number of differences: 103

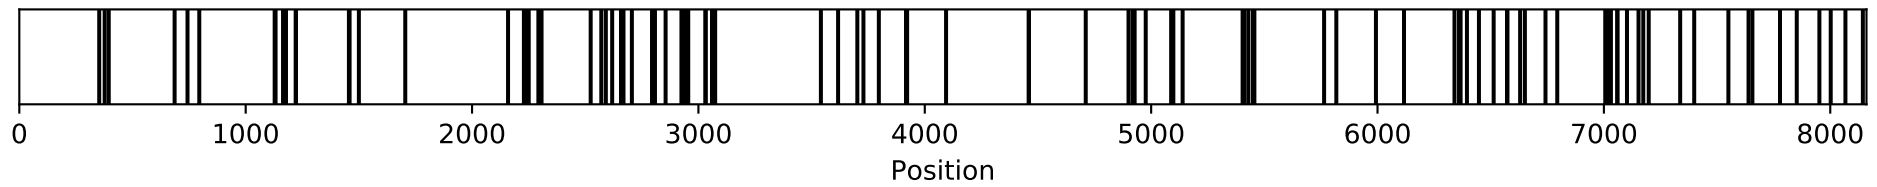

MA2 vs MM2  
Number of differences: 115

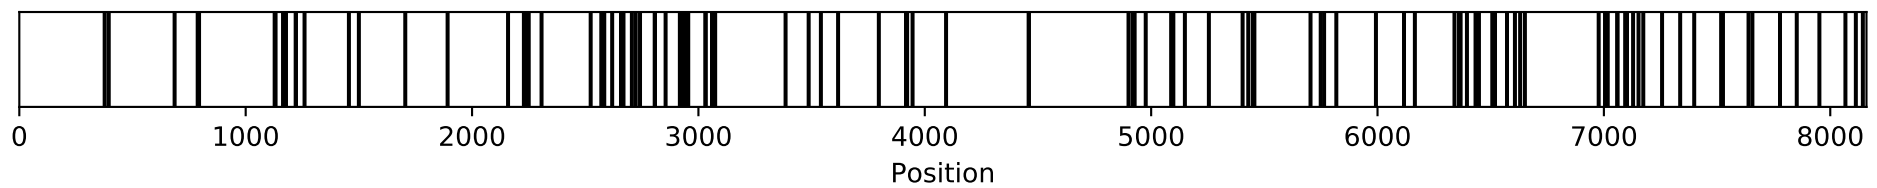

MM1 vs MM2  
Number of differences: 57

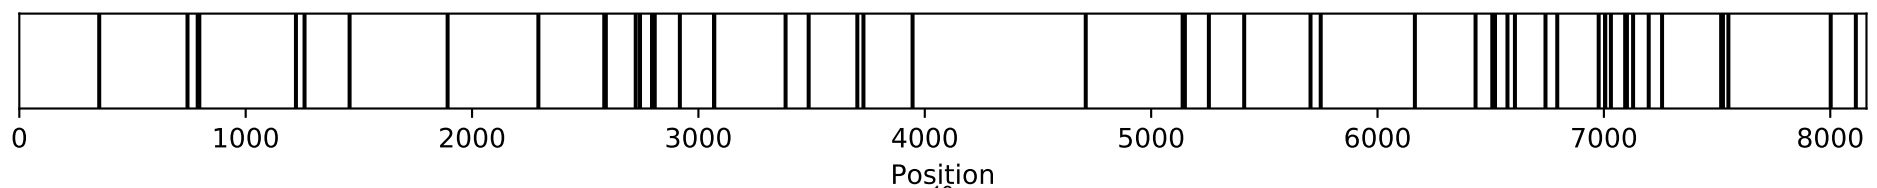



MA1 vs MA2  
Number of differences: 222

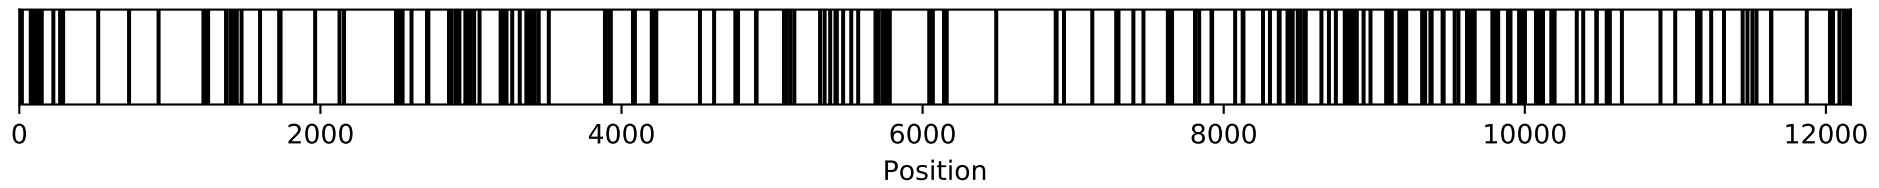

MA1 vs MM1  
Number of differences: 233

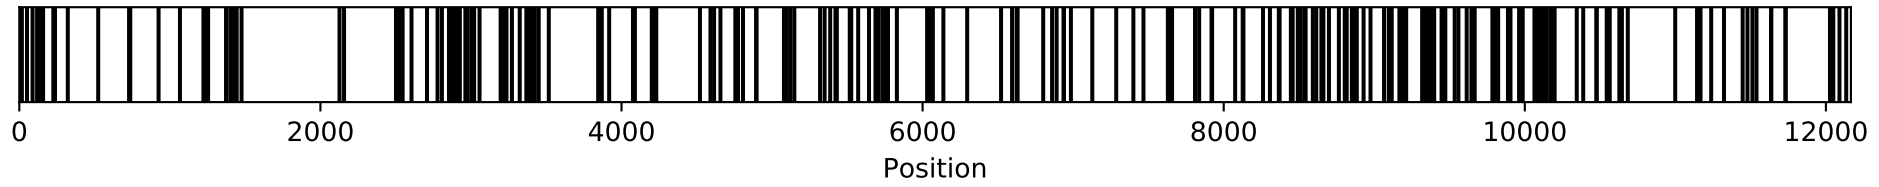

MA1 vs MM2  
Number of differences: 245

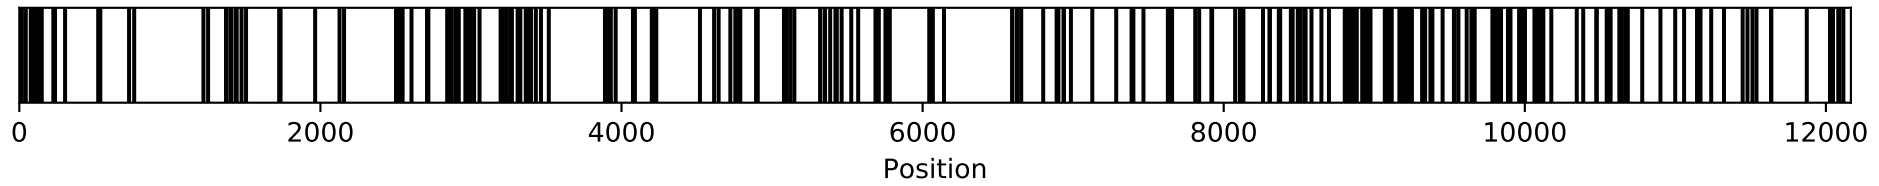

MA2 vs MM1  
Number of differences: 112

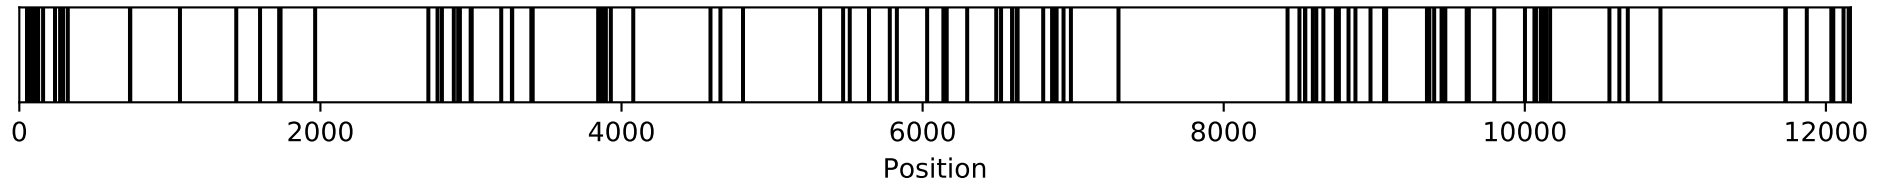

MA2 vs MM2  
Number of differences: 102

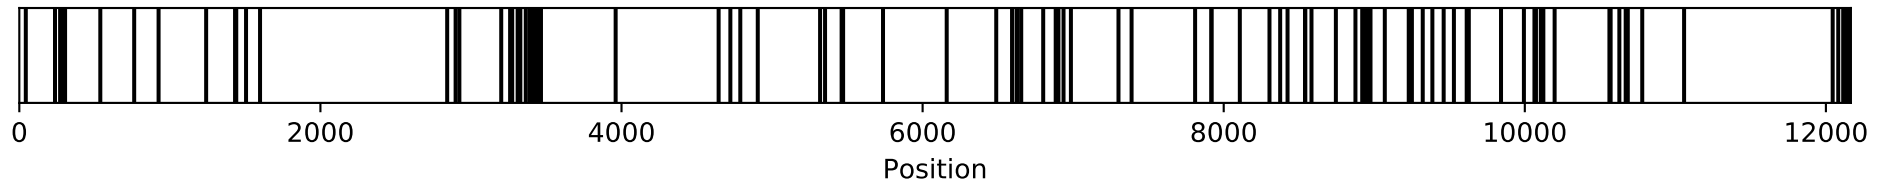

MM1 vs MM2  
Number of differences: 128

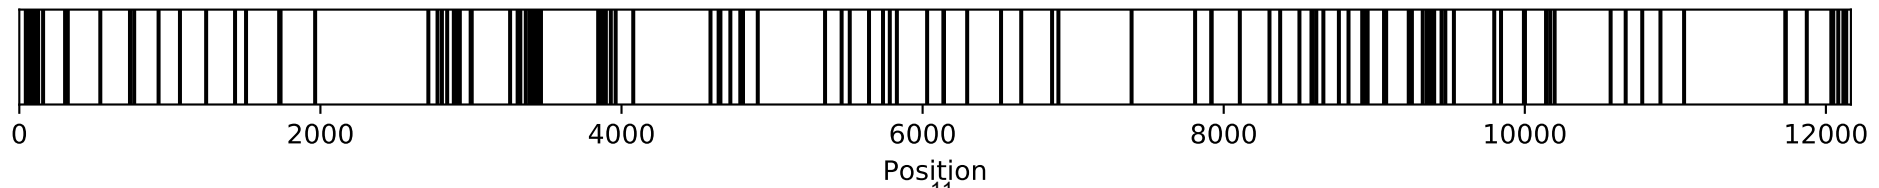

MA1 vs MA2  
Number of differences: 198

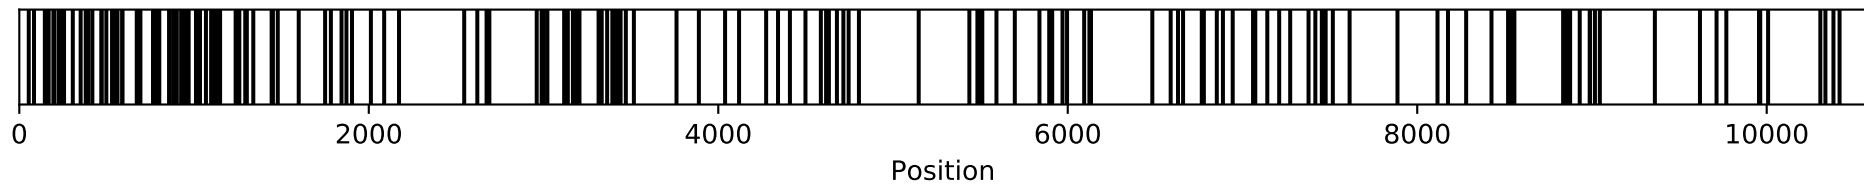

MA1 vs MM1  
Number of differences: 79

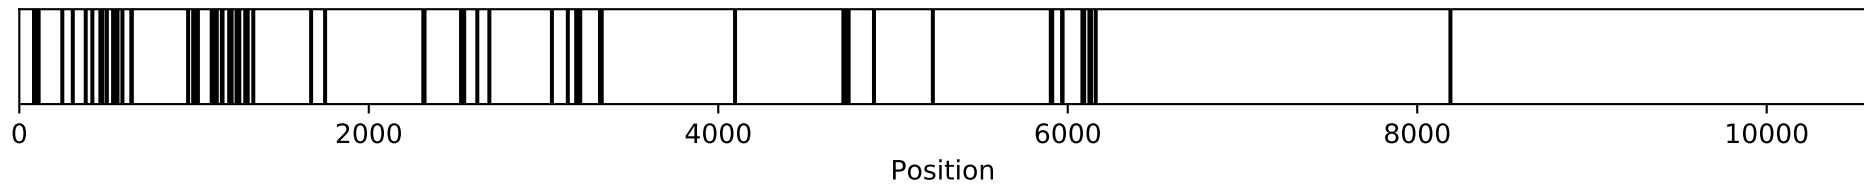

MA1 vs MM2  
Number of differences: 7

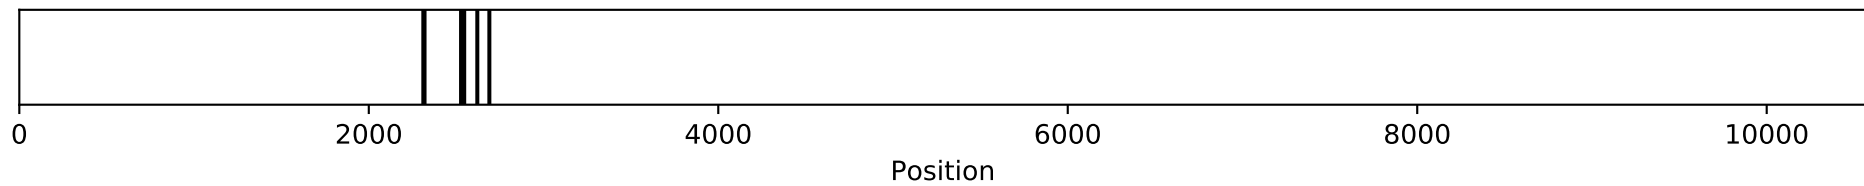

MA2 vs MM1  
Number of differences: 208

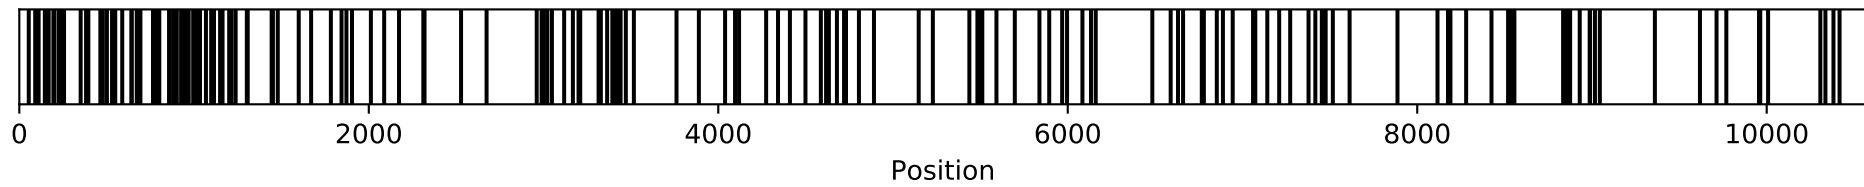

MA2 vs MM2  
Number of differences: 199

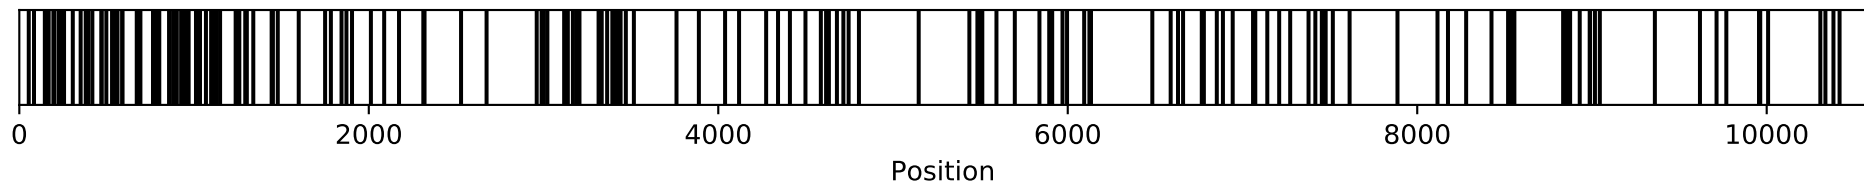

MM1 vs MM2  
Number of differences: 72

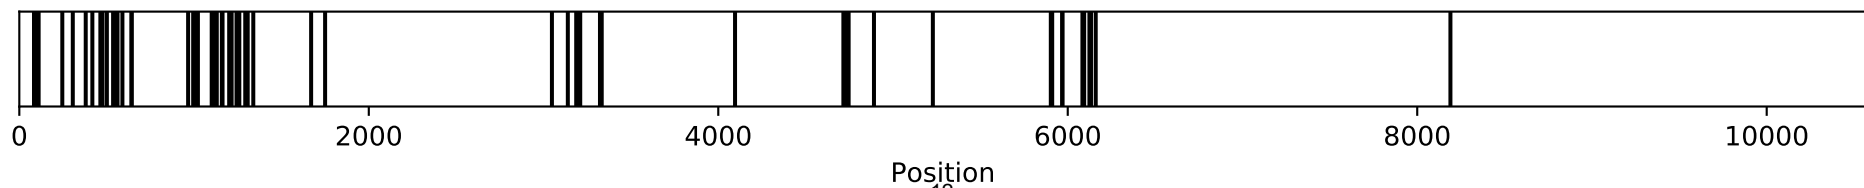

MA1 vs MA2  
Number of differences: 228

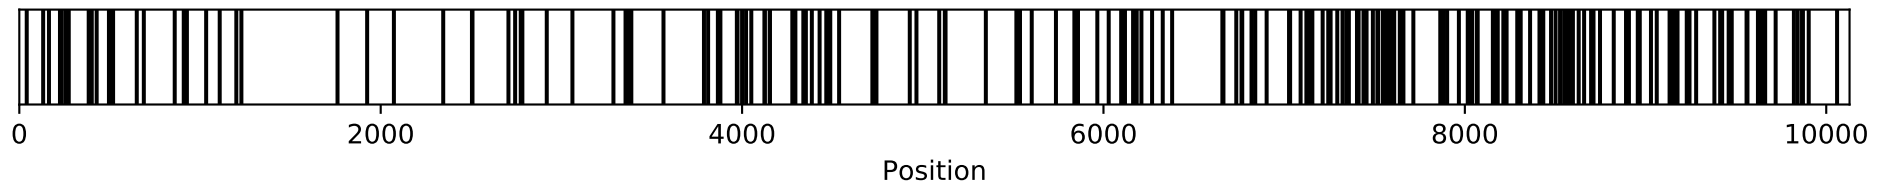

MA1 vs MM1  
Number of differences: 234

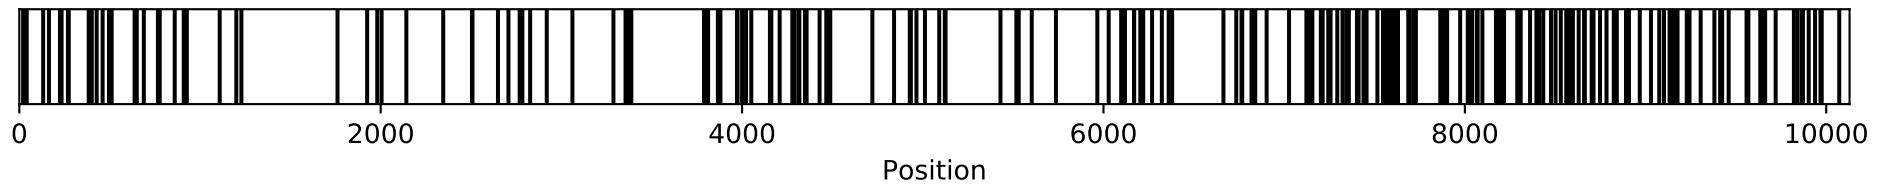

MA1 vs MM2  
Number of differences: 228

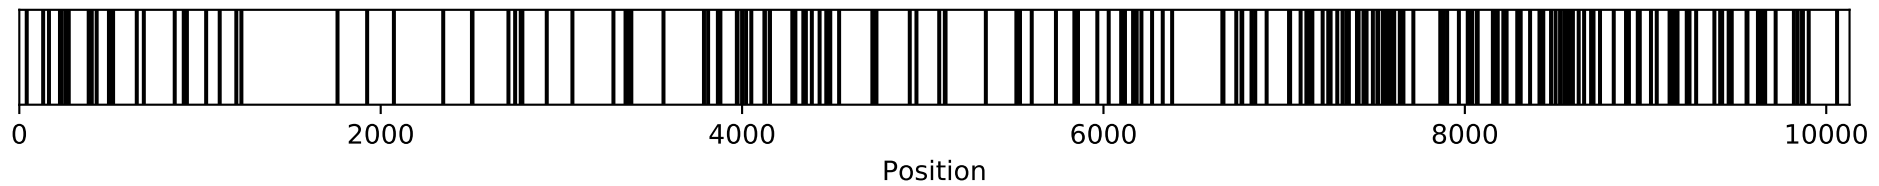

MA2 vs MM1  
Number of differences: 113

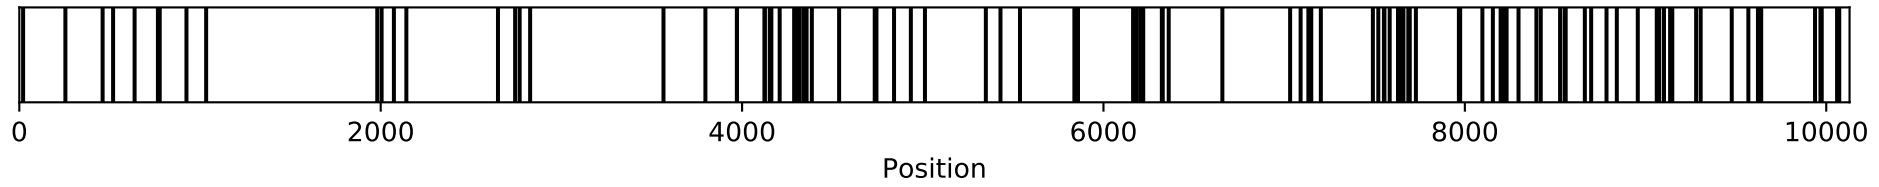

MA2 vs MM2  
Number of differences: 0

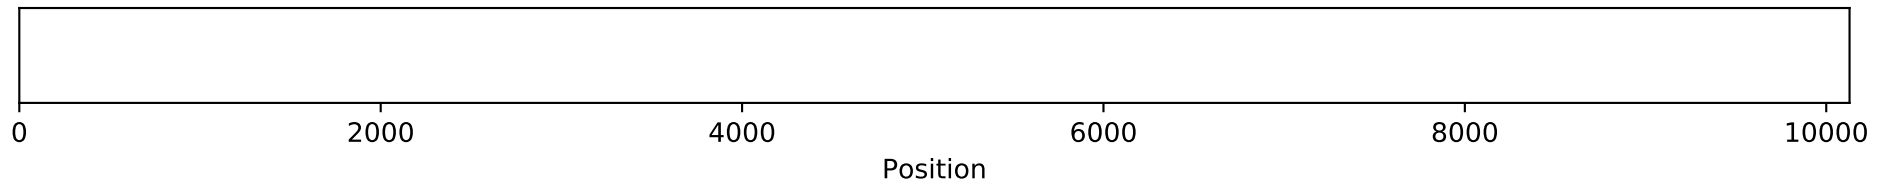

MM1 vs MM2  
Number of differences: 113

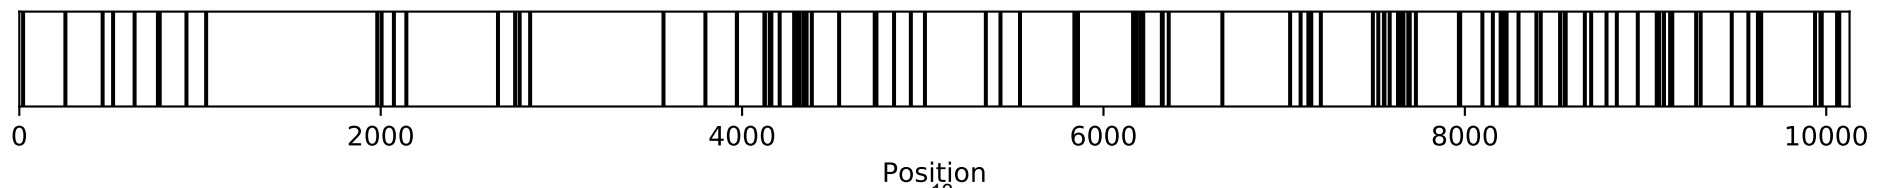

MA1 vs MA2  
Number of differences: 90

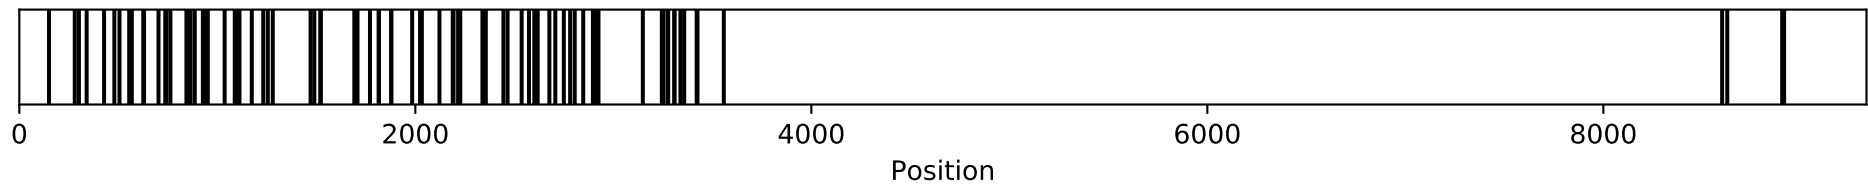

MA1 vs MM1  
Number of differences: 211

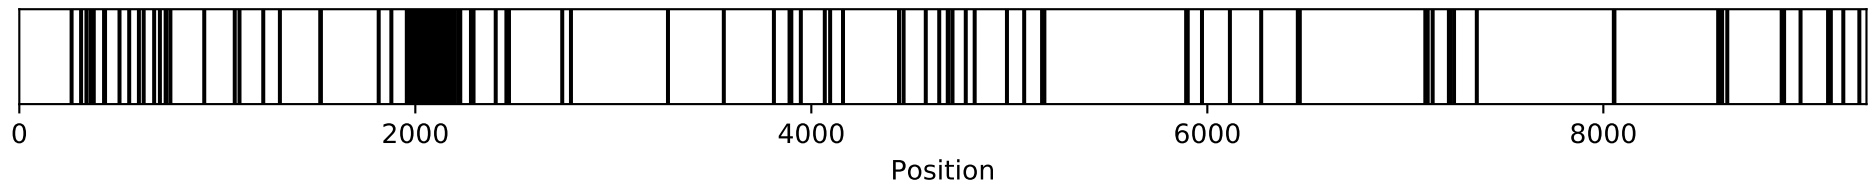

MA1 vs MM2  
Number of differences: 9

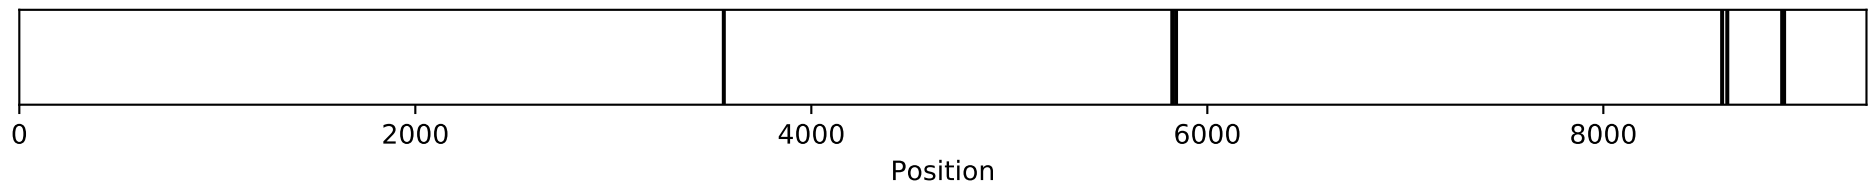

MA2 vs MM1  
Number of differences: 250

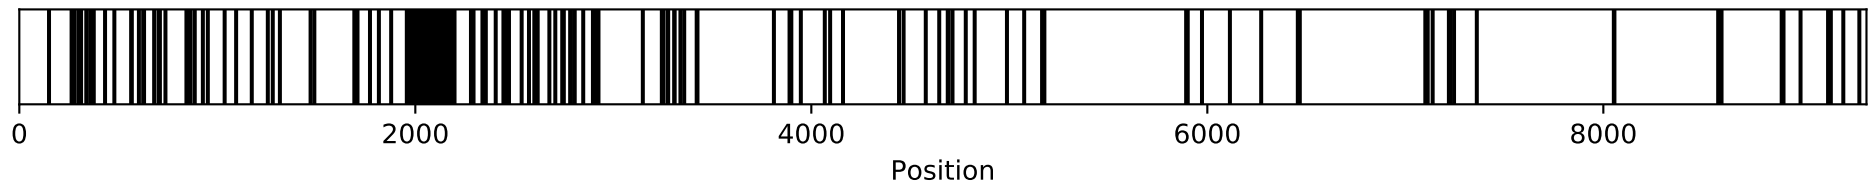

MA2 vs MM2  
Number of differences: 85

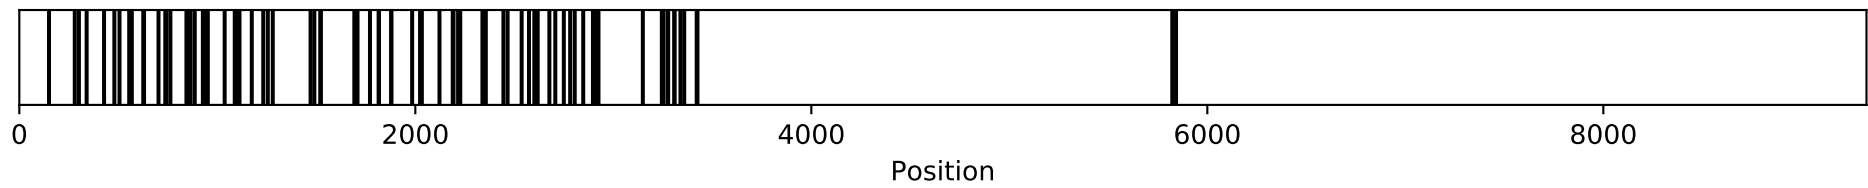

MM1 vs MM2  
Number of differences: 210

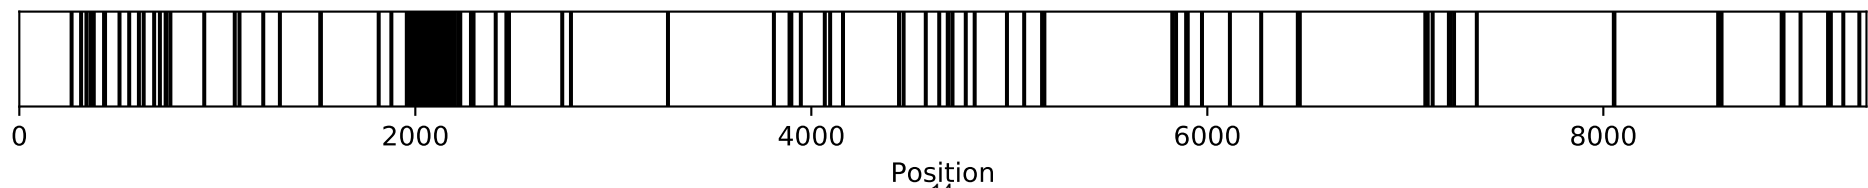

MA1 vs MA2  
Number of differences: 371

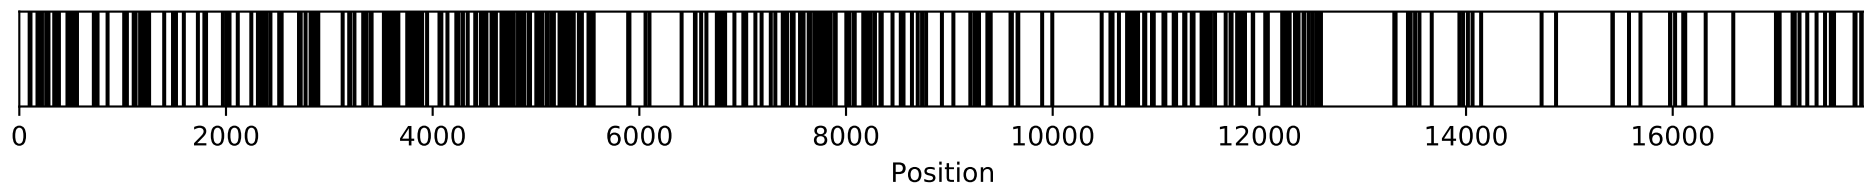

MA1 vs MM1  
Number of differences: 371

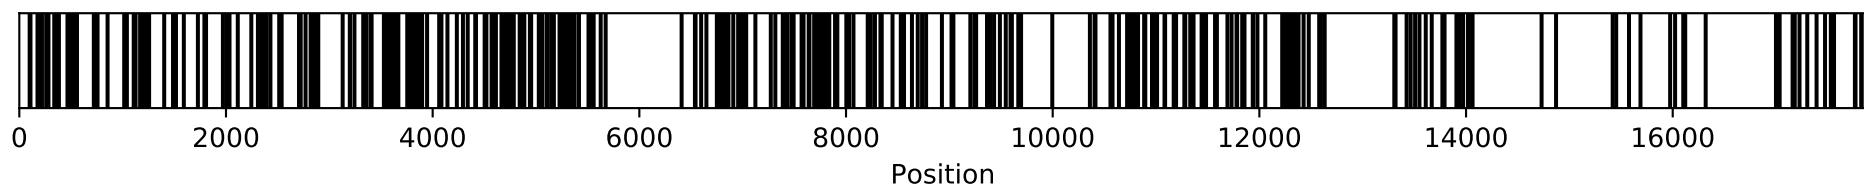

MA1 vs MM2  
Number of differences: 373

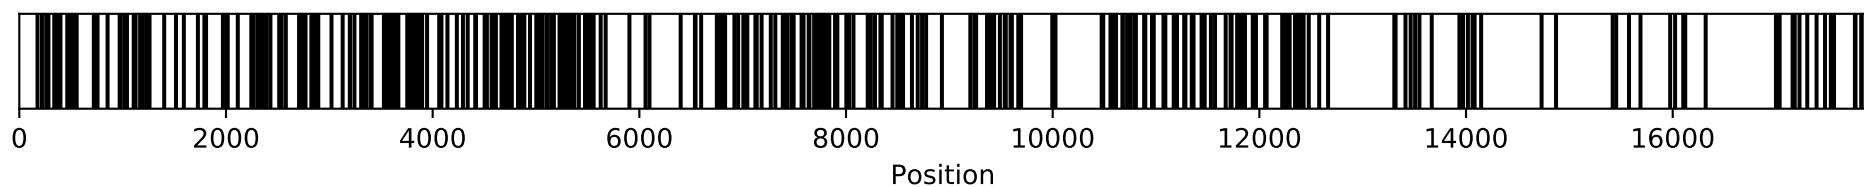

MA2 vs MM1  
Number of differences: 120

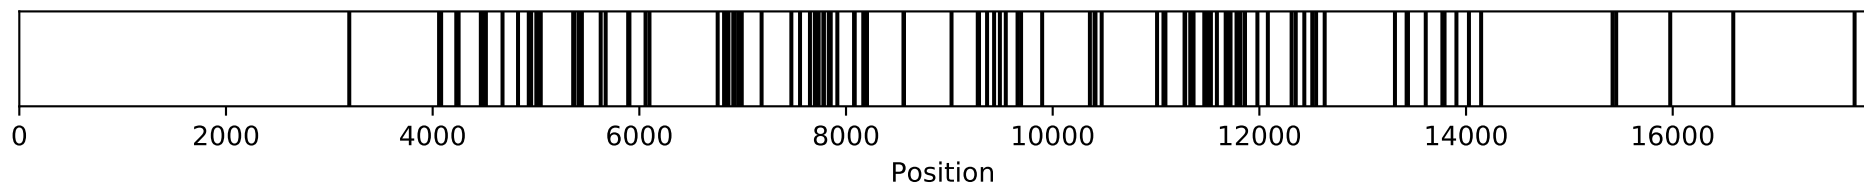

MA2 vs MM2  
Number of differences: 153

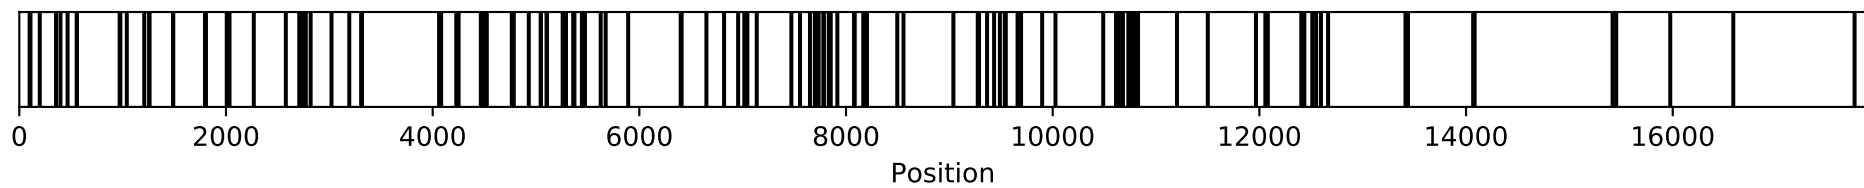

MM1 vs MM2  
Number of differences: 150

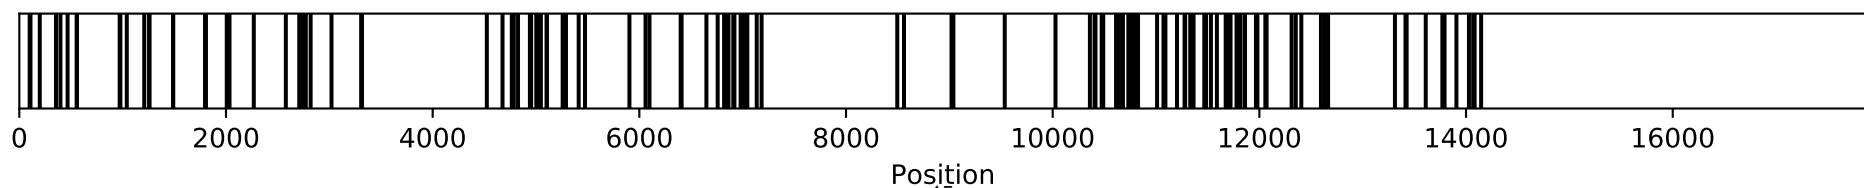

MA1 vs MA2  
Number of differences: 440

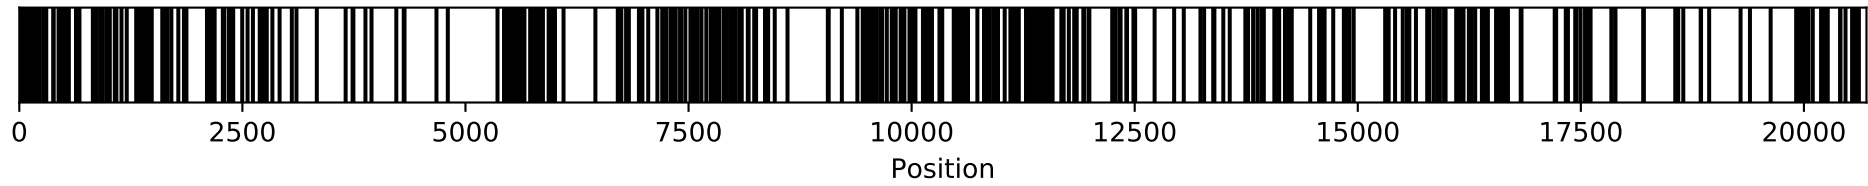

MA1 vs MM1  
Number of differences: 236

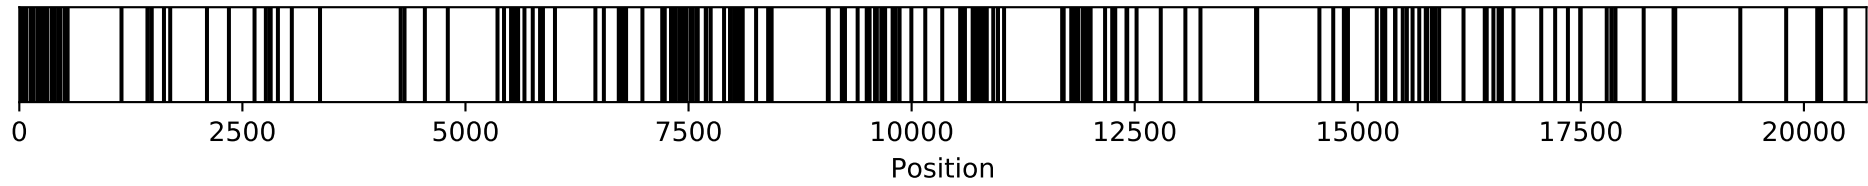

MA1 vs MM2  
Number of differences: 229

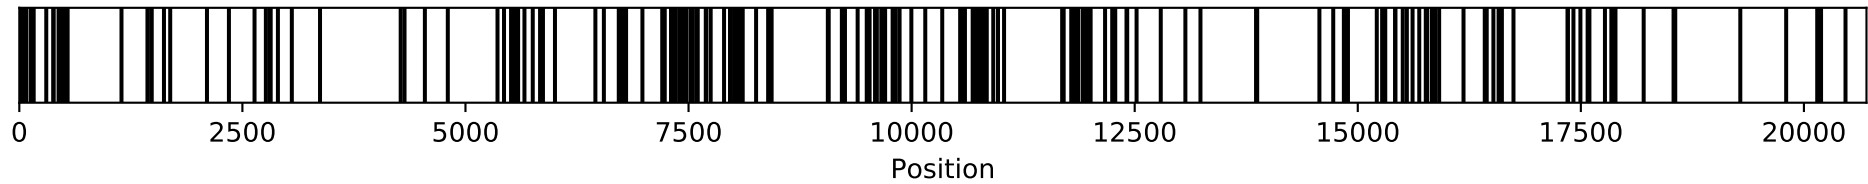

MA2 vs MM1  
Number of differences: 442

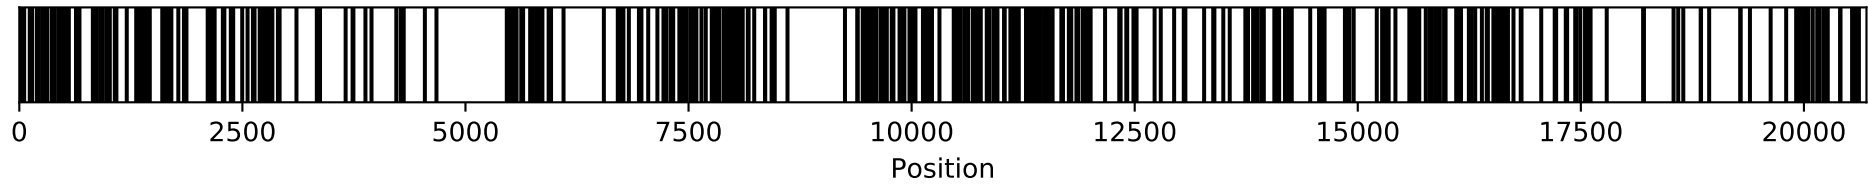

MA2 vs MM2  
Number of differences: 437

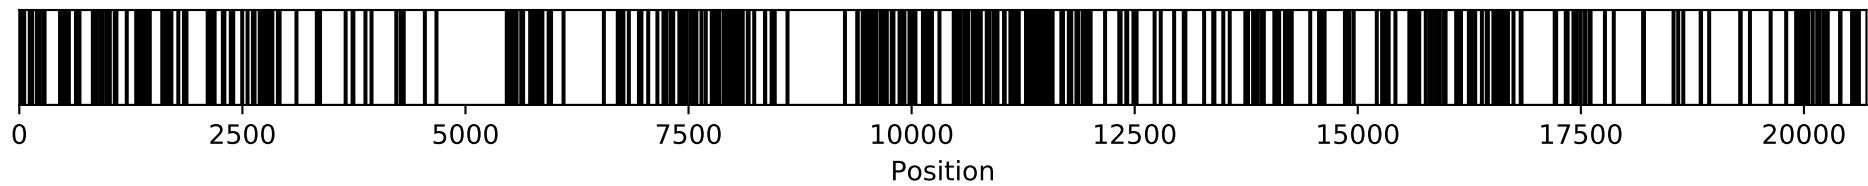

MM1 vs MM2  
Number of differences: 27

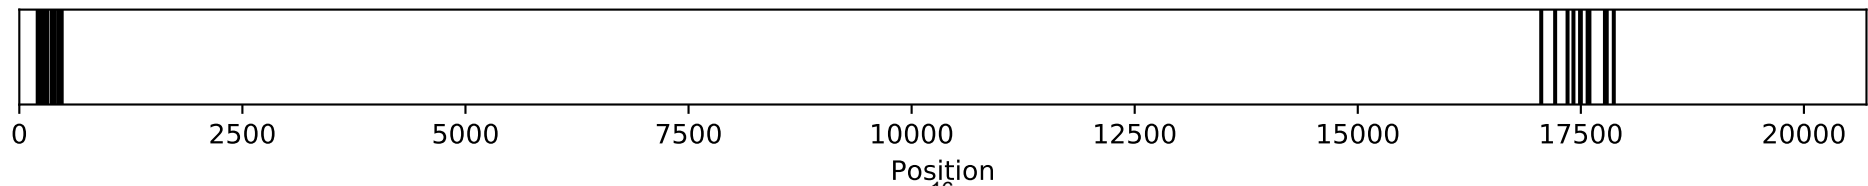

MA1 vs MA2  
Number of differences: 162

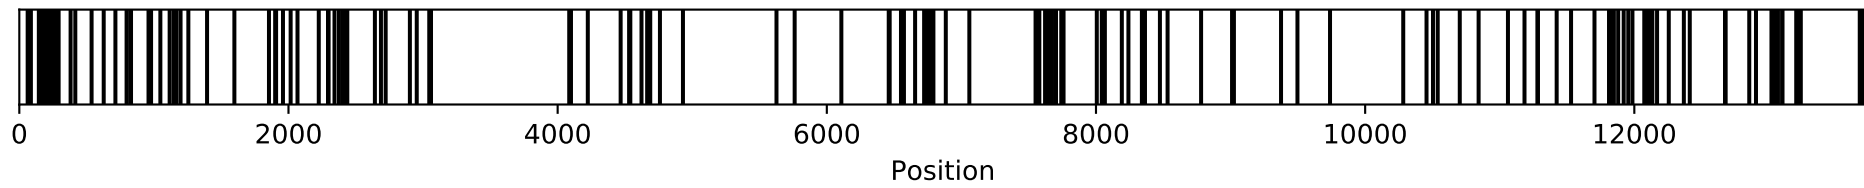

MA1 vs MM1  
Number of differences: 154

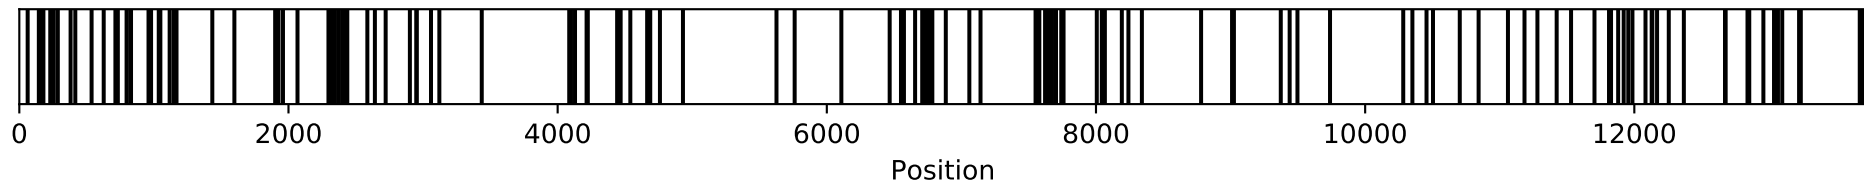

MA1 vs MM2  
Number of differences: 163

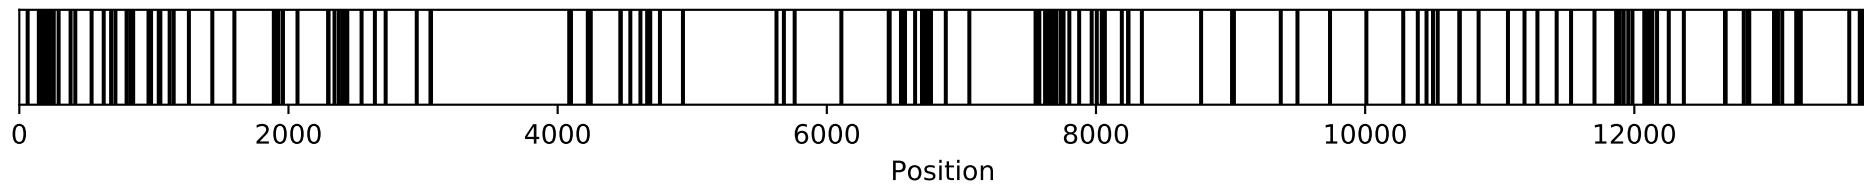

MA2 vs MM1  
Number of differences: 60

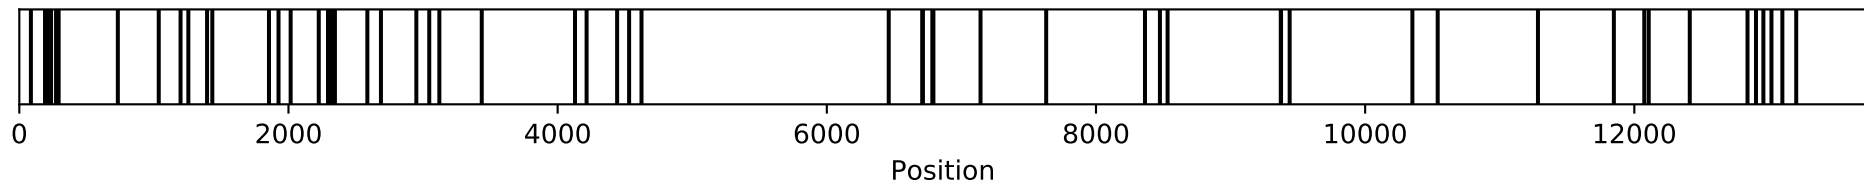

MA2 vs MM2  
Number of differences: 62

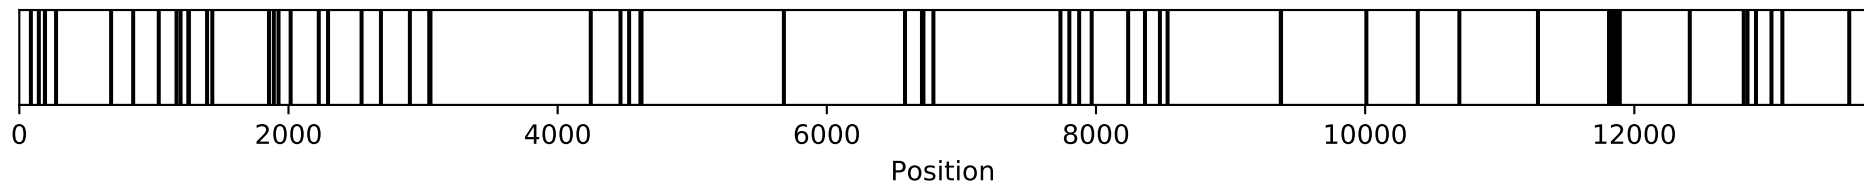

MM1 vs MM2  
Number of differences: 62

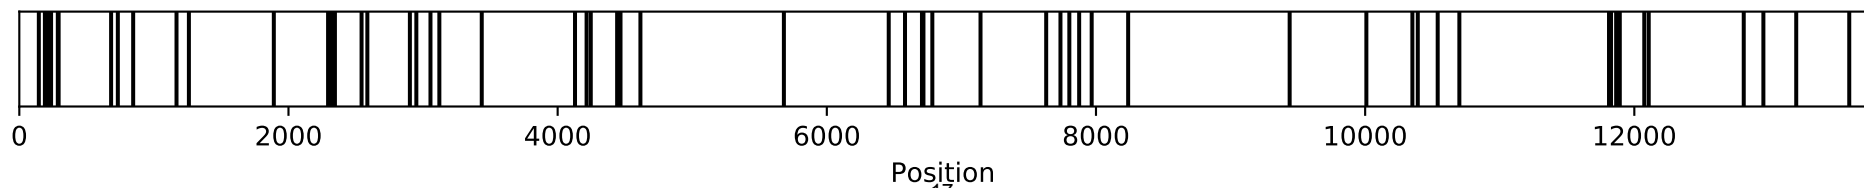

MA1 vs MA2  
Number of differences: 6

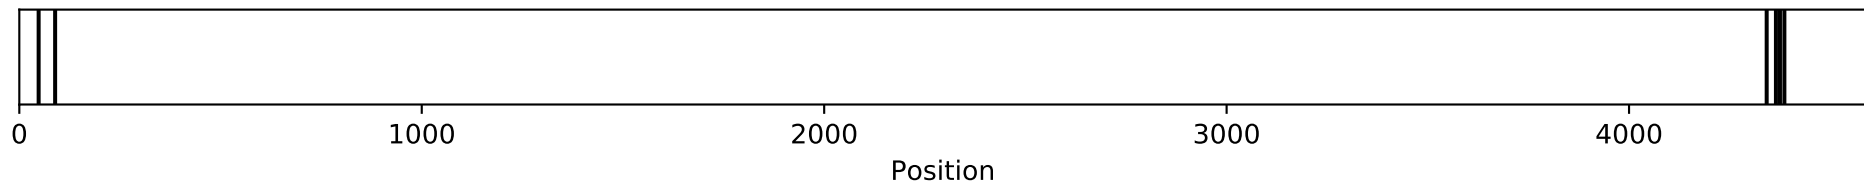

MA1 vs MM1  
Number of differences: 6

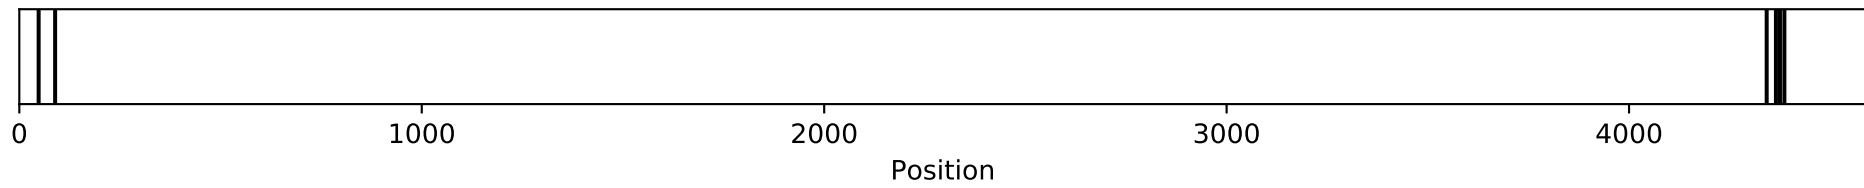

MA1 vs MM2  
Number of differences: 6

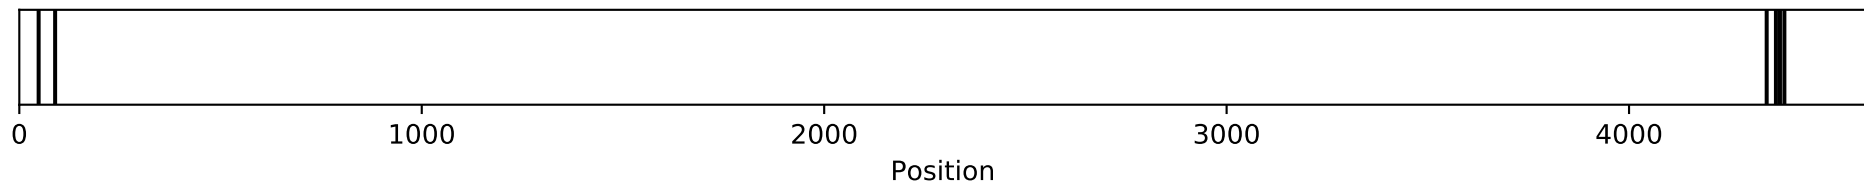

MA2 vs MM1  
Number of differences: 0

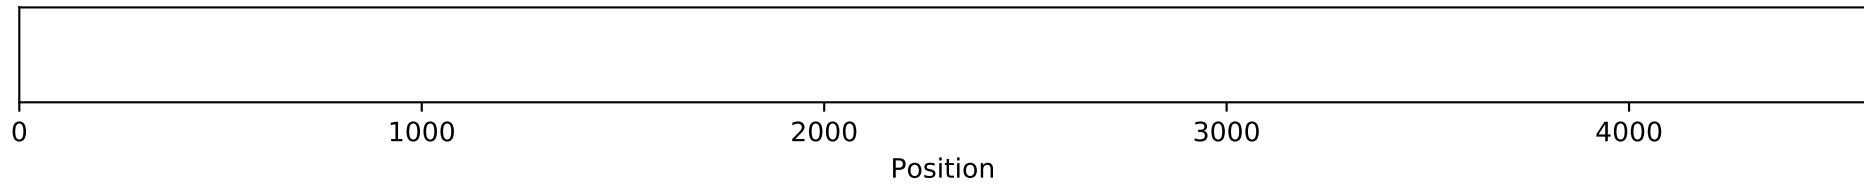

MA2 vs MM2  
Number of differences: 0

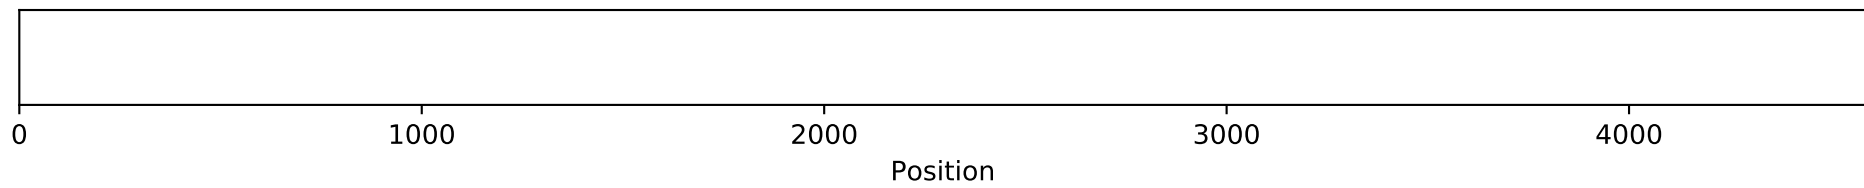

MM1 vs MM2  
Number of differences: 0

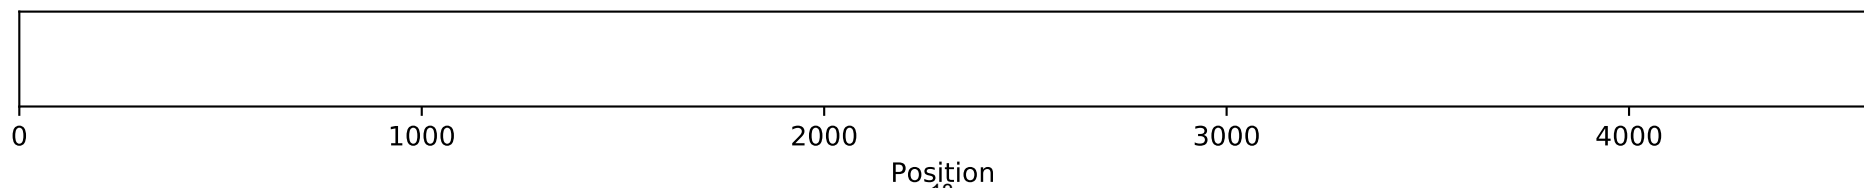



MA1 vs MA2  
Number of differences: 209

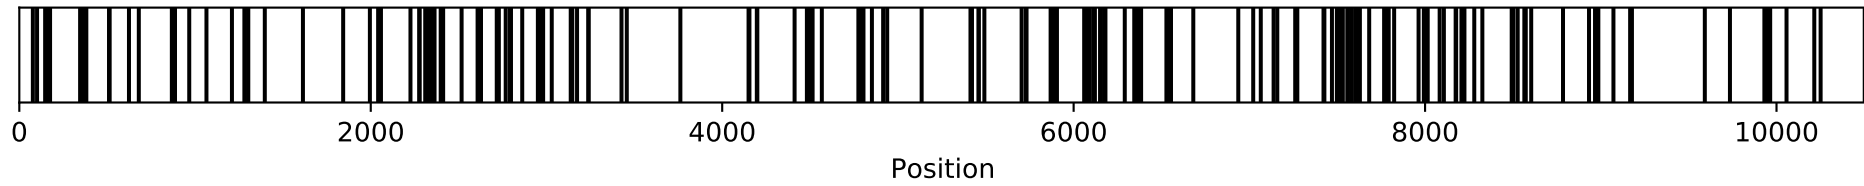

MA1 vs MM1  
Number of differences: 209

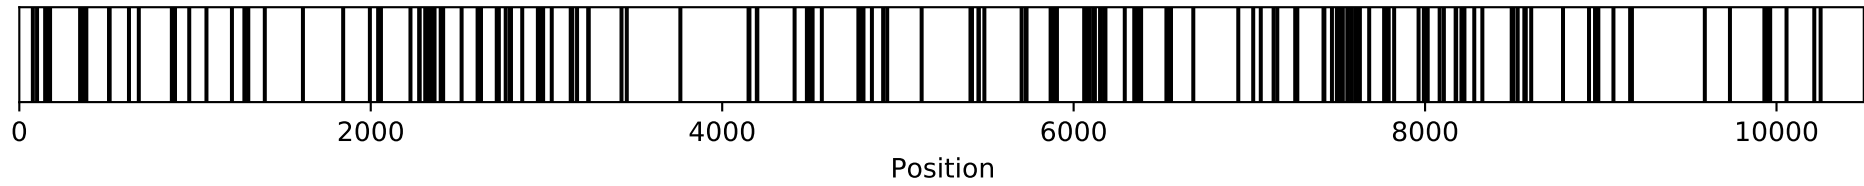

MA1 vs MM2  
Number of differences: 198

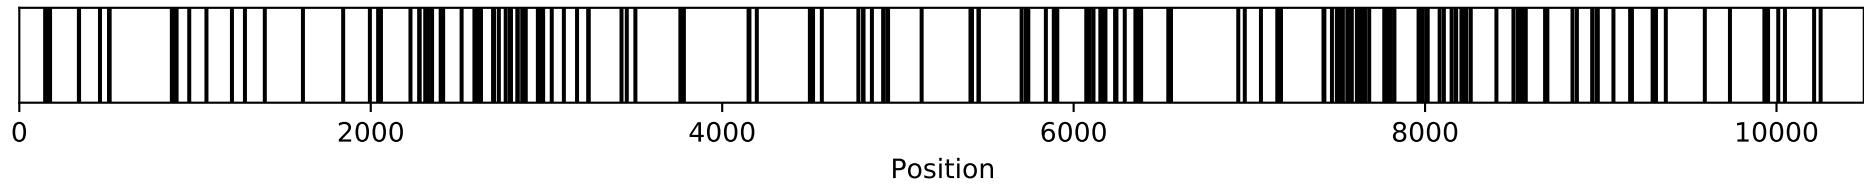

MA2 vs MM1  
Number of differences: 0

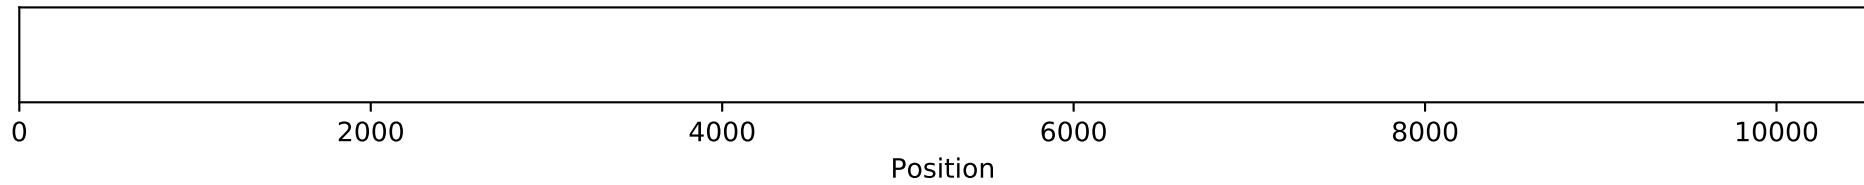

MA2 vs MM2  
Number of differences: 129

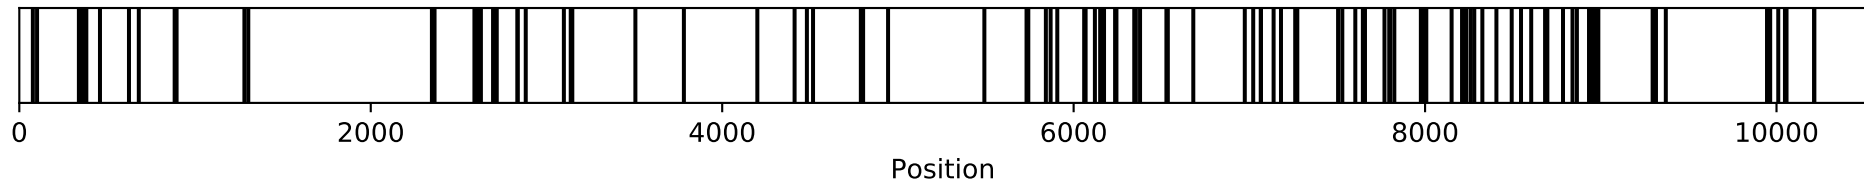

MM1 vs MM2  
Number of differences: 129

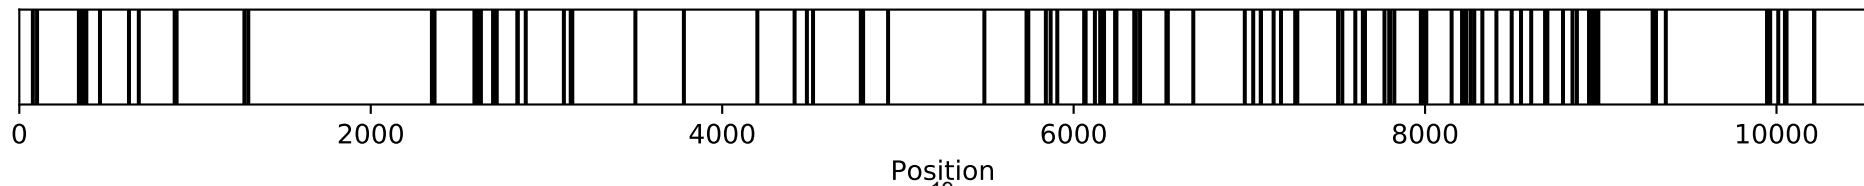

MA1 vs MA2  
Number of differences: 279

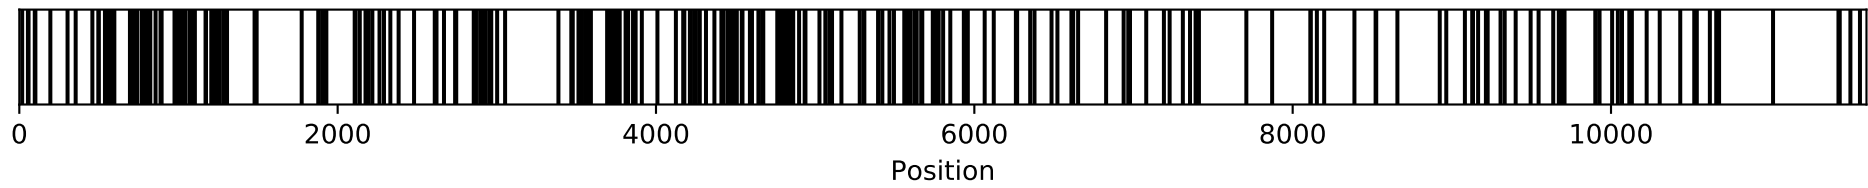

MA1 vs MM1  
Number of differences: 271

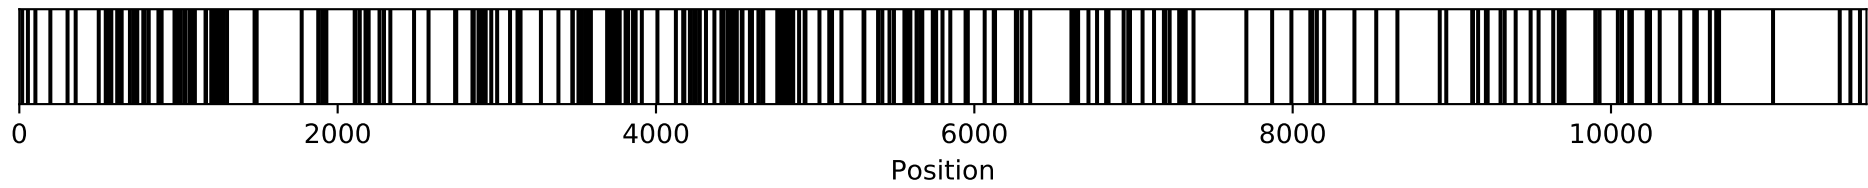

MA1 vs MM2  
Number of differences: 279

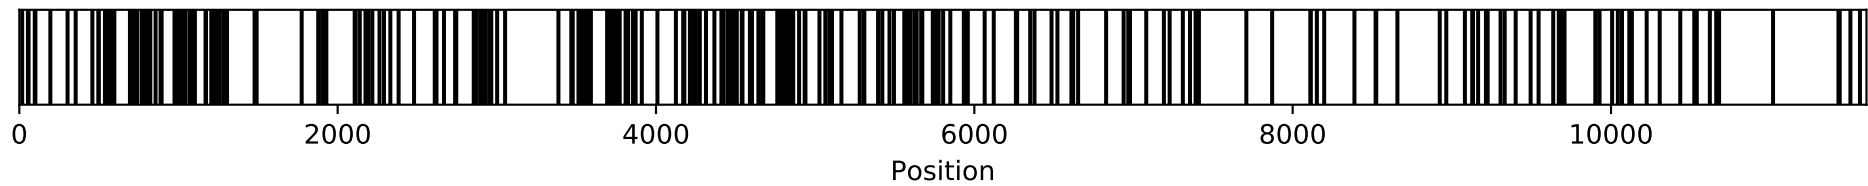

MA2 vs MM1  
Number of differences: 93

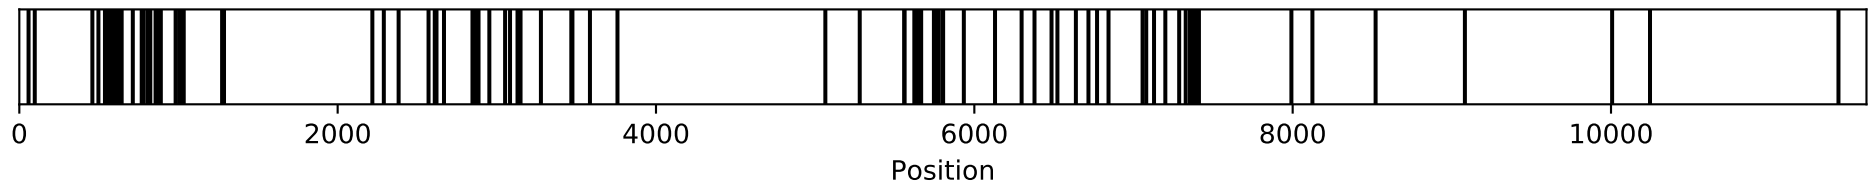

MA2 vs MM2  
Number of differences: 0

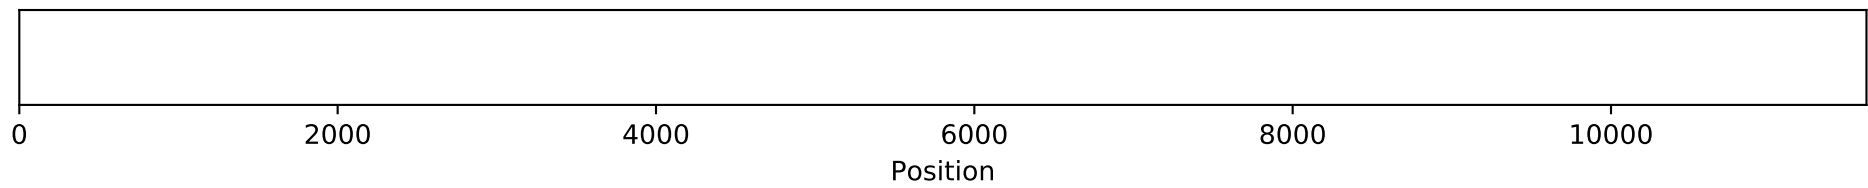

MM1 vs MM2  
Number of differences: 93

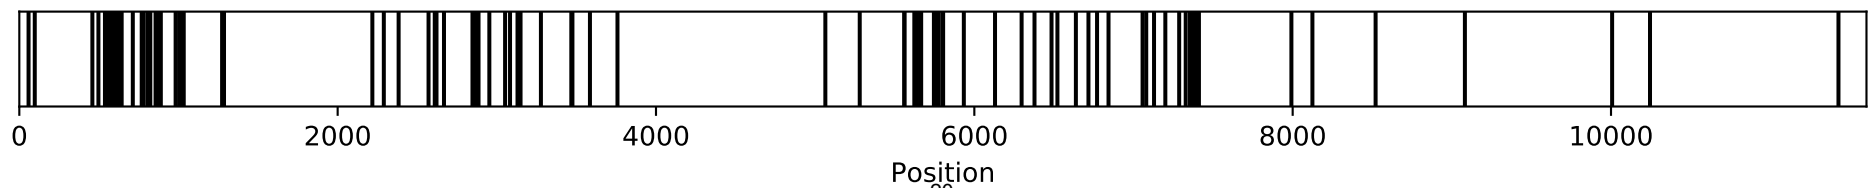

MA1 vs MA2  
Number of differences: 431

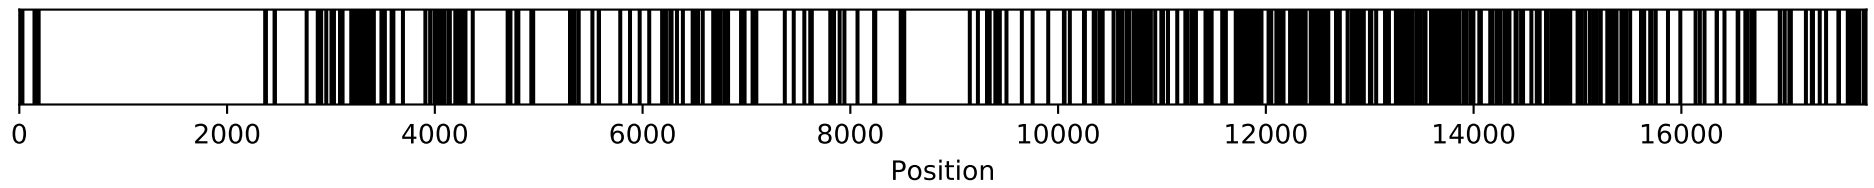

MA1 vs MM1  
Number of differences: 418

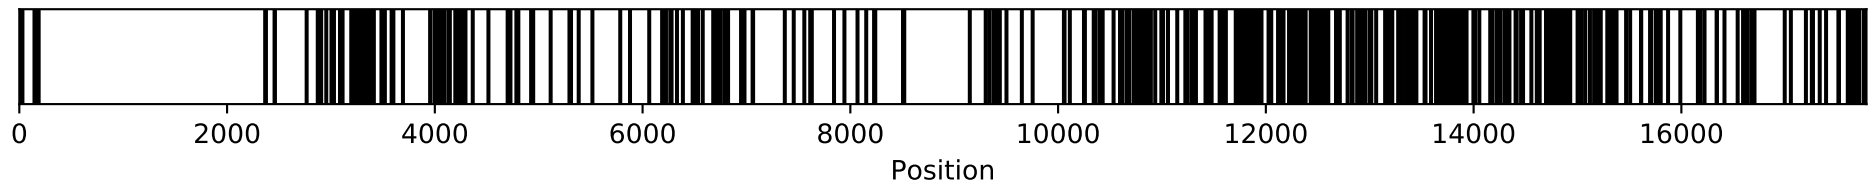

MA1 vs MM2  
Number of differences: 431

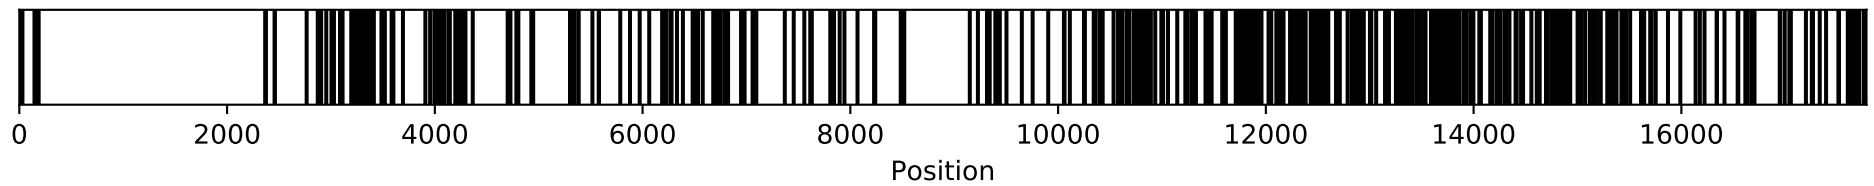

MA2 vs MM1  
Number of differences: 111

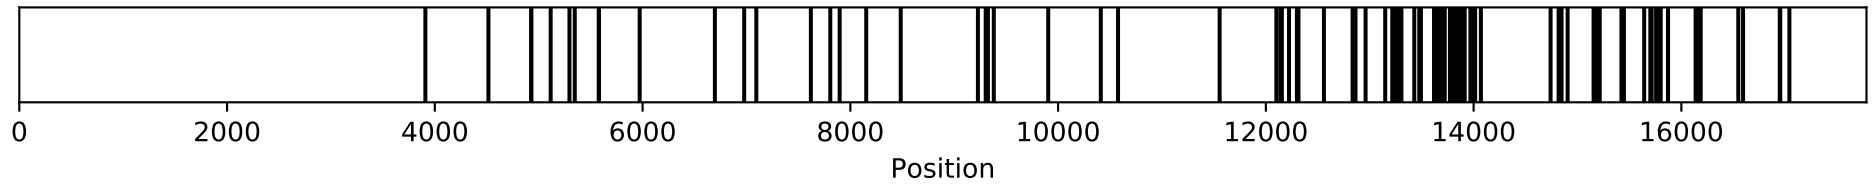

MA2 vs MM2  
Number of differences: 0

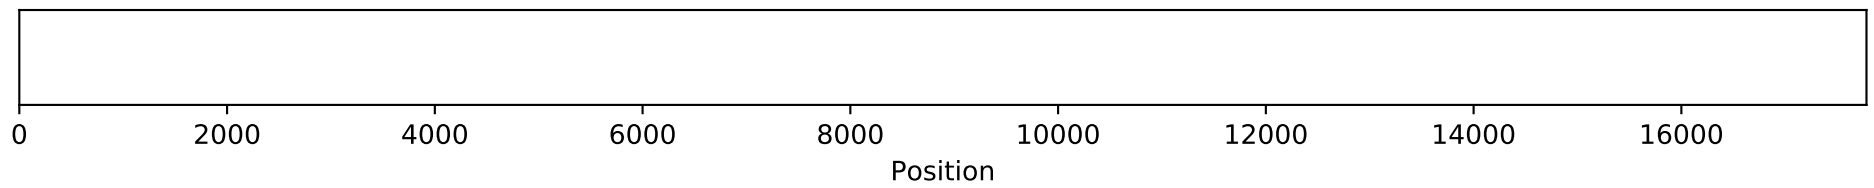

MM1 vs MM2  
Number of differences: 111

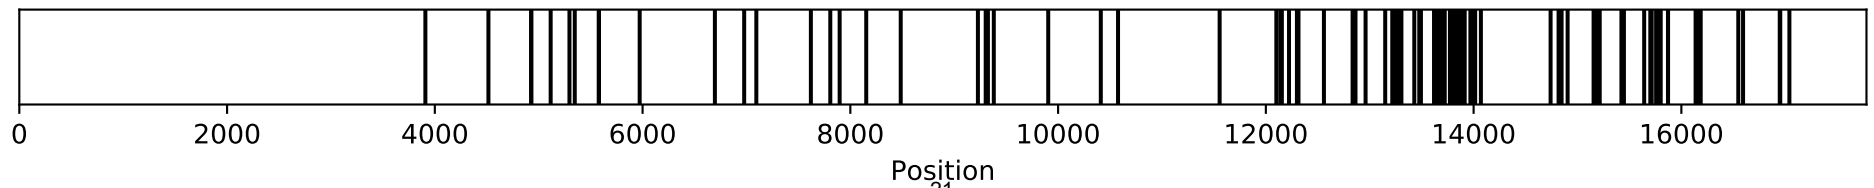

MA1 vs MA2  
Number of differences: 191

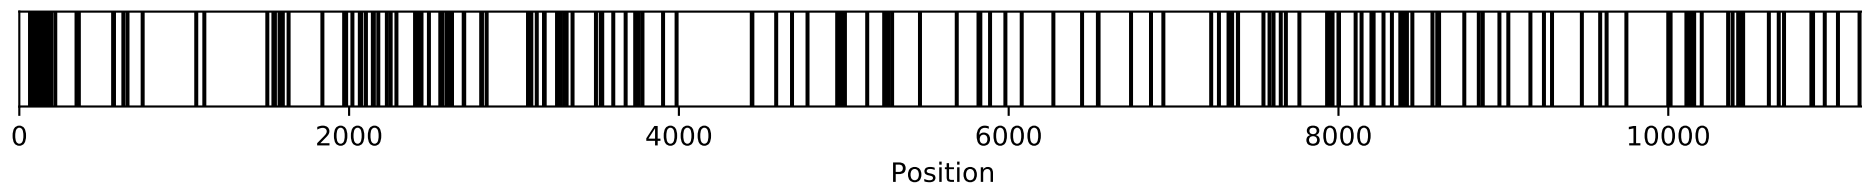

MA1 vs MM1  
Number of differences: 193

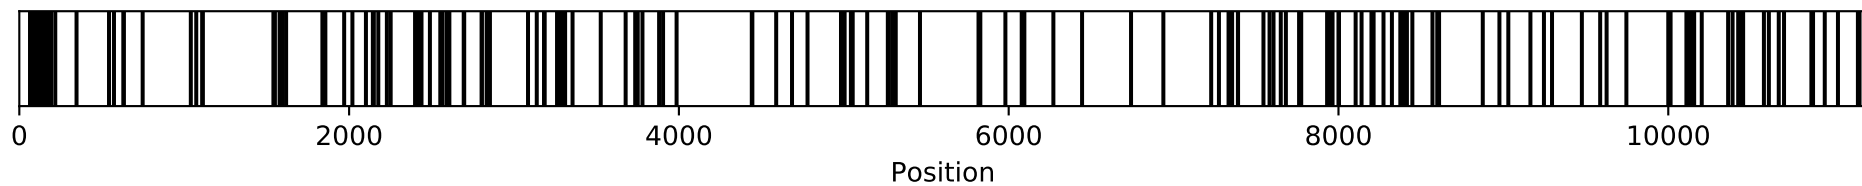

MA1 vs MM2  
Number of differences: 191

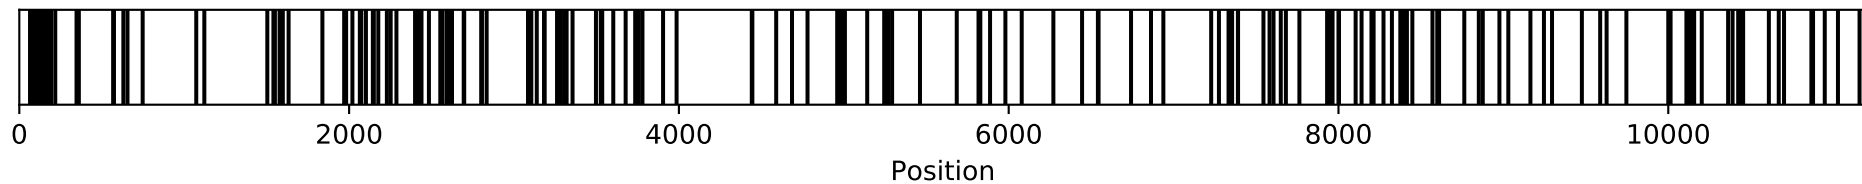

MA2 vs MM1  
Number of differences: 68

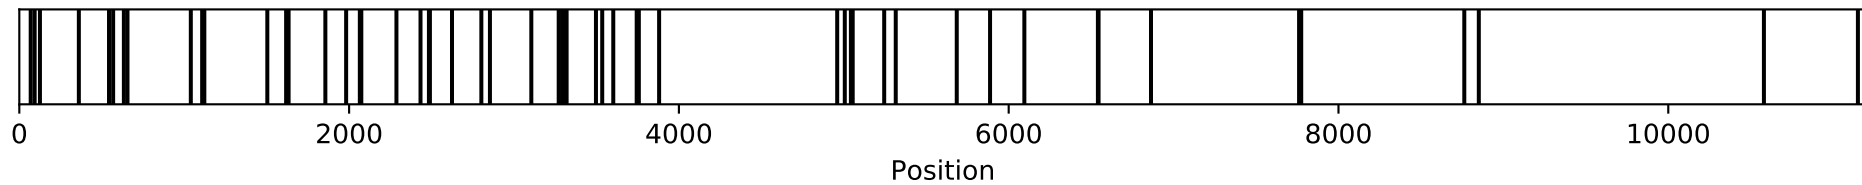

MA2 vs MM2  
Number of differences: 0

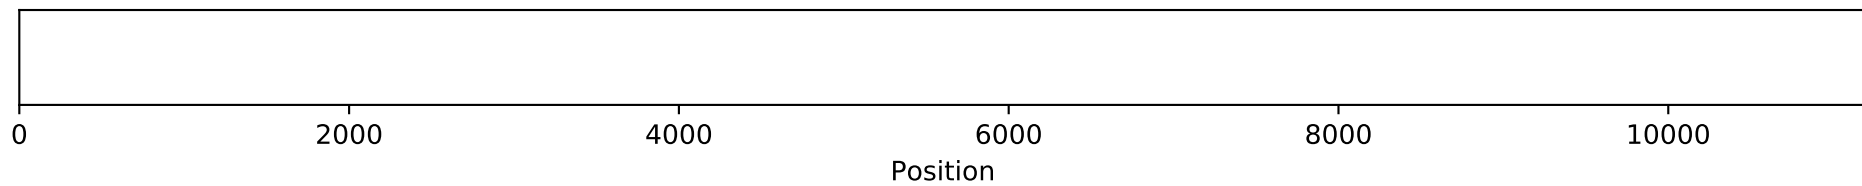

MM1 vs MM2  
Number of differences: 68

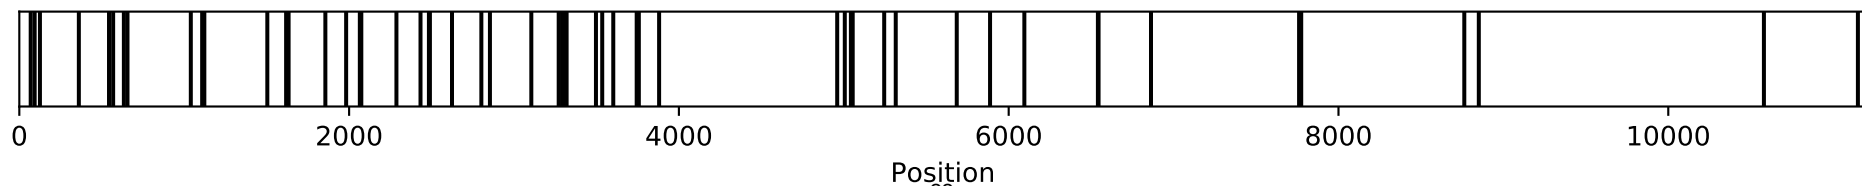

MA1 vs MA2  
Number of differences: 122

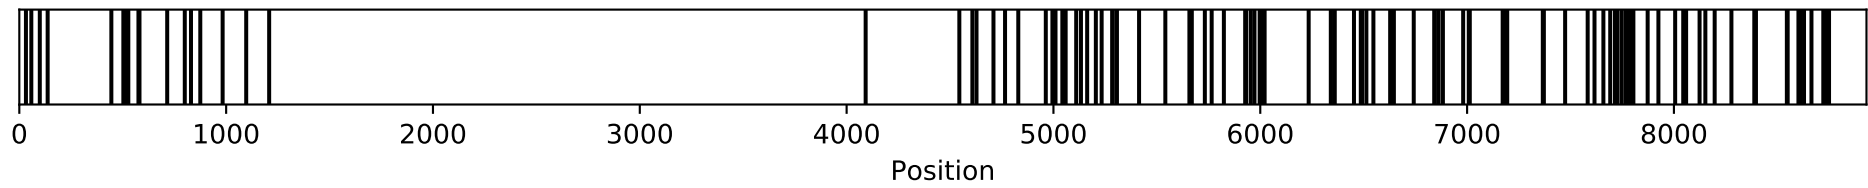

MA1 vs MM1  
Number of differences: 165

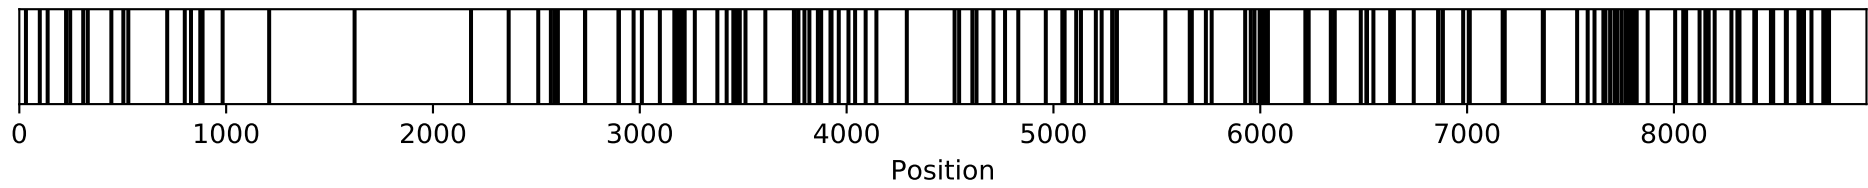

MA1 vs MM2  
Number of differences: 122

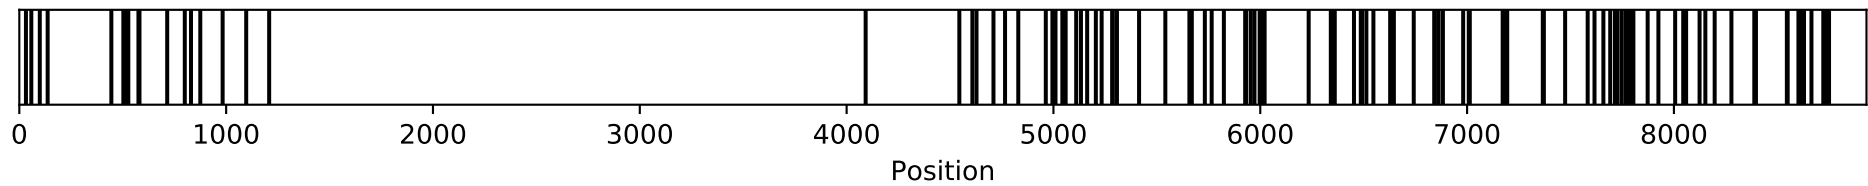

MA2 vs MM1  
Number of differences: 87

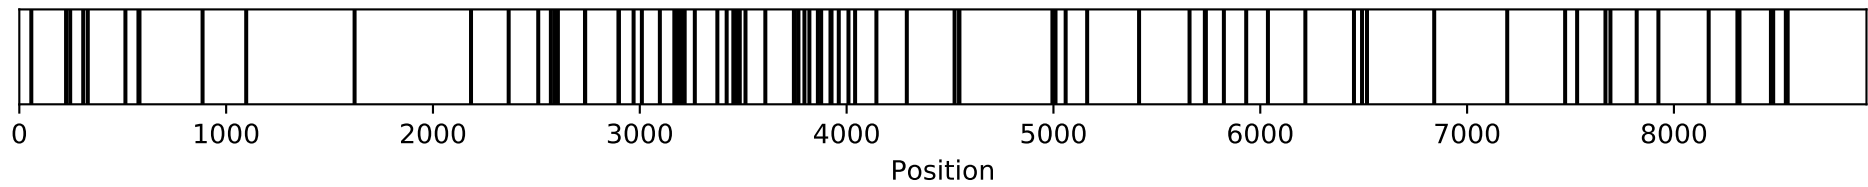

MA2 vs MM2  
Number of differences: 0

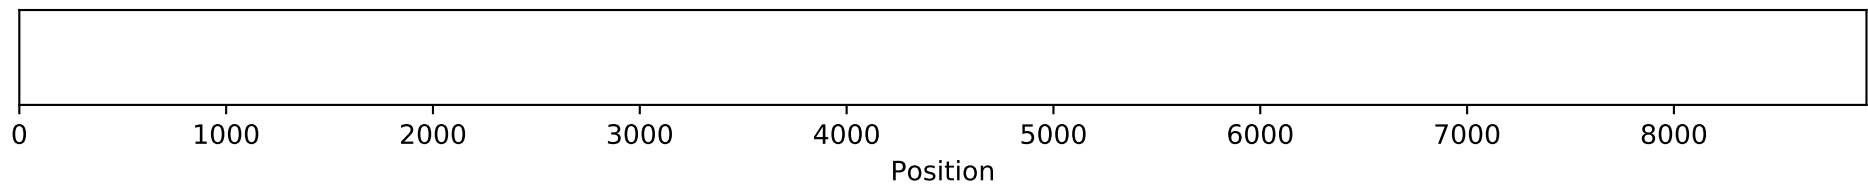

MM1 vs MM2  
Number of differences: 87

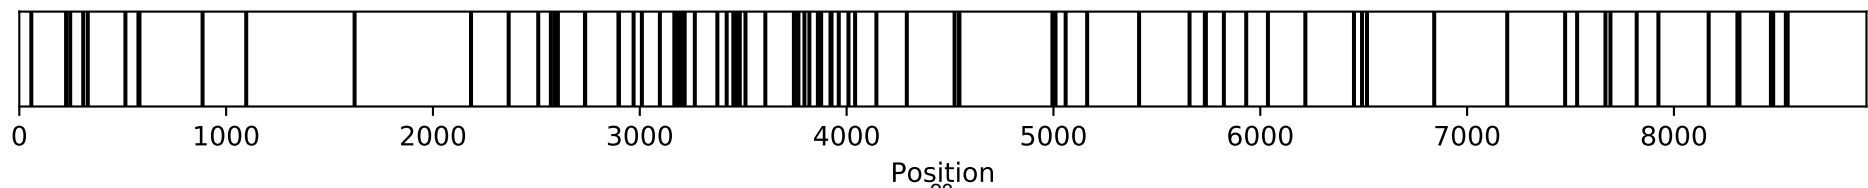

MA1 vs MA2  
Number of differences: 281

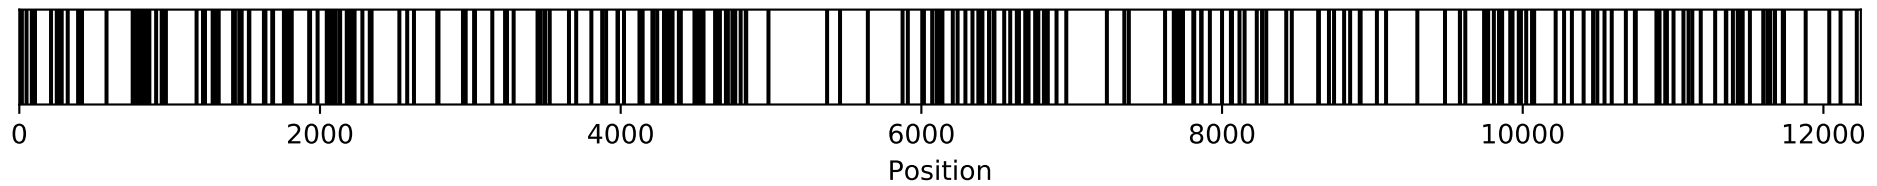

MA1 vs MM1  
Number of differences: 0

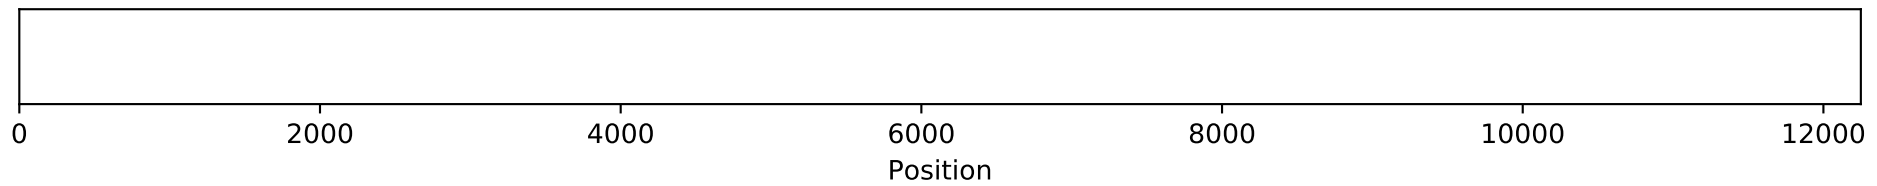

MA1 vs MM2  
Number of differences: 209

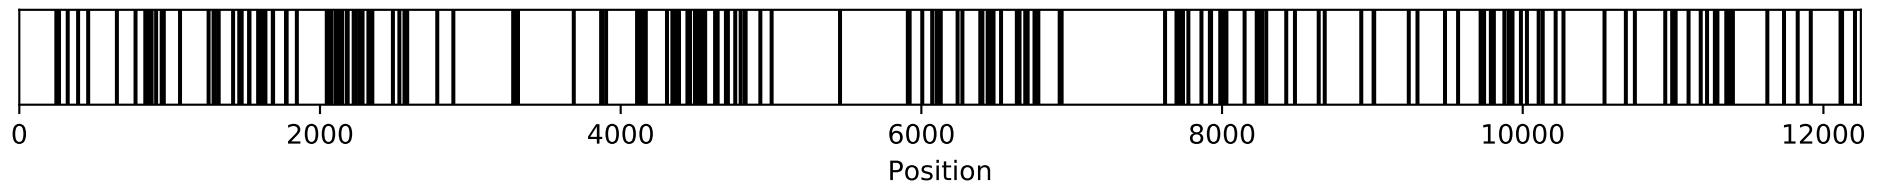

MA2 vs MM1  
Number of differences: 281

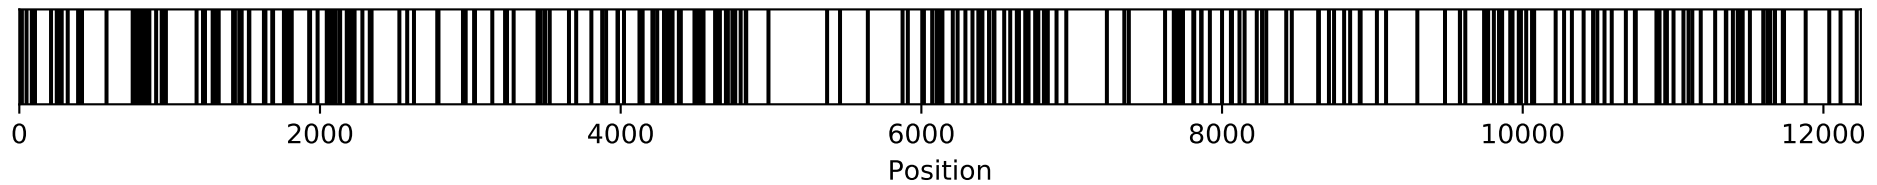

MA2 vs MM2  
Number of differences: 290

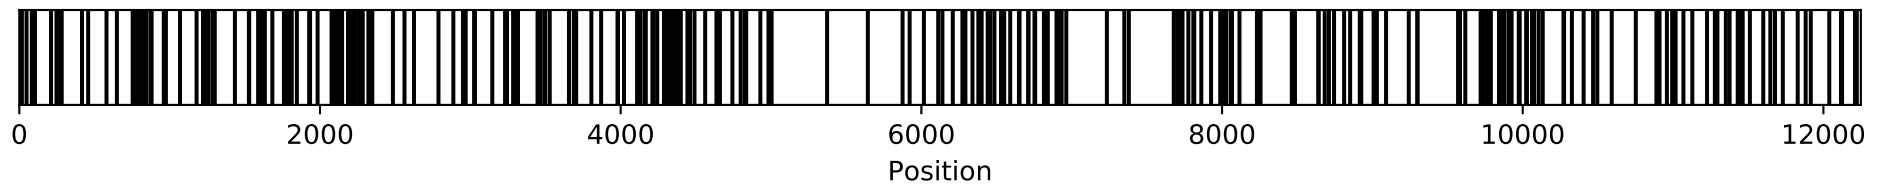

MM1 vs MM2  
Number of differences: 209

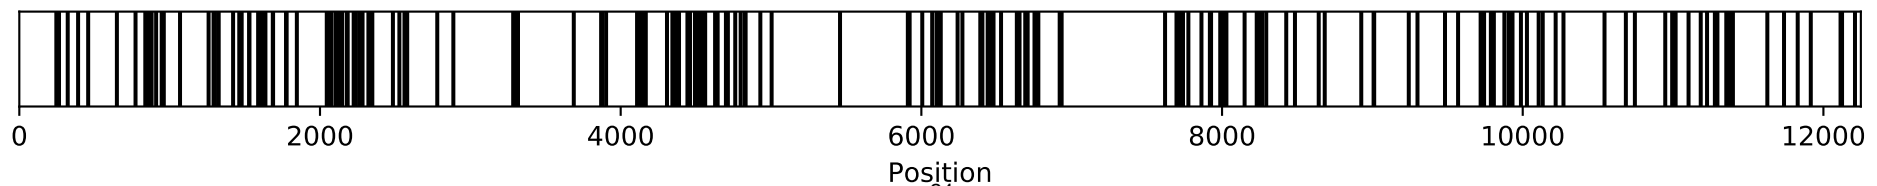

MA1 vs MA2  
Number of differences: 127

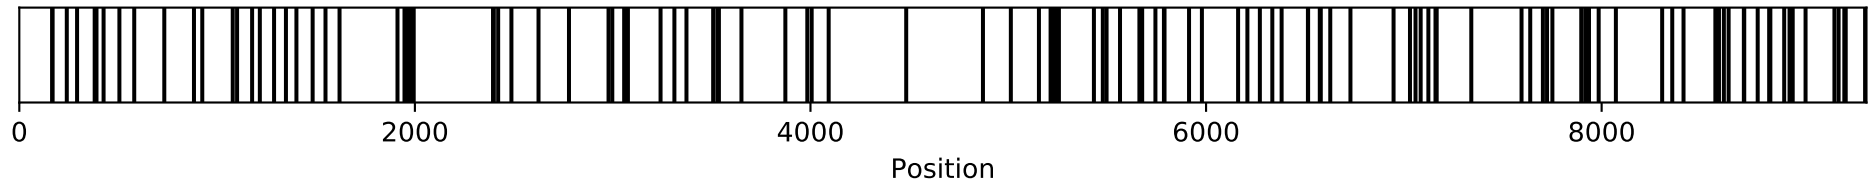

MA1 vs MM1  
Number of differences: 139

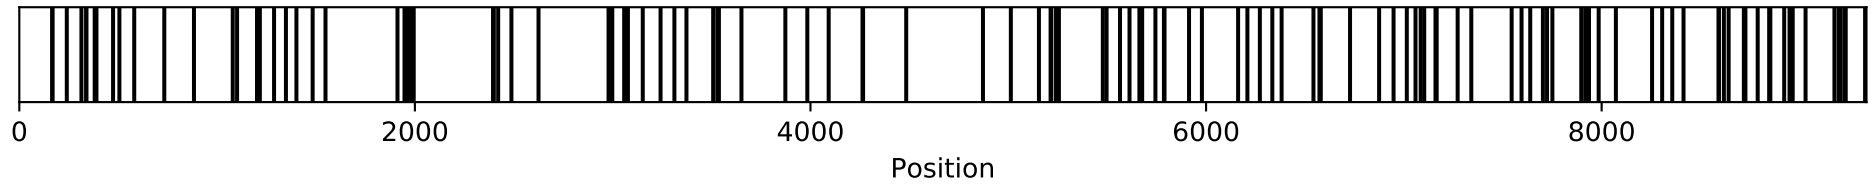

MA1 vs MM2  
Number of differences: 127

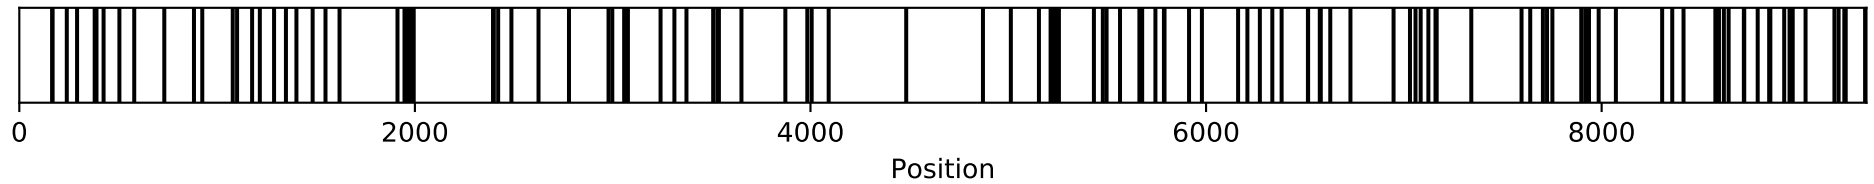

MA2 vs MM1  
Number of differences: 51

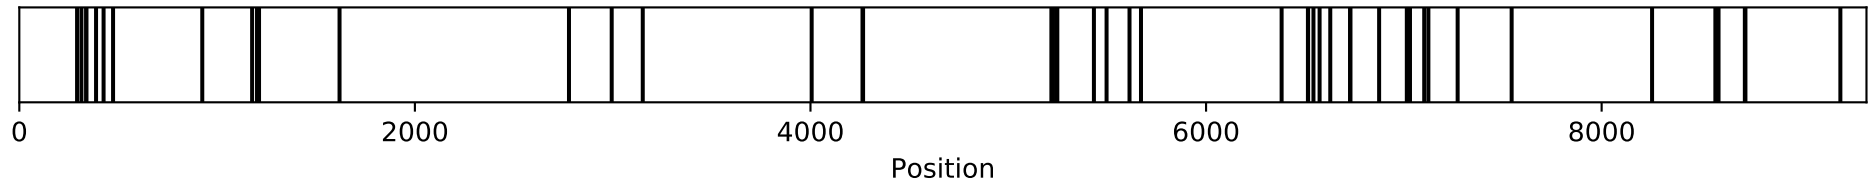

MA2 vs MM2  
Number of differences: 0

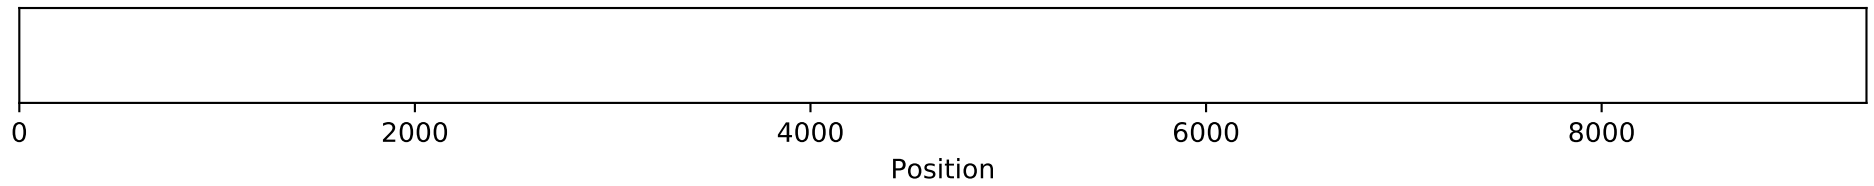

MM1 vs MM2  
Number of differences: 51

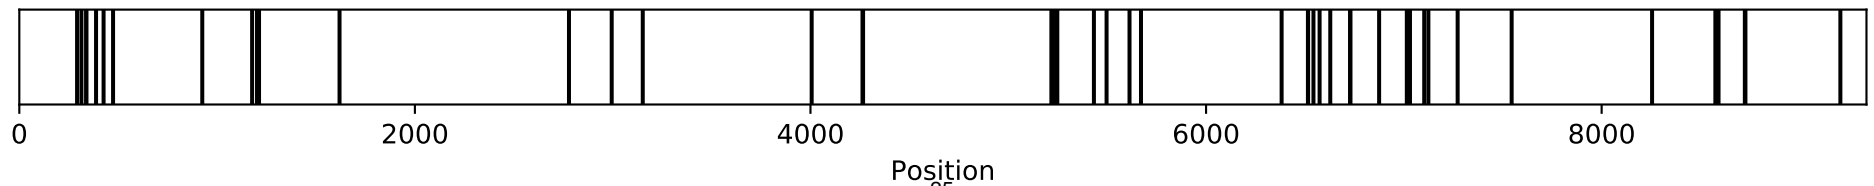

MA1 vs MA2  
Number of differences: 236

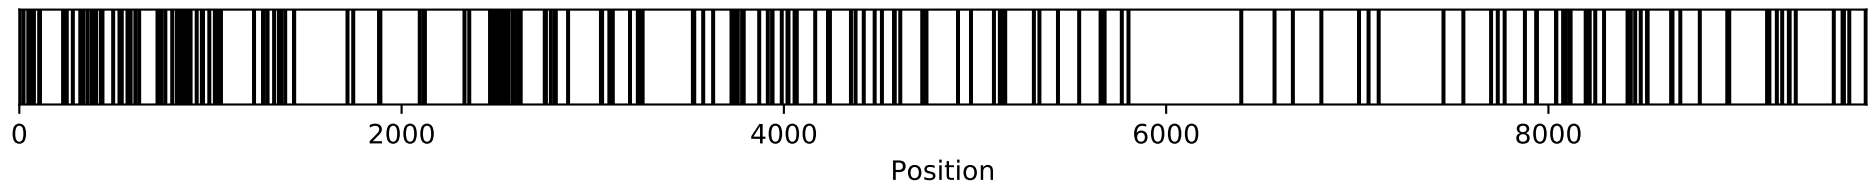

MA1 vs MM1  
Number of differences: 118

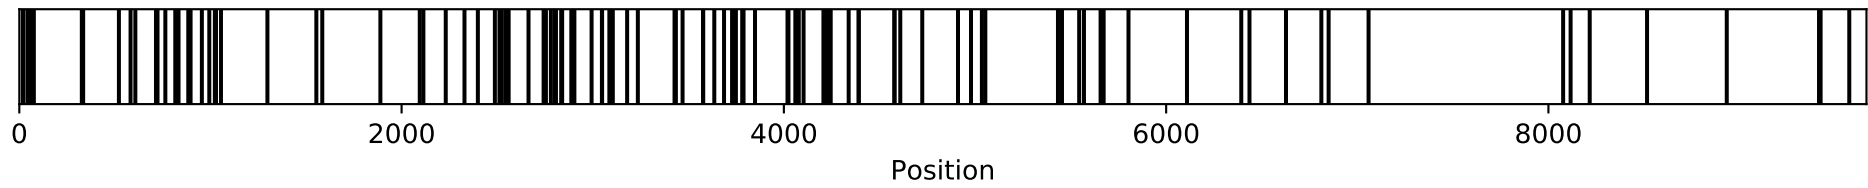

MA1 vs MM2  
Number of differences: 122

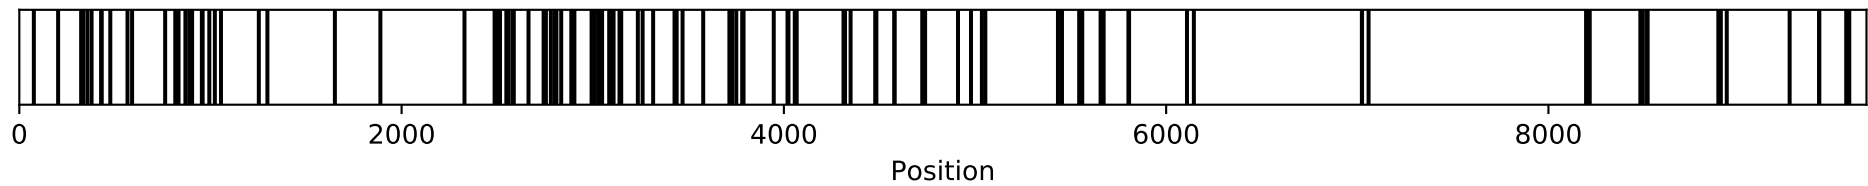

MA2 vs MM1  
Number of differences: 236

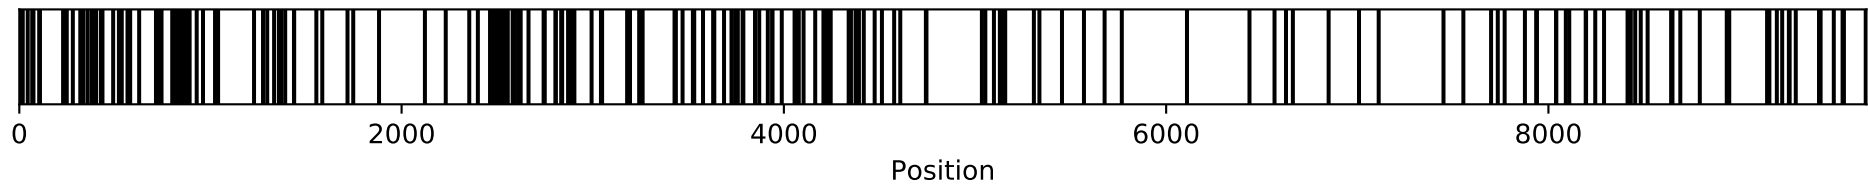

MA2 vs MM2  
Number of differences: 253

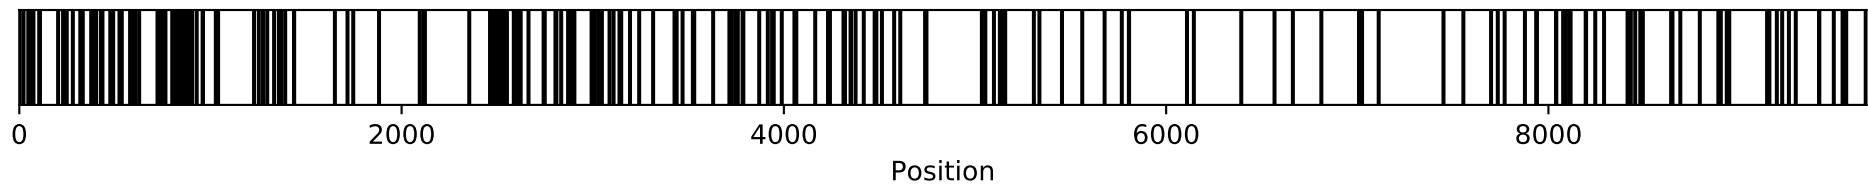

MM1 vs MM2  
Number of differences: 116

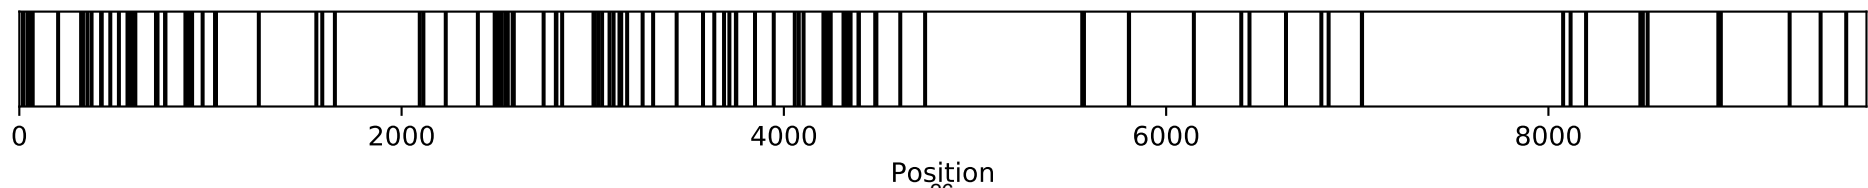



MA1 vs MA2  
Number of differences: 352

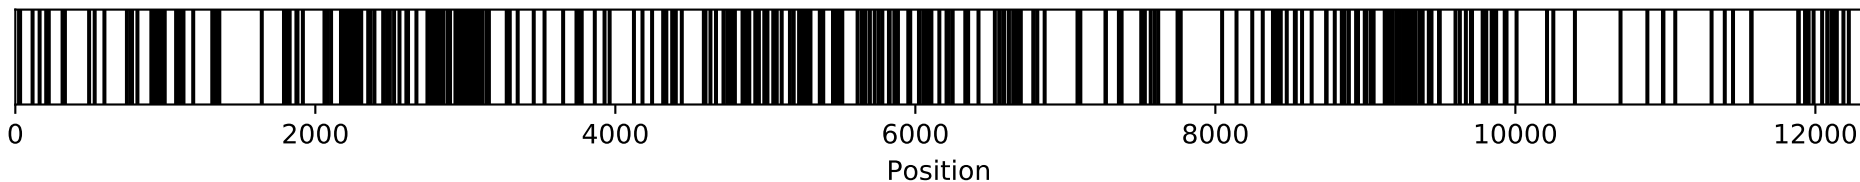

MA1 vs MM1  
Number of differences: 362

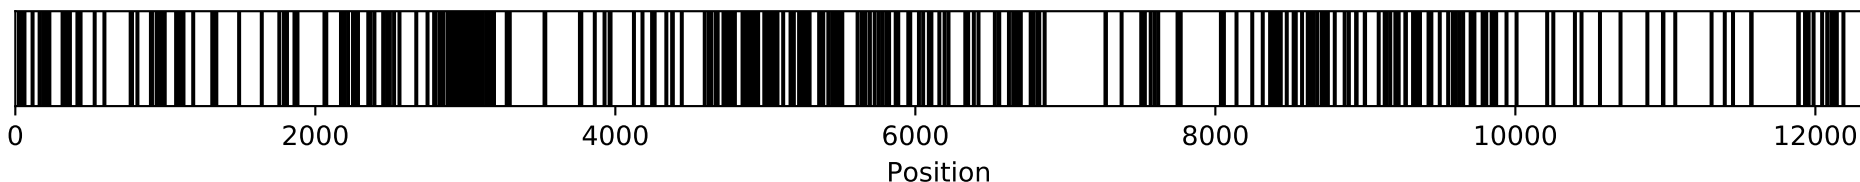

MA1 vs MM2  
Number of differences: 349

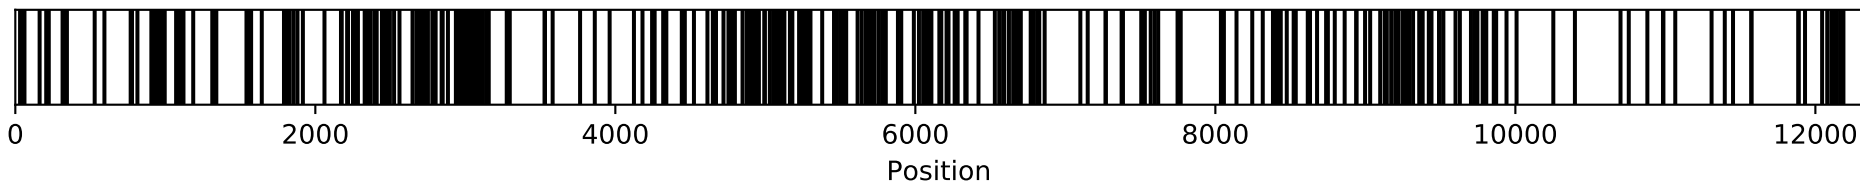

MA2 vs MM1  
Number of differences: 232

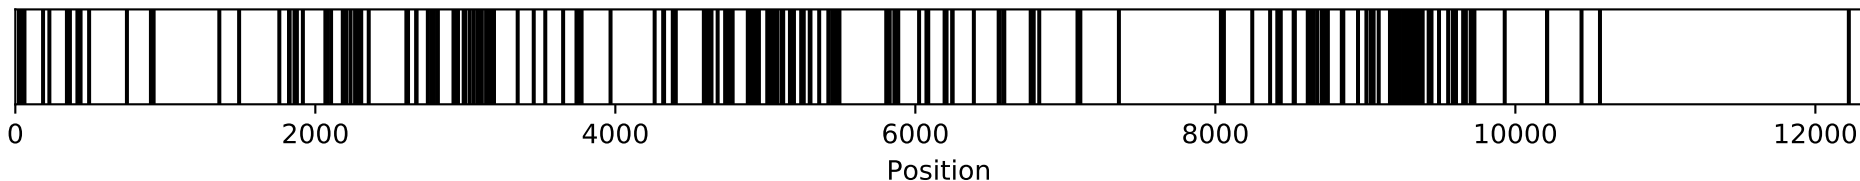

MA2 vs MM2  
Number of differences: 216

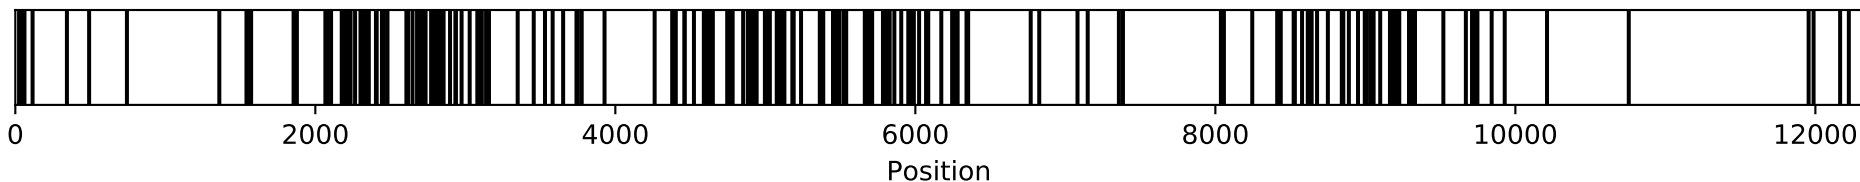

MM1 vs MM2  
Number of differences: 227

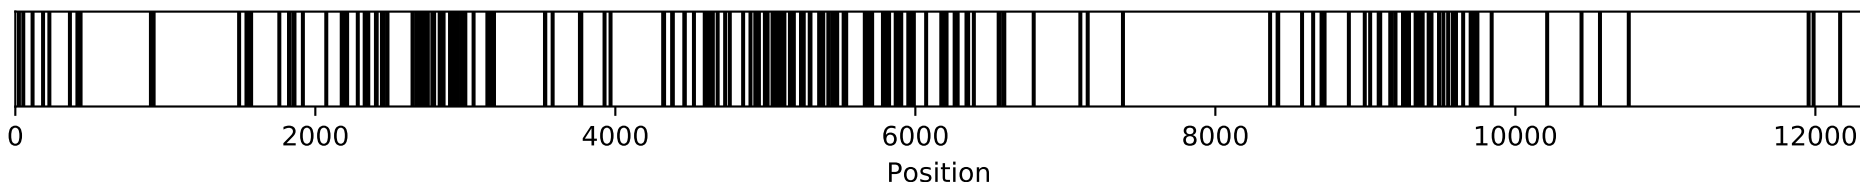

MA1 vs MA2  
Number of differences: 111

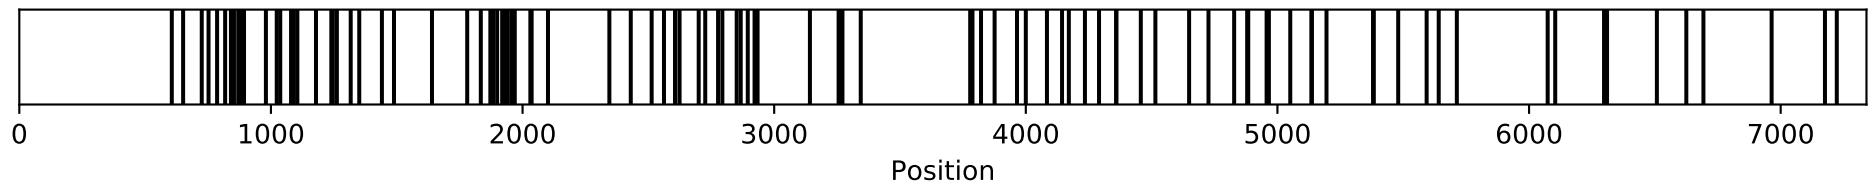

MA1 vs MM1  
Number of differences: 0

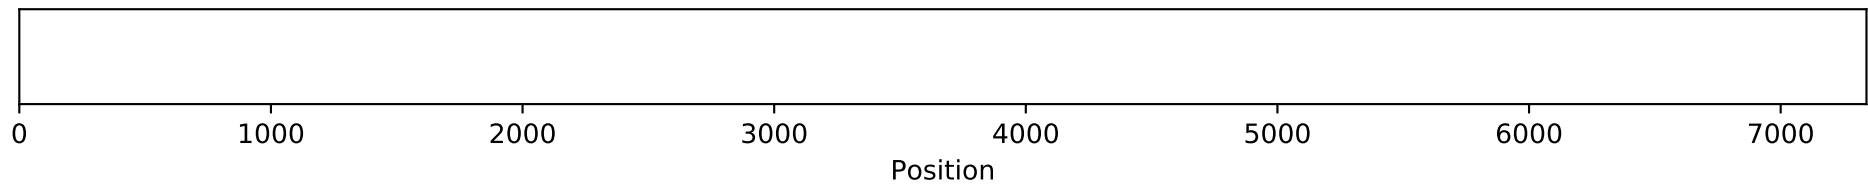

MA1 vs MM2  
Number of differences: 52

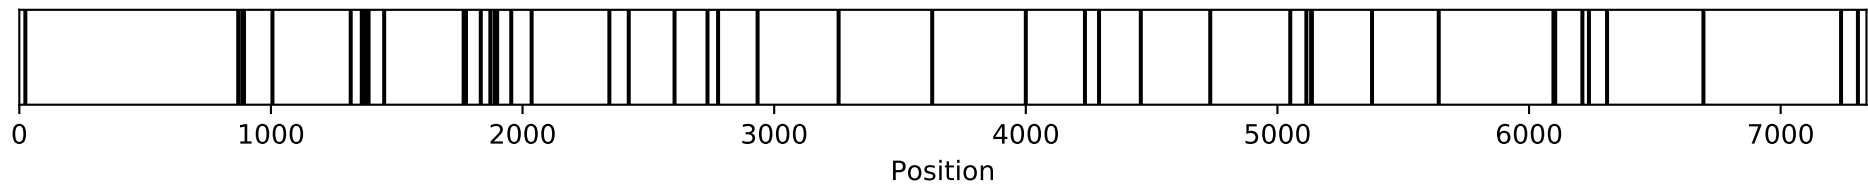

MA2 vs MM1  
Number of differences: 111

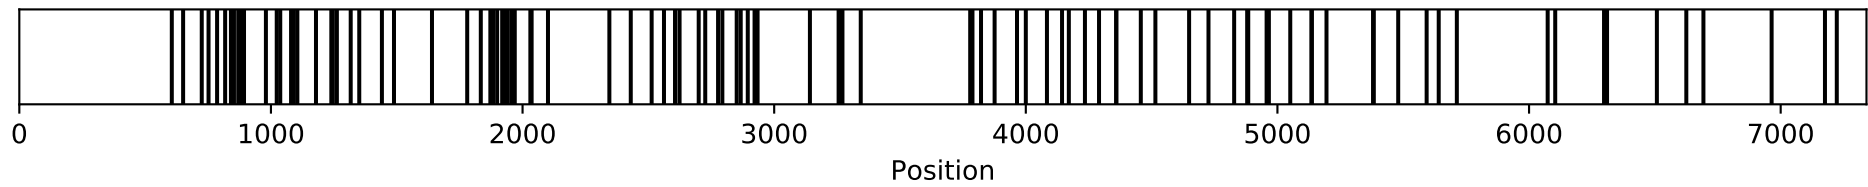

MA2 vs MM2  
Number of differences: 120

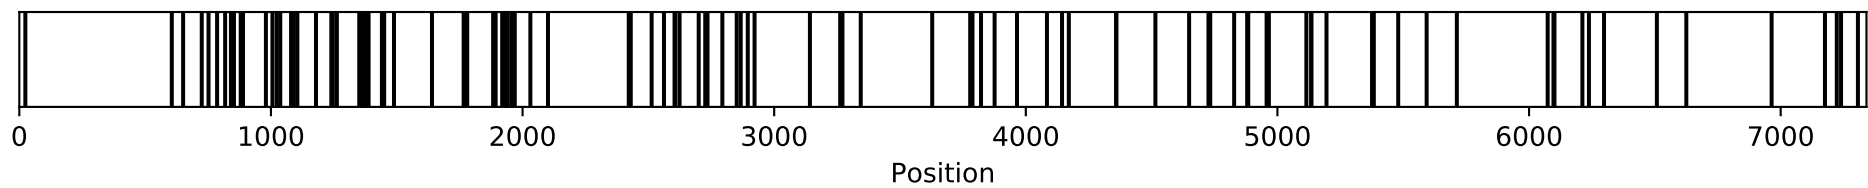

MM1 vs MM2  
Number of differences: 52

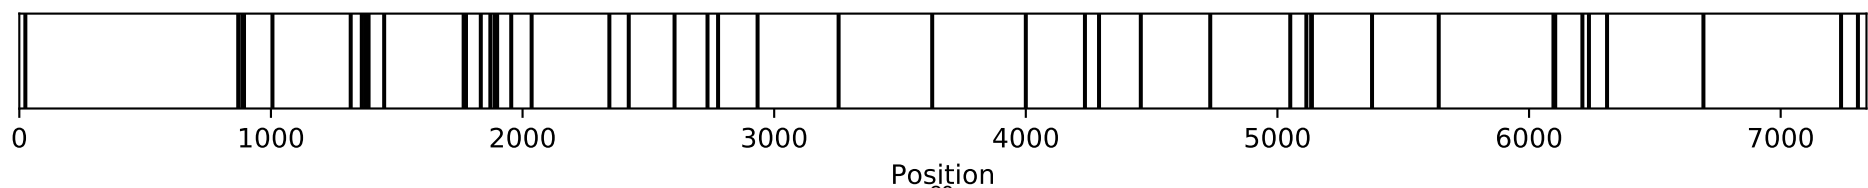

MA1 vs MA2  
Number of differences: 177

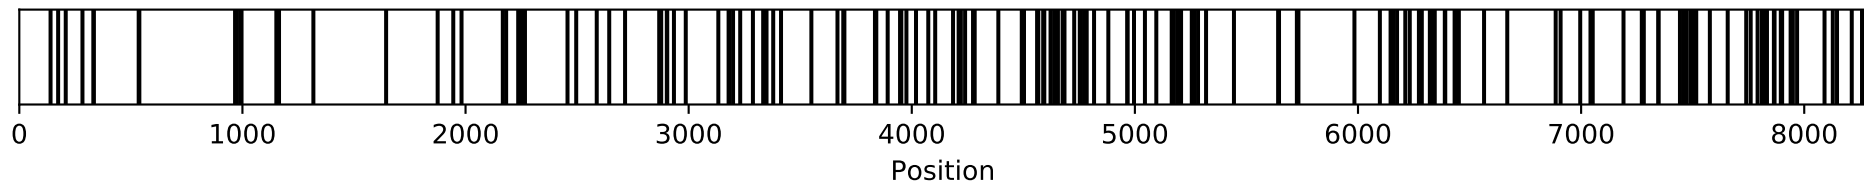

MA1 vs MM1  
Number of differences: 0

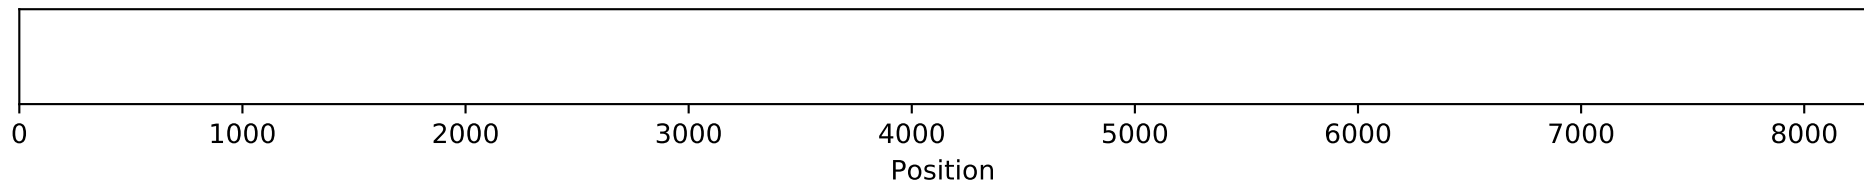

MA1 vs MM2  
Number of differences: 50

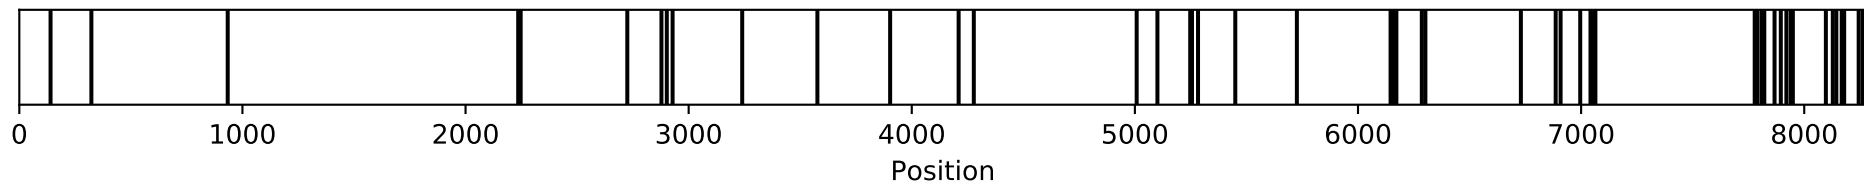

MA2 vs MM1  
Number of differences: 177

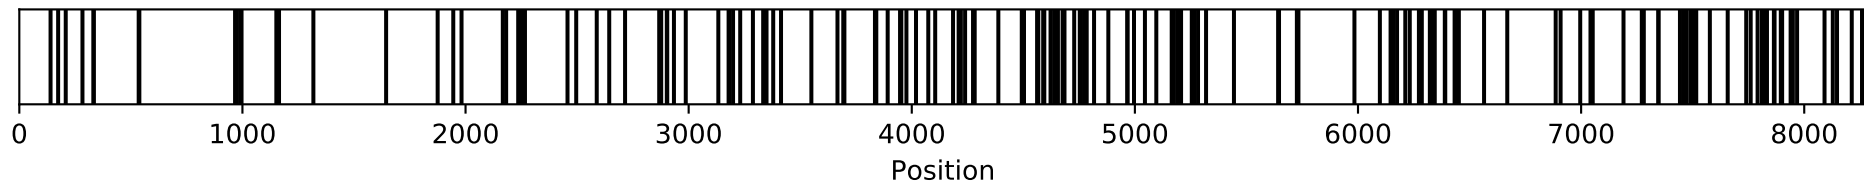

MA2 vs MM2  
Number of differences: 181

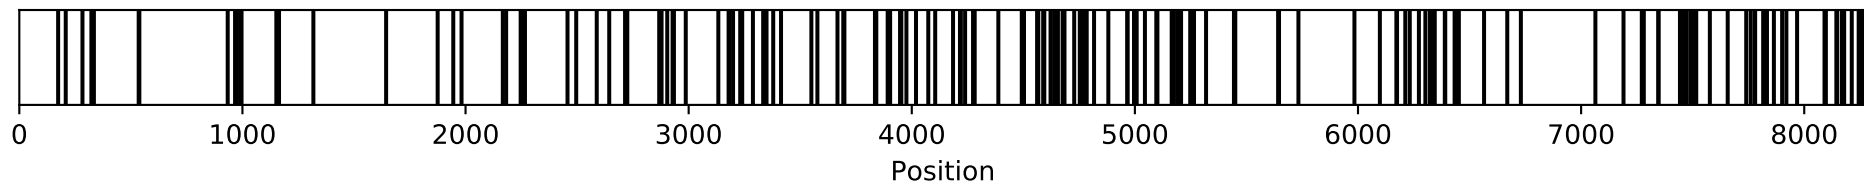

MM1 vs MM2  
Number of differences: 50

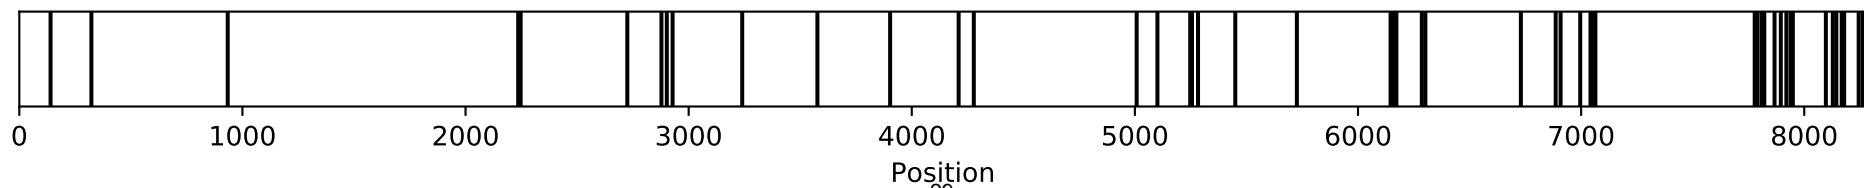

MA1 vs MA2  
Number of differences: 23

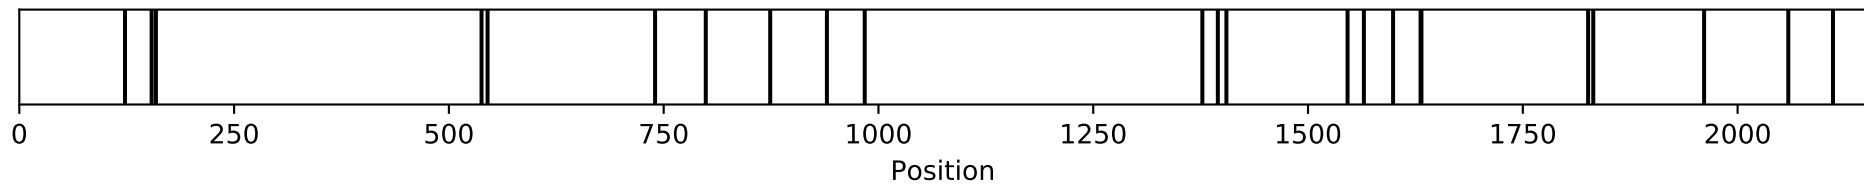

MA1 vs MM1  
Number of differences: 13

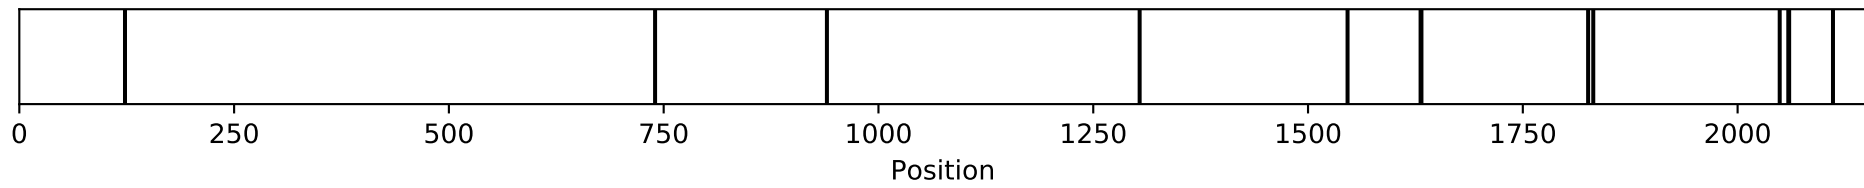

MA1 vs MM2  
Number of differences: 12

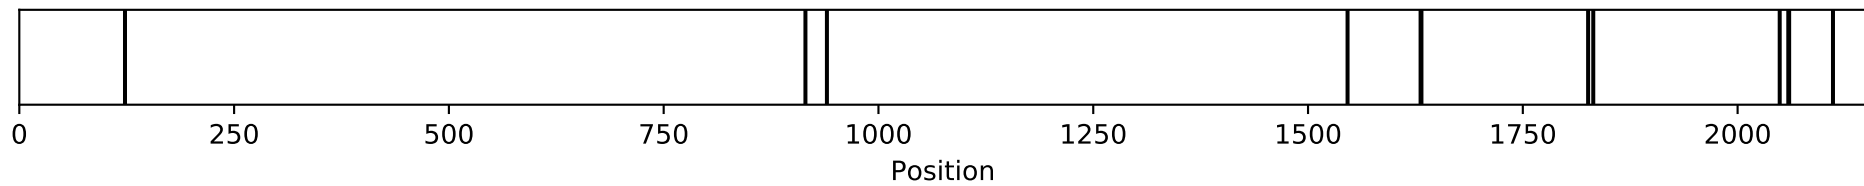

MA2 vs MM1  
Number of differences: 16

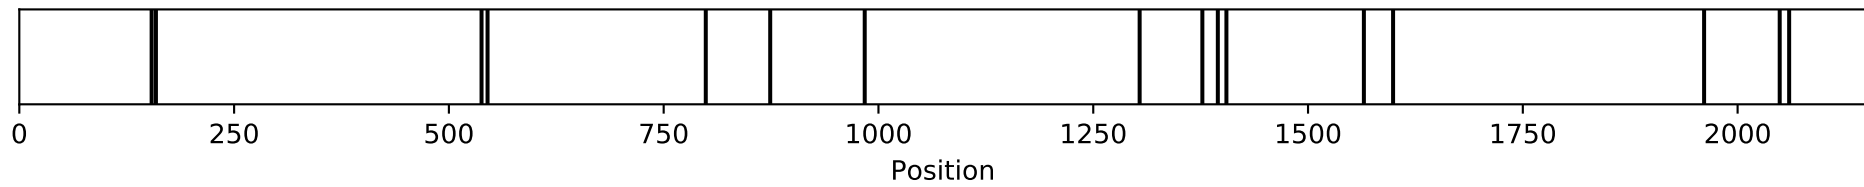

MA2 vs MM2  
Number of differences: 17

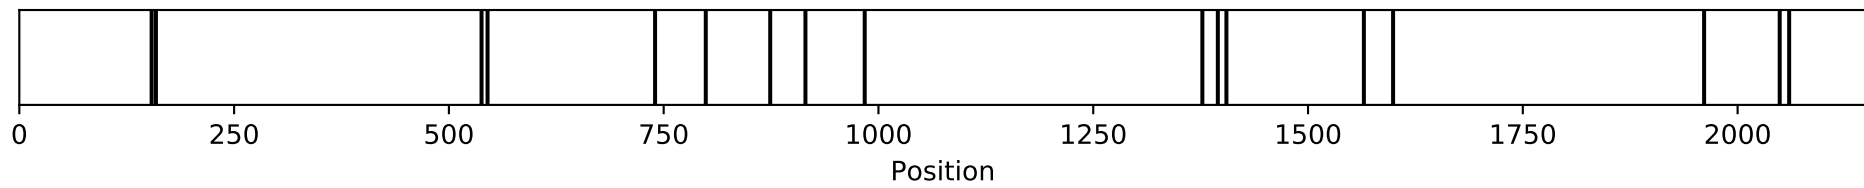

MM1 vs MM2  
Number of differences: 3

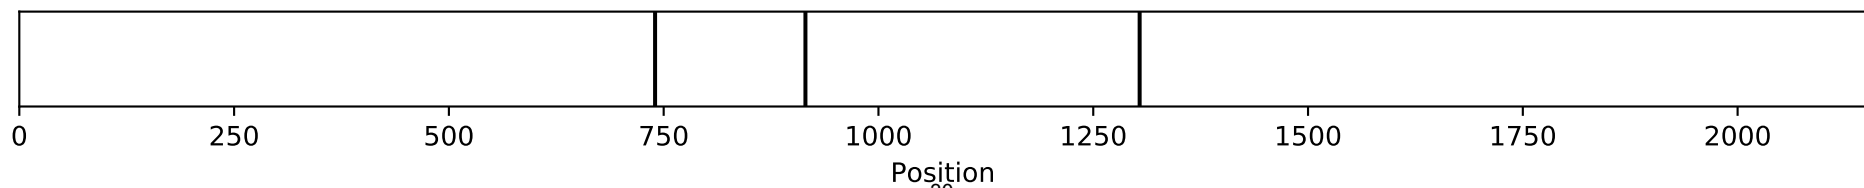

MA1 vs MA2  
Number of differences: 219

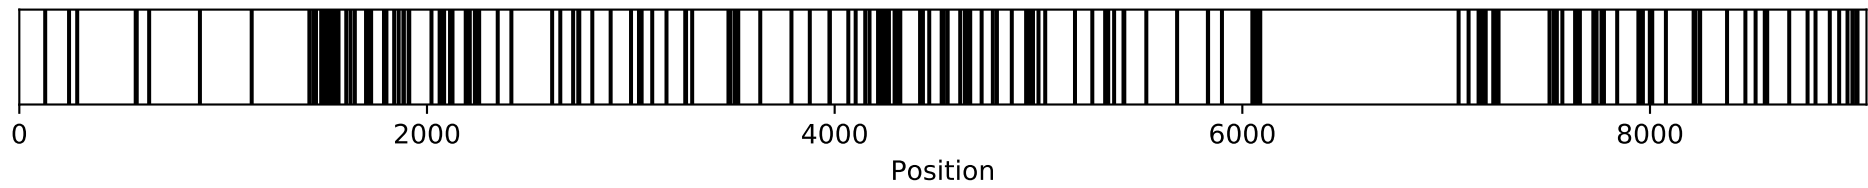

MA1 vs MM1  
Number of differences: 219

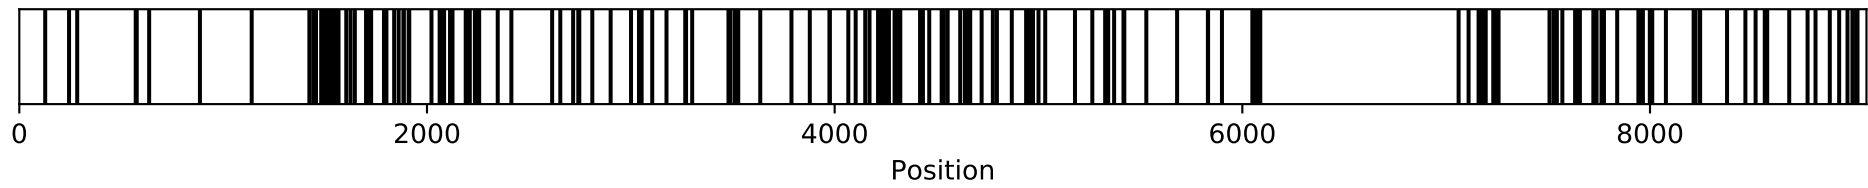

MA1 vs MM2  
Number of differences: 217

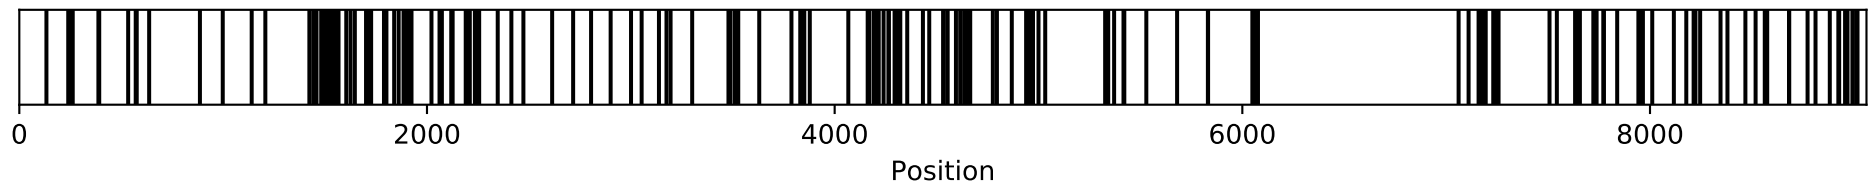

MA2 vs MM1  
Number of differences: 0

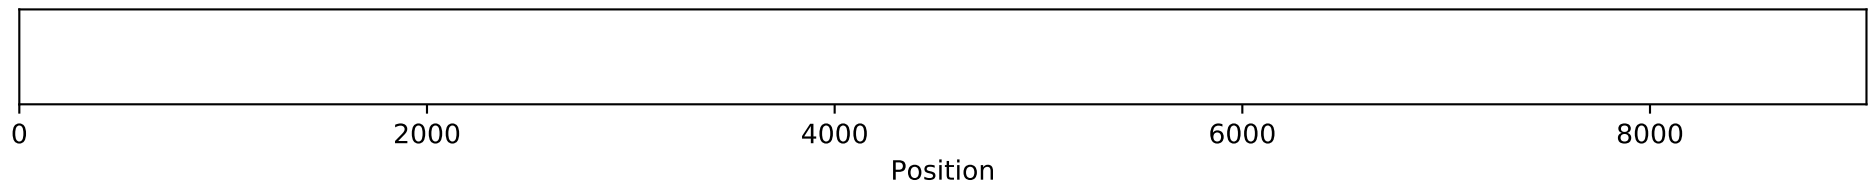

MA2 vs MM2  
Number of differences: 93

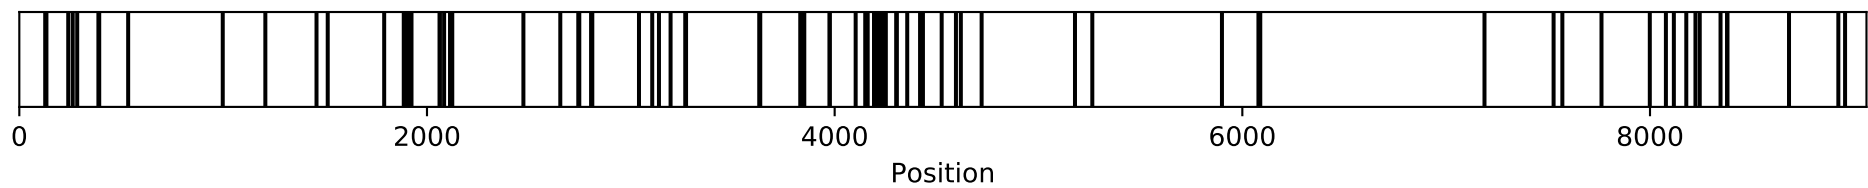

MM1 vs MM2  
Number of differences: 93

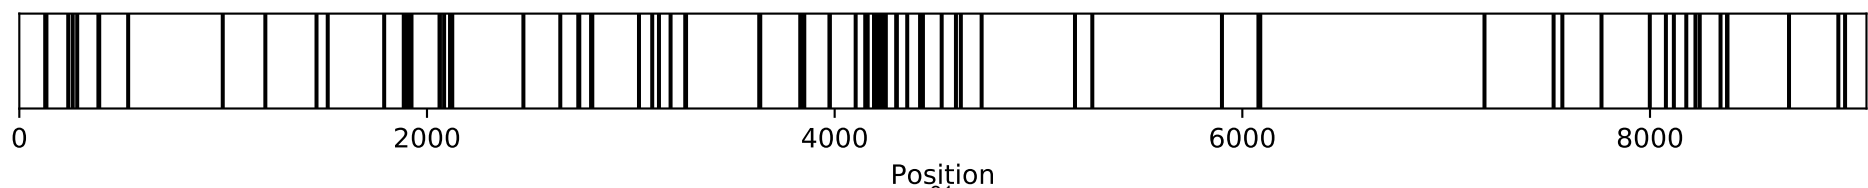

MA1 vs MA2  
Number of differences: 250

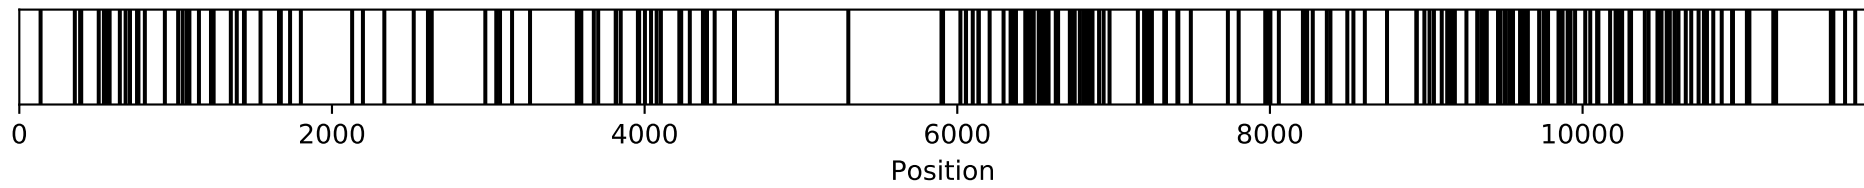

MA1 vs MM1  
Number of differences: 127

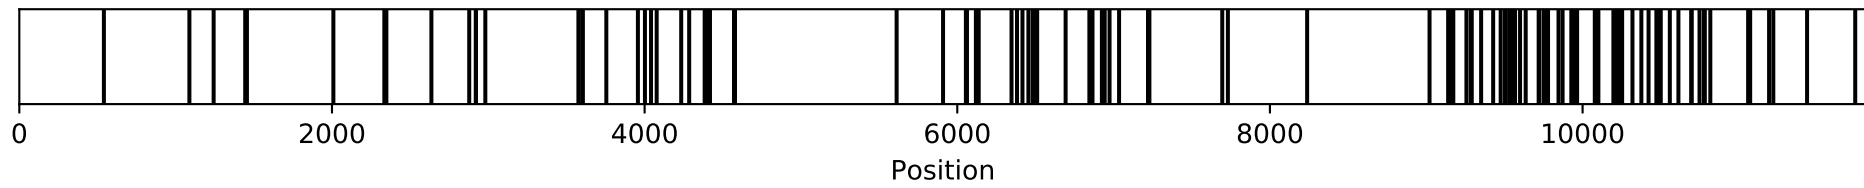

MA1 vs MM2  
Number of differences: 95

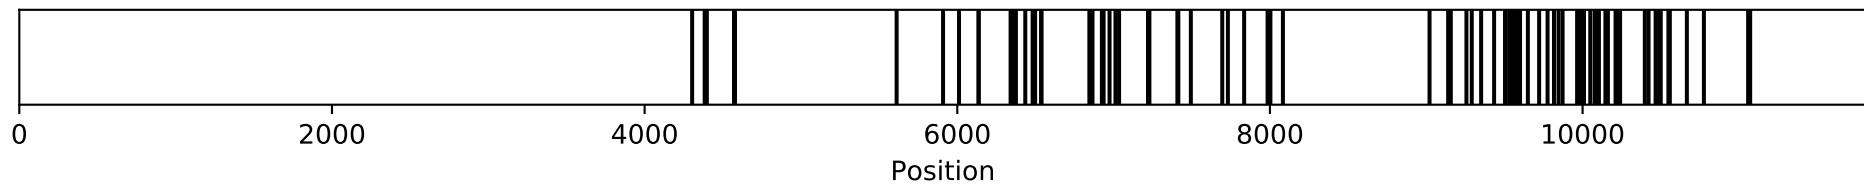

MA2 vs MM1  
Number of differences: 238

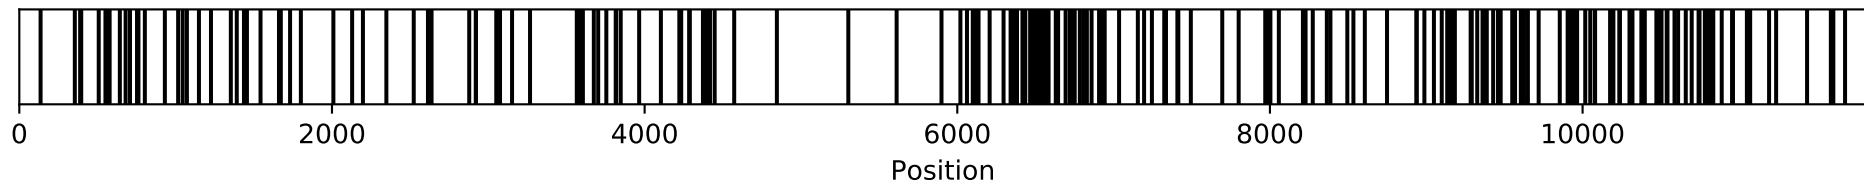

MA2 vs MM2  
Number of differences: 228

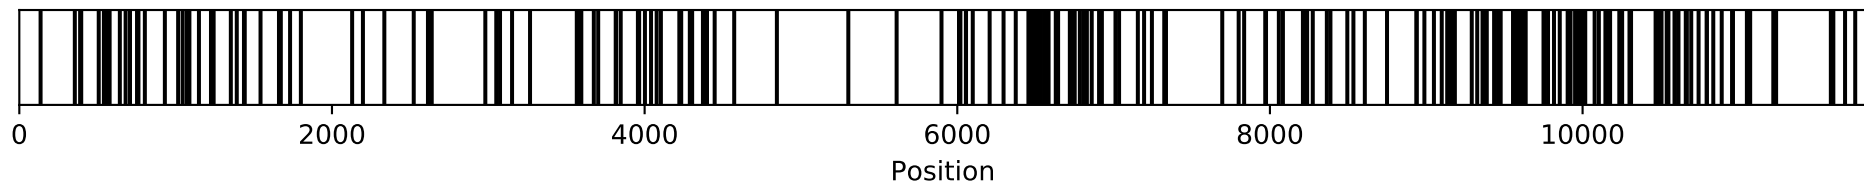

MM1 vs MM2  
Number of differences: 114

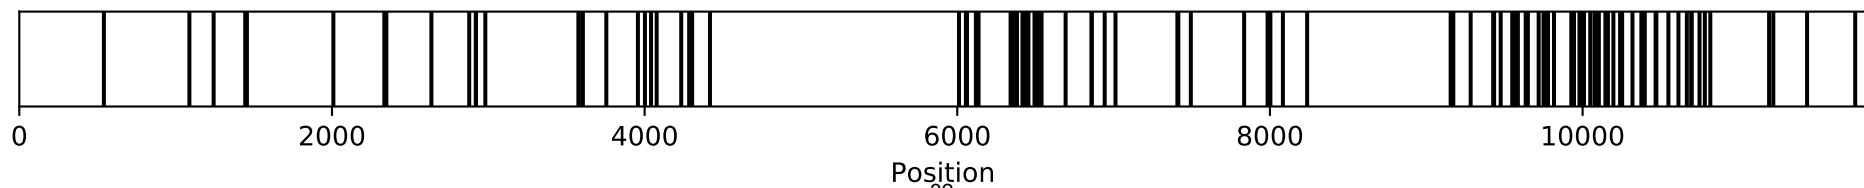

MA1 vs MA2  
Number of differences: 0

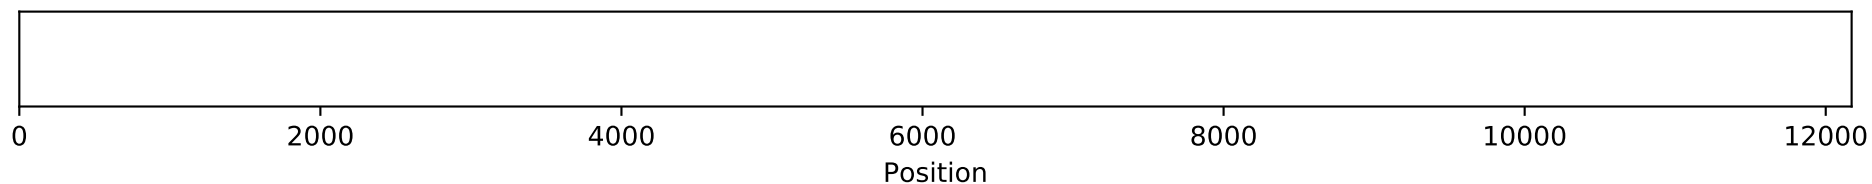

MA1 vs MM1  
Number of differences: 35

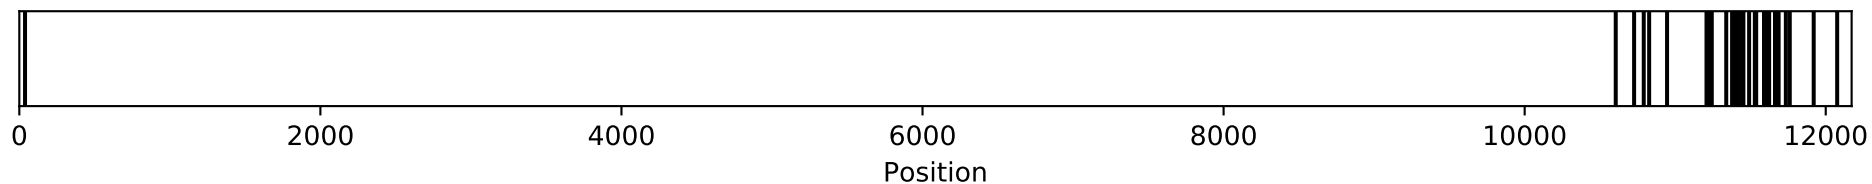

MA1 vs MM2  
Number of differences: 99

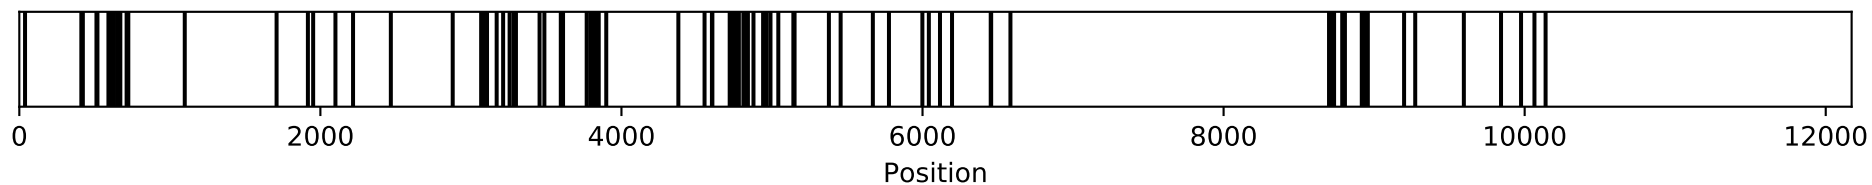

MA2 vs MM1  
Number of differences: 35

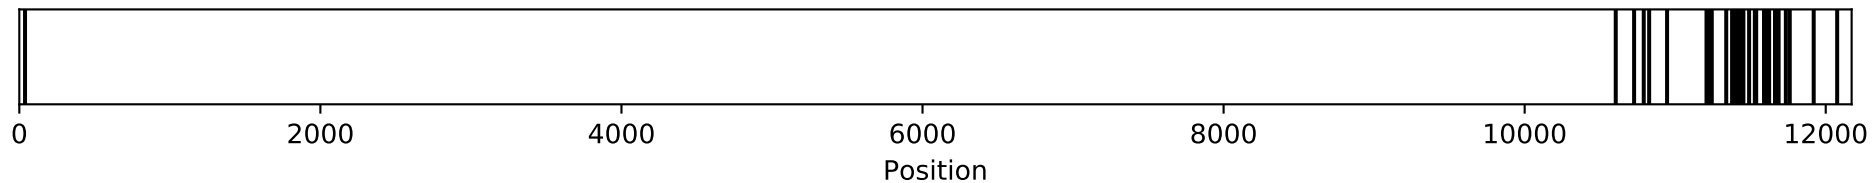

MA2 vs MM2  
Number of differences: 99

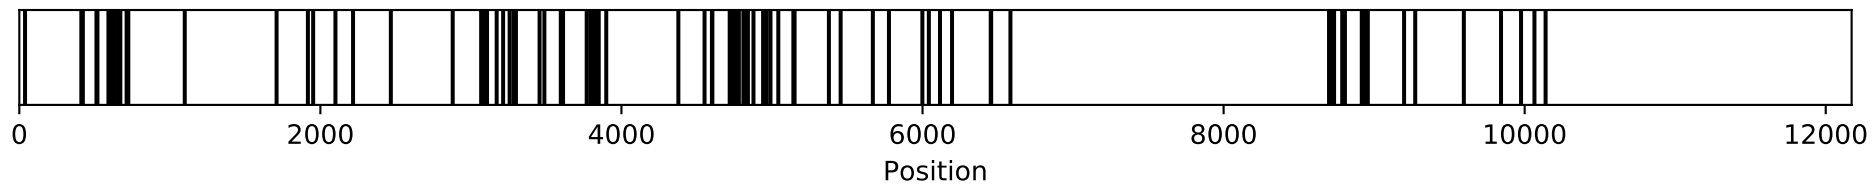

MM1 vs MM2  
Number of differences: 132

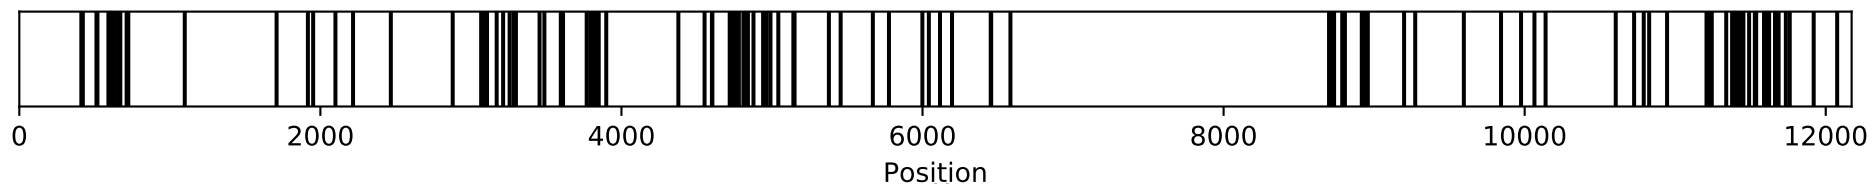

MA1 vs MA2  
Number of differences: 66

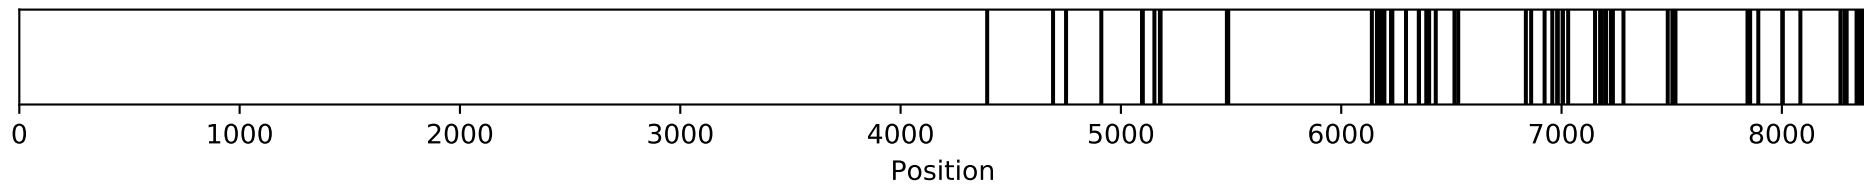

MA1 vs MM1  
Number of differences: 60

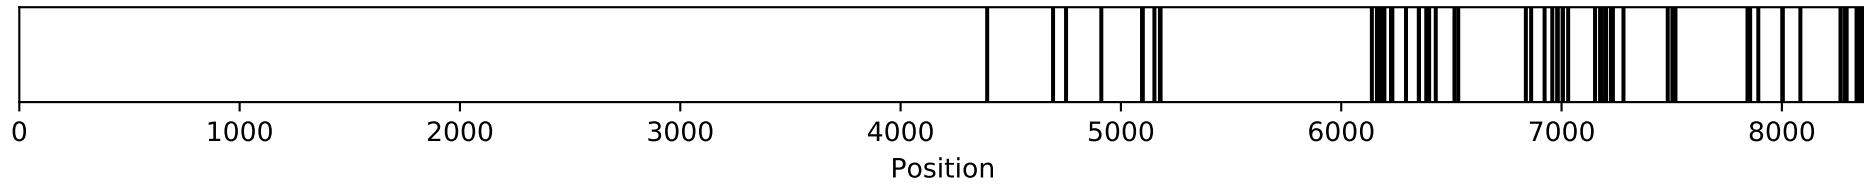

MA1 vs MM2  
Number of differences: 103

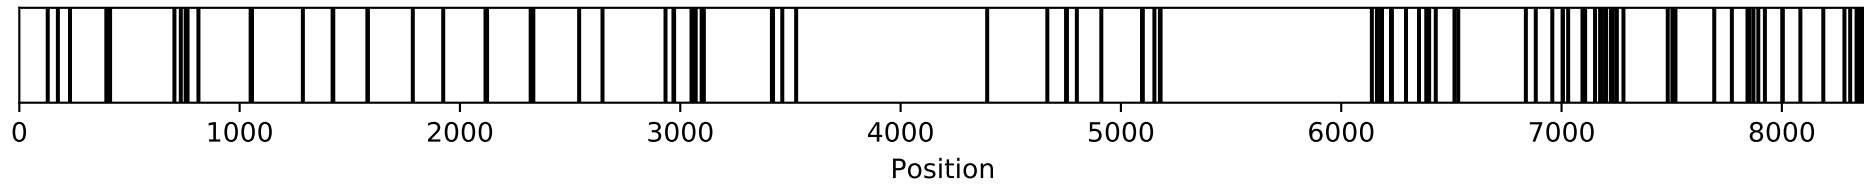

MA2 vs MM1  
Number of differences: 6

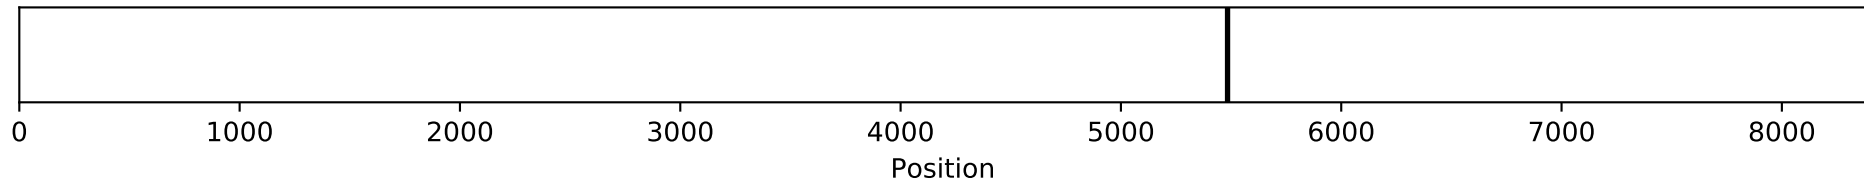

MA2 vs MM2  
Number of differences: 76

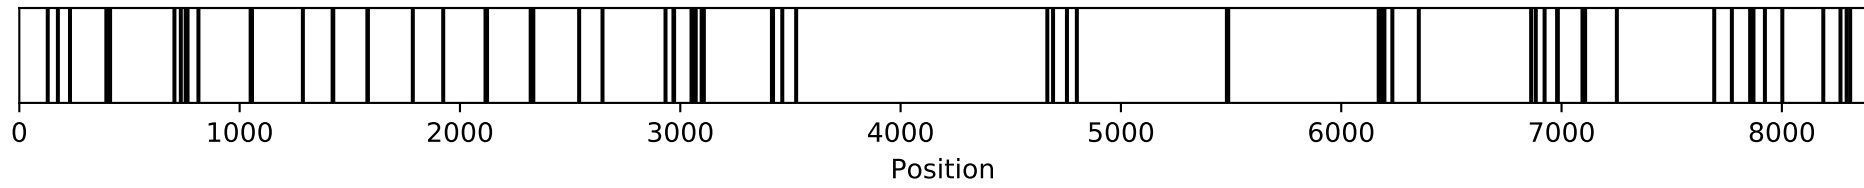

MM1 vs MM2  
Number of differences: 70

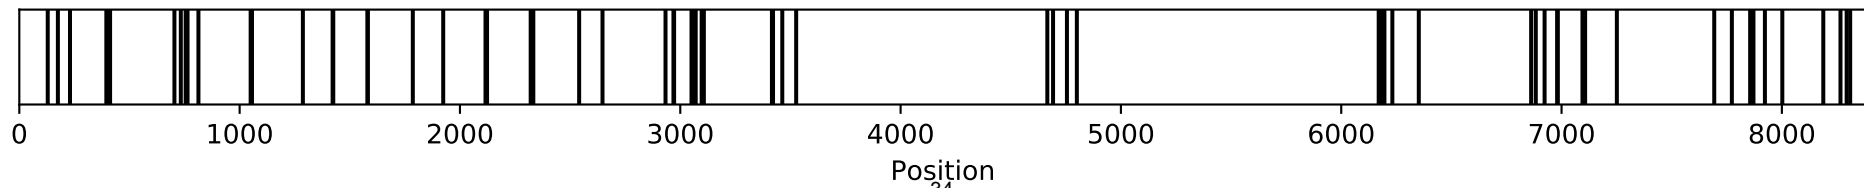



MA1 vs MA2  
Number of differences: 145

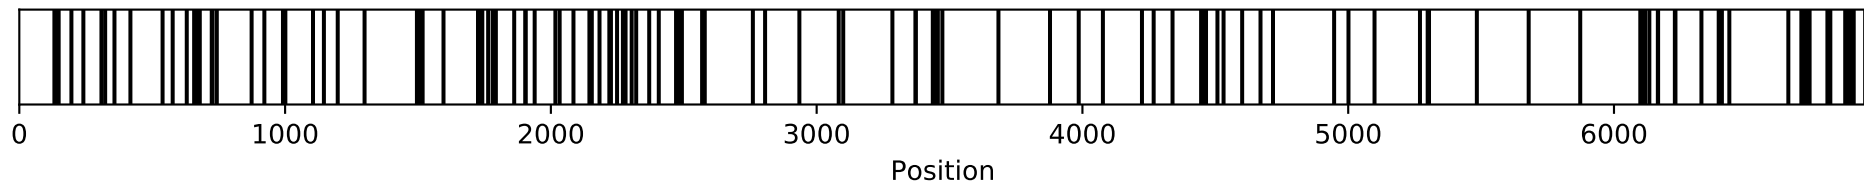

MA1 vs MM1  
Number of differences: 145

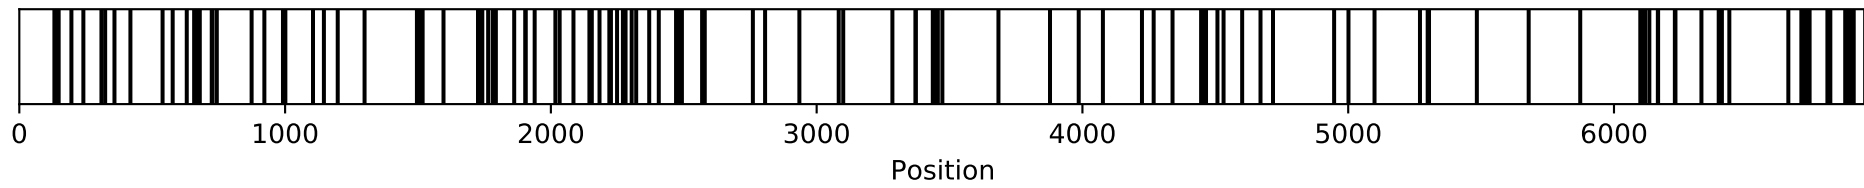

MA1 vs MM2  
Number of differences: 145

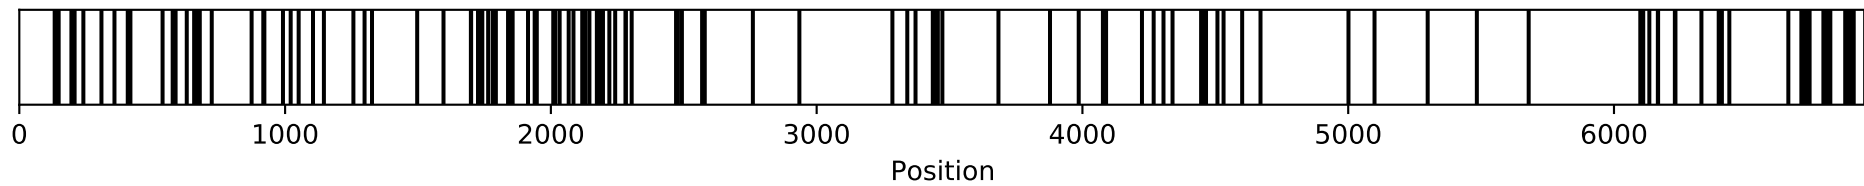

MA2 vs MM1  
Number of differences: 0

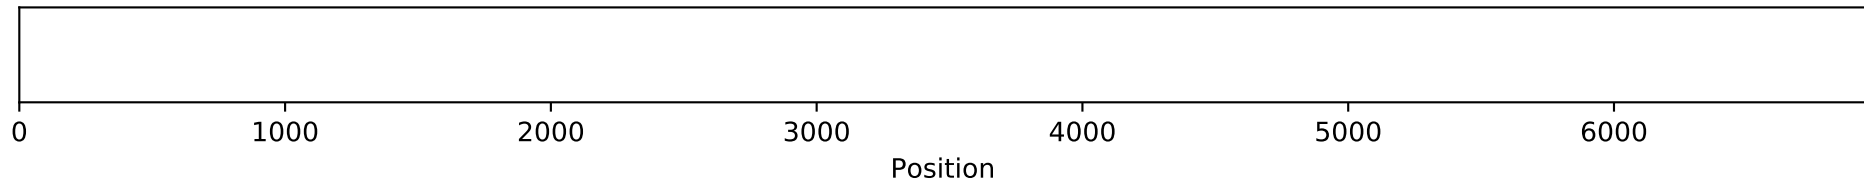

MA2 vs MM2  
Number of differences: 73

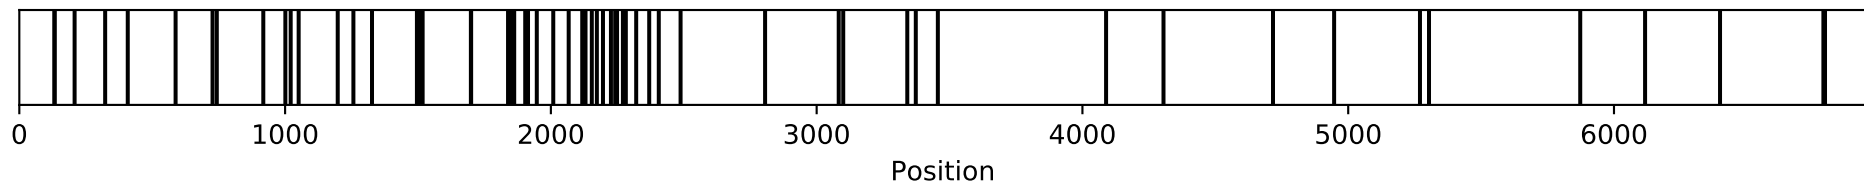

MM1 vs MM2  
Number of differences: 73

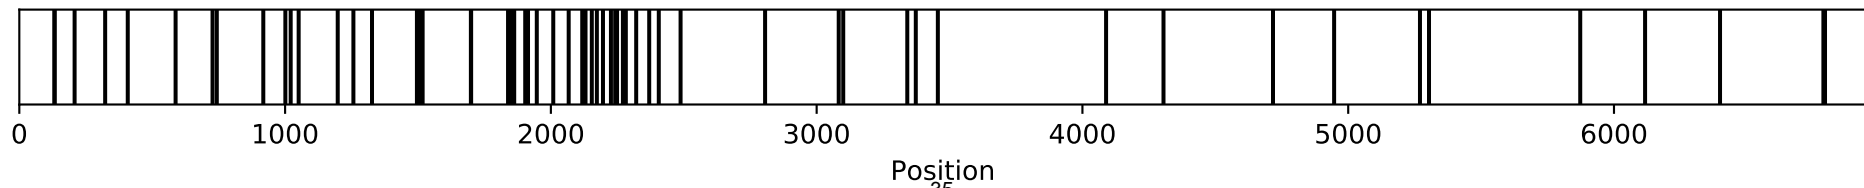

MA1 vs MA2  
Number of differences: 514

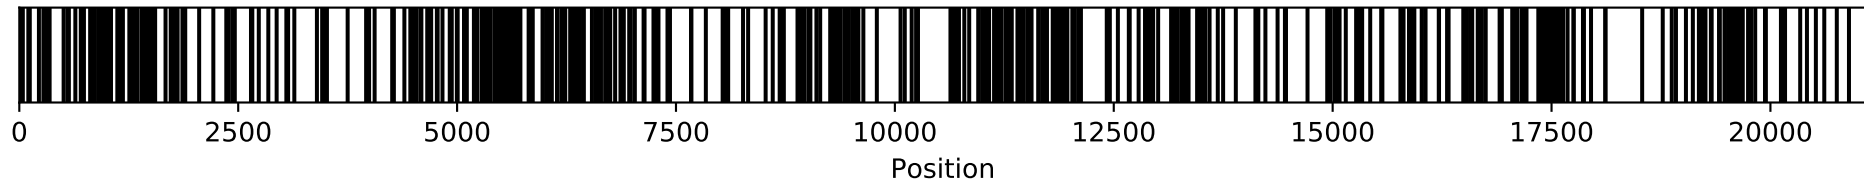

MA1 vs MM1  
Number of differences: 508

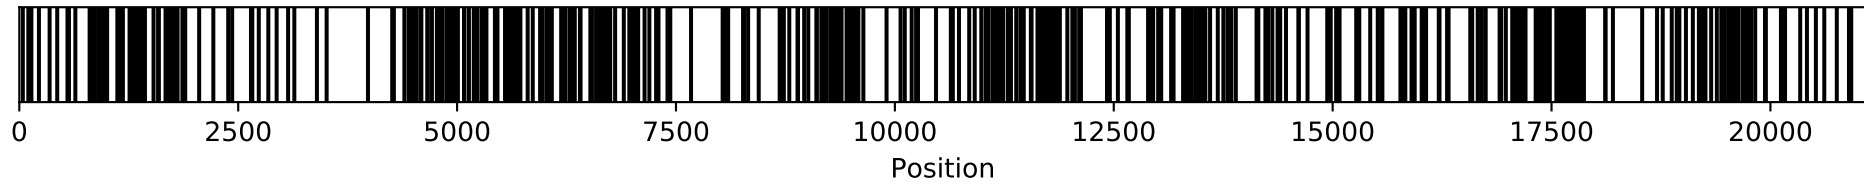

MA1 vs MM2  
Number of differences: 514

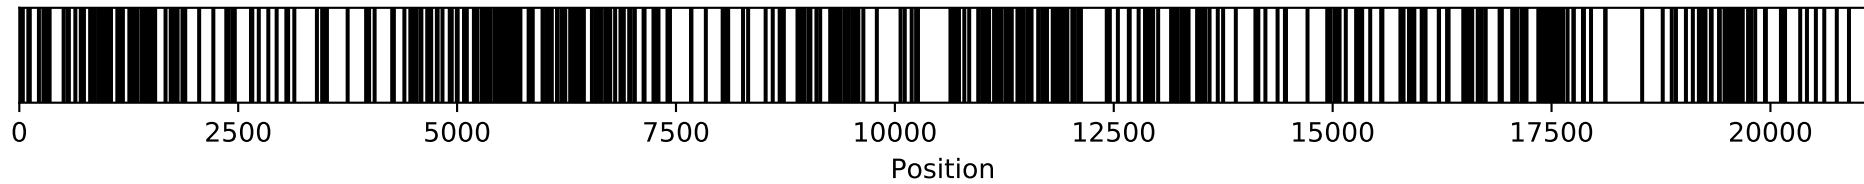

MA2 vs MM1  
Number of differences: 358

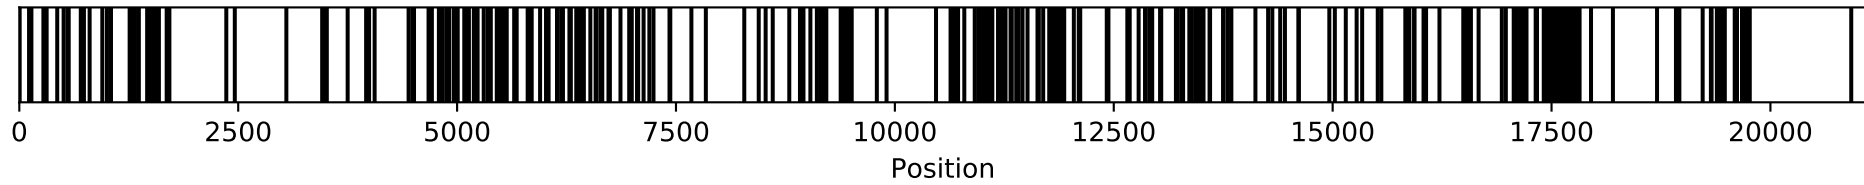

MA2 vs MM2  
Number of differences: 0

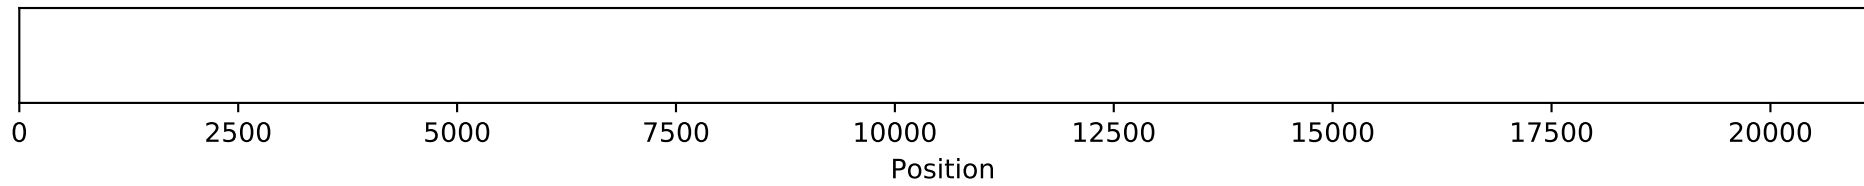

MM1 vs MM2  
Number of differences: 358

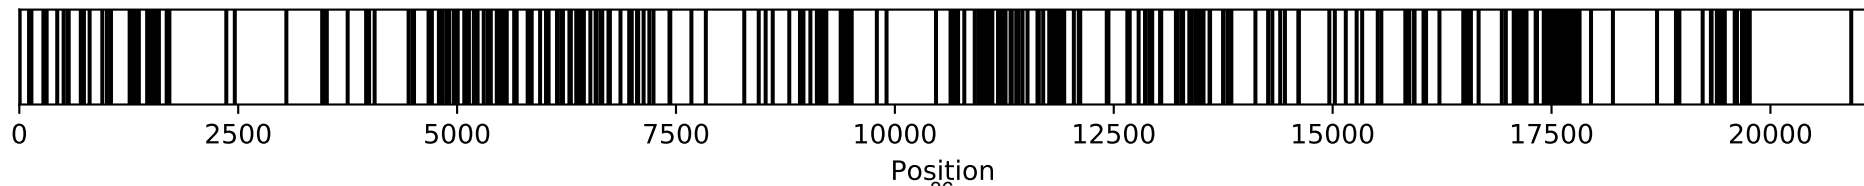

MA1 vs MA2  
Number of differences: 0

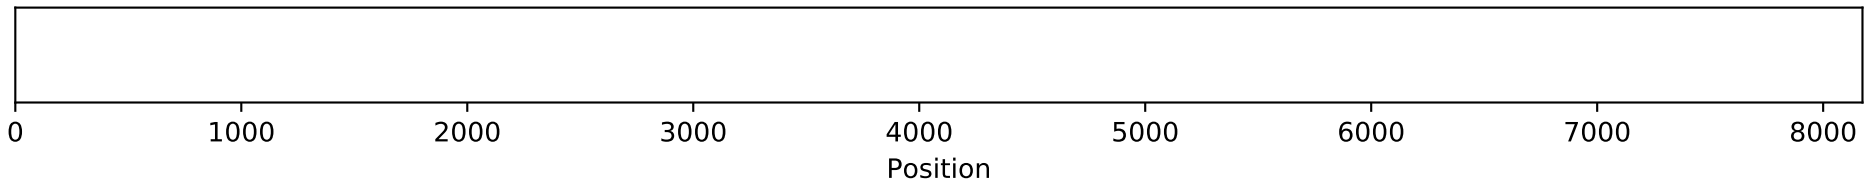

MA1 vs MM1  
Number of differences: 109

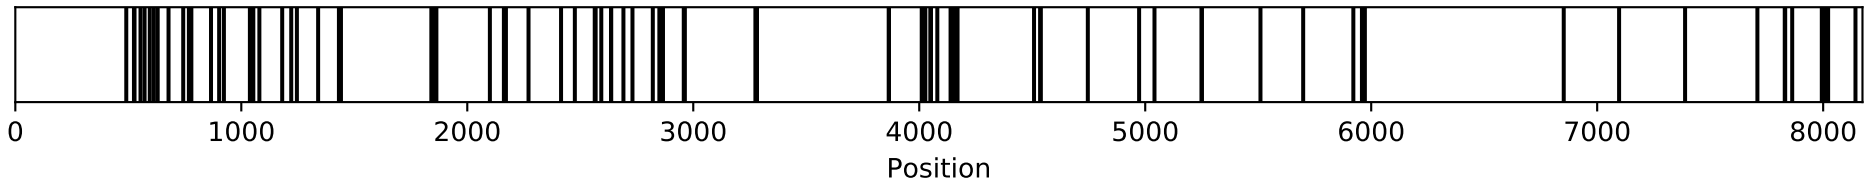

MA1 vs MM2  
Number of differences: 126

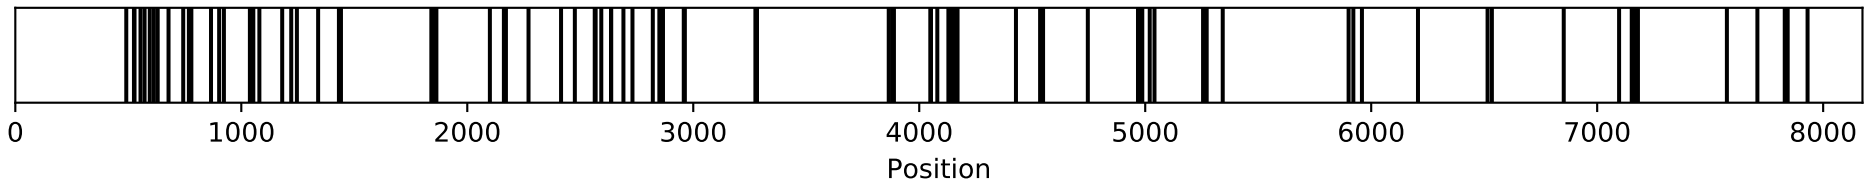

MA2 vs MM1  
Number of differences: 109

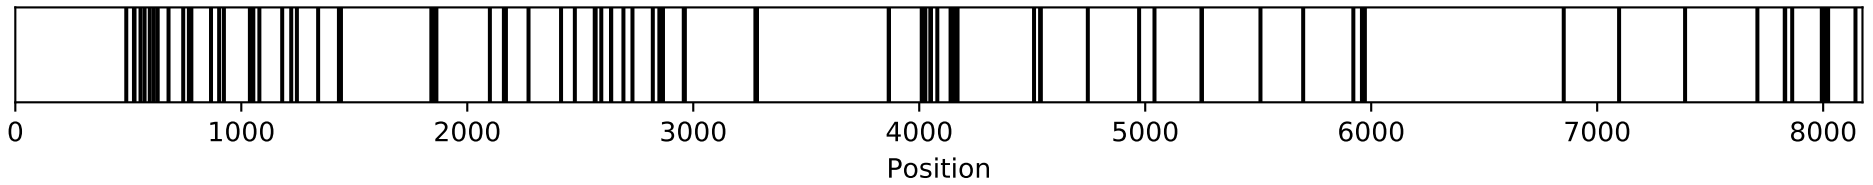

MA2 vs MM2  
Number of differences: 126

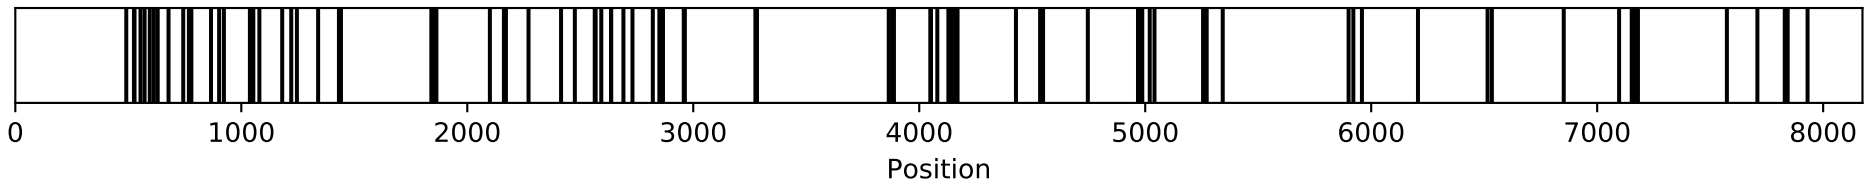

MM1 vs MM2  
Number of differences: 60

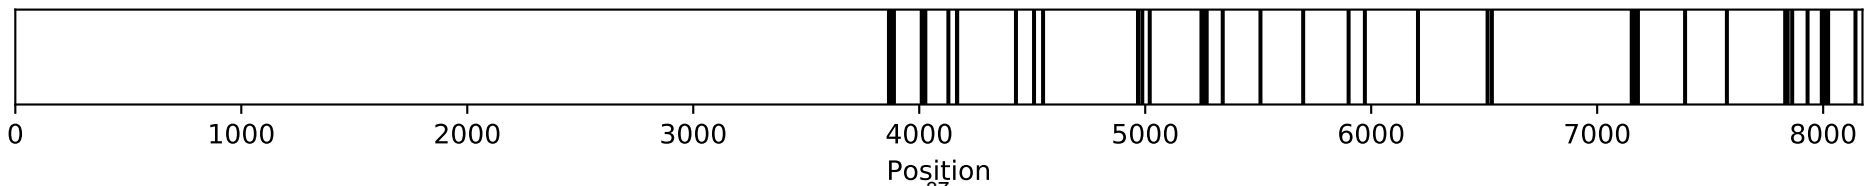

MA1 vs MA2  
Number of differences: 346

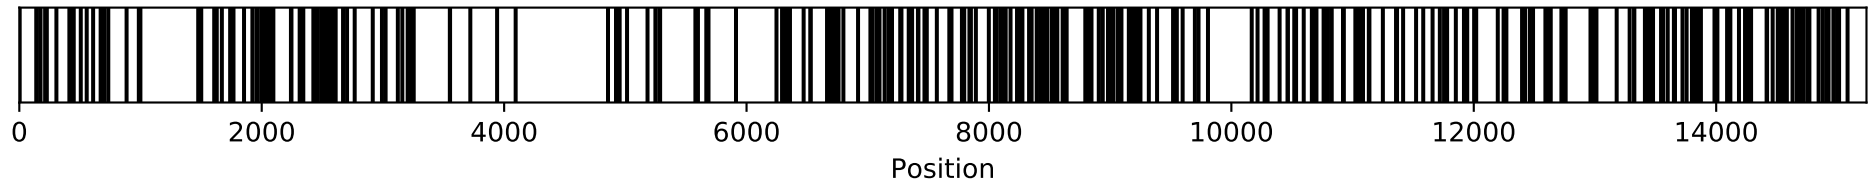

MA1 vs MM1  
Number of differences: 0

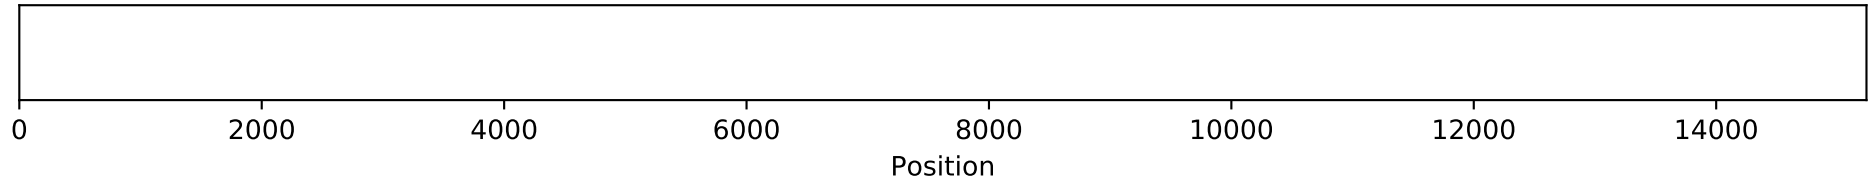

MA1 vs MM2  
Number of differences: 174

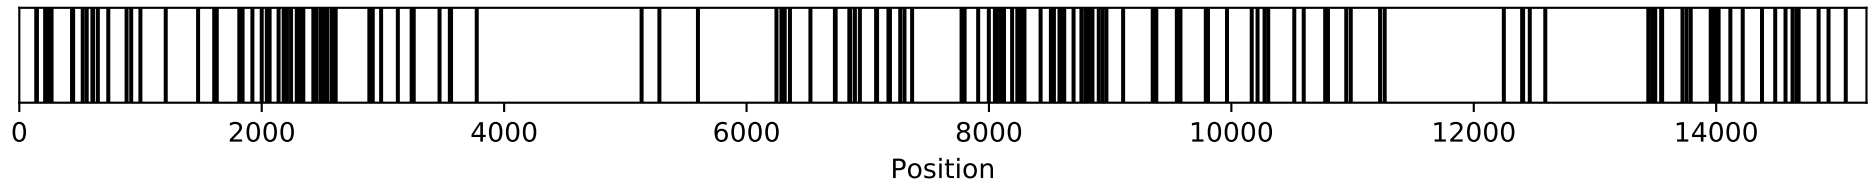

MA2 vs MM1  
Number of differences: 346

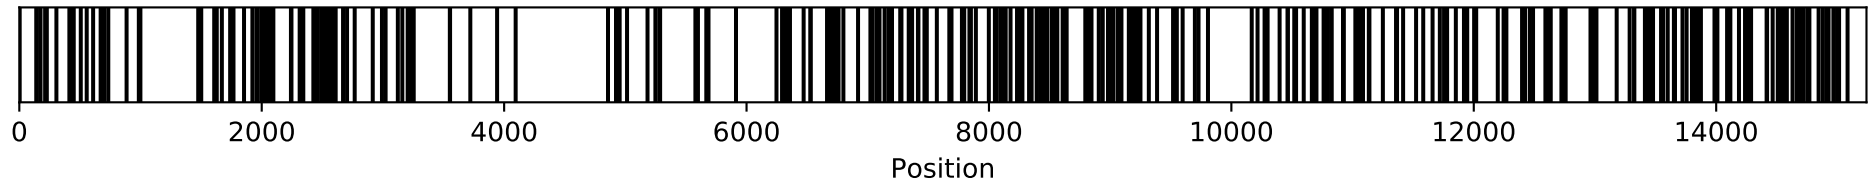

MA2 vs MM2  
Number of differences: 352

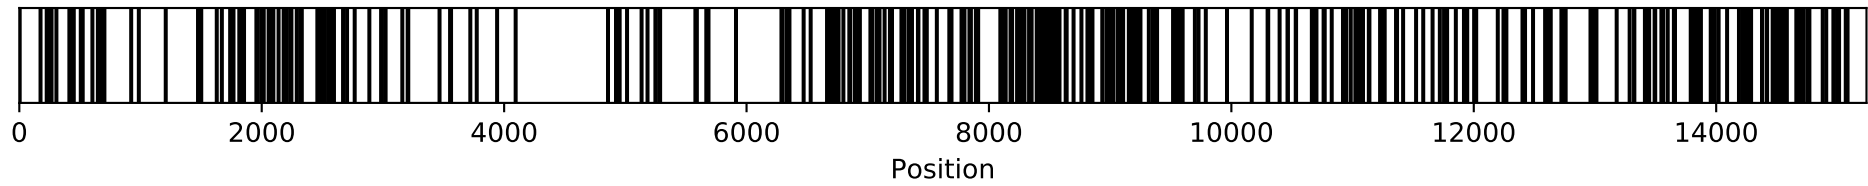

MM1 vs MM2  
Number of differences: 174

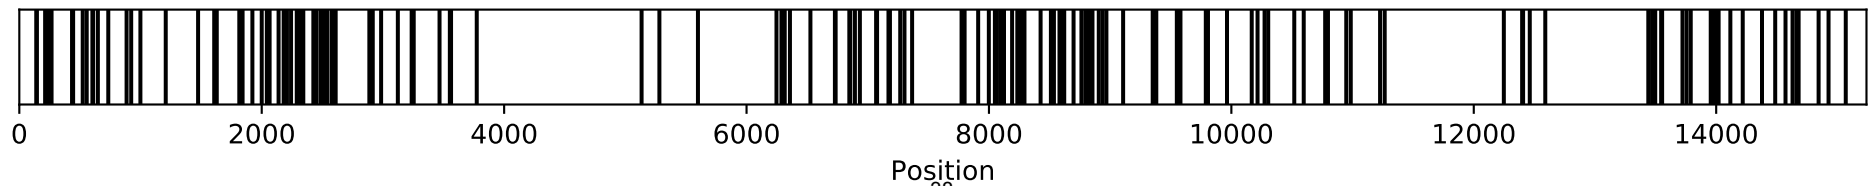

MA1 vs MA2  
Number of differences: 77

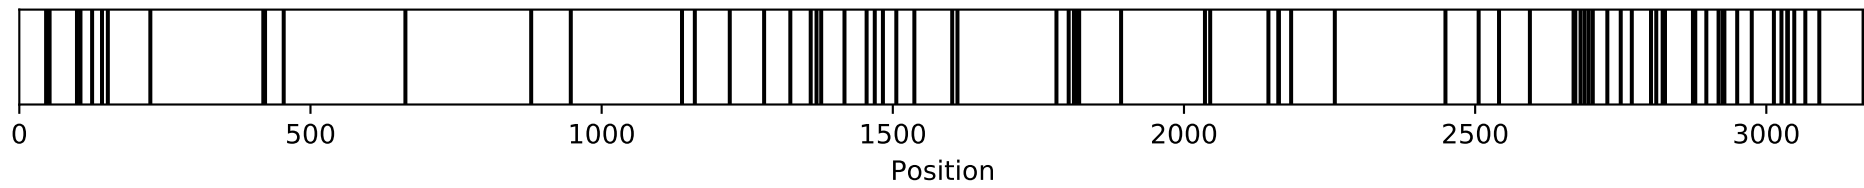

MA1 vs MM1  
Number of differences: 70

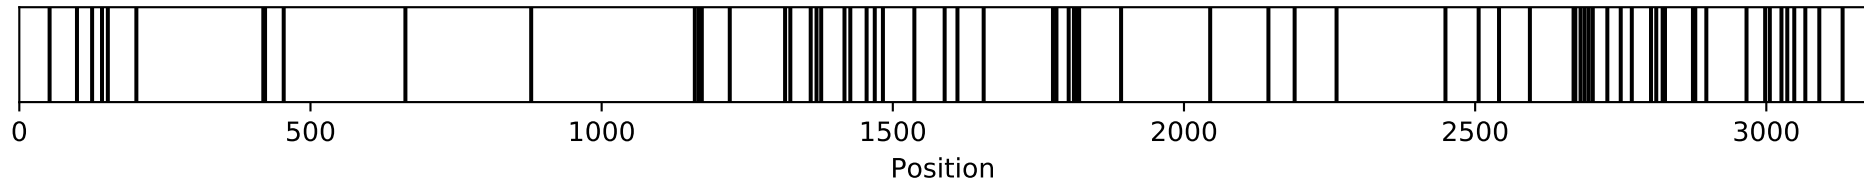

MA1 vs MM2  
Number of differences: 77

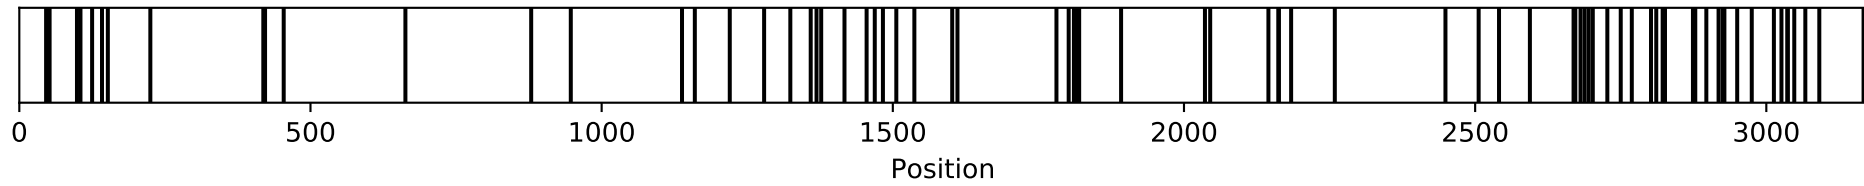

MA2 vs MM1  
Number of differences: 36

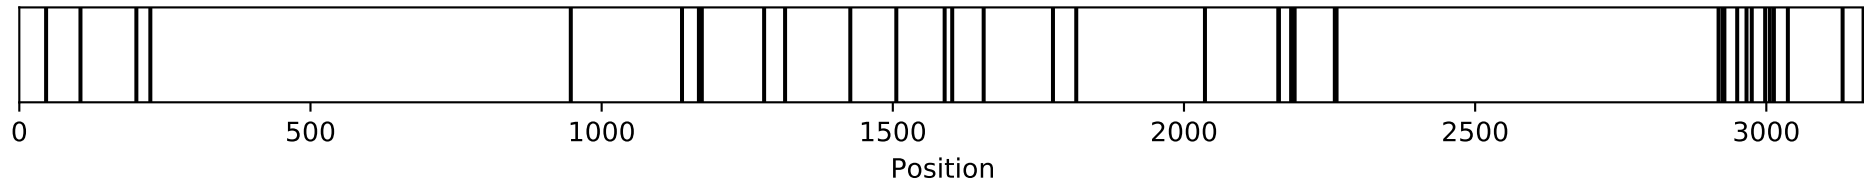

MA2 vs MM2  
Number of differences: 0

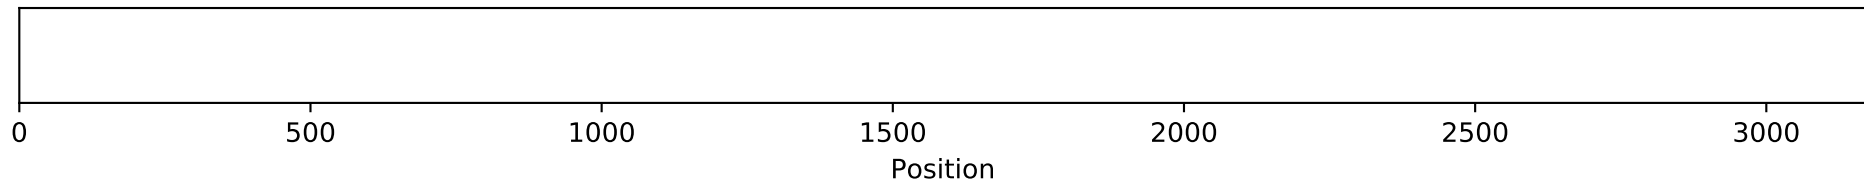

MM1 vs MM2  
Number of differences: 36

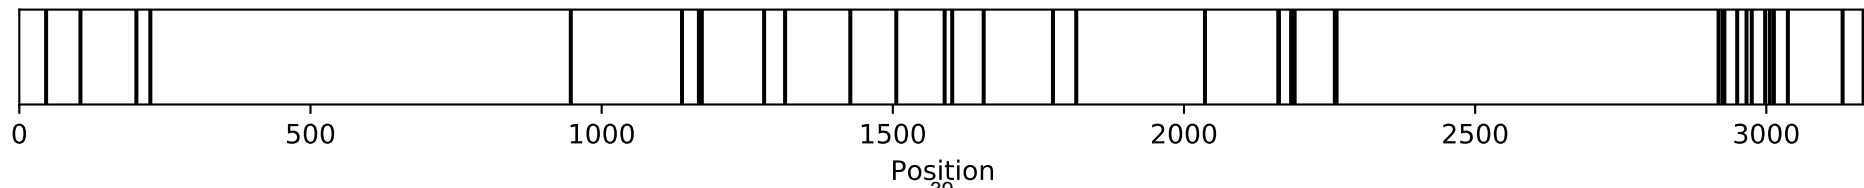

MA1 vs MA2  
Number of differences: 149

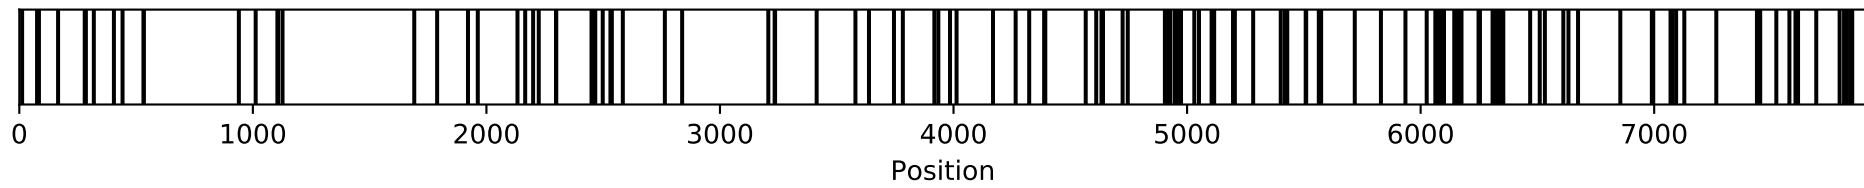

MA1 vs MM1  
Number of differences: 151

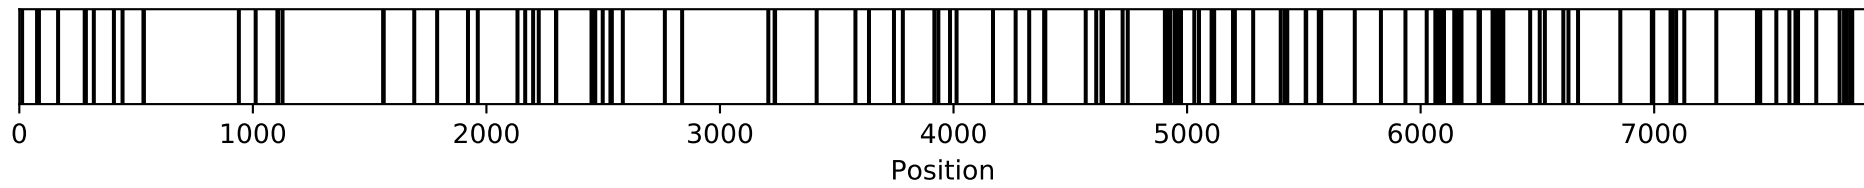

MA1 vs MM2  
Number of differences: 146

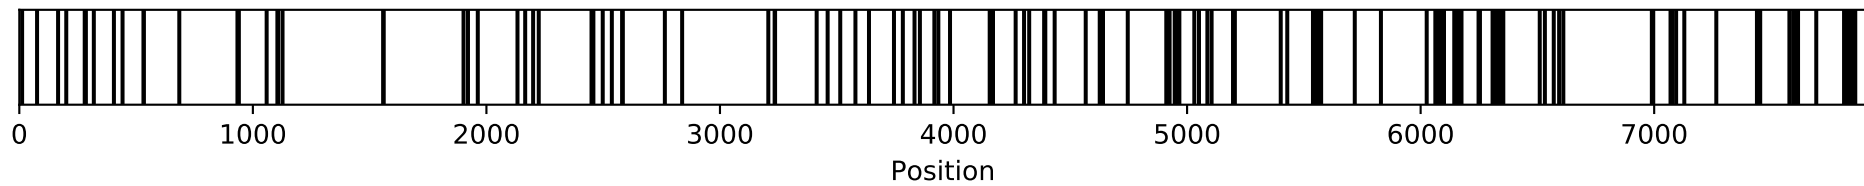

MA2 vs MM1  
Number of differences: 2

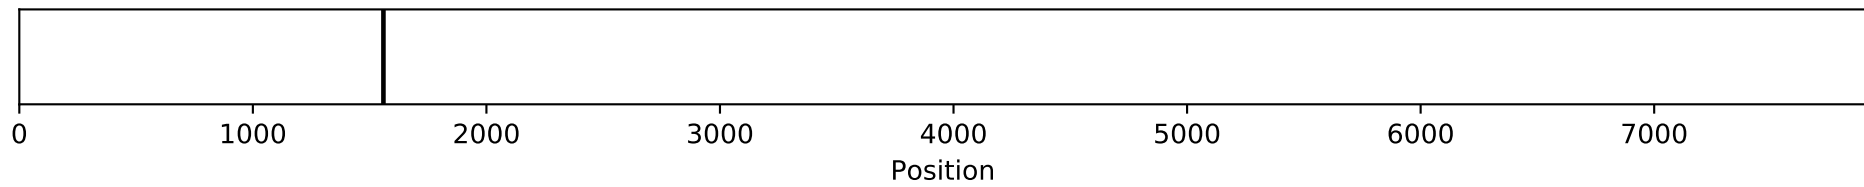

MA2 vs MM2  
Number of differences: 63

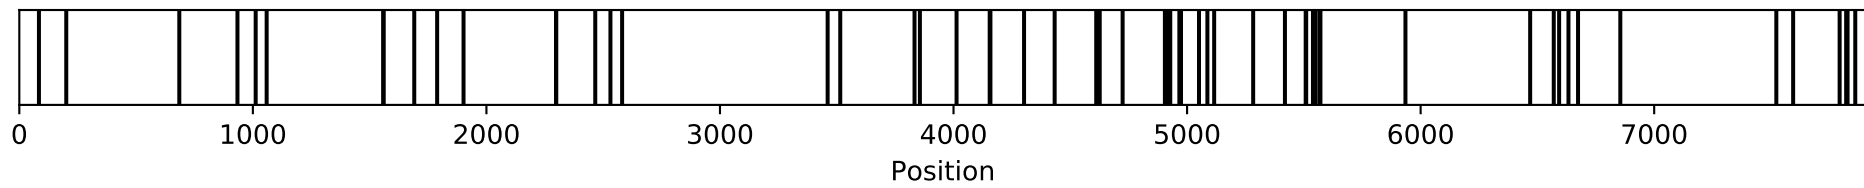

MM1 vs MM2  
Number of differences: 61

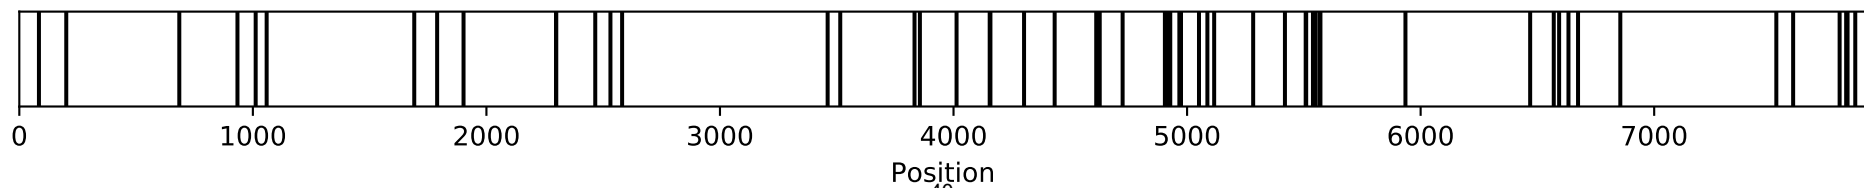

MA1 vs MA2  
Number of differences: 529

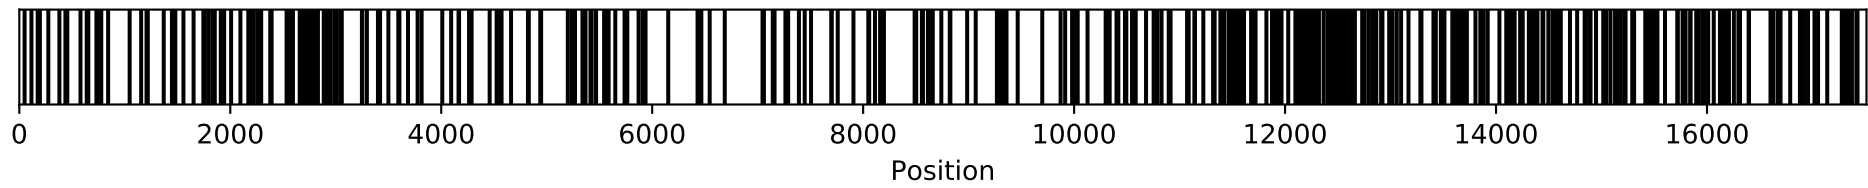

MA1 vs MM1  
Number of differences: 529

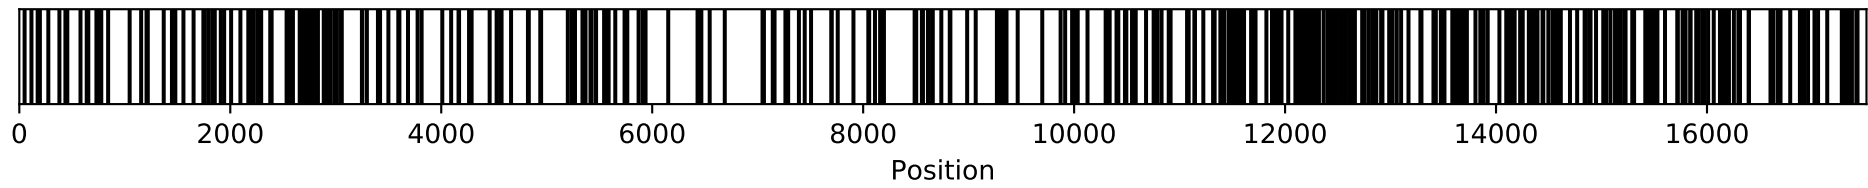

MA1 vs MM2  
Number of differences: 510

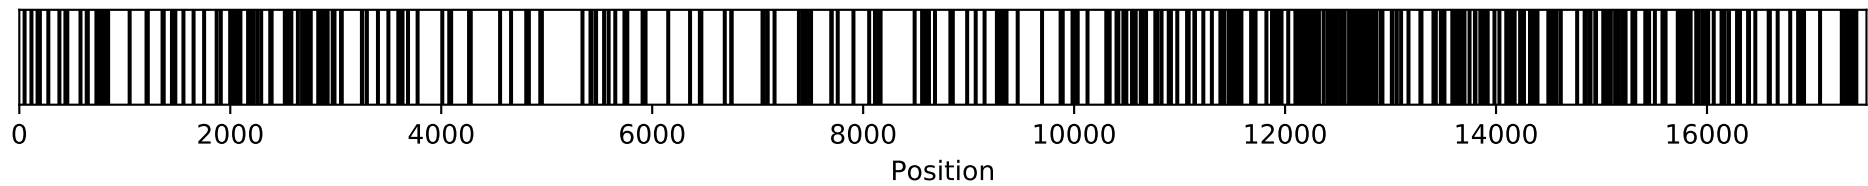

MA2 vs MM1  
Number of differences: 0

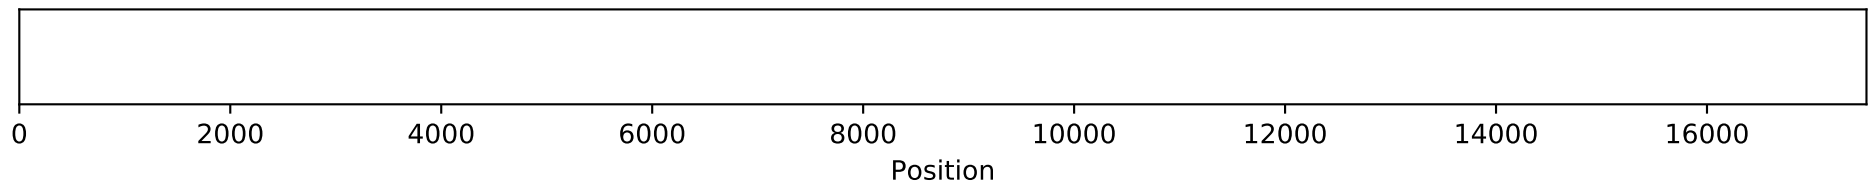

MA2 vs MM2  
Number of differences: 260

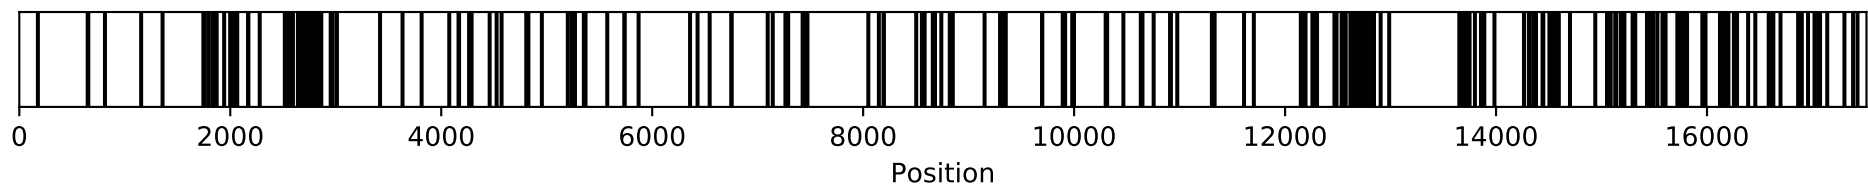

MM1 vs MM2  
Number of differences: 260

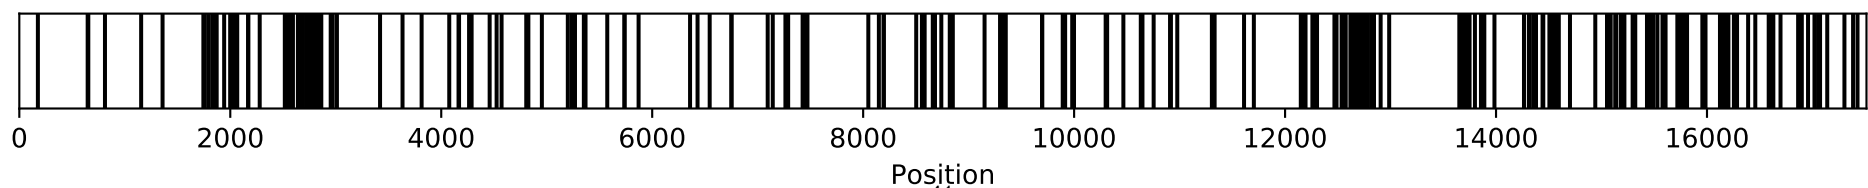

MA1 vs MA2  
Number of differences: 147

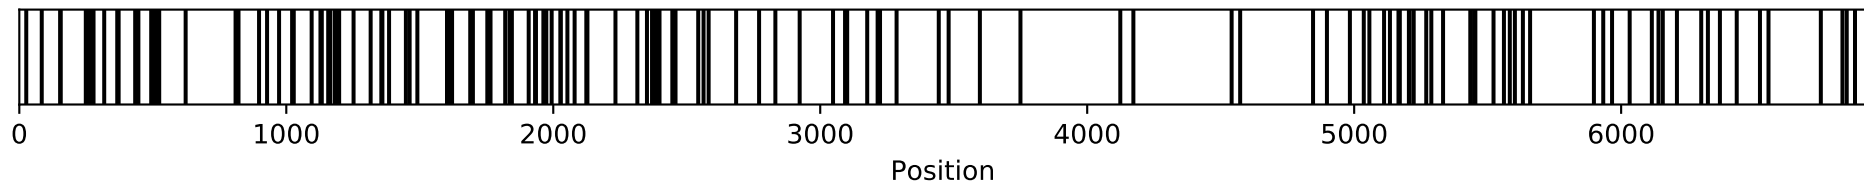

MA1 vs MM1  
Number of differences: 147

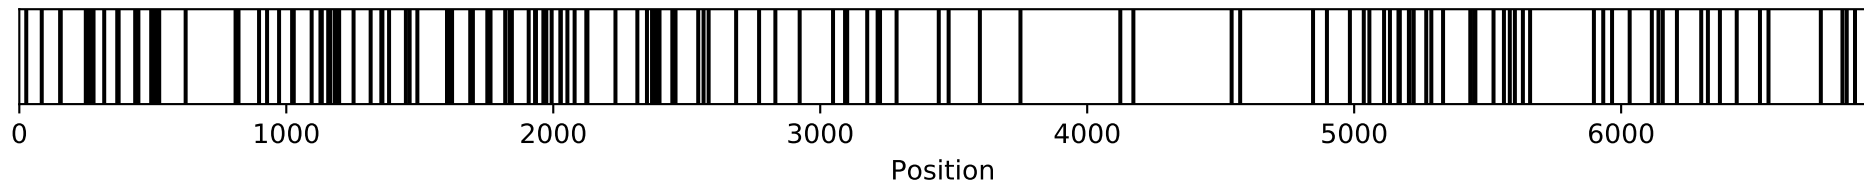

MA1 vs MM2  
Number of differences: 153

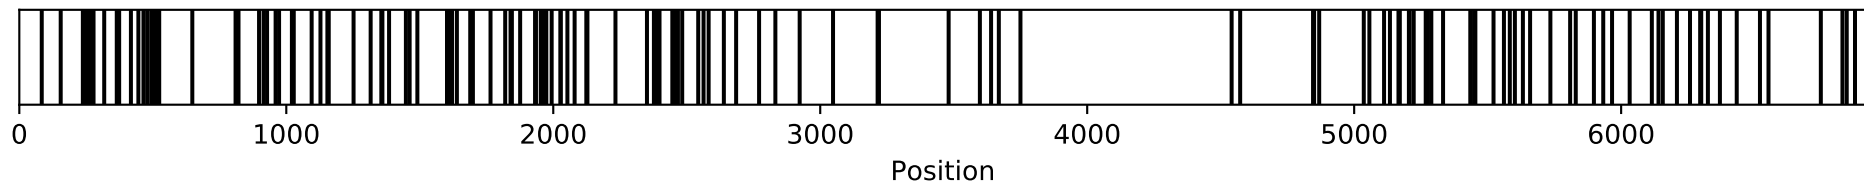

MA2 vs MM1  
Number of differences: 0

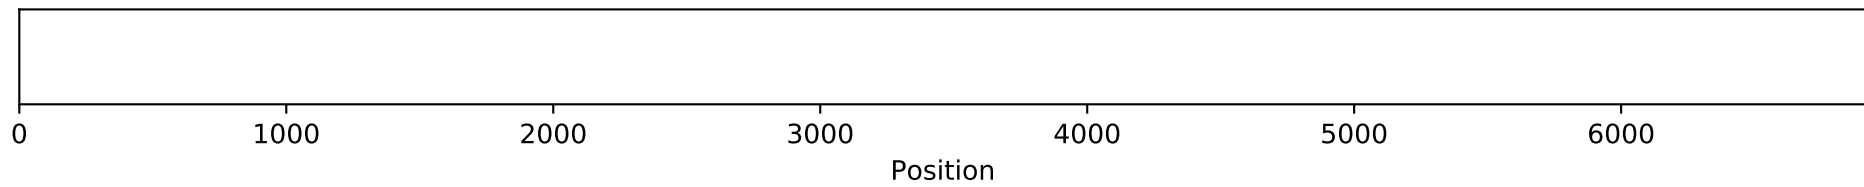

MA2 vs MM2  
Number of differences: 62

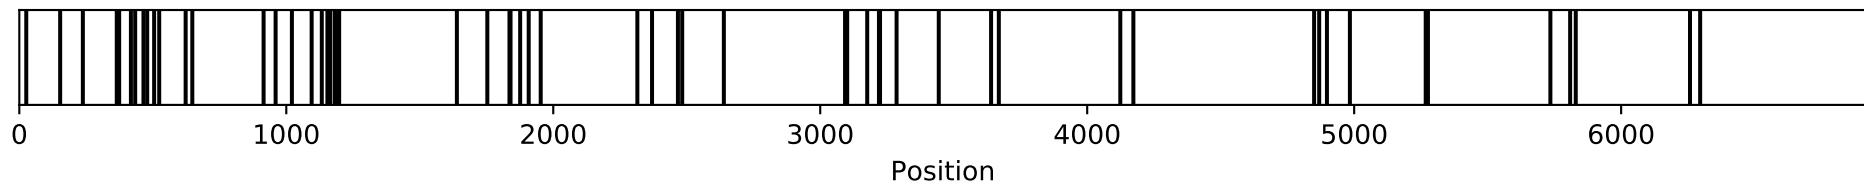

MM1 vs MM2  
Number of differences: 62

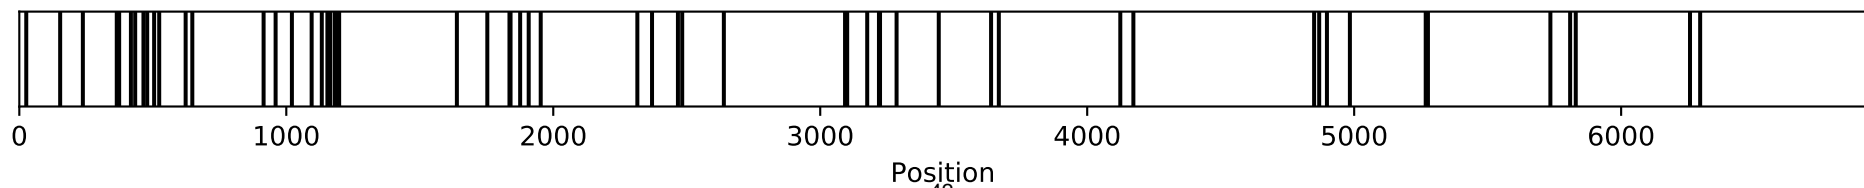



MA1 vs MA2  
Number of differences: 220

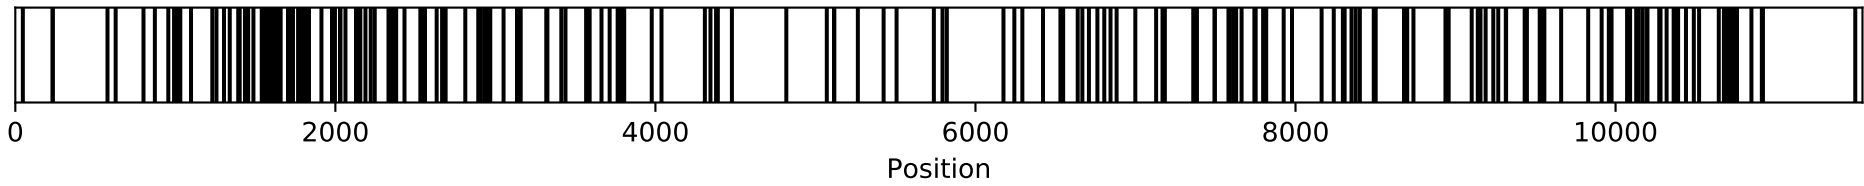

MA1 vs MM1  
Number of differences: 233

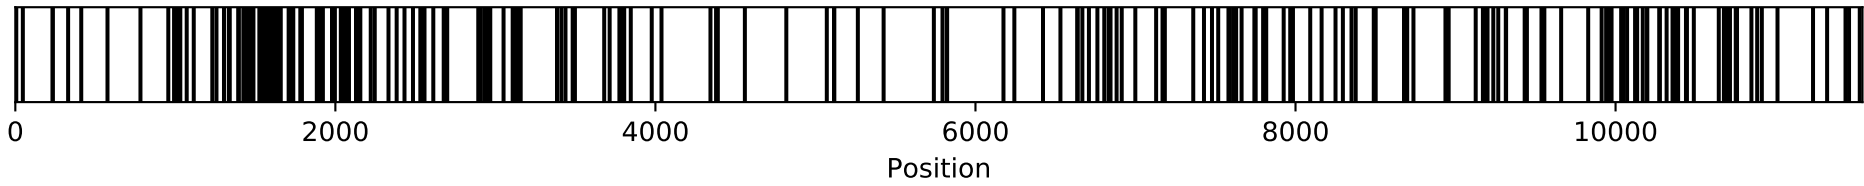

MA1 vs MM2  
Number of differences: 220

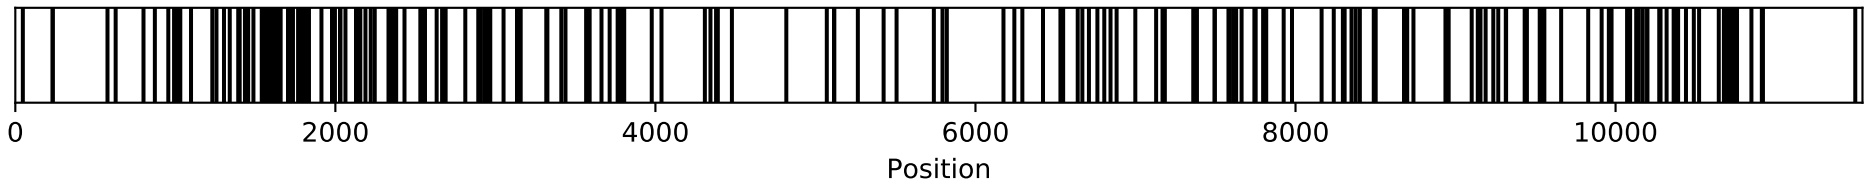

MA2 vs MM1  
Number of differences: 130

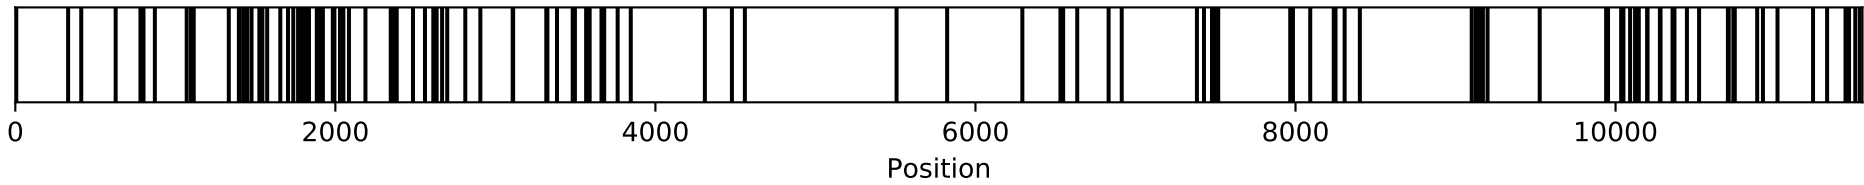

MA2 vs MM2  
Number of differences: 0

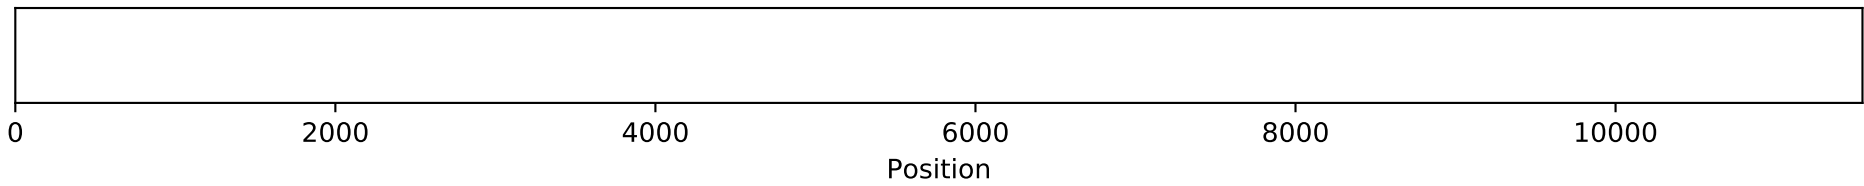

MM1 vs MM2  
Number of differences: 130

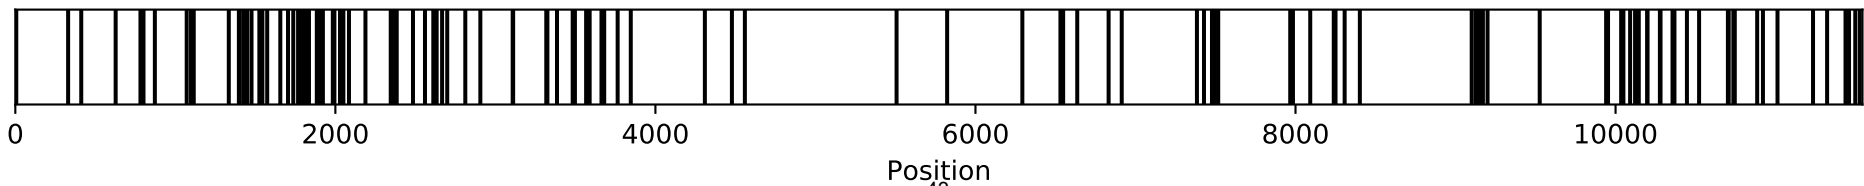

MA1 vs MA2  
Number of differences: 191

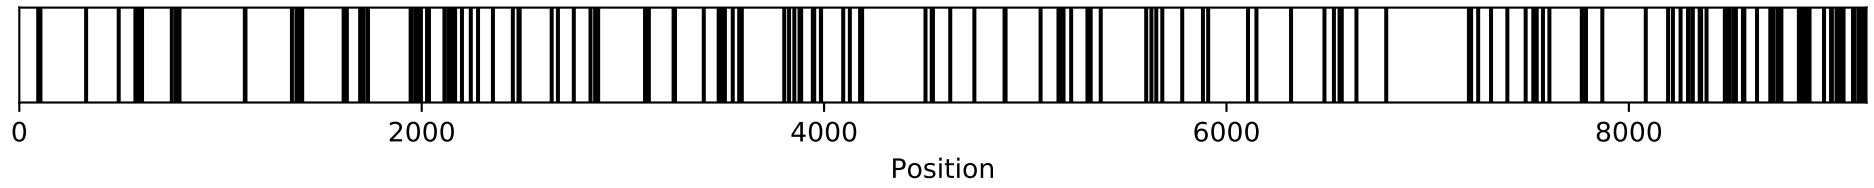

MA1 vs MM1  
Number of differences: 191

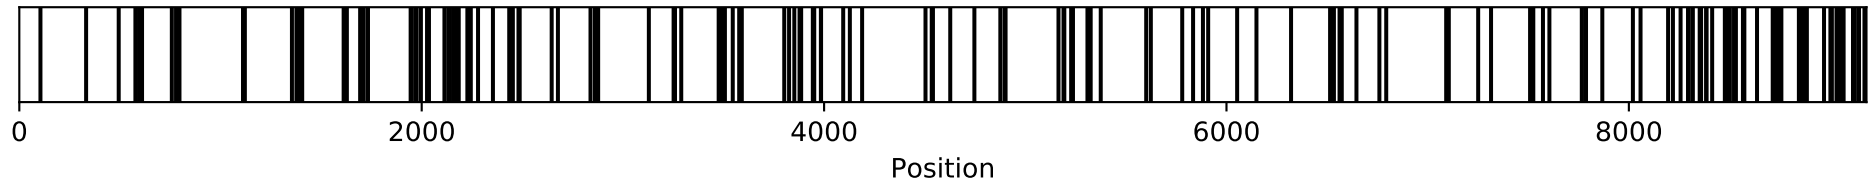

MA1 vs MM2  
Number of differences: 191

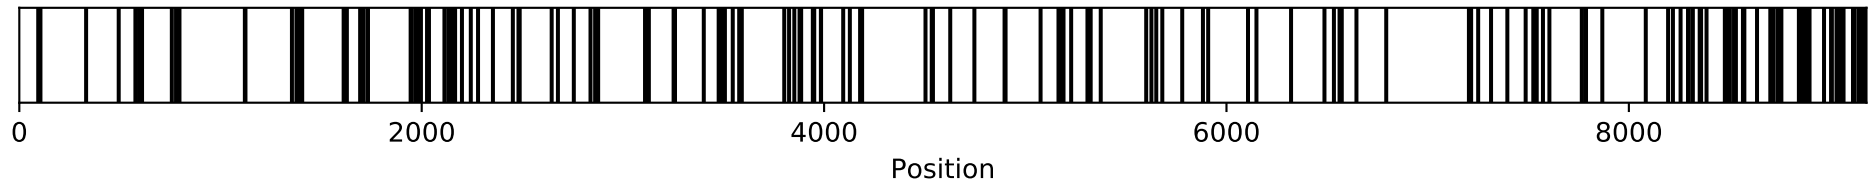

MA2 vs MM1  
Number of differences: 68

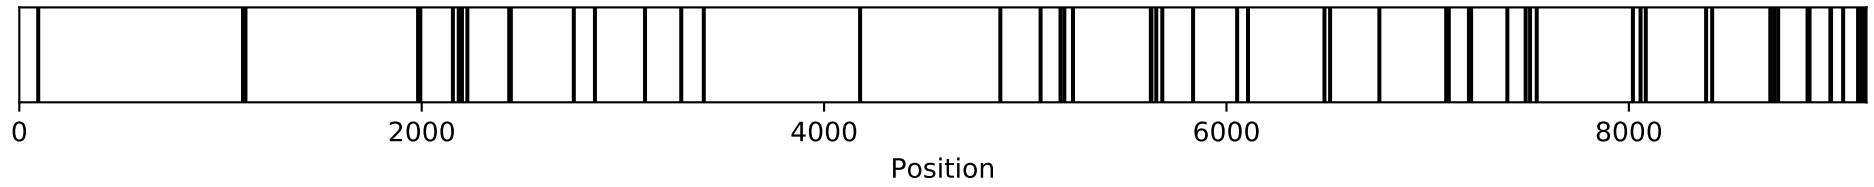

MA2 vs MM2  
Number of differences: 0

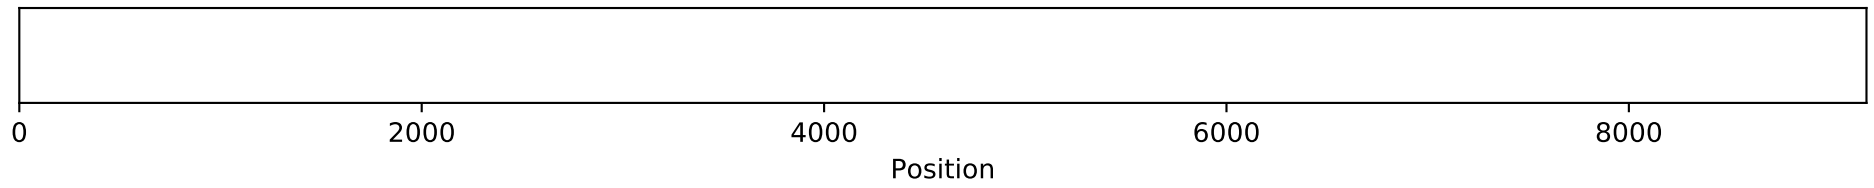

MM1 vs MM2  
Number of differences: 68

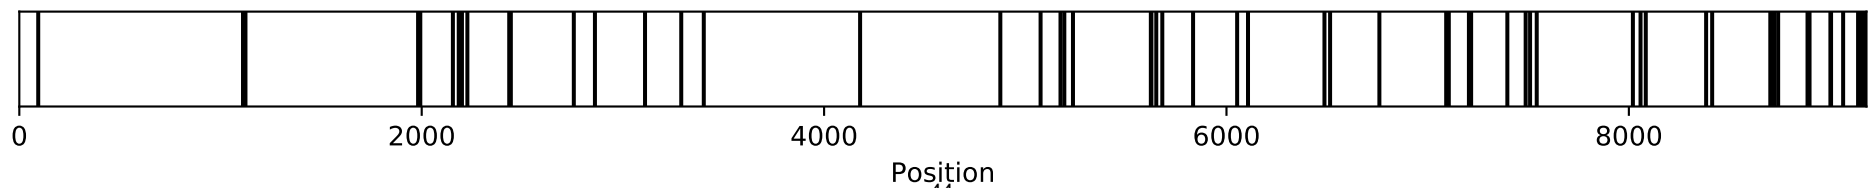

MA1 vs MA2  
Number of differences: 252

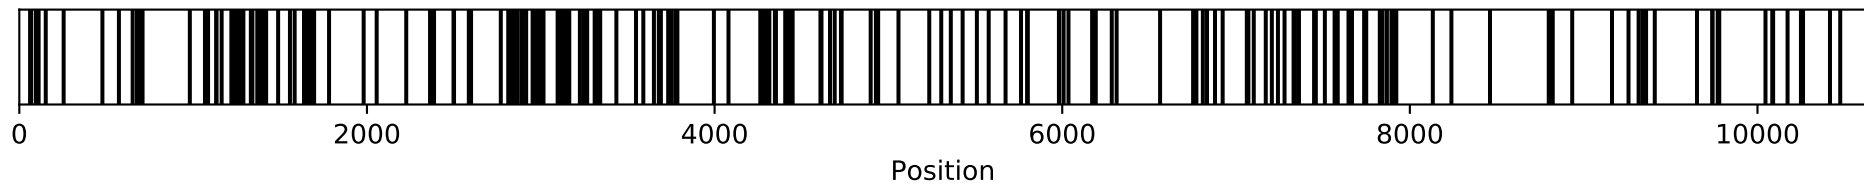

MA1 vs MM1  
Number of differences: 231

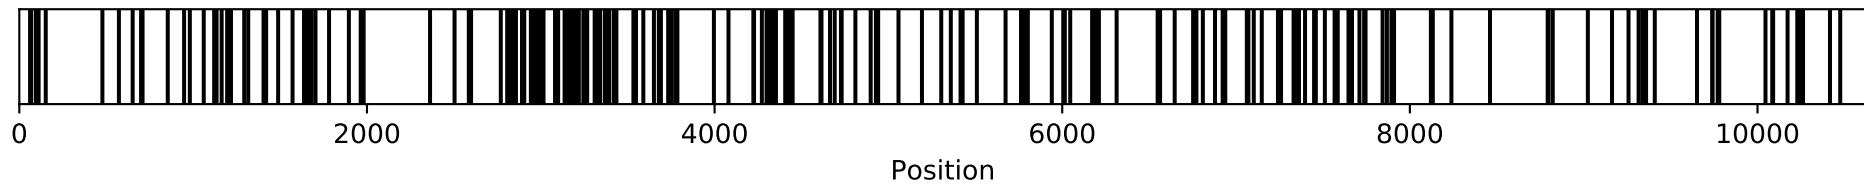

MA1 vs MM2  
Number of differences: 274

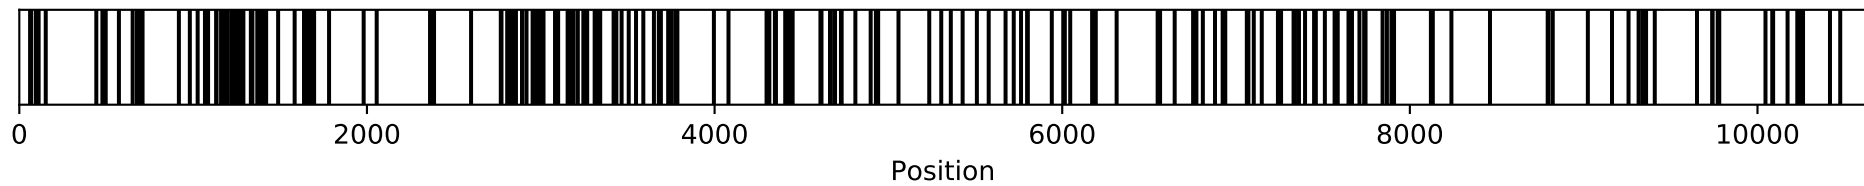

MA2 vs MM1  
Number of differences: 168

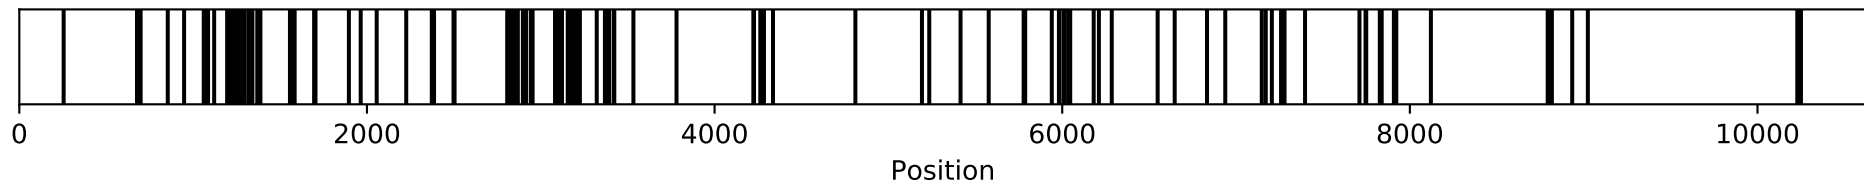

MA2 vs MM2  
Number of differences: 102

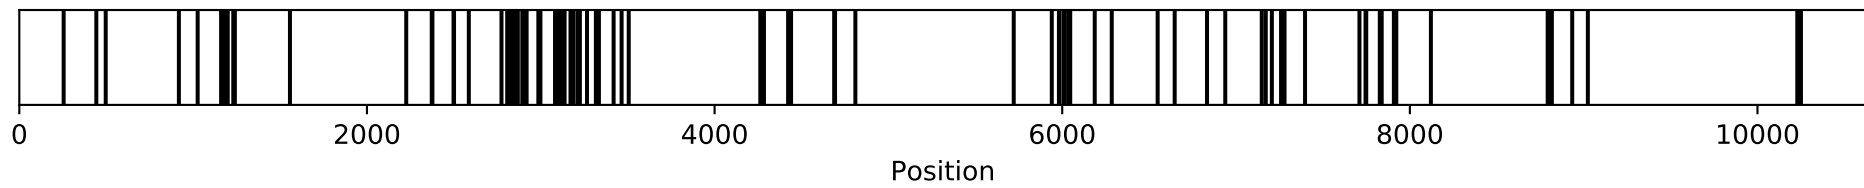

MM1 vs MM2  
Number of differences: 141

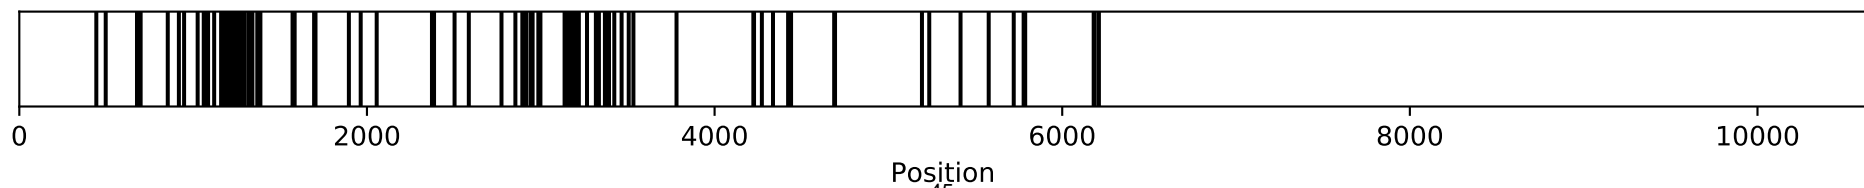

MA1 vs MA2  
Number of differences: 74

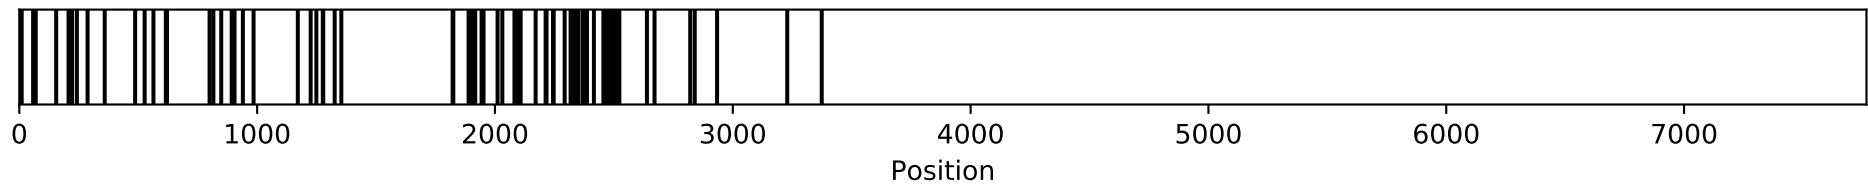

MA1 vs MM1  
Number of differences: 128

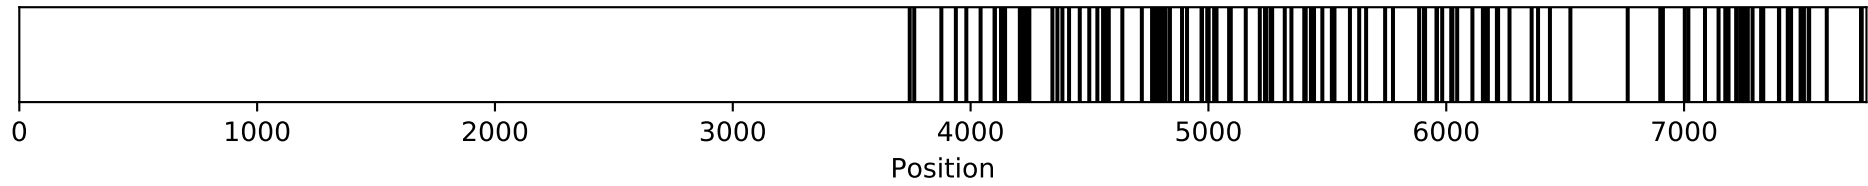

MA1 vs MM2  
Number of differences: 164

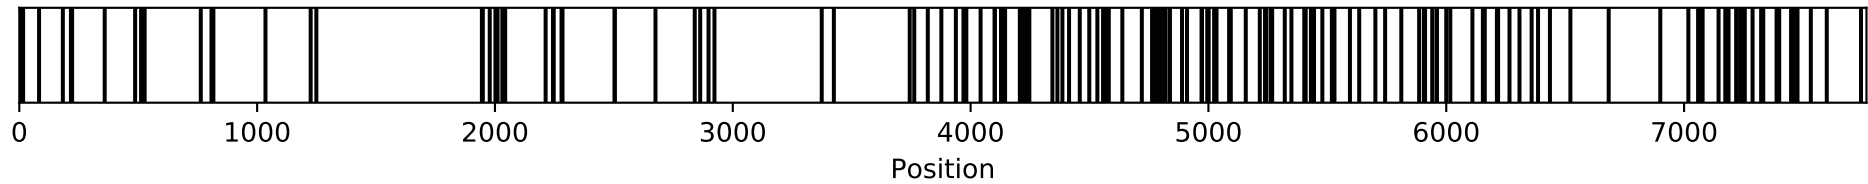

MA2 vs MM1  
Number of differences: 202

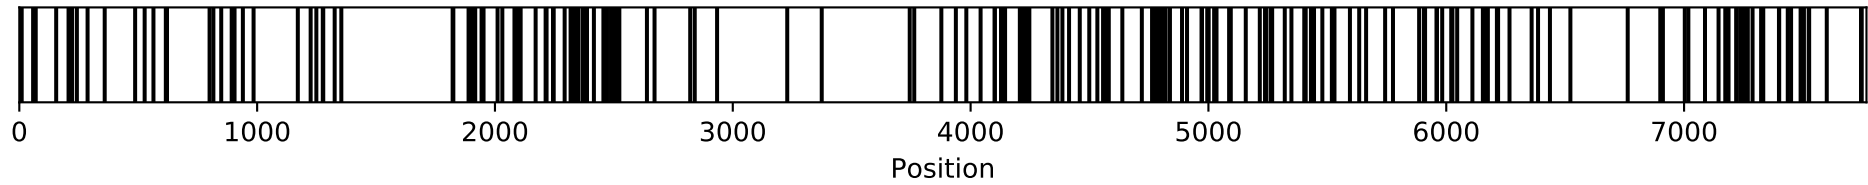

MA2 vs MM2  
Number of differences: 202

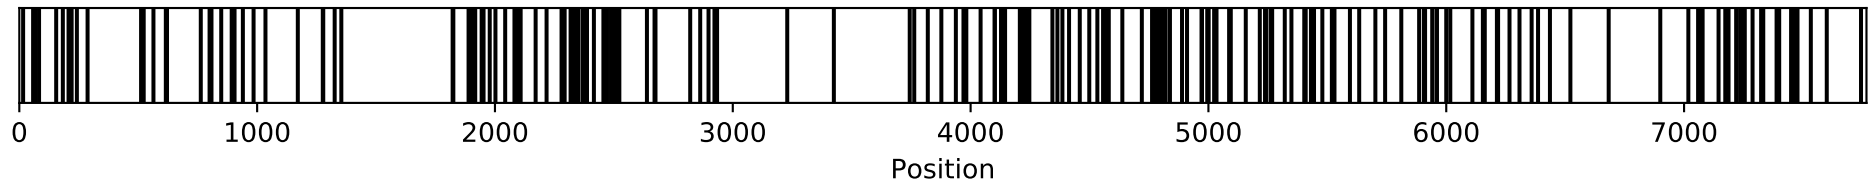

MM1 vs MM2  
Number of differences: 78

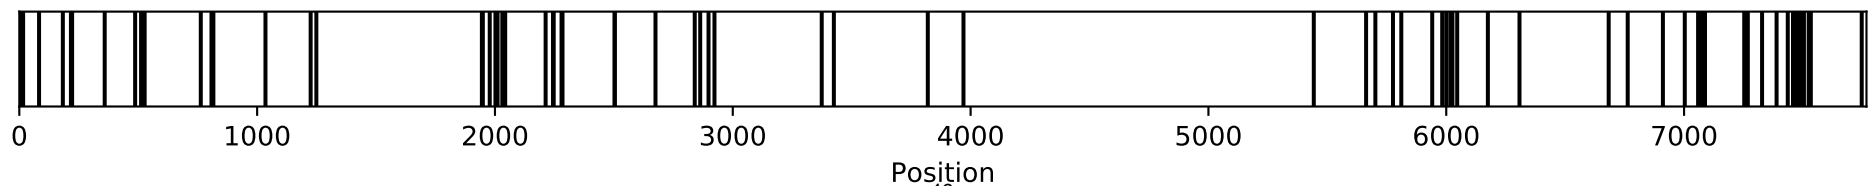

MA1 vs MA2  
Number of differences: 261

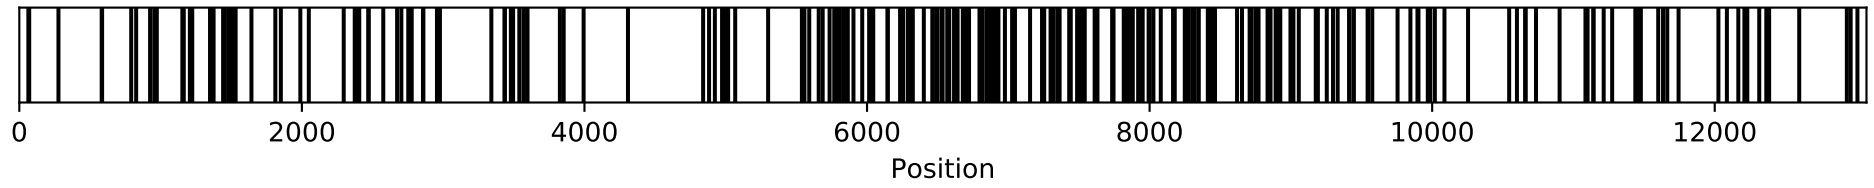

MA1 vs MM1  
Number of differences: 155

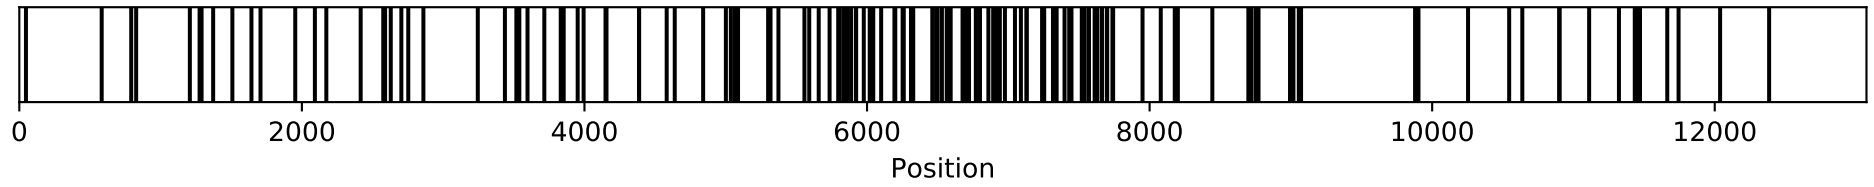

MA1 vs MM2  
Number of differences: 0

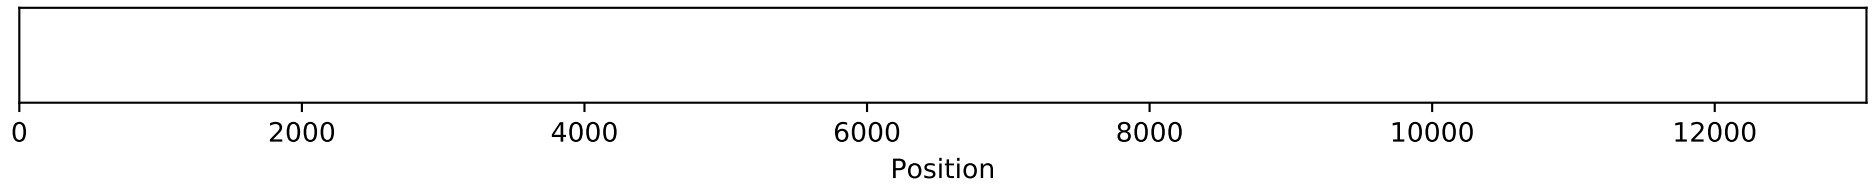

MA2 vs MM1  
Number of differences: 275

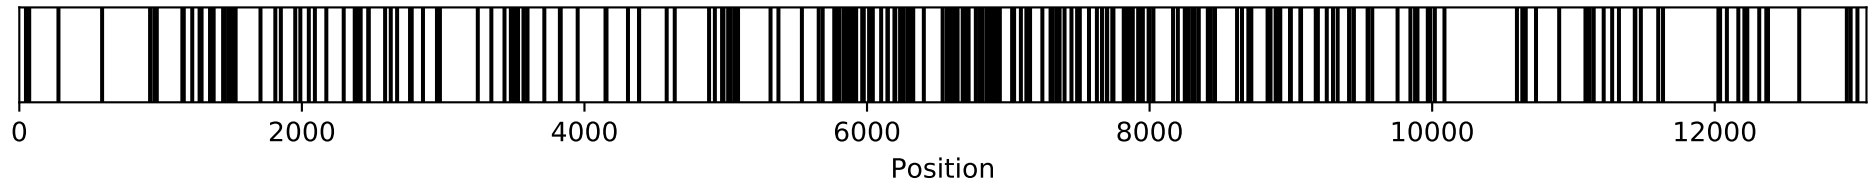

MA2 vs MM2  
Number of differences: 261

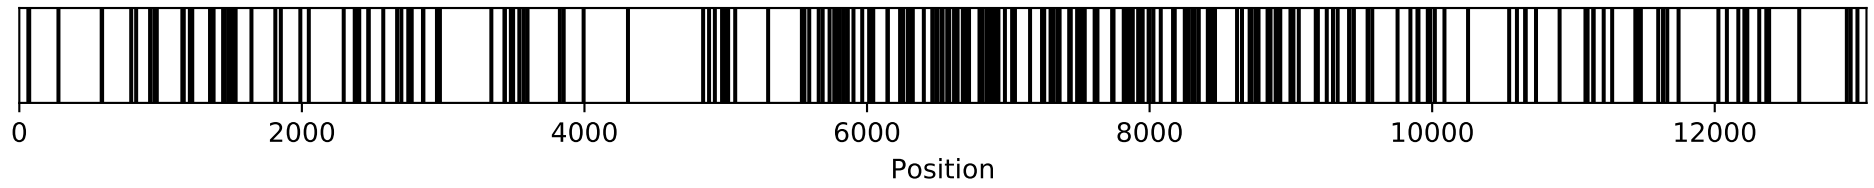

MM1 vs MM2  
Number of differences: 155

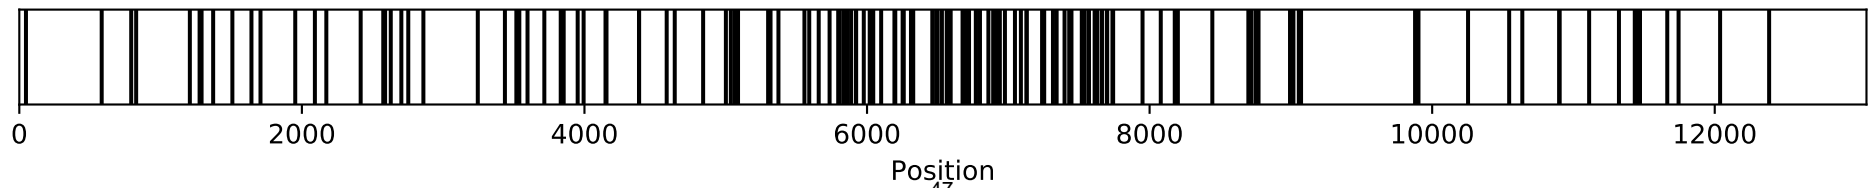

MA1 vs MA2  
Number of differences: 225

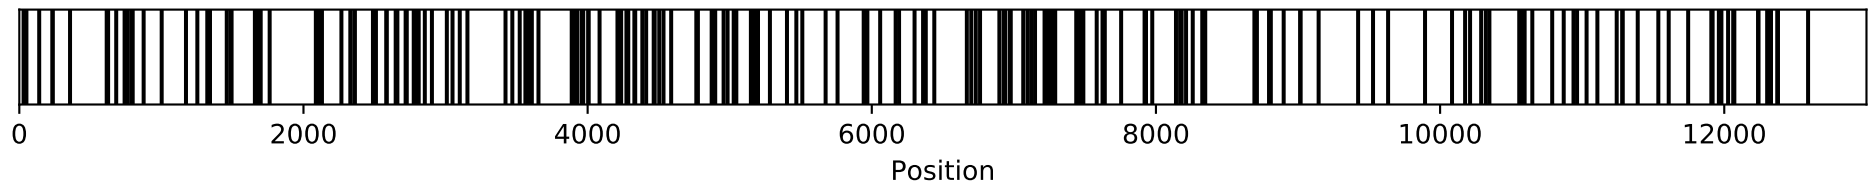

MA1 vs MM1  
Number of differences: 140

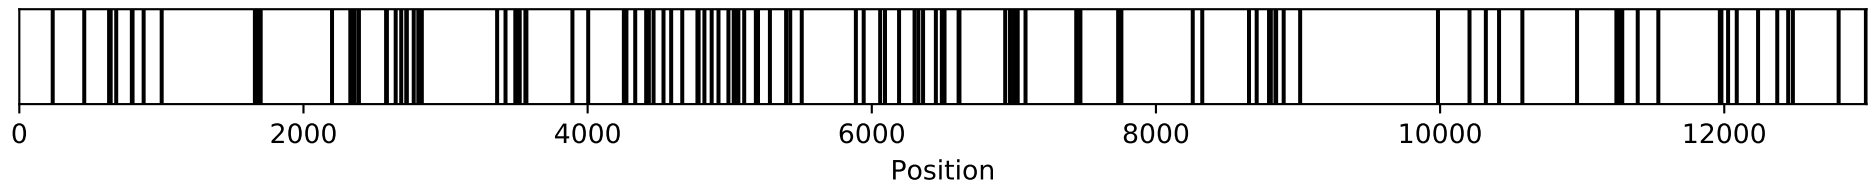

MA1 vs MM2  
Number of differences: 0

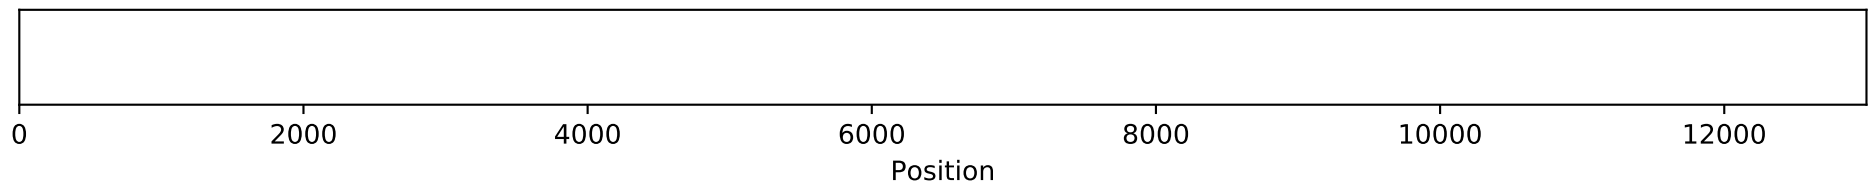

MA2 vs MM1  
Number of differences: 223

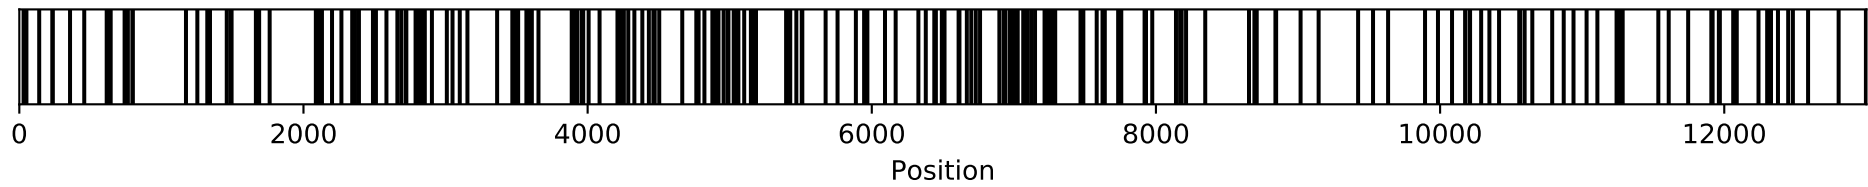

MA2 vs MM2  
Number of differences: 225

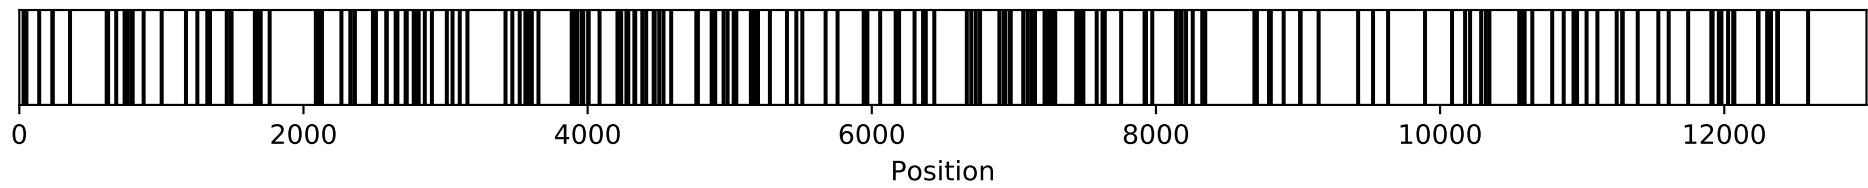

MM1 vs MM2  
Number of differences: 140

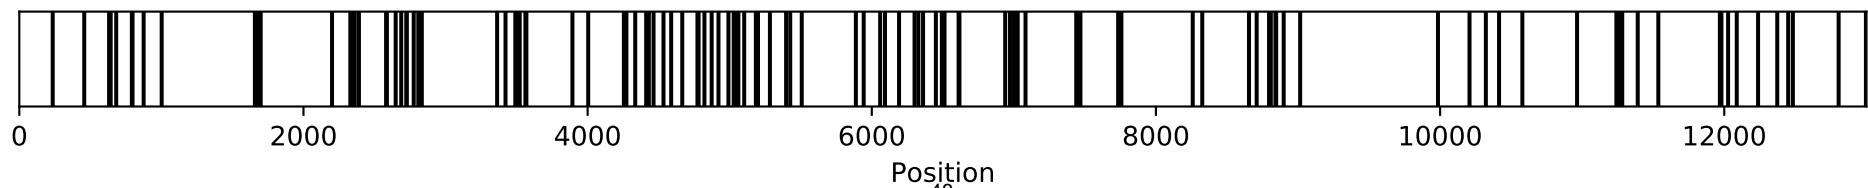

MA1 vs MA2  
Number of differences: 15

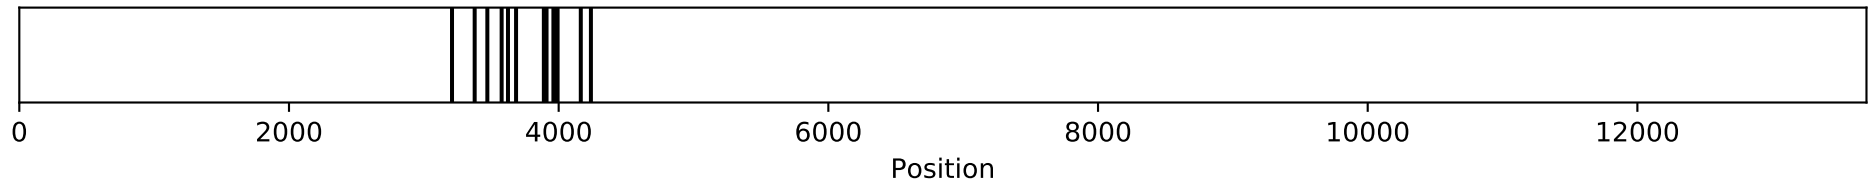

MA1 vs MM1  
Number of differences: 168

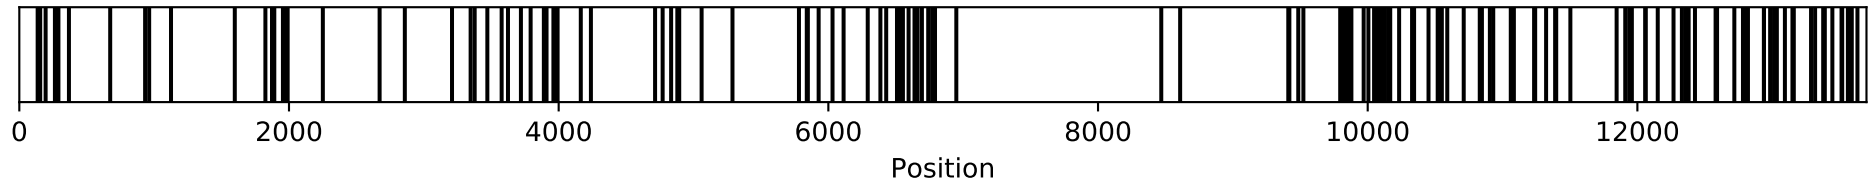

MA1 vs MM2  
Number of differences: 15

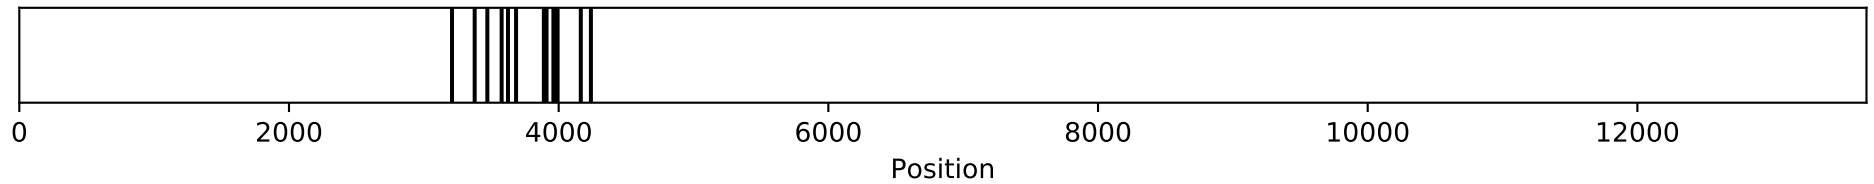

MA2 vs MM1  
Number of differences: 155

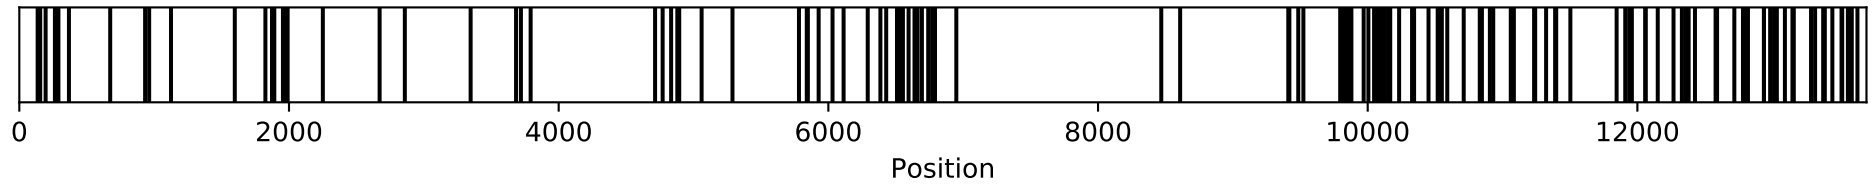

MA2 vs MM2  
Number of differences: 0

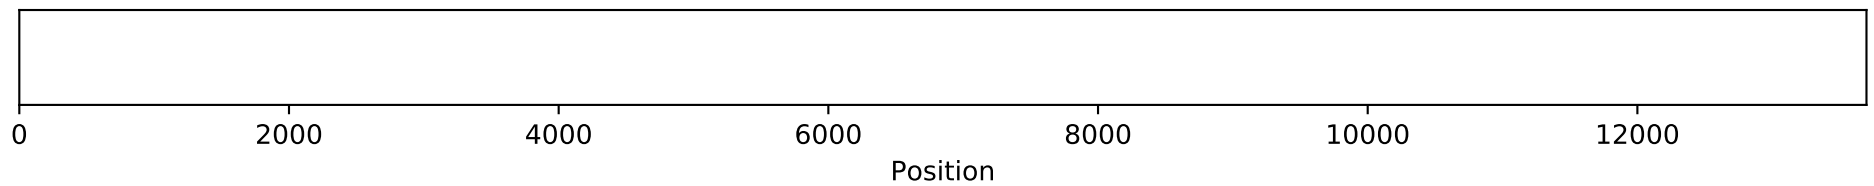

MM1 vs MM2  
Number of differences: 155

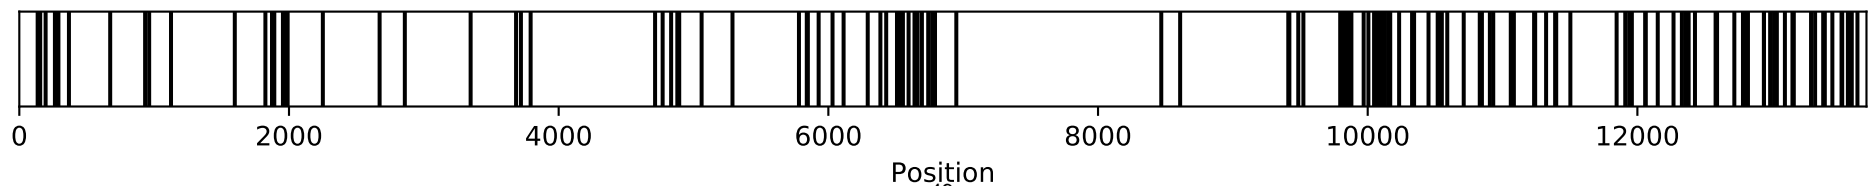

MA1 vs MA2  
Number of differences: 296

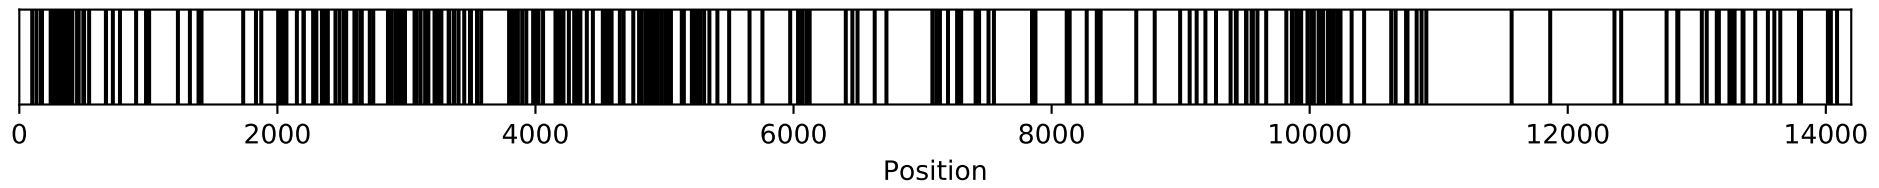

MA1 vs MM1  
Number of differences: 296

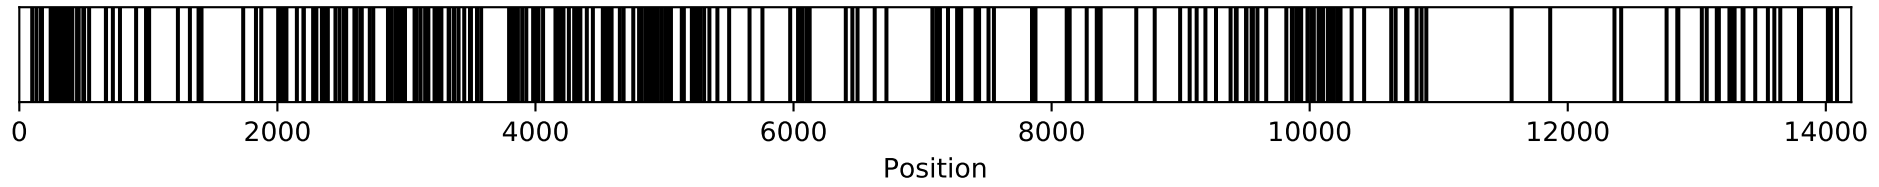

MA1 vs MM2  
Number of differences: 293

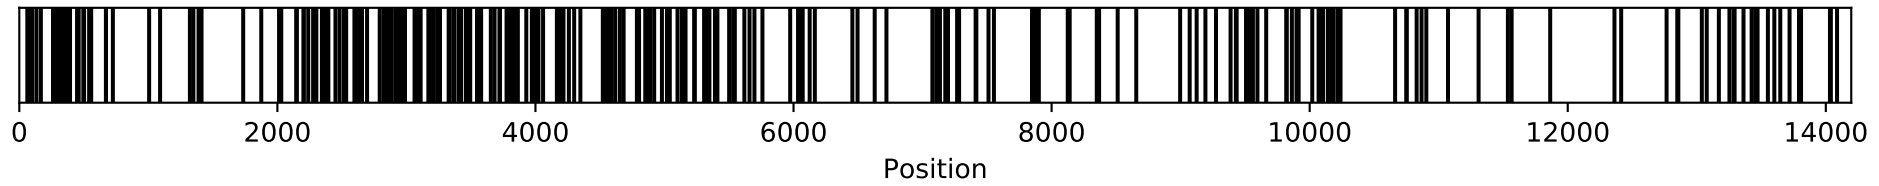

MA2 vs MM1  
Number of differences: 0

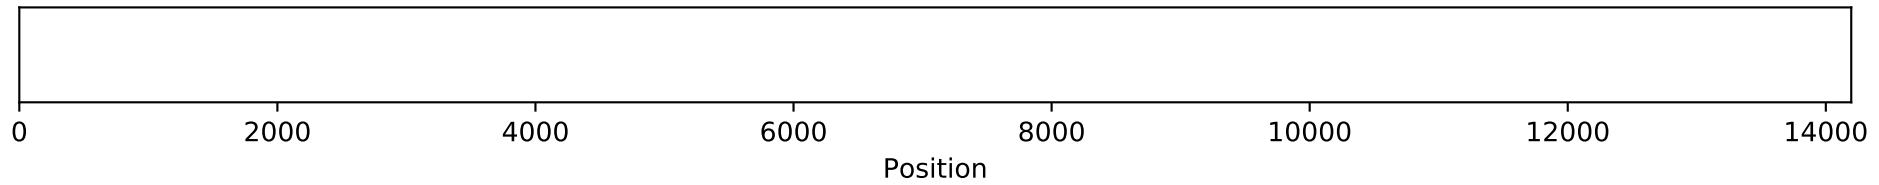

MA2 vs MM2  
Number of differences: 168

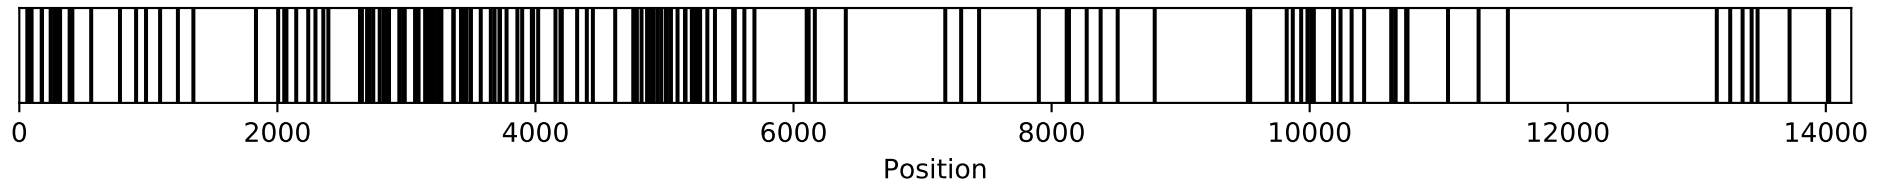

MM1 vs MM2  
Number of differences: 168

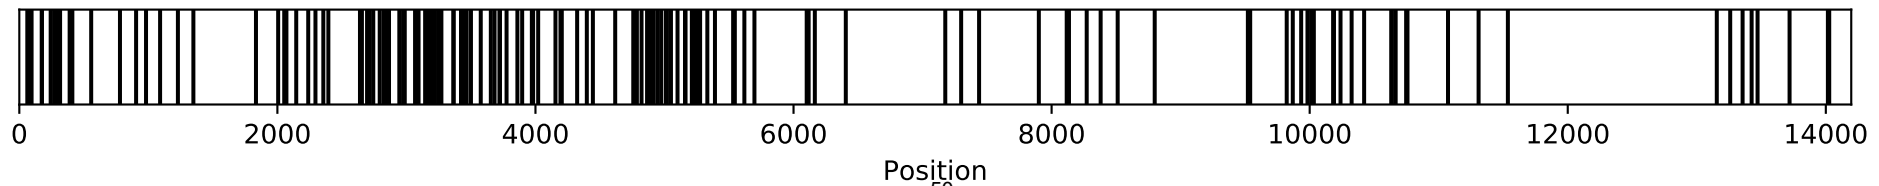



MA1 vs MA2  
Number of differences: 155

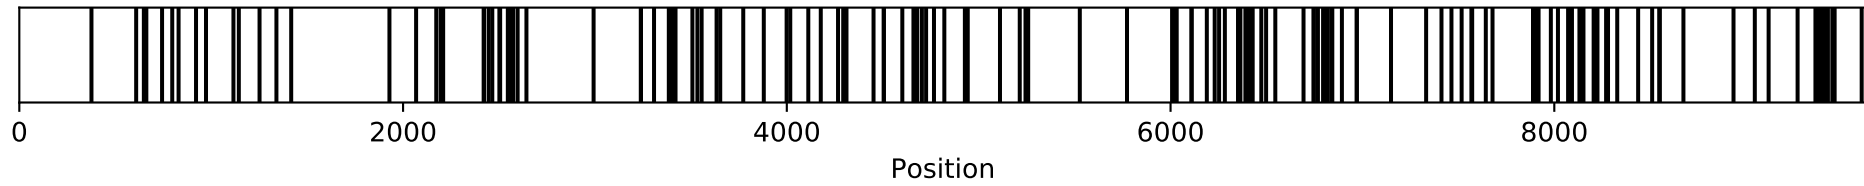

MA1 vs MM1  
Number of differences: 162

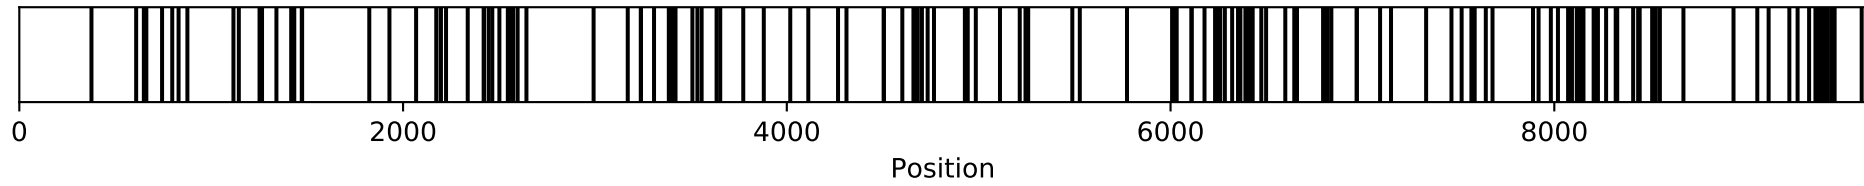

MA1 vs MM2  
Number of differences: 155

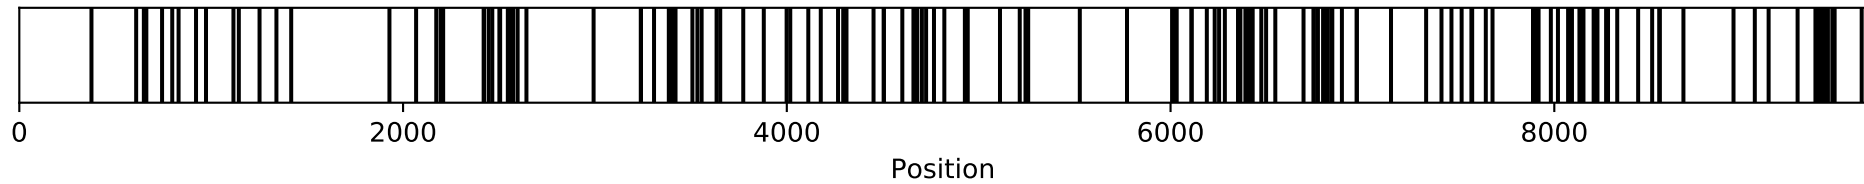

MA2 vs MM1  
Number of differences: 69

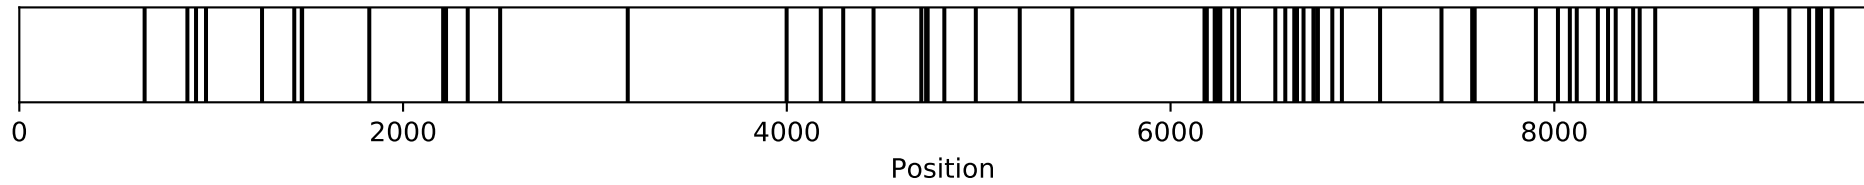

MA2 vs MM2  
Number of differences: 0

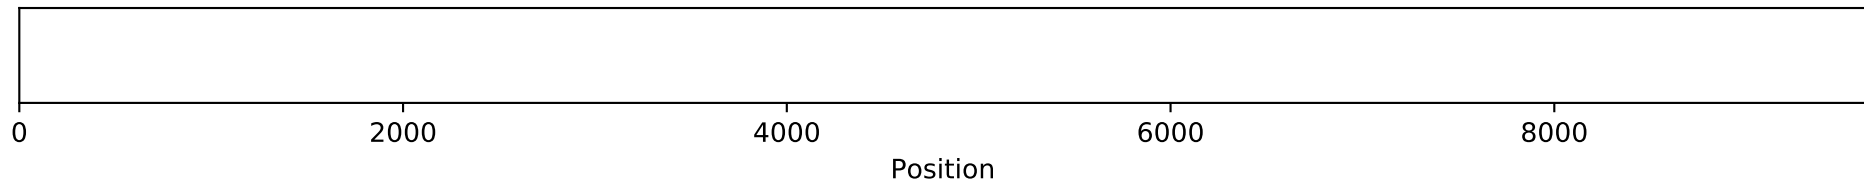

MM1 vs MM2  
Number of differences: 69

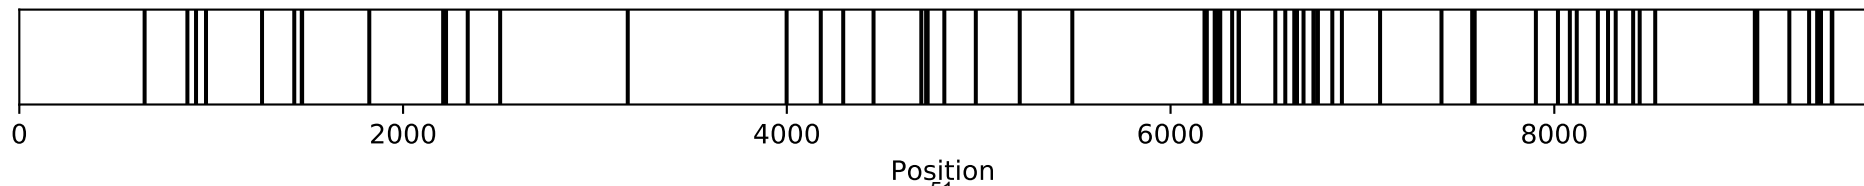

MA1 vs MA2  
Number of differences: 229

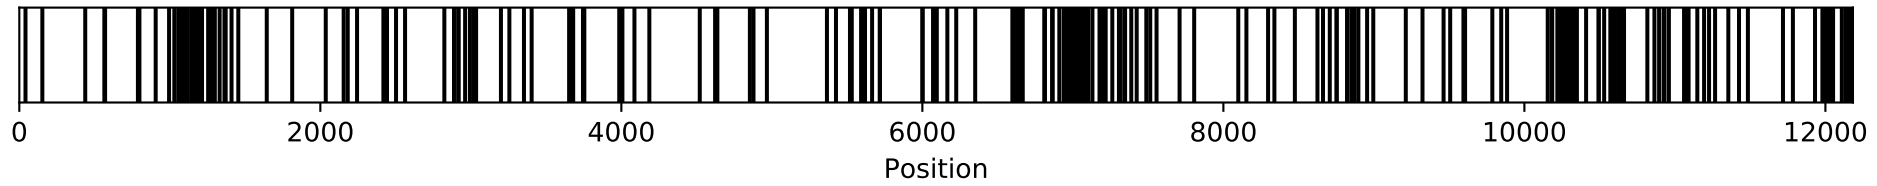

MA1 vs MM1  
Number of differences: 220

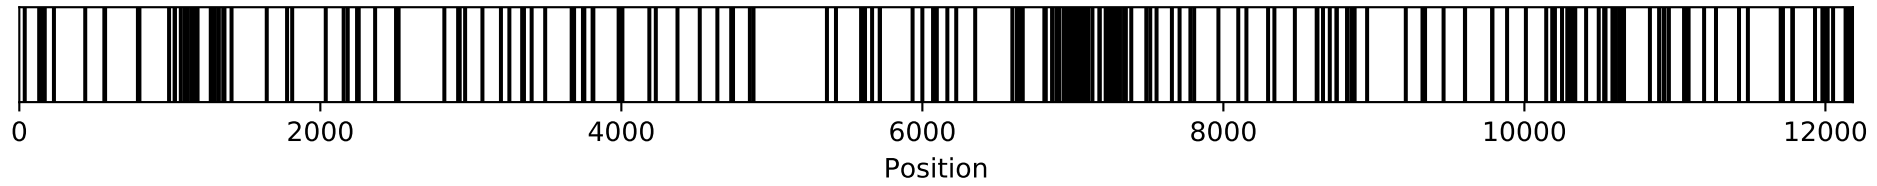

MA1 vs MM2  
Number of differences: 229

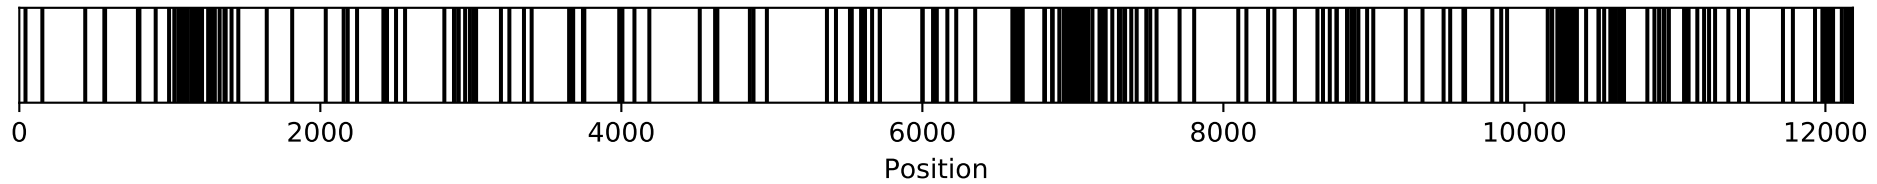

MA2 vs MM1  
Number of differences: 142

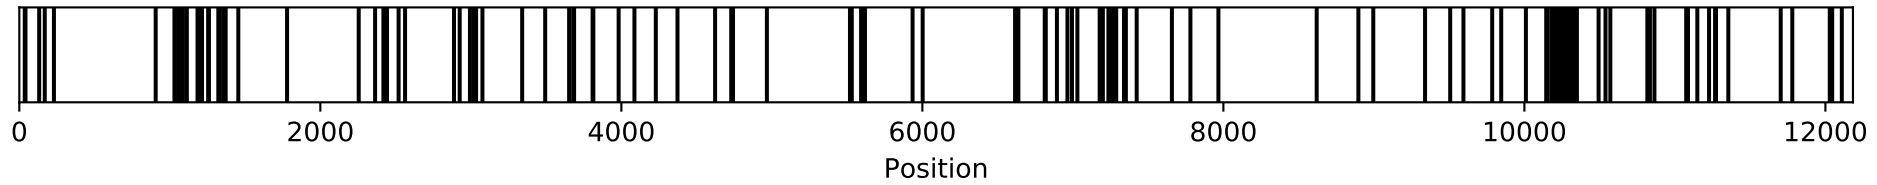

MA2 vs MM2  
Number of differences: 0

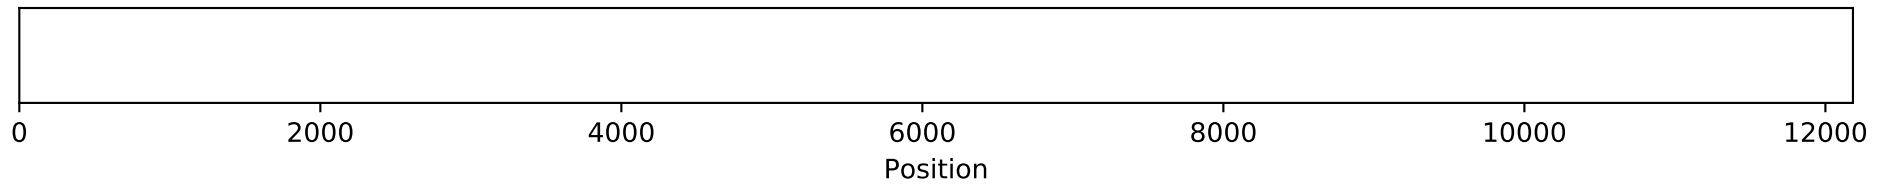

MM1 vs MM2  
Number of differences: 142

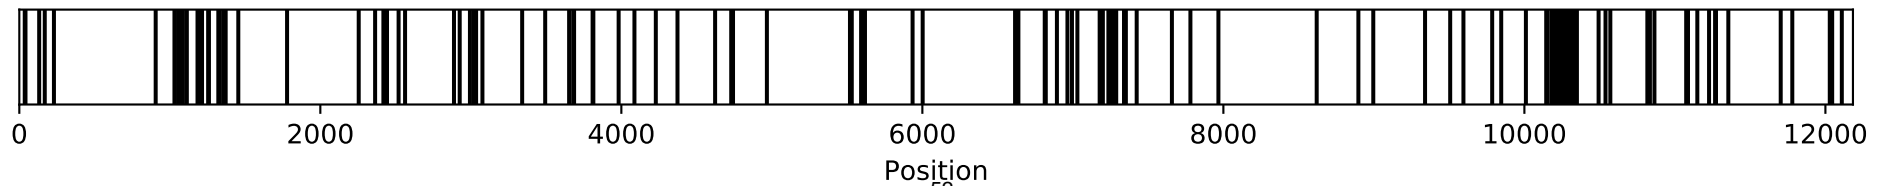

MA1 vs MA2  
Number of differences: 243

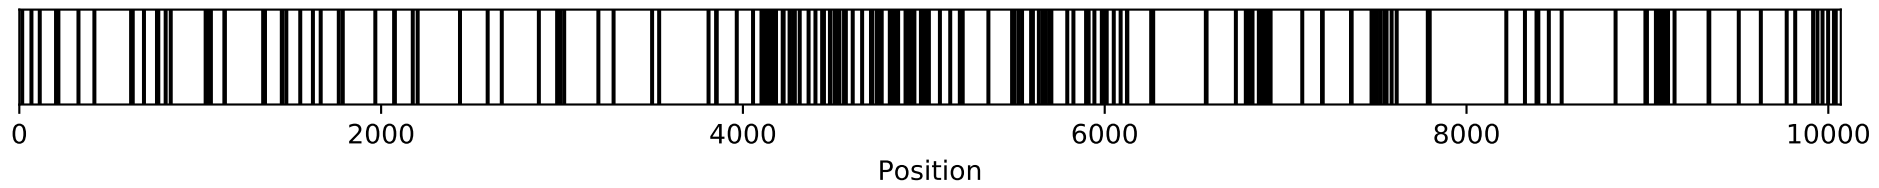

MA1 vs MM1  
Number of differences: 108

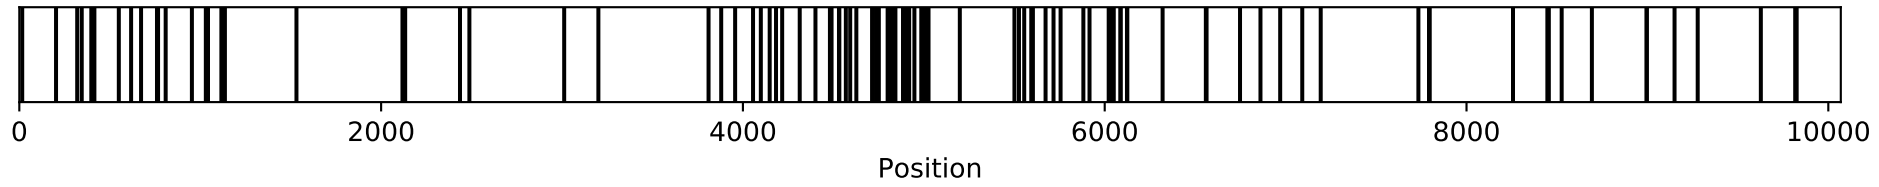

MA1 vs MM2  
Number of differences: 115

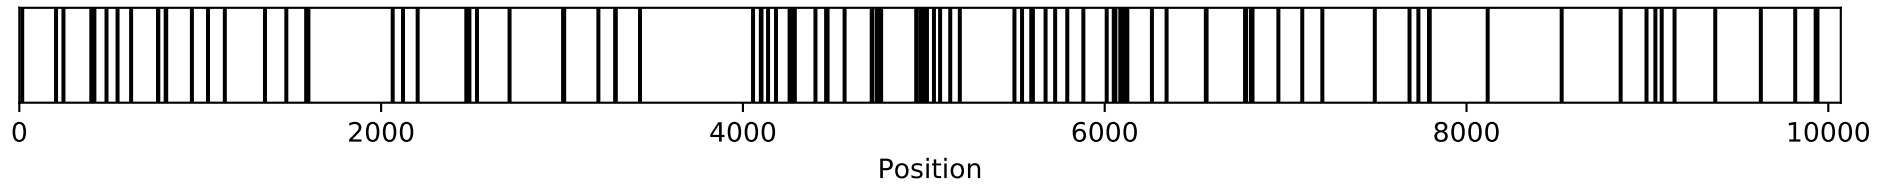

MA2 vs MM1  
Number of differences: 235

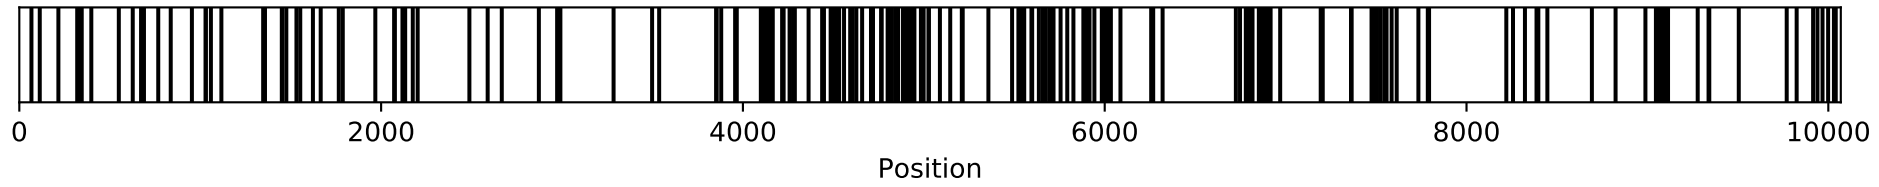

MA2 vs MM2  
Number of differences: 246

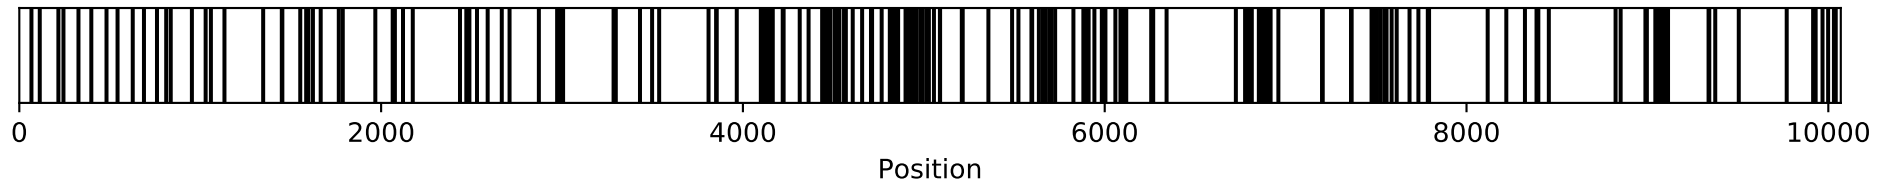

MM1 vs MM2  
Number of differences: 130

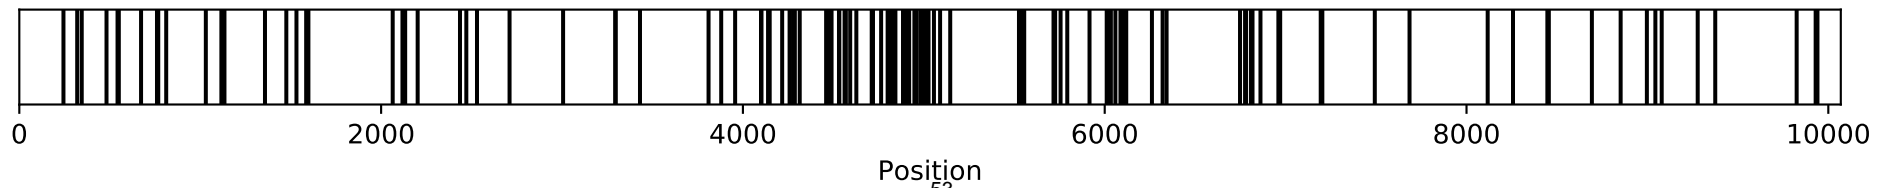

MA1 vs MA2  
Number of differences: 167

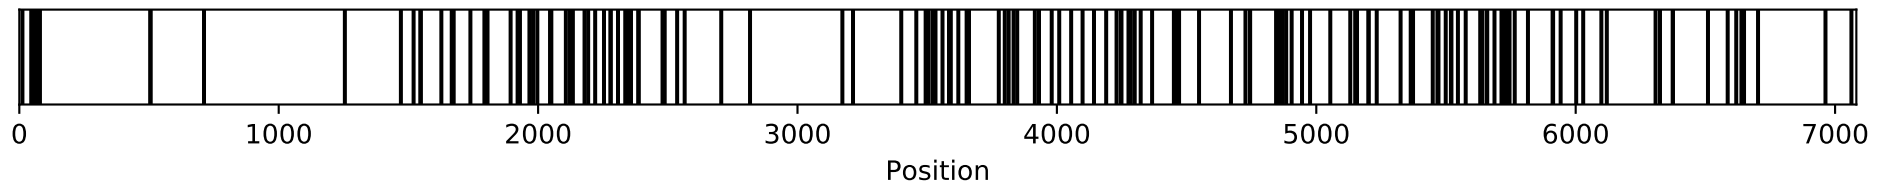

MA1 vs MM1  
Number of differences: 195

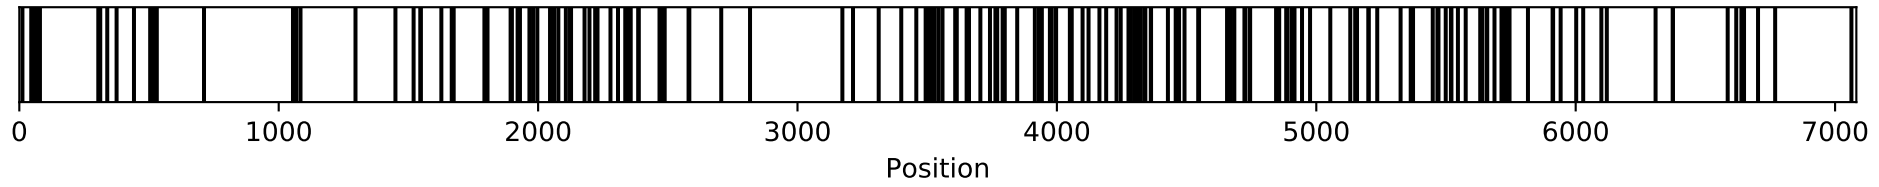

MA1 vs MM2  
Number of differences: 179

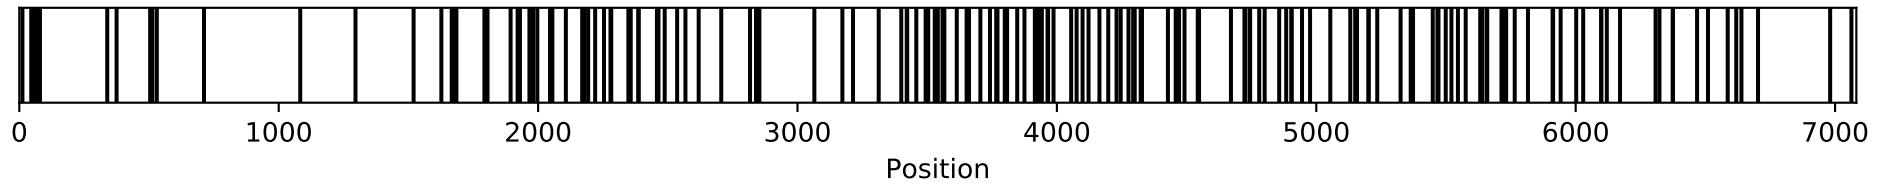

MA2 vs MM1  
Number of differences: 92

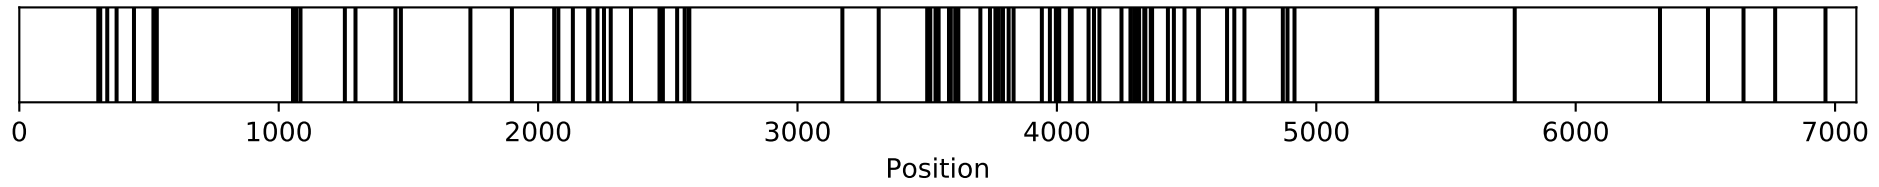

MA2 vs MM2  
Number of differences: 97

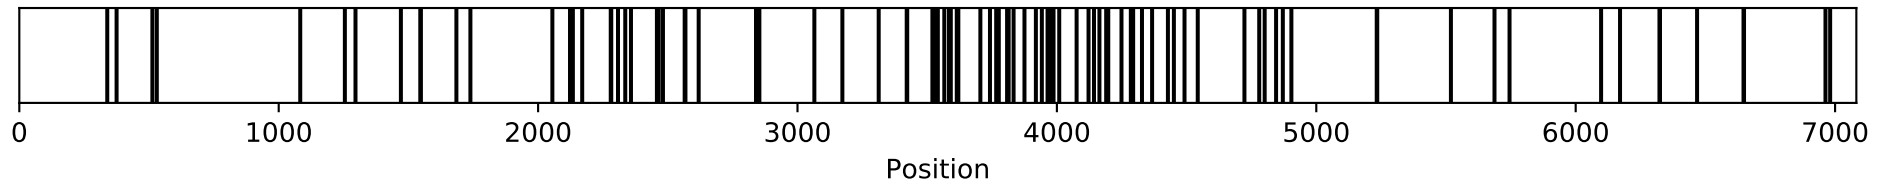

MM1 vs MM2  
Number of differences: 106

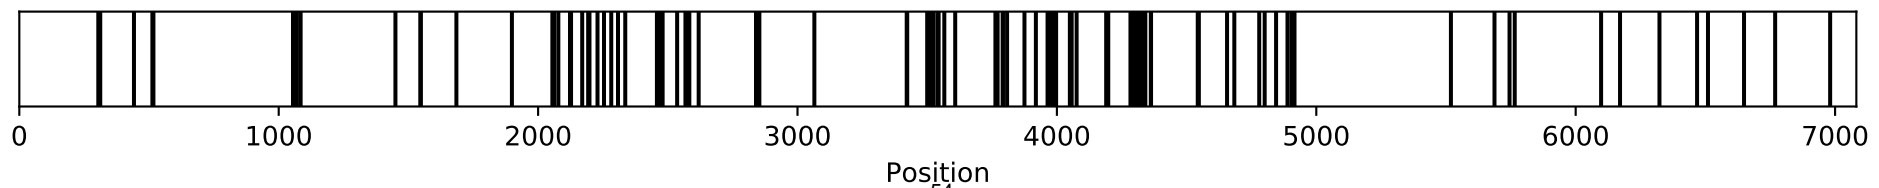

MA1 vs MA2  
Number of differences: 403

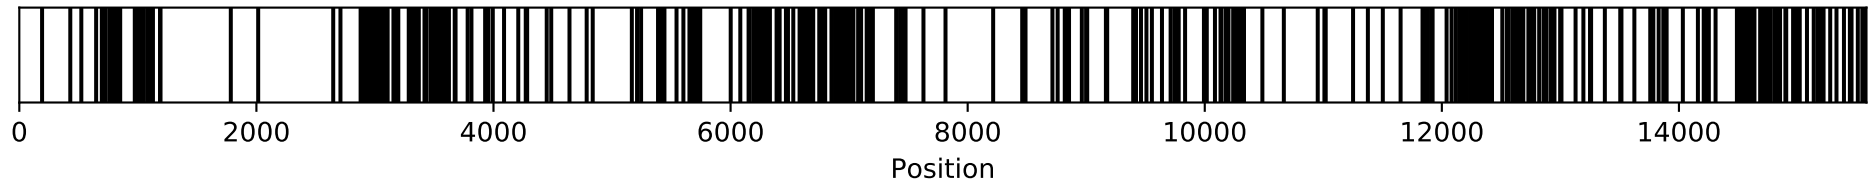

MA1 vs MM1  
Number of differences: 411

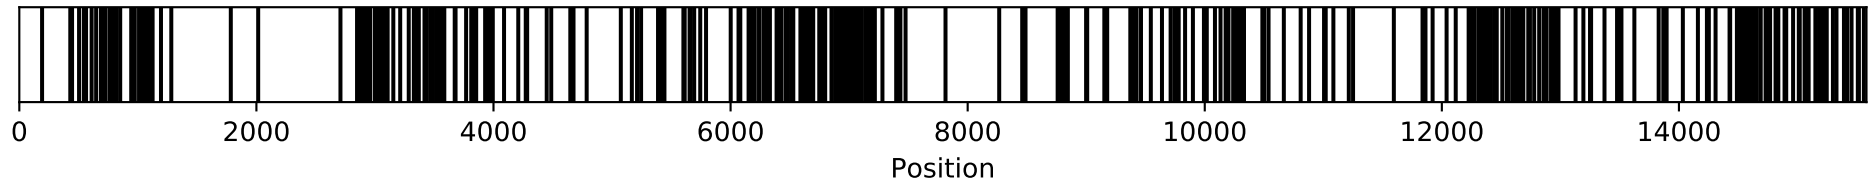

MA1 vs MM2  
Number of differences: 403

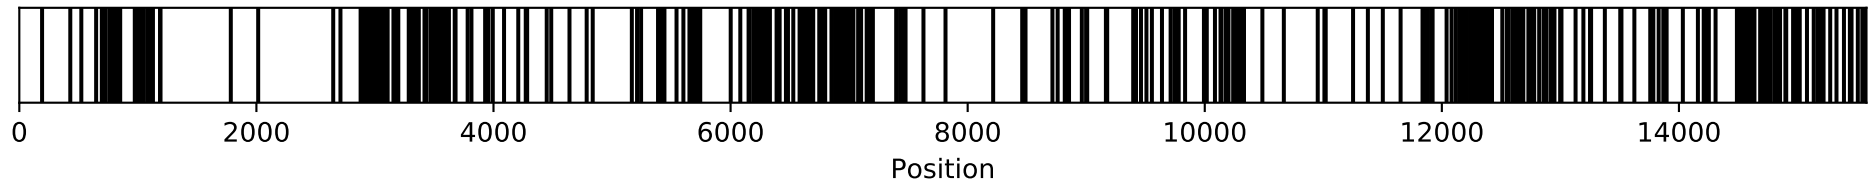

MA2 vs MM1  
Number of differences: 270

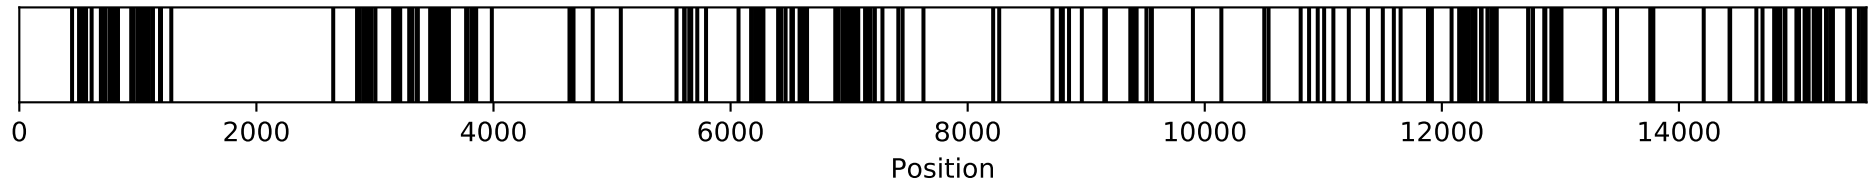

MA2 vs MM2  
Number of differences: 0

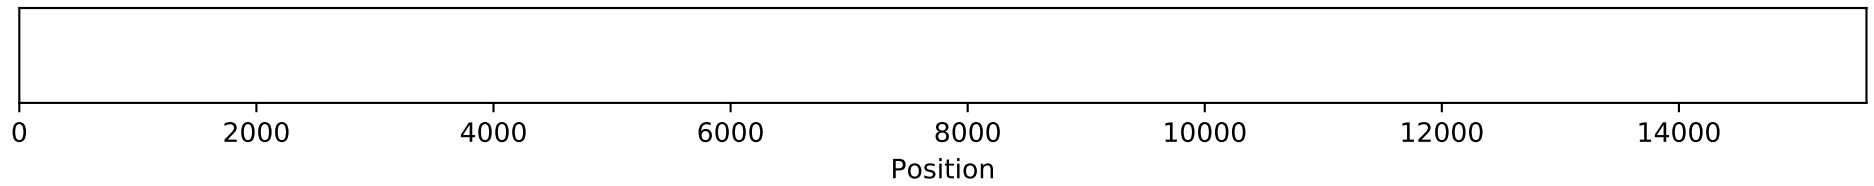

MM1 vs MM2  
Number of differences: 270

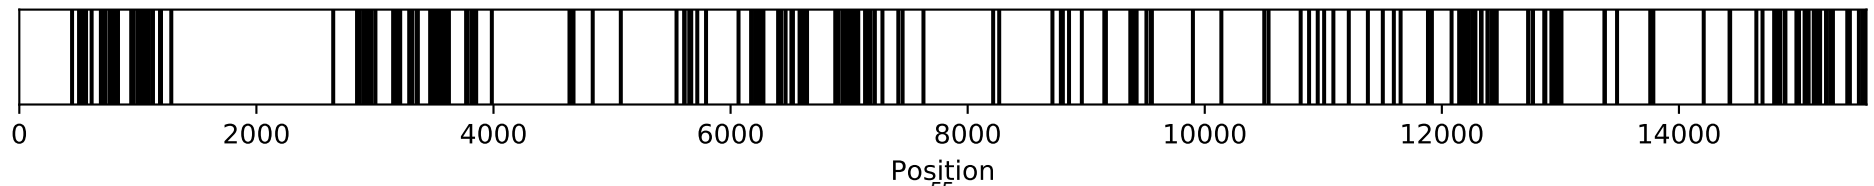

MA1 vs MA2  
Number of differences: 117

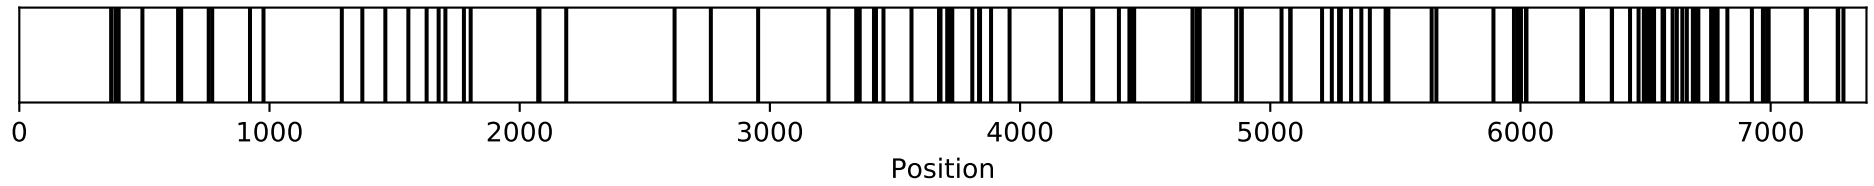

MA1 vs MM1  
Number of differences: 0

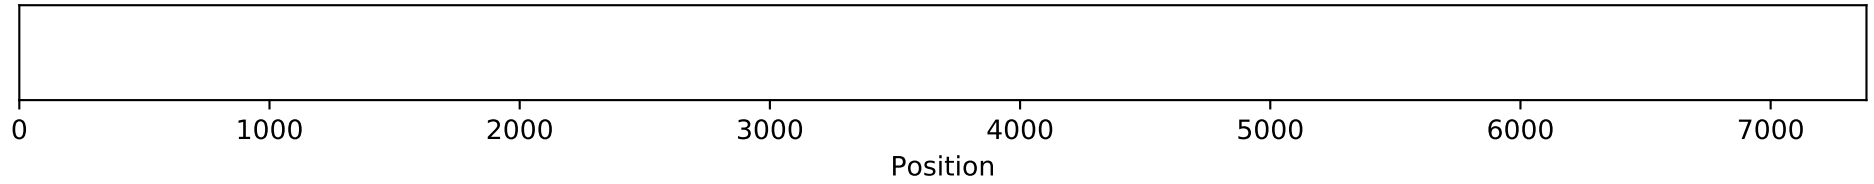

MA1 vs MM2  
Number of differences: 51

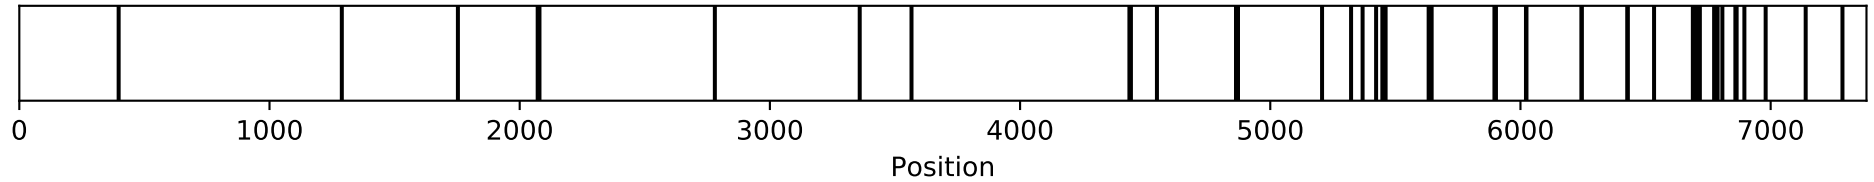

MA2 vs MM1  
Number of differences: 117

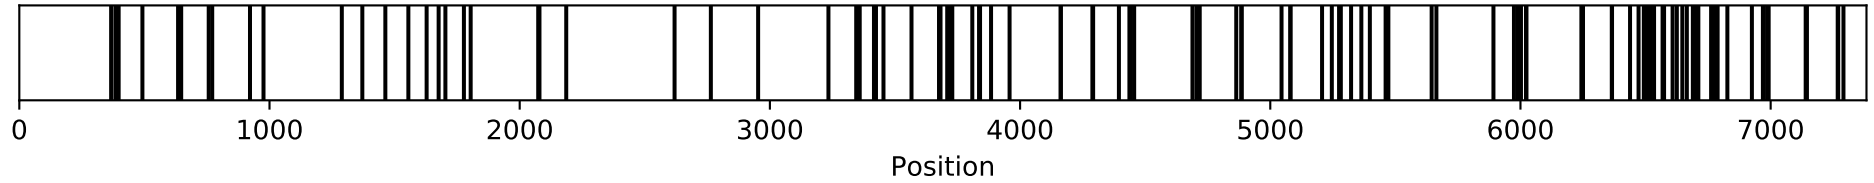

MA2 vs MM2  
Number of differences: 121

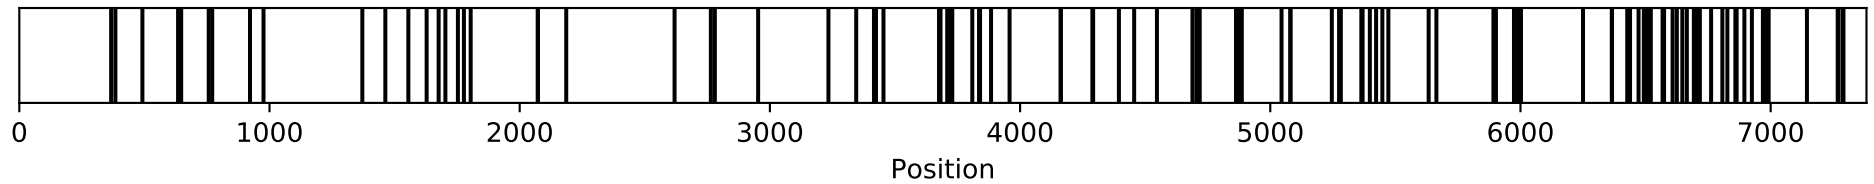

MM1 vs MM2  
Number of differences: 51

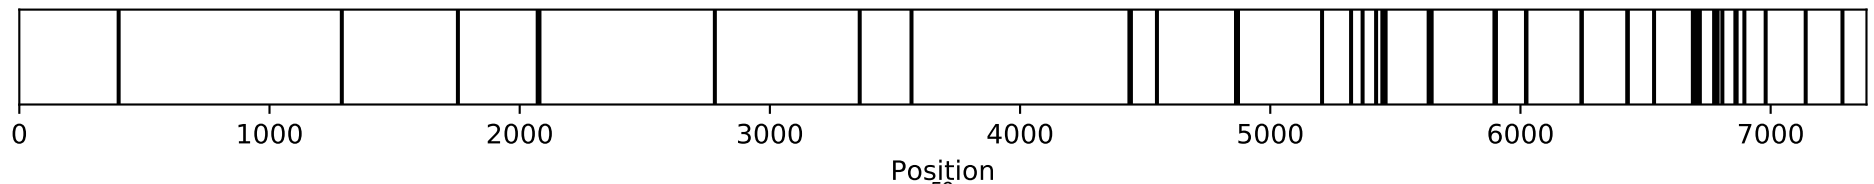

MA1 vs MA2  
Number of differences: 445

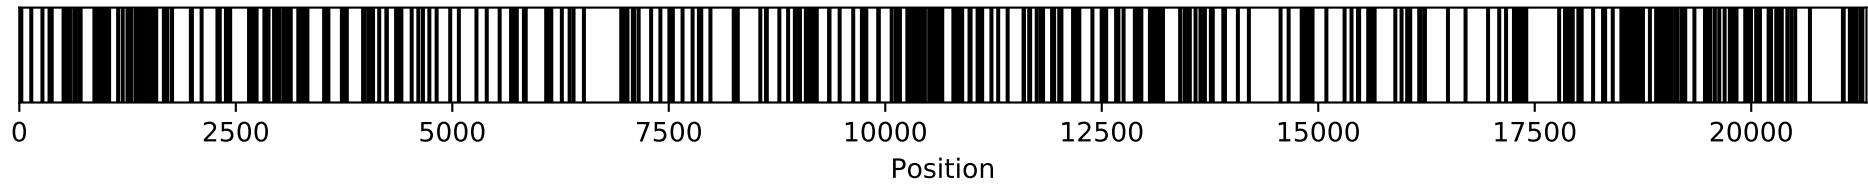

MA1 vs MM1  
Number of differences: 244

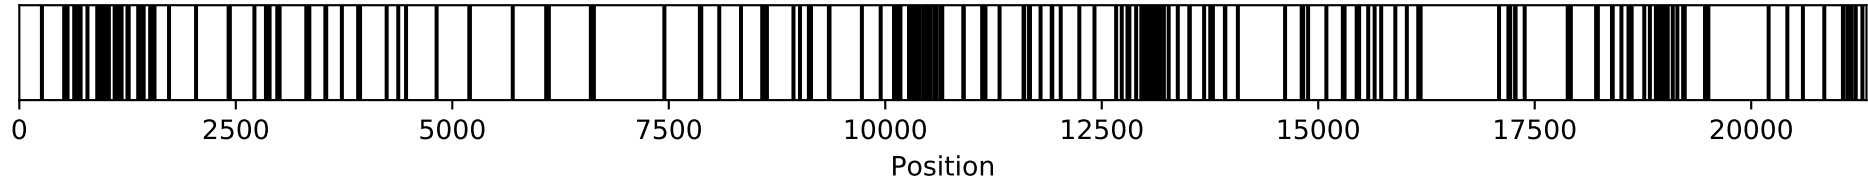

MA1 vs MM2  
Number of differences: 241

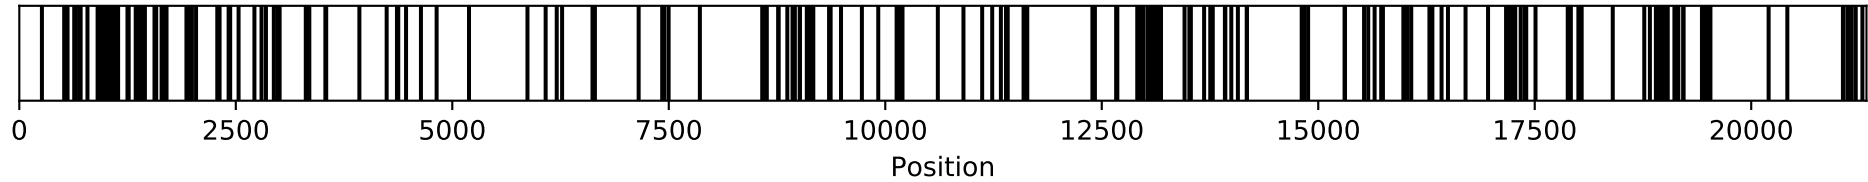

MA2 vs MM1  
Number of differences: 471

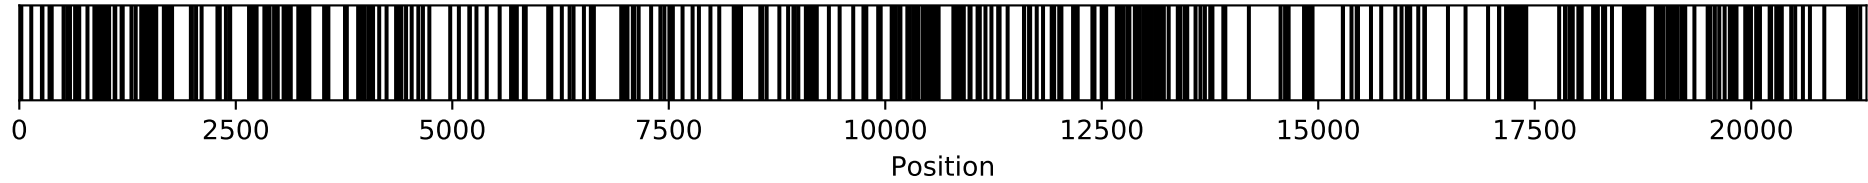

MA2 vs MM2  
Number of differences: 461

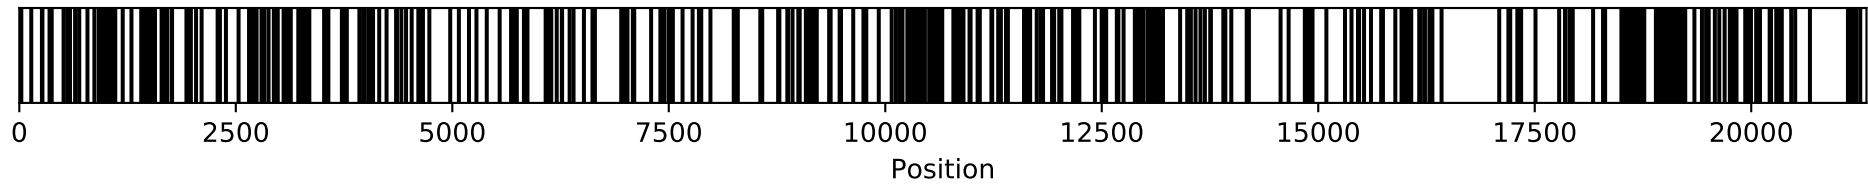

MM1 vs MM2  
Number of differences: 235

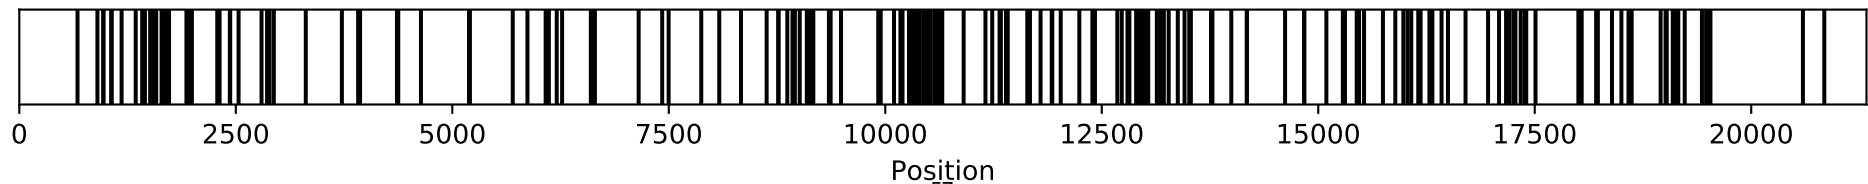

MA1 vs MA2  
Number of differences: 265

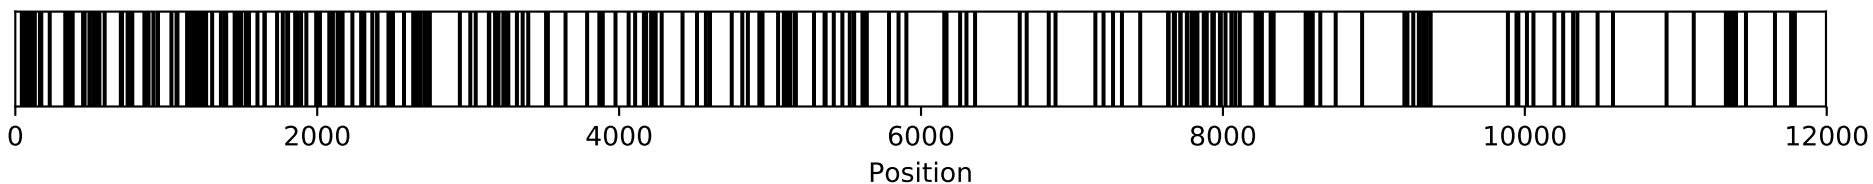

MA1 vs MM1  
Number of differences: 265

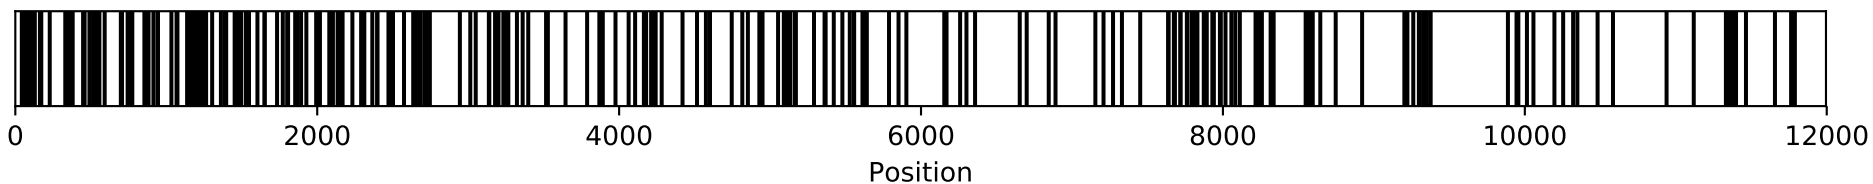

MA1 vs MM2  
Number of differences: 265

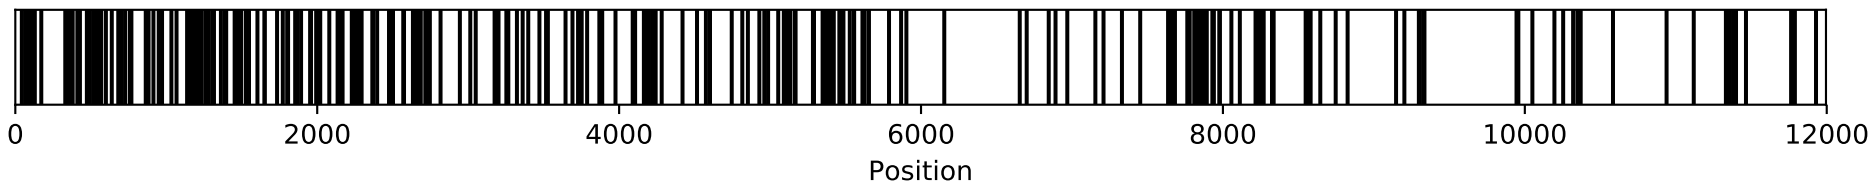

MA2 vs MM1  
Number of differences: 0

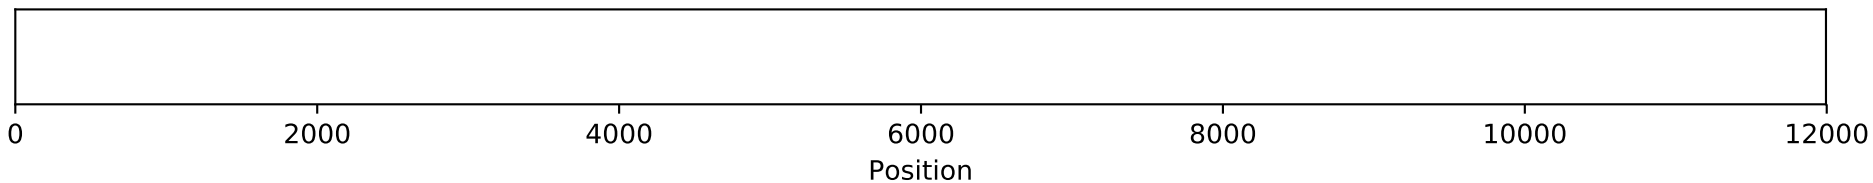

MA2 vs MM2  
Number of differences: 144

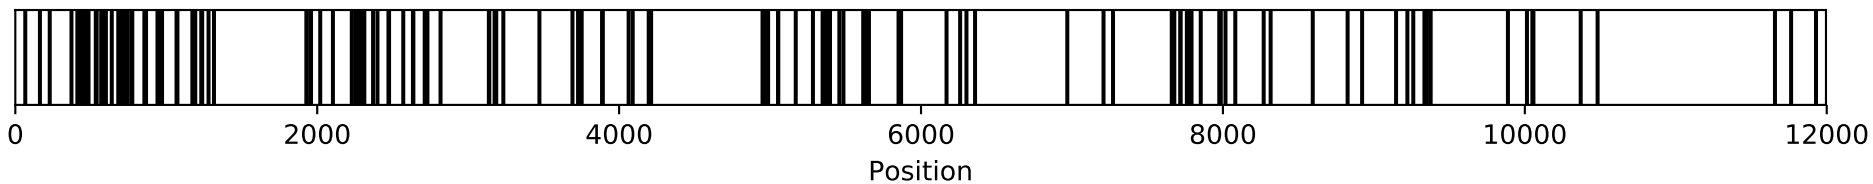

MM1 vs MM2  
Number of differences: 144

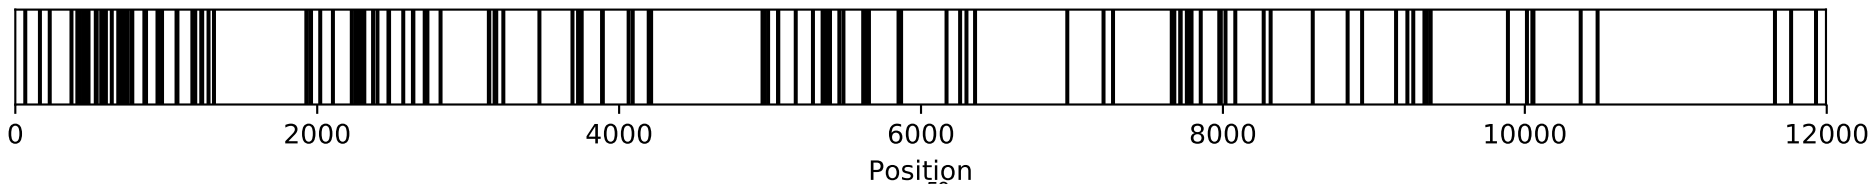



MA1 vs MA2  
Number of differences: 196

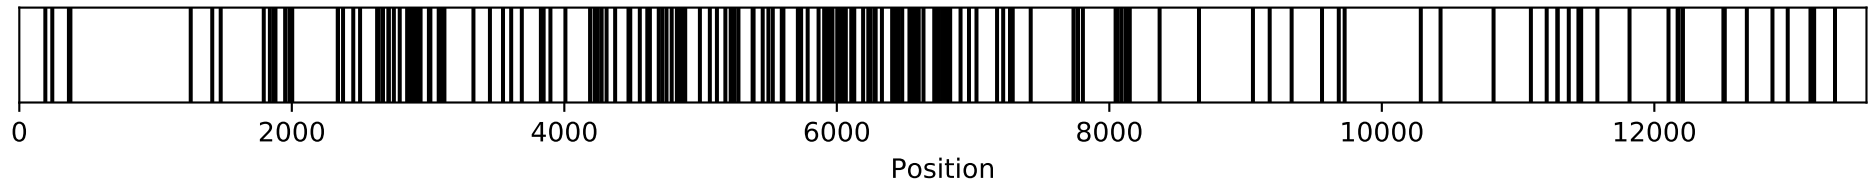

MA1 vs MM1  
Number of differences: 200

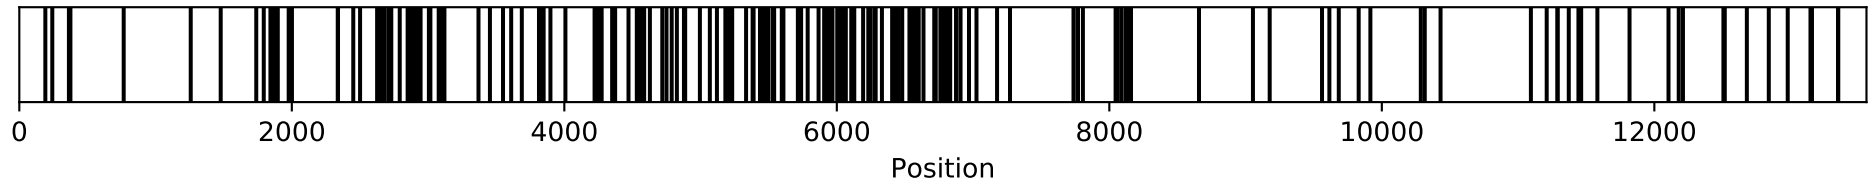

MA1 vs MM2  
Number of differences: 196

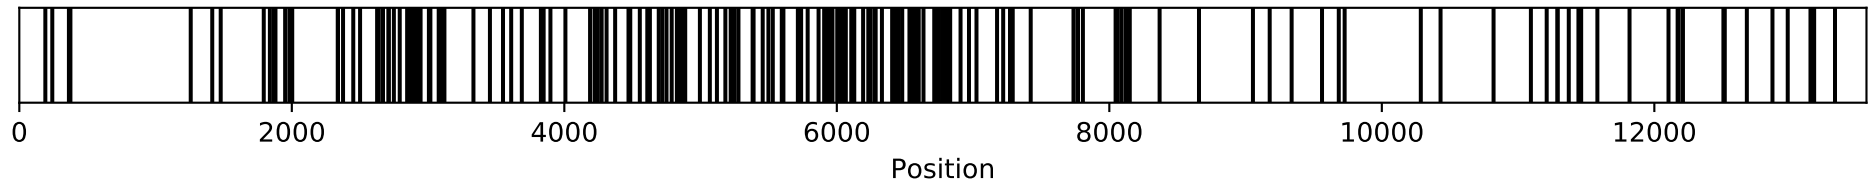

MA2 vs MM1  
Number of differences: 78

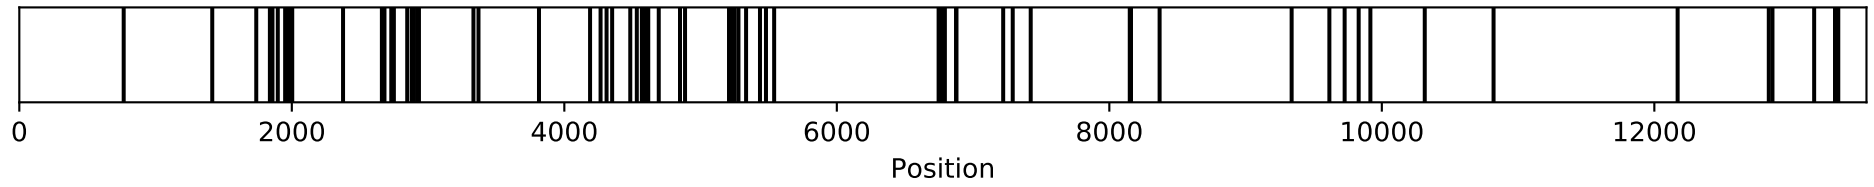

MA2 vs MM2  
Number of differences: 0

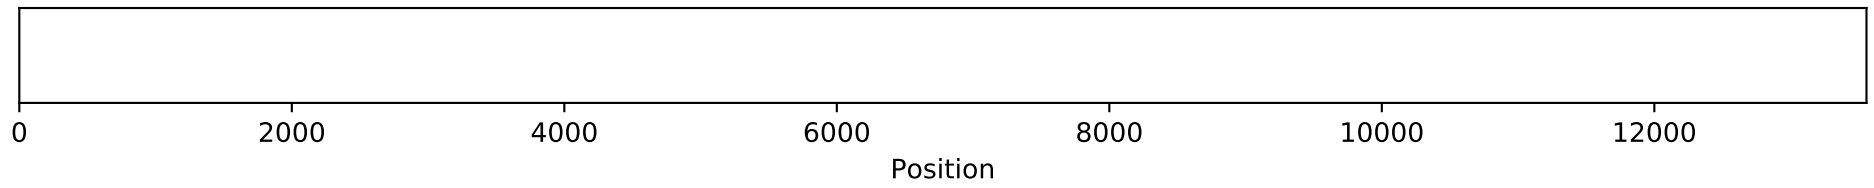

MM1 vs MM2  
Number of differences: 78

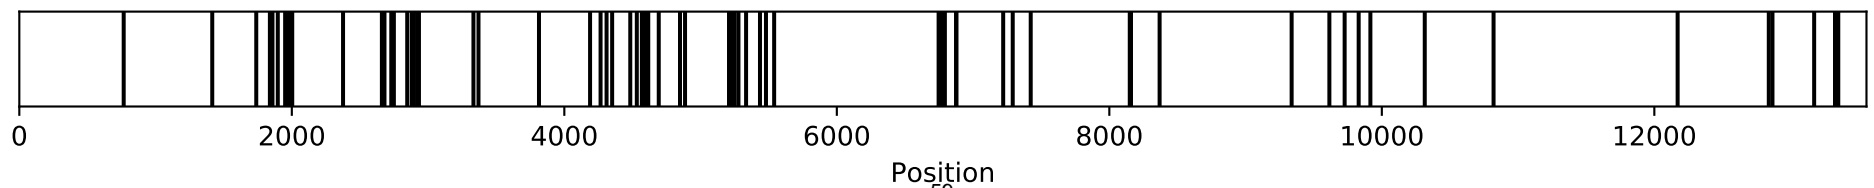

MA1 vs MA2  
Number of differences: 598

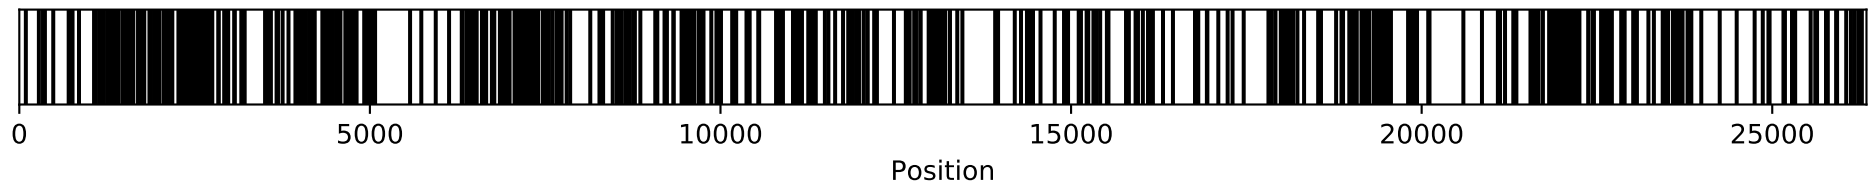

MA1 vs MM1  
Number of differences: 364

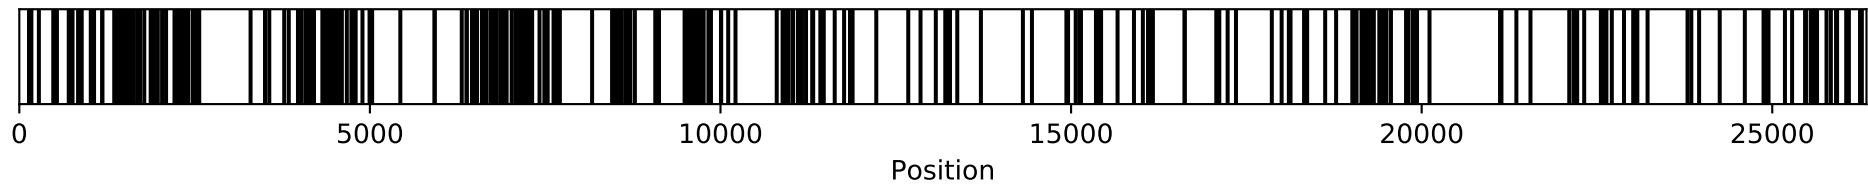

MA1 vs MM2  
Number of differences: 351

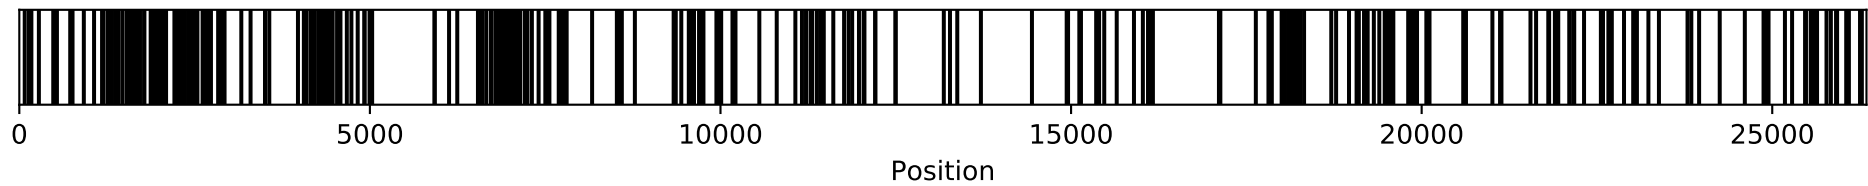

MA2 vs MM1  
Number of differences: 588

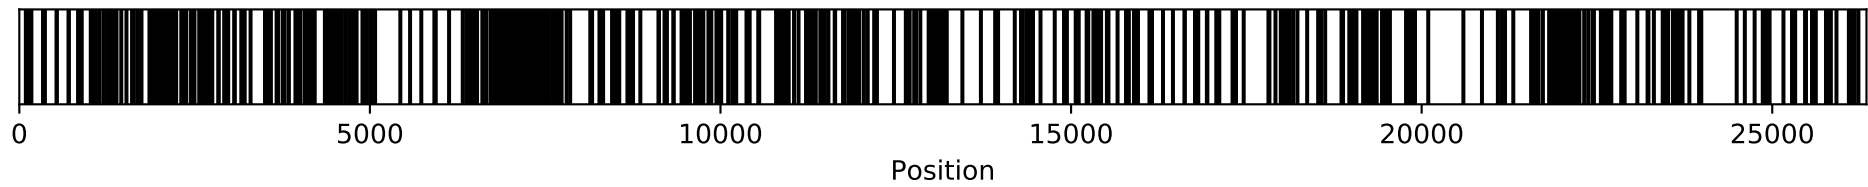

MA2 vs MM2  
Number of differences: 625

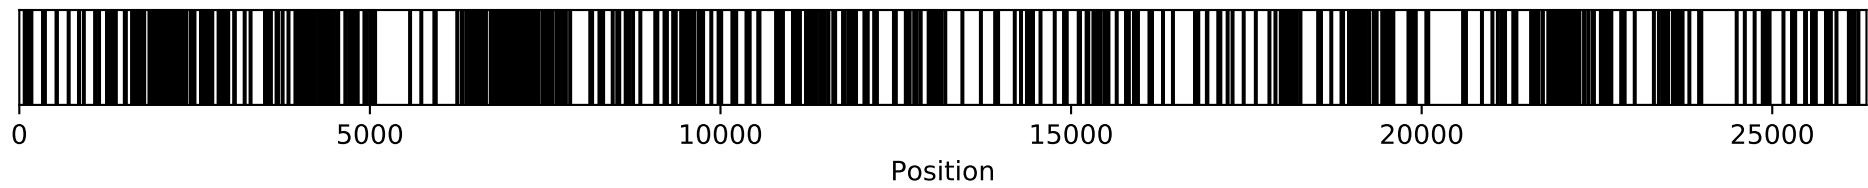

MM1 vs MM2  
Number of differences: 340

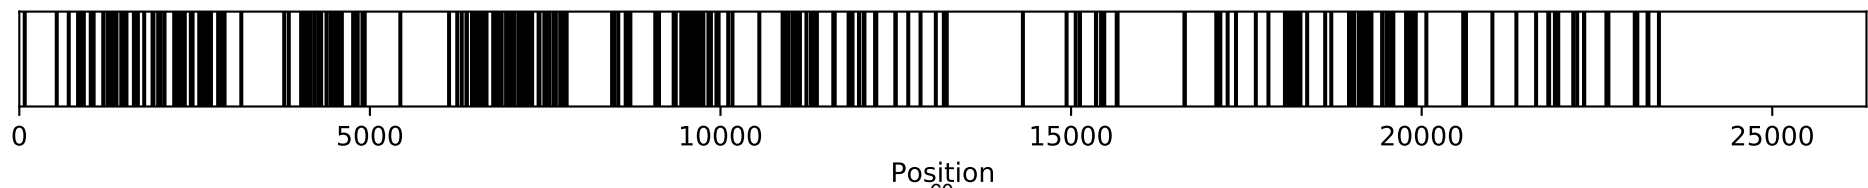

MA1 vs MA2  
Number of differences: 291

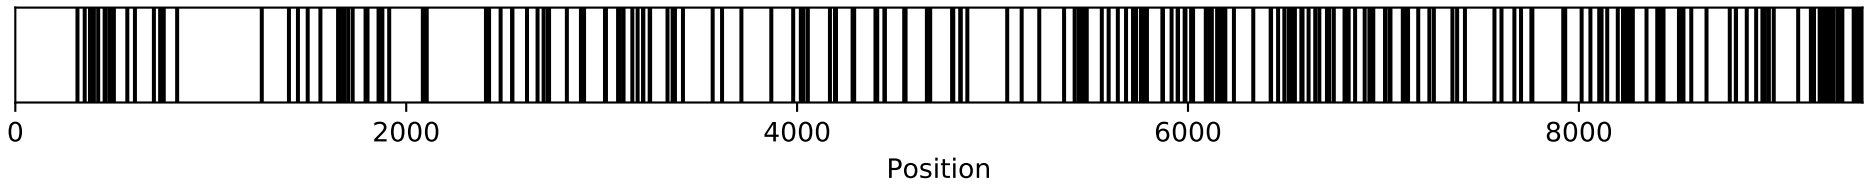

MA1 vs MM1  
Number of differences: 198

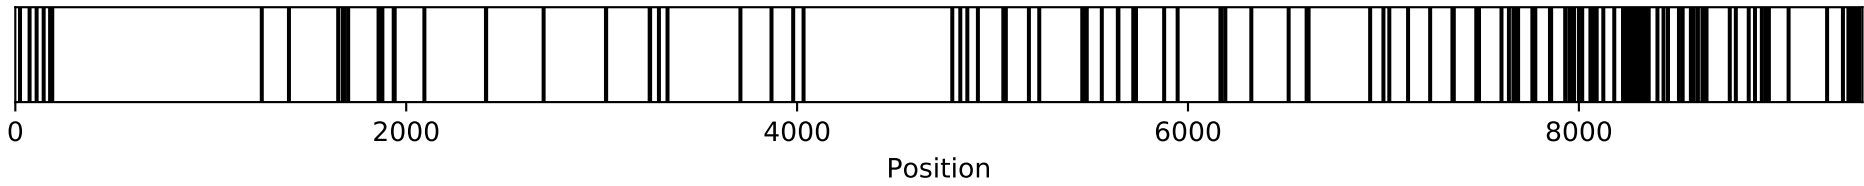

MA1 vs MM2  
Number of differences: 194

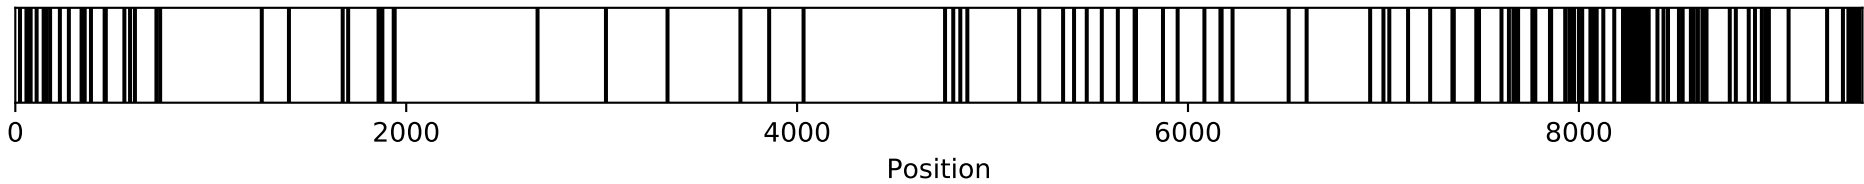

MA2 vs MM1  
Number of differences: 323

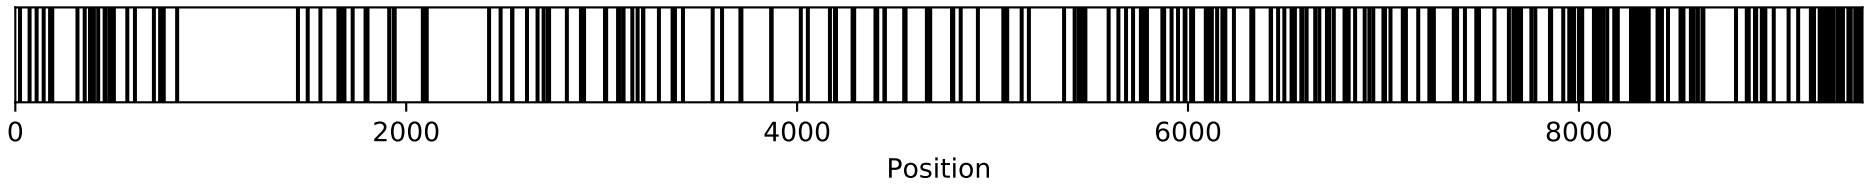

MA2 vs MM2  
Number of differences: 327

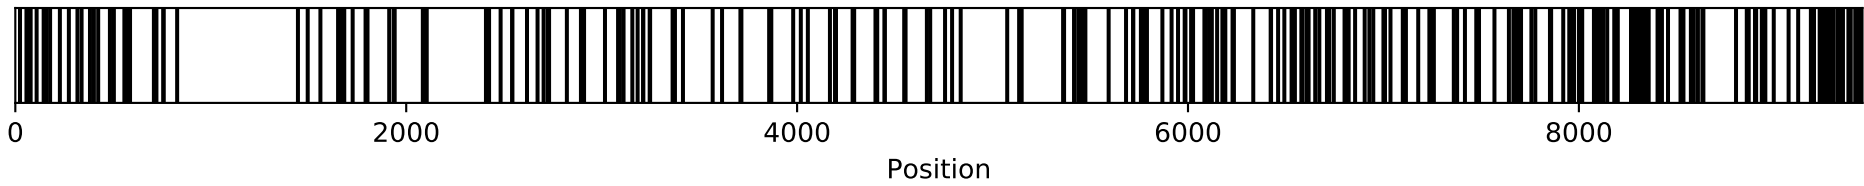

MM1 vs MM2  
Number of differences: 56

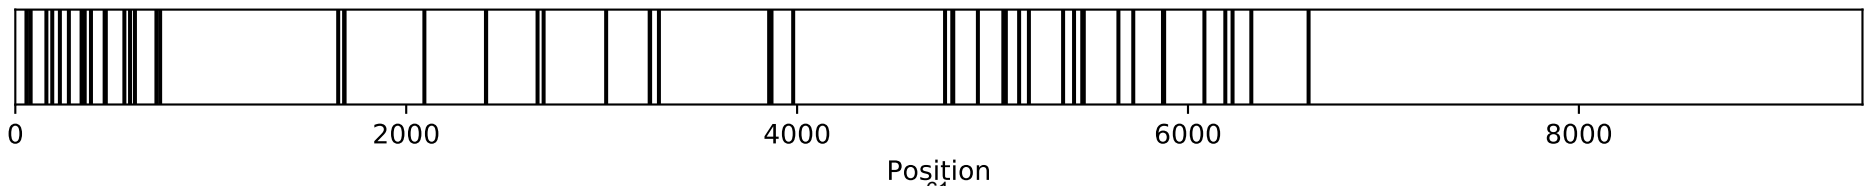

MA1 vs MA2  
Number of differences: 0

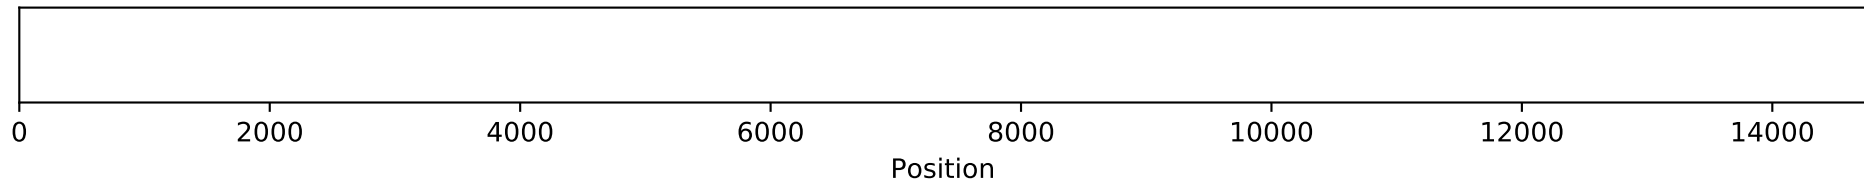

MA1 vs MM1  
Number of differences: 734

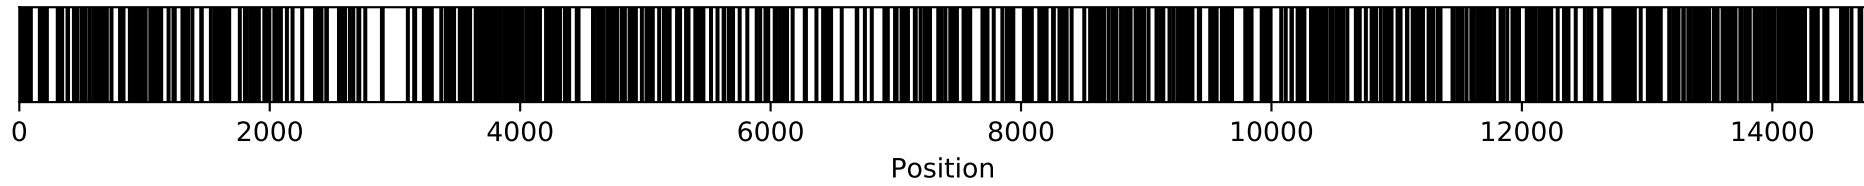

MA1 vs MM2  
Number of differences: 734

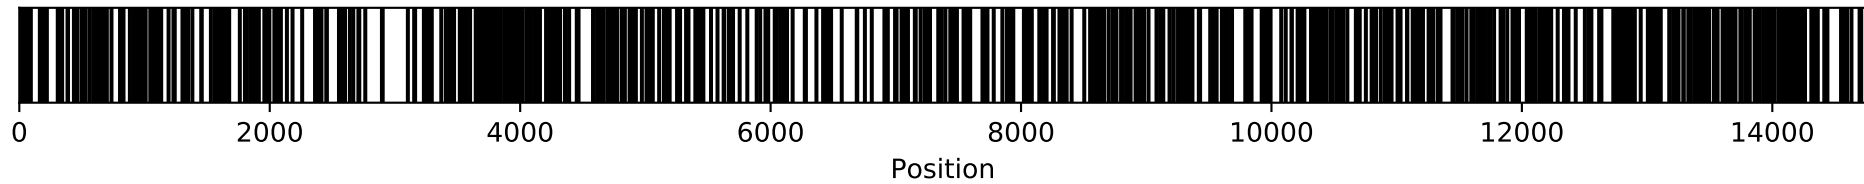

MA2 vs MM1  
Number of differences: 734

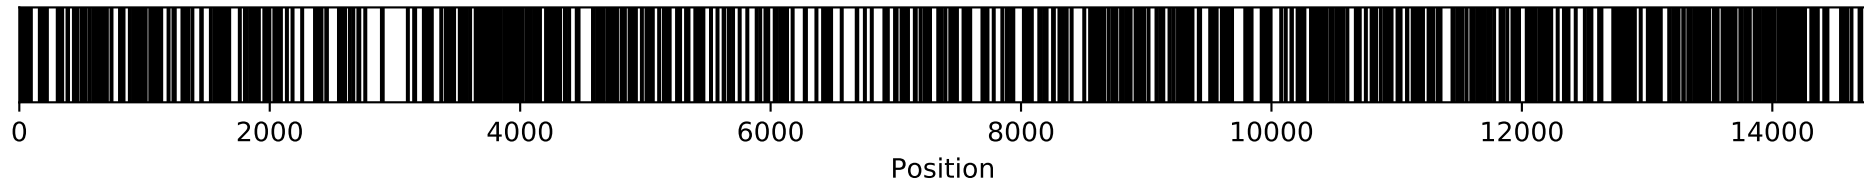

MA2 vs MM2  
Number of differences: 734

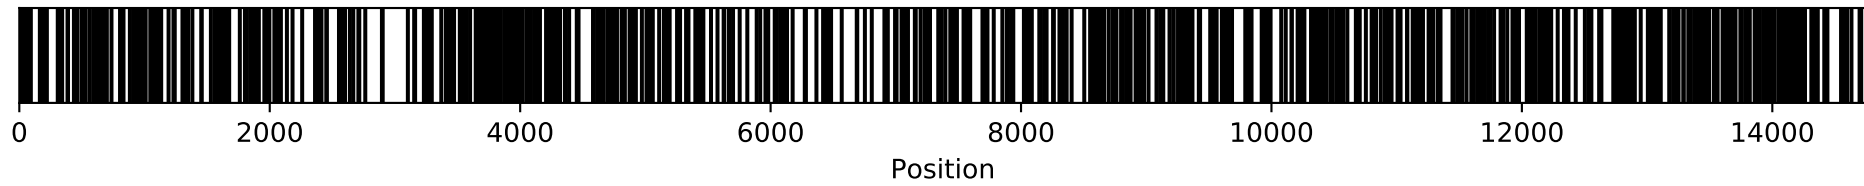

MM1 vs MM2  
Number of differences: 0

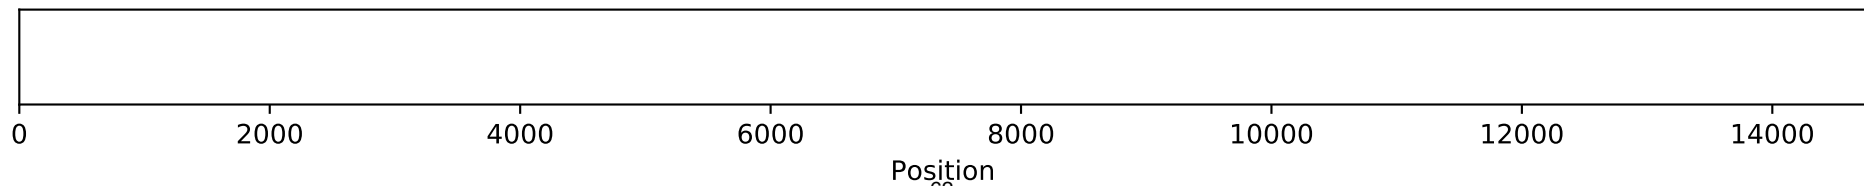

MA1 vs MA2  
Number of differences: 277

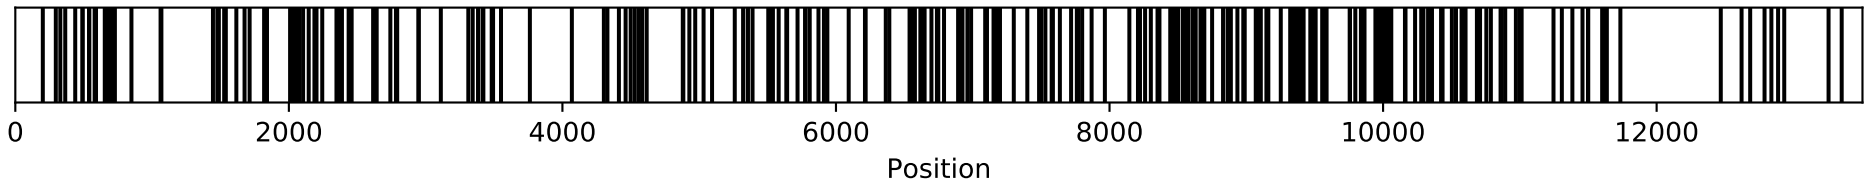

MA1 vs MM1  
Number of differences: 109

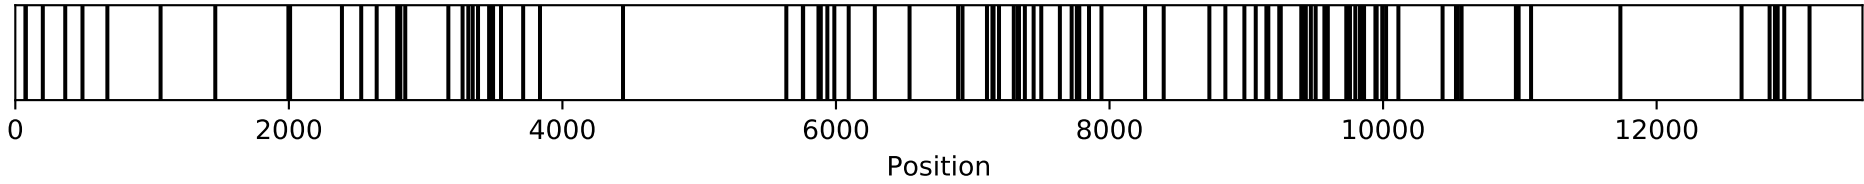

MA1 vs MM2  
Number of differences: 128

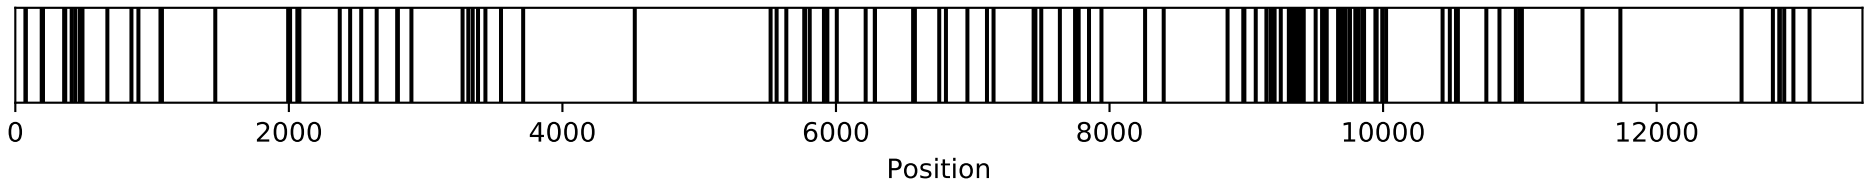

MA2 vs MM1  
Number of differences: 283

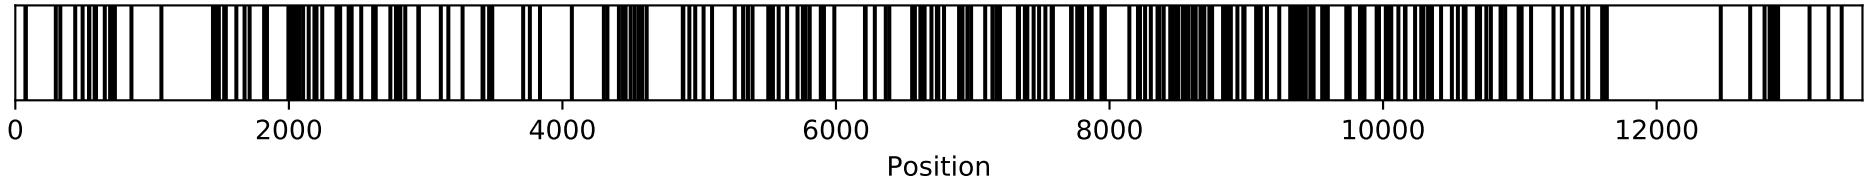

MA2 vs MM2  
Number of differences: 283

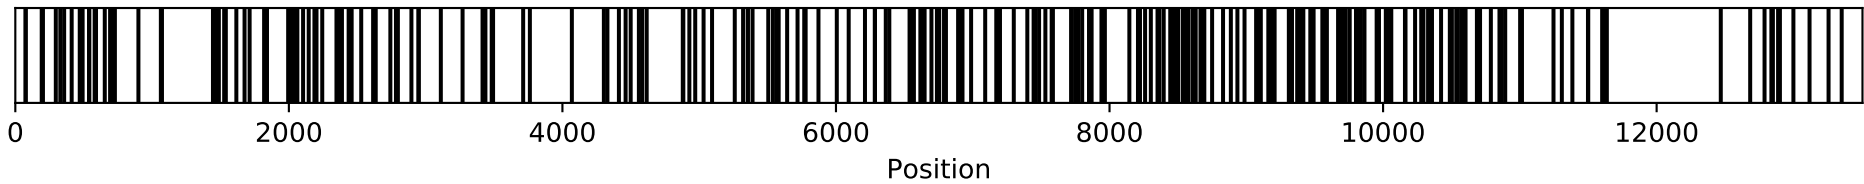

MM1 vs MM2  
Number of differences: 121

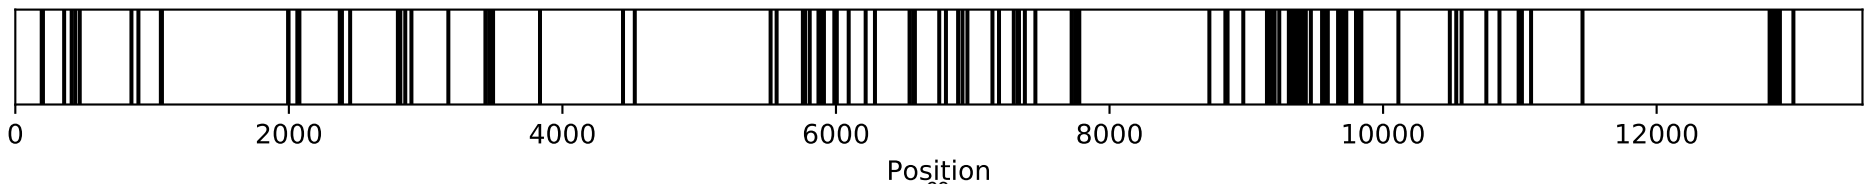

MA1 vs MA2  
Number of differences: 231

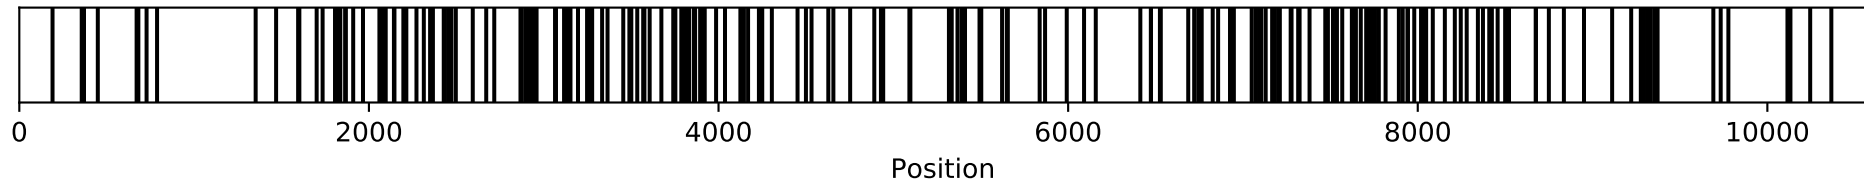

MA1 vs MM1  
Number of differences: 225

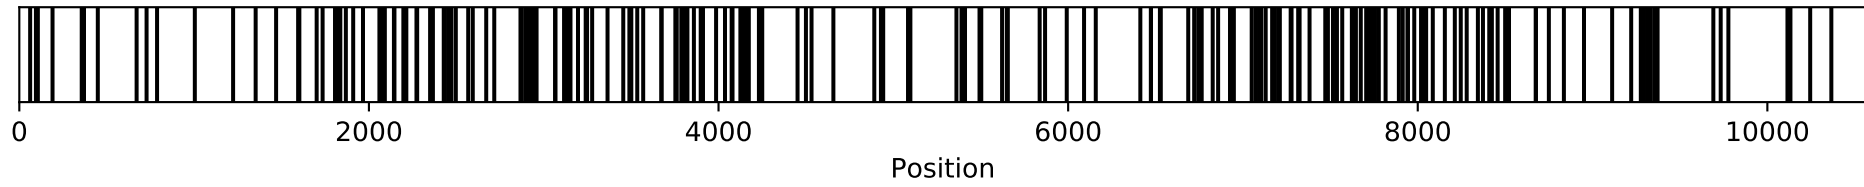

MA1 vs MM2  
Number of differences: 225

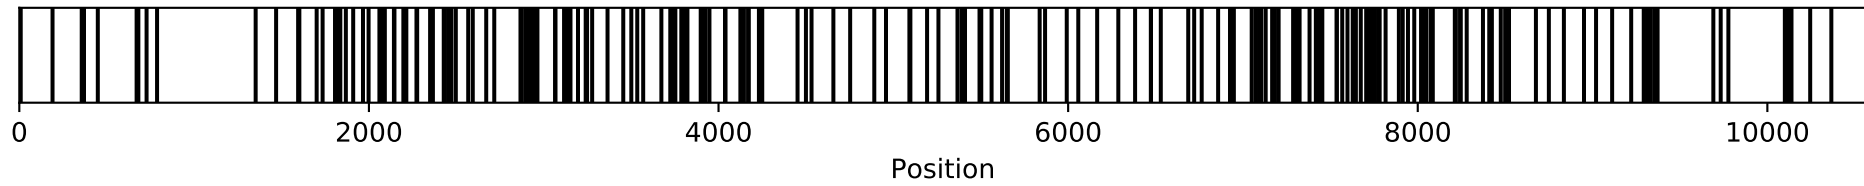

MA2 vs MM1  
Number of differences: 42

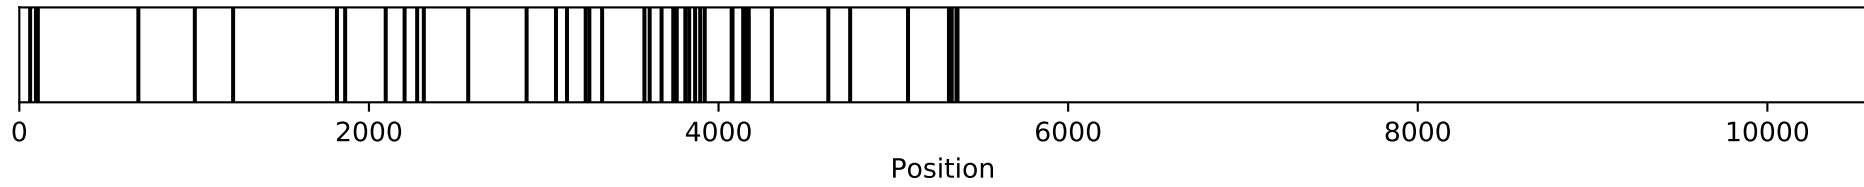

MA2 vs MM2  
Number of differences: 83

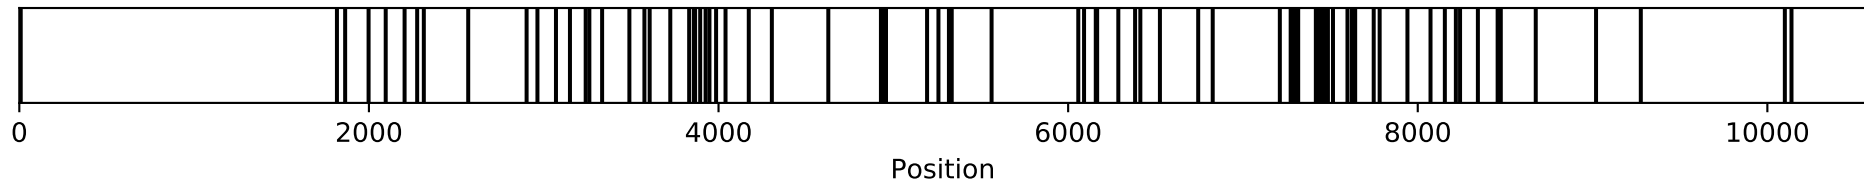

MM1 vs MM2  
Number of differences: 81

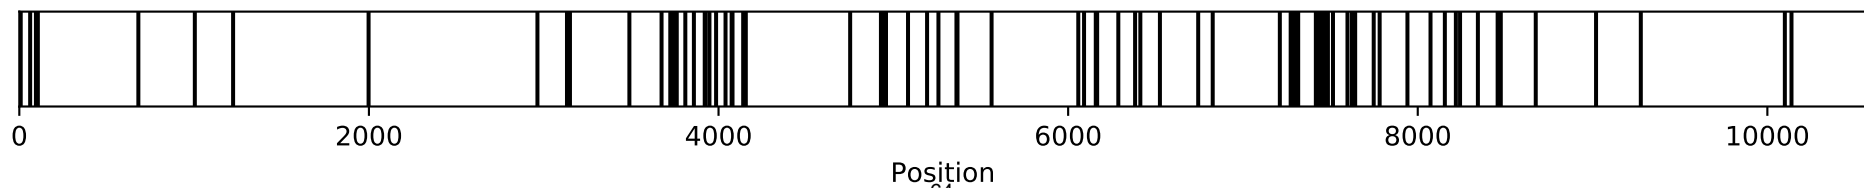

MA1 vs MA2  
Number of differences: 0

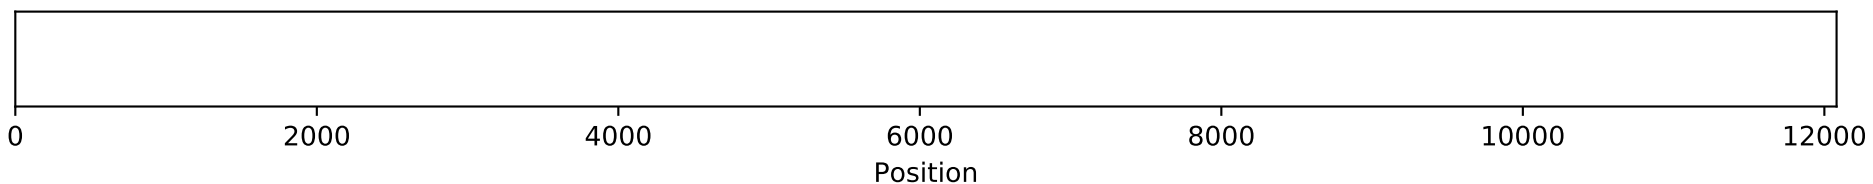

MA1 vs MM1  
Number of differences: 117

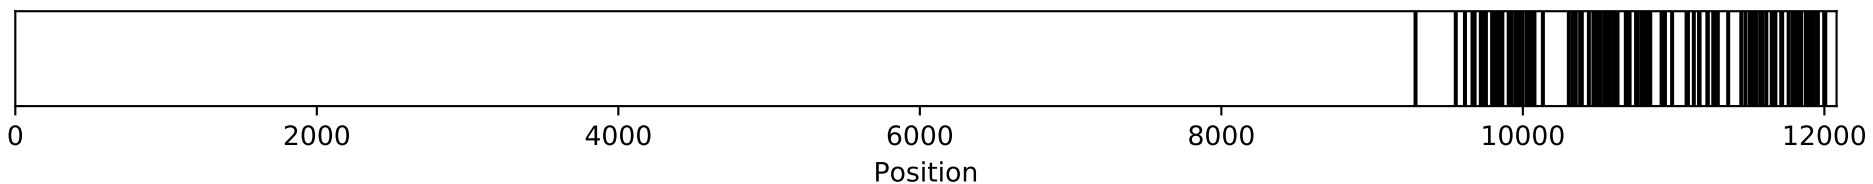

MA1 vs MM2  
Number of differences: 259

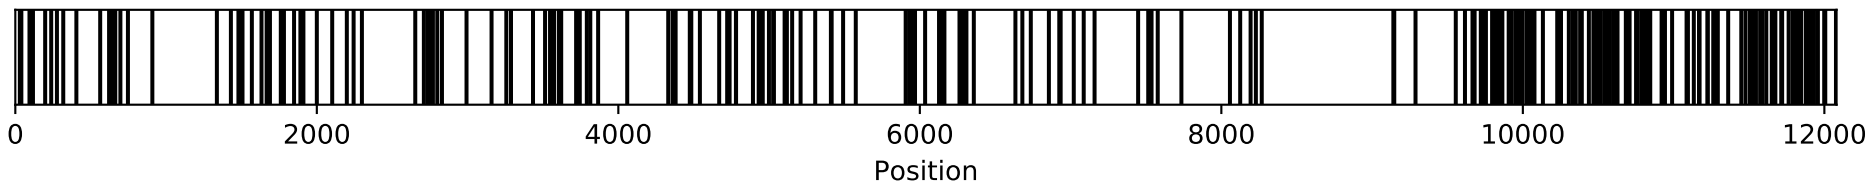

MA2 vs MM1  
Number of differences: 117

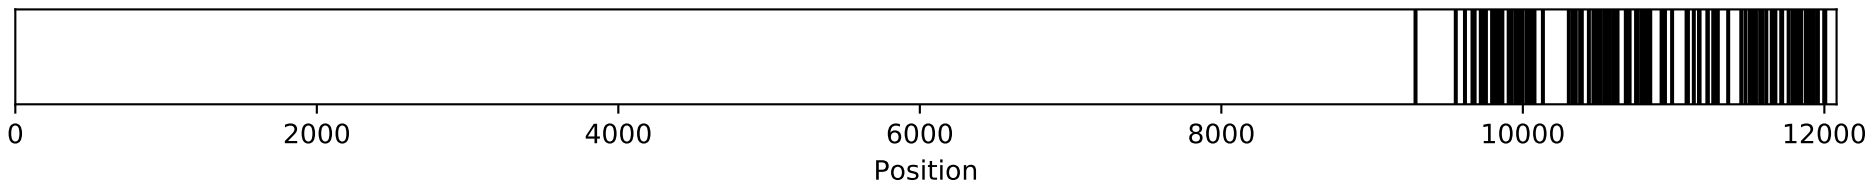

MA2 vs MM2  
Number of differences: 259

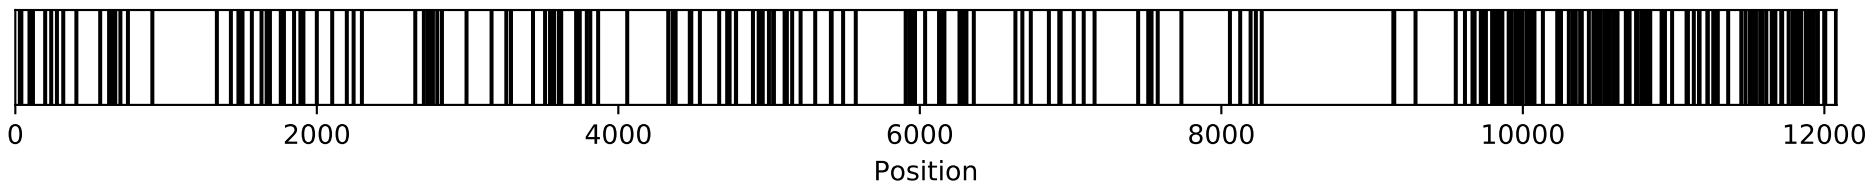

MM1 vs MM2  
Number of differences: 142

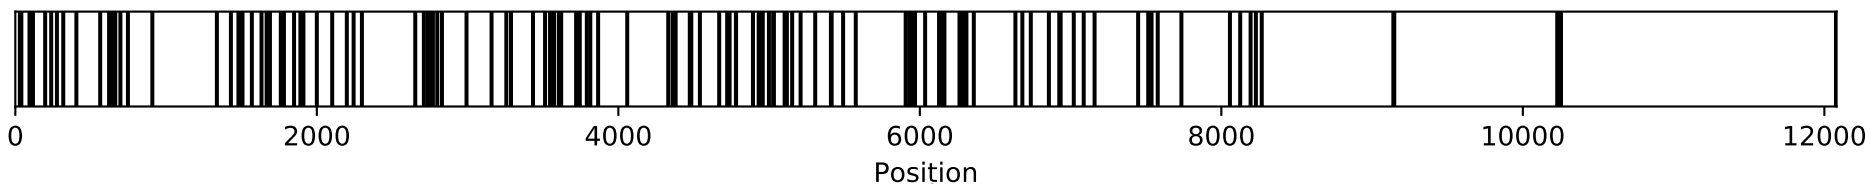

MA1 vs MA2  
Number of differences: 43

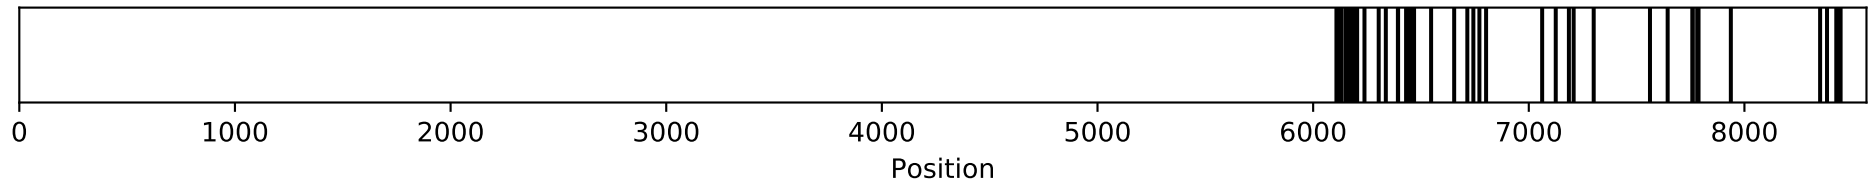

MA1 vs MM1  
Number of differences: 148

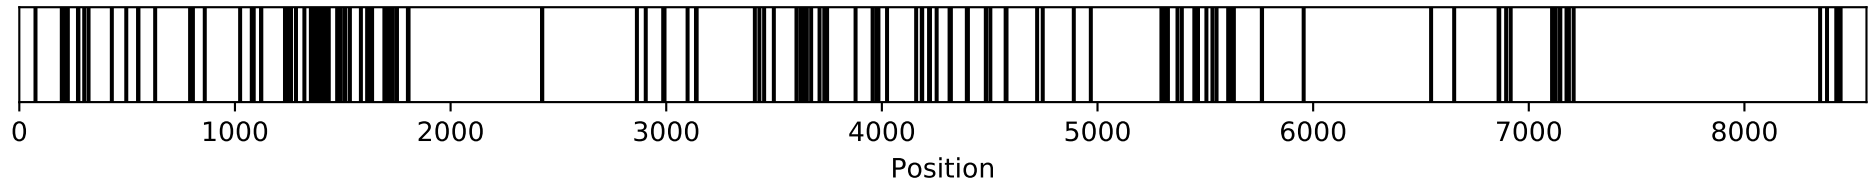

MA1 vs MM2  
Number of differences: 176

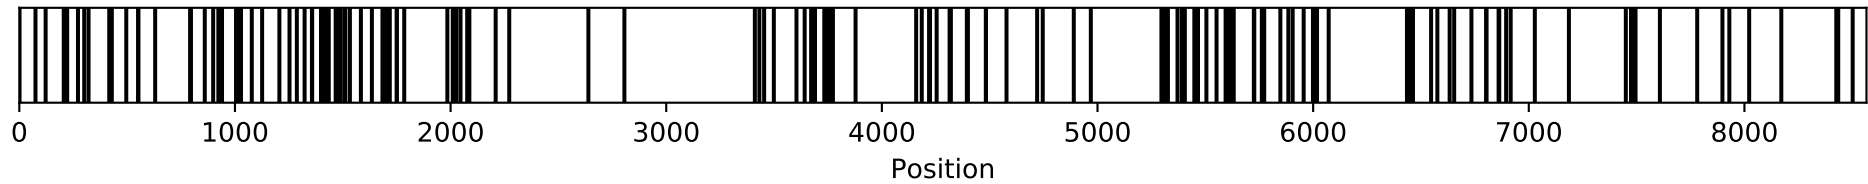

MA2 vs MM1  
Number of differences: 171

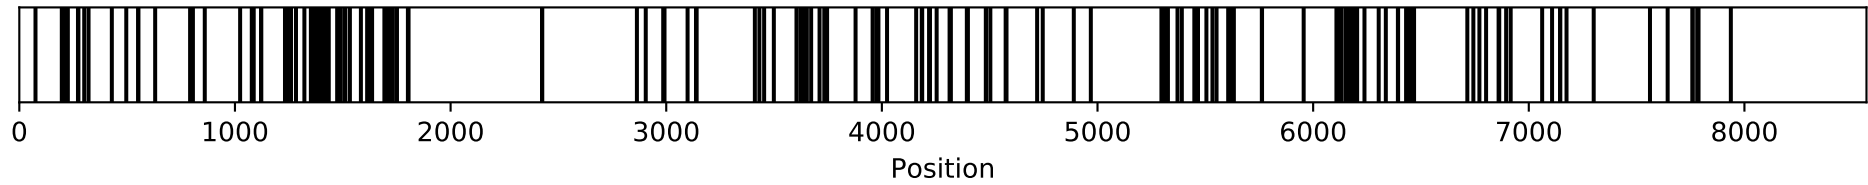

MA2 vs MM2  
Number of differences: 201

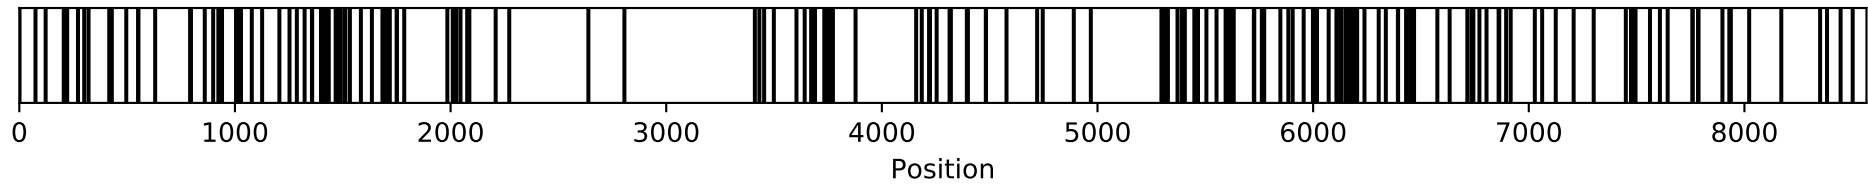

MM1 vs MM2  
Number of differences: 148

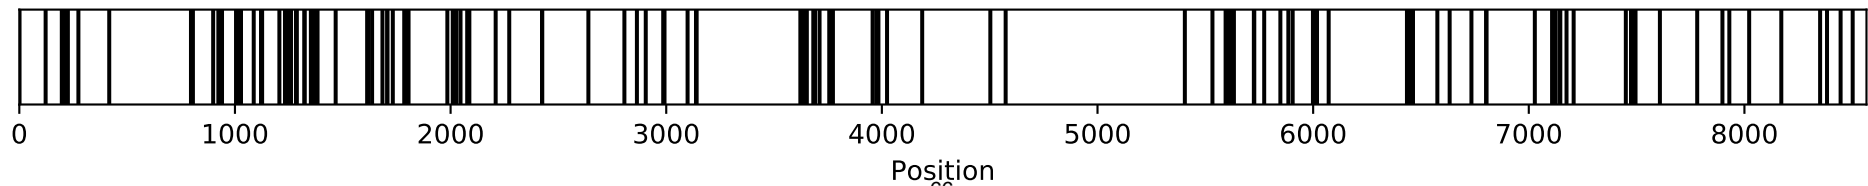



MA1 vs MA2  
Number of differences: 340

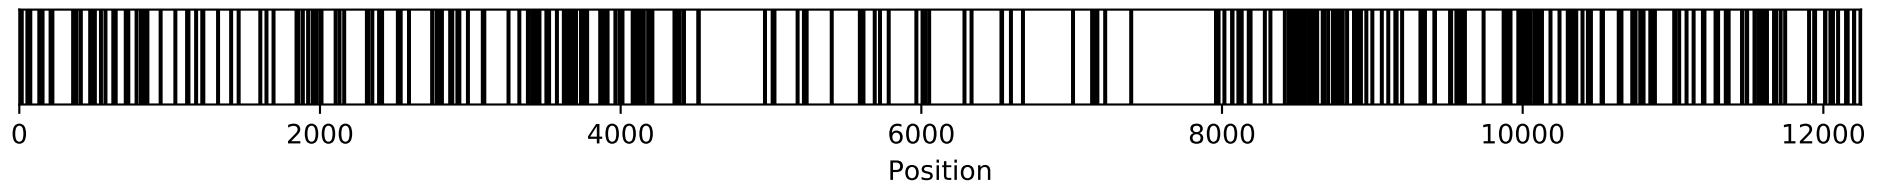

MA1 vs MM1  
Number of differences: 346

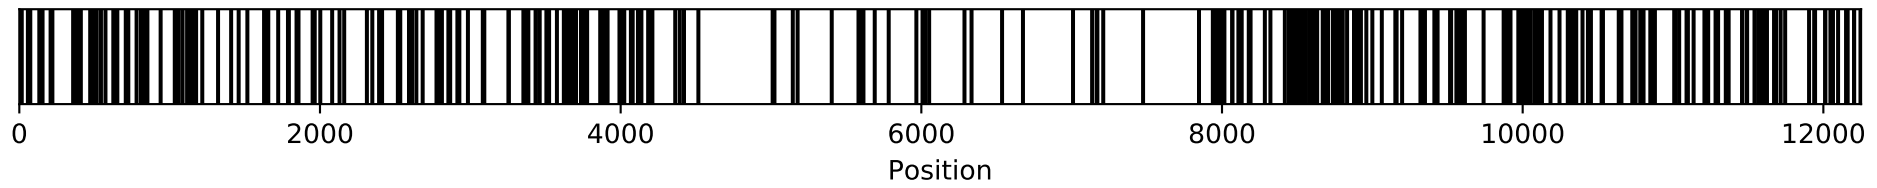

MA1 vs MM2  
Number of differences: 331

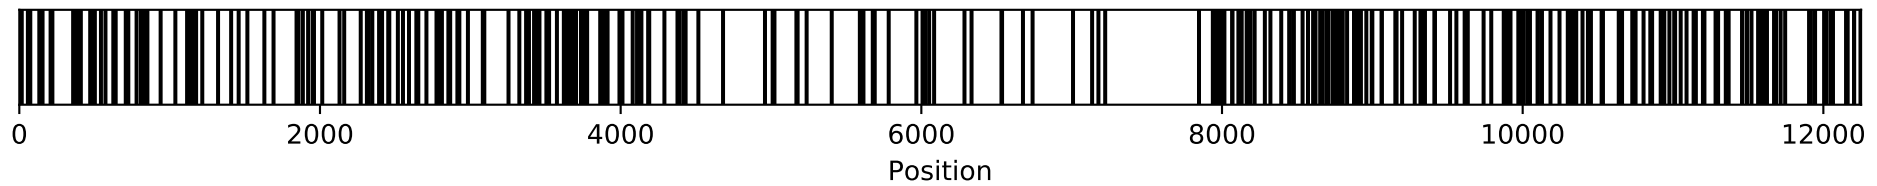

MA2 vs MM1  
Number of differences: 98

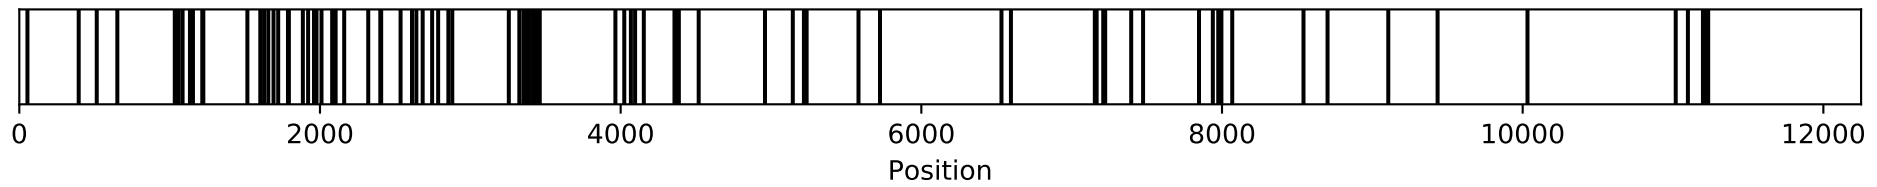

MA2 vs MM2  
Number of differences: 143

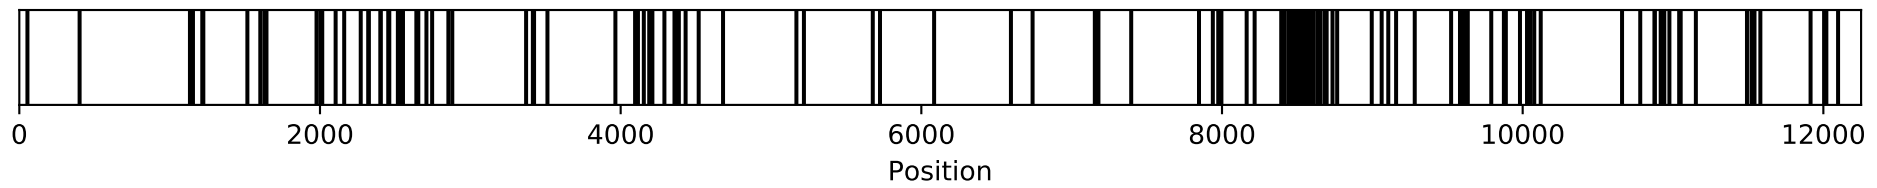

MM1 vs MM2  
Number of differences: 157

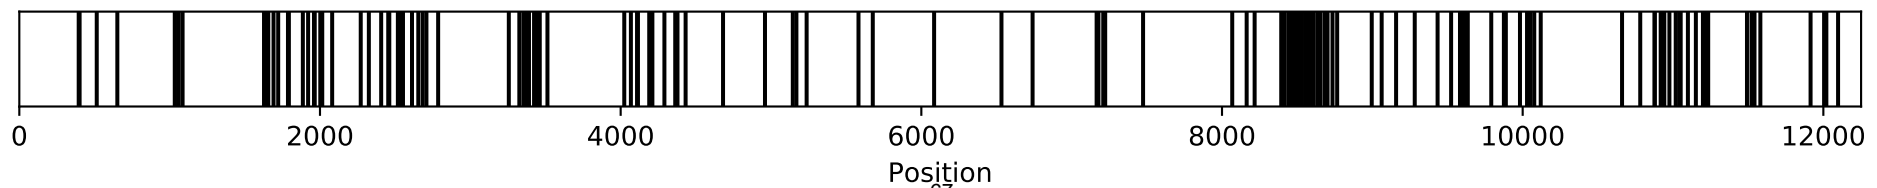

MA1 vs MA2  
Number of differences: 369

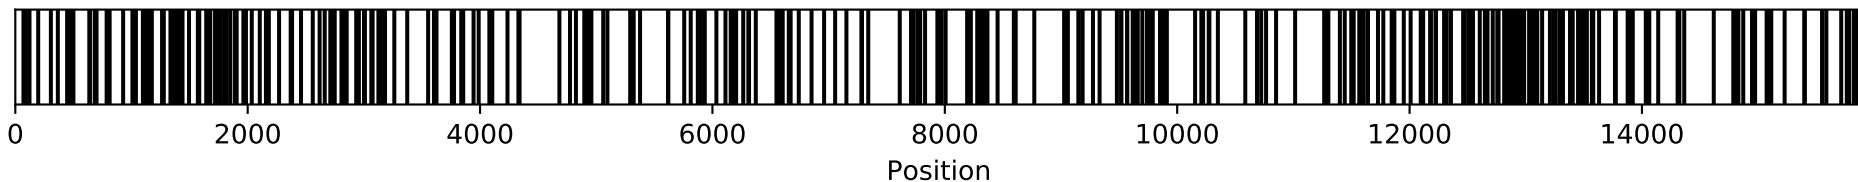

MA1 vs MM1  
Number of differences: 271

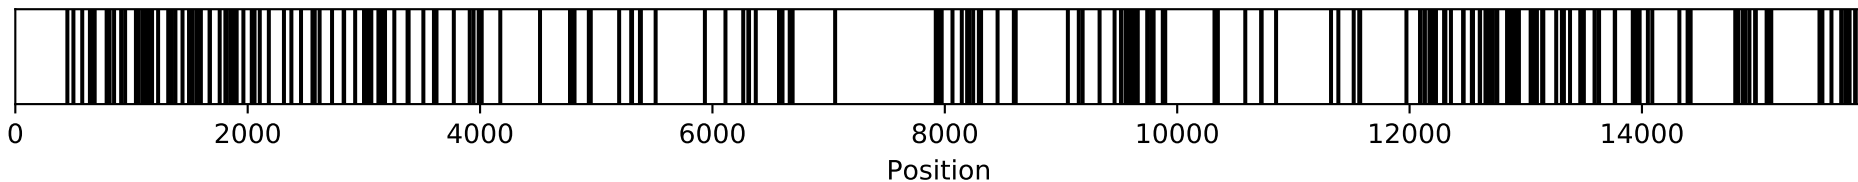

MA1 vs MM2  
Number of differences: 0

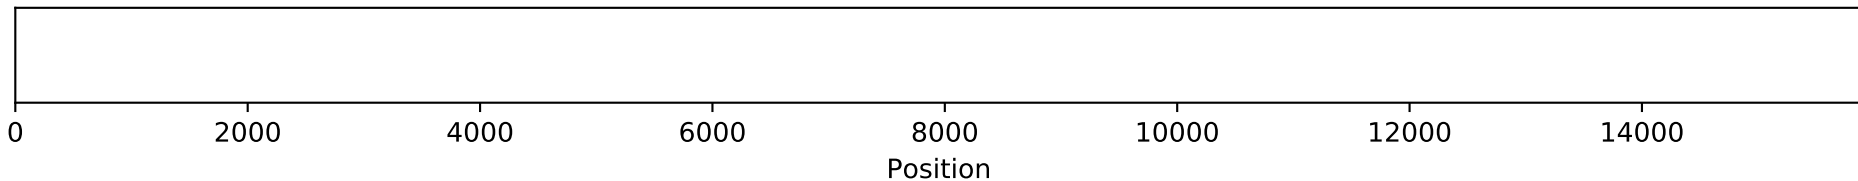

MA2 vs MM1  
Number of differences: 337

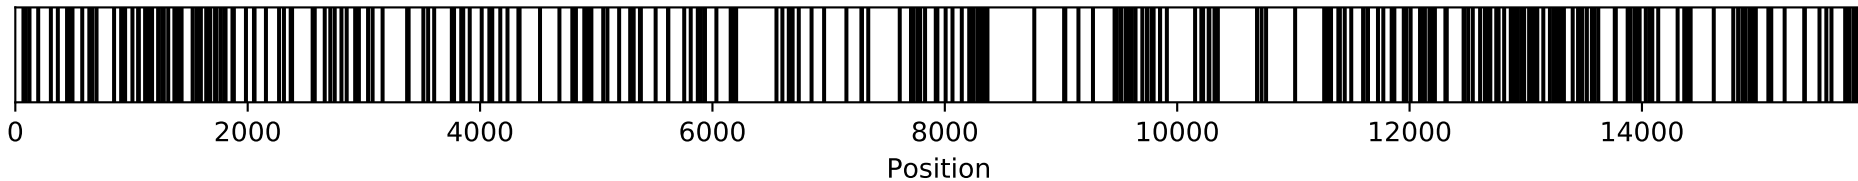

MA2 vs MM2  
Number of differences: 369

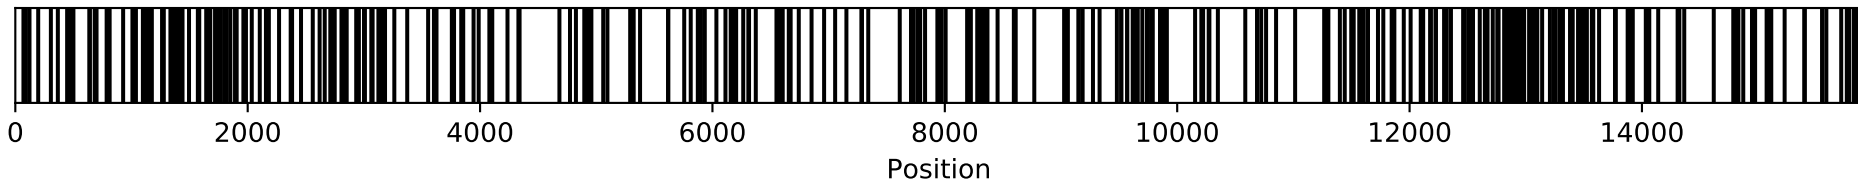

MM1 vs MM2  
Number of differences: 271

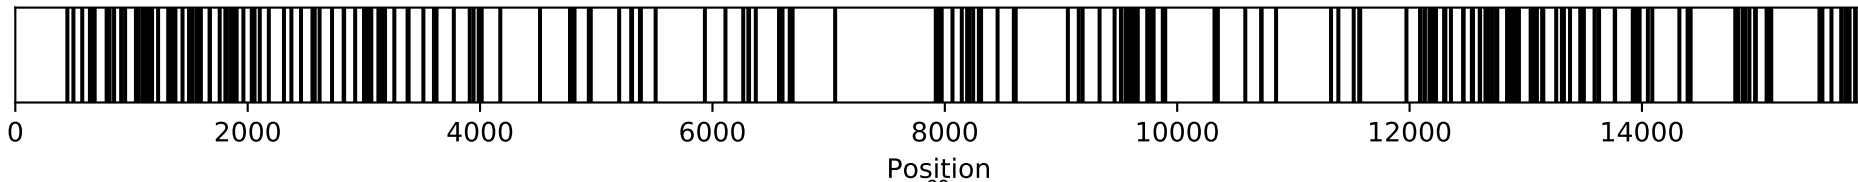

MA1 vs MA2  
Number of differences: 210

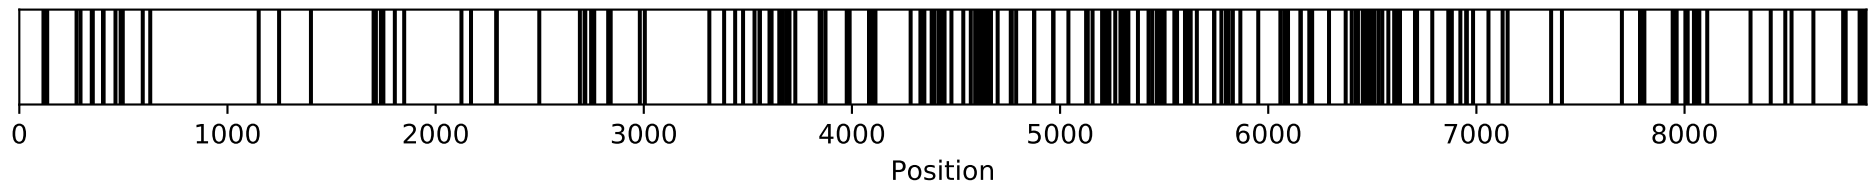

MA1 vs MM1  
Number of differences: 0

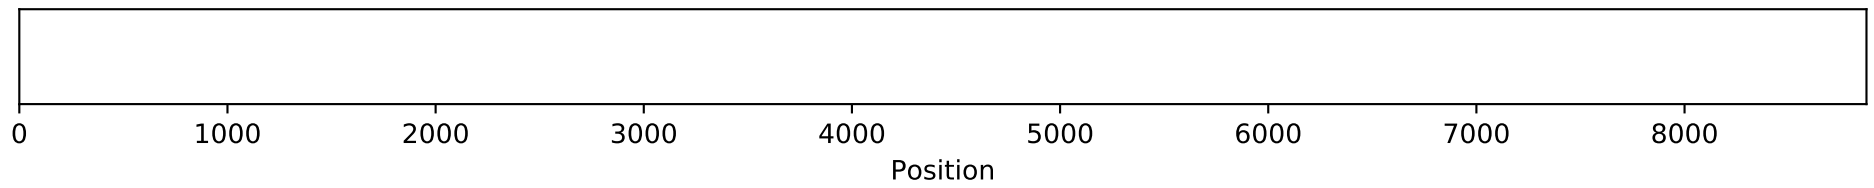

MA1 vs MM2  
Number of differences: 112

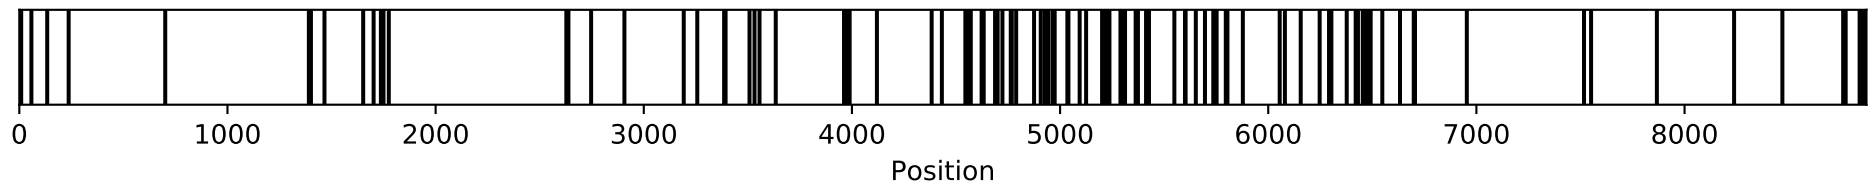

MA2 vs MM1  
Number of differences: 210

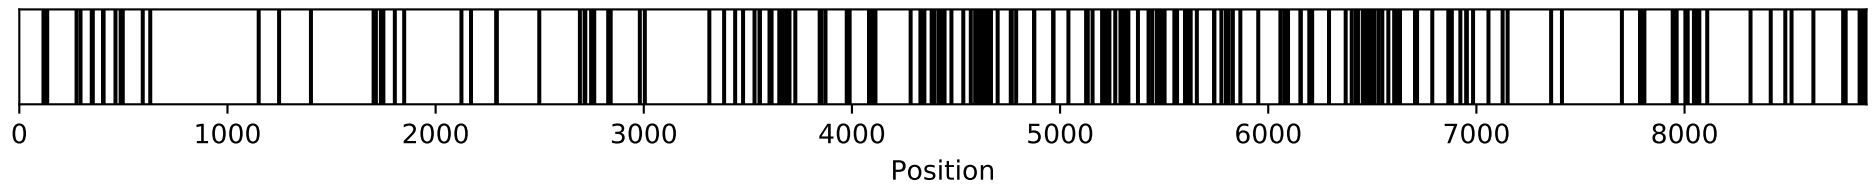

MA2 vs MM2  
Number of differences: 215

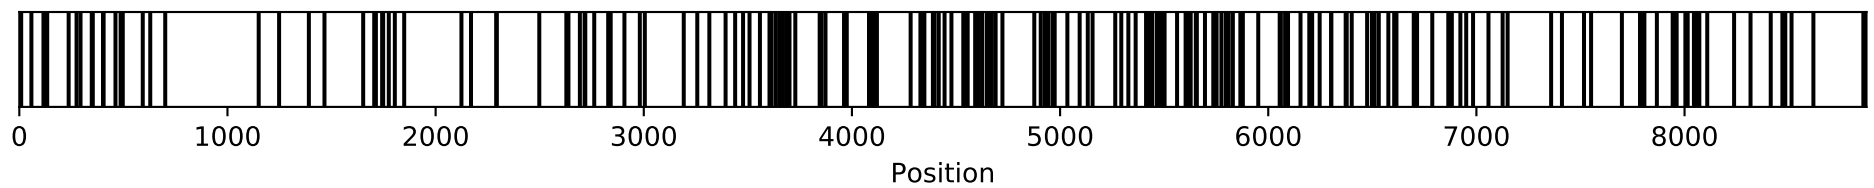

MM1 vs MM2  
Number of differences: 112

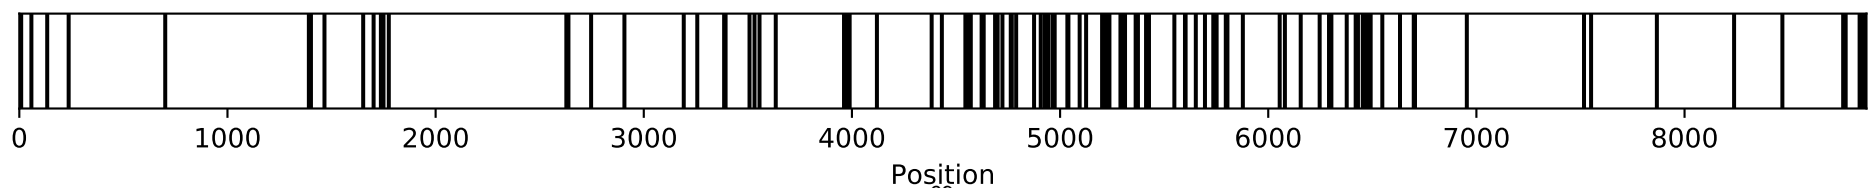

MA1 vs MA2  
Number of differences: 271

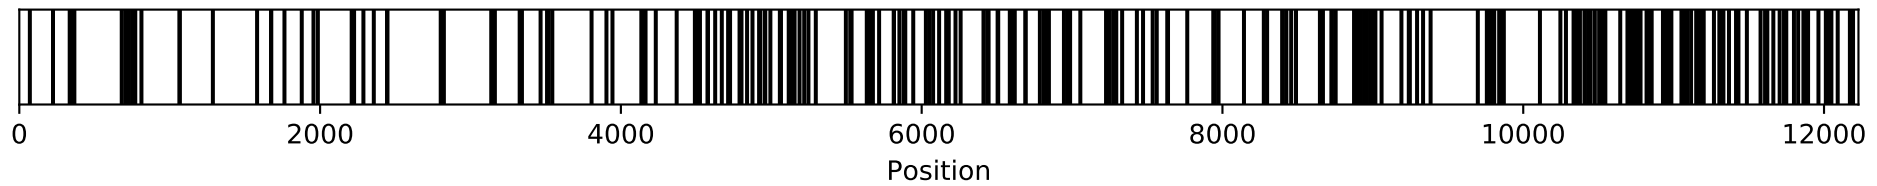

MA1 vs MM1  
Number of differences: 130

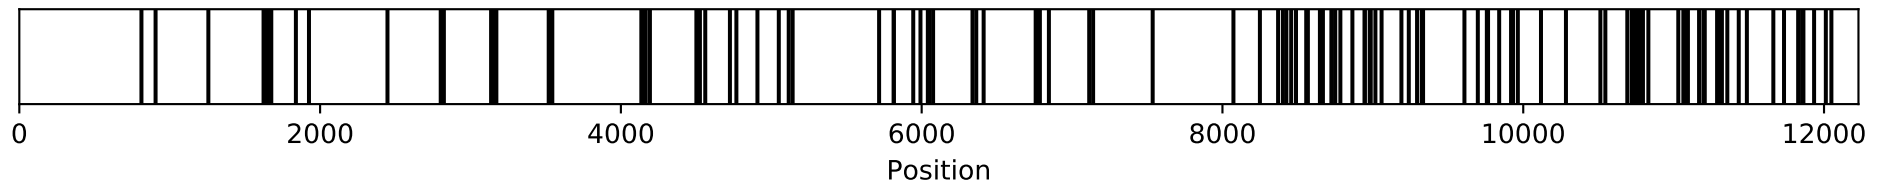

MA1 vs MM2  
Number of differences: 0

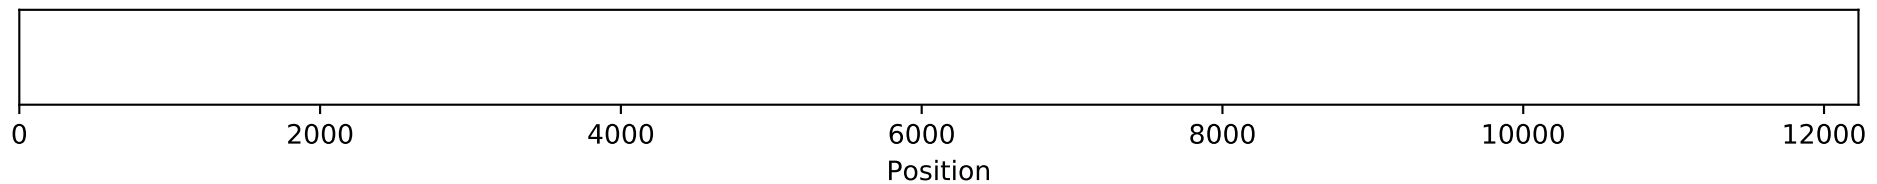

MA2 vs MM1  
Number of differences: 275

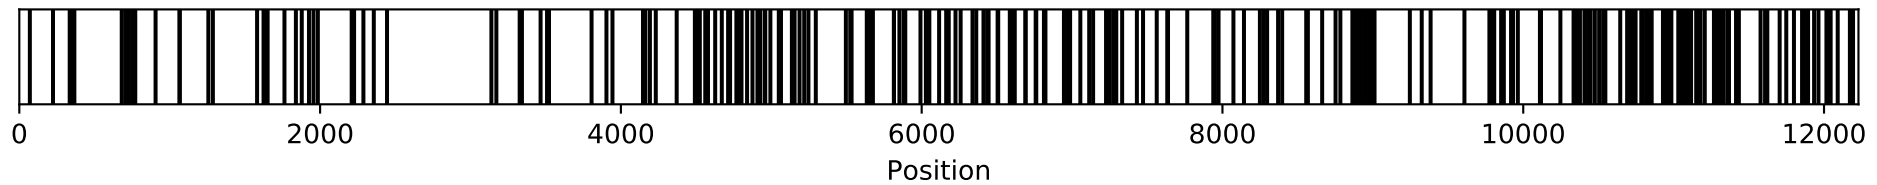

MA2 vs MM2  
Number of differences: 271

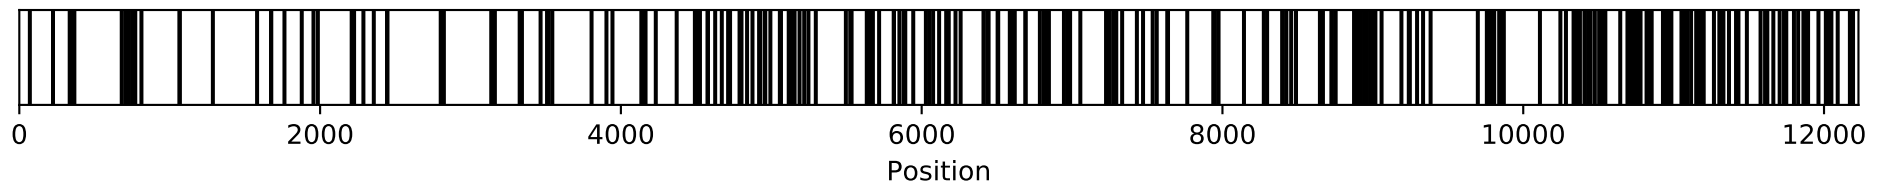

MM1 vs MM2  
Number of differences: 130

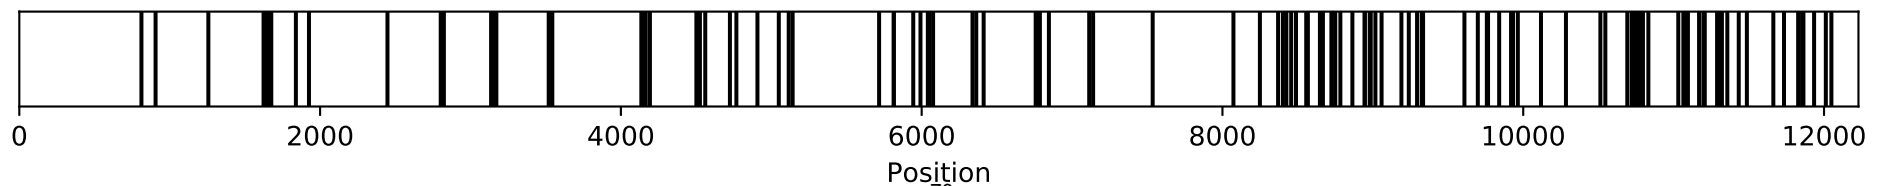

MA1 vs MA2  
Number of differences: 189

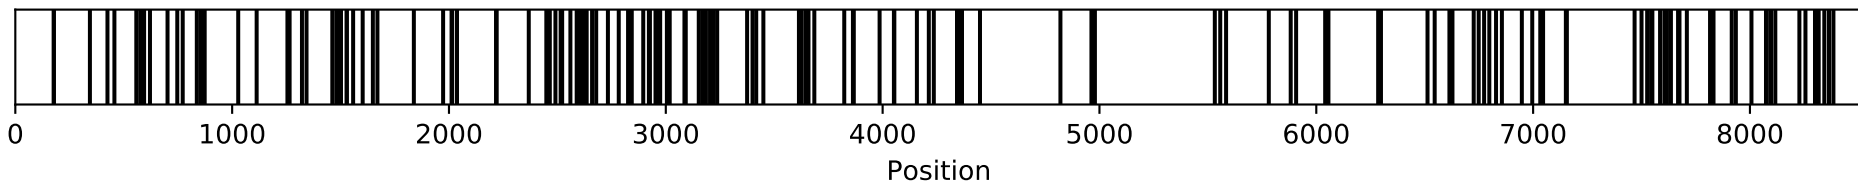

MA1 vs MM1  
Number of differences: 200

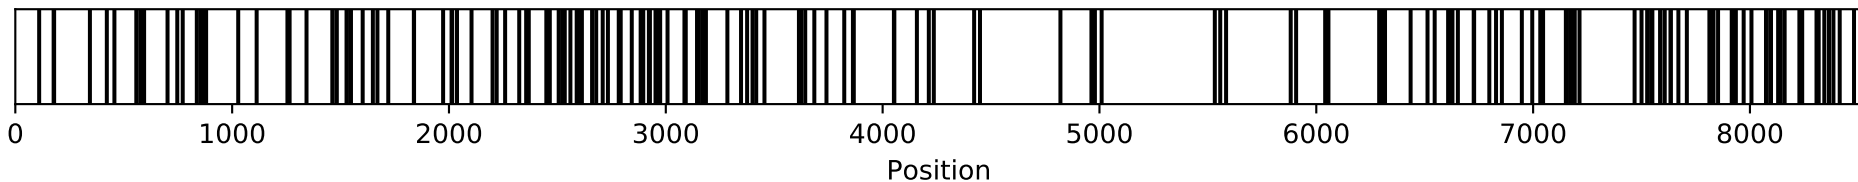

MA1 vs MM2  
Number of differences: 212

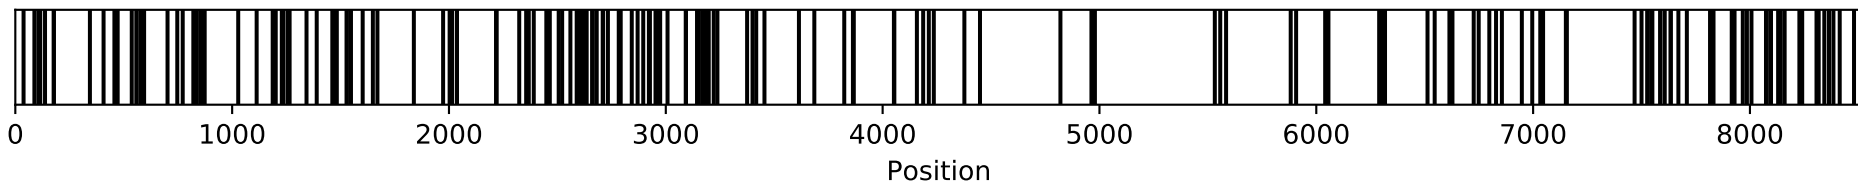

MA2 vs MM1  
Number of differences: 99

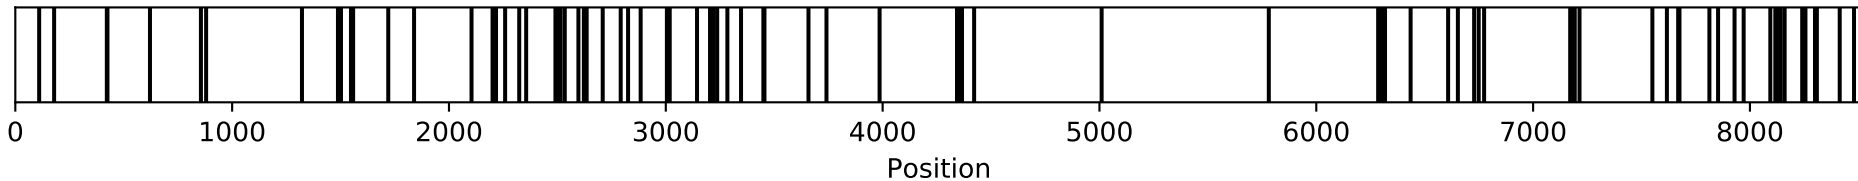

MA2 vs MM2  
Number of differences: 110

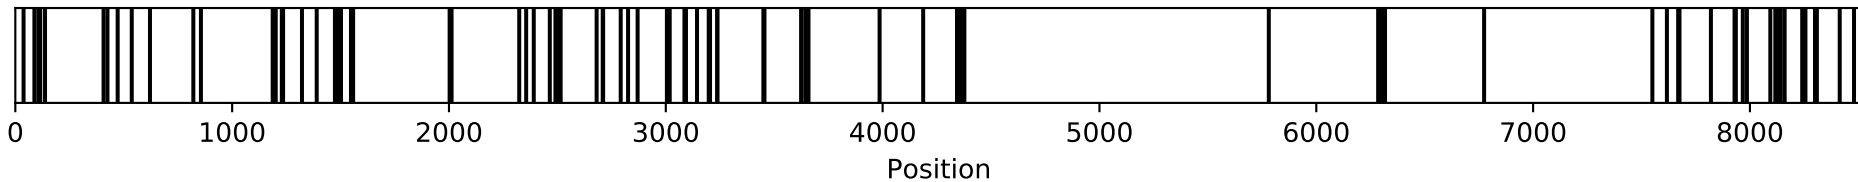

MM1 vs MM2  
Number of differences: 76

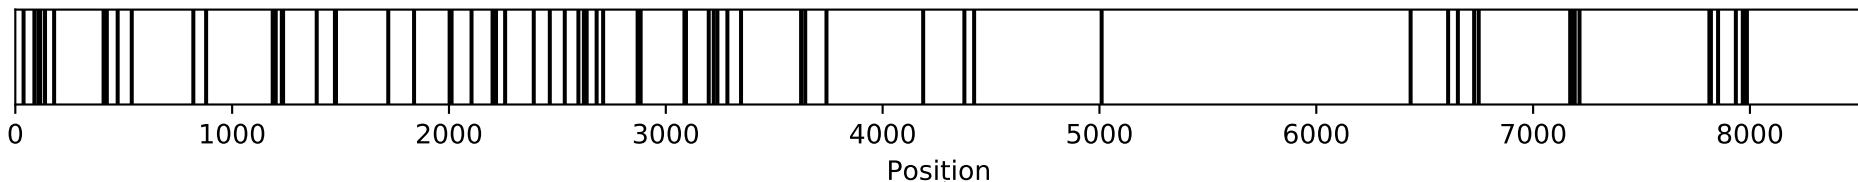

MA1 vs MA2  
Number of differences: 453

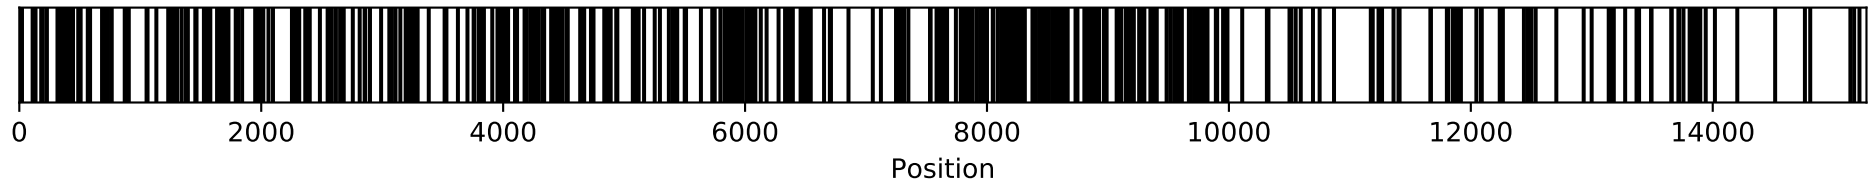

MA1 vs MM1  
Number of differences: 453

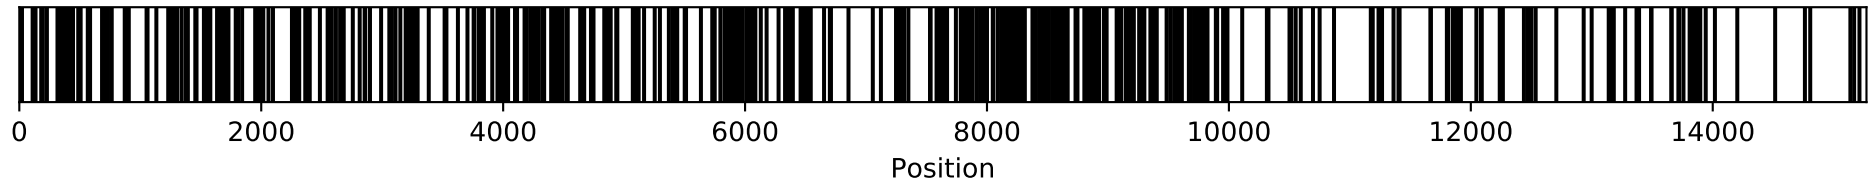

MA1 vs MM2  
Number of differences: 451

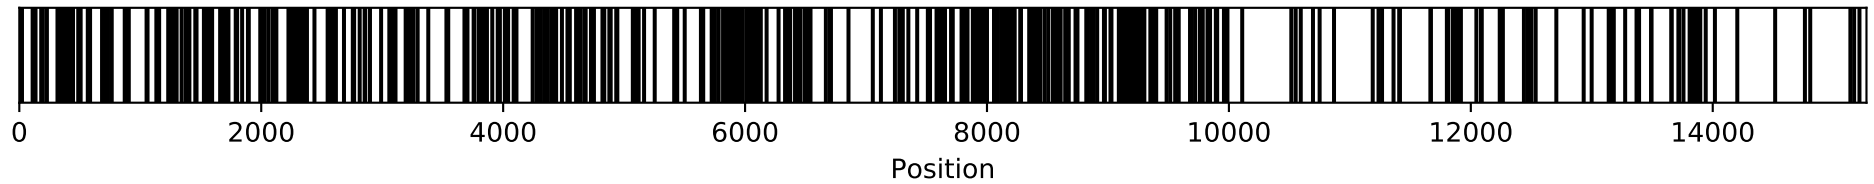

MA2 vs MM1  
Number of differences: 0

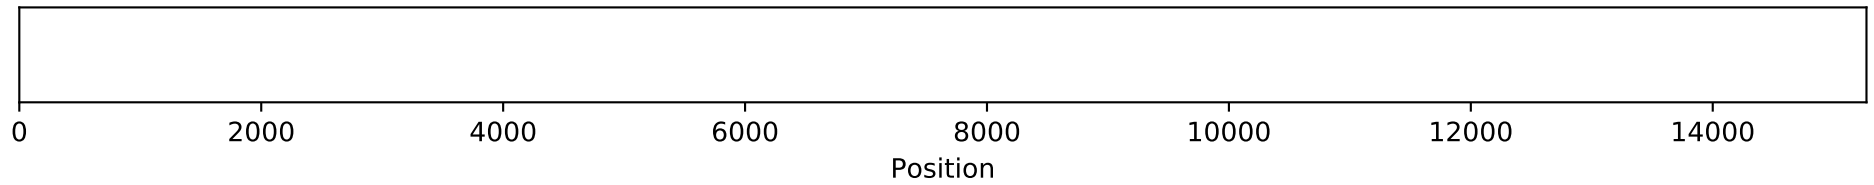

MA2 vs MM2  
Number of differences: 268

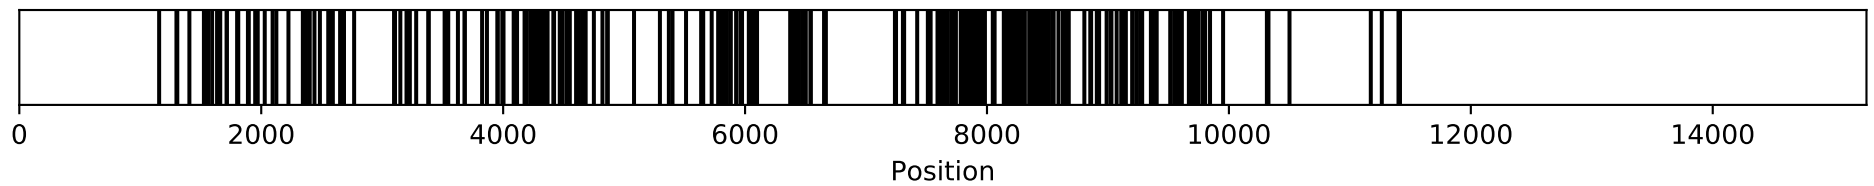

MM1 vs MM2  
Number of differences: 268

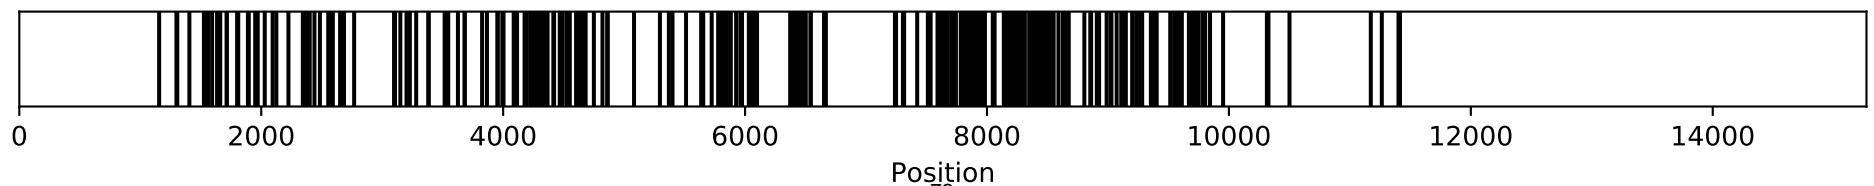

MA1 vs MA2  
Number of differences: 188

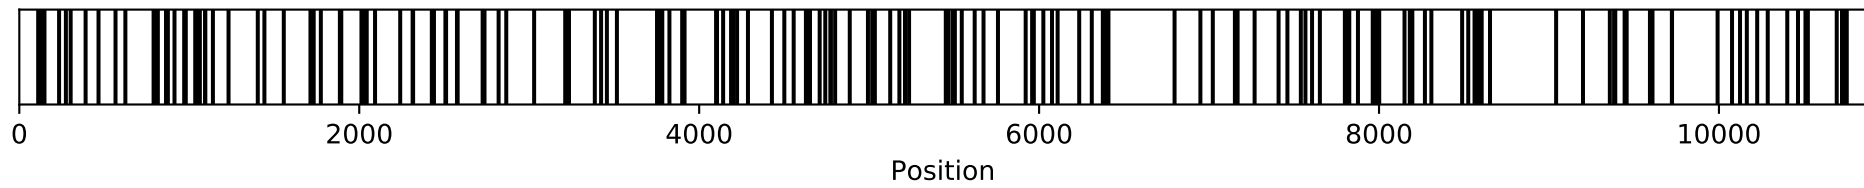

MA1 vs MM1  
Number of differences: 183

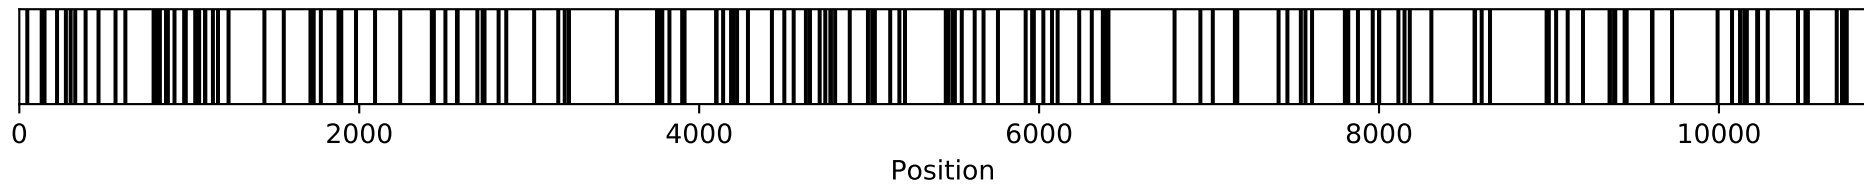

MA1 vs MM2  
Number of differences: 188

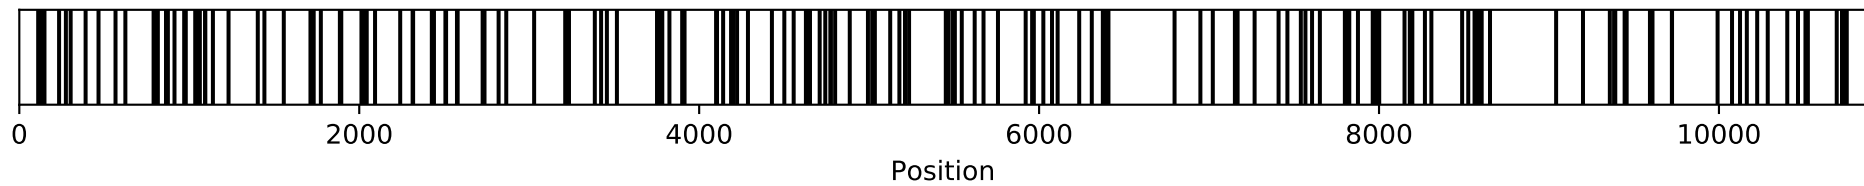

MA2 vs MM1  
Number of differences: 64

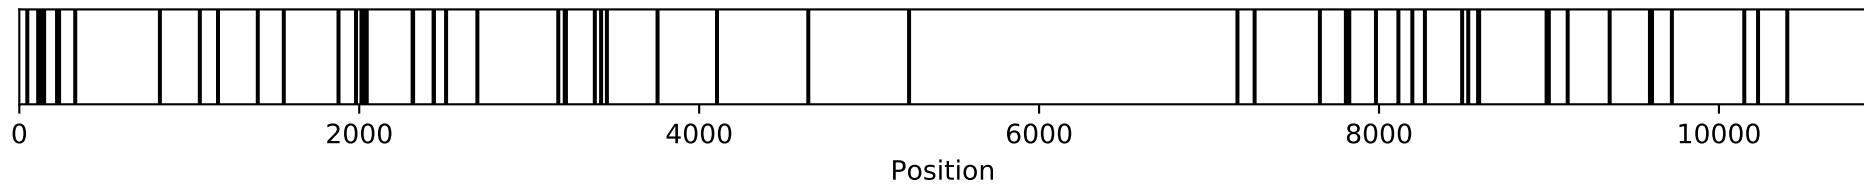

MA2 vs MM2  
Number of differences: 0

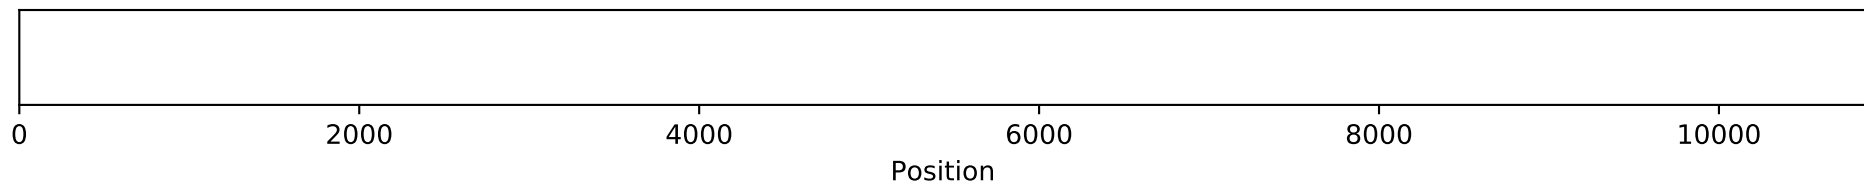

MM1 vs MM2  
Number of differences: 64

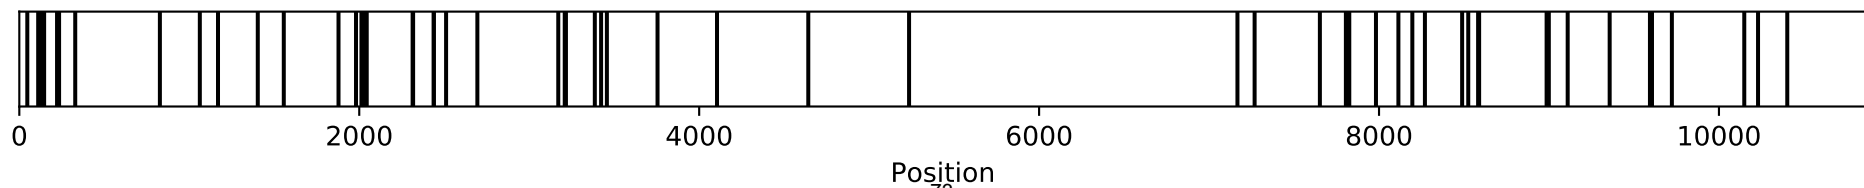

MA1 vs MA2  
Number of differences: 226

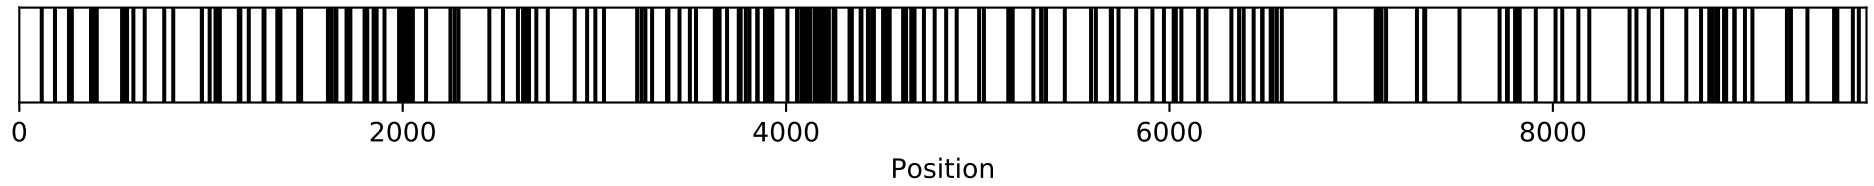

MA1 vs MM1  
Number of differences: 218

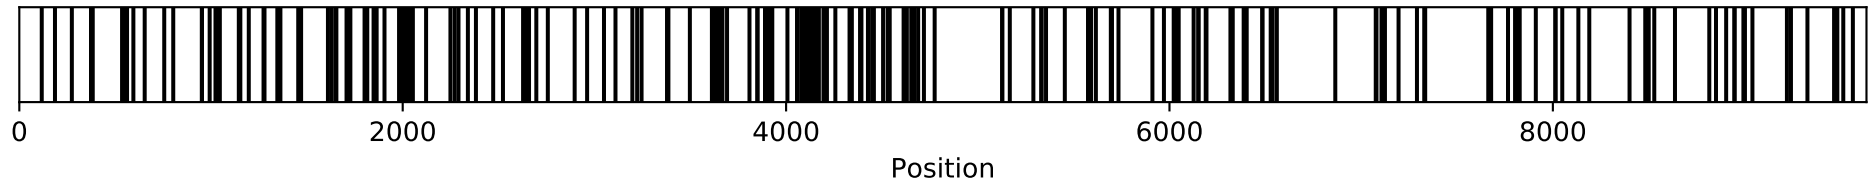

MA1 vs MM2  
Number of differences: 226

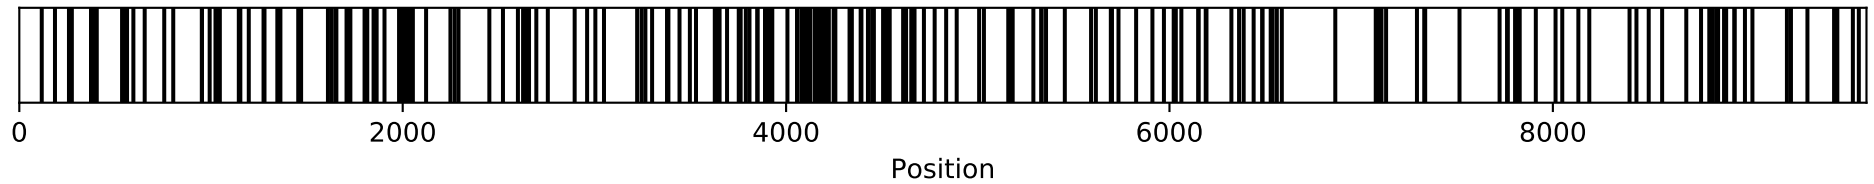

MA2 vs MM1  
Number of differences: 92

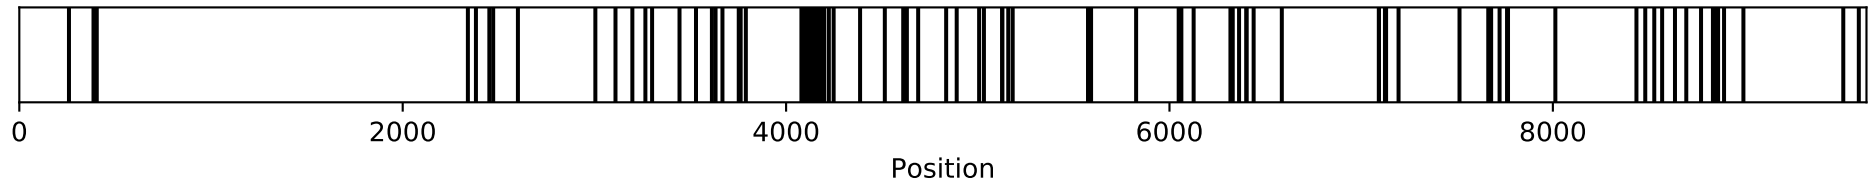

MA2 vs MM2  
Number of differences: 0

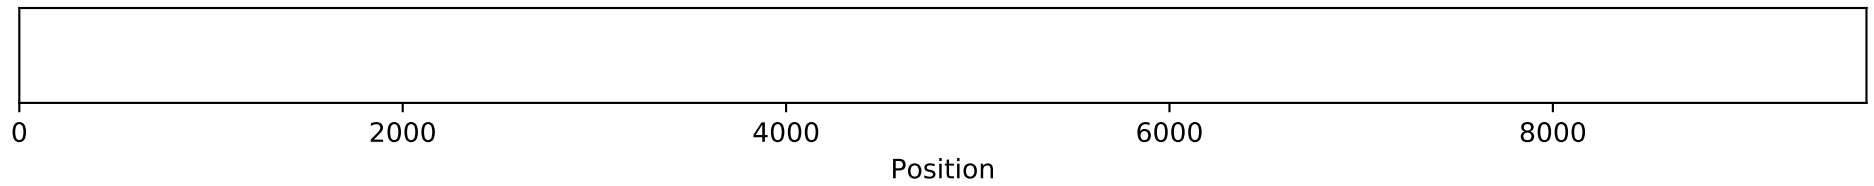

MM1 vs MM2  
Number of differences: 92

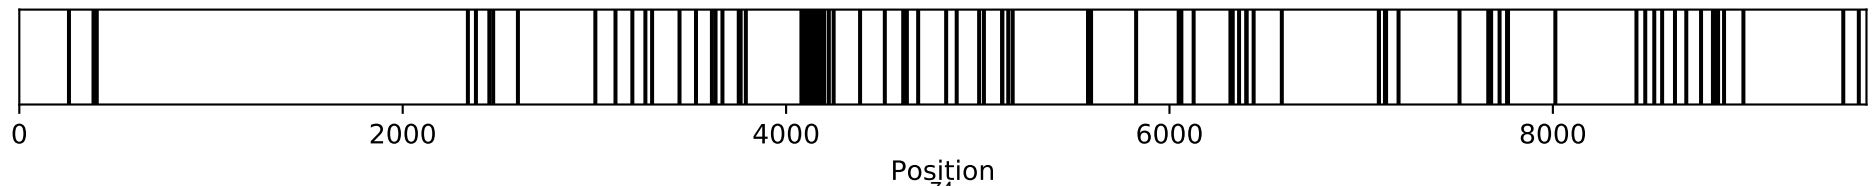



MA1 vs MA2  
Number of differences: 220

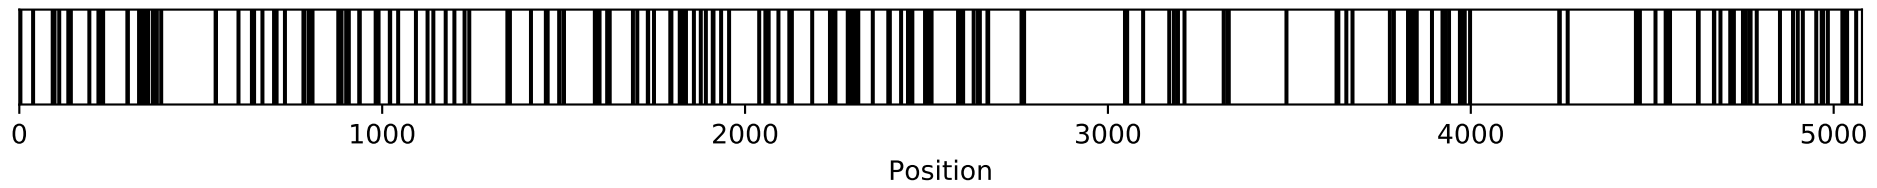

MA1 vs MM1  
Number of differences: 237

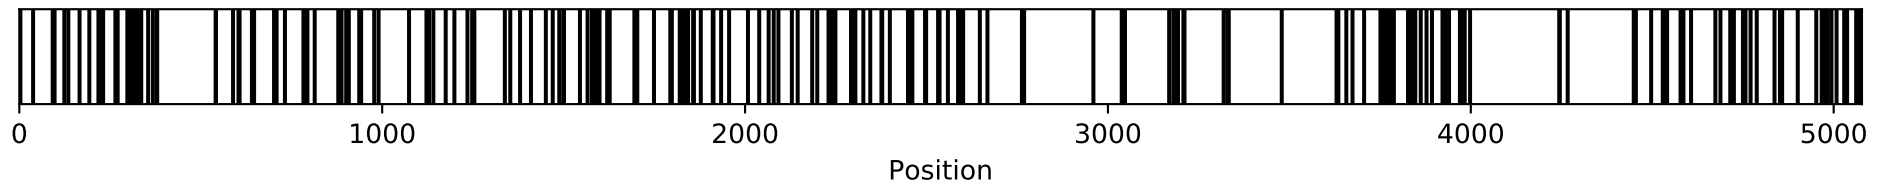

MA1 vs MM2  
Number of differences: 233

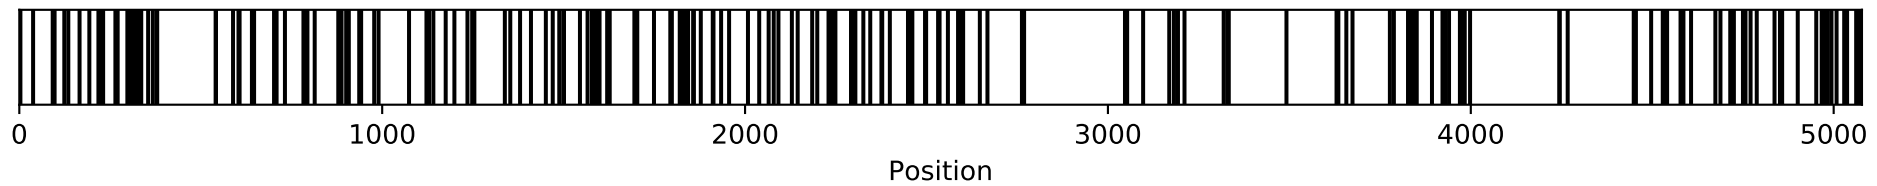

MA2 vs MM1  
Number of differences: 167

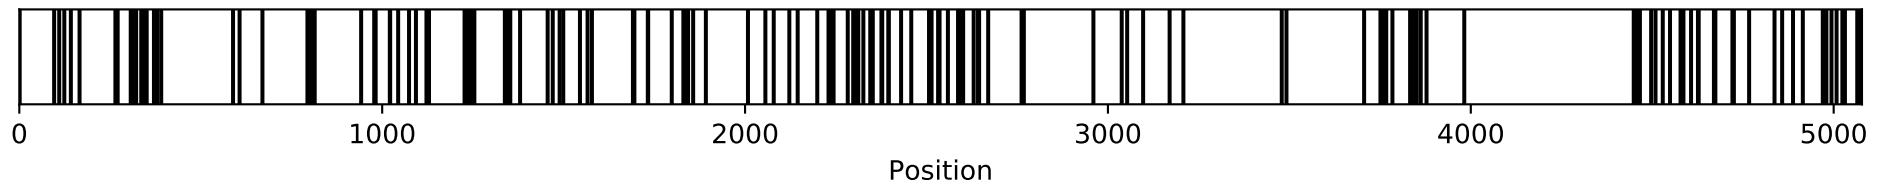

MA2 vs MM2  
Number of differences: 140

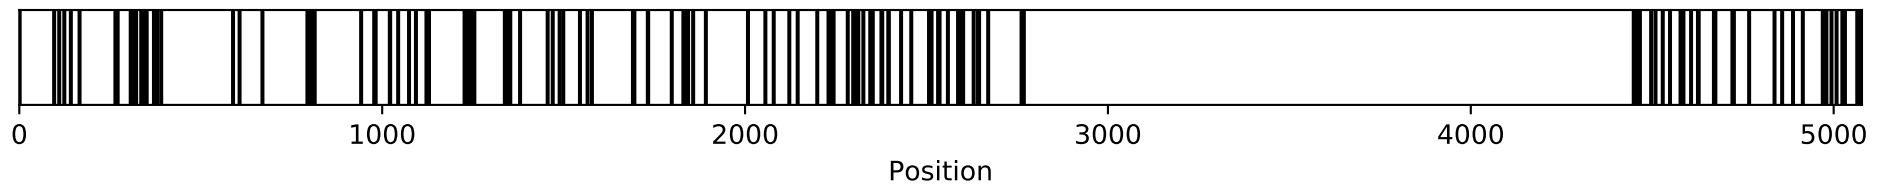

MM1 vs MM2  
Number of differences: 27

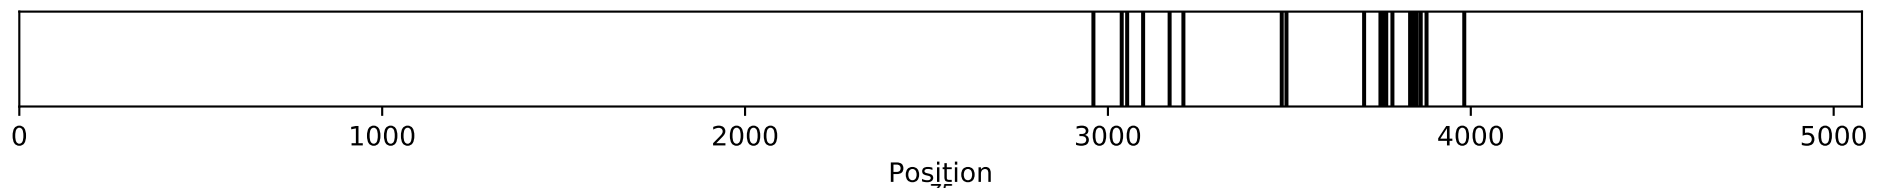

MA1 vs MA2  
Number of differences: 114

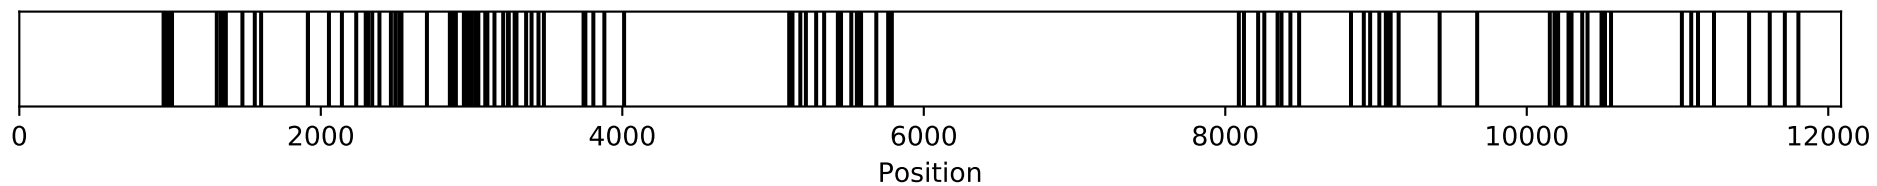

MA1 vs MM1  
Number of differences: 109

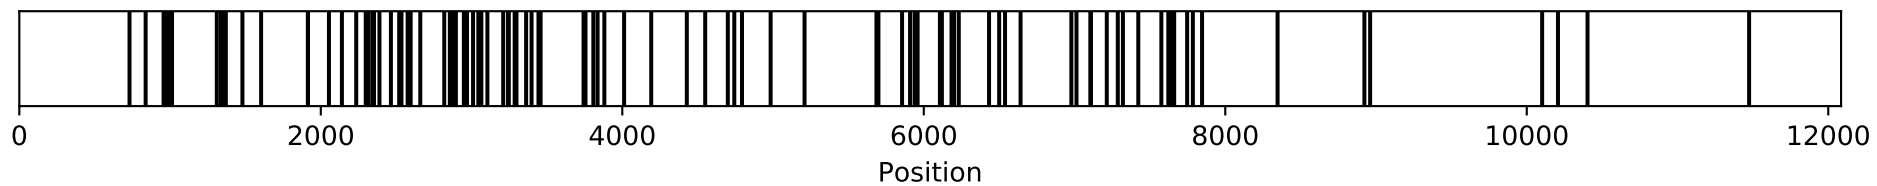

MA1 vs MM2  
Number of differences: 95

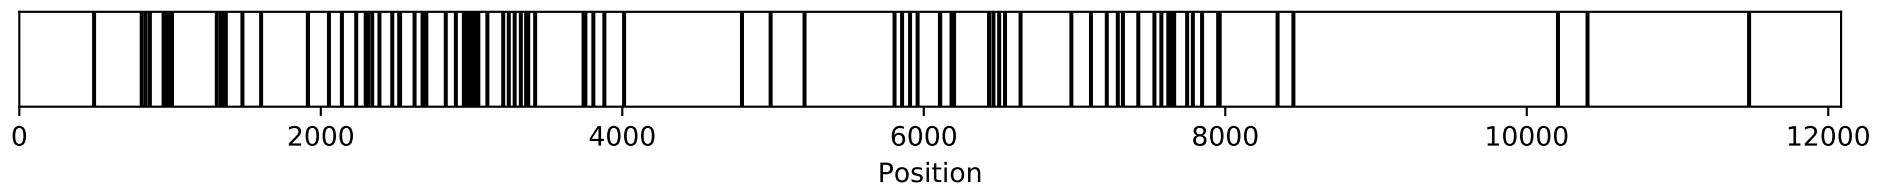

MA2 vs MM1  
Number of differences: 121

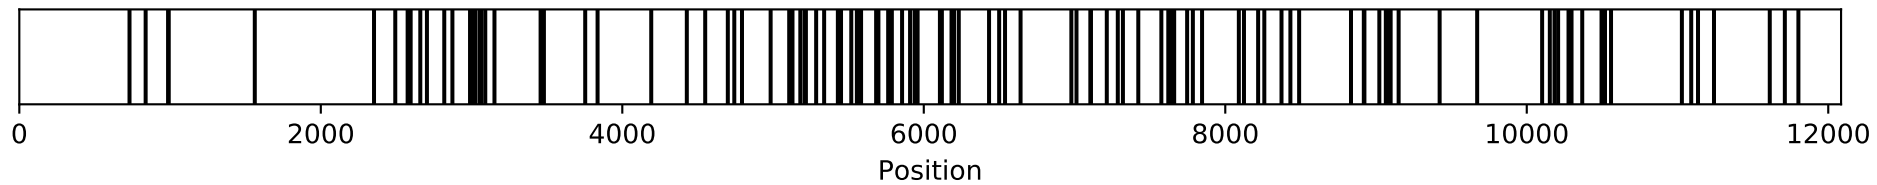

MA2 vs MM2  
Number of differences: 123

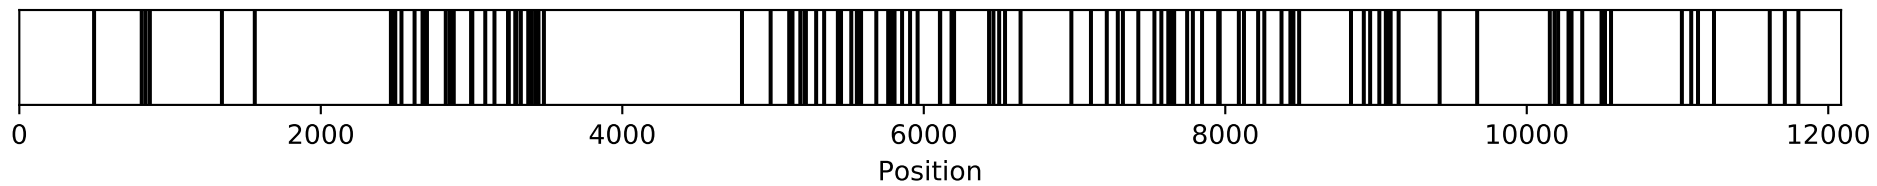

MM1 vs MM2  
Number of differences: 67

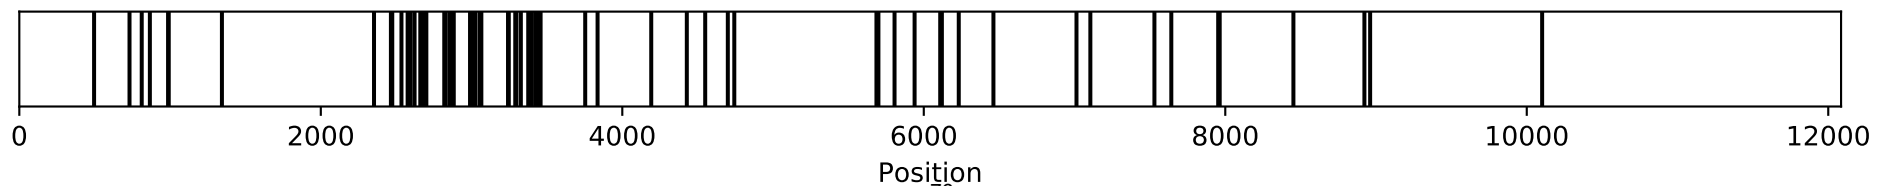

MA1 vs MA2  
Number of differences: 164

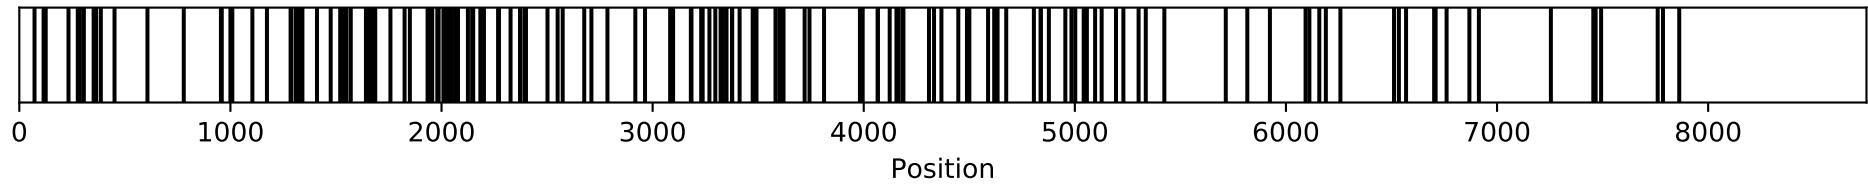

MA1 vs MM1  
Number of differences: 169

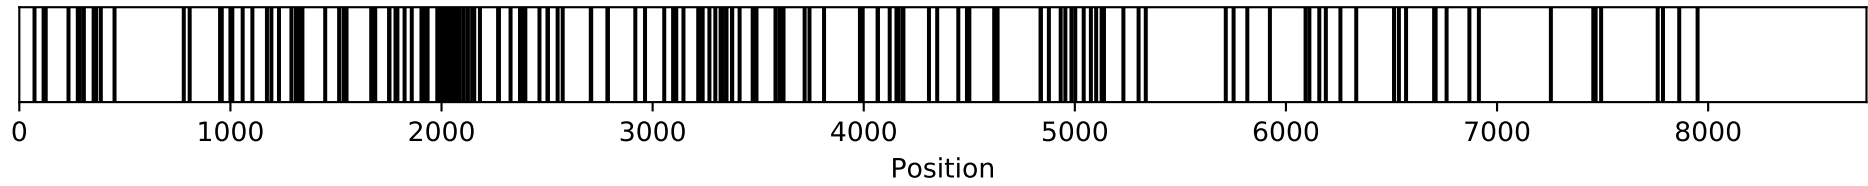

MA1 vs MM2  
Number of differences: 164

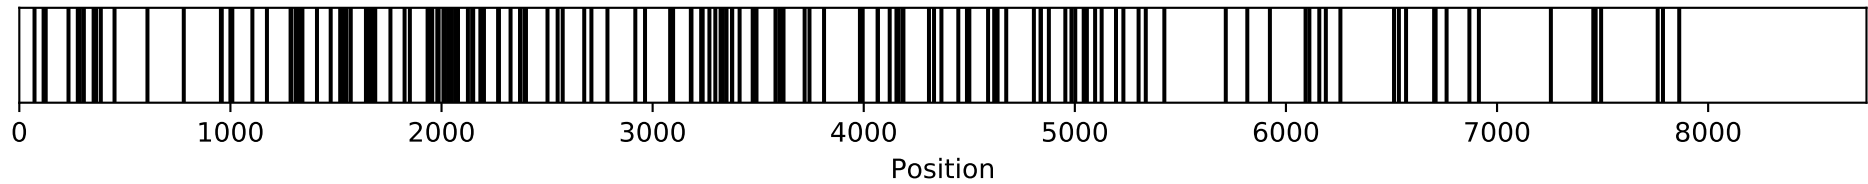

MA2 vs MM1  
Number of differences: 75

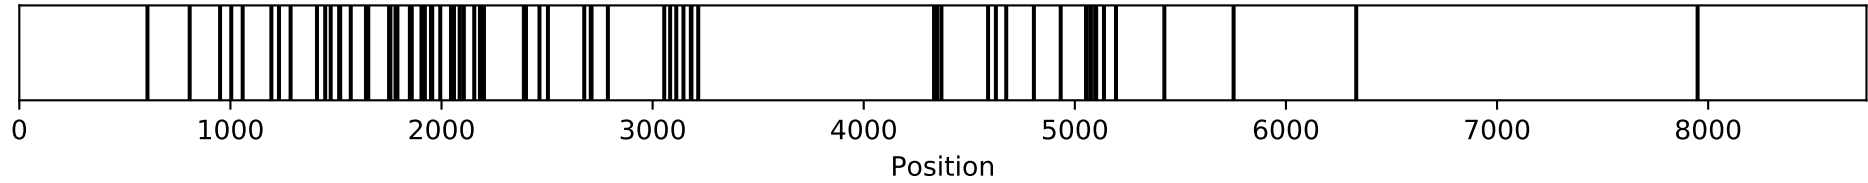

MA2 vs MM2  
Number of differences: 0

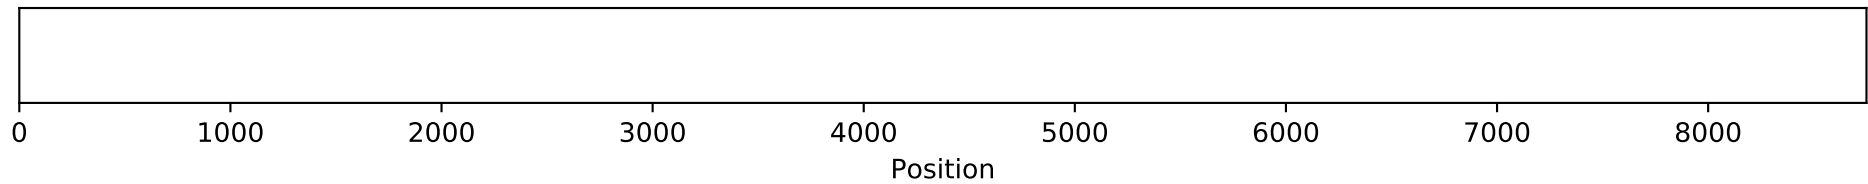

MM1 vs MM2  
Number of differences: 75

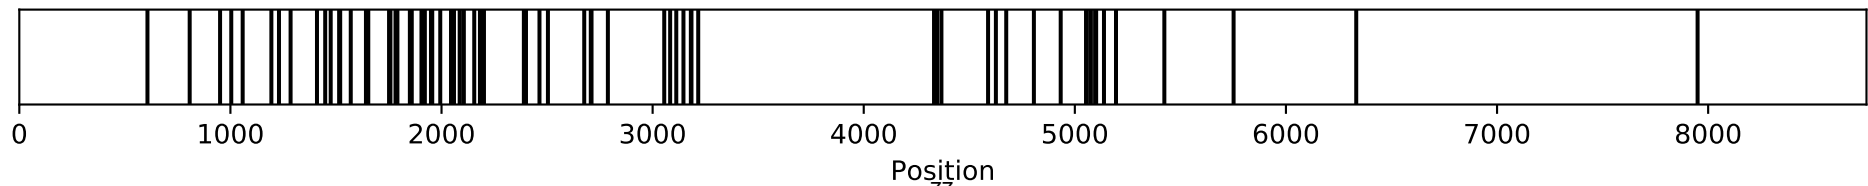

MA1 vs MA2  
Number of differences: 222

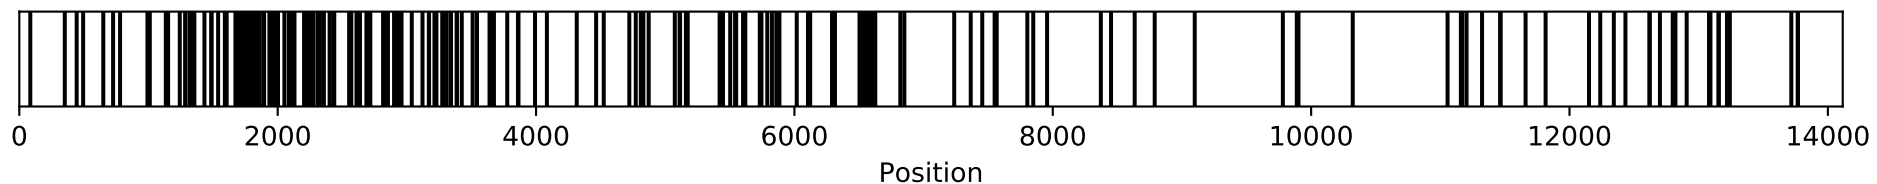

MA1 vs MM1  
Number of differences: 228

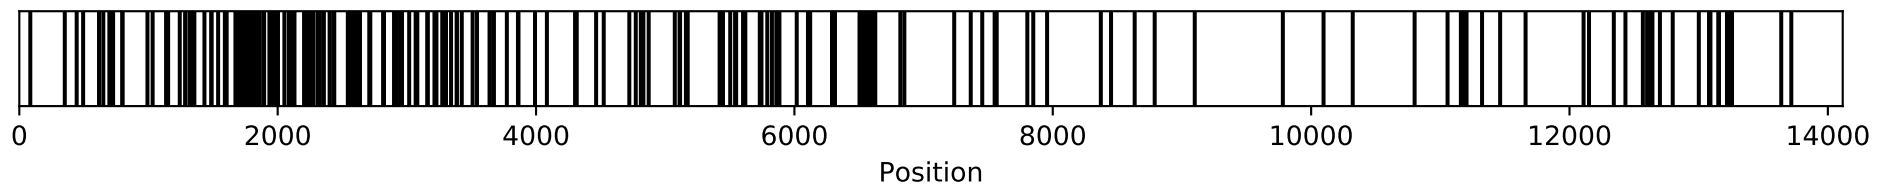

MA1 vs MM2  
Number of differences: 221

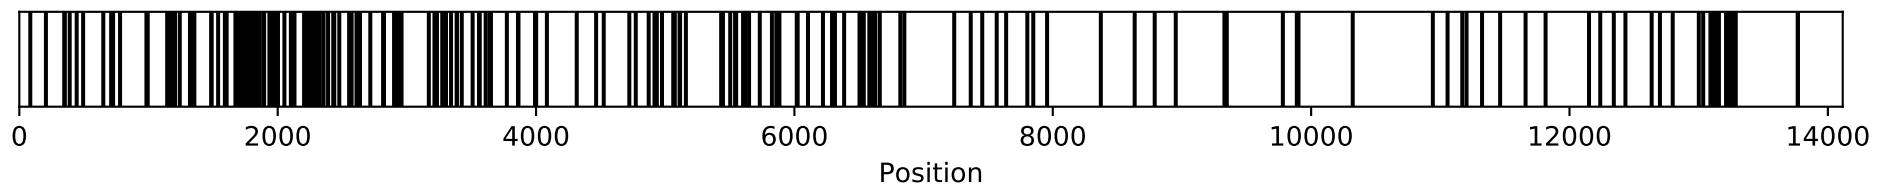

MA2 vs MM1  
Number of differences: 63

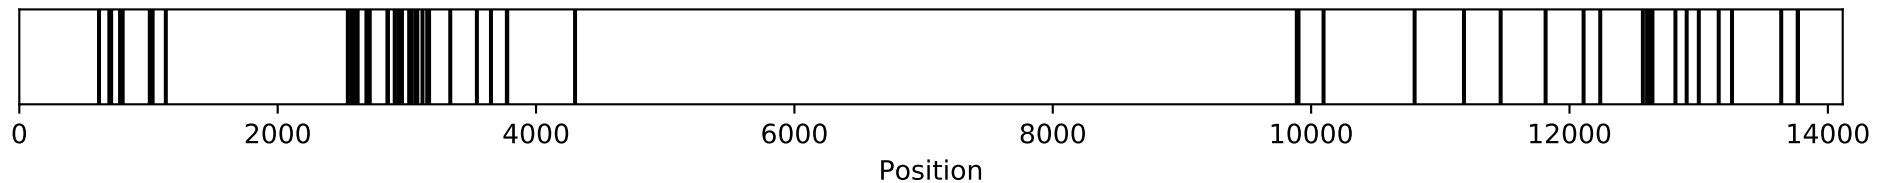

MA2 vs MM2  
Number of differences: 109

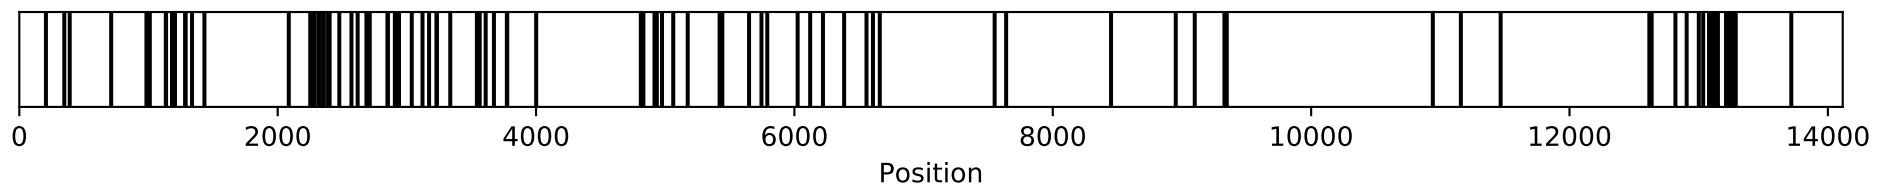

MM1 vs MM2  
Number of differences: 127

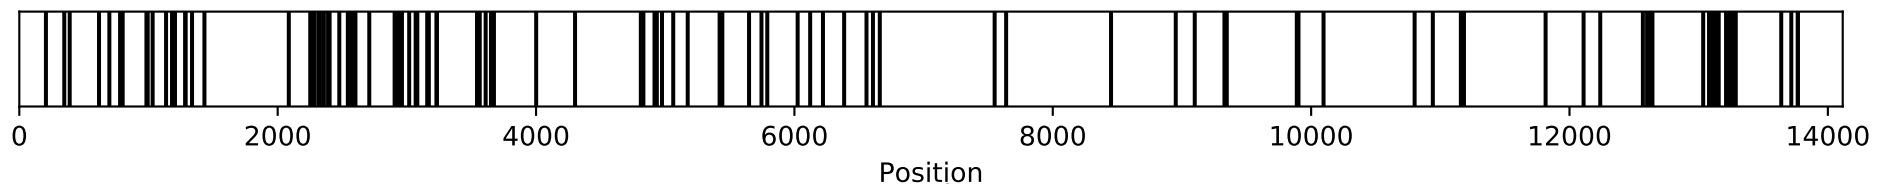

MA1 vs MA2  
Number of differences: 91

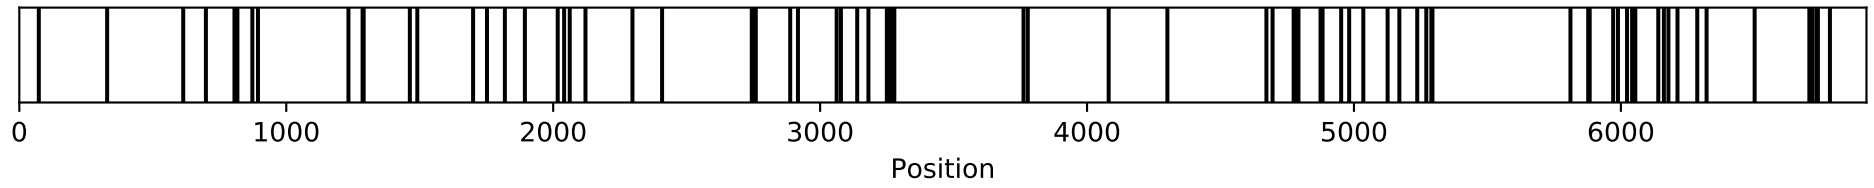

MA1 vs MM1  
Number of differences: 104

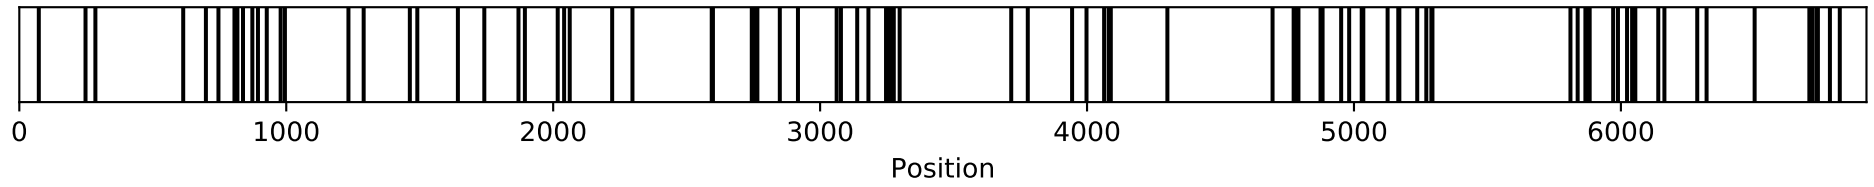

MA1 vs MM2  
Number of differences: 97

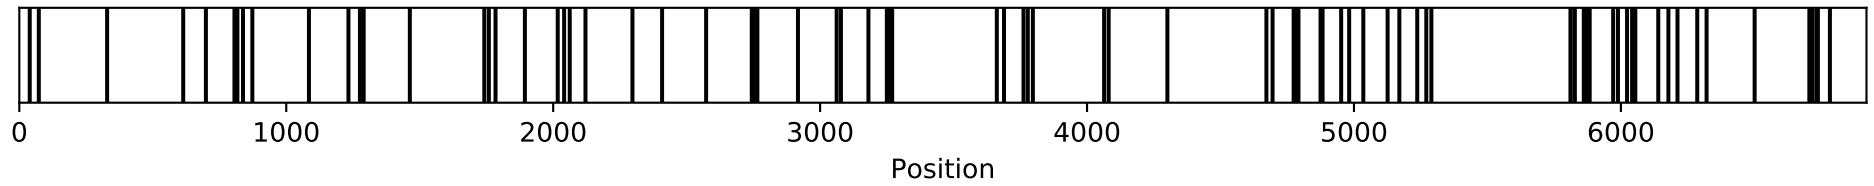

MA2 vs MM1  
Number of differences: 56

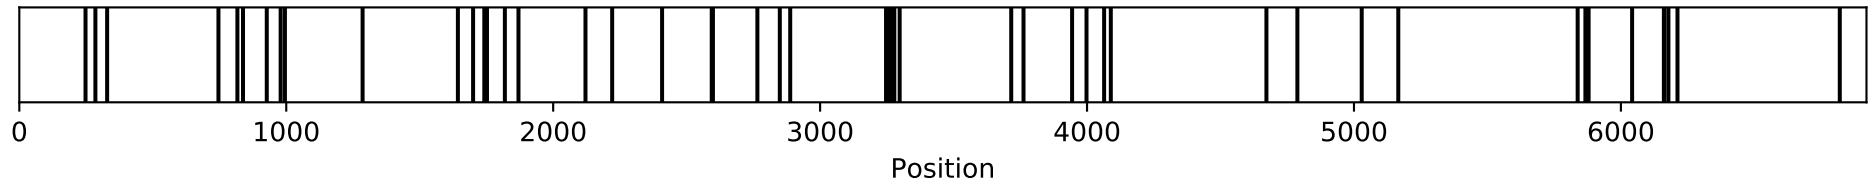

MA2 vs MM2  
Number of differences: 33

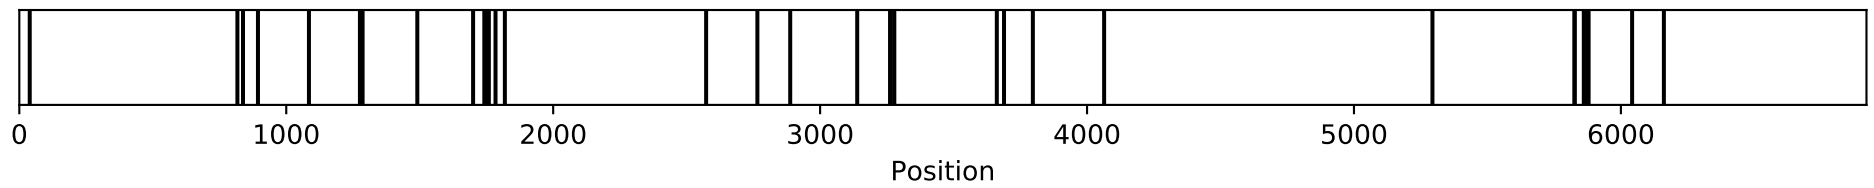

MM1 vs MM2  
Number of differences: 58

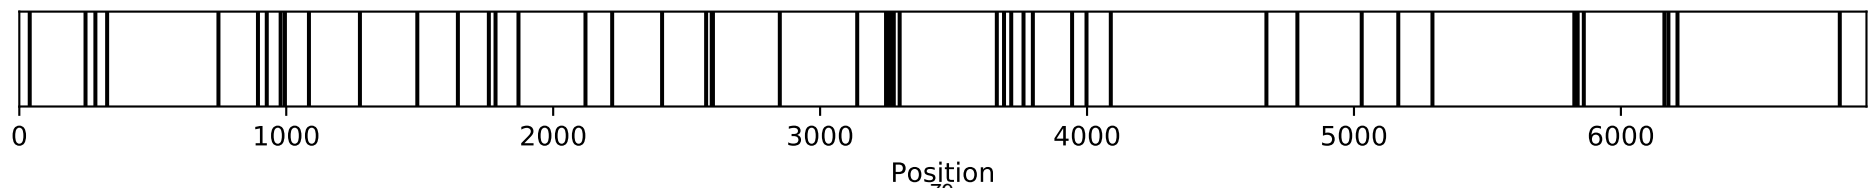

MA1 vs MA2  
Number of differences: 176

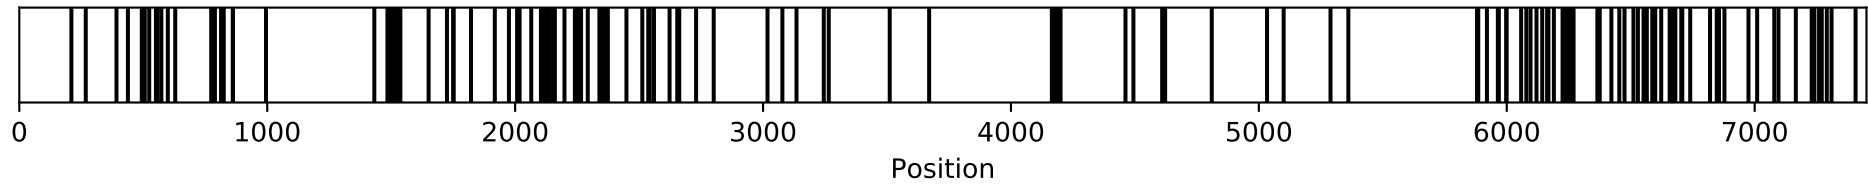

MA1 vs MM1  
Number of differences: 122

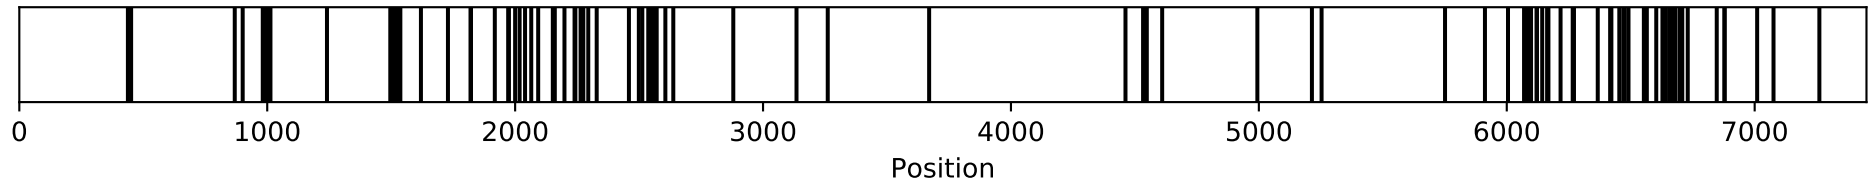

MA1 vs MM2  
Number of differences: 104

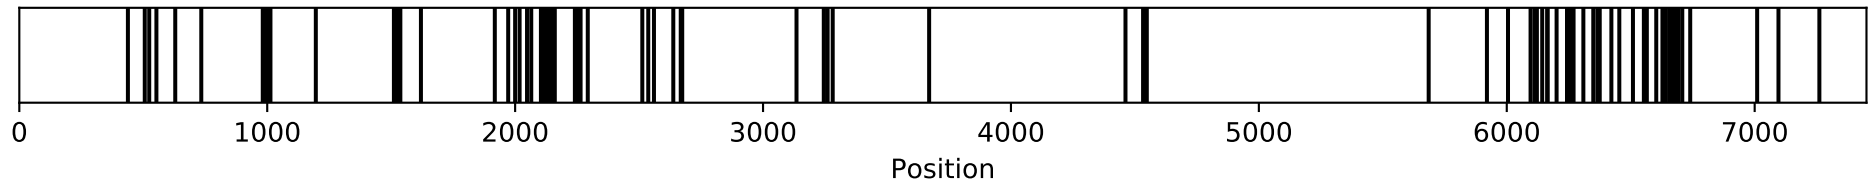

MA2 vs MM1  
Number of differences: 196

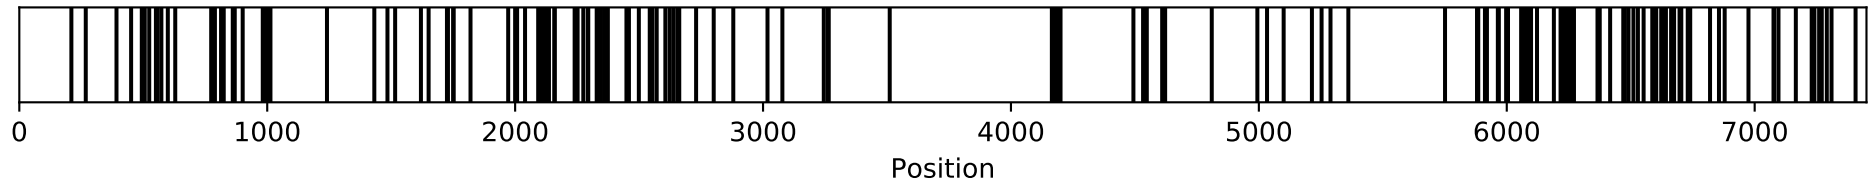

MA2 vs MM2  
Number of differences: 161

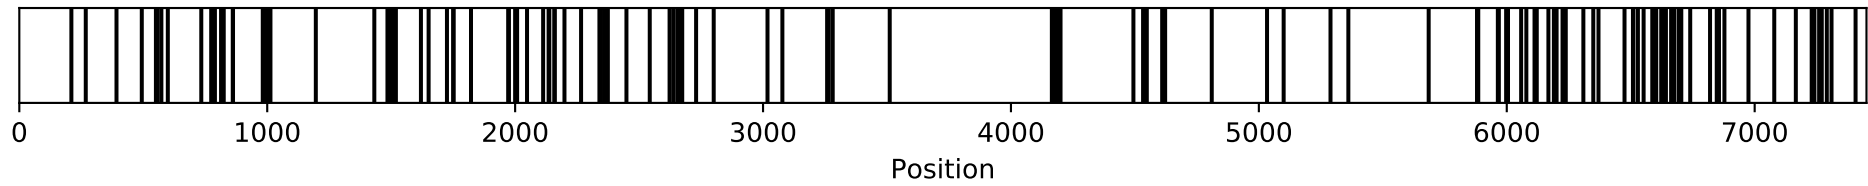

MM1 vs MM2  
Number of differences: 107

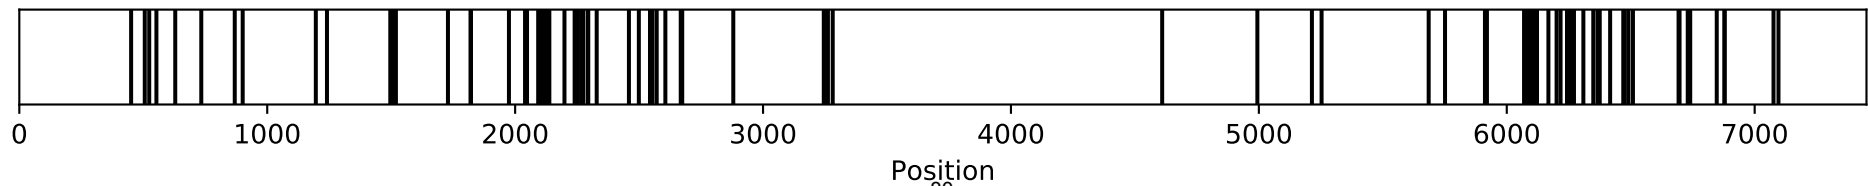

MA1 vs MA2  
Number of differences: 367

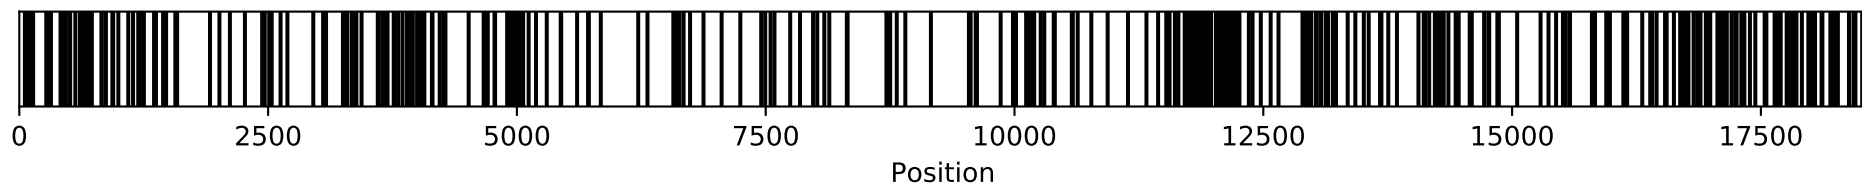

MA1 vs MM1  
Number of differences: 386

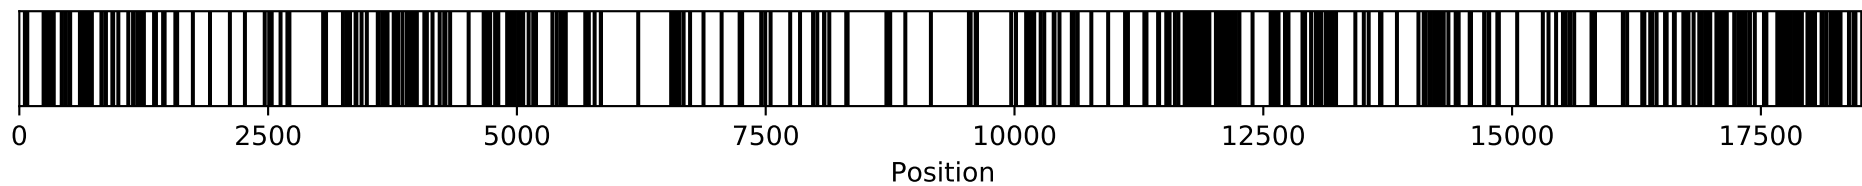

MA1 vs MM2  
Number of differences: 371

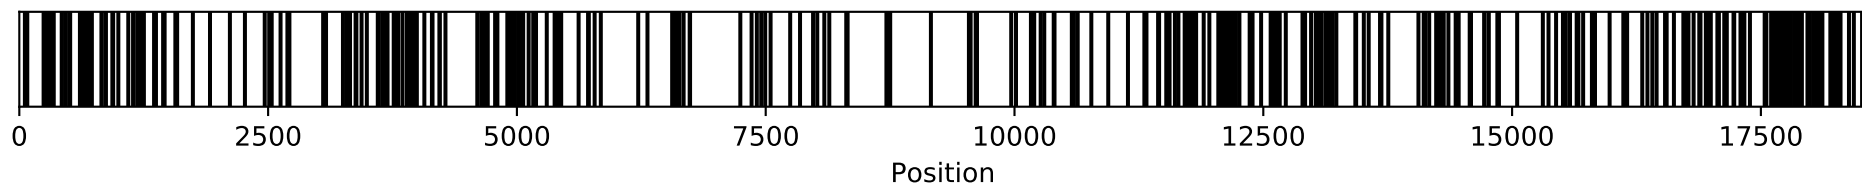

MA2 vs MM1  
Number of differences: 171

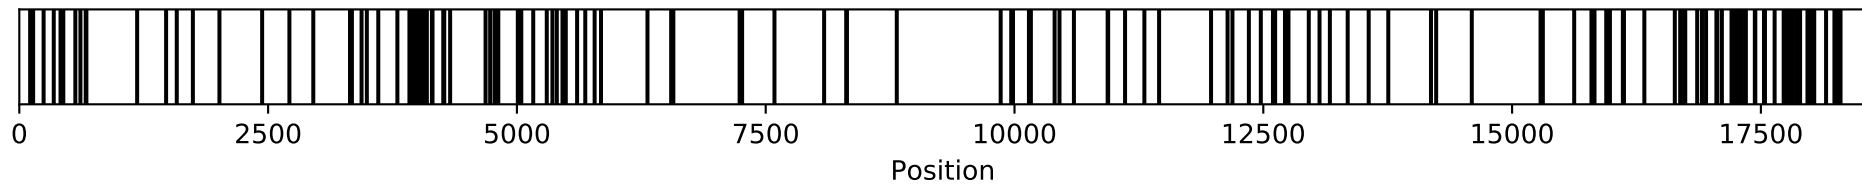

MA2 vs MM2  
Number of differences: 193

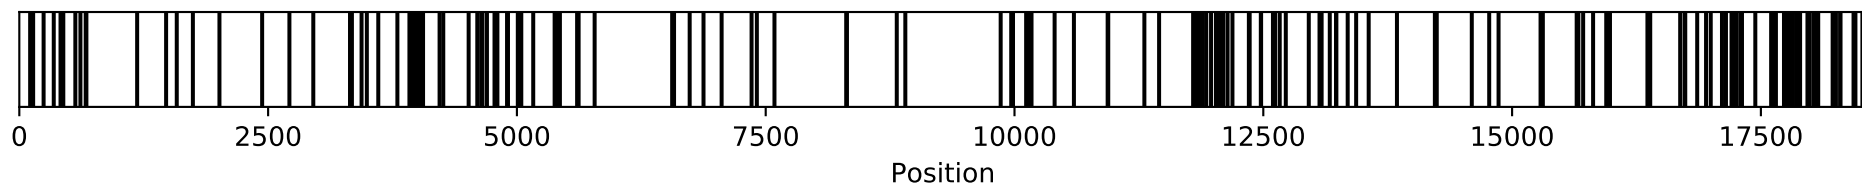

MM1 vs MM2  
Number of differences: 149

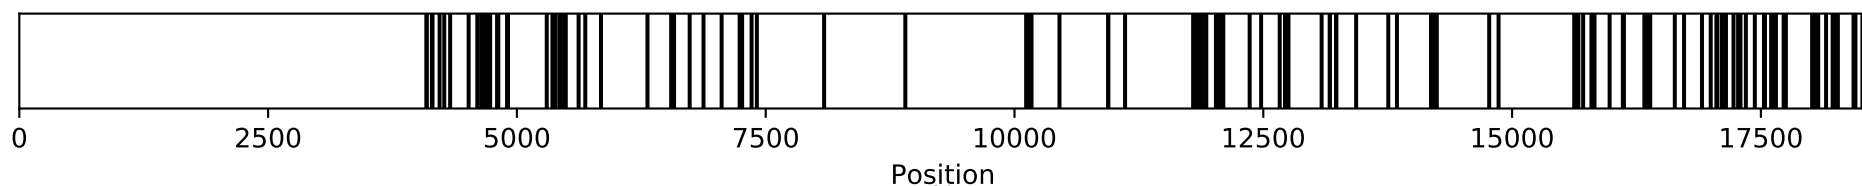

MA1 vs MA2  
Number of differences: 223

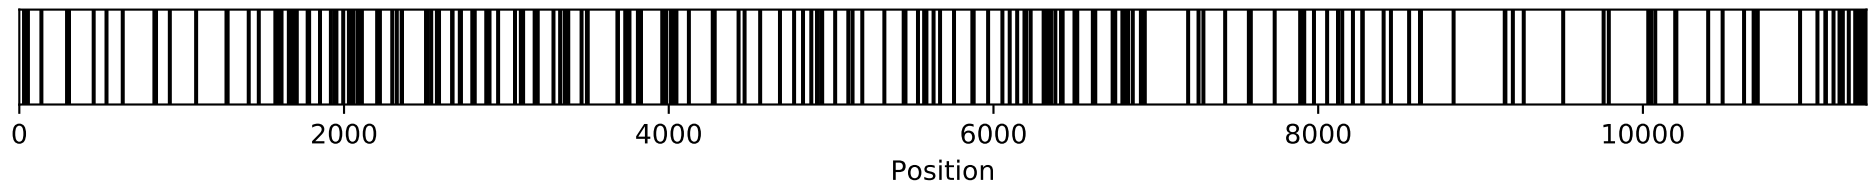

MA1 vs MM1  
Number of differences: 223

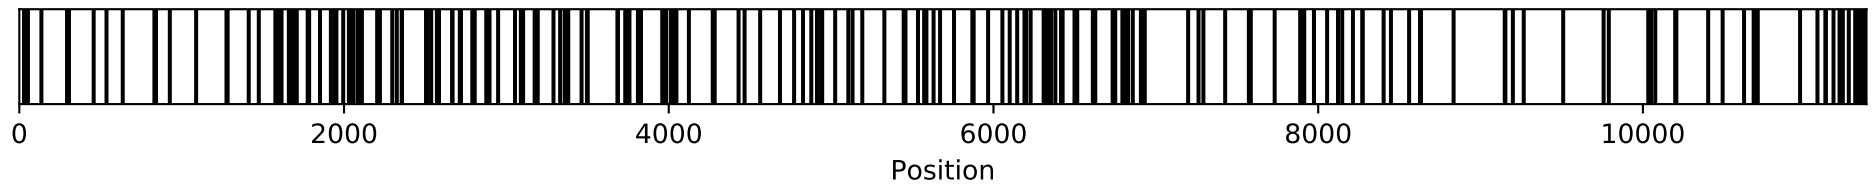

MA1 vs MM2  
Number of differences: 217

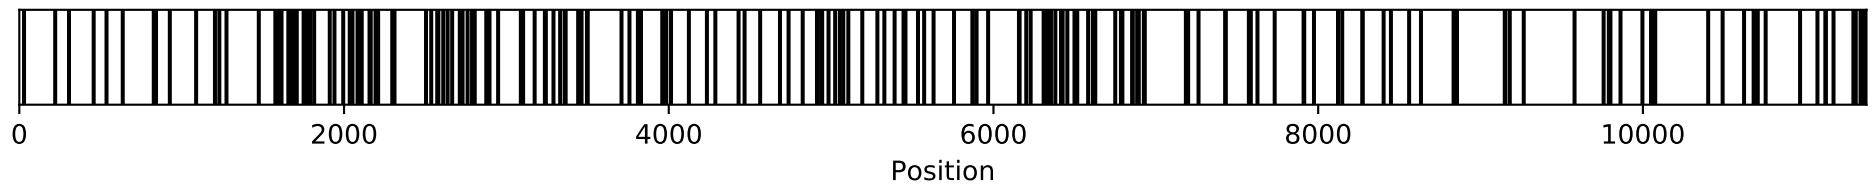

MA2 vs MM1  
Number of differences: 0

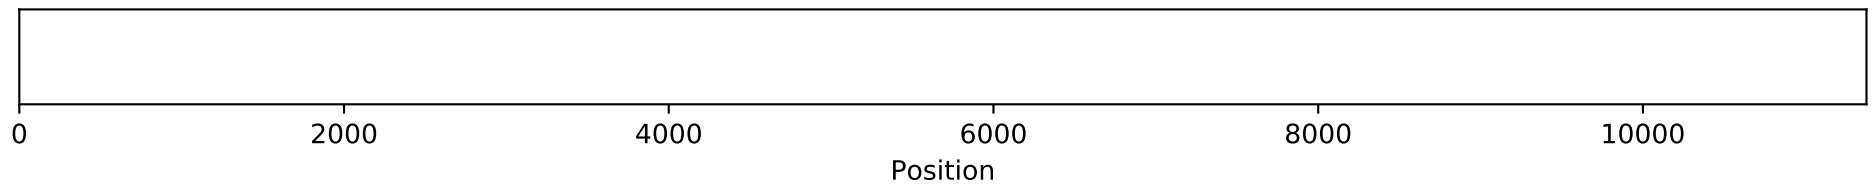

MA2 vs MM2  
Number of differences: 147

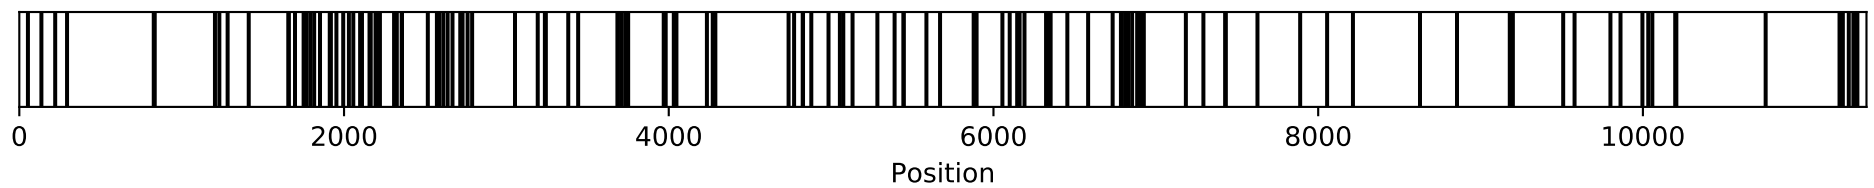

MM1 vs MM2  
Number of differences: 147

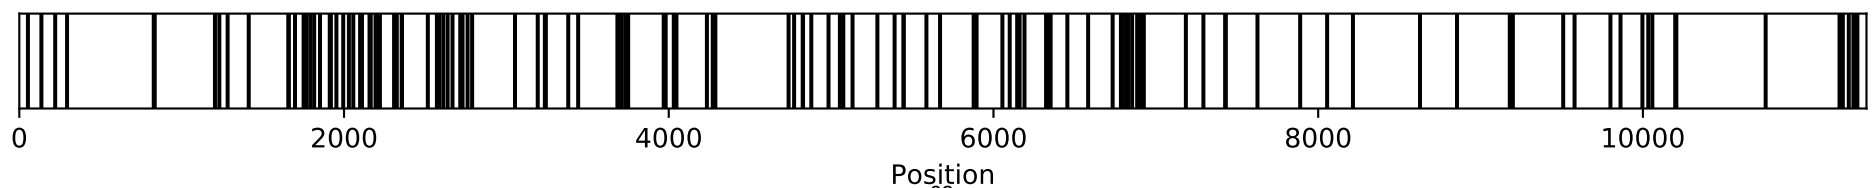



MA1 vs MA2  
Number of differences: 303

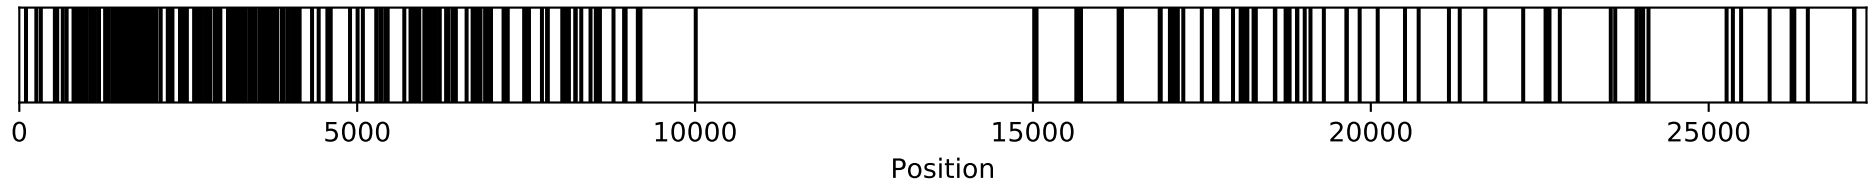

MA1 vs MM1  
Number of differences: 0

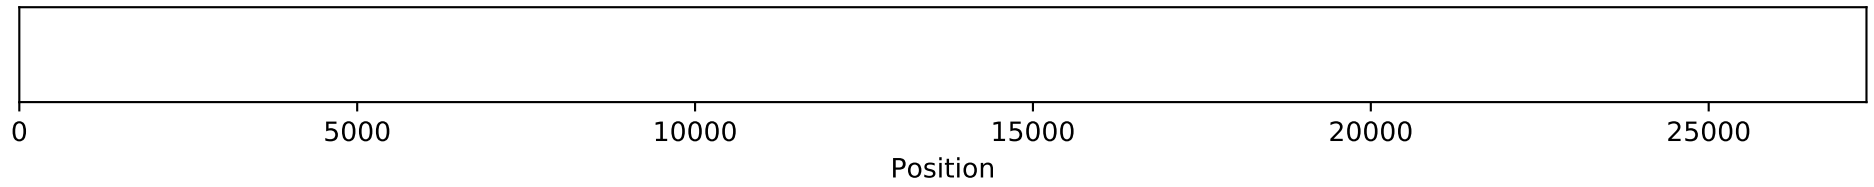

MA1 vs MM2  
Number of differences: 282

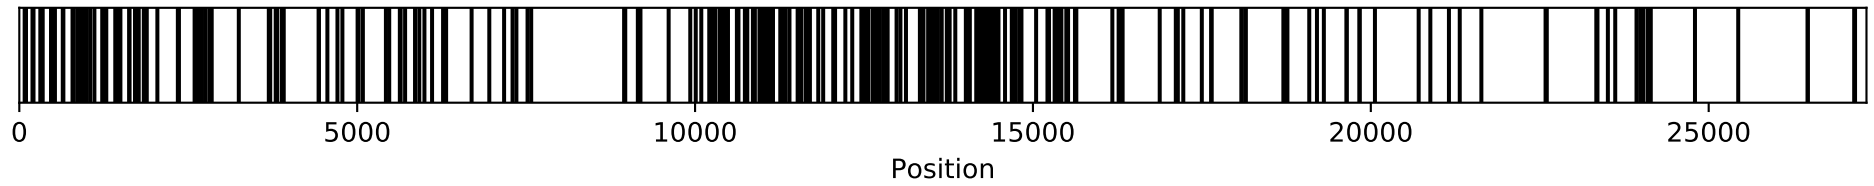

MA2 vs MM1  
Number of differences: 303

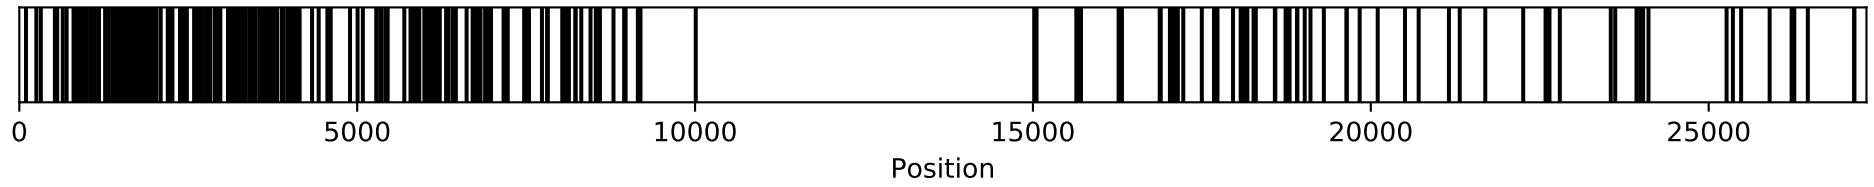

MA2 vs MM2  
Number of differences: 442

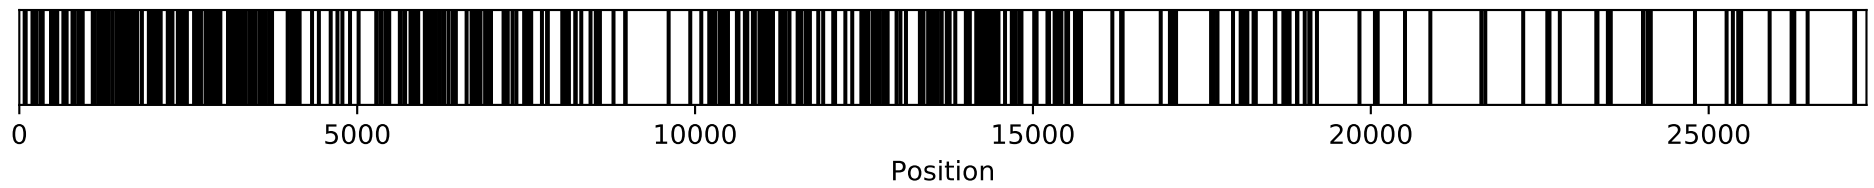

MM1 vs MM2  
Number of differences: 282

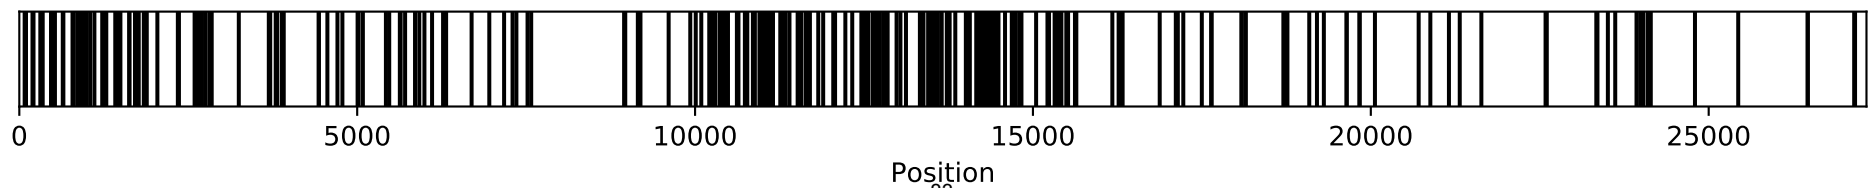

MA1 vs MA2  
Number of differences: 254

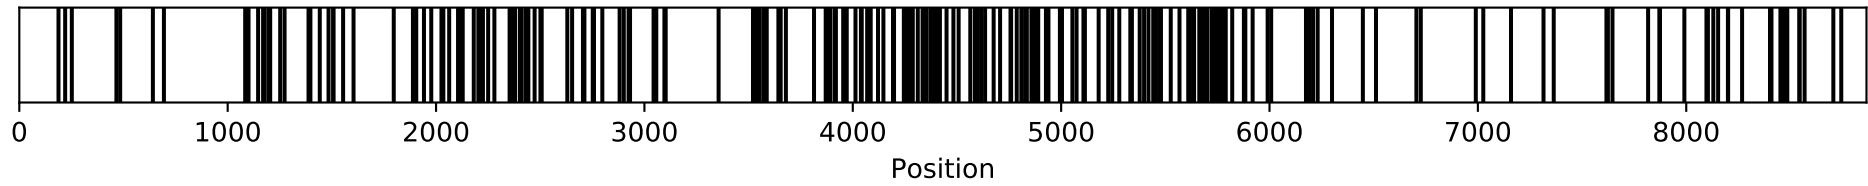

MA1 vs MM1  
Number of differences: 180

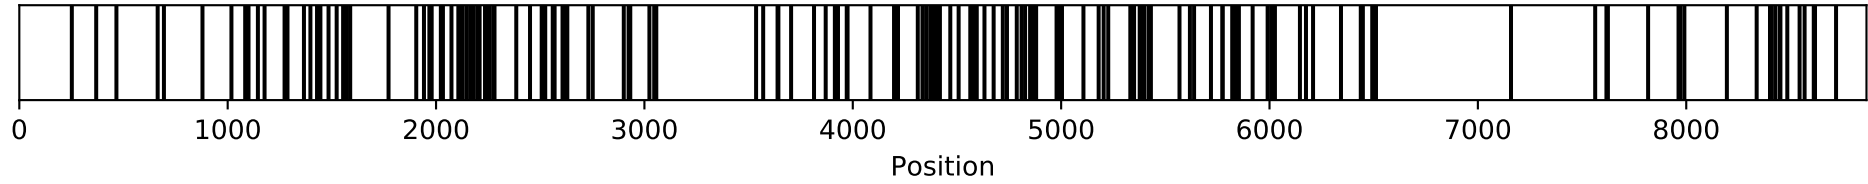

MA1 vs MM2  
Number of differences: 0

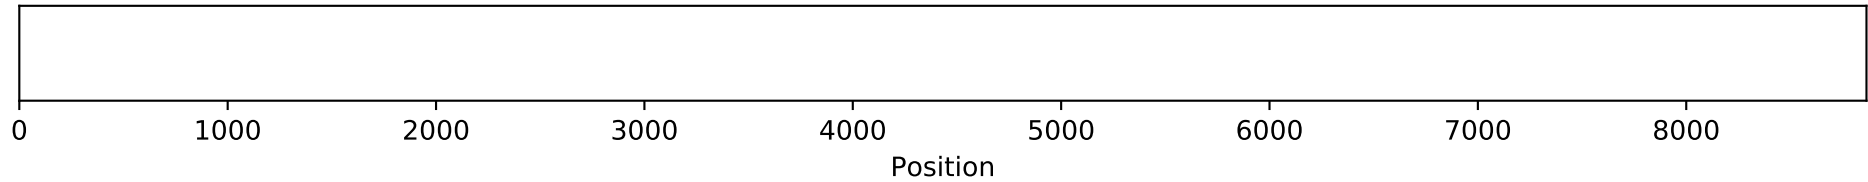

MA2 vs MM1  
Number of differences: 256

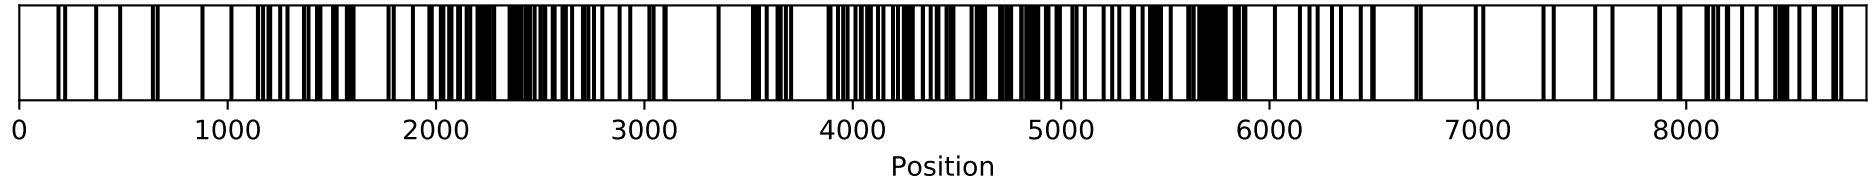

MA2 vs MM2  
Number of differences: 254

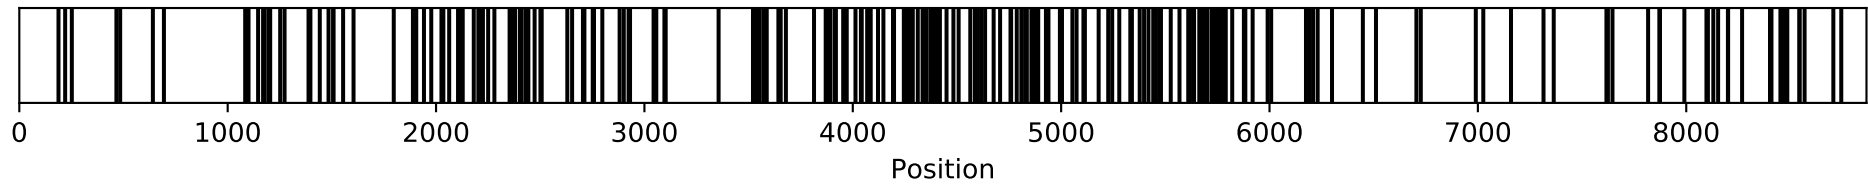

MM1 vs MM2  
Number of differences: 180

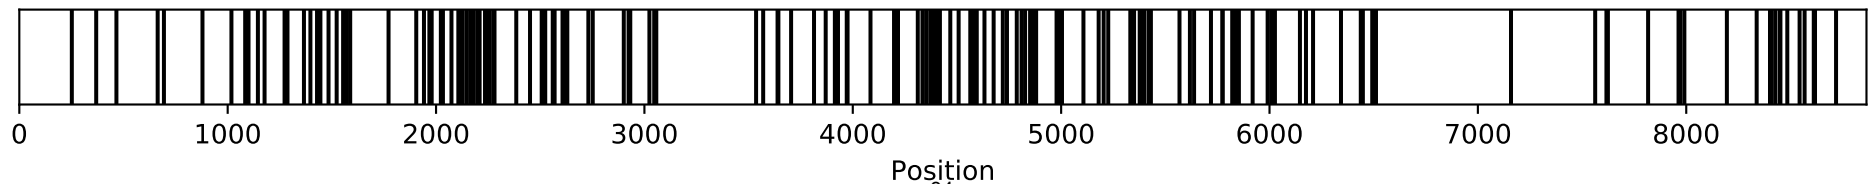

MA1 vs MA2  
Number of differences: 348

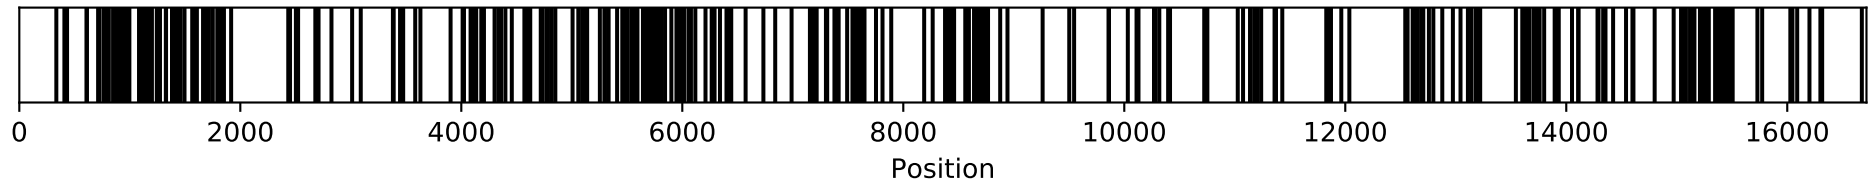

MA1 vs MM1  
Number of differences: 333

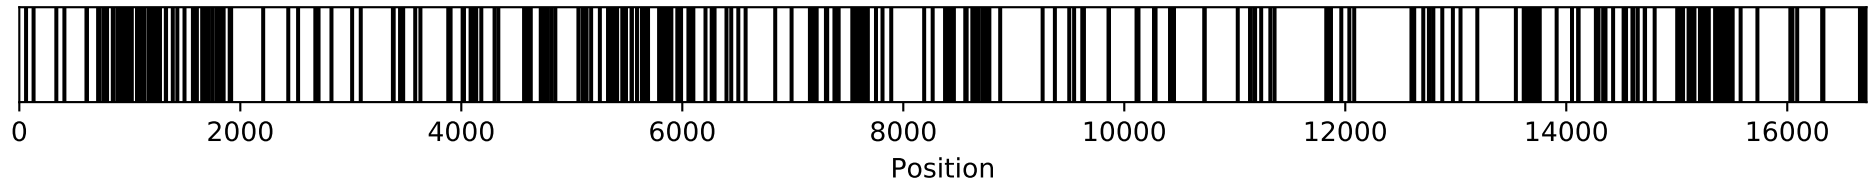

MA1 vs MM2  
Number of differences: 344

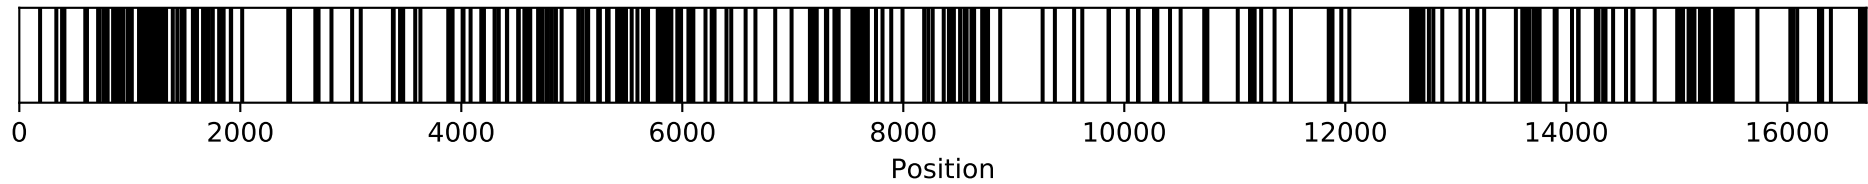

MA2 vs MM1  
Number of differences: 202

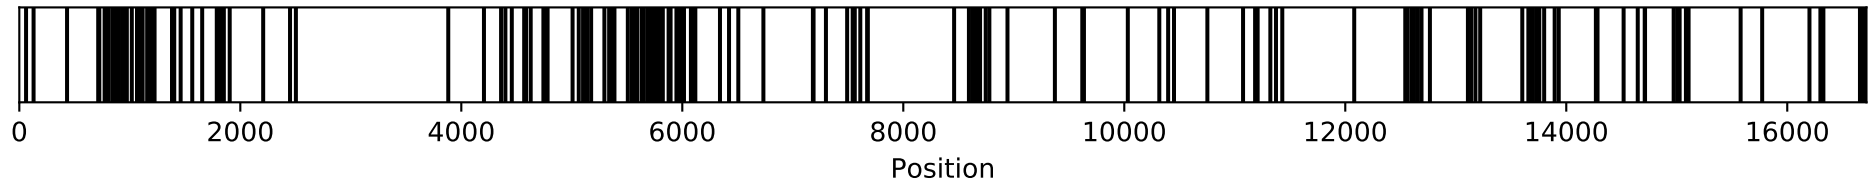

MA2 vs MM2  
Number of differences: 205

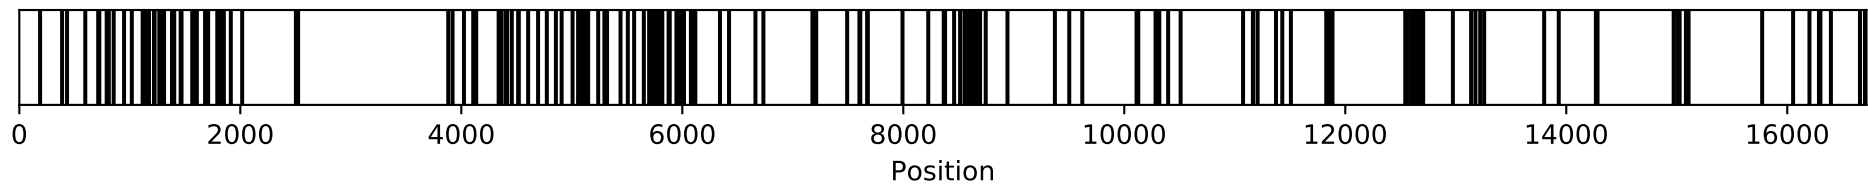

MM1 vs MM2  
Number of differences: 188

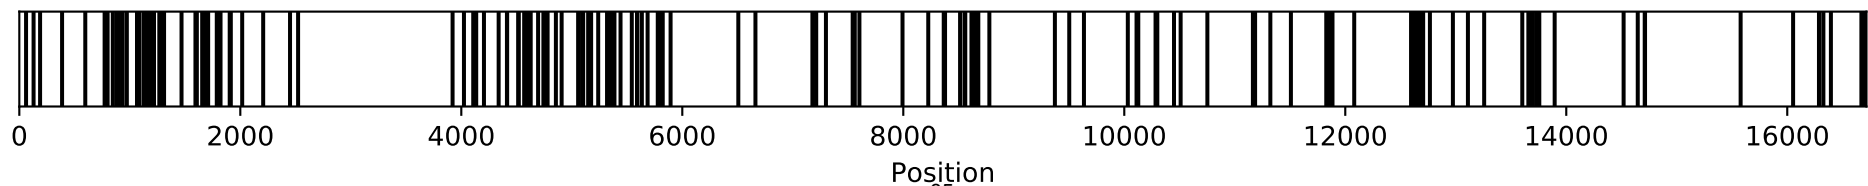

MA1 vs MA2  
Number of differences: 183

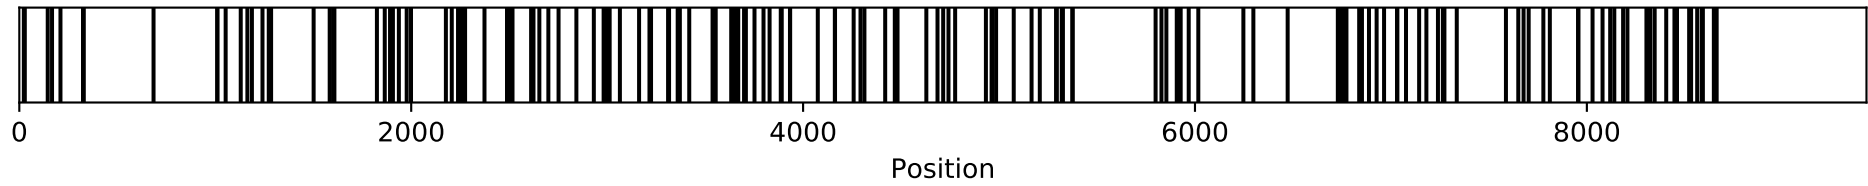

MA1 vs MM1  
Number of differences: 190

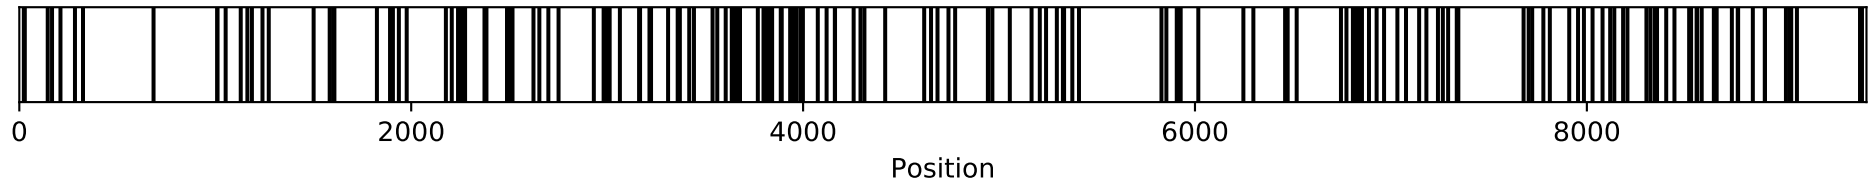

MA1 vs MM2  
Number of differences: 192

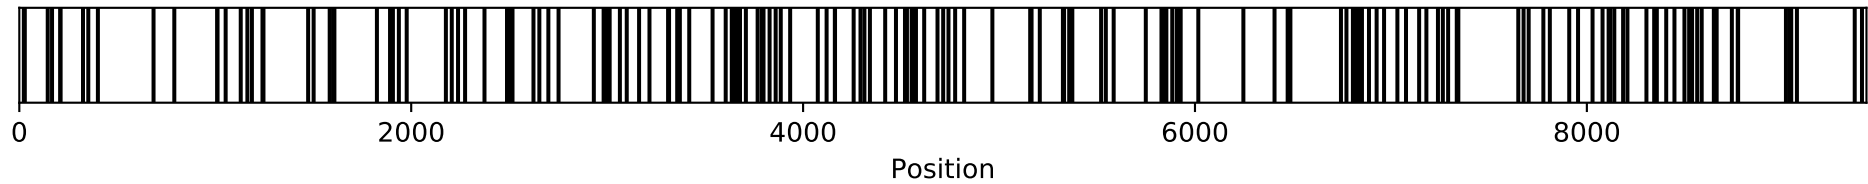

MA2 vs MM1  
Number of differences: 93

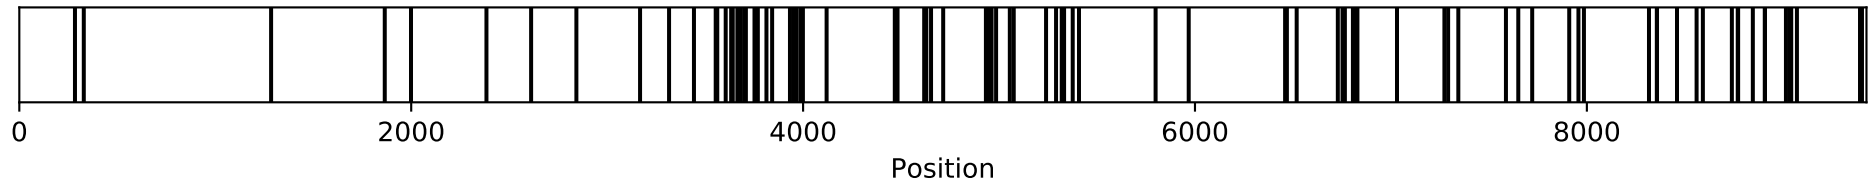

MA2 vs MM2  
Number of differences: 104

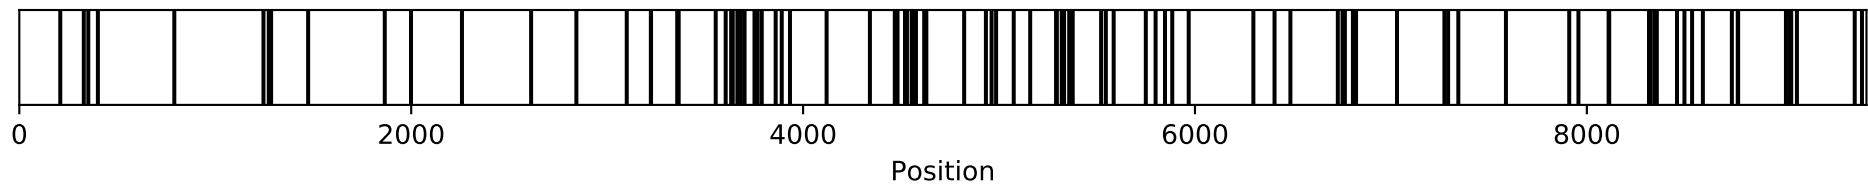

MM1 vs MM2  
Number of differences: 79

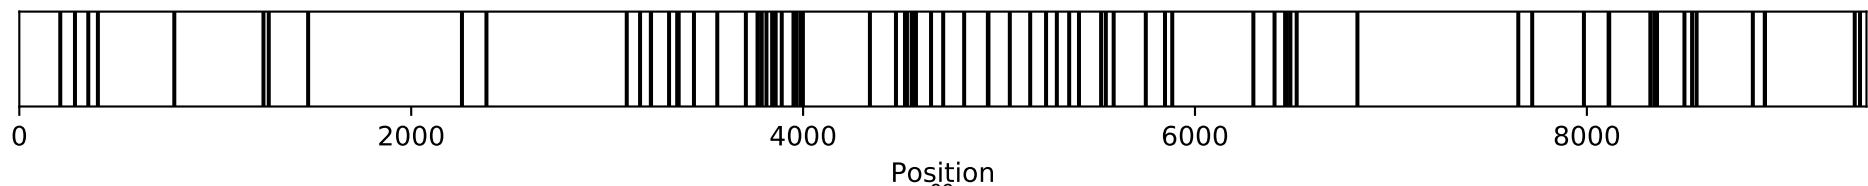

MA1 vs MA2  
Number of differences: 603

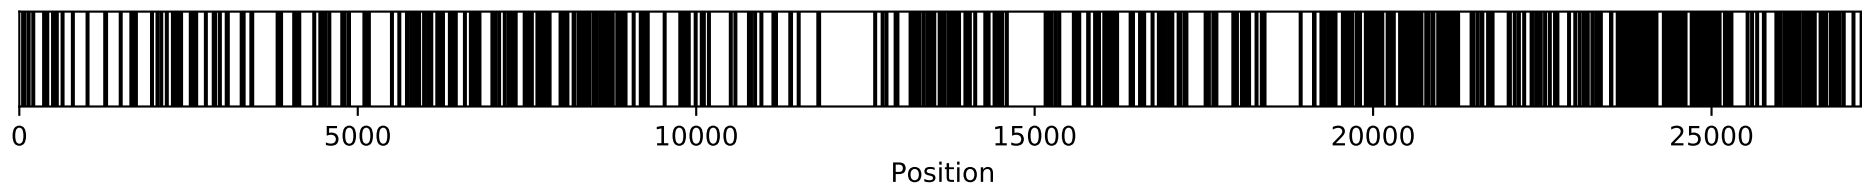

MA1 vs MM1  
Number of differences: 617

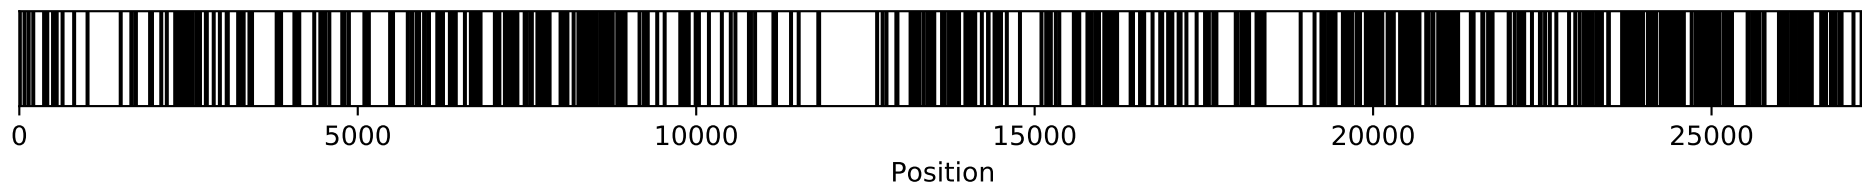

MA1 vs MM2  
Number of differences: 603

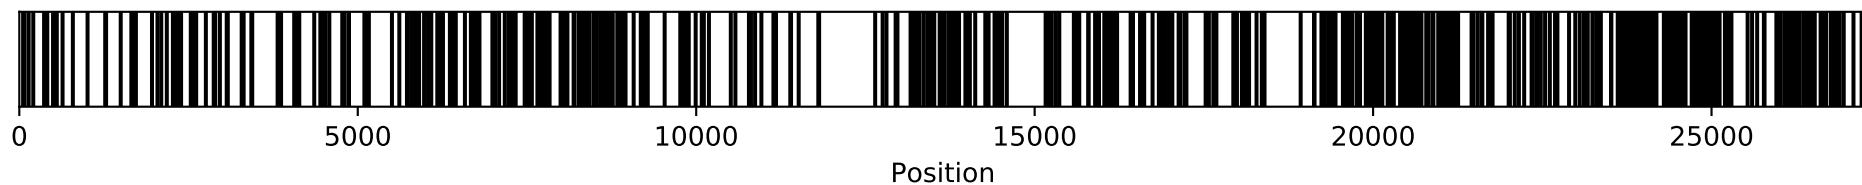

MA2 vs MM1  
Number of differences: 302

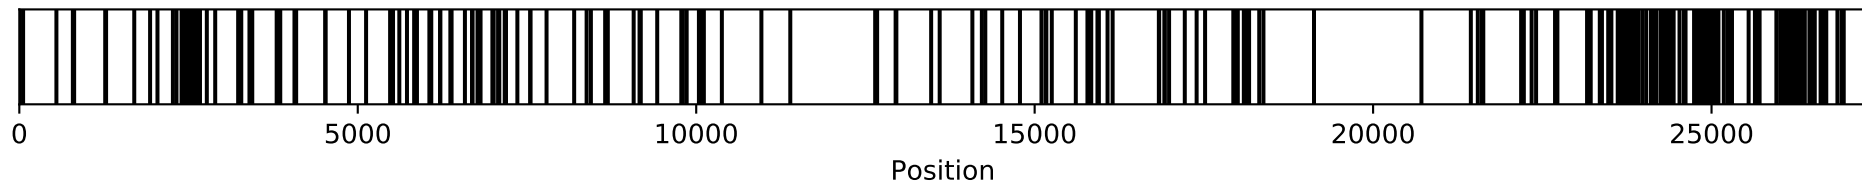

MA2 vs MM2  
Number of differences: 0

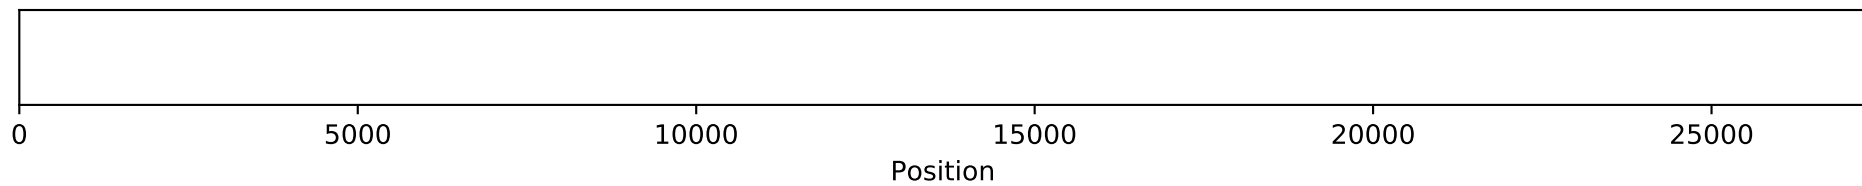

MM1 vs MM2  
Number of differences: 302

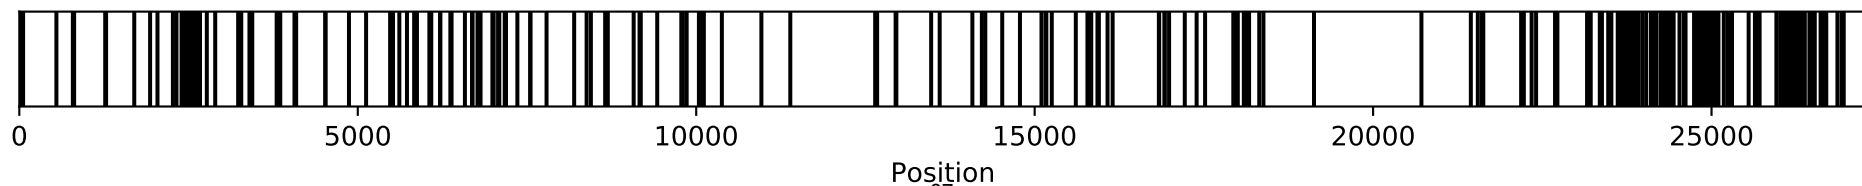

MA1 vs MA2  
Number of differences: 502

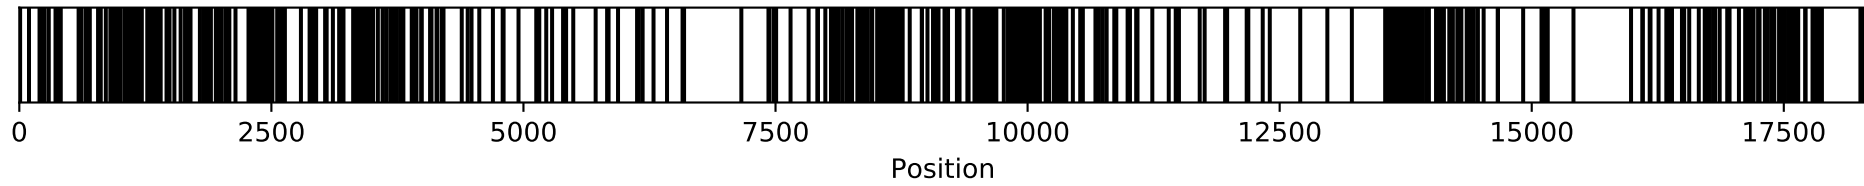

MA1 vs MM1  
Number of differences: 514

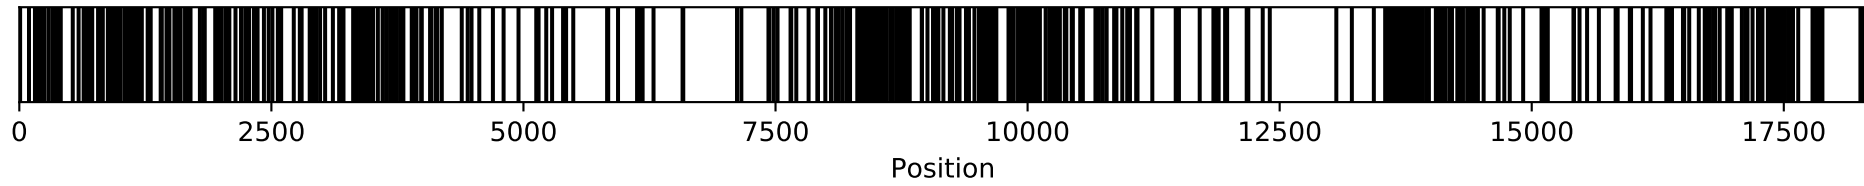

MA1 vs MM2  
Number of differences: 500

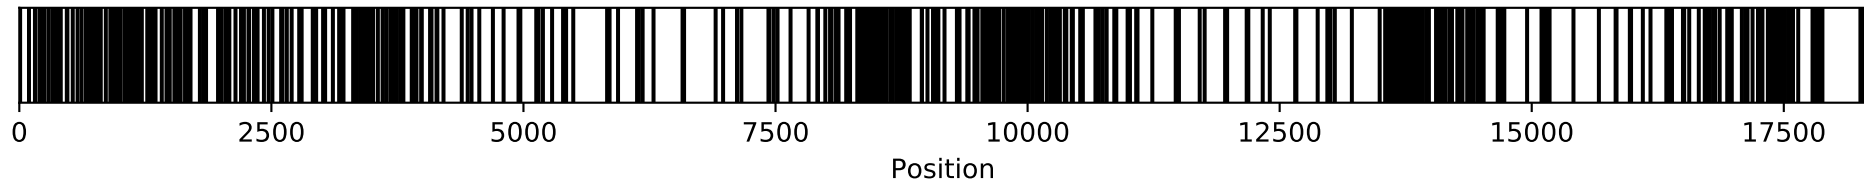

MA2 vs MM1  
Number of differences: 240

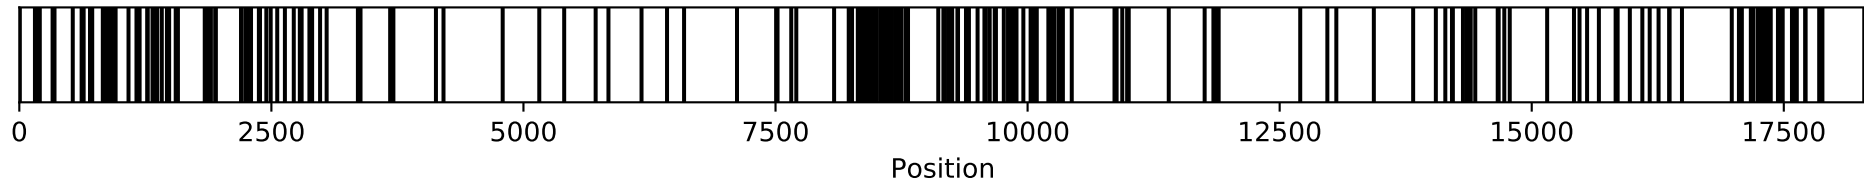

MA2 vs MM2  
Number of differences: 218

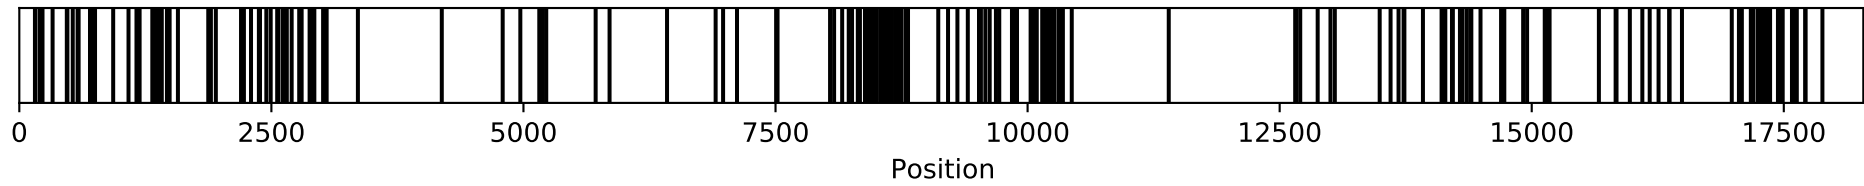

MM1 vs MM2  
Number of differences: 171

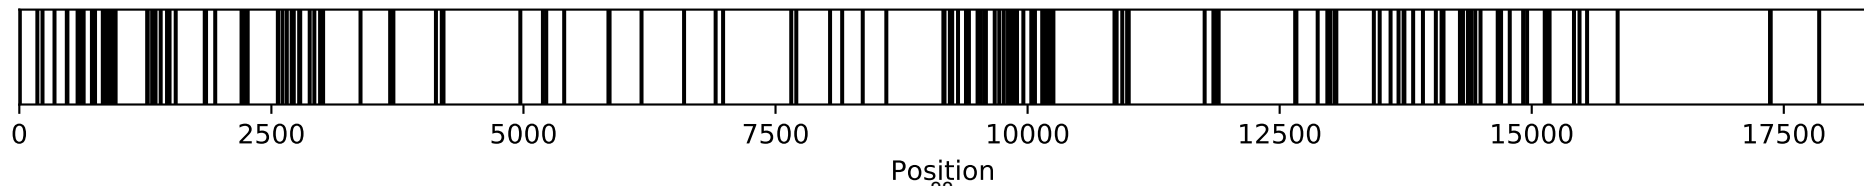

MA1 vs MA2  
Number of differences: 253

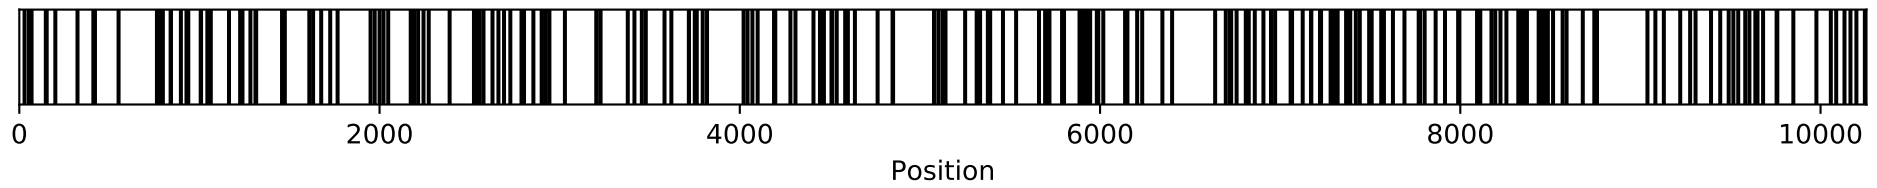

MA1 vs MM1  
Number of differences: 0

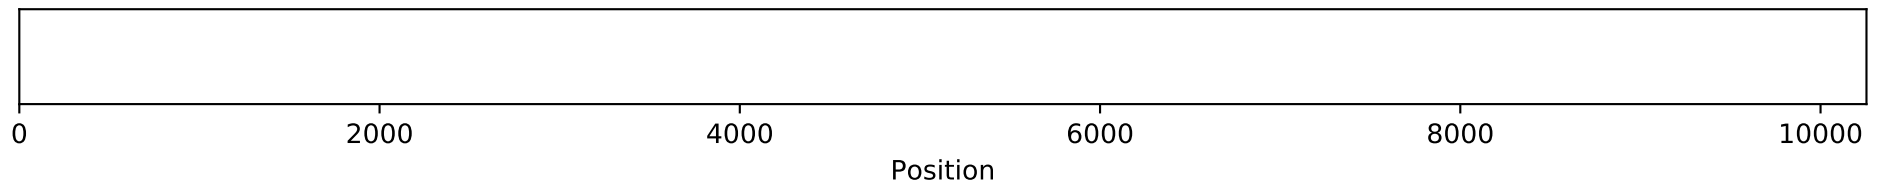

MA1 vs MM2  
Number of differences: 99

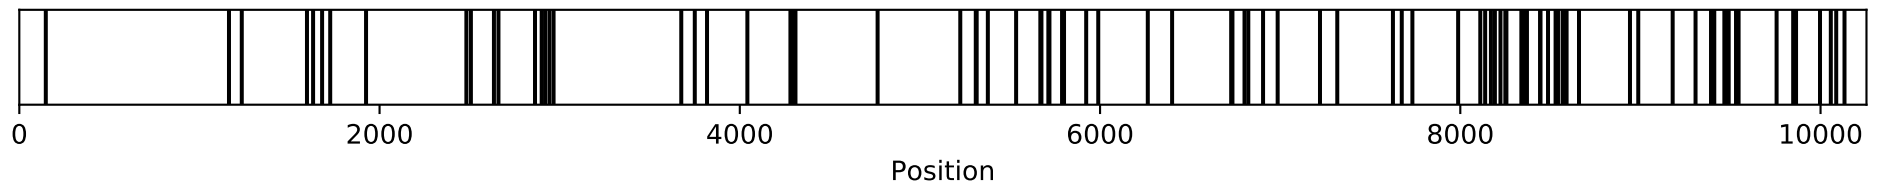

MA2 vs MM1  
Number of differences: 253

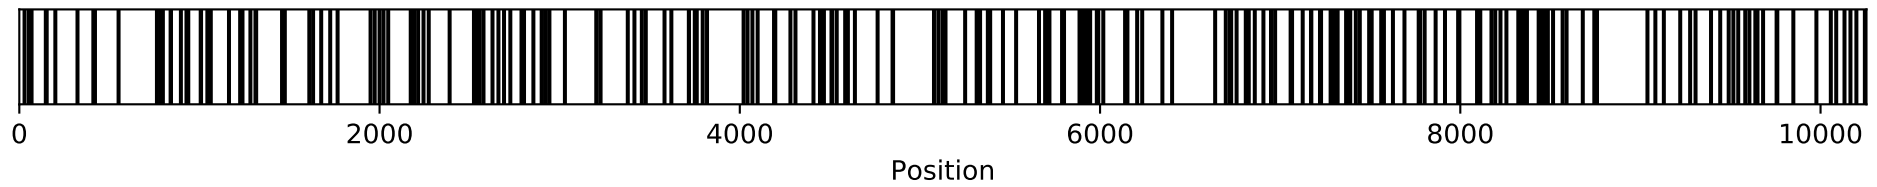

MA2 vs MM2  
Number of differences: 265

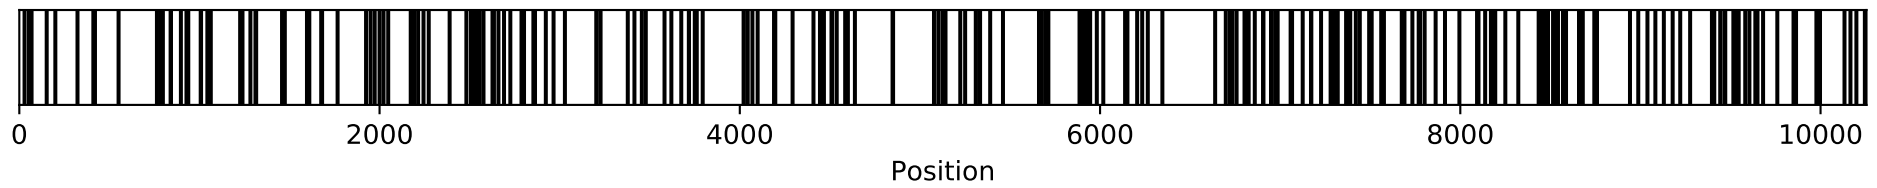

MM1 vs MM2  
Number of differences: 99

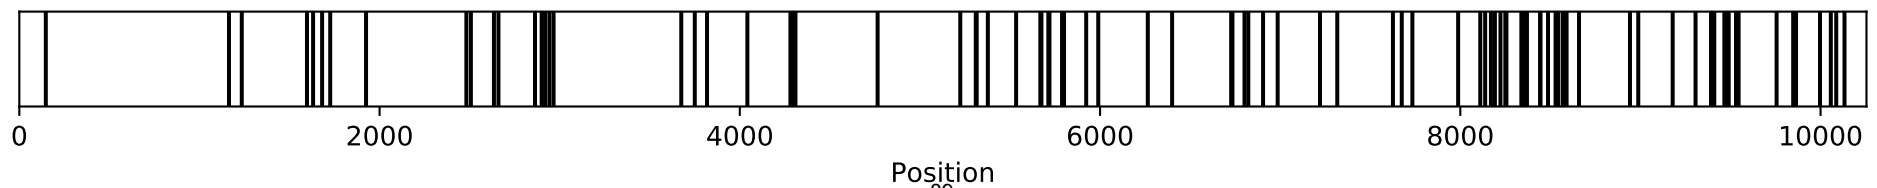

MA1 vs MA2  
Number of differences: 168

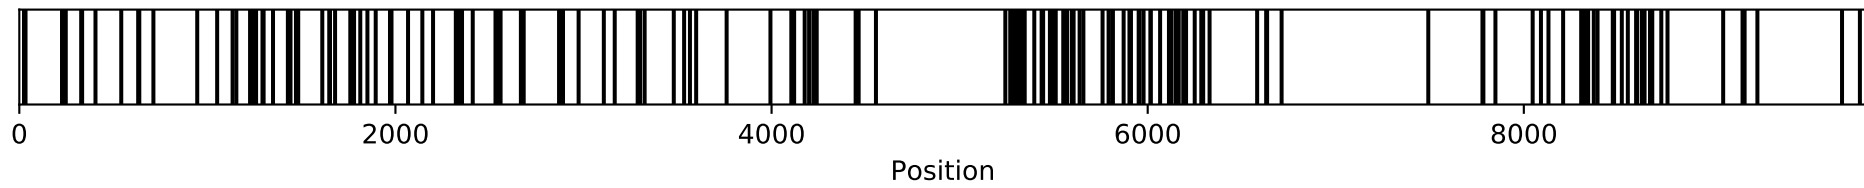

MA1 vs MM1  
Number of differences: 0

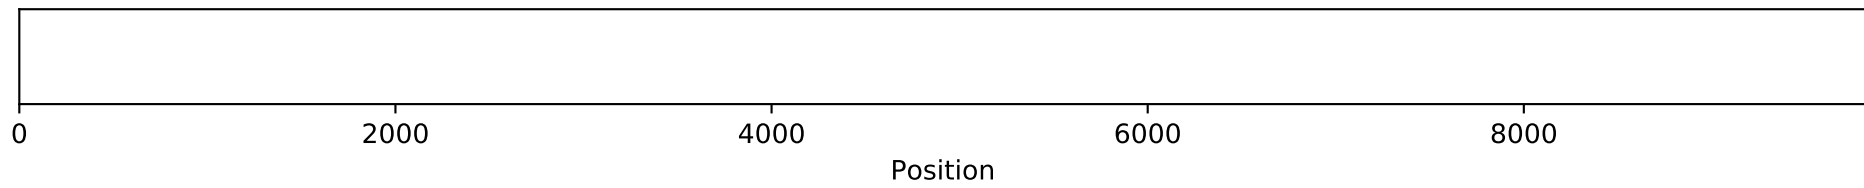

MA1 vs MM2  
Number of differences: 115

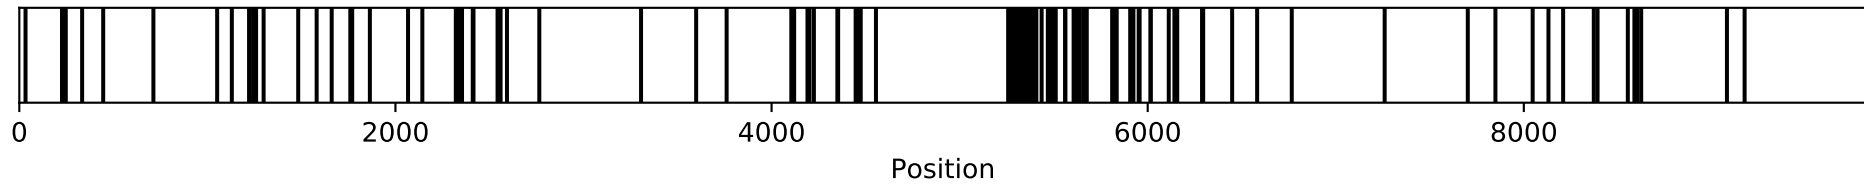

MA2 vs MM1  
Number of differences: 168

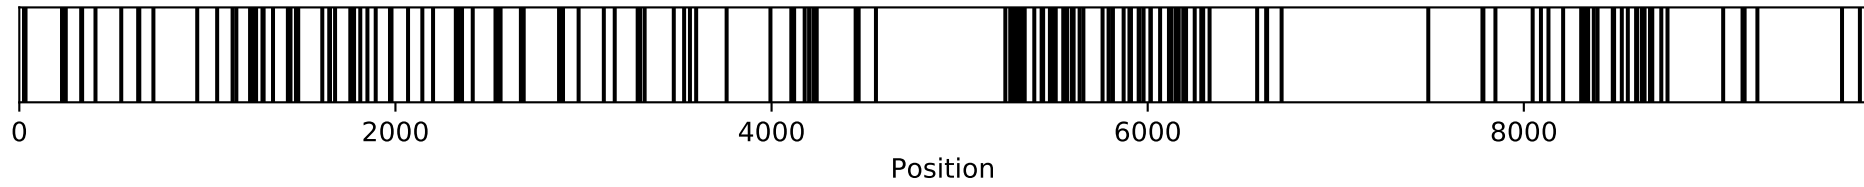

MA2 vs MM2  
Number of differences: 153

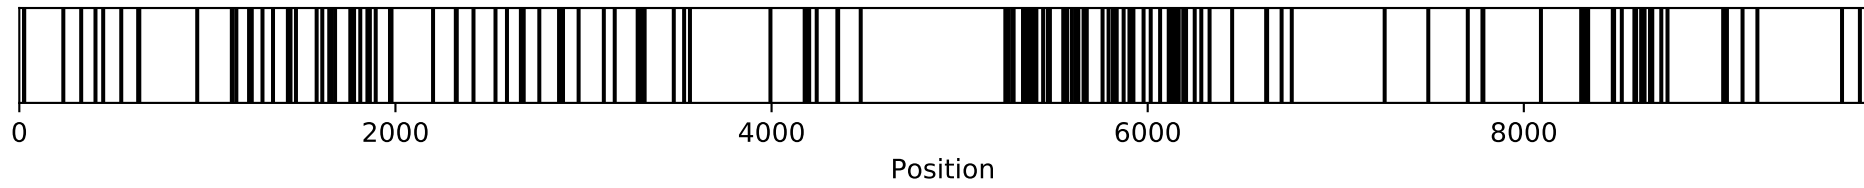

MM1 vs MM2  
Number of differences: 115

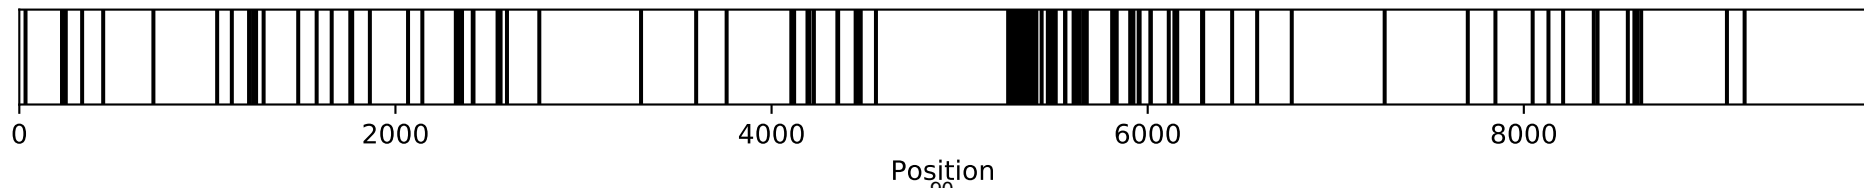



MA1 vs MA2  
Number of differences: 108

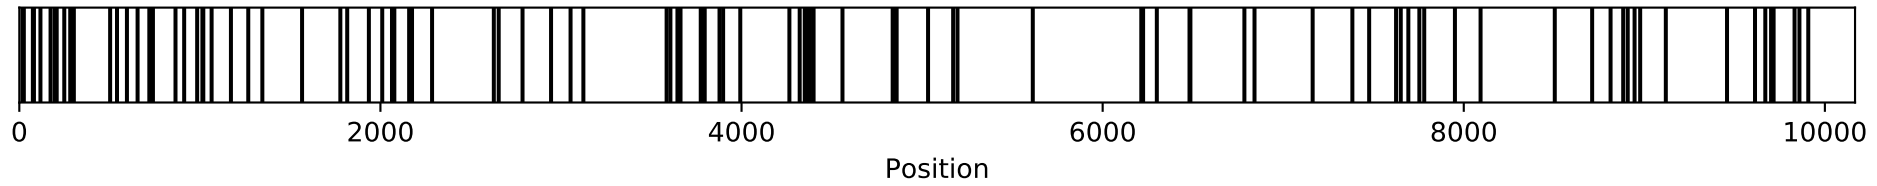

MA1 vs MM1  
Number of differences: 45

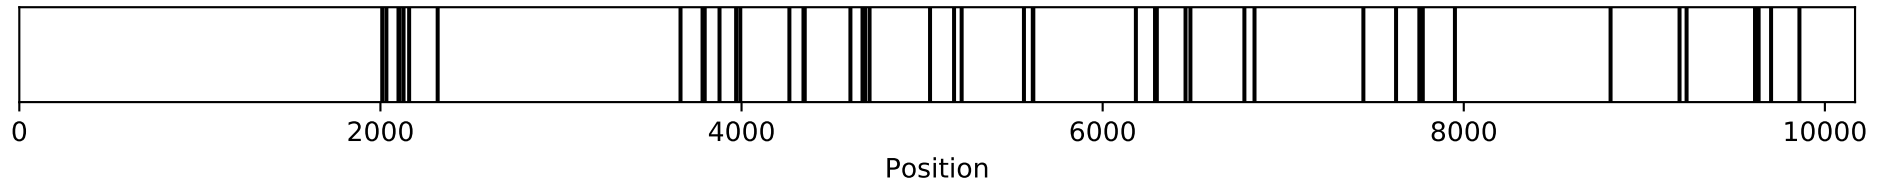

MA1 vs MM2  
Number of differences: 65

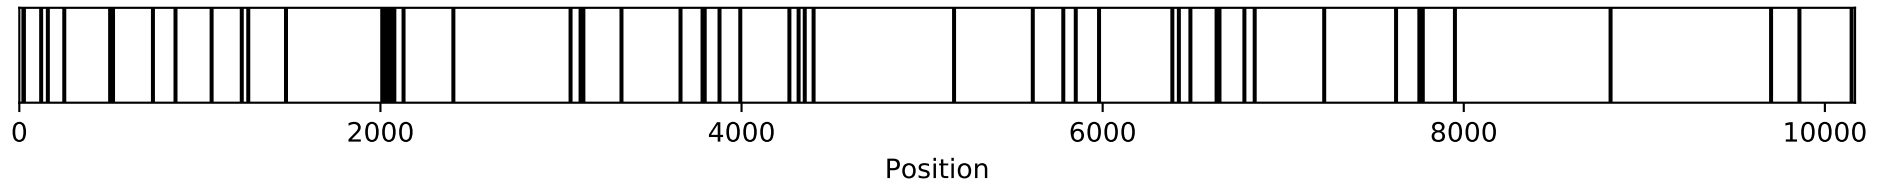

MA2 vs MM1  
Number of differences: 113

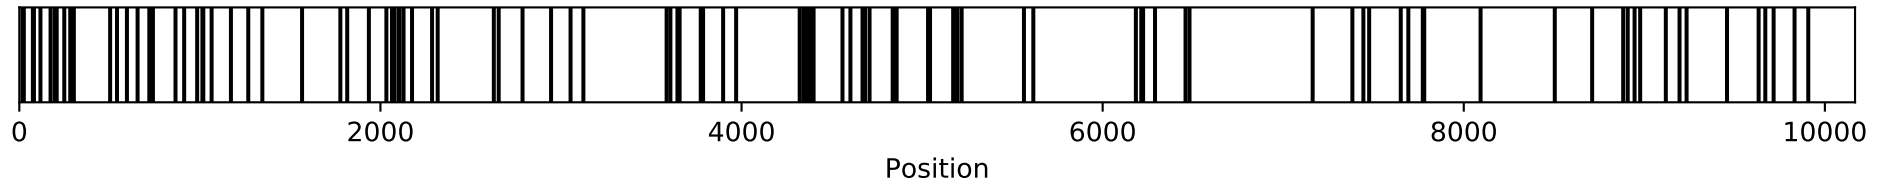

MA2 vs MM2  
Number of differences: 101

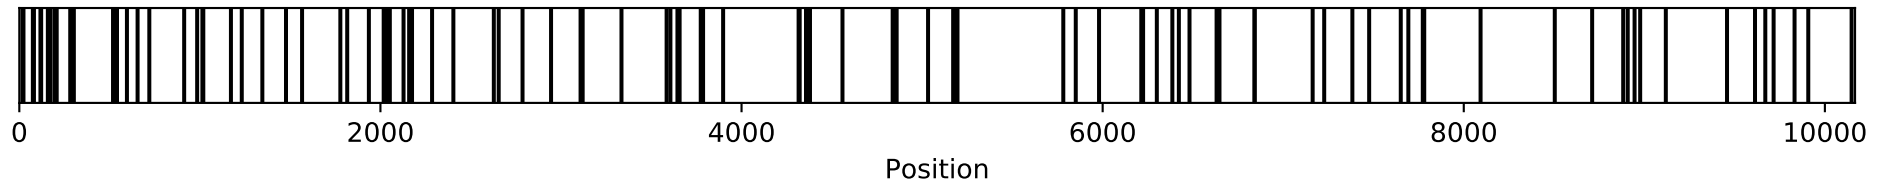

MM1 vs MM2  
Number of differences: 68

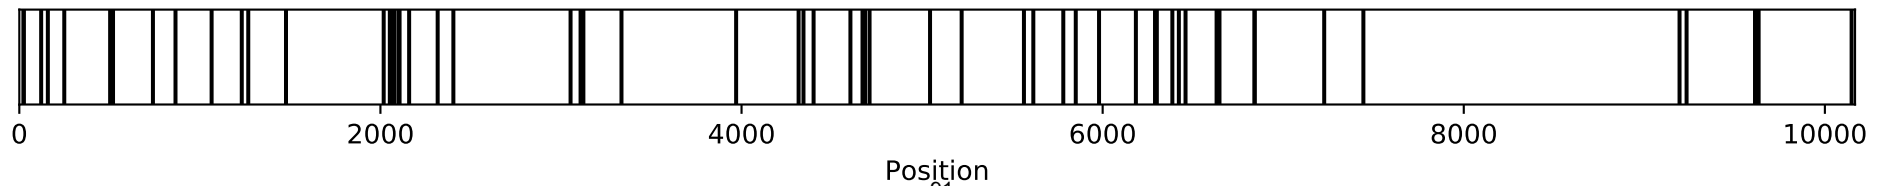

MA1 vs MA2  
Number of differences: 204

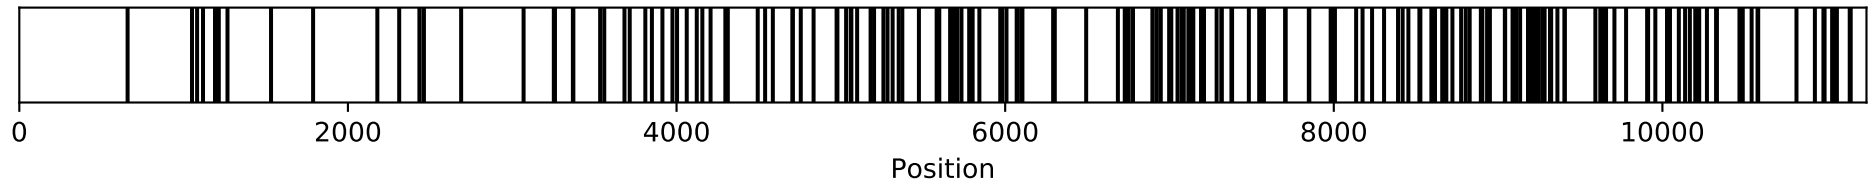

MA1 vs MM1  
Number of differences: 207

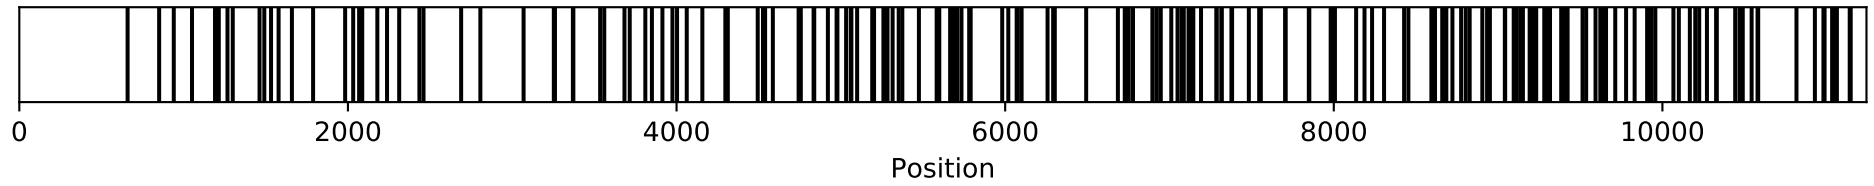

MA1 vs MM2  
Number of differences: 204

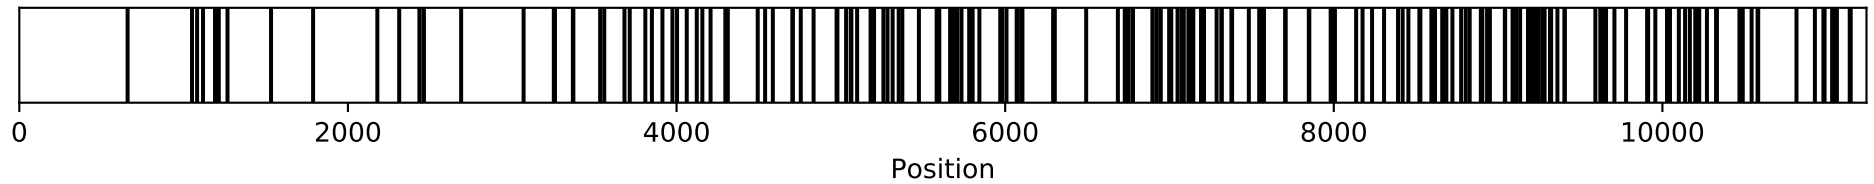

MA2 vs MM1  
Number of differences: 88

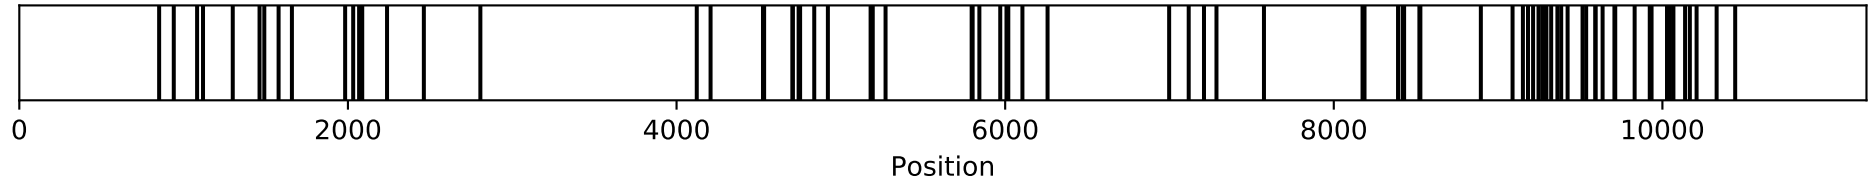

MA2 vs MM2  
Number of differences: 0

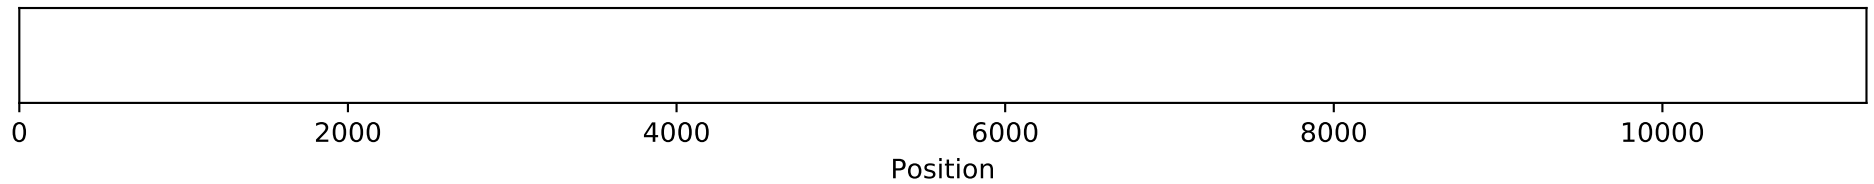

MM1 vs MM2  
Number of differences: 88

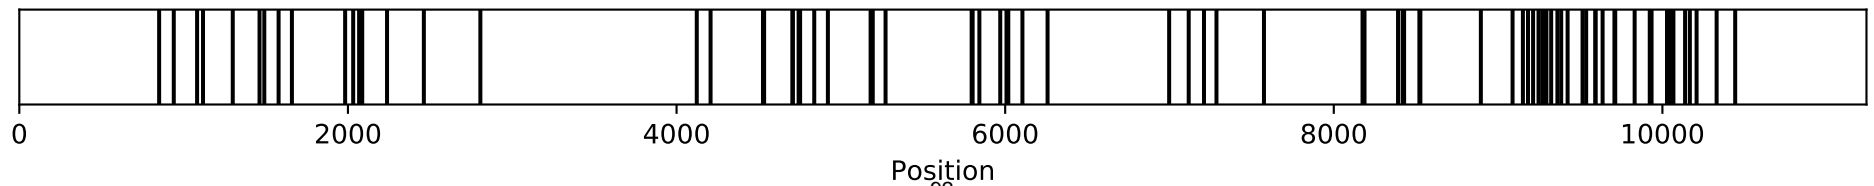

MA1 vs MA2  
Number of differences: 112

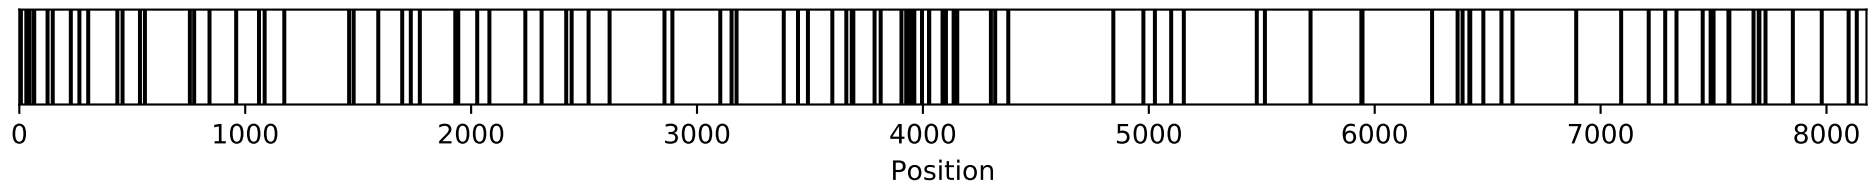

MA1 vs MM1  
Number of differences: 108

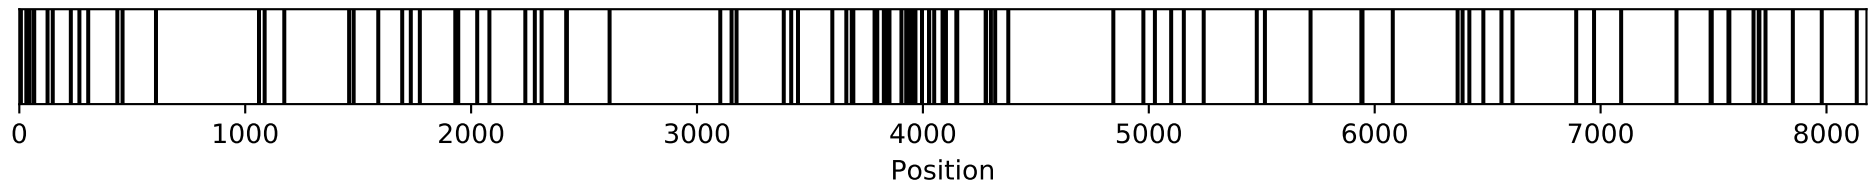

MA1 vs MM2  
Number of differences: 118

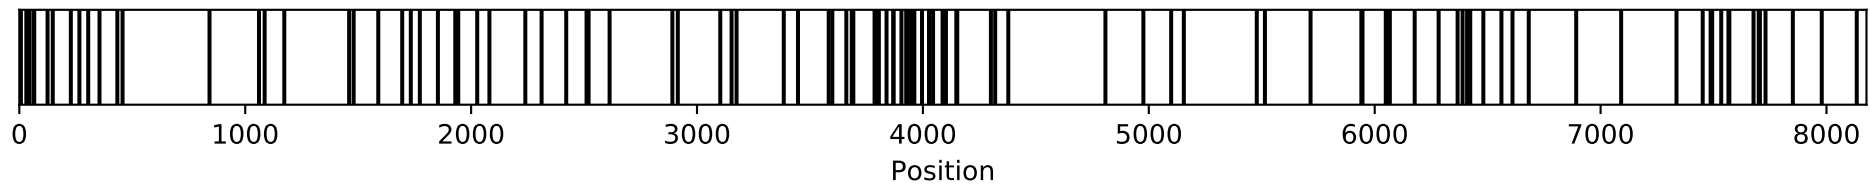

MA2 vs MM1  
Number of differences: 37

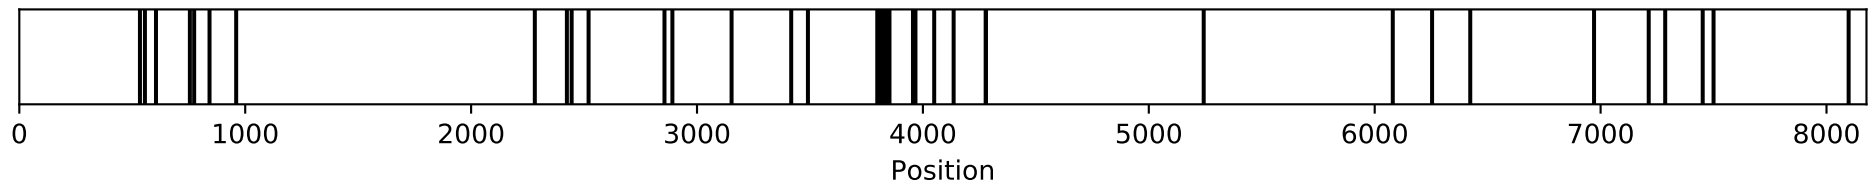

MA2 vs MM2  
Number of differences: 40

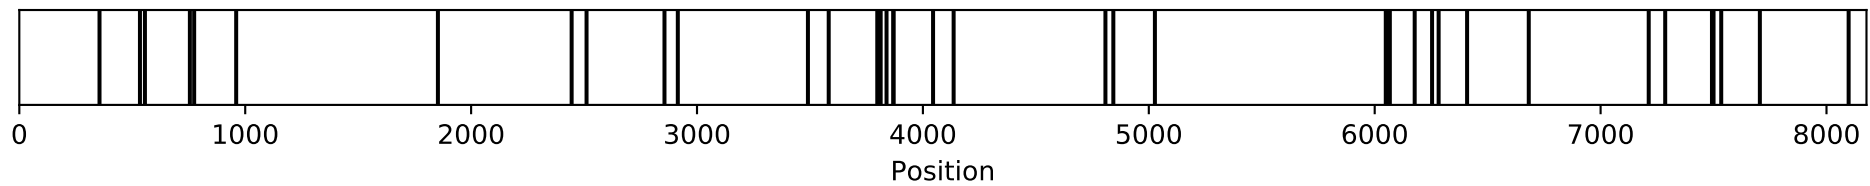

MM1 vs MM2  
Number of differences: 43

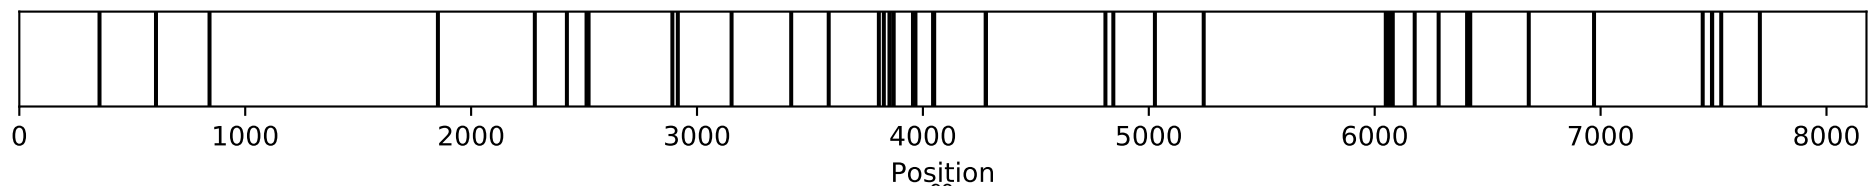

MA1 vs MA2  
Number of differences: 555

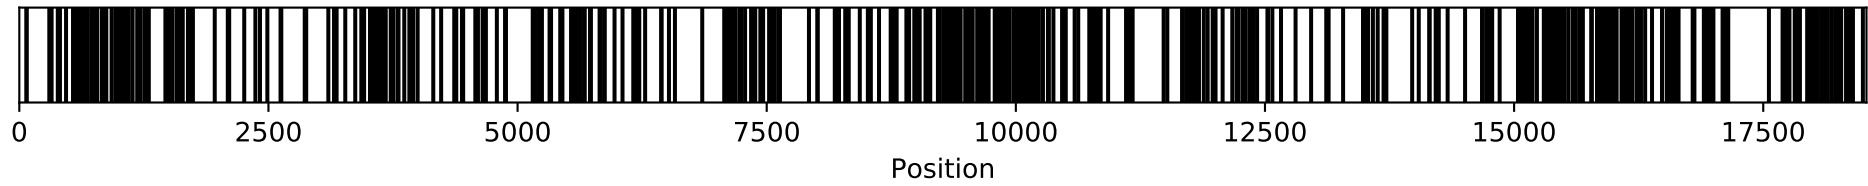

MA1 vs MM1  
Number of differences: 355

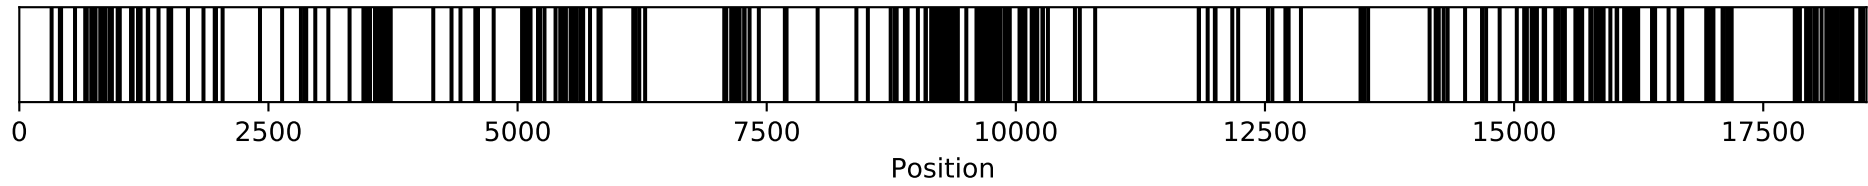

MA1 vs MM2  
Number of differences: 285

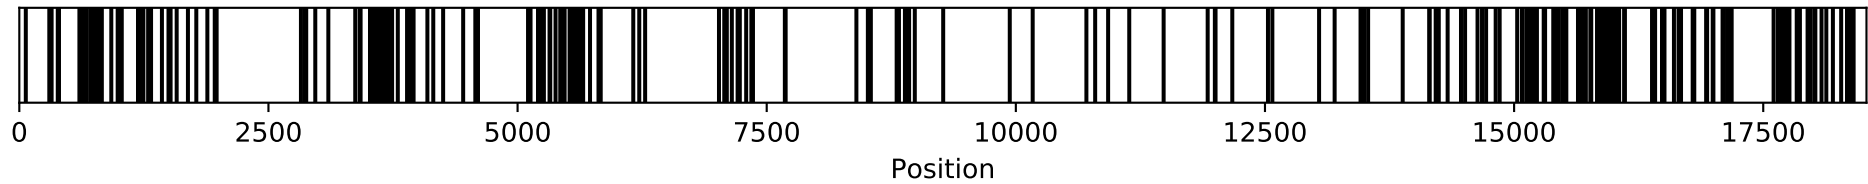

MA2 vs MM1  
Number of differences: 578

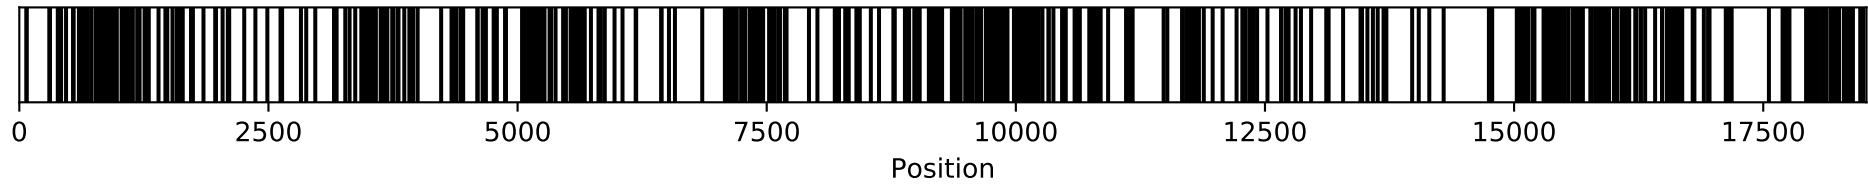

MA2 vs MM2  
Number of differences: 555

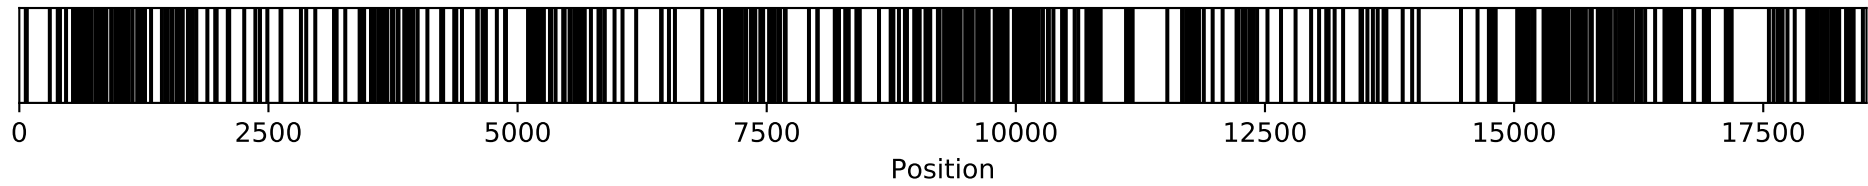

MM1 vs MM2  
Number of differences: 333

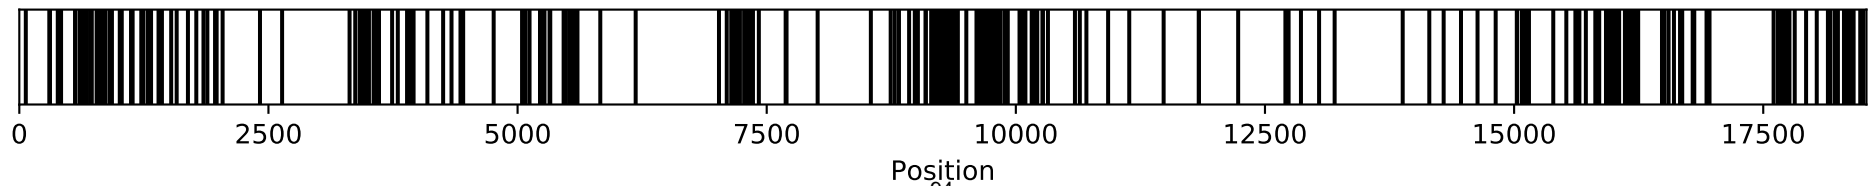

MA1 vs MA2  
Number of differences: 305

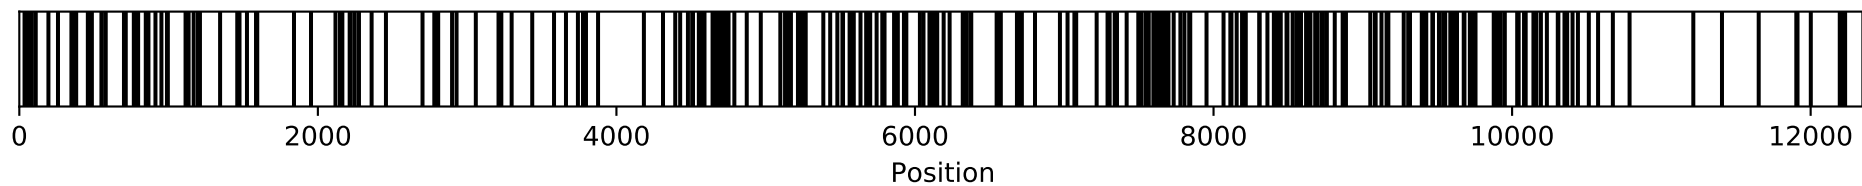

MA1 vs MM1  
Number of differences: 0

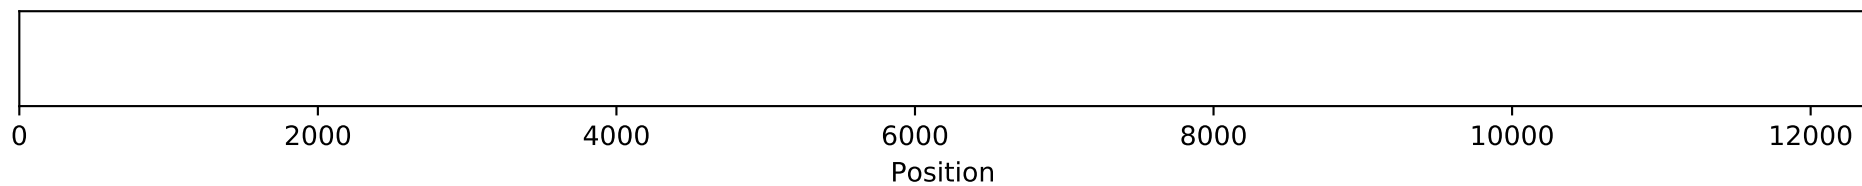

MA1 vs MM2  
Number of differences: 92

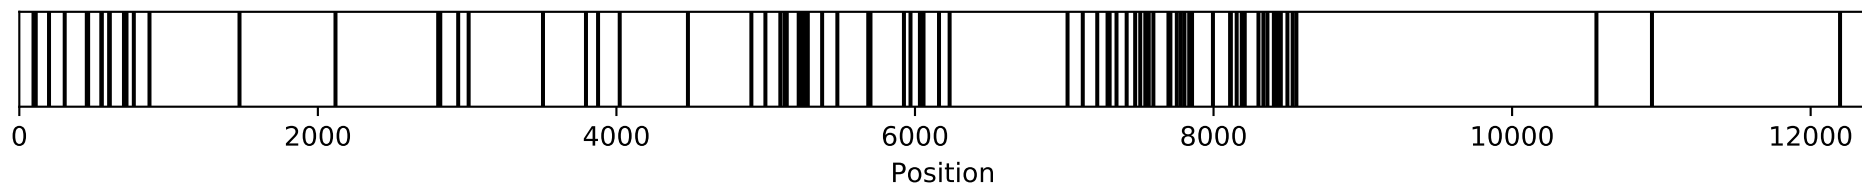

MA2 vs MM1  
Number of differences: 305

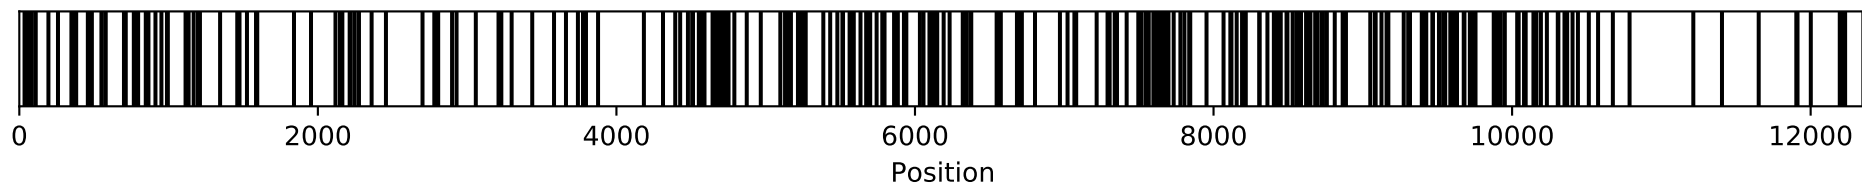

MA2 vs MM2  
Number of differences: 310

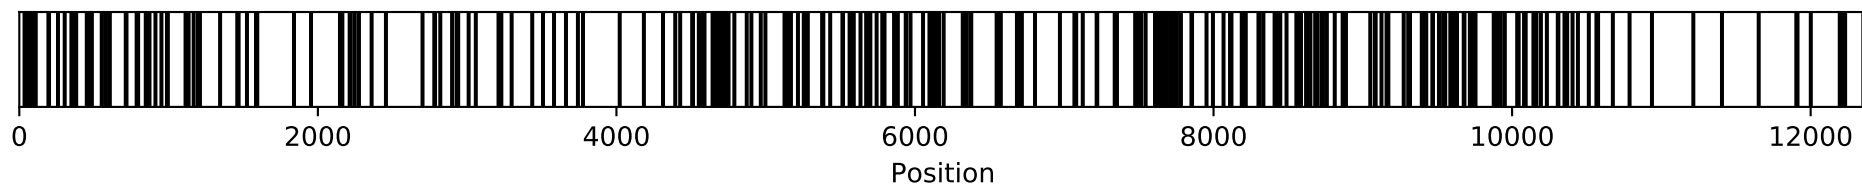

MM1 vs MM2  
Number of differences: 92

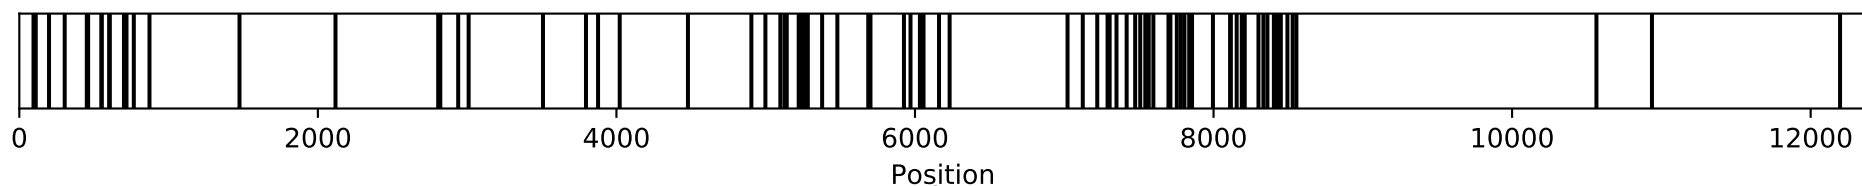

MA1 vs MA2  
Number of differences: 217

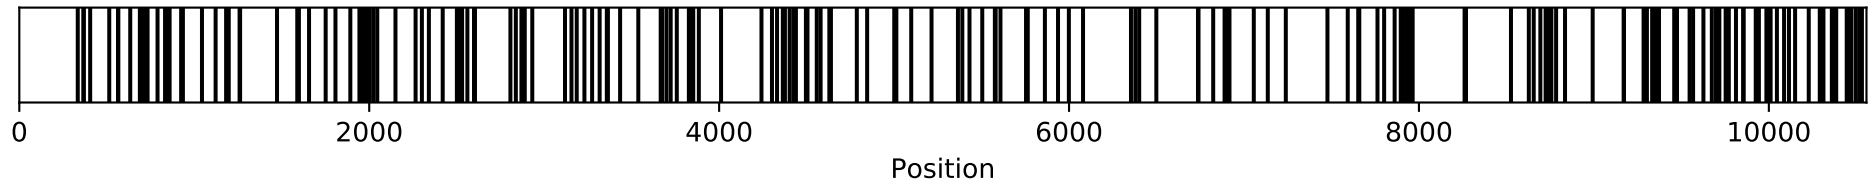

MA1 vs MM1  
Number of differences: 69

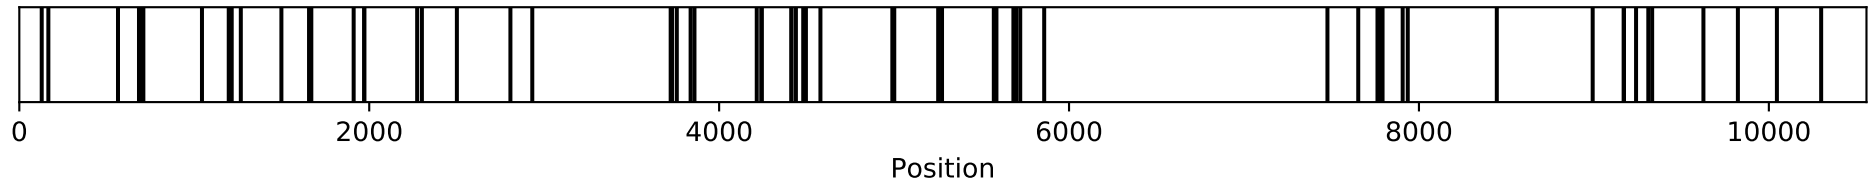

MA1 vs MM2  
Number of differences: 0

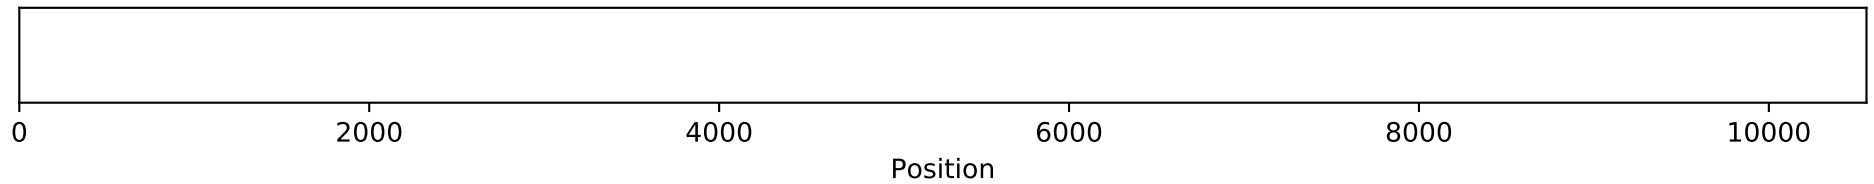

MA2 vs MM1  
Number of differences: 222

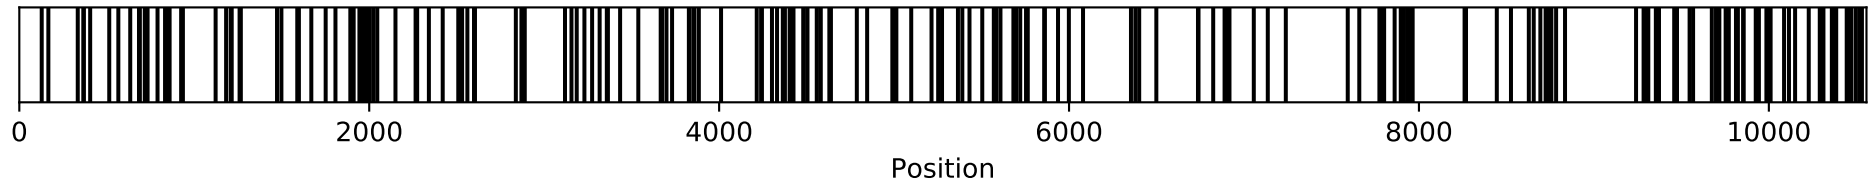

MA2 vs MM2  
Number of differences: 217

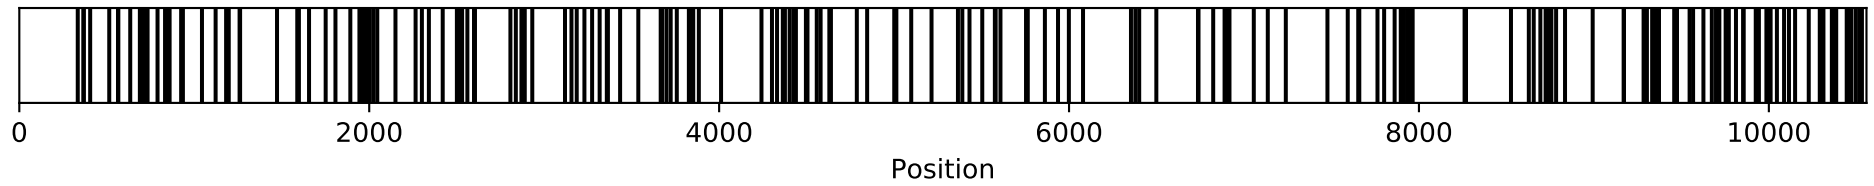

MM1 vs MM2  
Number of differences: 69

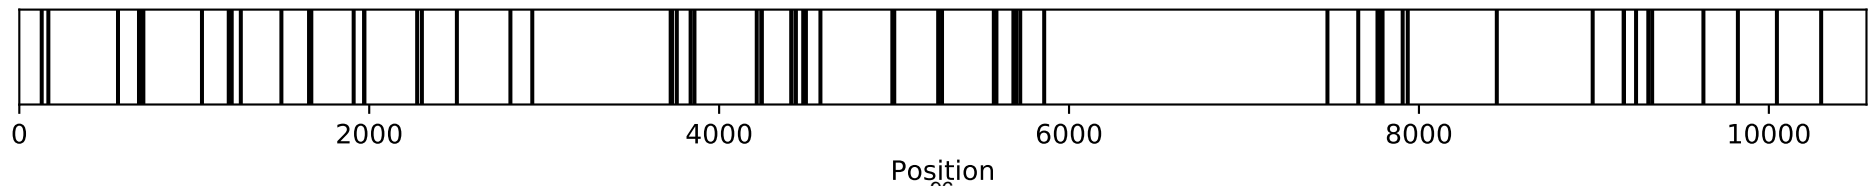

MA1 vs MA2  
Number of differences: 339

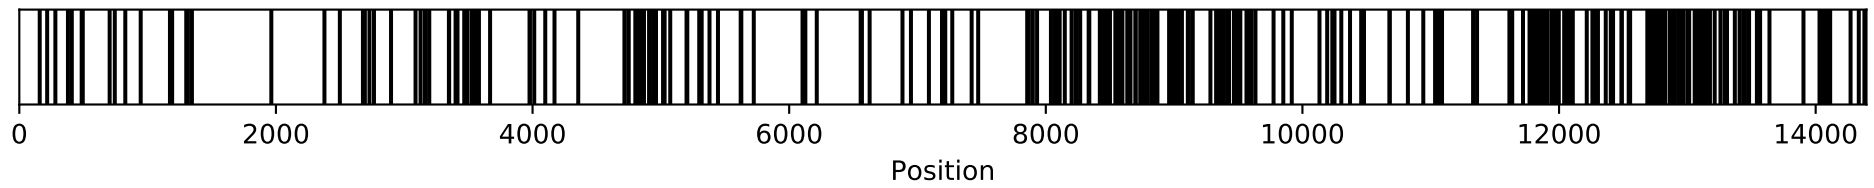

MA1 vs MM1  
Number of differences: 340

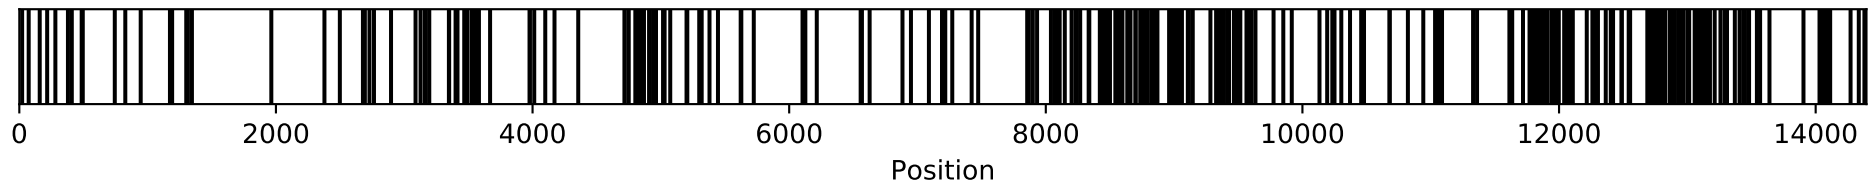

MA1 vs MM2  
Number of differences: 337

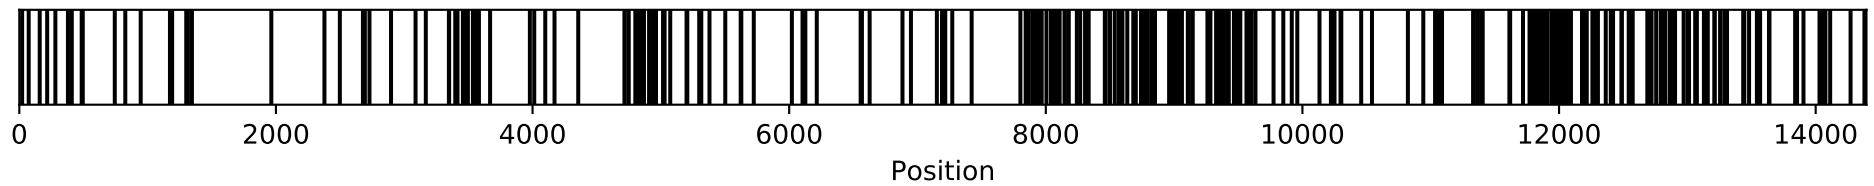

MA2 vs MM1  
Number of differences: 3

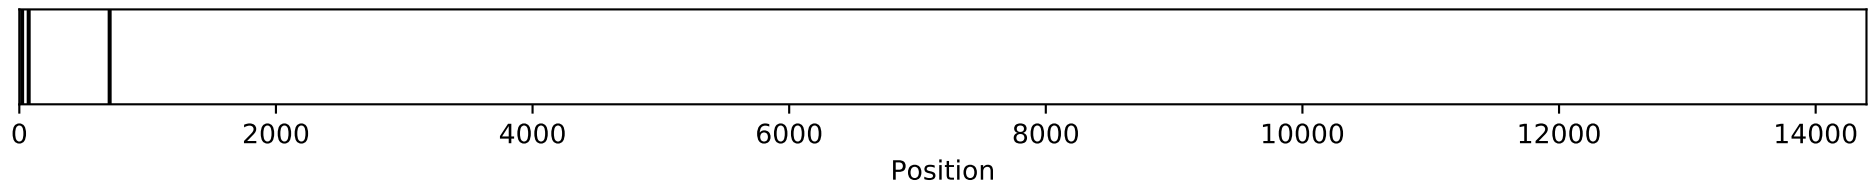

MA2 vs MM2  
Number of differences: 124

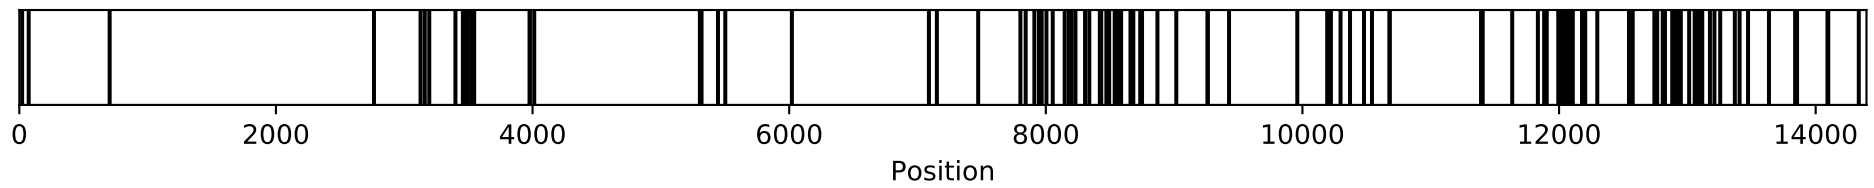

MM1 vs MM2  
Number of differences: 121

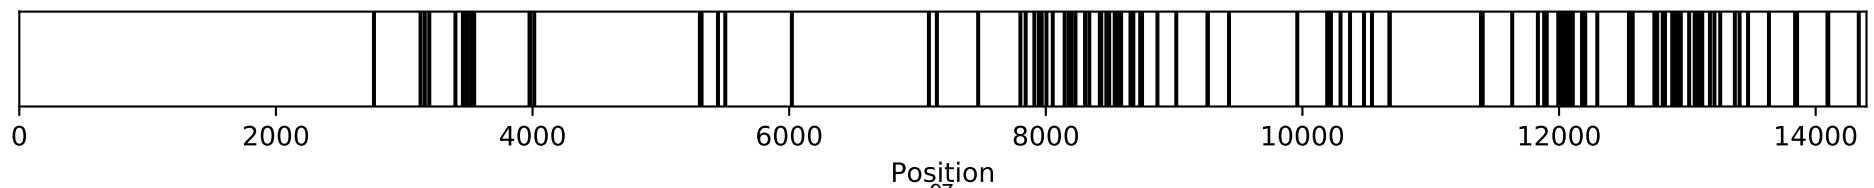

MA1 vs MA2  
Number of differences: 479

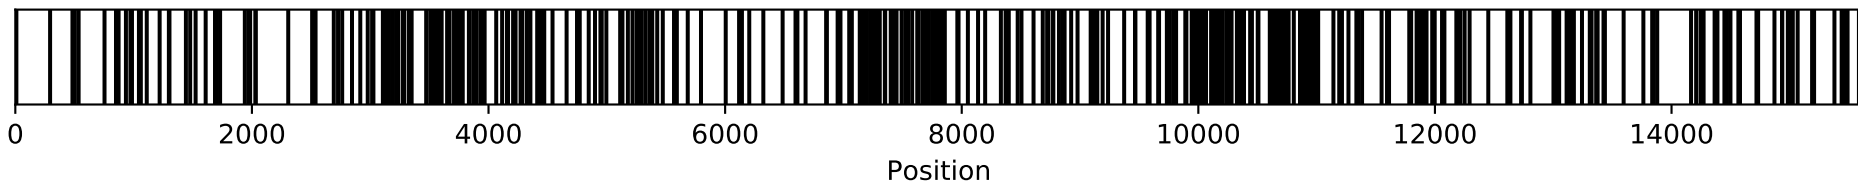

MA1 vs MM1  
Number of differences: 479

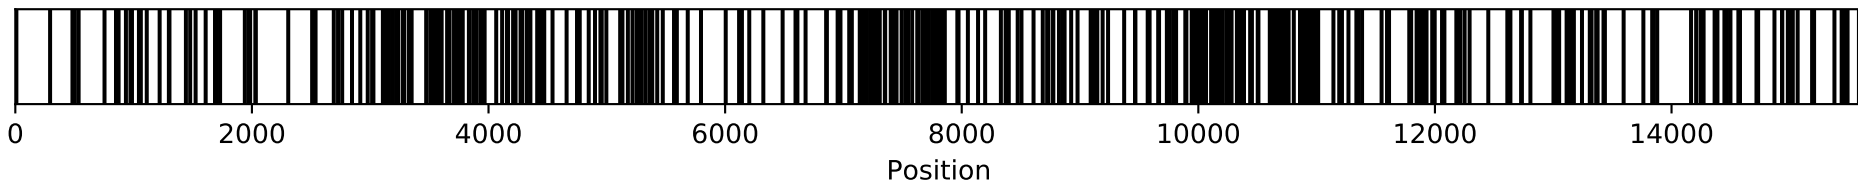

MA1 vs MM2  
Number of differences: 466

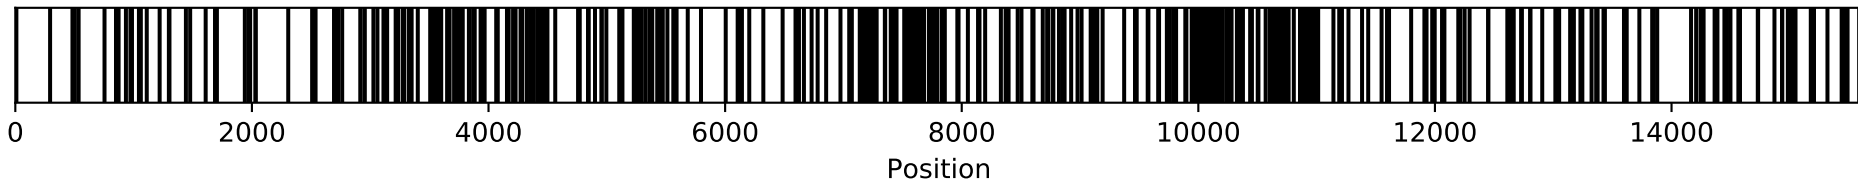

MA2 vs MM1  
Number of differences: 0

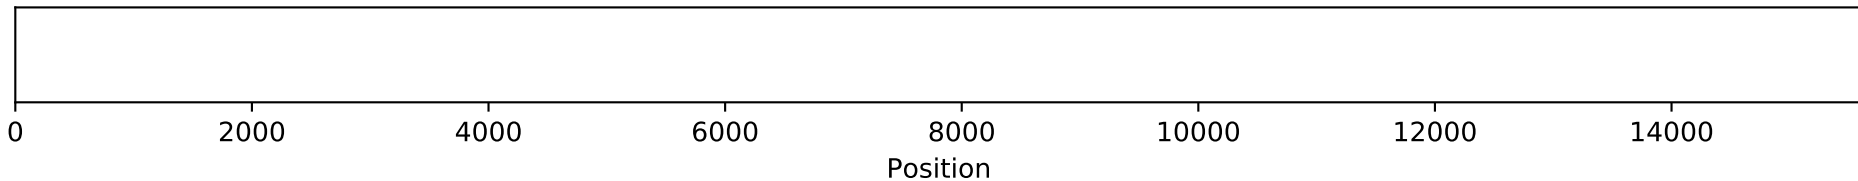

MA2 vs MM2  
Number of differences: 155

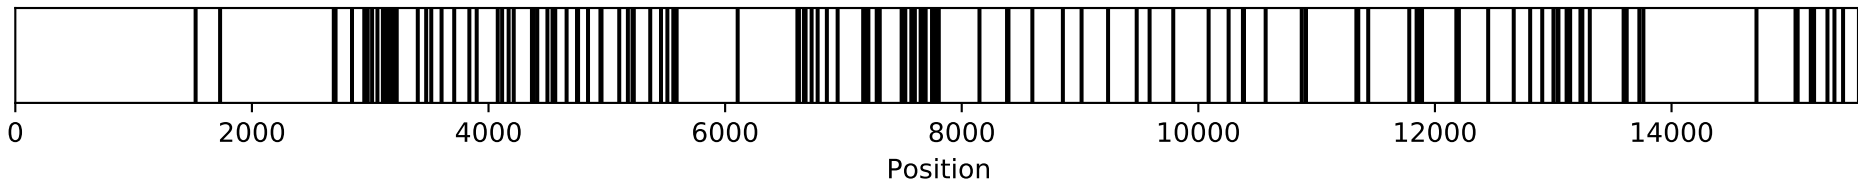

MM1 vs MM2  
Number of differences: 155

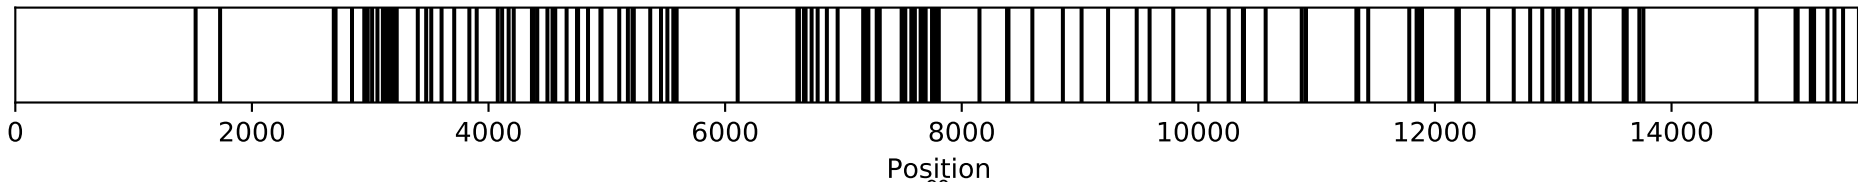



MA1 vs MA2  
Number of differences: 261

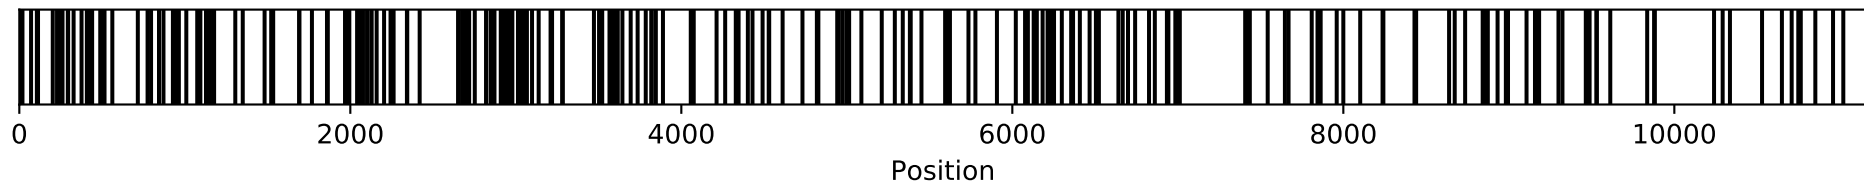

MA1 vs MM1  
Number of differences: 252

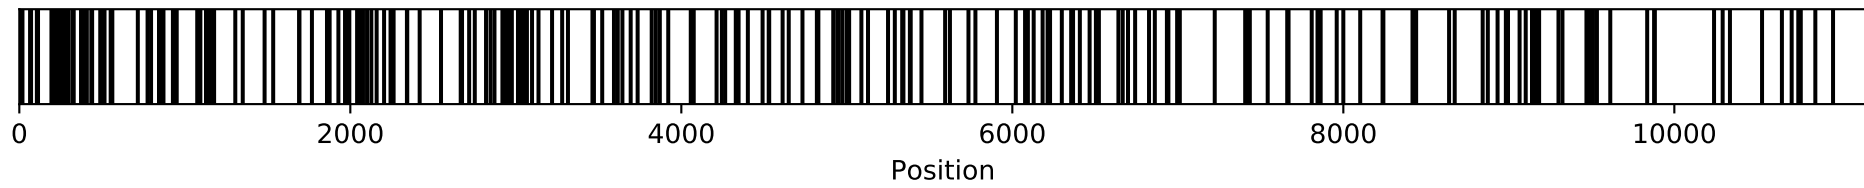

MA1 vs MM2  
Number of differences: 264

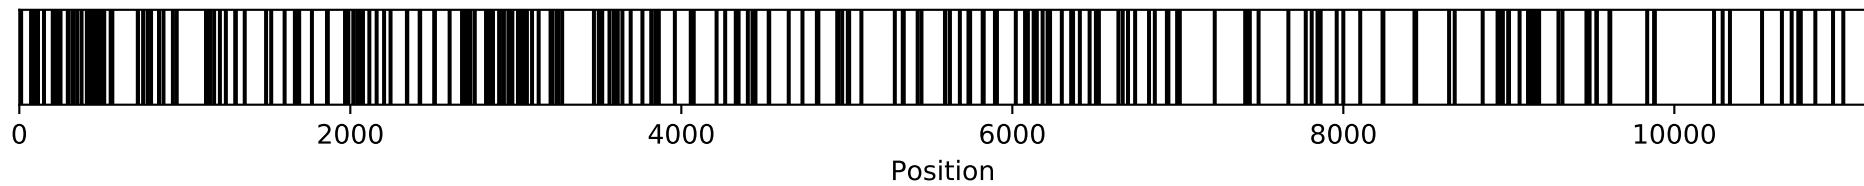

MA2 vs MM1  
Number of differences: 97

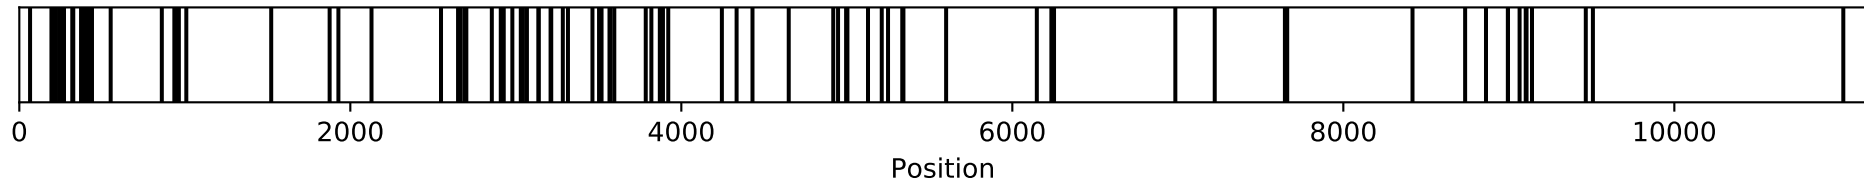

MA2 vs MM2  
Number of differences: 142

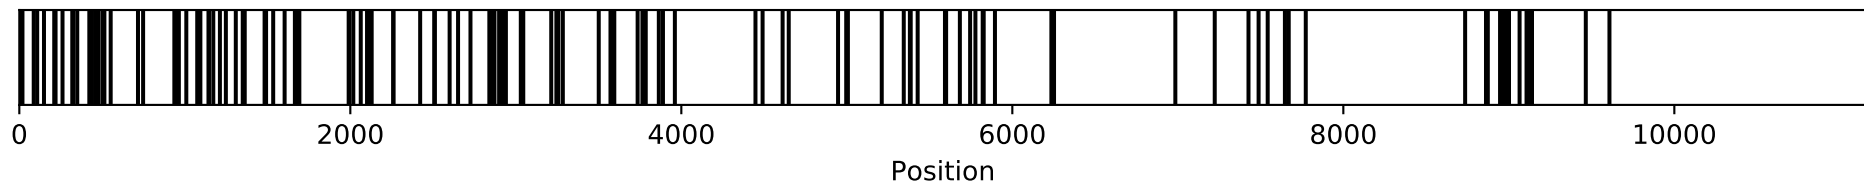

MM1 vs MM2  
Number of differences: 149

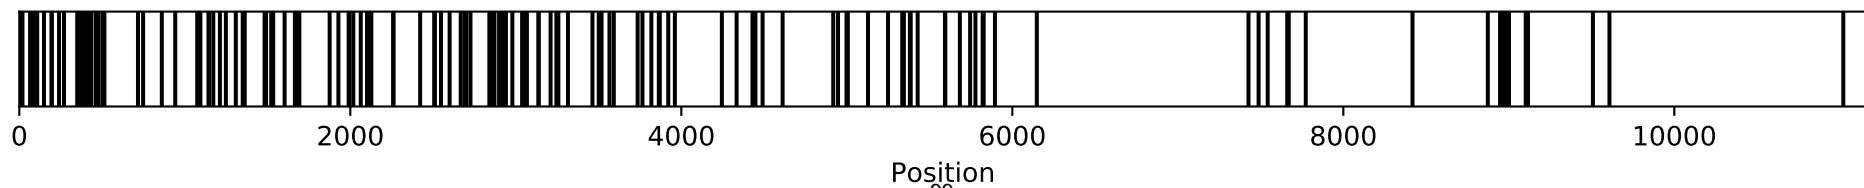

MA1 vs MA2  
Number of differences: 280

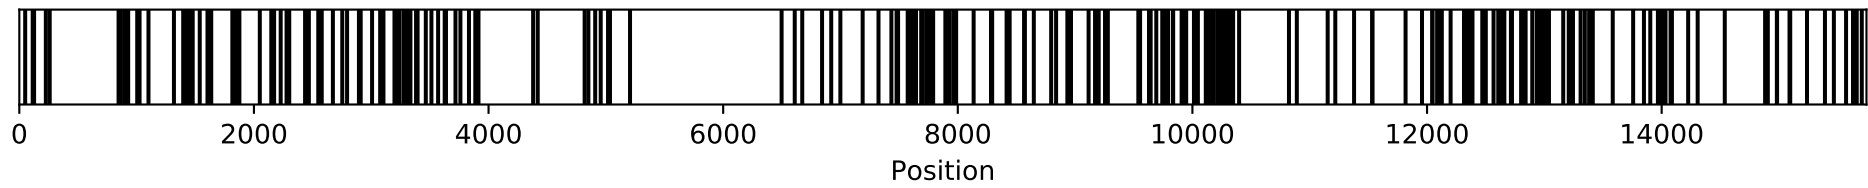

MA1 vs MM1  
Number of differences: 0

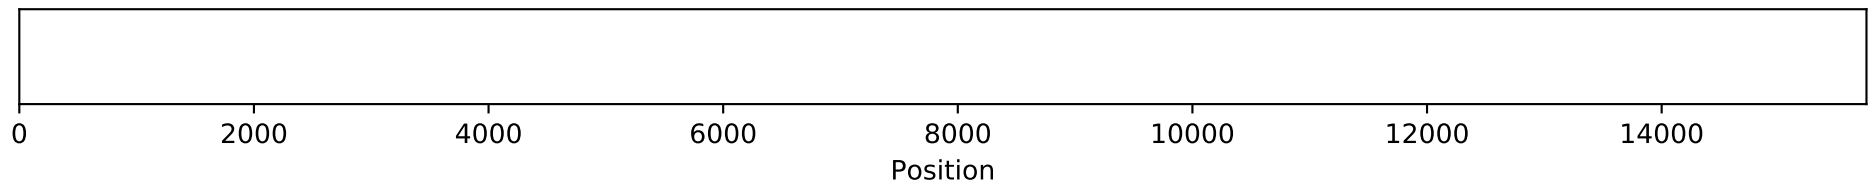

MA1 vs MM2  
Number of differences: 100

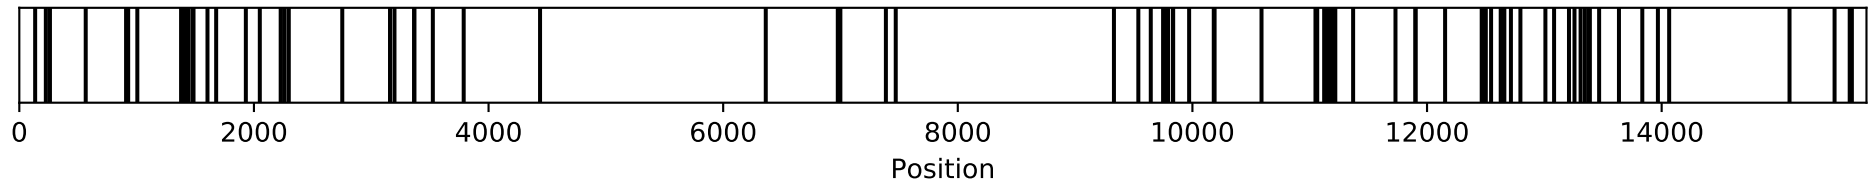

MA2 vs MM1  
Number of differences: 280

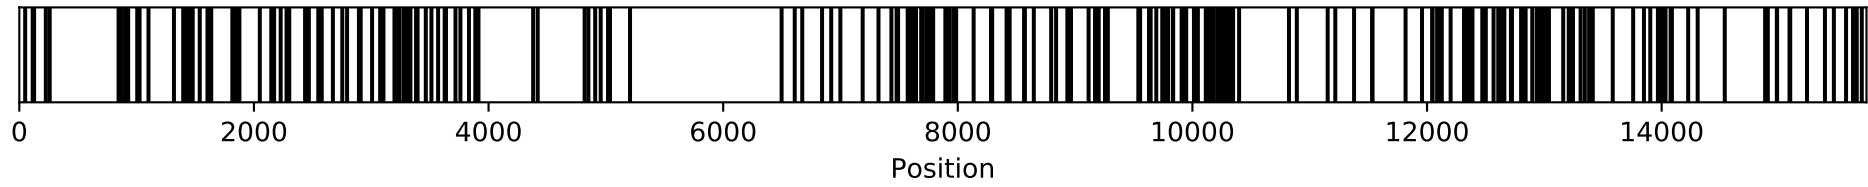

MA2 vs MM2  
Number of differences: 305

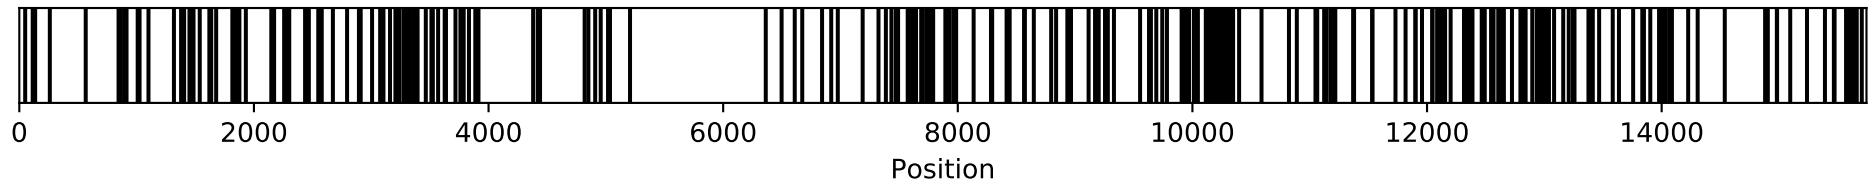

MM1 vs MM2  
Number of differences: 100

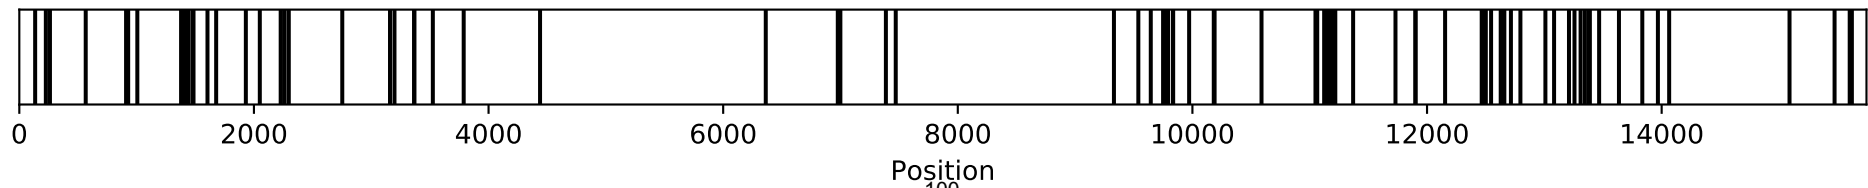

MA1 vs MA2  
Number of differences: 0

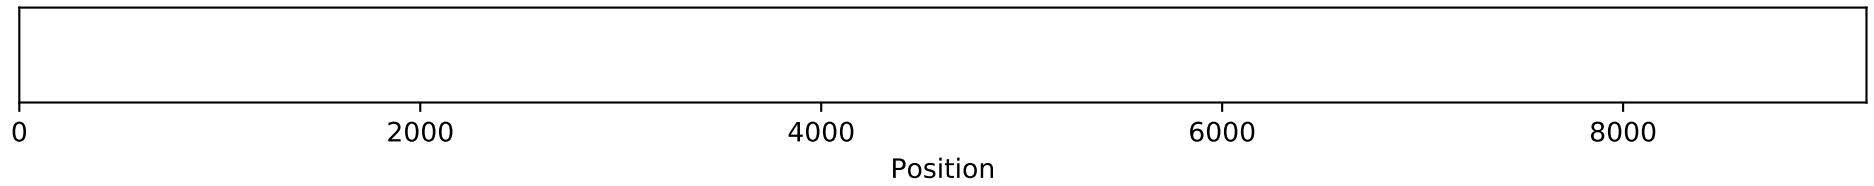

MA1 vs MM1  
Number of differences: 288

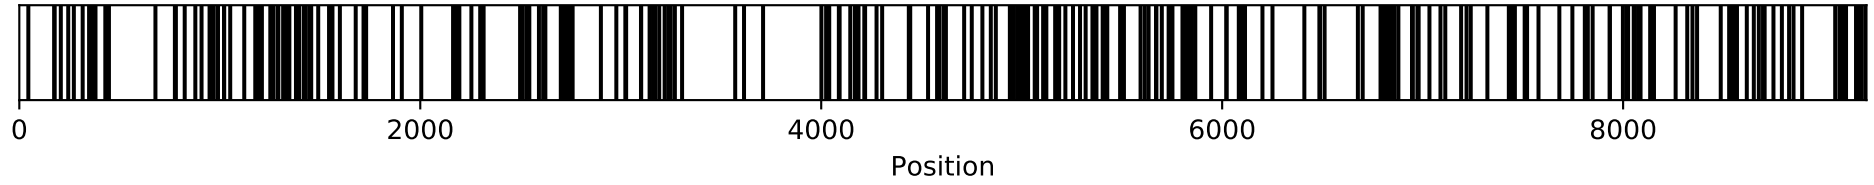

MA1 vs MM2  
Number of differences: 220

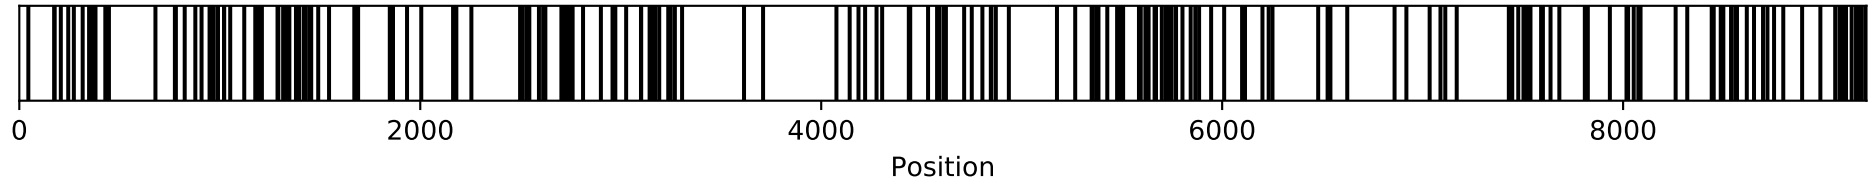

MA2 vs MM1  
Number of differences: 288

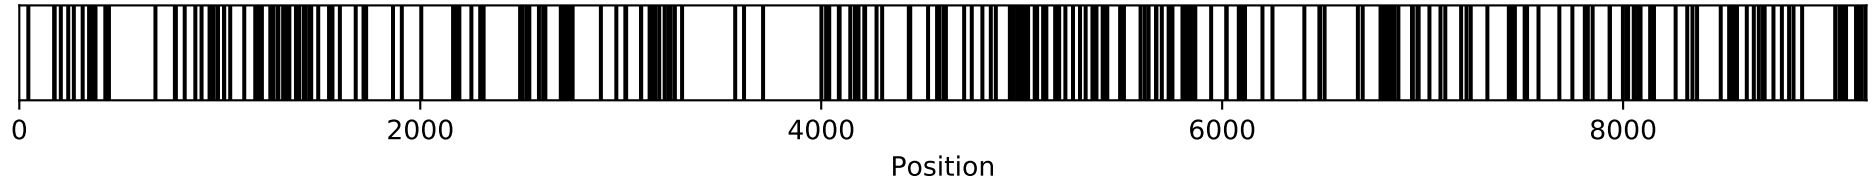

MA2 vs MM2  
Number of differences: 220

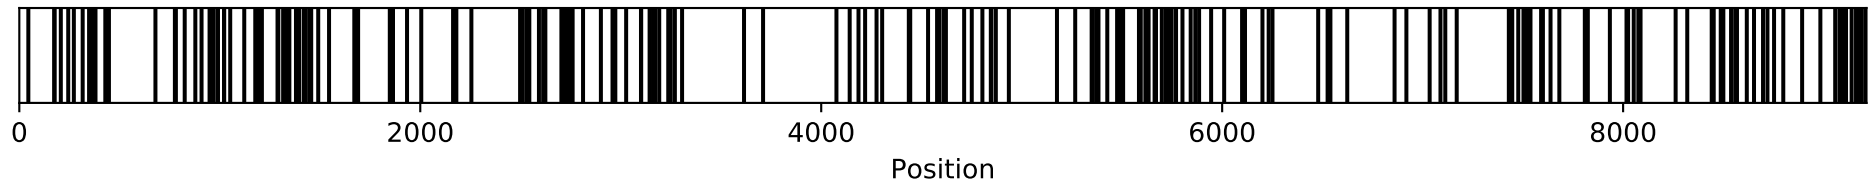

MM1 vs MM2  
Number of differences: 189

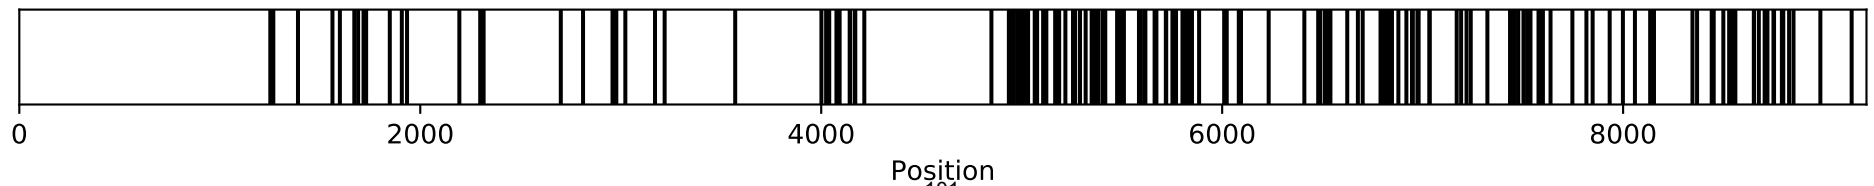

MA1 vs MA2  
Number of differences: 196

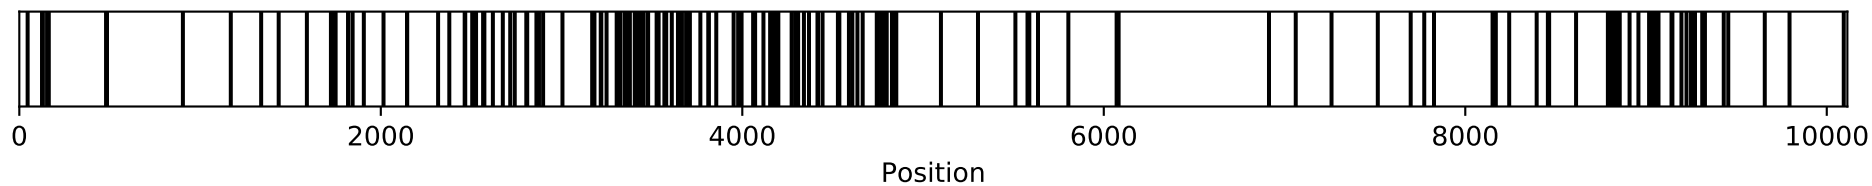

MA1 vs MM1  
Number of differences: 196

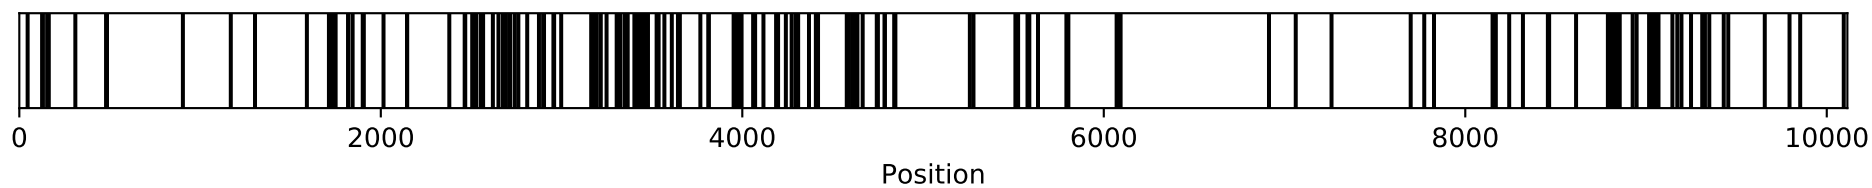

MA1 vs MM2  
Number of differences: 203

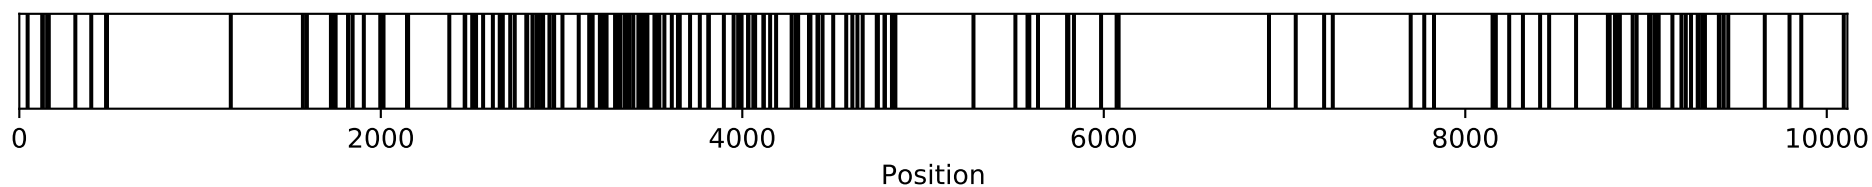

MA2 vs MM1  
Number of differences: 97

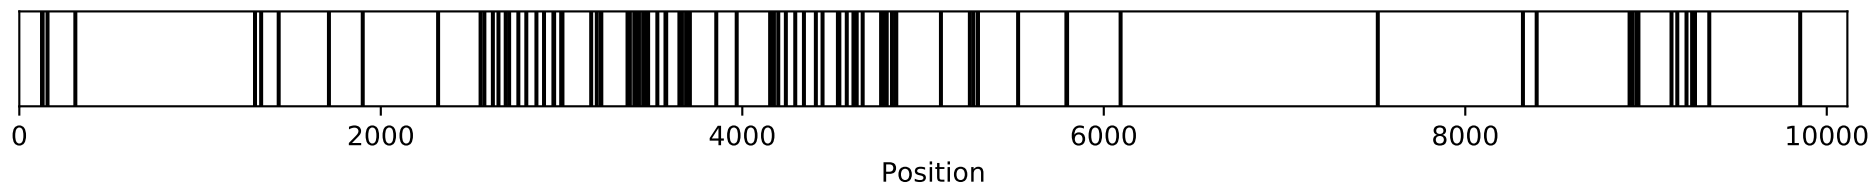

MA2 vs MM2  
Number of differences: 113

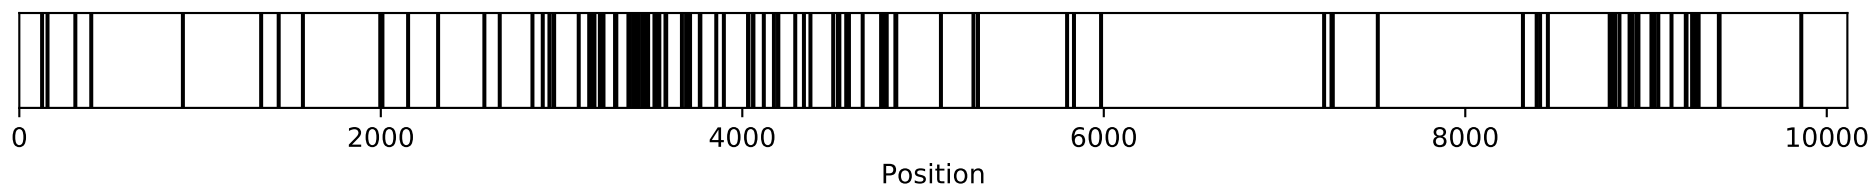

MM1 vs MM2  
Number of differences: 102

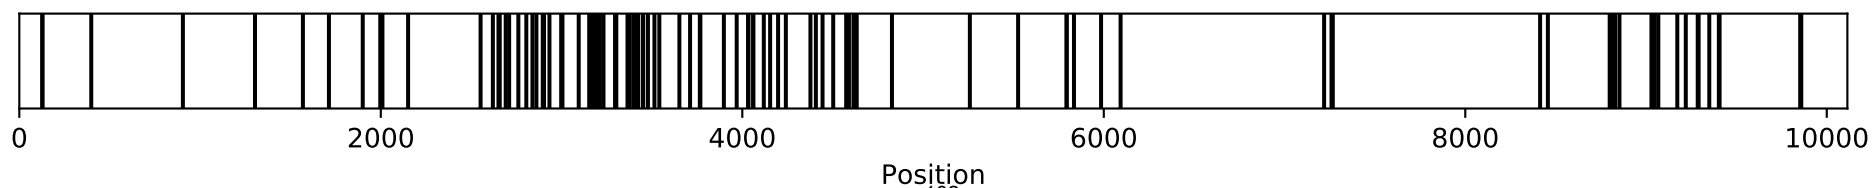

MA1 vs MA2  
Number of differences: 229

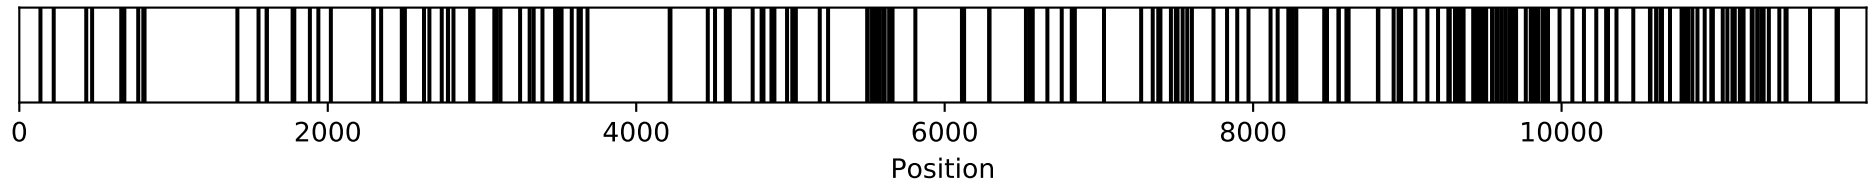

MA1 vs MM1  
Number of differences: 230

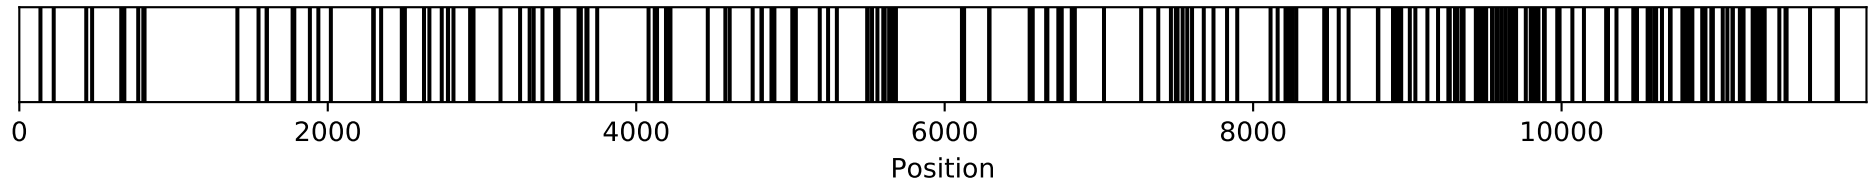

MA1 vs MM2  
Number of differences: 245

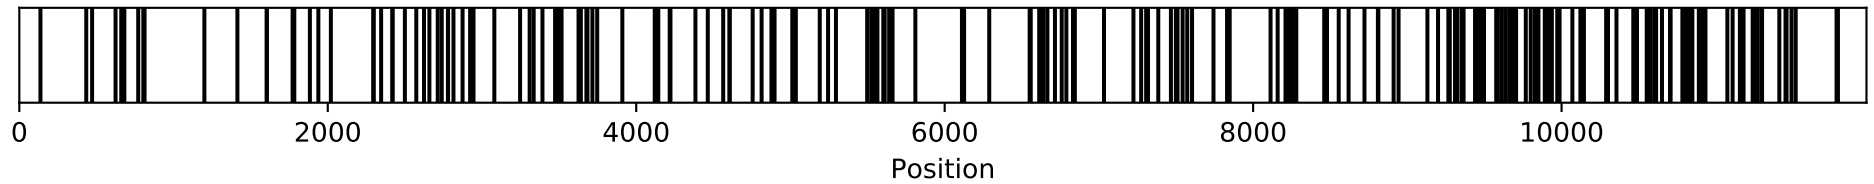

MA2 vs MM1  
Number of differences: 79

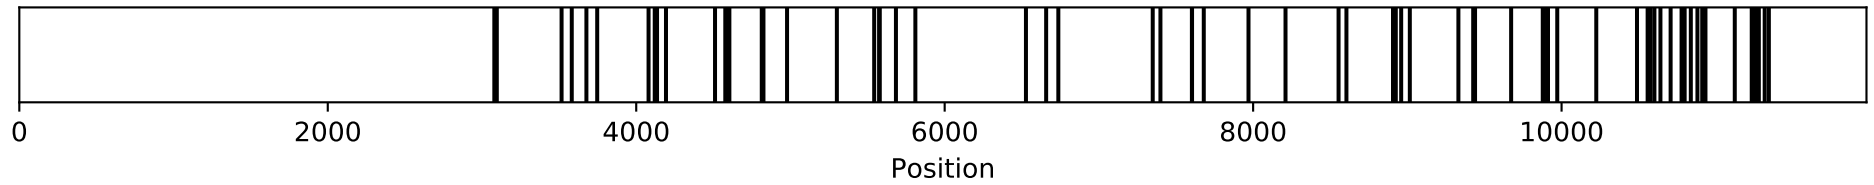

MA2 vs MM2  
Number of differences: 123

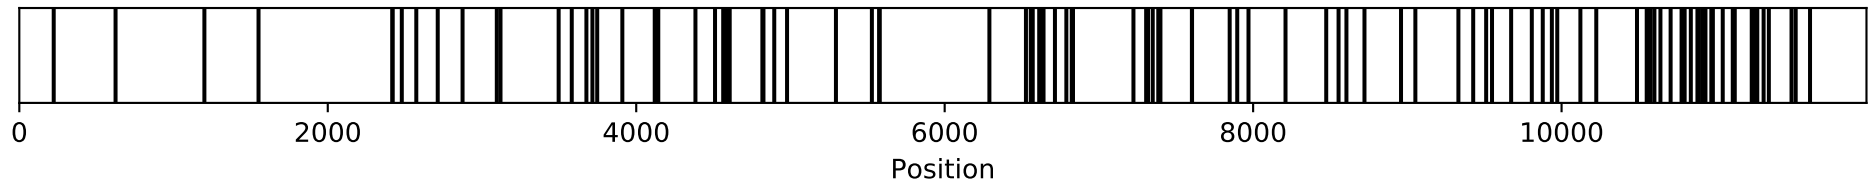

MM1 vs MM2  
Number of differences: 90

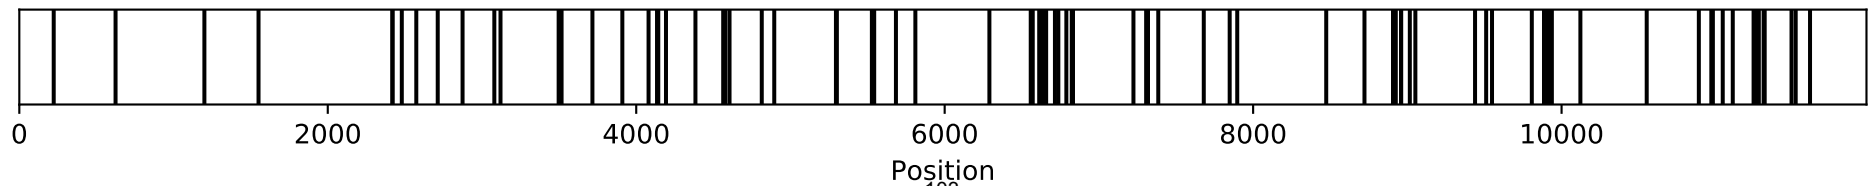

MA1 vs MA2  
Number of differences: 214

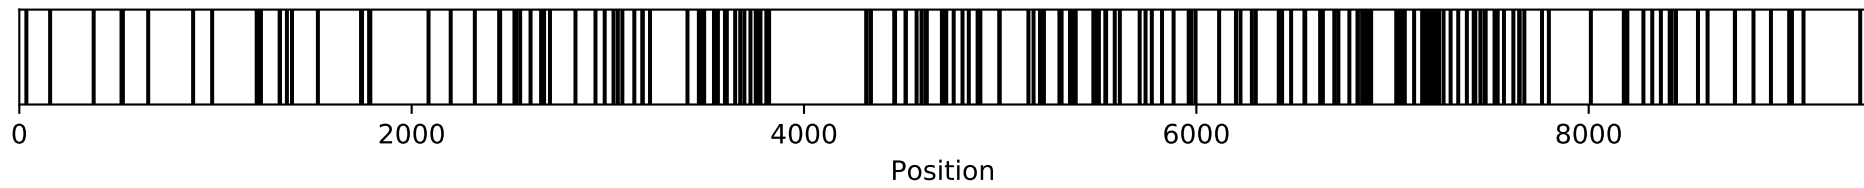

MA1 vs MM1  
Number of differences: 120

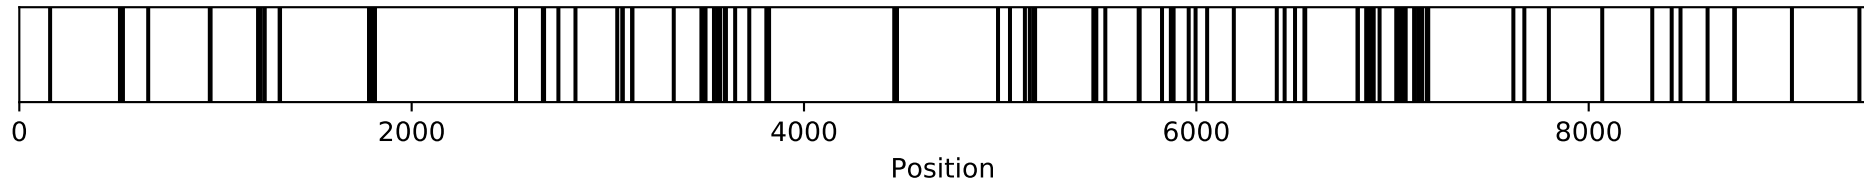

MA1 vs MM2  
Number of differences: 120

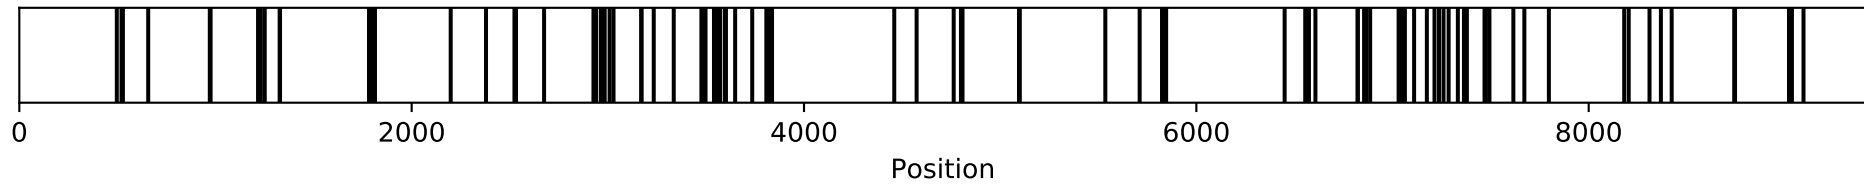

MA2 vs MM1  
Number of differences: 216

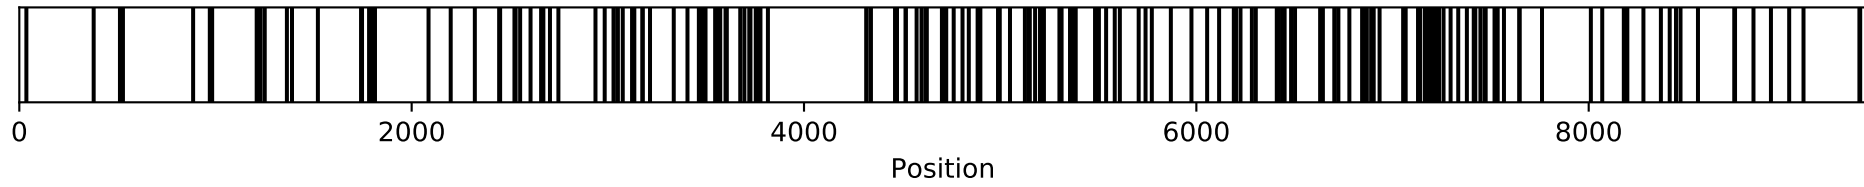

MA2 vs MM2  
Number of differences: 217

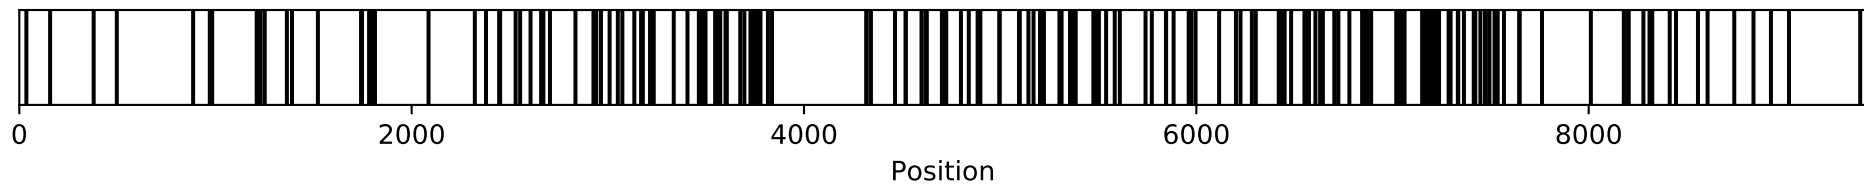

MM1 vs MM2  
Number of differences: 99

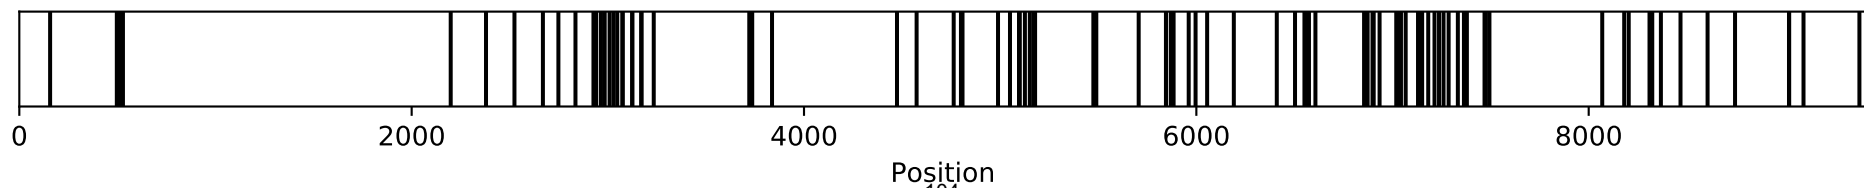

MA1 vs MA2  
Number of differences: 0

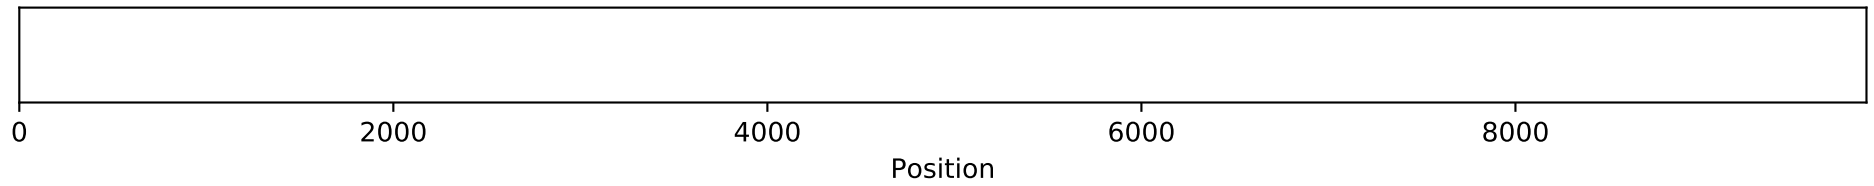

MA1 vs MM1  
Number of differences: 208

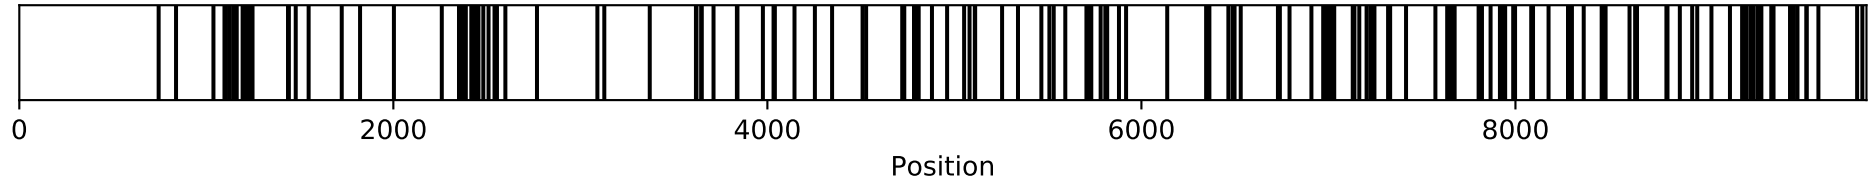

MA1 vs MM2  
Number of differences: 180

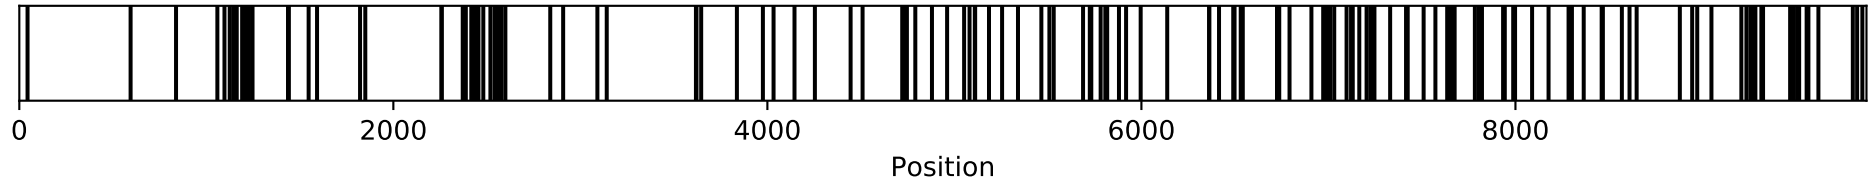

MA2 vs MM1  
Number of differences: 208

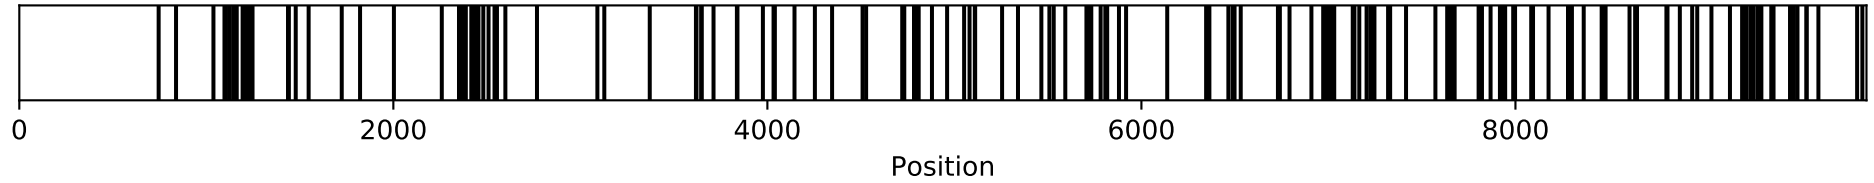

MA2 vs MM2  
Number of differences: 180

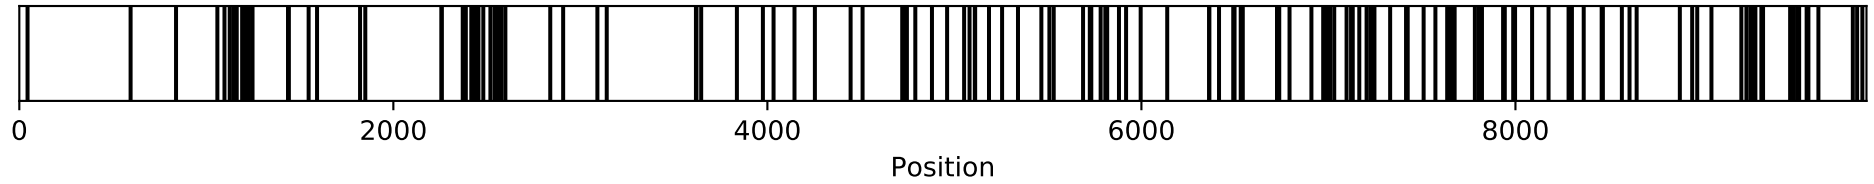

MM1 vs MM2  
Number of differences: 126

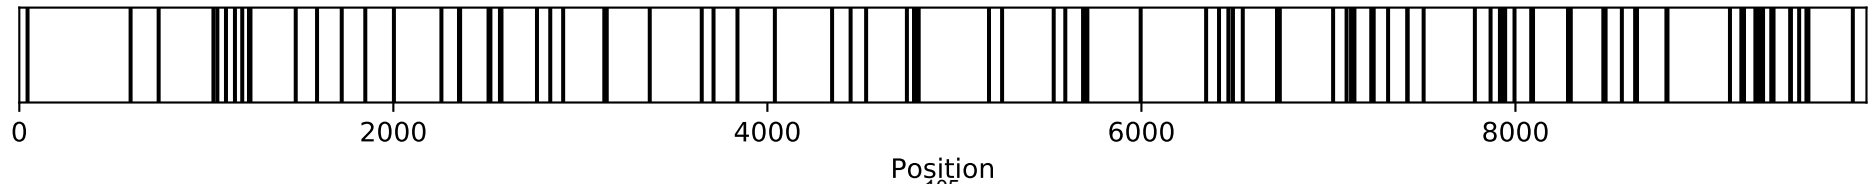

MA1 vs MA2  
Number of differences: 281

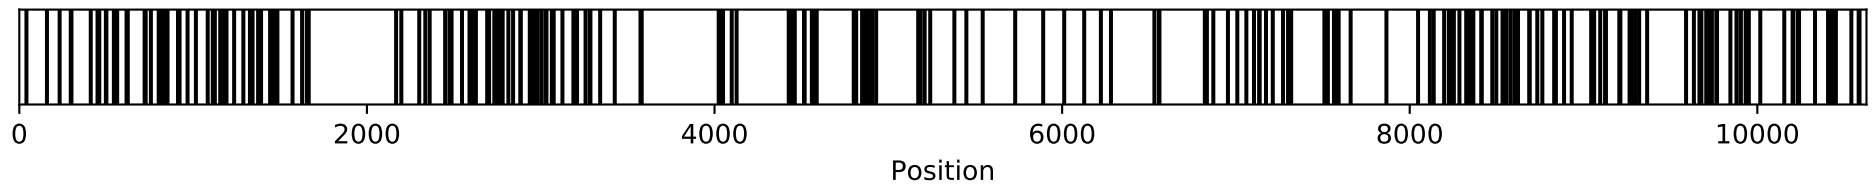

MA1 vs MM1  
Number of differences: 113

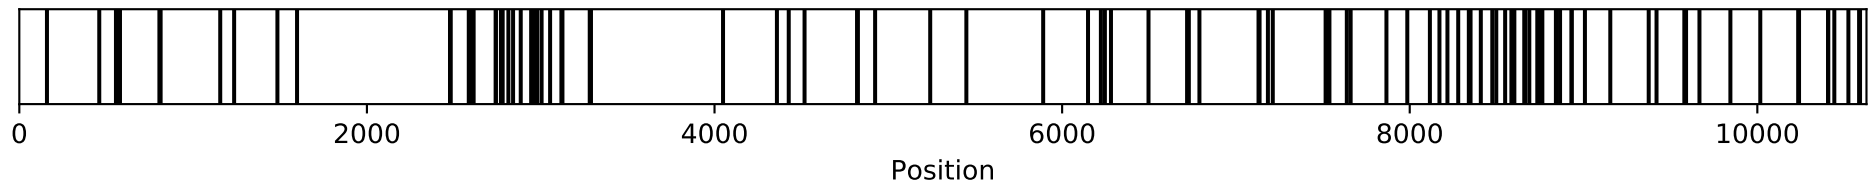

MA1 vs MM2  
Number of differences: 0

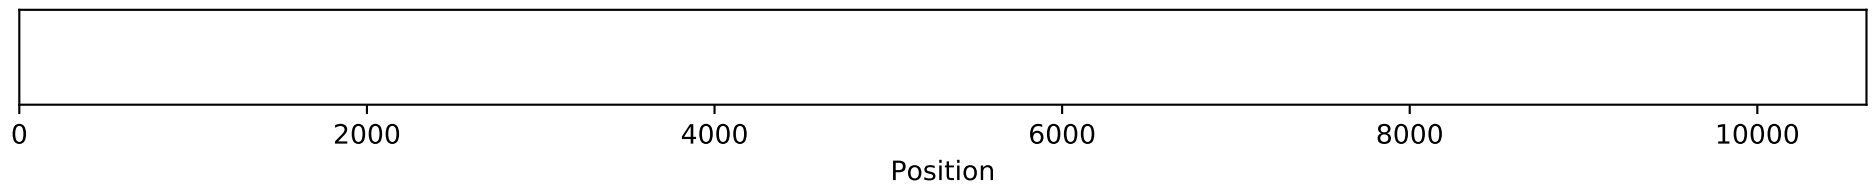

MA2 vs MM1  
Number of differences: 269

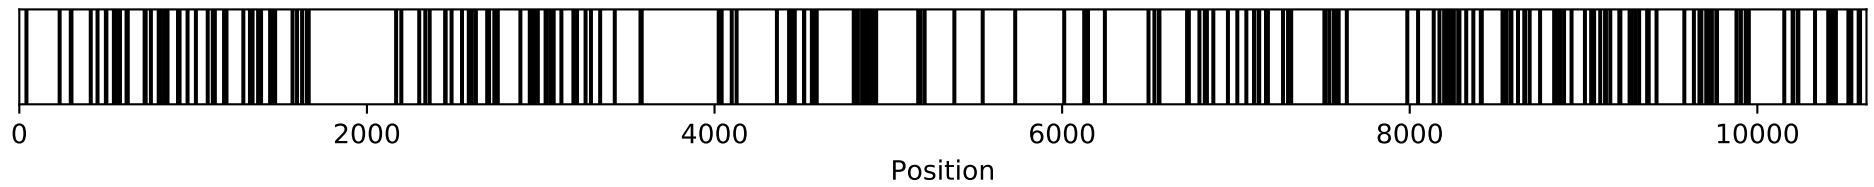

MA2 vs MM2  
Number of differences: 281

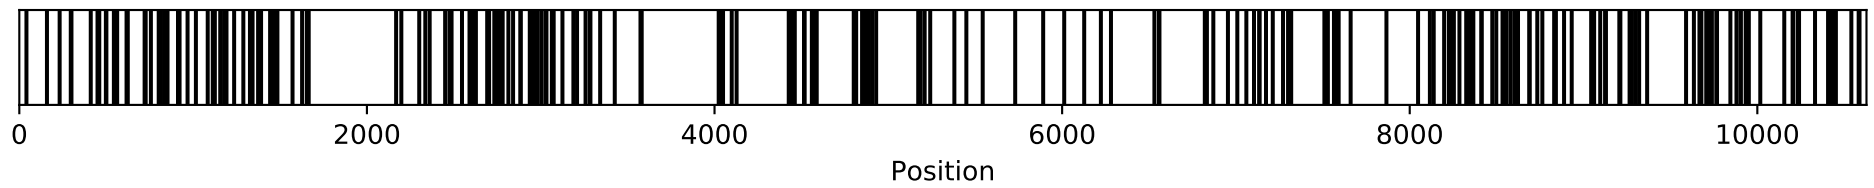

MM1 vs MM2  
Number of differences: 113

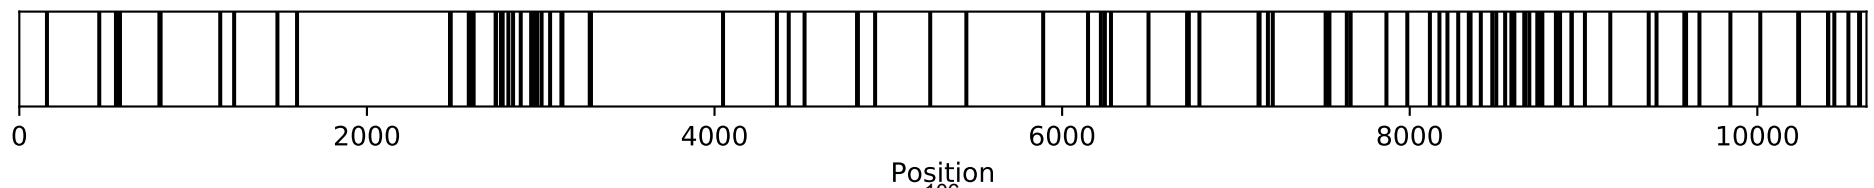



MA1 vs MA2  
Number of differences: 171

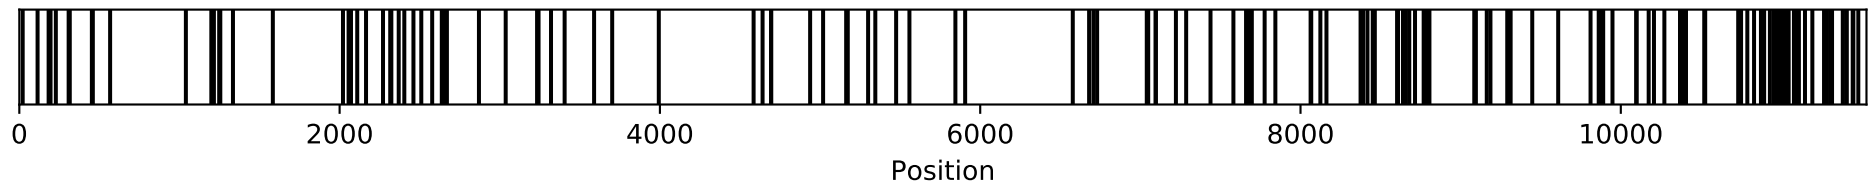

MA1 vs MM1  
Number of differences: 85

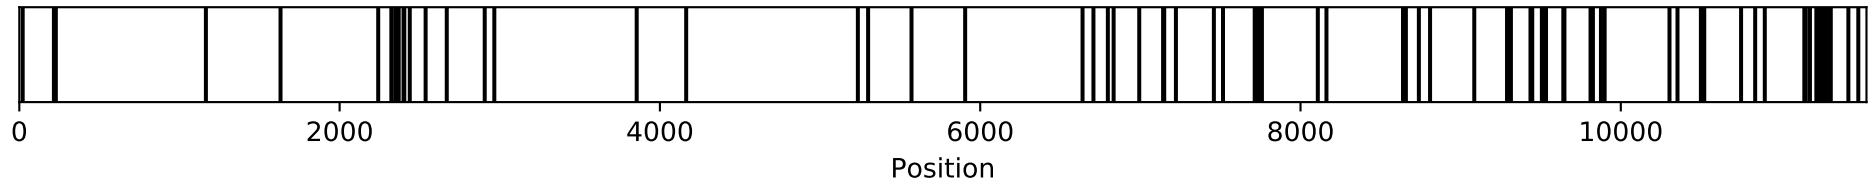

MA1 vs MM2  
Number of differences: 62

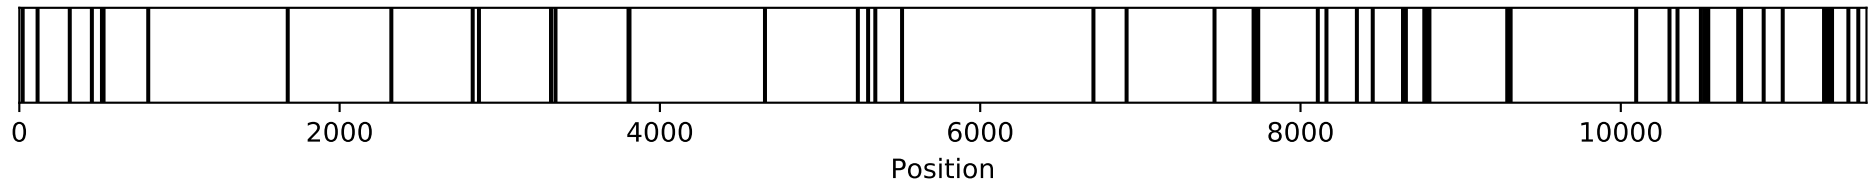

MA2 vs MM1  
Number of differences: 197

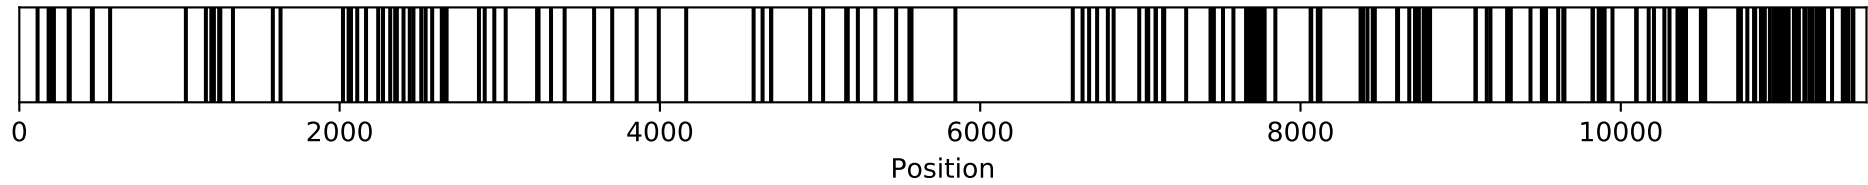

MA2 vs MM2  
Number of differences: 172

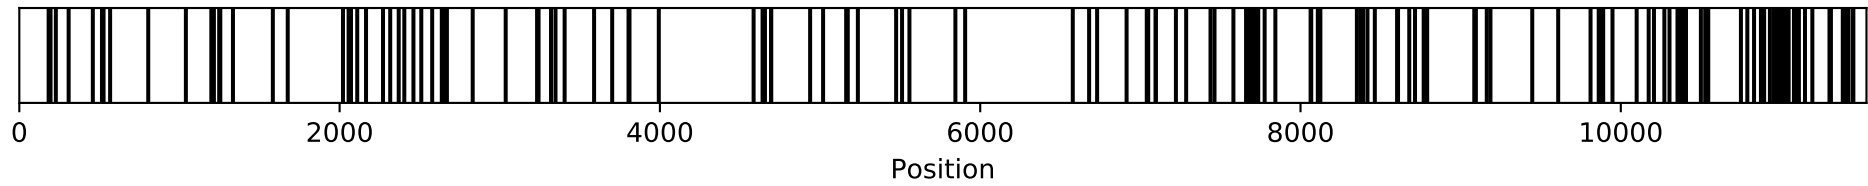

MM1 vs MM2  
Number of differences: 92

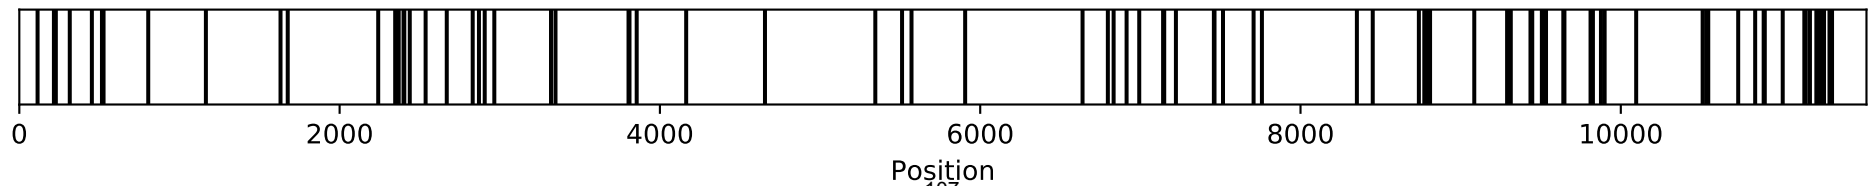

MA1 vs MA2  
Number of differences: 318

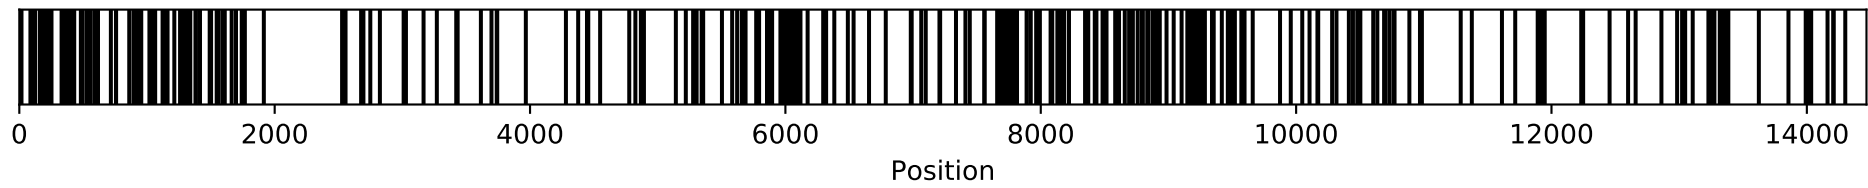

MA1 vs MM1  
Number of differences: 130

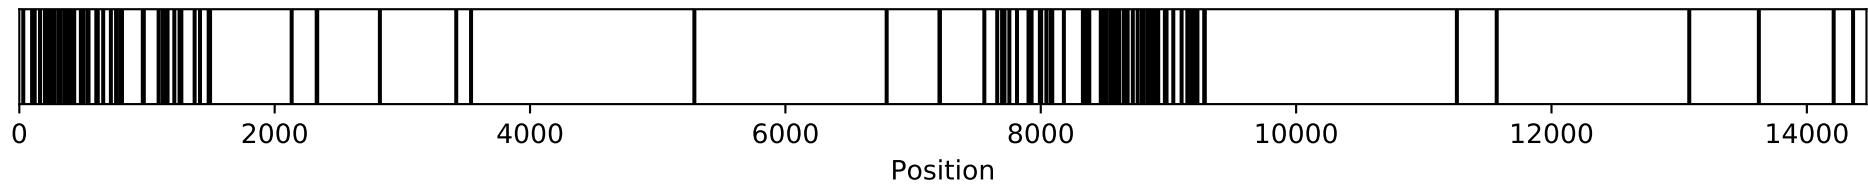

MA1 vs MM2  
Number of differences: 0

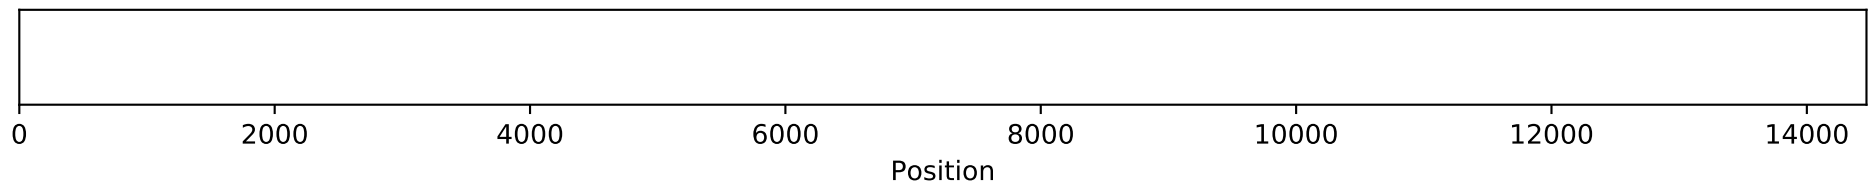

MA2 vs MM1  
Number of differences: 323

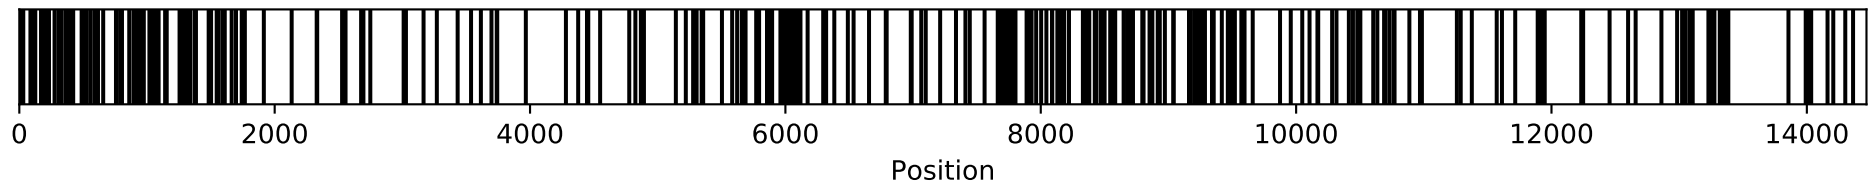

MA2 vs MM2  
Number of differences: 318

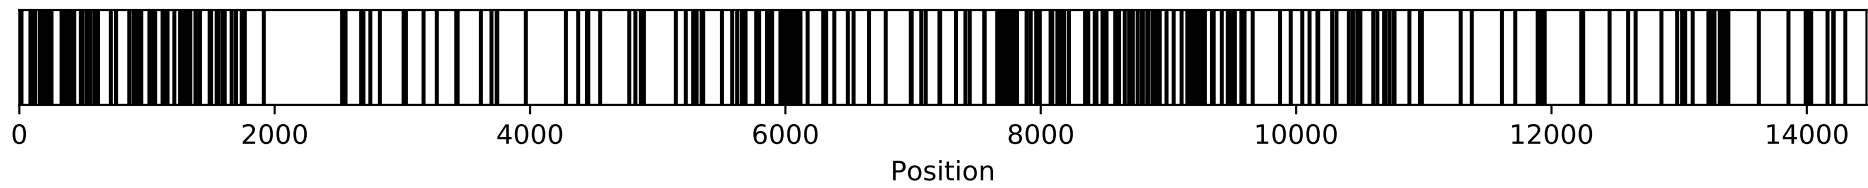

MM1 vs MM2  
Number of differences: 130

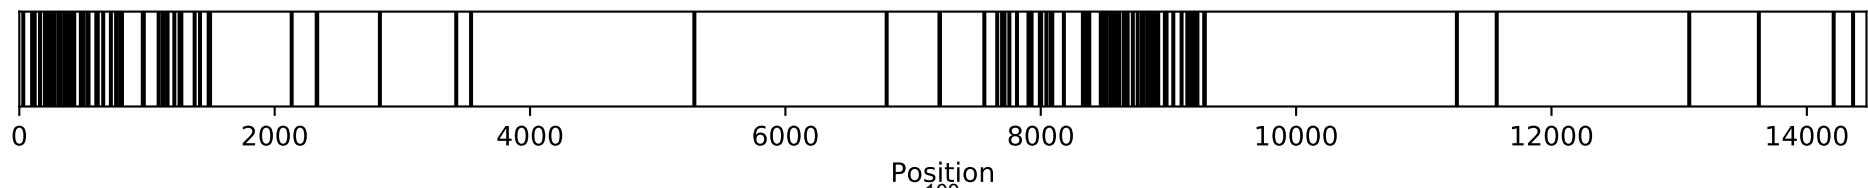

MA1 vs MA2  
Number of differences: 0

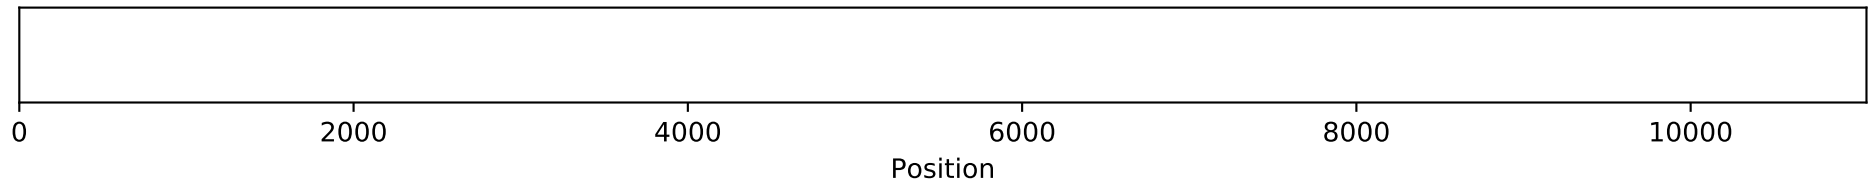

MA1 vs MM1  
Number of differences: 129

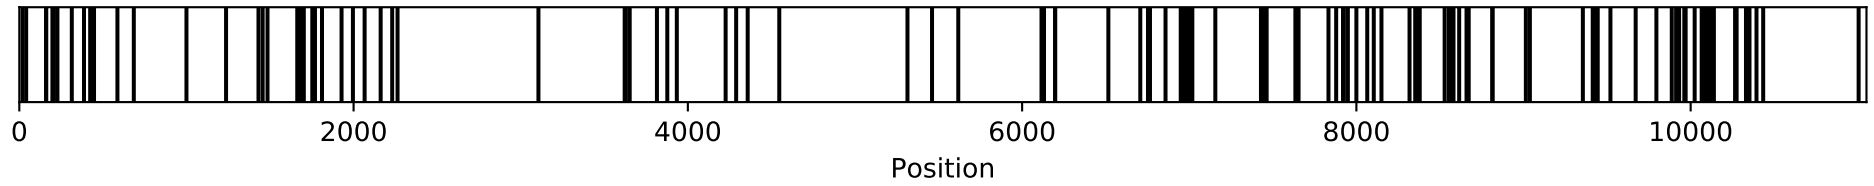

MA1 vs MM2  
Number of differences: 0

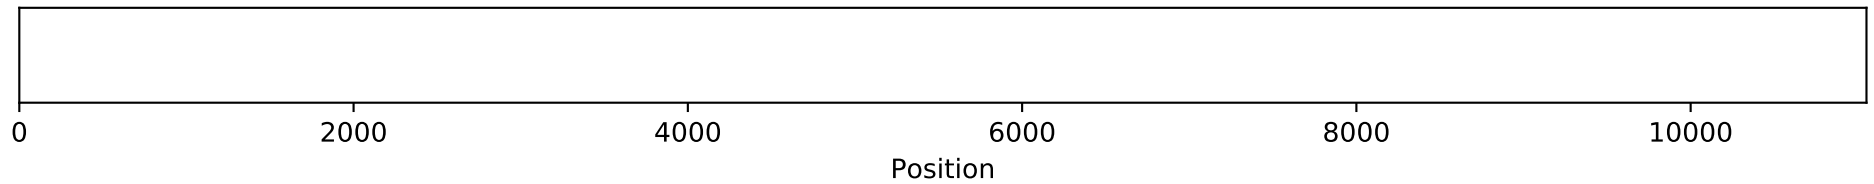

MA2 vs MM1  
Number of differences: 129

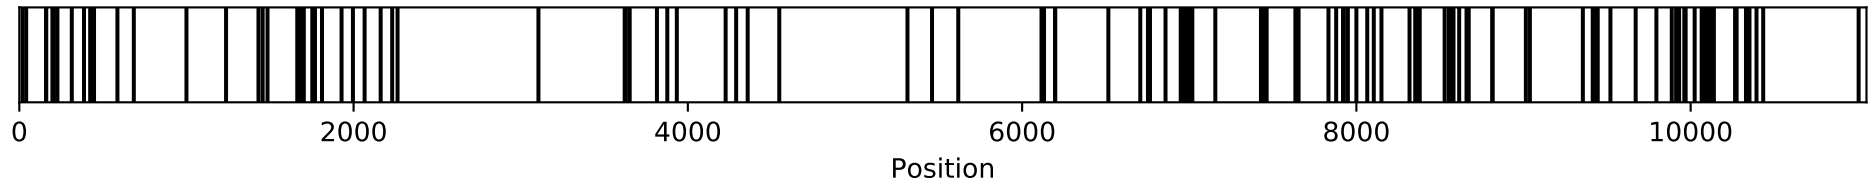

MA2 vs MM2  
Number of differences: 0

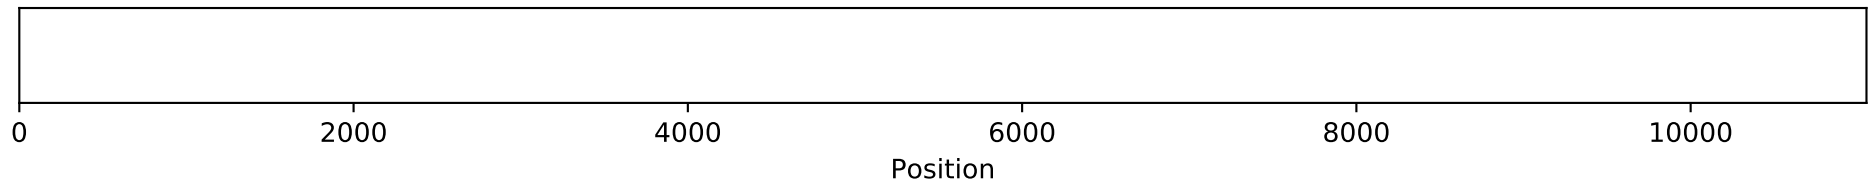

MM1 vs MM2  
Number of differences: 129

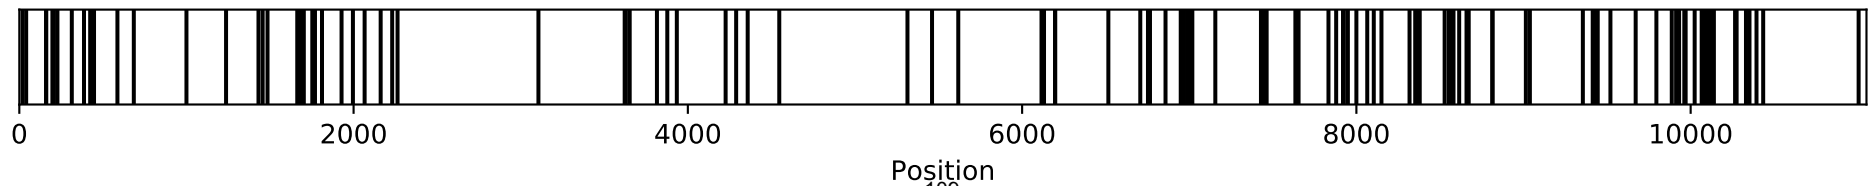

MA1 vs MA2  
Number of differences: 192

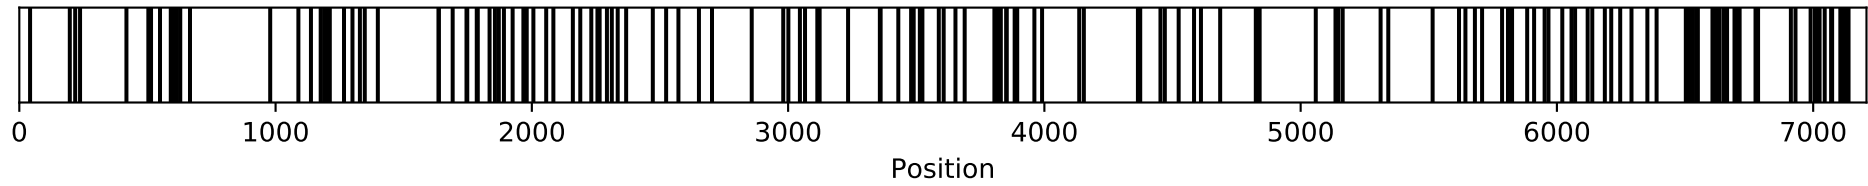

MA1 vs MM1  
Number of differences: 67

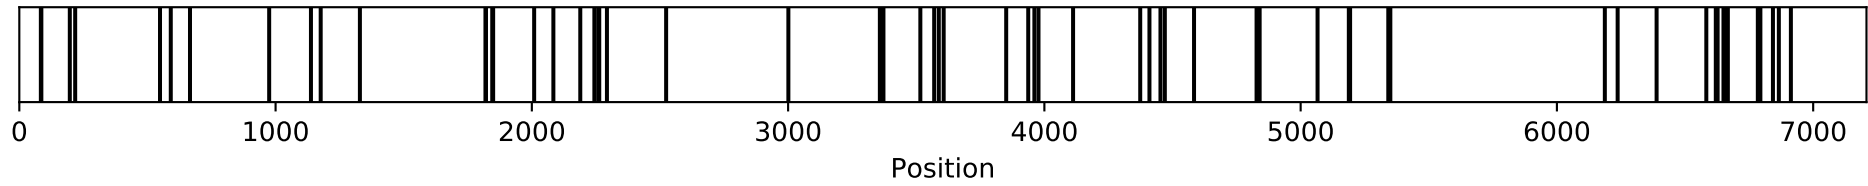

MA1 vs MM2  
Number of differences: 115

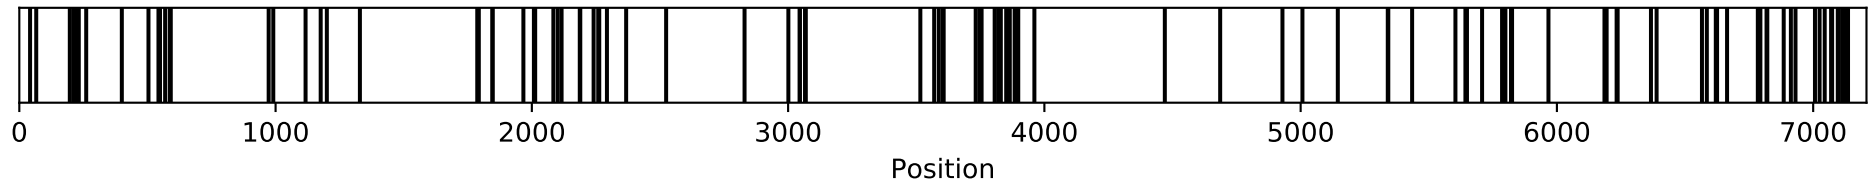

MA2 vs MM1  
Number of differences: 186

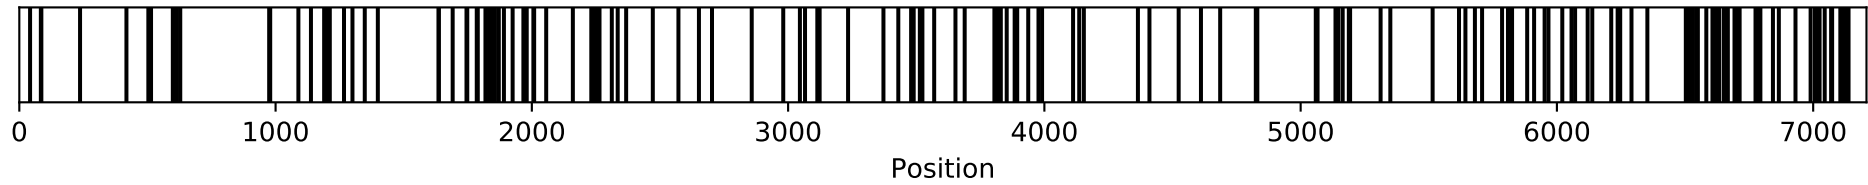

MA2 vs MM2  
Number of differences: 201

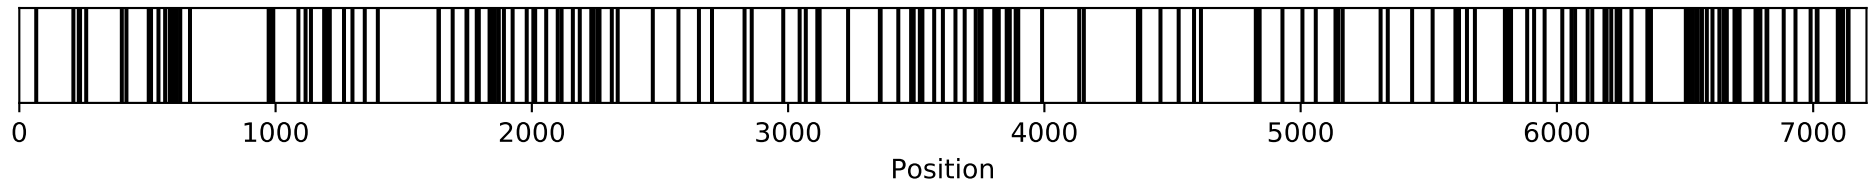

MM1 vs MM2  
Number of differences: 118

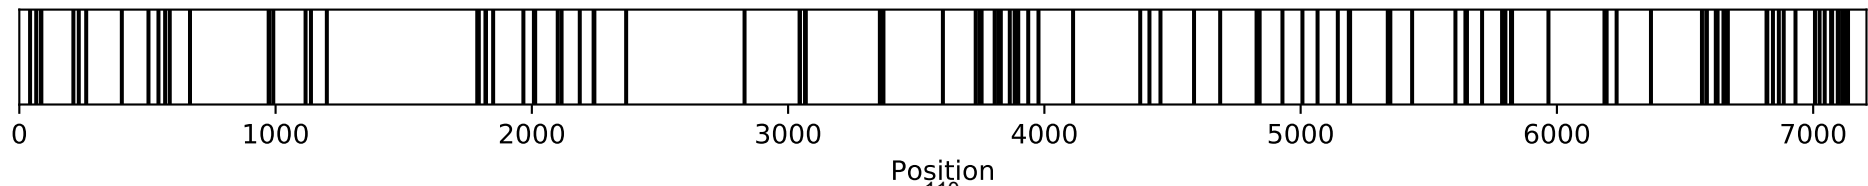

MA1 vs MA2  
Number of differences: 343

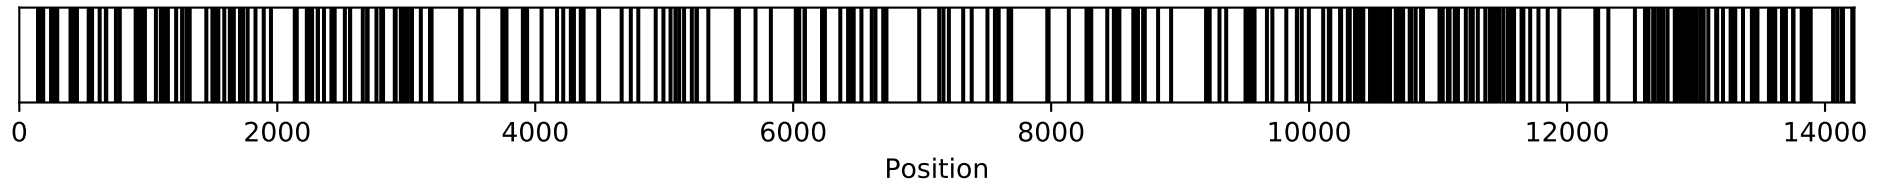

MA1 vs MM1  
Number of differences: 167

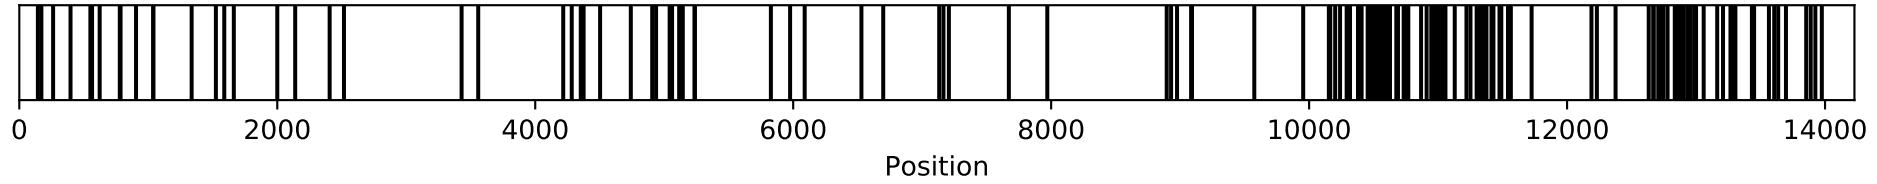

MA1 vs MM2  
Number of differences: 146

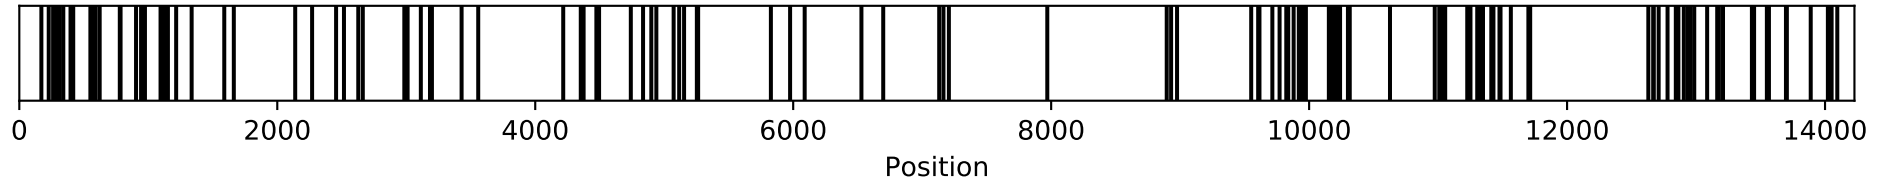

MA2 vs MM1  
Number of differences: 344

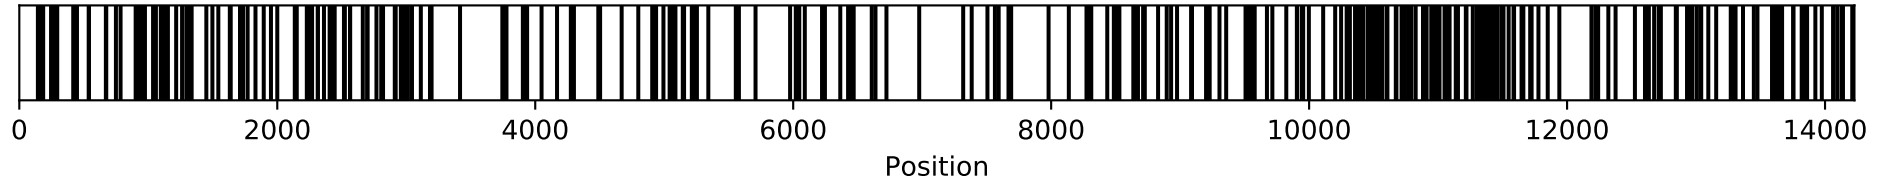

MA2 vs MM2  
Number of differences: 322

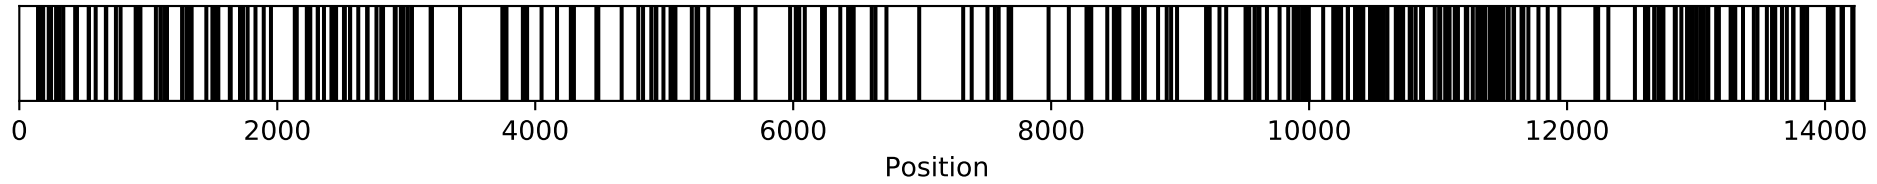

MM1 vs MM2  
Number of differences: 182

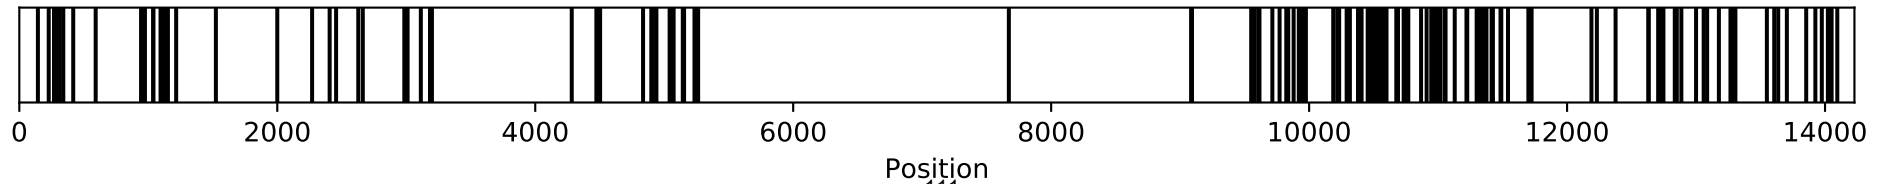

MA1 vs MA2  
Number of differences: 393

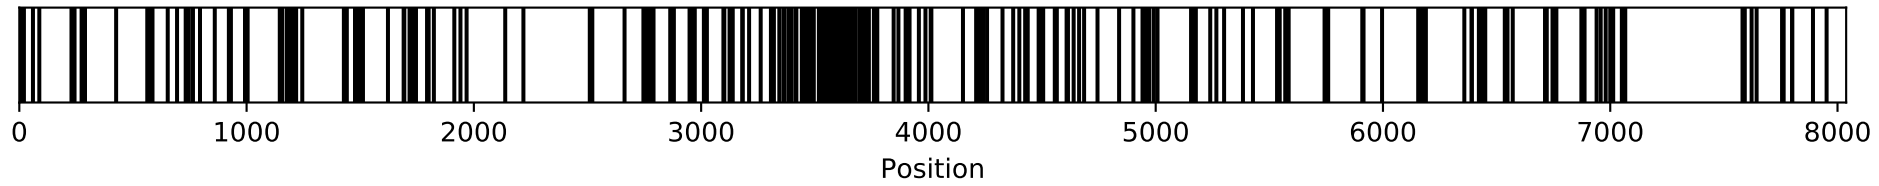

MA1 vs MM1  
Number of differences: 387

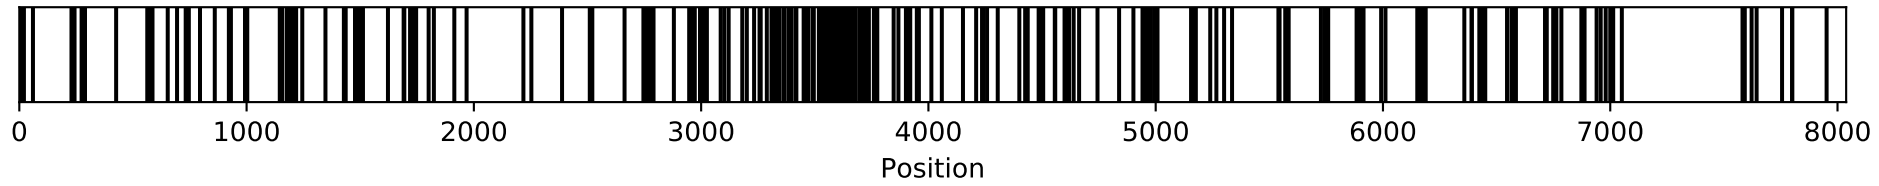

MA1 vs MM2  
Number of differences: 393

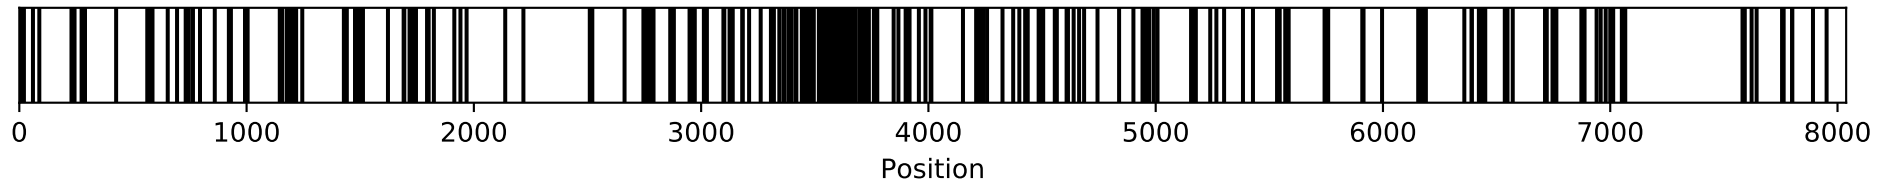

MA2 vs MM1  
Number of differences: 110

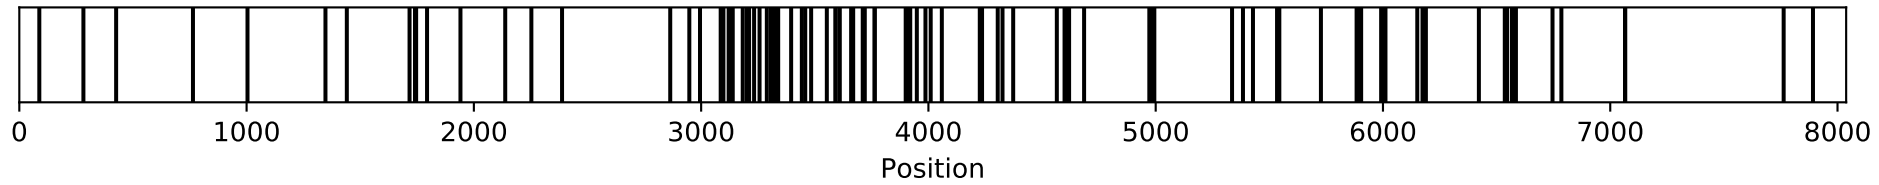

MA2 vs MM2  
Number of differences: 0

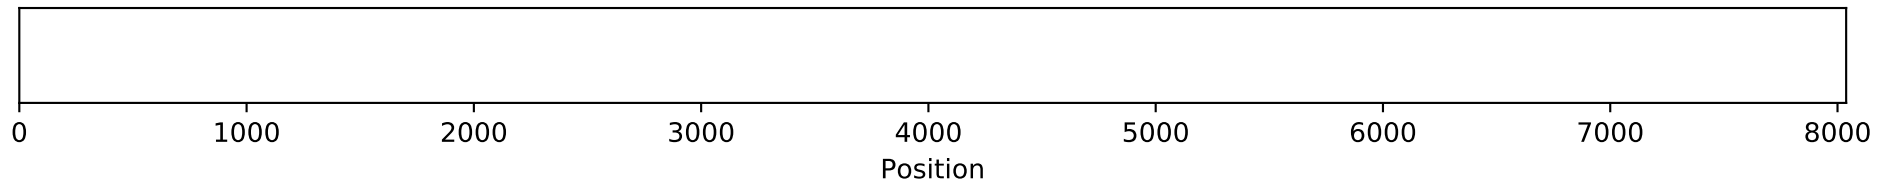

MM1 vs MM2  
Number of differences: 110

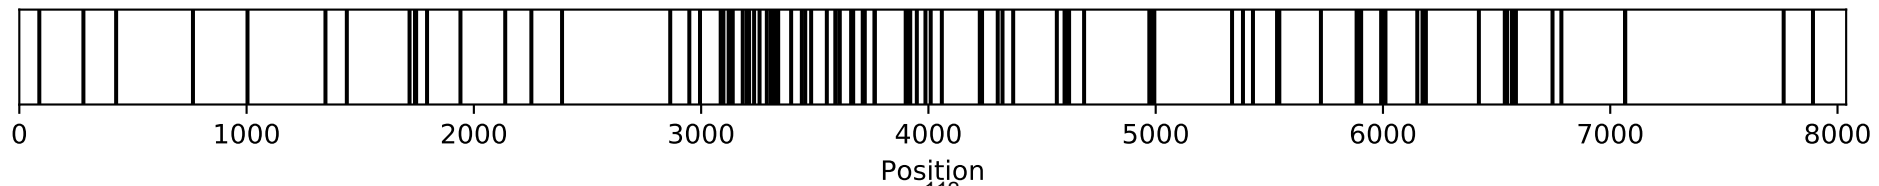

MA1 vs MA2  
Number of differences: 334

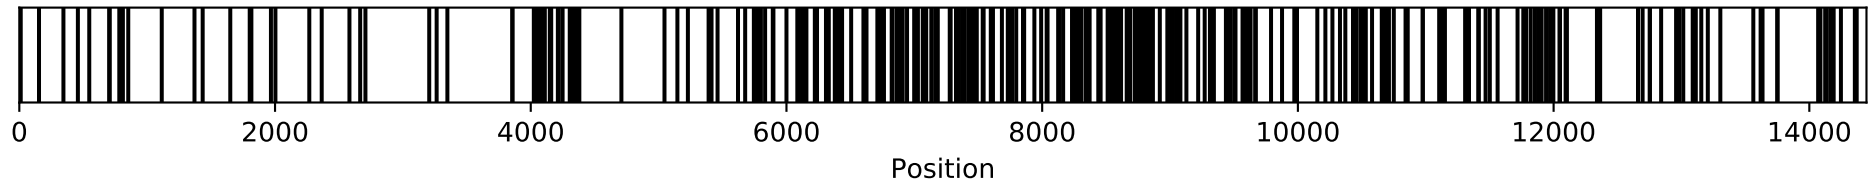

MA1 vs MM1  
Number of differences: 280

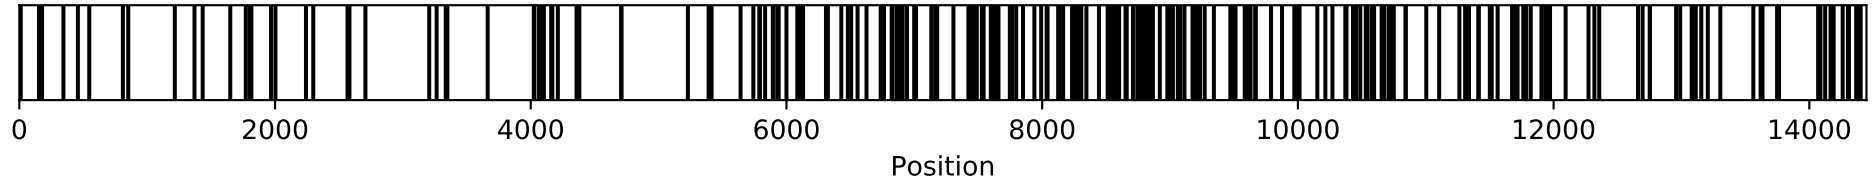

MA1 vs MM2  
Number of differences: 334

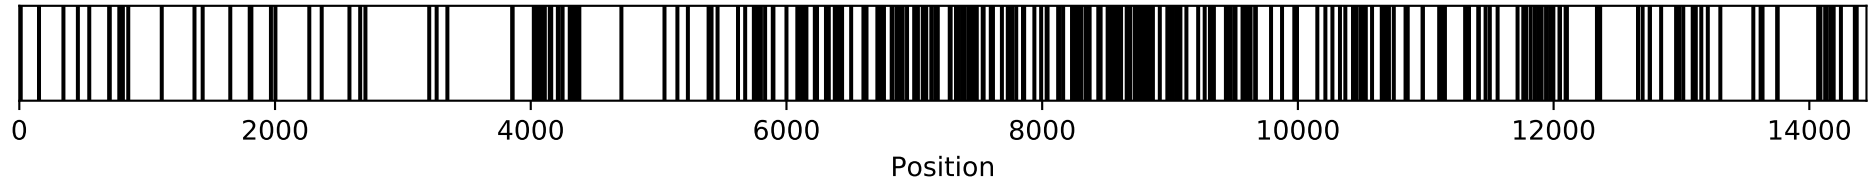

MA2 vs MM1  
Number of differences: 196

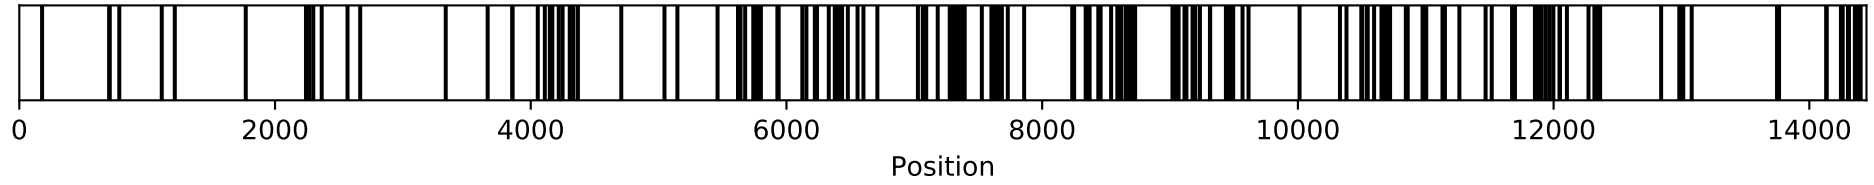

MA2 vs MM2  
Number of differences: 0

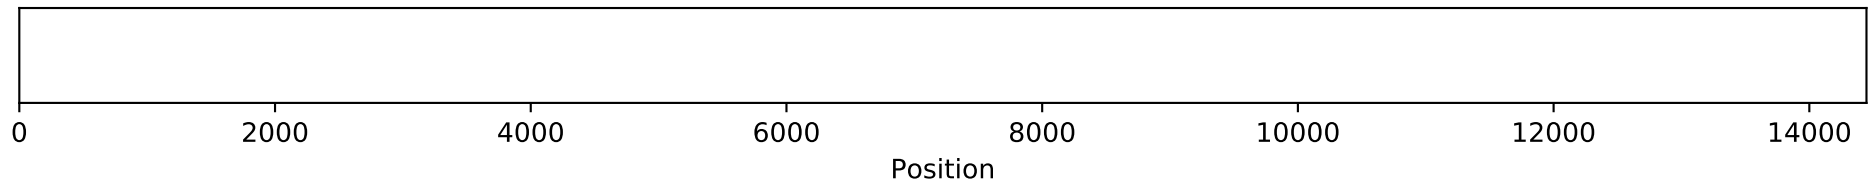

MM1 vs MM2  
Number of differences: 196

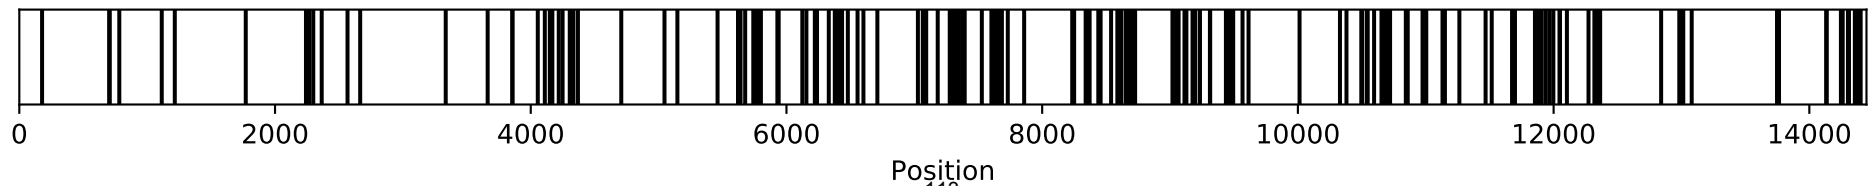

MA1 vs MA2  
Number of differences: 249

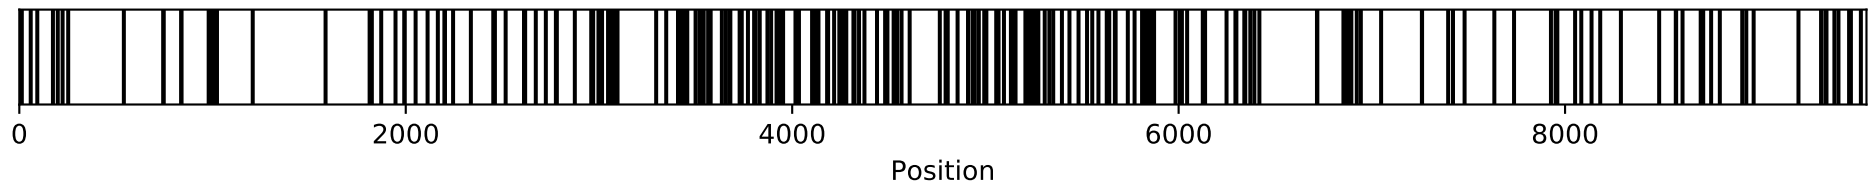

MA1 vs MM1  
Number of differences: 95

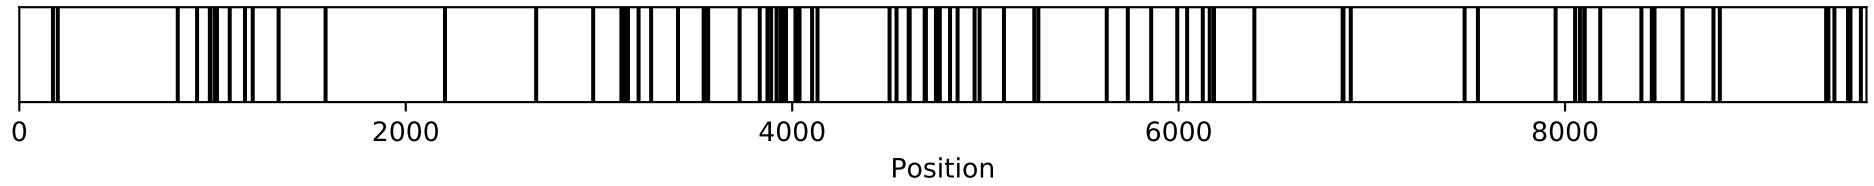

MA1 vs MM2  
Number of differences: 0

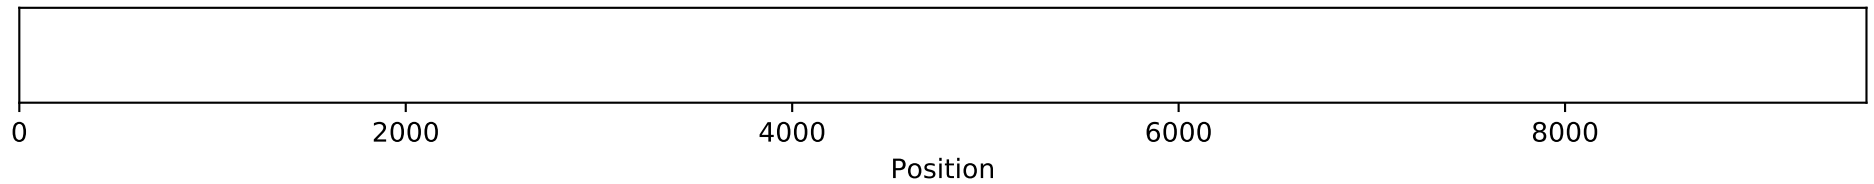

MA2 vs MM1  
Number of differences: 249

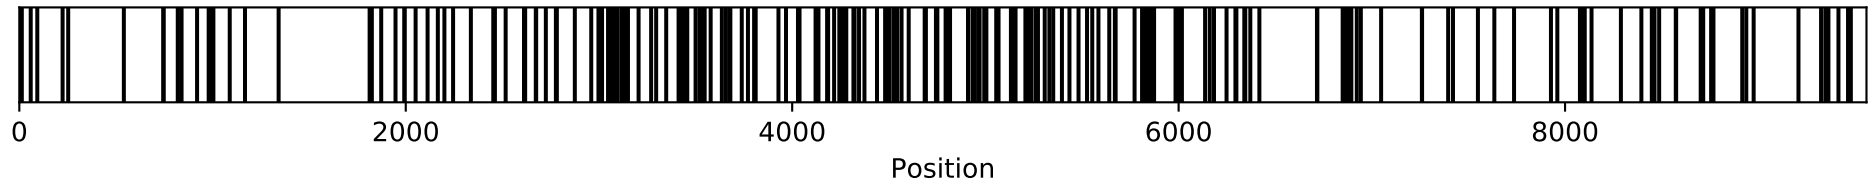

MA2 vs MM2  
Number of differences: 249

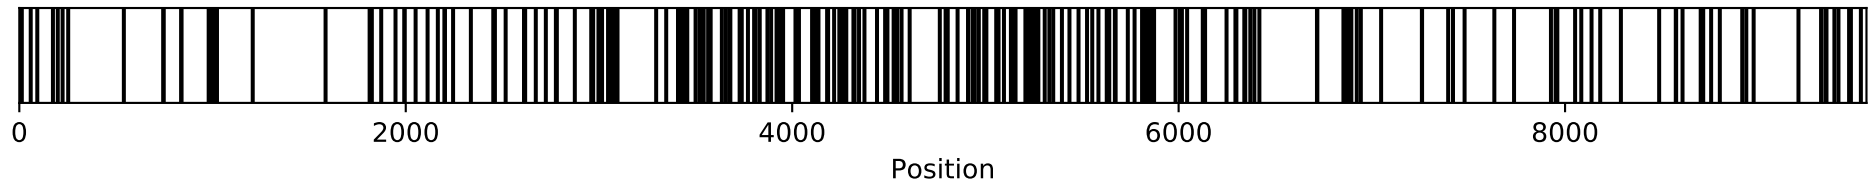

MM1 vs MM2  
Number of differences: 95

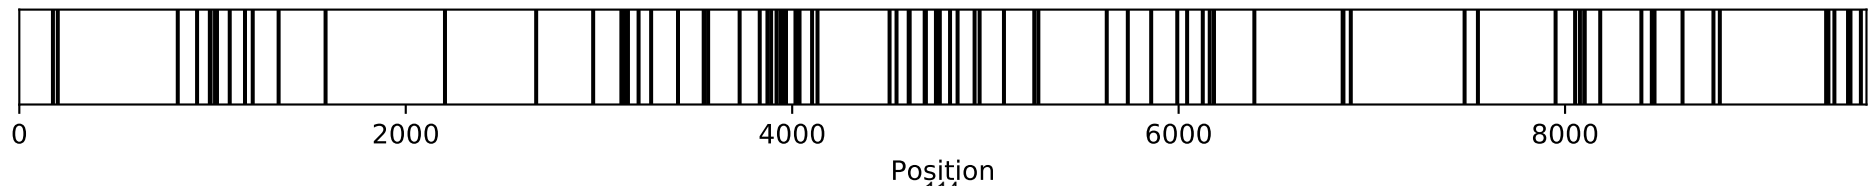



MA1 vs MA2  
Number of differences: 143

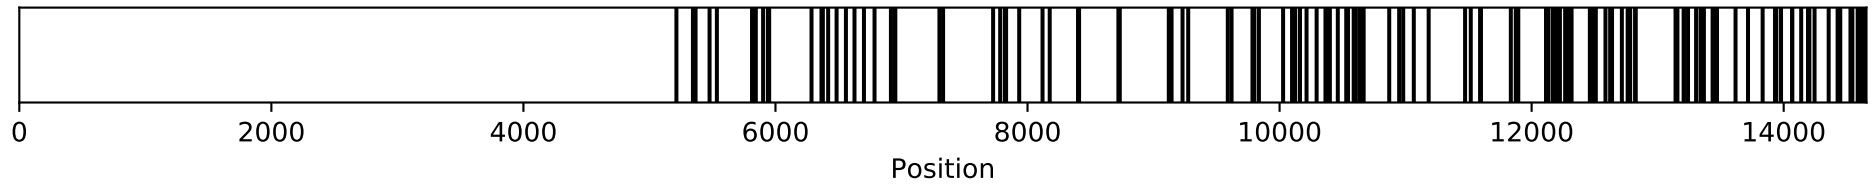

MA1 vs MM1  
Number of differences: 166

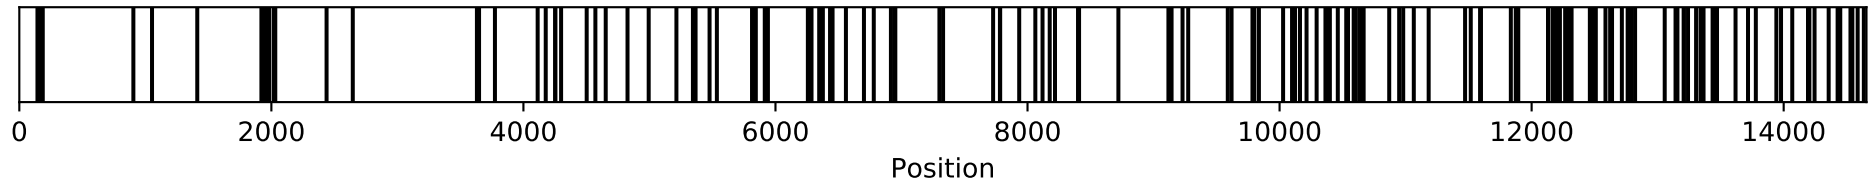

MA1 vs MM2  
Number of differences: 143

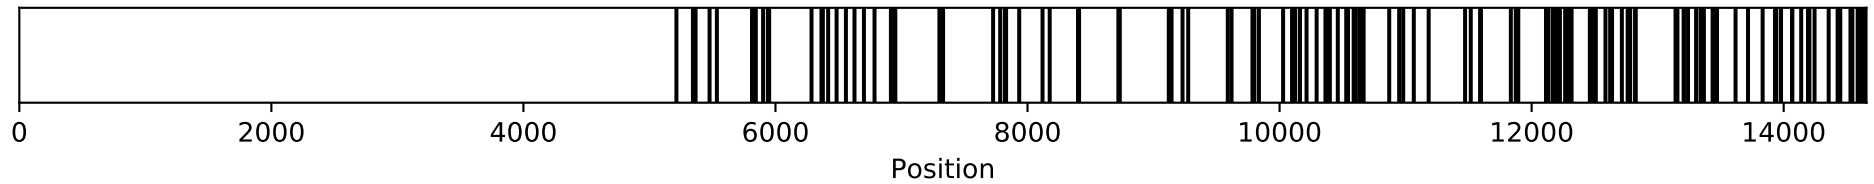

MA2 vs MM1  
Number of differences: 67

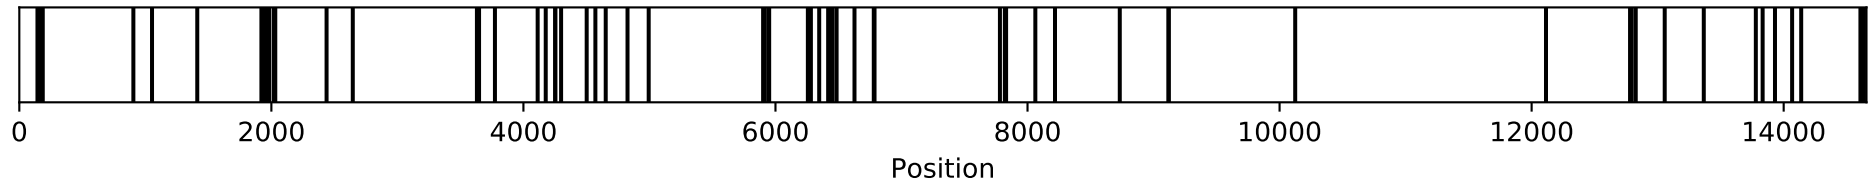

MA2 vs MM2  
Number of differences: 0

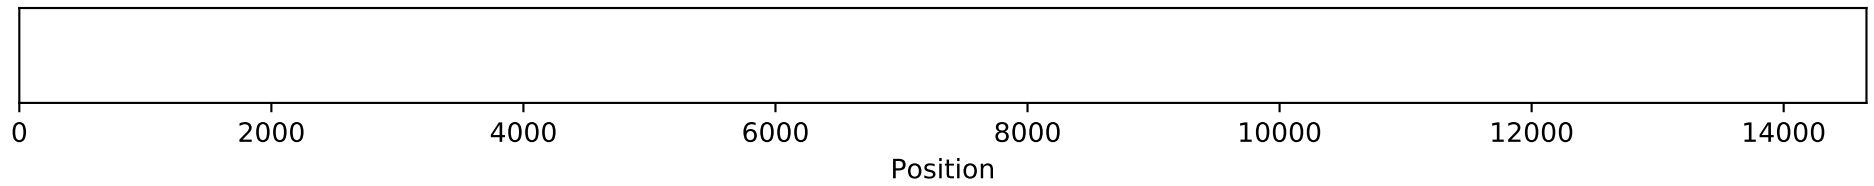

MM1 vs MM2  
Number of differences: 67

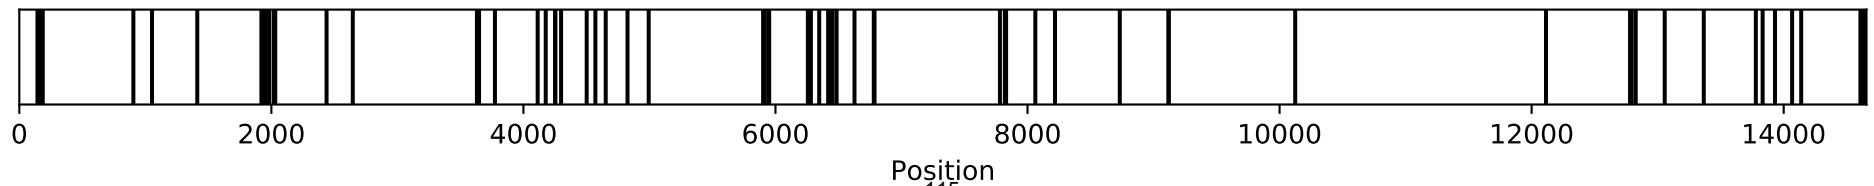

MA1 vs MA2  
Number of differences: 108

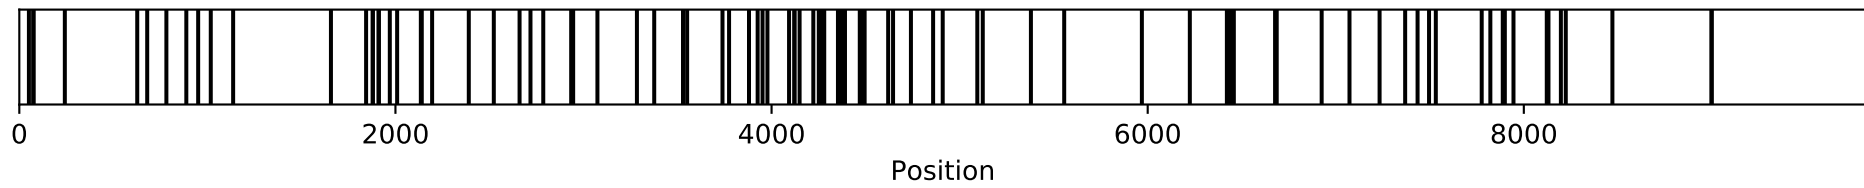

MA1 vs MM1  
Number of differences: 8

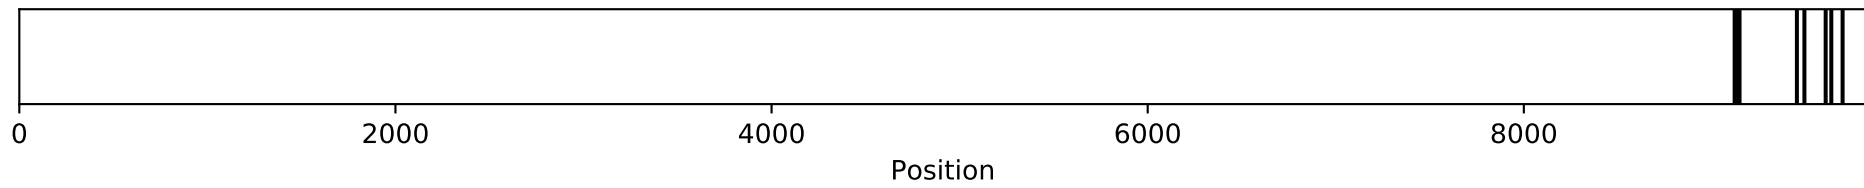

MA1 vs MM2  
Number of differences: 8

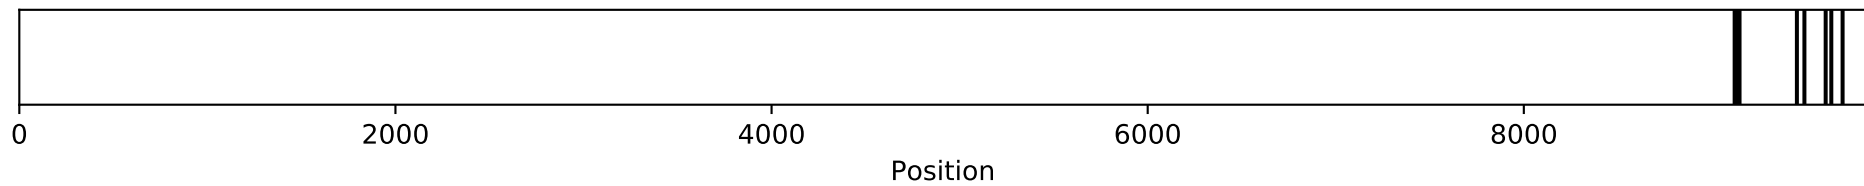

MA2 vs MM1  
Number of differences: 116

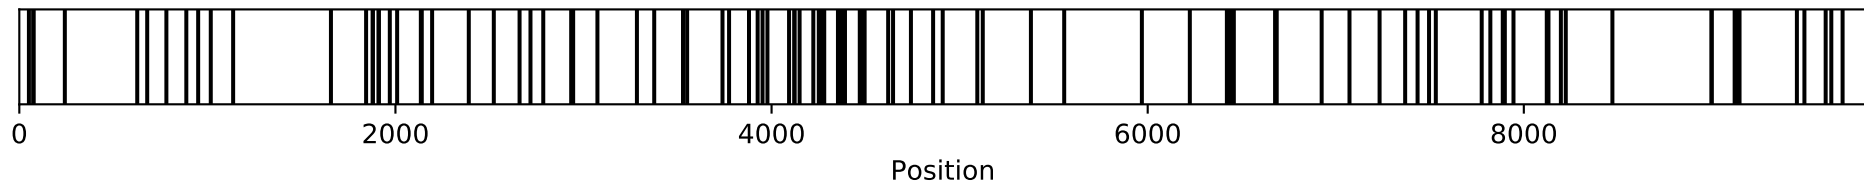

MA2 vs MM2  
Number of differences: 116

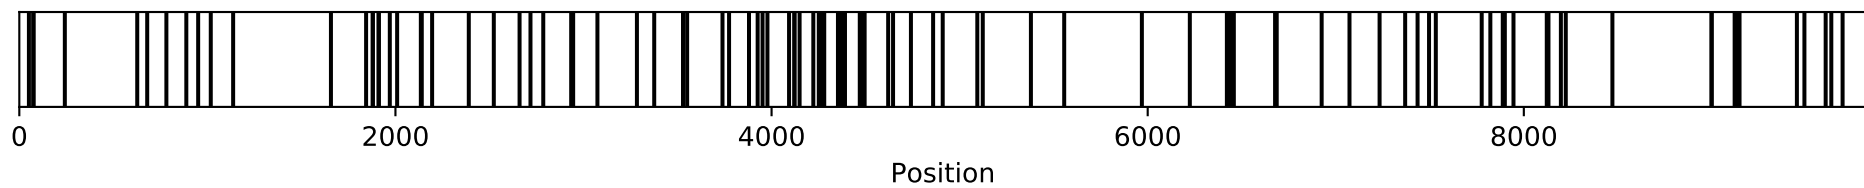

MM1 vs MM2  
Number of differences: 0

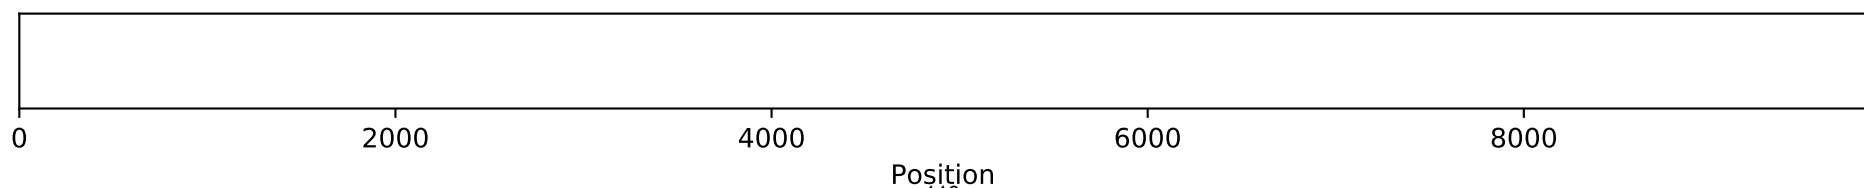

MA1 vs MA2  
Number of differences: 288

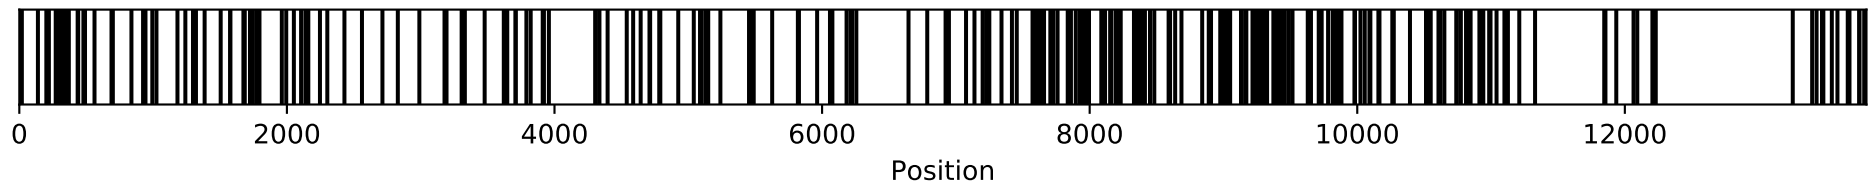

MA1 vs MM1  
Number of differences: 288

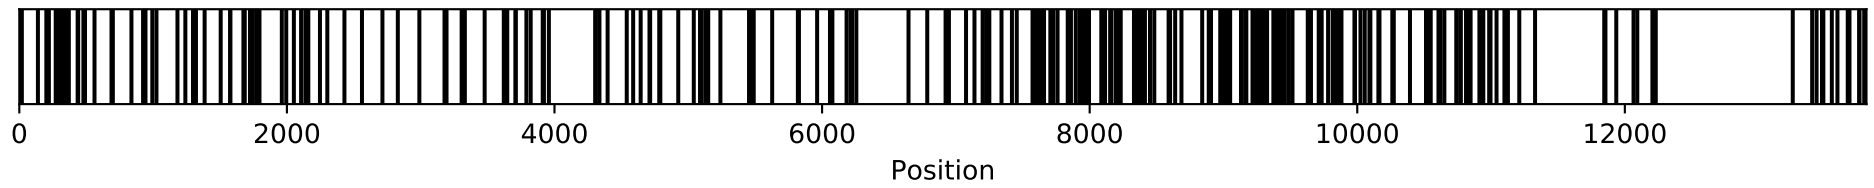

MA1 vs MM2  
Number of differences: 269

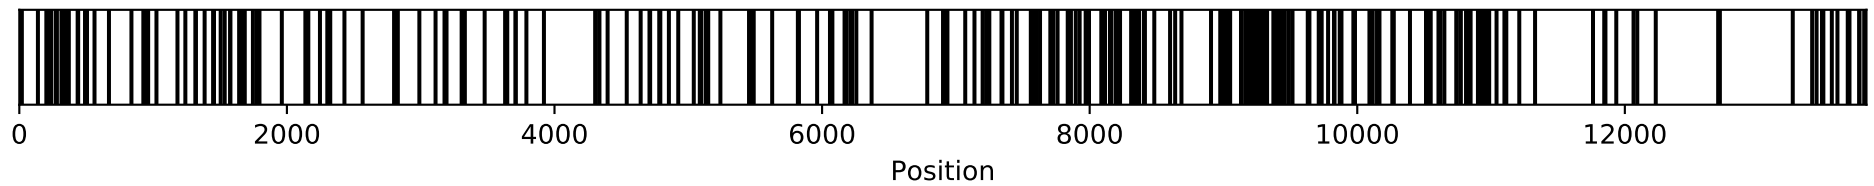

MA2 vs MM1  
Number of differences: 0

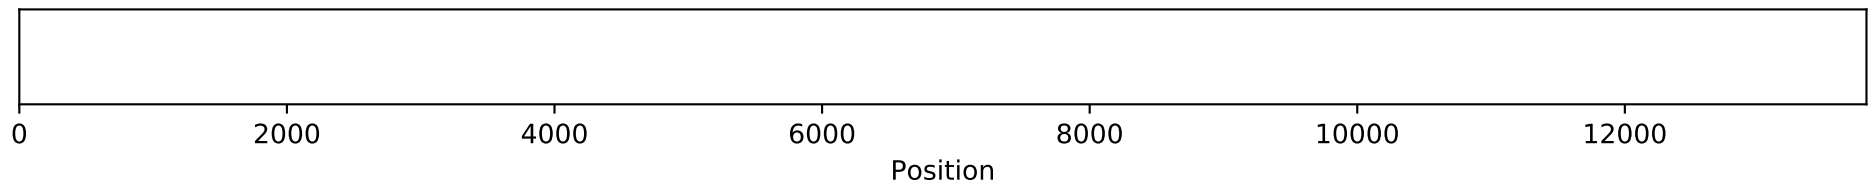

MA2 vs MM2  
Number of differences: 110

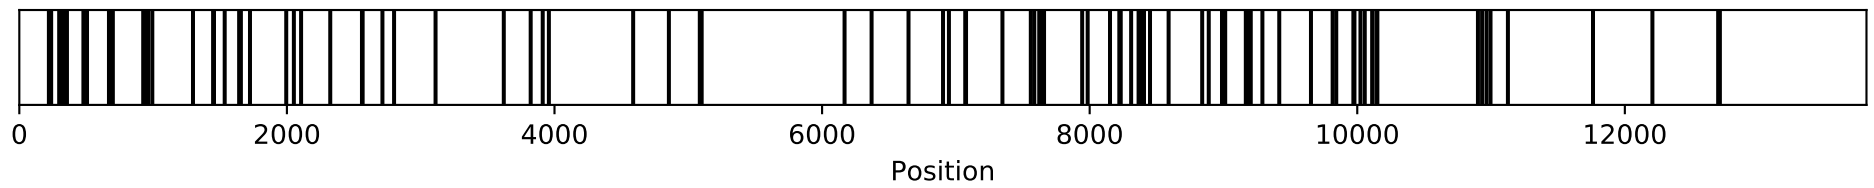

MM1 vs MM2  
Number of differences: 110

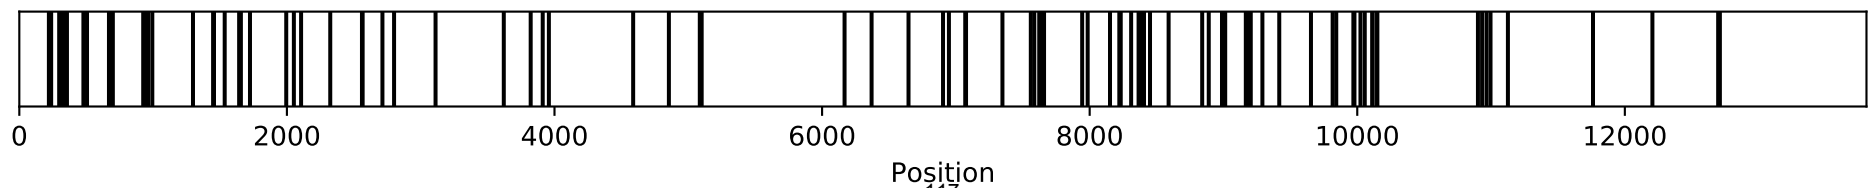

MA1 vs MA2  
Number of differences: 197

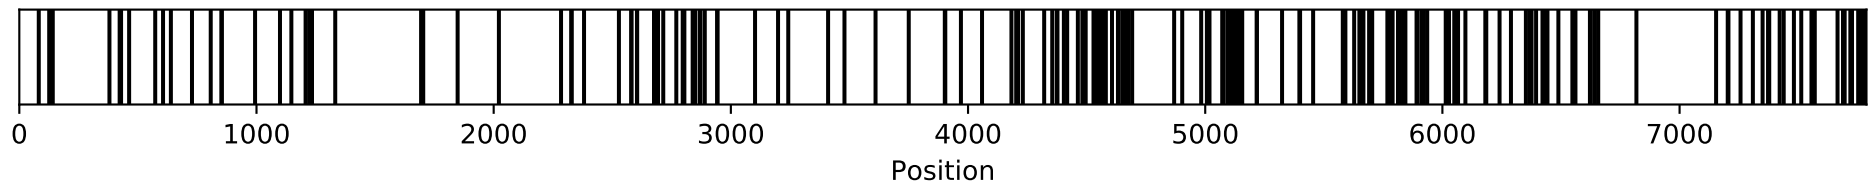

MA1 vs MM1  
Number of differences: 218

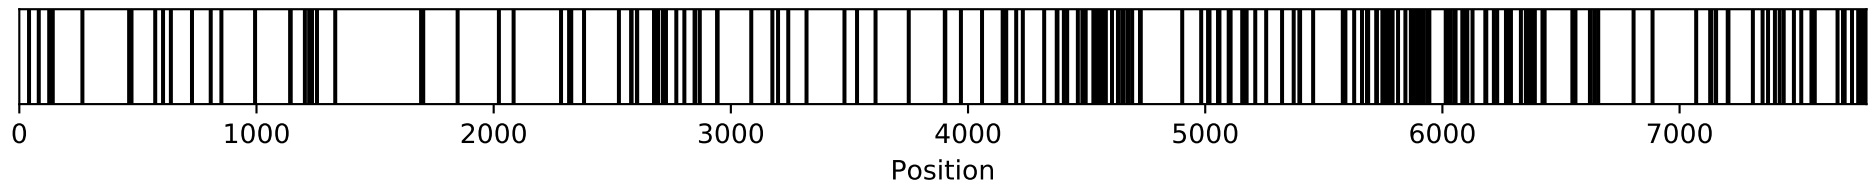

MA1 vs MM2  
Number of differences: 195

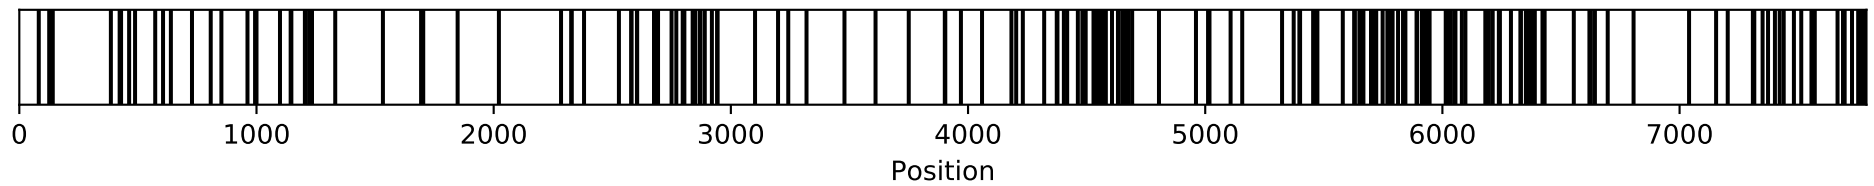

MA2 vs MM1  
Number of differences: 137

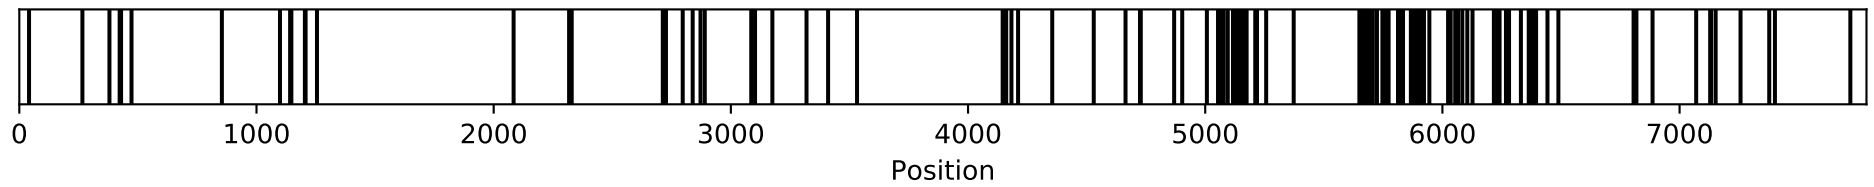

MA2 vs MM2  
Number of differences: 91

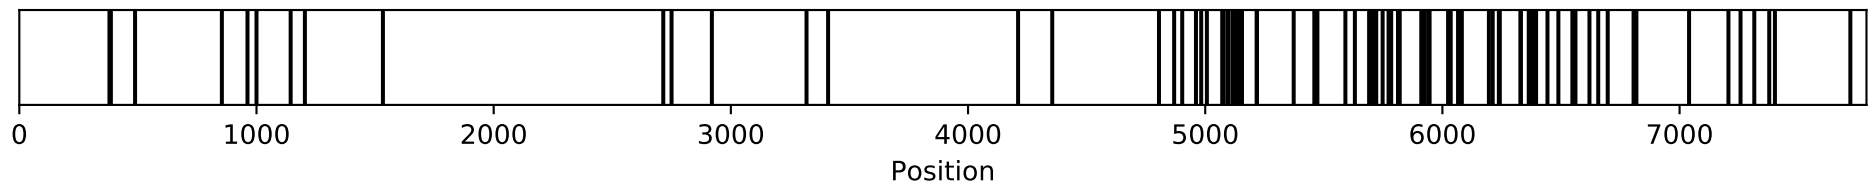

MM1 vs MM2  
Number of differences: 123

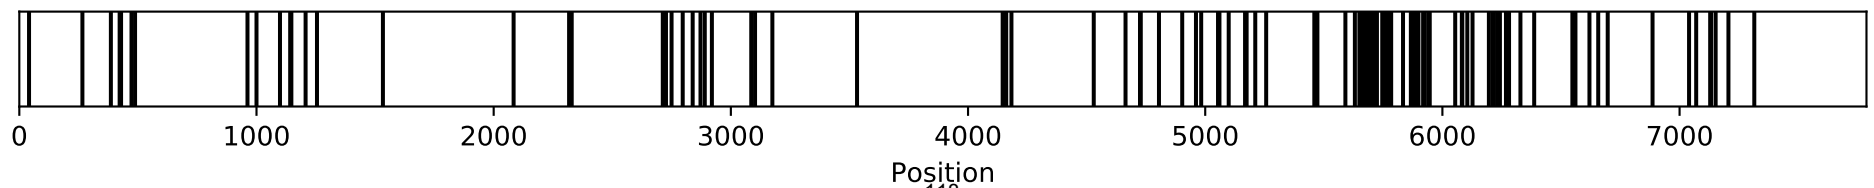

MA1 vs MA2  
Number of differences: 371

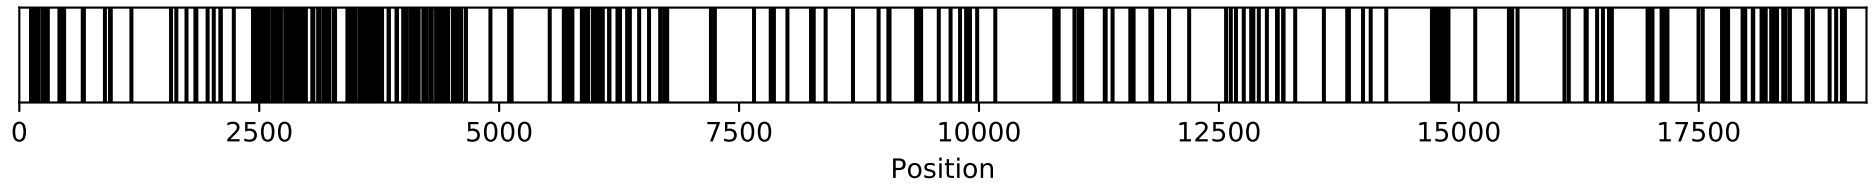

MA1 vs MM1  
Number of differences: 4

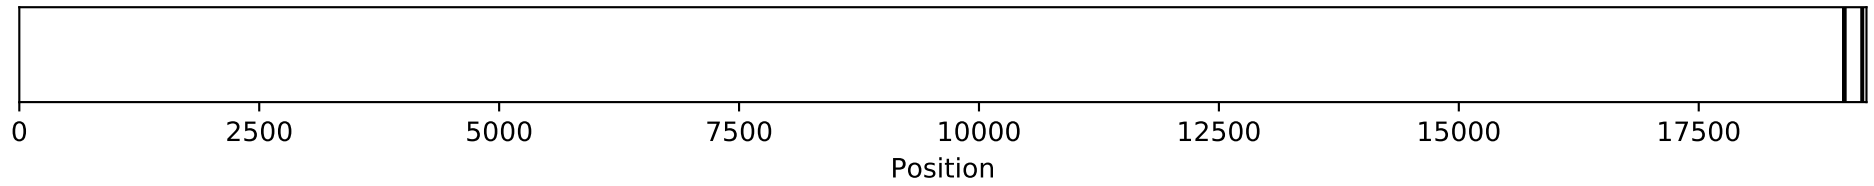

MA1 vs MM2  
Number of differences: 186

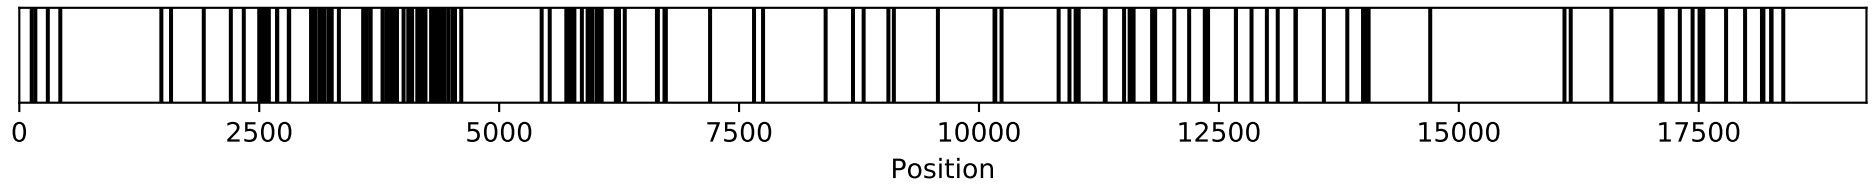

MA2 vs MM1  
Number of differences: 373

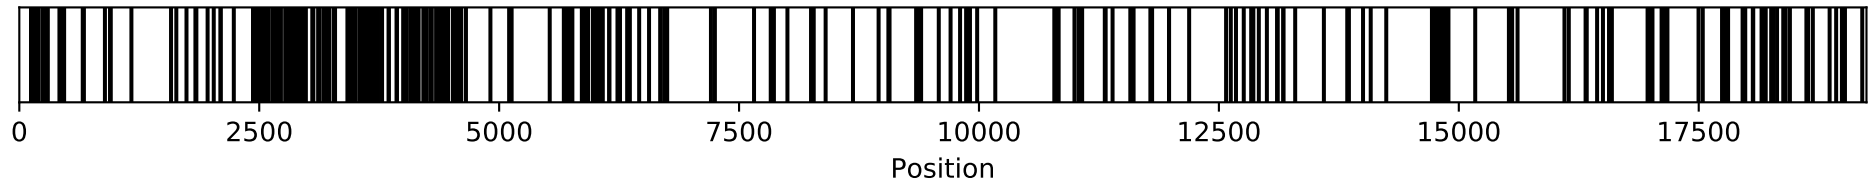

MA2 vs MM2  
Number of differences: 404

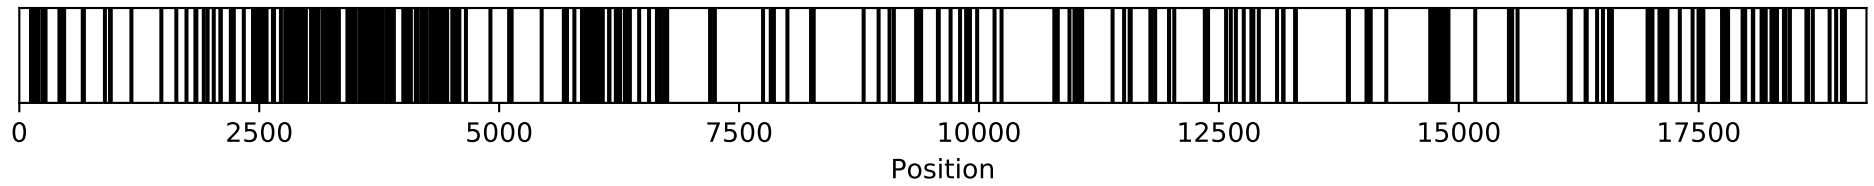

MM1 vs MM2  
Number of differences: 190

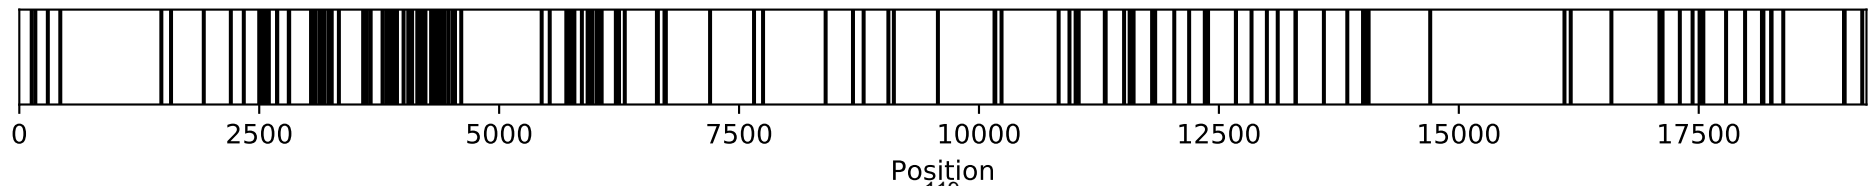

MA1 vs MA2  
Number of differences: 3

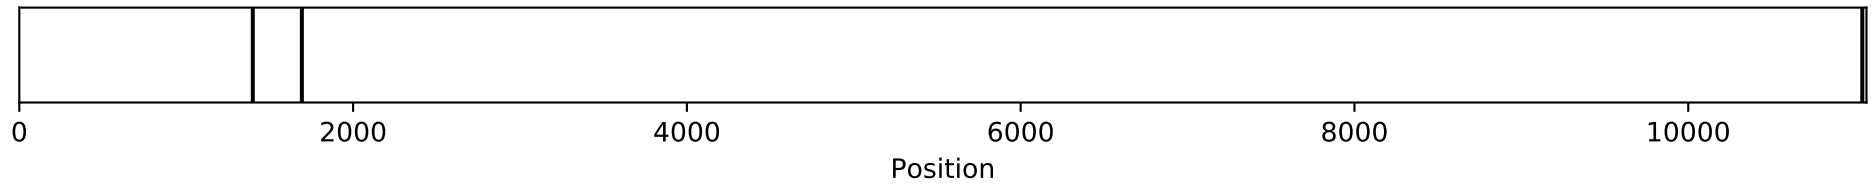

MA1 vs MM1  
Number of differences: 259

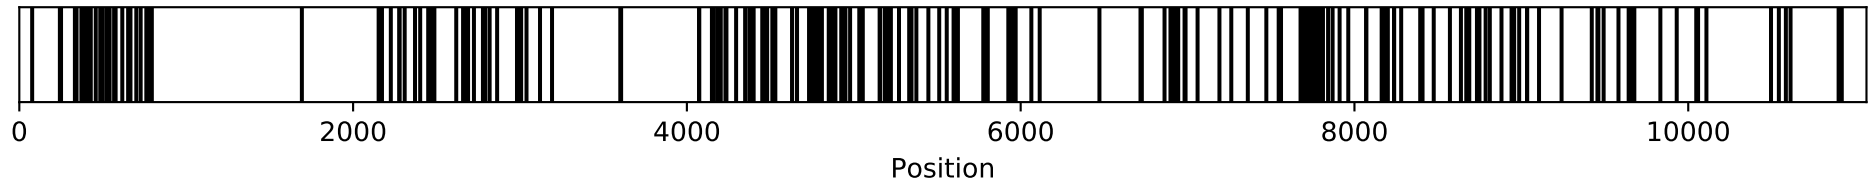

MA1 vs MM2  
Number of differences: 241

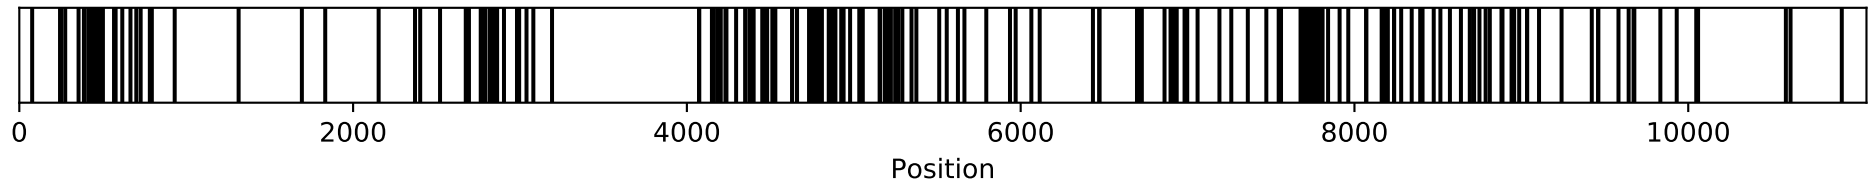

MA2 vs MM1  
Number of differences: 260

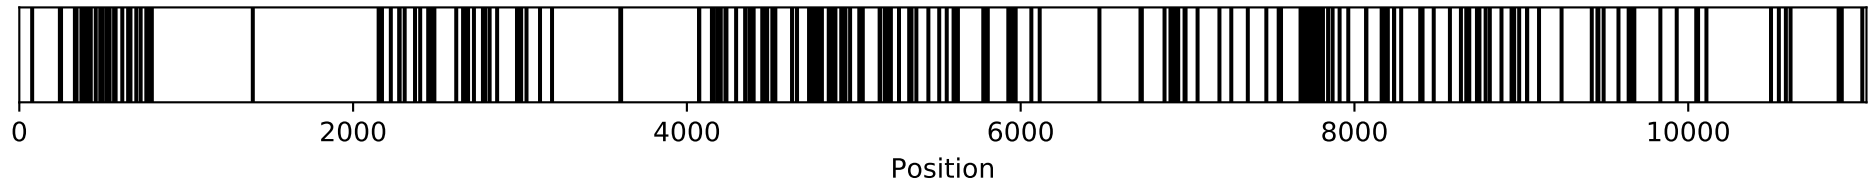

MA2 vs MM2  
Number of differences: 242

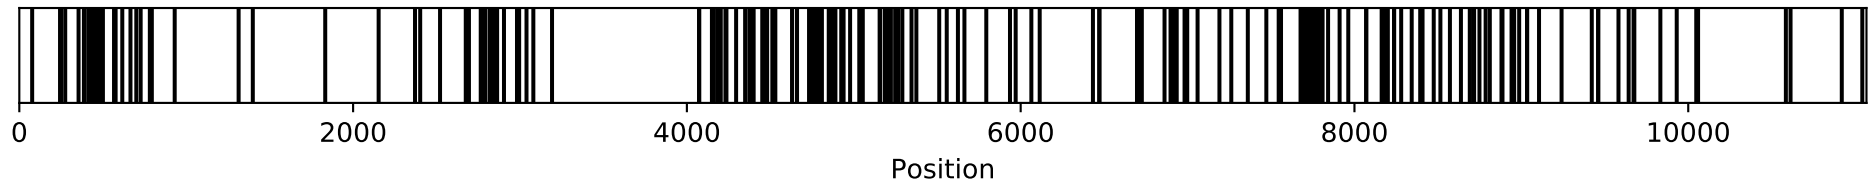

MM1 vs MM2  
Number of differences: 116

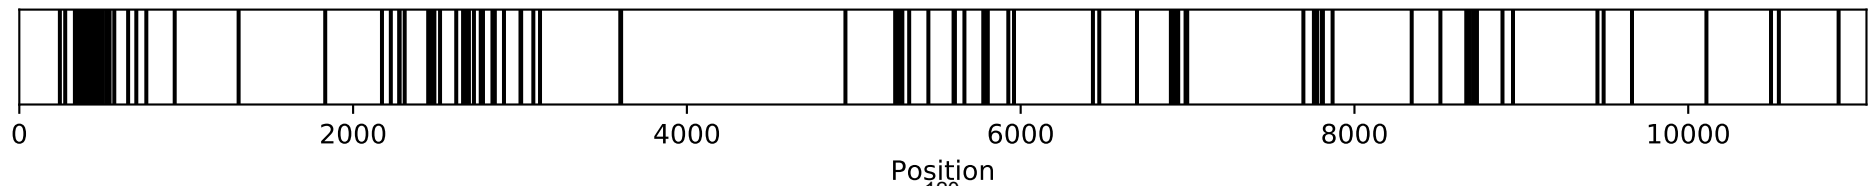

MA1 vs MA2  
Number of differences: 197

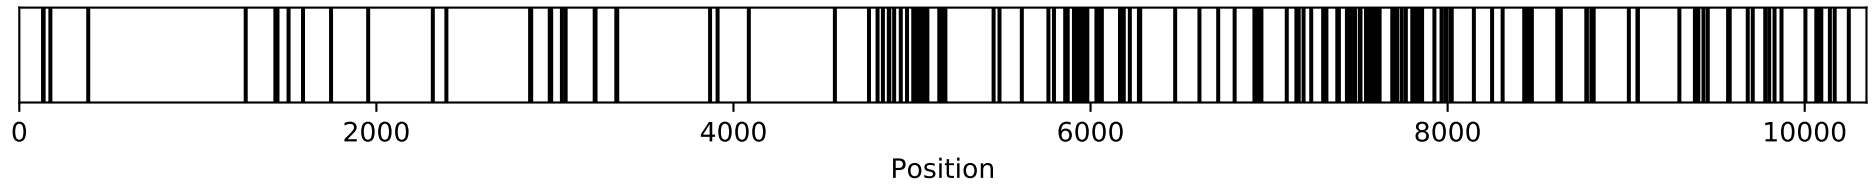

MA1 vs MM1  
Number of differences: 127

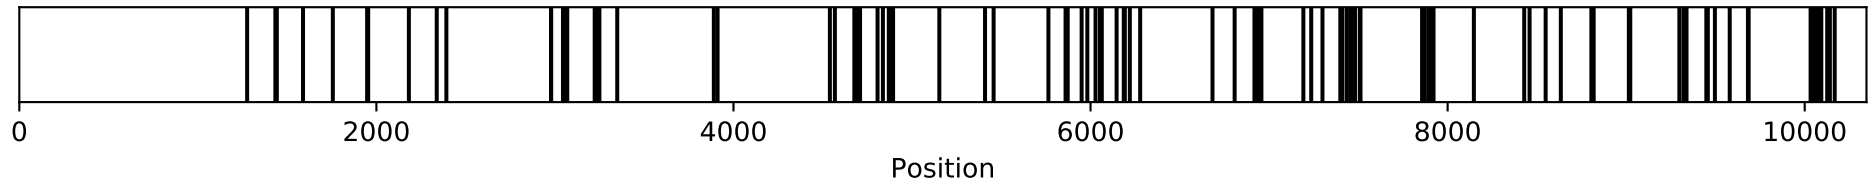

MA1 vs MM2  
Number of differences: 123

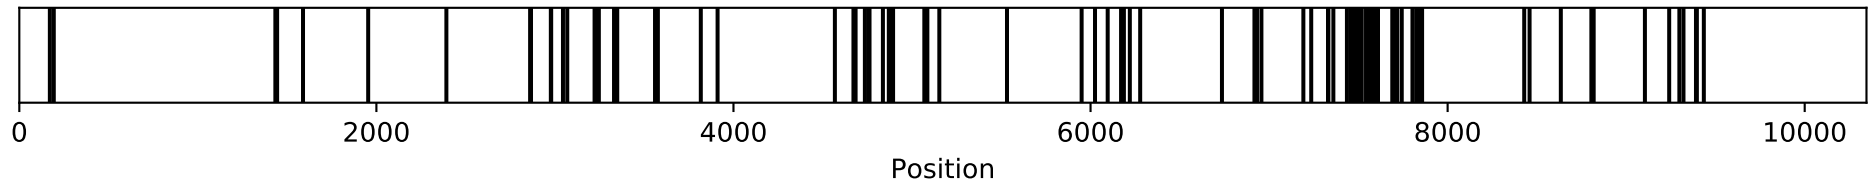

MA2 vs MM1  
Number of differences: 218

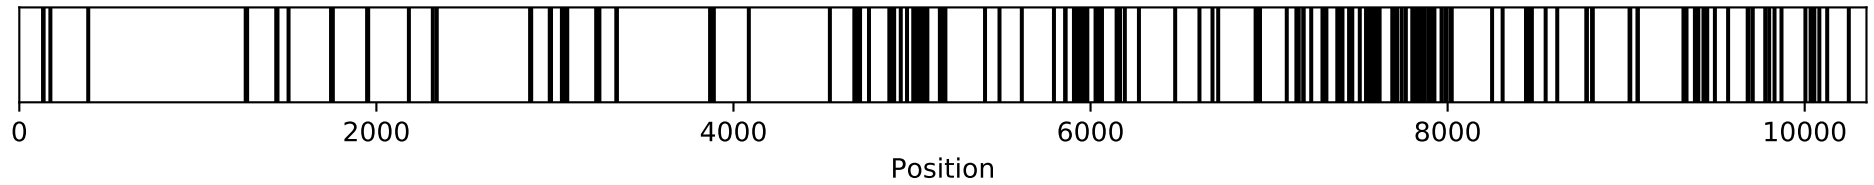

MA2 vs MM2  
Number of differences: 205

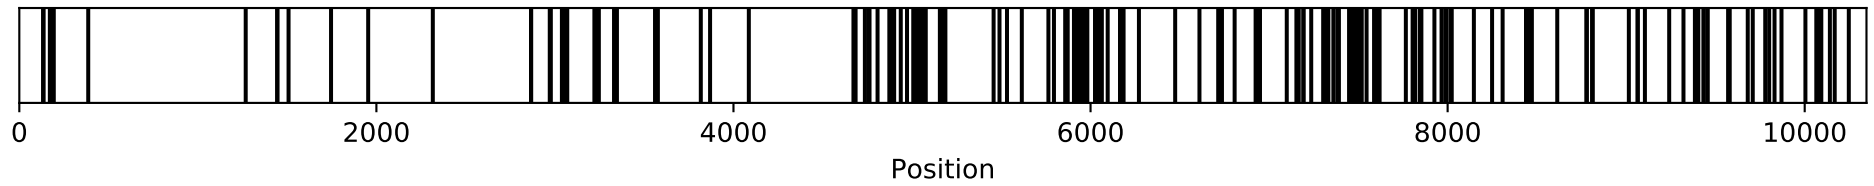

MM1 vs MM2  
Number of differences: 143

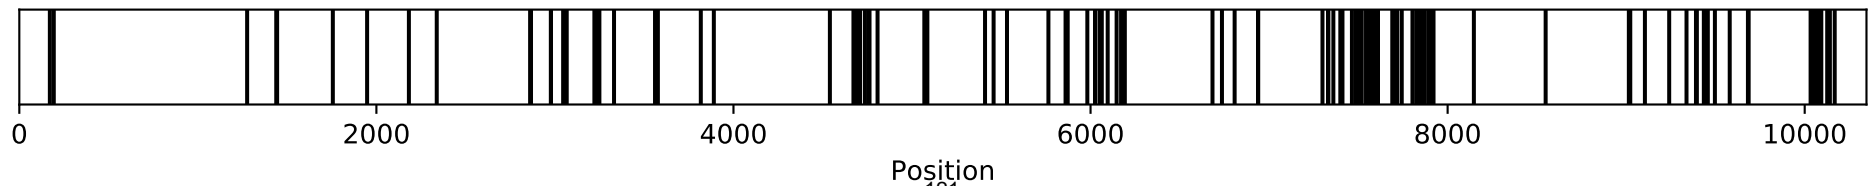

MA1 vs MA2  
Number of differences: 327

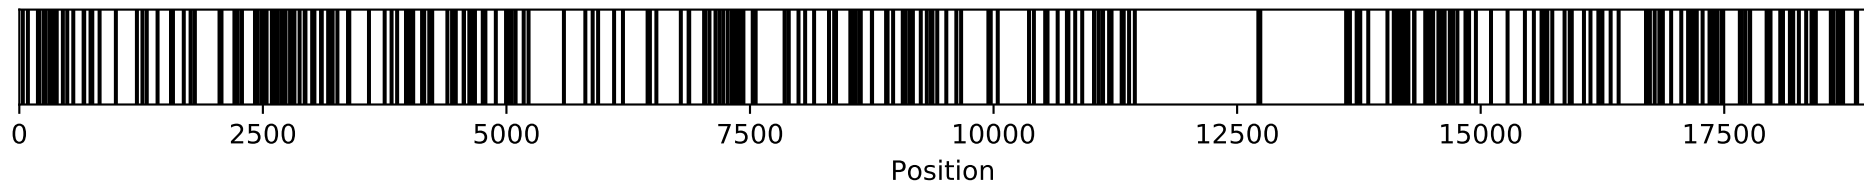

MA1 vs MM1  
Number of differences: 150

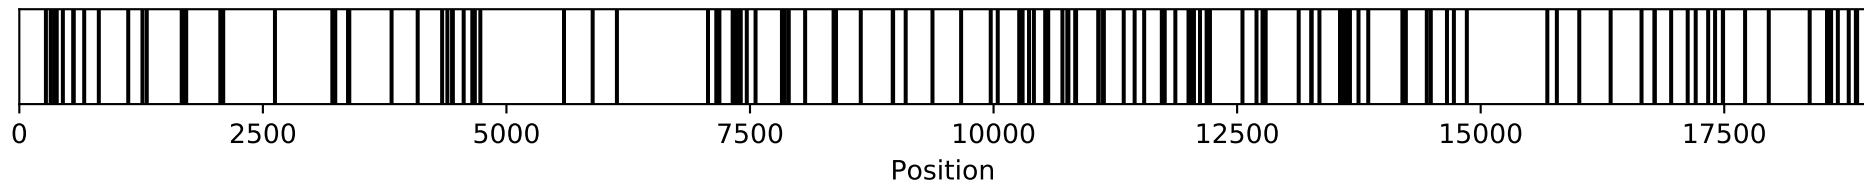

MA1 vs MM2  
Number of differences: 0

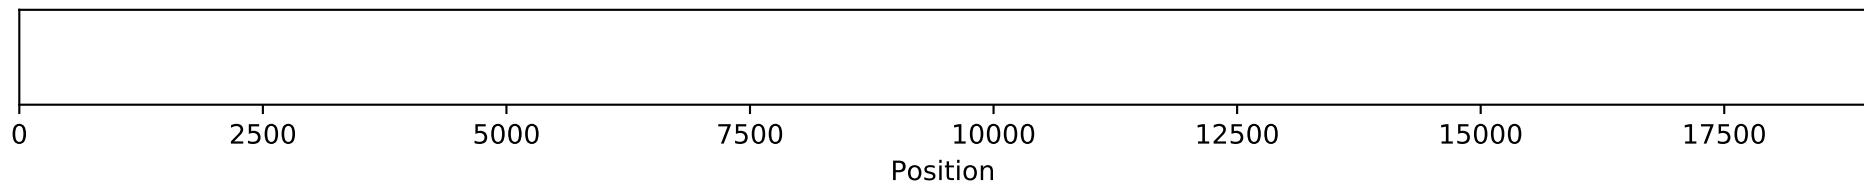

MA2 vs MM1  
Number of differences: 335

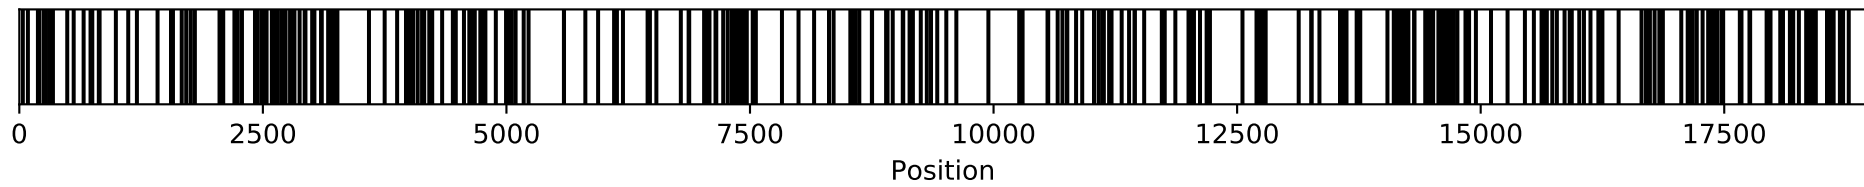

MA2 vs MM2  
Number of differences: 327

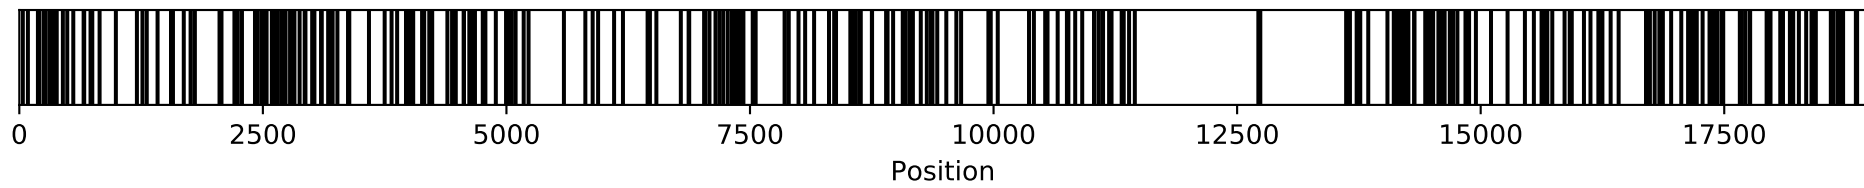

MM1 vs MM2  
Number of differences: 150

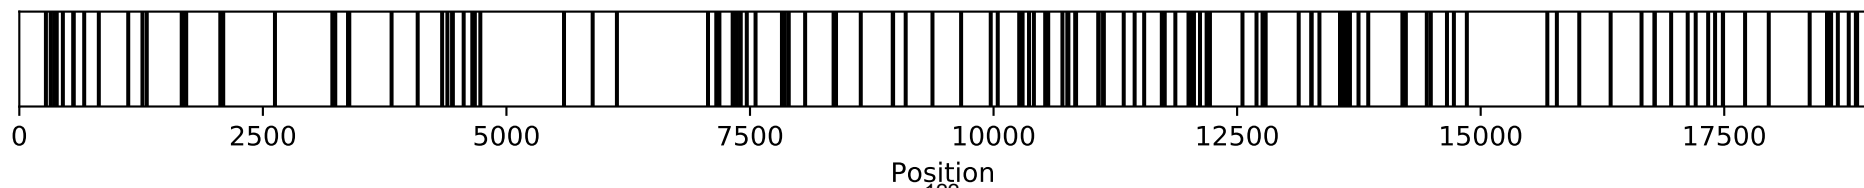



MA1 vs MA2  
Number of differences: 349

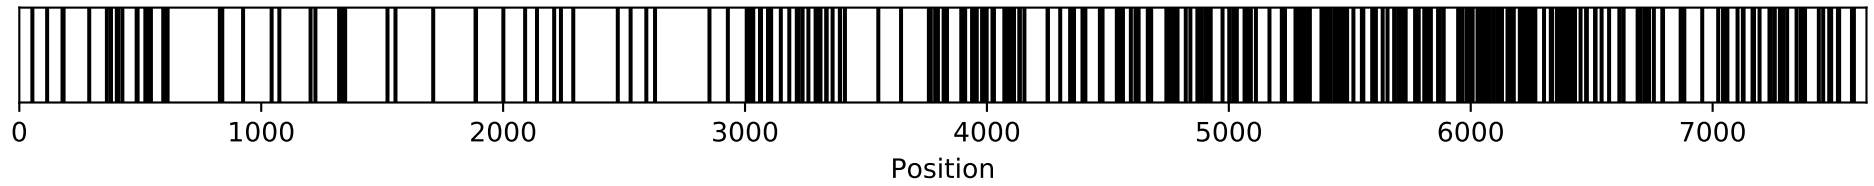

MA1 vs MM1  
Number of differences: 303

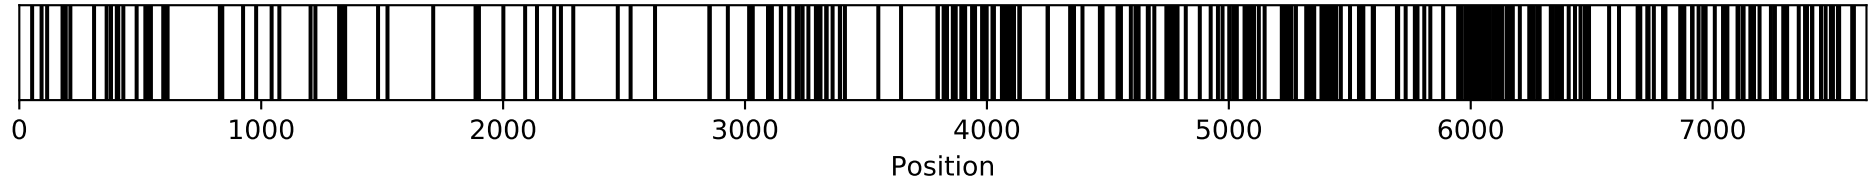

MA1 vs MM2  
Number of differences: 303

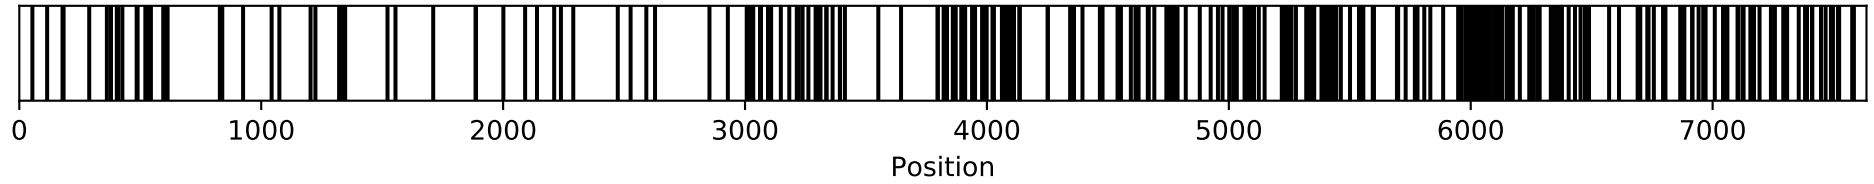

MA2 vs MM1  
Number of differences: 229

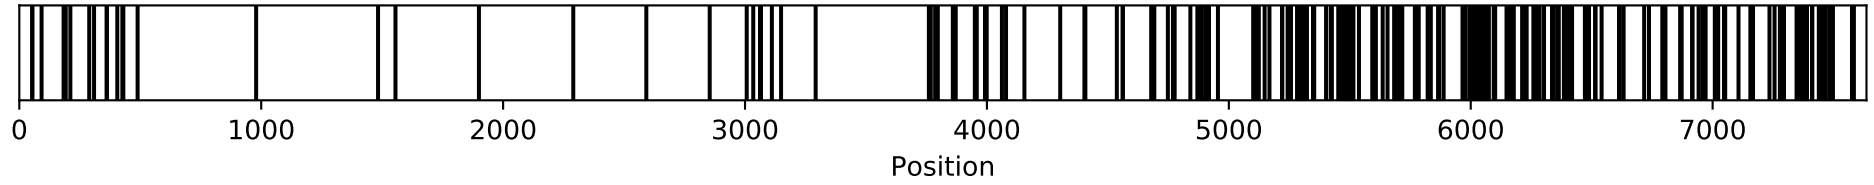

MA2 vs MM2  
Number of differences: 200

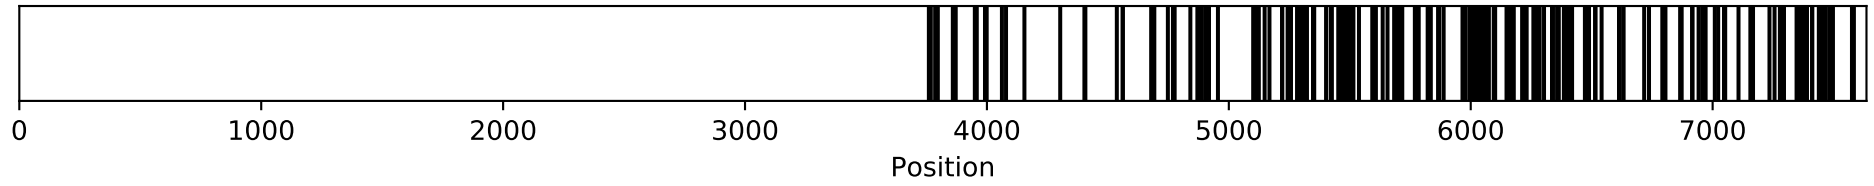

MM1 vs MM2  
Number of differences: 29

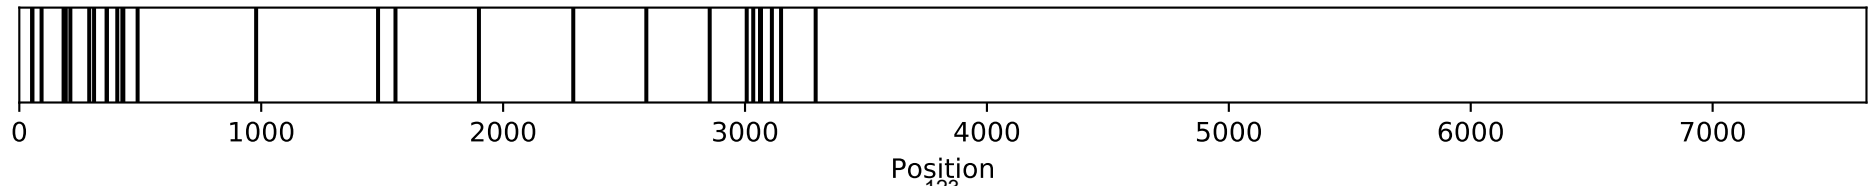

MA1 vs MA2  
Number of differences: 105

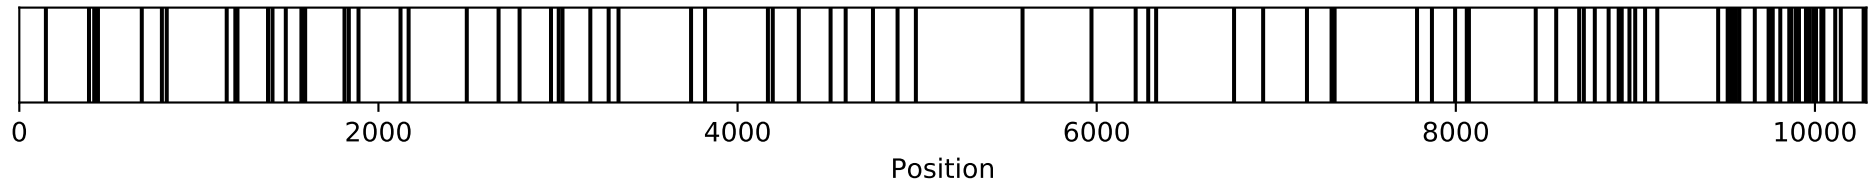

MA1 vs MM1  
Number of differences: 113

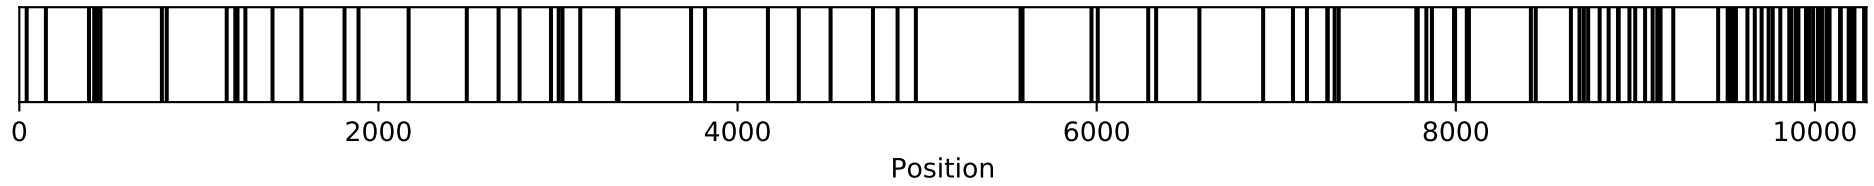

MA1 vs MM2  
Number of differences: 105

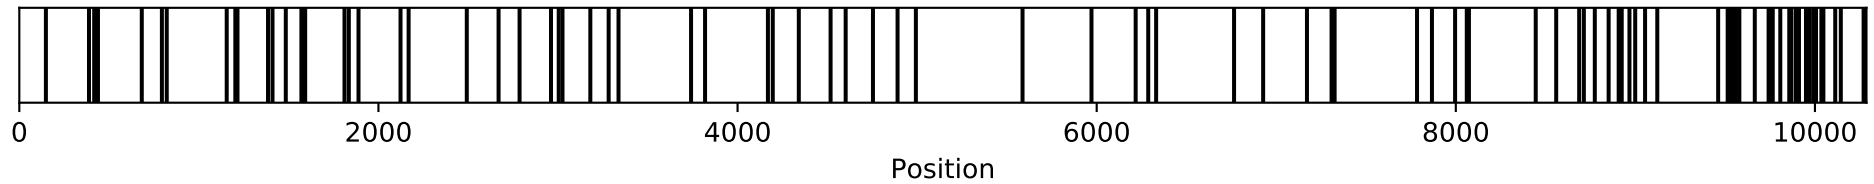

MA2 vs MM1  
Number of differences: 76

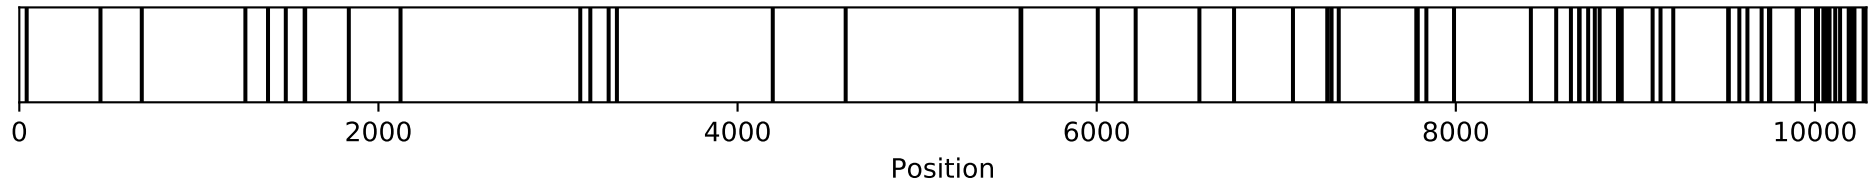

MA2 vs MM2  
Number of differences: 0

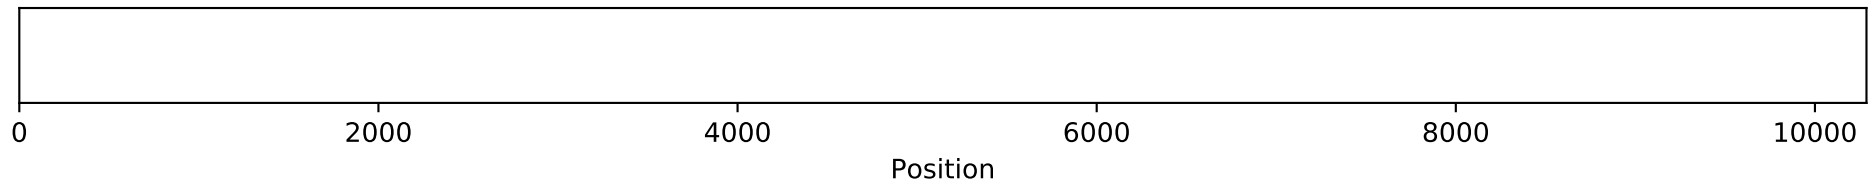

MM1 vs MM2  
Number of differences: 76

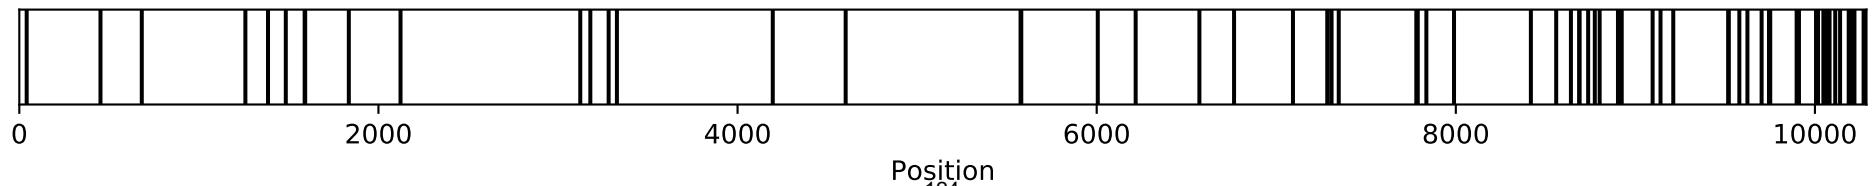

MA1 vs MA2  
Number of differences: 155

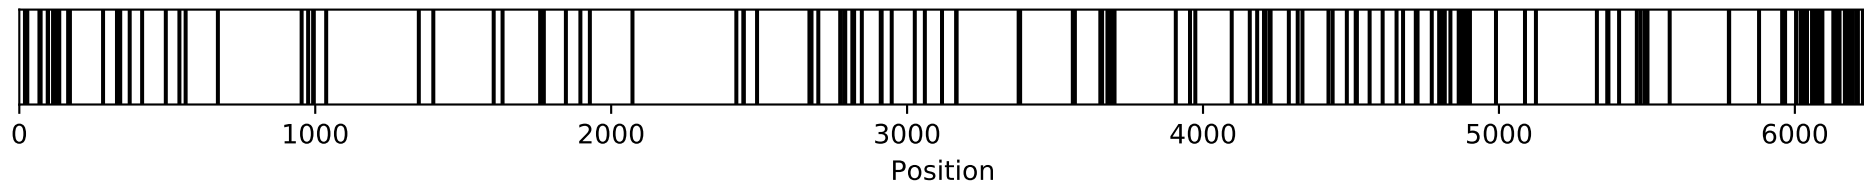

MA1 vs MM1  
Number of differences: 158

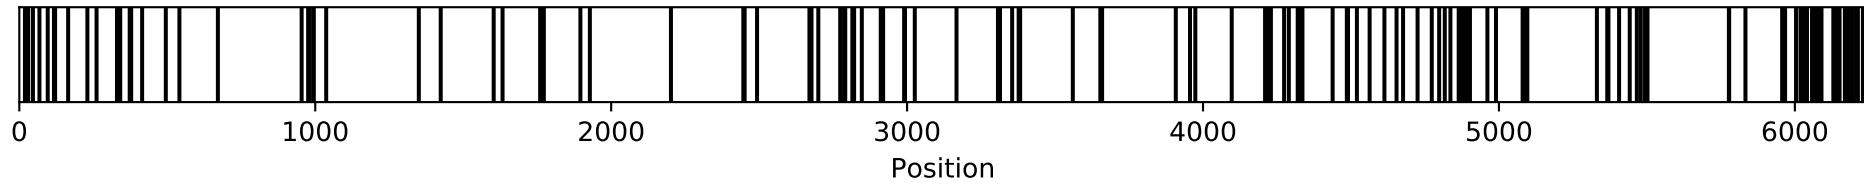

MA1 vs MM2  
Number of differences: 138

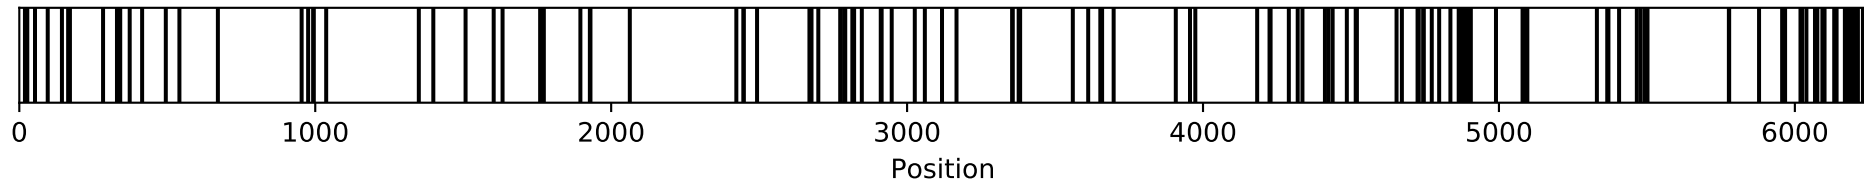

MA2 vs MM1  
Number of differences: 77

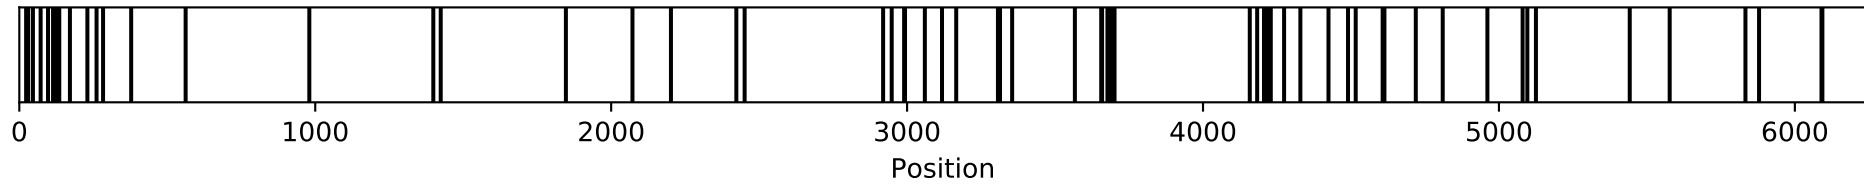

MA2 vs MM2  
Number of differences: 71

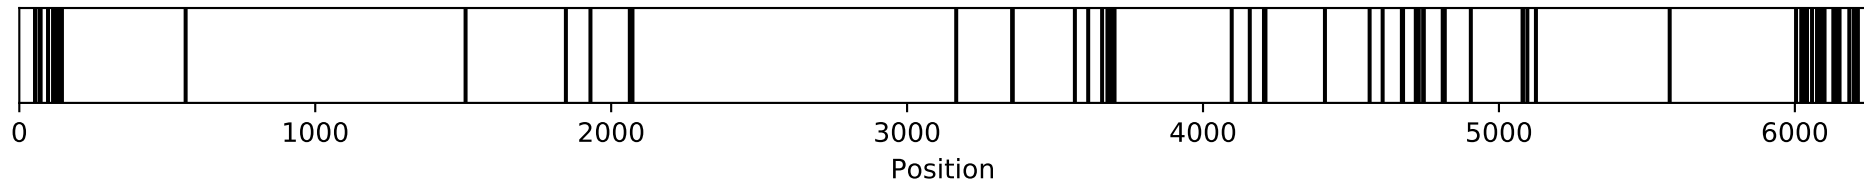

MM1 vs MM2  
Number of differences: 95

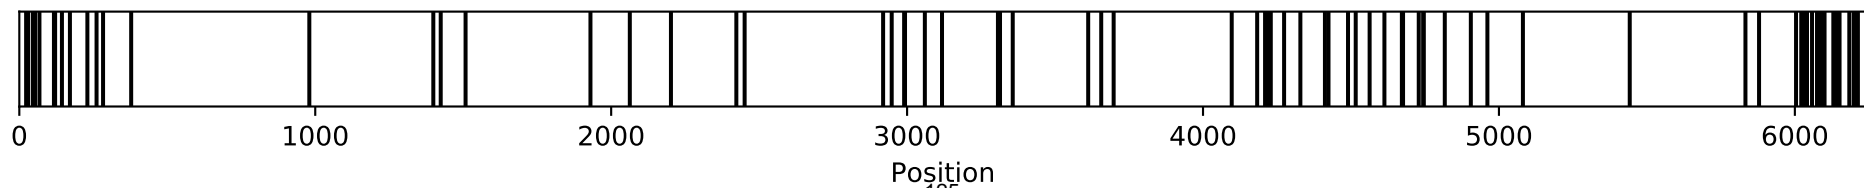

MA1 vs MA2  
Number of differences: 137

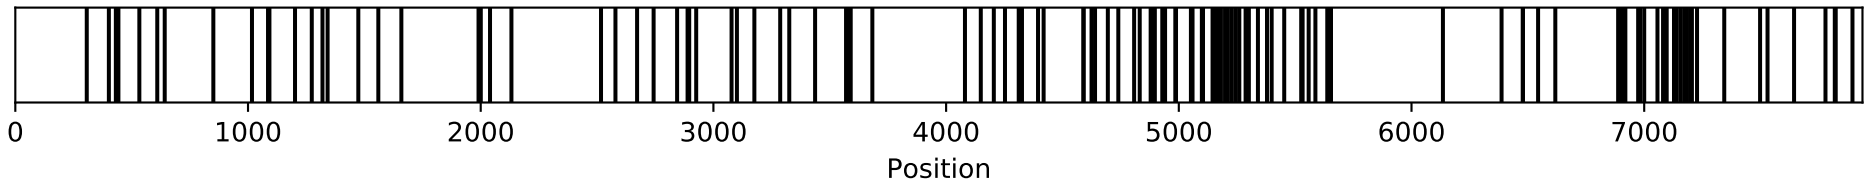

MA1 vs MM1  
Number of differences: 94

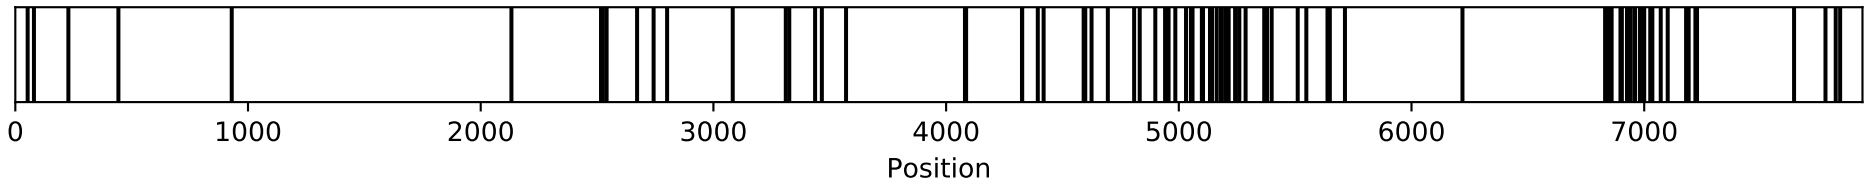

MA1 vs MM2  
Number of differences: 0

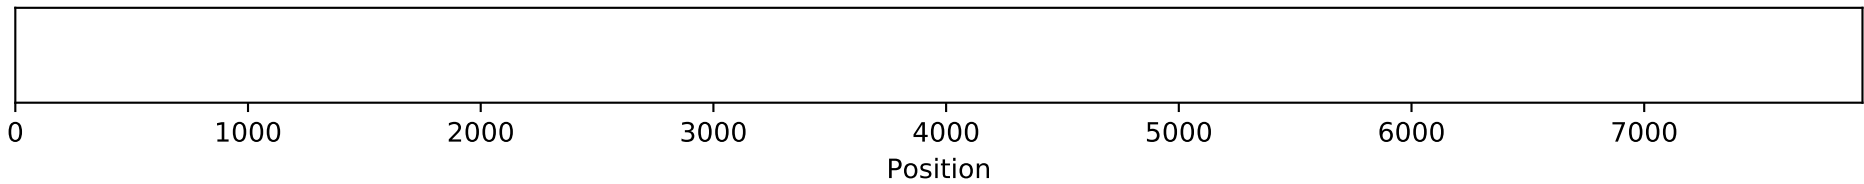

MA2 vs MM1  
Number of differences: 147

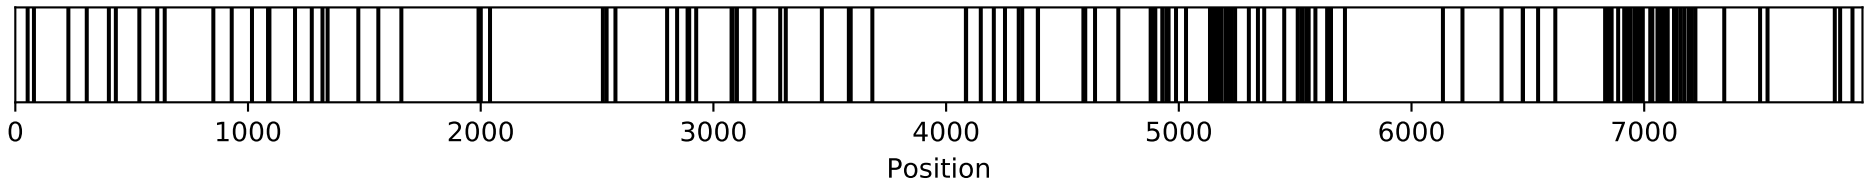

MA2 vs MM2  
Number of differences: 137

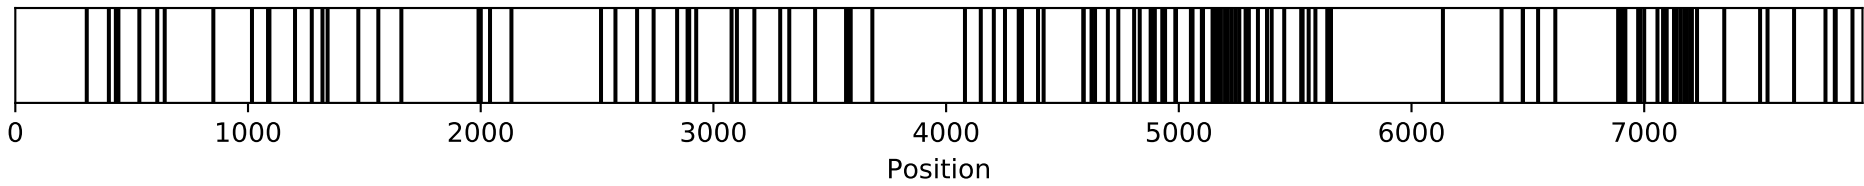

MM1 vs MM2  
Number of differences: 94

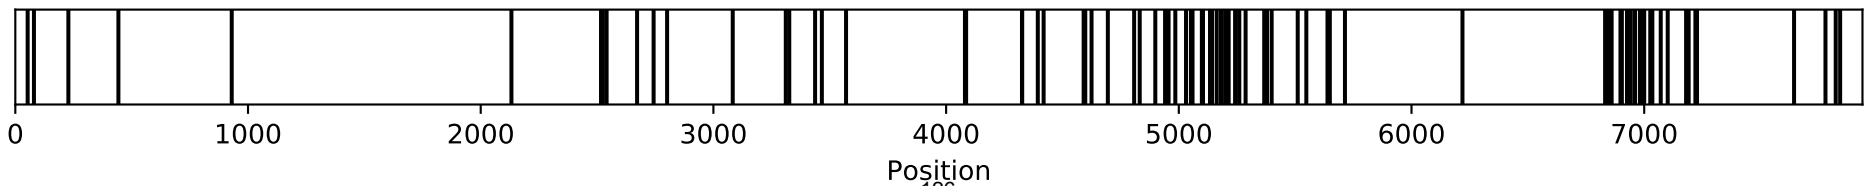

MA1 vs MA2  
Number of differences: 150

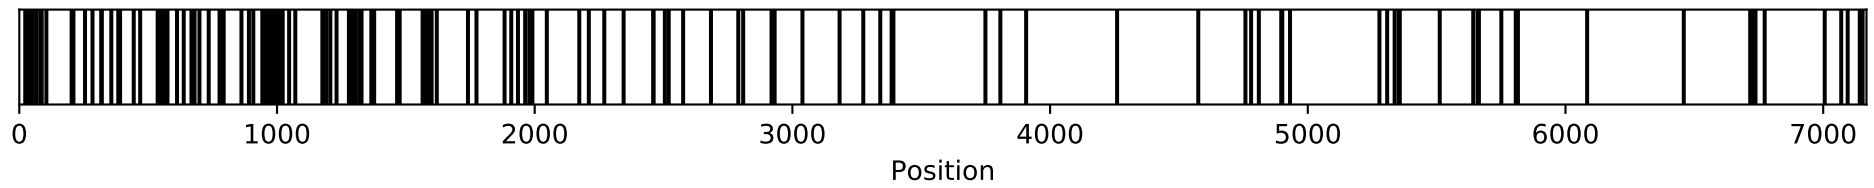

MA1 vs MM1  
Number of differences: 58

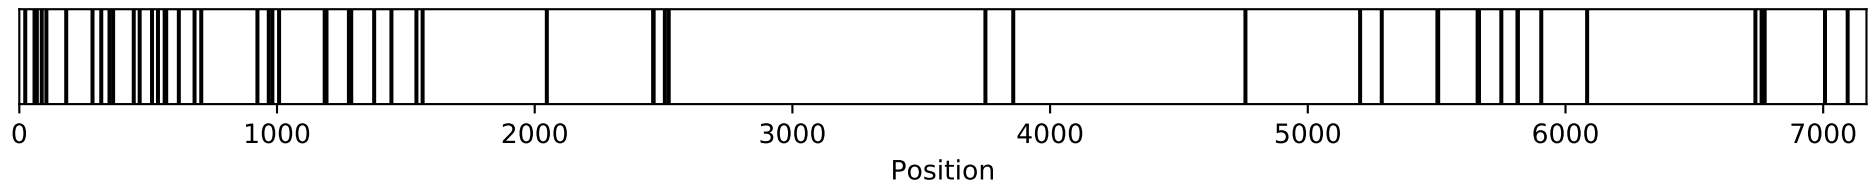

MA1 vs MM2  
Number of differences: 52

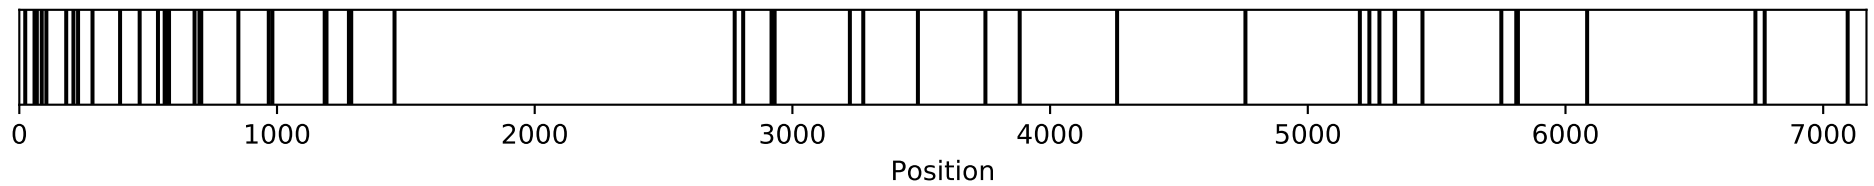

MA2 vs MM1  
Number of differences: 138

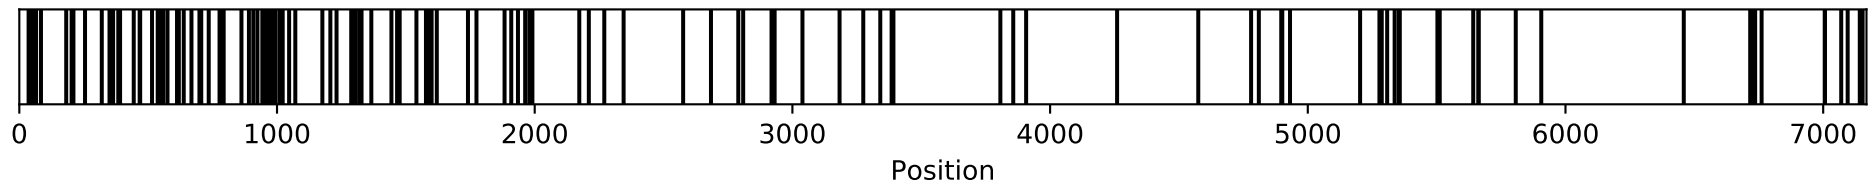

MA2 vs MM2  
Number of differences: 135

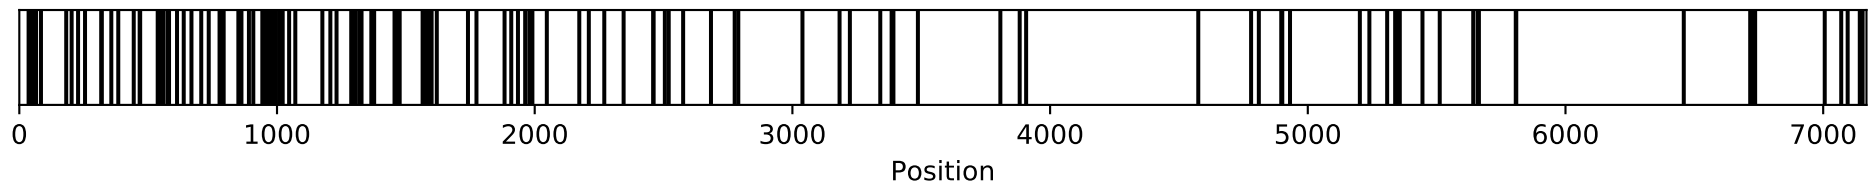

MM1 vs MM2  
Number of differences: 52

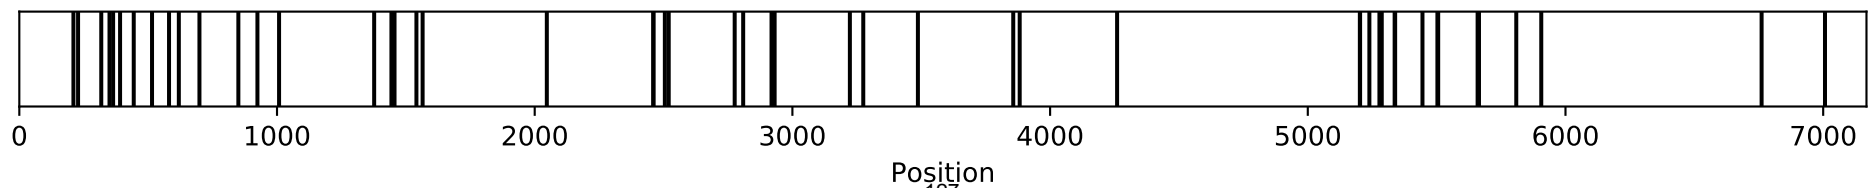

MA1 vs MA2  
Number of differences: 237

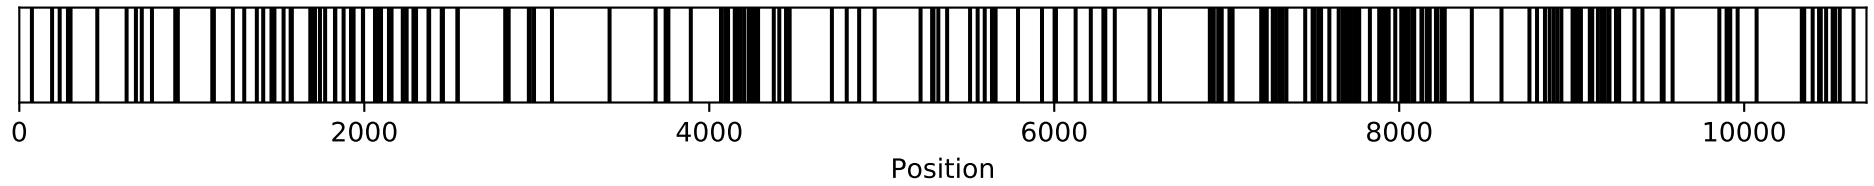

MA1 vs MM1  
Number of differences: 255

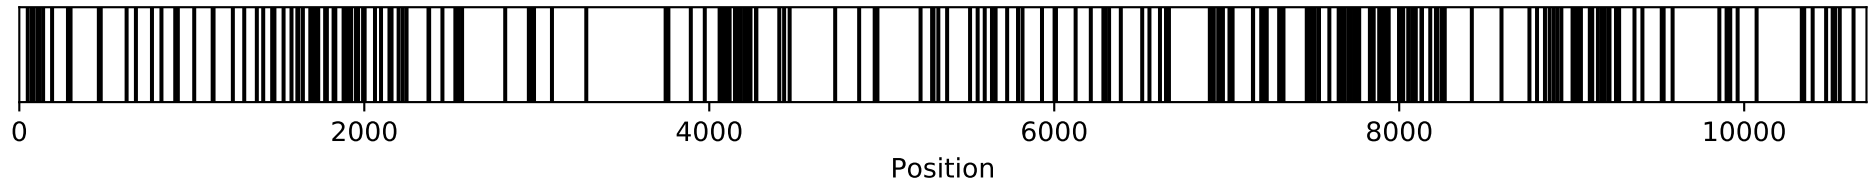

MA1 vs MM2  
Number of differences: 237

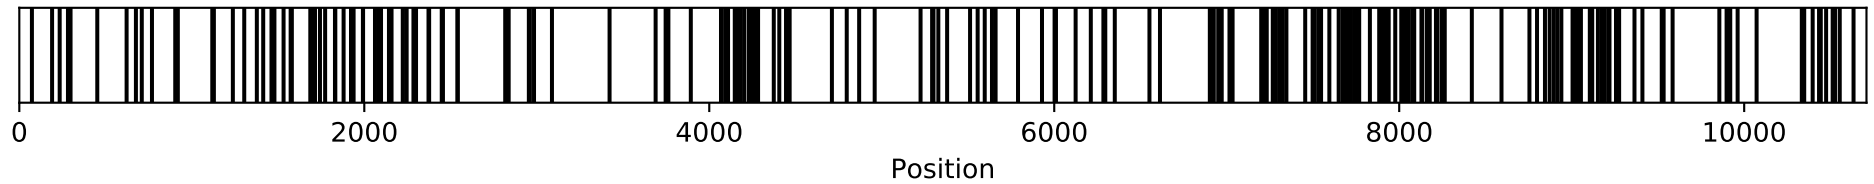

MA2 vs MM1  
Number of differences: 131

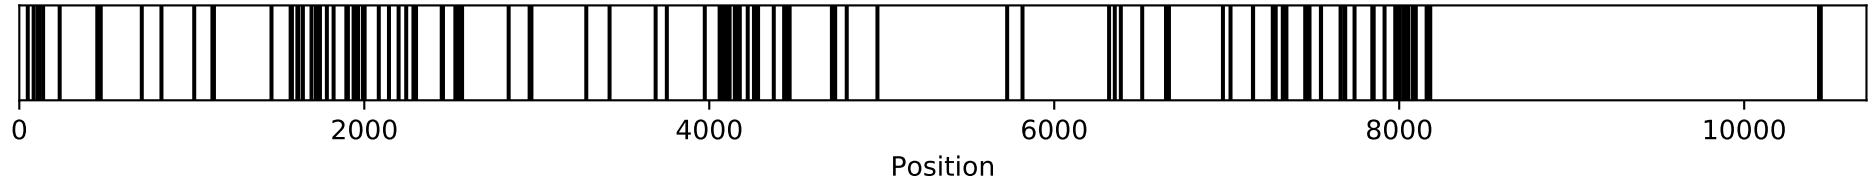

MA2 vs MM2  
Number of differences: 0

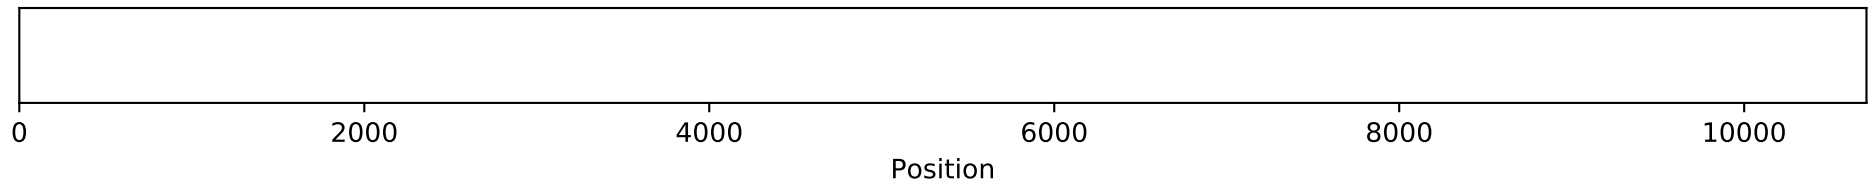

MM1 vs MM2  
Number of differences: 131

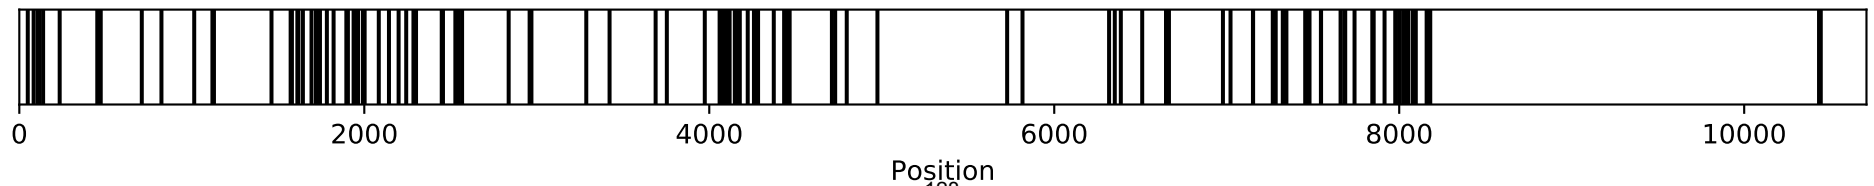

MA1 vs MA2  
Number of differences: 725

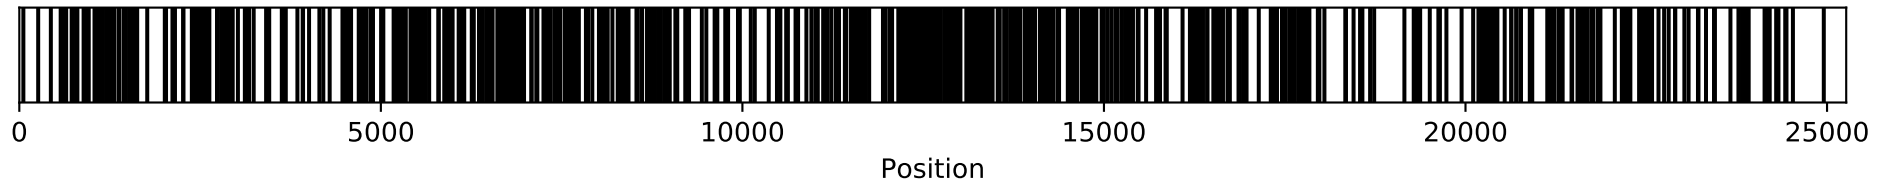

MA1 vs MM1  
Number of differences: 386

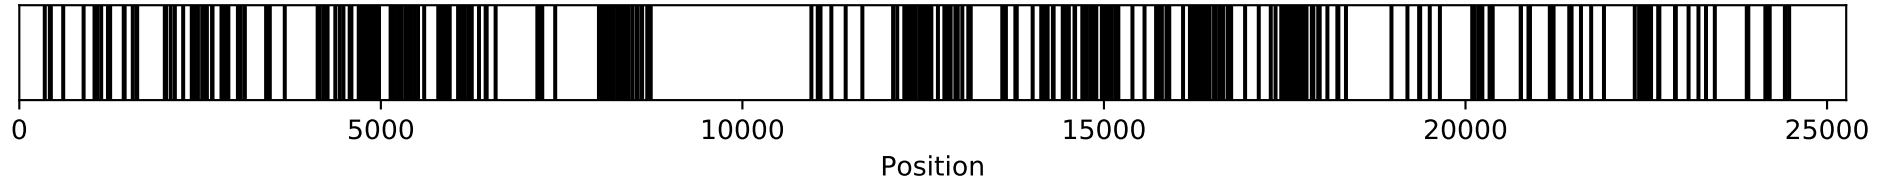

MA1 vs MM2  
Number of differences: 362

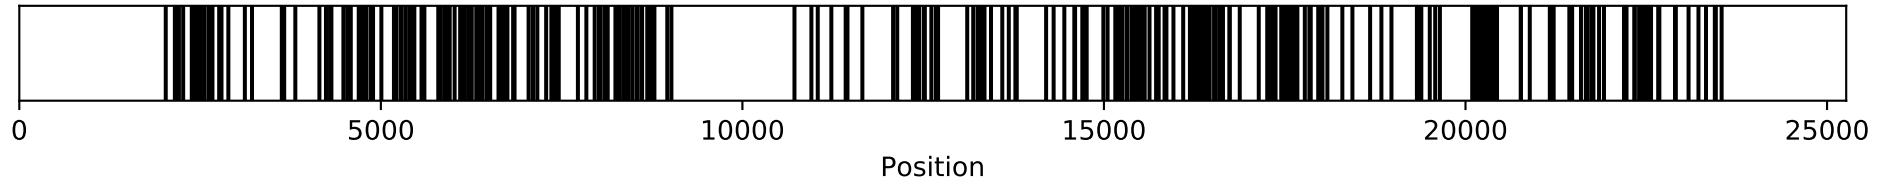

MA2 vs MM1  
Number of differences: 718

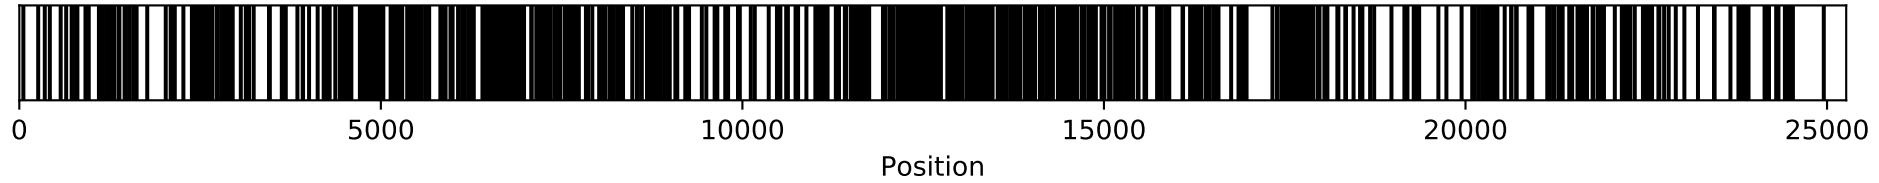

MA2 vs MM2  
Number of differences: 701

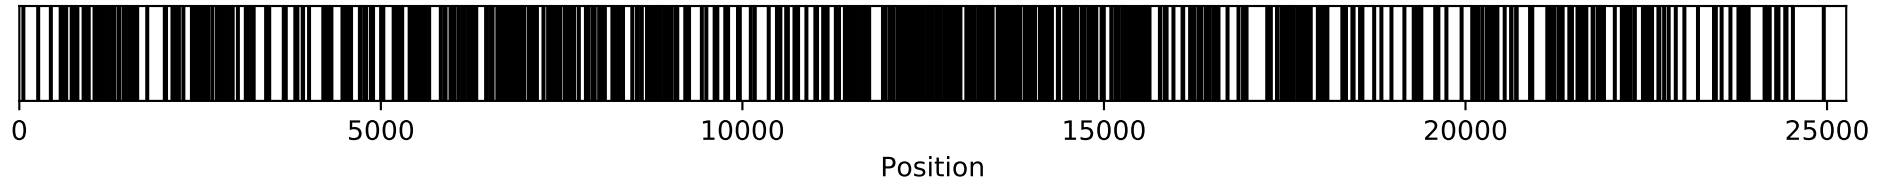

MM1 vs MM2  
Number of differences: 360

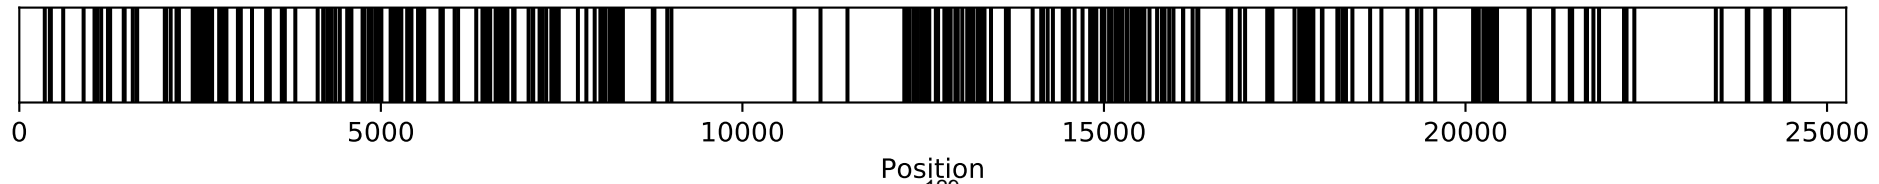

MA1 vs MA2  
Number of differences: 110

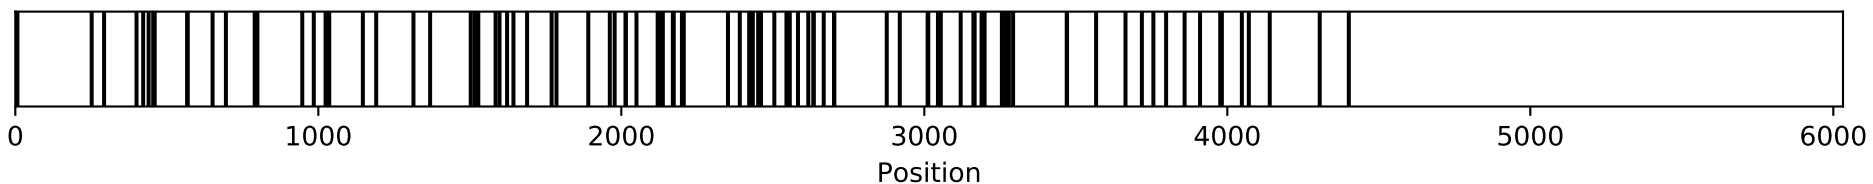

MA1 vs MM1  
Number of differences: 175

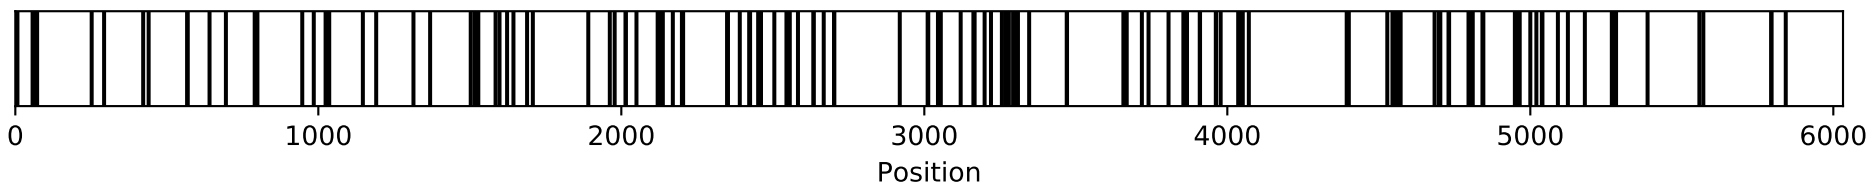

MA1 vs MM2  
Number of differences: 121

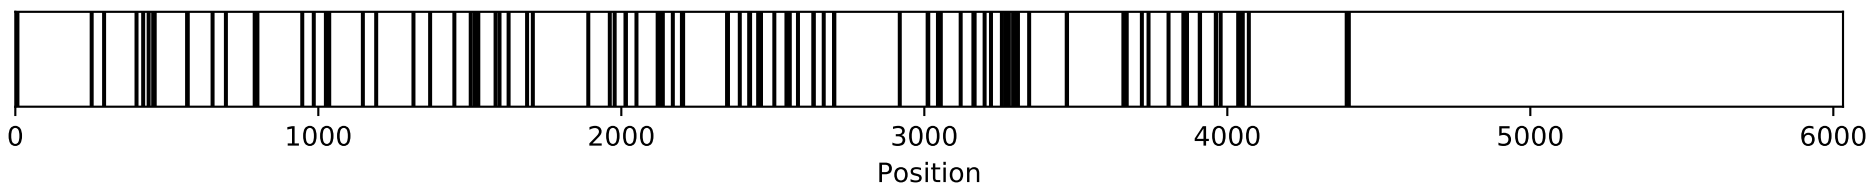

MA2 vs MM1  
Number of differences: 107

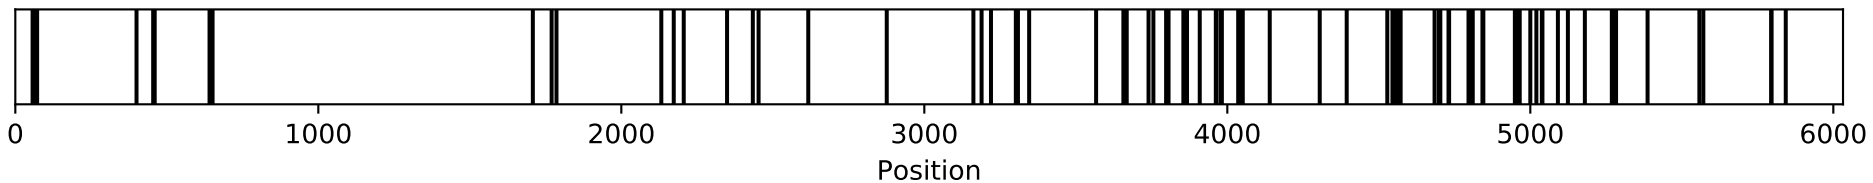

MA2 vs MM2  
Number of differences: 51

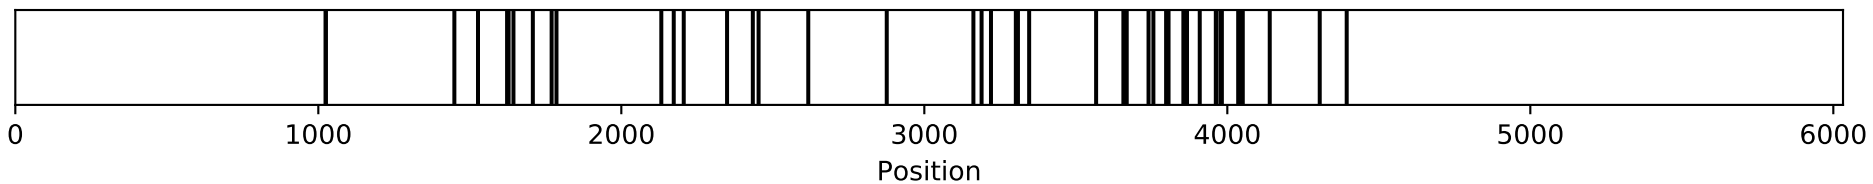

MM1 vs MM2  
Number of differences: 70

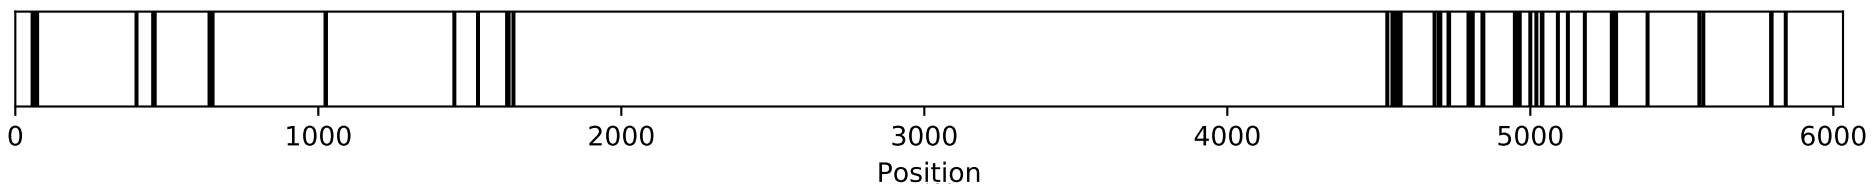



MA1 vs MA2  
Number of differences: 187

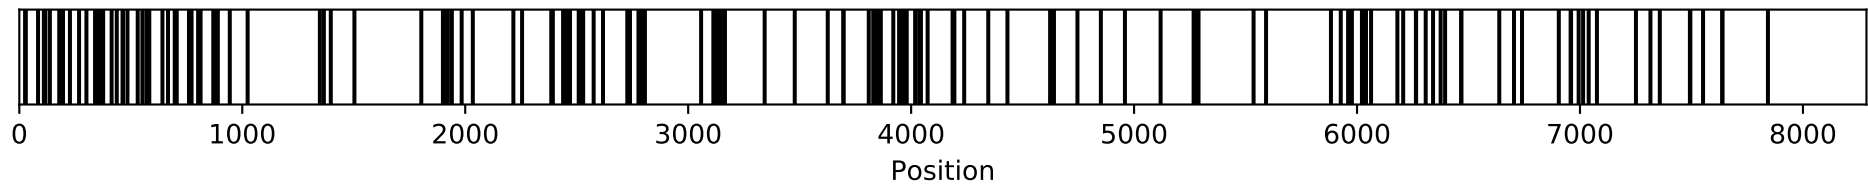

MA1 vs MM1  
Number of differences: 187

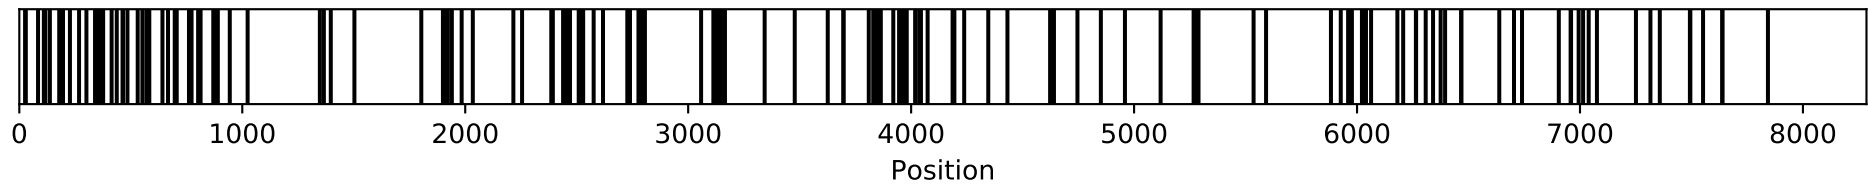

MA1 vs MM2  
Number of differences: 189

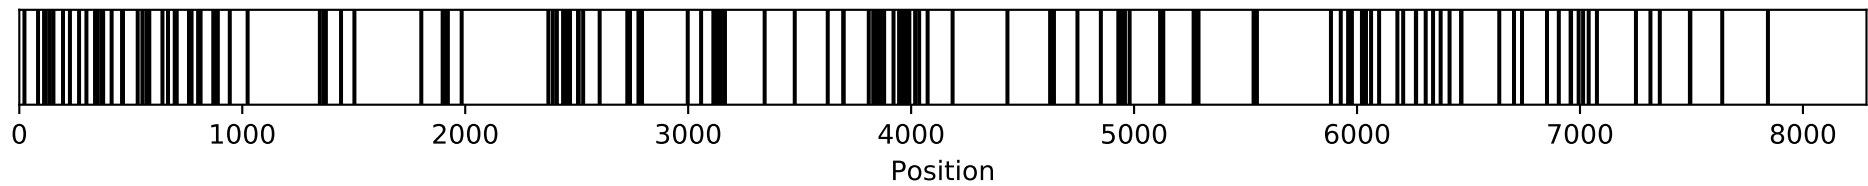

MA2 vs MM1  
Number of differences: 0

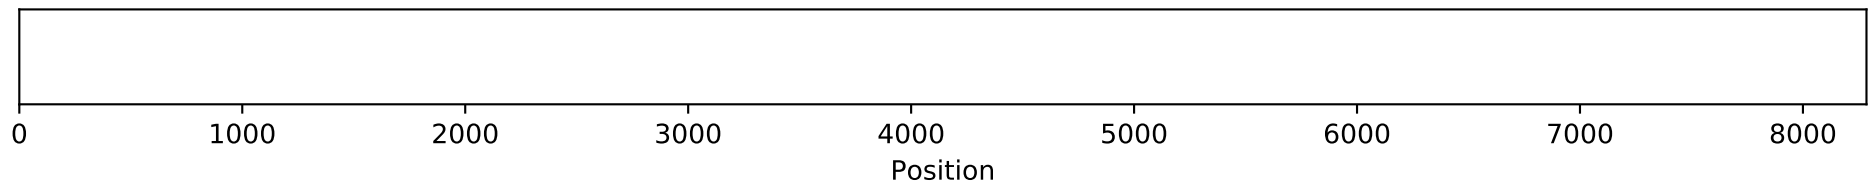

MA2 vs MM2  
Number of differences: 58

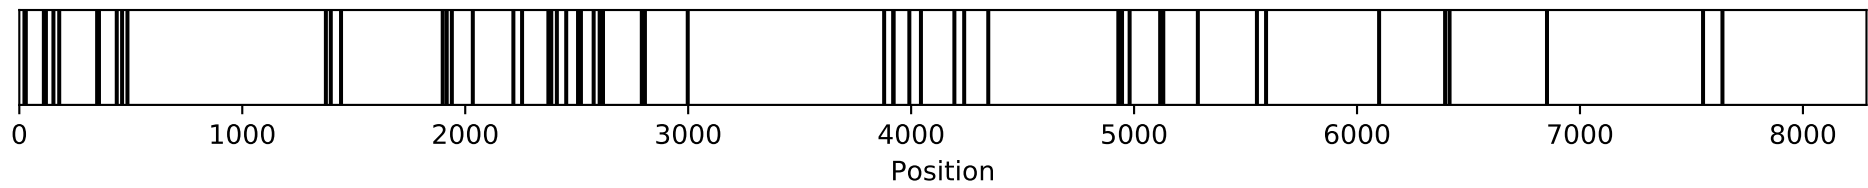

MM1 vs MM2  
Number of differences: 58

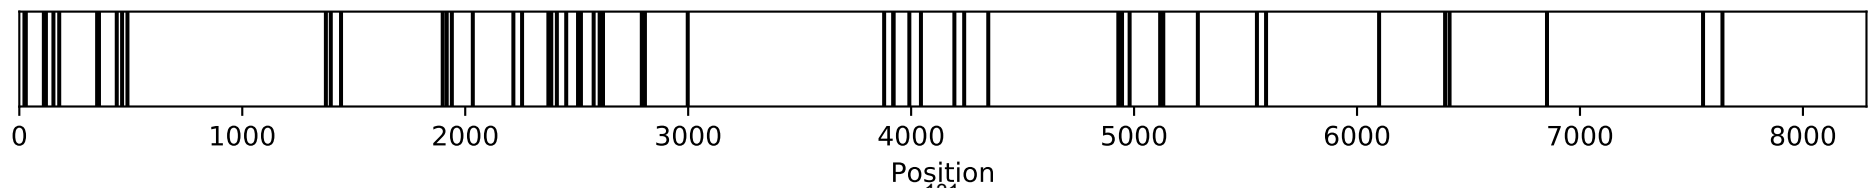

MA1 vs MA2  
Number of differences: 184

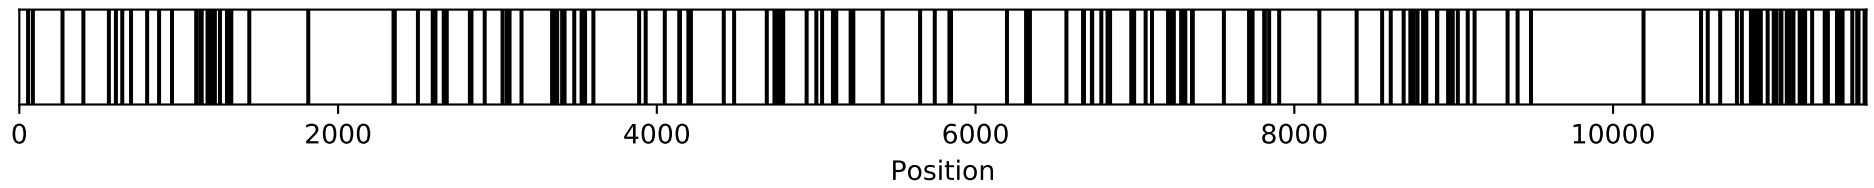

MA1 vs MM1  
Number of differences: 184

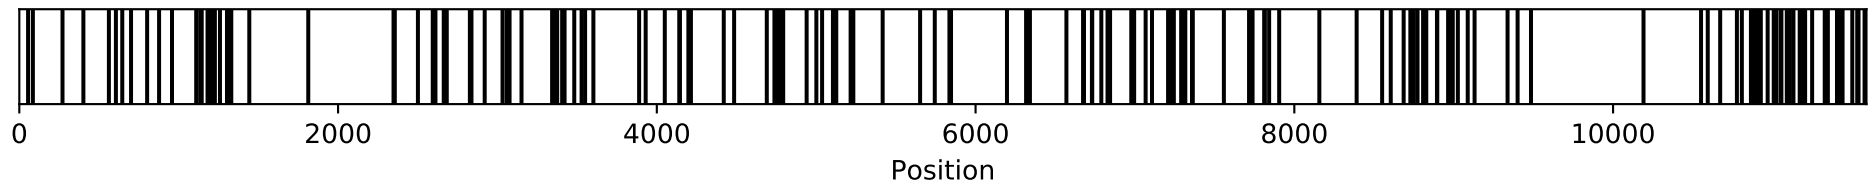

MA1 vs MM2  
Number of differences: 177

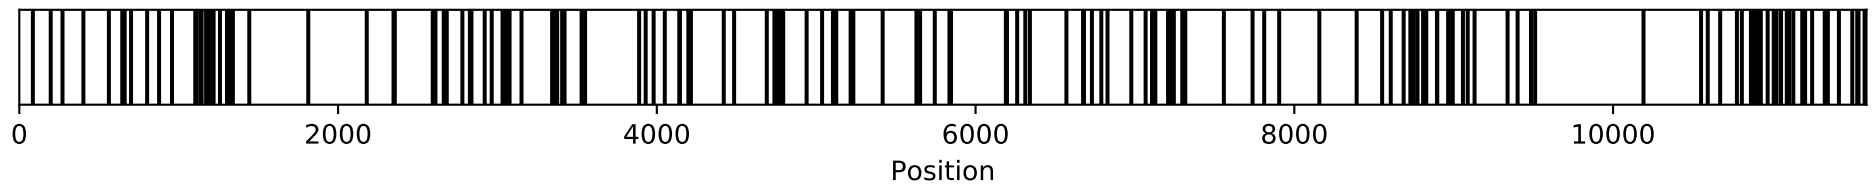

MA2 vs MM1  
Number of differences: 0

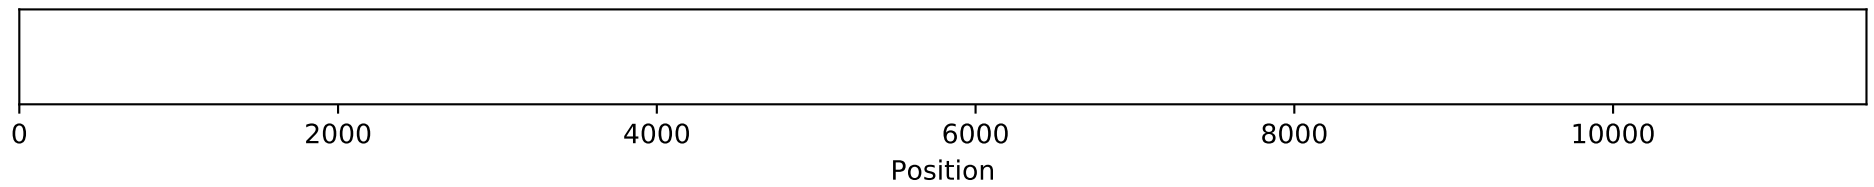

MA2 vs MM2  
Number of differences: 48

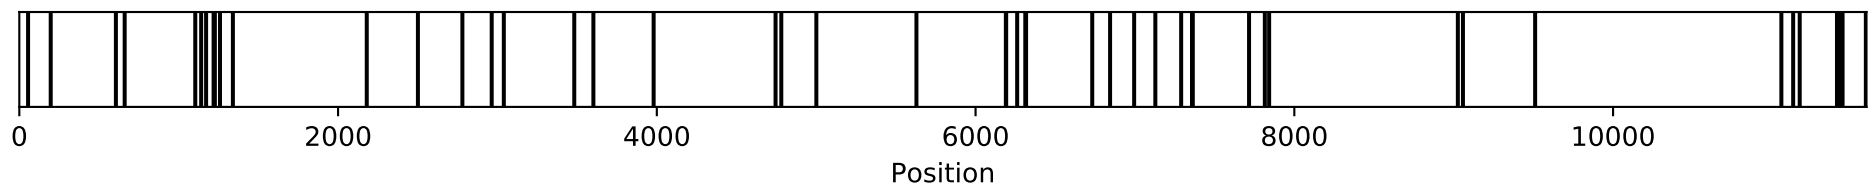

MM1 vs MM2  
Number of differences: 48

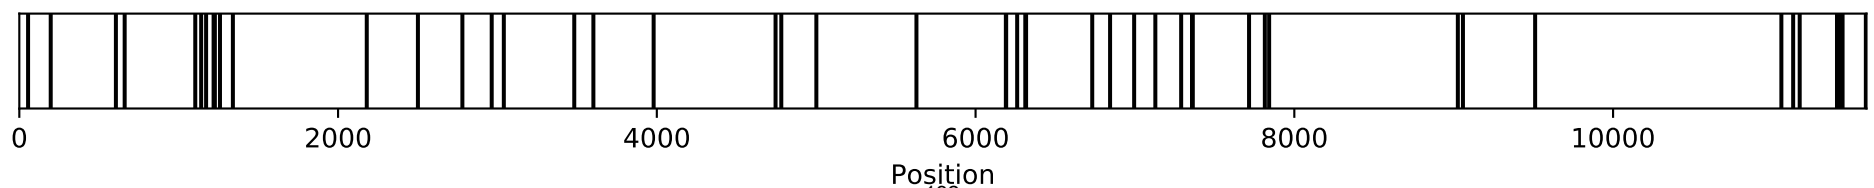

MA1 vs MA2  
Number of differences: 353

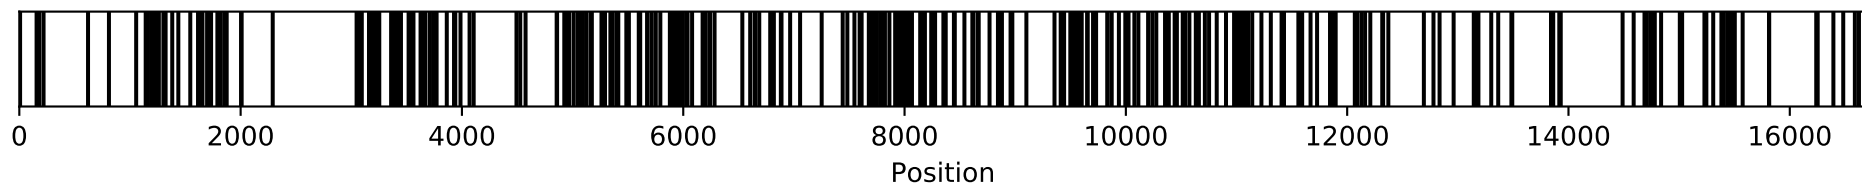

MA1 vs MM1  
Number of differences: 355

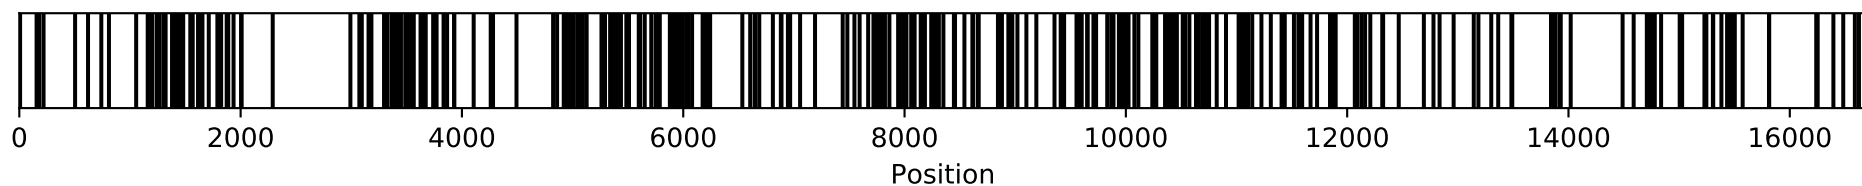

MA1 vs MM2  
Number of differences: 349

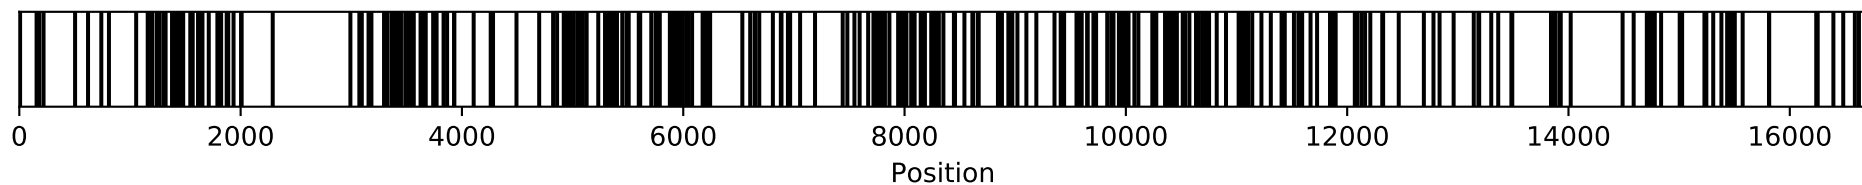

MA2 vs MM1  
Number of differences: 196

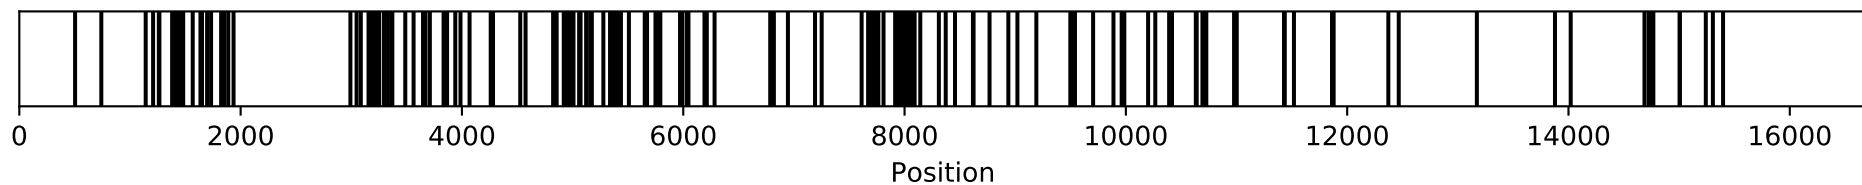

MA2 vs MM2  
Number of differences: 208

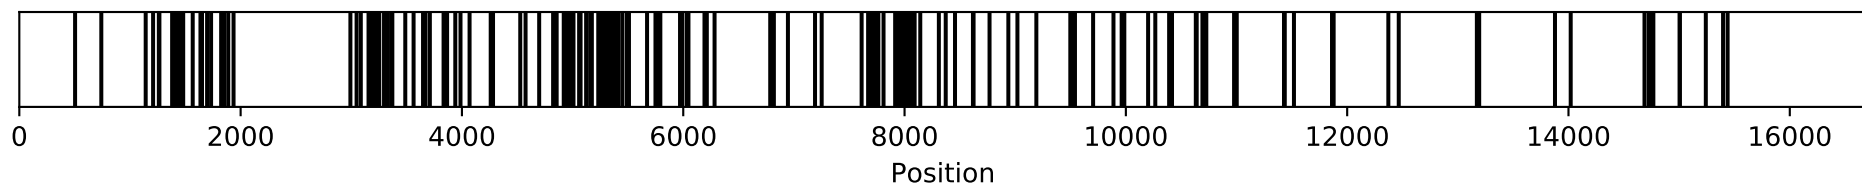

MM1 vs MM2  
Number of differences: 20

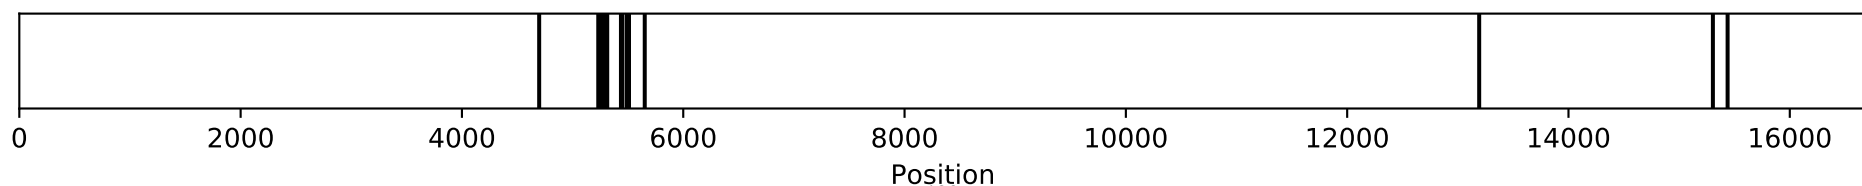

MA1 vs MA2  
Number of differences: 178

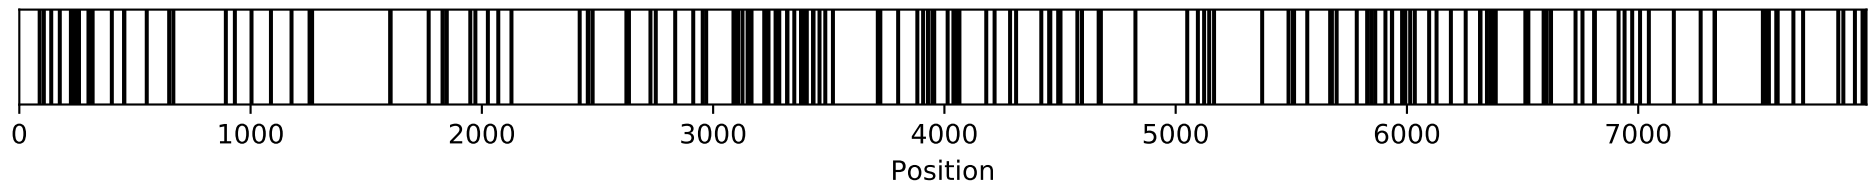

MA1 vs MM1  
Number of differences: 195

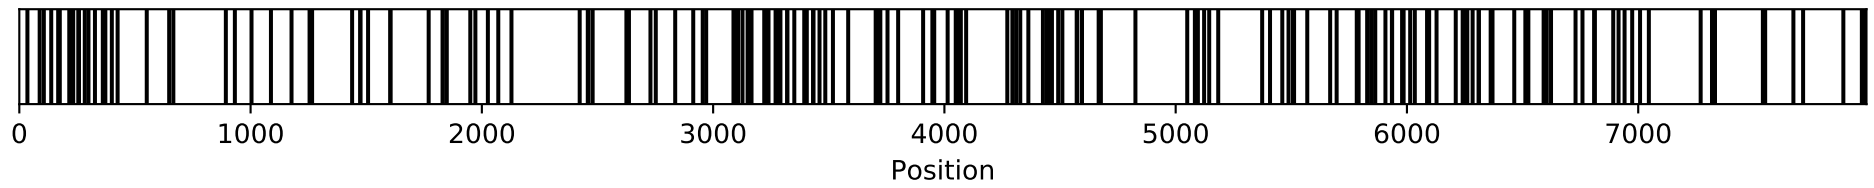

MA1 vs MM2  
Number of differences: 178

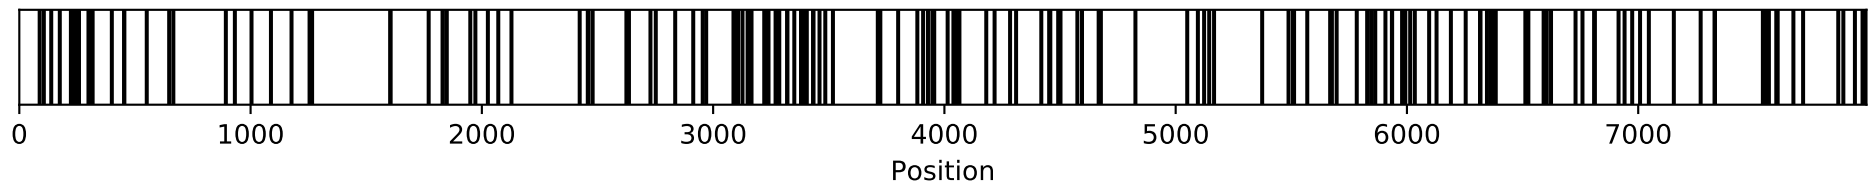

MA2 vs MM1  
Number of differences: 82

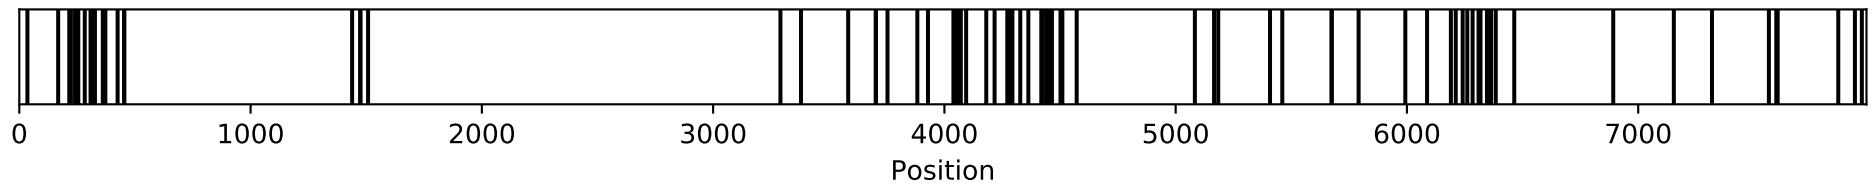

MA2 vs MM2  
Number of differences: 0

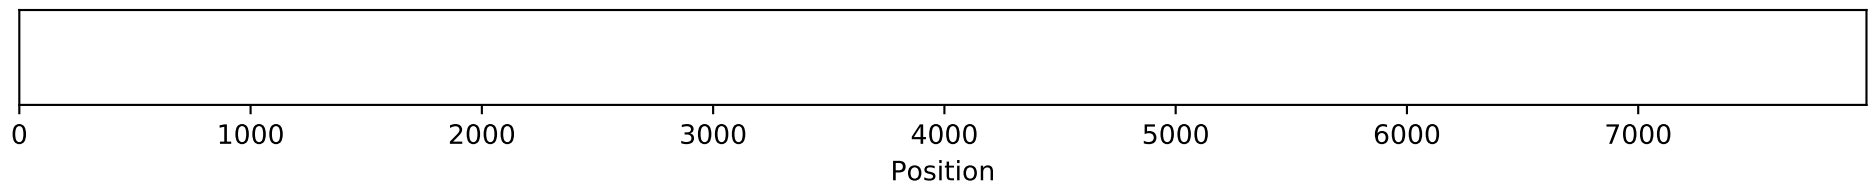

MM1 vs MM2  
Number of differences: 82

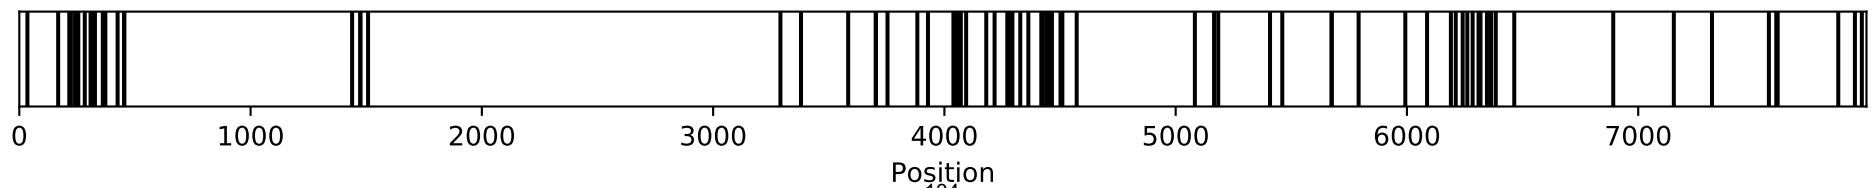

MA1 vs MA2  
Number of differences: 631

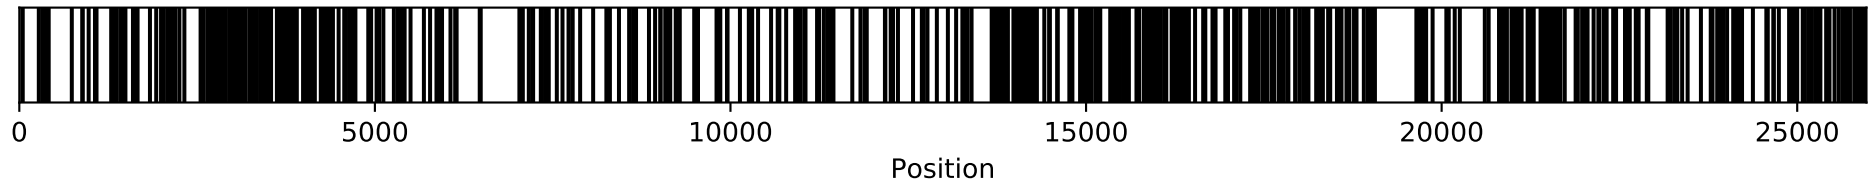

MA1 vs MM1  
Number of differences: 279

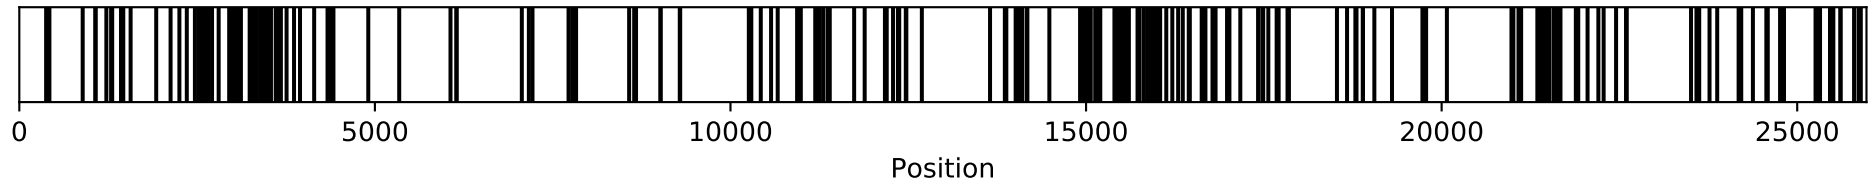

MA1 vs MM2  
Number of differences: 285

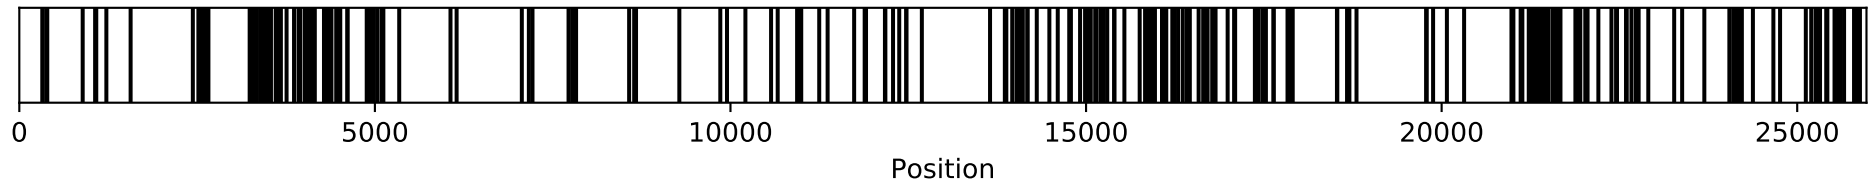

MA2 vs MM1  
Number of differences: 613

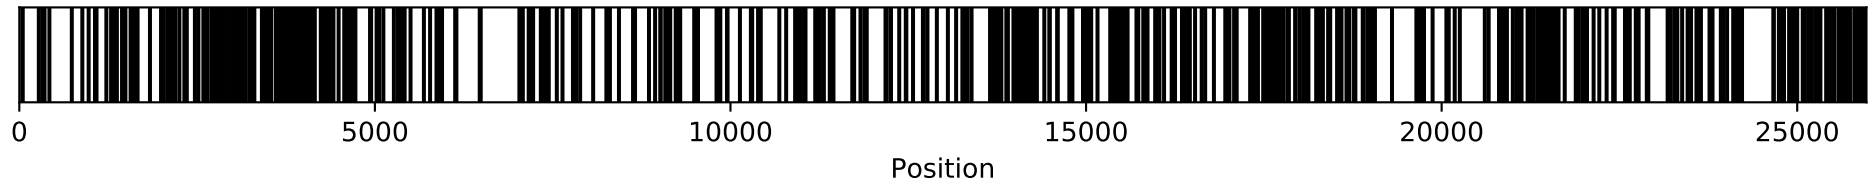

MA2 vs MM2  
Number of differences: 624

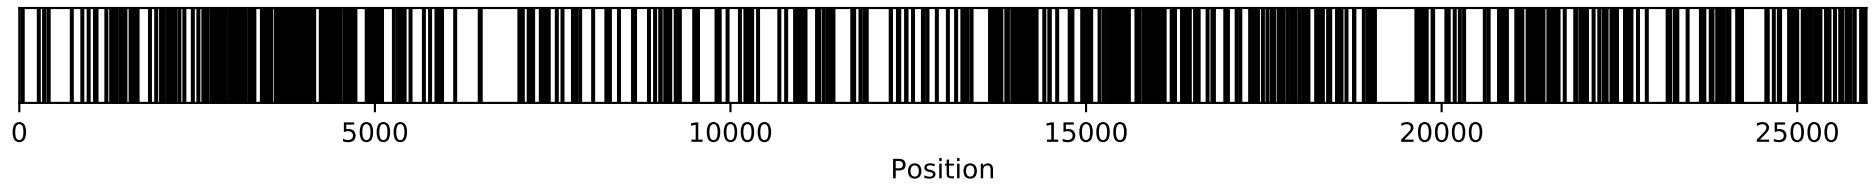

MM1 vs MM2  
Number of differences: 278

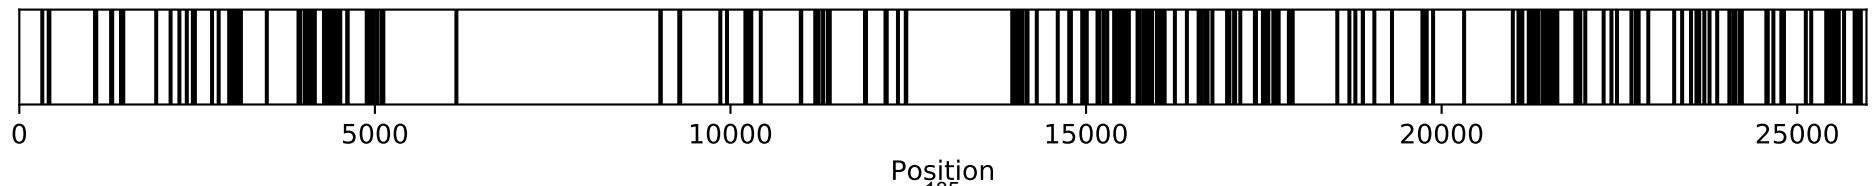

MA1 vs MA2  
Number of differences: 175

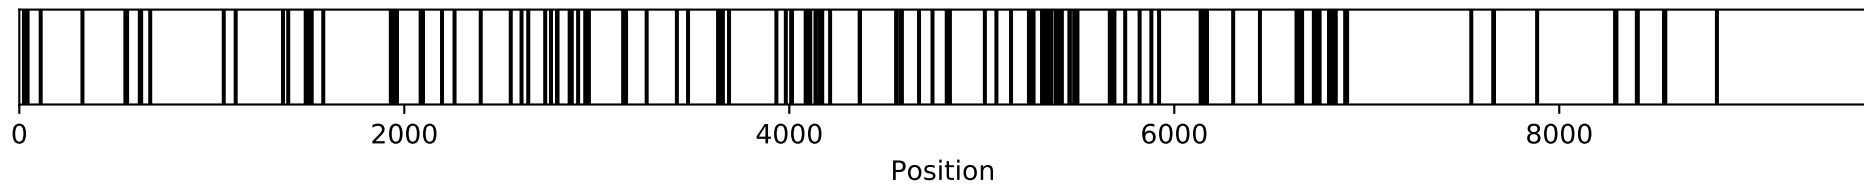

MA1 vs MM1  
Number of differences: 175

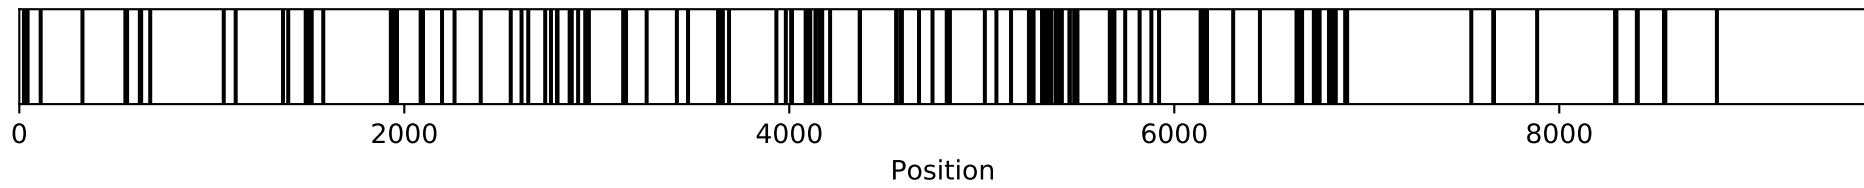

MA1 vs MM2  
Number of differences: 182

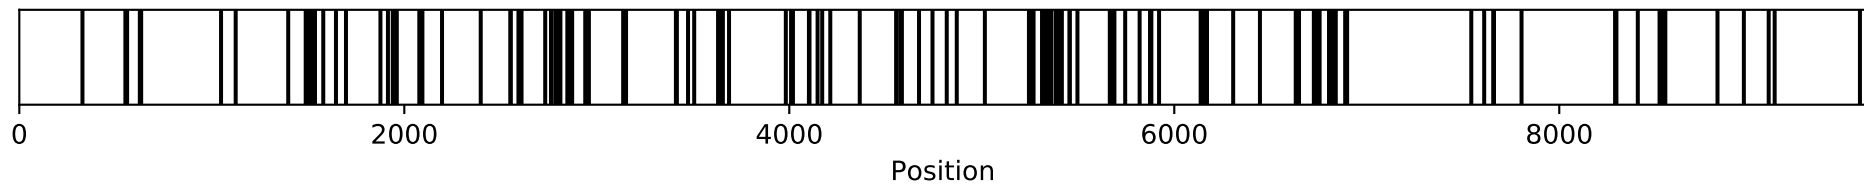

MA2 vs MM1  
Number of differences: 0

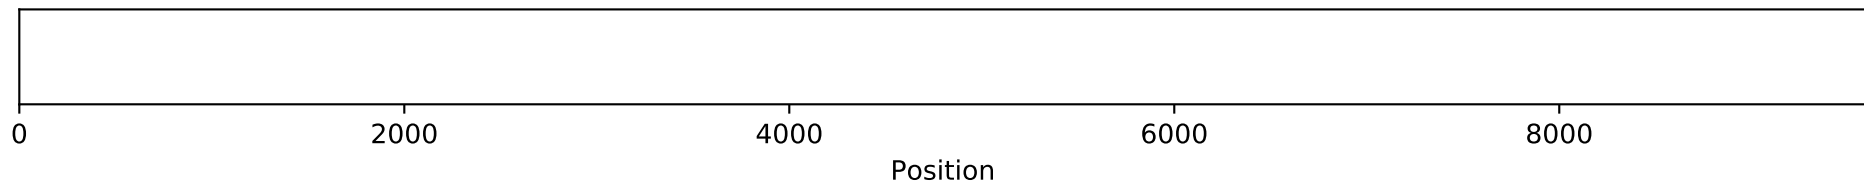

MA2 vs MM2  
Number of differences: 83

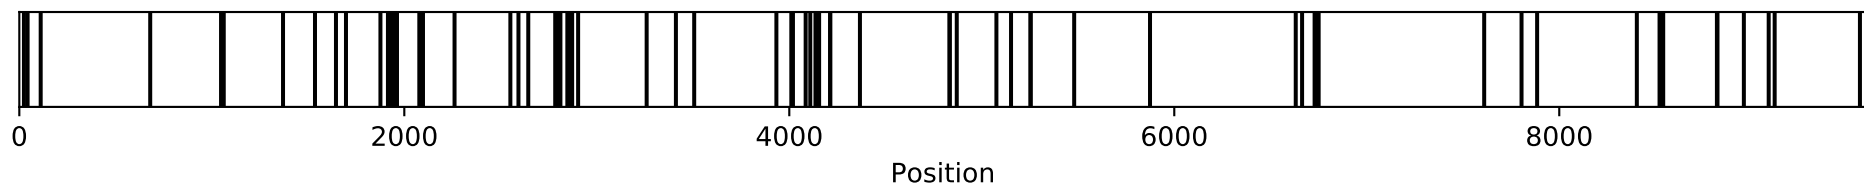

MM1 vs MM2  
Number of differences: 83

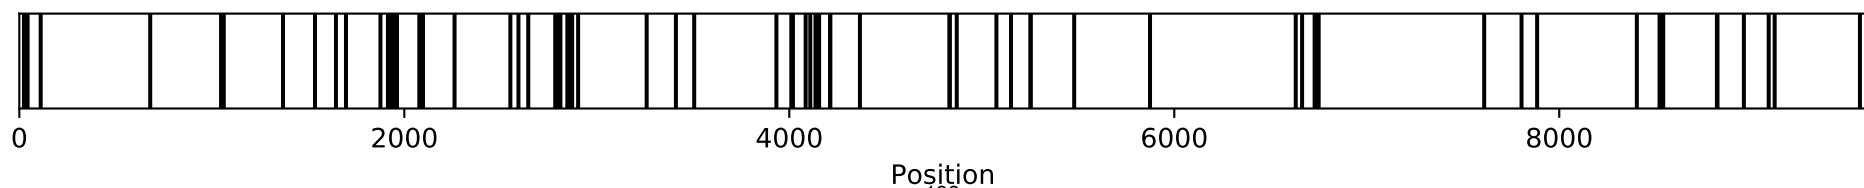

MA1 vs MA2  
Number of differences: 269

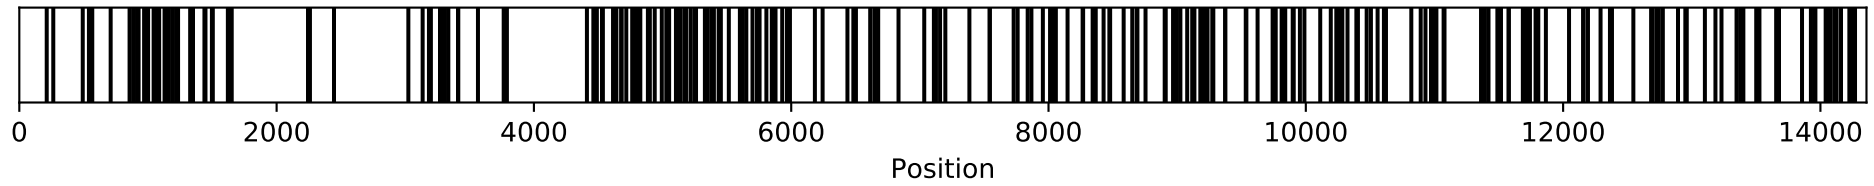

MA1 vs MM1  
Number of differences: 260

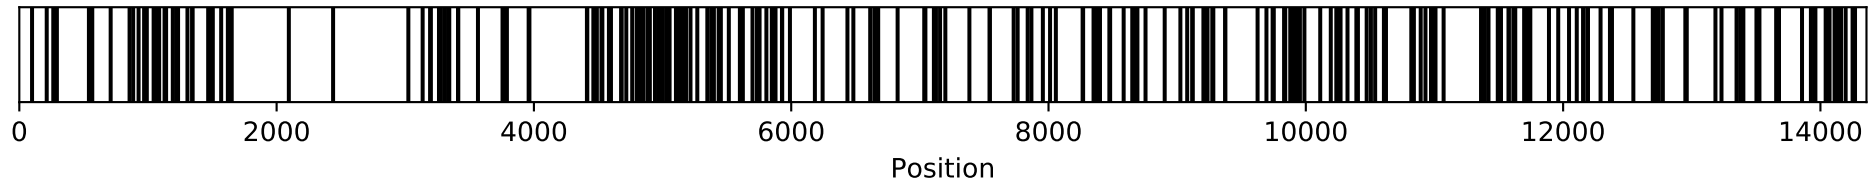

MA1 vs MM2  
Number of differences: 269

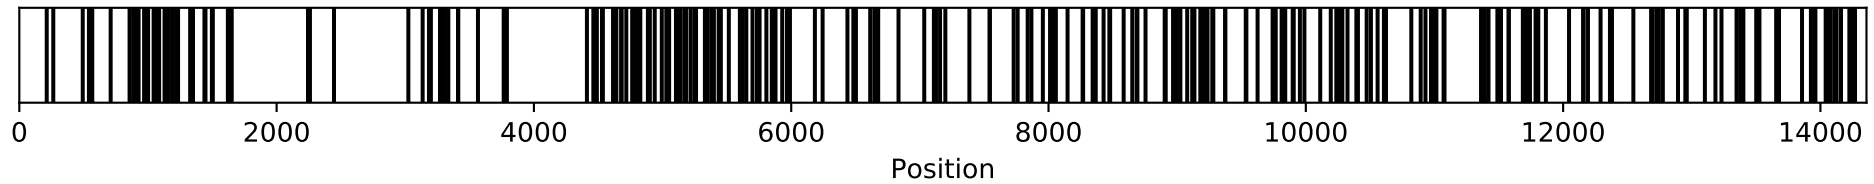

MA2 vs MM1  
Number of differences: 126

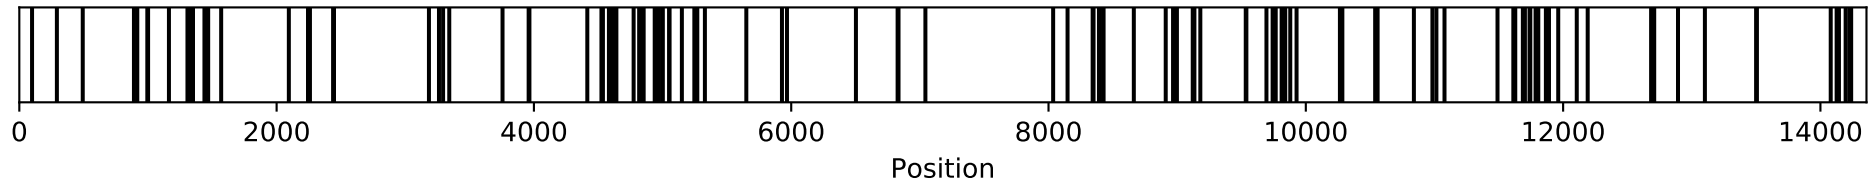

MA2 vs MM2  
Number of differences: 0

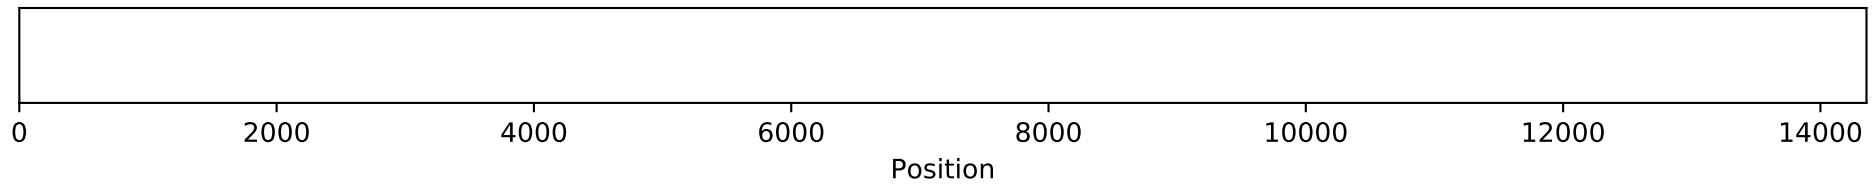

MM1 vs MM2  
Number of differences: 126

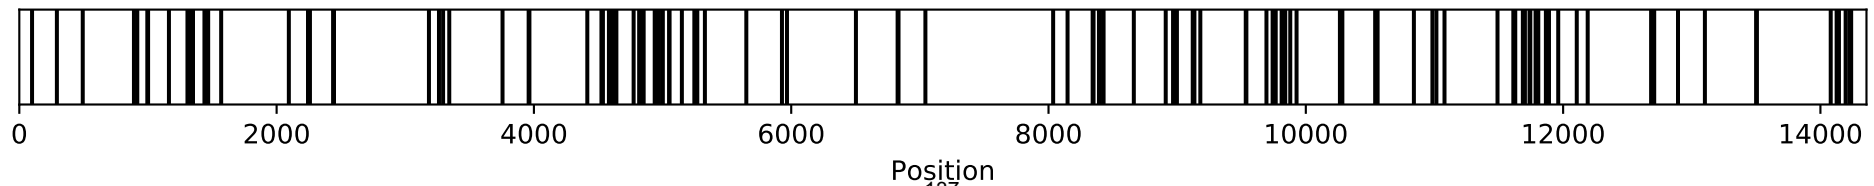

MA1 vs MA2  
Number of differences: 0

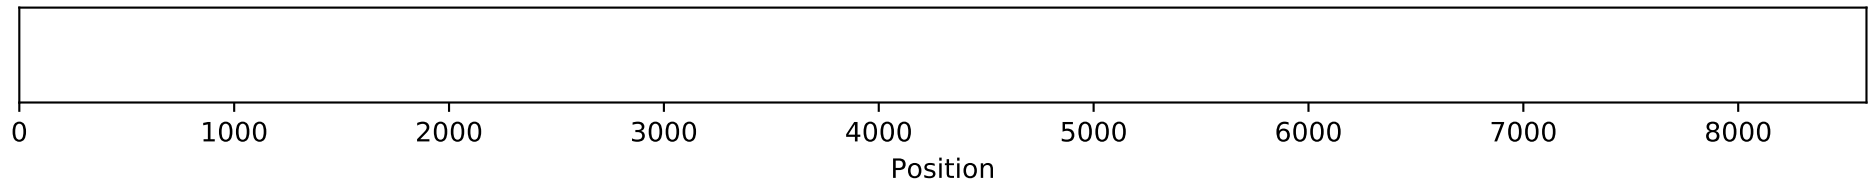

MA1 vs MM1  
Number of differences: 354

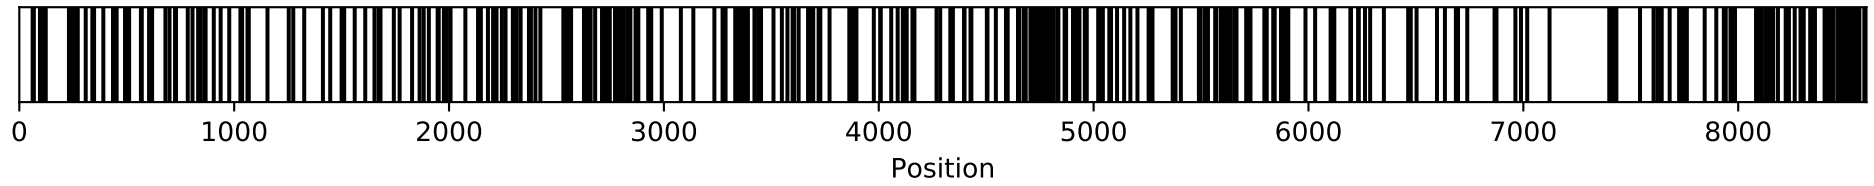

MA1 vs MM2  
Number of differences: 351

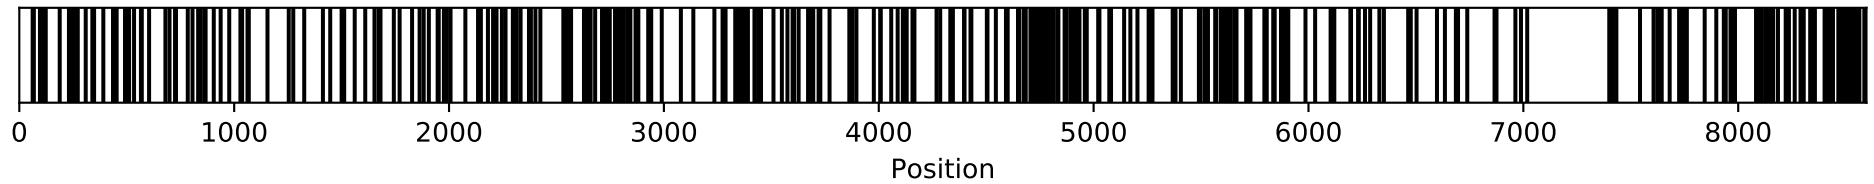

MA2 vs MM1  
Number of differences: 354

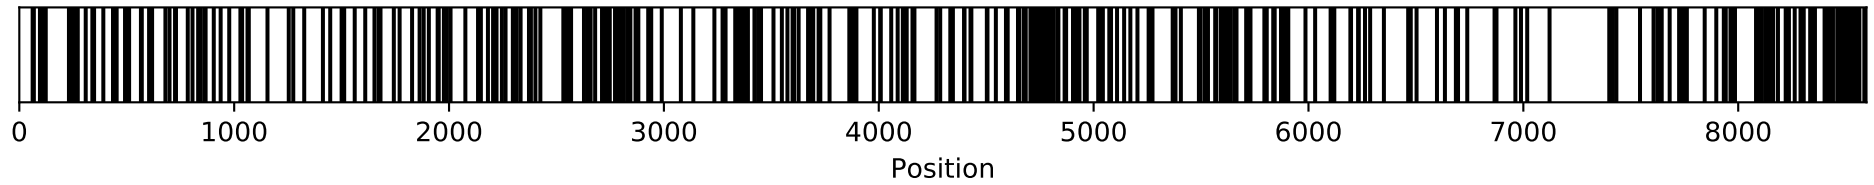

MA2 vs MM2  
Number of differences: 351

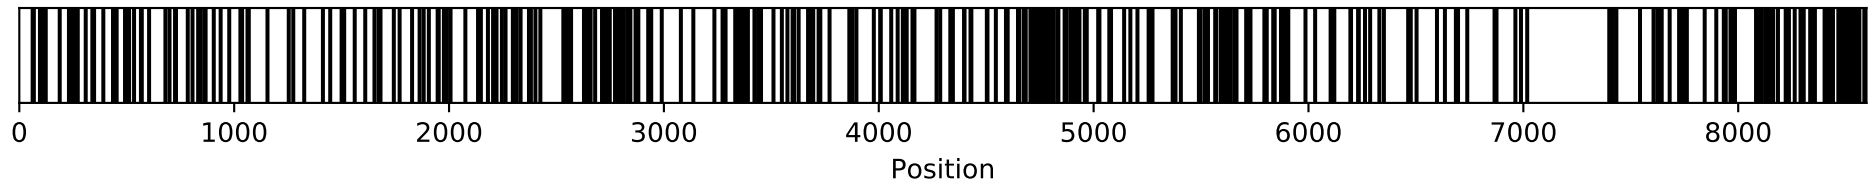

MM1 vs MM2  
Number of differences: 13

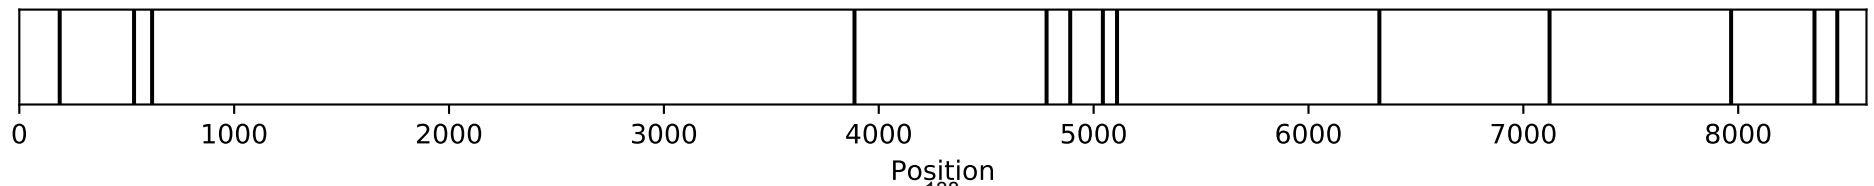



MA1 vs MA2  
Number of differences: 88

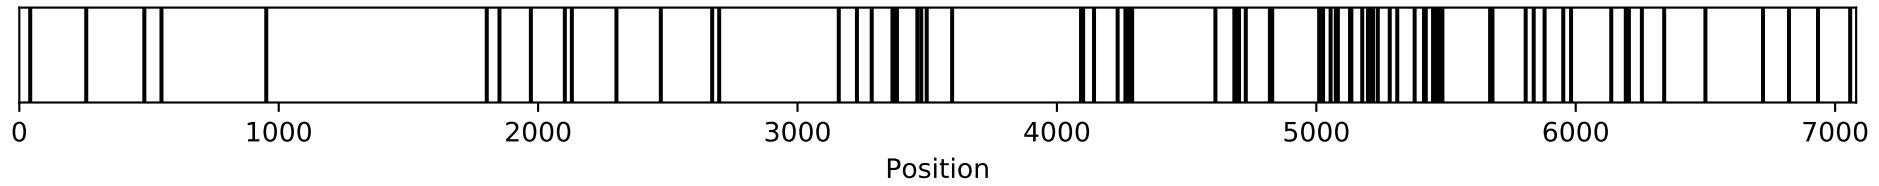

MA1 vs MM1  
Number of differences: 0

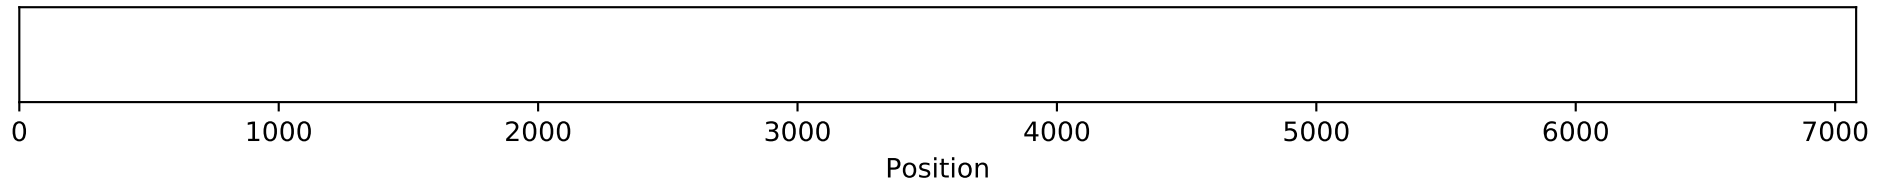

MA1 vs MM2  
Number of differences: 0

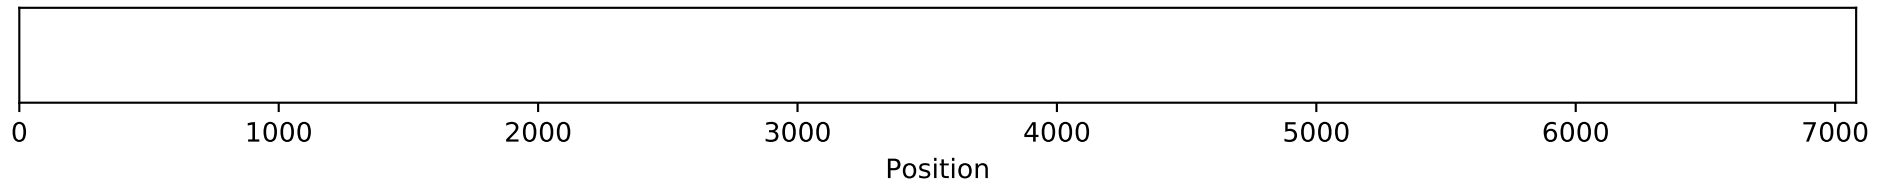

MA2 vs MM1  
Number of differences: 88

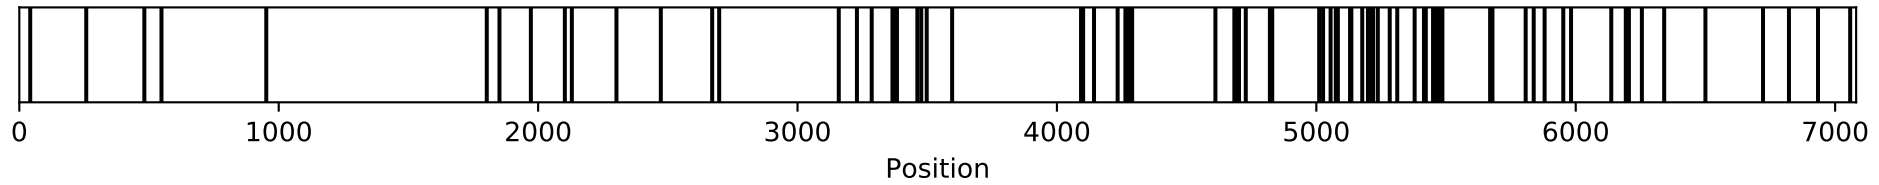

MA2 vs MM2  
Number of differences: 88

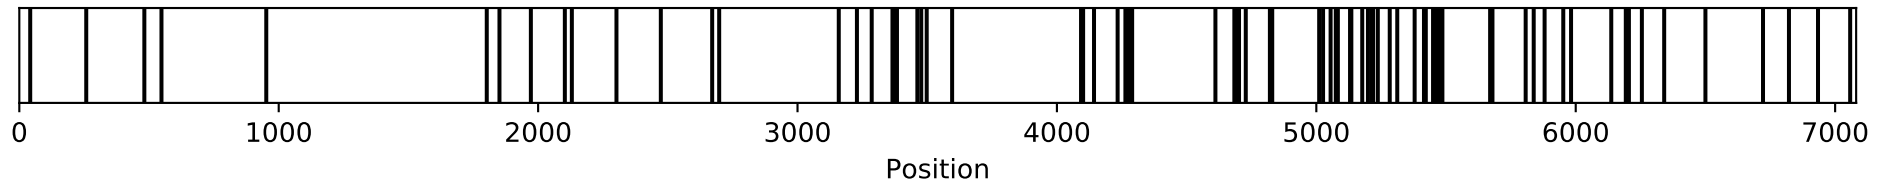

MM1 vs MM2  
Number of differences: 0

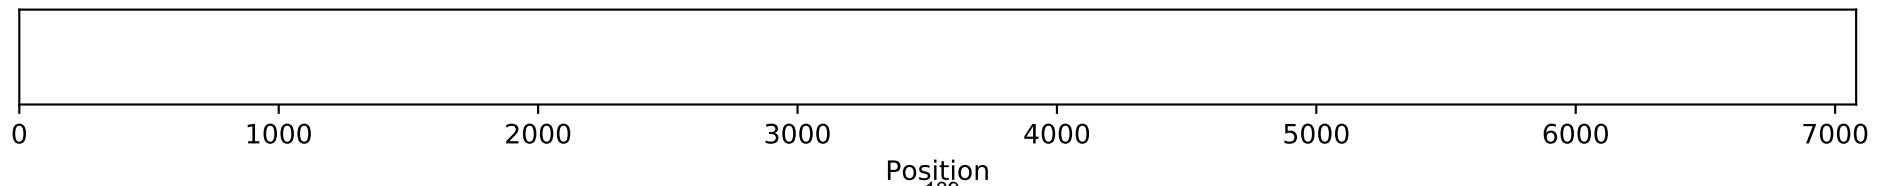

MA1 vs MA2  
Number of differences: 258

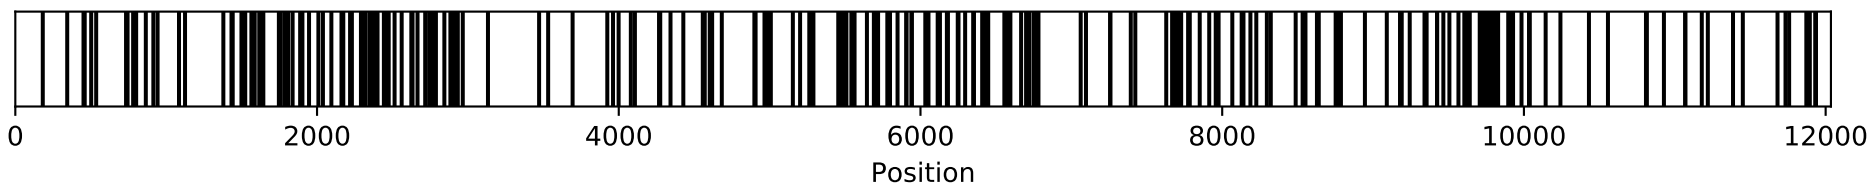

MA1 vs MM1  
Number of differences: 243

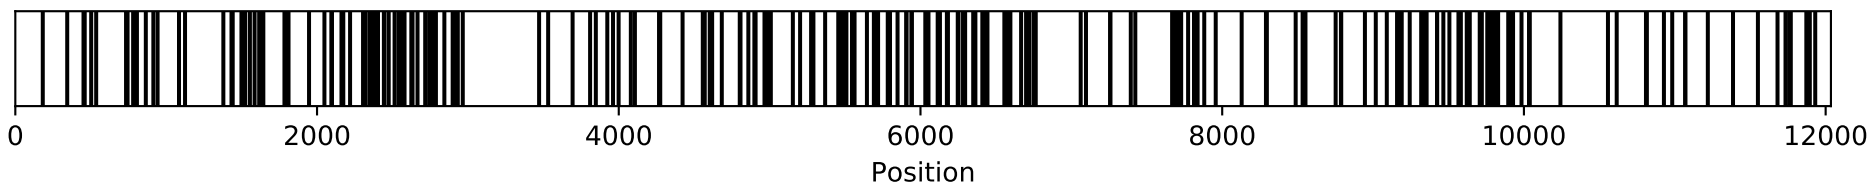

MA1 vs MM2  
Number of differences: 251

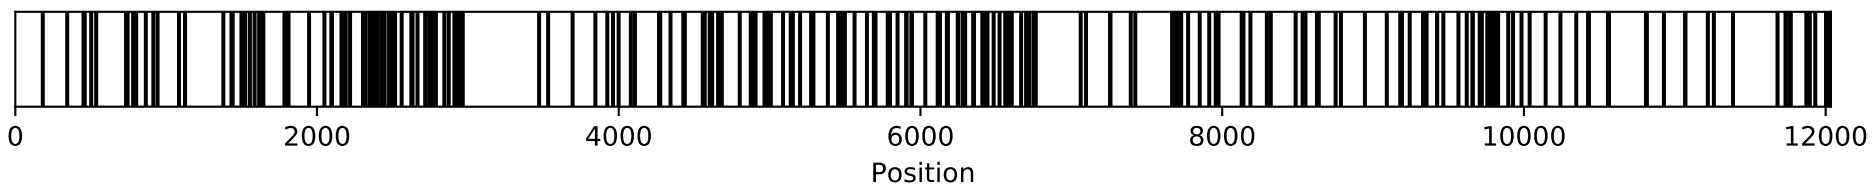

MA2 vs MM1  
Number of differences: 98

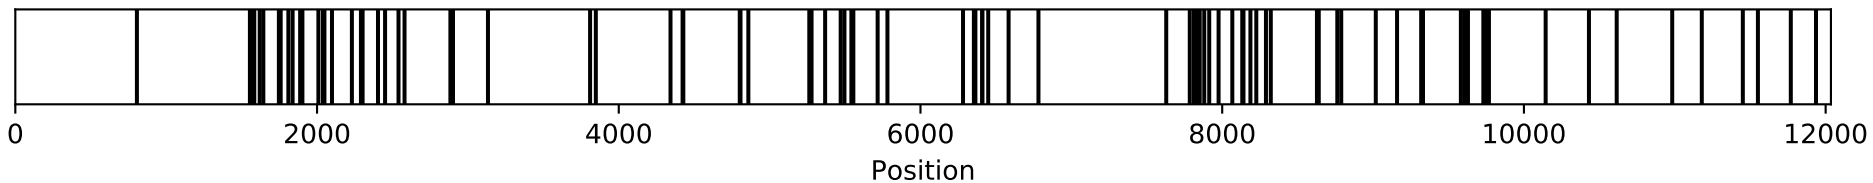

MA2 vs MM2  
Number of differences: 117

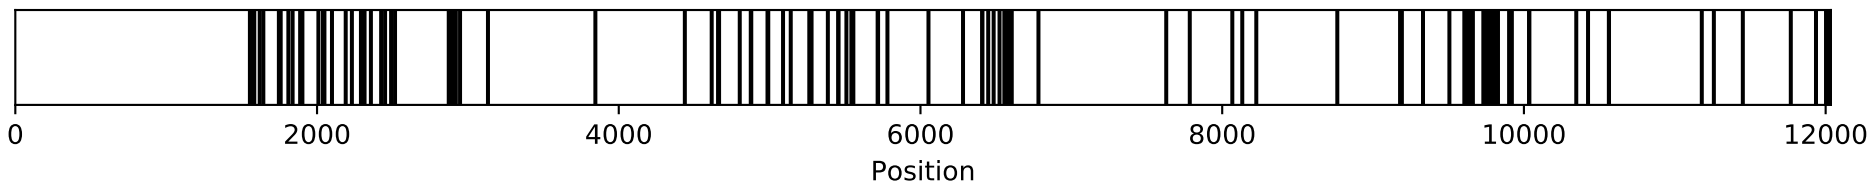

MM1 vs MM2  
Number of differences: 104

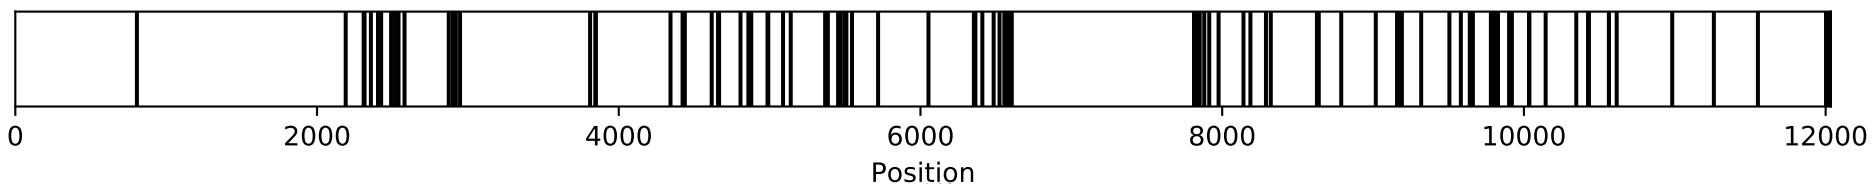

MA1 vs MA2  
Number of differences: 184

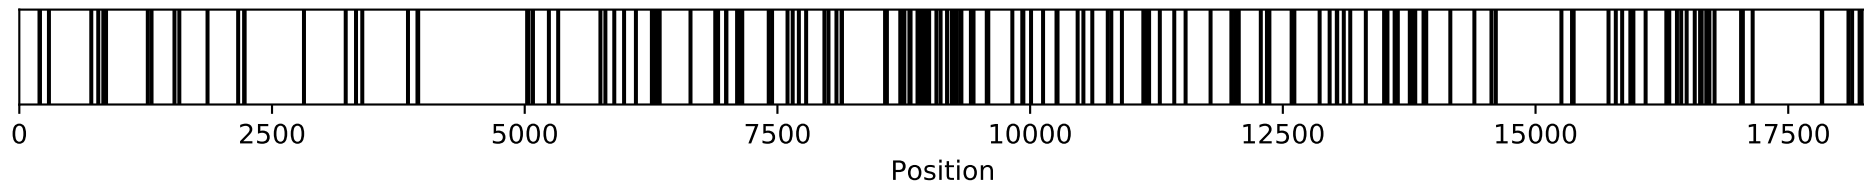

MA1 vs MM1  
Number of differences: 82

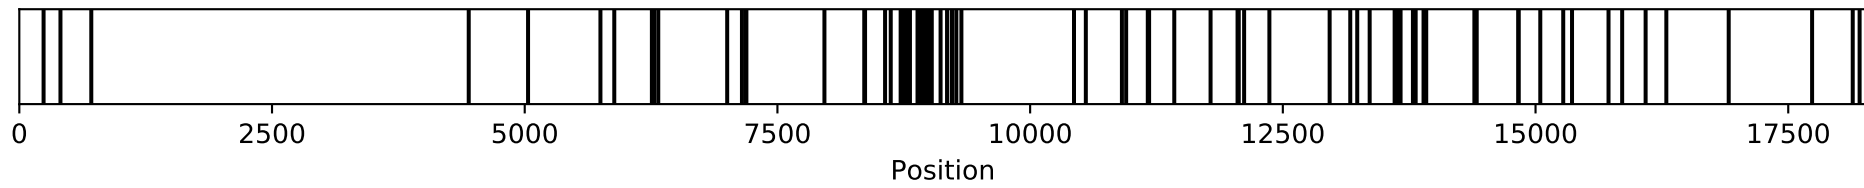

MA1 vs MM2  
Number of differences: 0

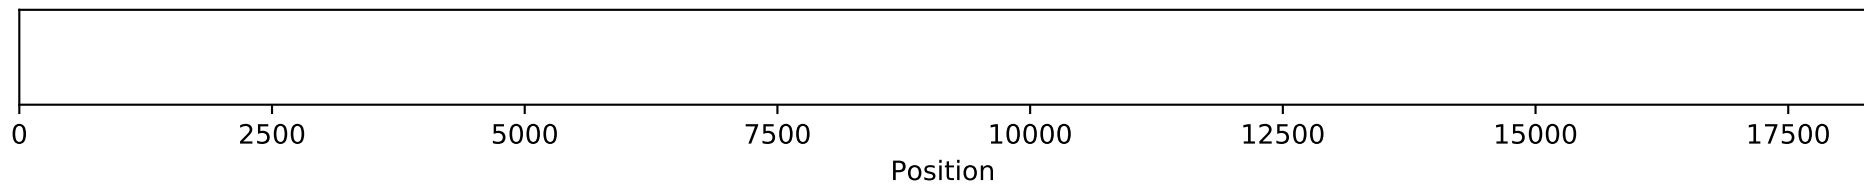

MA2 vs MM1  
Number of differences: 178

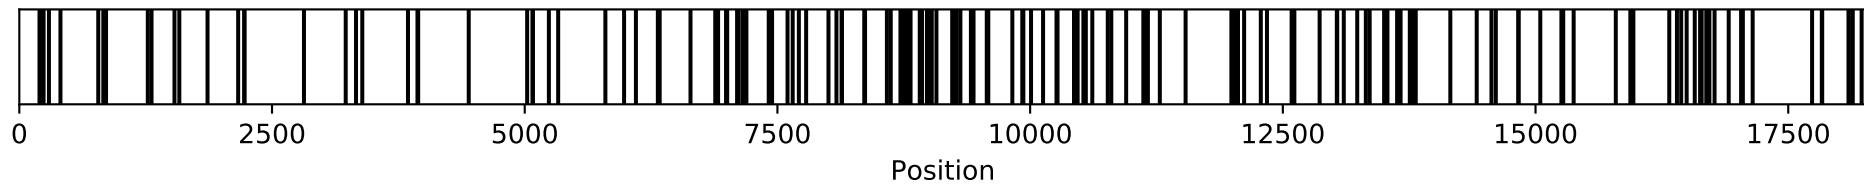

MA2 vs MM2  
Number of differences: 184

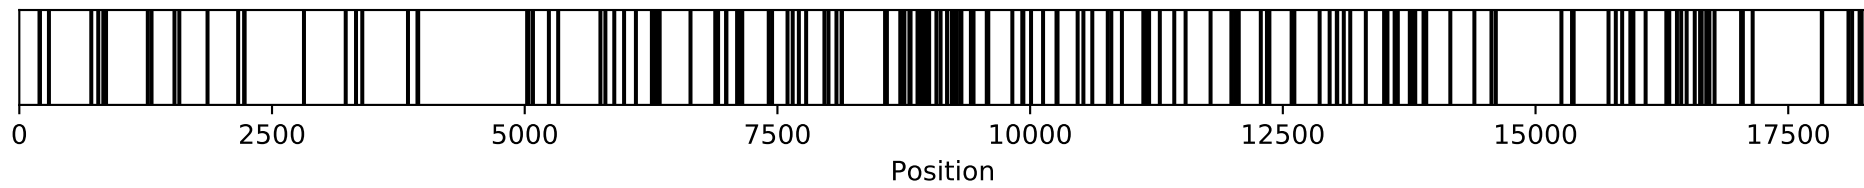

MM1 vs MM2  
Number of differences: 82

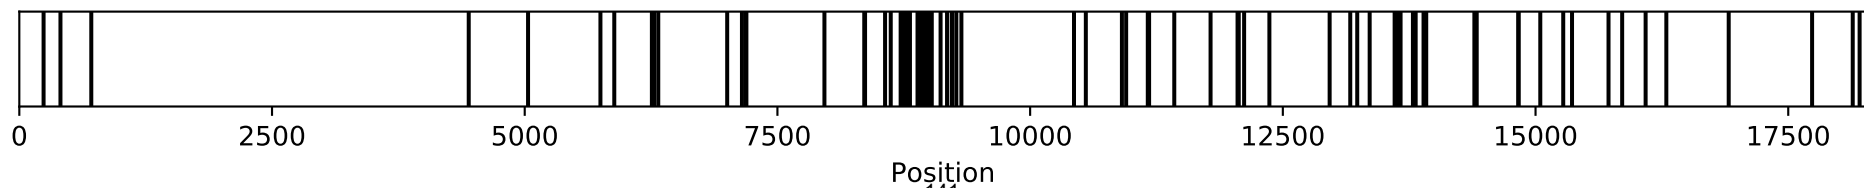

MA1 vs MA2  
Number of differences: 255

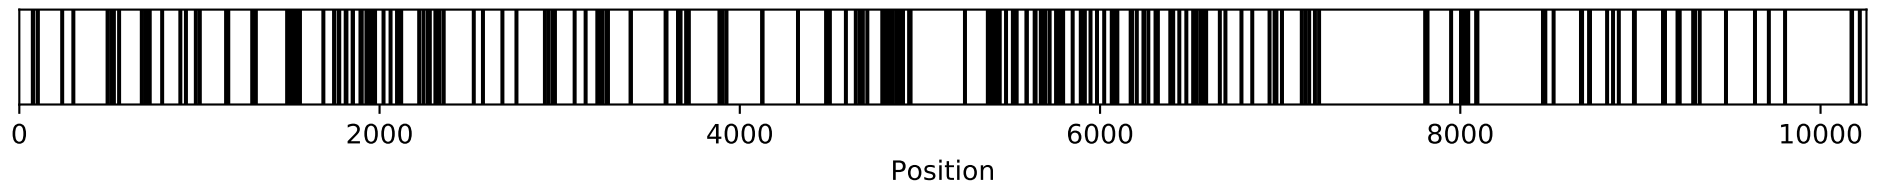

MA1 vs MM1  
Number of differences: 255

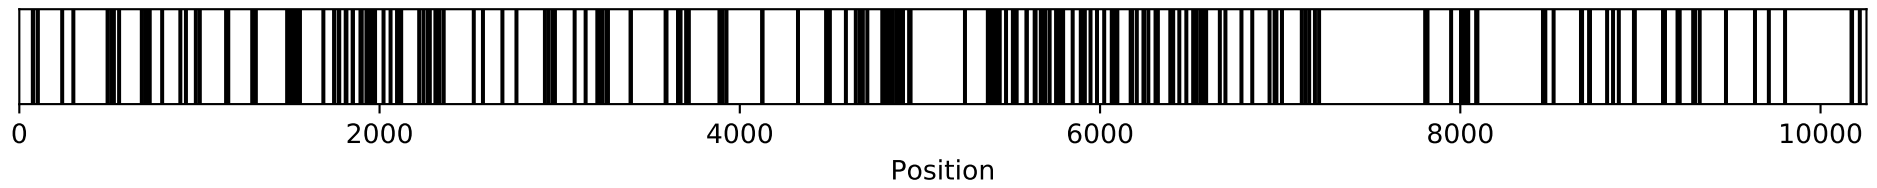

MA1 vs MM2  
Number of differences: 237

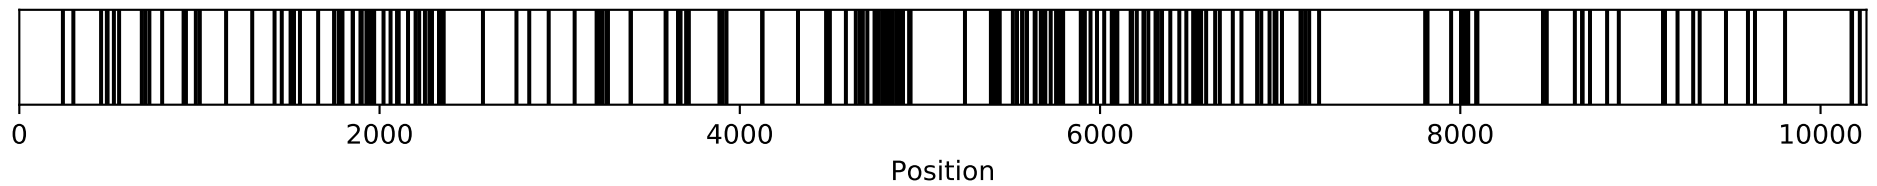

MA2 vs MM1  
Number of differences: 0

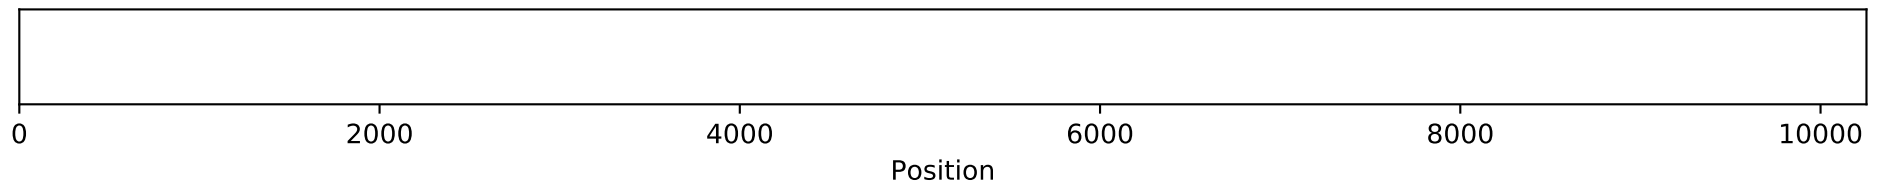

MA2 vs MM2  
Number of differences: 105

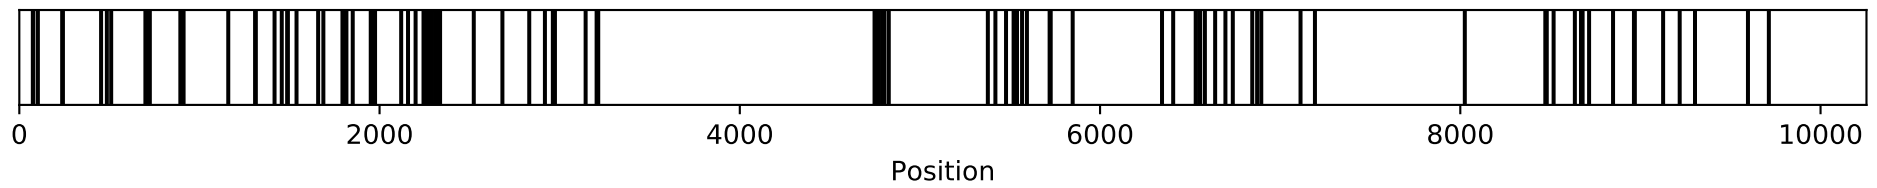

MM1 vs MM2  
Number of differences: 105

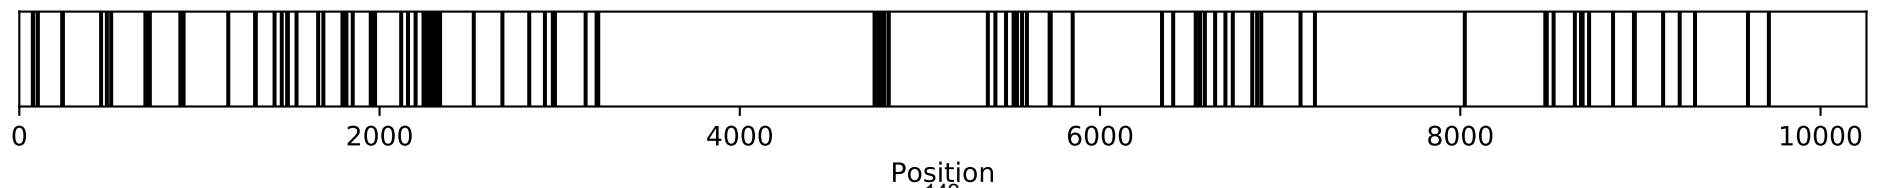

MA1 vs MA2  
Number of differences: 32

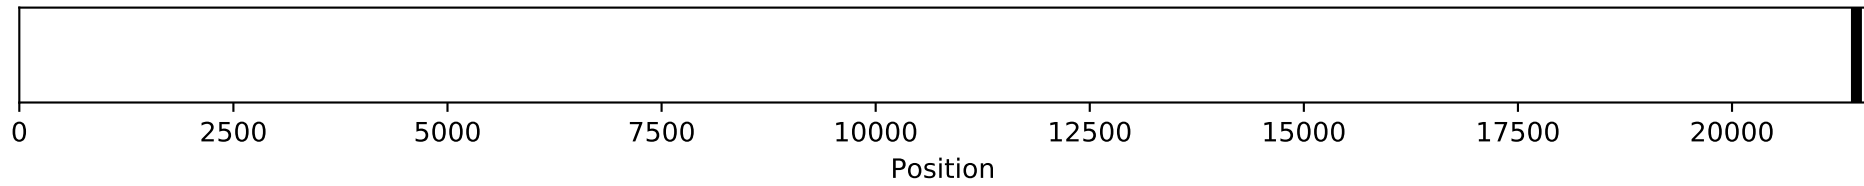

MA1 vs MM1  
Number of differences: 320

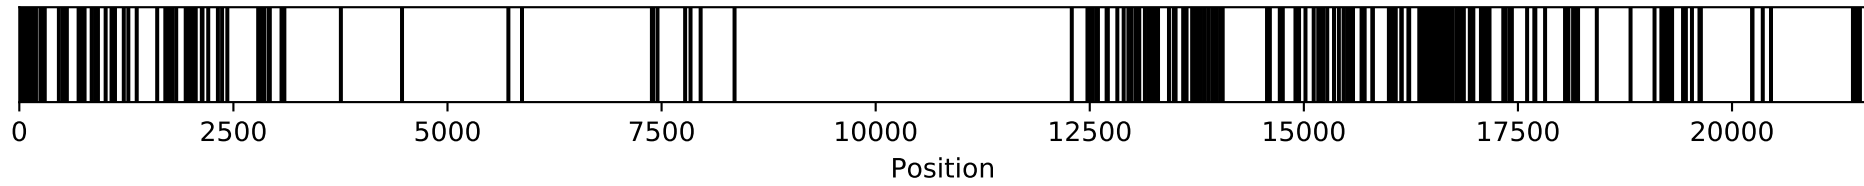

MA1 vs MM2  
Number of differences: 32

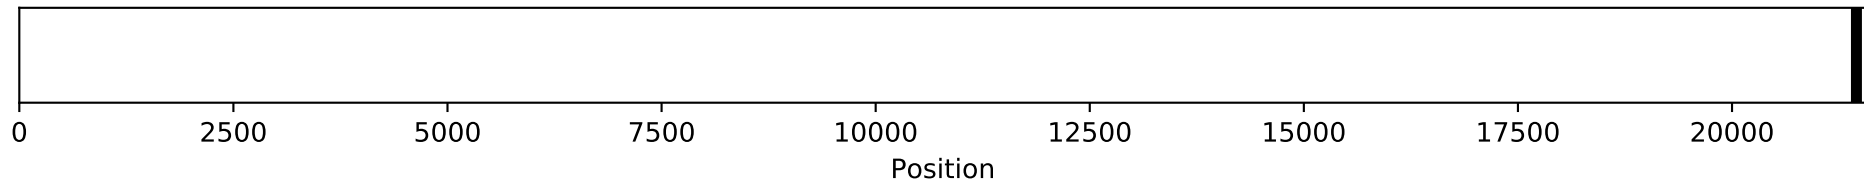

MA2 vs MM1  
Number of differences: 288

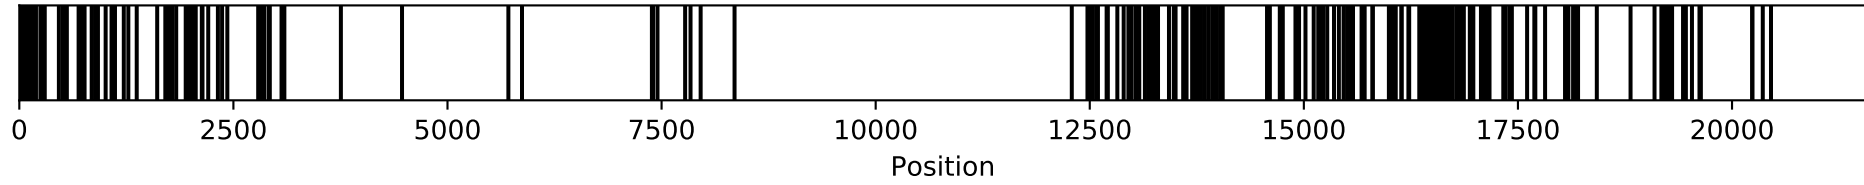

MA2 vs MM2  
Number of differences: 0

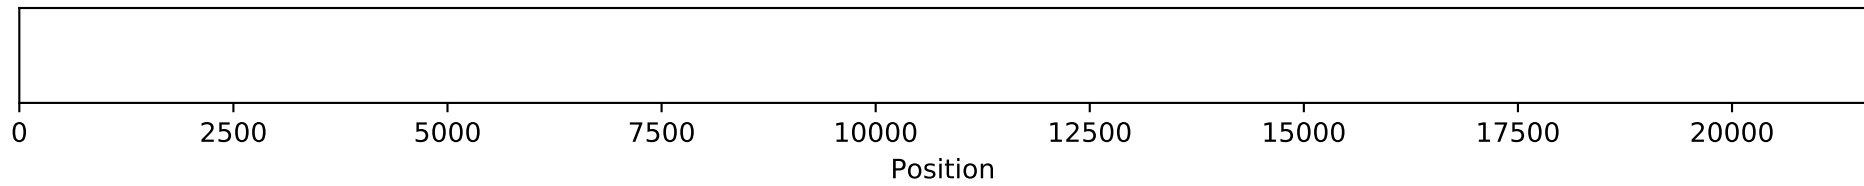

MM1 vs MM2  
Number of differences: 288

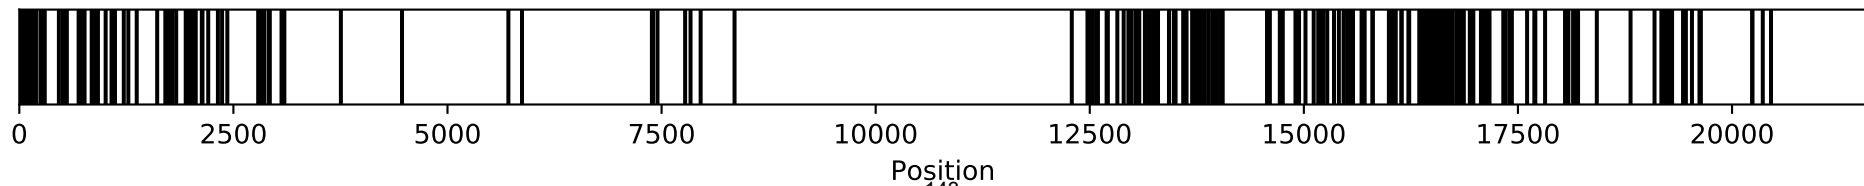

MA1 vs MA2  
Number of differences: 148

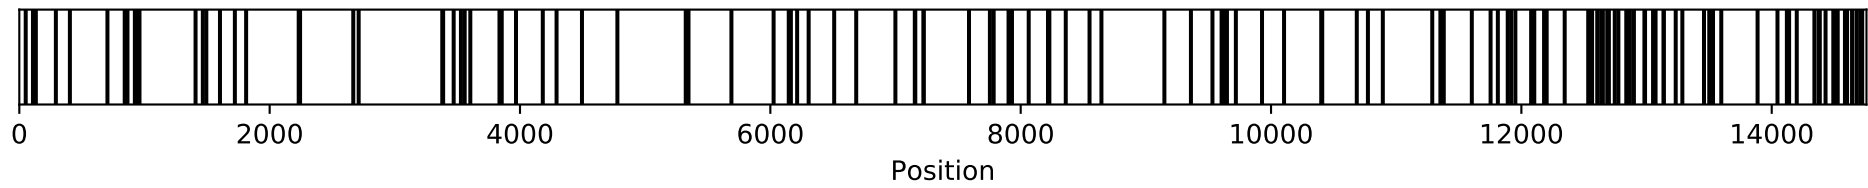

MA1 vs MM1  
Number of differences: 72

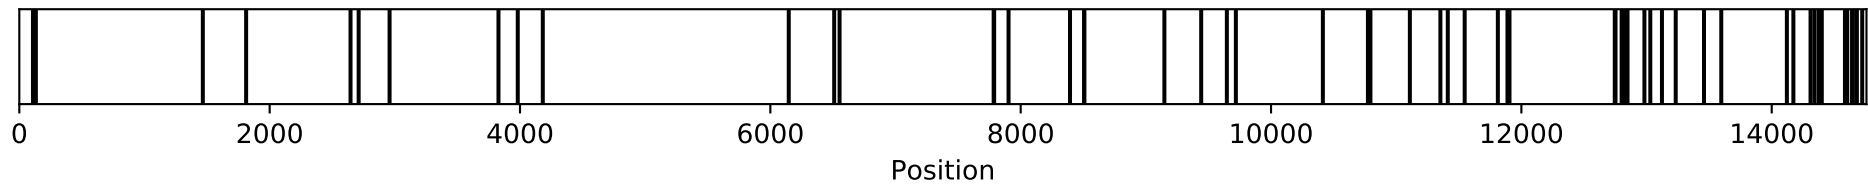

MA1 vs MM2  
Number of differences: 0

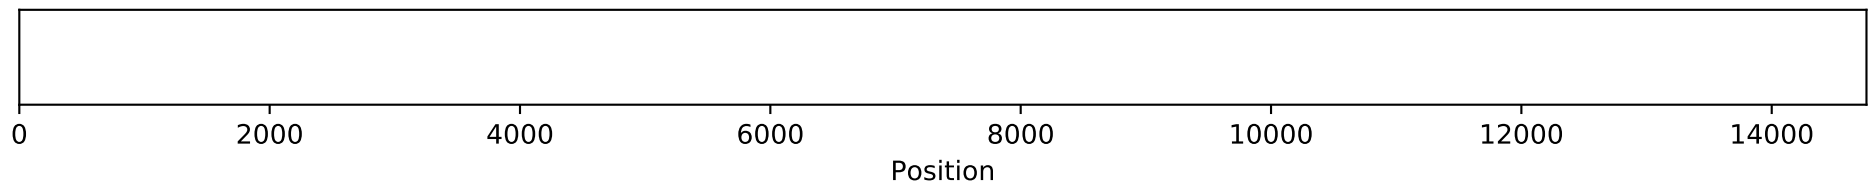

MA2 vs MM1  
Number of differences: 149

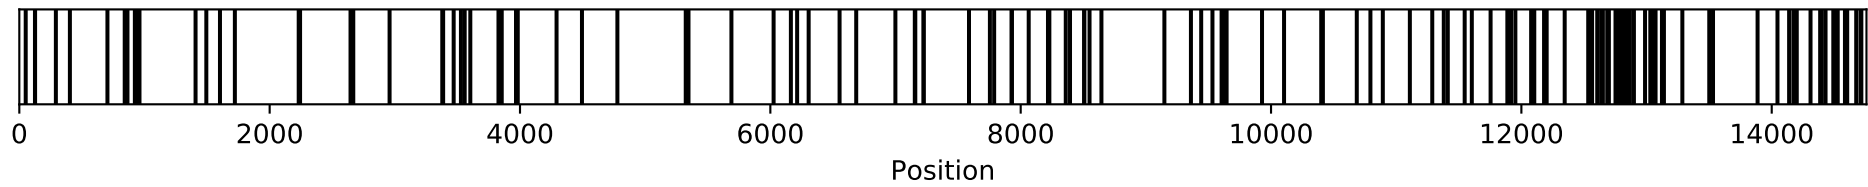

MA2 vs MM2  
Number of differences: 148

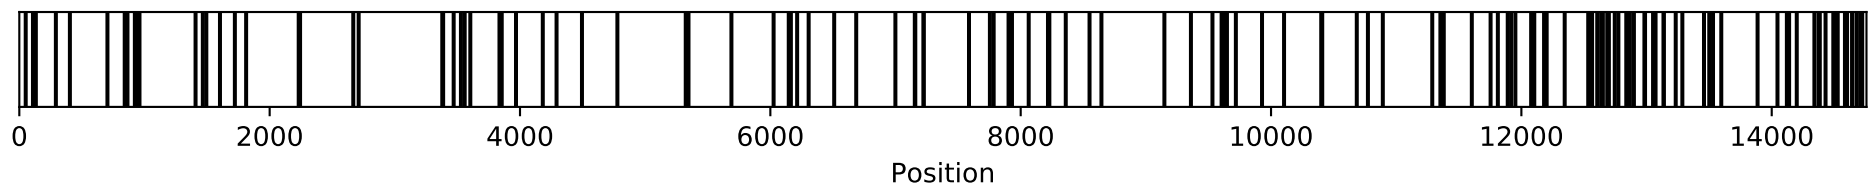

MM1 vs MM2  
Number of differences: 72

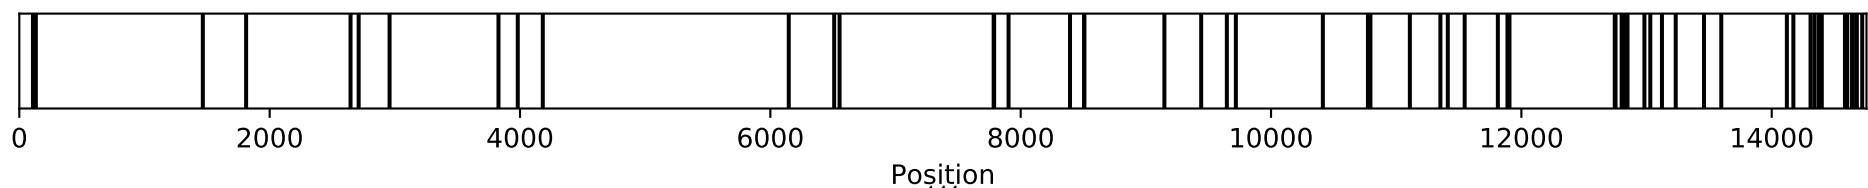

MA1 vs MA2  
Number of differences: 227

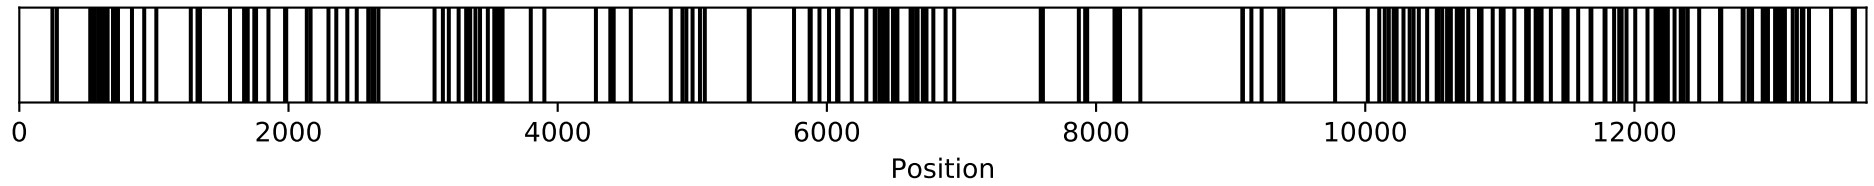

MA1 vs MM1  
Number of differences: 238

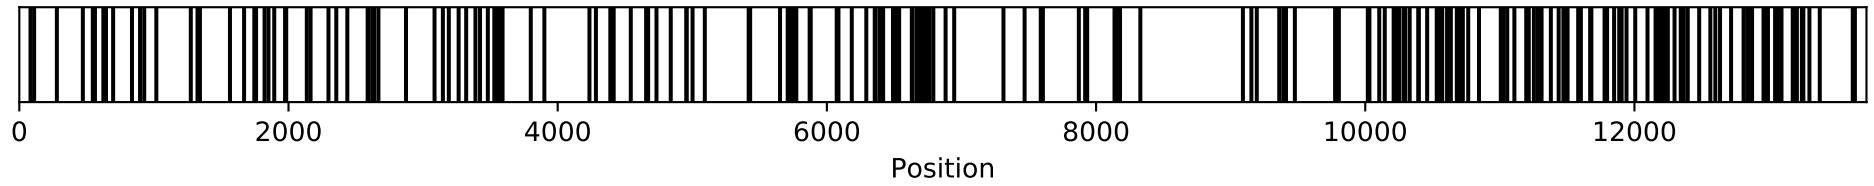

MA1 vs MM2  
Number of differences: 242

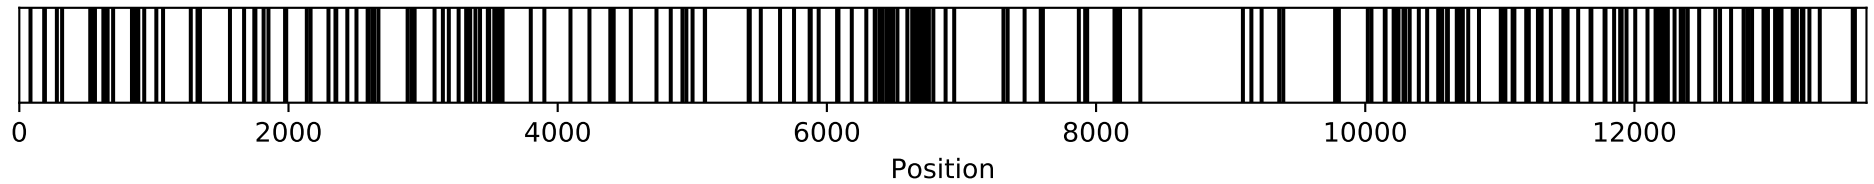

MA2 vs MM1  
Number of differences: 98

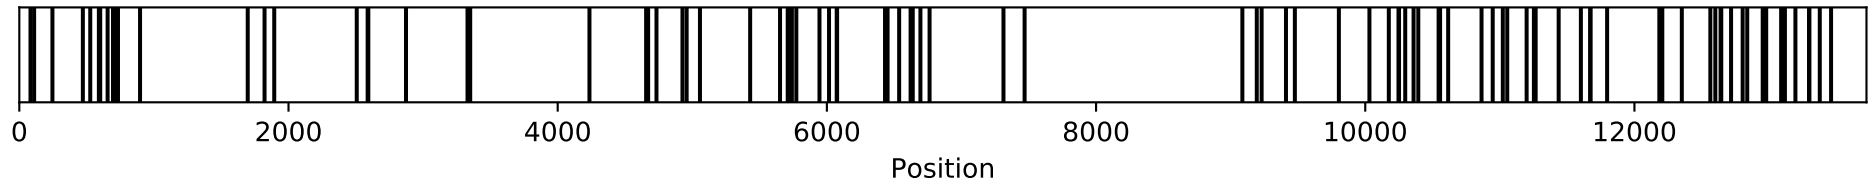

MA2 vs MM2  
Number of differences: 100

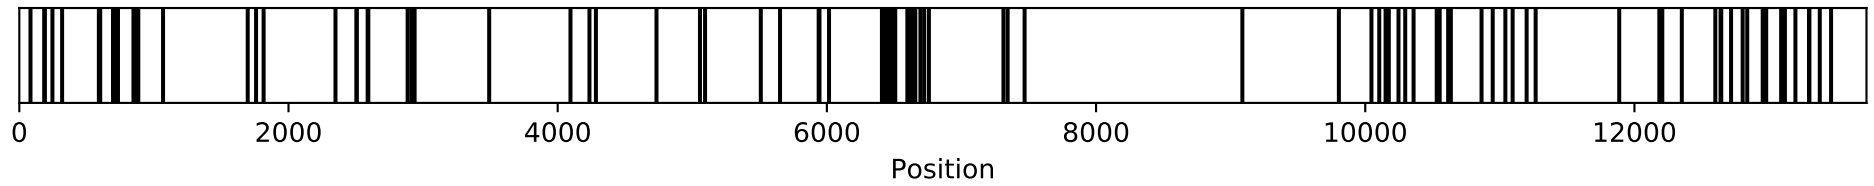

MM1 vs MM2  
Number of differences: 86

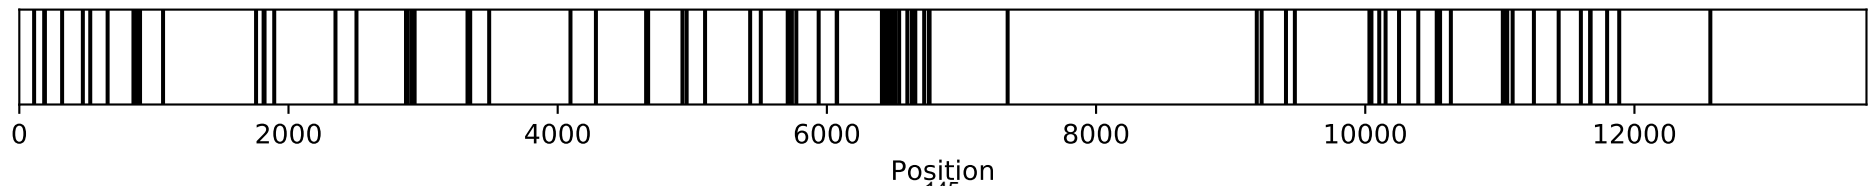

MA1 vs MA2  
Number of differences: 359

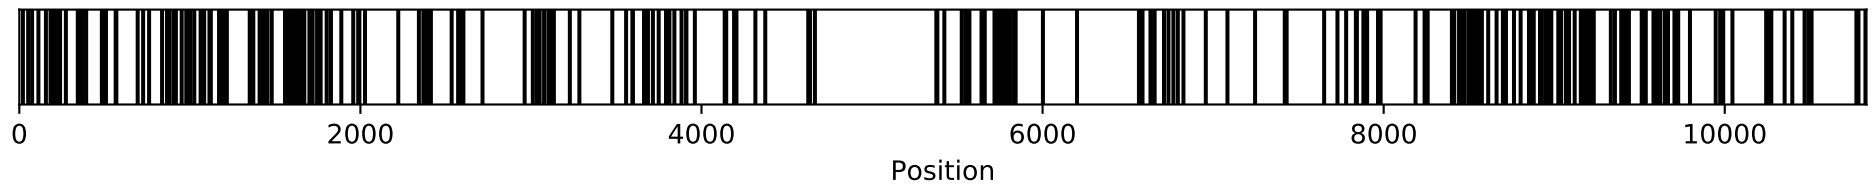

MA1 vs MM1  
Number of differences: 165

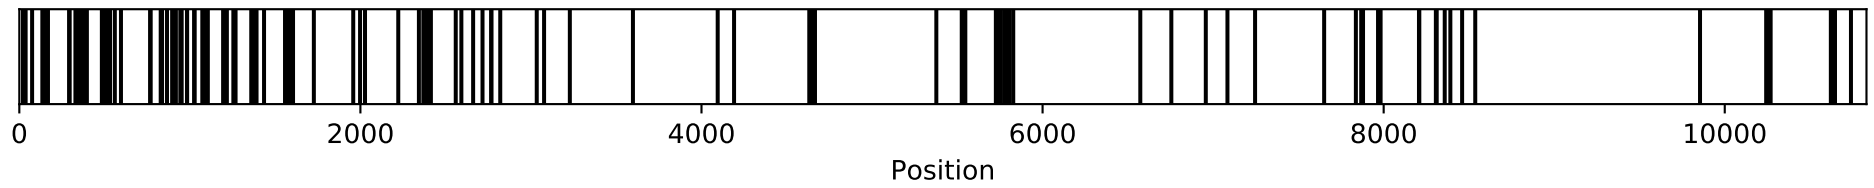

MA1 vs MM2  
Number of differences: 164

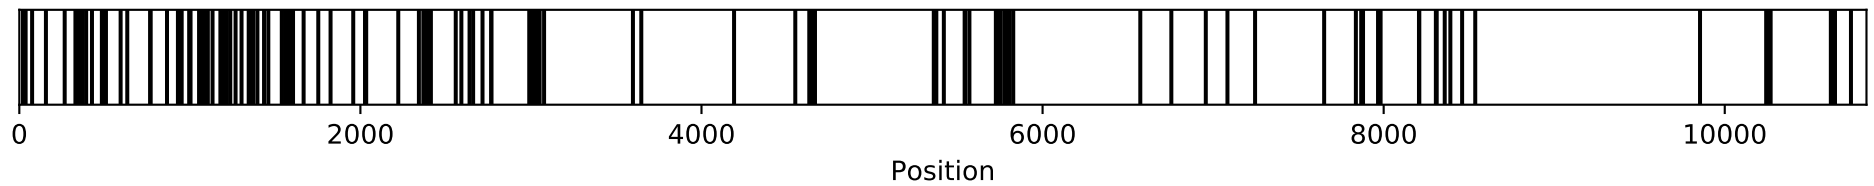

MA2 vs MM1  
Number of differences: 354

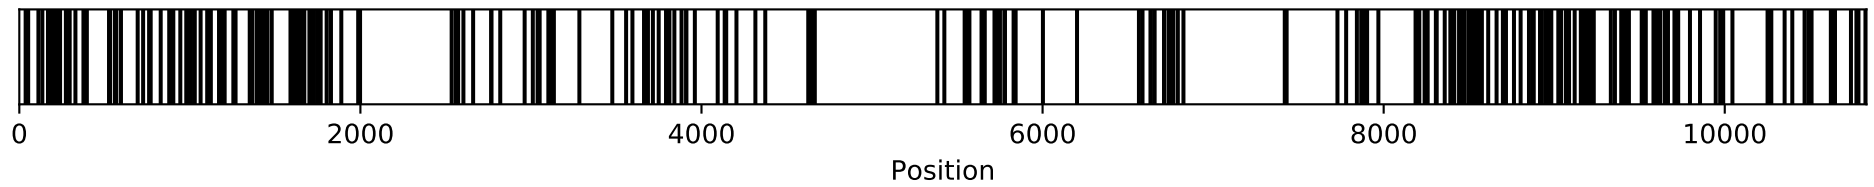

MA2 vs MM2  
Number of differences: 350

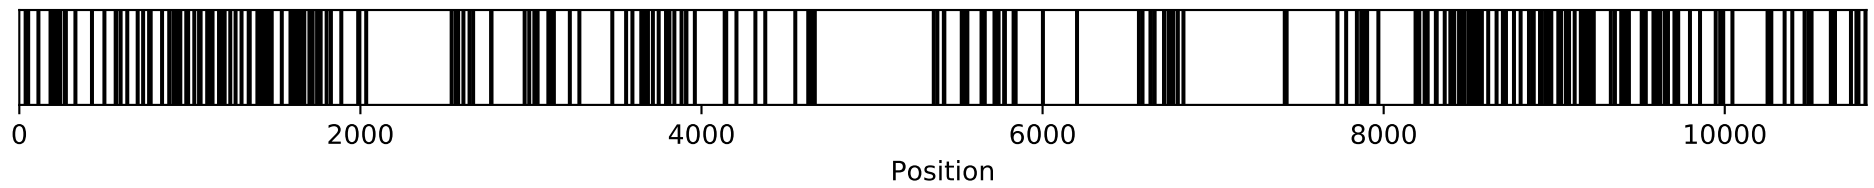

MM1 vs MM2  
Number of differences: 64

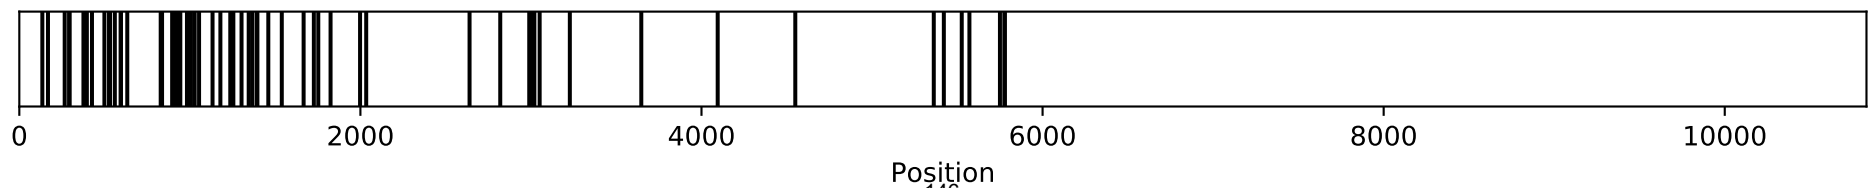



MA1 vs MA2  
Number of differences: 405

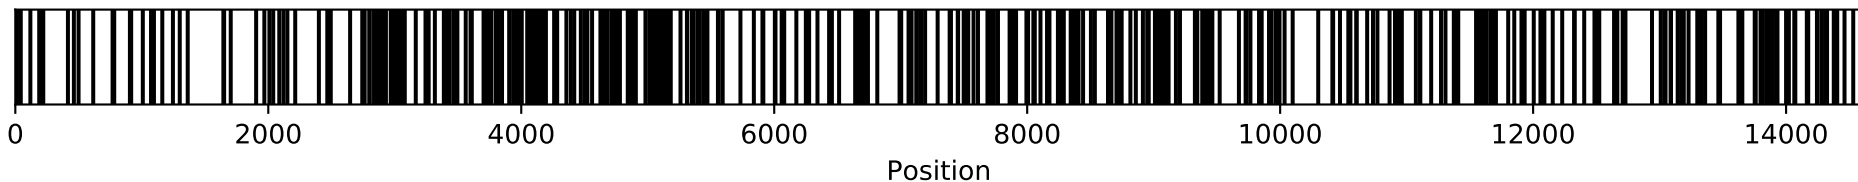

MA1 vs MM1  
Number of differences: 0

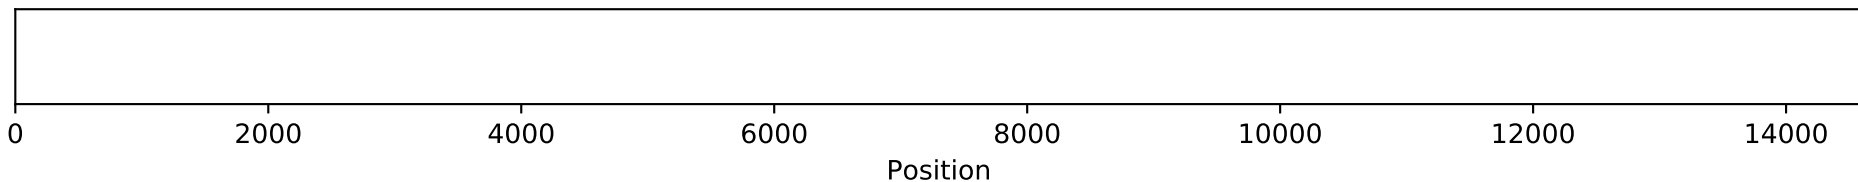

MA1 vs MM2  
Number of differences: 193

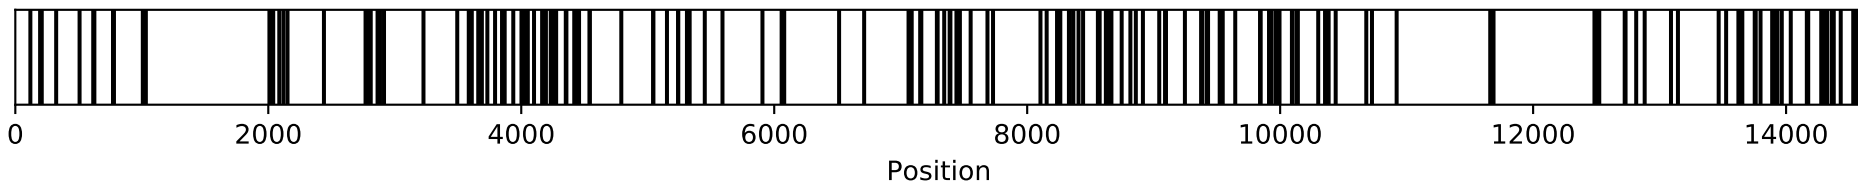

MA2 vs MM1  
Number of differences: 405

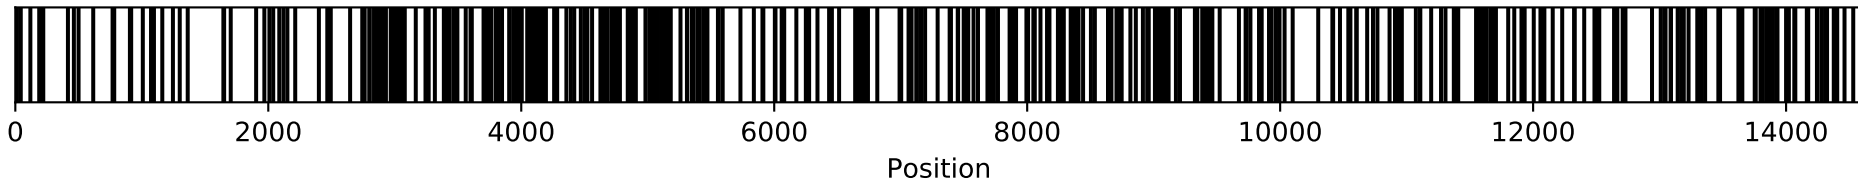

MA2 vs MM2  
Number of differences: 410

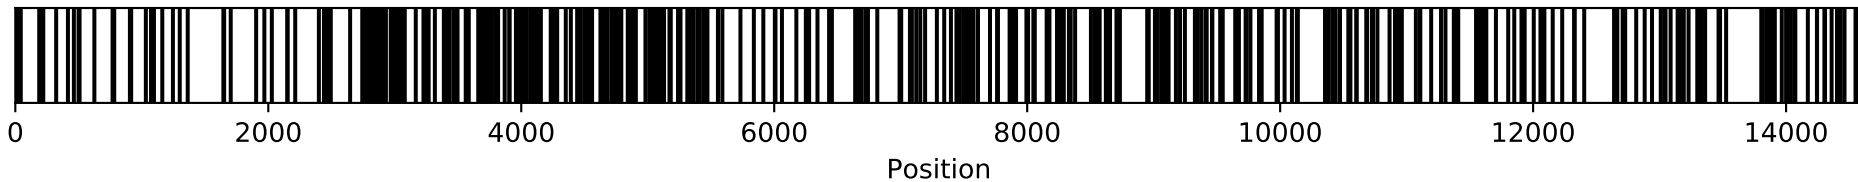

MM1 vs MM2  
Number of differences: 193

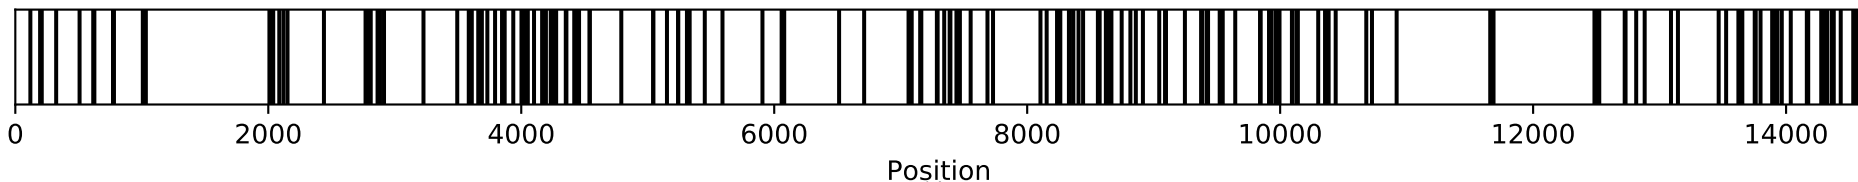

MA1 vs MA2  
Number of differences: 99

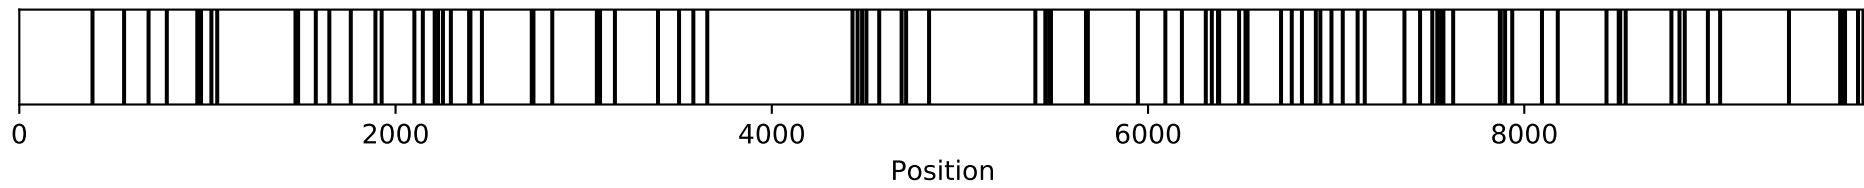

MA1 vs MM1  
Number of differences: 35

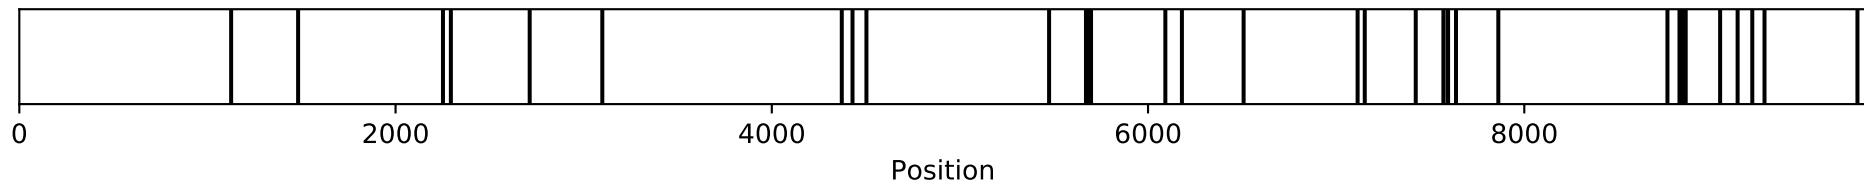

MA1 vs MM2  
Number of differences: 38

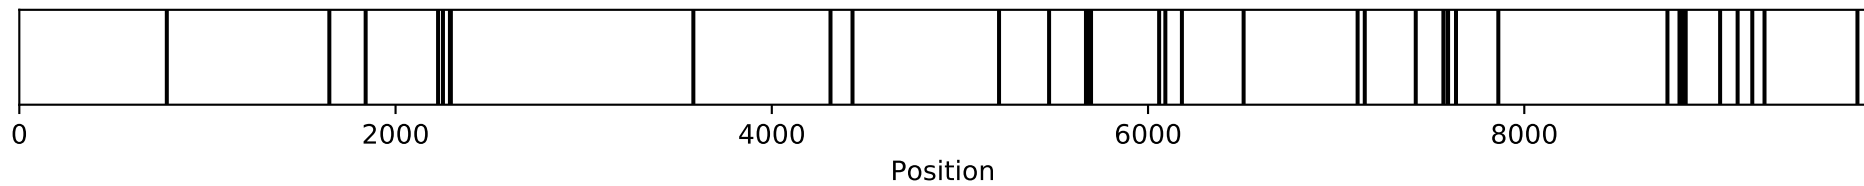

MA2 vs MM1  
Number of differences: 100

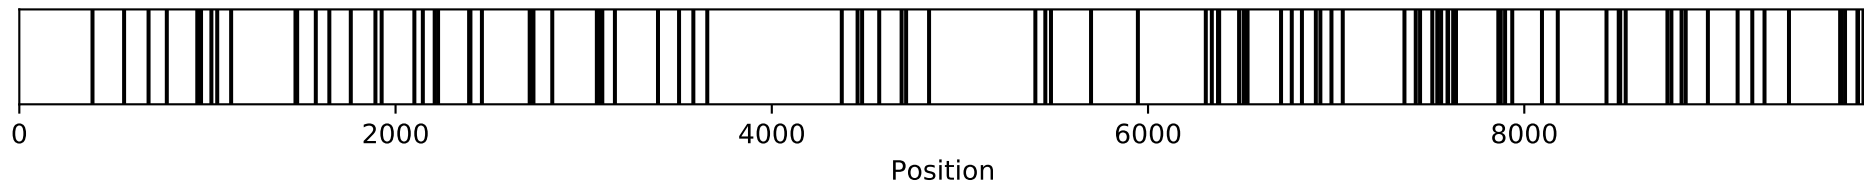

MA2 vs MM2  
Number of differences: 100

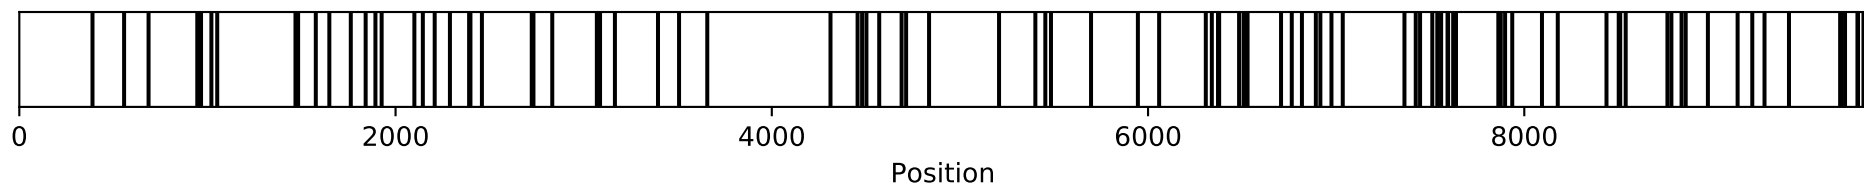

MM1 vs MM2  
Number of differences: 15

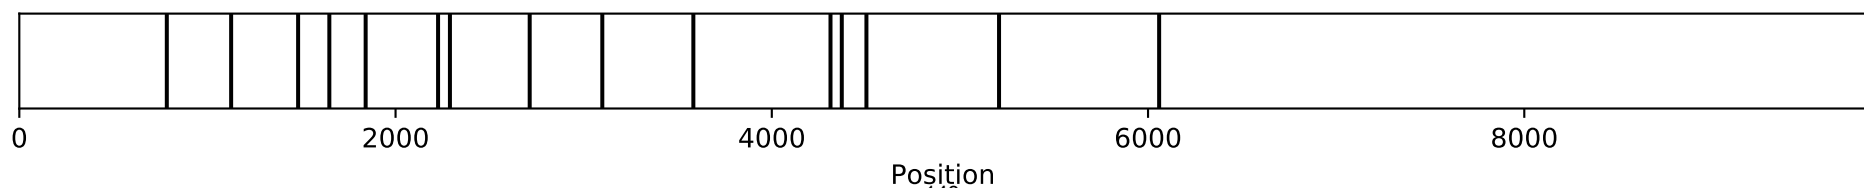

MA1 vs MA2  
Number of differences: 65

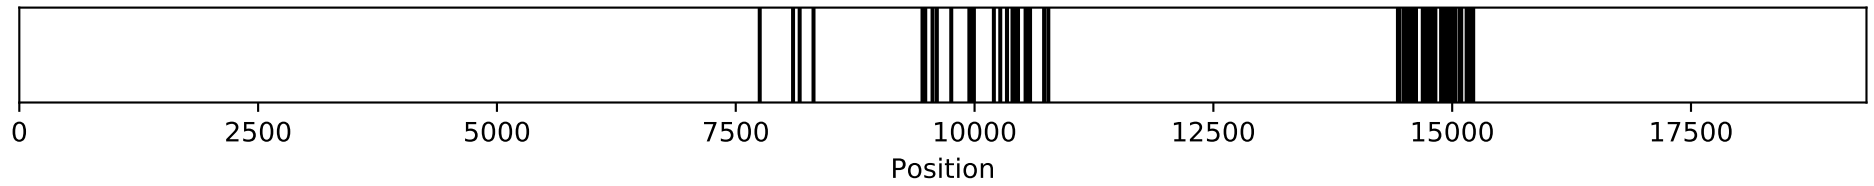

MA1 vs MM1  
Number of differences: 315

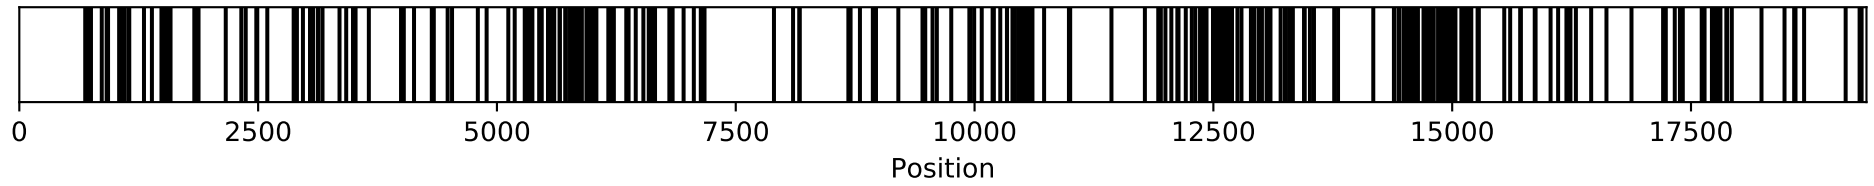

MA1 vs MM2  
Number of differences: 65

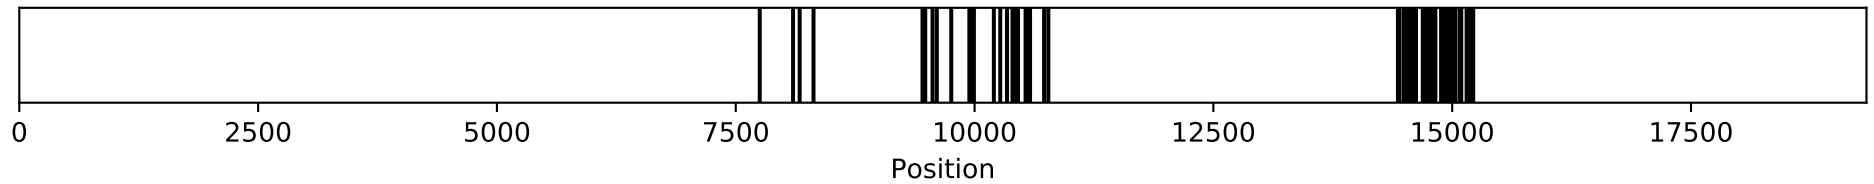

MA2 vs MM1  
Number of differences: 282

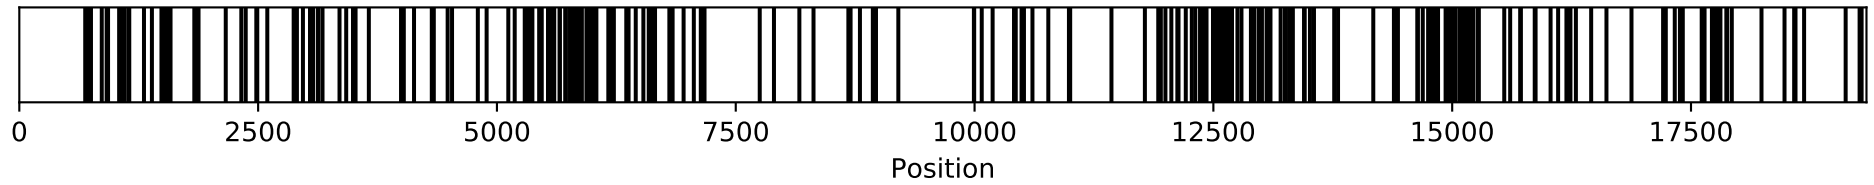

MA2 vs MM2  
Number of differences: 0

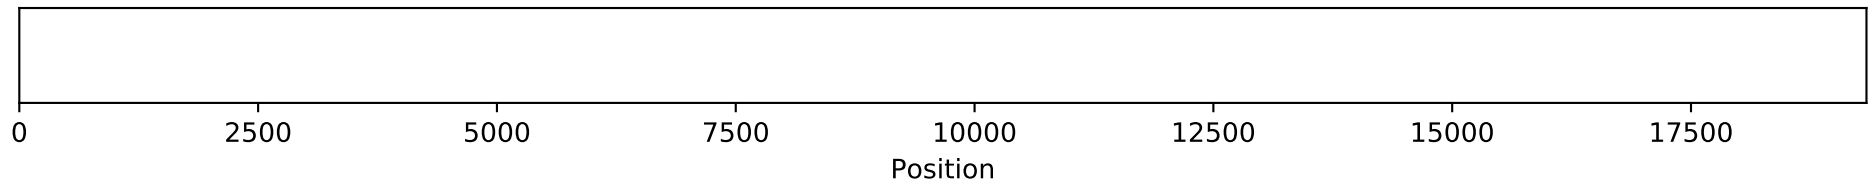

MM1 vs MM2  
Number of differences: 282

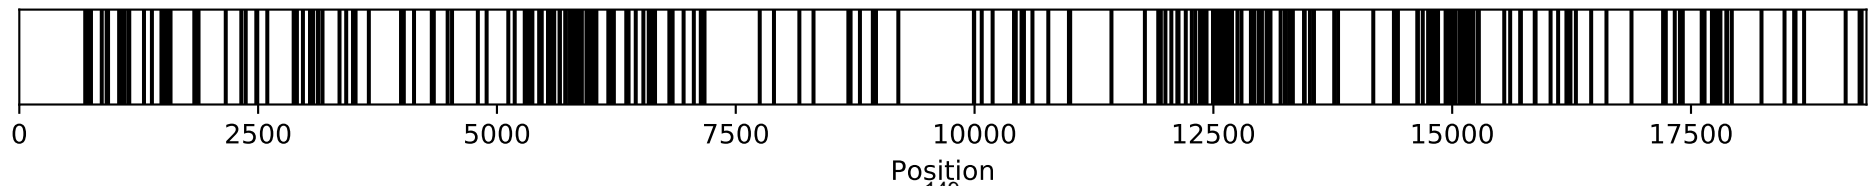

MA1 vs MA2  
Number of differences: 127

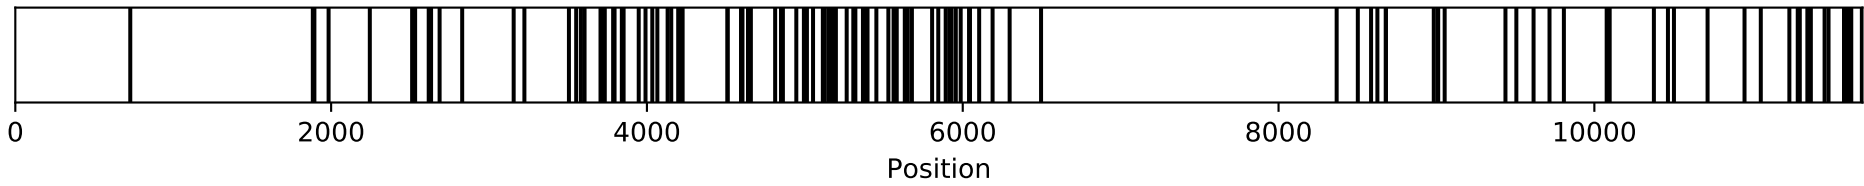

MA1 vs MM1  
Number of differences: 145

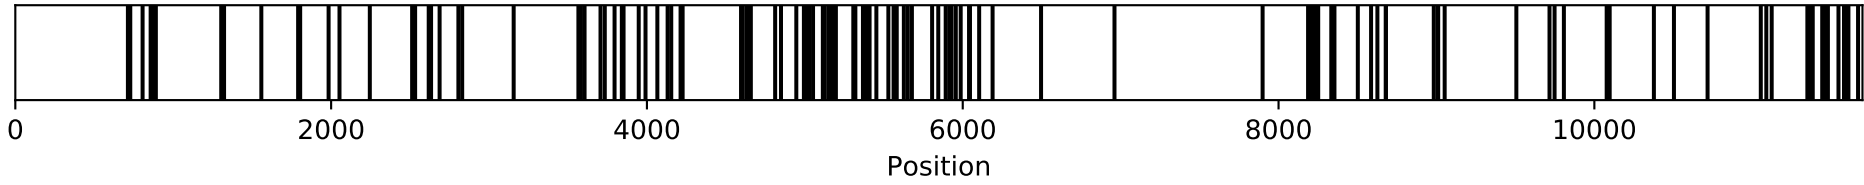

MA1 vs MM2  
Number of differences: 127

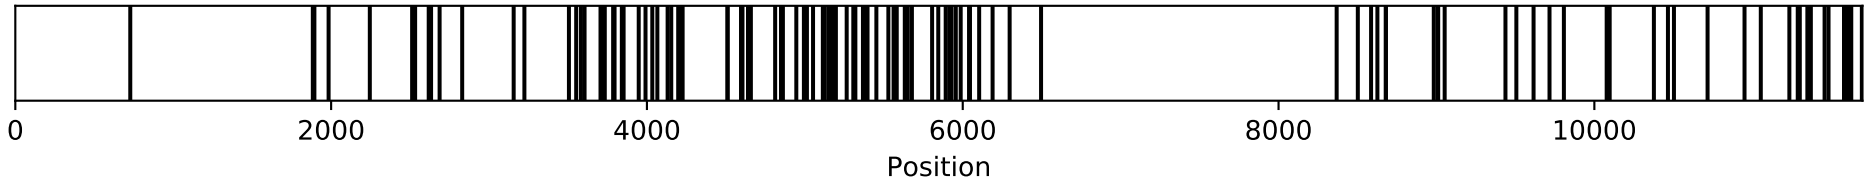

MA2 vs MM1  
Number of differences: 81

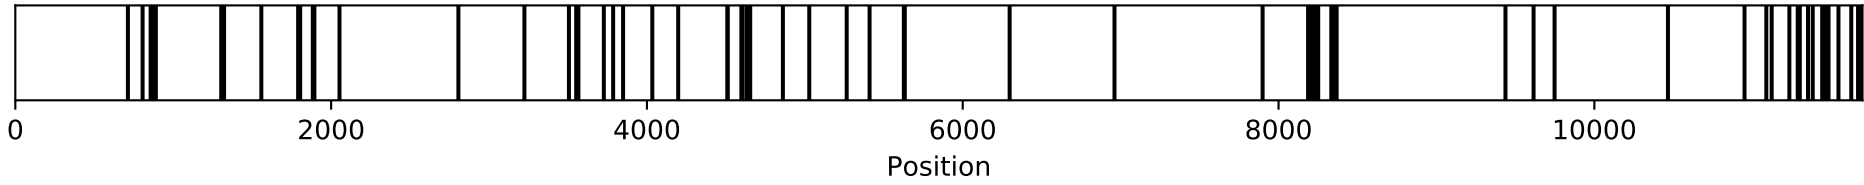

MA2 vs MM2  
Number of differences: 0

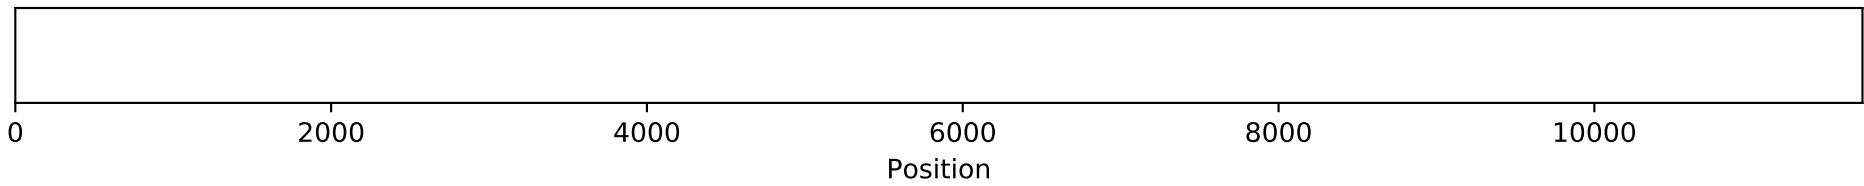

MM1 vs MM2  
Number of differences: 81

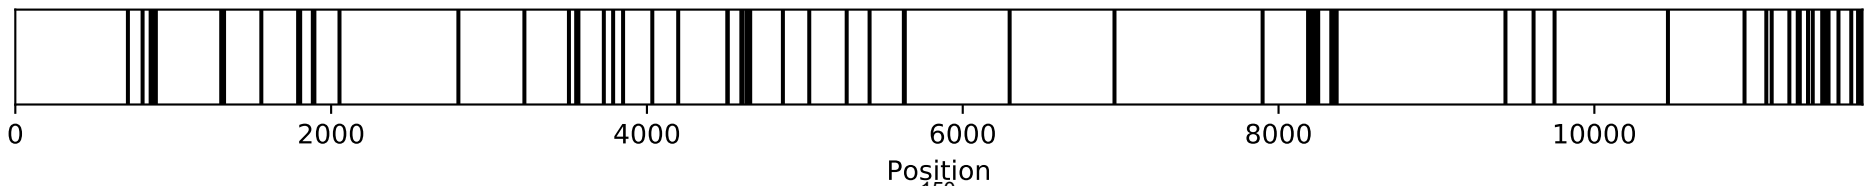

MA1 vs MA2  
Number of differences: 273

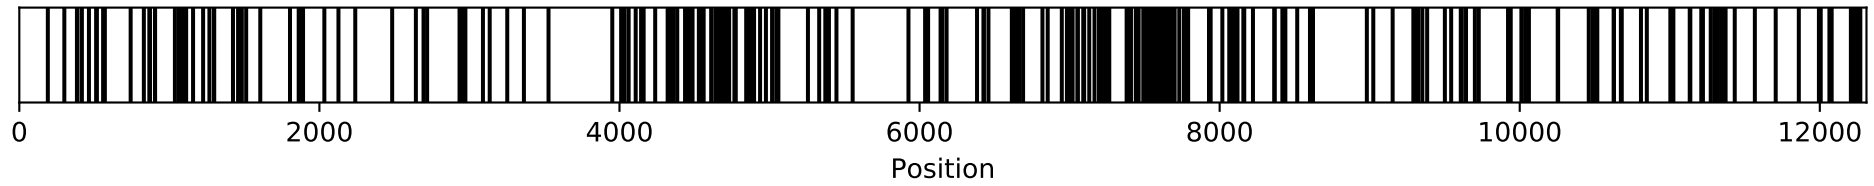

MA1 vs MM1  
Number of differences: 109

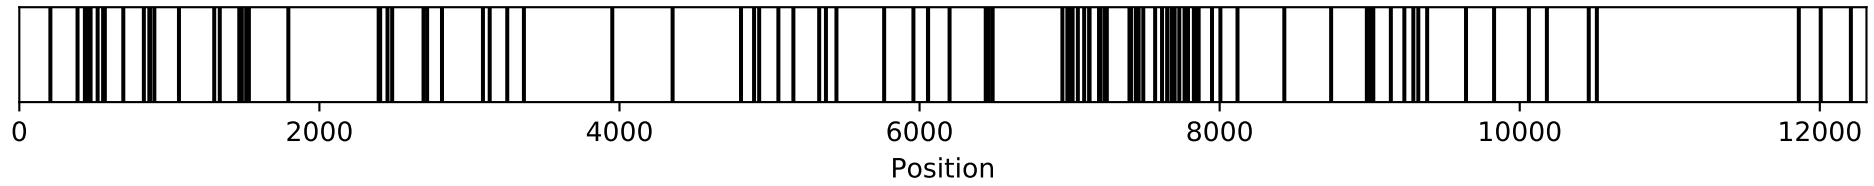

MA1 vs MM2  
Number of differences: 102

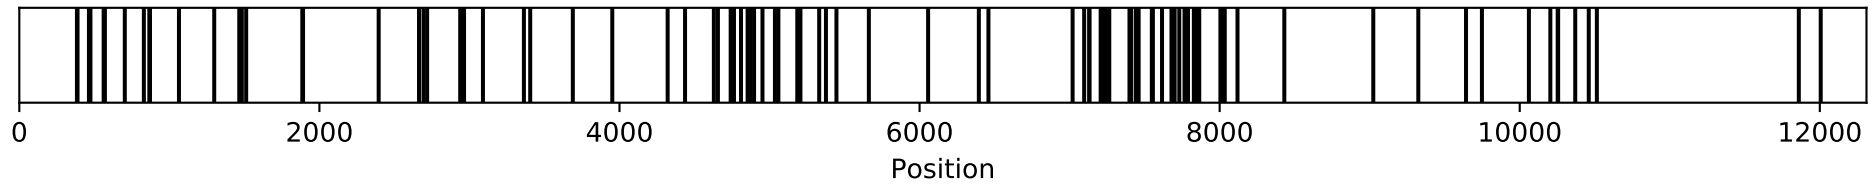

MA2 vs MM1  
Number of differences: 260

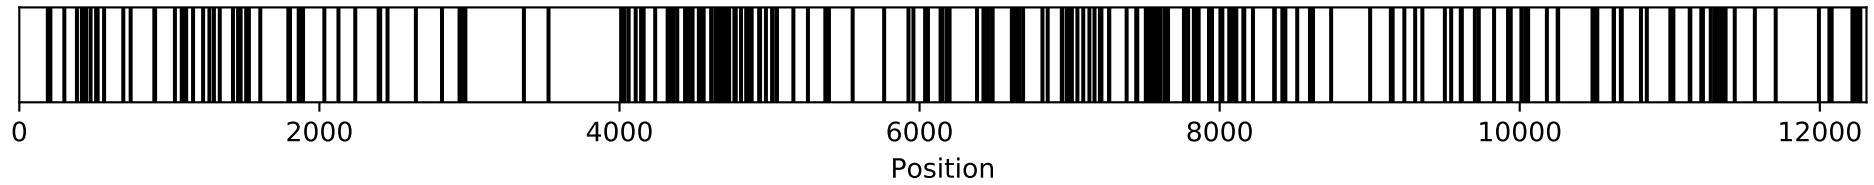

MA2 vs MM2  
Number of differences: 258

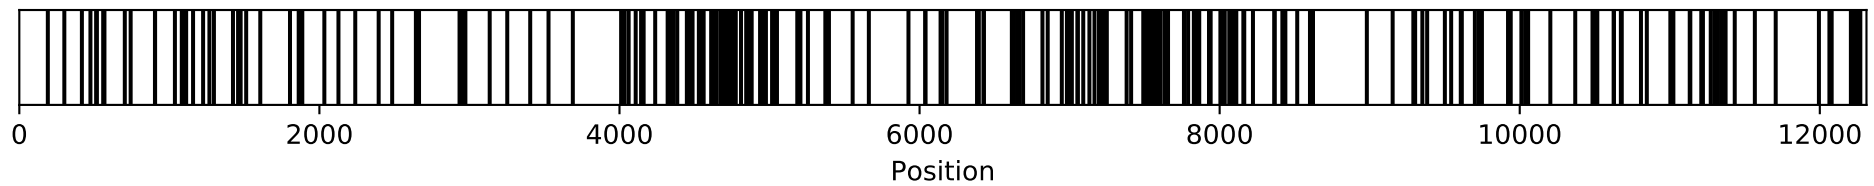

MM1 vs MM2  
Number of differences: 96

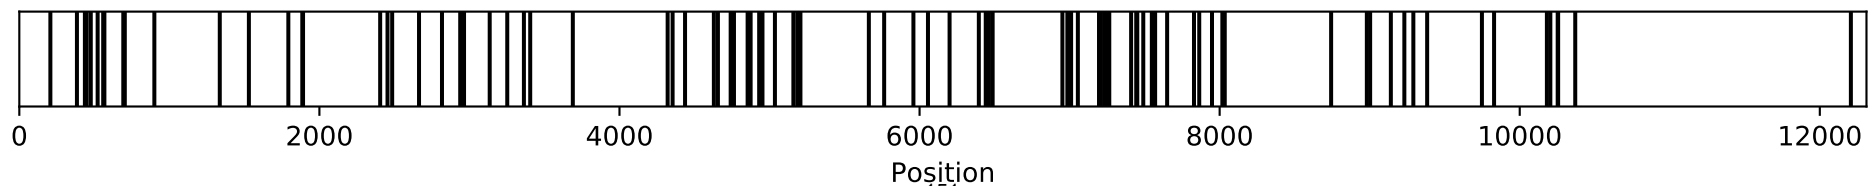

MA1 vs MA2  
Number of differences: 200

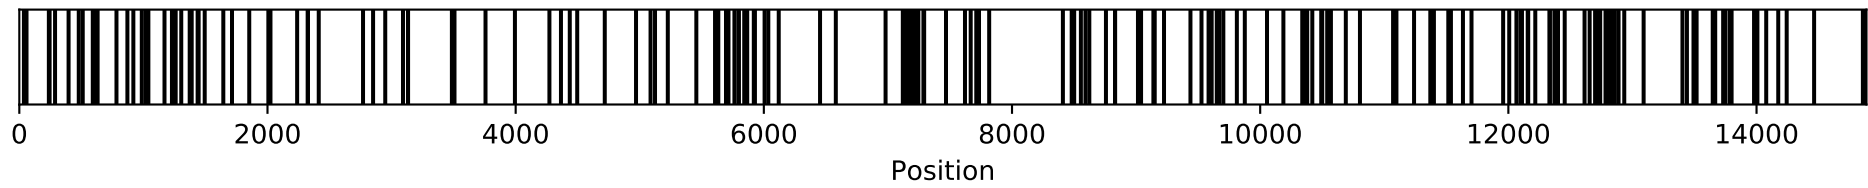

MA1 vs MM1  
Number of differences: 103

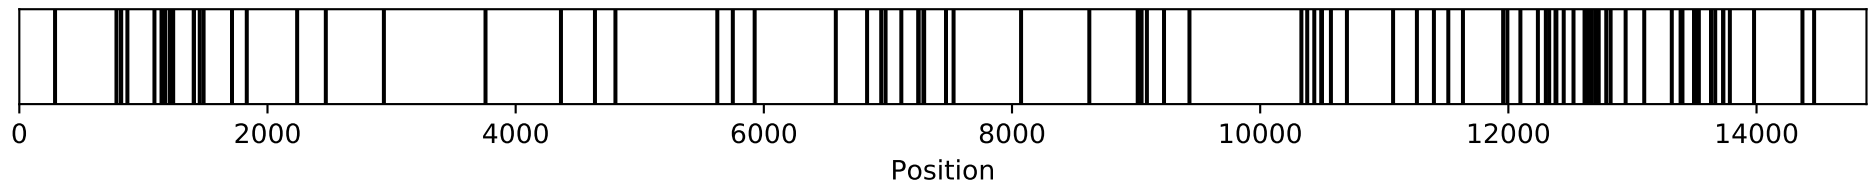

MA1 vs MM2  
Number of differences: 89

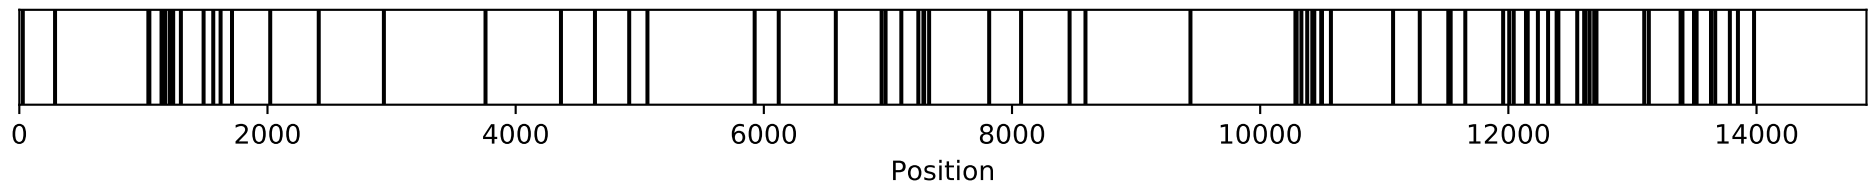

MA2 vs MM1  
Number of differences: 217

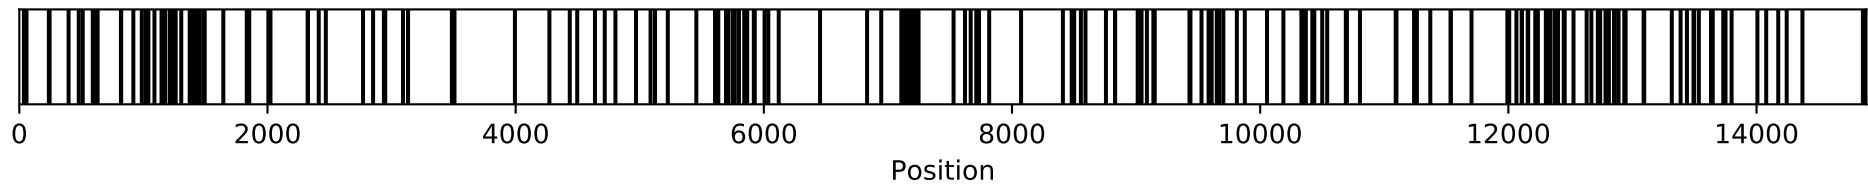

MA2 vs MM2  
Number of differences: 212

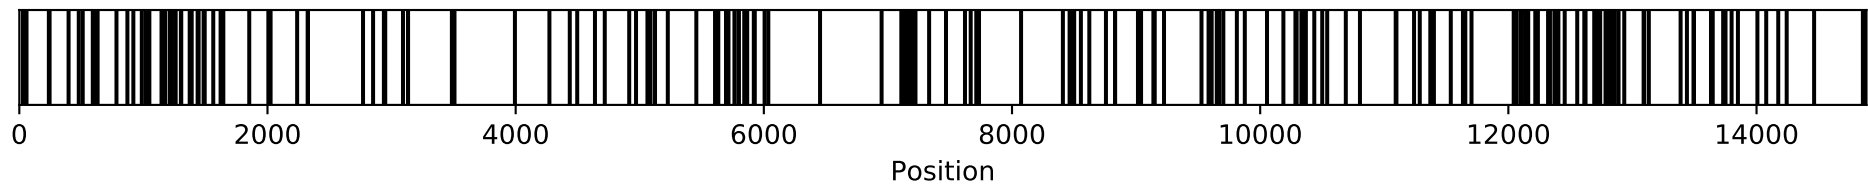

MM1 vs MM2  
Number of differences: 91

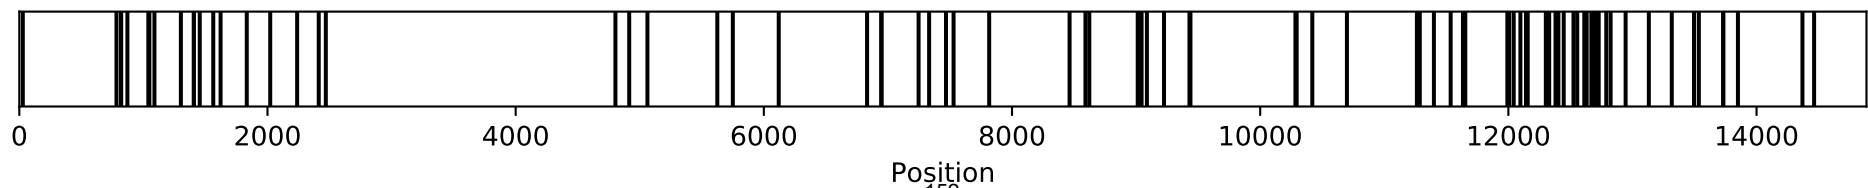

MA1 vs MA2  
Number of differences: 308

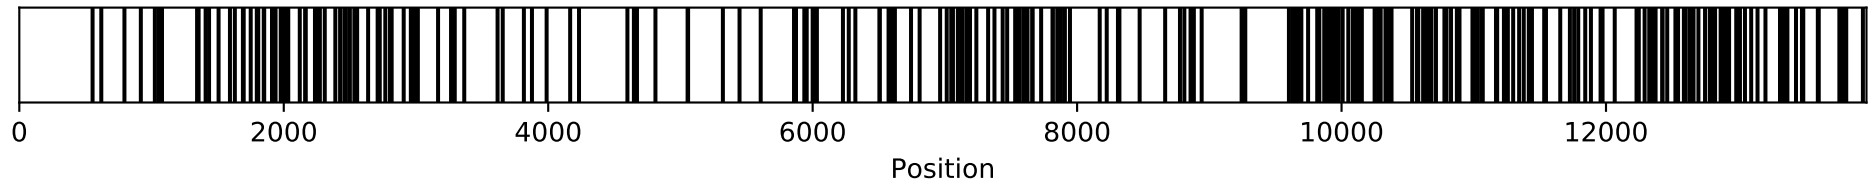

MA1 vs MM1  
Number of differences: 296

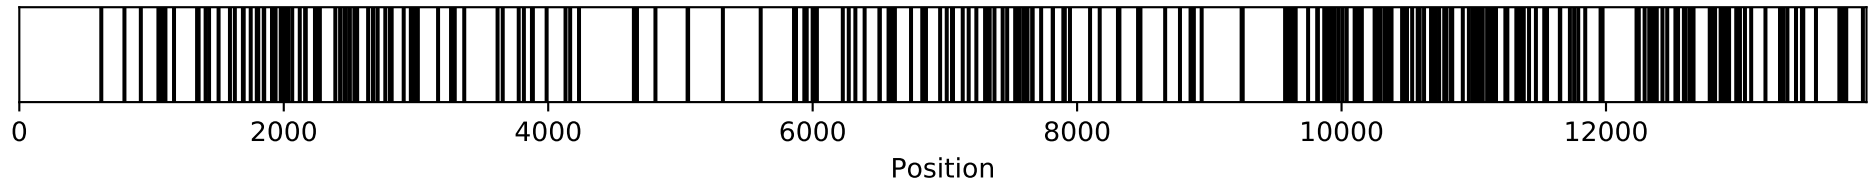

MA1 vs MM2  
Number of differences: 308

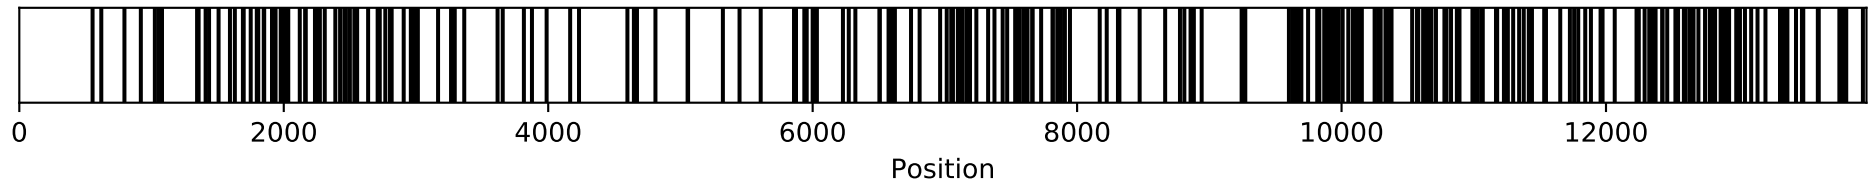

MA2 vs MM1  
Number of differences: 141

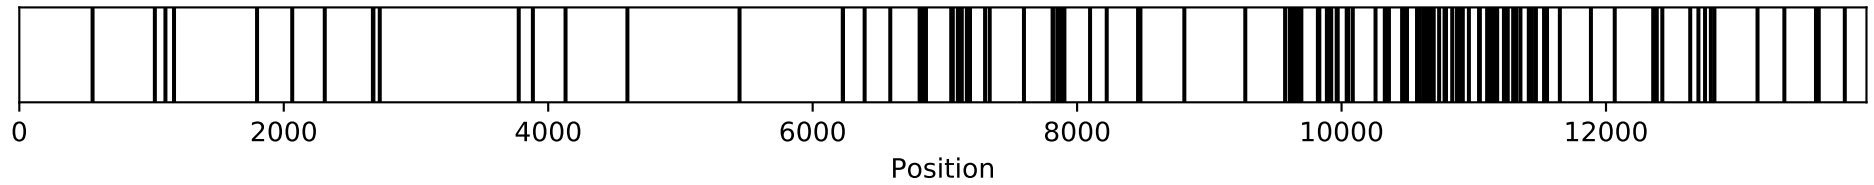

MA2 vs MM2  
Number of differences: 0

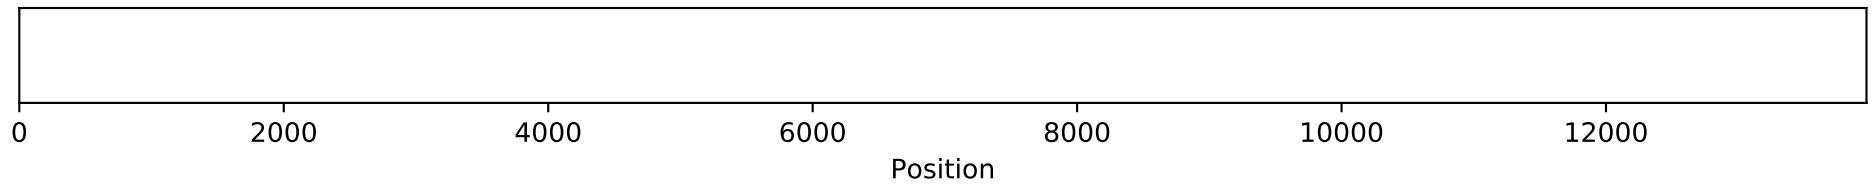

MM1 vs MM2  
Number of differences: 141

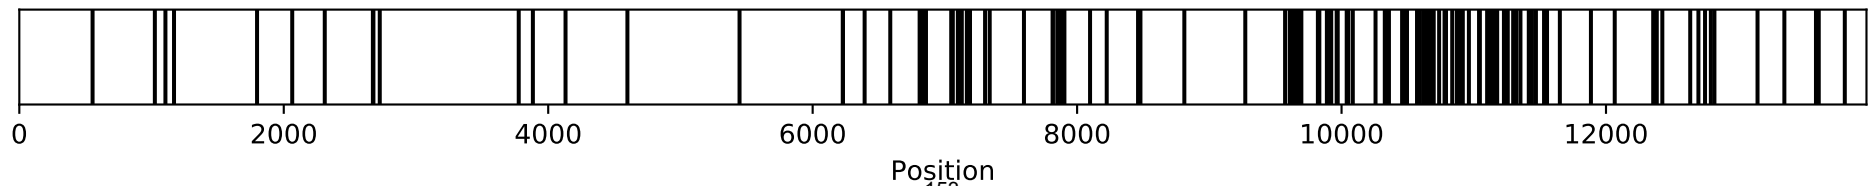

MA1 vs MA2  
Number of differences: 407

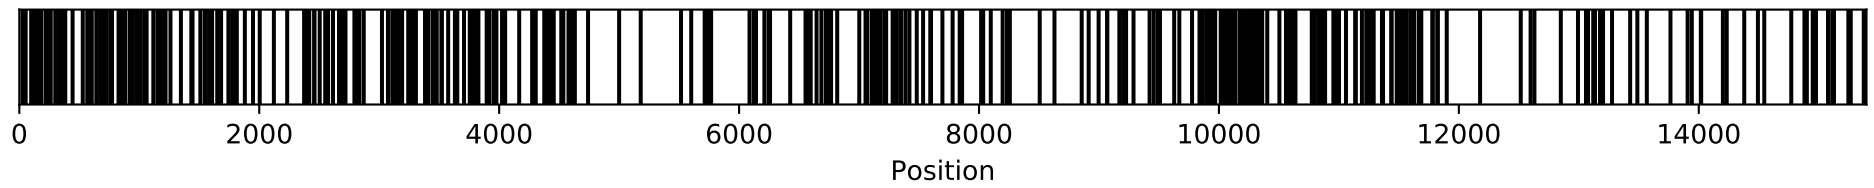

MA1 vs MM1  
Number of differences: 248

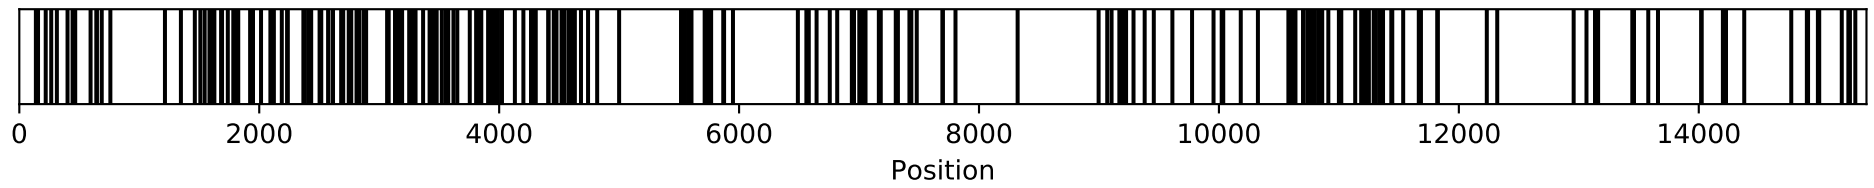

MA1 vs MM2  
Number of differences: 0

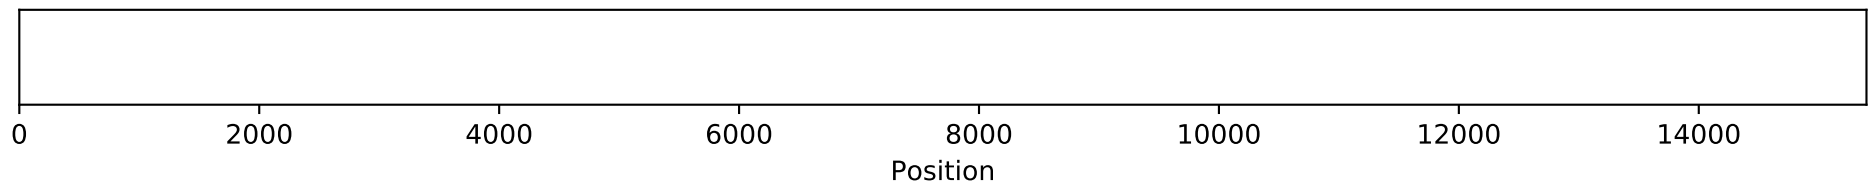

MA2 vs MM1  
Number of differences: 425

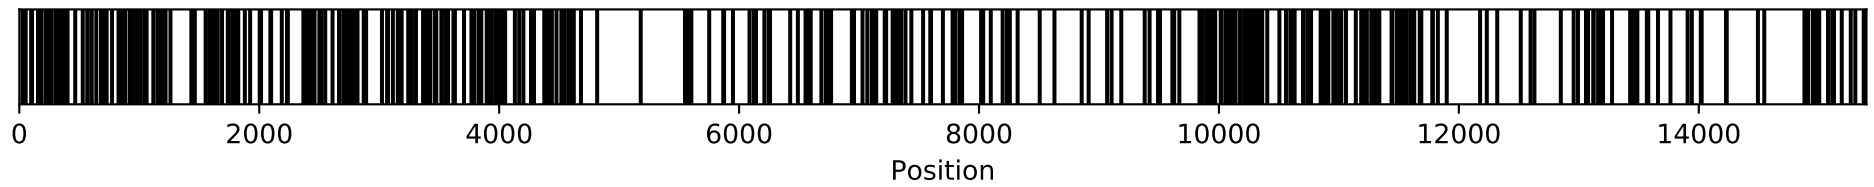

MA2 vs MM2  
Number of differences: 407

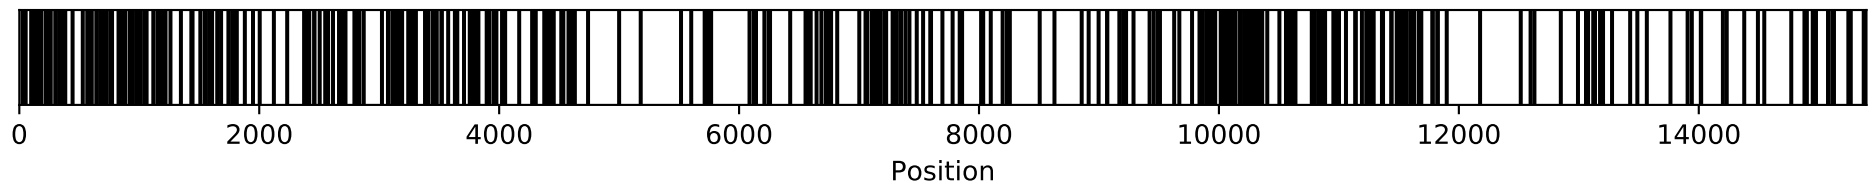

MM1 vs MM2  
Number of differences: 248

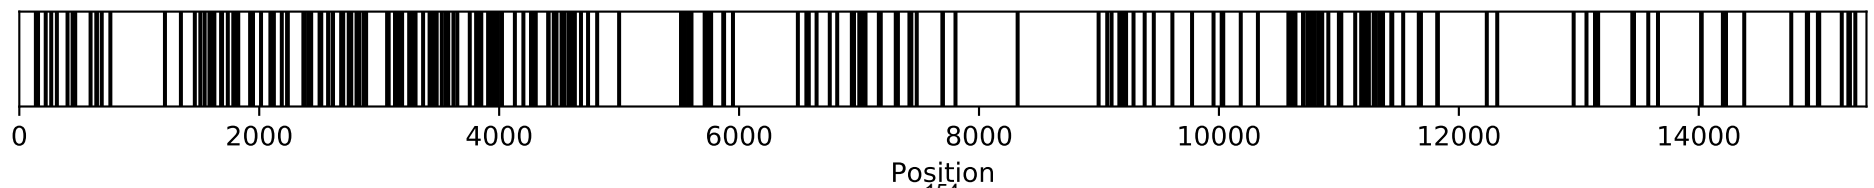



MA1 vs MA2  
Number of differences: 119

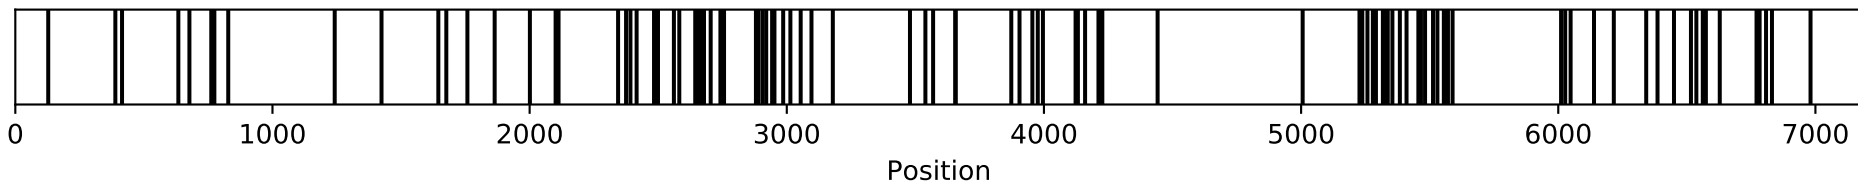

MA1 vs MM1  
Number of differences: 119

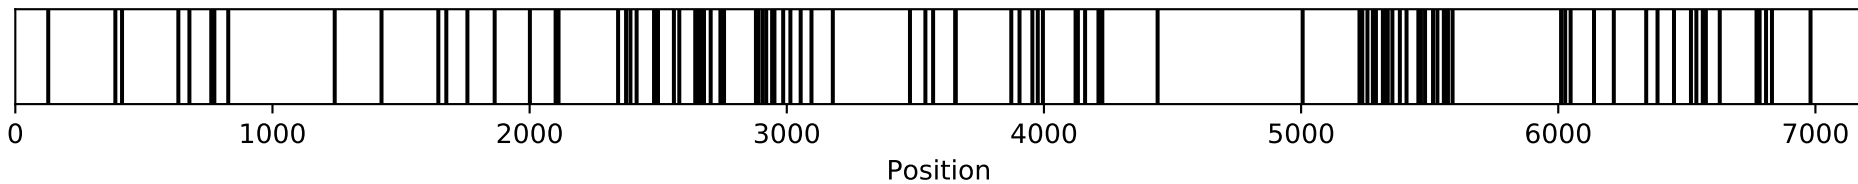

MA1 vs MM2  
Number of differences: 128

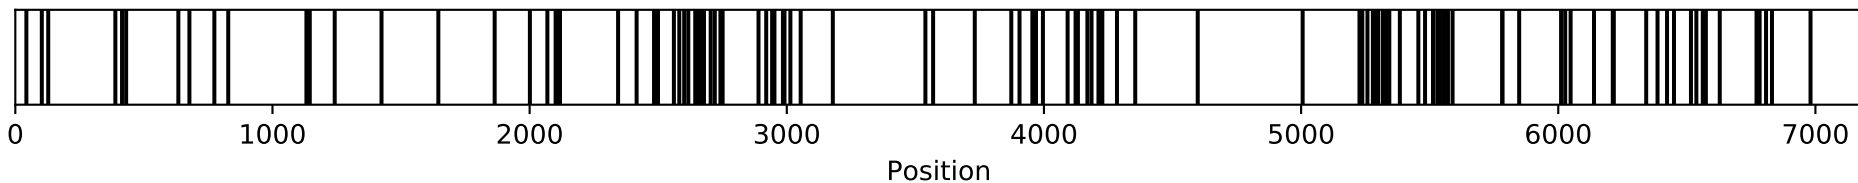

MA2 vs MM1  
Number of differences: 0

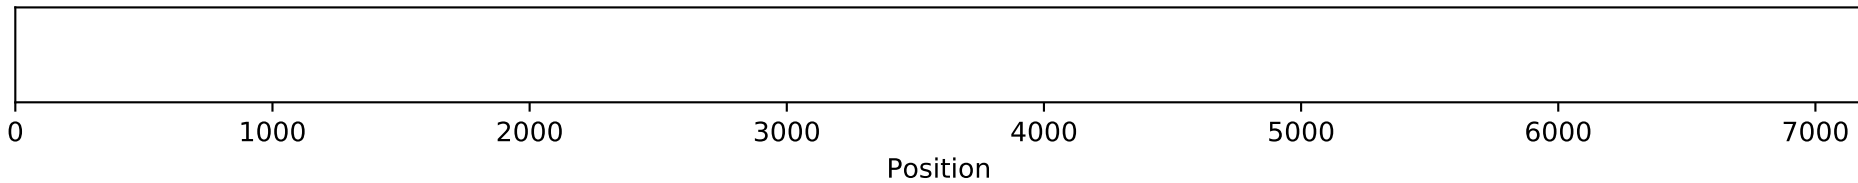

MA2 vs MM2  
Number of differences: 66

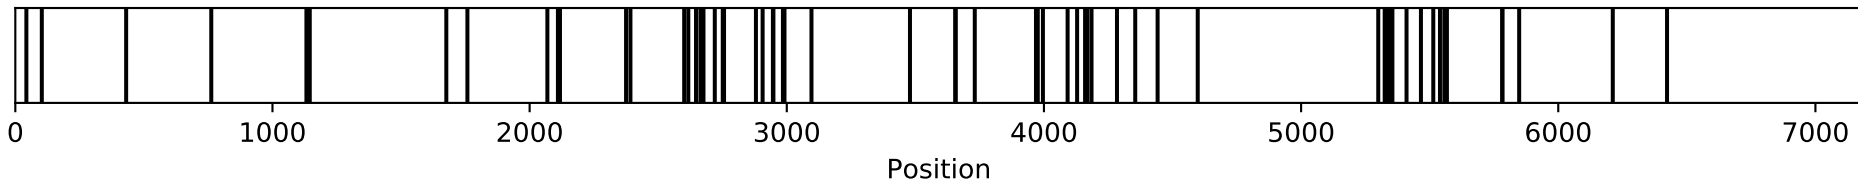

MM1 vs MM2  
Number of differences: 66

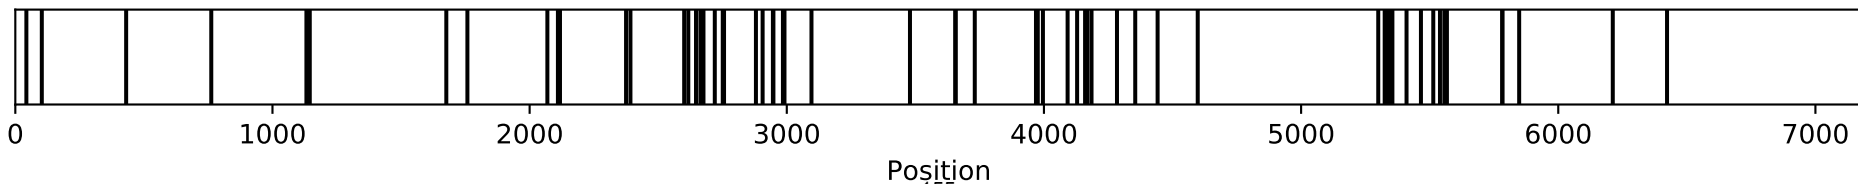

MA1 vs MA2  
Number of differences: 384

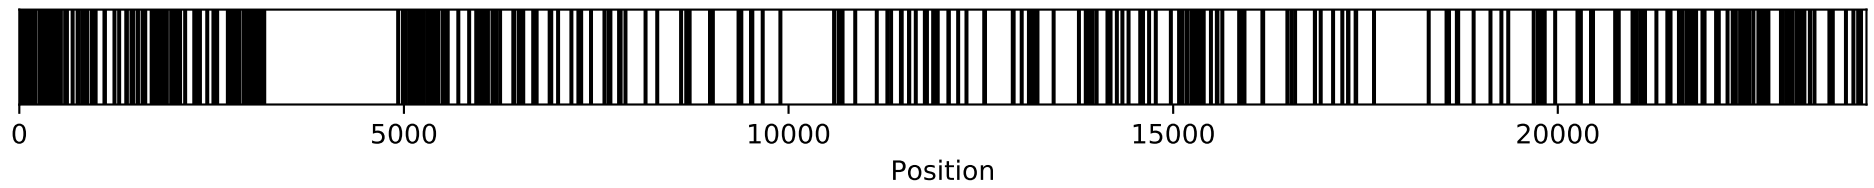

MA1 vs MM1  
Number of differences: 280

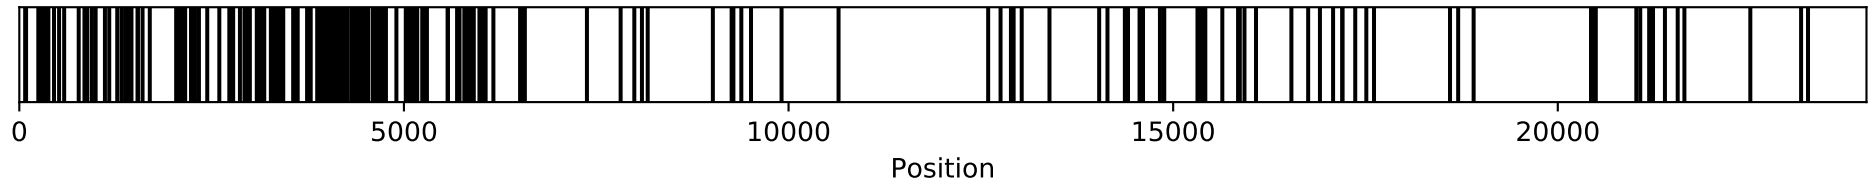

MA1 vs MM2  
Number of differences: 0

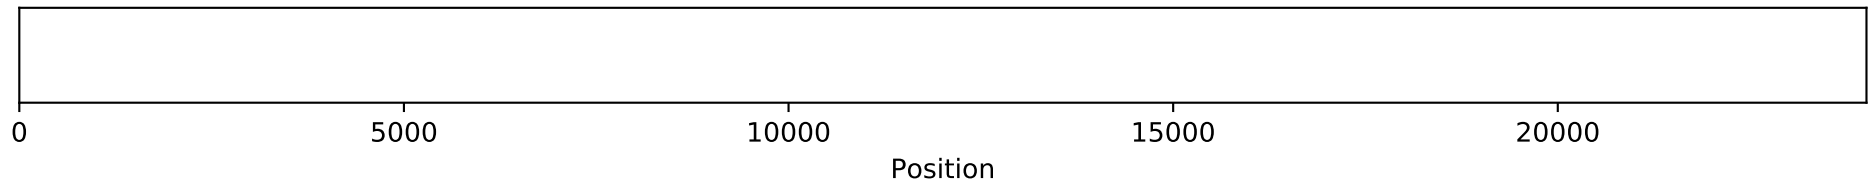

MA2 vs MM1  
Number of differences: 505

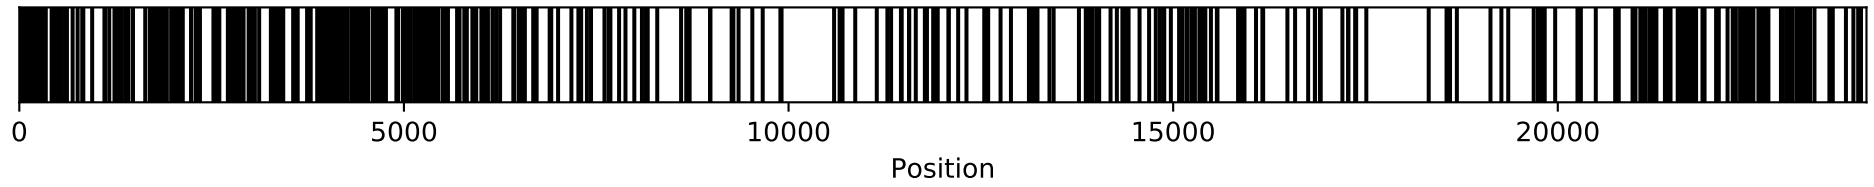

MA2 vs MM2  
Number of differences: 384

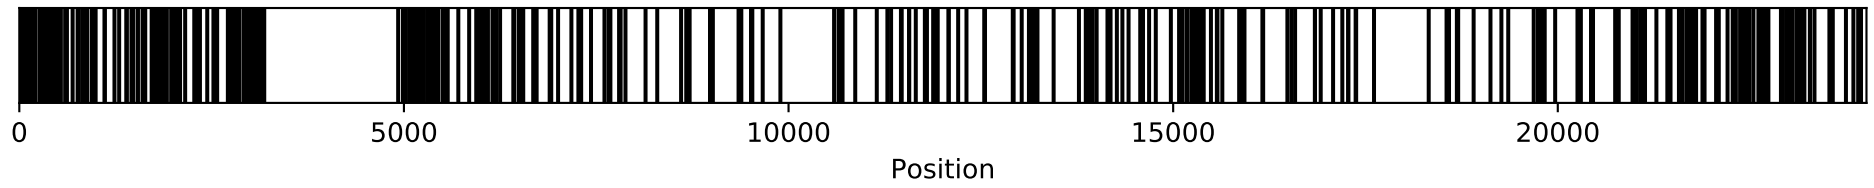

MM1 vs MM2  
Number of differences: 280

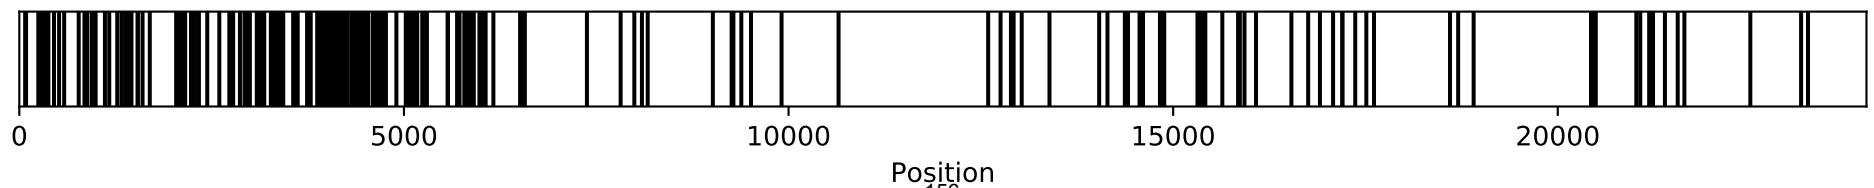

MA1 vs MA2  
Number of differences: 257

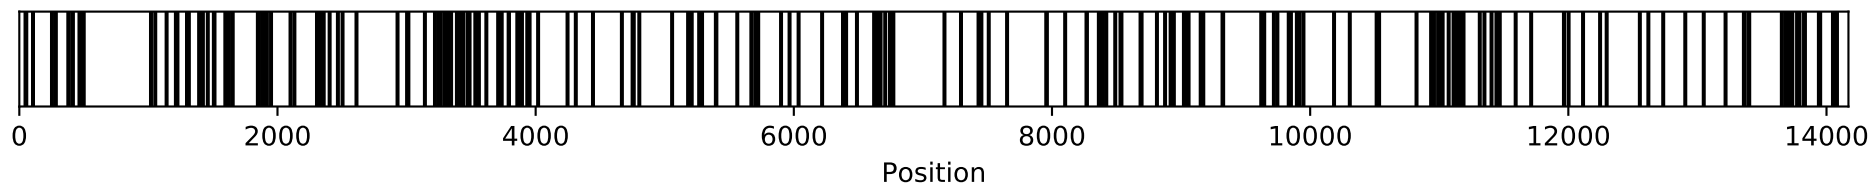

MA1 vs MM1  
Number of differences: 265

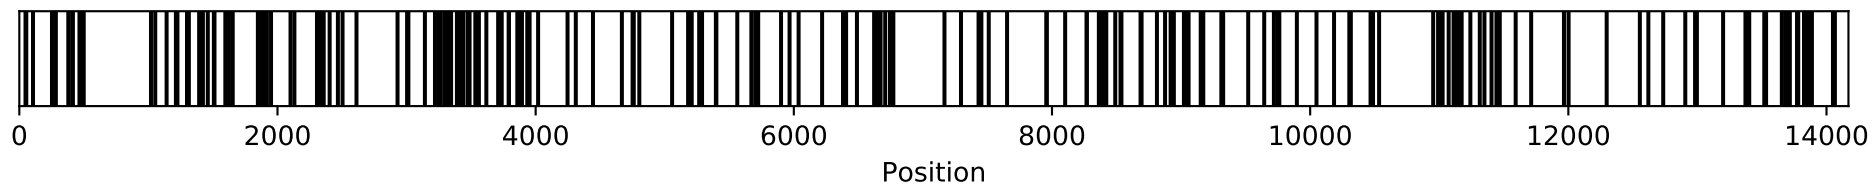

MA1 vs MM2  
Number of differences: 237

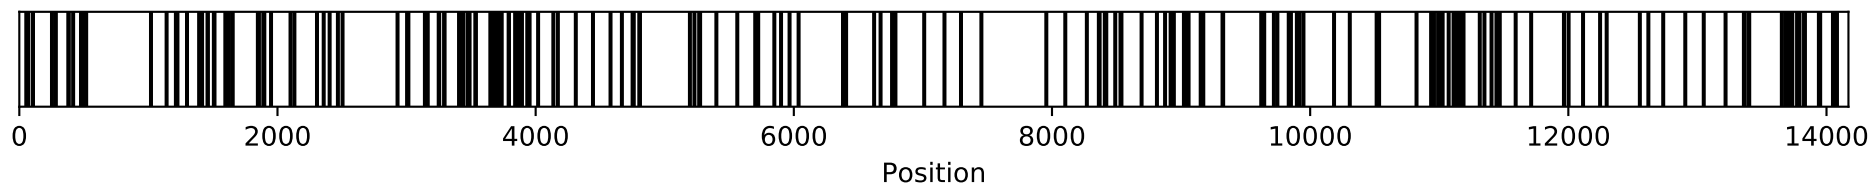

MA2 vs MM1  
Number of differences: 59

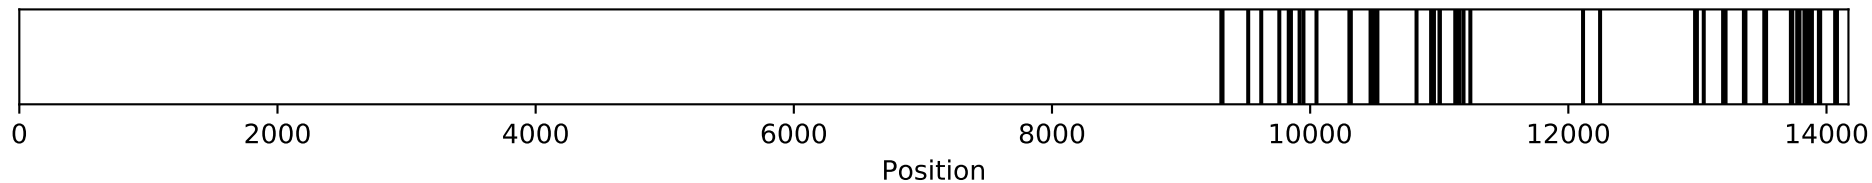

MA2 vs MM2  
Number of differences: 80

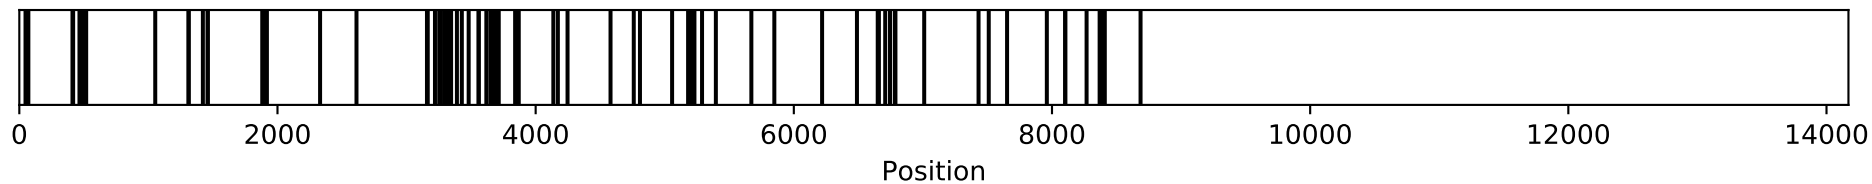

MM1 vs MM2  
Number of differences: 139

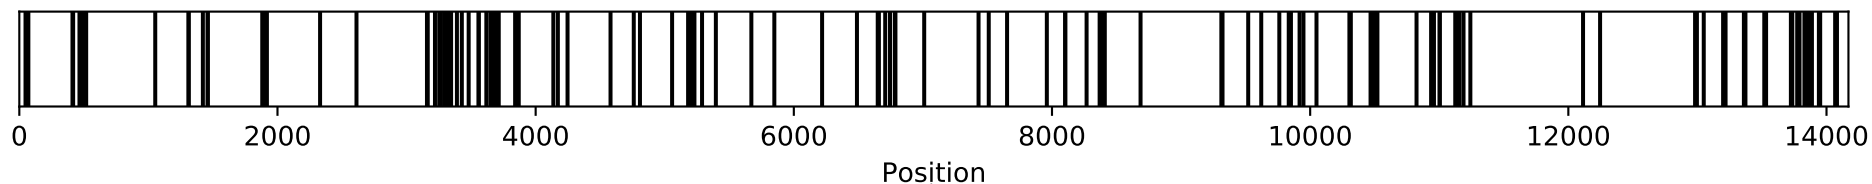

MA1 vs MA2  
Number of differences: 277

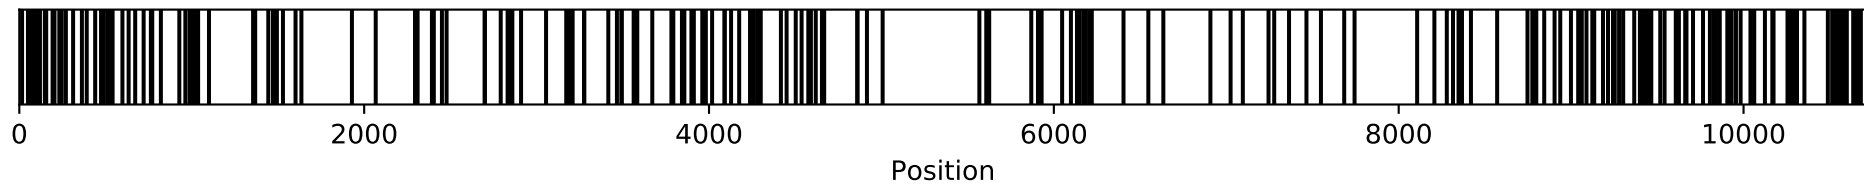

MA1 vs MM1  
Number of differences: 0

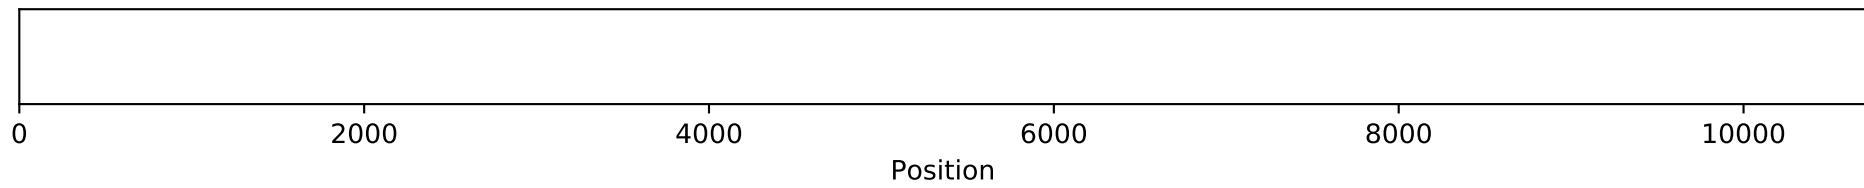

MA1 vs MM2  
Number of differences: 147

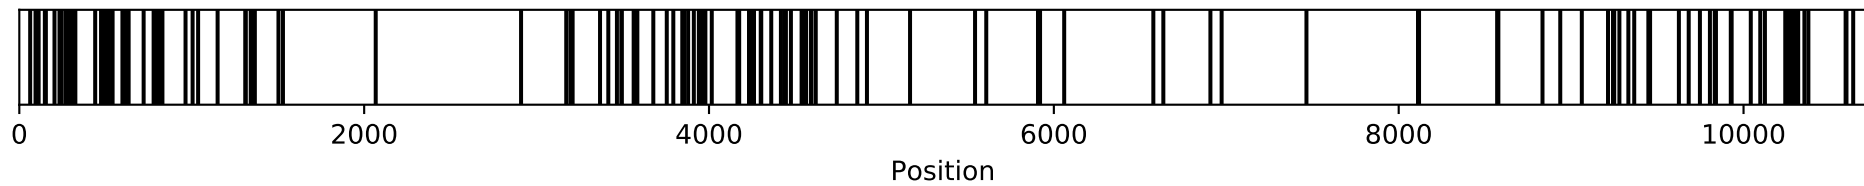

MA2 vs MM1  
Number of differences: 277

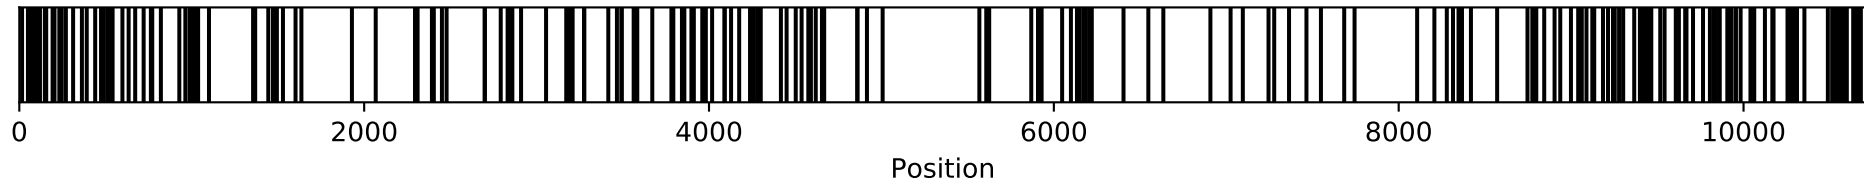

MA2 vs MM2  
Number of differences: 272

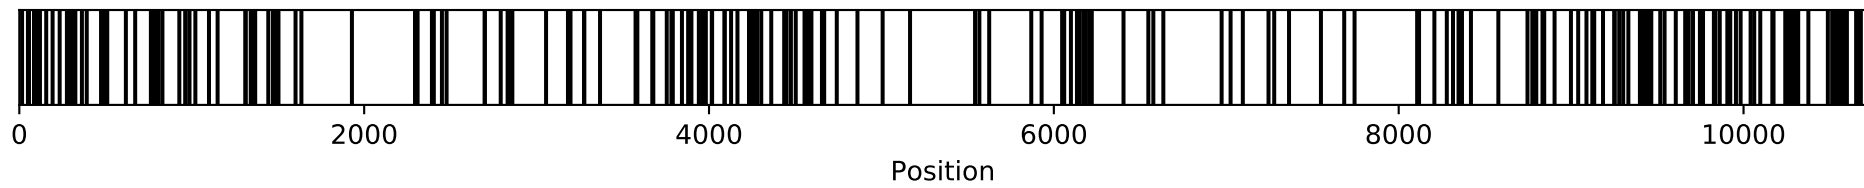

MM1 vs MM2  
Number of differences: 147

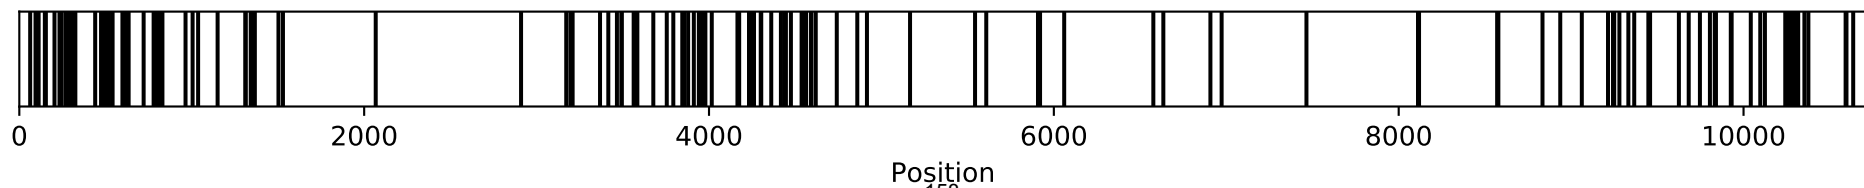

MA1 vs MA2  
Number of differences: 328

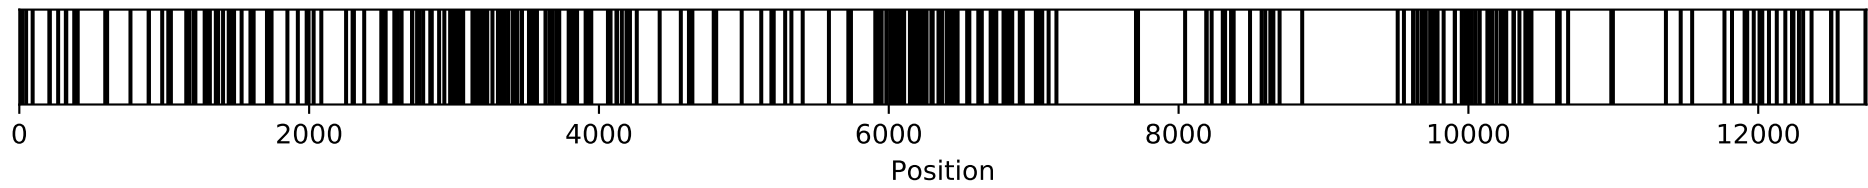

MA1 vs MM1  
Number of differences: 324

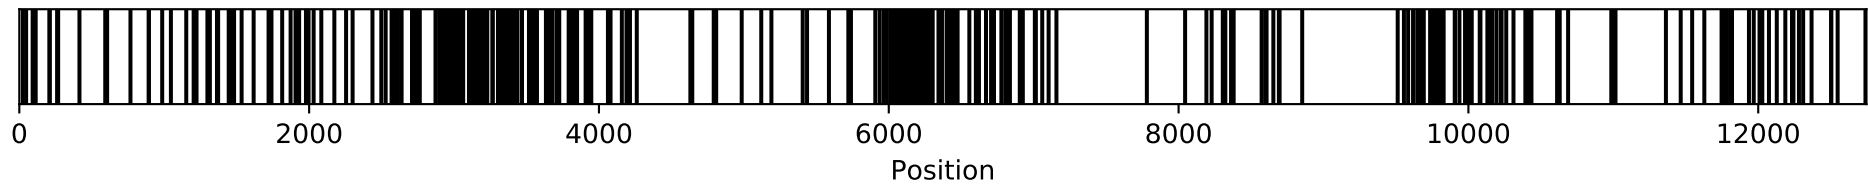

MA1 vs MM2  
Number of differences: 337

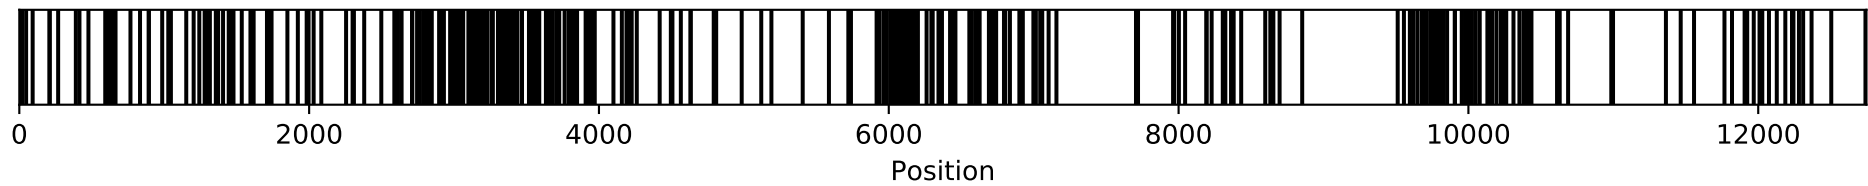

MA2 vs MM1  
Number of differences: 152

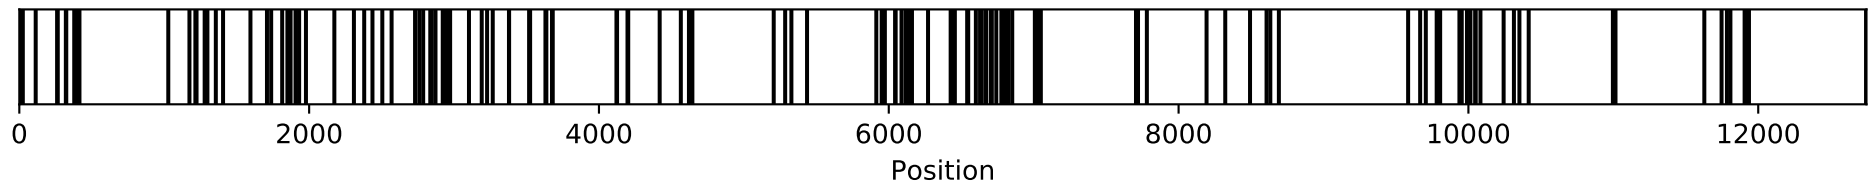

MA2 vs MM2  
Number of differences: 153

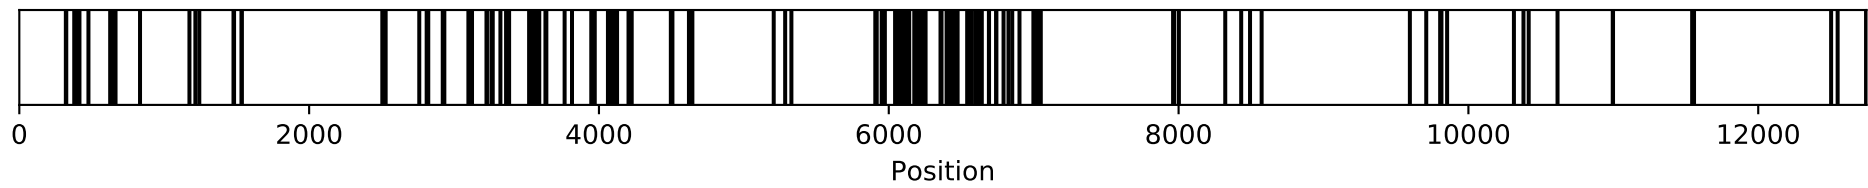

MM1 vs MM2  
Number of differences: 192

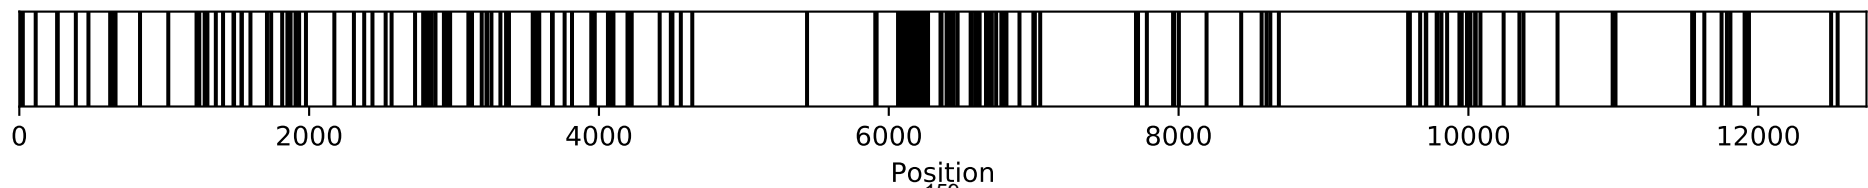

MA1 vs MA2  
Number of differences: 210

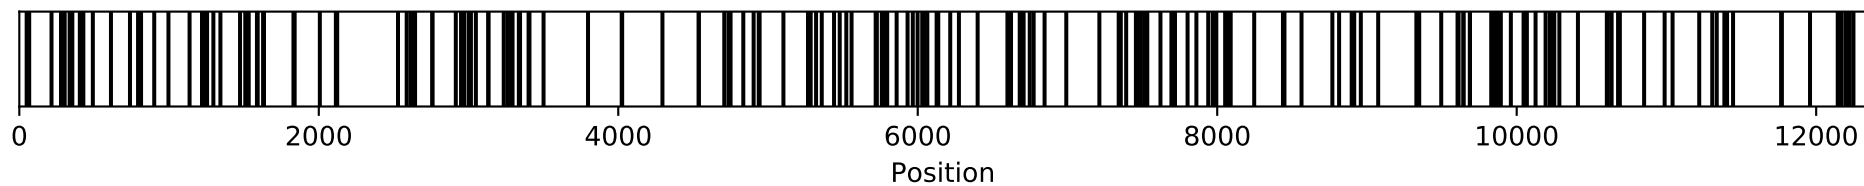

MA1 vs MM1  
Number of differences: 89

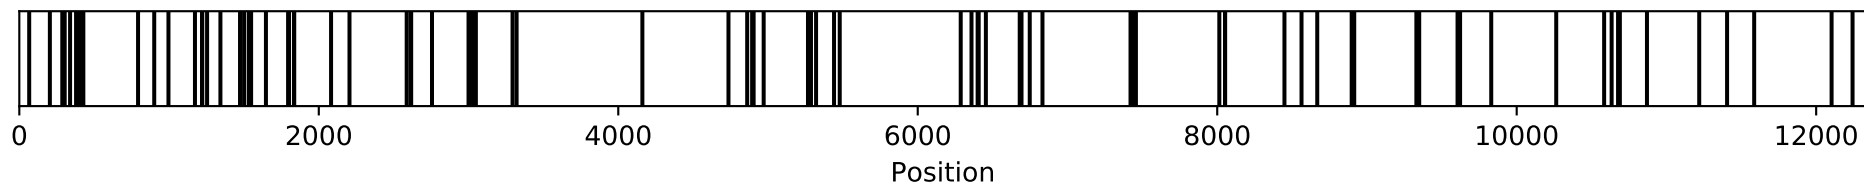

MA1 vs MM2  
Number of differences: 102

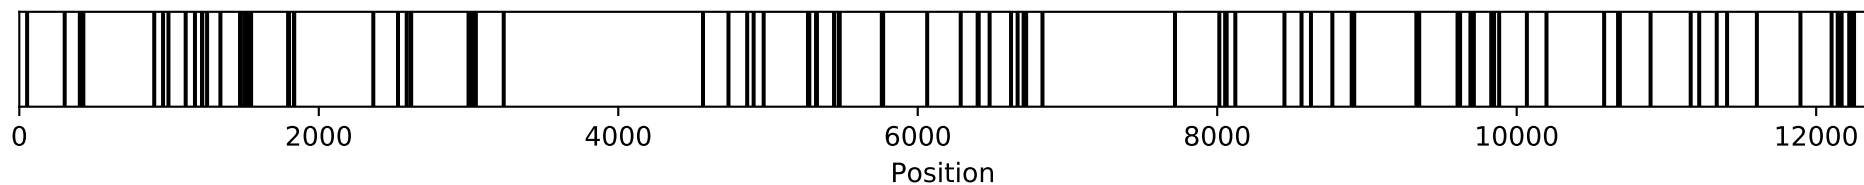

MA2 vs MM1  
Number of differences: 200

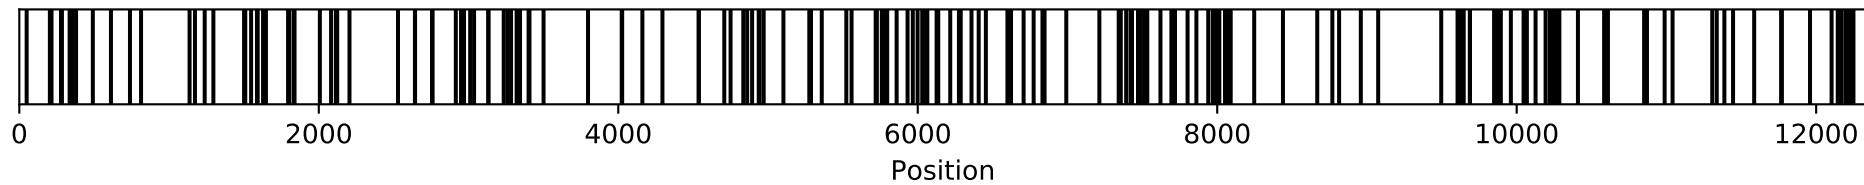

MA2 vs MM2  
Number of differences: 195

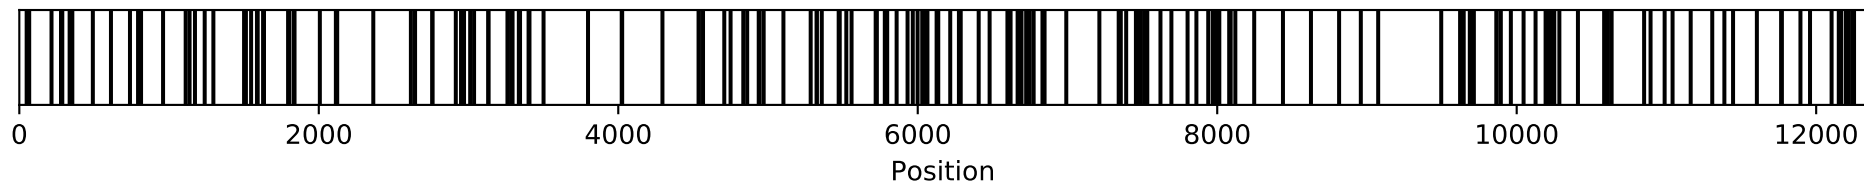

MM1 vs MM2  
Number of differences: 79

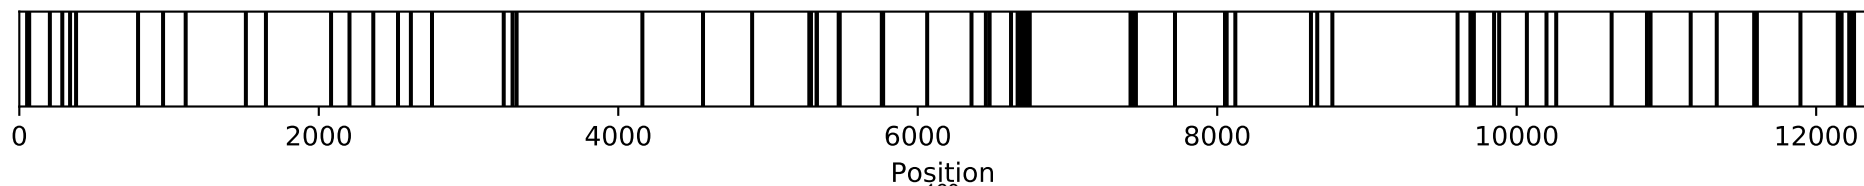

MA1 vs MA2  
Number of differences: 240

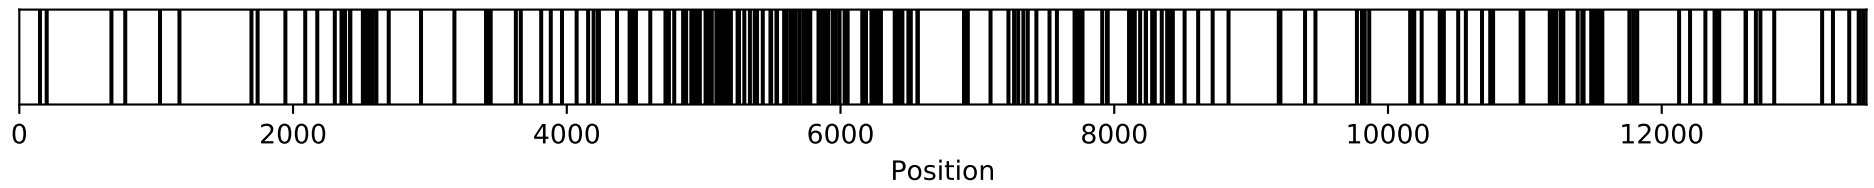

MA1 vs MM1  
Number of differences: 0

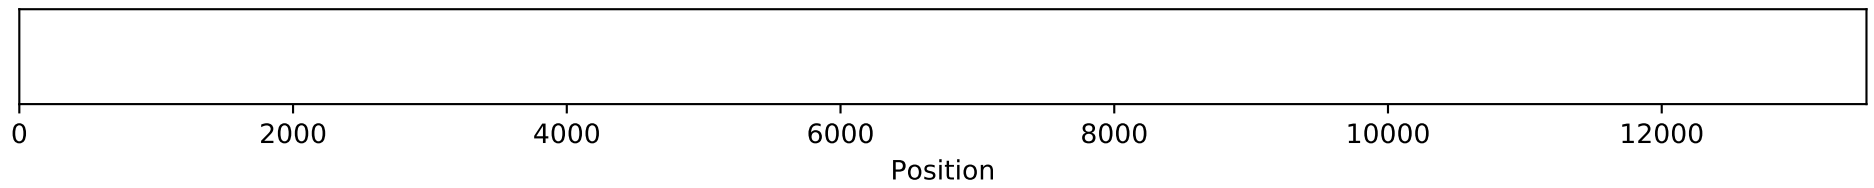

MA1 vs MM2  
Number of differences: 44

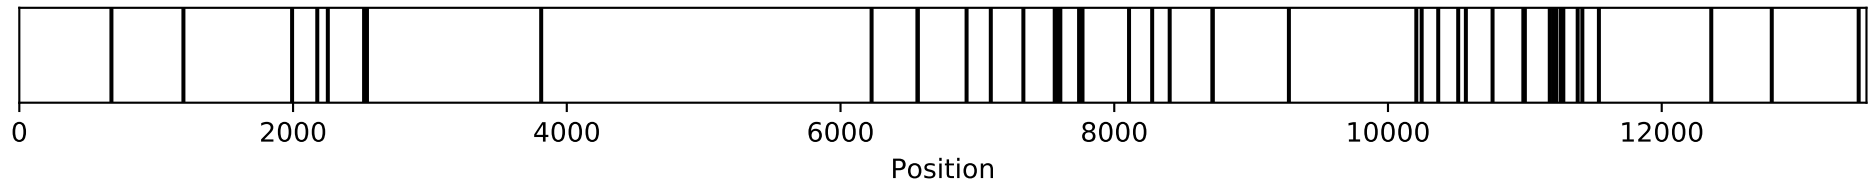

MA2 vs MM1  
Number of differences: 240

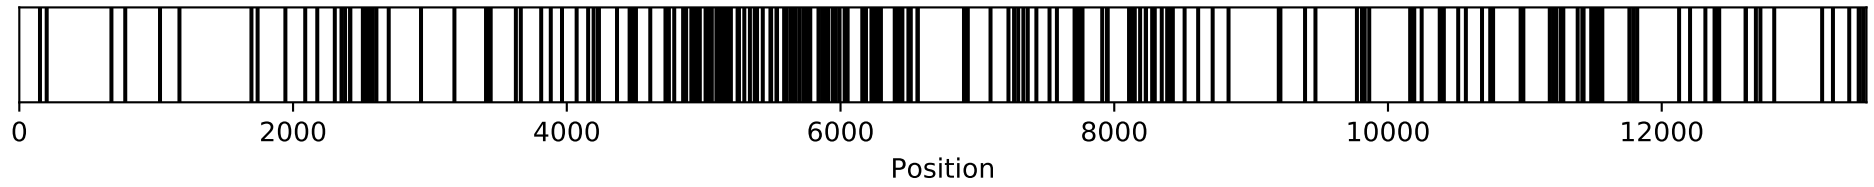

MA2 vs MM2  
Number of differences: 229

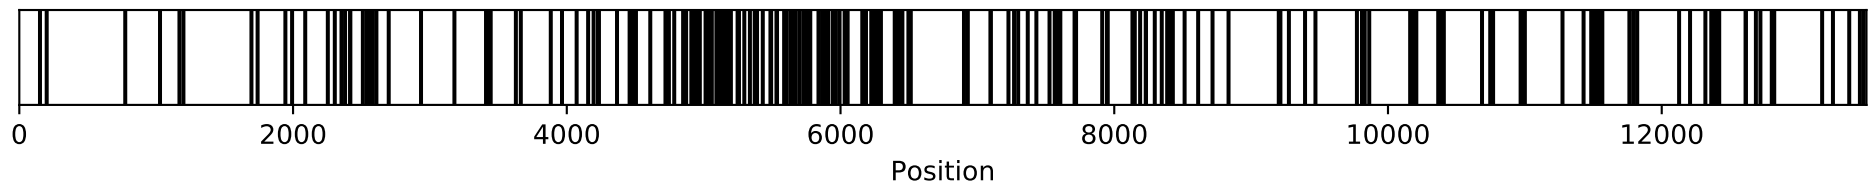

MM1 vs MM2  
Number of differences: 44

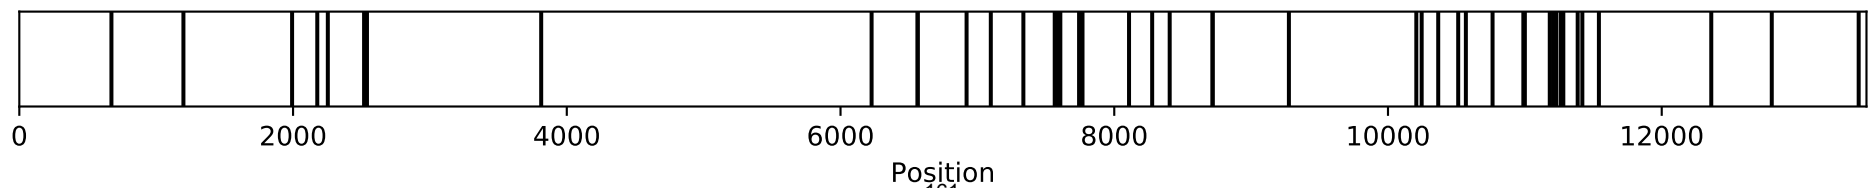

MA1 vs MA2  
Number of differences: 74

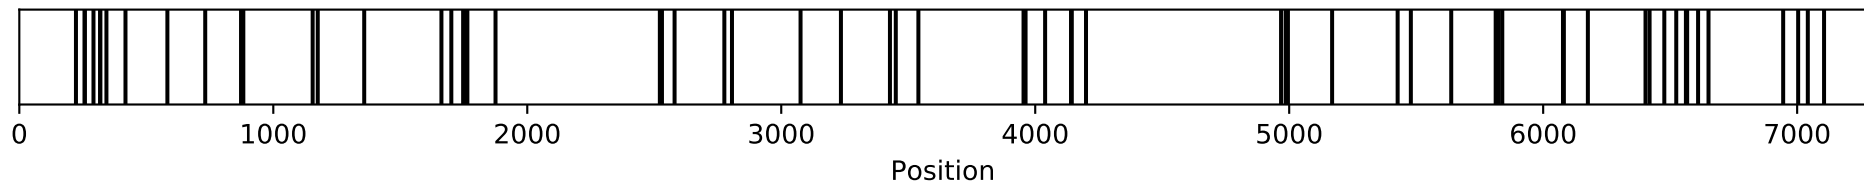

MA1 vs MM1  
Number of differences: 74

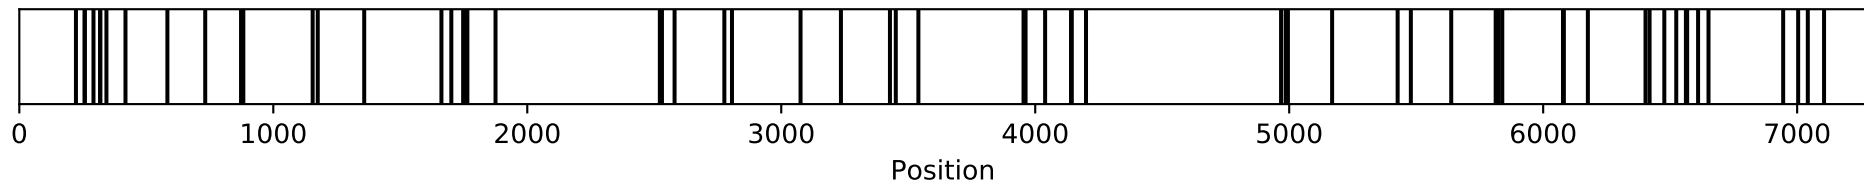

MA1 vs MM2  
Number of differences: 82

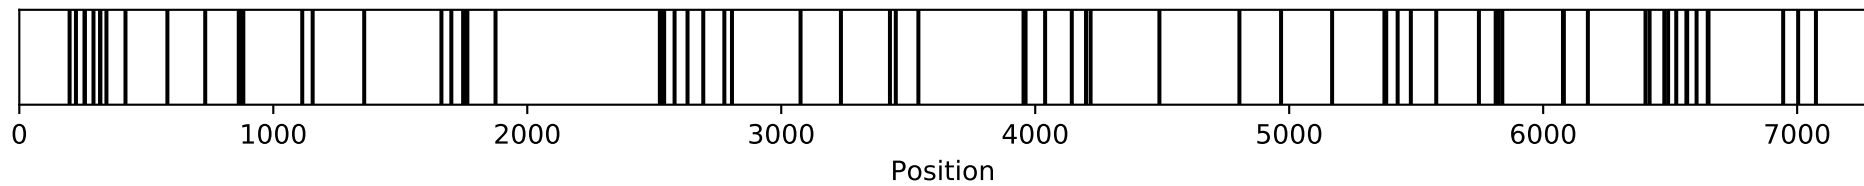

MA2 vs MM1  
Number of differences: 0

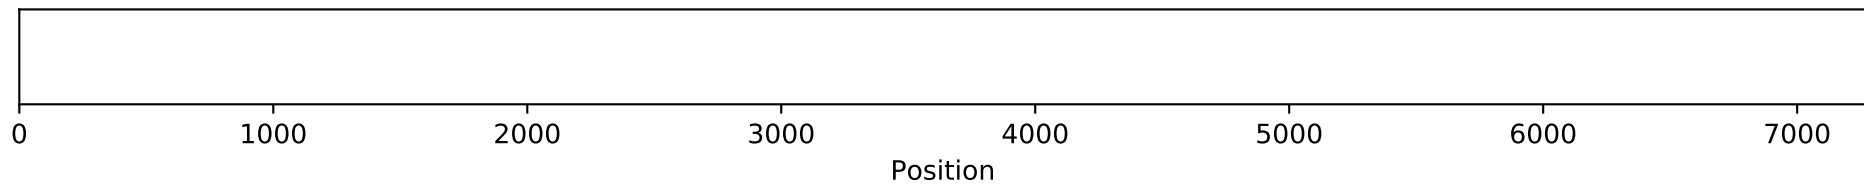

MA2 vs MM2  
Number of differences: 26

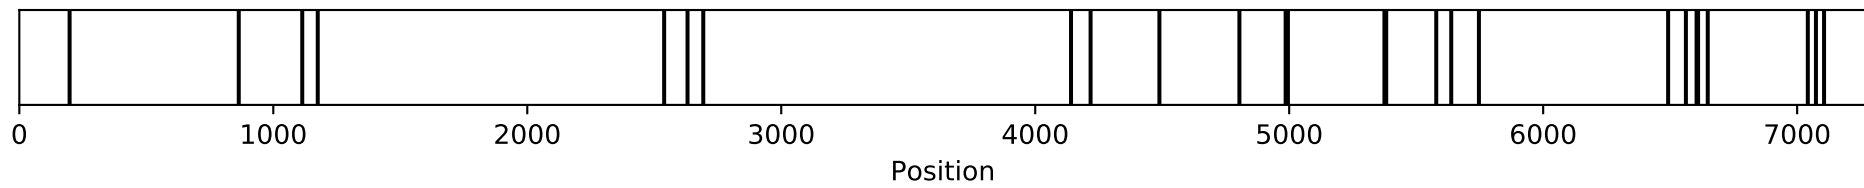

MM1 vs MM2  
Number of differences: 26

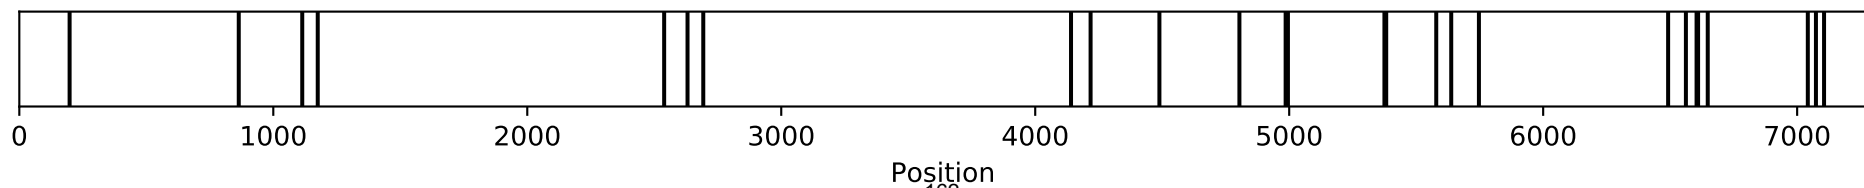



MA1 vs MA2  
Number of differences: 187

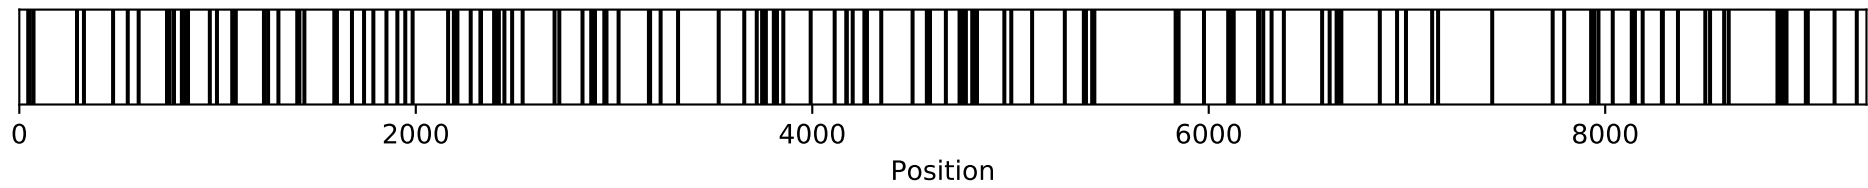

MA1 vs MM1  
Number of differences: 51

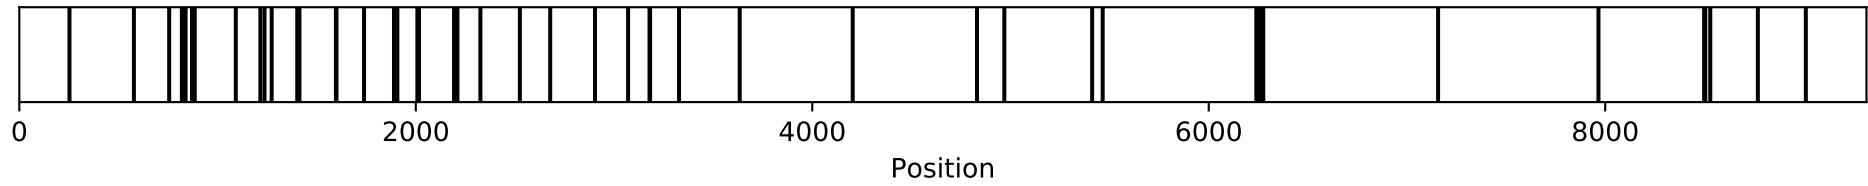

MA1 vs MM2  
Number of differences: 0

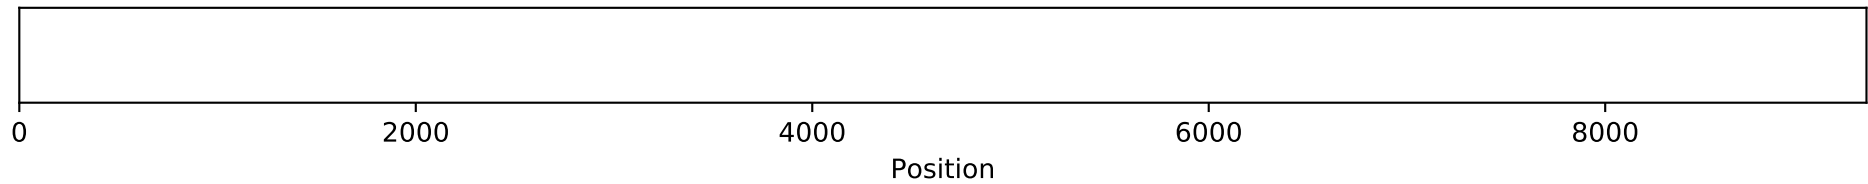

MA2 vs MM1  
Number of differences: 185

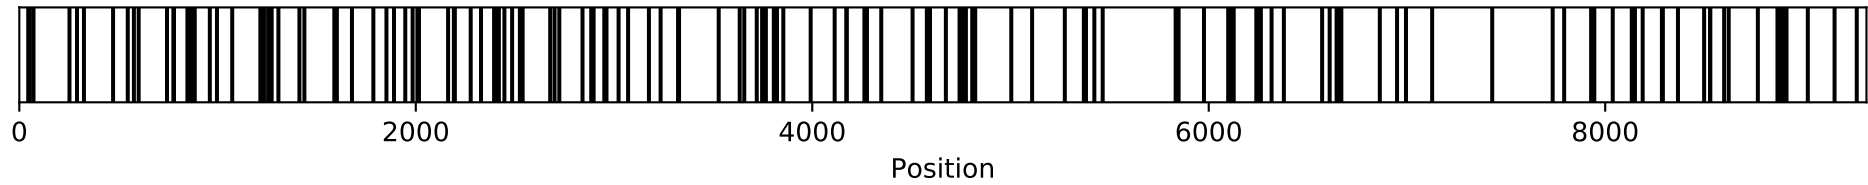

MA2 vs MM2  
Number of differences: 187

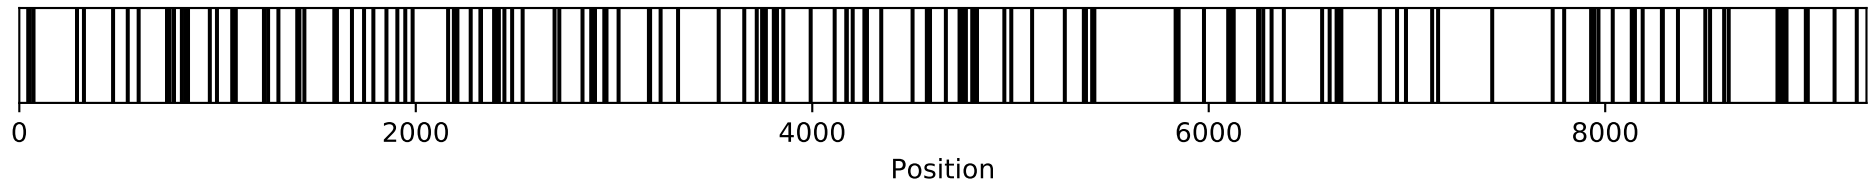

MM1 vs MM2  
Number of differences: 51

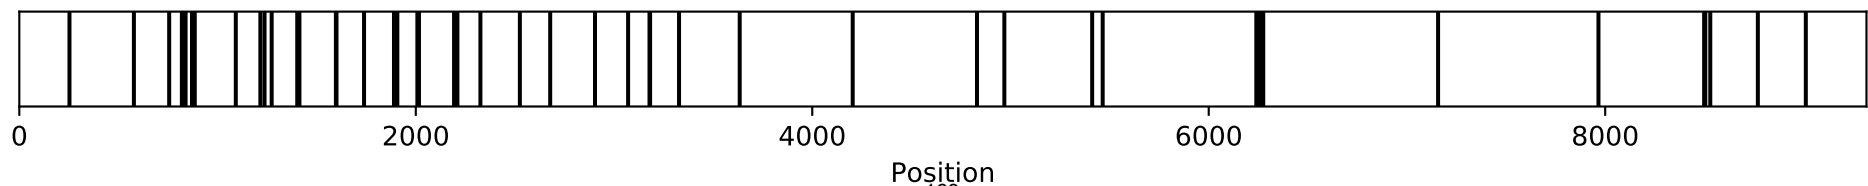

MA1 vs MA2  
Number of differences: 232

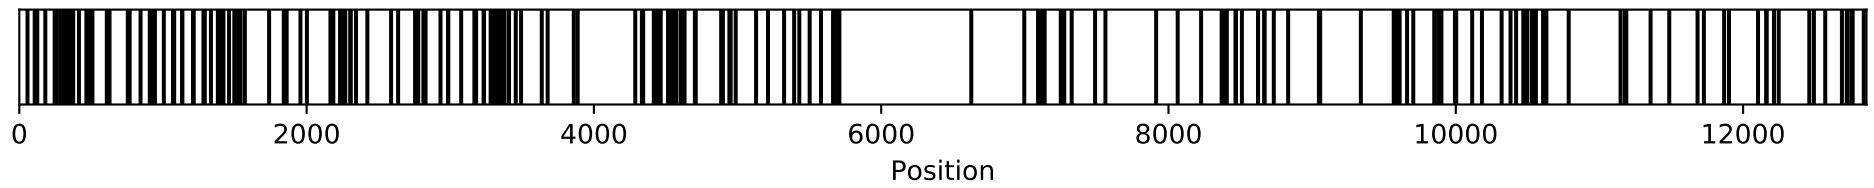

MA1 vs MM1  
Number of differences: 232

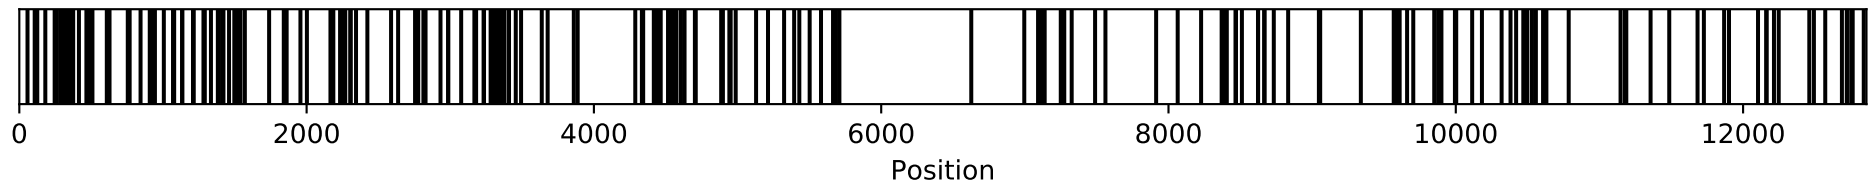

MA1 vs MM2  
Number of differences: 229

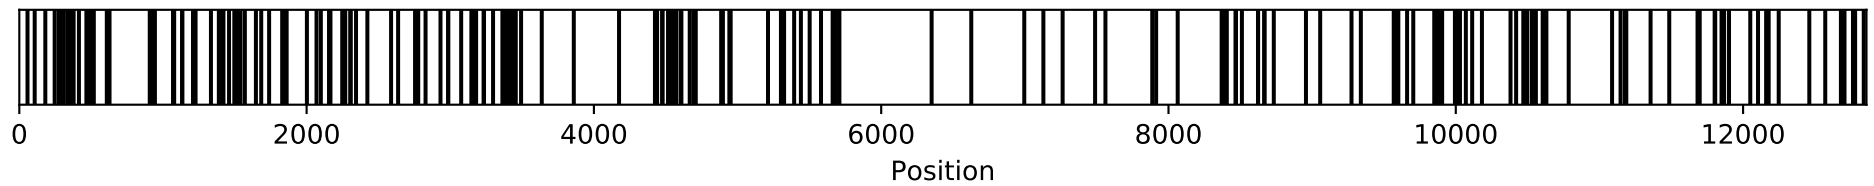

MA2 vs MM1  
Number of differences: 0

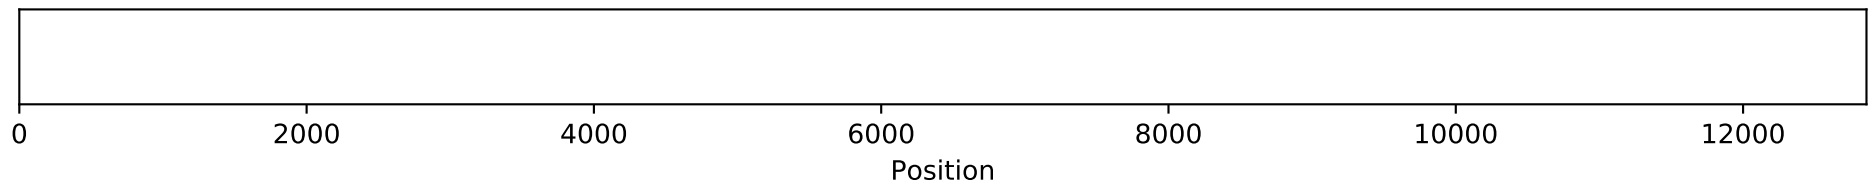

MA2 vs MM2  
Number of differences: 123

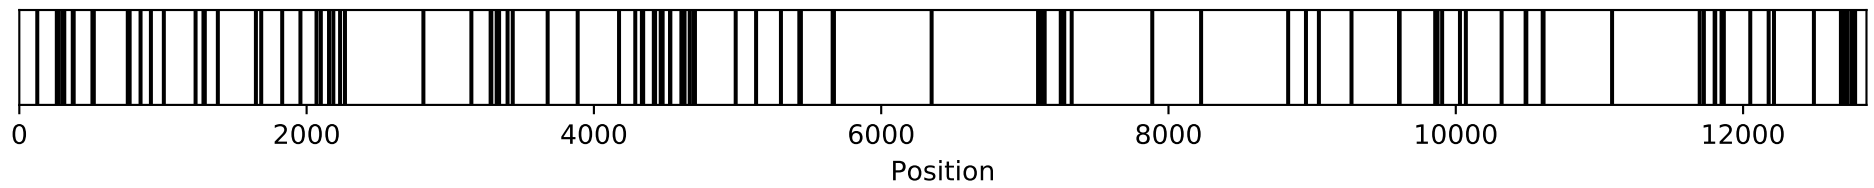

MM1 vs MM2  
Number of differences: 123

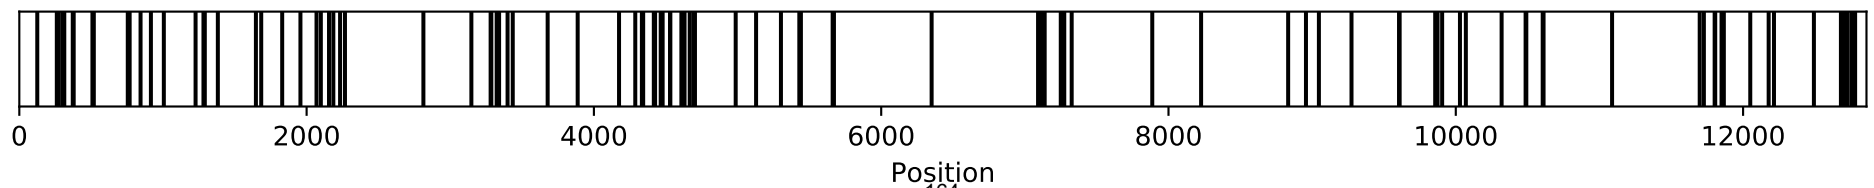

MA1 vs MA2  
Number of differences: 153

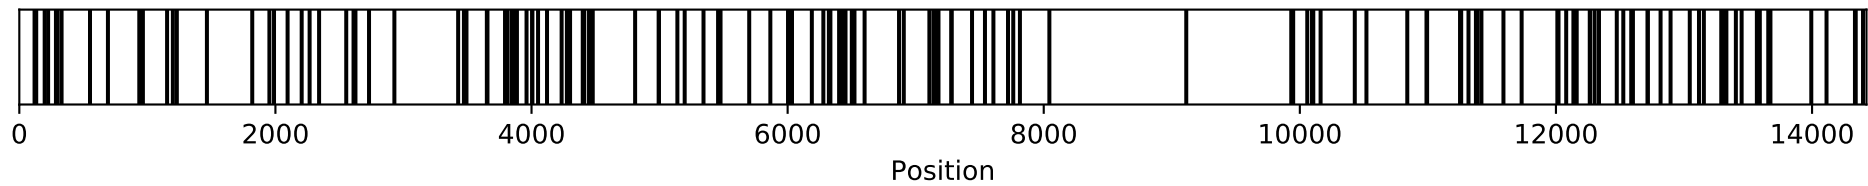

MA1 vs MM1  
Number of differences: 153

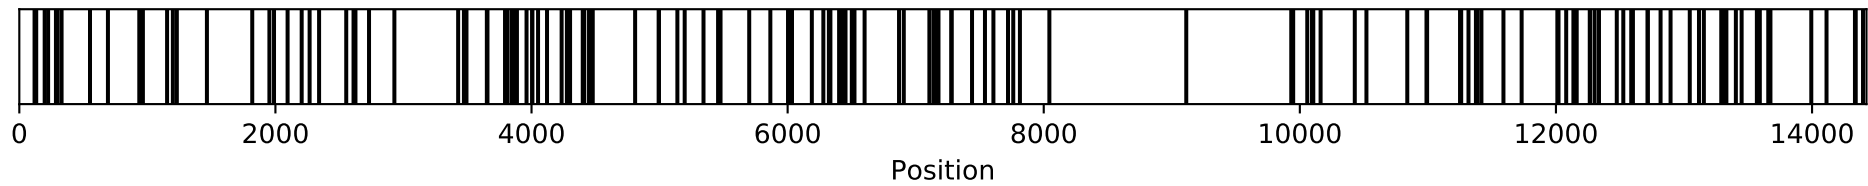

MA1 vs MM2  
Number of differences: 151

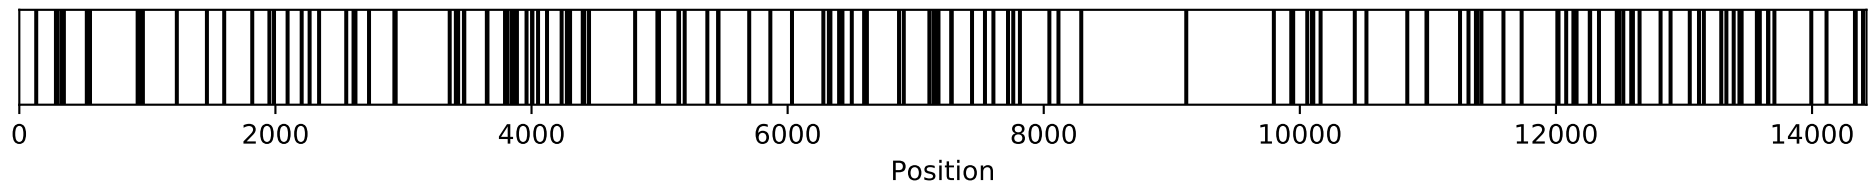

MA2 vs MM1  
Number of differences: 0

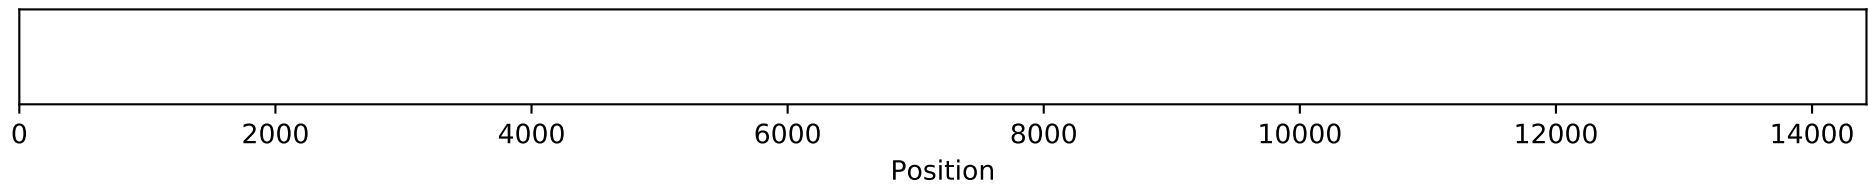

MA2 vs MM2  
Number of differences: 50

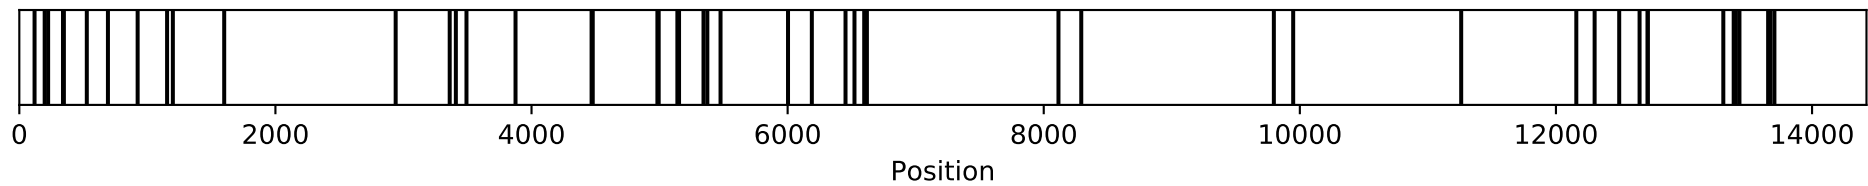

MM1 vs MM2  
Number of differences: 50

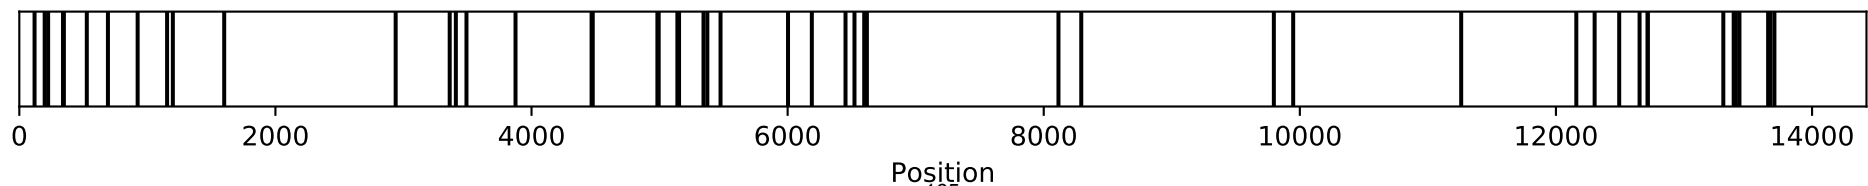

MA1 vs MA2  
Number of differences: 0

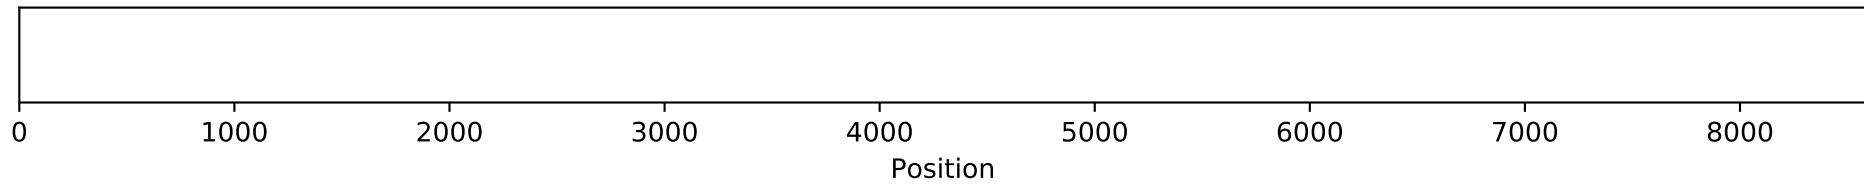

MA1 vs MM1  
Number of differences: 0

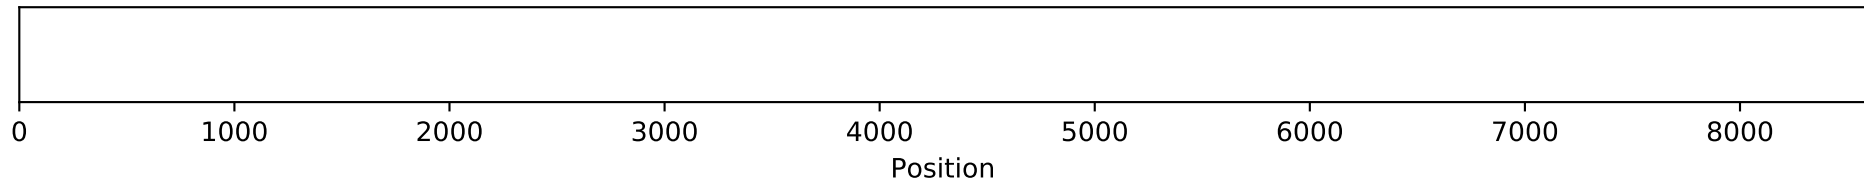

MA1 vs MM2  
Number of differences: 146

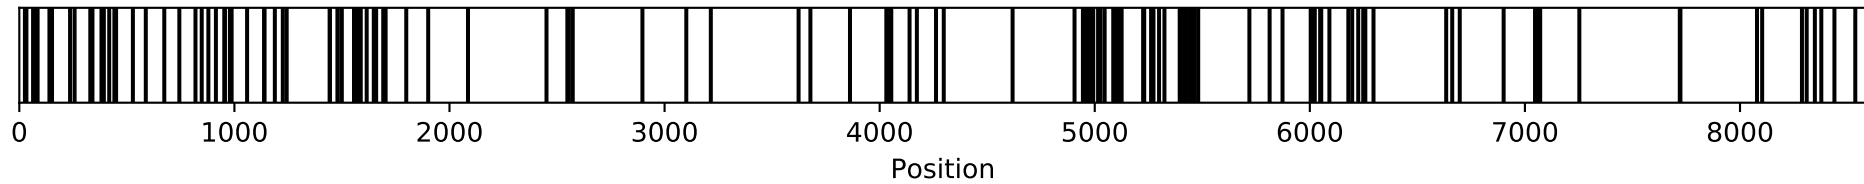

MA2 vs MM1  
Number of differences: 0

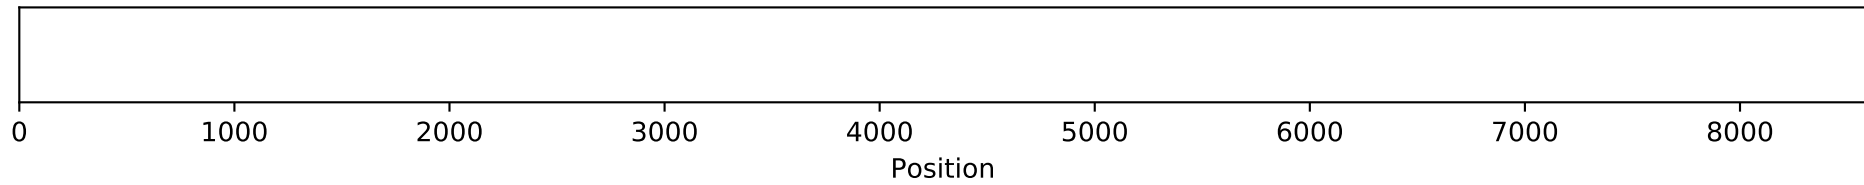

MA2 vs MM2  
Number of differences: 146

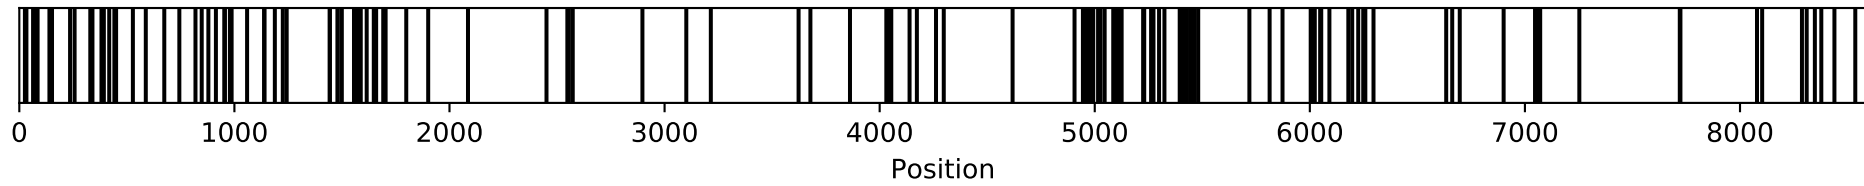

MM1 vs MM2  
Number of differences: 146

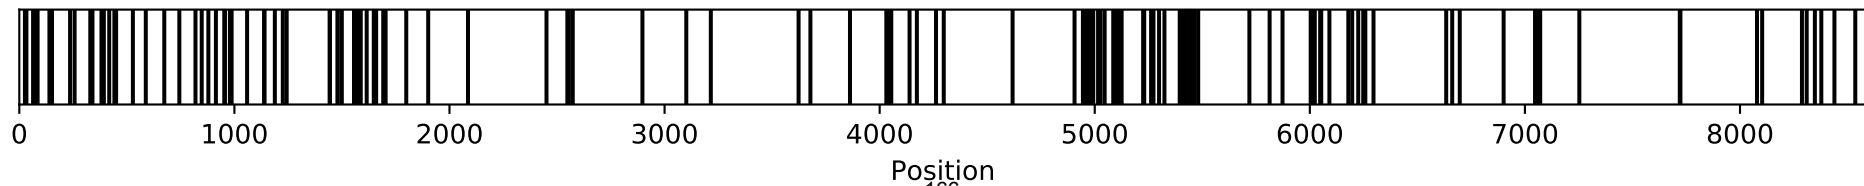

MA1 vs MA2  
Number of differences: 66

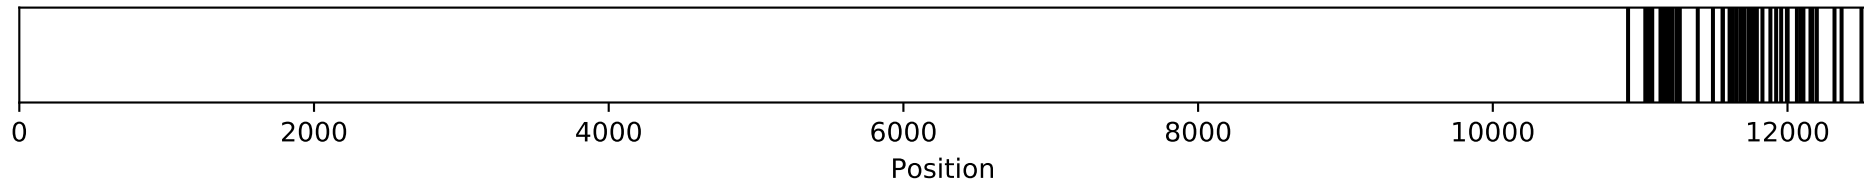

MA1 vs MM1  
Number of differences: 376

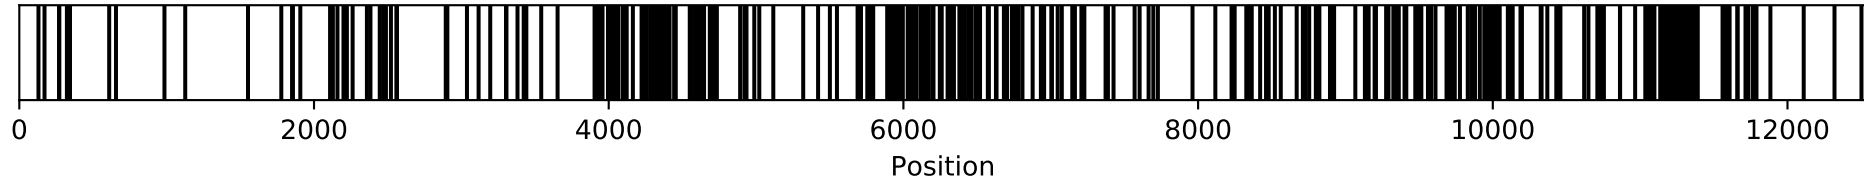

MA1 vs MM2  
Number of differences: 279

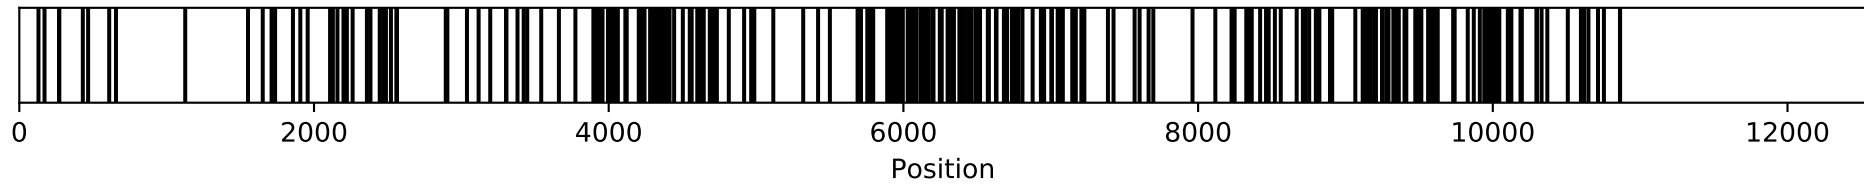

MA2 vs MM1  
Number of differences: 396

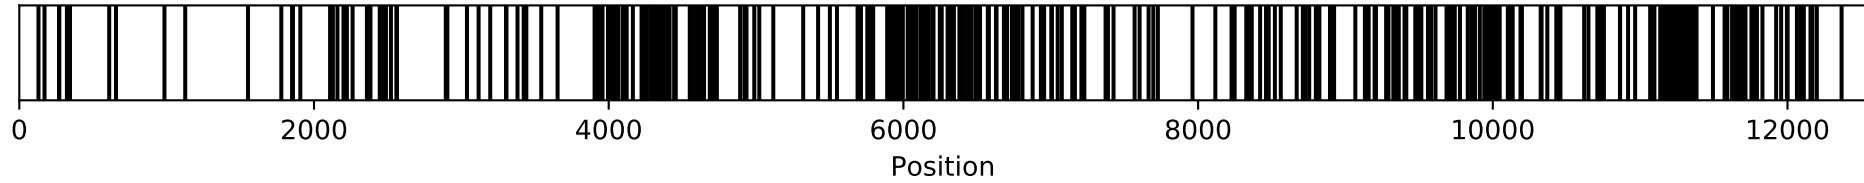

MA2 vs MM2  
Number of differences: 345

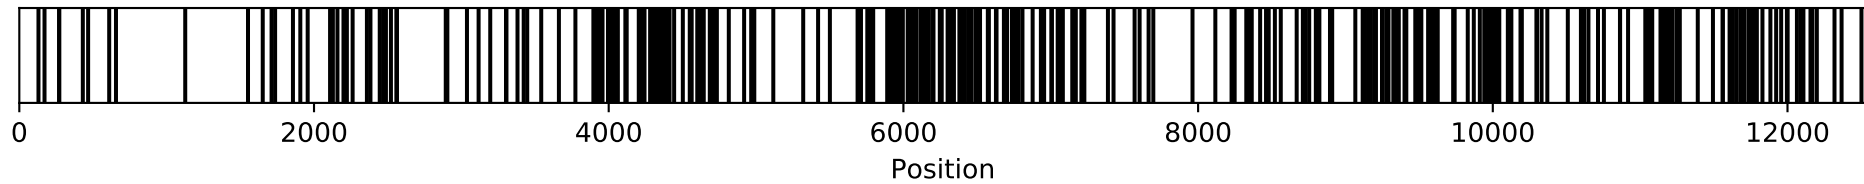

MM1 vs MM2  
Number of differences: 192

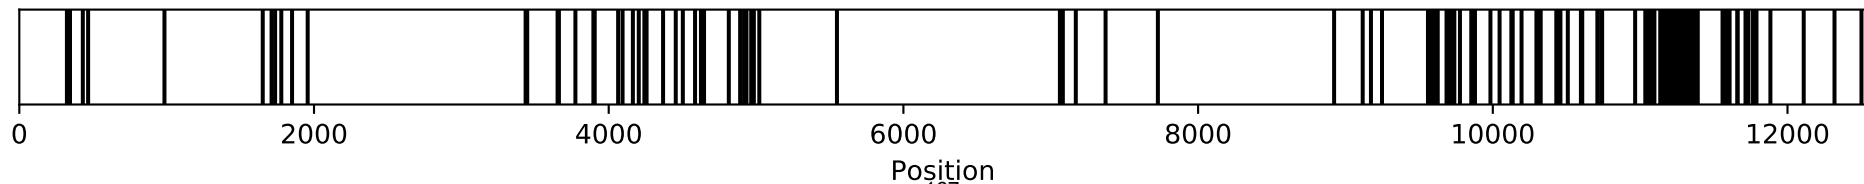

MA1 vs MA2  
Number of differences: 18

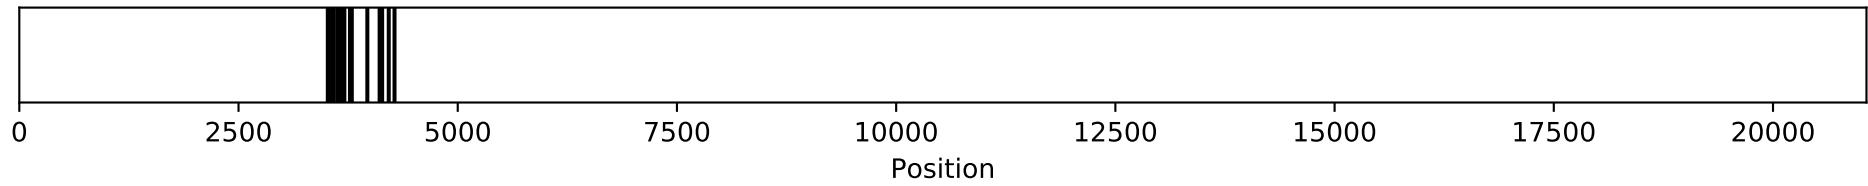

MA1 vs MM1  
Number of differences: 425

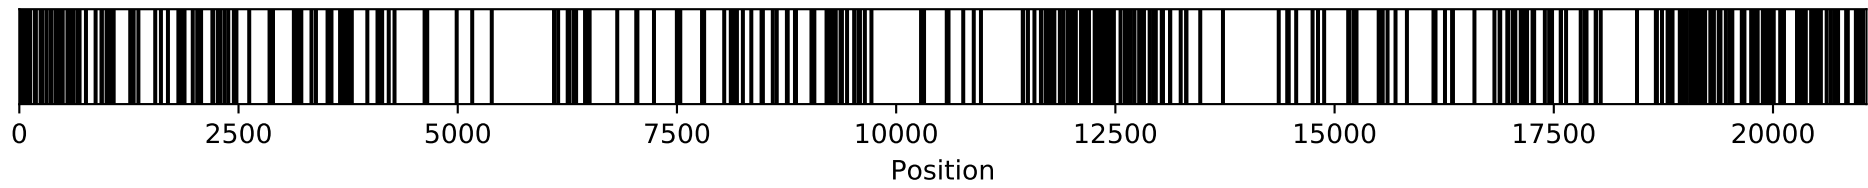

MA1 vs MM2  
Number of differences: 149

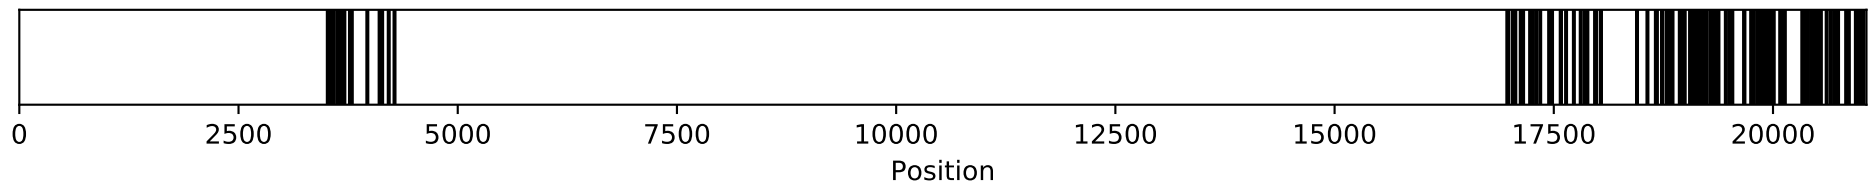

MA2 vs MM1  
Number of differences: 413

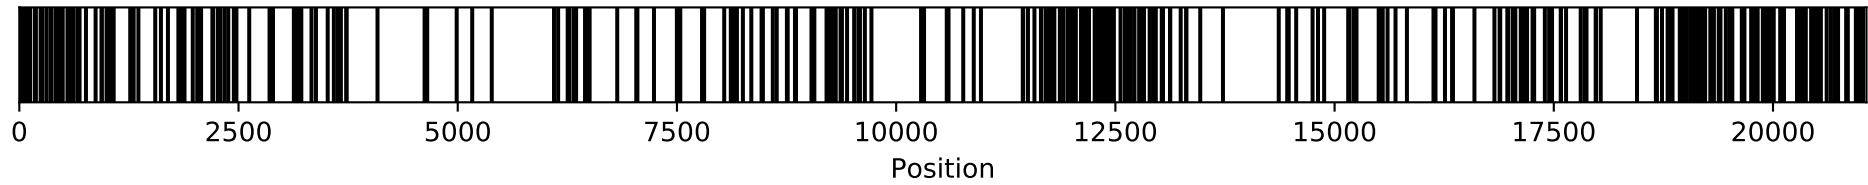

MA2 vs MM2  
Number of differences: 131

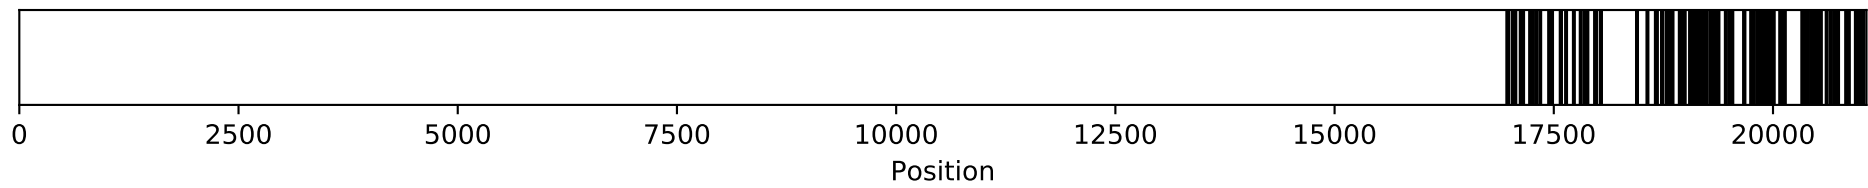

MM1 vs MM2  
Number of differences: 337

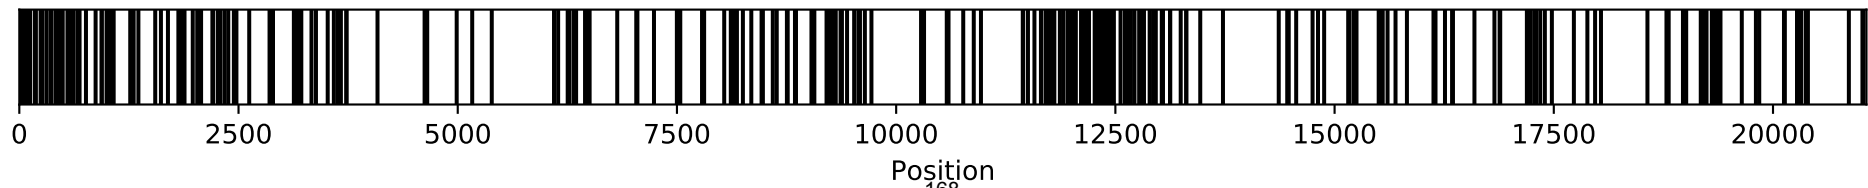

MA1 vs MA2  
Number of differences: 334

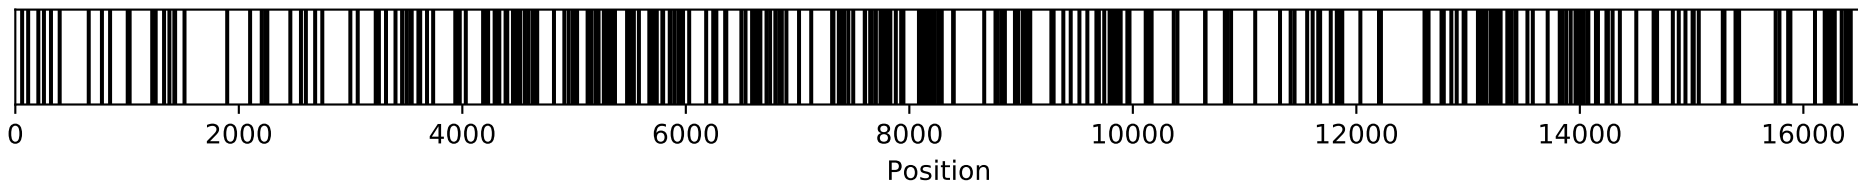

MA1 vs MM1  
Number of differences: 315

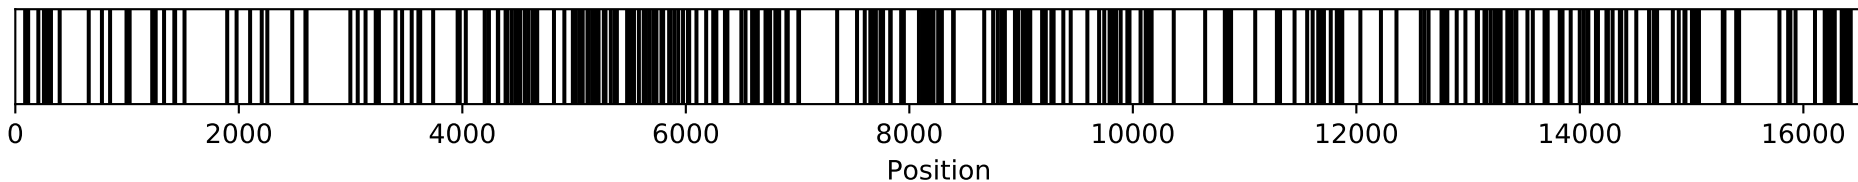

MA1 vs MM2  
Number of differences: 334

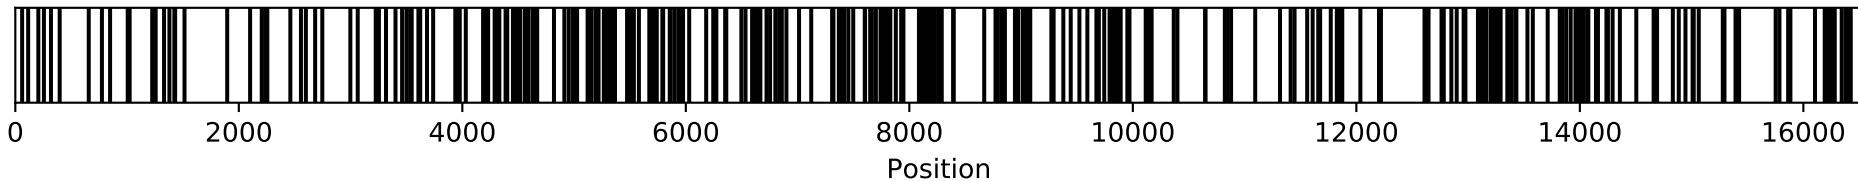

MA2 vs MM1  
Number of differences: 168

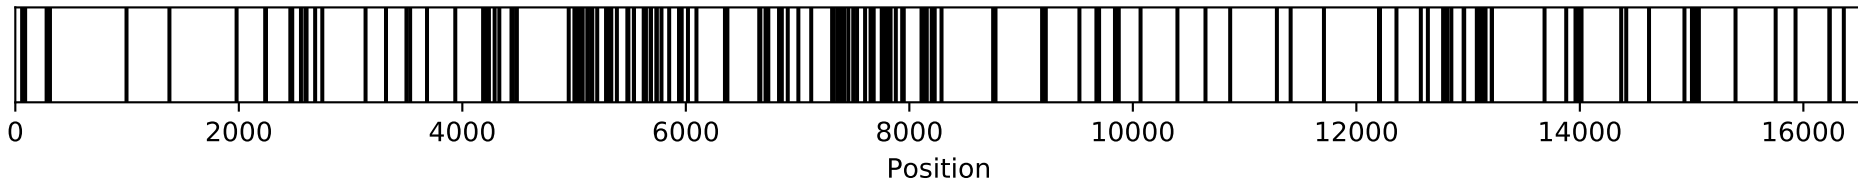

MA2 vs MM2  
Number of differences: 0

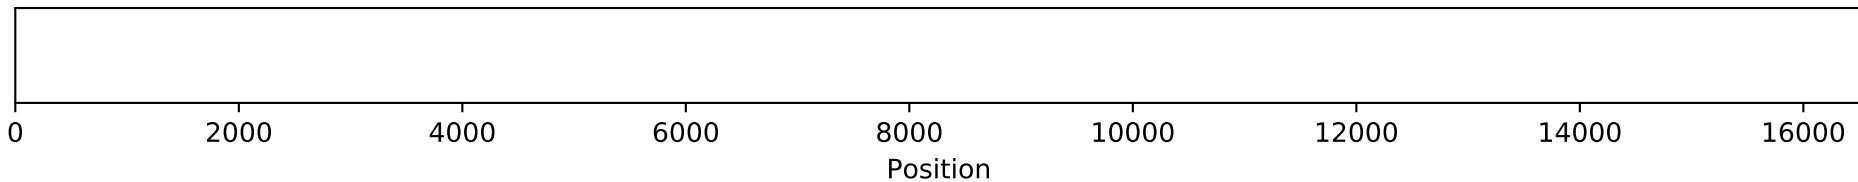

MM1 vs MM2  
Number of differences: 168

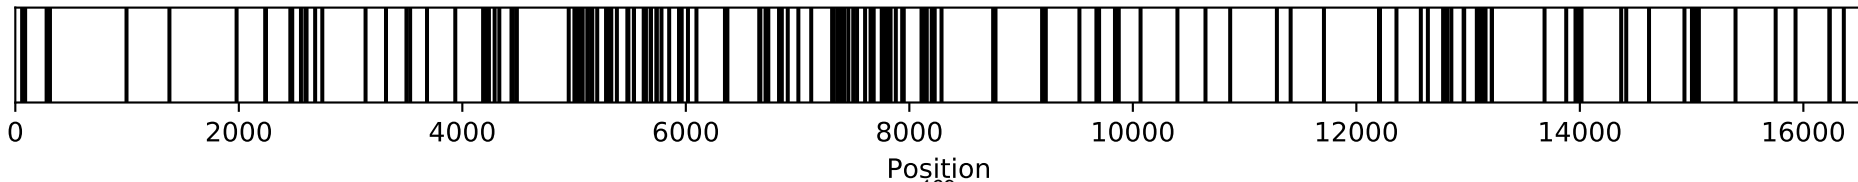

MA1 vs MA2  
Number of differences: 569

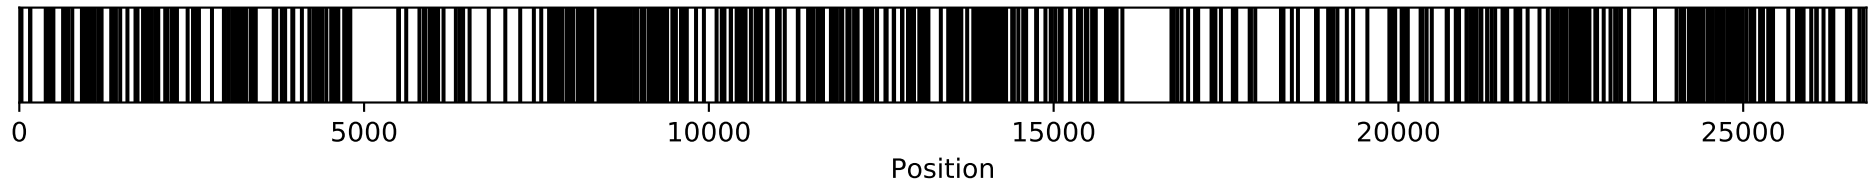

MA1 vs MM1  
Number of differences: 569

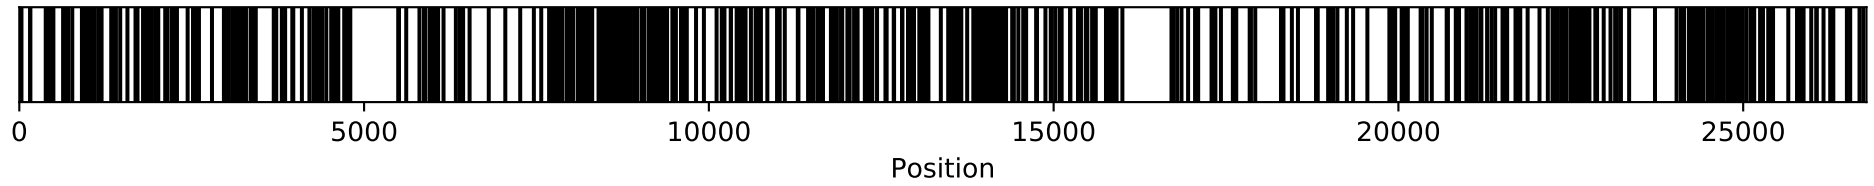

MA1 vs MM2  
Number of differences: 593

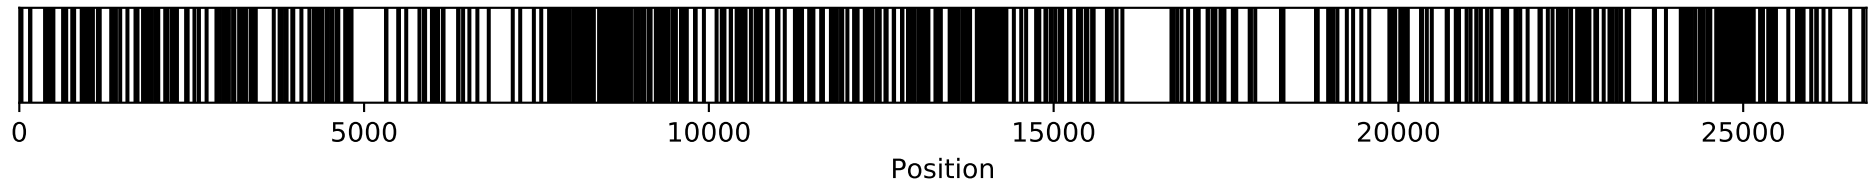

MA2 vs MM1  
Number of differences: 0

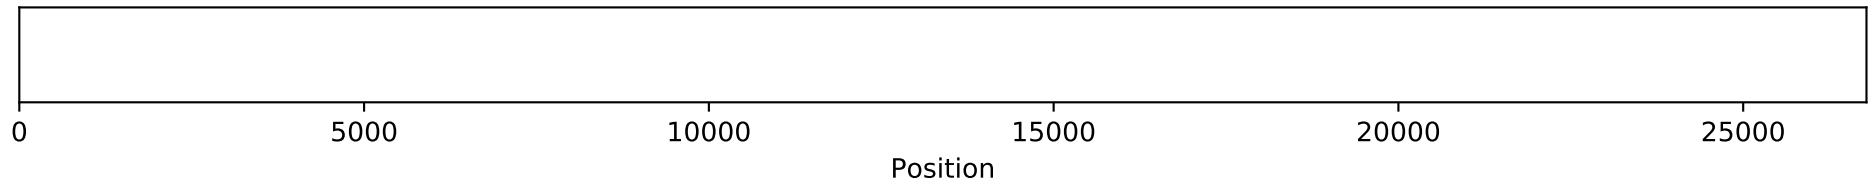

MA2 vs MM2  
Number of differences: 289

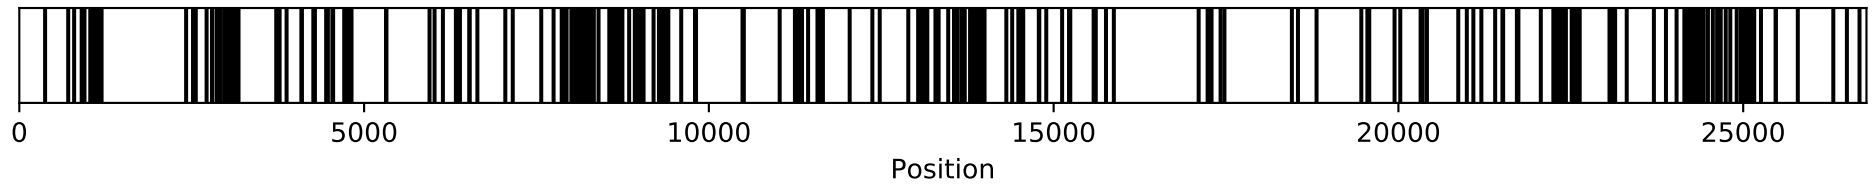

MM1 vs MM2  
Number of differences: 289

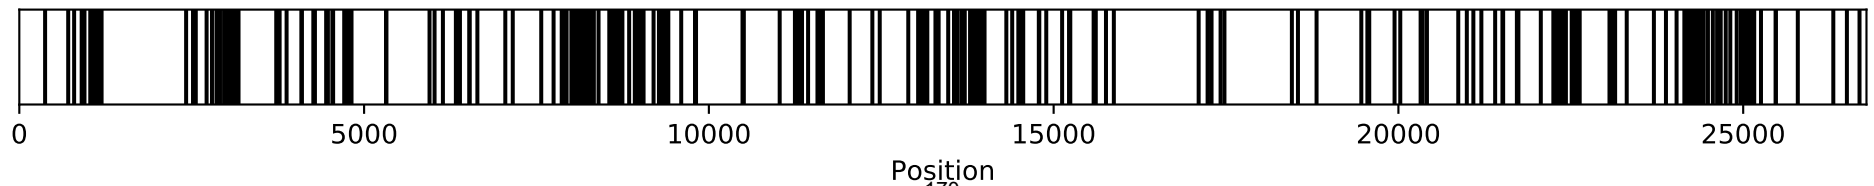



MA1 vs MA2  
Number of differences: 302

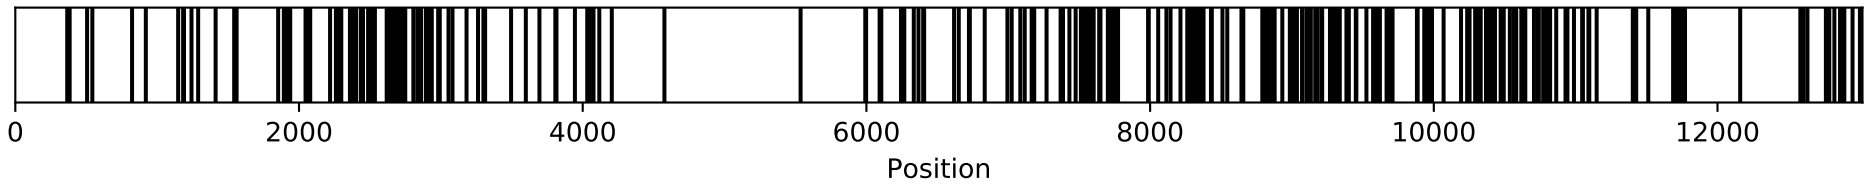

MA1 vs MM1  
Number of differences: 137

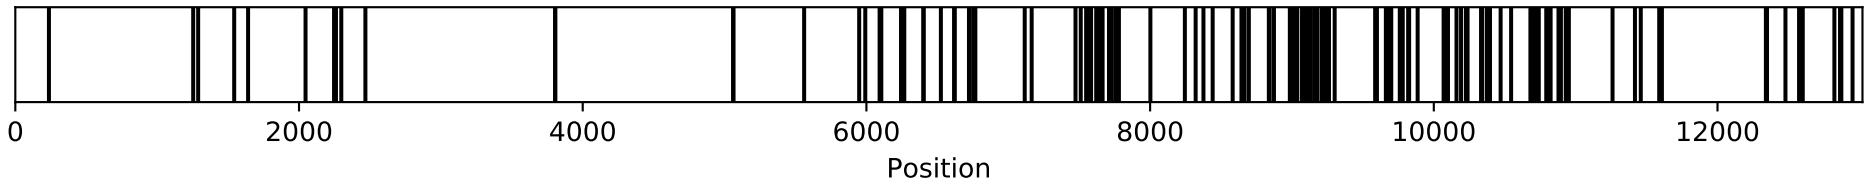

MA1 vs MM2  
Number of differences: 0

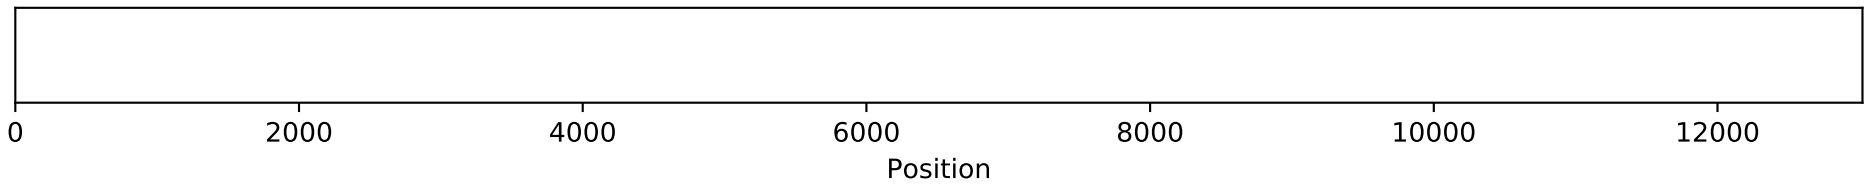

MA2 vs MM1  
Number of differences: 319

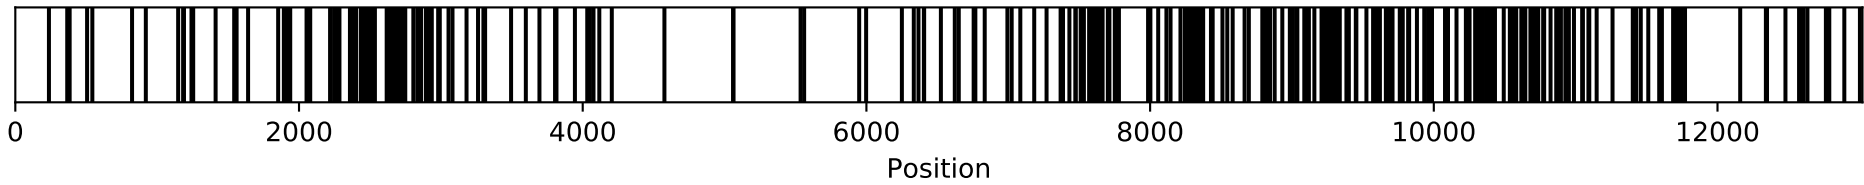

MA2 vs MM2  
Number of differences: 302

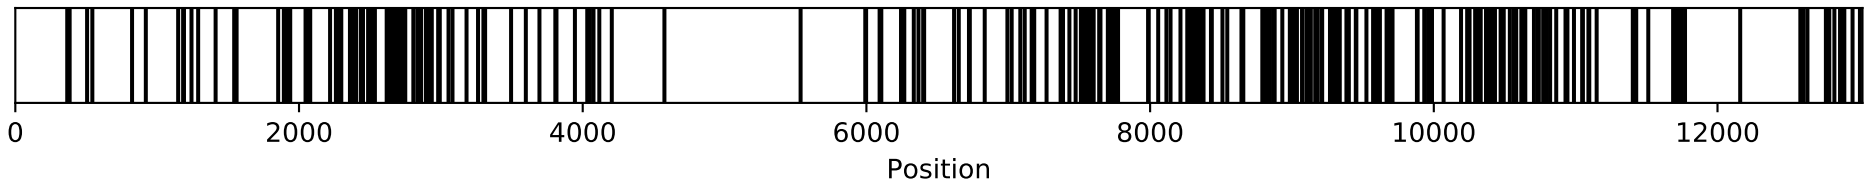

MM1 vs MM2  
Number of differences: 137

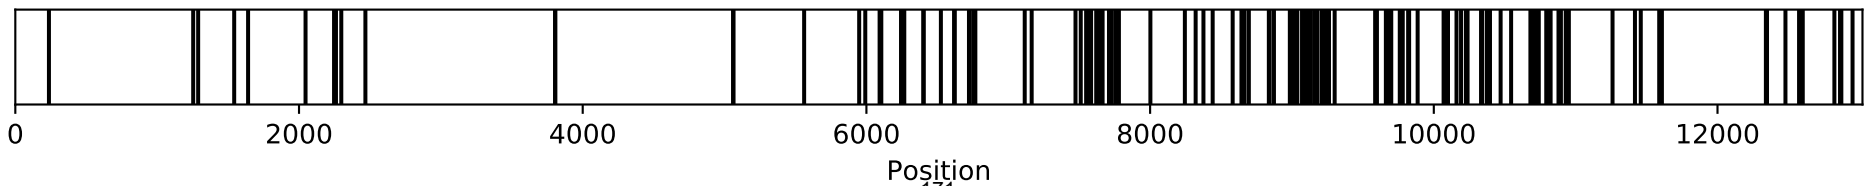

MA1 vs MA2  
Number of differences: 409

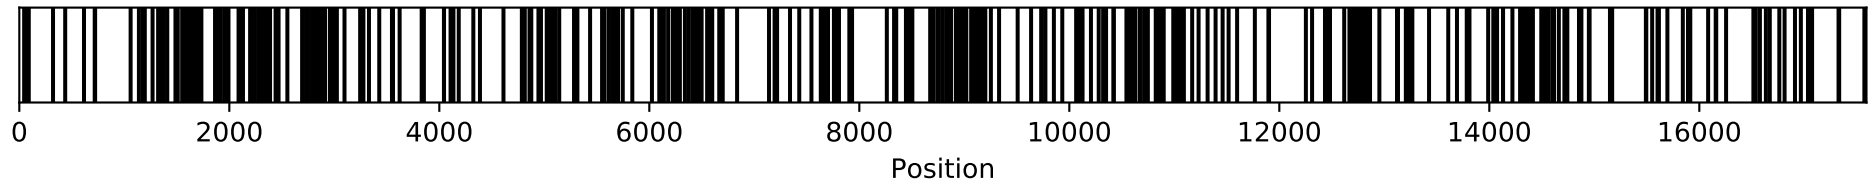

MA1 vs MM1  
Number of differences: 378

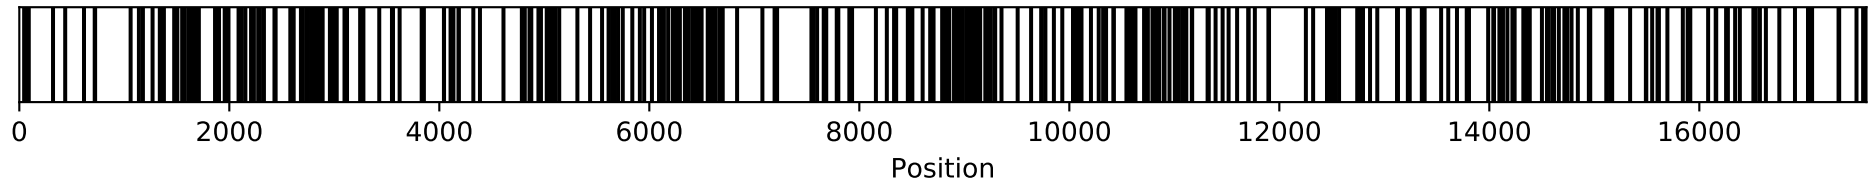

MA1 vs MM2  
Number of differences: 390

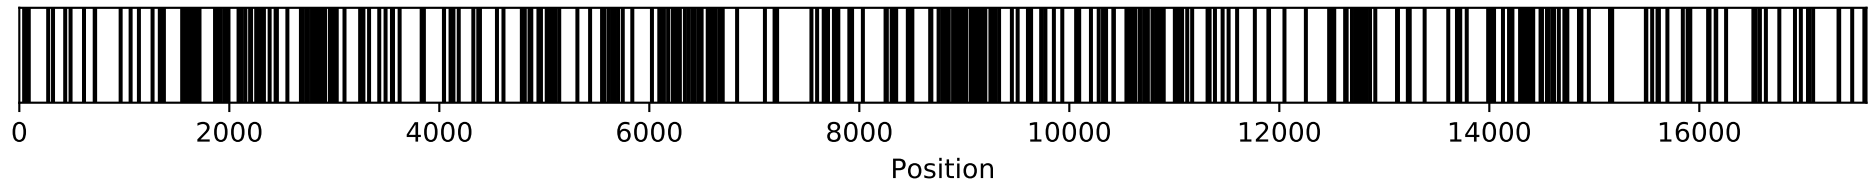

MA2 vs MM1  
Number of differences: 211

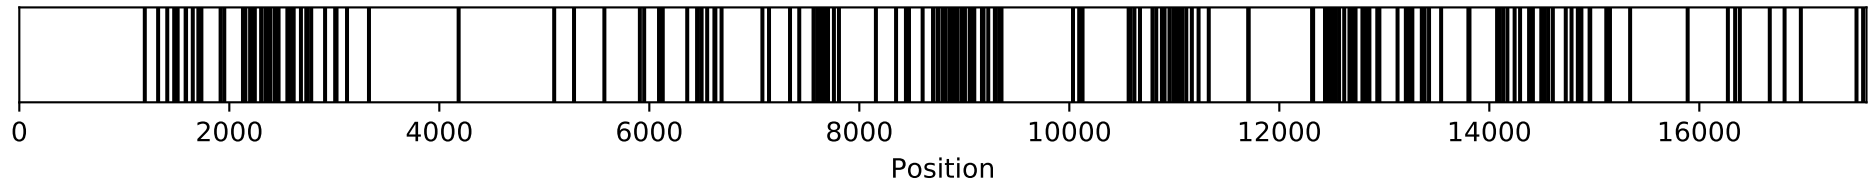

MA2 vs MM2  
Number of differences: 192

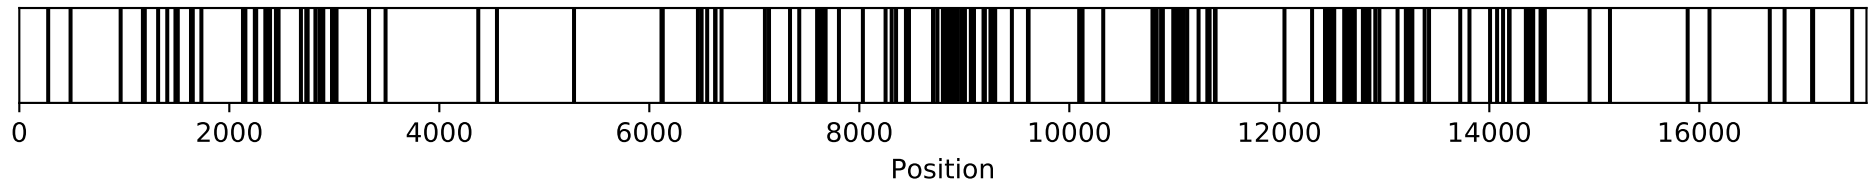

MM1 vs MM2  
Number of differences: 187

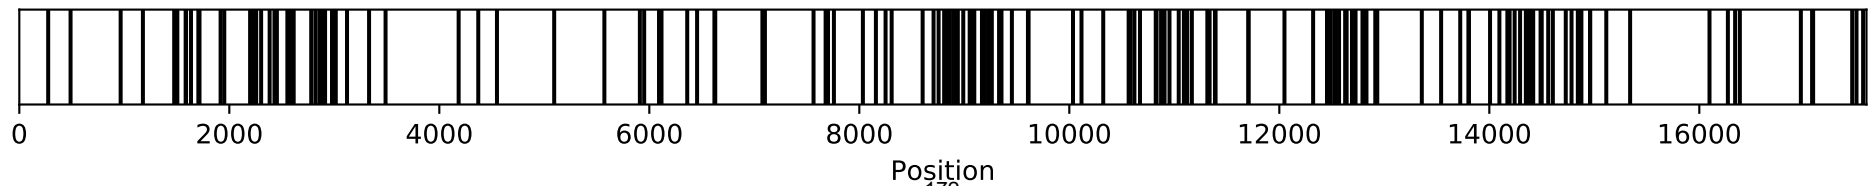

MA1 vs MA2  
Number of differences: 227

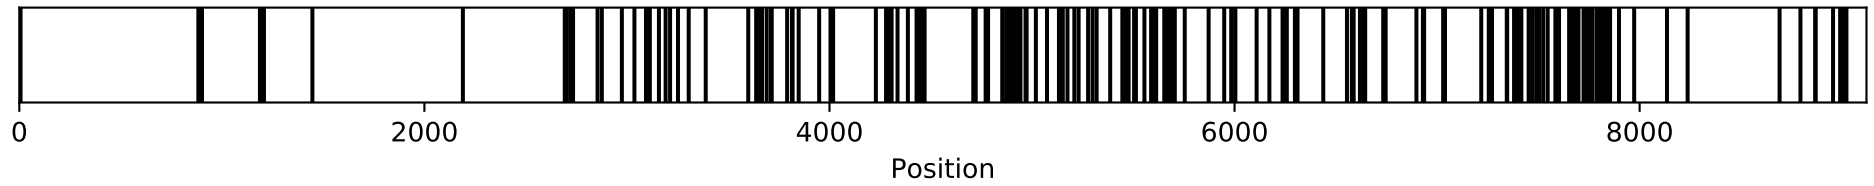

MA1 vs MM1  
Number of differences: 118

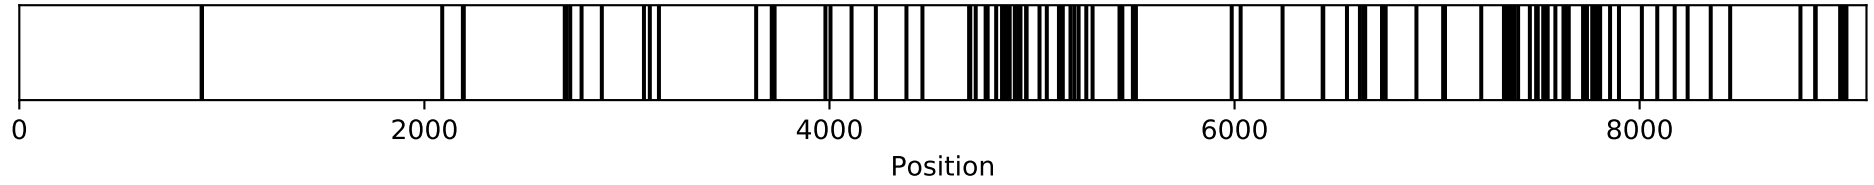

MA1 vs MM2  
Number of differences: 110

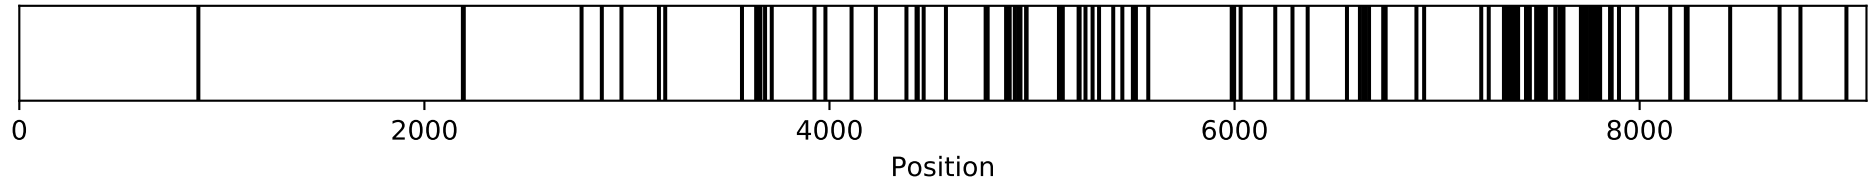

MA2 vs MM1  
Number of differences: 201

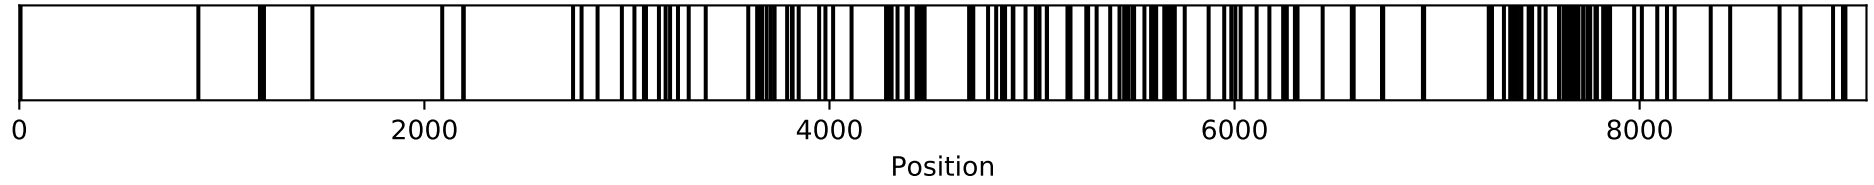

MA2 vs MM2  
Number of differences: 211

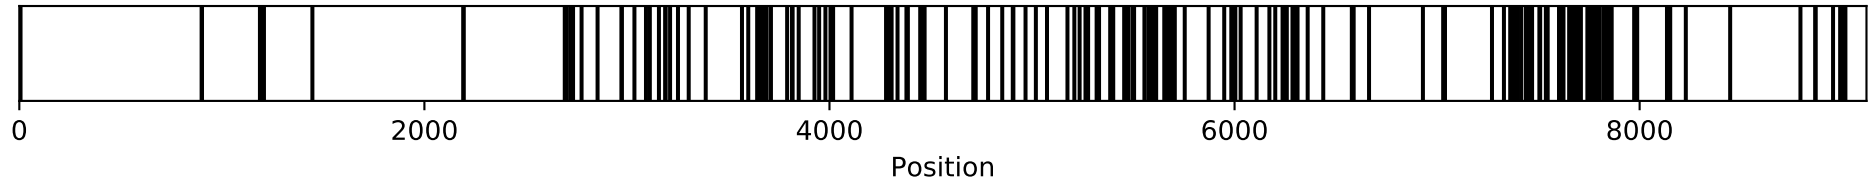

MM1 vs MM2  
Number of differences: 92

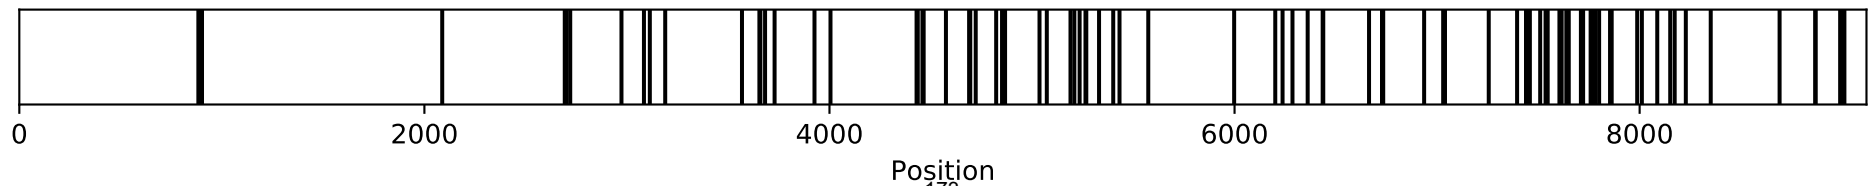

MA1 vs MA2  
Number of differences: 239

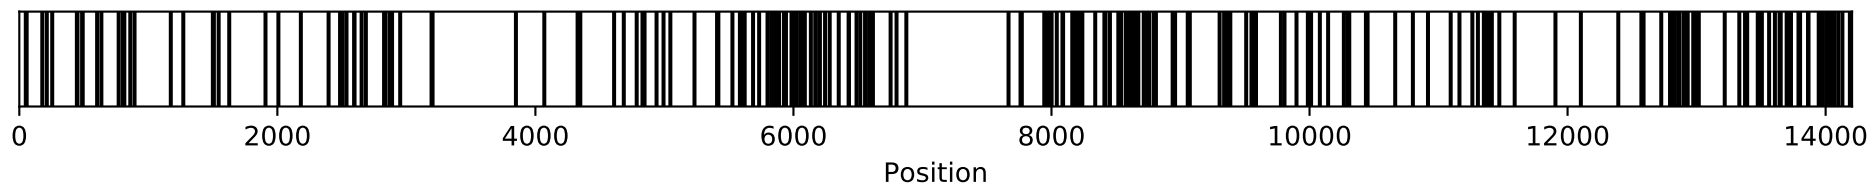

MA1 vs MM1  
Number of differences: 251

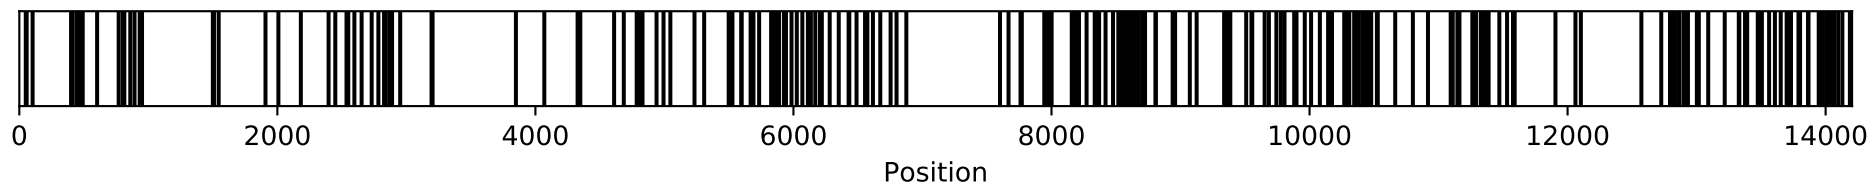

MA1 vs MM2  
Number of differences: 251

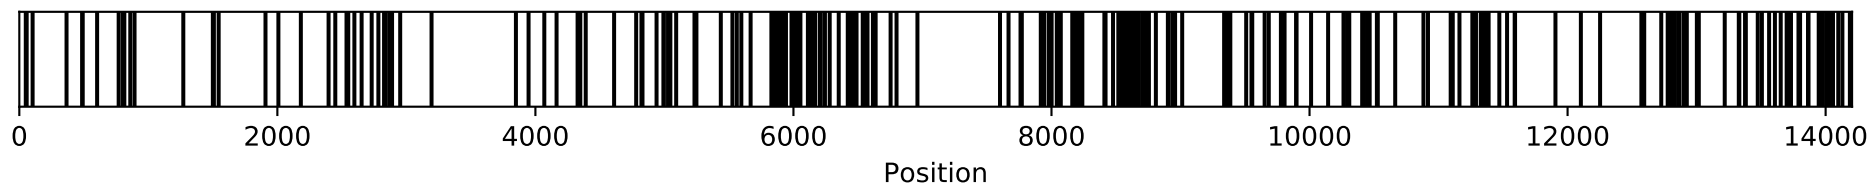

MA2 vs MM1  
Number of differences: 131

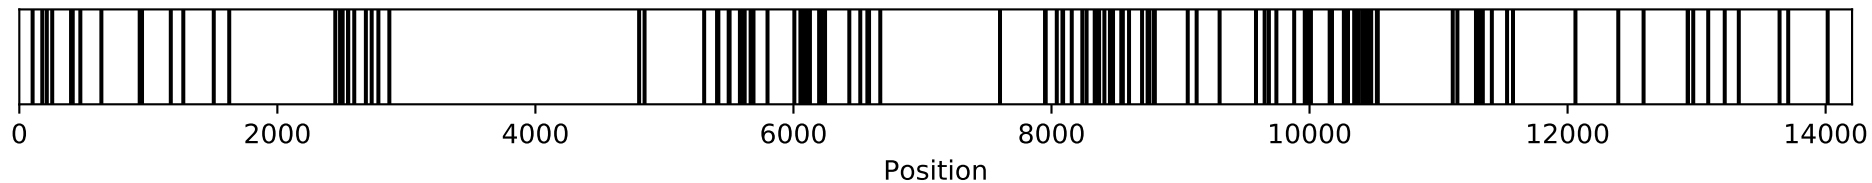

MA2 vs MM2  
Number of differences: 143

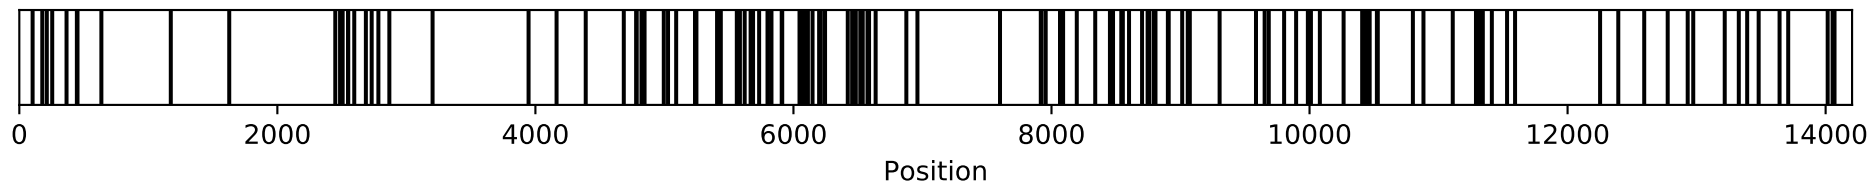

MM1 vs MM2  
Number of differences: 118

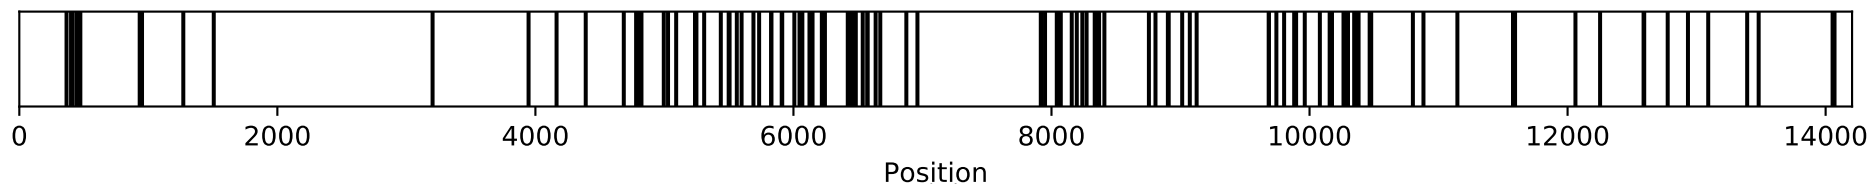

MA1 vs MA2  
Number of differences: 22

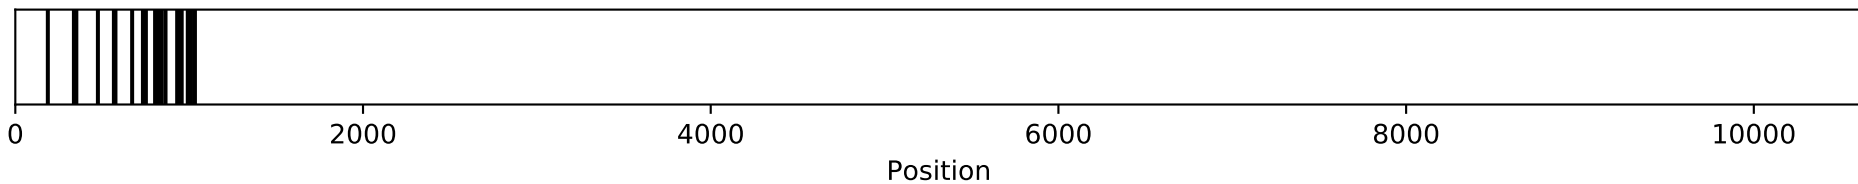

MA1 vs MM1  
Number of differences: 138

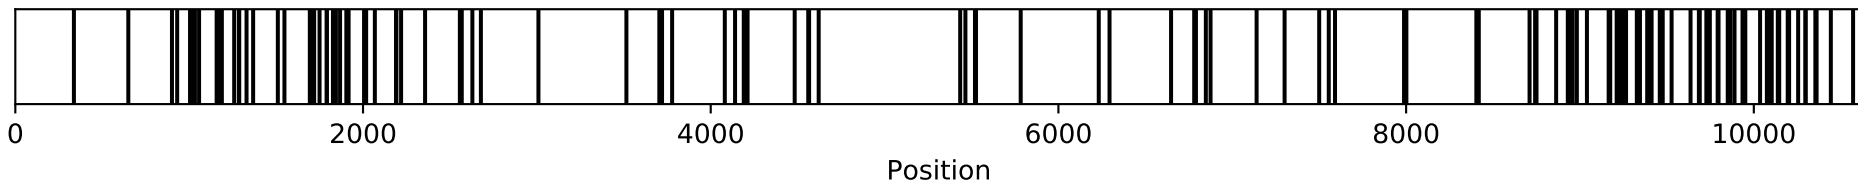

MA1 vs MM2  
Number of differences: 0

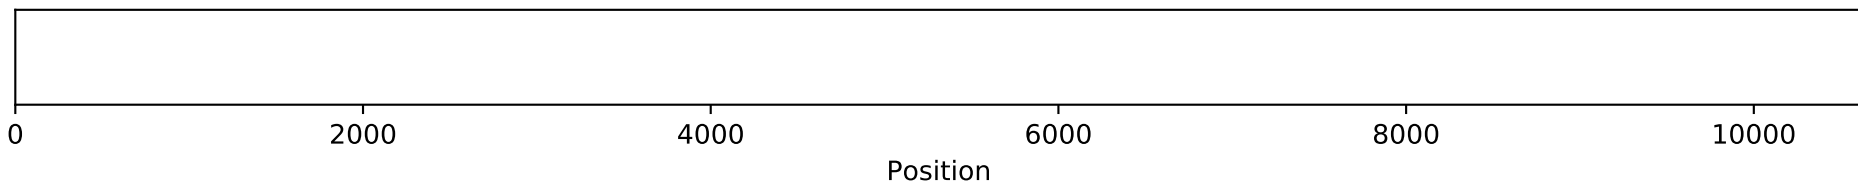

MA2 vs MM1  
Number of differences: 154

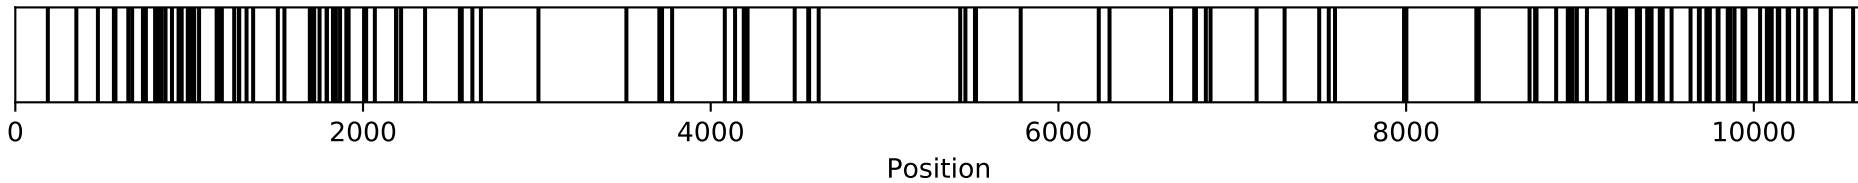

MA2 vs MM2  
Number of differences: 22

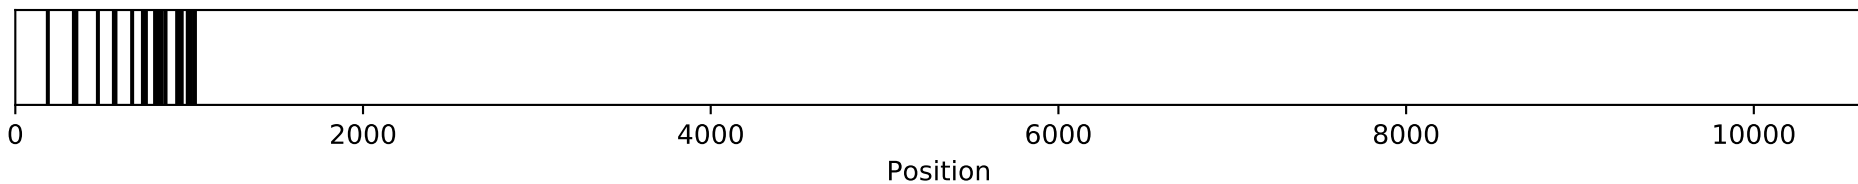

MM1 vs MM2  
Number of differences: 138

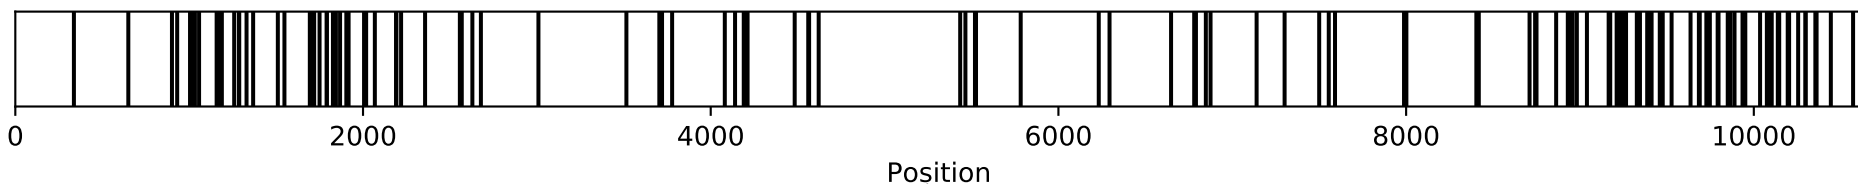

MA1 vs MA2  
Number of differences: 296

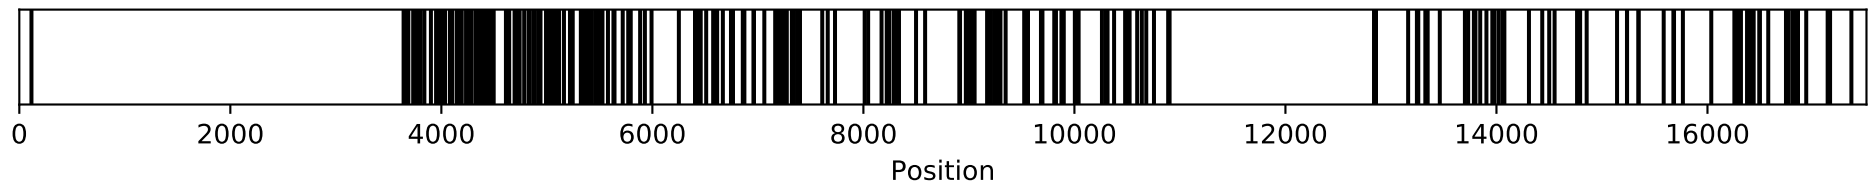

MA1 vs MM1  
Number of differences: 256

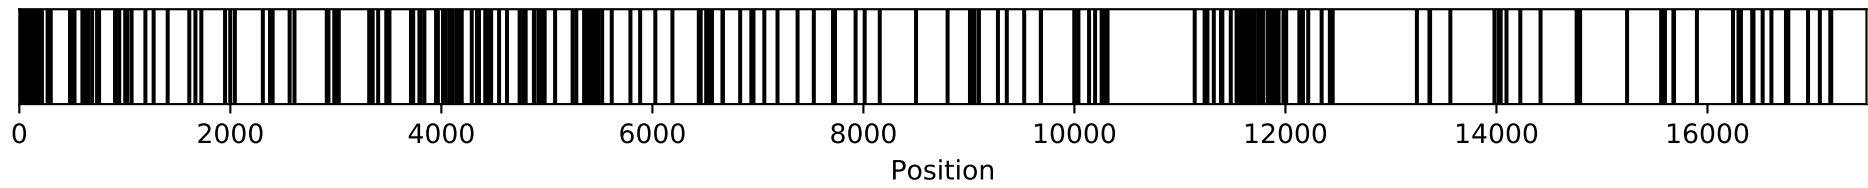

MA1 vs MM2  
Number of differences: 246

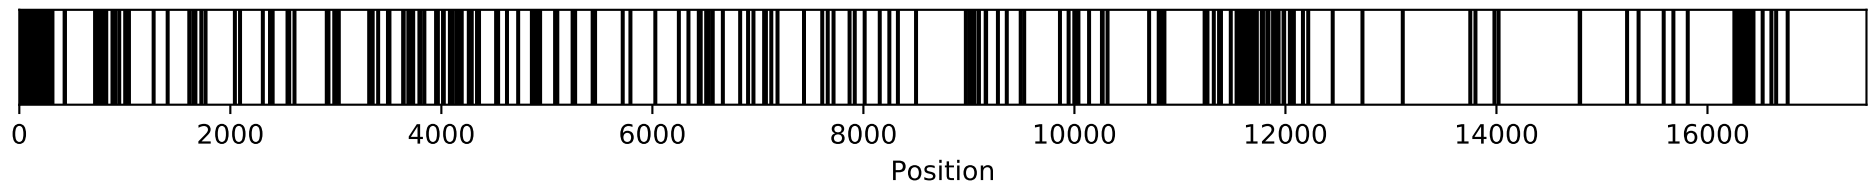

MA2 vs MM1  
Number of differences: 413

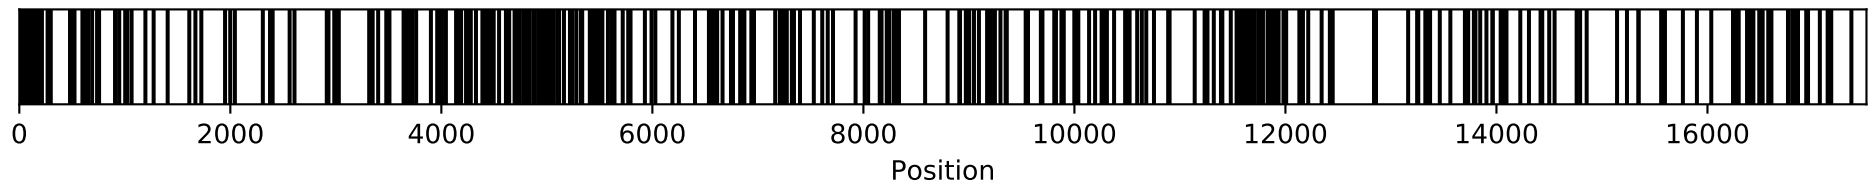

MA2 vs MM2  
Number of differences: 394

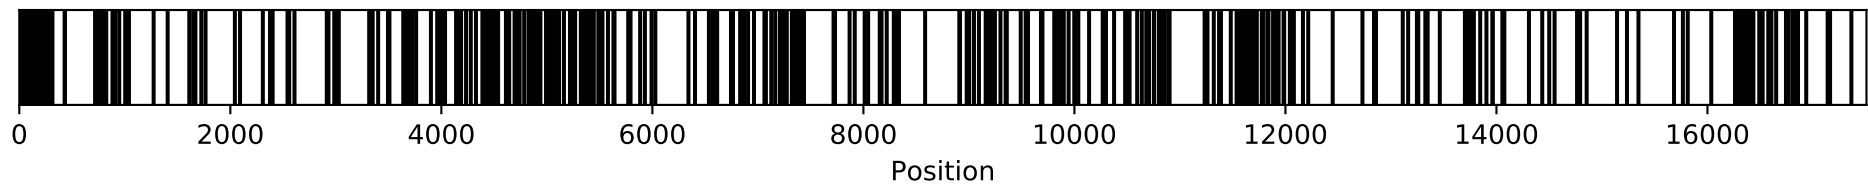

MM1 vs MM2  
Number of differences: 206

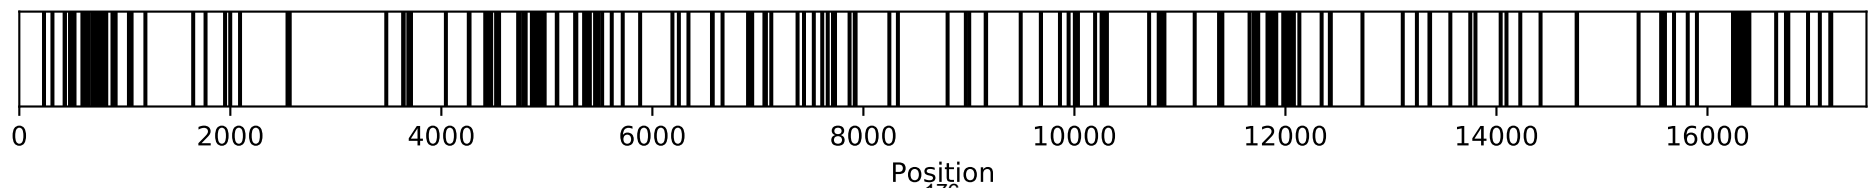

MA1 vs MA2  
Number of differences: 176

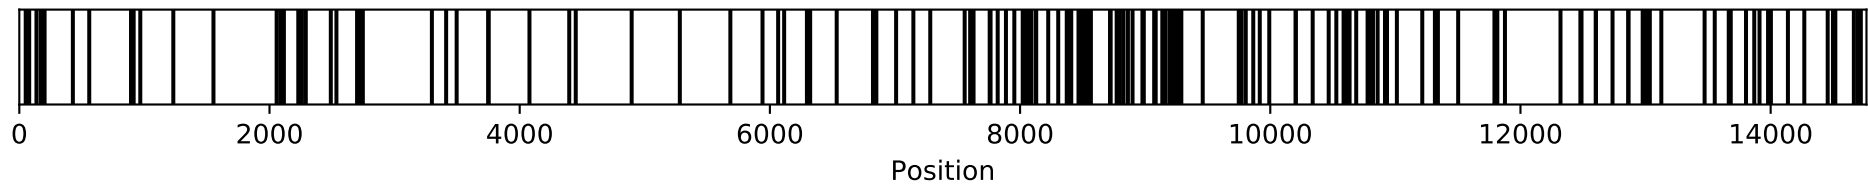

MA1 vs MM1  
Number of differences: 0

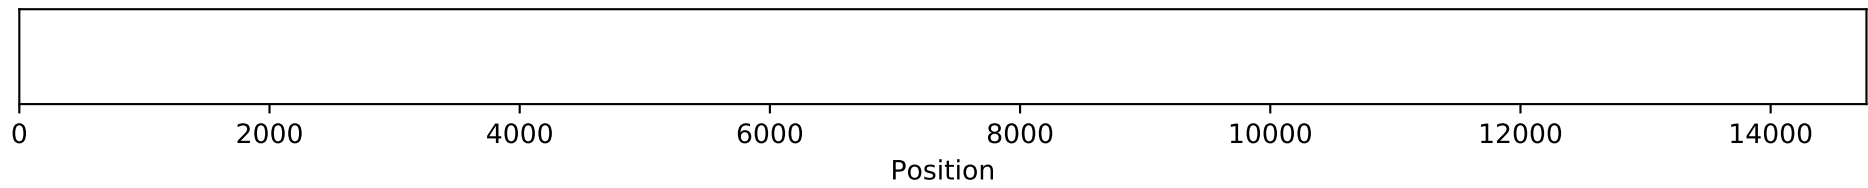

MA1 vs MM2  
Number of differences: 97

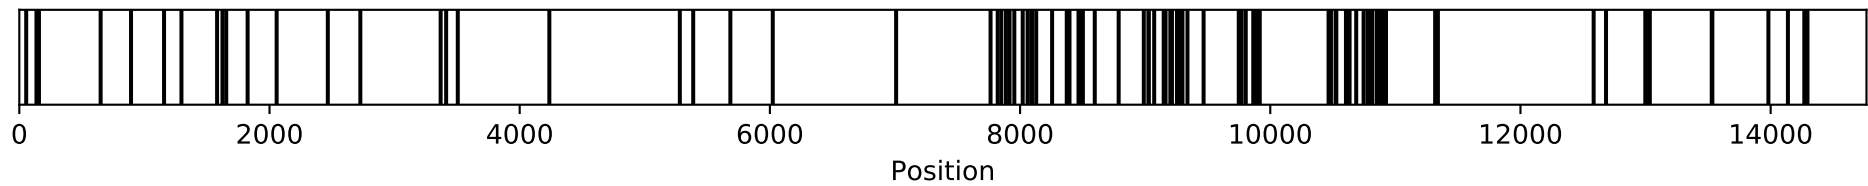

MA2 vs MM1  
Number of differences: 176

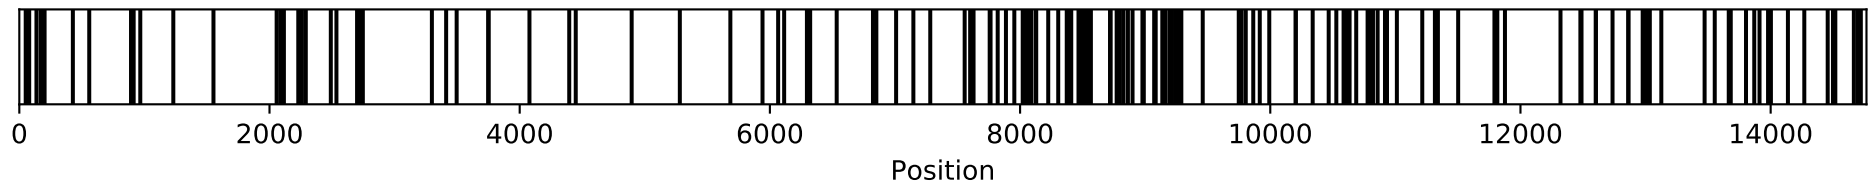

MA2 vs MM2  
Number of differences: 174

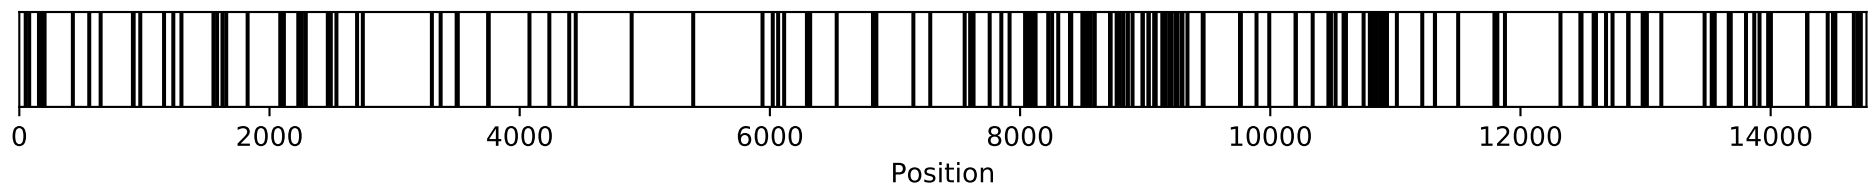

MM1 vs MM2  
Number of differences: 97

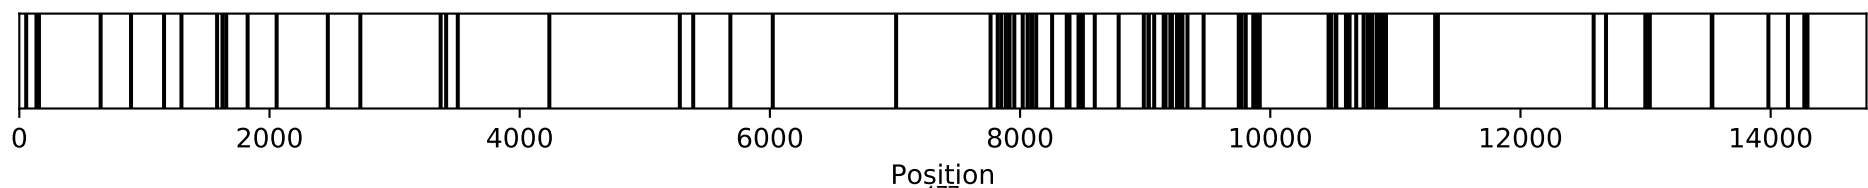

MA1 vs MA2  
Number of differences: 21

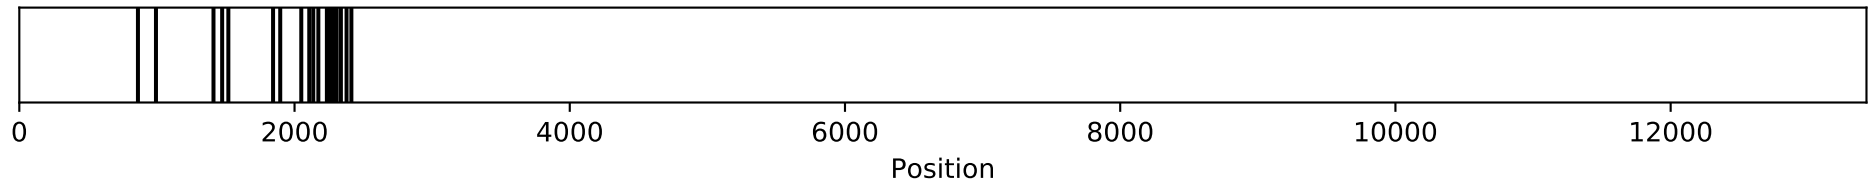

MA1 vs MM1  
Number of differences: 179

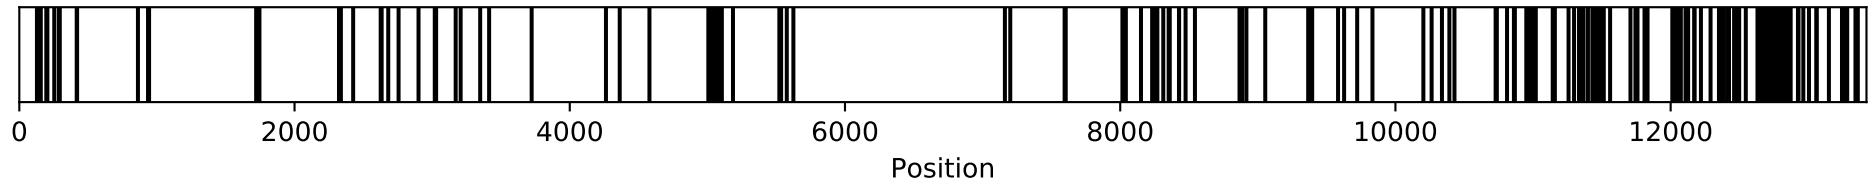

MA1 vs MM2  
Number of differences: 255

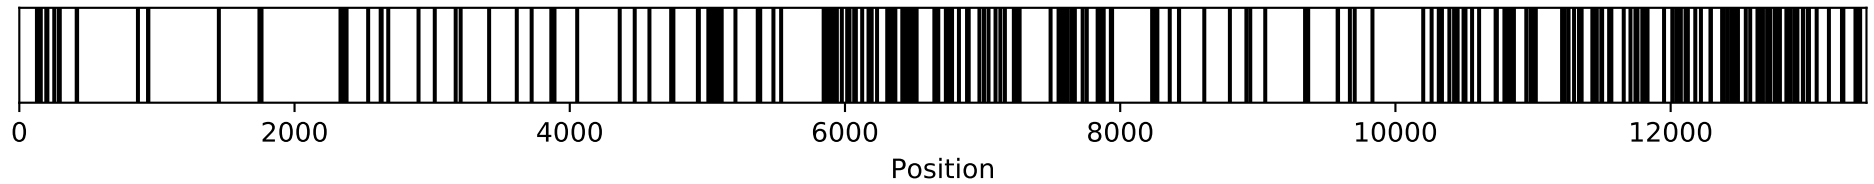

MA2 vs MM1  
Number of differences: 194

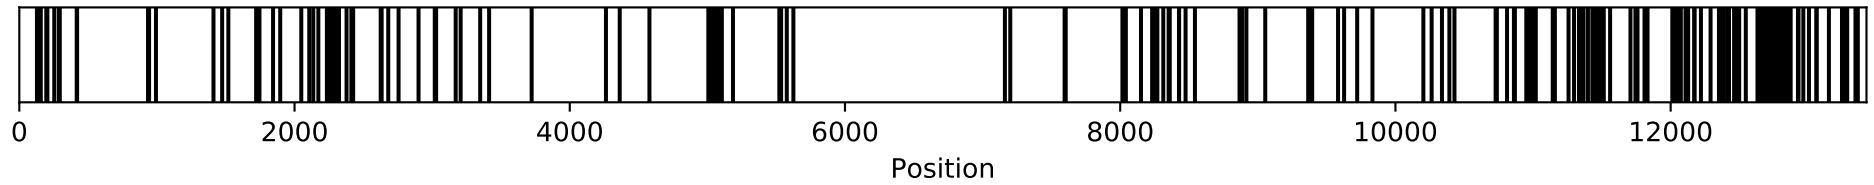

MA2 vs MM2  
Number of differences: 271

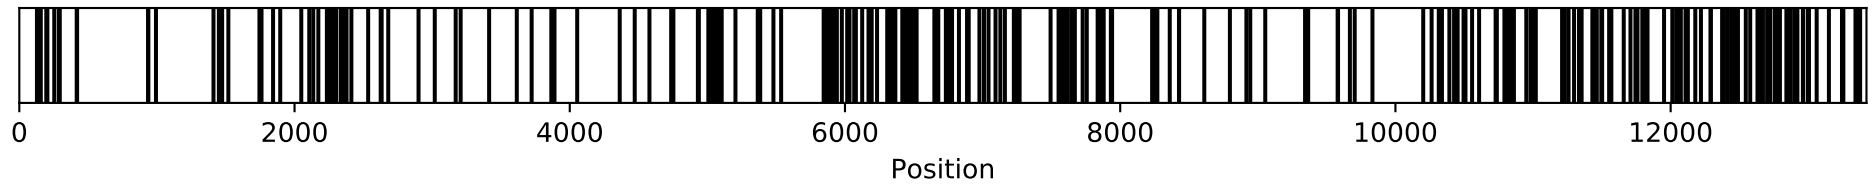

MM1 vs MM2  
Number of differences: 206

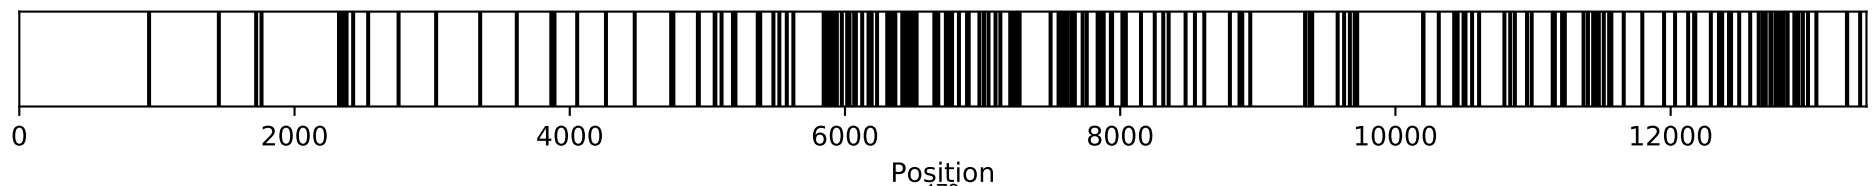



MA1 vs MA2  
Number of differences: 212

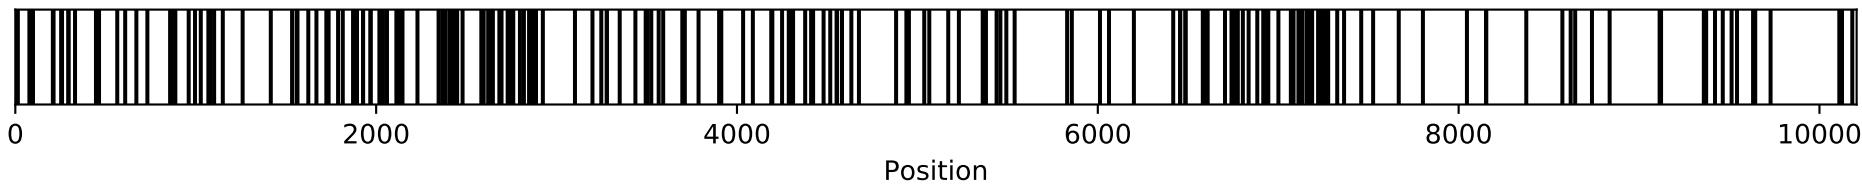

MA1 vs MM1  
Number of differences: 212

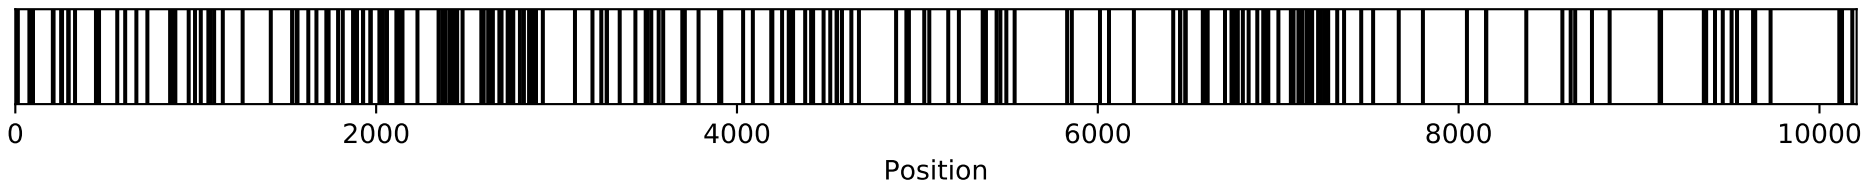

MA1 vs MM2  
Number of differences: 217

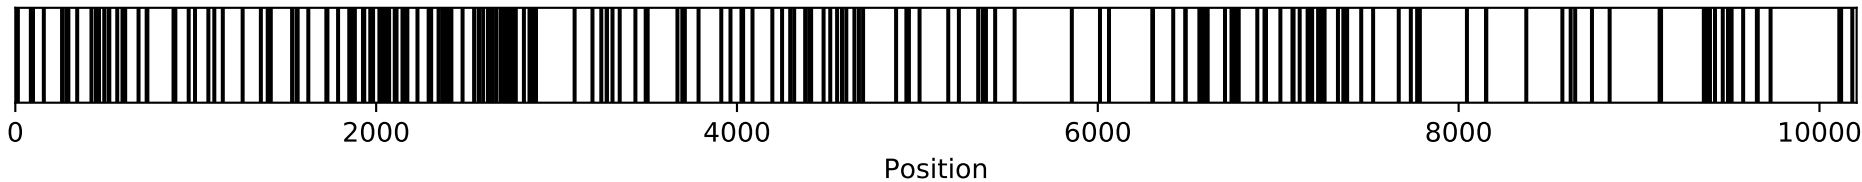

MA2 vs MM1  
Number of differences: 0

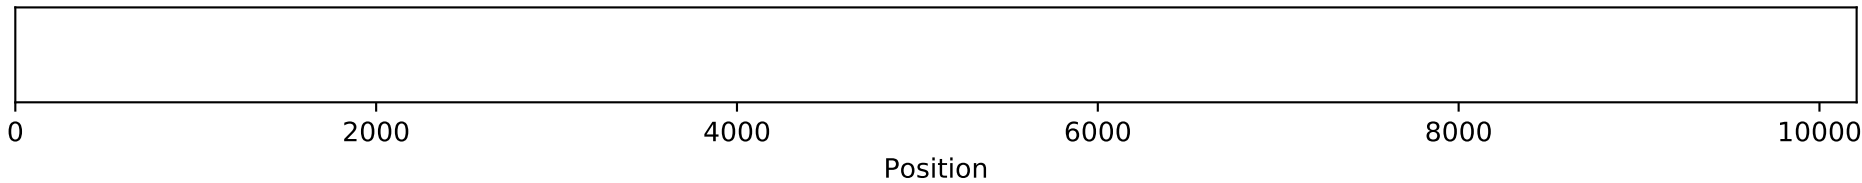

MA2 vs MM2  
Number of differences: 164

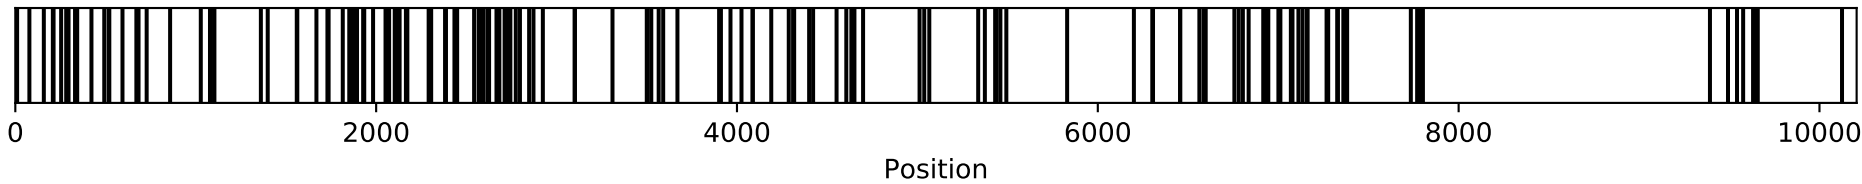

MM1 vs MM2  
Number of differences: 164

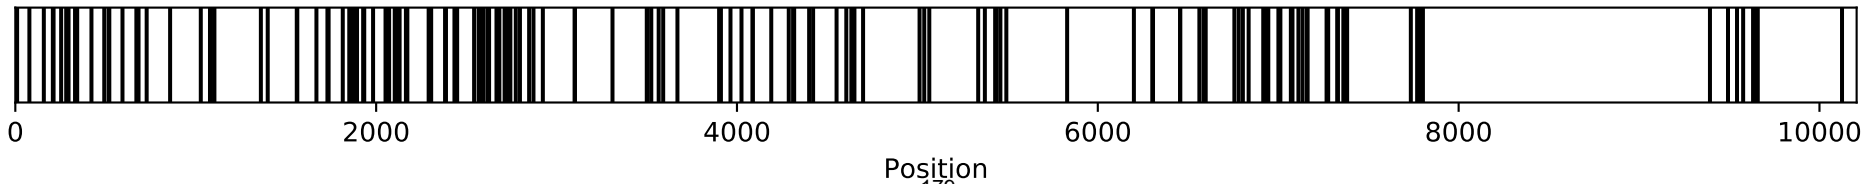

MA1 vs MA2  
Number of differences: 201

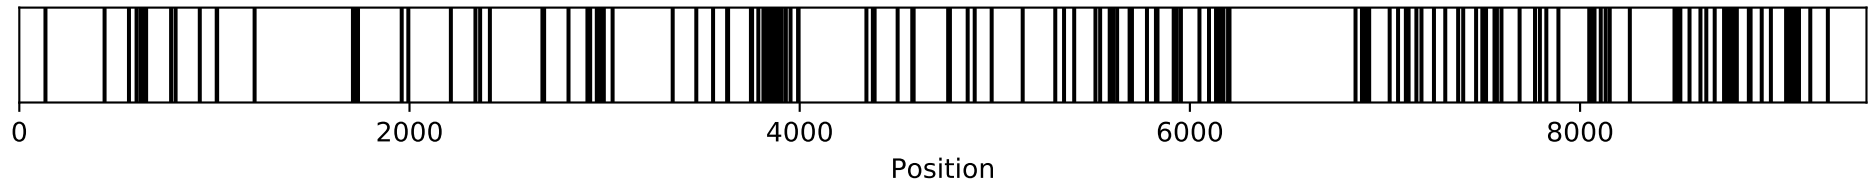

MA1 vs MM1  
Number of differences: 205

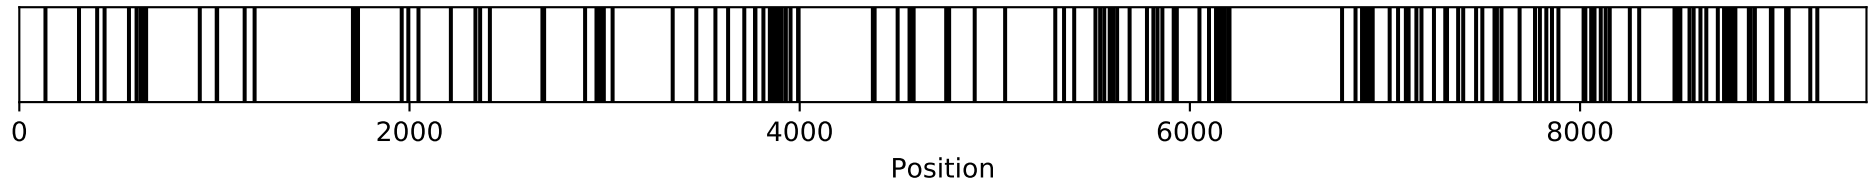

MA1 vs MM2  
Number of differences: 201

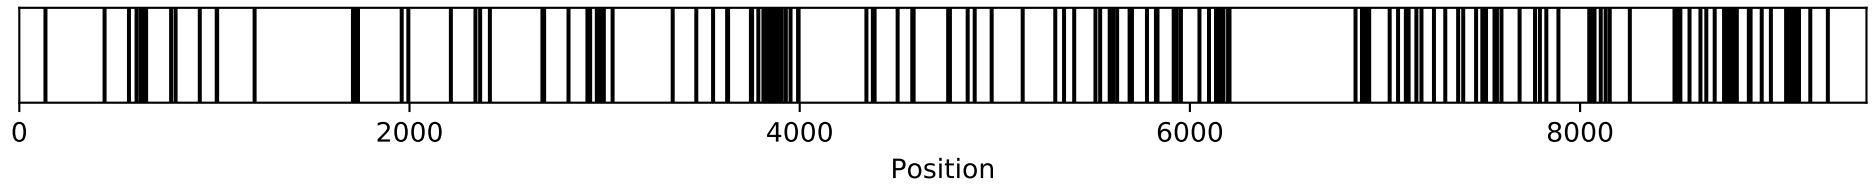

MA2 vs MM1  
Number of differences: 94

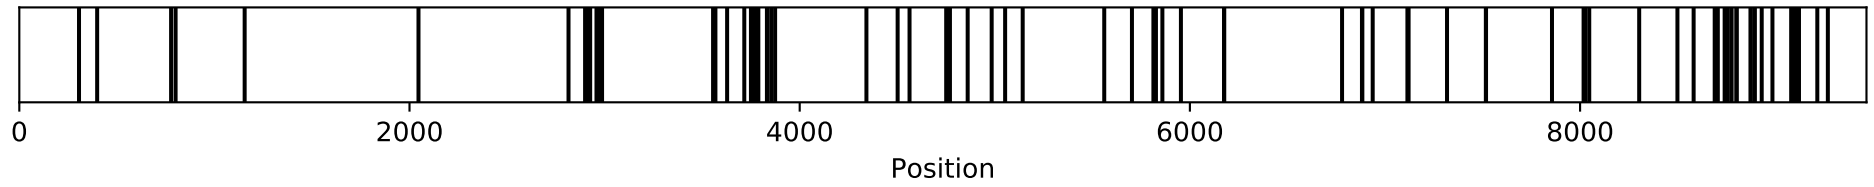

MA2 vs MM2  
Number of differences: 0

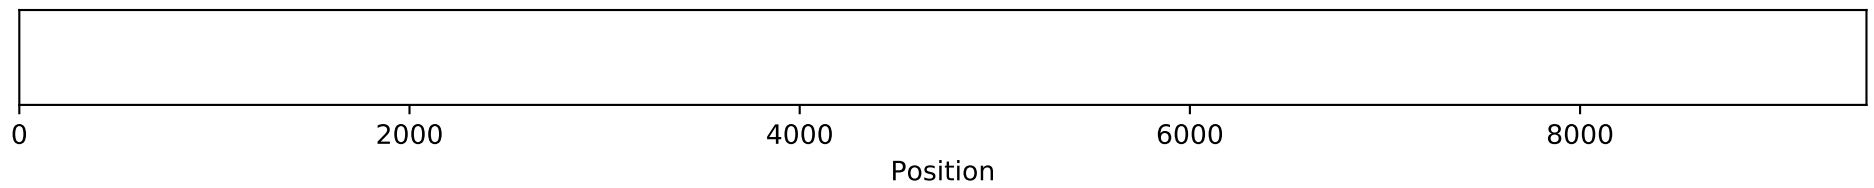

MM1 vs MM2  
Number of differences: 94

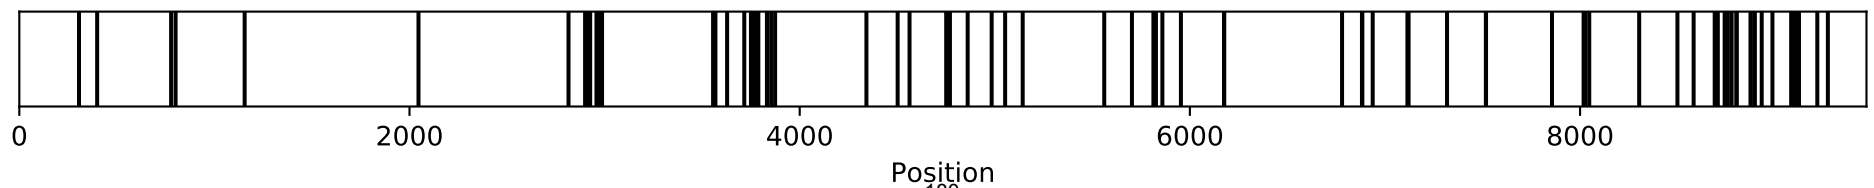

MA1 vs MA2  
Number of differences: 246

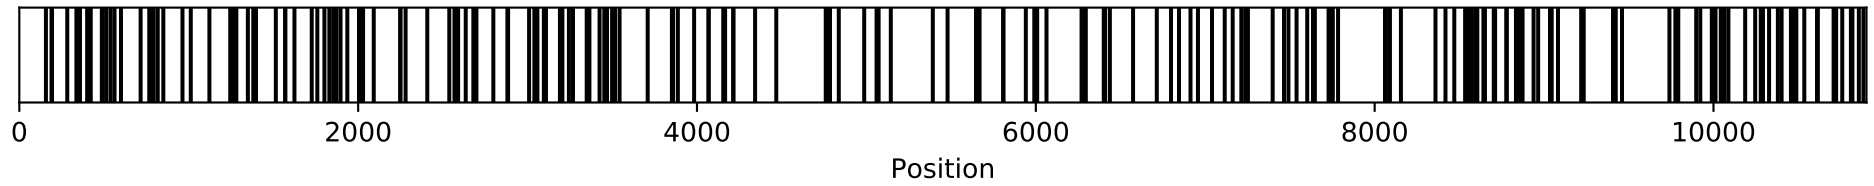

MA1 vs MM1  
Number of differences: 236

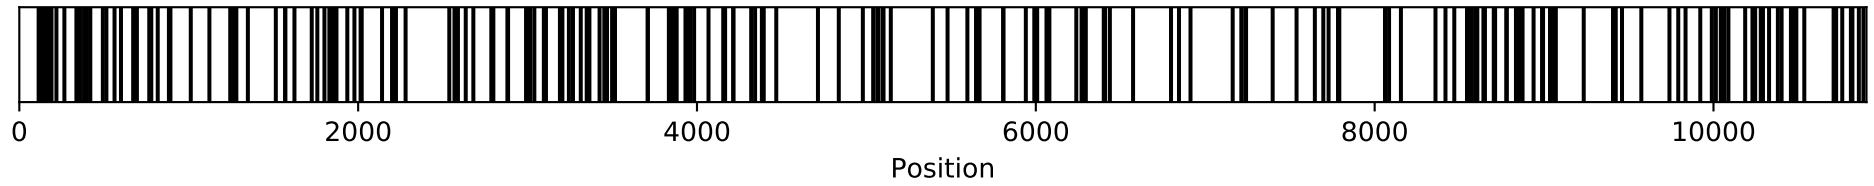

MA1 vs MM2  
Number of differences: 241

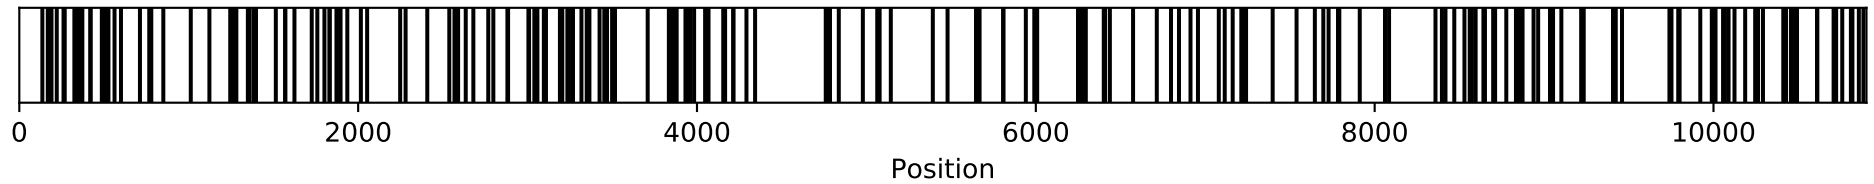

MA2 vs MM1  
Number of differences: 132

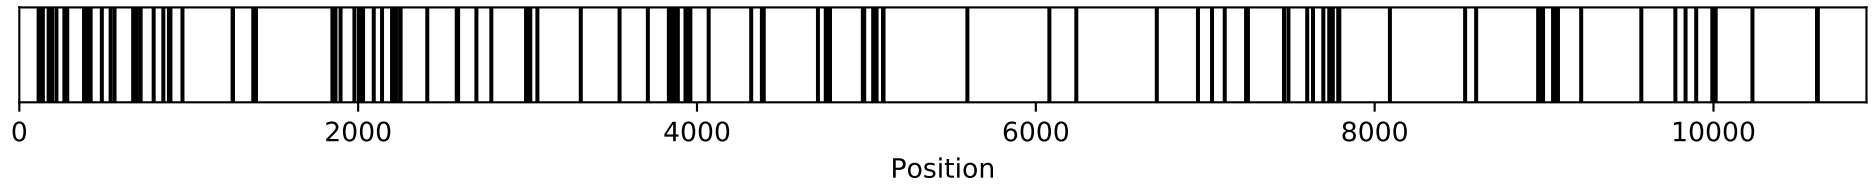

MA2 vs MM2  
Number of differences: 131

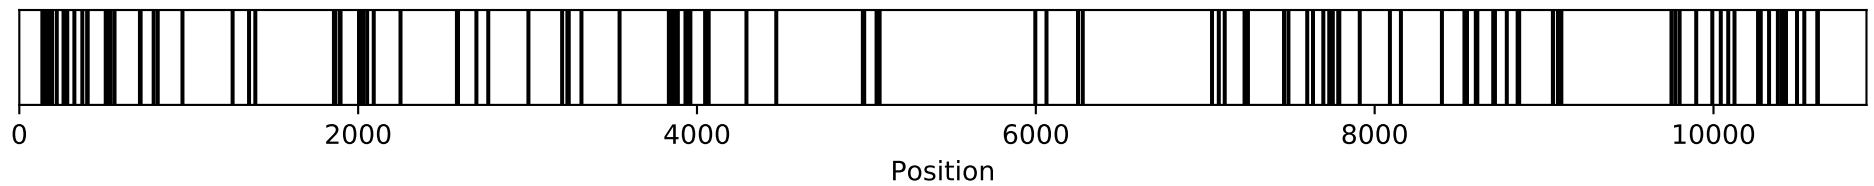

MM1 vs MM2  
Number of differences: 133

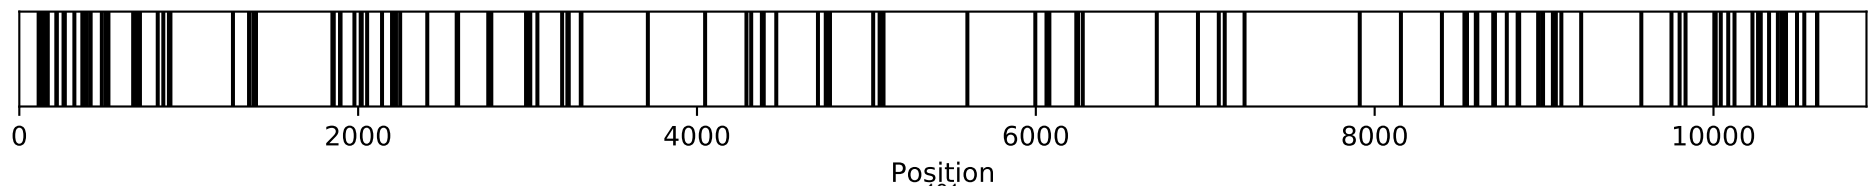

MA1 vs MA2  
Number of differences: 352

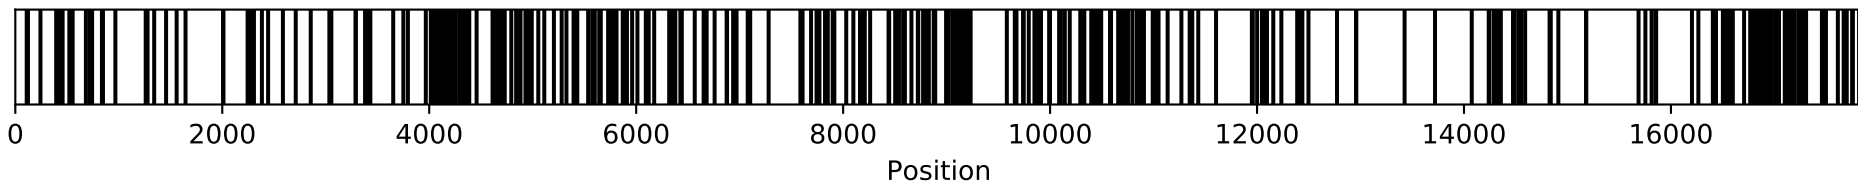

MA1 vs MM1  
Number of differences: 362

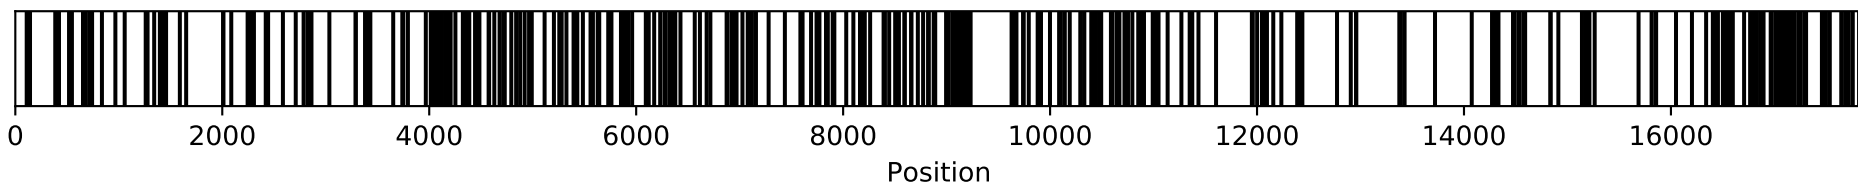

MA1 vs MM2  
Number of differences: 342

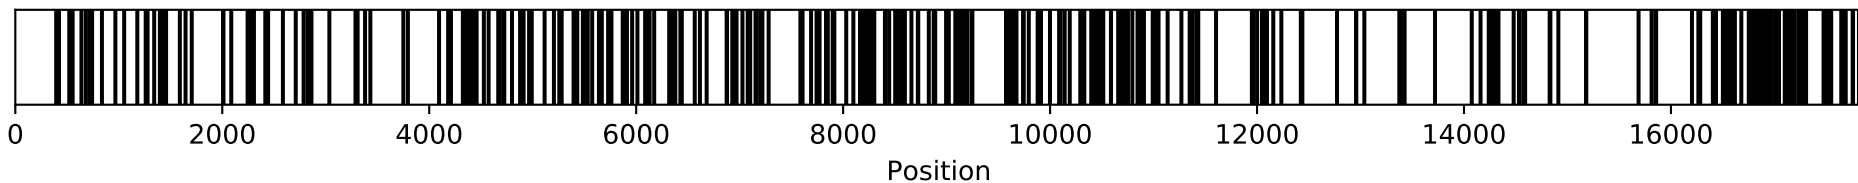

MA2 vs MM1  
Number of differences: 186

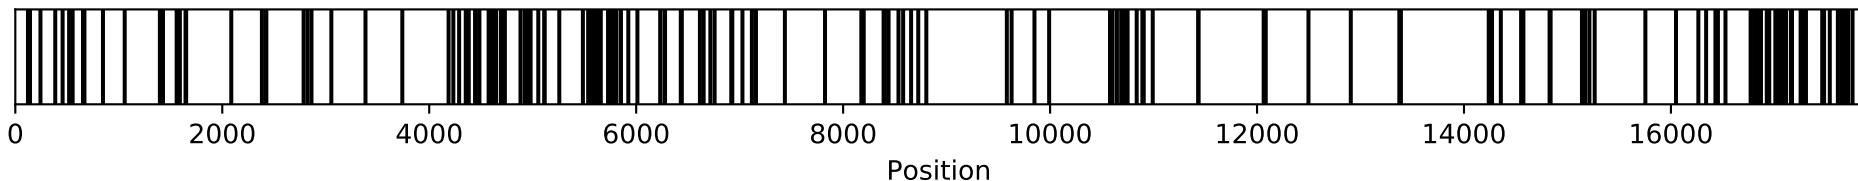

MA2 vs MM2  
Number of differences: 189

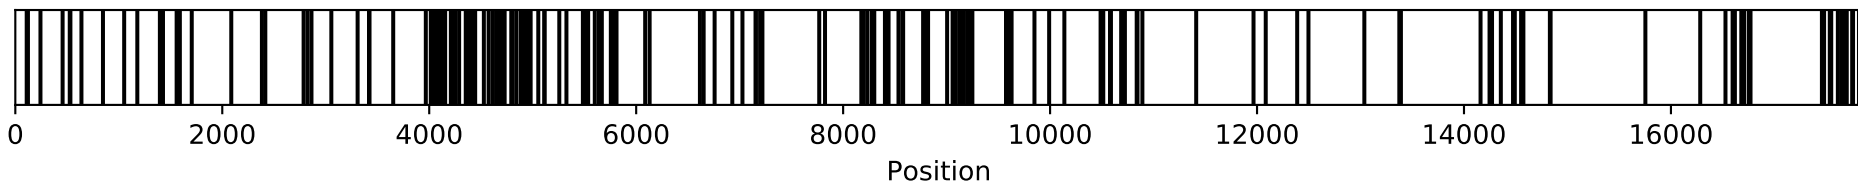

MM1 vs MM2  
Number of differences: 181

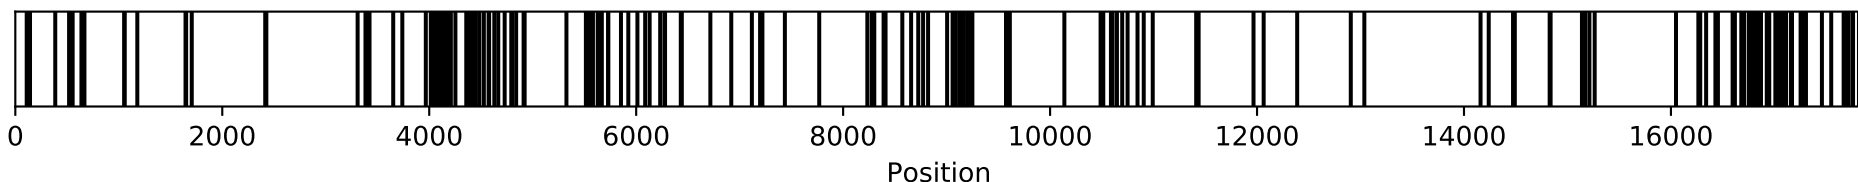

MA1 vs MA2  
Number of differences: 375

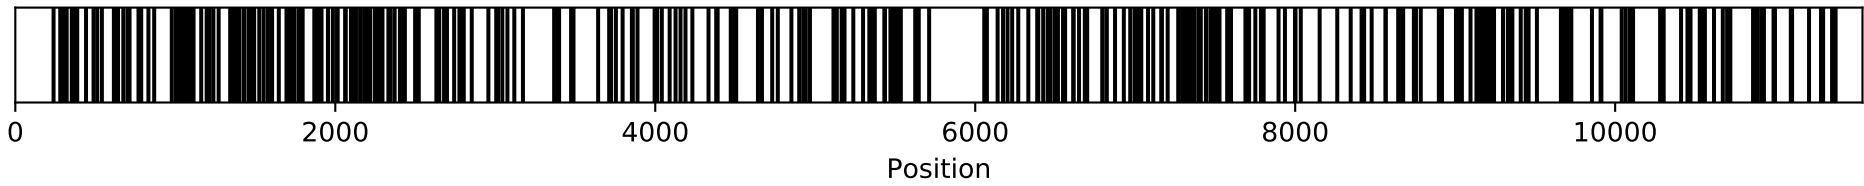

MA1 vs MM1  
Number of differences: 0

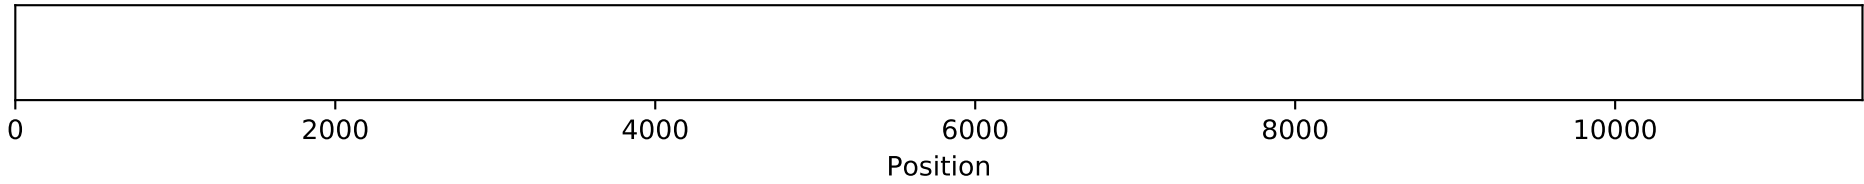

MA1 vs MM2  
Number of differences: 178

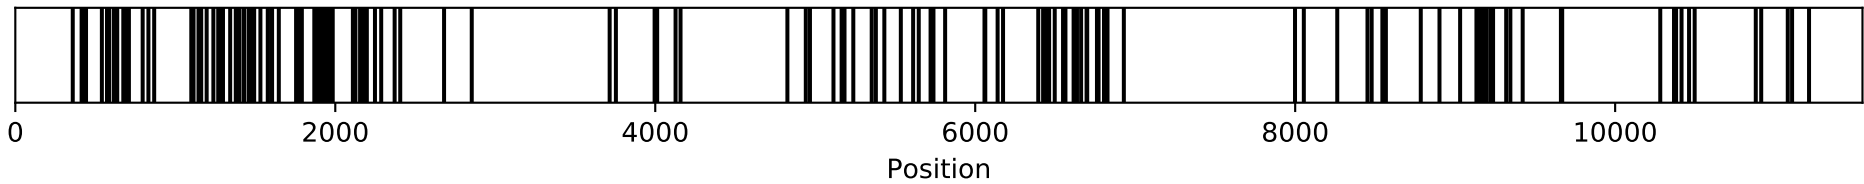

MA2 vs MM1  
Number of differences: 375

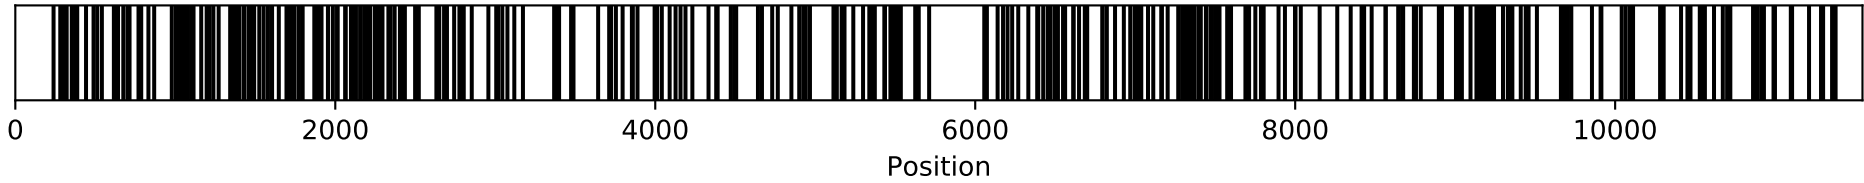

MA2 vs MM2  
Number of differences: 350

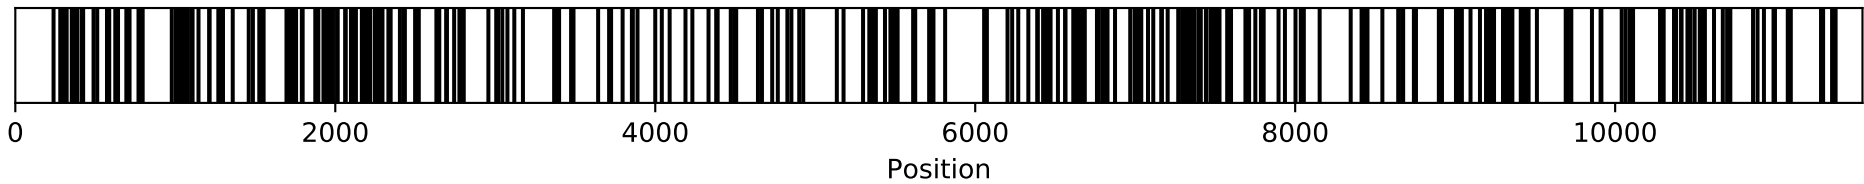

MM1 vs MM2  
Number of differences: 178

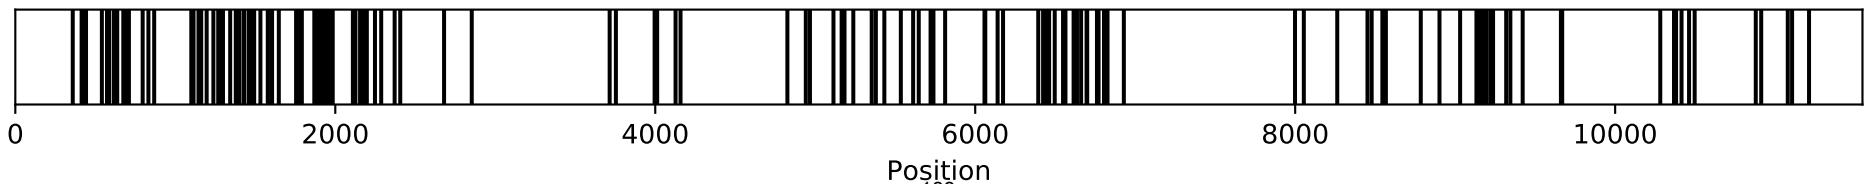

MA1 vs MA2  
Number of differences: 246

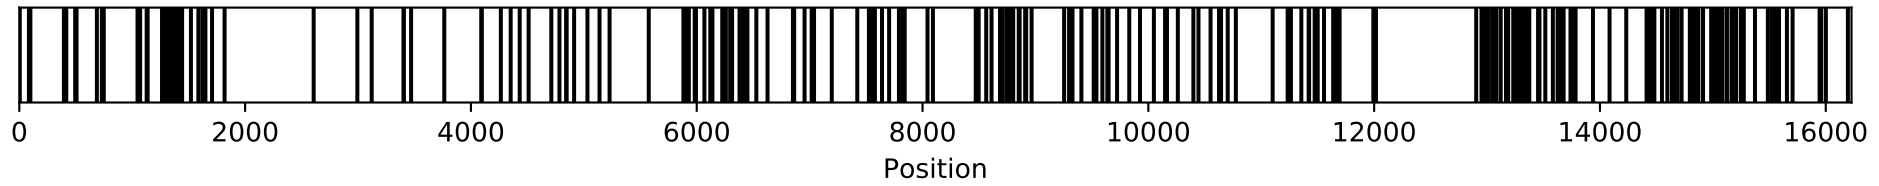

MA1 vs MM1  
Number of differences: 106

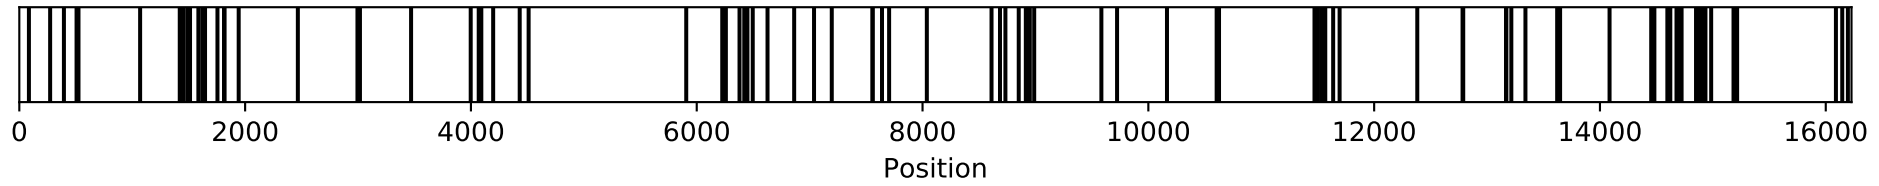

MA1 vs MM2  
Number of differences: 103

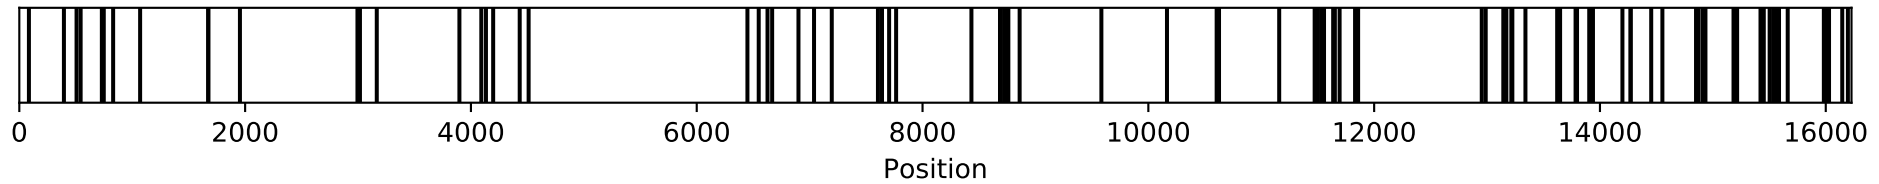

MA2 vs MM1  
Number of differences: 249

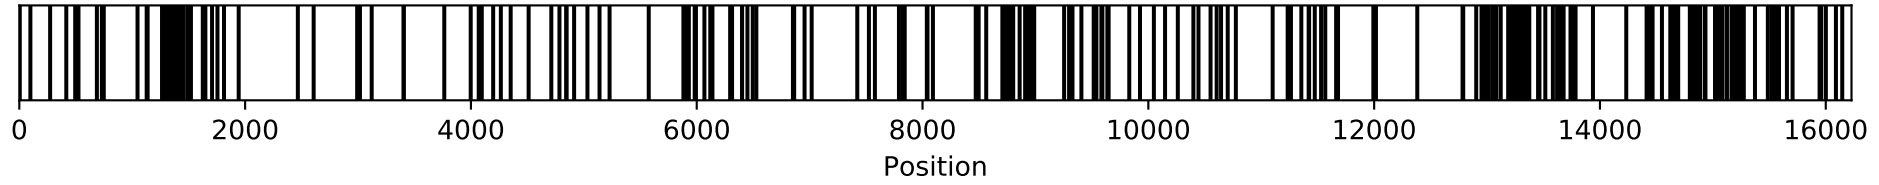

MA2 vs MM2  
Number of differences: 273

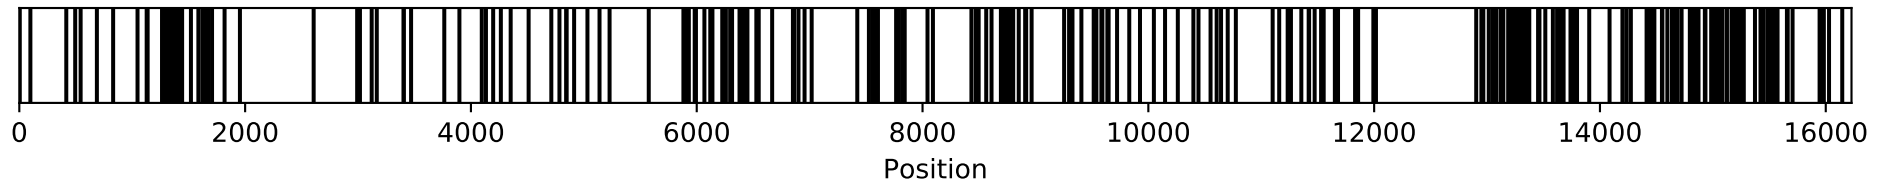

MM1 vs MM2  
Number of differences: 114

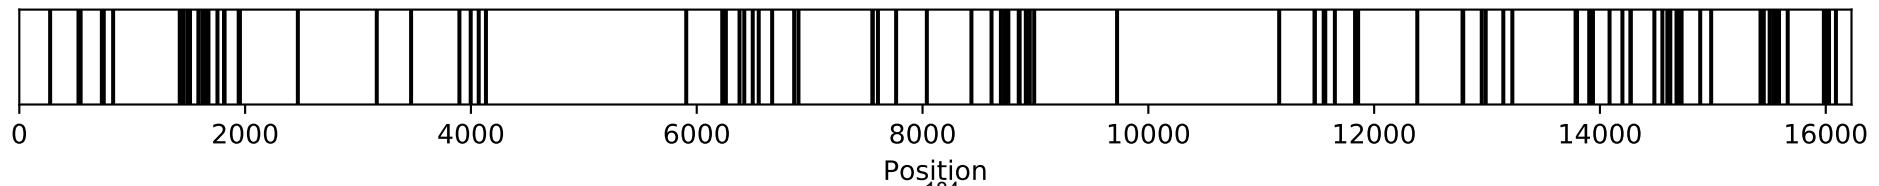

MA1 vs MA2  
Number of differences: 235

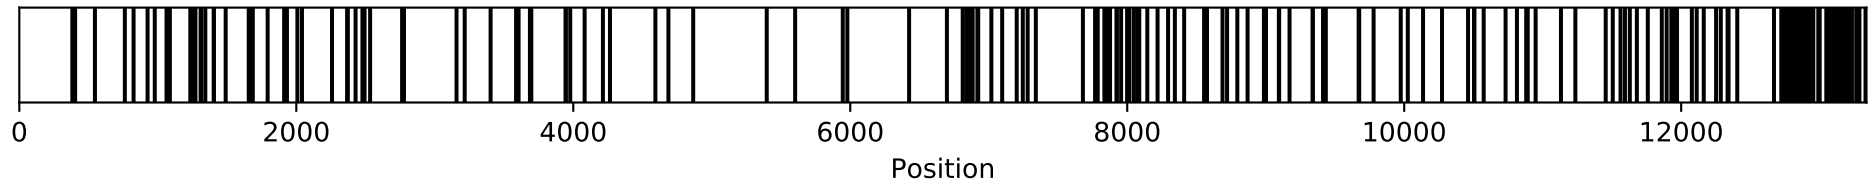

MA1 vs MM1  
Number of differences: 235

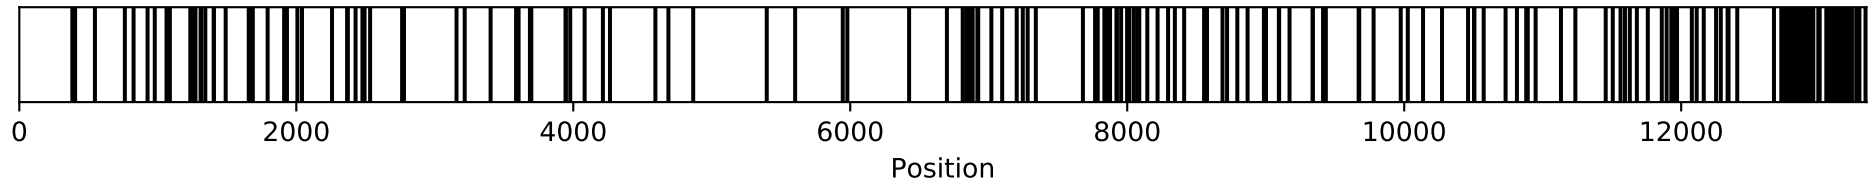

MA1 vs MM2  
Number of differences: 232

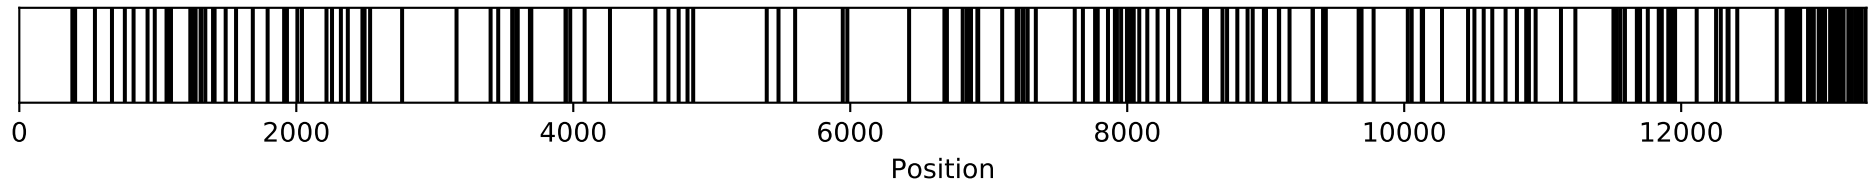

MA2 vs MM1  
Number of differences: 0

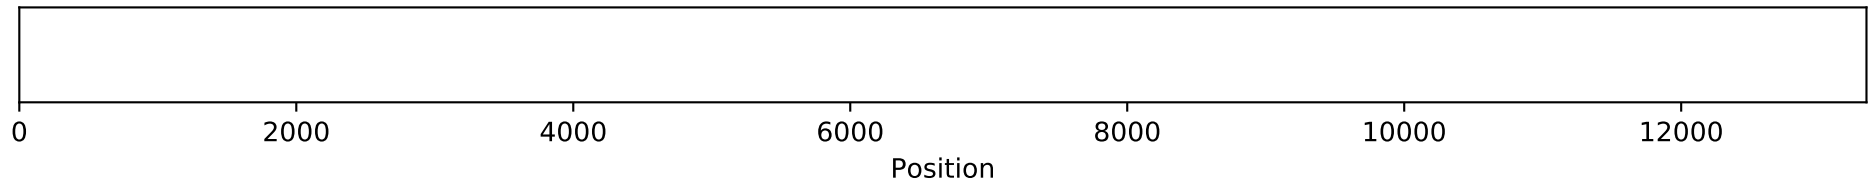

MA2 vs MM2  
Number of differences: 112

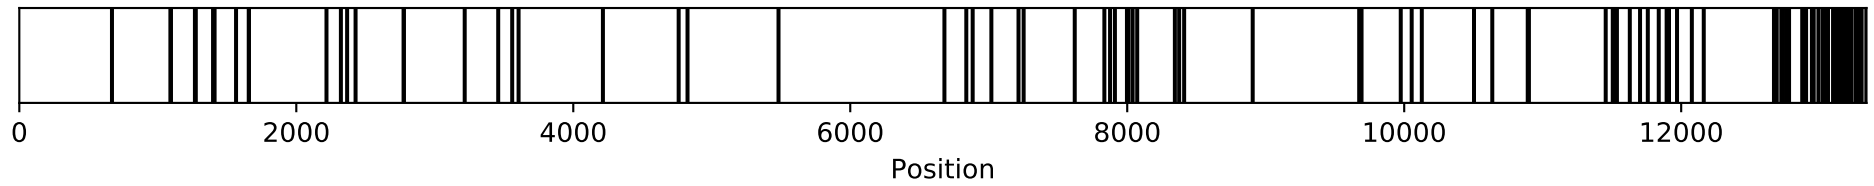

MM1 vs MM2  
Number of differences: 112

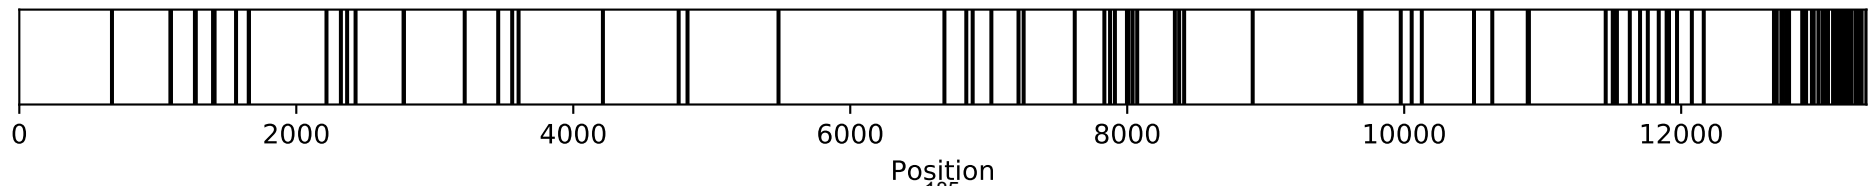

MA1 vs MA2  
Number of differences: 337

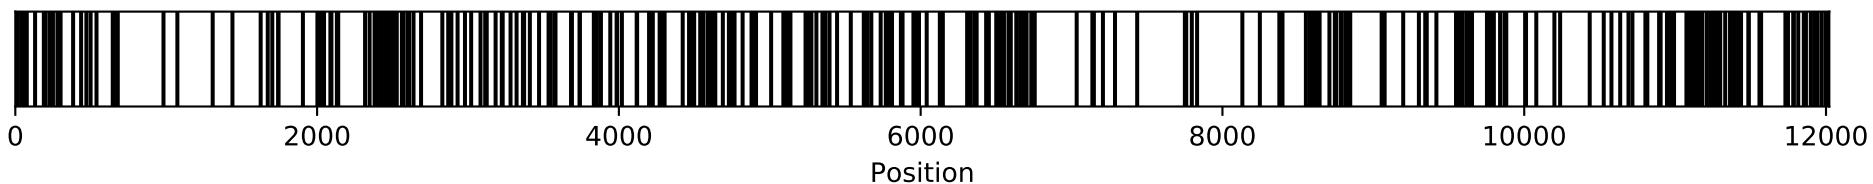

MA1 vs MM1  
Number of differences: 0

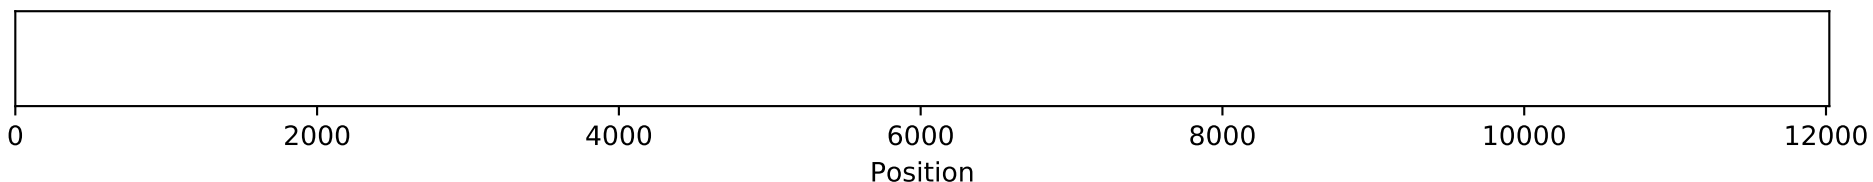

MA1 vs MM2  
Number of differences: 194

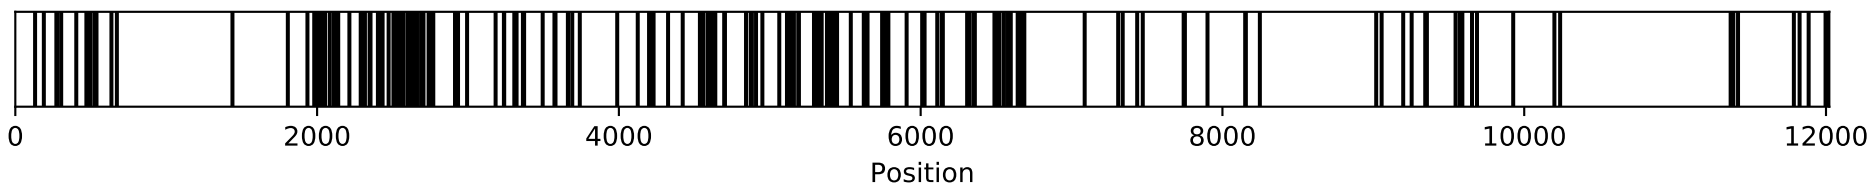

MA2 vs MM1  
Number of differences: 337

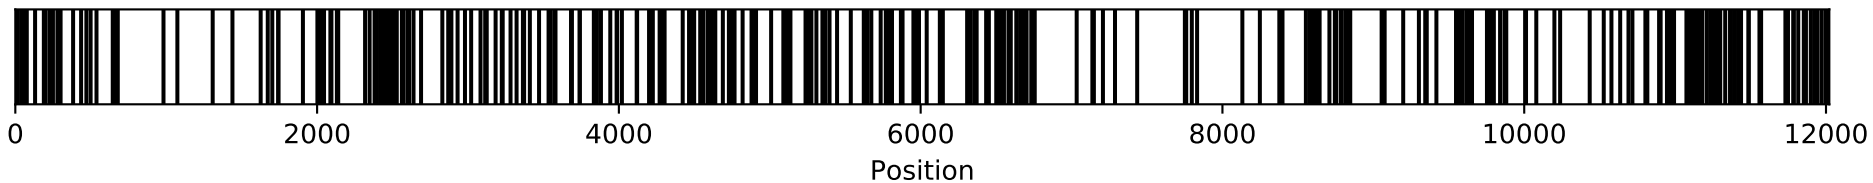

MA2 vs MM2  
Number of differences: 358

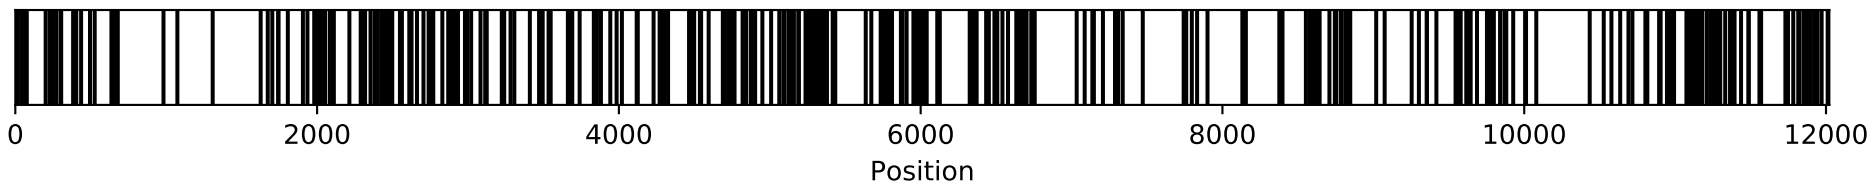

MM1 vs MM2  
Number of differences: 194

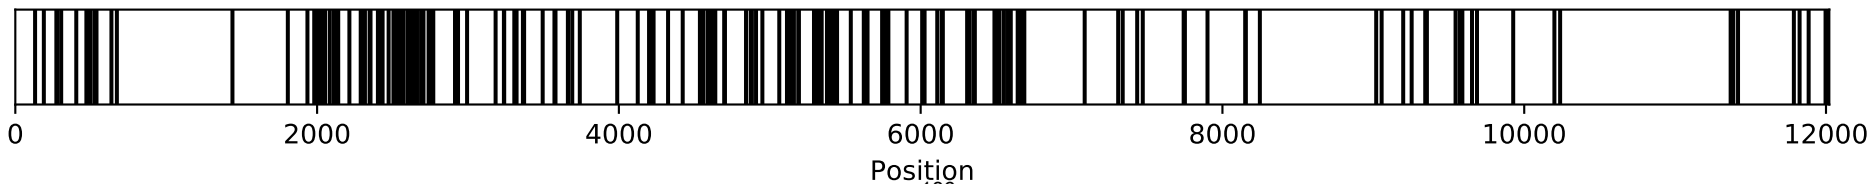



MA1 vs MA2  
Number of differences: 223

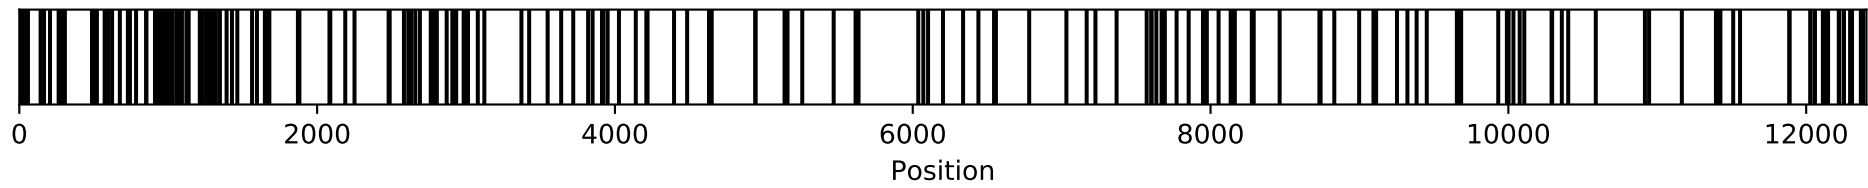

MA1 vs MM1  
Number of differences: 60

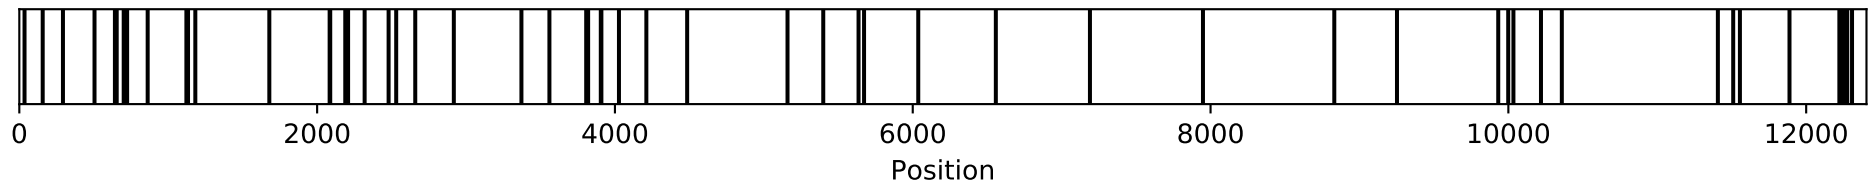

MA1 vs MM2  
Number of differences: 73

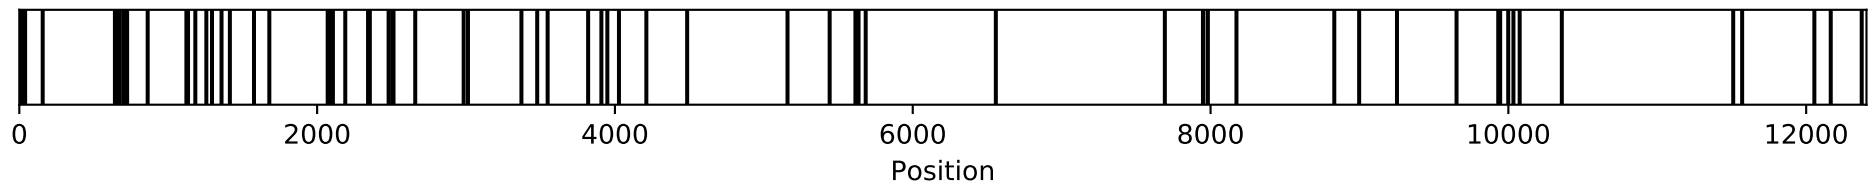

MA2 vs MM1  
Number of differences: 214

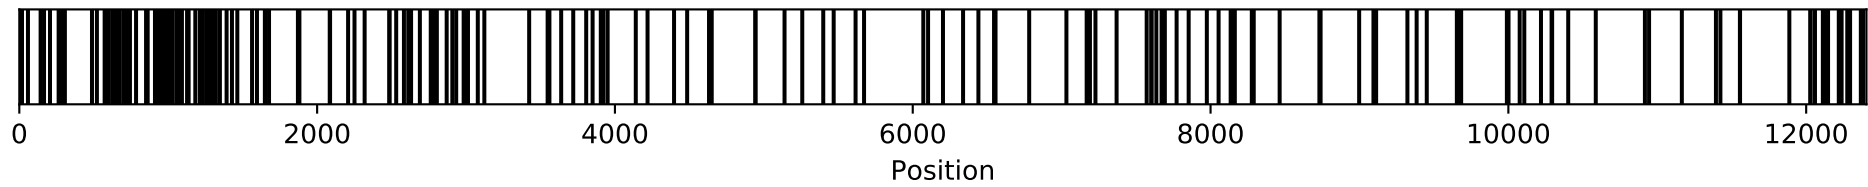

MA2 vs MM2  
Number of differences: 219

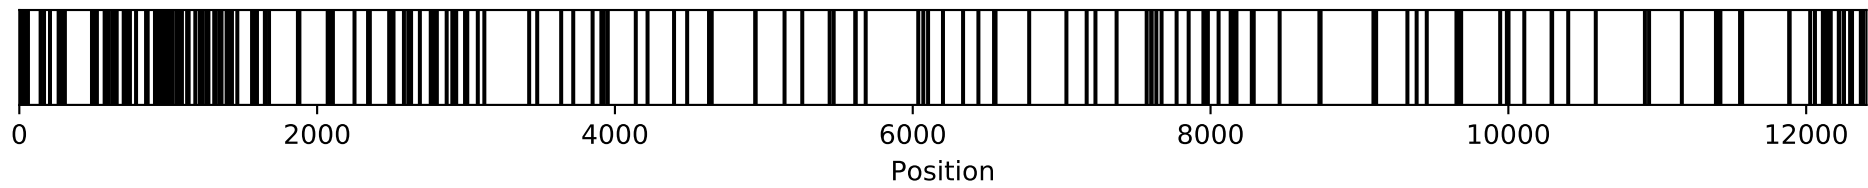

MM1 vs MM2  
Number of differences: 66

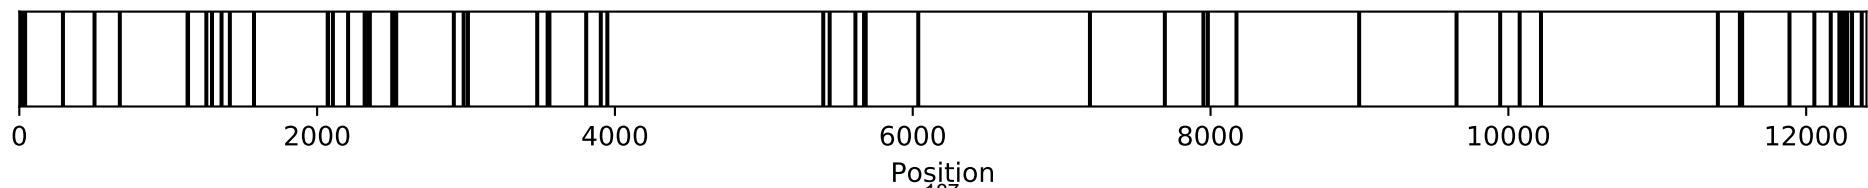

MA1 vs MA2  
Number of differences: 148

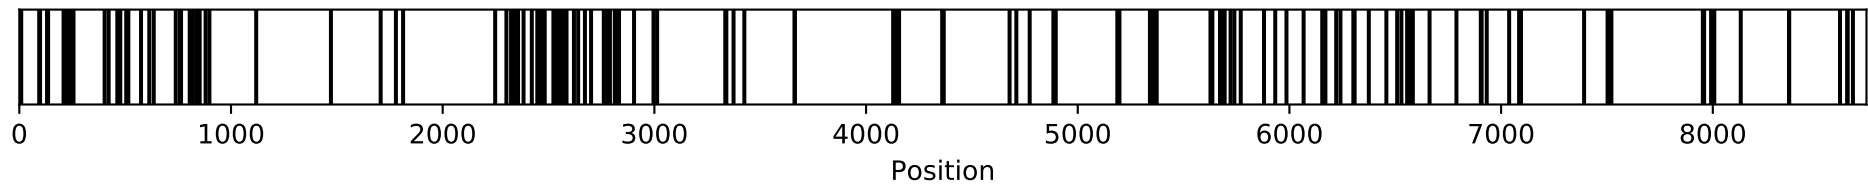

MA1 vs MM1  
Number of differences: 151

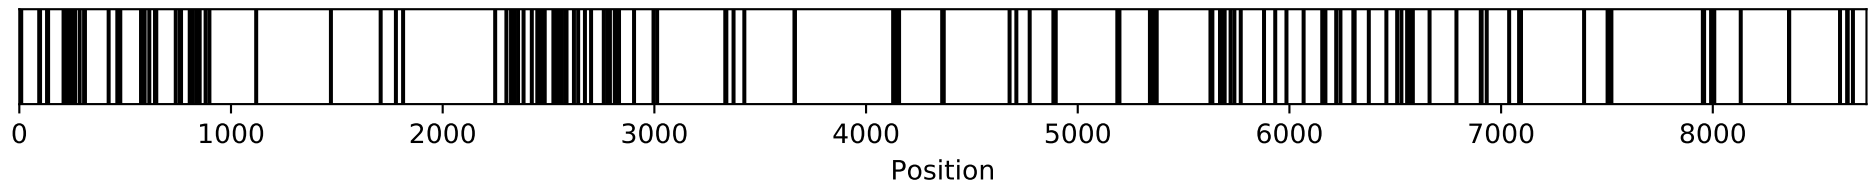

MA1 vs MM2  
Number of differences: 158

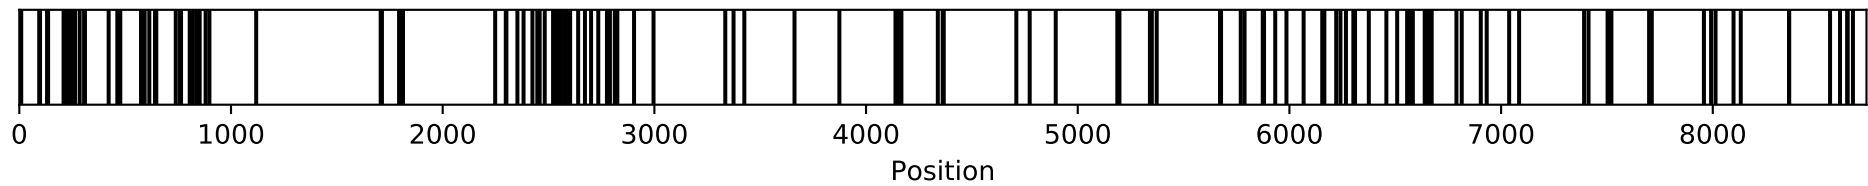

MA2 vs MM1  
Number of differences: 19

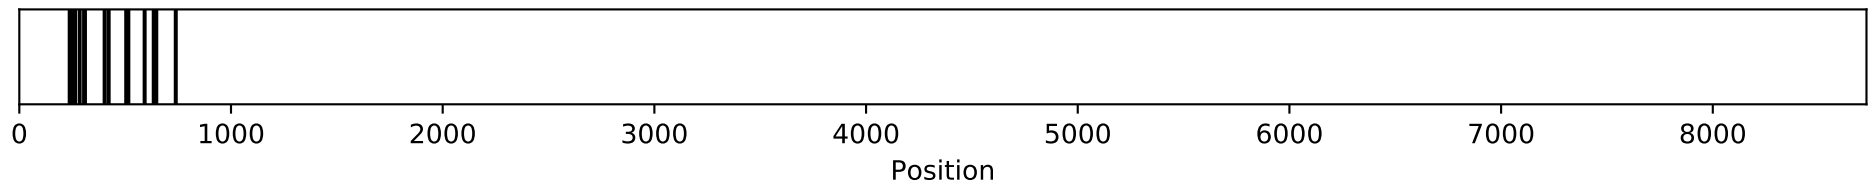

MA2 vs MM2  
Number of differences: 99

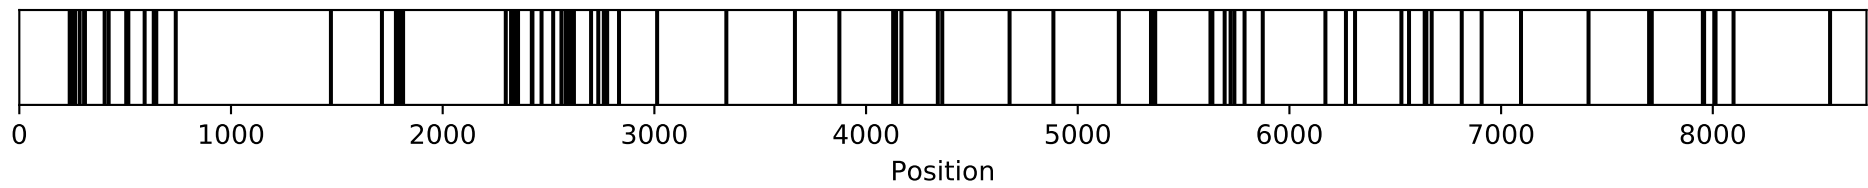

MM1 vs MM2  
Number of differences: 80

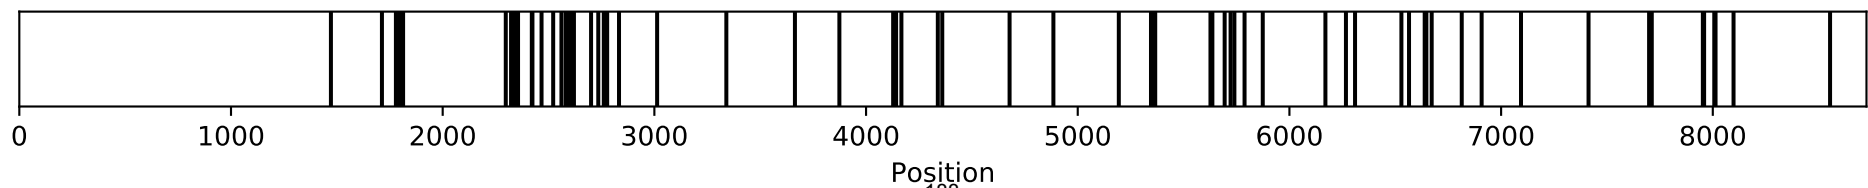

MA1 vs MA2  
Number of differences: 135

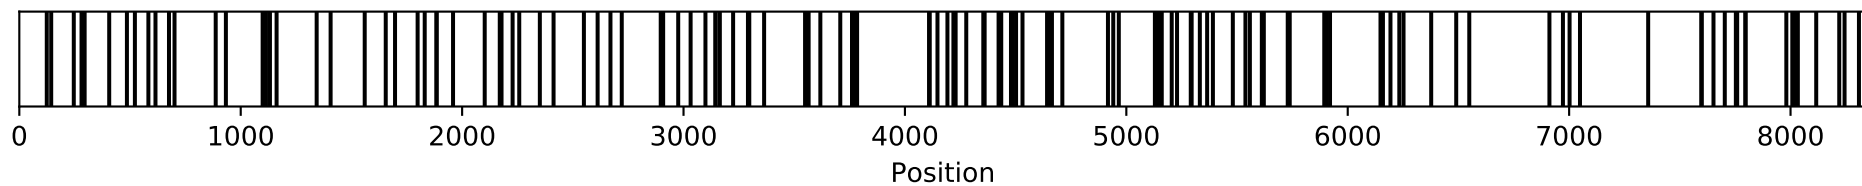

MA1 vs MM1  
Number of differences: 135

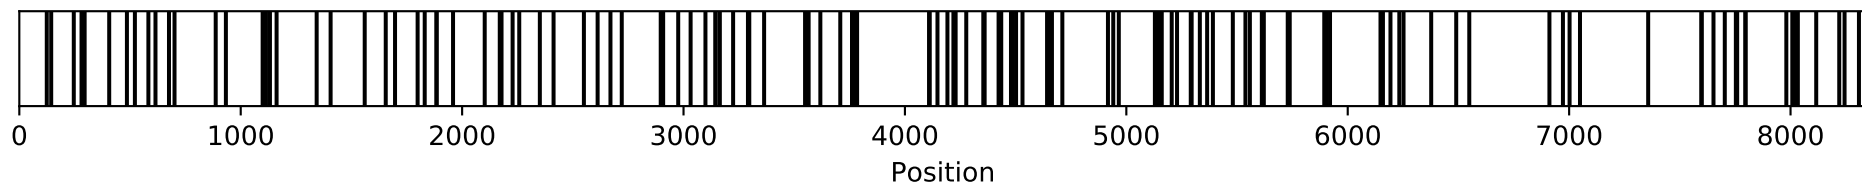

MA1 vs MM2  
Number of differences: 135

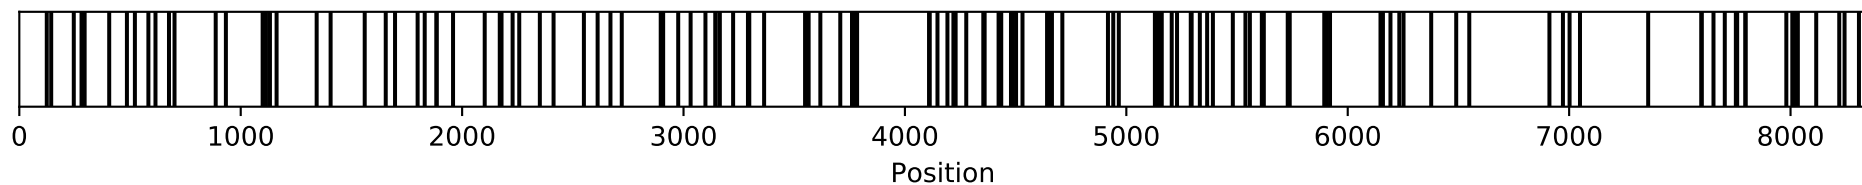

MA2 vs MM1  
Number of differences: 0

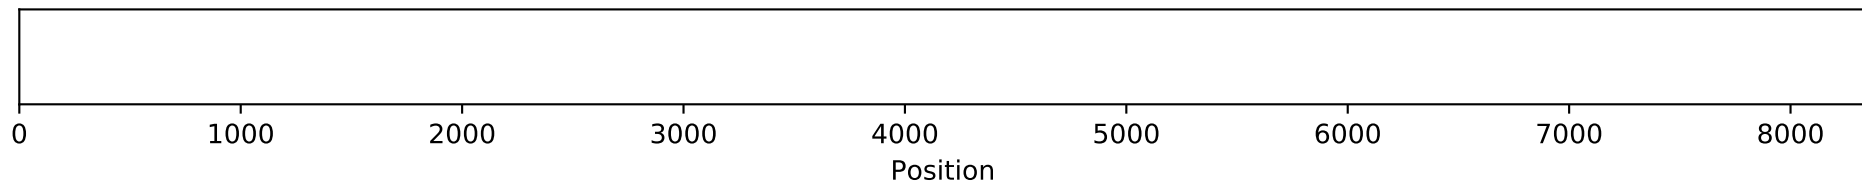

MA2 vs MM2  
Number of differences: 0

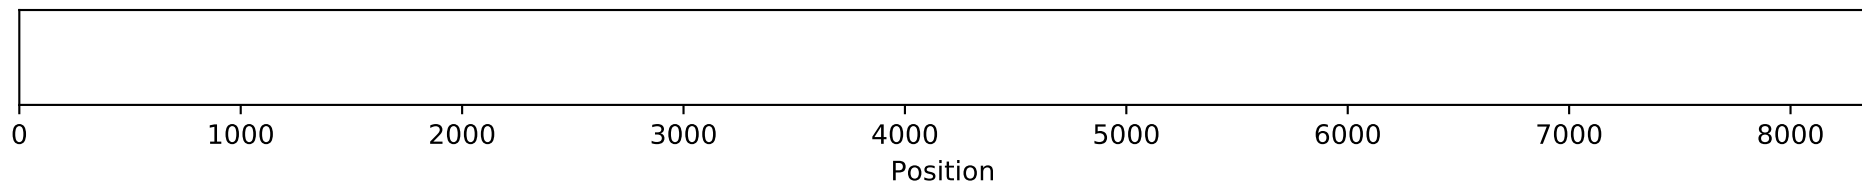

MM1 vs MM2  
Number of differences: 0

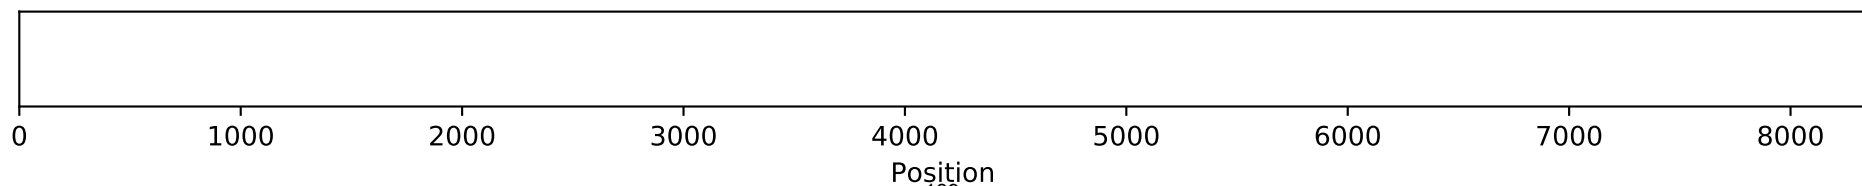

MA1 vs MA2  
Number of differences: 178

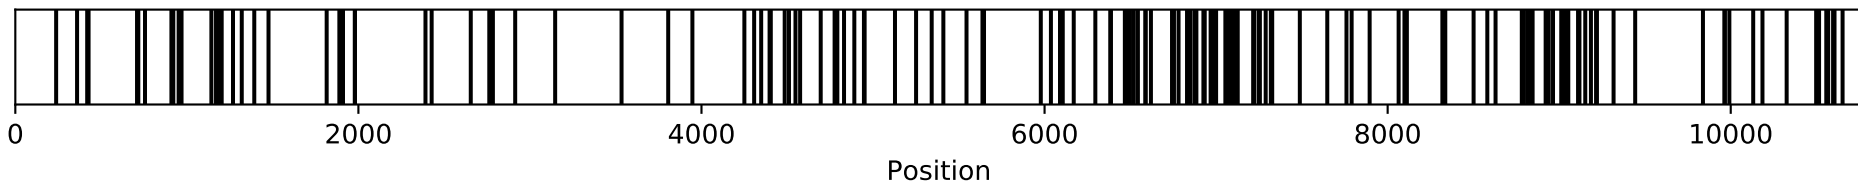

MA1 vs MM1  
Number of differences: 172

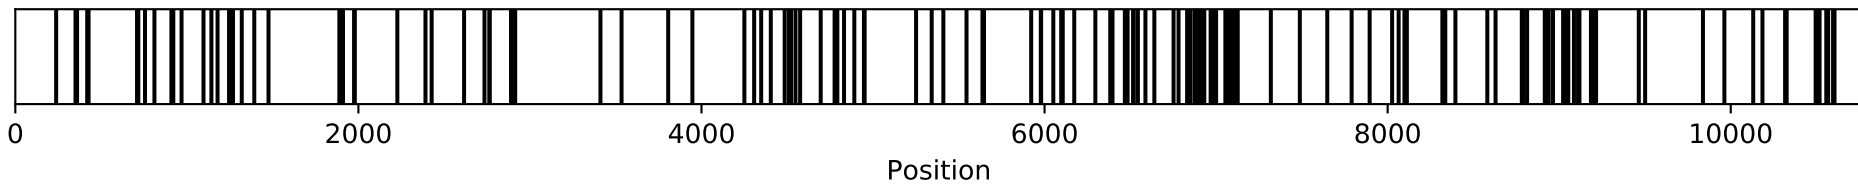

MA1 vs MM2  
Number of differences: 162

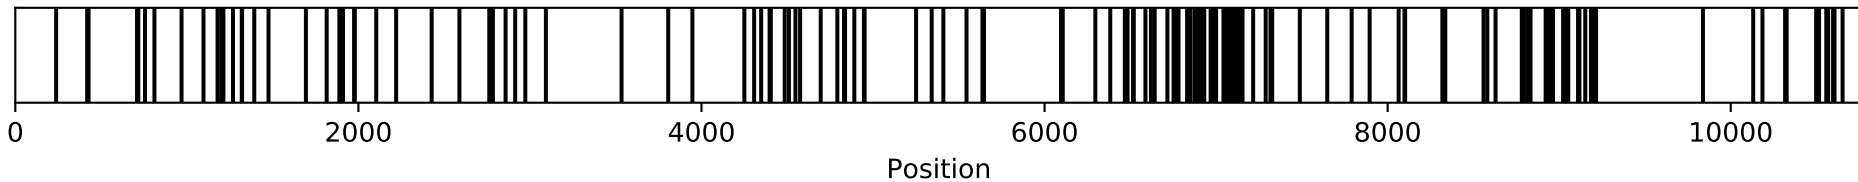

MA2 vs MM1  
Number of differences: 86

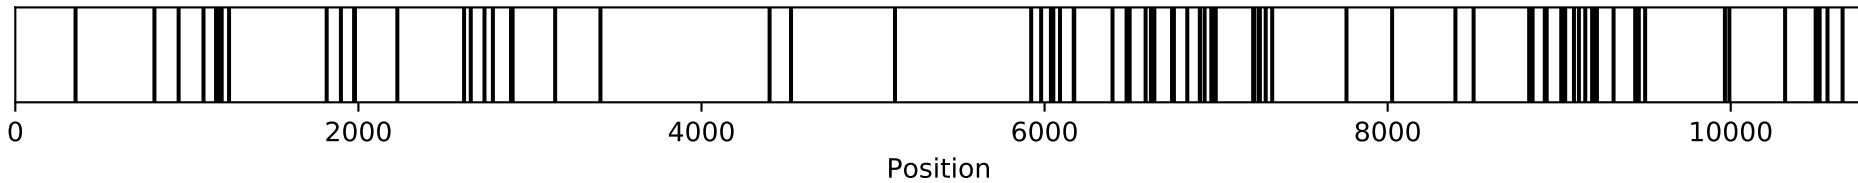

MA2 vs MM2  
Number of differences: 88

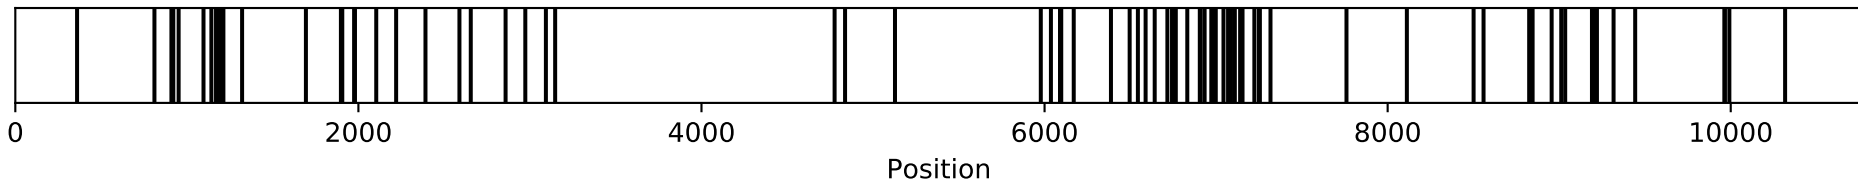

MM1 vs MM2  
Number of differences: 86

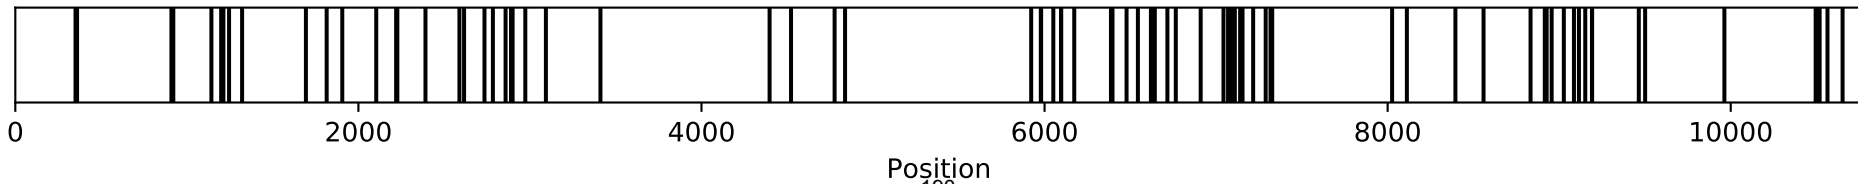

MA1 vs MA2  
Number of differences: 214

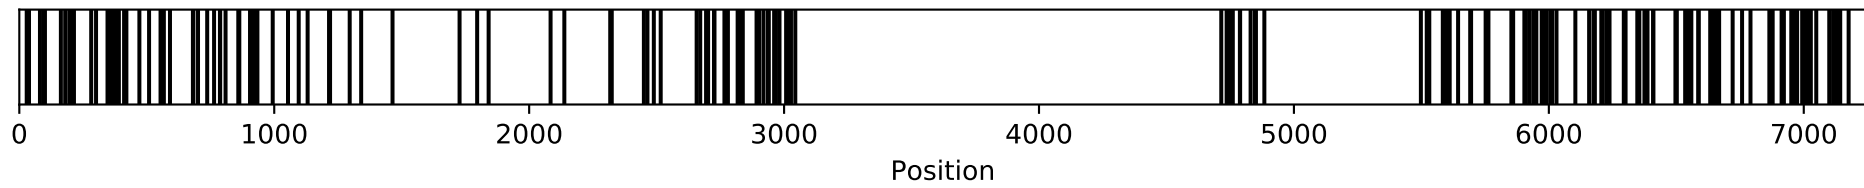

MA1 vs MM1  
Number of differences: 135

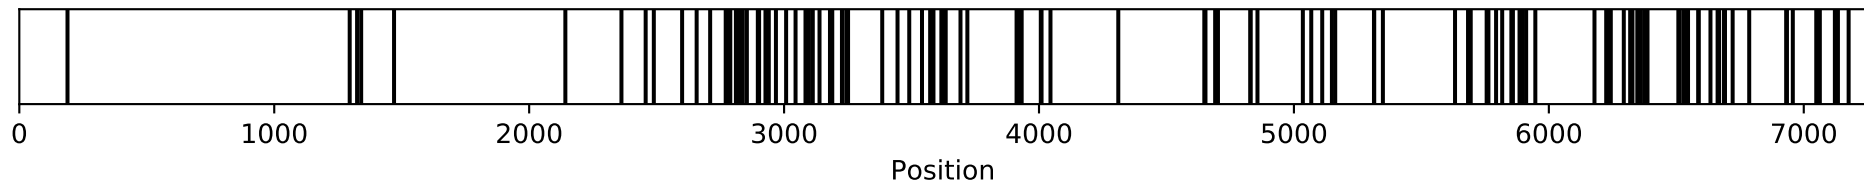

MA1 vs MM2  
Number of differences: 127

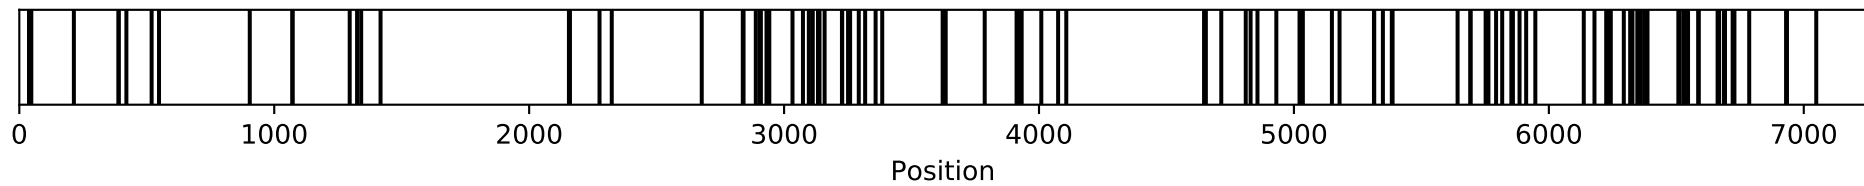

MA2 vs MM1  
Number of differences: 263

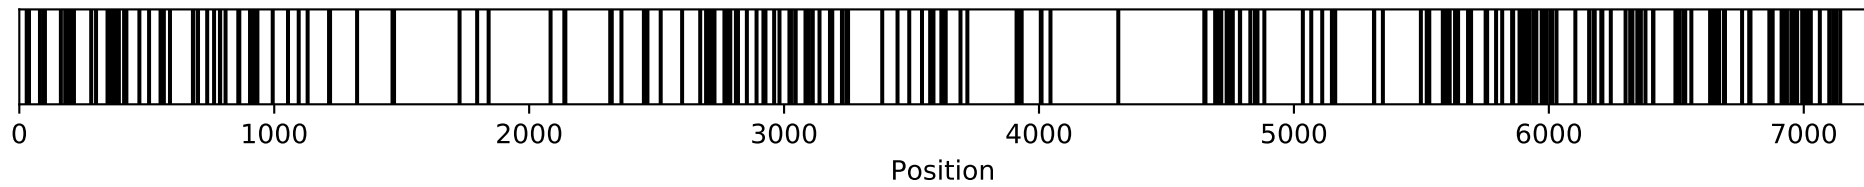

MA2 vs MM2  
Number of differences: 266

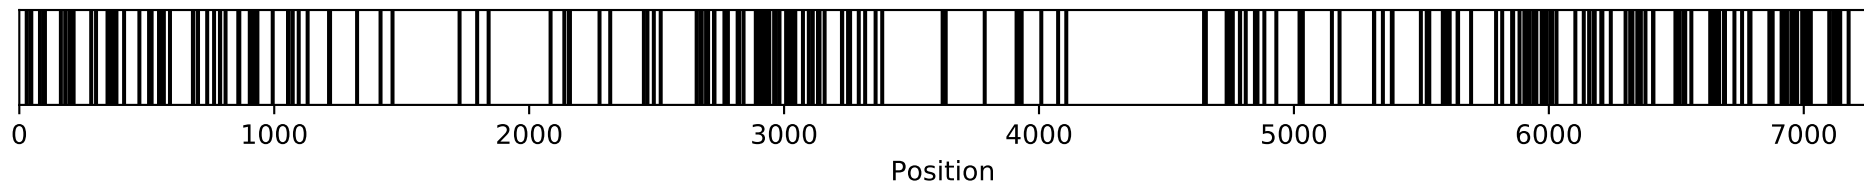

MM1 vs MM2  
Number of differences: 114

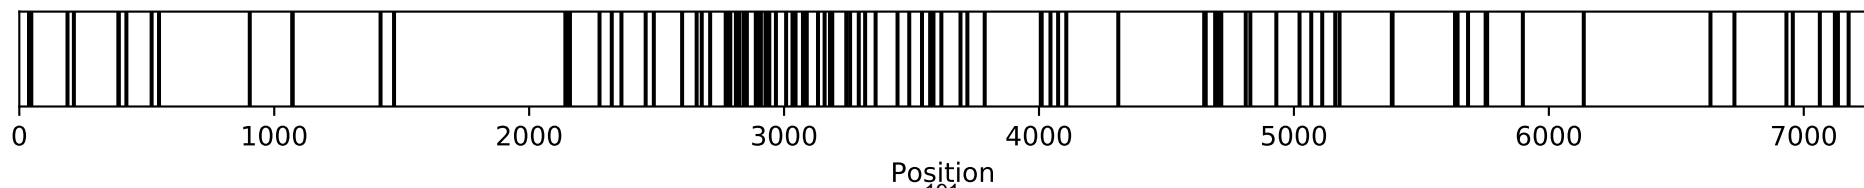

MA1 vs MA2  
Number of differences: 178

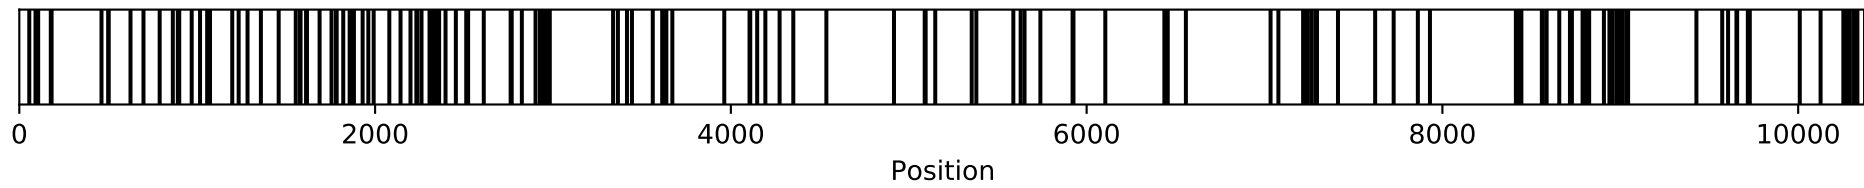

MA1 vs MM1  
Number of differences: 173

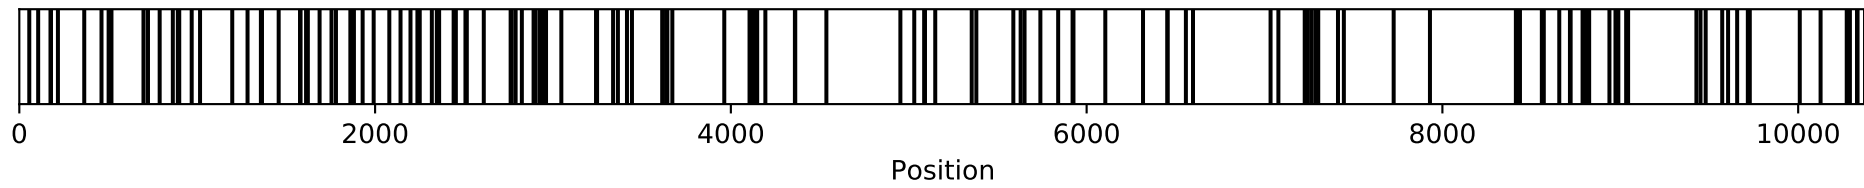

MA1 vs MM2  
Number of differences: 168

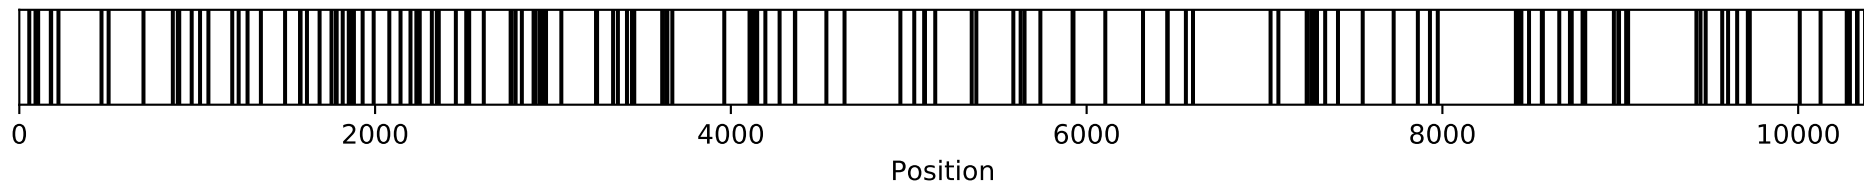

MA2 vs MM1  
Number of differences: 98

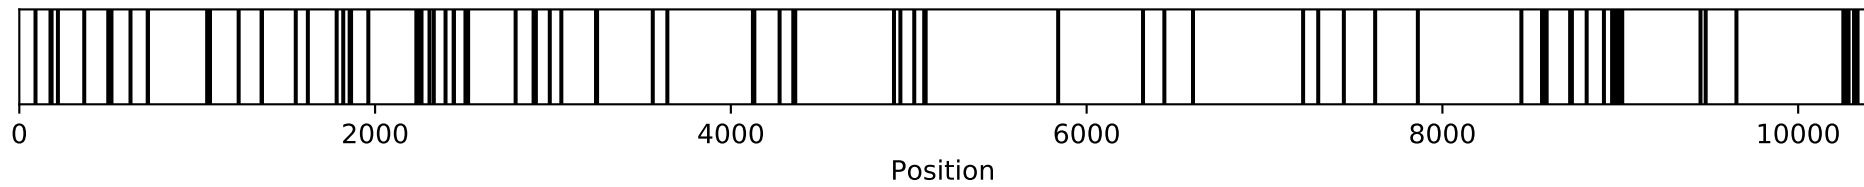

MA2 vs MM2  
Number of differences: 93

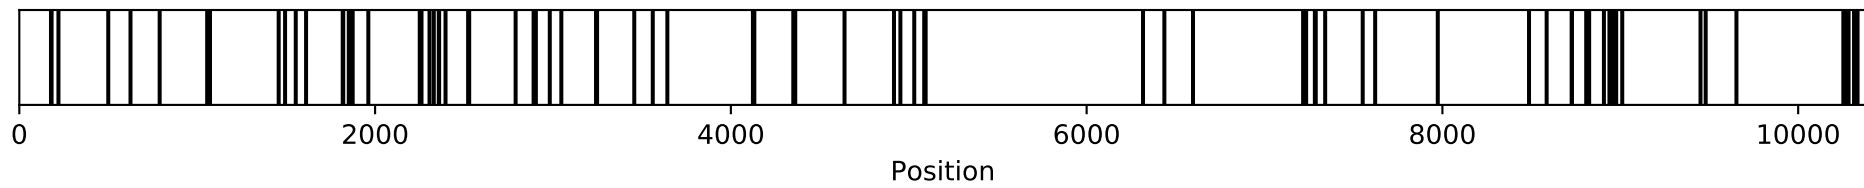

MM1 vs MM2  
Number of differences: 61

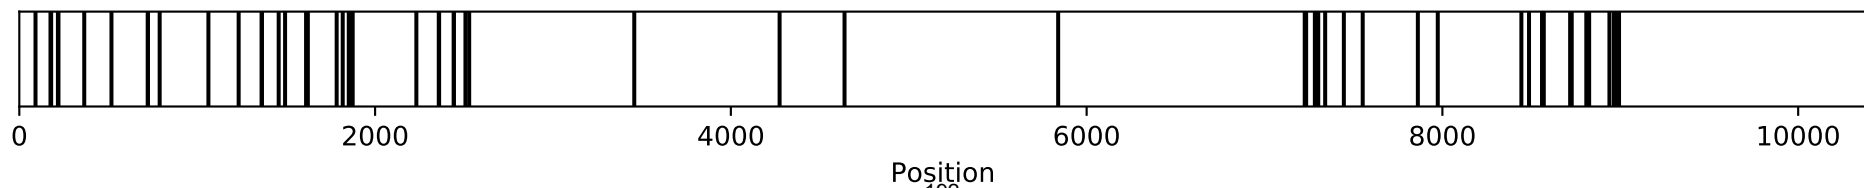

MA1 vs MA2  
Number of differences: 202

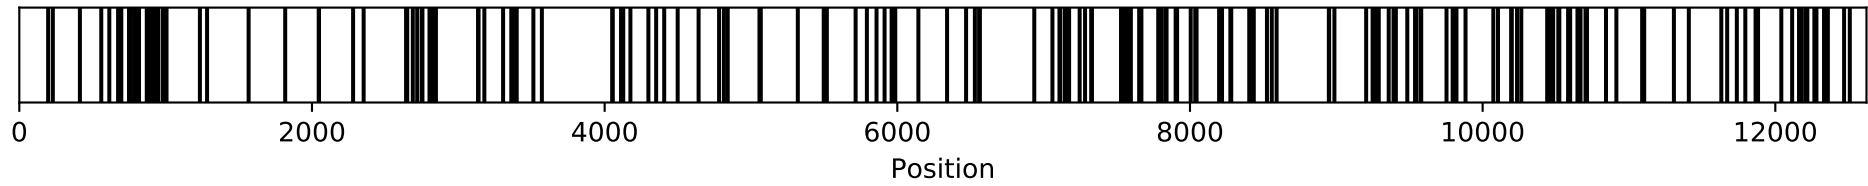

MA1 vs MM1  
Number of differences: 202

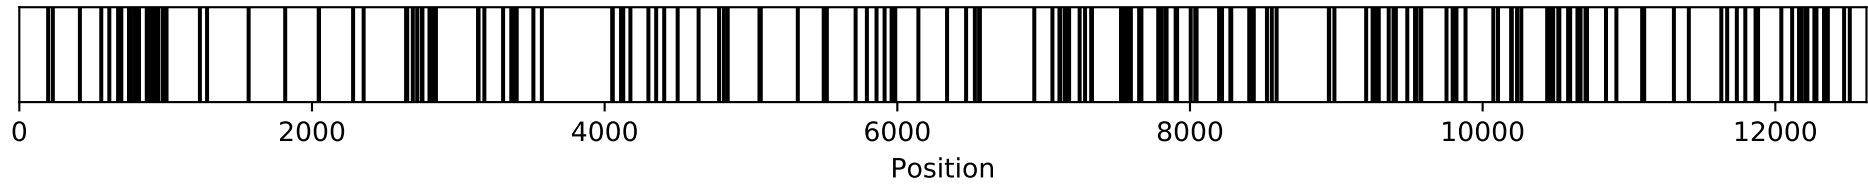

MA1 vs MM2  
Number of differences: 201

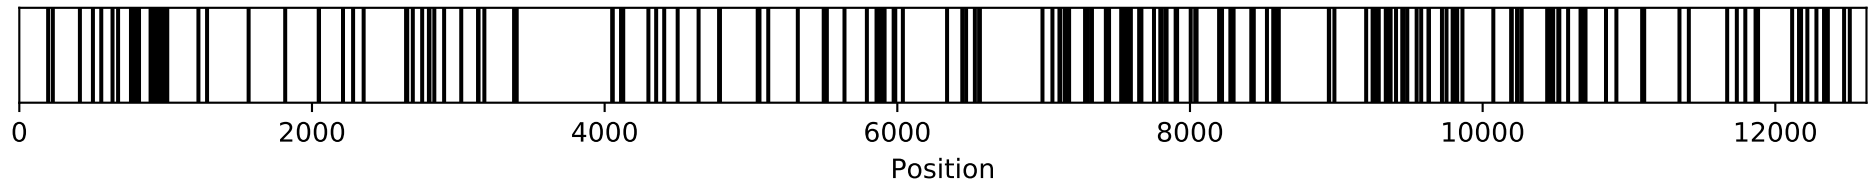

MA2 vs MM1  
Number of differences: 0

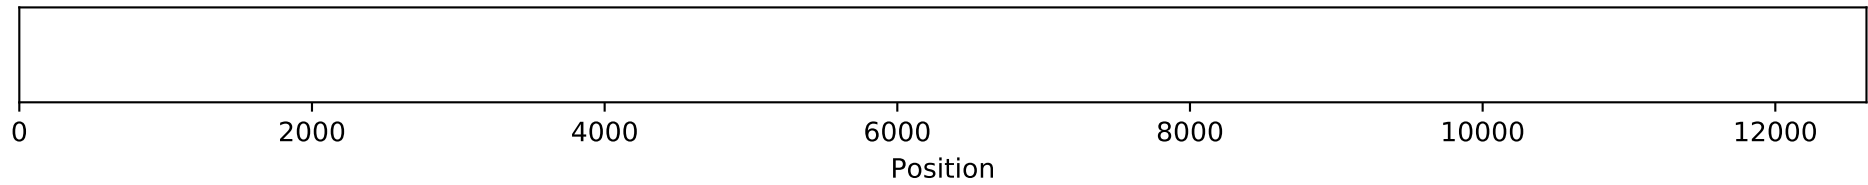

MA2 vs MM2  
Number of differences: 98

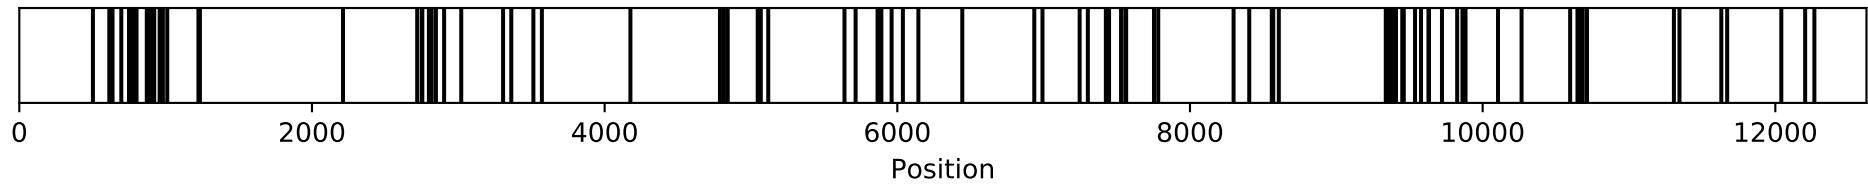

MM1 vs MM2  
Number of differences: 98

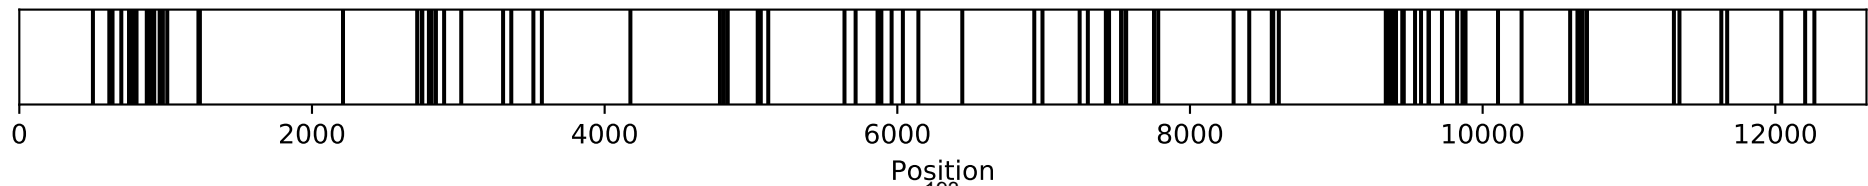

MA1 vs MA2  
Number of differences: 120

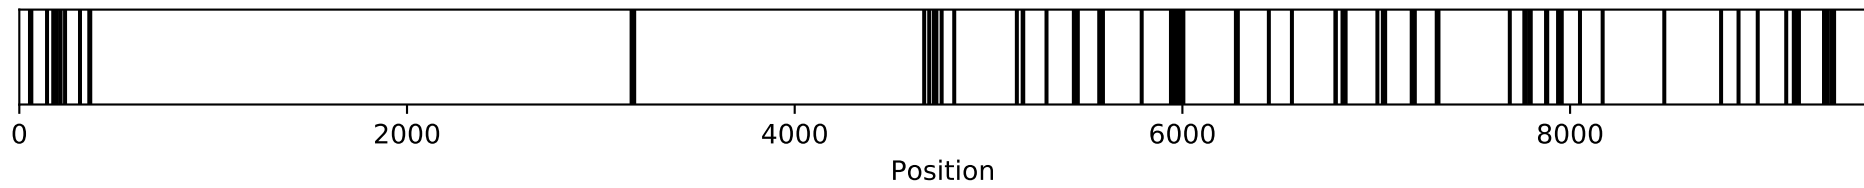

MA1 vs MM1  
Number of differences: 177

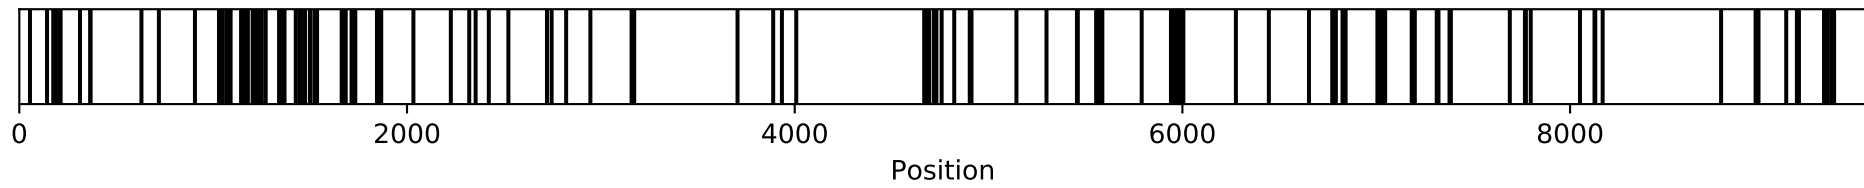

MA1 vs MM2  
Number of differences: 120

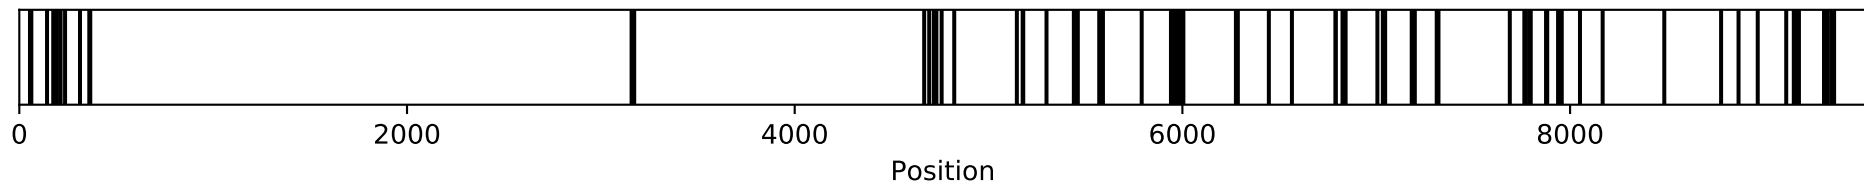

MA2 vs MM1  
Number of differences: 107

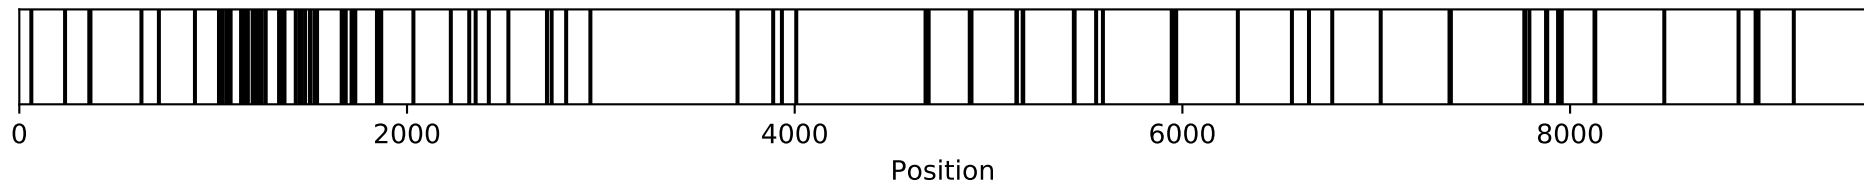

MA2 vs MM2  
Number of differences: 0

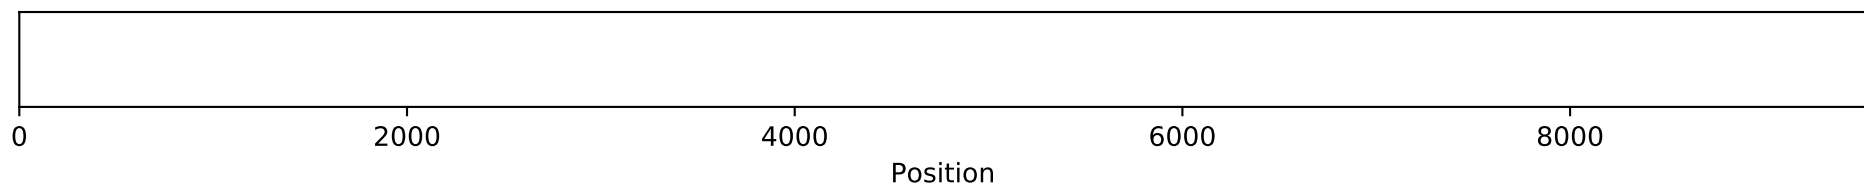

MM1 vs MM2  
Number of differences: 107

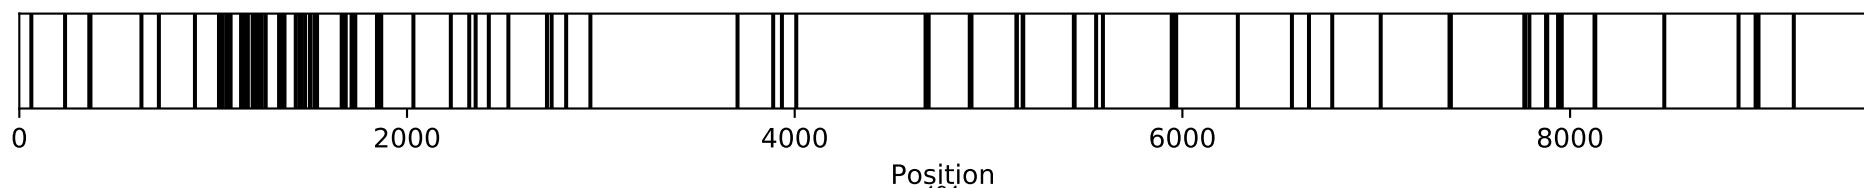



MA1 vs MA2  
Number of differences: 162

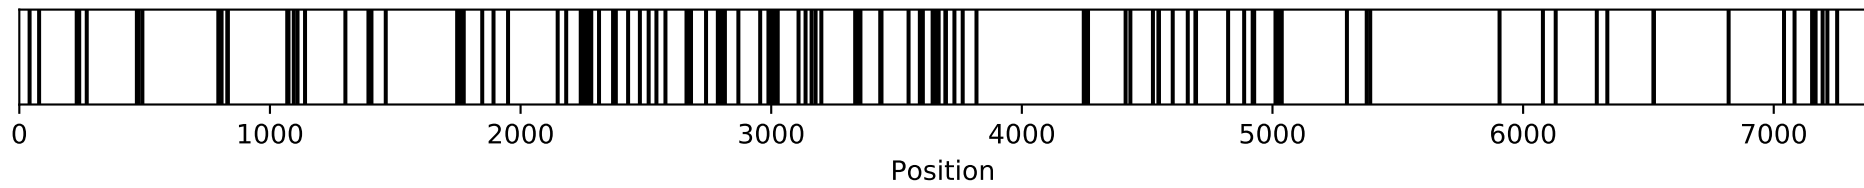

MA1 vs MM1  
Number of differences: 162

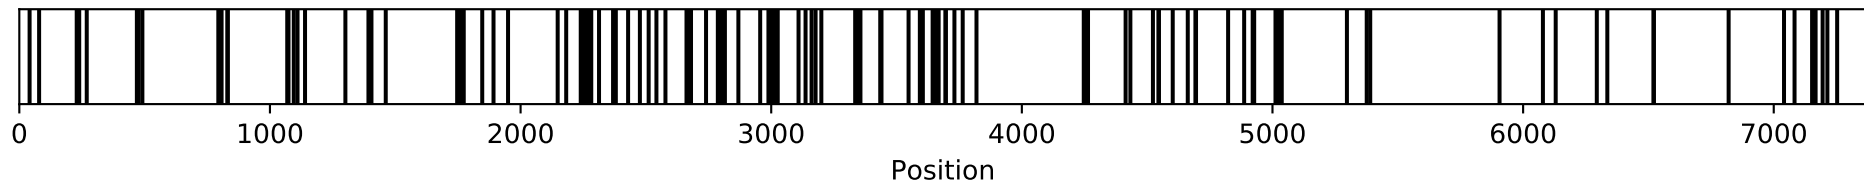

MA1 vs MM2  
Number of differences: 166

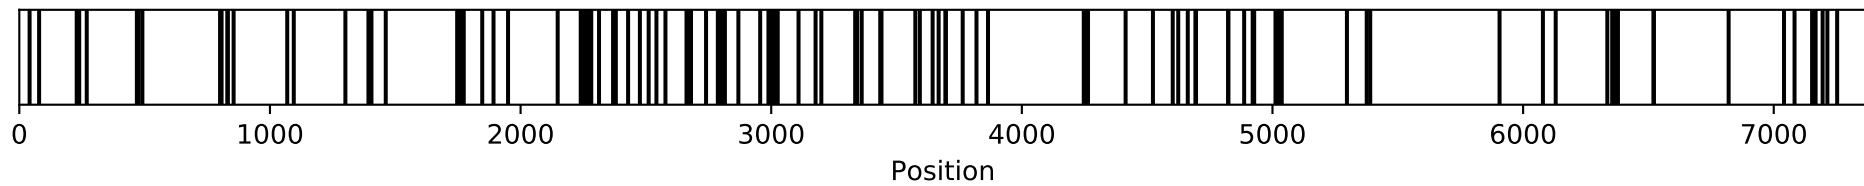

MA2 vs MM1  
Number of differences: 0

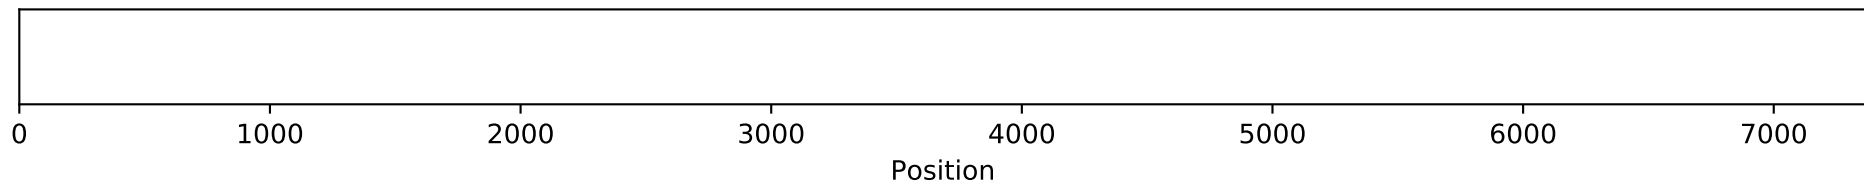

MA2 vs MM2  
Number of differences: 40

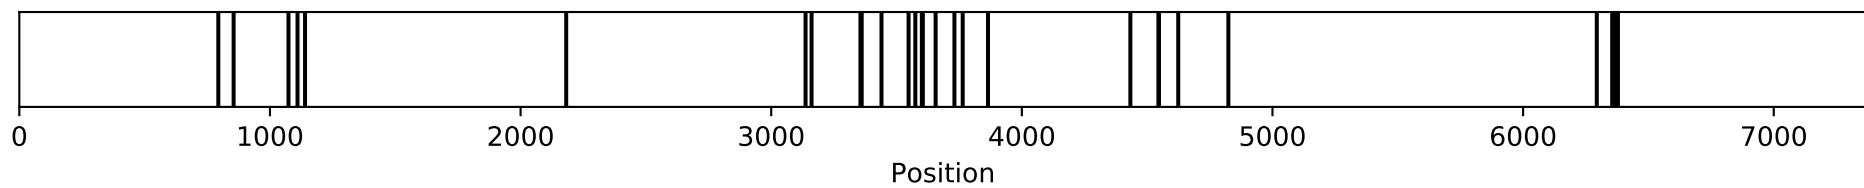

MM1 vs MM2  
Number of differences: 40

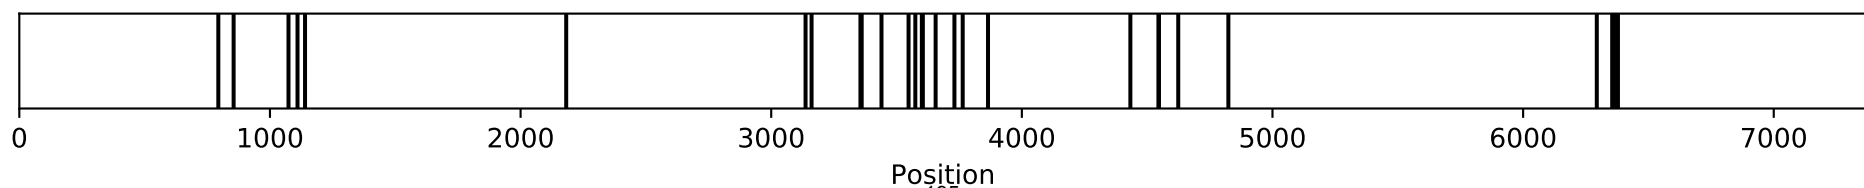

MA1 vs MA2  
Number of differences: 195

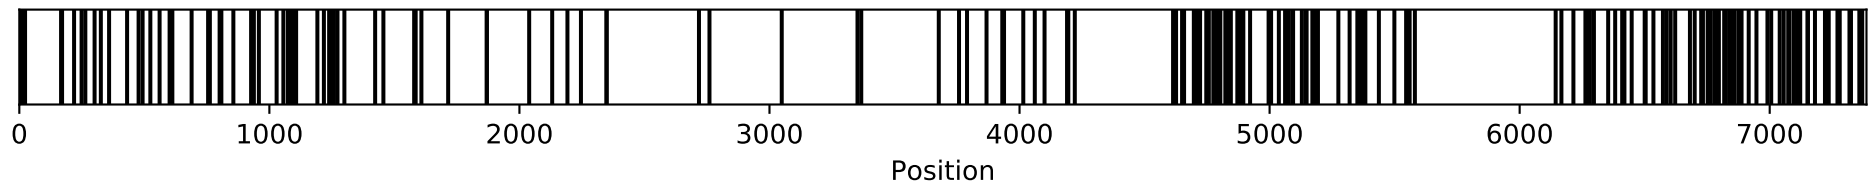

MA1 vs MM1  
Number of differences: 206

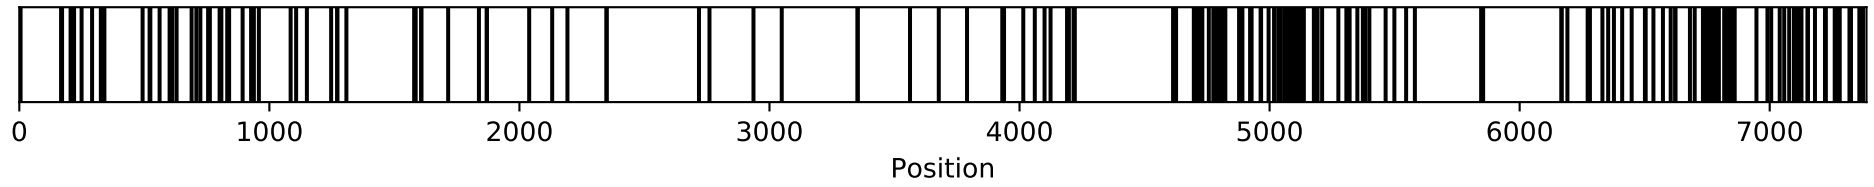

MA1 vs MM2  
Number of differences: 207

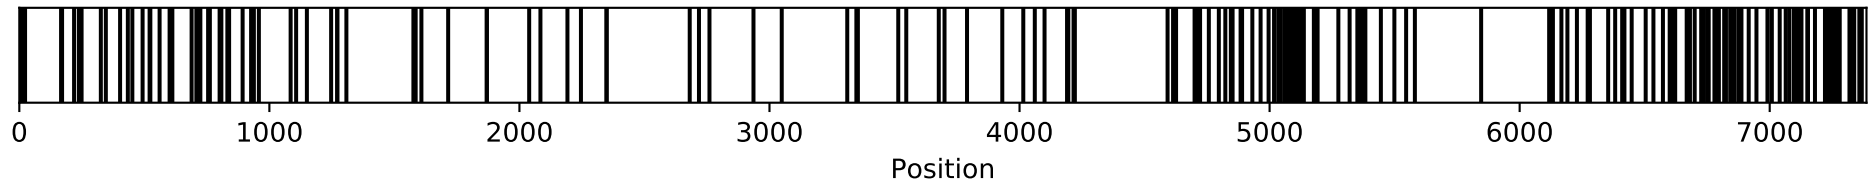

MA2 vs MM1  
Number of differences: 142

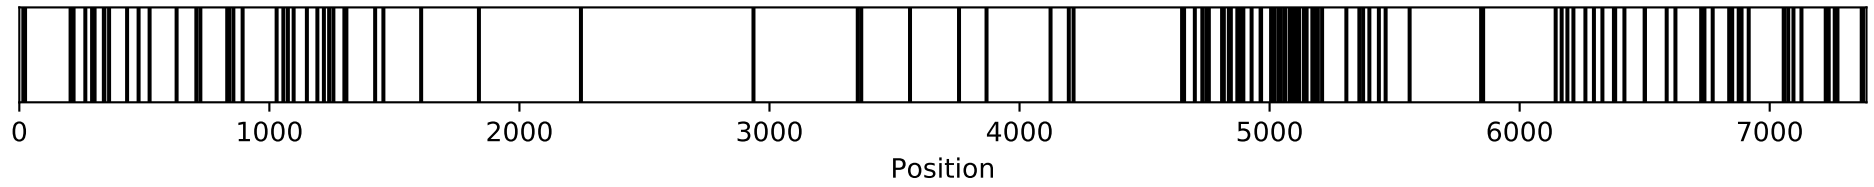

MA2 vs MM2  
Number of differences: 143

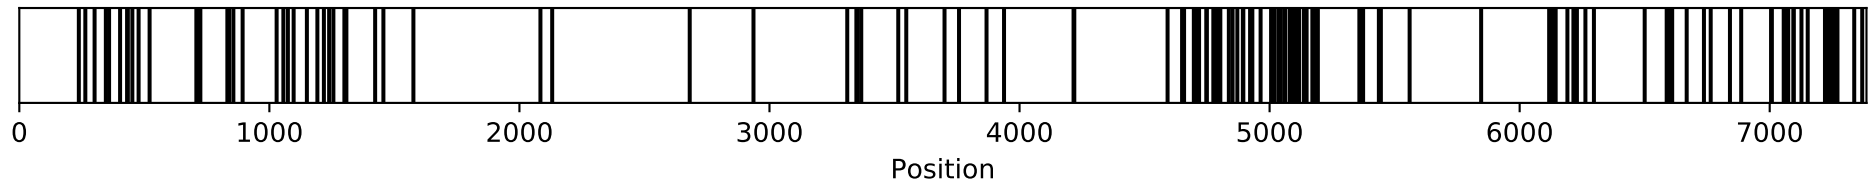

MM1 vs MM2  
Number of differences: 106

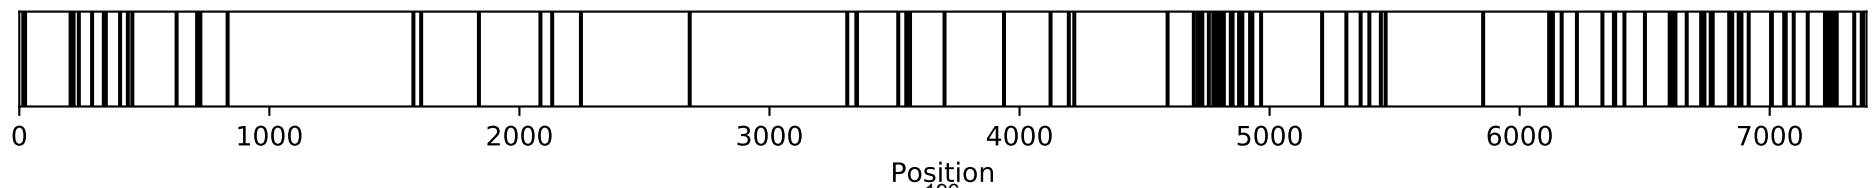

MA1 vs MA2  
Number of differences: 246

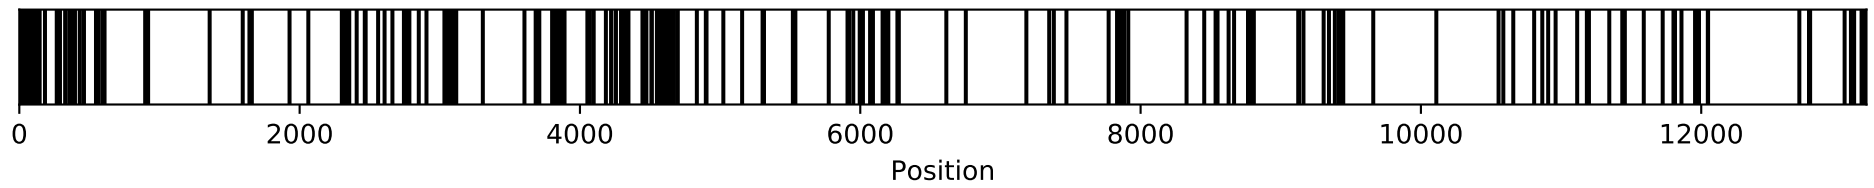

MA1 vs MM1  
Number of differences: 214

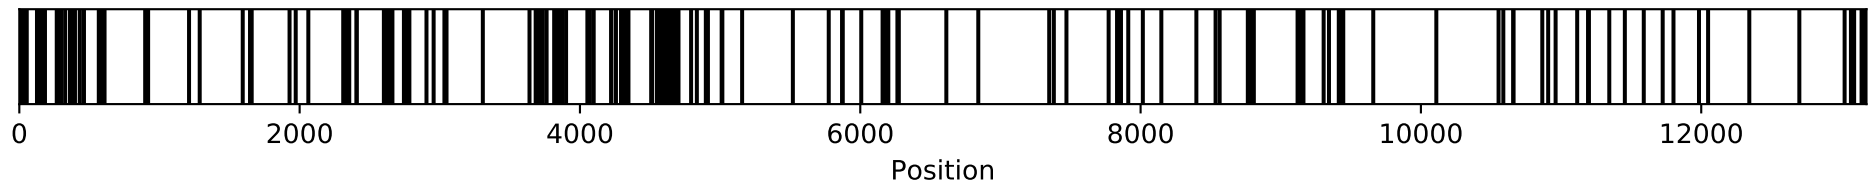

MA1 vs MM2  
Number of differences: 246

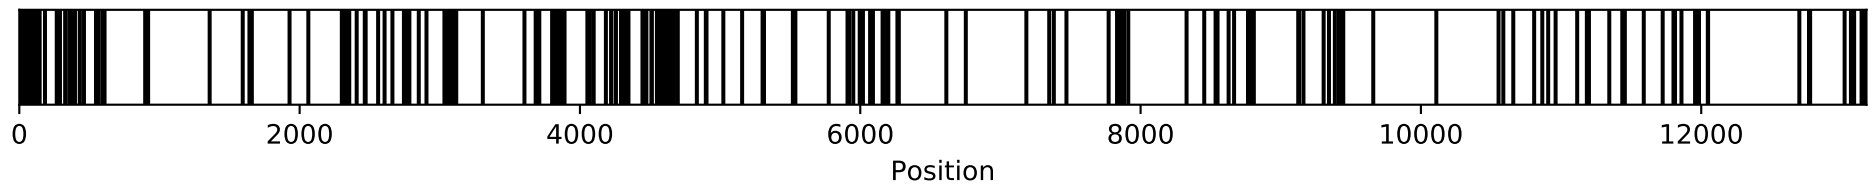

MA2 vs MM1  
Number of differences: 126

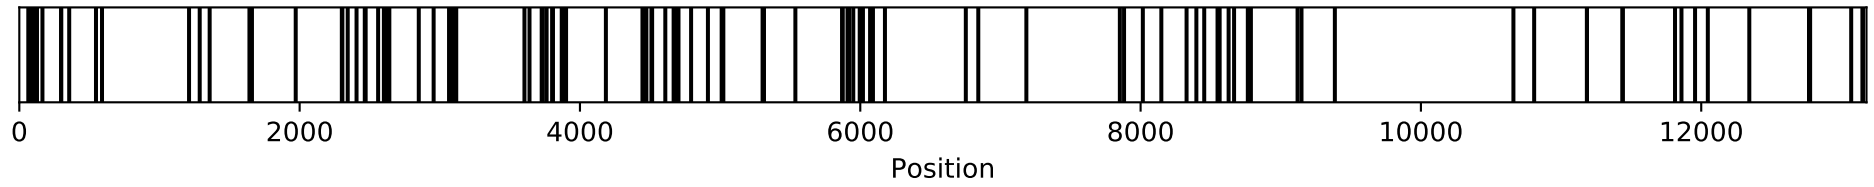

MA2 vs MM2  
Number of differences: 0

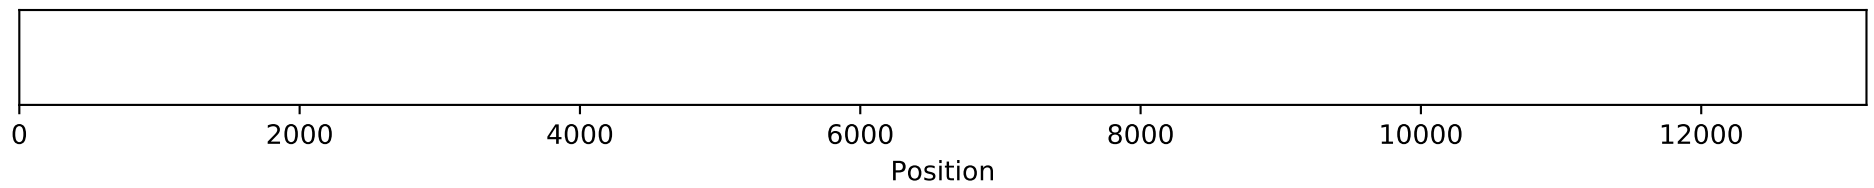

MM1 vs MM2  
Number of differences: 126

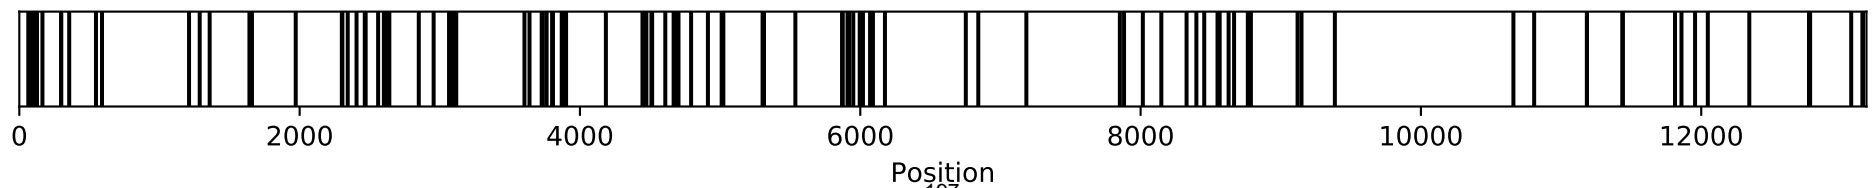

MA1 vs MA2  
Number of differences: 267

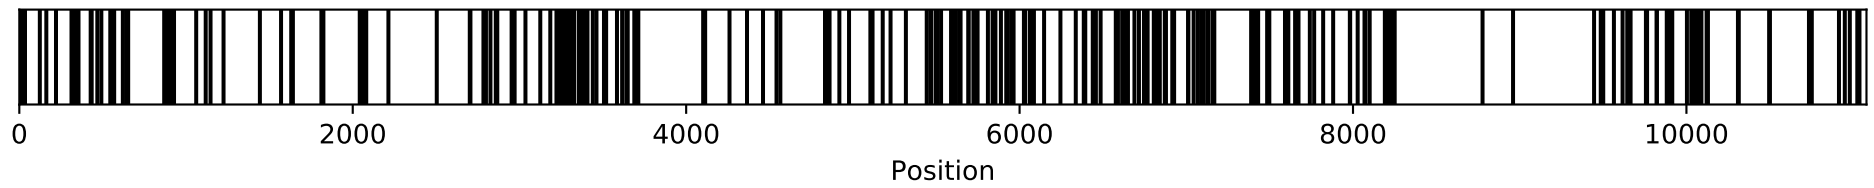

MA1 vs MM1  
Number of differences: 268

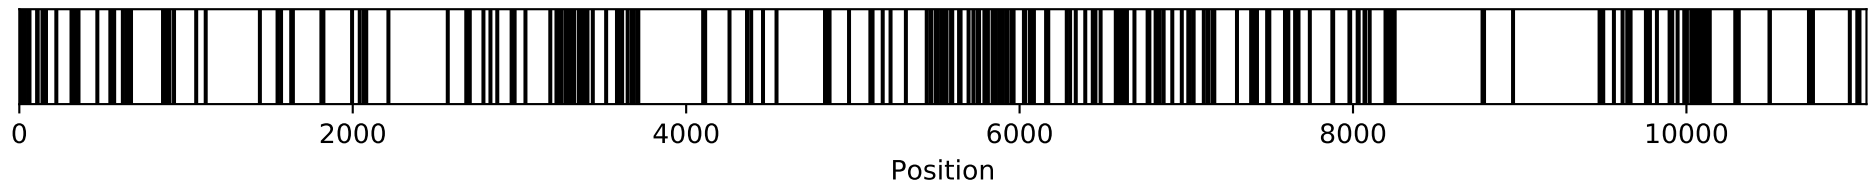

MA1 vs MM2  
Number of differences: 272

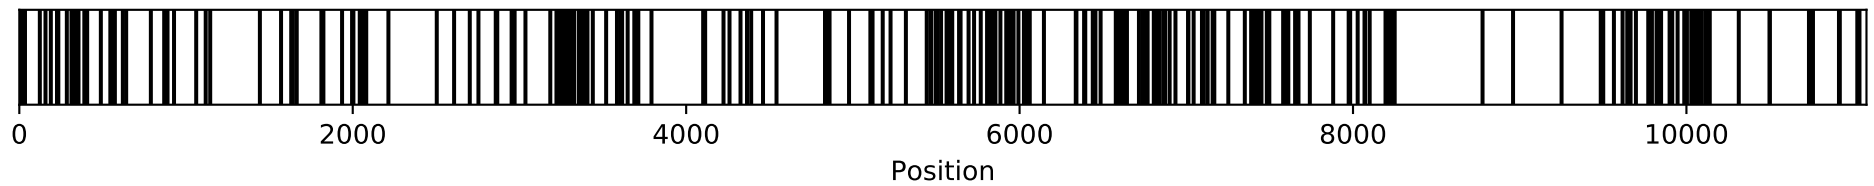

MA2 vs MM1  
Number of differences: 144

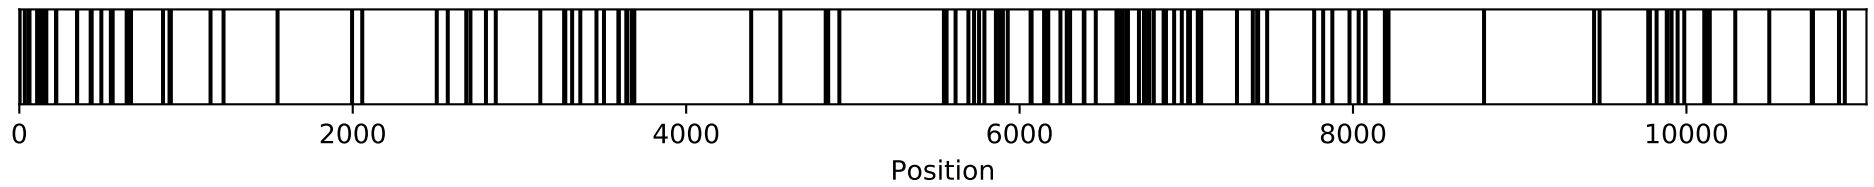

MA2 vs MM2  
Number of differences: 152

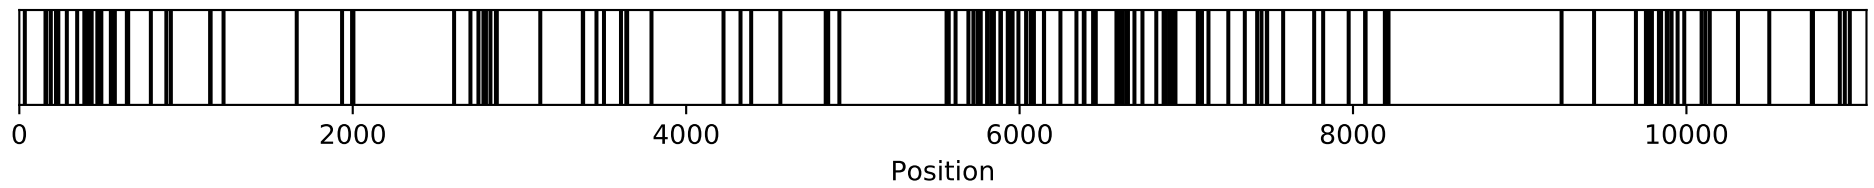

MM1 vs MM2  
Number of differences: 148

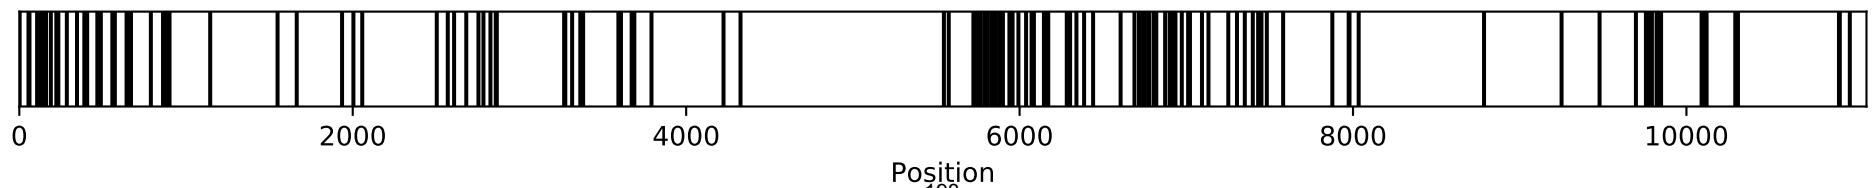

MA1 vs MA2  
Number of differences: 456

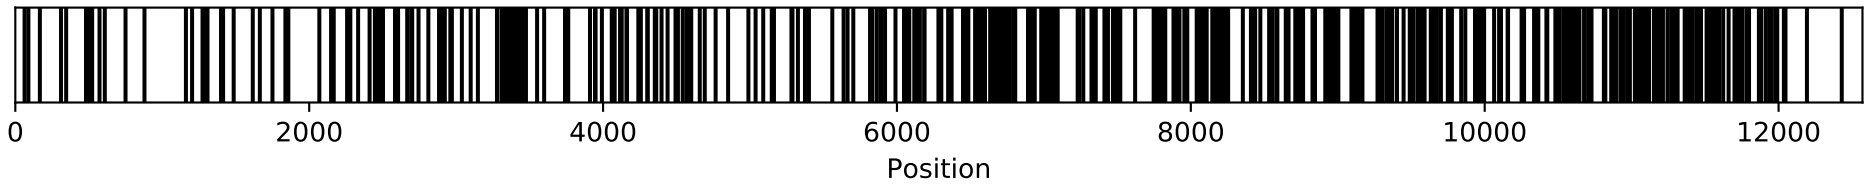

MA1 vs MM1  
Number of differences: 290

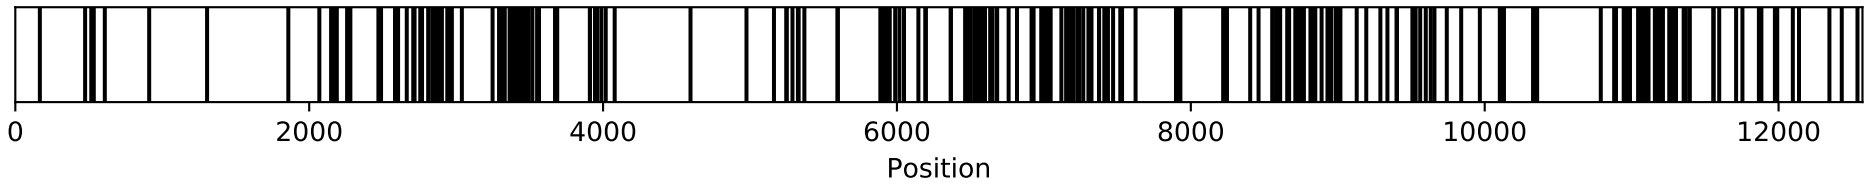

MA1 vs MM2  
Number of differences: 249

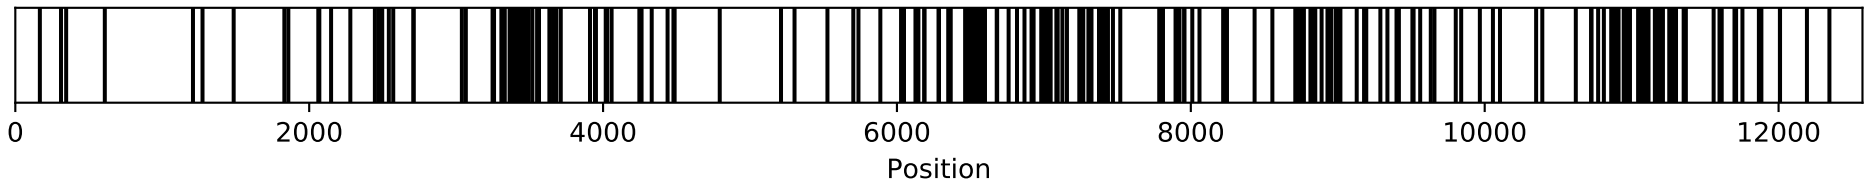

MA2 vs MM1  
Number of differences: 495

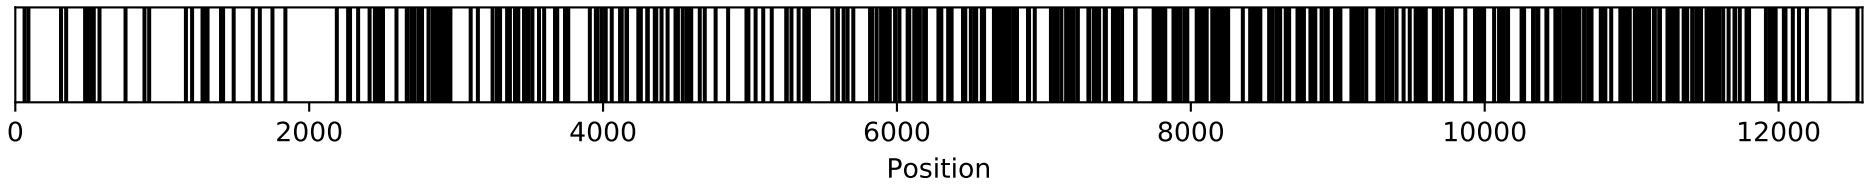

MA2 vs MM2  
Number of differences: 455

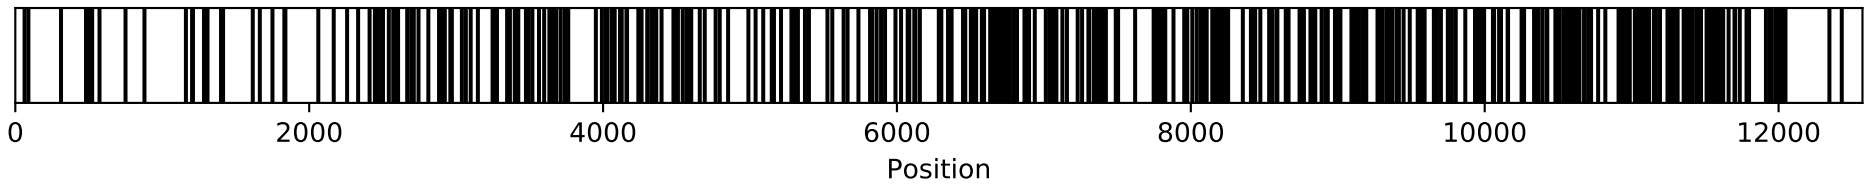

MM1 vs MM2  
Number of differences: 221

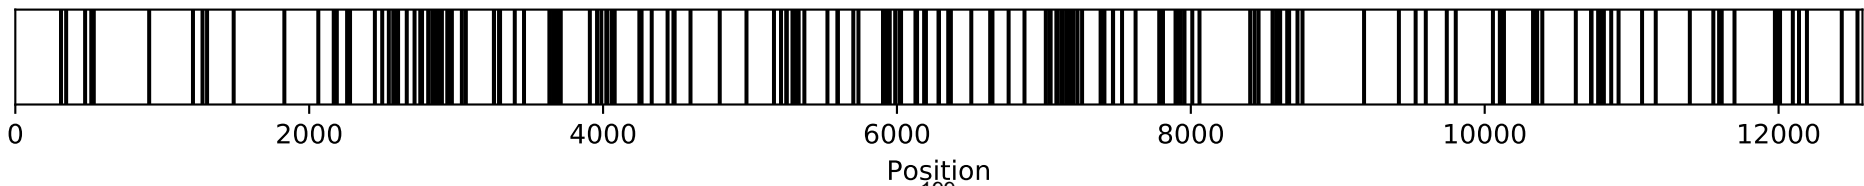

MA1 vs MA2  
Number of differences: 300

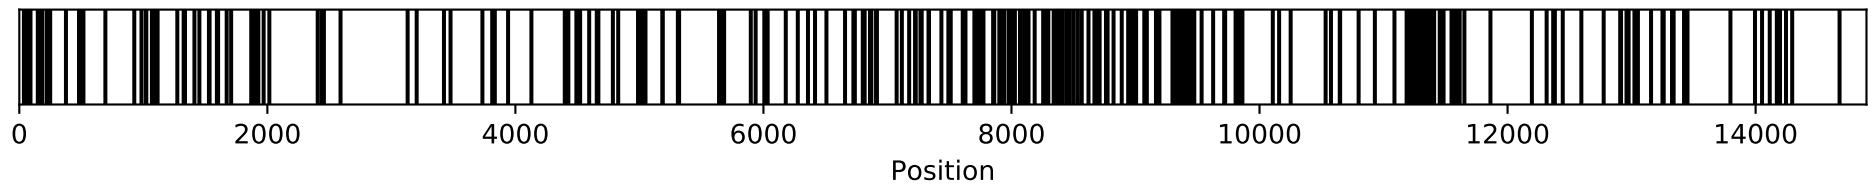

MA1 vs MM1  
Number of differences: 301

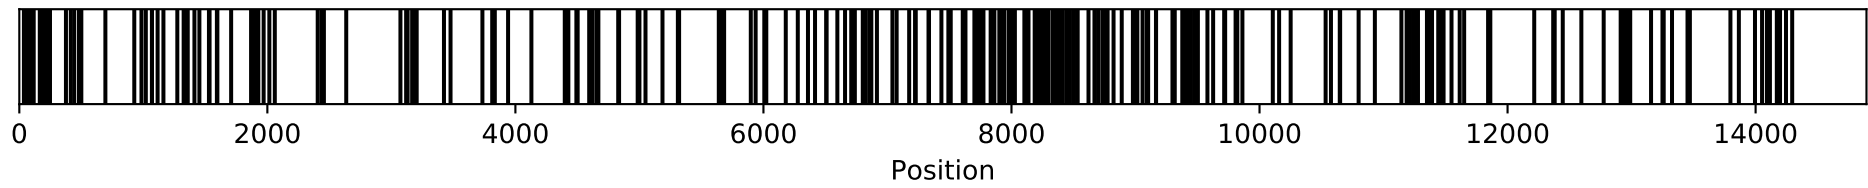

MA1 vs MM2  
Number of differences: 300

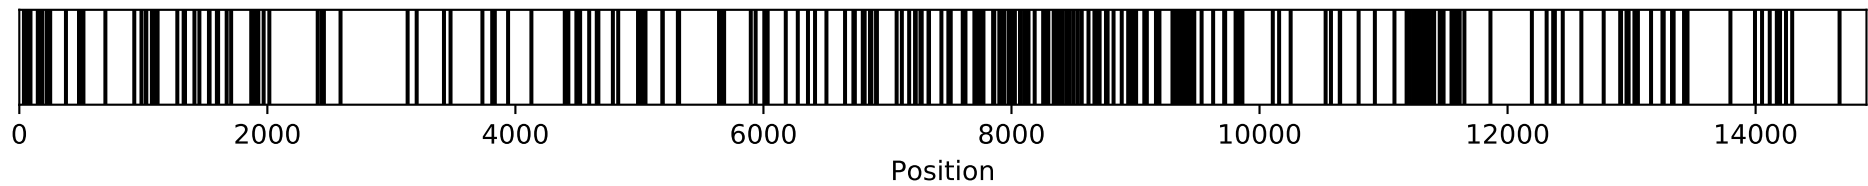

MA2 vs MM1  
Number of differences: 140

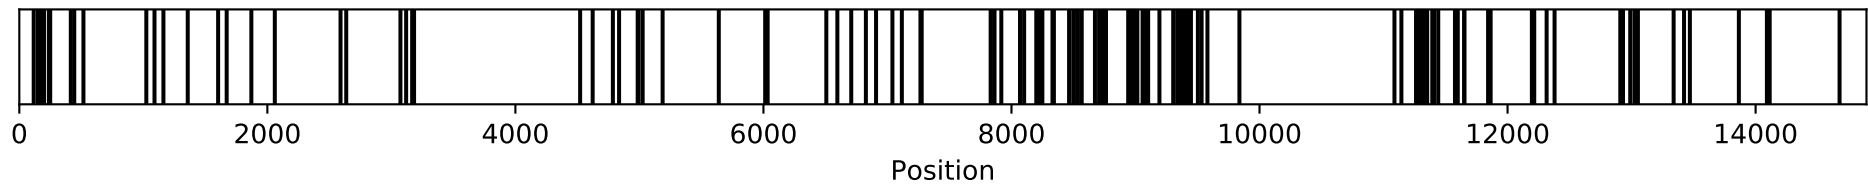

MA2 vs MM2  
Number of differences: 0

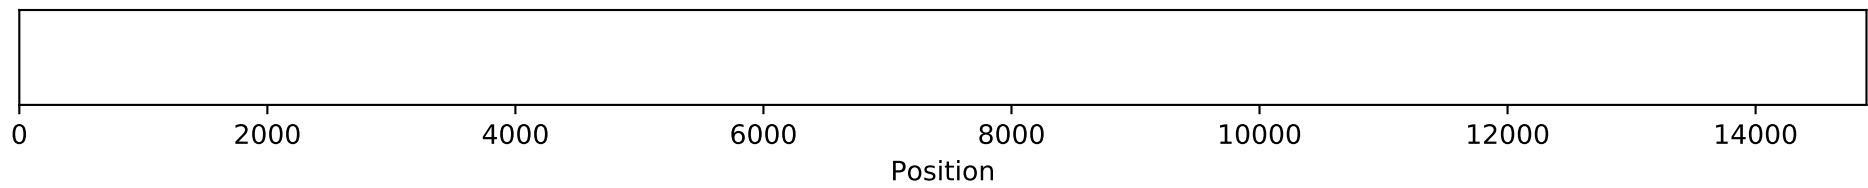

MM1 vs MM2  
Number of differences: 140

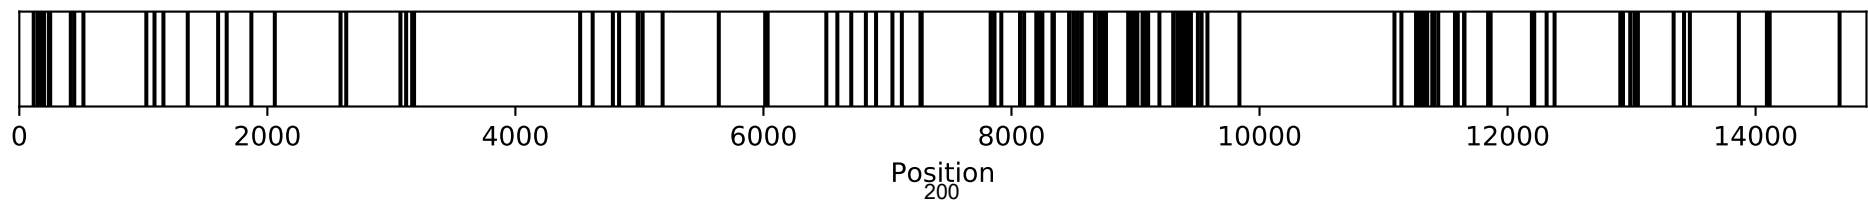

MA1 vs MA2  
Number of differences: 241

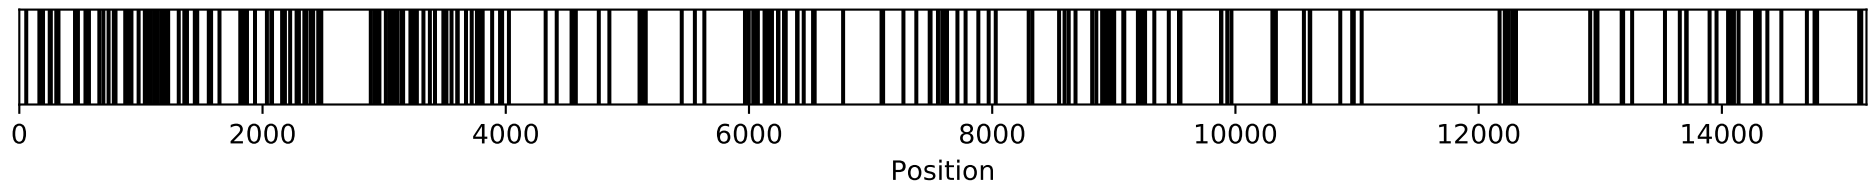

MA1 vs MM1  
Number of differences: 0

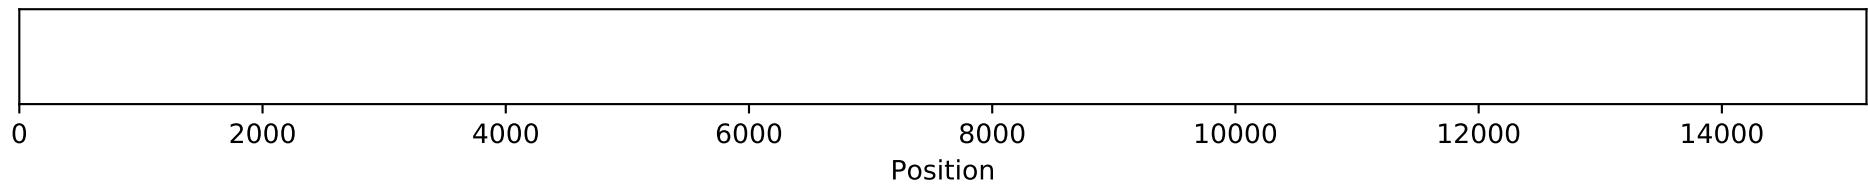

MA1 vs MM2  
Number of differences: 134

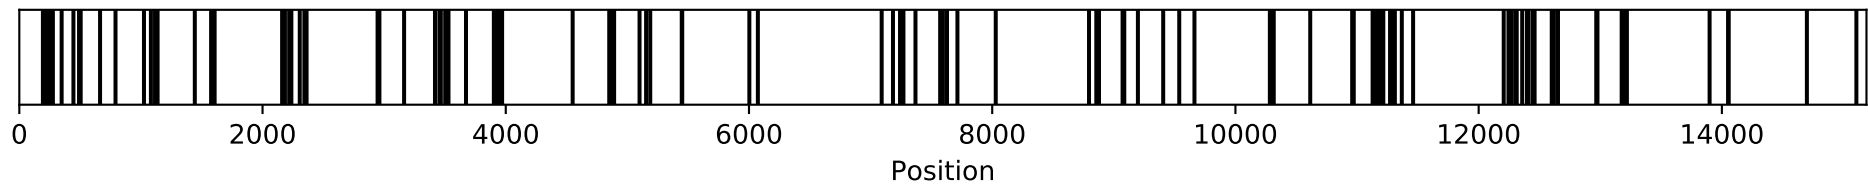

MA2 vs MM1  
Number of differences: 241

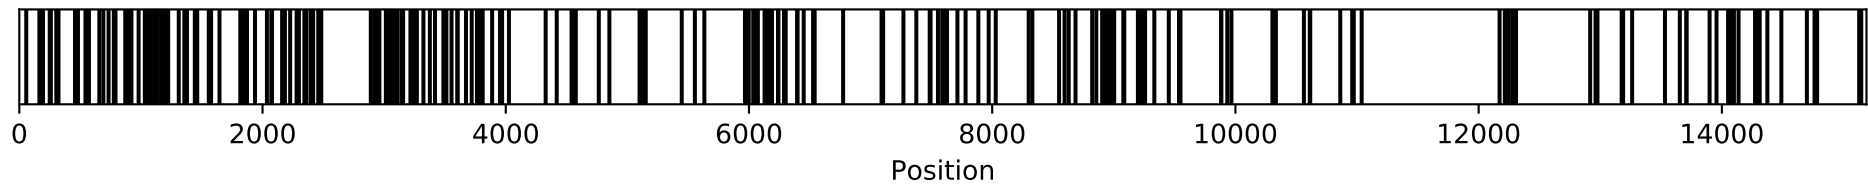

MA2 vs MM2  
Number of differences: 271

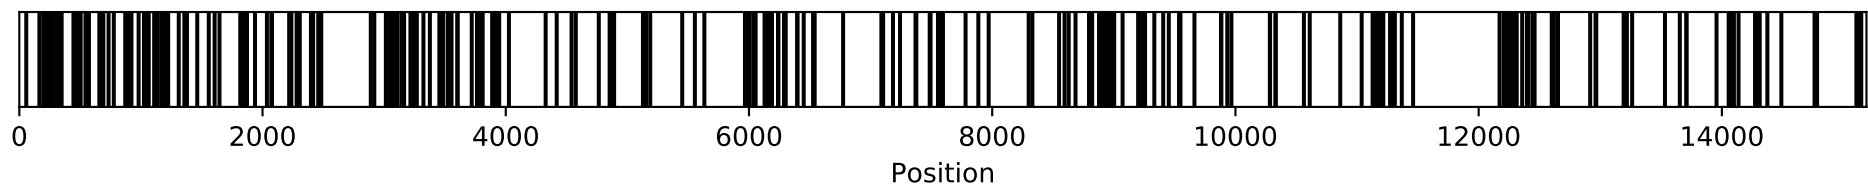

MM1 vs MM2  
Number of differences: 134

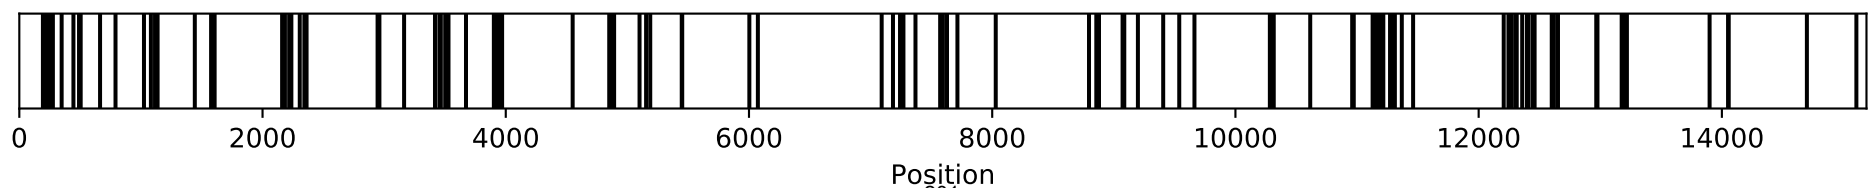

MA1 vs MA2  
Number of differences: 162

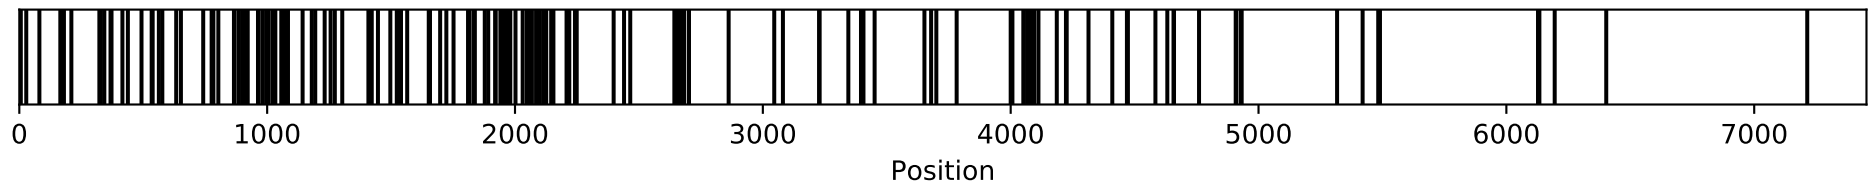

MA1 vs MM1  
Number of differences: 98

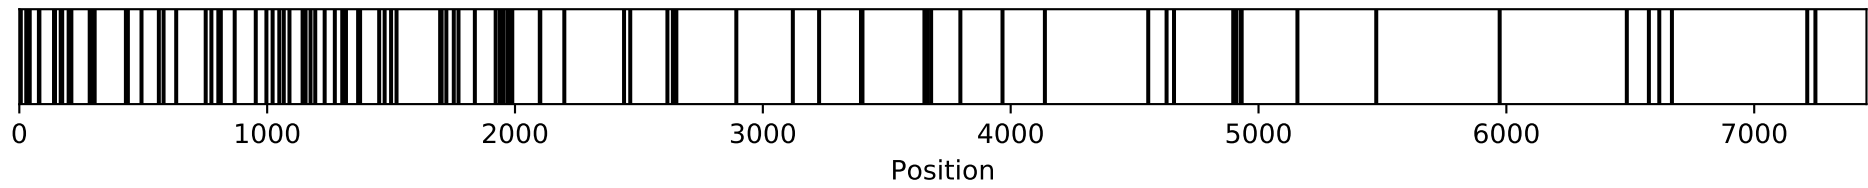

MA1 vs MM2  
Number of differences: 19

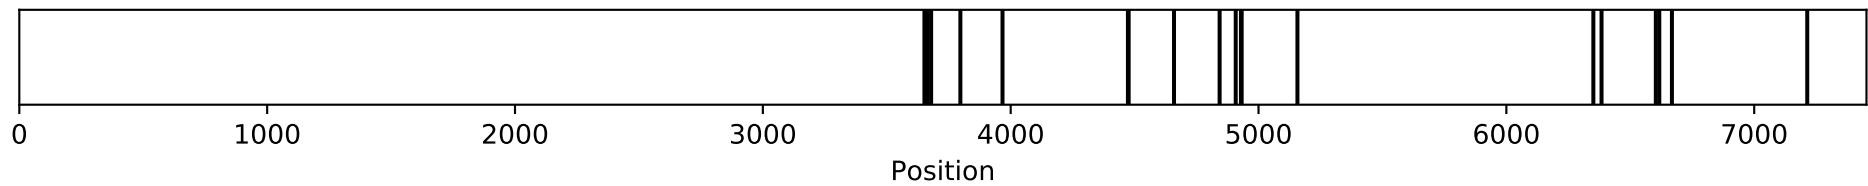

MA2 vs MM1  
Number of differences: 177

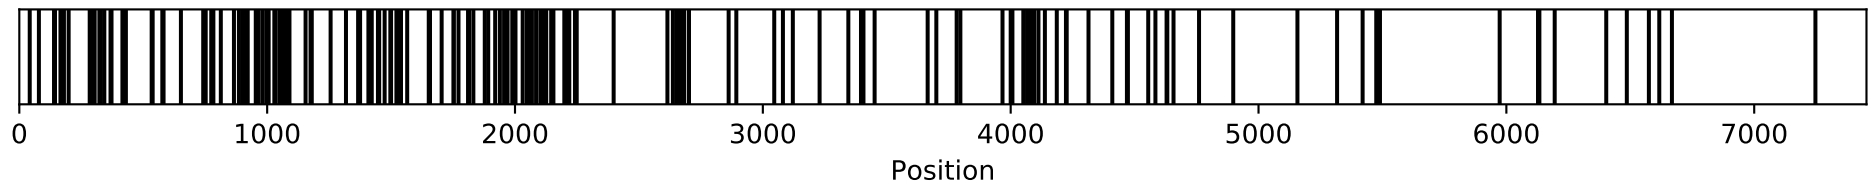

MA2 vs MM2  
Number of differences: 165

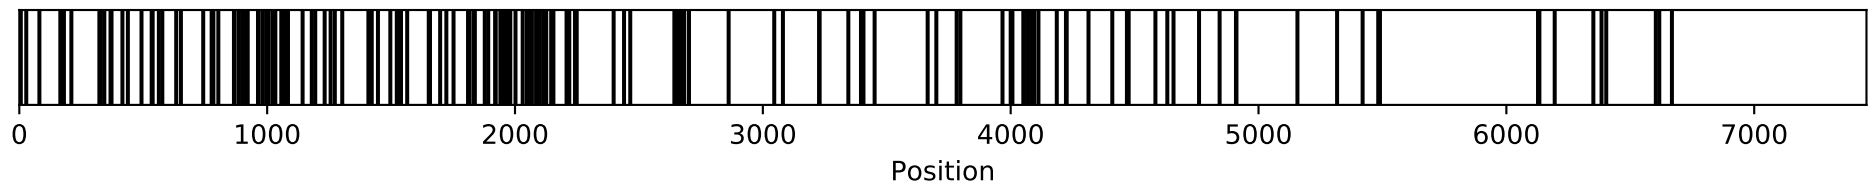

MM1 vs MM2  
Number of differences: 92

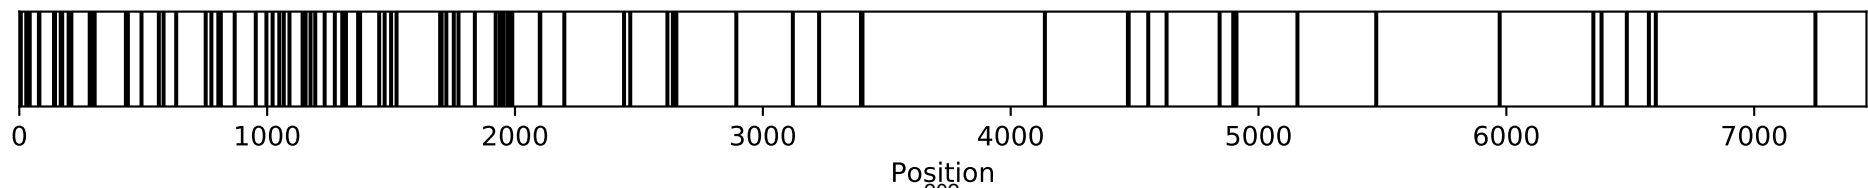



MA1 vs MA2  
Number of differences: 337

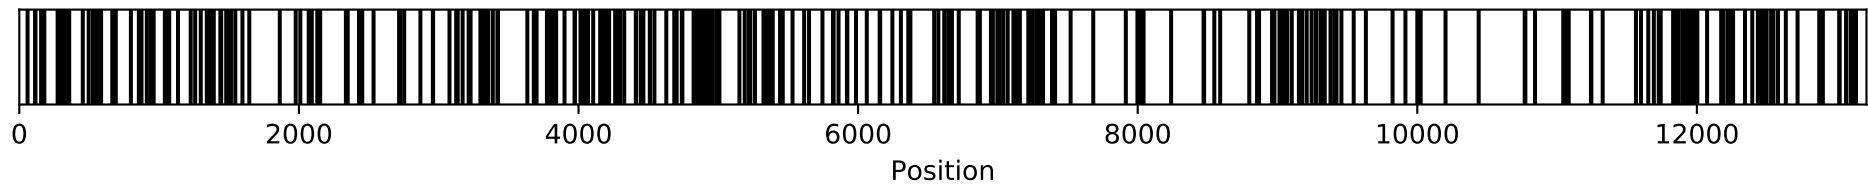

MA1 vs MM1  
Number of differences: 337

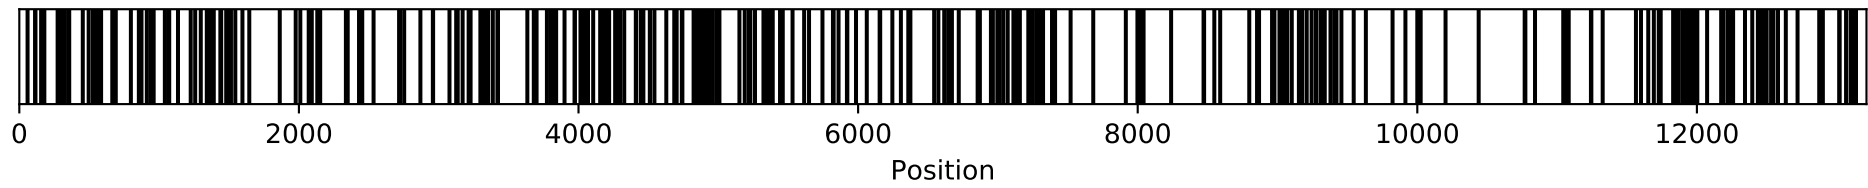

MA1 vs MM2  
Number of differences: 351

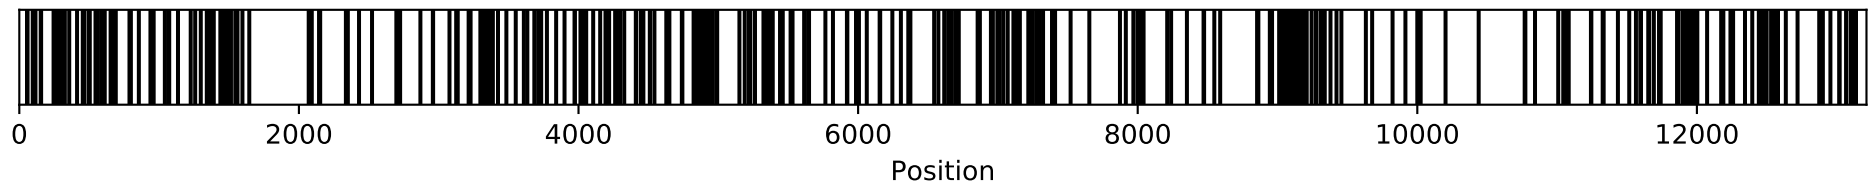

MA2 vs MM1  
Number of differences: 0

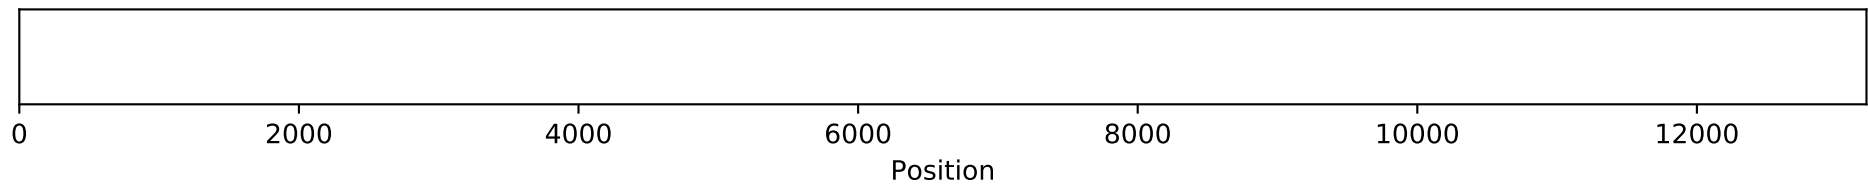

MA2 vs MM2  
Number of differences: 129

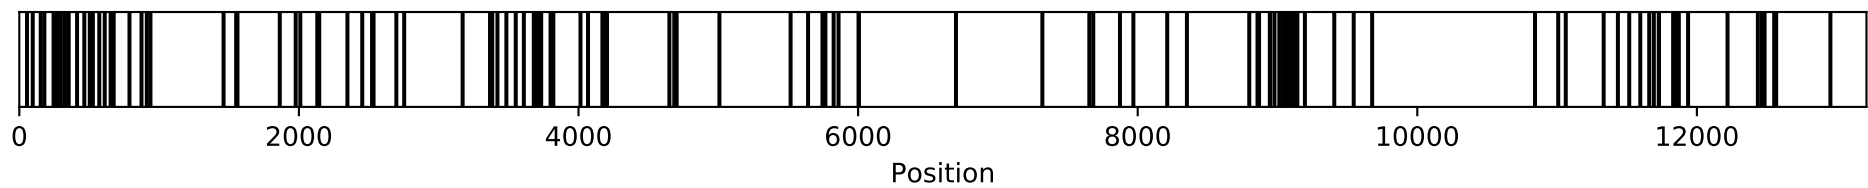

MM1 vs MM2  
Number of differences: 129

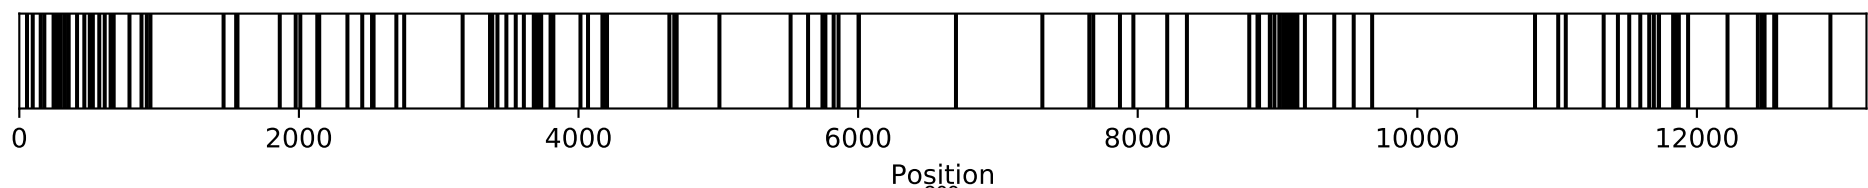

MA1 vs MA2  
Number of differences: 204

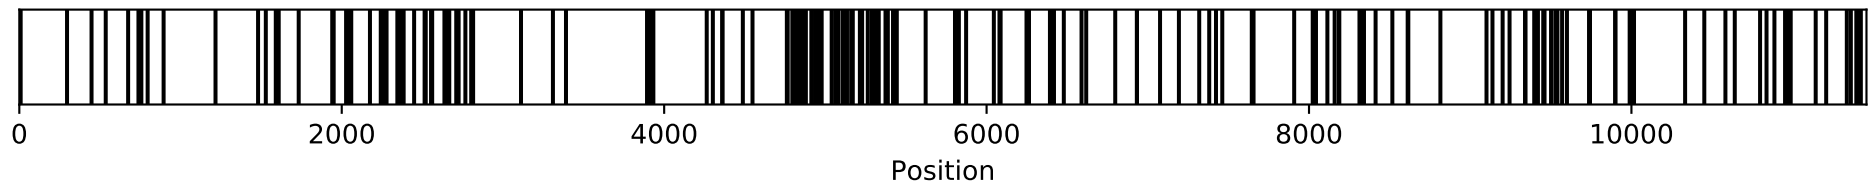

MA1 vs MM1  
Number of differences: 200

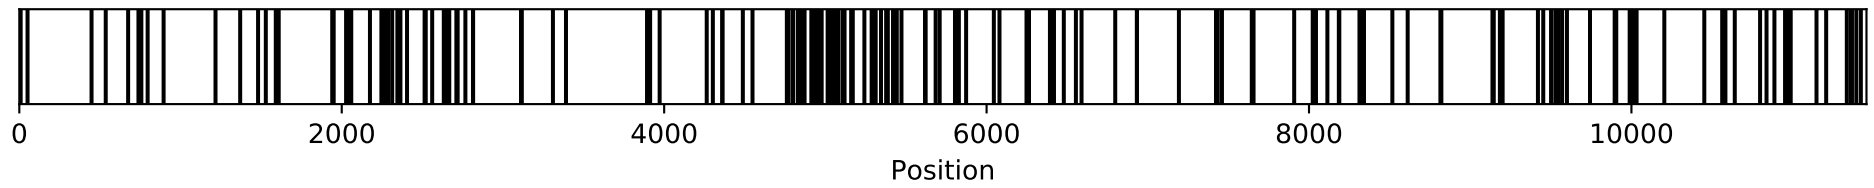

MA1 vs MM2  
Number of differences: 195

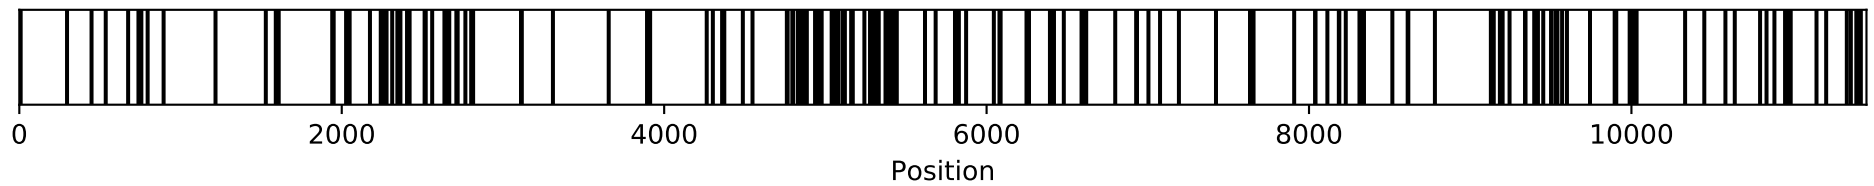

MA2 vs MM1  
Number of differences: 92

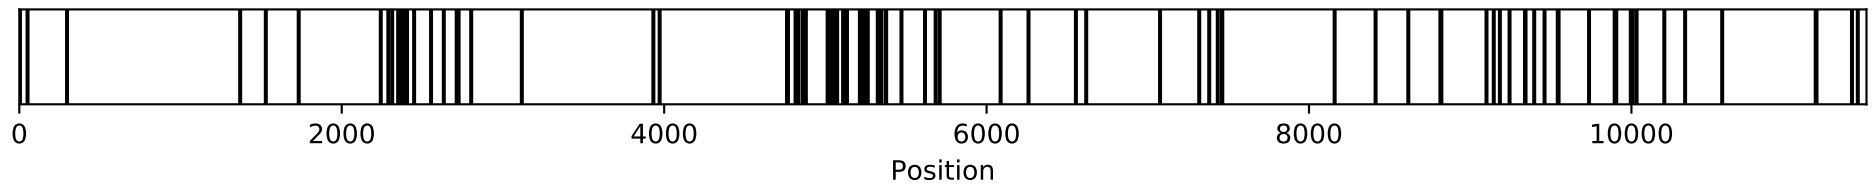

MA2 vs MM2  
Number of differences: 76

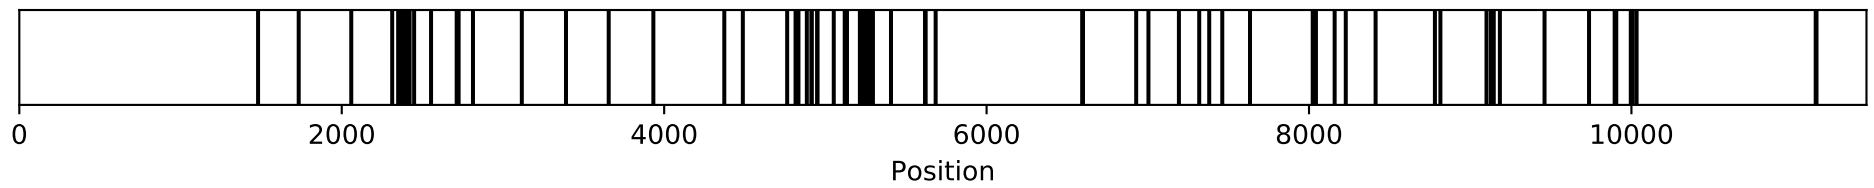

MM1 vs MM2  
Number of differences: 81

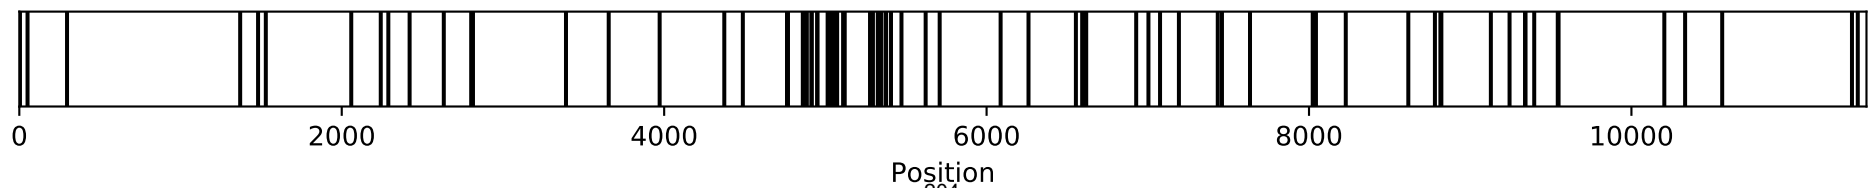

MA1 vs MA2  
Number of differences: 85

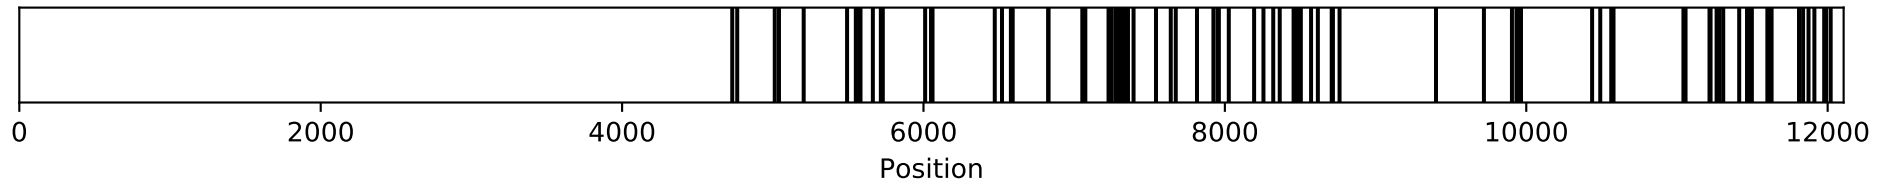

MA1 vs MM1  
Number of differences: 86

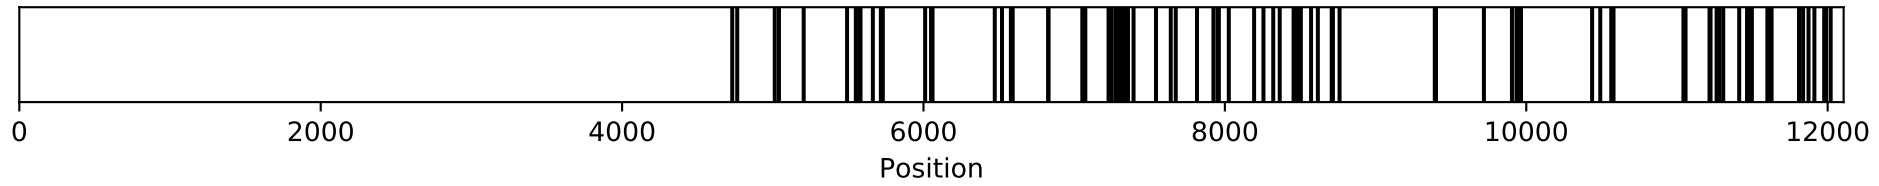

MA1 vs MM2  
Number of differences: 173

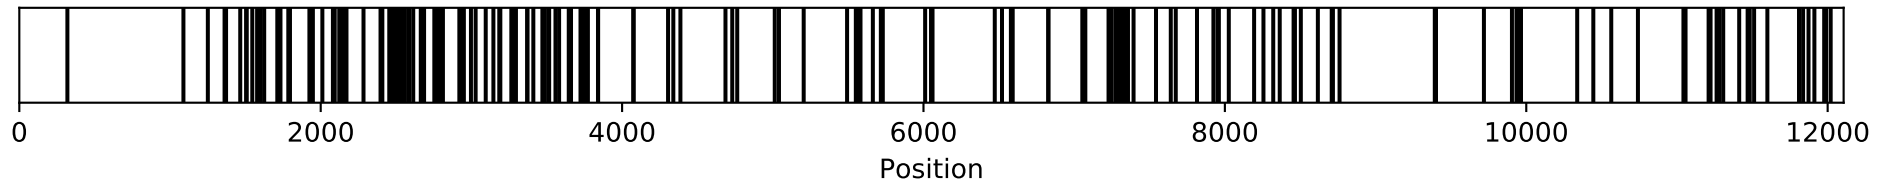

MA2 vs MM1  
Number of differences: 1

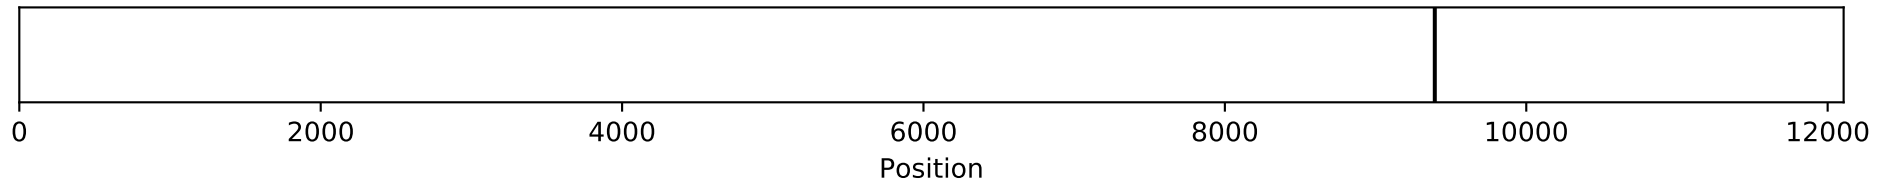

MA2 vs MM2  
Number of differences: 108

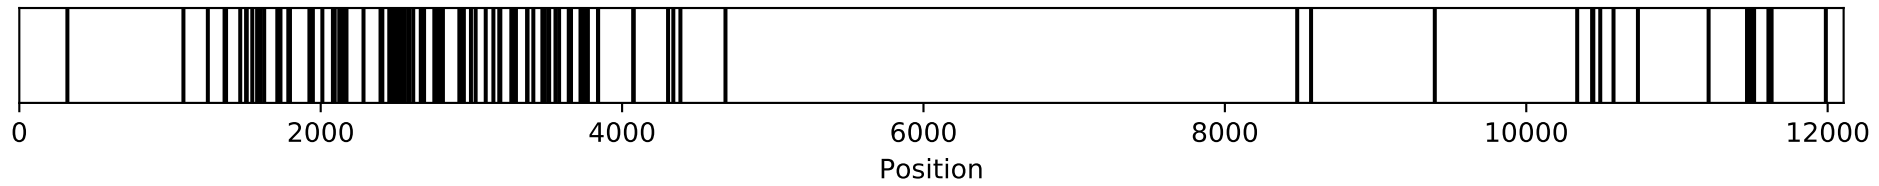

MM1 vs MM2  
Number of differences: 107

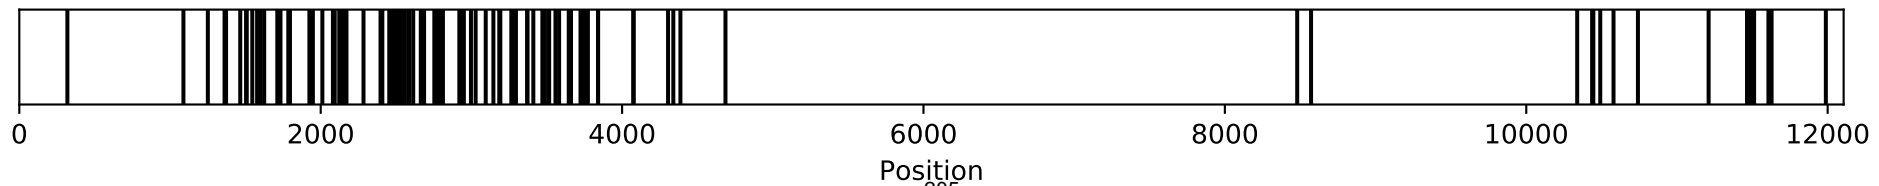

MA1 vs MA2  
Number of differences: 176

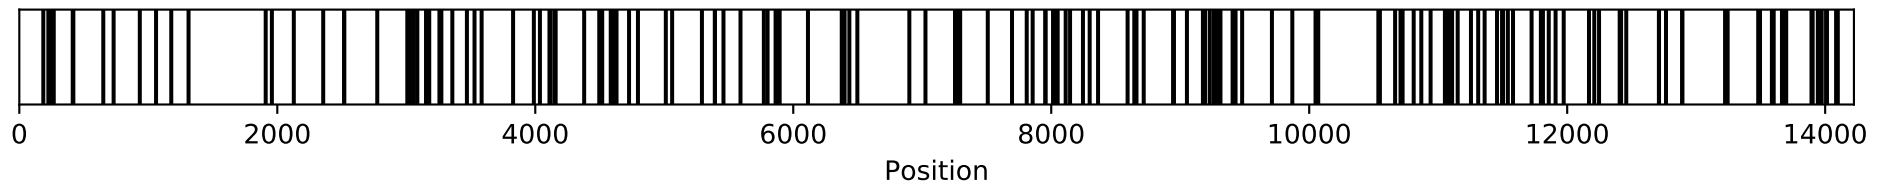

MA1 vs MM1  
Number of differences: 168

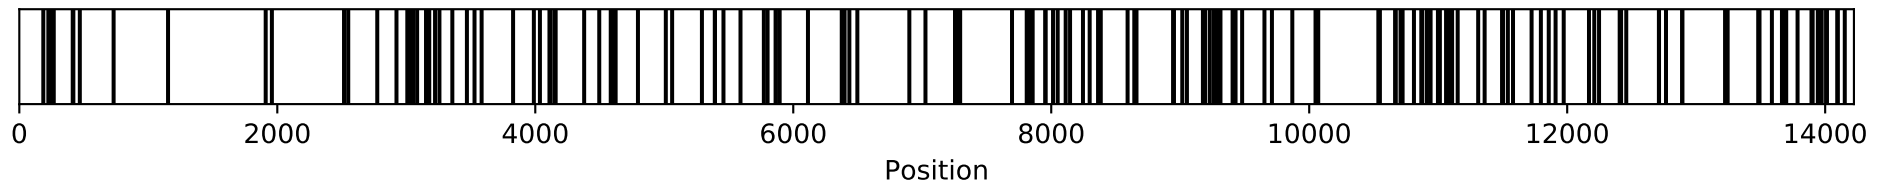

MA1 vs MM2  
Number of differences: 176

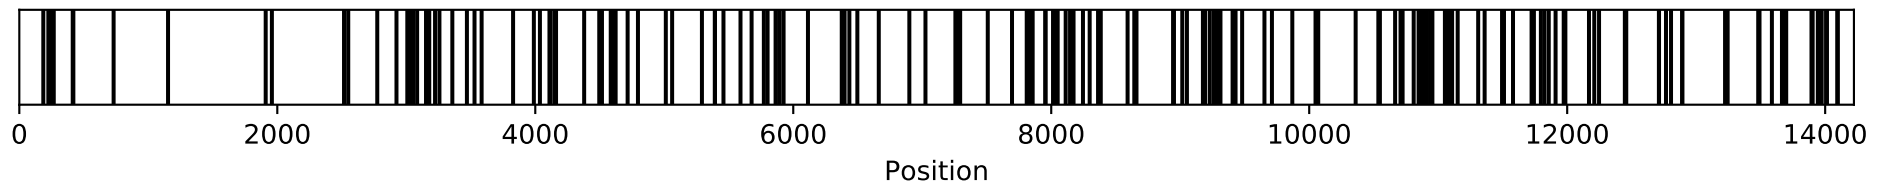

MA2 vs MM1  
Number of differences: 48

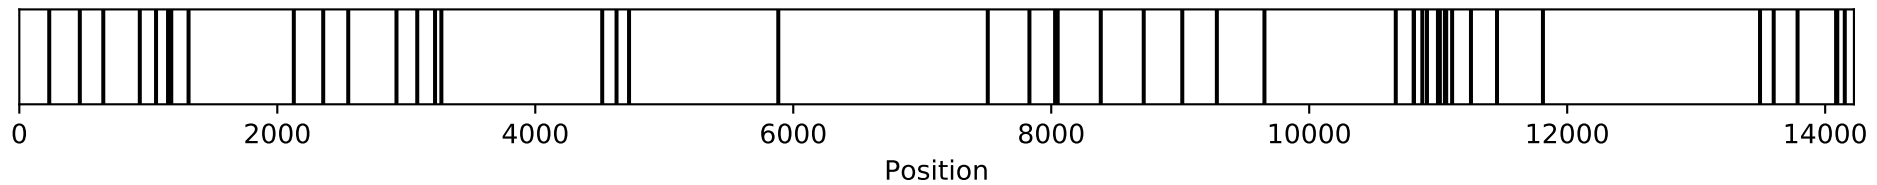

MA2 vs MM2  
Number of differences: 57

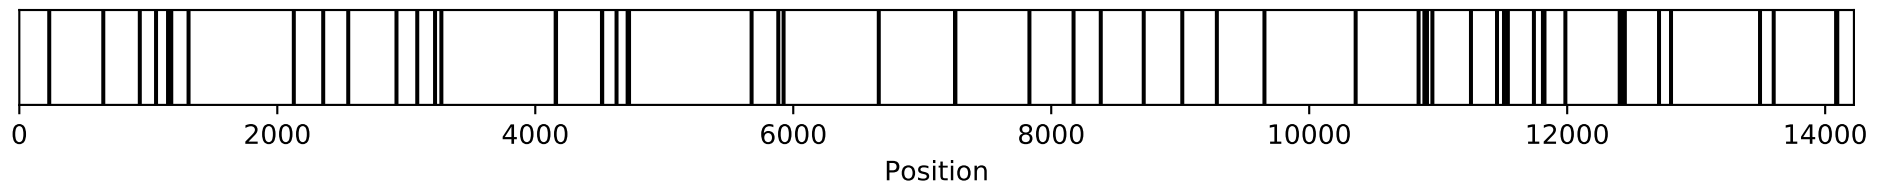

MM1 vs MM2  
Number of differences: 39

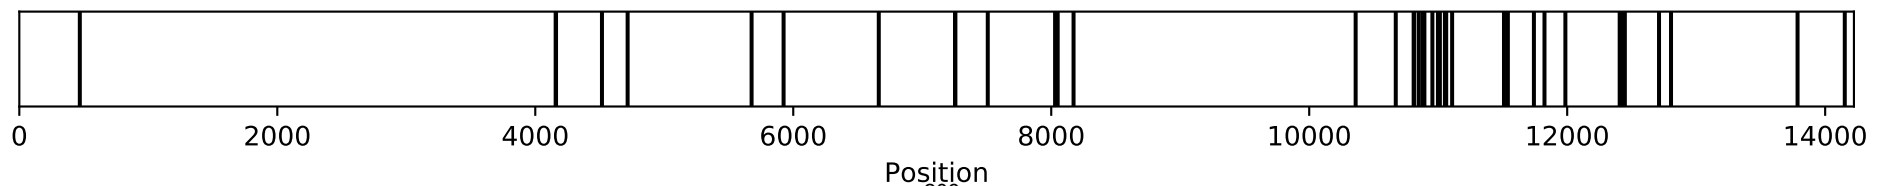

MA1 vs MA2  
Number of differences: 775

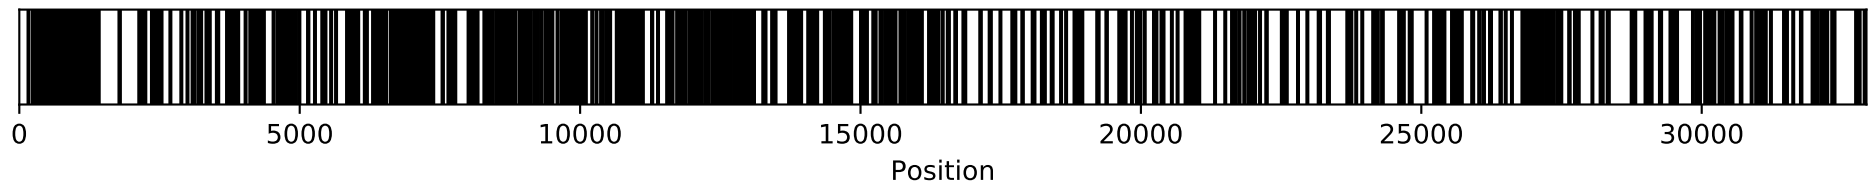

MA1 vs MM1  
Number of differences: 249

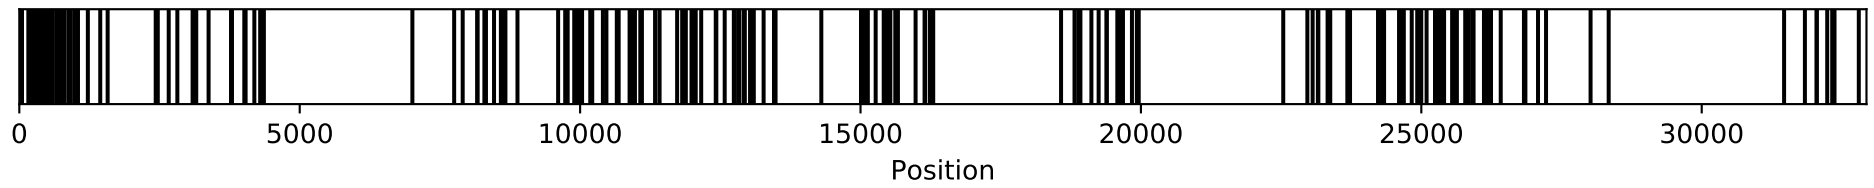

MA1 vs MM2  
Number of differences: 404

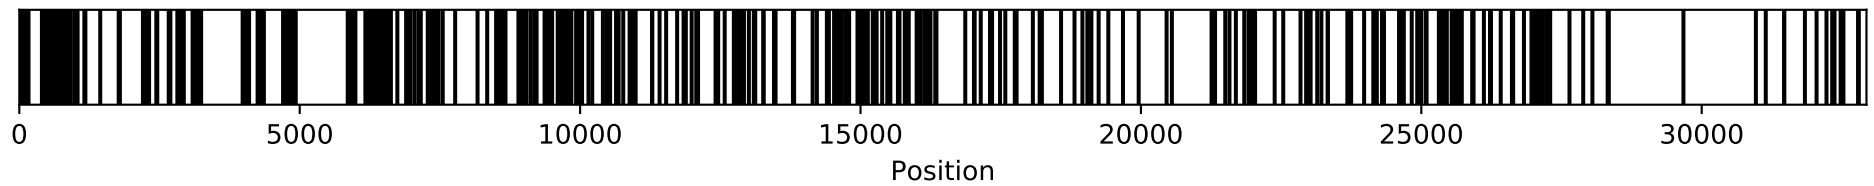

MA2 vs MM1  
Number of differences: 783

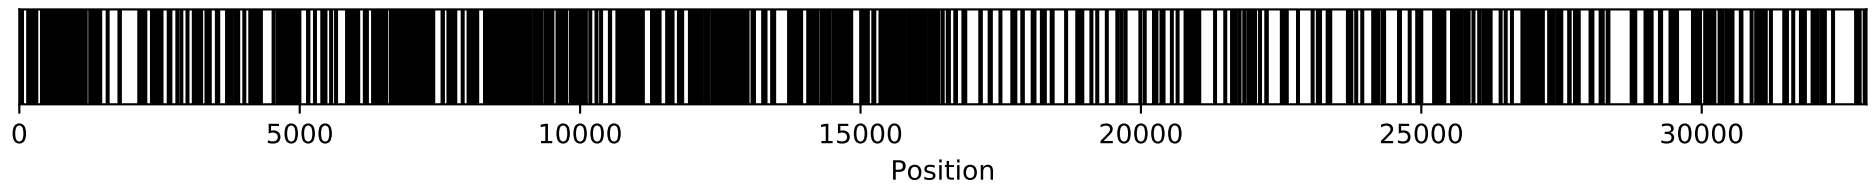

MA2 vs MM2  
Number of differences: 782

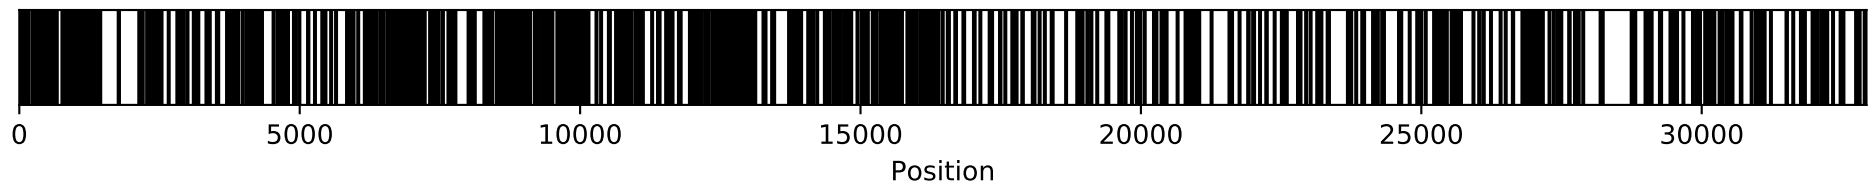

MM1 vs MM2  
Number of differences: 431

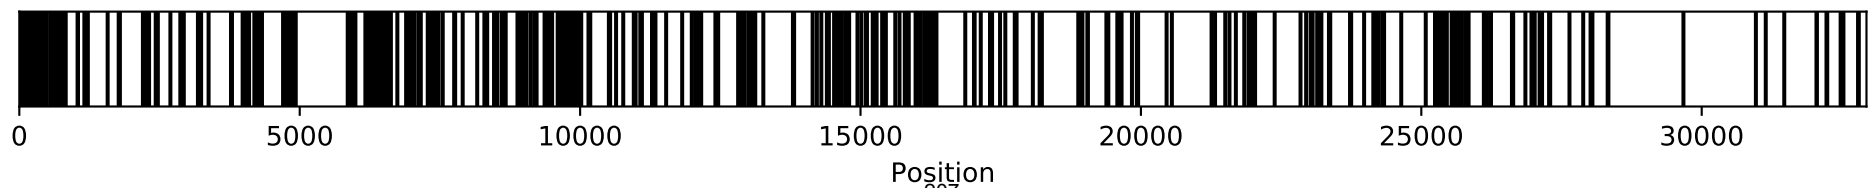

MA1 vs MA2  
Number of differences: 262

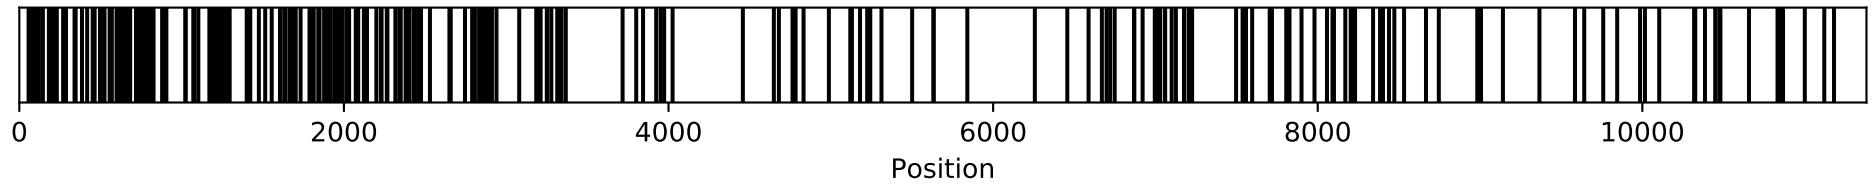

MA1 vs MM1  
Number of differences: 0

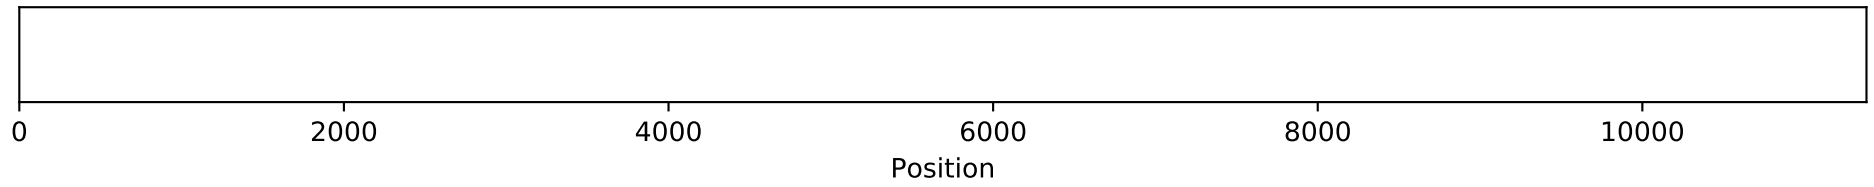

MA1 vs MM2  
Number of differences: 10

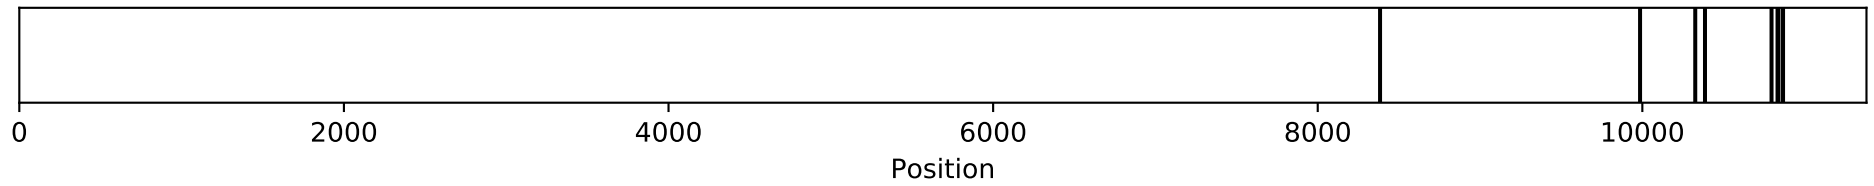

MA2 vs MM1  
Number of differences: 262

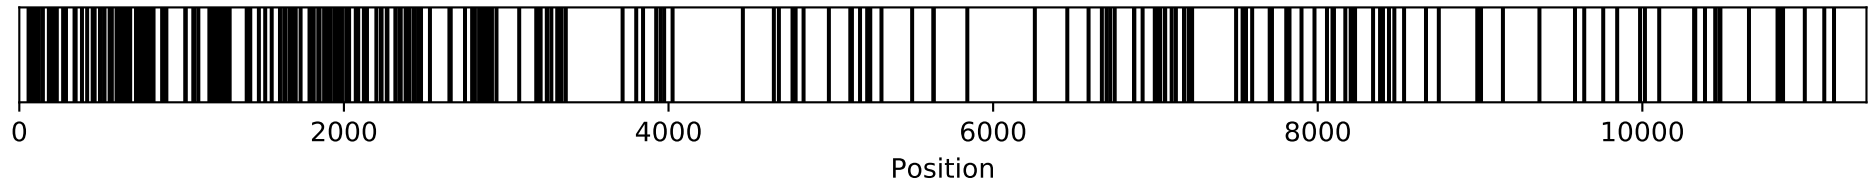

MA2 vs MM2  
Number of differences: 255

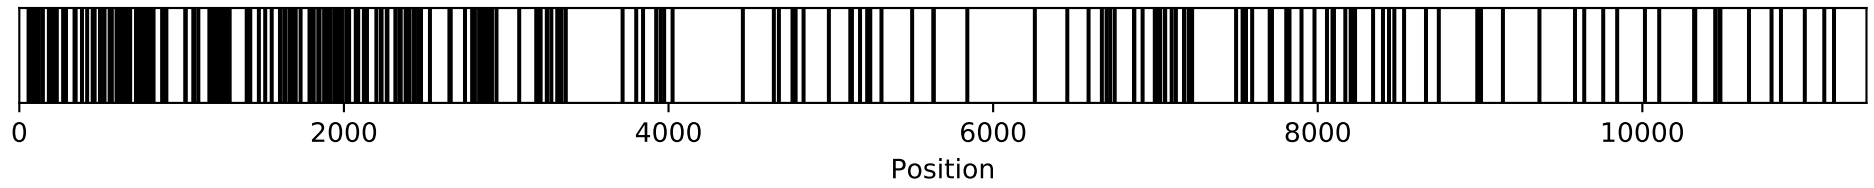

MM1 vs MM2  
Number of differences: 10

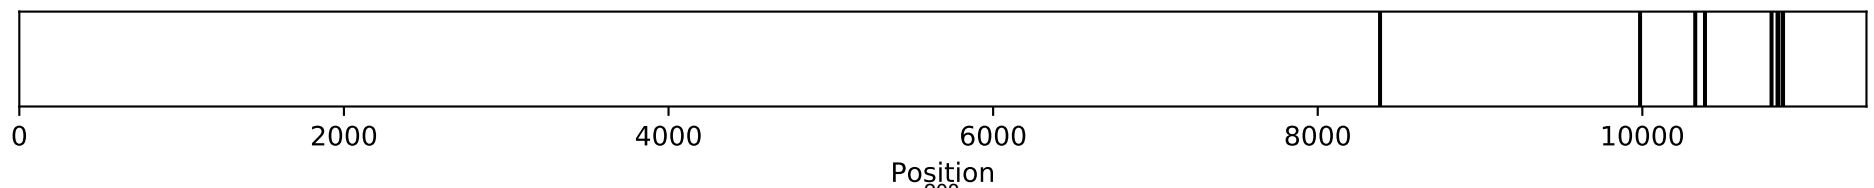

MA1 vs MA2  
Number of differences: 227

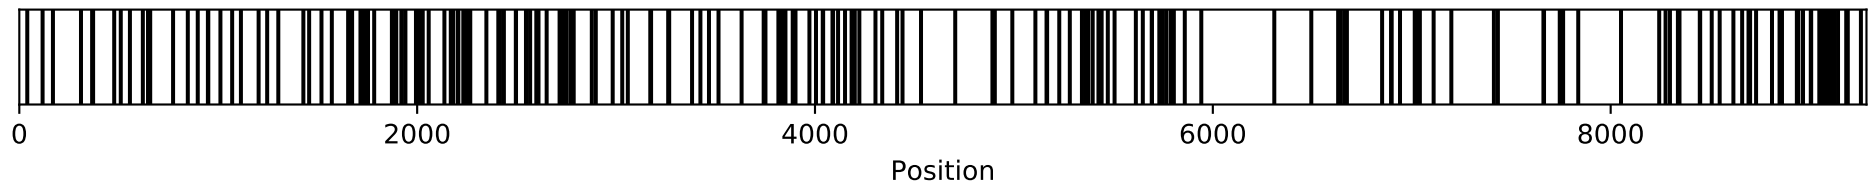

MA1 vs MM1  
Number of differences: 133

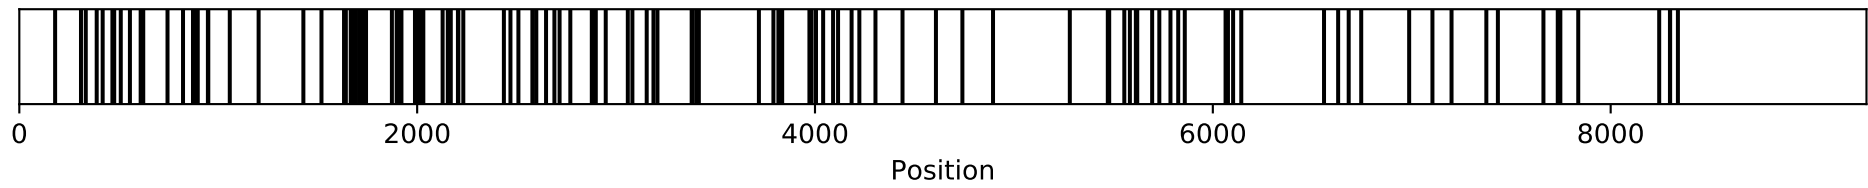

MA1 vs MM2  
Number of differences: 49

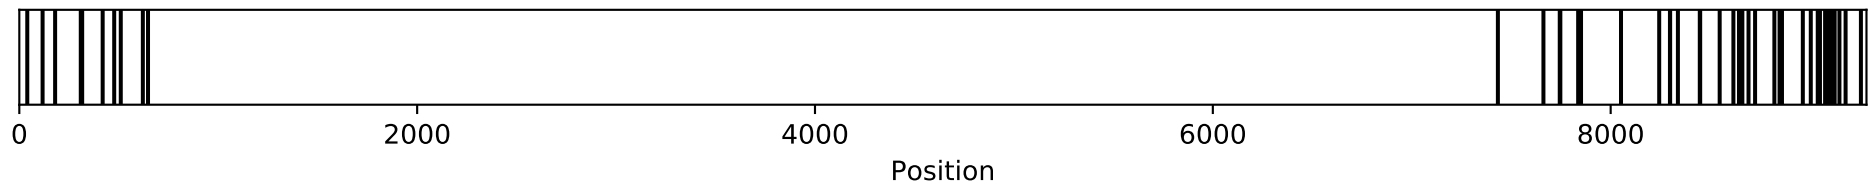

MA2 vs MM1  
Number of differences: 241

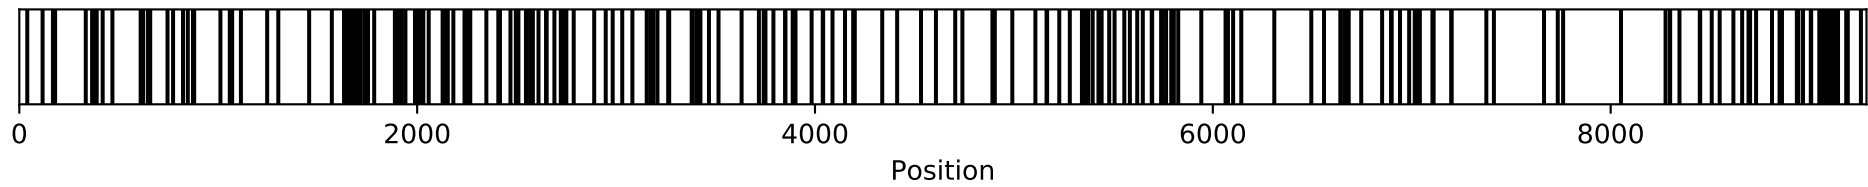

MA2 vs MM2  
Number of differences: 213

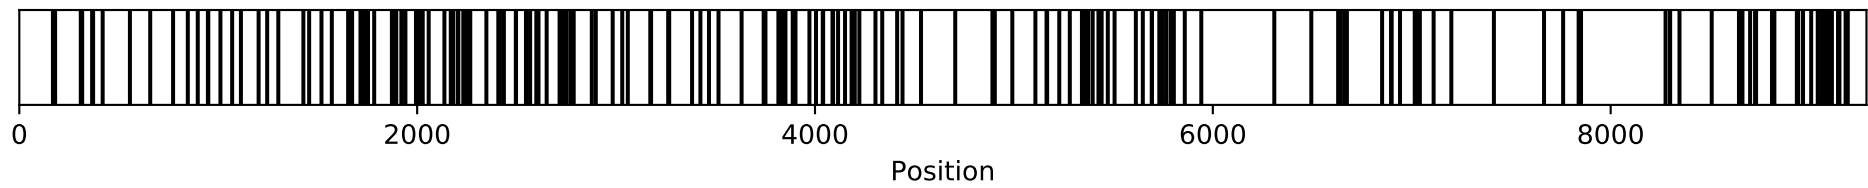

MM1 vs MM2  
Number of differences: 152

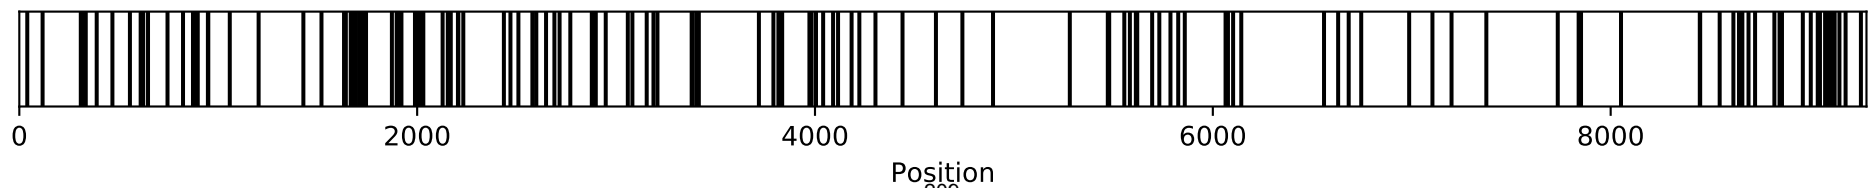

MA1 vs MA2  
Number of differences: 378

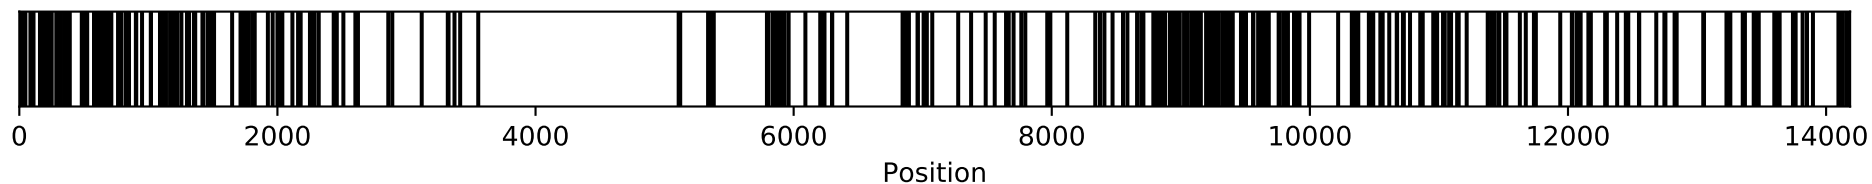

MA1 vs MM1  
Number of differences: 375

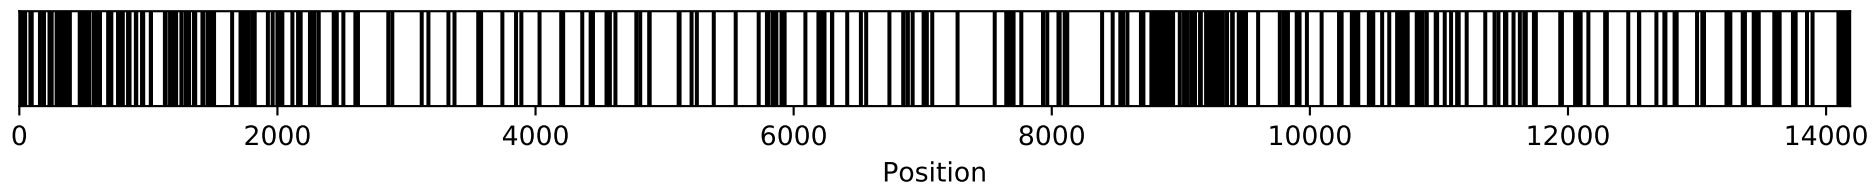

MA1 vs MM2  
Number of differences: 365

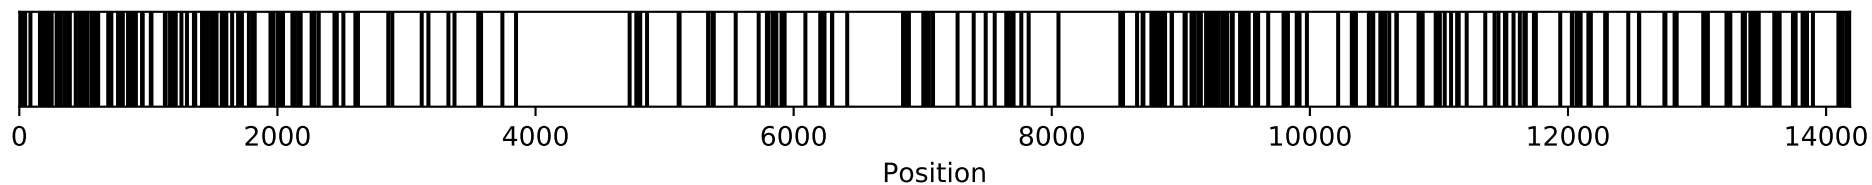

MA2 vs MM1  
Number of differences: 213

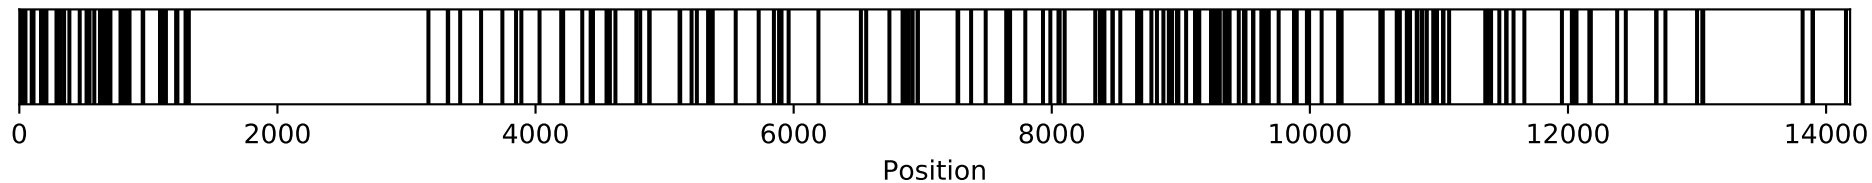

MA2 vs MM2  
Number of differences: 222

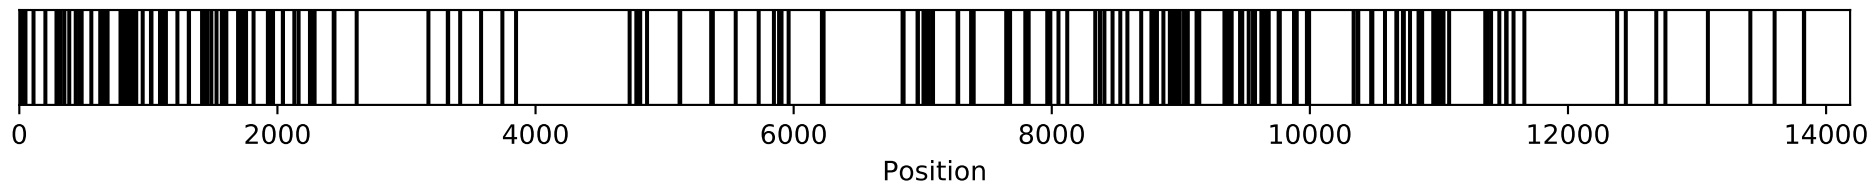

MM1 vs MM2  
Number of differences: 213

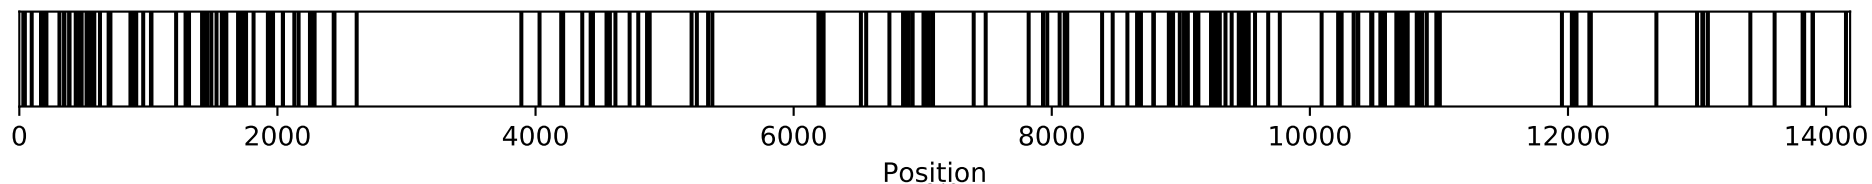



MA1 vs MA2  
Number of differences: 471

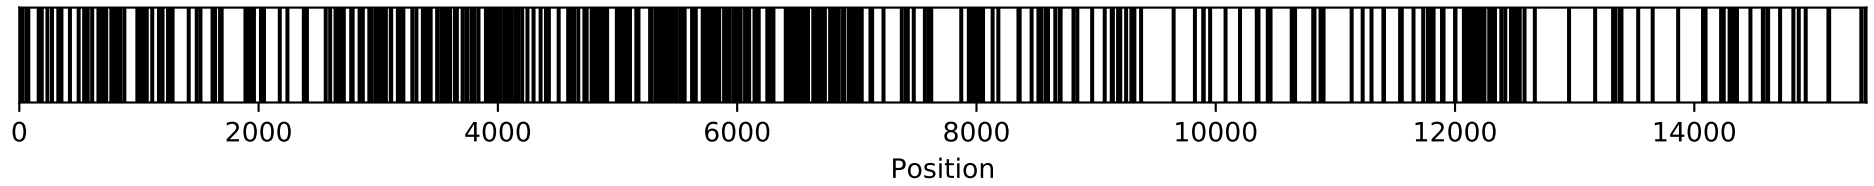

MA1 vs MM1  
Number of differences: 471

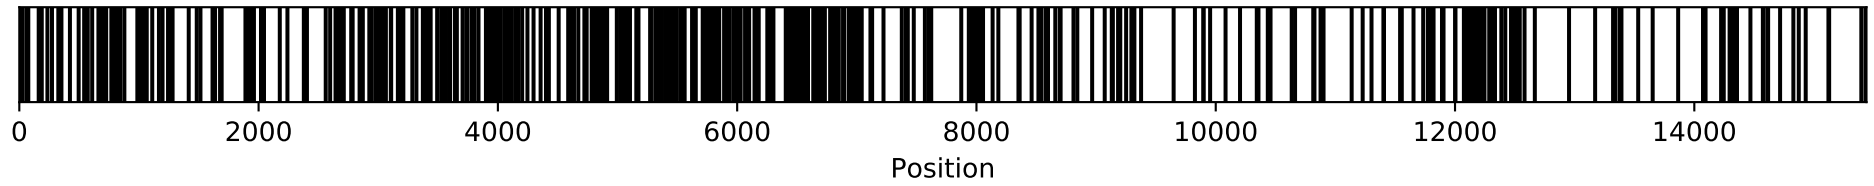

MA1 vs MM2  
Number of differences: 472

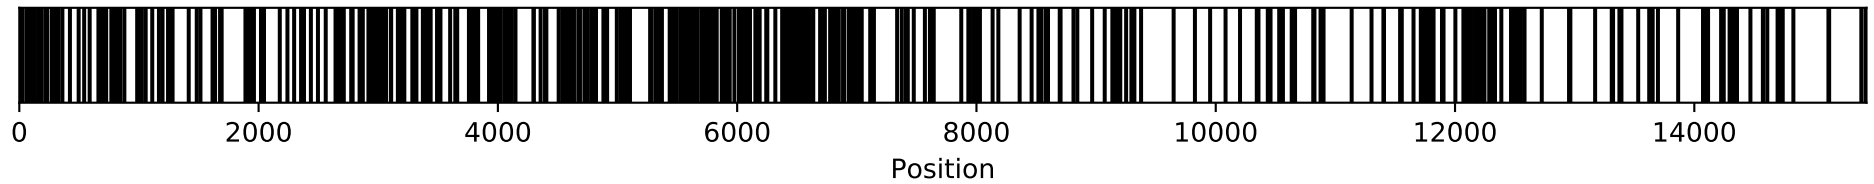

MA2 vs MM1  
Number of differences: 0

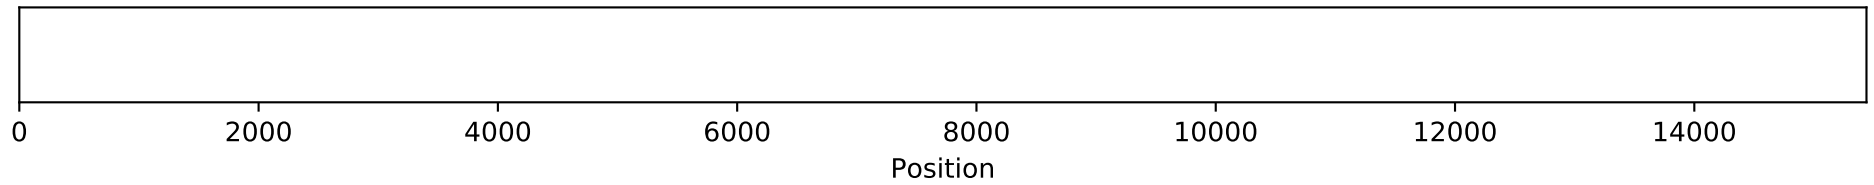

MA2 vs MM2  
Number of differences: 221

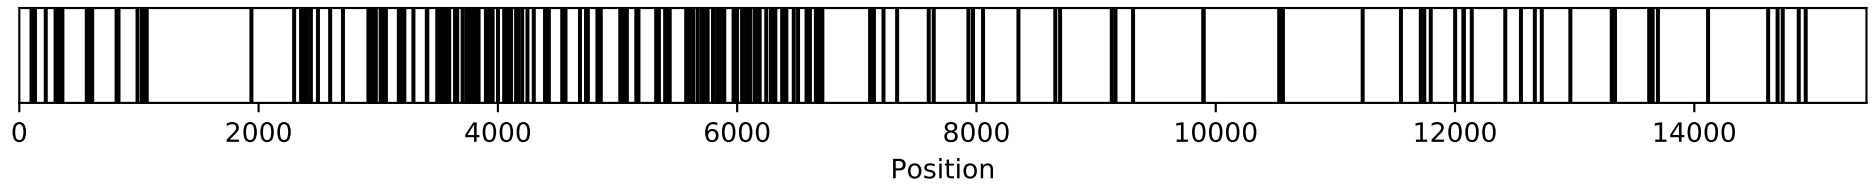

MM1 vs MM2  
Number of differences: 221

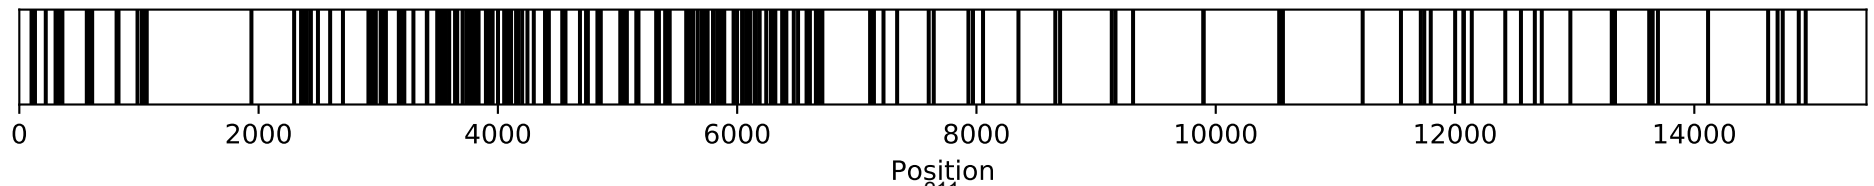

MA1 vs MA2  
Number of differences: 63

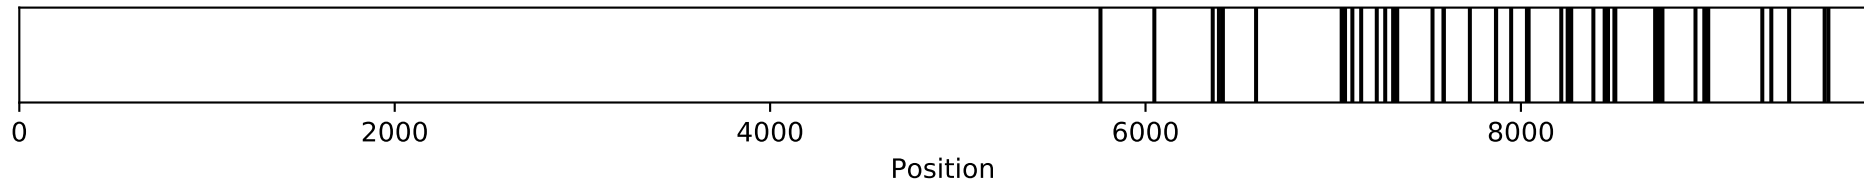

MA1 vs MM1  
Number of differences: 256

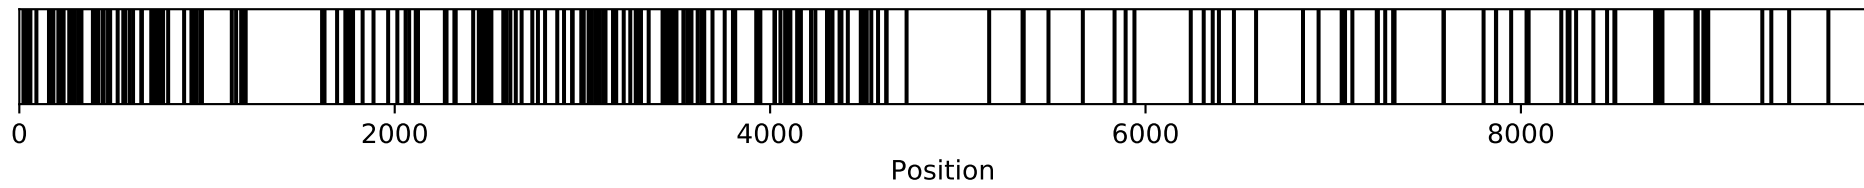

MA1 vs MM2  
Number of differences: 265

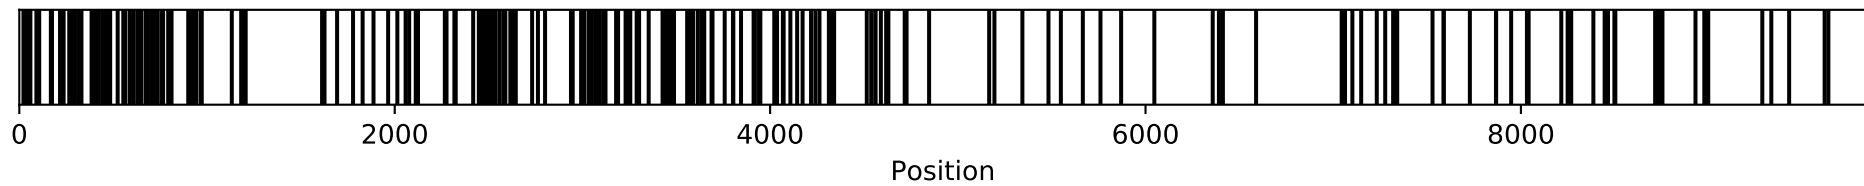

MA2 vs MM1  
Number of differences: 222

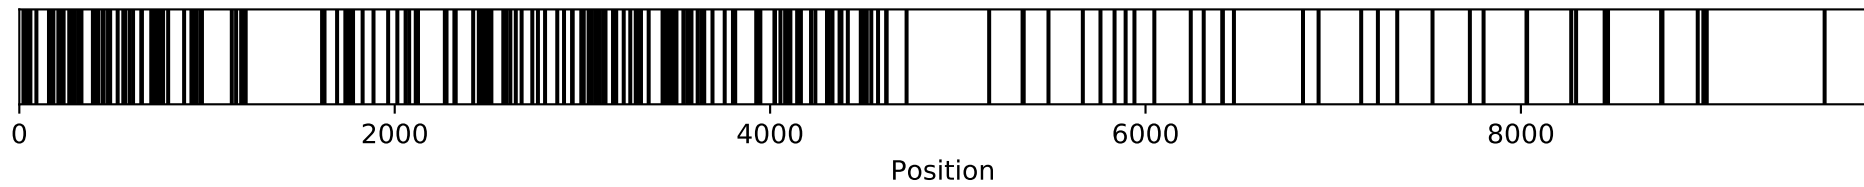

MA2 vs MM2  
Number of differences: 202

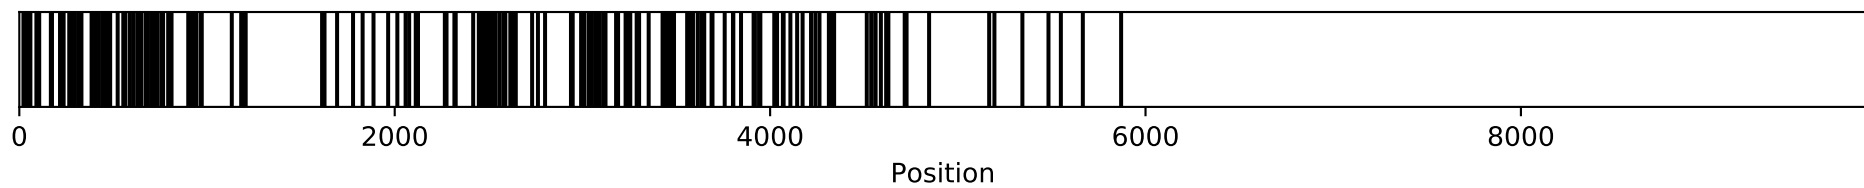

MM1 vs MM2  
Number of differences: 141

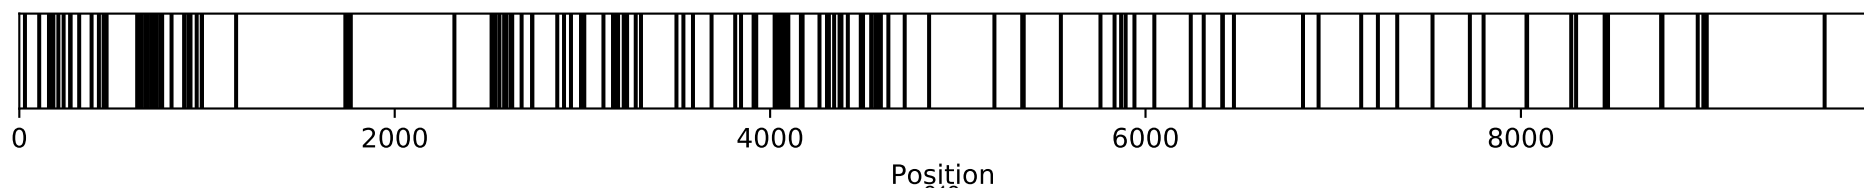

MA1 vs MA2  
Number of differences: 258

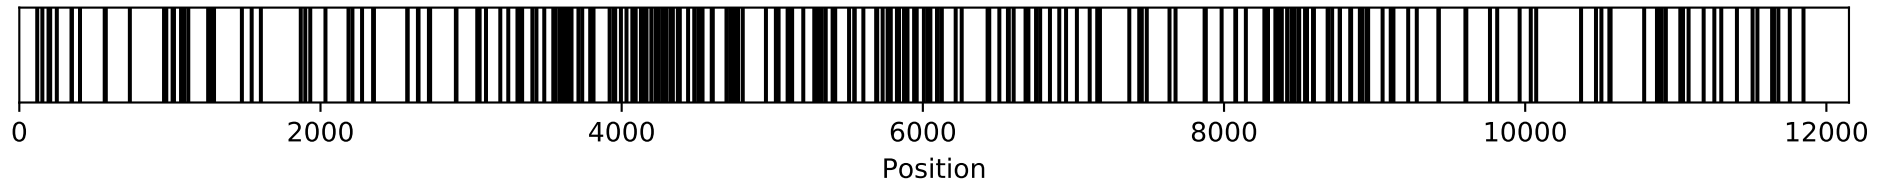

MA1 vs MM1  
Number of differences: 116

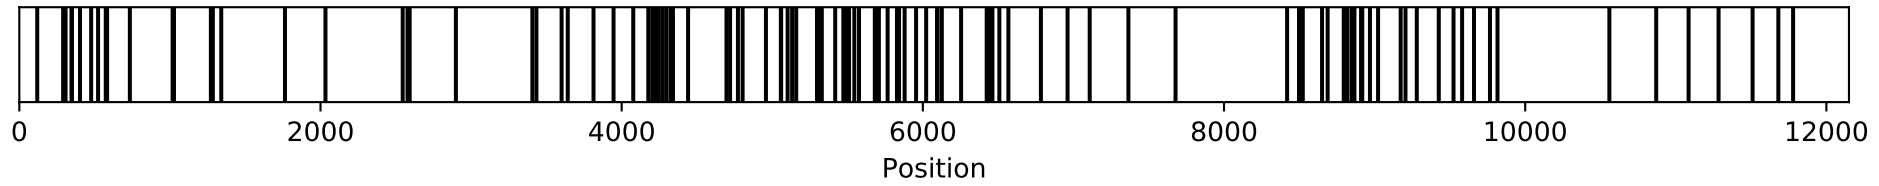

MA1 vs MM2  
Number of differences: 0

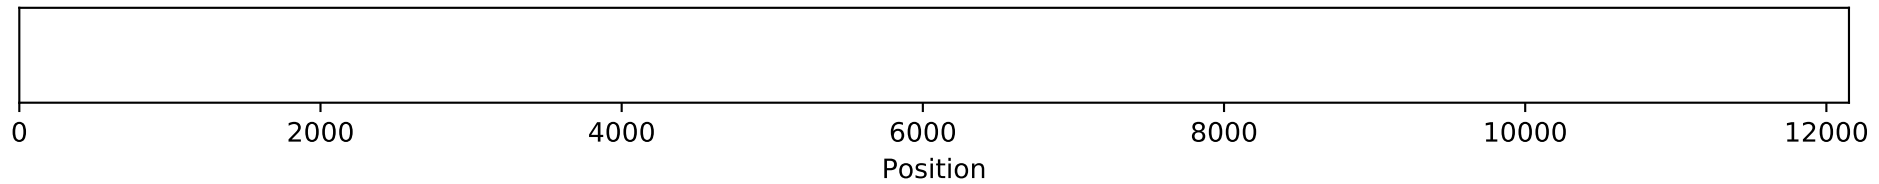

MA2 vs MM1  
Number of differences: 246

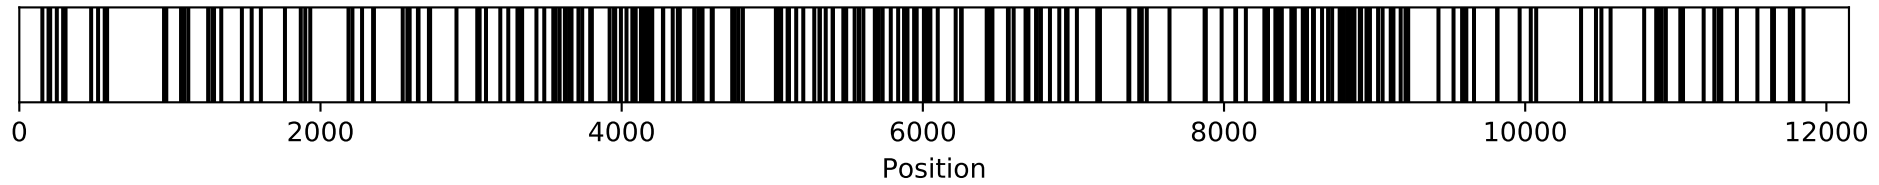

MA2 vs MM2  
Number of differences: 258

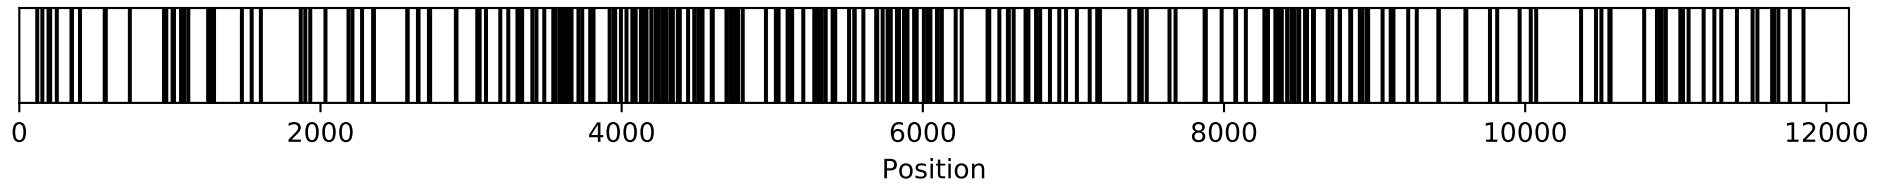

MM1 vs MM2  
Number of differences: 116

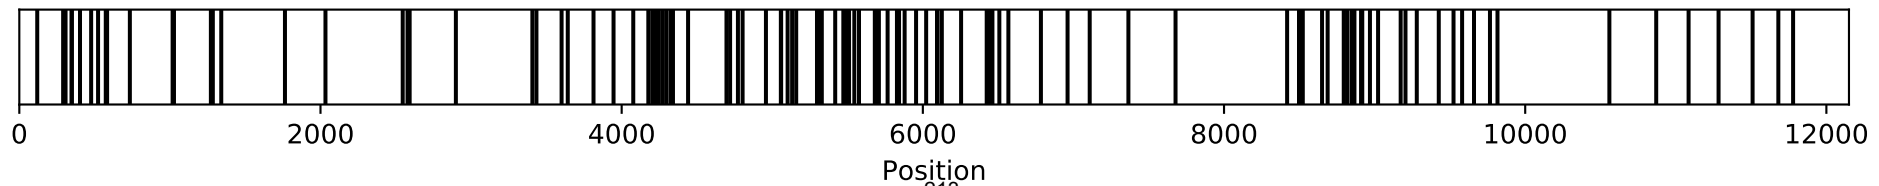

MA1 vs MA2  
Number of differences: 312

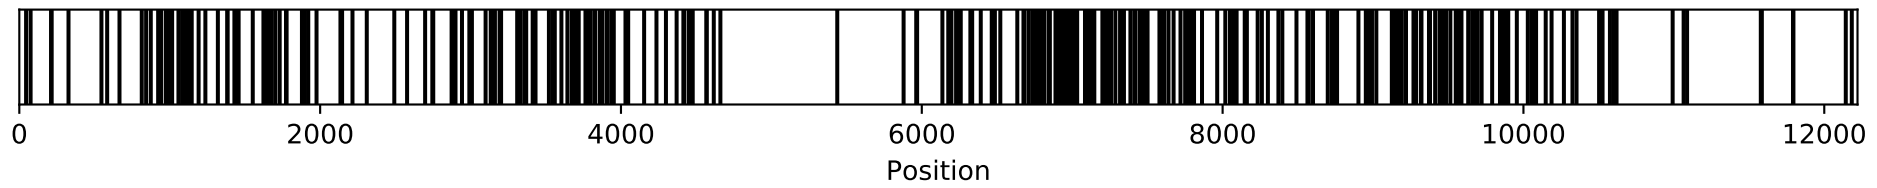

MA1 vs MM1  
Number of differences: 182

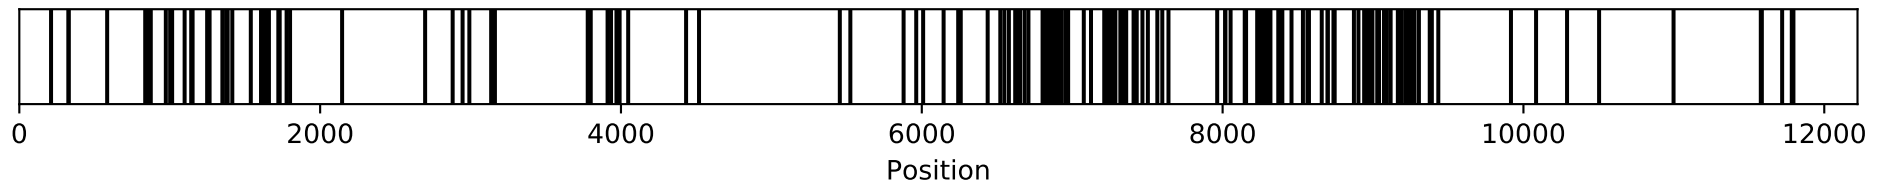

MA1 vs MM2  
Number of differences: 178

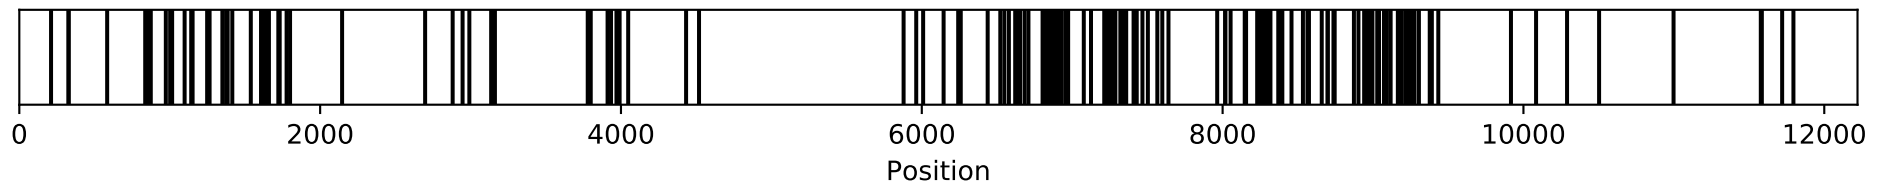

MA2 vs MM1  
Number of differences: 337

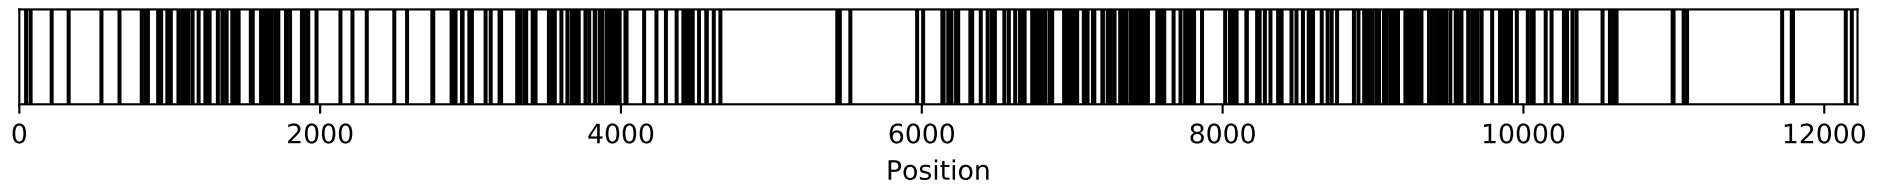

MA2 vs MM2  
Number of differences: 333

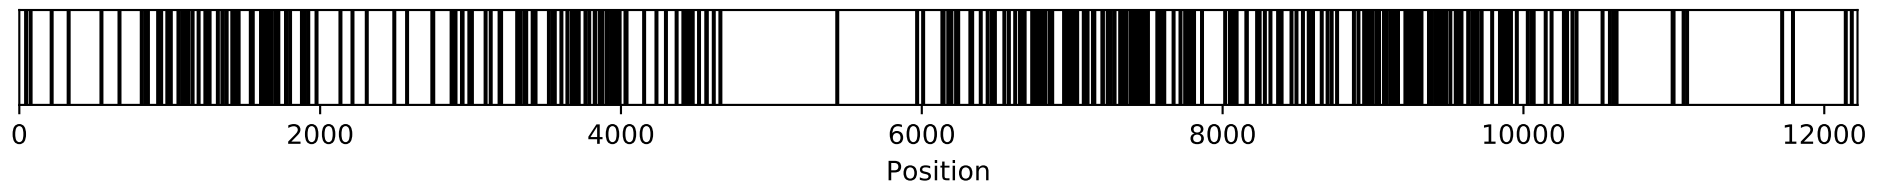

MM1 vs MM2  
Number of differences: 4

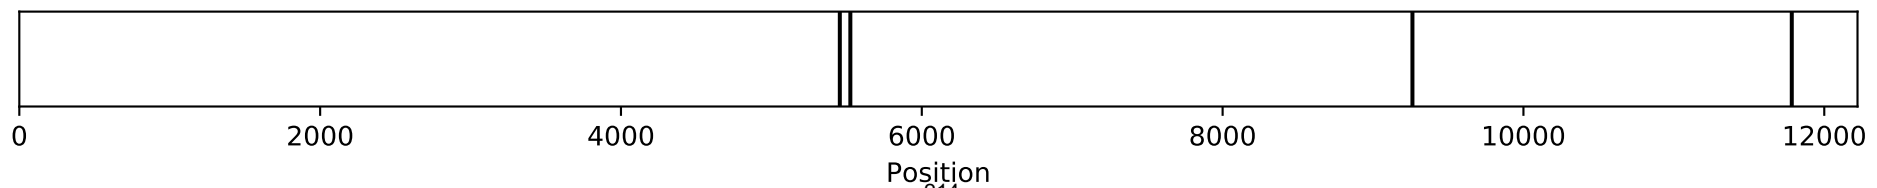

MA1 vs MA2  
Number of differences: 483

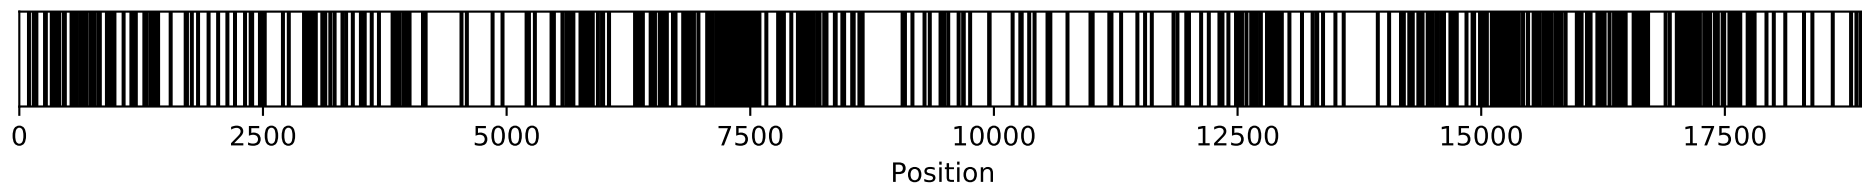

MA1 vs MM1  
Number of differences: 487

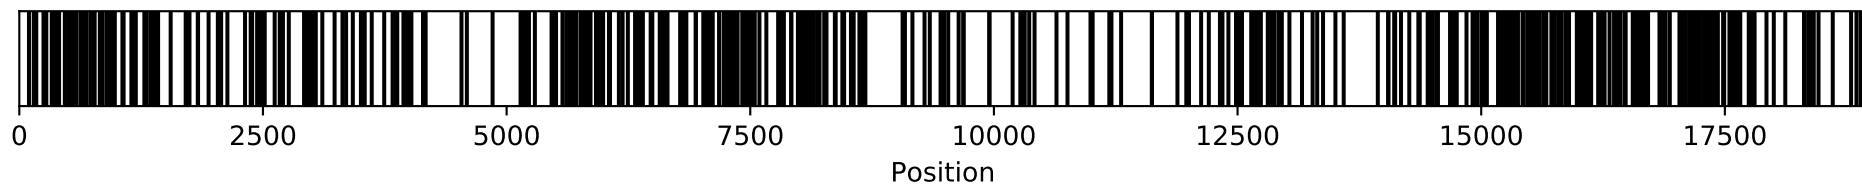

MA1 vs MM2  
Number of differences: 502

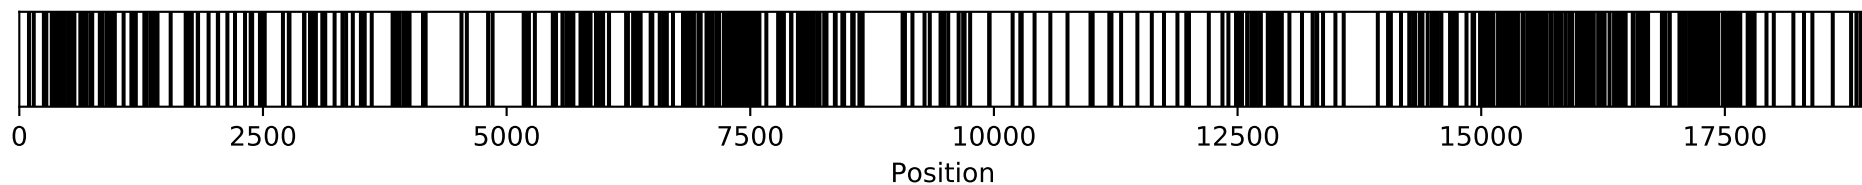

MA2 vs MM1  
Number of differences: 213

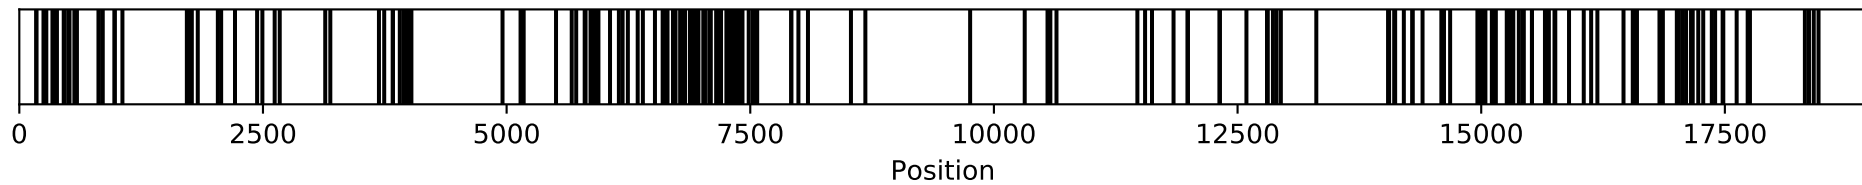

MA2 vs MM2  
Number of differences: 188

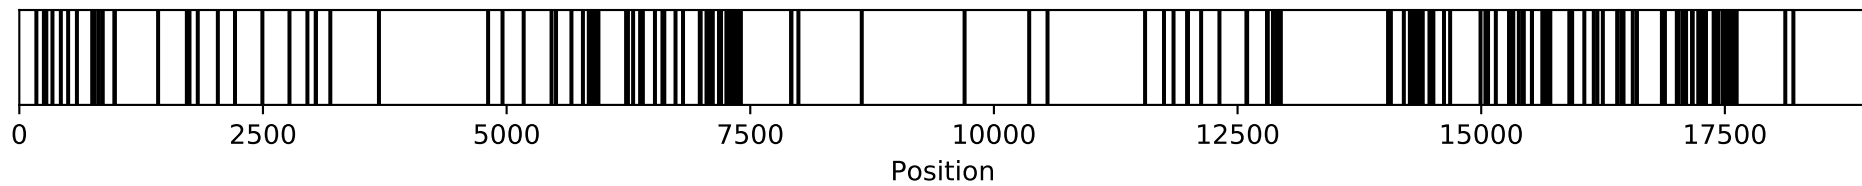

MM1 vs MM2  
Number of differences: 202

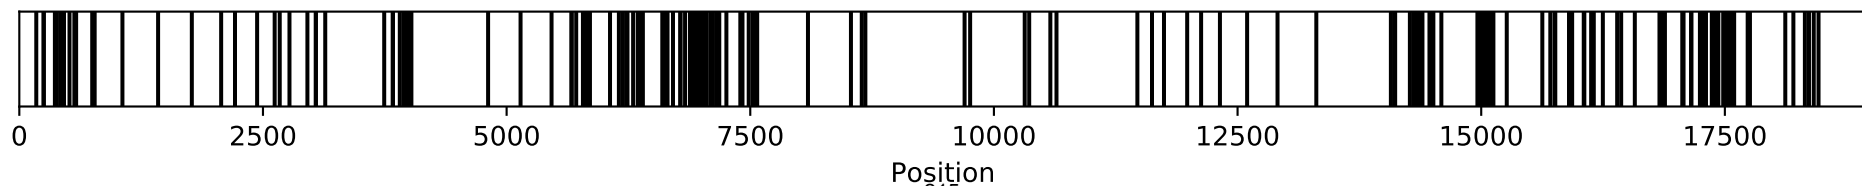

MA1 vs MA2  
Number of differences: 210

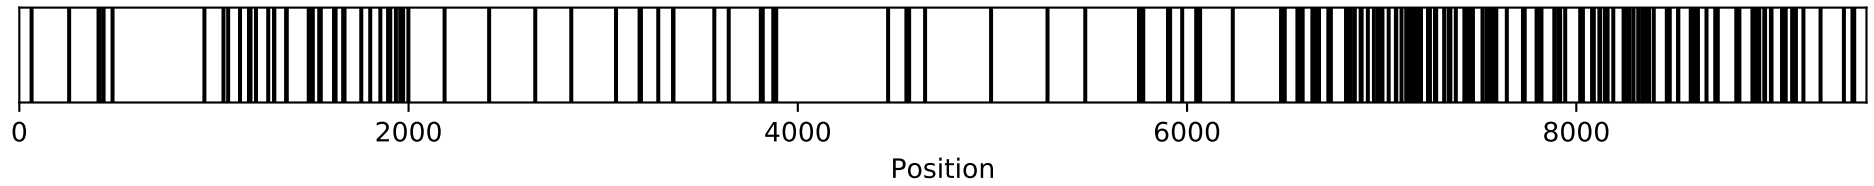

MA1 vs MM1  
Number of differences: 210

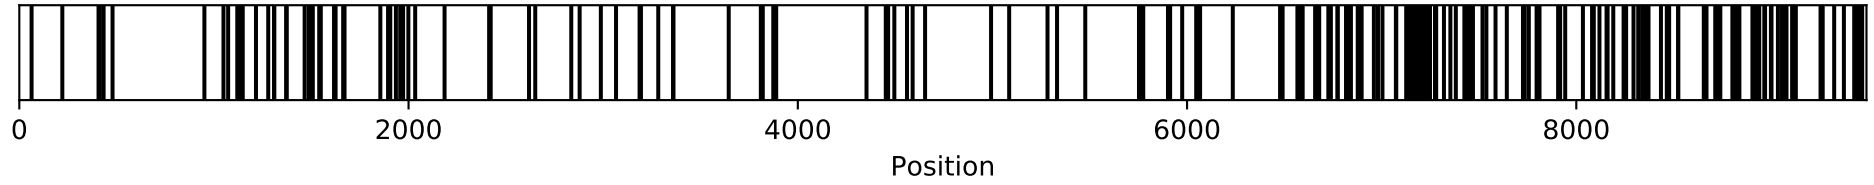

MA1 vs MM2  
Number of differences: 210

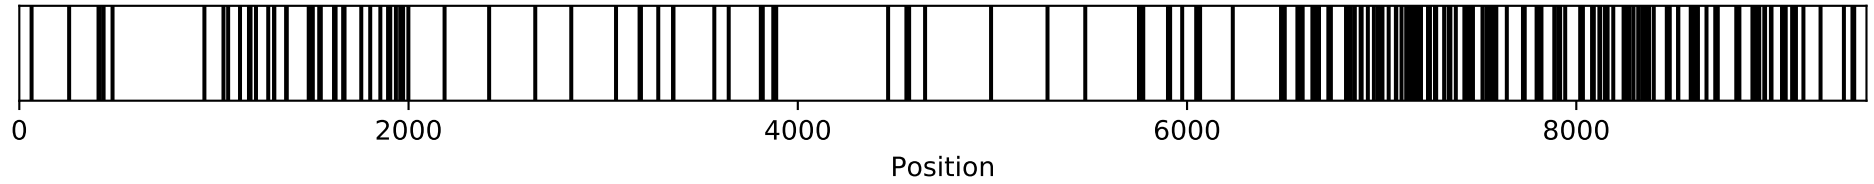

MA2 vs MM1  
Number of differences: 96

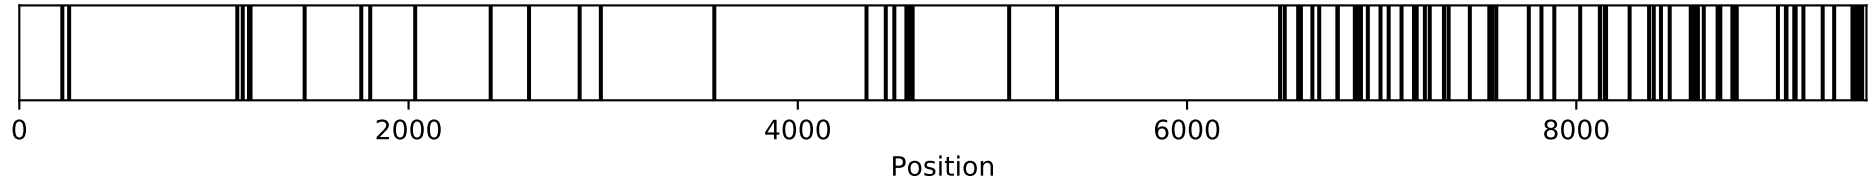

MA2 vs MM2  
Number of differences: 0

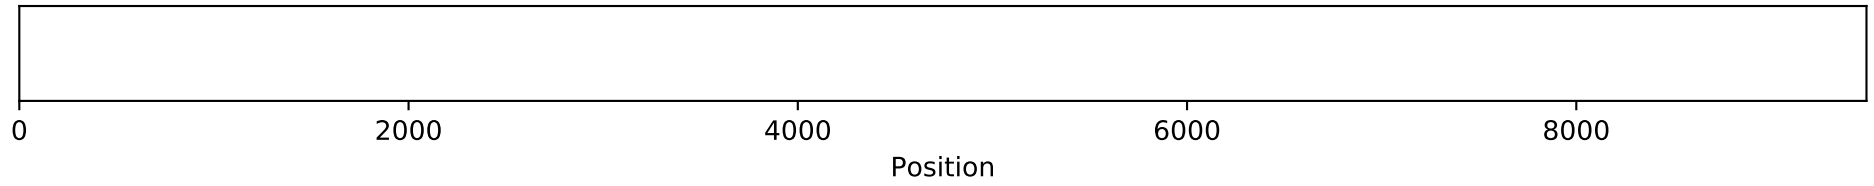

MM1 vs MM2  
Number of differences: 96

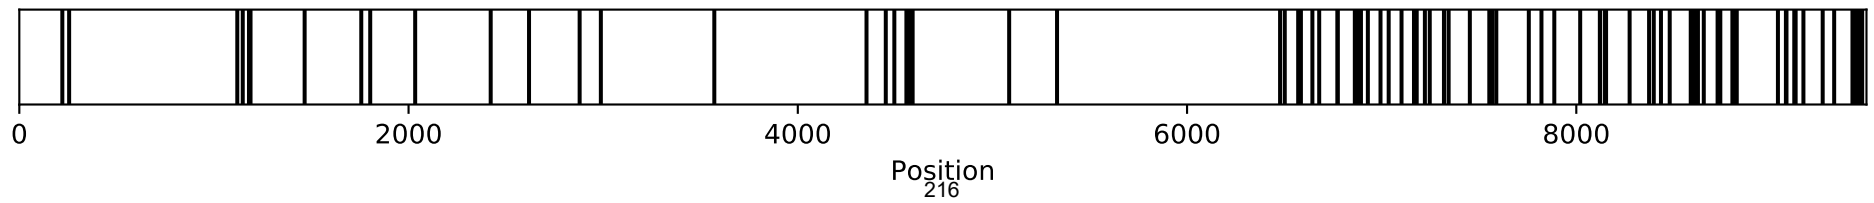

MA1 vs MA2  
Number of differences: 407

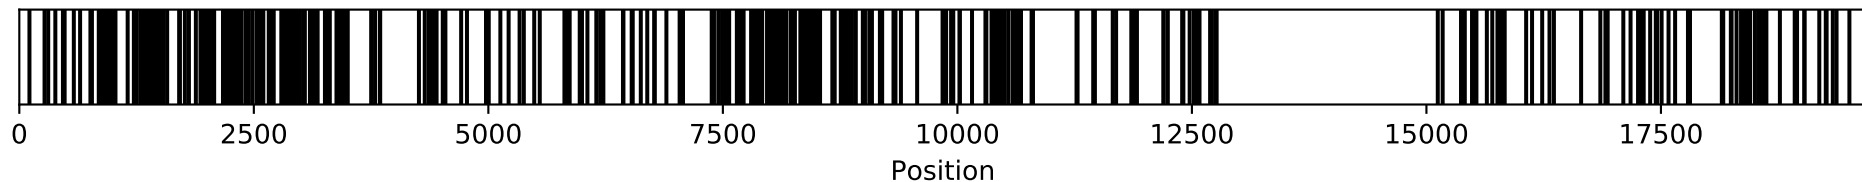

MA1 vs MM1  
Number of differences: 444

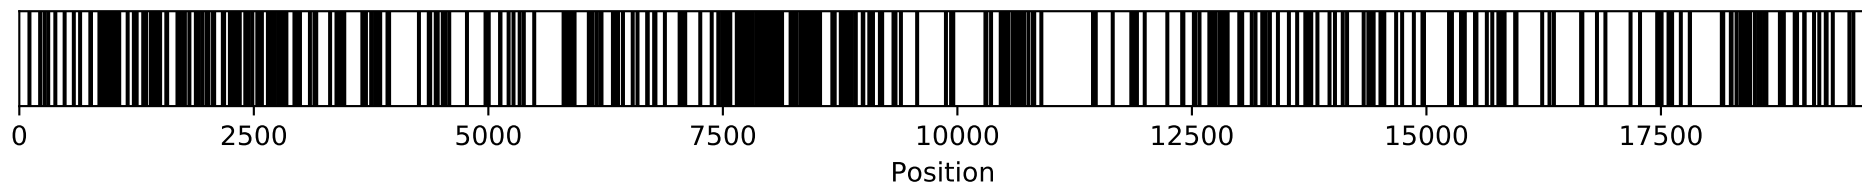

MA1 vs MM2  
Number of differences: 457

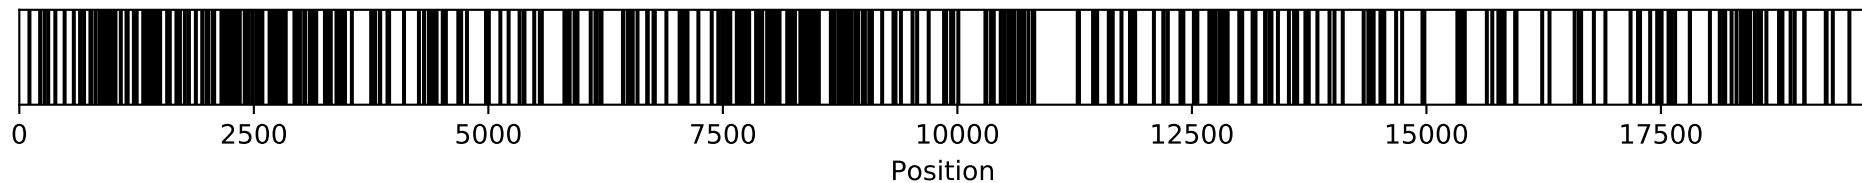

MA2 vs MM1  
Number of differences: 315

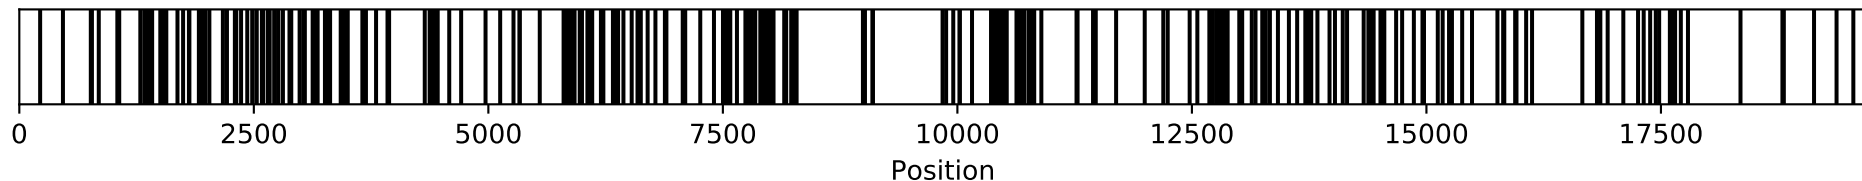

MA2 vs MM2  
Number of differences: 332

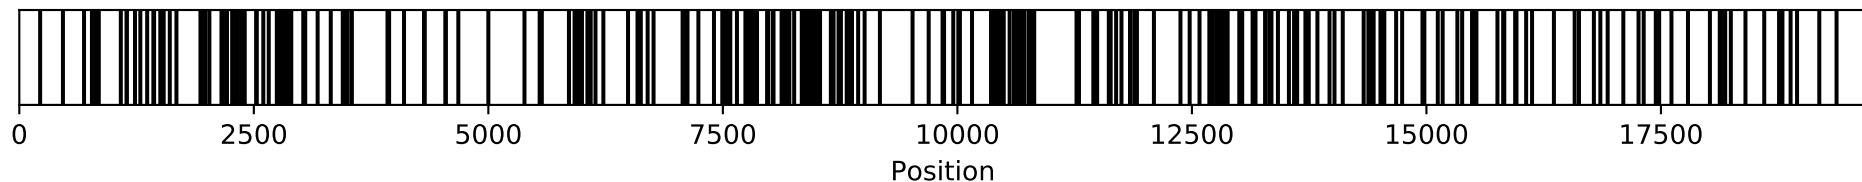

MM1 vs MM2  
Number of differences: 281

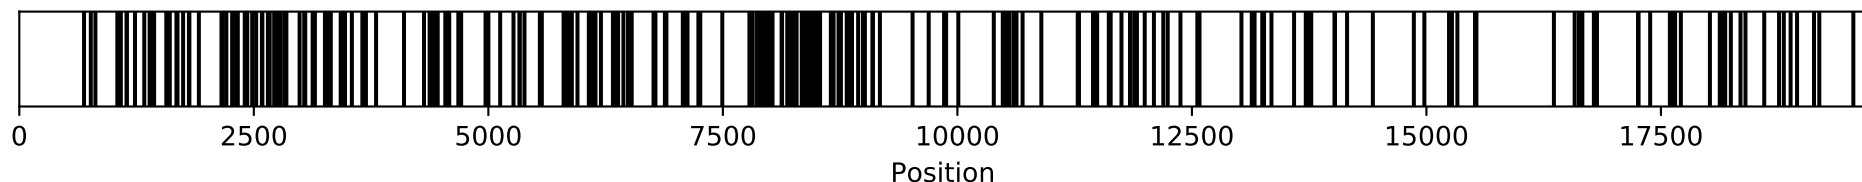

MA1 vs MA2  
Number of differences: 281

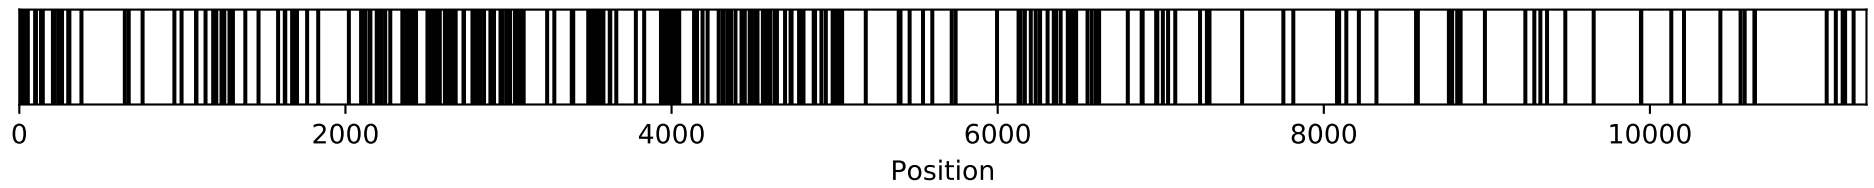

MA1 vs MM1  
Number of differences: 281

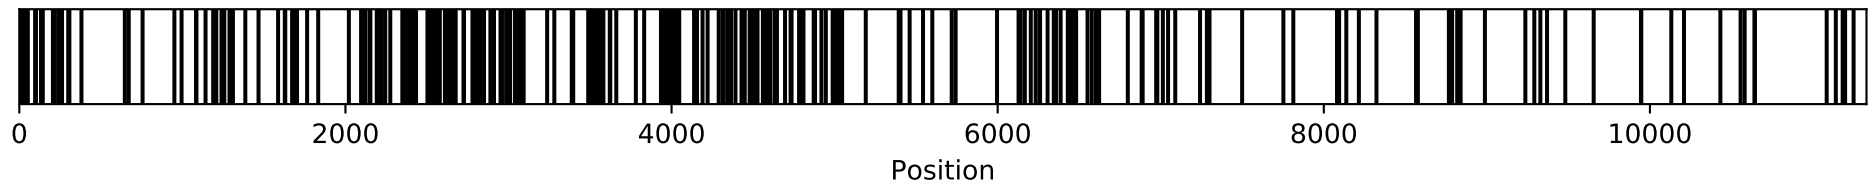

MA1 vs MM2  
Number of differences: 263

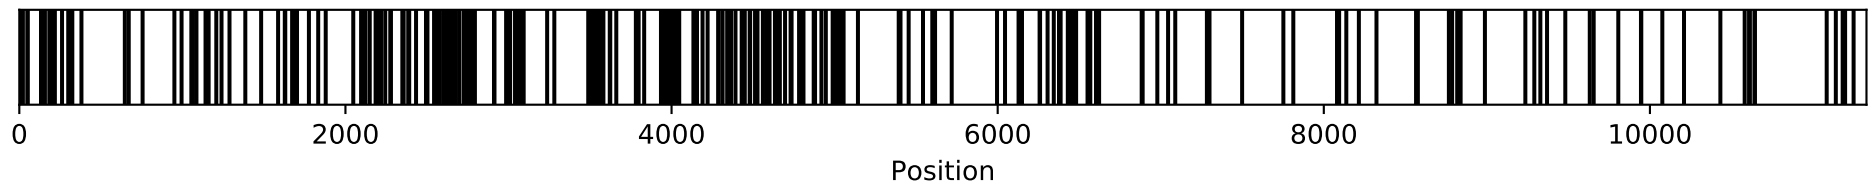

MA2 vs MM1  
Number of differences: 0

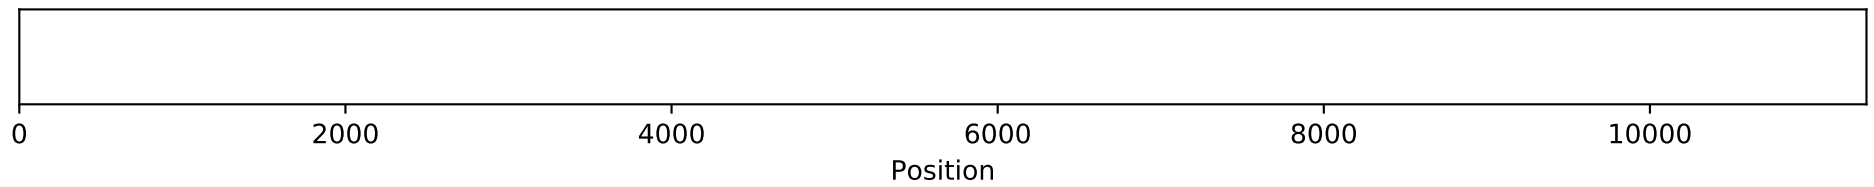

MA2 vs MM2  
Number of differences: 126

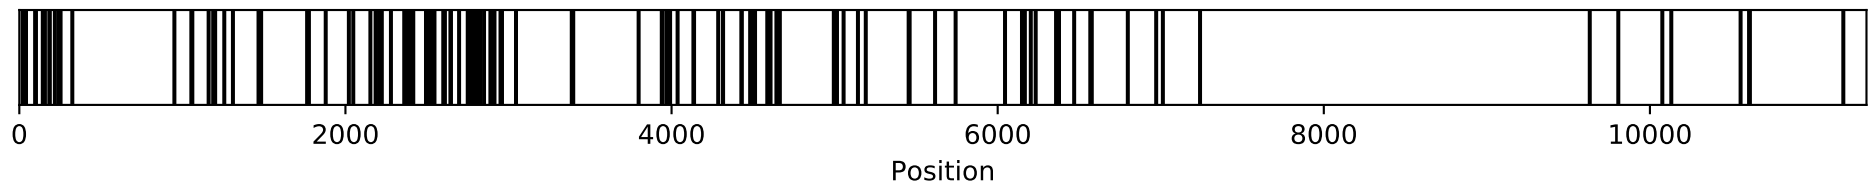

MM1 vs MM2  
Number of differences: 126

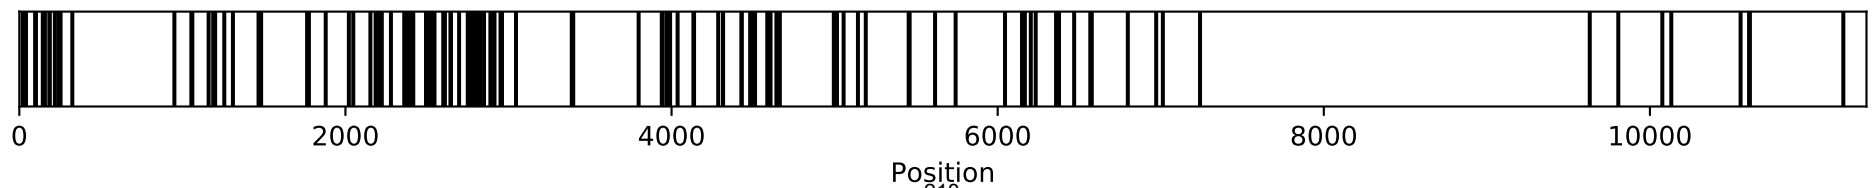



MA1 vs MA2  
Number of differences: 184

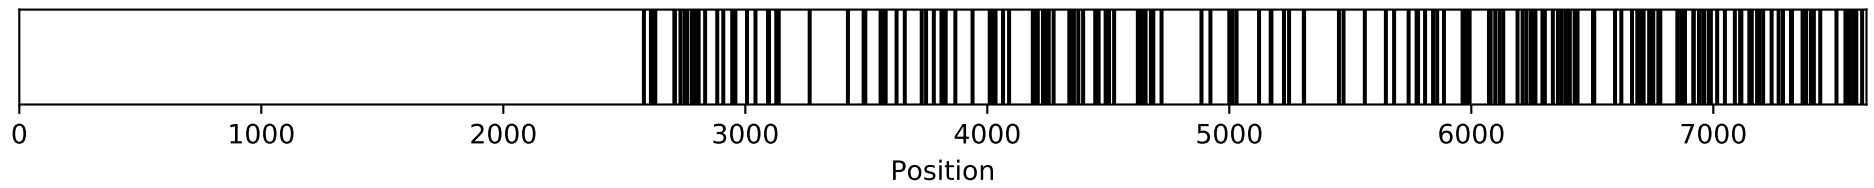

MA1 vs MM1  
Number of differences: 47

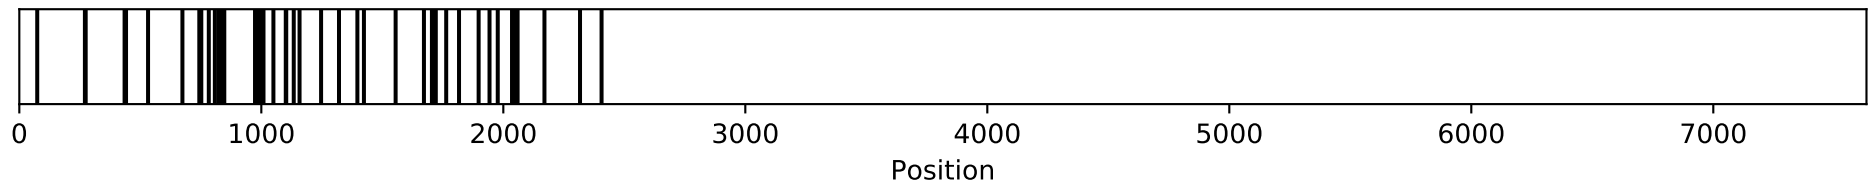

MA1 vs MM2  
Number of differences: 160

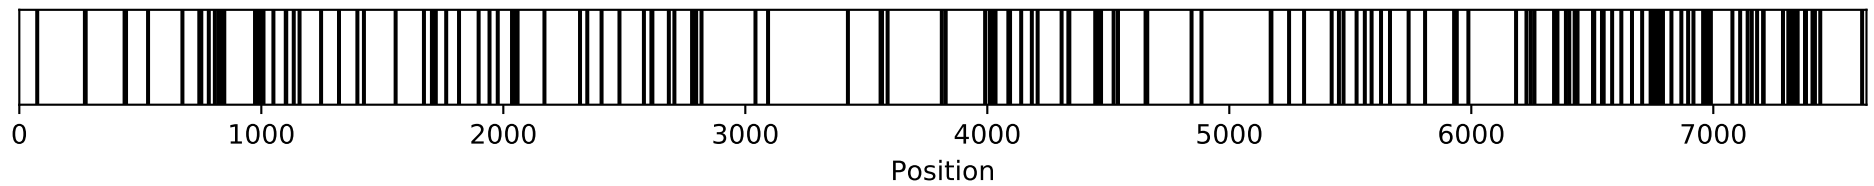

MA2 vs MM1  
Number of differences: 231

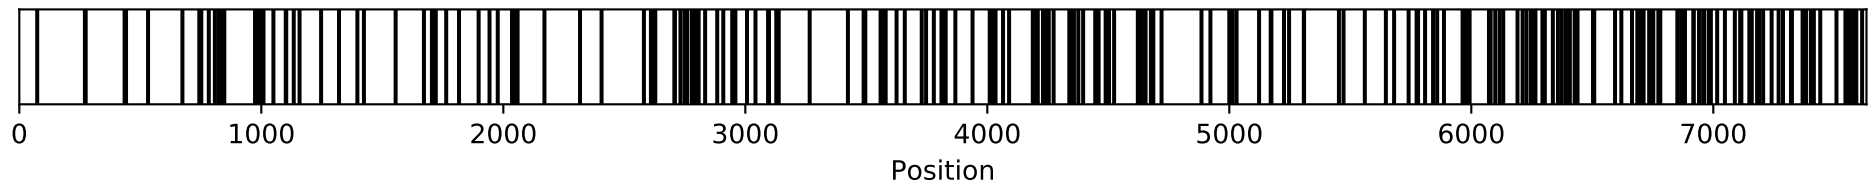

MA2 vs MM2  
Number of differences: 221

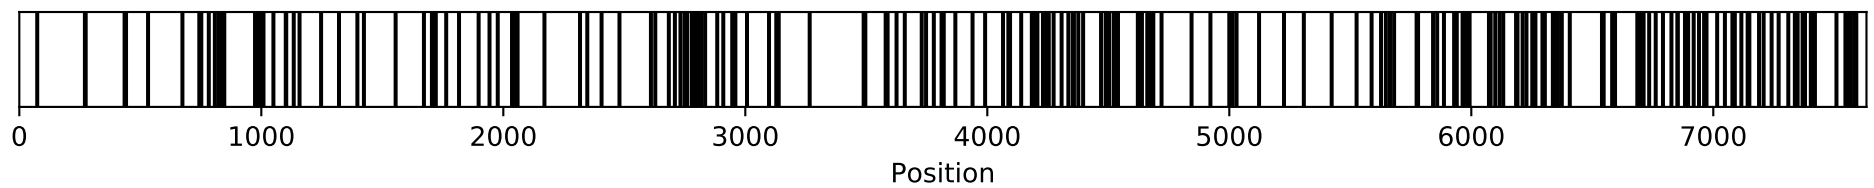

MM1 vs MM2  
Number of differences: 113

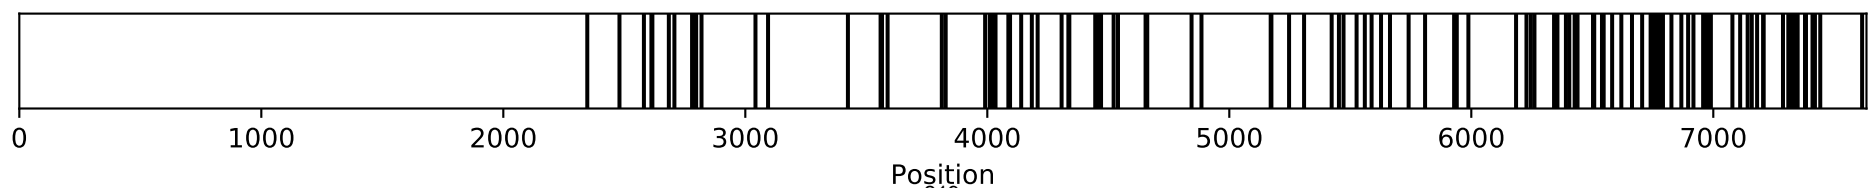

MA1 vs MA2  
Number of differences: 71

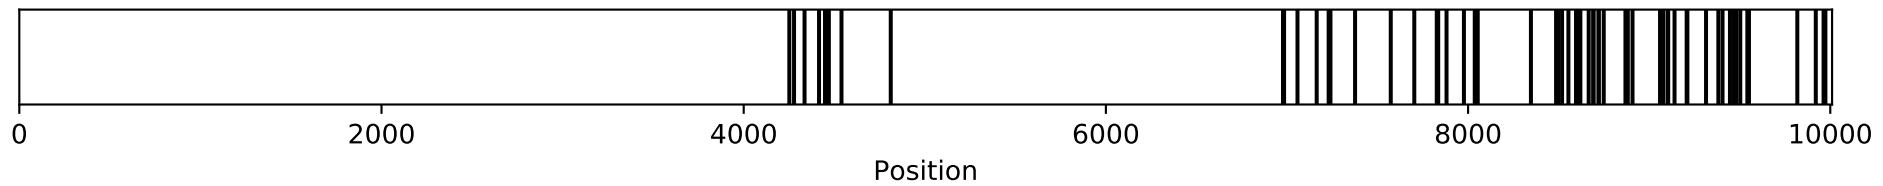

MA1 vs MM1  
Number of differences: 284

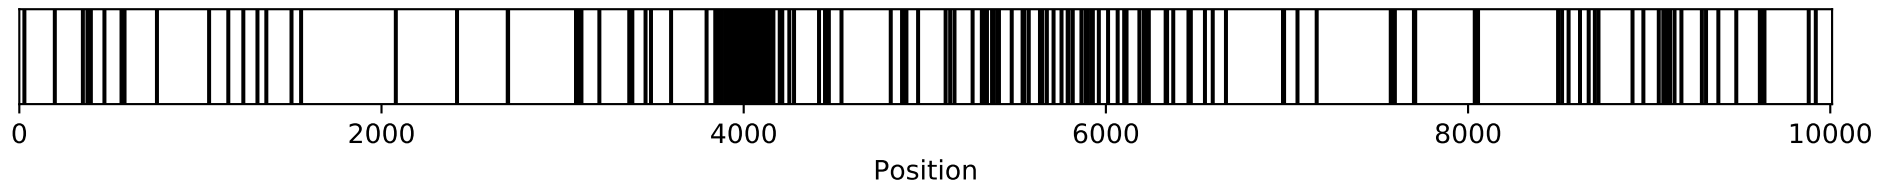

MA1 vs MM2  
Number of differences: 261

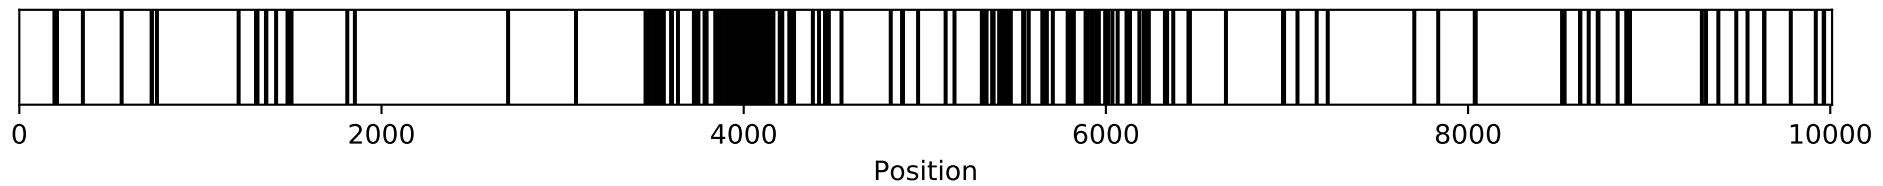

MA2 vs MM1  
Number of differences: 289

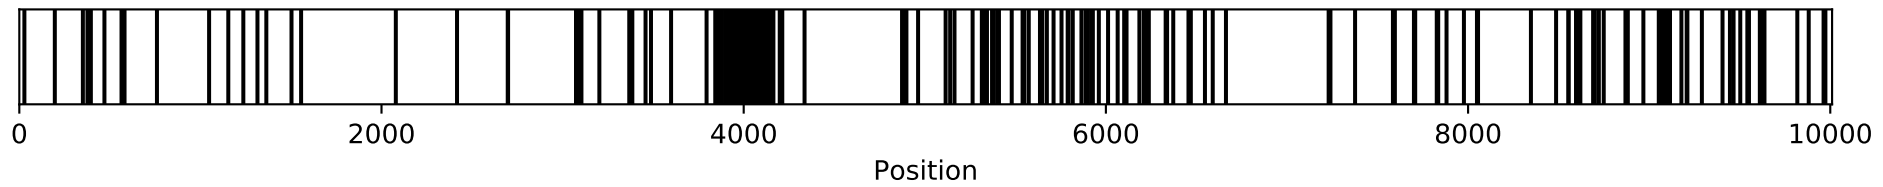

MA2 vs MM2  
Number of differences: 275

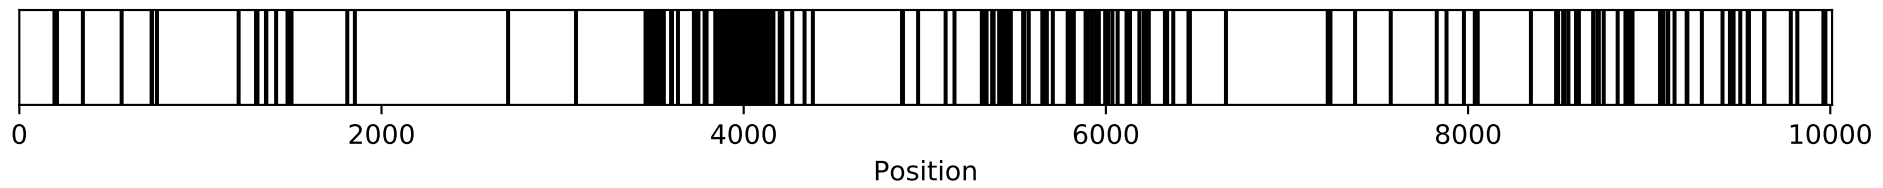

MM1 vs MM2  
Number of differences: 162

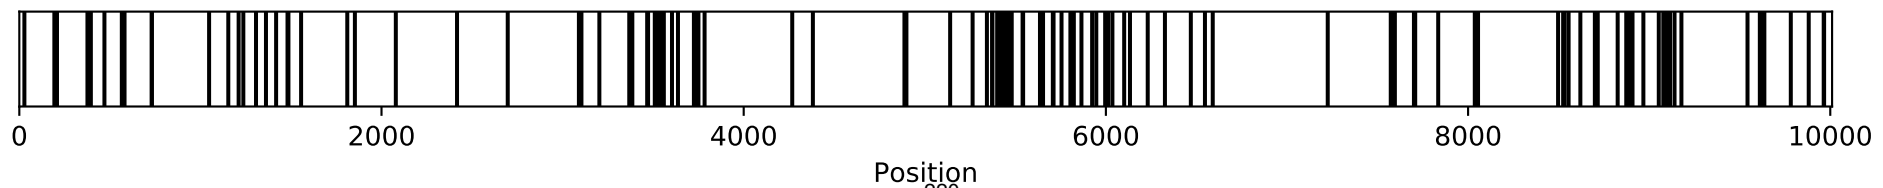

MA1 vs MA2  
Number of differences: 334

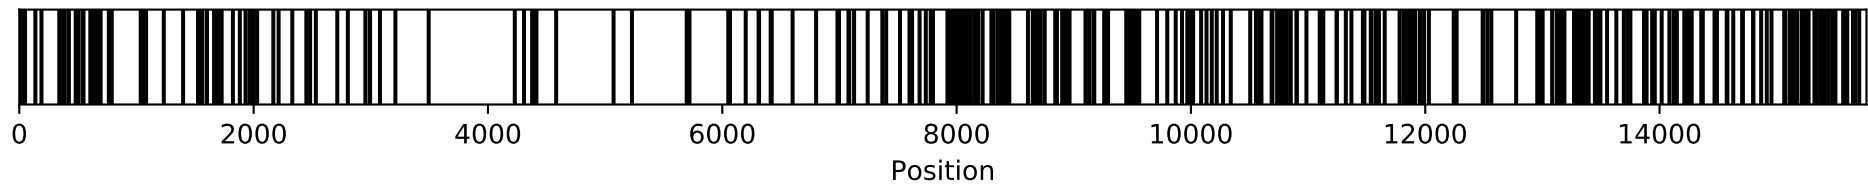

MA1 vs MM1  
Number of differences: 330

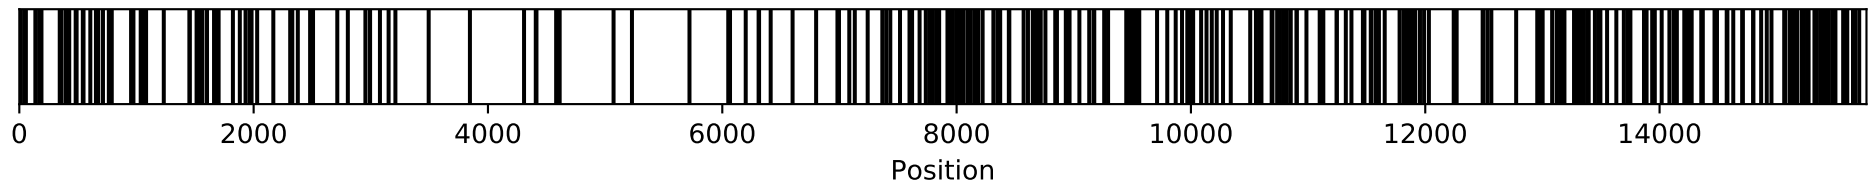

MA1 vs MM2  
Number of differences: 334

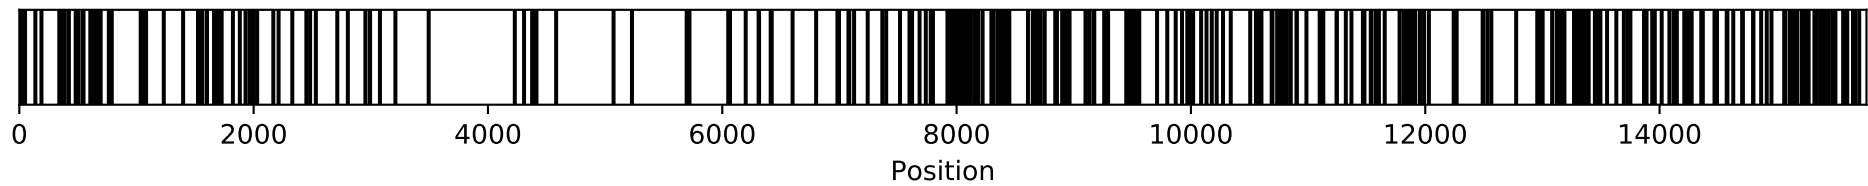

MA2 vs MM1  
Number of differences: 80

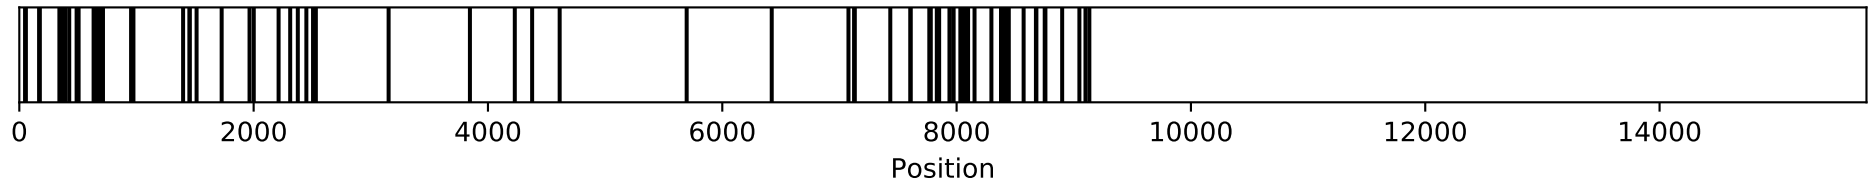

MA2 vs MM2  
Number of differences: 0

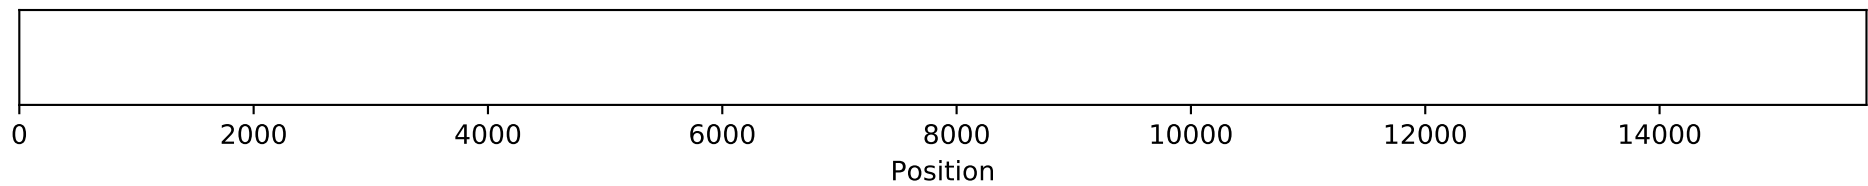

MM1 vs MM2  
Number of differences: 80

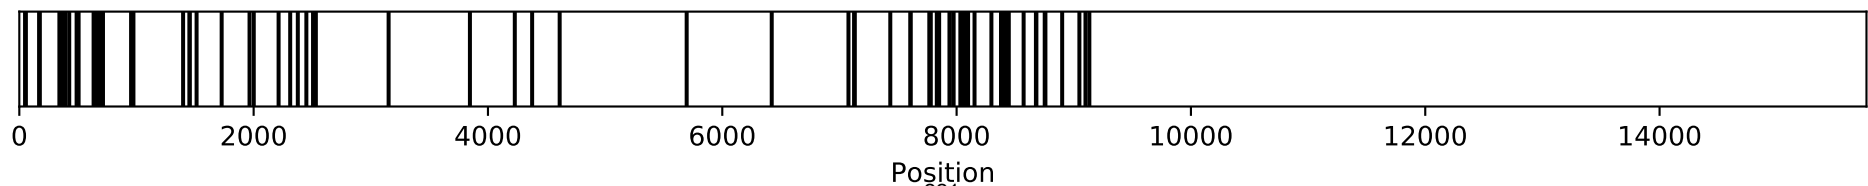

MA1 vs MA2  
Number of differences: 158

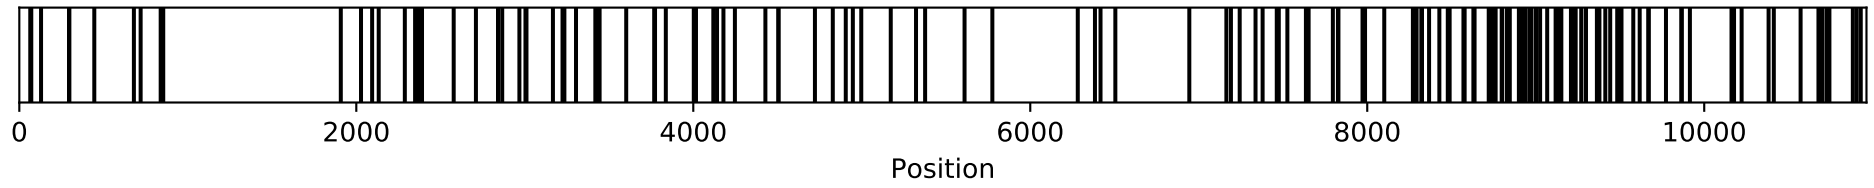

MA1 vs MM1  
Number of differences: 162

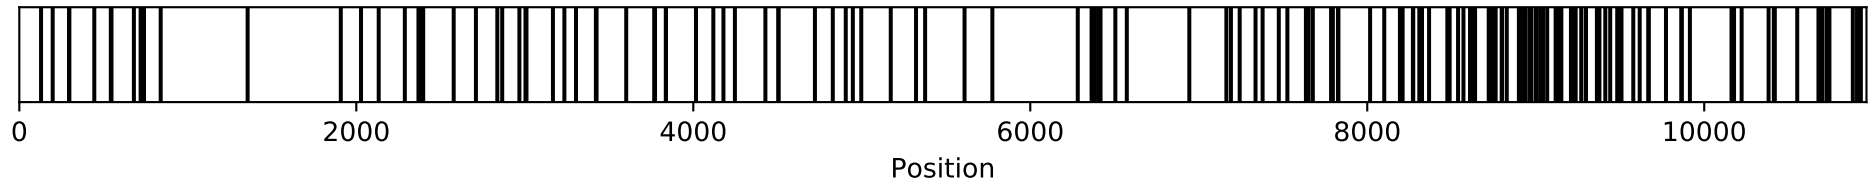

MA1 vs MM2  
Number of differences: 166

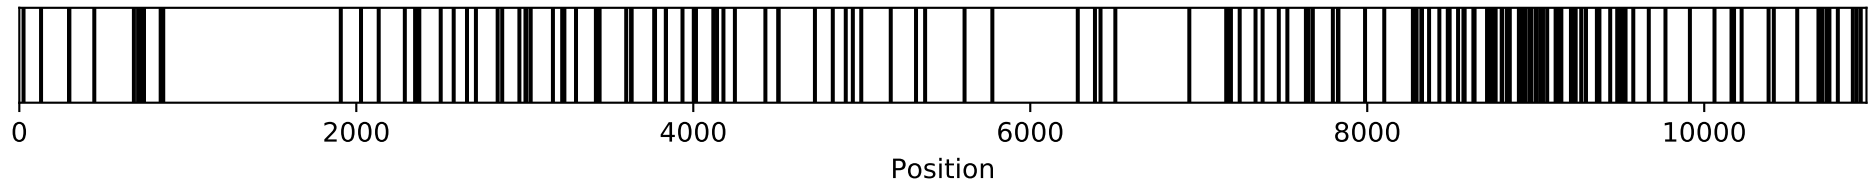

MA2 vs MM1  
Number of differences: 51

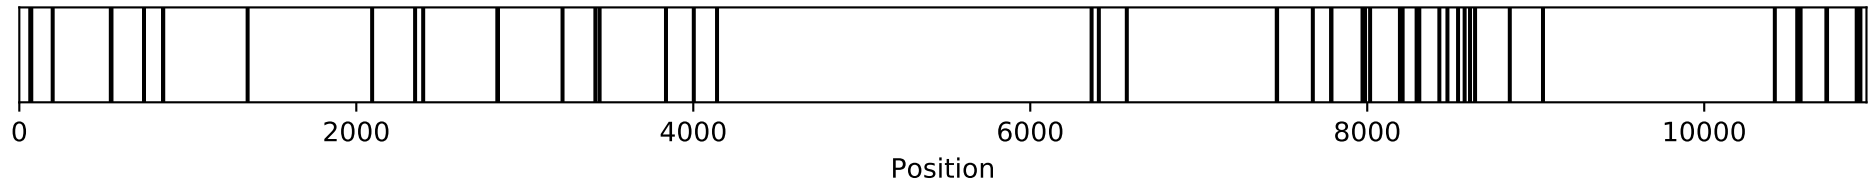

MA2 vs MM2  
Number of differences: 46

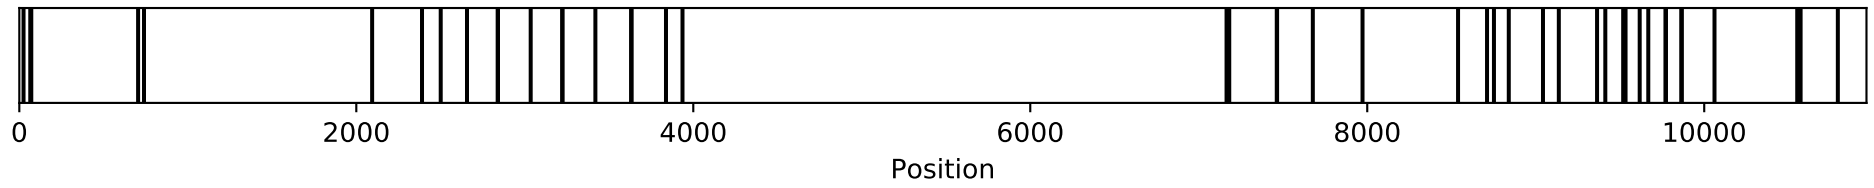

MM1 vs MM2  
Number of differences: 65

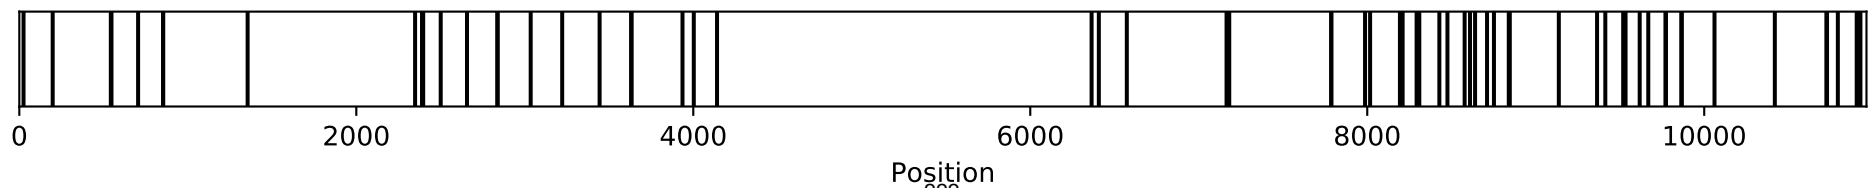

MA1 vs MA2  
Number of differences: 31

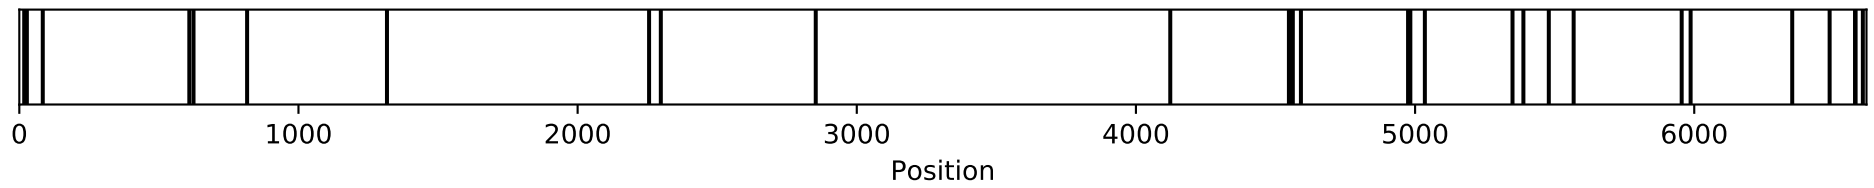

MA1 vs MM1  
Number of differences: 22

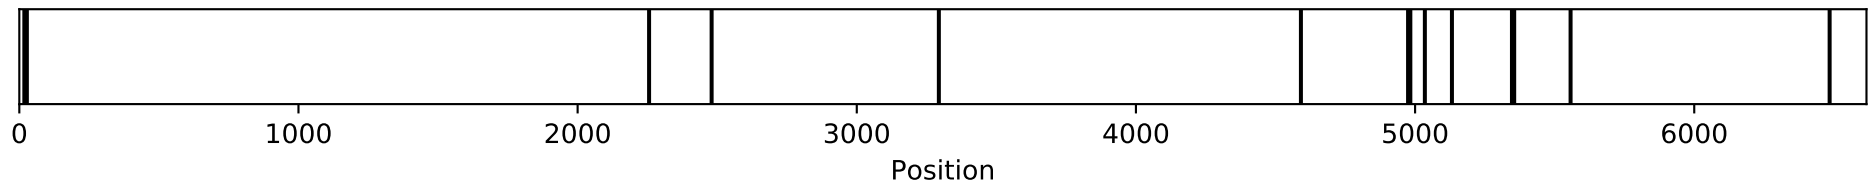

MA1 vs MM2  
Number of differences: 8

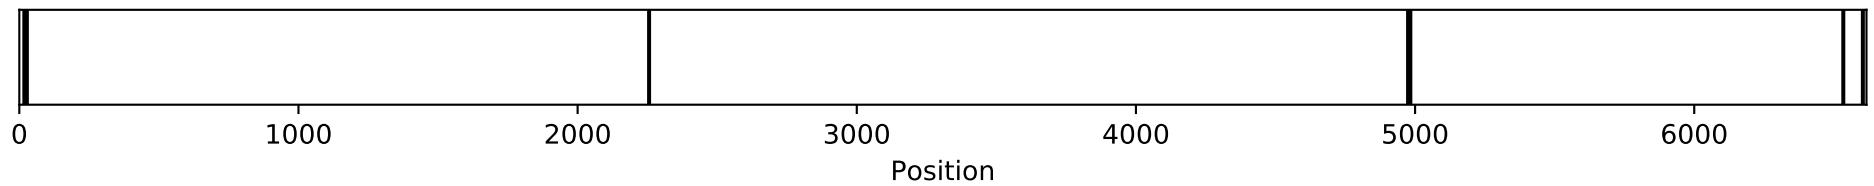

MA2 vs MM1  
Number of differences: 34

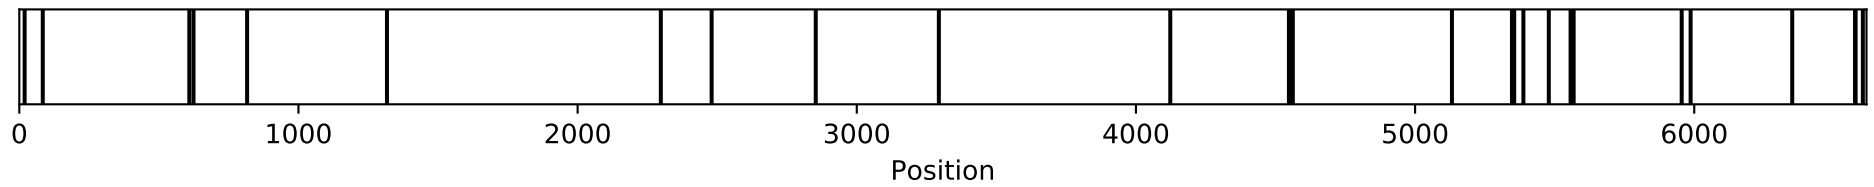

MA2 vs MM2  
Number of differences: 25

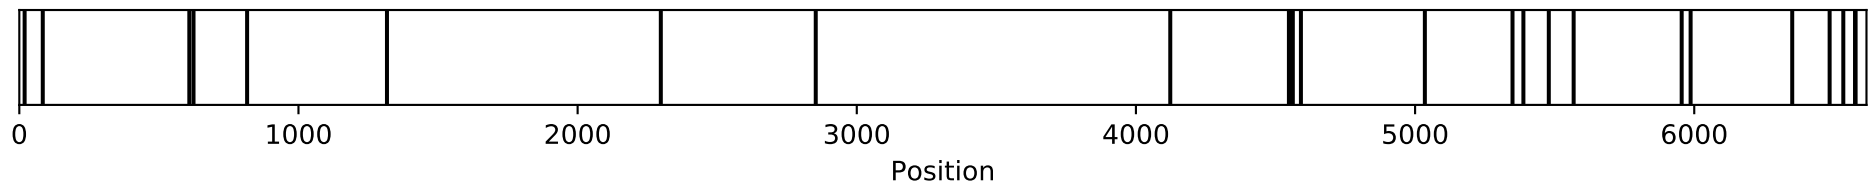

MM1 vs MM2  
Number of differences: 18

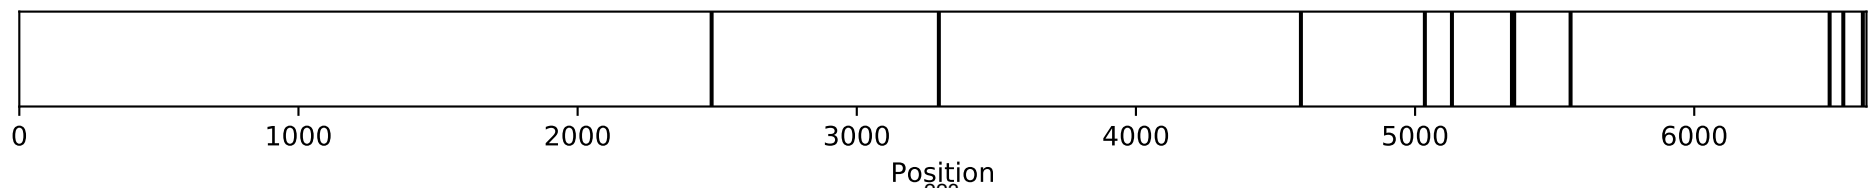

MA1 vs MA2  
Number of differences: 214

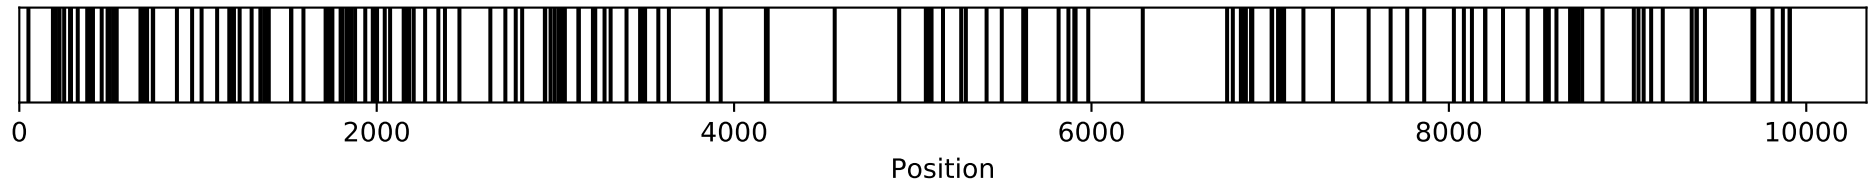

MA1 vs MM1  
Number of differences: 214

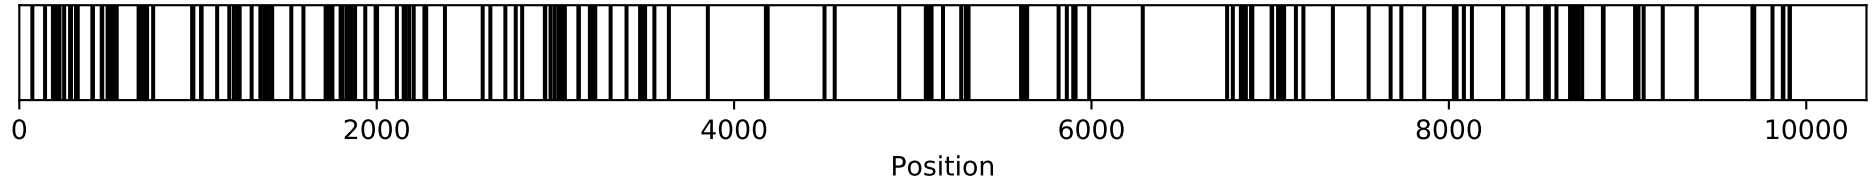

MA1 vs MM2  
Number of differences: 214

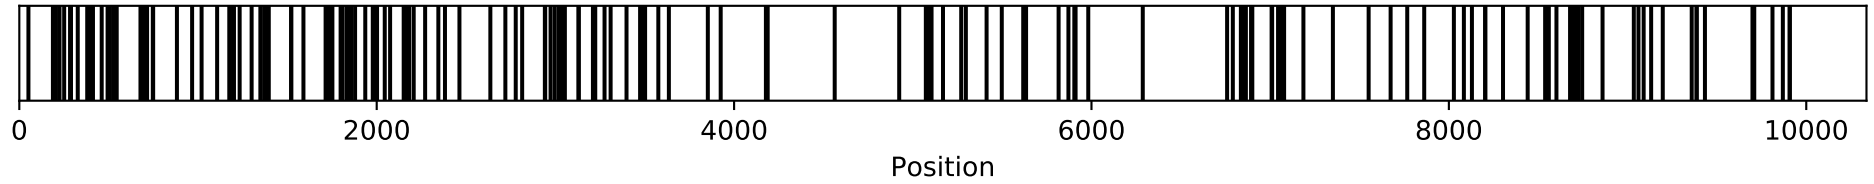

MA2 vs MM1  
Number of differences: 64

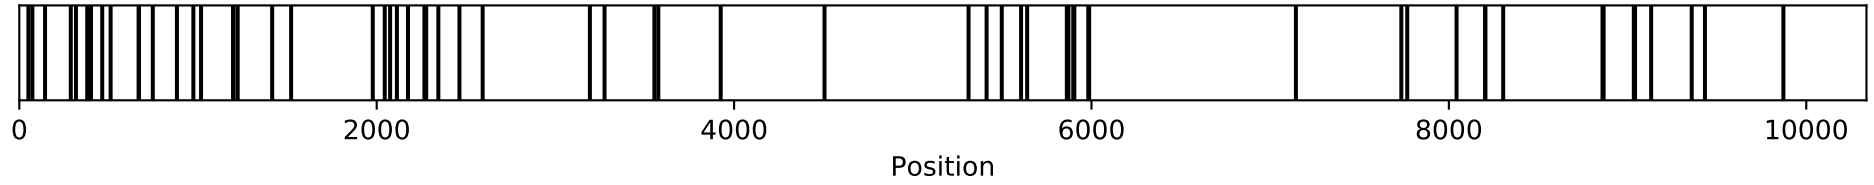

MA2 vs MM2  
Number of differences: 0

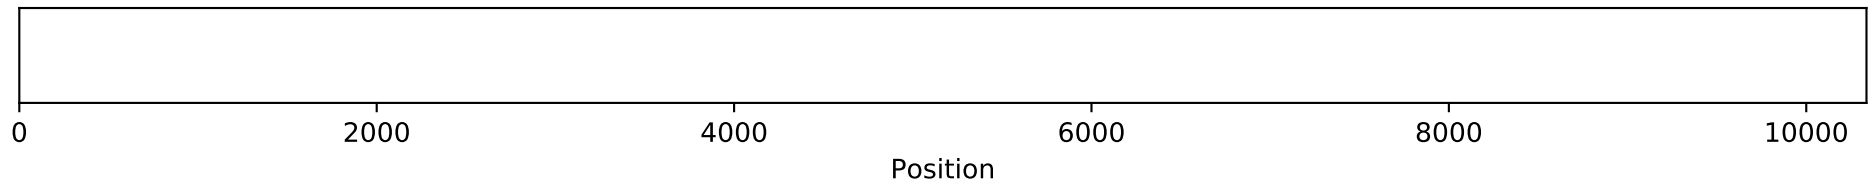

MM1 vs MM2  
Number of differences: 64

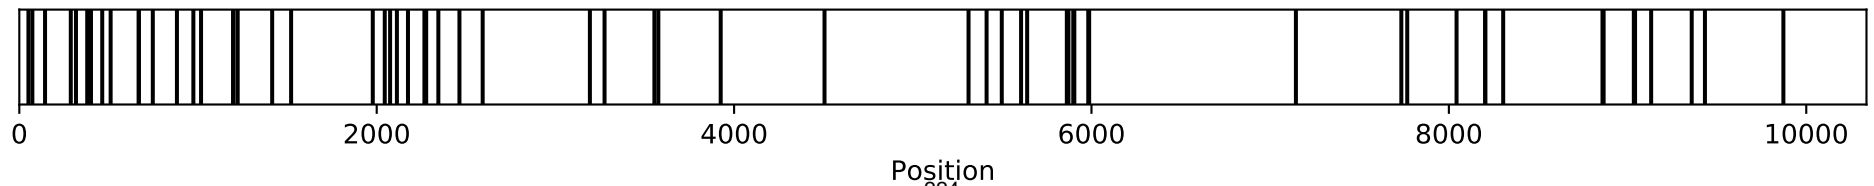

MA1 vs MA2  
Number of differences: 306

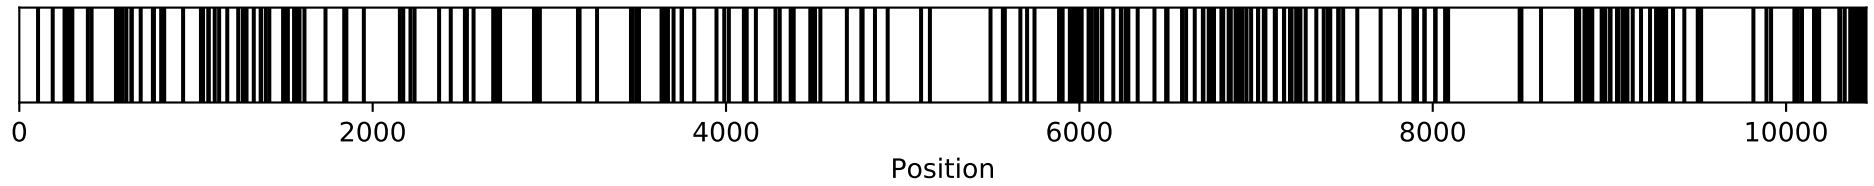

MA1 vs MM1  
Number of differences: 264

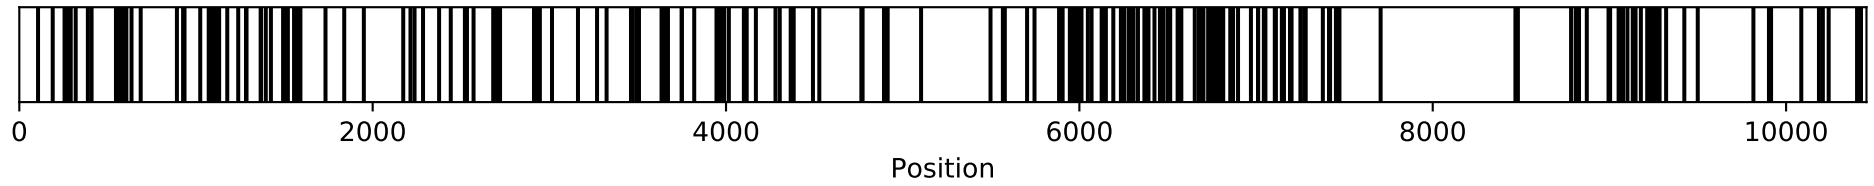

MA1 vs MM2  
Number of differences: 215

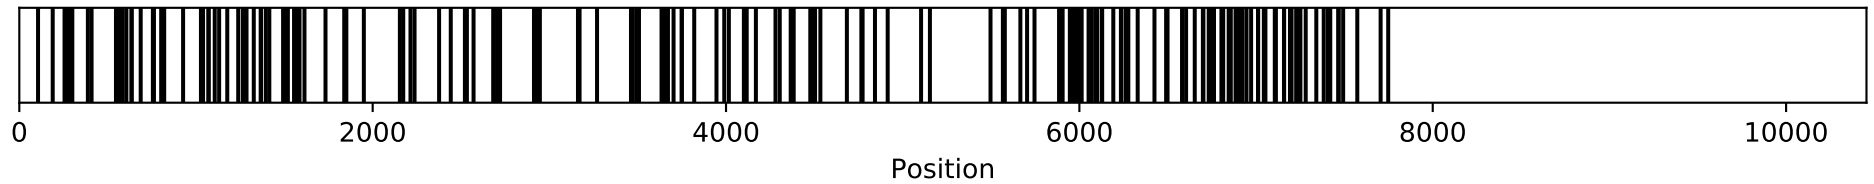

MA2 vs MM1  
Number of differences: 233

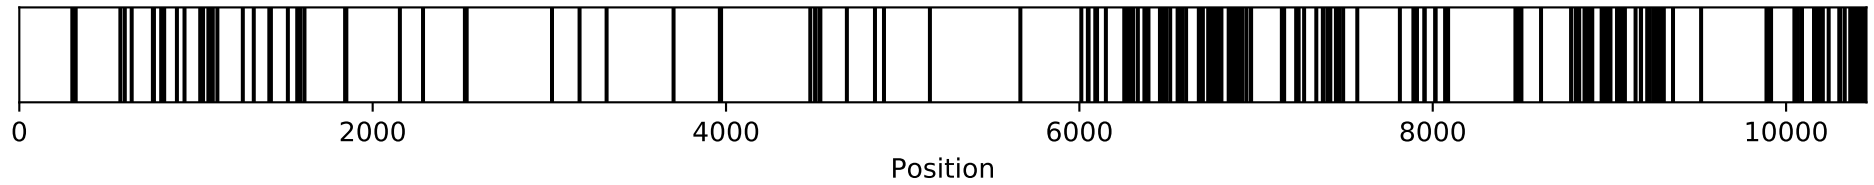

MA2 vs MM2  
Number of differences: 93

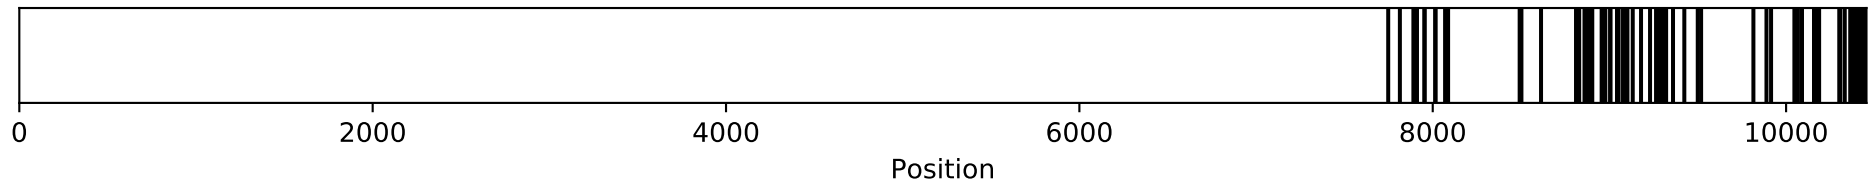

MM1 vs MM2  
Number of differences: 166

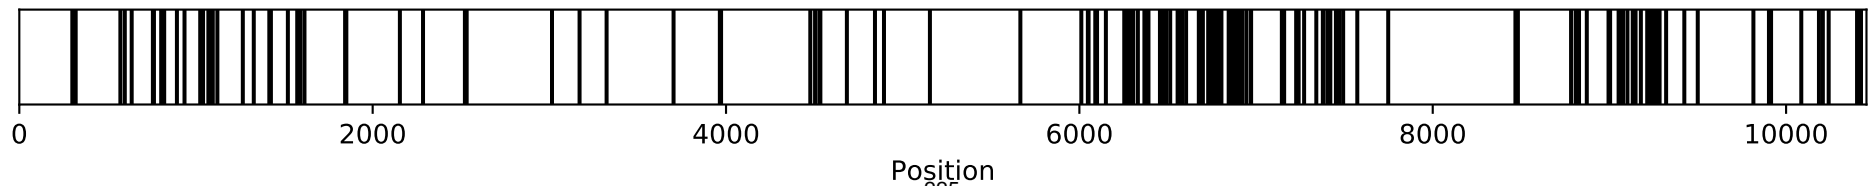

MA1 vs MA2  
Number of differences: 249

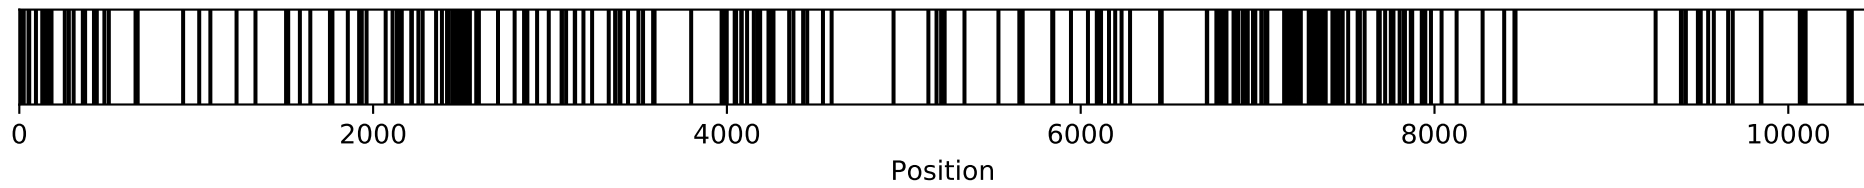

MA1 vs MM1  
Number of differences: 3

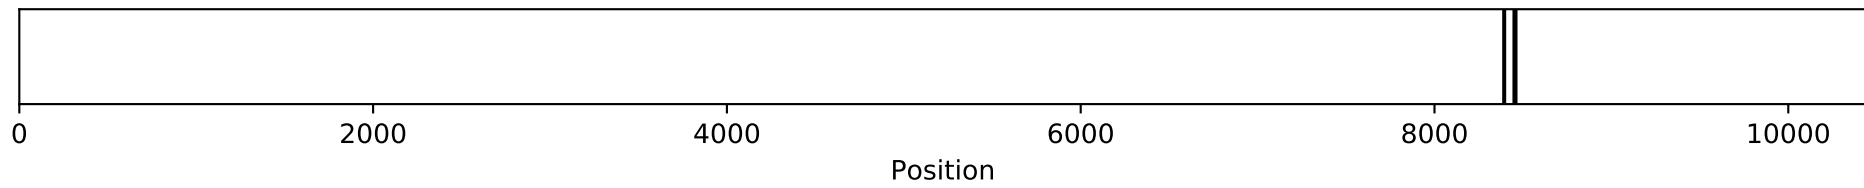

MA1 vs MM2  
Number of differences: 104

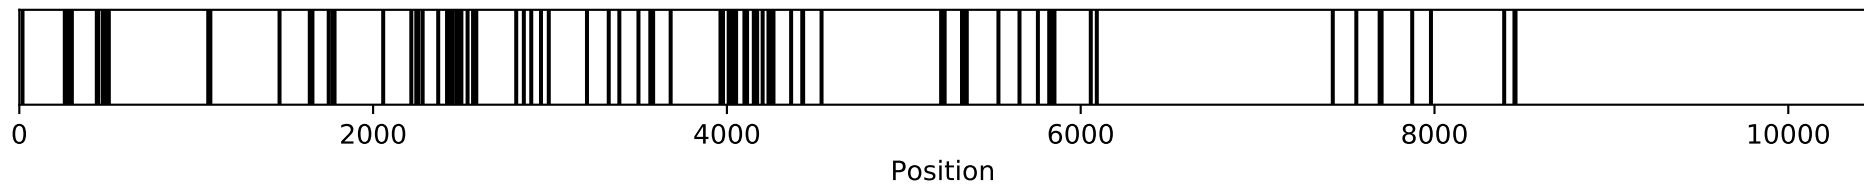

MA2 vs MM1  
Number of differences: 246

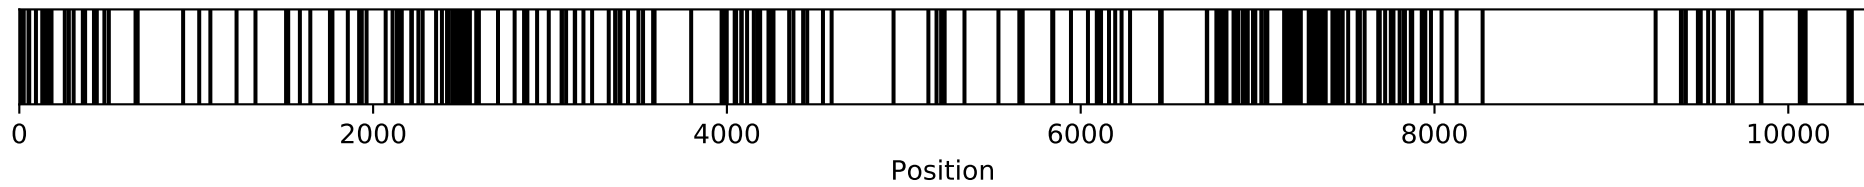

MA2 vs MM2  
Number of differences: 256

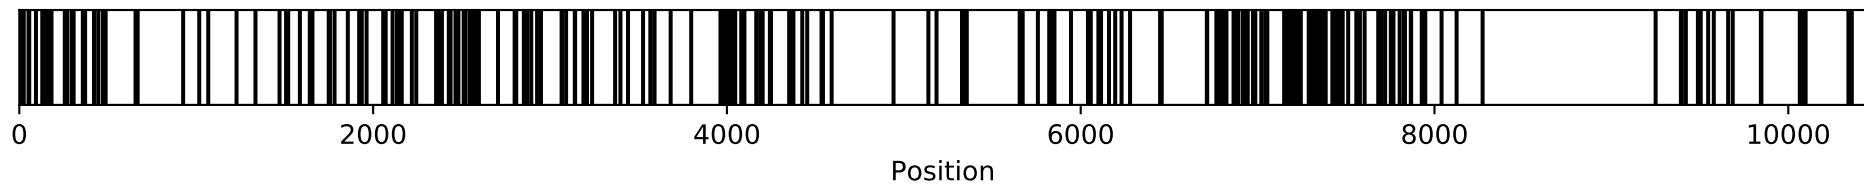

MM1 vs MM2  
Number of differences: 101

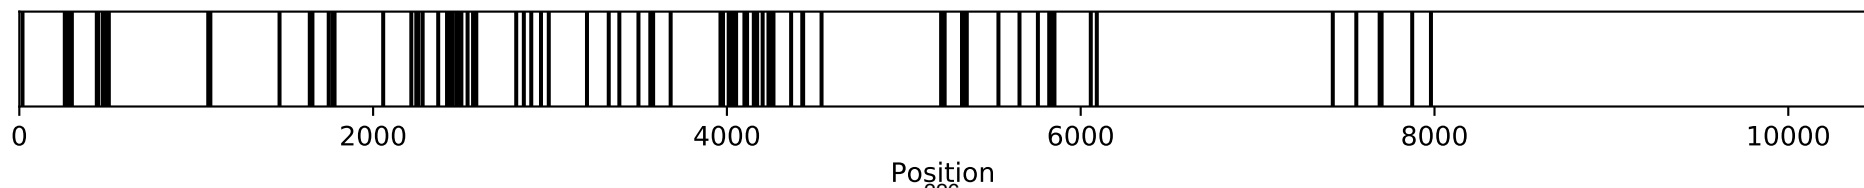



MA1 vs MA2  
Number of differences: 181

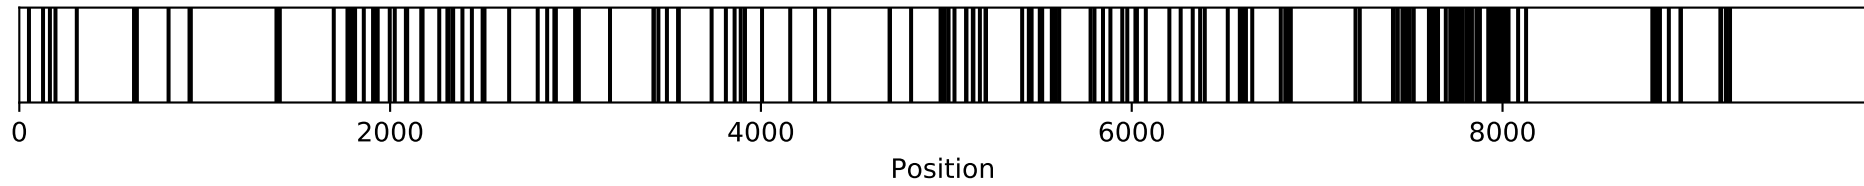

MA1 vs MM1  
Number of differences: 189

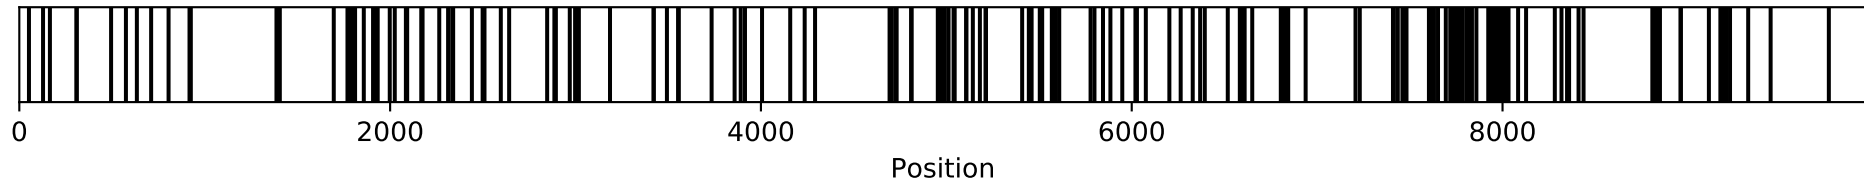

MA1 vs MM2  
Number of differences: 181

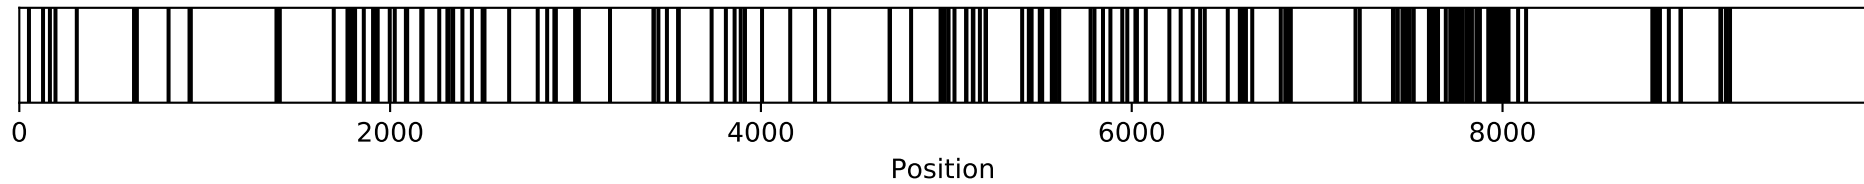

MA2 vs MM1  
Number of differences: 46

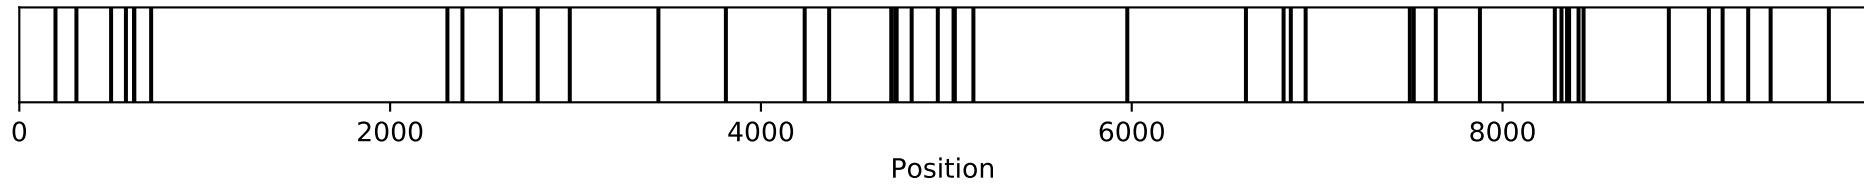

MA2 vs MM2  
Number of differences: 0

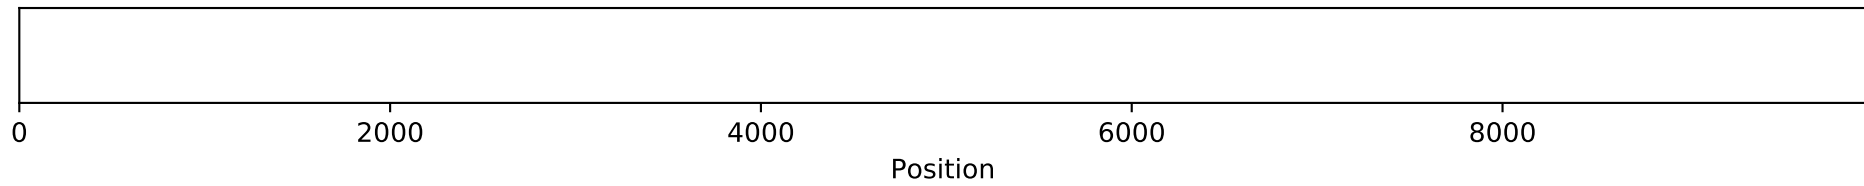

MM1 vs MM2  
Number of differences: 46

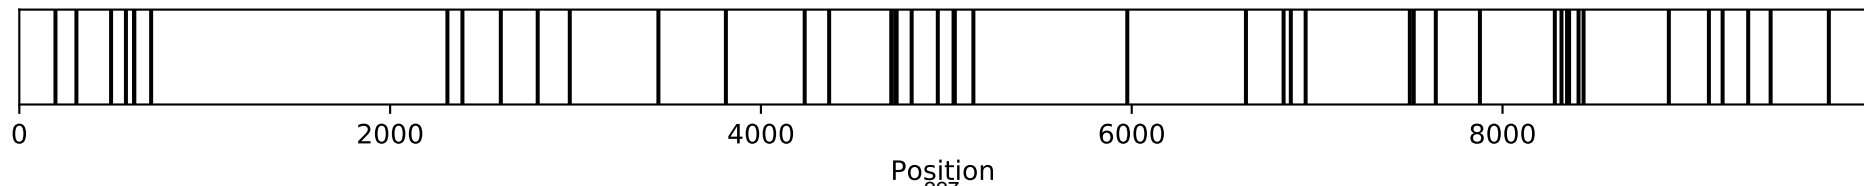

MA1 vs MA2  
Number of differences: 110

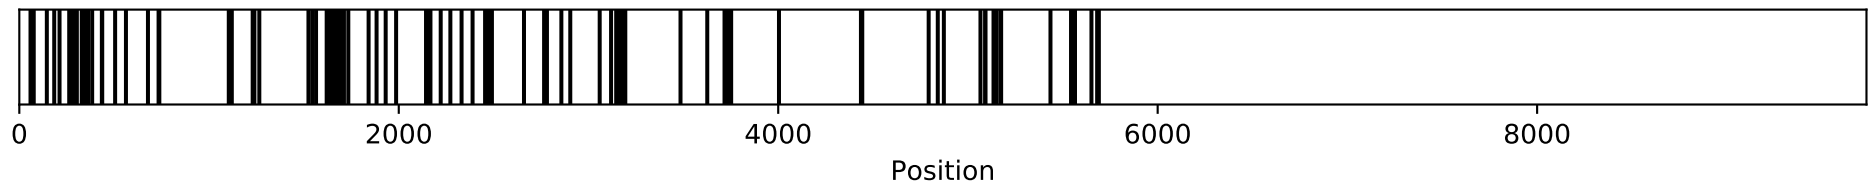

MA1 vs MM1  
Number of differences: 107

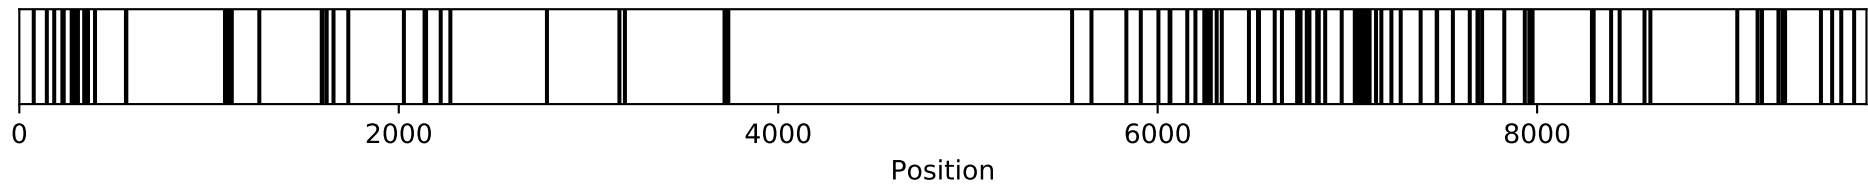

MA1 vs MM2  
Number of differences: 102

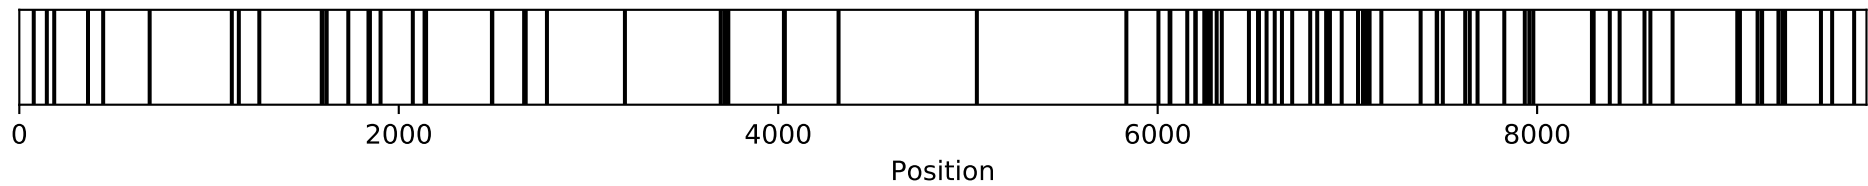

MA2 vs MM1  
Number of differences: 164

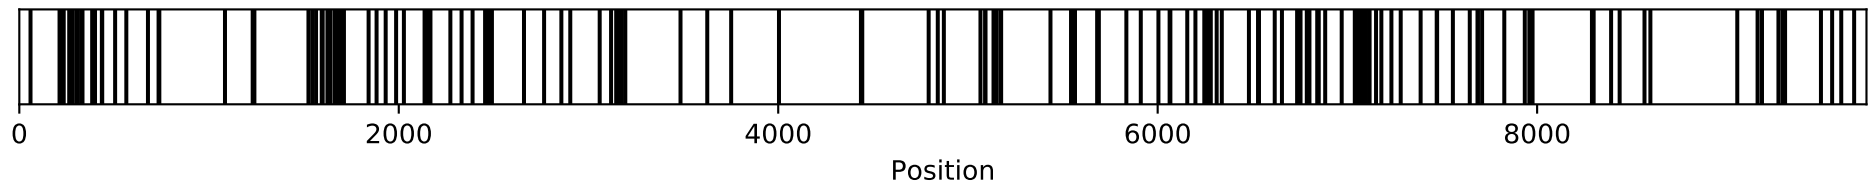

MA2 vs MM2  
Number of differences: 181

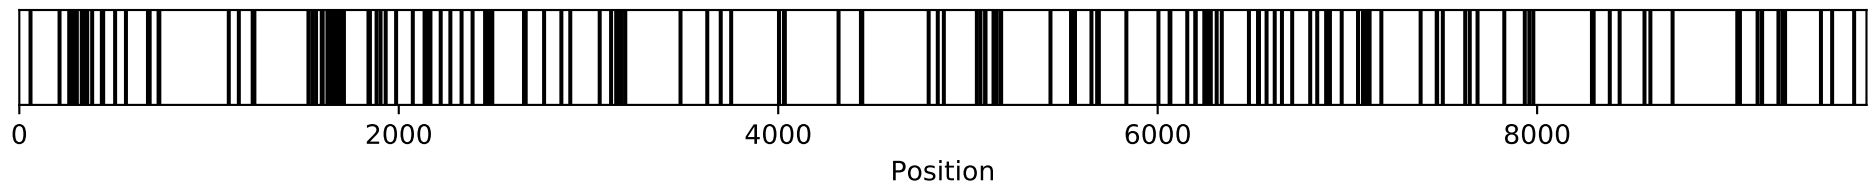

MM1 vs MM2  
Number of differences: 77

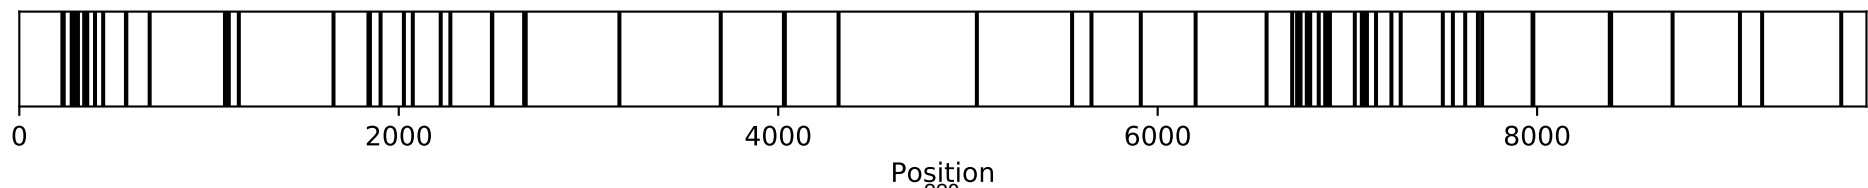

MA1 vs MA2  
Number of differences: 193

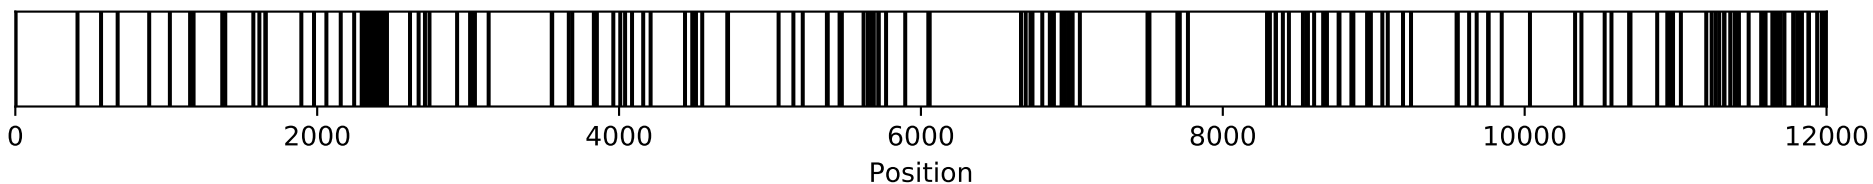

MA1 vs MM1  
Number of differences: 0

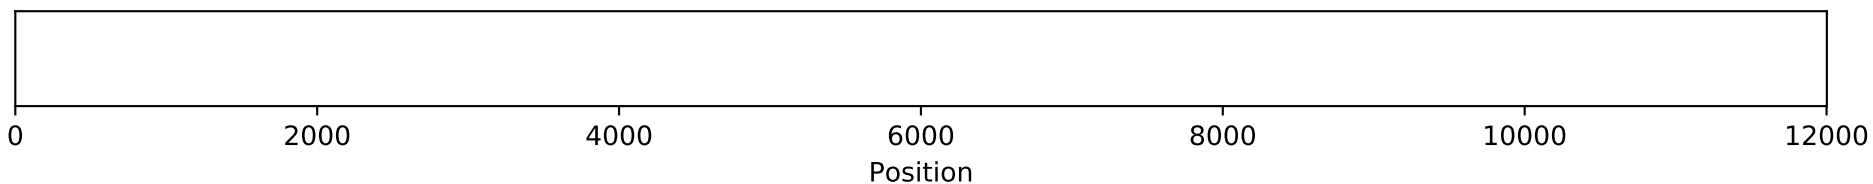

MA1 vs MM2  
Number of differences: 112

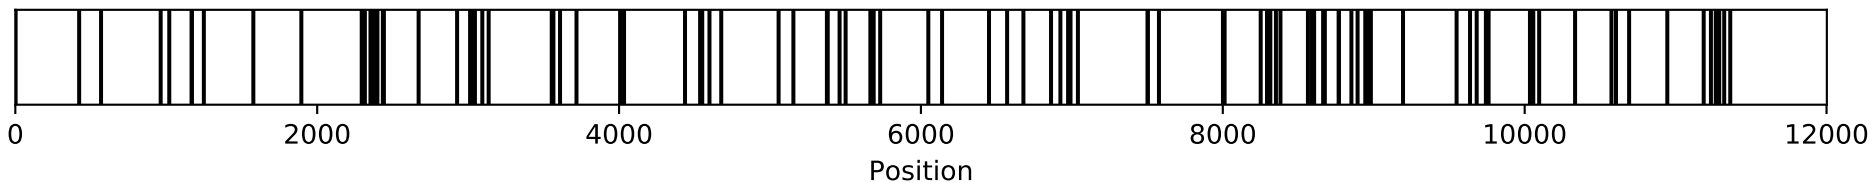

MA2 vs MM1  
Number of differences: 193

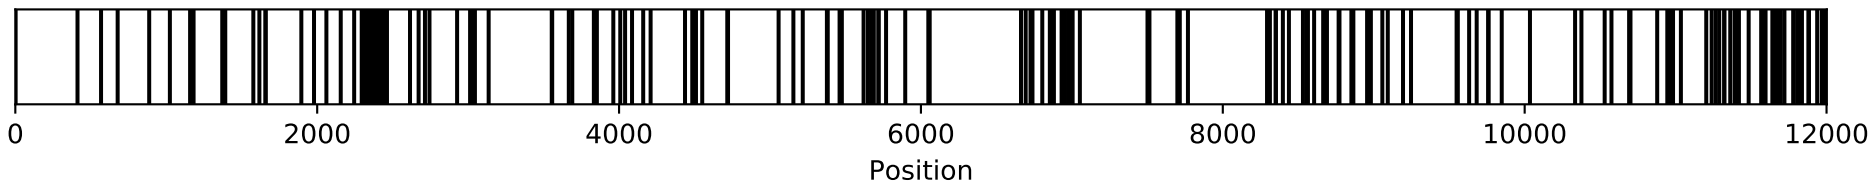

MA2 vs MM2  
Number of differences: 179

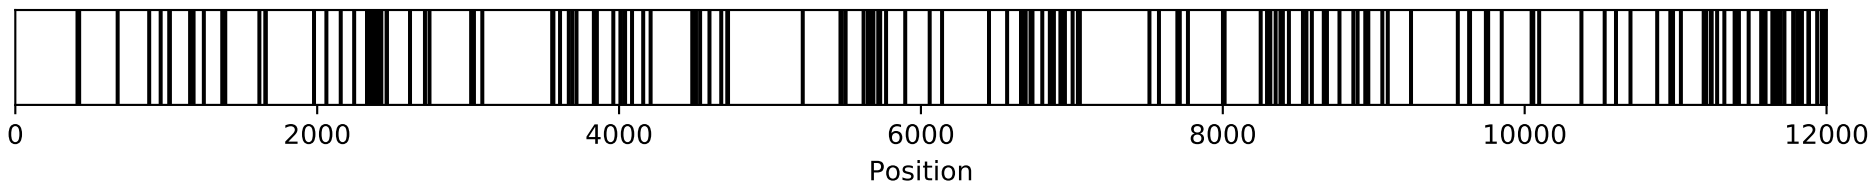

MM1 vs MM2  
Number of differences: 112

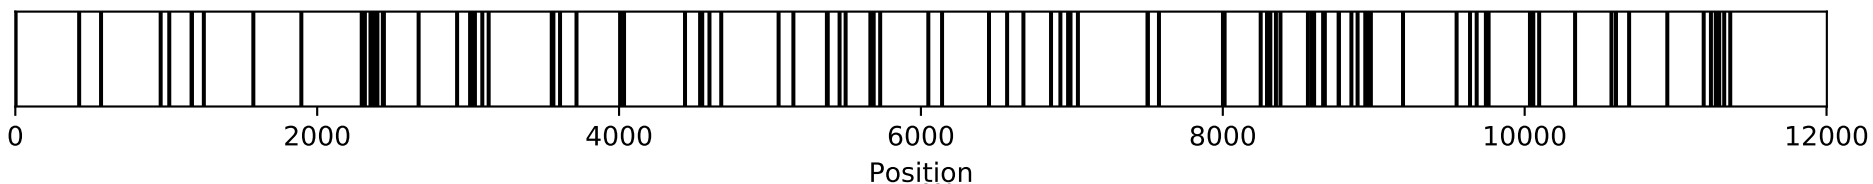

MA1 vs MA2  
Number of differences: 553

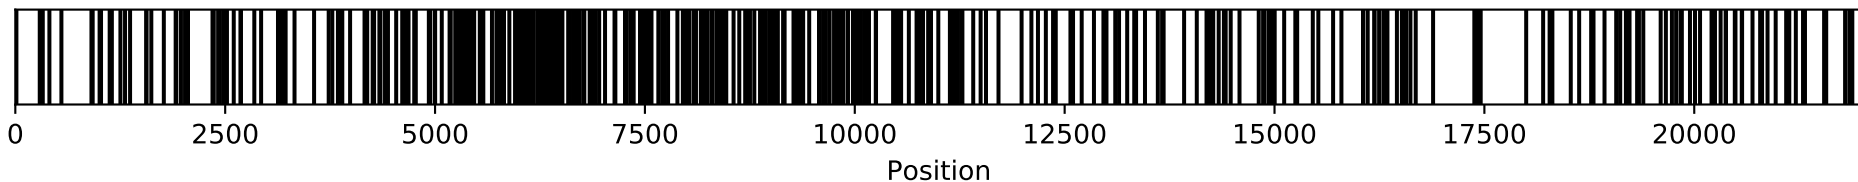

MA1 vs MM1  
Number of differences: 553

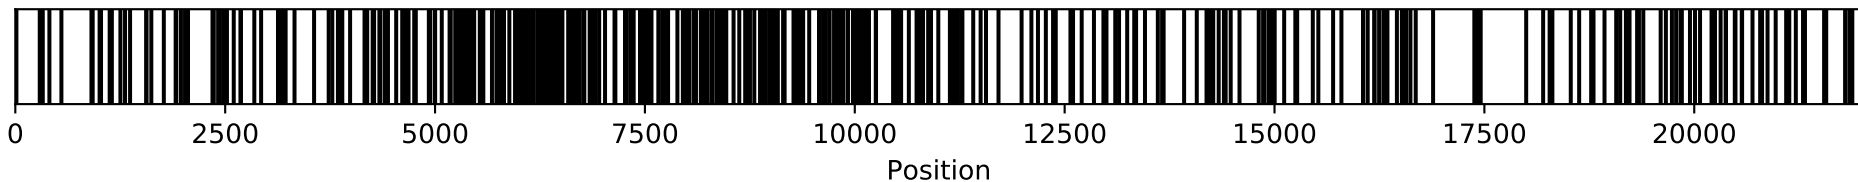

MA1 vs MM2  
Number of differences: 548

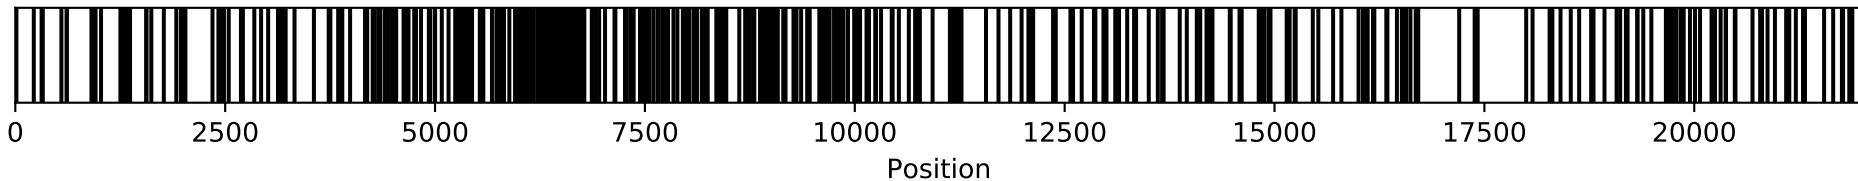

MA2 vs MM1  
Number of differences: 0

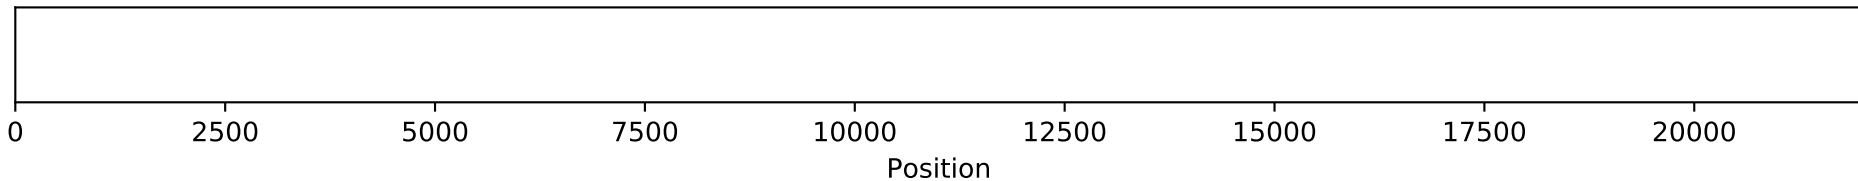

MA2 vs MM2  
Number of differences: 261

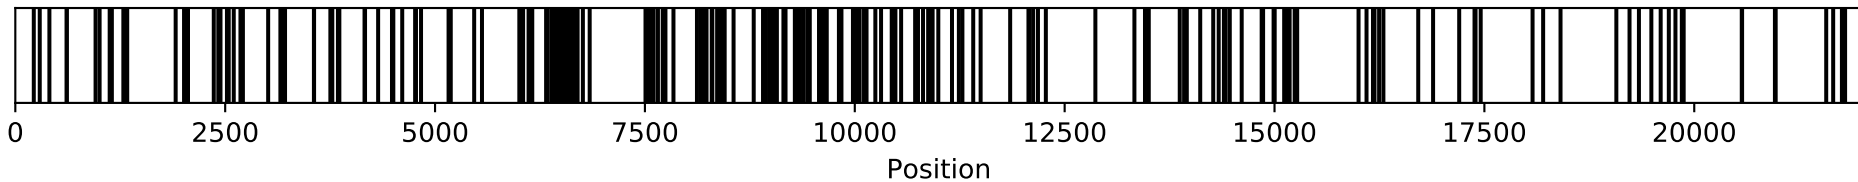

MM1 vs MM2  
Number of differences: 261

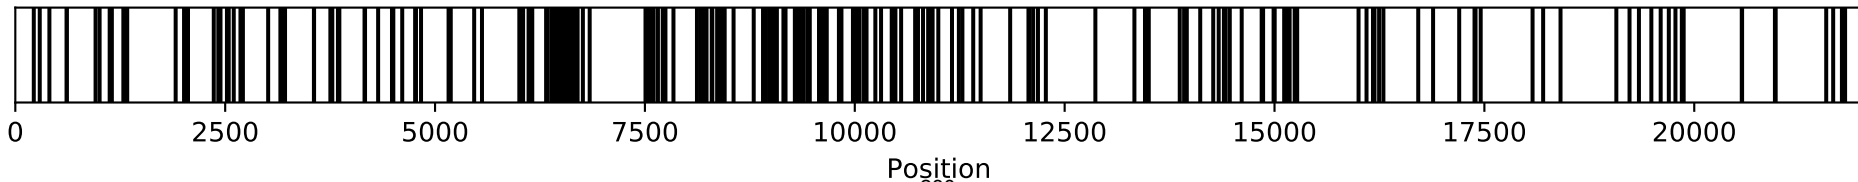

MA1 vs MA2  
Number of differences: 227

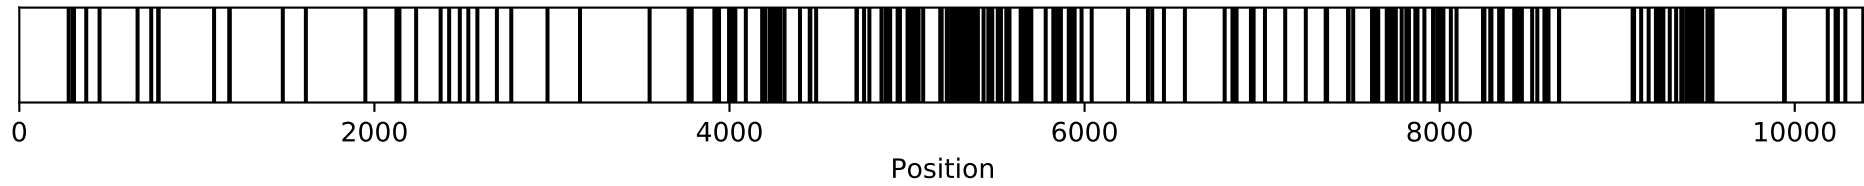

MA1 vs MM1  
Number of differences: 227

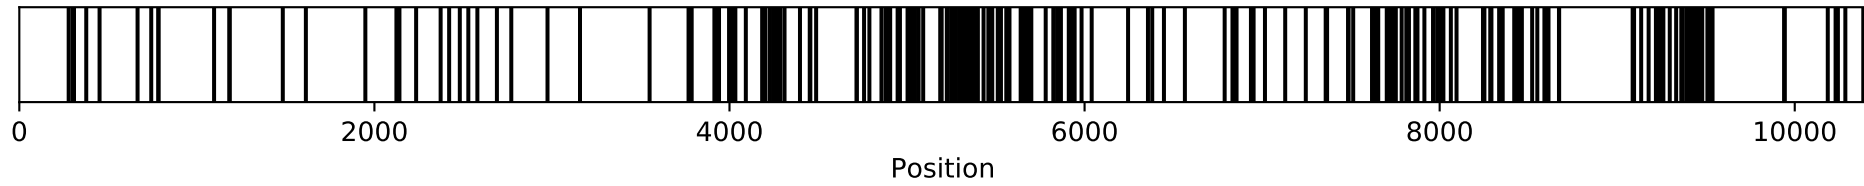

MA1 vs MM2  
Number of differences: 217

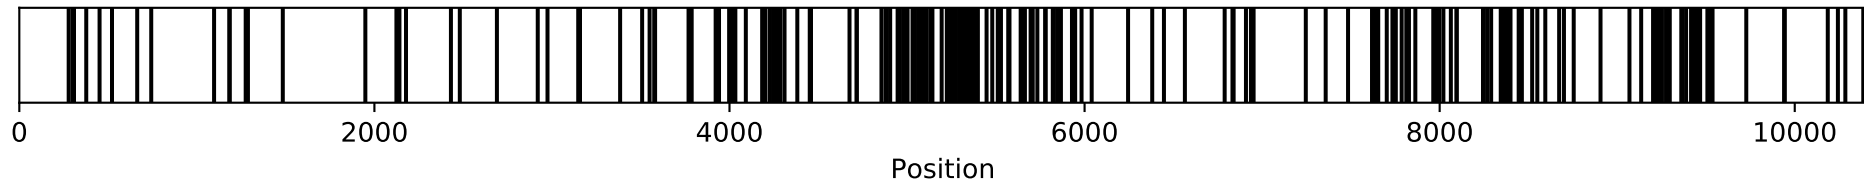

MA2 vs MM1  
Number of differences: 0

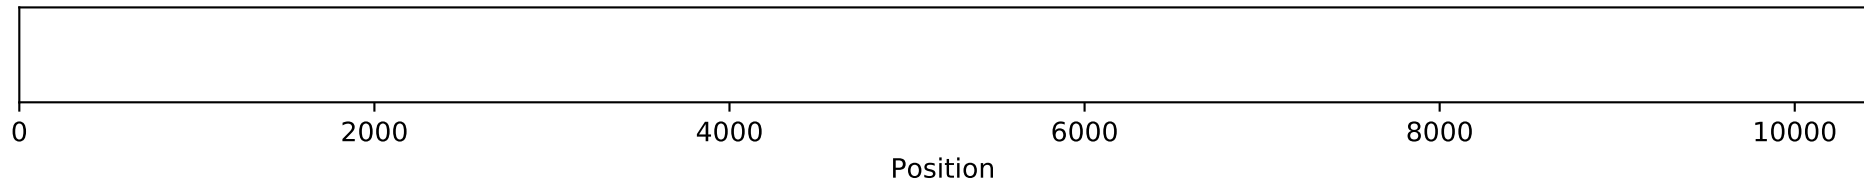

MA2 vs MM2  
Number of differences: 125

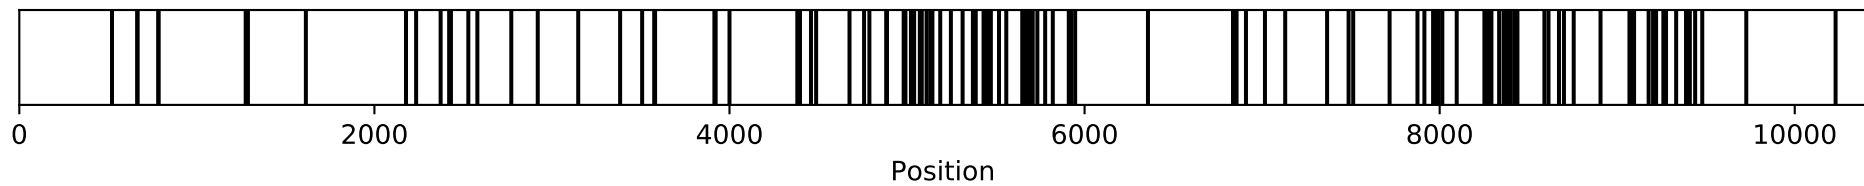

MM1 vs MM2  
Number of differences: 125

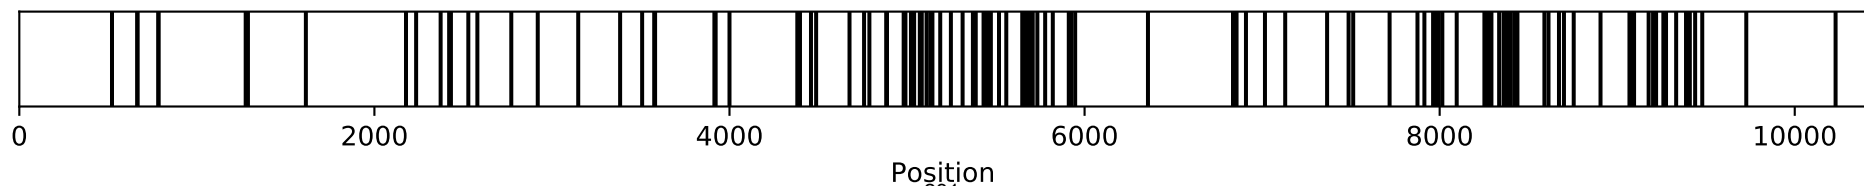

MA1 vs MA2  
Number of differences: 216

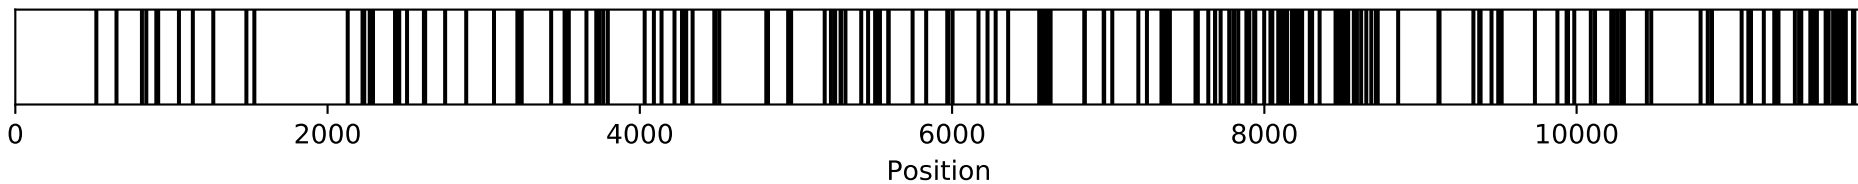

MA1 vs MM1  
Number of differences: 115

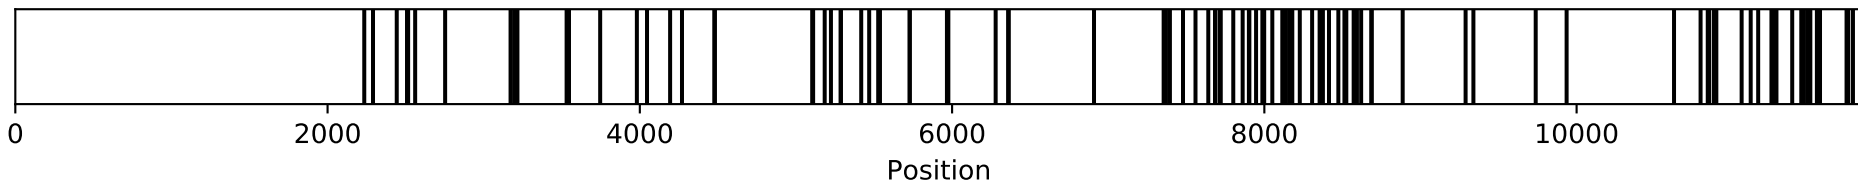

MA1 vs MM2  
Number of differences: 115

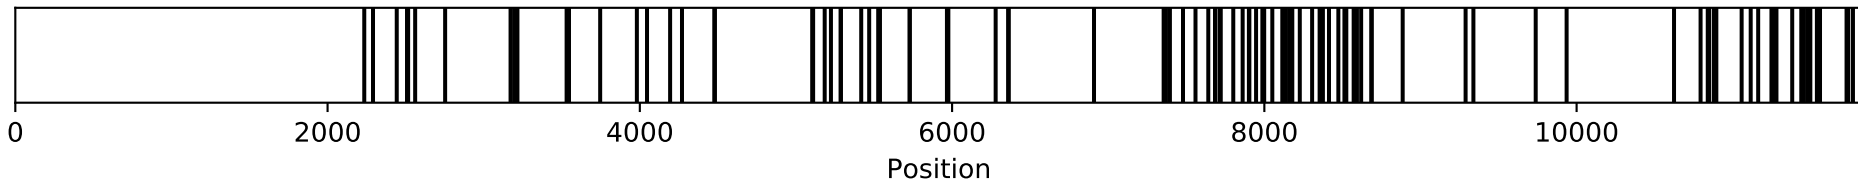

MA2 vs MM1  
Number of differences: 217

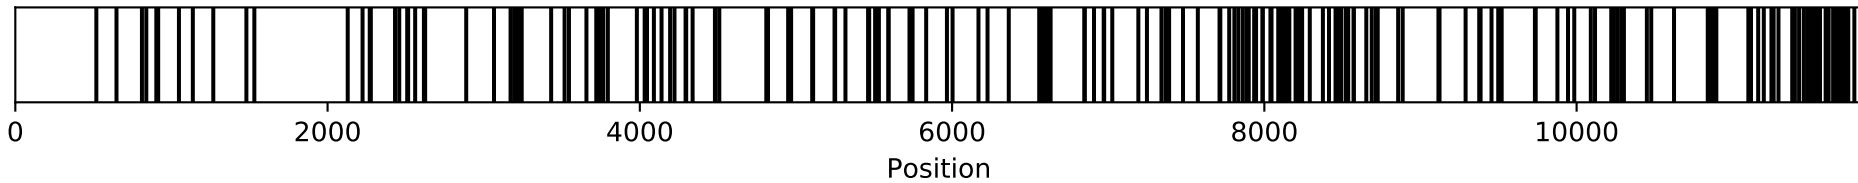

MA2 vs MM2  
Number of differences: 217

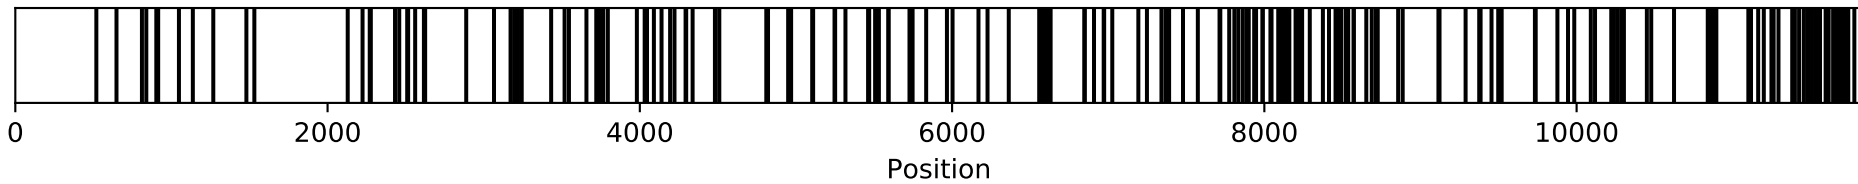

MM1 vs MM2  
Number of differences: 0

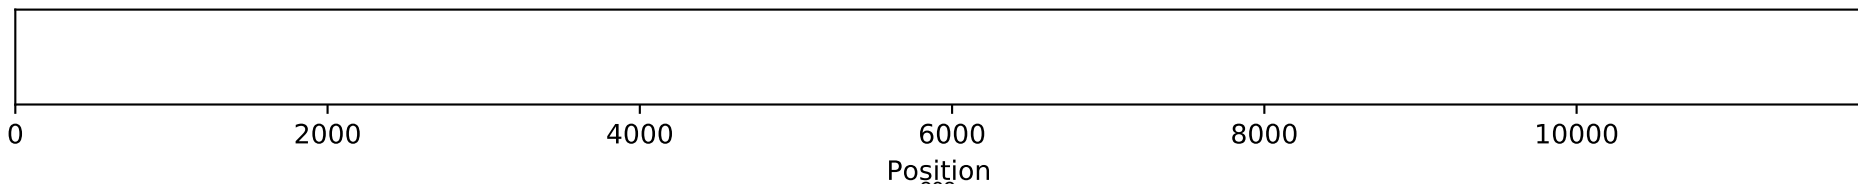

MA1 vs MA2  
Number of differences: 245

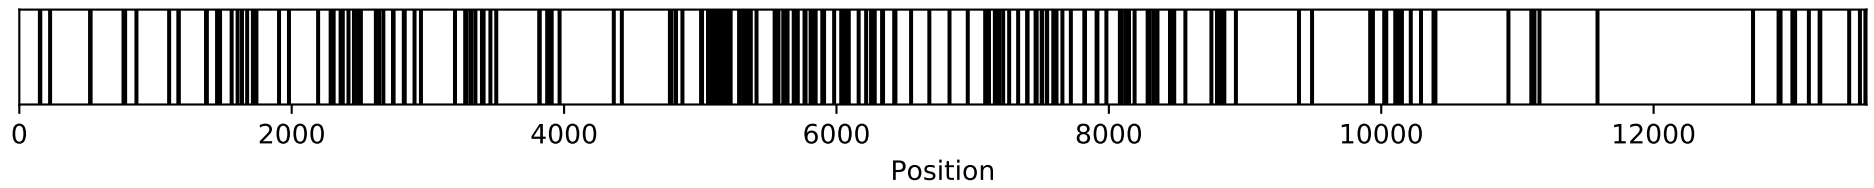

MA1 vs MM1  
Number of differences: 245

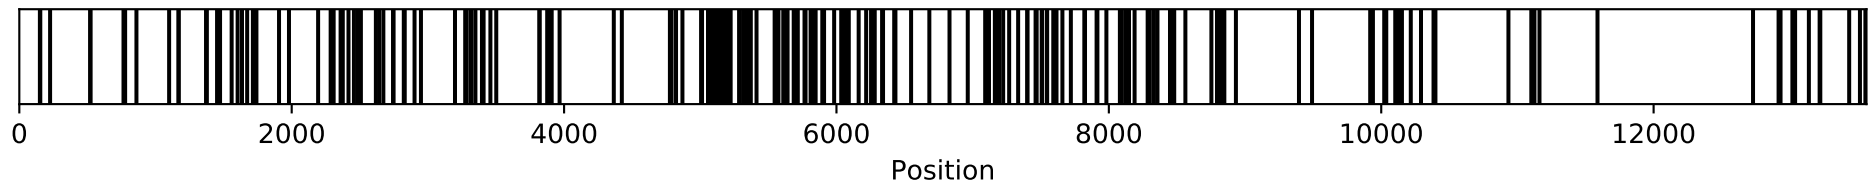

MA1 vs MM2  
Number of differences: 227

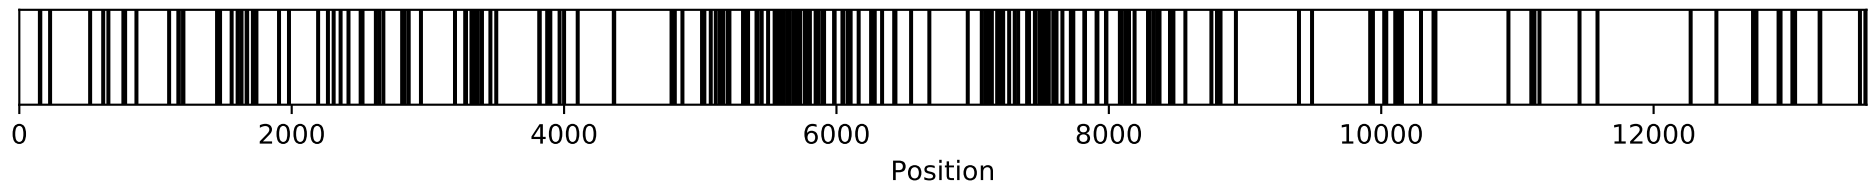

MA2 vs MM1  
Number of differences: 0

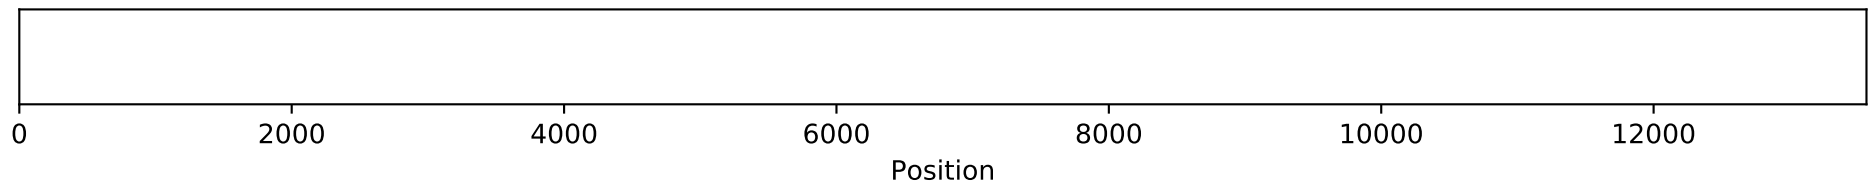

MA2 vs MM2  
Number of differences: 136

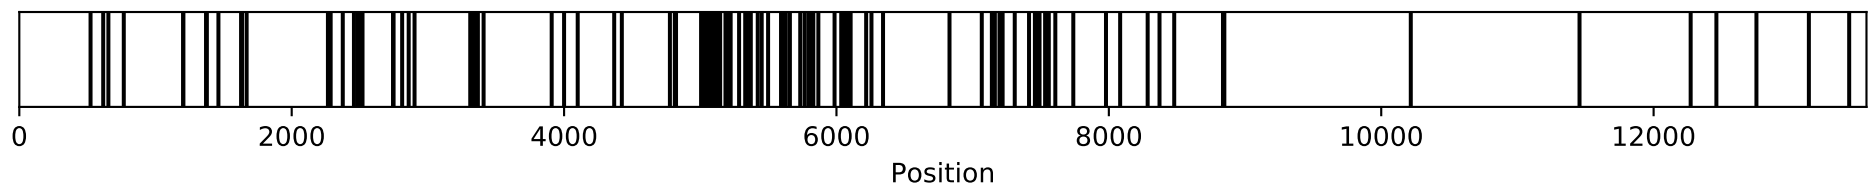

MM1 vs MM2  
Number of differences: 136

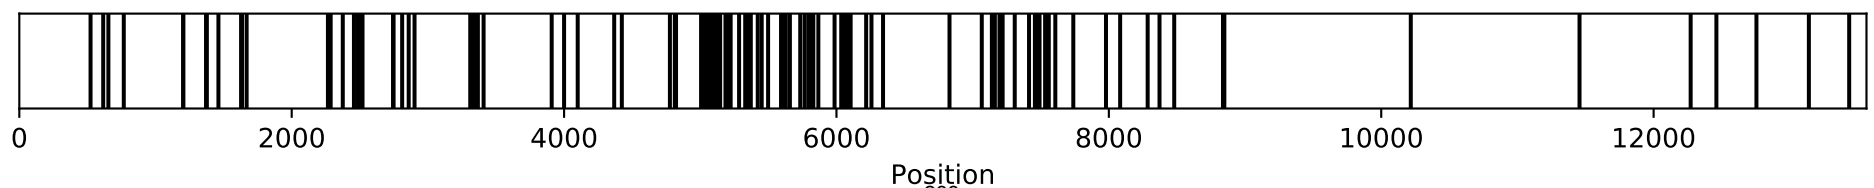

MA1 vs MA2  
Number of differences: 259

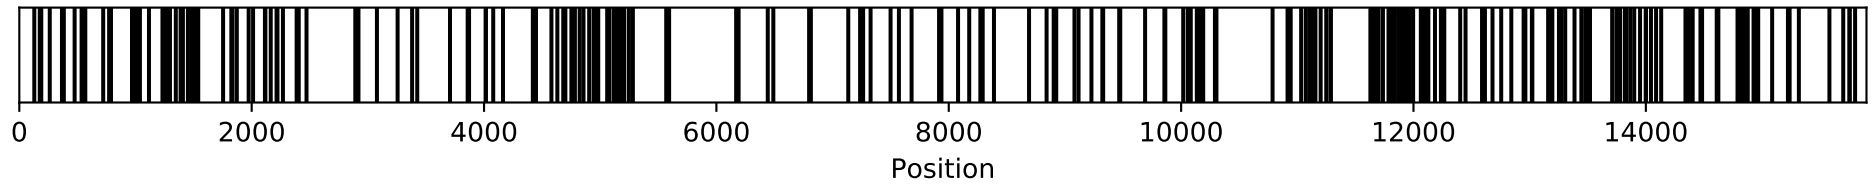

MA1 vs MM1  
Number of differences: 259

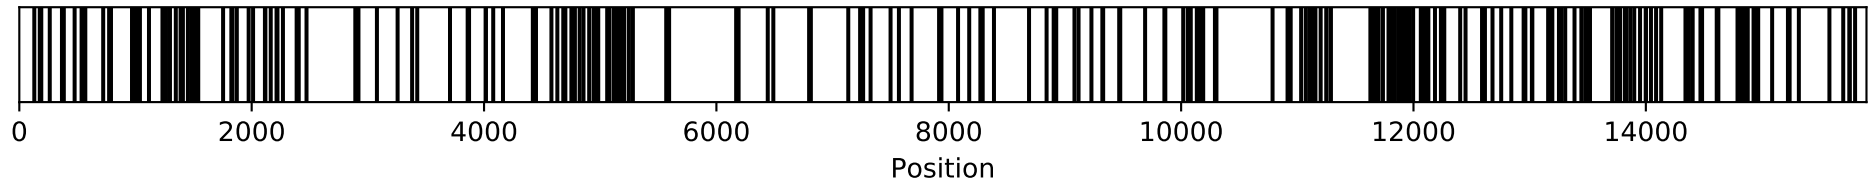

MA1 vs MM2  
Number of differences: 238

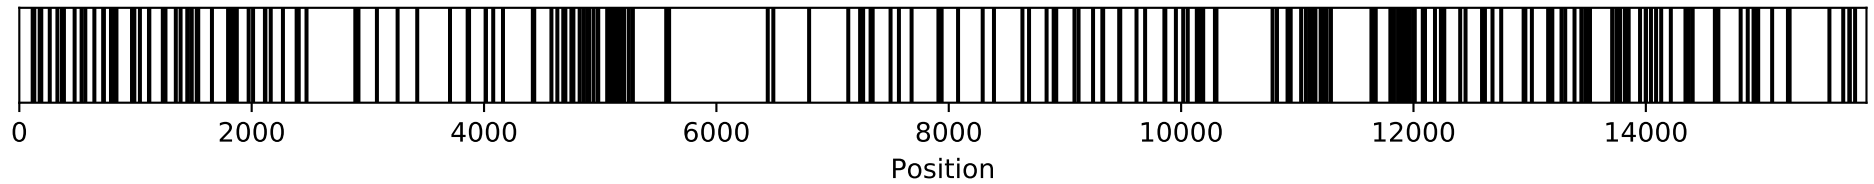

MA2 vs MM1  
Number of differences: 0

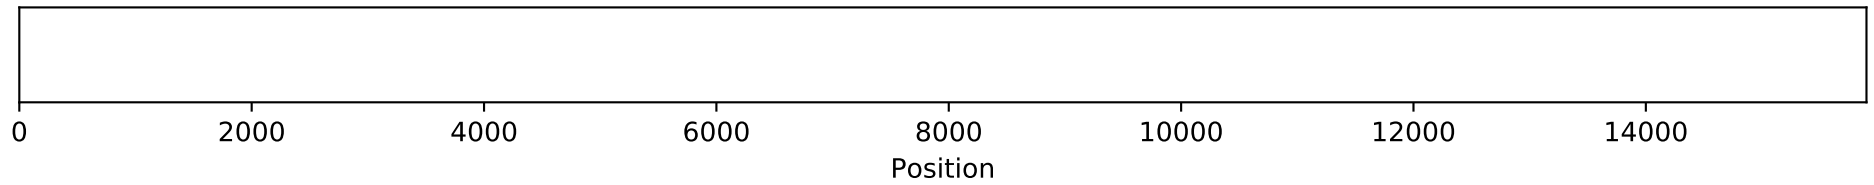

MA2 vs MM2  
Number of differences: 103

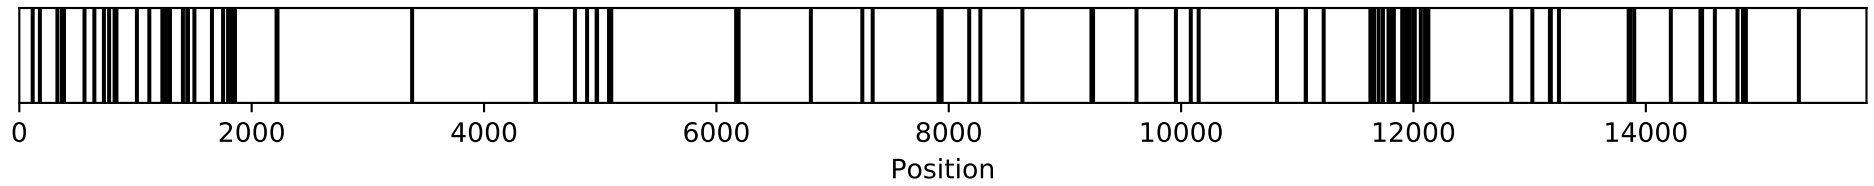

MM1 vs MM2  
Number of differences: 103

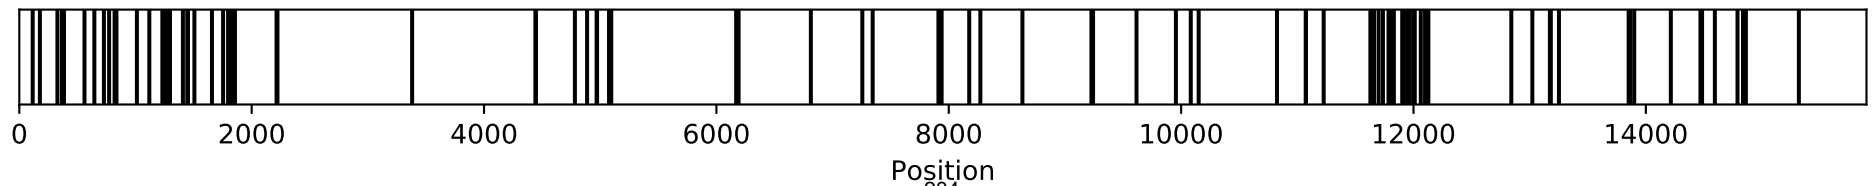



MA1 vs MA2  
Number of differences: 182

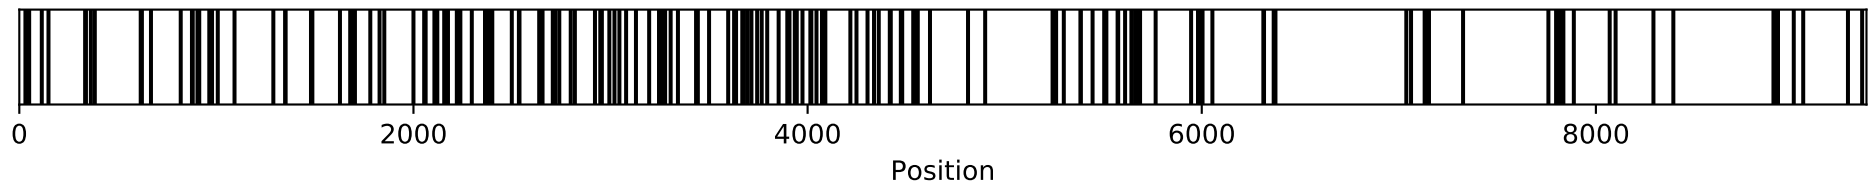

MA1 vs MM1  
Number of differences: 12

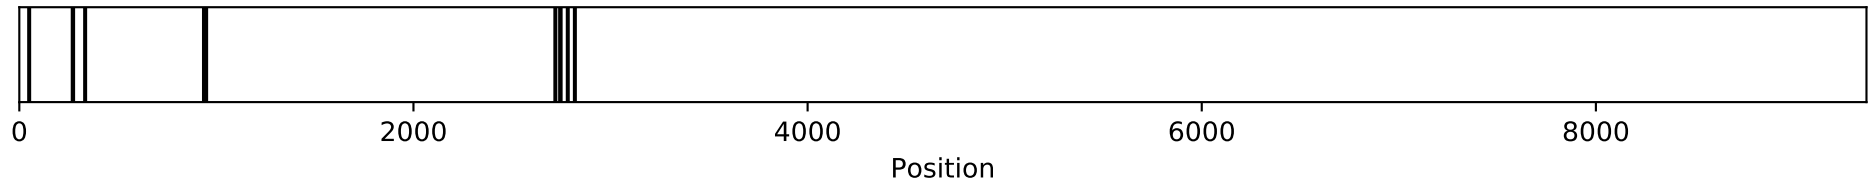

MA1 vs MM2  
Number of differences: 0

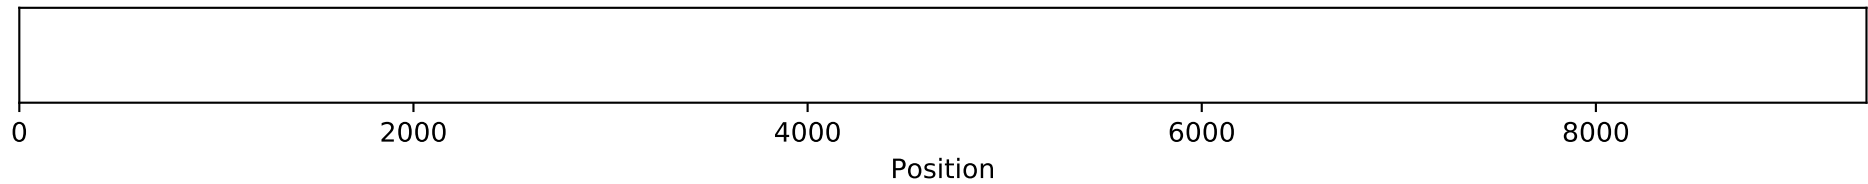

MA2 vs MM1  
Number of differences: 186

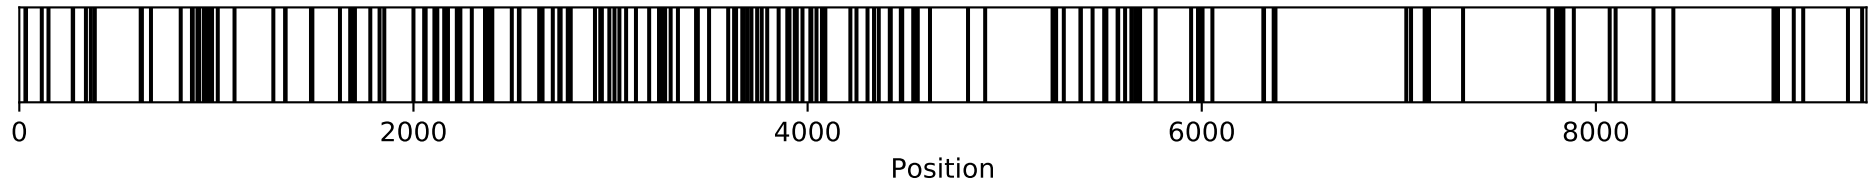

MA2 vs MM2  
Number of differences: 182

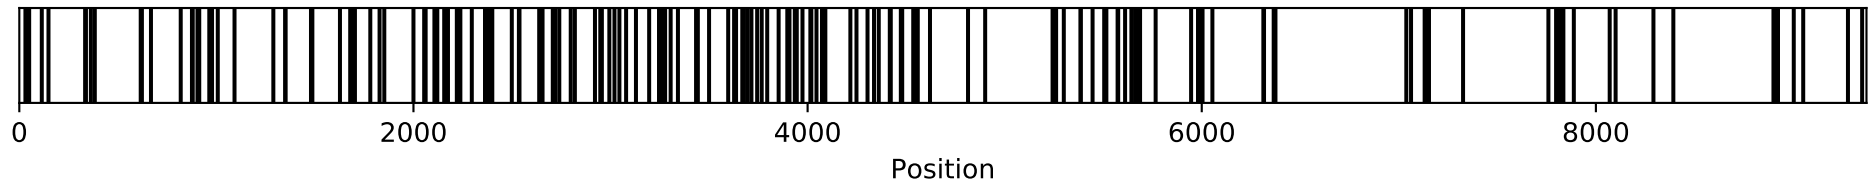

MM1 vs MM2  
Number of differences: 12

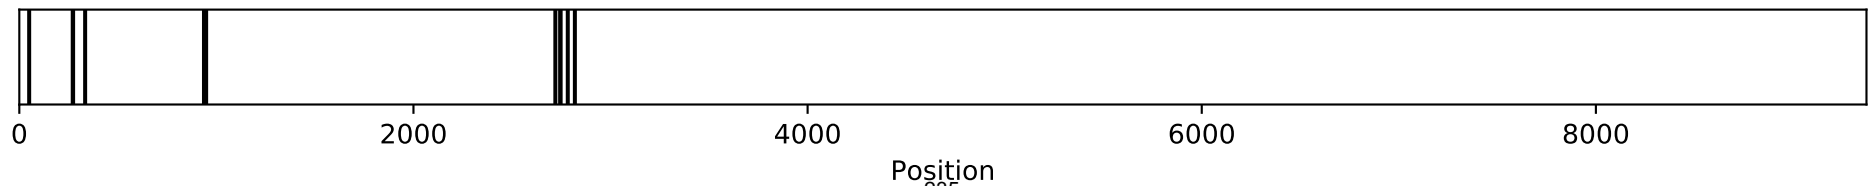

MA1 vs MA2  
Number of differences: 190

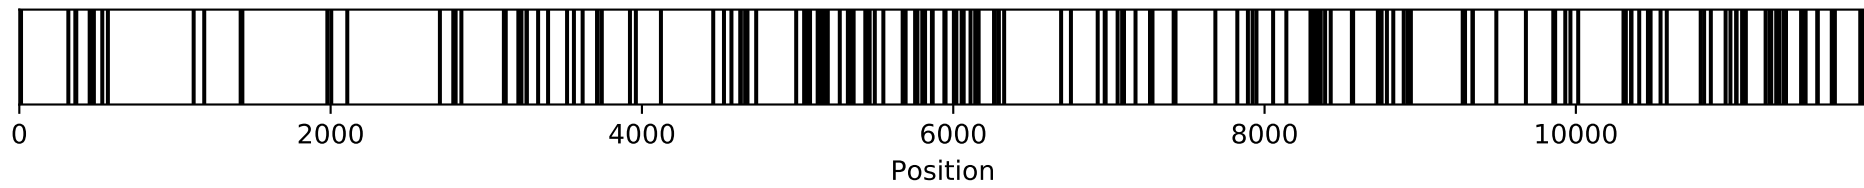

MA1 vs MM1  
Number of differences: 107

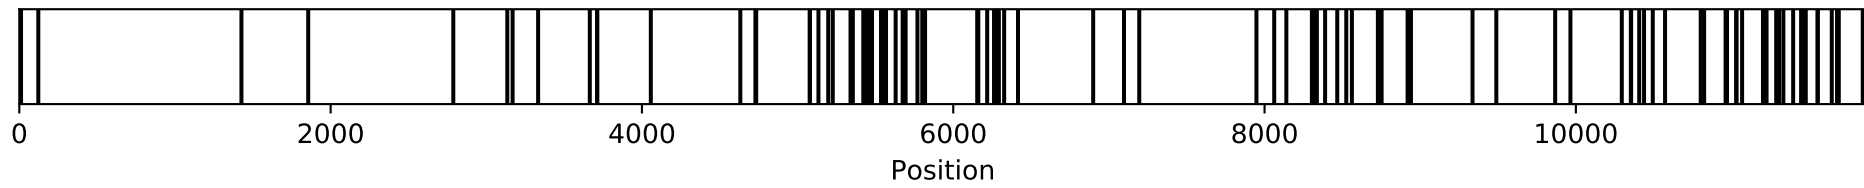

MA1 vs MM2  
Number of differences: 0

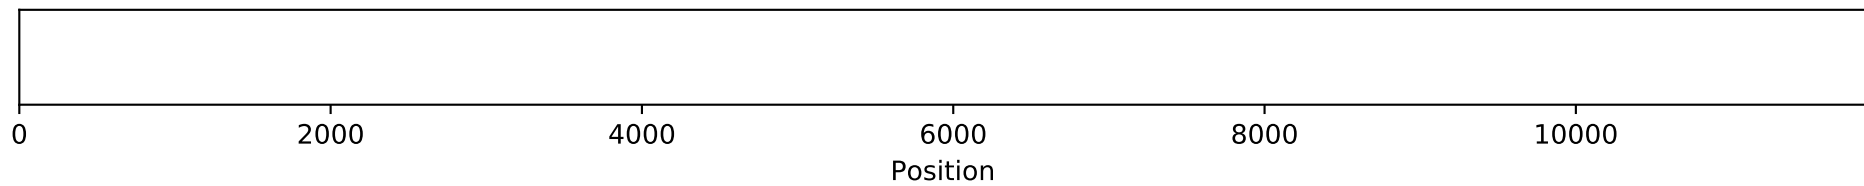

MA2 vs MM1  
Number of differences: 179

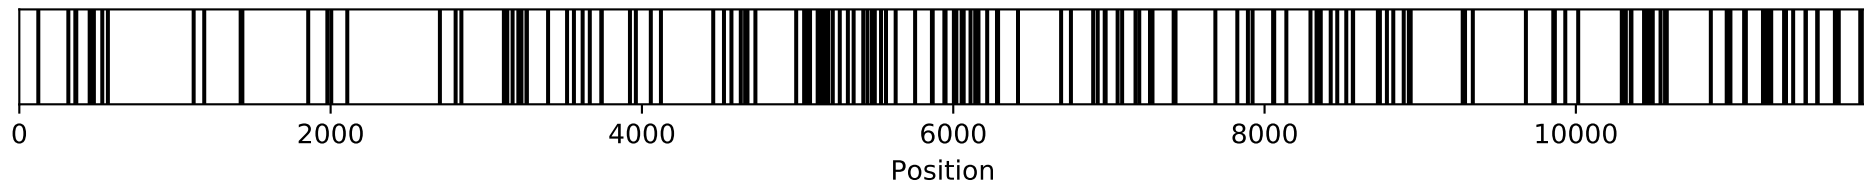

MA2 vs MM2  
Number of differences: 190

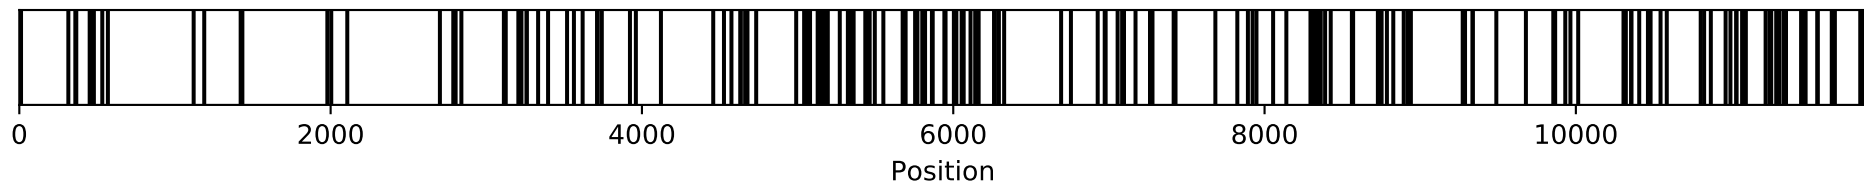

MM1 vs MM2  
Number of differences: 107

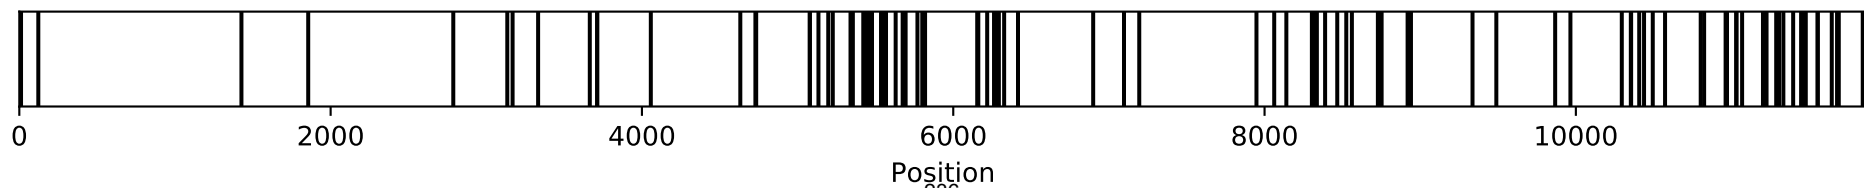

MA1 vs MA2  
Number of differences: 110

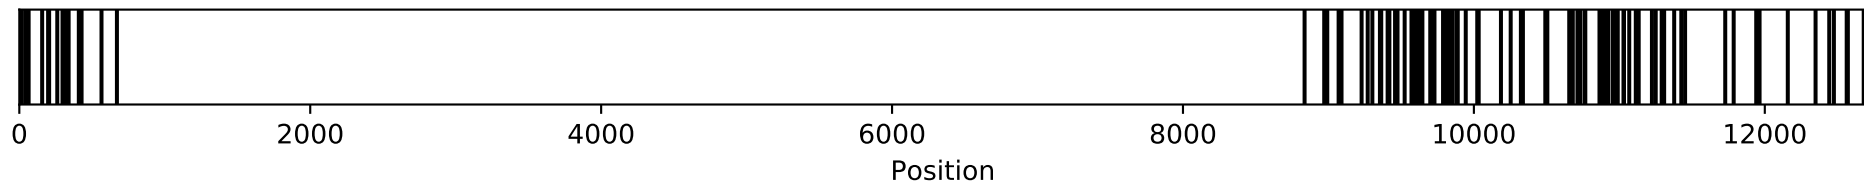

MA1 vs MM1  
Number of differences: 165

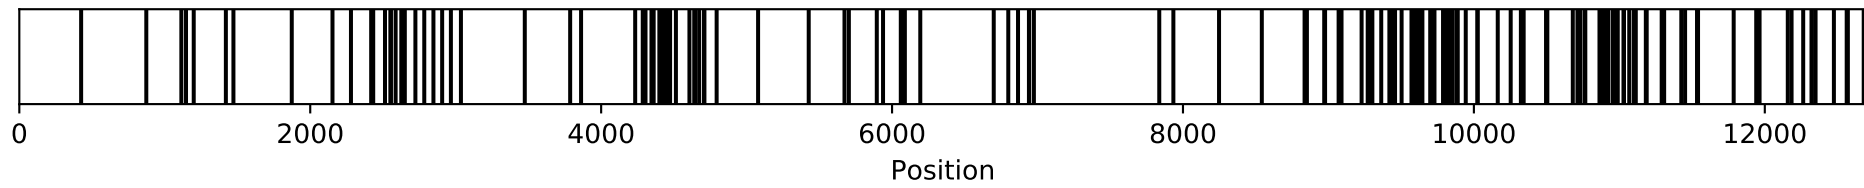

MA1 vs MM2  
Number of differences: 129

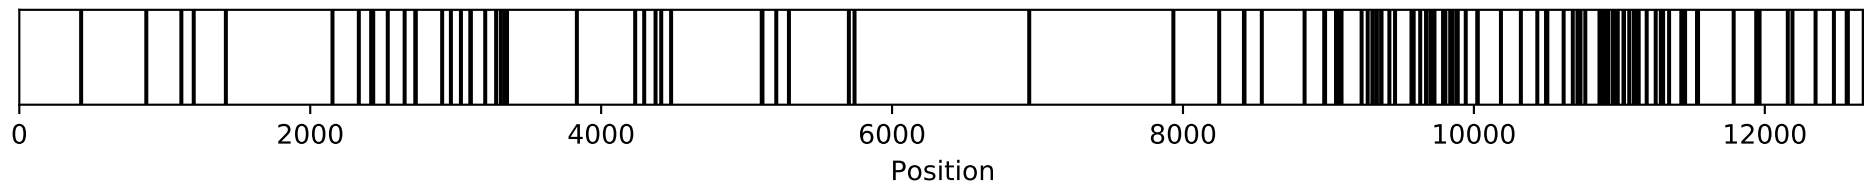

MA2 vs MM1  
Number of differences: 129

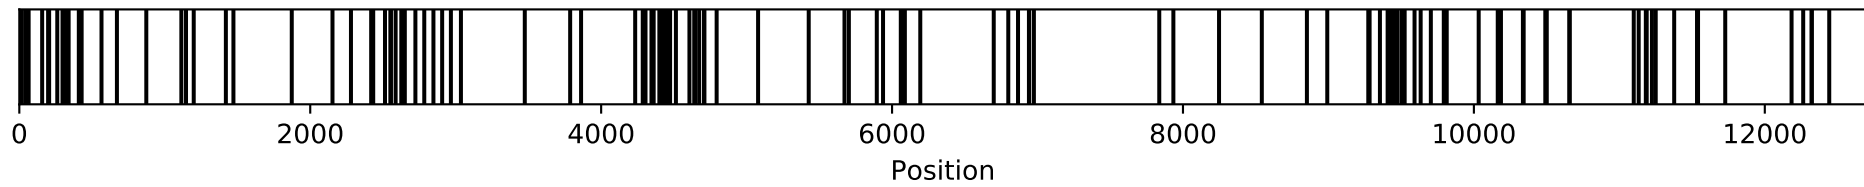

MA2 vs MM2  
Number of differences: 103

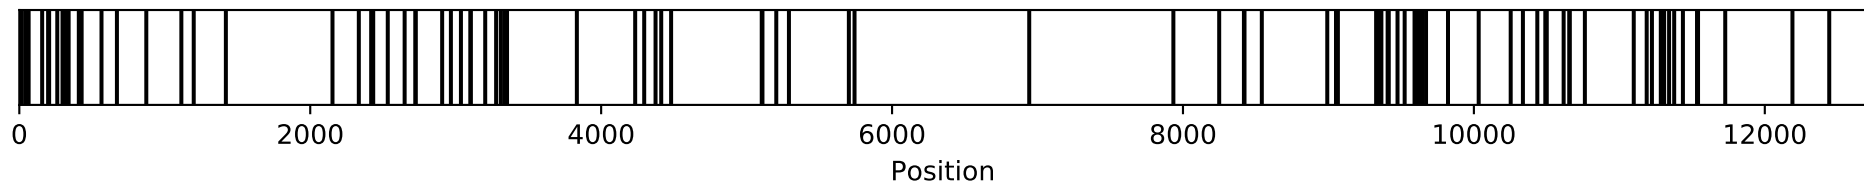

MM1 vs MM2  
Number of differences: 118

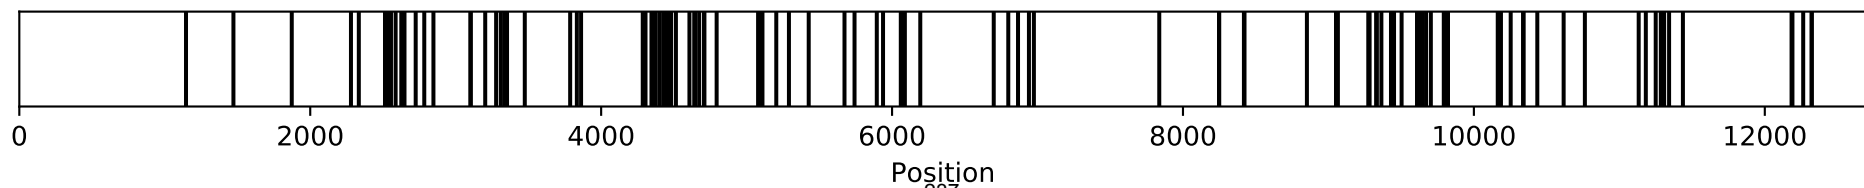

MA1 vs MA2  
Number of differences: 176

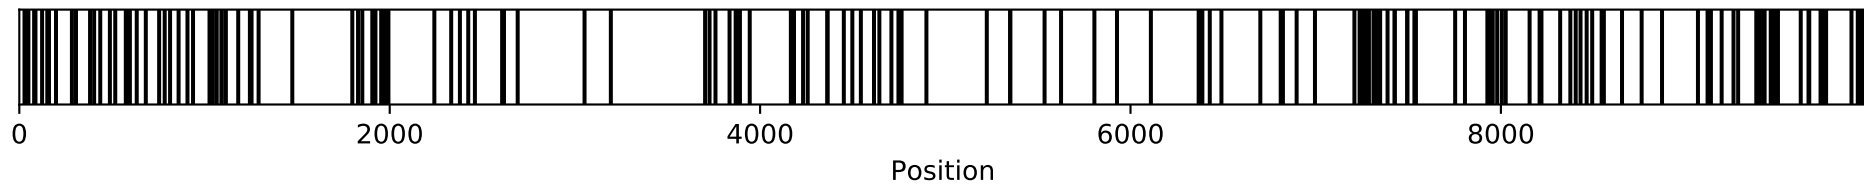

MA1 vs MM1  
Number of differences: 0

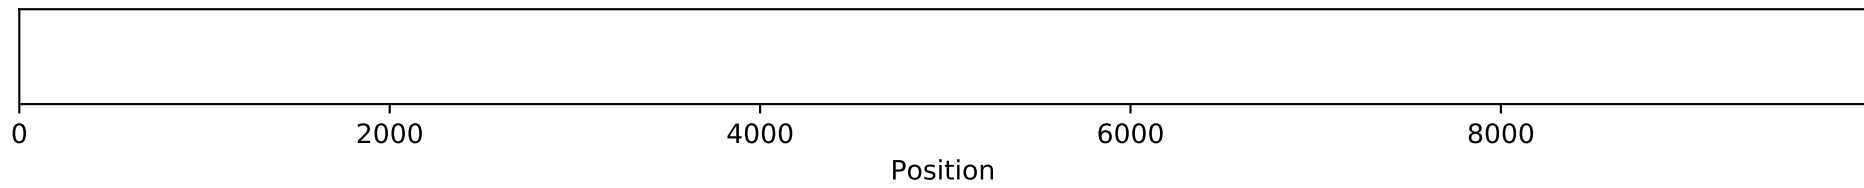

MA1 vs MM2  
Number of differences: 76

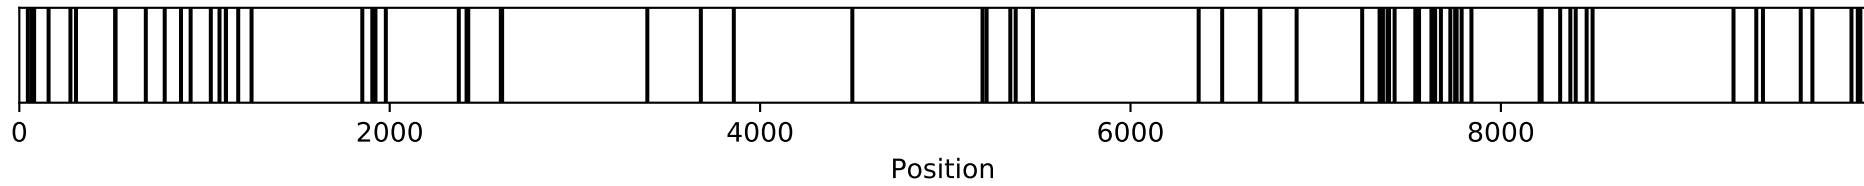

MA2 vs MM1  
Number of differences: 176

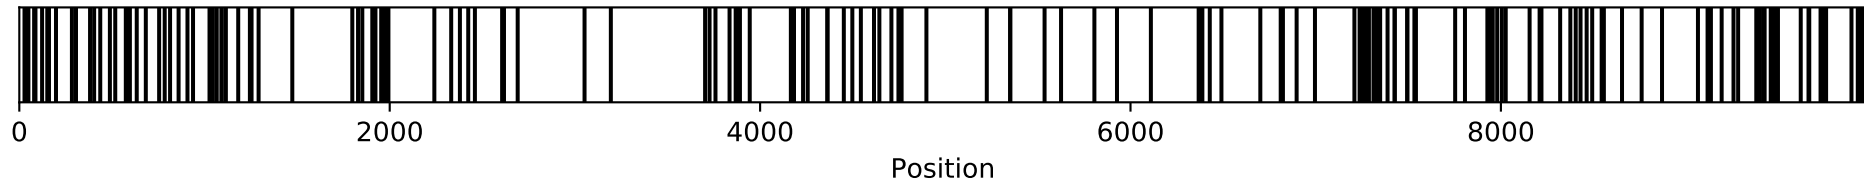

MA2 vs MM2  
Number of differences: 175

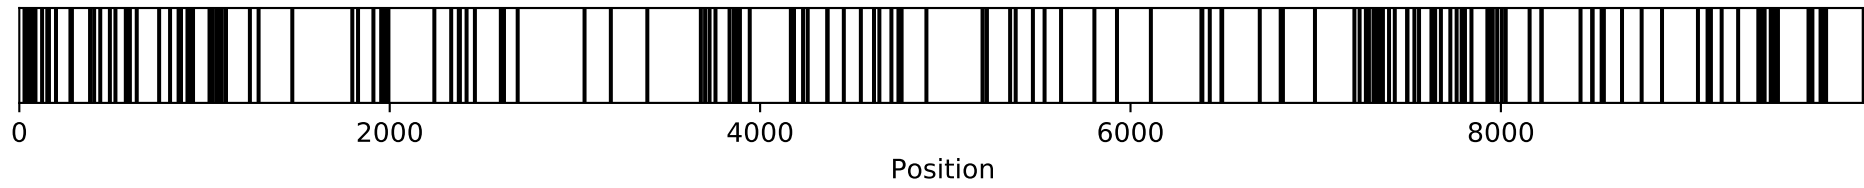

MM1 vs MM2  
Number of differences: 76

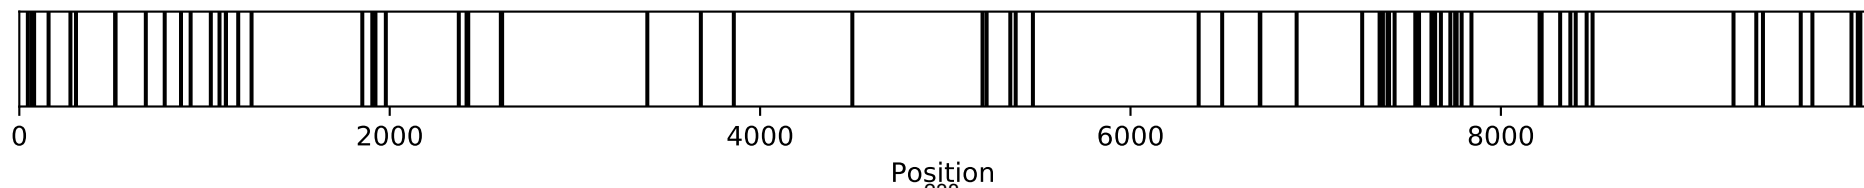

MA1 vs MA2  
Number of differences: 221

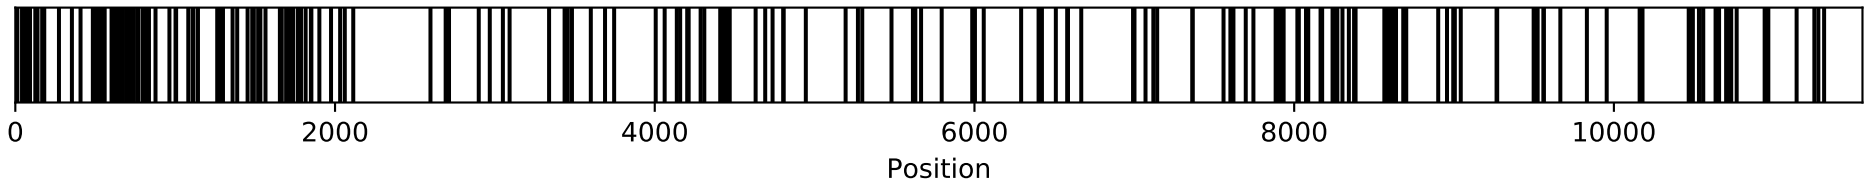

MA1 vs MM1  
Number of differences: 221

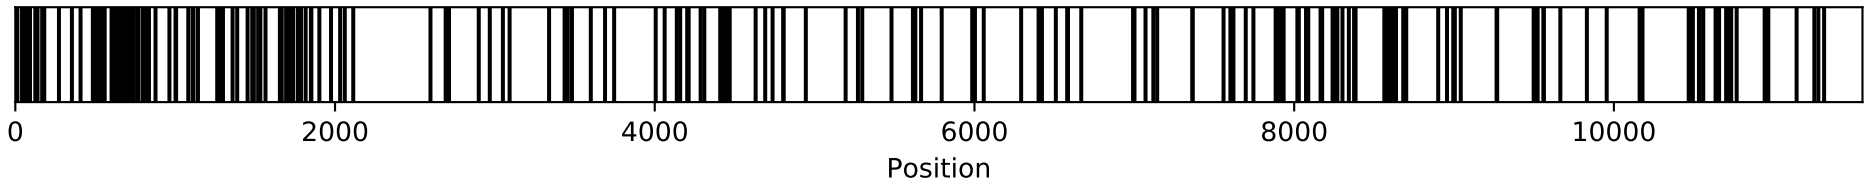

MA1 vs MM2  
Number of differences: 214

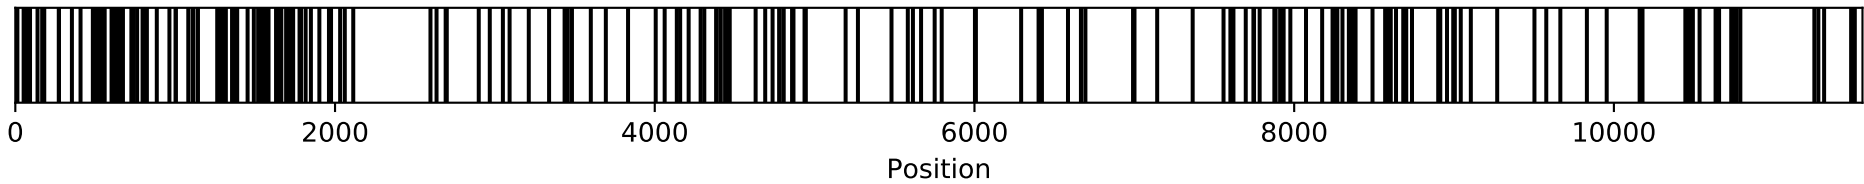

MA2 vs MM1  
Number of differences: 0

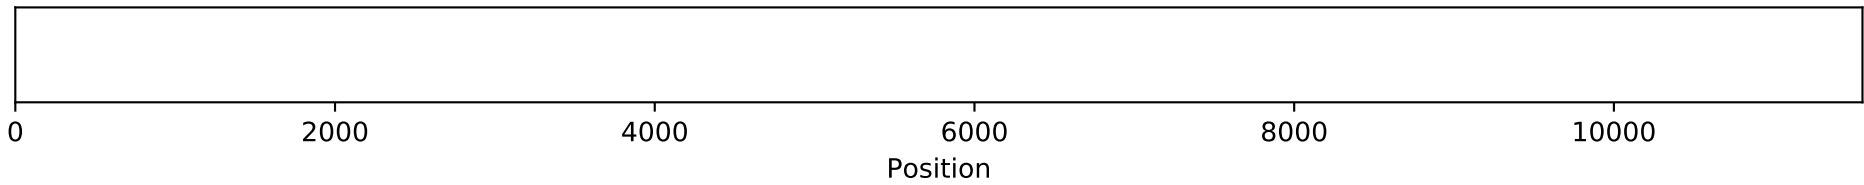

MA2 vs MM2  
Number of differences: 106

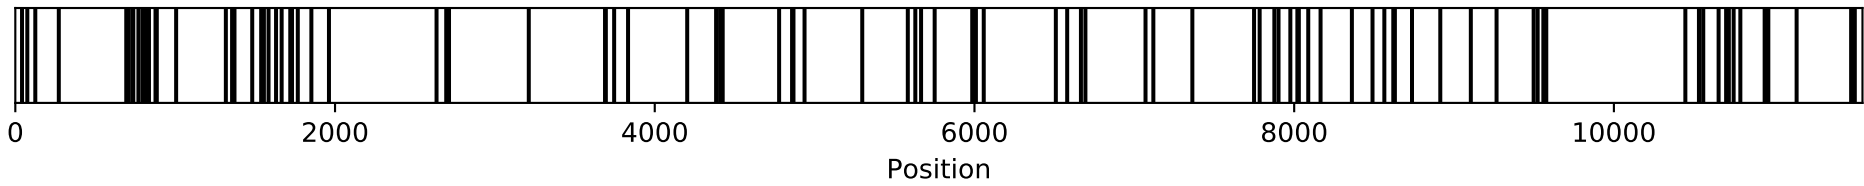

MM1 vs MM2  
Number of differences: 106

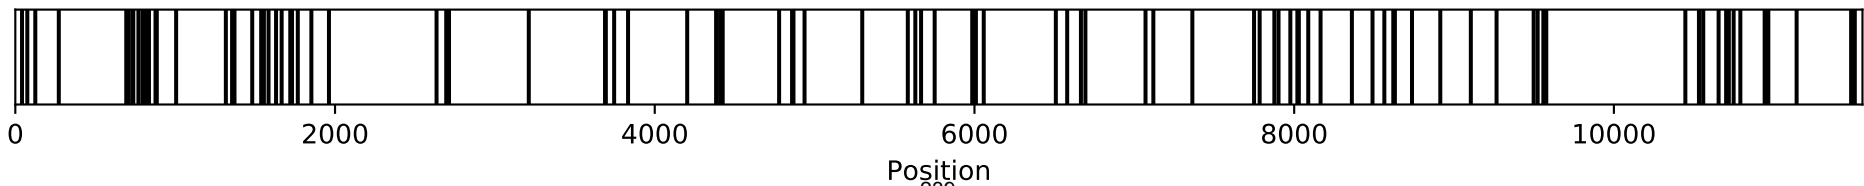

MA1 vs MA2  
Number of differences: 238

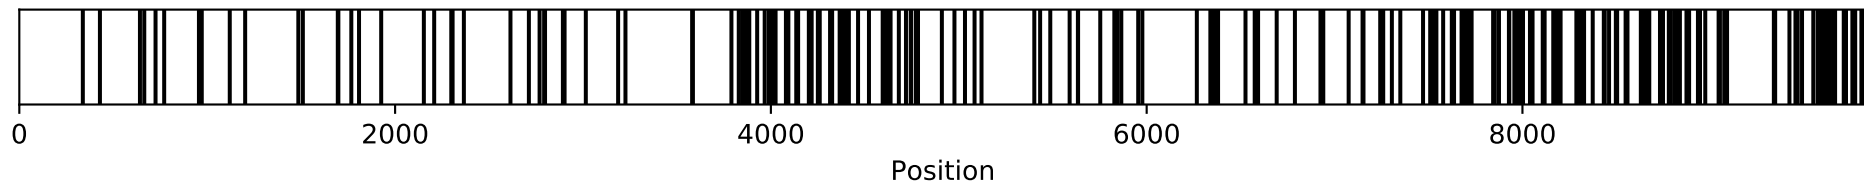

MA1 vs MM1  
Number of differences: 127

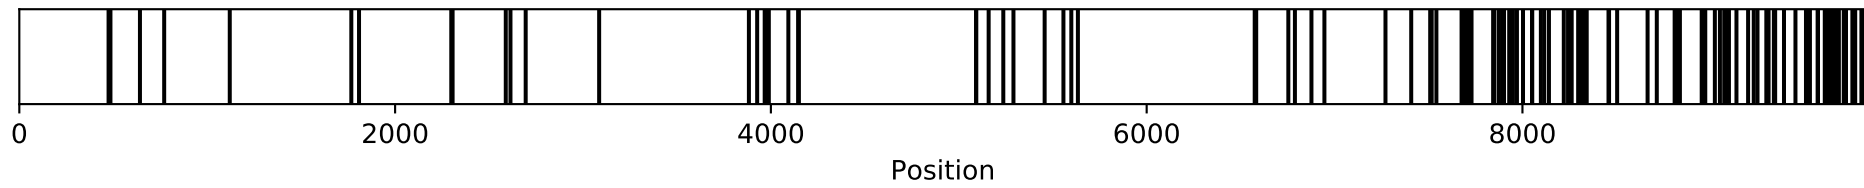

MA1 vs MM2  
Number of differences: 125

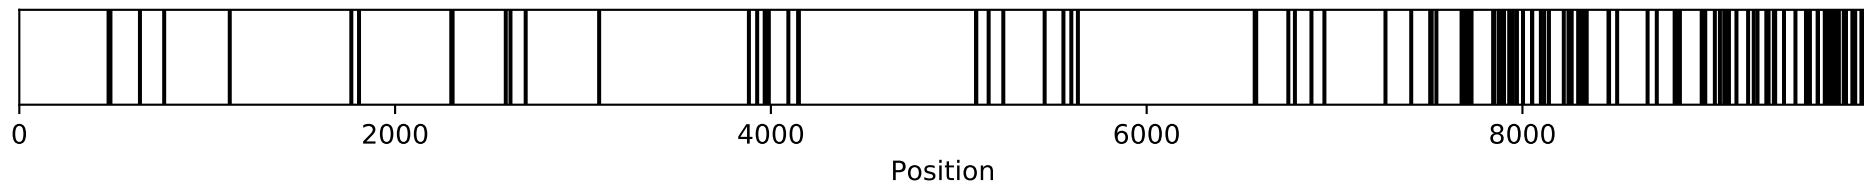

MA2 vs MM1  
Number of differences: 235

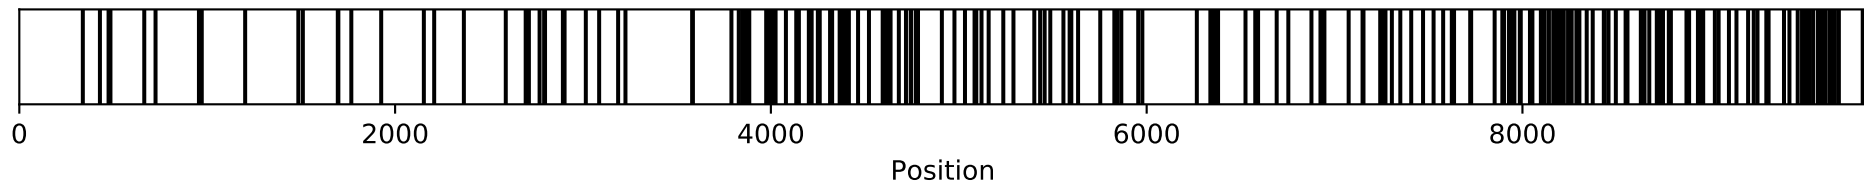

MA2 vs MM2  
Number of differences: 233

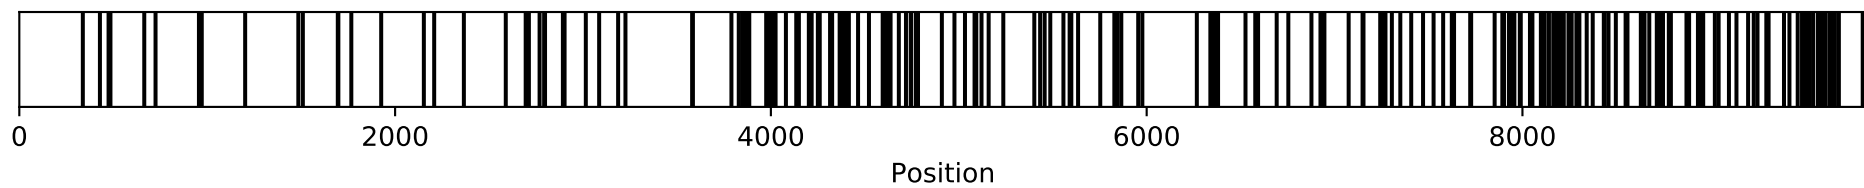

MM1 vs MM2  
Number of differences: 2

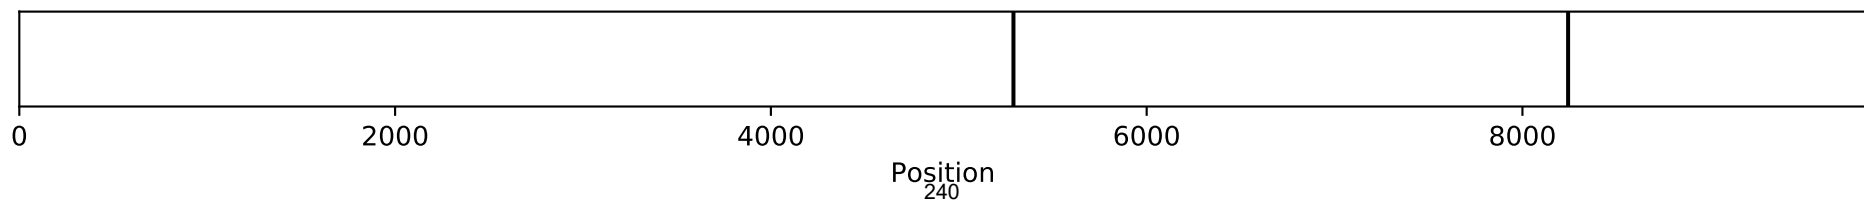

MA1 vs MA2  
Number of differences: 293

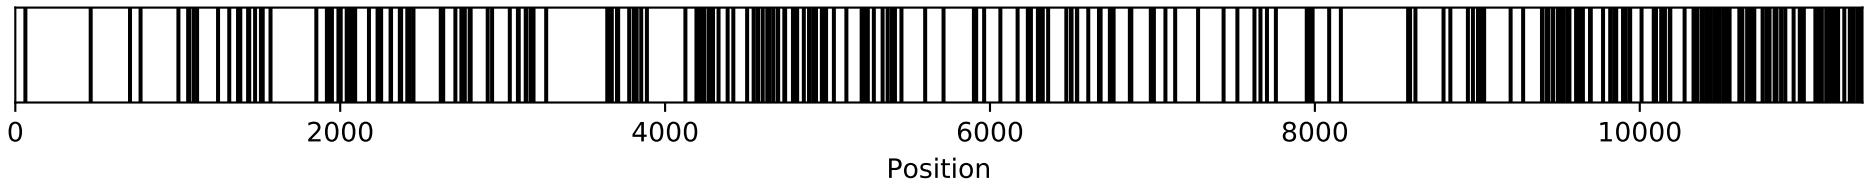

MA1 vs MM1  
Number of differences: 300

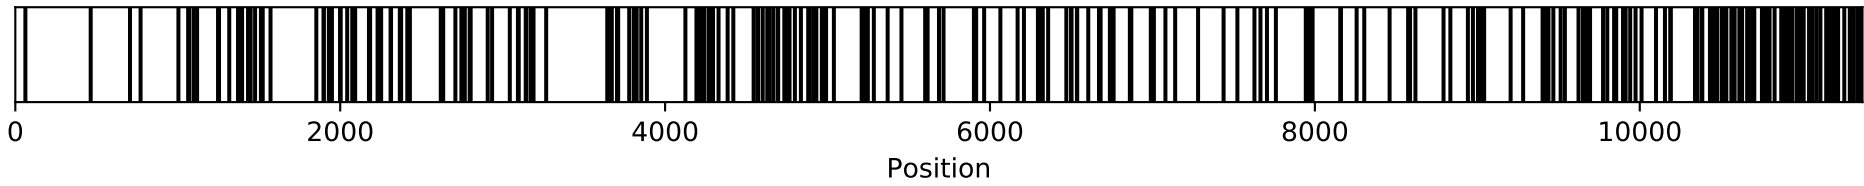

MA1 vs MM2  
Number of differences: 293

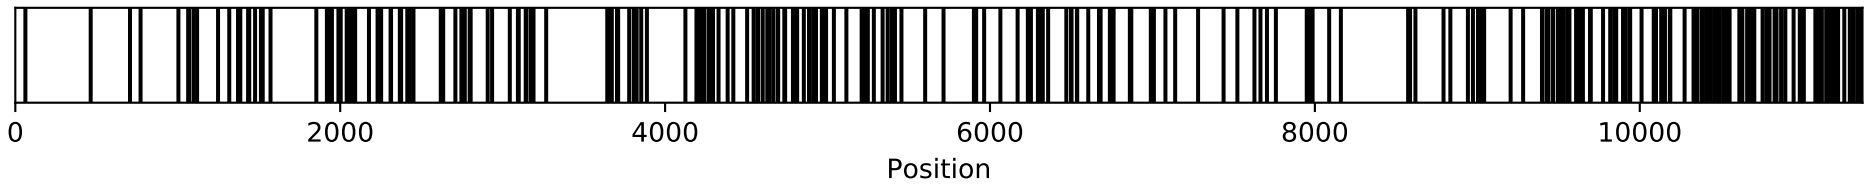

MA2 vs MM1  
Number of differences: 126

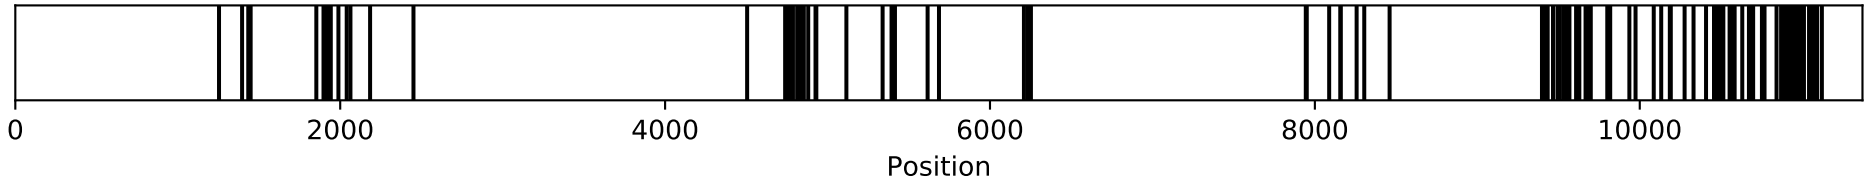

MA2 vs MM2  
Number of differences: 0

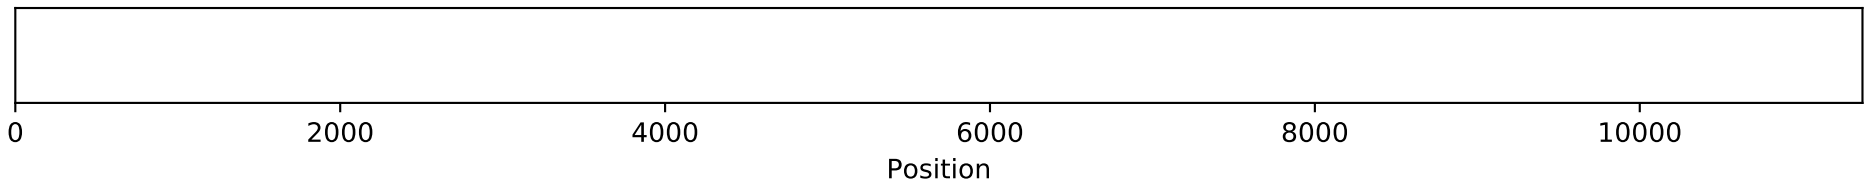

MM1 vs MM2  
Number of differences: 126

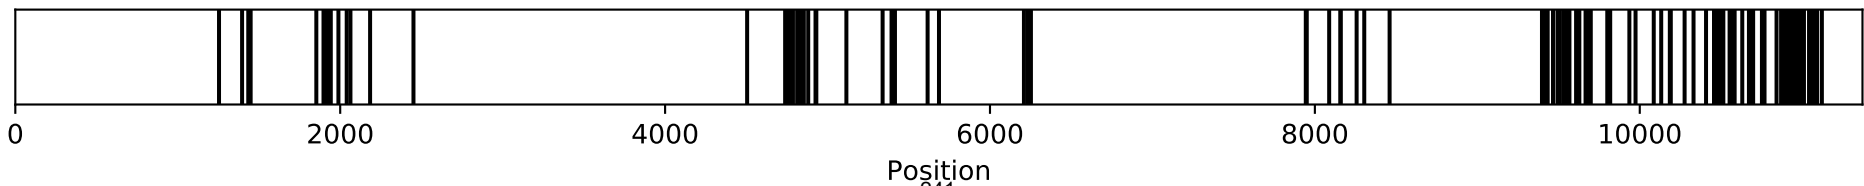

MA1 vs MA2  
Number of differences: 325

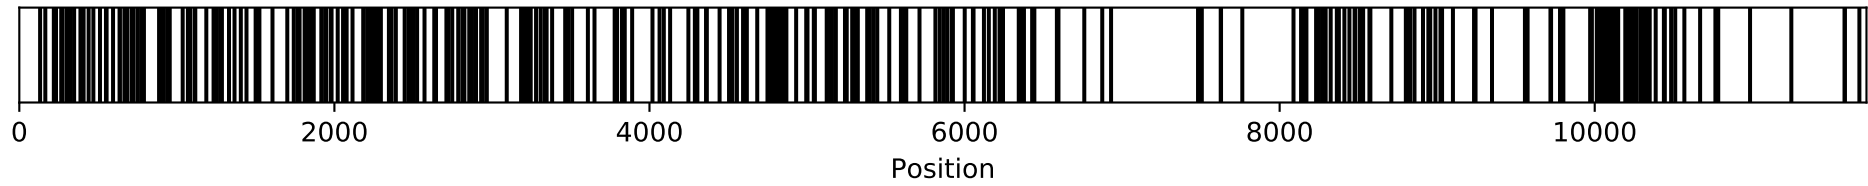

MA1 vs MM1  
Number of differences: 159

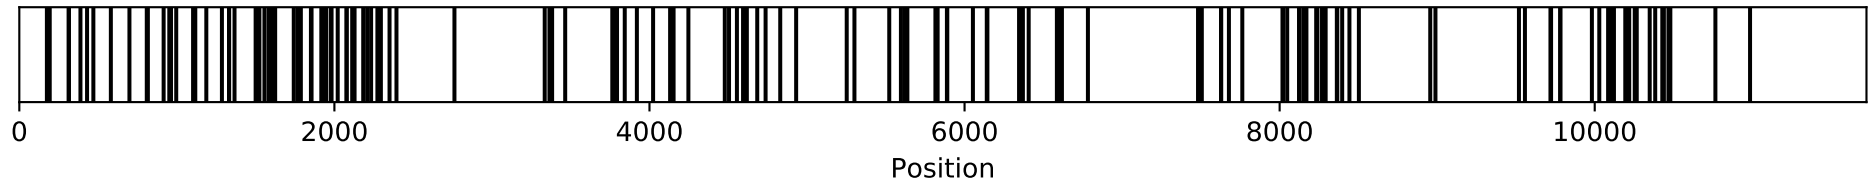

MA1 vs MM2  
Number of differences: 0

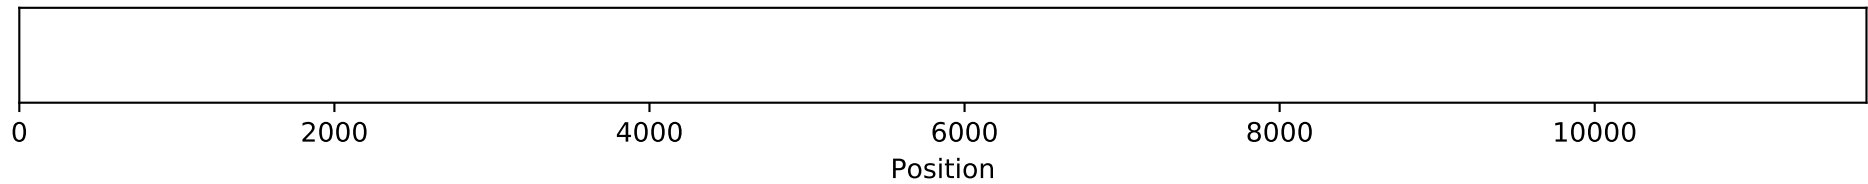

MA2 vs MM1  
Number of differences: 305

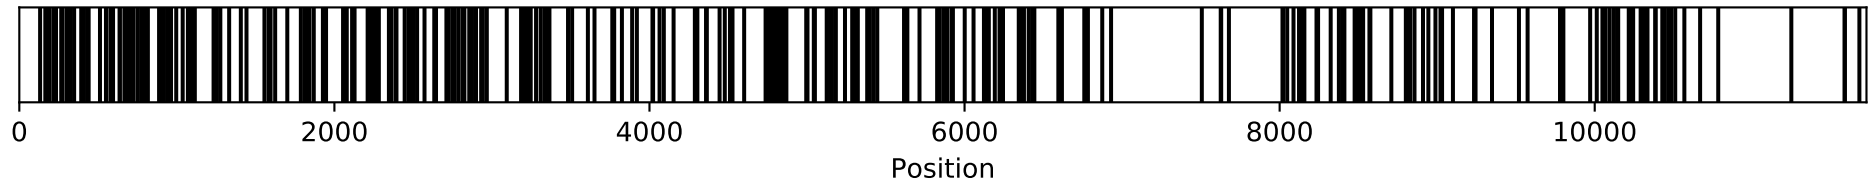

MA2 vs MM2  
Number of differences: 325

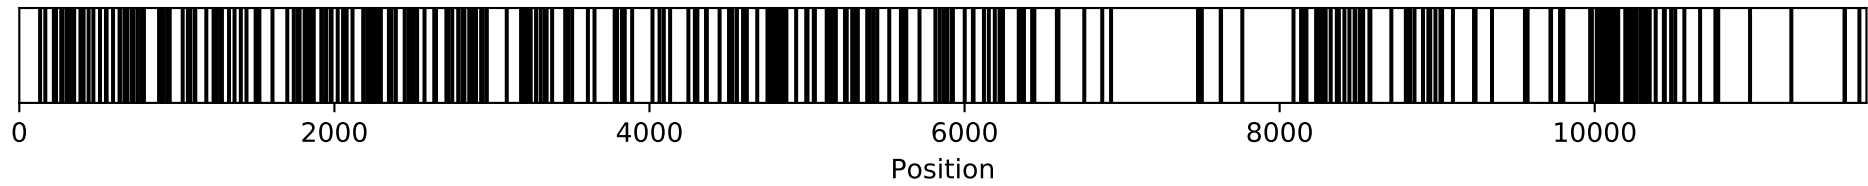

MM1 vs MM2  
Number of differences: 159

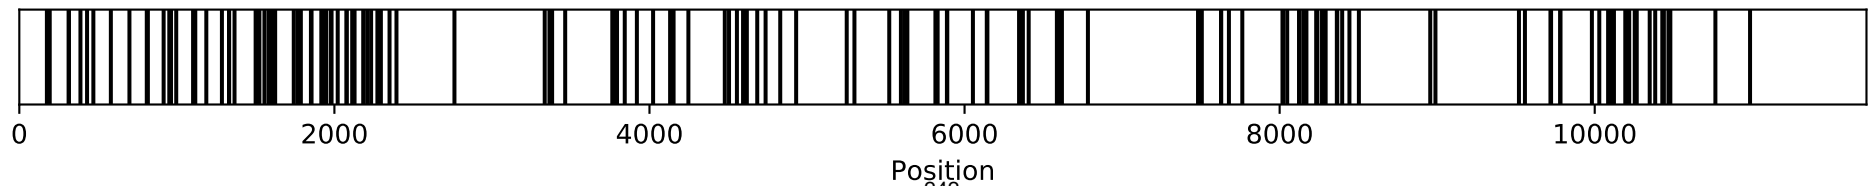



MA1 vs MA2  
Number of differences: 282

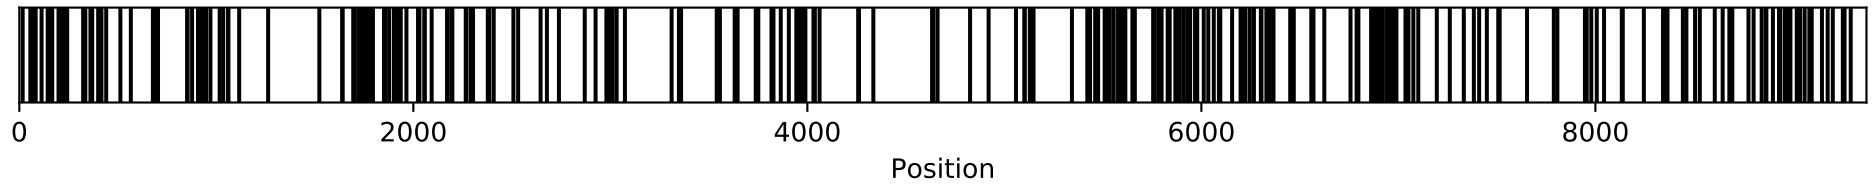

MA1 vs MM1  
Number of differences: 287

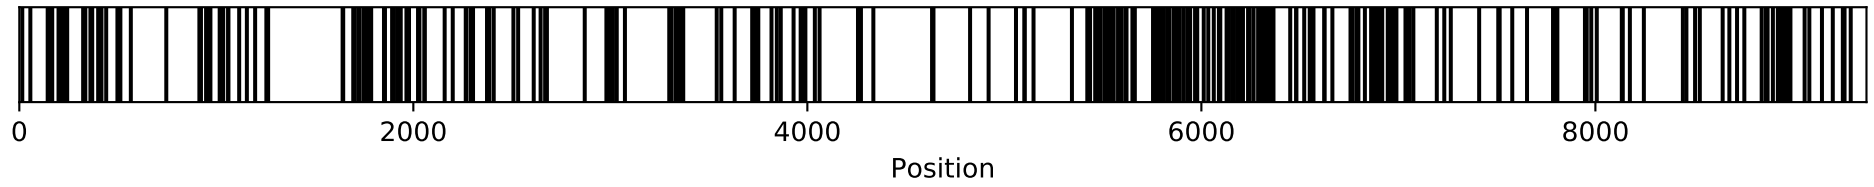

MA1 vs MM2  
Number of differences: 286

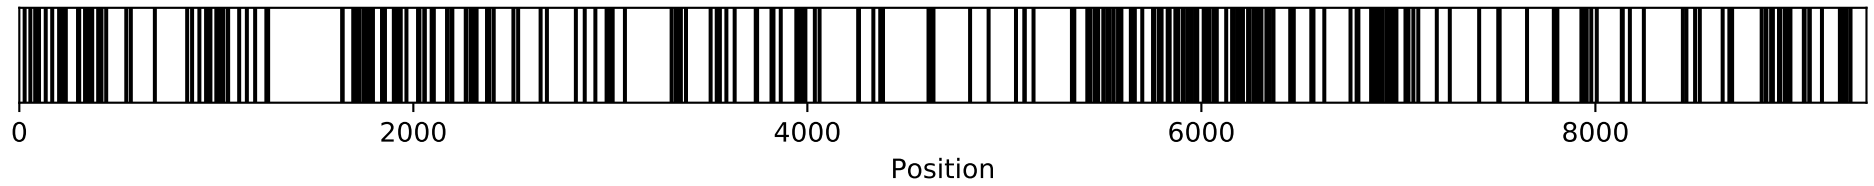

MA2 vs MM1  
Number of differences: 158

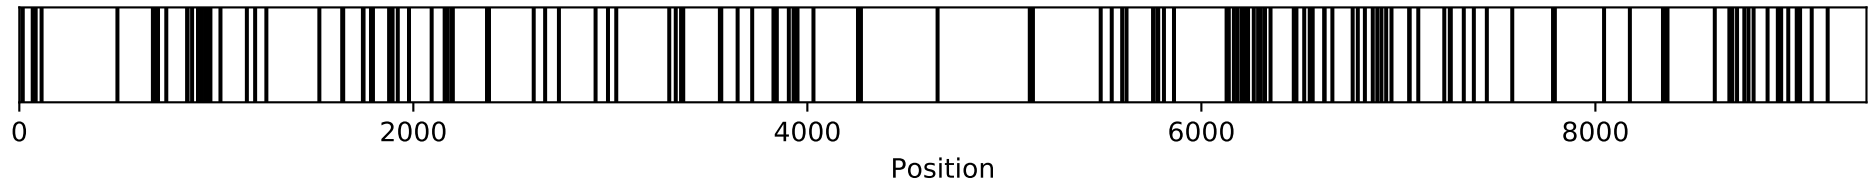

MA2 vs MM2  
Number of differences: 167

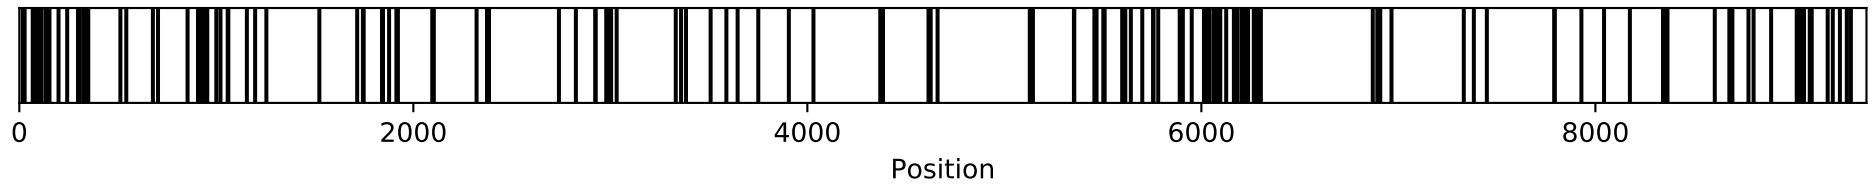

MM1 vs MM2  
Number of differences: 176

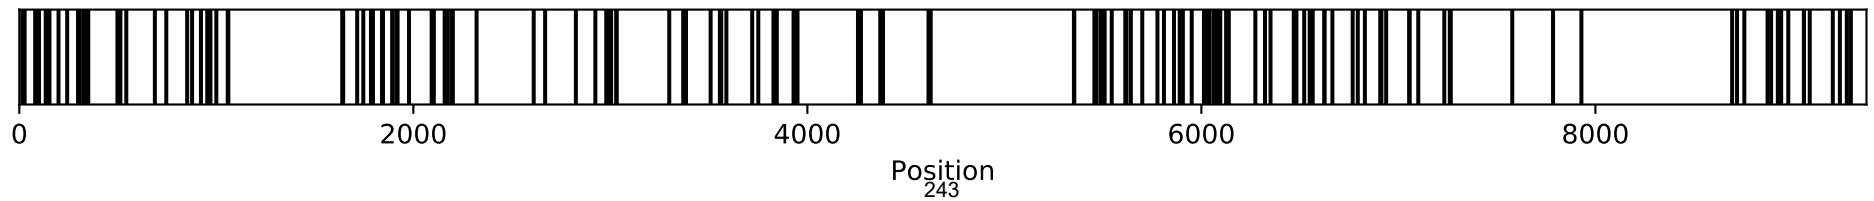

MA1 vs MA2  
Number of differences: 142

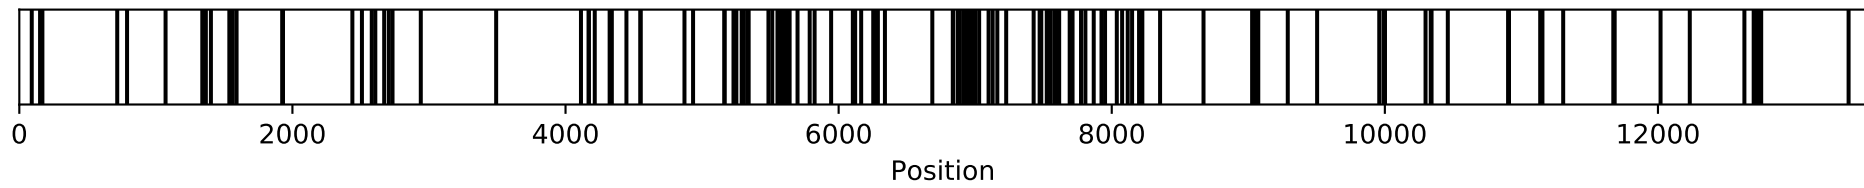

MA1 vs MM1  
Number of differences: 67

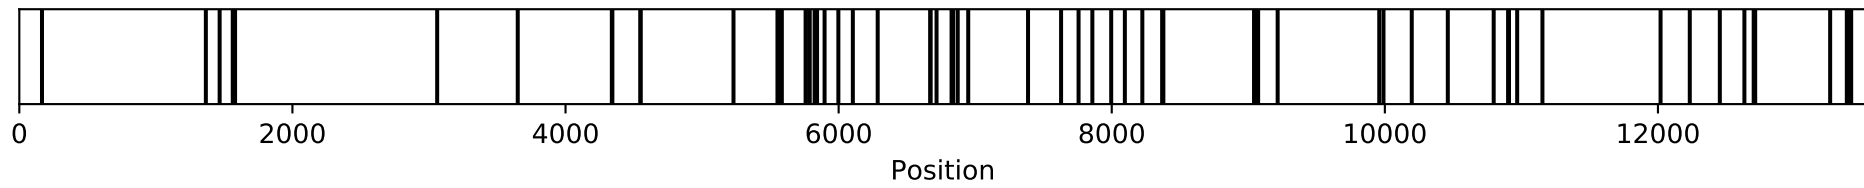

MA1 vs MM2  
Number of differences: 79

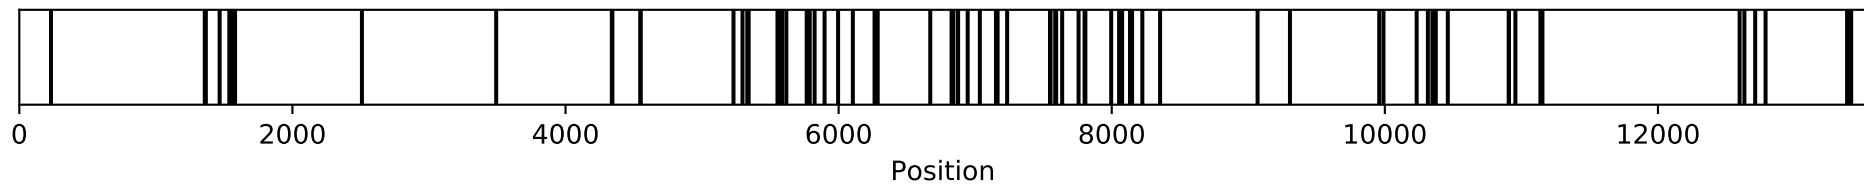

MA2 vs MM1  
Number of differences: 146

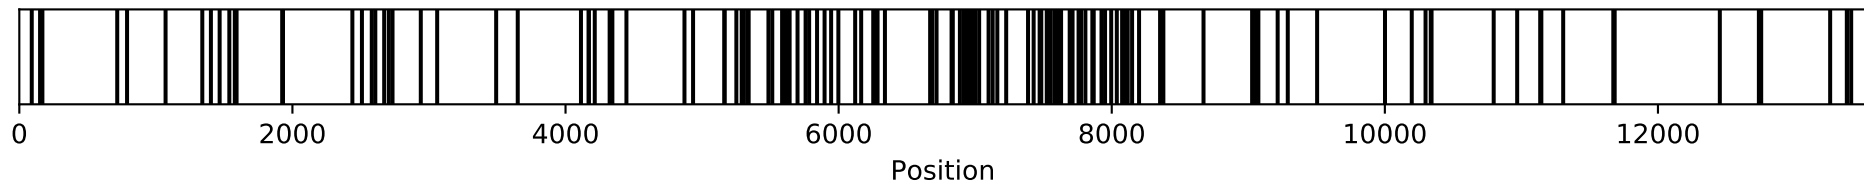

MA2 vs MM2  
Number of differences: 145

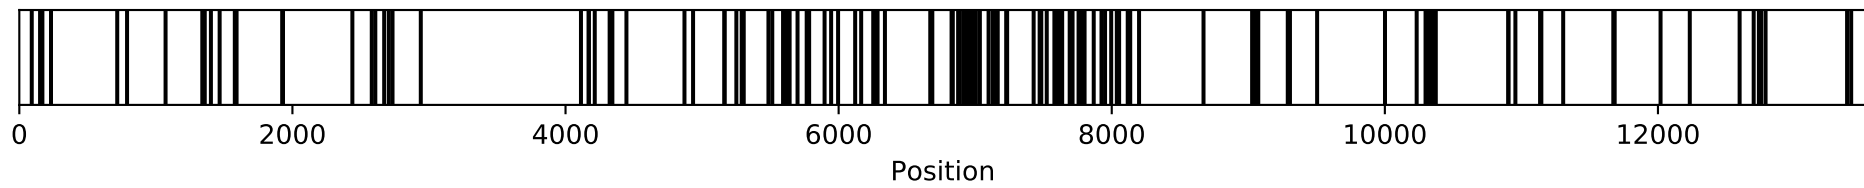

MM1 vs MM2  
Number of differences: 70

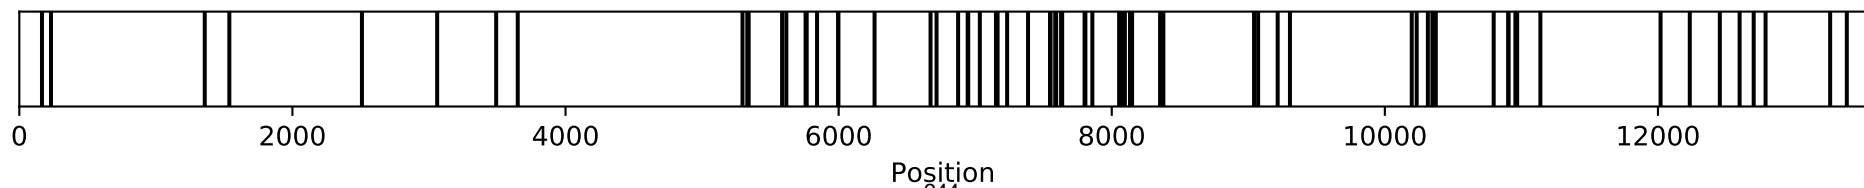

MA1 vs MA2  
Number of differences: 468

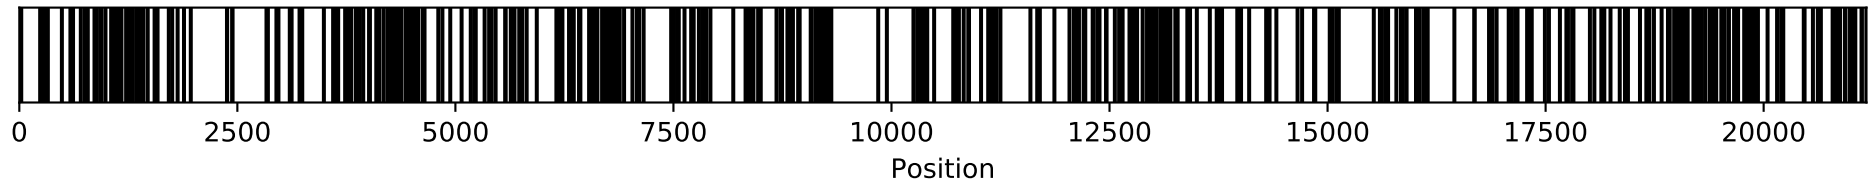

MA1 vs MM1  
Number of differences: 460

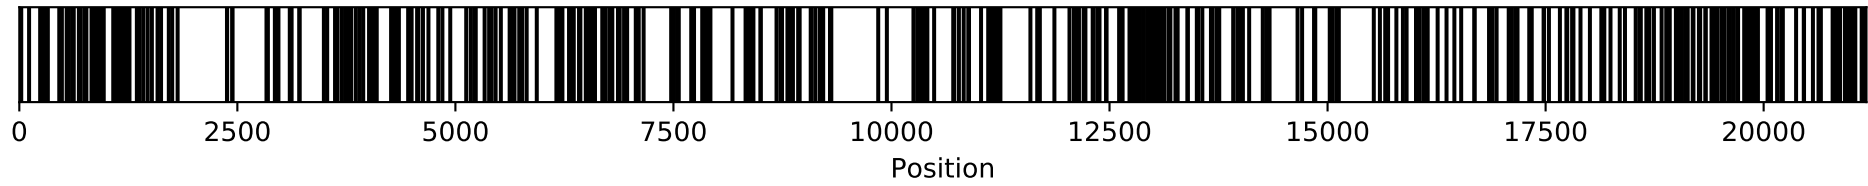

MA1 vs MM2  
Number of differences: 476

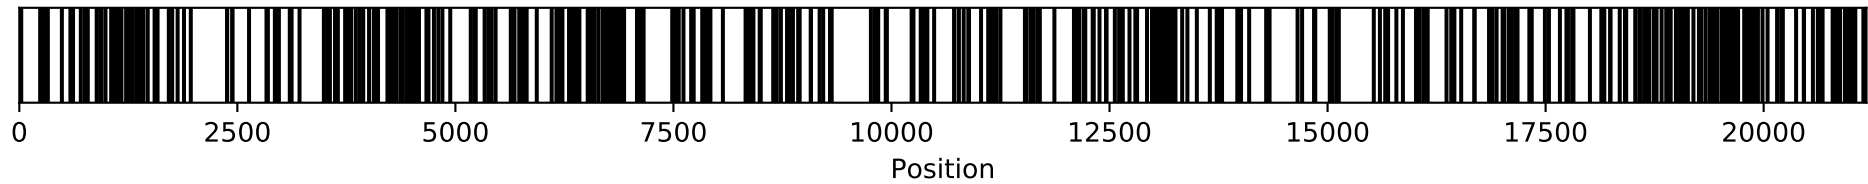

MA2 vs MM1  
Number of differences: 222

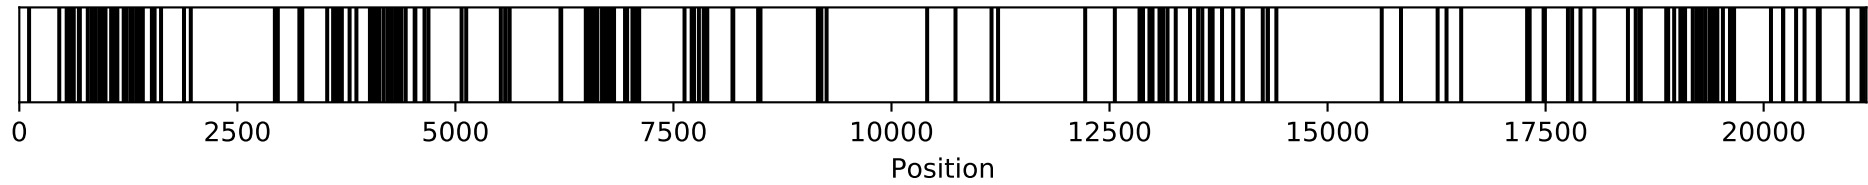

MA2 vs MM2  
Number of differences: 200

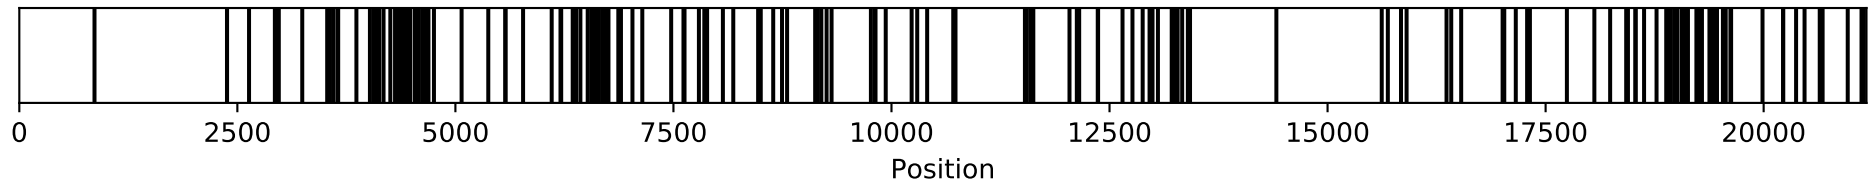

MM1 vs MM2  
Number of differences: 254

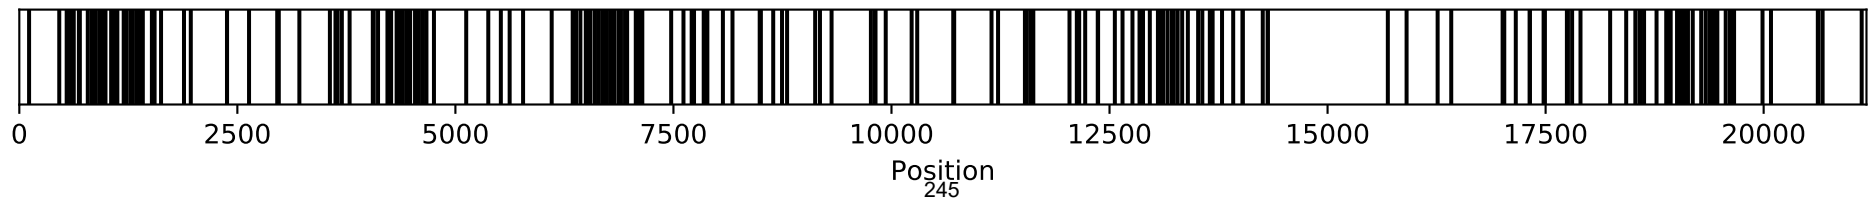

MA1 vs MA2  
Number of differences: 267

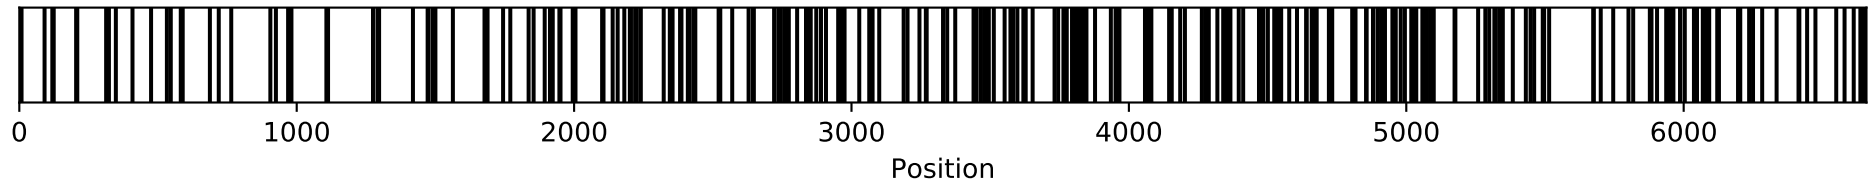

MA1 vs MM1  
Number of differences: 247

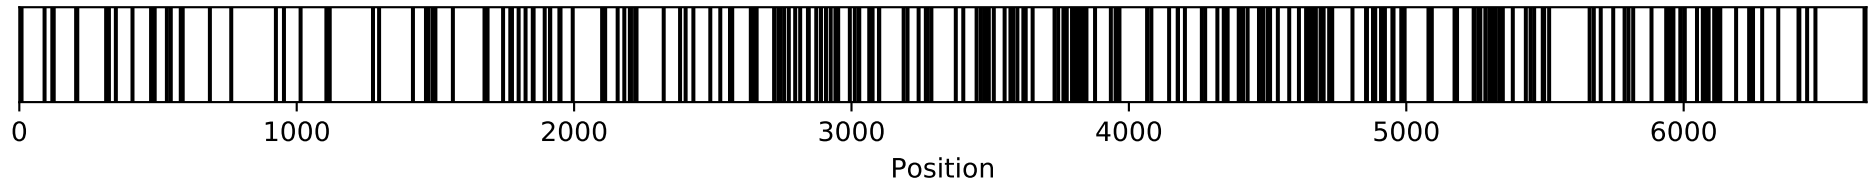

MA1 vs MM2  
Number of differences: 237

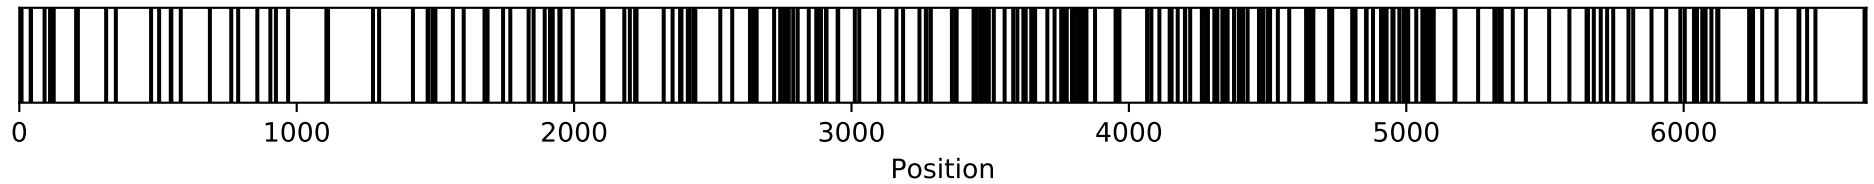

MA2 vs MM1  
Number of differences: 162

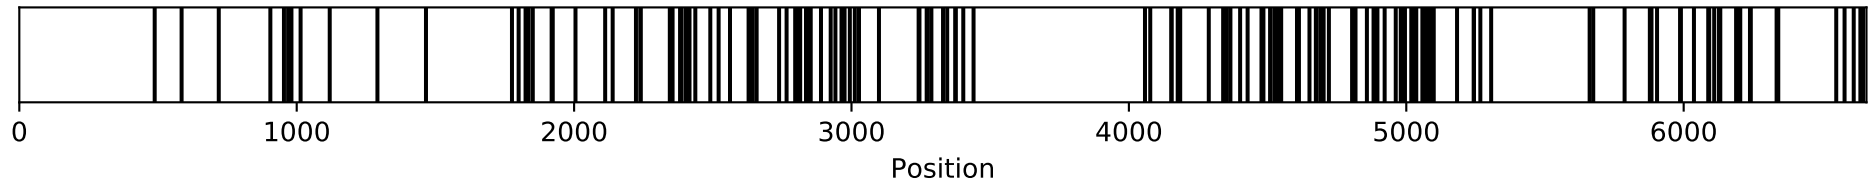

MA2 vs MM2  
Number of differences: 154

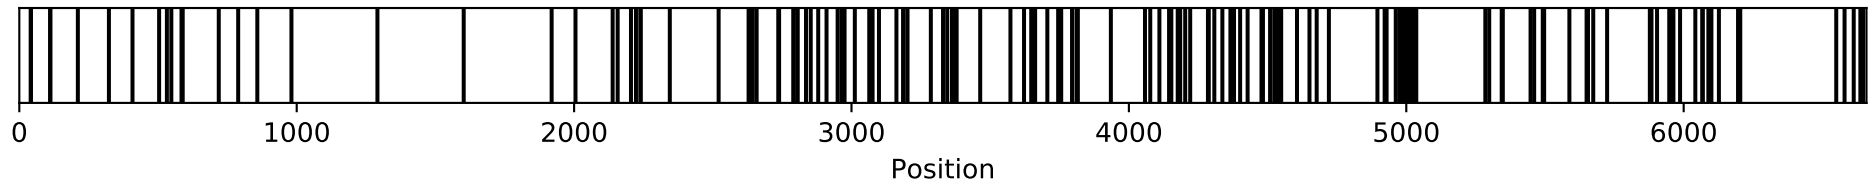

MM1 vs MM2  
Number of differences: 170

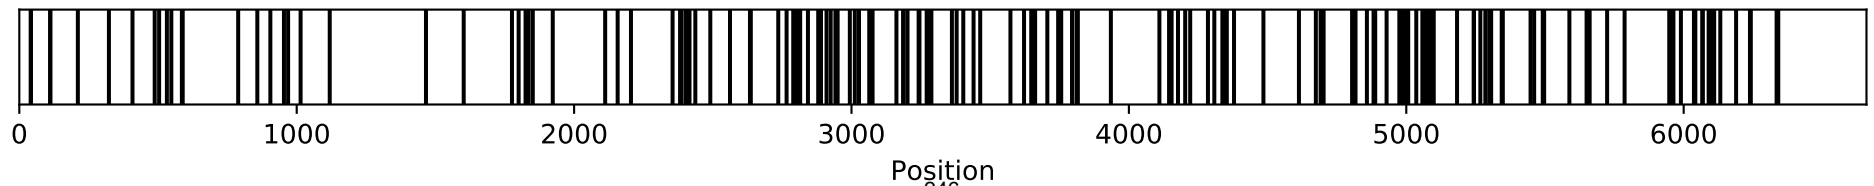

MA1 vs MA2  
Number of differences: 264

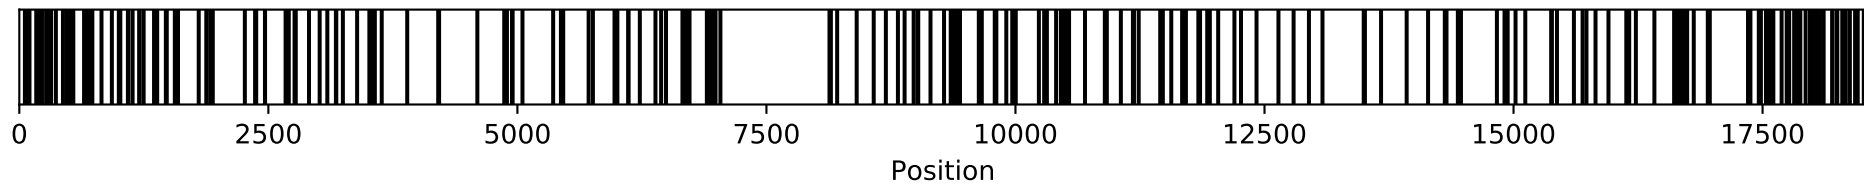

MA1 vs MM1  
Number of differences: 262

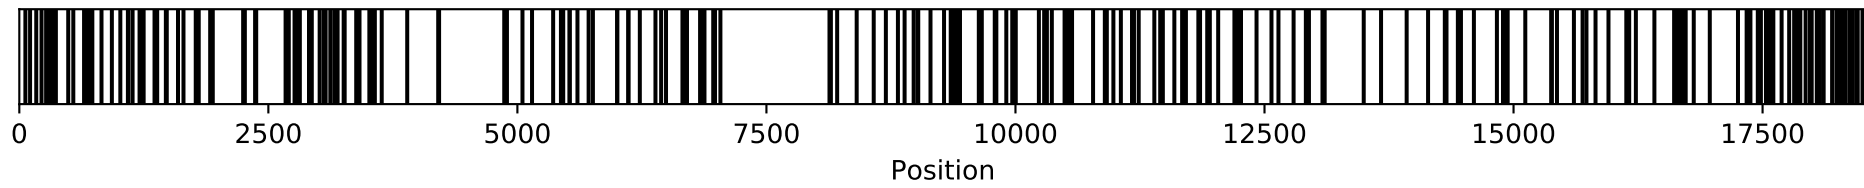

MA1 vs MM2  
Number of differences: 264

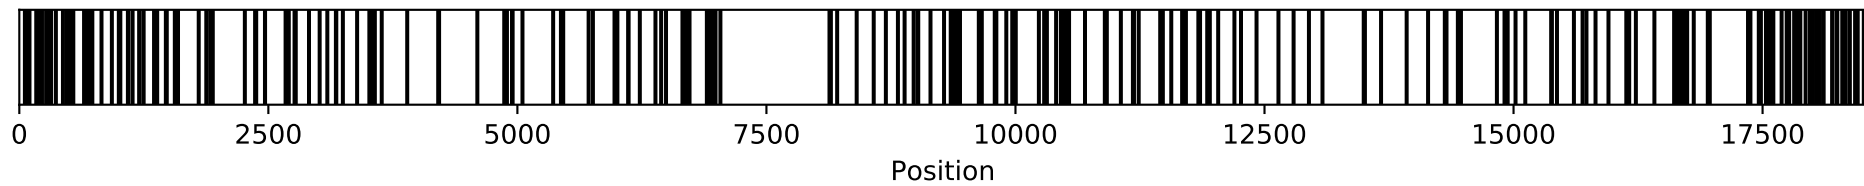

MA2 vs MM1  
Number of differences: 110

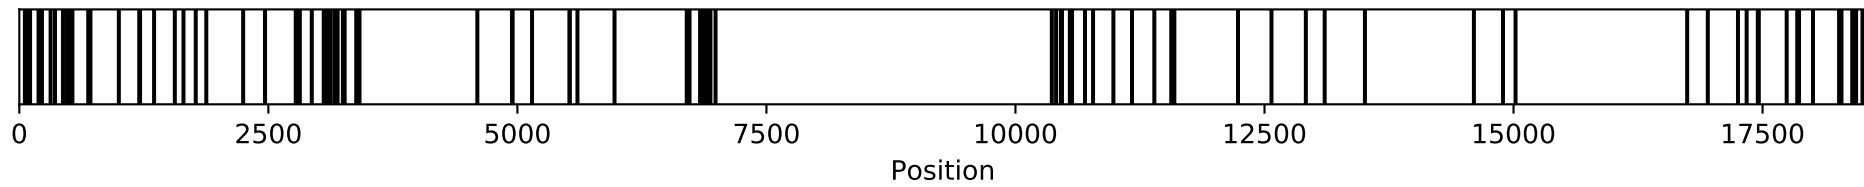

MA2 vs MM2  
Number of differences: 0

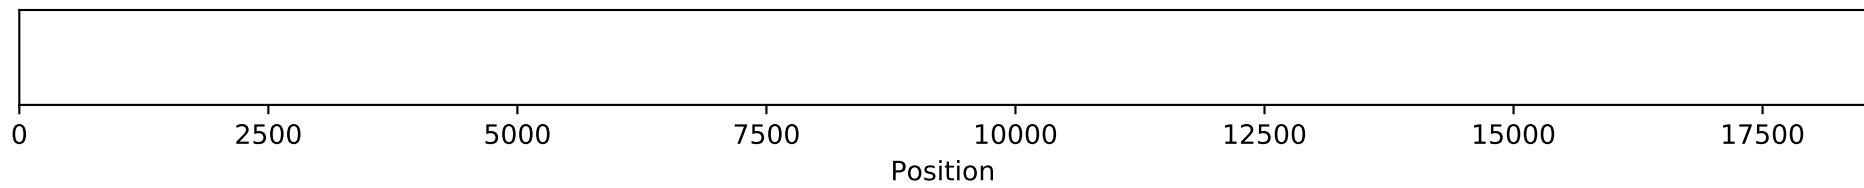

MM1 vs MM2  
Number of differences: 110

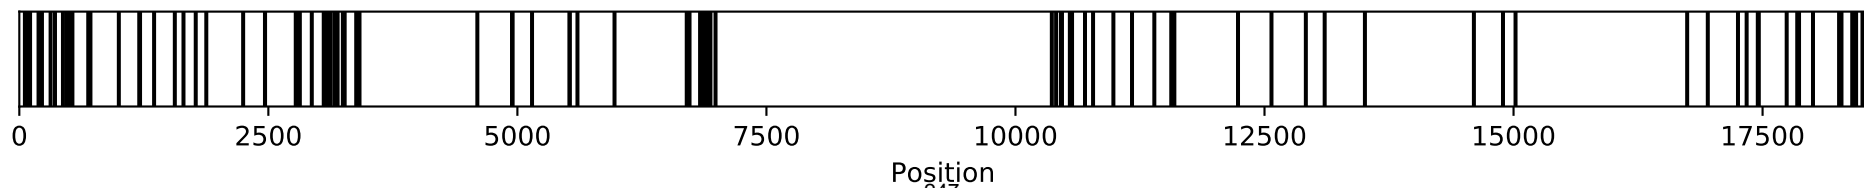

MA1 vs MA2  
Number of differences: 172

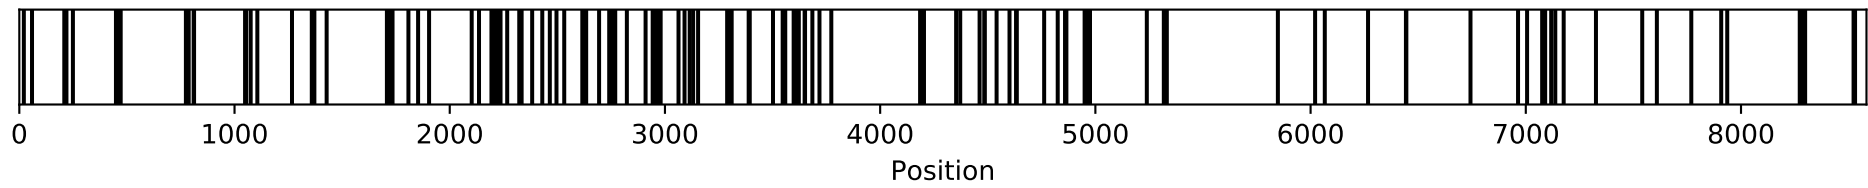

MA1 vs MM1  
Number of differences: 172

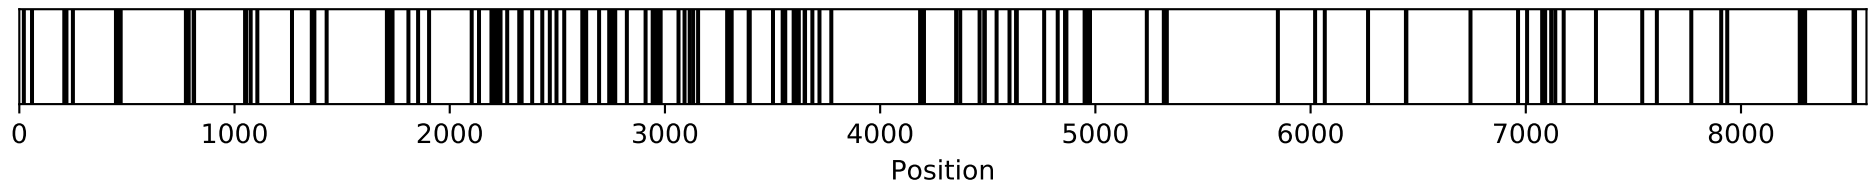

MA1 vs MM2  
Number of differences: 164

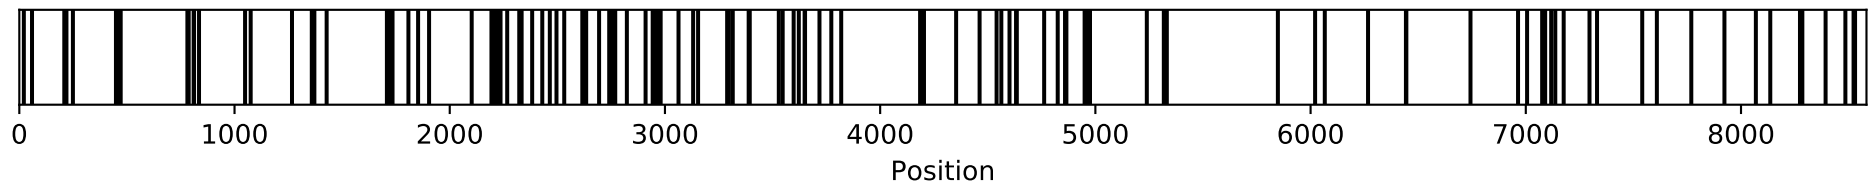

MA2 vs MM1  
Number of differences: 0

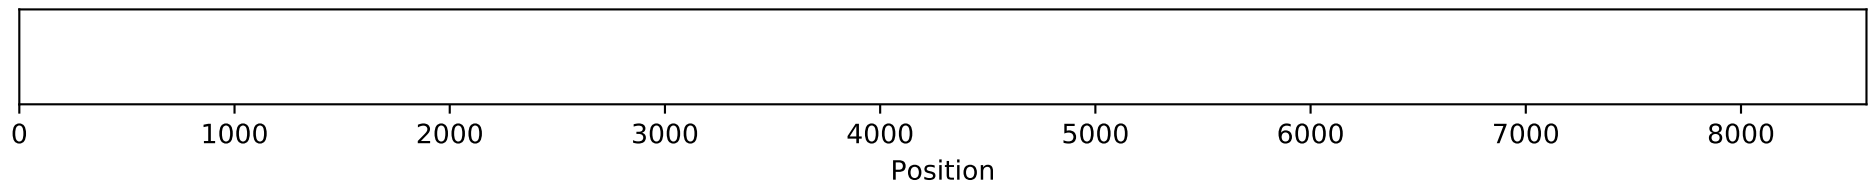

MA2 vs MM2  
Number of differences: 34

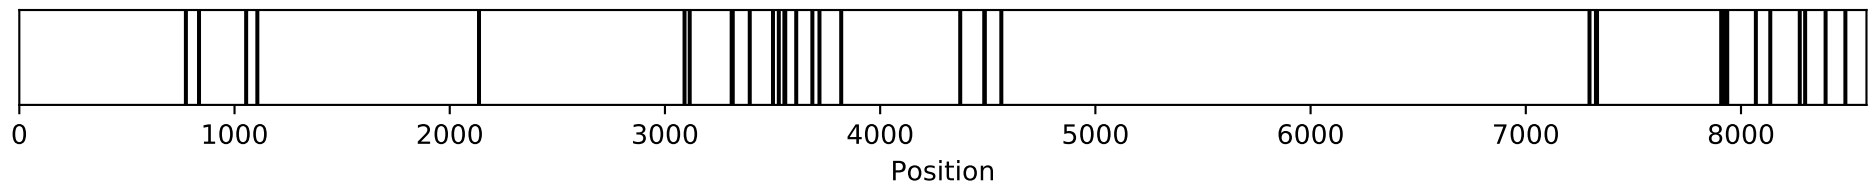

MM1 vs MM2  
Number of differences: 34

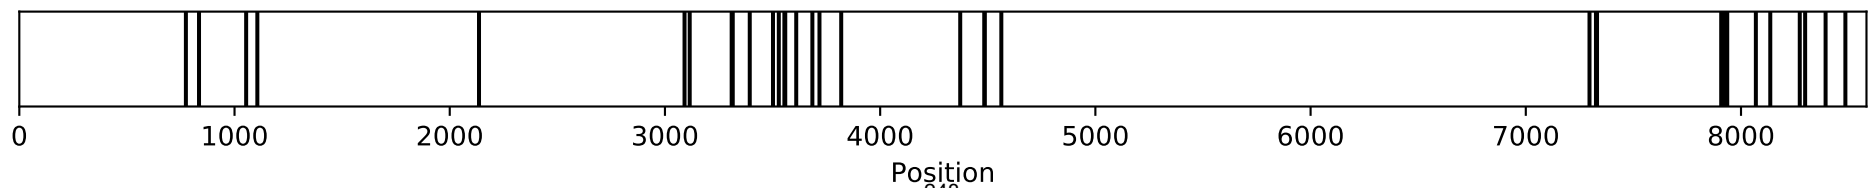

MA1 vs MA2  
Number of differences: 267

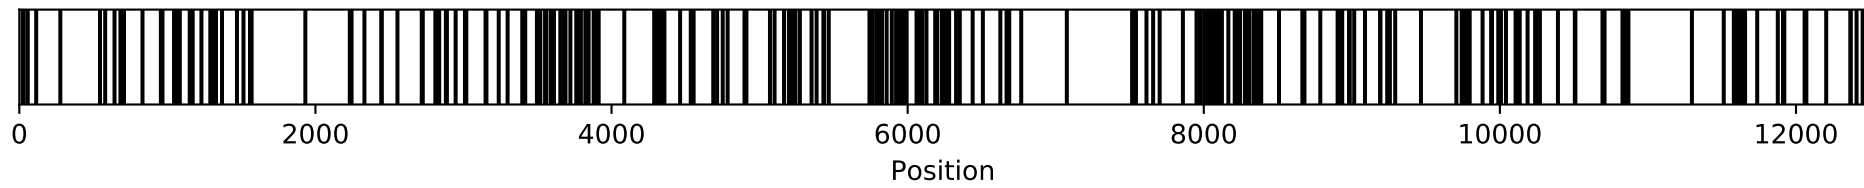

MA1 vs MM1  
Number of differences: 241

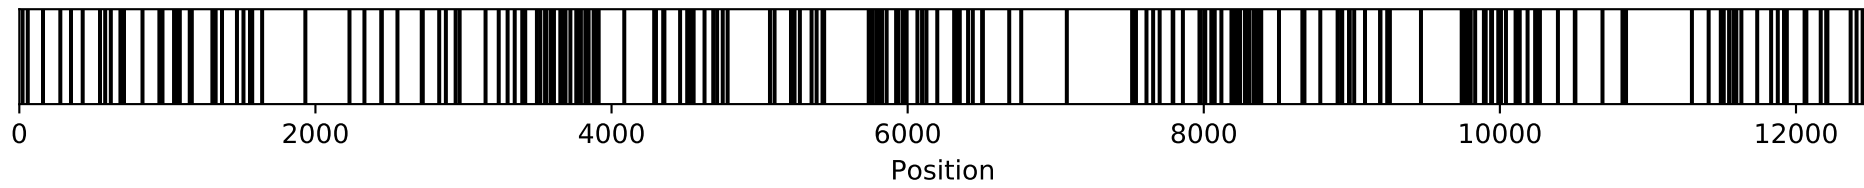

MA1 vs MM2  
Number of differences: 270

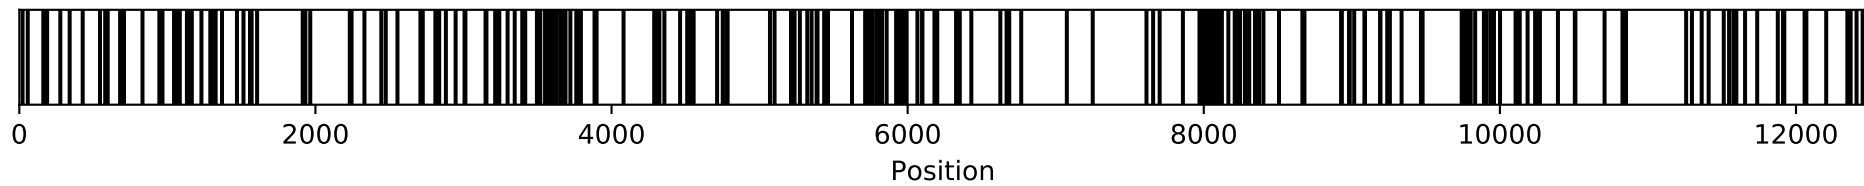

MA2 vs MM1  
Number of differences: 118

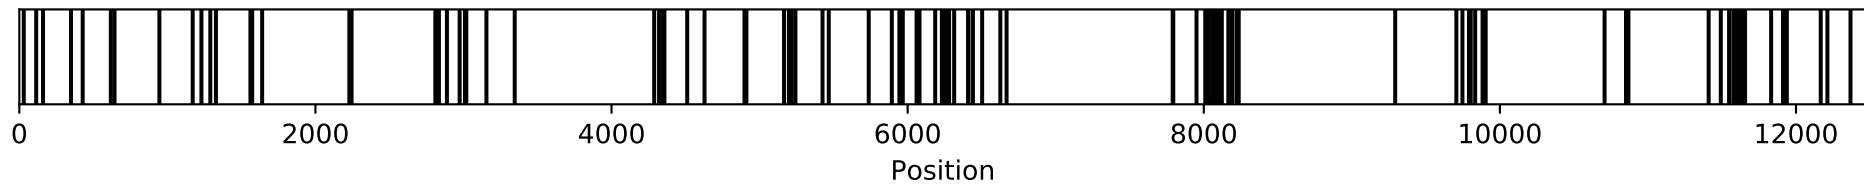

MA2 vs MM2  
Number of differences: 149

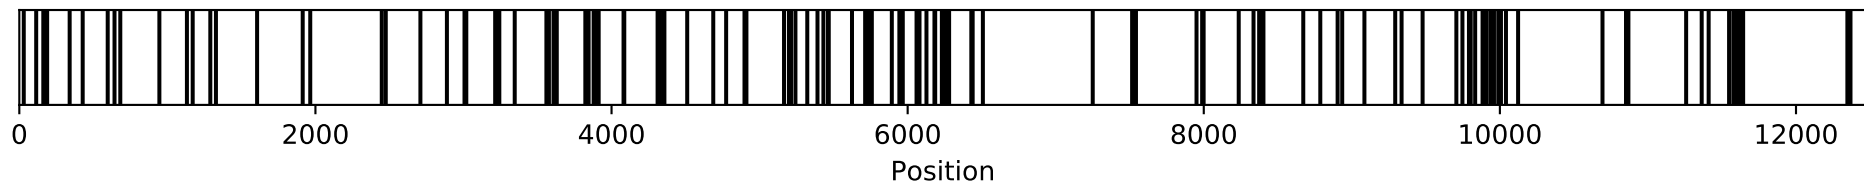

MM1 vs MM2  
Number of differences: 137

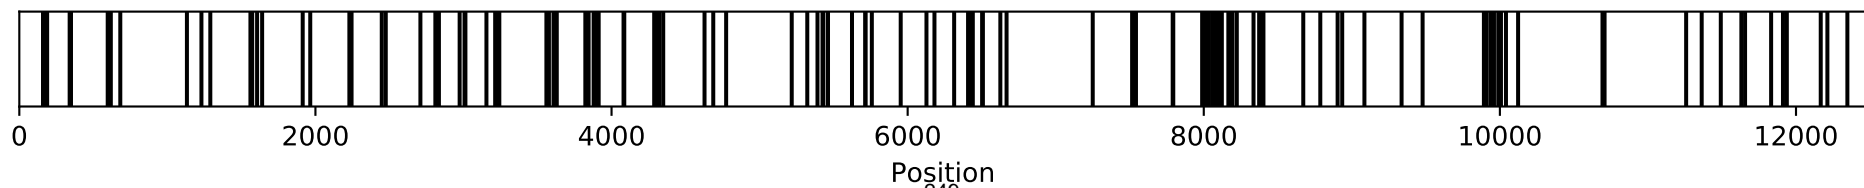

MA1 vs MA2  
Number of differences: 238

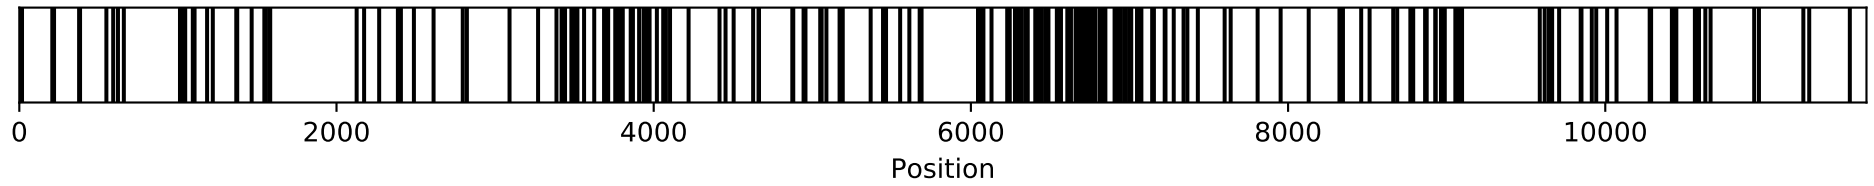

MA1 vs MM1  
Number of differences: 238

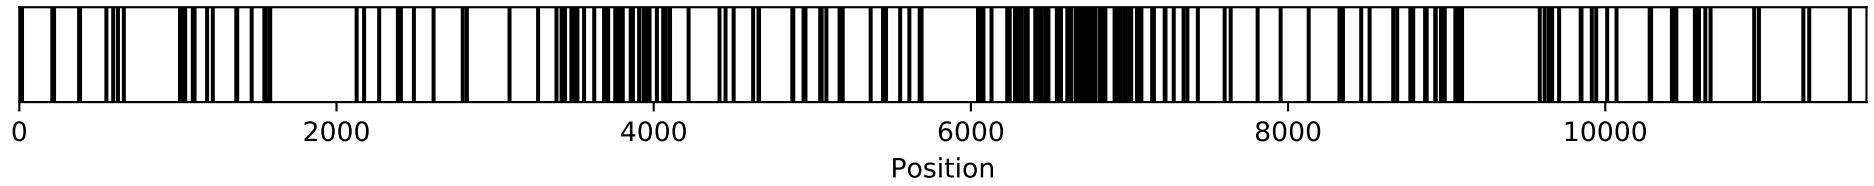

MA1 vs MM2  
Number of differences: 239

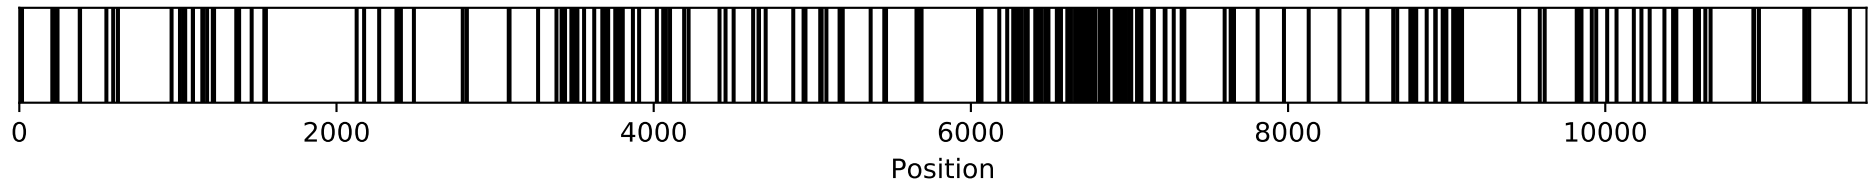

MA2 vs MM1  
Number of differences: 0

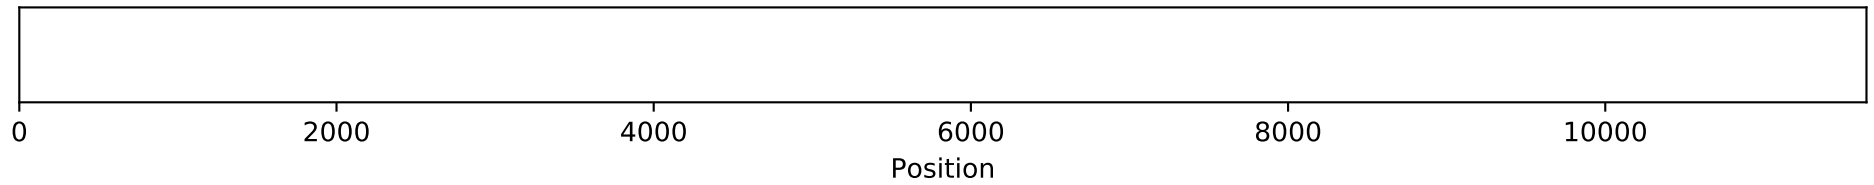

MA2 vs MM2  
Number of differences: 94

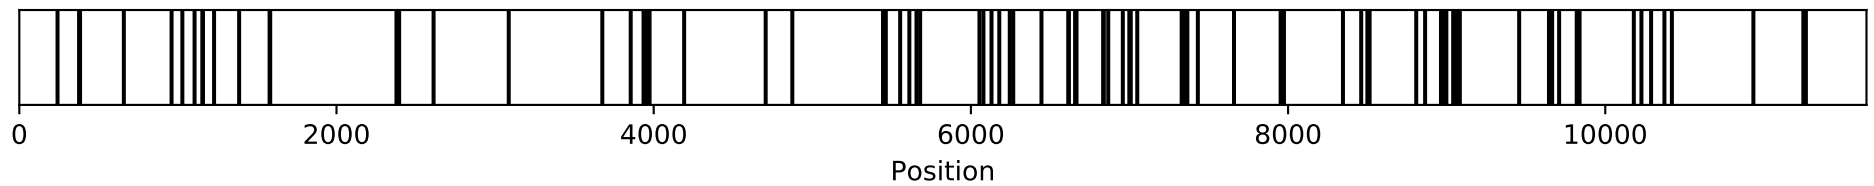

MM1 vs MM2  
Number of differences: 94

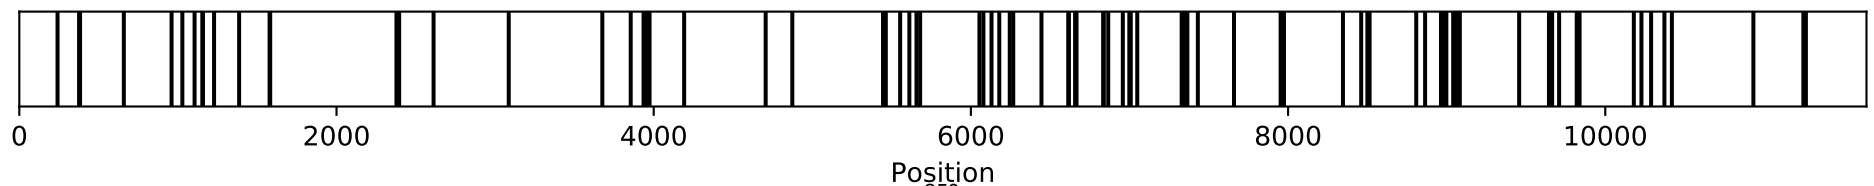



MA1 vs MA2  
Number of differences: 470

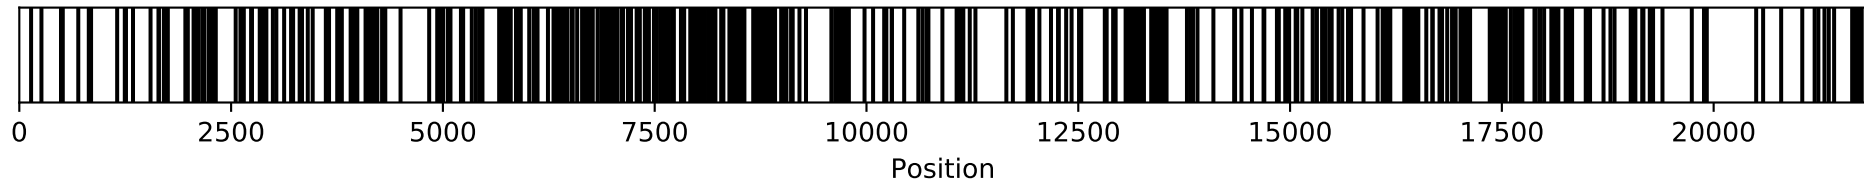

MA1 vs MM1  
Number of differences: 470

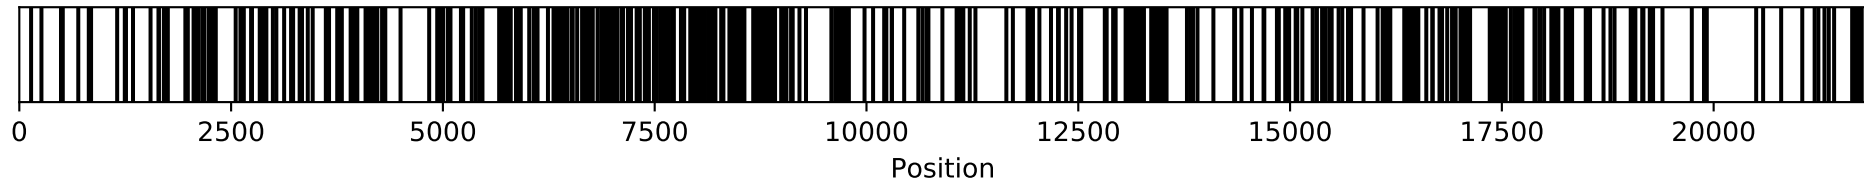

MA1 vs MM2  
Number of differences: 468

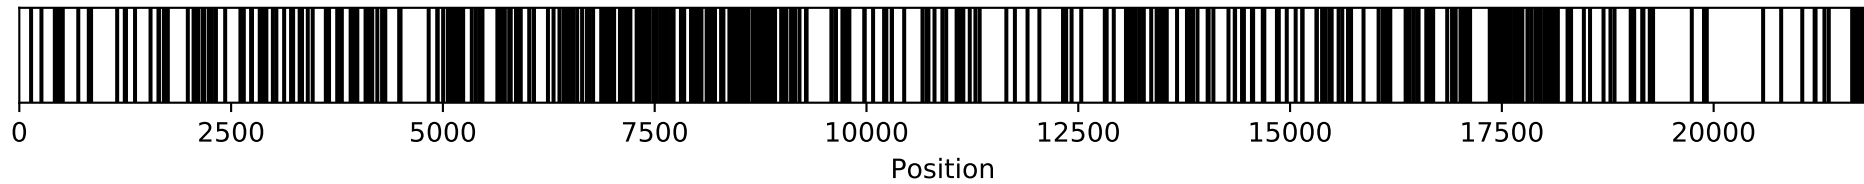

MA2 vs MM1  
Number of differences: 0

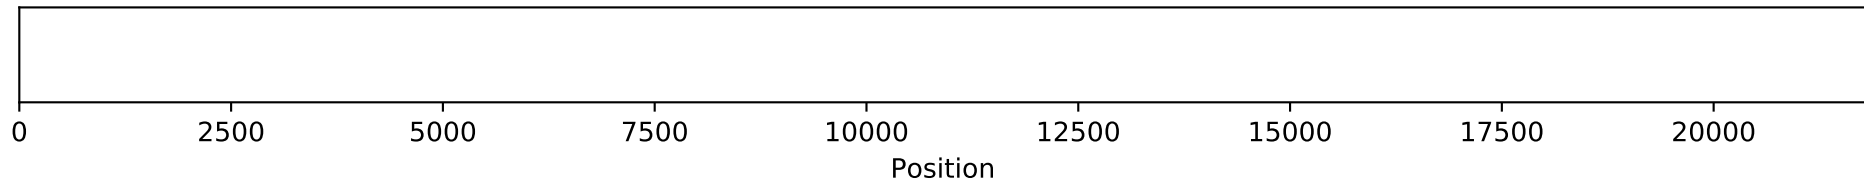

MA2 vs MM2  
Number of differences: 225

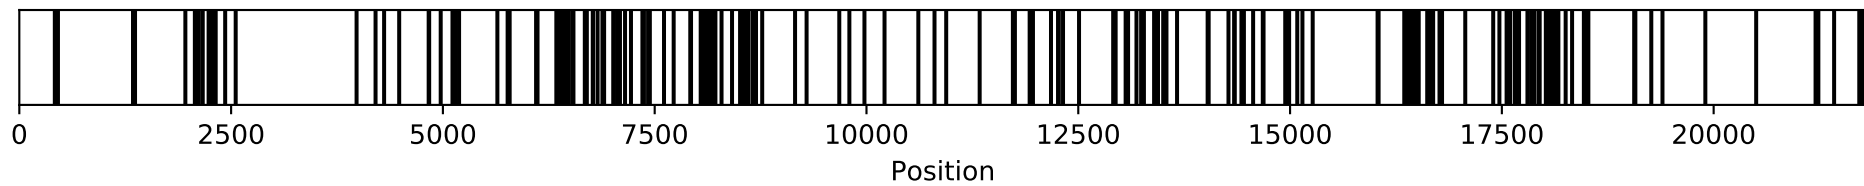

MM1 vs MM2  
Number of differences: 225

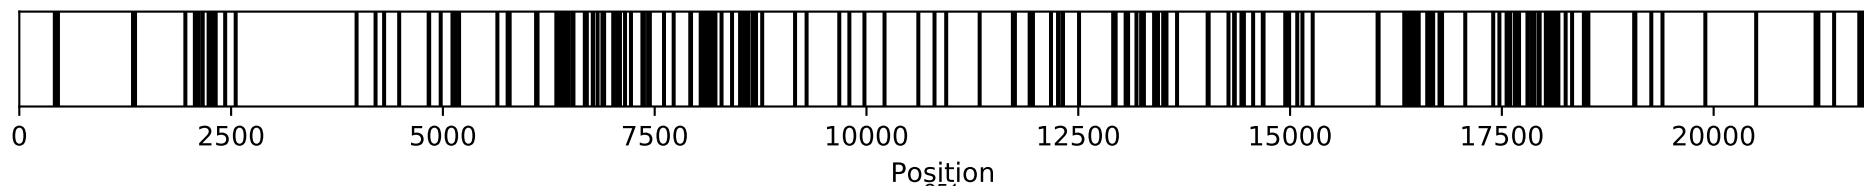

MA1 vs MA2  
Number of differences: 47

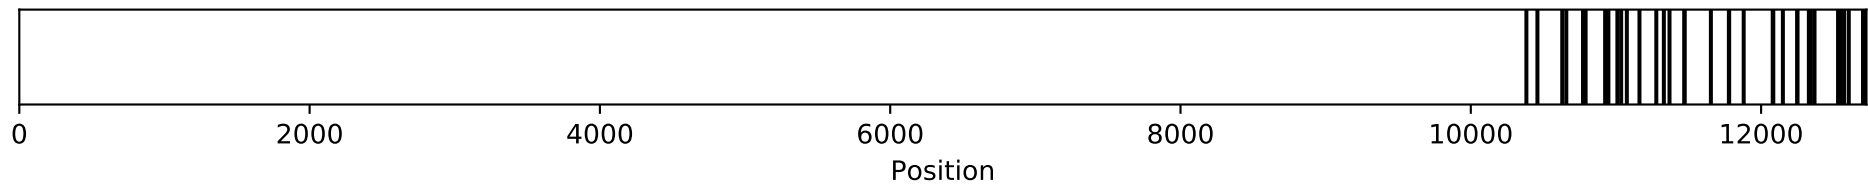

MA1 vs MM1  
Number of differences: 177

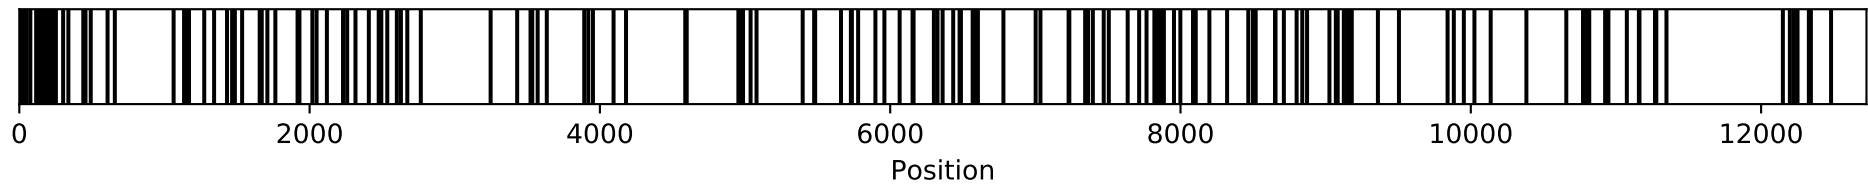

MA1 vs MM2  
Number of differences: 158

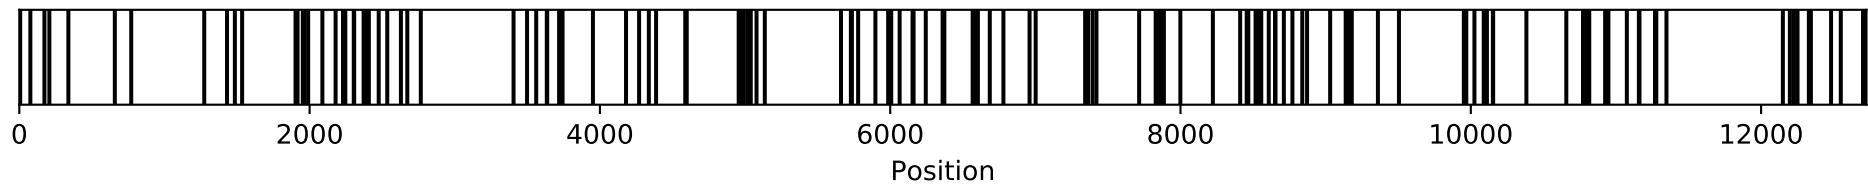

MA2 vs MM1  
Number of differences: 195

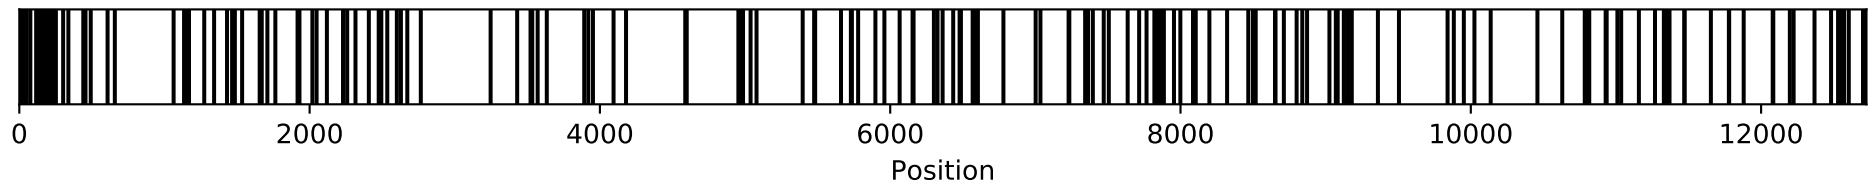

MA2 vs MM2  
Number of differences: 170

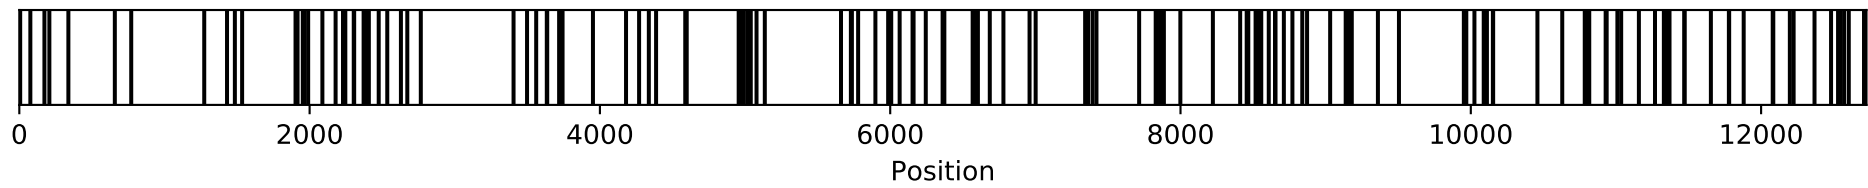

MM1 vs MM2  
Number of differences: 149

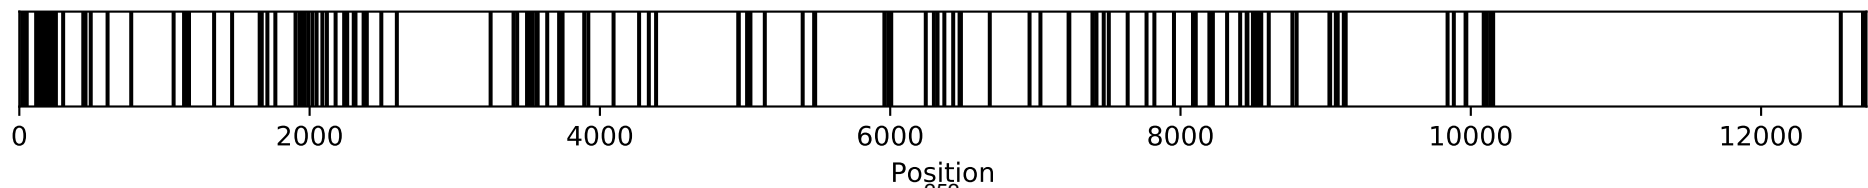

MA1 vs MA2  
Number of differences: 0

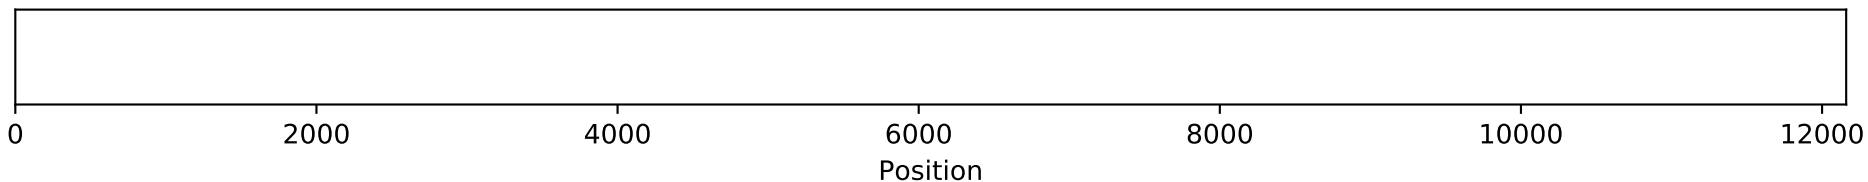

MA1 vs MM1  
Number of differences: 195

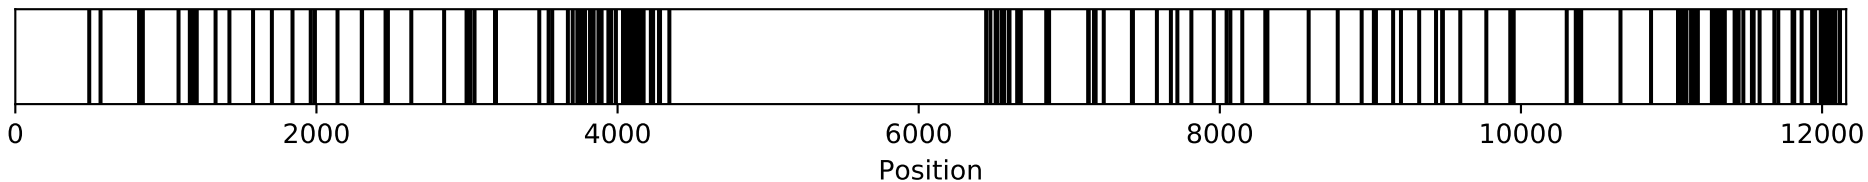

MA1 vs MM2  
Number of differences: 215

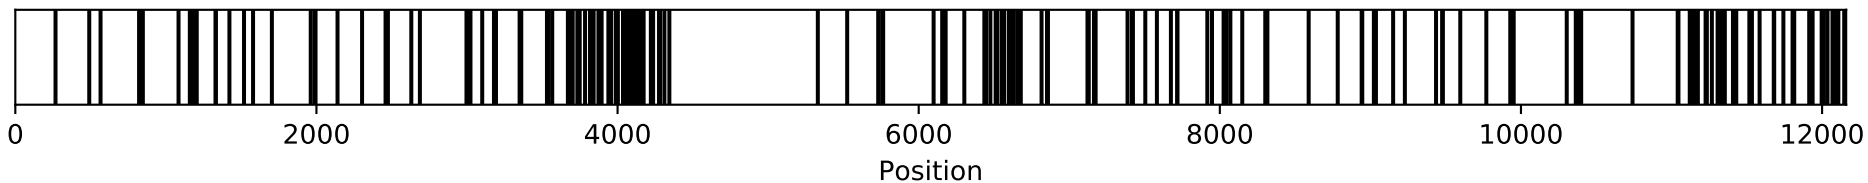

MA2 vs MM1  
Number of differences: 195

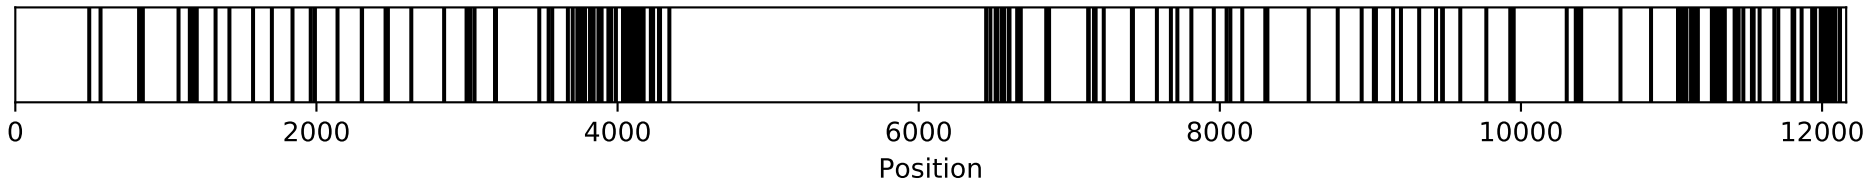

MA2 vs MM2  
Number of differences: 215

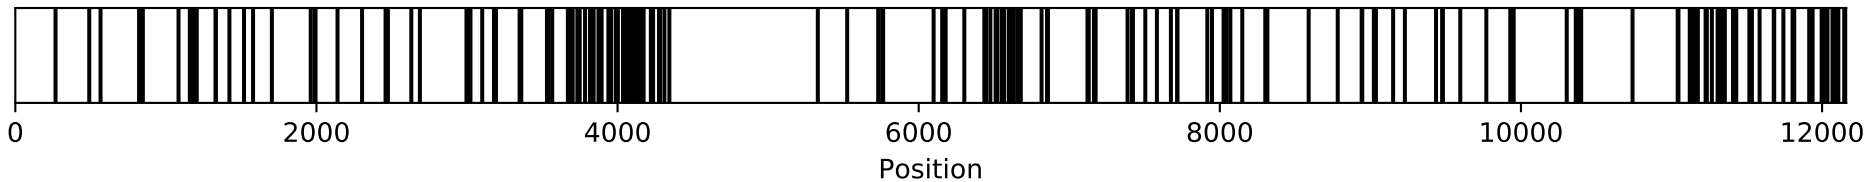

MM1 vs MM2  
Number of differences: 127

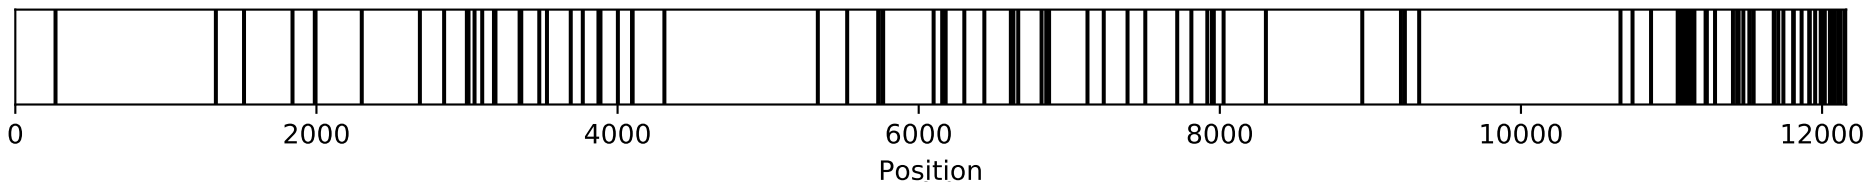

MA1 vs MA2  
Number of differences: 215

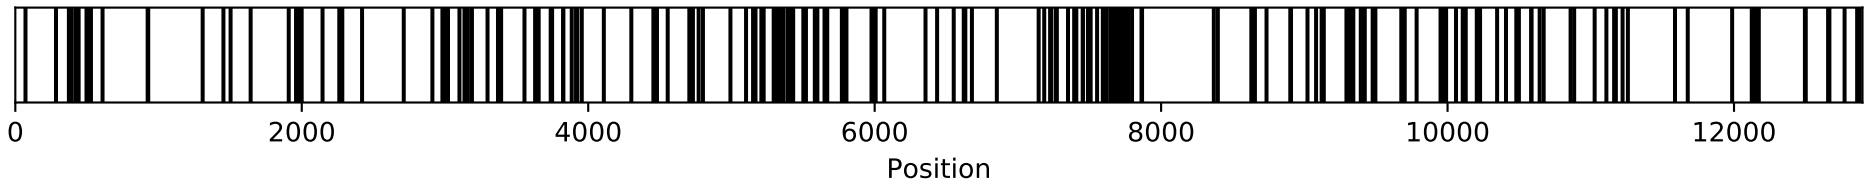

MA1 vs MM1  
Number of differences: 214

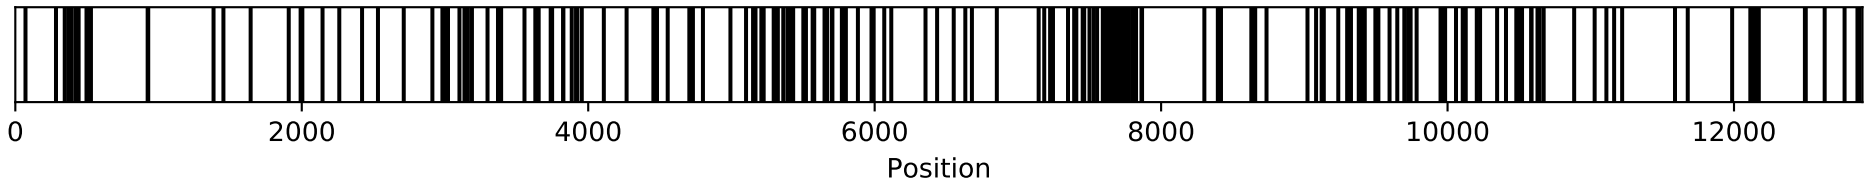

MA1 vs MM2  
Number of differences: 212

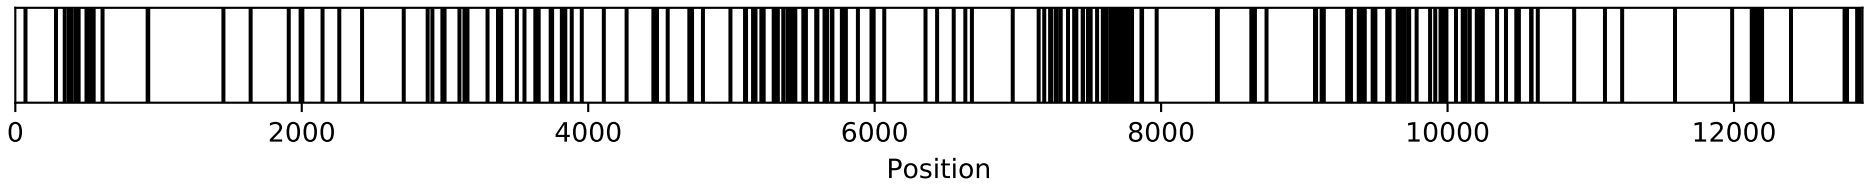

MA2 vs MM1  
Number of differences: 88

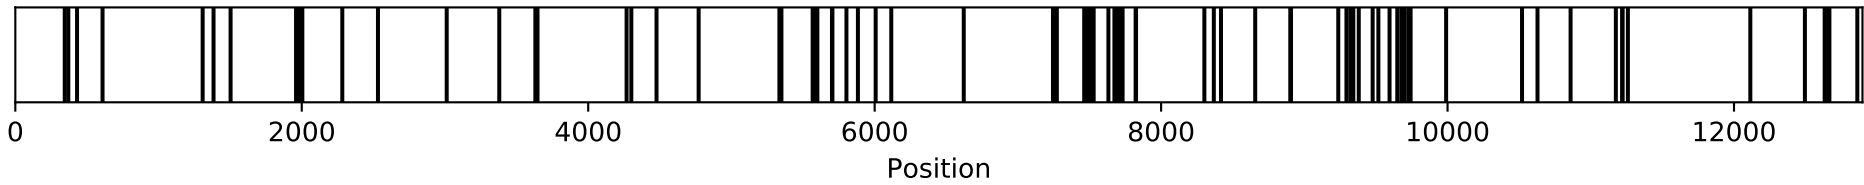

MA2 vs MM2  
Number of differences: 93

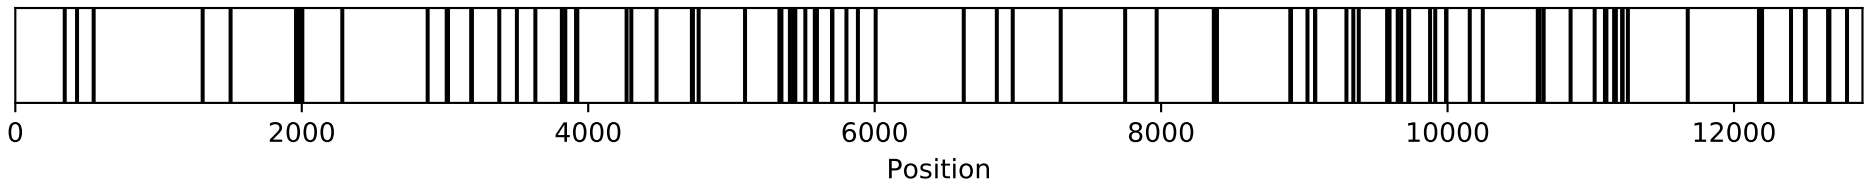

MM1 vs MM2  
Number of differences: 94

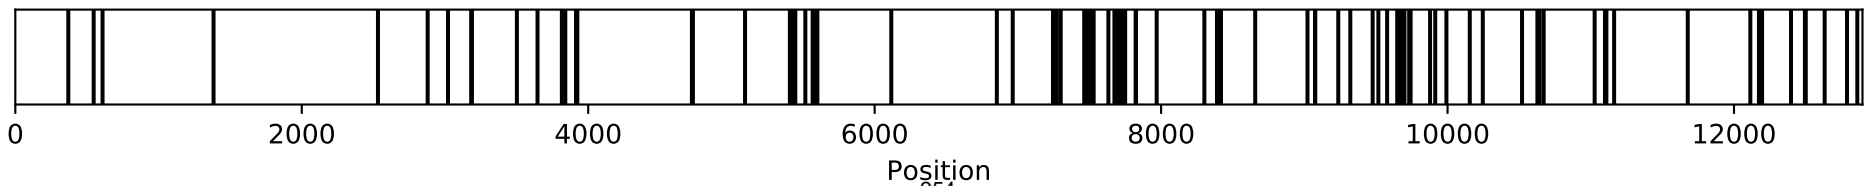

MA1 vs MA2  
Number of differences: 390

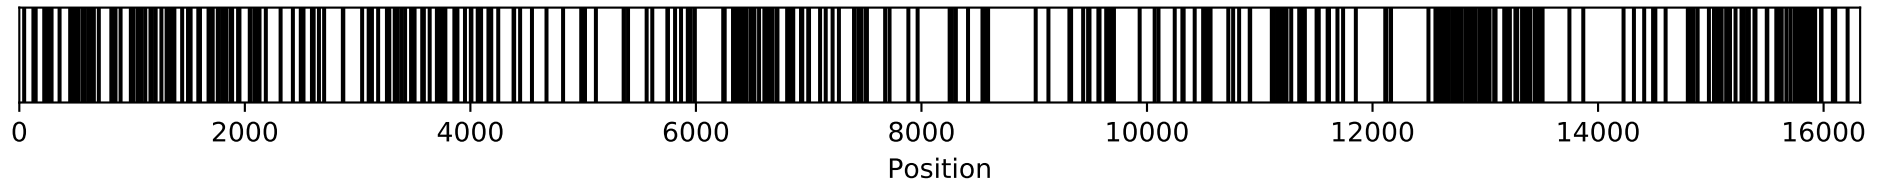

MA1 vs MM1  
Number of differences: 201

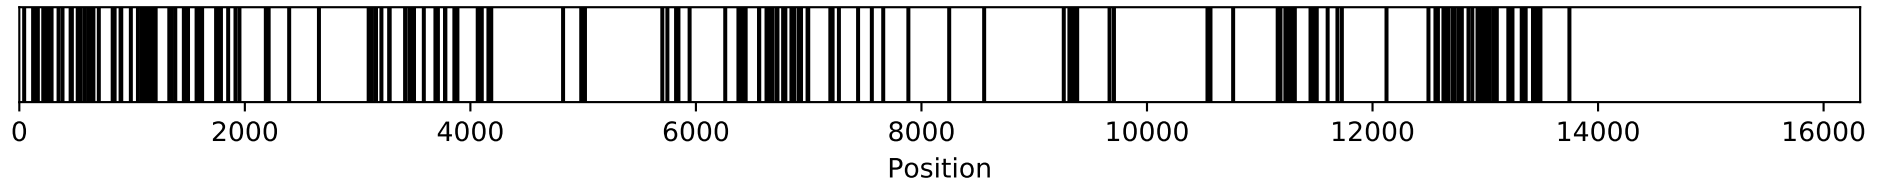

MA1 vs MM2  
Number of differences: 235

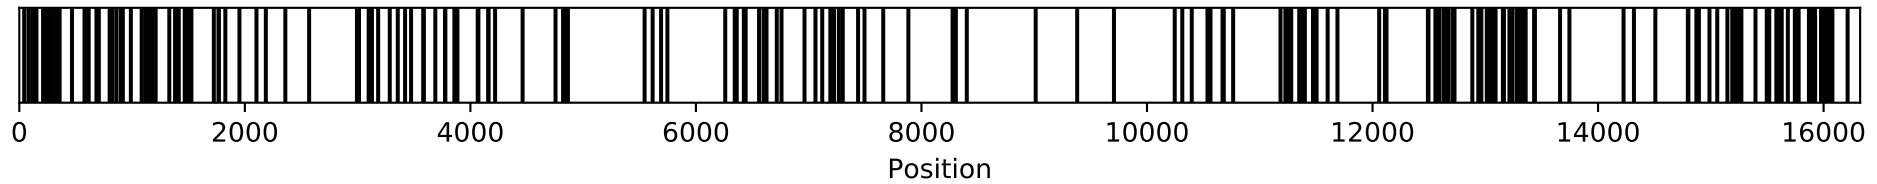

MA2 vs MM1  
Number of differences: 392

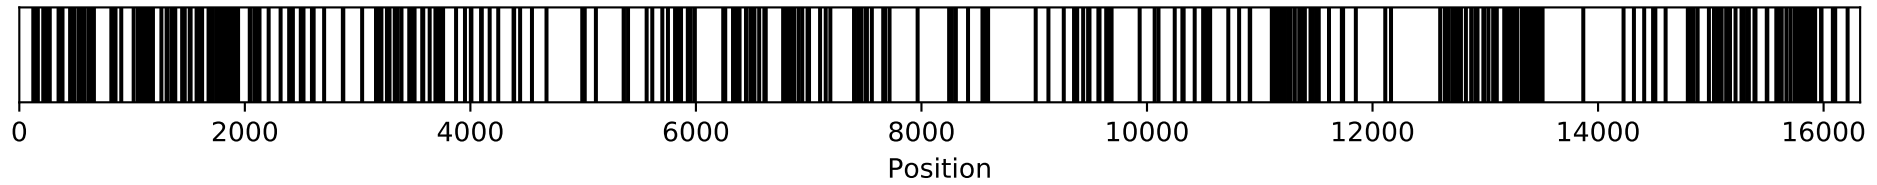

MA2 vs MM2  
Number of differences: 408

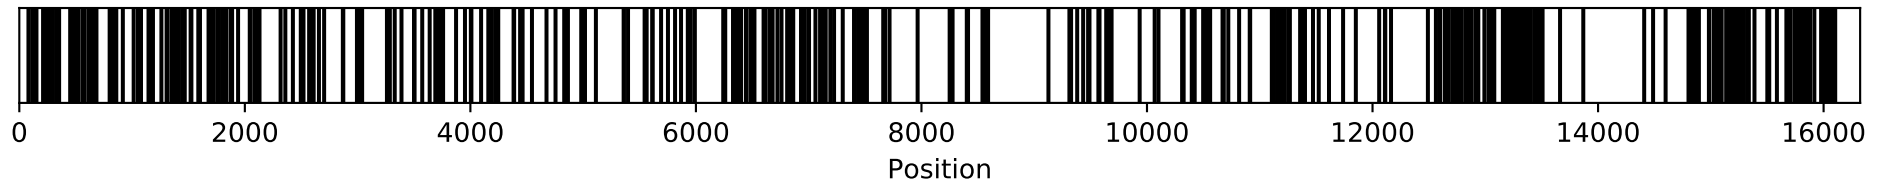

MM1 vs MM2  
Number of differences: 250

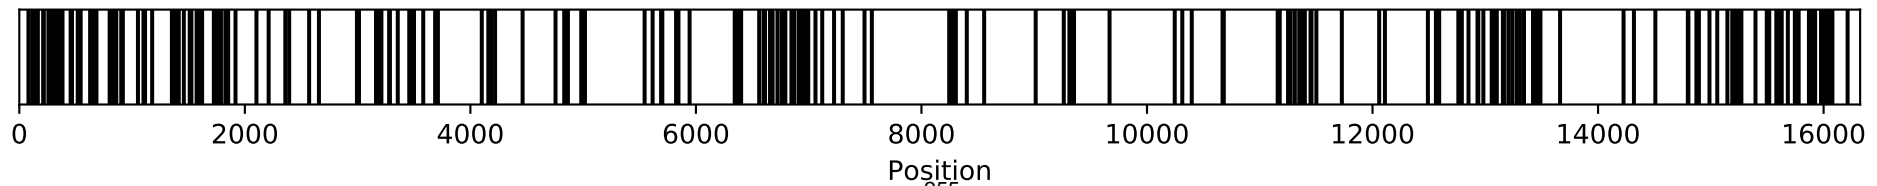

MA1 vs MA2  
Number of differences: 350

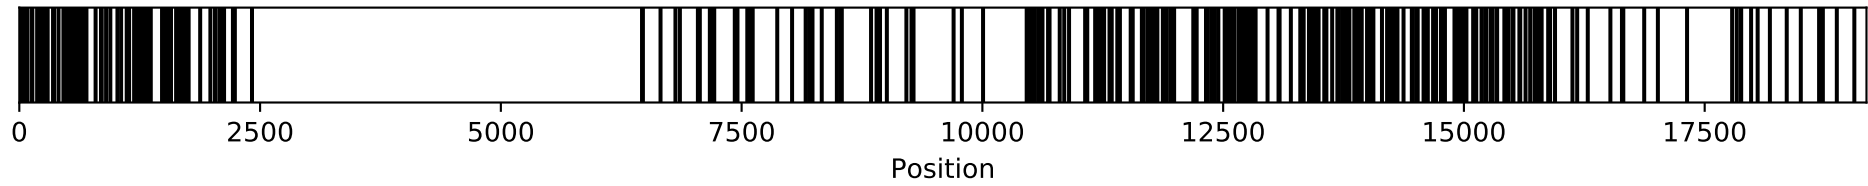

MA1 vs MM1  
Number of differences: 372

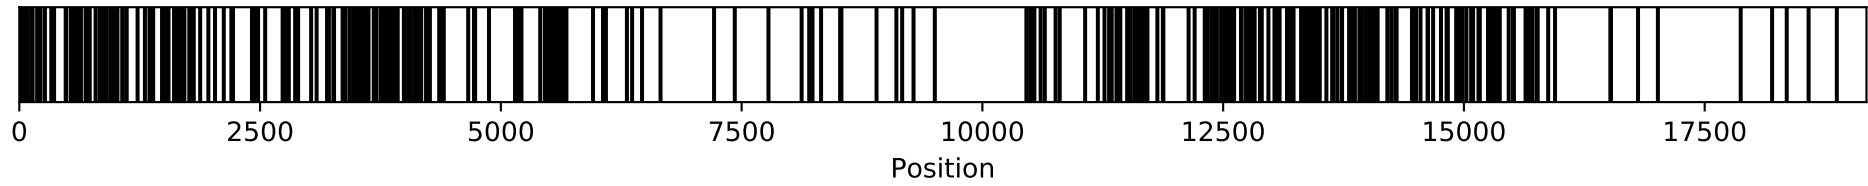

MA1 vs MM2  
Number of differences: 363

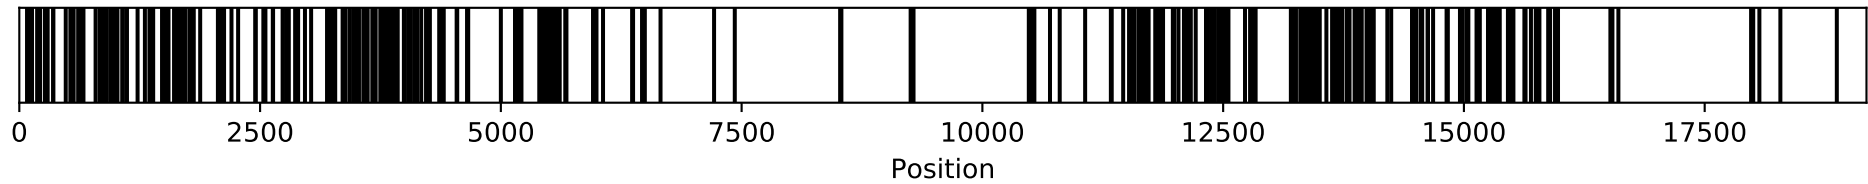

MA2 vs MM1  
Number of differences: 445

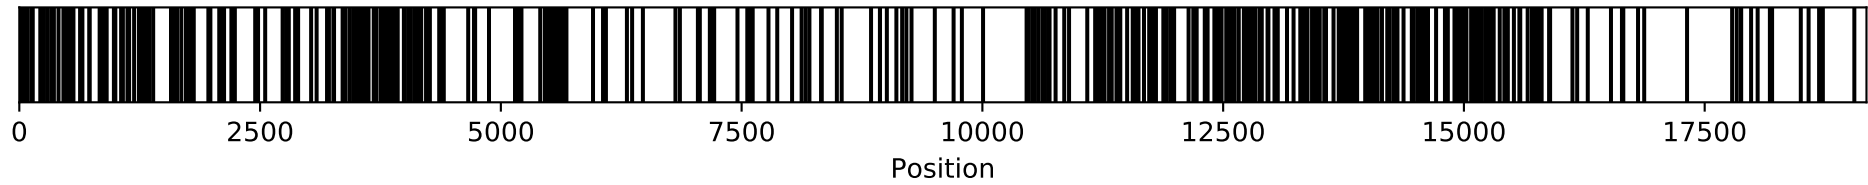

MA2 vs MM2  
Number of differences: 470

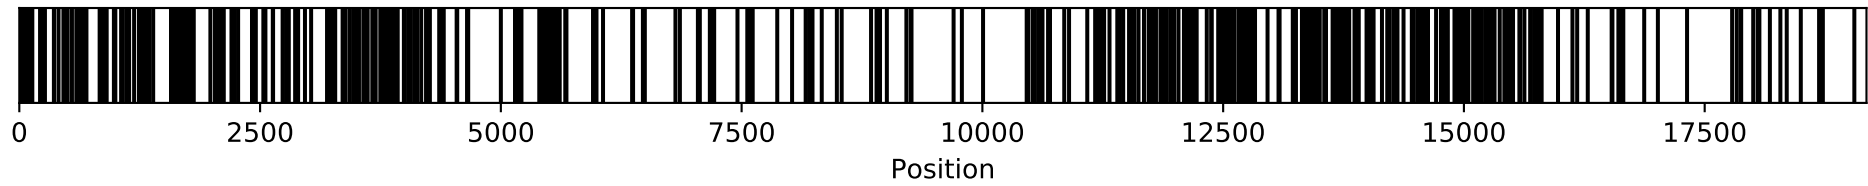

MM1 vs MM2  
Number of differences: 278

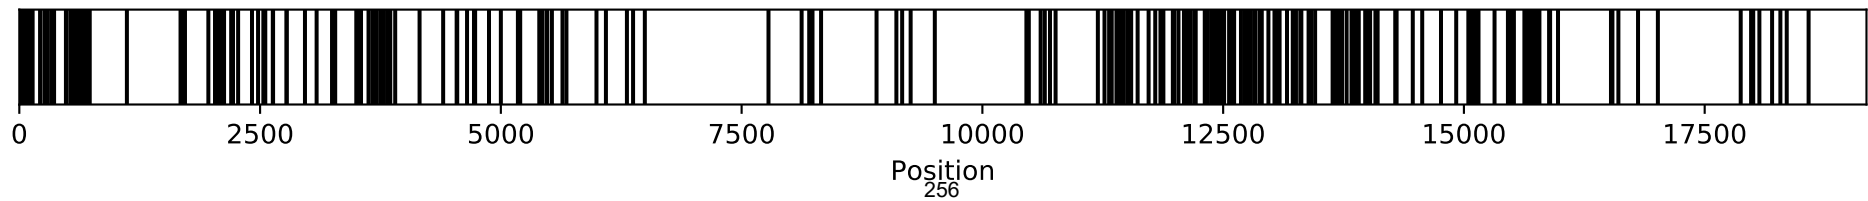

MA1 vs MA2  
Number of differences: 268

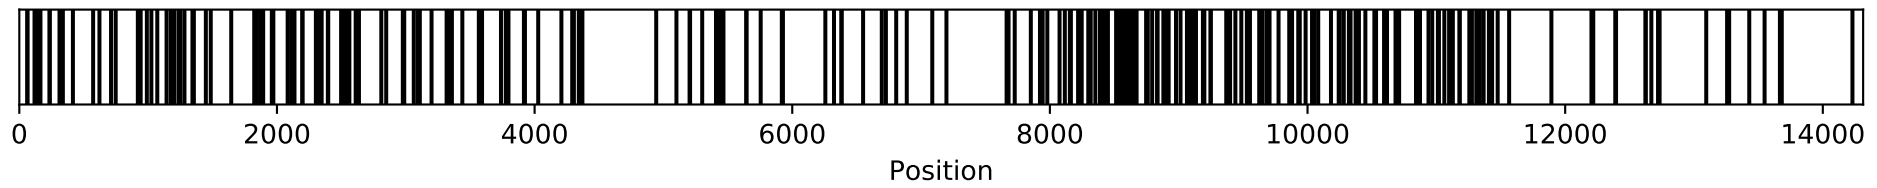

MA1 vs MM1  
Number of differences: 0

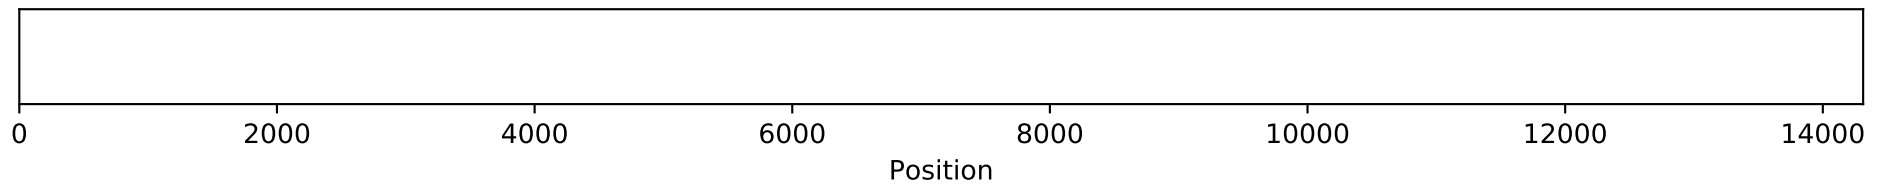

MA1 vs MM2  
Number of differences: 139

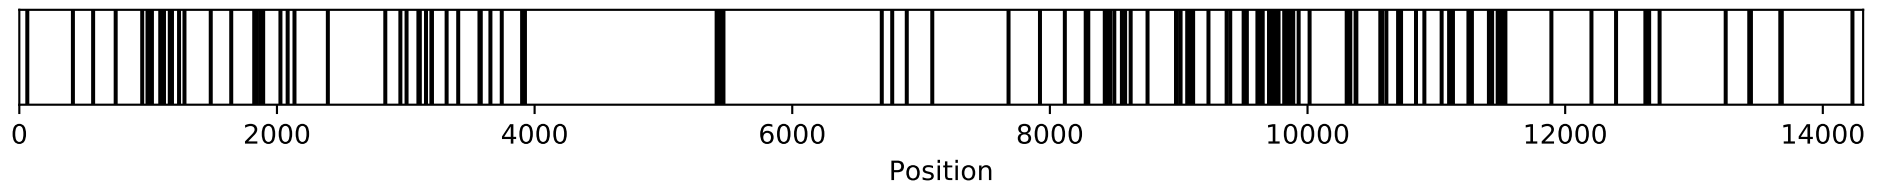

MA2 vs MM1  
Number of differences: 268

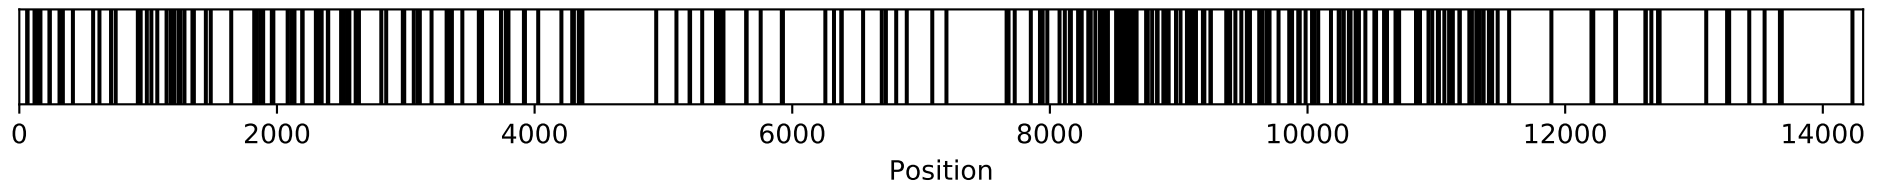

MA2 vs MM2  
Number of differences: 264

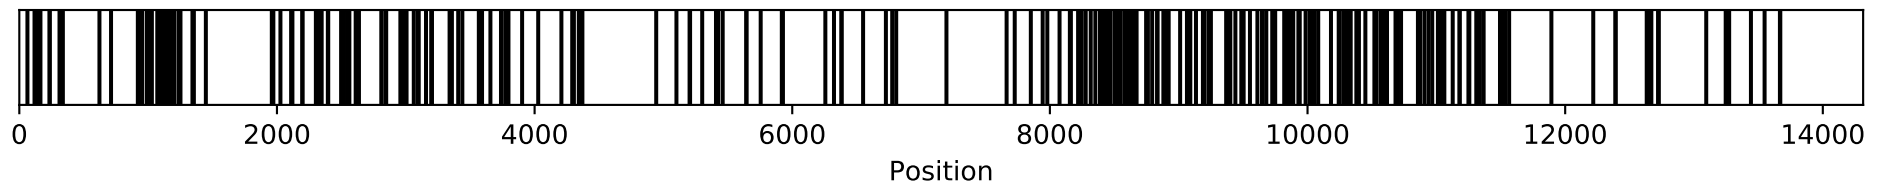

MM1 vs MM2  
Number of differences: 139

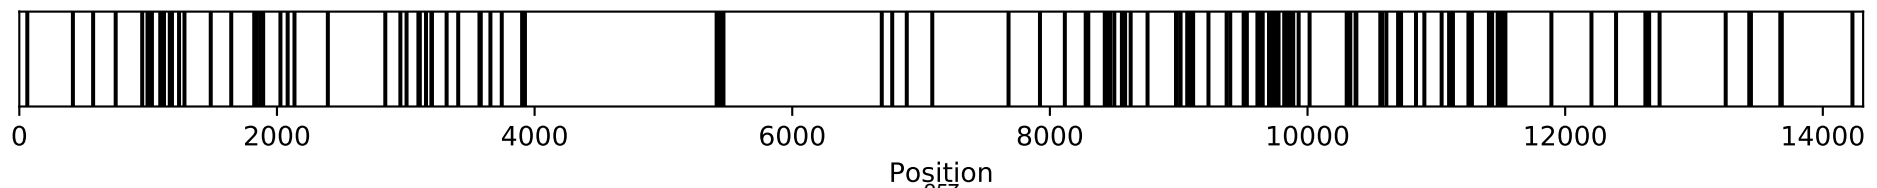

MA1 vs MA2  
Number of differences: 0

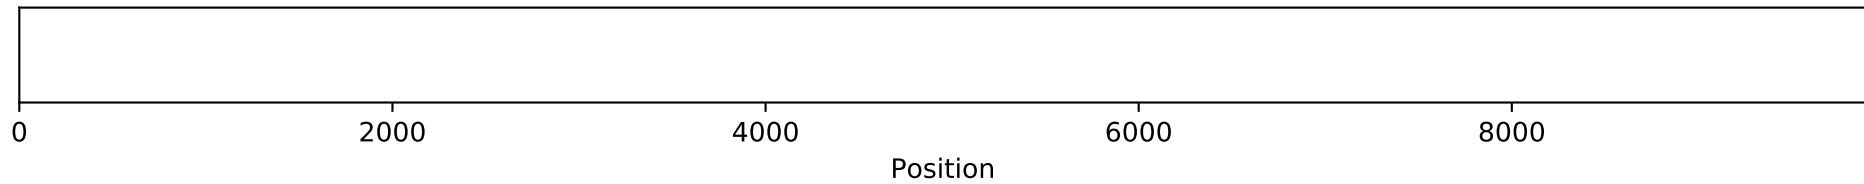

MA1 vs MM1  
Number of differences: 206

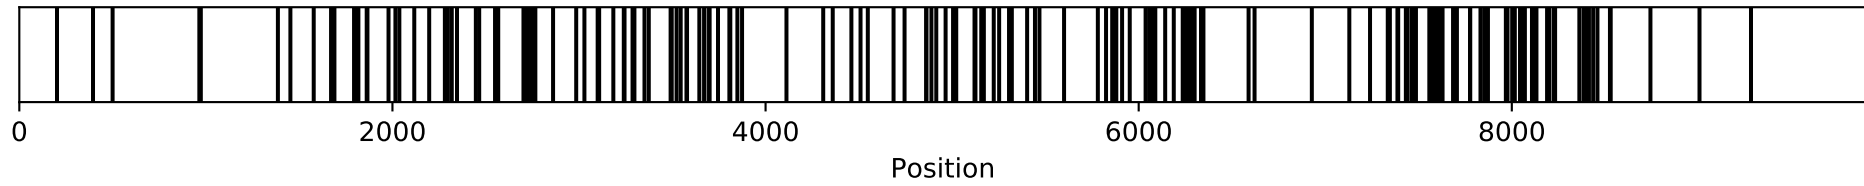

MA1 vs MM2  
Number of differences: 0

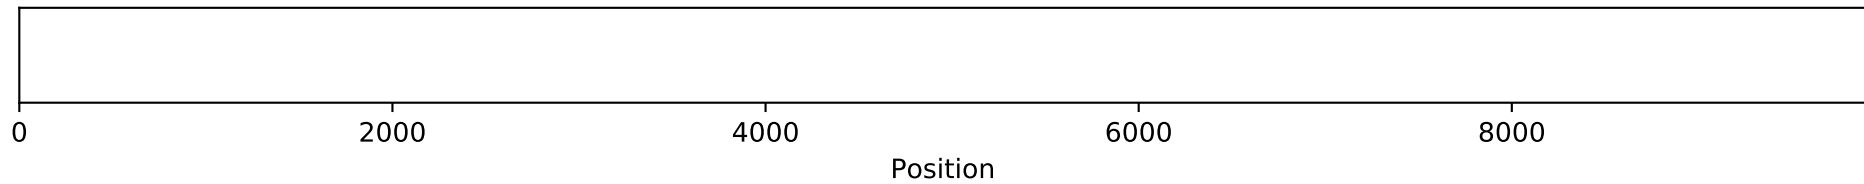

MA2 vs MM1  
Number of differences: 206

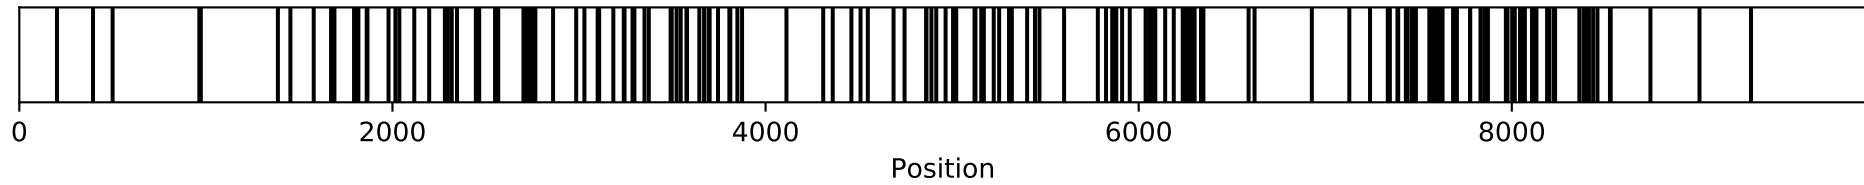

MA2 vs MM2  
Number of differences: 0

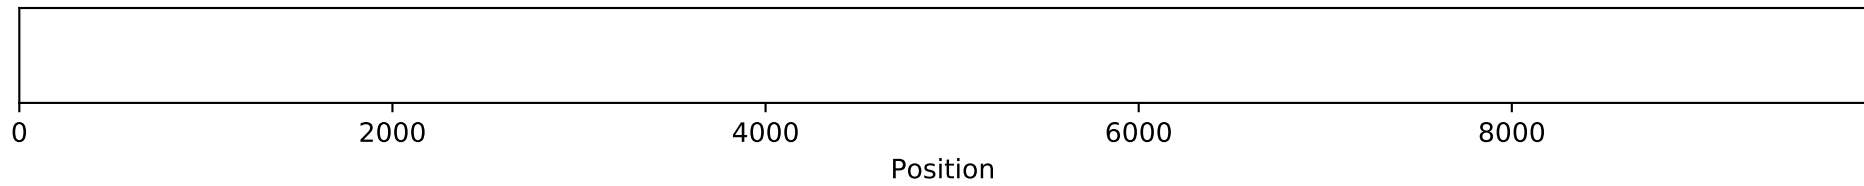

MM1 vs MM2  
Number of differences: 206

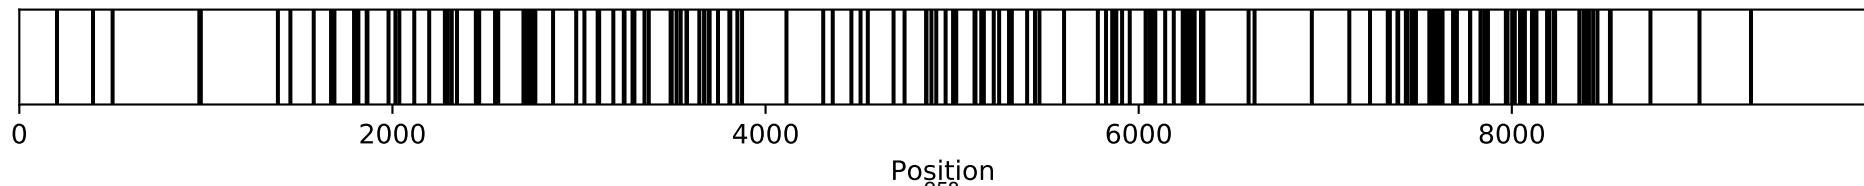



MA1 vs MA2  
Number of differences: 180

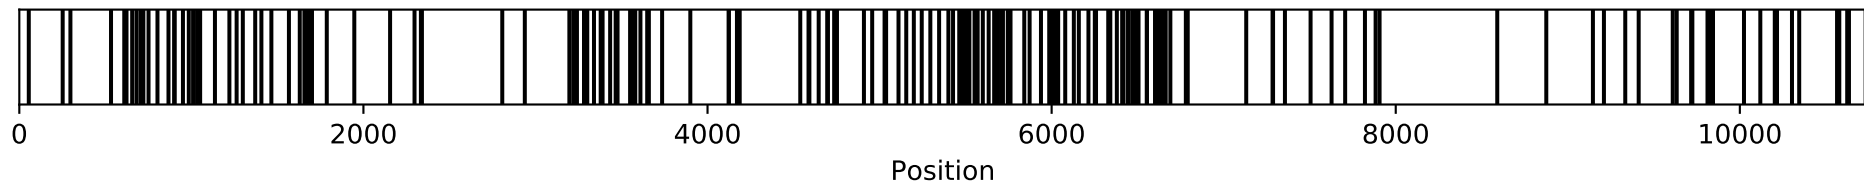

MA1 vs MM1  
Number of differences: 0

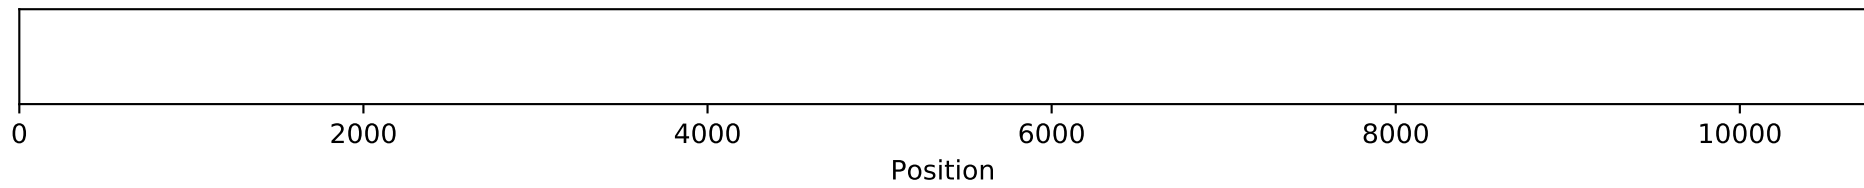

MA1 vs MM2  
Number of differences: 96

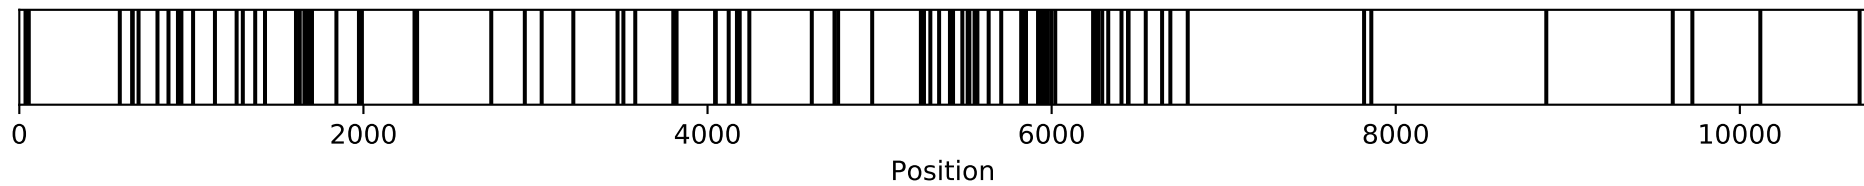

MA2 vs MM1  
Number of differences: 180

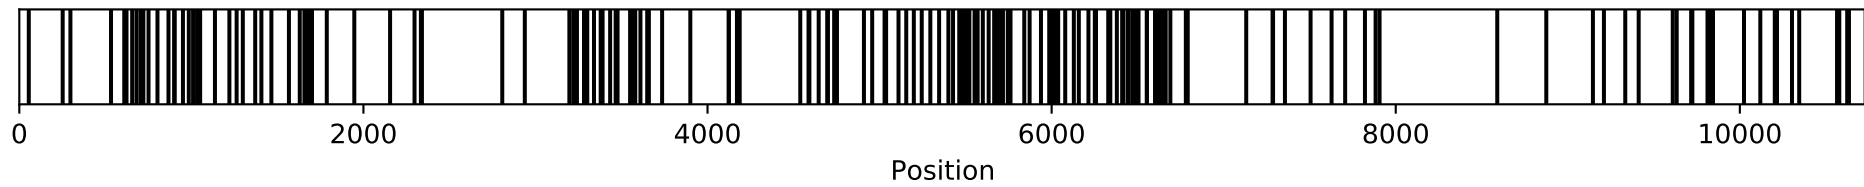

MA2 vs MM2  
Number of differences: 183

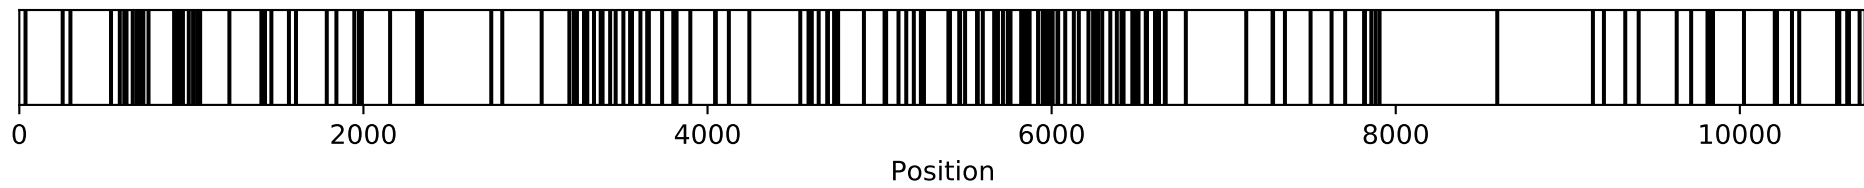

MM1 vs MM2  
Number of differences: 96

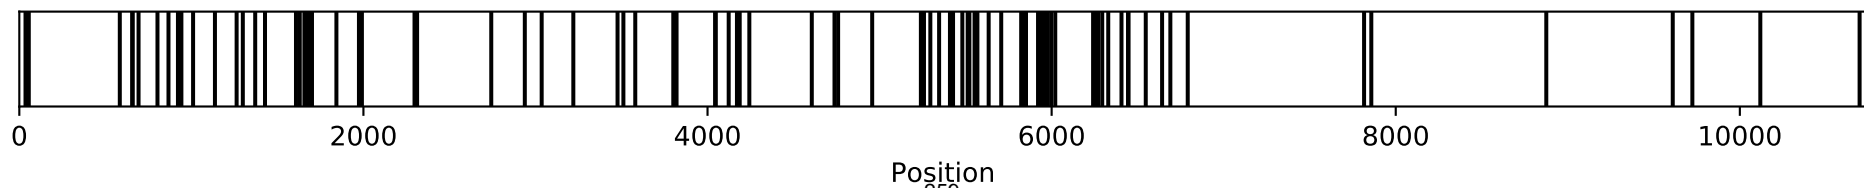

MA1 vs MA2  
Number of differences: 102

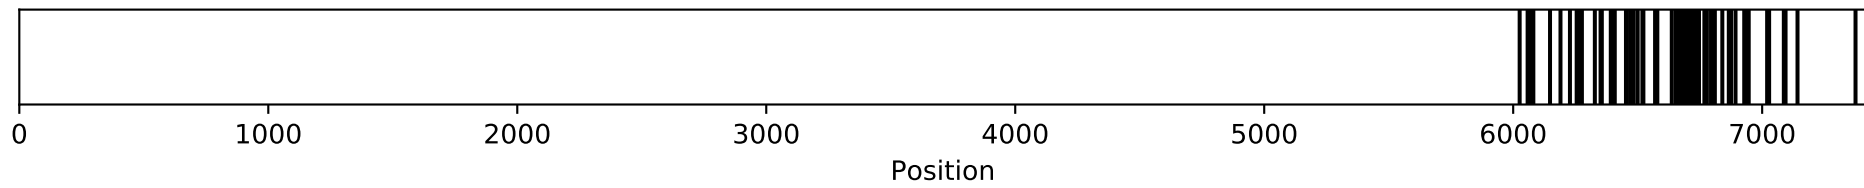

MA1 vs MM1  
Number of differences: 75

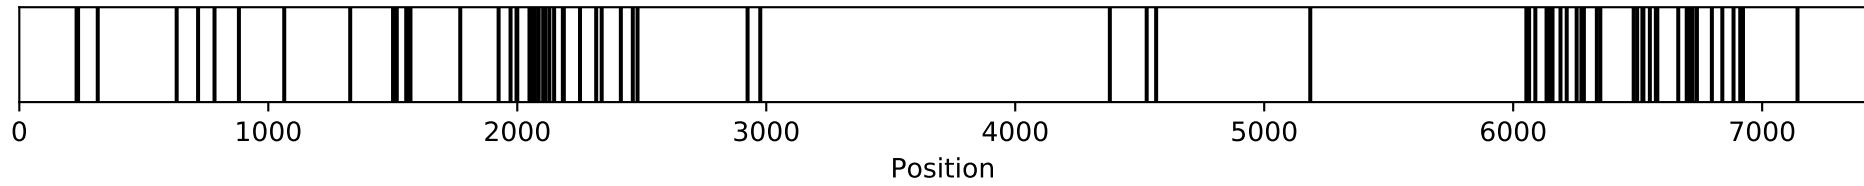

MA1 vs MM2  
Number of differences: 81

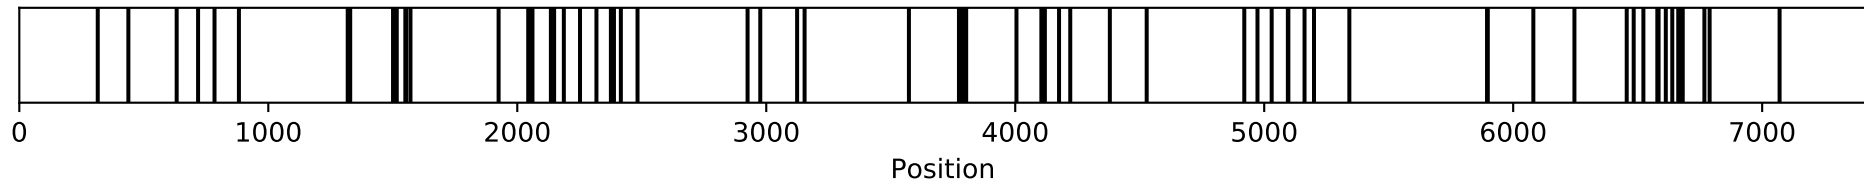

MA2 vs MM1  
Number of differences: 144

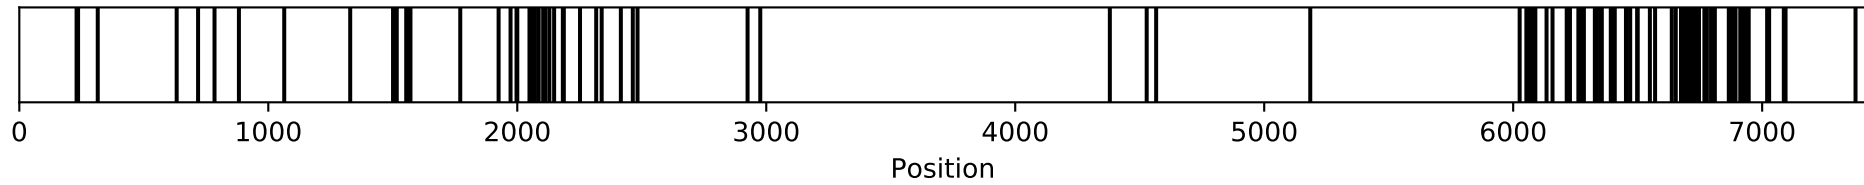

MA2 vs MM2  
Number of differences: 167

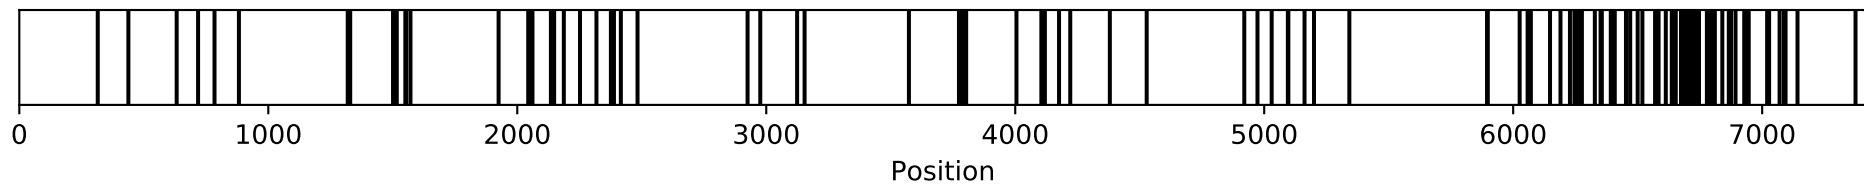

MM1 vs MM2  
Number of differences: 105

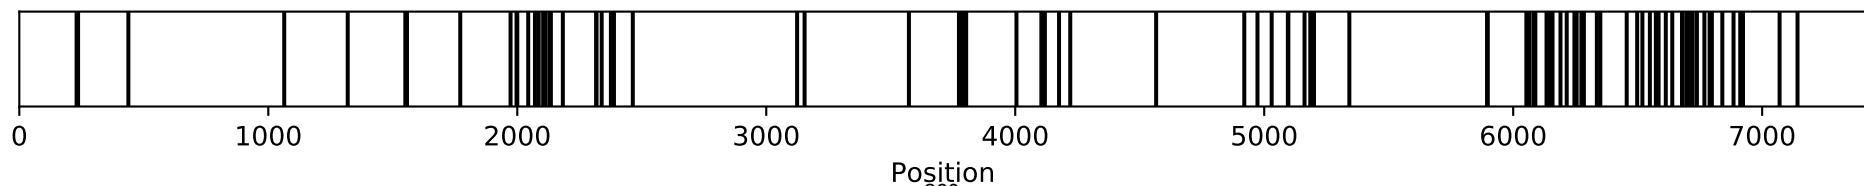

MA1 vs MA2  
Number of differences: 614

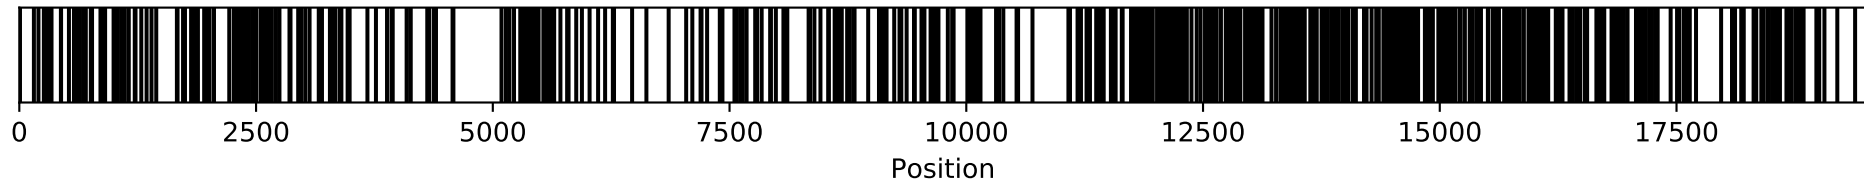

MA1 vs MM1  
Number of differences: 561

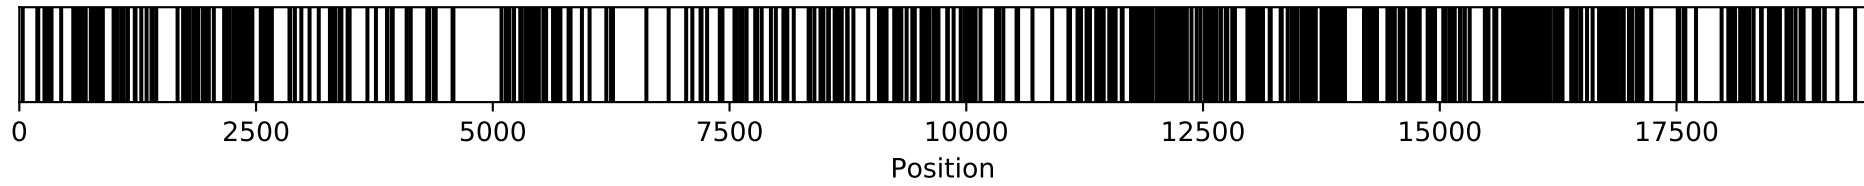

MA1 vs MM2  
Number of differences: 614

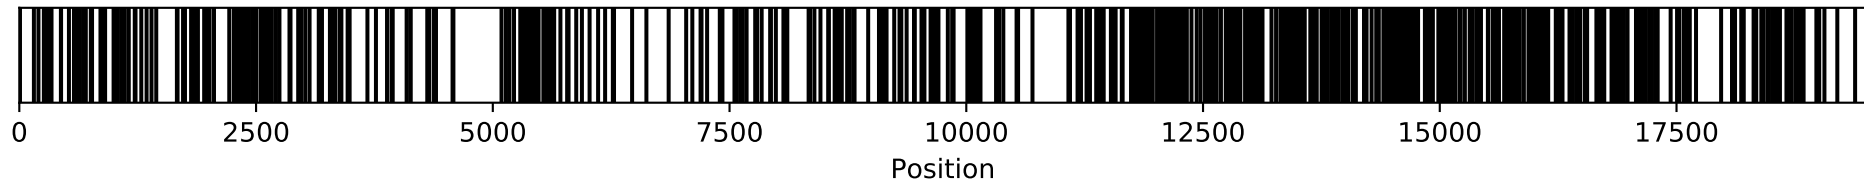

MA2 vs MM1  
Number of differences: 377

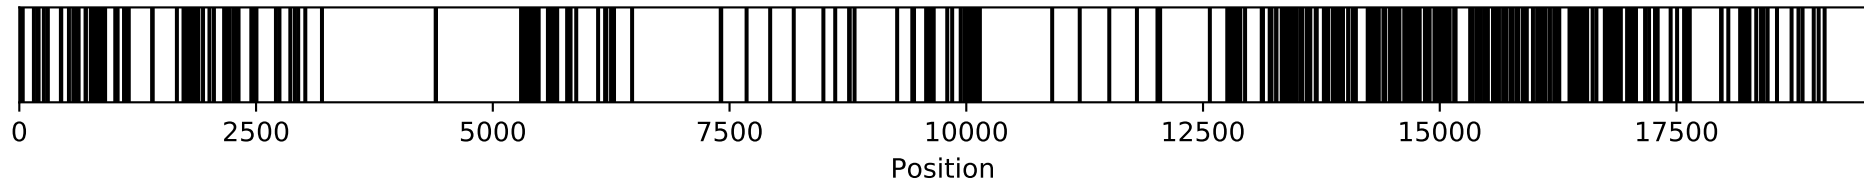

MA2 vs MM2  
Number of differences: 0

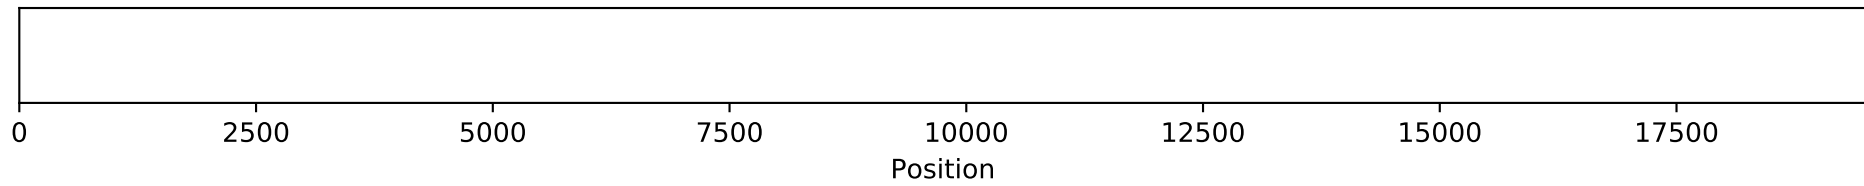

MM1 vs MM2  
Number of differences: 377

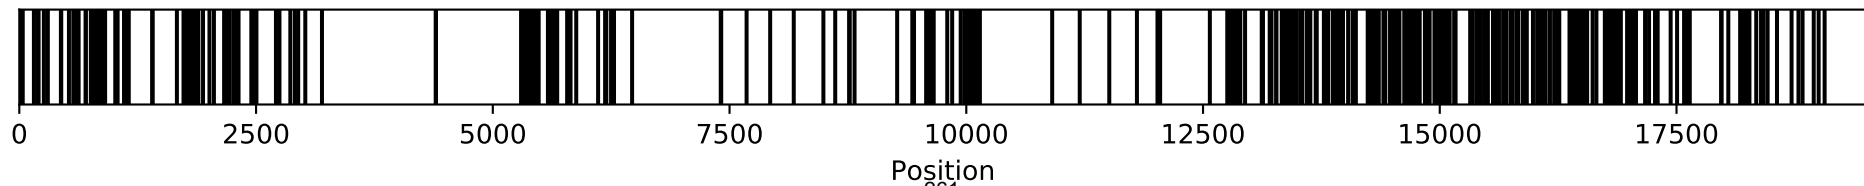

MA1 vs MA2  
Number of differences: 170

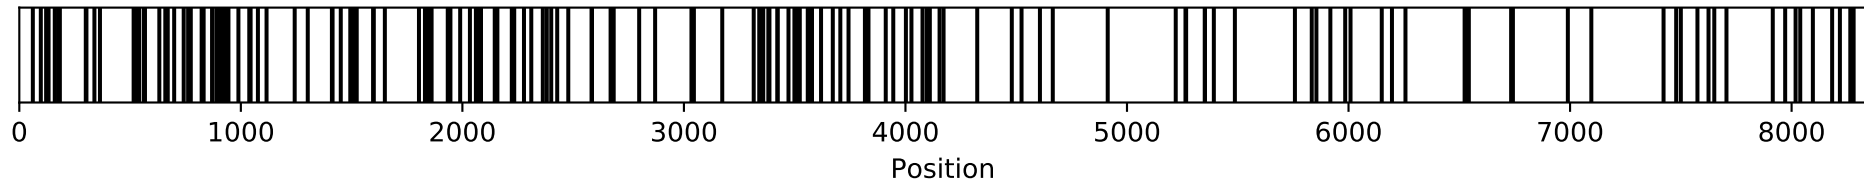

MA1 vs MM1  
Number of differences: 0

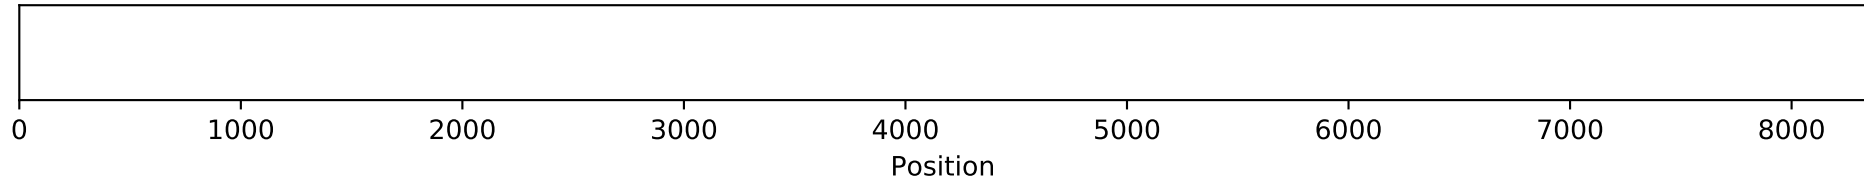

MA1 vs MM2  
Number of differences: 81

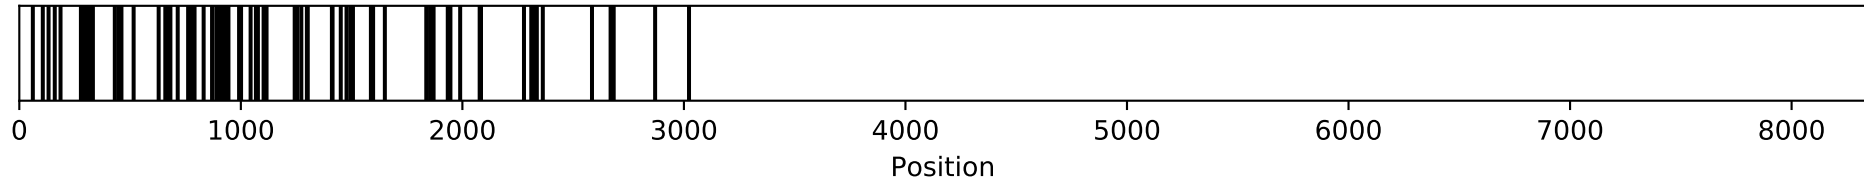

MA2 vs MM1  
Number of differences: 170

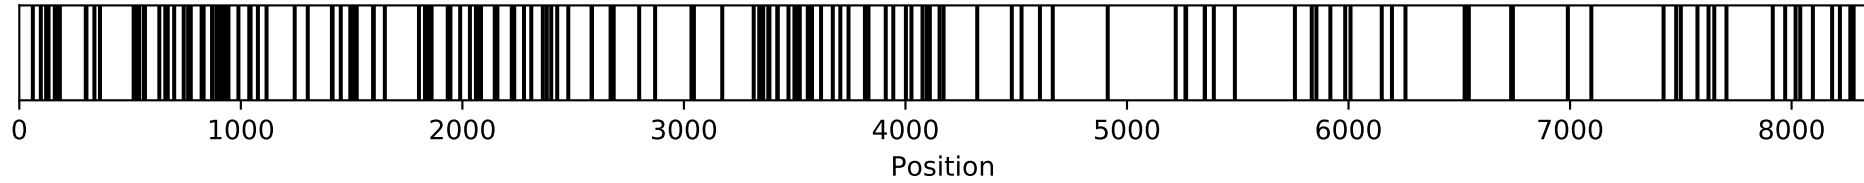

MA2 vs MM2  
Number of differences: 167

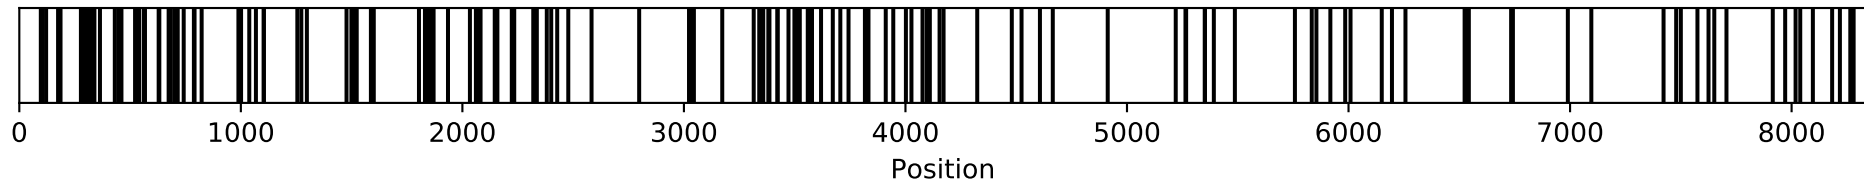

MM1 vs MM2  
Number of differences: 81

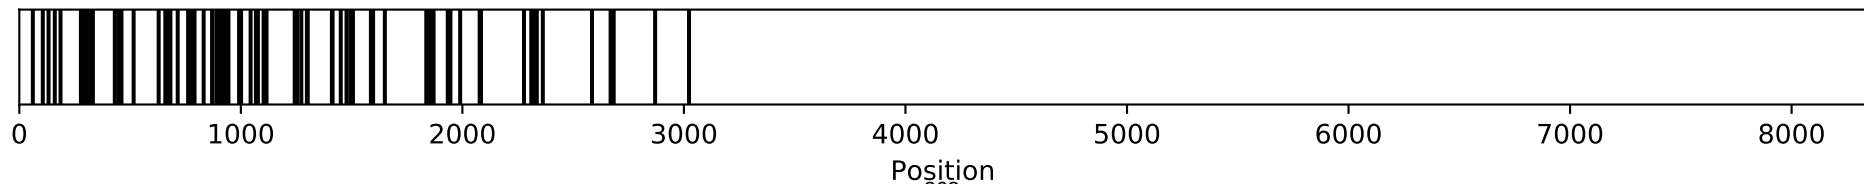

MA1 vs MA2  
Number of differences: 324

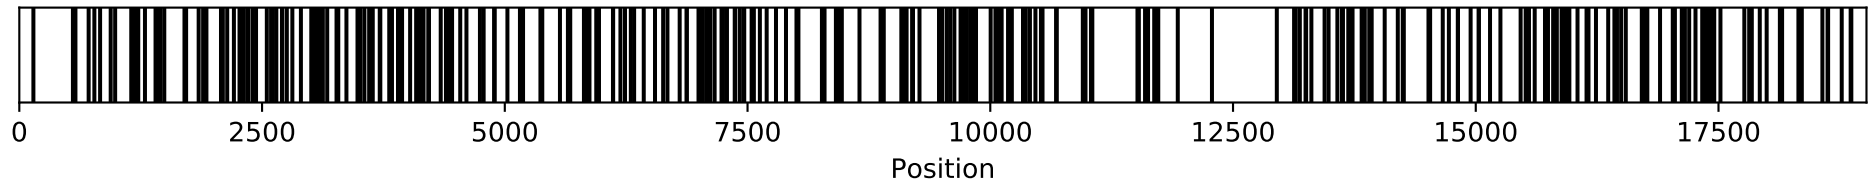

MA1 vs MM1  
Number of differences: 0

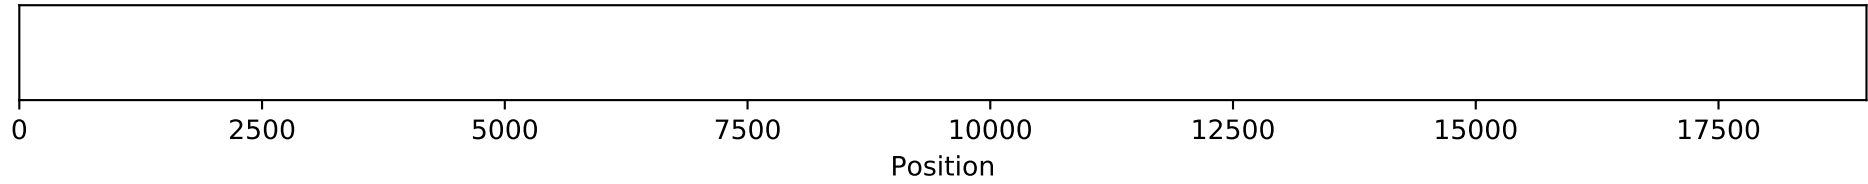

MA1 vs MM2  
Number of differences: 166

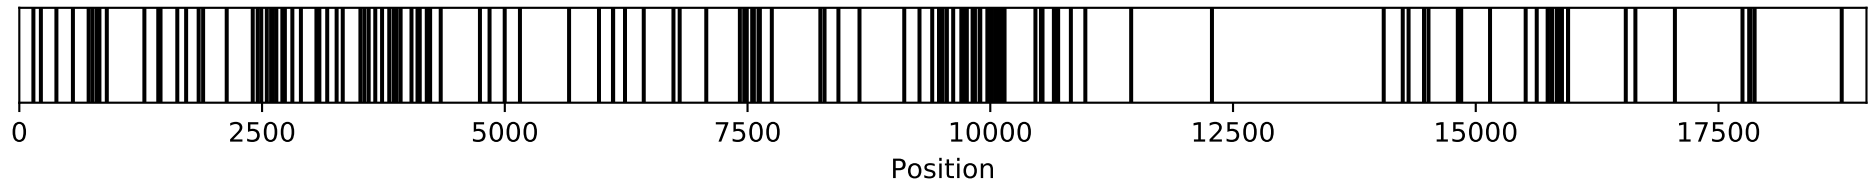

MA2 vs MM1  
Number of differences: 324

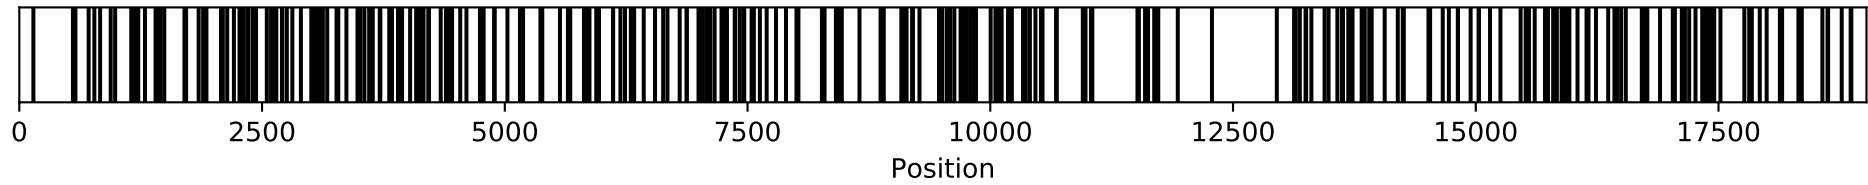

MA2 vs MM2  
Number of differences: 324

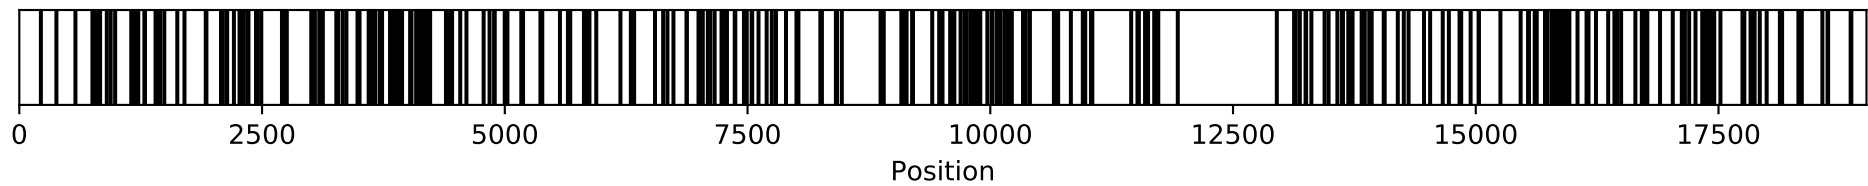

MM1 vs MM2  
Number of differences: 166

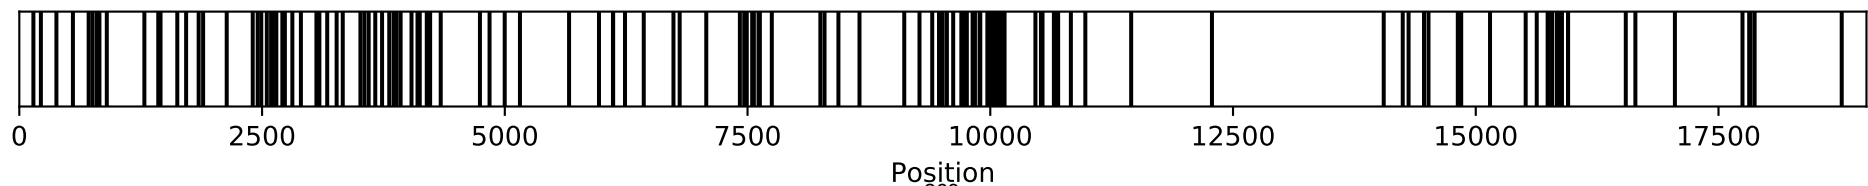

MA1 vs MA2  
Number of differences: 305

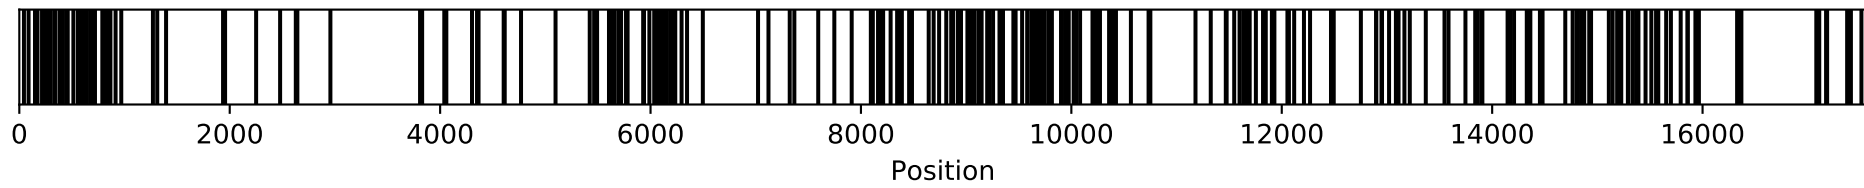

MA1 vs MM1  
Number of differences: 67

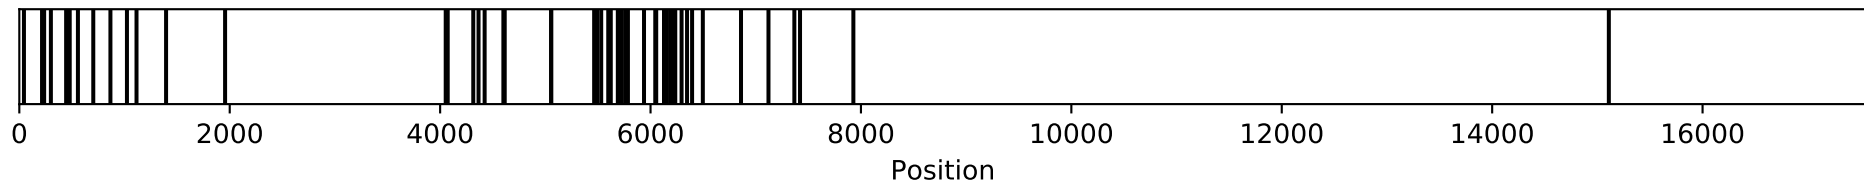

MA1 vs MM2  
Number of differences: 157

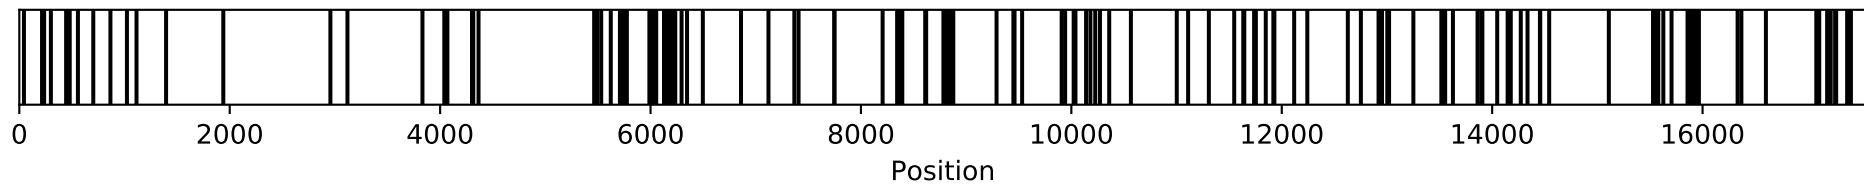

MA2 vs MM1  
Number of differences: 290

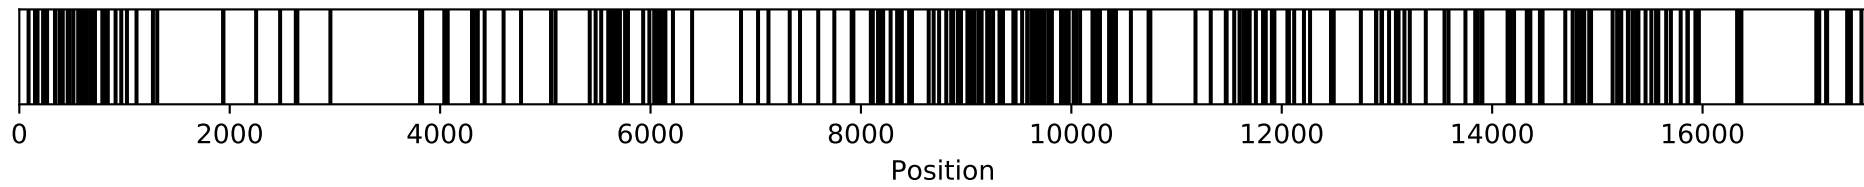

MA2 vs MM2  
Number of differences: 276

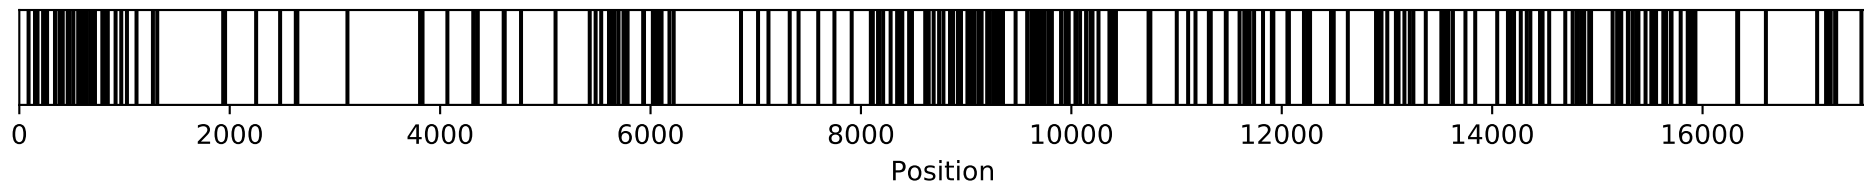

MM1 vs MM2  
Number of differences: 136

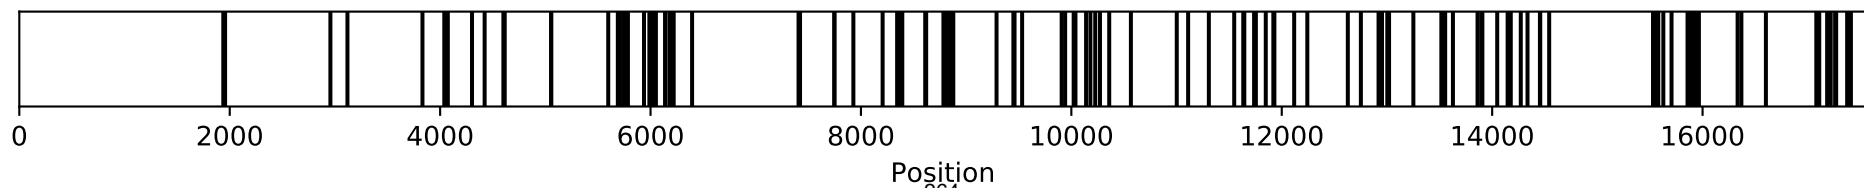

MA1 vs MA2  
Number of differences: 159

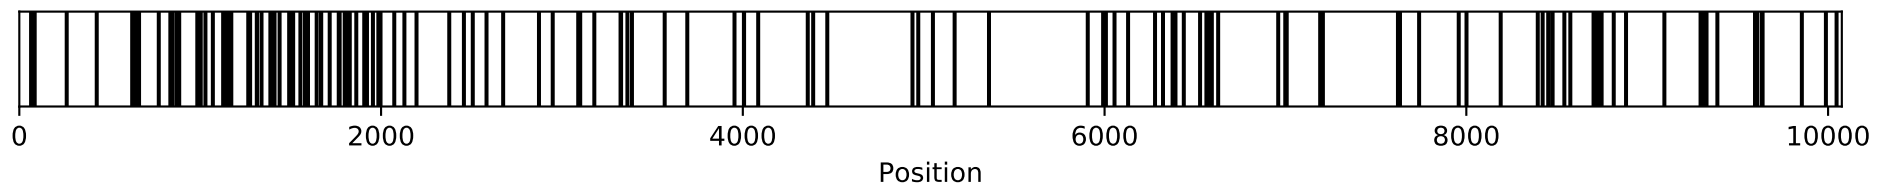

MA1 vs MM1  
Number of differences: 104

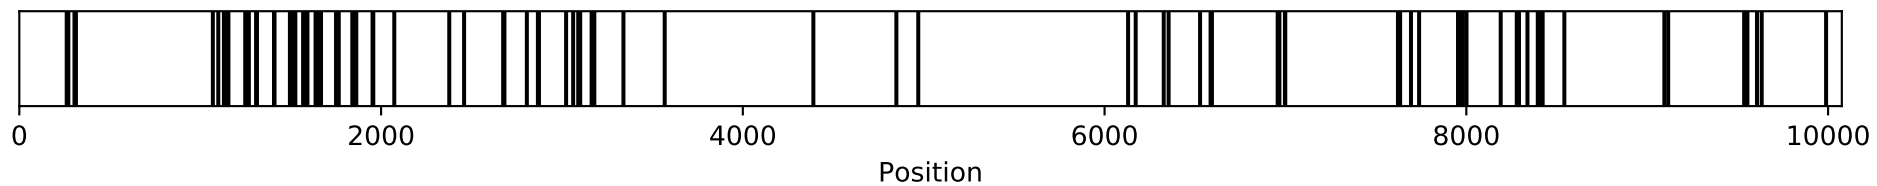

MA1 vs MM2  
Number of differences: 0

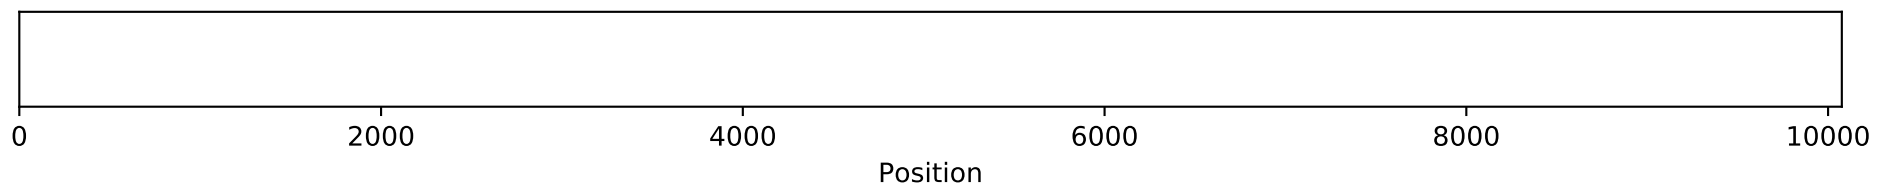

MA2 vs MM1  
Number of differences: 181

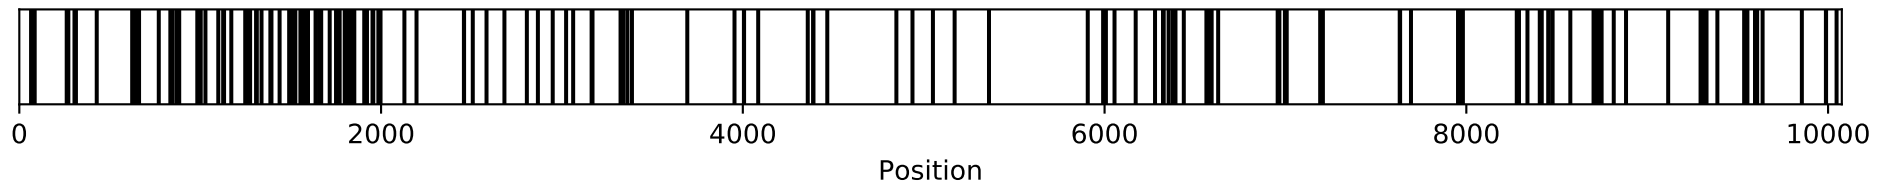

MA2 vs MM2  
Number of differences: 159

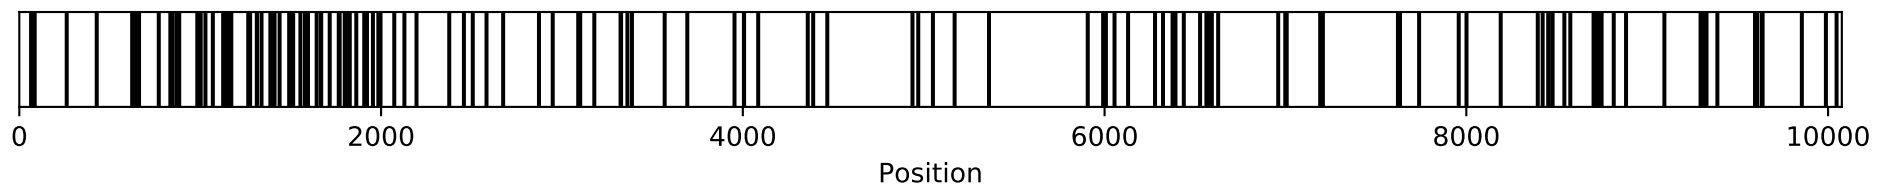

MM1 vs MM2  
Number of differences: 104

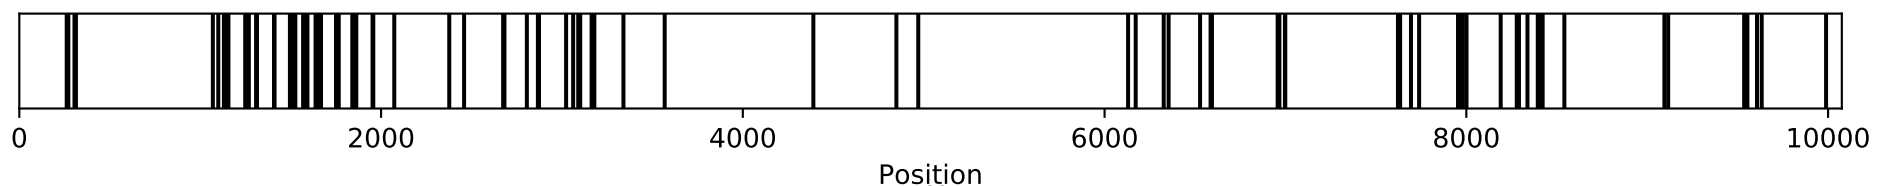

MA1 vs MA2  
Number of differences: 366

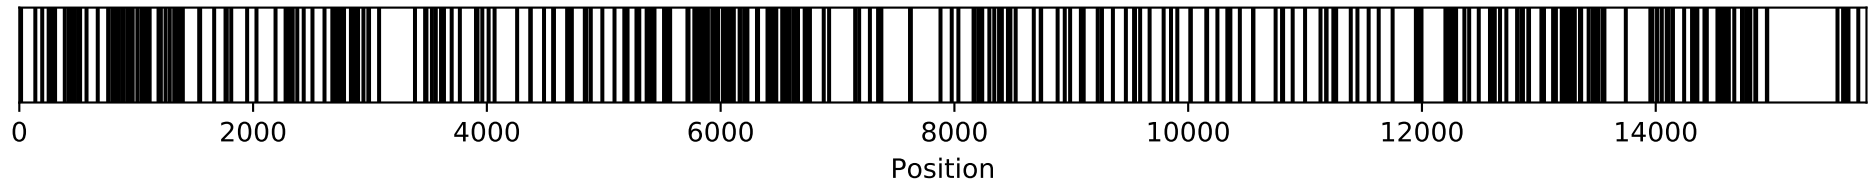

MA1 vs MM1  
Number of differences: 0

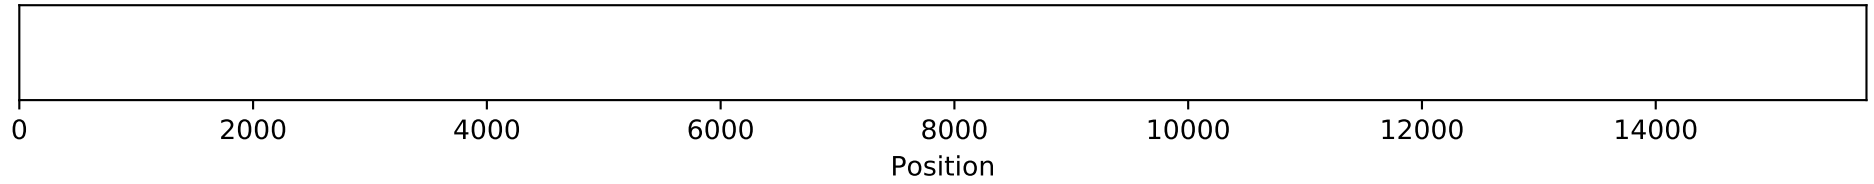

MA1 vs MM2  
Number of differences: 208

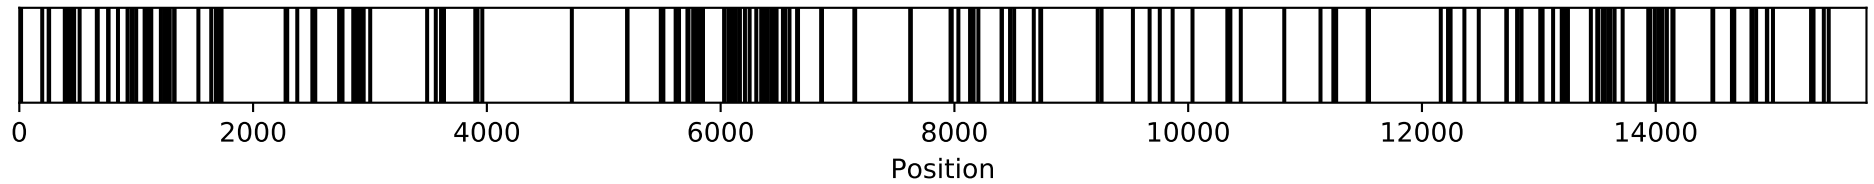

MA2 vs MM1  
Number of differences: 366

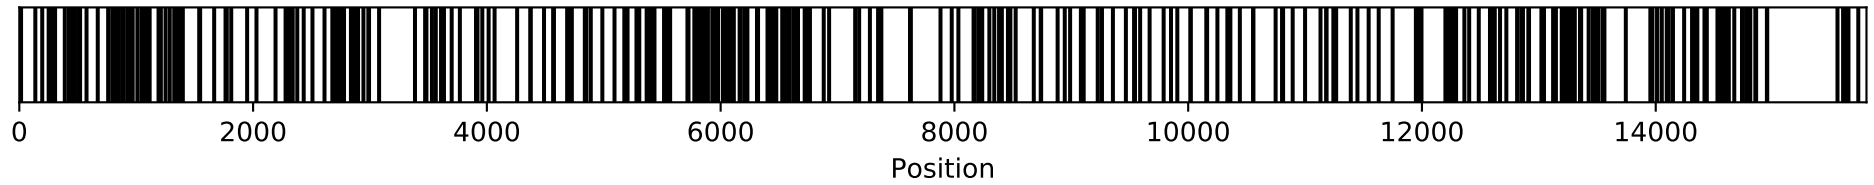

MA2 vs MM2  
Number of differences: 373

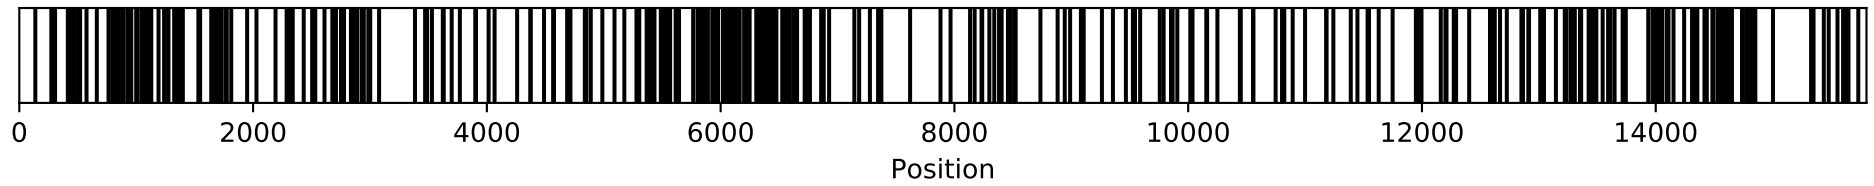

MM1 vs MM2  
Number of differences: 208

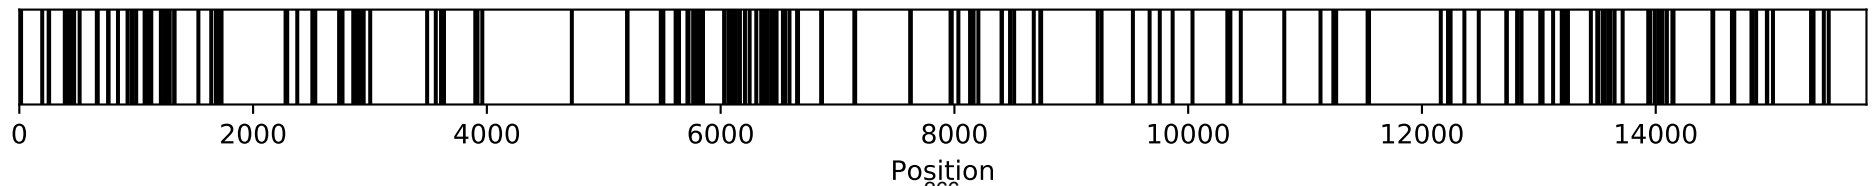



MA1 vs MA2  
Number of differences: 78

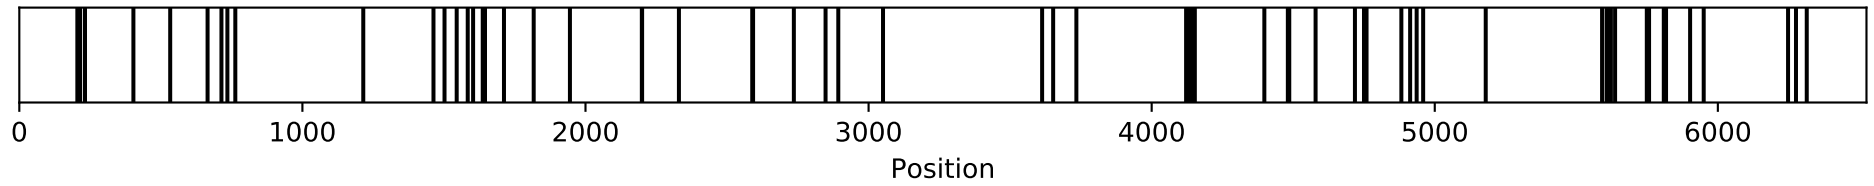

MA1 vs MM1  
Number of differences: 0

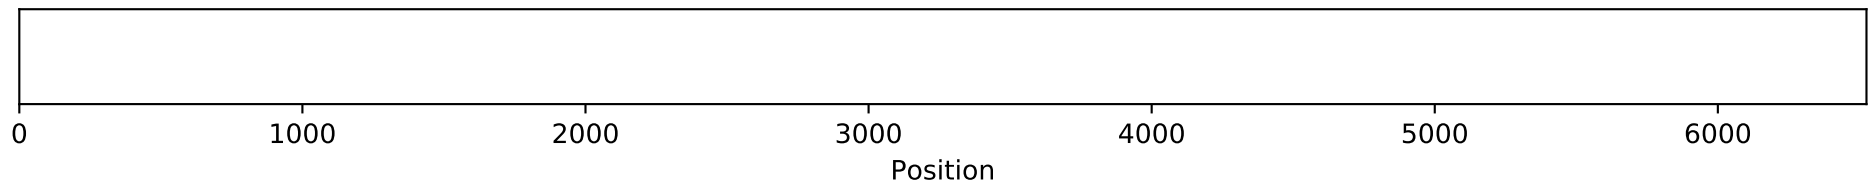

MA1 vs MM2  
Number of differences: 16

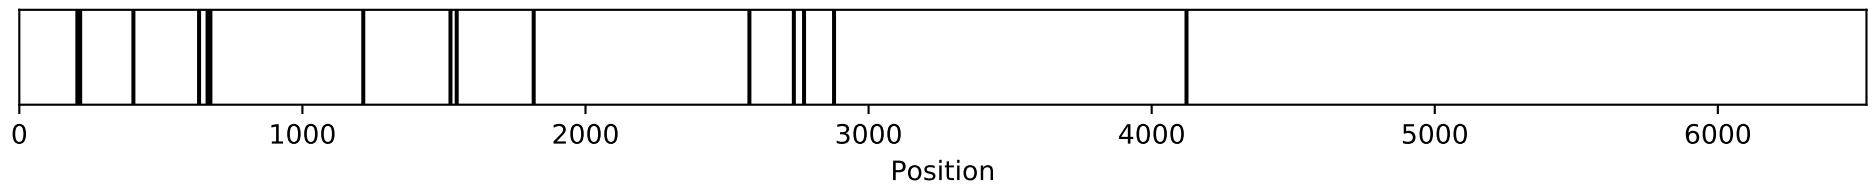

MA2 vs MM1  
Number of differences: 78

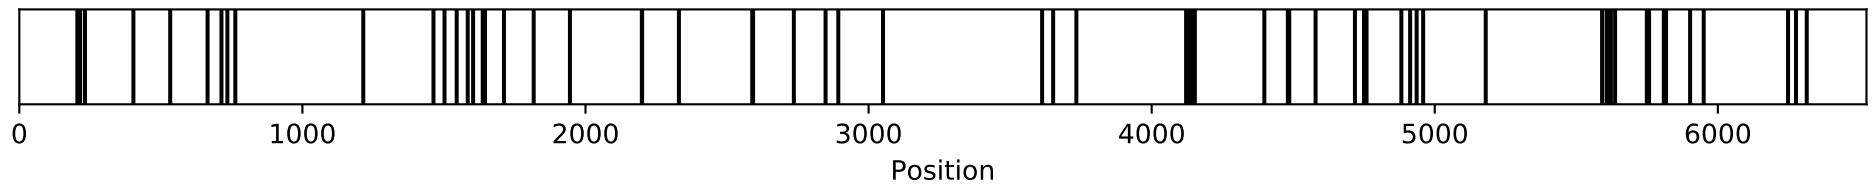

MA2 vs MM2  
Number of differences: 75

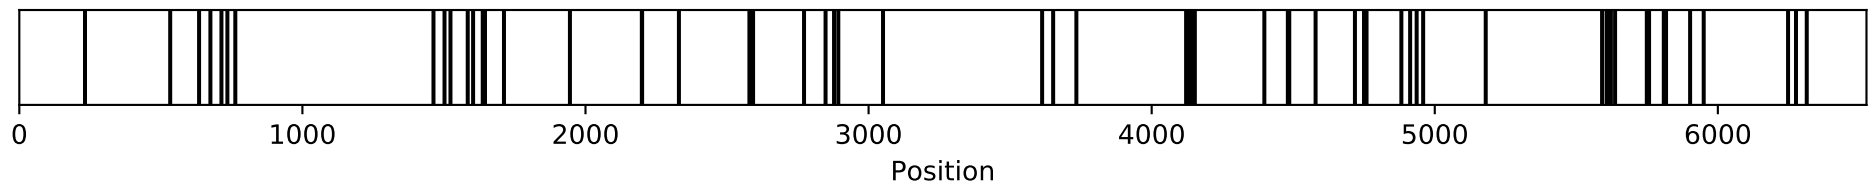

MM1 vs MM2  
Number of differences: 16

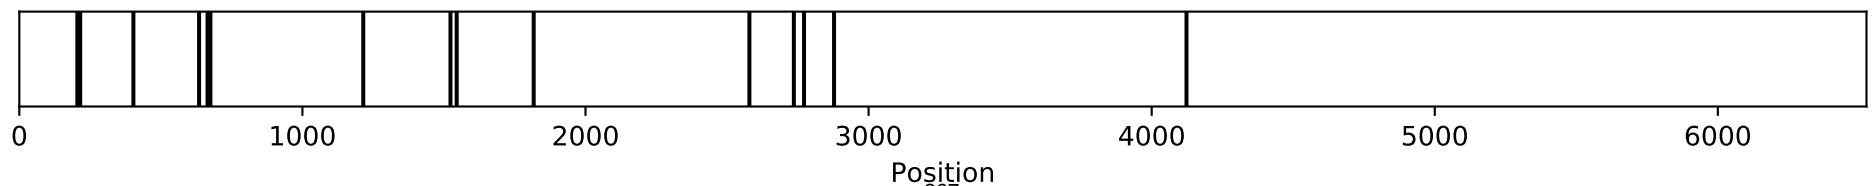

MA1 vs MA2  
Number of differences: 65

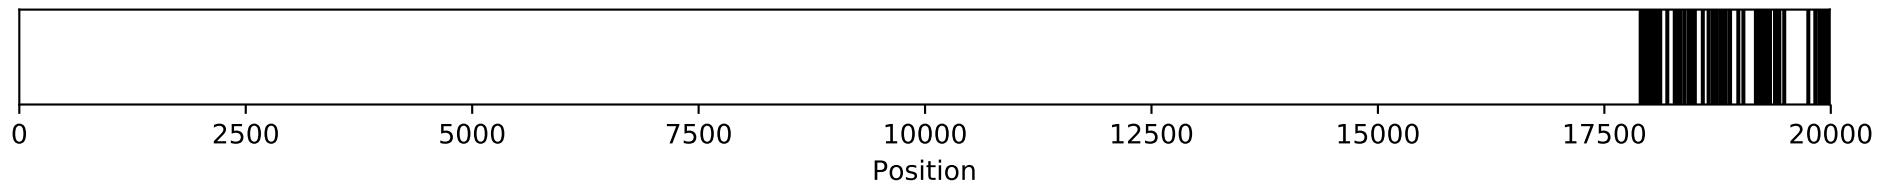

MA1 vs MM1  
Number of differences: 267

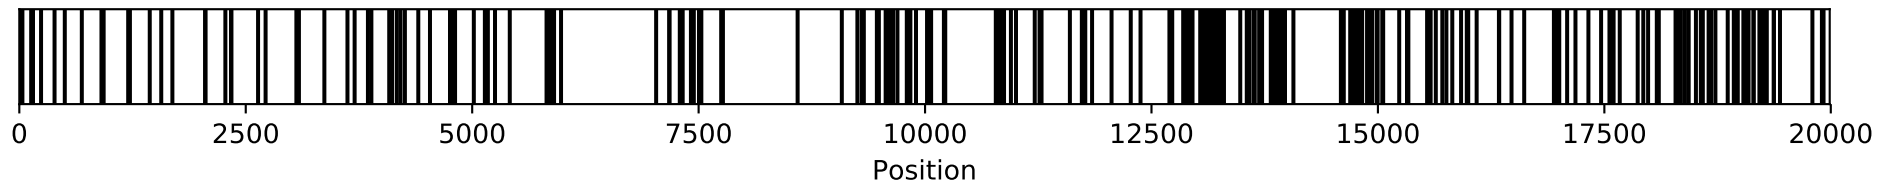

MA1 vs MM2  
Number of differences: 0

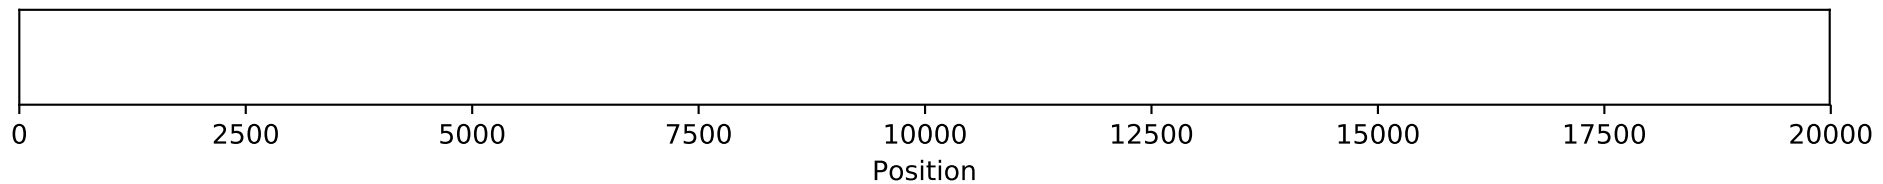

MA2 vs MM1  
Number of differences: 304

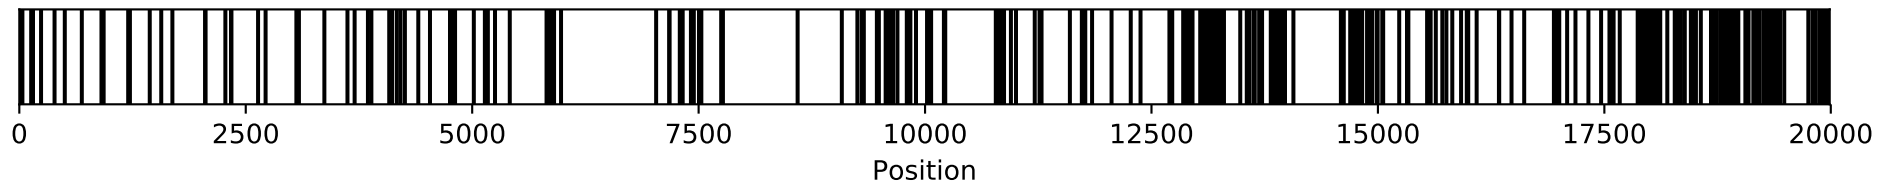

MA2 vs MM2  
Number of differences: 65

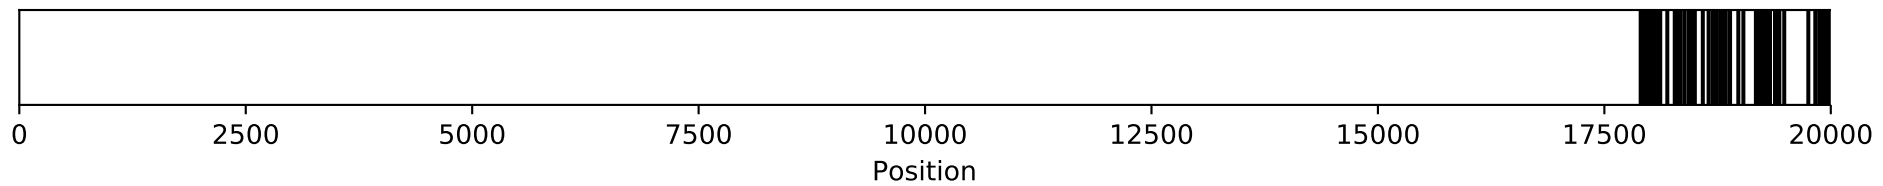

MM1 vs MM2  
Number of differences: 267

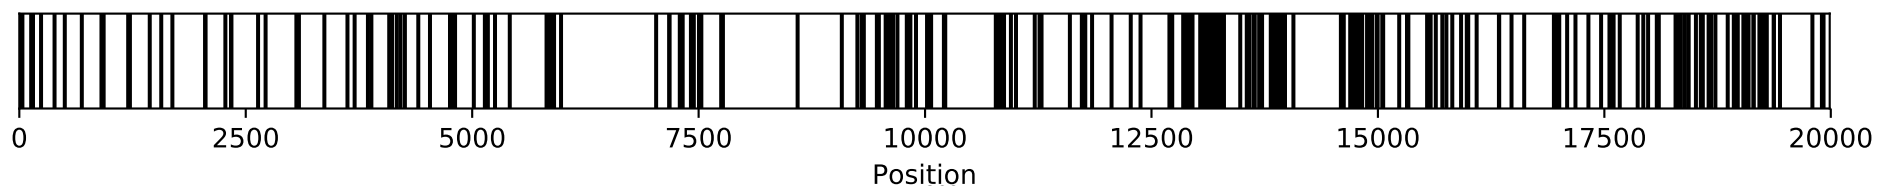

MA1 vs MA2  
Number of differences: 88

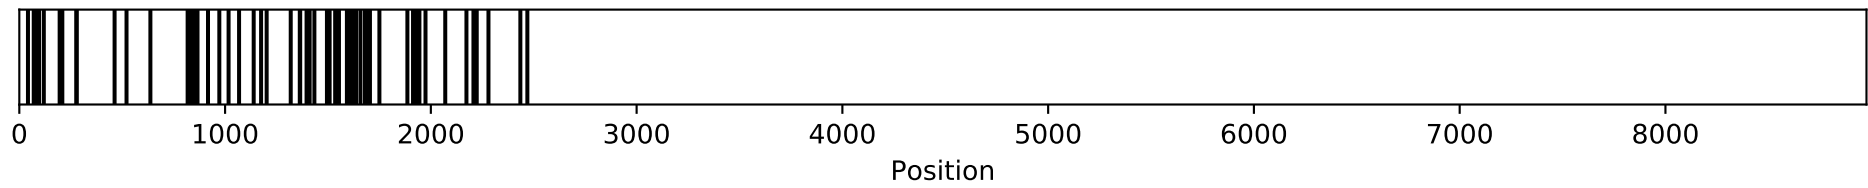

MA1 vs MM1  
Number of differences: 111

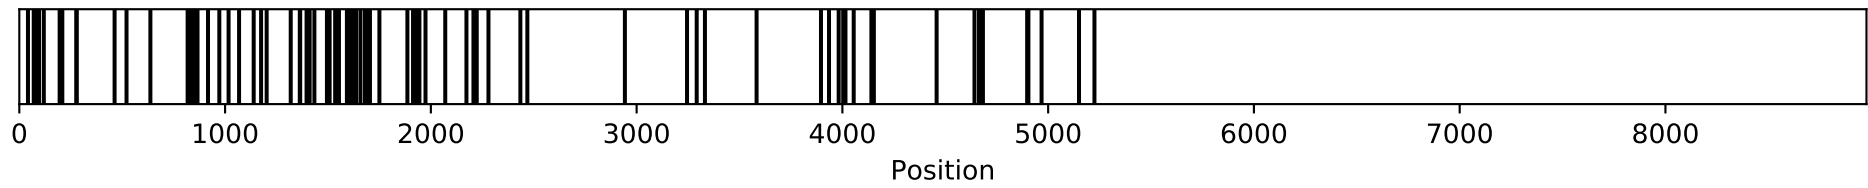

MA1 vs MM2  
Number of differences: 147

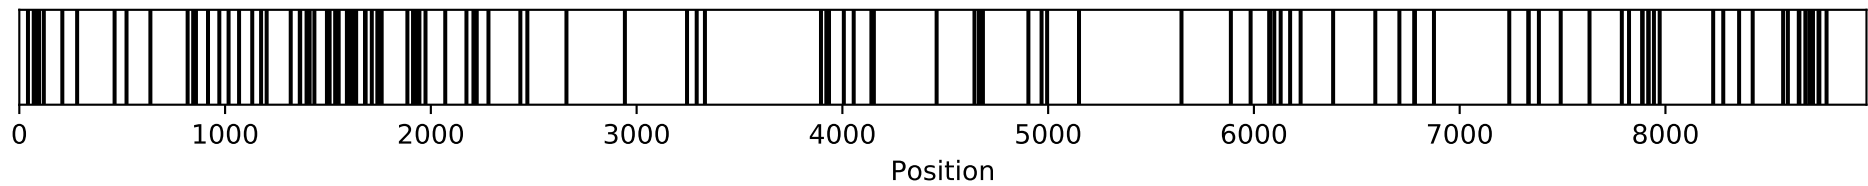

MA2 vs MM1  
Number of differences: 23

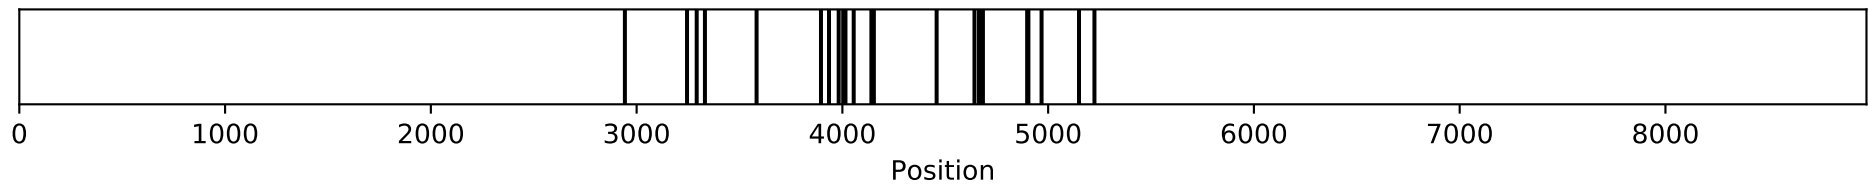

MA2 vs MM2  
Number of differences: 86

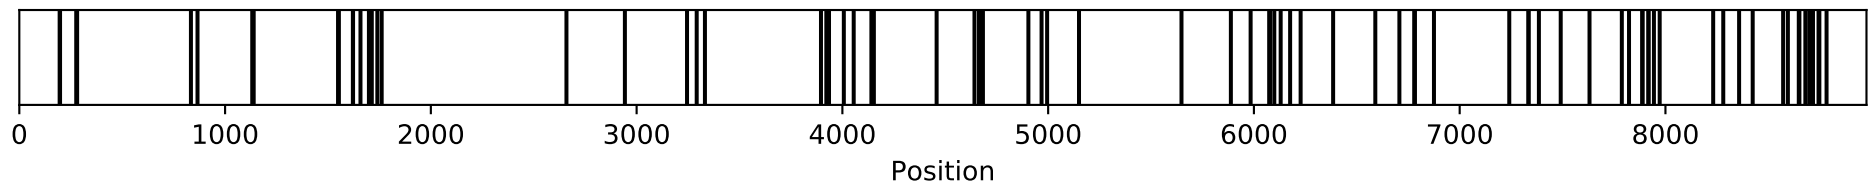

MM1 vs MM2  
Number of differences: 76

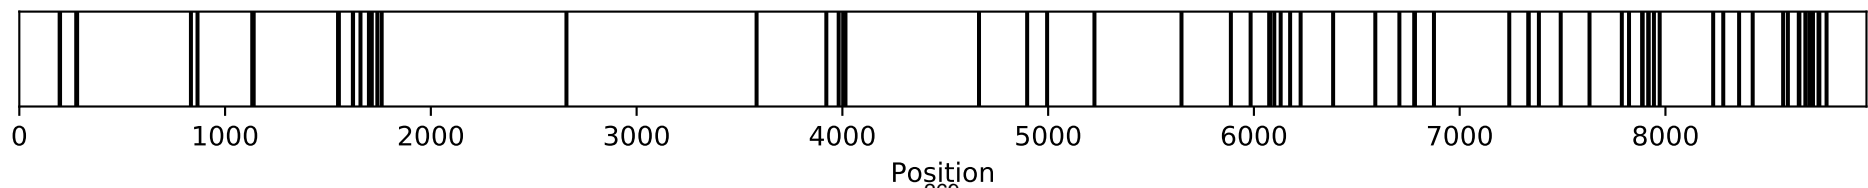

MA1 vs MA2  
Number of differences: 364

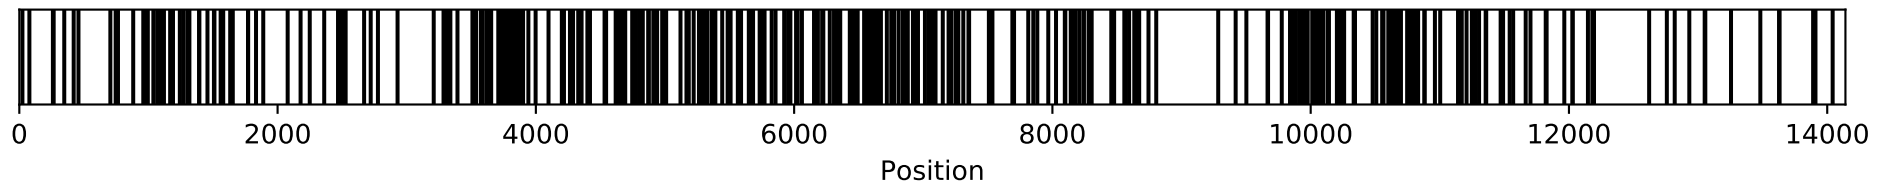

MA1 vs MM1  
Number of differences: 248

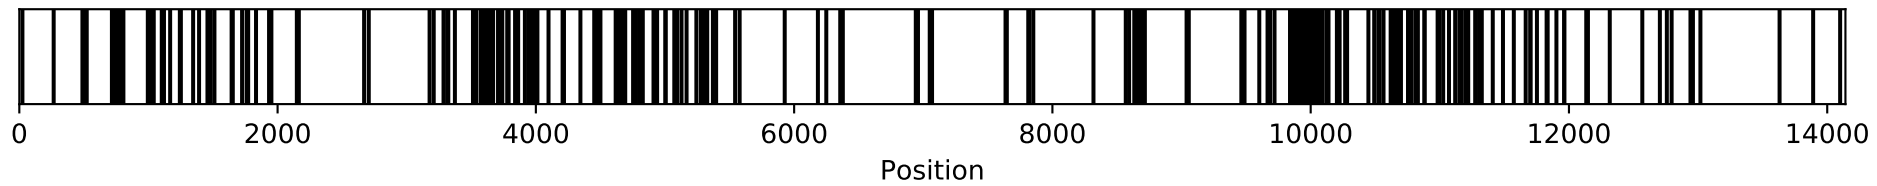

MA1 vs MM2  
Number of differences: 196

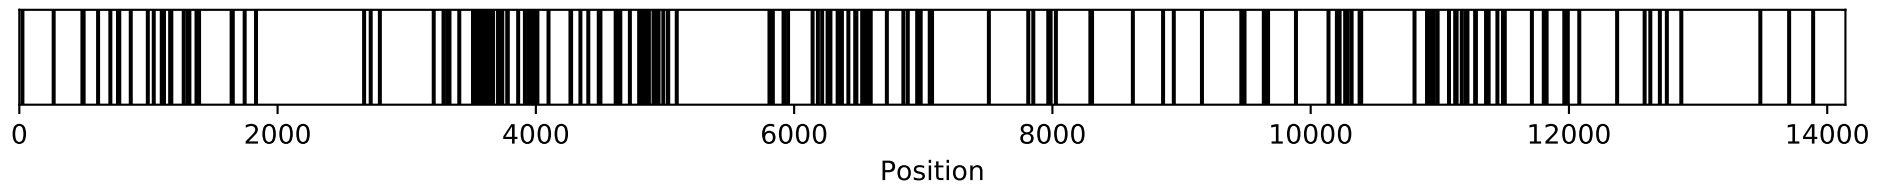

MA2 vs MM1  
Number of differences: 392

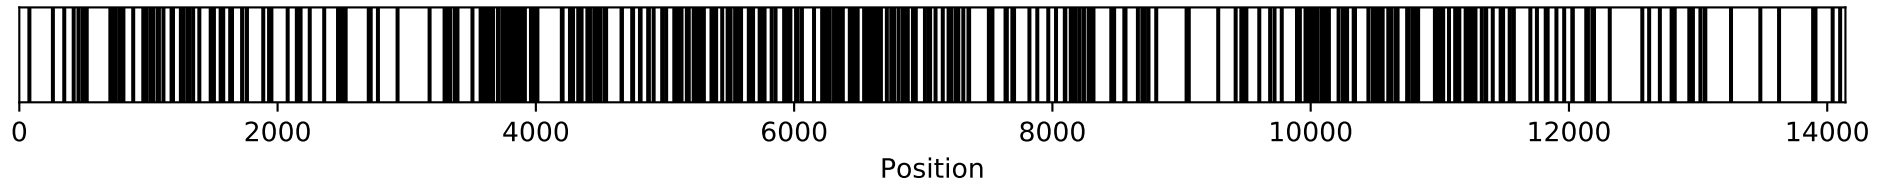

MA2 vs MM2  
Number of differences: 386

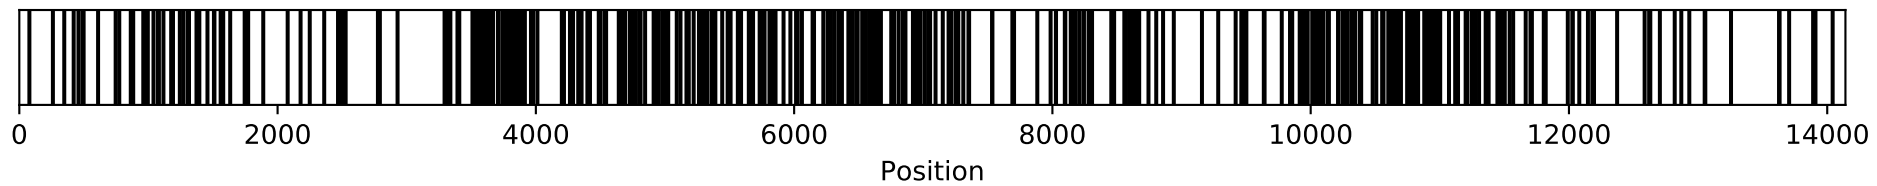

MM1 vs MM2  
Number of differences: 249

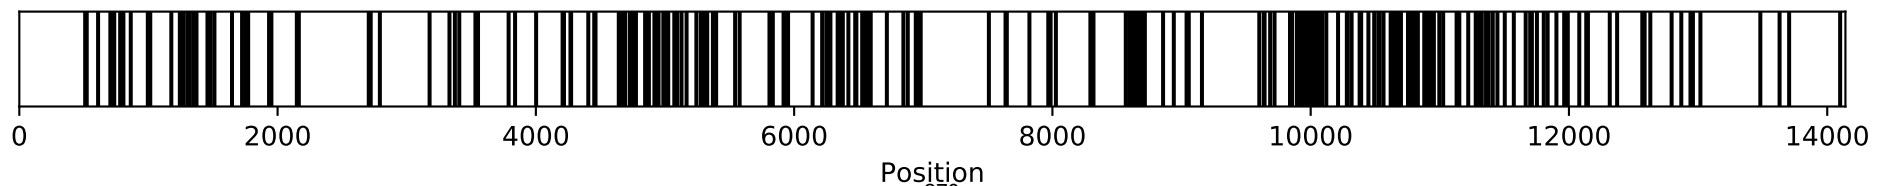

MA1 vs MA2  
Number of differences: 193

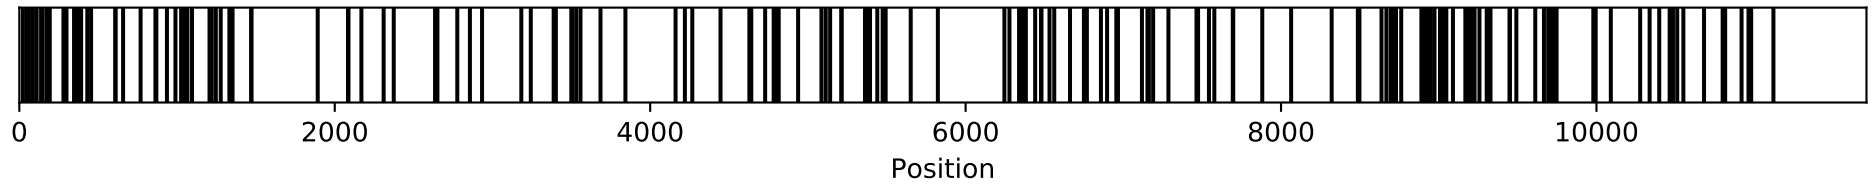

MA1 vs MM1  
Number of differences: 18

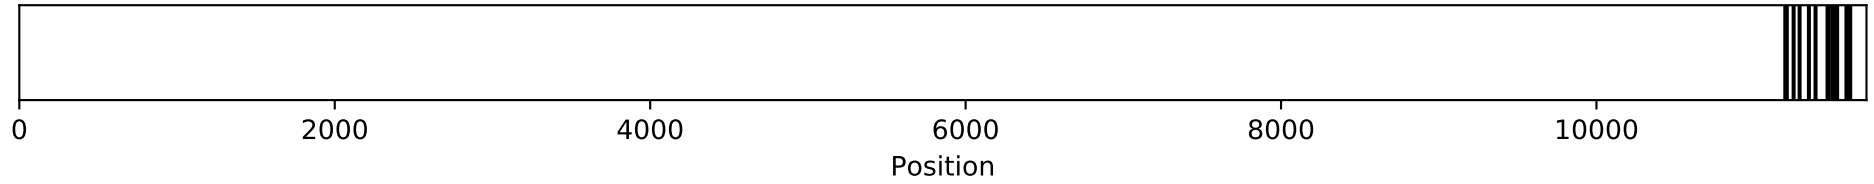

MA1 vs MM2  
Number of differences: 94

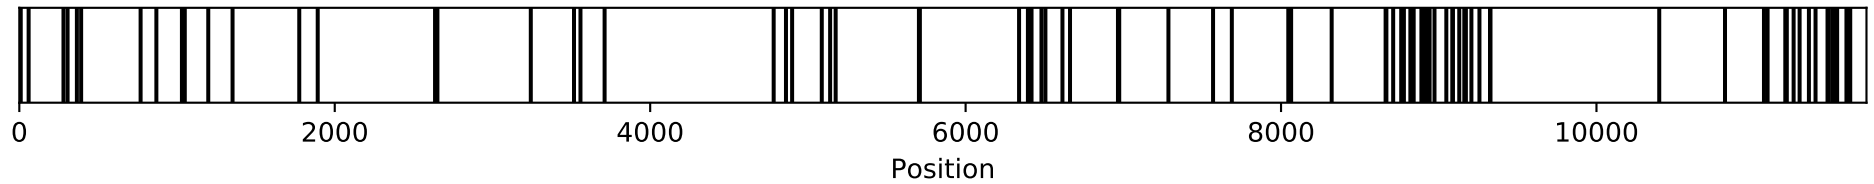

MA2 vs MM1  
Number of differences: 211

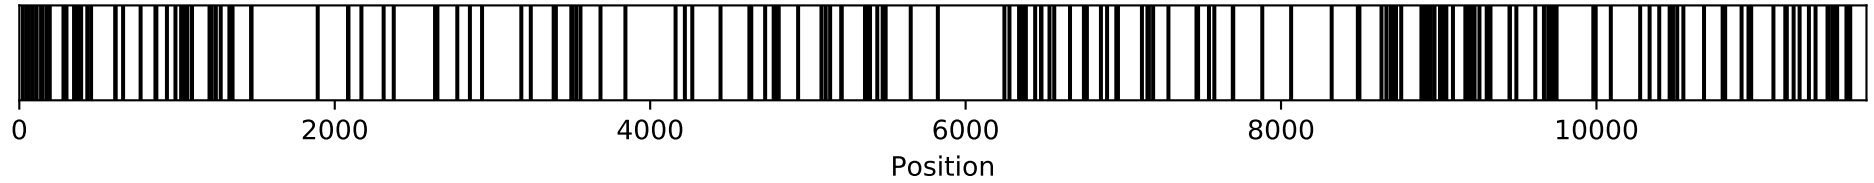

MA2 vs MM2  
Number of differences: 207

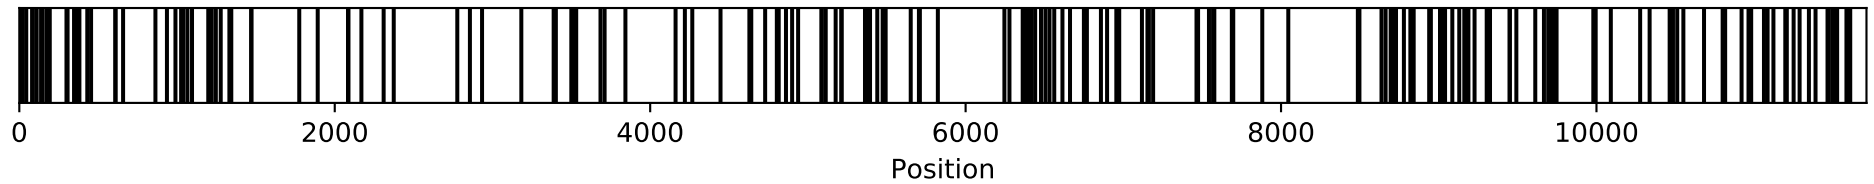

MM1 vs MM2  
Number of differences: 76

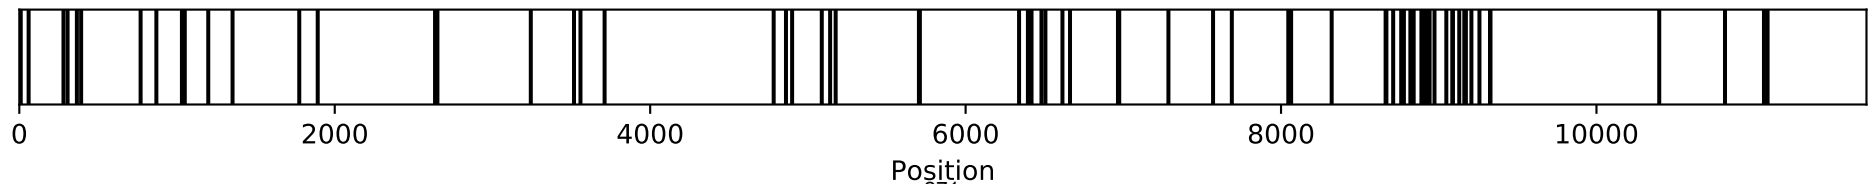

MA1 vs MA2  
Number of differences: 219

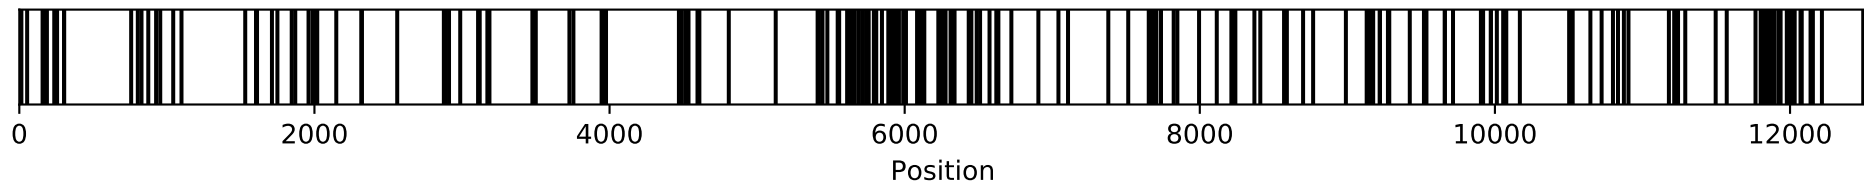

MA1 vs MM1  
Number of differences: 201

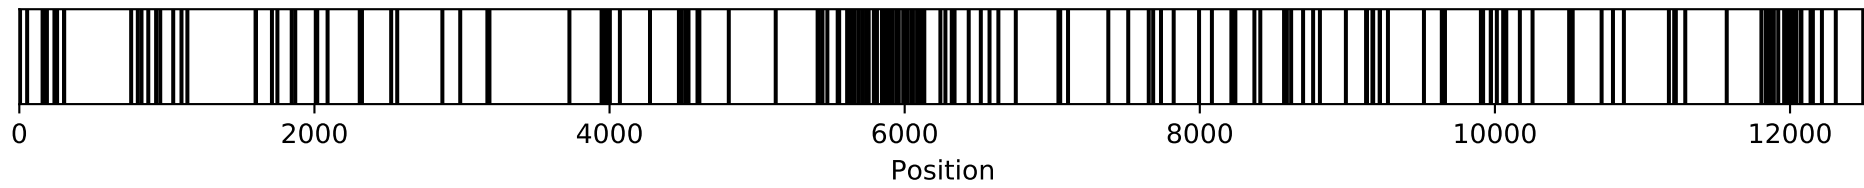

MA1 vs MM2  
Number of differences: 219

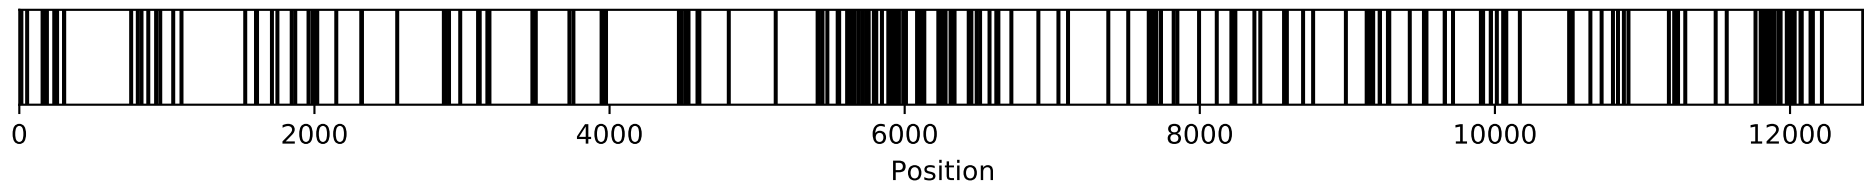

MA2 vs MM1  
Number of differences: 98

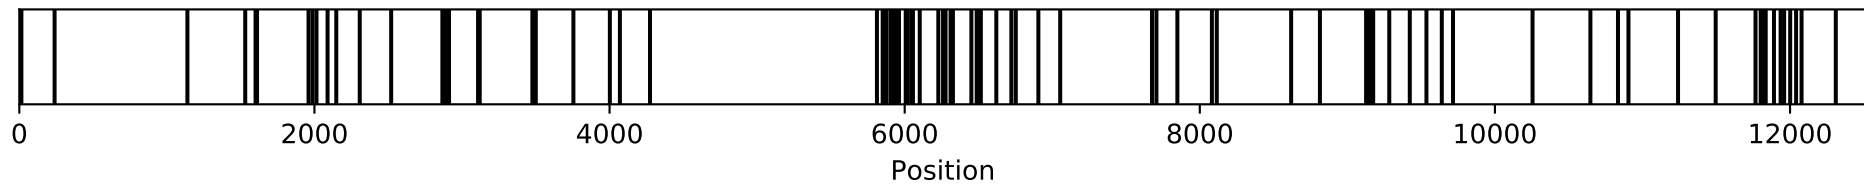

MA2 vs MM2  
Number of differences: 0

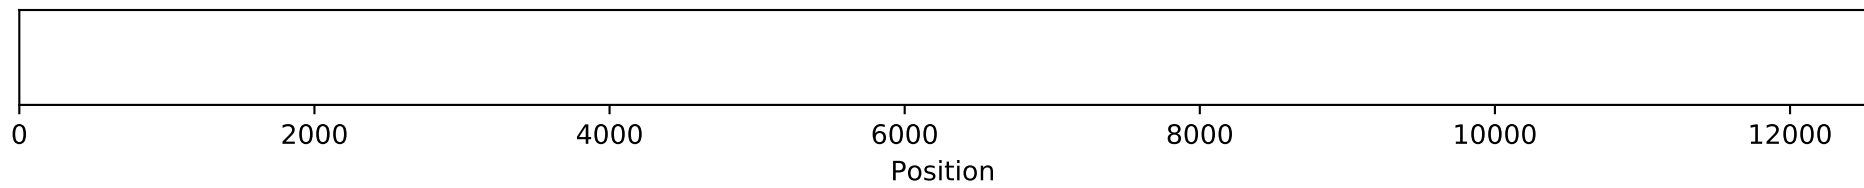

MM1 vs MM2  
Number of differences: 98

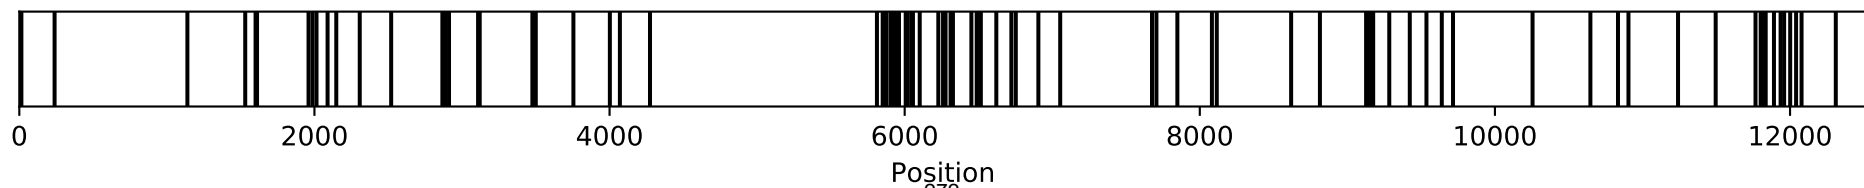

MA1 vs MA2  
Number of differences: 208

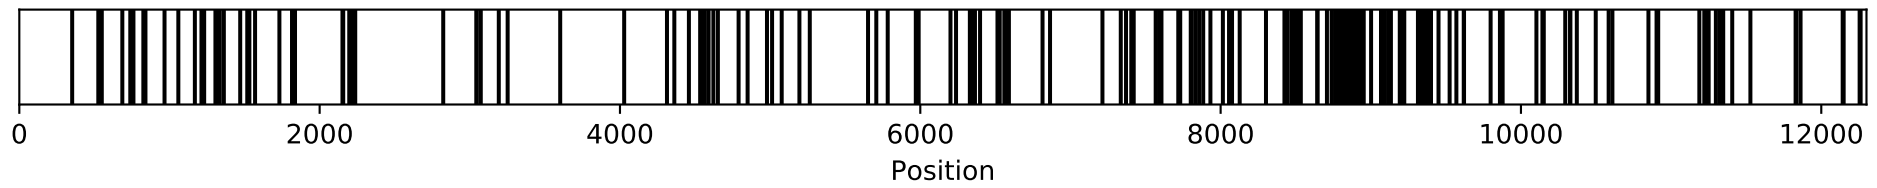

MA1 vs MM1  
Number of differences: 91

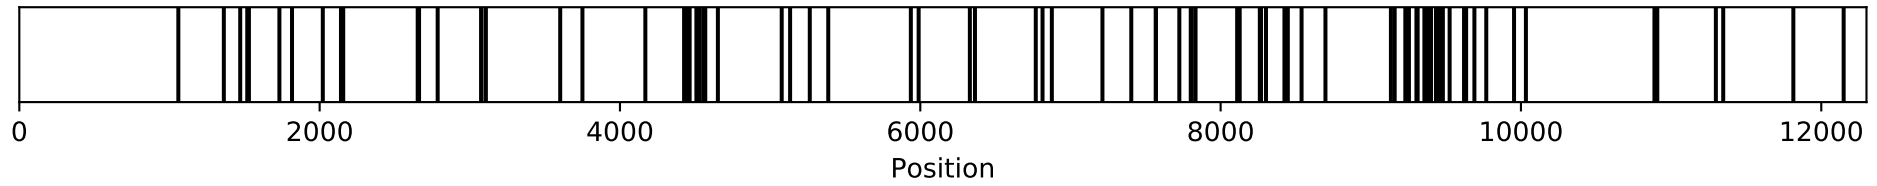

MA1 vs MM2  
Number of differences: 86

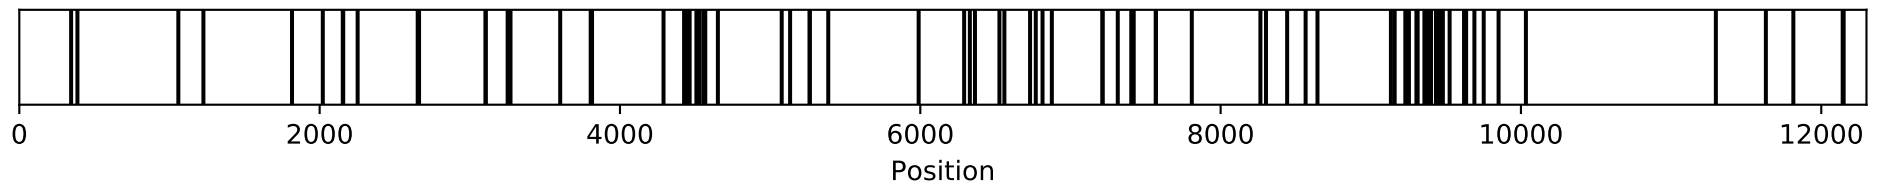

MA2 vs MM1  
Number of differences: 209

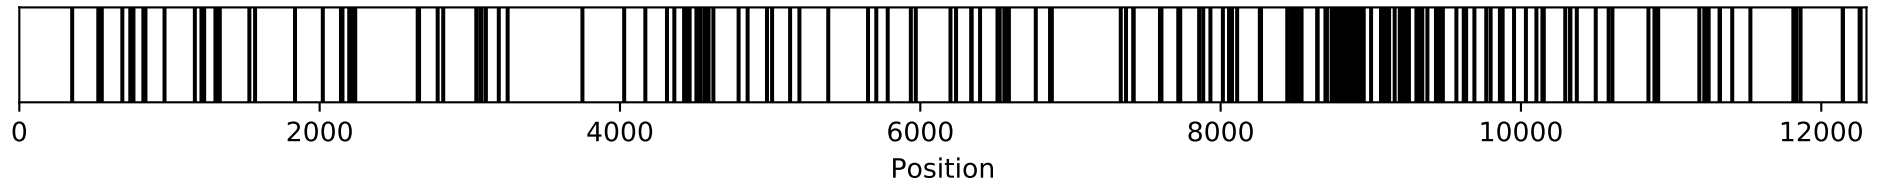

MA2 vs MM2  
Number of differences: 222

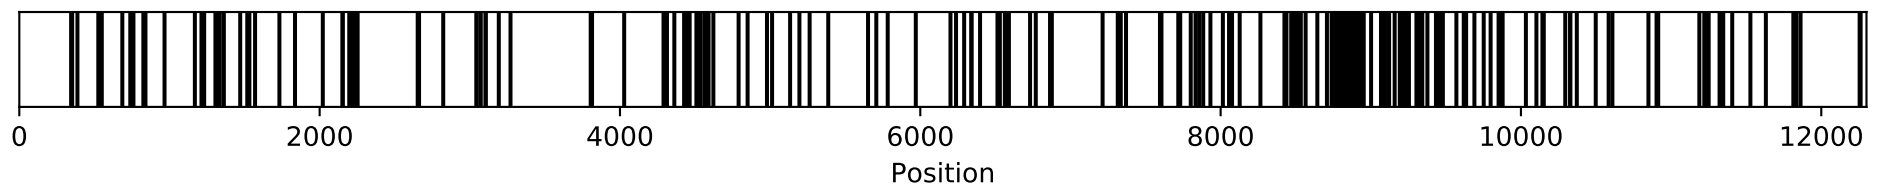

MM1 vs MM2  
Number of differences: 61

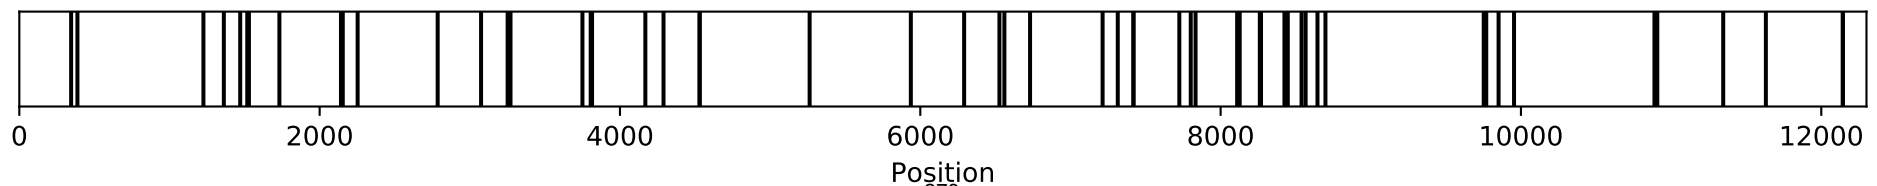

MA1 vs MA2  
Number of differences: 137

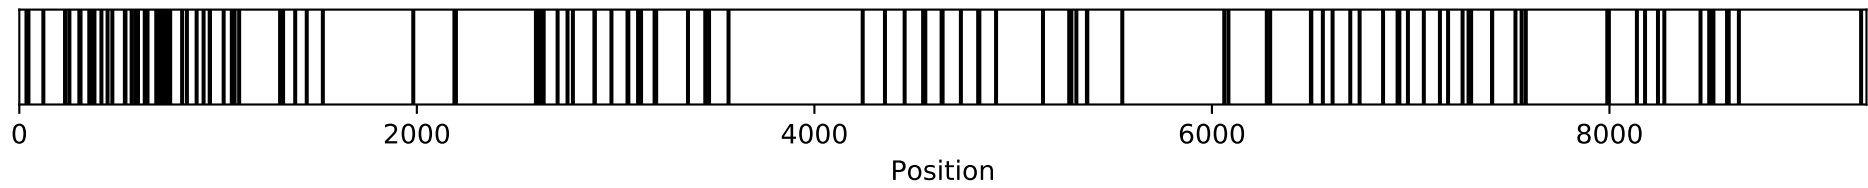

MA1 vs MM1  
Number of differences: 137

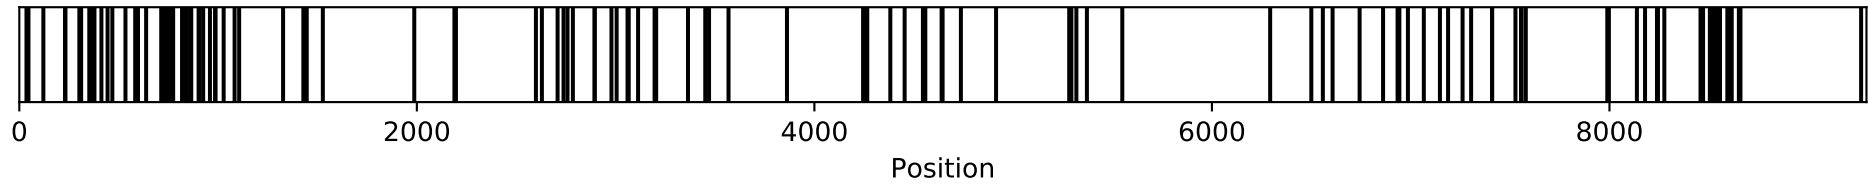

MA1 vs MM2  
Number of differences: 124

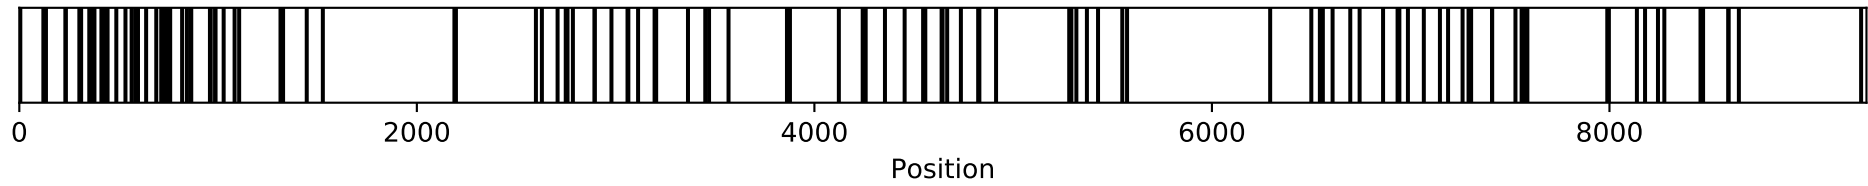

MA2 vs MM1  
Number of differences: 70

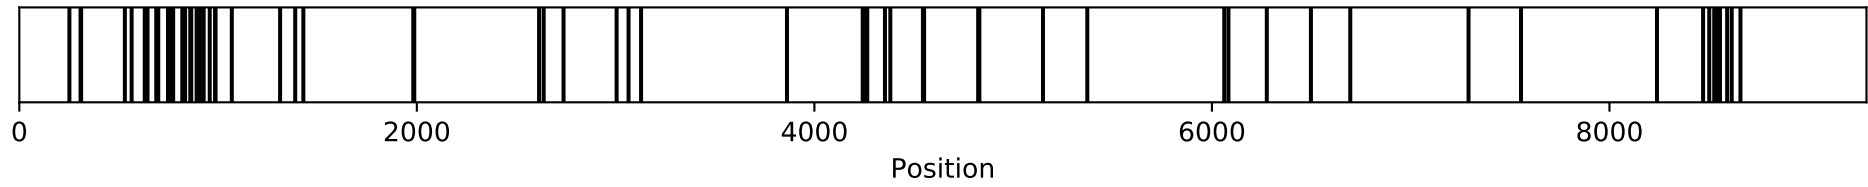

MA2 vs MM2  
Number of differences: 68

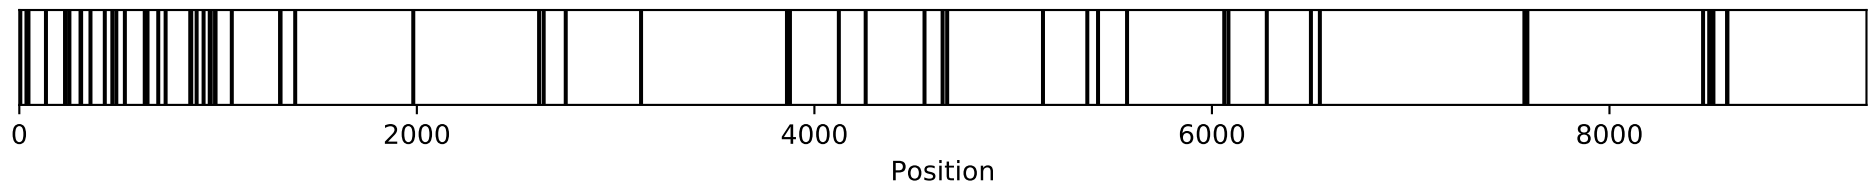

MM1 vs MM2  
Number of differences: 76

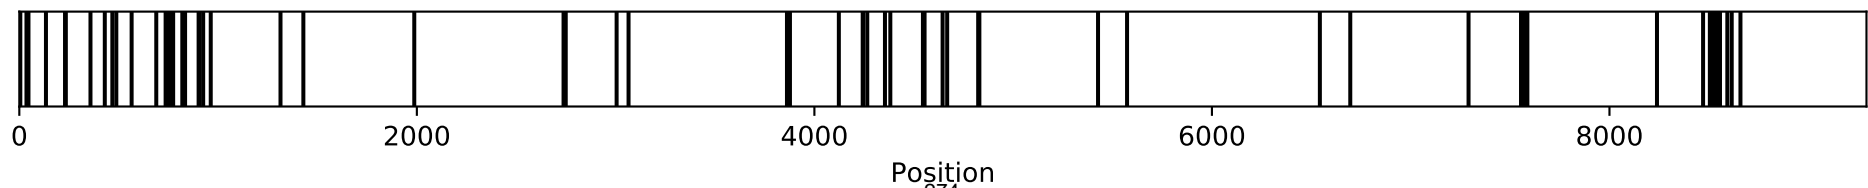



MA1 vs MA2  
Number of differences: 174

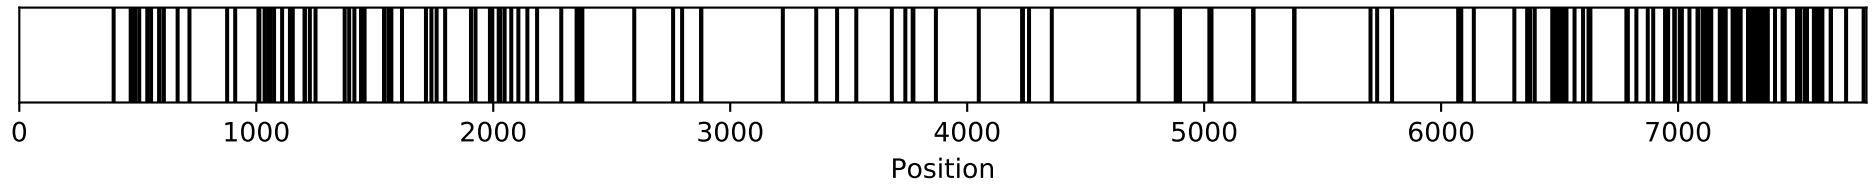

MA1 vs MM1  
Number of differences: 104

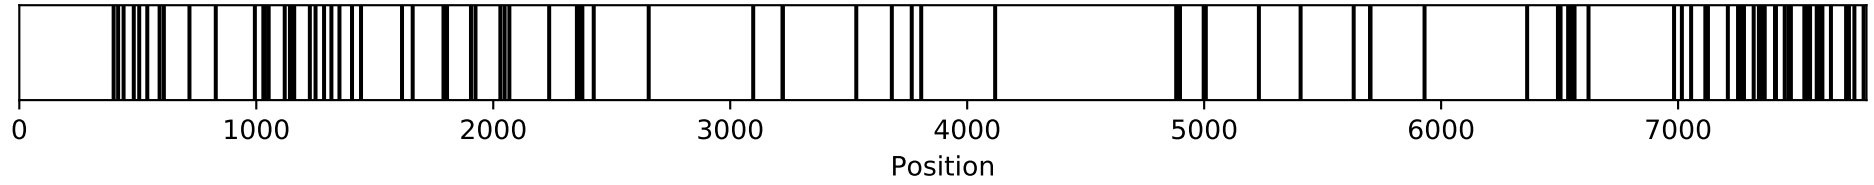

MA1 vs MM2  
Number of differences: 0

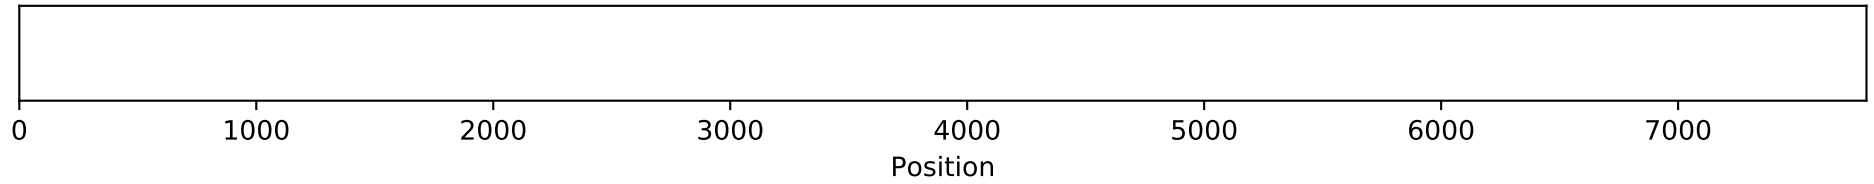

MA2 vs MM1  
Number of differences: 178

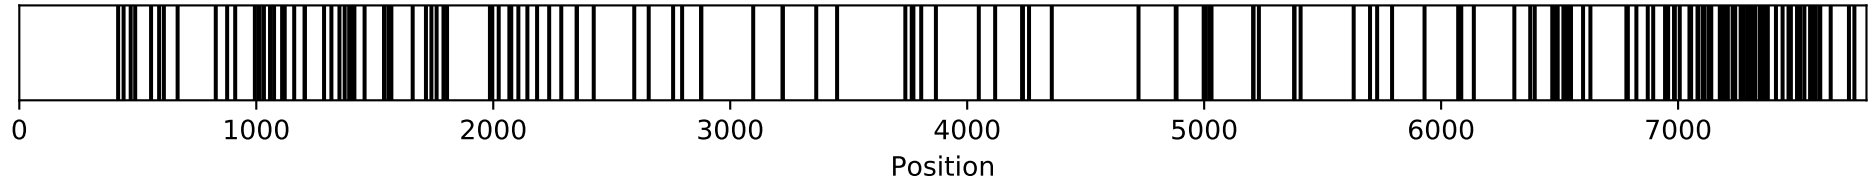

MA2 vs MM2  
Number of differences: 174

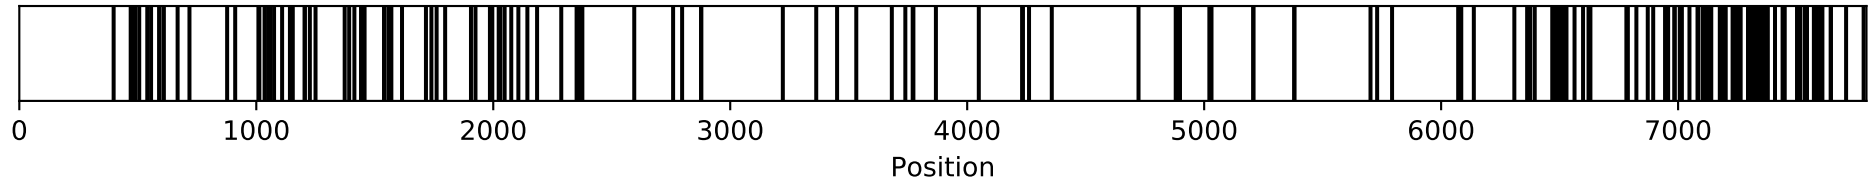

MM1 vs MM2  
Number of differences: 104

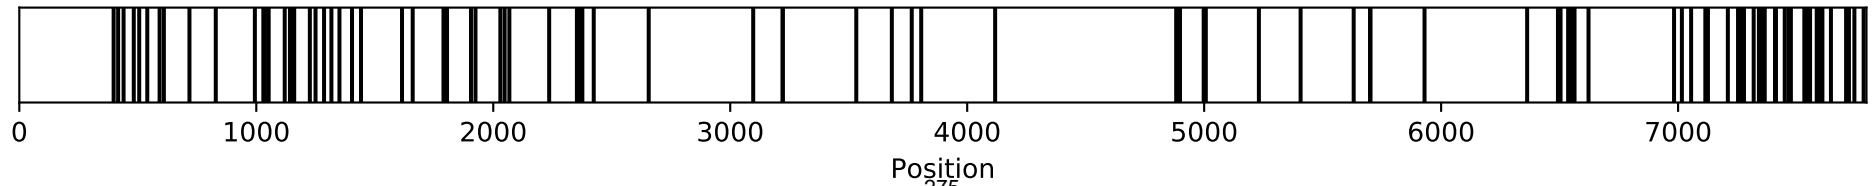

MA1 vs MA2  
Number of differences: 339

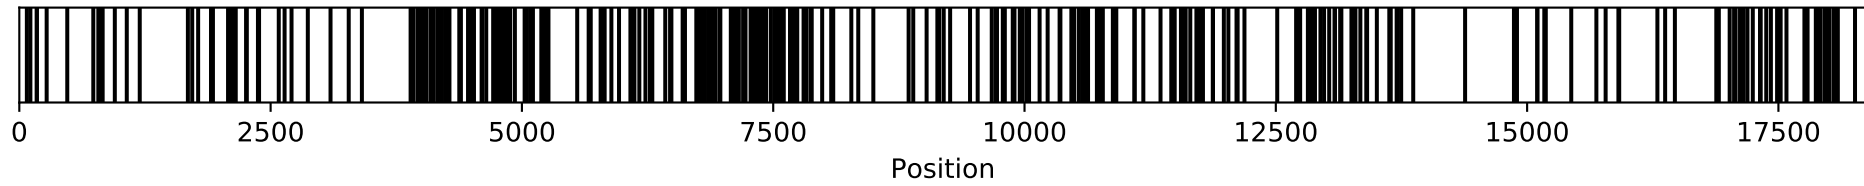

MA1 vs MM1  
Number of differences: 179

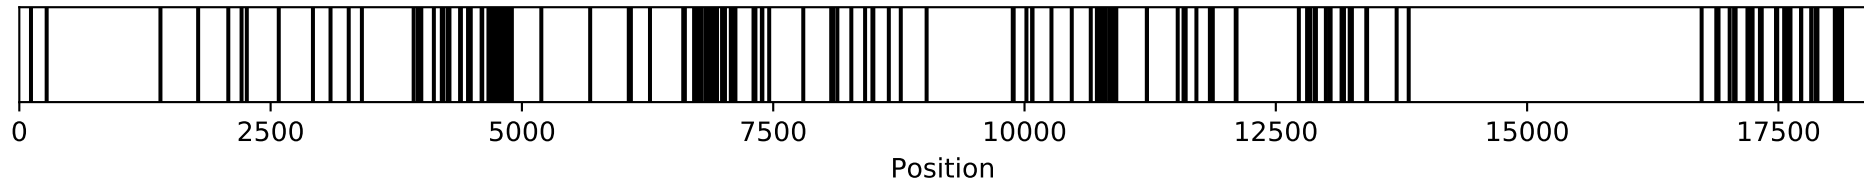

MA1 vs MM2  
Number of differences: 0

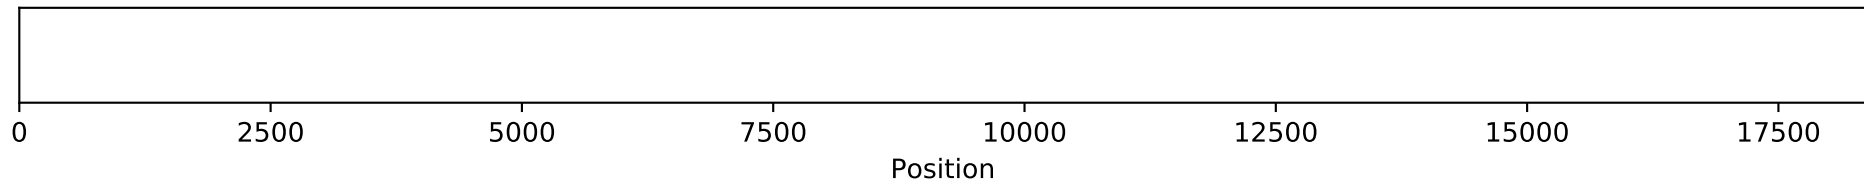

MA2 vs MM1  
Number of differences: 350

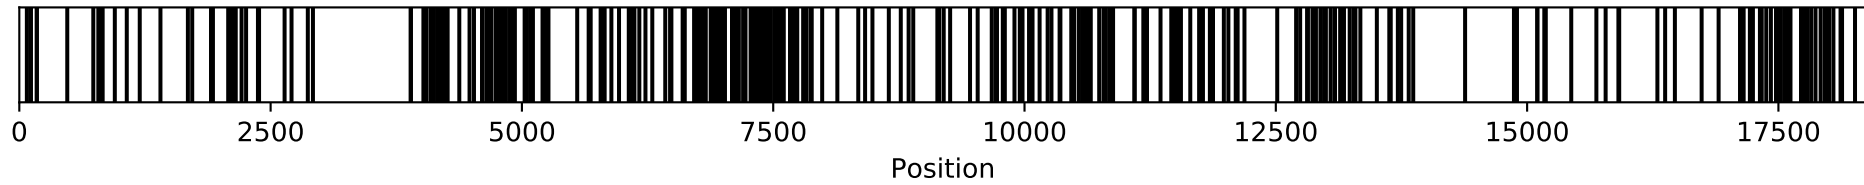

MA2 vs MM2  
Number of differences: 339

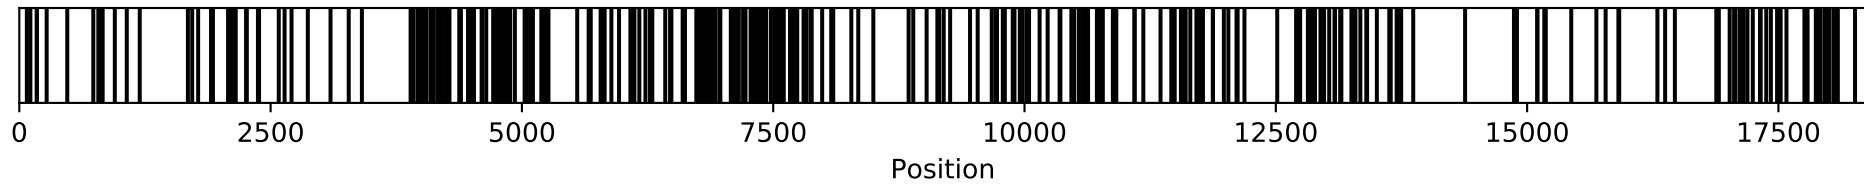

MM1 vs MM2  
Number of differences: 179

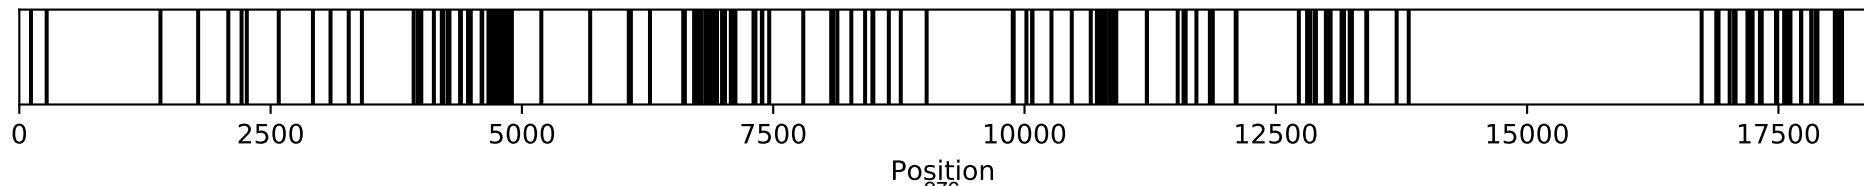

MA1 vs MA2  
Number of differences: 120

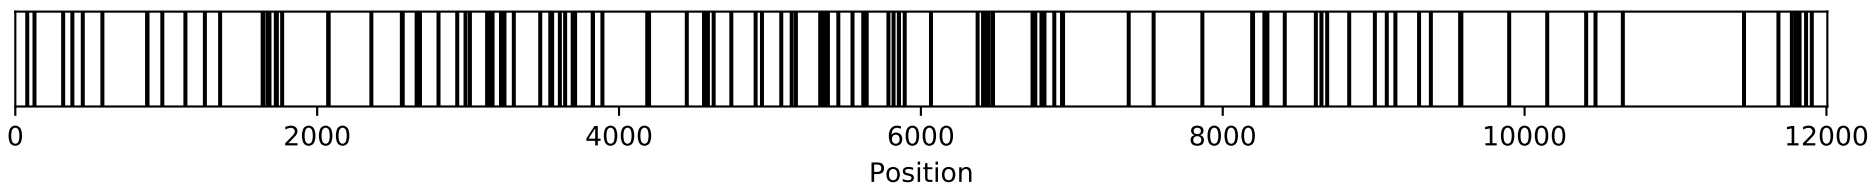

MA1 vs MM1  
Number of differences: 0

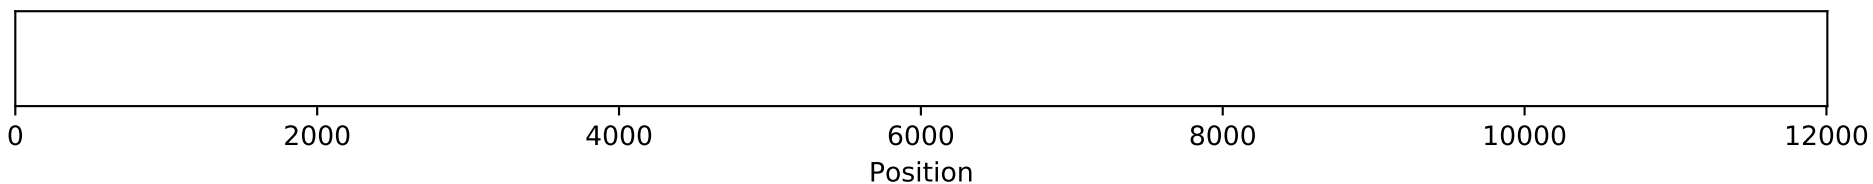

MA1 vs MM2  
Number of differences: 49

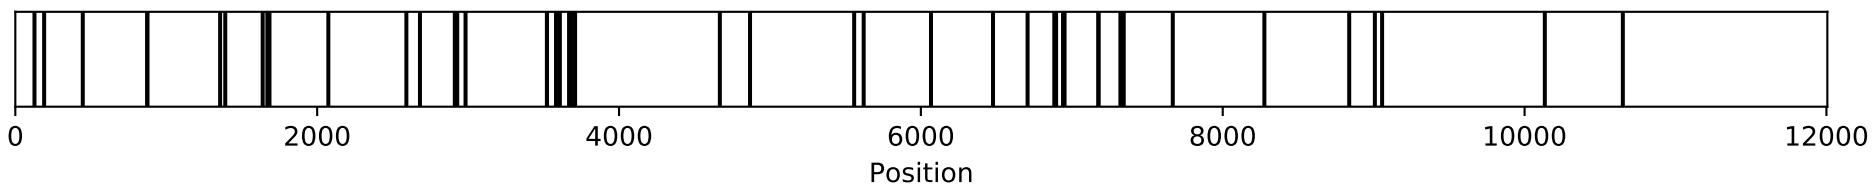

MA2 vs MM1  
Number of differences: 120

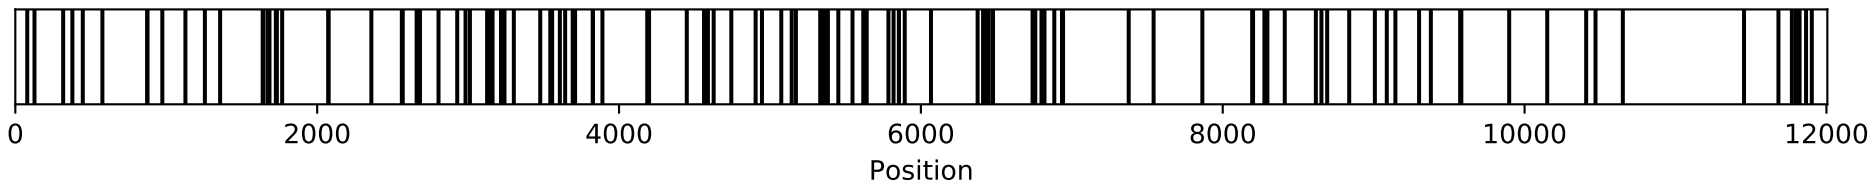

MA2 vs MM2  
Number of differences: 123

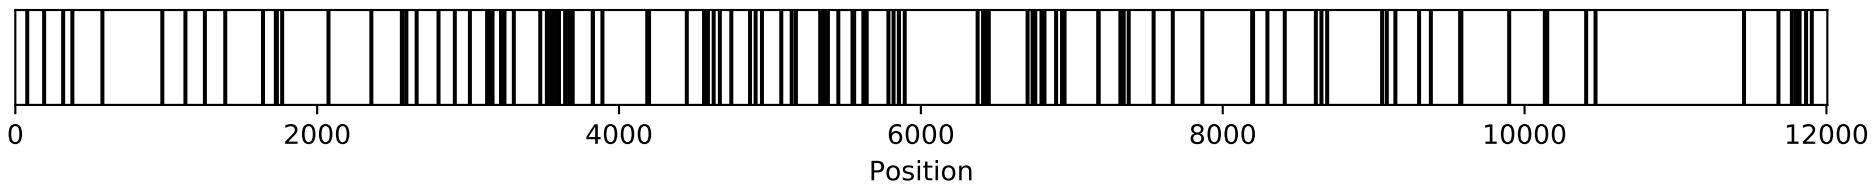

MM1 vs MM2  
Number of differences: 49

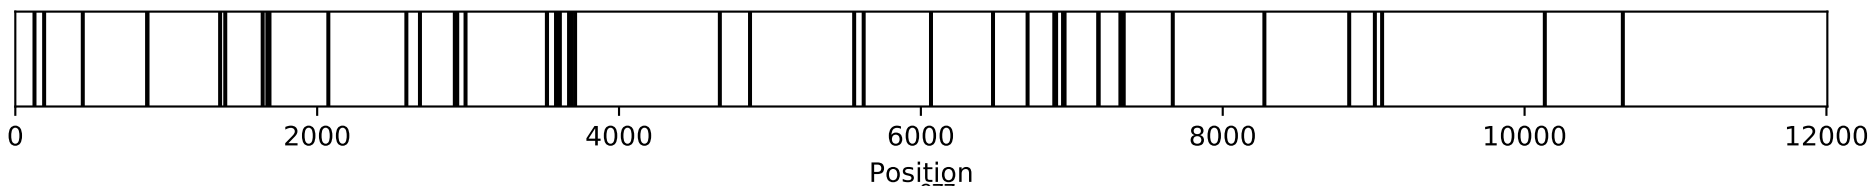

MA1 vs MA2  
Number of differences: 247

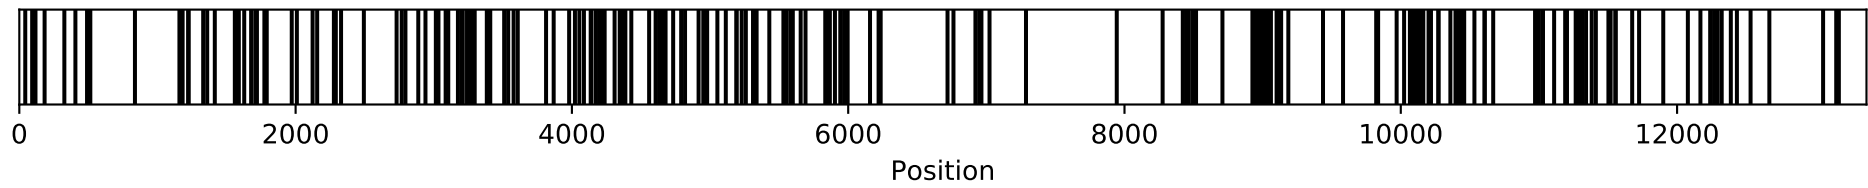

MA1 vs MM1  
Number of differences: 238

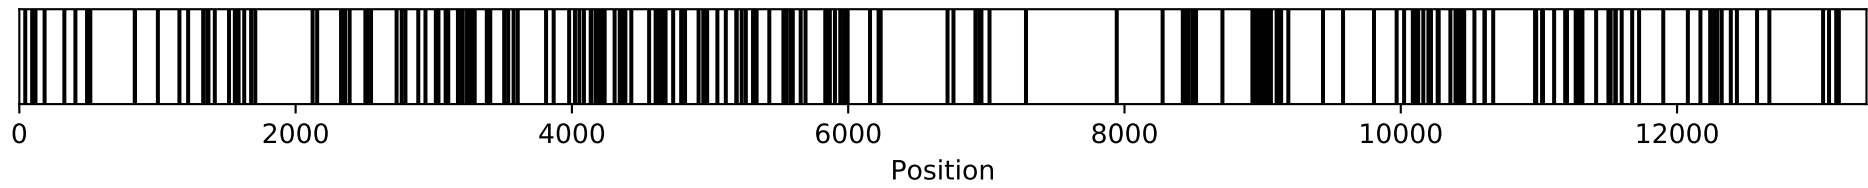

MA1 vs MM2  
Number of differences: 248

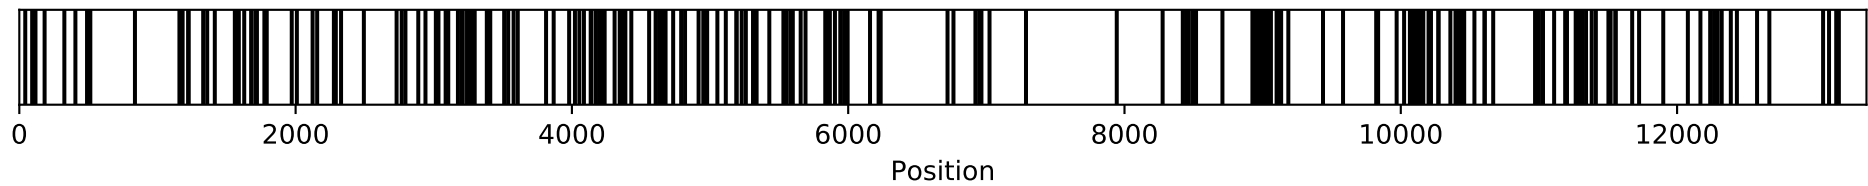

MA2 vs MM1  
Number of differences: 56

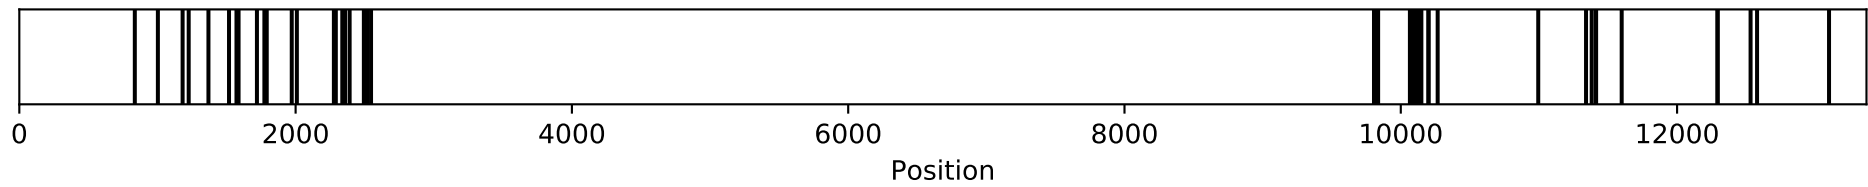

MA2 vs MM2  
Number of differences: 3

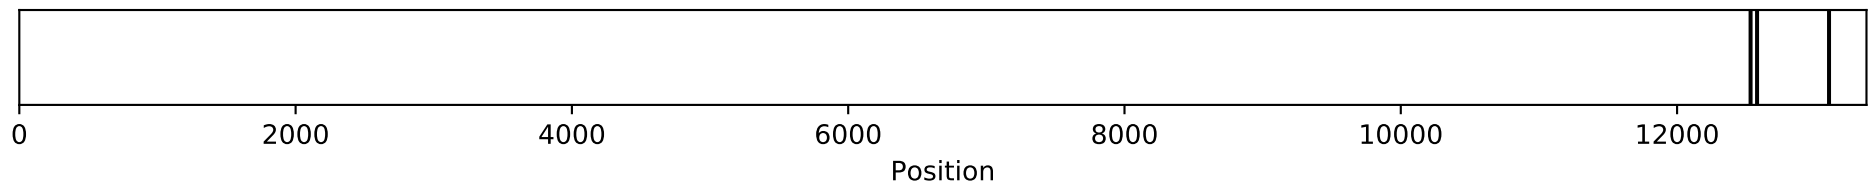

MM1 vs MM2  
Number of differences: 53

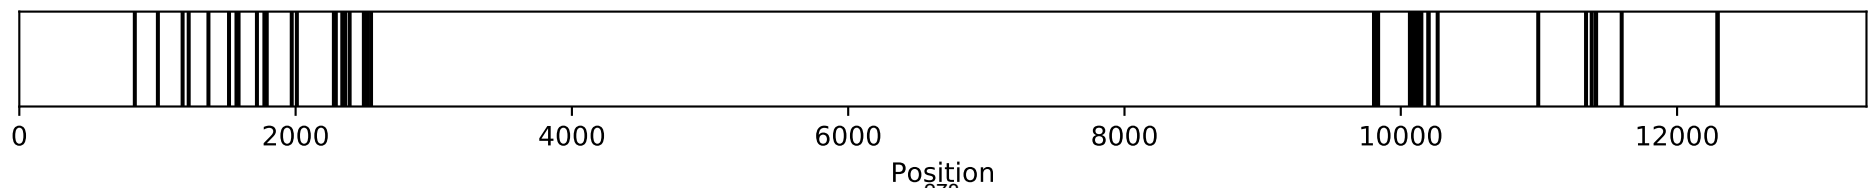

MA1 vs MA2  
Number of differences: 81

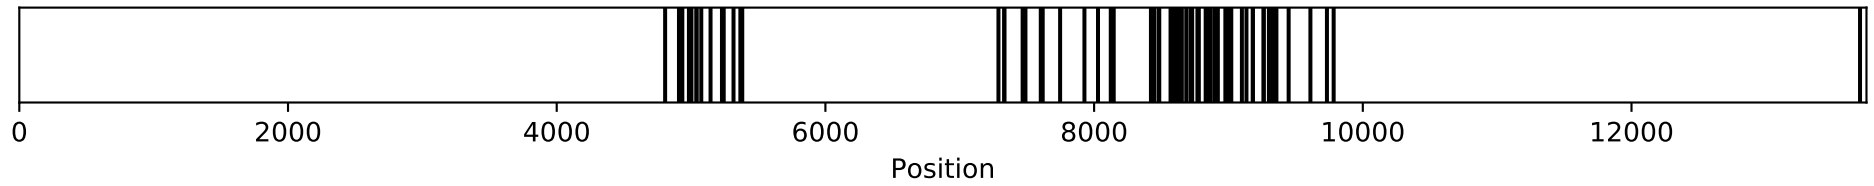

MA1 vs MM1  
Number of differences: 269

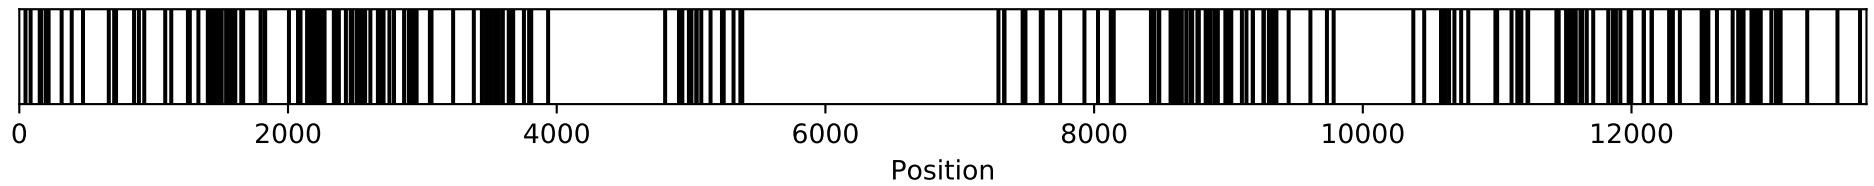

MA1 vs MM2  
Number of differences: 294

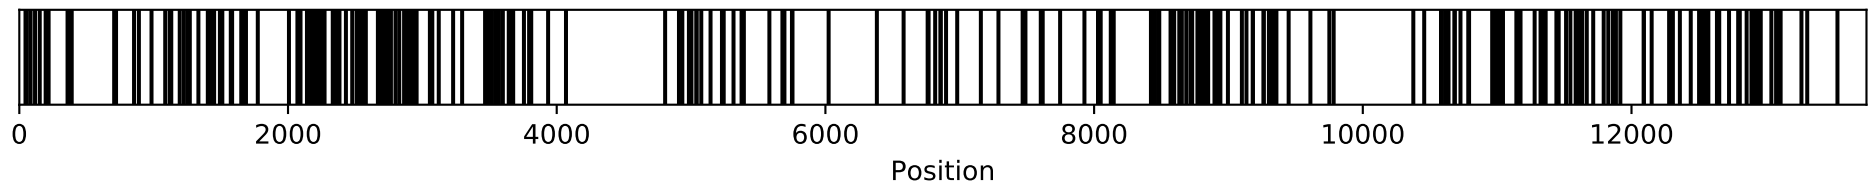

MA2 vs MM1  
Number of differences: 188

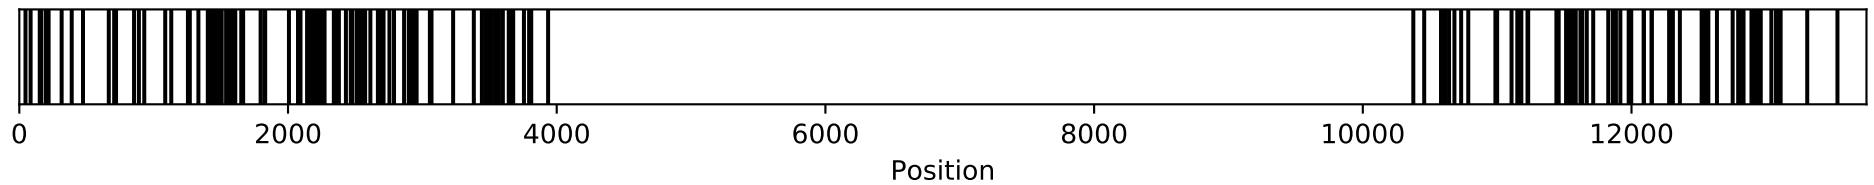

MA2 vs MM2  
Number of differences: 247

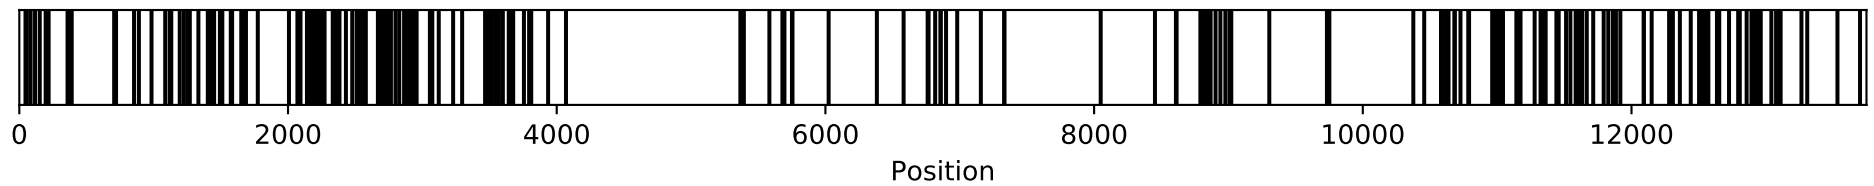

MM1 vs MM2  
Number of differences: 178

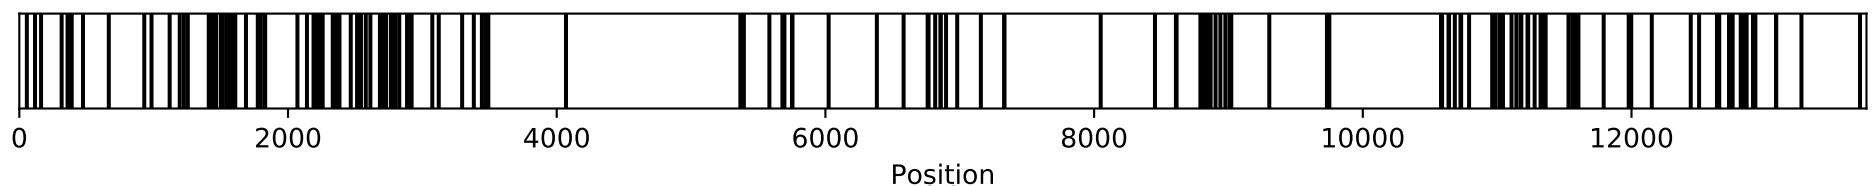

MA1 vs MA2  
Number of differences: 189

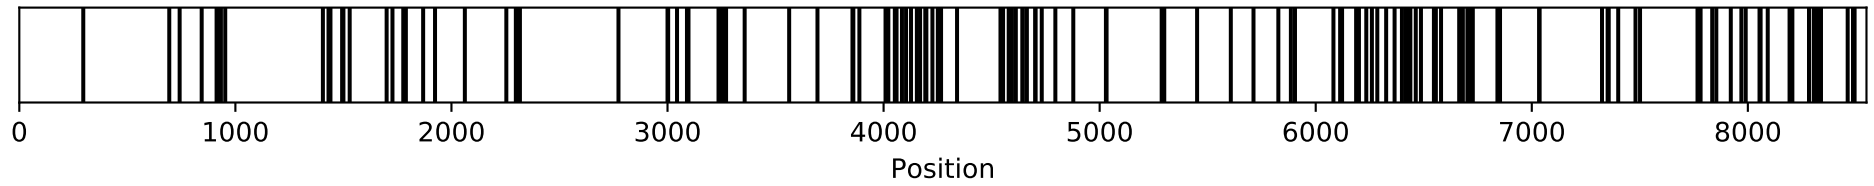

MA1 vs MM1  
Number of differences: 188

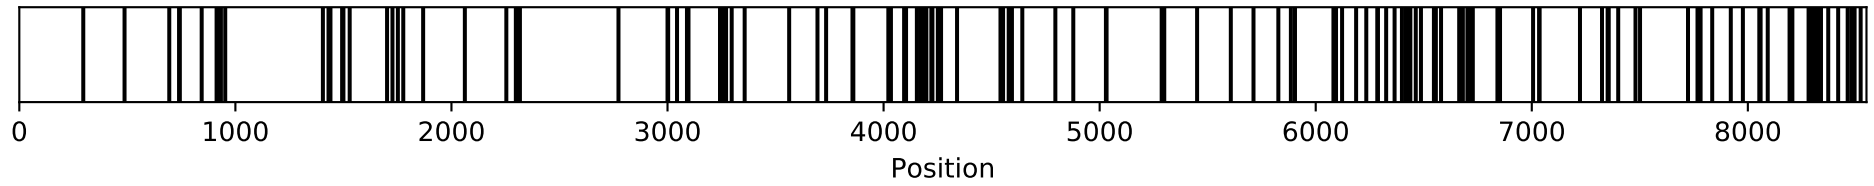

MA1 vs MM2  
Number of differences: 188

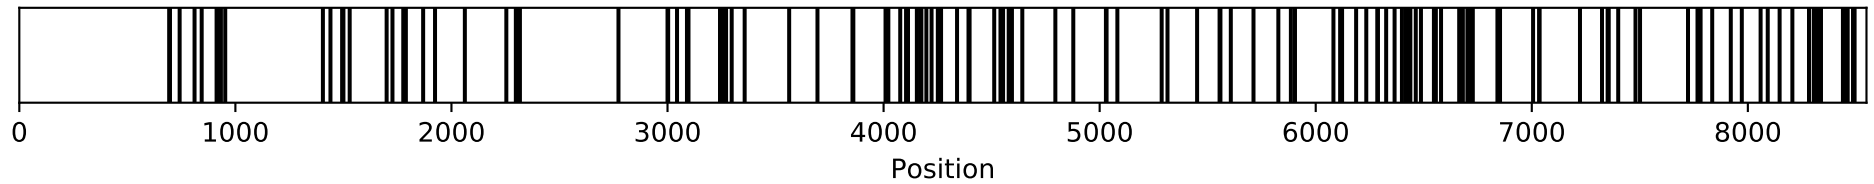

MA2 vs MM1  
Number of differences: 52

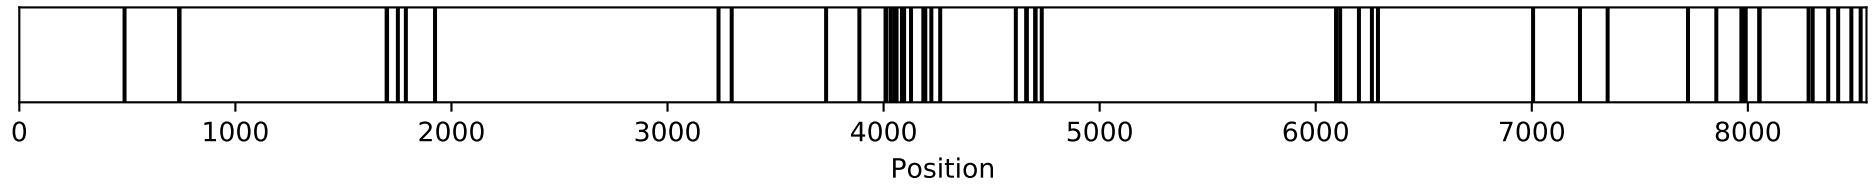

MA2 vs MM2  
Number of differences: 51

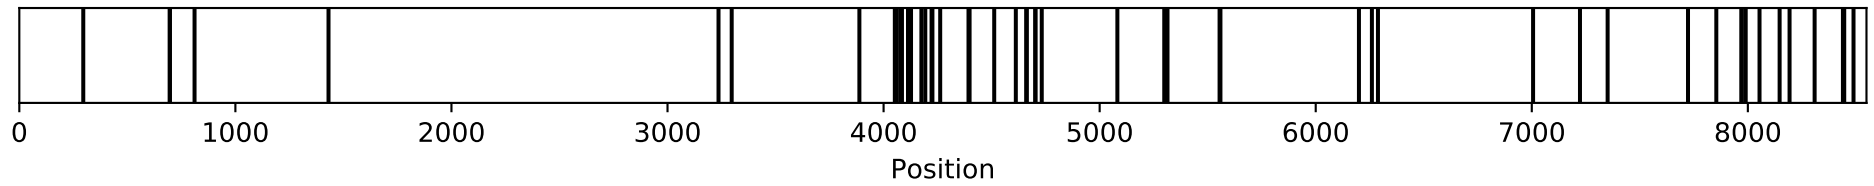

MM1 vs MM2  
Number of differences: 51

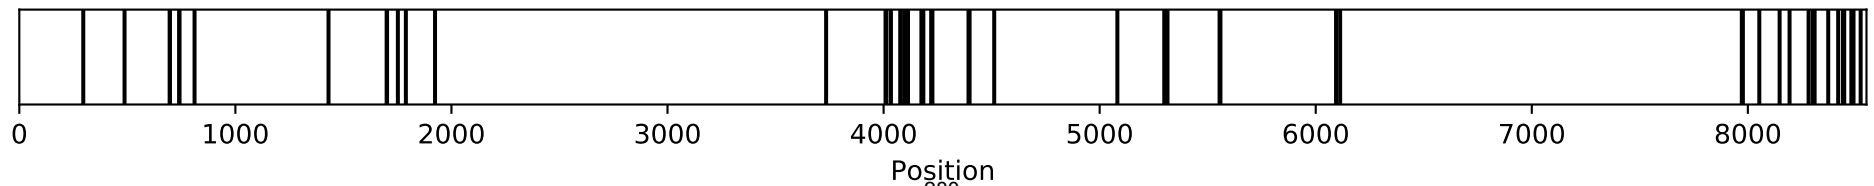

MA1 vs MA2  
Number of differences: 351

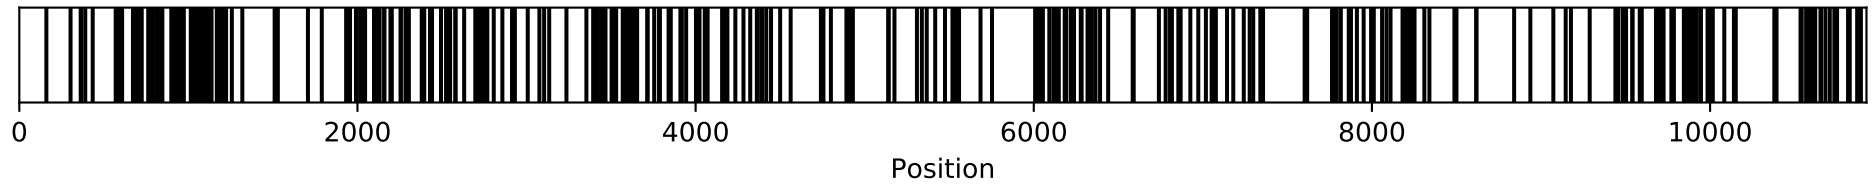

MA1 vs MM1  
Number of differences: 189

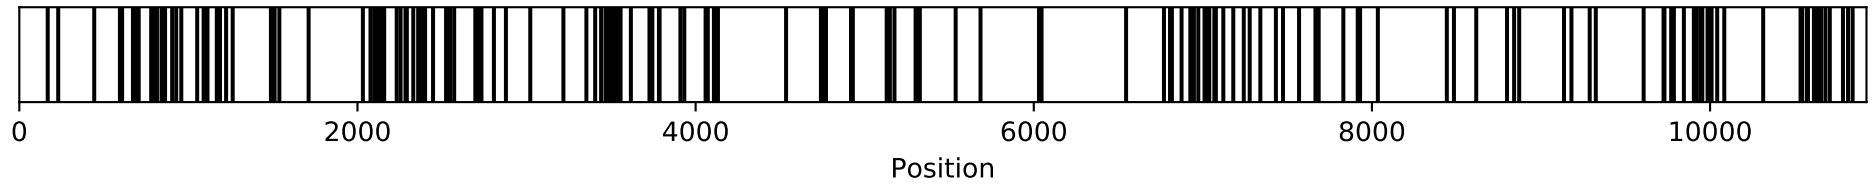

MA1 vs MM2  
Number of differences: 190

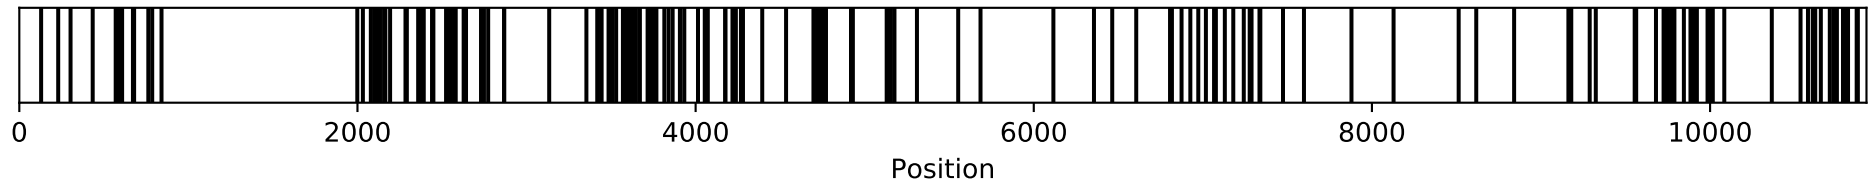

MA2 vs MM1  
Number of differences: 364

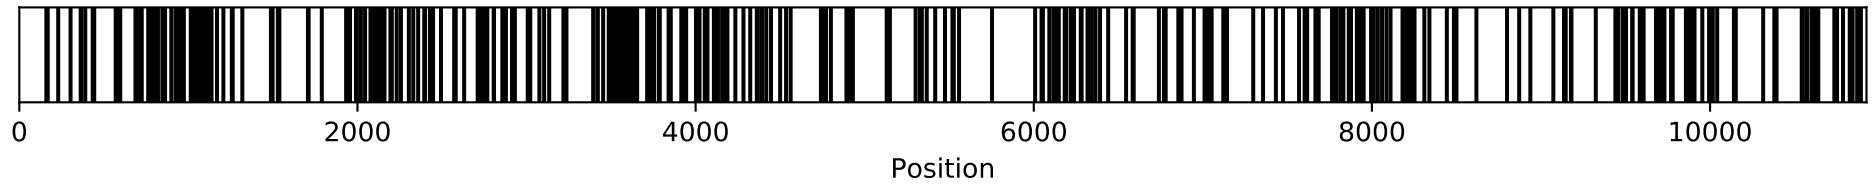

MA2 vs MM2  
Number of differences: 350

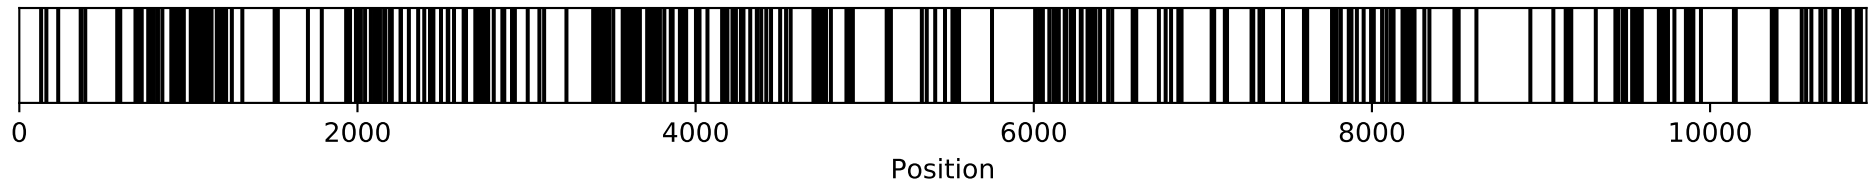

MM1 vs MM2  
Number of differences: 217

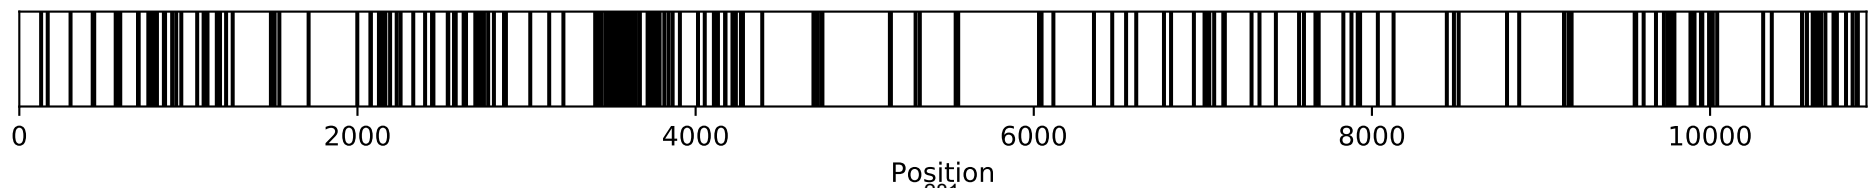

MA1 vs MA2  
Number of differences: 225

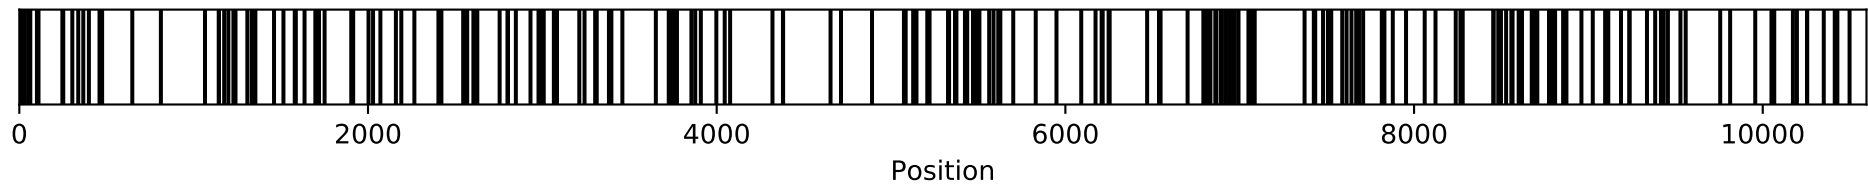

MA1 vs MM1  
Number of differences: 234

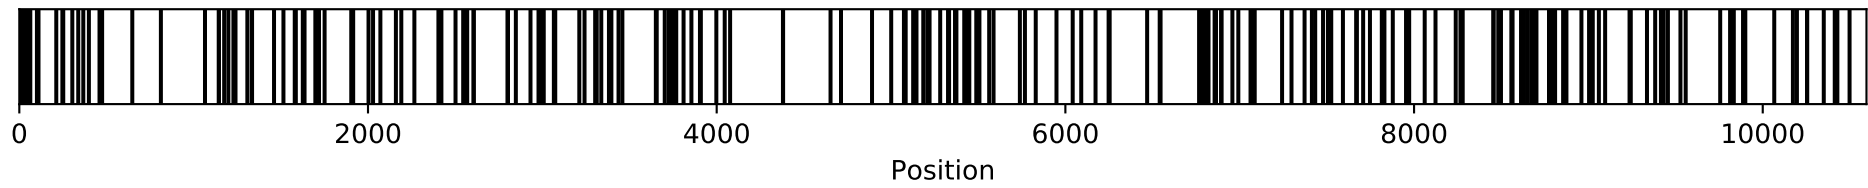

MA1 vs MM2  
Number of differences: 218

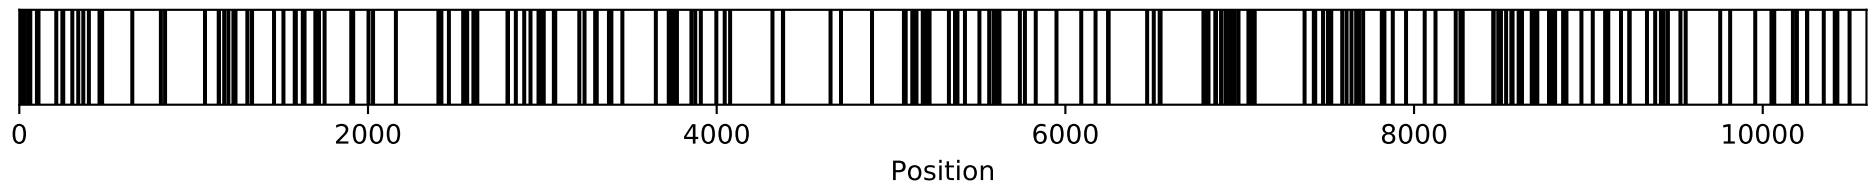

MA2 vs MM1  
Number of differences: 95

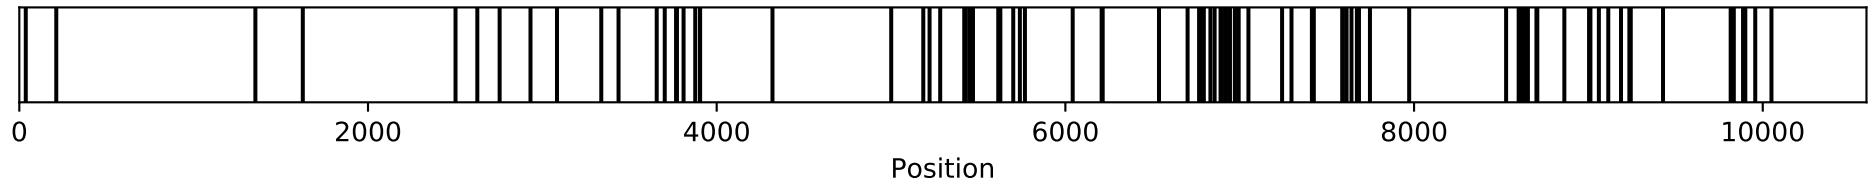

MA2 vs MM2  
Number of differences: 42

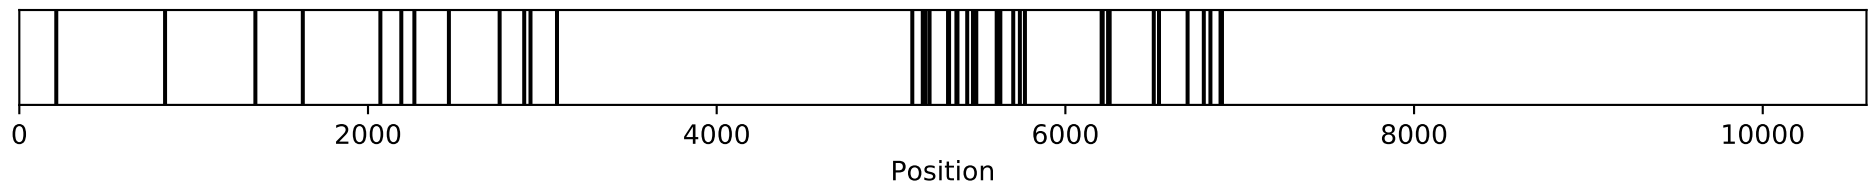

MM1 vs MM2  
Number of differences: 94

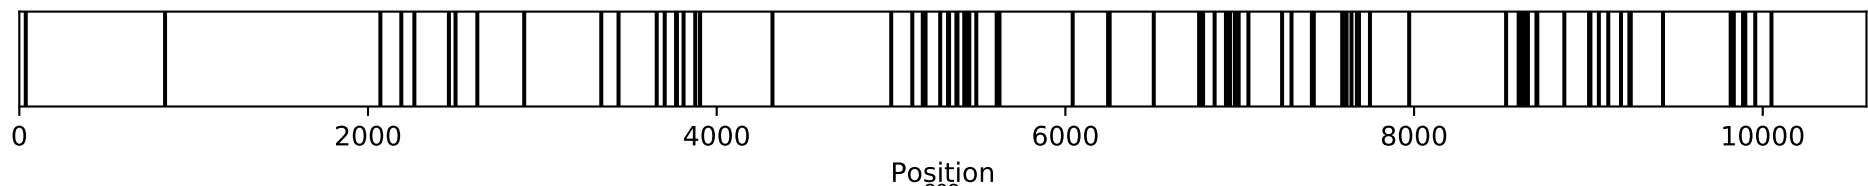



MA1 vs MA2  
Number of differences: 152

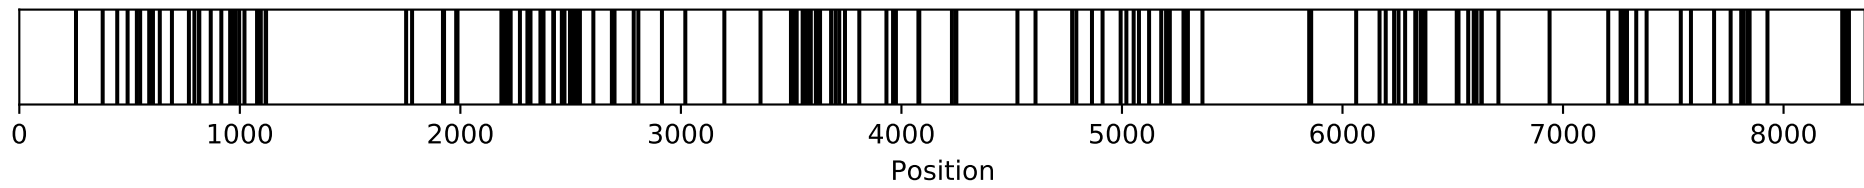

MA1 vs MM1  
Number of differences: 94

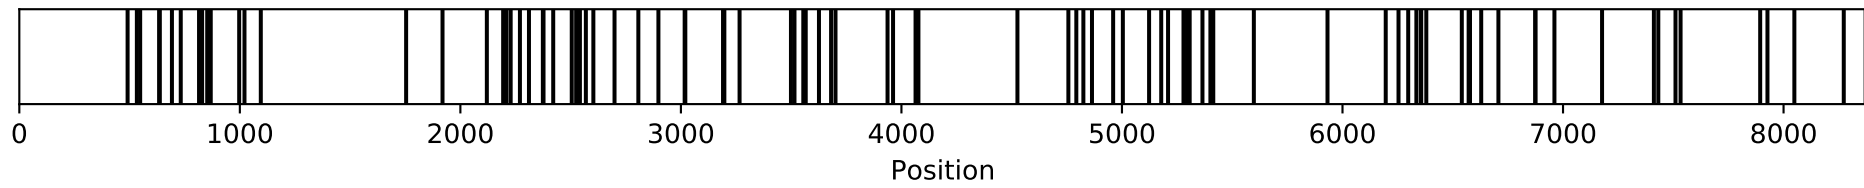

MA1 vs MM2  
Number of differences: 0

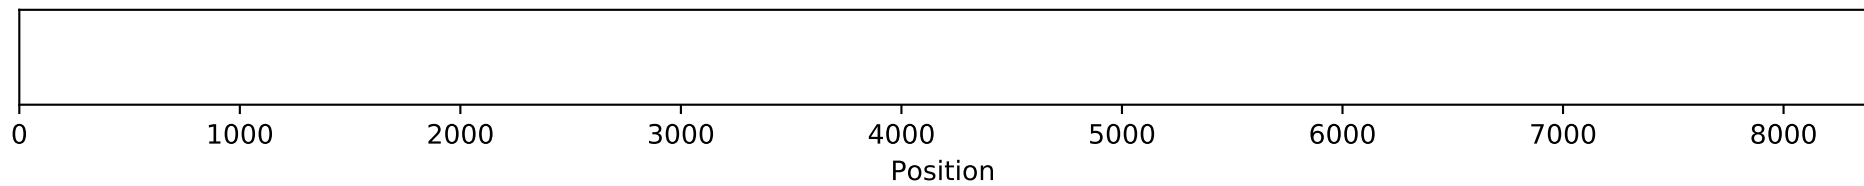

MA2 vs MM1  
Number of differences: 150

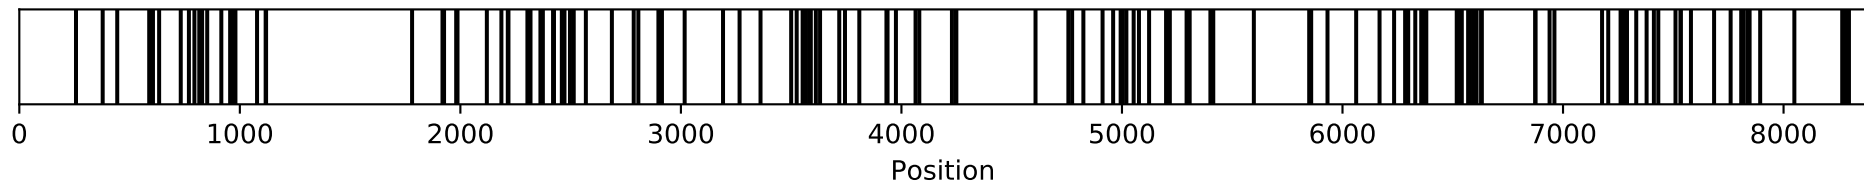

MA2 vs MM2  
Number of differences: 152

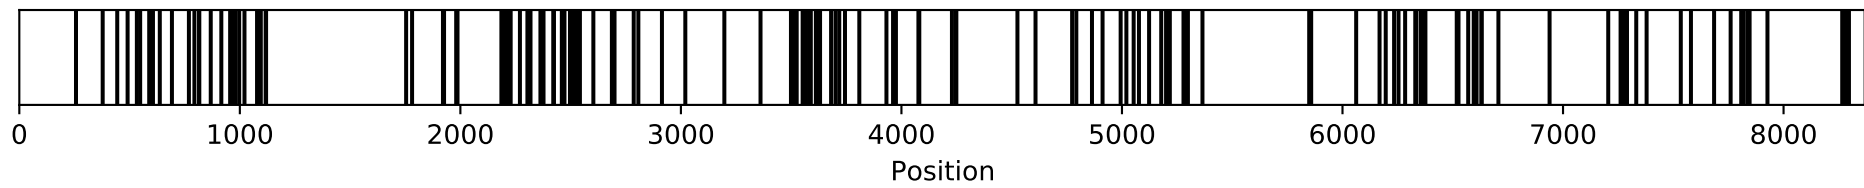

MM1 vs MM2  
Number of differences: 94

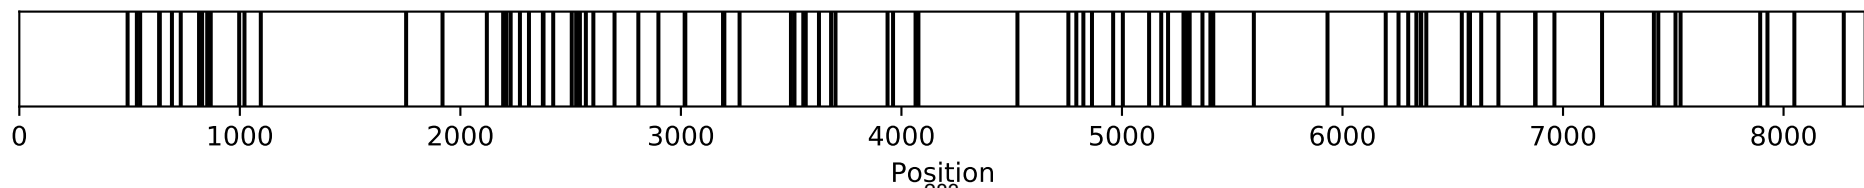

MA1 vs MA2  
Number of differences: 241

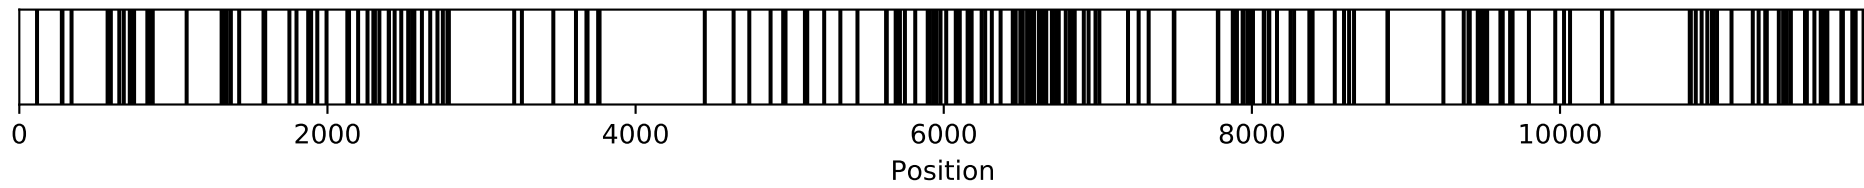

MA1 vs MM1  
Number of differences: 209

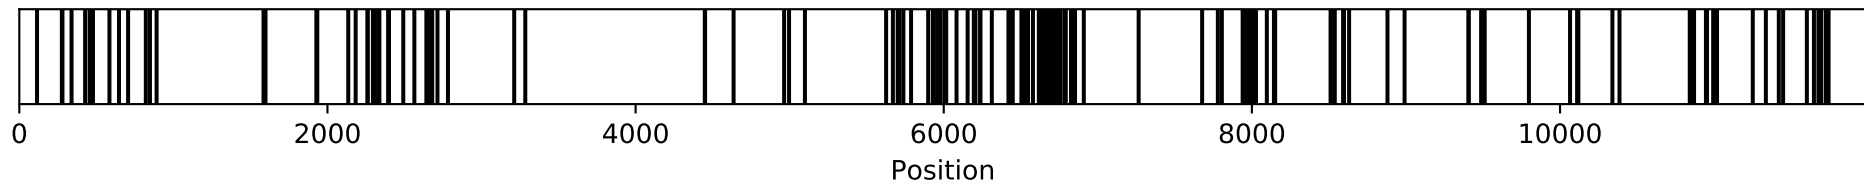

MA1 vs MM2  
Number of differences: 114

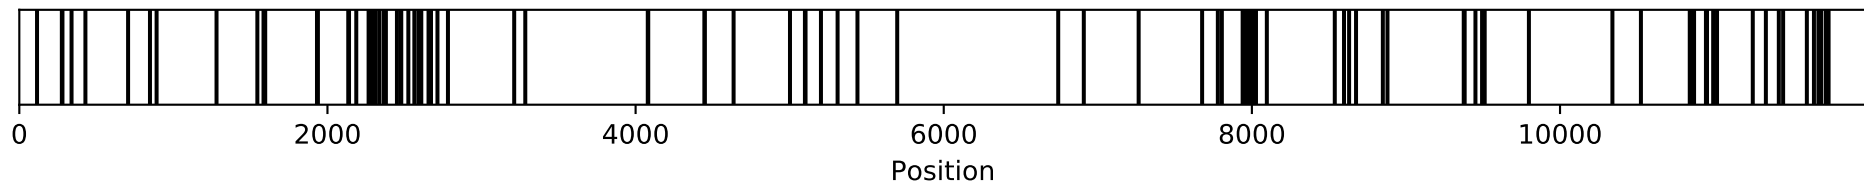

MA2 vs MM1  
Number of differences: 261

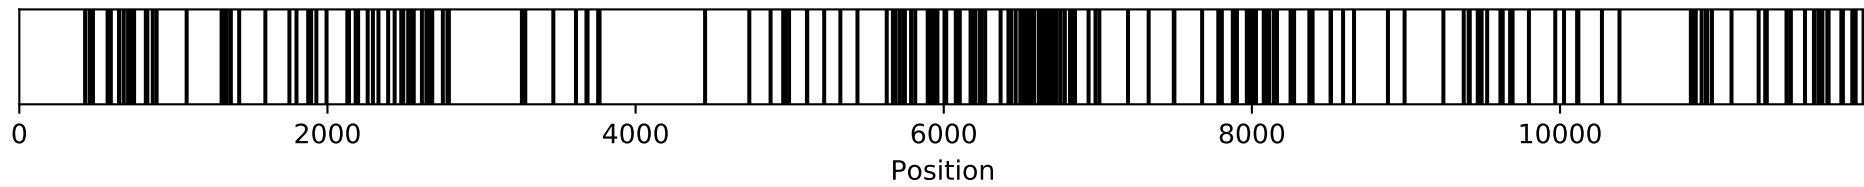

MA2 vs MM2  
Number of differences: 257

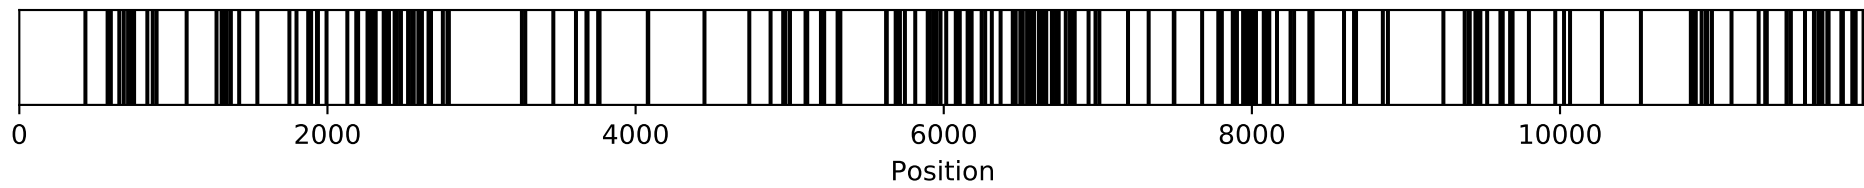

MM1 vs MM2  
Number of differences: 176

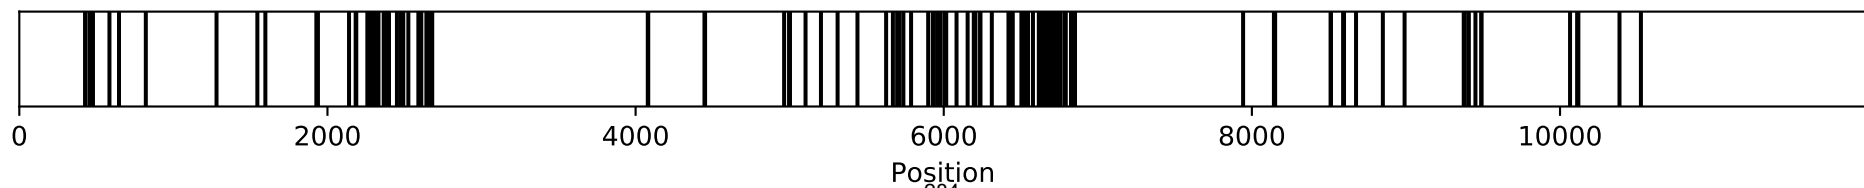

MA1 vs MA2  
Number of differences: 126

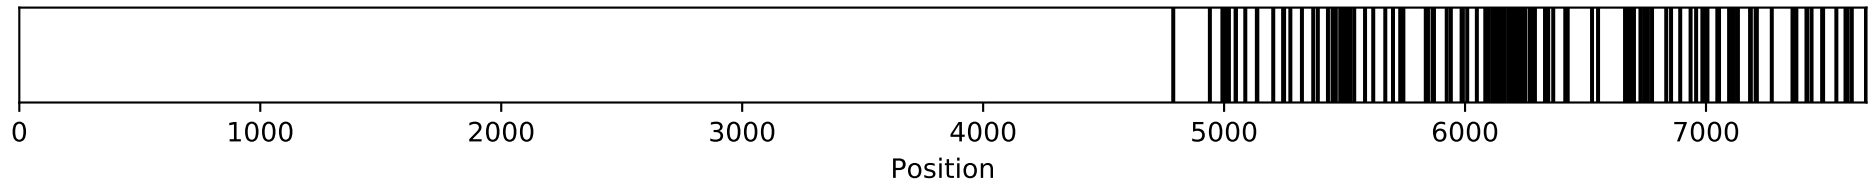

MA1 vs MM1  
Number of differences: 126

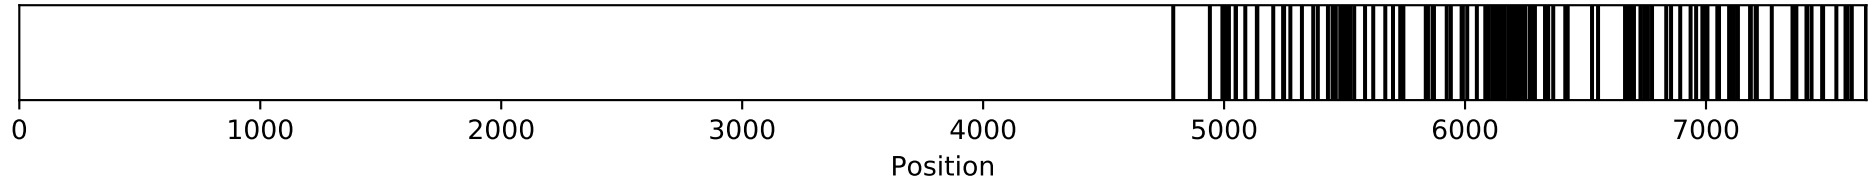

MA1 vs MM2  
Number of differences: 168

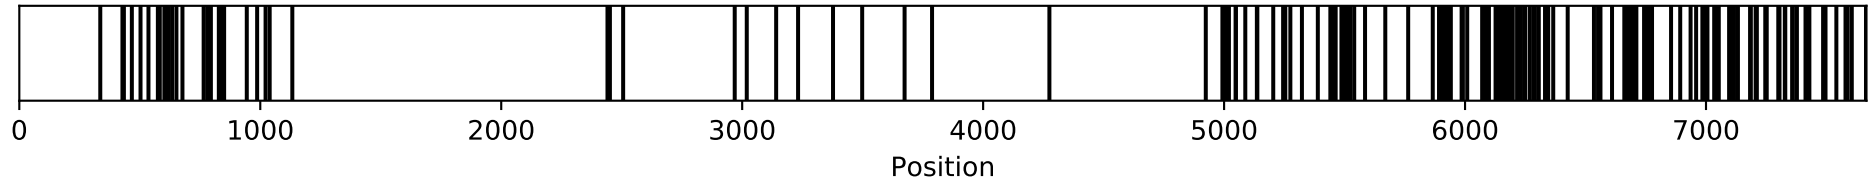

MA2 vs MM1  
Number of differences: 0

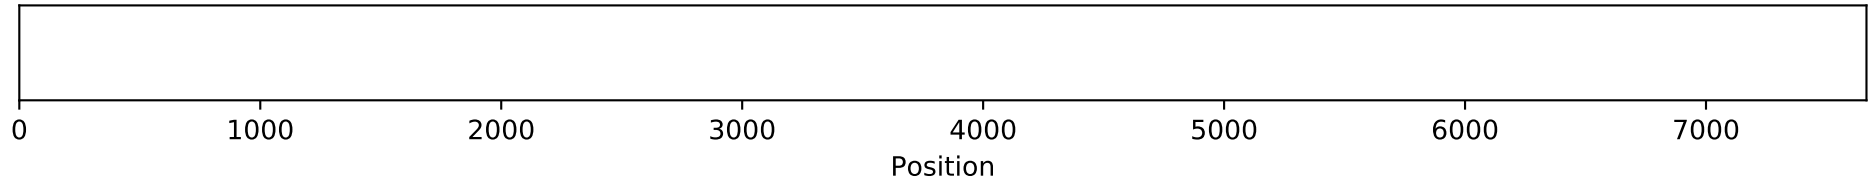

MA2 vs MM2  
Number of differences: 116

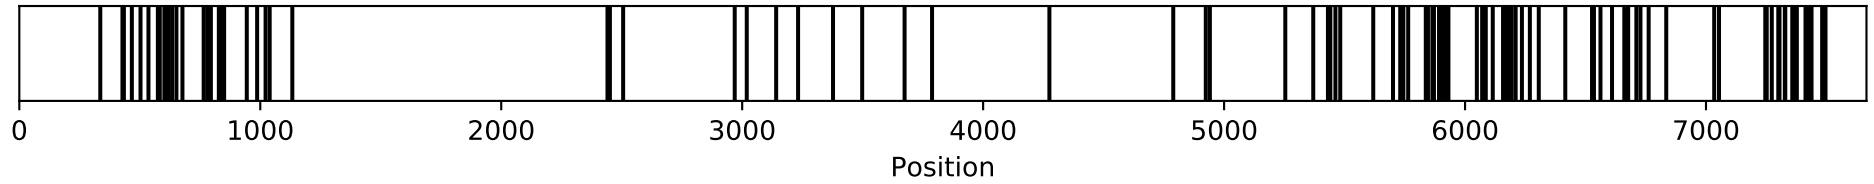

MM1 vs MM2  
Number of differences: 116

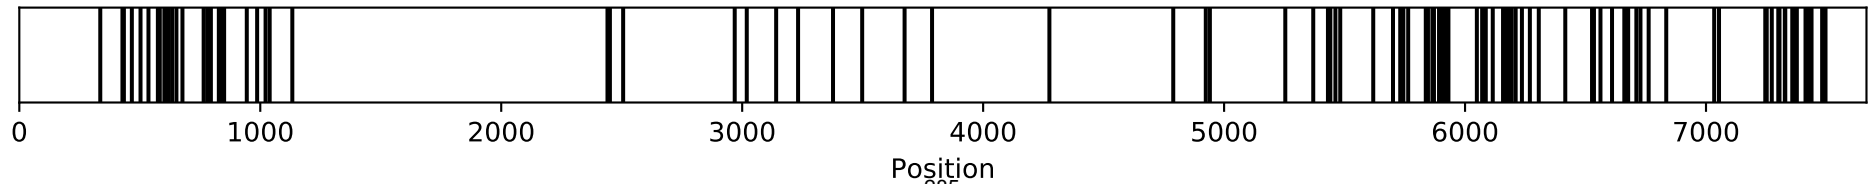

MA1 vs MA2  
Number of differences: 325

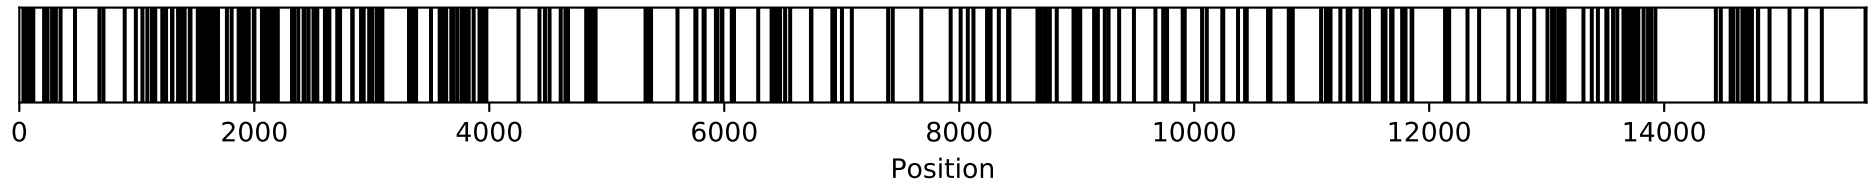

MA1 vs MM1  
Number of differences: 325

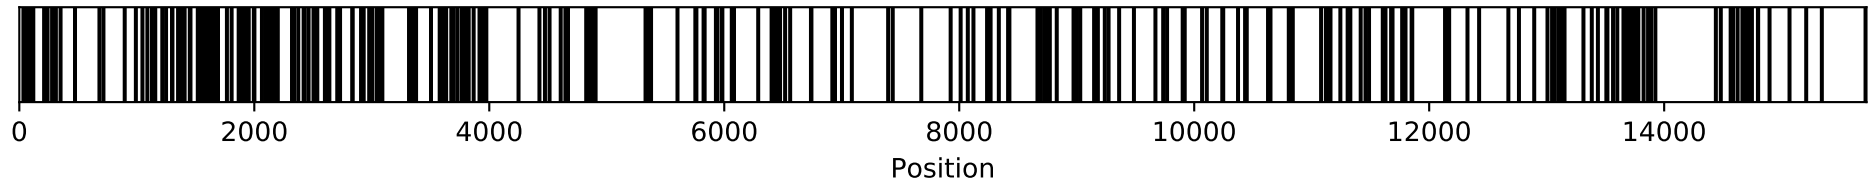

MA1 vs MM2  
Number of differences: 314

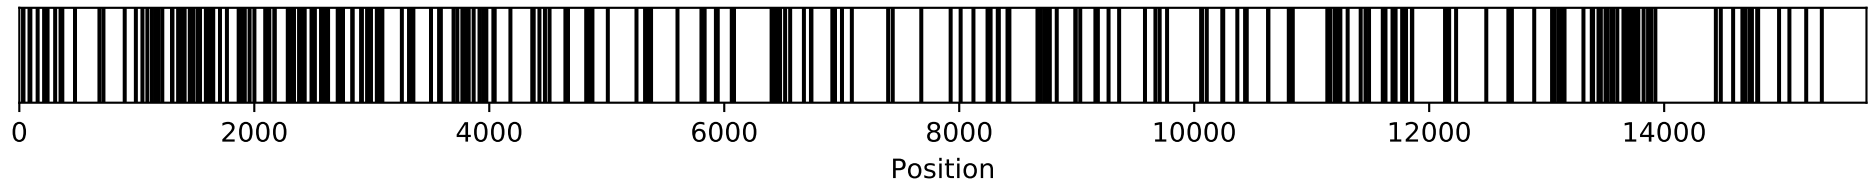

MA2 vs MM1  
Number of differences: 0

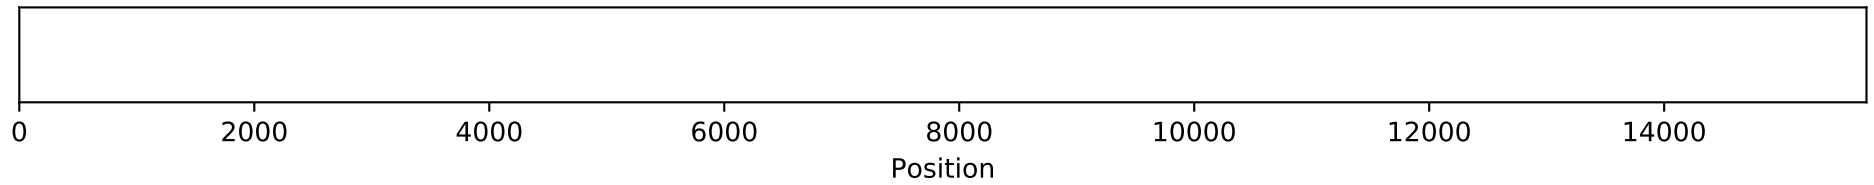

MA2 vs MM2  
Number of differences: 171

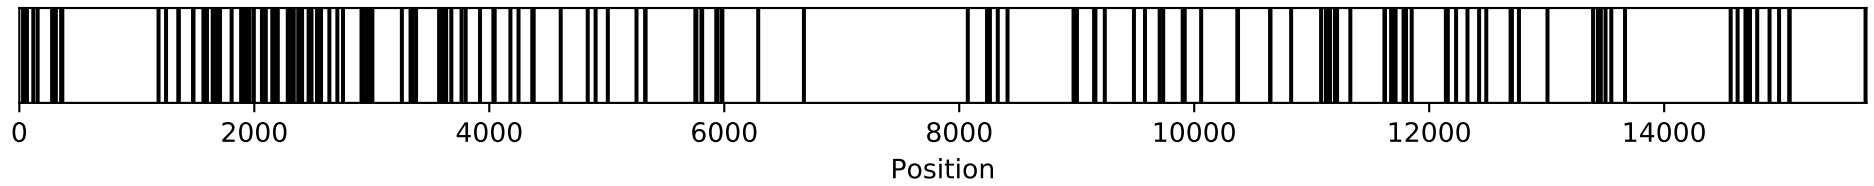

MM1 vs MM2  
Number of differences: 171

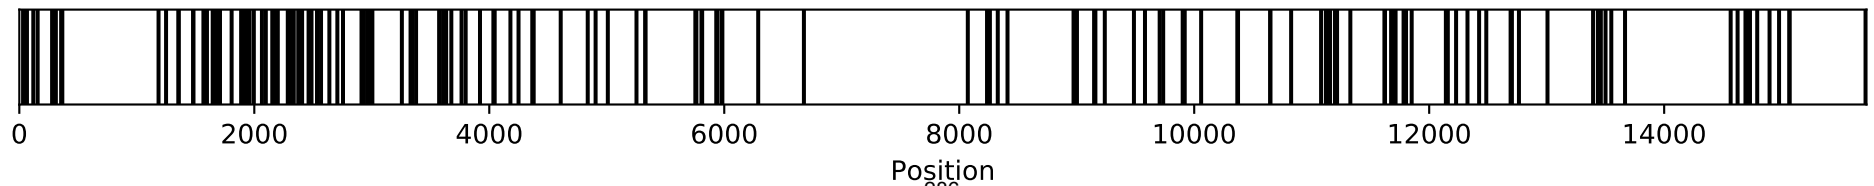

MA1 vs MA2  
Number of differences: 206

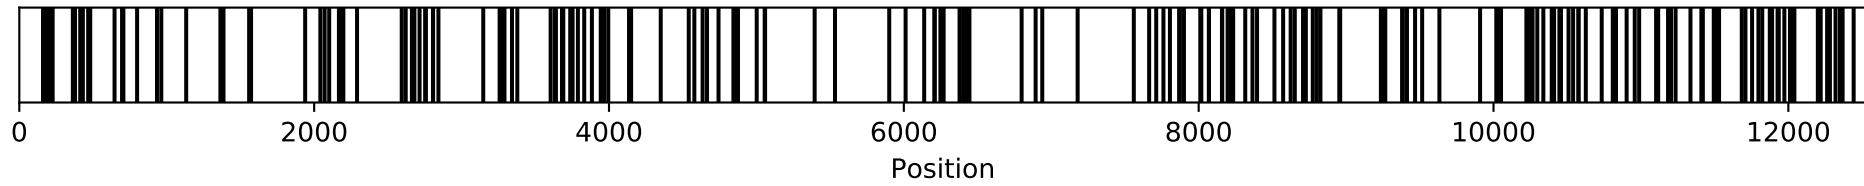

MA1 vs MM1  
Number of differences: 197

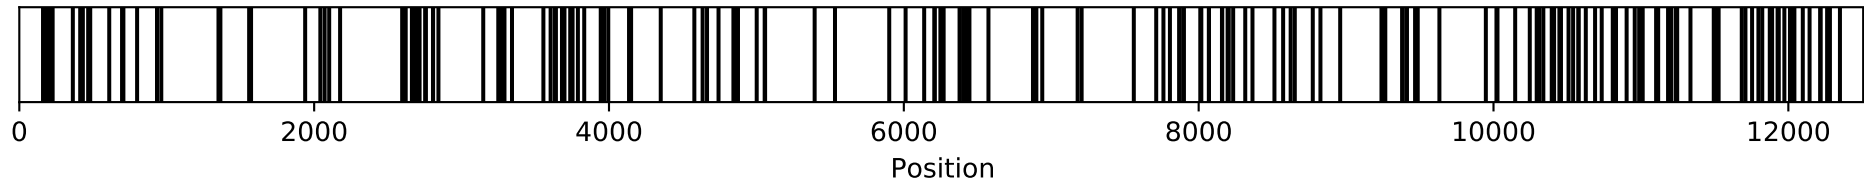

MA1 vs MM2  
Number of differences: 206

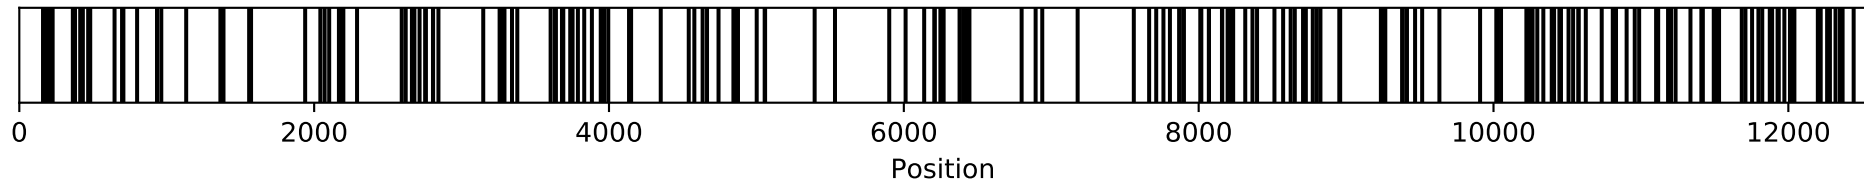

MA2 vs MM1  
Number of differences: 74

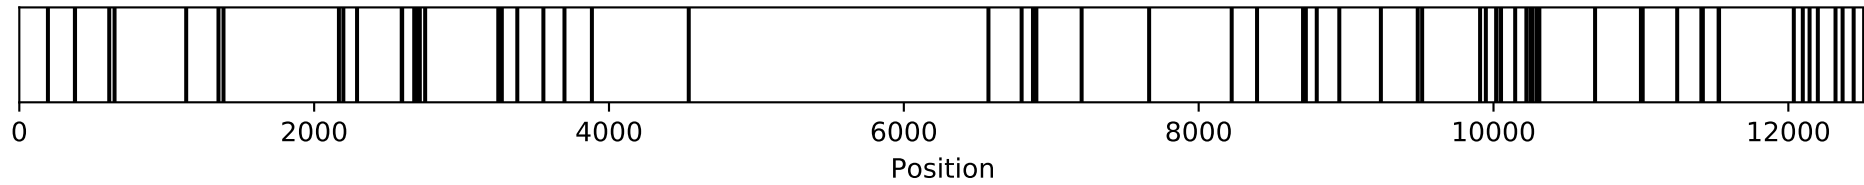

MA2 vs MM2  
Number of differences: 0

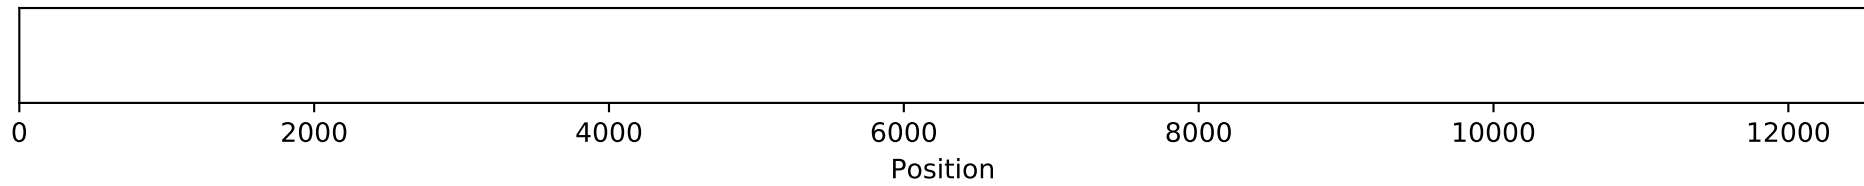

MM1 vs MM2  
Number of differences: 74

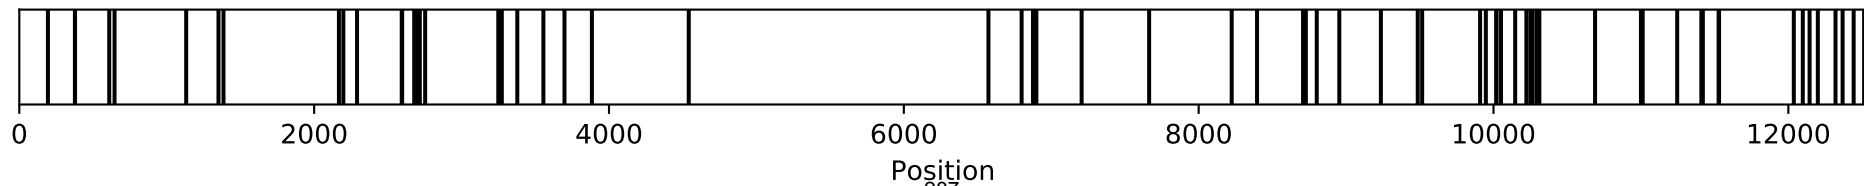

MA1 vs MA2  
Number of differences: 391

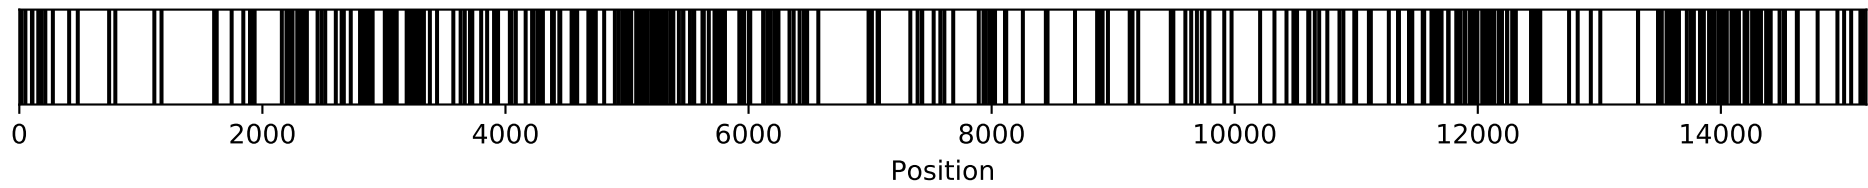

MA1 vs MM1  
Number of differences: 407

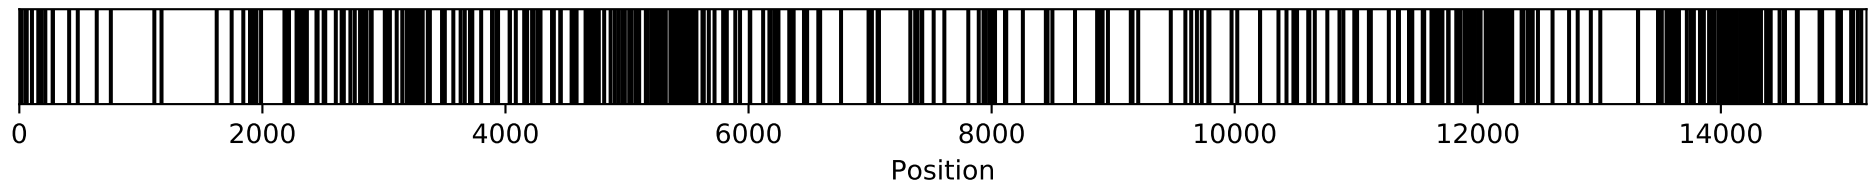

MA1 vs MM2  
Number of differences: 414

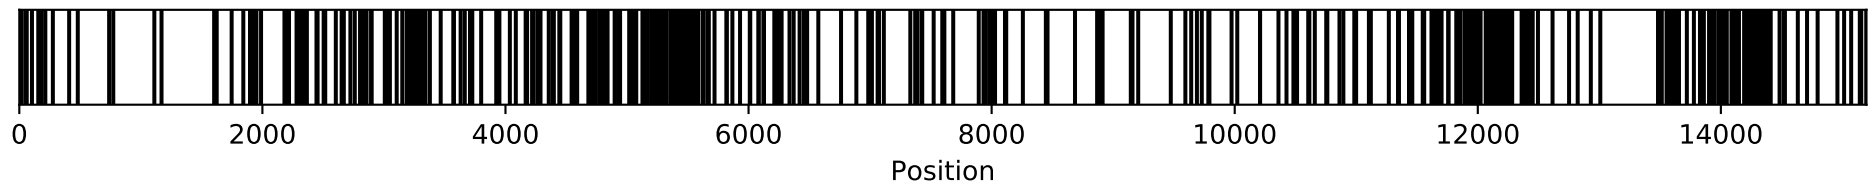

MA2 vs MM1  
Number of differences: 217

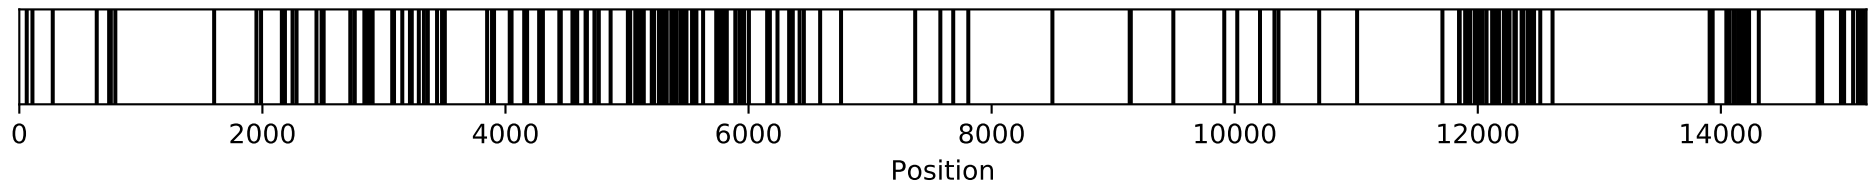

MA2 vs MM2  
Number of differences: 209

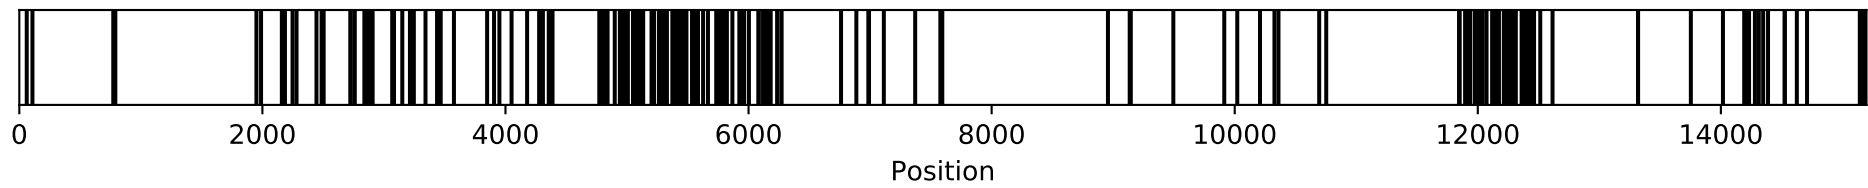

MM1 vs MM2  
Number of differences: 140

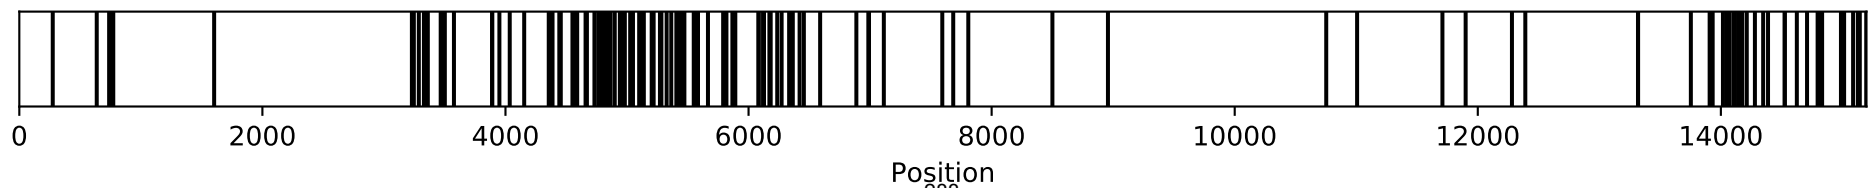

MA1 vs MA2  
Number of differences: 149

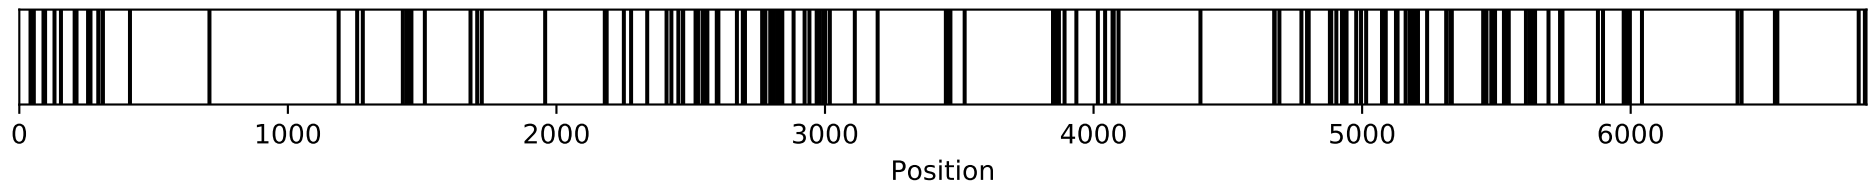

MA1 vs MM1  
Number of differences: 0

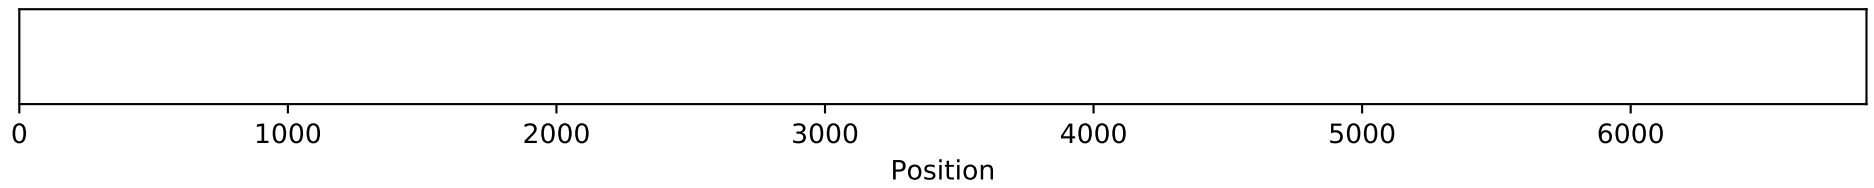

MA1 vs MM2  
Number of differences: 66

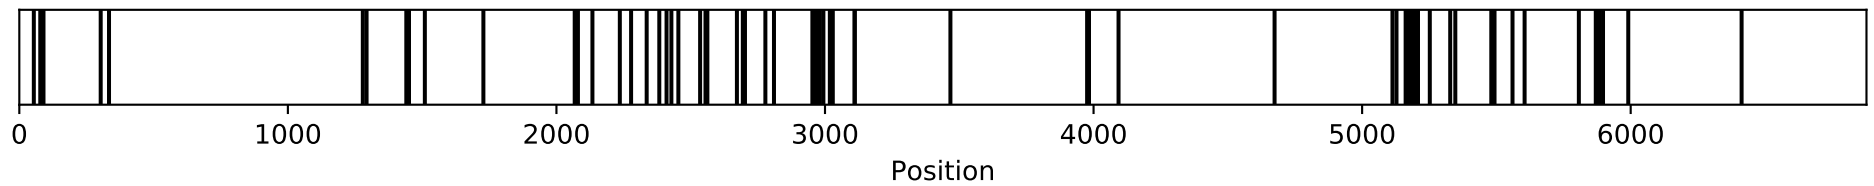

MA2 vs MM1  
Number of differences: 149

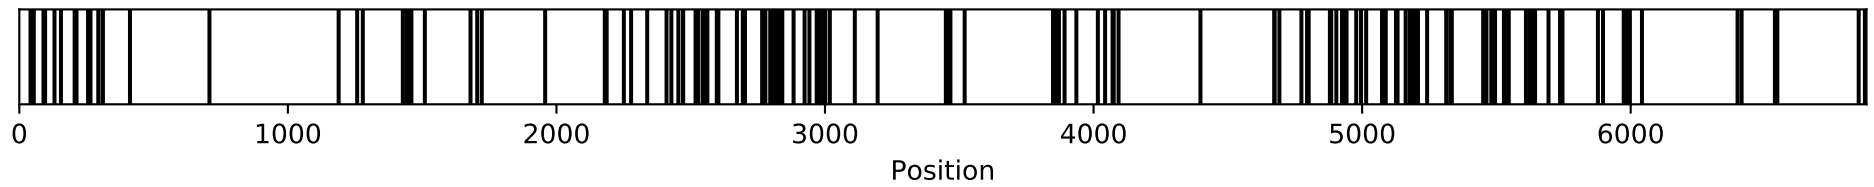

MA2 vs MM2  
Number of differences: 139

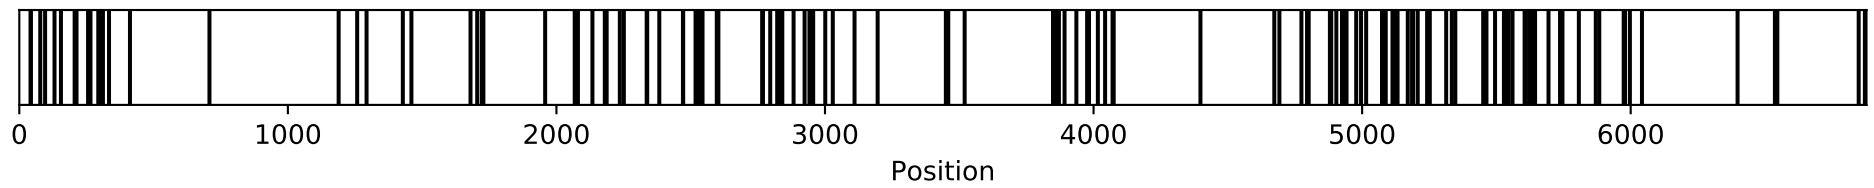

MM1 vs MM2  
Number of differences: 66

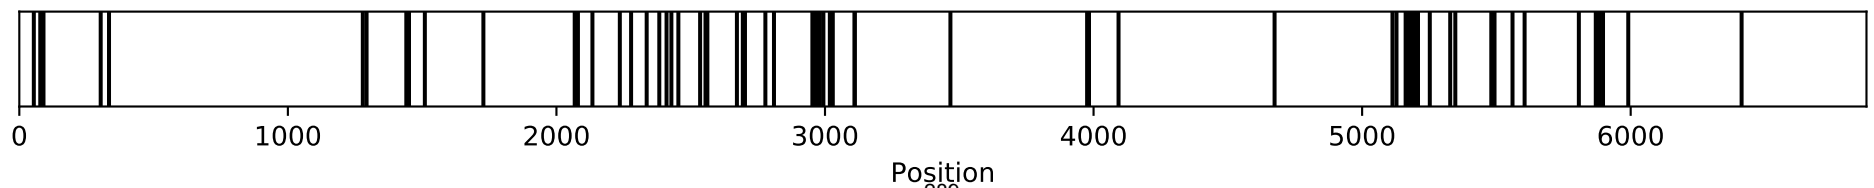

MA1 vs MA2  
Number of differences: 183

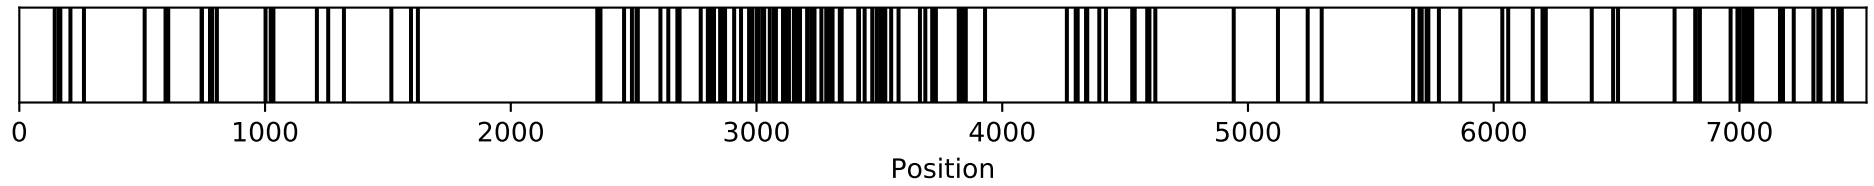

MA1 vs MM1  
Number of differences: 211

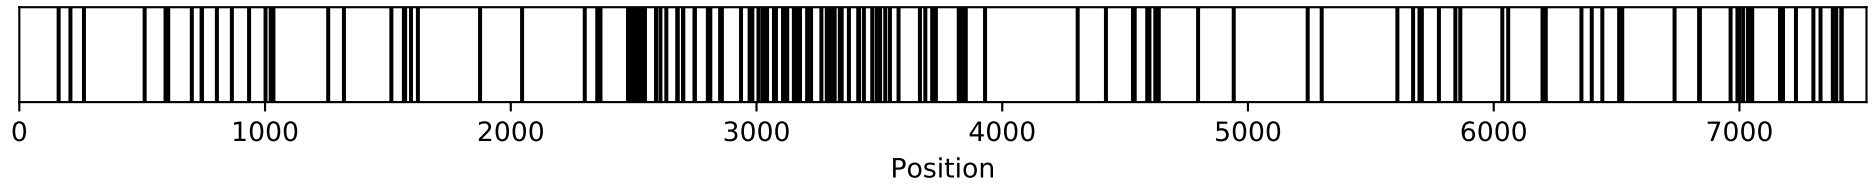

MA1 vs MM2  
Number of differences: 216

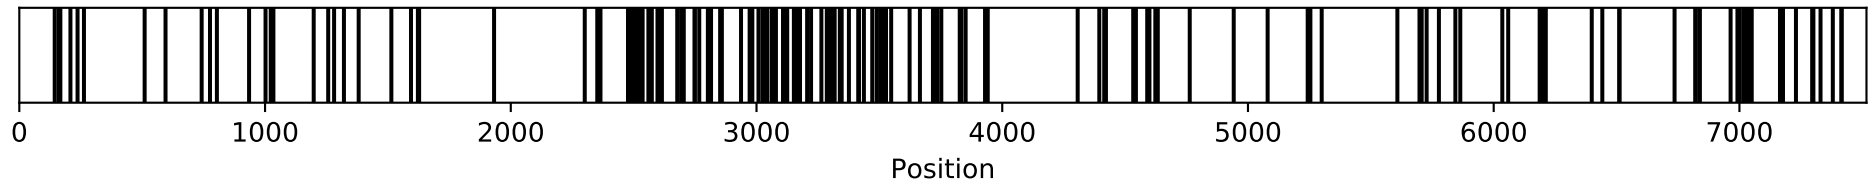

MA2 vs MM1  
Number of differences: 137

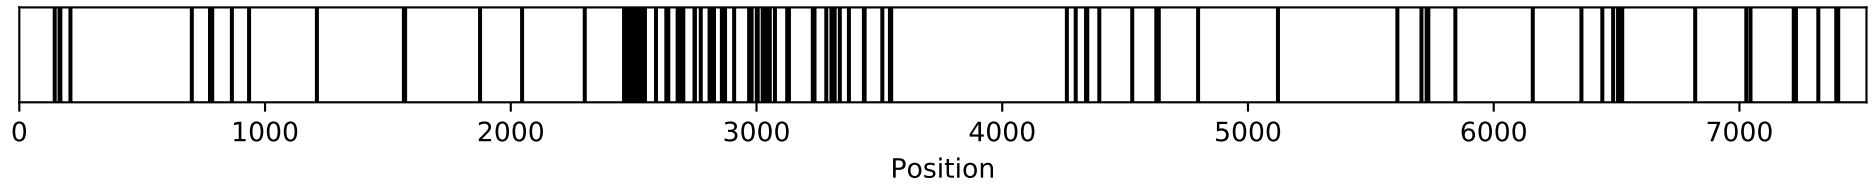

MA2 vs MM2  
Number of differences: 145

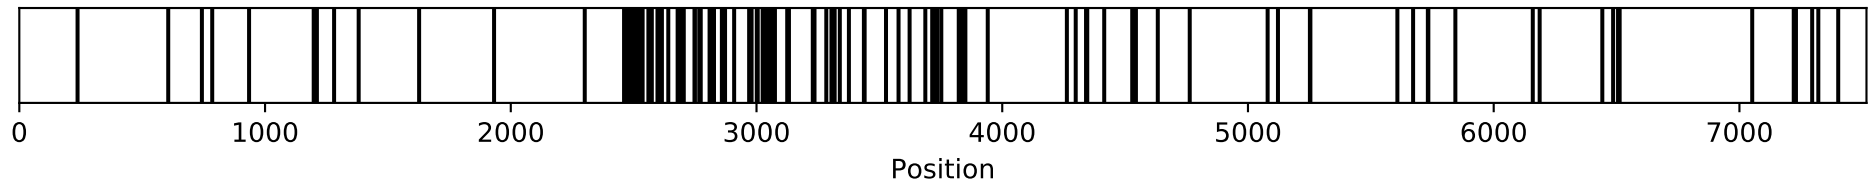

MM1 vs MM2  
Number of differences: 84

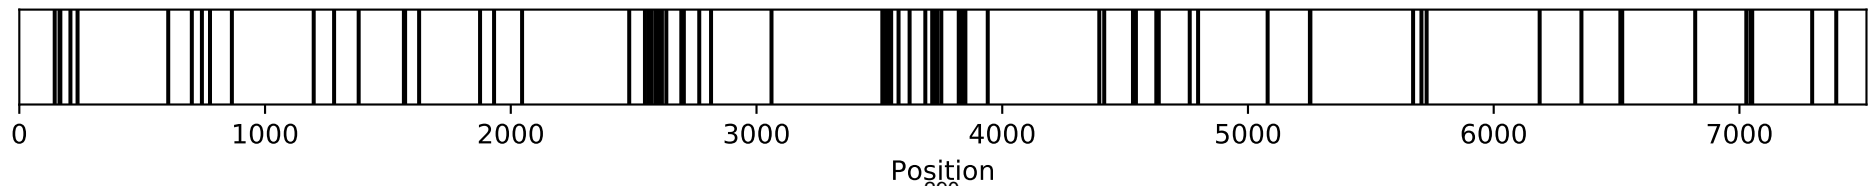



MA1 vs MA2  
Number of differences: 244

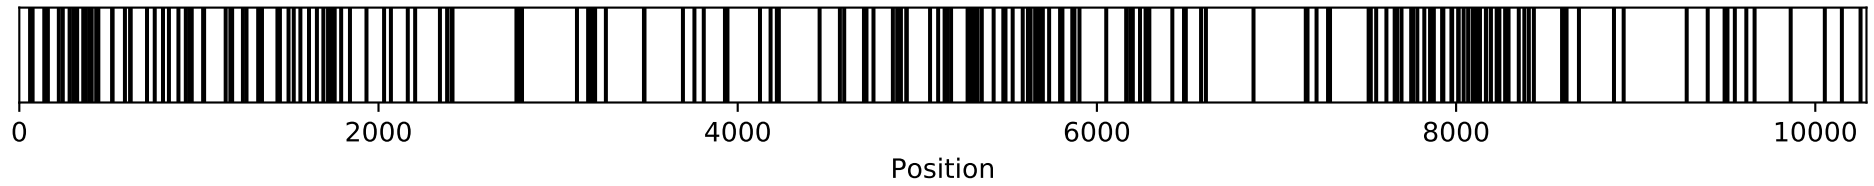

MA1 vs MM1  
Number of differences: 244

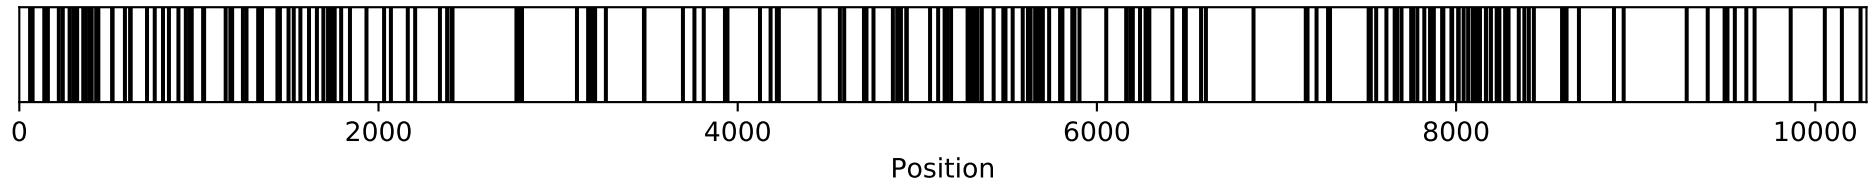

MA1 vs MM2  
Number of differences: 264

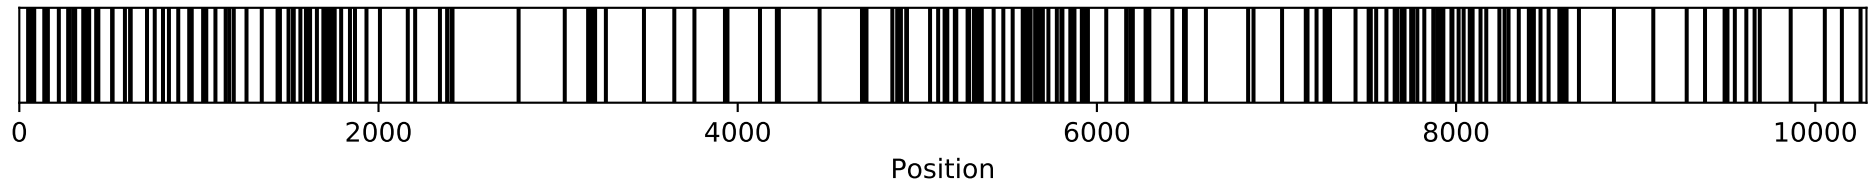

MA2 vs MM1  
Number of differences: 0

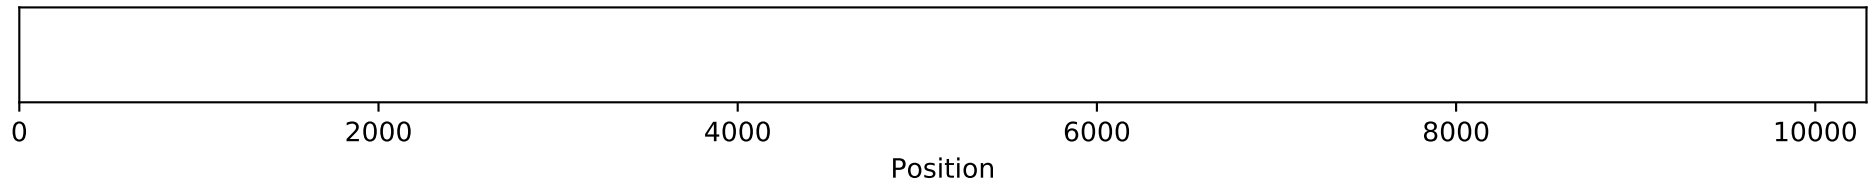

MA2 vs MM2  
Number of differences: 135

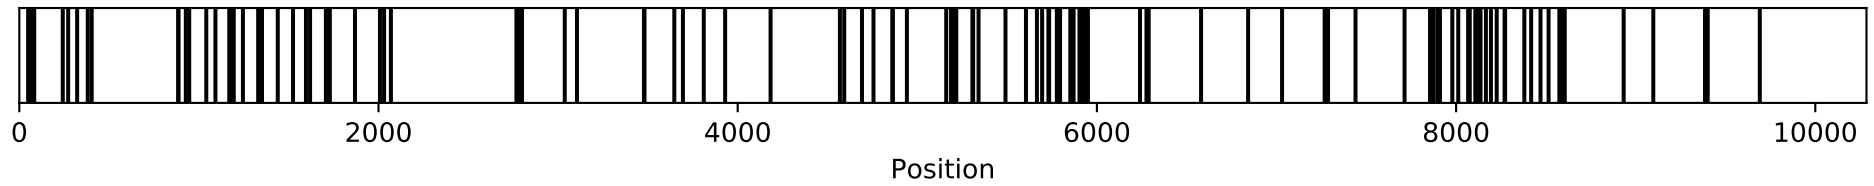

MM1 vs MM2  
Number of differences: 135

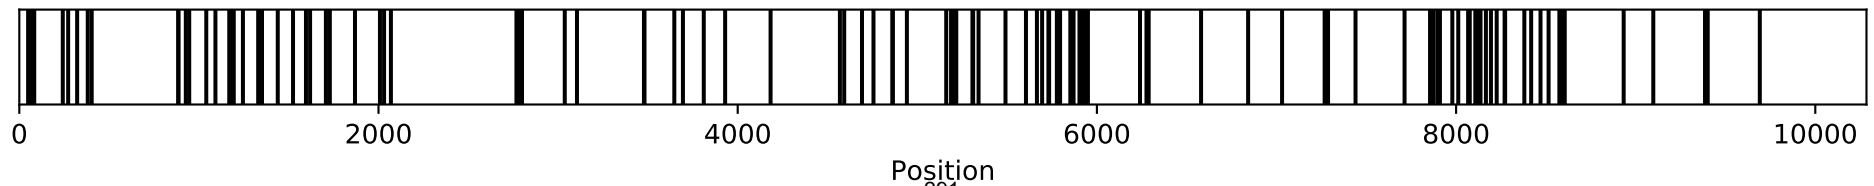

CR1 vs CR2  
Number of differences: 356

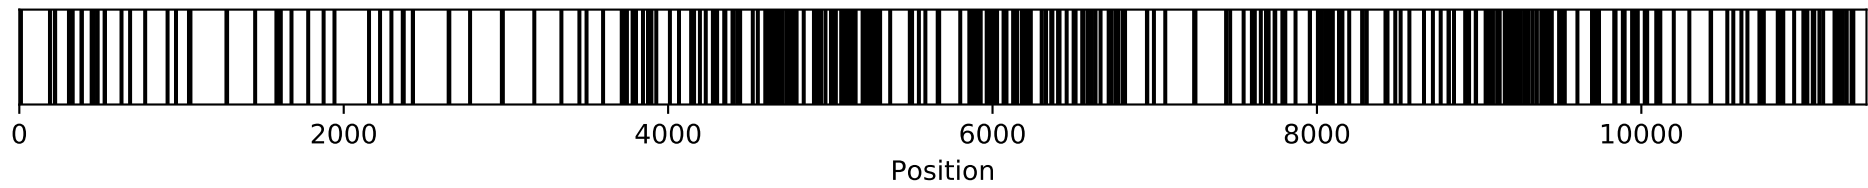

CR1 vs MM1  
Number of differences: 132

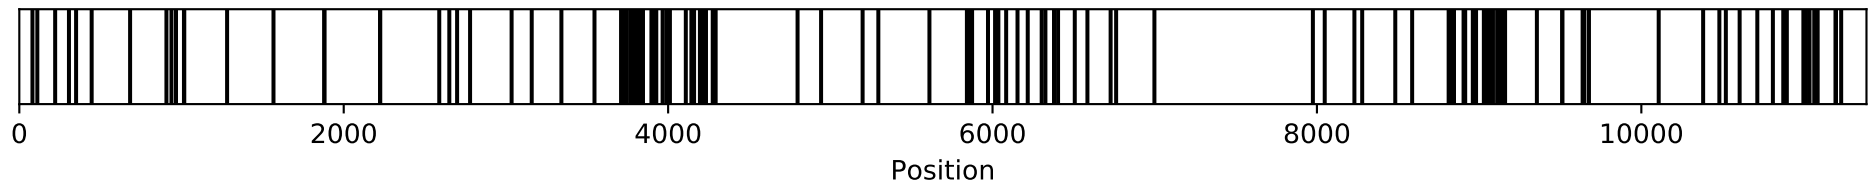

CR1 vs MM2  
Number of differences: 134

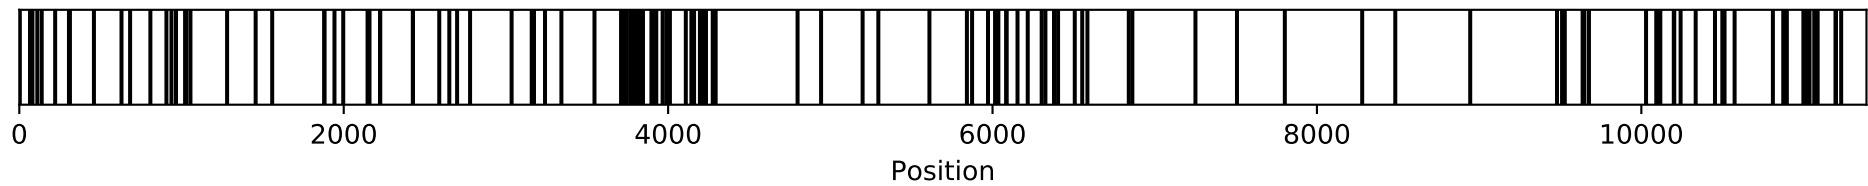

CR2 vs MM1  
Number of differences: 367

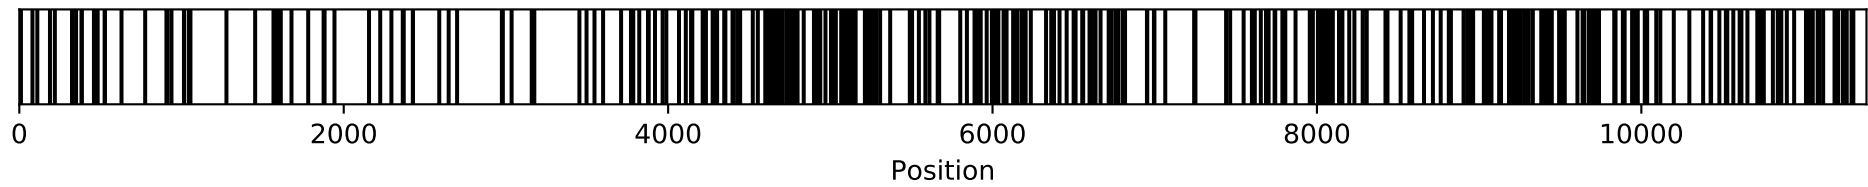

CR2 vs MM2  
Number of differences: 374

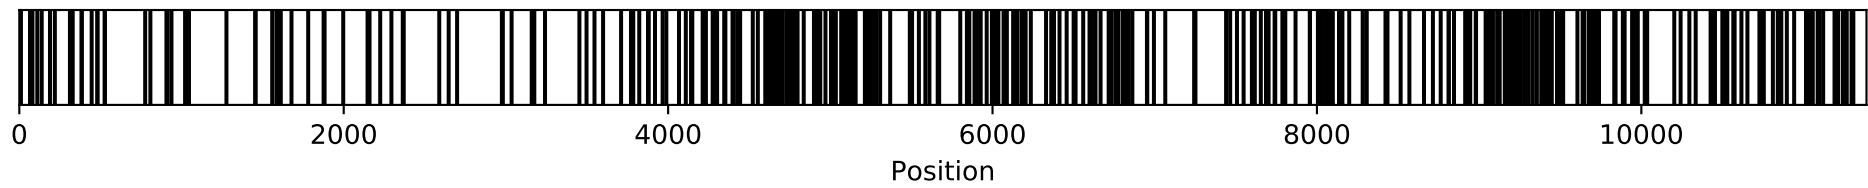

MM1 vs MM2  
Number of differences: 88

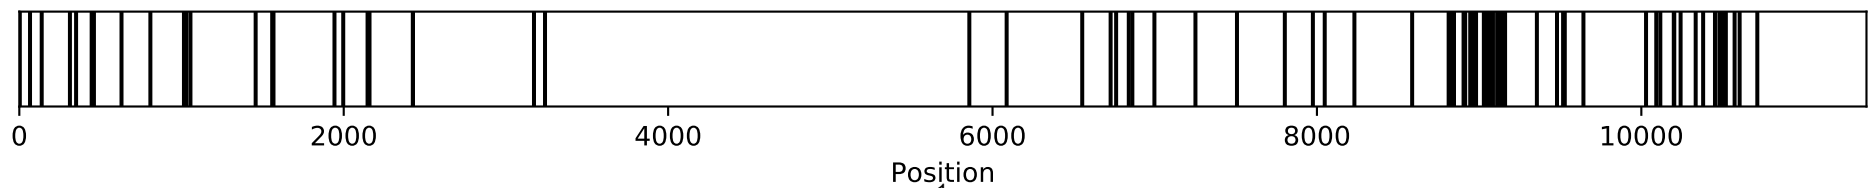

CR1 vs CR2  
Number of differences: 333

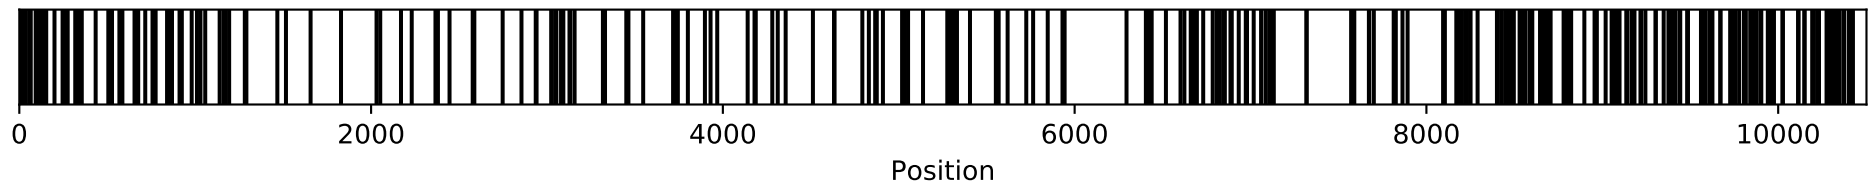

CR1 vs MM1  
Number of differences: 129

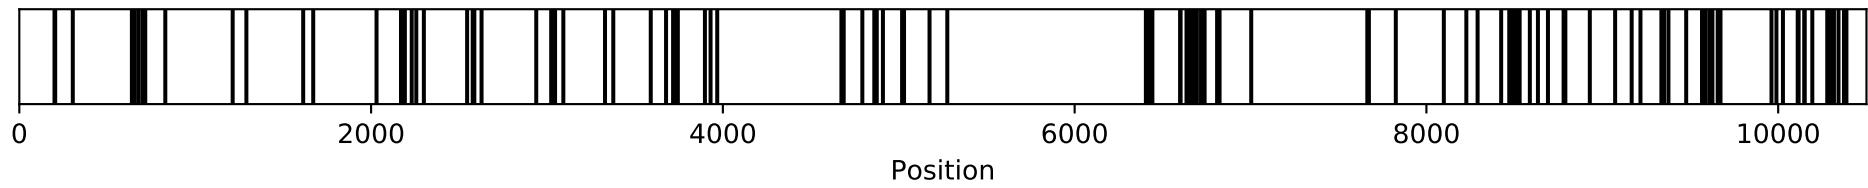

CR1 vs MM2  
Number of differences: 159

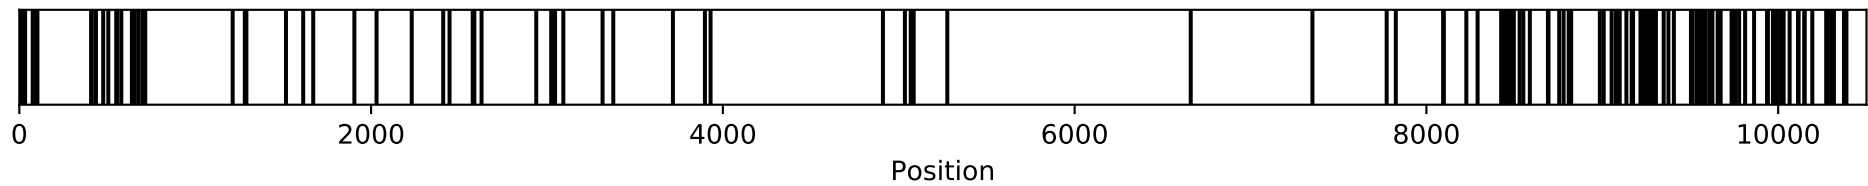

CR2 vs MM1  
Number of differences: 319

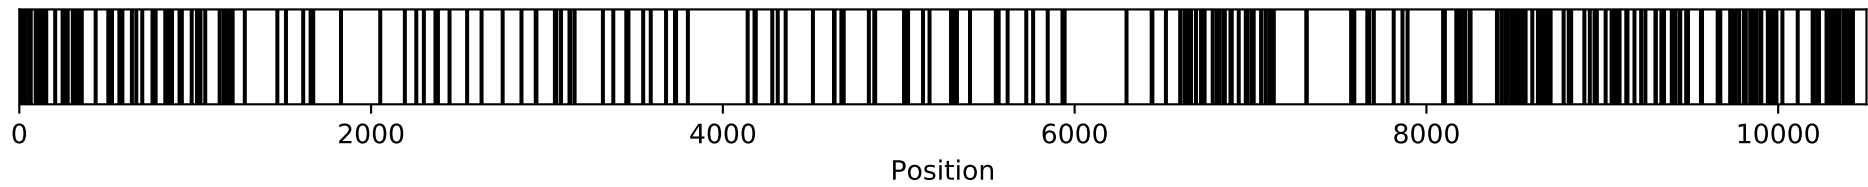

CR2 vs MM2  
Number of differences: 322

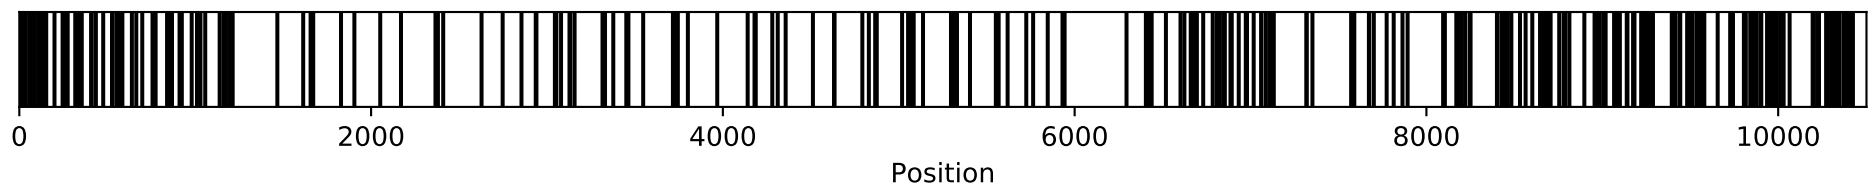

MM1 vs MM2  
Number of differences: 153

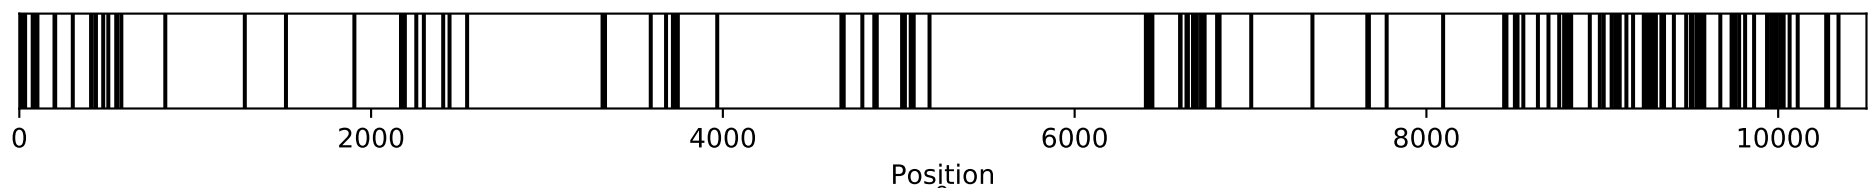

CR1 vs CR2  
Number of differences: 274

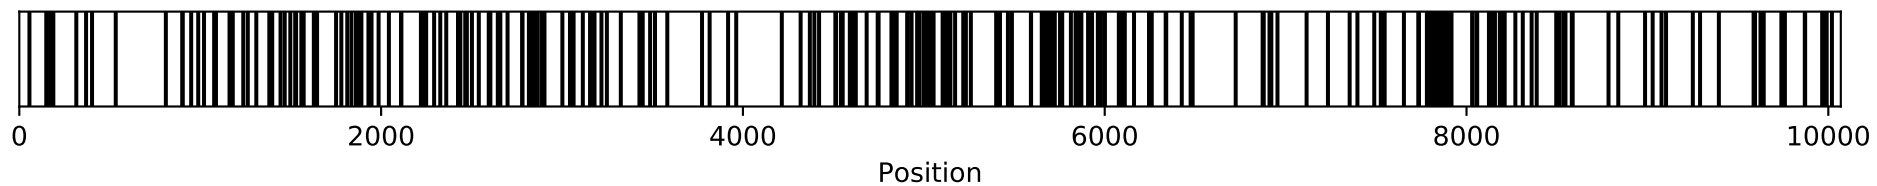

CR1 vs MM1  
Number of differences: 188

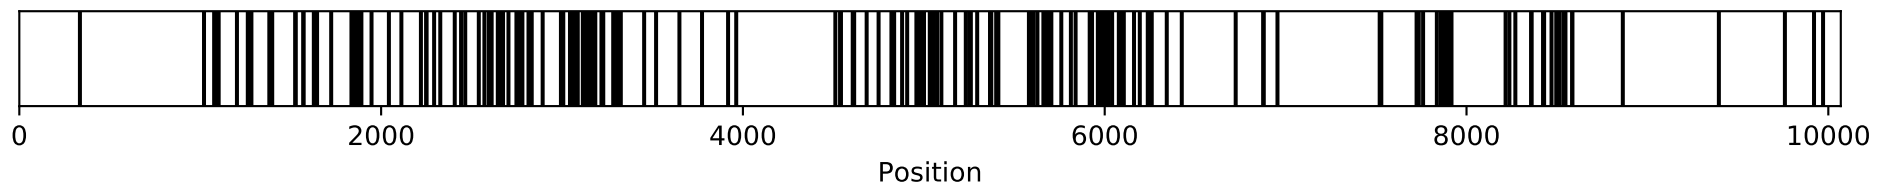

CR1 vs MM2  
Number of differences: 168

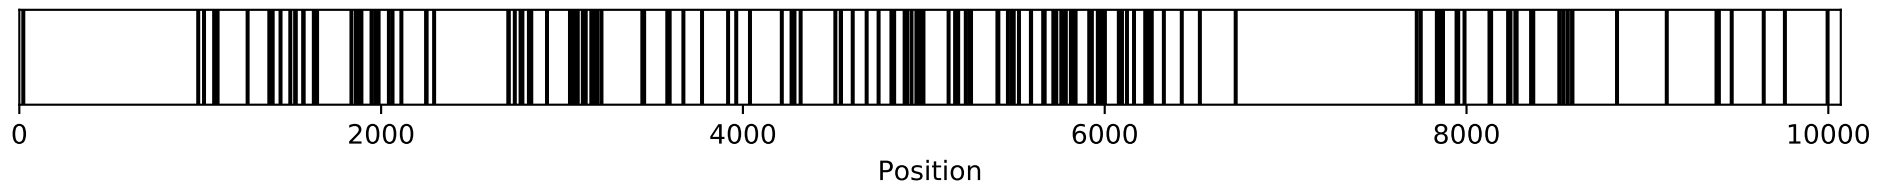

CR2 vs MM1  
Number of differences: 253

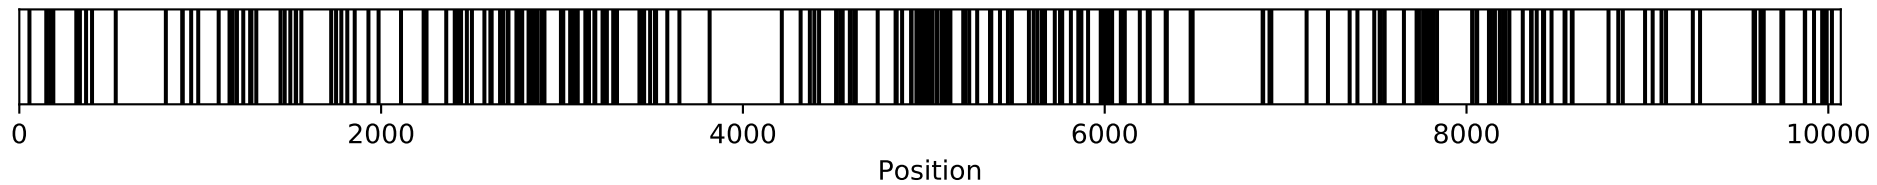

CR2 vs MM2  
Number of differences: 271

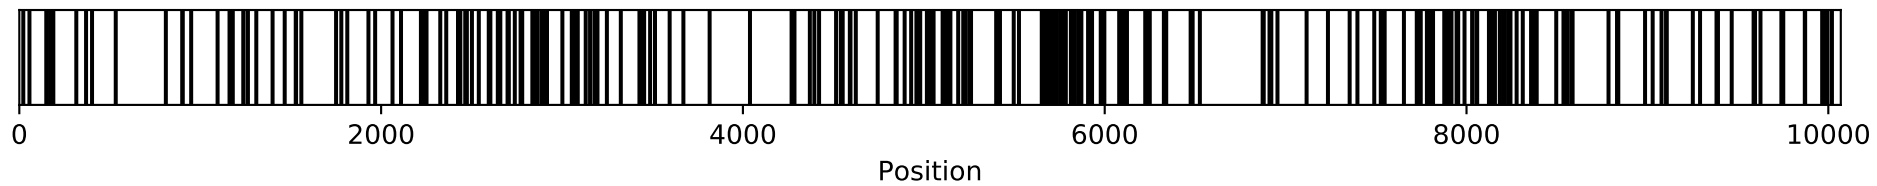

MM1 vs MM2  
Number of differences: 179

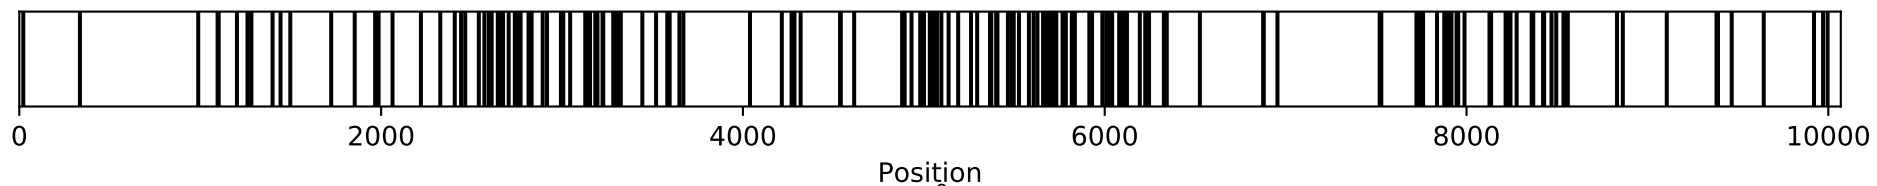

CR1 vs CR2  
Number of differences: 143

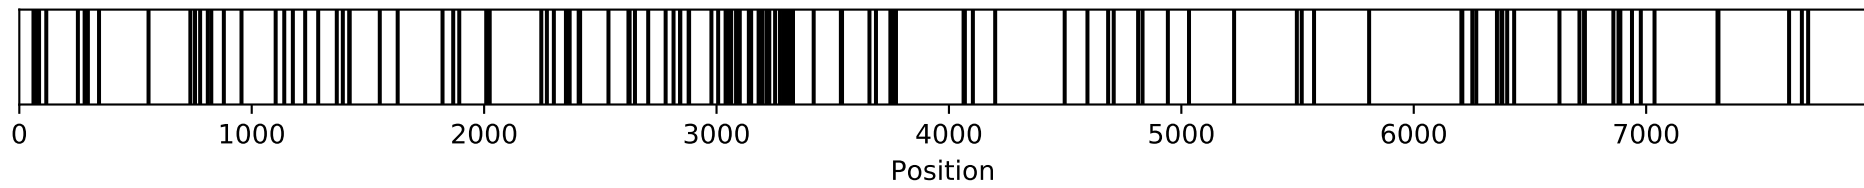

CR1 vs MM1  
Number of differences: 49

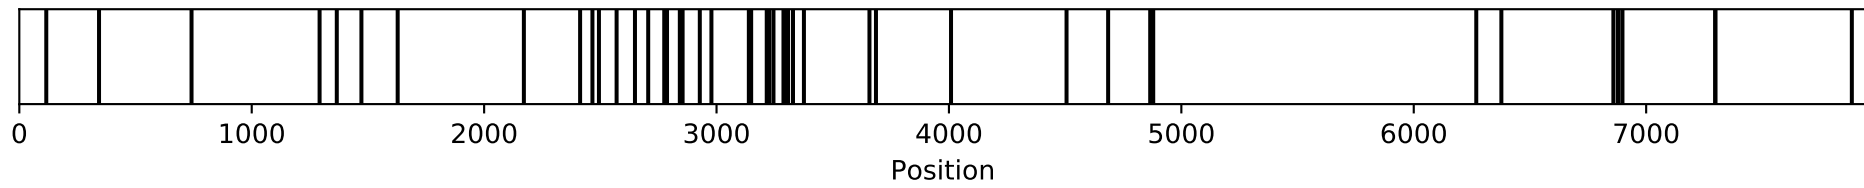

CR1 vs MM2  
Number of differences: 66

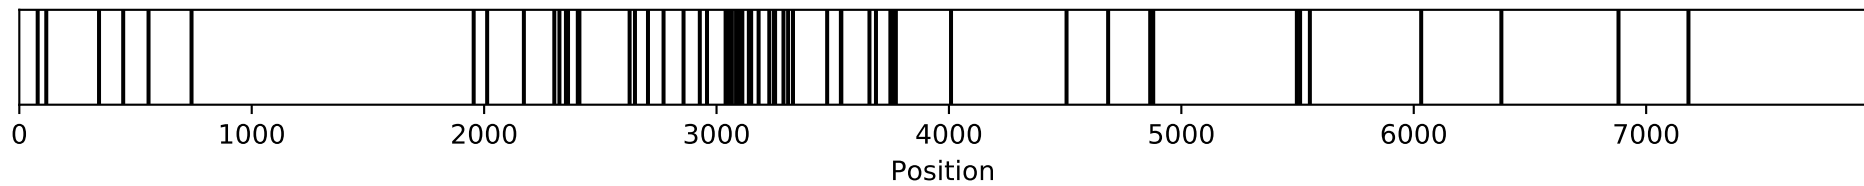

CR2 vs MM1  
Number of differences: 140

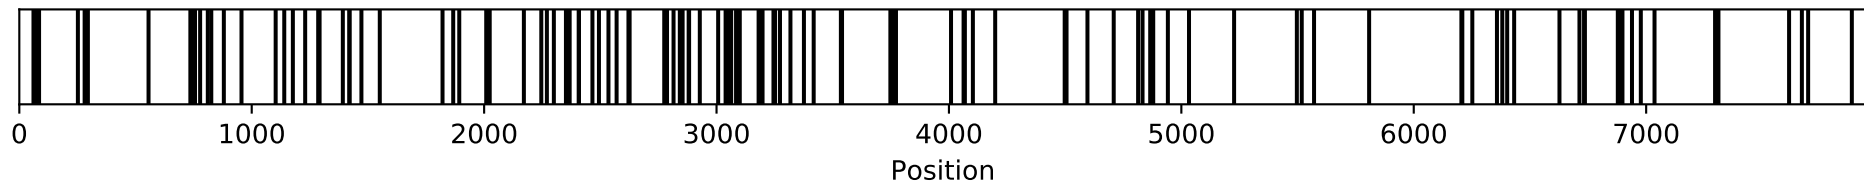

CR2 vs MM2  
Number of differences: 141

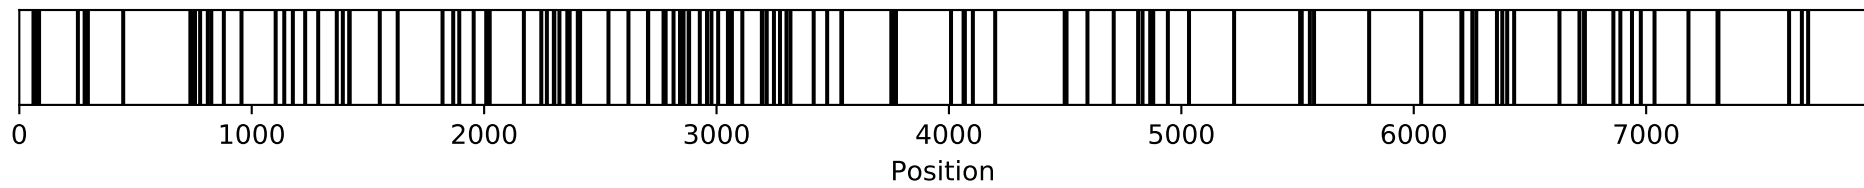

MM1 vs MM2  
Number of differences: 71

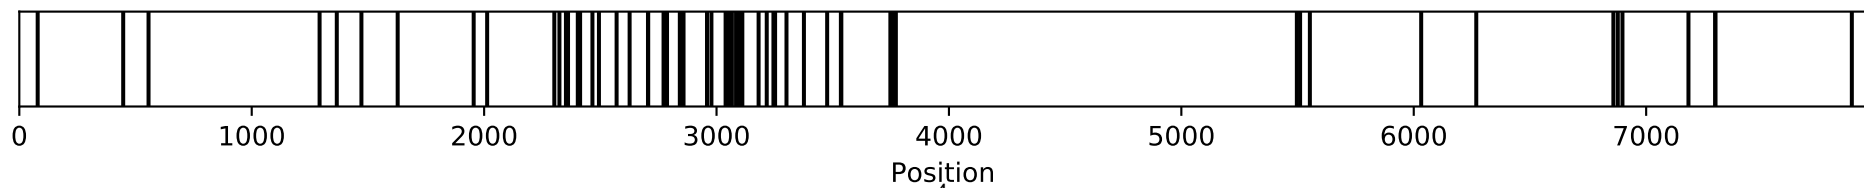

CR1 vs CR2  
Number of differences: 85

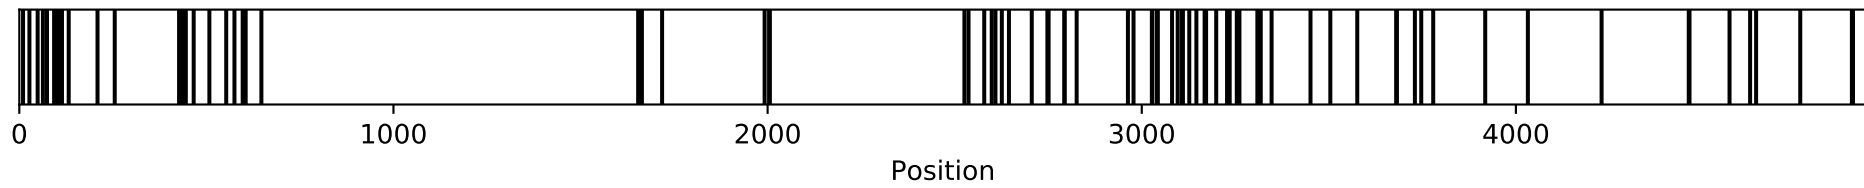

CR1 vs MM1  
Number of differences: 80

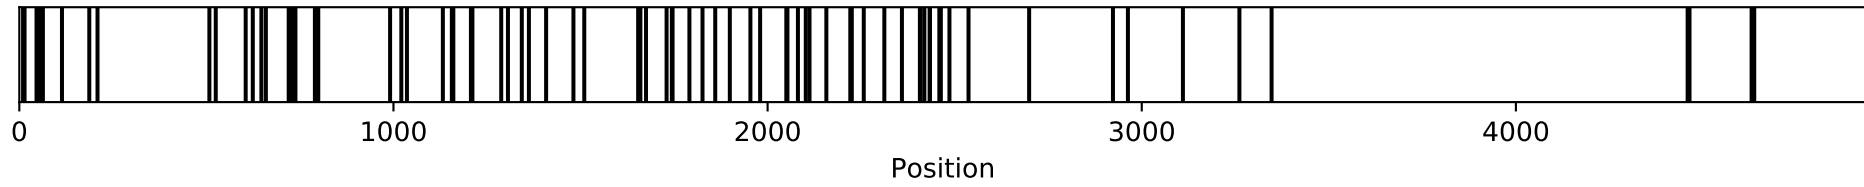

CR1 vs MM2  
Number of differences: 82

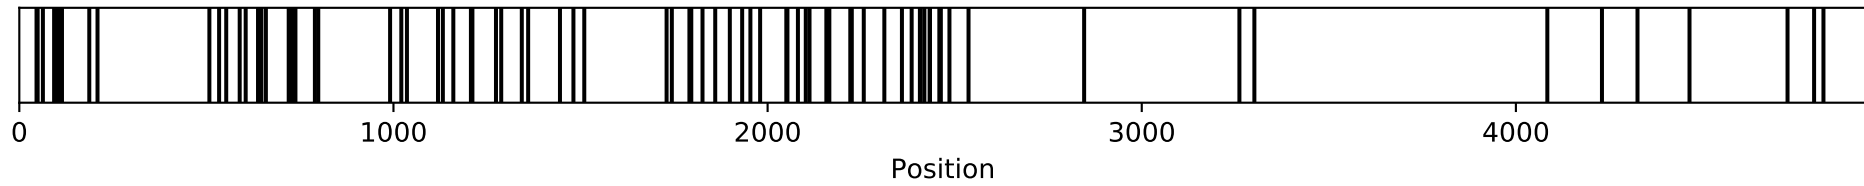

CR2 vs MM1  
Number of differences: 136

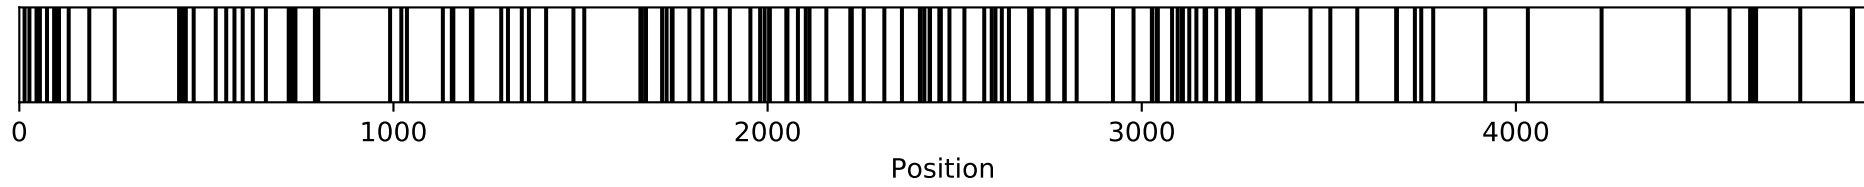

CR2 vs MM2  
Number of differences: 140

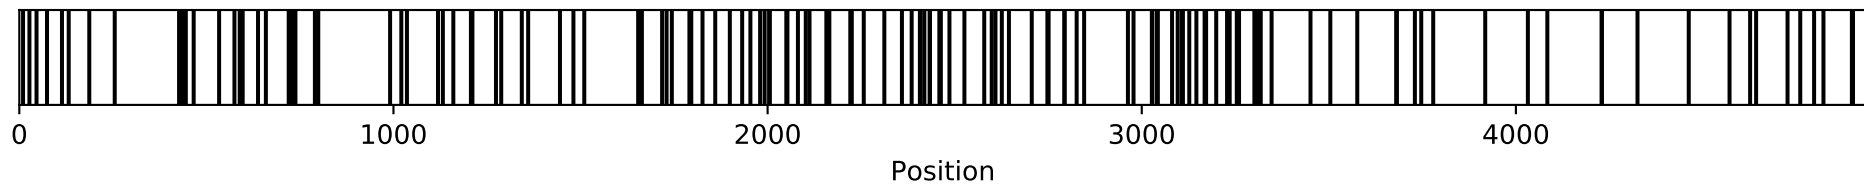

MM1 vs MM2  
Number of differences: 47

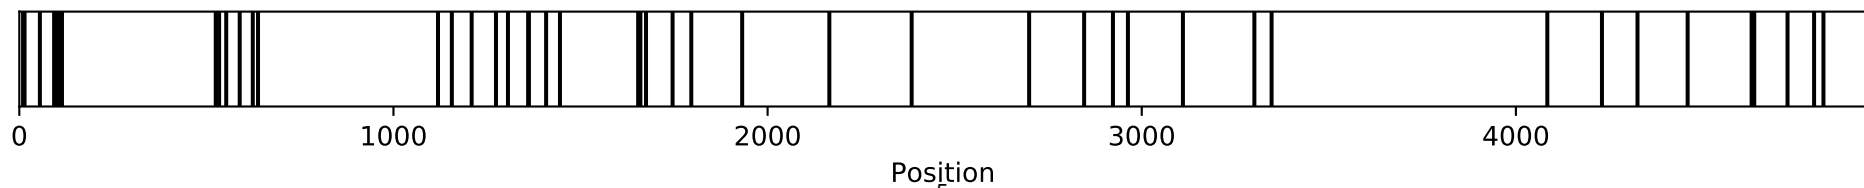

CR1 vs CR2  
Number of differences: 307

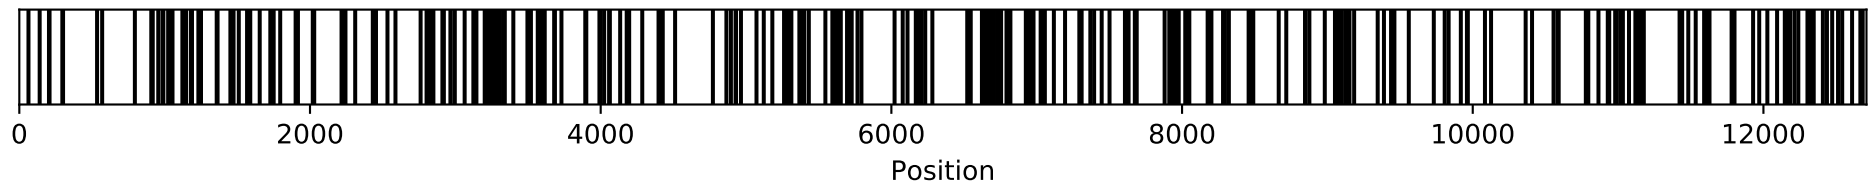

CR1 vs MM1  
Number of differences: 141

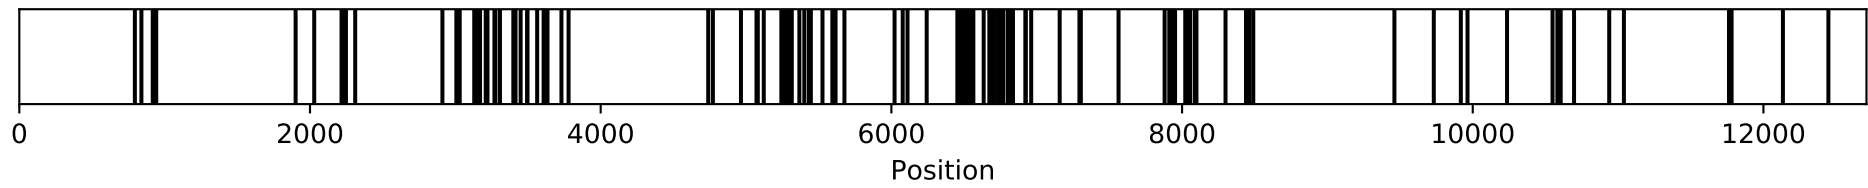

CR1 vs MM2  
Number of differences: 186

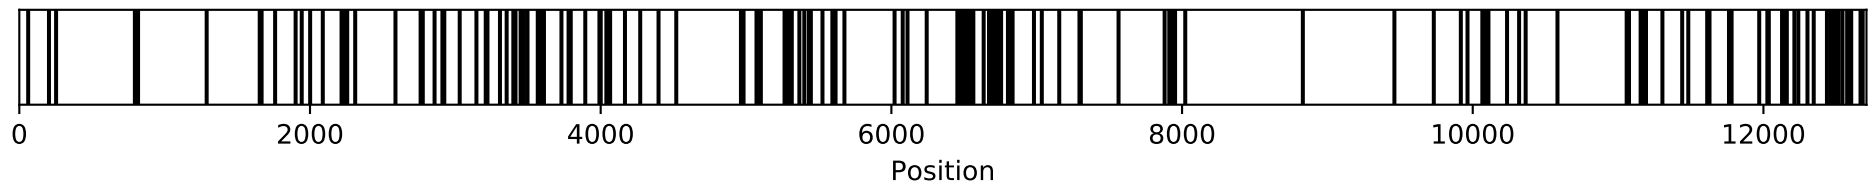

CR2 vs MM1  
Number of differences: 311

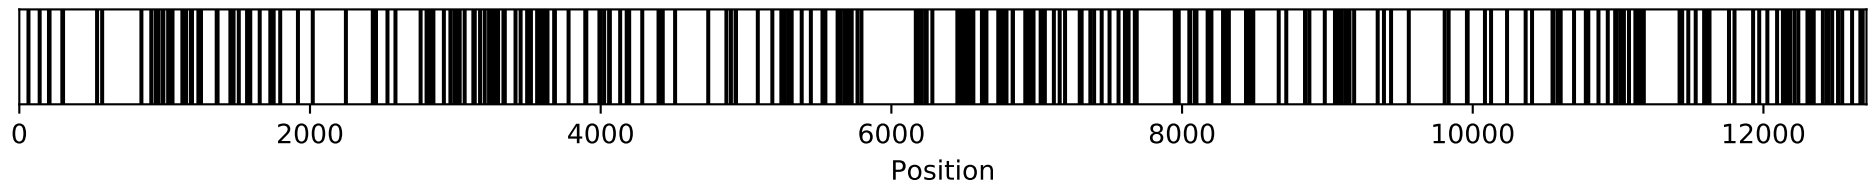

CR2 vs MM2  
Number of differences: 308

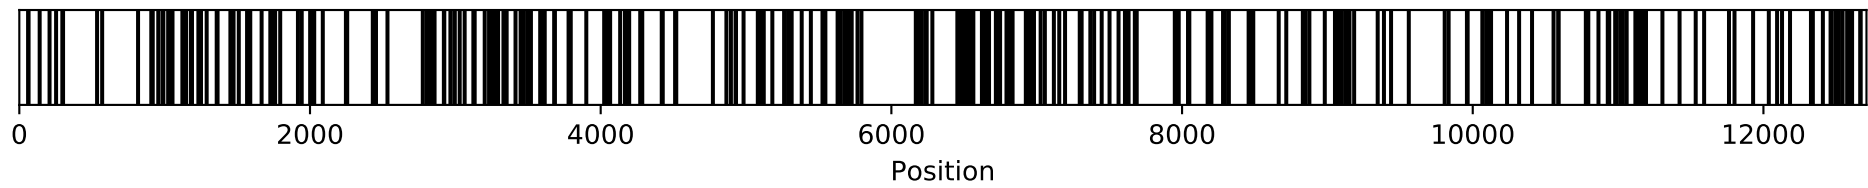

MM1 vs MM2  
Number of differences: 134

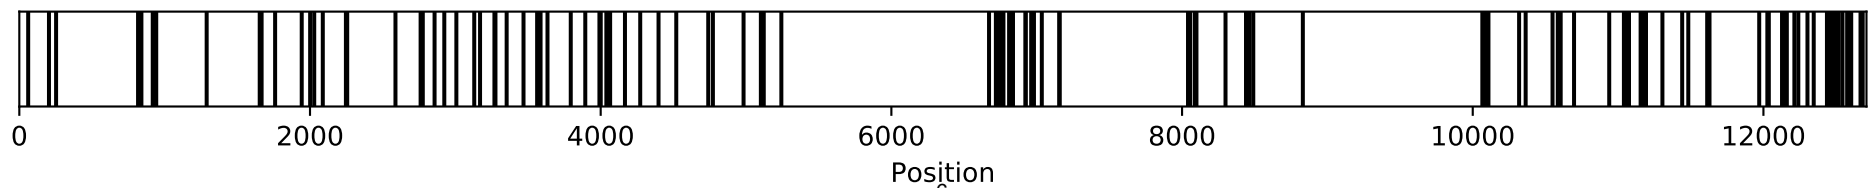

CR1 vs CR2  
Number of differences: 15

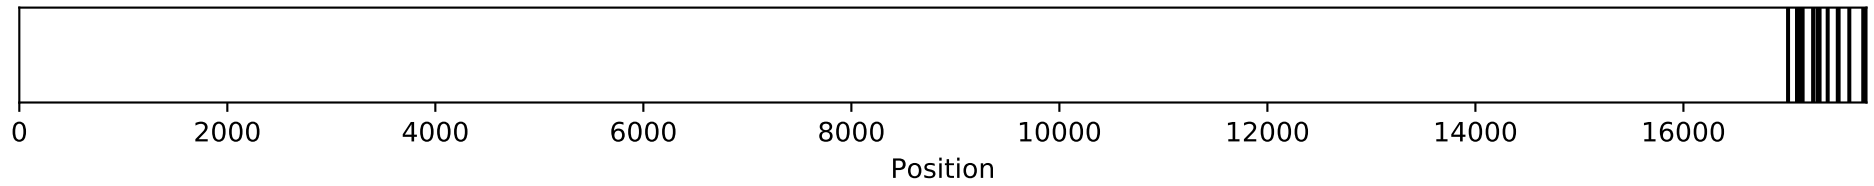

CR1 vs MM1  
Number of differences: 129

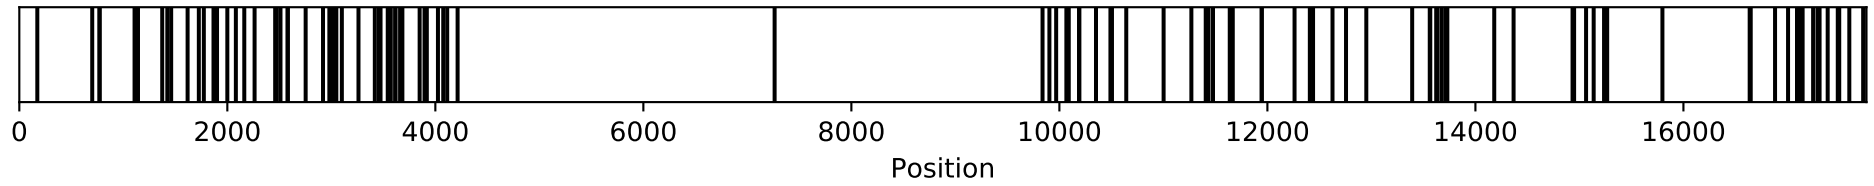

CR1 vs MM2  
Number of differences: 168

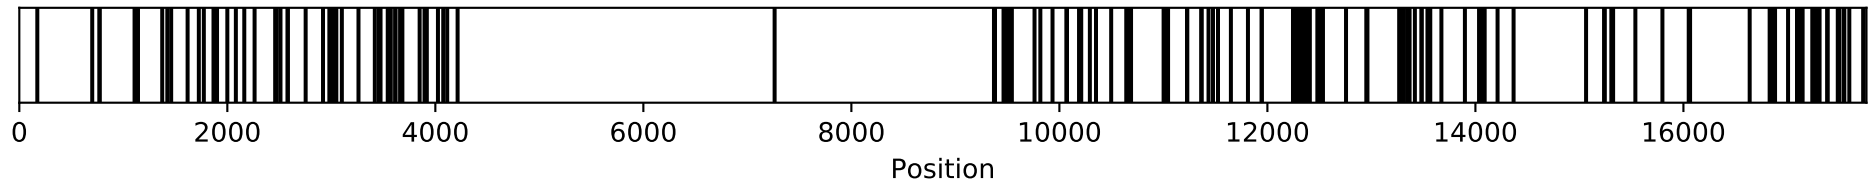

CR2 vs MM1  
Number of differences: 116

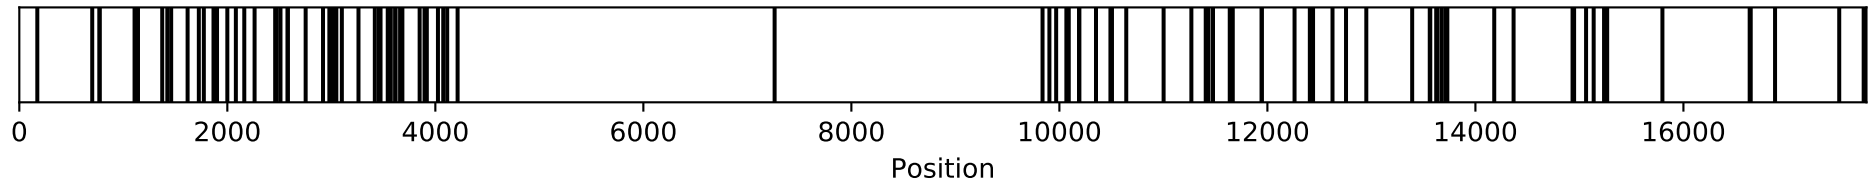

CR2 vs MM2  
Number of differences: 155

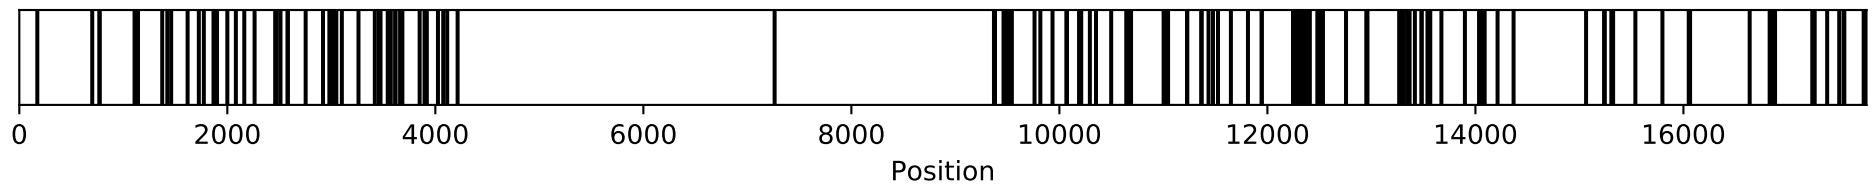

MM1 vs MM2  
Number of differences: 105

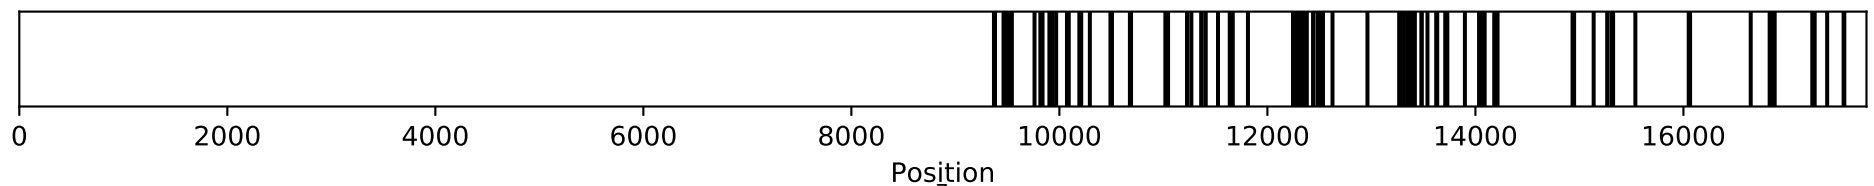



CR1 vs CR2  
Number of differences: 903

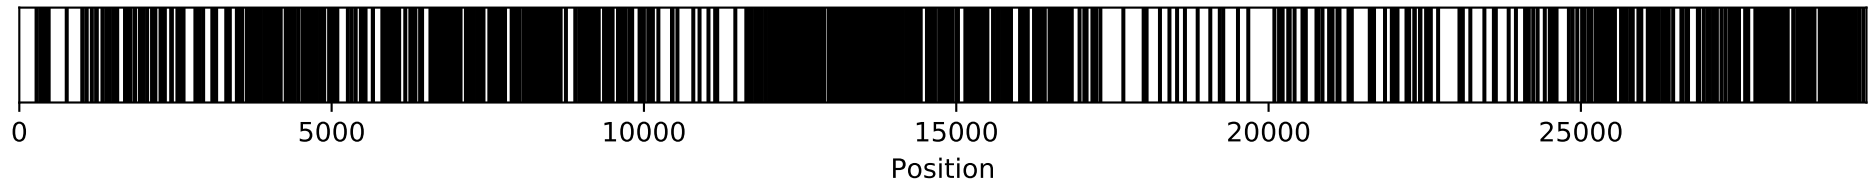

CR1 vs MM1  
Number of differences: 713

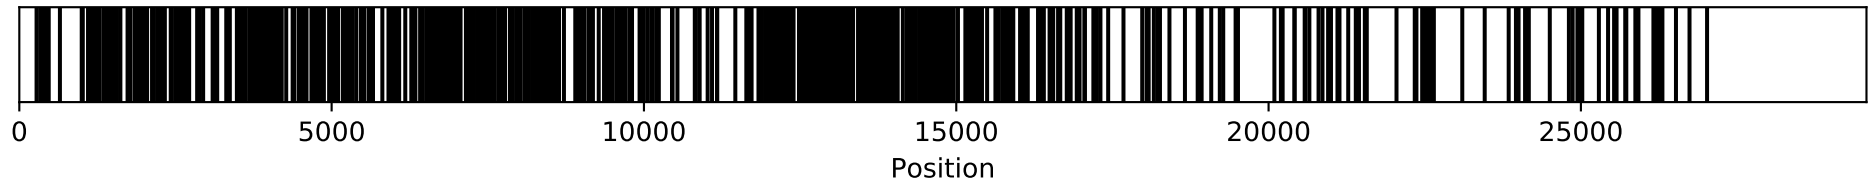

CR1 vs MM2  
Number of differences: 859

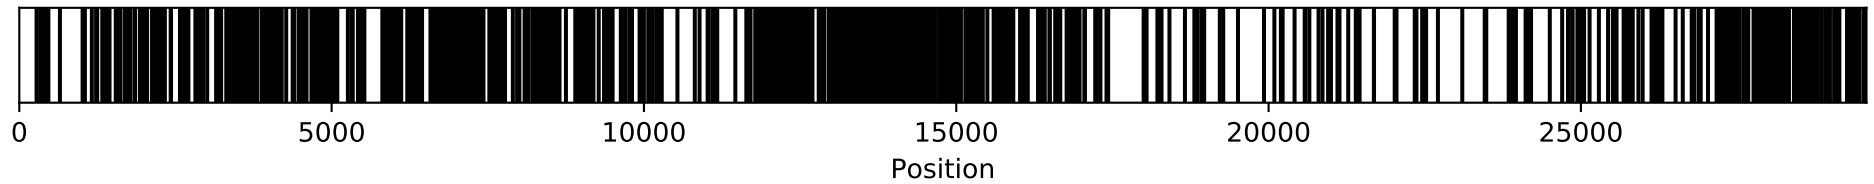

CR2 vs MM1  
Number of differences: 719

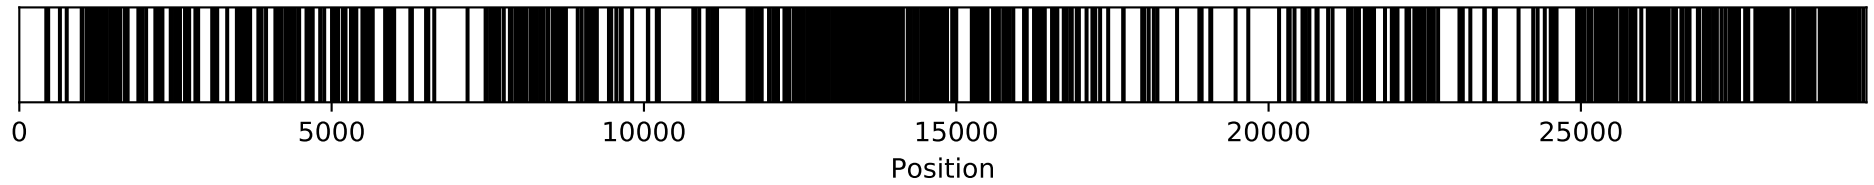

CR2 vs MM2  
Number of differences: 689

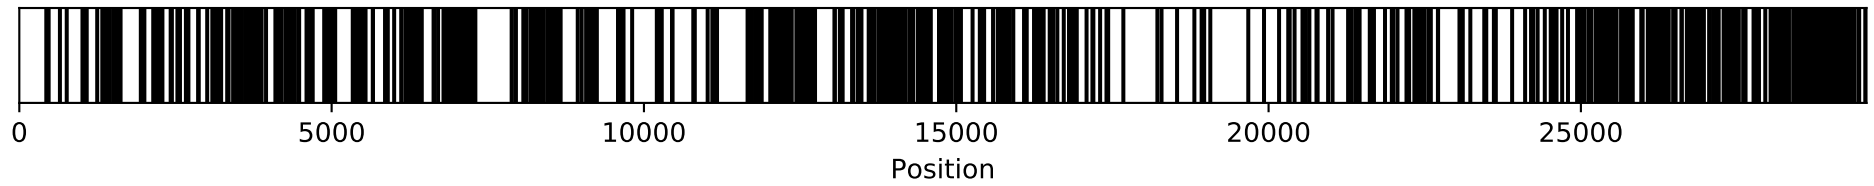

MM1 vs MM2  
Number of differences: 626

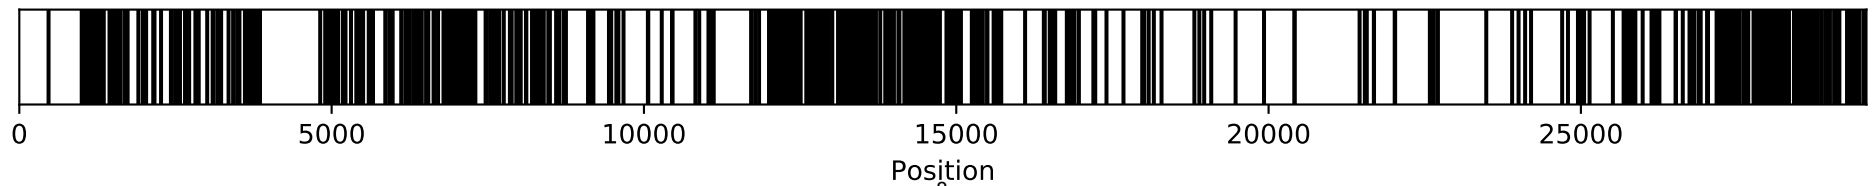

CR1 vs CR2  
Number of differences: 167

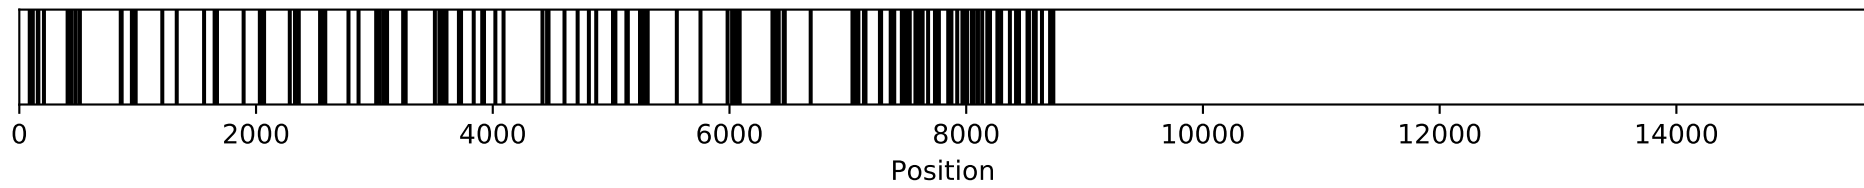

CR1 vs MM1  
Number of differences: 187

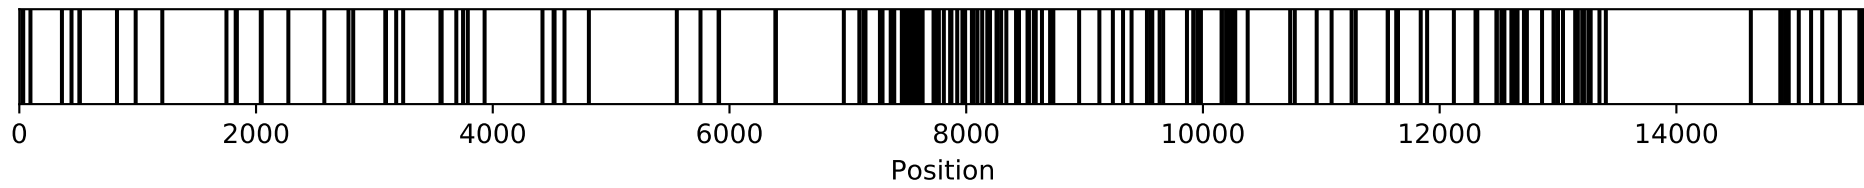

CR1 vs MM2  
Number of differences: 197

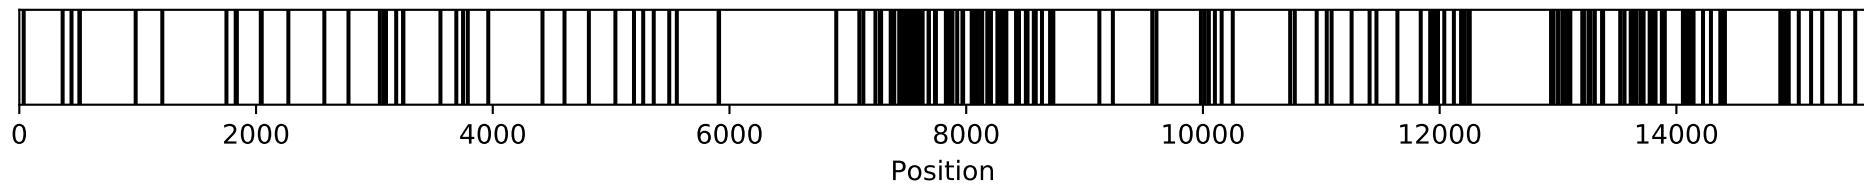

CR2 vs MM1  
Number of differences: 222

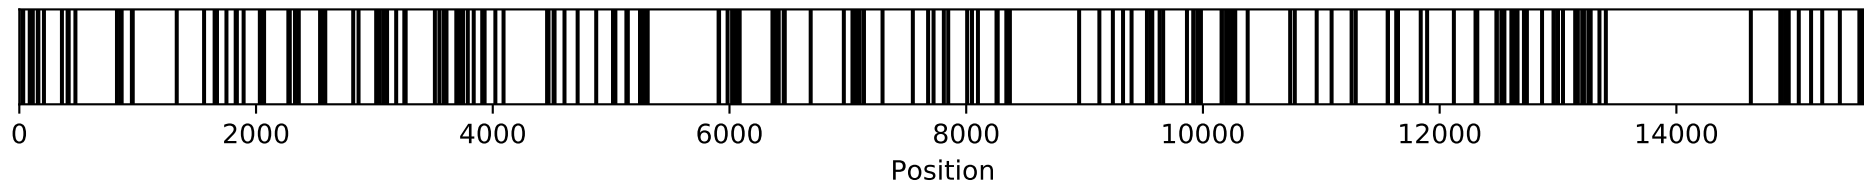

CR2 vs MM2  
Number of differences: 235

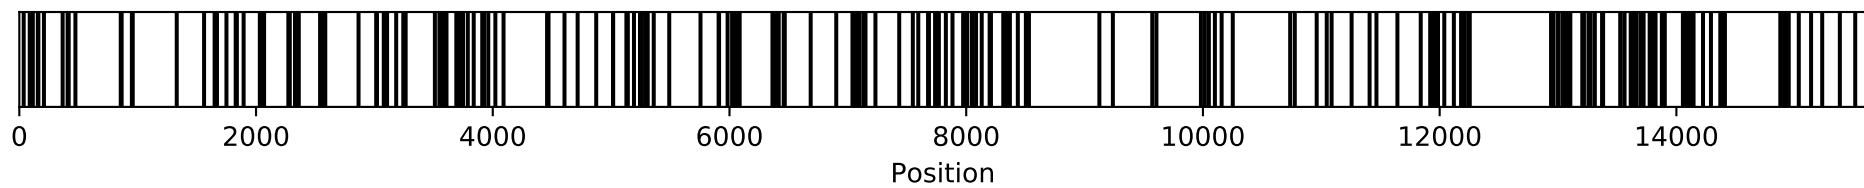

MM1 vs MM2  
Number of differences: 185

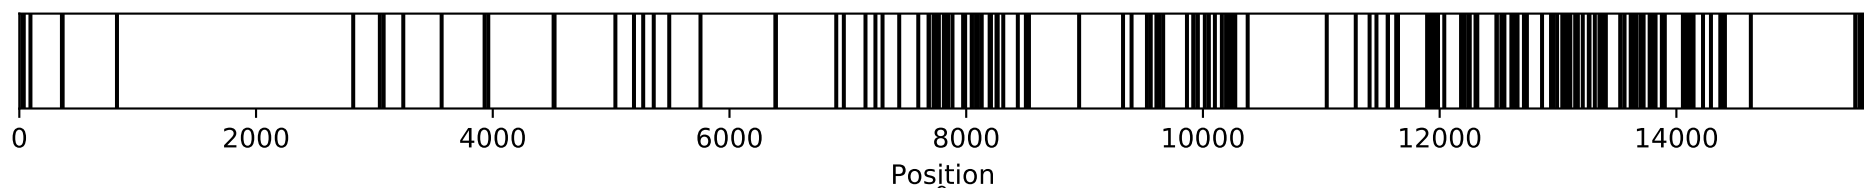

CR1 vs CR2  
Number of differences: 456

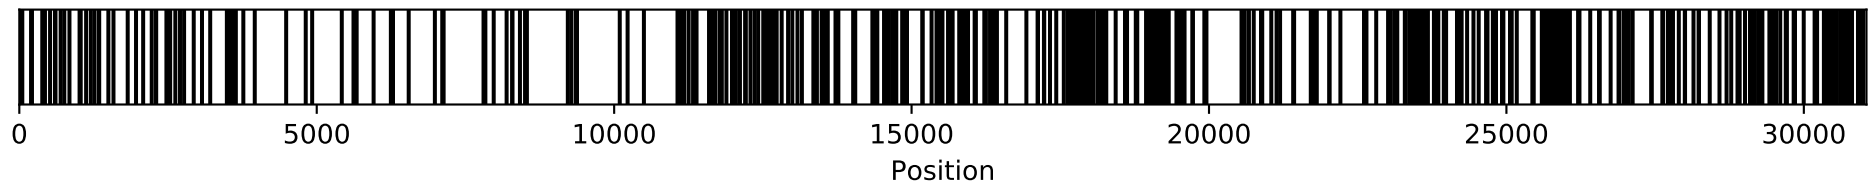

CR1 vs MM1  
Number of differences: 201

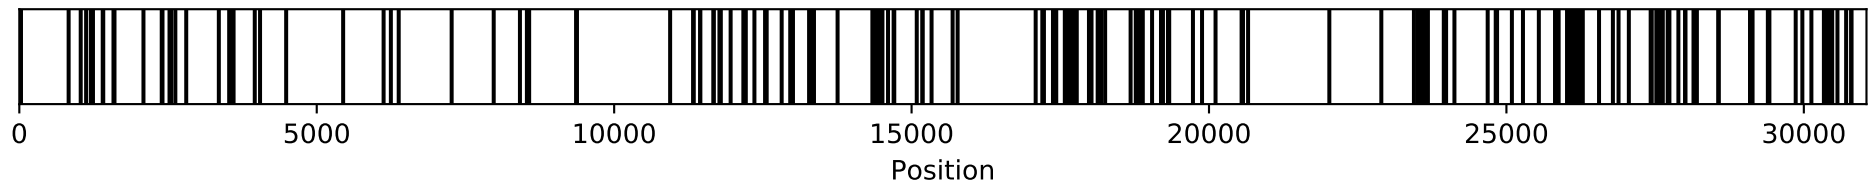

CR1 vs MM2  
Number of differences: 195

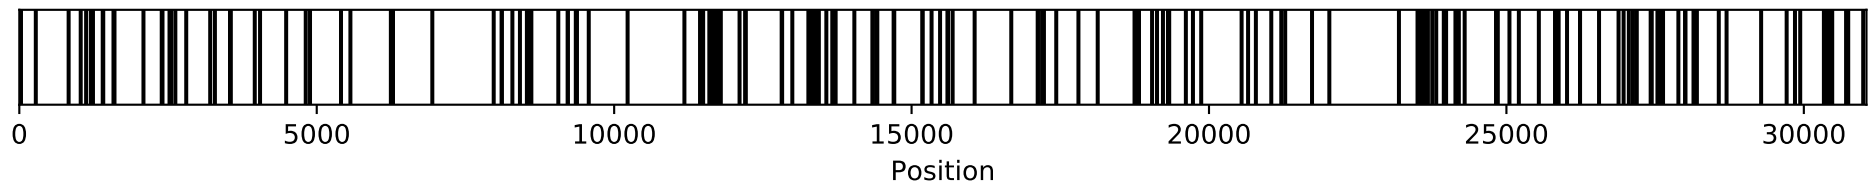

CR2 vs MM1  
Number of differences: 489

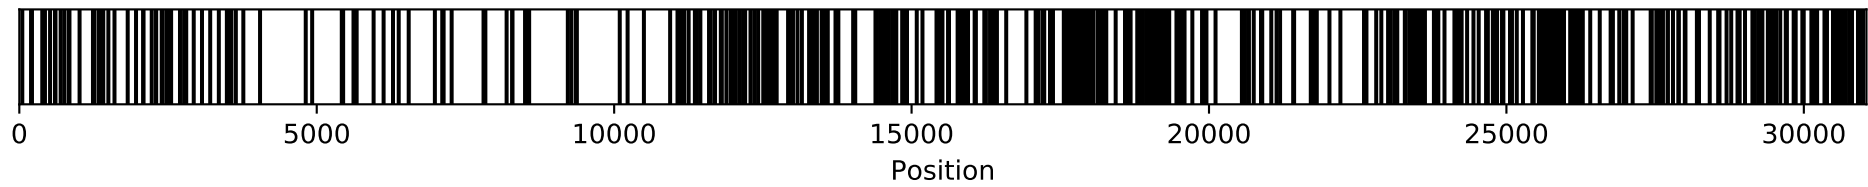

CR2 vs MM2  
Number of differences: 465

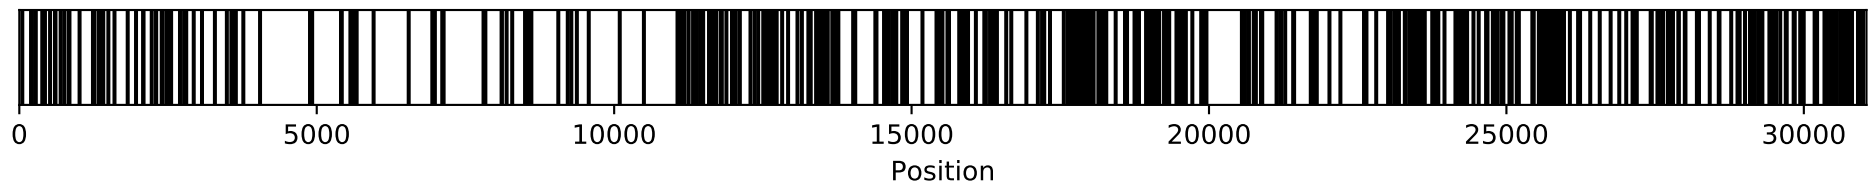

MM1 vs MM2  
Number of differences: 187

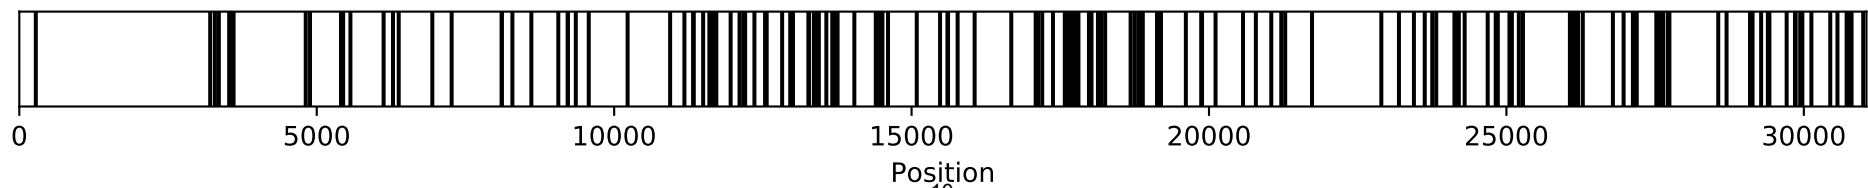

CR1 vs CR2  
Number of differences: 357

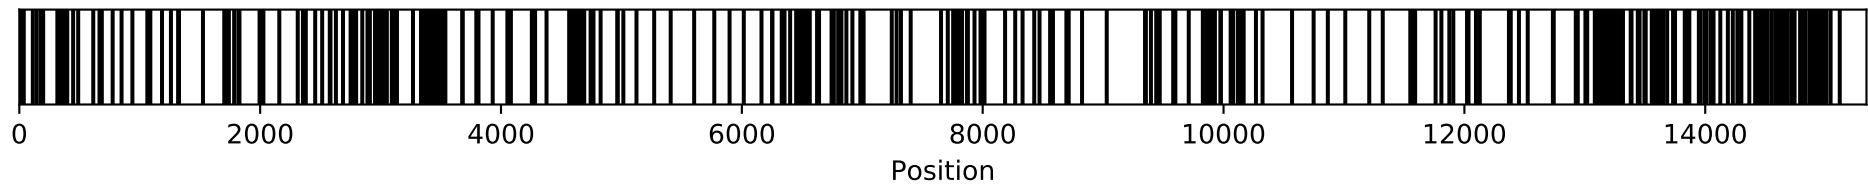

CR1 vs MM1  
Number of differences: 228

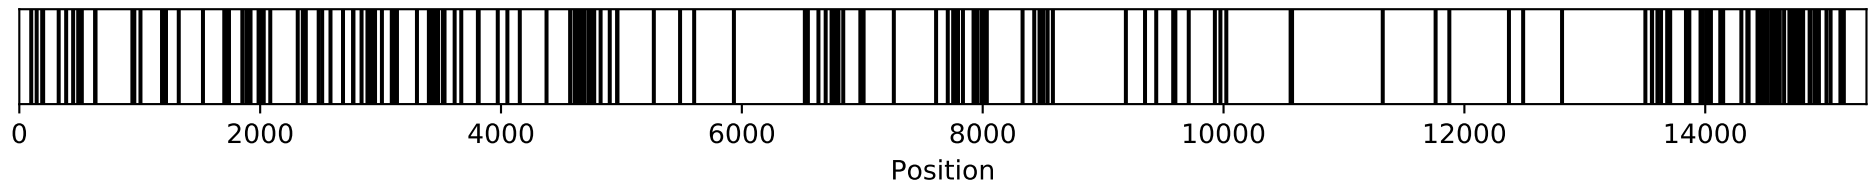

CR1 vs MM2  
Number of differences: 238

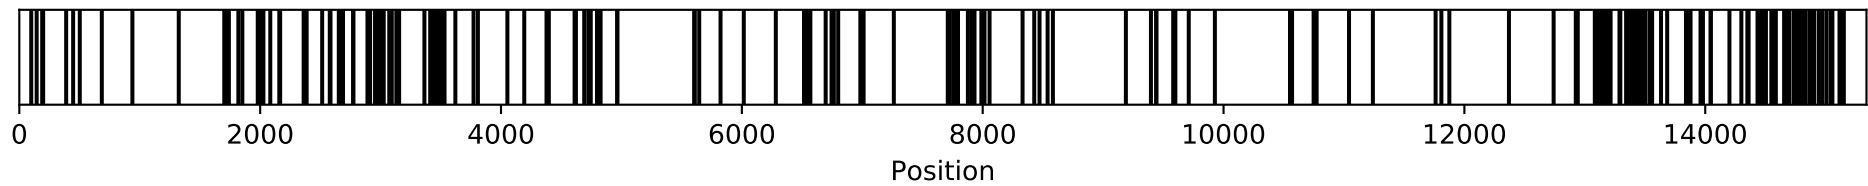

CR2 vs MM1  
Number of differences: 340

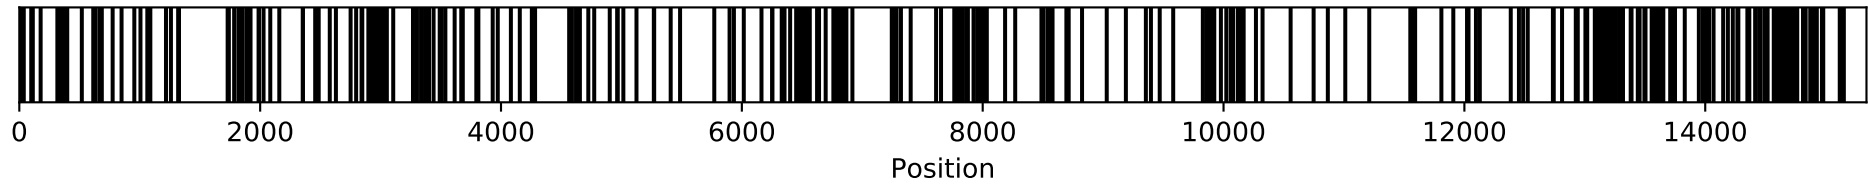

CR2 vs MM2  
Number of differences: 326

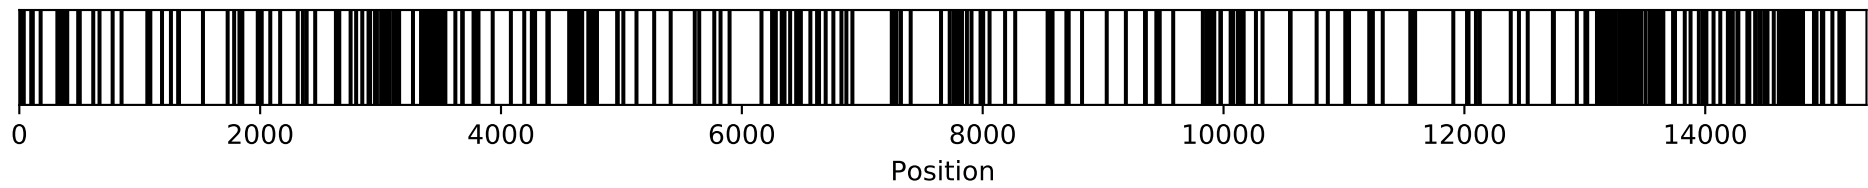

MM1 vs MM2  
Number of differences: 187

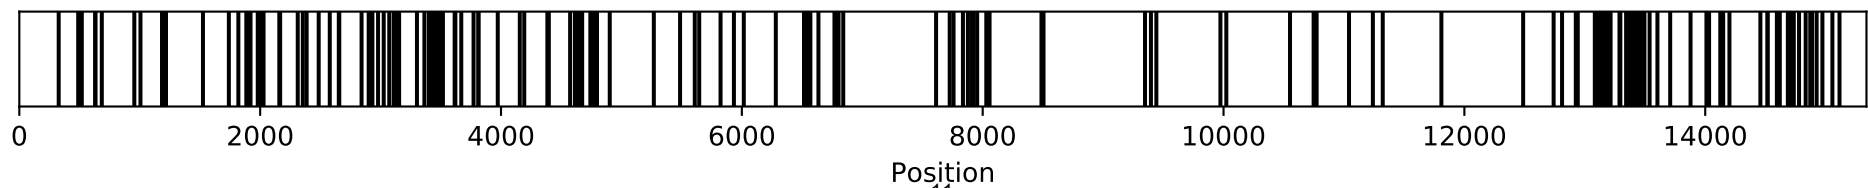

CR1 vs CR2  
Number of differences: 190

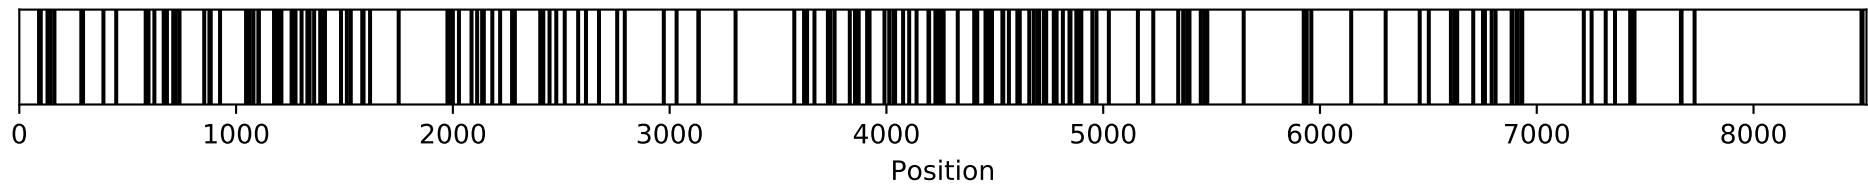

CR1 vs MM1  
Number of differences: 116

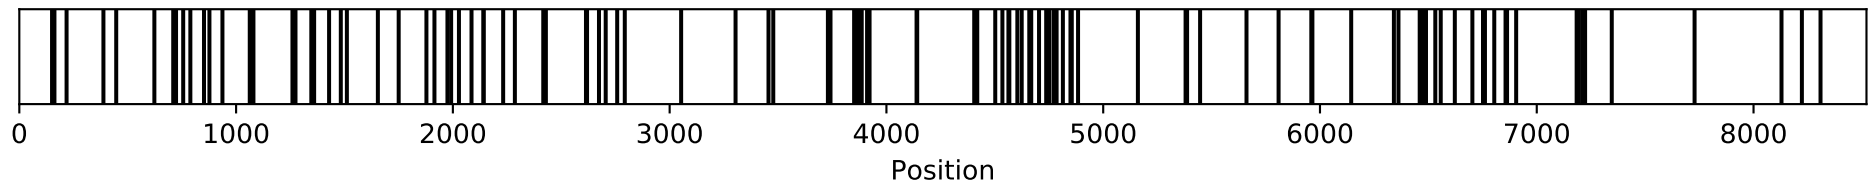

CR1 vs MM2  
Number of differences: 116

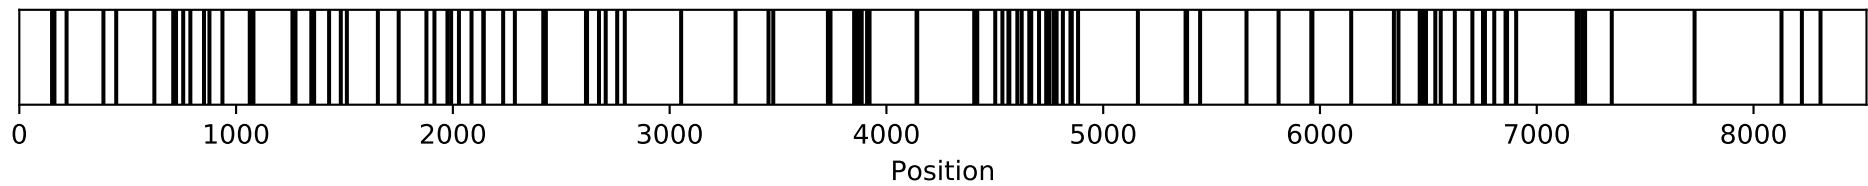

CR2 vs MM1  
Number of differences: 194

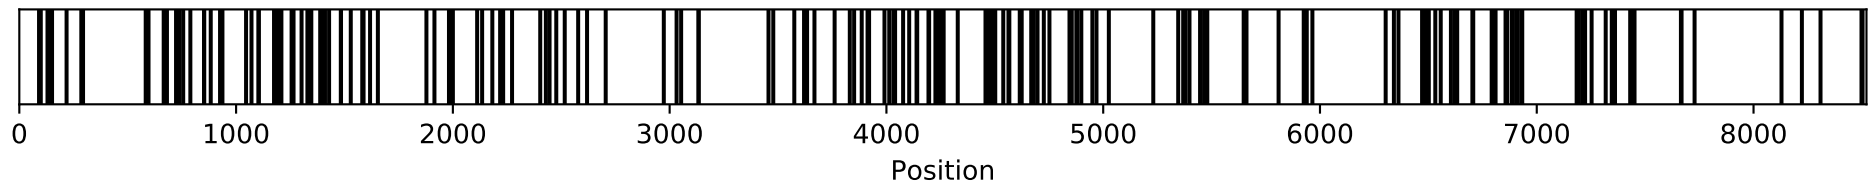

CR2 vs MM2  
Number of differences: 194

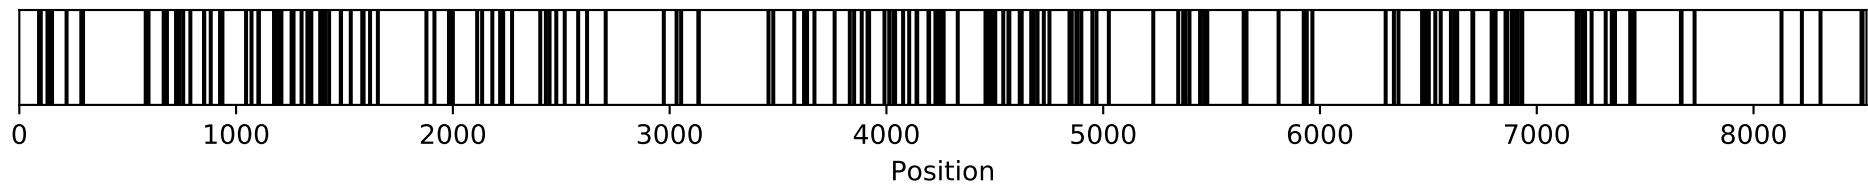

MM1 vs MM2  
Number of differences: 0

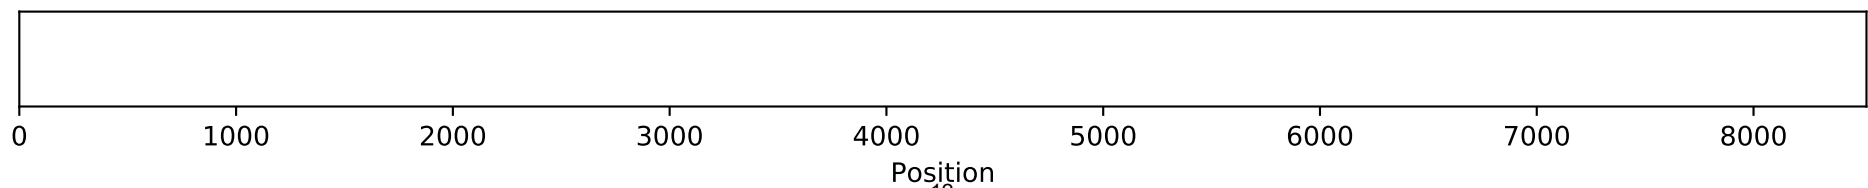

CR1 vs CR2  
Number of differences: 393

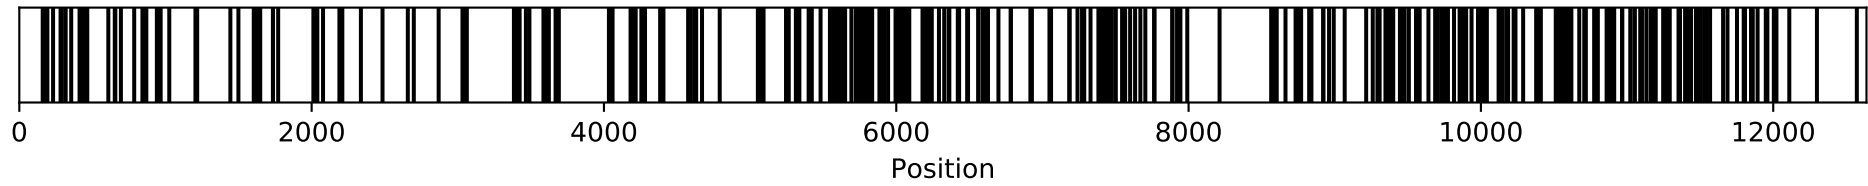

CR1 vs MM1  
Number of differences: 197

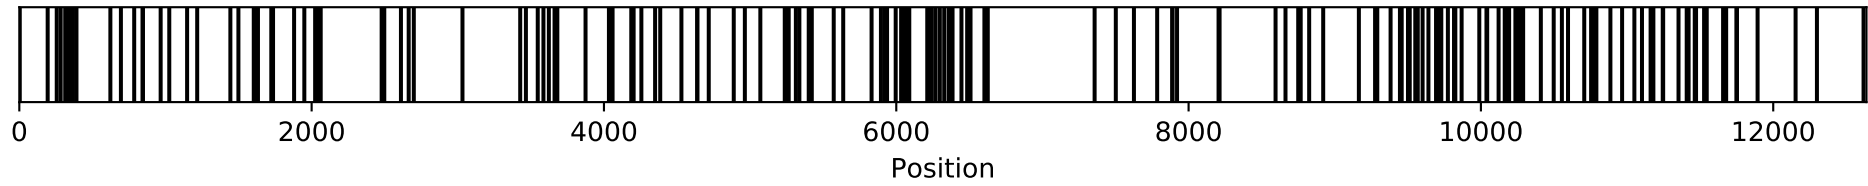

CR1 vs MM2  
Number of differences: 204

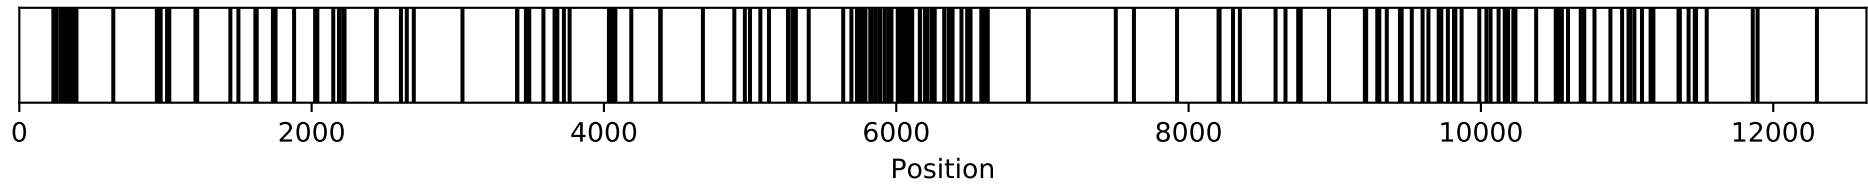

CR2 vs MM1  
Number of differences: 396

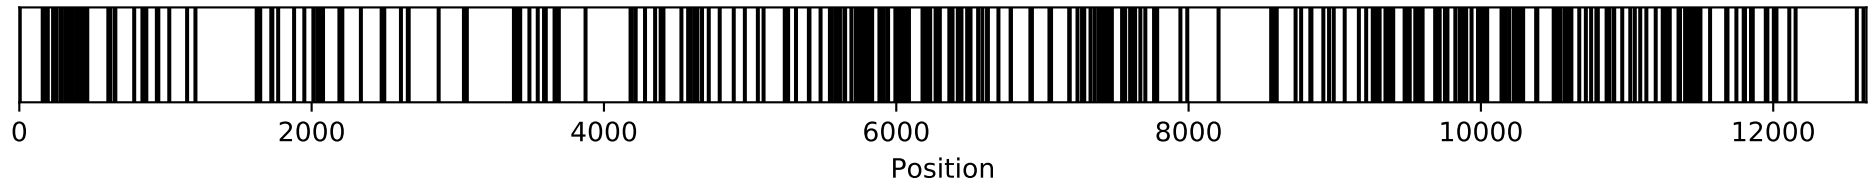

CR2 vs MM2  
Number of differences: 379

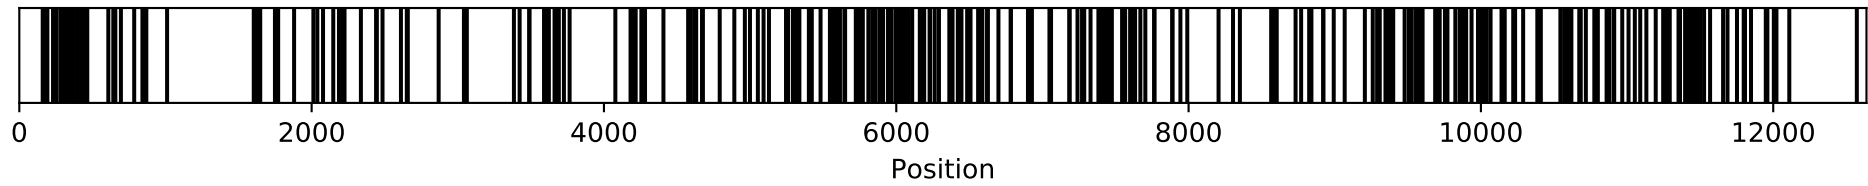

MM1 vs MM2  
Number of differences: 180

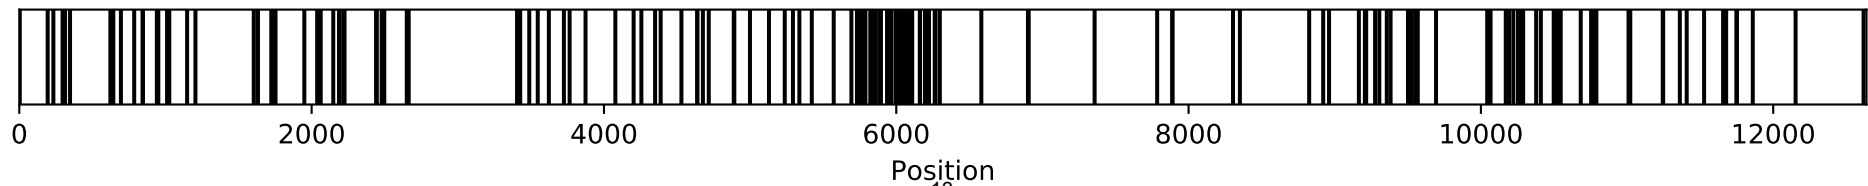

CR1 vs CR2  
Number of differences: 276

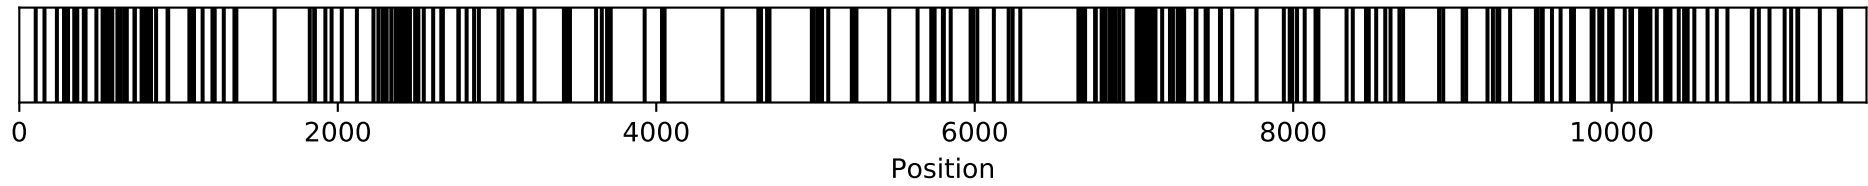

CR1 vs MM1  
Number of differences: 164

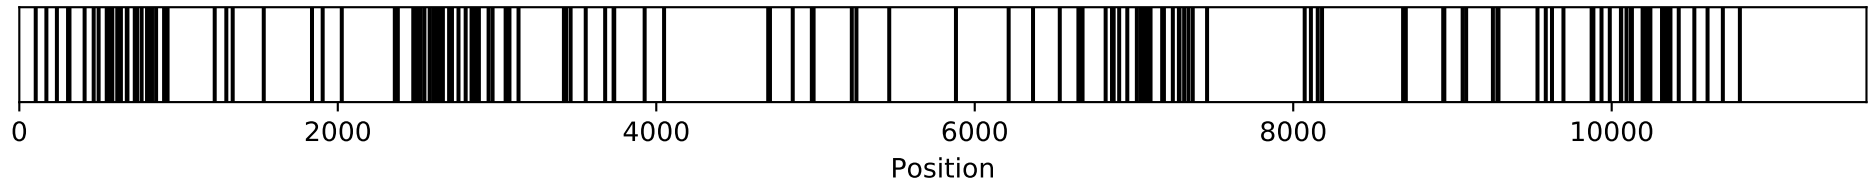

CR1 vs MM2  
Number of differences: 165

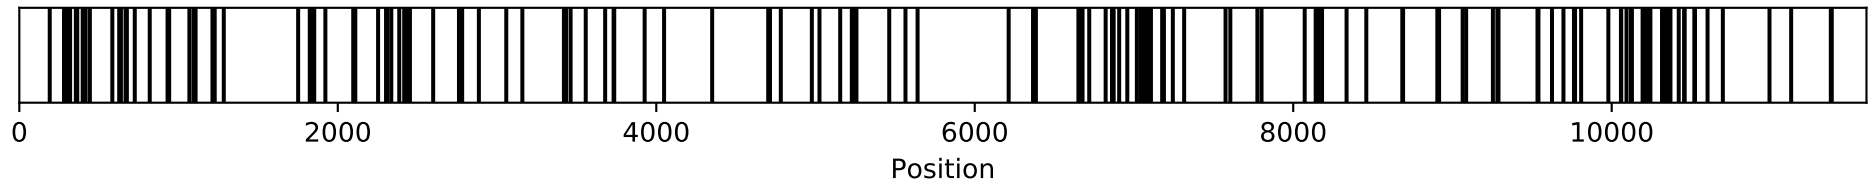

CR2 vs MM1  
Number of differences: 274

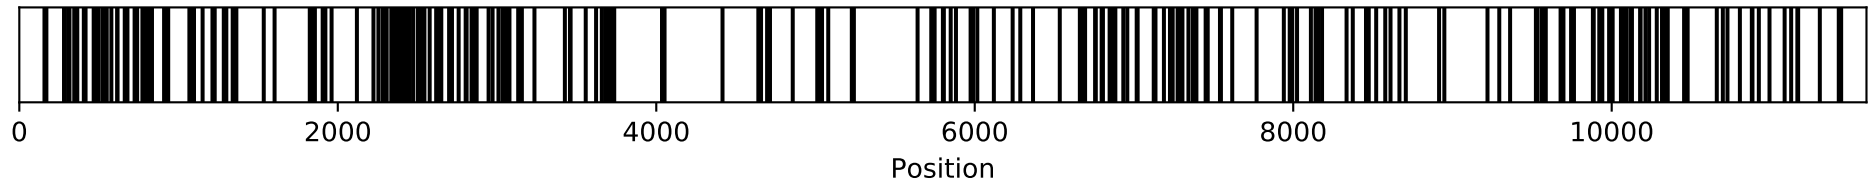

CR2 vs MM2  
Number of differences: 261

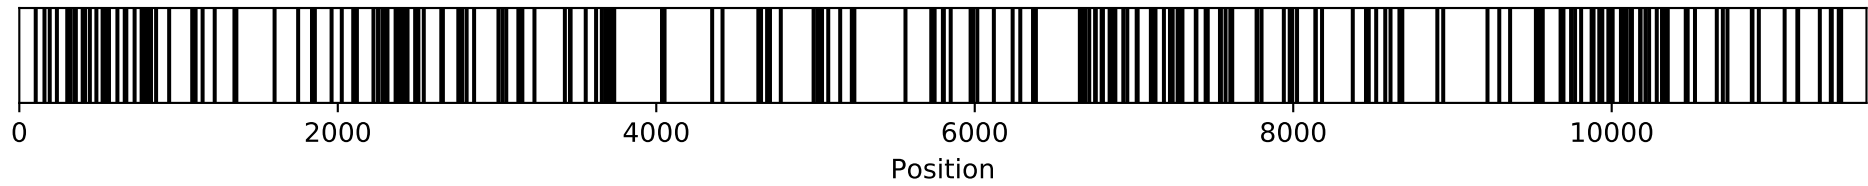

MM1 vs MM2  
Number of differences: 156

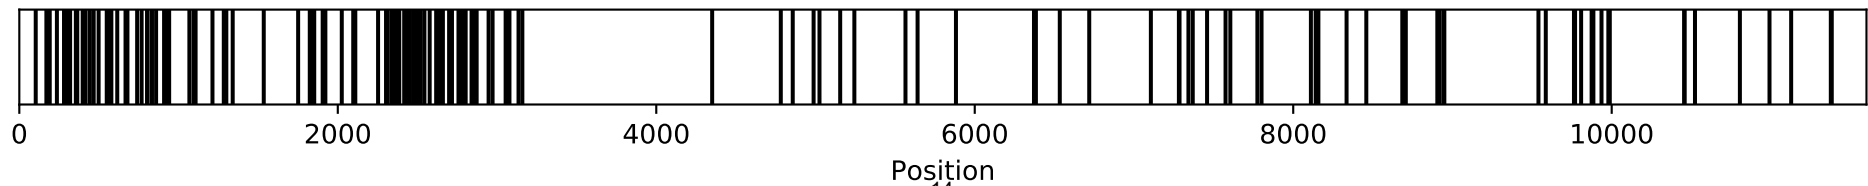

CR1 vs CR2  
Number of differences: 0

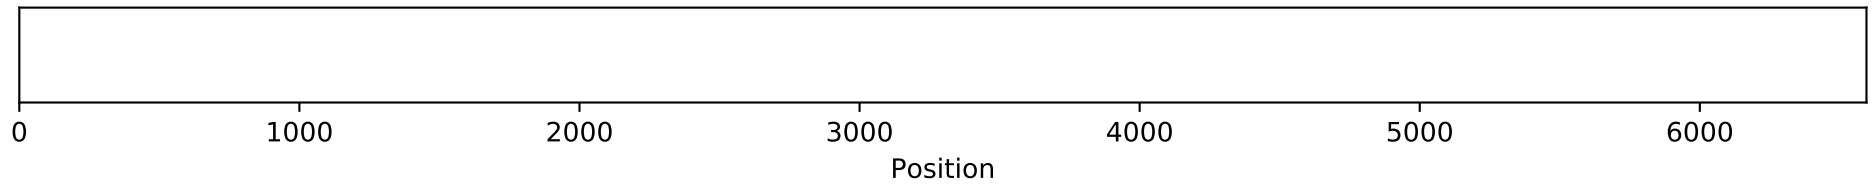

CR1 vs MM1  
Number of differences: 218

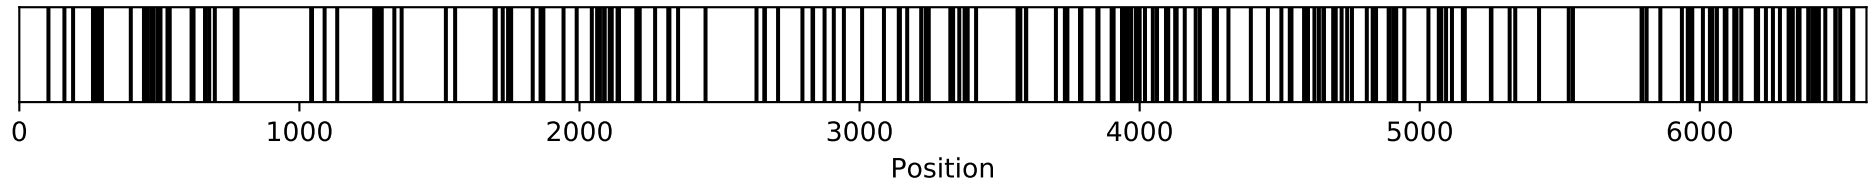

CR1 vs MM2  
Number of differences: 224

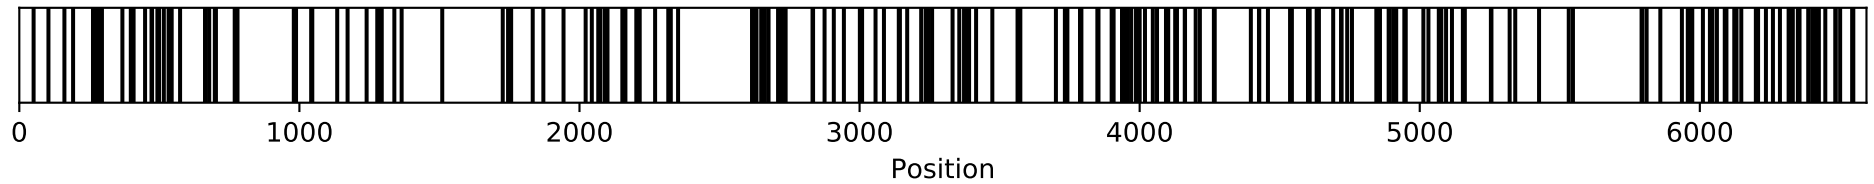

CR2 vs MM1  
Number of differences: 218

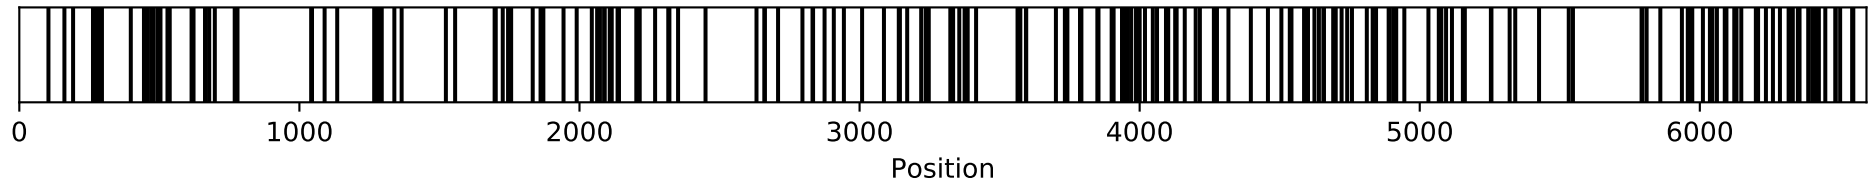

CR2 vs MM2  
Number of differences: 224

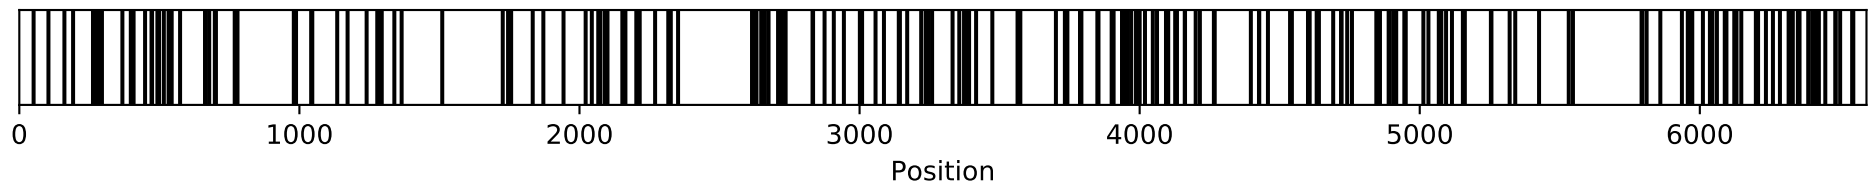

MM1 vs MM2  
Number of differences: 104

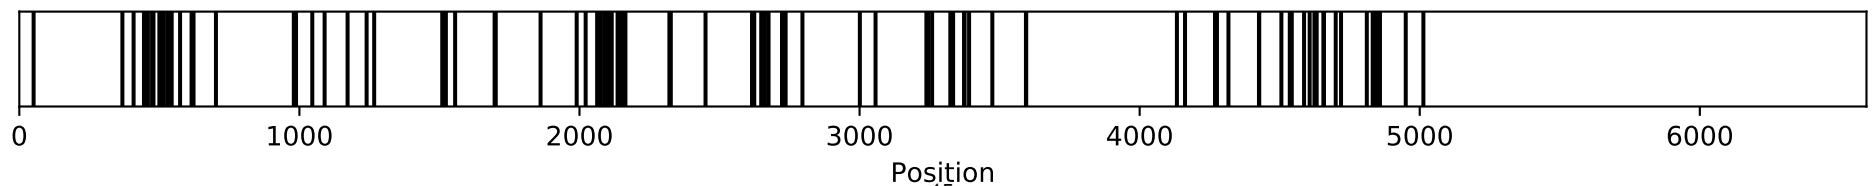



CR1 vs CR2  
Number of differences: 142

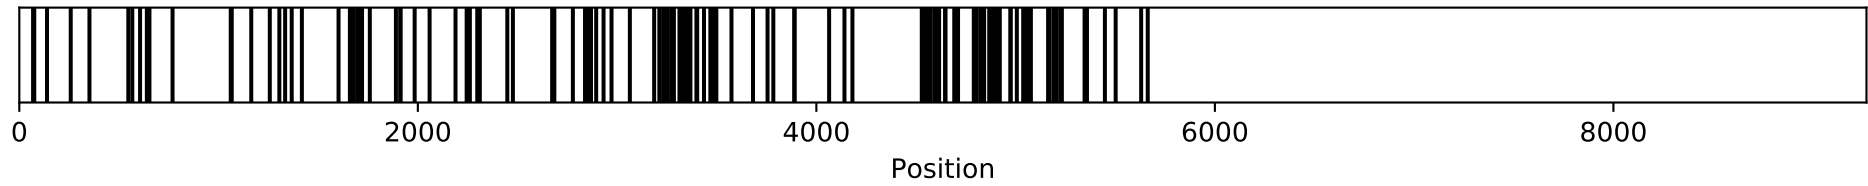

CR1 vs MM1  
Number of differences: 223

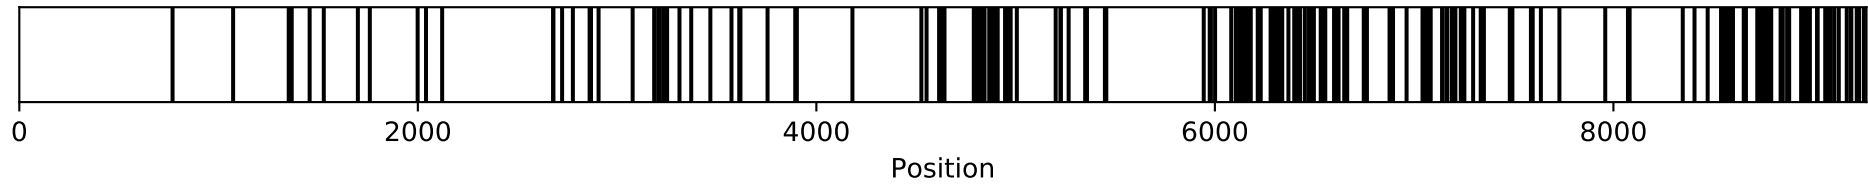

CR1 vs MM2  
Number of differences: 232

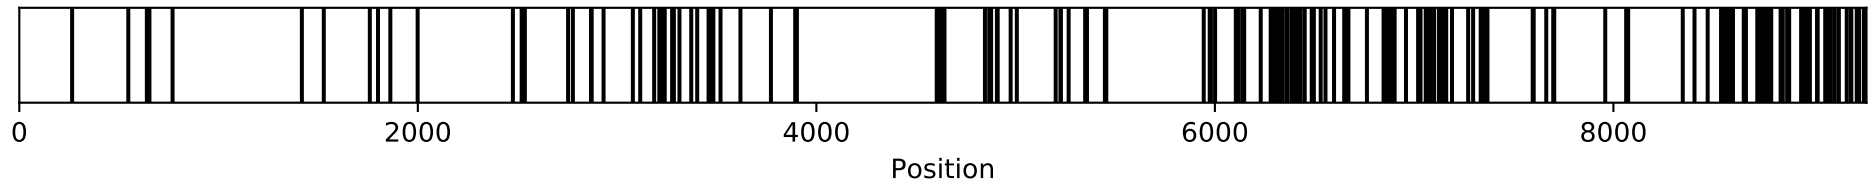

CR2 vs MM1  
Number of differences: 297

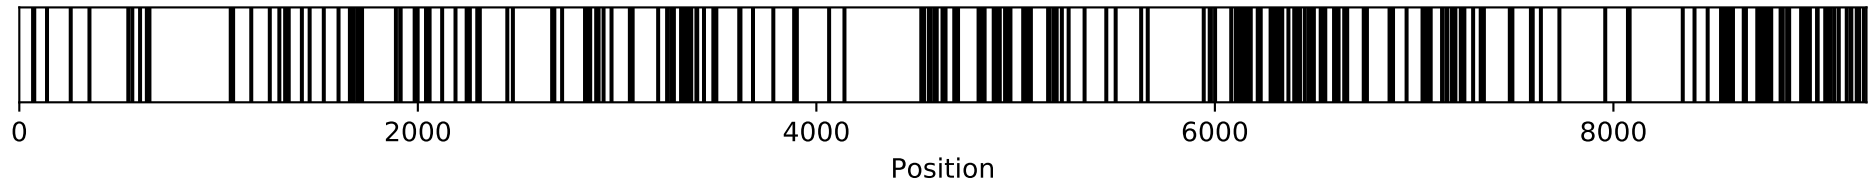

CR2 vs MM2  
Number of differences: 308

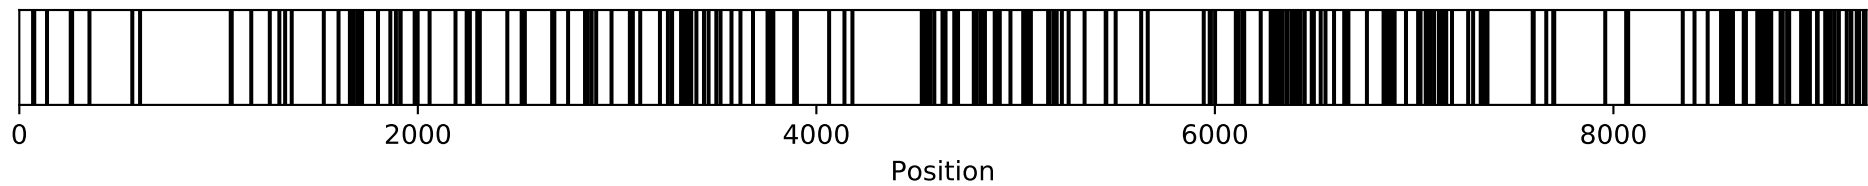

MM1 vs MM2  
Number of differences: 177

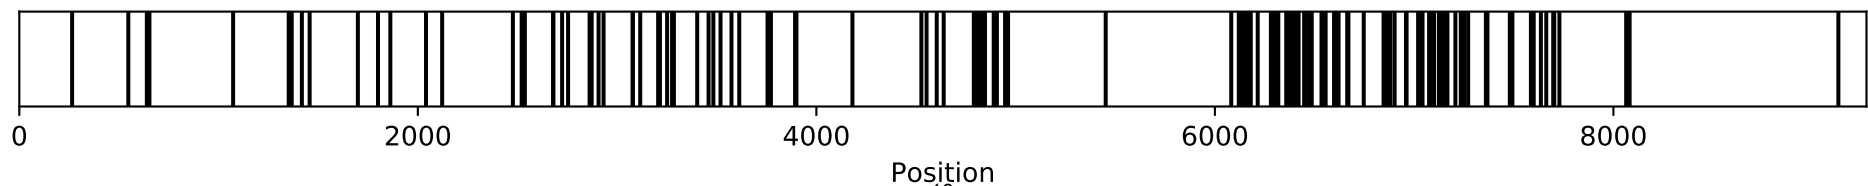

CR1 vs CR2  
Number of differences: 275

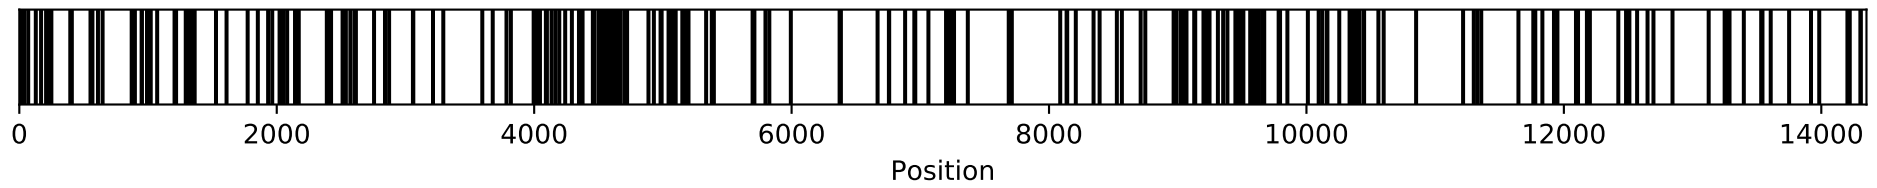

CR1 vs MM1  
Number of differences: 121

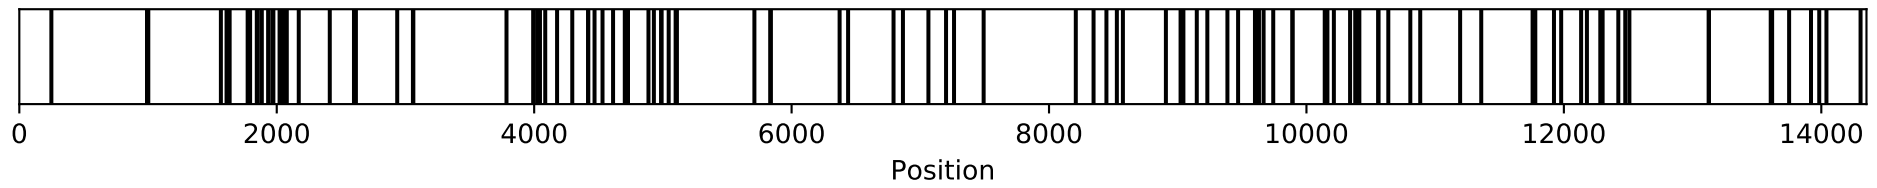

CR1 vs MM2  
Number of differences: 135

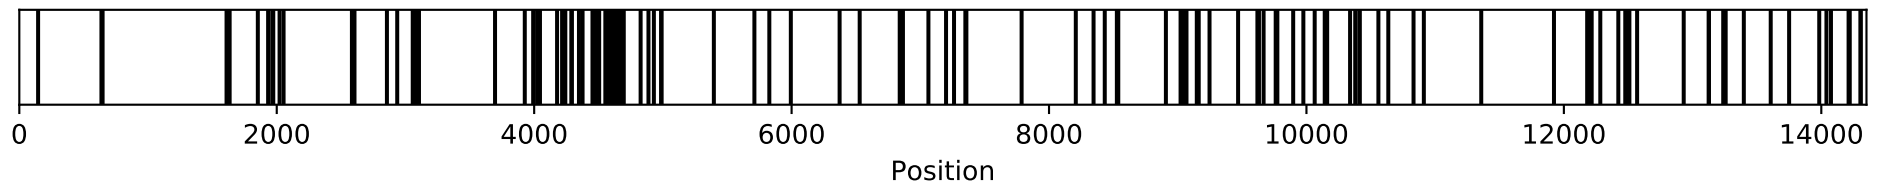

CR2 vs MM1  
Number of differences: 272

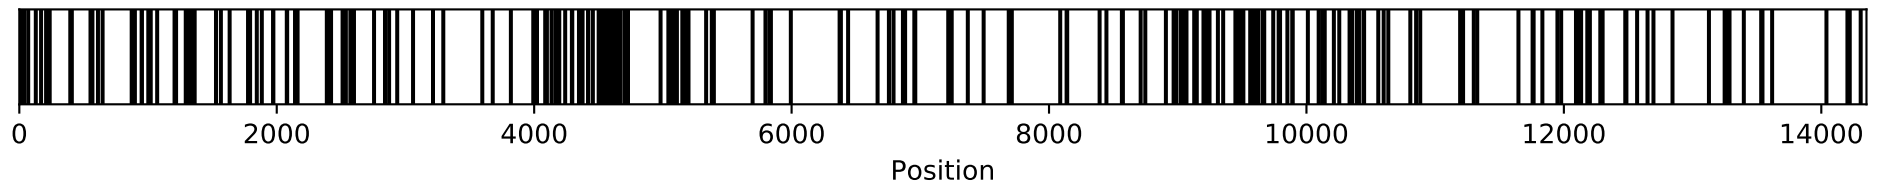

CR2 vs MM2  
Number of differences: 264

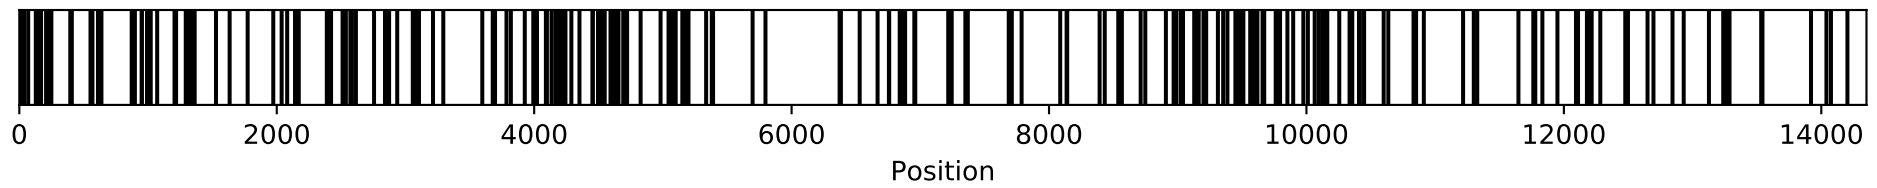

MM1 vs MM2  
Number of differences: 134

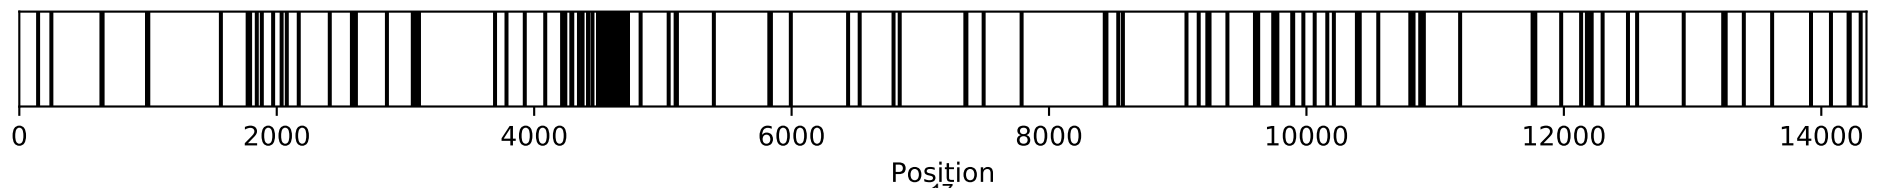

CR1 vs CR2  
Number of differences: 66

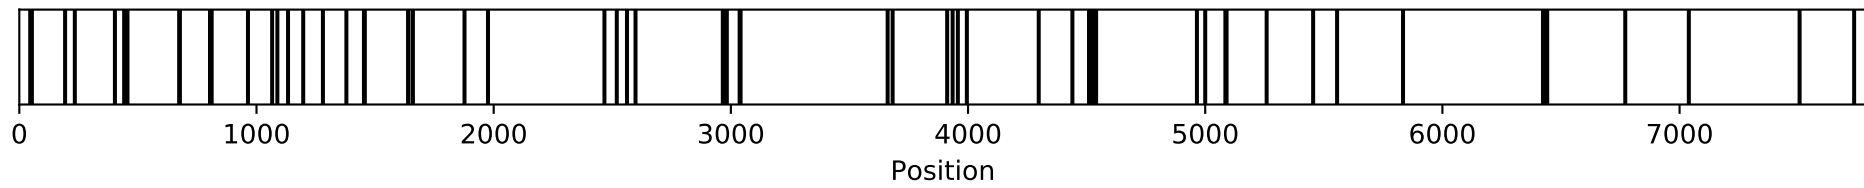

CR1 vs MM1  
Number of differences: 35

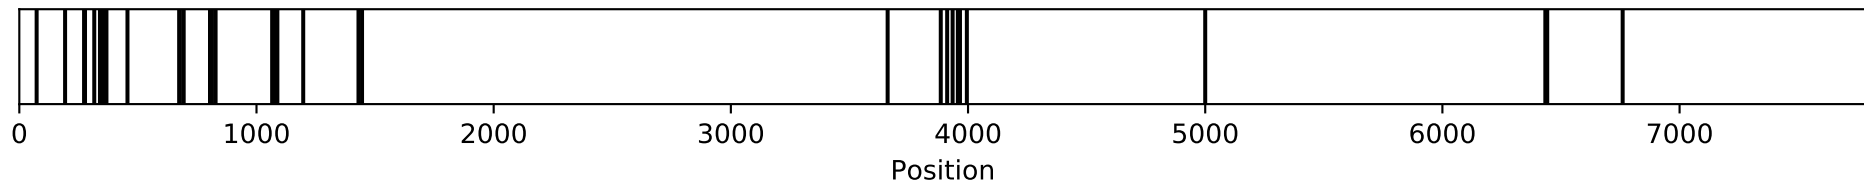

CR1 vs MM2  
Number of differences: 34

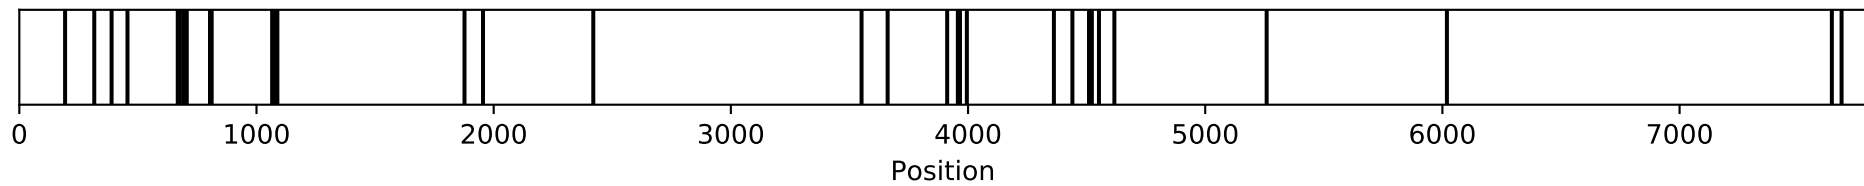

CR2 vs MM1  
Number of differences: 65

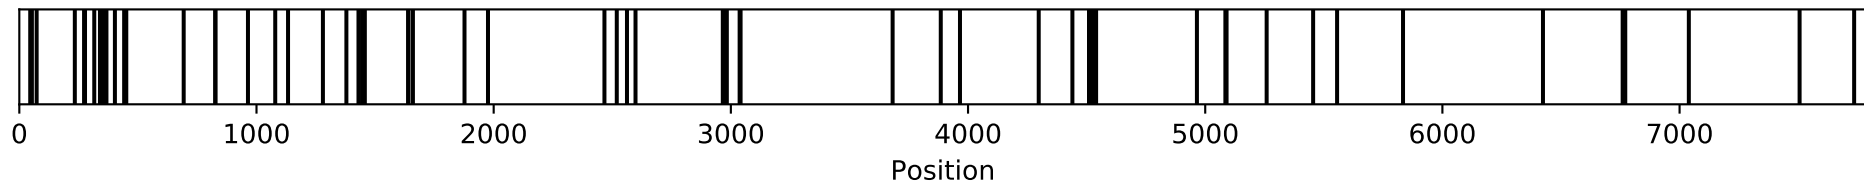

CR2 vs MM2  
Number of differences: 66

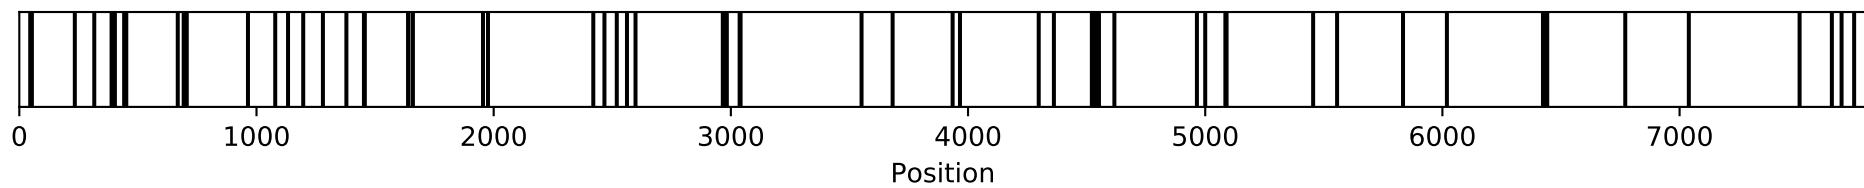

MM1 vs MM2  
Number of differences: 35

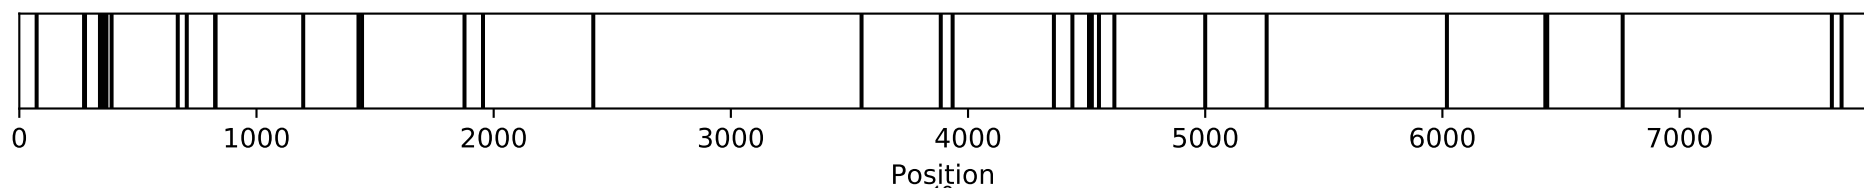

CR1 vs CR2  
Number of differences: 204

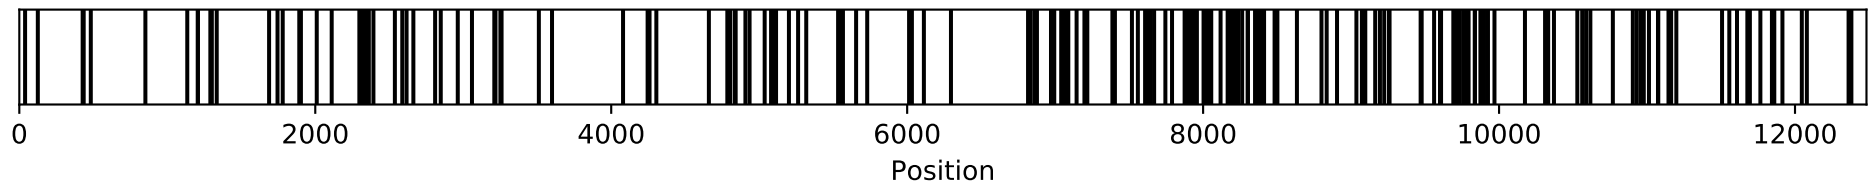

CR1 vs MM1  
Number of differences: 114

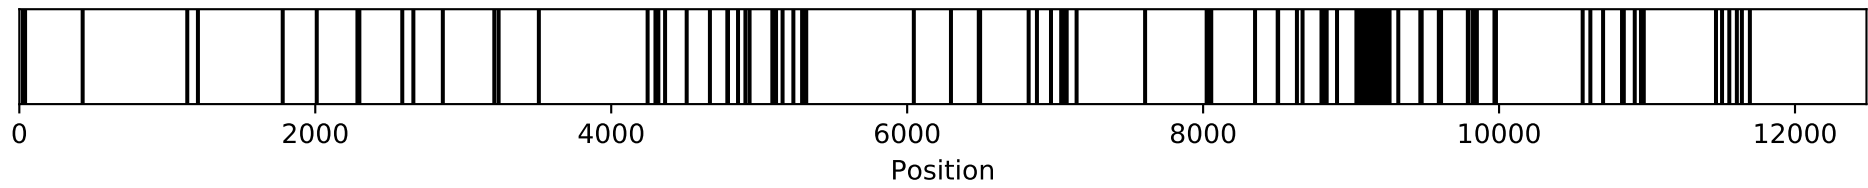

CR1 vs MM2  
Number of differences: 119

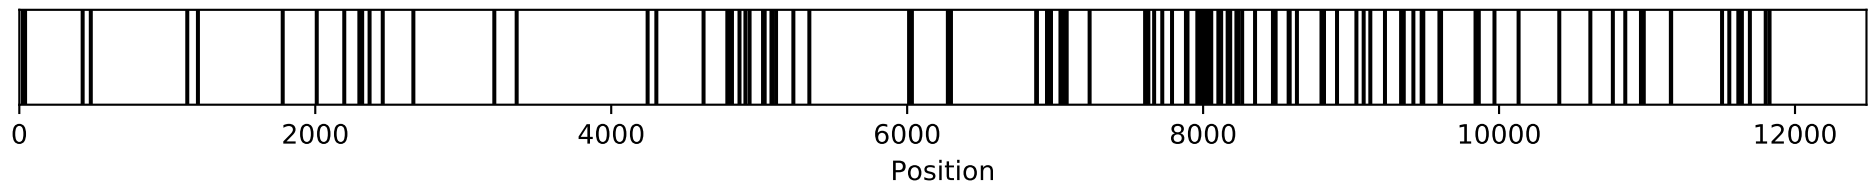

CR2 vs MM1  
Number of differences: 204

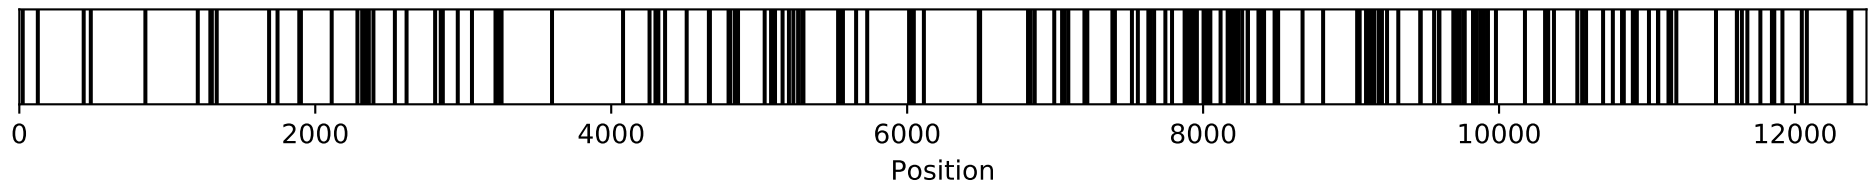

CR2 vs MM2  
Number of differences: 192

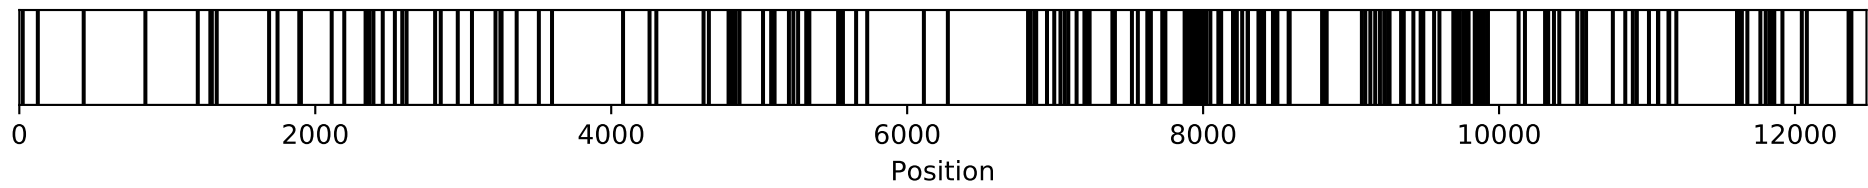

MM1 vs MM2  
Number of differences: 136

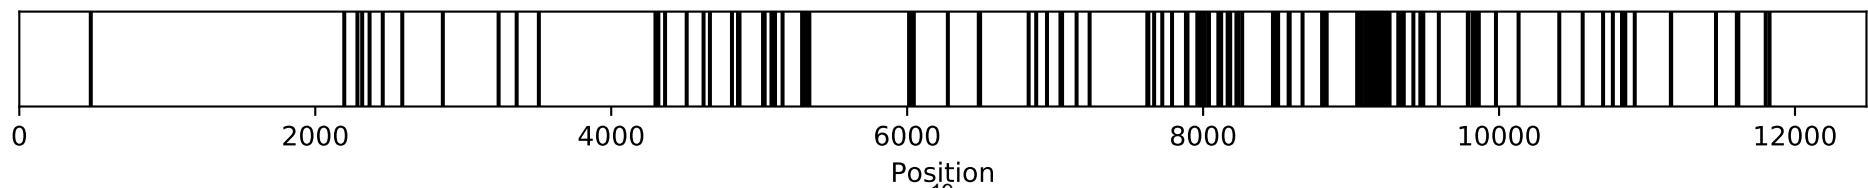

CR1 vs CR2  
Number of differences: 273

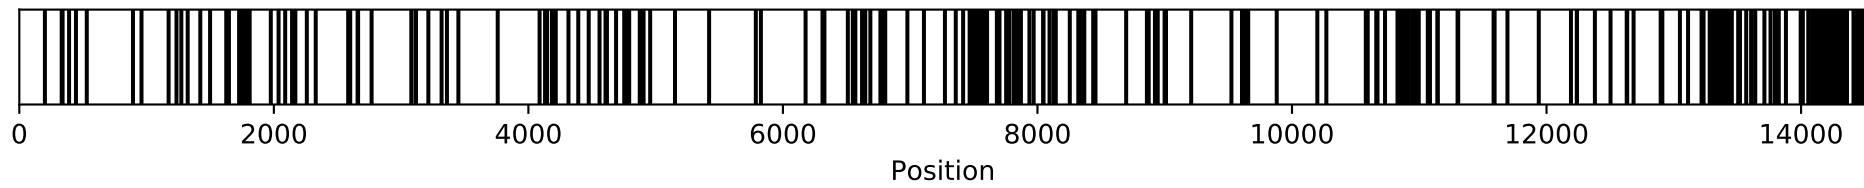

CR1 vs MM1  
Number of differences: 110

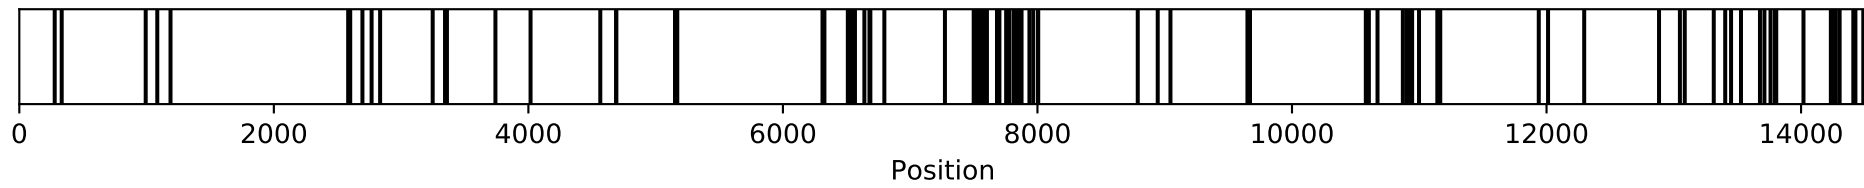

CR1 vs MM2  
Number of differences: 140

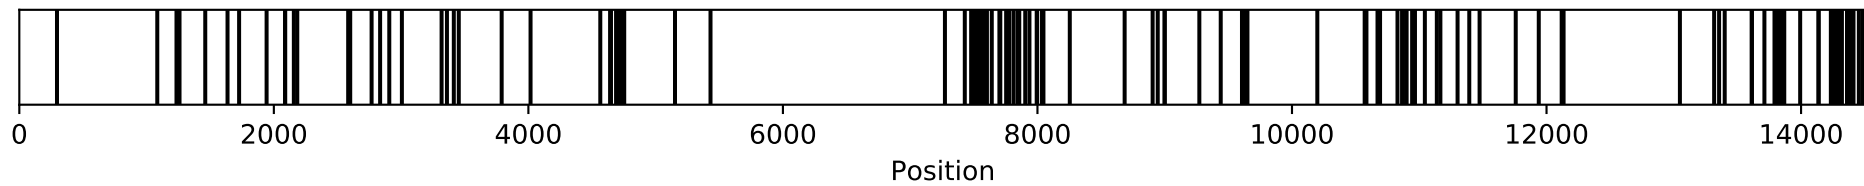

CR2 vs MM1  
Number of differences: 258

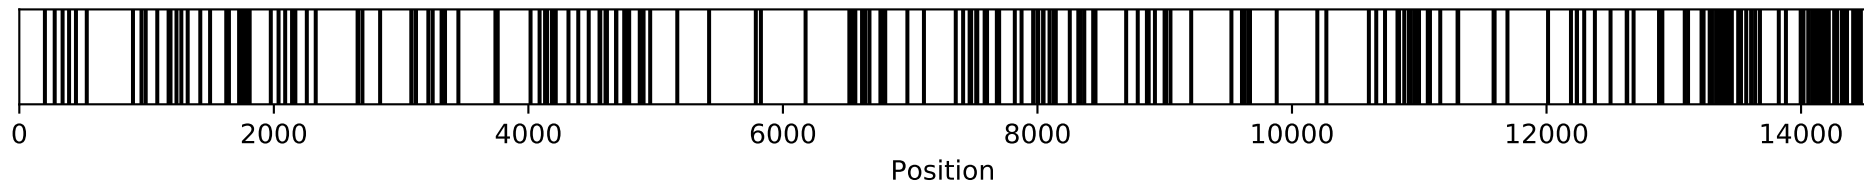

CR2 vs MM2  
Number of differences: 286

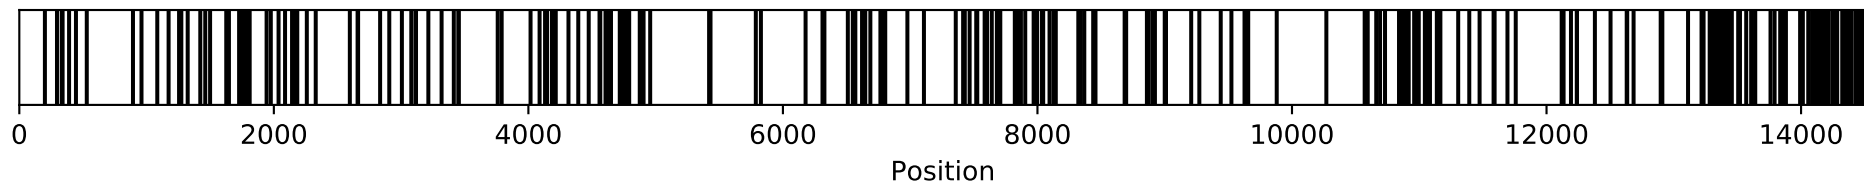

MM1 vs MM2  
Number of differences: 150

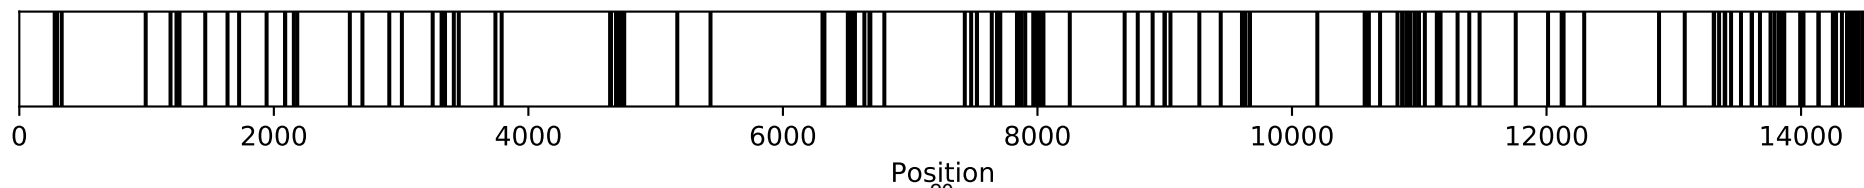

CR1 vs CR2  
Number of differences: 254

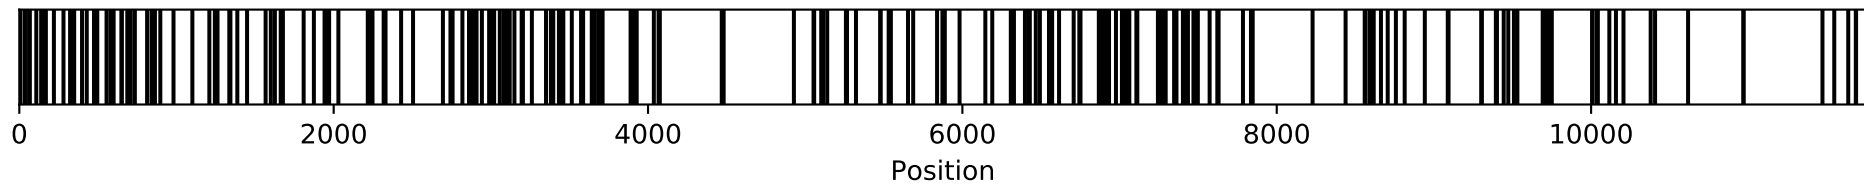

CR1 vs MM1  
Number of differences: 0

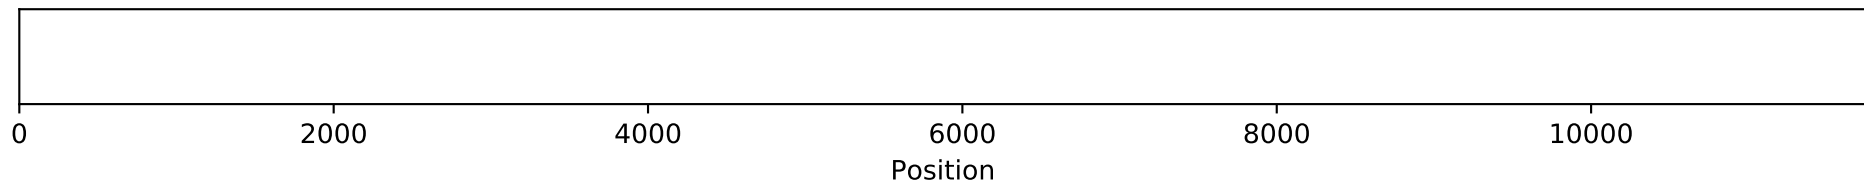

CR1 vs MM2  
Number of differences: 136

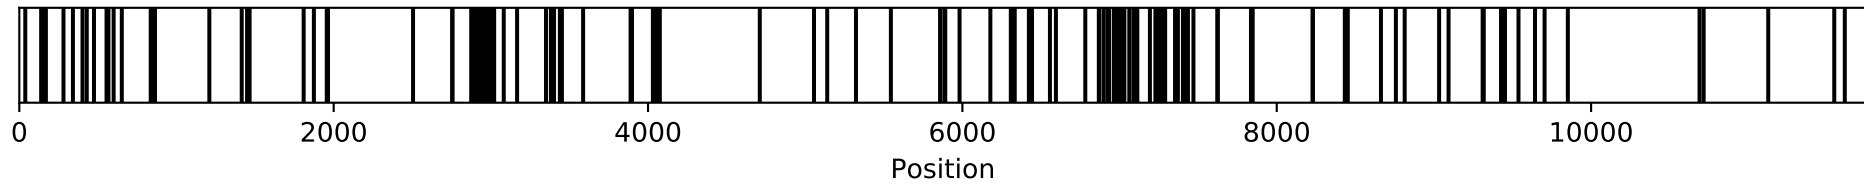

CR2 vs MM1  
Number of differences: 254

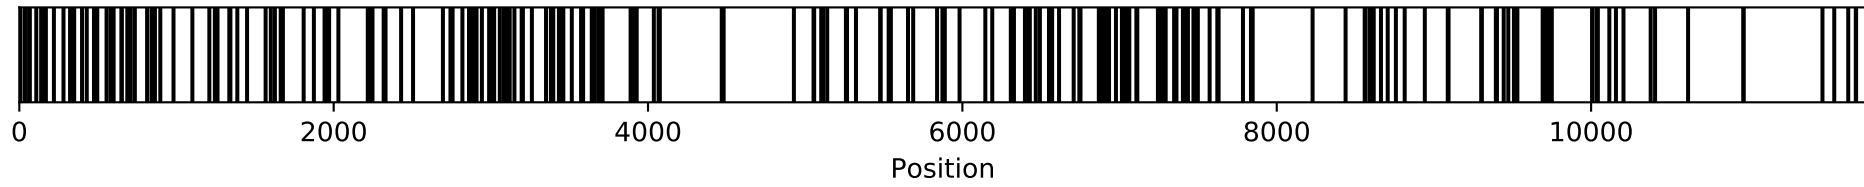

CR2 vs MM2  
Number of differences: 237

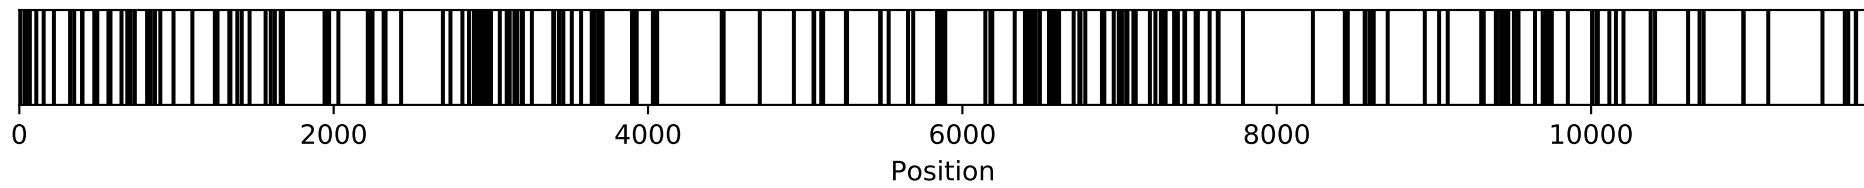

MM1 vs MM2  
Number of differences: 136

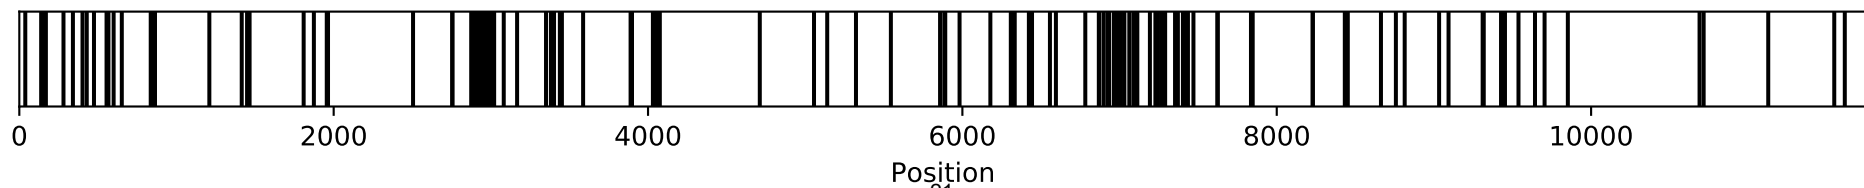

CR1 vs CR2  
Number of differences: 221

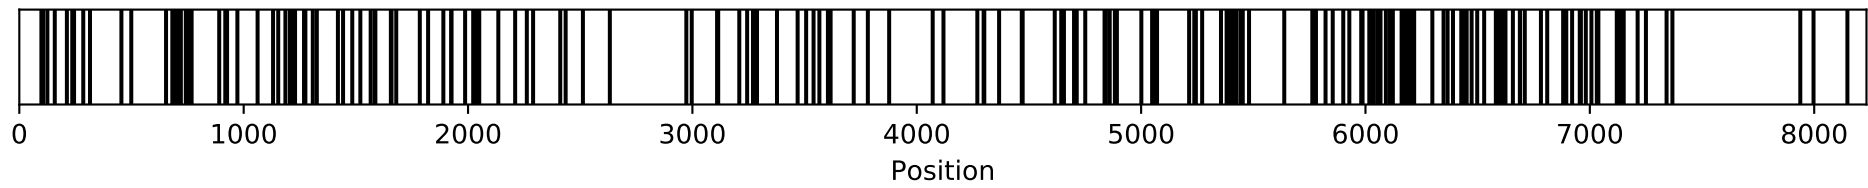

CR1 vs MM1  
Number of differences: 98

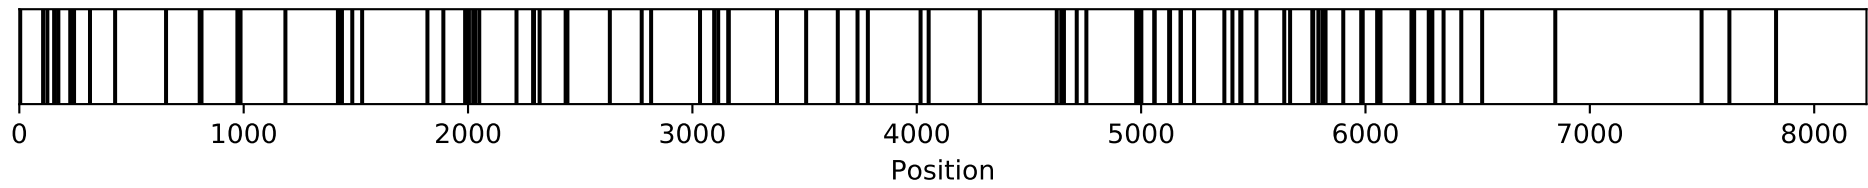

CR1 vs MM2  
Number of differences: 123

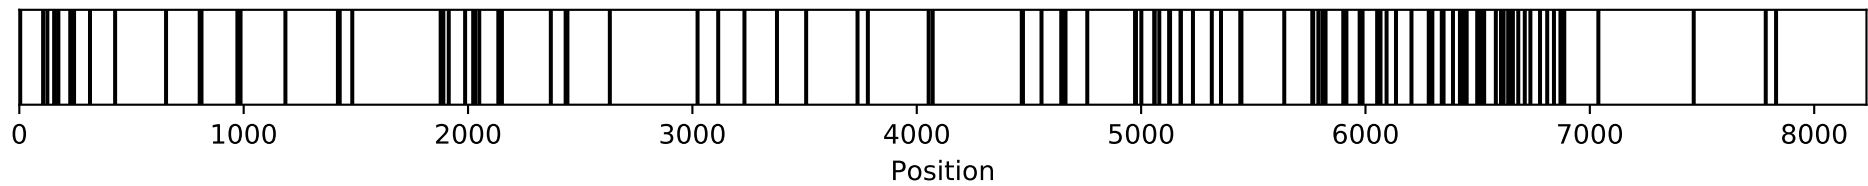

CR2 vs MM1  
Number of differences: 232

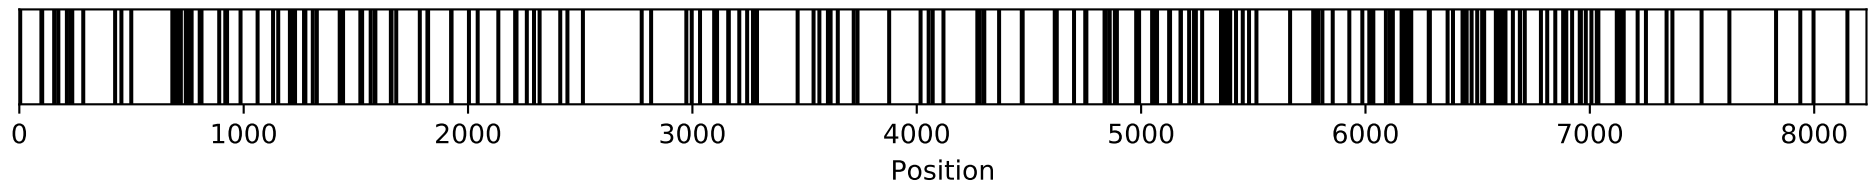

CR2 vs MM2  
Number of differences: 220

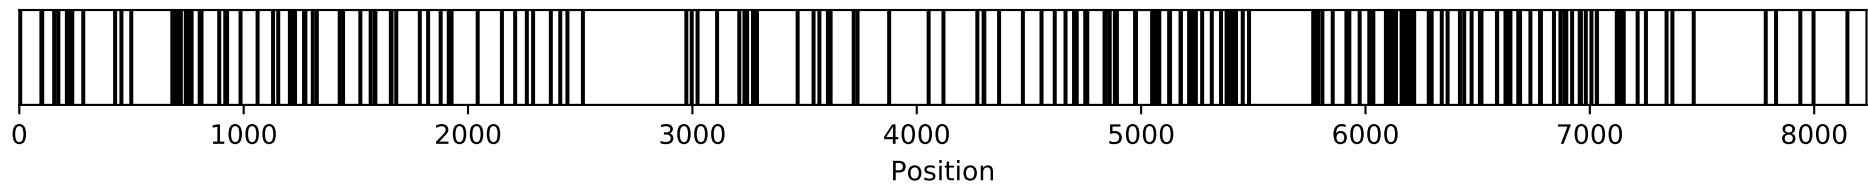

MM1 vs MM2  
Number of differences: 91

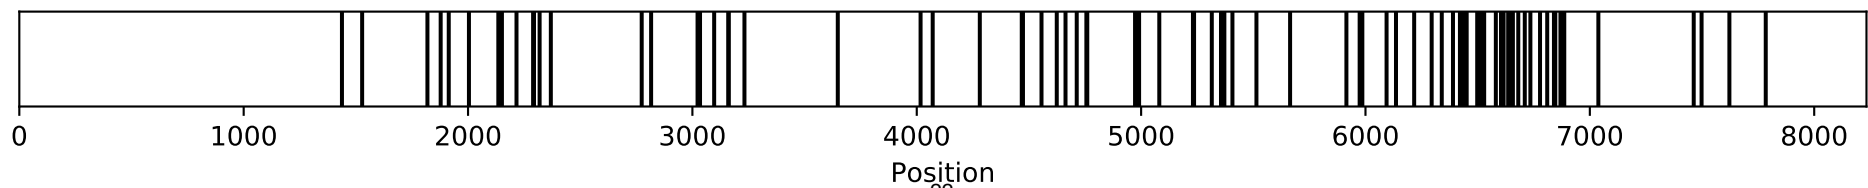

CR1 vs CR2  
Number of differences: 363

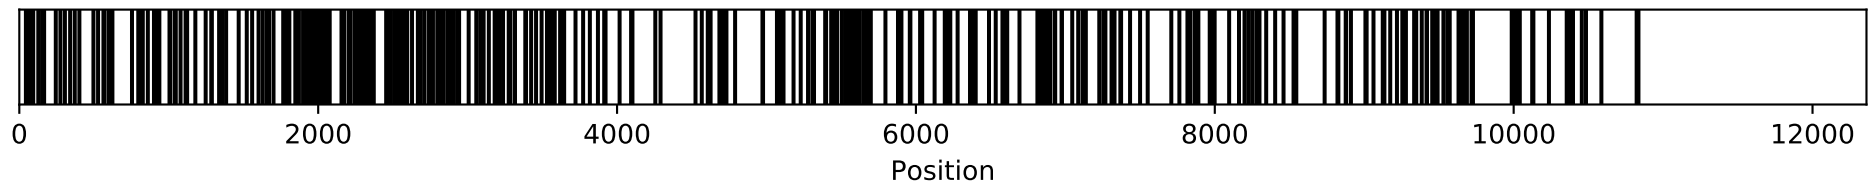

CR1 vs MM1  
Number of differences: 405

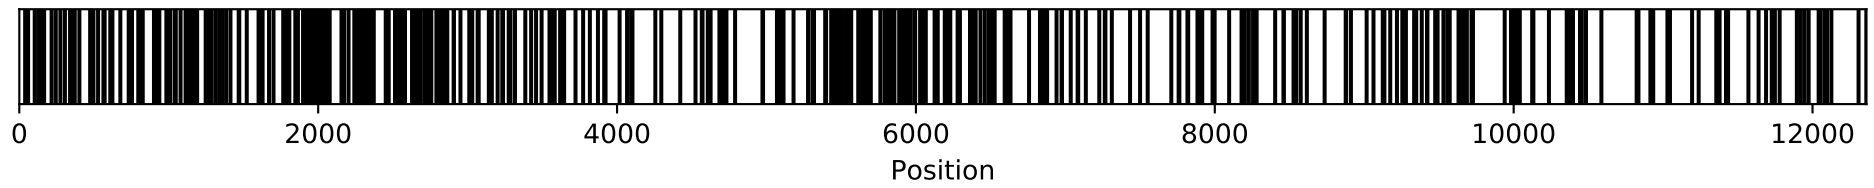

CR1 vs MM2  
Number of differences: 413

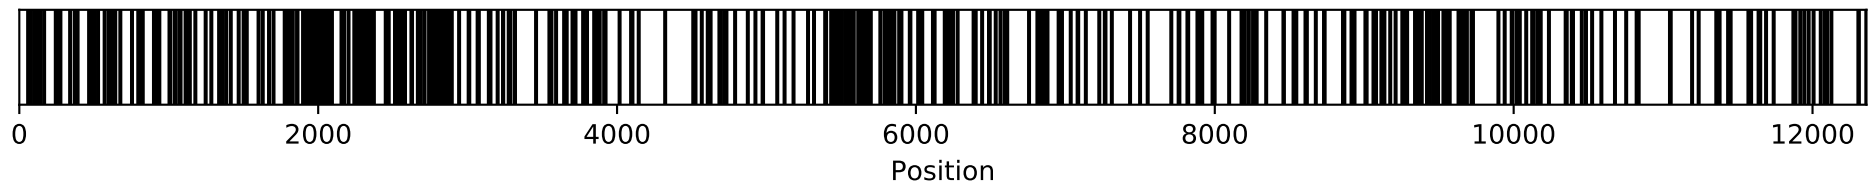

CR2 vs MM1  
Number of differences: 221

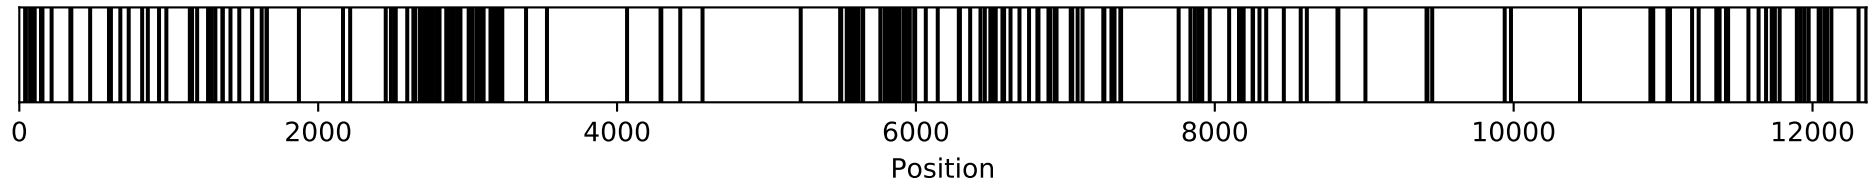

CR2 vs MM2  
Number of differences: 281

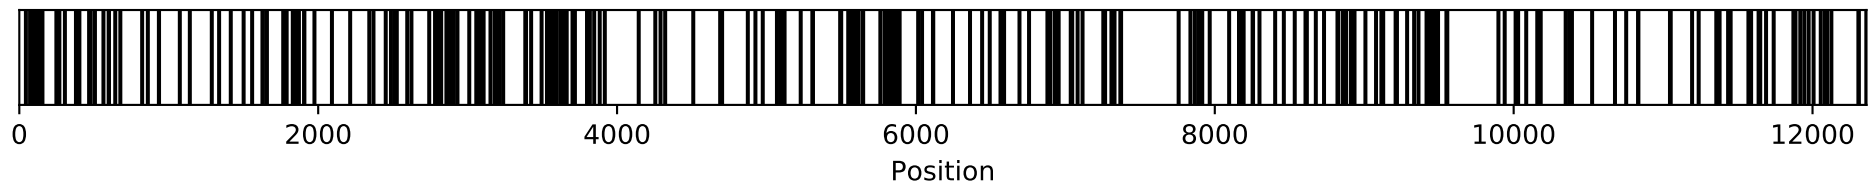

MM1 vs MM2  
Number of differences: 246

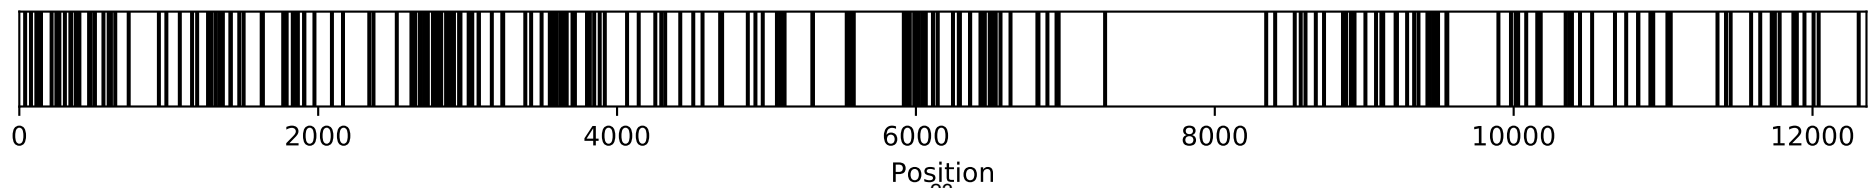



CR1 vs CR2  
Number of differences: 227

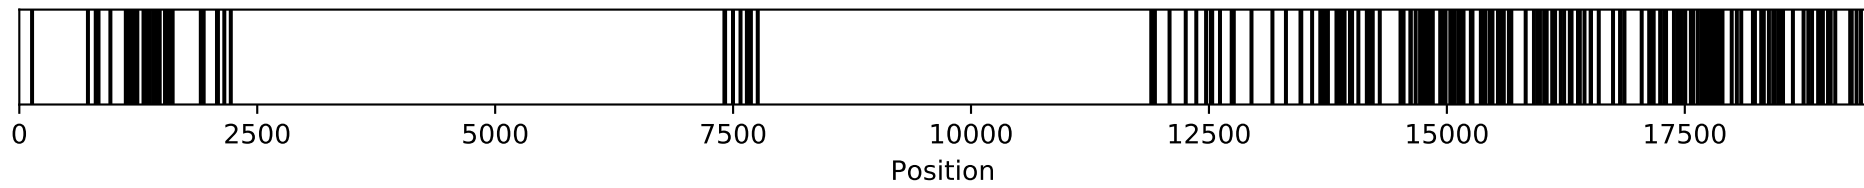

CR1 vs MM1  
Number of differences: 343

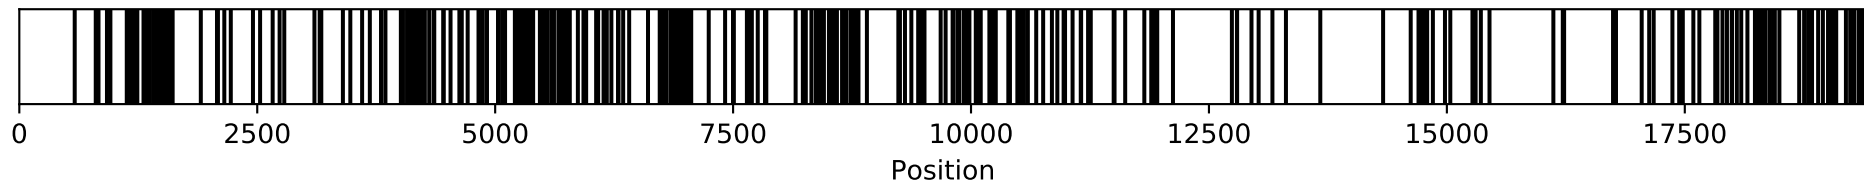

CR1 vs MM2  
Number of differences: 345

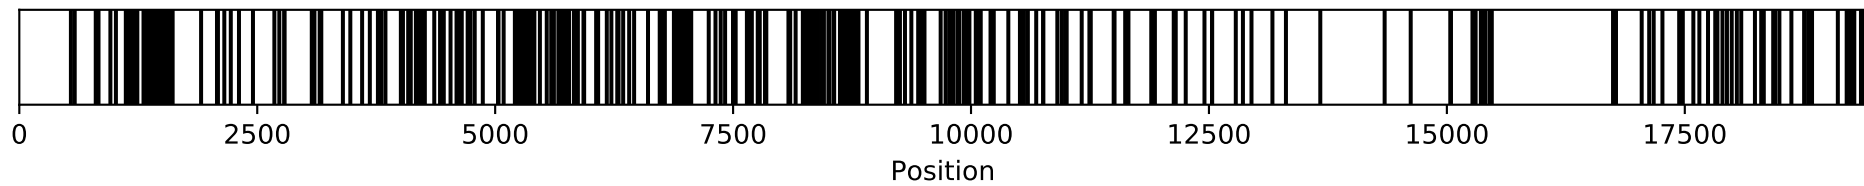

CR2 vs MM1  
Number of differences: 411

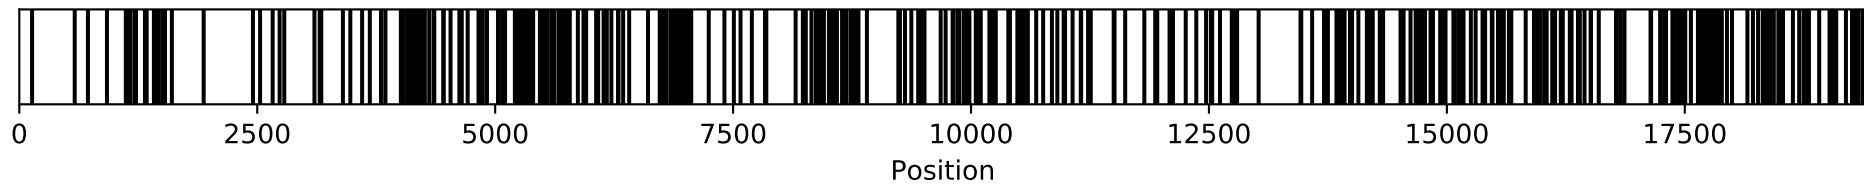

CR2 vs MM2  
Number of differences: 418

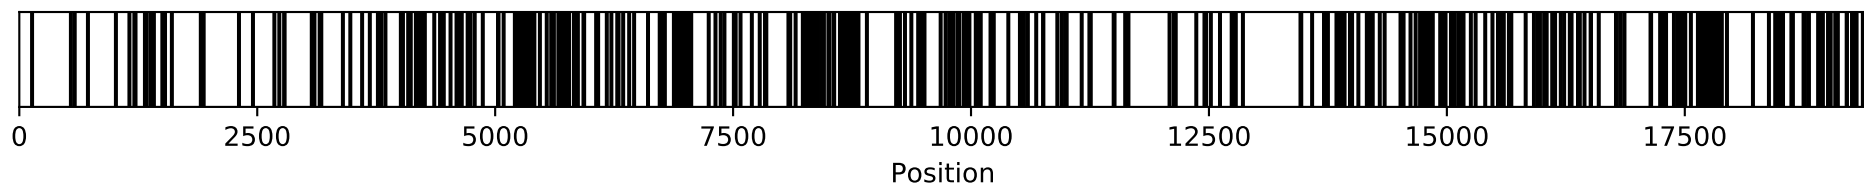

MM1 vs MM2  
Number of differences: 228

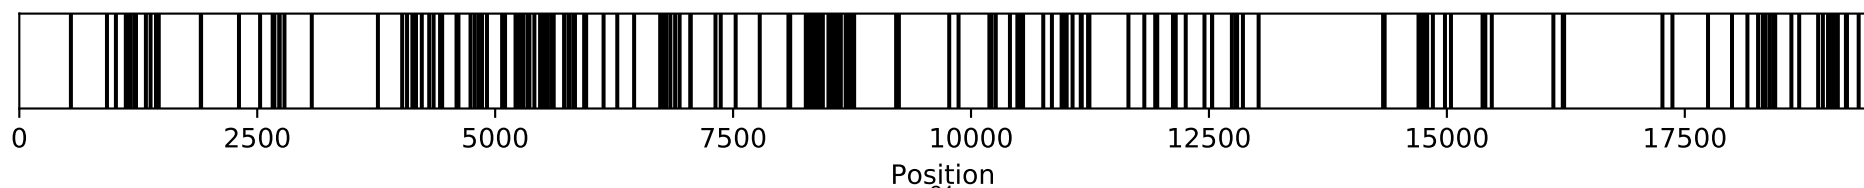

CR1 vs CR2  
Number of differences: 239

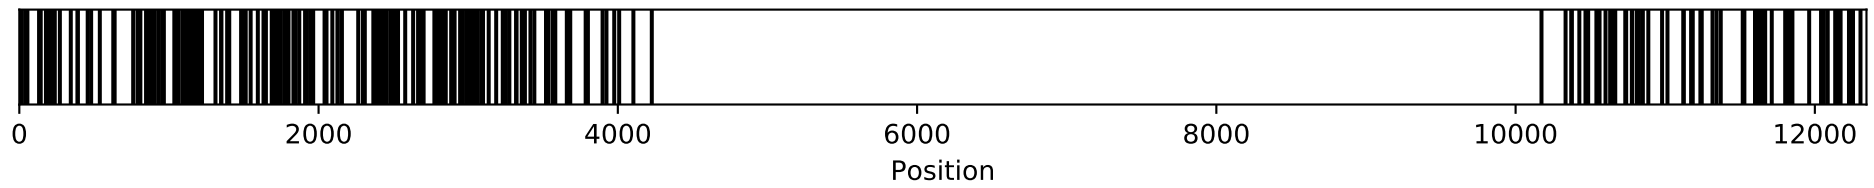

CR1 vs MM1  
Number of differences: 208

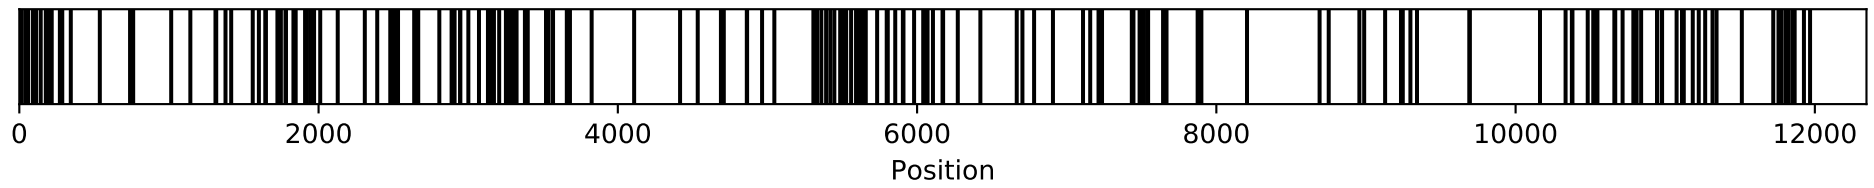

CR1 vs MM2  
Number of differences: 218

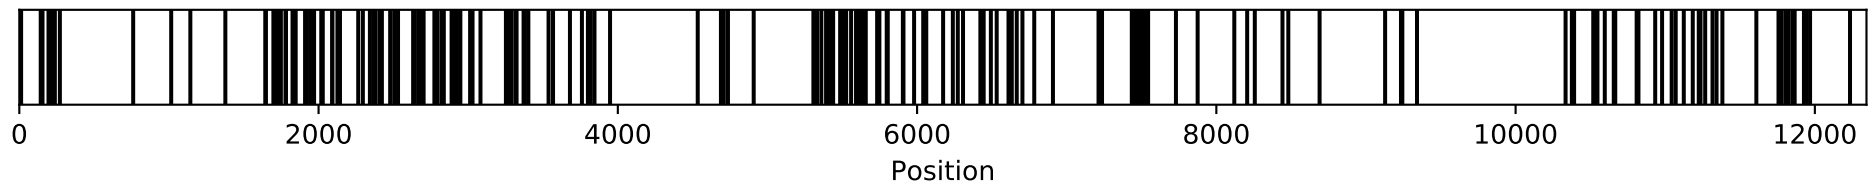

CR2 vs MM1  
Number of differences: 324

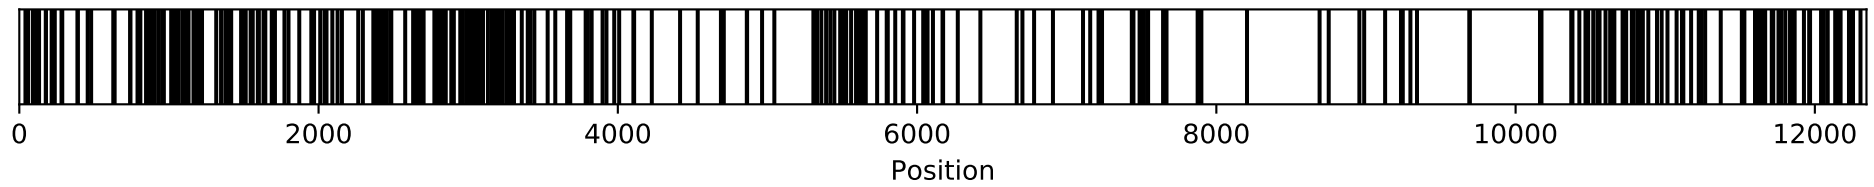

CR2 vs MM2  
Number of differences: 300

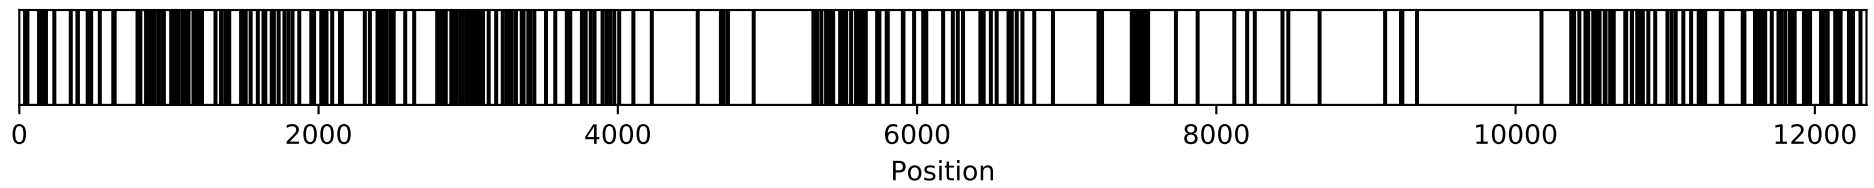

MM1 vs MM2  
Number of differences: 177

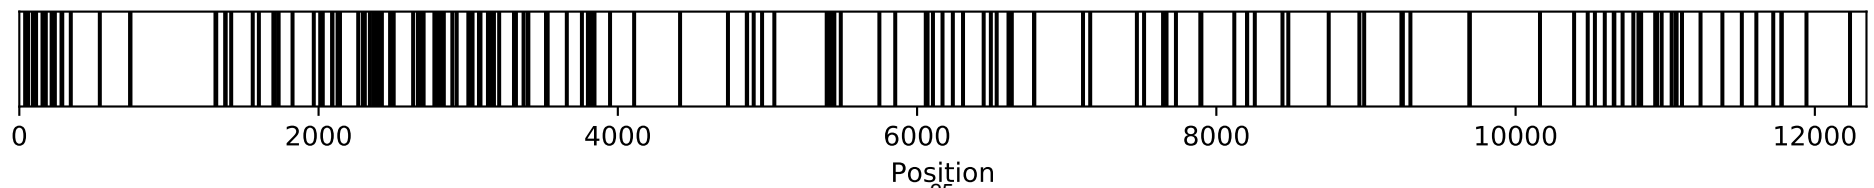

CR1 vs CR2  
Number of differences: 380

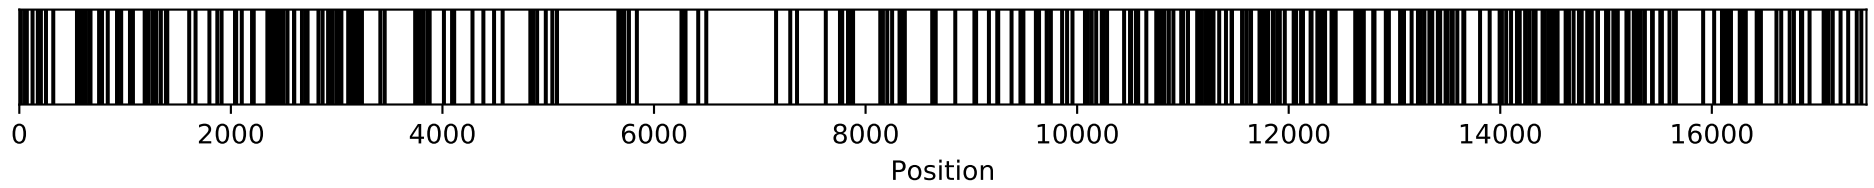

CR1 vs MM1  
Number of differences: 146

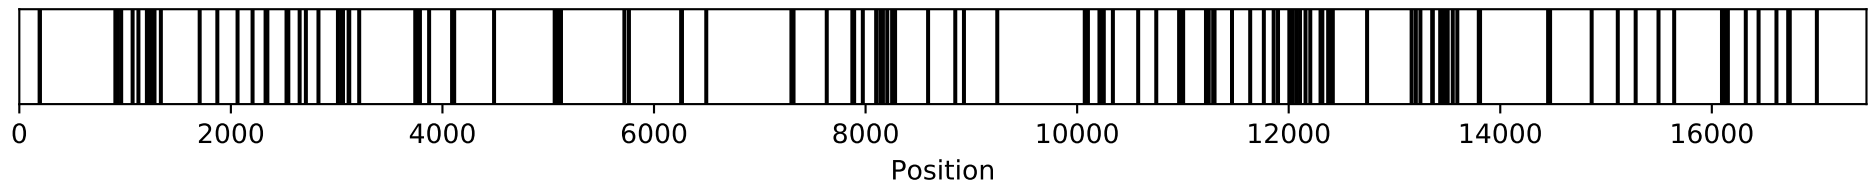

CR1 vs MM2  
Number of differences: 172

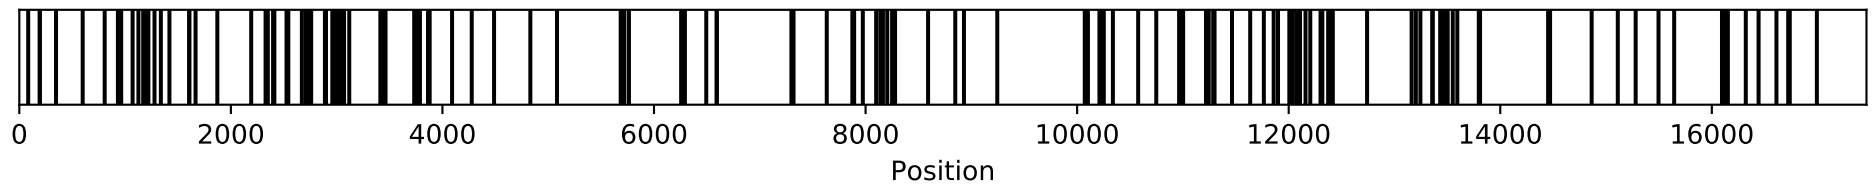

CR2 vs MM1  
Number of differences: 385

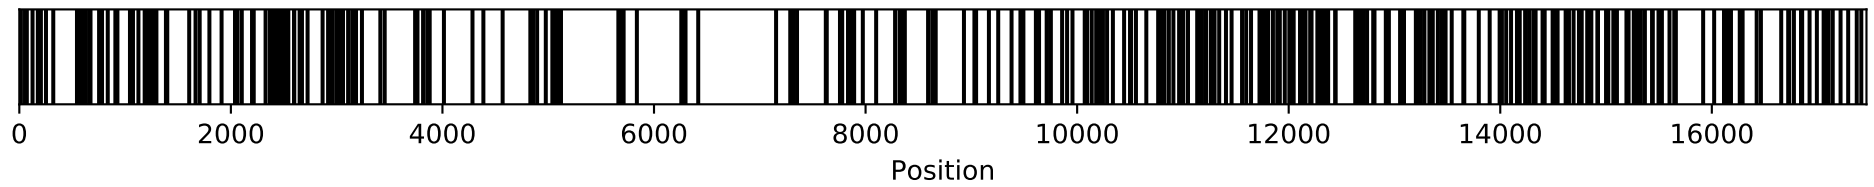

CR2 vs MM2  
Number of differences: 392

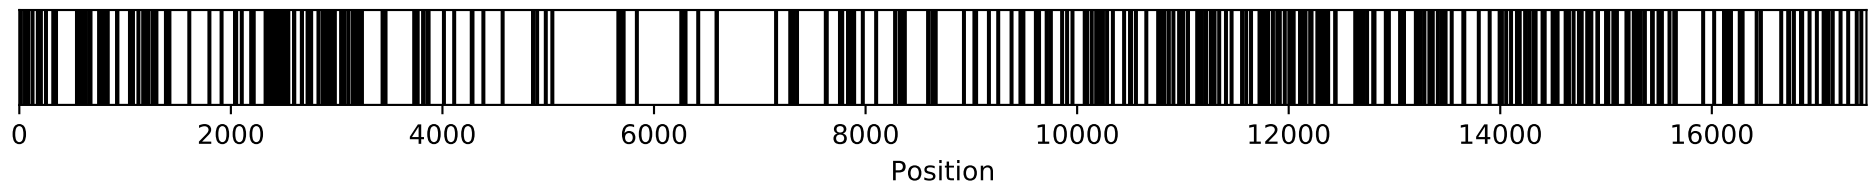

MM1 vs MM2  
Number of differences: 62

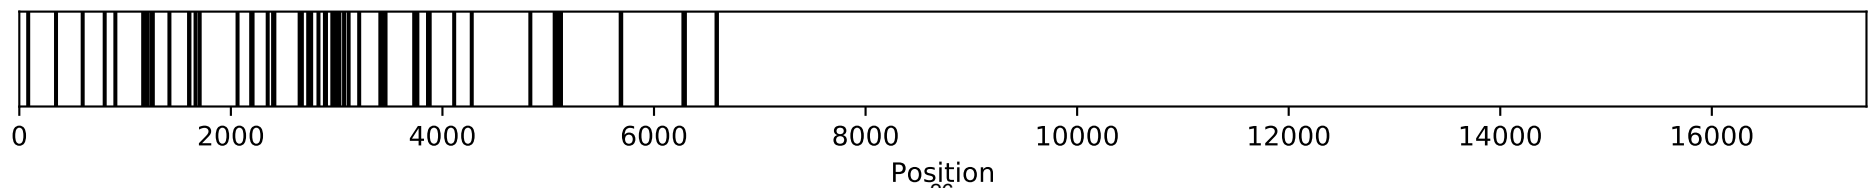

CR1 vs CR2  
Number of differences: 230

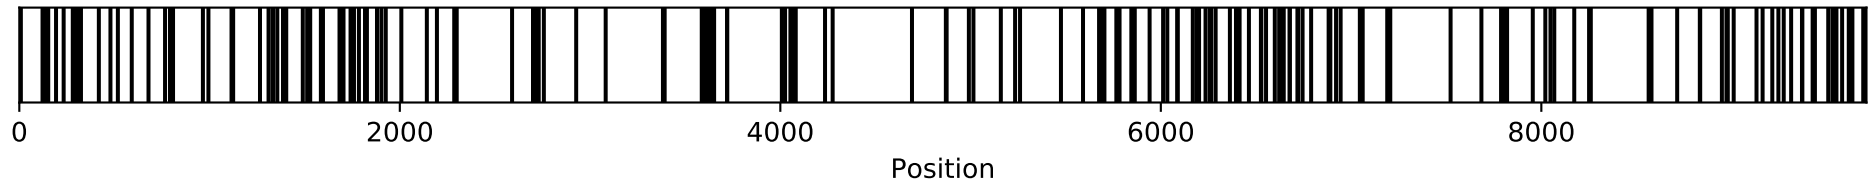

CR1 vs MM1  
Number of differences: 94

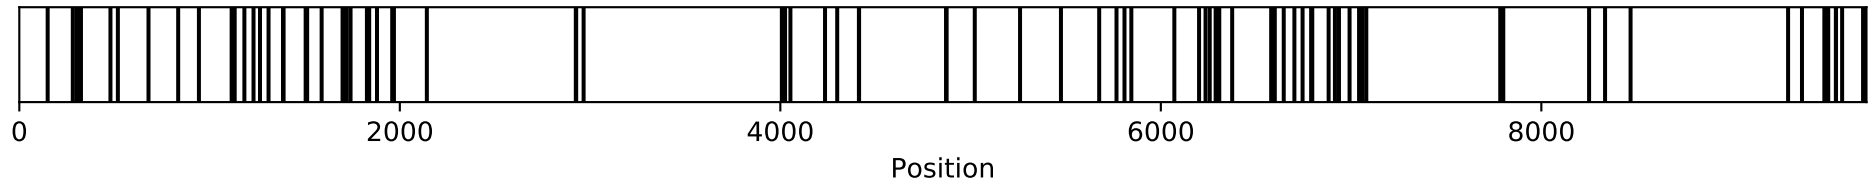

CR1 vs MM2  
Number of differences: 123

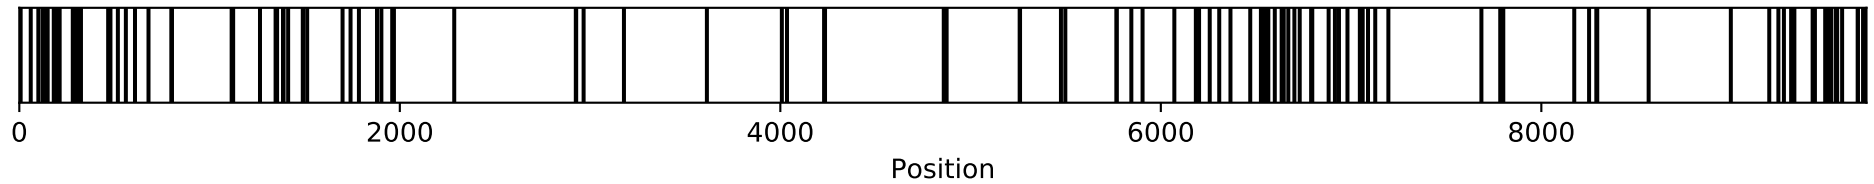

CR2 vs MM1  
Number of differences: 221

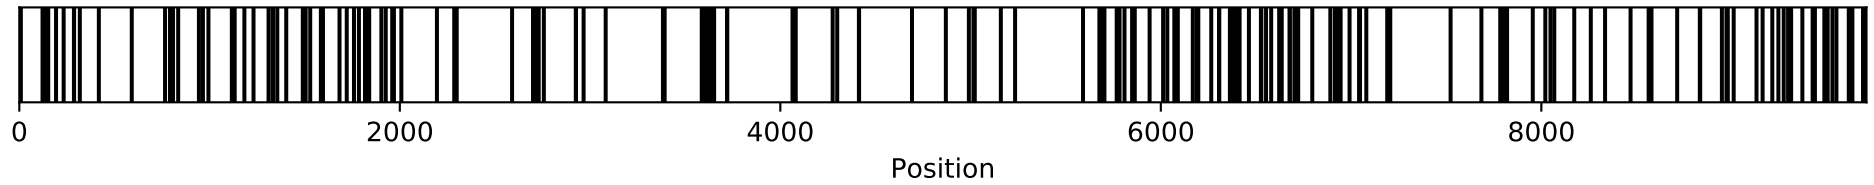

CR2 vs MM2  
Number of differences: 224

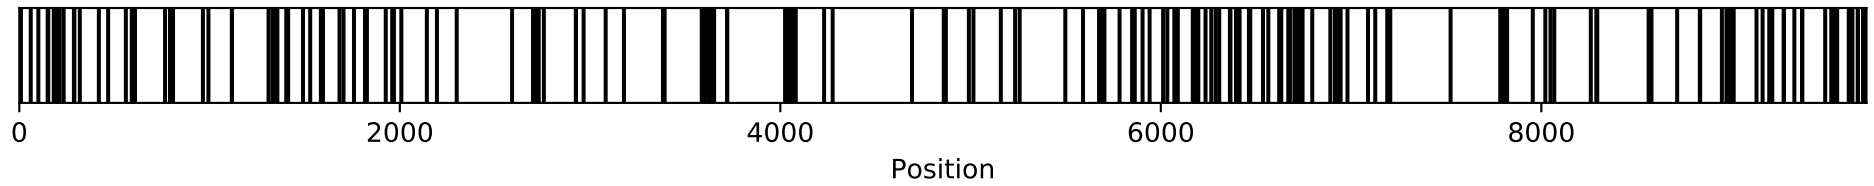

MM1 vs MM2  
Number of differences: 109

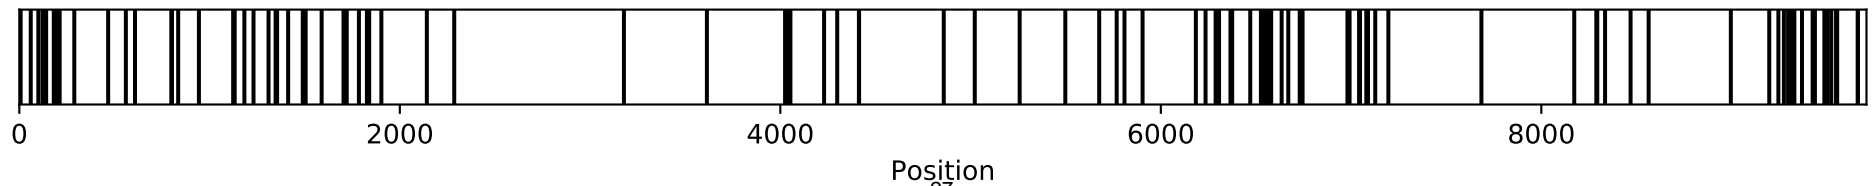

CR1 vs CR2  
Number of differences: 318

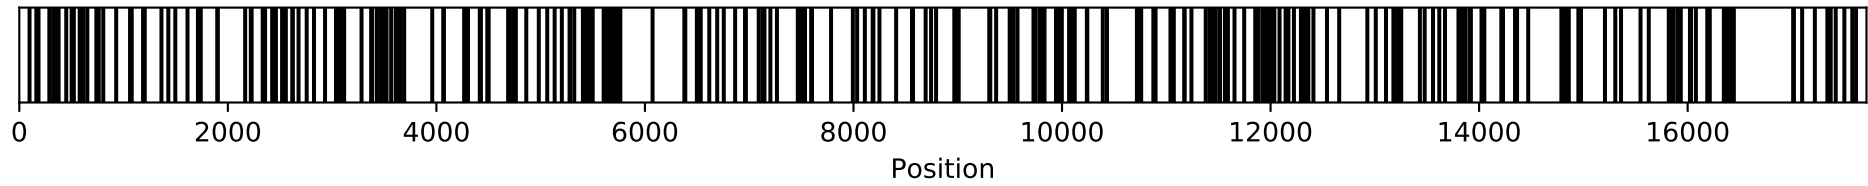

CR1 vs MM1  
Number of differences: 187

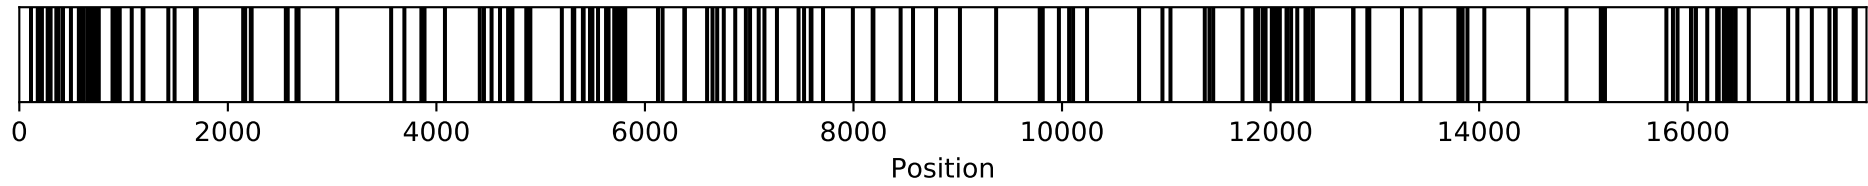

CR1 vs MM2  
Number of differences: 200

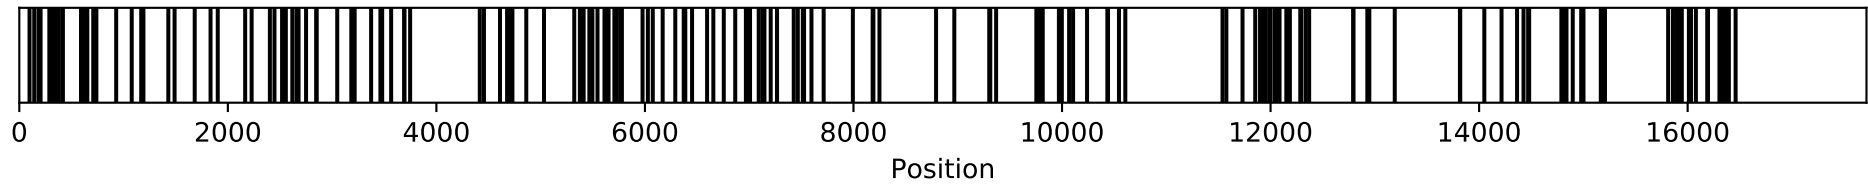

CR2 vs MM1  
Number of differences: 340

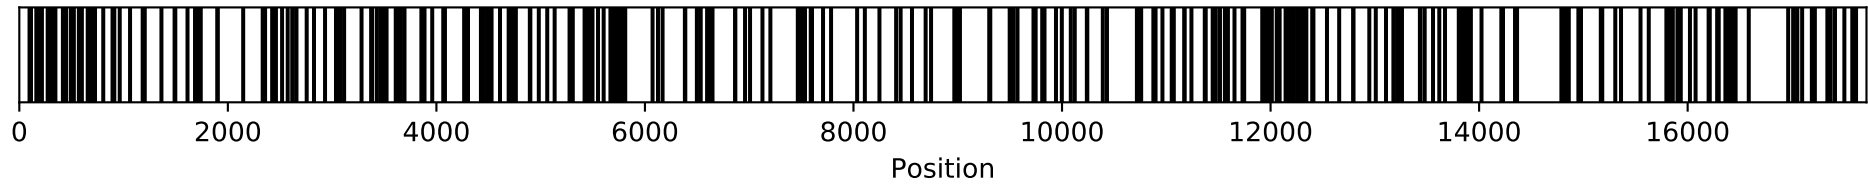

CR2 vs MM2  
Number of differences: 329

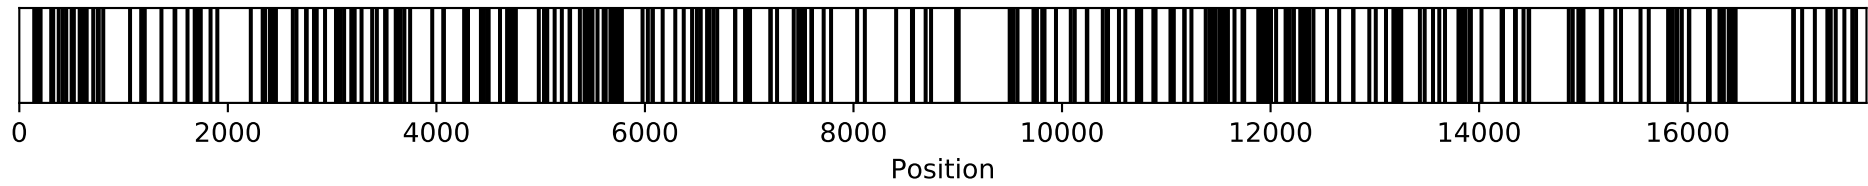

MM1 vs MM2  
Number of differences: 206

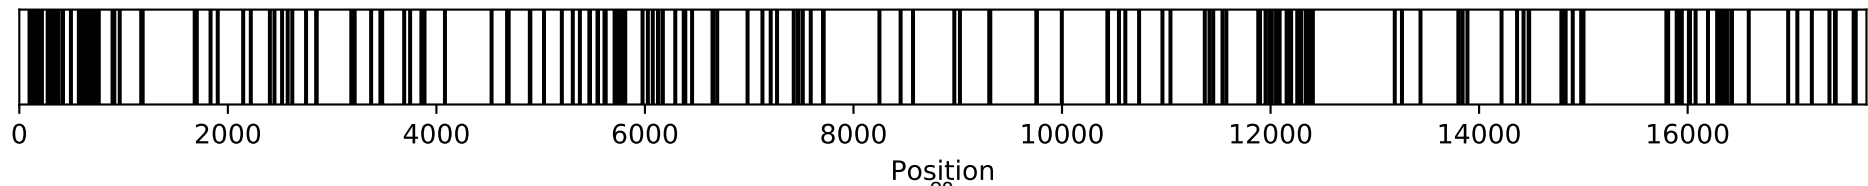

CR1 vs CR2  
Number of differences: 225

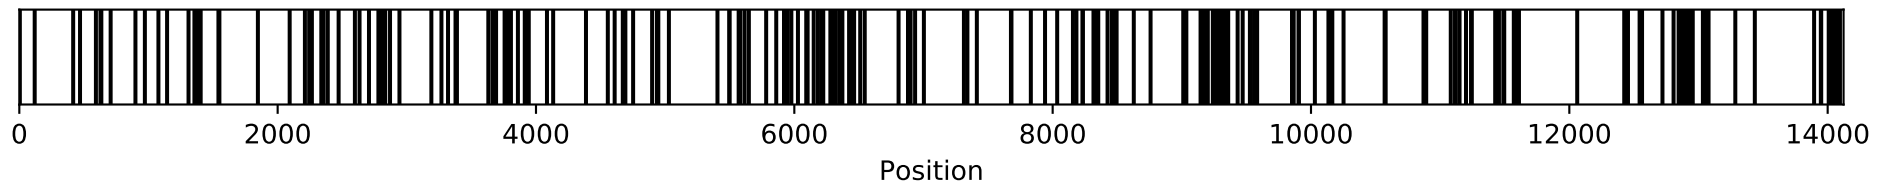

CR1 vs MM1  
Number of differences: 221

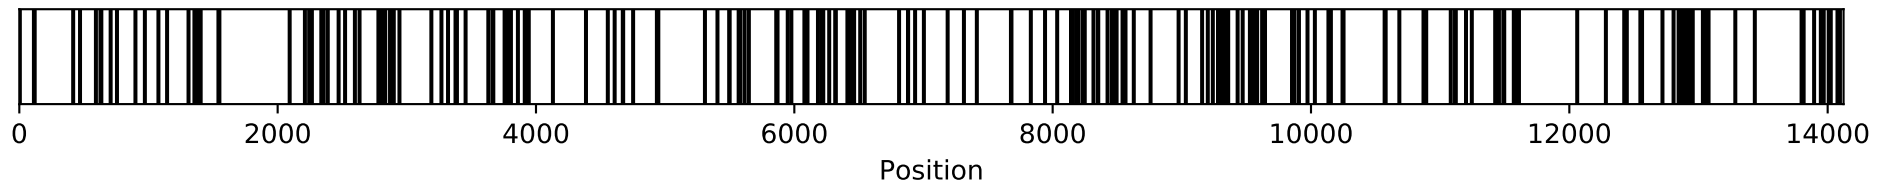

CR1 vs MM2  
Number of differences: 224

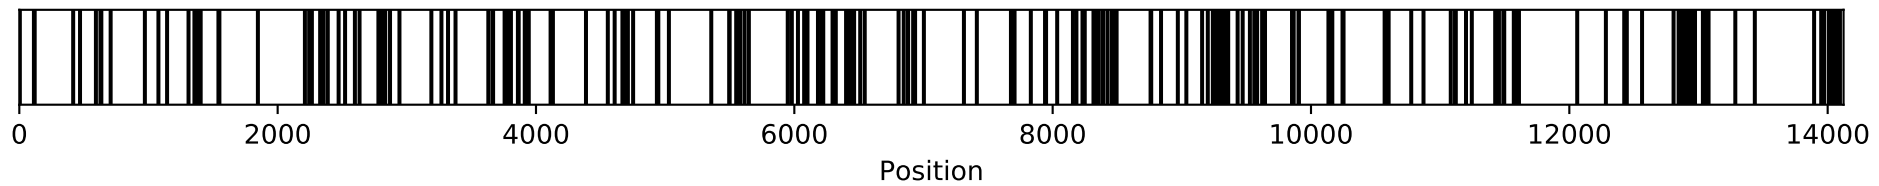

CR2 vs MM1  
Number of differences: 88

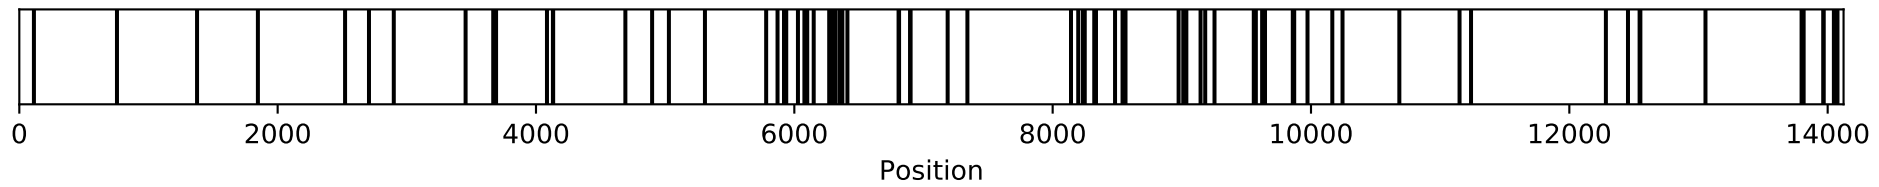

CR2 vs MM2  
Number of differences: 96

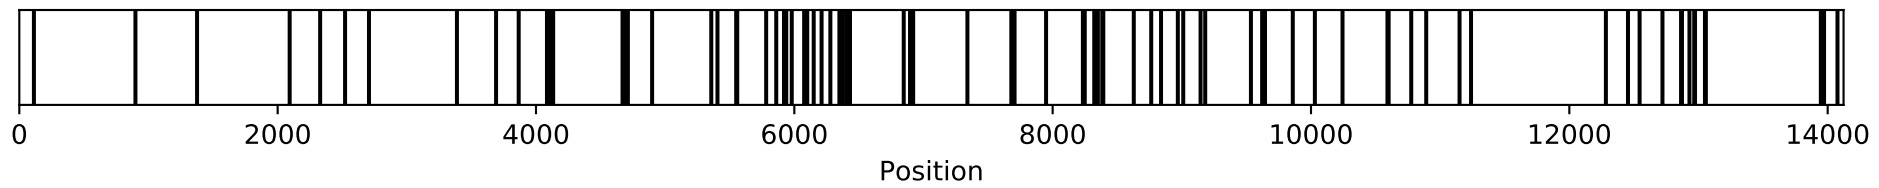

MM1 vs MM2  
Number of differences: 93

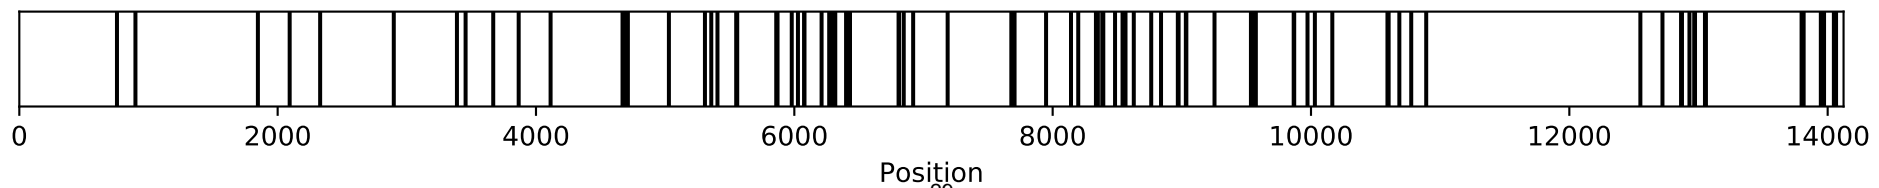

CR1 vs CR2  
Number of differences: 185

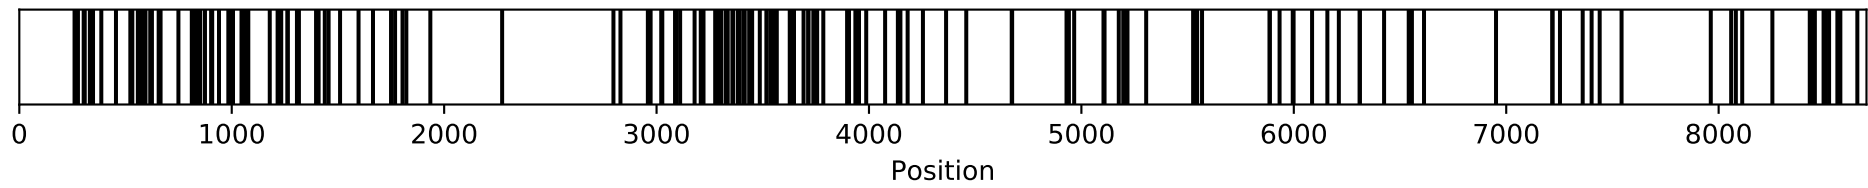

CR1 vs MM1  
Number of differences: 204

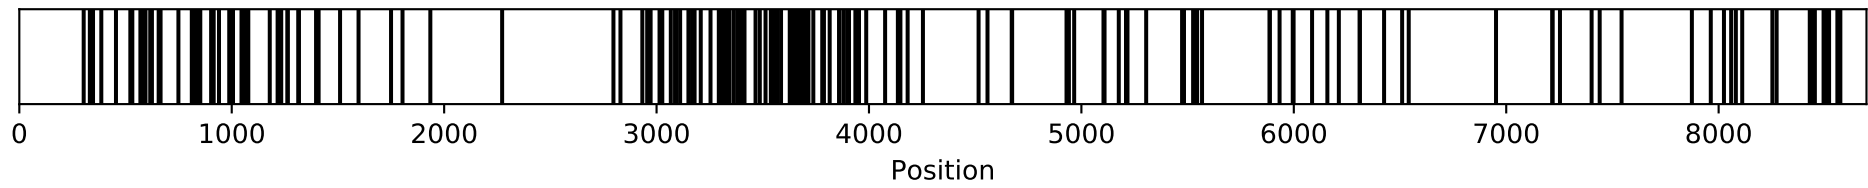

CR1 vs MM2  
Number of differences: 211

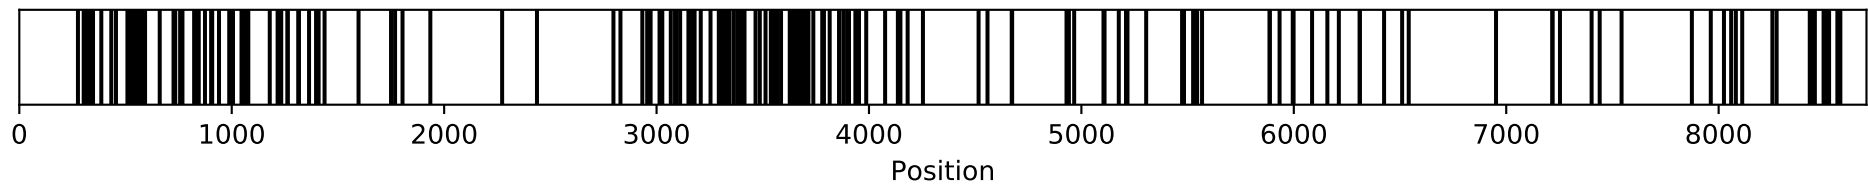

CR2 vs MM1  
Number of differences: 95

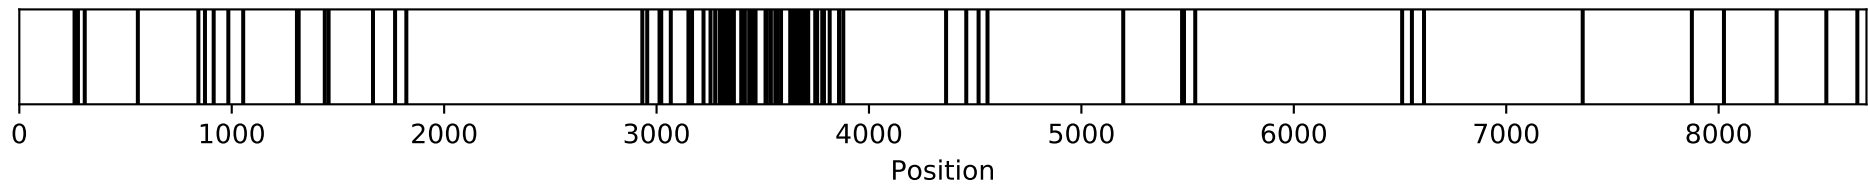

CR2 vs MM2  
Number of differences: 123

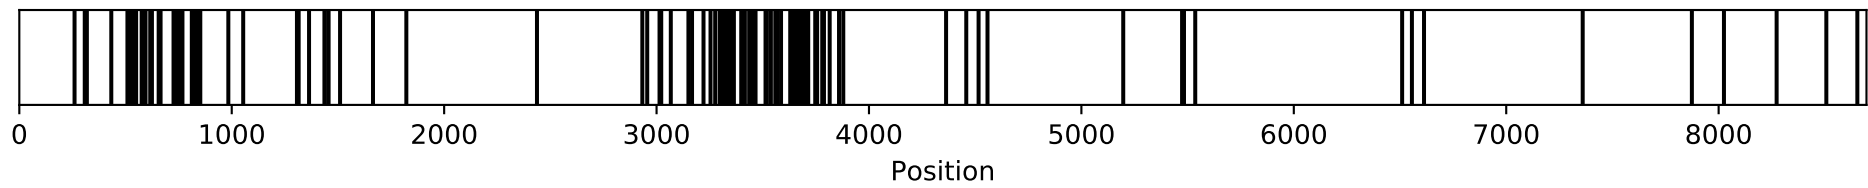

MM1 vs MM2  
Number of differences: 39

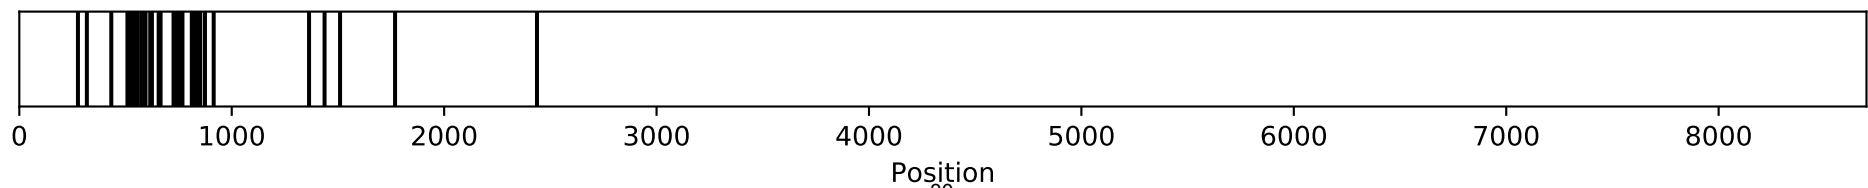

CR1 vs CR2  
Number of differences: 380

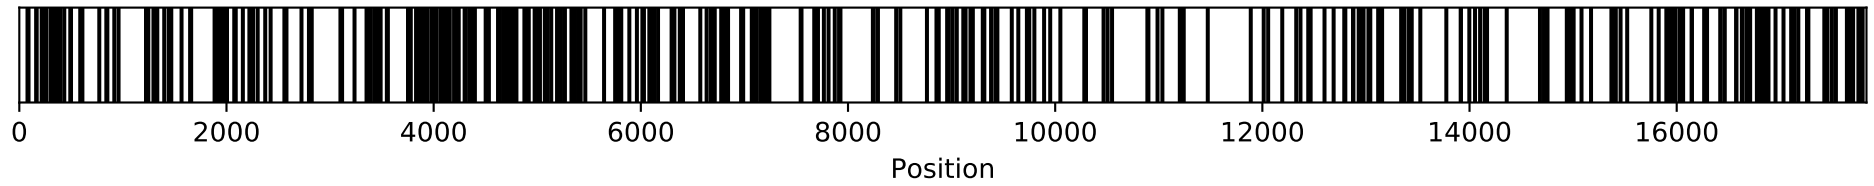

CR1 vs MM1  
Number of differences: 388

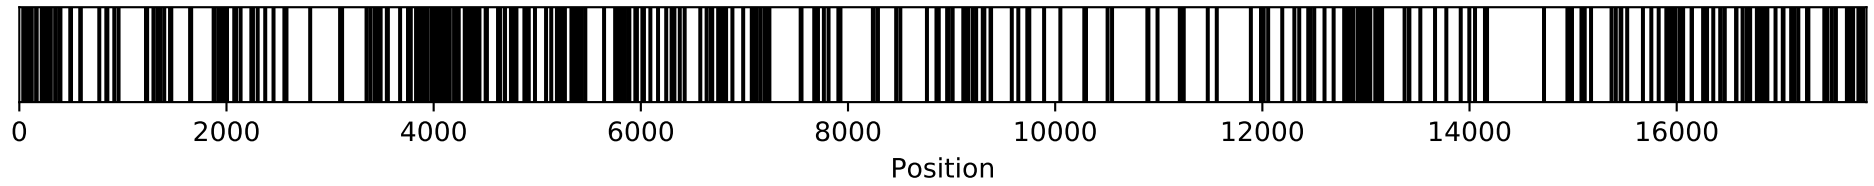

CR1 vs MM2  
Number of differences: 400

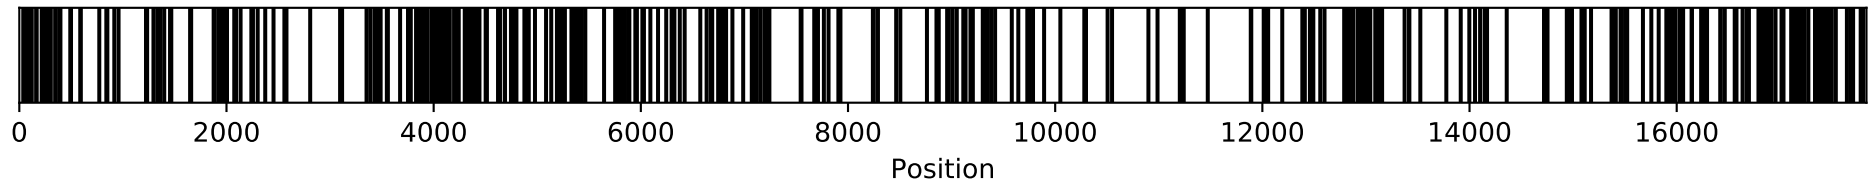

CR2 vs MM1  
Number of differences: 178

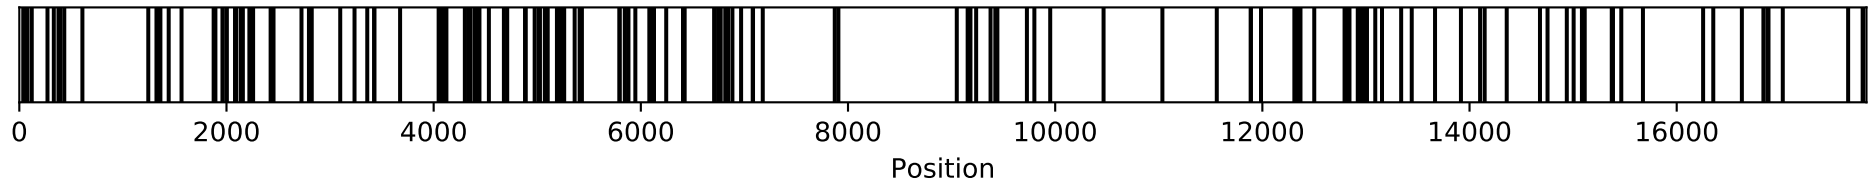

CR2 vs MM2  
Number of differences: 203

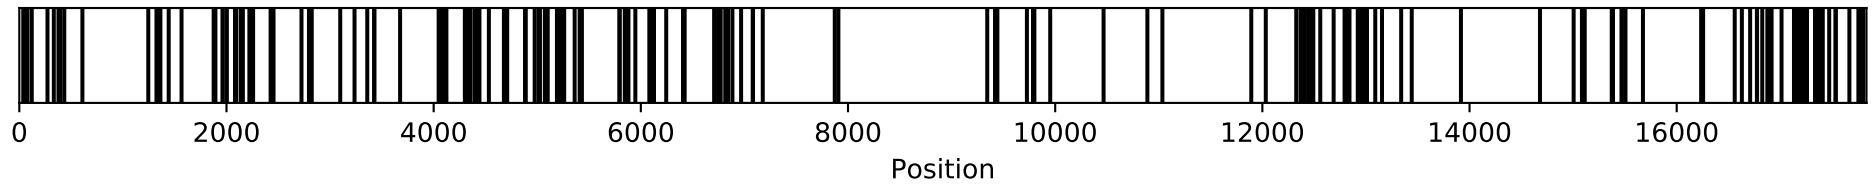

MM1 vs MM2  
Number of differences: 73

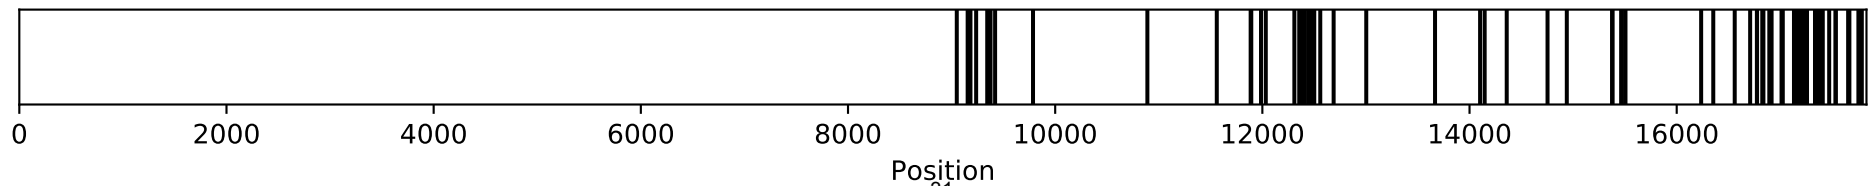



CR1 vs CR2  
Number of differences: 146

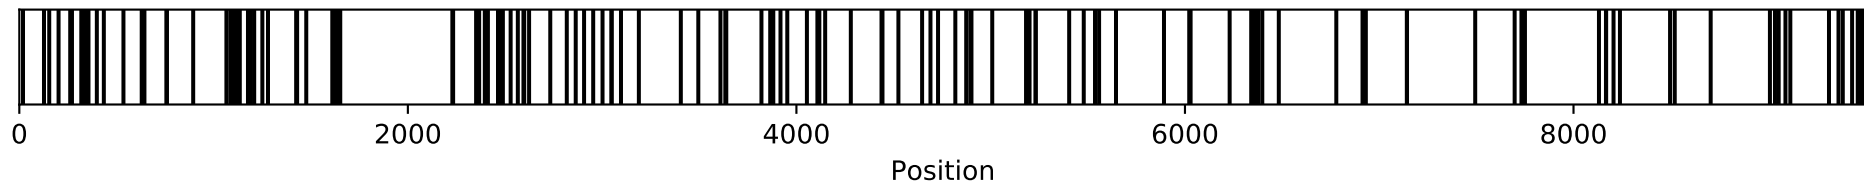

CR1 vs MM1  
Number of differences: 137

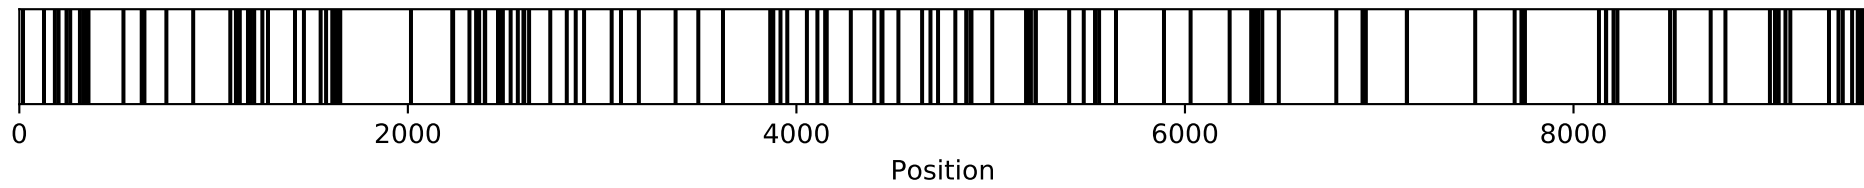

CR1 vs MM2  
Number of differences: 141

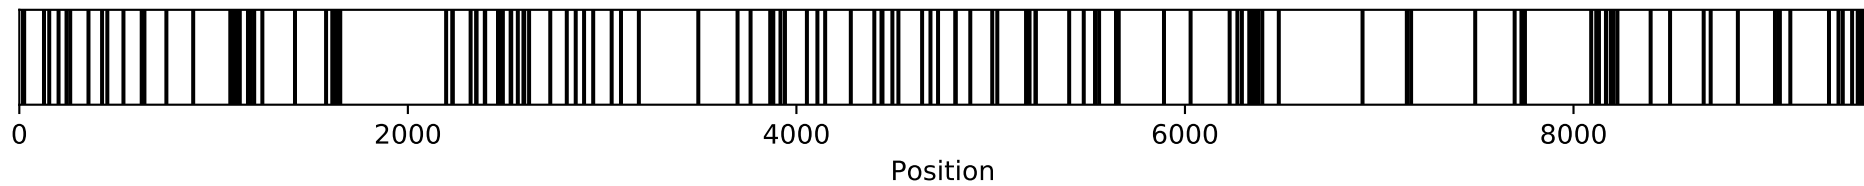

CR2 vs MM1  
Number of differences: 44

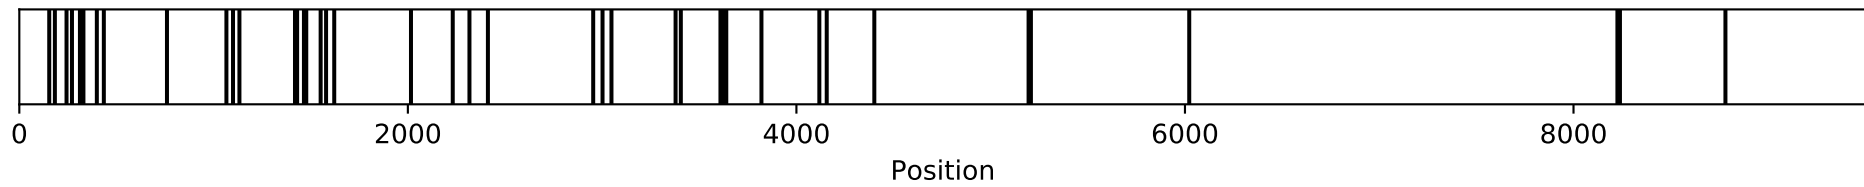

CR2 vs MM2  
Number of differences: 67

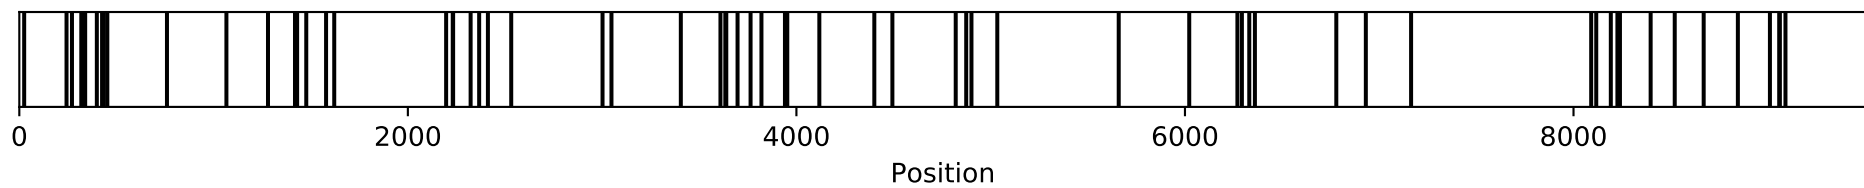

MM1 vs MM2  
Number of differences: 55

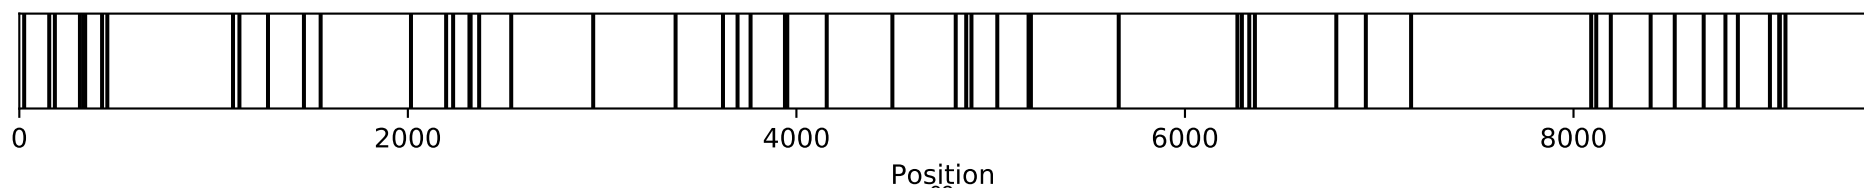

CR1 vs CR2  
Number of differences: 412

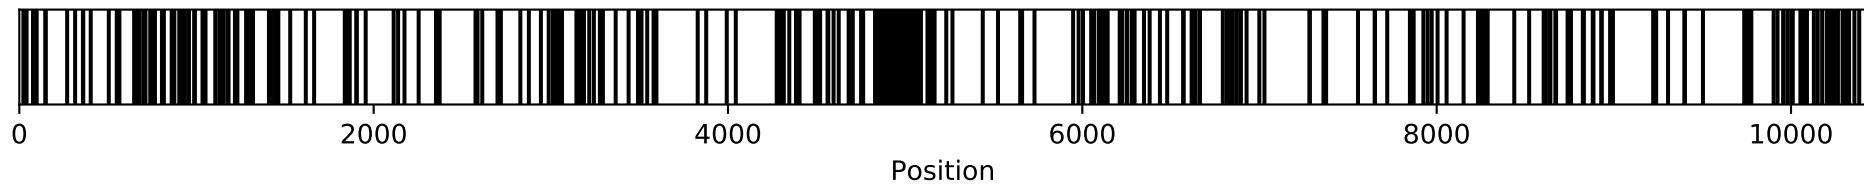

CR1 vs MM1  
Number of differences: 174

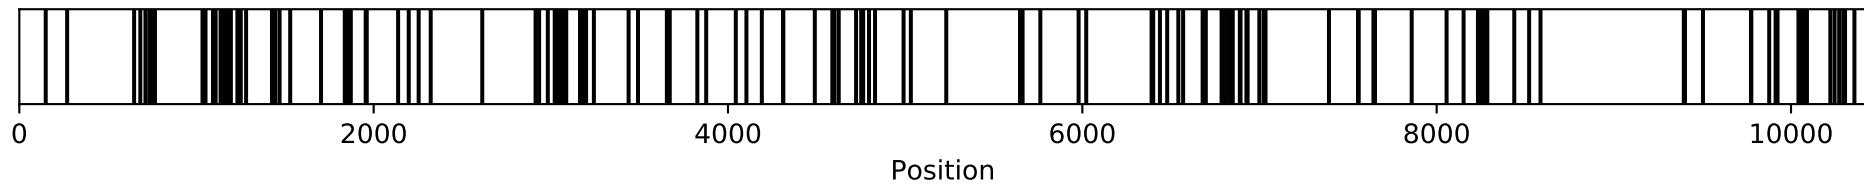

CR1 vs MM2  
Number of differences: 193

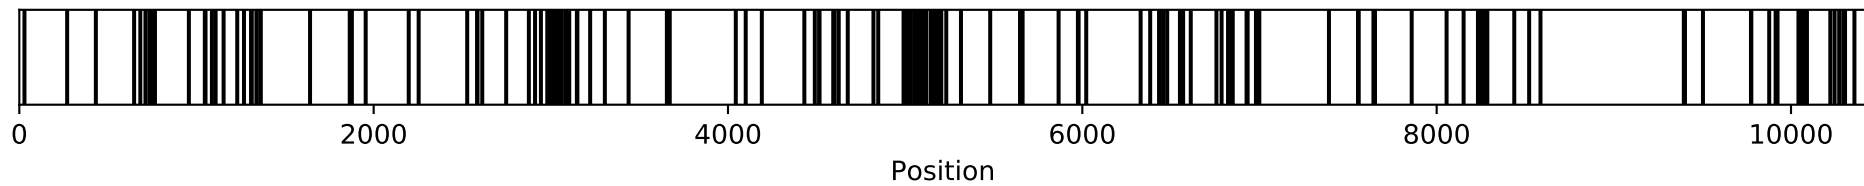

CR2 vs MM1  
Number of differences: 416

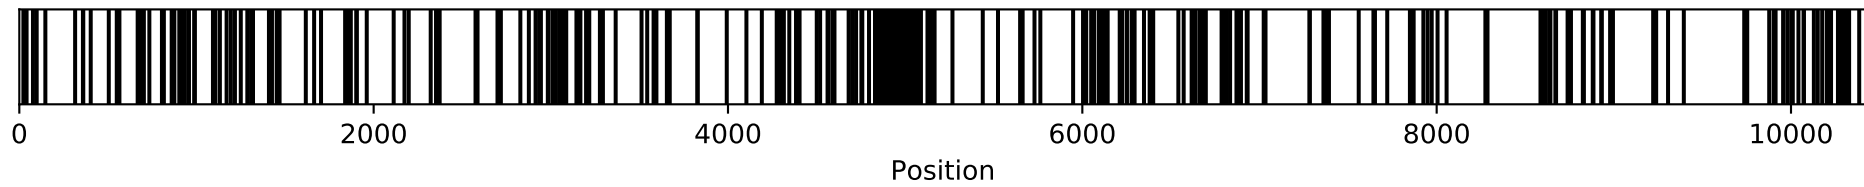

CR2 vs MM2  
Number of differences: 425

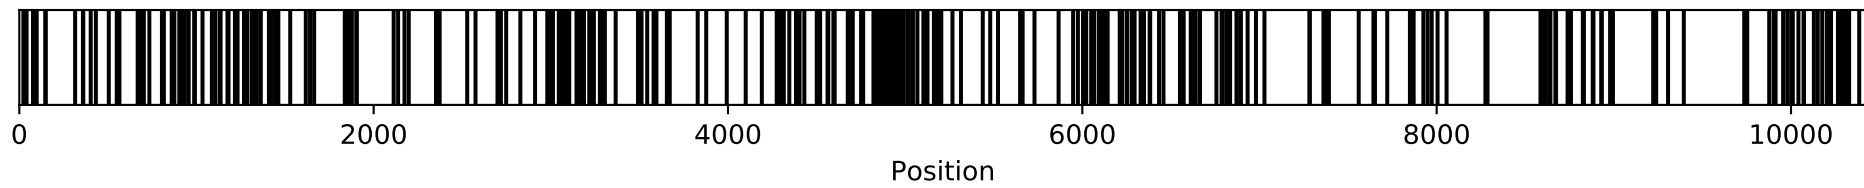

MM1 vs MM2  
Number of differences: 150

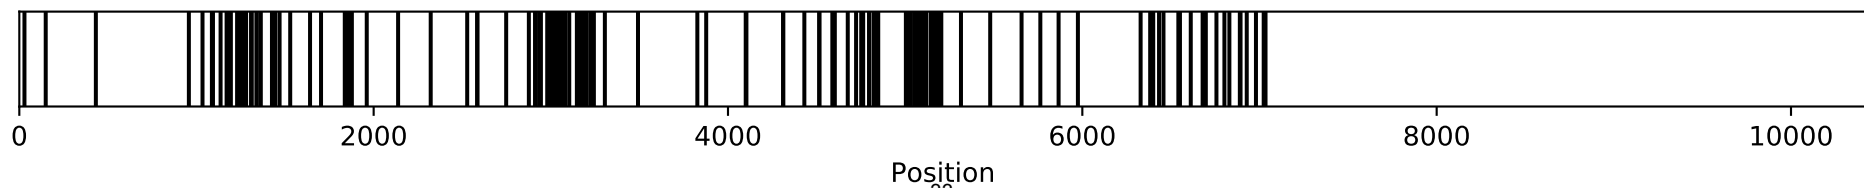

CR1 vs CR2  
Number of differences: 330

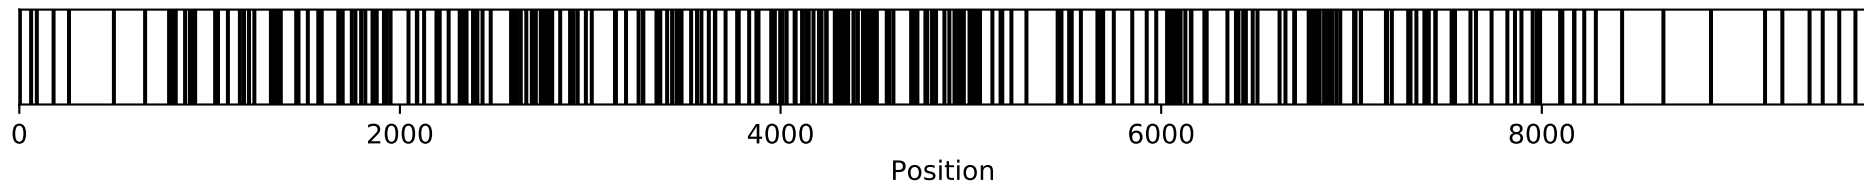

CR1 vs MM1  
Number of differences: 217

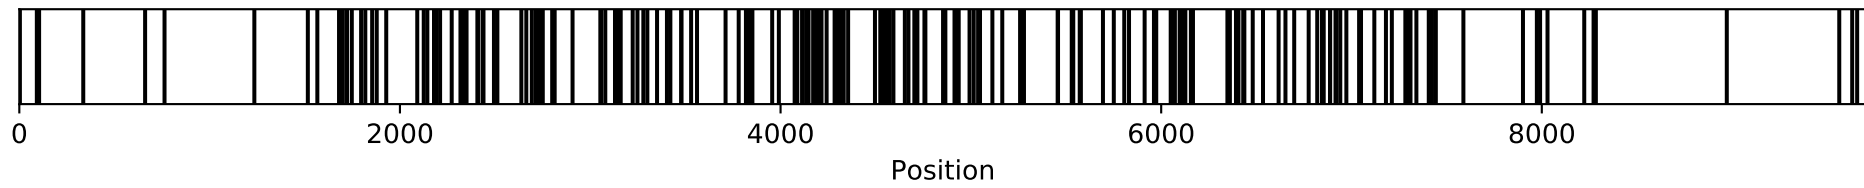

CR1 vs MM2  
Number of differences: 217

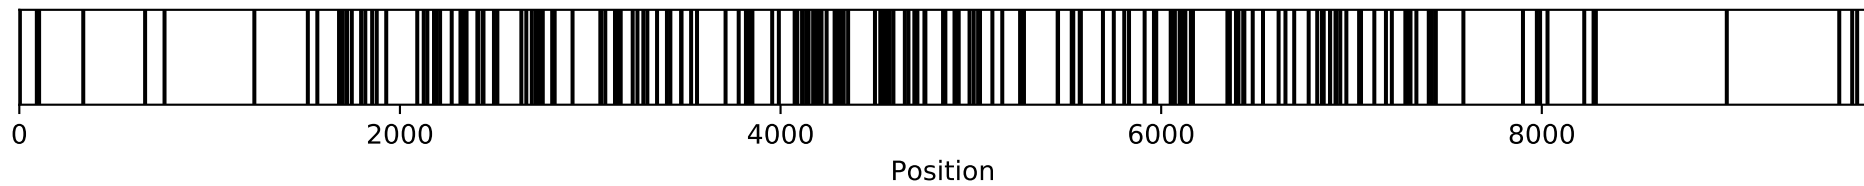

CR2 vs MM1  
Number of differences: 307

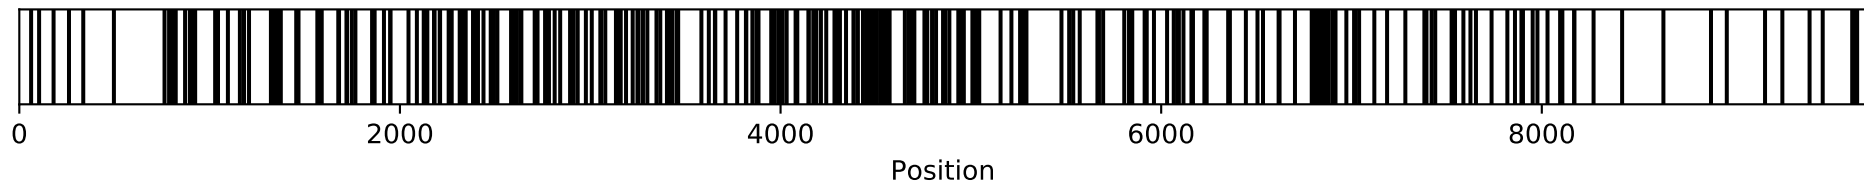

CR2 vs MM2  
Number of differences: 307

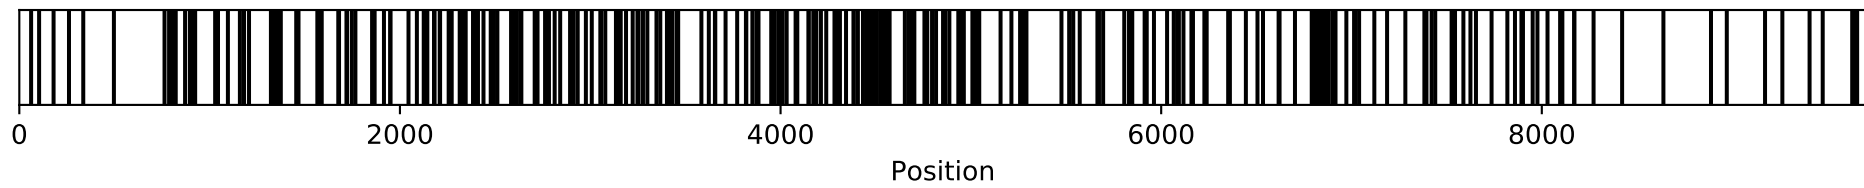

MM1 vs MM2  
Number of differences: 0

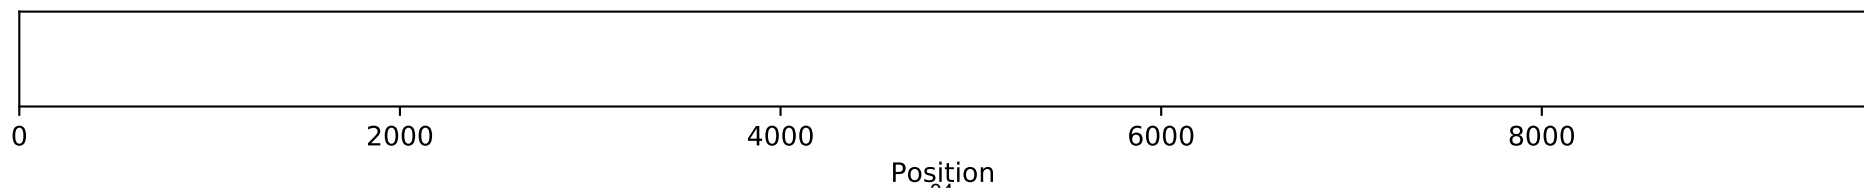

CR1 vs CR2  
Number of differences: 294

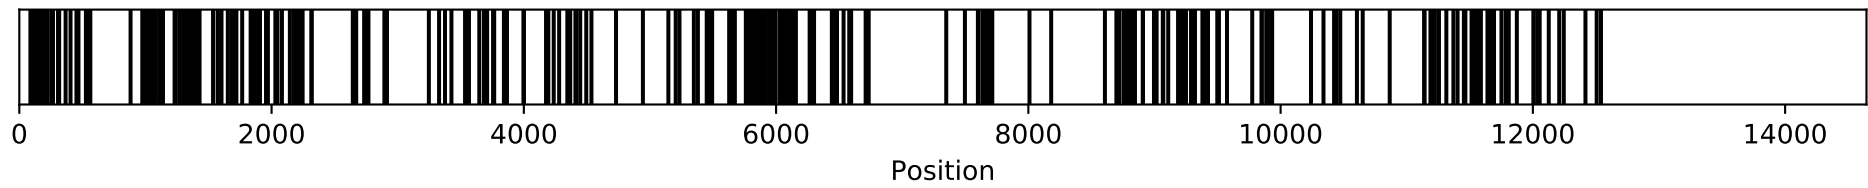

CR1 vs MM1  
Number of differences: 144

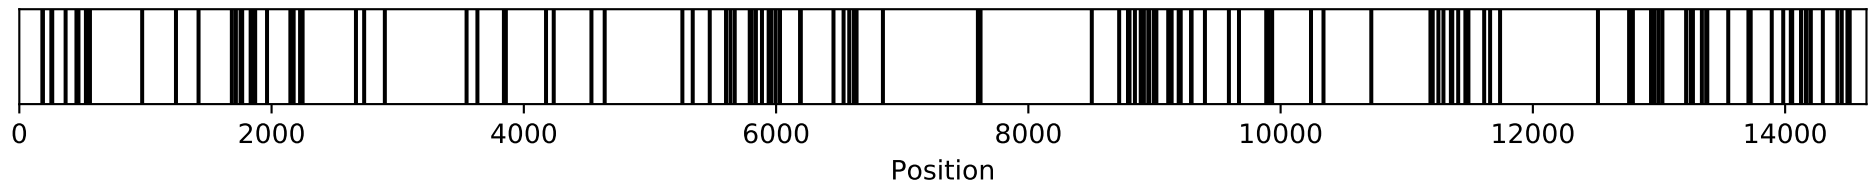

CR1 vs MM2  
Number of differences: 139

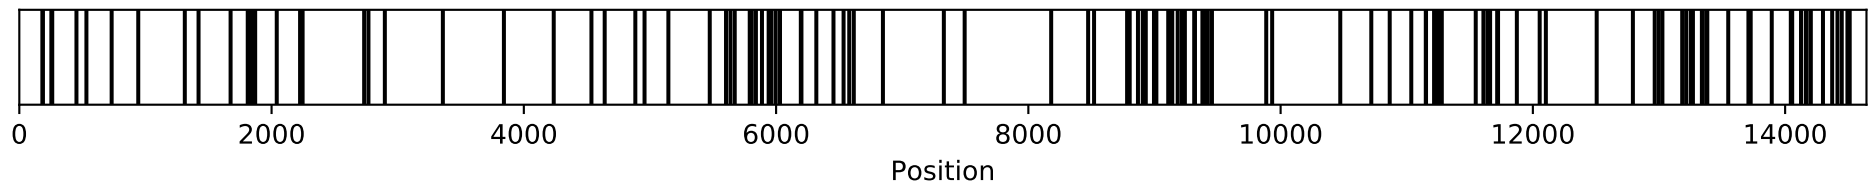

CR2 vs MM1  
Number of differences: 326

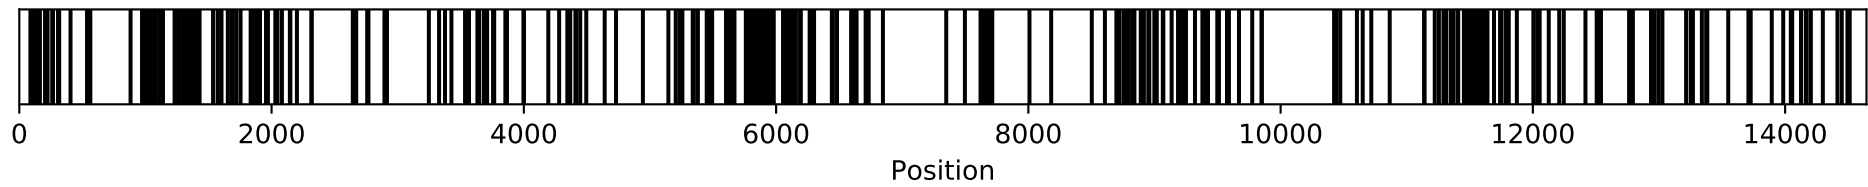

CR2 vs MM2  
Number of differences: 332

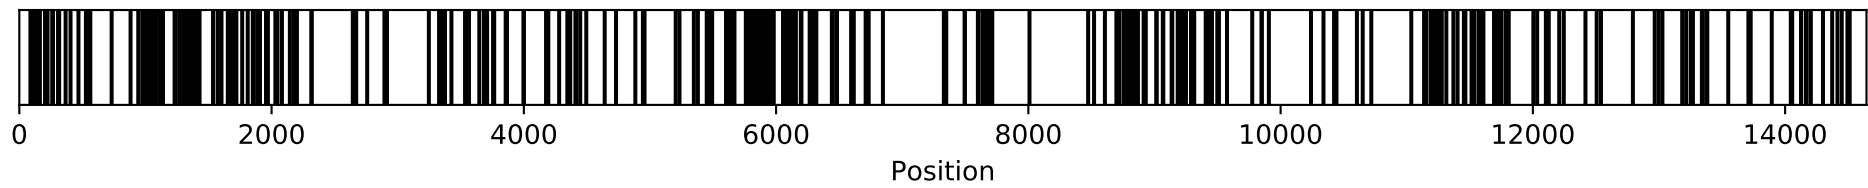

MM1 vs MM2  
Number of differences: 133

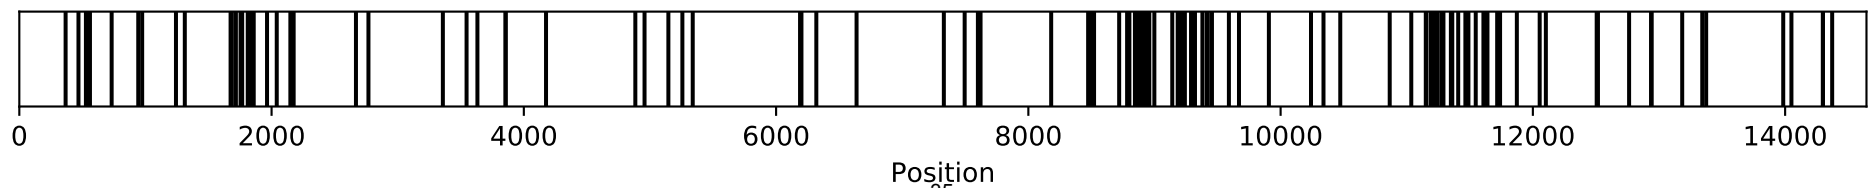

CR1 vs CR2  
Number of differences: 43

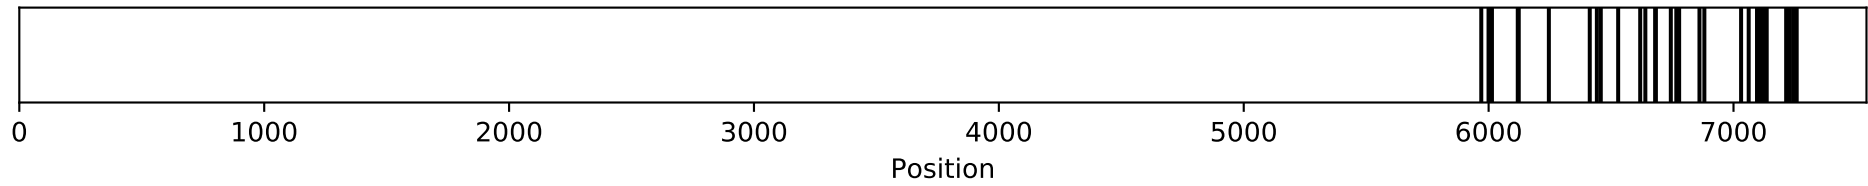

CR1 vs MM1  
Number of differences: 150

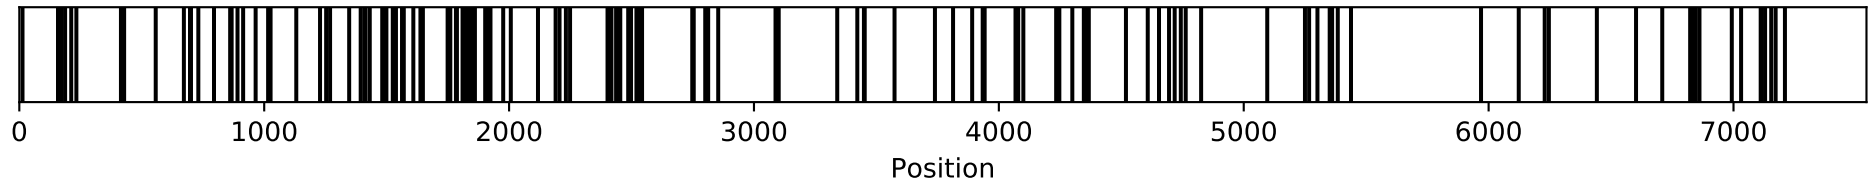

CR1 vs MM2  
Number of differences: 151

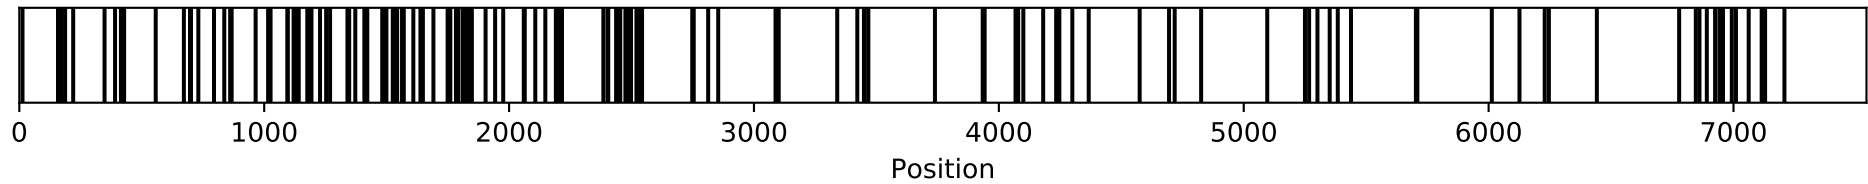

CR2 vs MM1  
Number of differences: 176

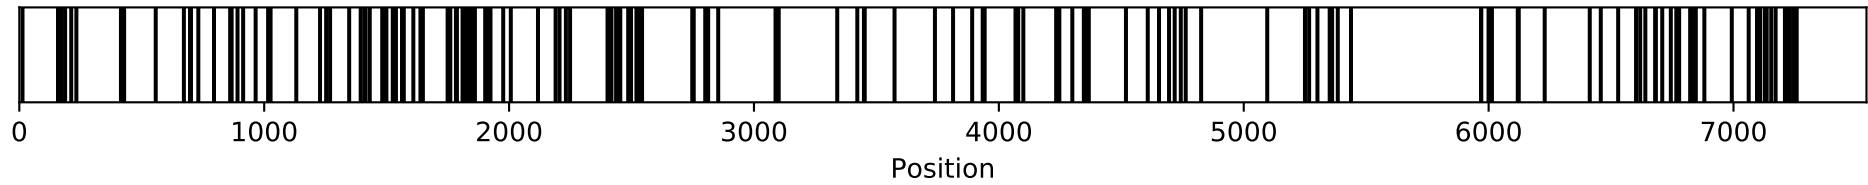

CR2 vs MM2  
Number of differences: 179

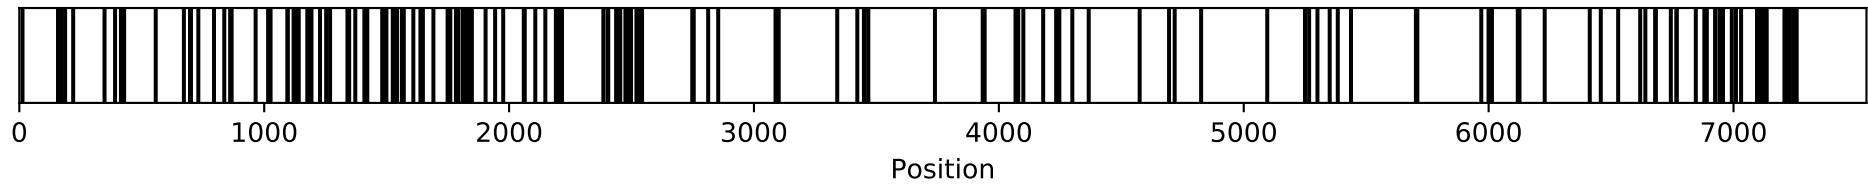

MM1 vs MM2  
Number of differences: 94

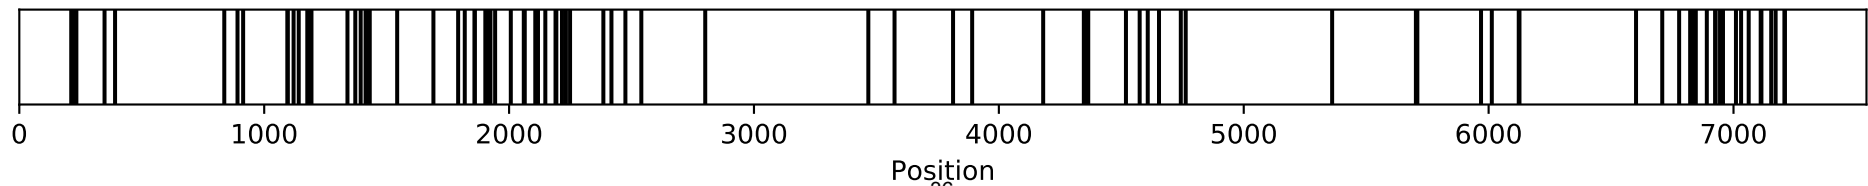

CR1 vs CR2  
Number of differences: 195

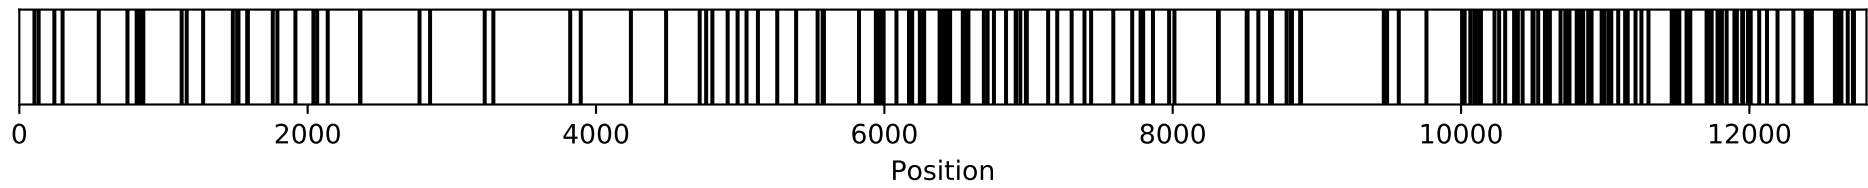

CR1 vs MM1  
Number of differences: 190

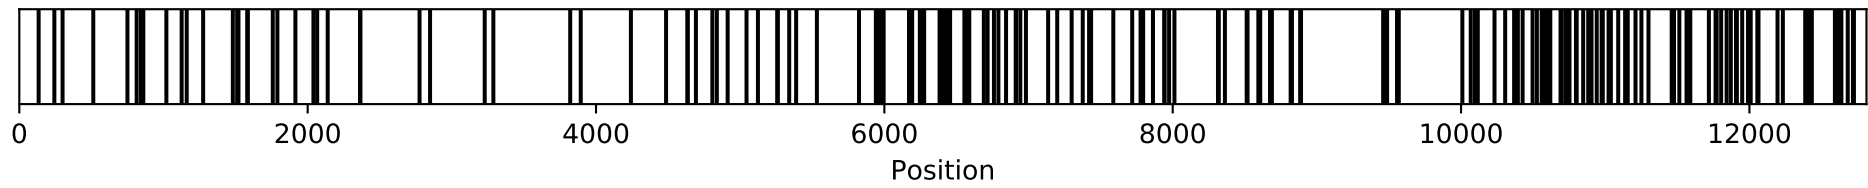

CR1 vs MM2  
Number of differences: 198

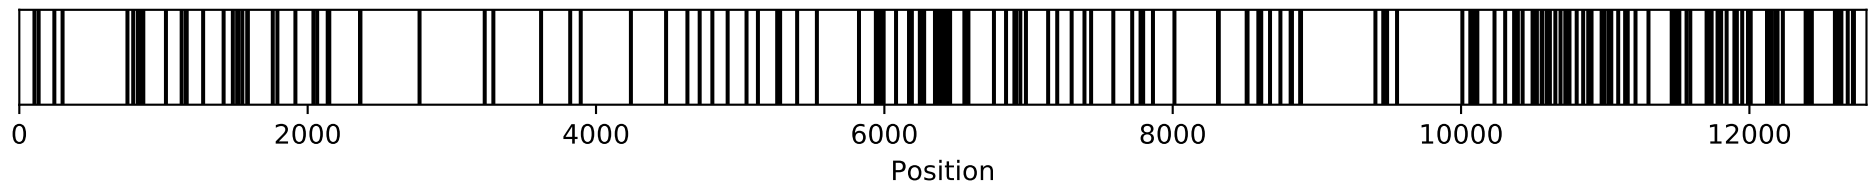

CR2 vs MM1  
Number of differences: 84

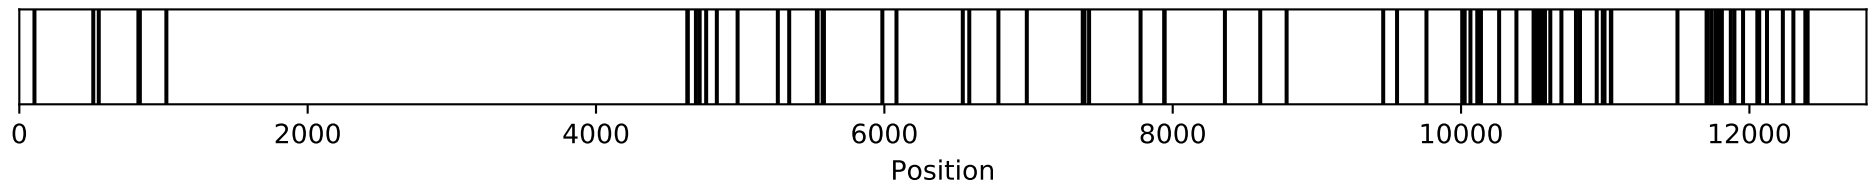

CR2 vs MM2  
Number of differences: 82

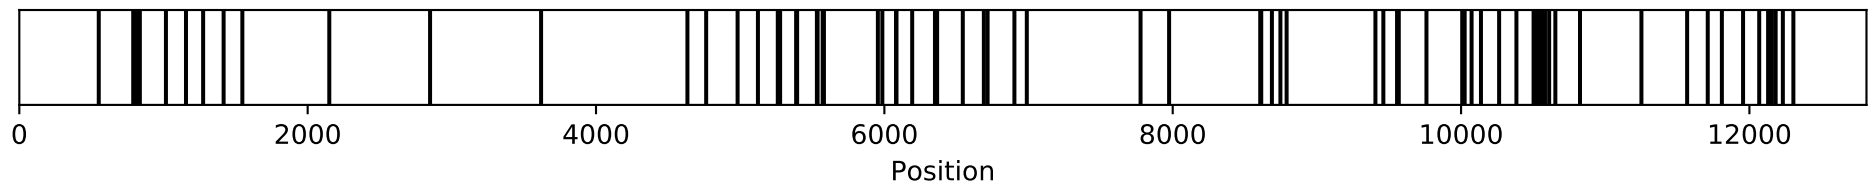

MM1 vs MM2  
Number of differences: 92

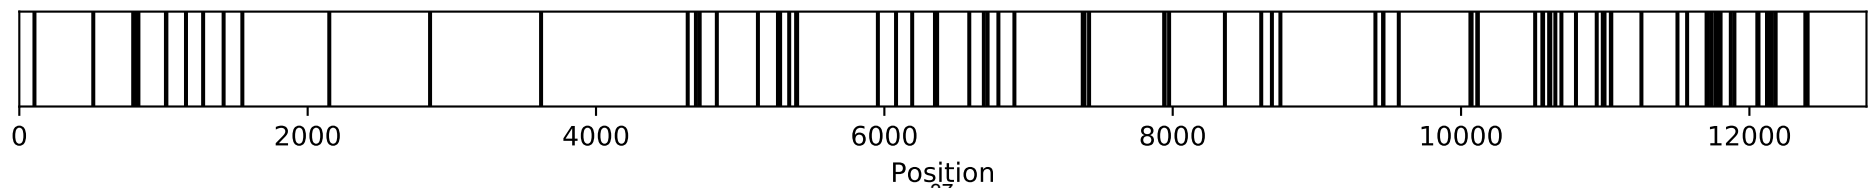

CR1 vs CR2  
Number of differences: 374

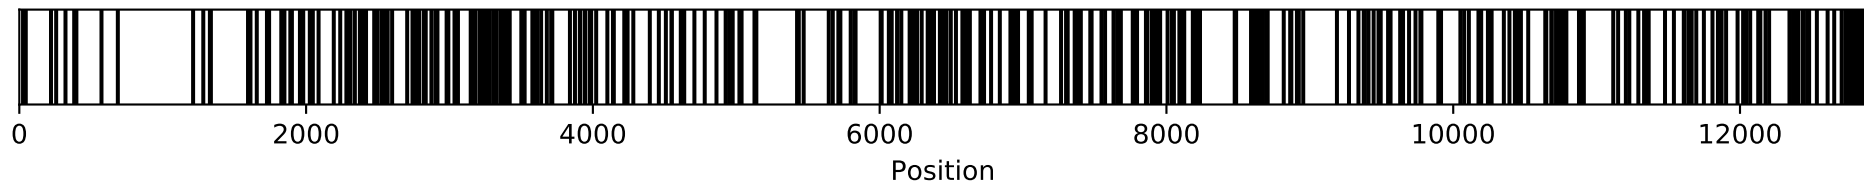

CR1 vs MM1  
Number of differences: 320

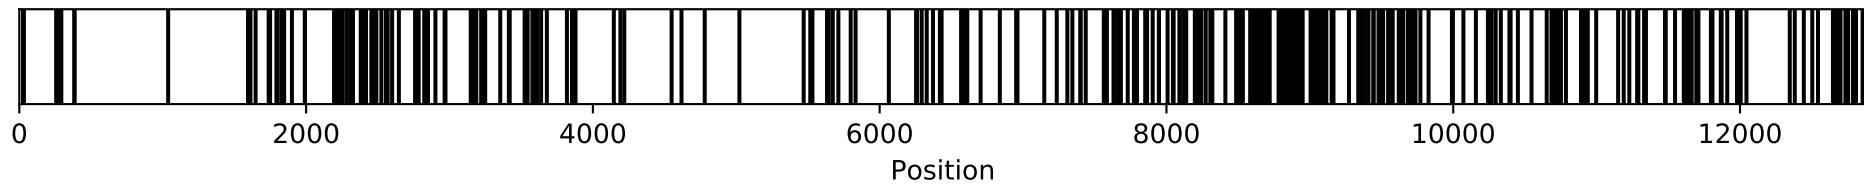

CR1 vs MM2  
Number of differences: 273

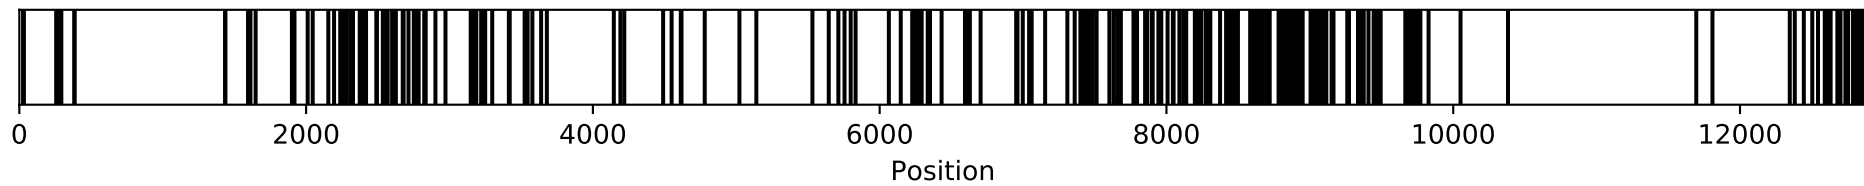

CR2 vs MM1  
Number of differences: 387

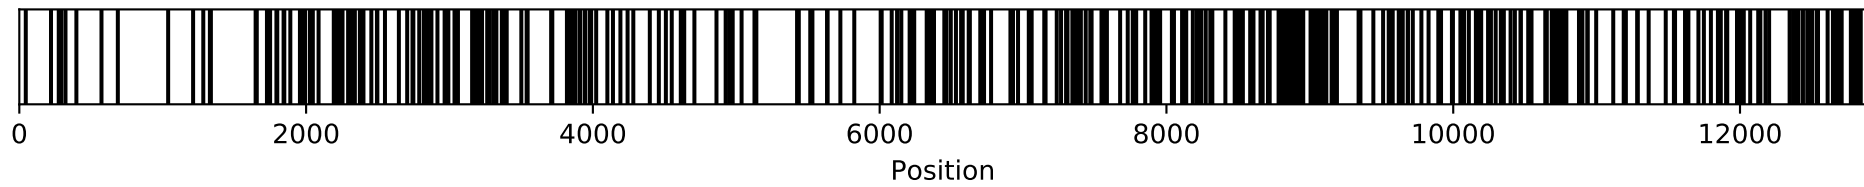

CR2 vs MM2  
Number of differences: 389

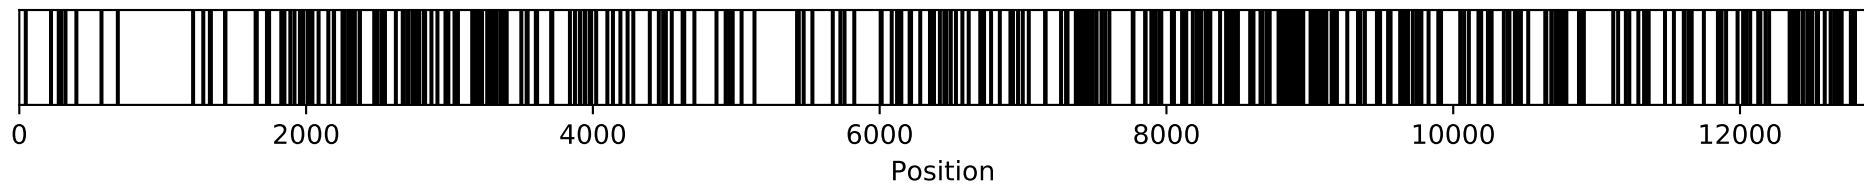

MM1 vs MM2  
Number of differences: 210

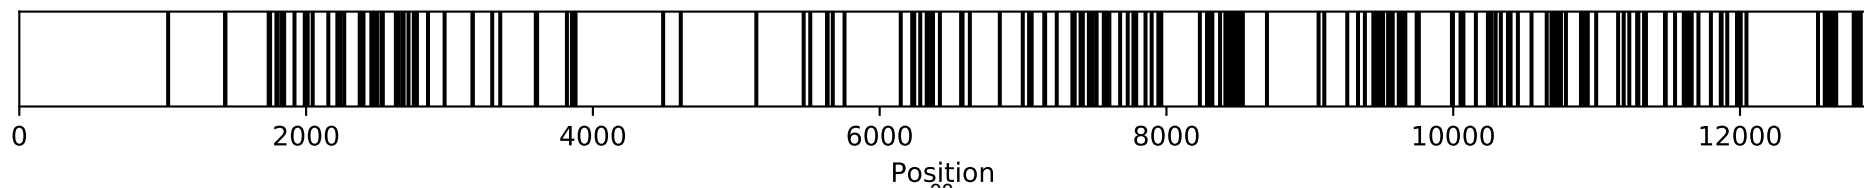

CR1 vs CR2  
Number of differences: 378

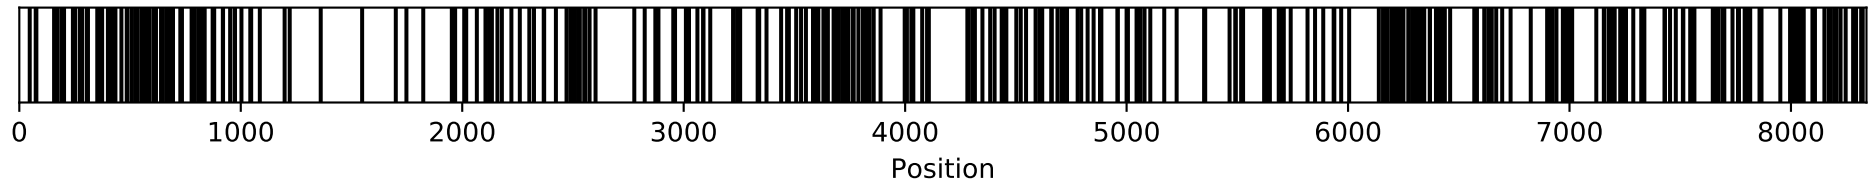

CR1 vs MM1  
Number of differences: 203

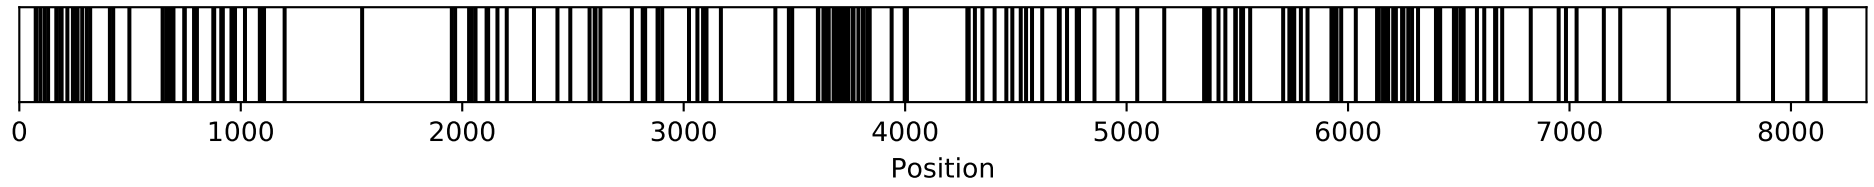

CR1 vs MM2  
Number of differences: 174

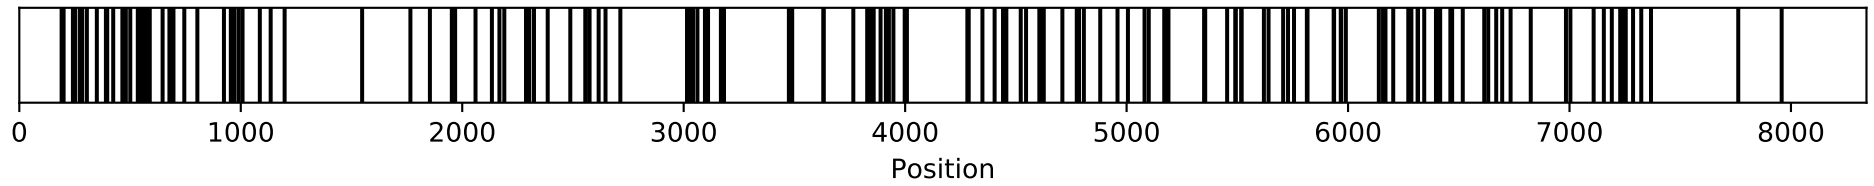

CR2 vs MM1  
Number of differences: 352

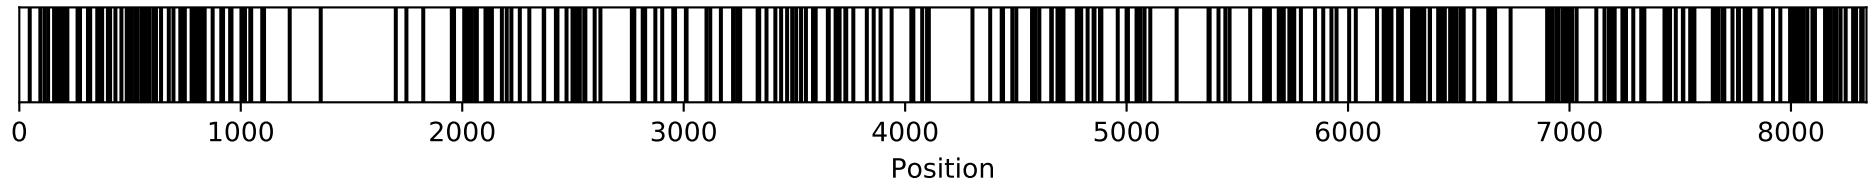

CR2 vs MM2  
Number of differences: 353

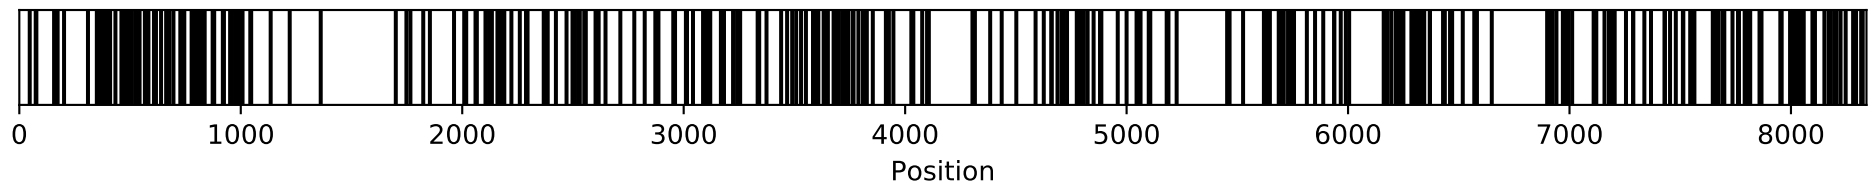

MM1 vs MM2  
Number of differences: 216

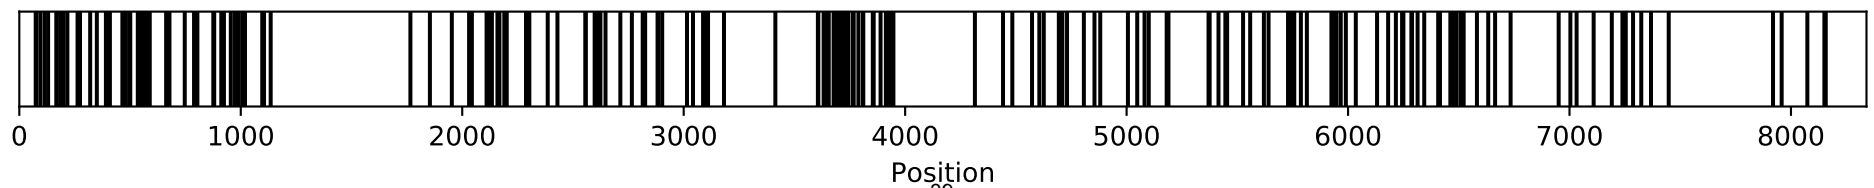



CR1 vs CR2  
Number of differences: 114

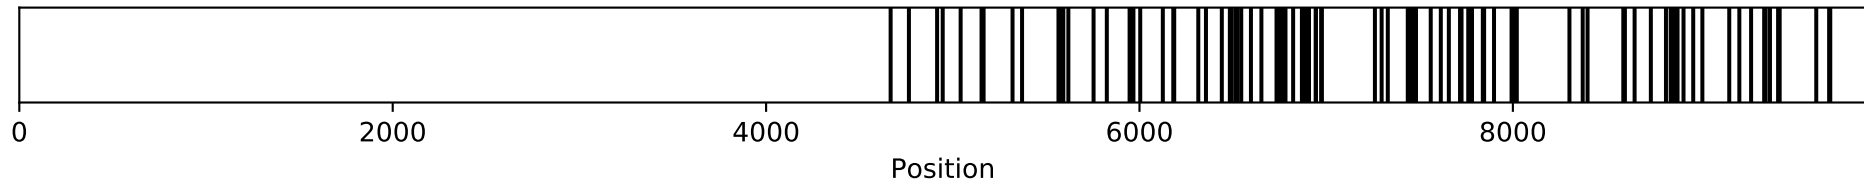

CR1 vs MM1  
Number of differences: 187

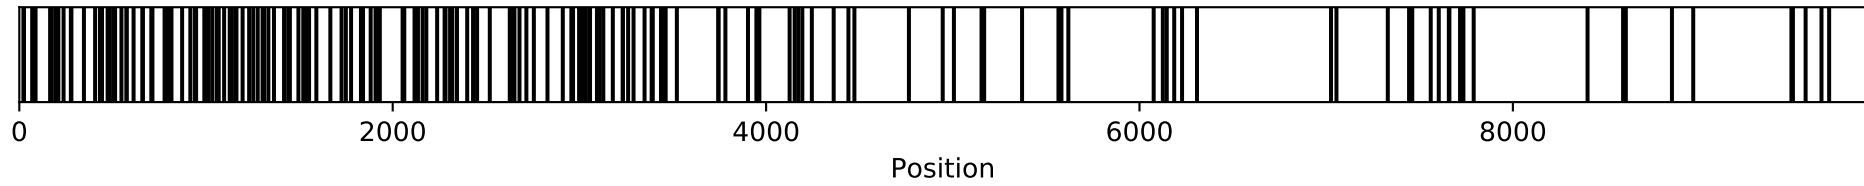

CR1 vs MM2  
Number of differences: 236

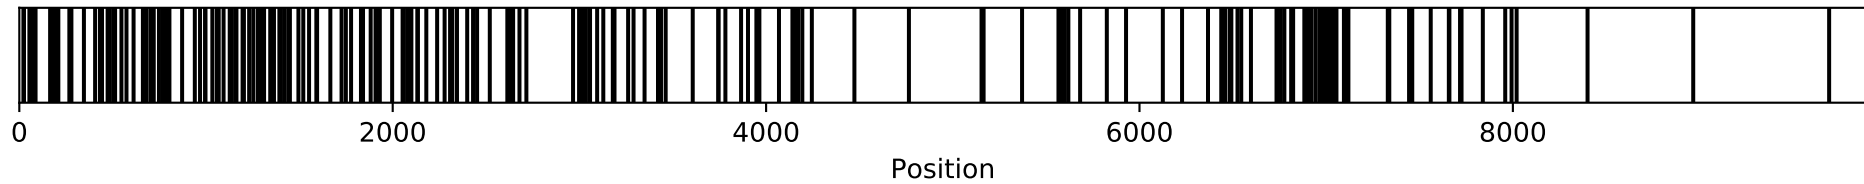

CR2 vs MM1  
Number of differences: 261

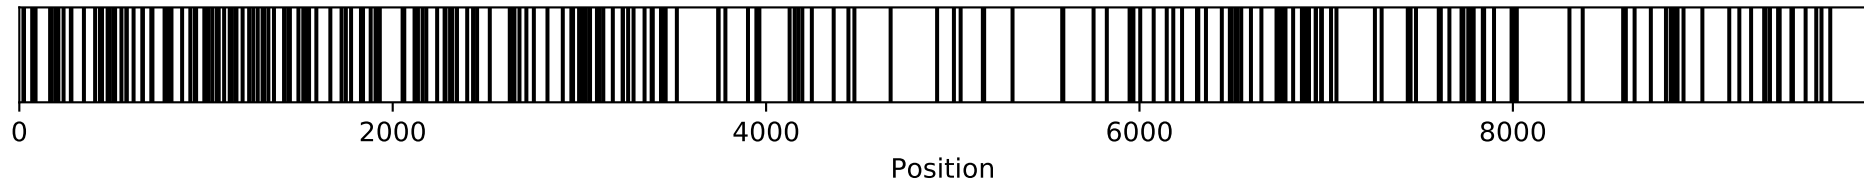

CR2 vs MM2  
Number of differences: 282

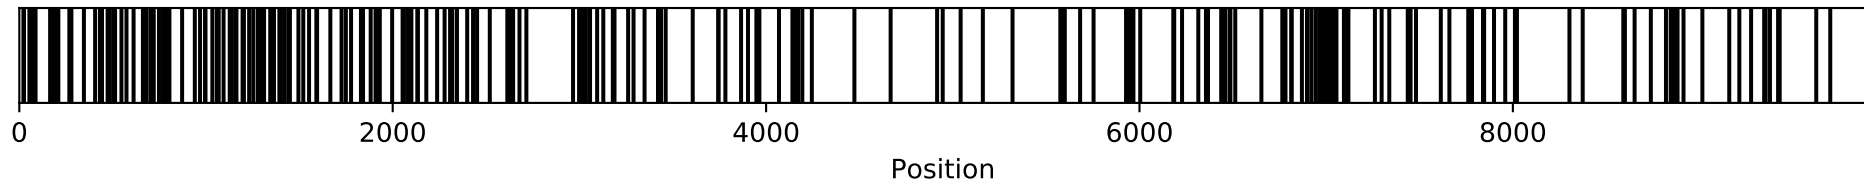

MM1 vs MM2  
Number of differences: 155

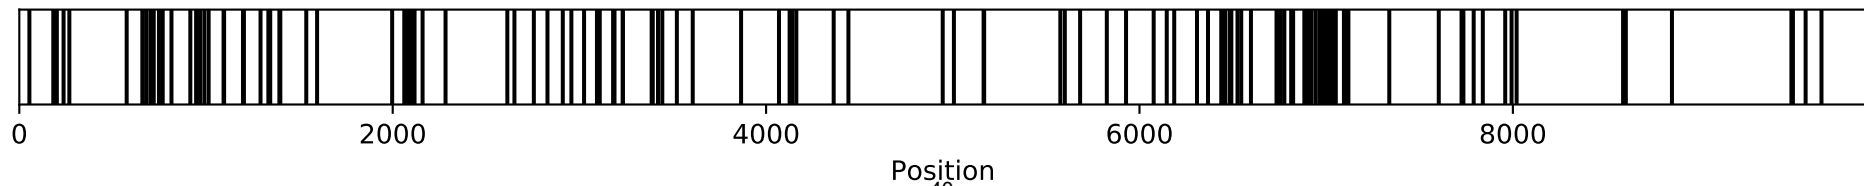

CR1 vs CR2  
Number of differences: 298

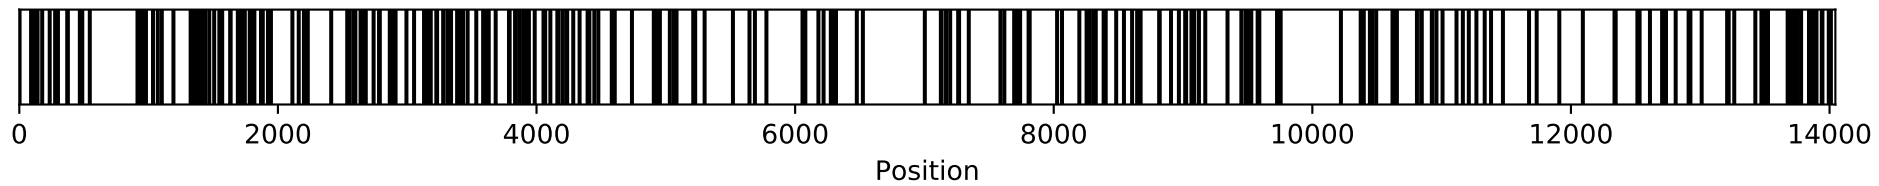

CR1 vs MM1  
Number of differences: 139

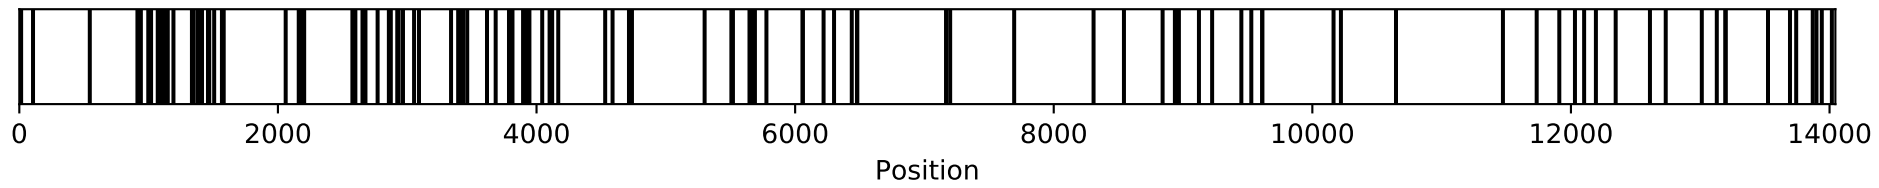

CR1 vs MM2  
Number of differences: 127

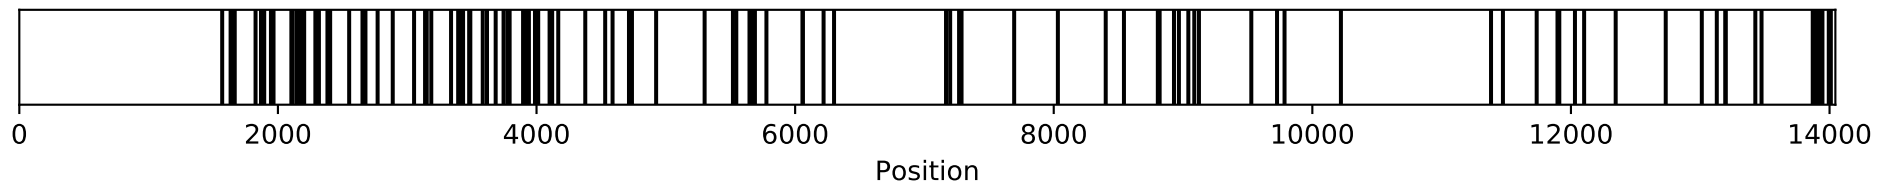

CR2 vs MM1  
Number of differences: 302

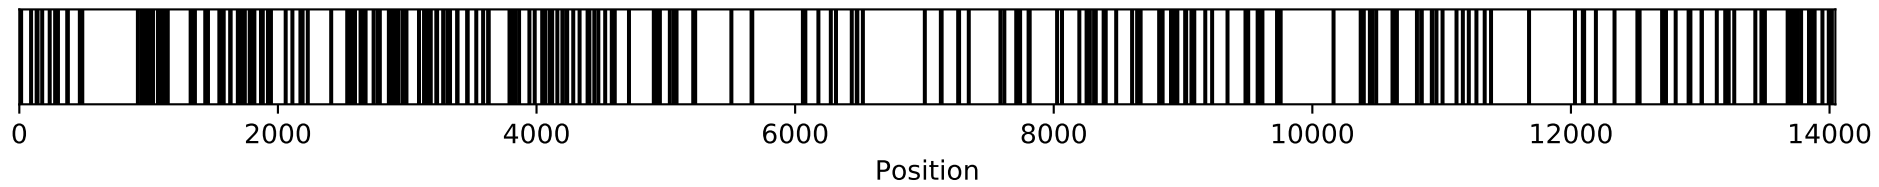

CR2 vs MM2  
Number of differences: 294

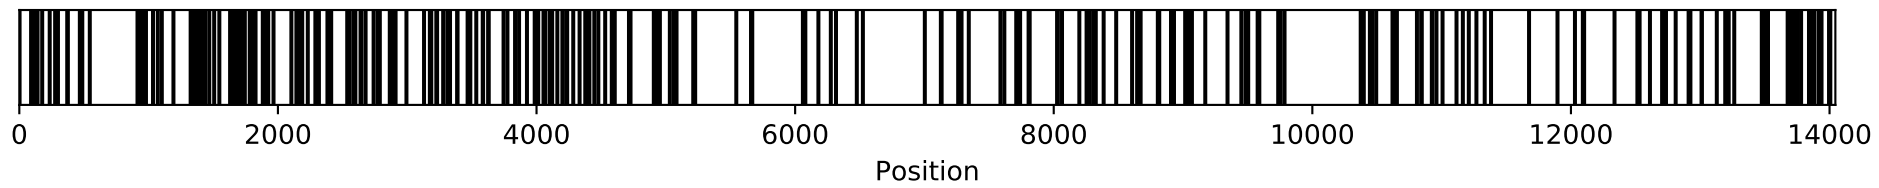

MM1 vs MM2  
Number of differences: 143

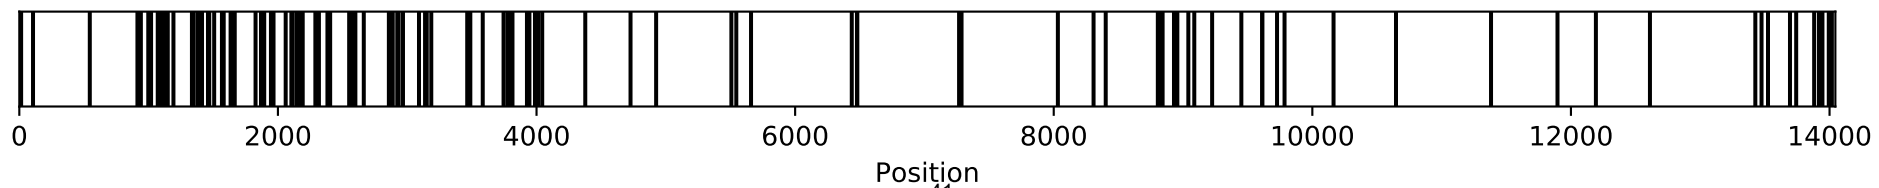

CR1 vs CR2  
Number of differences: 359

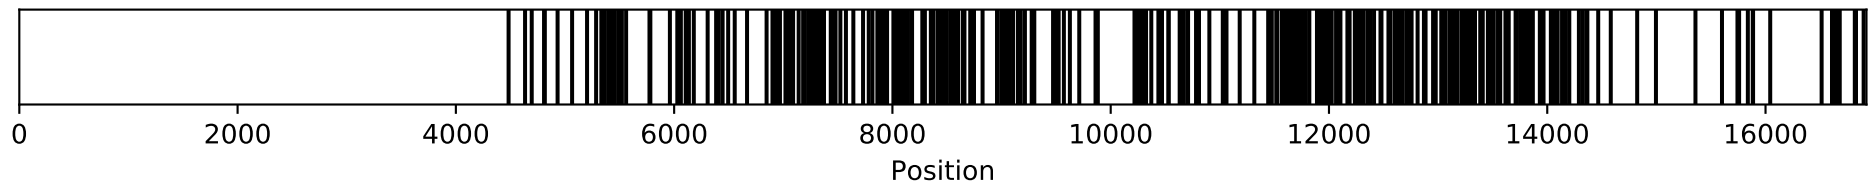

CR1 vs MM1  
Number of differences: 314

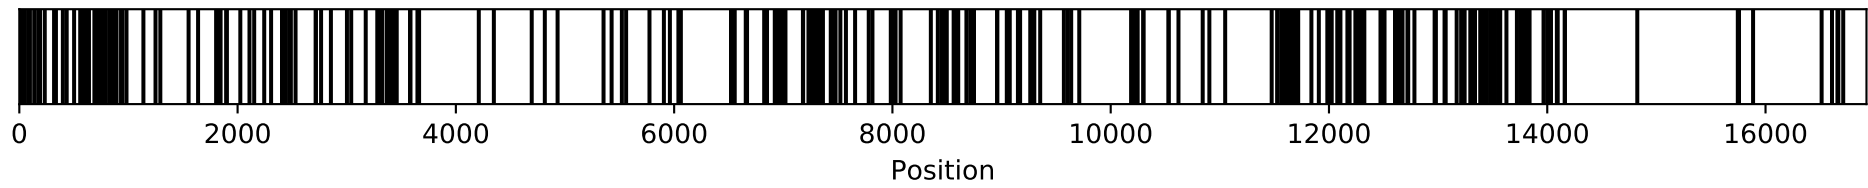

CR1 vs MM2  
Number of differences: 325

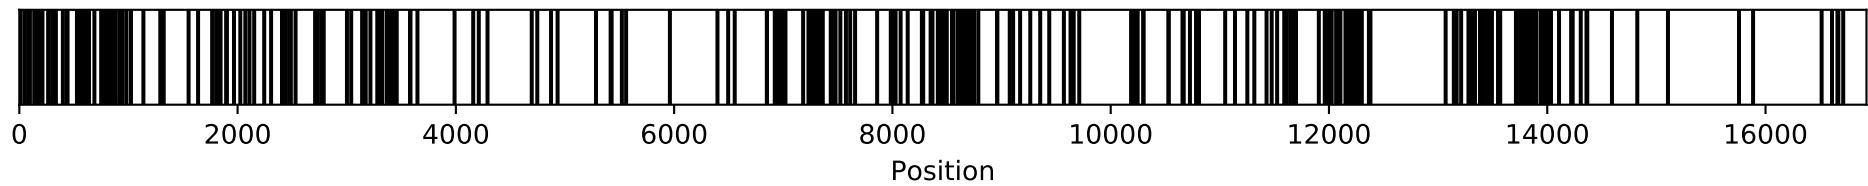

CR2 vs MM1  
Number of differences: 397

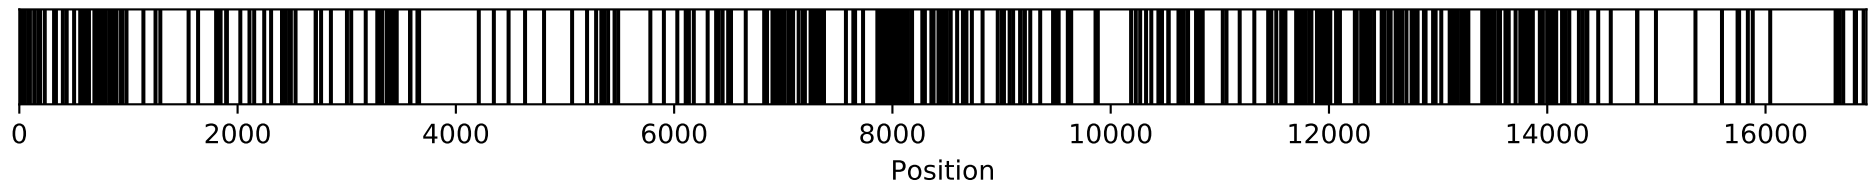

CR2 vs MM2  
Number of differences: 462

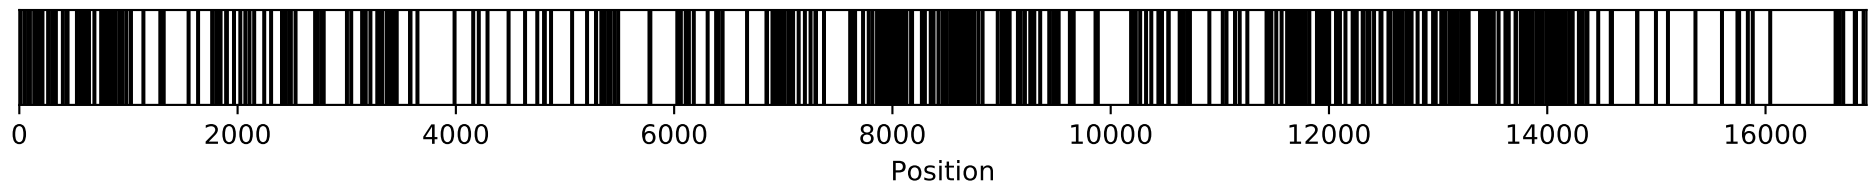

MM1 vs MM2  
Number of differences: 243

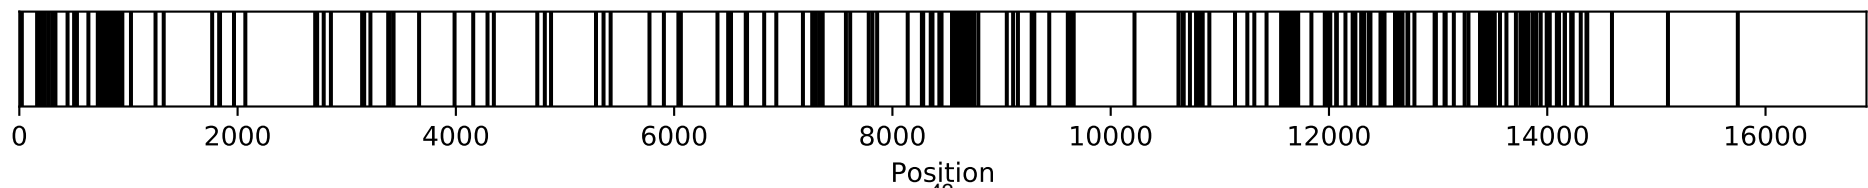

CR1 vs CR2  
Number of differences: 362

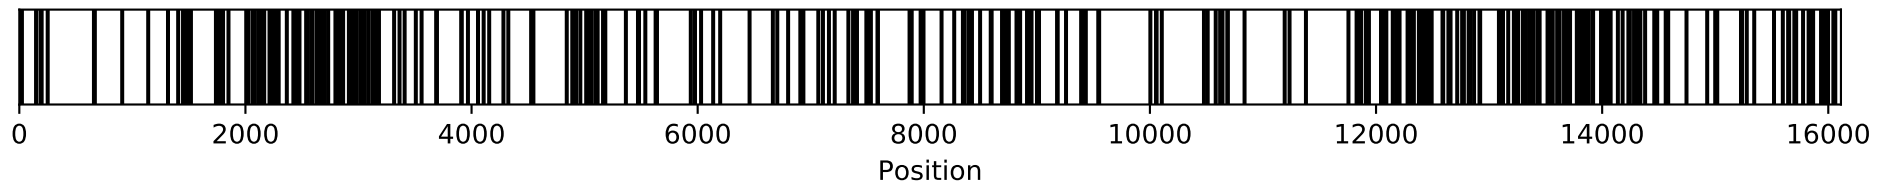

CR1 vs MM1  
Number of differences: 183

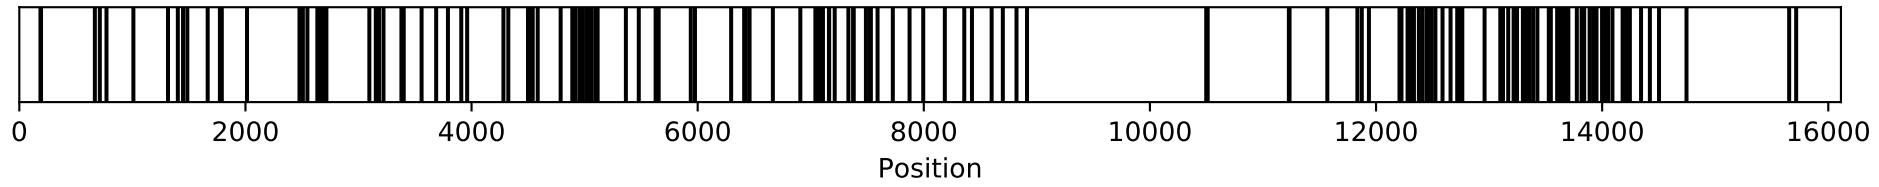

CR1 vs MM2  
Number of differences: 146

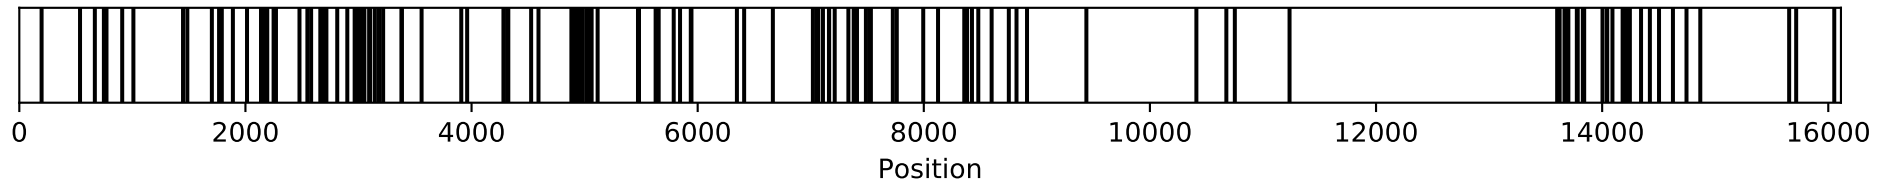

CR2 vs MM1  
Number of differences: 347

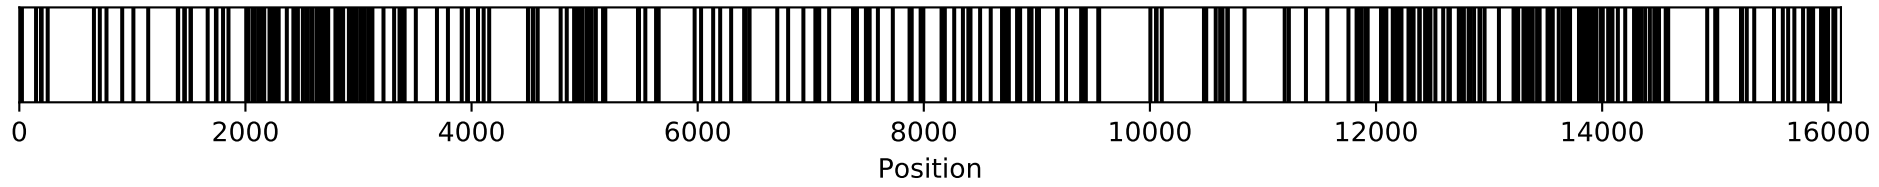

CR2 vs MM2  
Number of differences: 334

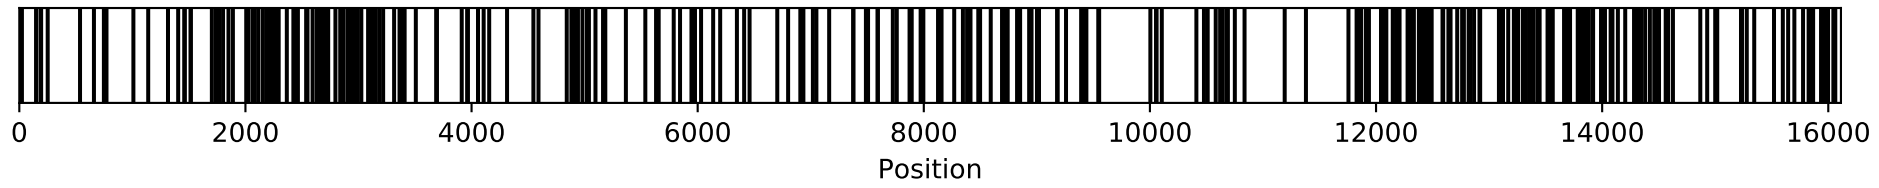

MM1 vs MM2  
Number of differences: 163

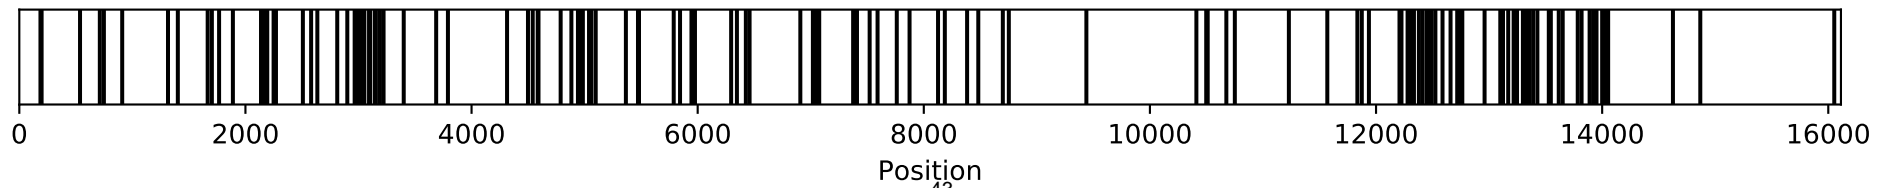

CR1 vs CR2  
Number of differences: 337

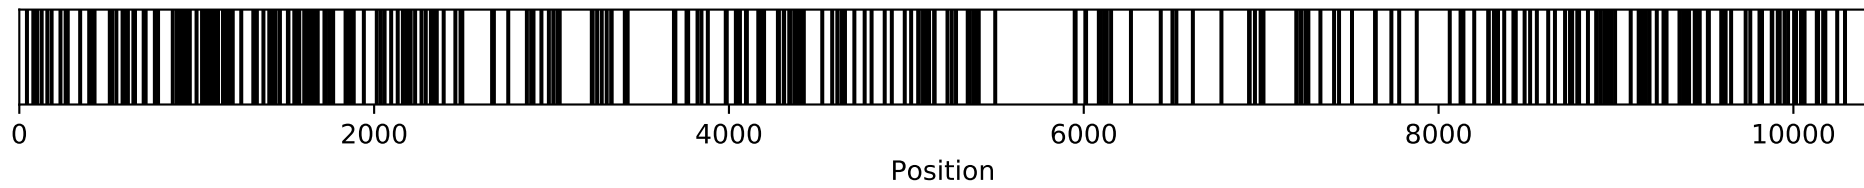

CR1 vs MM1  
Number of differences: 105

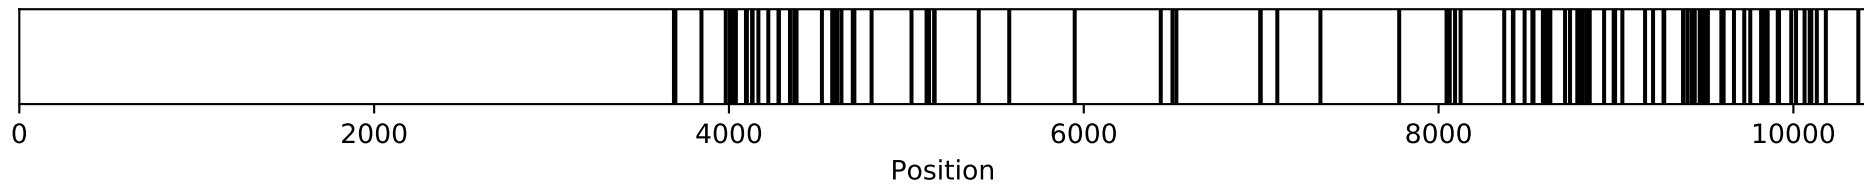

CR1 vs MM2  
Number of differences: 201

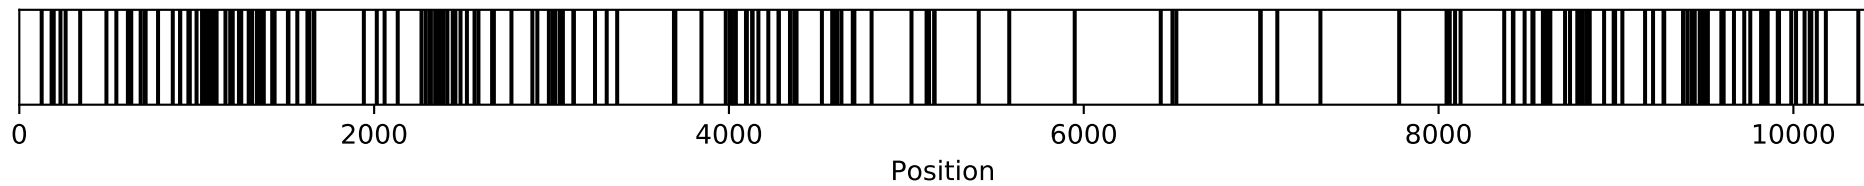

CR2 vs MM1  
Number of differences: 316

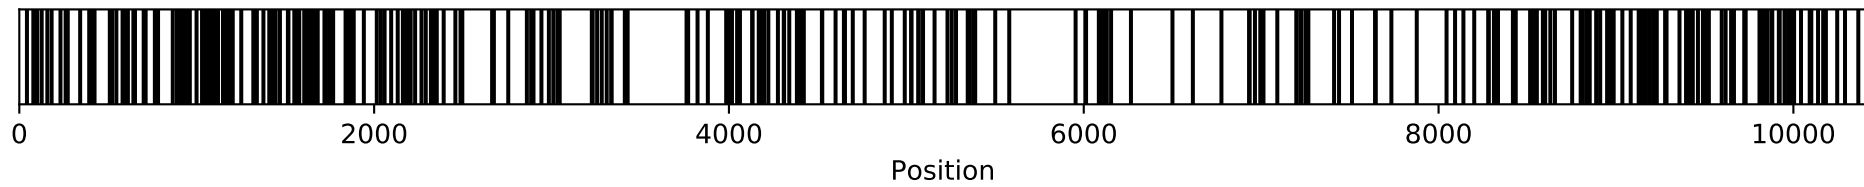

CR2 vs MM2  
Number of differences: 291

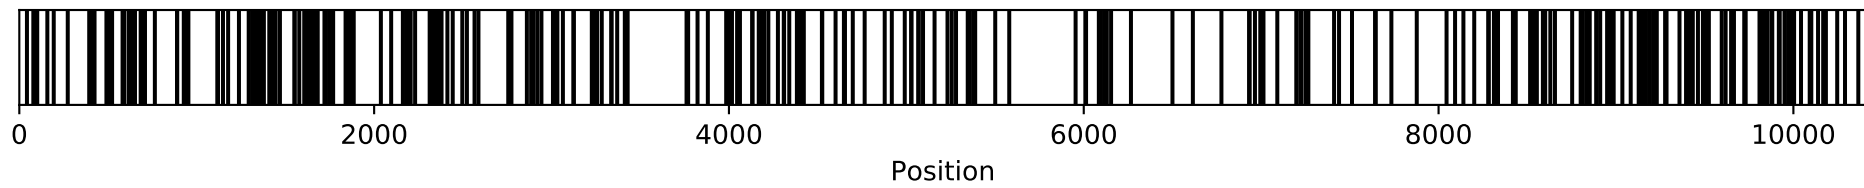

MM1 vs MM2  
Number of differences: 96

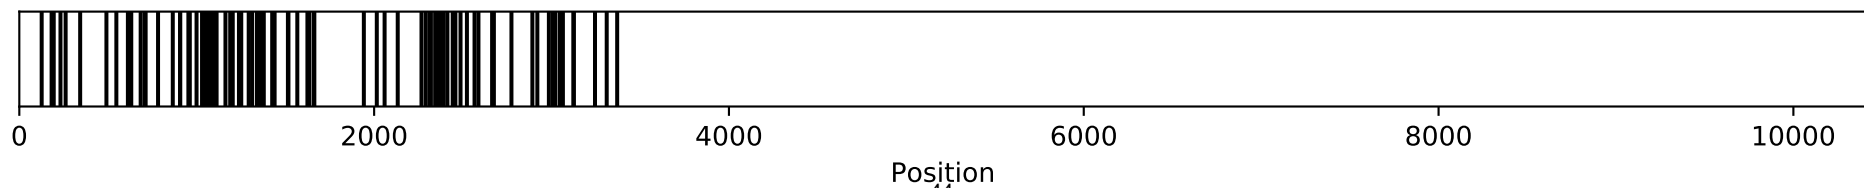

CR1 vs CR2  
Number of differences: 203

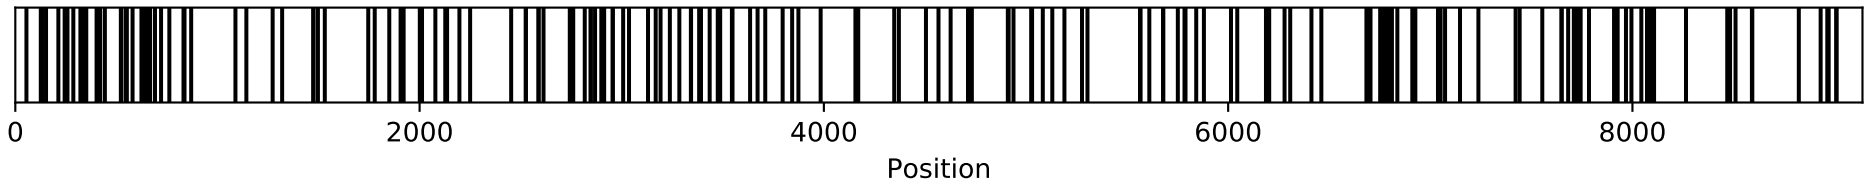

CR1 vs MM1  
Number of differences: 114

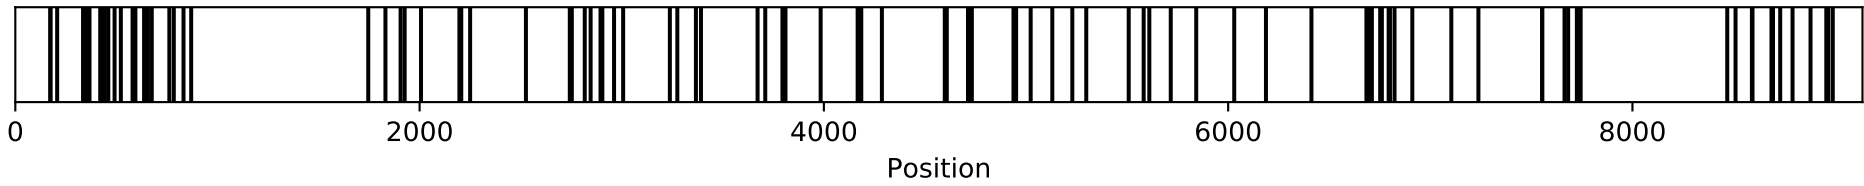

CR1 vs MM2  
Number of differences: 97

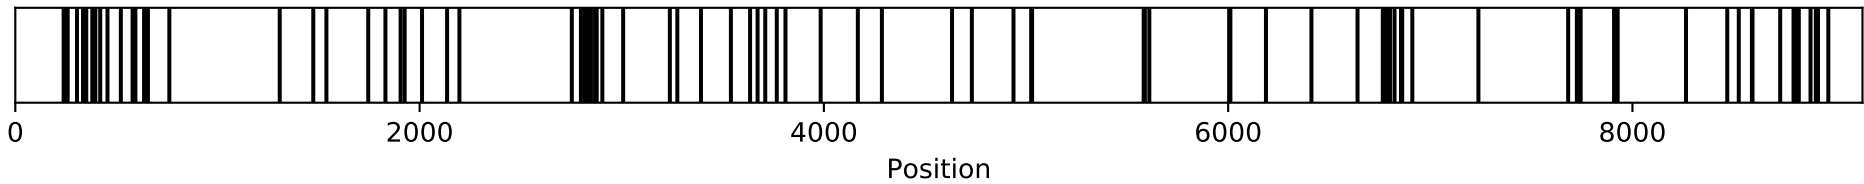

CR2 vs MM1  
Number of differences: 209

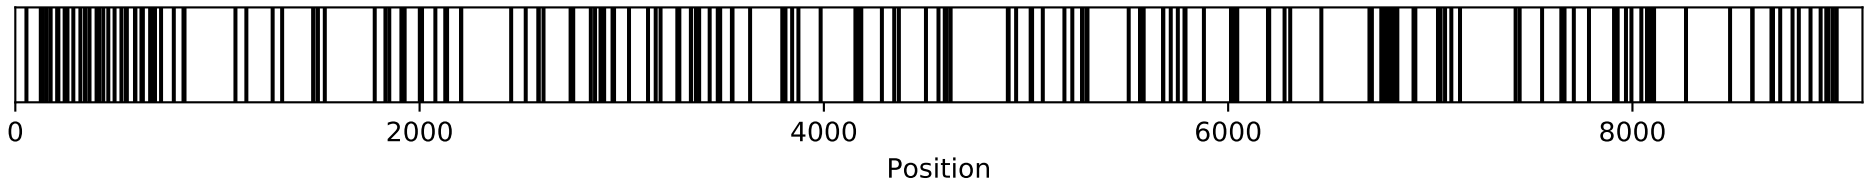

CR2 vs MM2  
Number of differences: 193

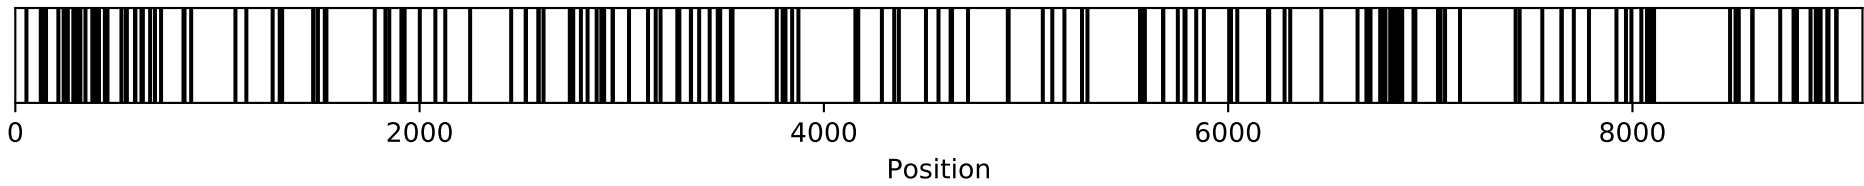

MM1 vs MM2  
Number of differences: 113

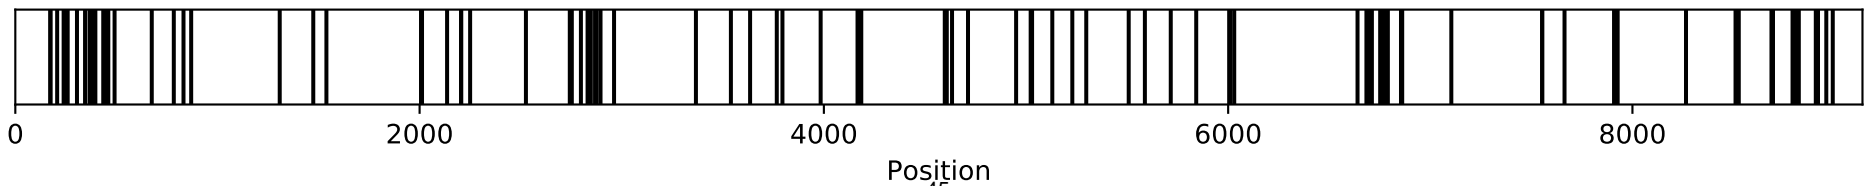

CR1 vs CR2  
Number of differences: 190

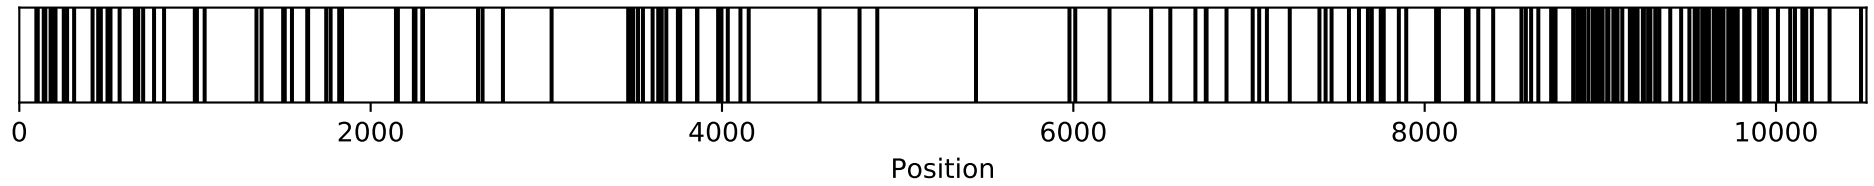

CR1 vs MM1  
Number of differences: 184

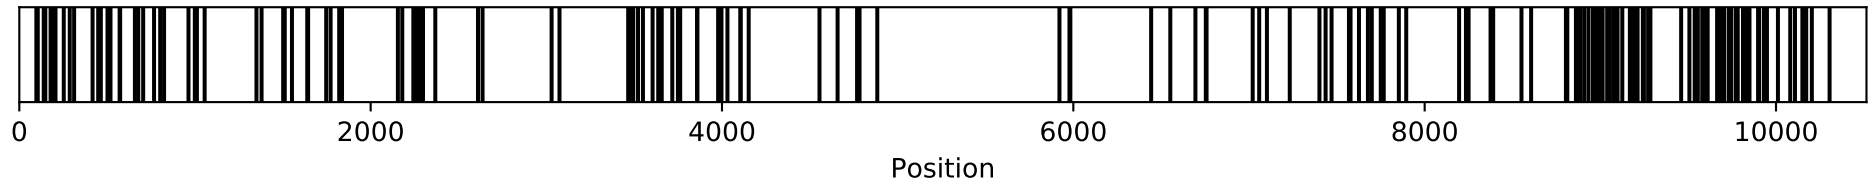

CR1 vs MM2  
Number of differences: 183

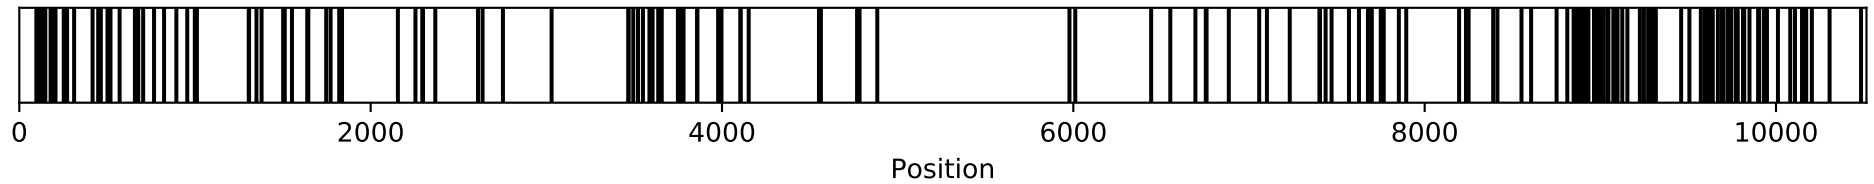

CR2 vs MM1  
Number of differences: 77

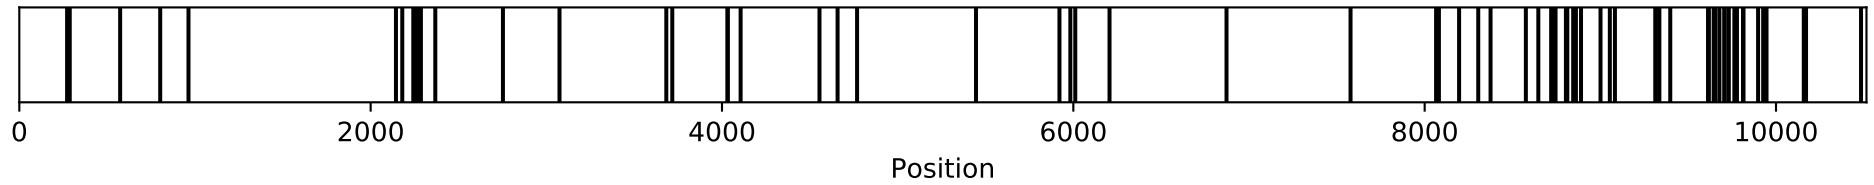

CR2 vs MM2  
Number of differences: 102

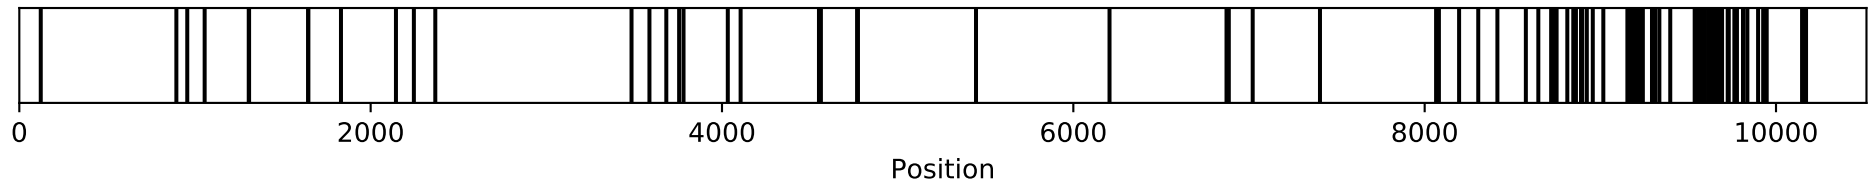

MM1 vs MM2  
Number of differences: 87

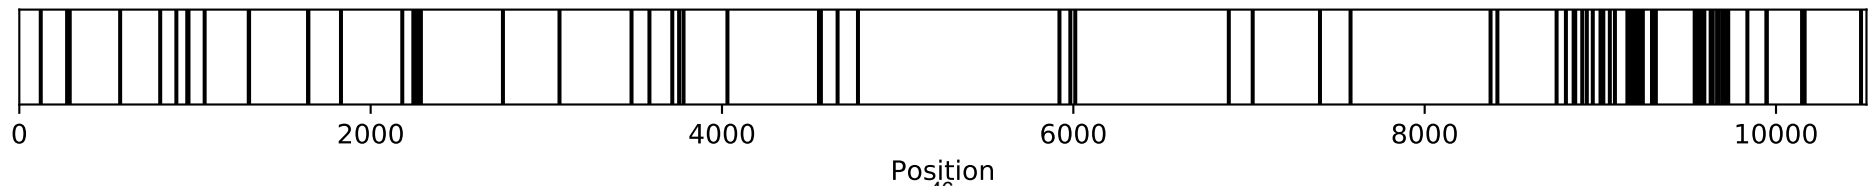

CR1 vs CR2  
Number of differences: 242

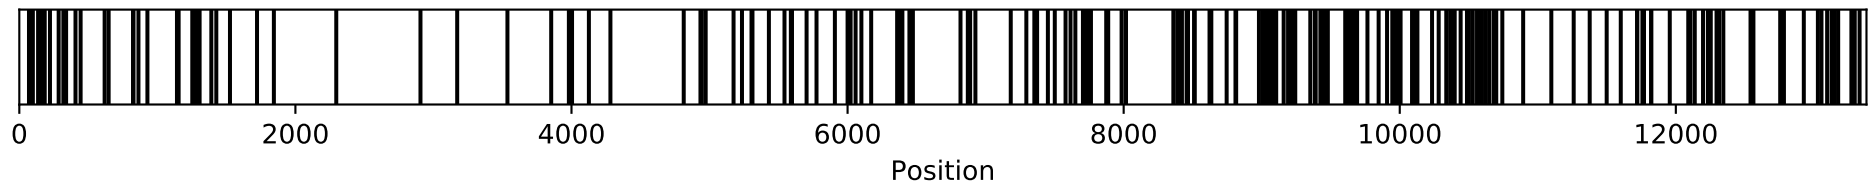

CR1 vs MM1  
Number of differences: 141

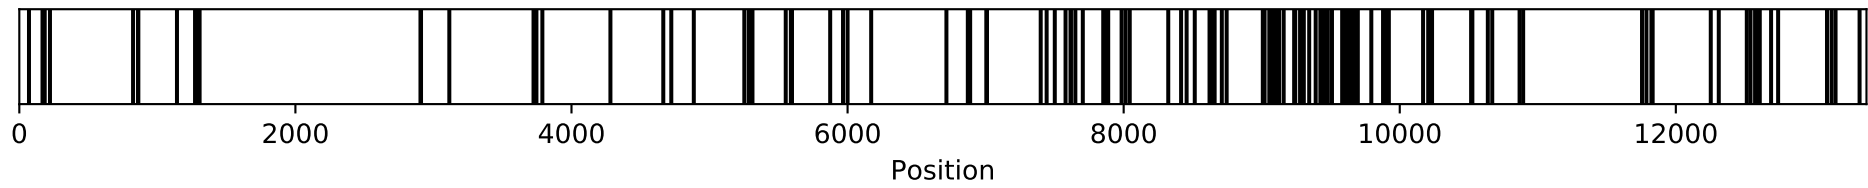

CR1 vs MM2  
Number of differences: 149

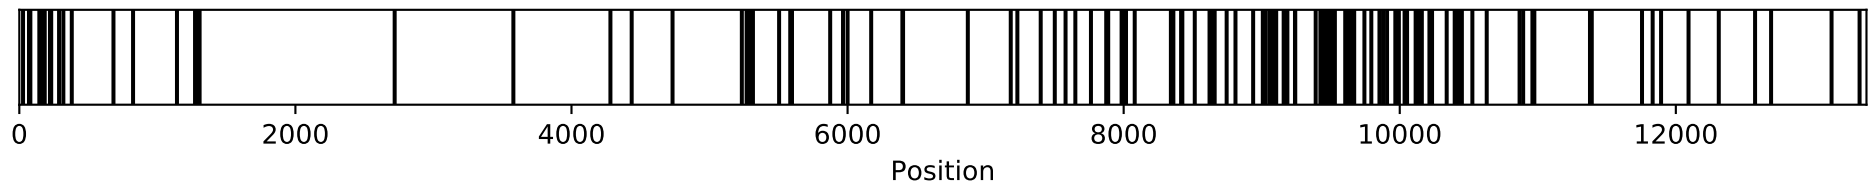

CR2 vs MM1  
Number of differences: 242

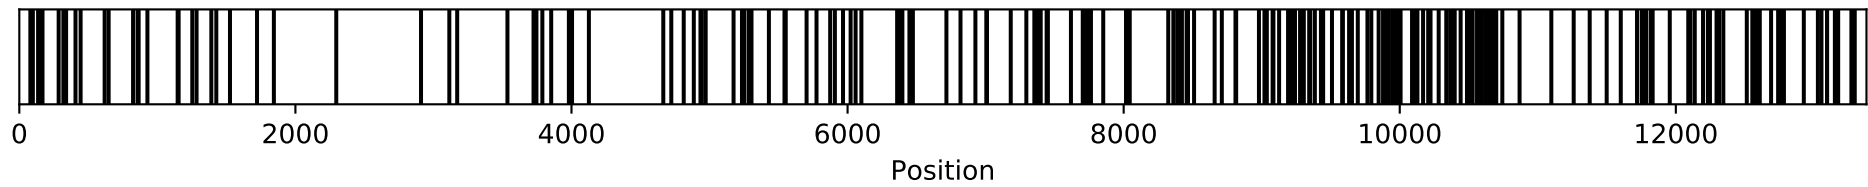

CR2 vs MM2  
Number of differences: 231

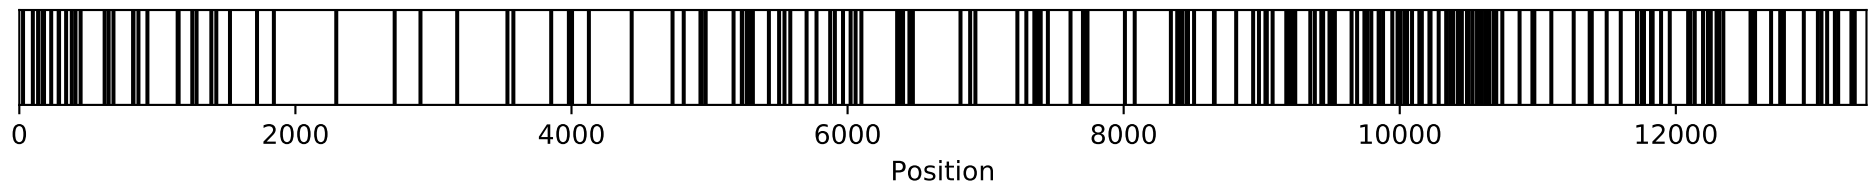

MM1 vs MM2  
Number of differences: 134

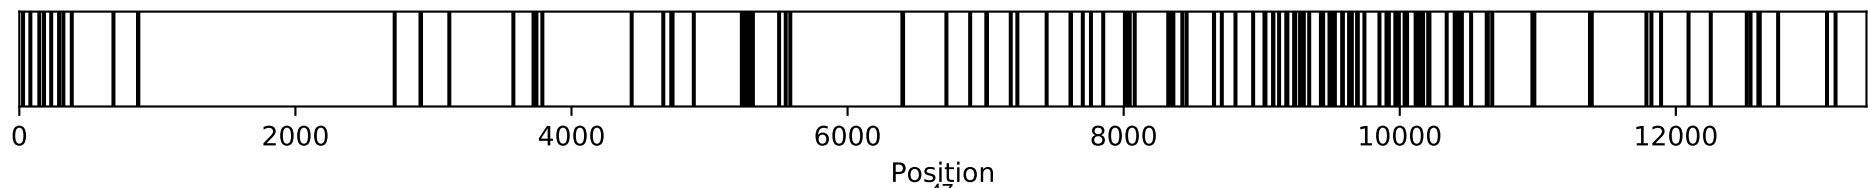



CR1 vs CR2  
Number of differences: 199

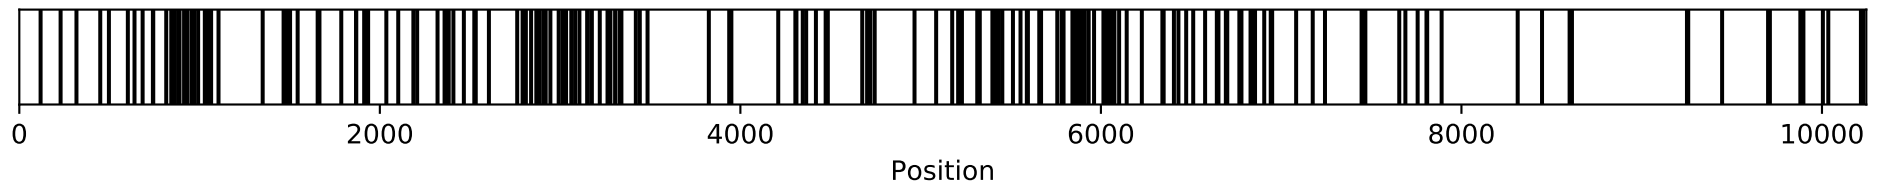

CR1 vs MM1  
Number of differences: 97

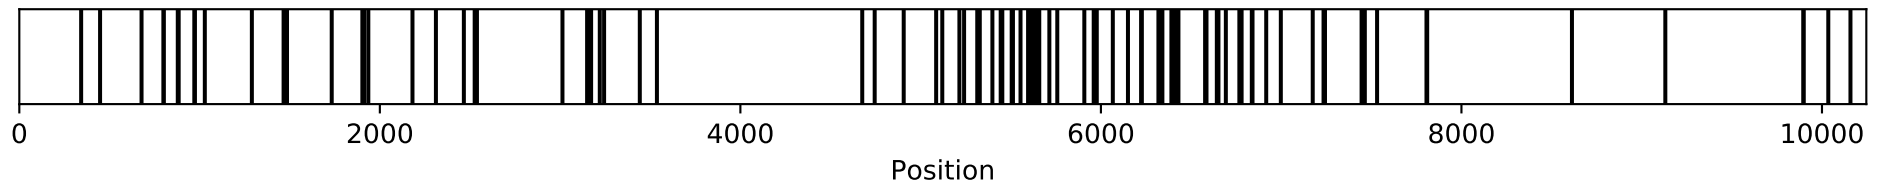

CR1 vs MM2  
Number of differences: 85

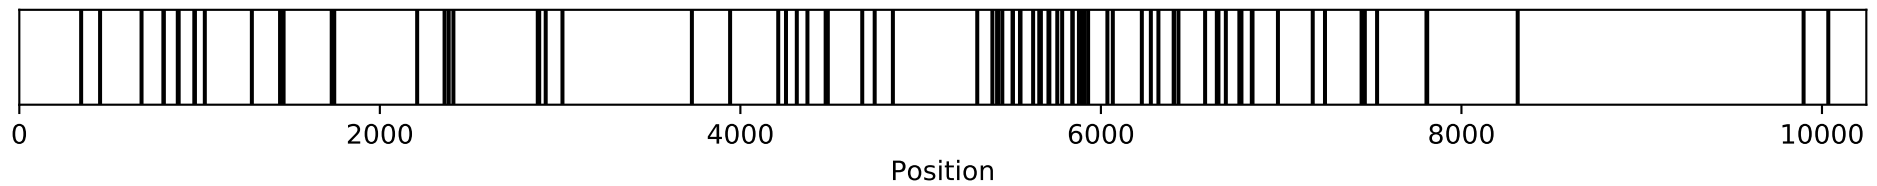

CR2 vs MM1  
Number of differences: 205

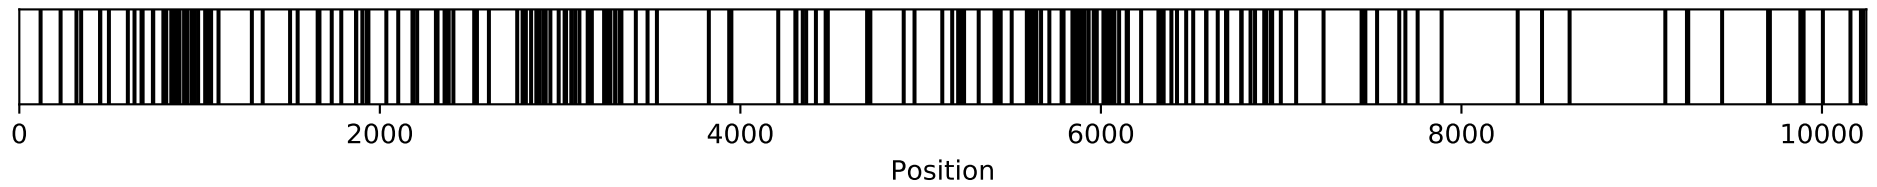

CR2 vs MM2  
Number of differences: 192

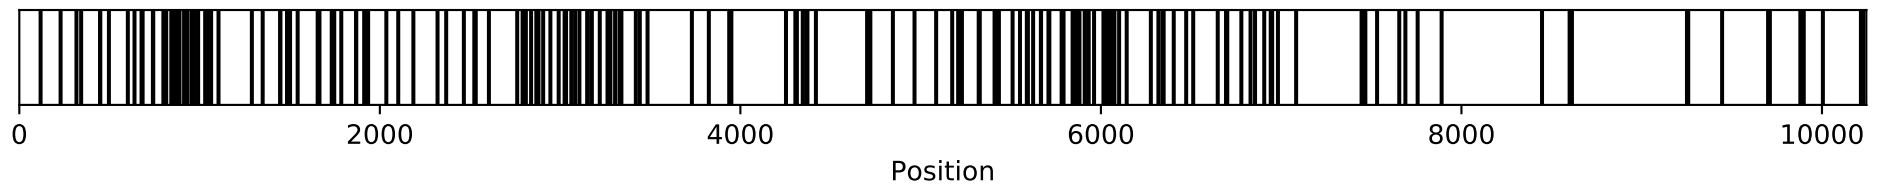

MM1 vs MM2  
Number of differences: 87

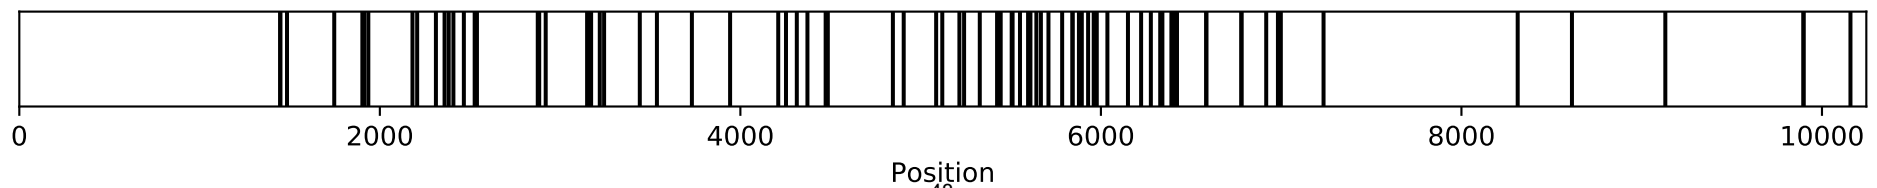

CR1 vs CR2  
Number of differences: 10

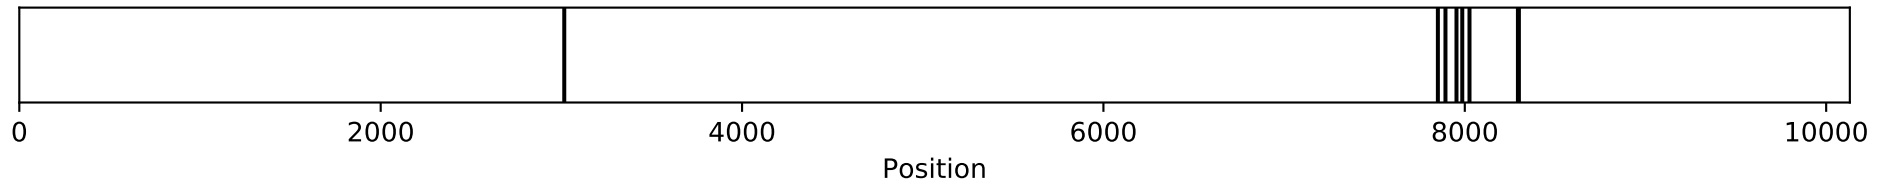

CR1 vs MM1  
Number of differences: 236

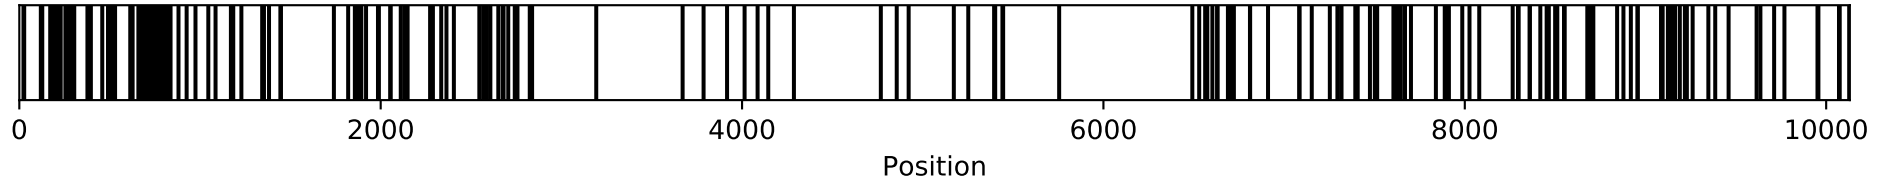

CR1 vs MM2  
Number of differences: 211

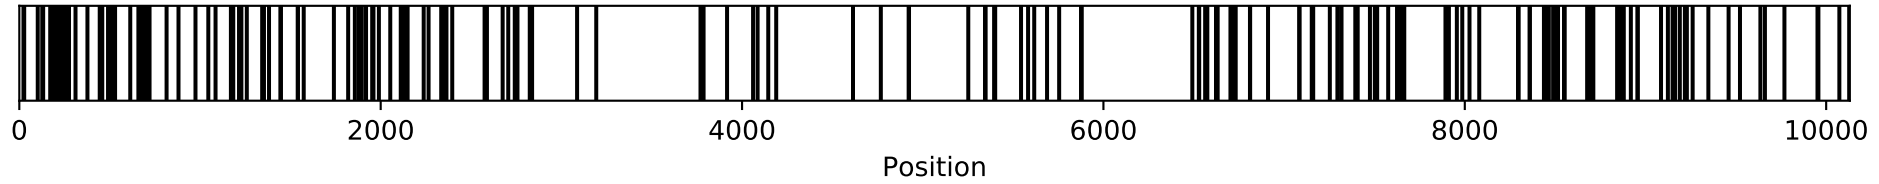

CR2 vs MM1  
Number of differences: 237

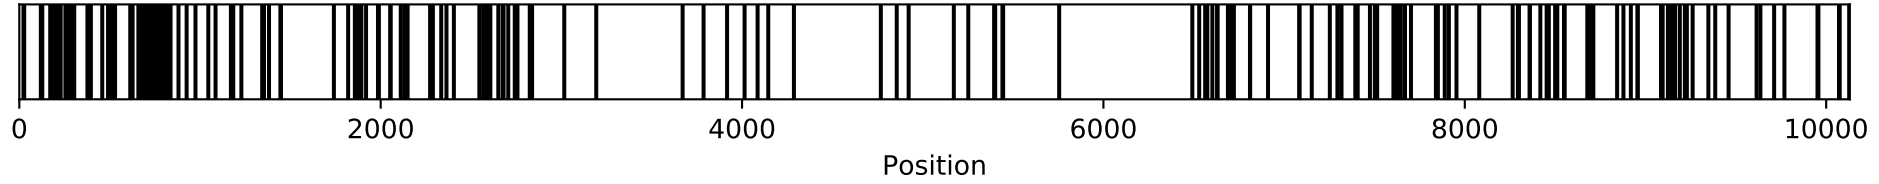

CR2 vs MM2  
Number of differences: 212

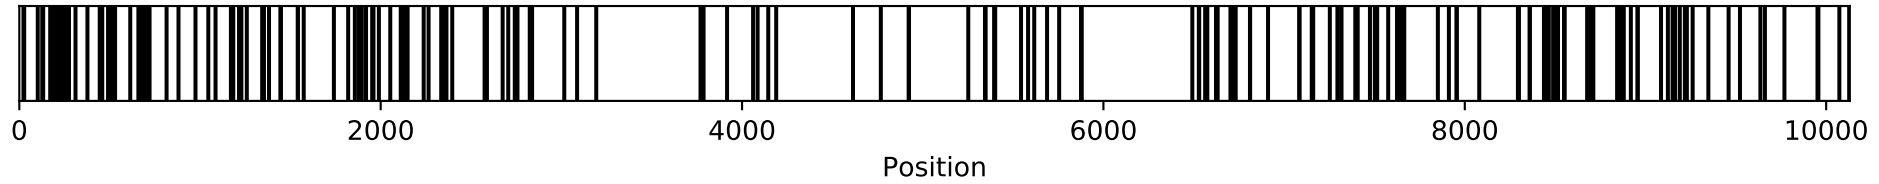

MM1 vs MM2  
Number of differences: 147

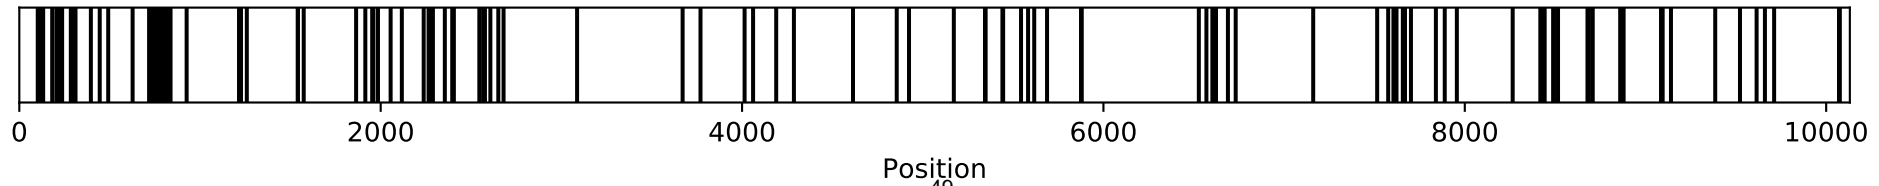

CR1 vs CR2  
Number of differences: 240

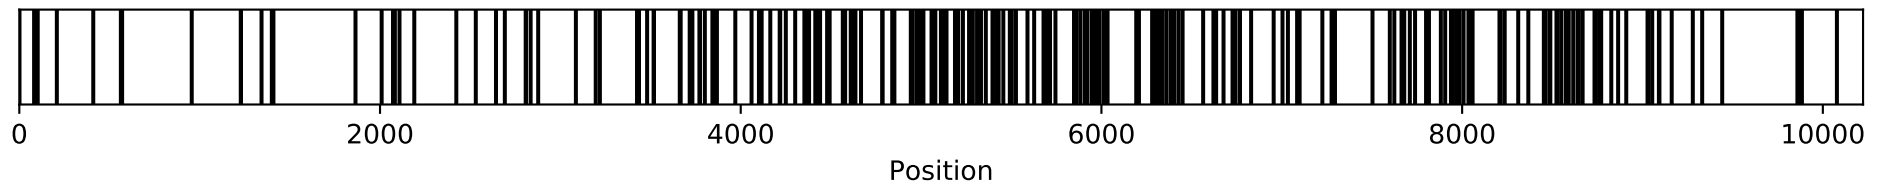

CR1 vs MM1  
Number of differences: 182

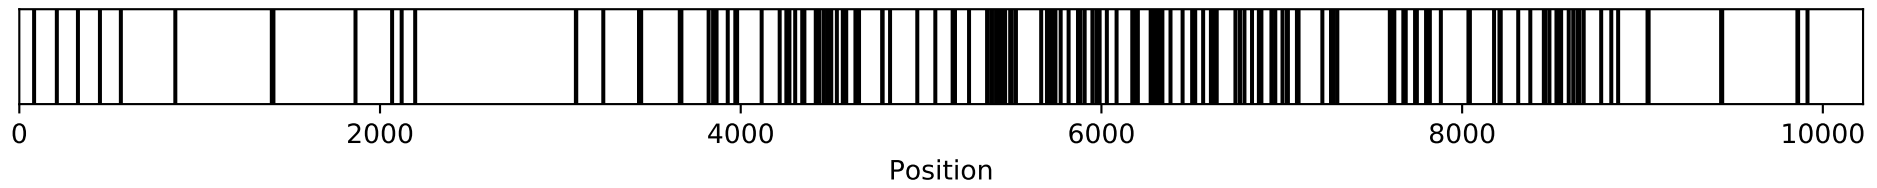

CR1 vs MM2  
Number of differences: 152

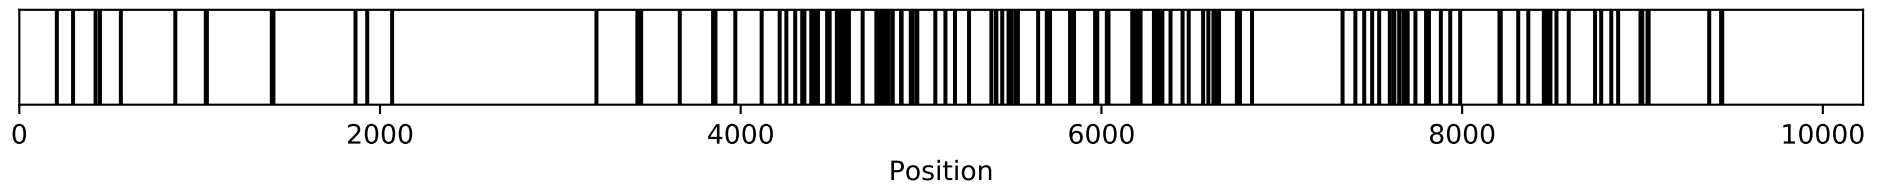

CR2 vs MM1  
Number of differences: 229

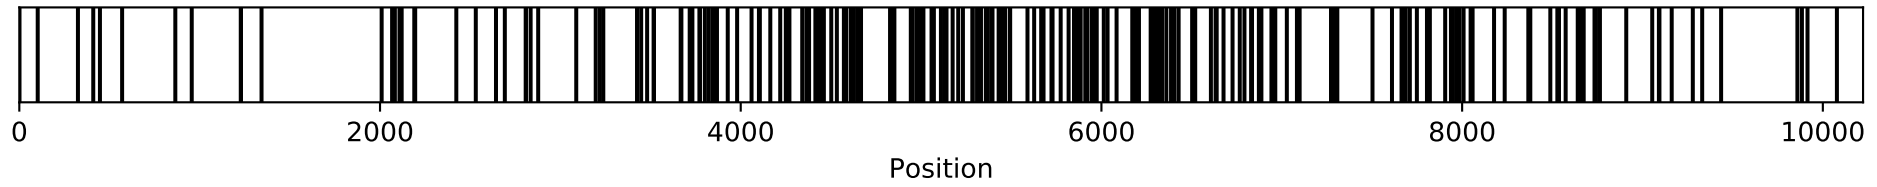

CR2 vs MM2  
Number of differences: 236

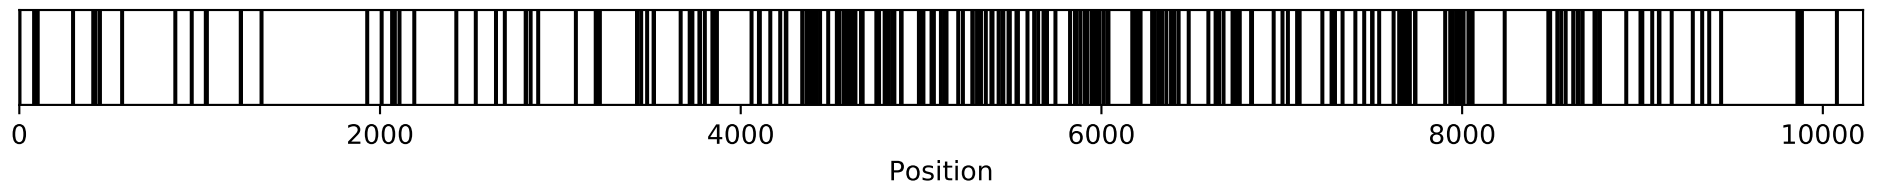

MM1 vs MM2  
Number of differences: 155

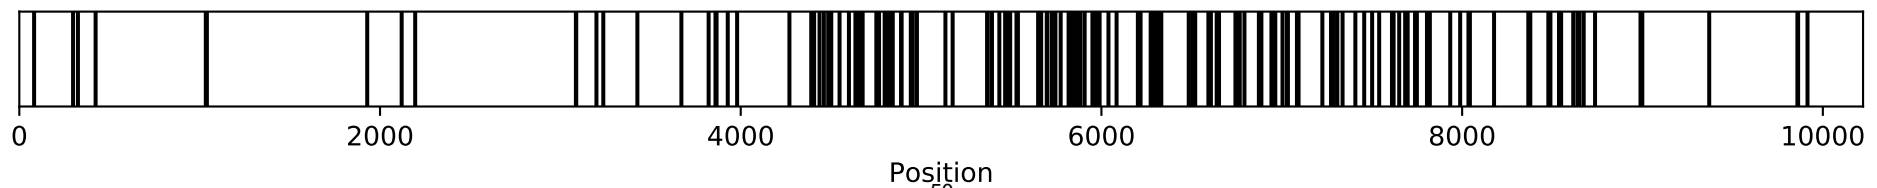

CR1 vs CR2  
Number of differences: 332

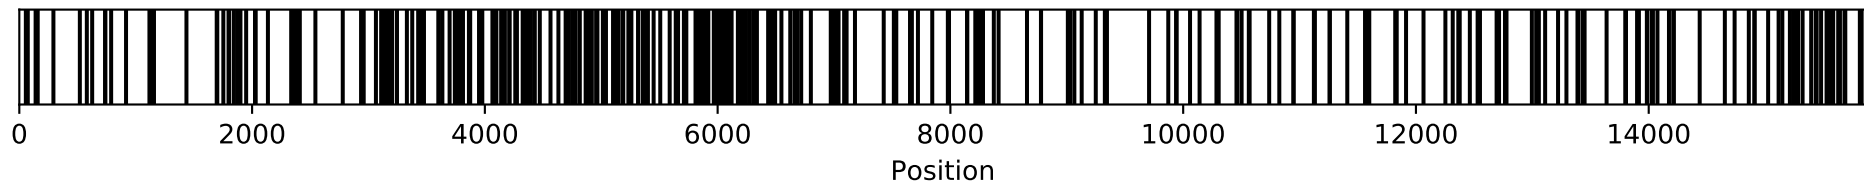

CR1 vs MM1  
Number of differences: 172

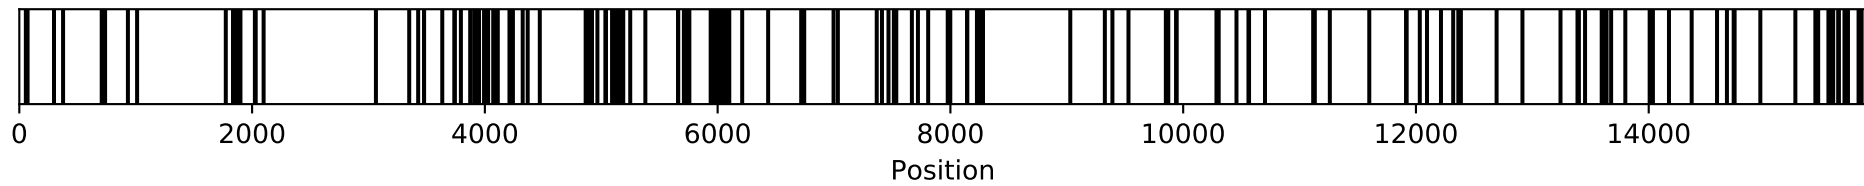

CR1 vs MM2  
Number of differences: 175

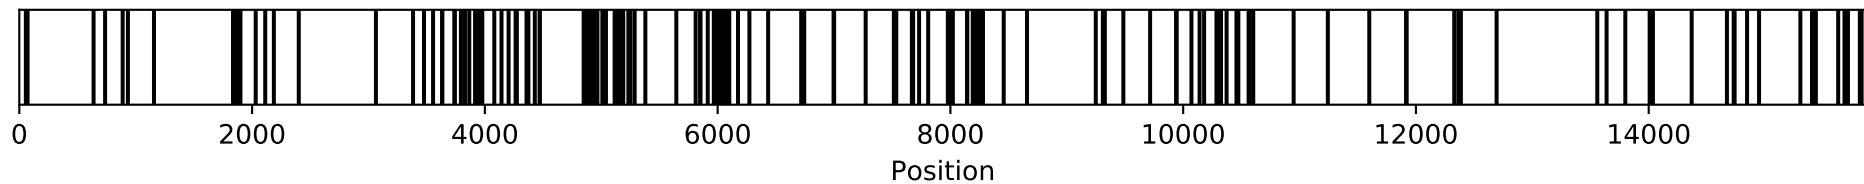

CR2 vs MM1  
Number of differences: 341

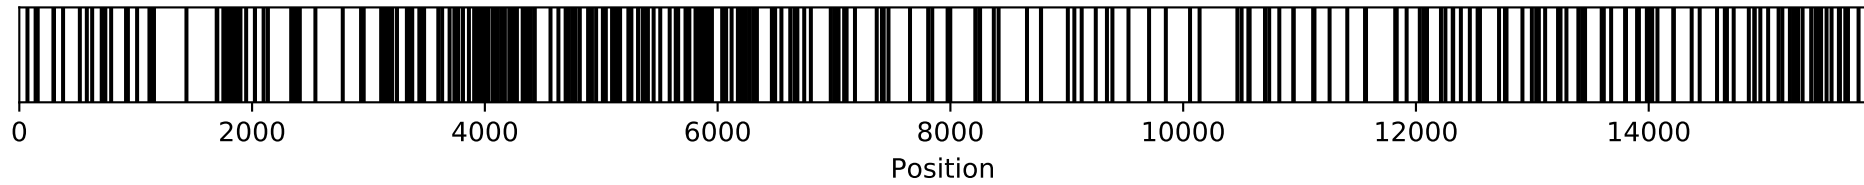

CR2 vs MM2  
Number of differences: 335

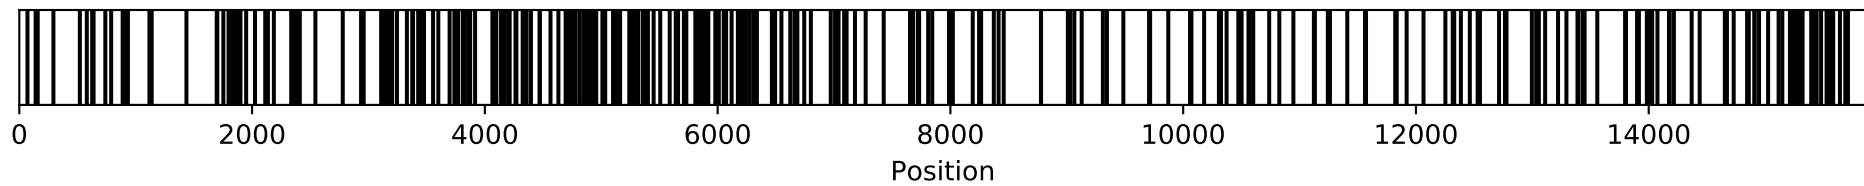

MM1 vs MM2  
Number of differences: 171

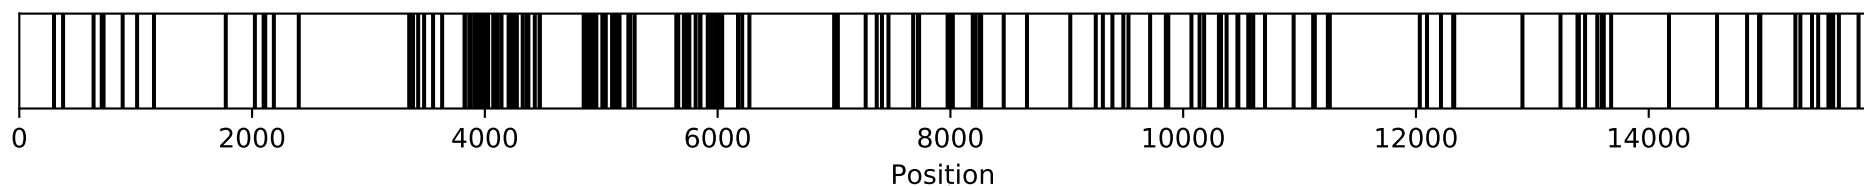

CR1 vs CR2  
Number of differences: 183

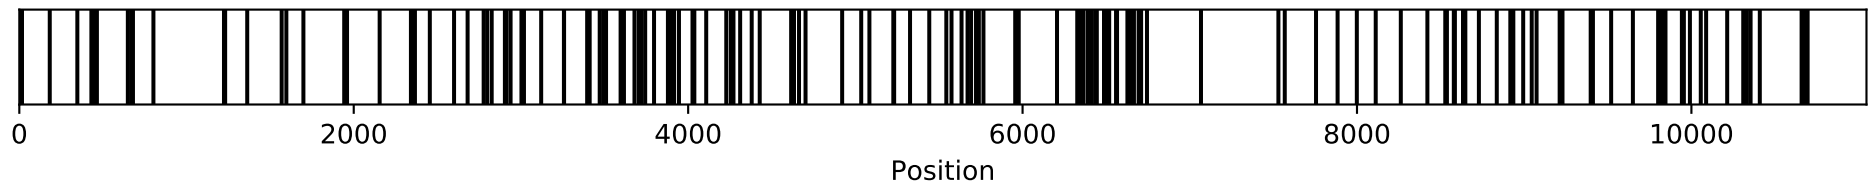

CR1 vs MM1  
Number of differences: 86

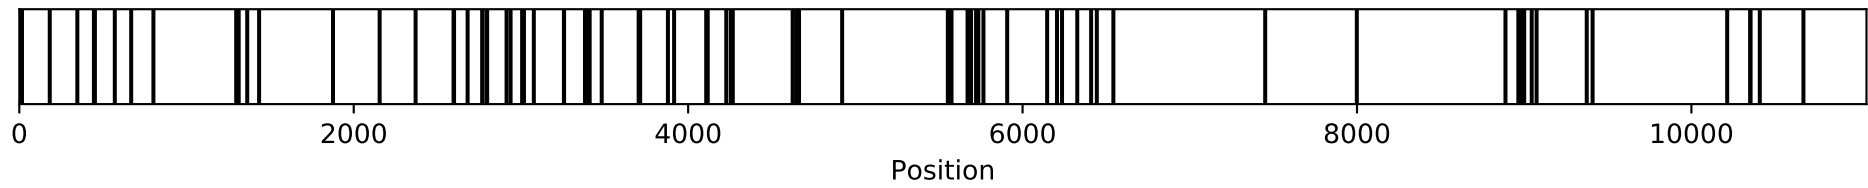

CR1 vs MM2  
Number of differences: 128

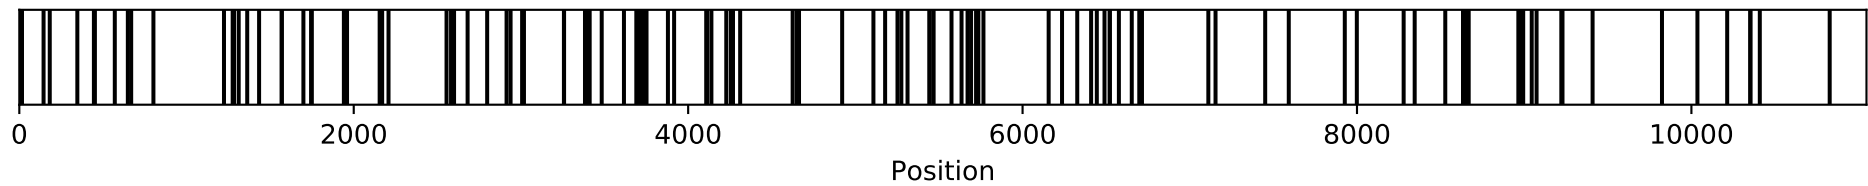

CR2 vs MM1  
Number of differences: 166

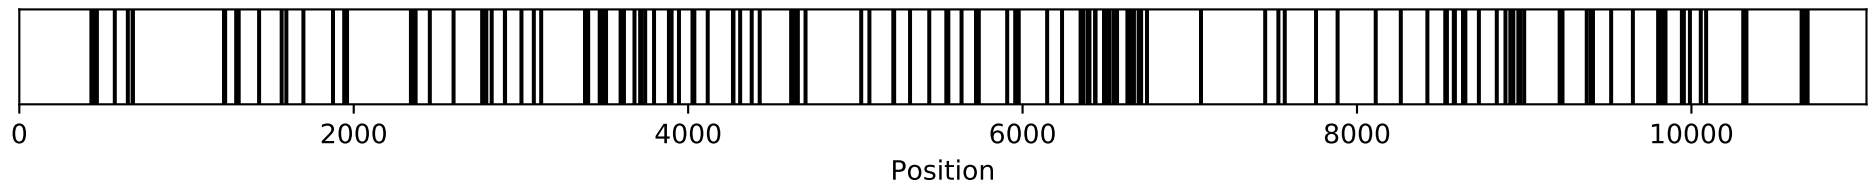

CR2 vs MM2  
Number of differences: 174

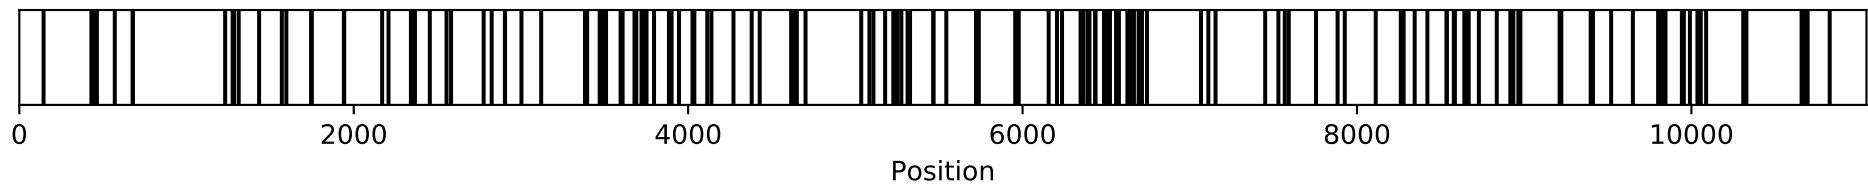

MM1 vs MM2  
Number of differences: 86

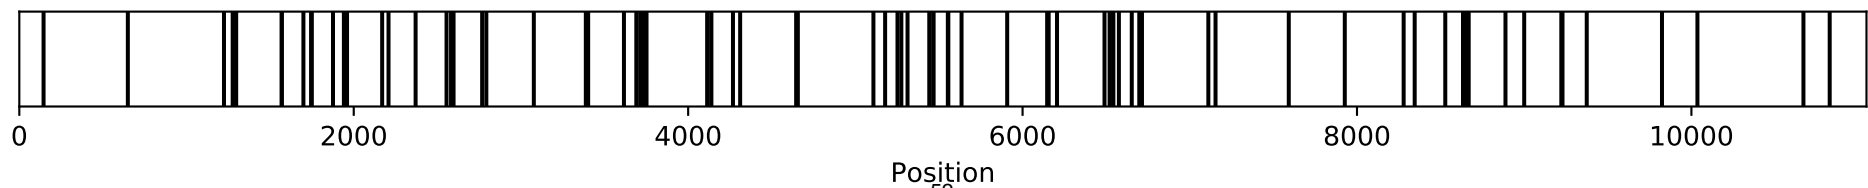

CR1 vs CR2  
Number of differences: 215

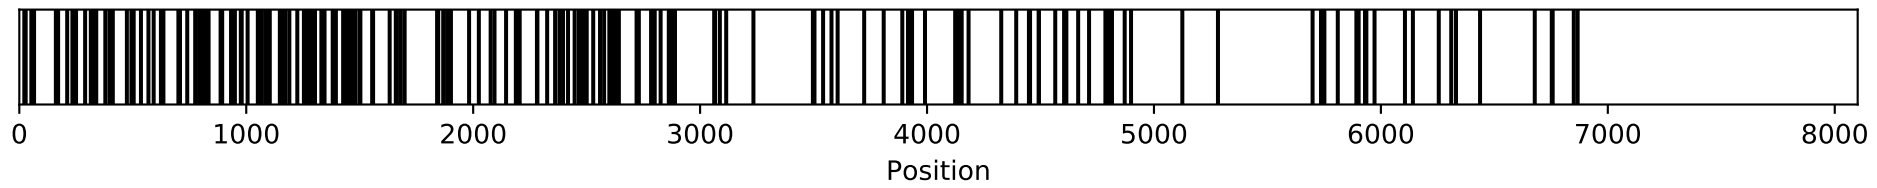

CR1 vs MM1  
Number of differences: 135

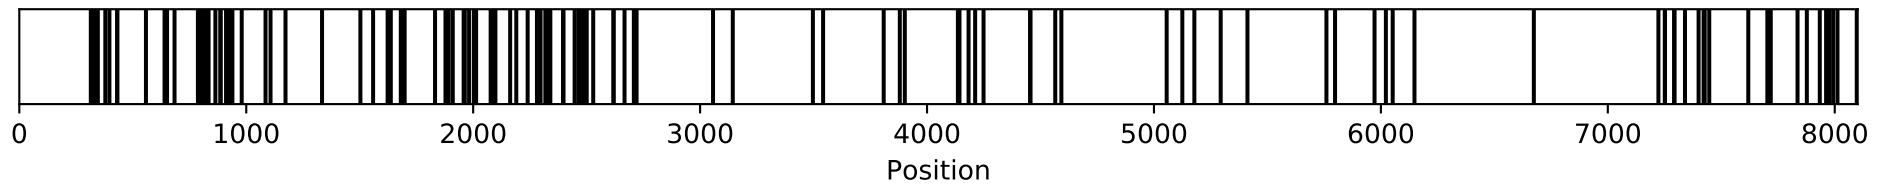

CR1 vs MM2  
Number of differences: 110

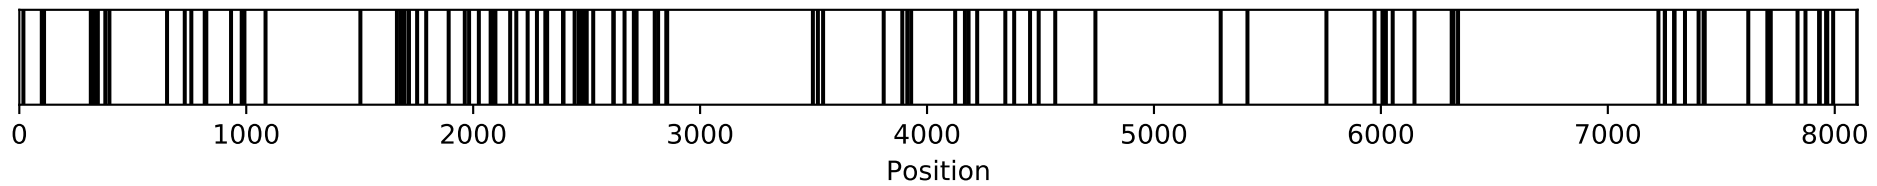

CR2 vs MM1  
Number of differences: 258

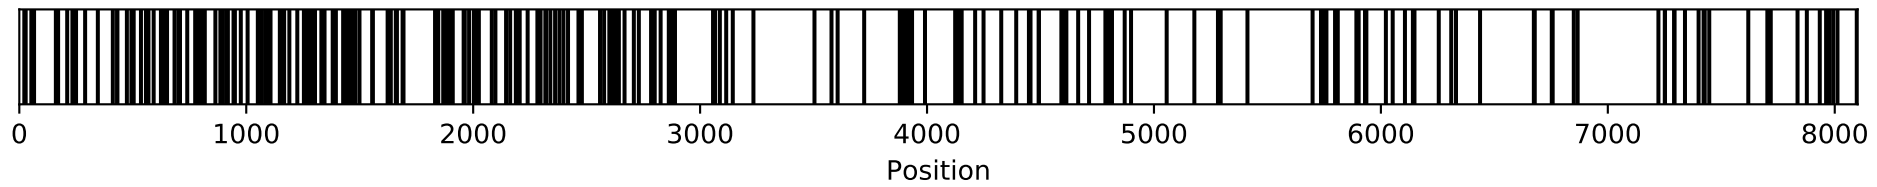

CR2 vs MM2  
Number of differences: 239

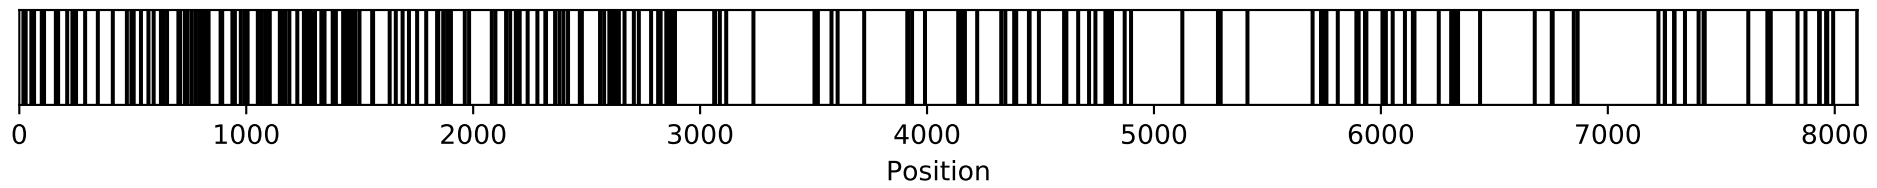

MM1 vs MM2  
Number of differences: 93

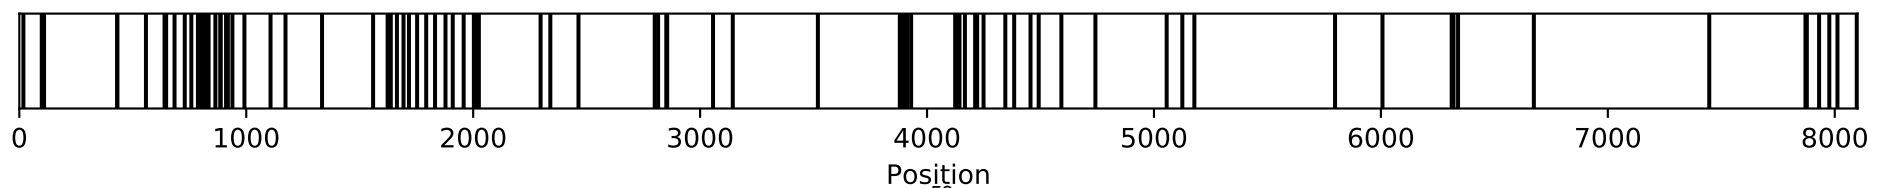

CR1 vs CR2  
Number of differences: 0

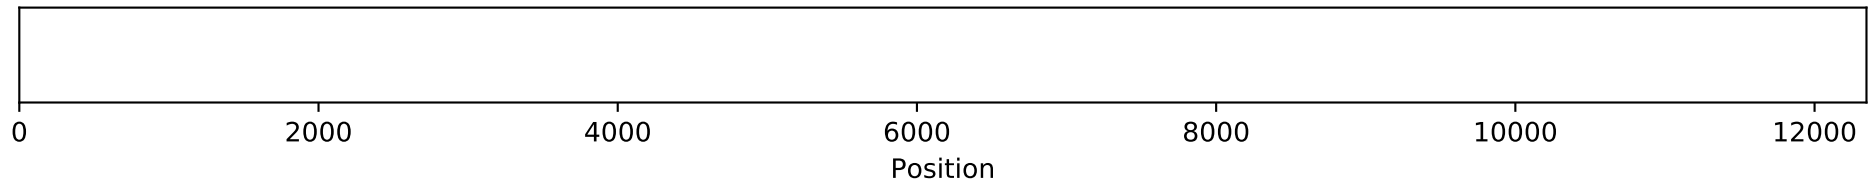

CR1 vs MM1  
Number of differences: 307

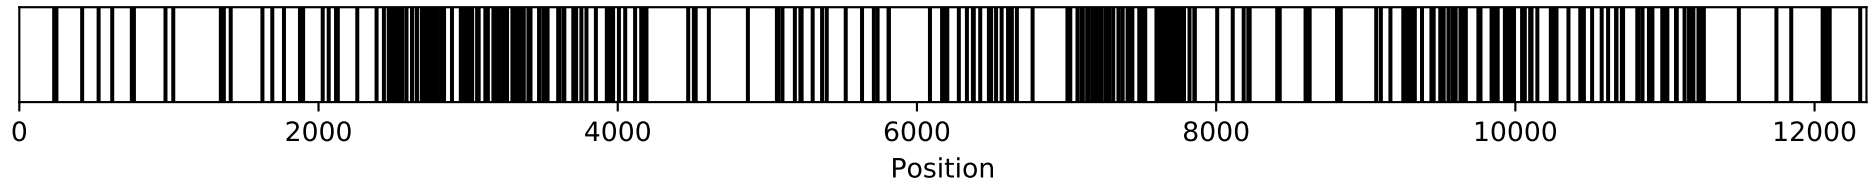

CR1 vs MM2  
Number of differences: 320

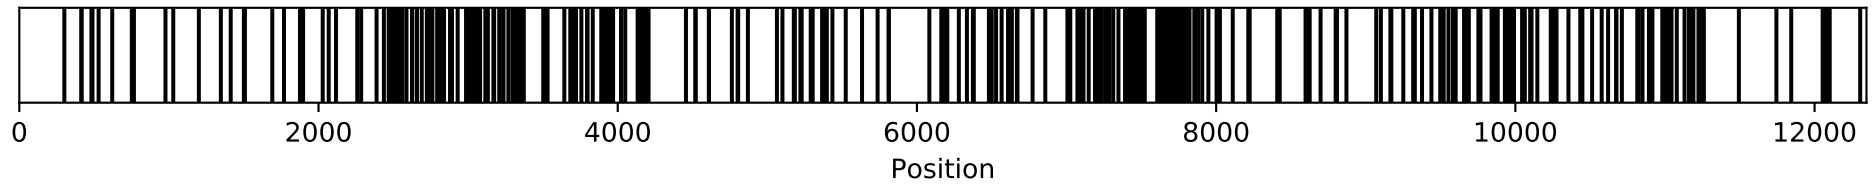

CR2 vs MM1  
Number of differences: 307

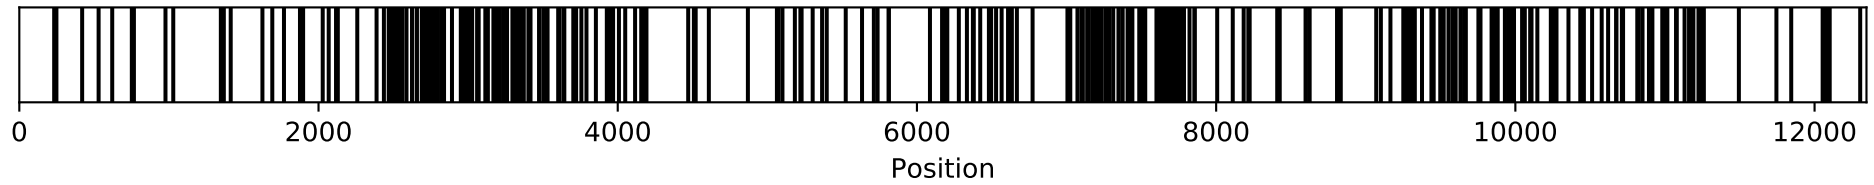

CR2 vs MM2  
Number of differences: 320

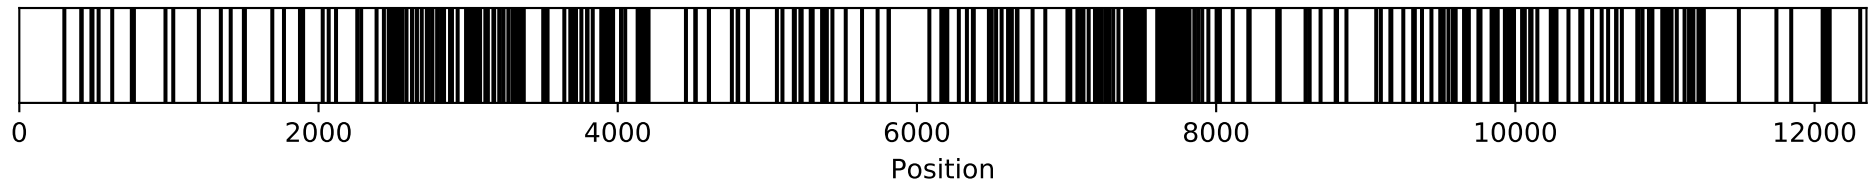

MM1 vs MM2  
Number of differences: 165

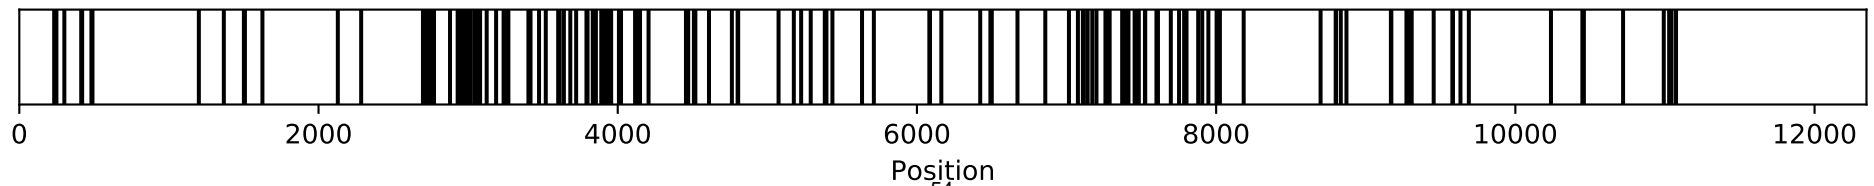

CR1 vs CR2  
Number of differences: 215

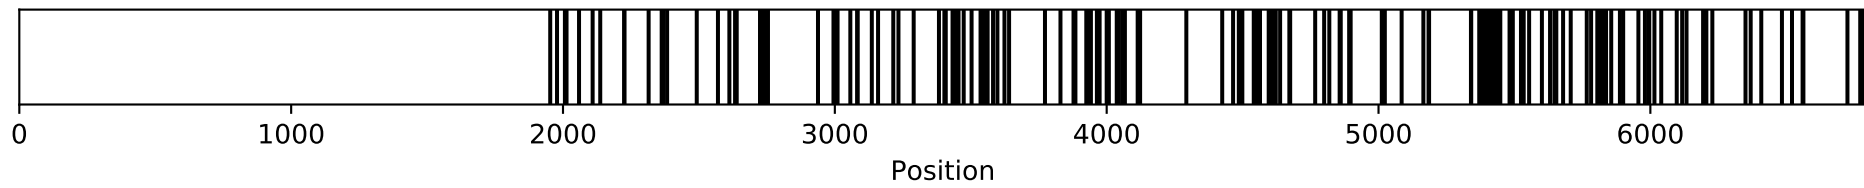

CR1 vs MM1  
Number of differences: 198

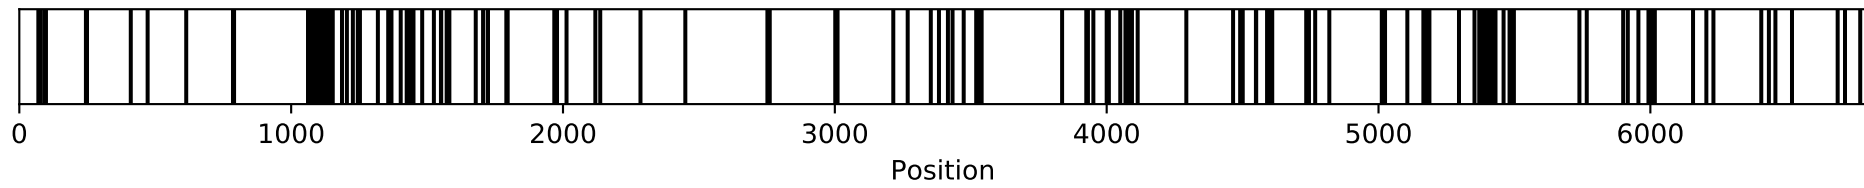

CR1 vs MM2  
Number of differences: 202

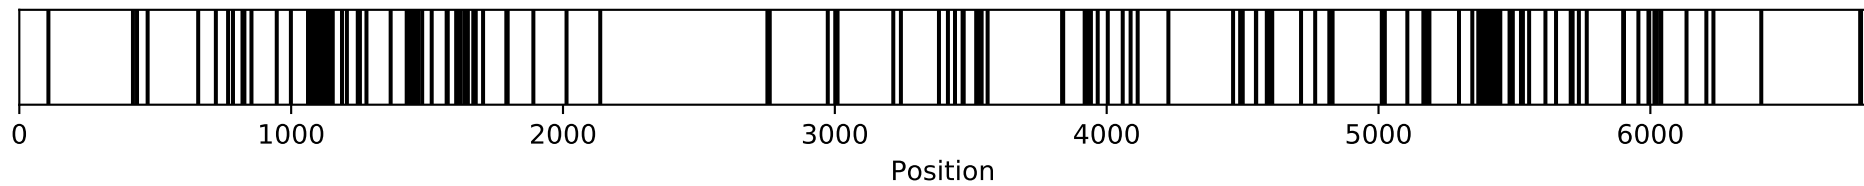

CR2 vs MM1  
Number of differences: 241

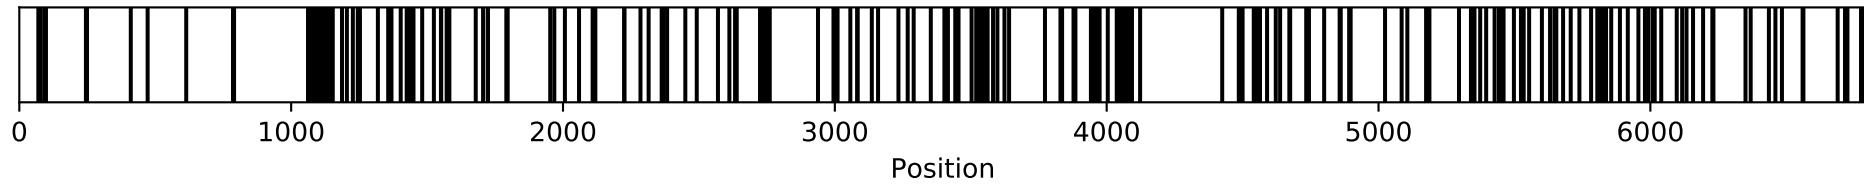

CR2 vs MM2  
Number of differences: 234

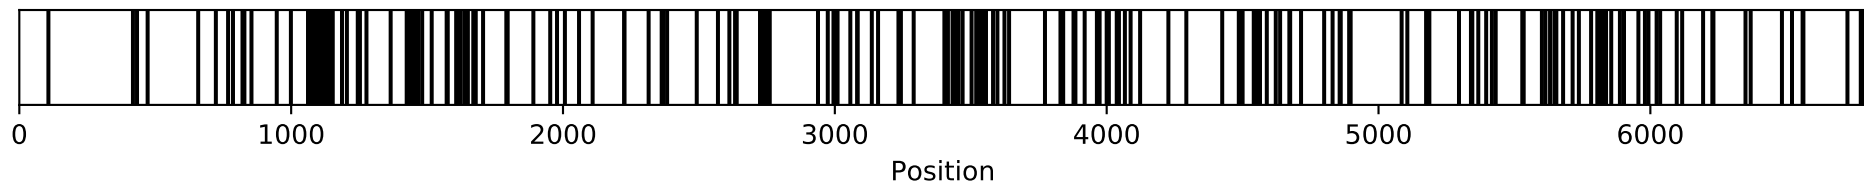

MM1 vs MM2  
Number of differences: 123

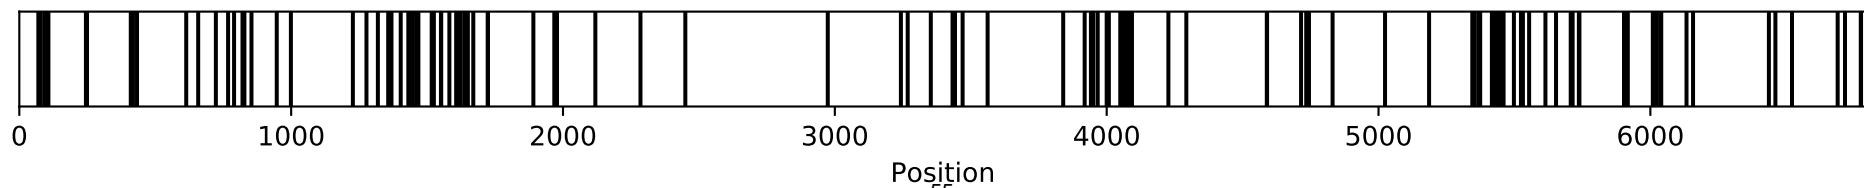



CR1 vs CR2  
Number of differences: 264

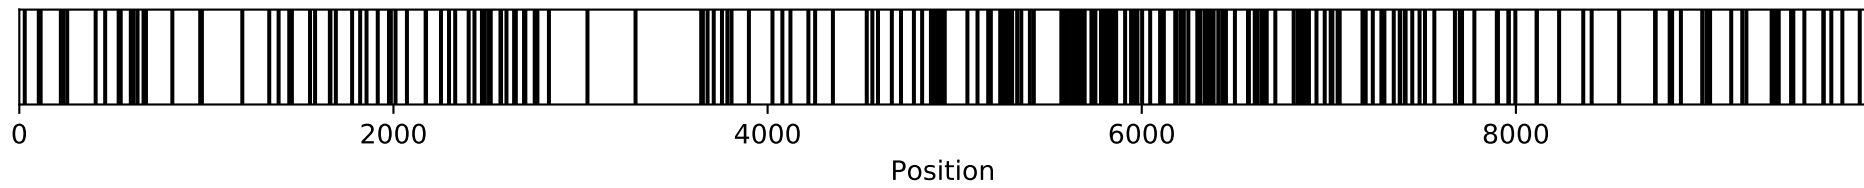

CR1 vs MM1  
Number of differences: 249

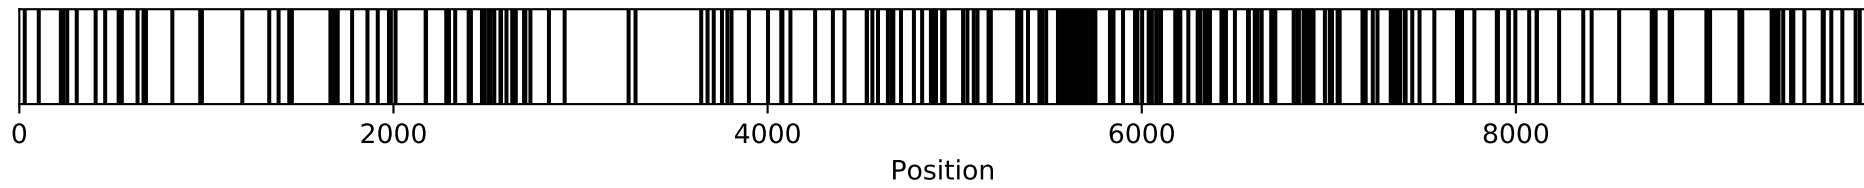

CR1 vs MM2  
Number of differences: 263

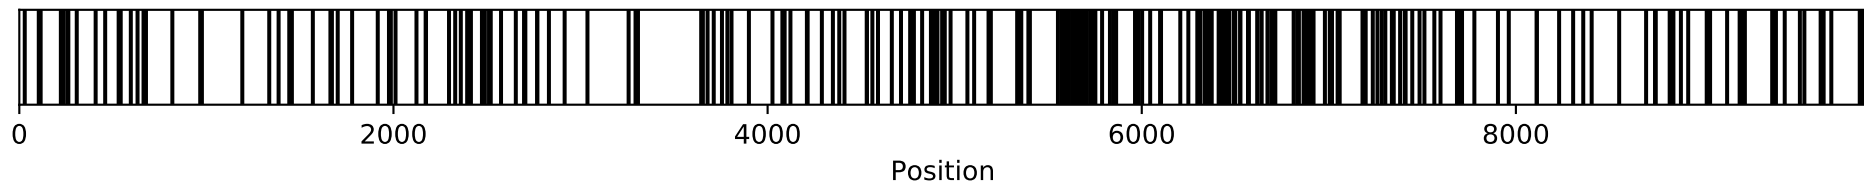

CR2 vs MM1  
Number of differences: 143

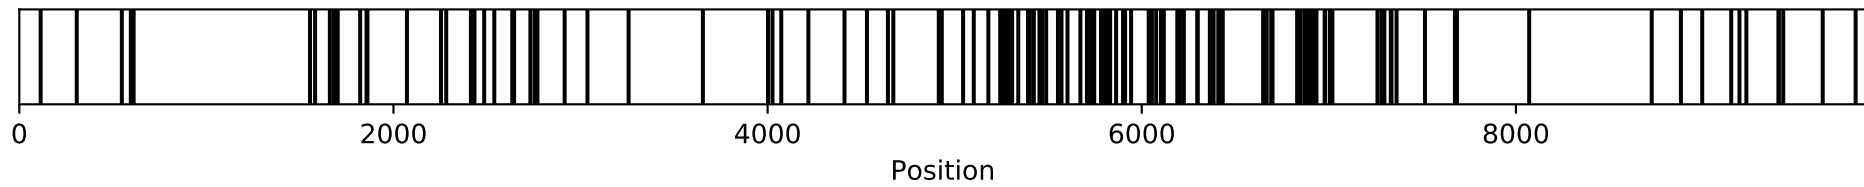

CR2 vs MM2  
Number of differences: 164

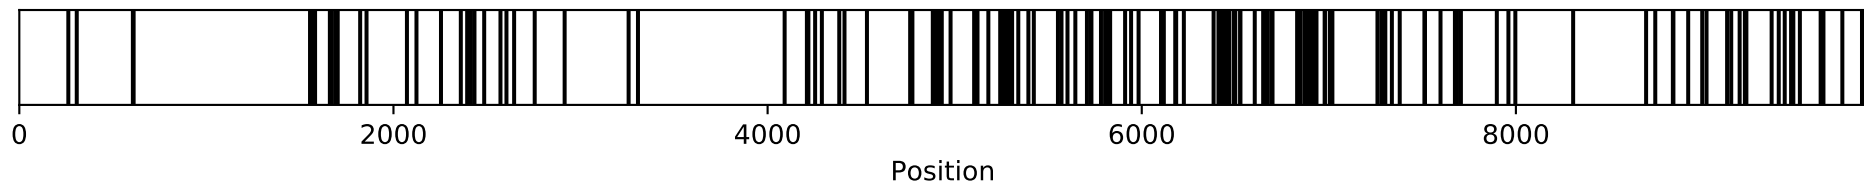

MM1 vs MM2  
Number of differences: 131

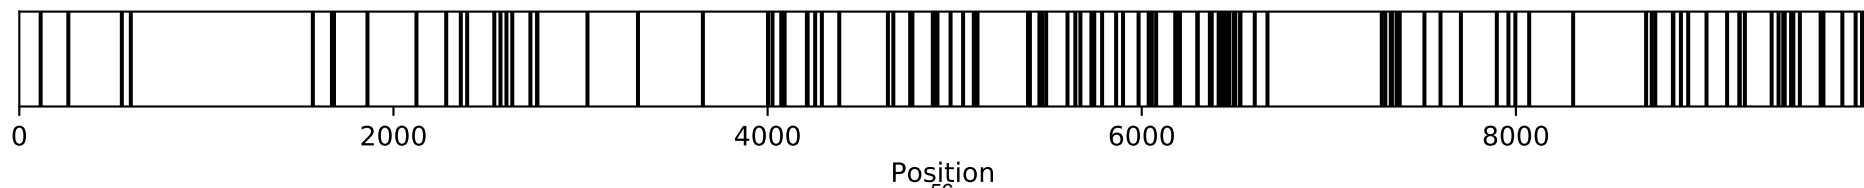

CR1 vs CR2  
Number of differences: 347

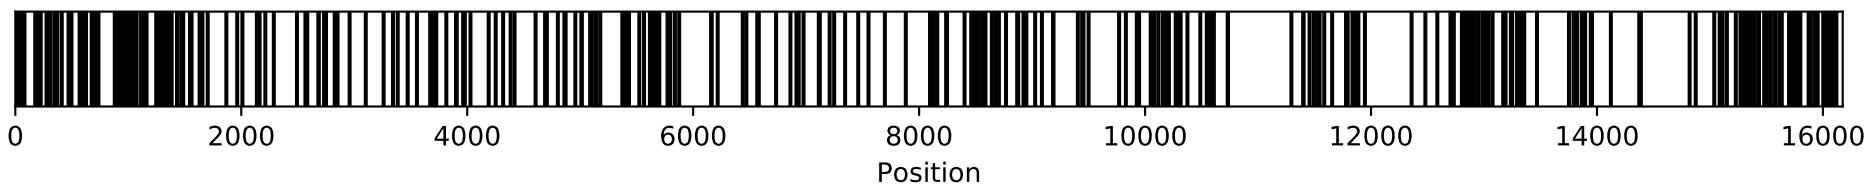

CR1 vs MM1  
Number of differences: 136

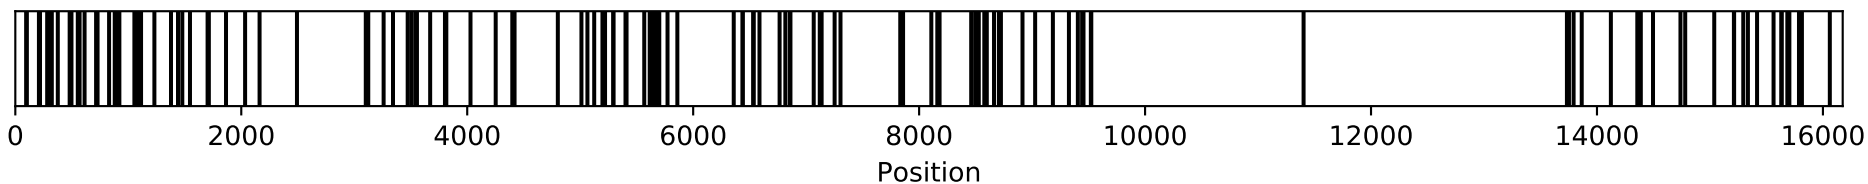

CR1 vs MM2  
Number of differences: 127

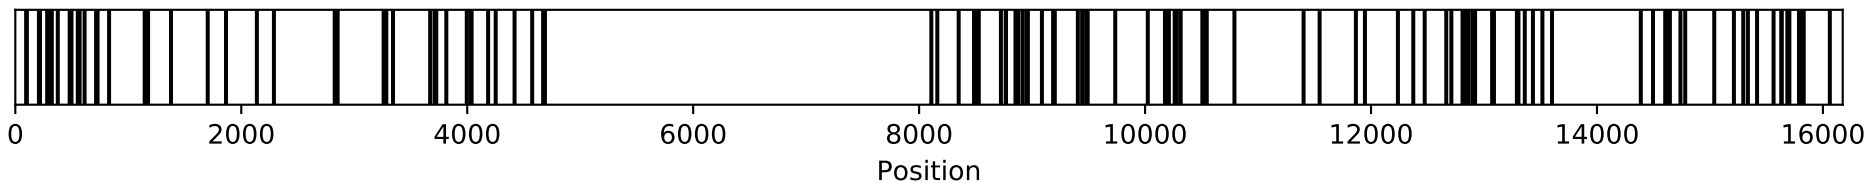

CR2 vs MM1  
Number of differences: 352

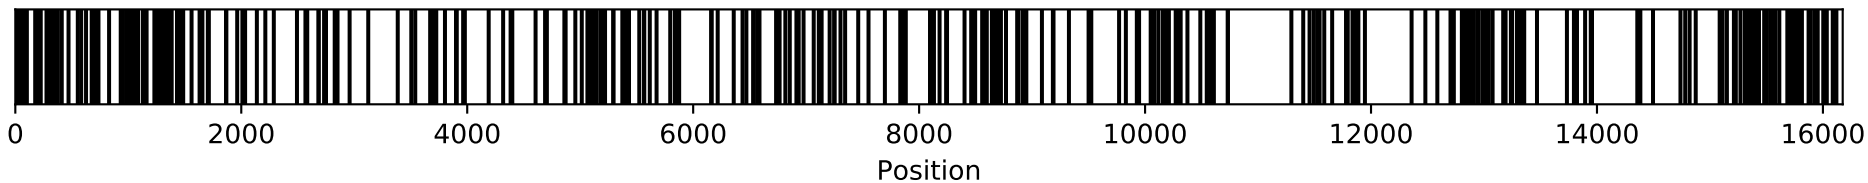

CR2 vs MM2  
Number of differences: 362

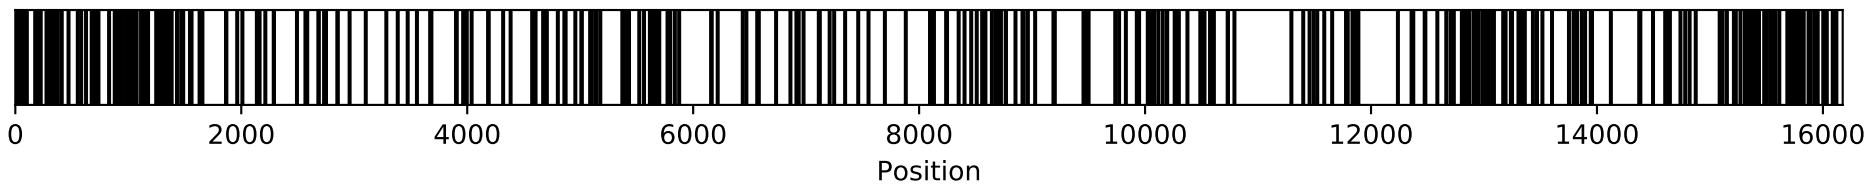

MM1 vs MM2  
Number of differences: 156

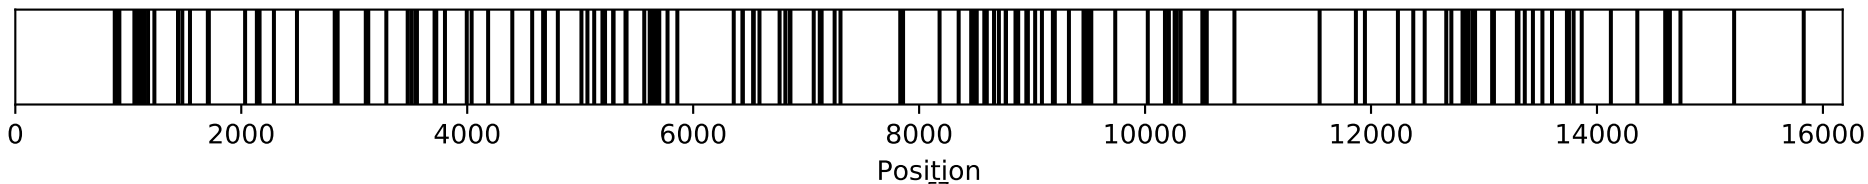

CR1 vs CR2  
Number of differences: 312

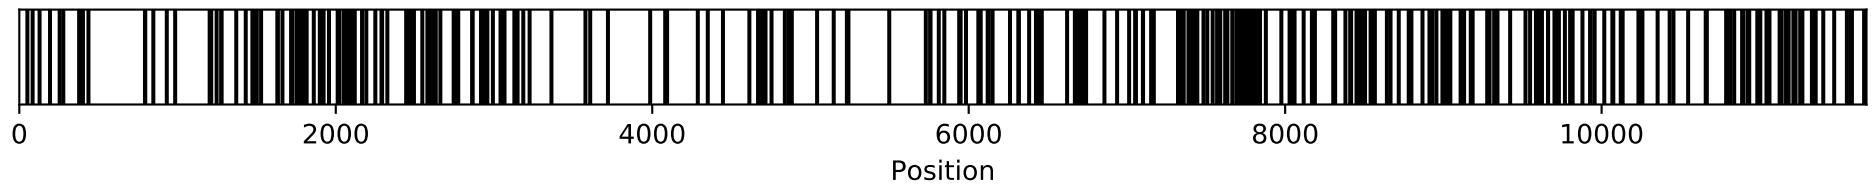

CR1 vs MM1  
Number of differences: 144

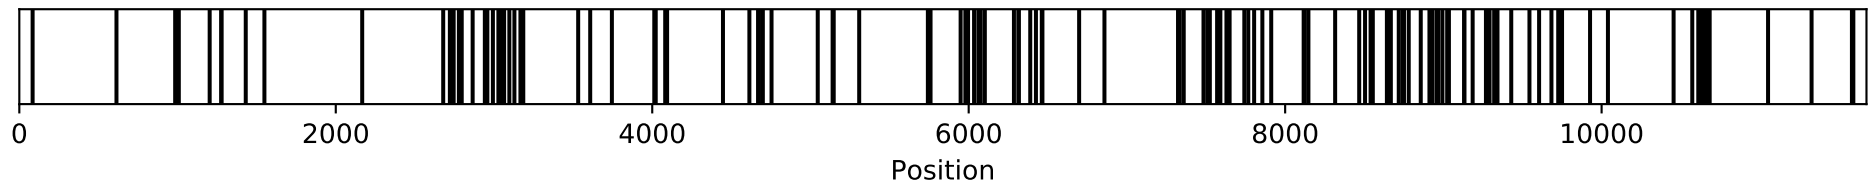

CR1 vs MM2  
Number of differences: 163

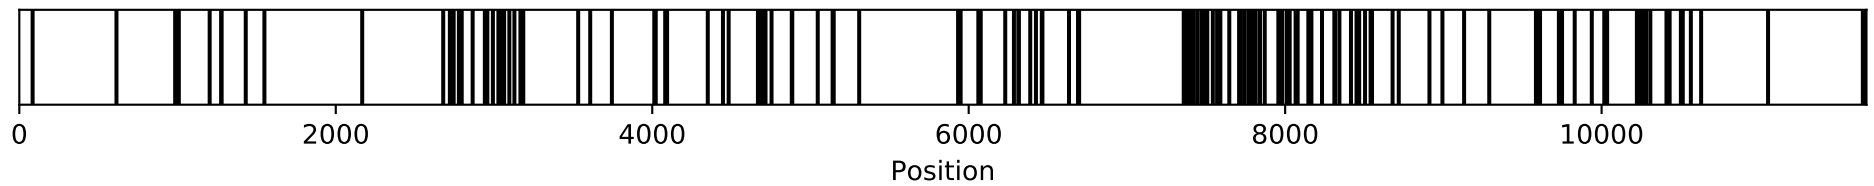

CR2 vs MM1  
Number of differences: 316

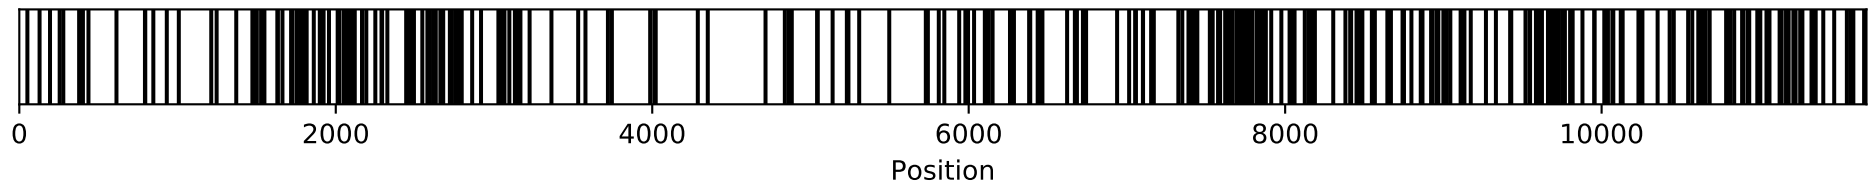

CR2 vs MM2  
Number of differences: 335

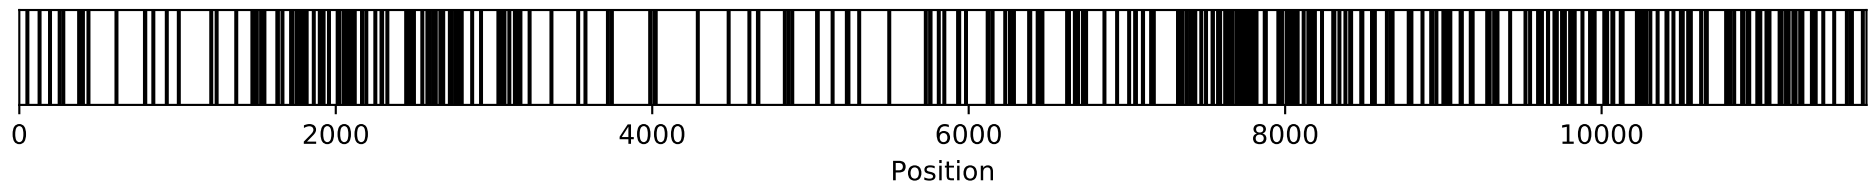

MM1 vs MM2  
Number of differences: 143

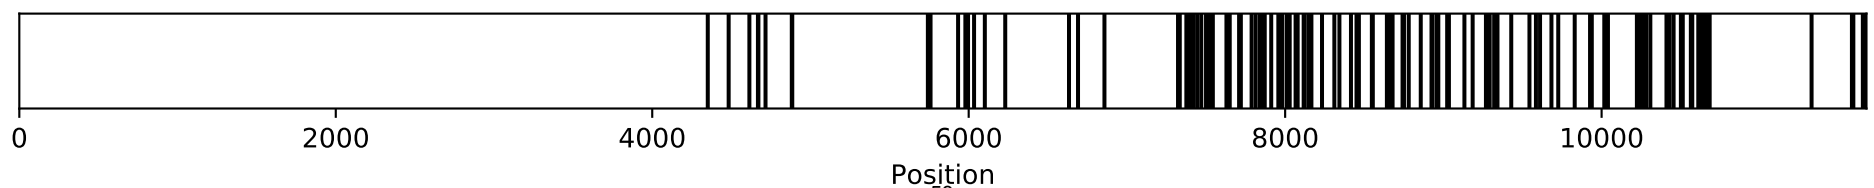

CR1 vs CR2  
Number of differences: 363

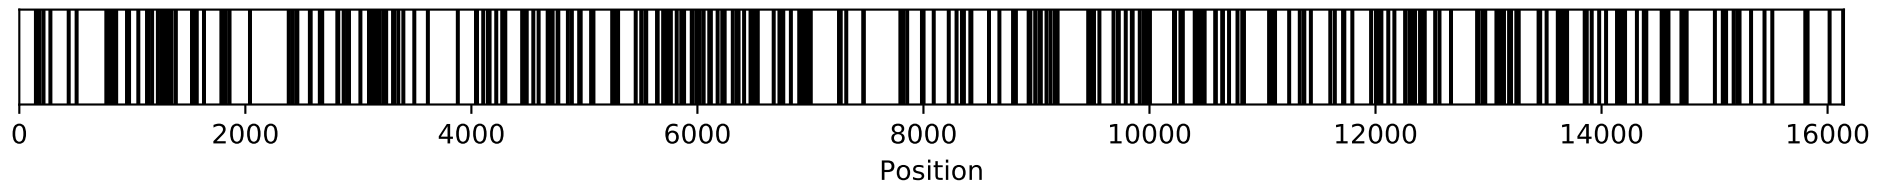

CR1 vs MM1  
Number of differences: 372

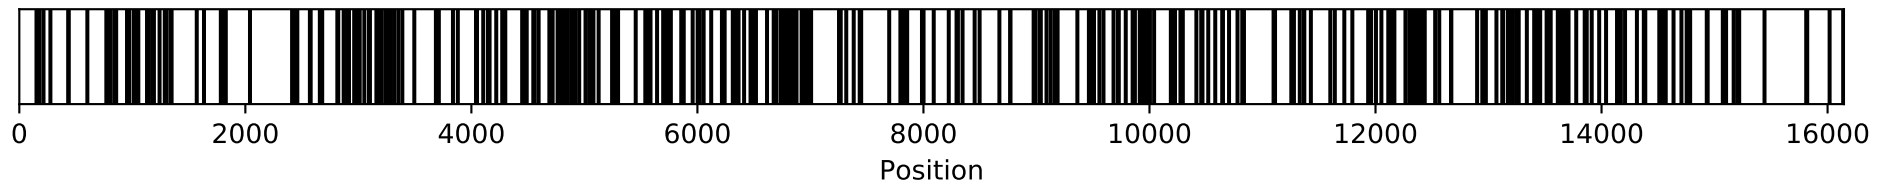

CR1 vs MM2  
Number of differences: 339

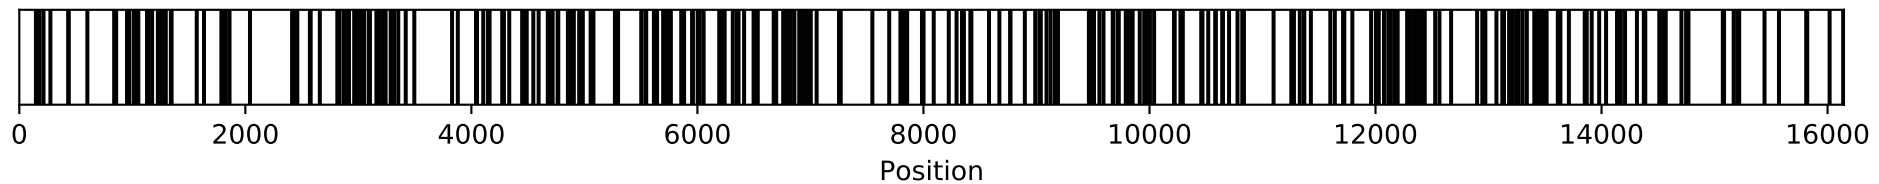

CR2 vs MM1  
Number of differences: 245

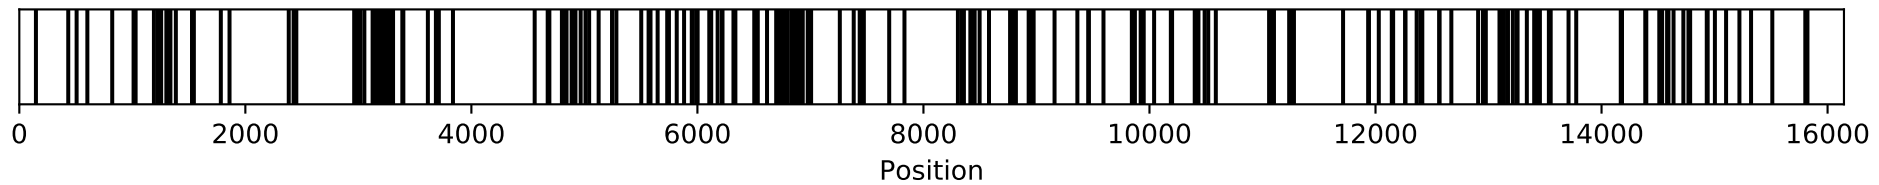

CR2 vs MM2  
Number of differences: 206

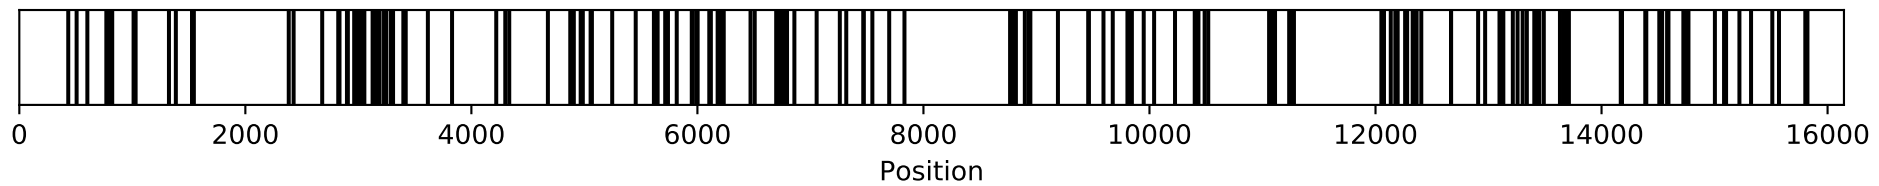

MM1 vs MM2  
Number of differences: 189

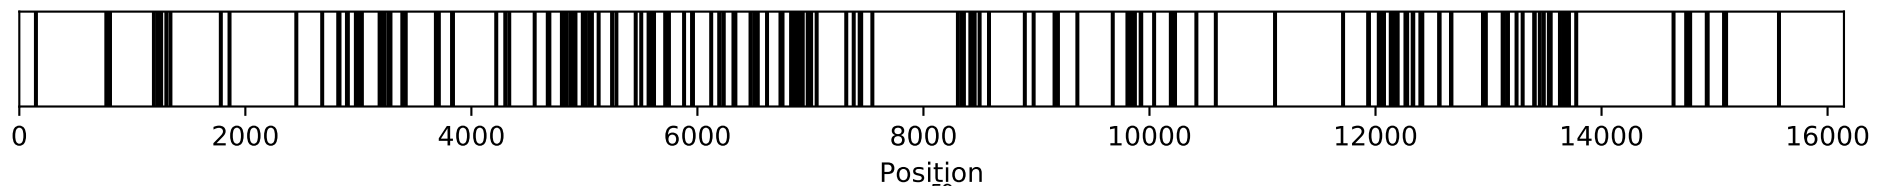

CR1 vs CR2  
Number of differences: 232

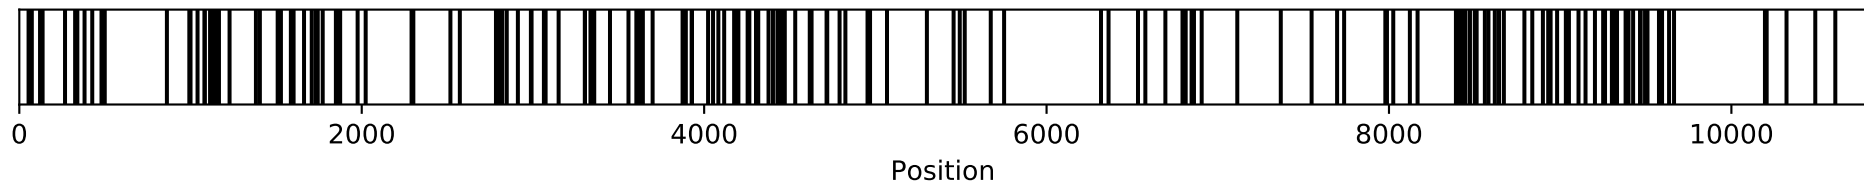

CR1 vs MM1  
Number of differences: 74

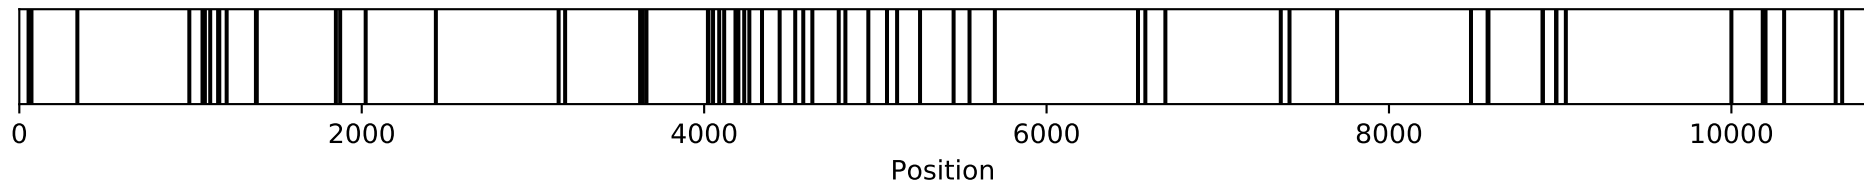

CR1 vs MM2  
Number of differences: 14

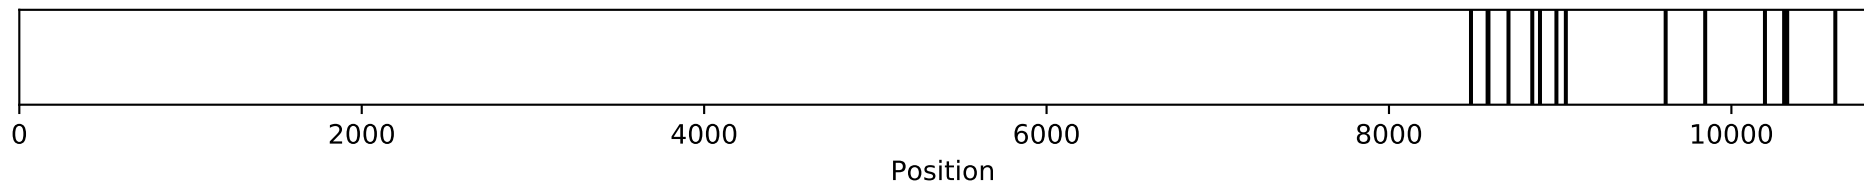

CR2 vs MM1  
Number of differences: 244

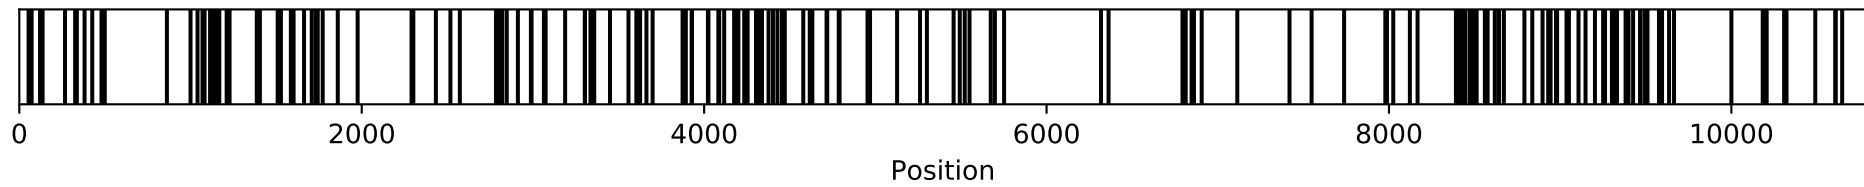

CR2 vs MM2  
Number of differences: 236

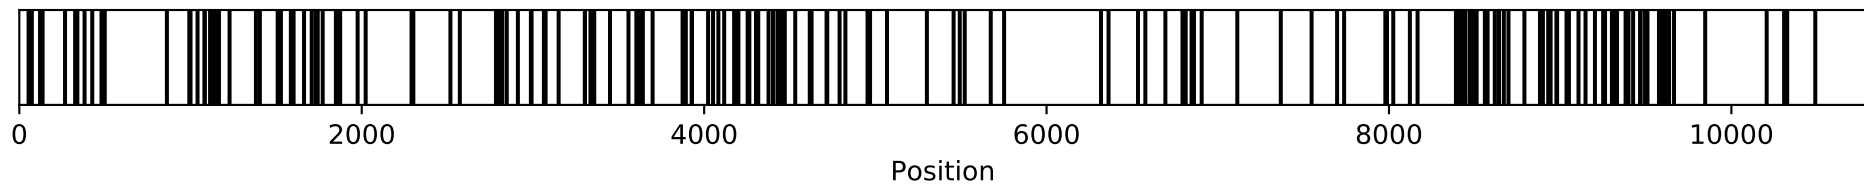

MM1 vs MM2  
Number of differences: 75

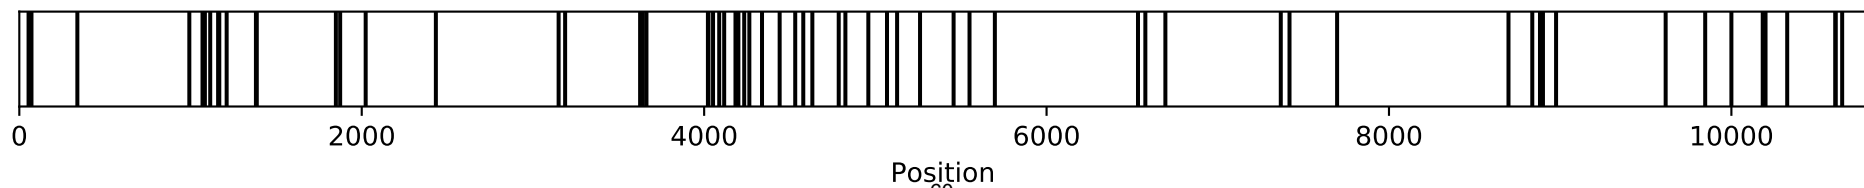

CR1 vs CR2  
Number of differences: 273

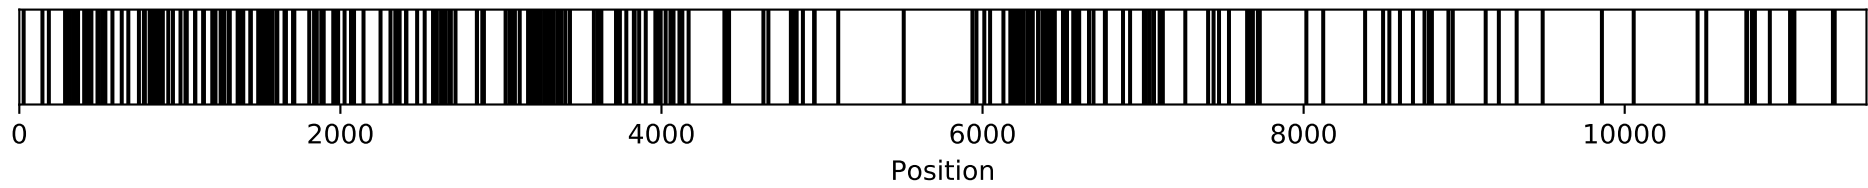

CR1 vs MM1  
Number of differences: 185

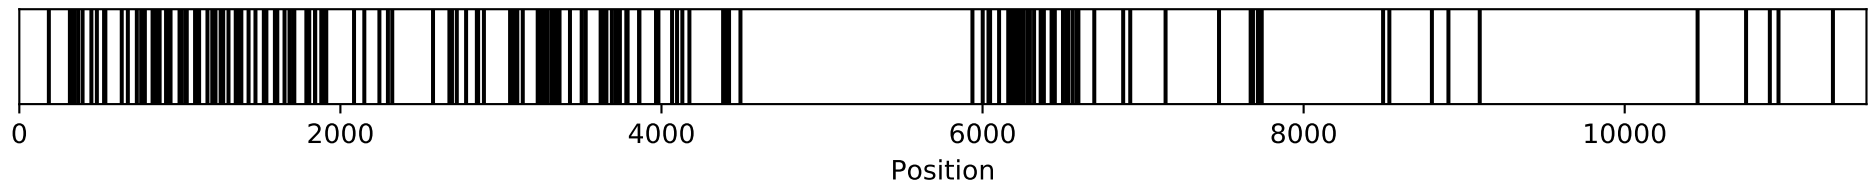

CR1 vs MM2  
Number of differences: 164

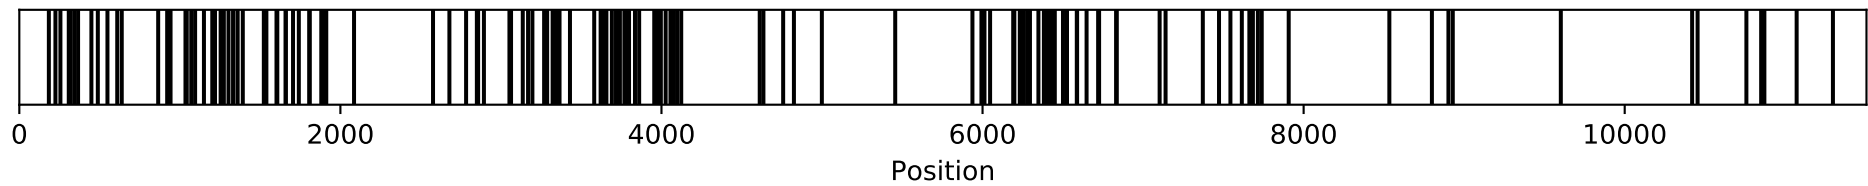

CR2 vs MM1  
Number of differences: 276

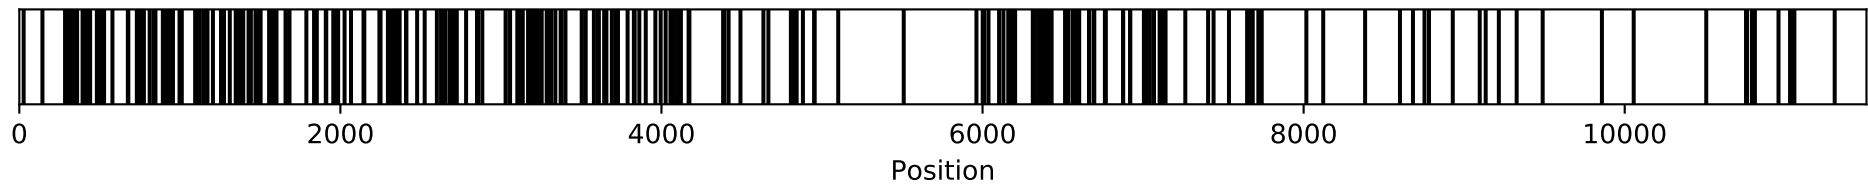

CR2 vs MM2  
Number of differences: 251

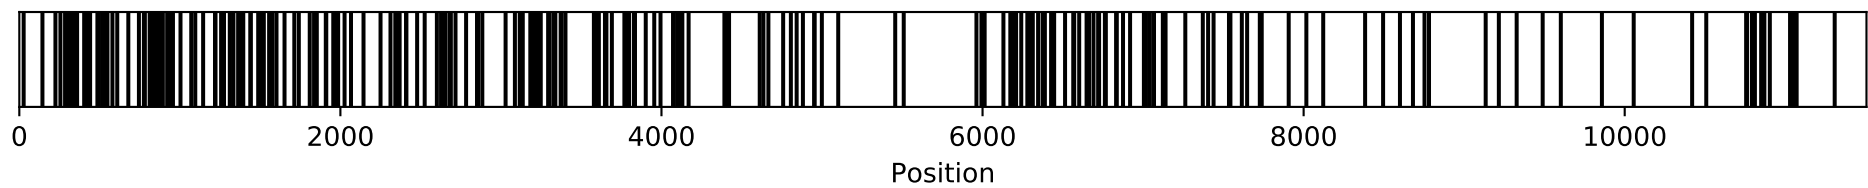

MM1 vs MM2  
Number of differences: 174

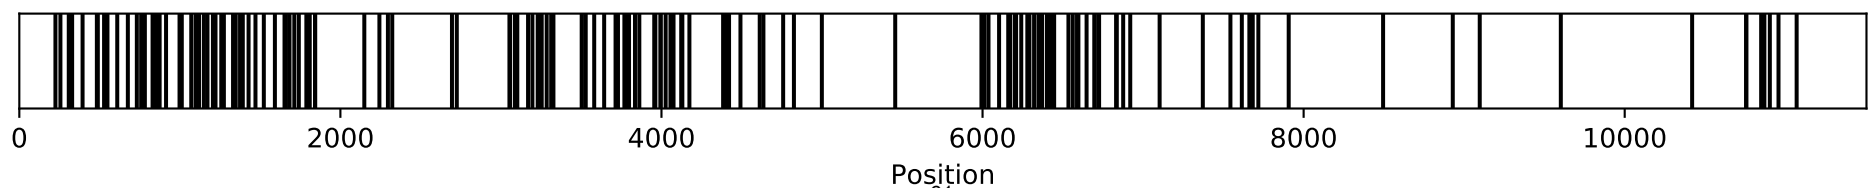

CR1 vs CR2  
Number of differences: 166

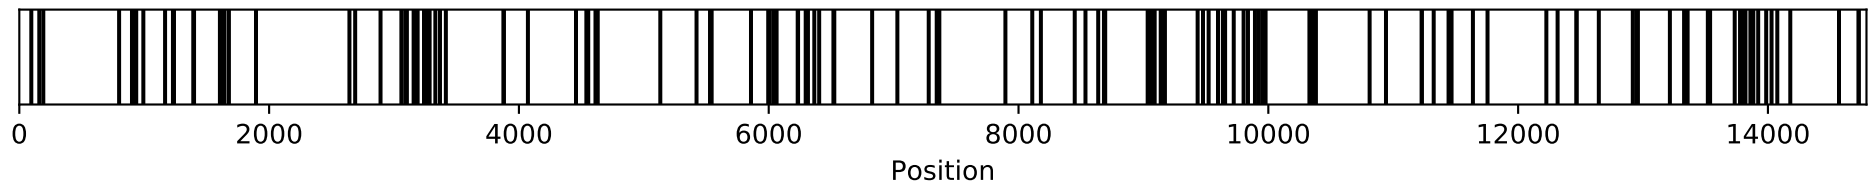

CR1 vs MM1  
Number of differences: 46

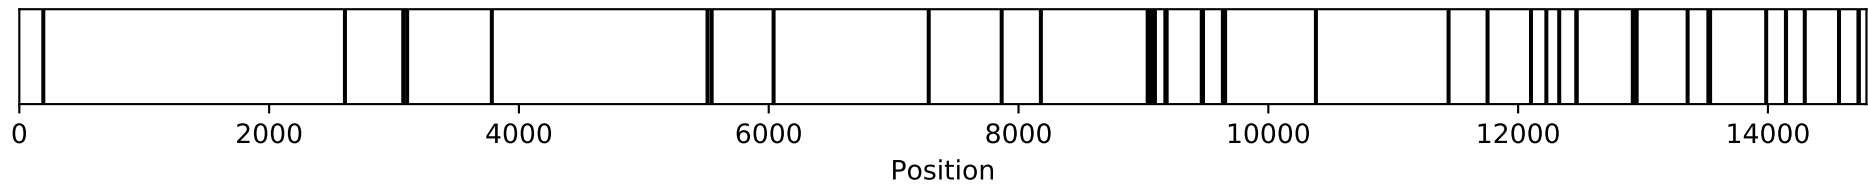

CR1 vs MM2  
Number of differences: 42

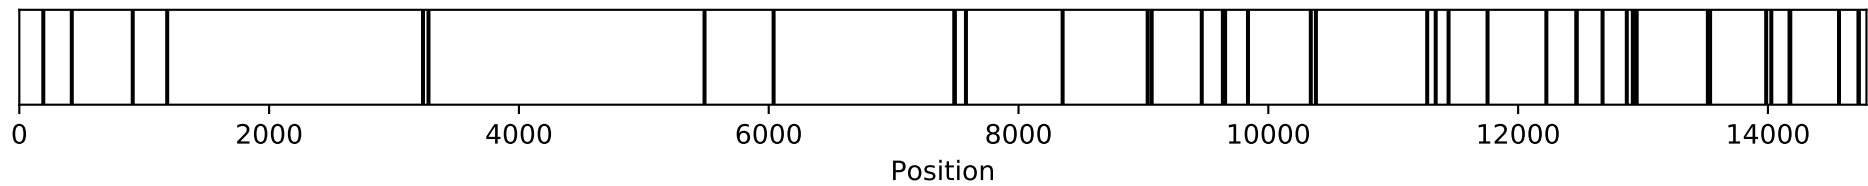

CR2 vs MM1  
Number of differences: 156

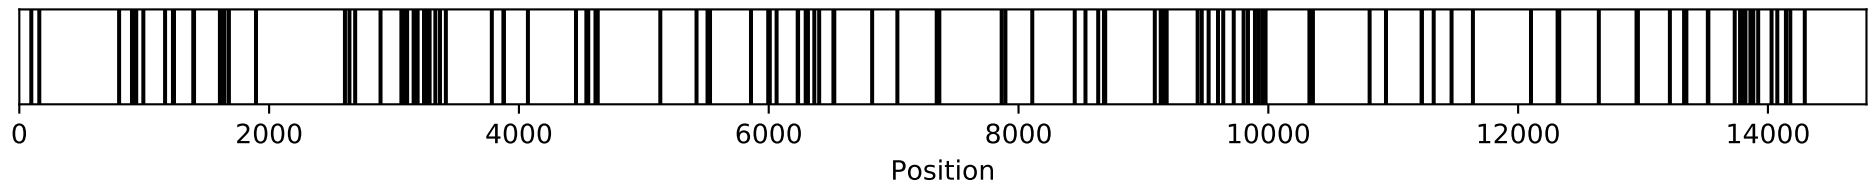

CR2 vs MM2  
Number of differences: 162

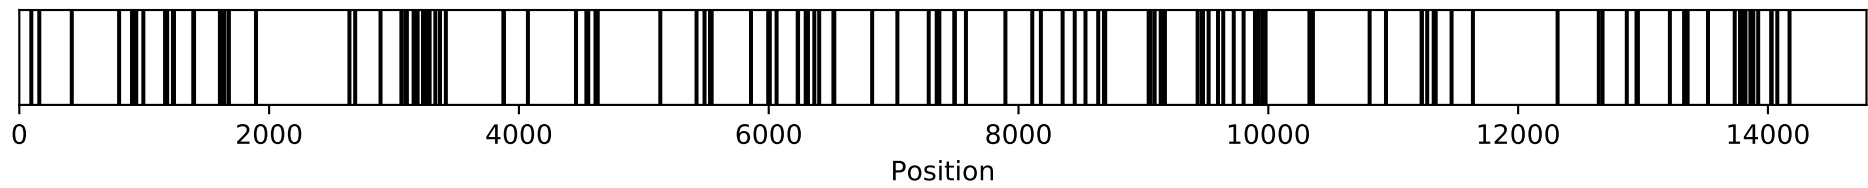

MM1 vs MM2  
Number of differences: 44

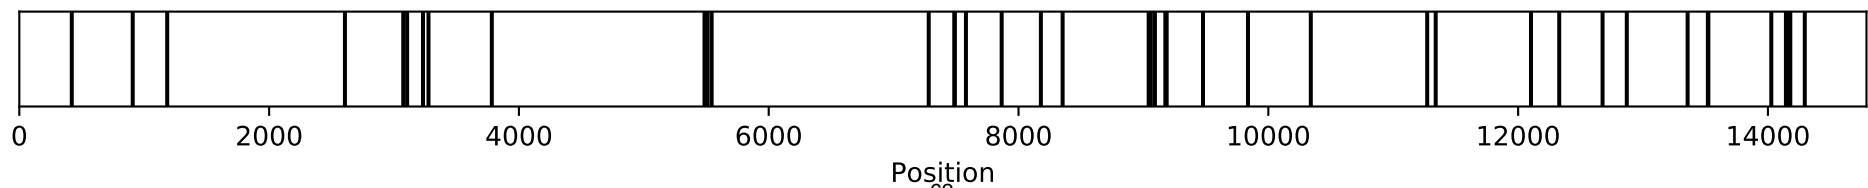

CR1 vs CR2  
Number of differences: 197

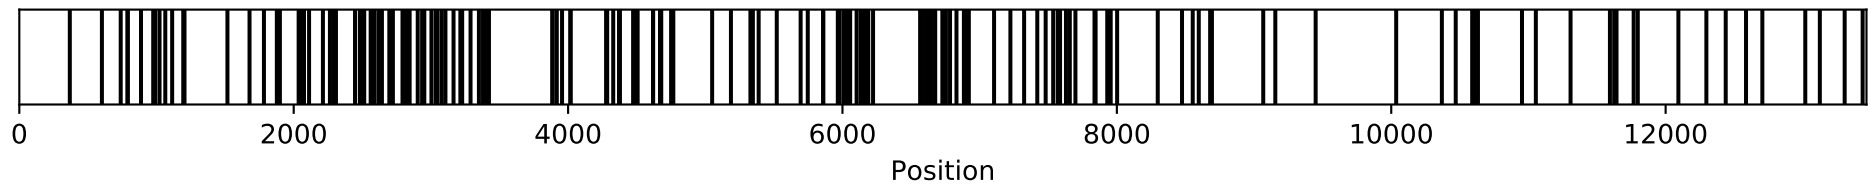

CR1 vs MM1  
Number of differences: 94

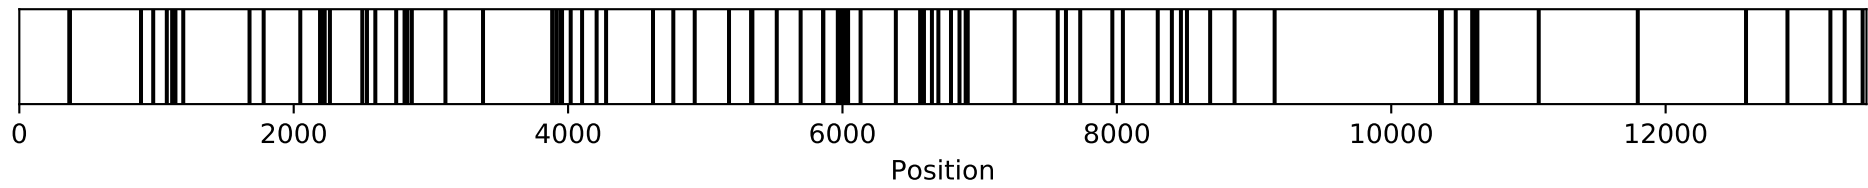

CR1 vs MM2  
Number of differences: 68

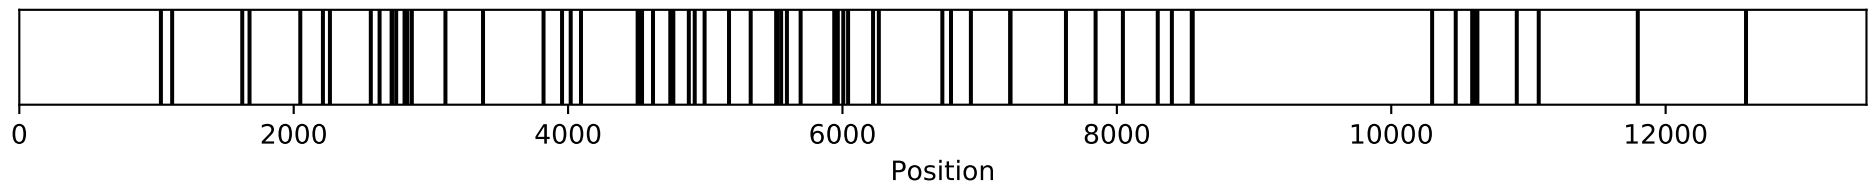

CR2 vs MM1  
Number of differences: 187

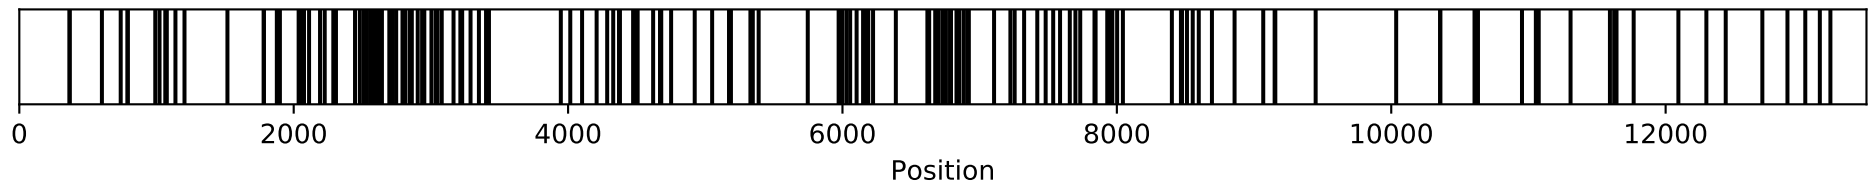

CR2 vs MM2  
Number of differences: 198

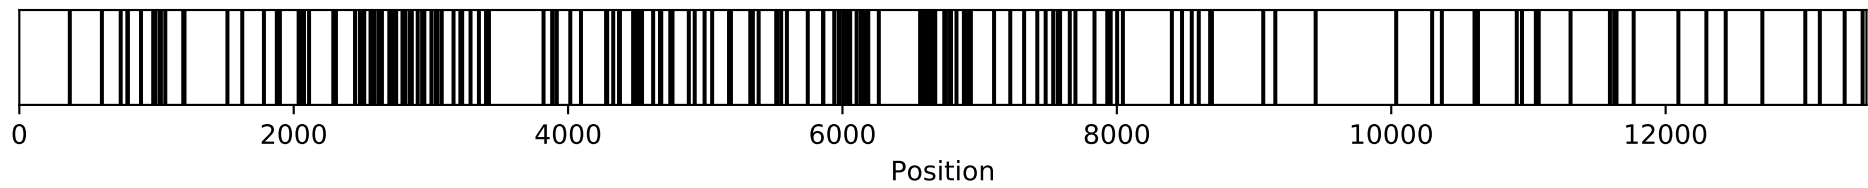

MM1 vs MM2  
Number of differences: 94

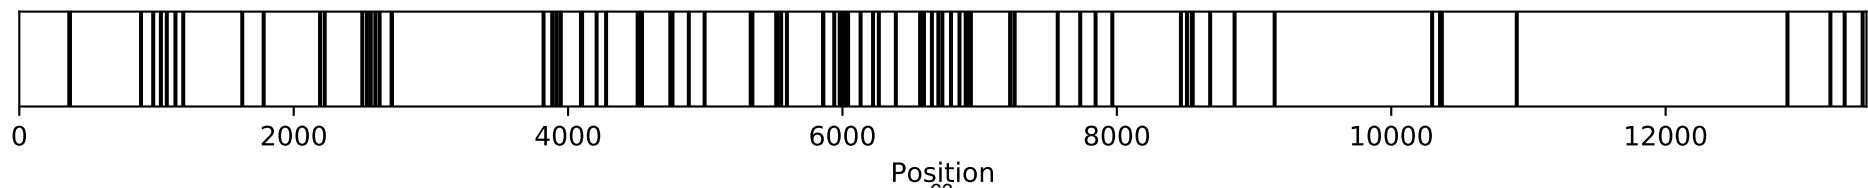



CR1 vs CR2  
Number of differences: 444

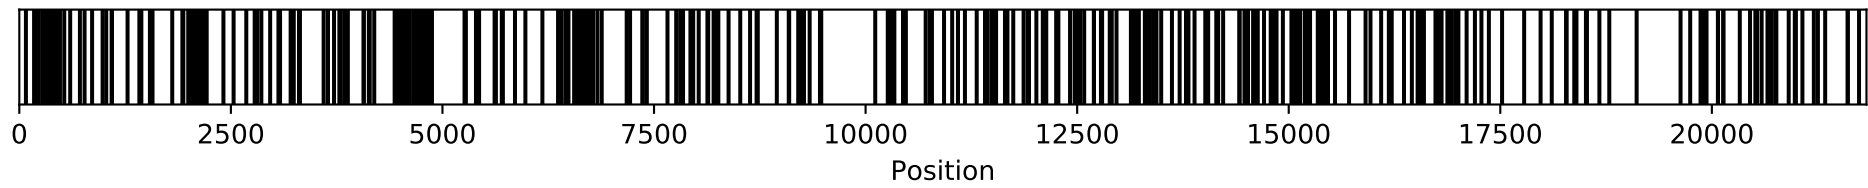

CR1 vs MM1  
Number of differences: 205

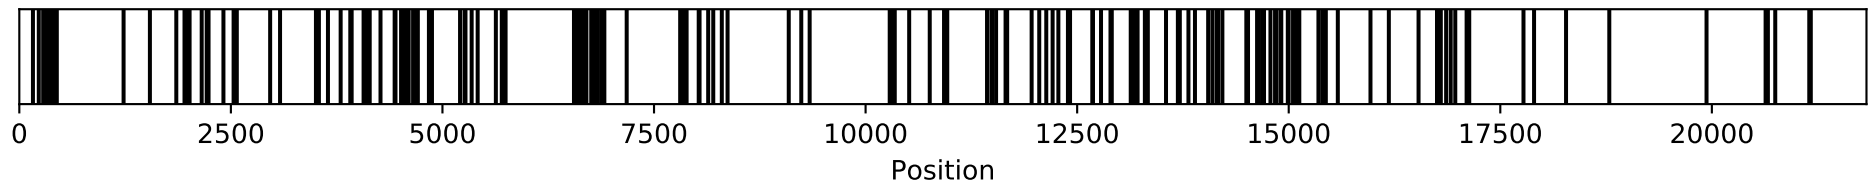

CR1 vs MM2  
Number of differences: 191

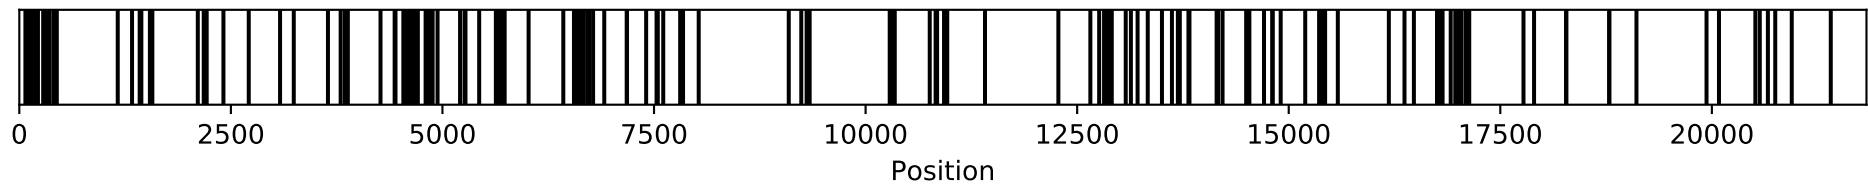

CR2 vs MM1  
Number of differences: 467

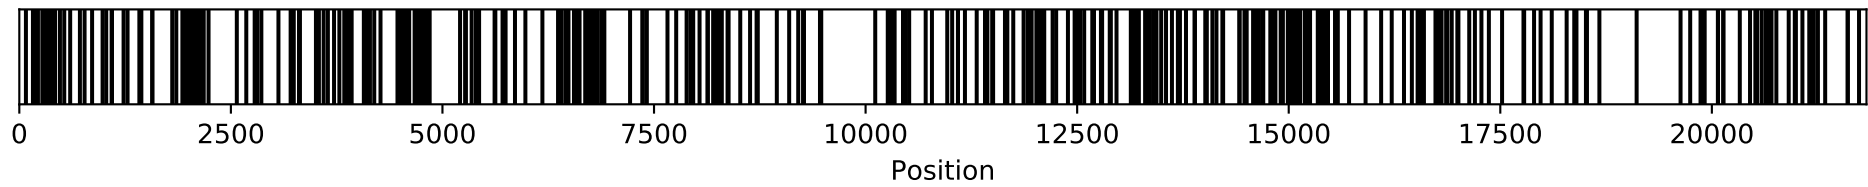

CR2 vs MM2  
Number of differences: 470

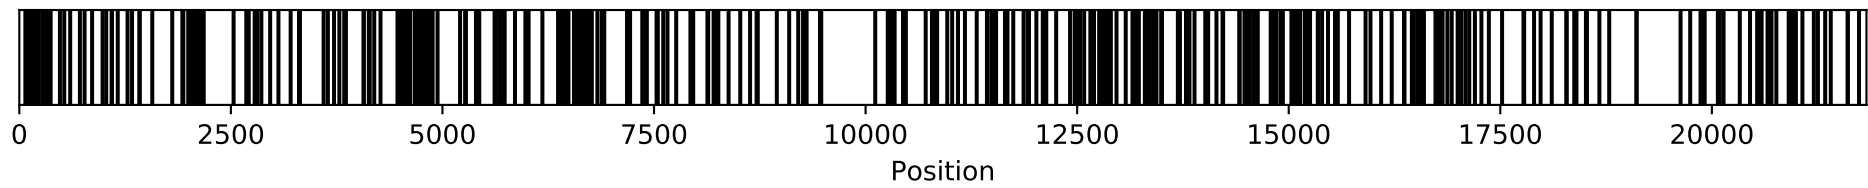

MM1 vs MM2  
Number of differences: 188

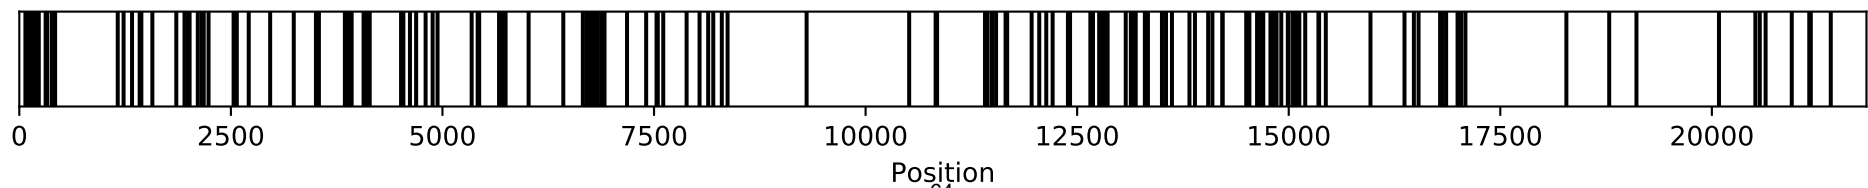

CR1 vs CR2  
Number of differences: 124

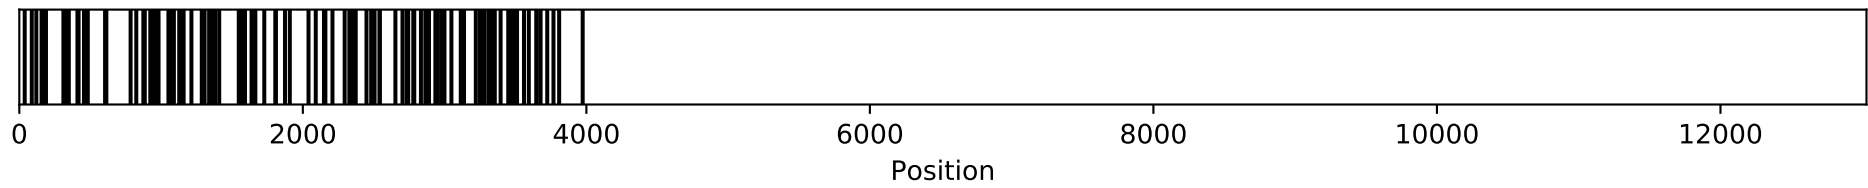

CR1 vs MM1  
Number of differences: 420

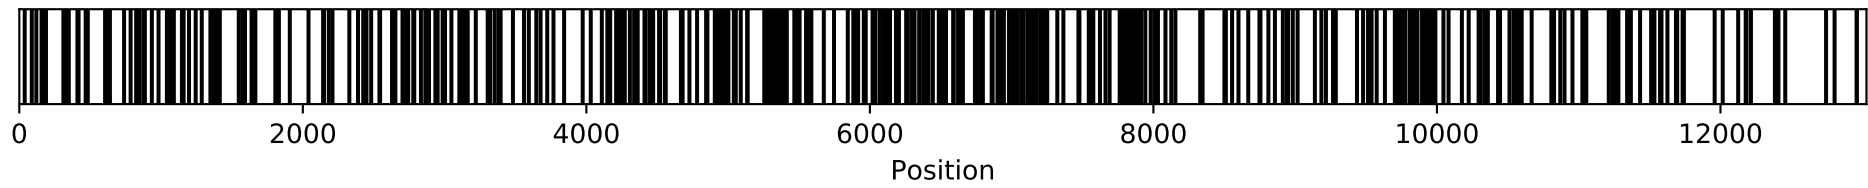

CR1 vs MM2  
Number of differences: 454

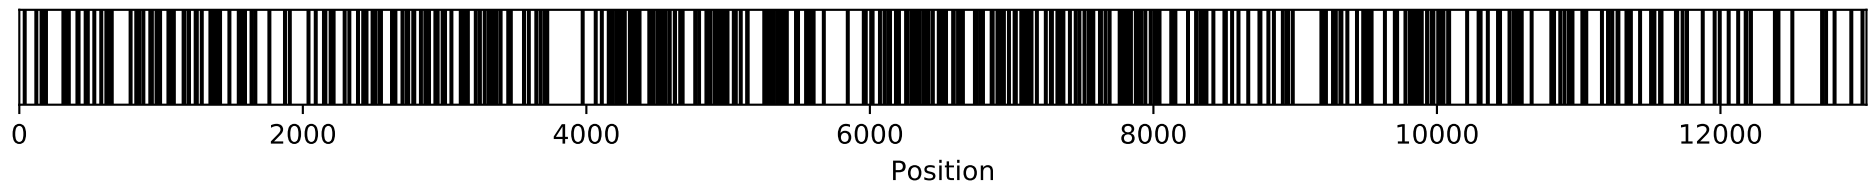

CR2 vs MM1  
Number of differences: 383

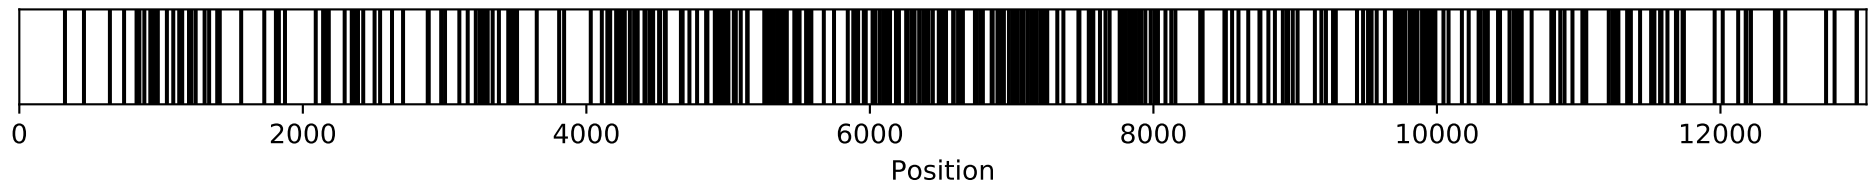

CR2 vs MM2  
Number of differences: 399

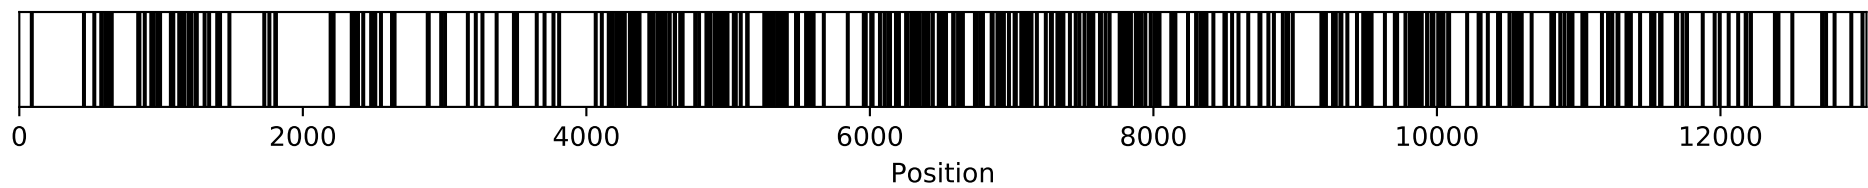

MM1 vs MM2  
Number of differences: 258

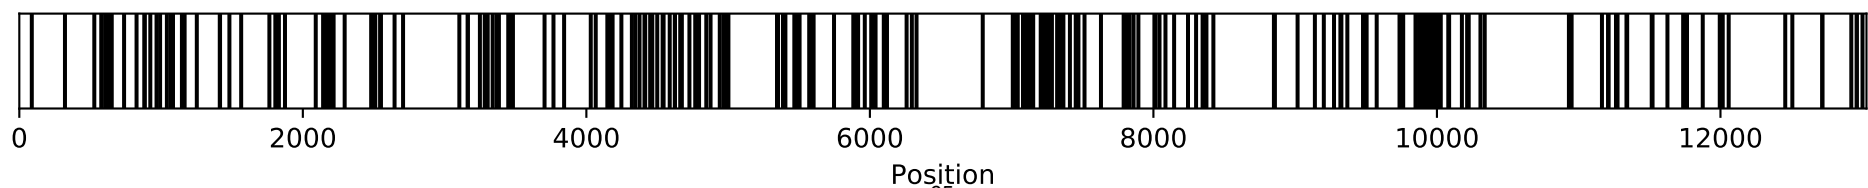

CR1 vs CR2  
Number of differences: 278

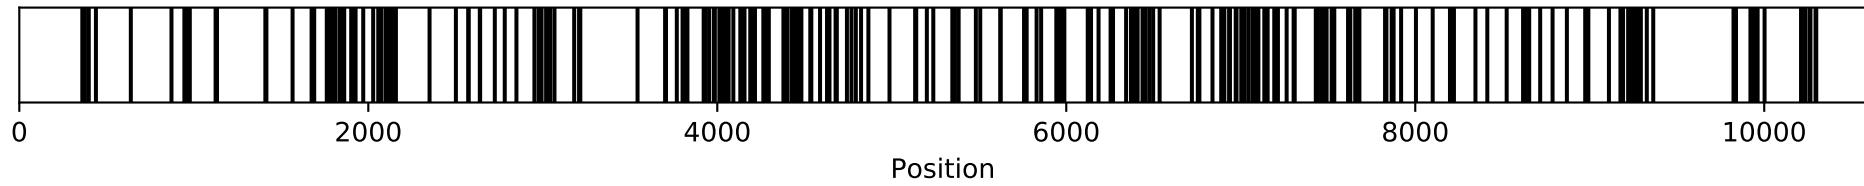

CR1 vs MM1  
Number of differences: 228

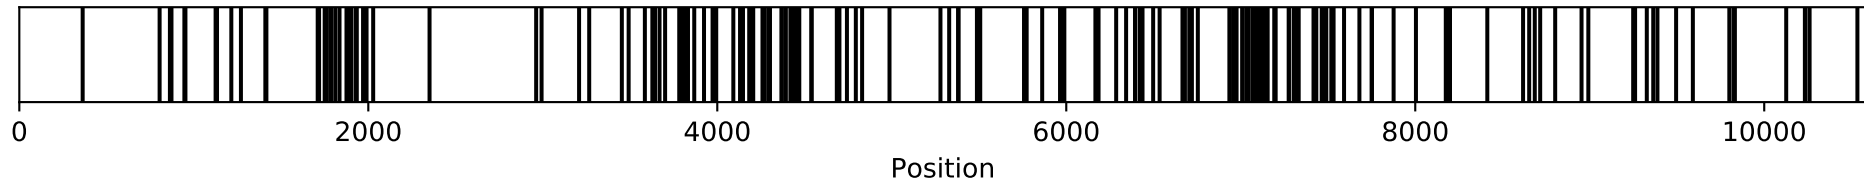

CR1 vs MM2  
Number of differences: 207

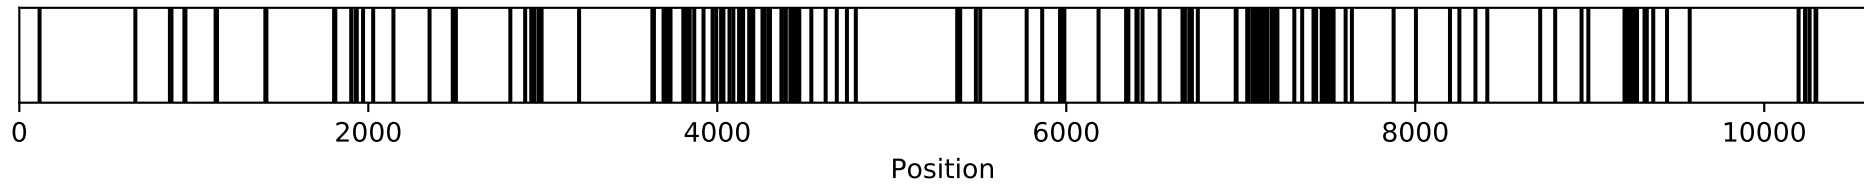

CR2 vs MM1  
Number of differences: 316

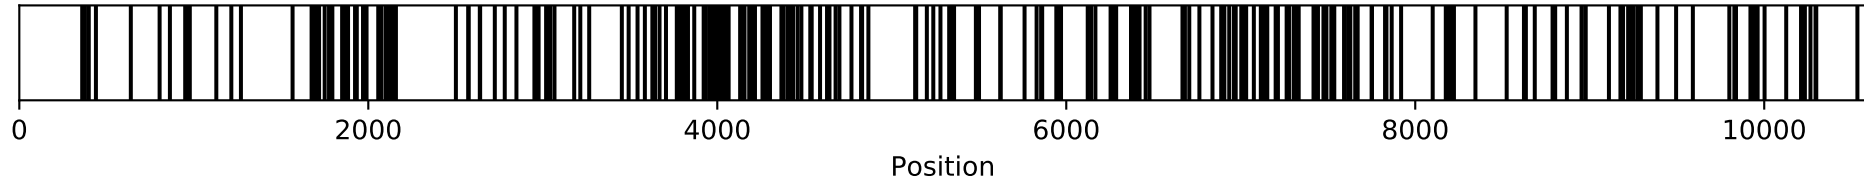

CR2 vs MM2  
Number of differences: 299

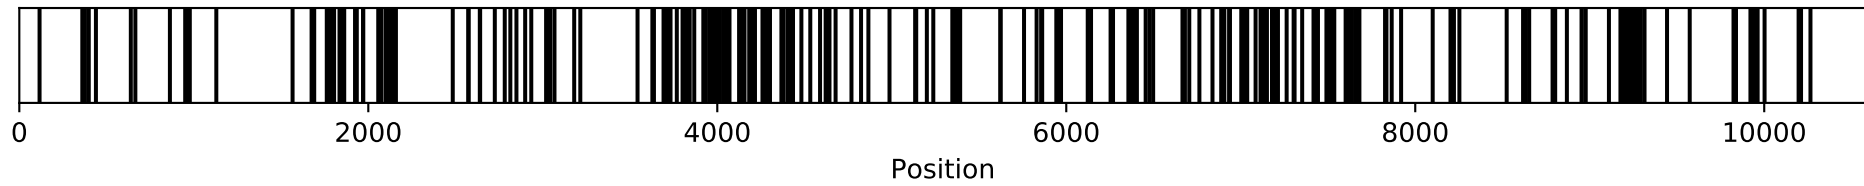

MM1 vs MM2  
Number of differences: 172

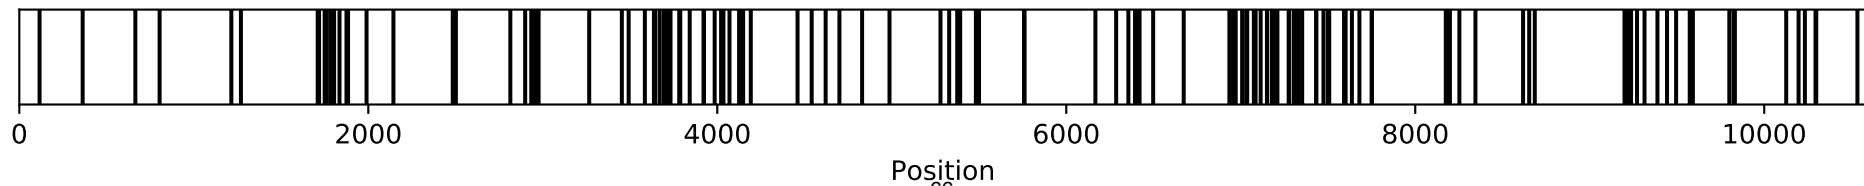

CR1 vs CR2  
Number of differences: 325

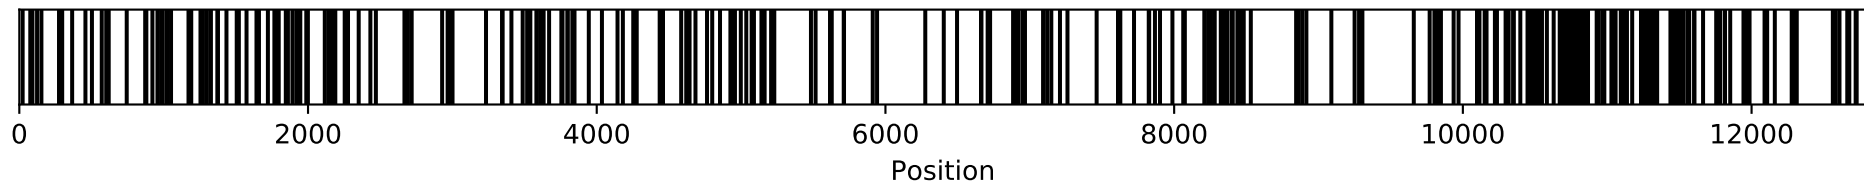

CR1 vs MM1  
Number of differences: 161

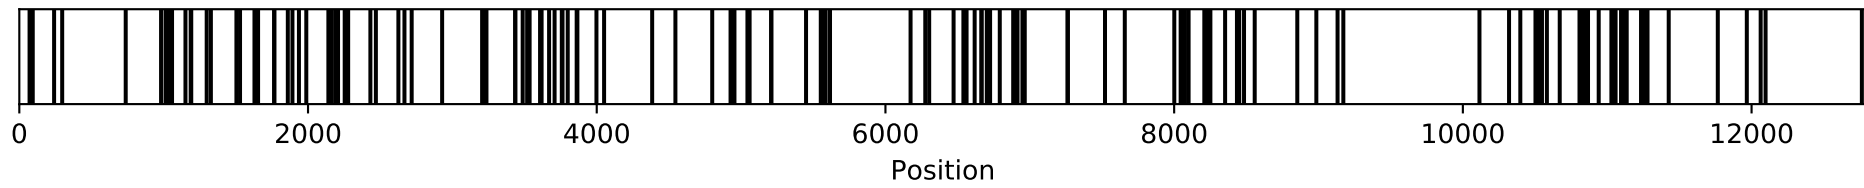

CR1 vs MM2  
Number of differences: 159

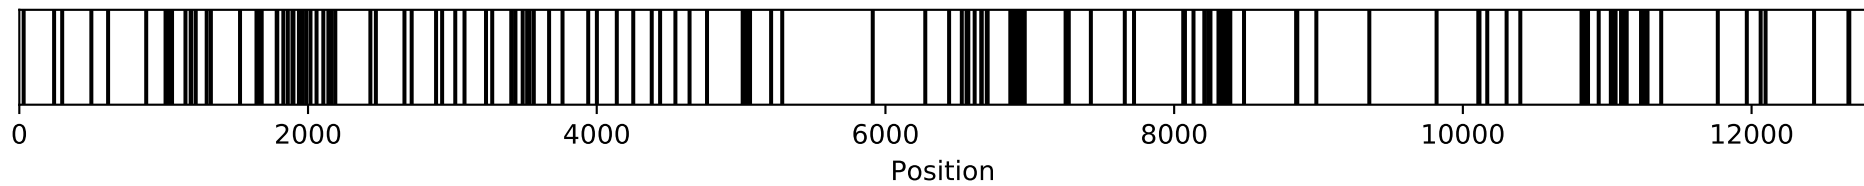

CR2 vs MM1  
Number of differences: 320

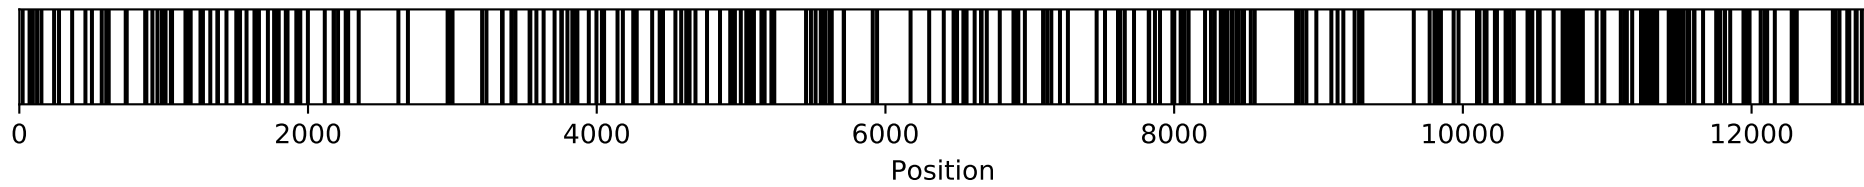

CR2 vs MM2  
Number of differences: 328

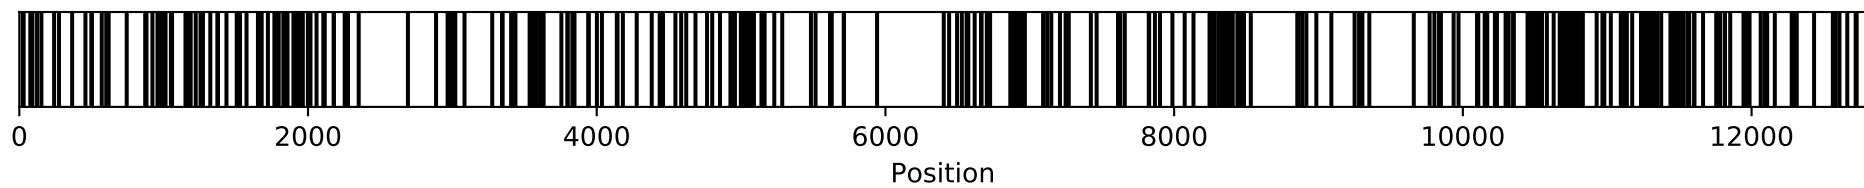

MM1 vs MM2  
Number of differences: 133

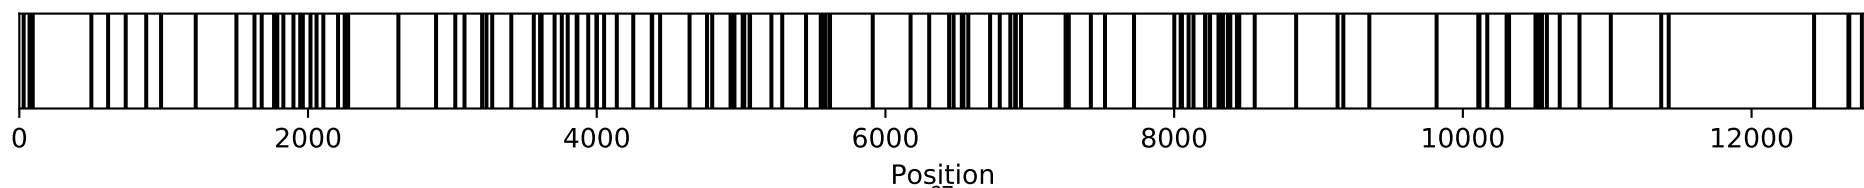

CR1 vs CR2  
Number of differences: 202

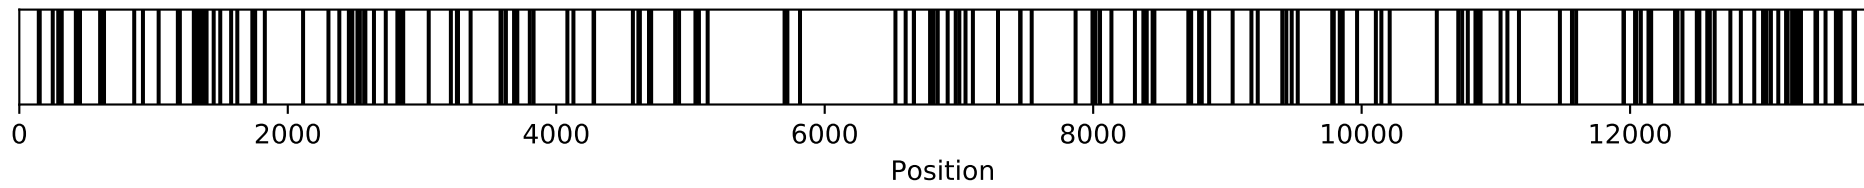

CR1 vs MM1  
Number of differences: 108

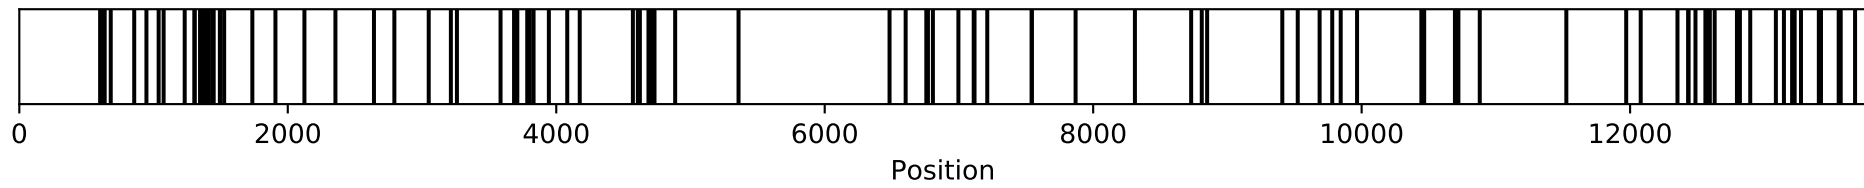

CR1 vs MM2  
Number of differences: 88

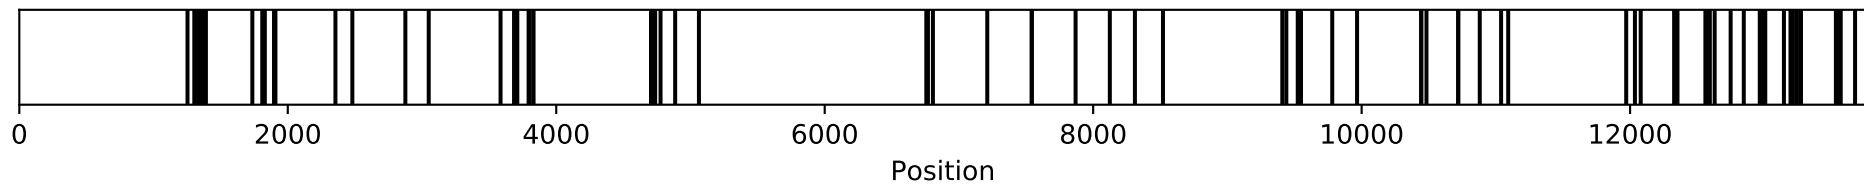

CR2 vs MM1  
Number of differences: 216

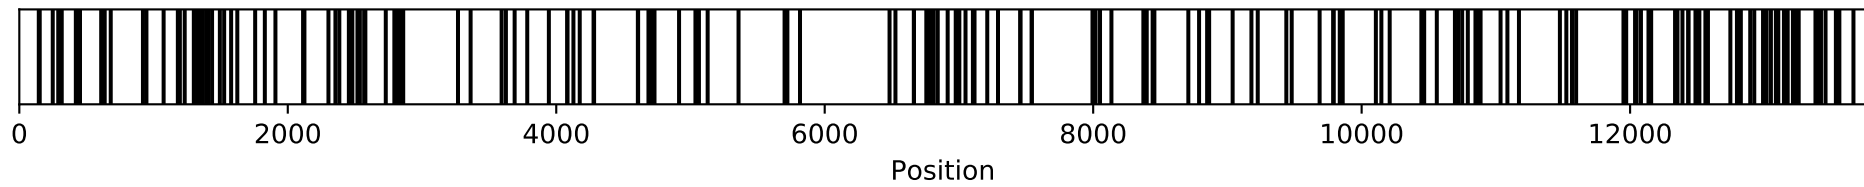

CR2 vs MM2  
Number of differences: 200

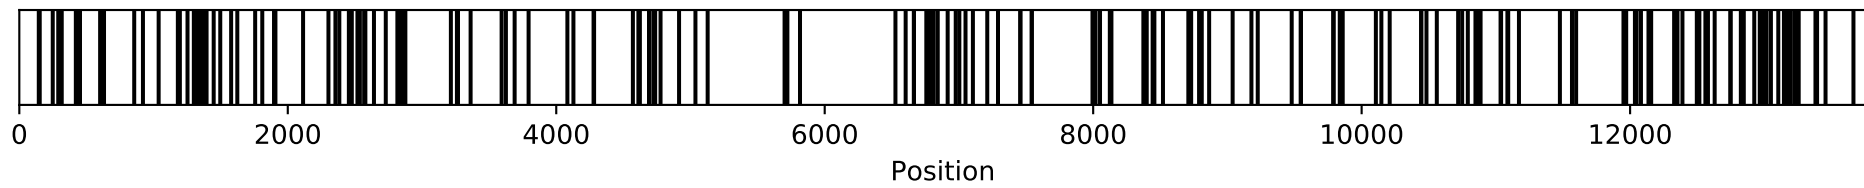

MM1 vs MM2  
Number of differences: 101

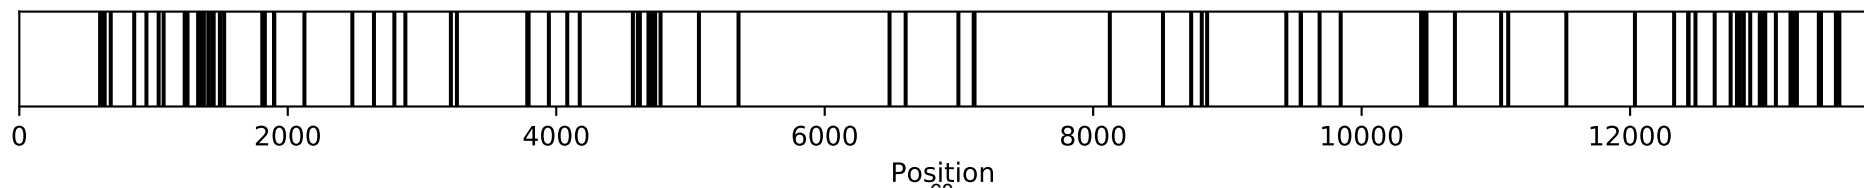

CR1 vs CR2  
Number of differences: 373

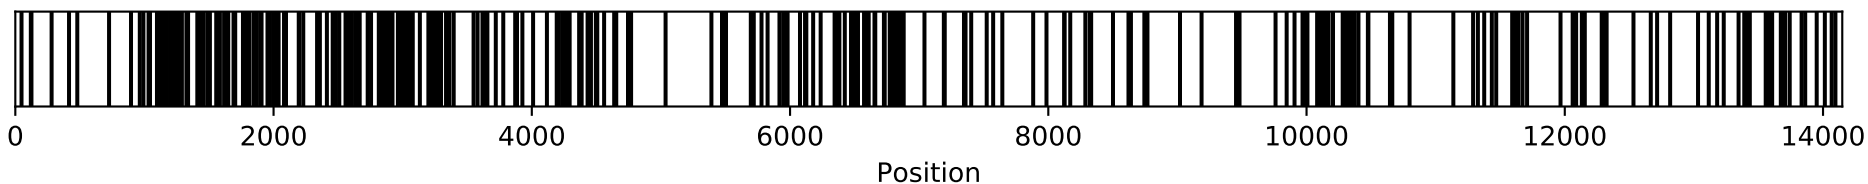

CR1 vs MM1  
Number of differences: 166

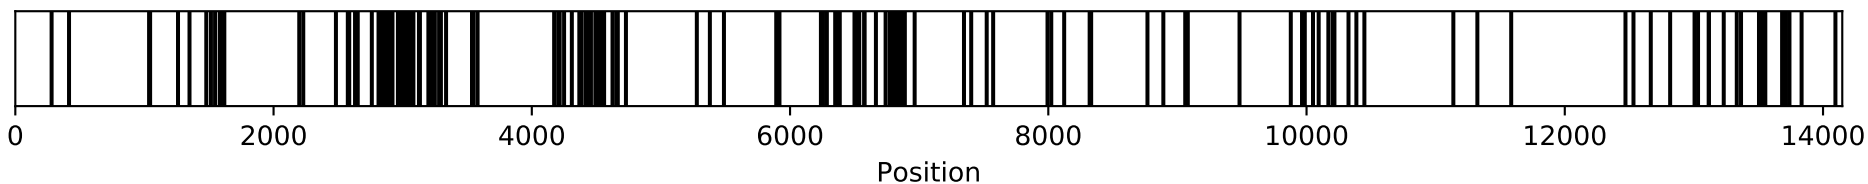

CR1 vs MM2  
Number of differences: 44

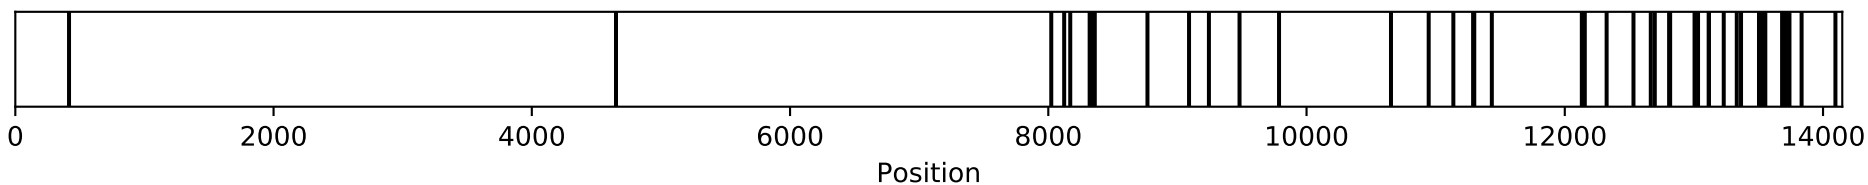

CR2 vs MM1  
Number of differences: 380

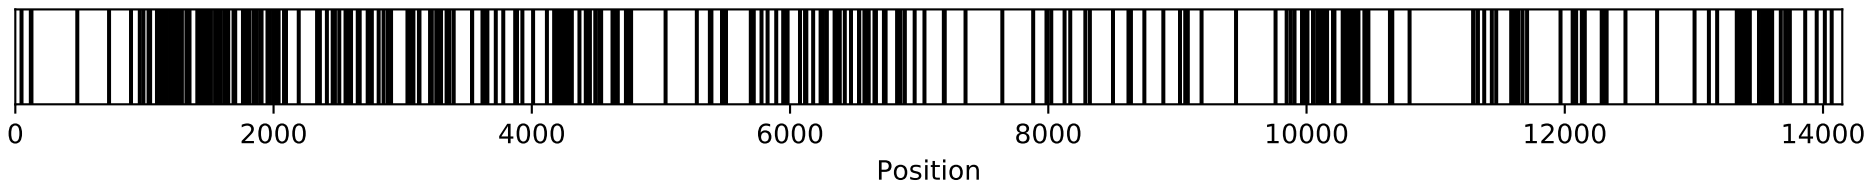

CR2 vs MM2  
Number of differences: 372

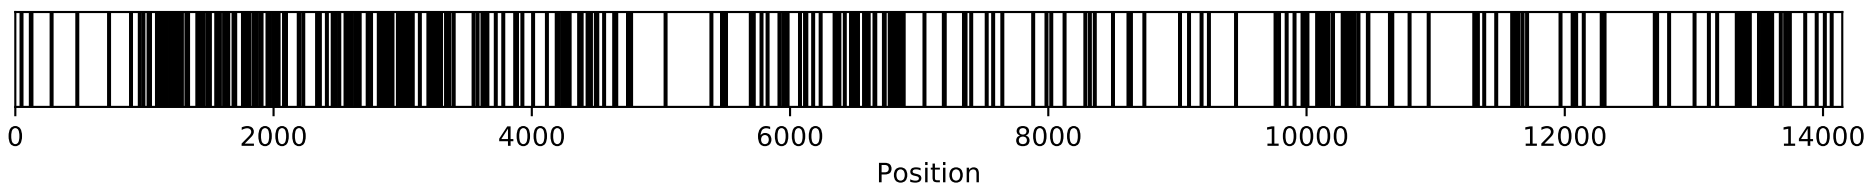

MM1 vs MM2  
Number of differences: 154

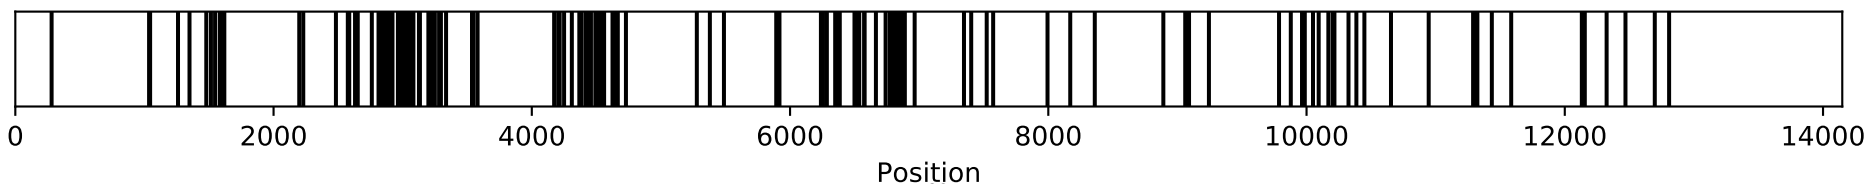

CR1 vs CR2  
Number of differences: 270

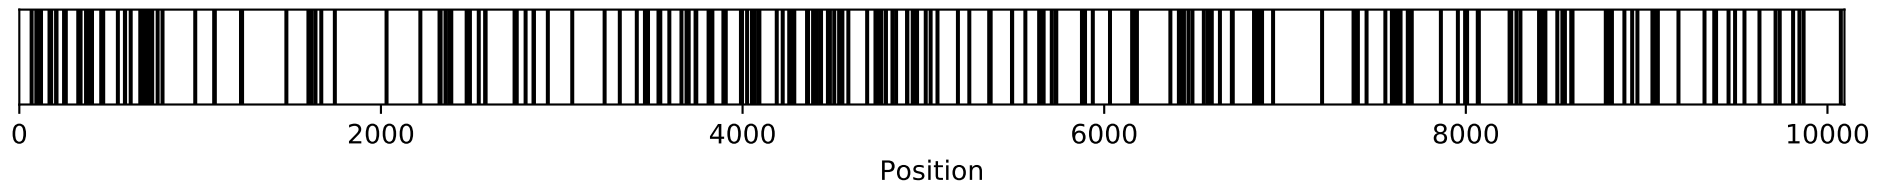

CR1 vs MM1  
Number of differences: 161

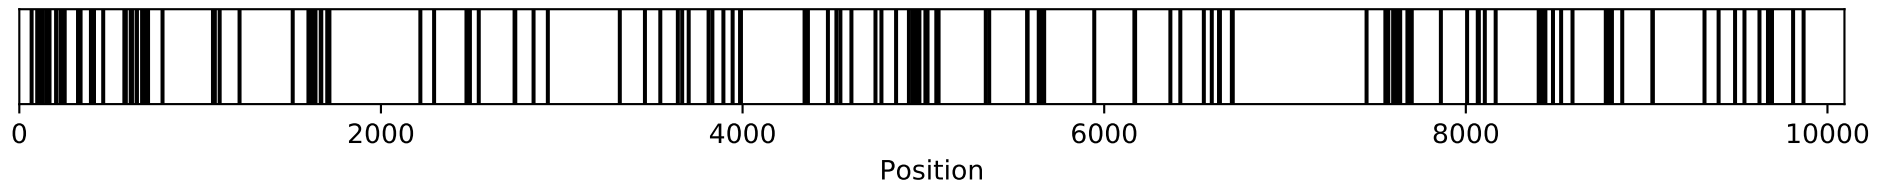

CR1 vs MM2  
Number of differences: 168

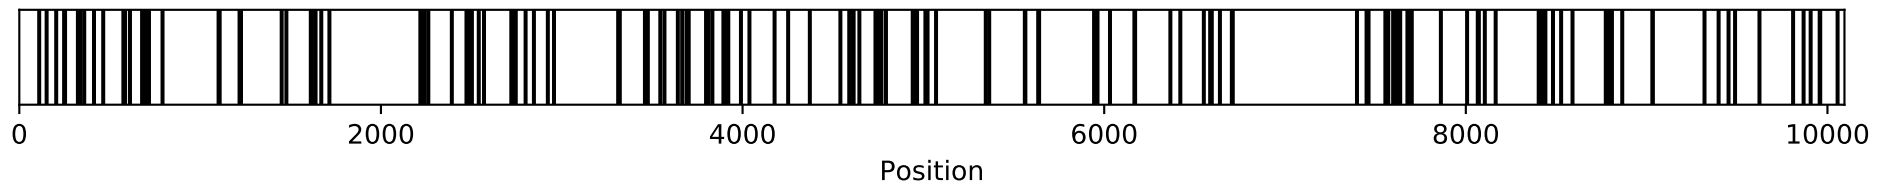

CR2 vs MM1  
Number of differences: 251

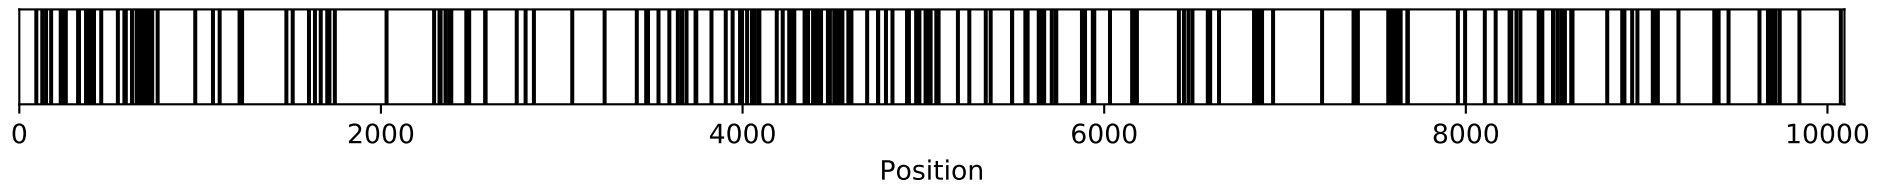

CR2 vs MM2  
Number of differences: 262

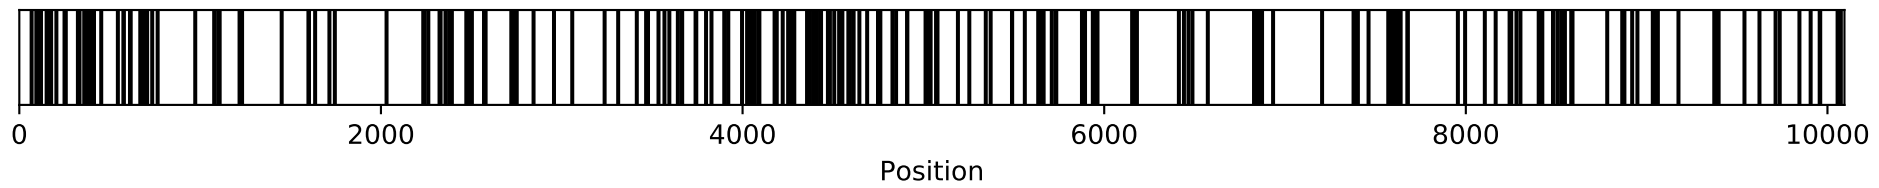

MM1 vs MM2  
Number of differences: 129

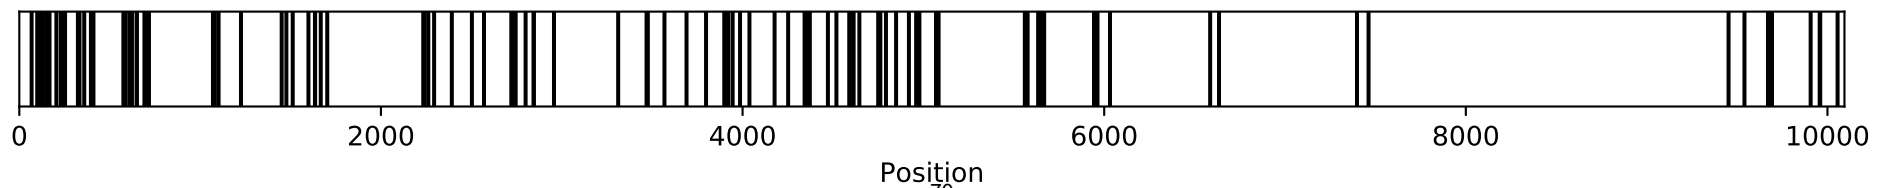

CR1 vs CR2  
Number of differences: 271

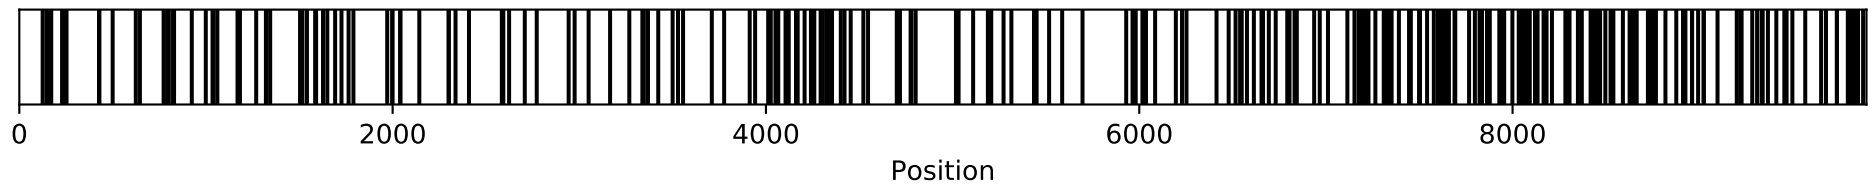

CR1 vs MM1  
Number of differences: 140

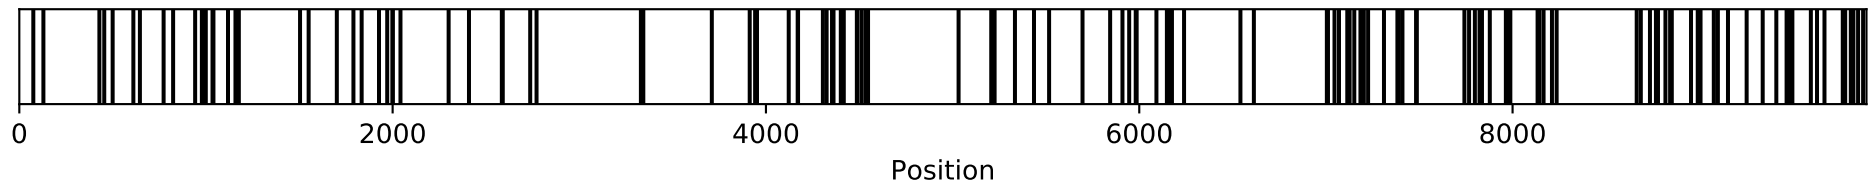

CR1 vs MM2  
Number of differences: 111

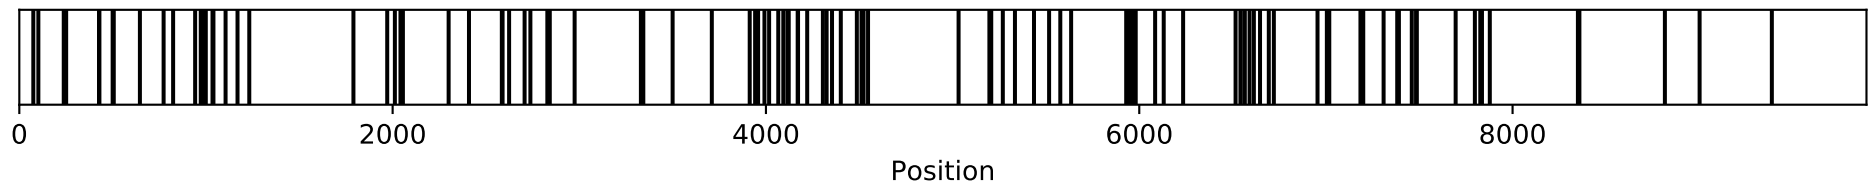

CR2 vs MM1  
Number of differences: 288

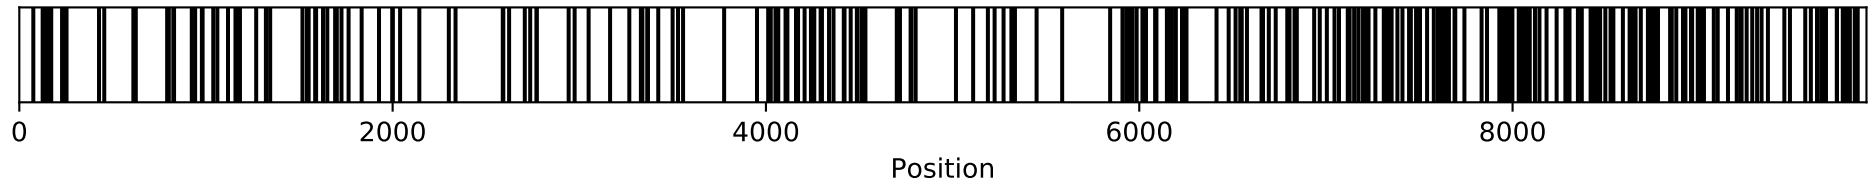

CR2 vs MM2  
Number of differences: 281

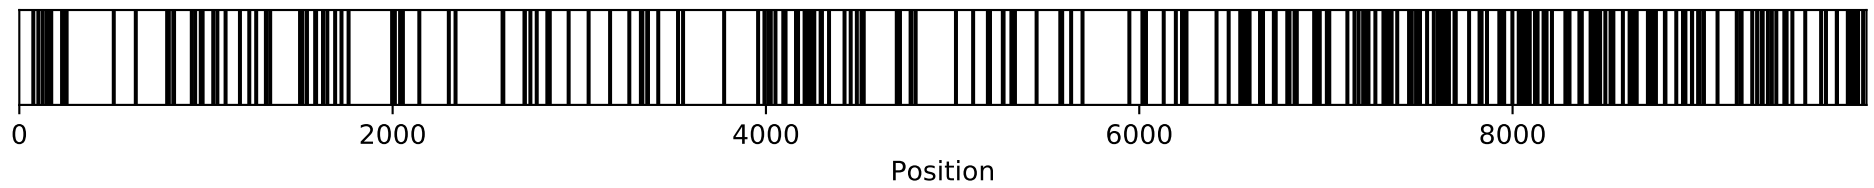

MM1 vs MM2  
Number of differences: 151

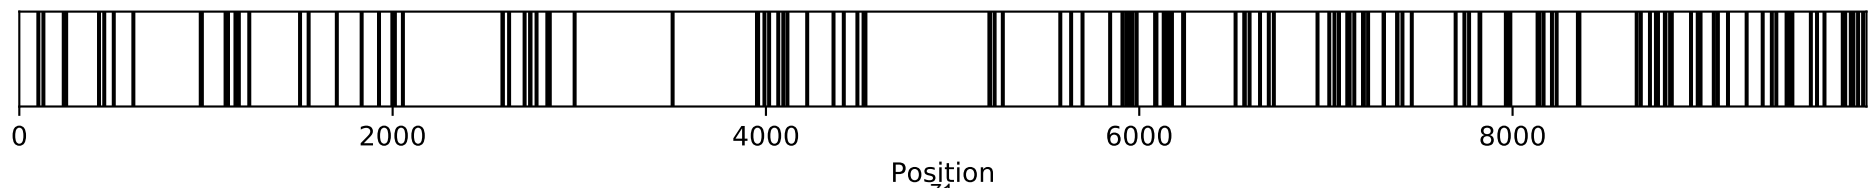



CR1 vs CR2  
Number of differences: 478

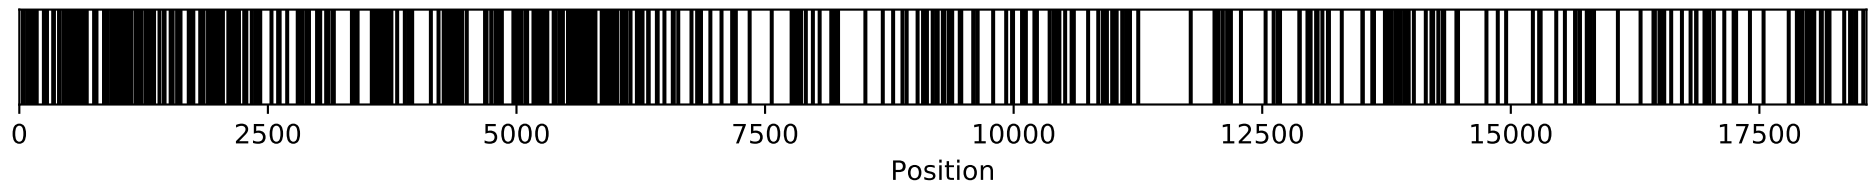

CR1 vs MM1  
Number of differences: 323

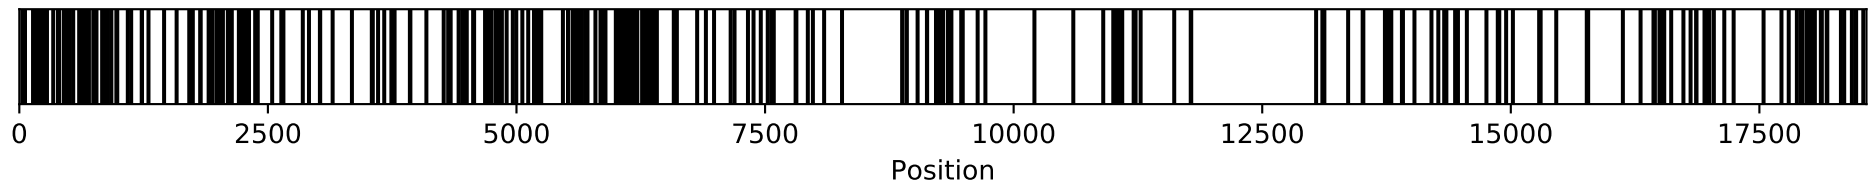

CR1 vs MM2  
Number of differences: 302

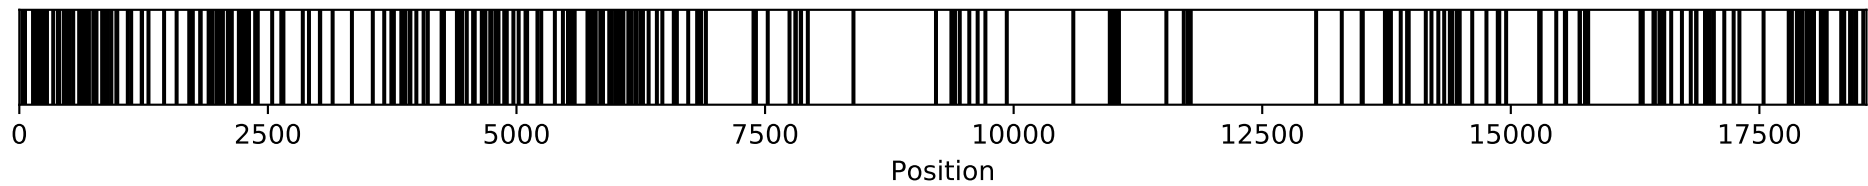

CR2 vs MM1  
Number of differences: 469

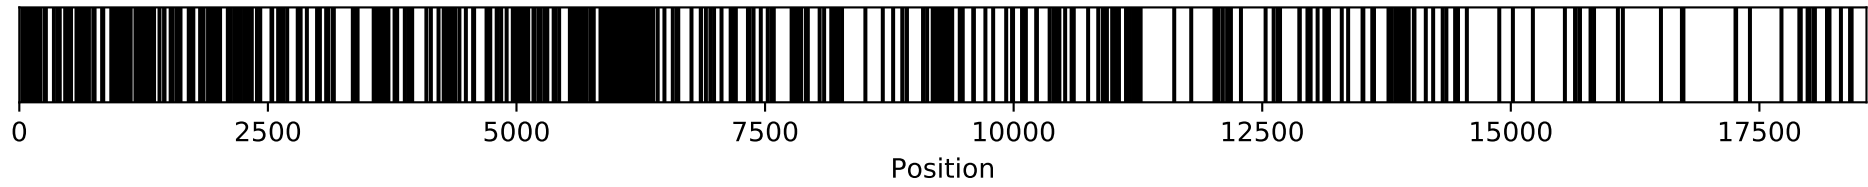

CR2 vs MM2  
Number of differences: 453

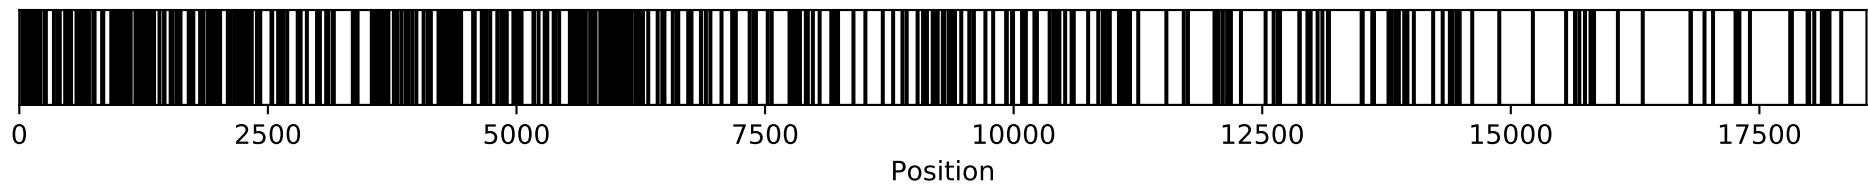

MM1 vs MM2  
Number of differences: 222

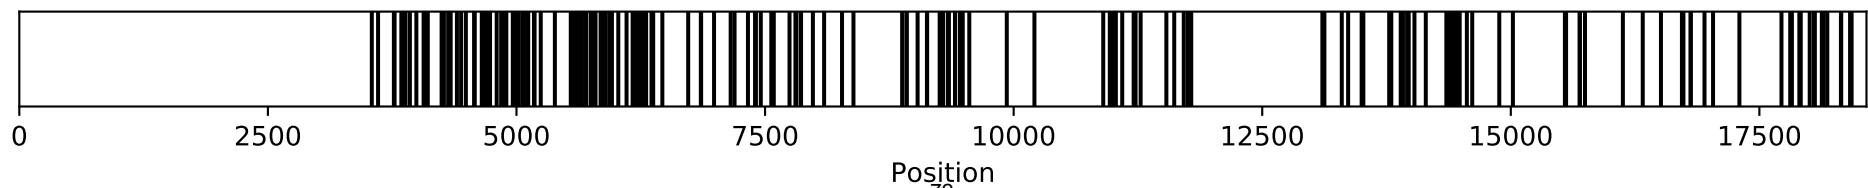

CR1 vs CR2  
Number of differences: 419

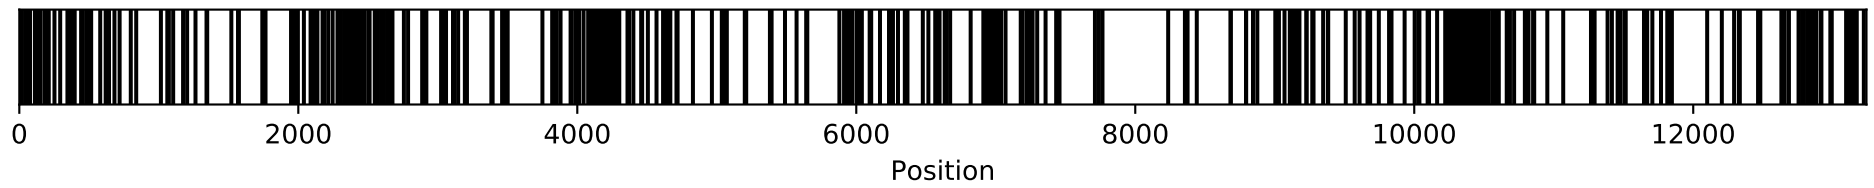

CR1 vs MM1  
Number of differences: 376

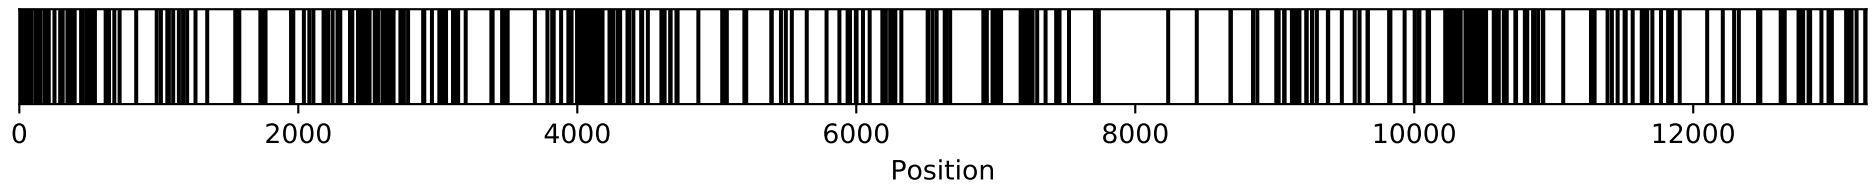

CR1 vs MM2  
Number of differences: 392

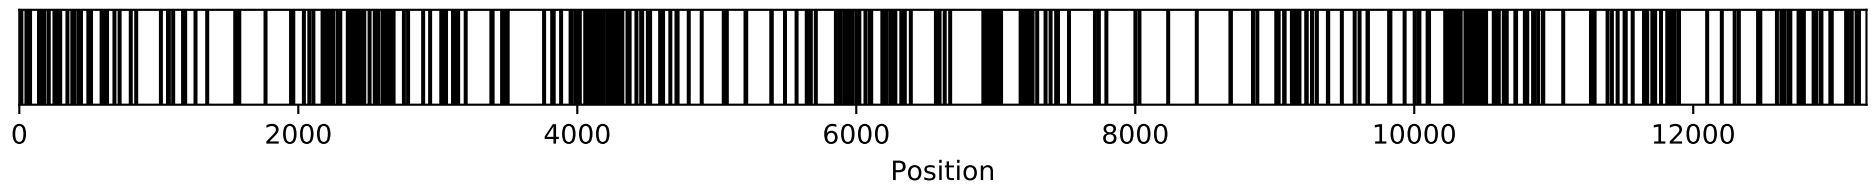

CR2 vs MM1  
Number of differences: 250

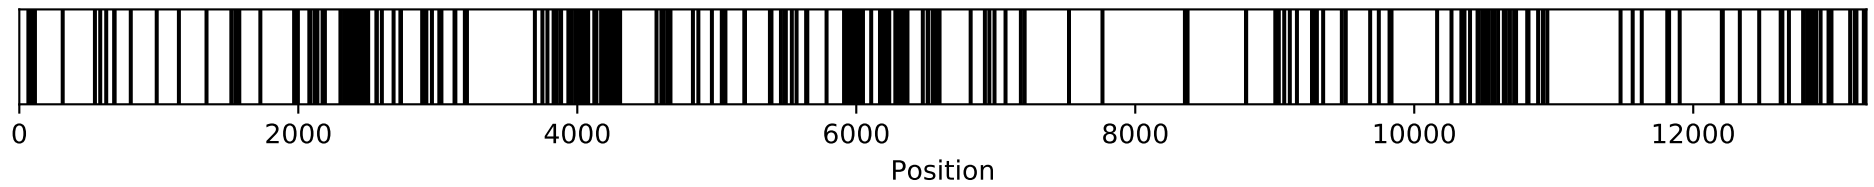

CR2 vs MM2  
Number of differences: 251

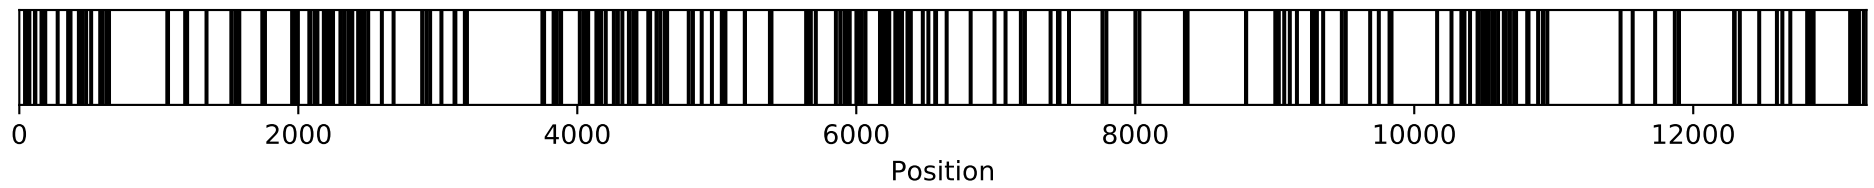

MM1 vs MM2  
Number of differences: 202

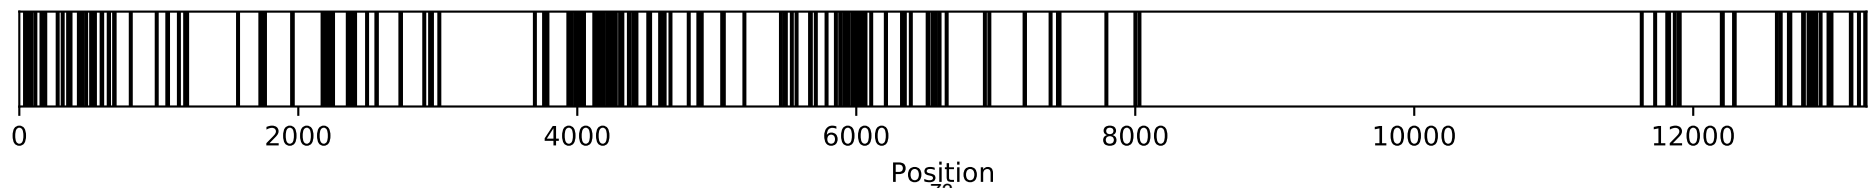

CR1 vs CR2  
Number of differences: 239

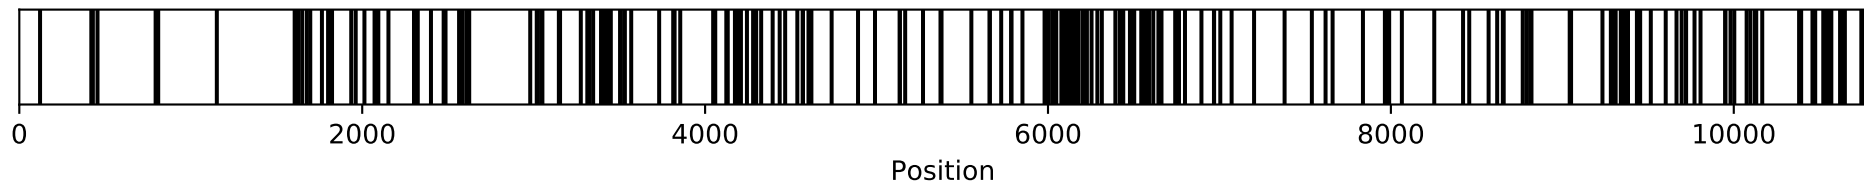

CR1 vs MM1  
Number of differences: 152

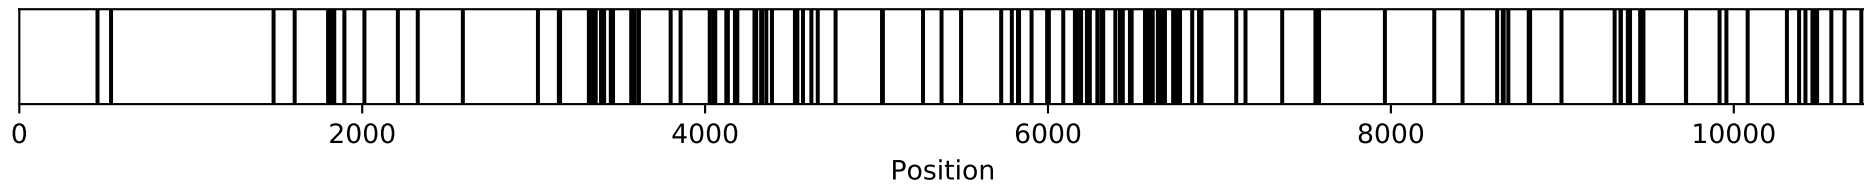

CR1 vs MM2  
Number of differences: 156

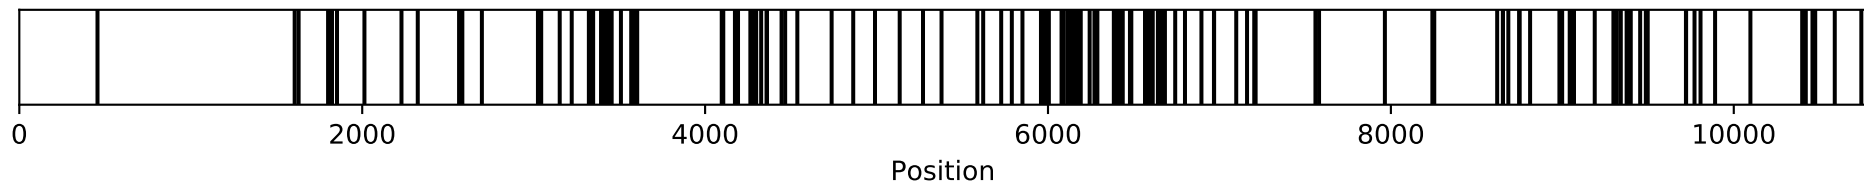

CR2 vs MM1  
Number of differences: 233

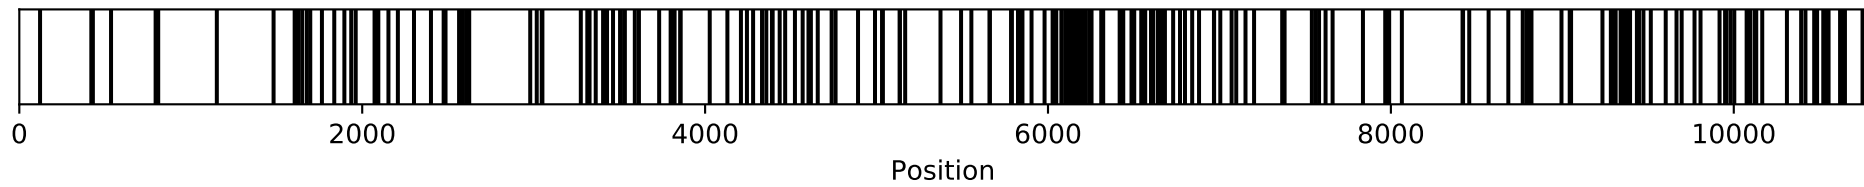

CR2 vs MM2  
Number of differences: 241

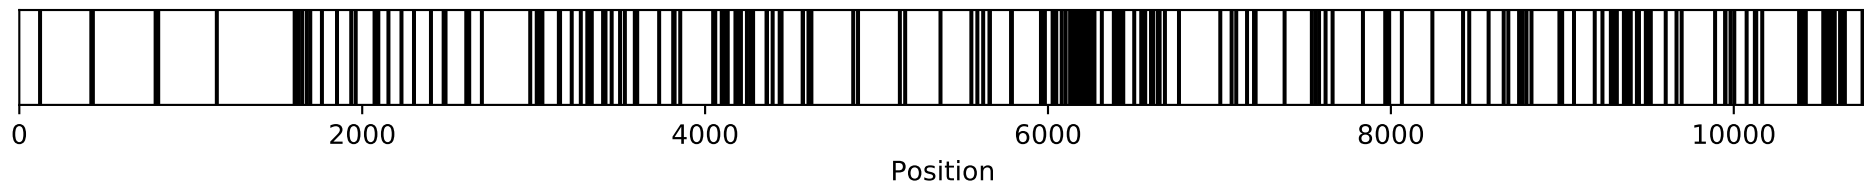

MM1 vs MM2  
Number of differences: 163

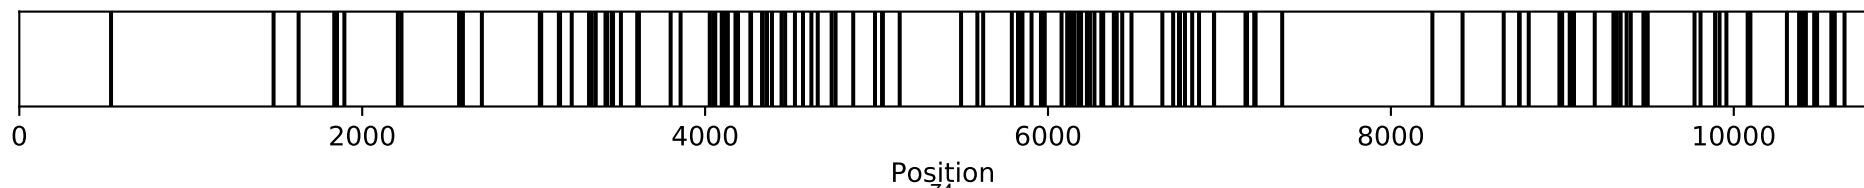

CR1 vs CR2  
Number of differences: 207

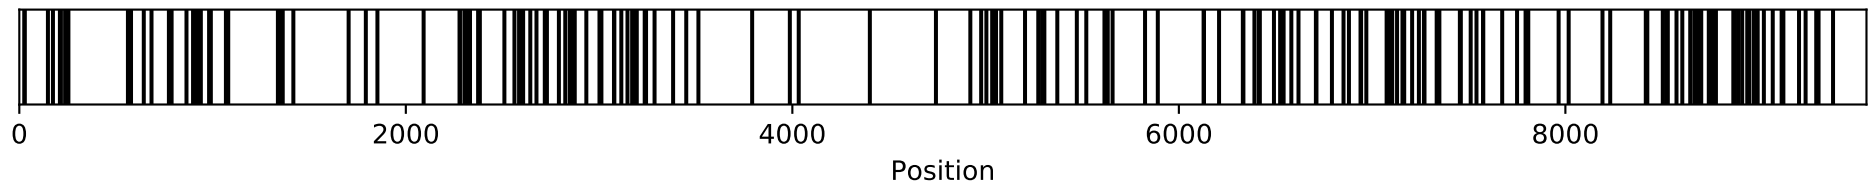

CR1 vs MM1  
Number of differences: 130

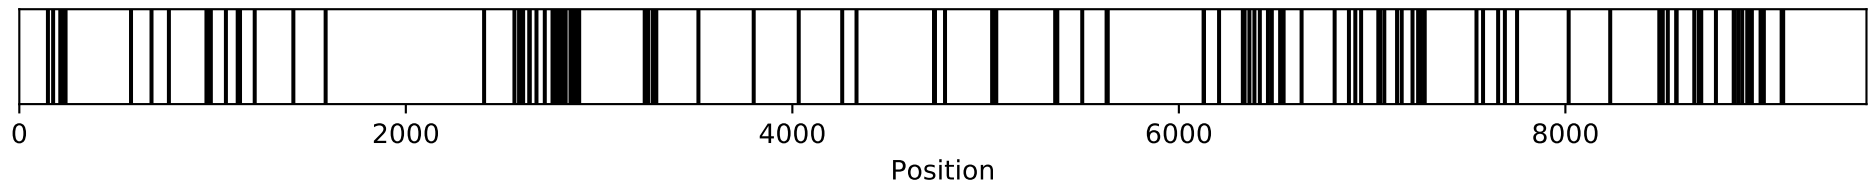

CR1 vs MM2  
Number of differences: 110

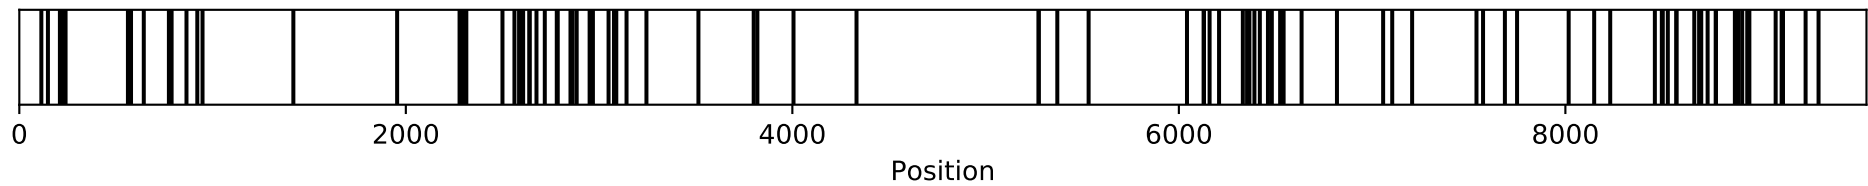

CR2 vs MM1  
Number of differences: 219

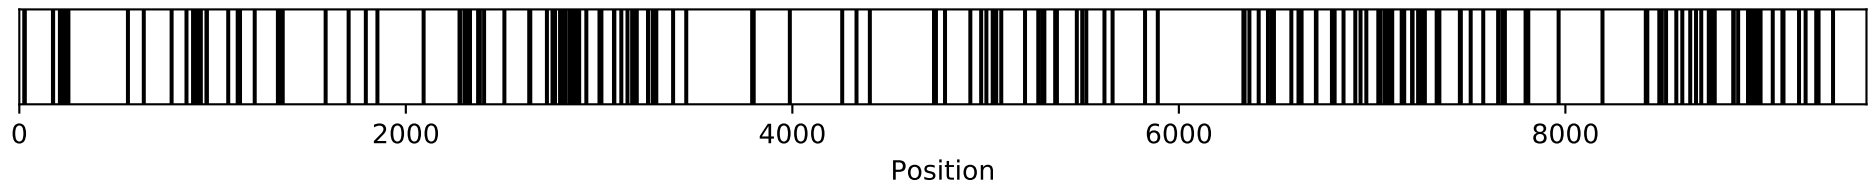

CR2 vs MM2  
Number of differences: 209

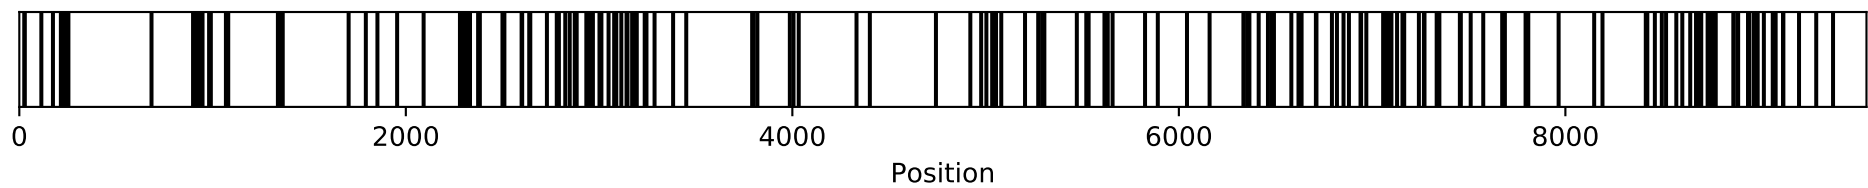

MM1 vs MM2  
Number of differences: 133

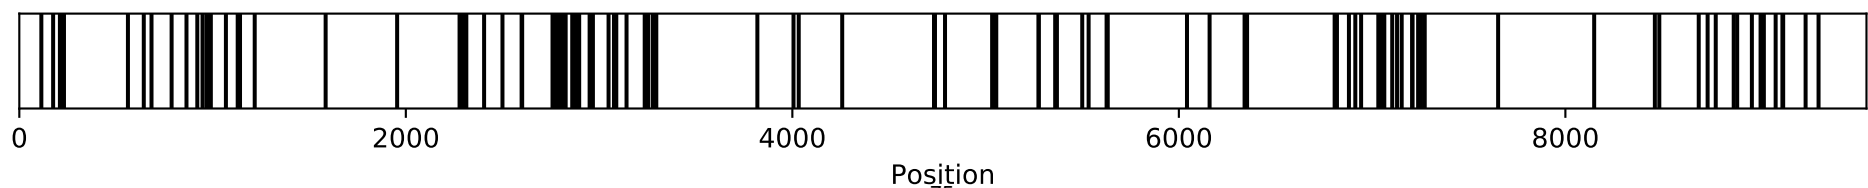

CR1 vs CR2  
Number of differences: 306

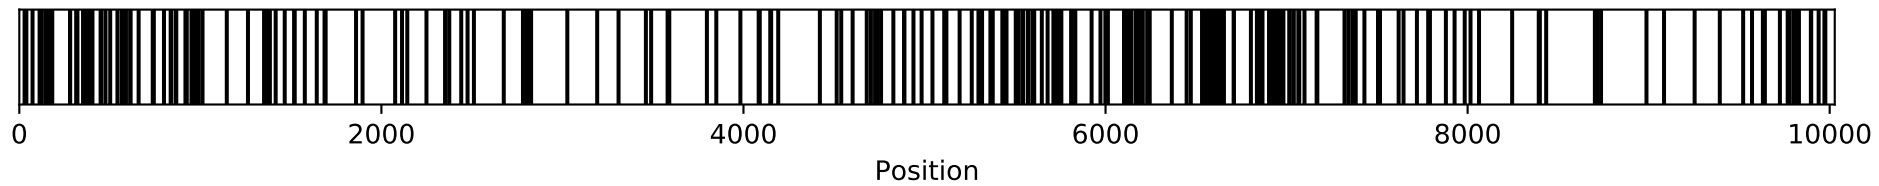

CR1 vs MM1  
Number of differences: 292

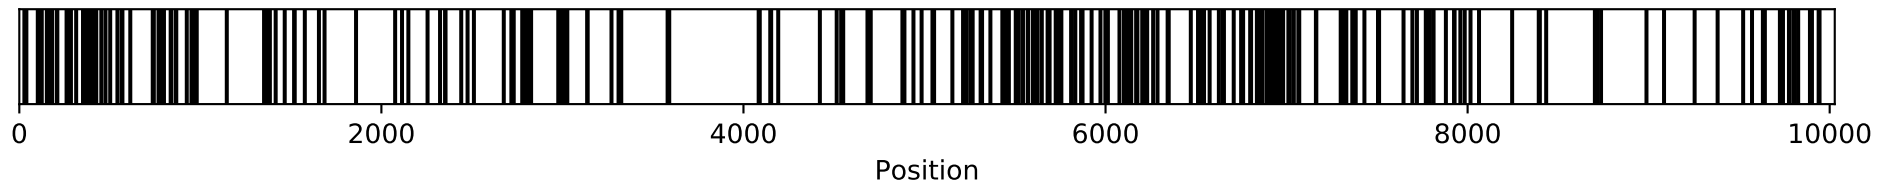

CR1 vs MM2  
Number of differences: 302

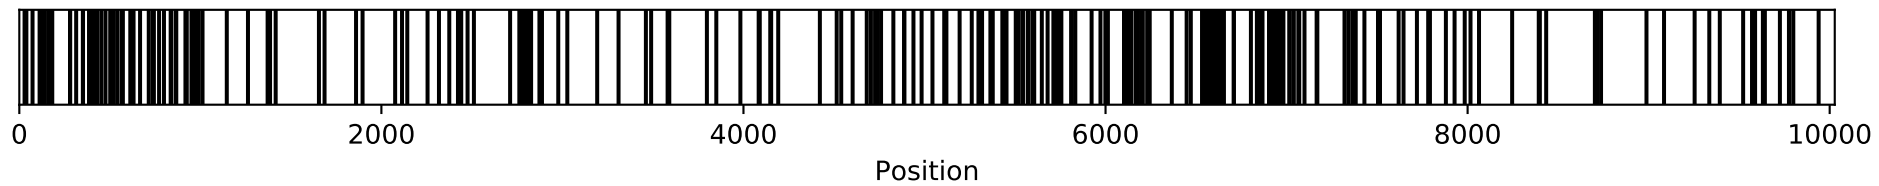

CR2 vs MM1  
Number of differences: 222

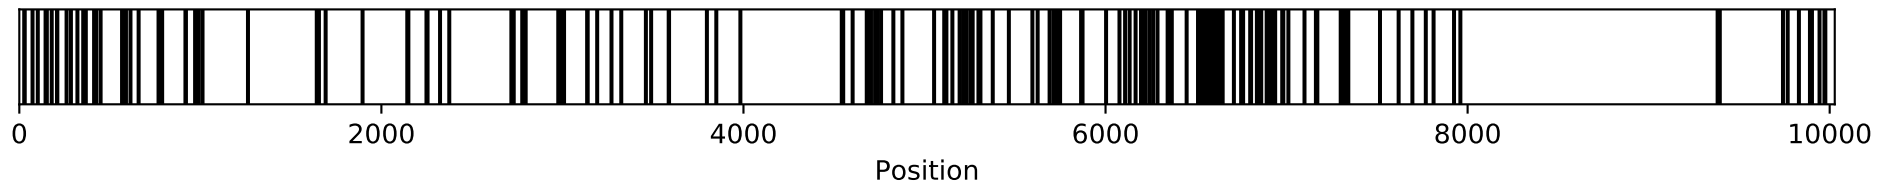

CR2 vs MM2  
Number of differences: 65

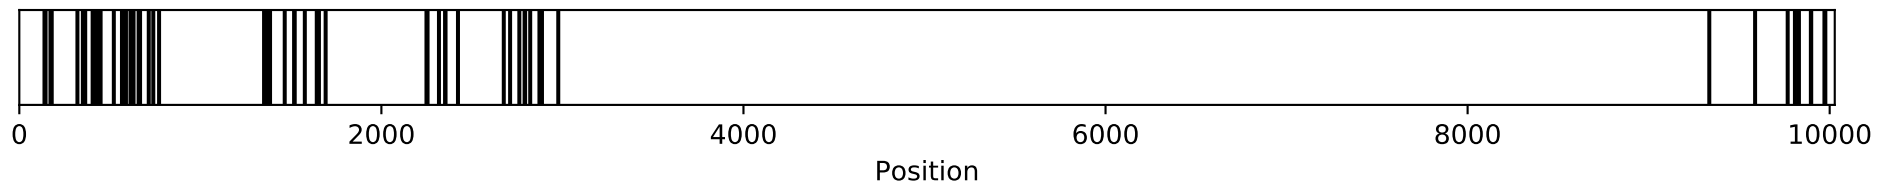

MM1 vs MM2  
Number of differences: 246

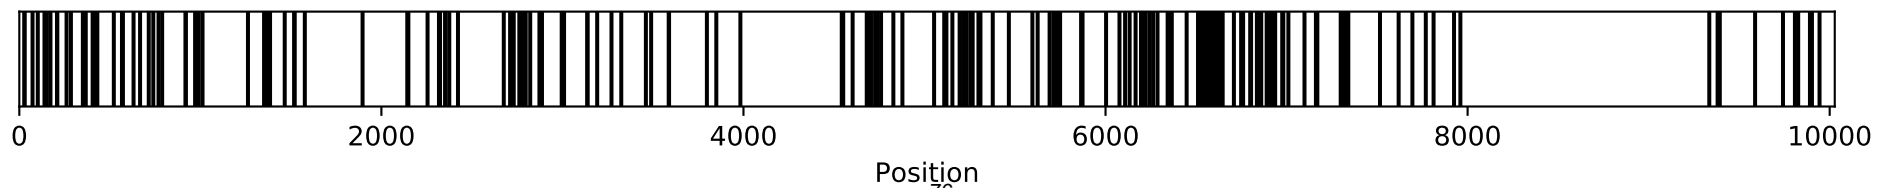

CR1 vs CR2  
Number of differences: 250

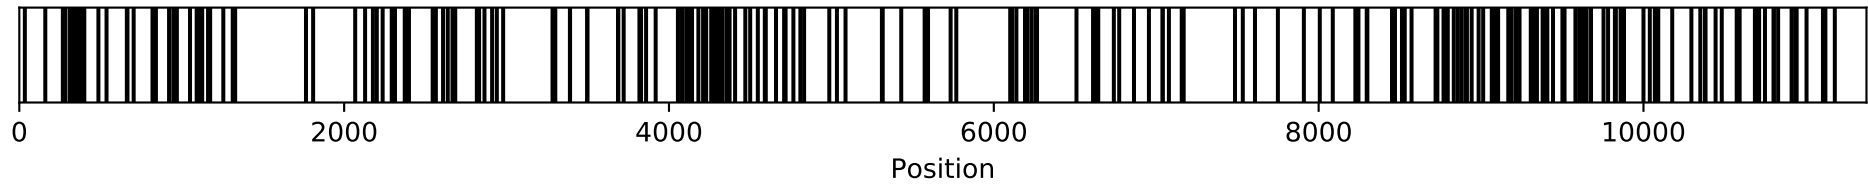

CR1 vs MM1  
Number of differences: 242

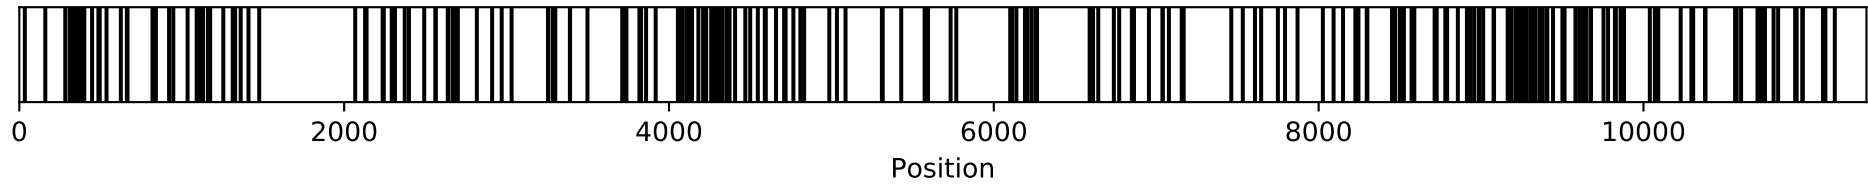

CR1 vs MM2  
Number of differences: 248

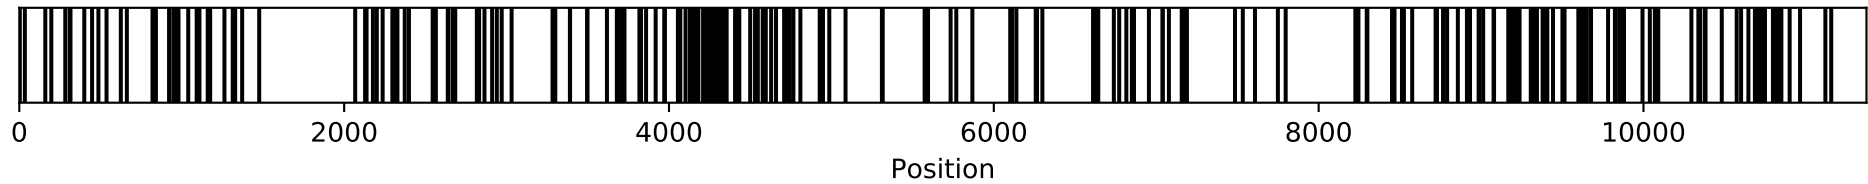

CR2 vs MM1  
Number of differences: 114

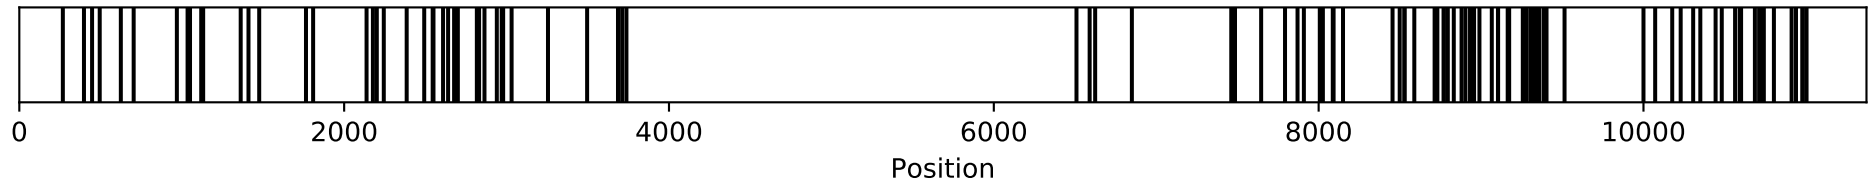

CR2 vs MM2  
Number of differences: 147

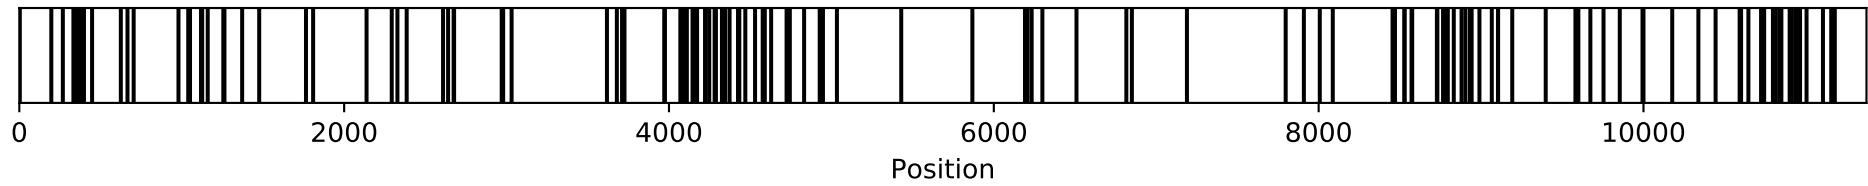

MM1 vs MM2  
Number of differences: 166

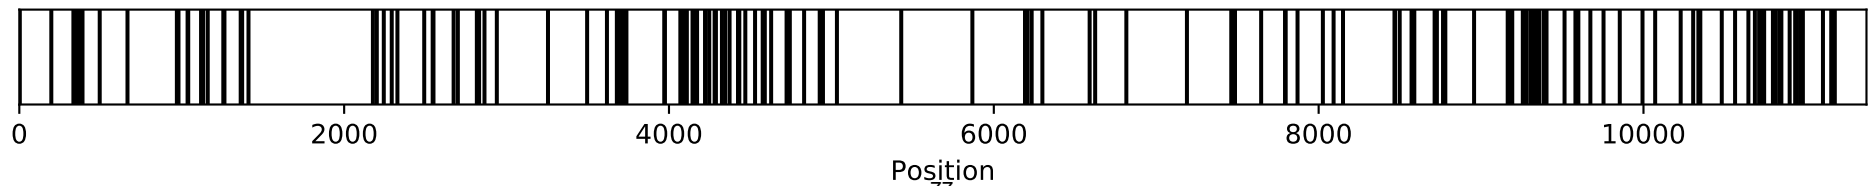

CR1 vs CR2  
Number of differences: 159

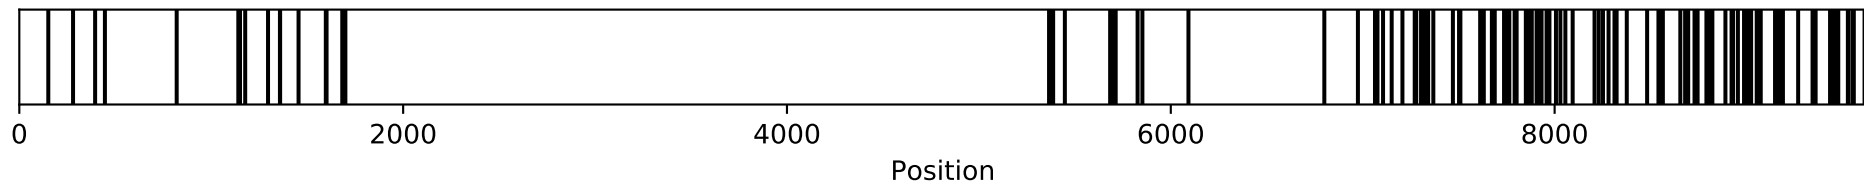

CR1 vs MM1  
Number of differences: 122

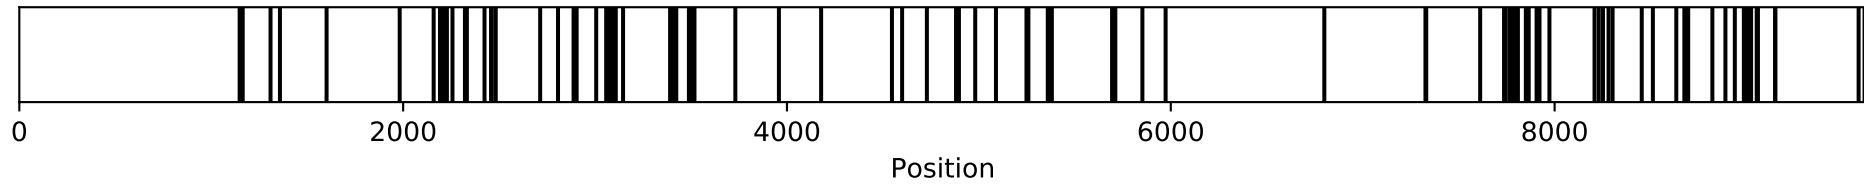

CR1 vs MM2  
Number of differences: 132

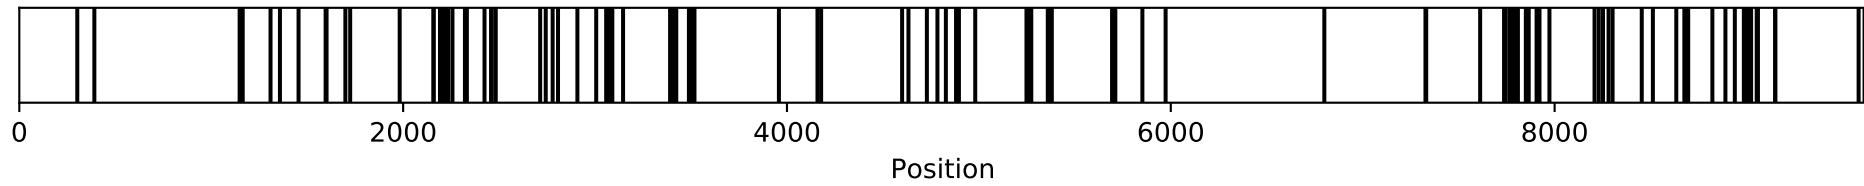

CR2 vs MM1  
Number of differences: 185

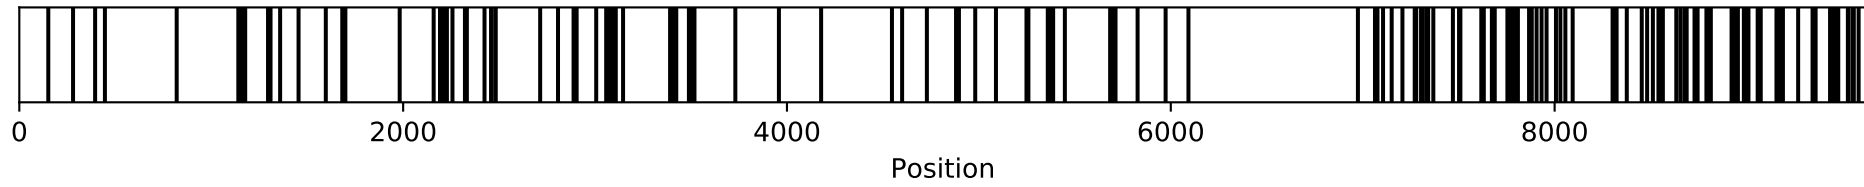

CR2 vs MM2  
Number of differences: 191

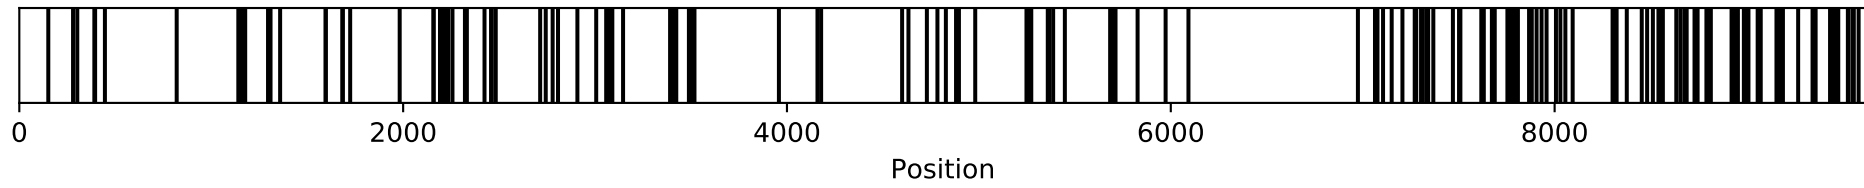

MM1 vs MM2  
Number of differences: 24

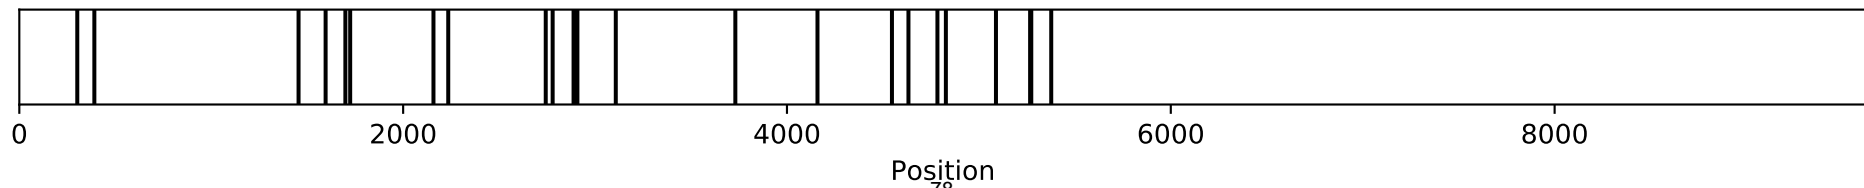

CR1 vs CR2  
Number of differences: 186

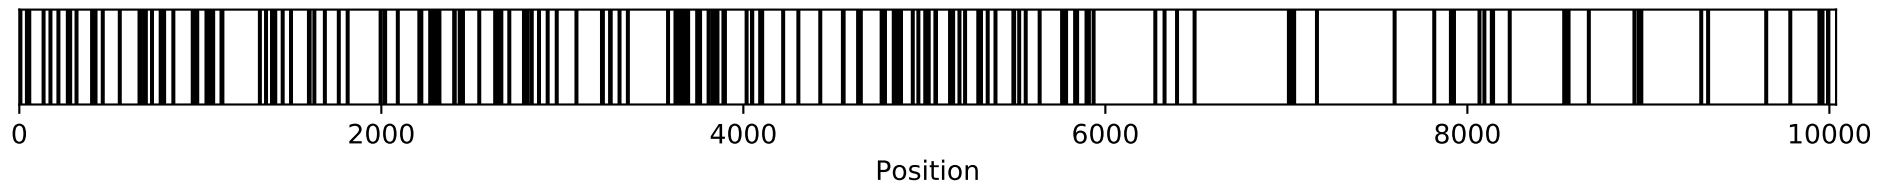

CR1 vs MM1  
Number of differences: 92

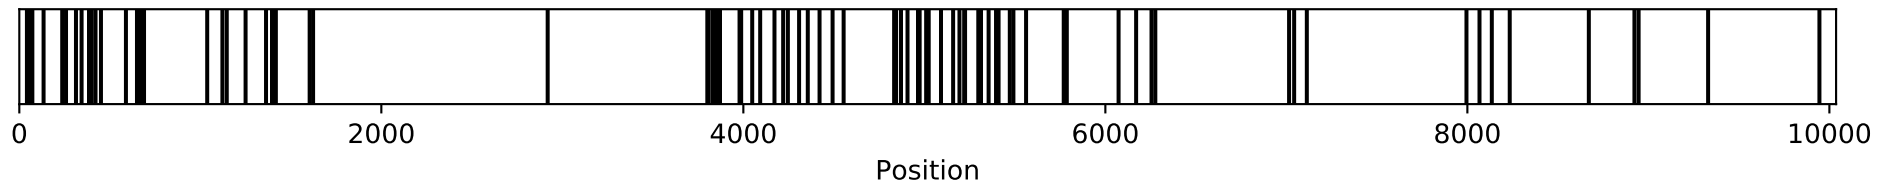

CR1 vs MM2  
Number of differences: 108

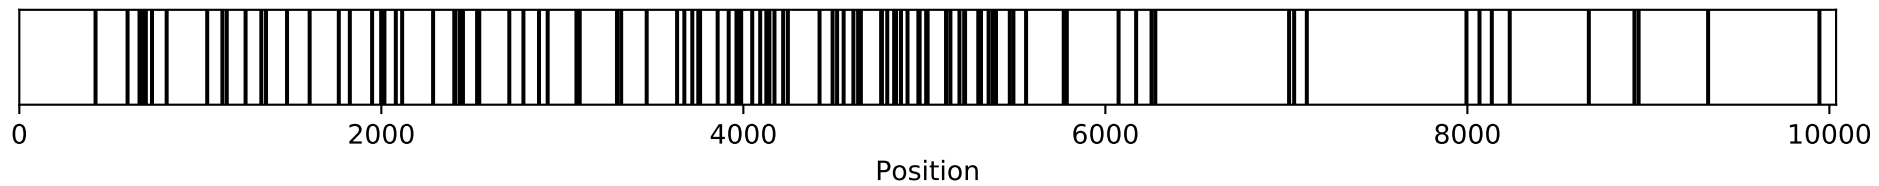

CR2 vs MM1  
Number of differences: 194

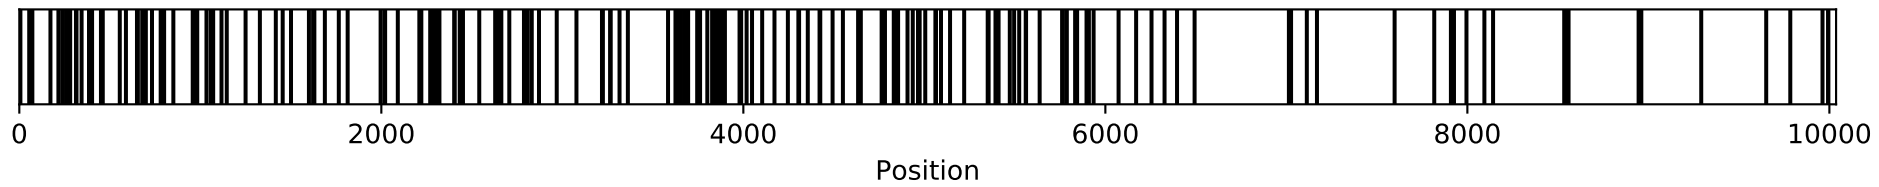

CR2 vs MM2  
Number of differences: 190

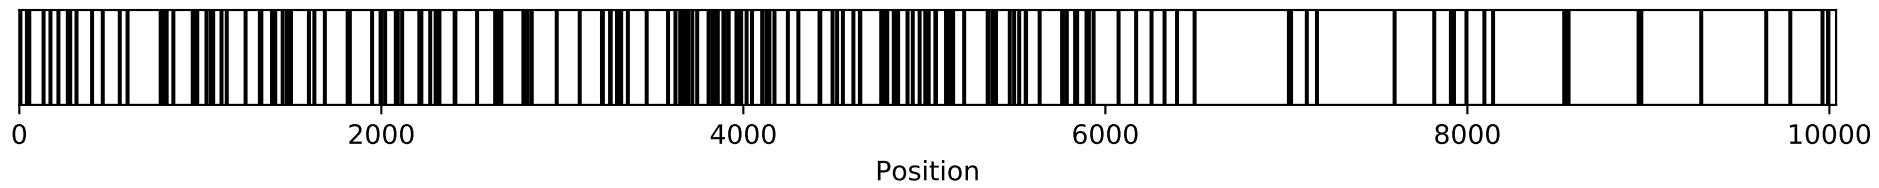

MM1 vs MM2  
Number of differences: 86

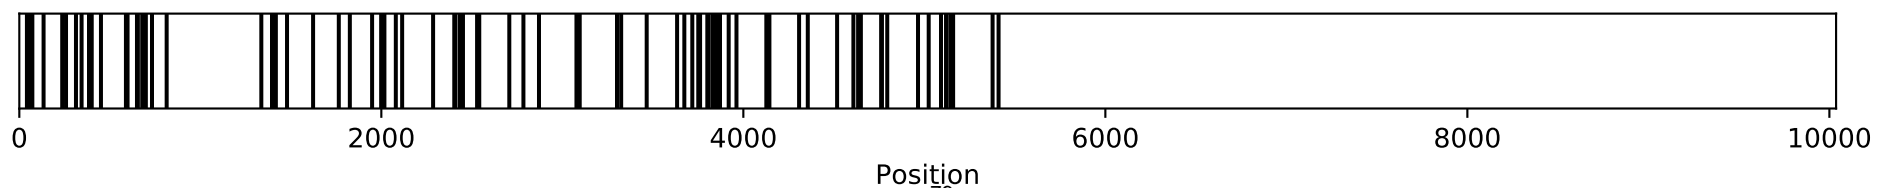



CR1 vs CR2  
Number of differences: 218

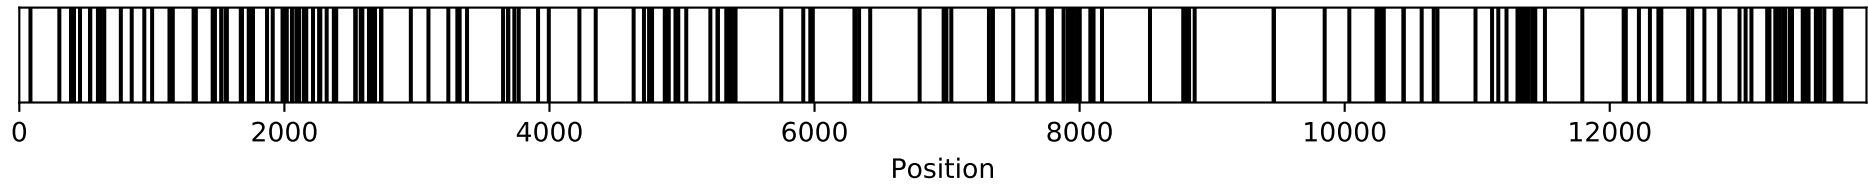

CR1 vs MM1  
Number of differences: 231

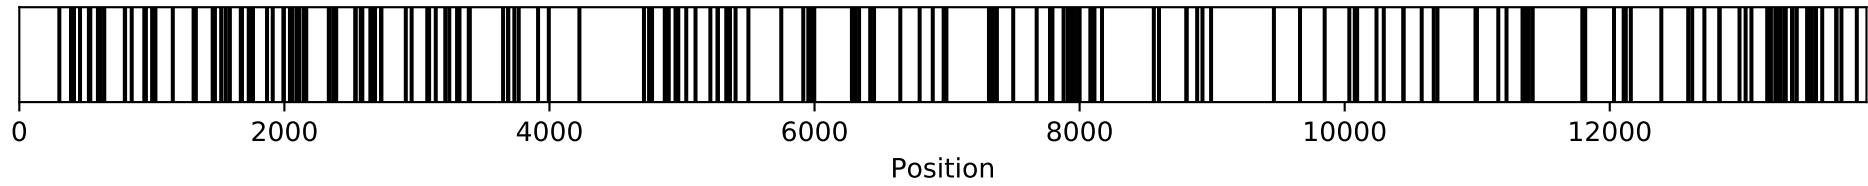

CR1 vs MM2  
Number of differences: 222

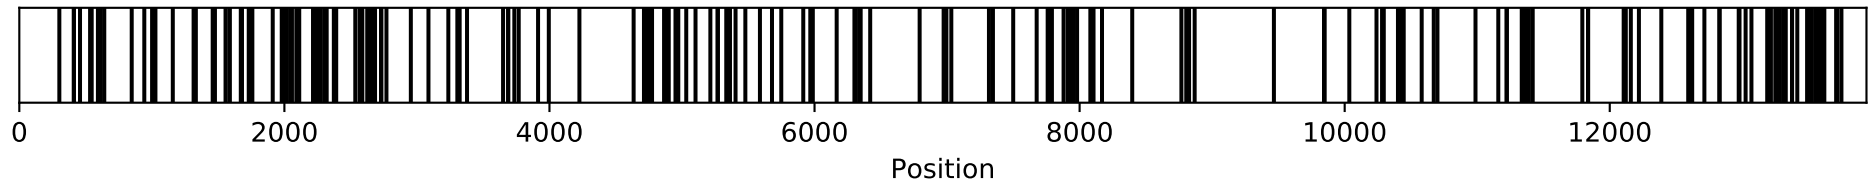

CR2 vs MM1  
Number of differences: 118

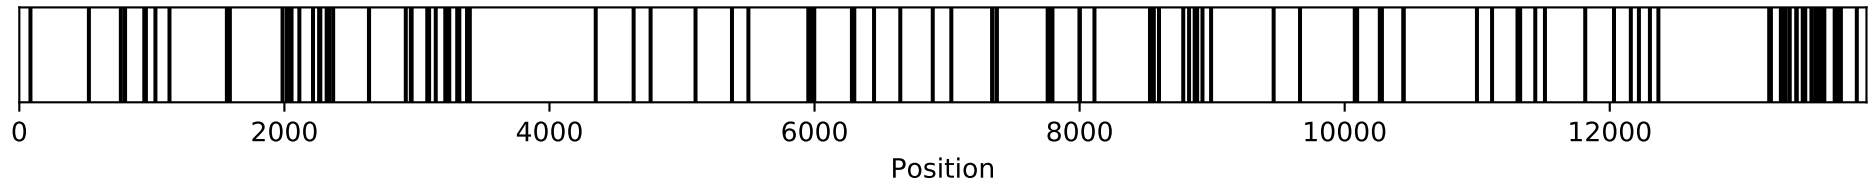

CR2 vs MM2  
Number of differences: 109

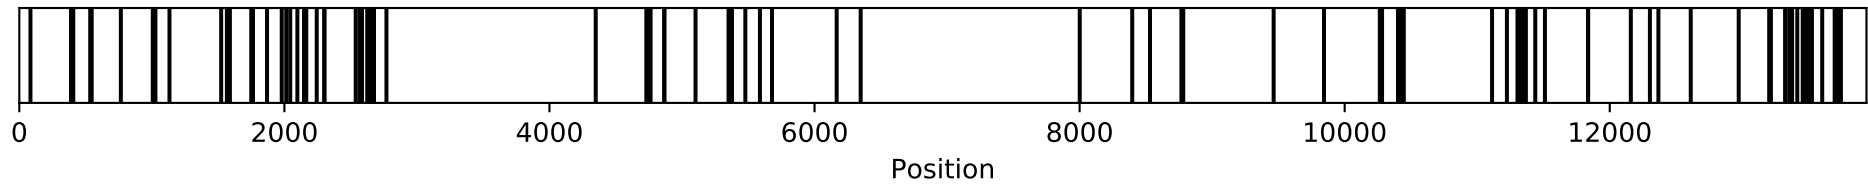

MM1 vs MM2  
Number of differences: 143

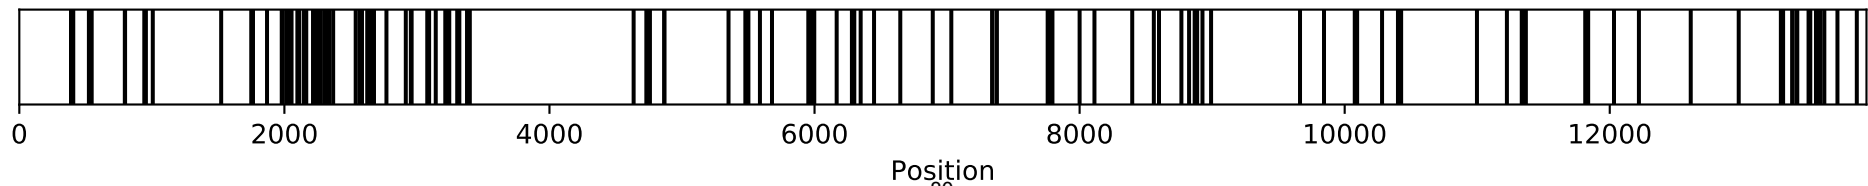

CR1 vs CR2  
Number of differences: 202

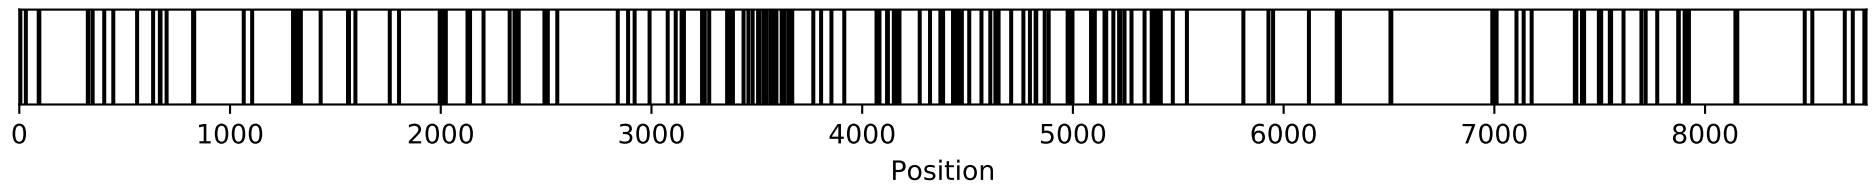

CR1 vs MM1  
Number of differences: 206

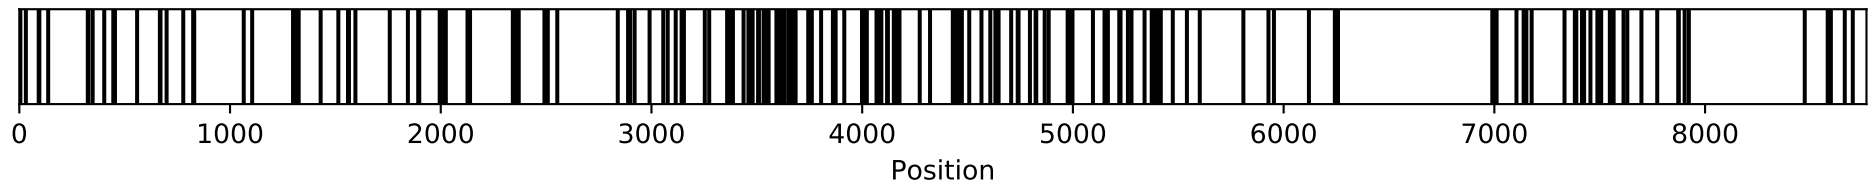

CR1 vs MM2  
Number of differences: 206

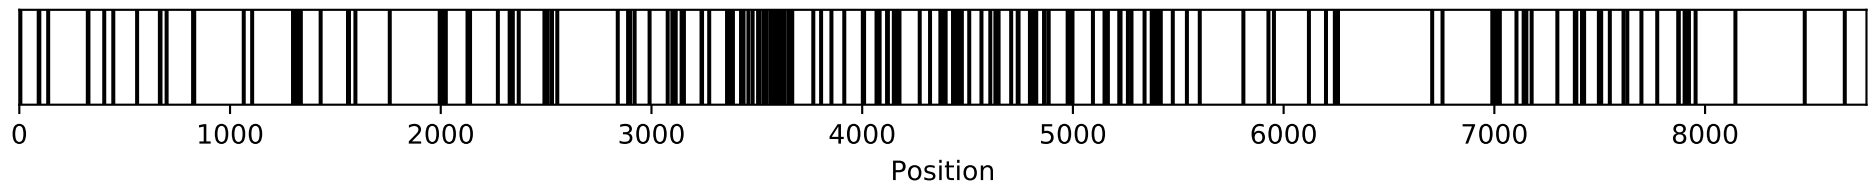

CR2 vs MM1  
Number of differences: 89

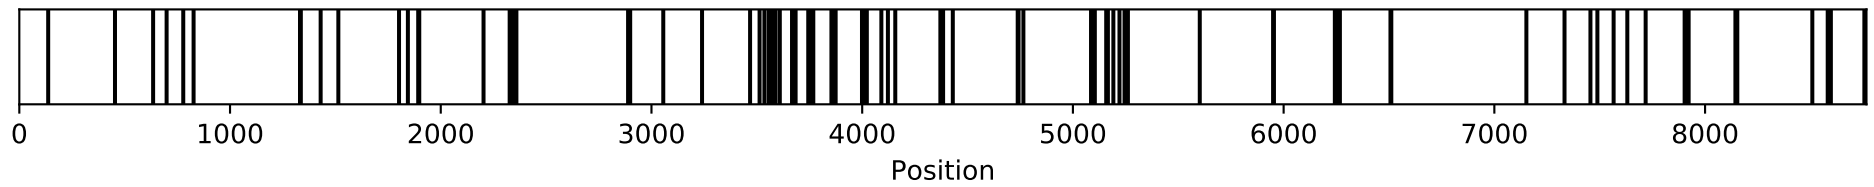

CR2 vs MM2  
Number of differences: 70

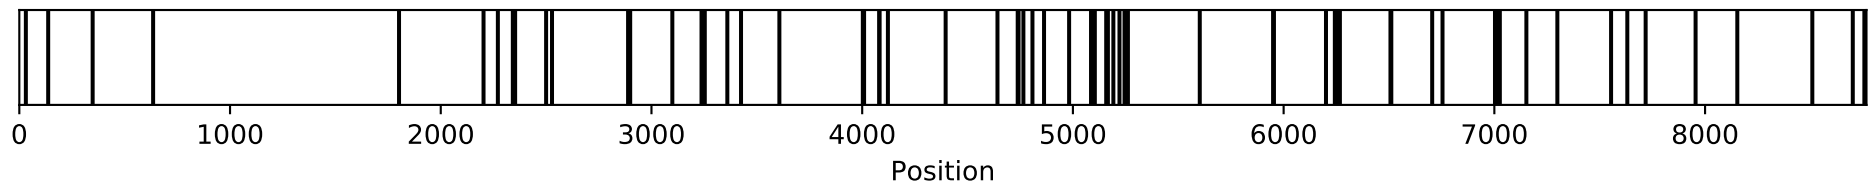

MM1 vs MM2  
Number of differences: 91

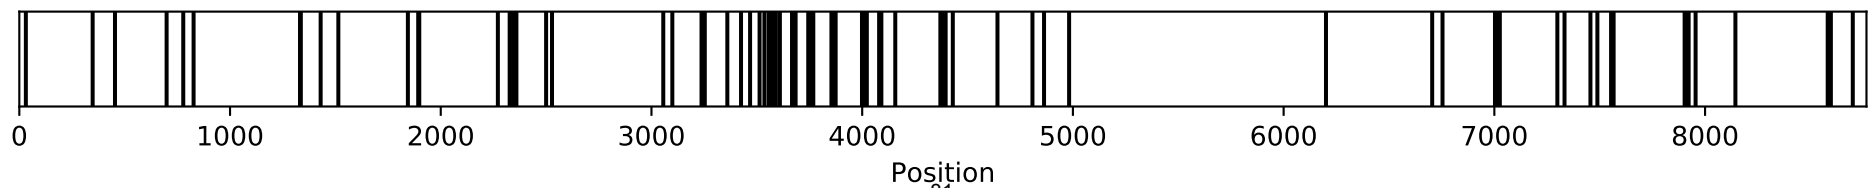

CR1 vs CR2  
Number of differences: 130

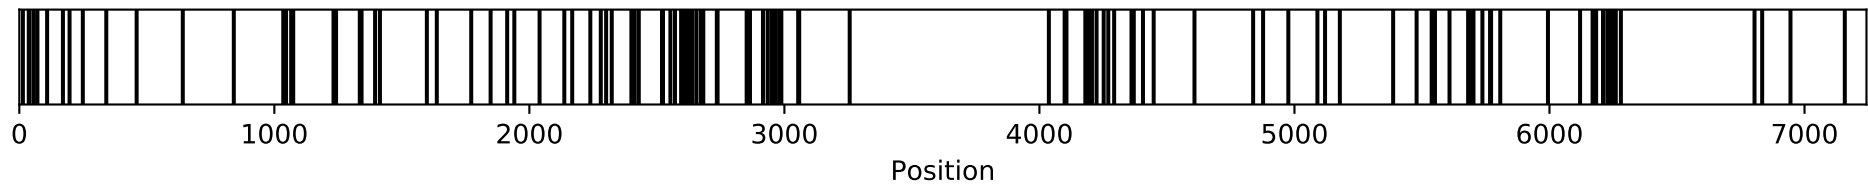

CR1 vs MM1  
Number of differences: 113

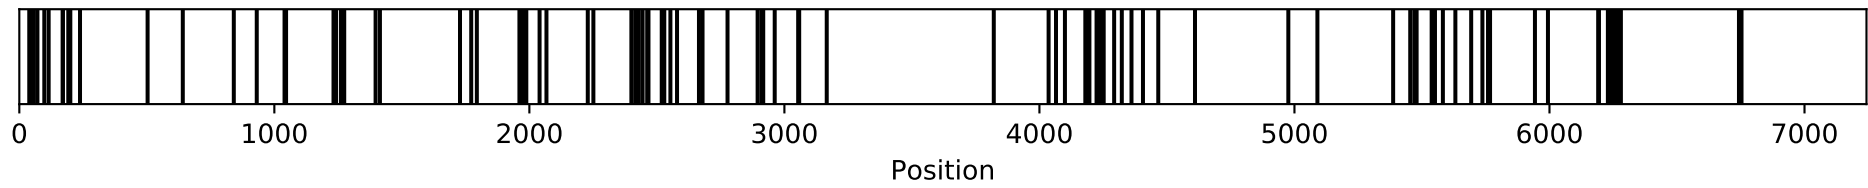

CR1 vs MM2  
Number of differences: 105

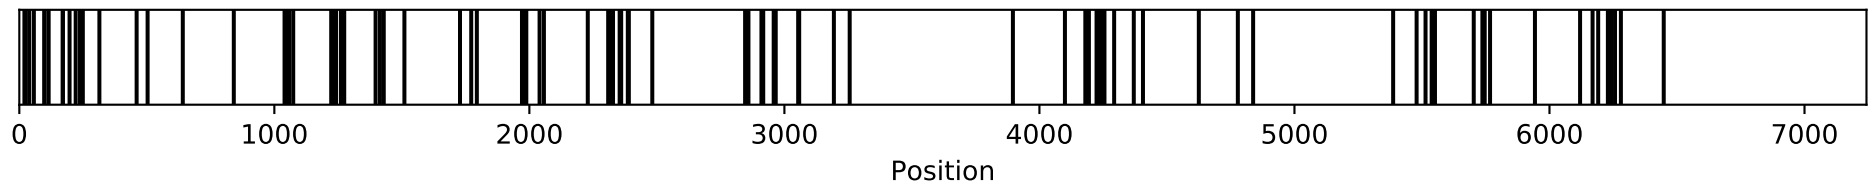

CR2 vs MM1  
Number of differences: 147

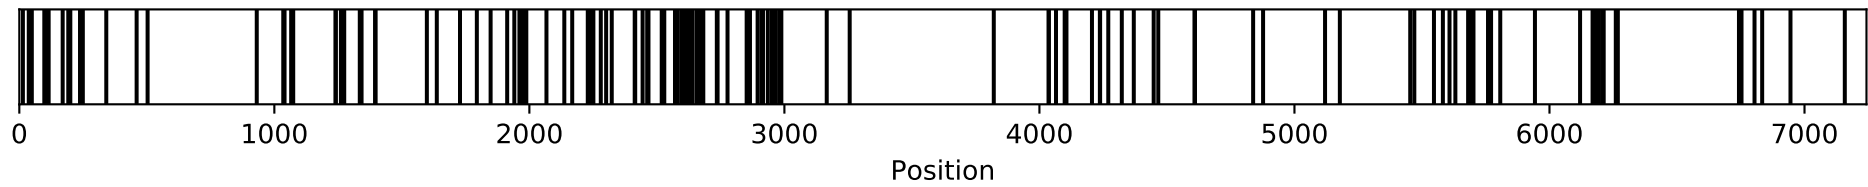

CR2 vs MM2  
Number of differences: 145

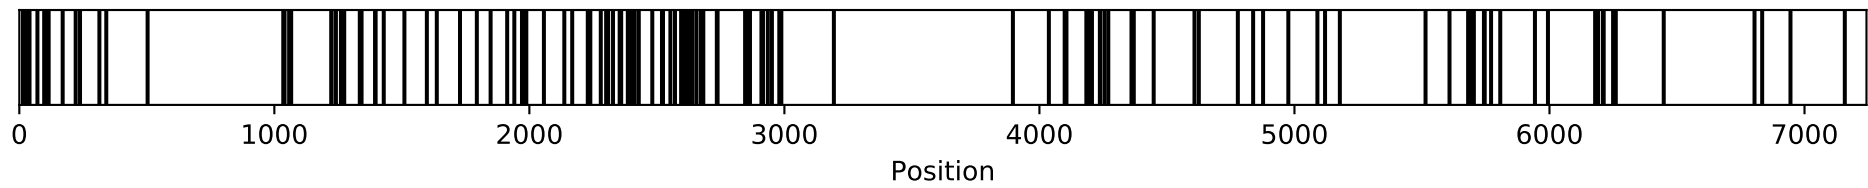

MM1 vs MM2  
Number of differences: 94

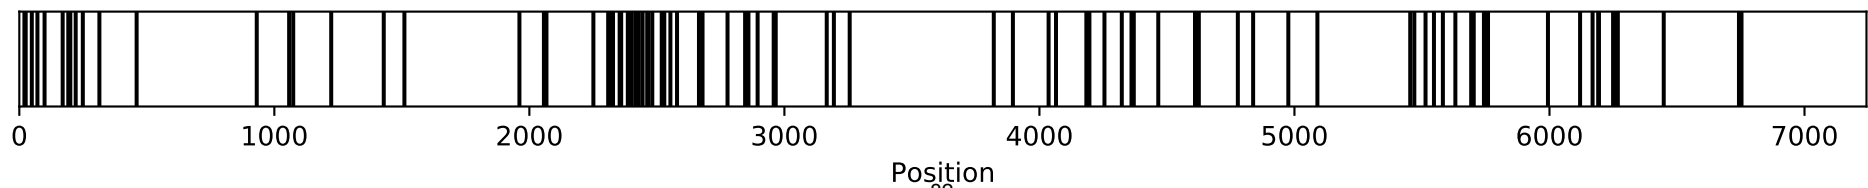

CR1 vs CR2  
Number of differences: 254

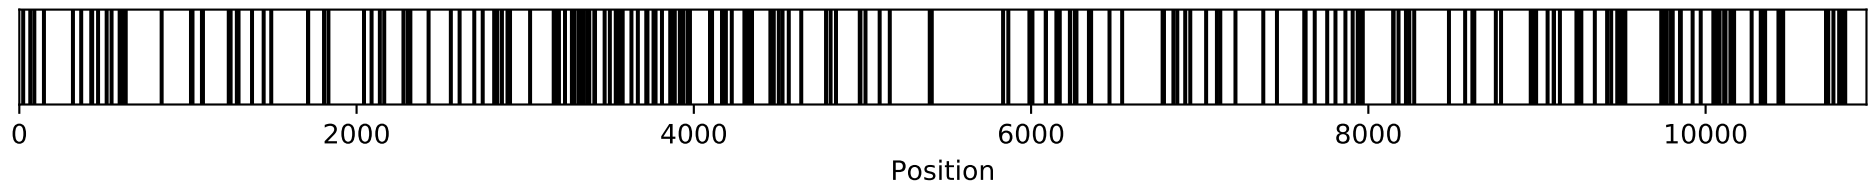

CR1 vs MM1  
Number of differences: 244

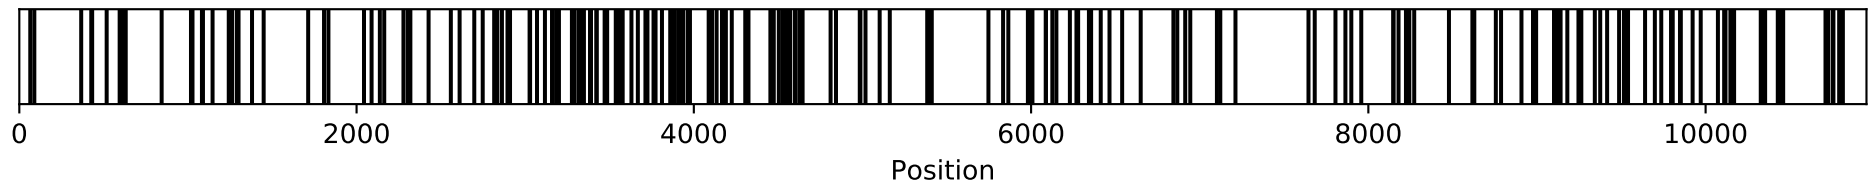

CR1 vs MM2  
Number of differences: 234

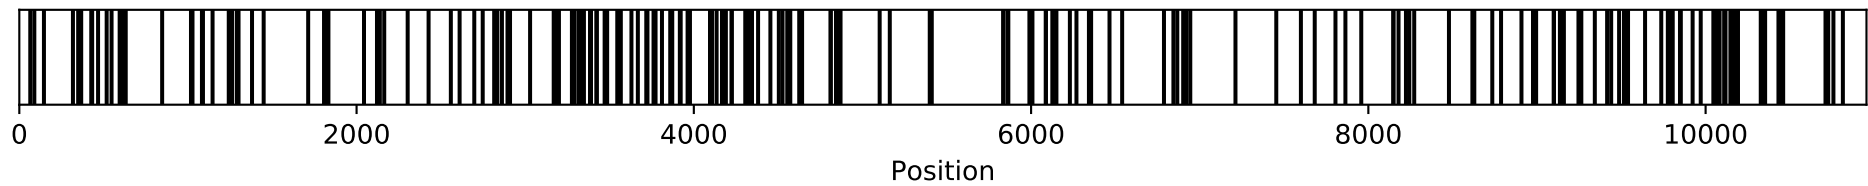

CR2 vs MM1  
Number of differences: 118

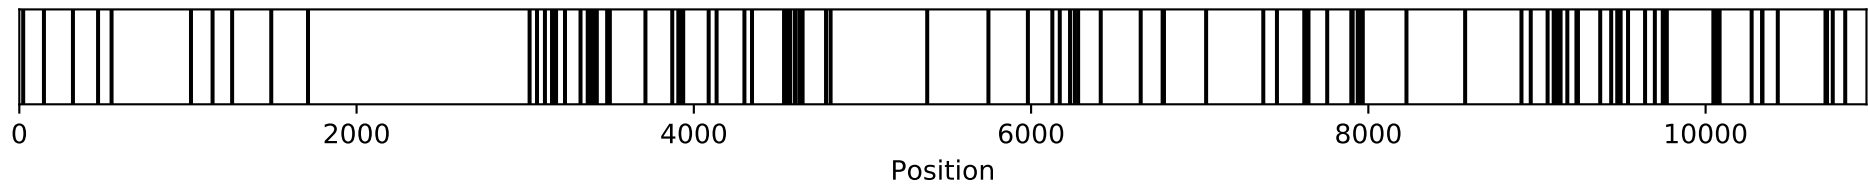

CR2 vs MM2  
Number of differences: 113

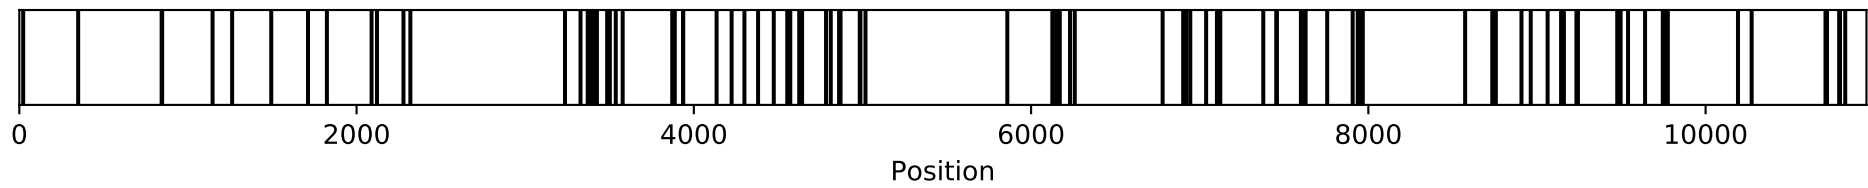

MM1 vs MM2  
Number of differences: 93

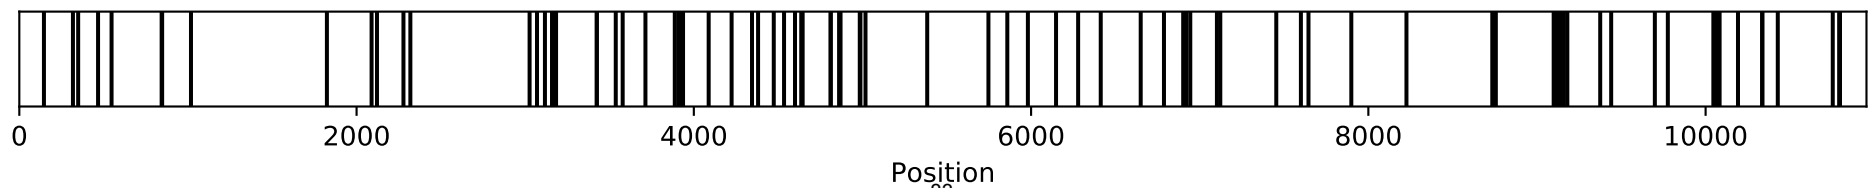

CR1 vs CR2  
Number of differences: 235

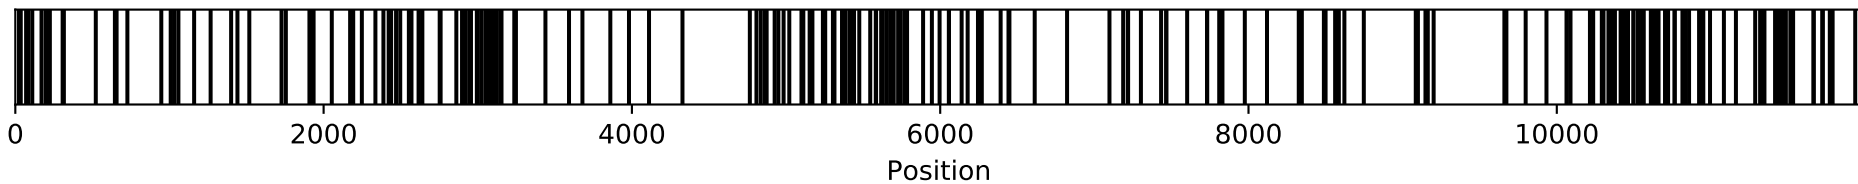

CR1 vs MM1  
Number of differences: 239

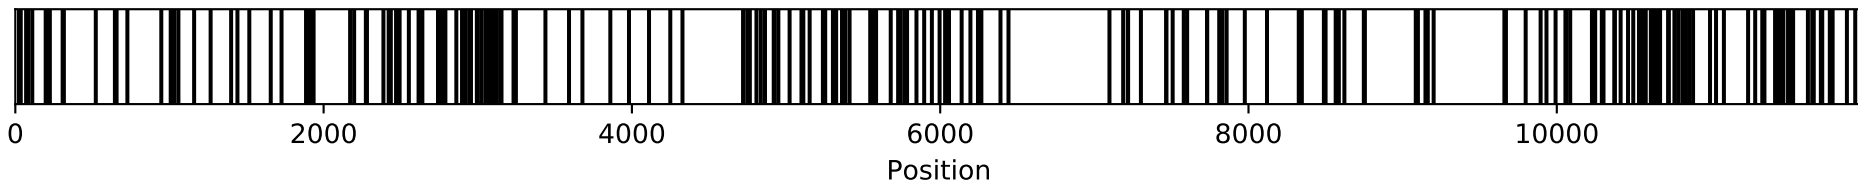

CR1 vs MM2  
Number of differences: 243

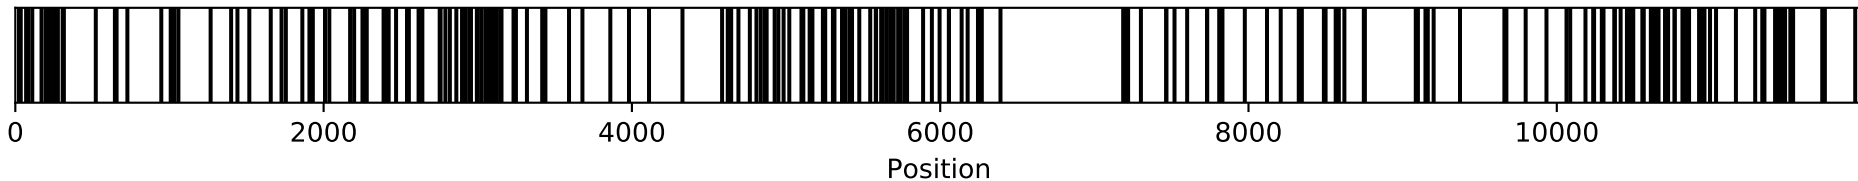

CR2 vs MM1  
Number of differences: 129

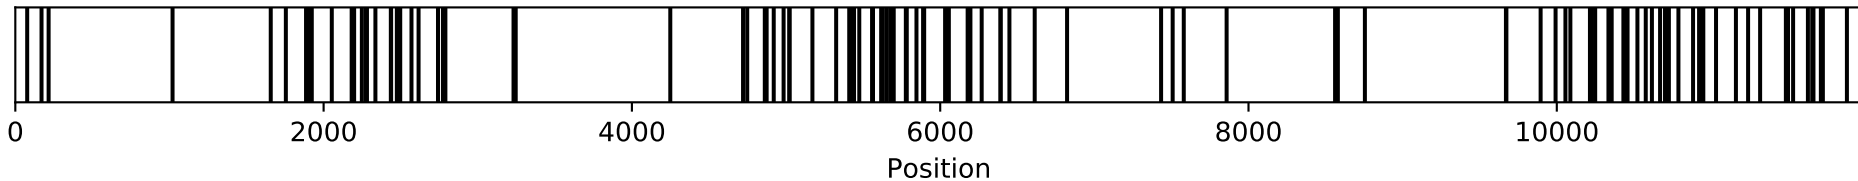

CR2 vs MM2  
Number of differences: 95

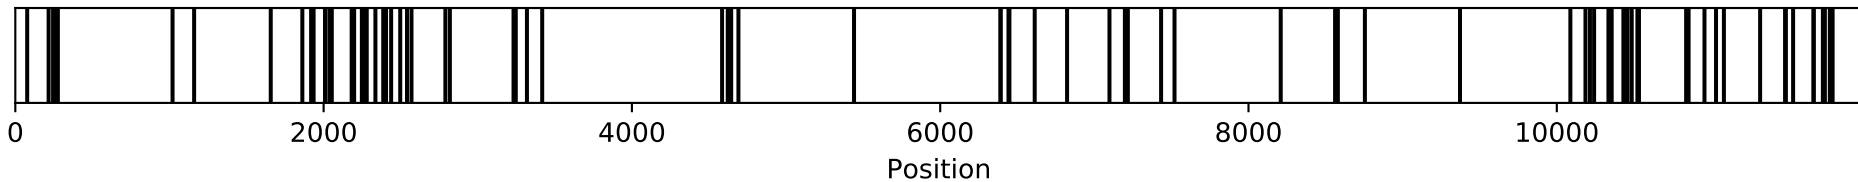

MM1 vs MM2  
Number of differences: 122

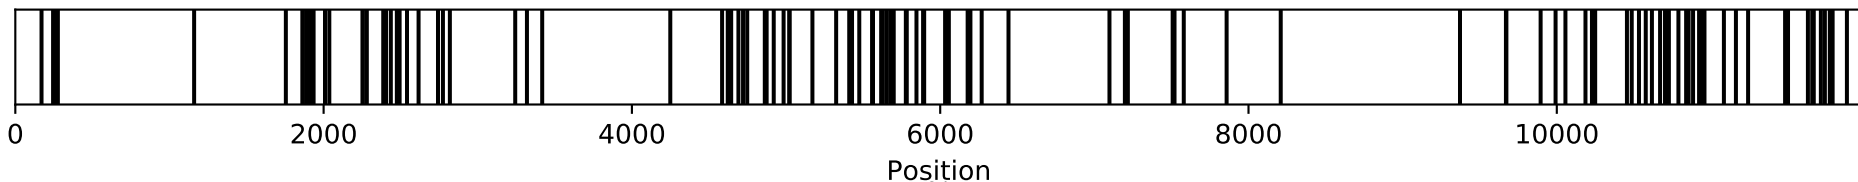

CR1 vs CR2  
Number of differences: 11

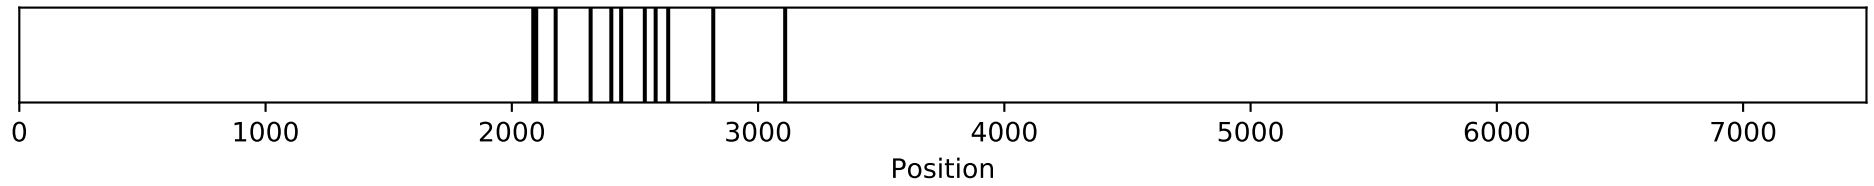

CR1 vs MM1  
Number of differences: 166

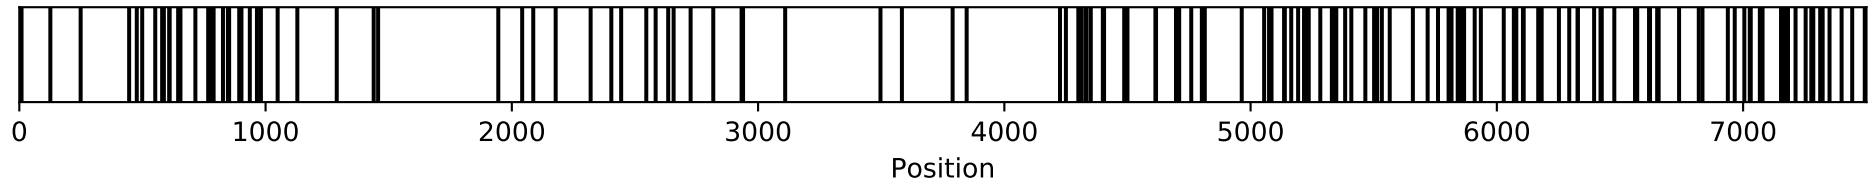

CR1 vs MM2  
Number of differences: 167

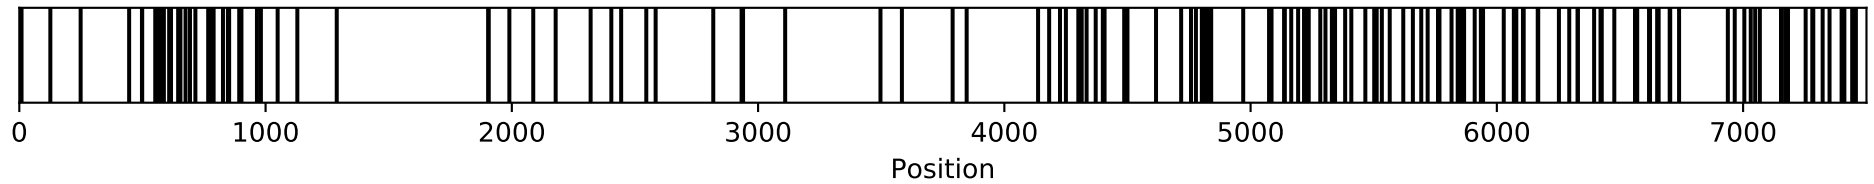

CR2 vs MM1  
Number of differences: 159

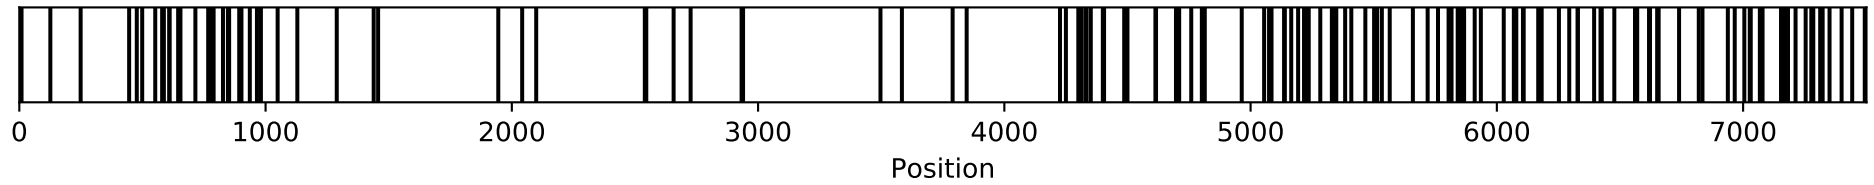

CR2 vs MM2  
Number of differences: 162

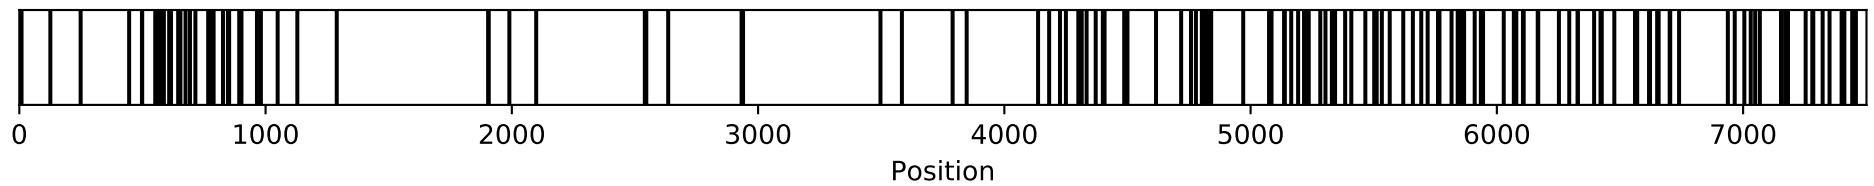

MM1 vs MM2  
Number of differences: 69

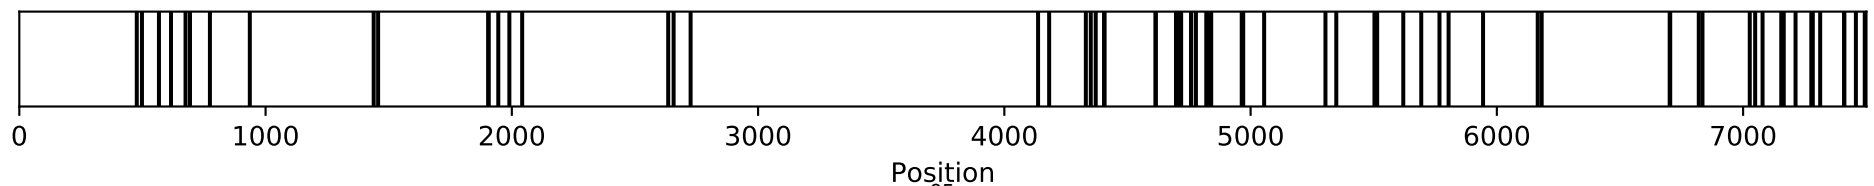

CR1 vs CR2  
Number of differences: 228

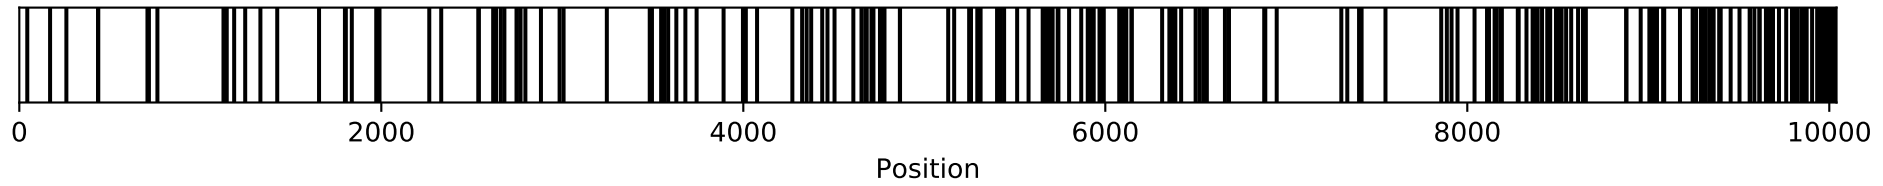

CR1 vs MM1  
Number of differences: 214

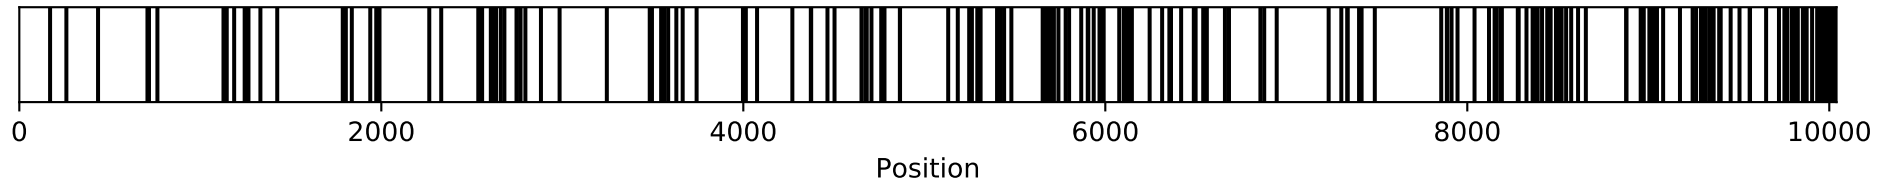

CR1 vs MM2  
Number of differences: 217

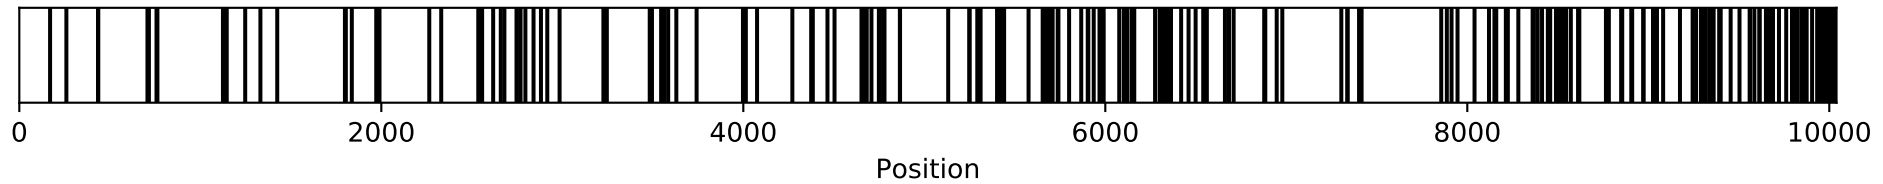

CR2 vs MM1  
Number of differences: 84

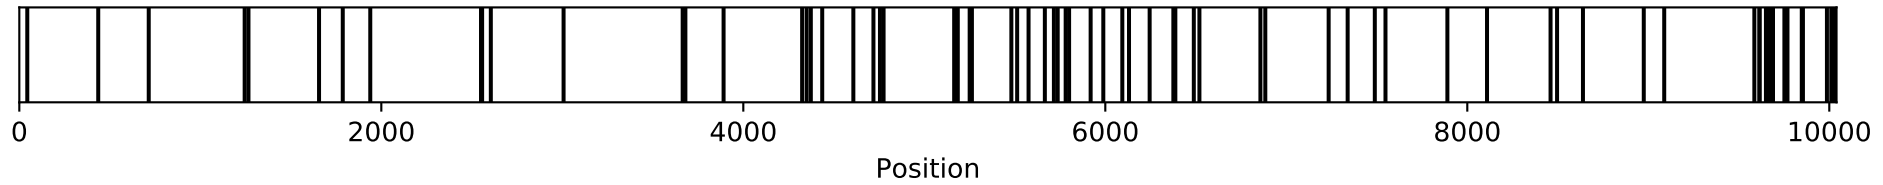

CR2 vs MM2  
Number of differences: 89

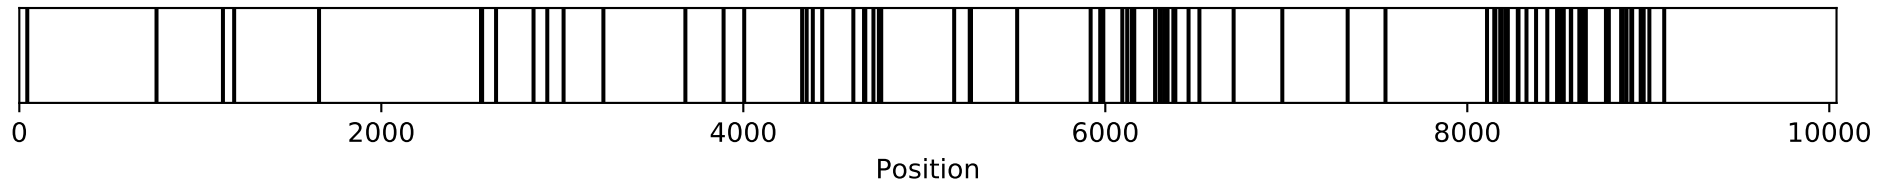

MM1 vs MM2  
Number of differences: 113

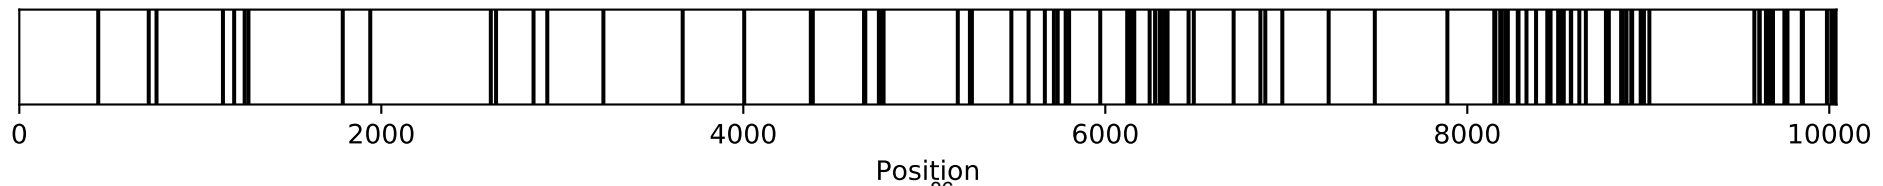

CR1 vs CR2  
Number of differences: 162

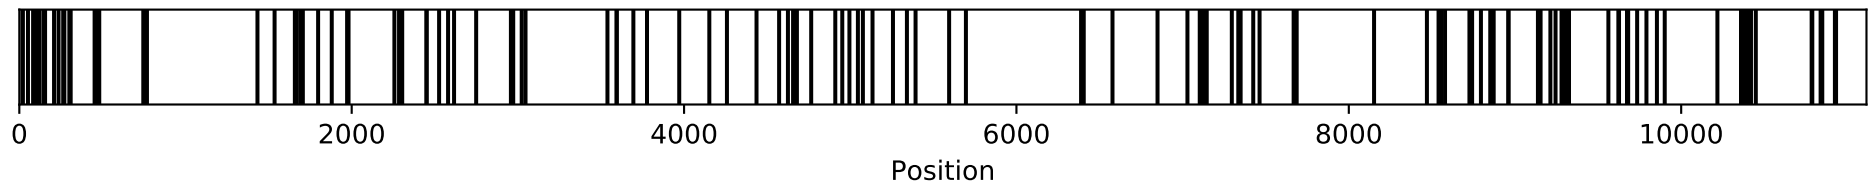

CR1 vs MM1  
Number of differences: 161

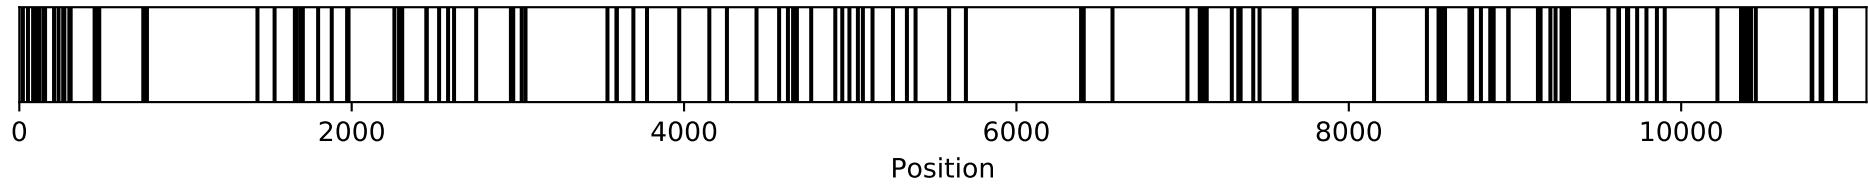

CR1 vs MM2  
Number of differences: 166

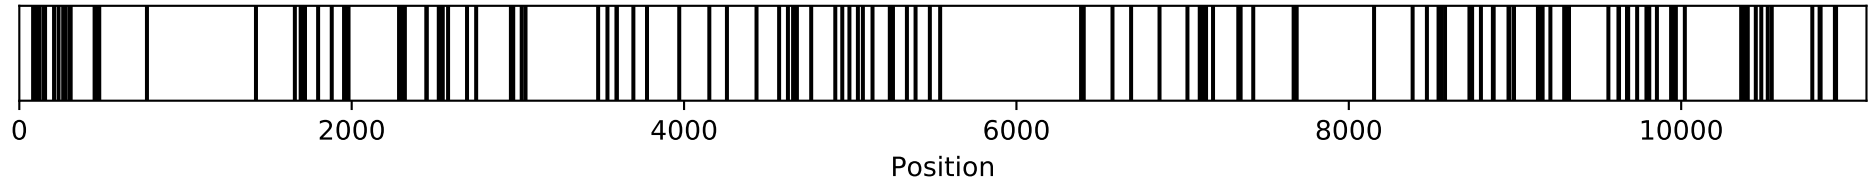

CR2 vs MM1  
Number of differences: 1

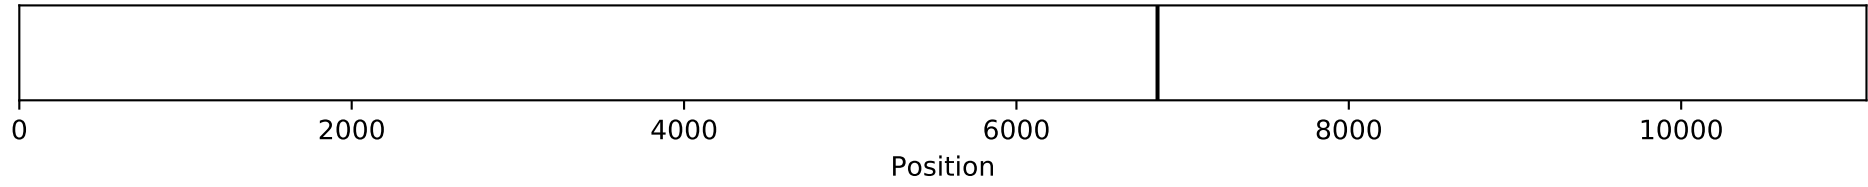

CR2 vs MM2  
Number of differences: 80

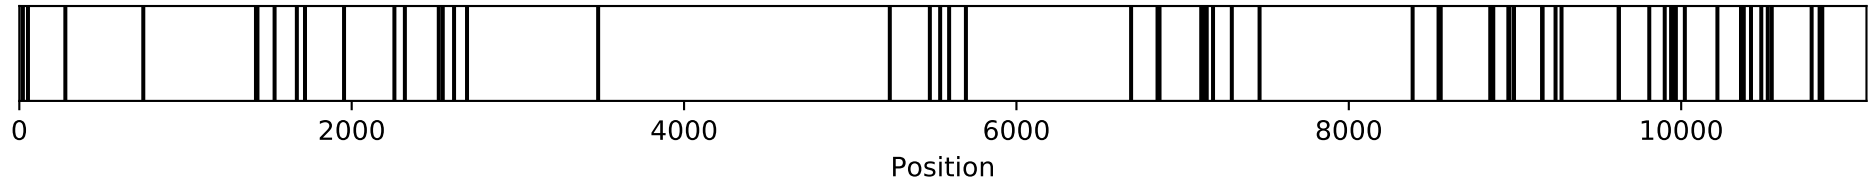

MM1 vs MM2  
Number of differences: 79

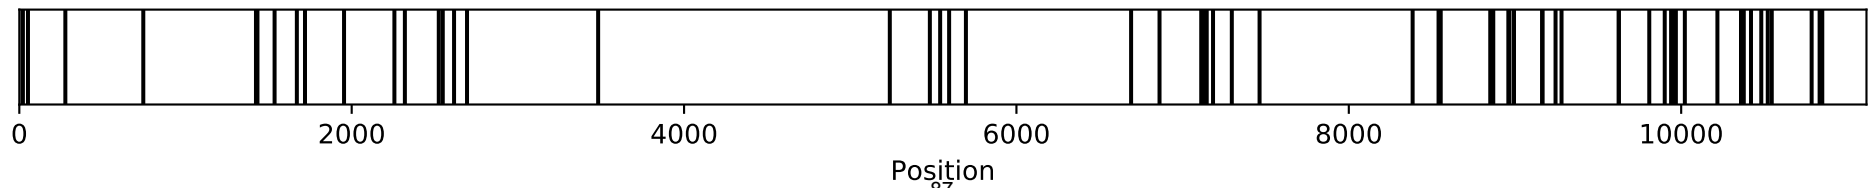



CR1 vs CR2  
Number of differences: 672

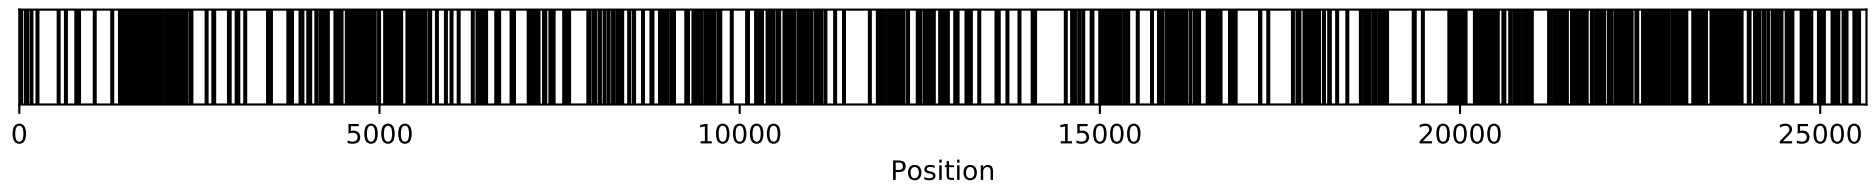

CR1 vs MM1  
Number of differences: 226

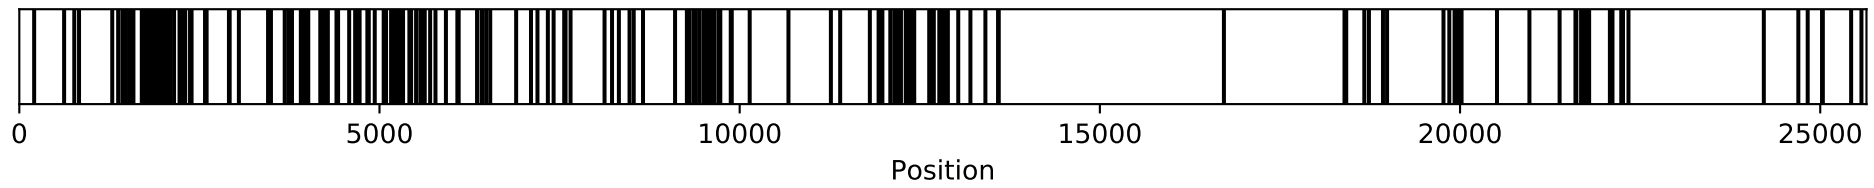

CR1 vs MM2  
Number of differences: 226

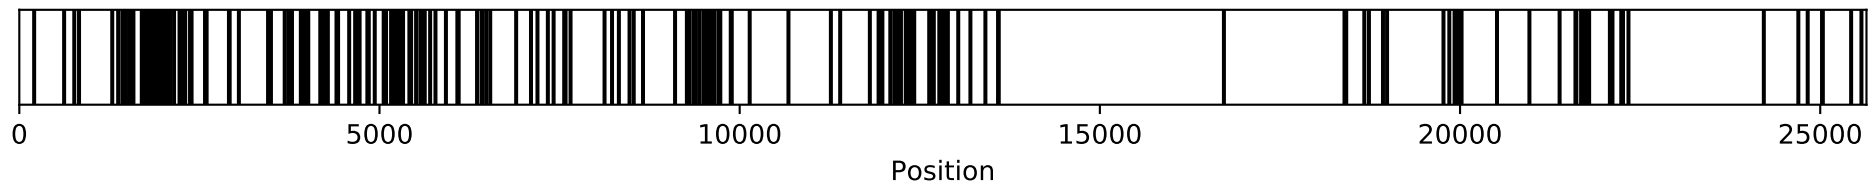

CR2 vs MM1  
Number of differences: 693

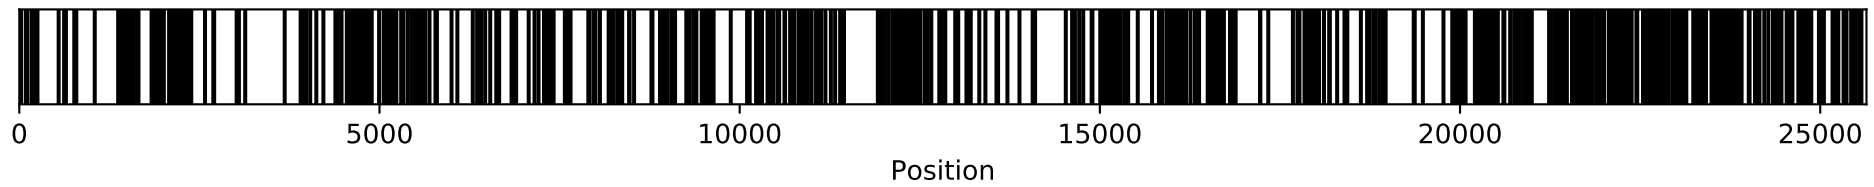

CR2 vs MM2  
Number of differences: 693

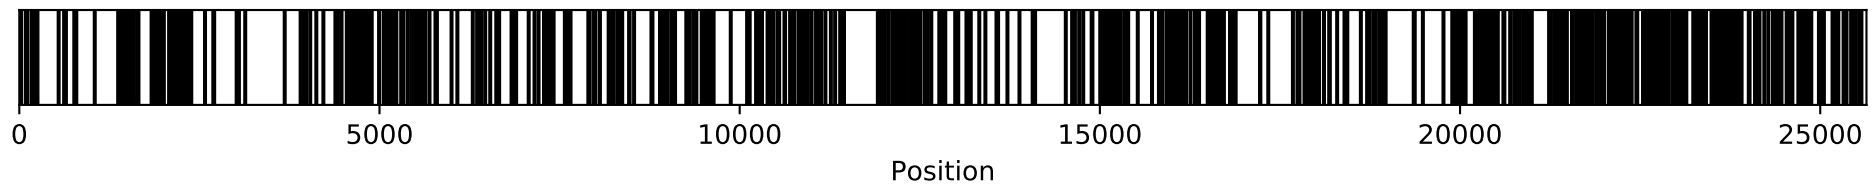

MM1 vs MM2  
Number of differences: 0

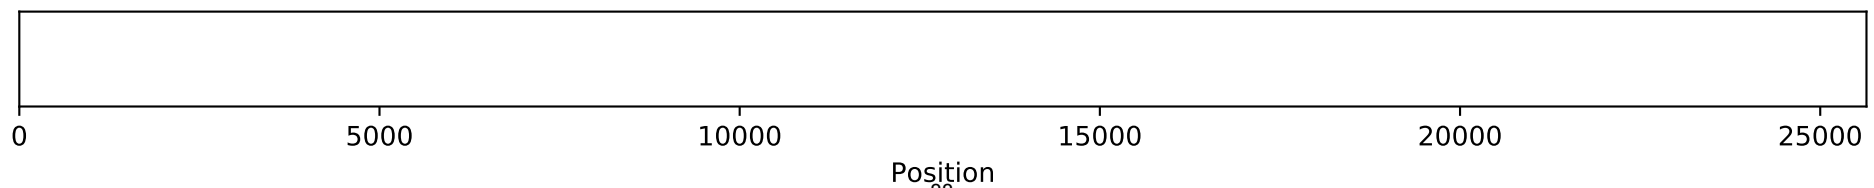

CR1 vs CR2  
Number of differences: 300

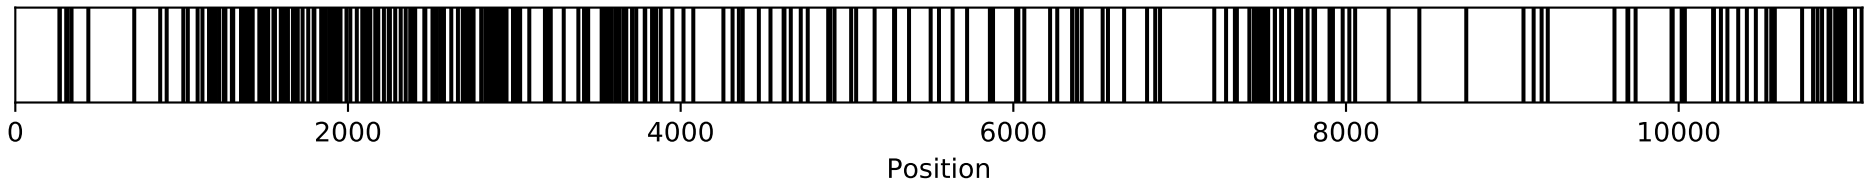

CR1 vs MM1  
Number of differences: 167

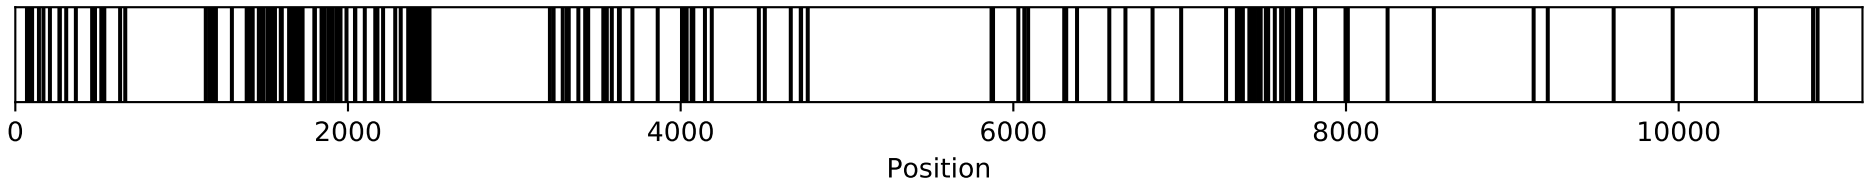

CR1 vs MM2  
Number of differences: 175

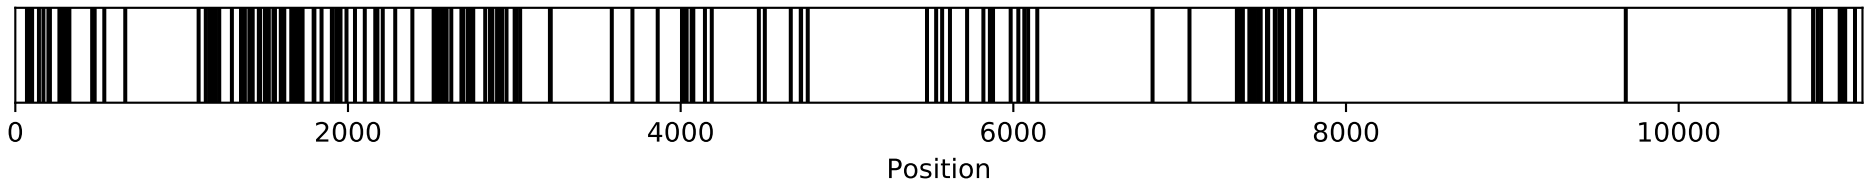

CR2 vs MM1  
Number of differences: 302

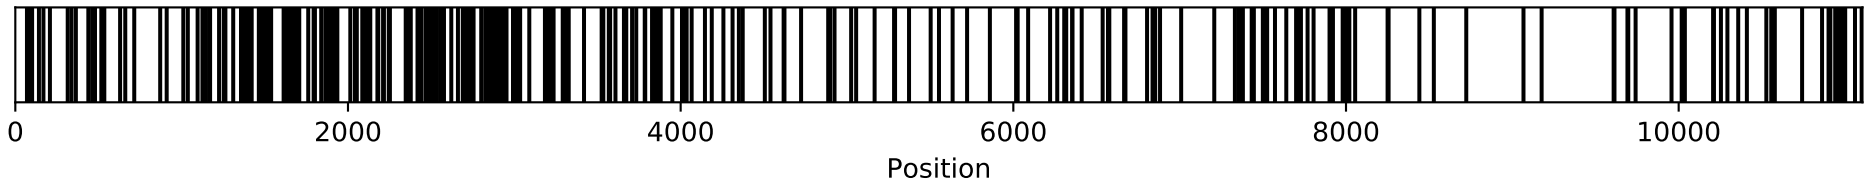

CR2 vs MM2  
Number of differences: 283

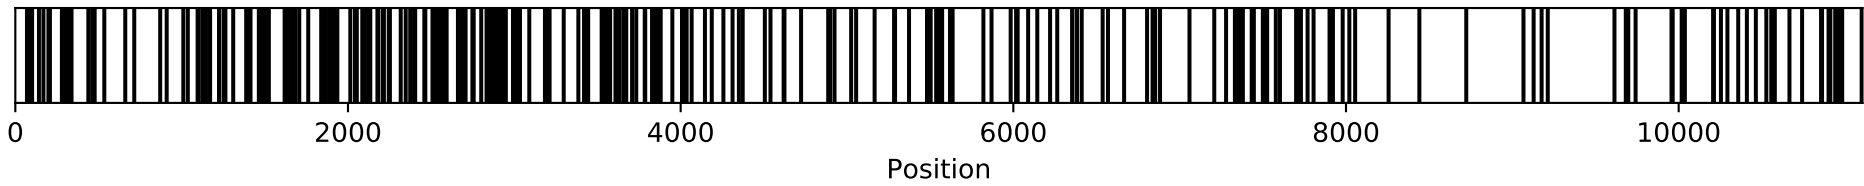

MM1 vs MM2  
Number of differences: 154

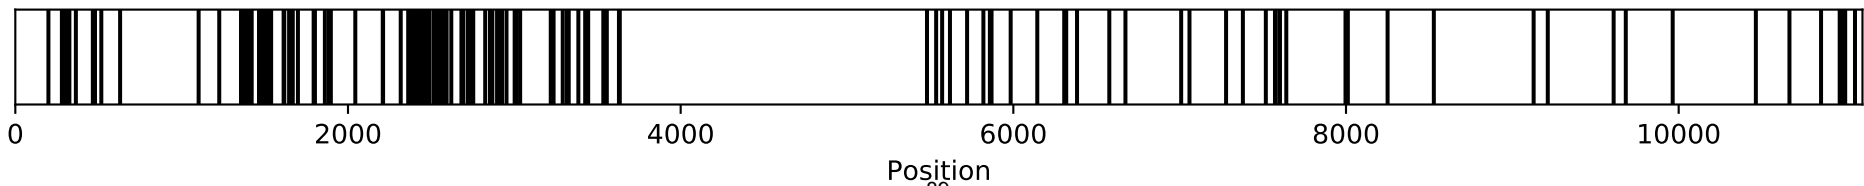

CR1 vs CR2  
Number of differences: 6

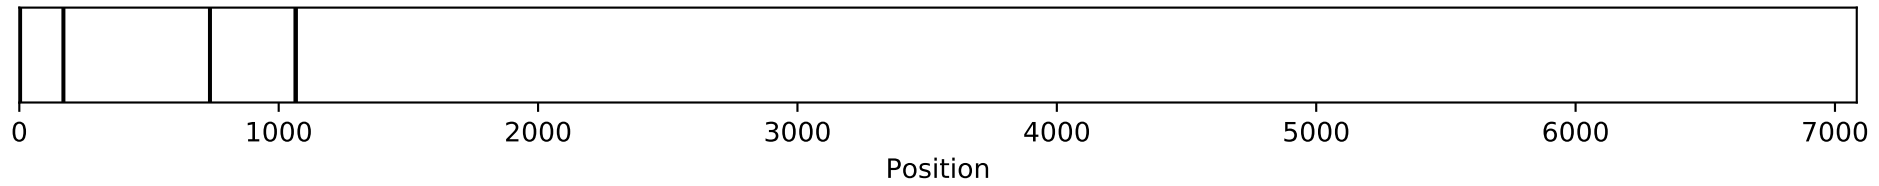

CR1 vs MM1  
Number of differences: 25

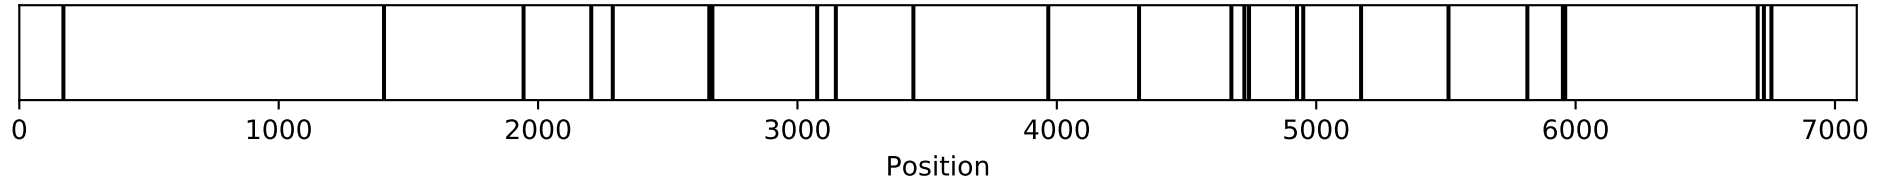

CR1 vs MM2  
Number of differences: 37

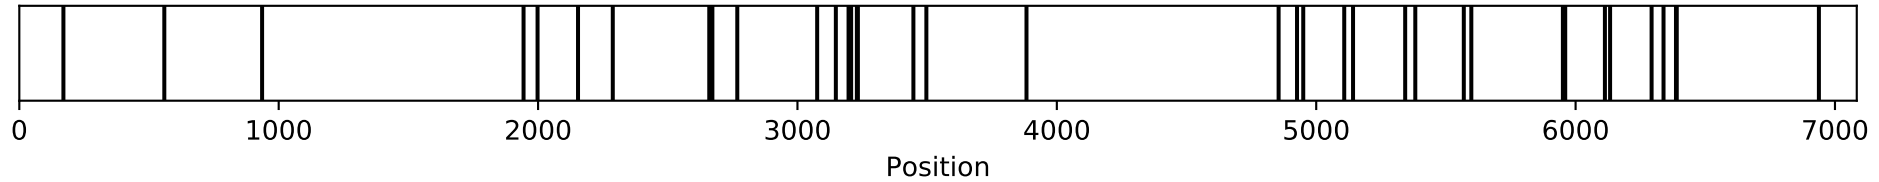

CR2 vs MM1  
Number of differences: 29

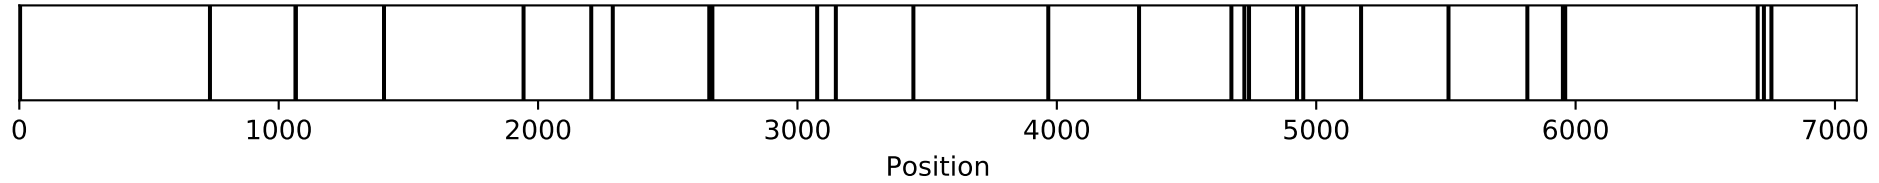

CR2 vs MM2  
Number of differences: 41

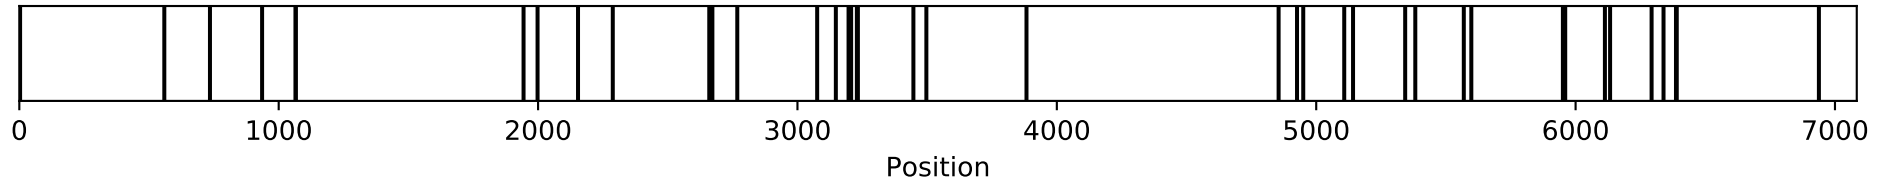

MM1 vs MM2  
Number of differences: 39

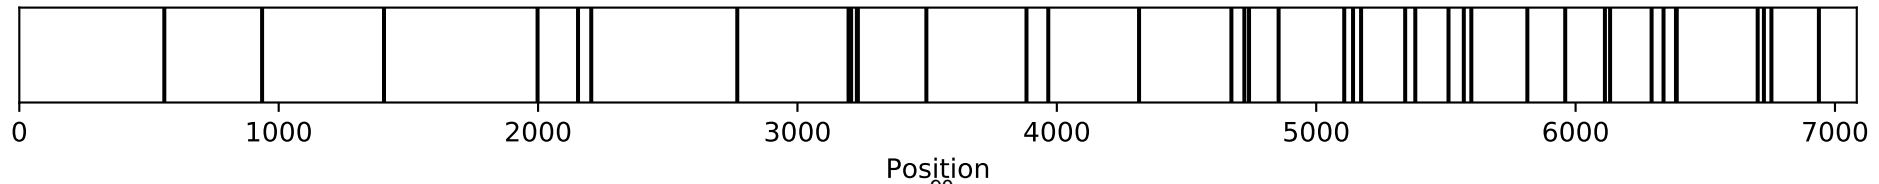

CR1 vs CR2  
Number of differences: 170

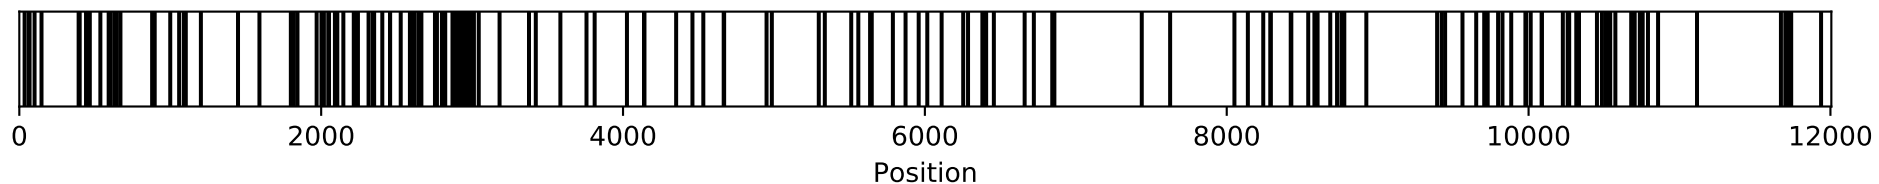

CR1 vs MM1  
Number of differences: 70

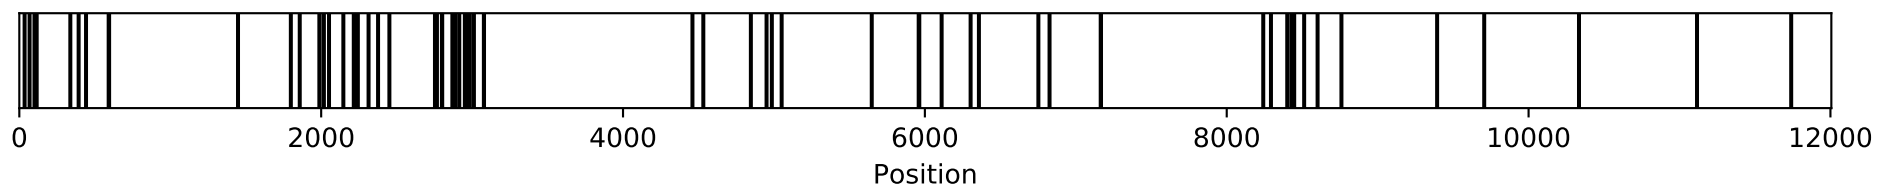

CR1 vs MM2  
Number of differences: 88

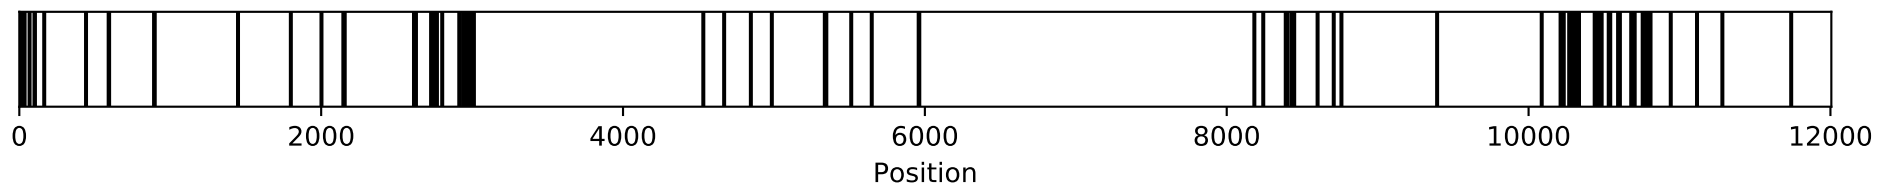

CR2 vs MM1  
Number of differences: 155

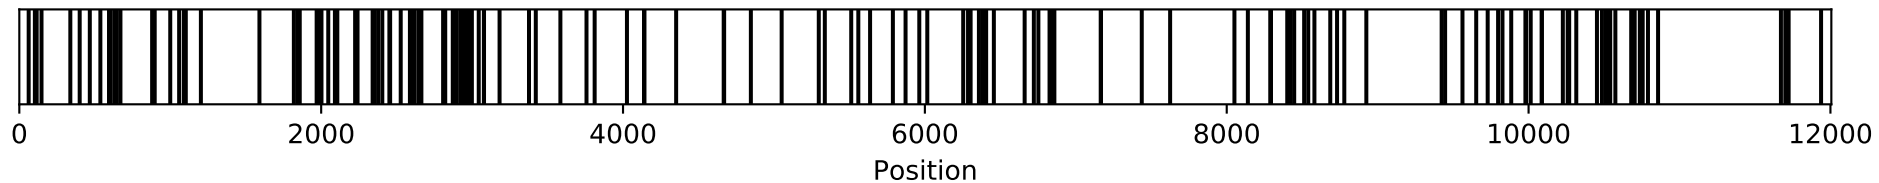

CR2 vs MM2  
Number of differences: 167

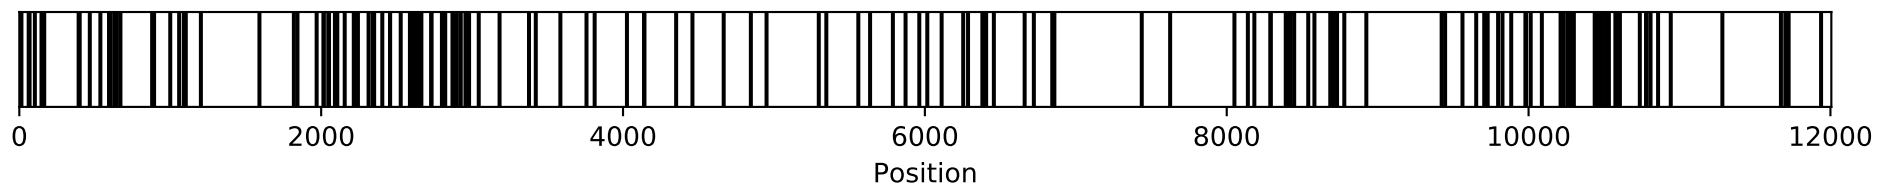

MM1 vs MM2  
Number of differences: 94

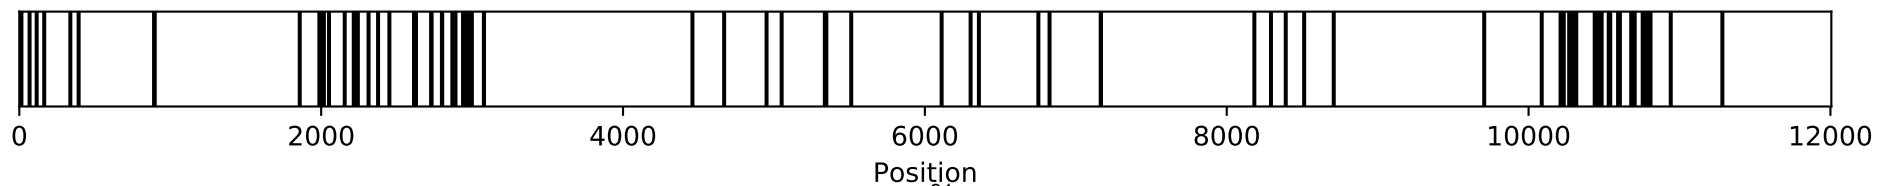

CR1 vs CR2  
Number of differences: 183

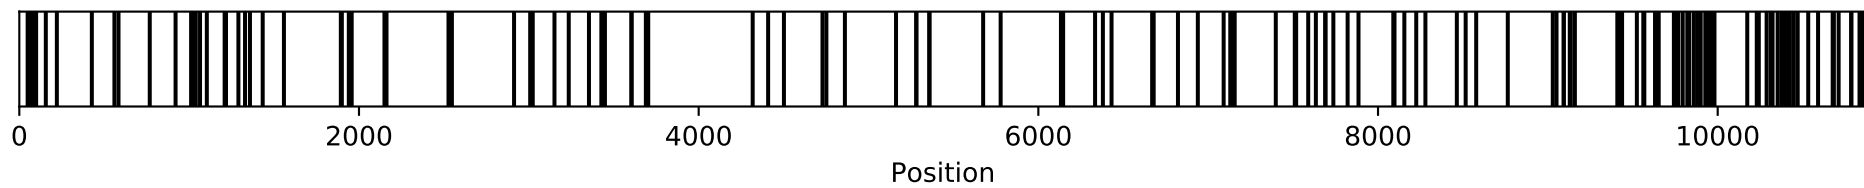

CR1 vs MM1  
Number of differences: 148

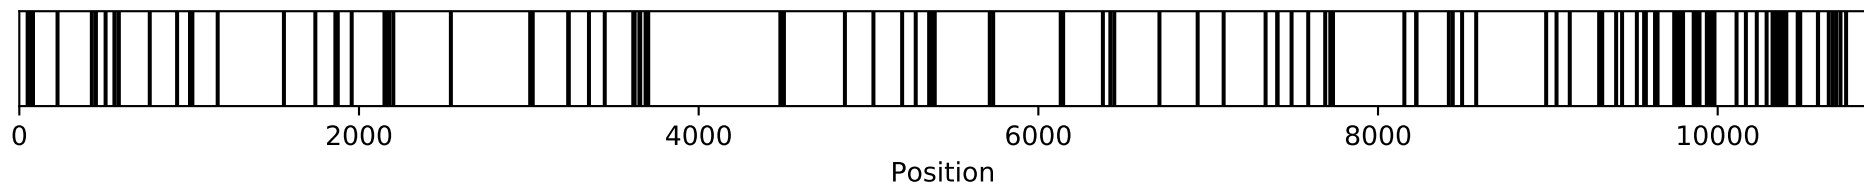

CR1 vs MM2  
Number of differences: 141

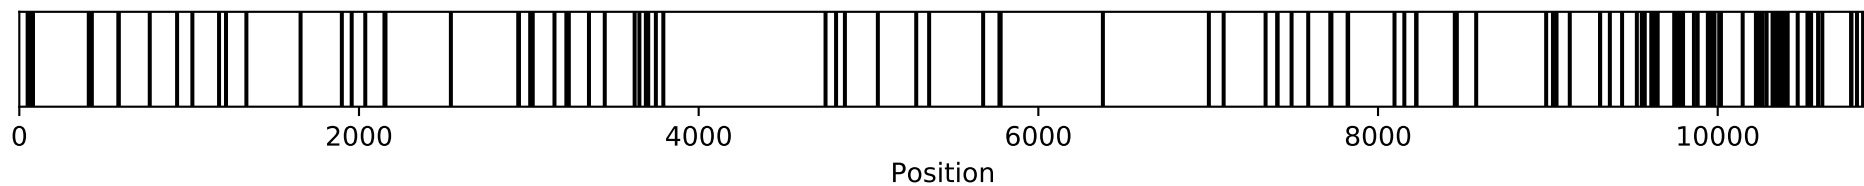

CR2 vs MM1  
Number of differences: 201

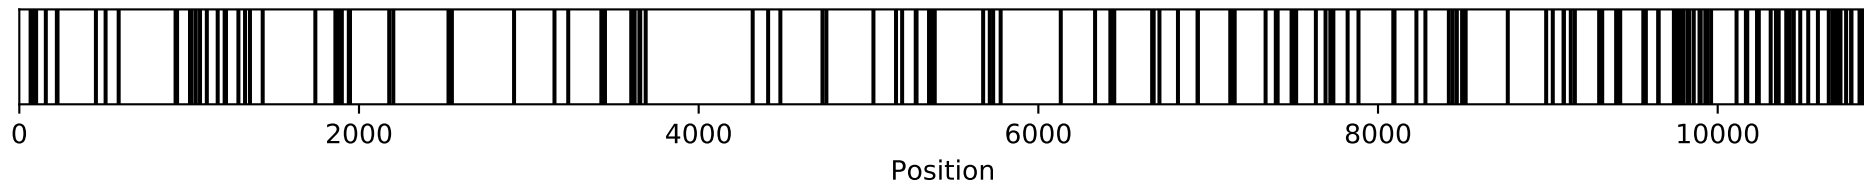

CR2 vs MM2  
Number of differences: 194

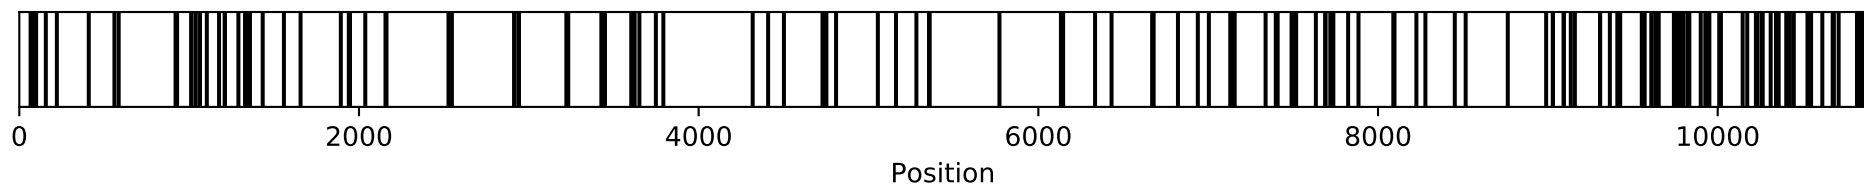

MM1 vs MM2  
Number of differences: 121

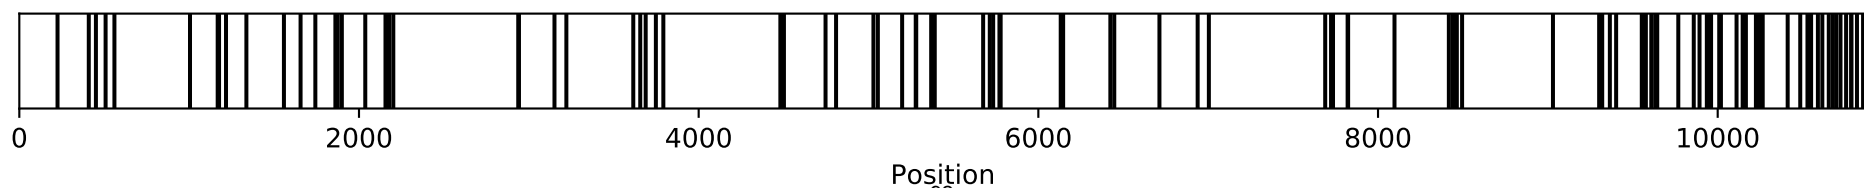

CR1 vs CR2  
Number of differences: 207

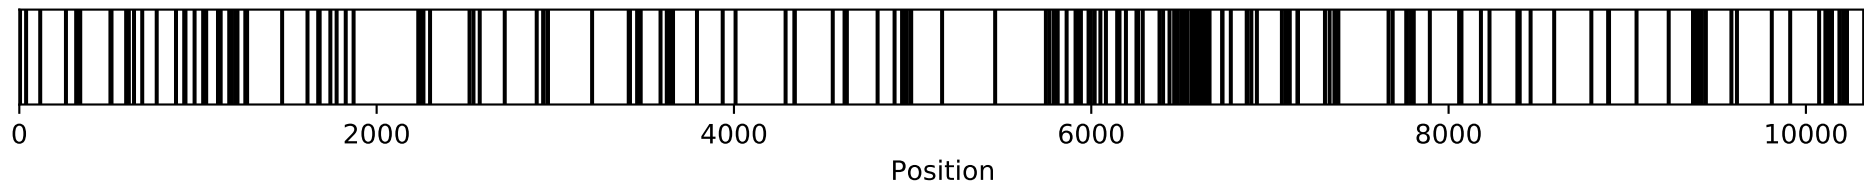

CR1 vs MM1  
Number of differences: 217

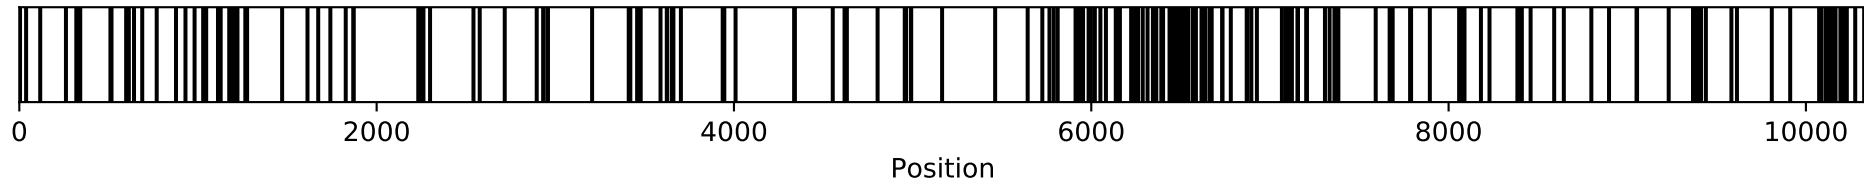

CR1 vs MM2  
Number of differences: 220

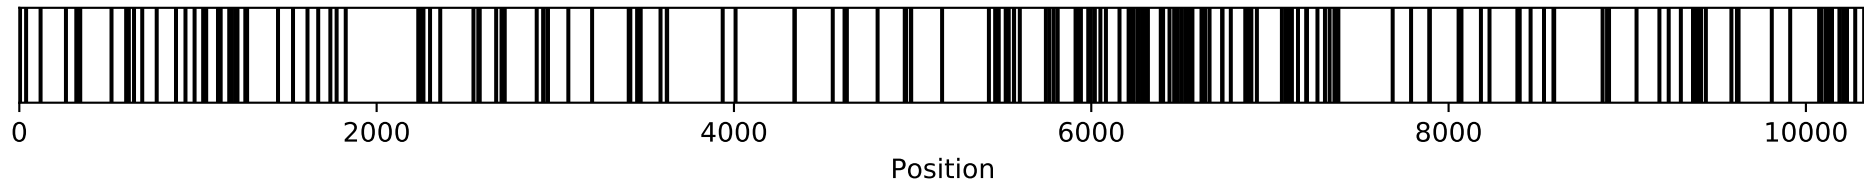

CR2 vs MM1  
Number of differences: 89

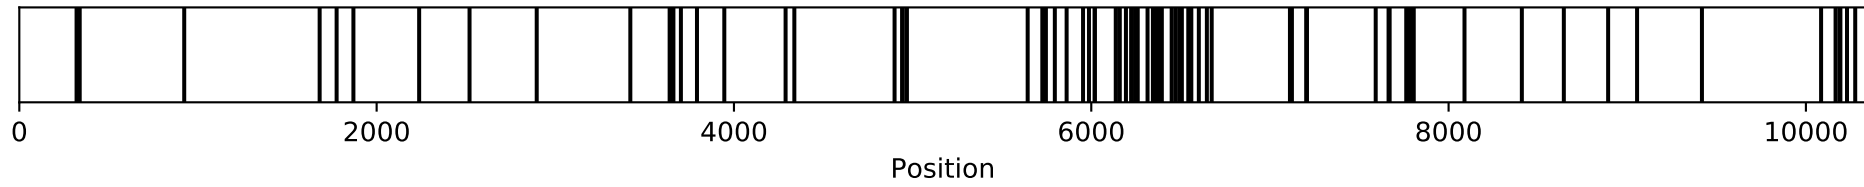

CR2 vs MM2  
Number of differences: 113

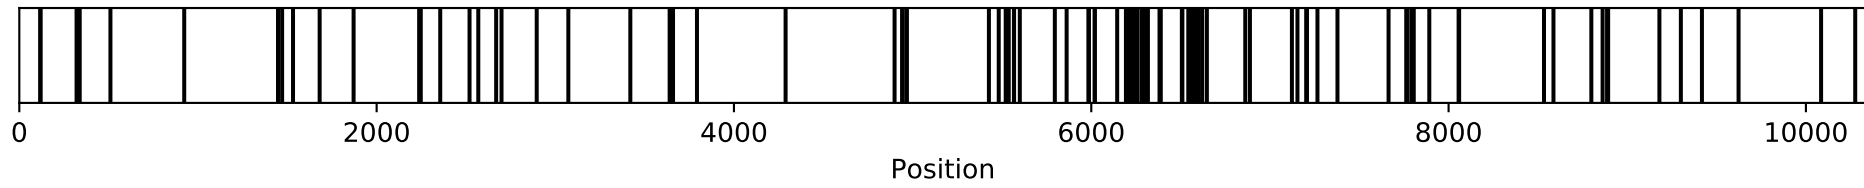

MM1 vs MM2  
Number of differences: 105

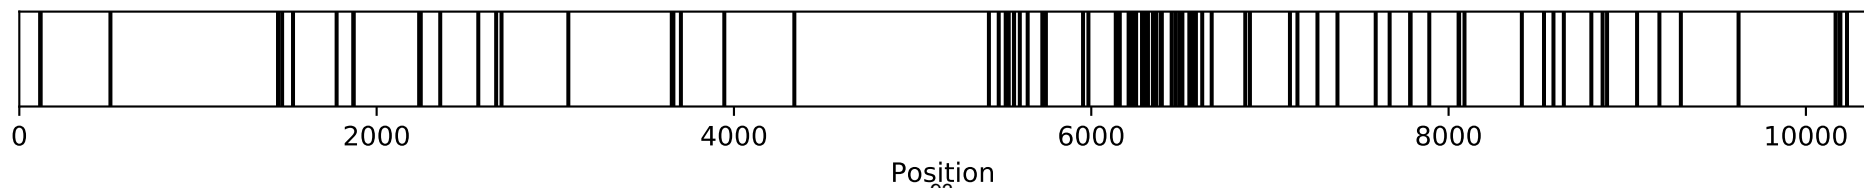

CR1 vs CR2  
Number of differences: 176

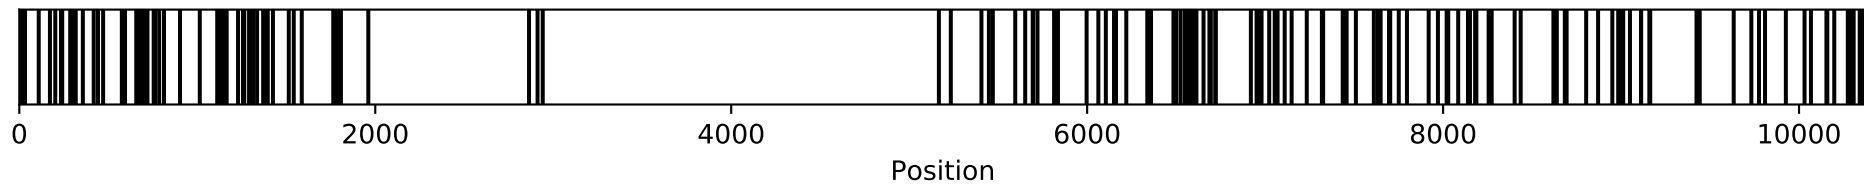

CR1 vs MM1  
Number of differences: 109

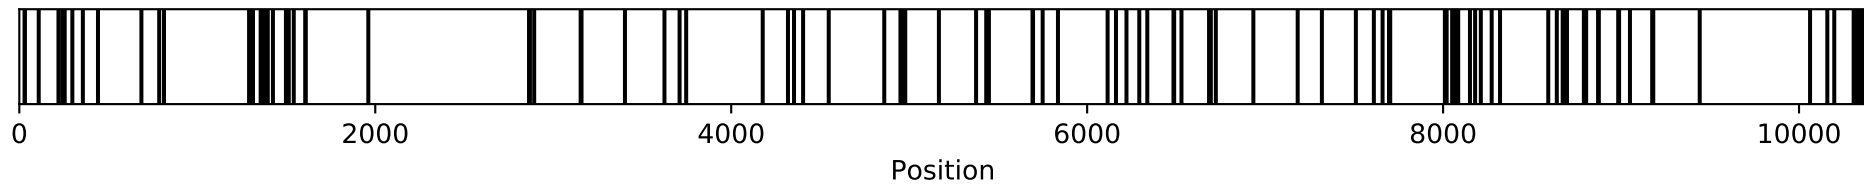

CR1 vs MM2  
Number of differences: 88

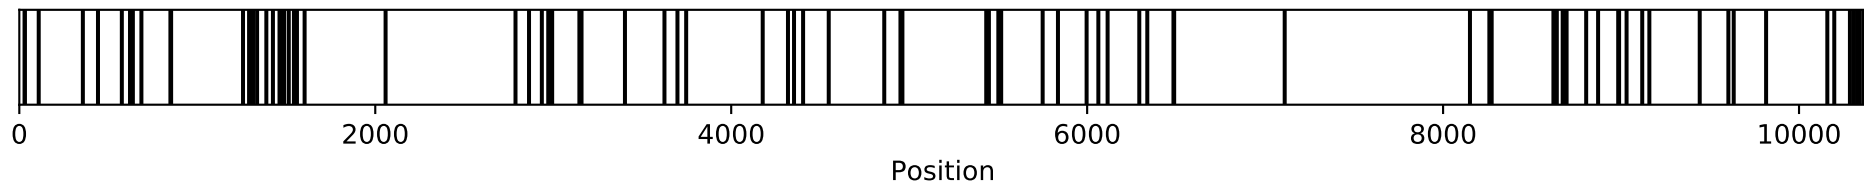

CR2 vs MM1  
Number of differences: 178

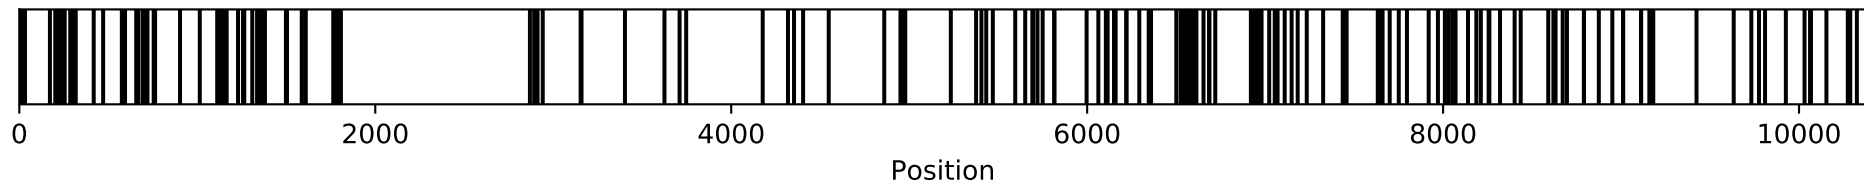

CR2 vs MM2  
Number of differences: 179

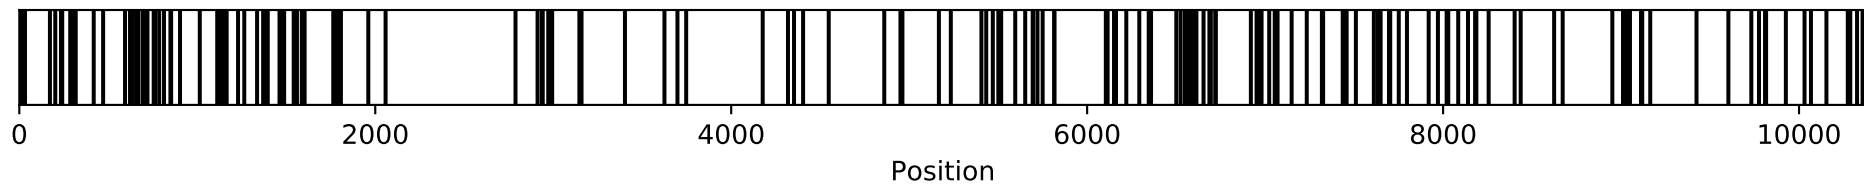

MM1 vs MM2  
Number of differences: 98

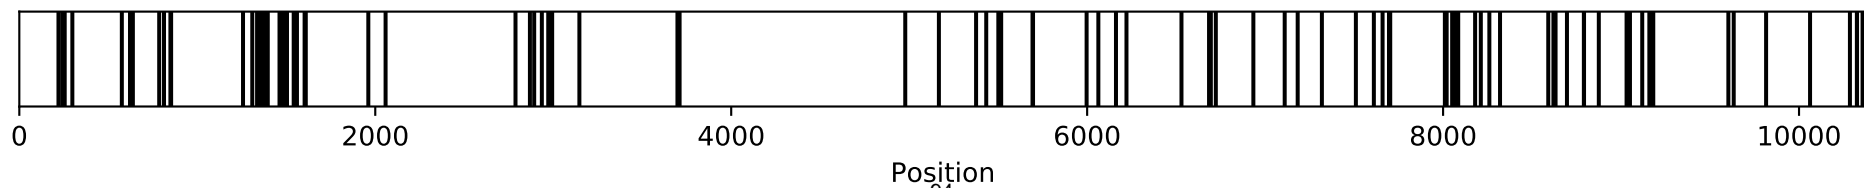

CR1 vs CR2  
Number of differences: 461

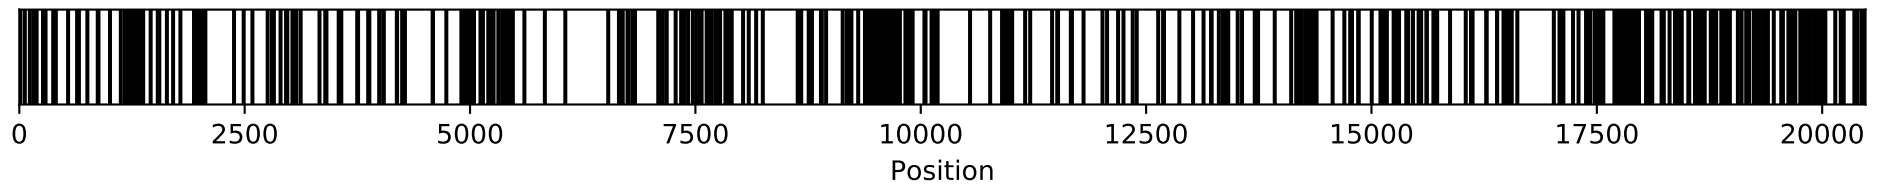

CR1 vs MM1  
Number of differences: 70

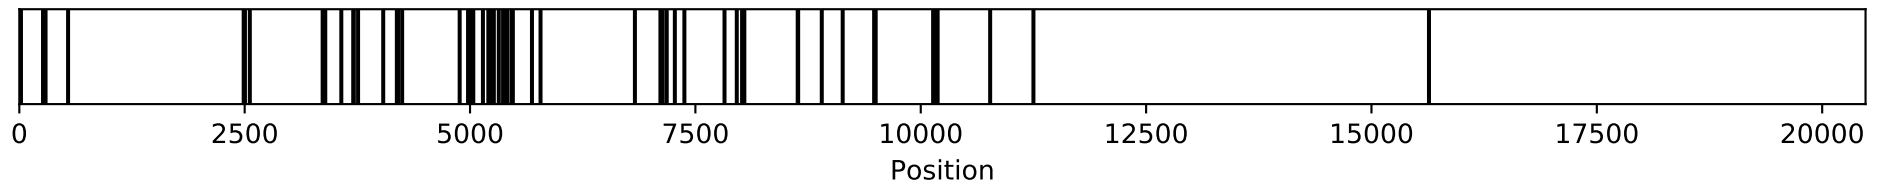

CR1 vs MM2  
Number of differences: 100

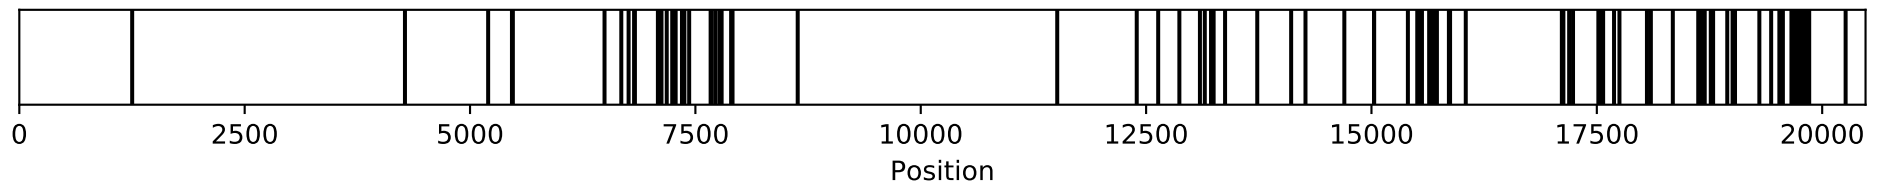

CR2 vs MM1  
Number of differences: 453

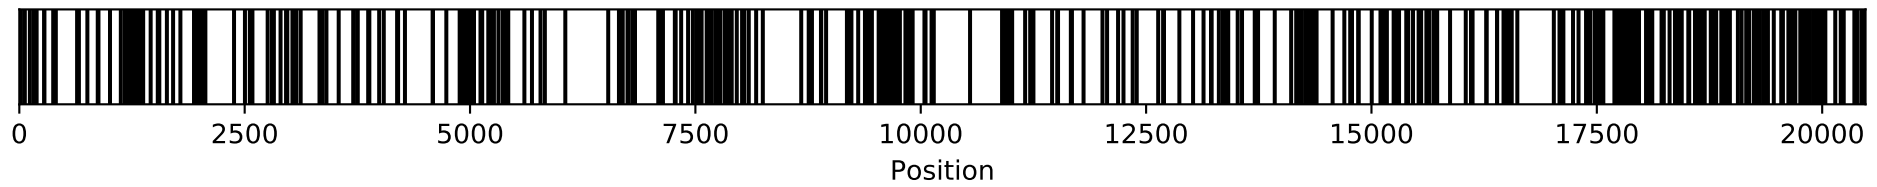

CR2 vs MM2  
Number of differences: 451

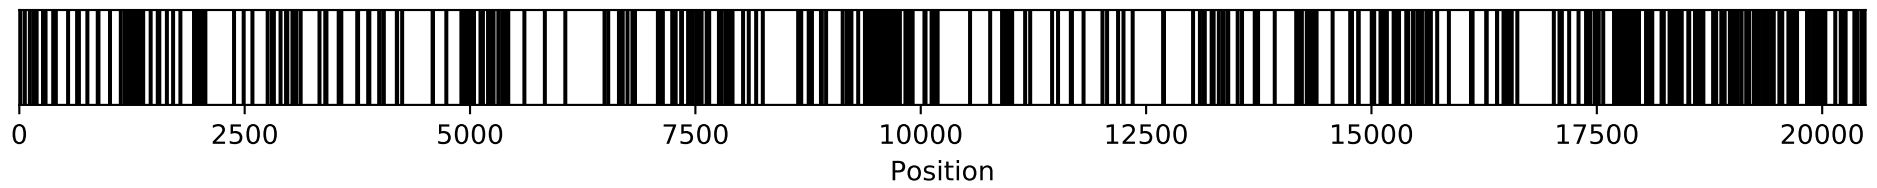

MM1 vs MM2  
Number of differences: 152

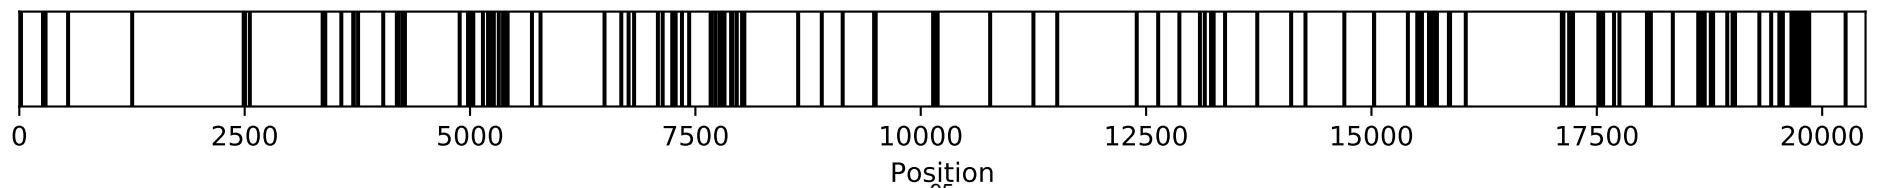



CR1 vs CR2  
Number of differences: 346

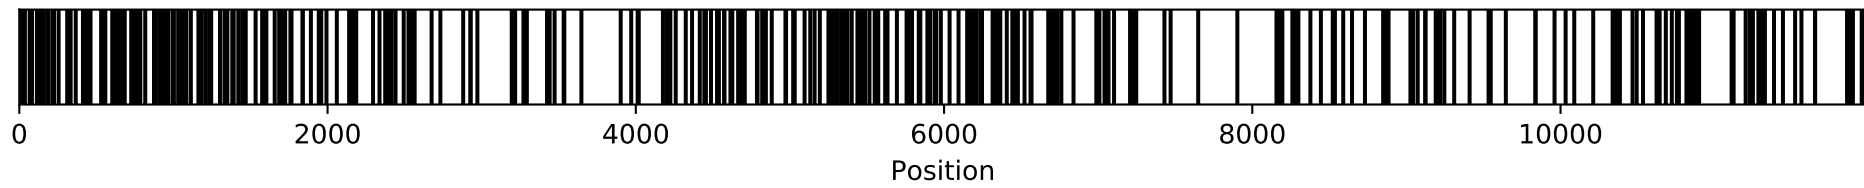

CR1 vs MM1  
Number of differences: 173

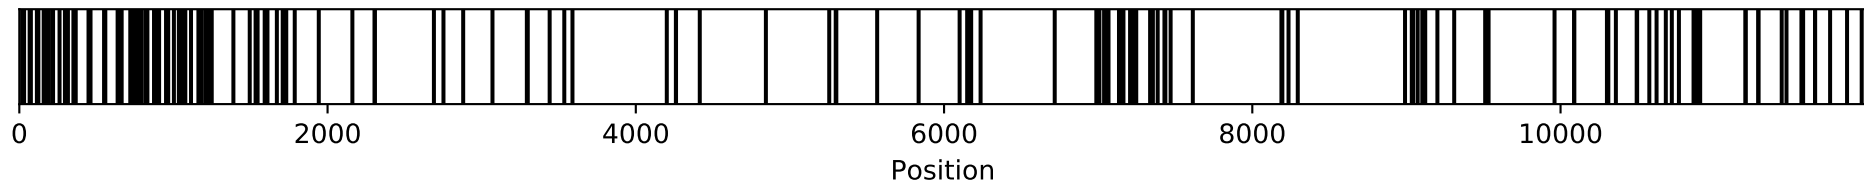

CR1 vs MM2  
Number of differences: 173

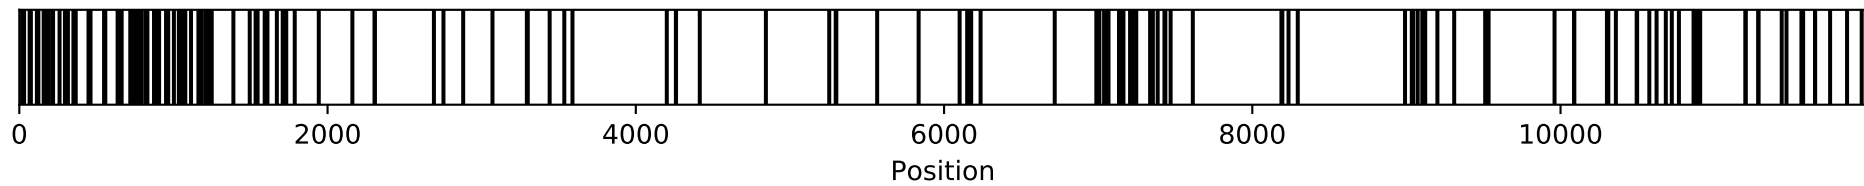

CR2 vs MM1  
Number of differences: 330

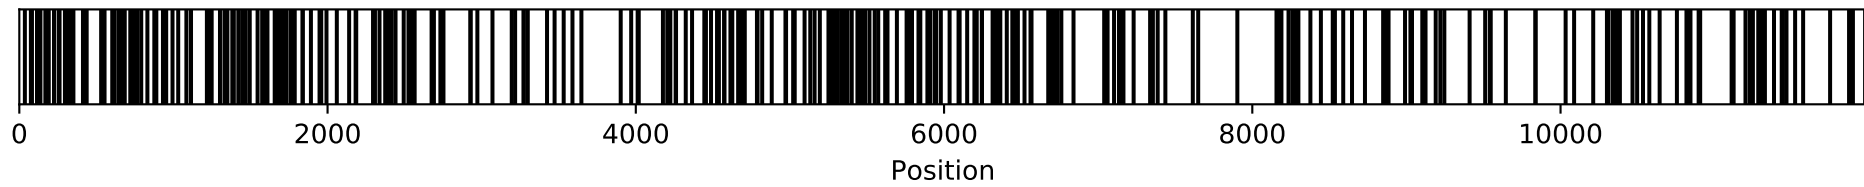

CR2 vs MM2  
Number of differences: 330

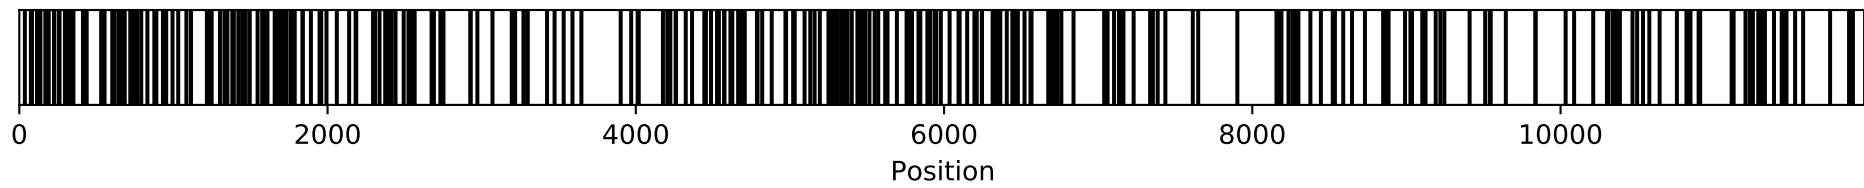

MM1 vs MM2  
Number of differences: 0

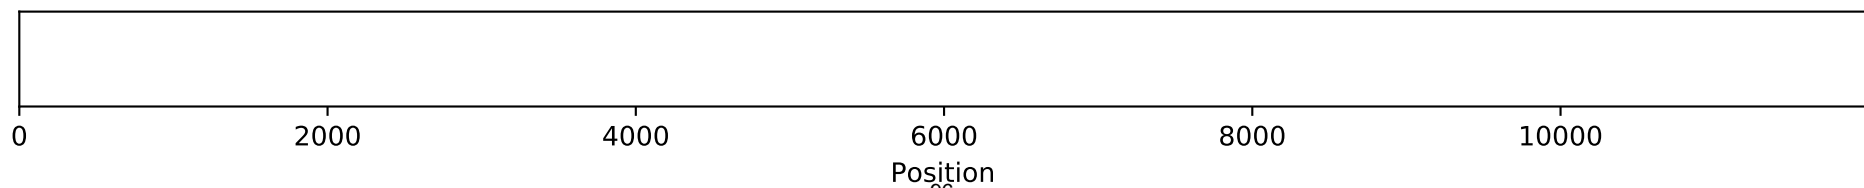

CR1 vs CR2  
Number of differences: 209

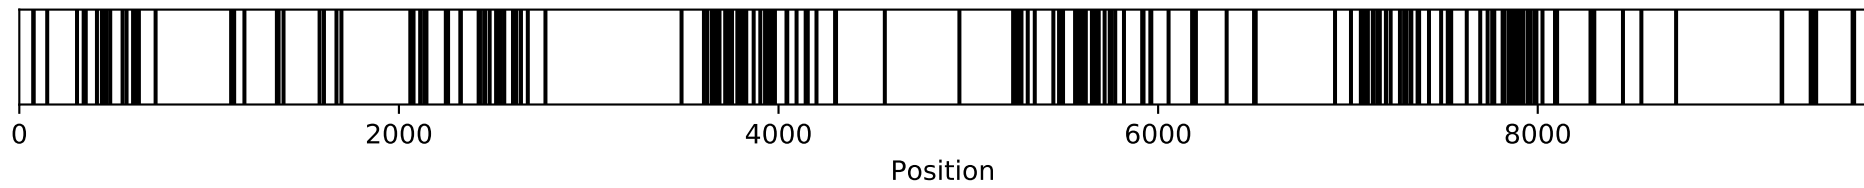

CR1 vs MM1  
Number of differences: 197

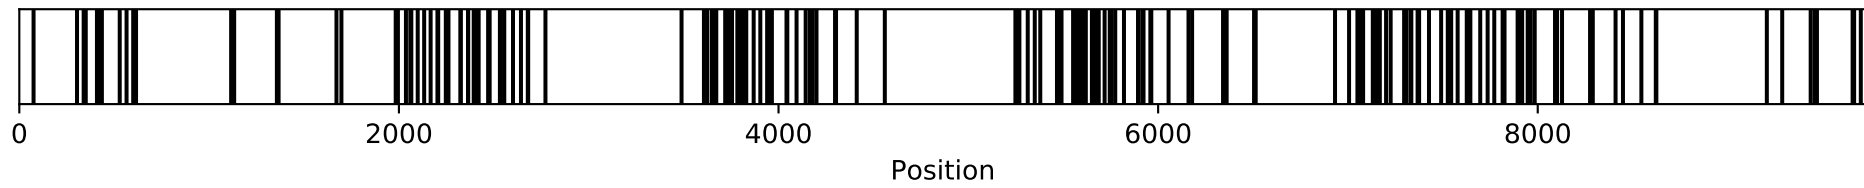

CR1 vs MM2  
Number of differences: 245

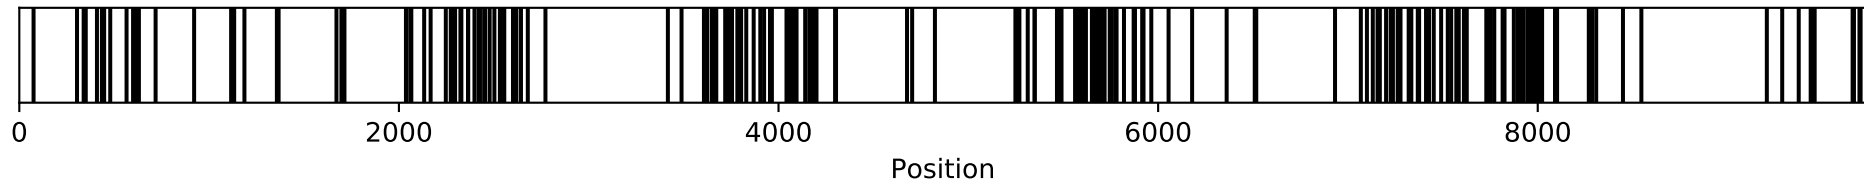

CR2 vs MM1  
Number of differences: 115

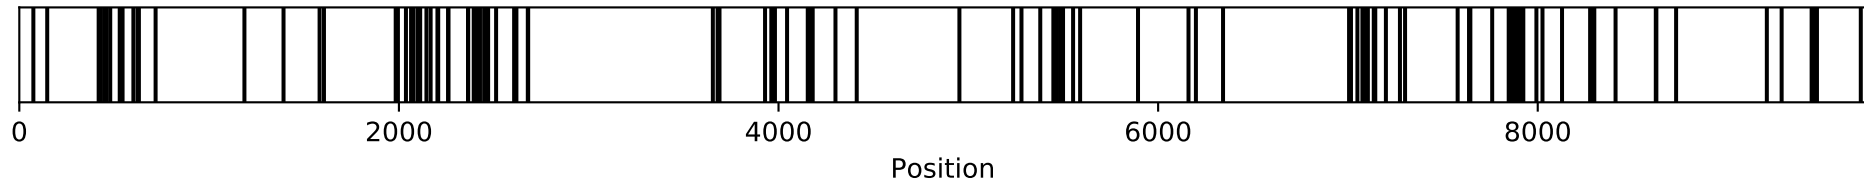

CR2 vs MM2  
Number of differences: 185

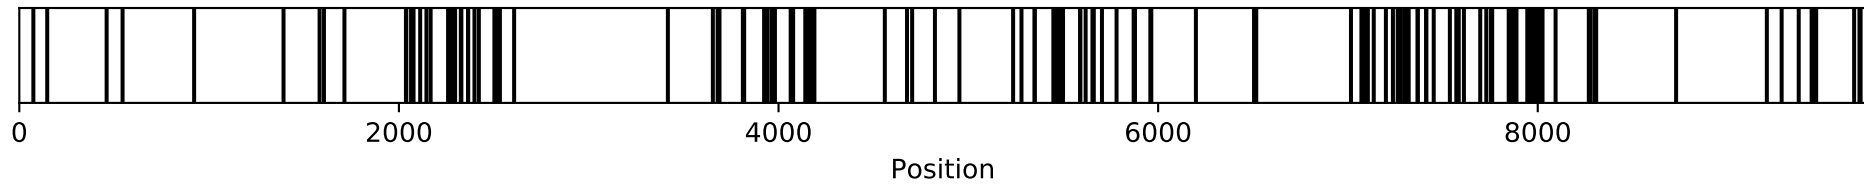

MM1 vs MM2  
Number of differences: 178

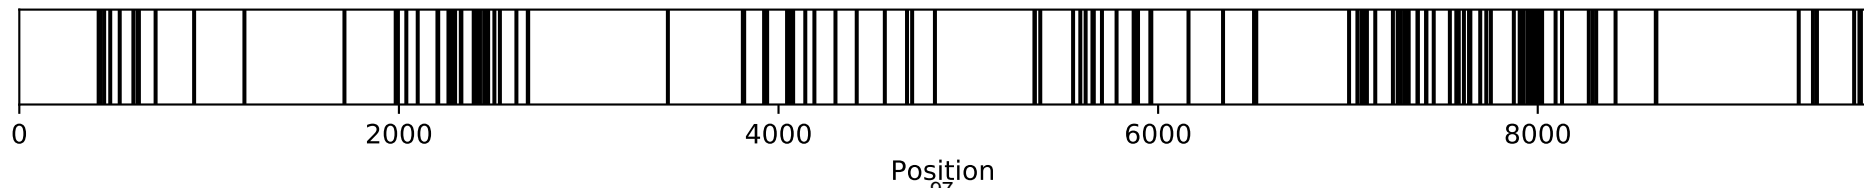

CR1 vs CR2  
Number of differences: 22

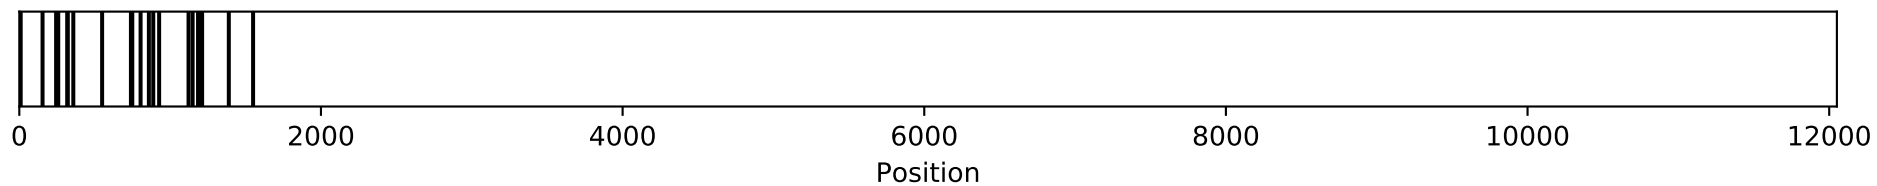

CR1 vs MM1  
Number of differences: 95

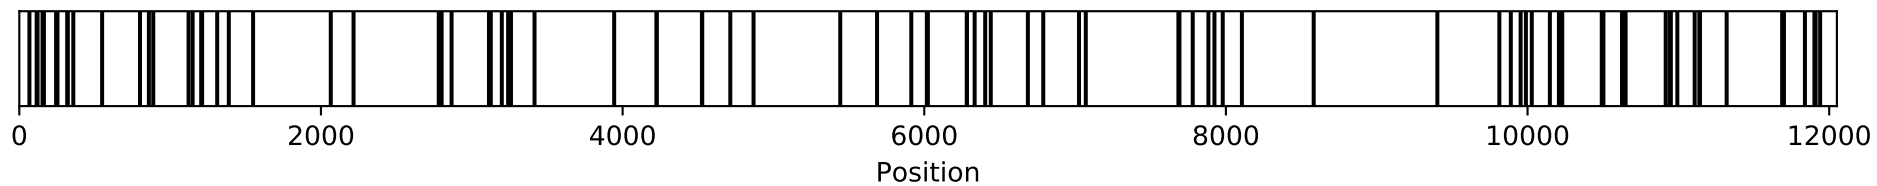

CR1 vs MM2  
Number of differences: 108

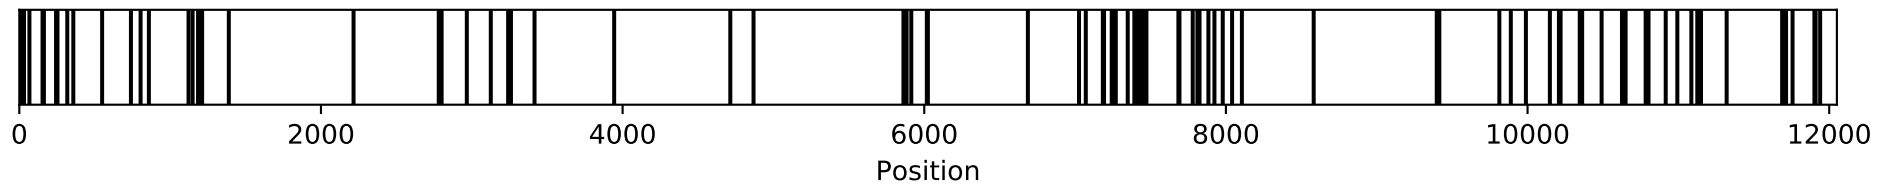

CR2 vs MM1  
Number of differences: 87

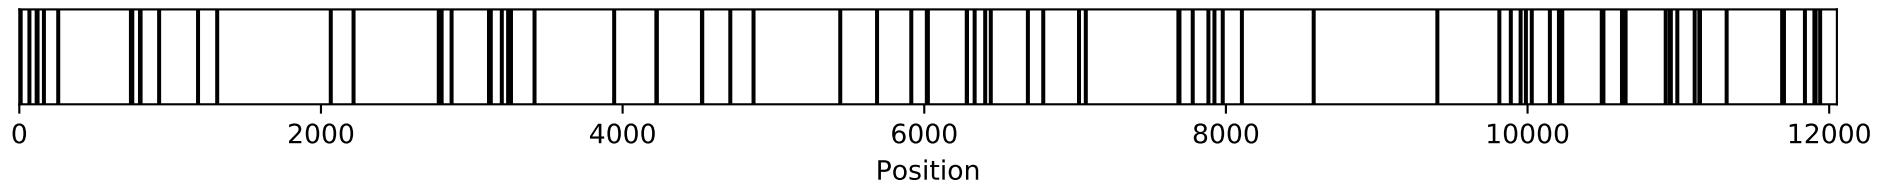

CR2 vs MM2  
Number of differences: 98

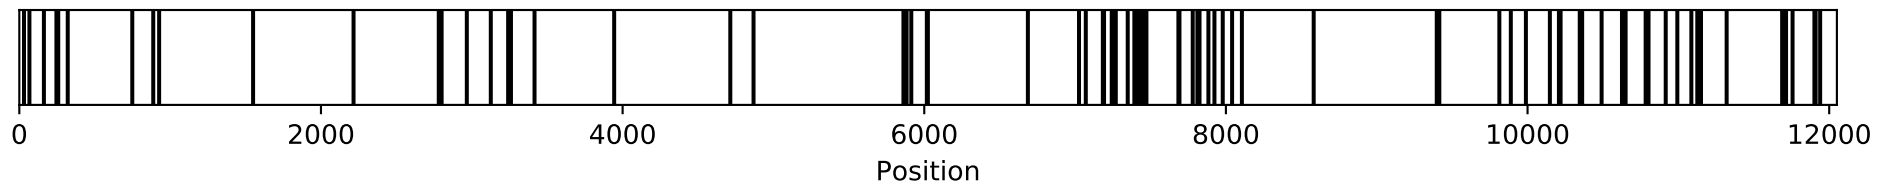

MM1 vs MM2  
Number of differences: 87

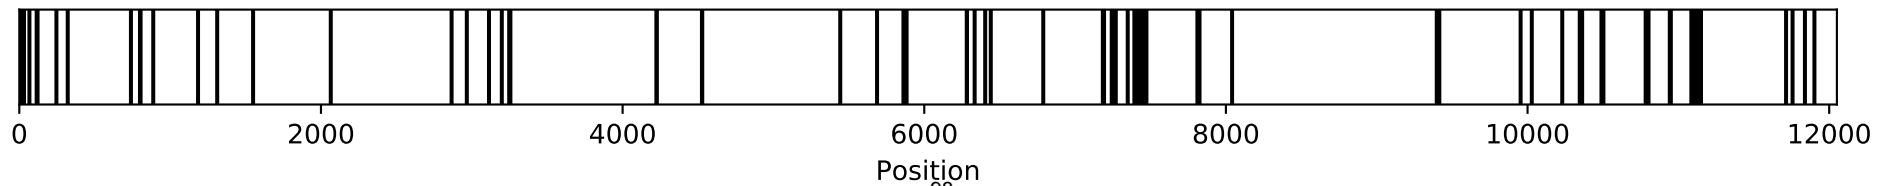

CR1 vs CR2  
Number of differences: 331

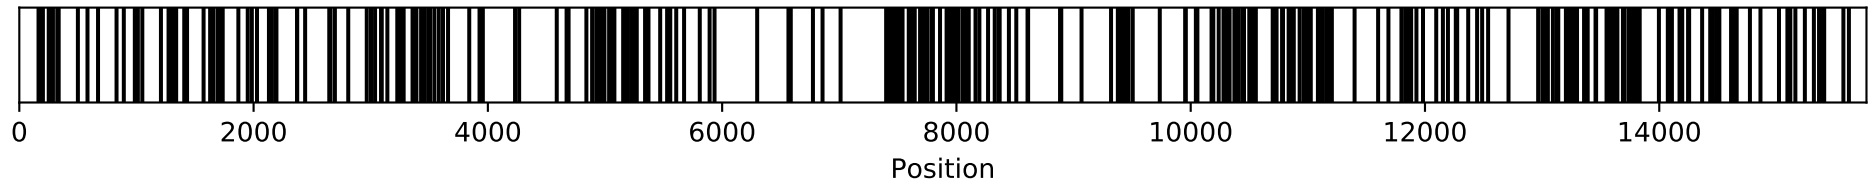

CR1 vs MM1  
Number of differences: 212

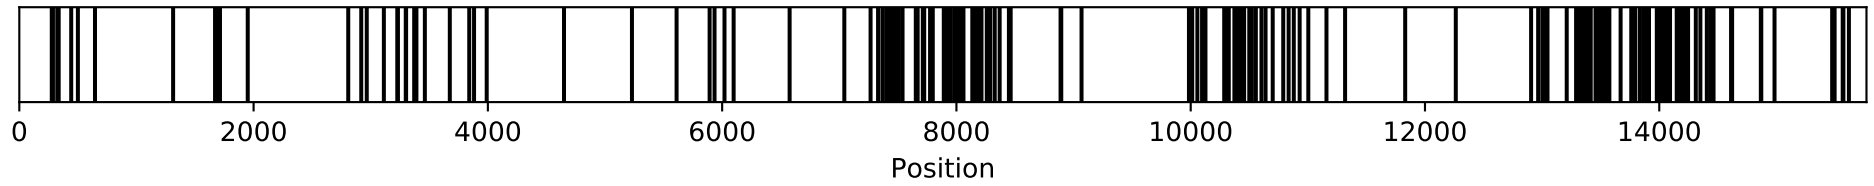

CR1 vs MM2  
Number of differences: 189

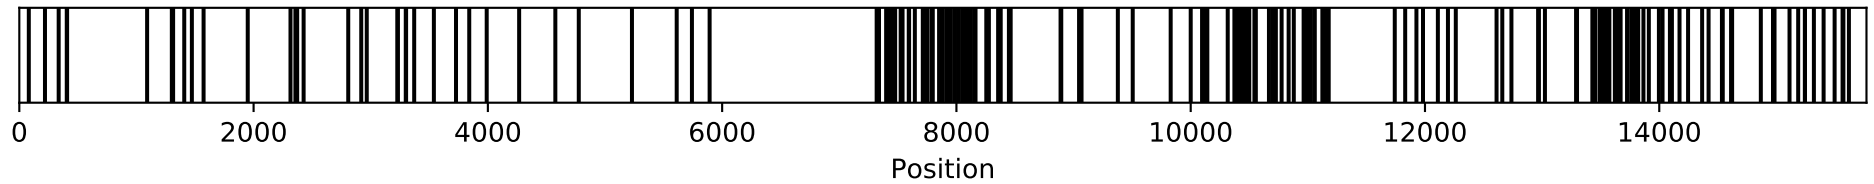

CR2 vs MM1  
Number of differences: 360

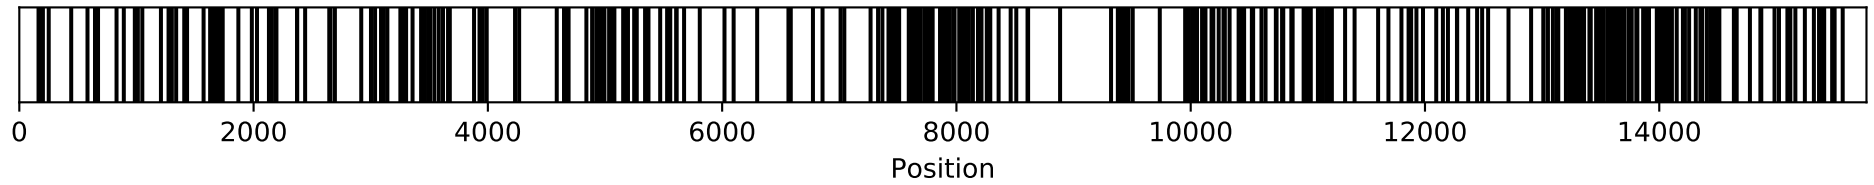

CR2 vs MM2  
Number of differences: 326

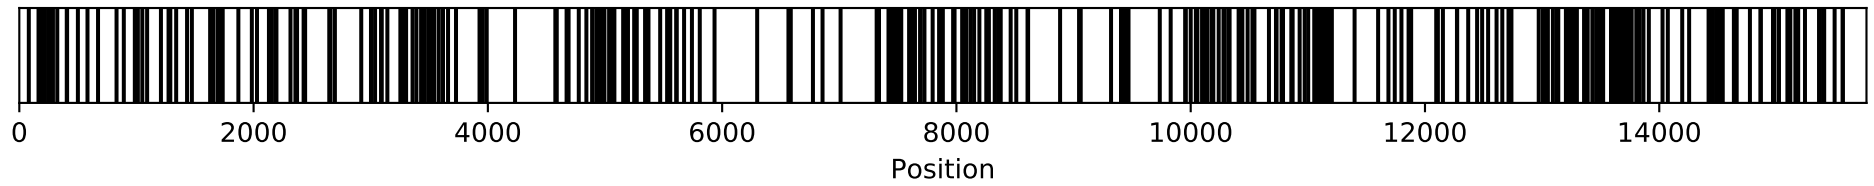

MM1 vs MM2  
Number of differences: 219

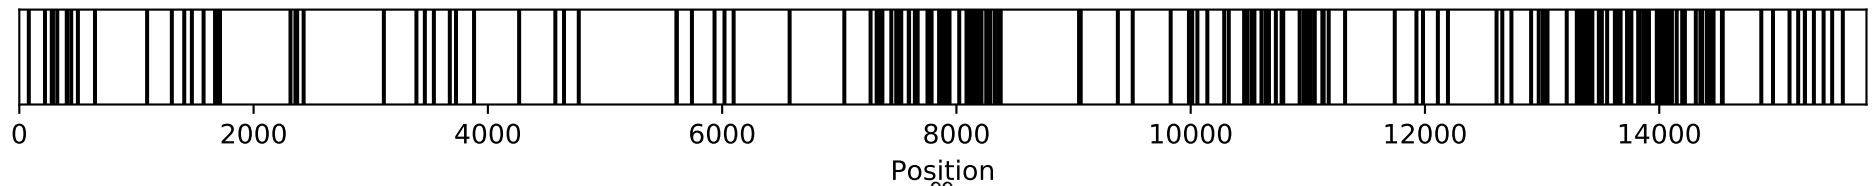

CR1 vs CR2  
Number of differences: 228

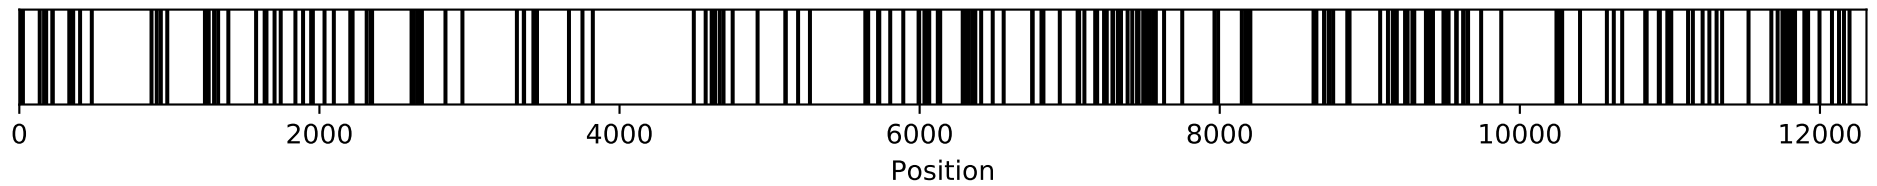

CR1 vs MM1  
Number of differences: 135

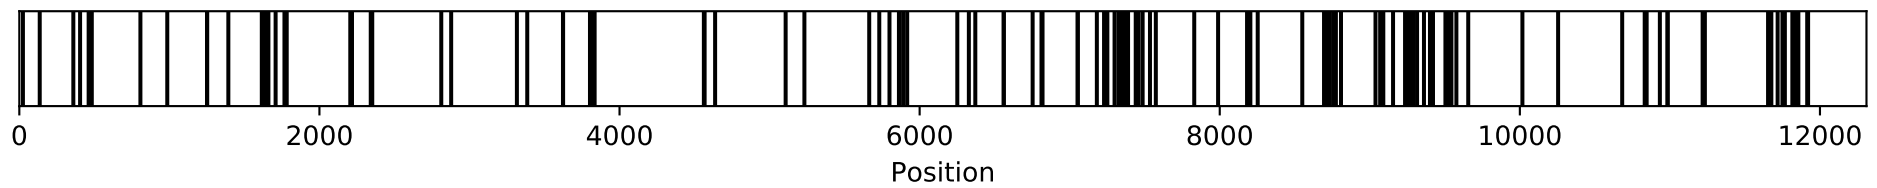

CR1 vs MM2  
Number of differences: 142

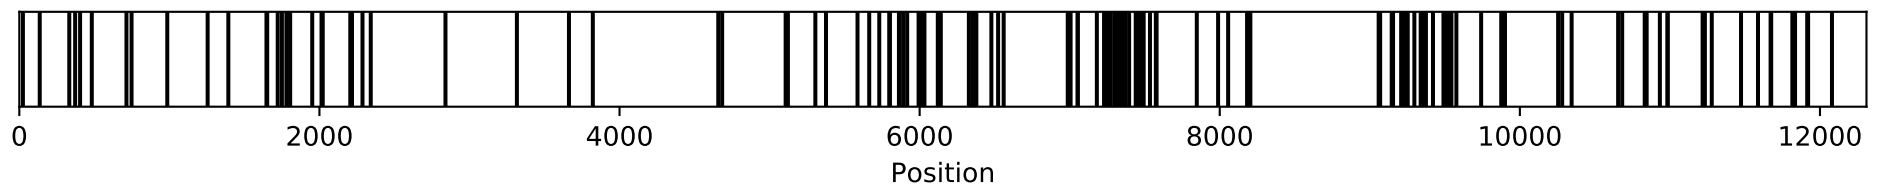

CR2 vs MM1  
Number of differences: 222

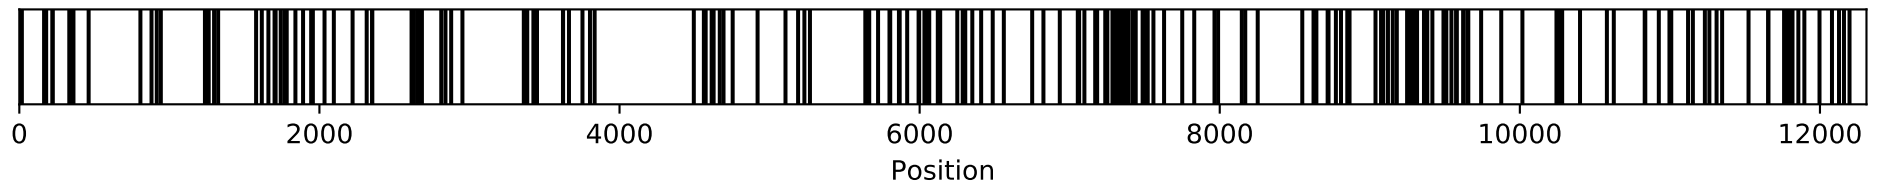

CR2 vs MM2  
Number of differences: 225

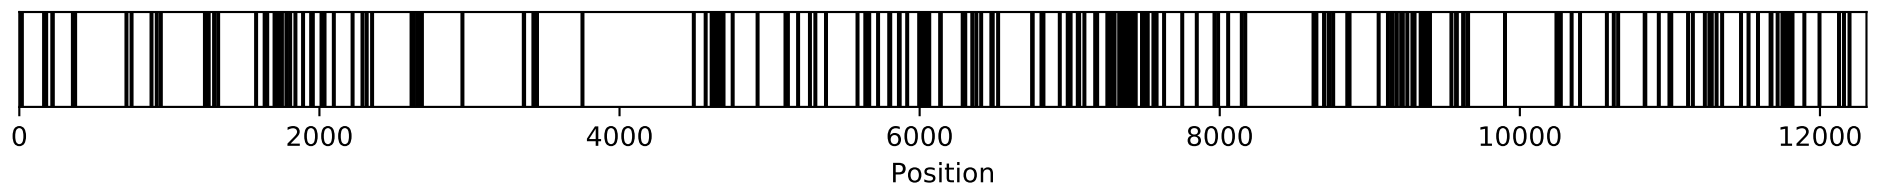

MM1 vs MM2  
Number of differences: 129

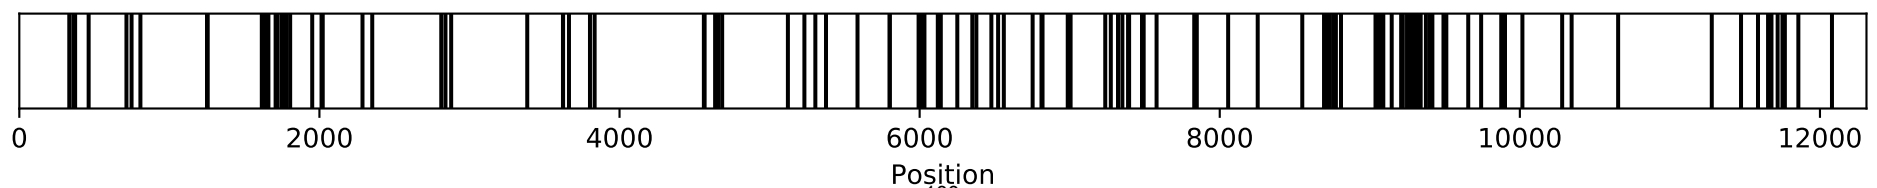

CR1 vs CR2  
Number of differences: 39

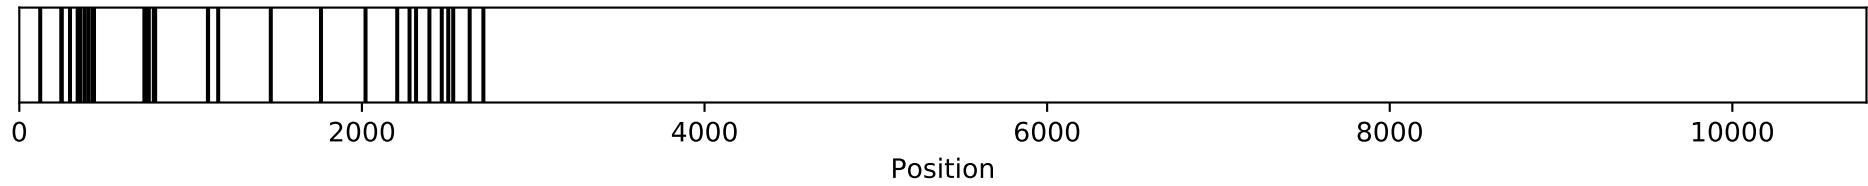

CR1 vs MM1  
Number of differences: 227

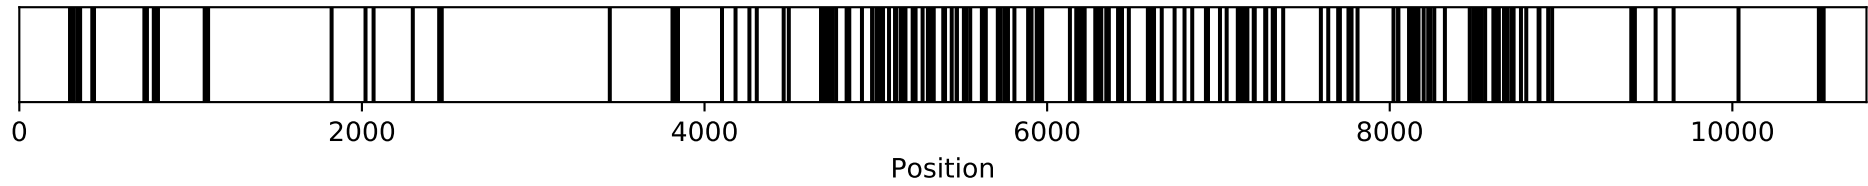

CR1 vs MM2  
Number of differences: 200

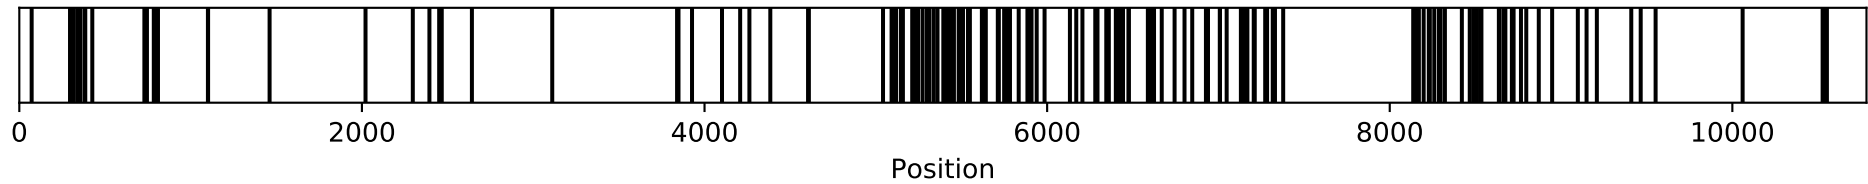

CR2 vs MM1  
Number of differences: 222

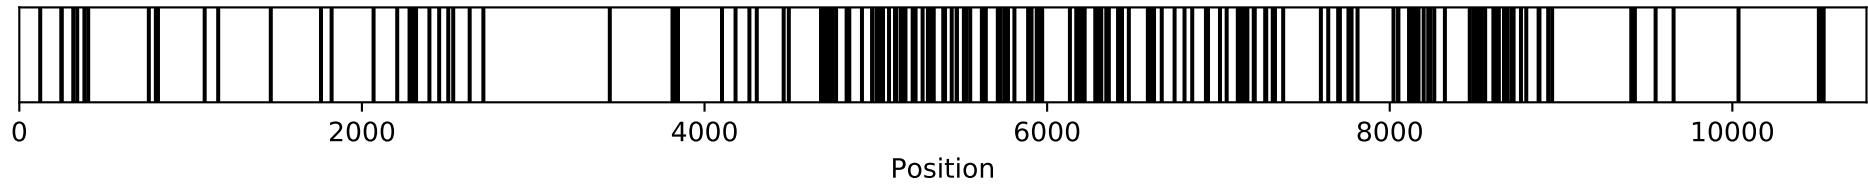

CR2 vs MM2  
Number of differences: 193

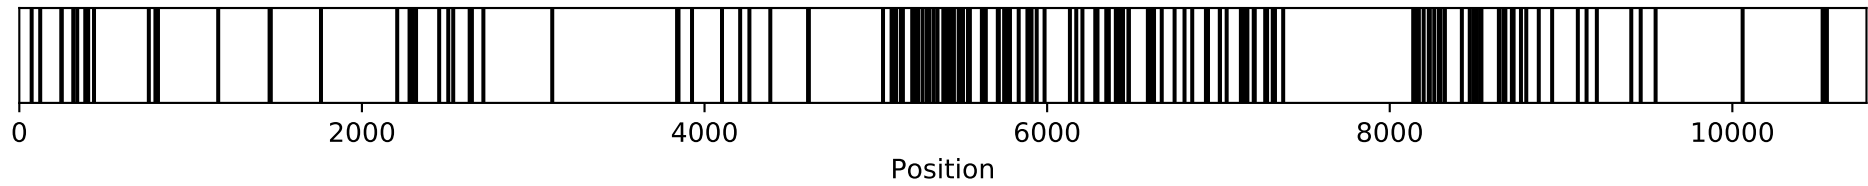

MM1 vs MM2  
Number of differences: 170

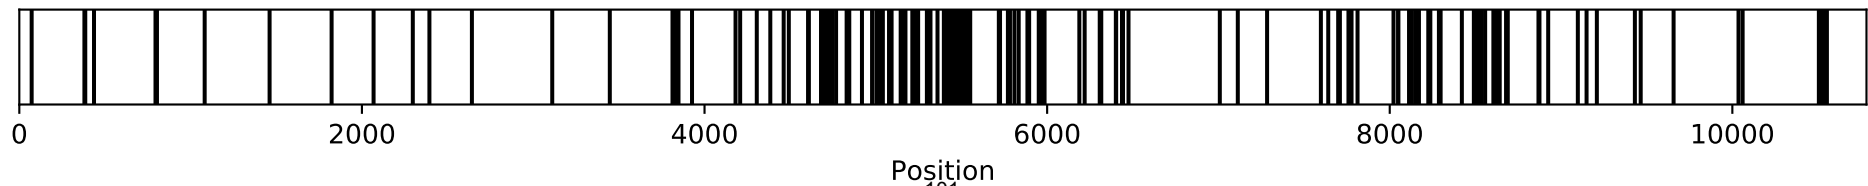

CR1 vs CR2  
Number of differences: 97

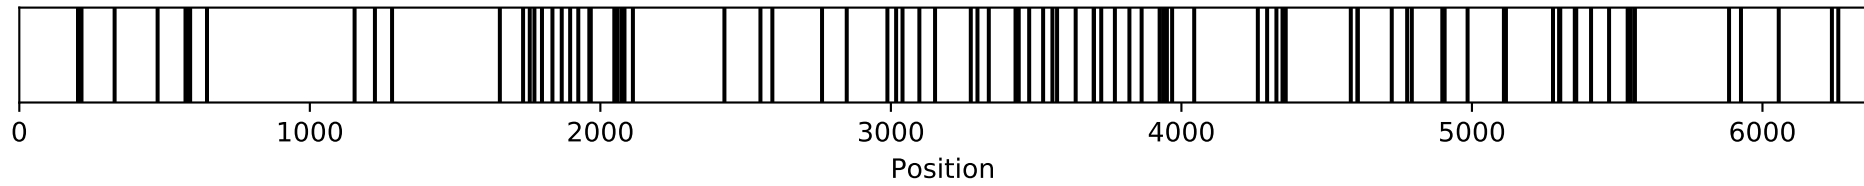

CR1 vs MM1  
Number of differences: 44

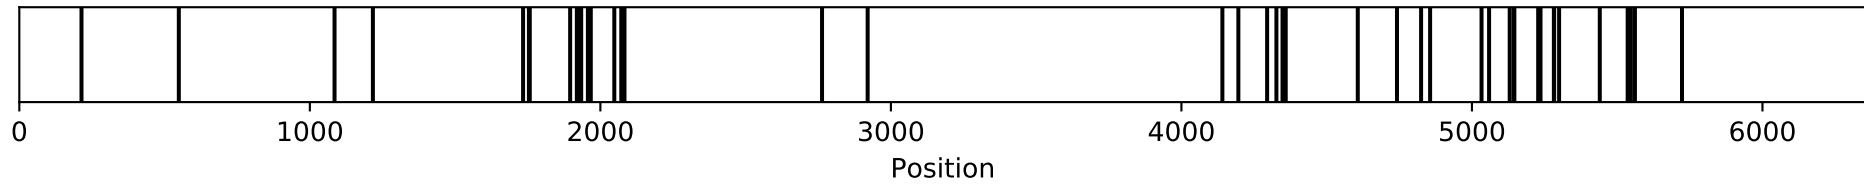

CR1 vs MM2  
Number of differences: 0

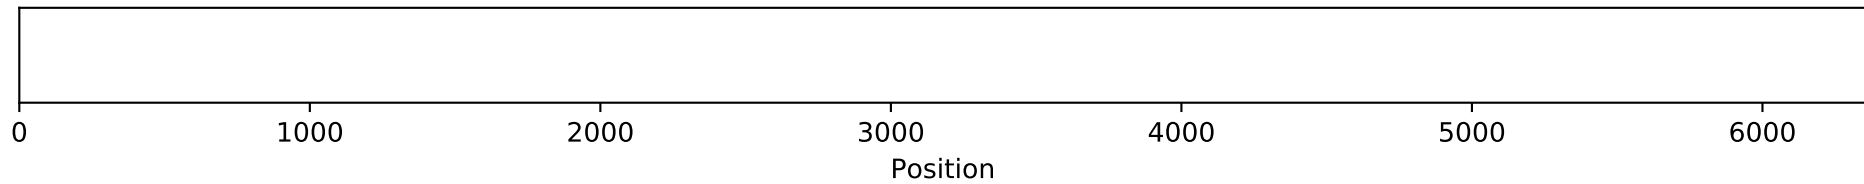

CR2 vs MM1  
Number of differences: 101

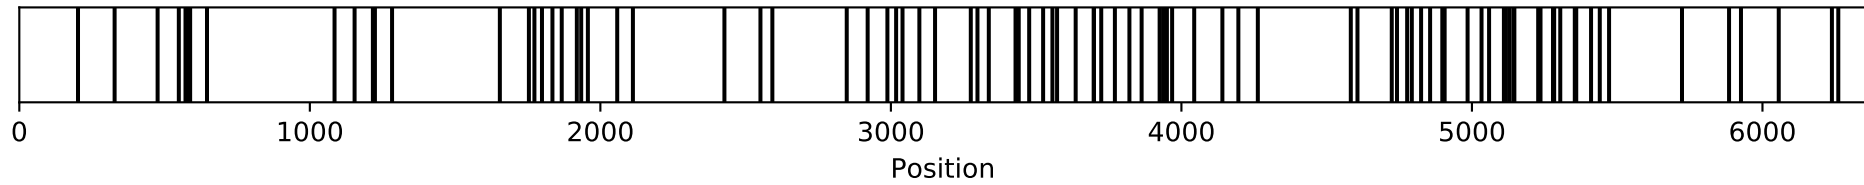

CR2 vs MM2  
Number of differences: 97

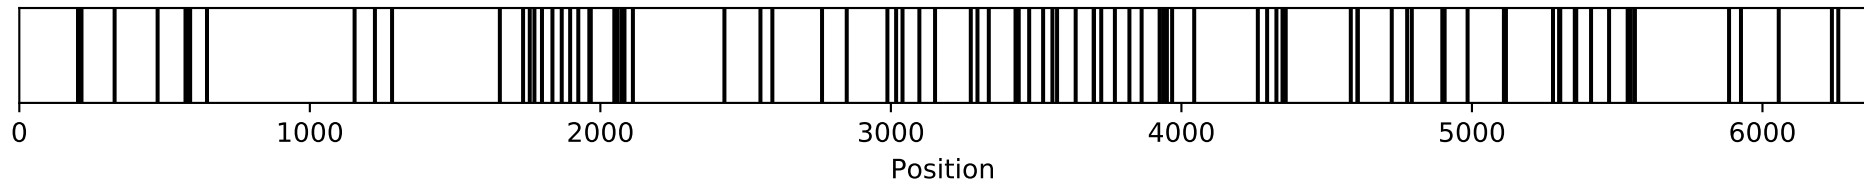

MM1 vs MM2  
Number of differences: 44

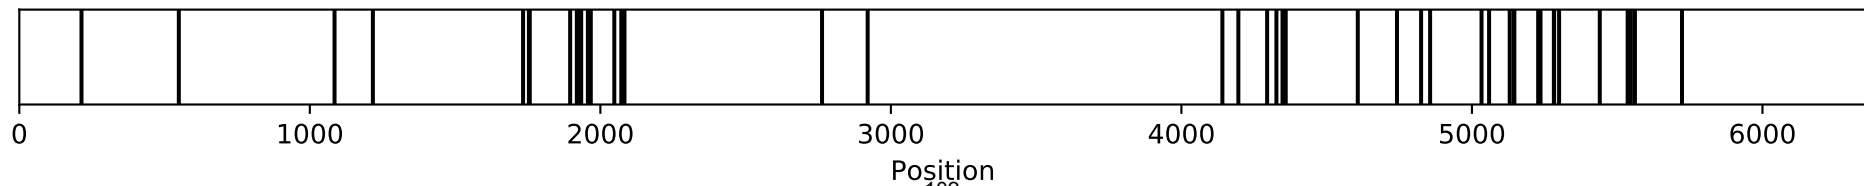

CR1 vs CR2  
Number of differences: 170

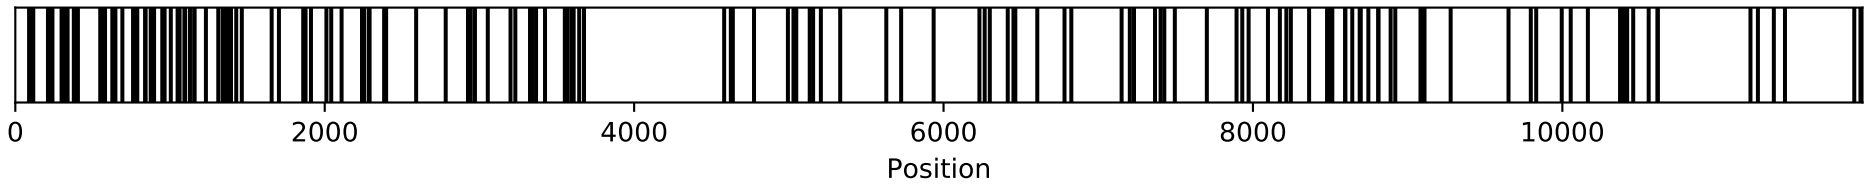

CR1 vs MM1  
Number of differences: 76

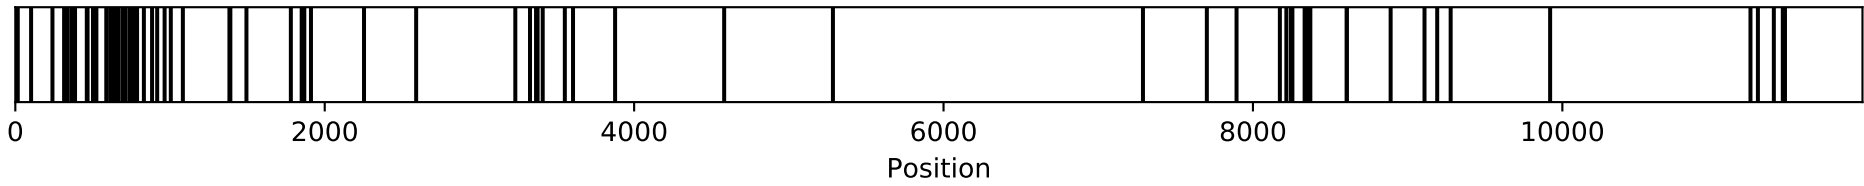

CR1 vs MM2  
Number of differences: 101

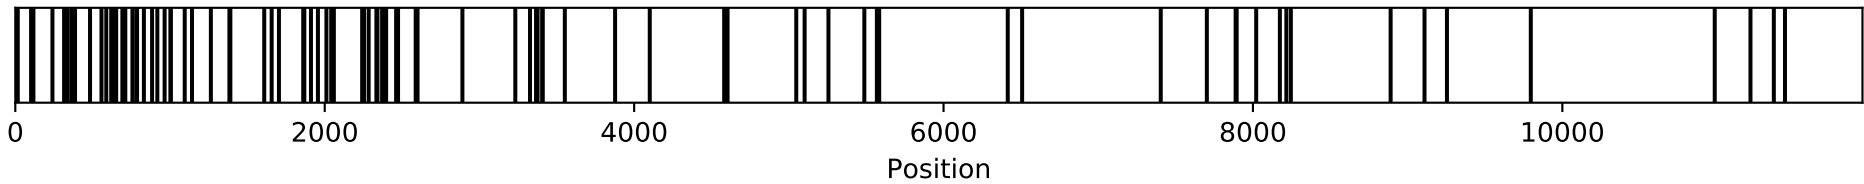

CR2 vs MM1  
Number of differences: 176

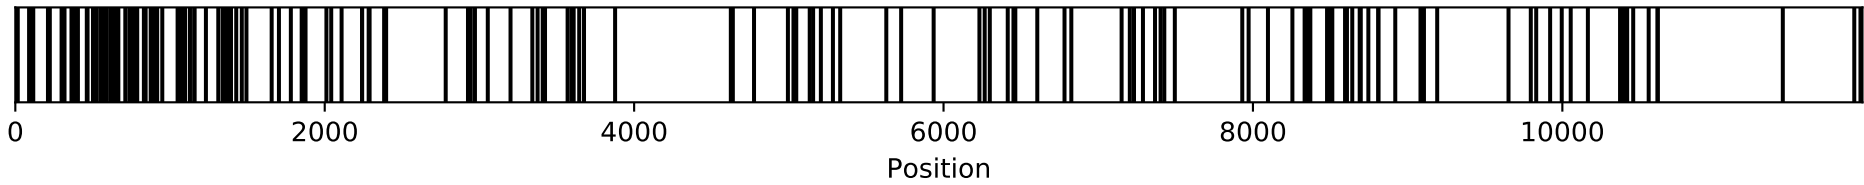

CR2 vs MM2  
Number of differences: 182

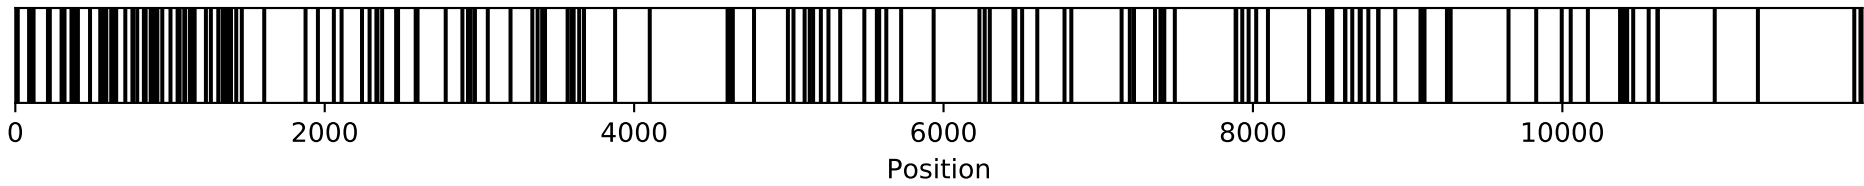

MM1 vs MM2  
Number of differences: 82

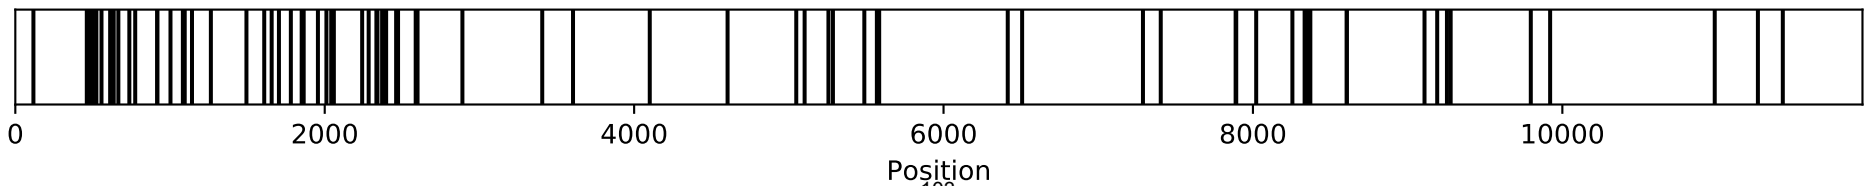



CR1 vs CR2  
Number of differences: 1

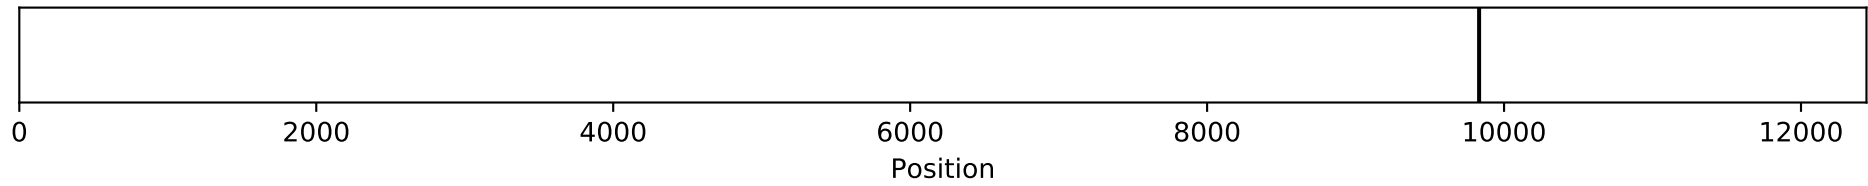

CR1 vs MM1  
Number of differences: 203

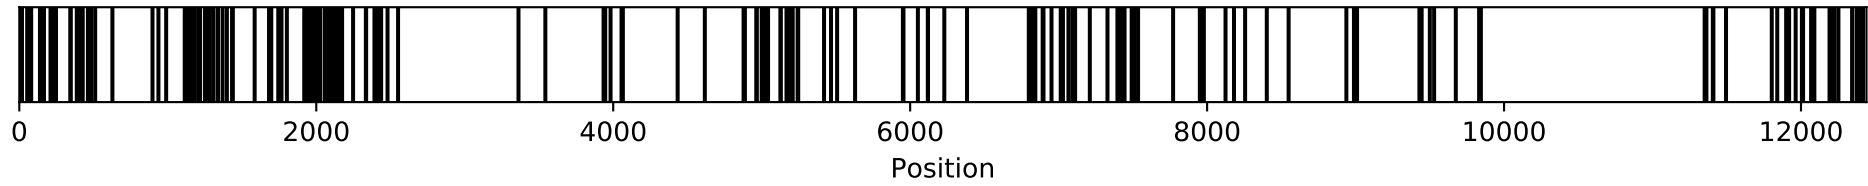

CR1 vs MM2  
Number of differences: 167

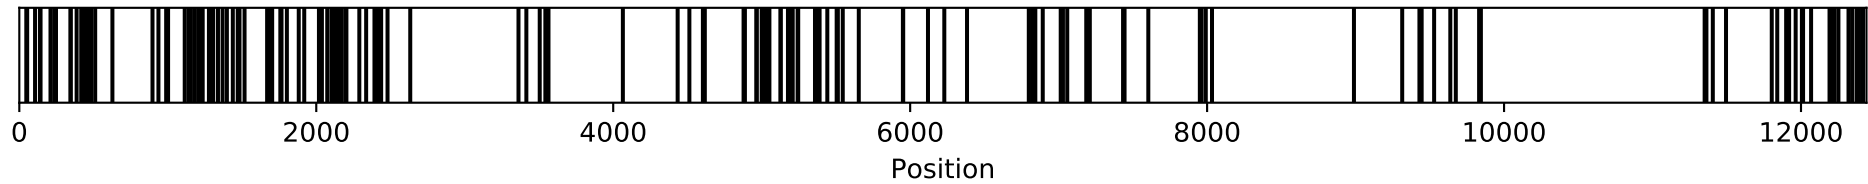

CR2 vs MM1  
Number of differences: 202

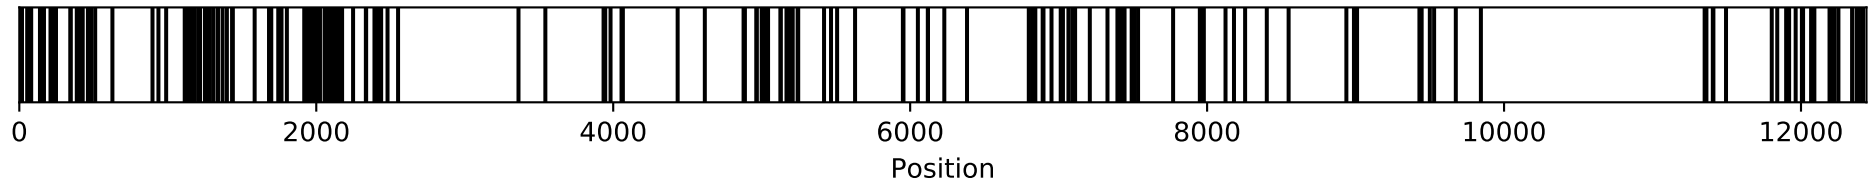

CR2 vs MM2  
Number of differences: 166

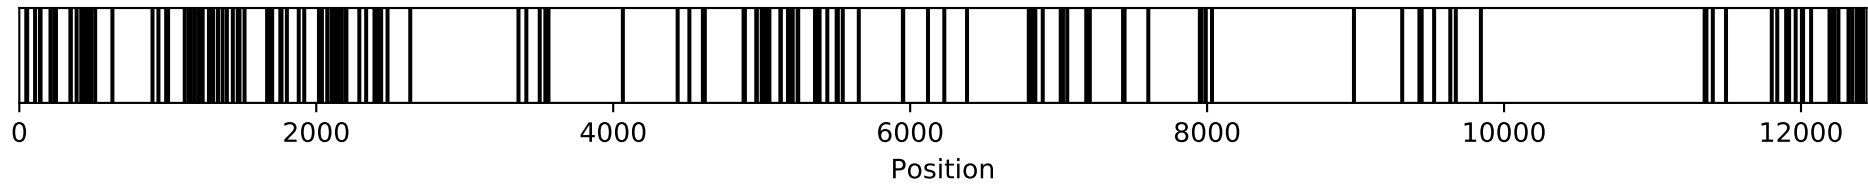

MM1 vs MM2  
Number of differences: 143

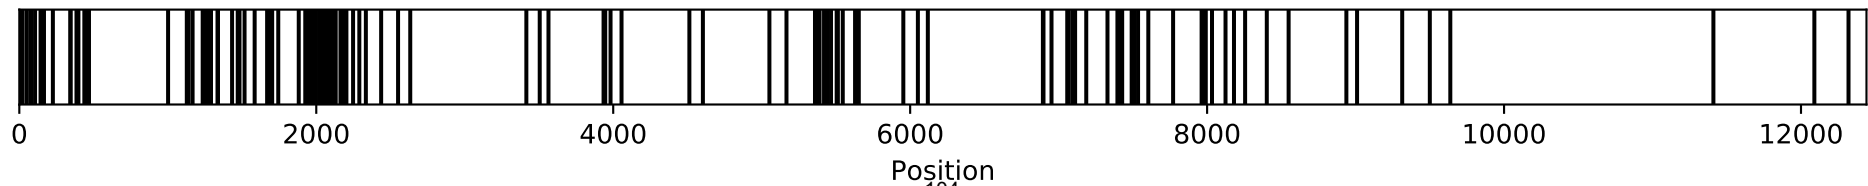

CR1 vs CR2  
Number of differences: 65

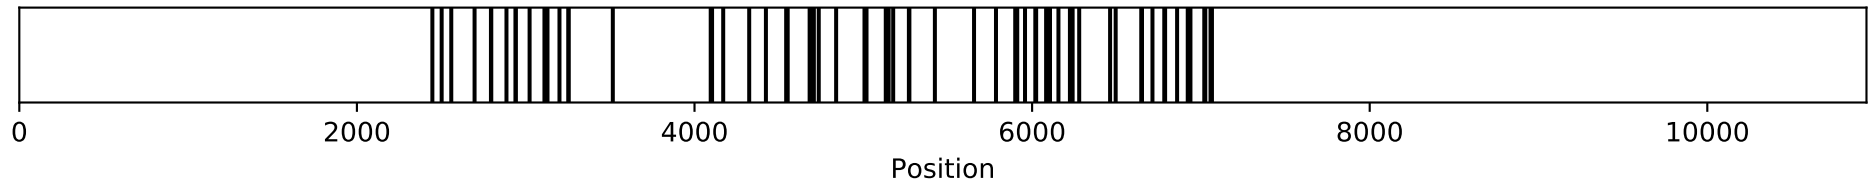

CR1 vs MM1  
Number of differences: 334

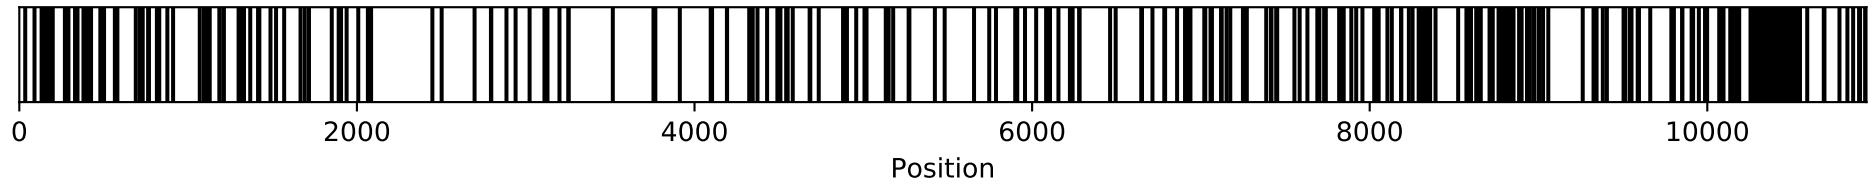

CR1 vs MM2  
Number of differences: 329

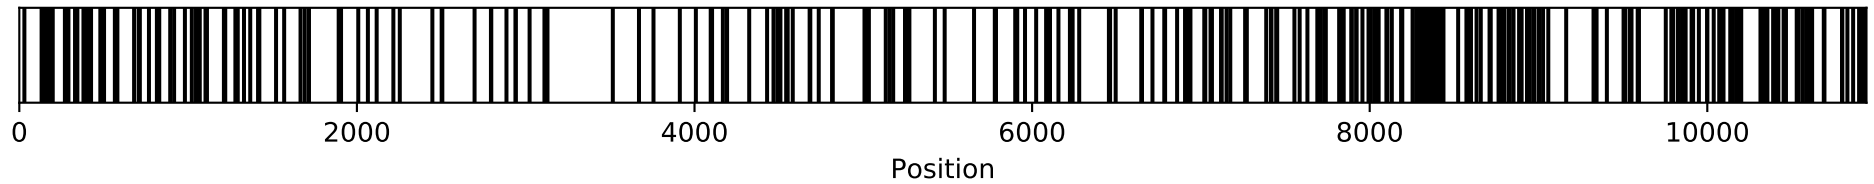

CR2 vs MM1  
Number of differences: 284

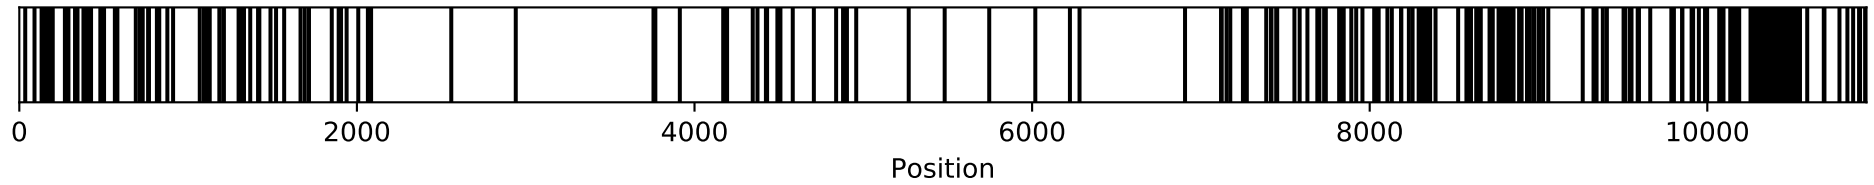

CR2 vs MM2  
Number of differences: 284

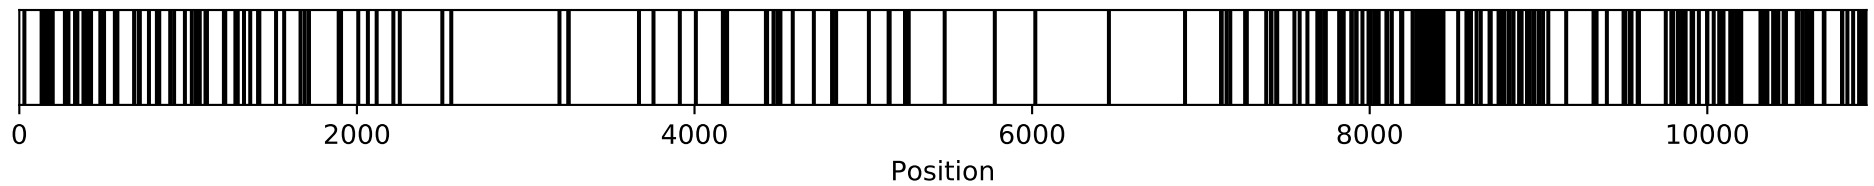

MM1 vs MM2  
Number of differences: 190

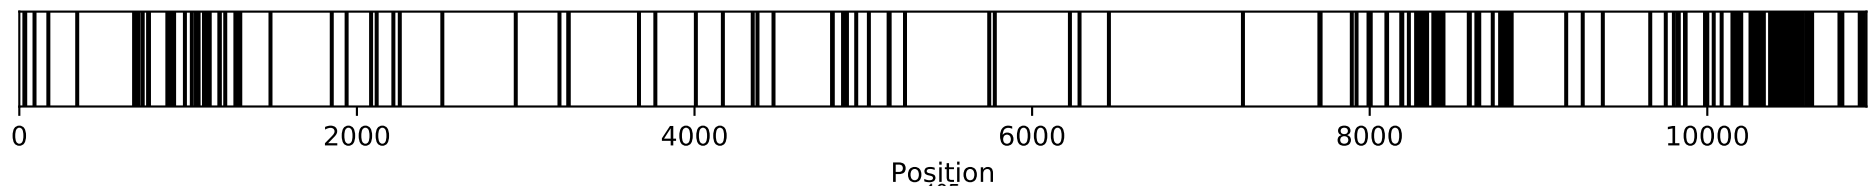

CR1 vs CR2  
Number of differences: 52

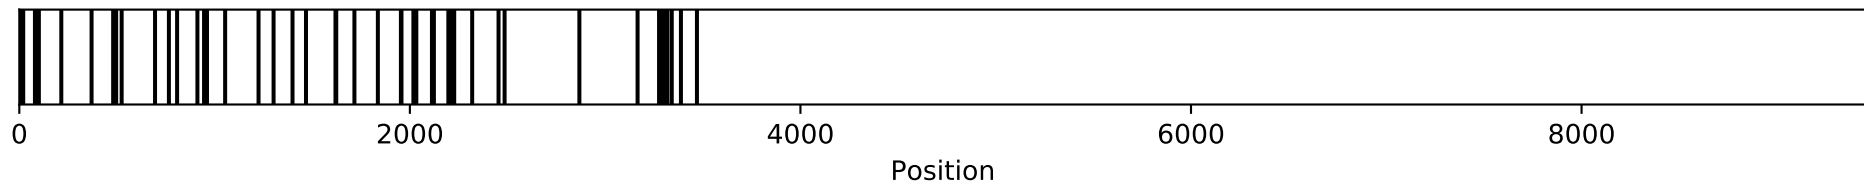

CR1 vs MM1  
Number of differences: 235

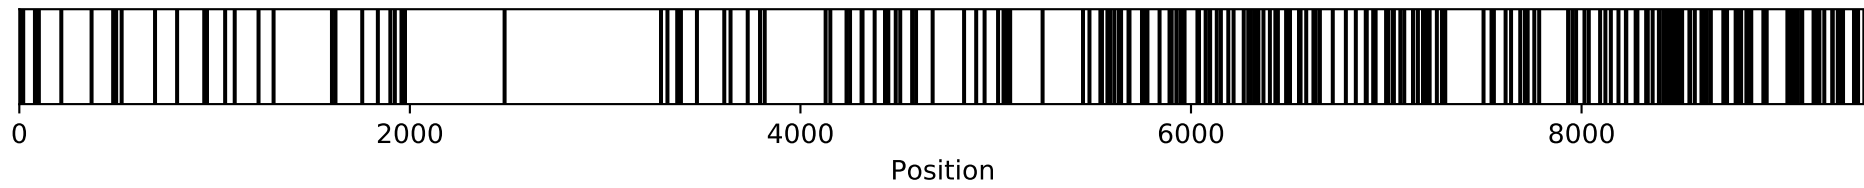

CR1 vs MM2  
Number of differences: 230

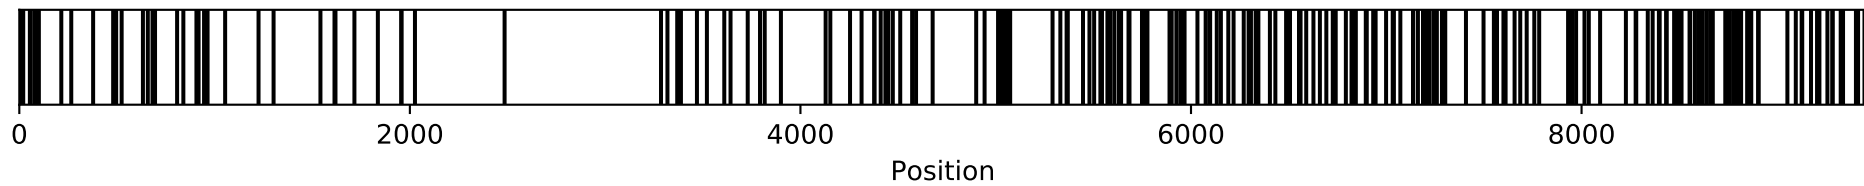

CR2 vs MM1  
Number of differences: 233

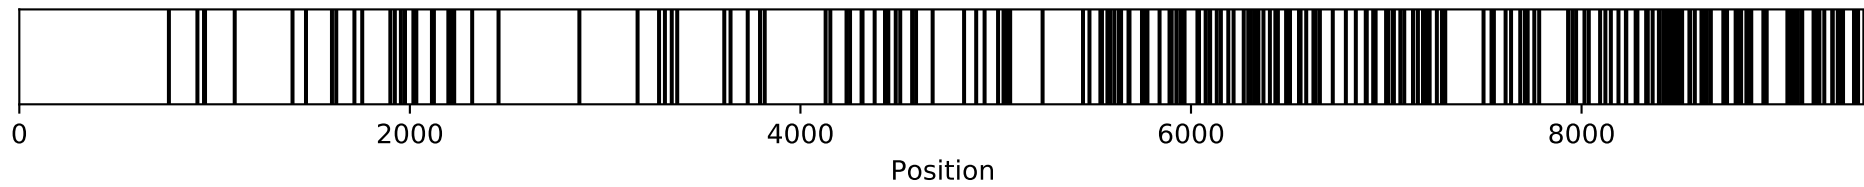

CR2 vs MM2  
Number of differences: 226

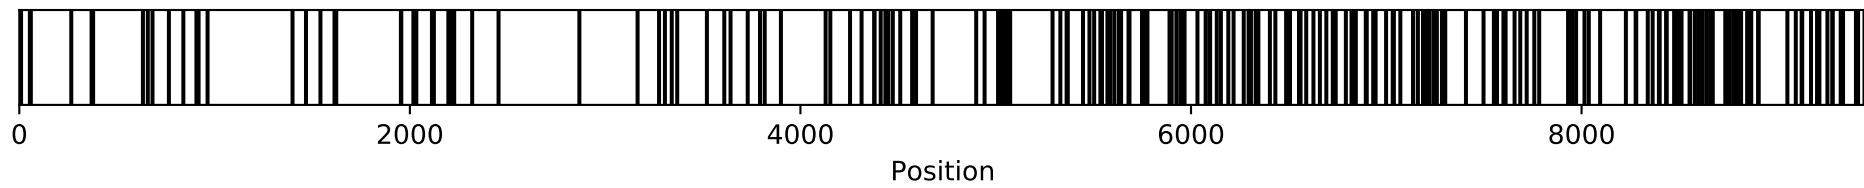

MM1 vs MM2  
Number of differences: 126

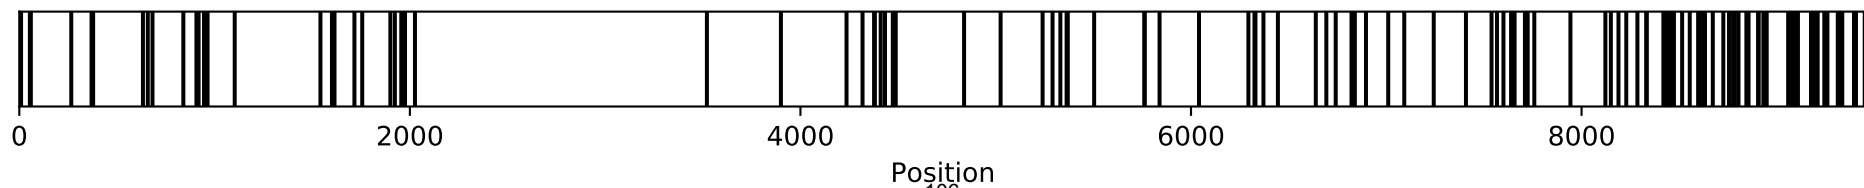

CR1 vs CR2  
Number of differences: 248

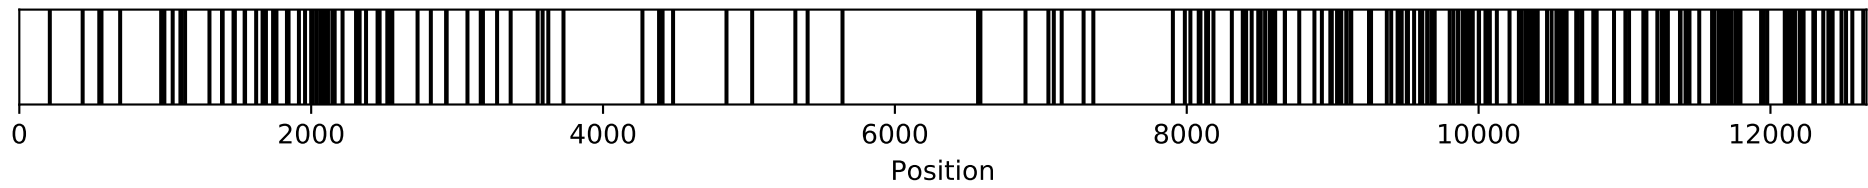

CR1 vs MM1  
Number of differences: 136

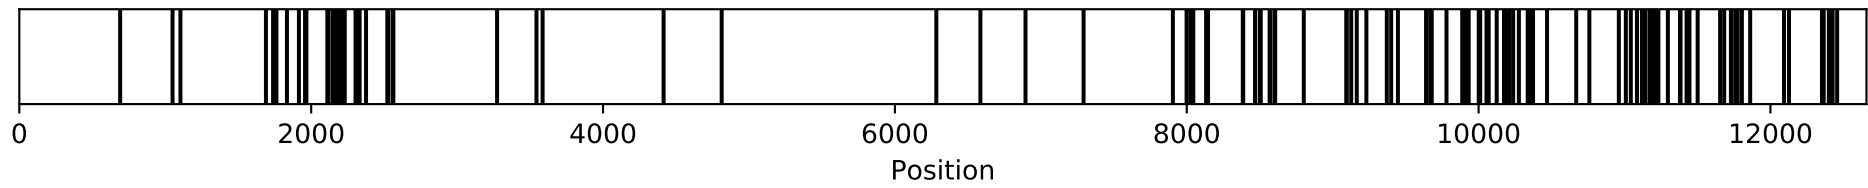

CR1 vs MM2  
Number of differences: 107

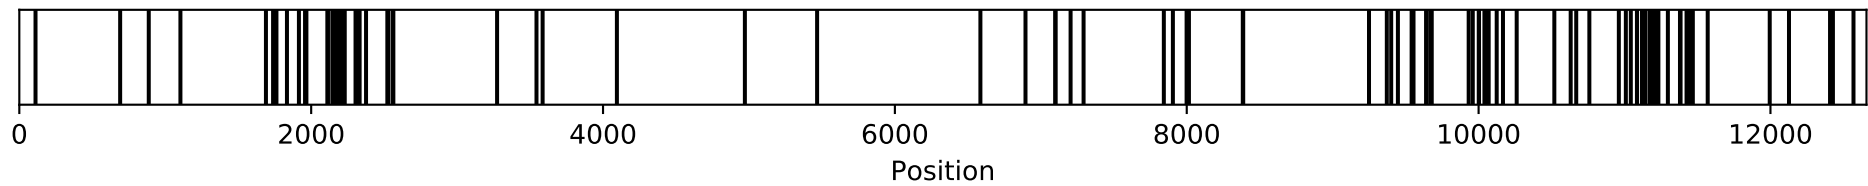

CR2 vs MM1  
Number of differences: 240

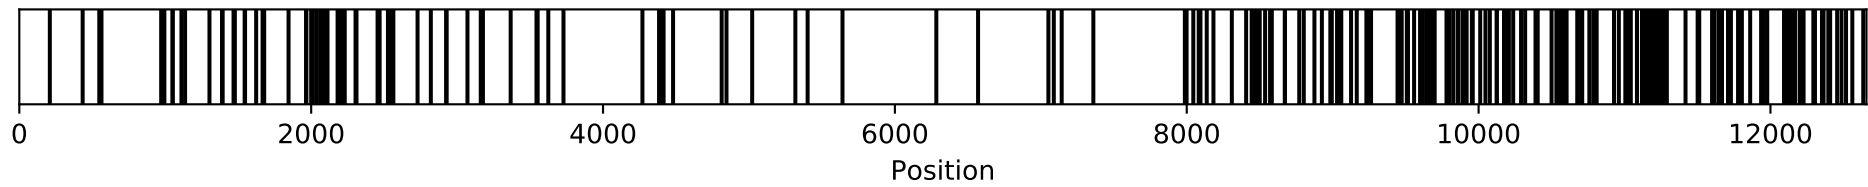

CR2 vs MM2  
Number of differences: 257

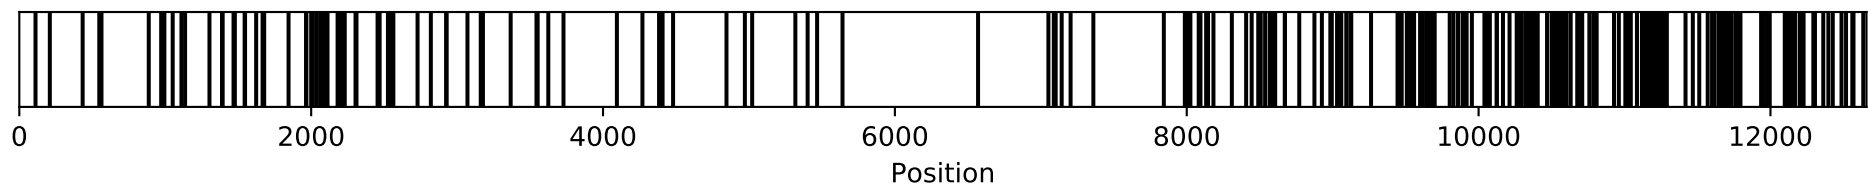

MM1 vs MM2  
Number of differences: 85

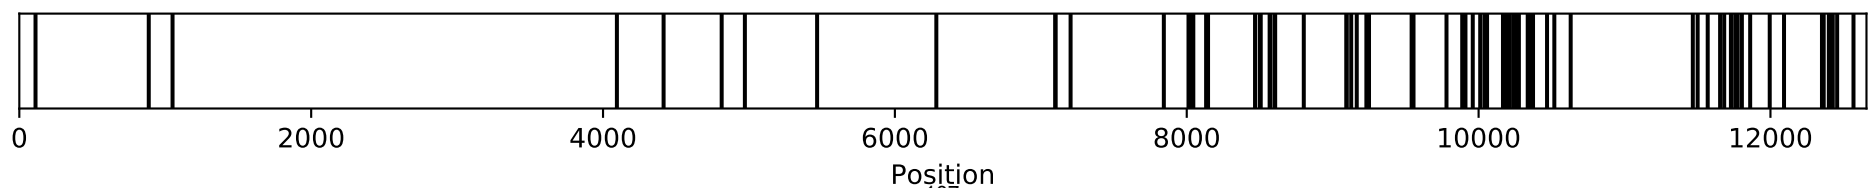

CR1 vs CR2  
Number of differences: 229

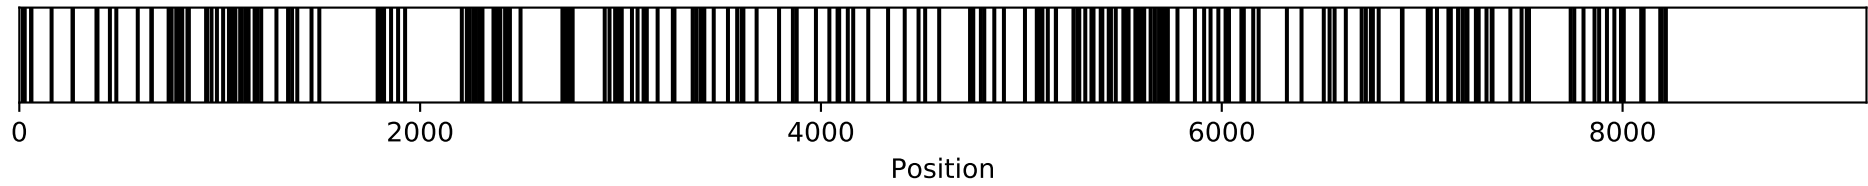

CR1 vs MM1  
Number of differences: 91

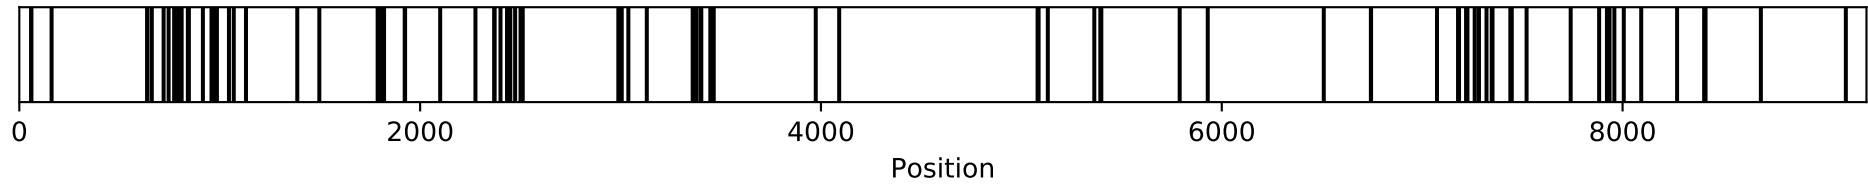

CR1 vs MM2  
Number of differences: 101

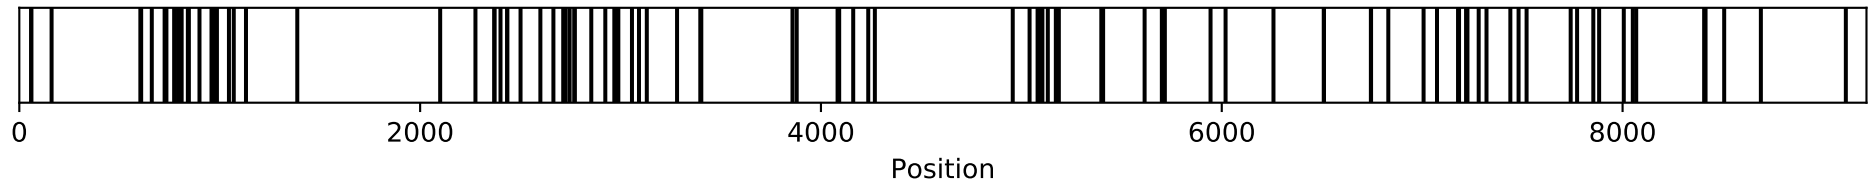

CR2 vs MM1  
Number of differences: 211

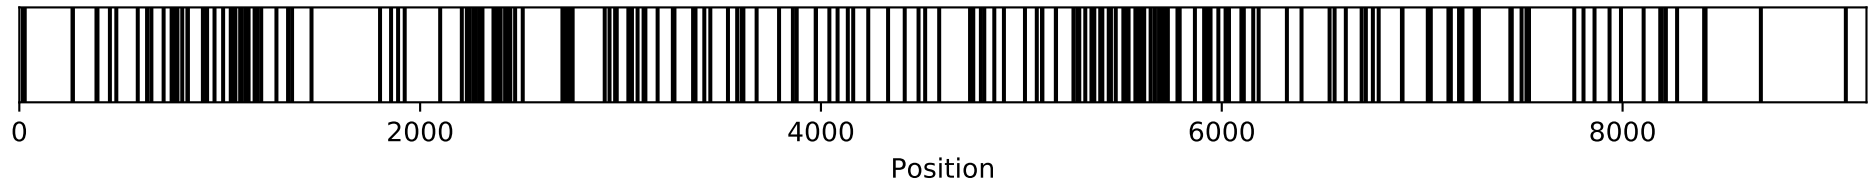

CR2 vs MM2  
Number of differences: 218

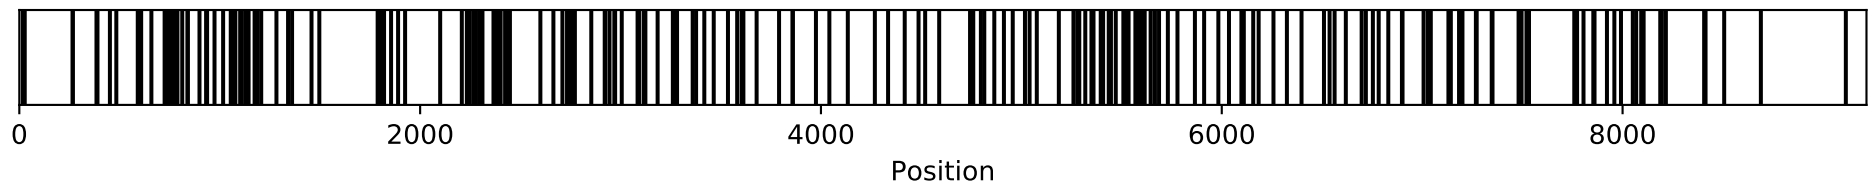

MM1 vs MM2  
Number of differences: 87

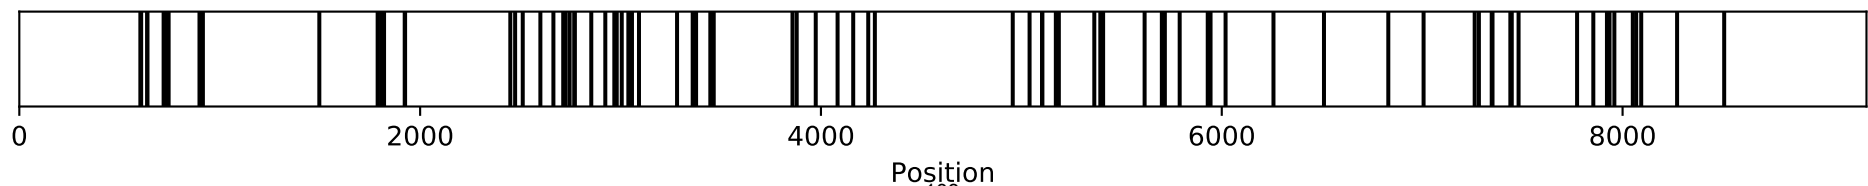

CR1 vs CR2  
Number of differences: 167

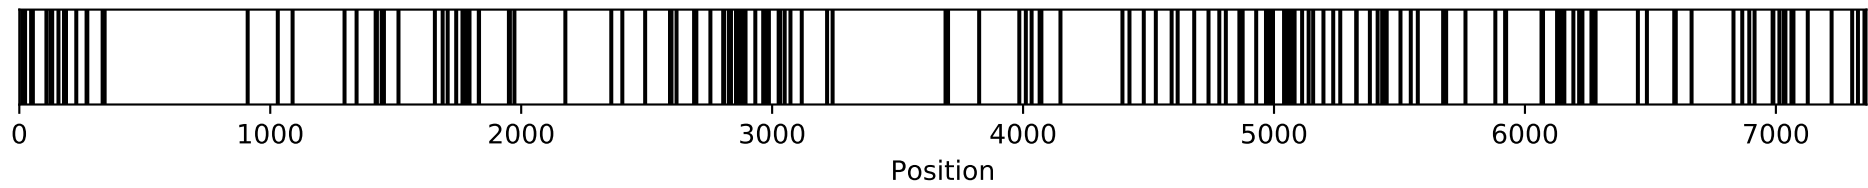

CR1 vs MM1  
Number of differences: 69

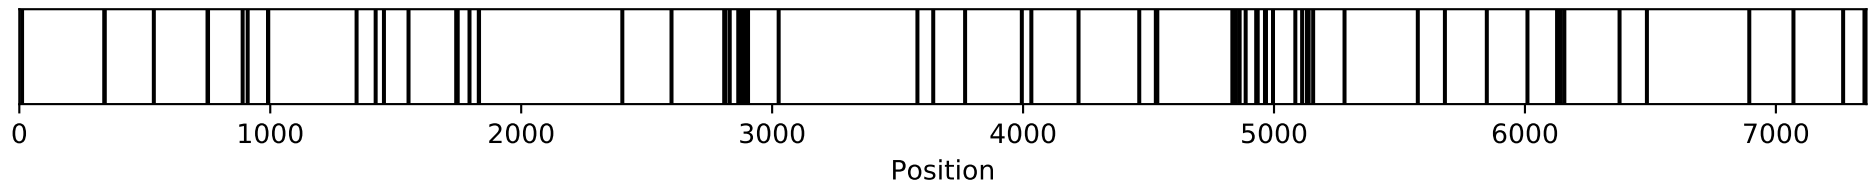

CR1 vs MM2  
Number of differences: 71

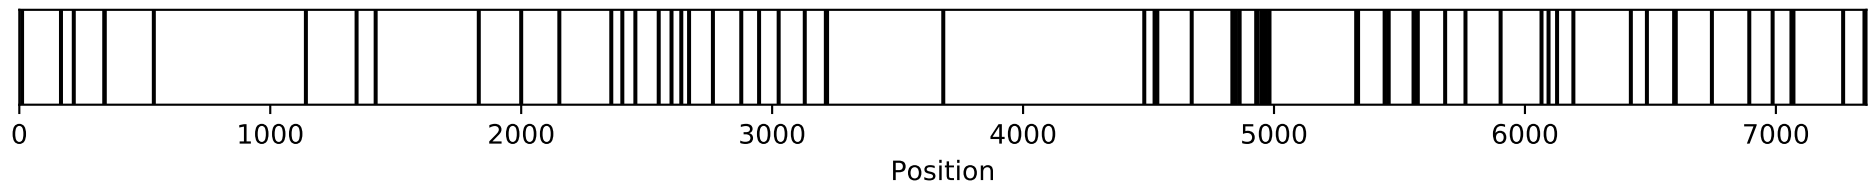

CR2 vs MM1  
Number of differences: 171

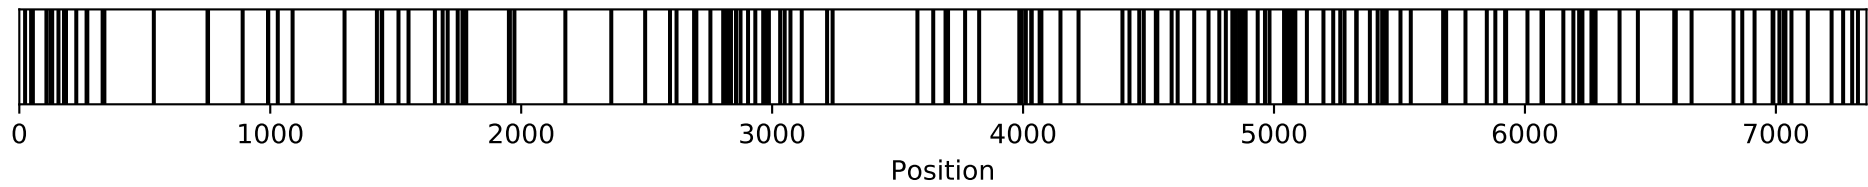

CR2 vs MM2  
Number of differences: 179

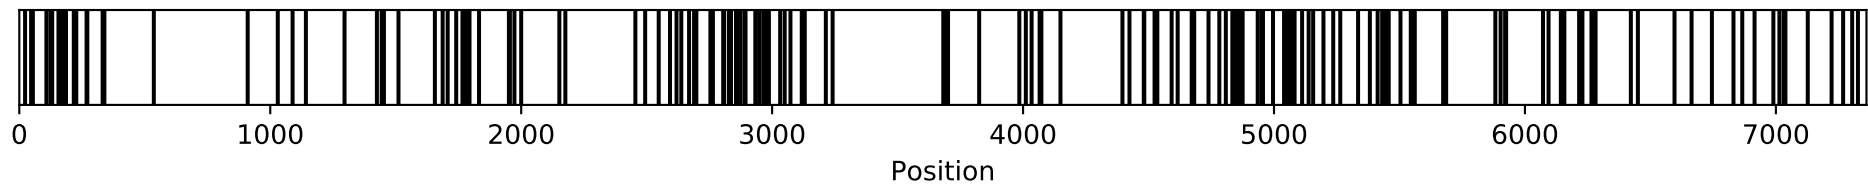

MM1 vs MM2  
Number of differences: 84

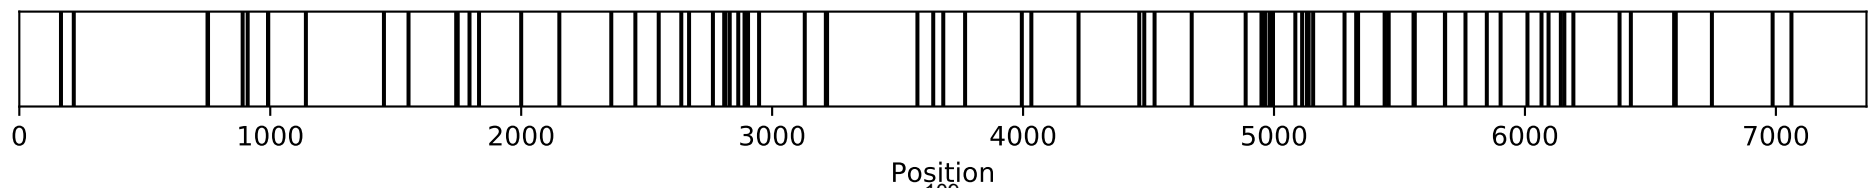

CR1 vs CR2  
Number of differences: 273

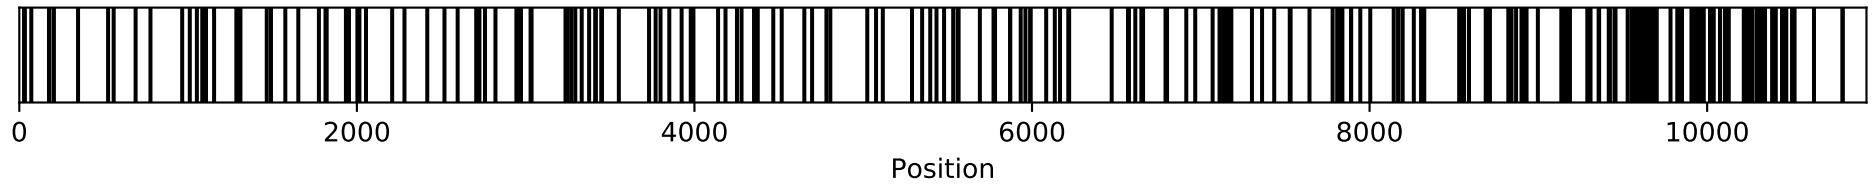

CR1 vs MM1  
Number of differences: 94

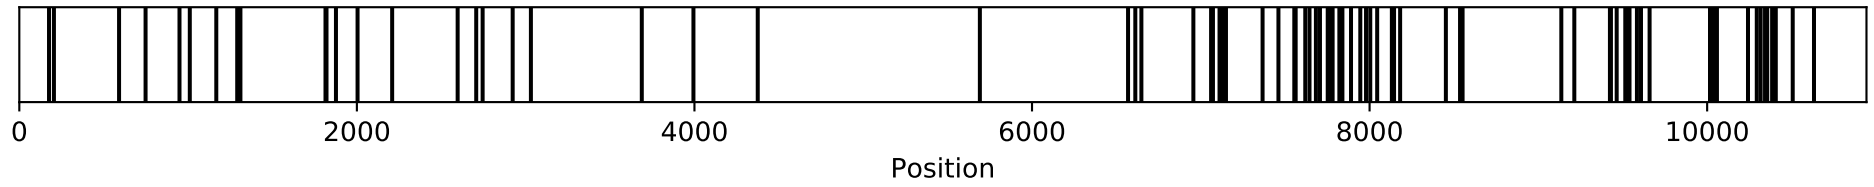

CR1 vs MM2  
Number of differences: 99

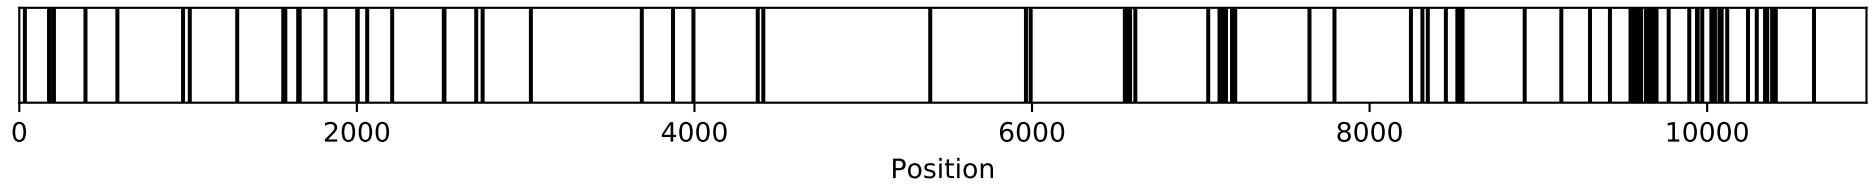

CR2 vs MM1  
Number of differences: 285

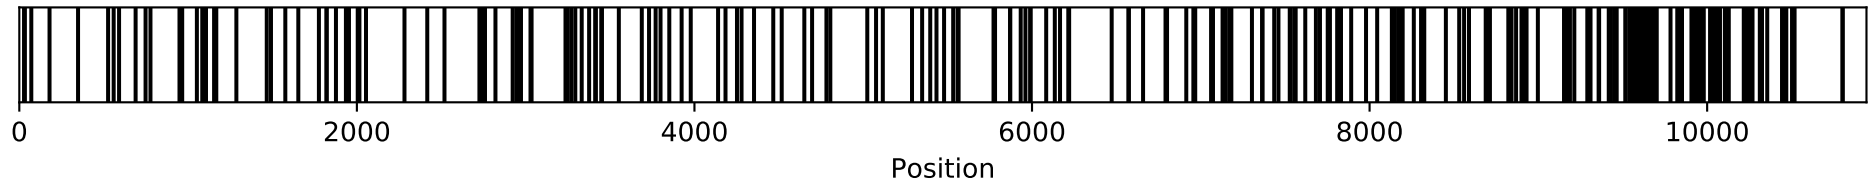

CR2 vs MM2  
Number of differences: 268

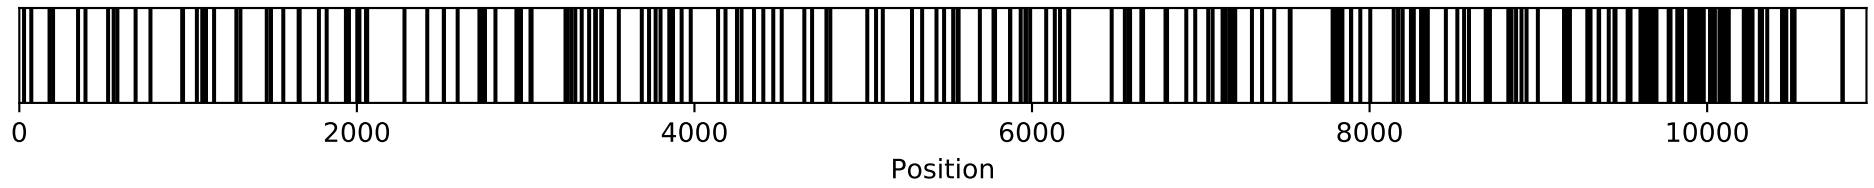

MM1 vs MM2  
Number of differences: 113

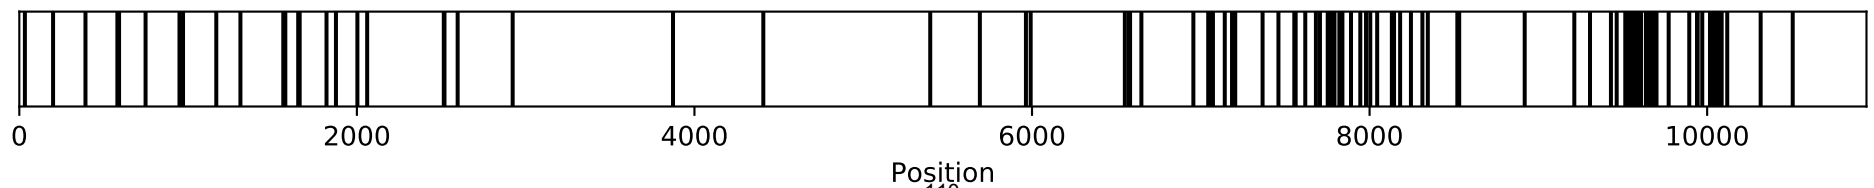

CR1 vs CR2  
Number of differences: 229

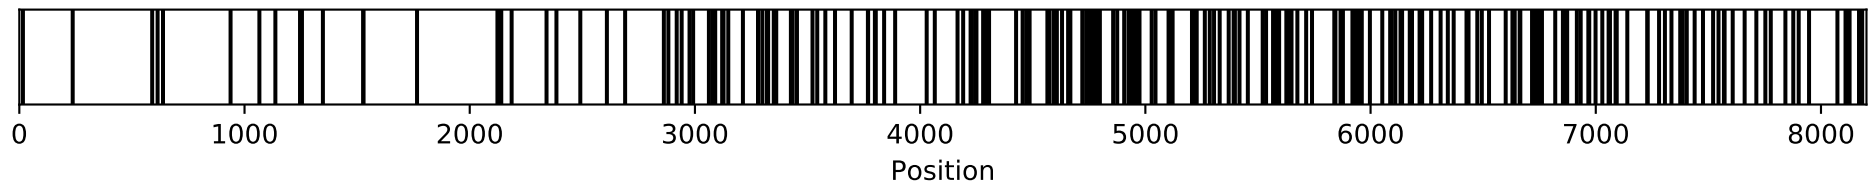

CR1 vs MM1  
Number of differences: 70

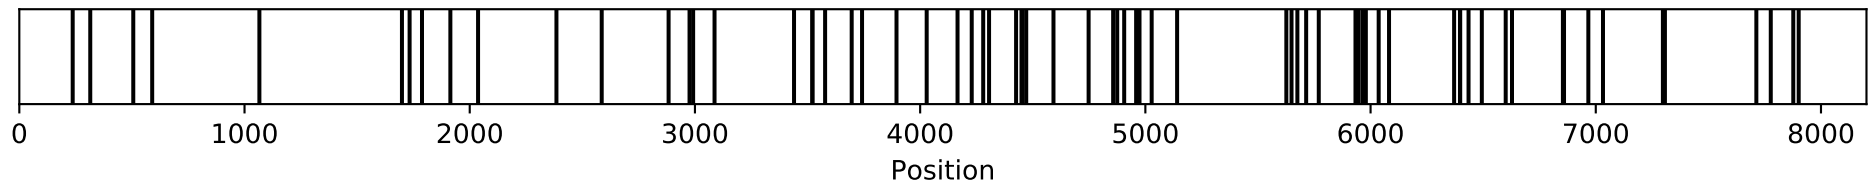

CR1 vs MM2  
Number of differences: 65

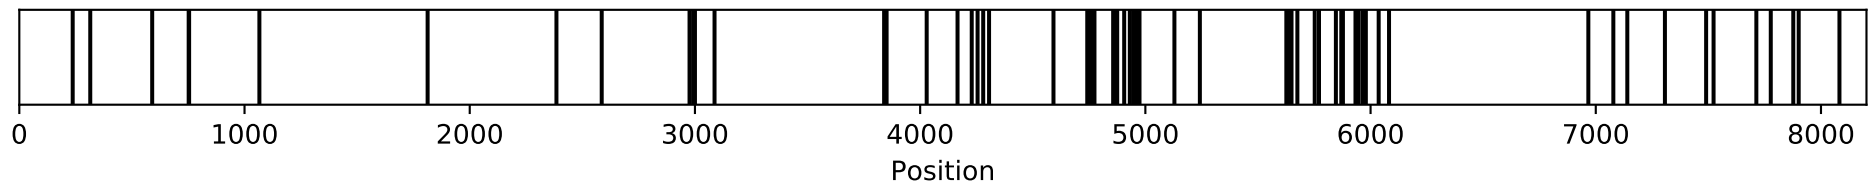

CR2 vs MM1  
Number of differences: 217

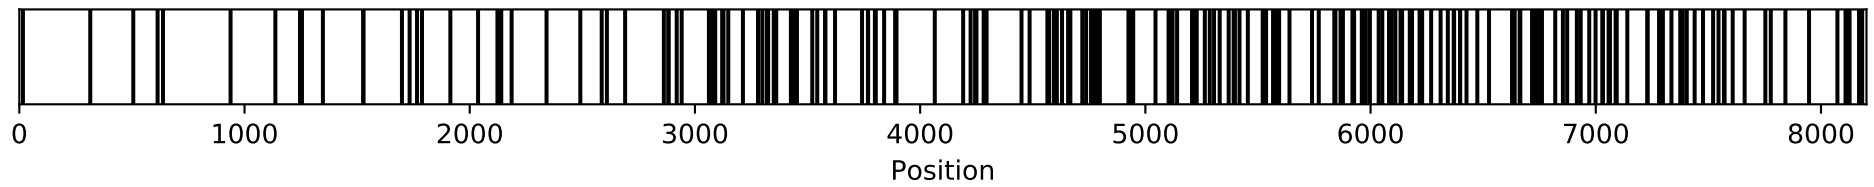

CR2 vs MM2  
Number of differences: 218

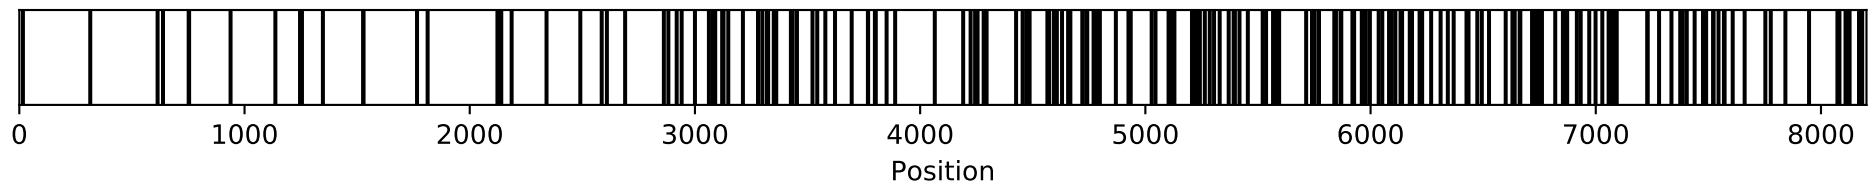

MM1 vs MM2  
Number of differences: 62

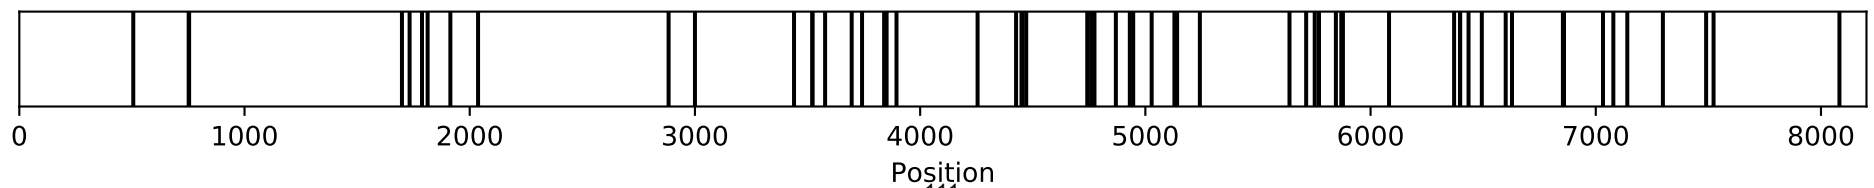



CR1 vs CR2  
Number of differences: 324

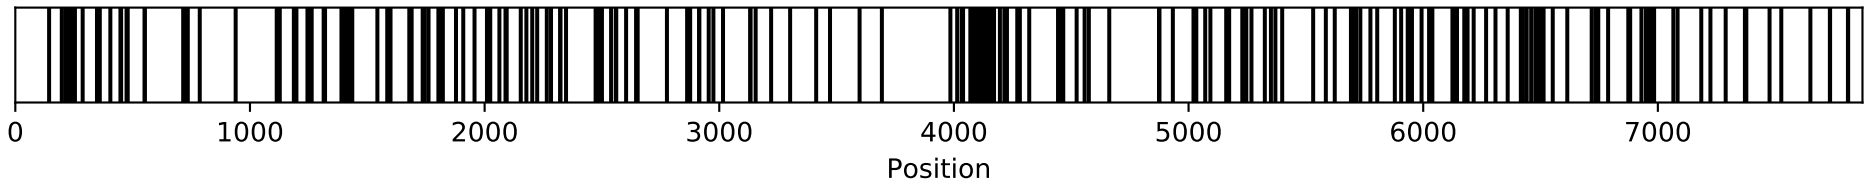

CR1 vs MM1  
Number of differences: 383

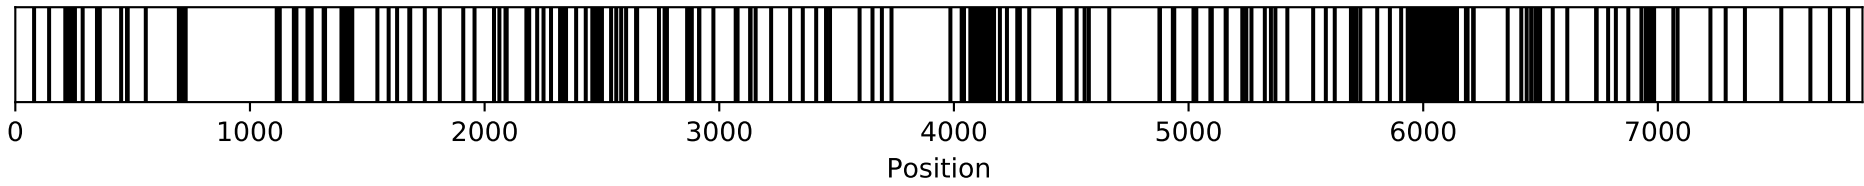

CR1 vs MM2  
Number of differences: 392

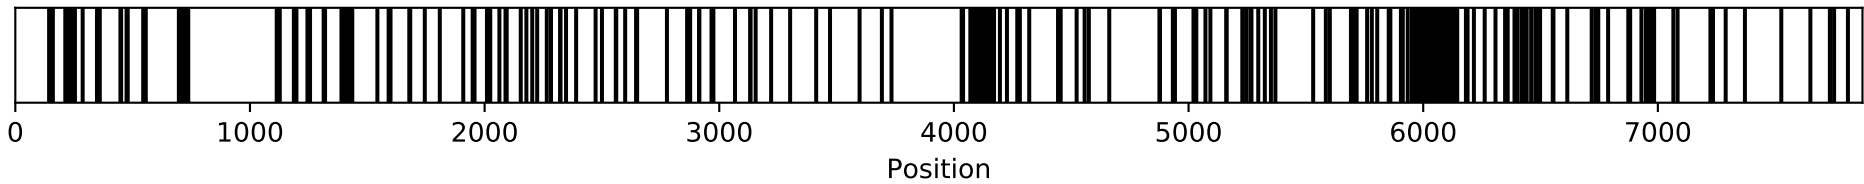

CR2 vs MM1  
Number of differences: 190

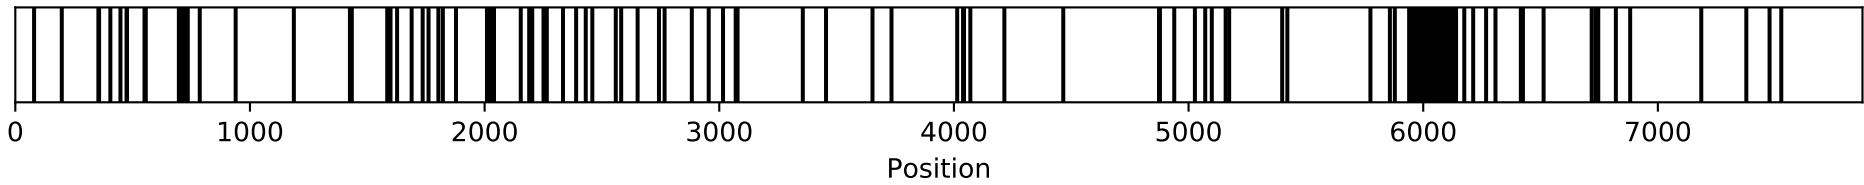

CR2 vs MM2  
Number of differences: 189

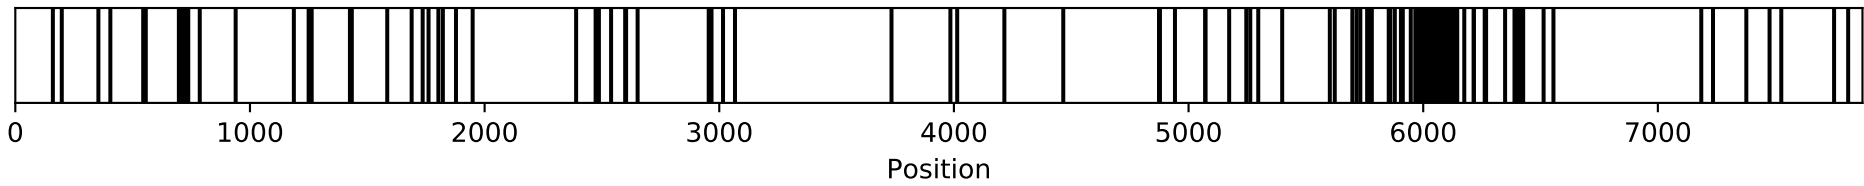

MM1 vs MM2  
Number of differences: 97

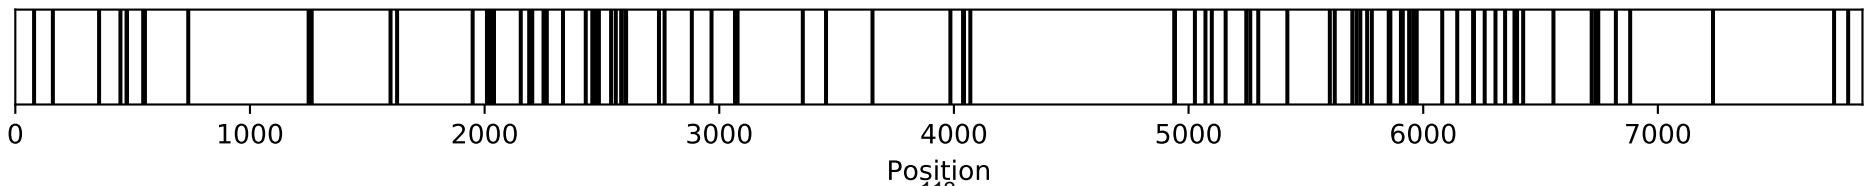

CR1 vs CR2  
Number of differences: 322

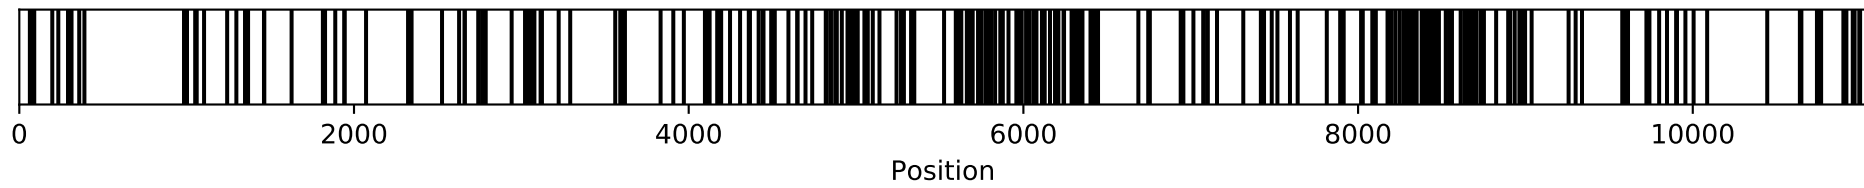

CR1 vs MM1  
Number of differences: 138

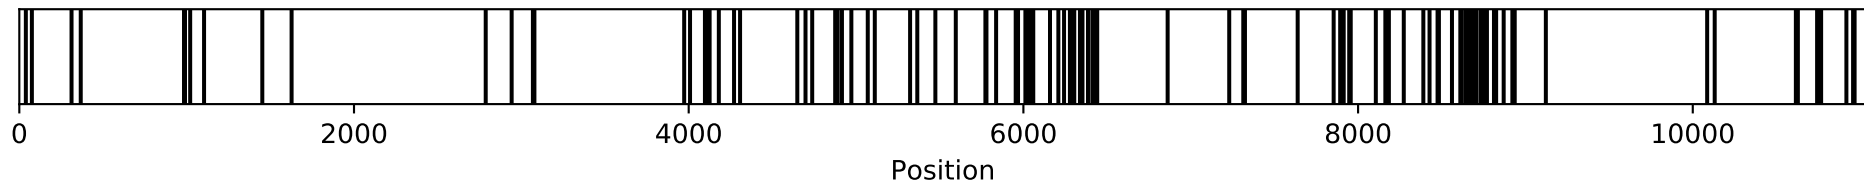

CR1 vs MM2  
Number of differences: 137

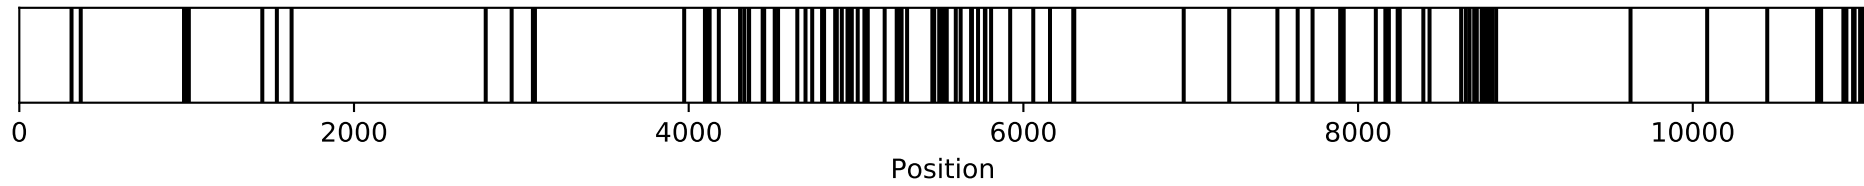

CR2 vs MM1  
Number of differences: 300

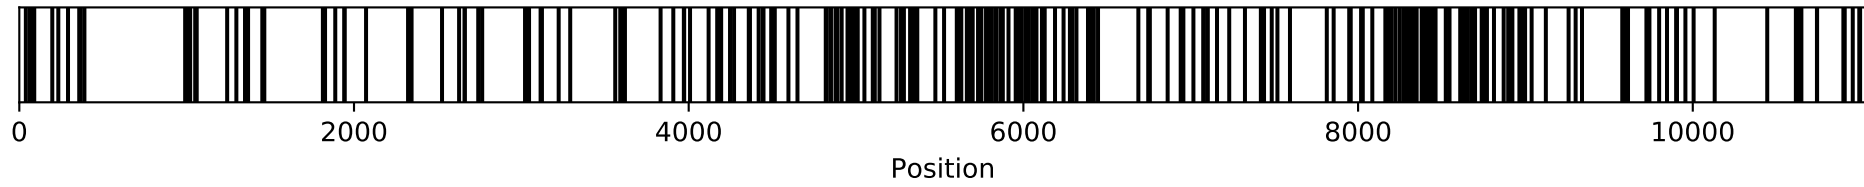

CR2 vs MM2  
Number of differences: 310

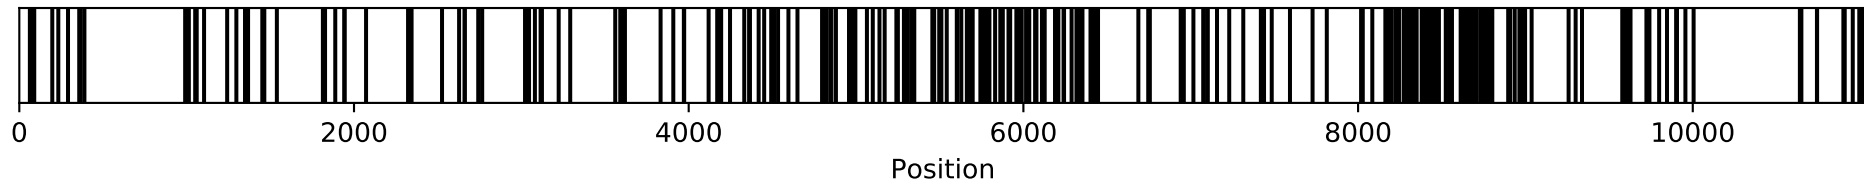

MM1 vs MM2  
Number of differences: 138

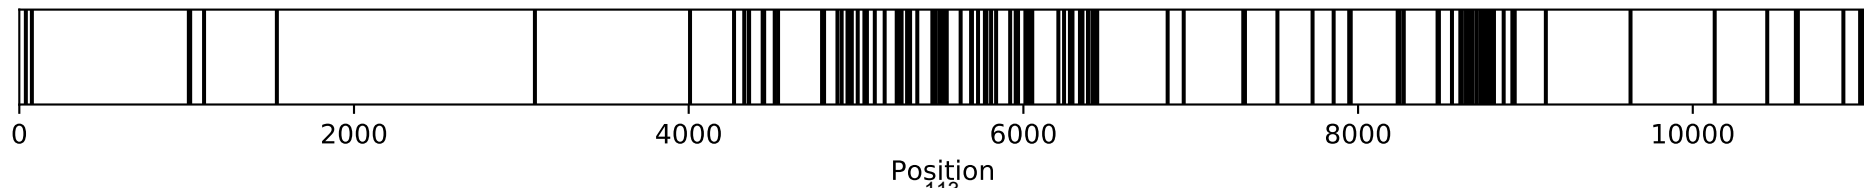

CR1 vs CR2  
Number of differences: 156

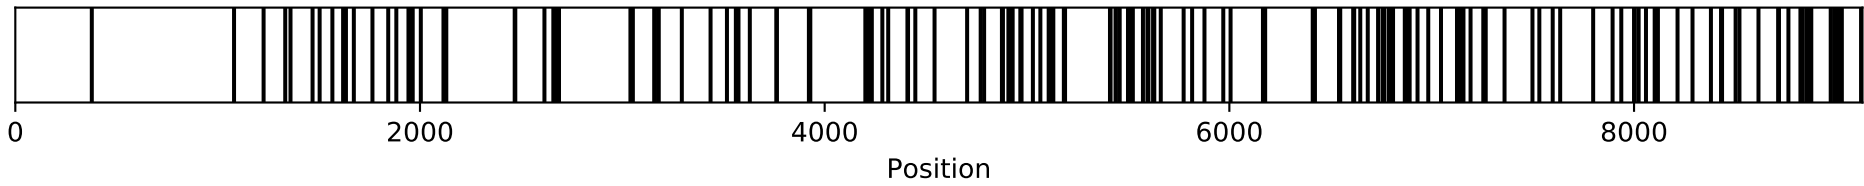

CR1 vs MM1  
Number of differences: 80

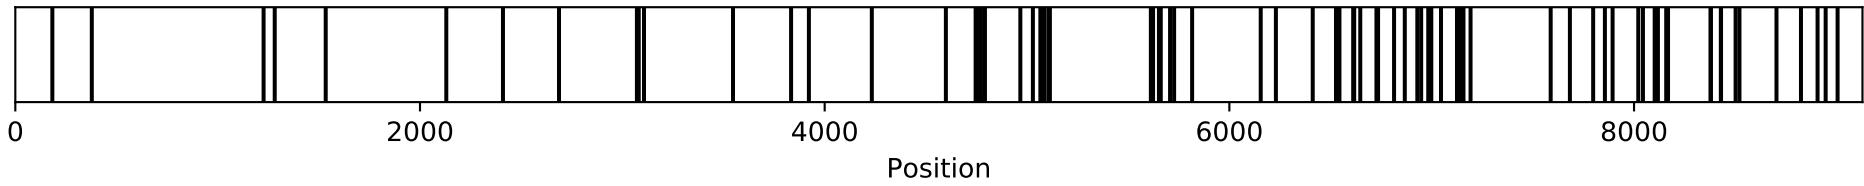

CR1 vs MM2  
Number of differences: 85

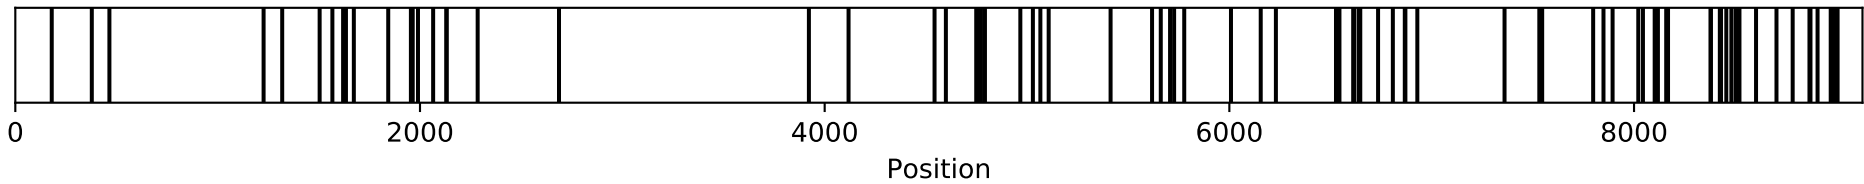

CR2 vs MM1  
Number of differences: 159

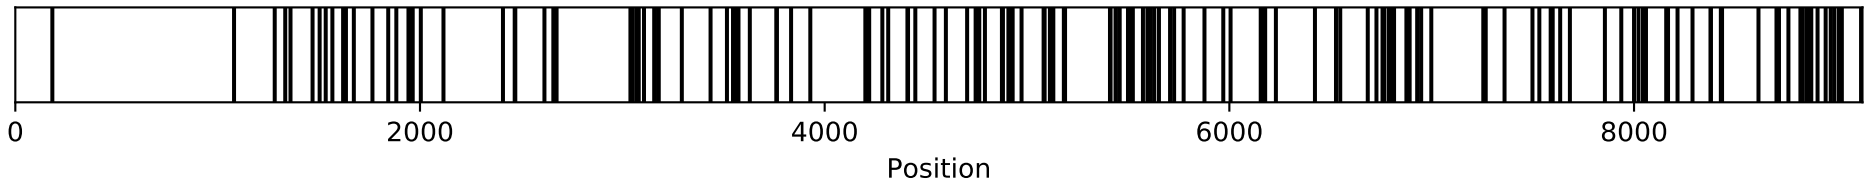

CR2 vs MM2  
Number of differences: 156

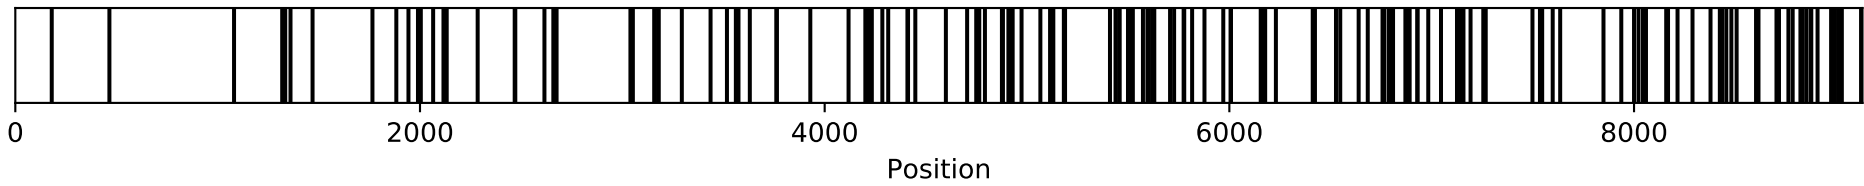

MM1 vs MM2  
Number of differences: 77

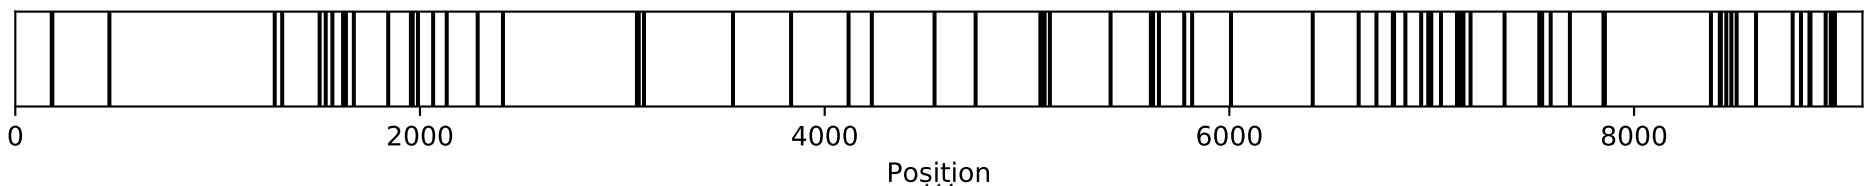

CR1 vs CR2  
Number of differences: 289

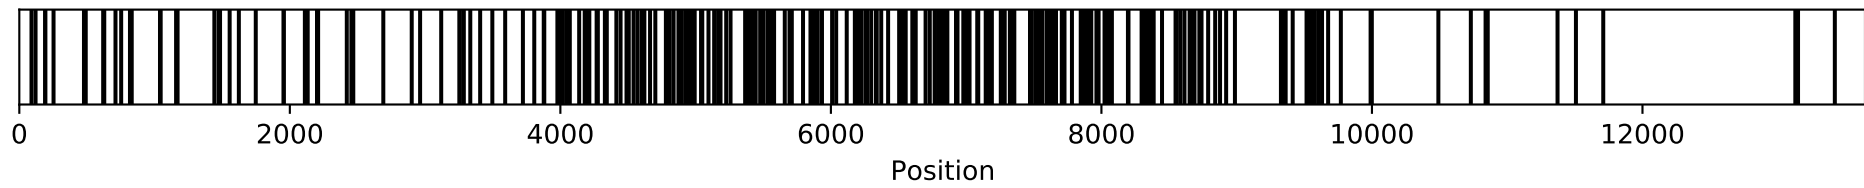

CR1 vs MM1  
Number of differences: 117

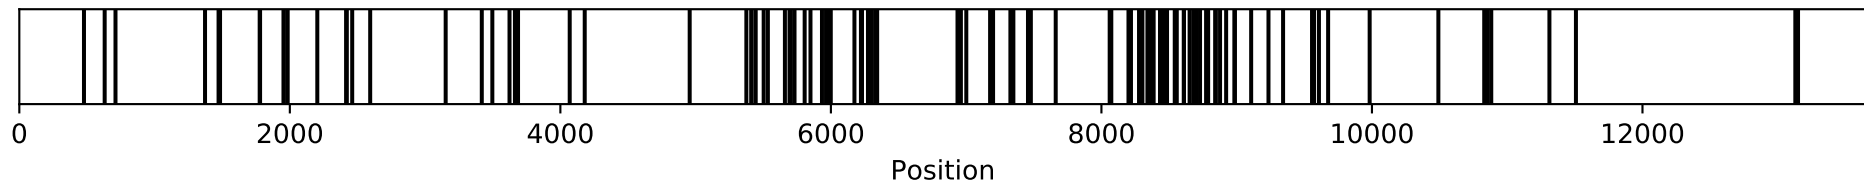

CR1 vs MM2  
Number of differences: 185

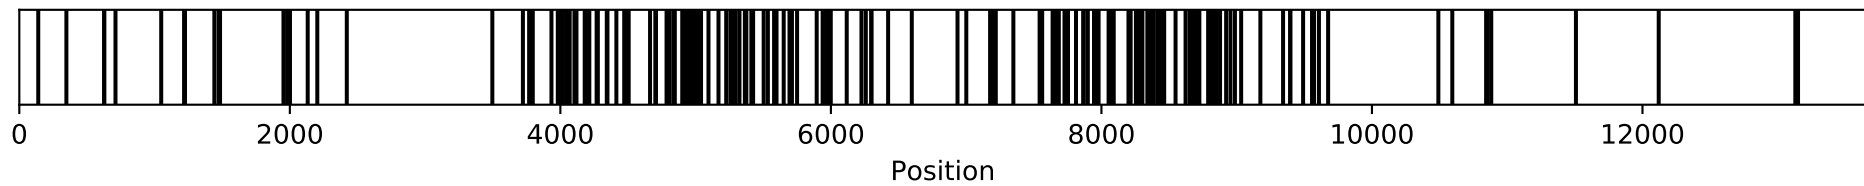

CR2 vs MM1  
Number of differences: 296

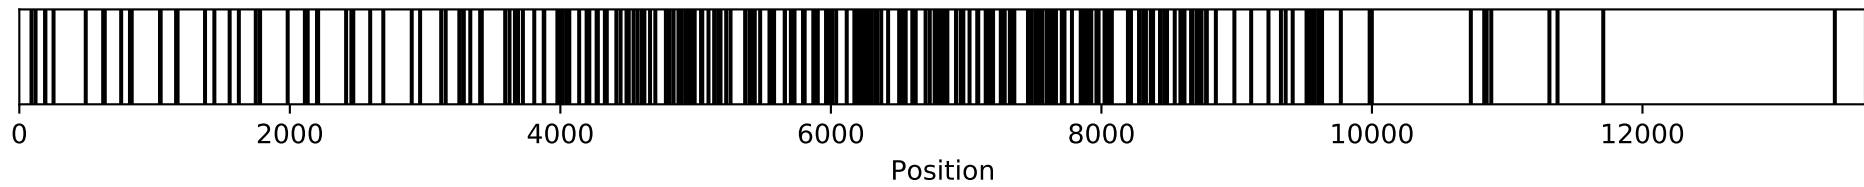

CR2 vs MM2  
Number of differences: 289

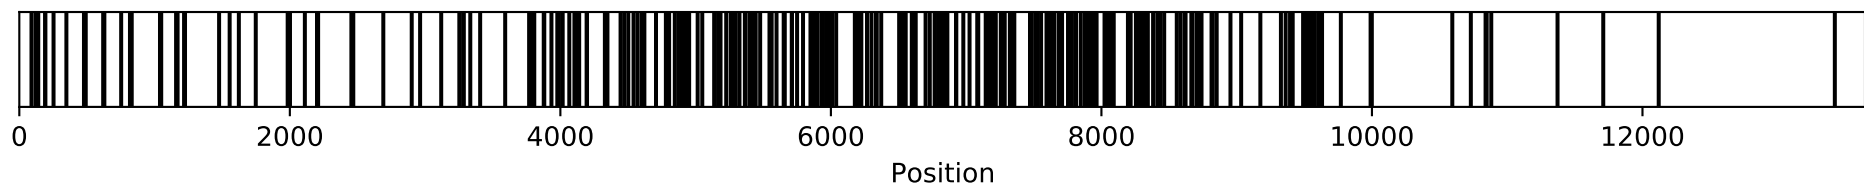

MM1 vs MM2  
Number of differences: 172

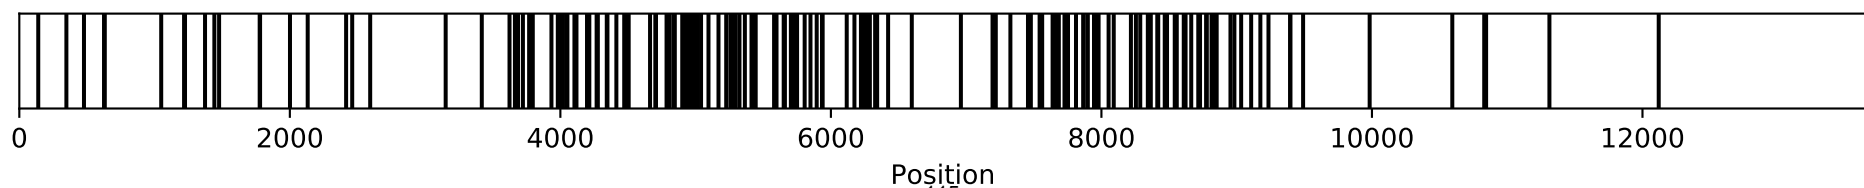

CR1 vs CR2  
Number of differences: 269

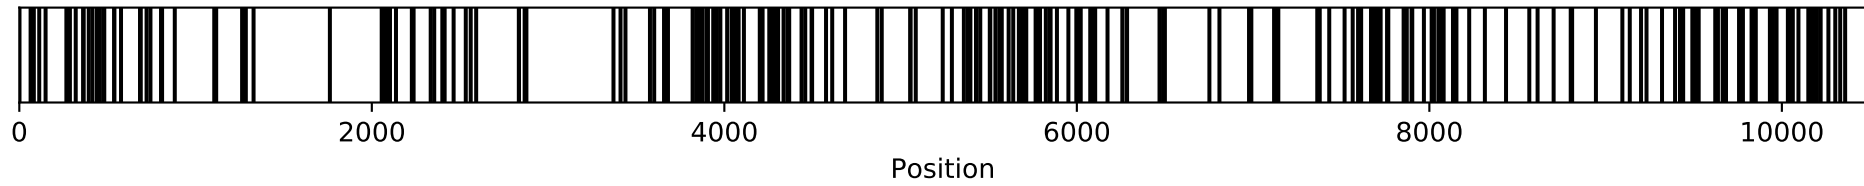

CR1 vs MM1  
Number of differences: 174

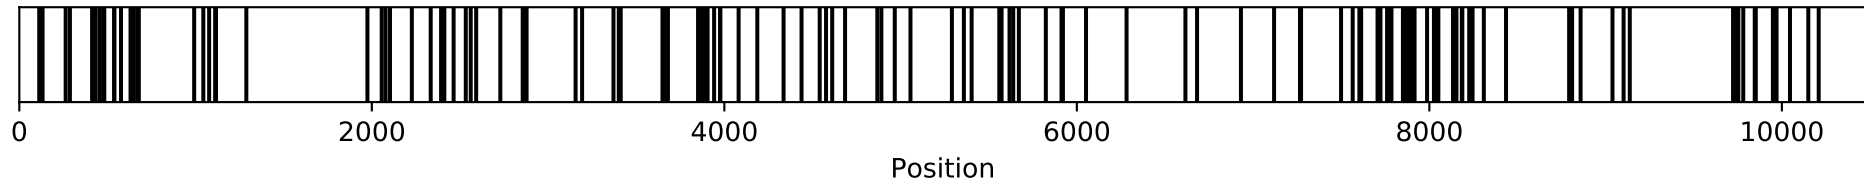

CR1 vs MM2  
Number of differences: 155

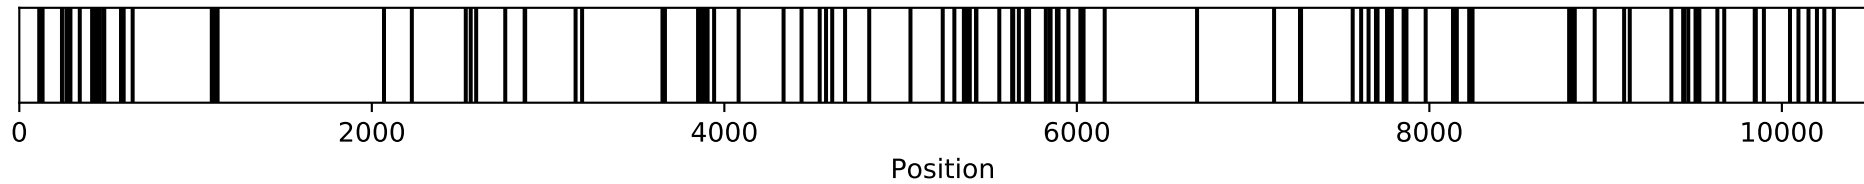

CR2 vs MM1  
Number of differences: 269

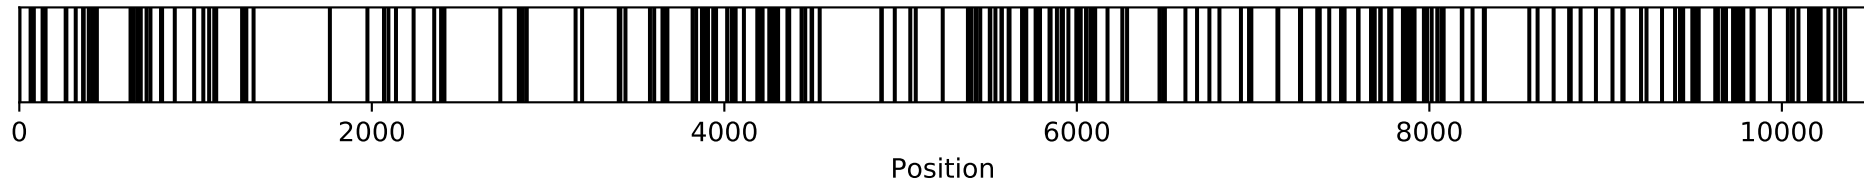

CR2 vs MM2  
Number of differences: 260

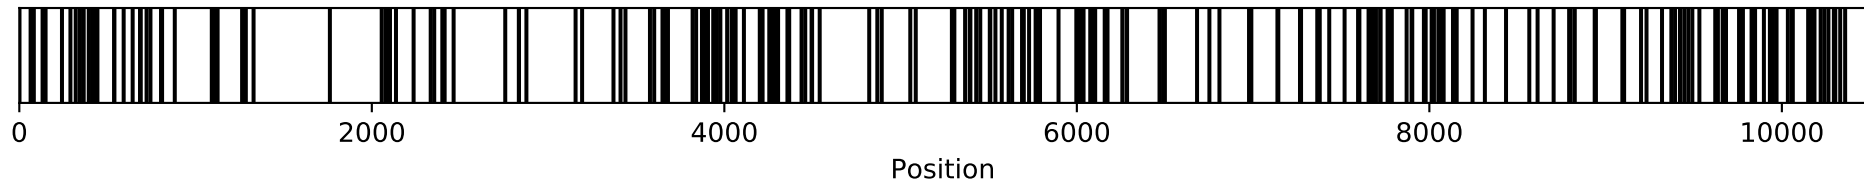

MM1 vs MM2  
Number of differences: 149

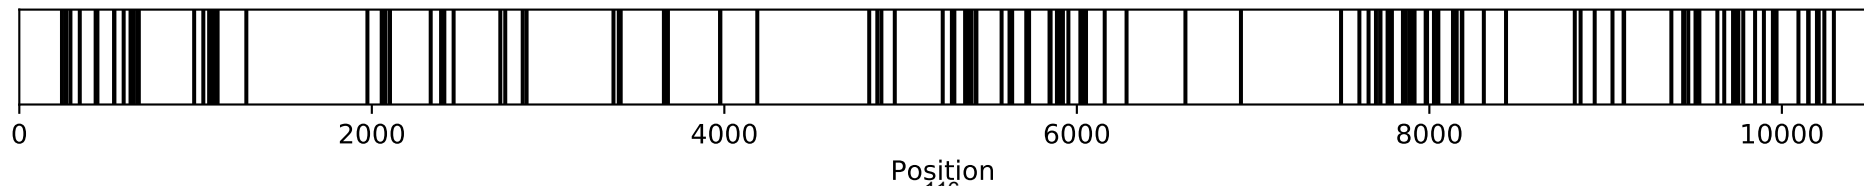

CR1 vs CR2  
Number of differences: 256

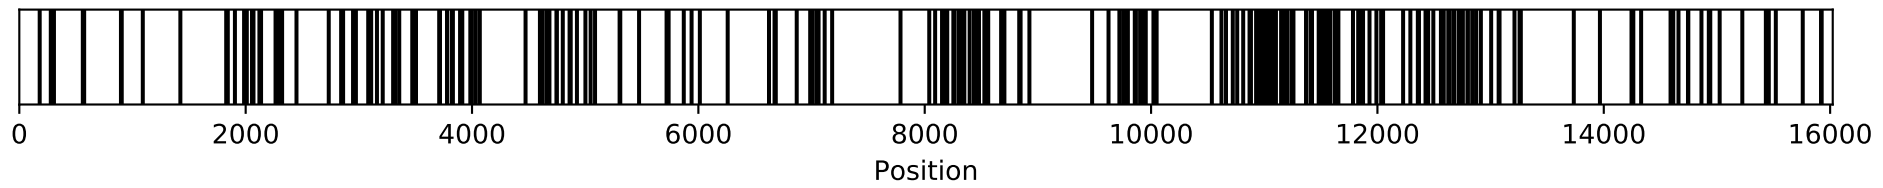

CR1 vs MM1  
Number of differences: 274

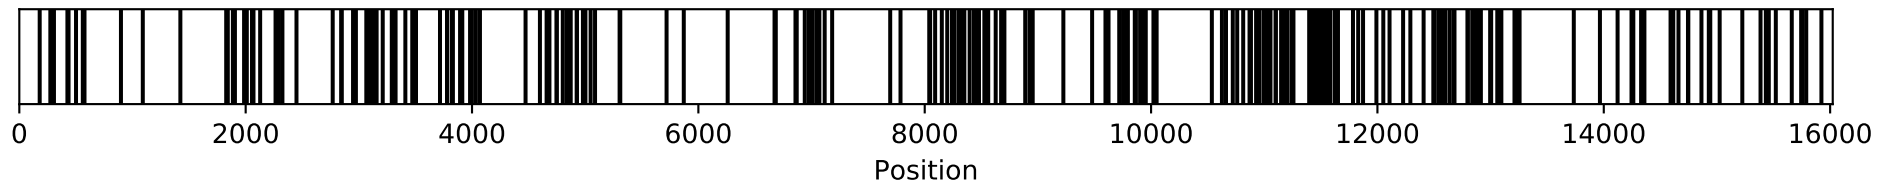

CR1 vs MM2  
Number of differences: 268

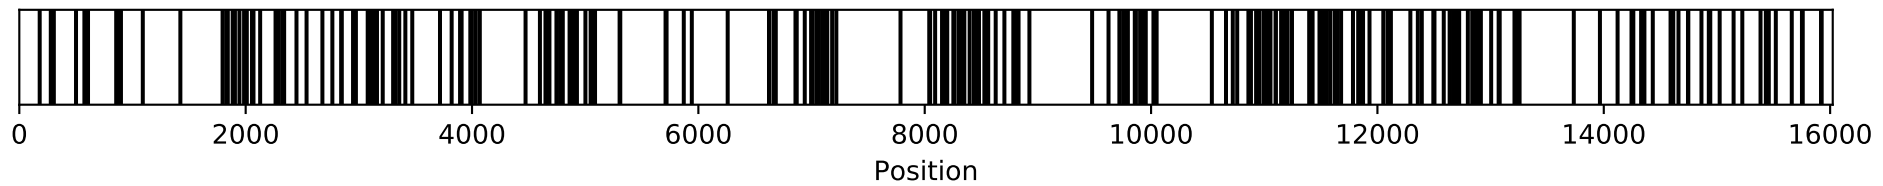

CR2 vs MM1  
Number of differences: 120

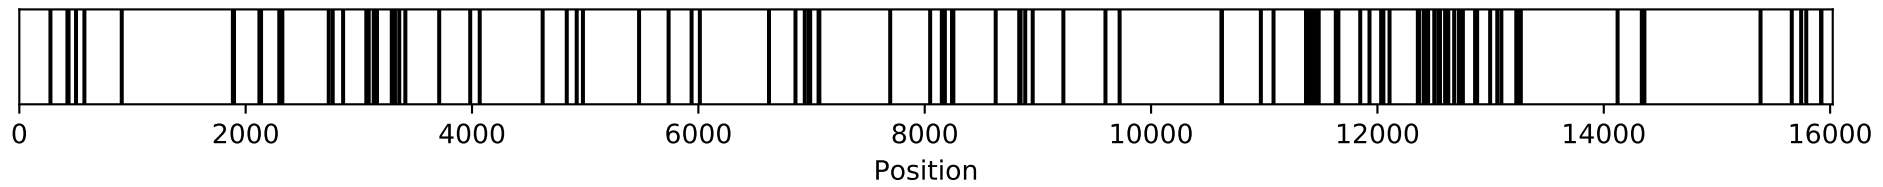

CR2 vs MM2  
Number of differences: 129

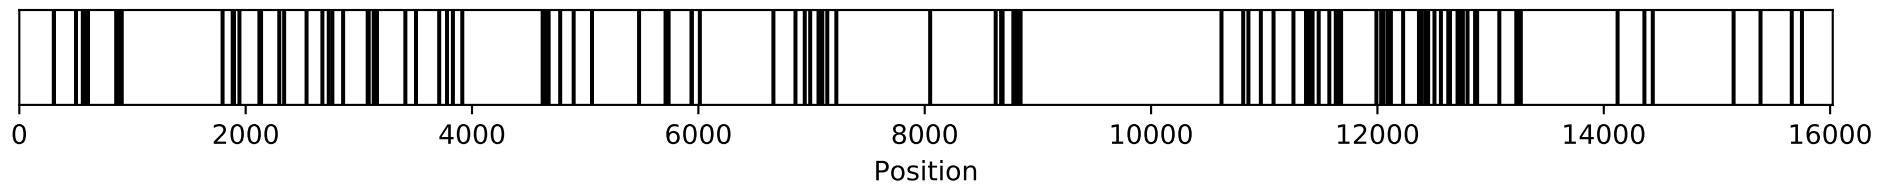

MM1 vs MM2  
Number of differences: 115

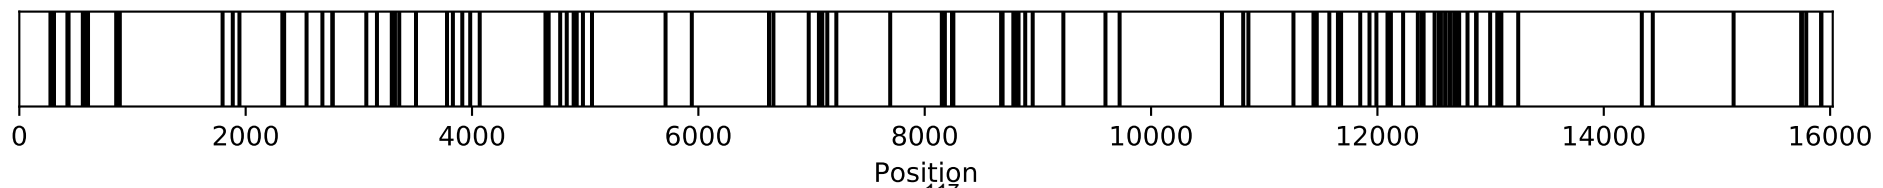

CR1 vs CR2  
Number of differences: 271

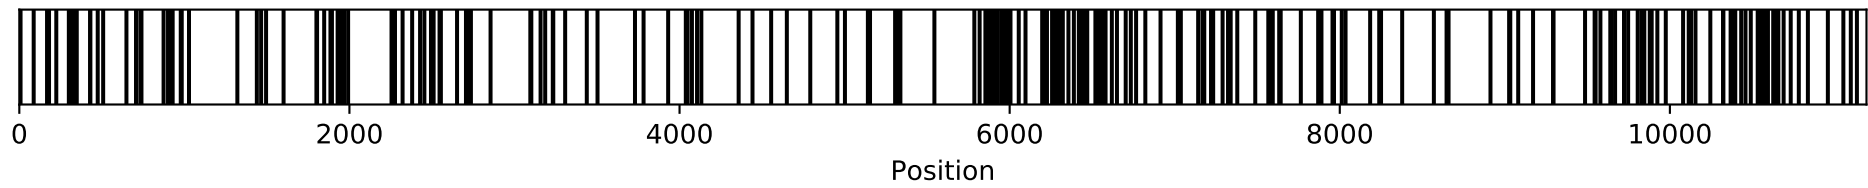

CR1 vs MM1  
Number of differences: 104

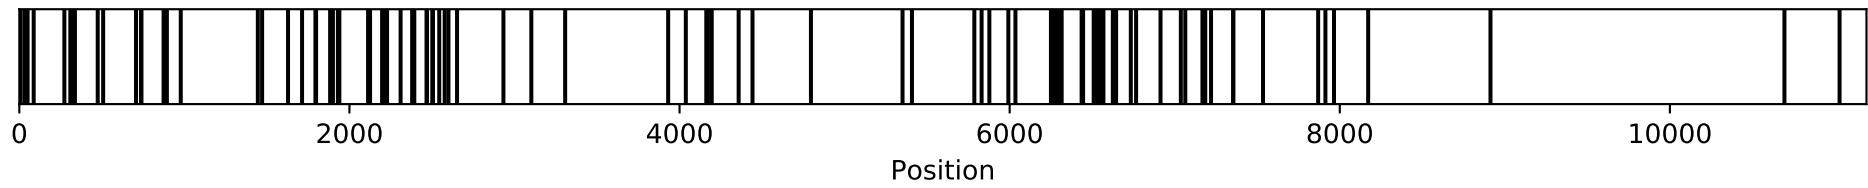

CR1 vs MM2  
Number of differences: 127

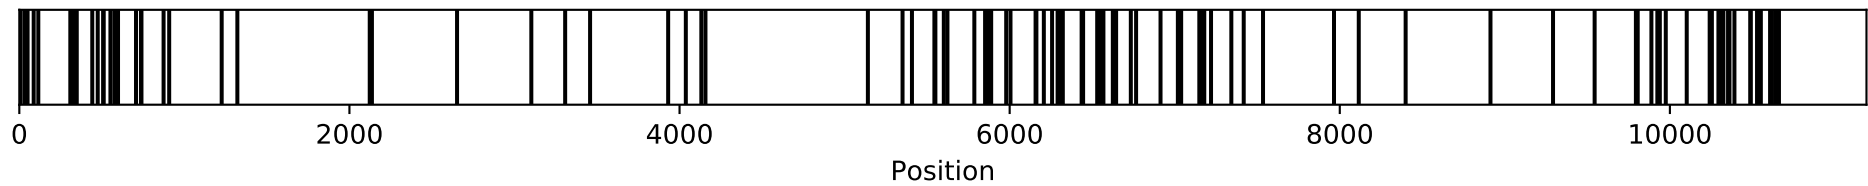

CR2 vs MM1  
Number of differences: 280

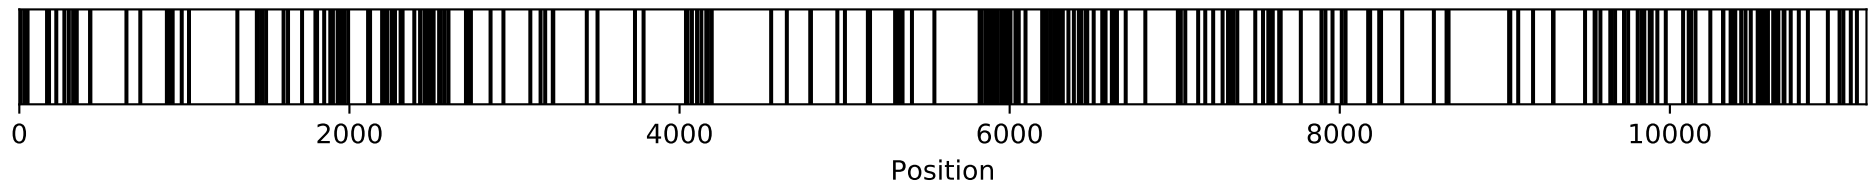

CR2 vs MM2  
Number of differences: 274

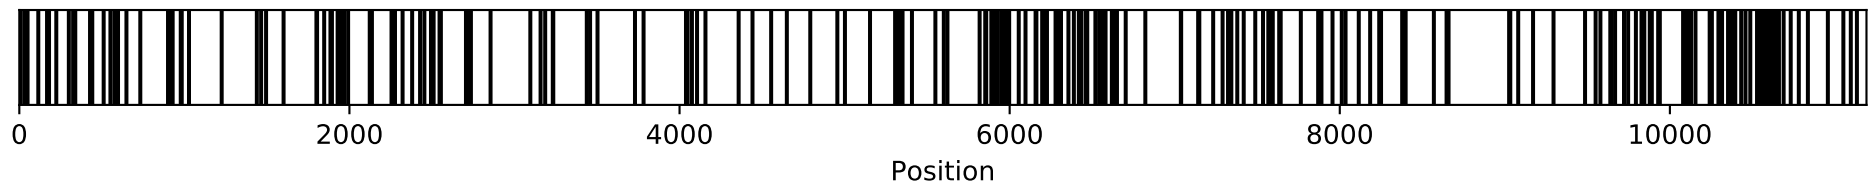

MM1 vs MM2  
Number of differences: 137

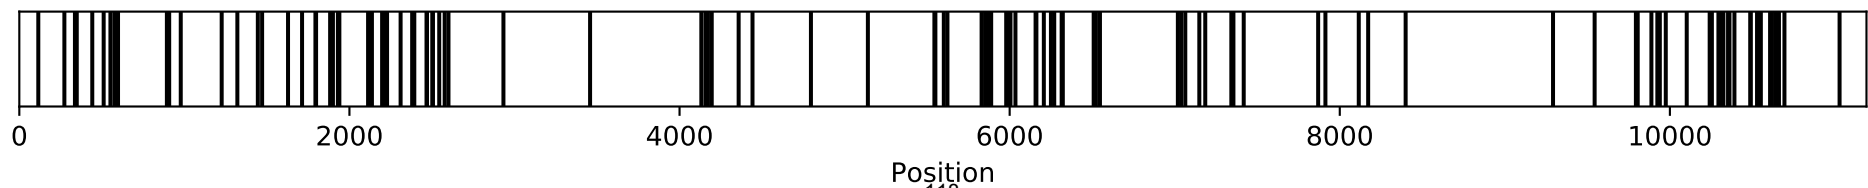

CR1 vs CR2  
Number of differences: 278

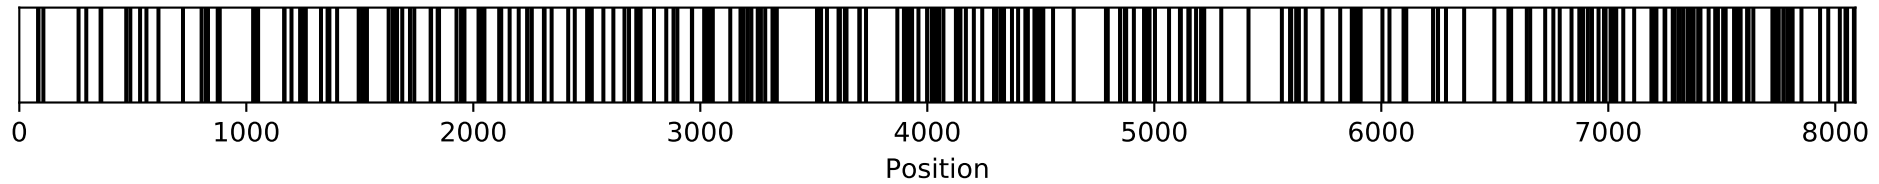

CR1 vs MM1  
Number of differences: 302

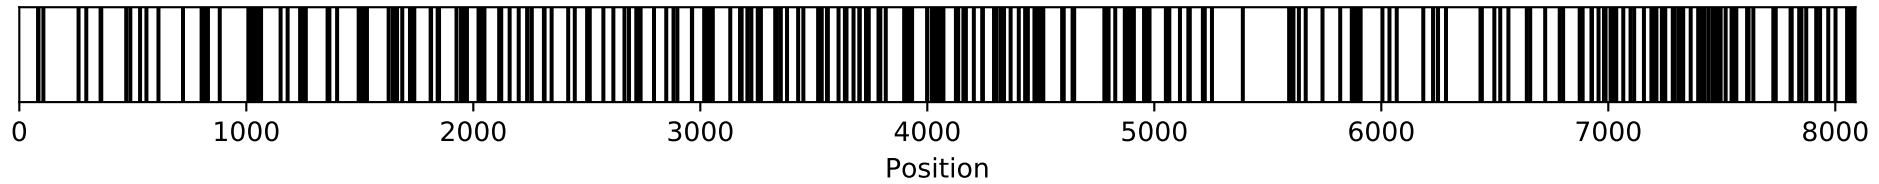

CR1 vs MM2  
Number of differences: 268

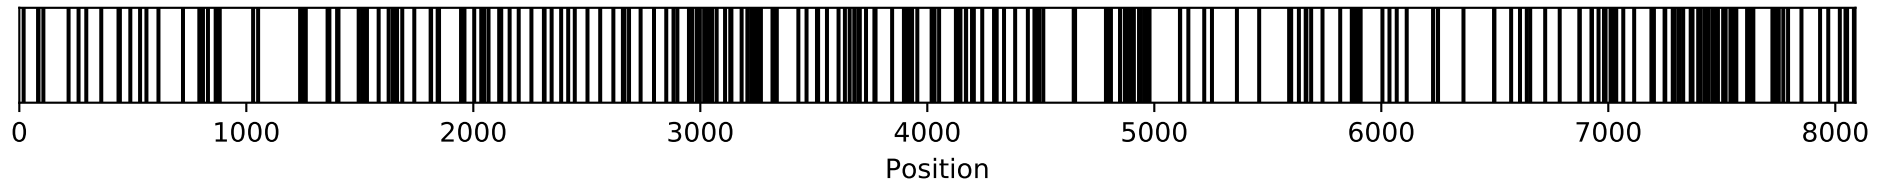

CR2 vs MM1  
Number of differences: 149

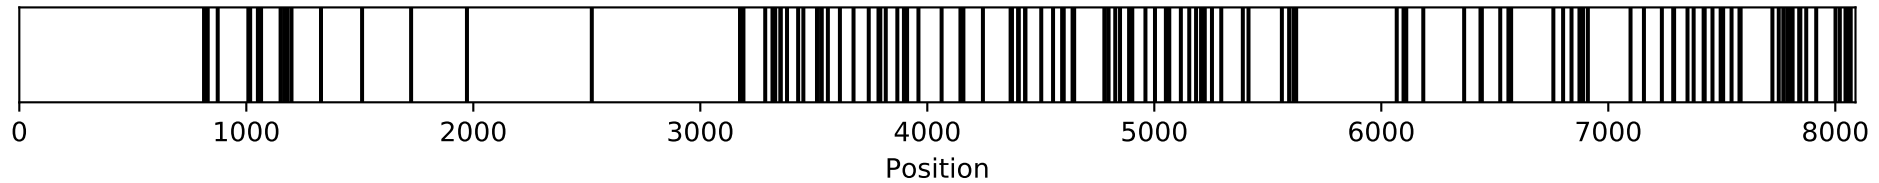

CR2 vs MM2  
Number of differences: 148

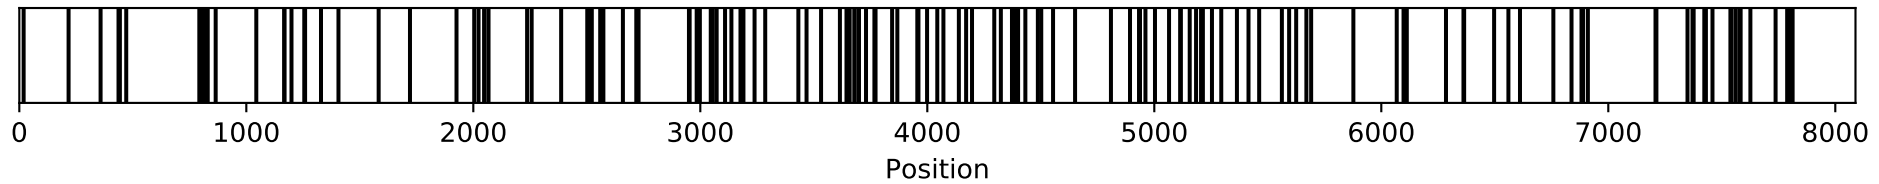

MM1 vs MM2  
Number of differences: 193

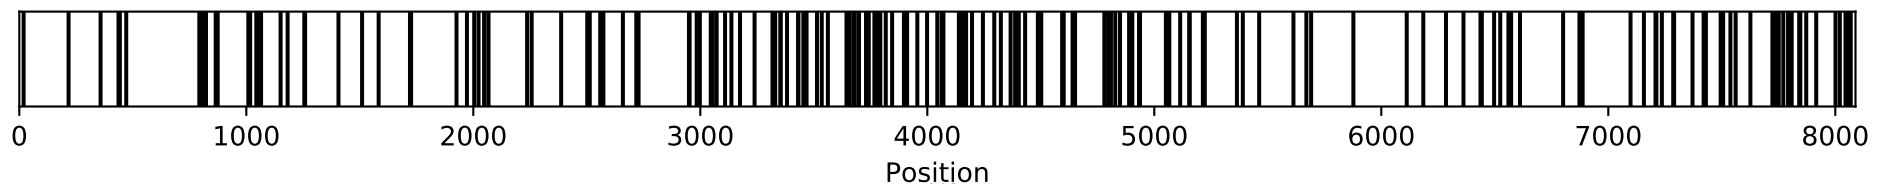



CR1 vs CR2  
Number of differences: 354

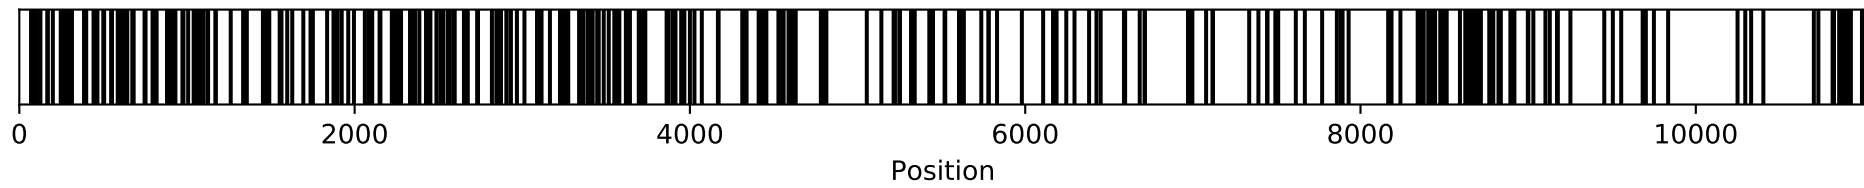

CR1 vs MM1  
Number of differences: 364

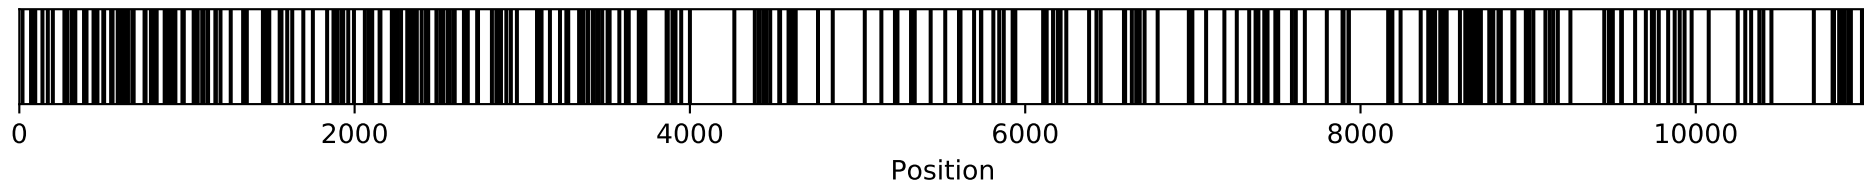

CR1 vs MM2  
Number of differences: 364

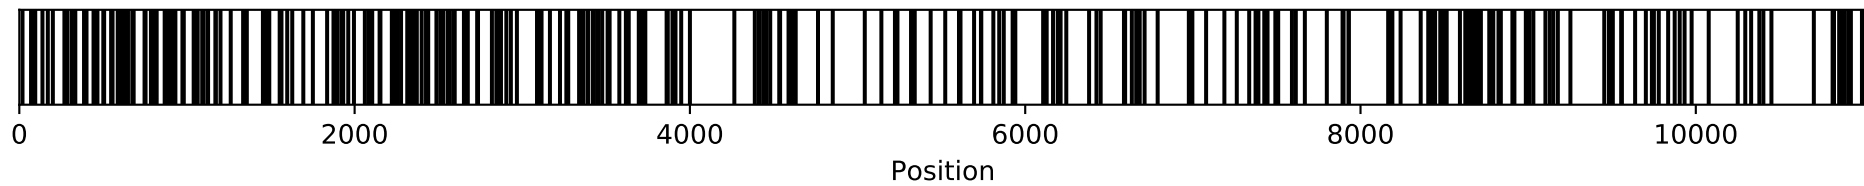

CR2 vs MM1  
Number of differences: 172

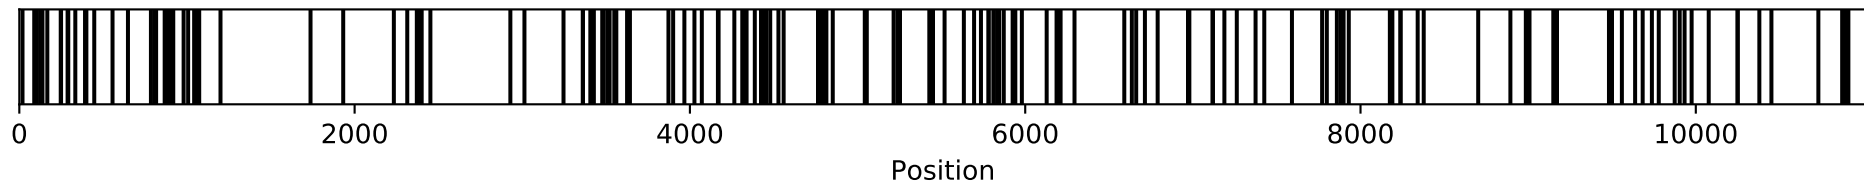

CR2 vs MM2  
Number of differences: 172

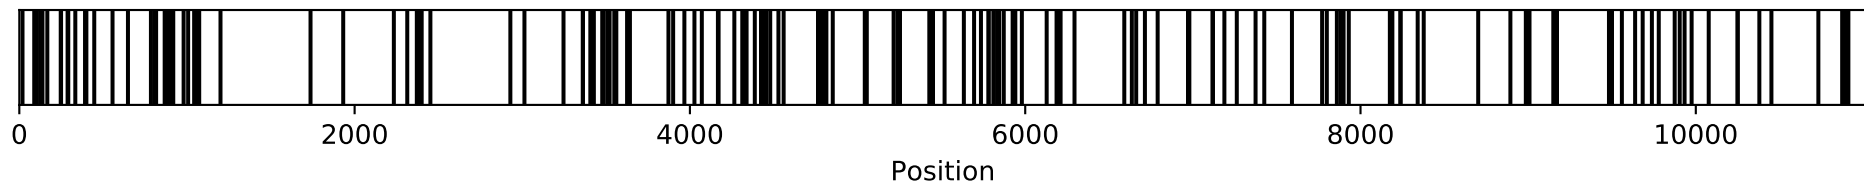

MM1 vs MM2  
Number of differences: 0

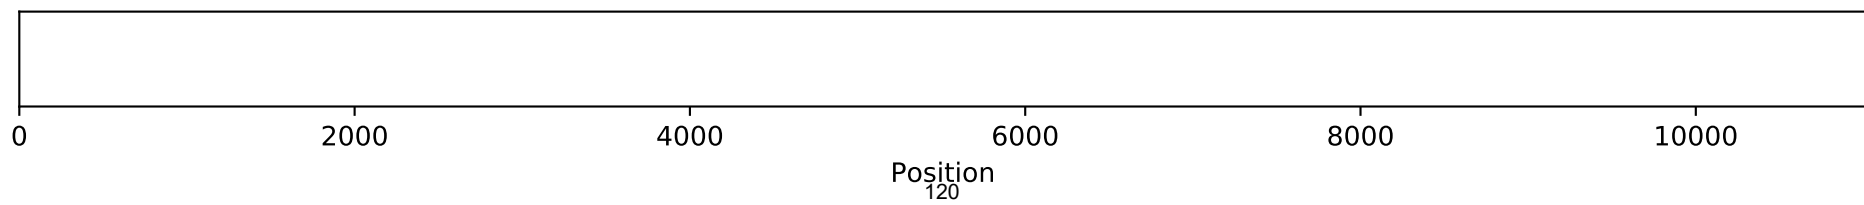

CR1 vs CR2  
Number of differences: 16

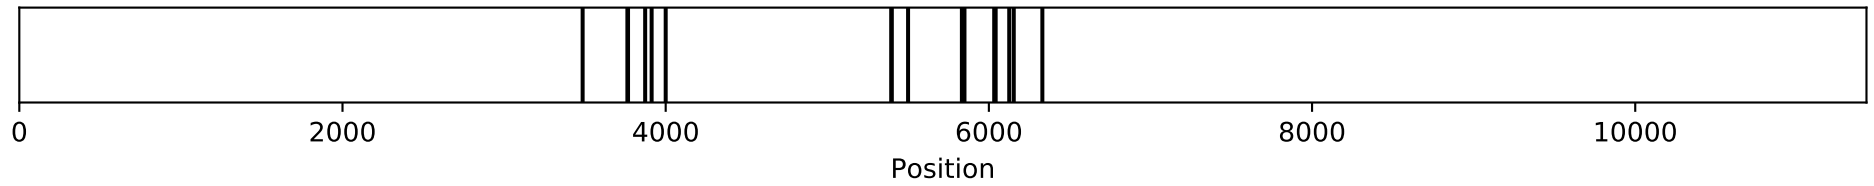

CR1 vs MM1  
Number of differences: 131

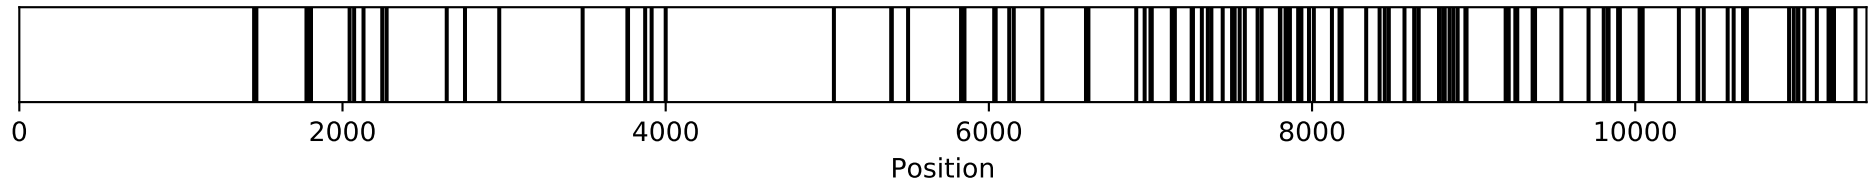

CR1 vs MM2  
Number of differences: 152

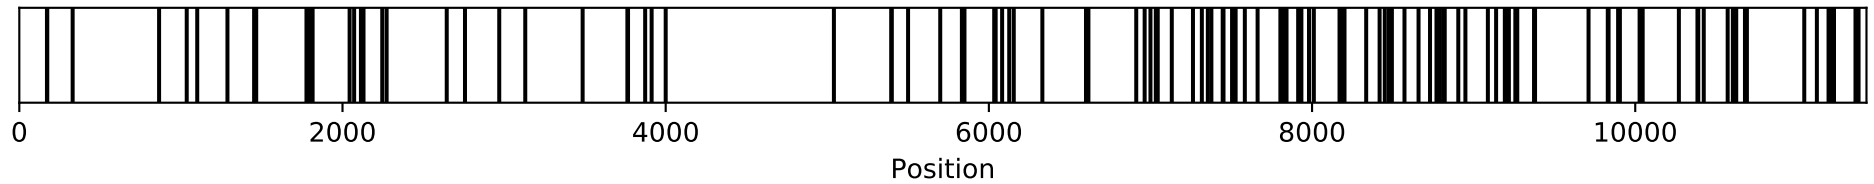

CR2 vs MM1  
Number of differences: 115

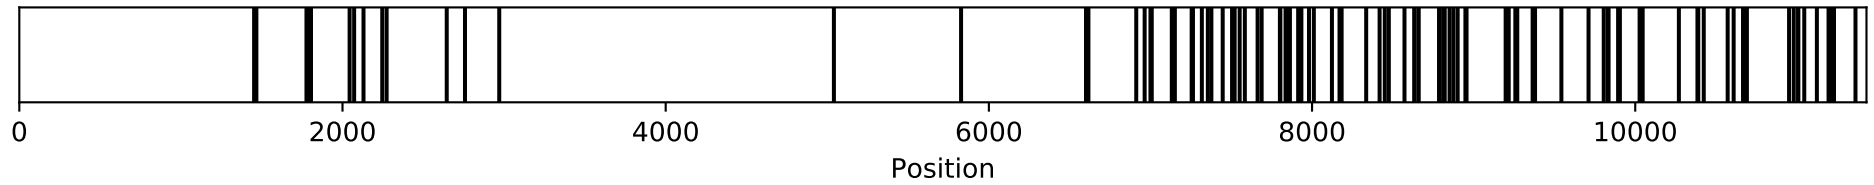

CR2 vs MM2  
Number of differences: 136

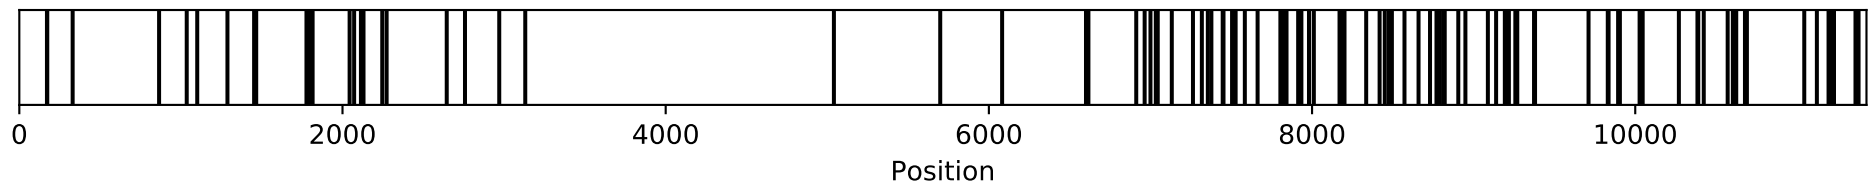

MM1 vs MM2  
Number of differences: 73

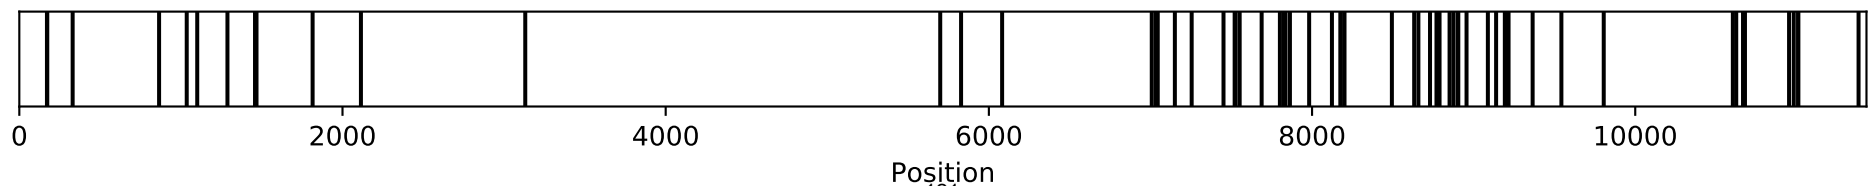

CR1 vs CR2  
Number of differences: 0

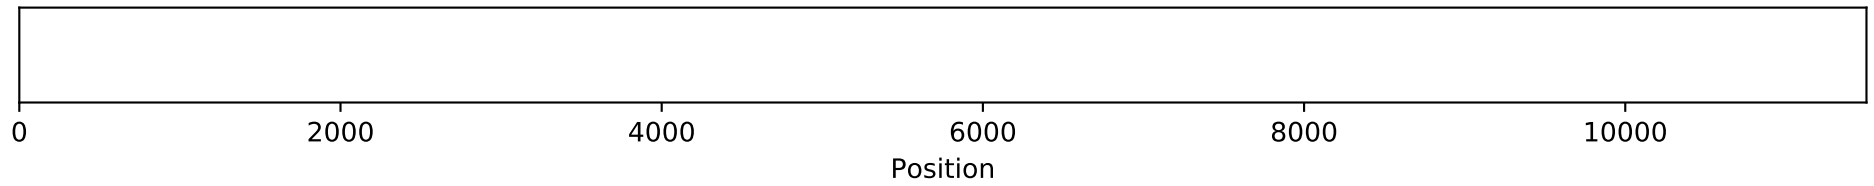

CR1 vs MM1  
Number of differences: 347

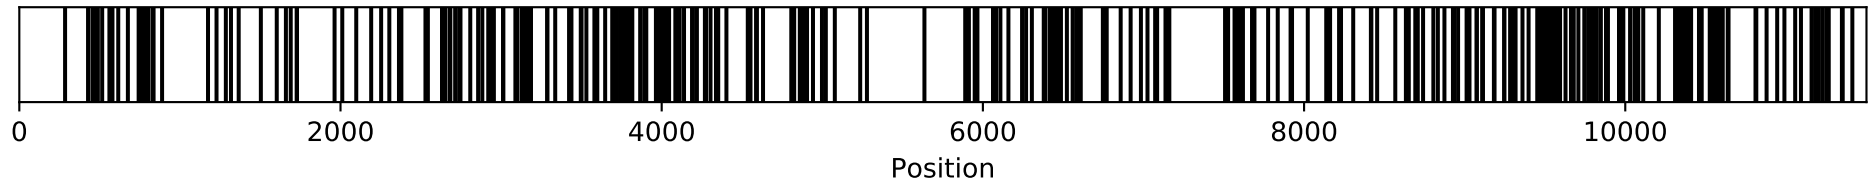

CR1 vs MM2  
Number of differences: 347

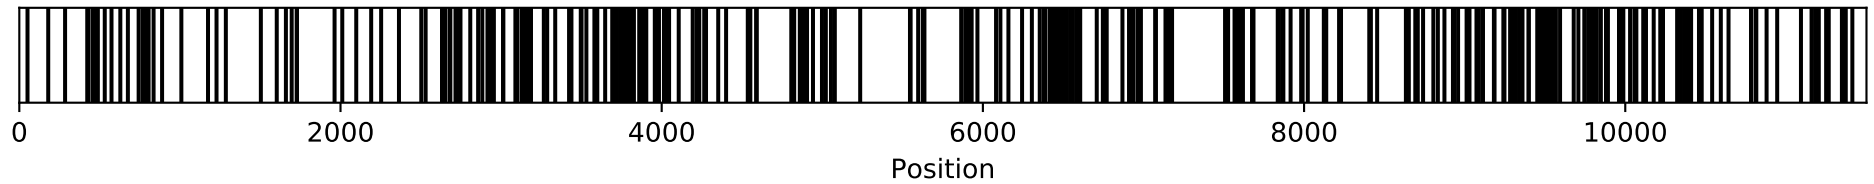

CR2 vs MM1  
Number of differences: 347

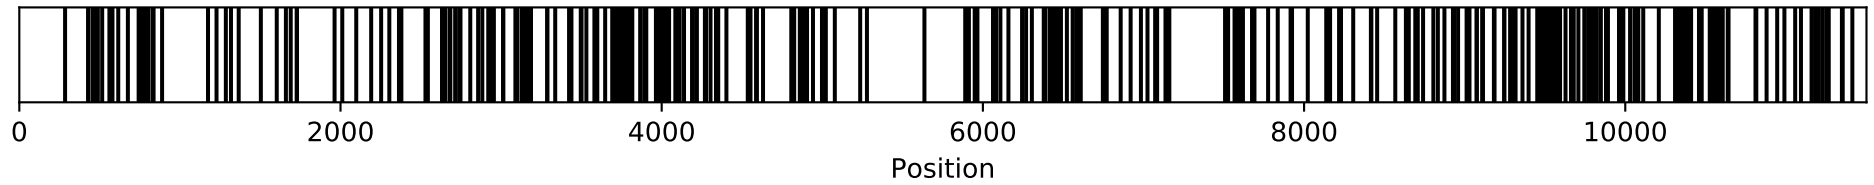

CR2 vs MM2  
Number of differences: 347

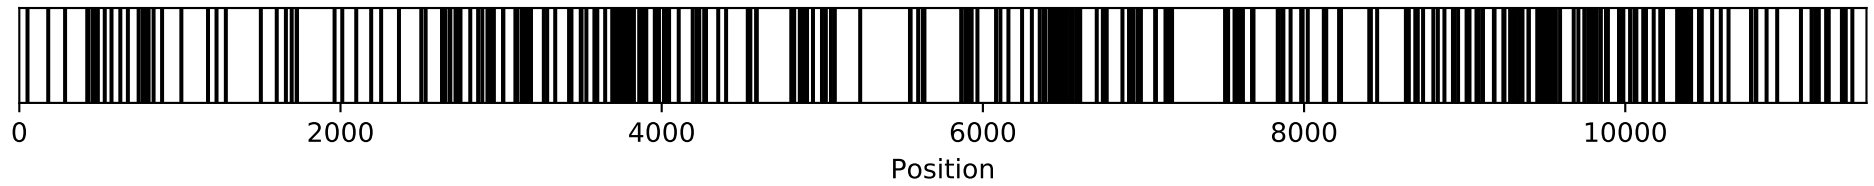

MM1 vs MM2  
Number of differences: 153

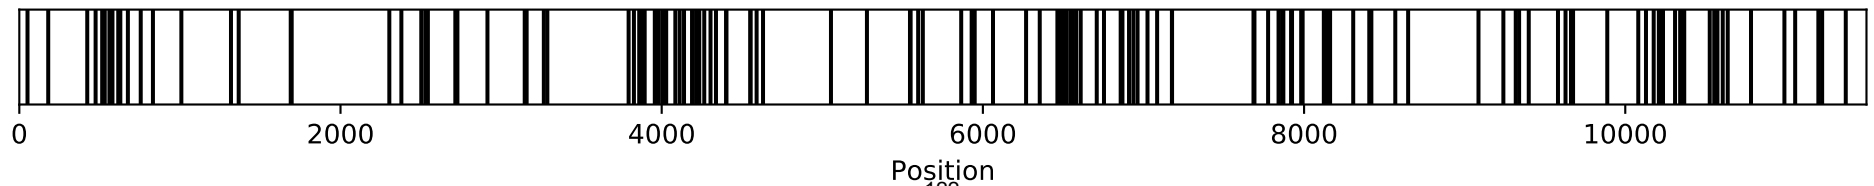

CR1 vs CR2  
Number of differences: 414

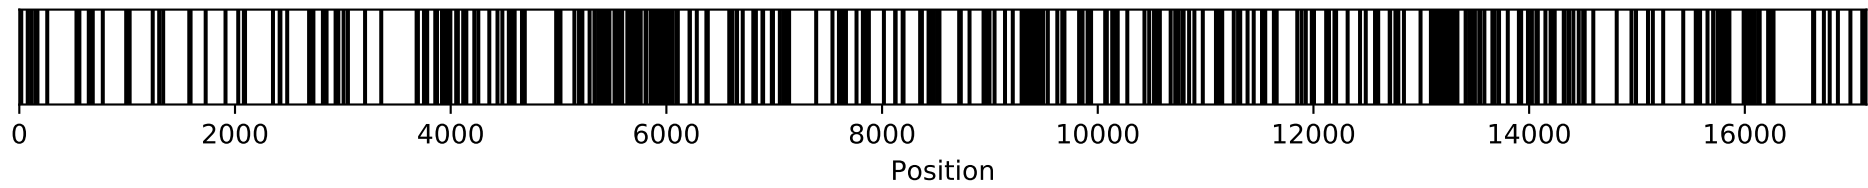

CR1 vs MM1  
Number of differences: 232

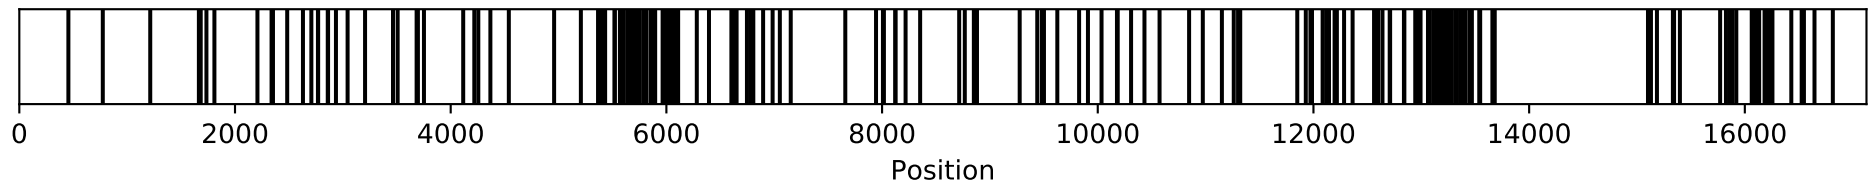

CR1 vs MM2  
Number of differences: 285

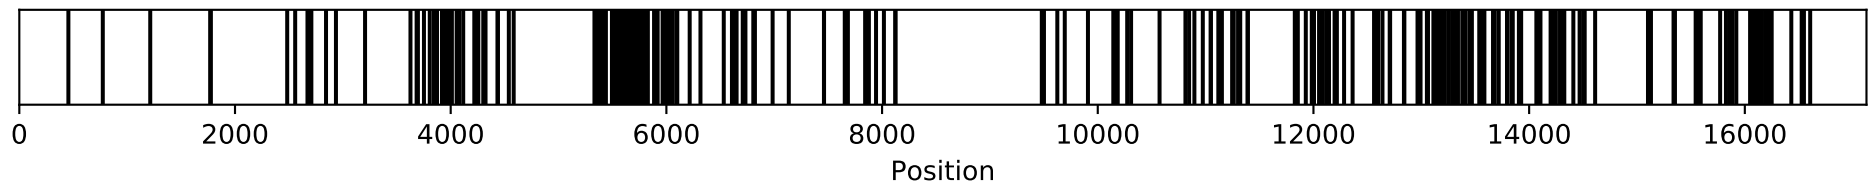

CR2 vs MM1  
Number of differences: 401

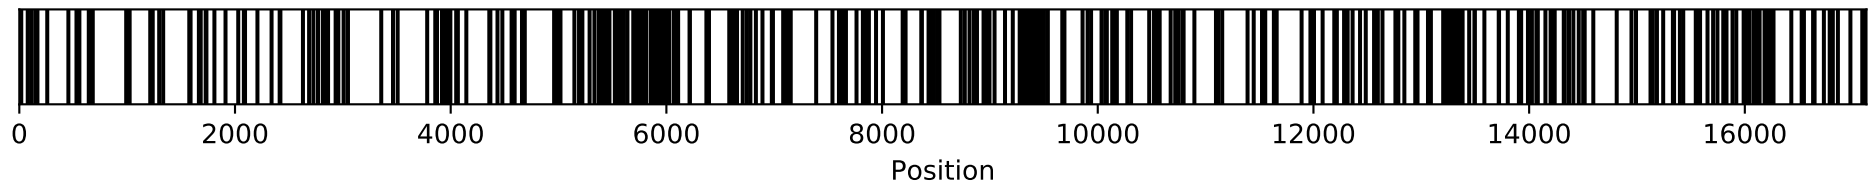

CR2 vs MM2  
Number of differences: 383

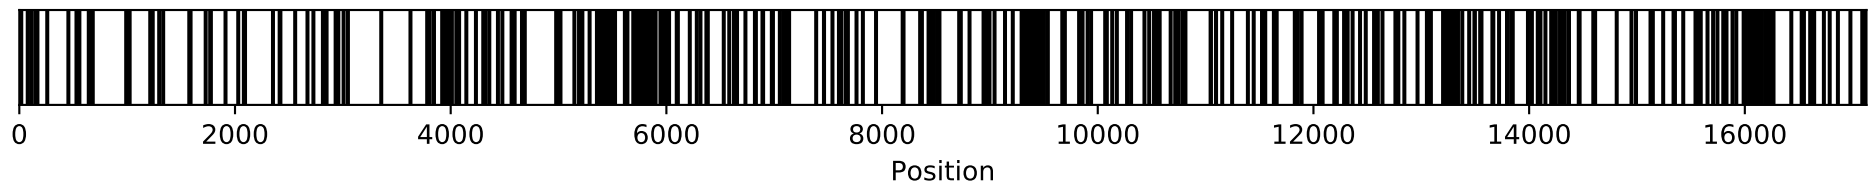

MM1 vs MM2  
Number of differences: 218

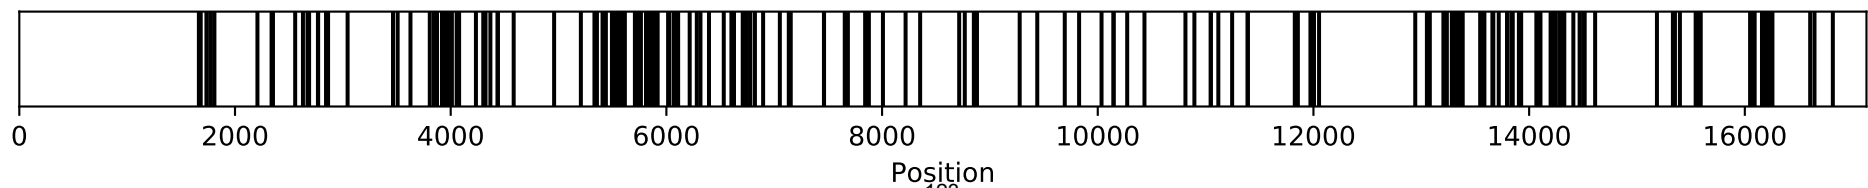

CR1 vs CR2  
Number of differences: 407

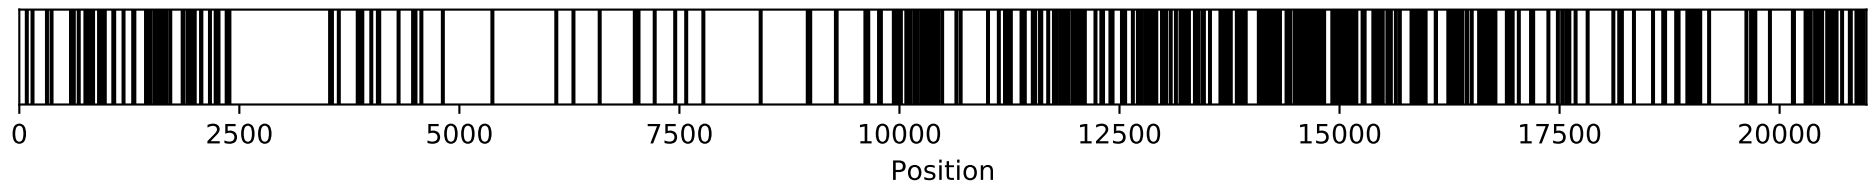

CR1 vs MM1  
Number of differences: 188

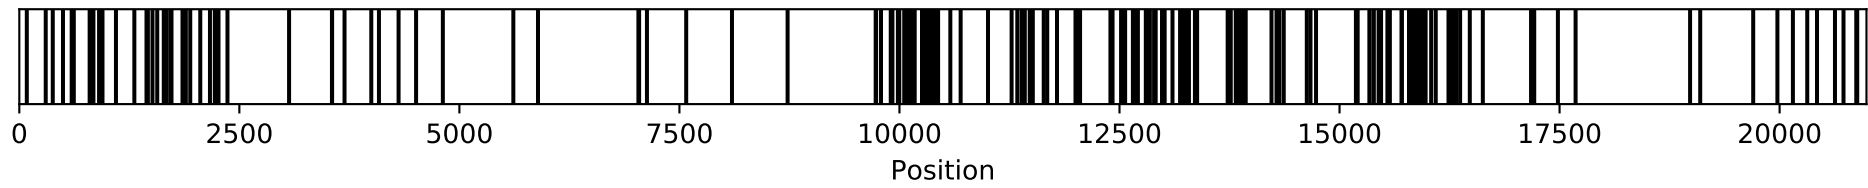

CR1 vs MM2  
Number of differences: 205

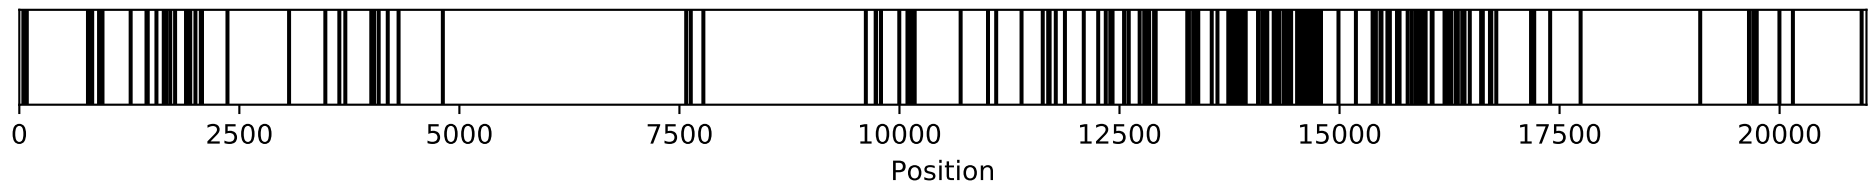

CR2 vs MM1  
Number of differences: 379

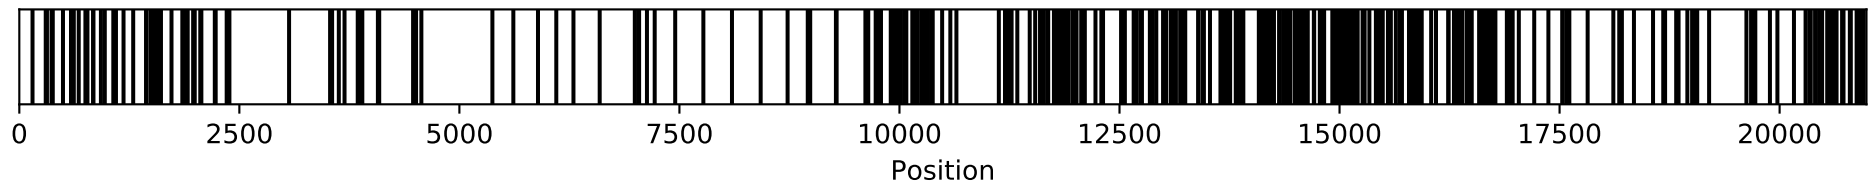

CR2 vs MM2  
Number of differences: 419

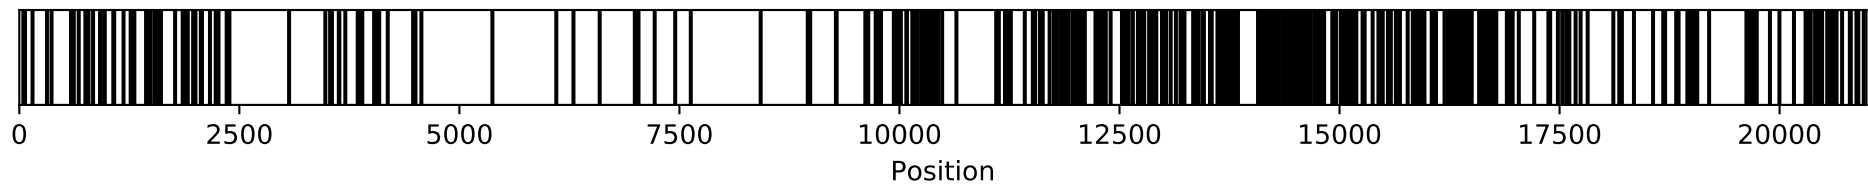

MM1 vs MM2  
Number of differences: 240

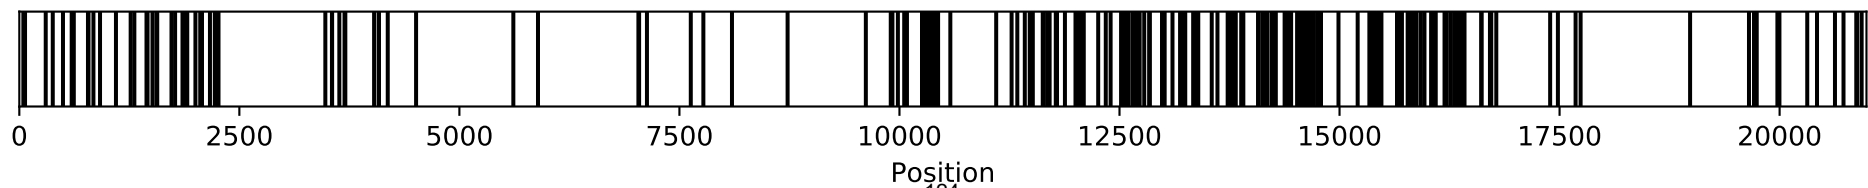

CR1 vs CR2  
Number of differences: 117

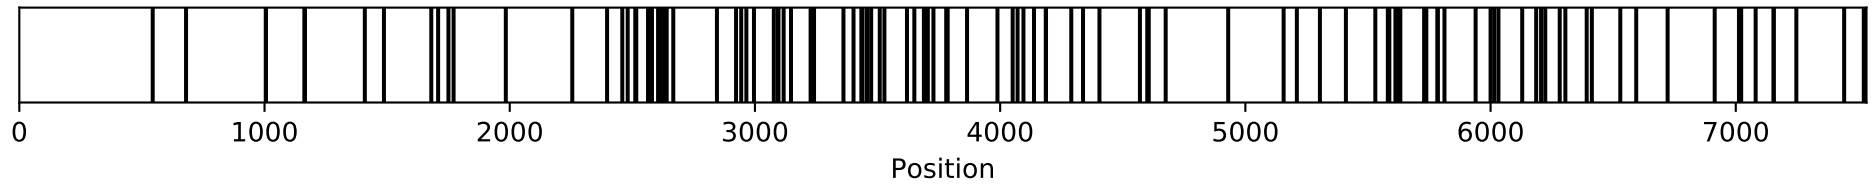

CR1 vs MM1  
Number of differences: 25

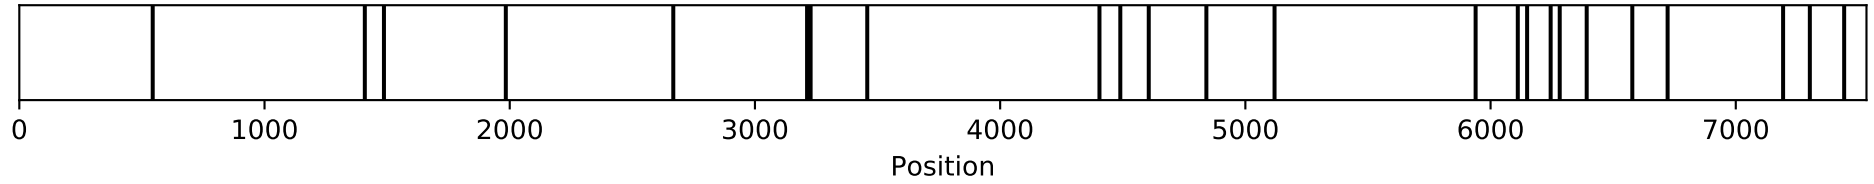

CR1 vs MM2  
Number of differences: 37

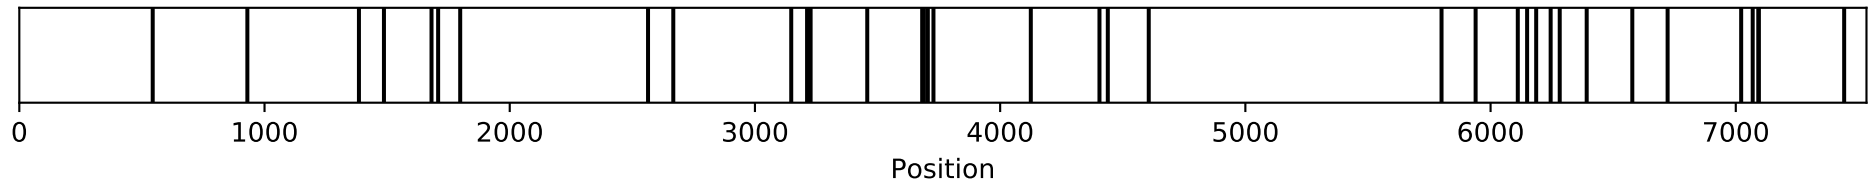

CR2 vs MM1  
Number of differences: 114

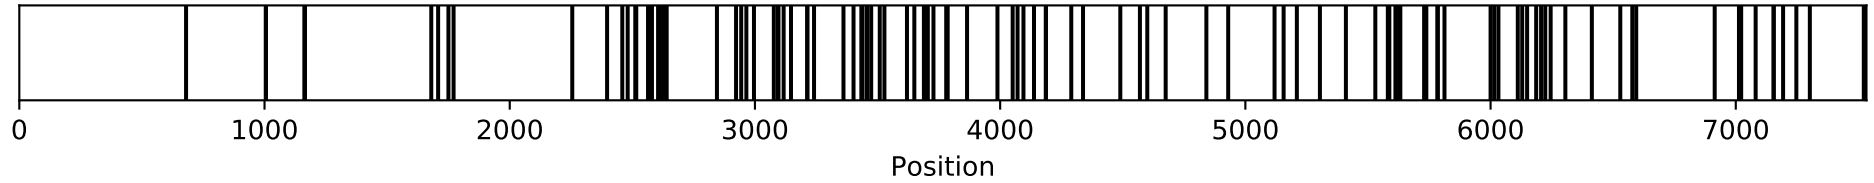

CR2 vs MM2  
Number of differences: 117

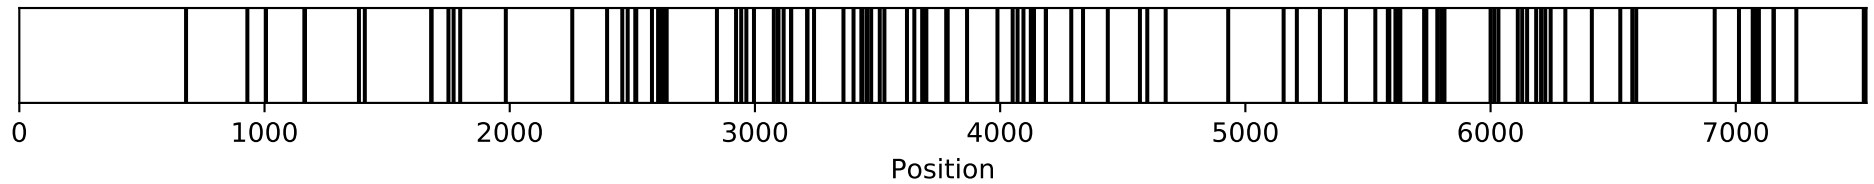

MM1 vs MM2  
Number of differences: 26

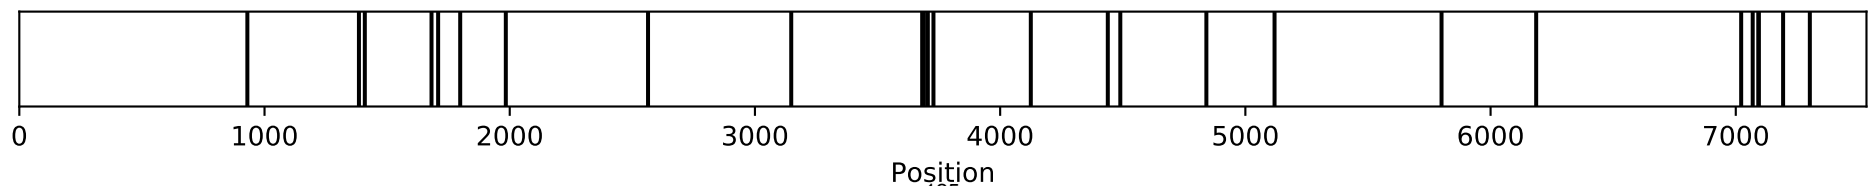

CR1 vs CR2  
Number of differences: 140

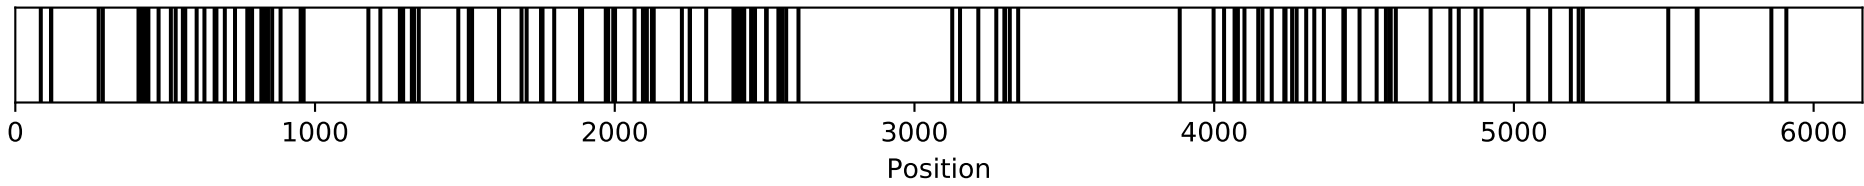

CR1 vs MM1  
Number of differences: 69

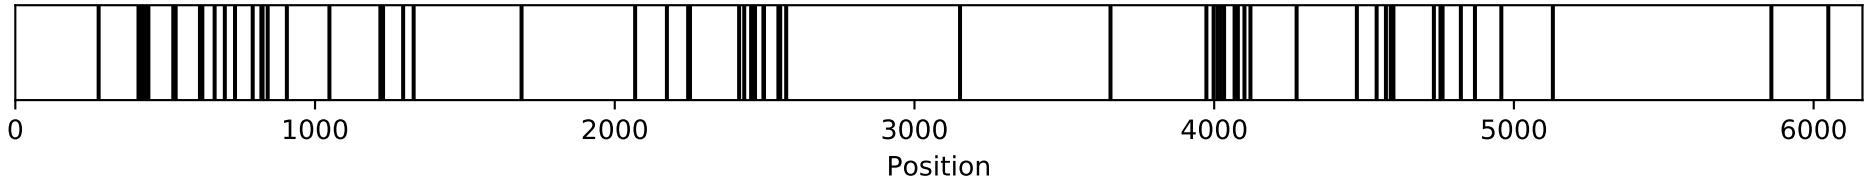

CR1 vs MM2  
Number of differences: 86

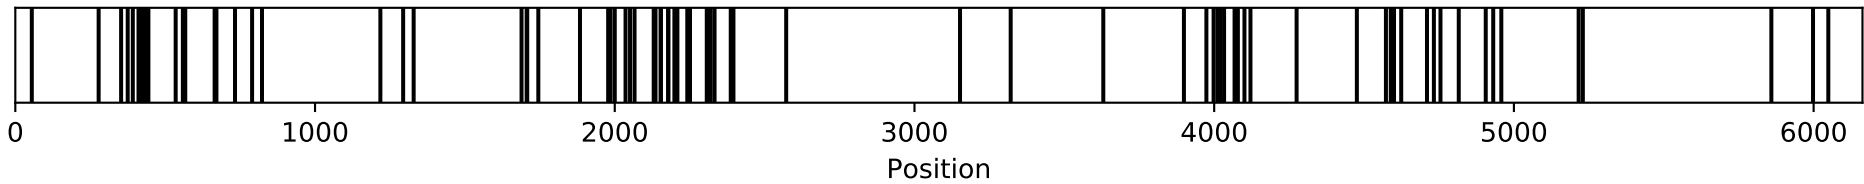

CR2 vs MM1  
Number of differences: 135

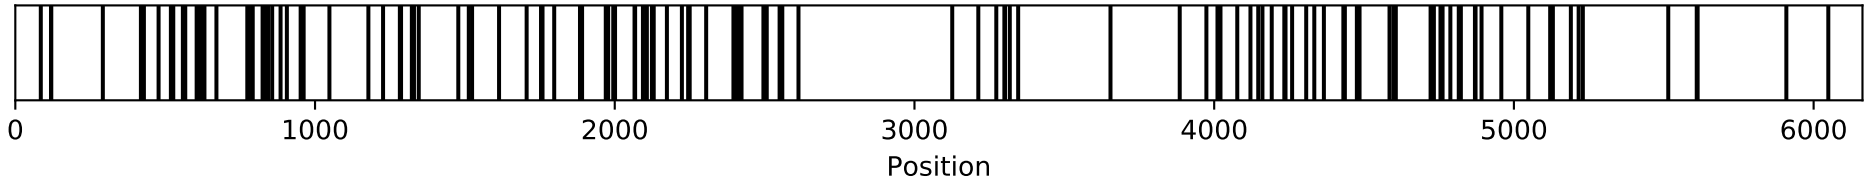

CR2 vs MM2  
Number of differences: 142

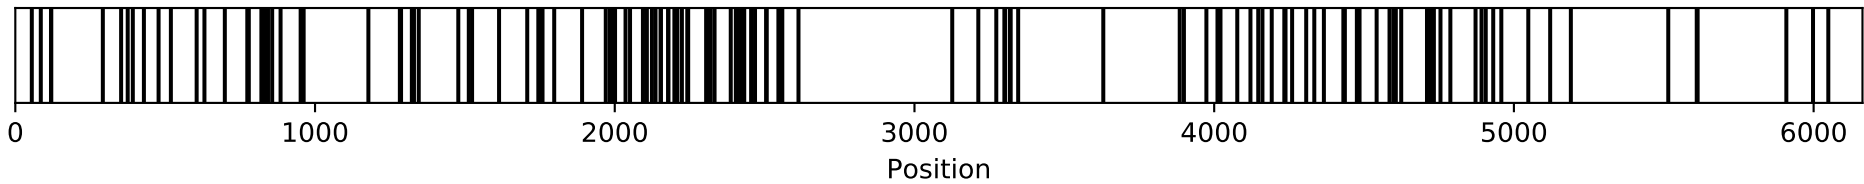

MM1 vs MM2  
Number of differences: 80

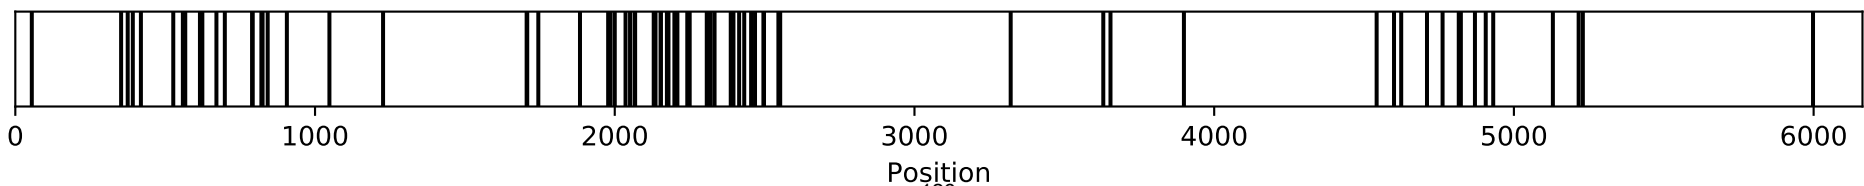

CR1 vs CR2  
Number of differences: 163

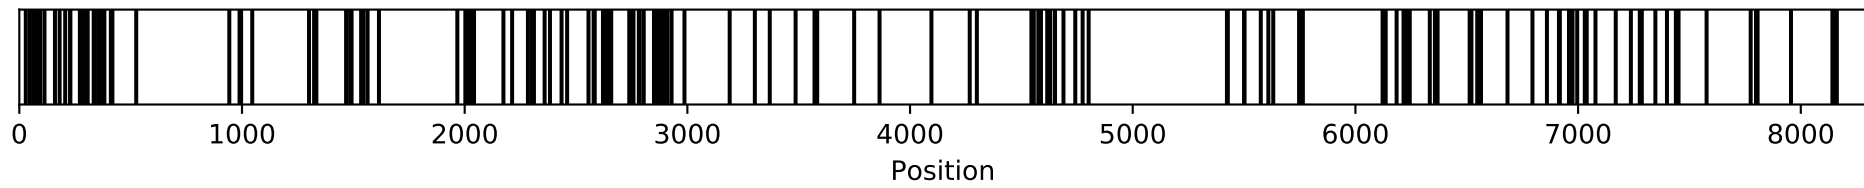

CR1 vs MM1  
Number of differences: 97

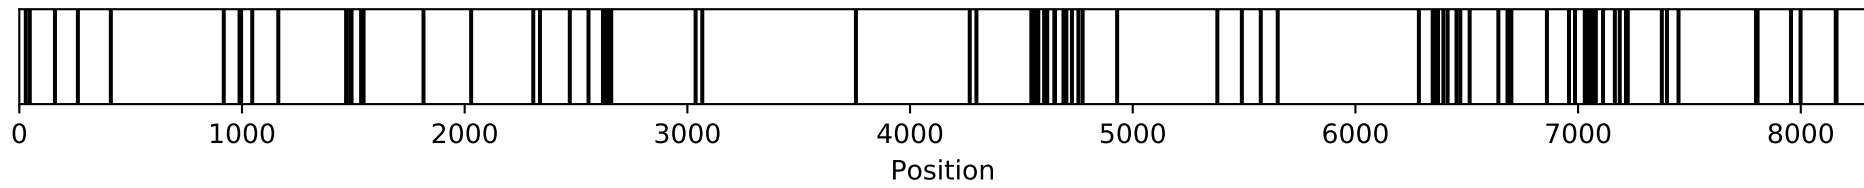

CR1 vs MM2  
Number of differences: 0

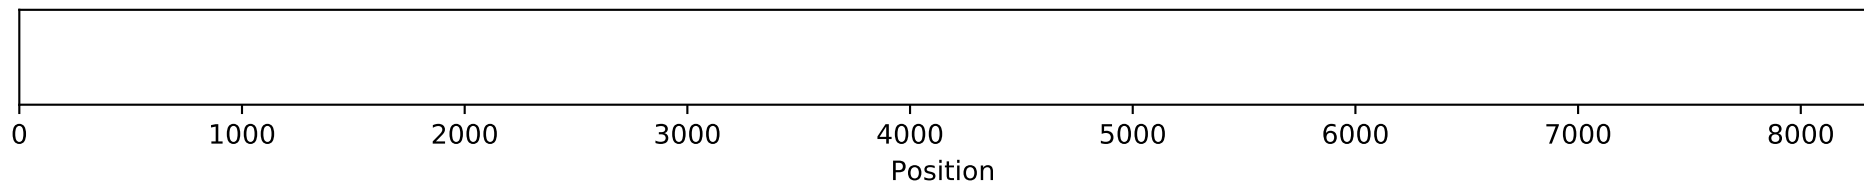

CR2 vs MM1  
Number of differences: 170

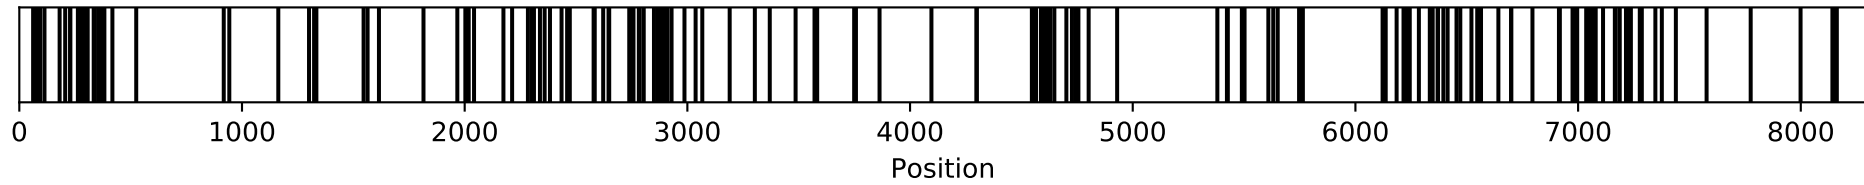

CR2 vs MM2  
Number of differences: 163

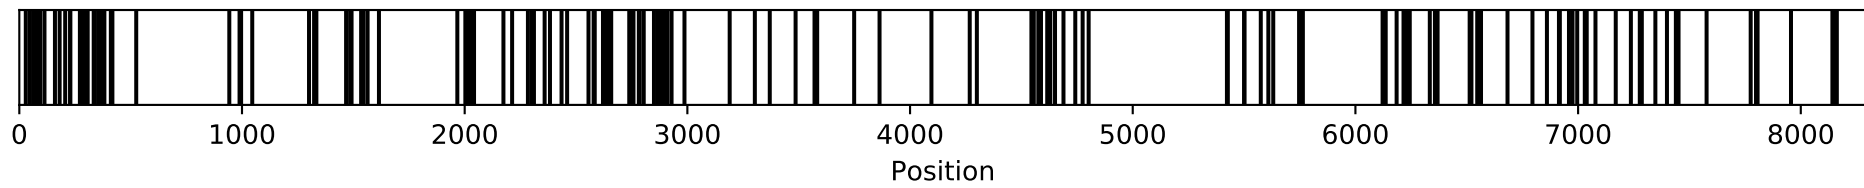

MM1 vs MM2  
Number of differences: 97

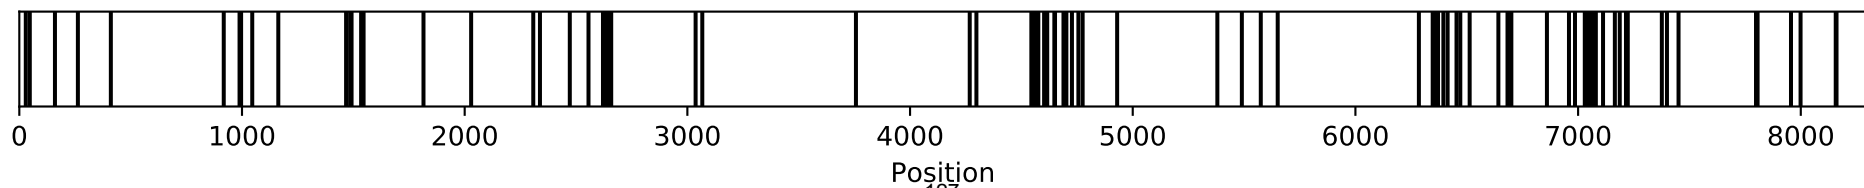



CR1 vs CR2  
Number of differences: 255

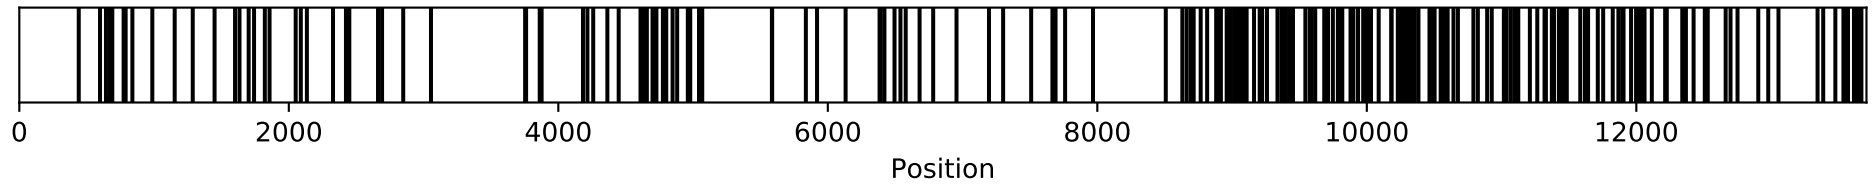

CR1 vs MM1  
Number of differences: 273

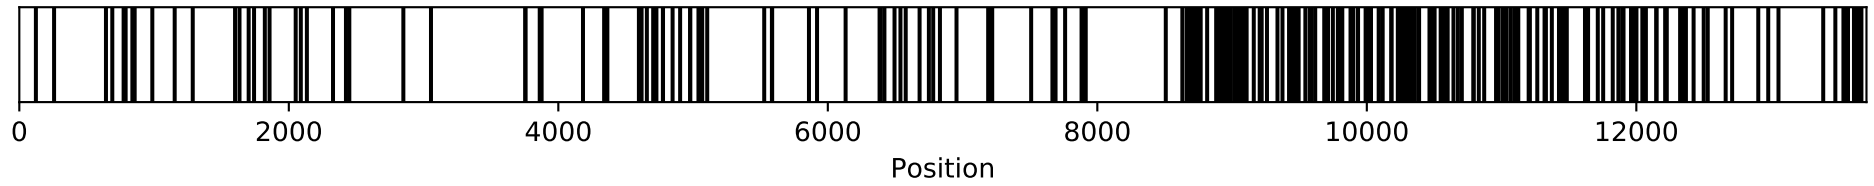

CR1 vs MM2  
Number of differences: 250

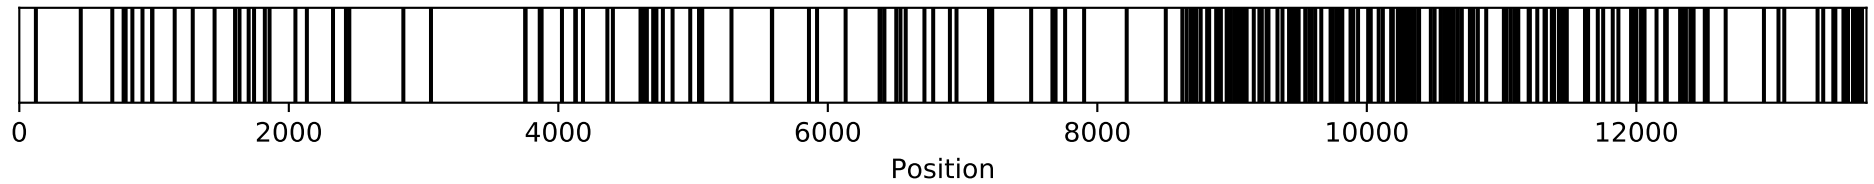

CR2 vs MM1  
Number of differences: 115

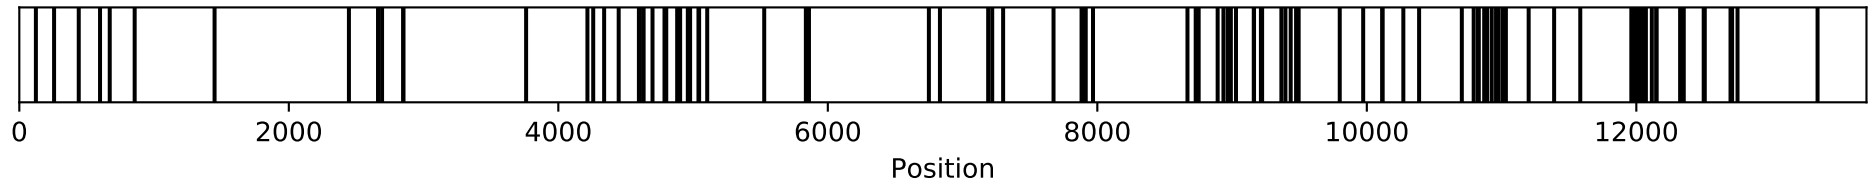

CR2 vs MM2  
Number of differences: 130

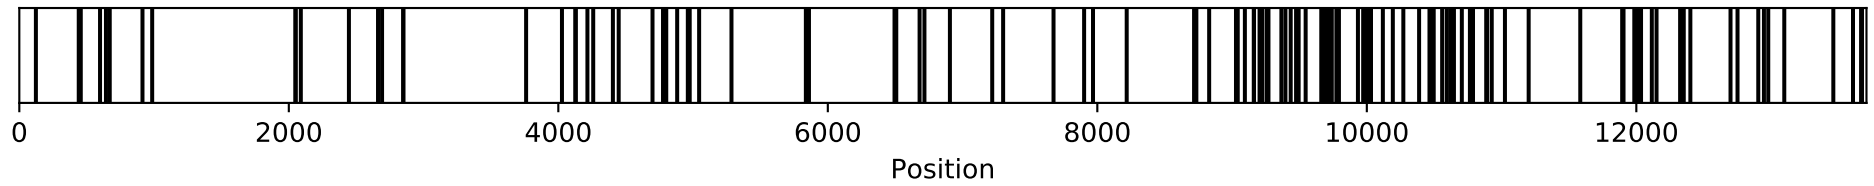

MM1 vs MM2  
Number of differences: 134

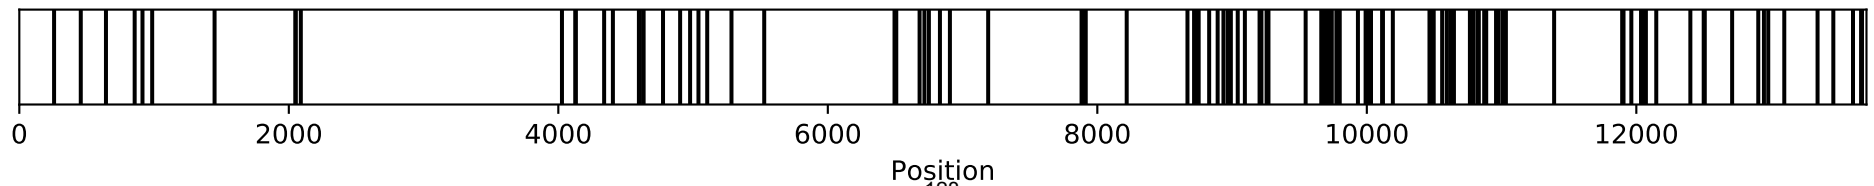

CR1 vs CR2  
Number of differences: 229

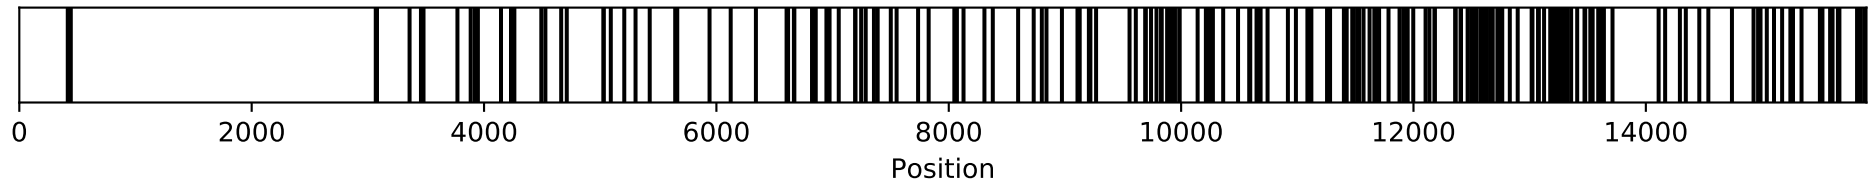

CR1 vs MM1  
Number of differences: 276

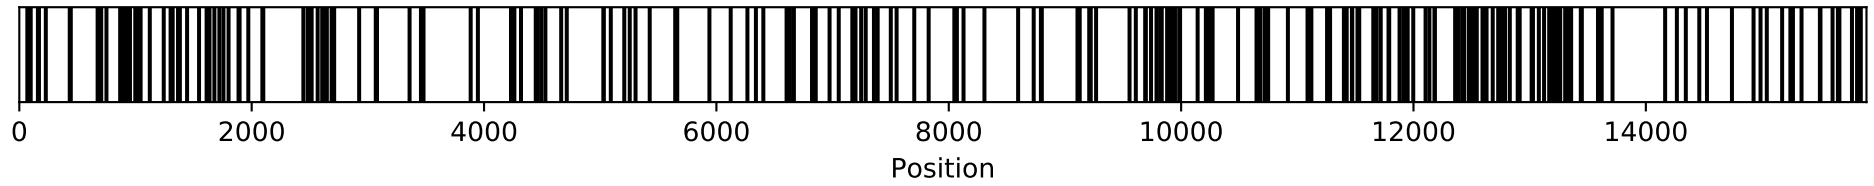

CR1 vs MM2  
Number of differences: 274

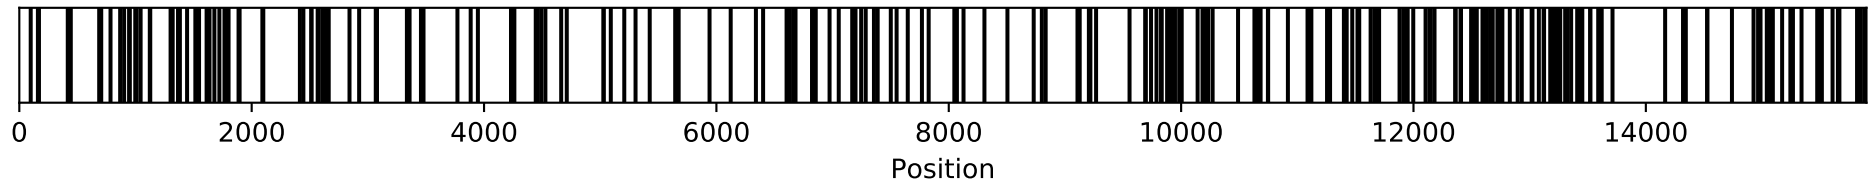

CR2 vs MM1  
Number of differences: 168

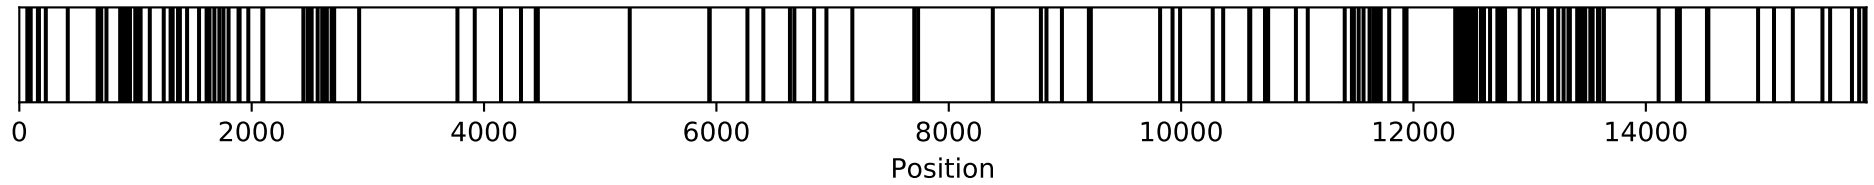

CR2 vs MM2  
Number of differences: 136

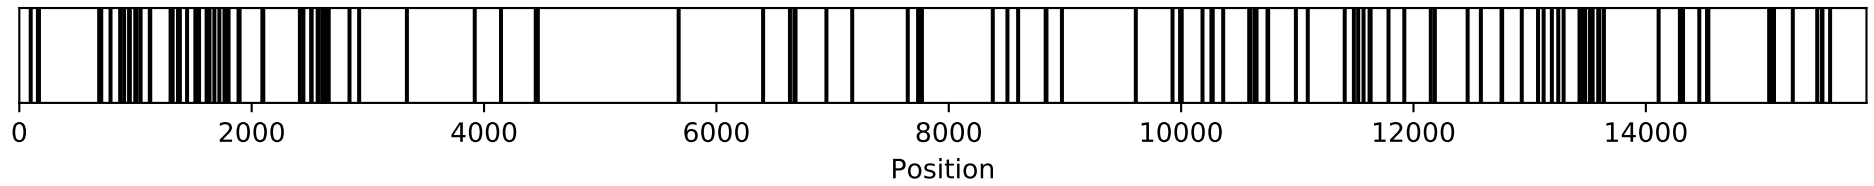

MM1 vs MM2  
Number of differences: 138

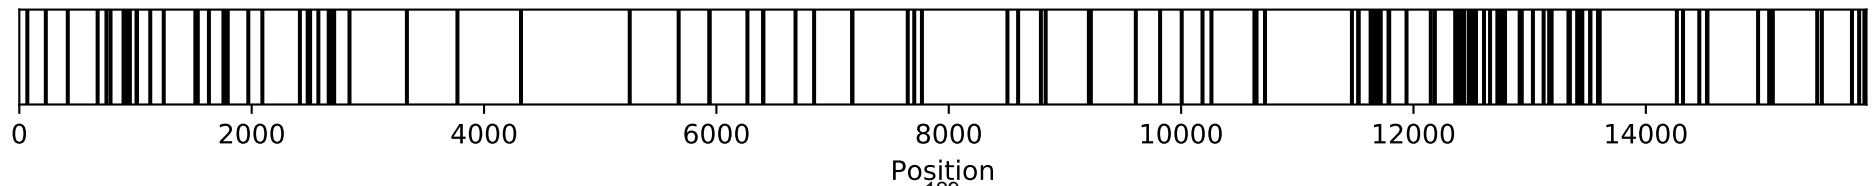

CR1 vs CR2  
Number of differences: 423

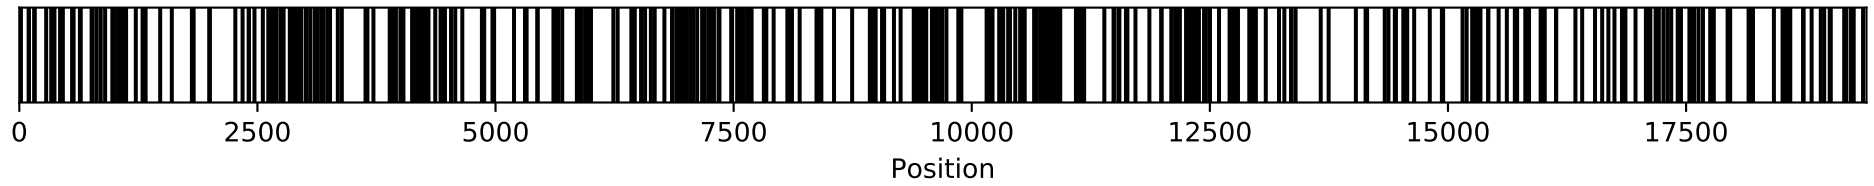

CR1 vs MM1  
Number of differences: 413

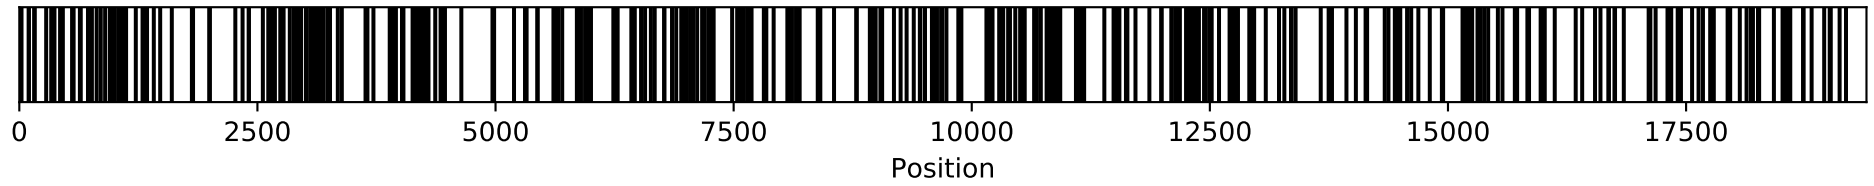

CR1 vs MM2  
Number of differences: 395

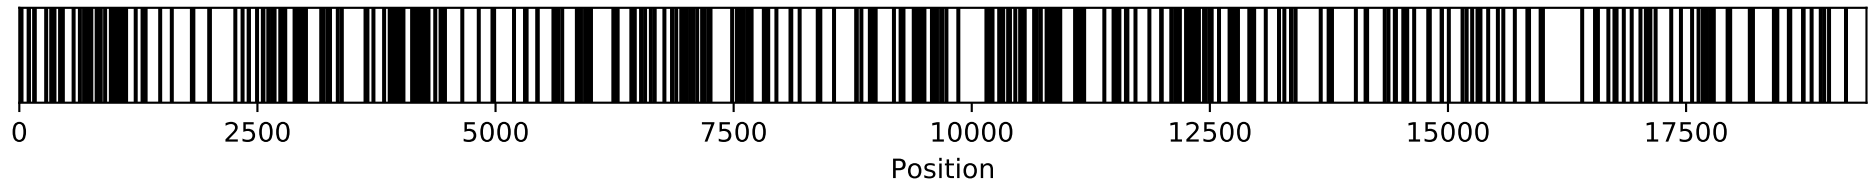

CR2 vs MM1  
Number of differences: 135

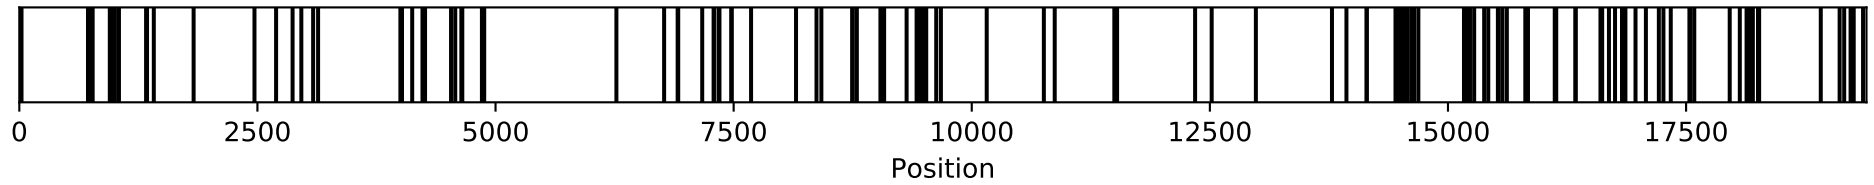

CR2 vs MM2  
Number of differences: 171

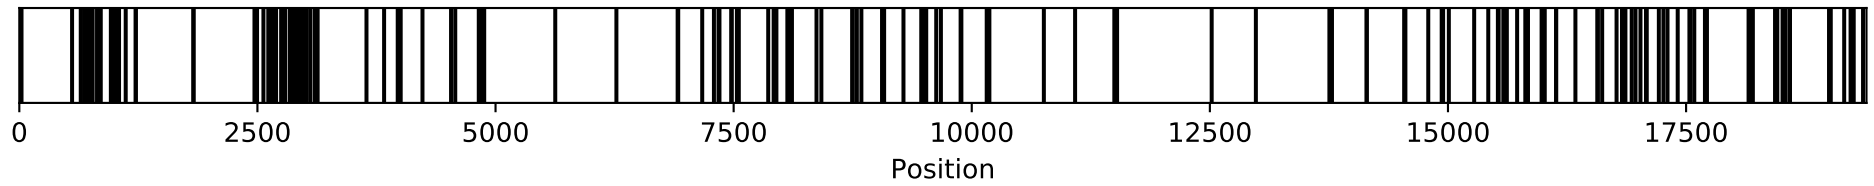

MM1 vs MM2  
Number of differences: 155

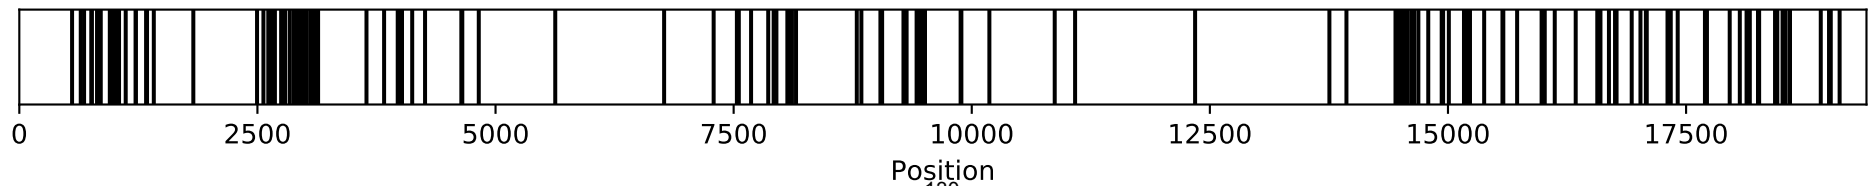

CR1 vs CR2  
Number of differences: 280

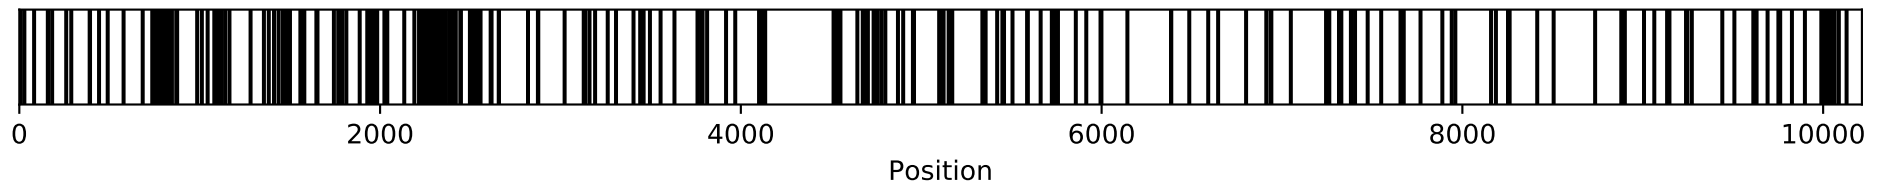

CR1 vs MM1  
Number of differences: 271

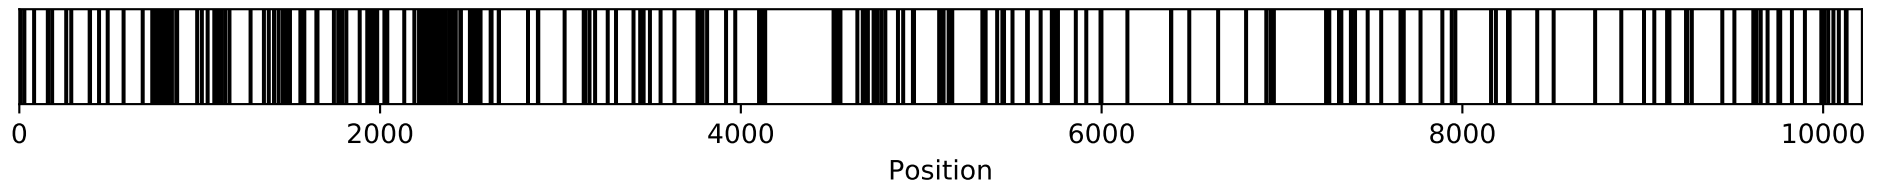

CR1 vs MM2  
Number of differences: 277

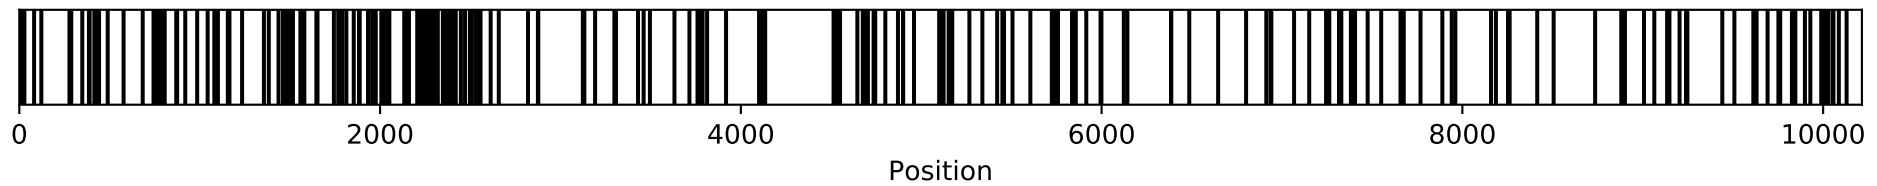

CR2 vs MM1  
Number of differences: 15

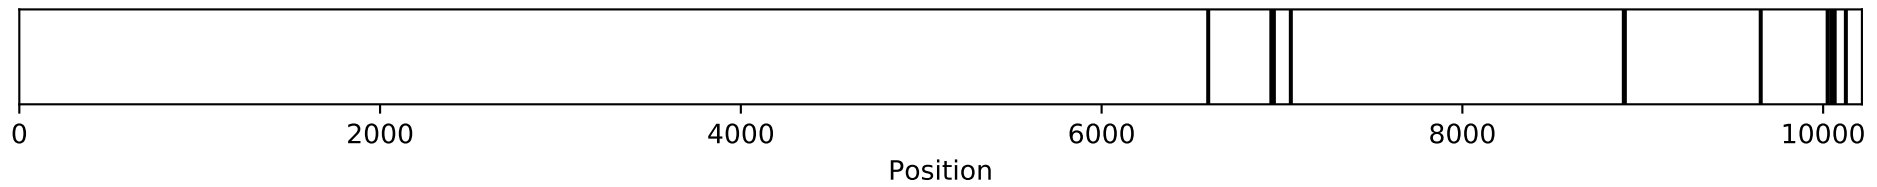

CR2 vs MM2  
Number of differences: 126

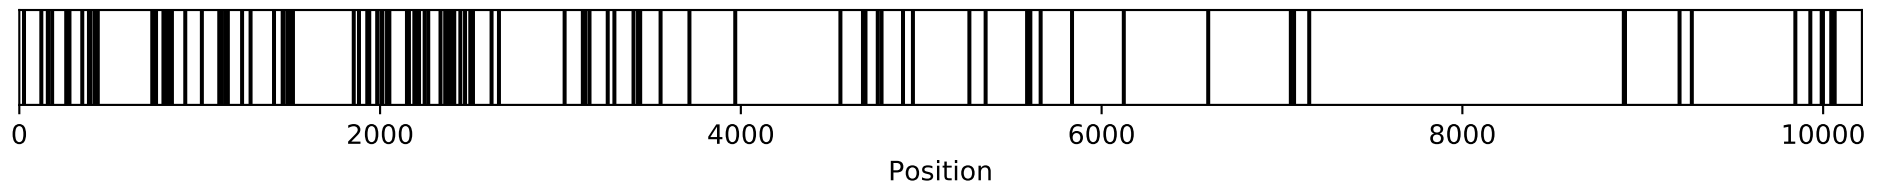

MM1 vs MM2  
Number of differences: 123

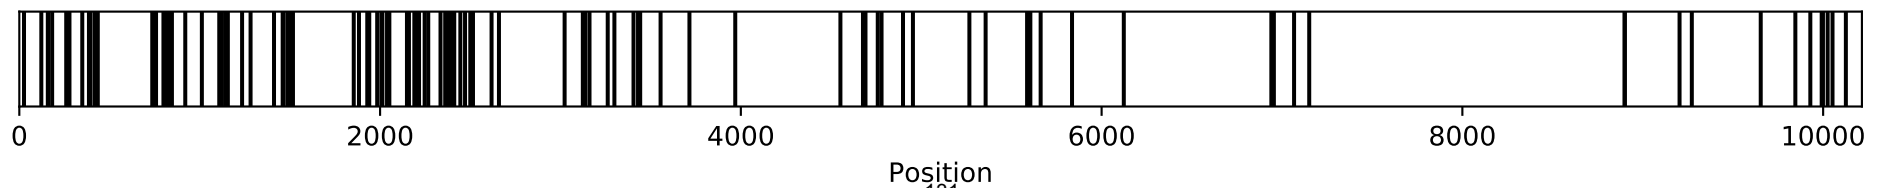

CR1 vs CR2  
Number of differences: 254

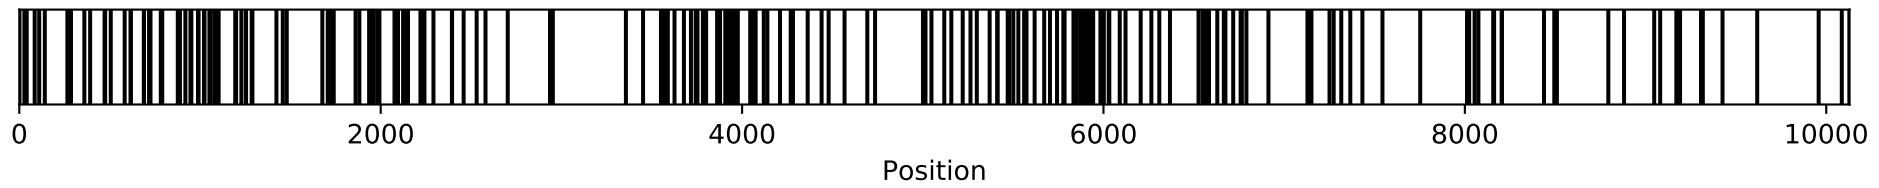

CR1 vs MM1  
Number of differences: 138

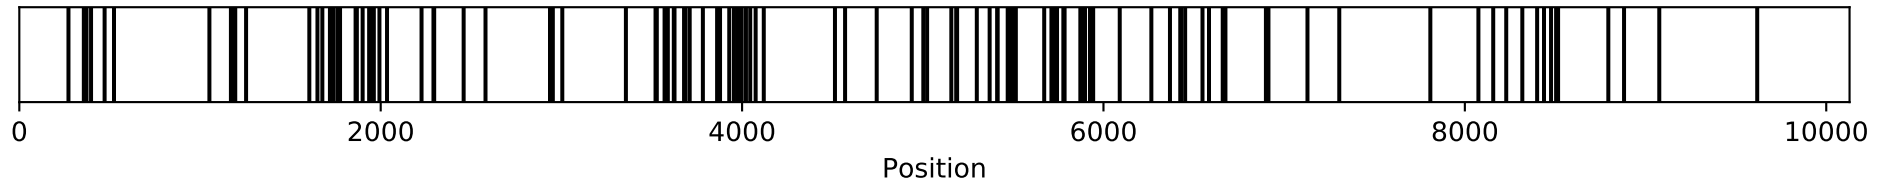

CR1 vs MM2  
Number of differences: 127

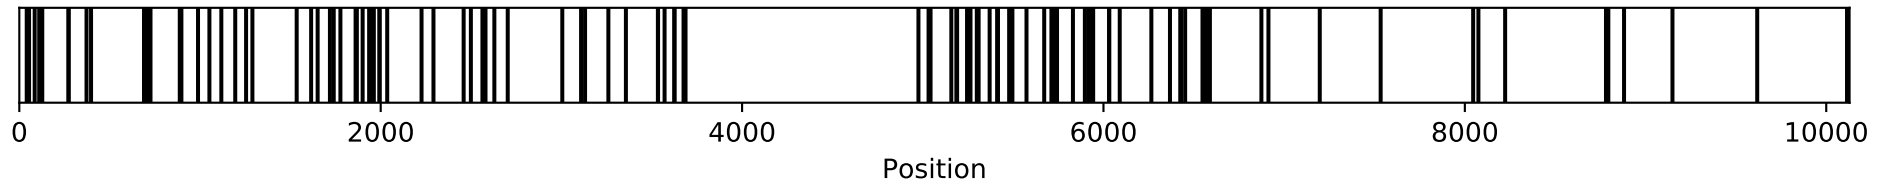

CR2 vs MM1  
Number of differences: 228

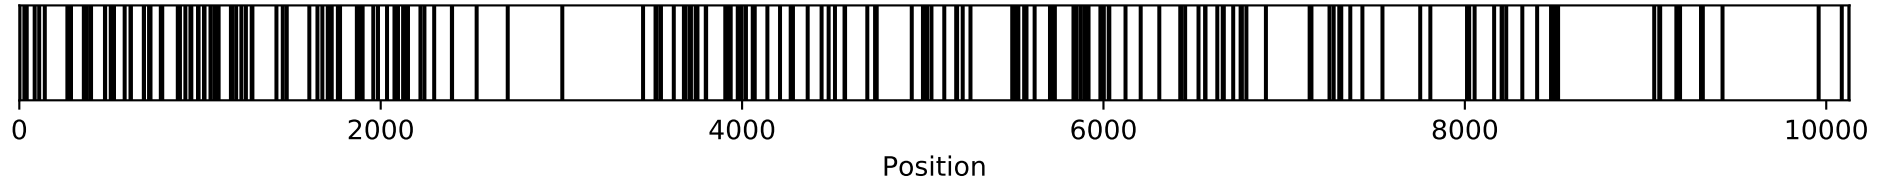

CR2 vs MM2  
Number of differences: 256

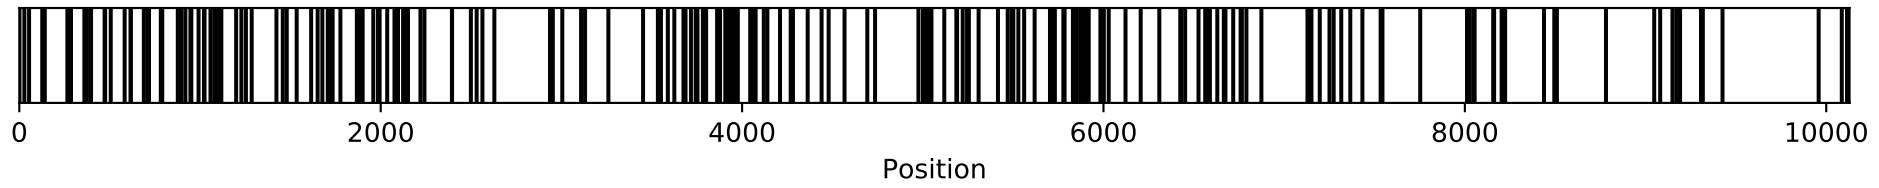

MM1 vs MM2  
Number of differences: 141

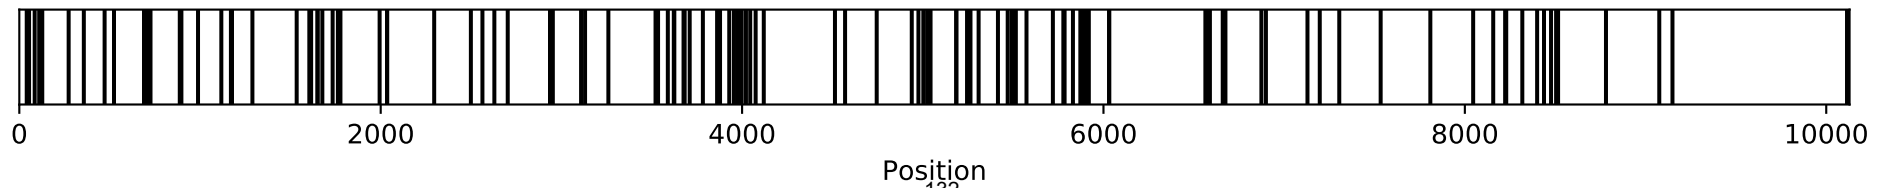

CR1 vs CR2  
Number of differences: 227

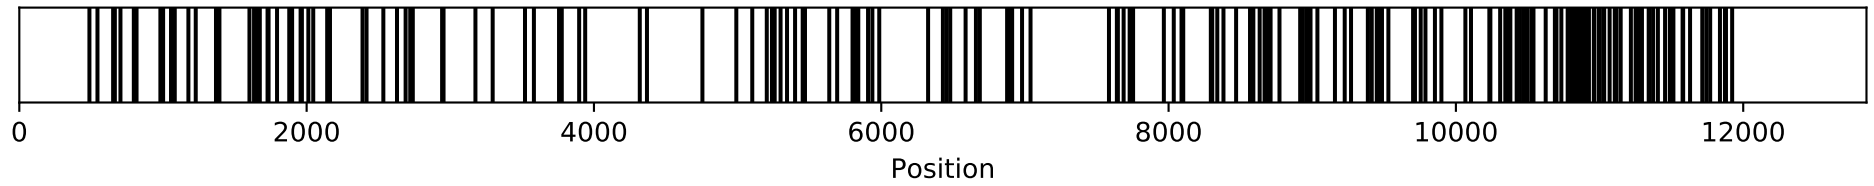

CR1 vs MM1  
Number of differences: 231

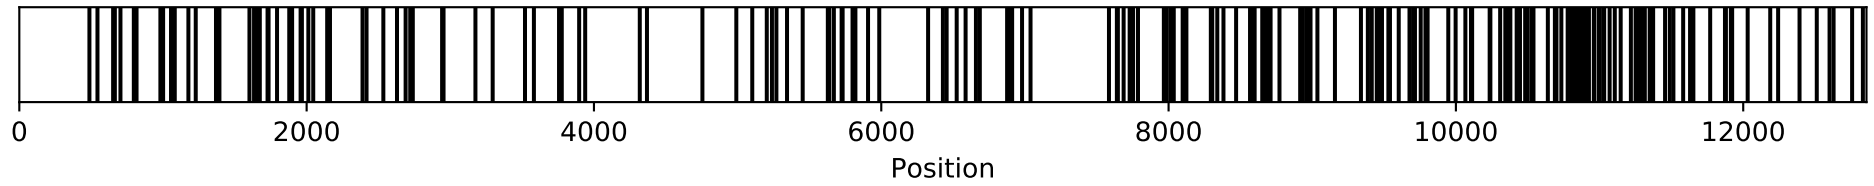

CR1 vs MM2  
Number of differences: 248

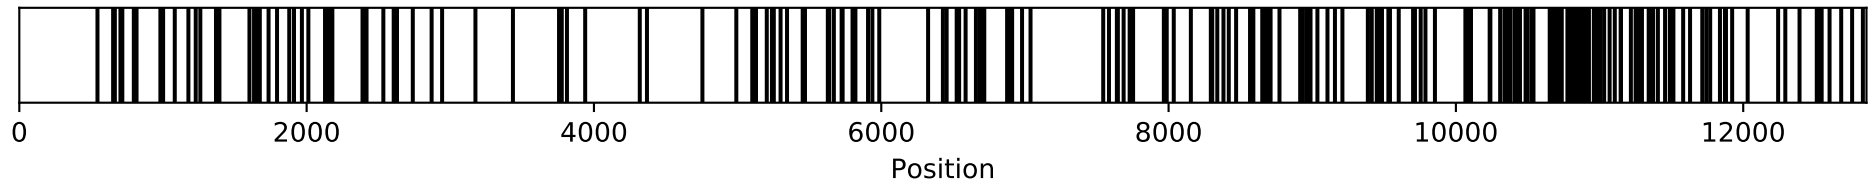

CR2 vs MM1  
Number of differences: 72

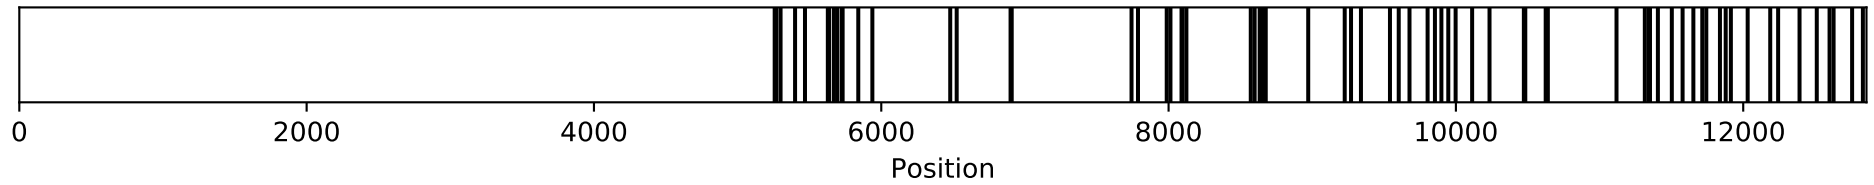

CR2 vs MM2  
Number of differences: 118

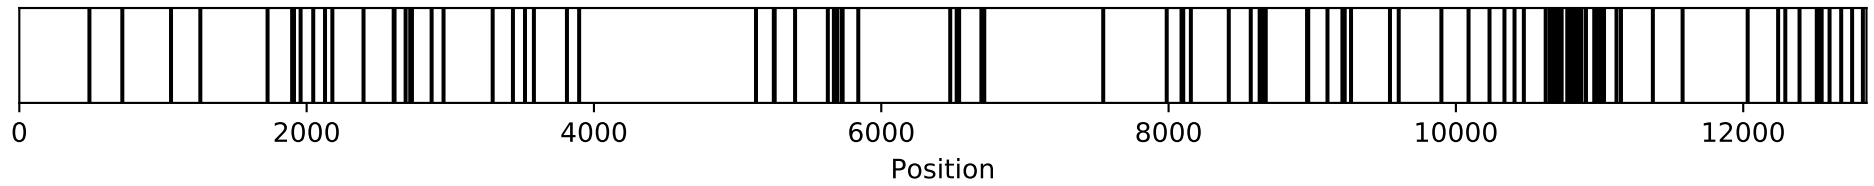

MM1 vs MM2  
Number of differences: 116

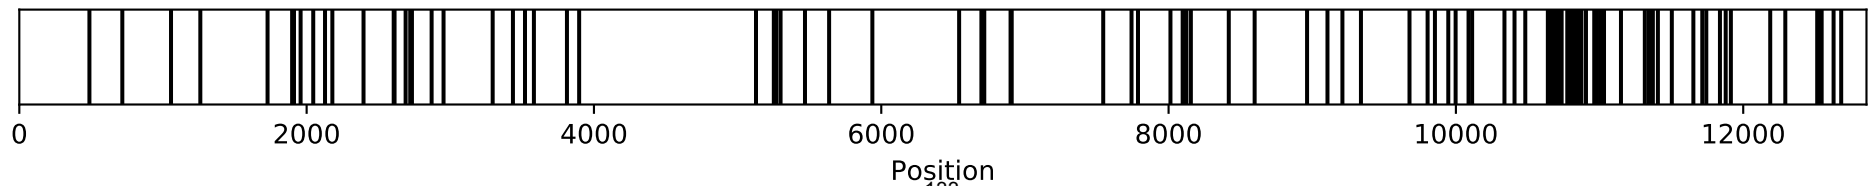

CR1 vs CR2  
Number of differences: 178

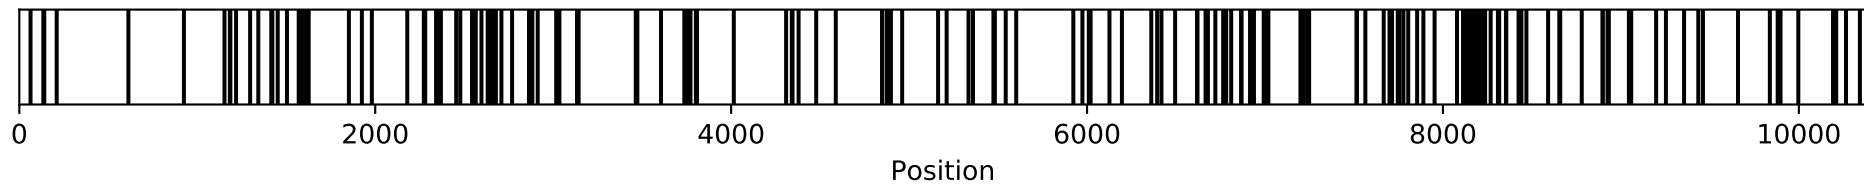

CR1 vs MM1  
Number of differences: 197

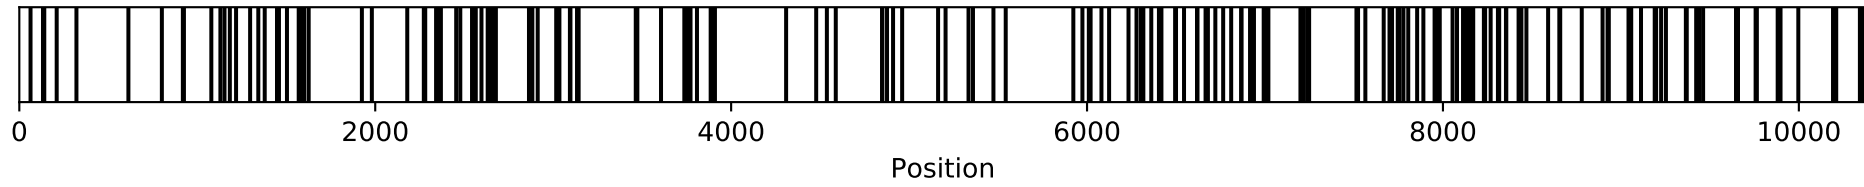

CR1 vs MM2  
Number of differences: 189

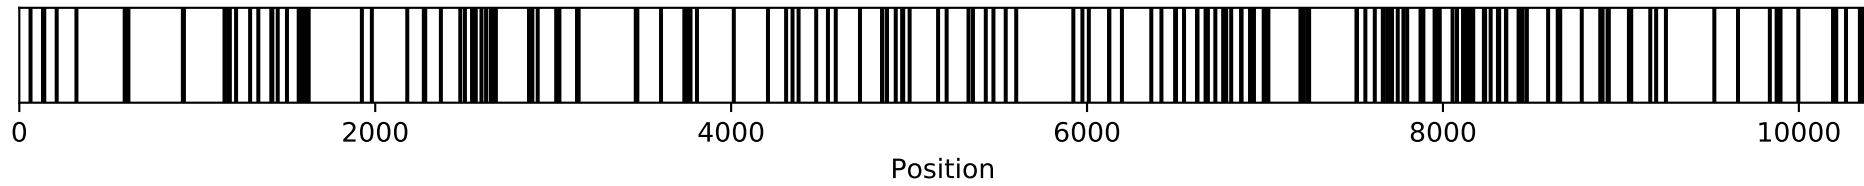

CR2 vs MM1  
Number of differences: 90

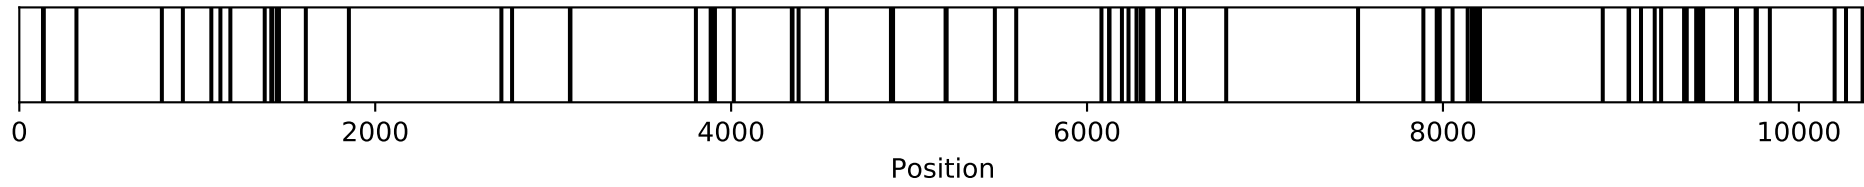

CR2 vs MM2  
Number of differences: 69

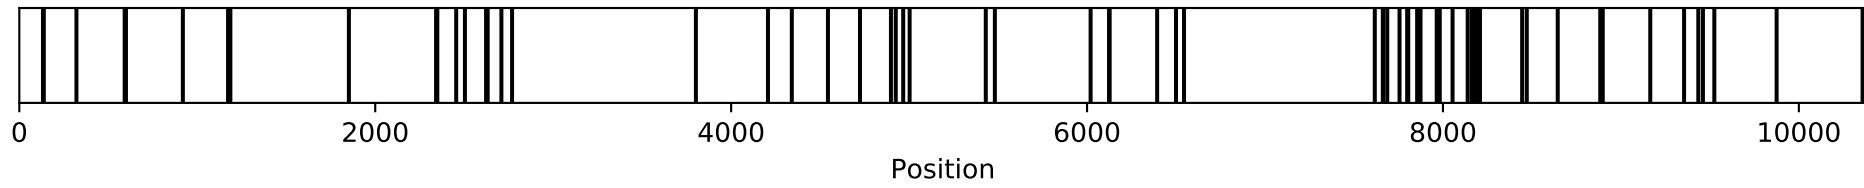

MM1 vs MM2  
Number of differences: 92

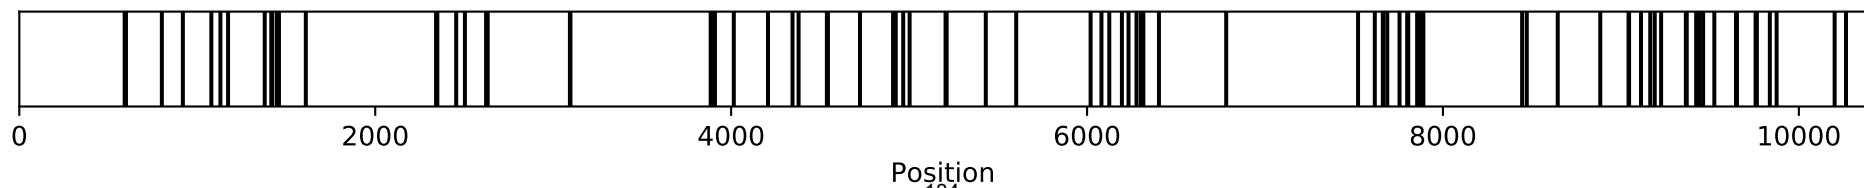

CR1 vs CR2  
Number of differences: 401

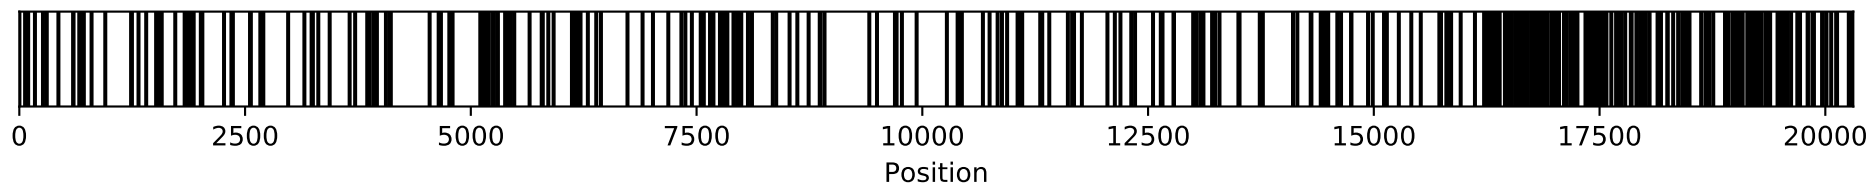

CR1 vs MM1  
Number of differences: 247

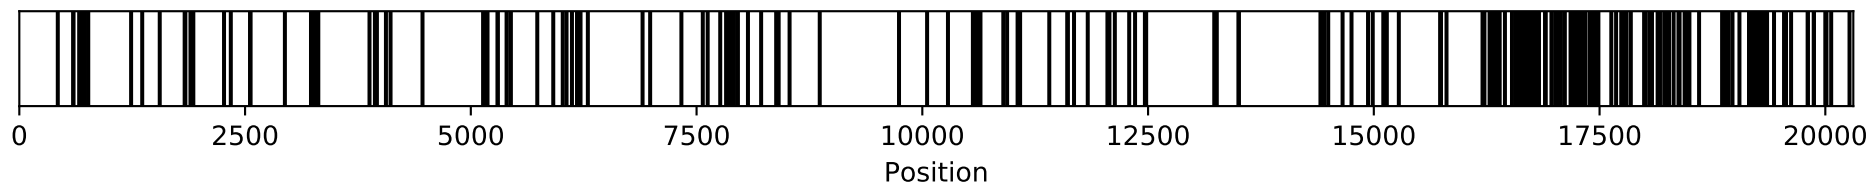

CR1 vs MM2  
Number of differences: 211

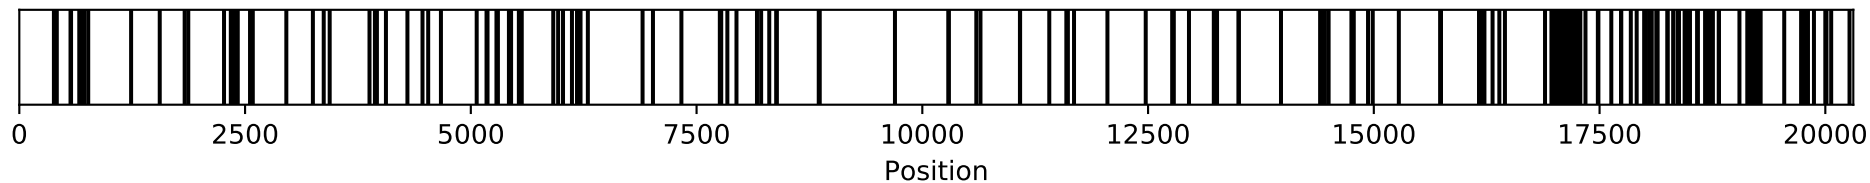

CR2 vs MM1  
Number of differences: 374

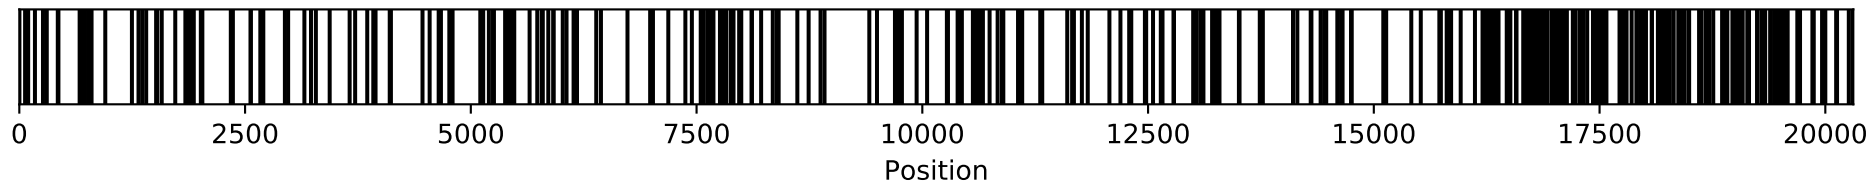

CR2 vs MM2  
Number of differences: 384

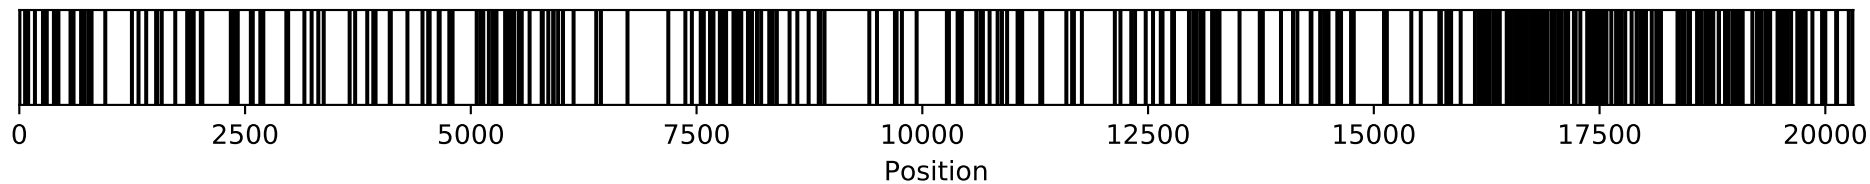

MM1 vs MM2  
Number of differences: 234

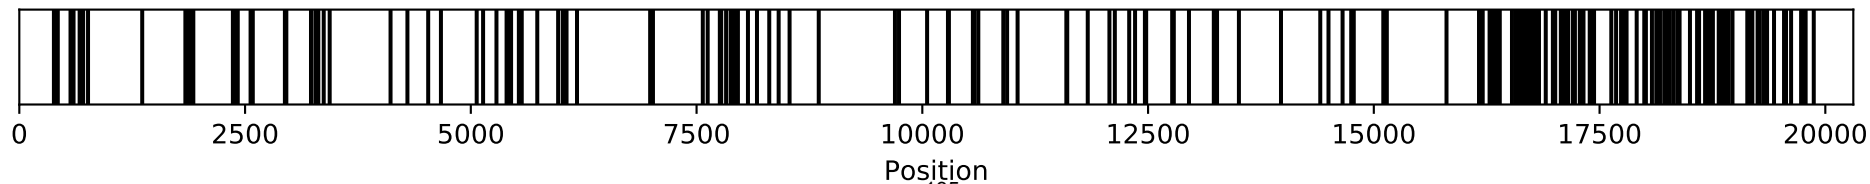



CR1 vs CR2  
Number of differences: 3

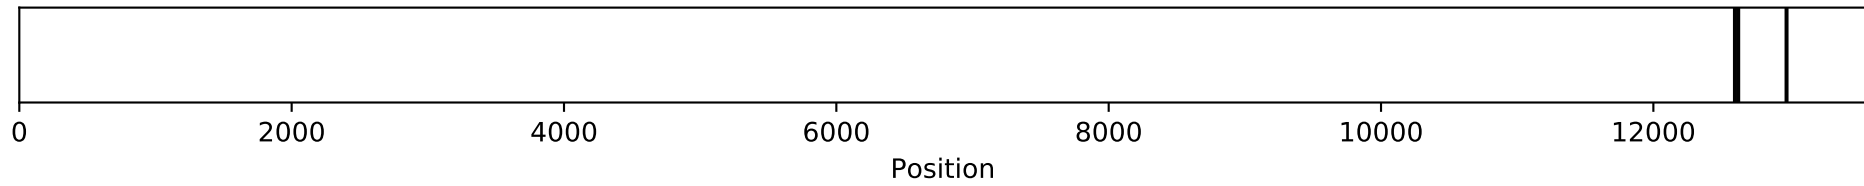

CR1 vs MM1  
Number of differences: 447

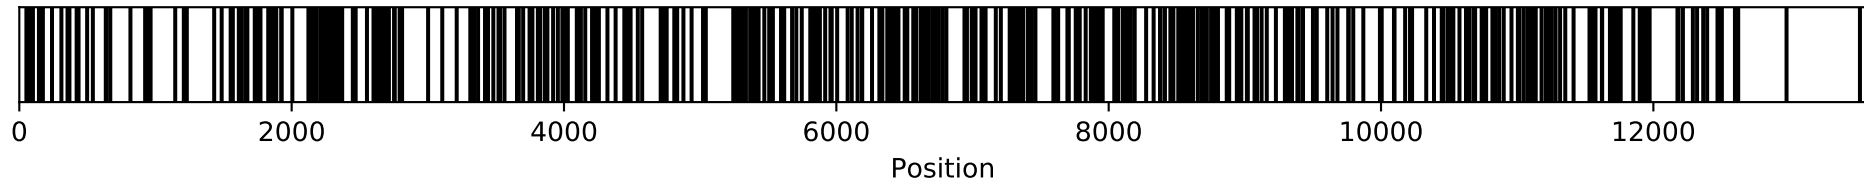

CR1 vs MM2  
Number of differences: 475

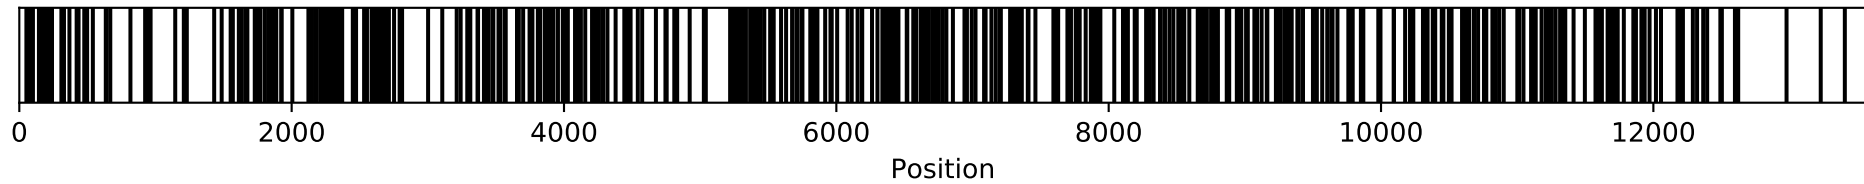

CR2 vs MM1  
Number of differences: 444

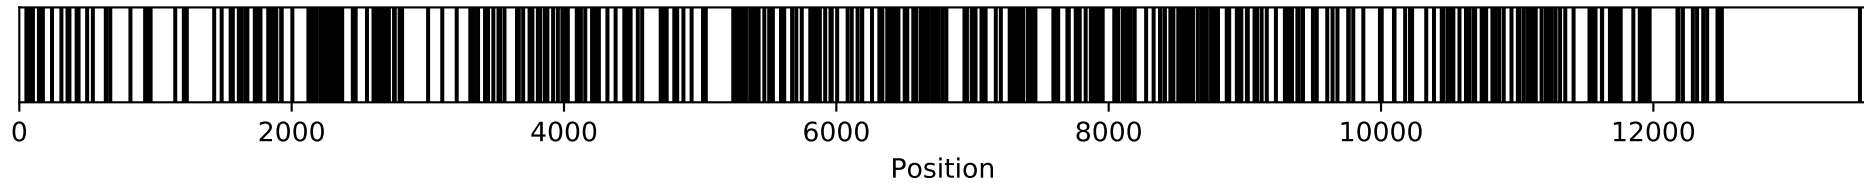

CR2 vs MM2  
Number of differences: 472

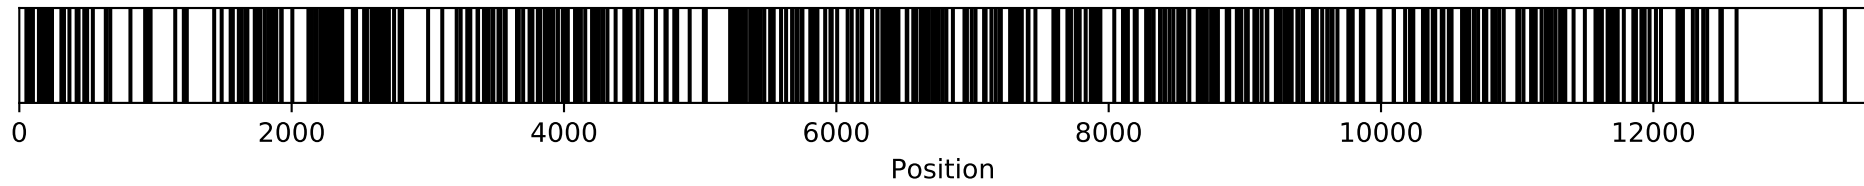

MM1 vs MM2  
Number of differences: 192

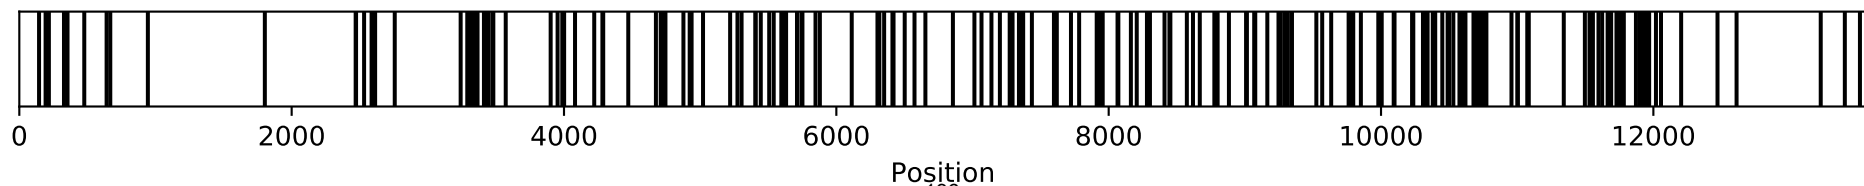

CR1 vs CR2  
Number of differences: 321

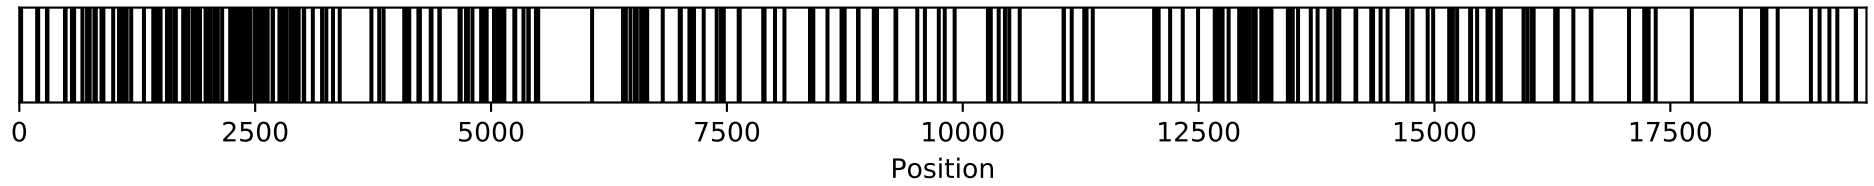

CR1 vs MM1  
Number of differences: 179

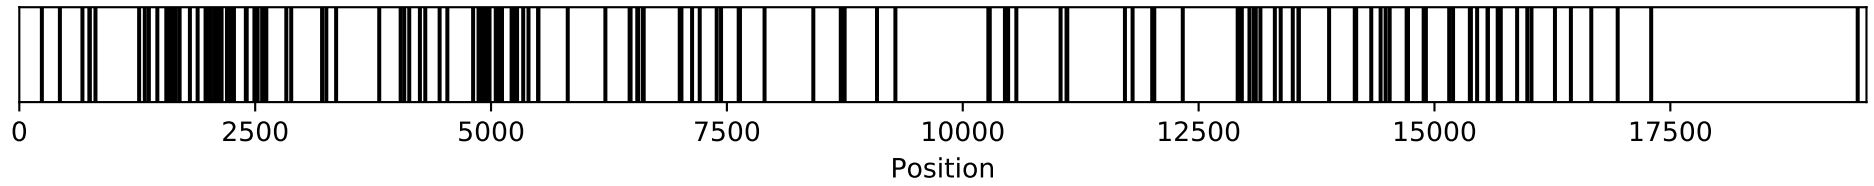

CR1 vs MM2  
Number of differences: 190

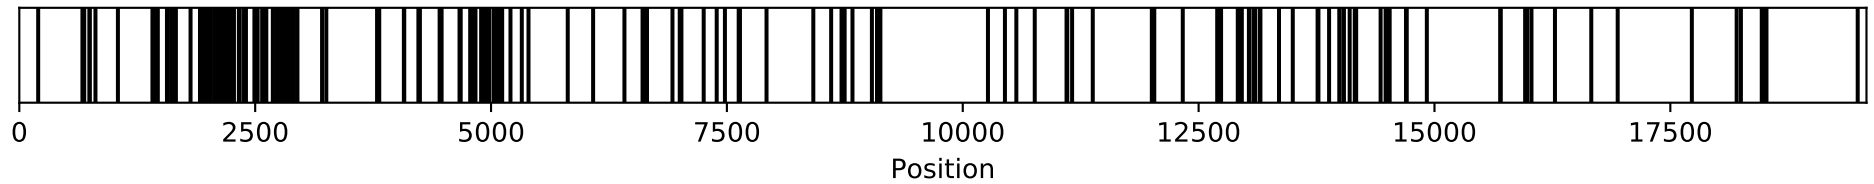

CR2 vs MM1  
Number of differences: 362

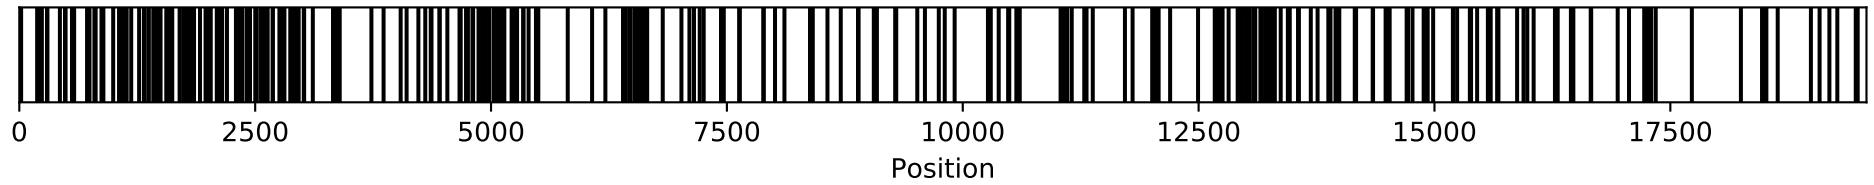

CR2 vs MM2  
Number of differences: 339

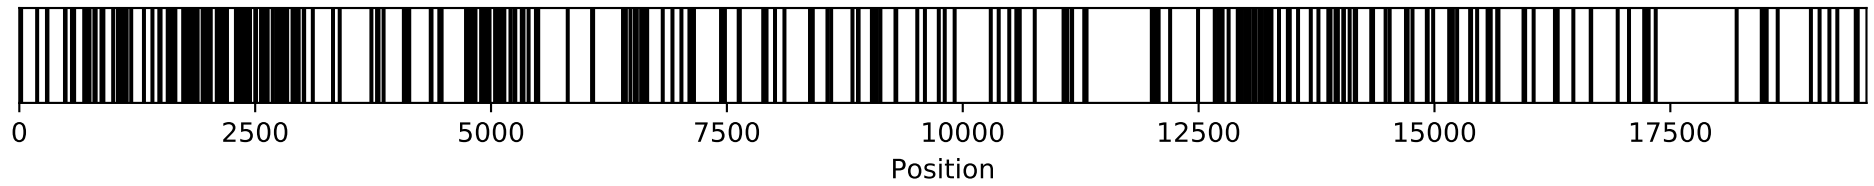

MM1 vs MM2  
Number of differences: 194

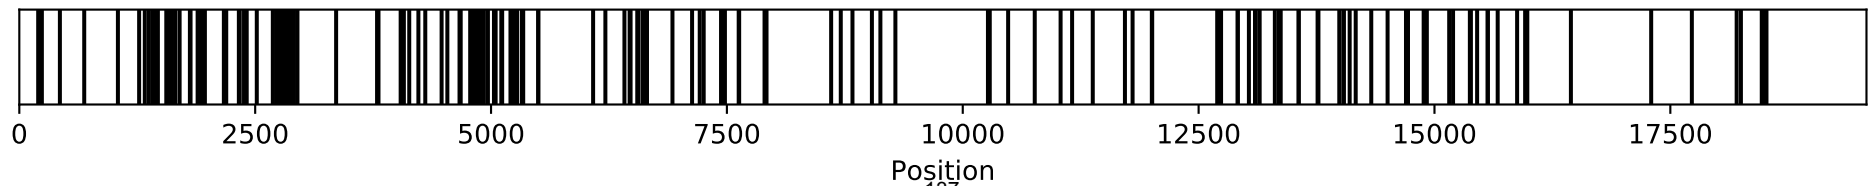

CR1 vs CR2  
Number of differences: 37

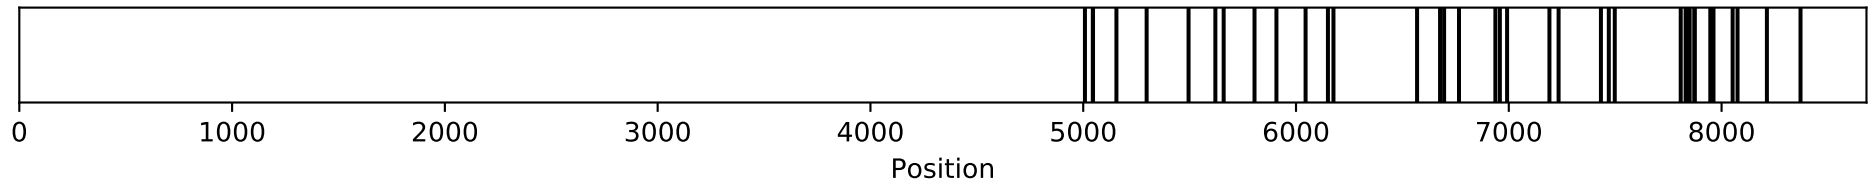

CR1 vs MM1  
Number of differences: 191

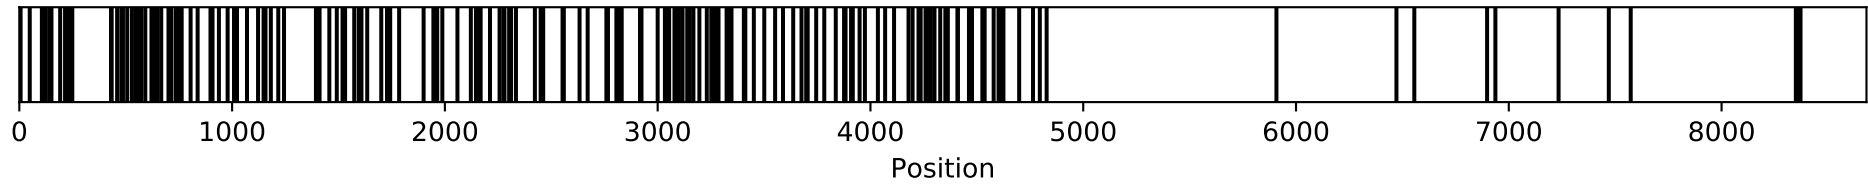

CR1 vs MM2  
Number of differences: 194

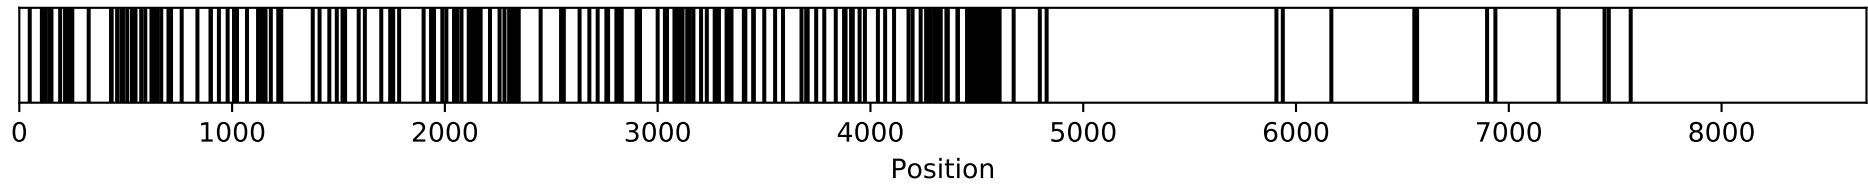

CR2 vs MM1  
Number of differences: 218

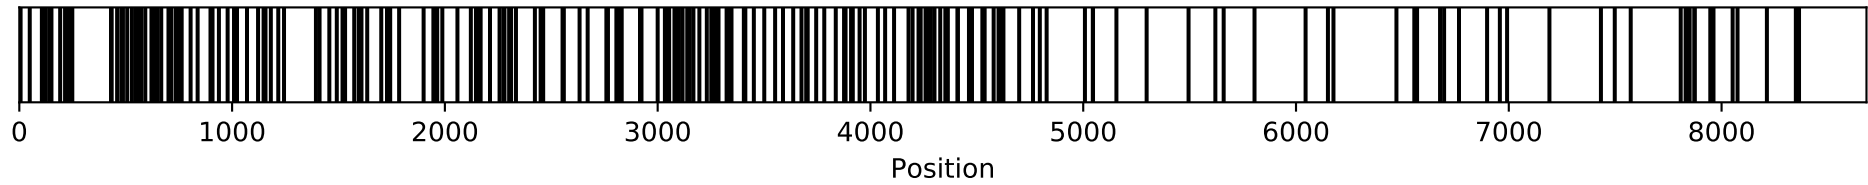

CR2 vs MM2  
Number of differences: 221

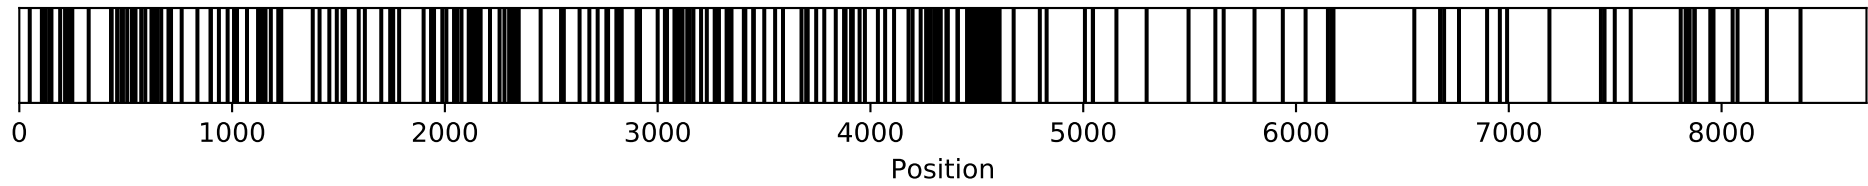

MM1 vs MM2  
Number of differences: 94

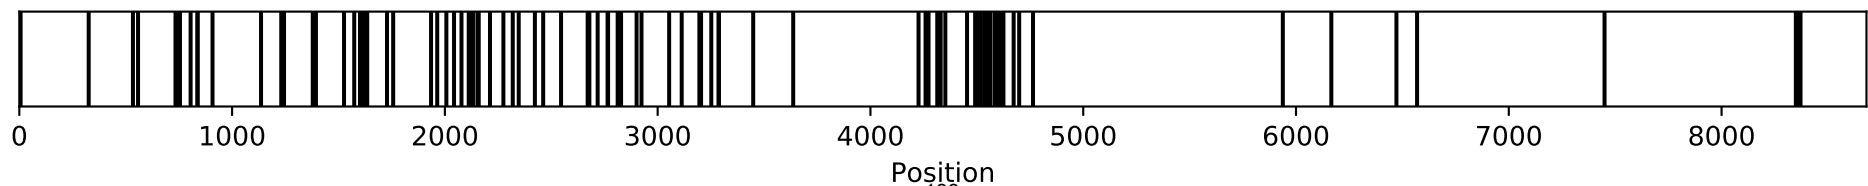

CR1 vs CR2  
Number of differences: 237

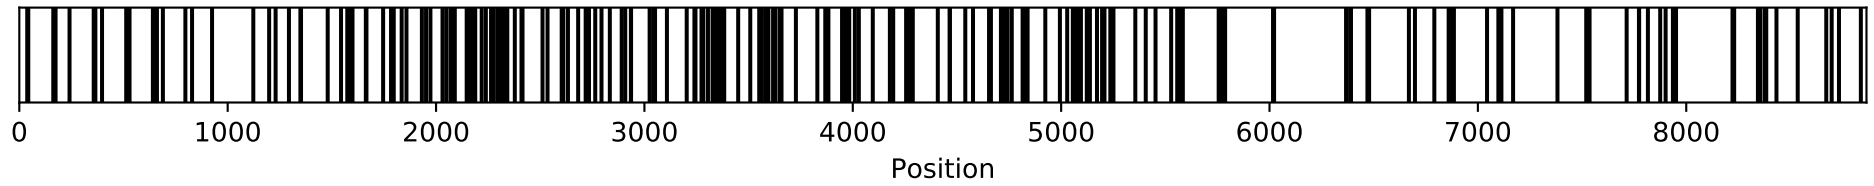

CR1 vs MM1  
Number of differences: 128

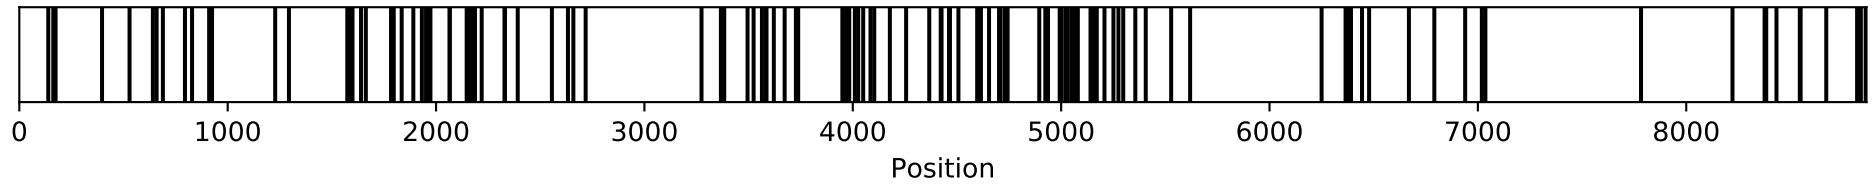

CR1 vs MM2  
Number of differences: 109

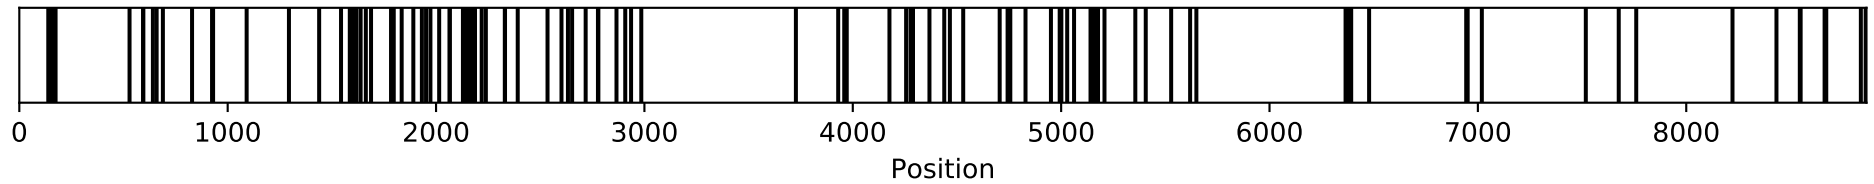

CR2 vs MM1  
Number of differences: 235

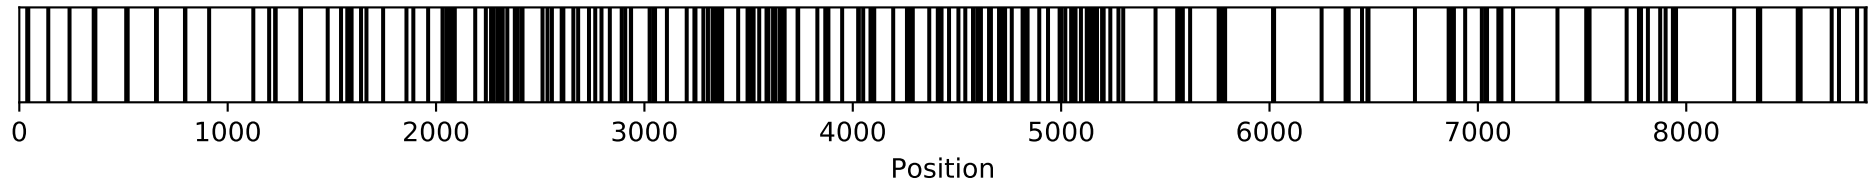

CR2 vs MM2  
Number of differences: 245

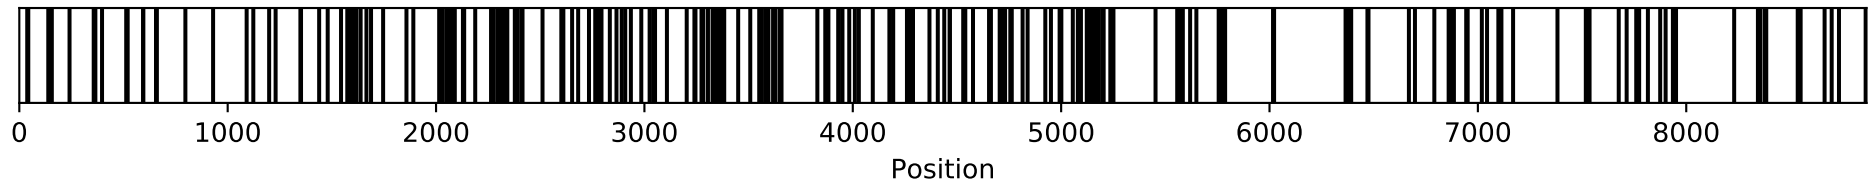

MM1 vs MM2  
Number of differences: 110

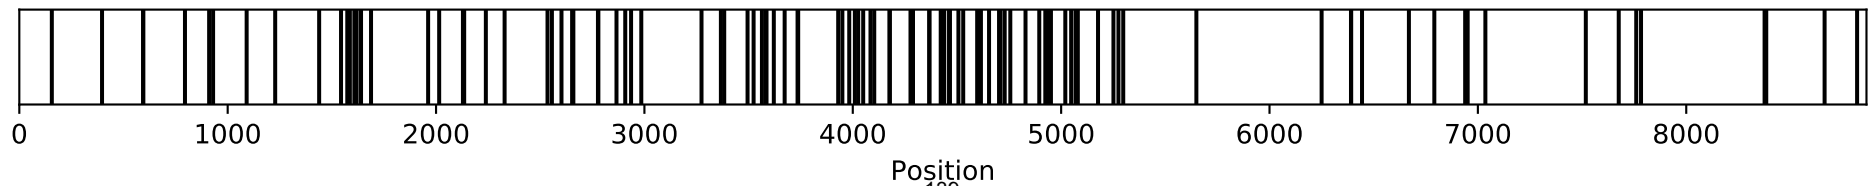

CR1 vs CR2  
Number of differences: 93

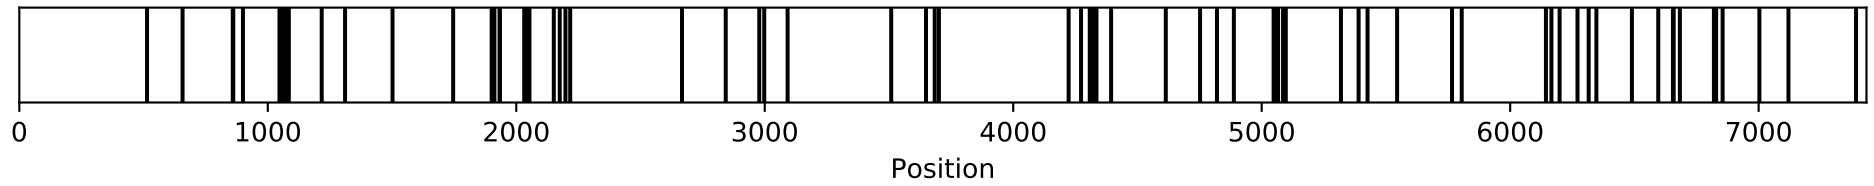

CR1 vs MM1  
Number of differences: 36

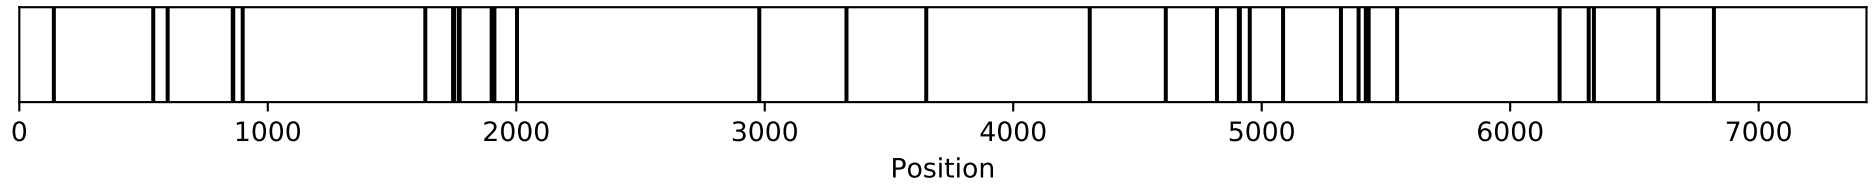

CR1 vs MM2  
Number of differences: 37

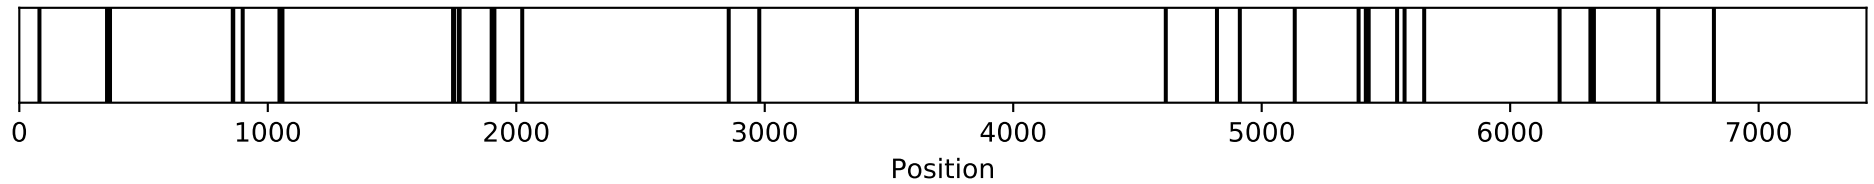

CR2 vs MM1  
Number of differences: 95

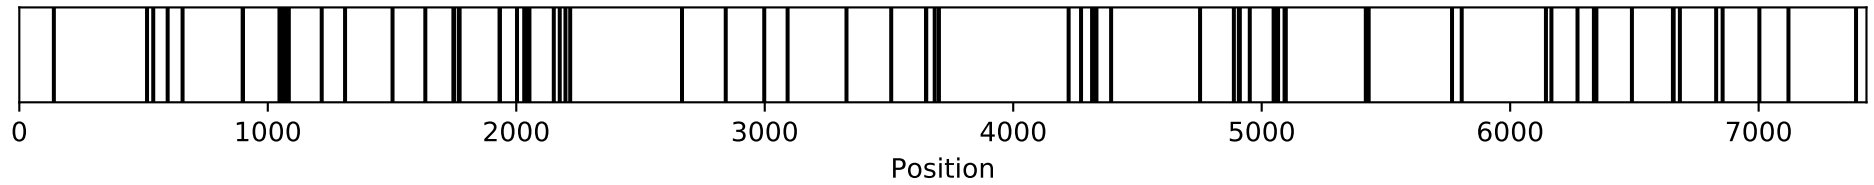

CR2 vs MM2  
Number of differences: 98

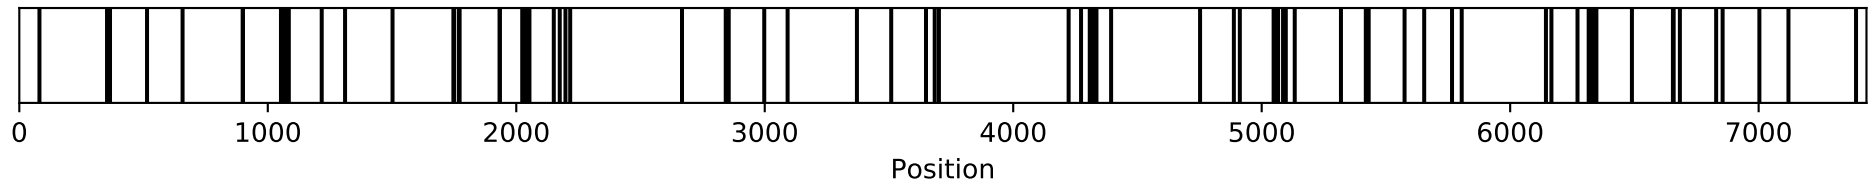

MM1 vs MM2  
Number of differences: 28

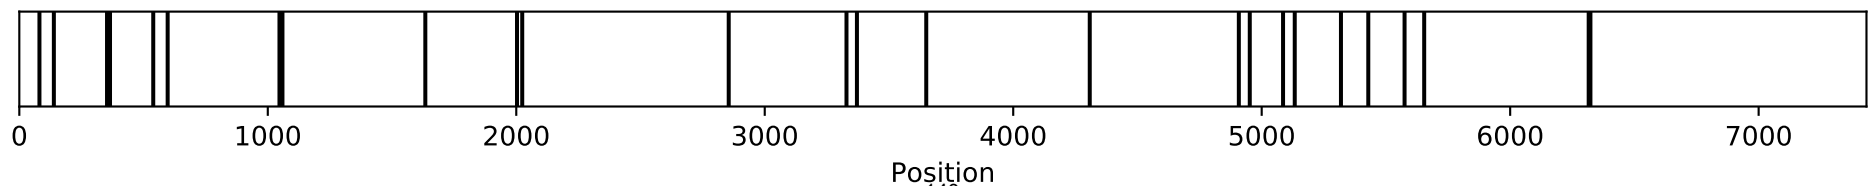

CR1 vs CR2  
Number of differences: 159

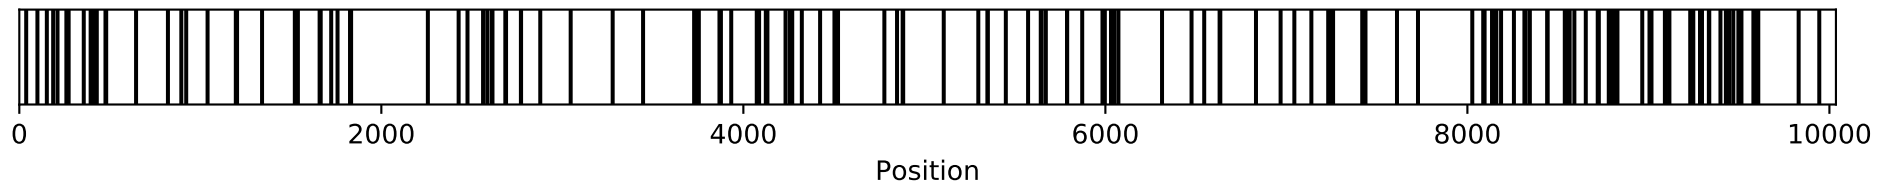

CR1 vs MM1  
Number of differences: 88

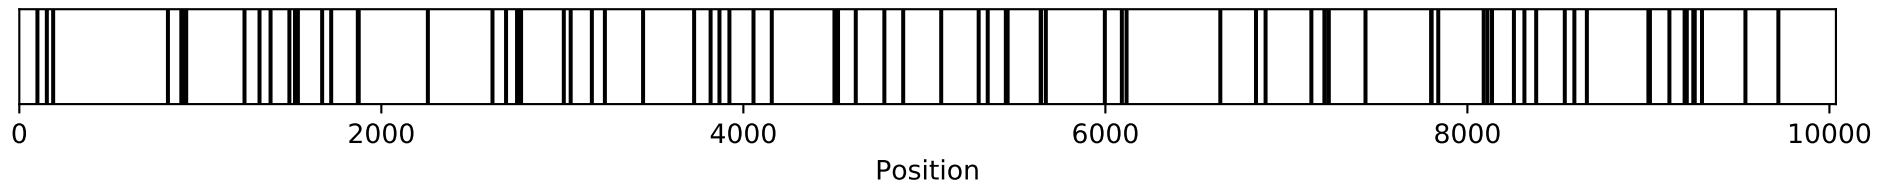

CR1 vs MM2  
Number of differences: 91

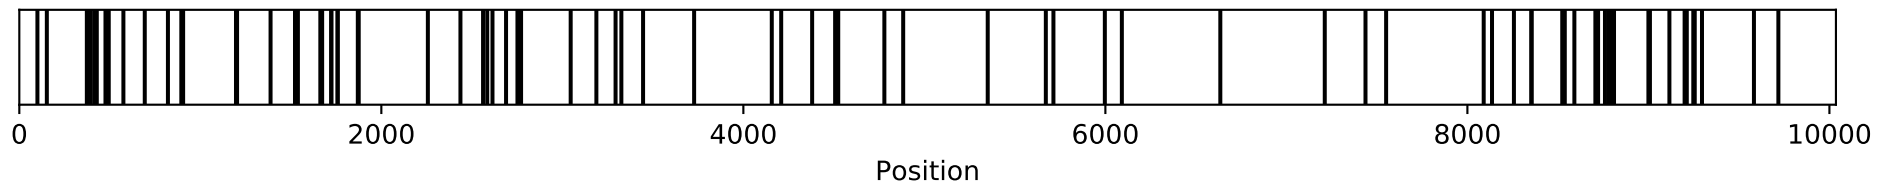

CR2 vs MM1  
Number of differences: 160

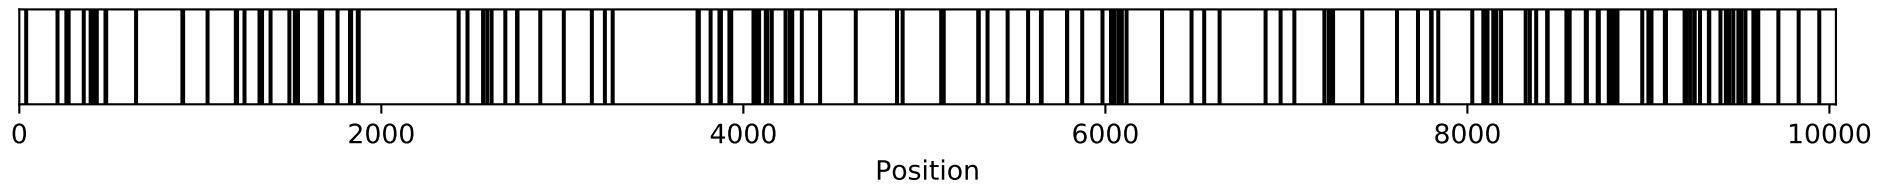

CR2 vs MM2  
Number of differences: 160

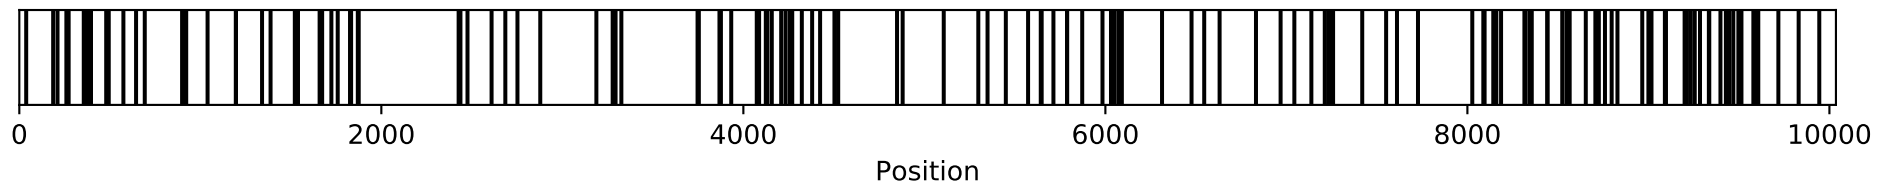

MM1 vs MM2  
Number of differences: 77

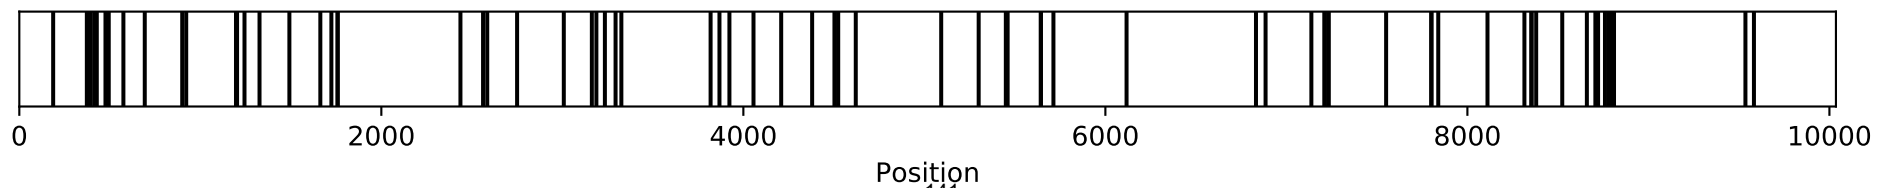

CR1 vs CR2  
Number of differences: 385

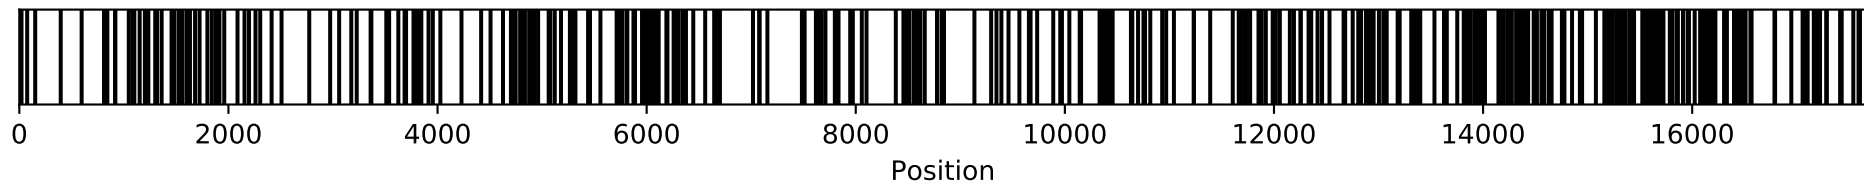

CR1 vs MM1  
Number of differences: 134

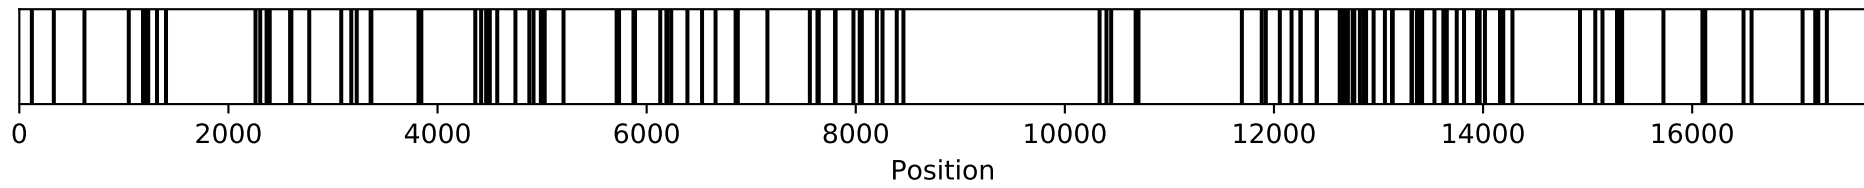

CR1 vs MM2  
Number of differences: 152

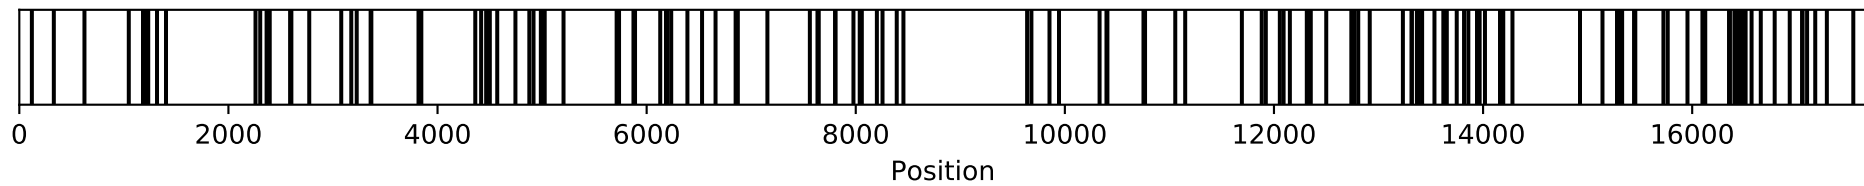

CR2 vs MM1  
Number of differences: 393

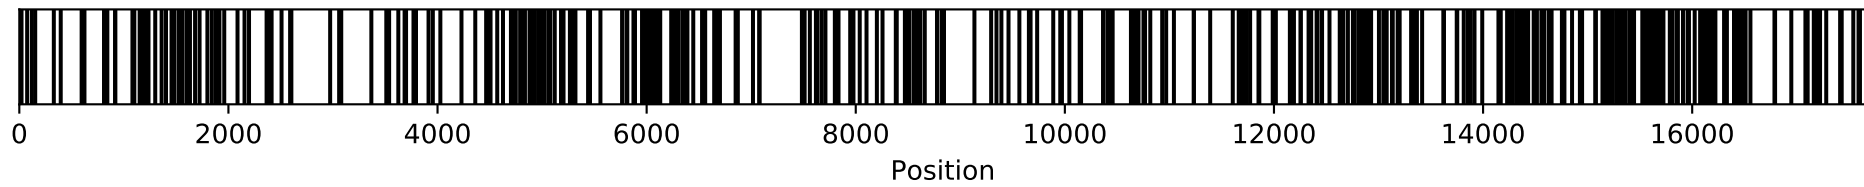

CR2 vs MM2  
Number of differences: 409

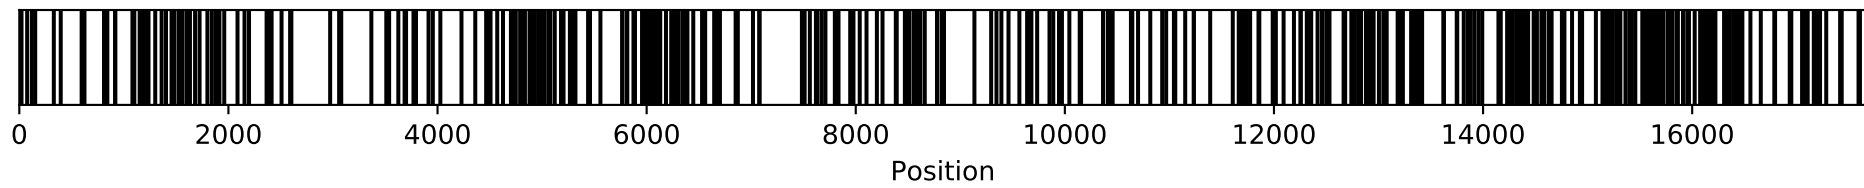

MM1 vs MM2  
Number of differences: 73

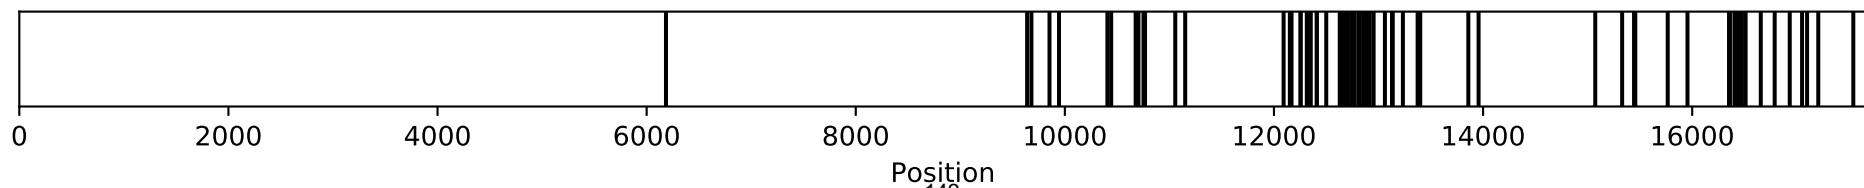

CR1 vs CR2  
Number of differences: 292

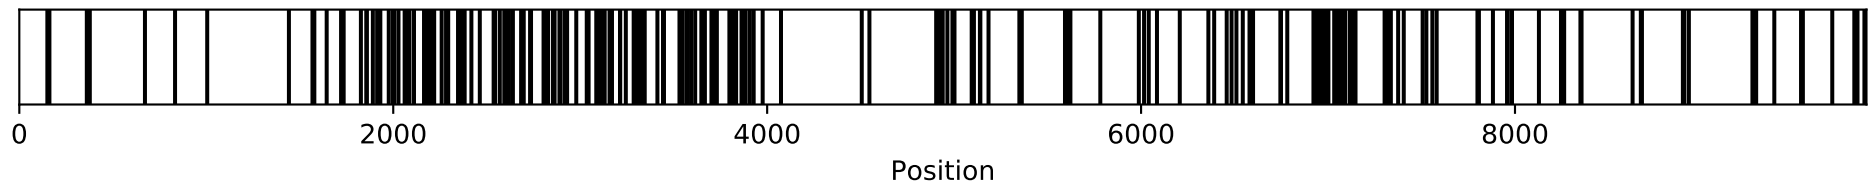

CR1 vs MM1  
Number of differences: 288

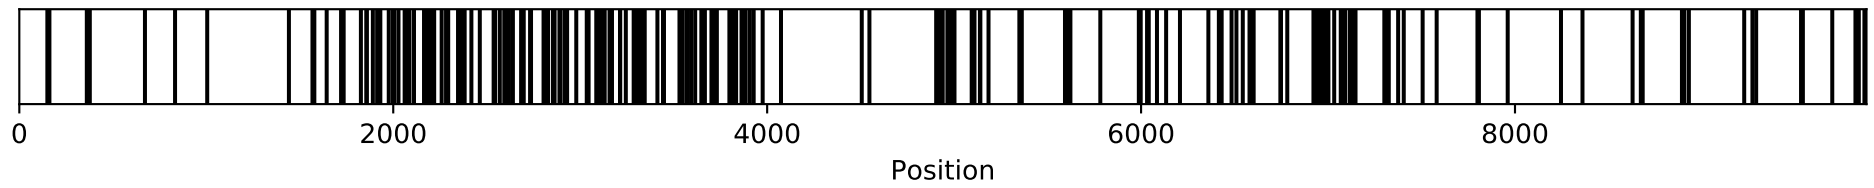

CR1 vs MM2  
Number of differences: 289

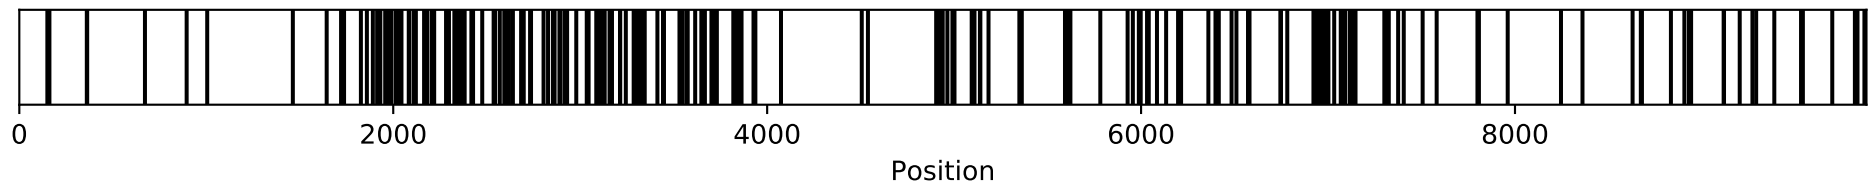

CR2 vs MM1  
Number of differences: 52

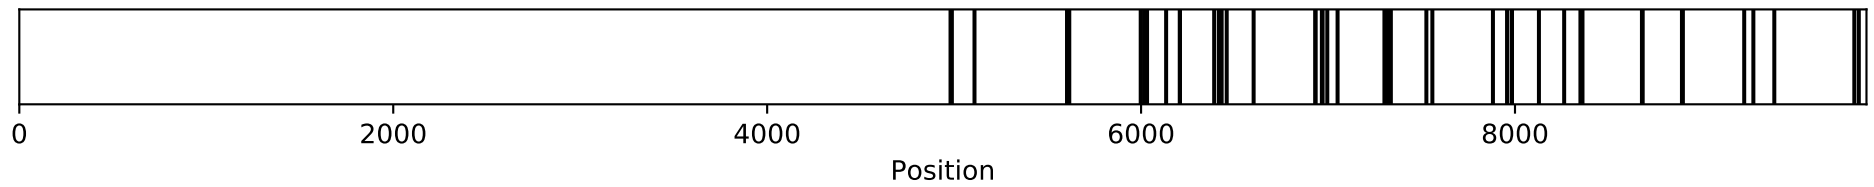

CR2 vs MM2  
Number of differences: 123

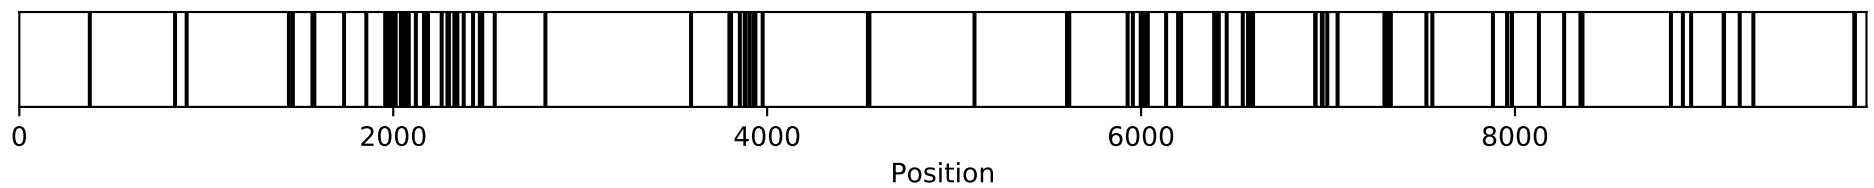

MM1 vs MM2  
Number of differences: 97

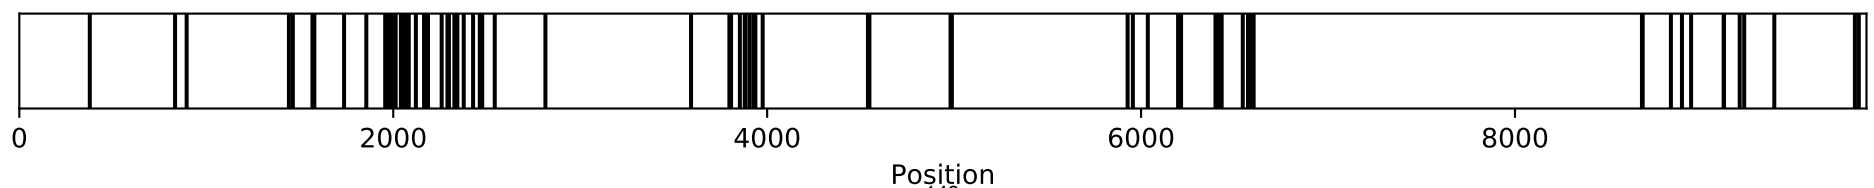



CR1 vs CR2  
Number of differences: 253

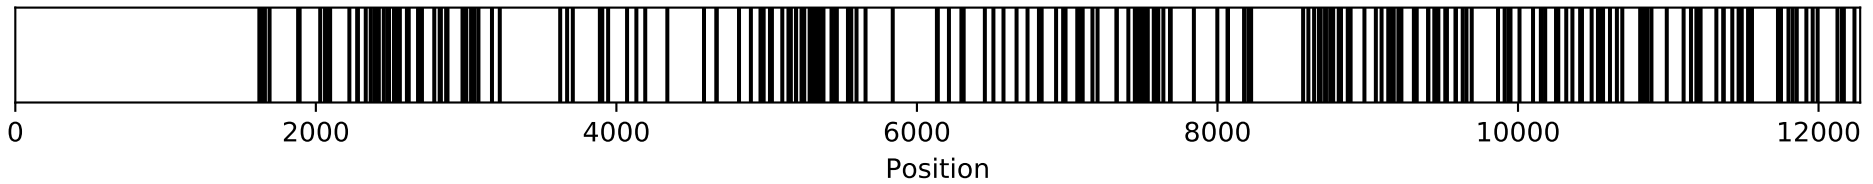

CR1 vs MM1  
Number of differences: 165

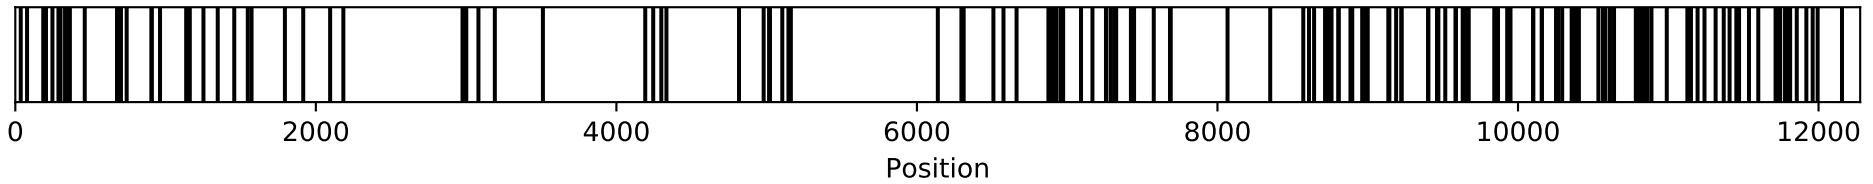

CR1 vs MM2  
Number of differences: 167

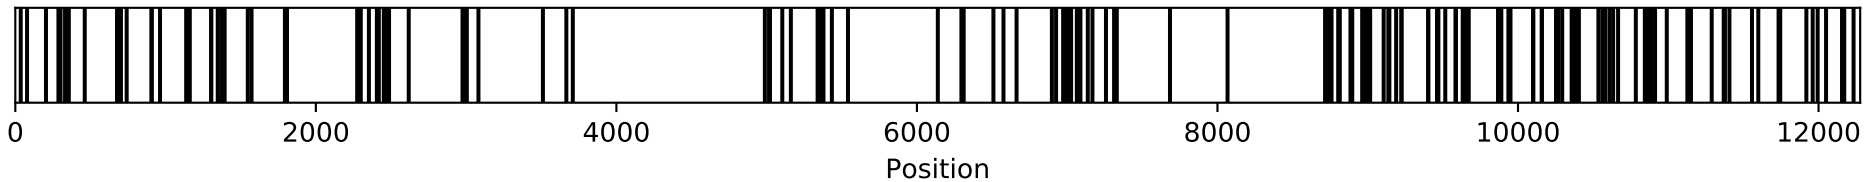

CR2 vs MM1  
Number of differences: 284

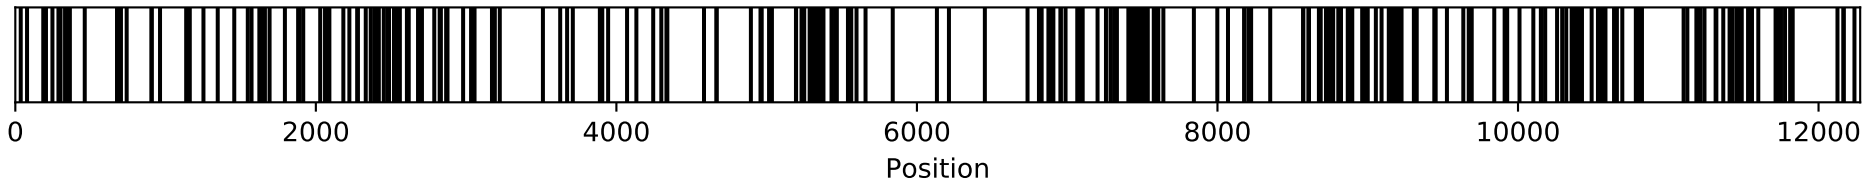

CR2 vs MM2  
Number of differences: 279

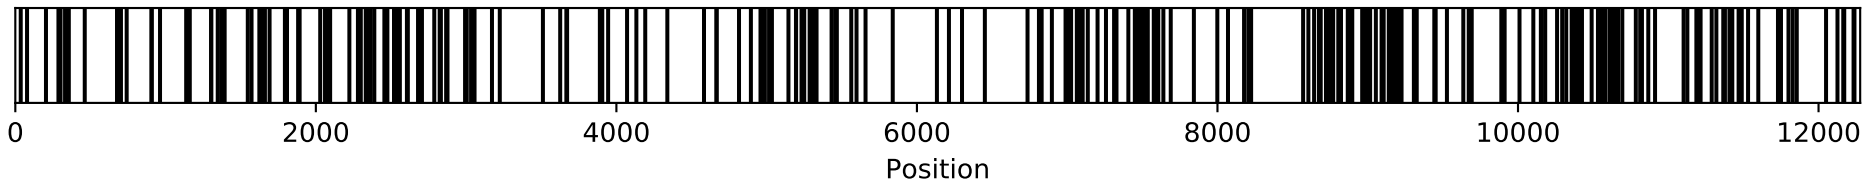

MM1 vs MM2  
Number of differences: 108

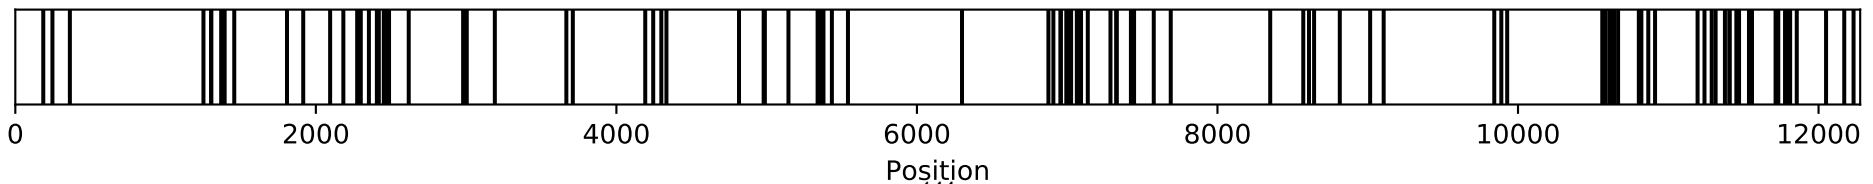

CR1 vs CR2  
Number of differences: 236

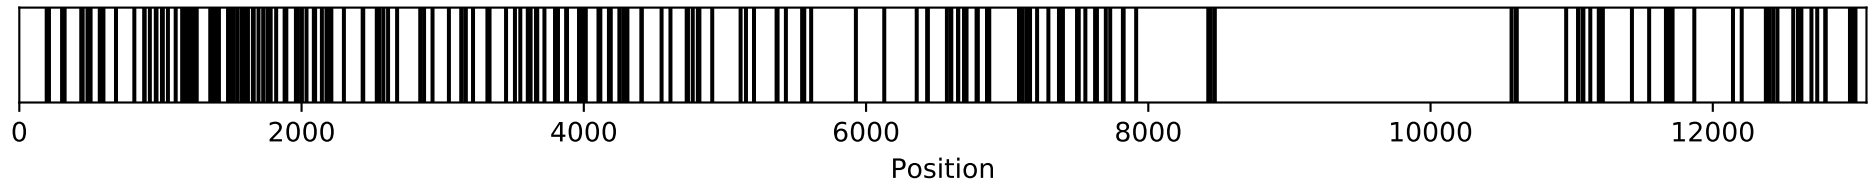

CR1 vs MM1  
Number of differences: 165

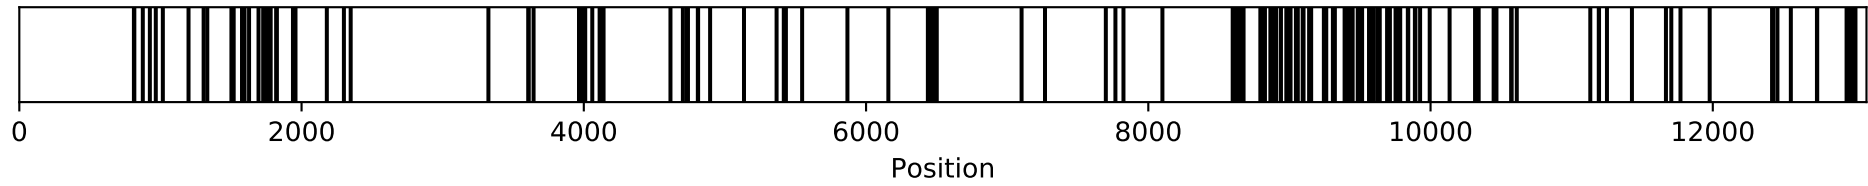

CR1 vs MM2  
Number of differences: 196

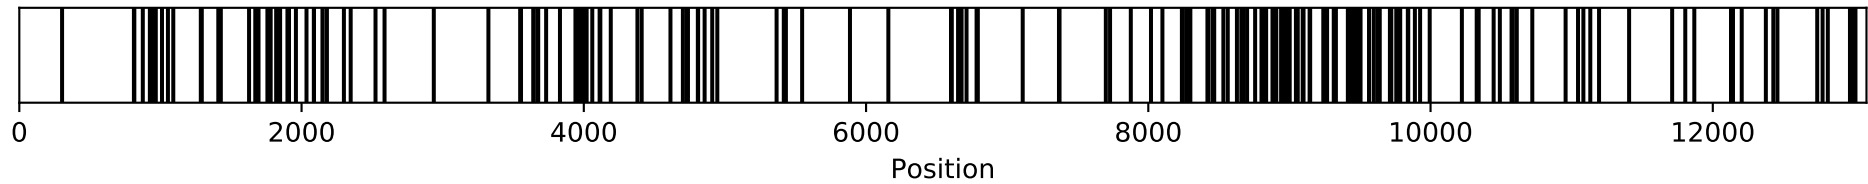

CR2 vs MM1  
Number of differences: 318

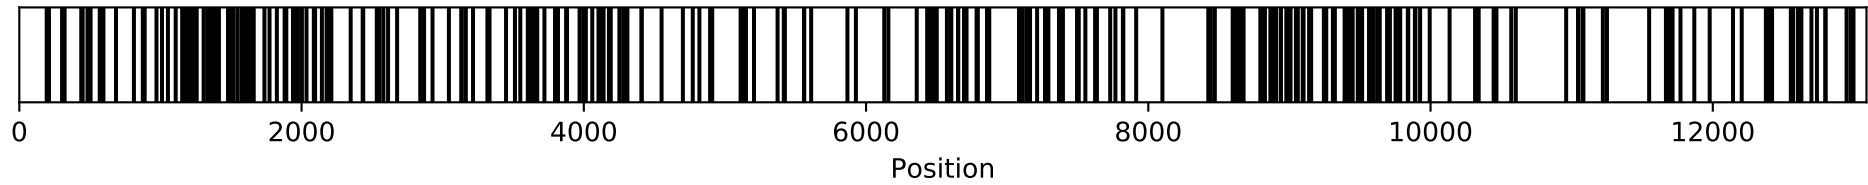

CR2 vs MM2  
Number of differences: 307

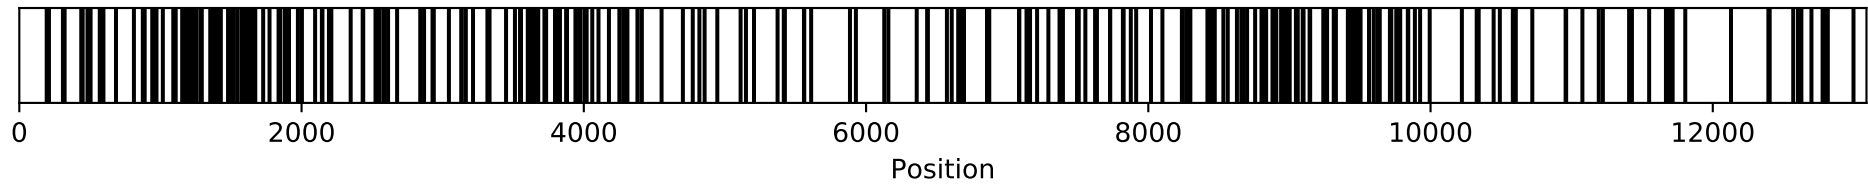

MM1 vs MM2  
Number of differences: 190

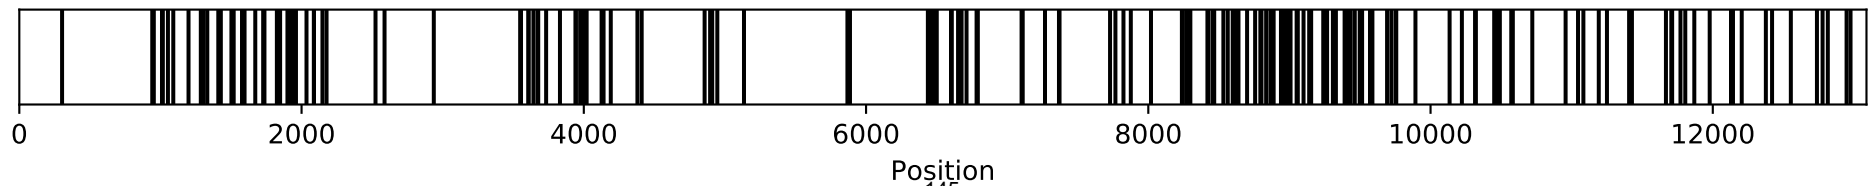

CR1 vs CR2  
Number of differences: 229

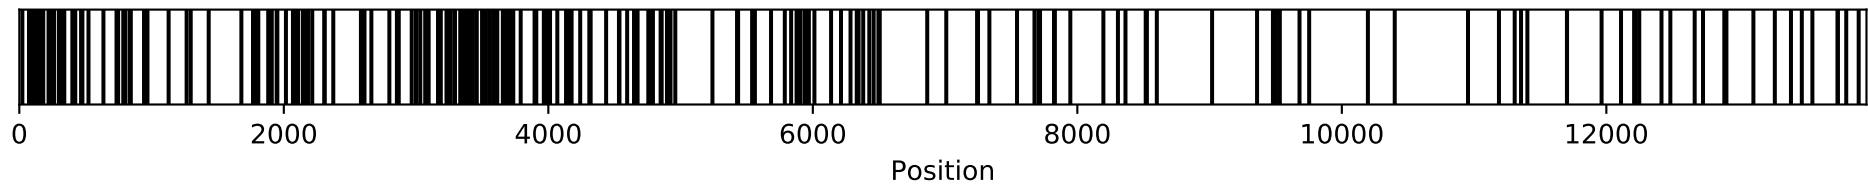

CR1 vs MM1  
Number of differences: 214

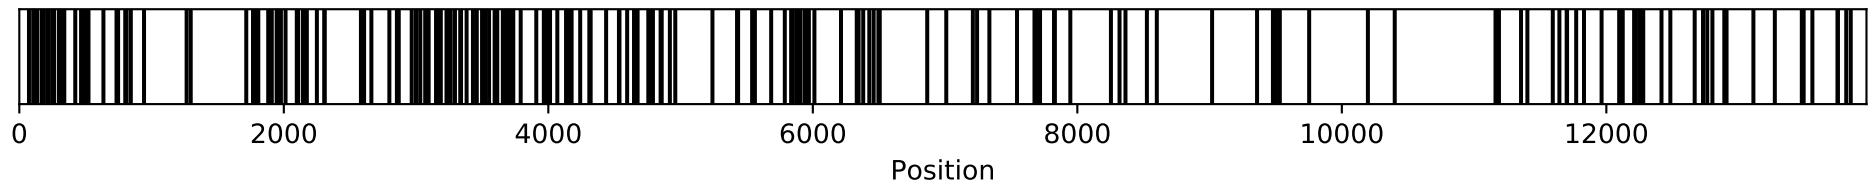

CR1 vs MM2  
Number of differences: 225

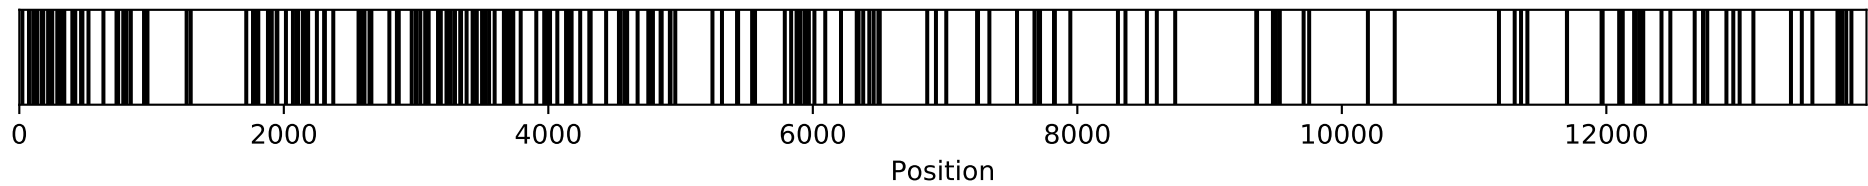

CR2 vs MM1  
Number of differences: 84

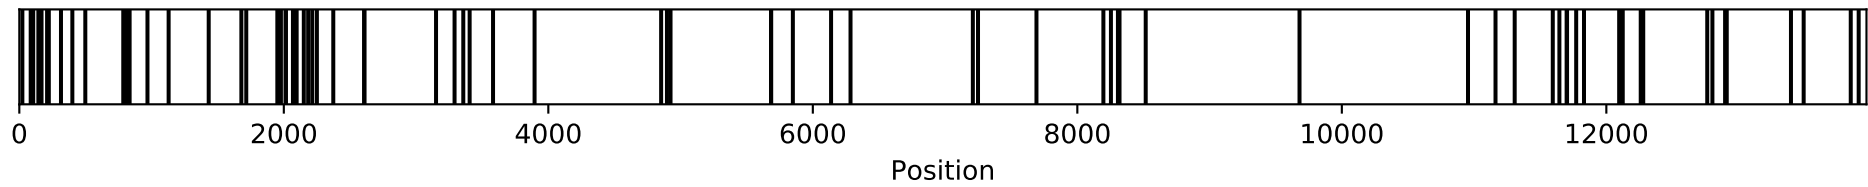

CR2 vs MM2  
Number of differences: 80

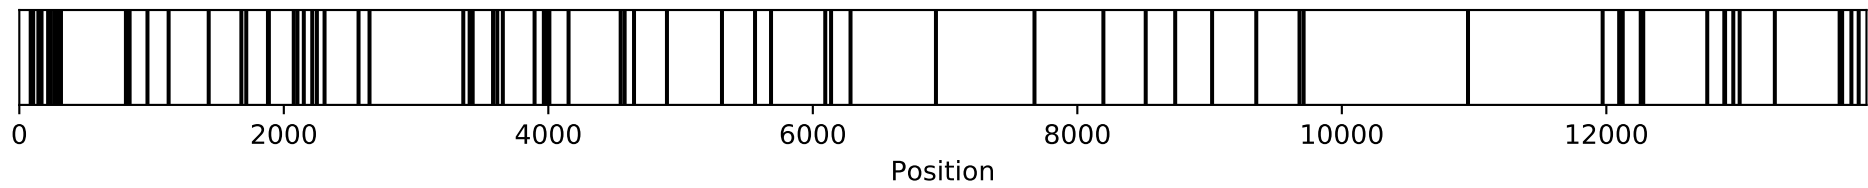

MM1 vs MM2  
Number of differences: 83

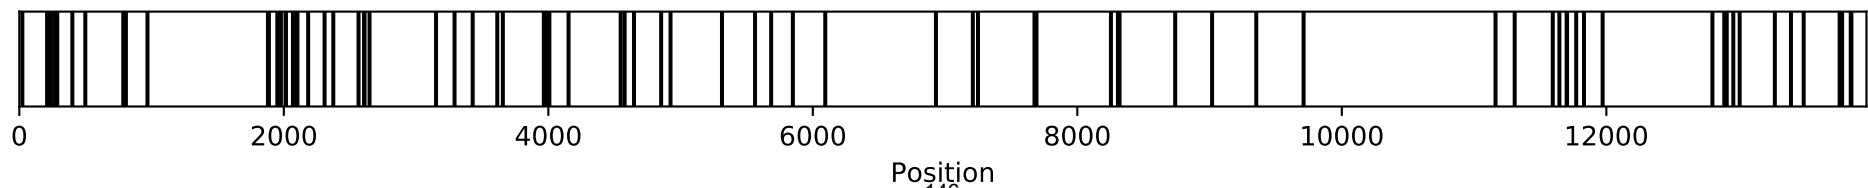

CR1 vs CR2  
Number of differences: 290

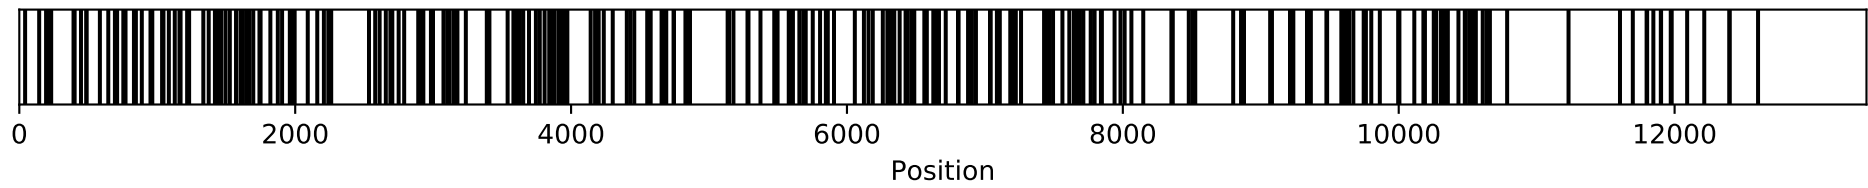

CR1 vs MM1  
Number of differences: 136

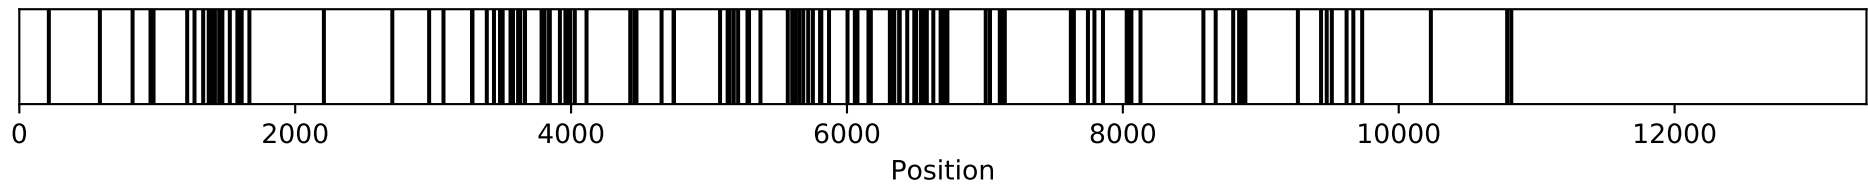

CR1 vs MM2  
Number of differences: 155

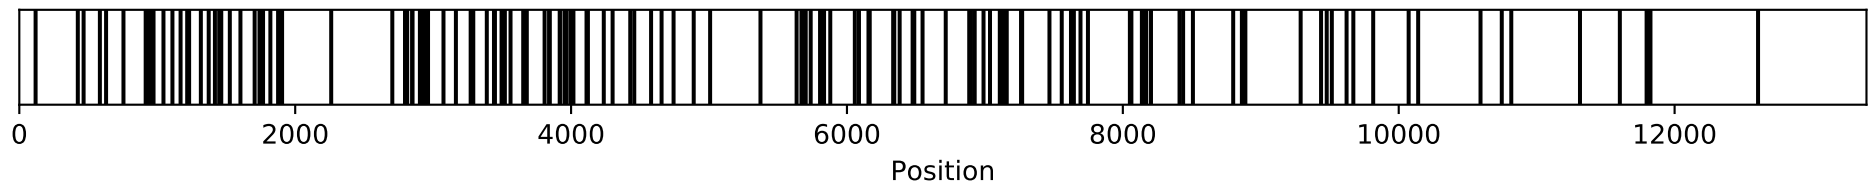

CR2 vs MM1  
Number of differences: 307

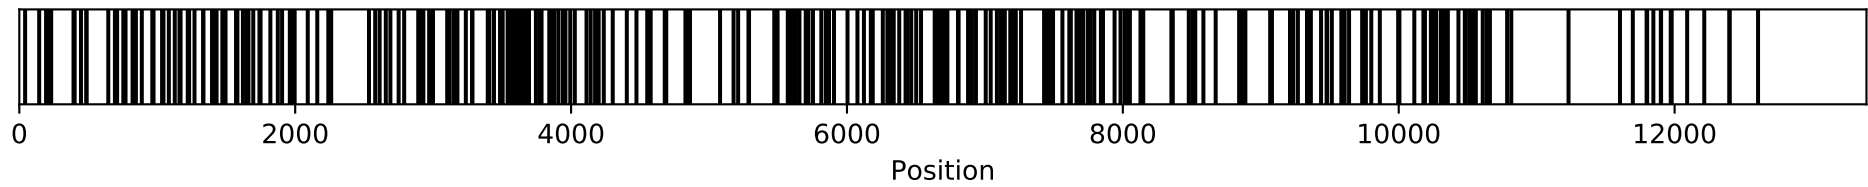

CR2 vs MM2  
Number of differences: 316

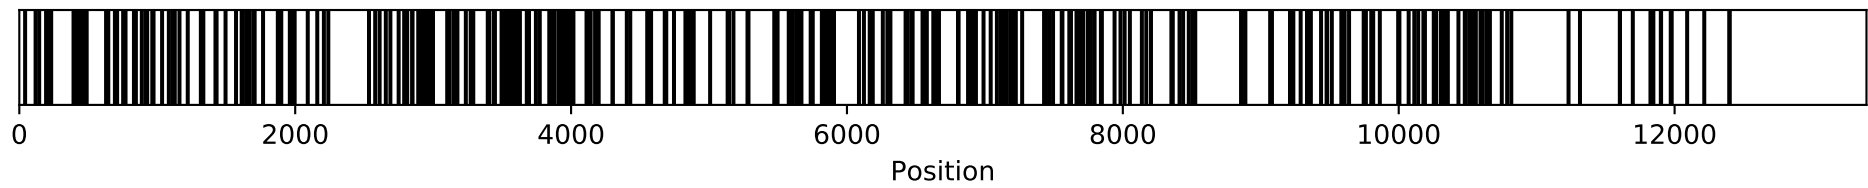

MM1 vs MM2  
Number of differences: 174

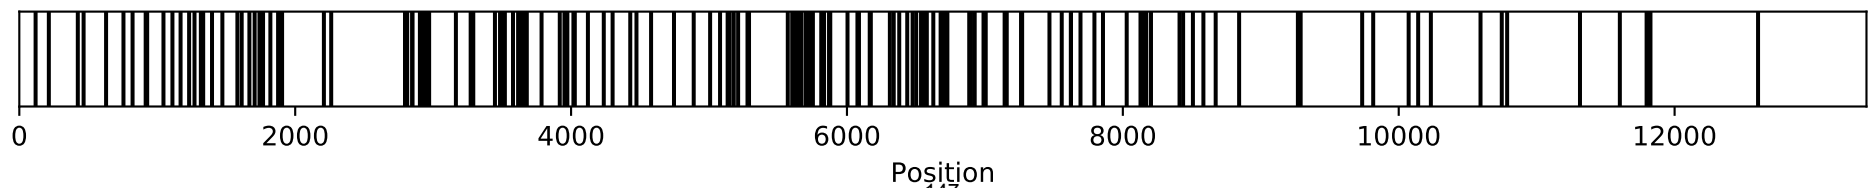

CR1 vs CR2  
Number of differences: 51

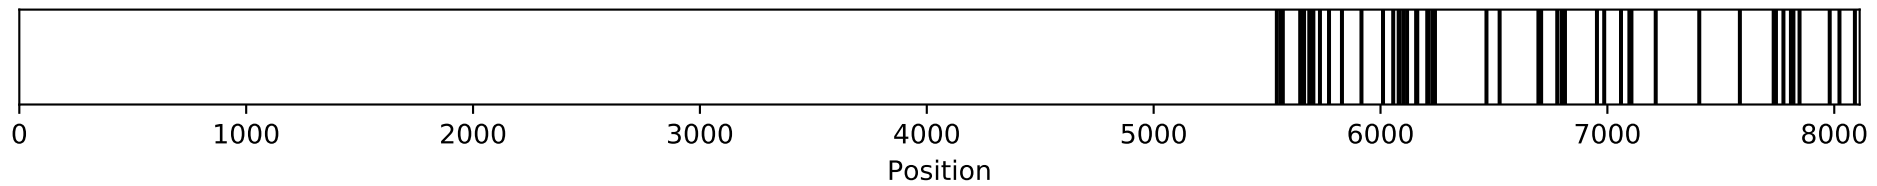

CR1 vs MM1  
Number of differences: 253

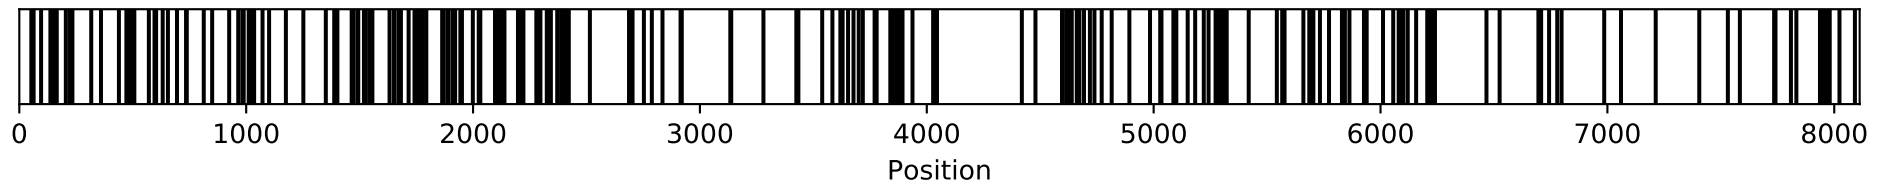

CR1 vs MM2  
Number of differences: 241

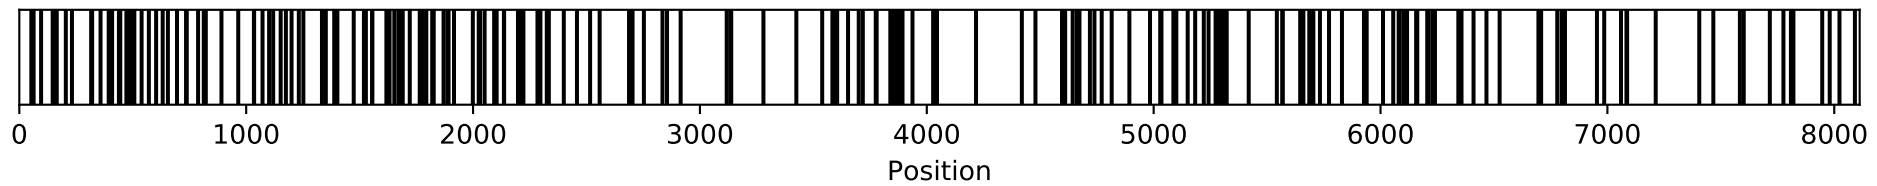

CR2 vs MM1  
Number of differences: 232

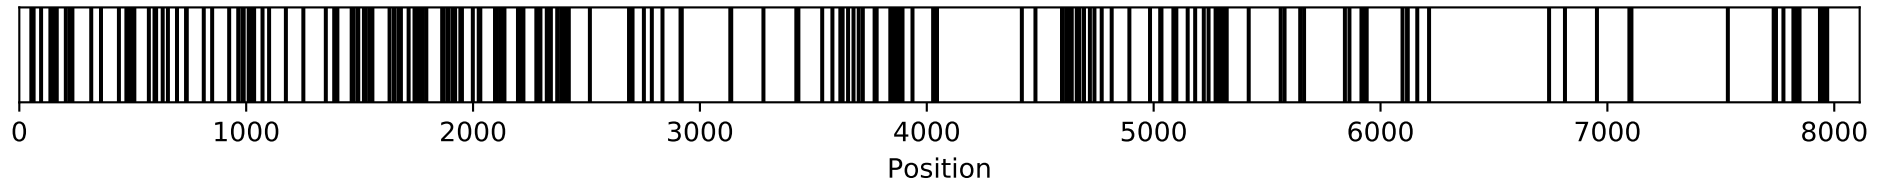

CR2 vs MM2  
Number of differences: 206

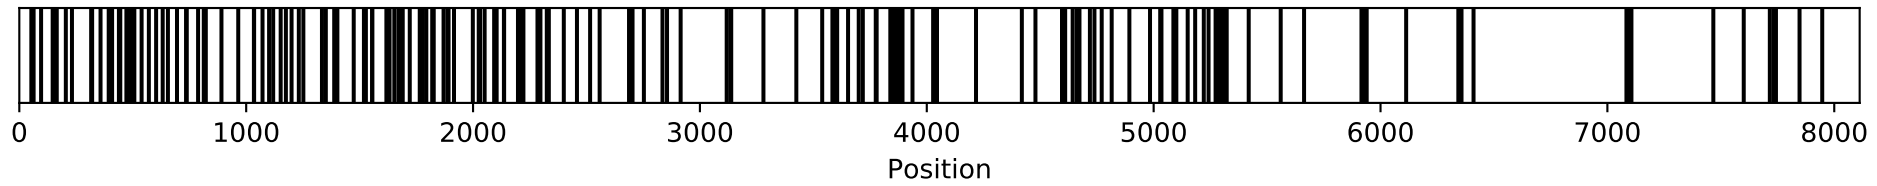

MM1 vs MM2  
Number of differences: 133

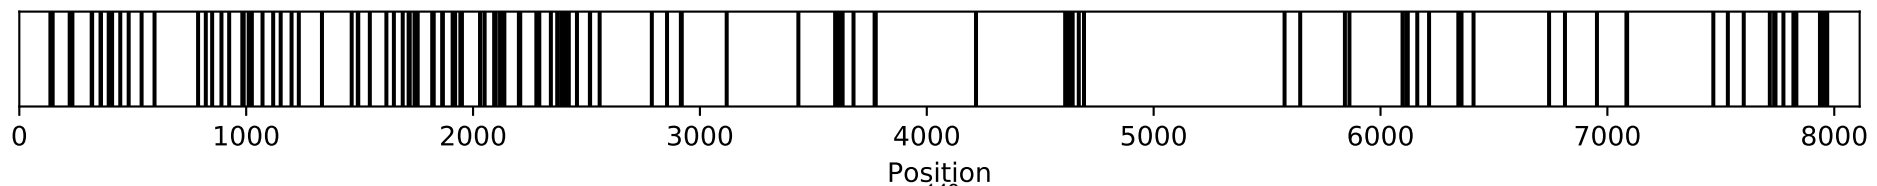

CR1 vs CR2  
Number of differences: 195

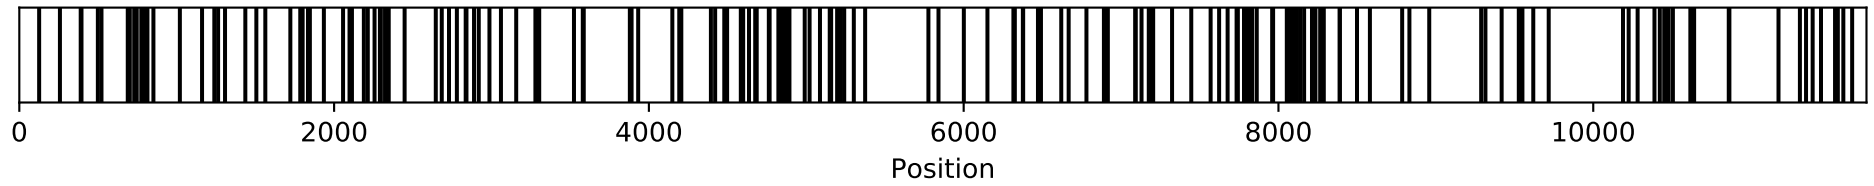

CR1 vs MM1  
Number of differences: 84

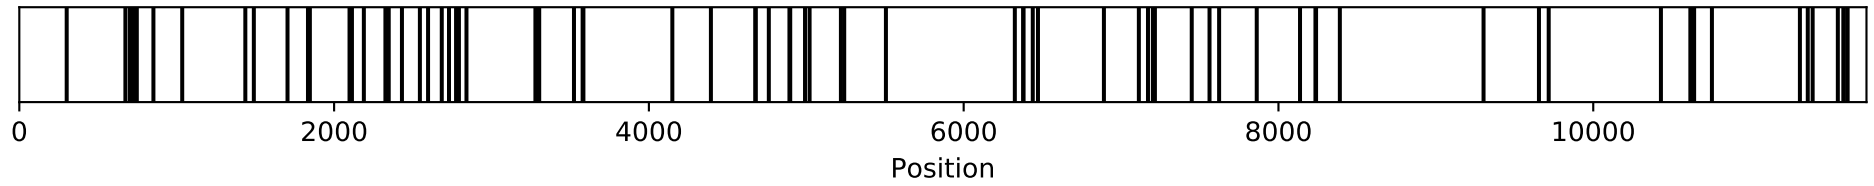

CR1 vs MM2  
Number of differences: 91

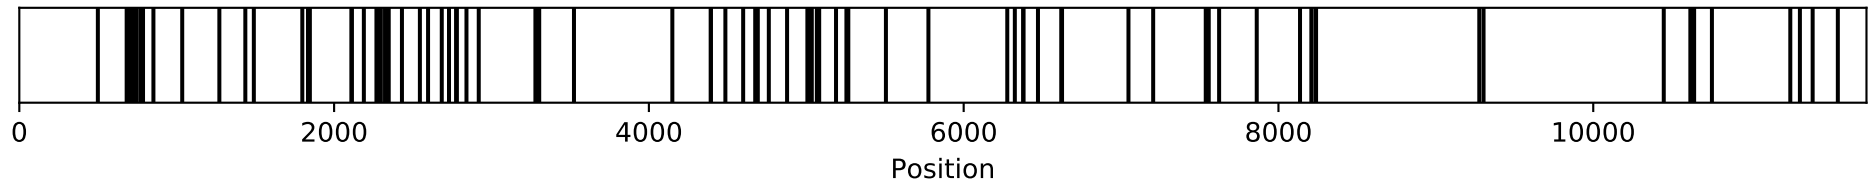

CR2 vs MM1  
Number of differences: 180

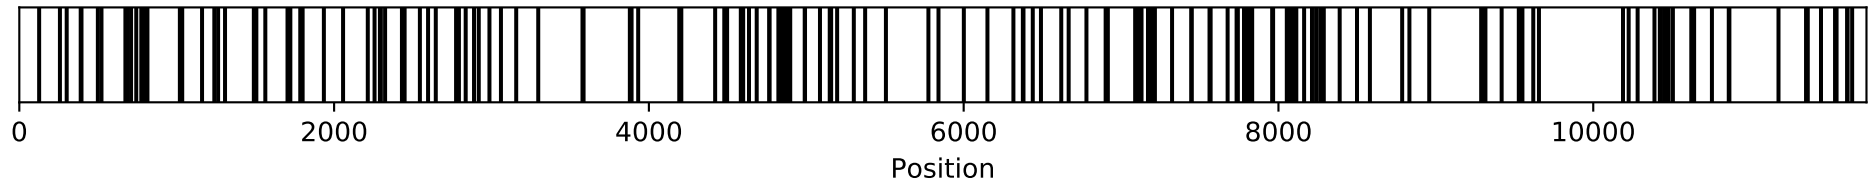

CR2 vs MM2  
Number of differences: 192

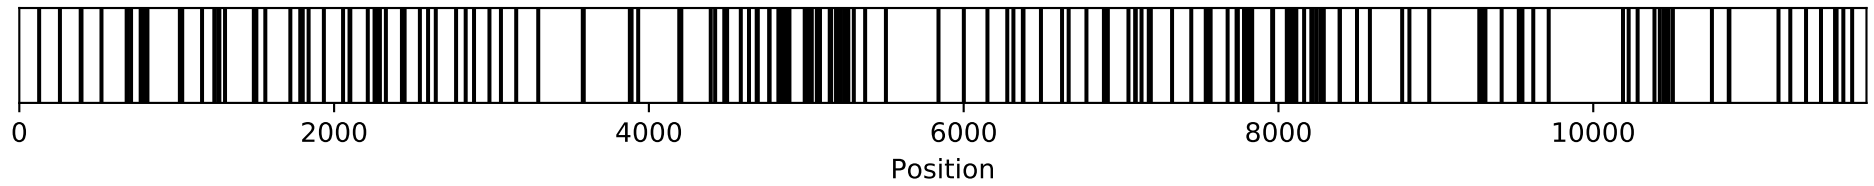

MM1 vs MM2  
Number of differences: 70

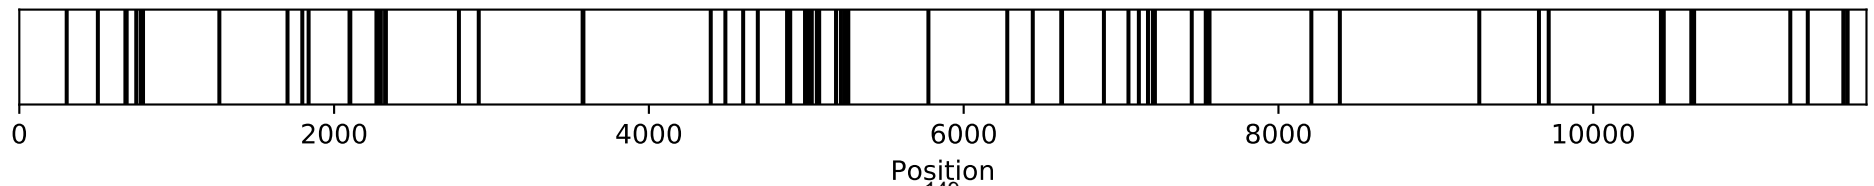

CR1 vs CR2  
Number of differences: 111

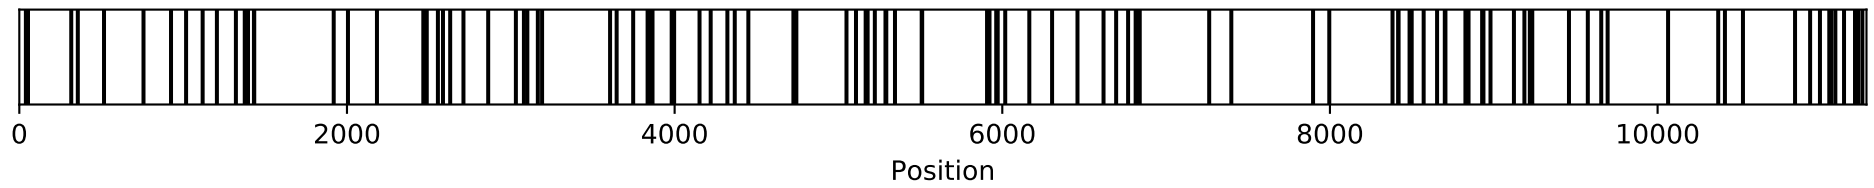

CR1 vs MM1  
Number of differences: 42

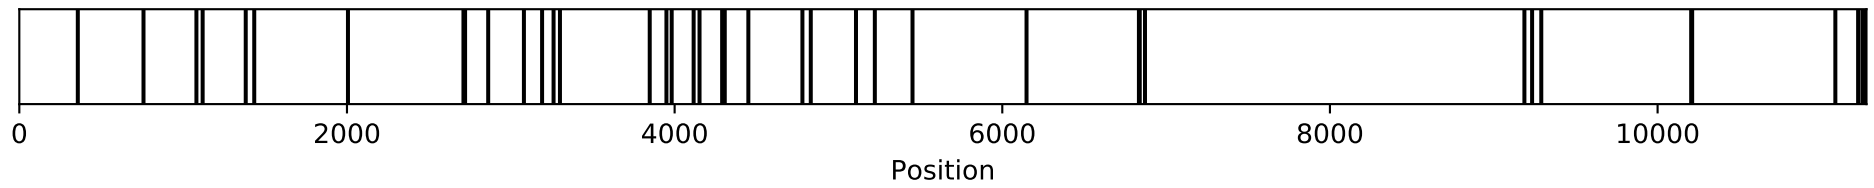

CR1 vs MM2  
Number of differences: 48

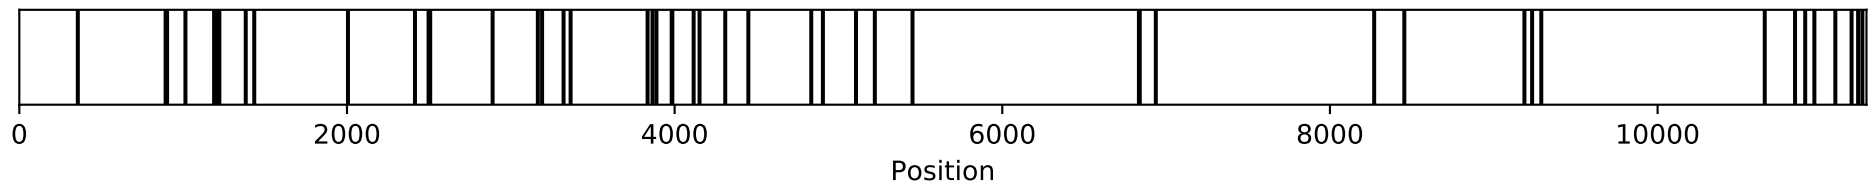

CR2 vs MM1  
Number of differences: 113

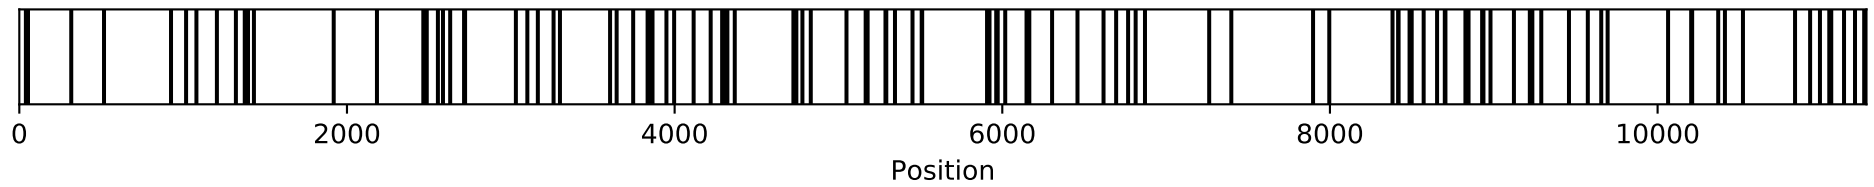

CR2 vs MM2  
Number of differences: 119

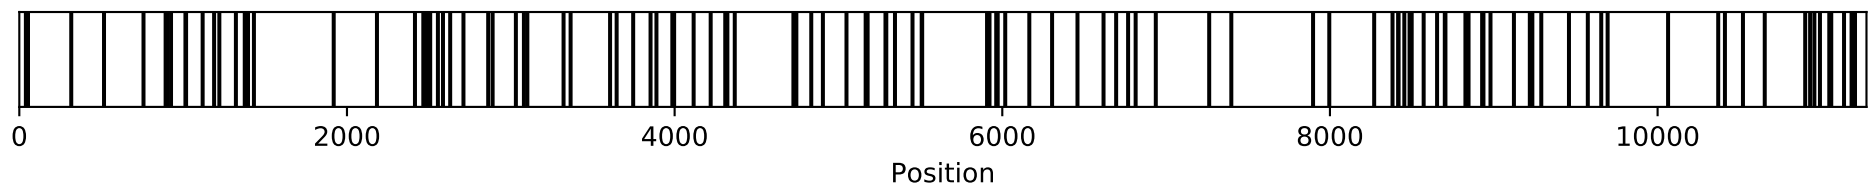

MM1 vs MM2  
Number of differences: 50

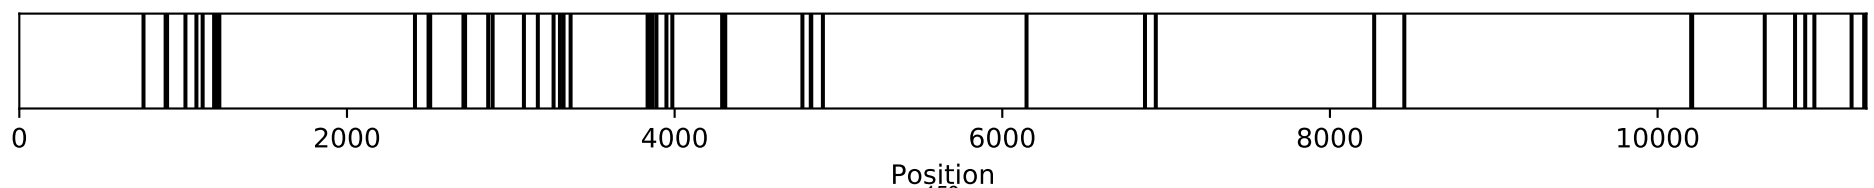

CR1 vs CR2  
Number of differences: 267

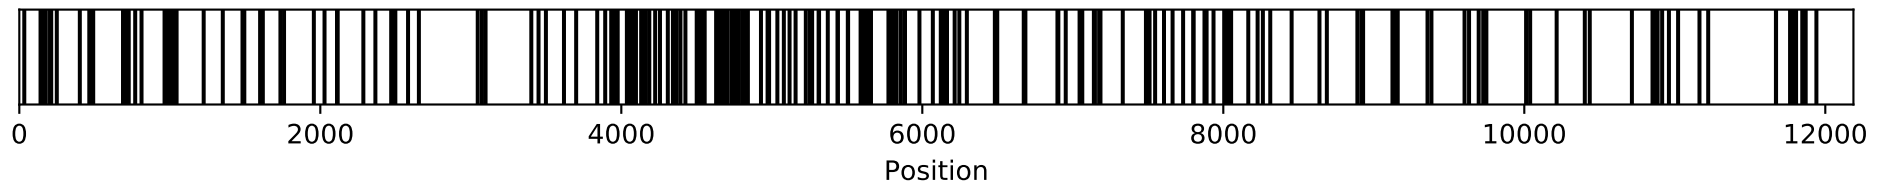

CR1 vs MM1  
Number of differences: 118

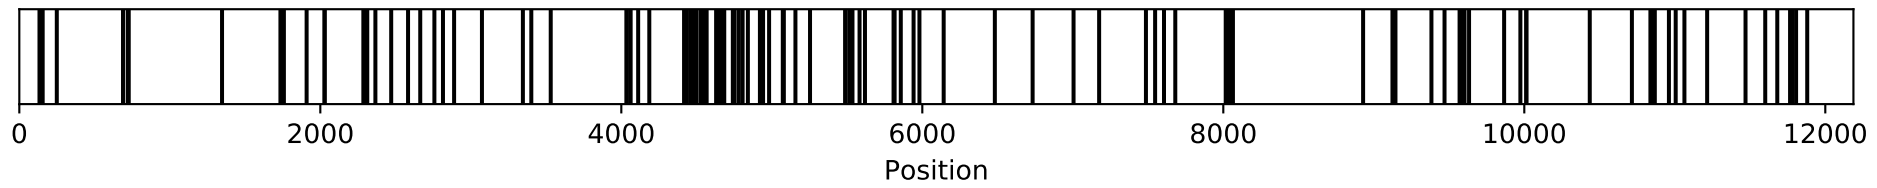

CR1 vs MM2  
Number of differences: 133

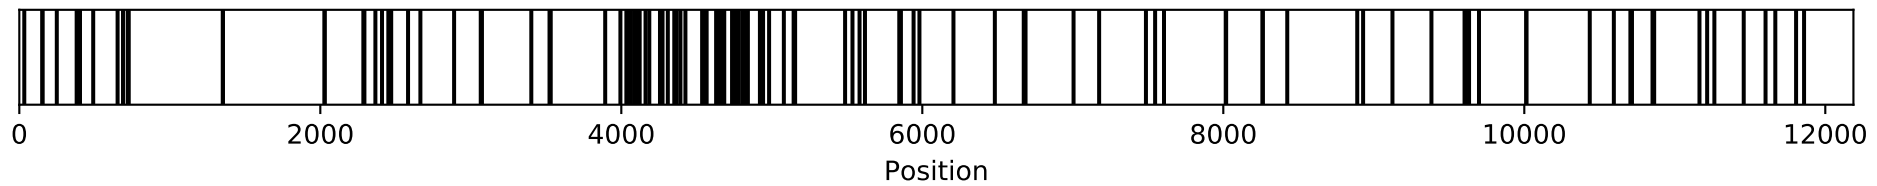

CR2 vs MM1  
Number of differences: 257

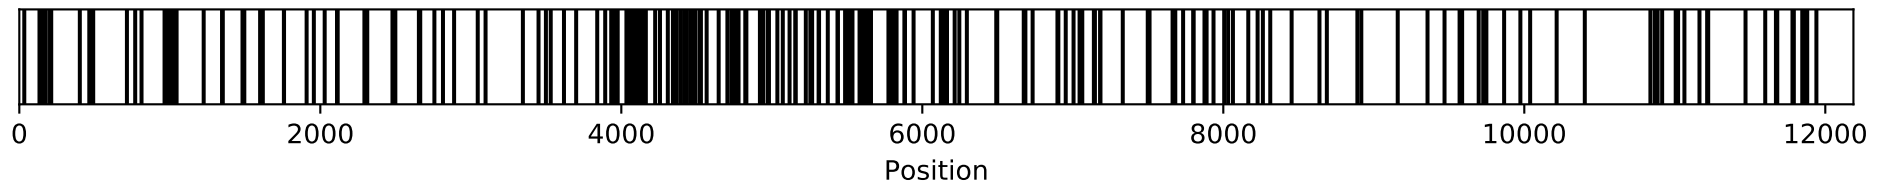

CR2 vs MM2  
Number of differences: 260

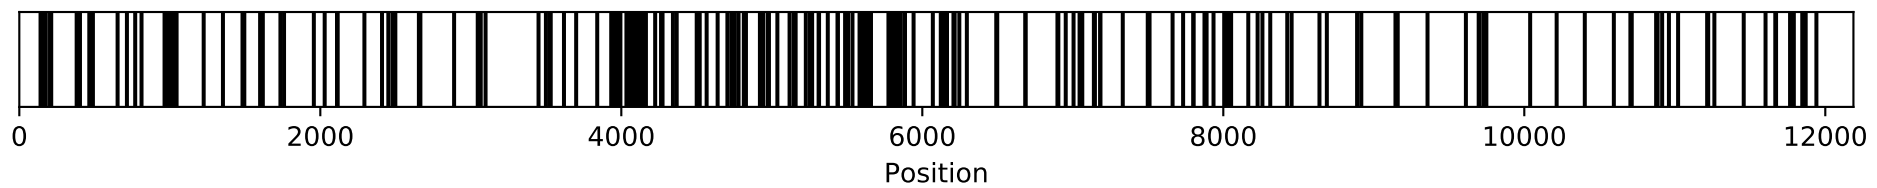

MM1 vs MM2  
Number of differences: 124

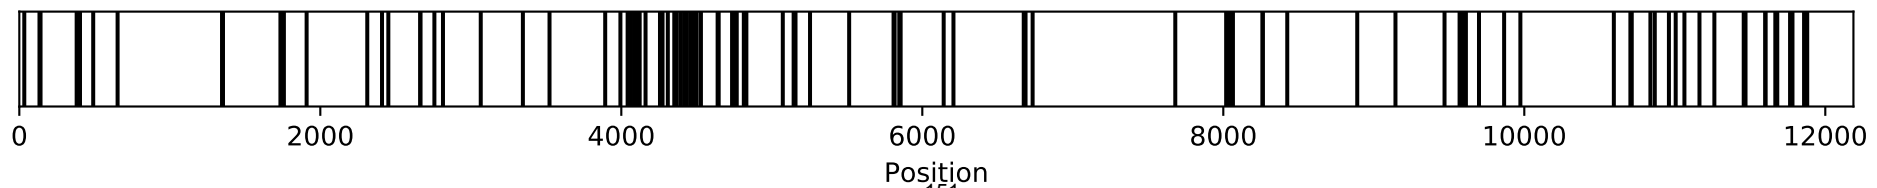



CR1 vs CR2  
Number of differences: 158

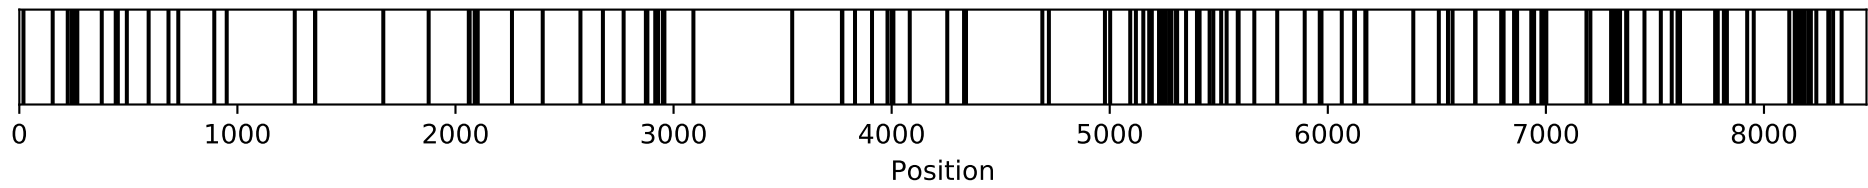

CR1 vs MM1  
Number of differences: 59

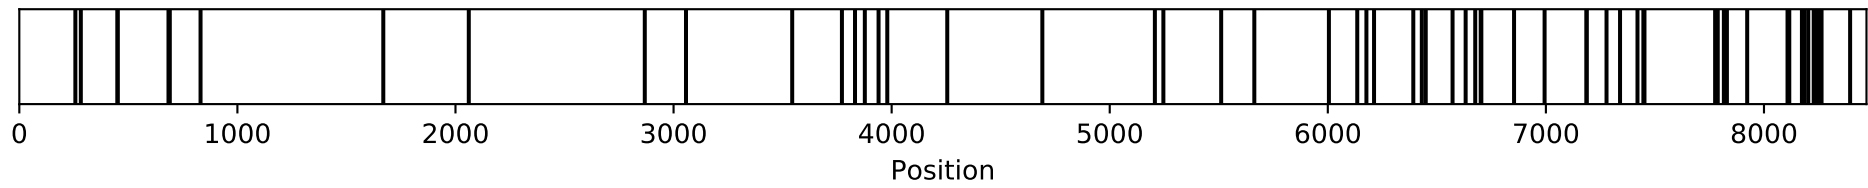

CR1 vs MM2  
Number of differences: 56

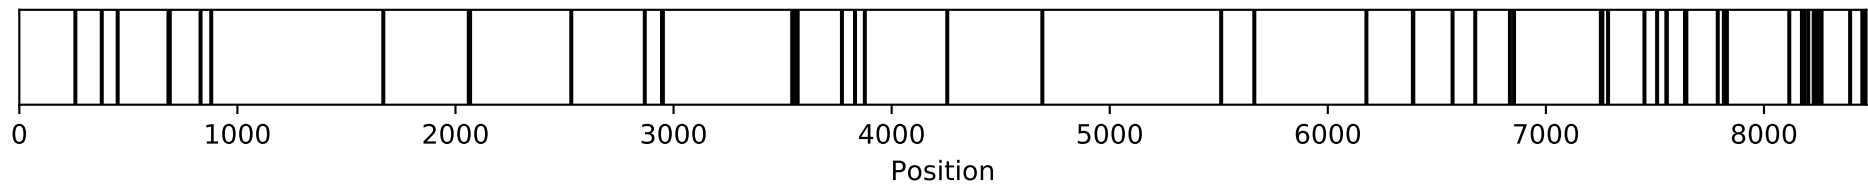

CR2 vs MM1  
Number of differences: 154

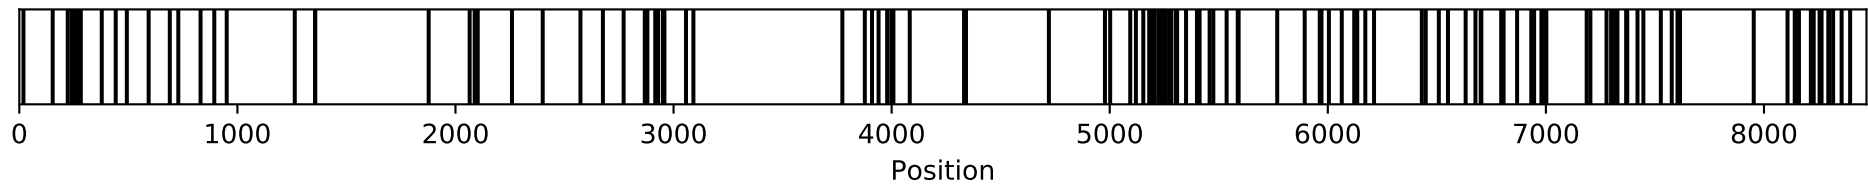

CR2 vs MM2  
Number of differences: 158

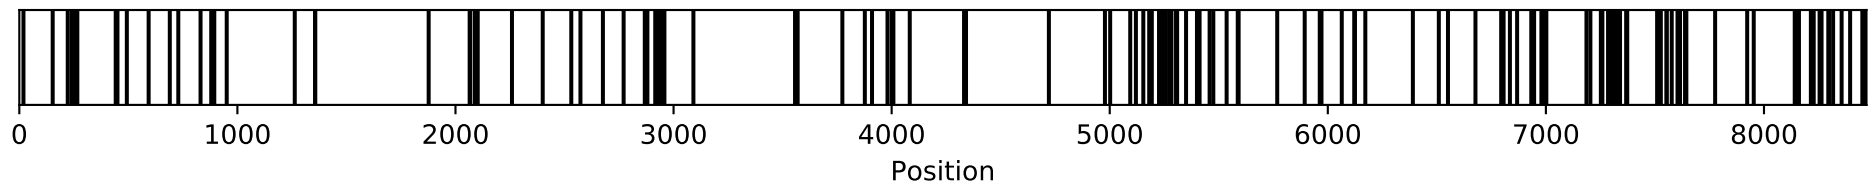

MM1 vs MM2  
Number of differences: 47

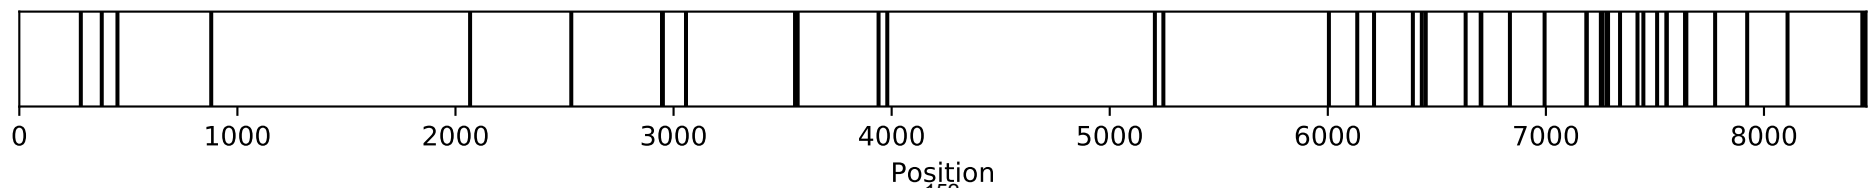

CR1 vs CR2  
Number of differences: 25

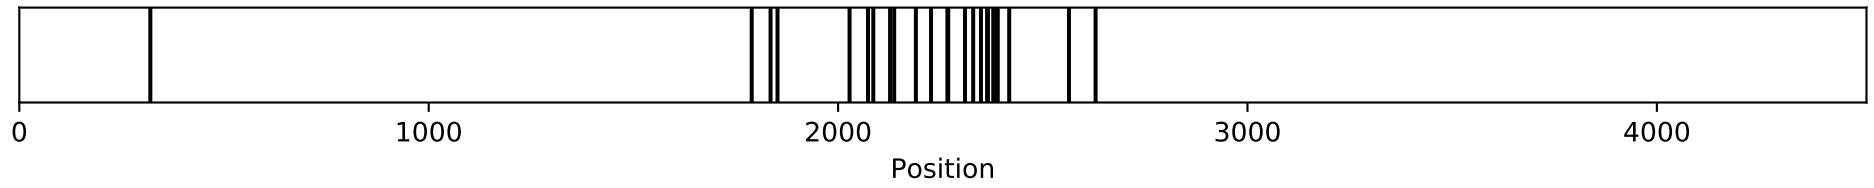

CR1 vs MM1  
Number of differences: 57

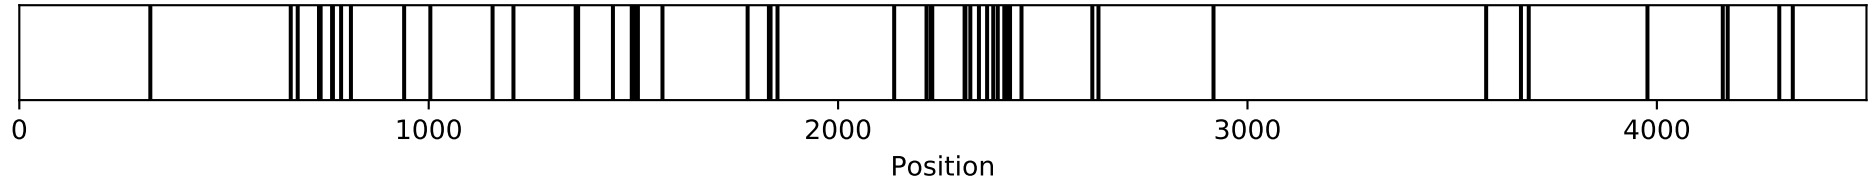

CR1 vs MM2  
Number of differences: 59

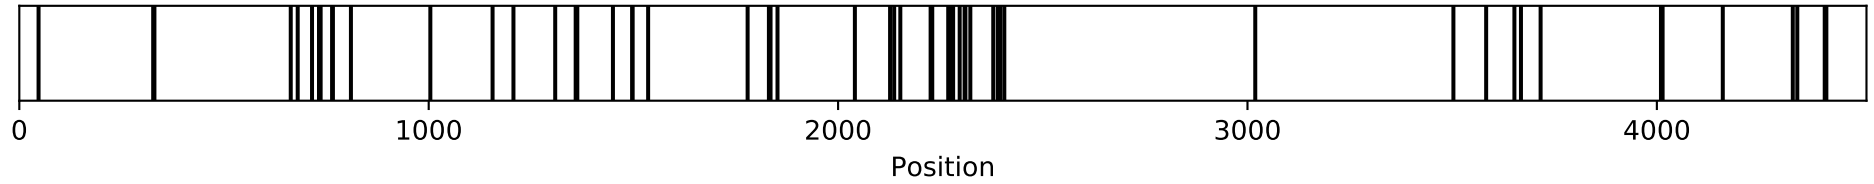

CR2 vs MM1  
Number of differences: 66

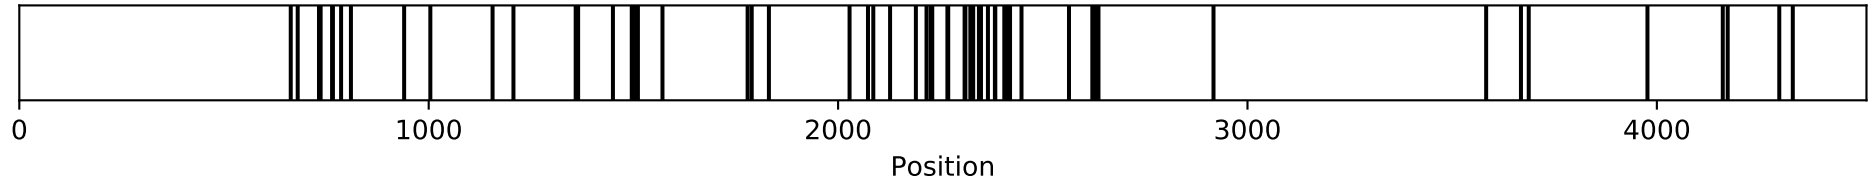

CR2 vs MM2  
Number of differences: 68

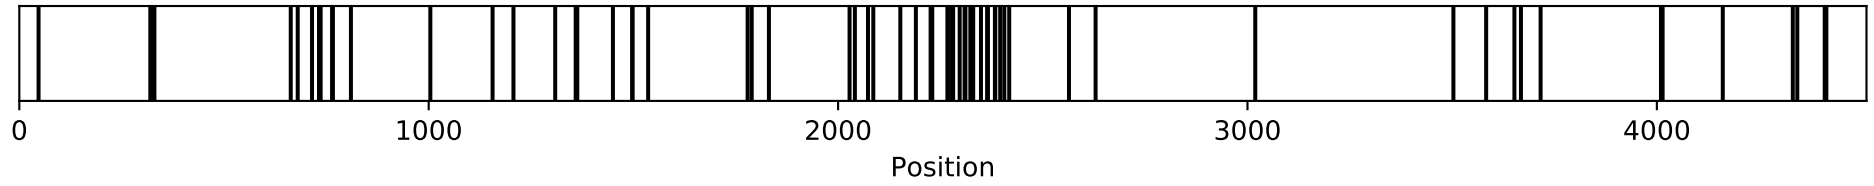

MM1 vs MM2  
Number of differences: 48

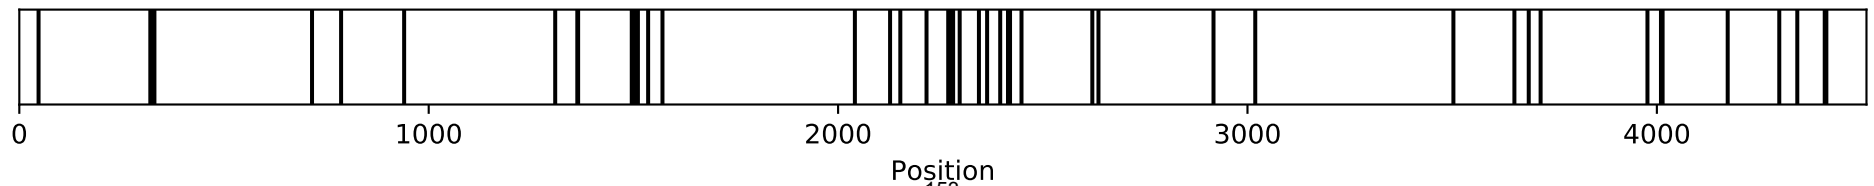

CR1 vs CR2  
Number of differences: 149

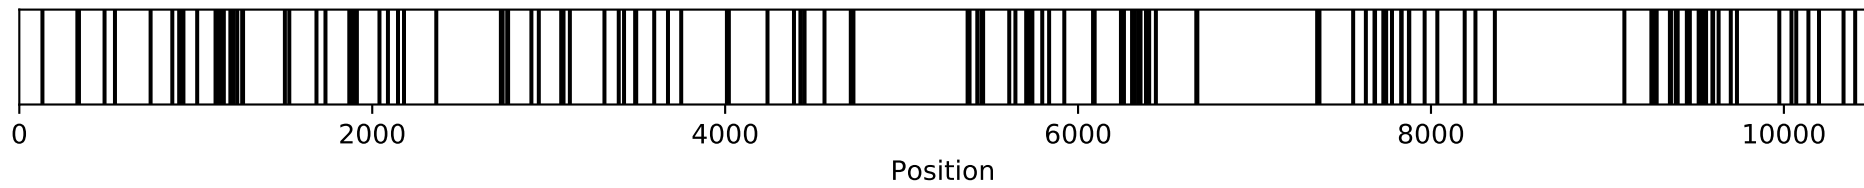

CR1 vs MM1  
Number of differences: 30

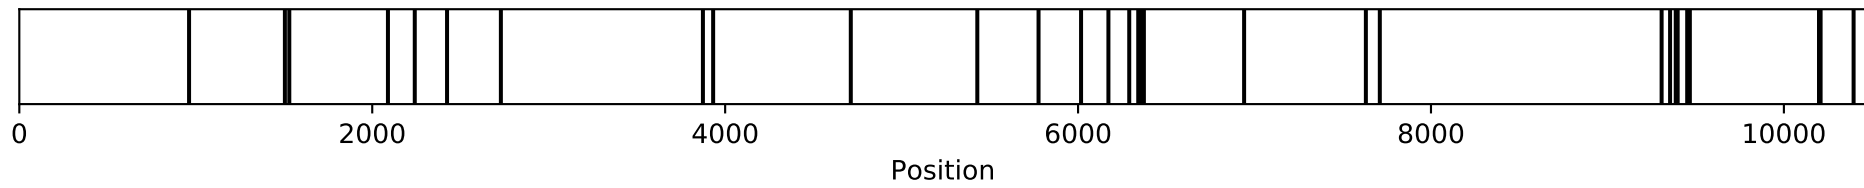

CR1 vs MM2  
Number of differences: 15

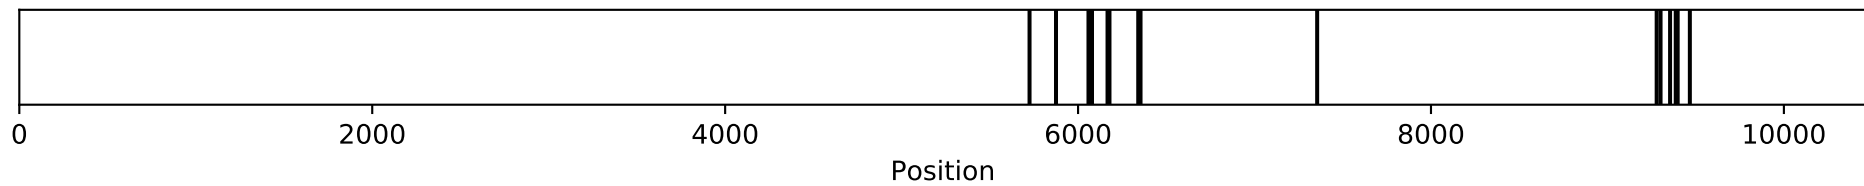

CR2 vs MM1  
Number of differences: 153

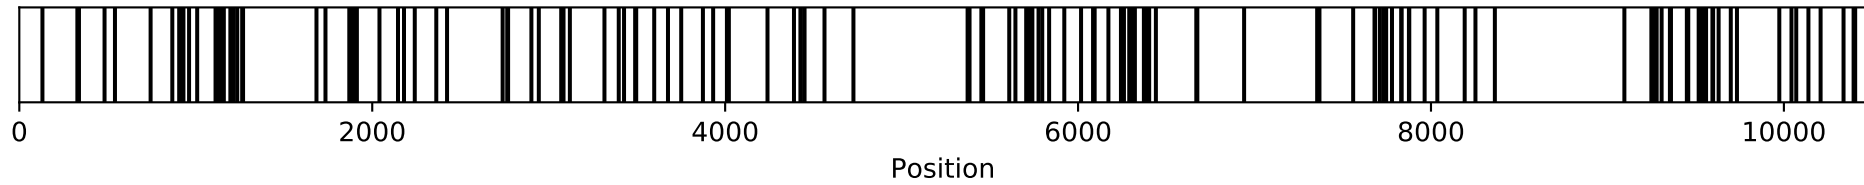

CR2 vs MM2  
Number of differences: 149

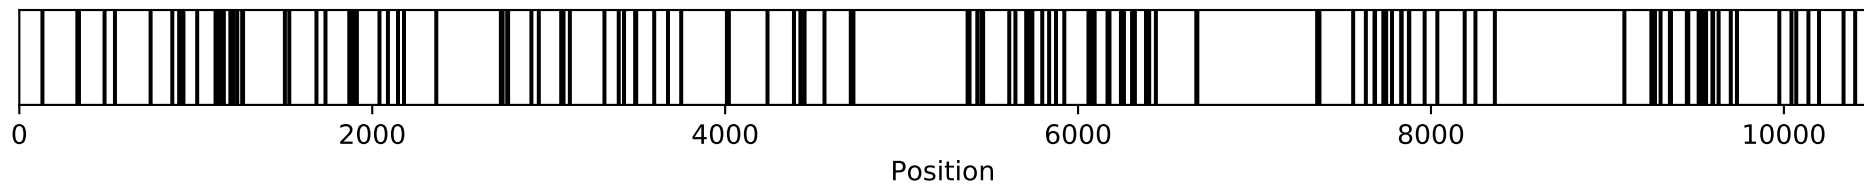

MM1 vs MM2  
Number of differences: 33

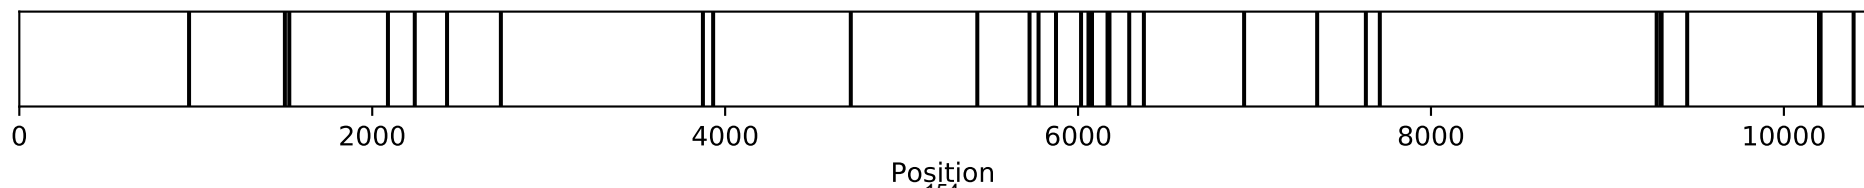

CR1 vs CR2  
Number of differences: 294

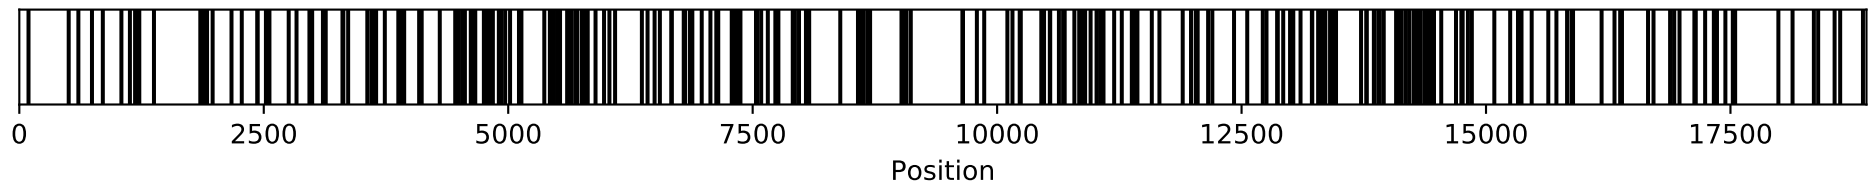

CR1 vs MM1  
Number of differences: 89

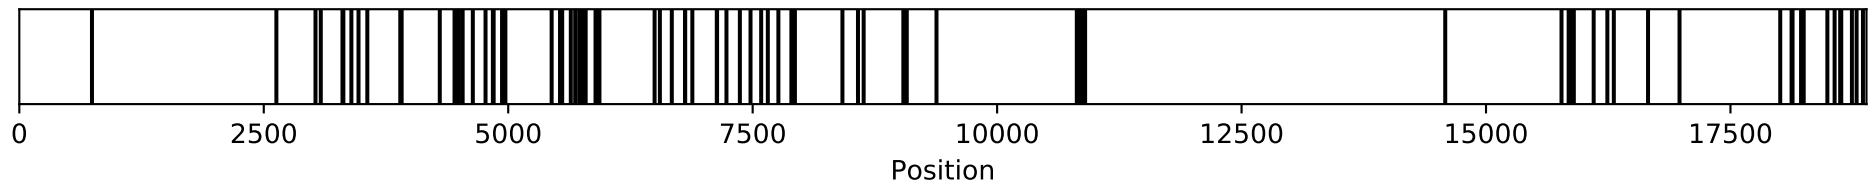

CR1 vs MM2  
Number of differences: 145

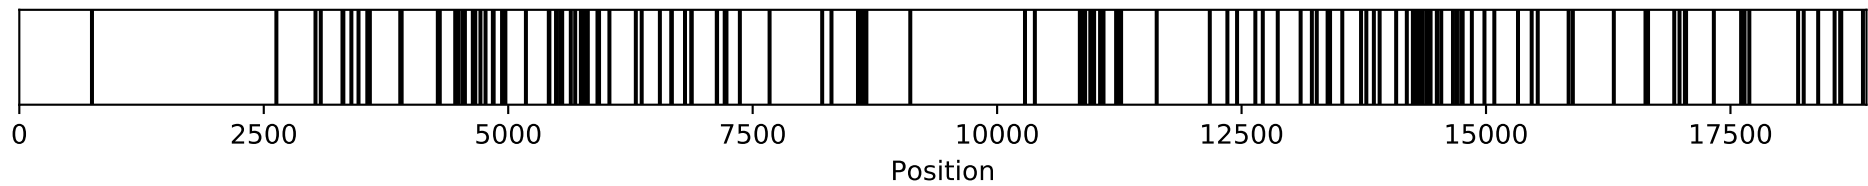

CR2 vs MM1  
Number of differences: 290

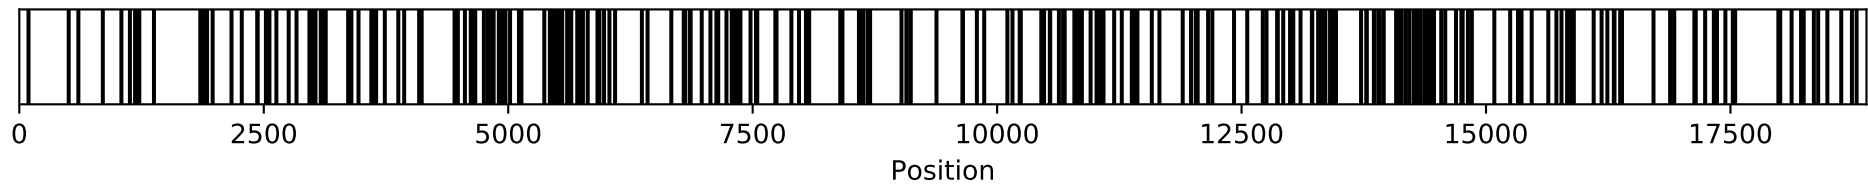

CR2 vs MM2  
Number of differences: 305

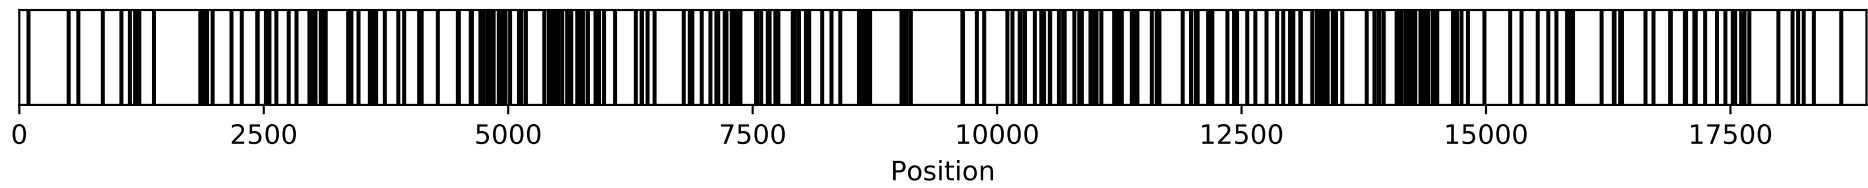

MM1 vs MM2  
Number of differences: 128

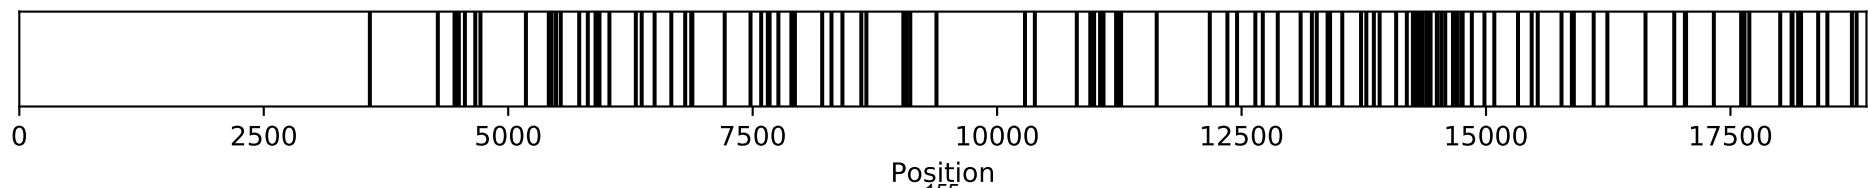

CR1 vs CR2  
Number of differences: 349

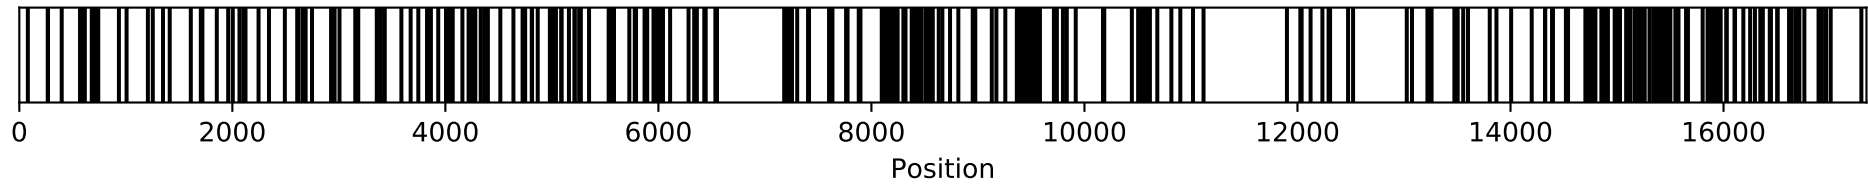

CR1 vs MM1  
Number of differences: 366

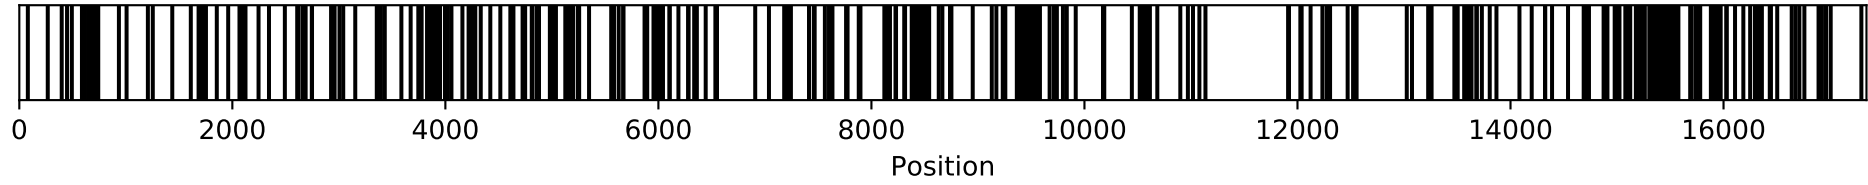

CR1 vs MM2  
Number of differences: 383

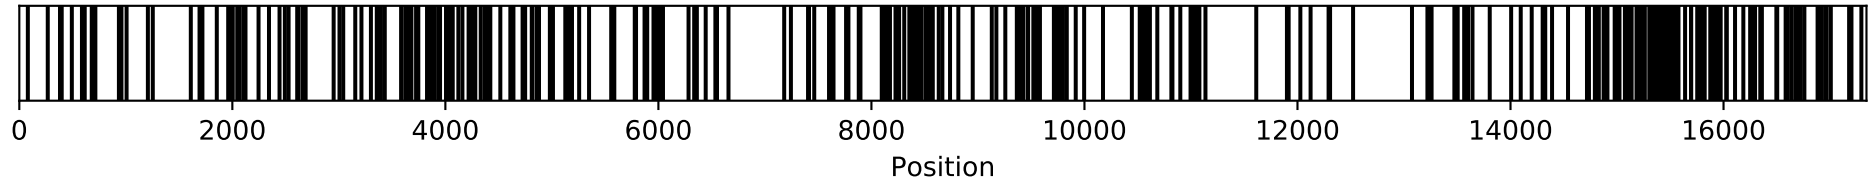

CR2 vs MM1  
Number of differences: 195

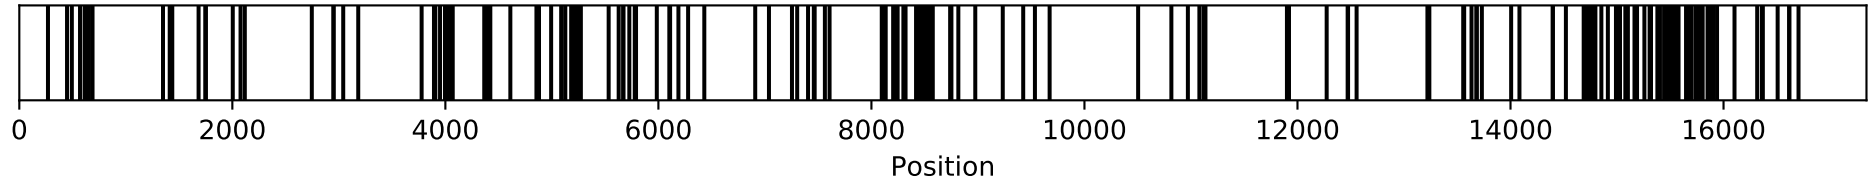

CR2 vs MM2  
Number of differences: 192

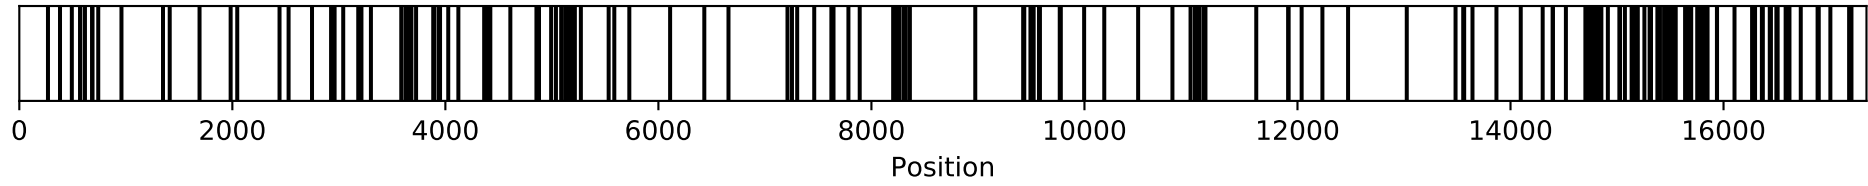

MM1 vs MM2  
Number of differences: 203

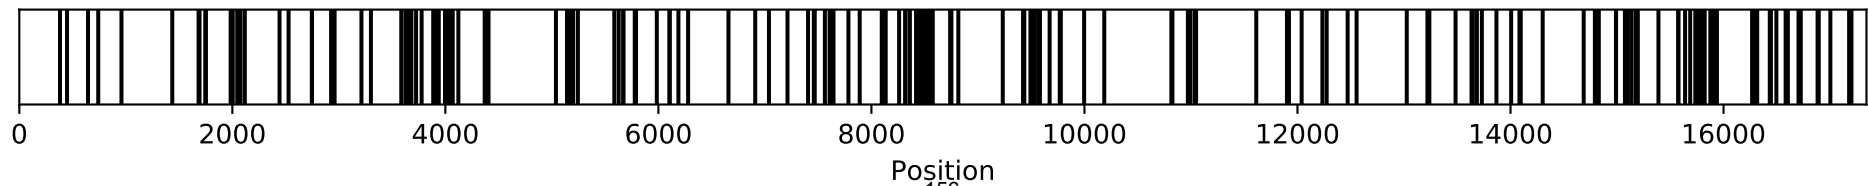

CR1 vs CR2  
Number of differences: 334

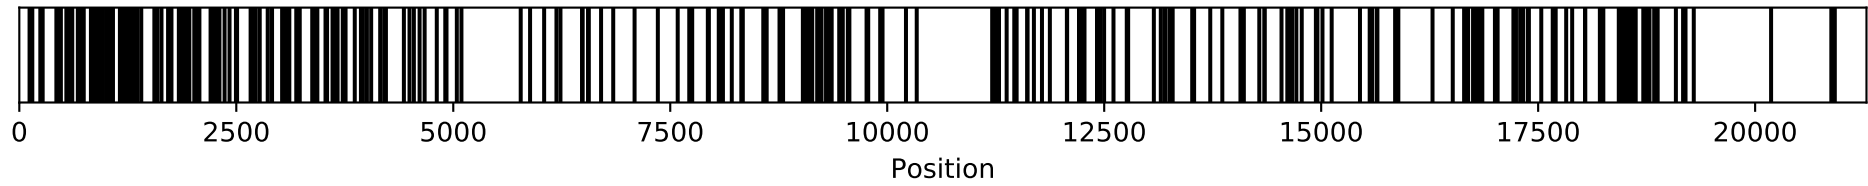

CR1 vs MM1  
Number of differences: 163

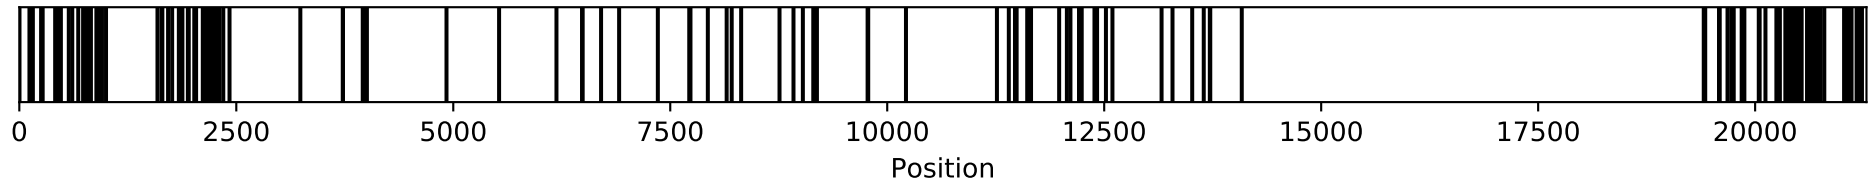

CR1 vs MM2  
Number of differences: 193

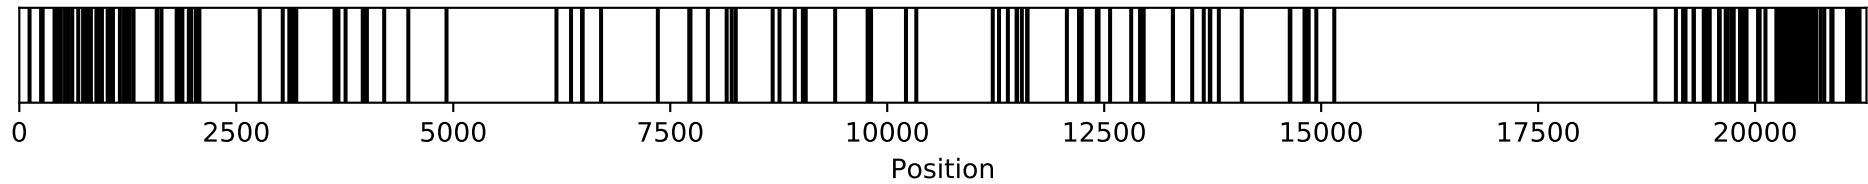

CR2 vs MM1  
Number of differences: 374

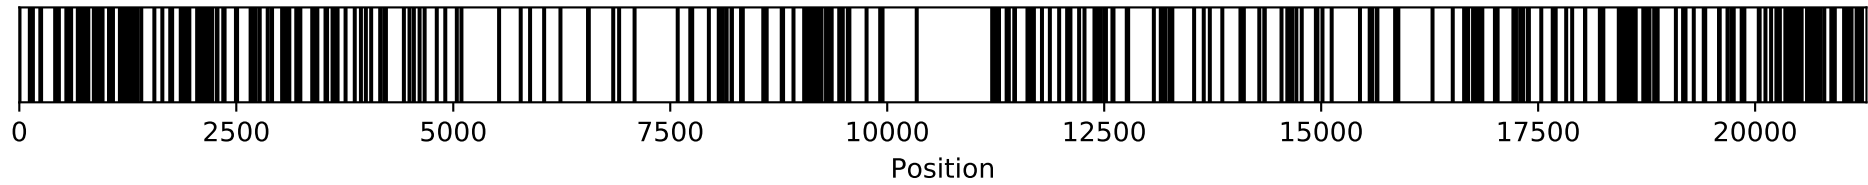

CR2 vs MM2  
Number of differences: 382

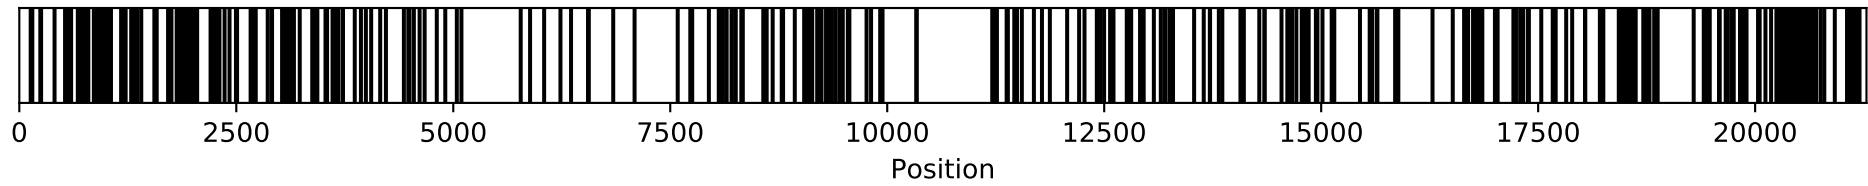

MM1 vs MM2  
Number of differences: 161

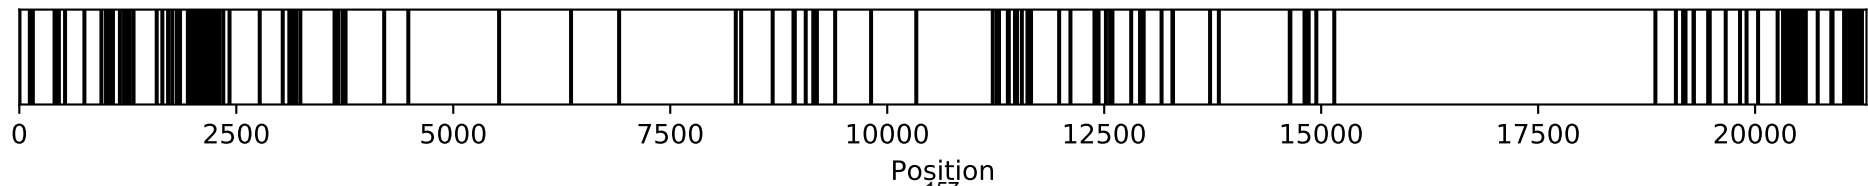

CR1 vs CR2  
Number of differences: 228

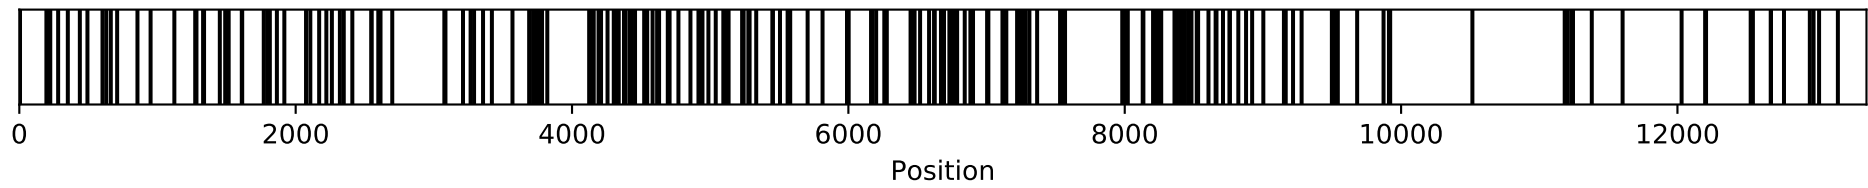

CR1 vs MM1  
Number of differences: 130

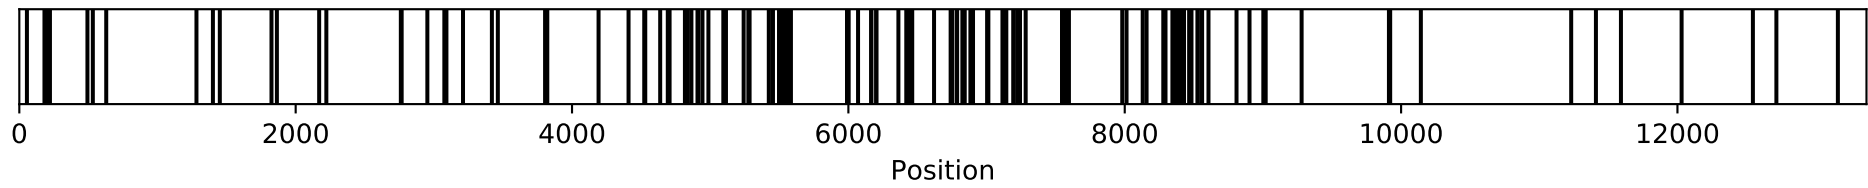

CR1 vs MM2  
Number of differences: 136

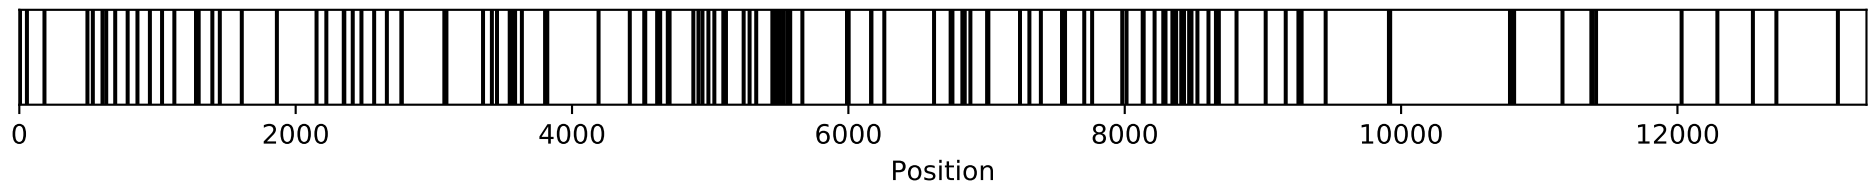

CR2 vs MM1  
Number of differences: 214

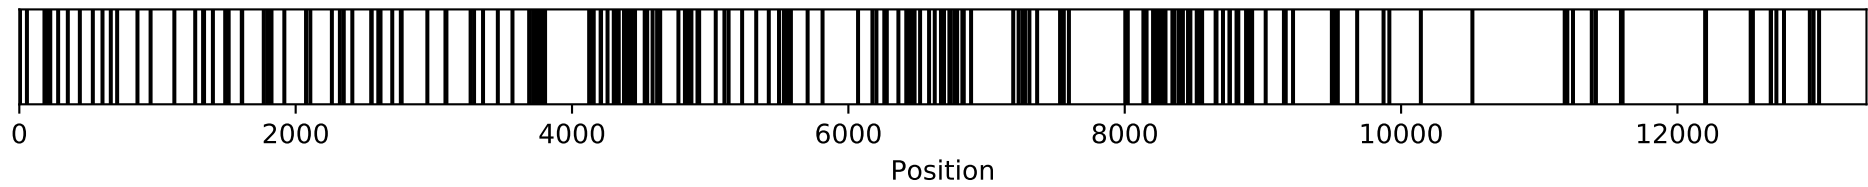

CR2 vs MM2  
Number of differences: 219

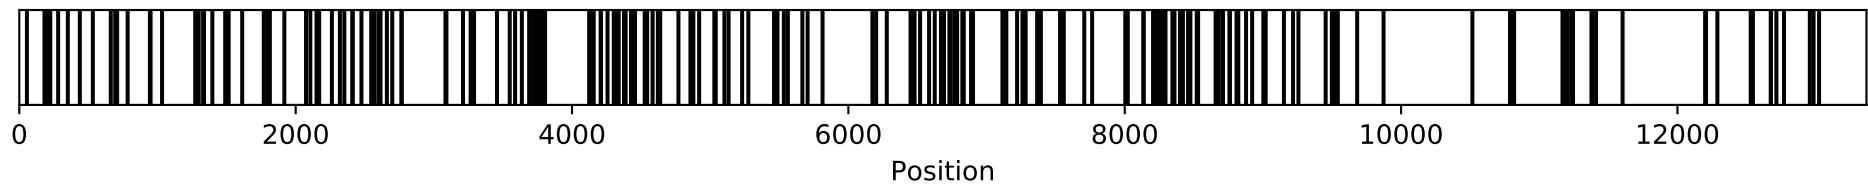

MM1 vs MM2  
Number of differences: 111

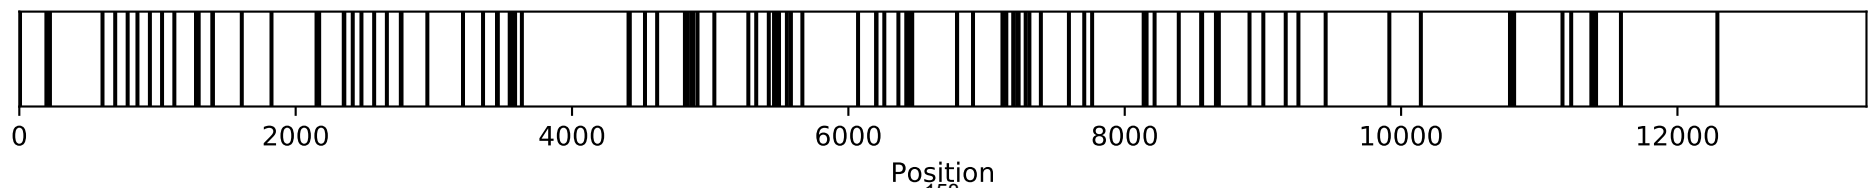

CR1 vs CR2  
Number of differences: 58

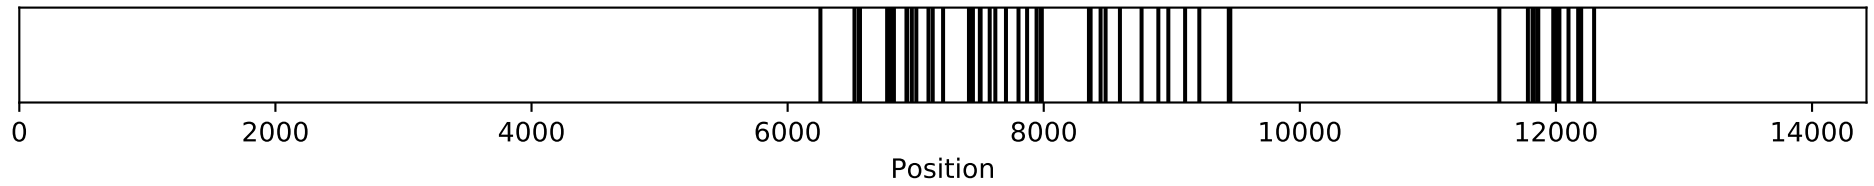

CR1 vs MM1  
Number of differences: 218

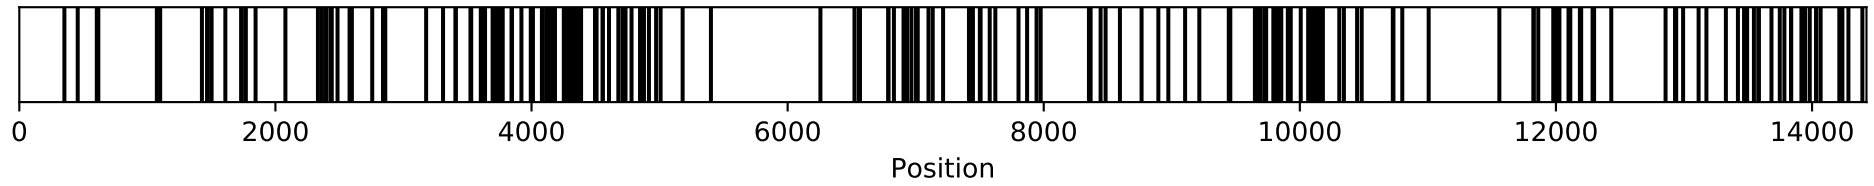

CR1 vs MM2  
Number of differences: 186

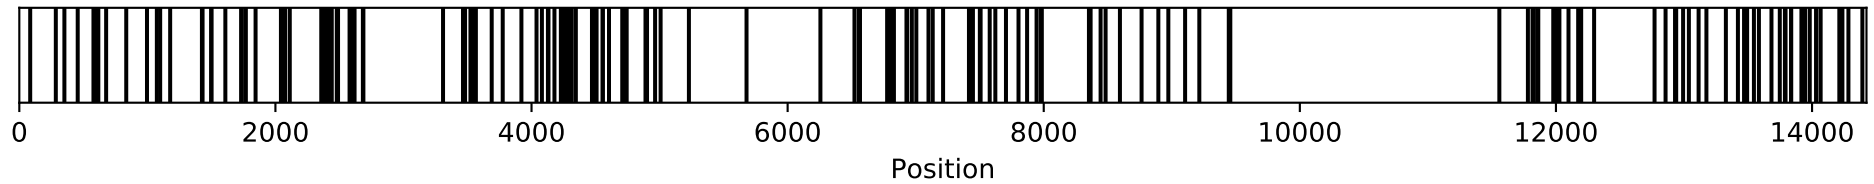

CR2 vs MM1  
Number of differences: 180

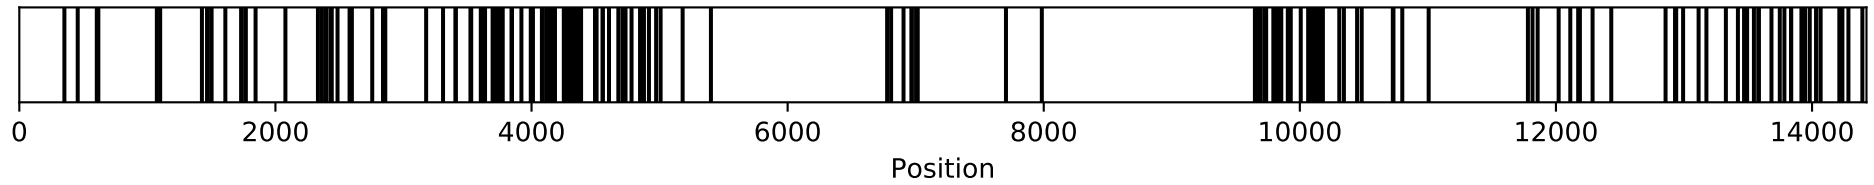

CR2 vs MM2  
Number of differences: 128

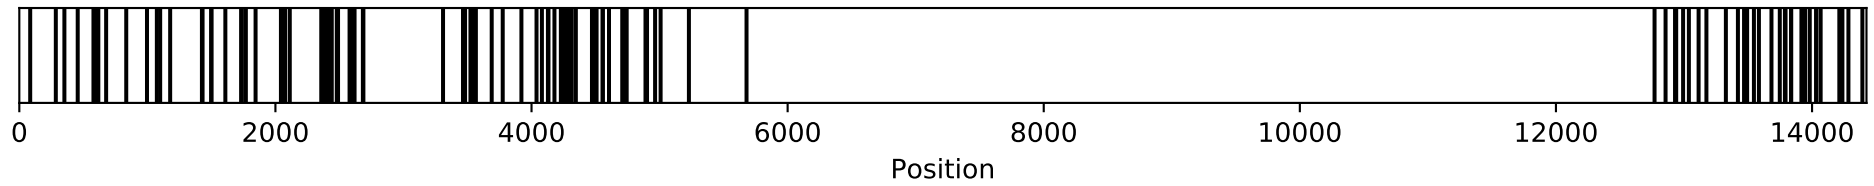

MM1 vs MM2  
Number of differences: 168

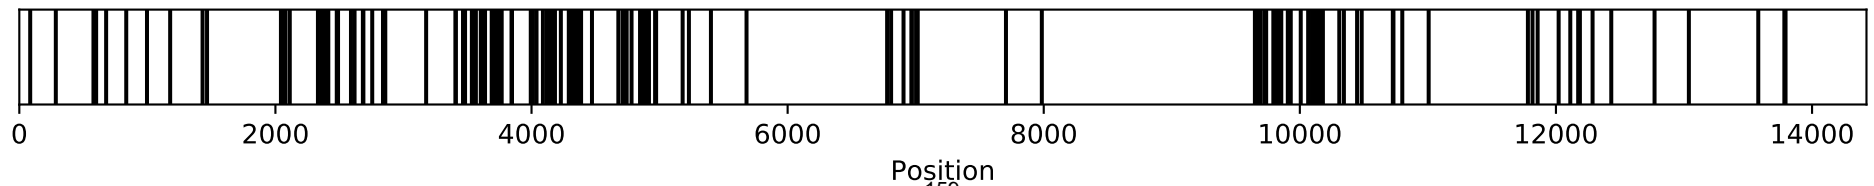



CR1 vs CR2  
Number of differences: 279

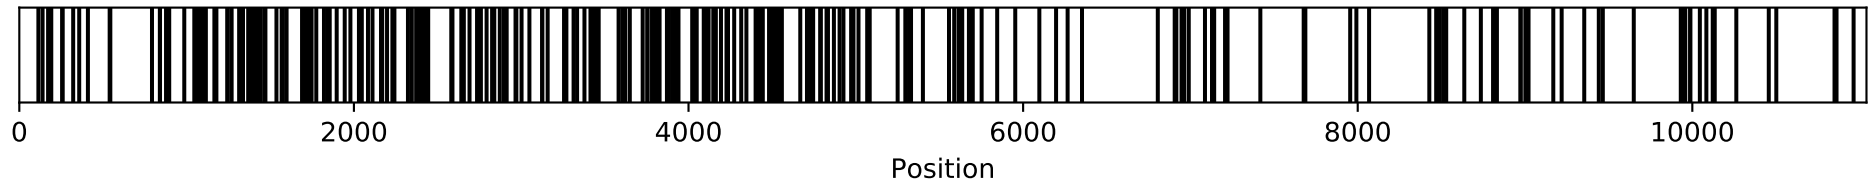

CR1 vs MM1  
Number of differences: 156

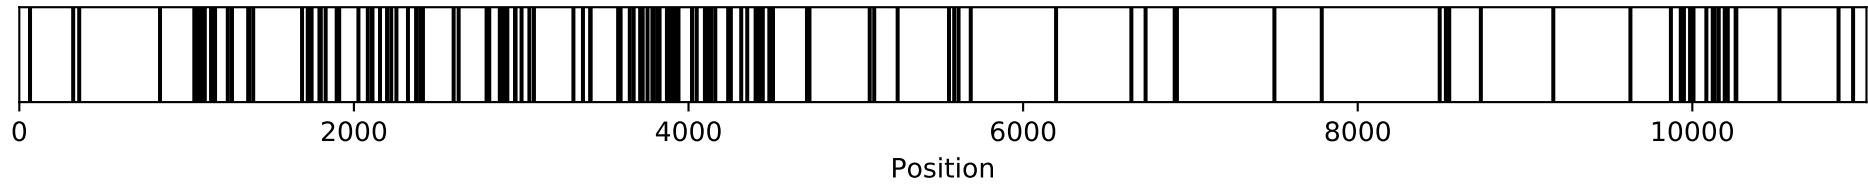

CR1 vs MM2  
Number of differences: 156

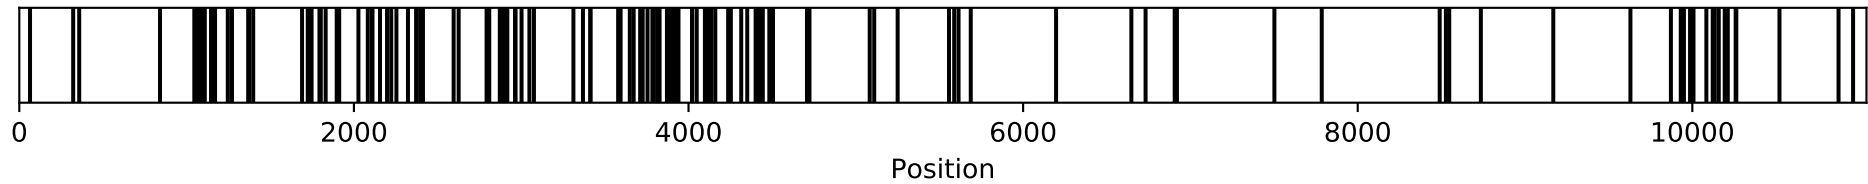

CR2 vs MM1  
Number of differences: 255

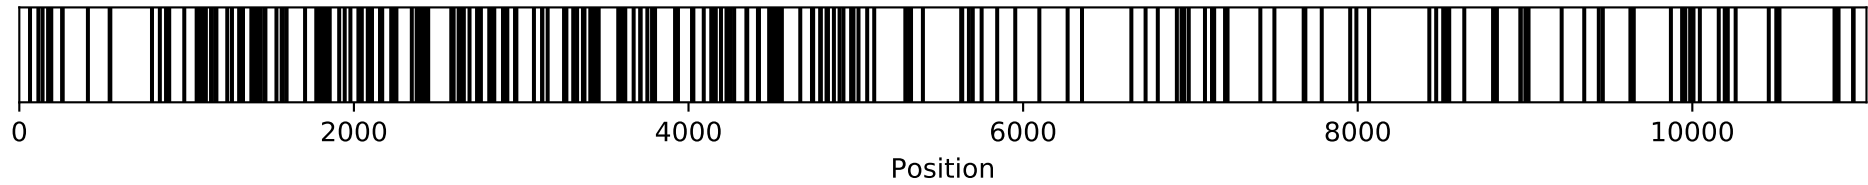

CR2 vs MM2  
Number of differences: 255

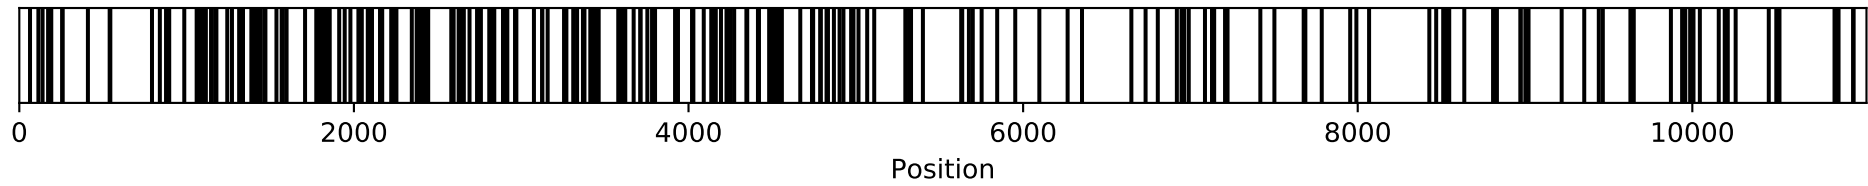

MM1 vs MM2  
Number of differences: 0

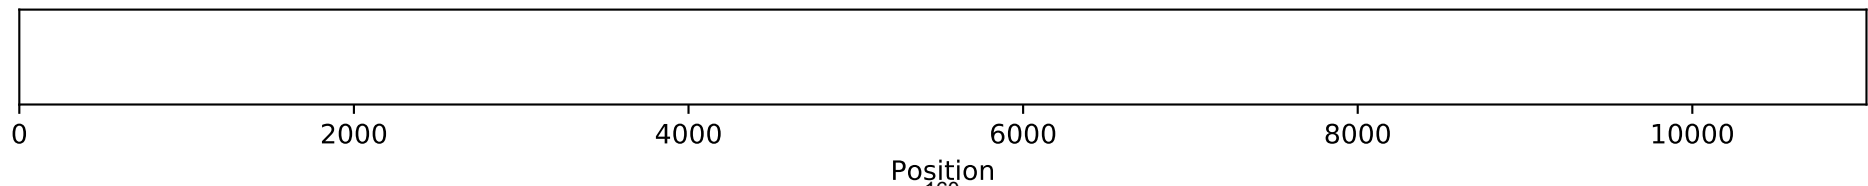

CR1 vs CR2  
Number of differences: 152

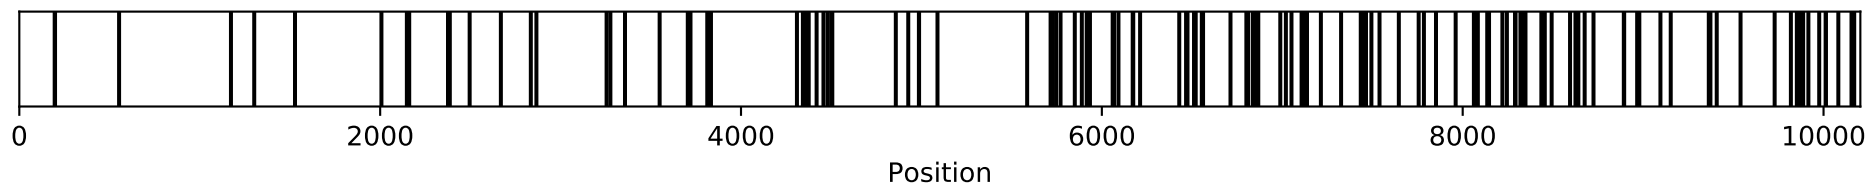

CR1 vs MM1  
Number of differences: 150

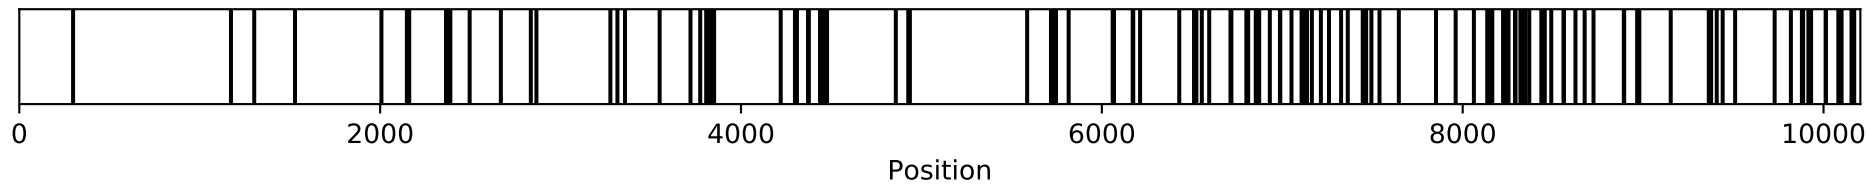

CR1 vs MM2  
Number of differences: 150

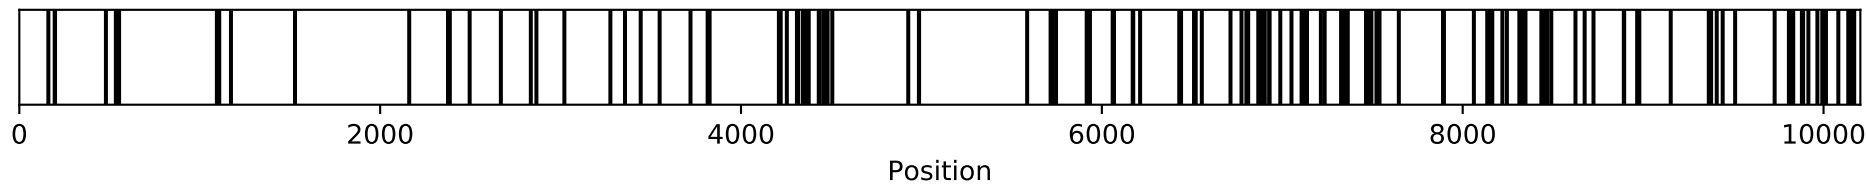

CR2 vs MM1  
Number of differences: 108

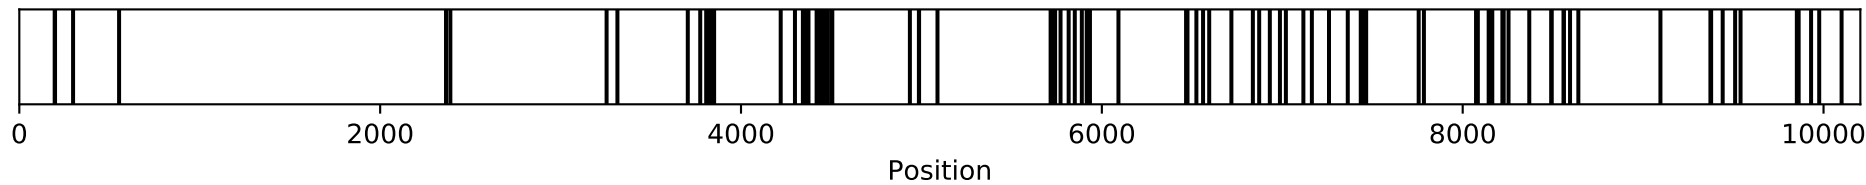

CR2 vs MM2  
Number of differences: 102

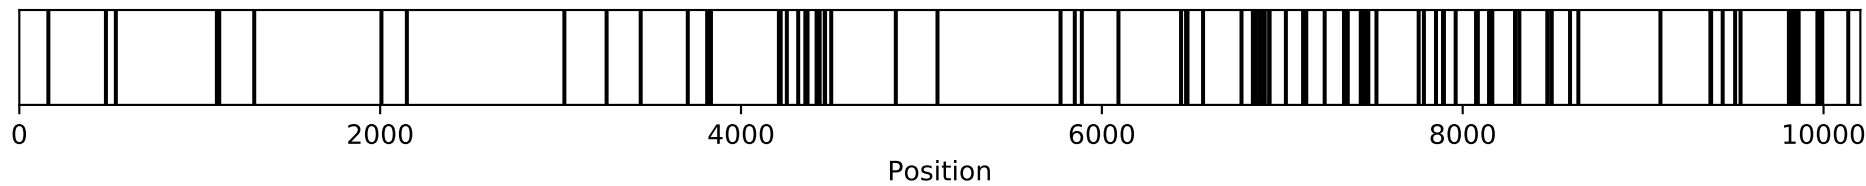

MM1 vs MM2  
Number of differences: 111

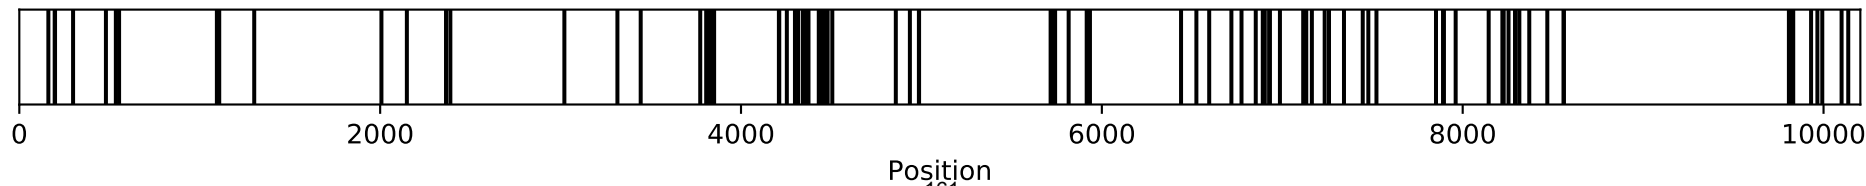

CR1 vs CR2  
Number of differences: 272

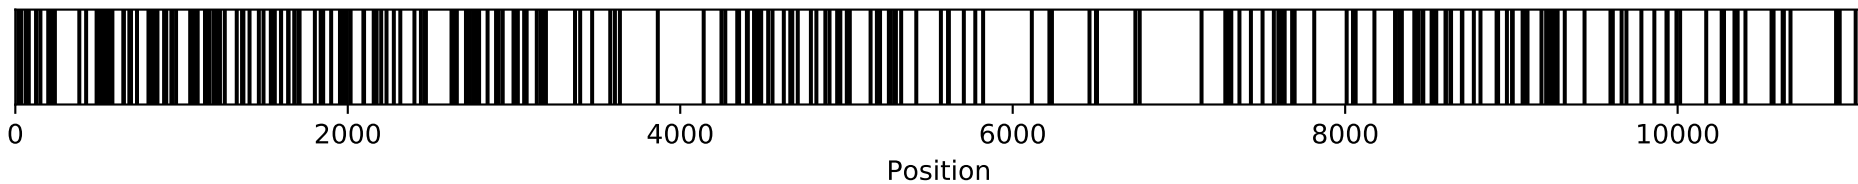

CR1 vs MM1  
Number of differences: 175

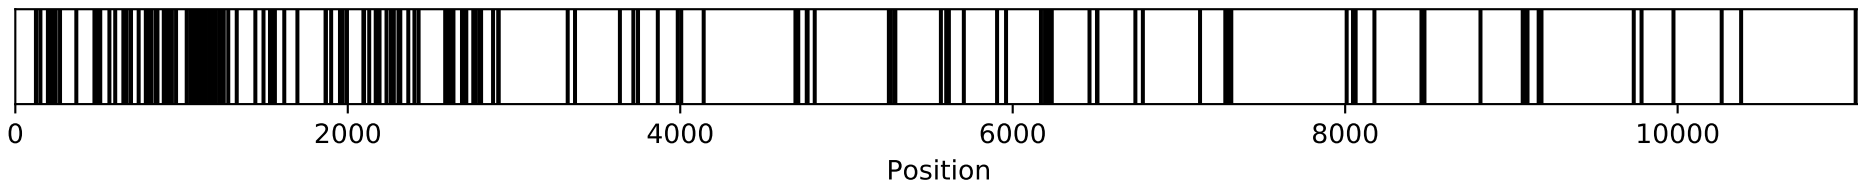

CR1 vs MM2  
Number of differences: 177

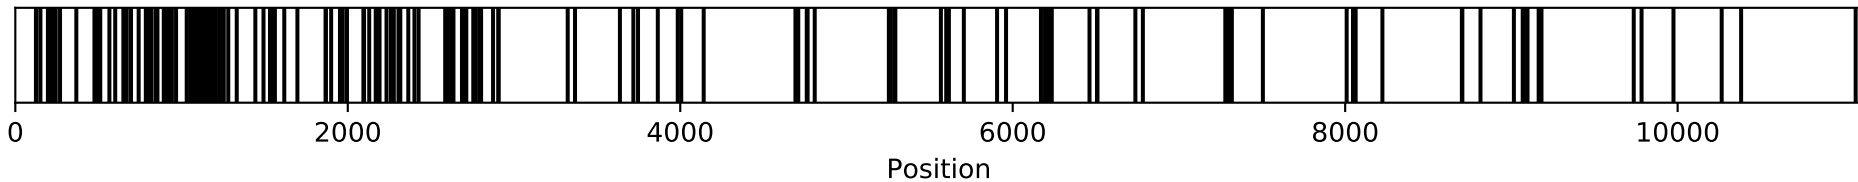

CR2 vs MM1  
Number of differences: 286

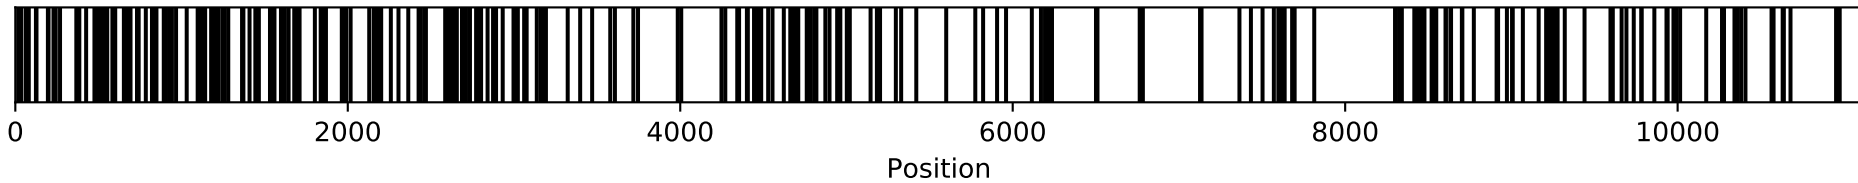

CR2 vs MM2  
Number of differences: 286

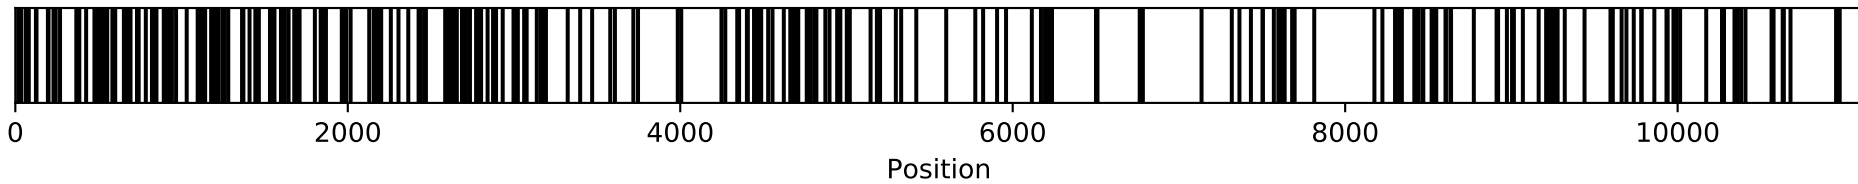

MM1 vs MM2  
Number of differences: 10

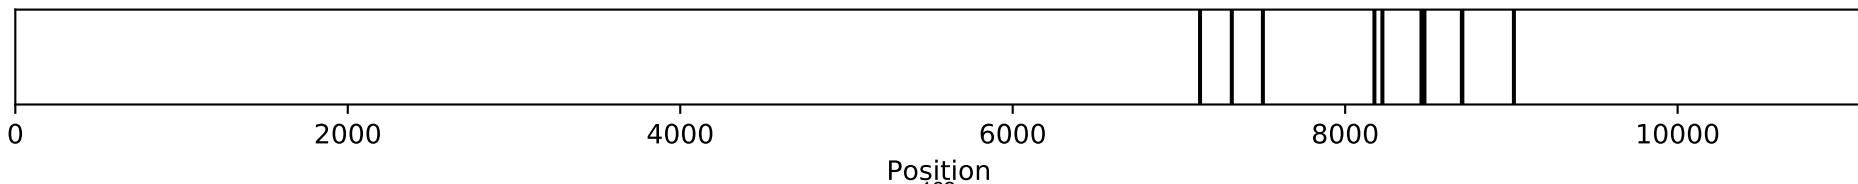

CR1 vs CR2  
Number of differences: 444

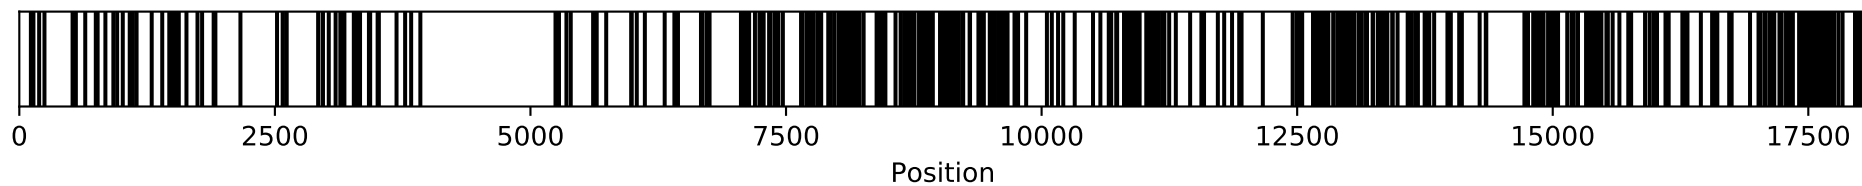

CR1 vs MM1  
Number of differences: 256

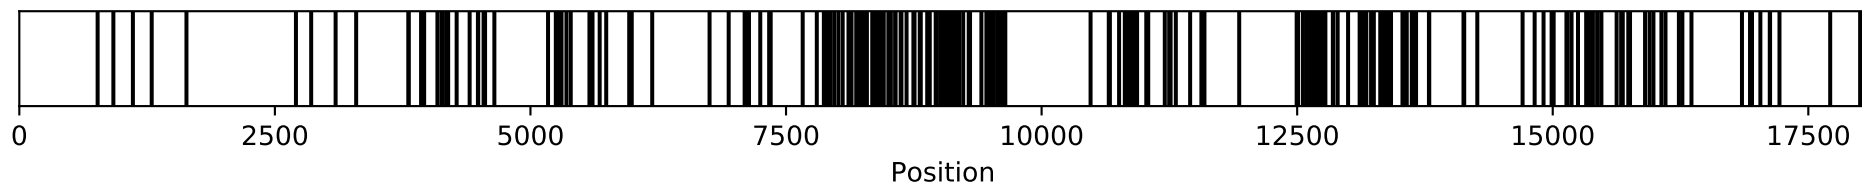

CR1 vs MM2  
Number of differences: 256

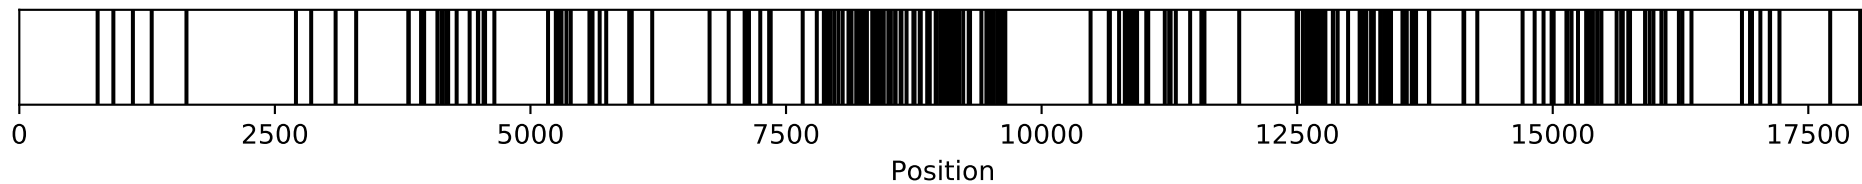

CR2 vs MM1  
Number of differences: 468

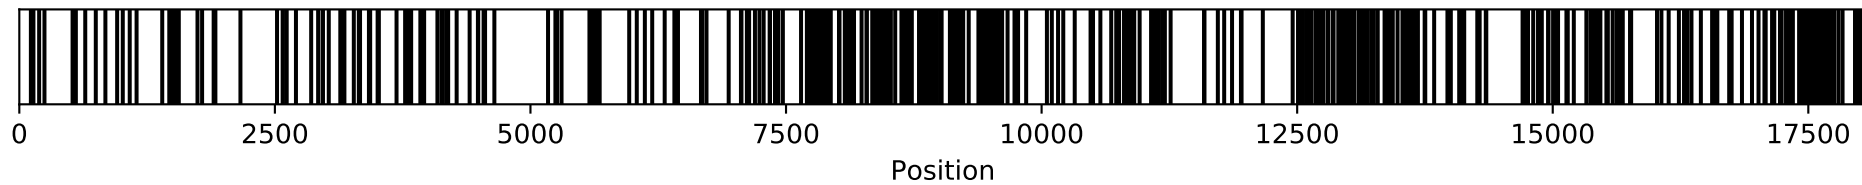

CR2 vs MM2  
Number of differences: 468

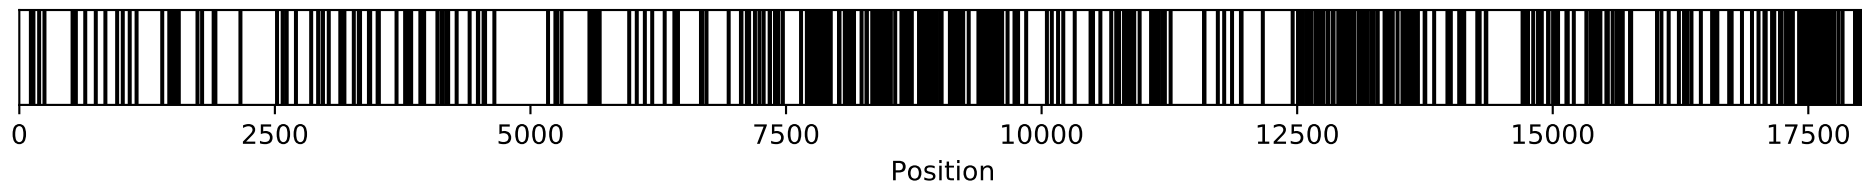

MM1 vs MM2  
Number of differences: 0

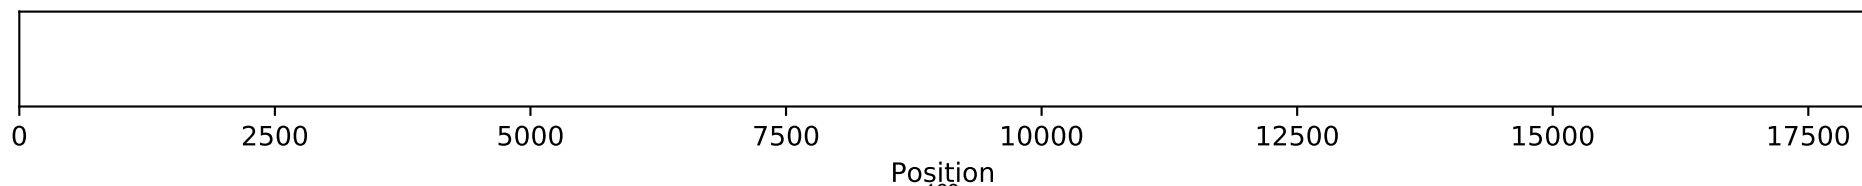

CR1 vs CR2  
Number of differences: 244

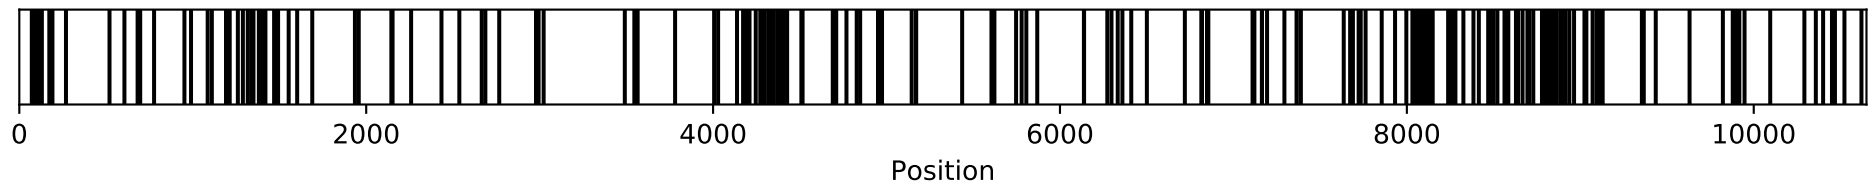

CR1 vs MM1  
Number of differences: 255

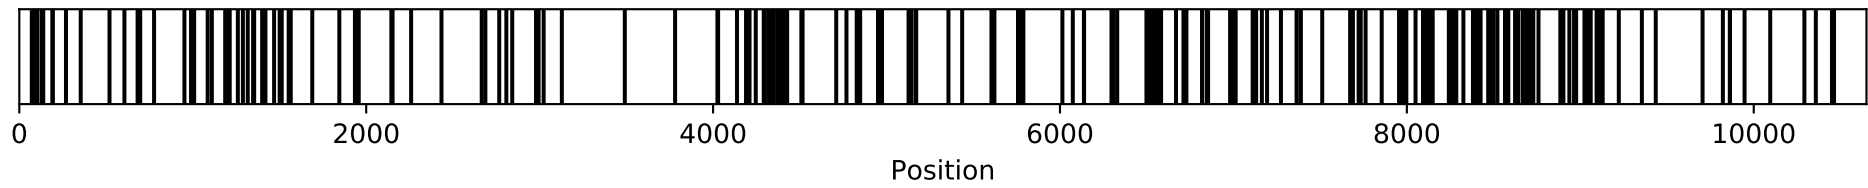

CR1 vs MM2  
Number of differences: 252

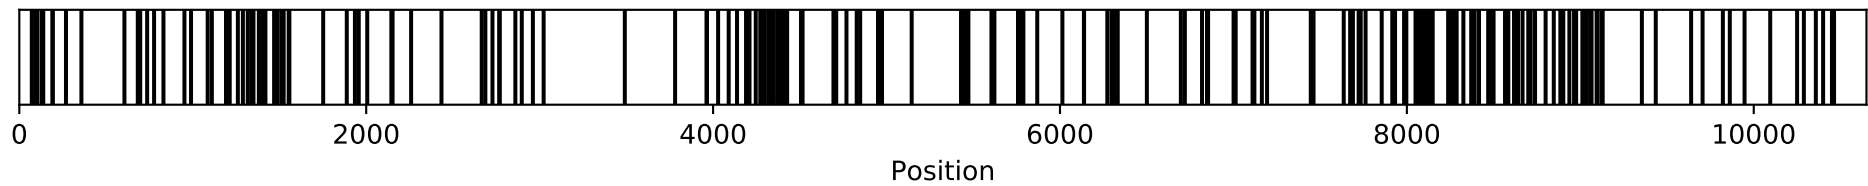

CR2 vs MM1  
Number of differences: 141

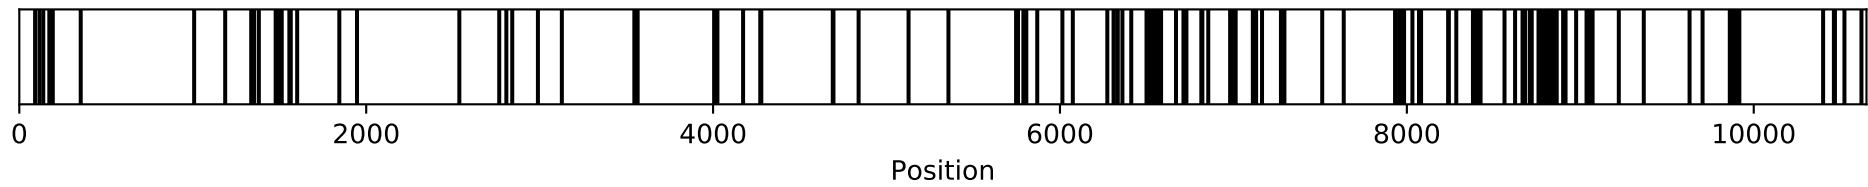

CR2 vs MM2  
Number of differences: 139

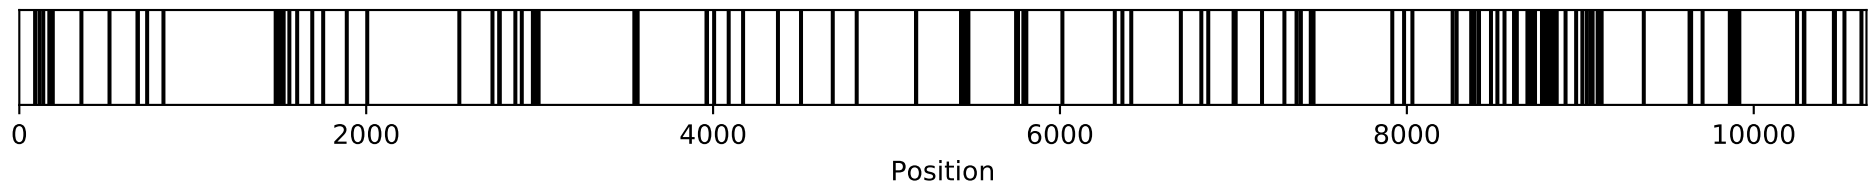

MM1 vs MM2  
Number of differences: 159

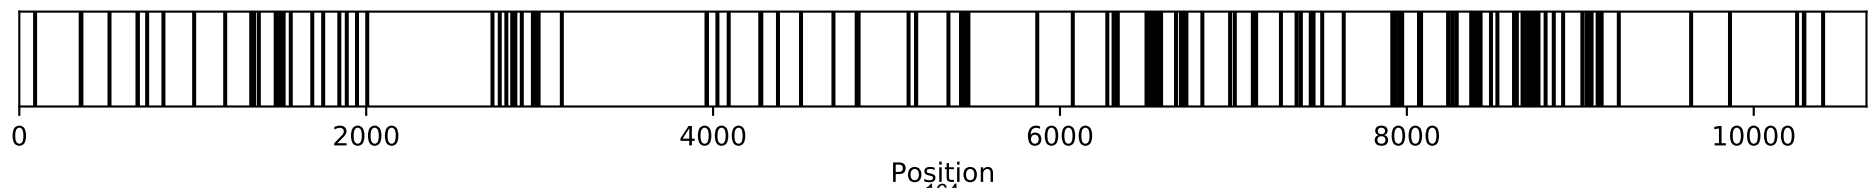

CR1 vs CR2  
Number of differences: 403

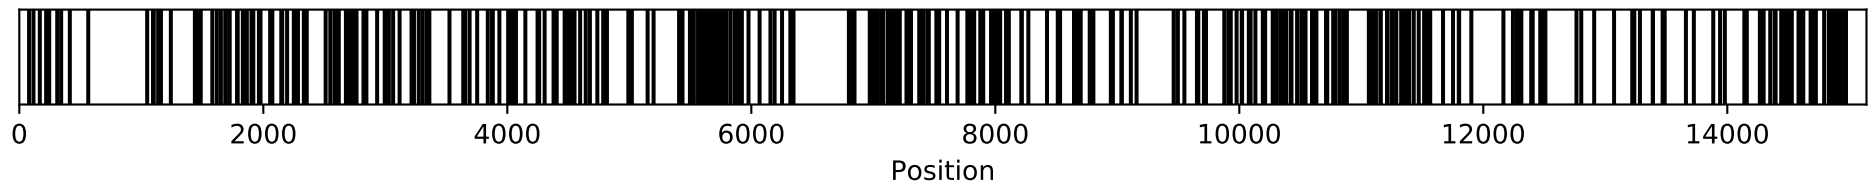

CR1 vs MM1  
Number of differences: 174

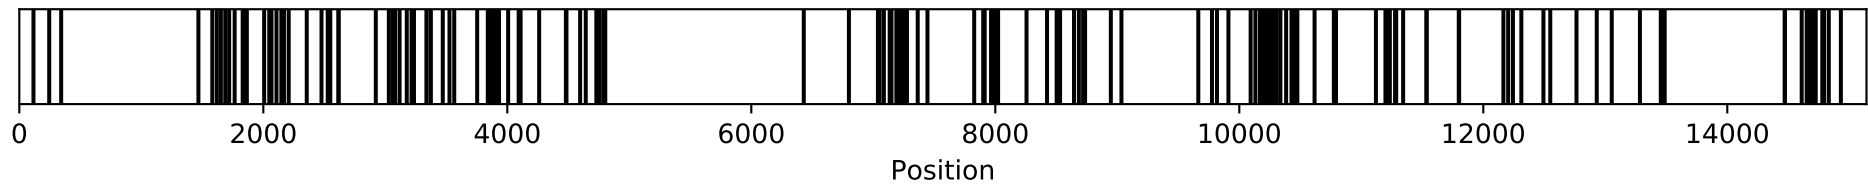

CR1 vs MM2  
Number of differences: 174

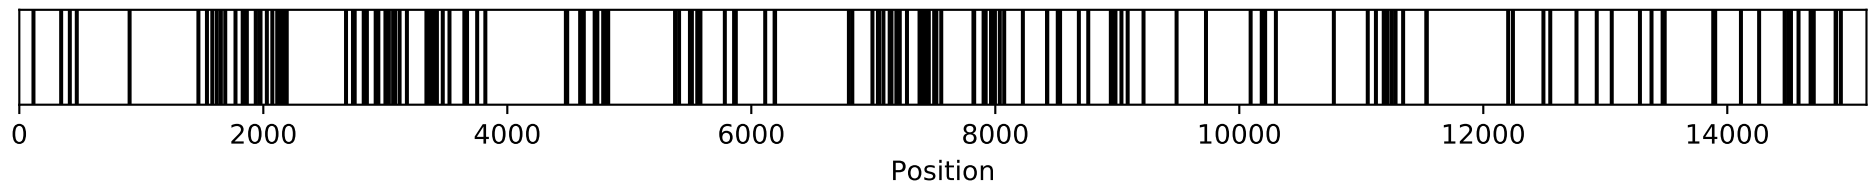

CR2 vs MM1  
Number of differences: 380

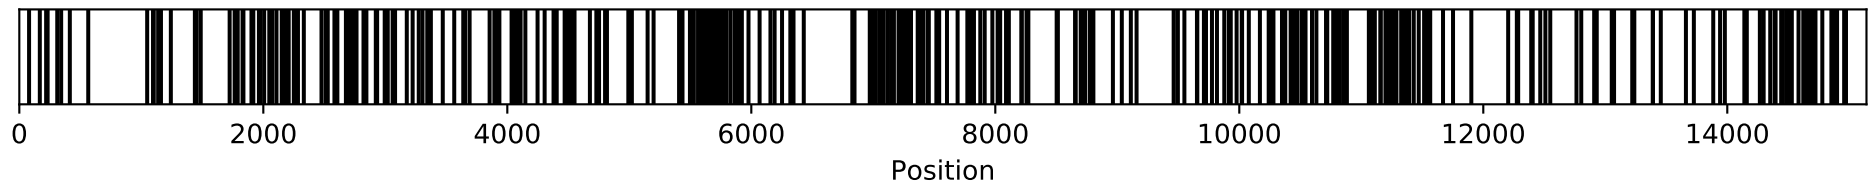

CR2 vs MM2  
Number of differences: 397

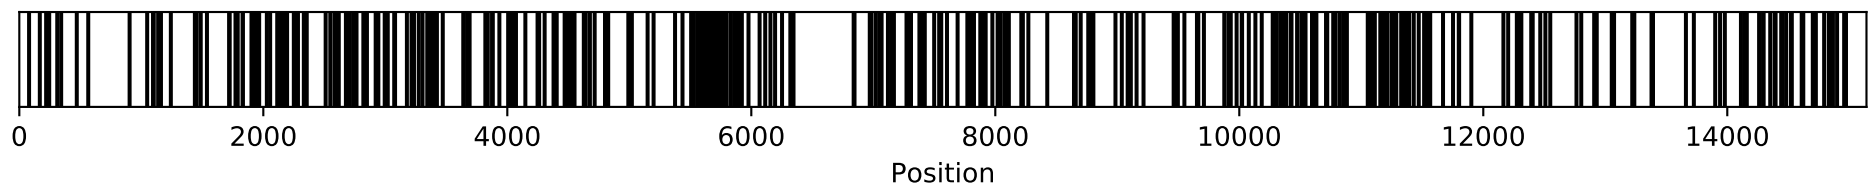

MM1 vs MM2  
Number of differences: 193

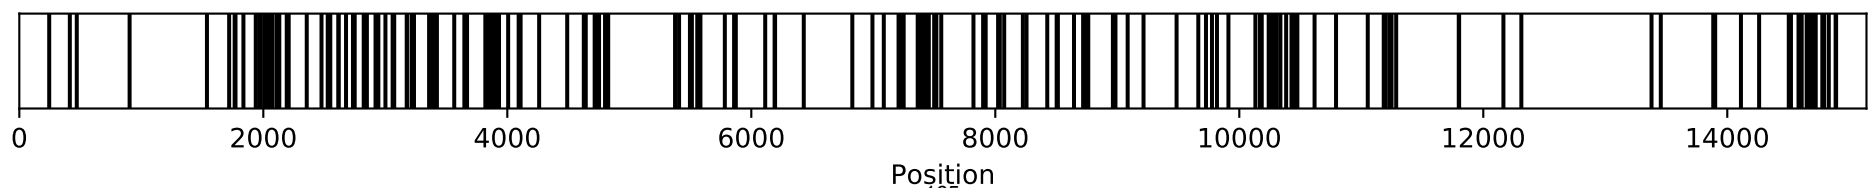

CR1 vs CR2  
Number of differences: 255

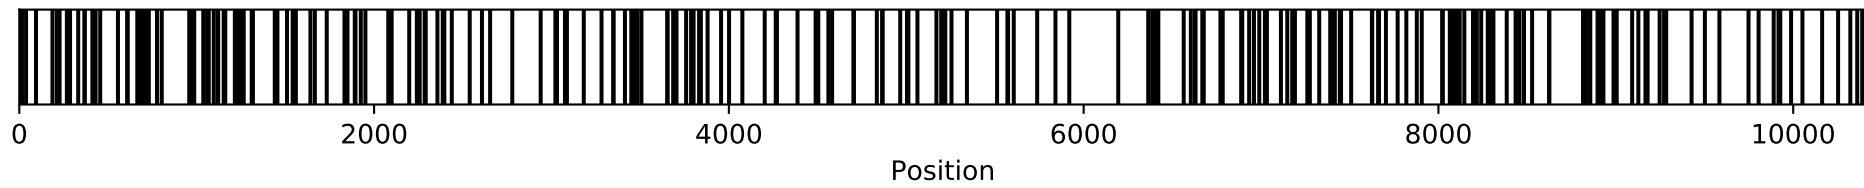

CR1 vs MM1  
Number of differences: 267

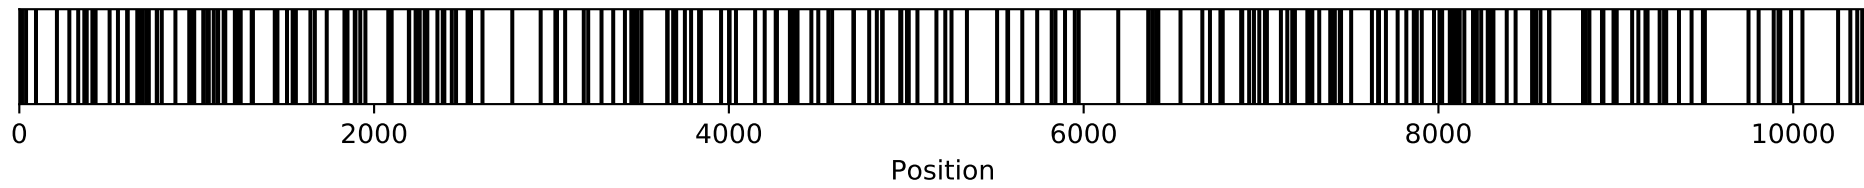

CR1 vs MM2  
Number of differences: 254

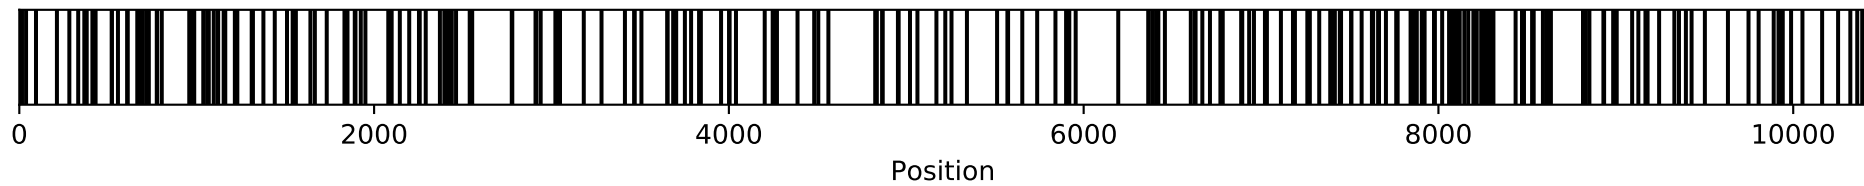

CR2 vs MM1  
Number of differences: 96

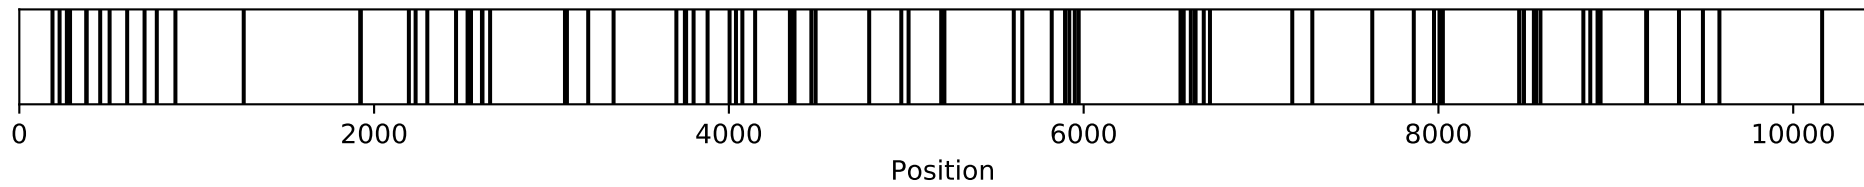

CR2 vs MM2  
Number of differences: 127

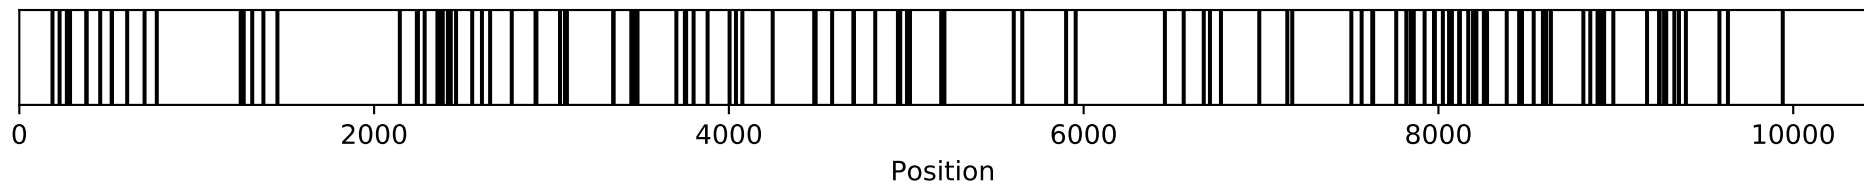

MM1 vs MM2  
Number of differences: 130

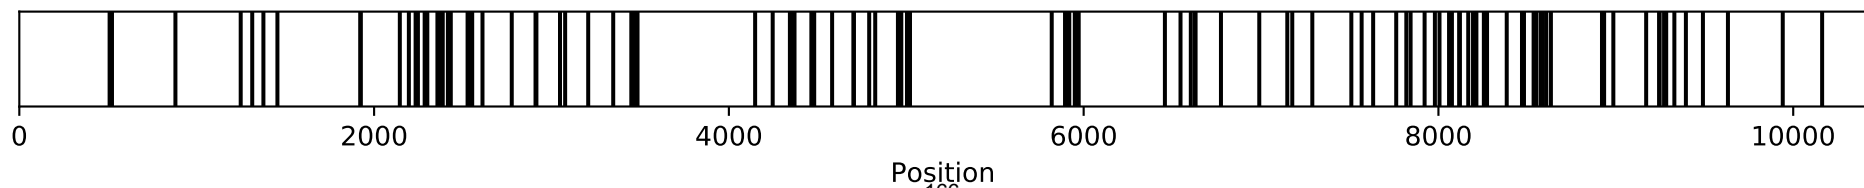

CR1 vs CR2  
Number of differences: 82

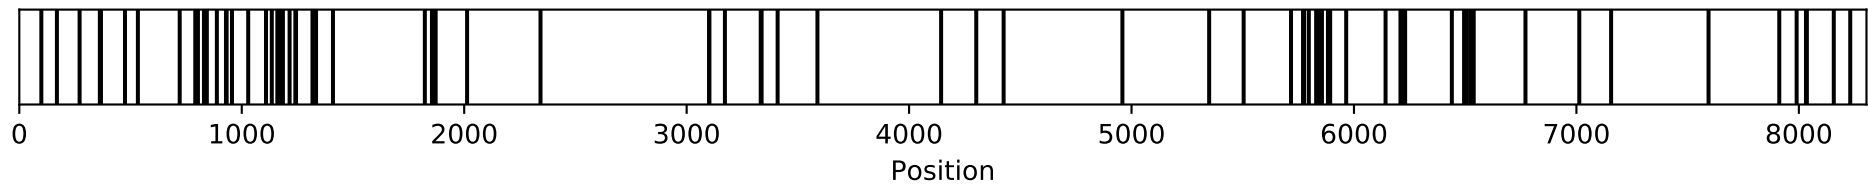

CR1 vs MM1  
Number of differences: 42

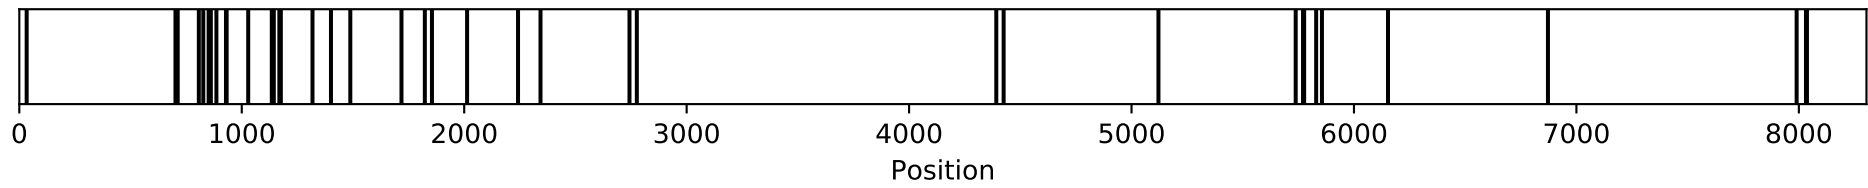

CR1 vs MM2  
Number of differences: 30

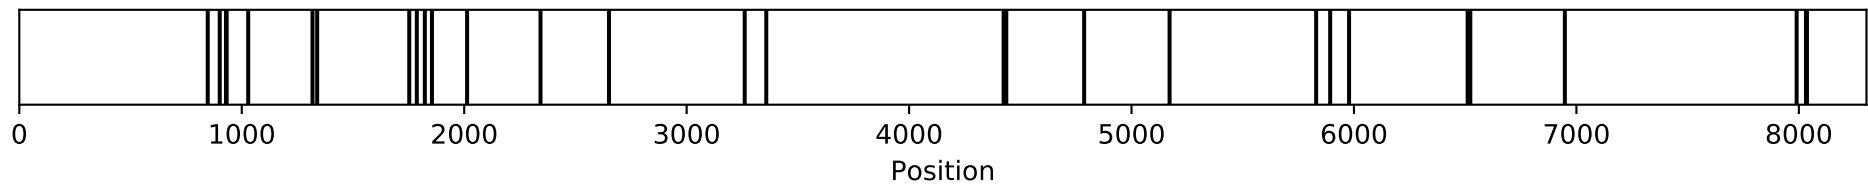

CR2 vs MM1  
Number of differences: 87

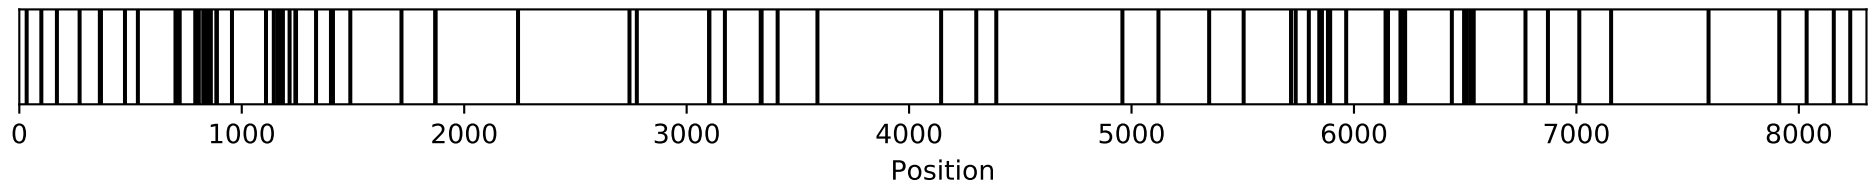

CR2 vs MM2  
Number of differences: 82

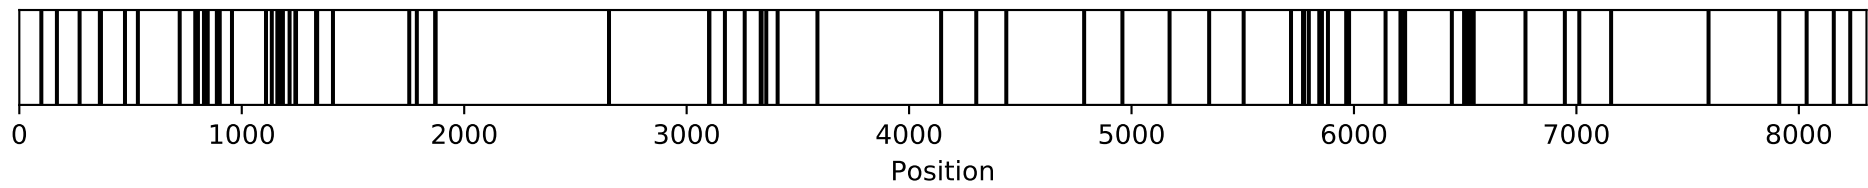

MM1 vs MM2  
Number of differences: 44

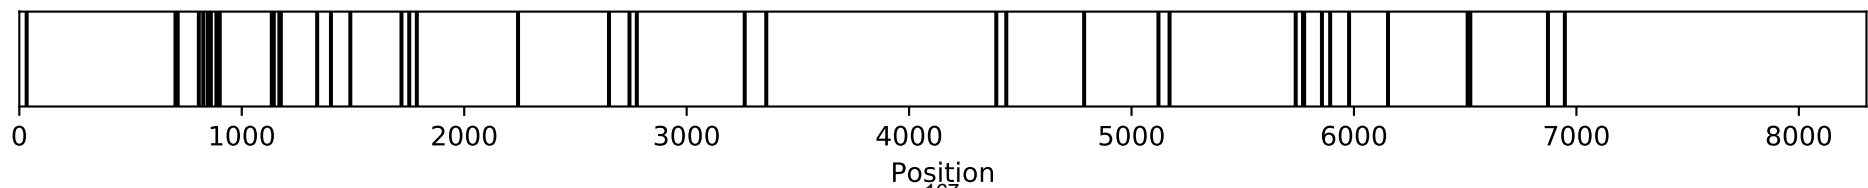



CR1 vs CR2  
Number of differences: 284

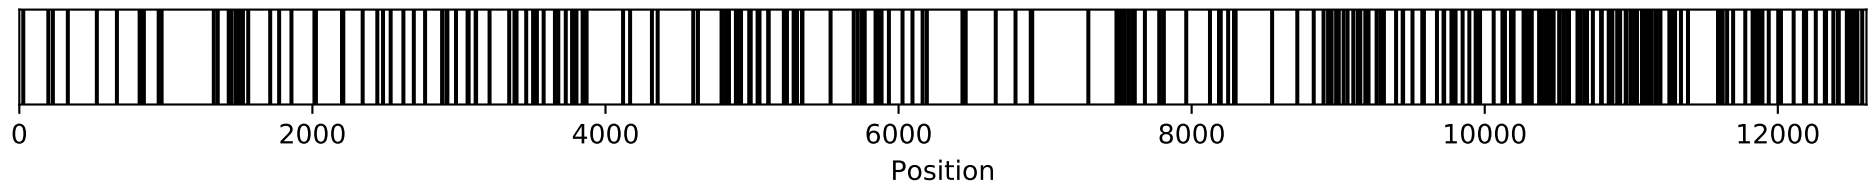

CR1 vs MM1  
Number of differences: 188

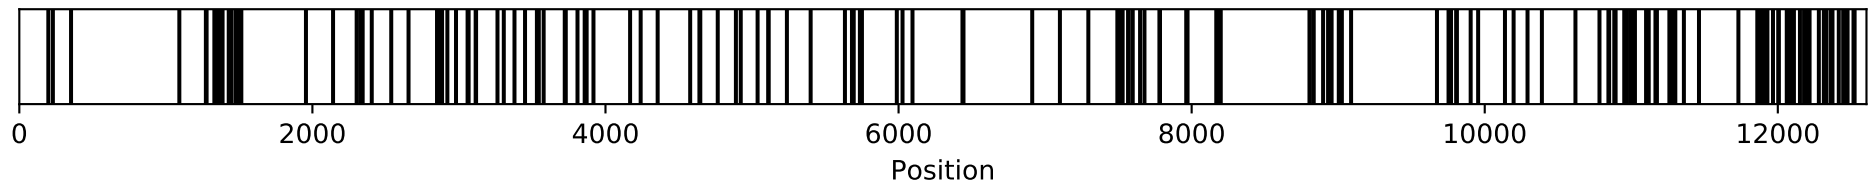

CR1 vs MM2  
Number of differences: 188

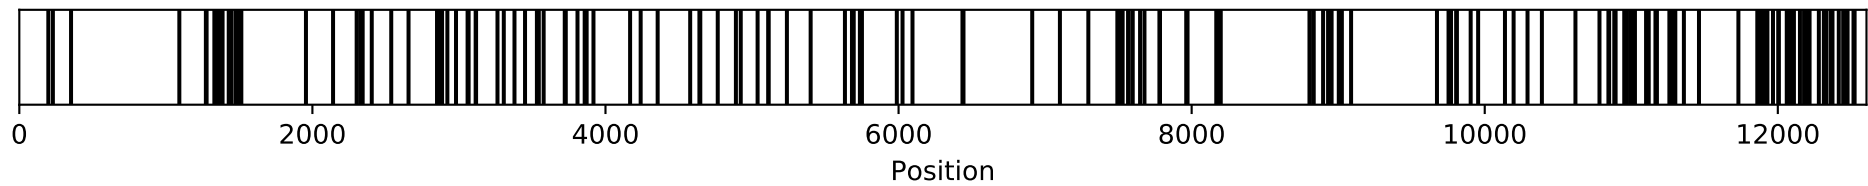

CR2 vs MM1  
Number of differences: 301

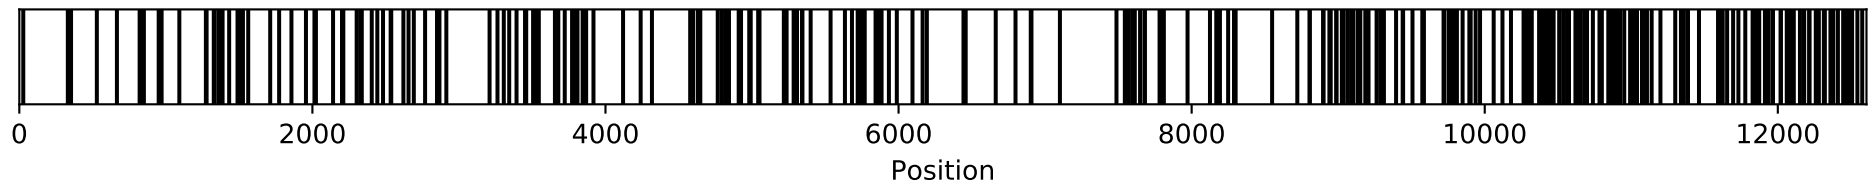

CR2 vs MM2  
Number of differences: 301

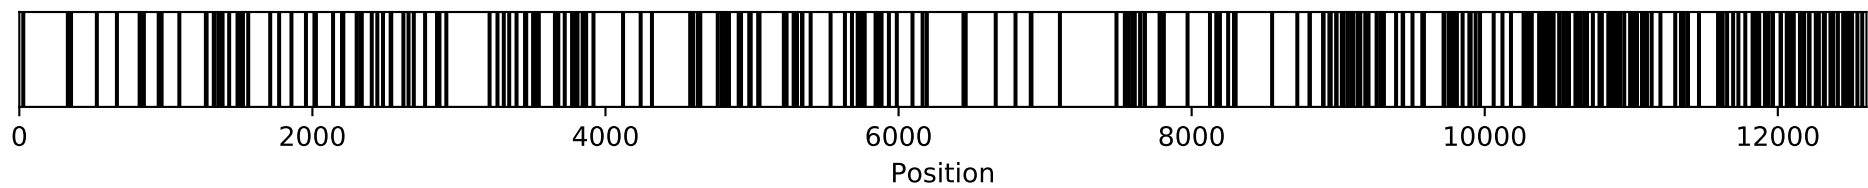

MM1 vs MM2  
Number of differences: 0

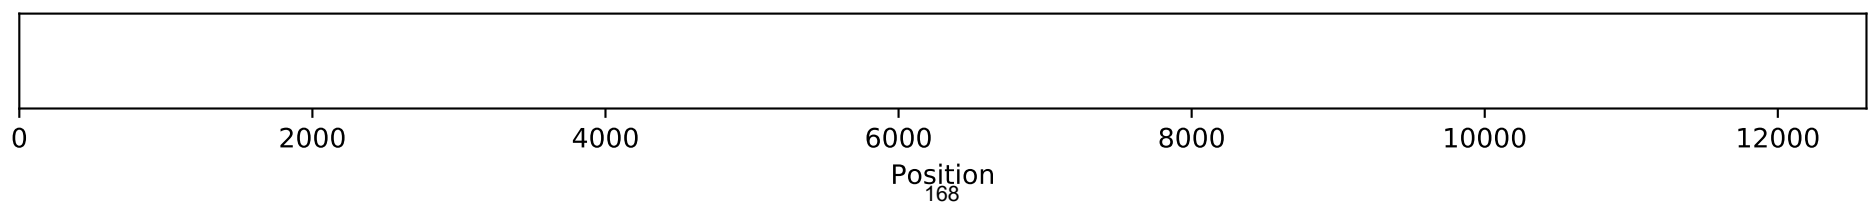

CR1 vs CR2  
Number of differences: 373

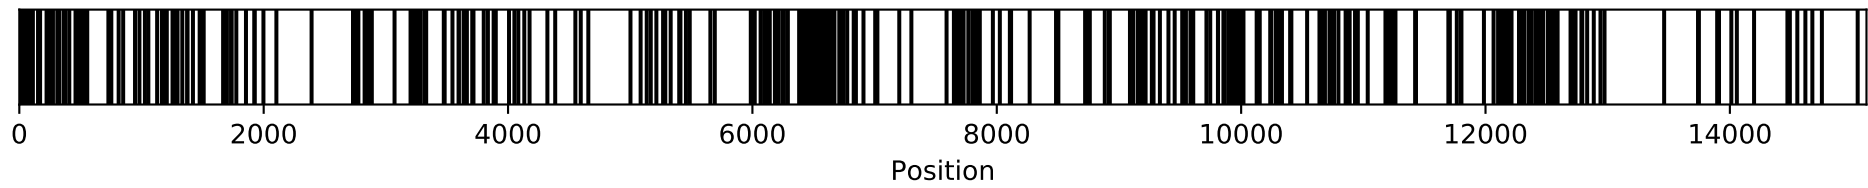

CR1 vs MM1  
Number of differences: 236

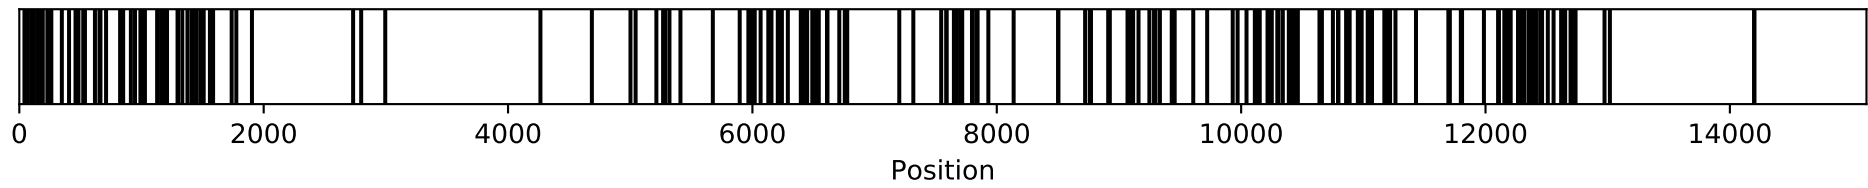

CR1 vs MM2  
Number of differences: 233

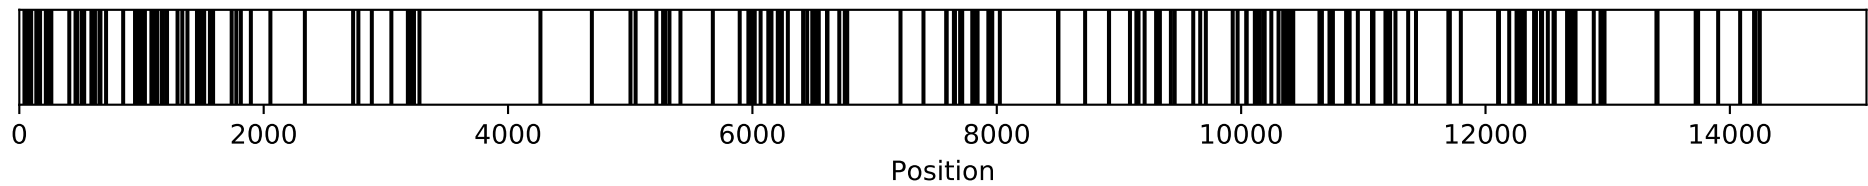

CR2 vs MM1  
Number of differences: 378

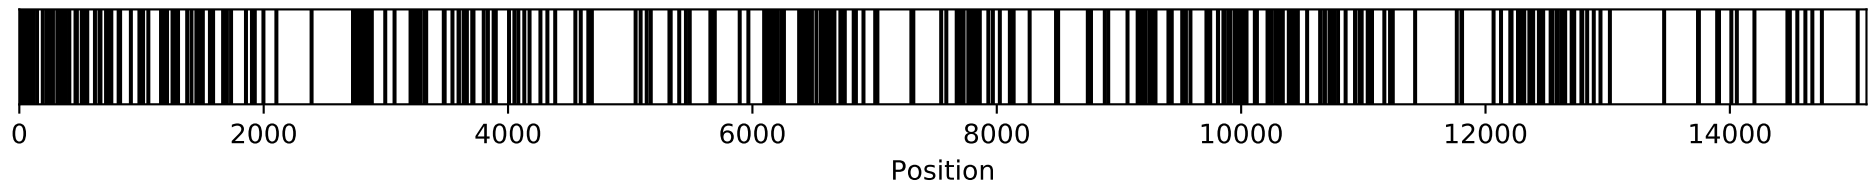

CR2 vs MM2  
Number of differences: 381

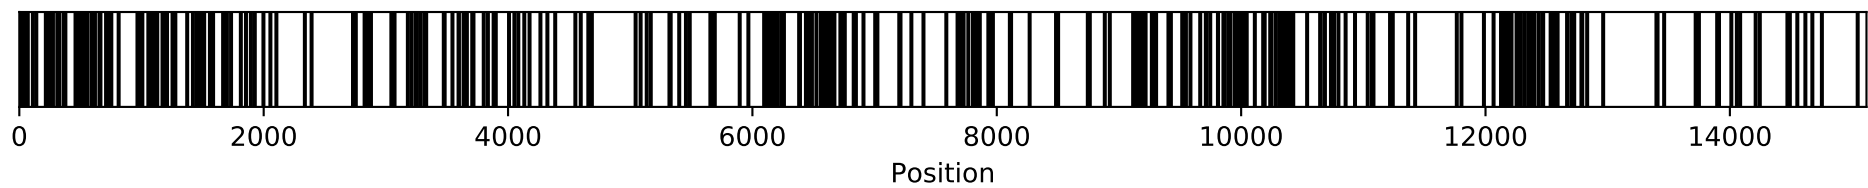

MM1 vs MM2  
Number of differences: 178

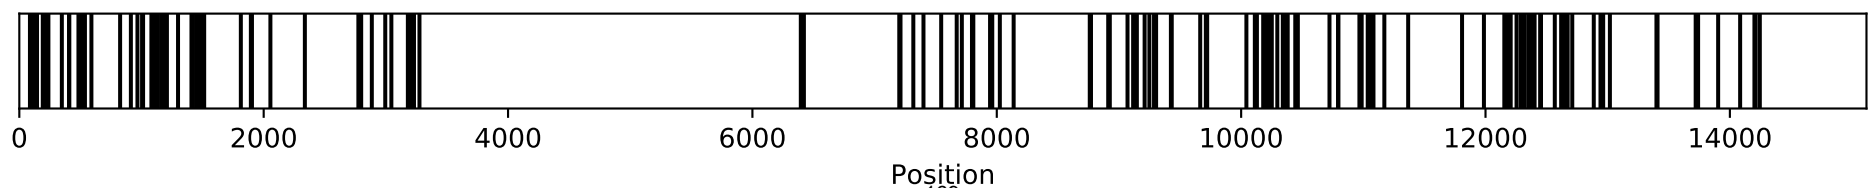

CR1 vs CR2  
Number of differences: 297

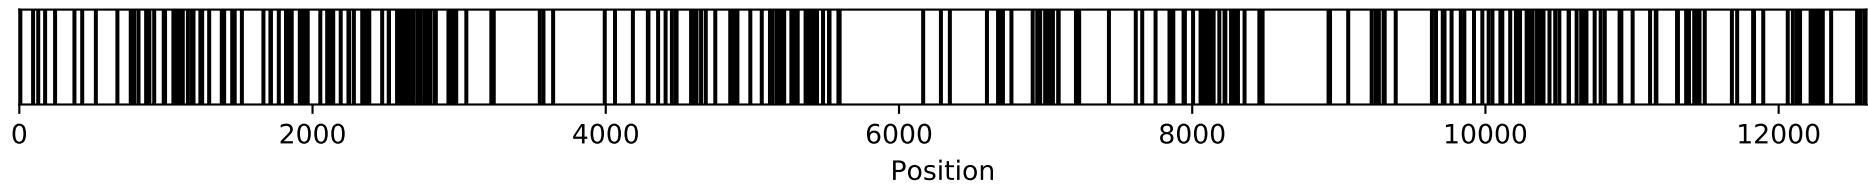

CR1 vs MM1  
Number of differences: 150

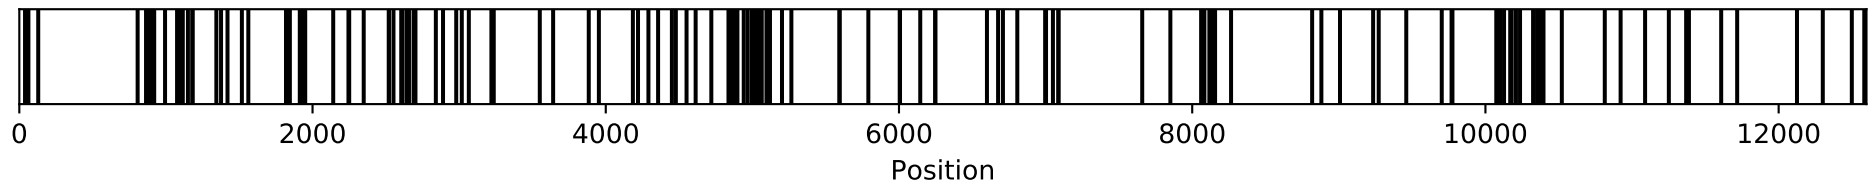

CR1 vs MM2  
Number of differences: 154

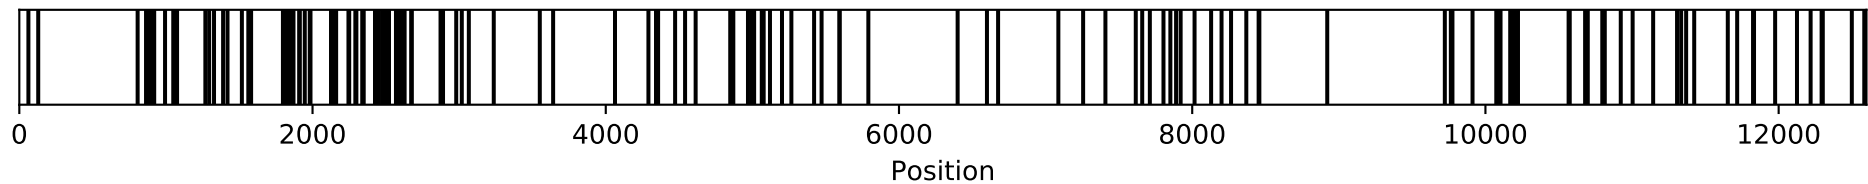

CR2 vs MM1  
Number of differences: 292

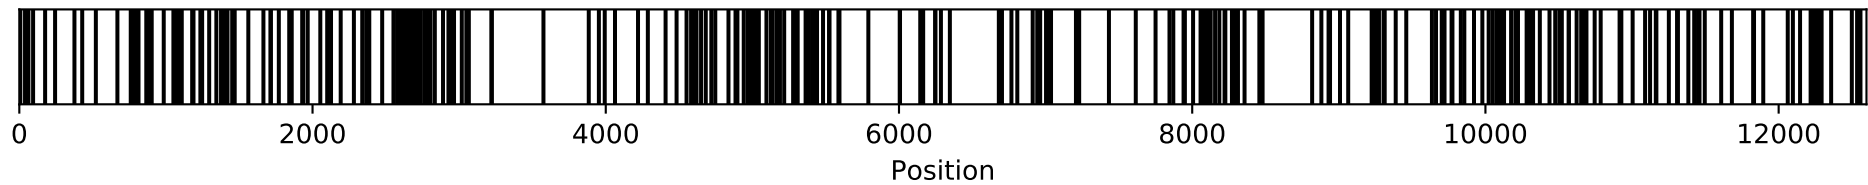

CR2 vs MM2  
Number of differences: 316

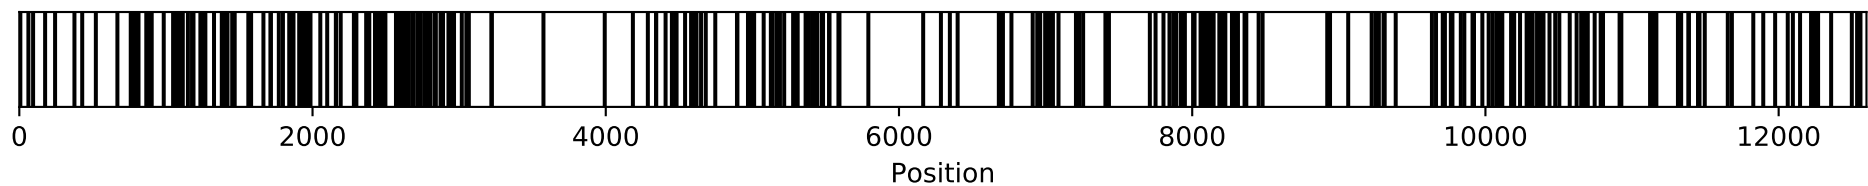

MM1 vs MM2  
Number of differences: 160

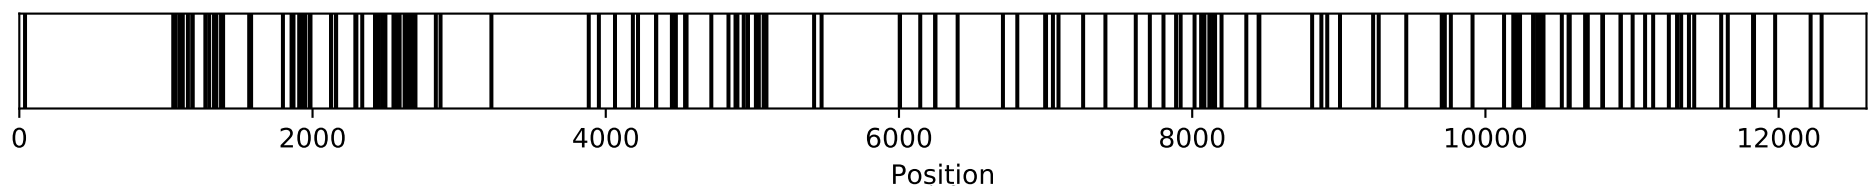

CR1 vs CR2  
Number of differences: 300

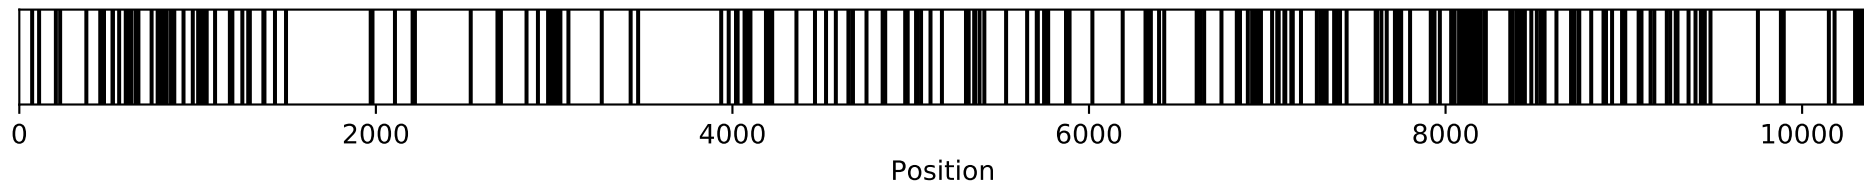

CR1 vs MM1  
Number of differences: 129

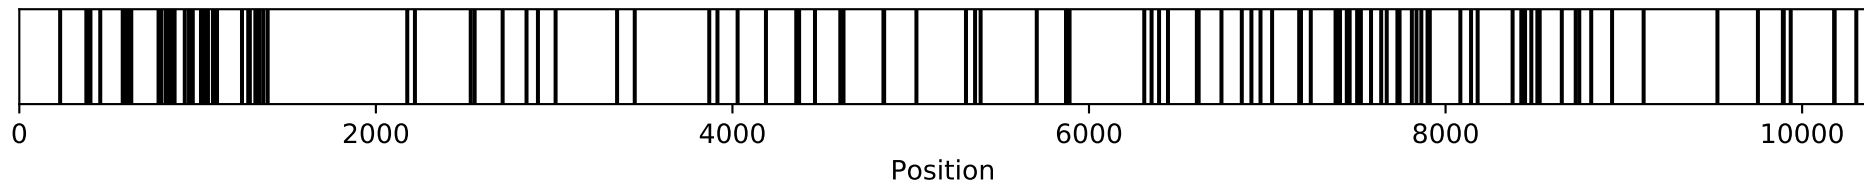

CR1 vs MM2  
Number of differences: 166

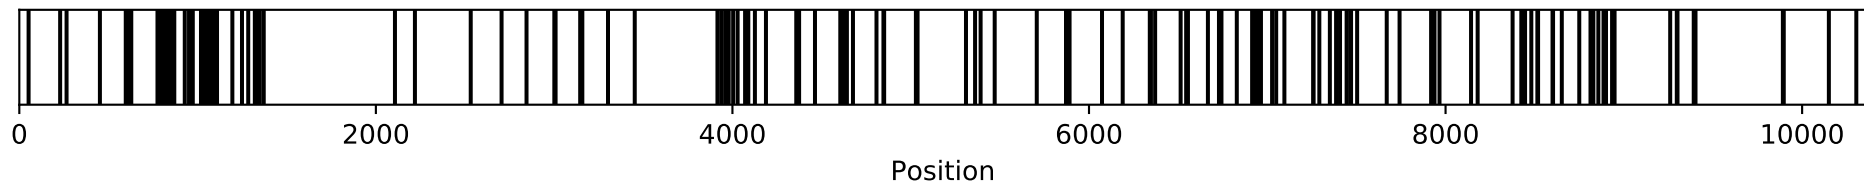

CR2 vs MM1  
Number of differences: 308

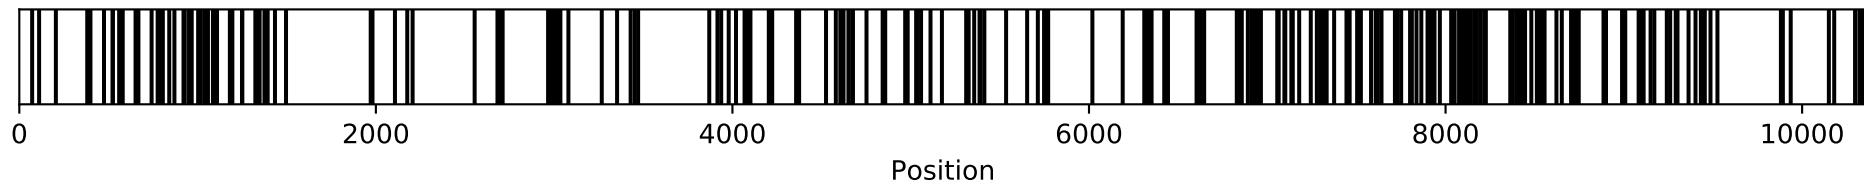

CR2 vs MM2  
Number of differences: 302

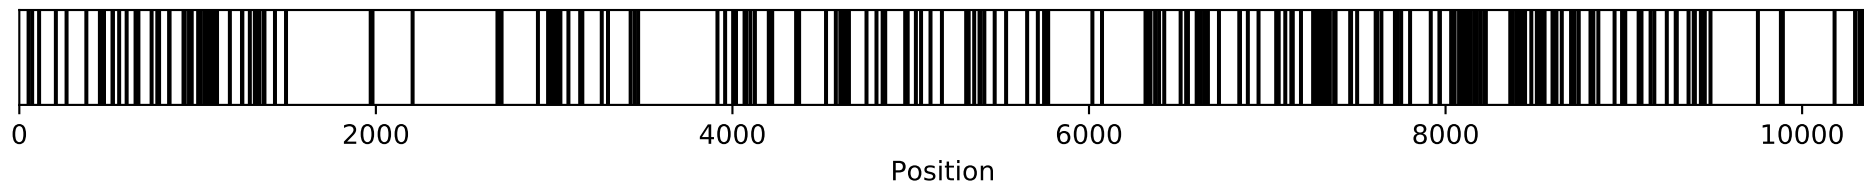

MM1 vs MM2  
Number of differences: 139

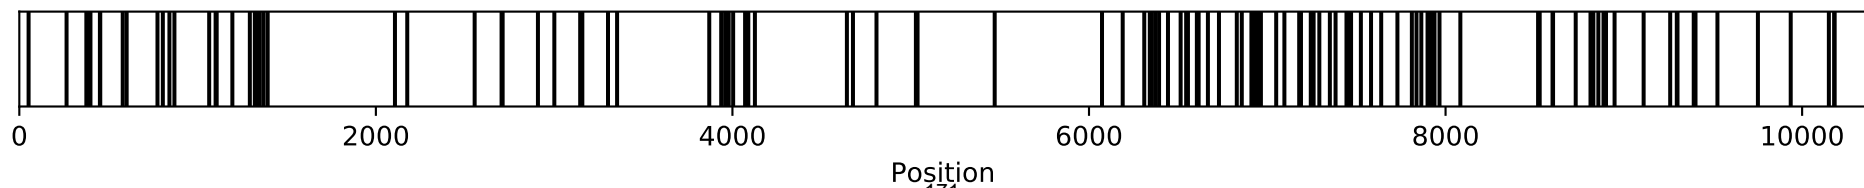

CR1 vs CR2  
Number of differences: 164

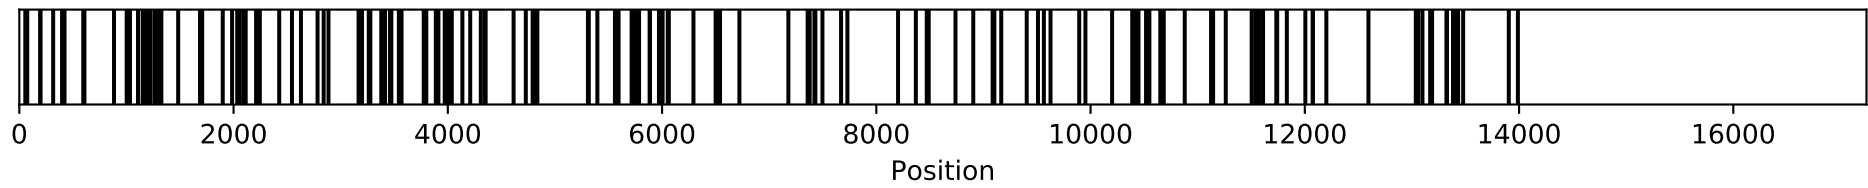

CR1 vs MM1  
Number of differences: 138

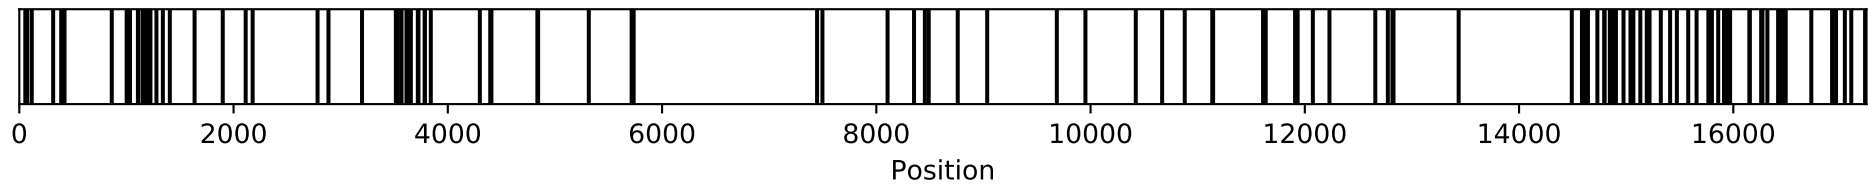

CR1 vs MM2  
Number of differences: 123

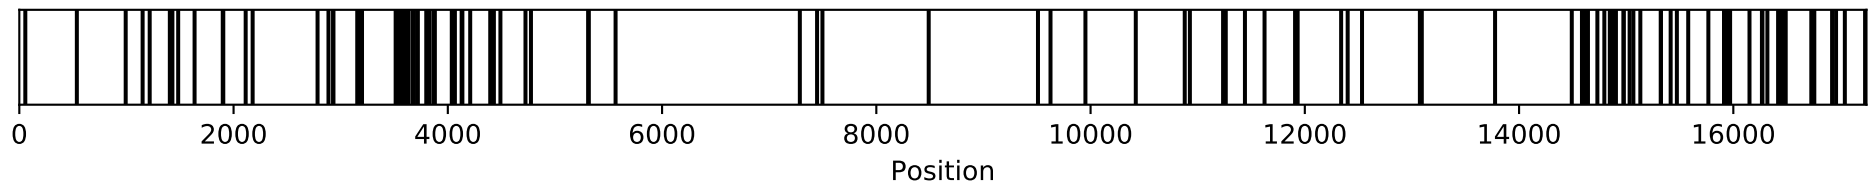

CR2 vs MM1  
Number of differences: 234

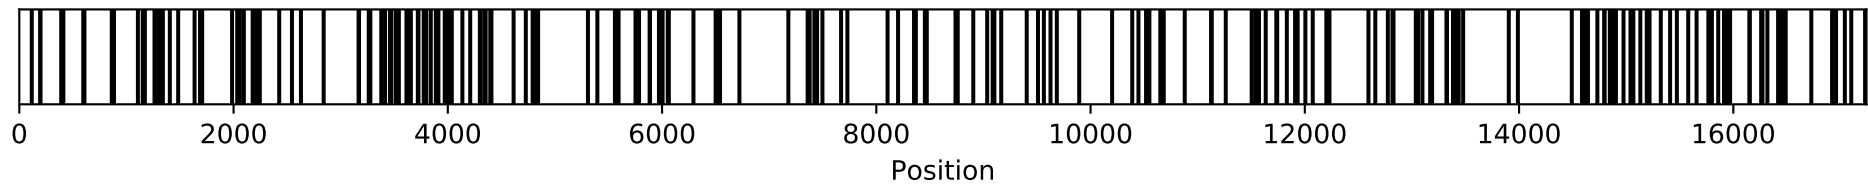

CR2 vs MM2  
Number of differences: 240

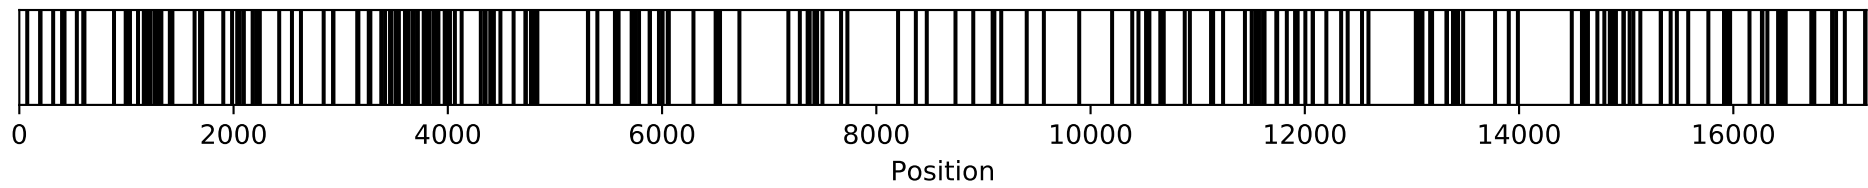

MM1 vs MM2  
Number of differences: 134

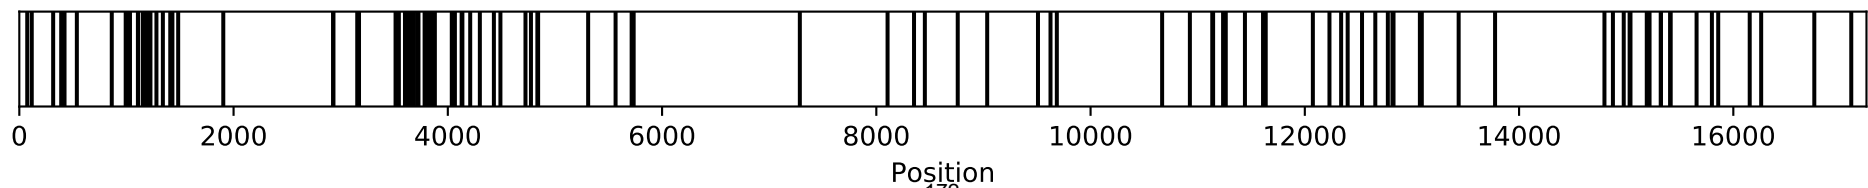

CR1 vs CR2  
Number of differences: 234

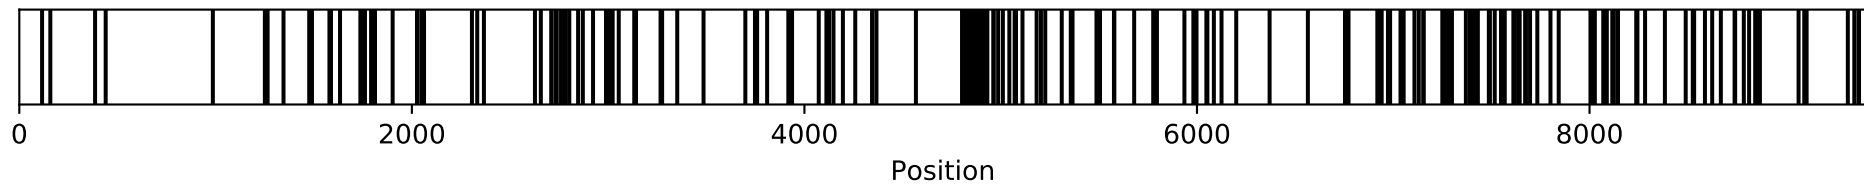

CR1 vs MM1  
Number of differences: 145

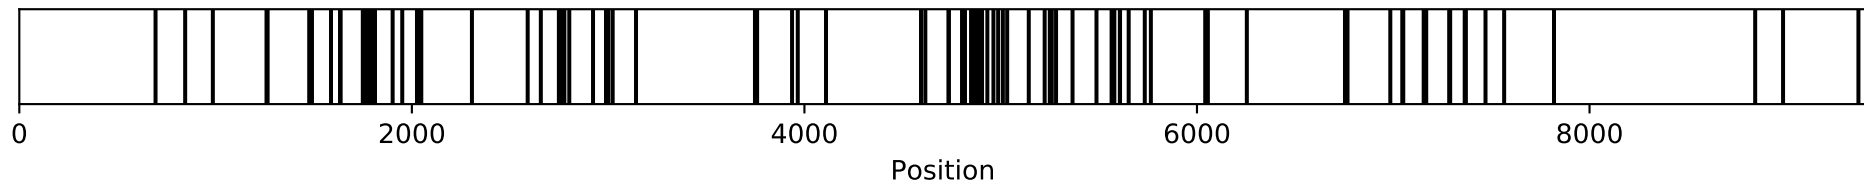

CR1 vs MM2  
Number of differences: 96

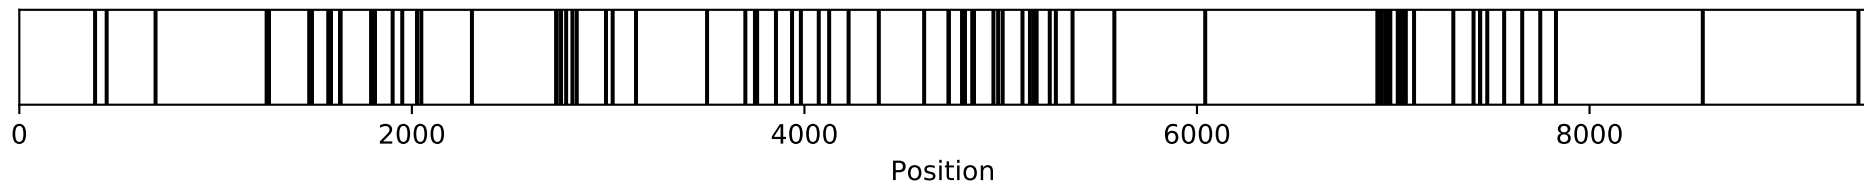

CR2 vs MM1  
Number of differences: 251

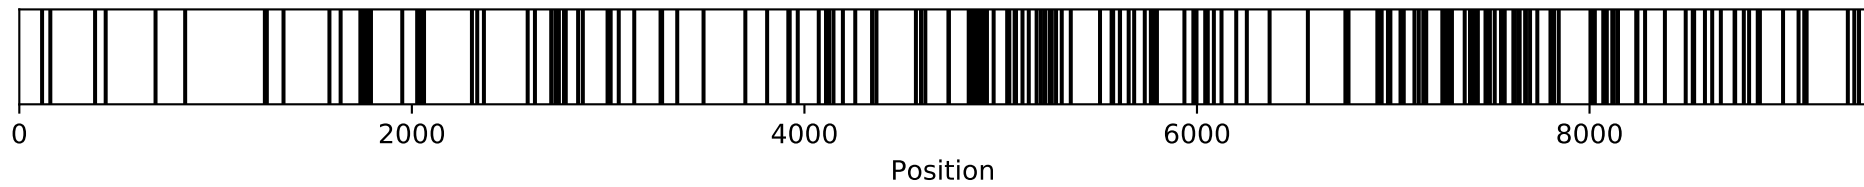

CR2 vs MM2  
Number of differences: 227

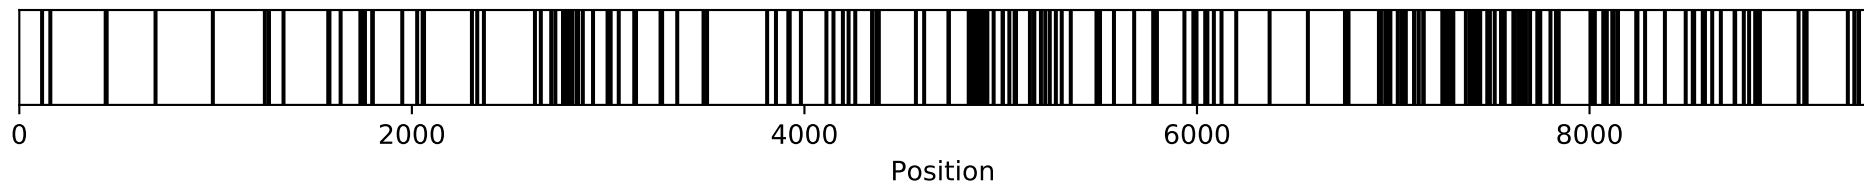

MM1 vs MM2  
Number of differences: 141

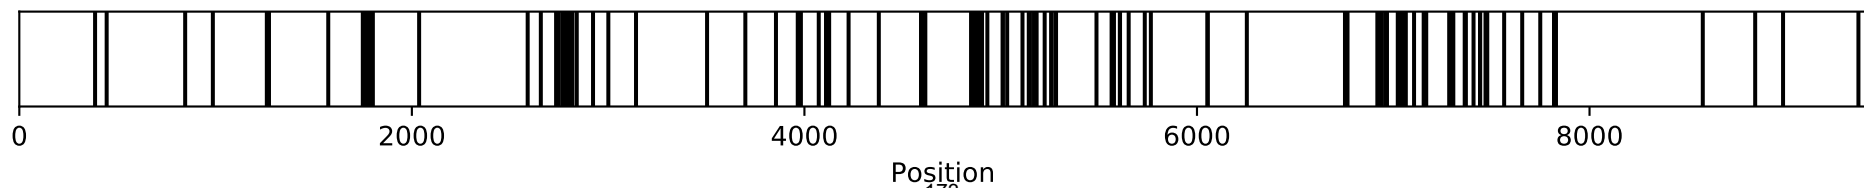

CR1 vs CR2  
Number of differences: 449

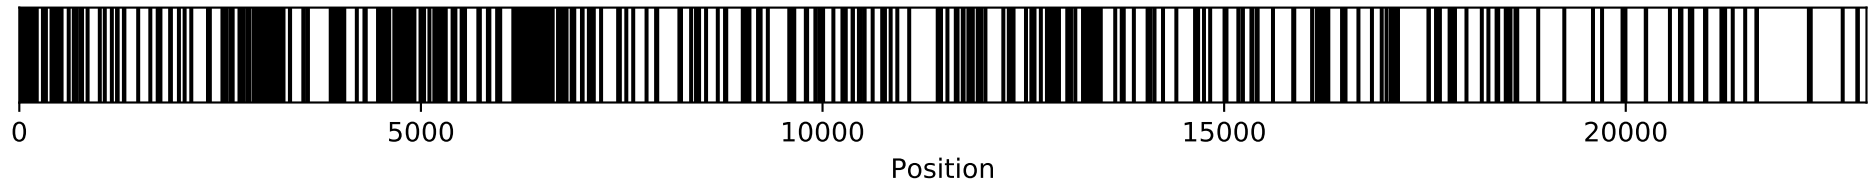

CR1 vs MM1  
Number of differences: 274

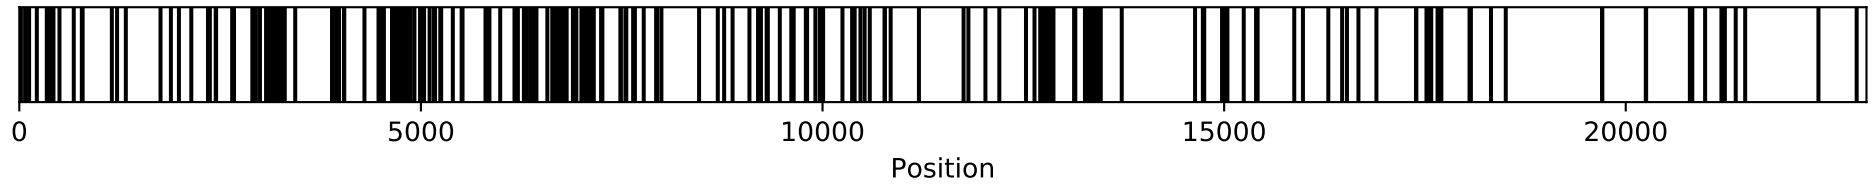

CR1 vs MM2  
Number of differences: 280

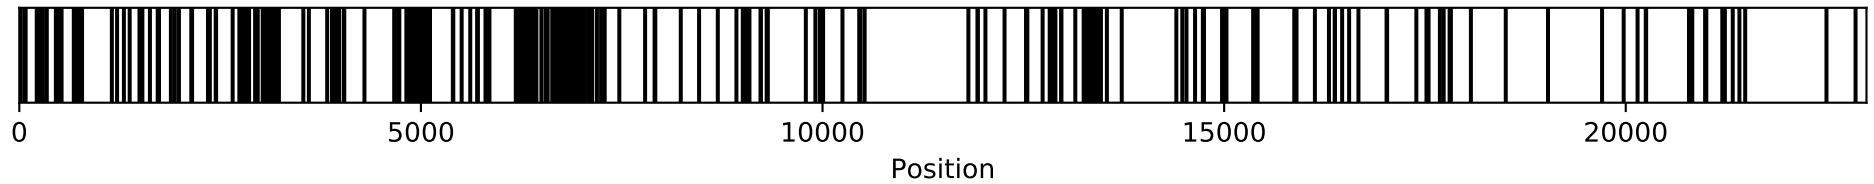

CR2 vs MM1  
Number of differences: 448

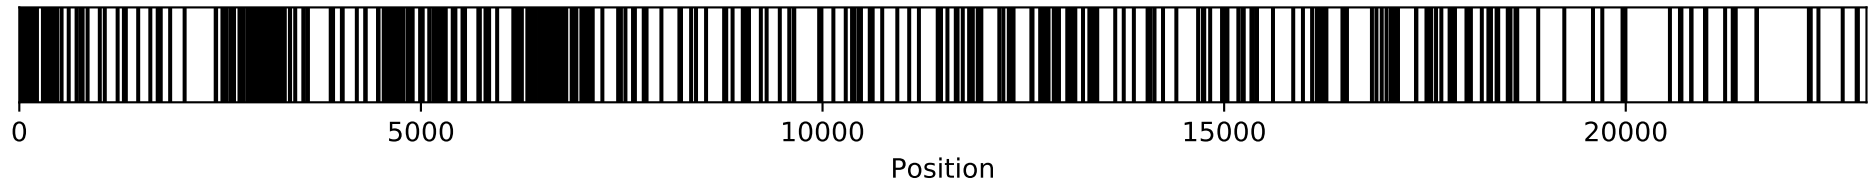

CR2 vs MM2  
Number of differences: 464

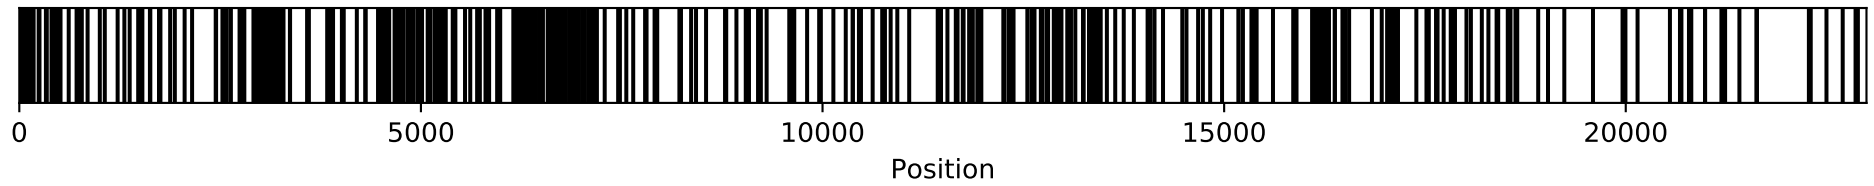

MM1 vs MM2  
Number of differences: 283

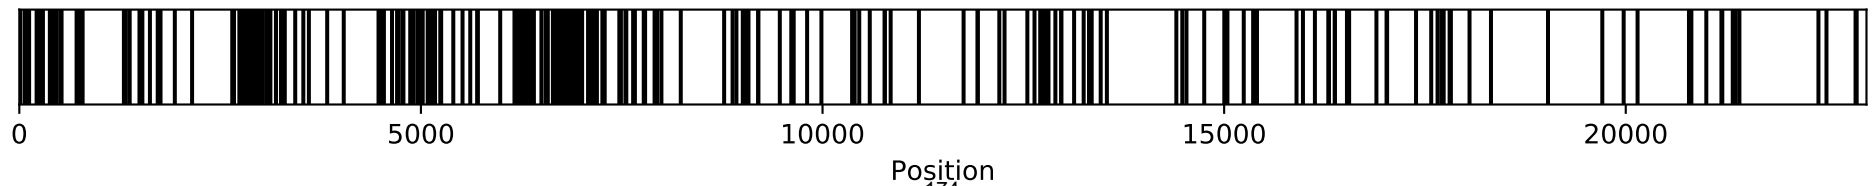

CR1 vs CR2  
Number of differences: 300

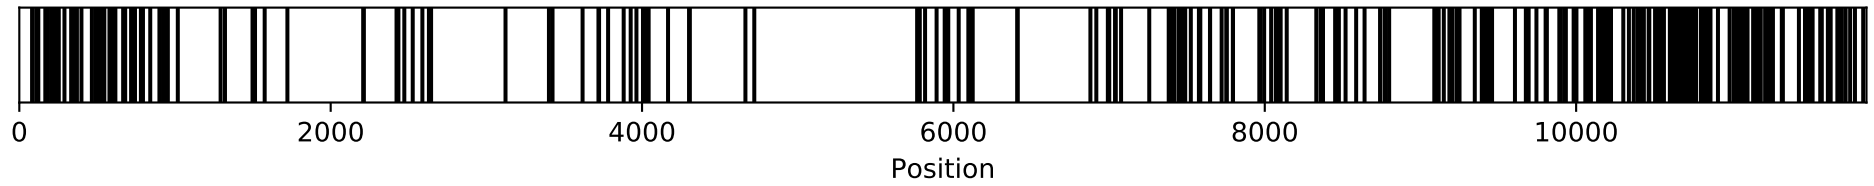

CR1 vs MM1  
Number of differences: 175

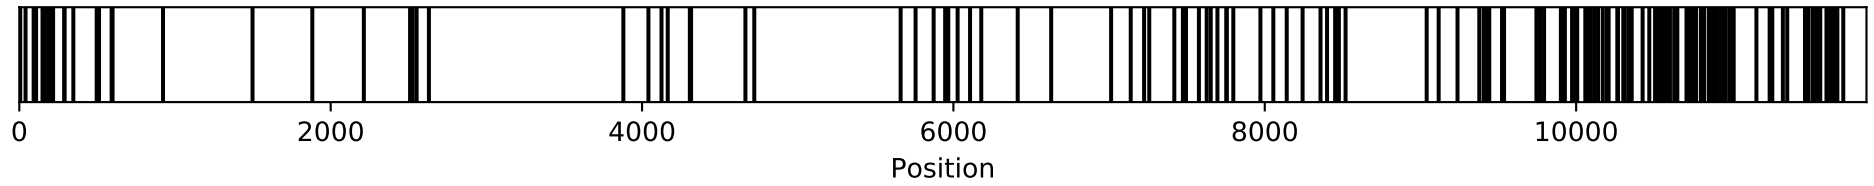

CR1 vs MM2  
Number of differences: 209

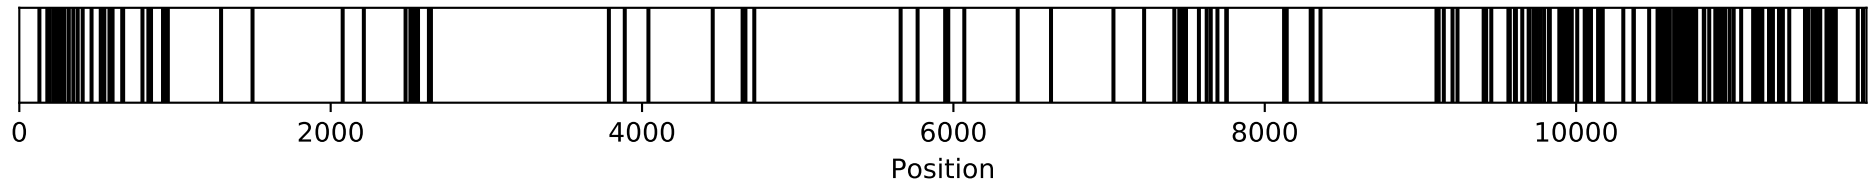

CR2 vs MM1  
Number of differences: 321

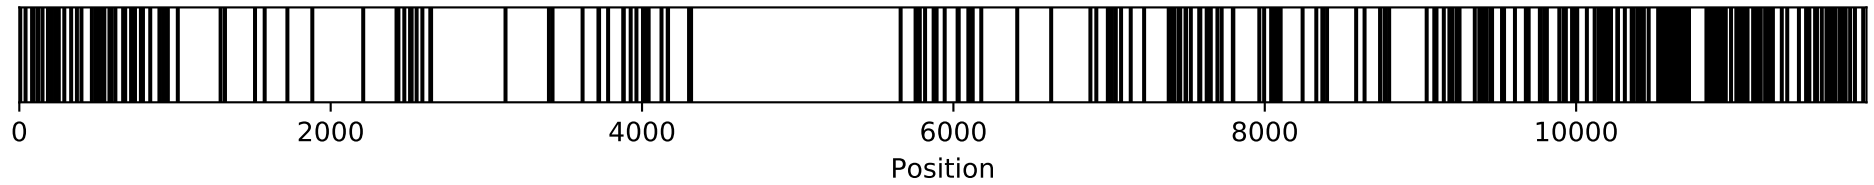

CR2 vs MM2  
Number of differences: 304

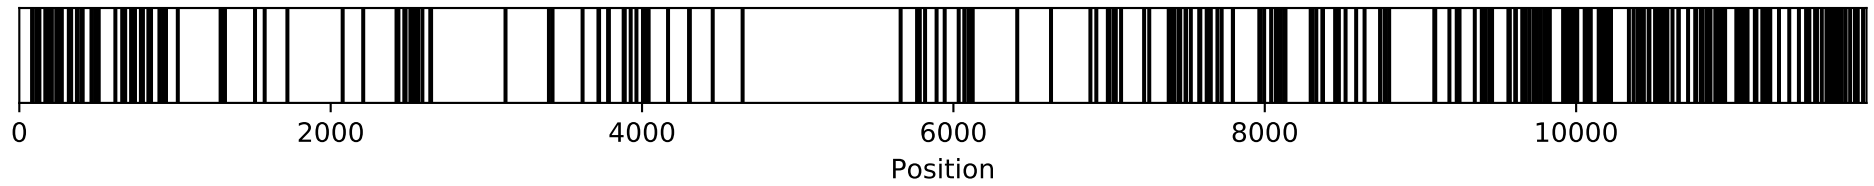

MM1 vs MM2  
Number of differences: 208

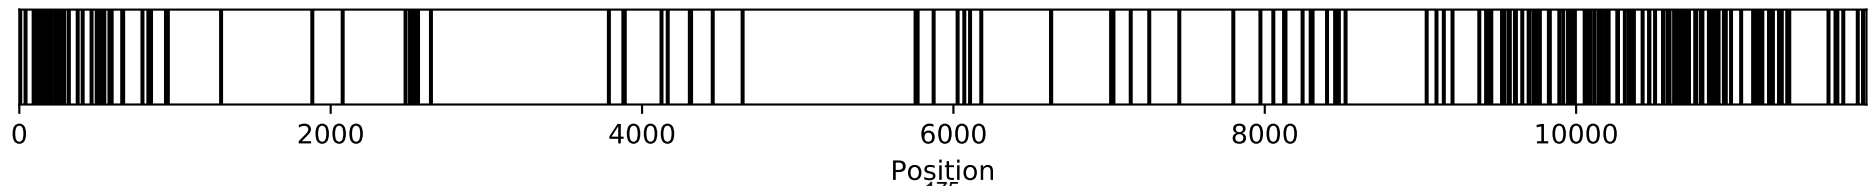



CR1 vs CR2  
Number of differences: 209

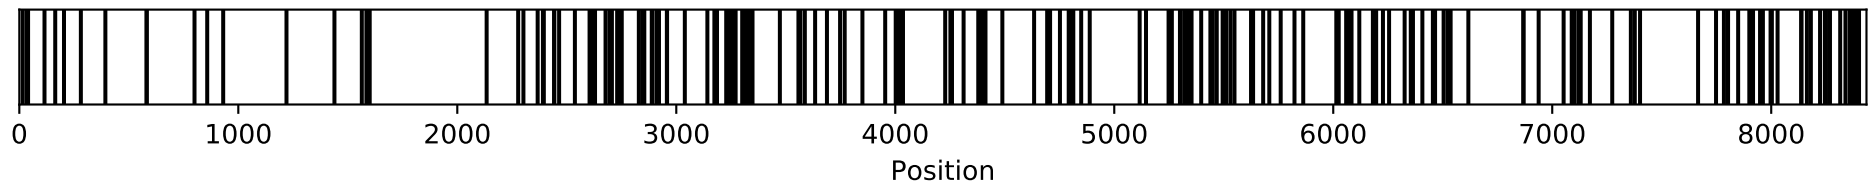

CR1 vs MM1  
Number of differences: 202

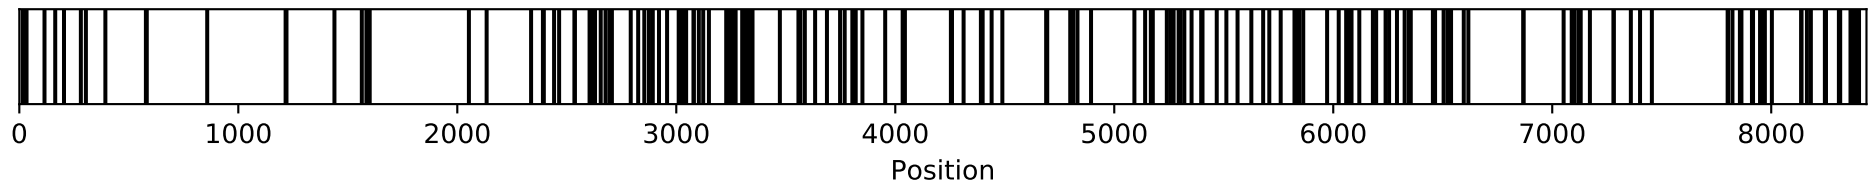

CR1 vs MM2  
Number of differences: 203

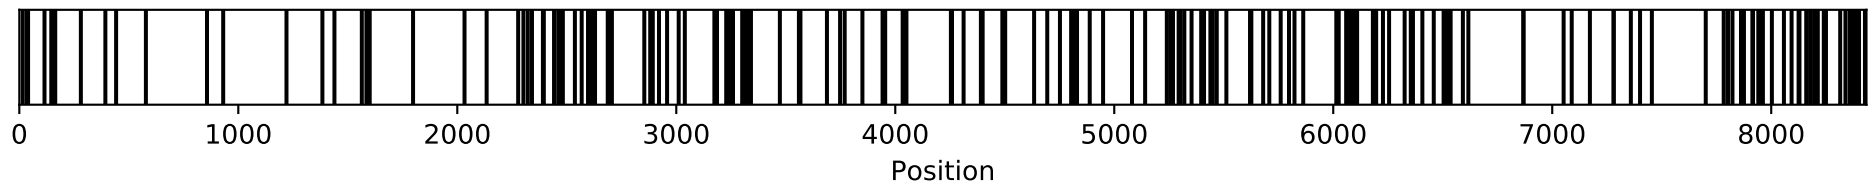

CR2 vs MM1  
Number of differences: 135

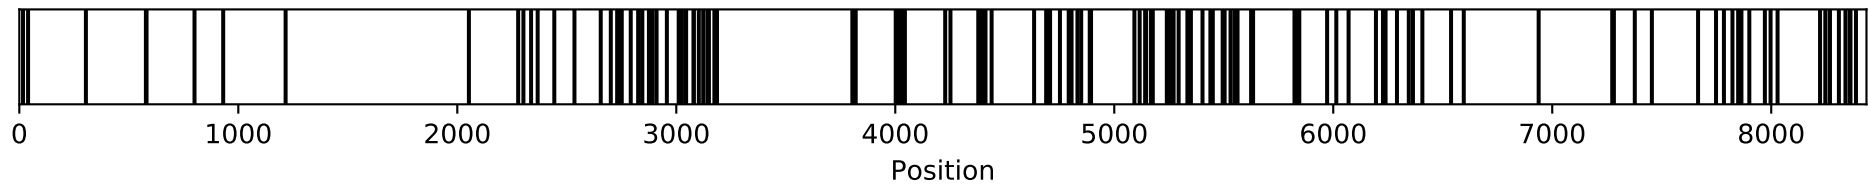

CR2 vs MM2  
Number of differences: 146

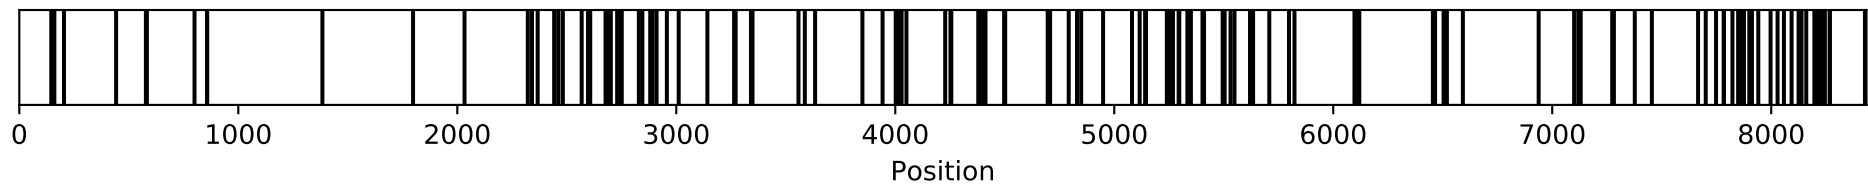

MM1 vs MM2  
Number of differences: 145

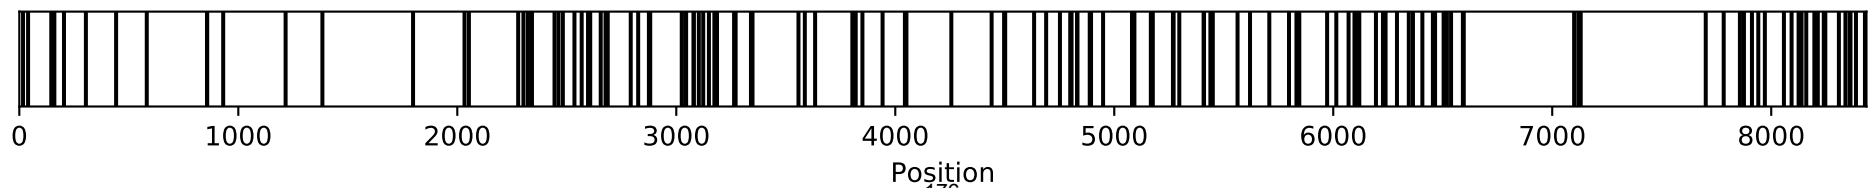

CR1 vs CR2  
Number of differences: 156

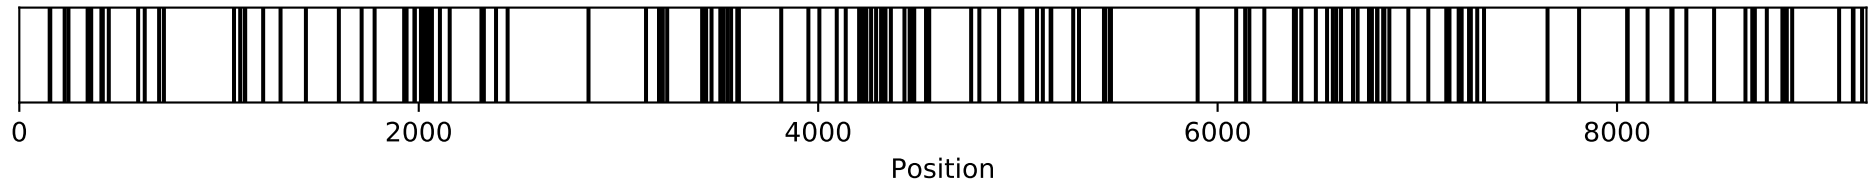

CR1 vs MM1  
Number of differences: 84

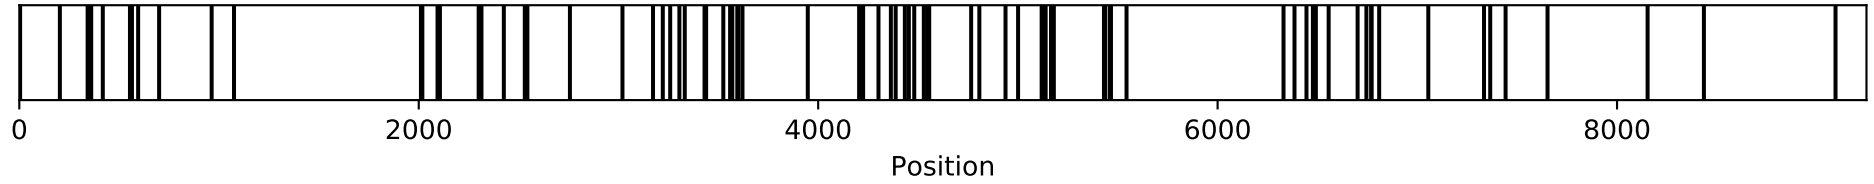

CR1 vs MM2  
Number of differences: 58

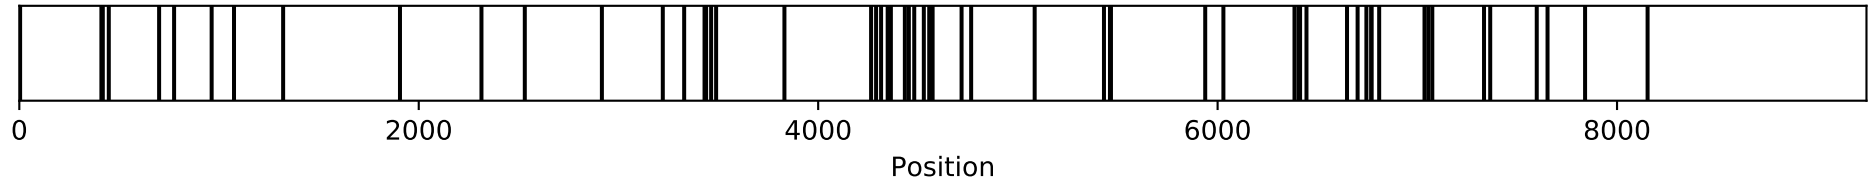

CR2 vs MM1  
Number of differences: 167

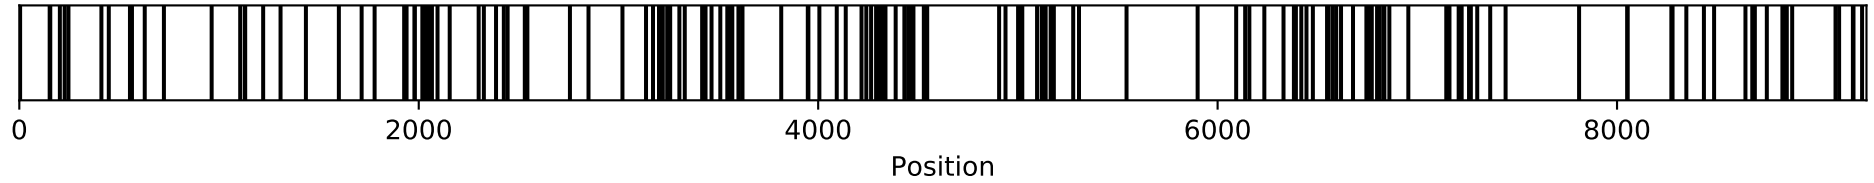

CR2 vs MM2  
Number of differences: 162

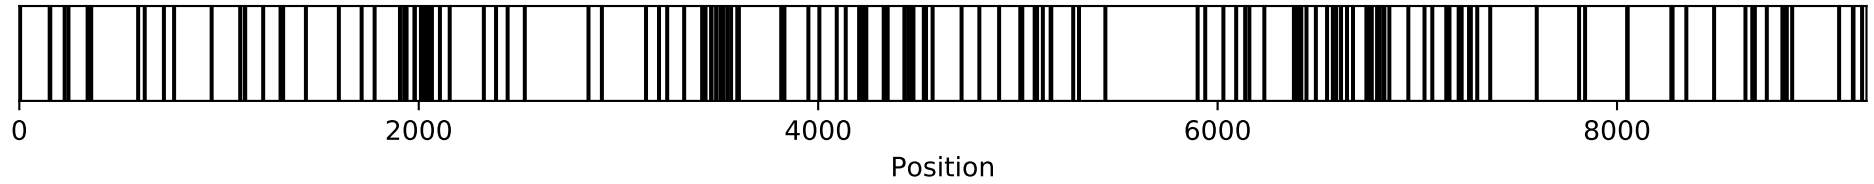

MM1 vs MM2  
Number of differences: 79

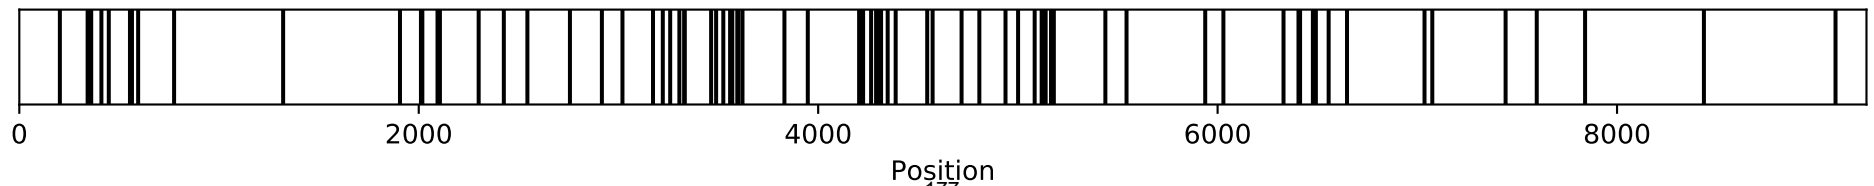

CR1 vs CR2  
Number of differences: 280

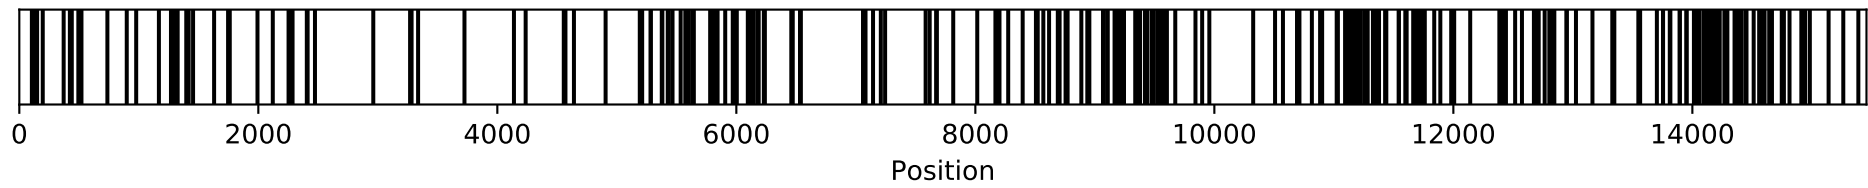

CR1 vs MM1  
Number of differences: 141

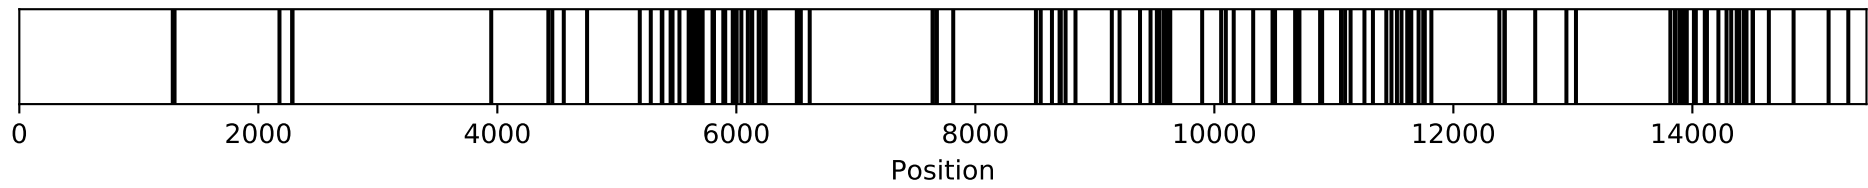

CR1 vs MM2  
Number of differences: 158

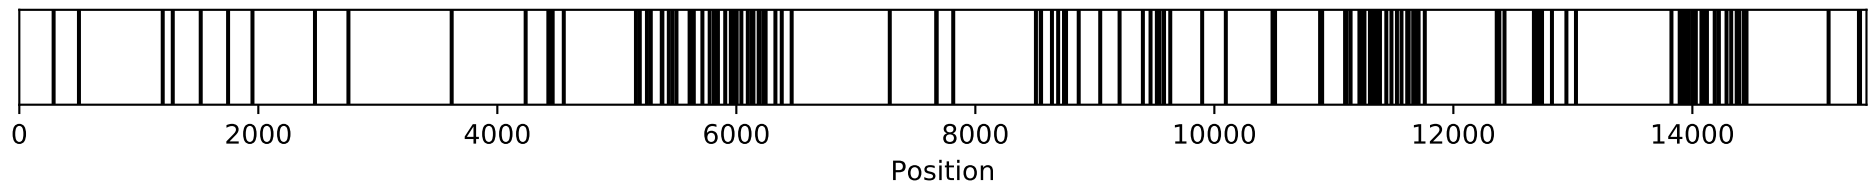

CR2 vs MM1  
Number of differences: 283

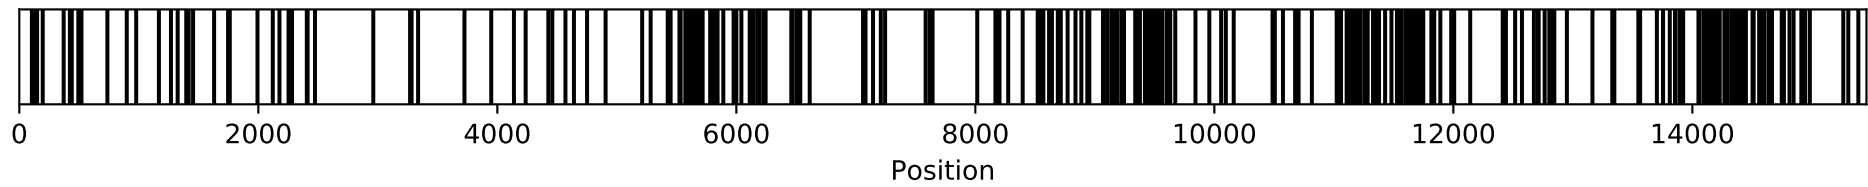

CR2 vs MM2  
Number of differences: 290

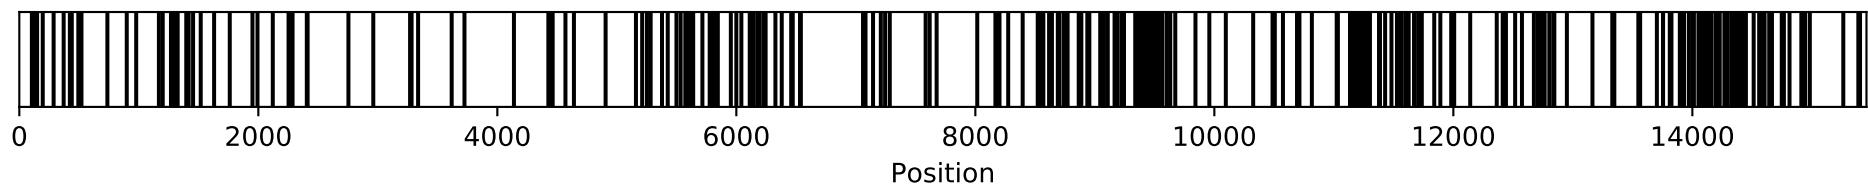

MM1 vs MM2  
Number of differences: 139

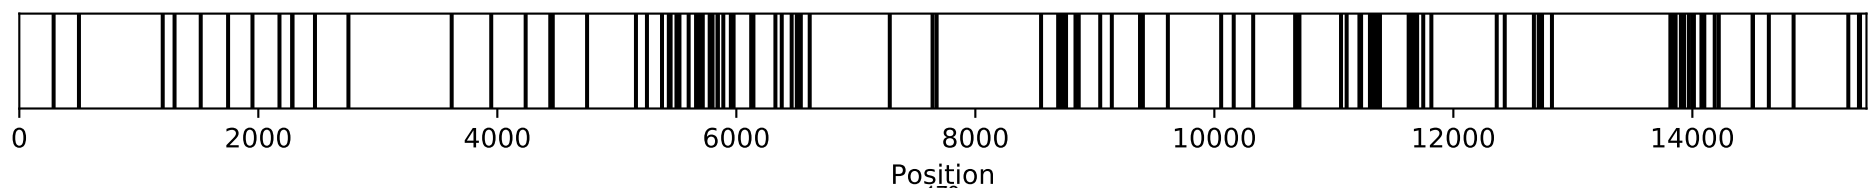

CR1 vs CR2  
Number of differences: 264

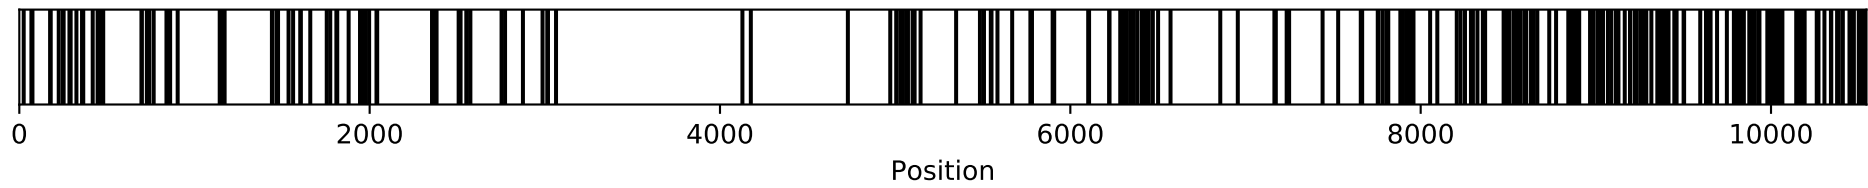

CR1 vs MM1  
Number of differences: 142

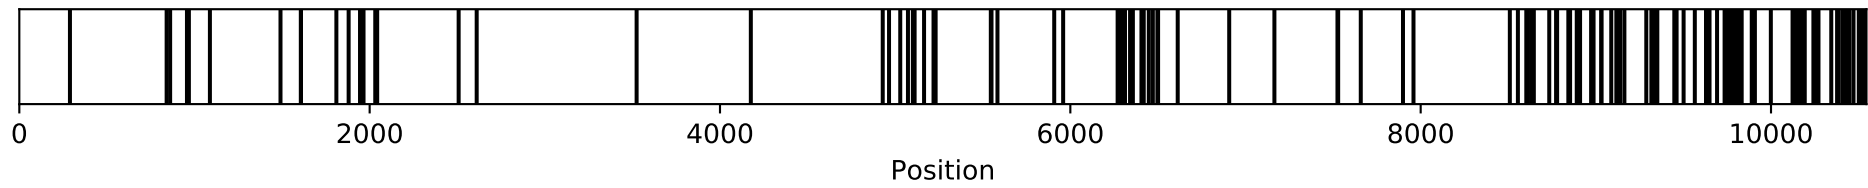

CR1 vs MM2  
Number of differences: 142

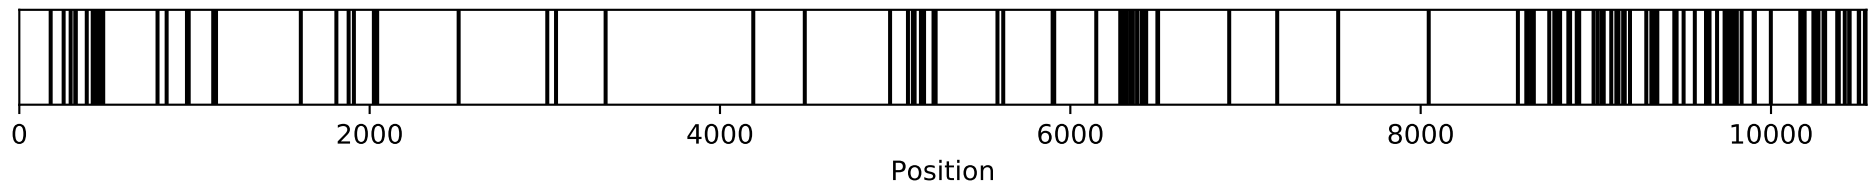

CR2 vs MM1  
Number of differences: 230

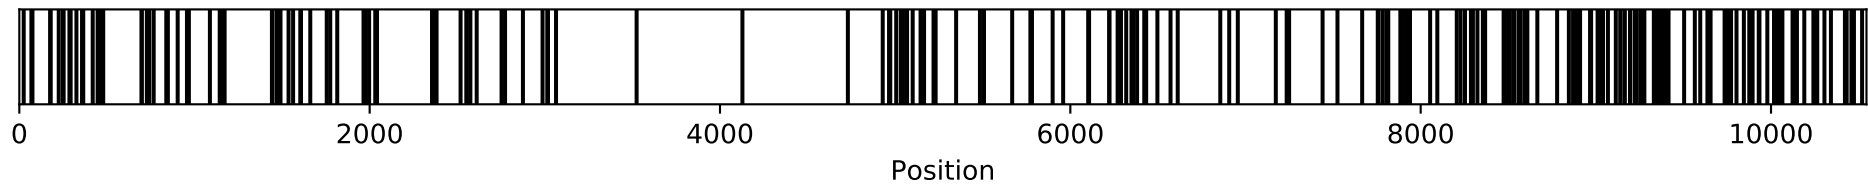

CR2 vs MM2  
Number of differences: 237

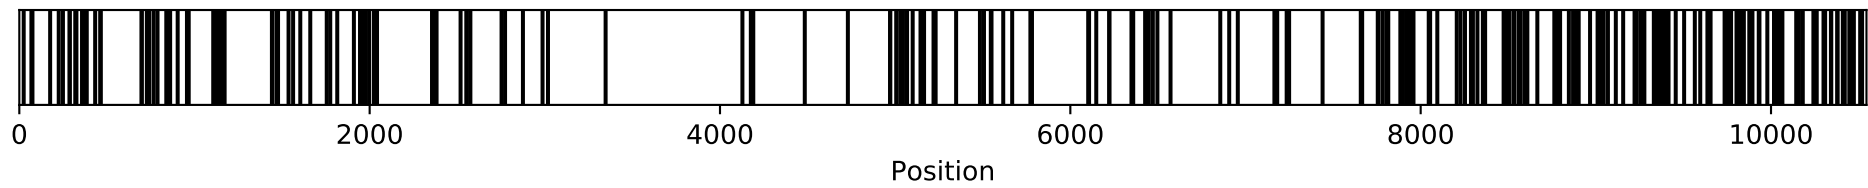

MM1 vs MM2  
Number of differences: 110

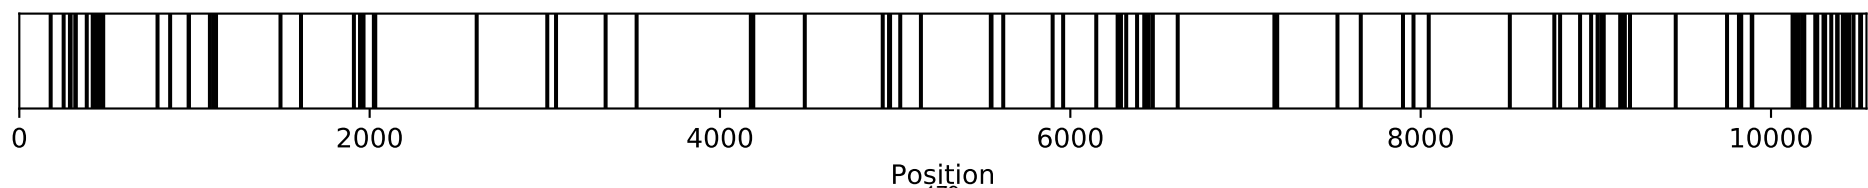

CR1 vs CR2  
Number of differences: 321

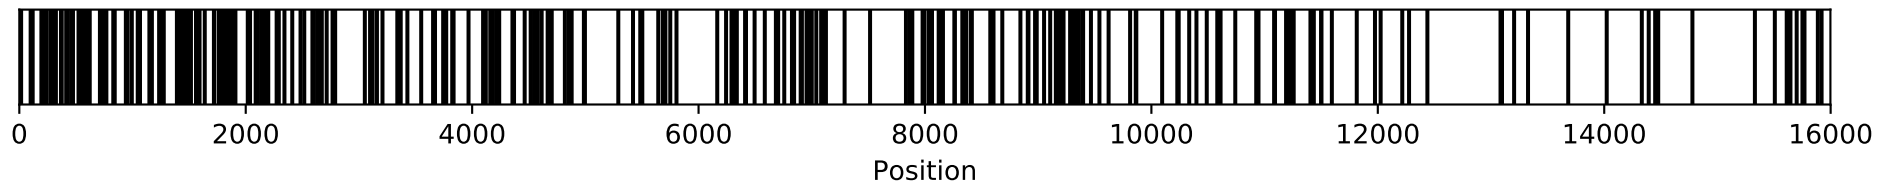

CR1 vs MM1  
Number of differences: 28

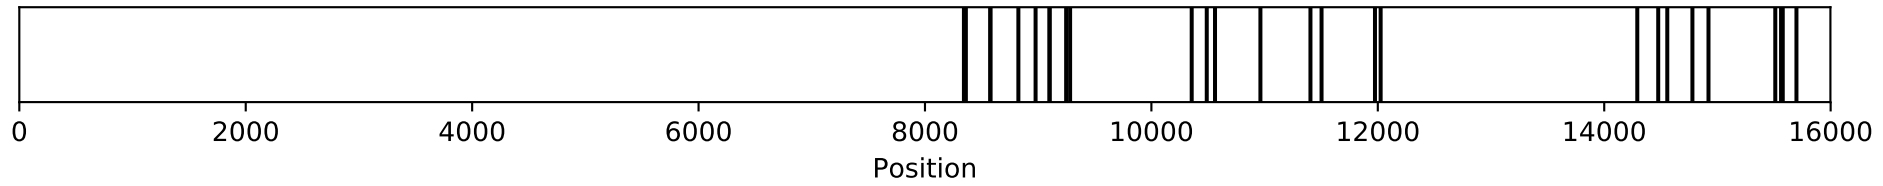

CR1 vs MM2  
Number of differences: 89

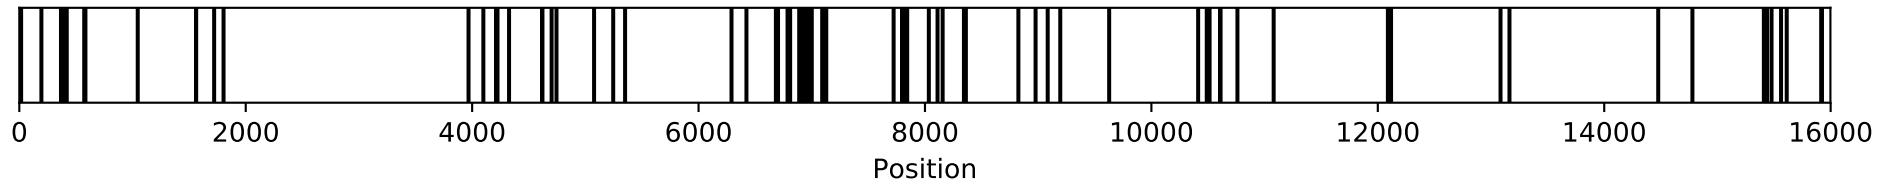

CR2 vs MM1  
Number of differences: 327

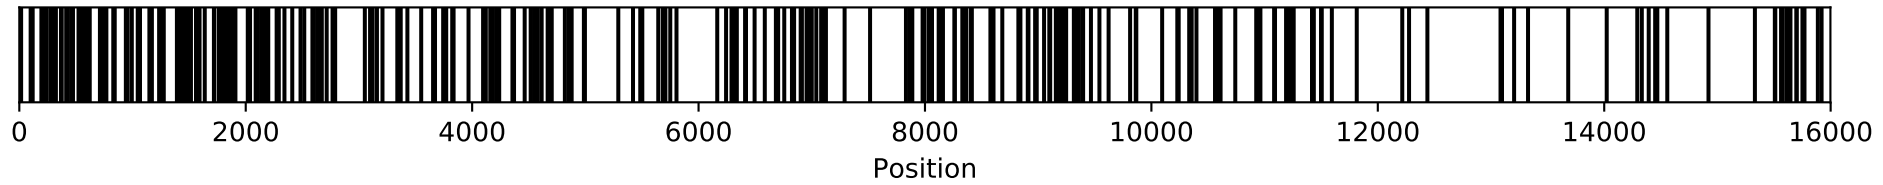

CR2 vs MM2  
Number of differences: 327

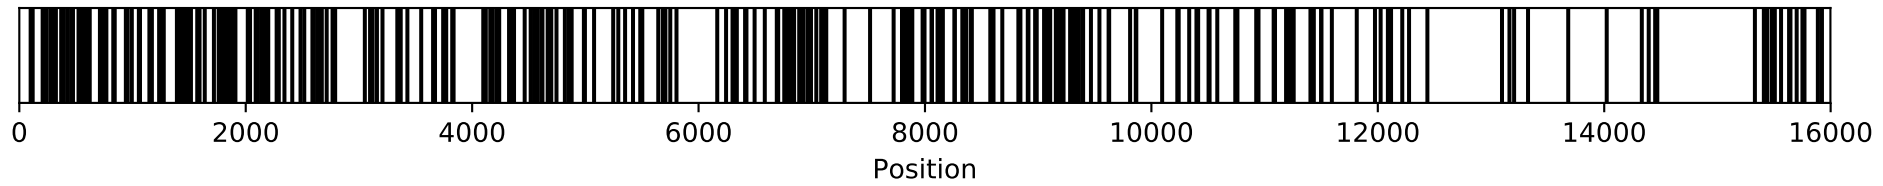

MM1 vs MM2  
Number of differences: 101

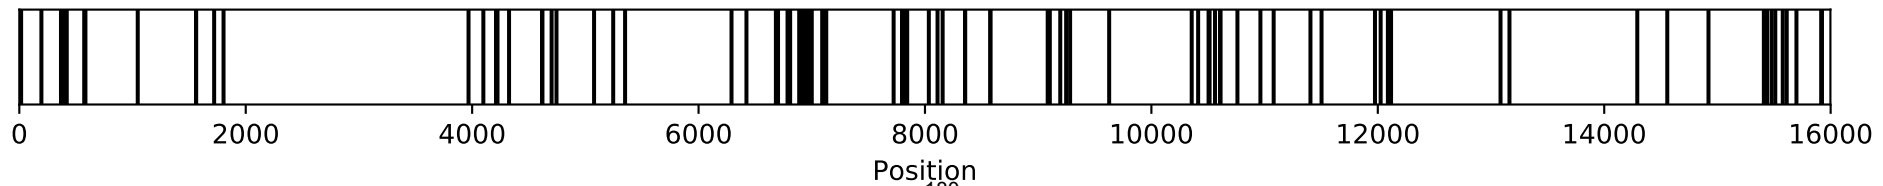

CR1 vs CR2  
Number of differences: 103

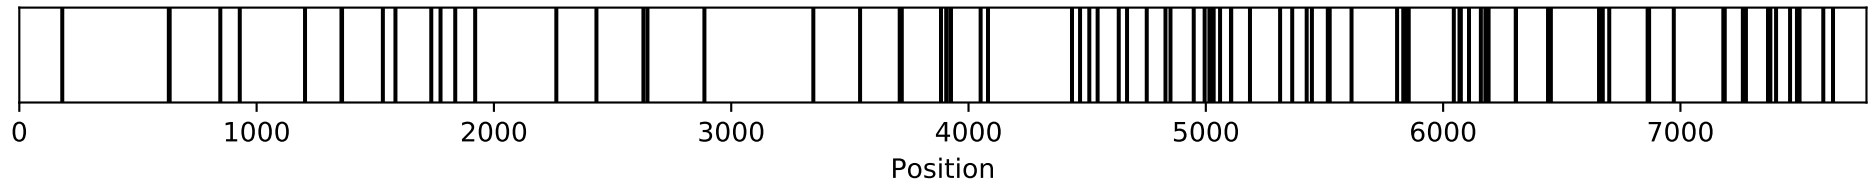

CR1 vs MM1  
Number of differences: 50

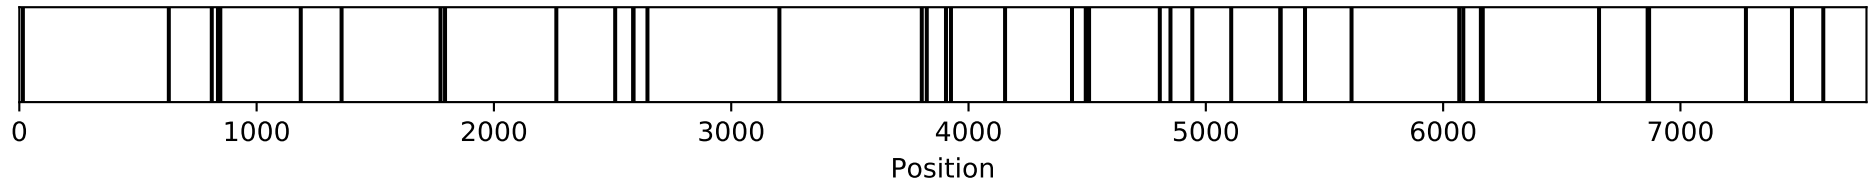

CR1 vs MM2  
Number of differences: 67

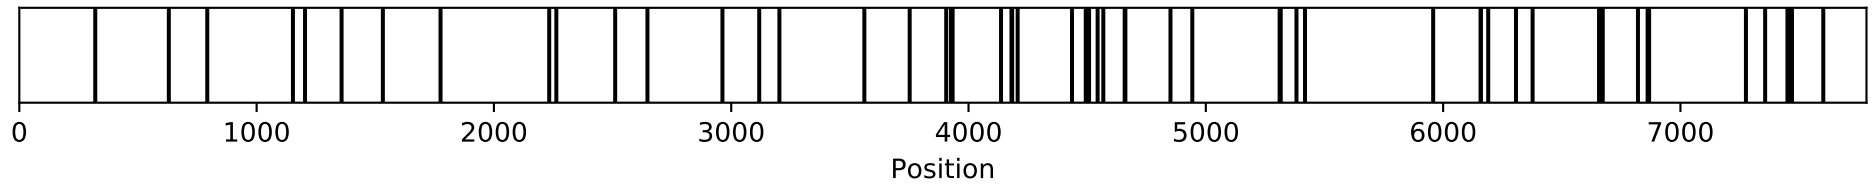

CR2 vs MM1  
Number of differences: 111

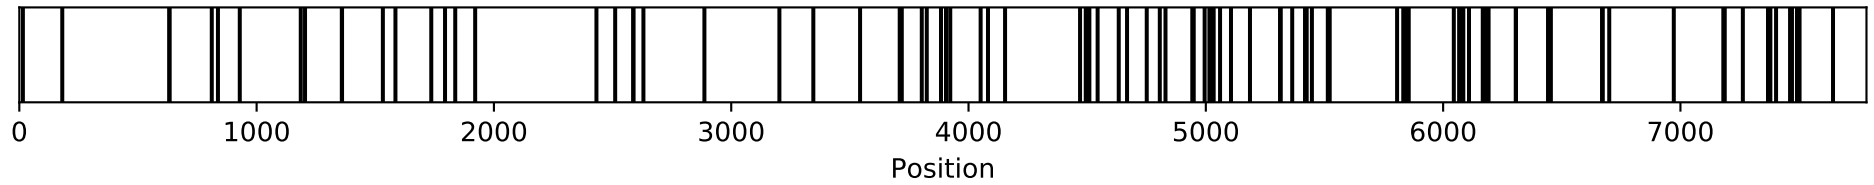

CR2 vs MM2  
Number of differences: 119

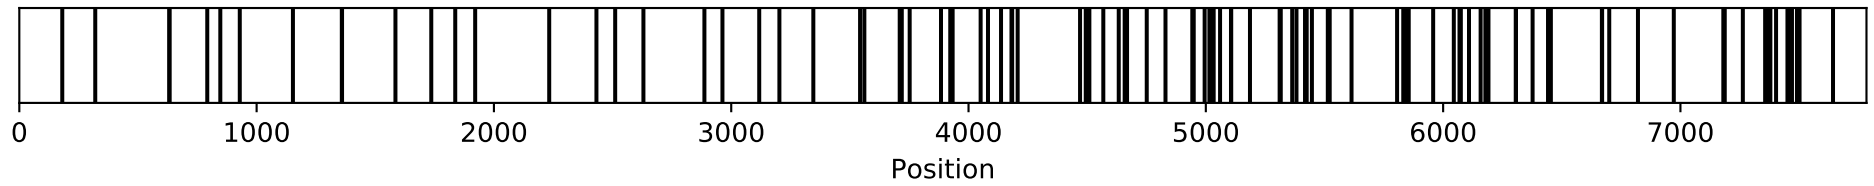

MM1 vs MM2  
Number of differences: 53

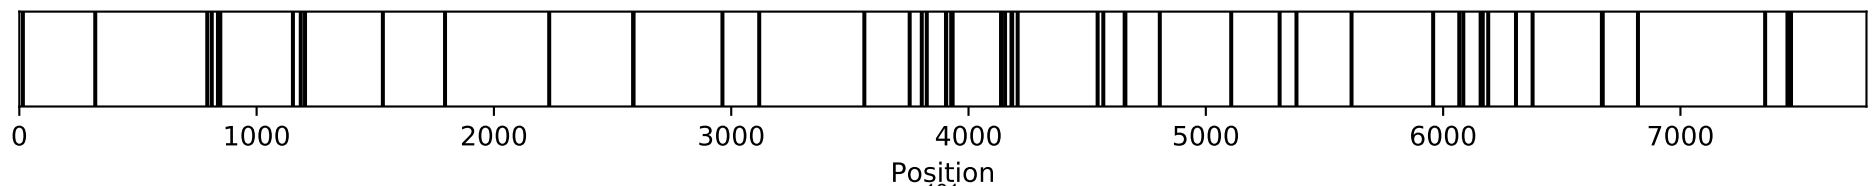

CR1 vs CR2  
Number of differences: 332

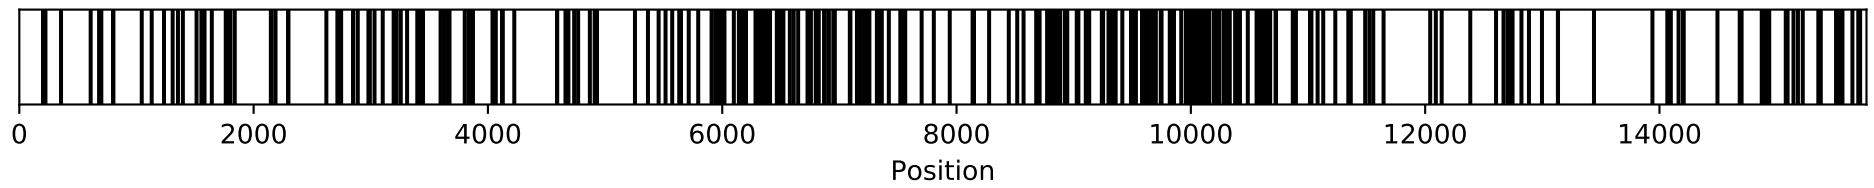

CR1 vs MM1  
Number of differences: 28

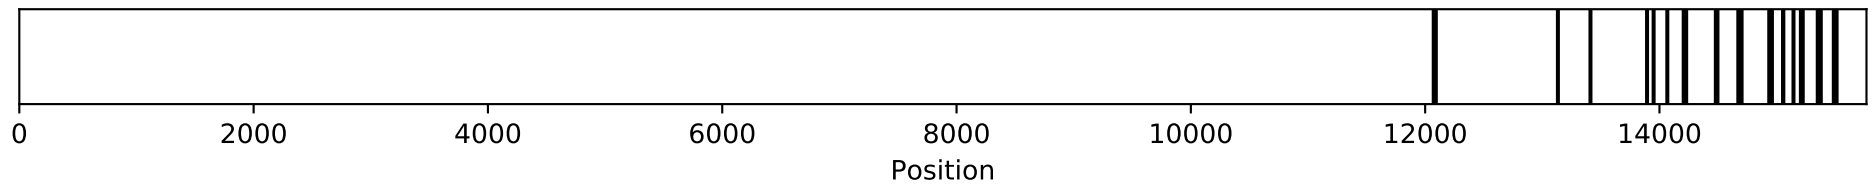

CR1 vs MM2  
Number of differences: 3

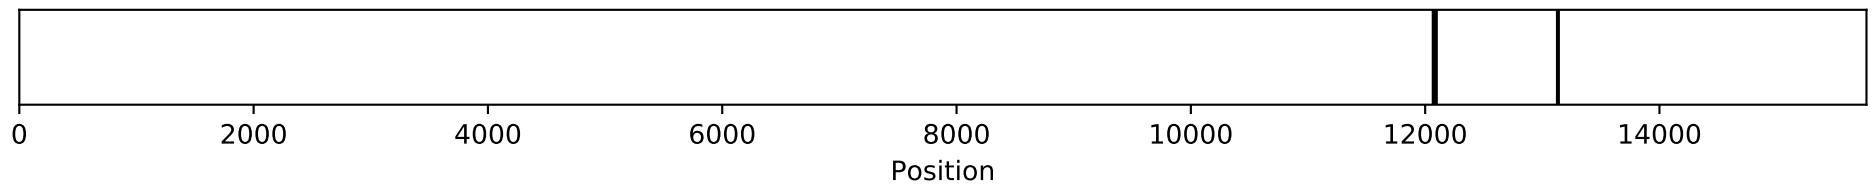

CR2 vs MM1  
Number of differences: 336

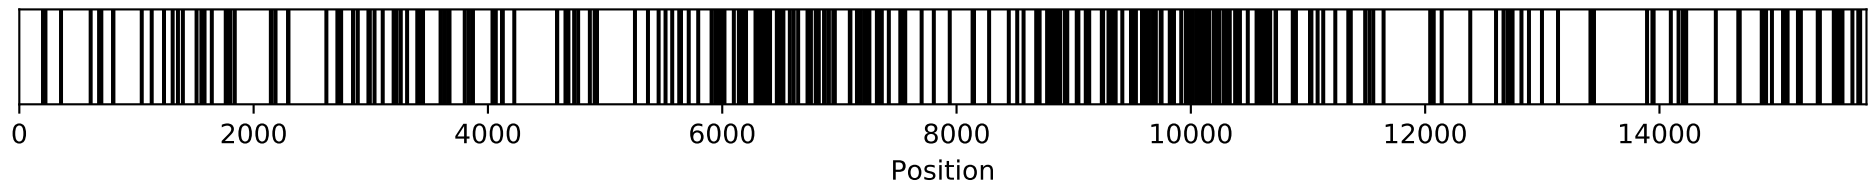

CR2 vs MM2  
Number of differences: 331

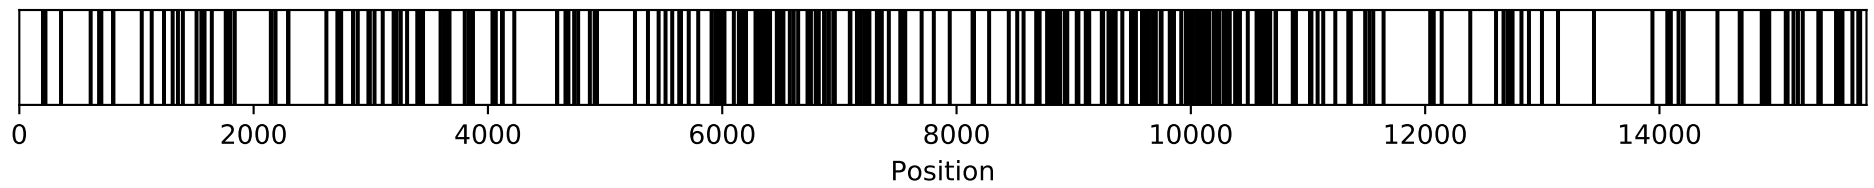

MM1 vs MM2  
Number of differences: 25

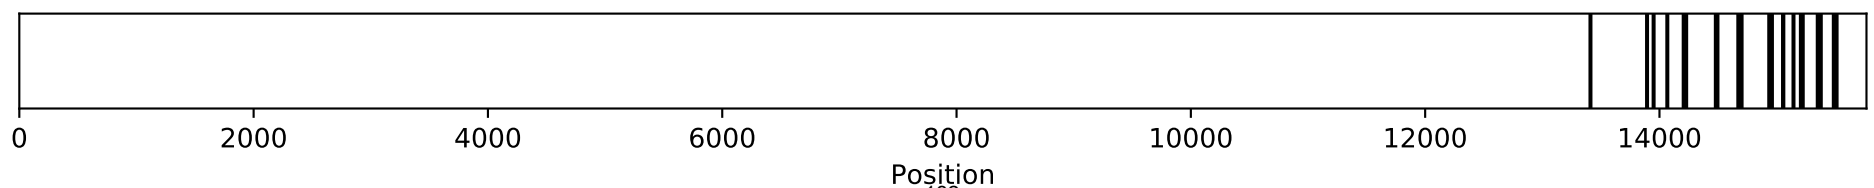

CR1 vs CR2  
Number of differences: 8

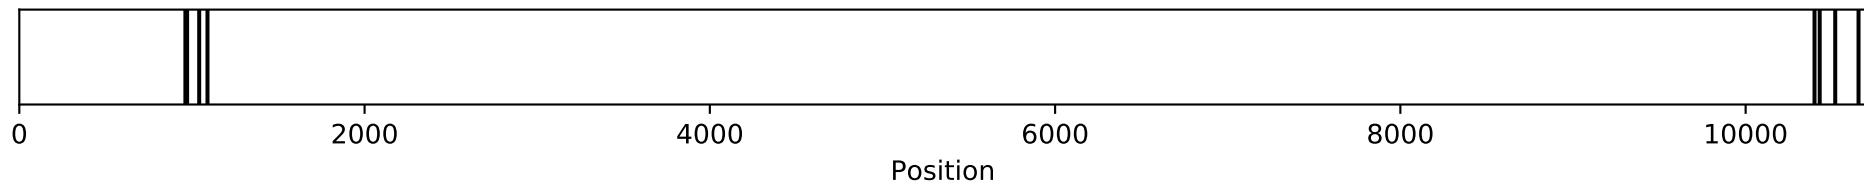

CR1 vs MM1  
Number of differences: 158

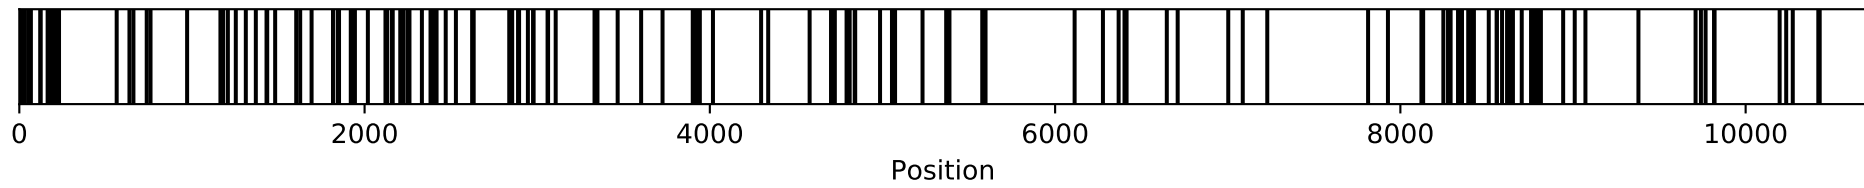

CR1 vs MM2  
Number of differences: 164

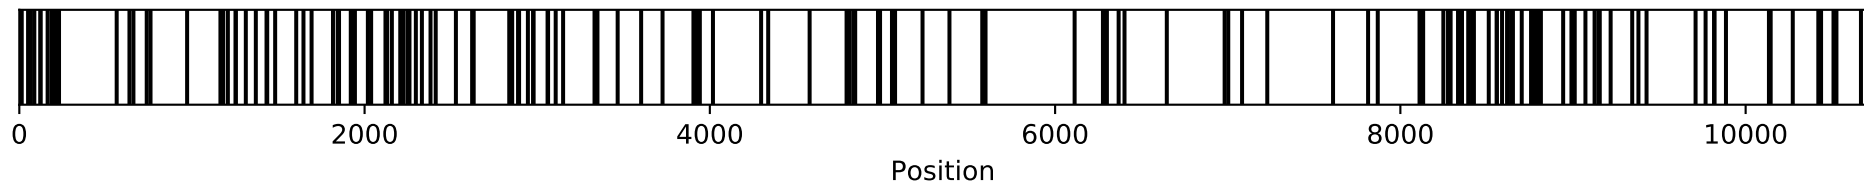

CR2 vs MM1  
Number of differences: 162

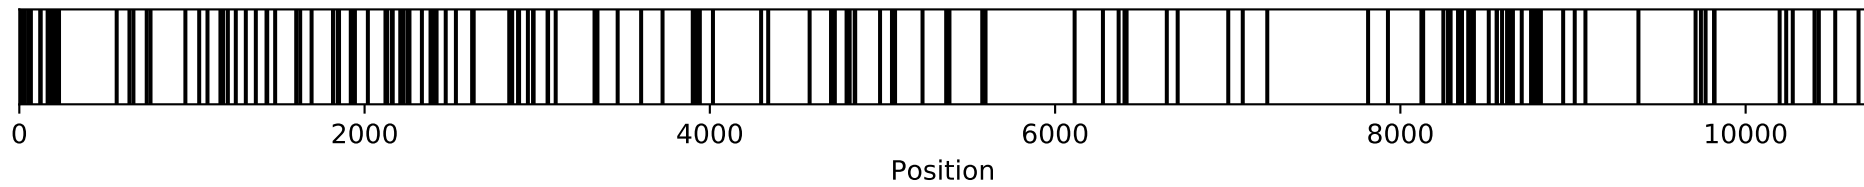

CR2 vs MM2  
Number of differences: 168

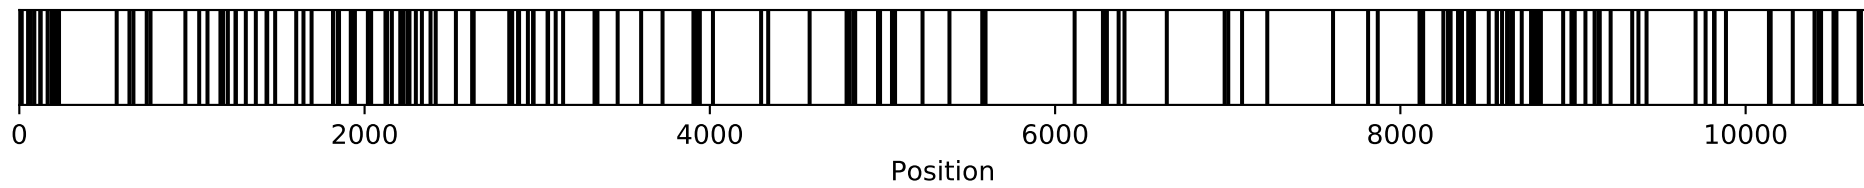

MM1 vs MM2  
Number of differences: 58

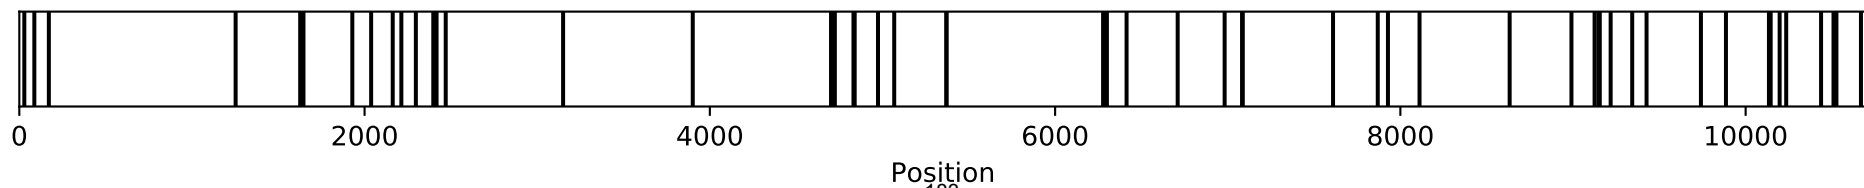



CR1 vs CR2  
Number of differences: 282

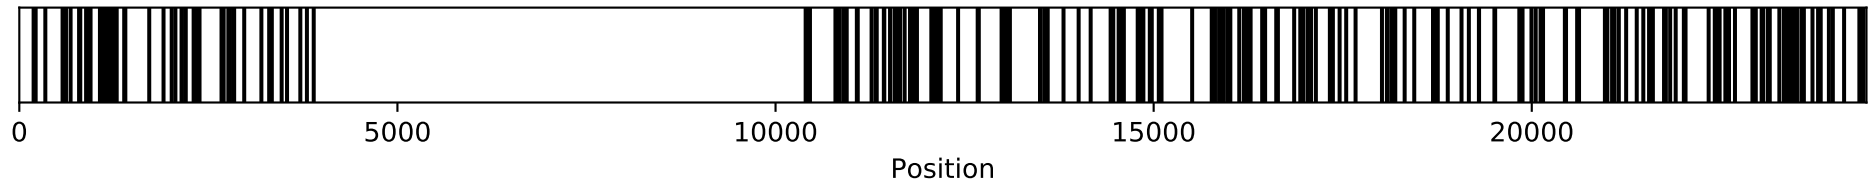

CR1 vs MM1  
Number of differences: 241

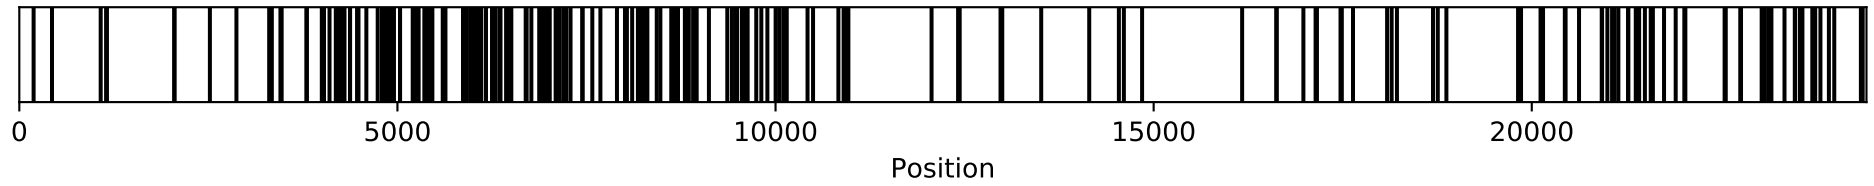

CR1 vs MM2  
Number of differences: 224

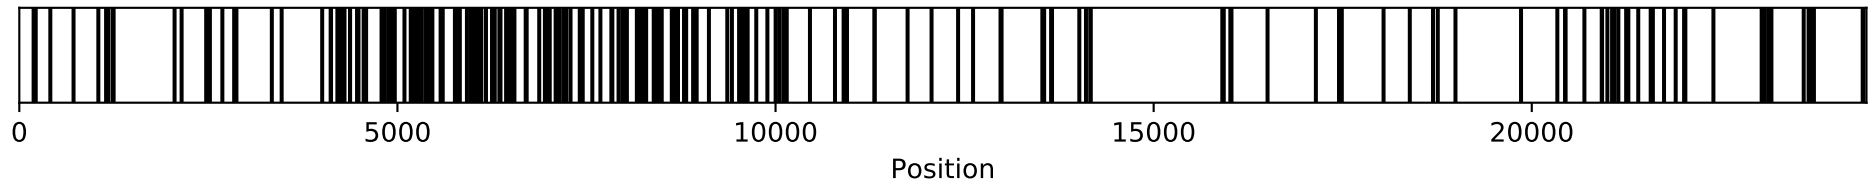

CR2 vs MM1  
Number of differences: 420

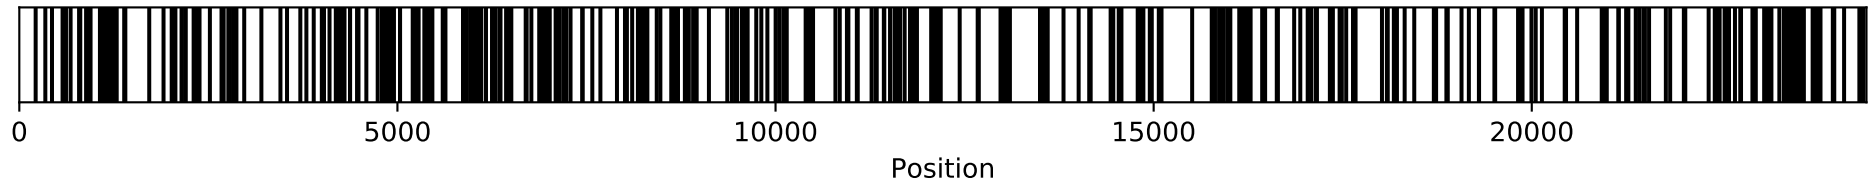

CR2 vs MM2  
Number of differences: 412

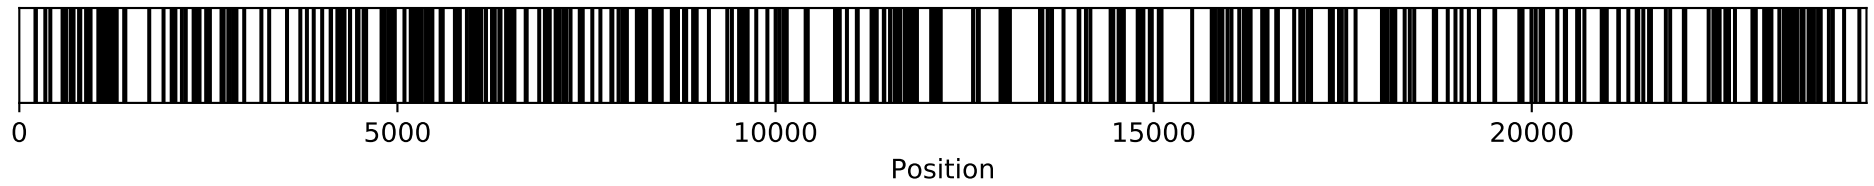

MM1 vs MM2  
Number of differences: 194

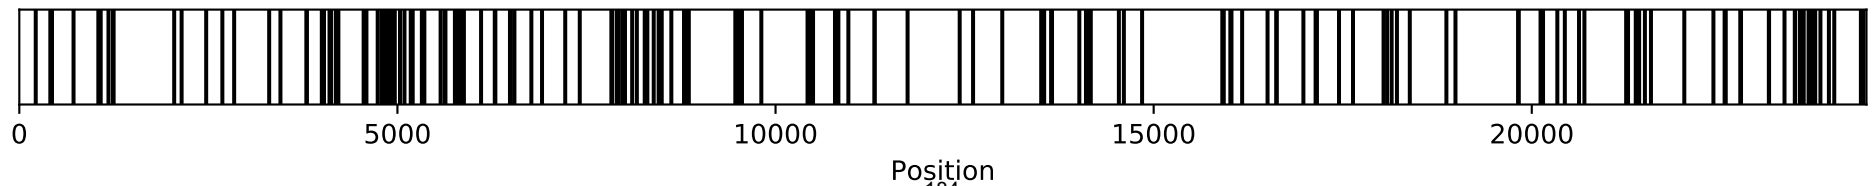

CR1 vs CR2  
Number of differences: 357

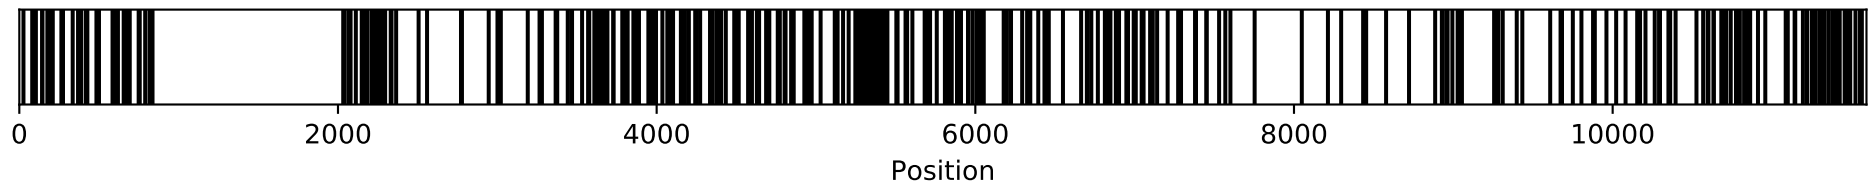

CR1 vs MM1  
Number of differences: 382

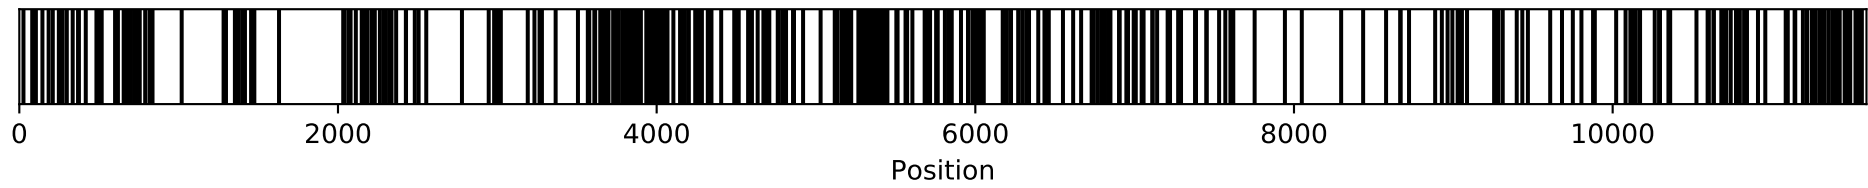

CR1 vs MM2  
Number of differences: 373

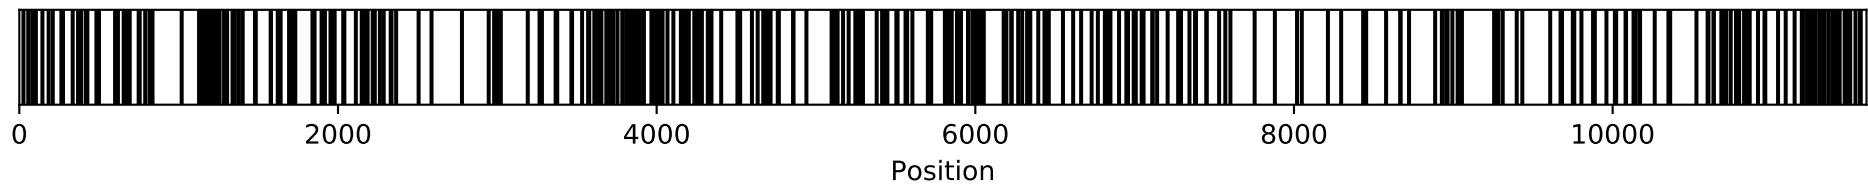

CR2 vs MM1  
Number of differences: 184

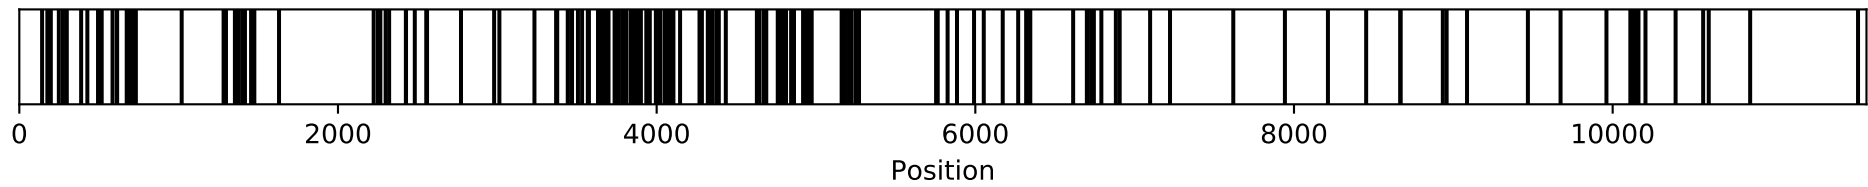

CR2 vs MM2  
Number of differences: 206

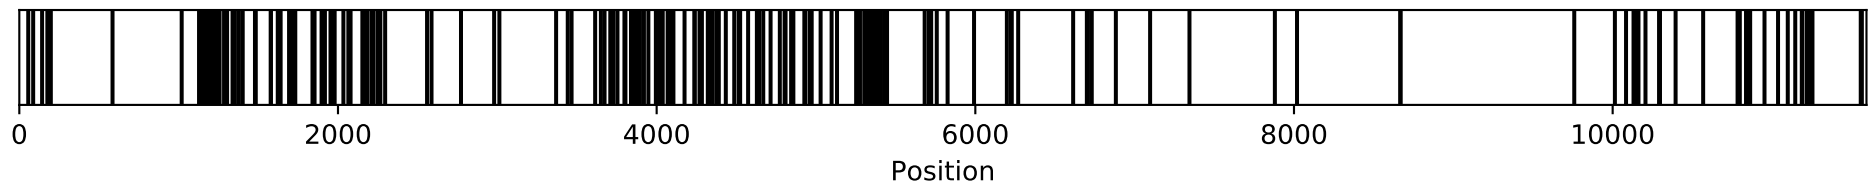

MM1 vs MM2  
Number of differences: 228

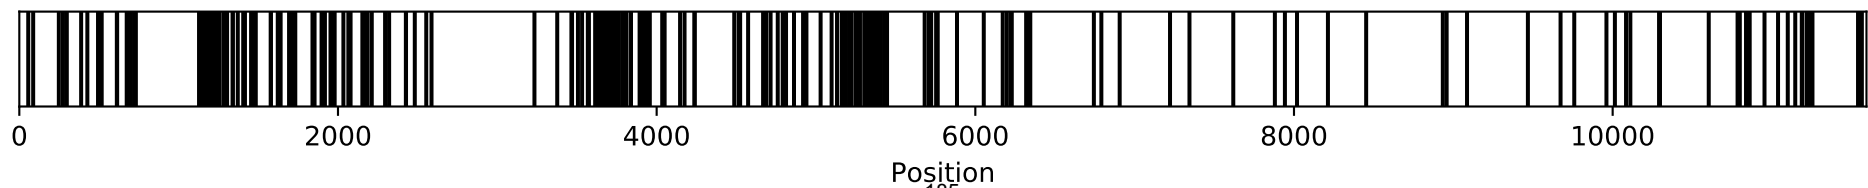

CR1 vs CR2  
Number of differences: 242

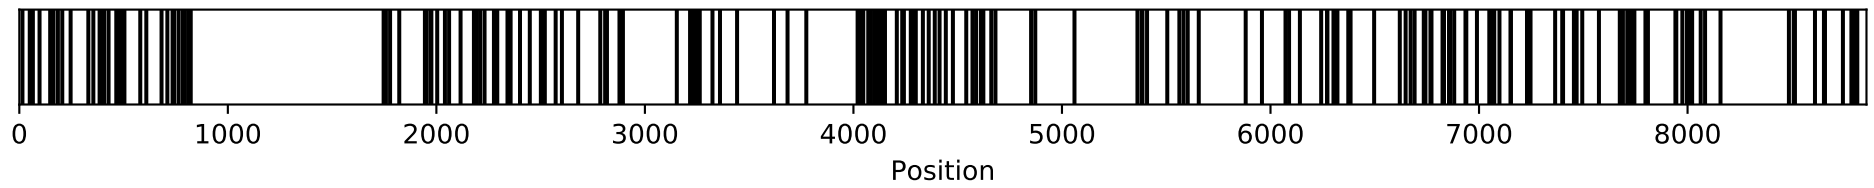

CR1 vs MM1  
Number of differences: 104

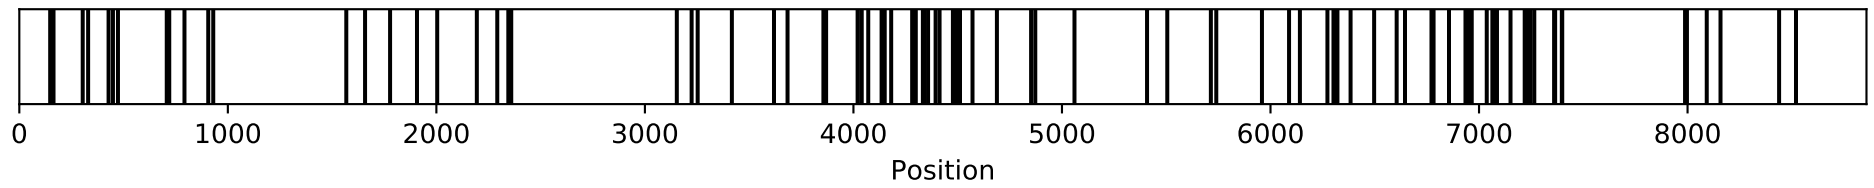

CR1 vs MM2  
Number of differences: 119

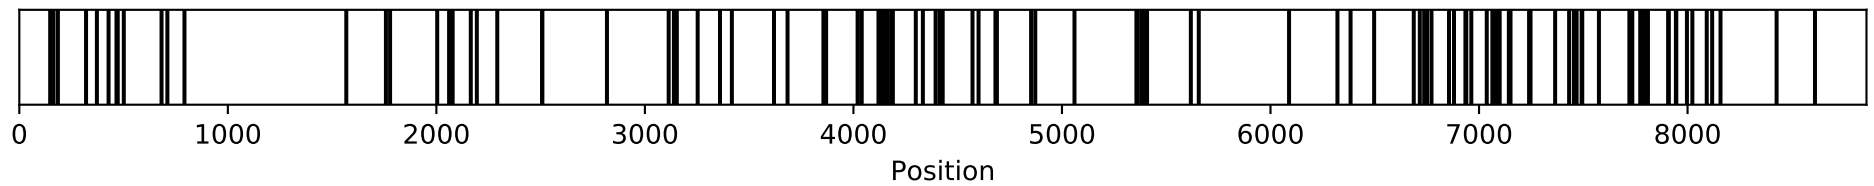

CR2 vs MM1  
Number of differences: 240

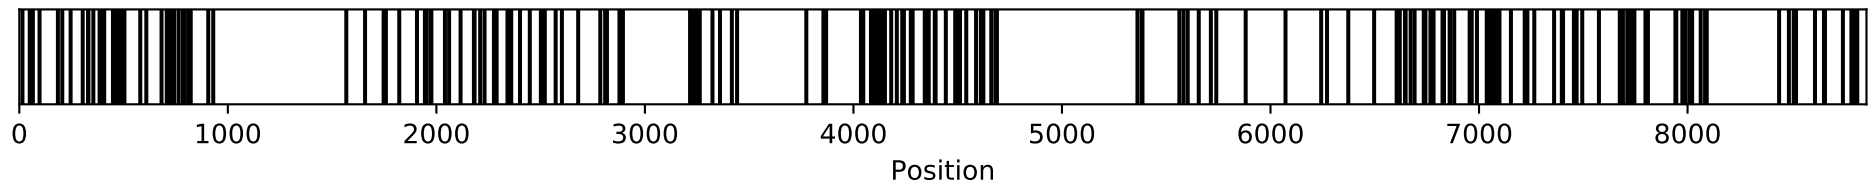

CR2 vs MM2  
Number of differences: 233

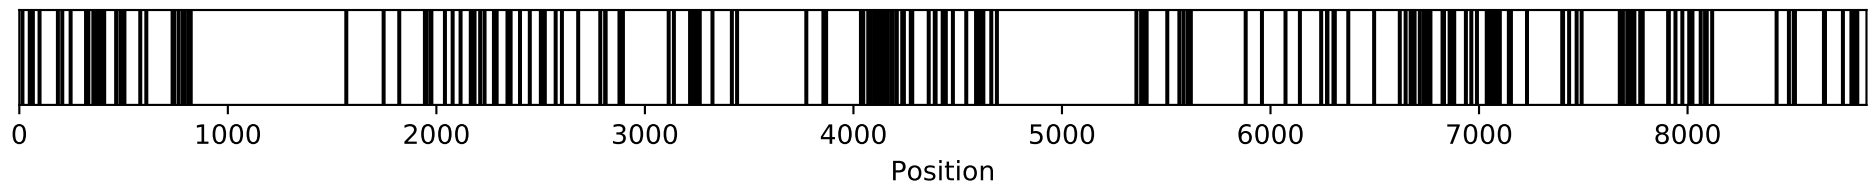

MM1 vs MM2  
Number of differences: 115

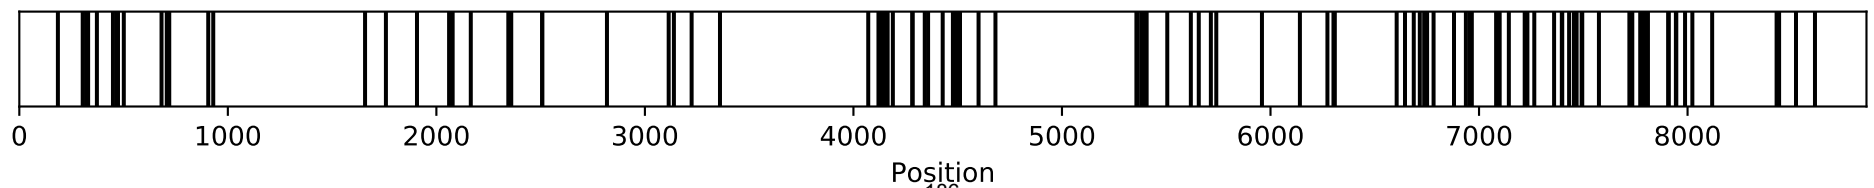

CR1 vs CR2  
Number of differences: 0

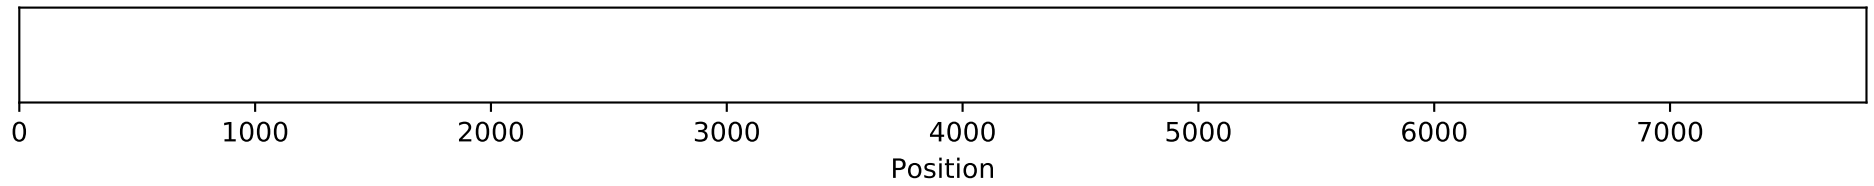

CR1 vs MM1  
Number of differences: 238

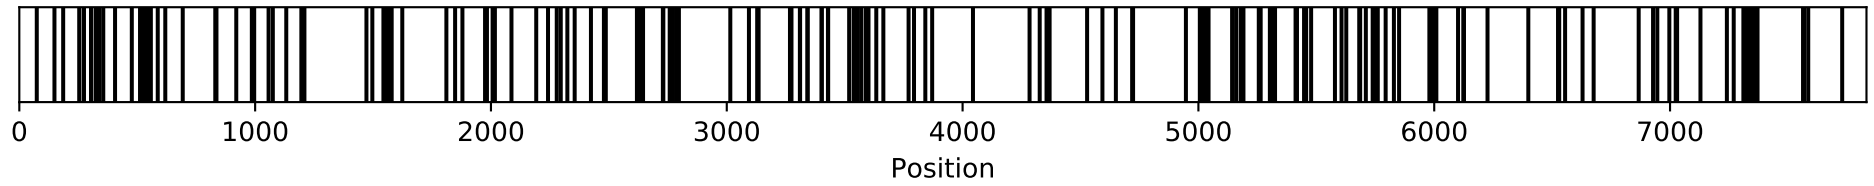

CR1 vs MM2  
Number of differences: 257

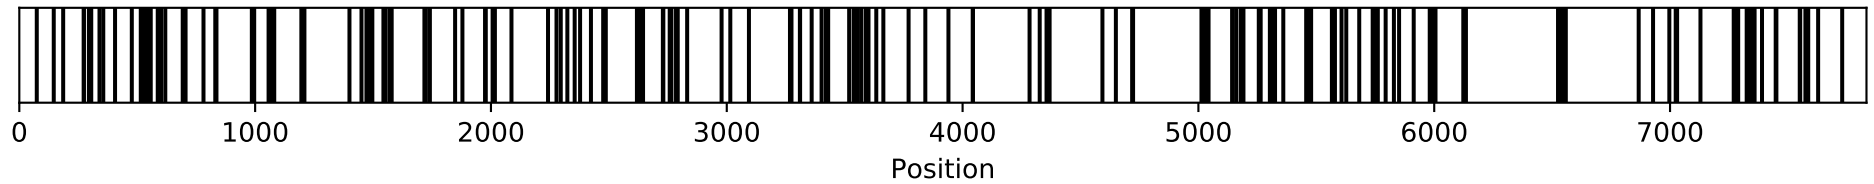

CR2 vs MM1  
Number of differences: 238

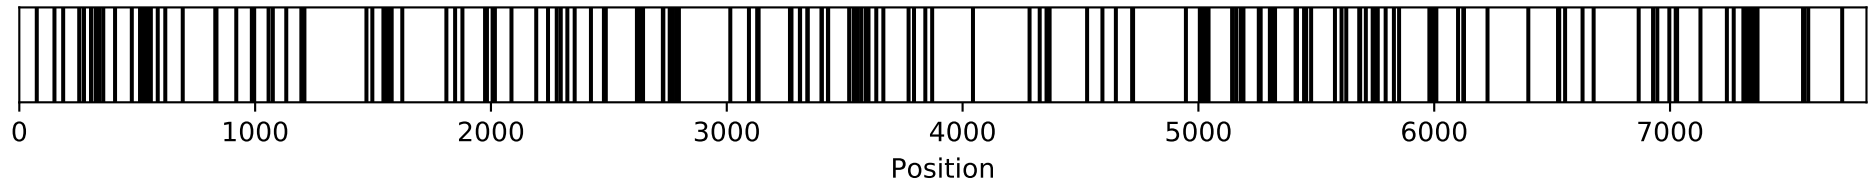

CR2 vs MM2  
Number of differences: 257

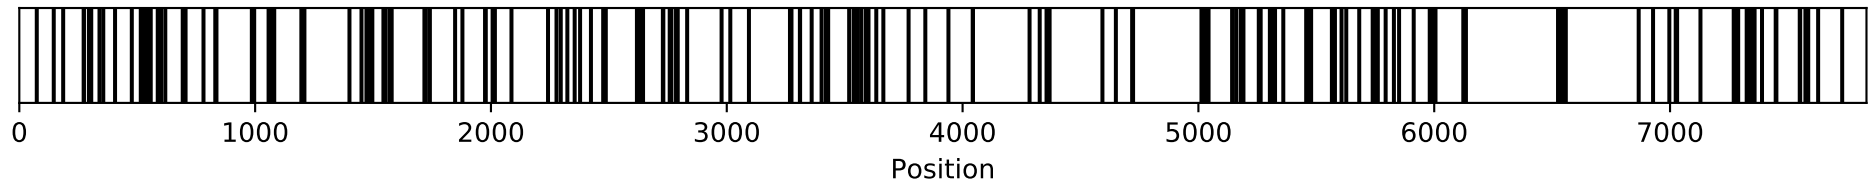

MM1 vs MM2  
Number of differences: 141

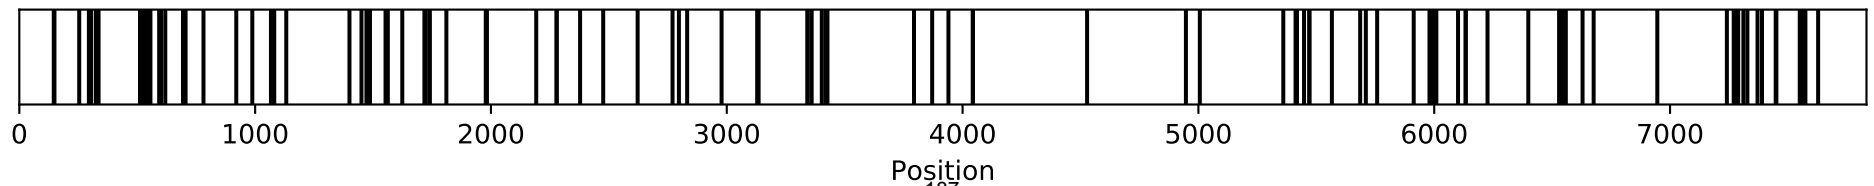

CR1 vs CR2  
Number of differences: 281

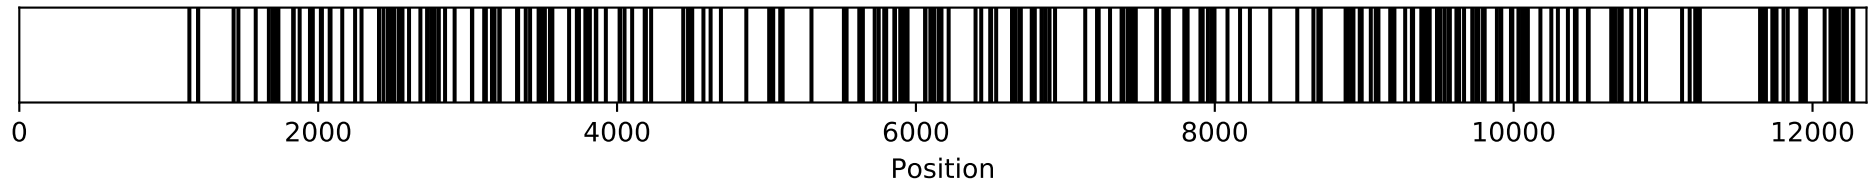

CR1 vs MM1  
Number of differences: 222

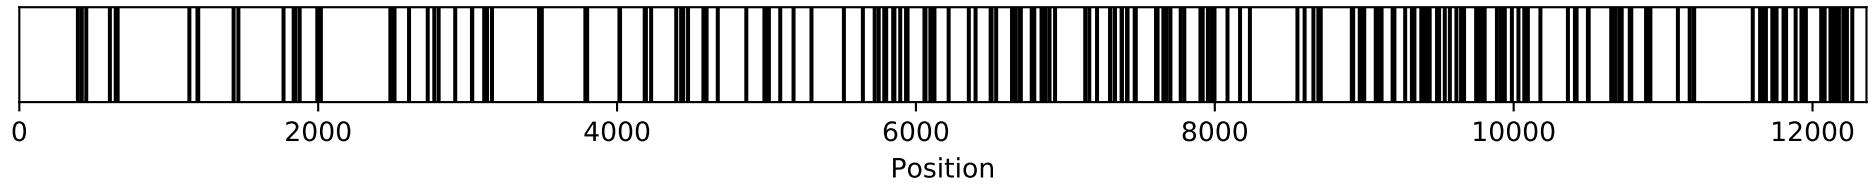

CR1 vs MM2  
Number of differences: 218

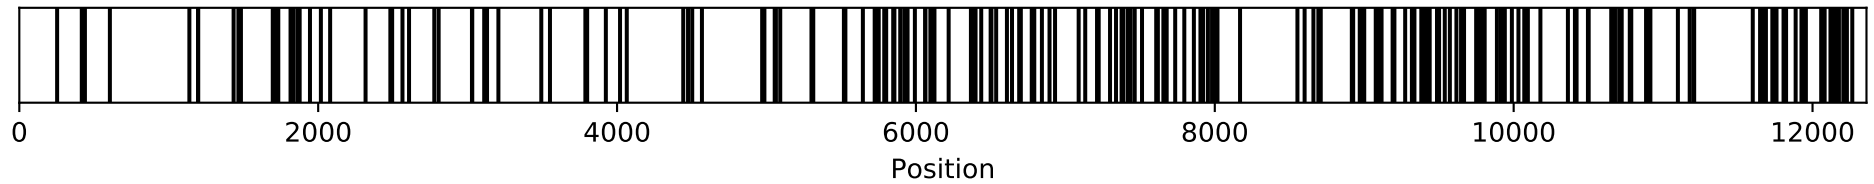

CR2 vs MM1  
Number of differences: 183

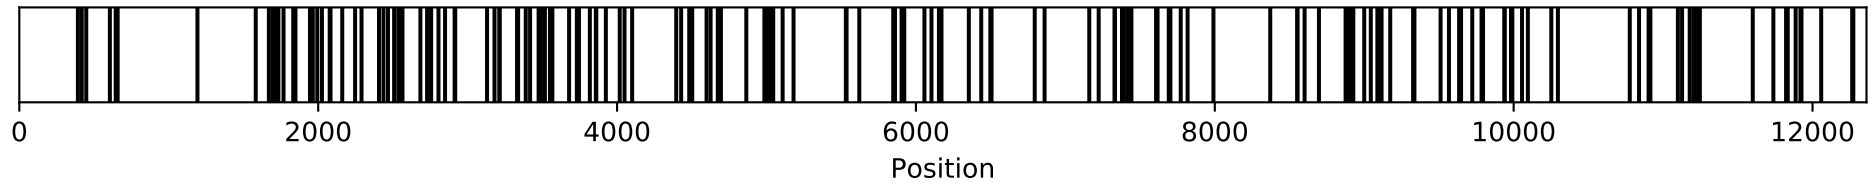

CR2 vs MM2  
Number of differences: 181

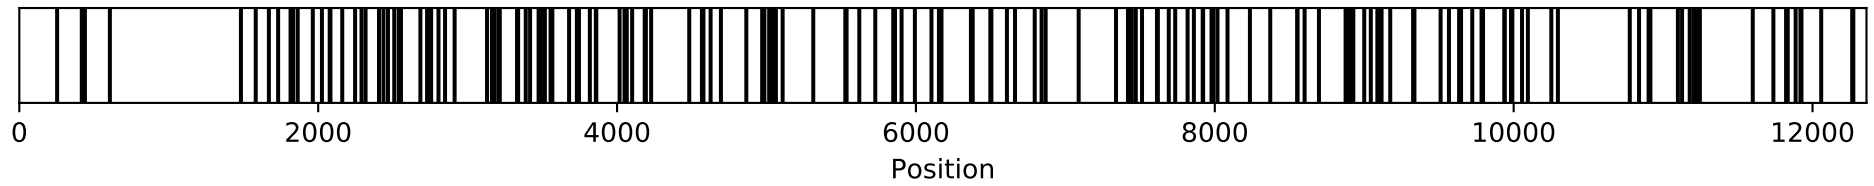

MM1 vs MM2  
Number of differences: 94

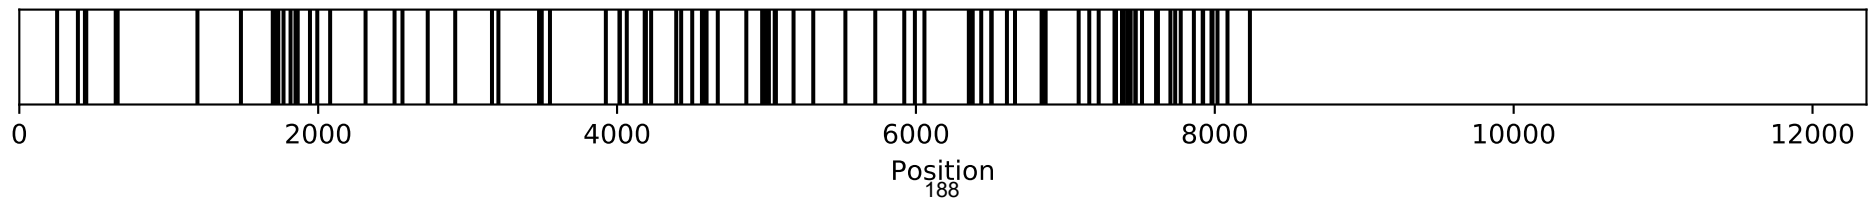

CR1 vs CR2  
Number of differences: 151

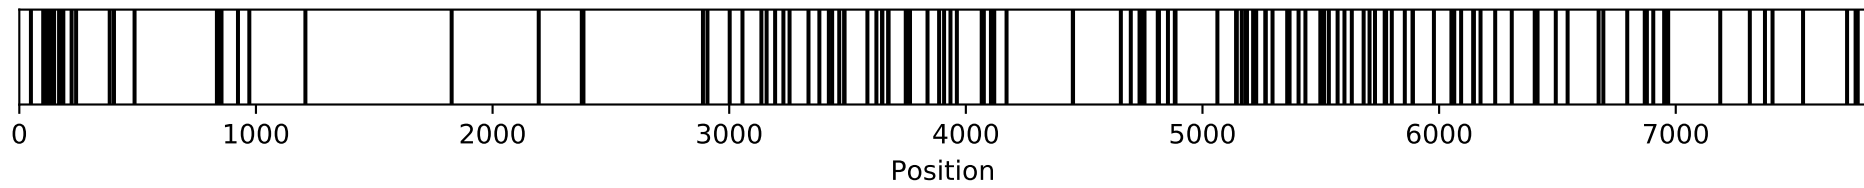

CR1 vs MM1  
Number of differences: 68

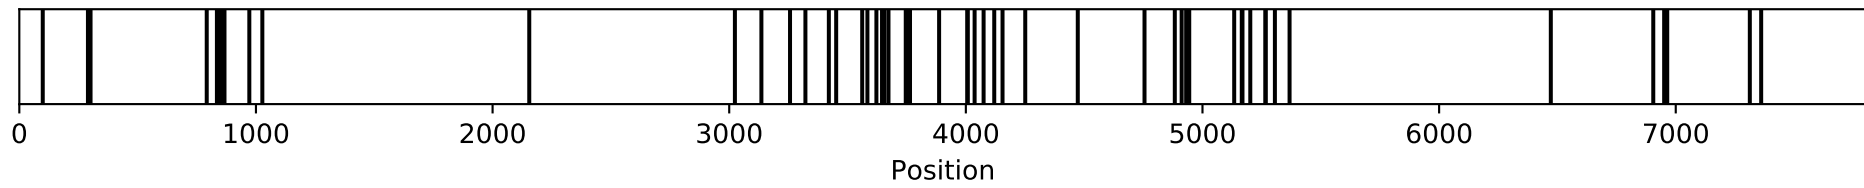

CR1 vs MM2  
Number of differences: 72

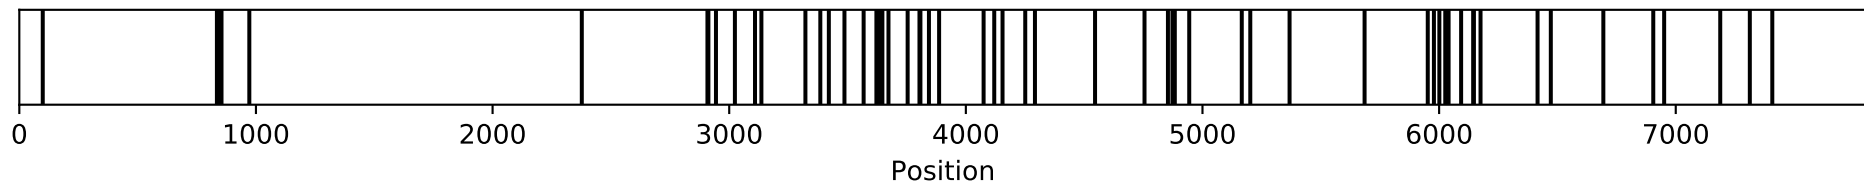

CR2 vs MM1  
Number of differences: 146

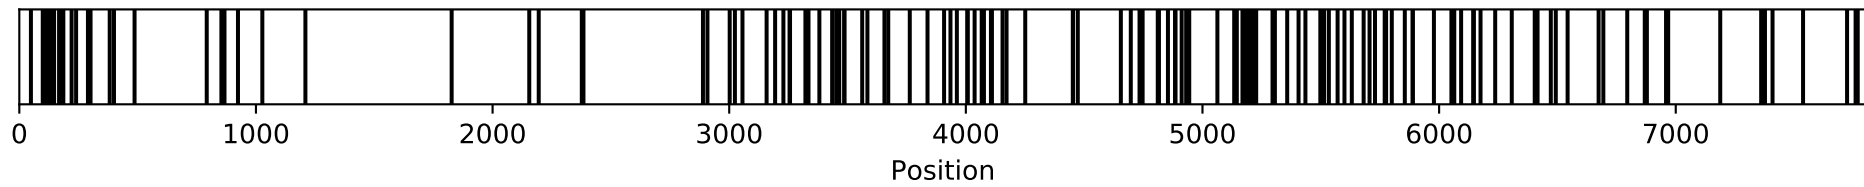

CR2 vs MM2  
Number of differences: 136

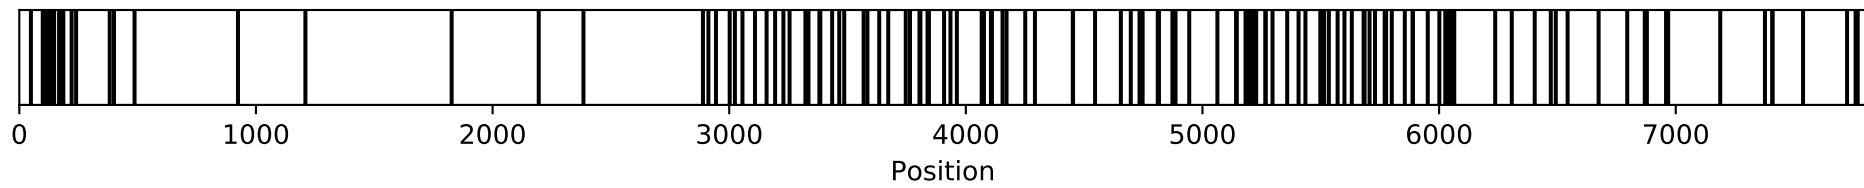

MM1 vs MM2  
Number of differences: 60

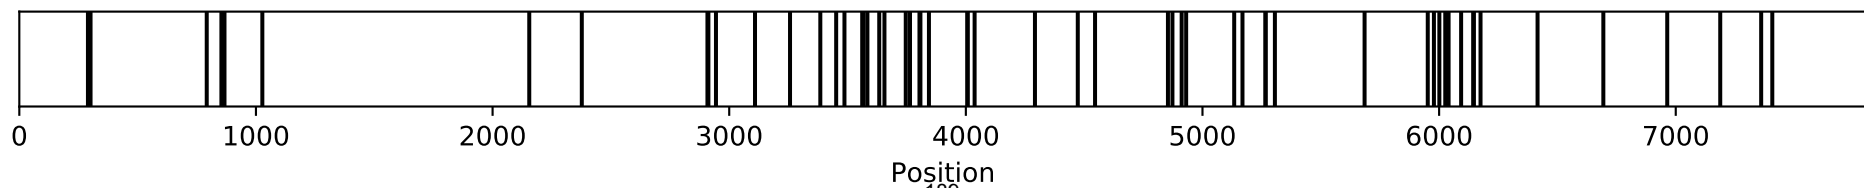

CR1 vs CR2  
Number of differences: 307

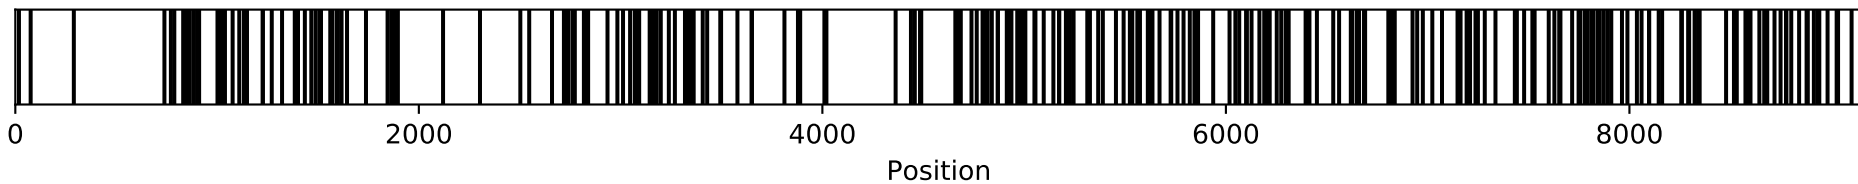

CR1 vs MM1  
Number of differences: 159

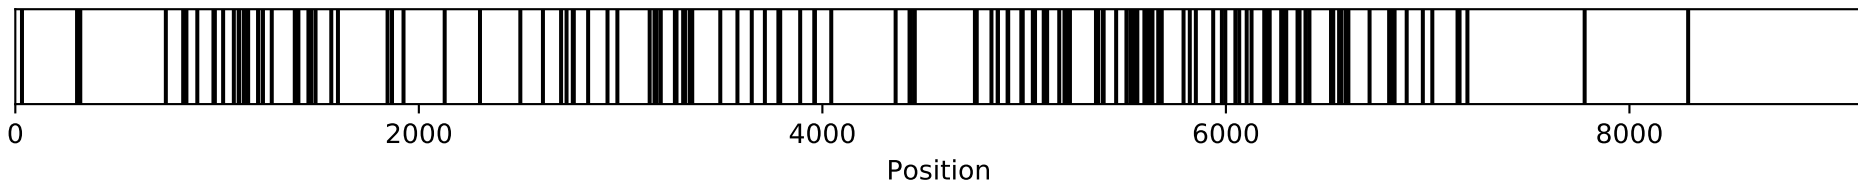

CR1 vs MM2  
Number of differences: 207

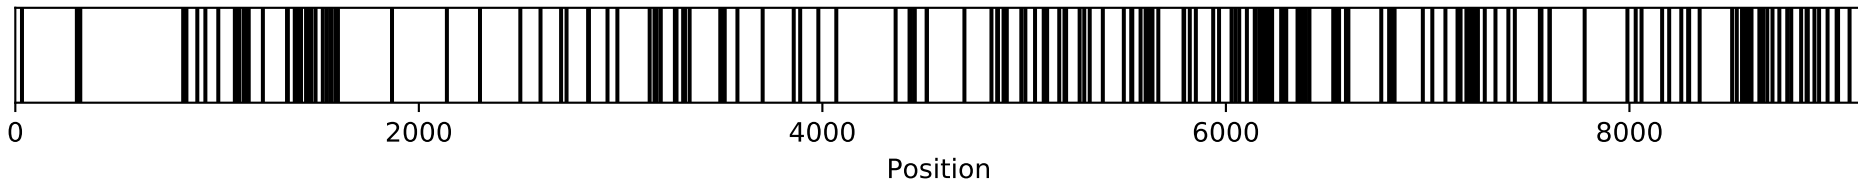

CR2 vs MM1  
Number of differences: 296

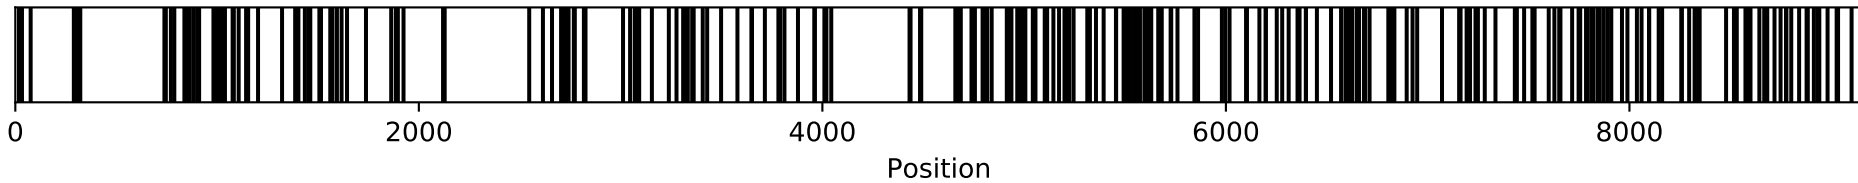

CR2 vs MM2  
Number of differences: 300

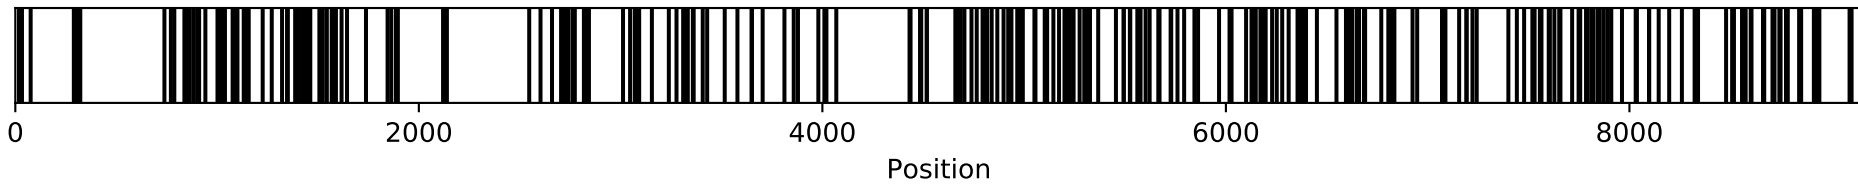

MM1 vs MM2  
Number of differences: 168

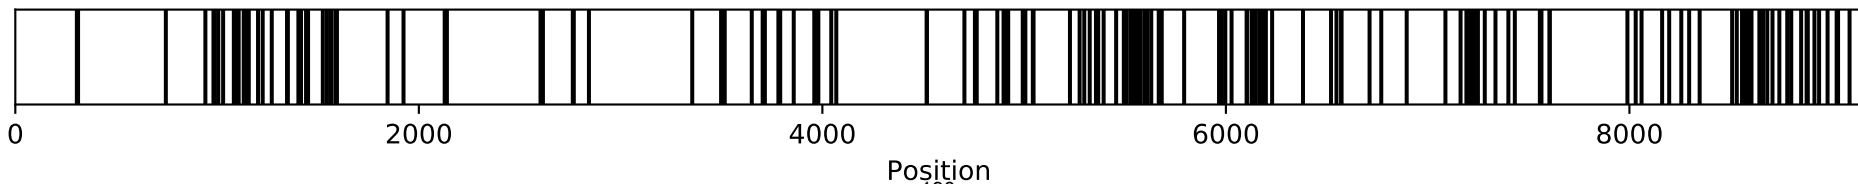

CR1 vs CR2  
Number of differences: 360

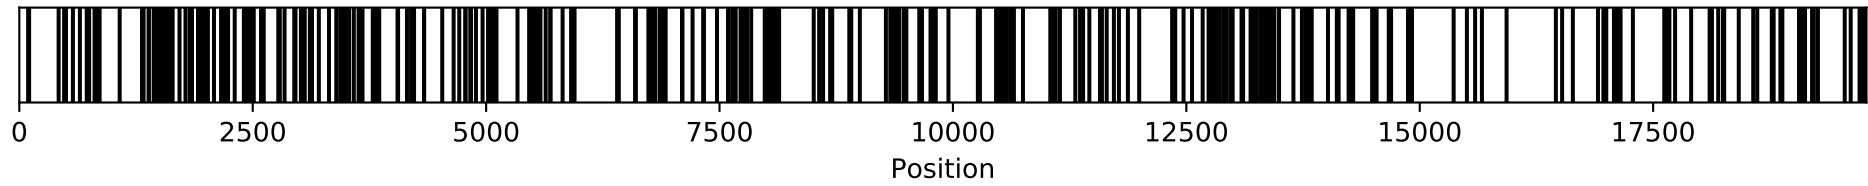

CR1 vs MM1  
Number of differences: 165

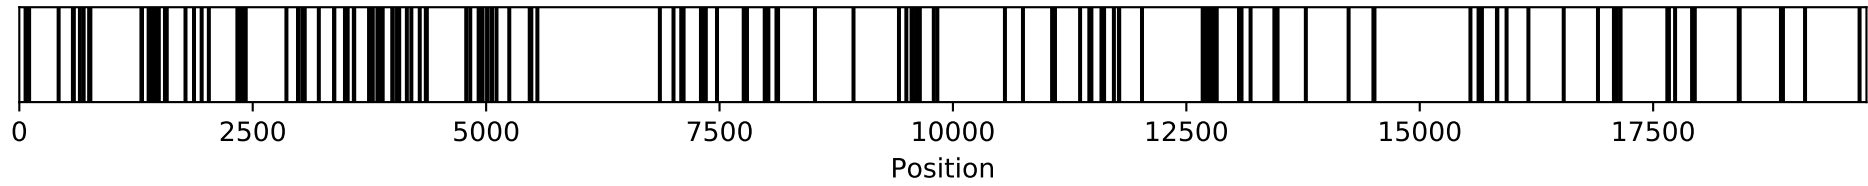

CR1 vs MM2  
Number of differences: 89

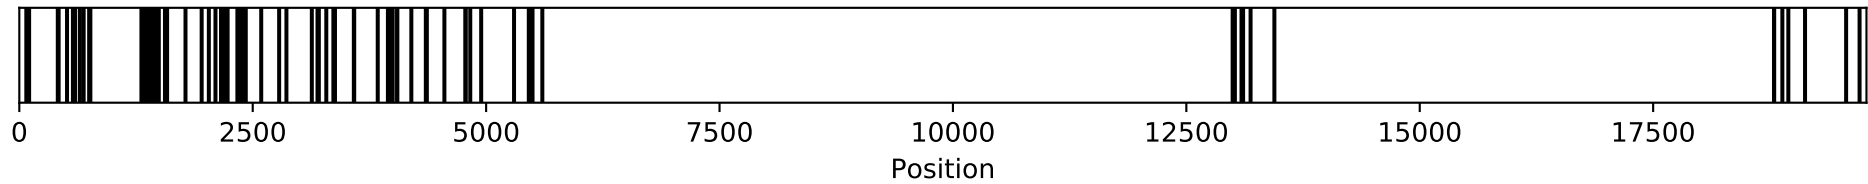

CR2 vs MM1  
Number of differences: 356

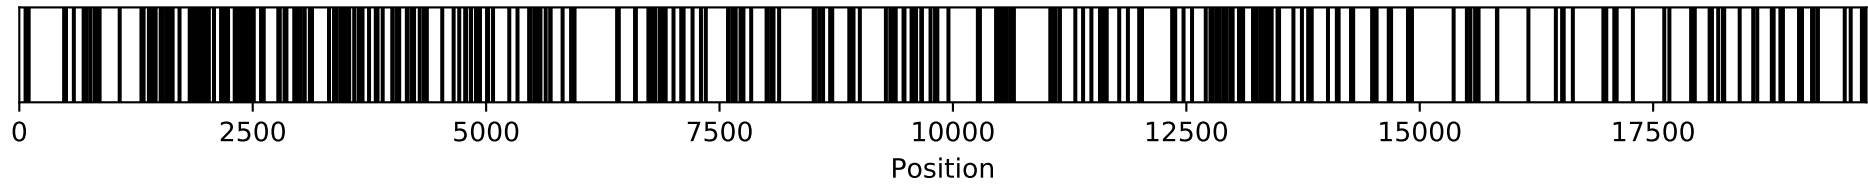

CR2 vs MM2  
Number of differences: 373

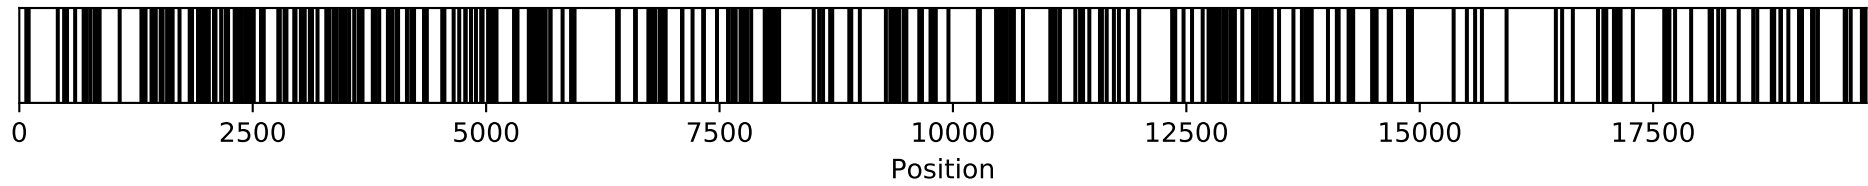

MM1 vs MM2  
Number of differences: 162

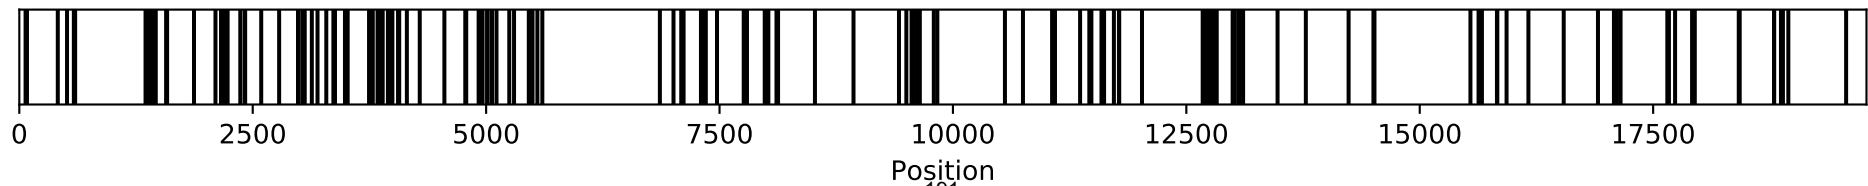



CR1 vs CR2  
Number of differences: 491

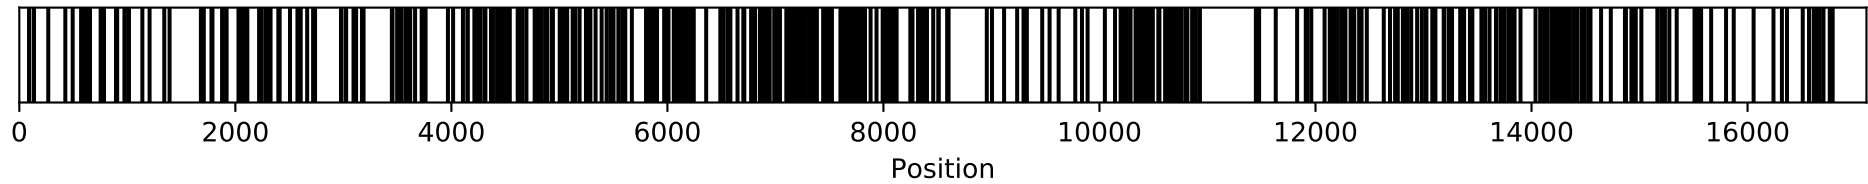

CR1 vs MM1  
Number of differences: 340

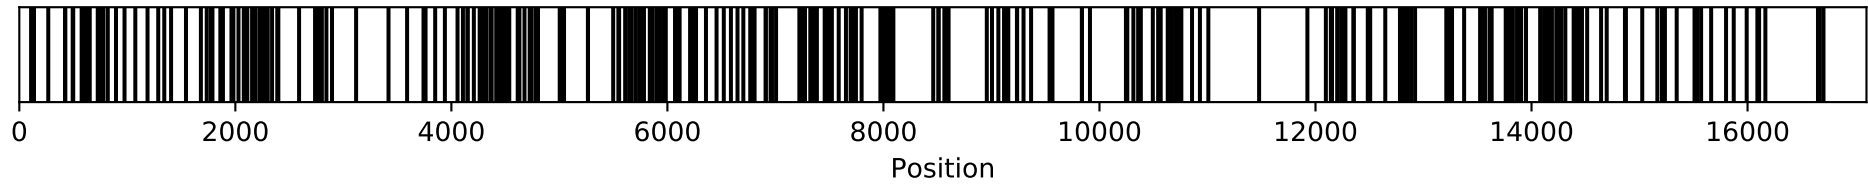

CR1 vs MM2  
Number of differences: 240

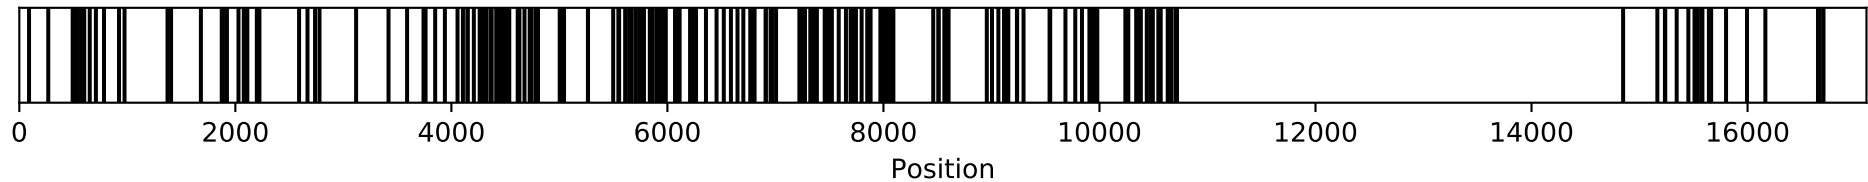

CR2 vs MM1  
Number of differences: 477

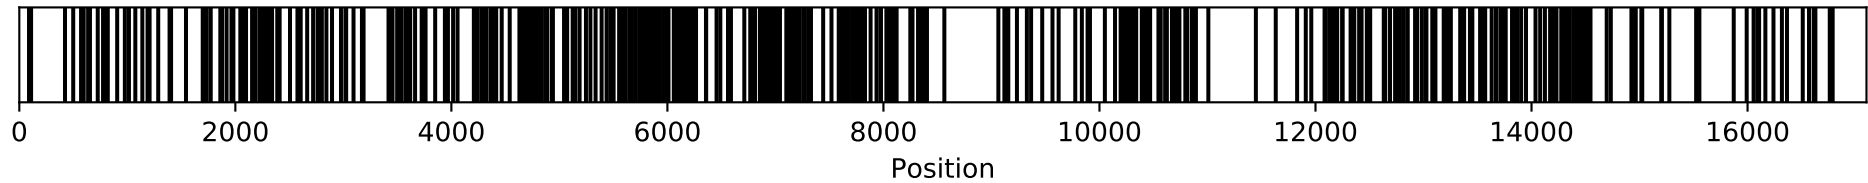

CR2 vs MM2  
Number of differences: 475

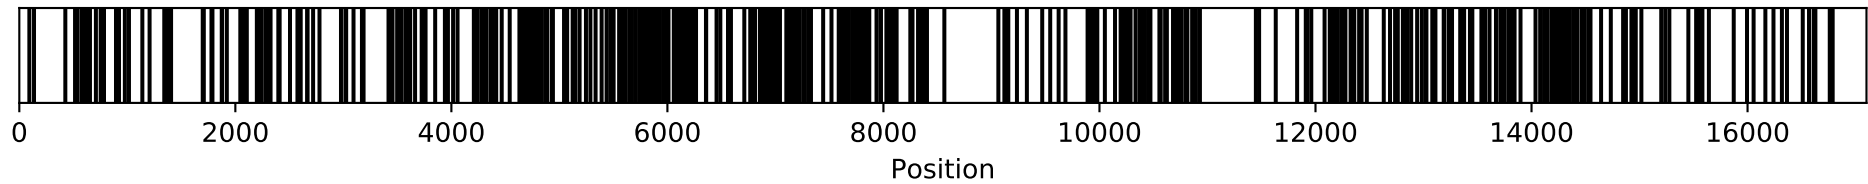

MM1 vs MM2  
Number of differences: 185

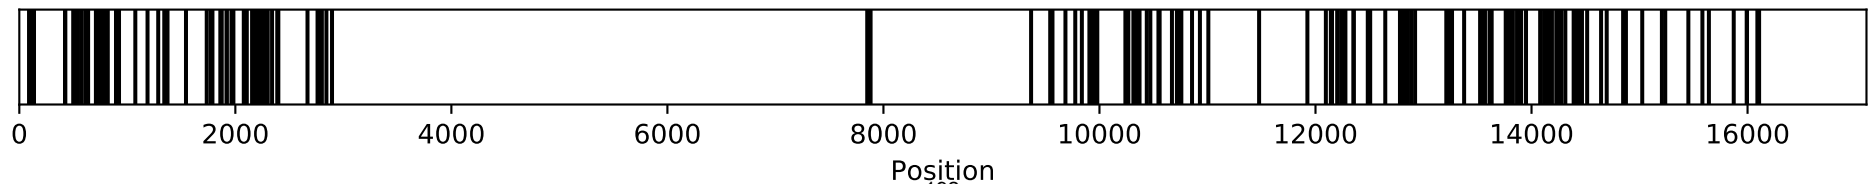

CR1 vs CR2  
Number of differences: 253

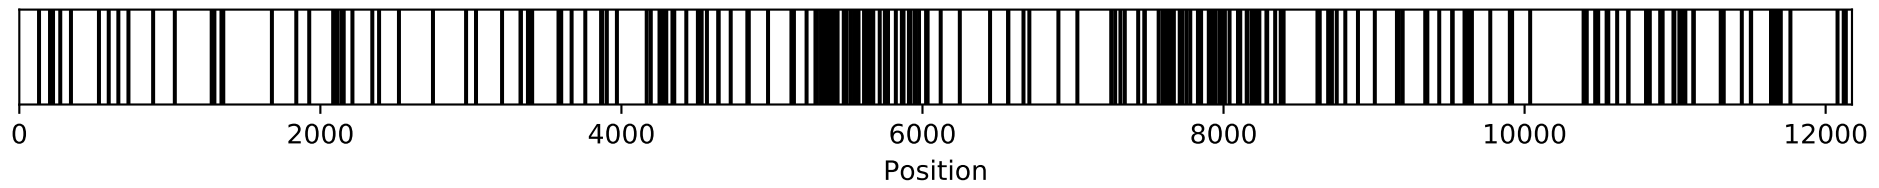

CR1 vs MM1  
Number of differences: 268

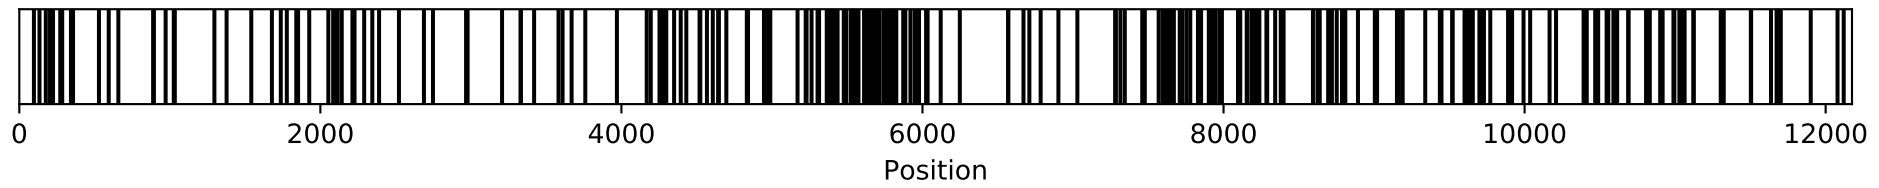

CR1 vs MM2  
Number of differences: 296

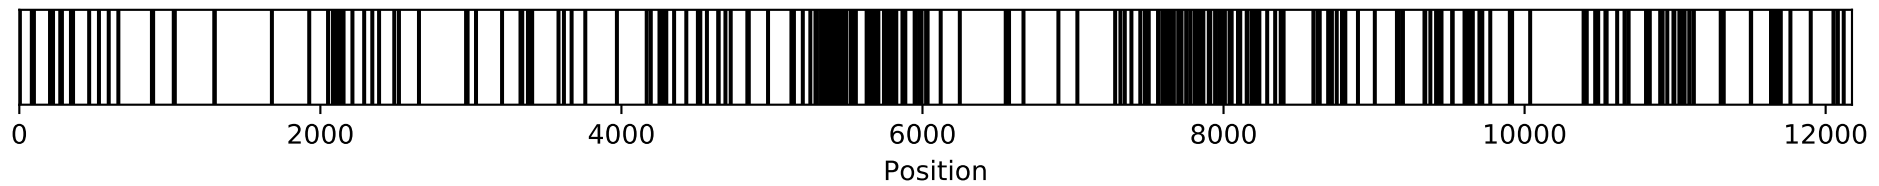

CR2 vs MM1  
Number of differences: 146

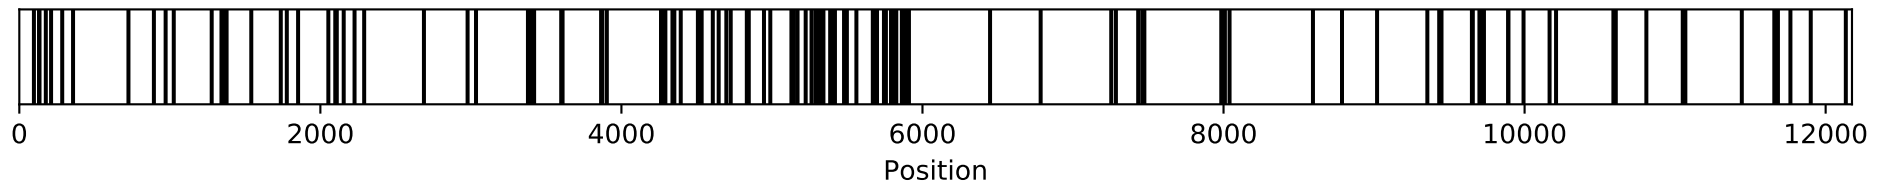

CR2 vs MM2  
Number of differences: 158

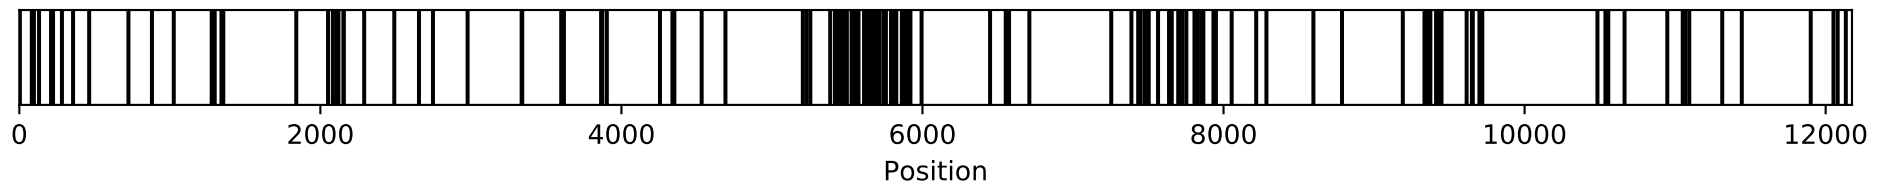

MM1 vs MM2  
Number of differences: 184

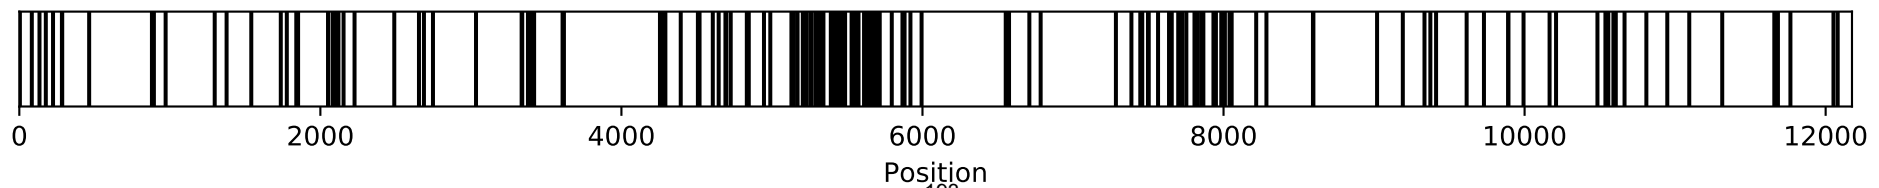

CR1 vs CR2  
Number of differences: 245

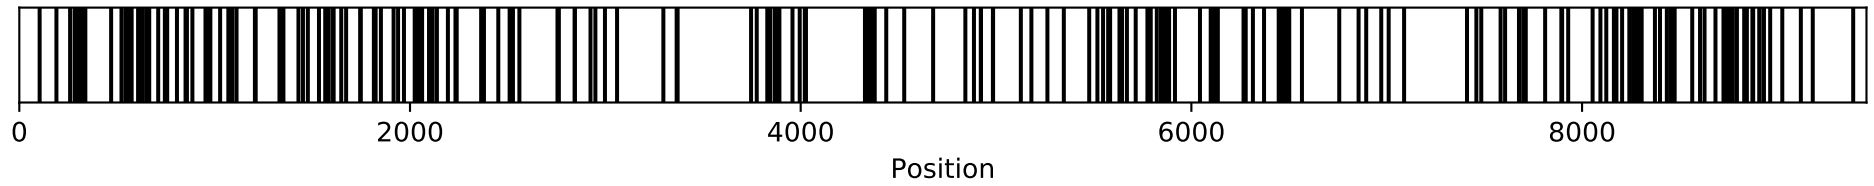

CR1 vs MM1  
Number of differences: 245

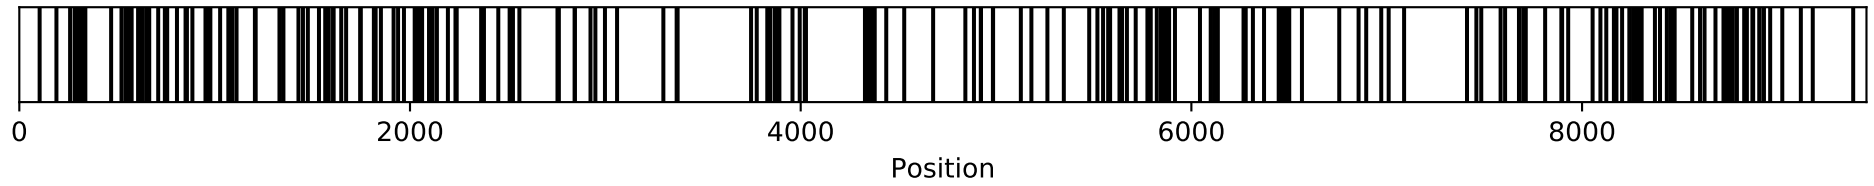

CR1 vs MM2  
Number of differences: 276

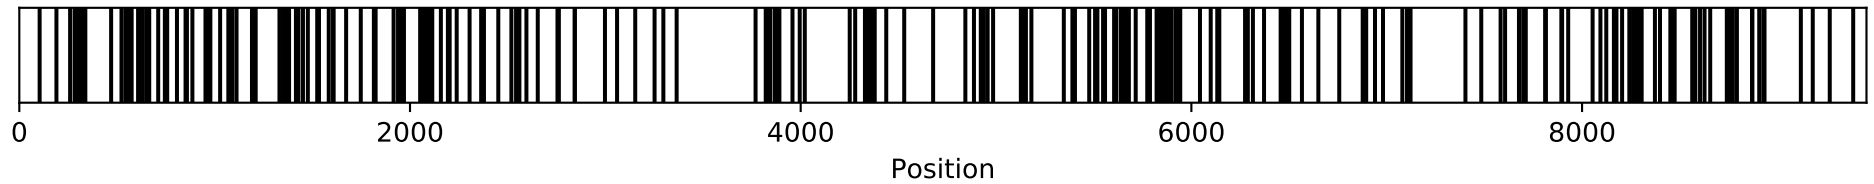

CR2 vs MM1  
Number of differences: 0

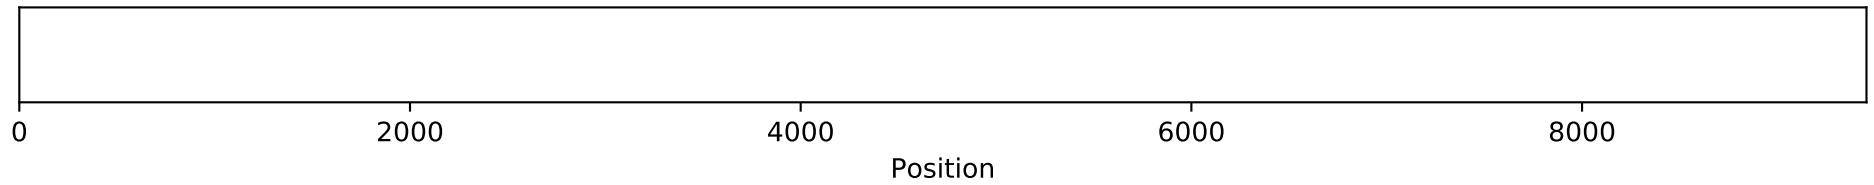

CR2 vs MM2  
Number of differences: 143

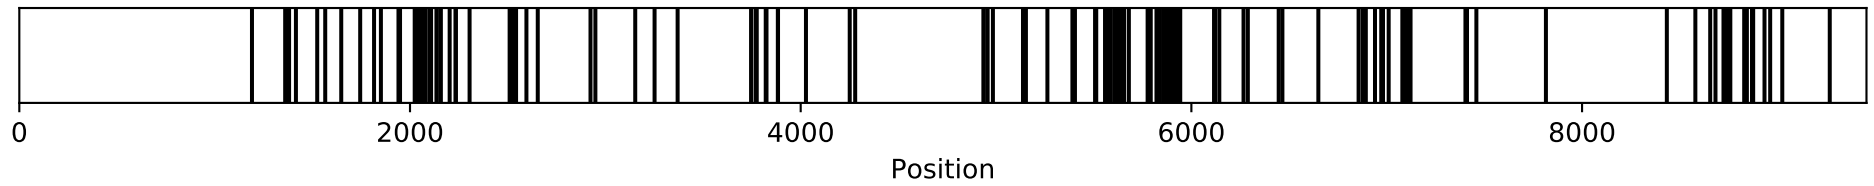

MM1 vs MM2  
Number of differences: 143

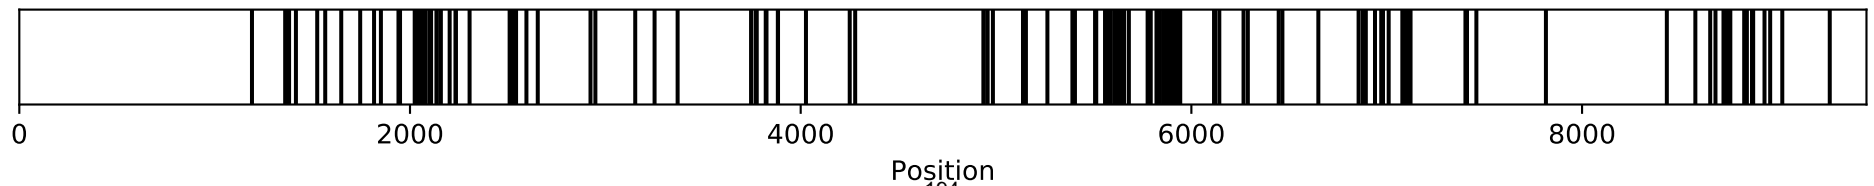

CR1 vs CR2  
Number of differences: 194

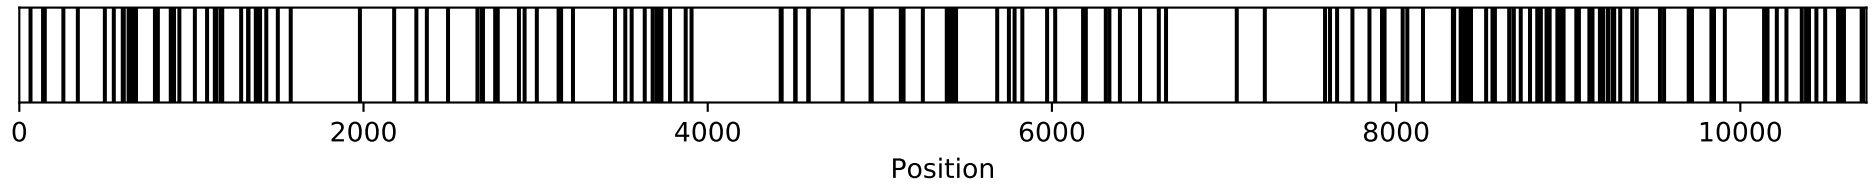

CR1 vs MM1  
Number of differences: 95

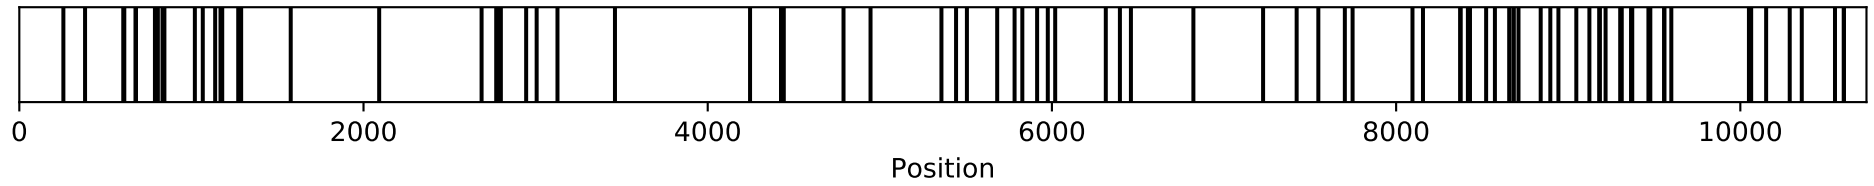

CR1 vs MM2  
Number of differences: 97

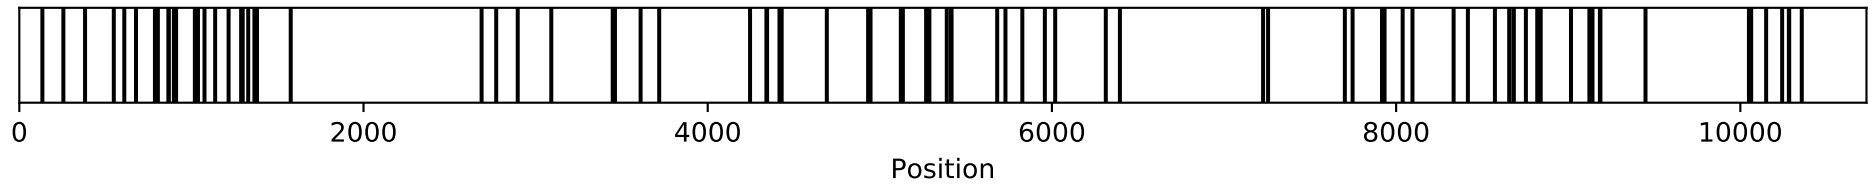

CR2 vs MM1  
Number of differences: 204

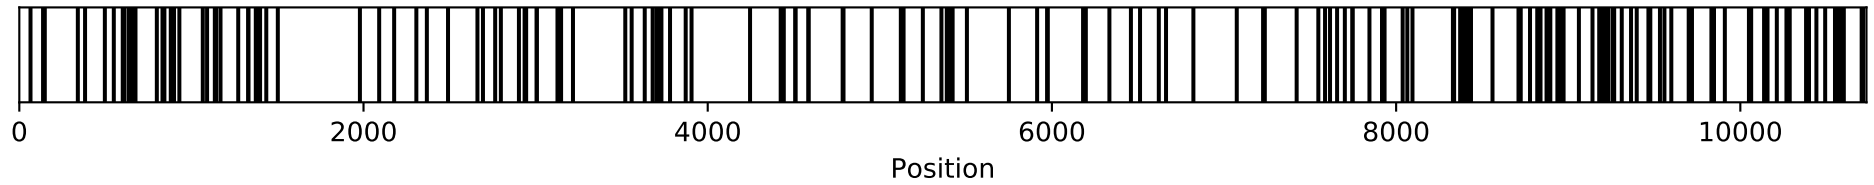

CR2 vs MM2  
Number of differences: 190

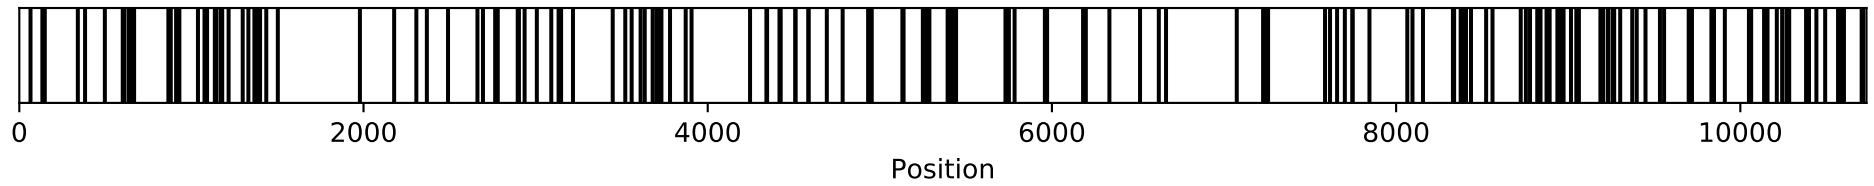

MM1 vs MM2  
Number of differences: 115

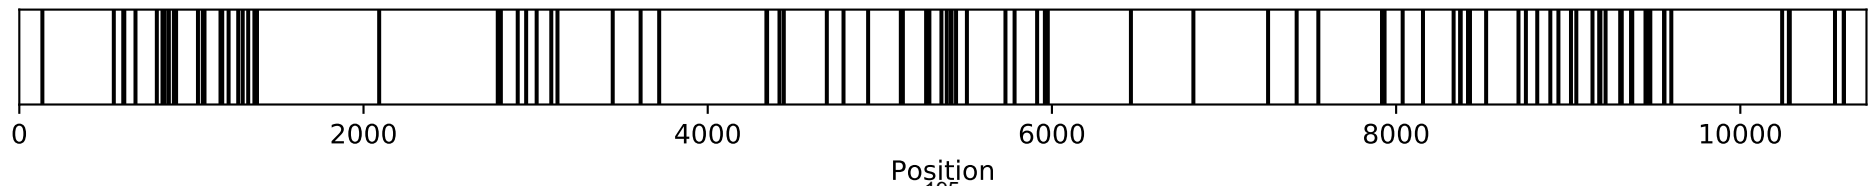

CR1 vs CR2  
Number of differences: 300

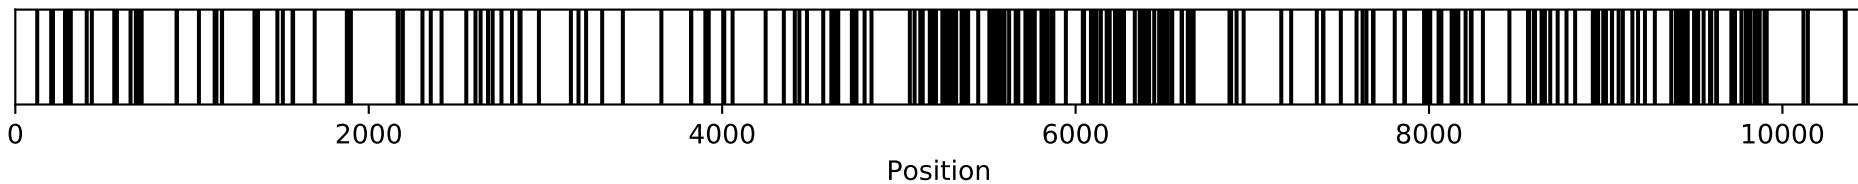

CR1 vs MM1  
Number of differences: 112

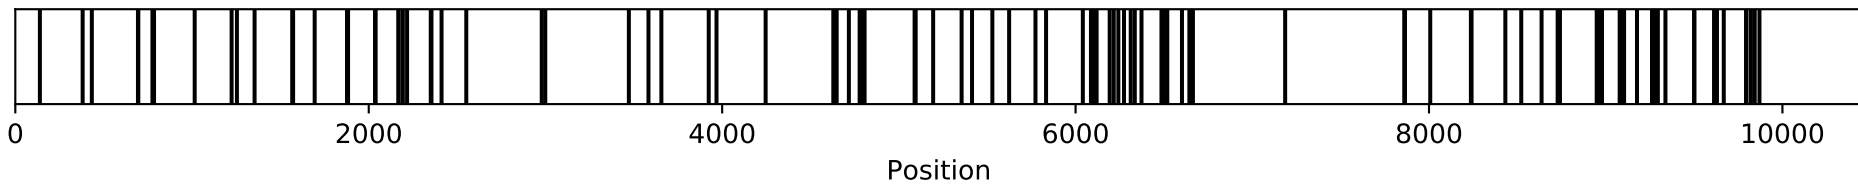

CR1 vs MM2  
Number of differences: 128

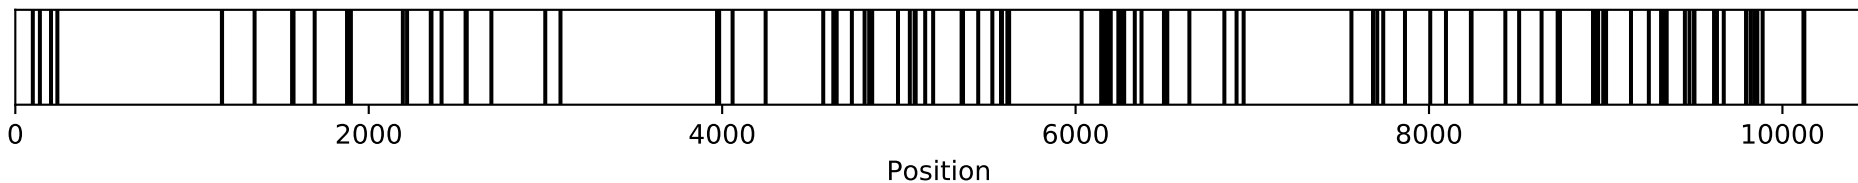

CR2 vs MM1  
Number of differences: 298

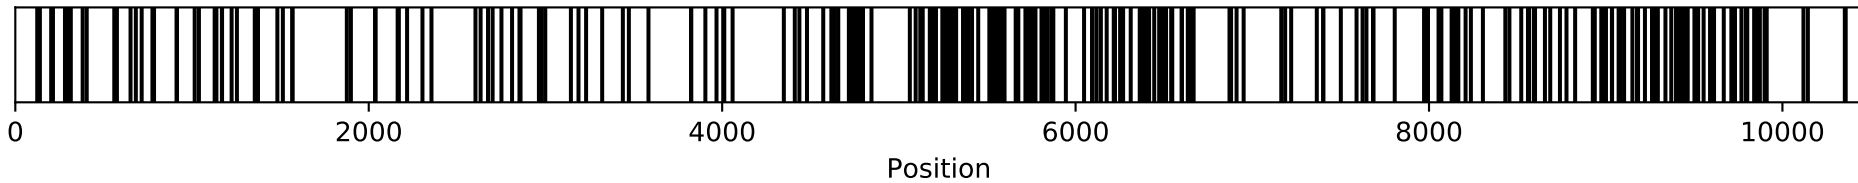

CR2 vs MM2  
Number of differences: 305

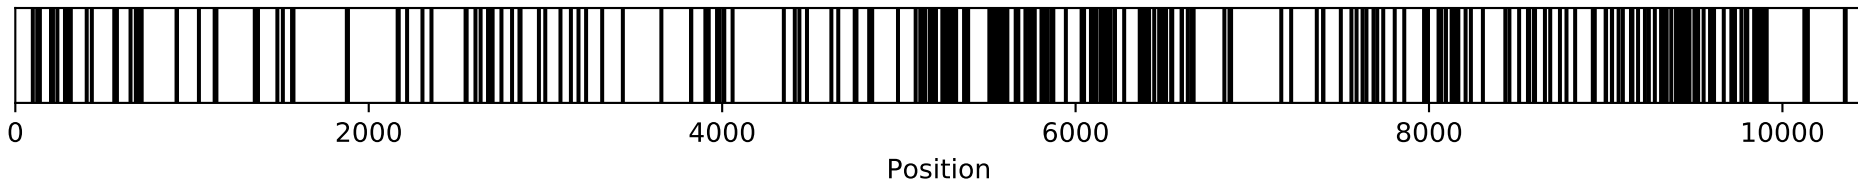

MM1 vs MM2  
Number of differences: 128

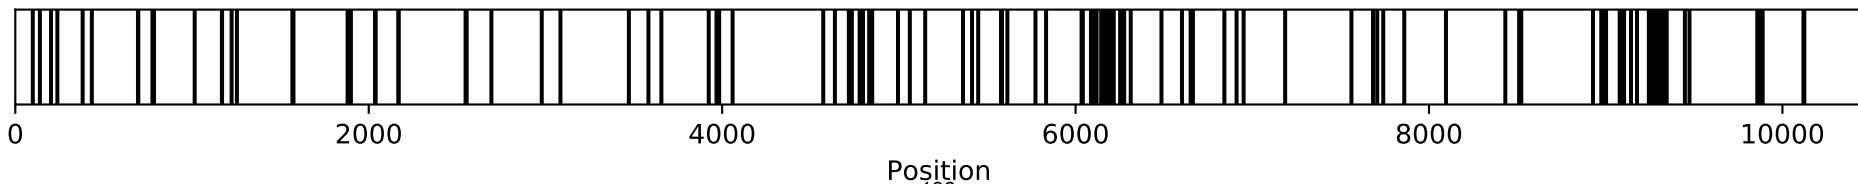

CR1 vs CR2  
Number of differences: 151

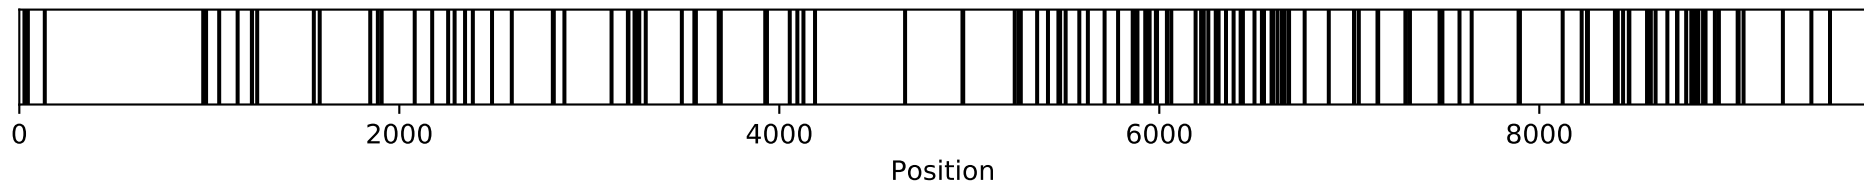

CR1 vs MM1  
Number of differences: 70

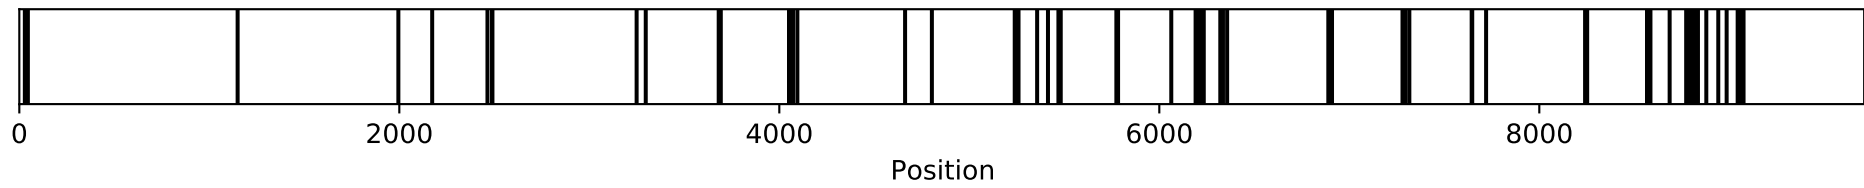

CR1 vs MM2  
Number of differences: 76

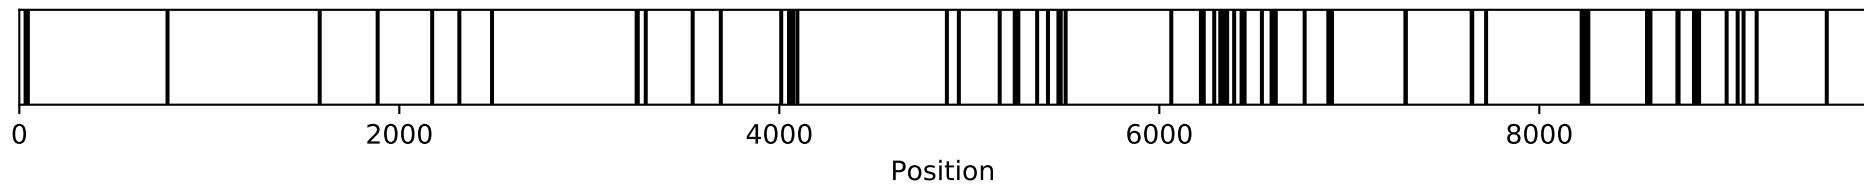

CR2 vs MM1  
Number of differences: 150

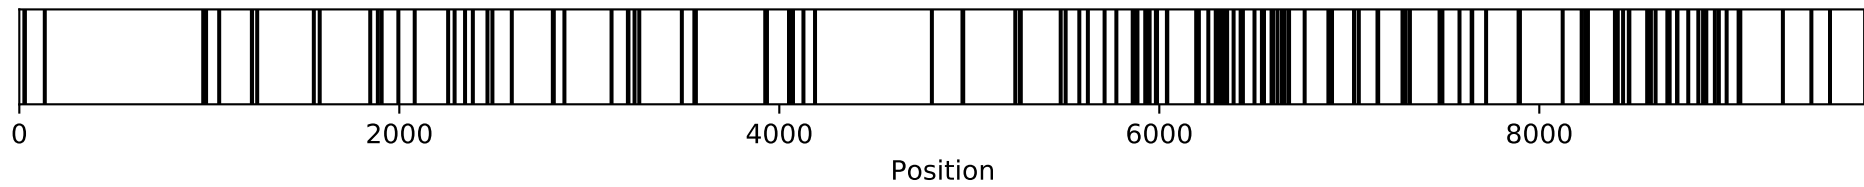

CR2 vs MM2  
Number of differences: 154

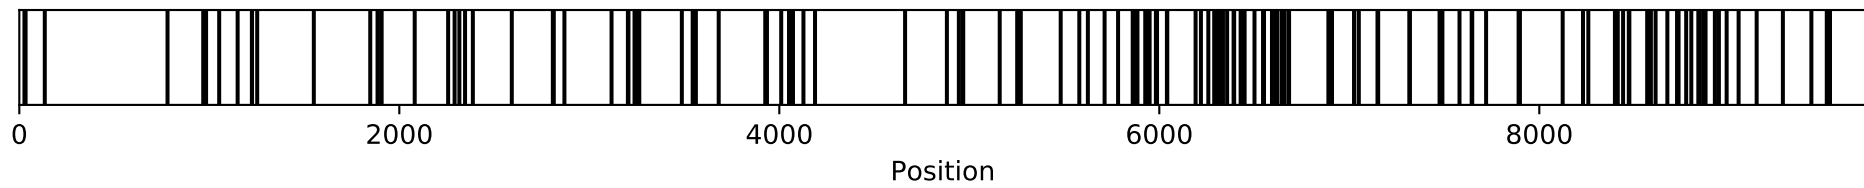

MM1 vs MM2  
Number of differences: 64

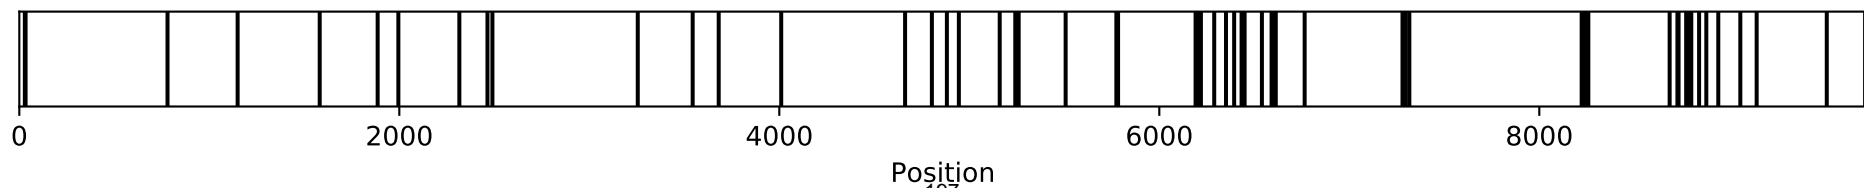

CR1 vs CR2  
Number of differences: 191

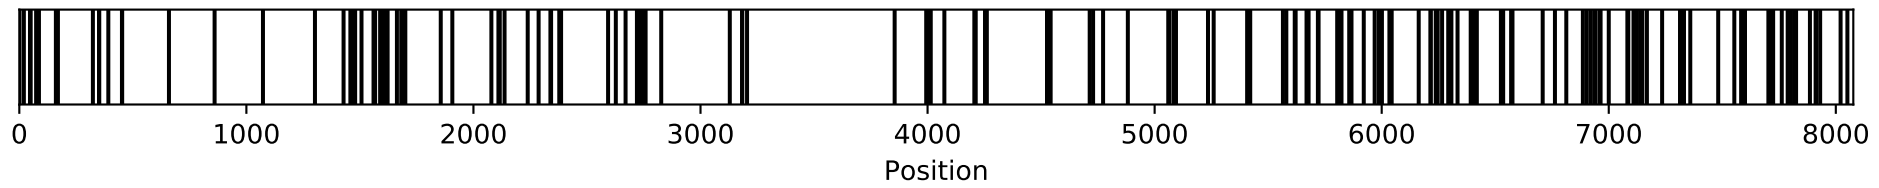

CR1 vs MM1  
Number of differences: 59

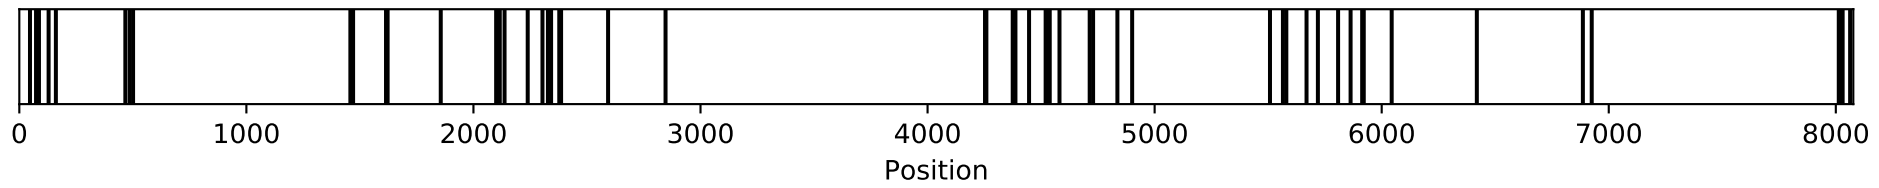

CR1 vs MM2  
Number of differences: 60

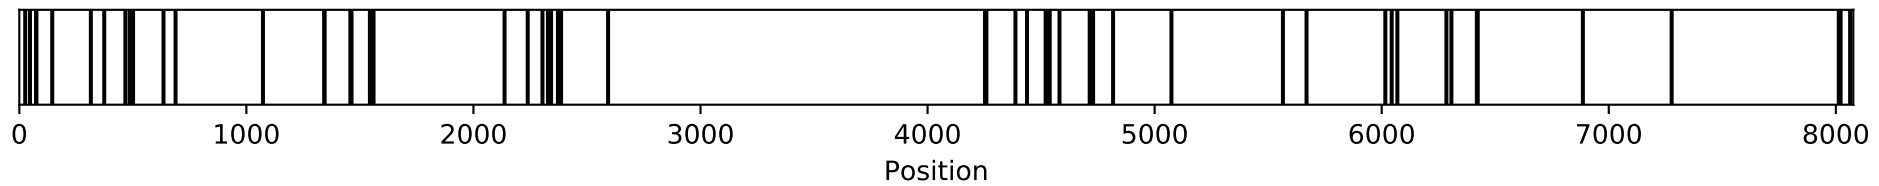

CR2 vs MM1  
Number of differences: 184

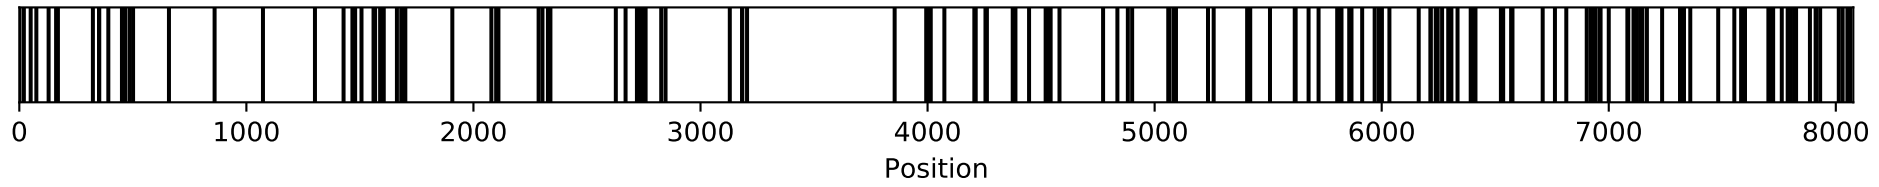

CR2 vs MM2  
Number of differences: 203

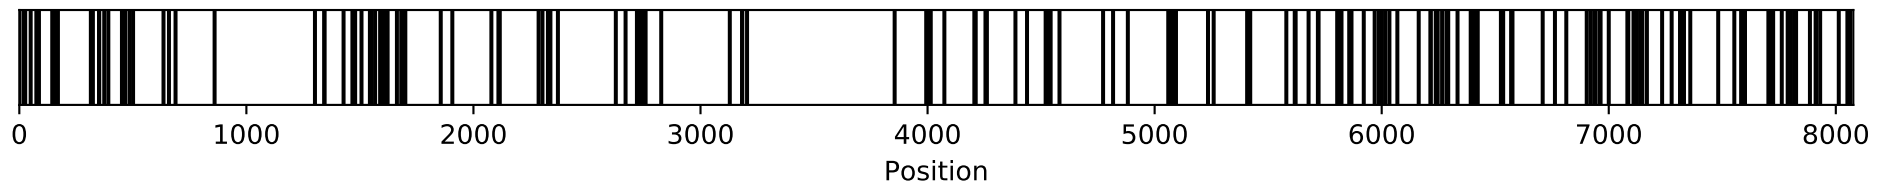

MM1 vs MM2  
Number of differences: 51

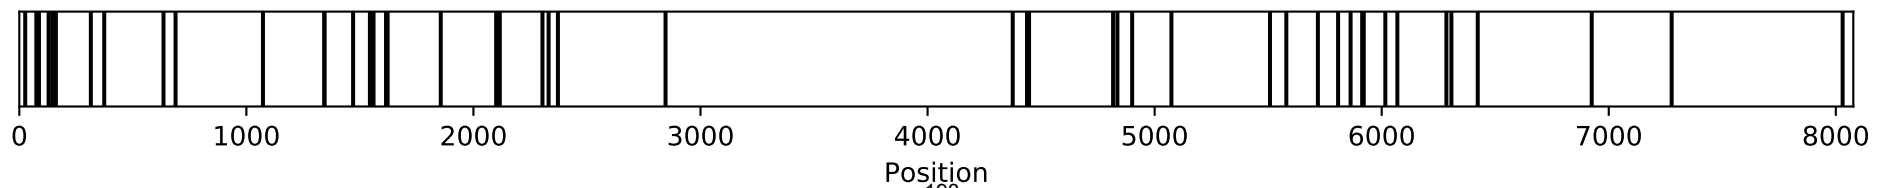

CR1 vs CR2  
Number of differences: 0

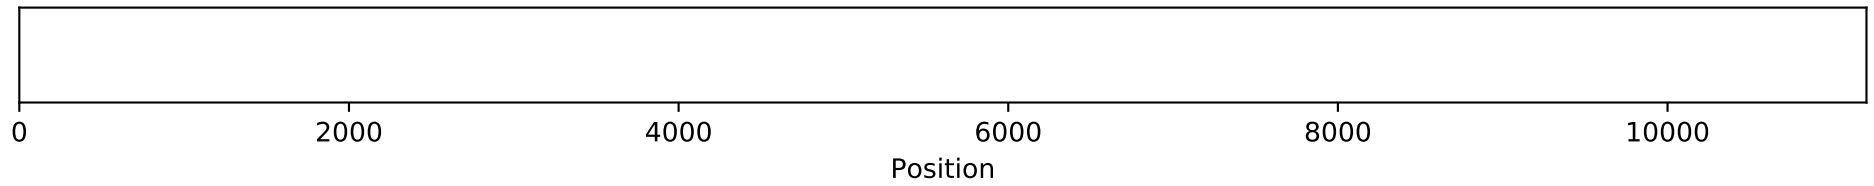

CR1 vs MM1  
Number of differences: 216

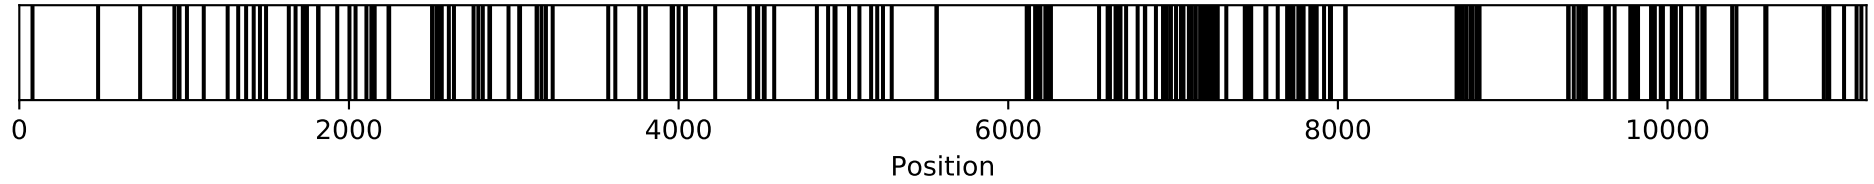

CR1 vs MM2  
Number of differences: 241

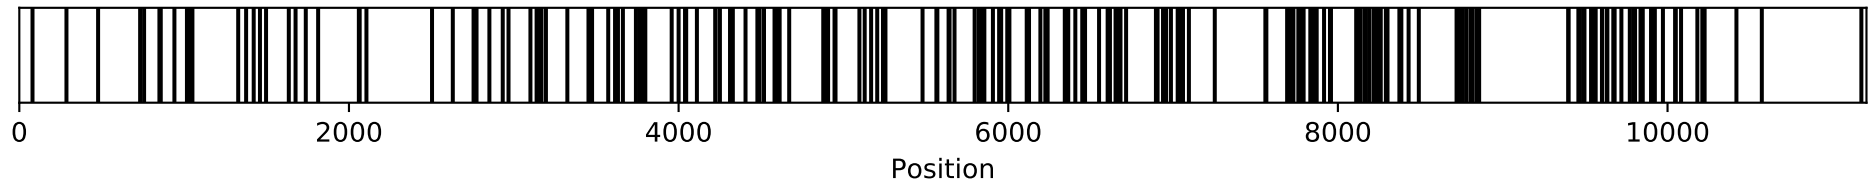

CR2 vs MM1  
Number of differences: 216

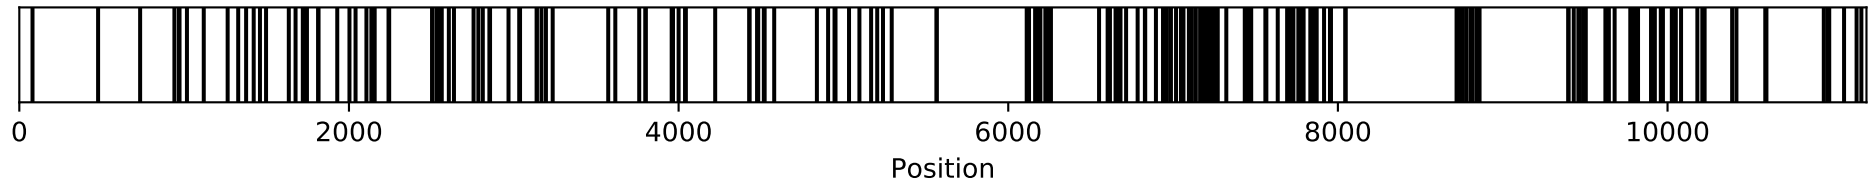

CR2 vs MM2  
Number of differences: 241

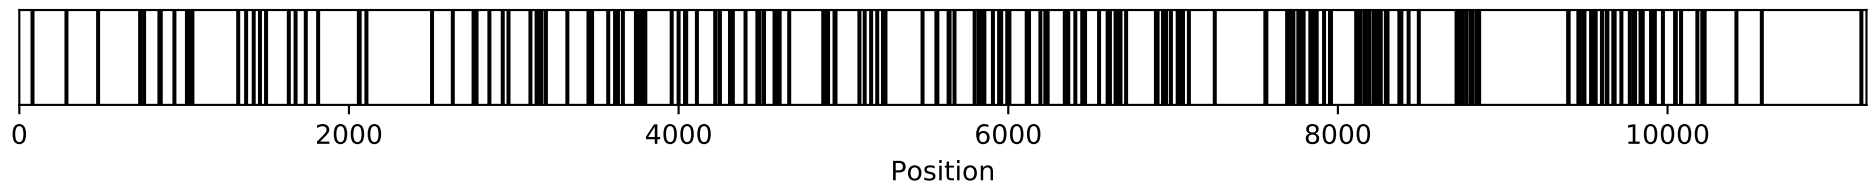

MM1 vs MM2  
Number of differences: 205

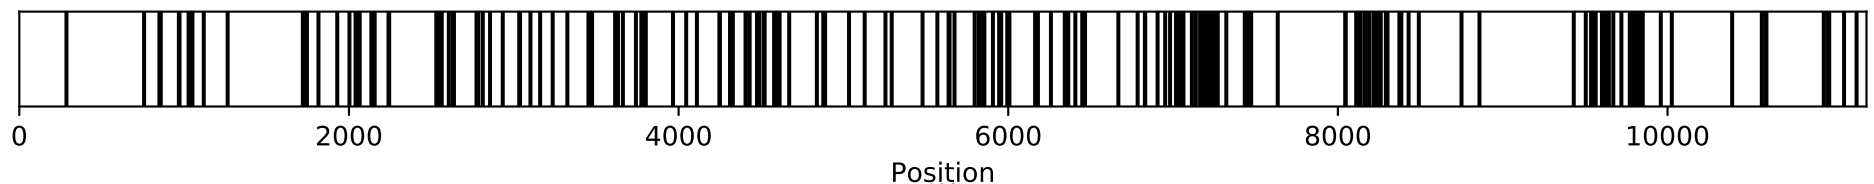



CR1 vs CR2  
Number of differences: 243

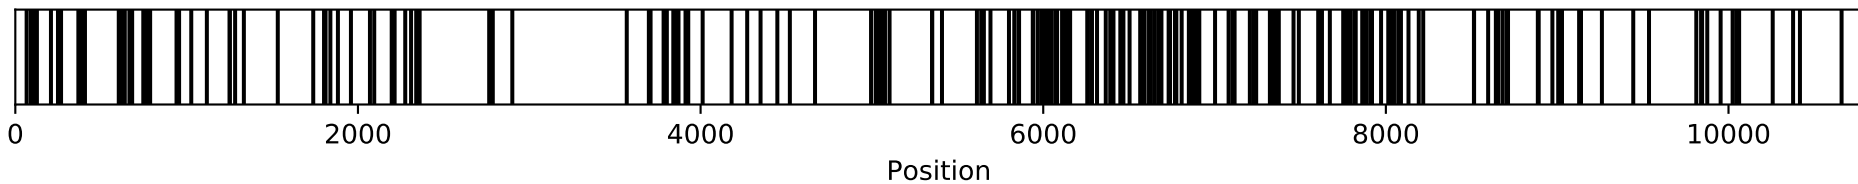

CR1 vs MM1  
Number of differences: 162

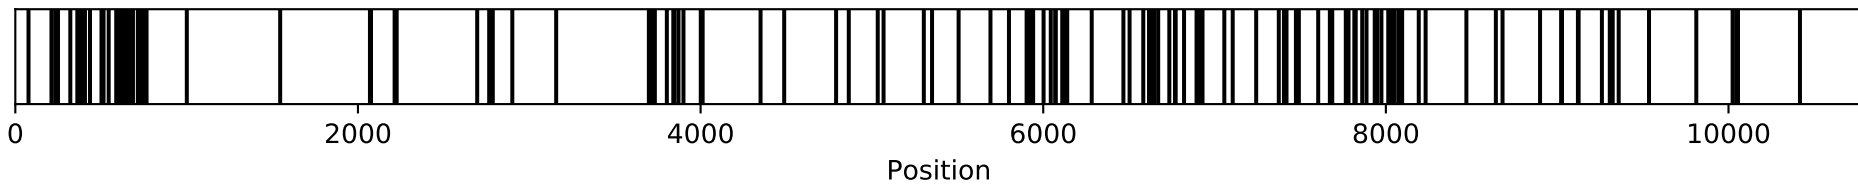

CR1 vs MM2  
Number of differences: 211

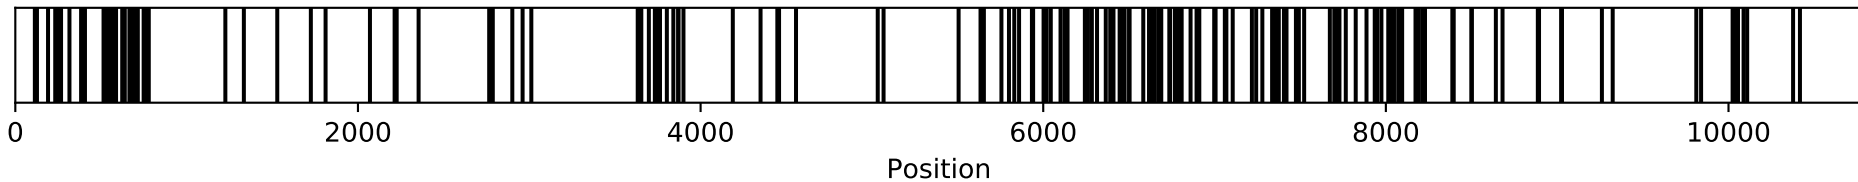

CR2 vs MM1  
Number of differences: 219

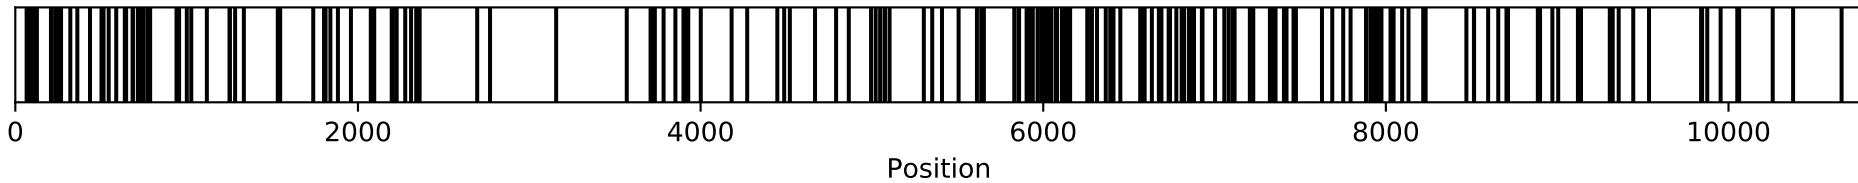

CR2 vs MM2  
Number of differences: 236

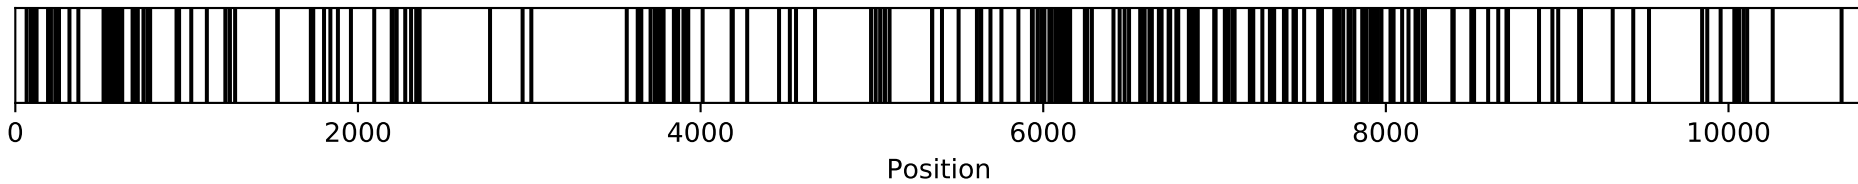

MM1 vs MM2  
Number of differences: 168

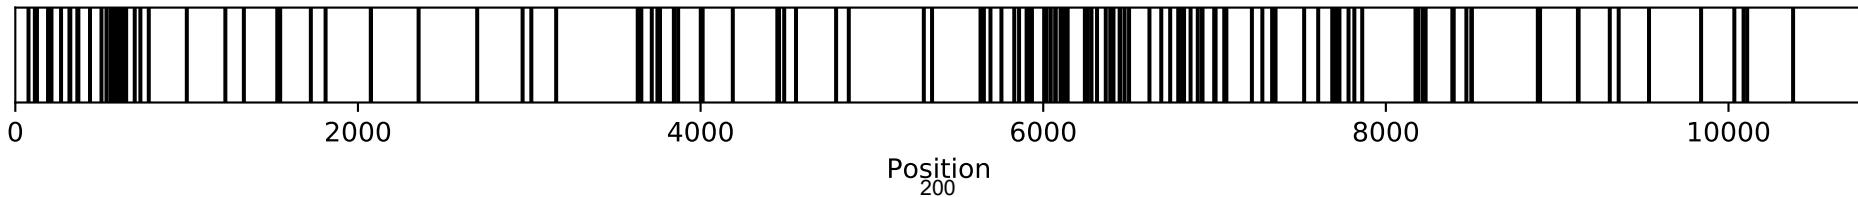

CR1 vs CR2  
Number of differences: 163

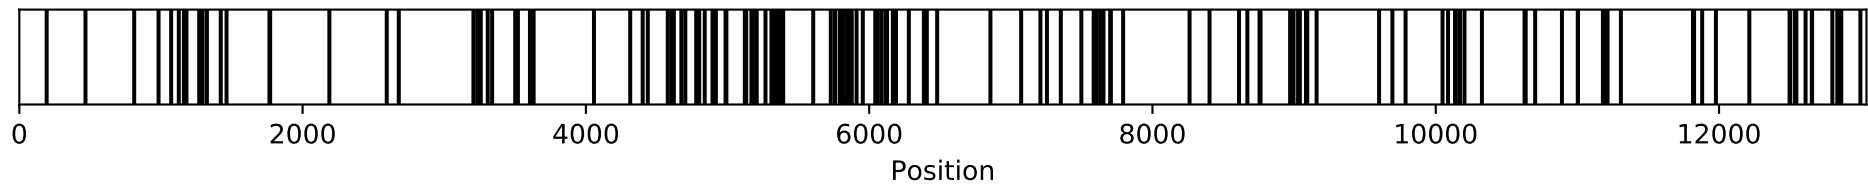

CR1 vs MM1  
Number of differences: 164

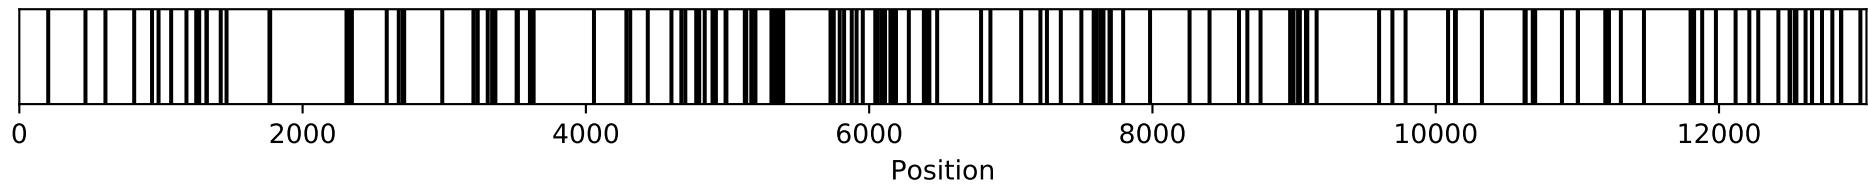

CR1 vs MM2  
Number of differences: 166

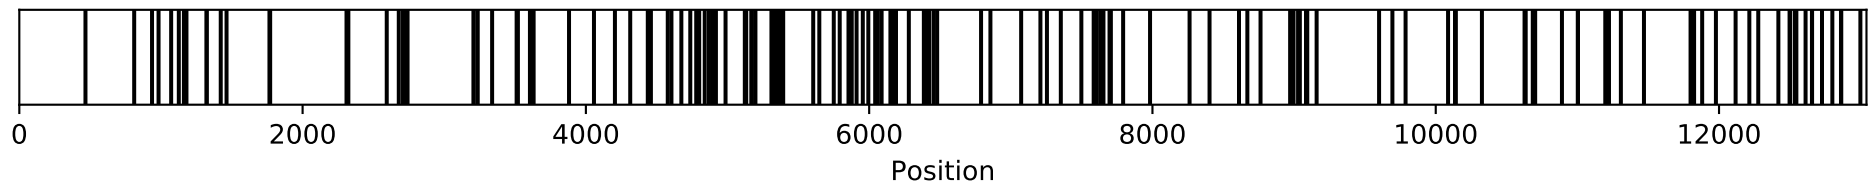

CR2 vs MM1  
Number of differences: 76

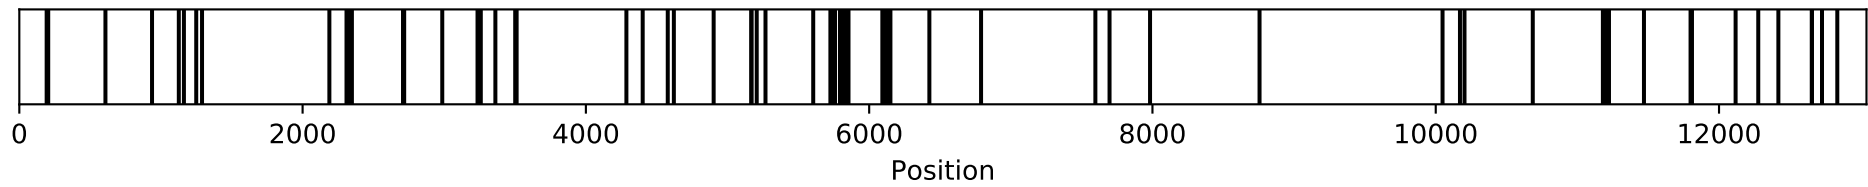

CR2 vs MM2  
Number of differences: 77

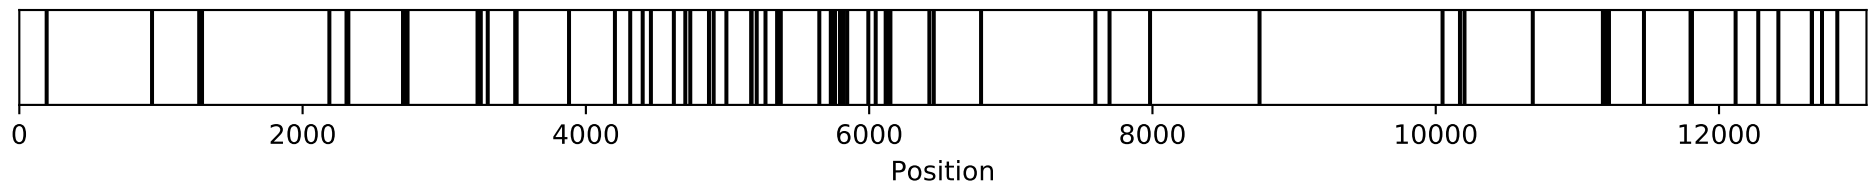

MM1 vs MM2  
Number of differences: 33

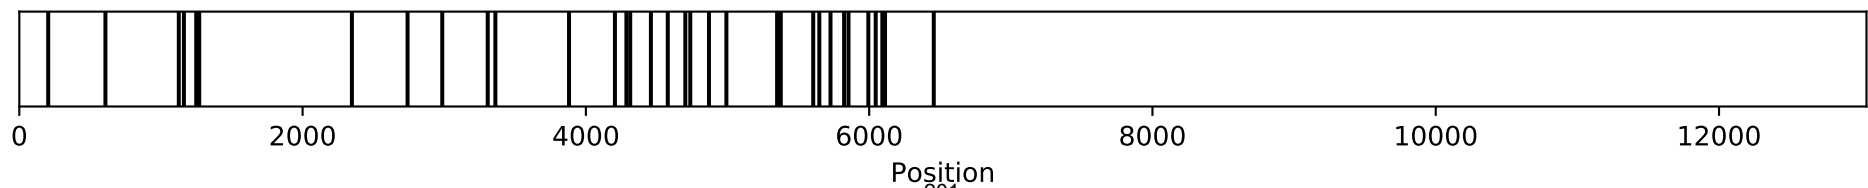

CR1 vs CR2  
Number of differences: 0

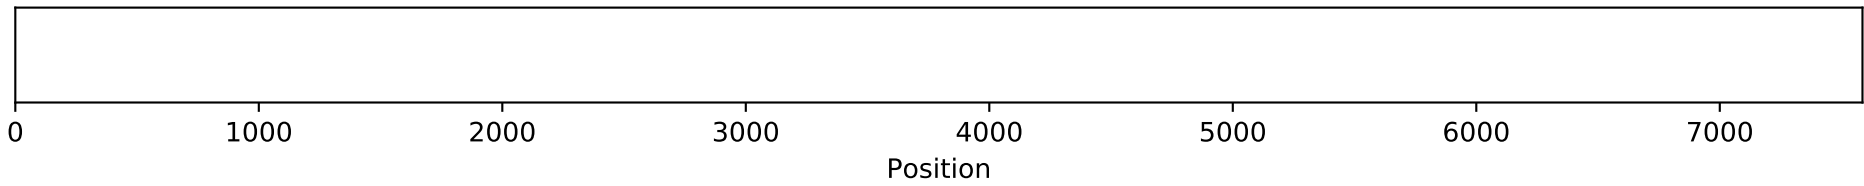

CR1 vs MM1  
Number of differences: 232

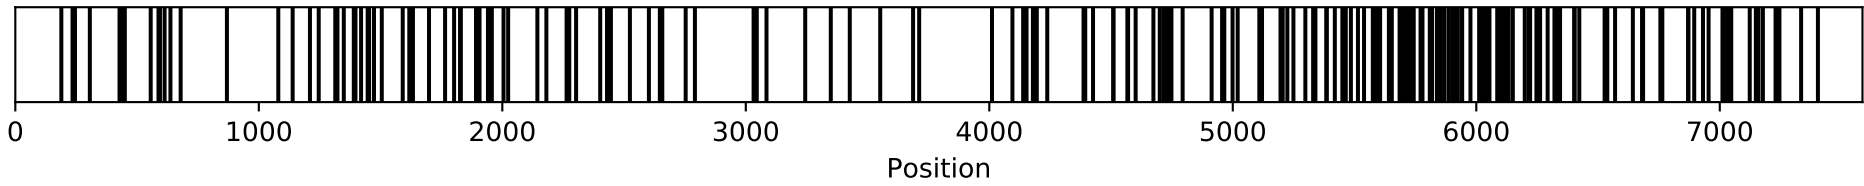

CR1 vs MM2  
Number of differences: 256

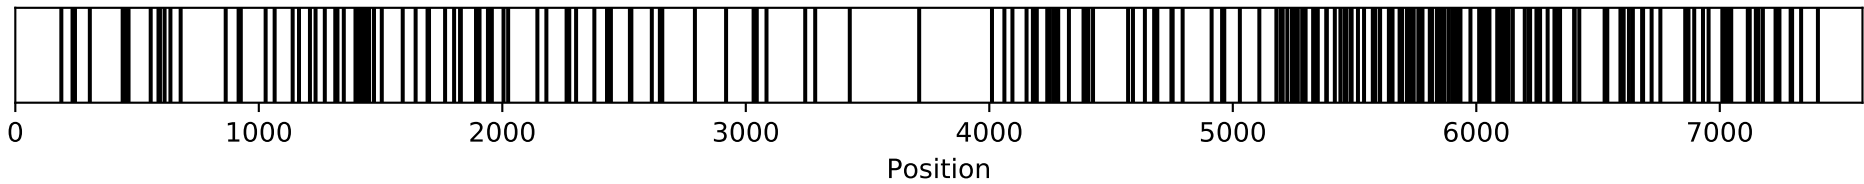

CR2 vs MM1  
Number of differences: 232

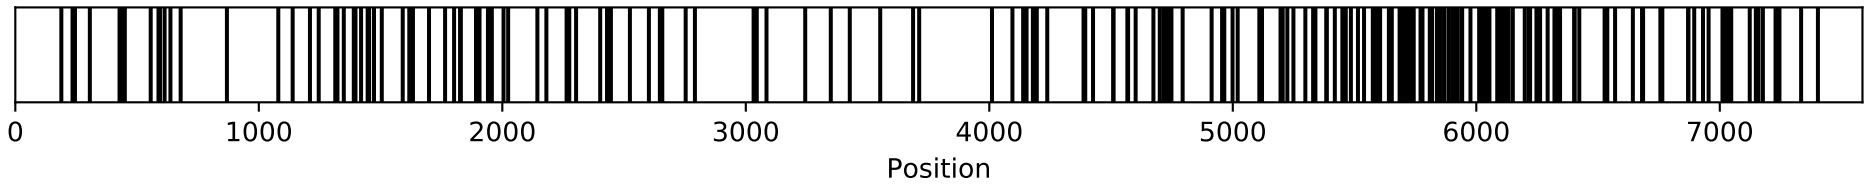

CR2 vs MM2  
Number of differences: 256

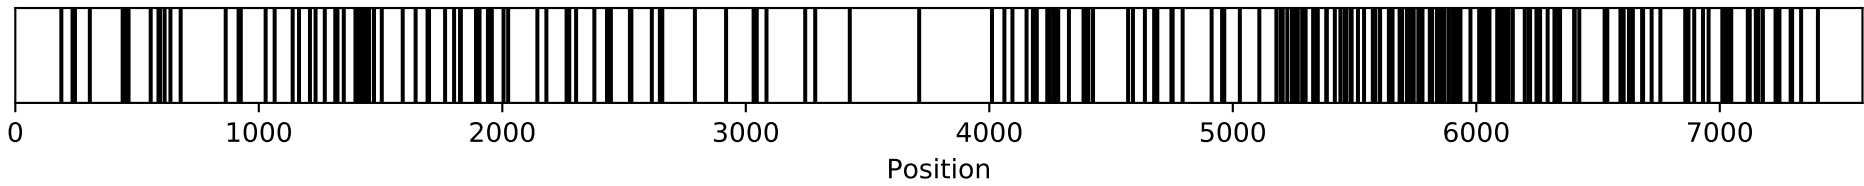

MM1 vs MM2  
Number of differences: 105

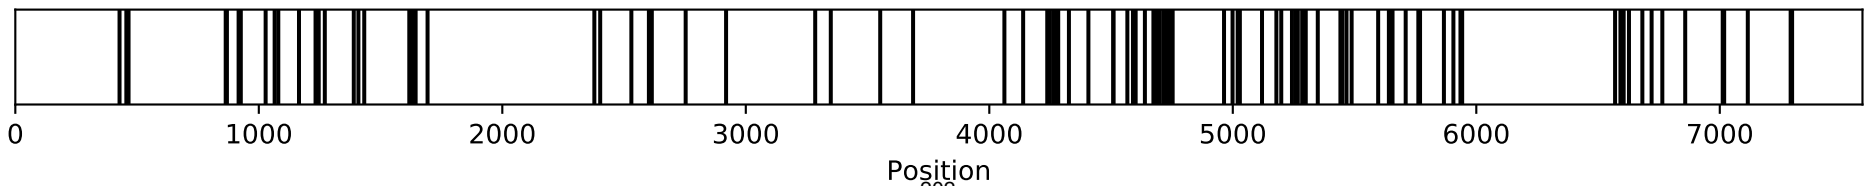

CR1 vs CR2  
Number of differences: 228

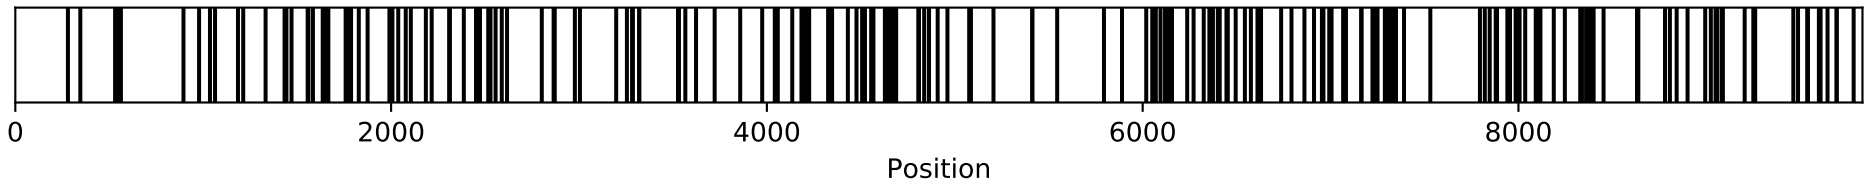

CR1 vs MM1  
Number of differences: 69

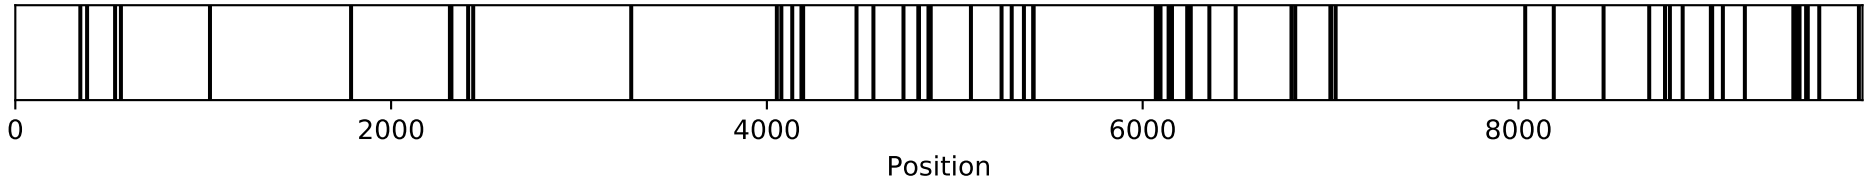

CR1 vs MM2  
Number of differences: 71

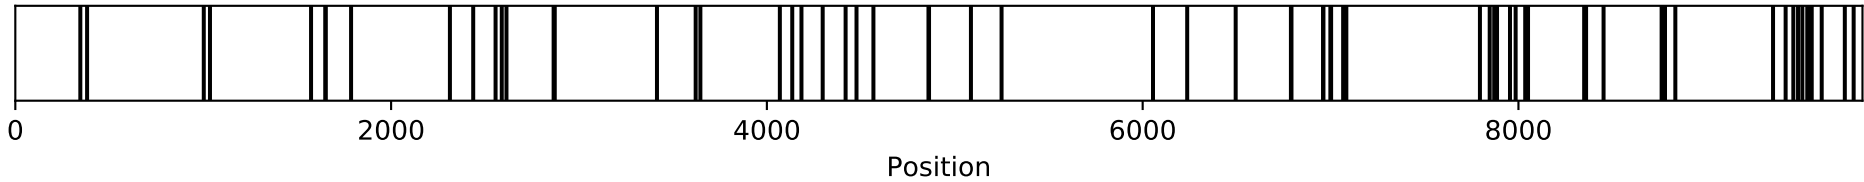

CR2 vs MM1  
Number of differences: 229

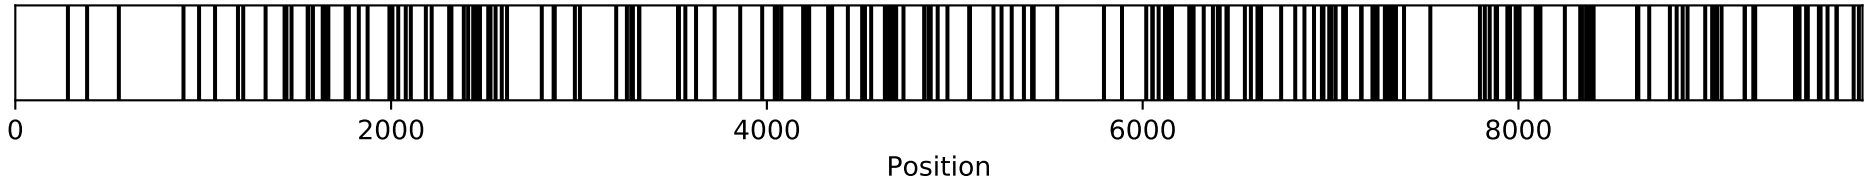

CR2 vs MM2  
Number of differences: 223

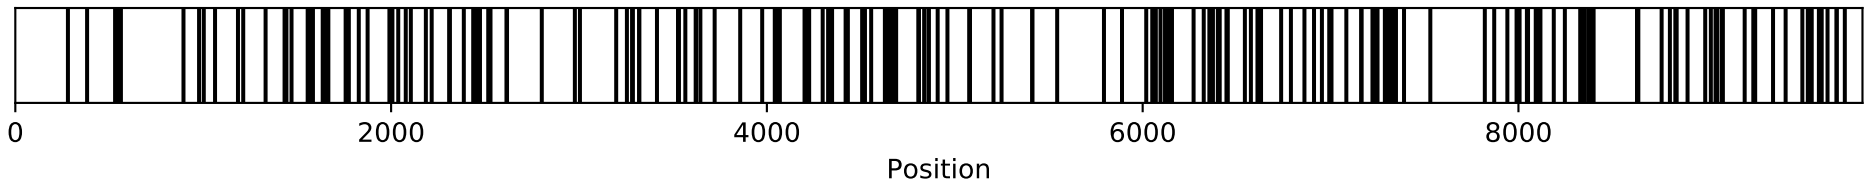

MM1 vs MM2  
Number of differences: 89

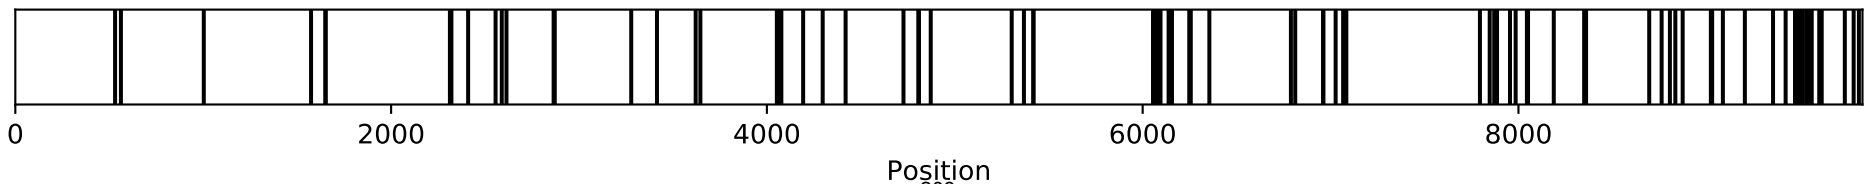

CR1 vs CR2  
Number of differences: 171

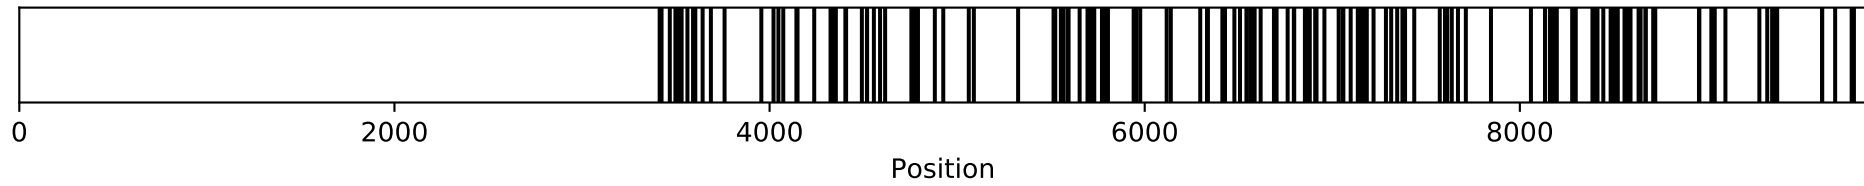

CR1 vs MM1  
Number of differences: 231

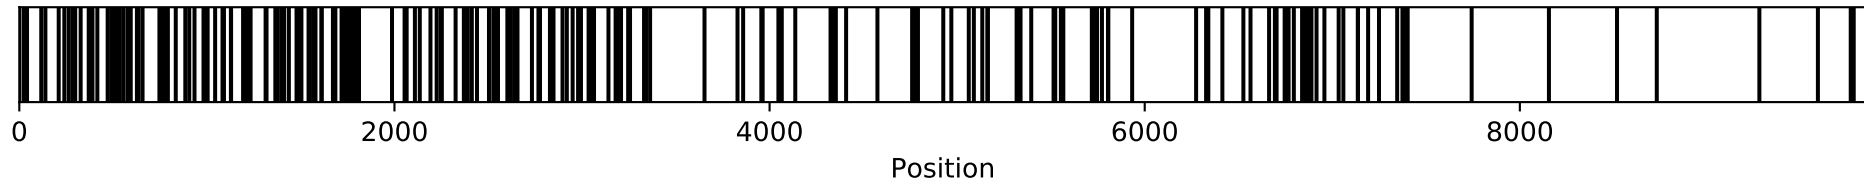

CR1 vs MM2  
Number of differences: 226

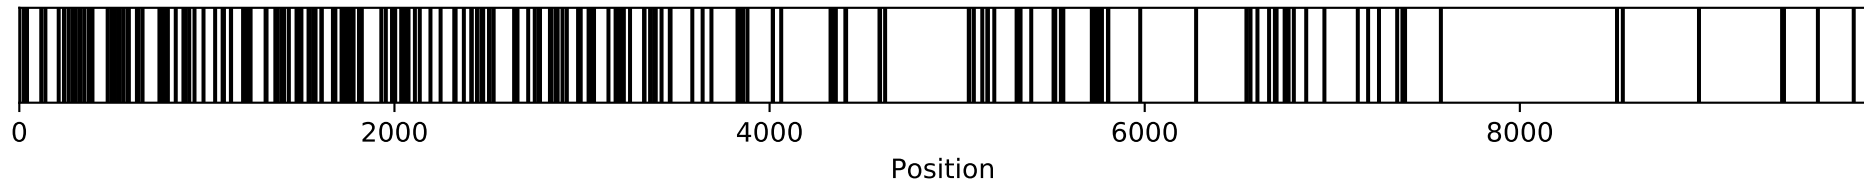

CR2 vs MM1  
Number of differences: 311

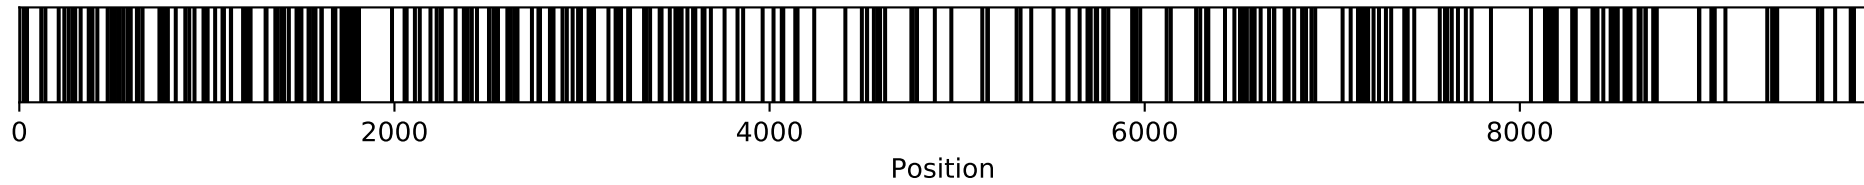

CR2 vs MM2  
Number of differences: 316

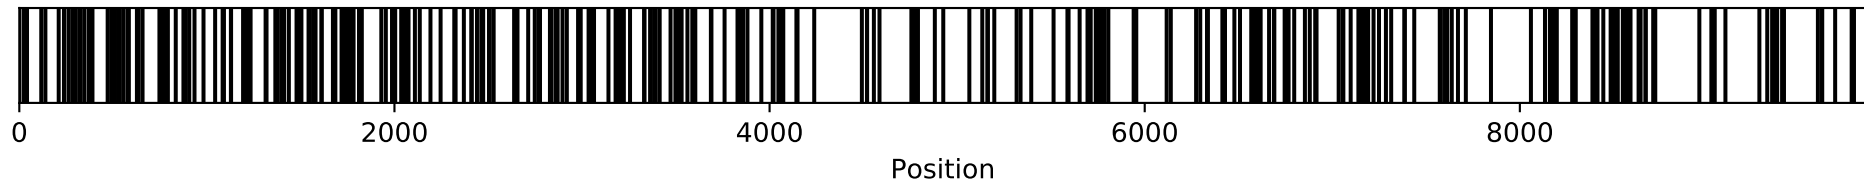

MM1 vs MM2  
Number of differences: 119

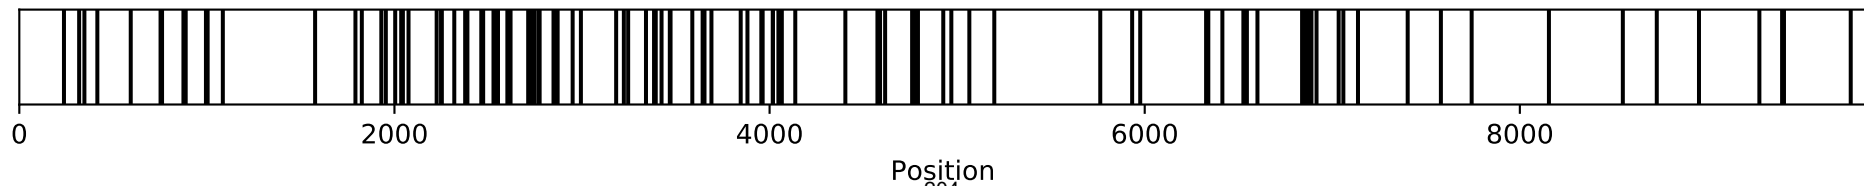

CR1 vs CR2  
Number of differences: 297

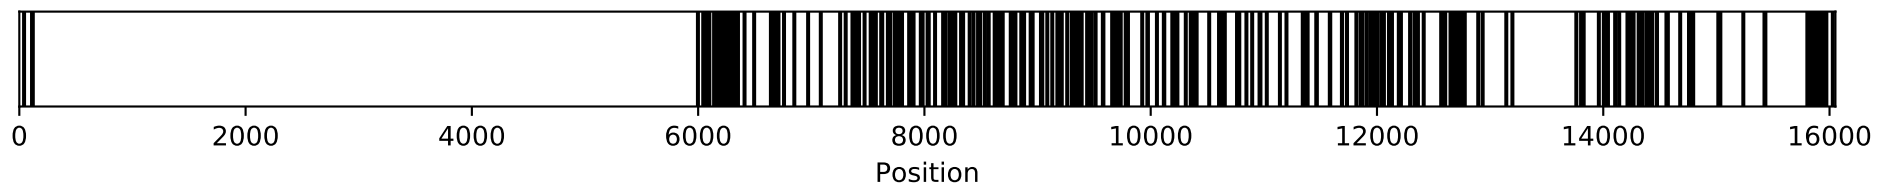

CR1 vs MM1  
Number of differences: 389

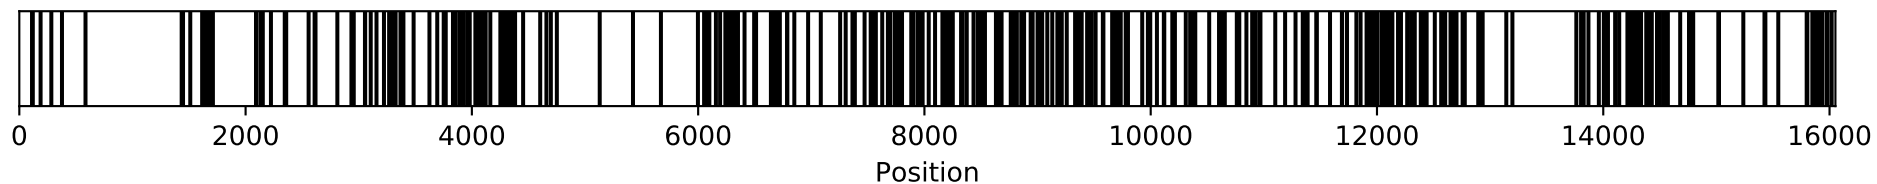

CR1 vs MM2  
Number of differences: 390

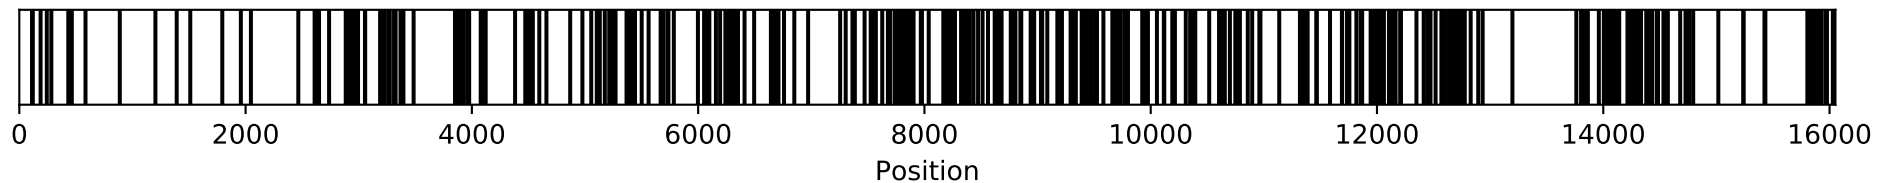

CR2 vs MM1  
Number of differences: 215

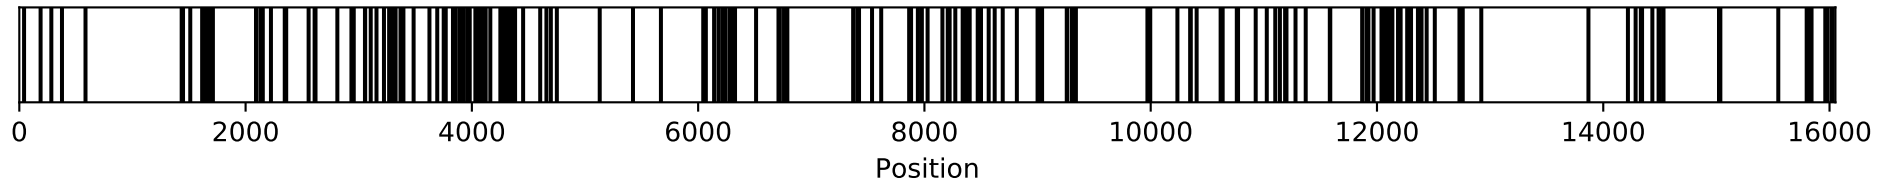

CR2 vs MM2  
Number of differences: 263

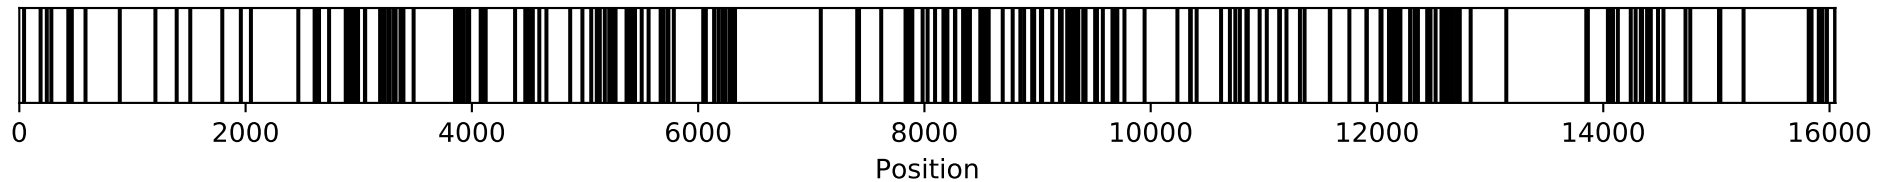

MM1 vs MM2  
Number of differences: 300

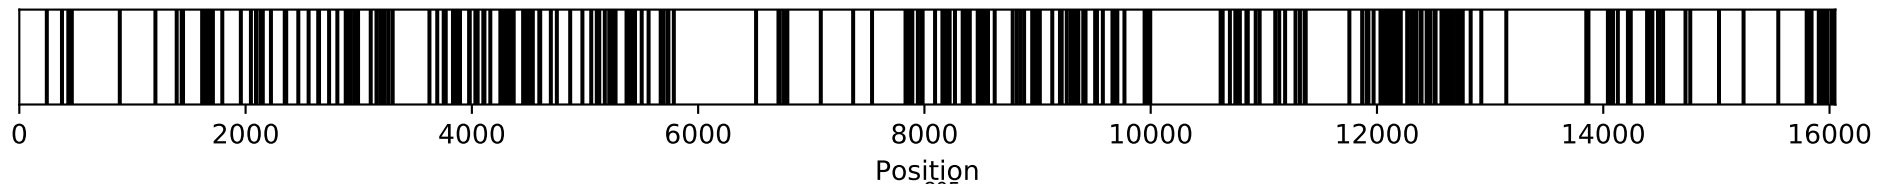

CR1 vs CR2  
Number of differences: 173

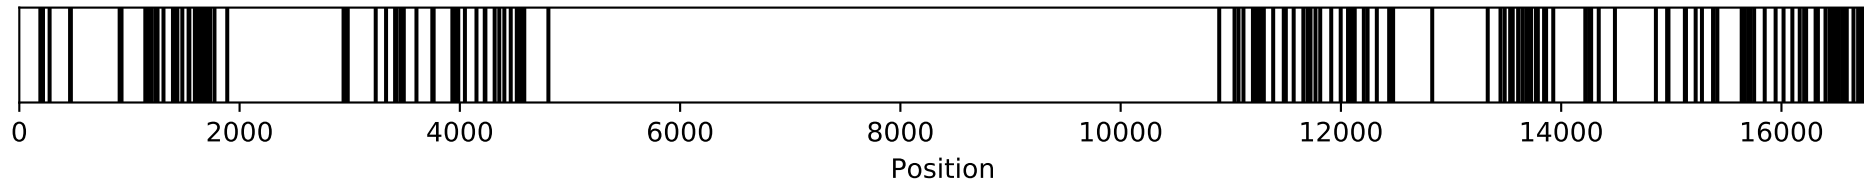

CR1 vs MM1  
Number of differences: 159

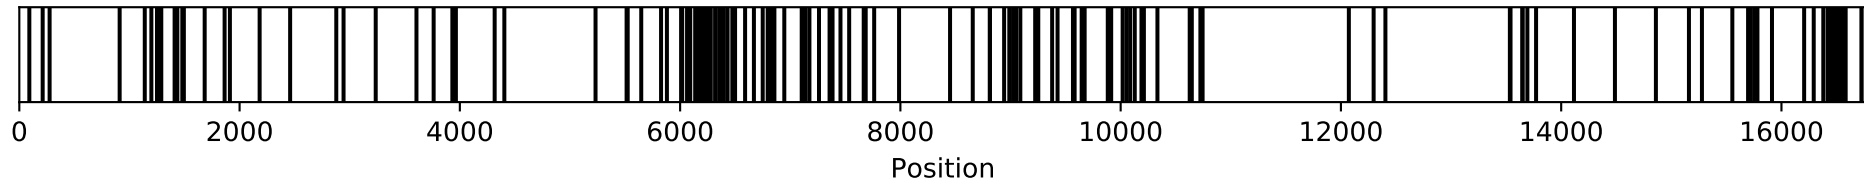

CR1 vs MM2  
Number of differences: 180

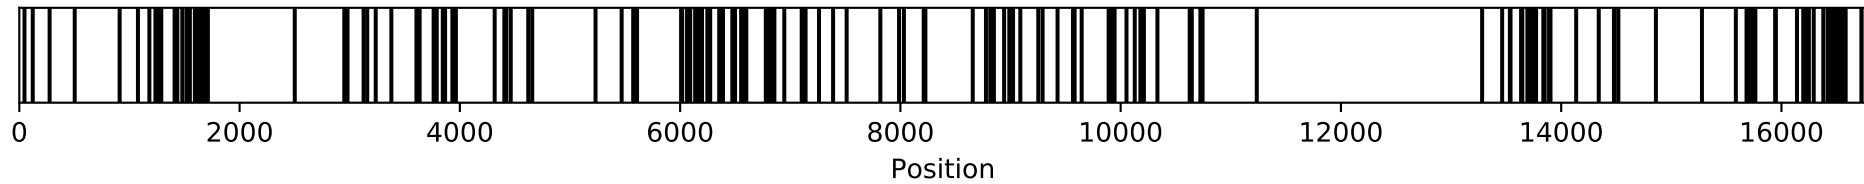

CR2 vs MM1  
Number of differences: 260

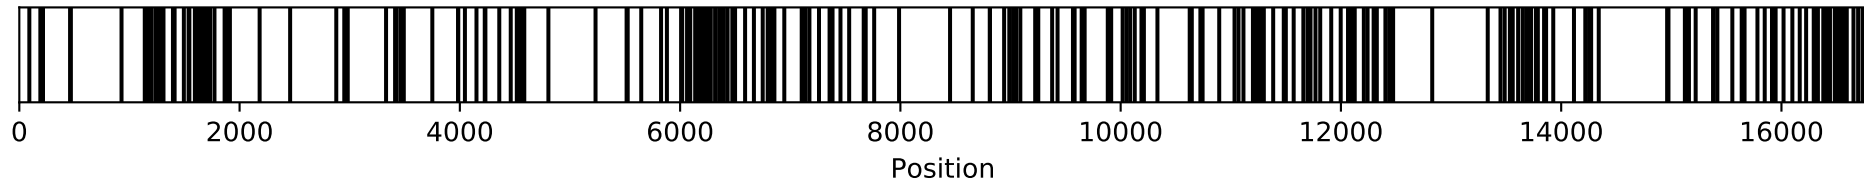

CR2 vs MM2  
Number of differences: 264

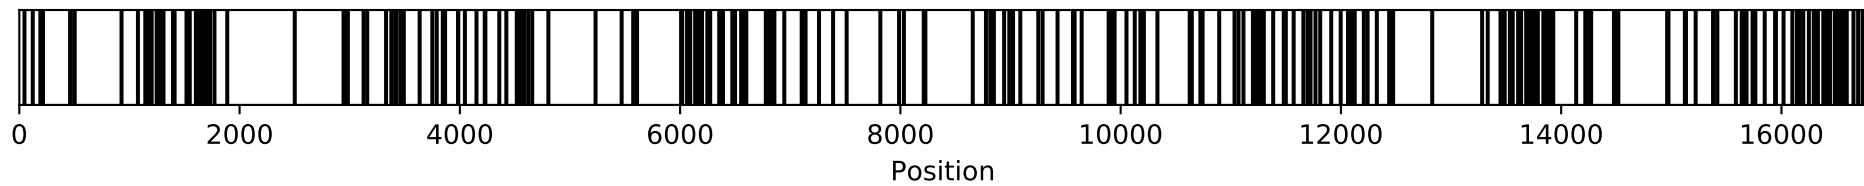

MM1 vs MM2  
Number of differences: 157

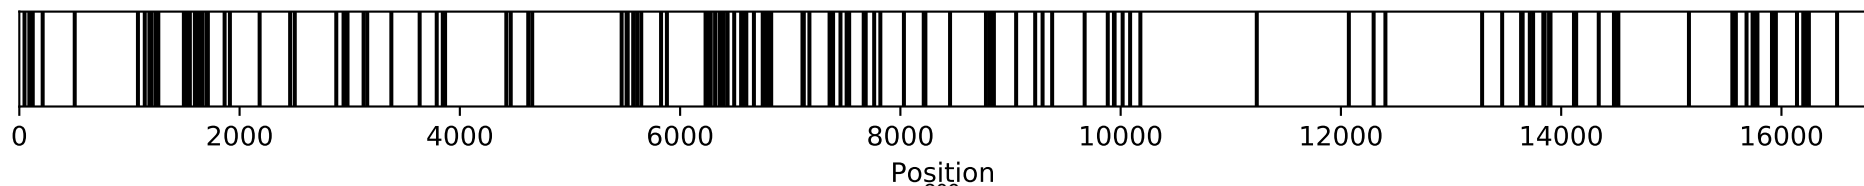

CR1 vs CR2  
Number of differences: 268

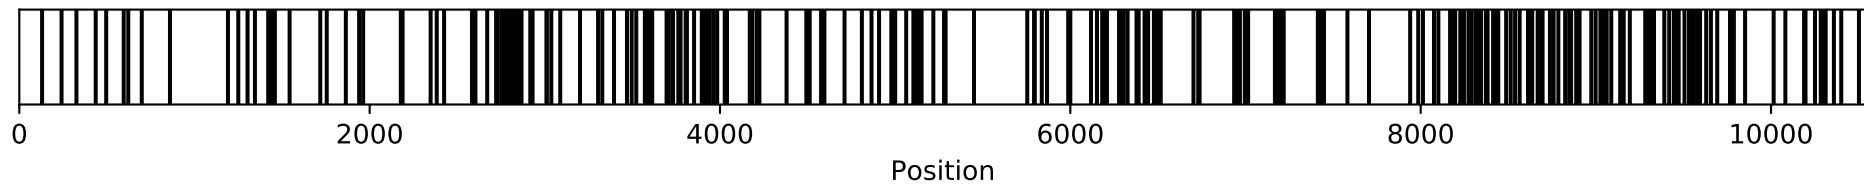

CR1 vs MM1  
Number of differences: 145

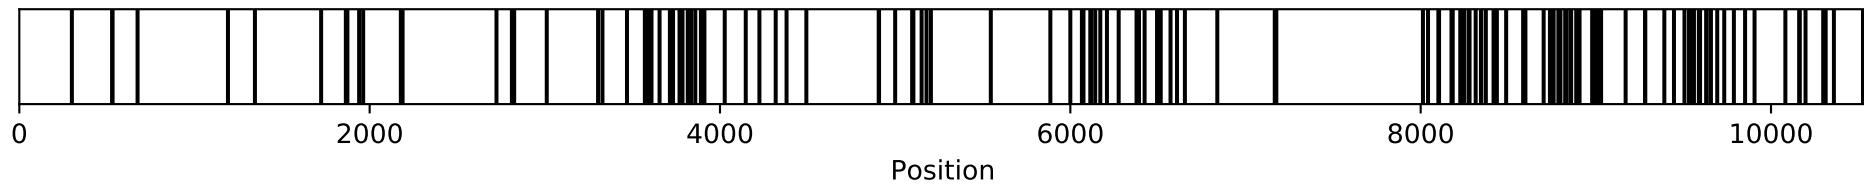

CR1 vs MM2  
Number of differences: 144

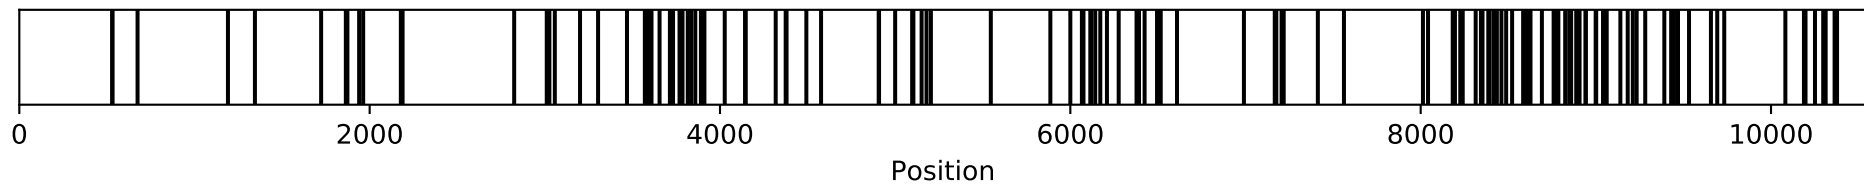

CR2 vs MM1  
Number of differences: 262

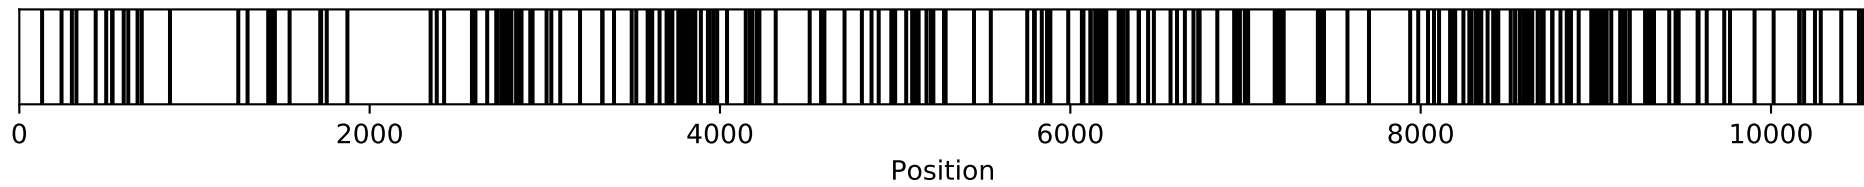

CR2 vs MM2  
Number of differences: 280

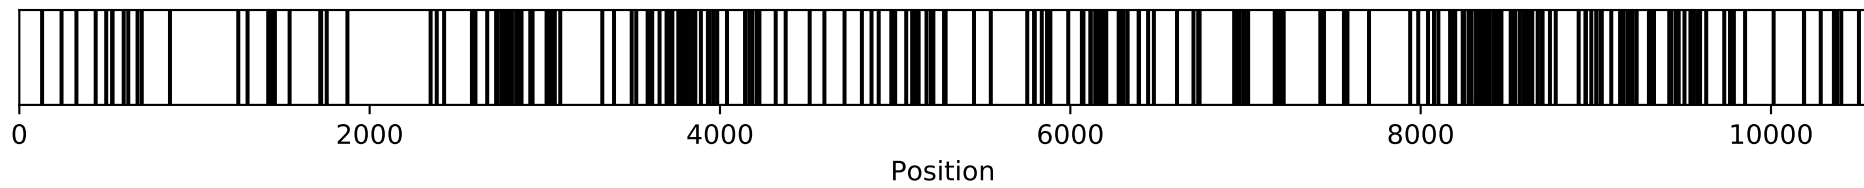

MM1 vs MM2  
Number of differences: 97

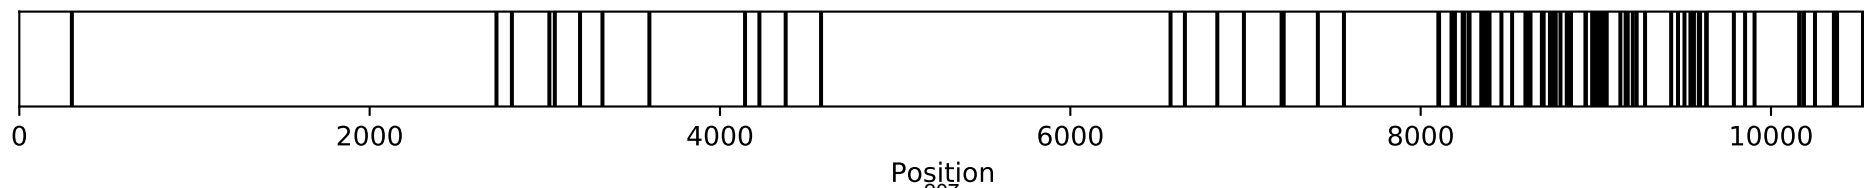



CR1 vs CR2  
Number of differences: 115

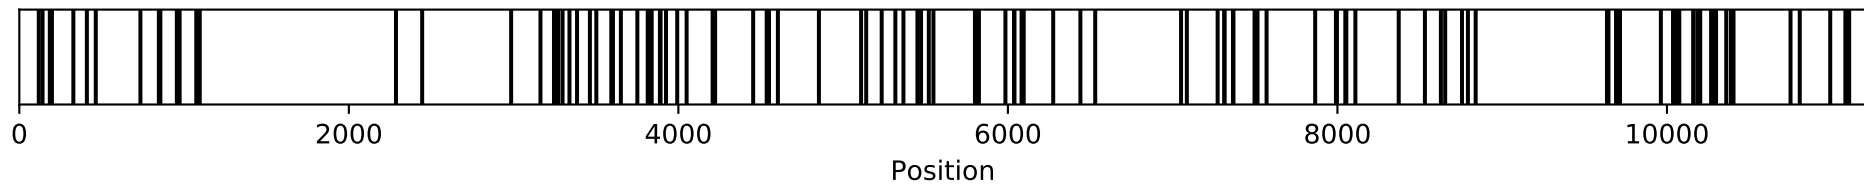

CR1 vs MM1  
Number of differences: 33

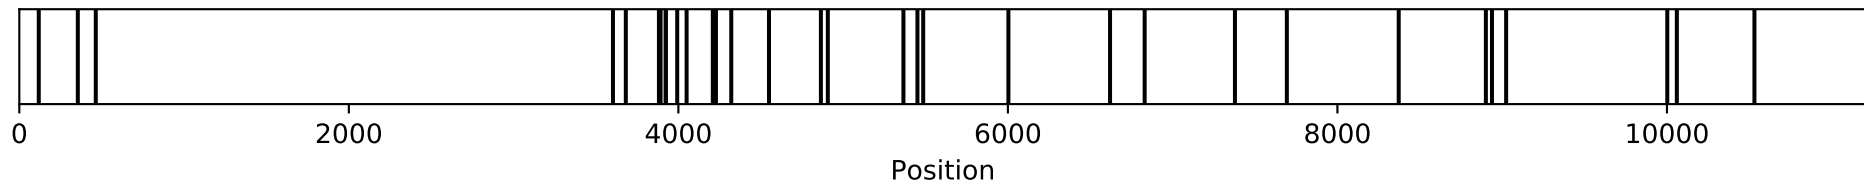

CR1 vs MM2  
Number of differences: 36

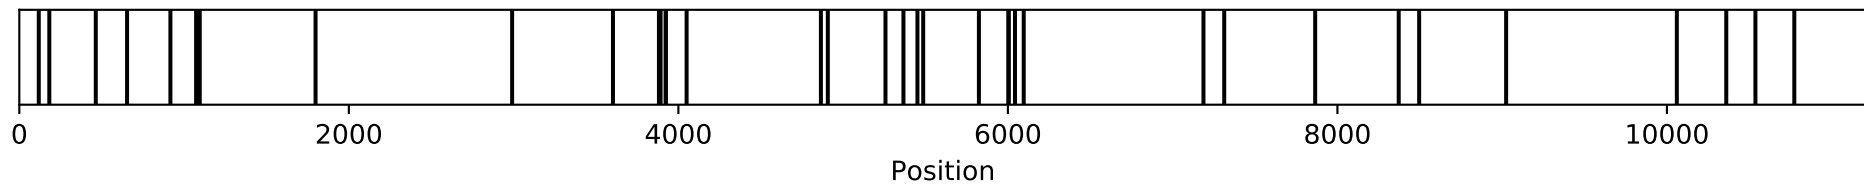

CR2 vs MM1  
Number of differences: 126

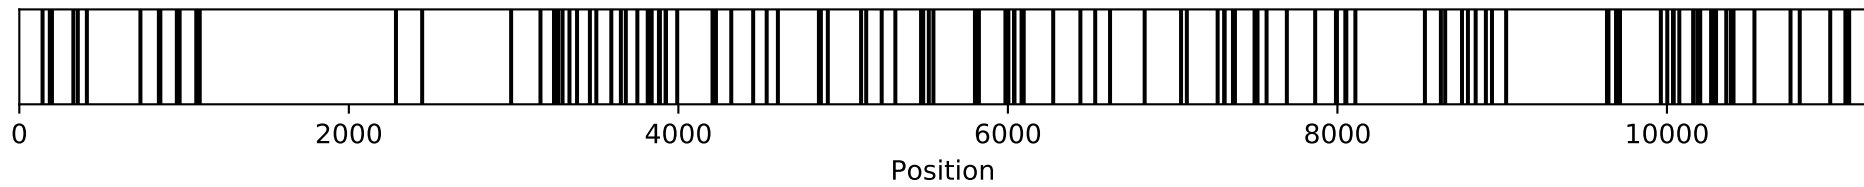

CR2 vs MM2  
Number of differences: 122

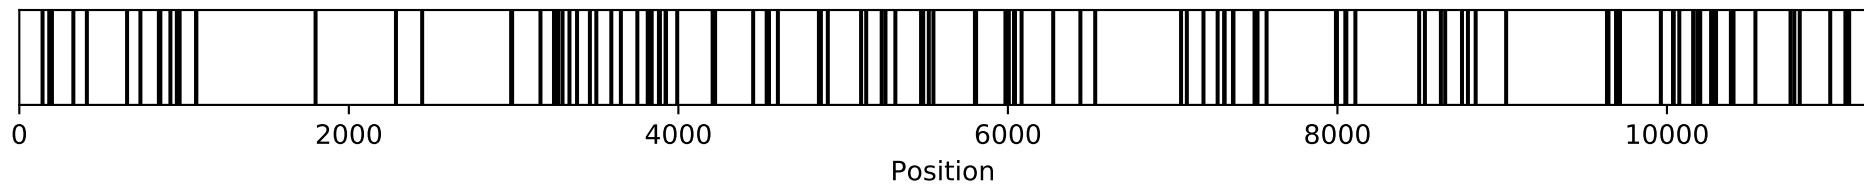

MM1 vs MM2  
Number of differences: 35

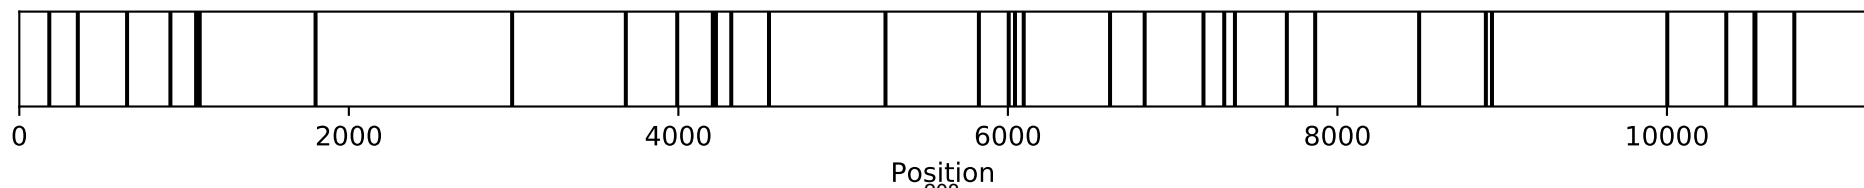

CR1 vs CR2  
Number of differences: 139

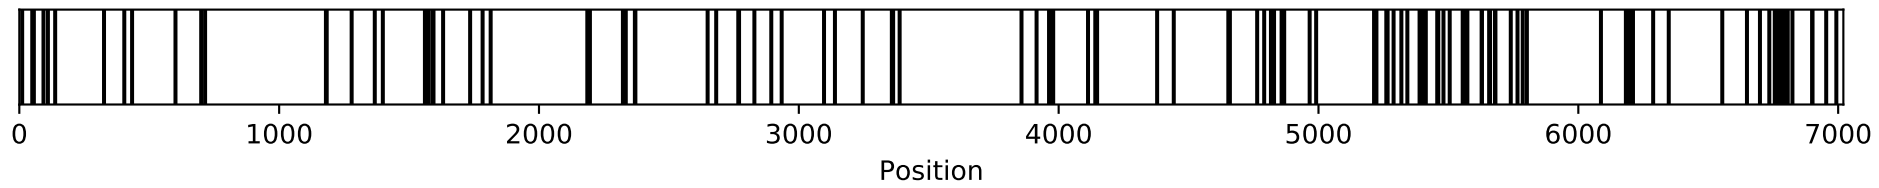

CR1 vs MM1  
Number of differences: 148

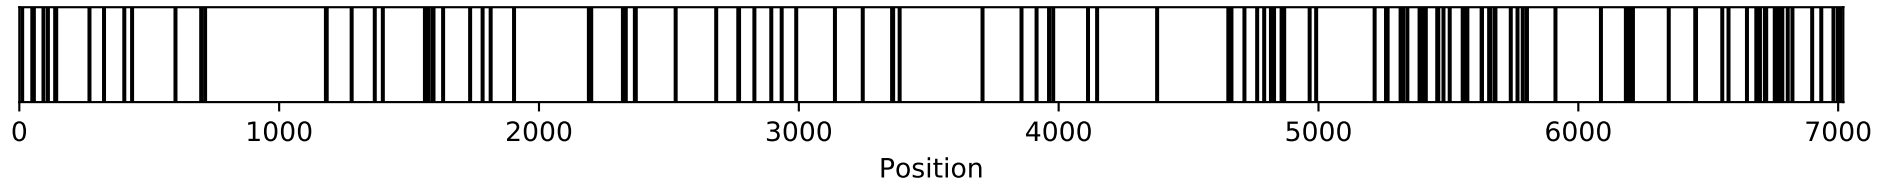

CR1 vs MM2  
Number of differences: 146

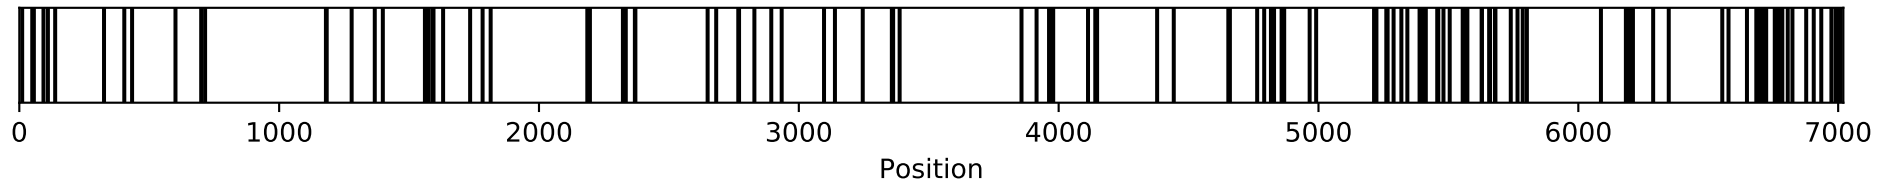

CR2 vs MM1  
Number of differences: 51

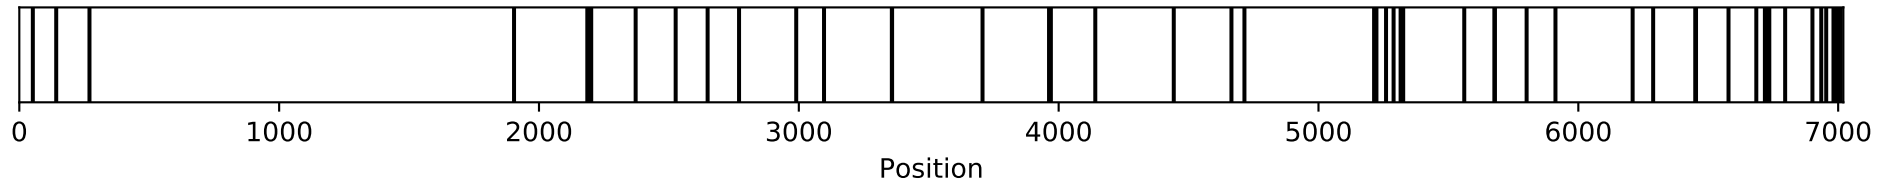

CR2 vs MM2  
Number of differences: 21

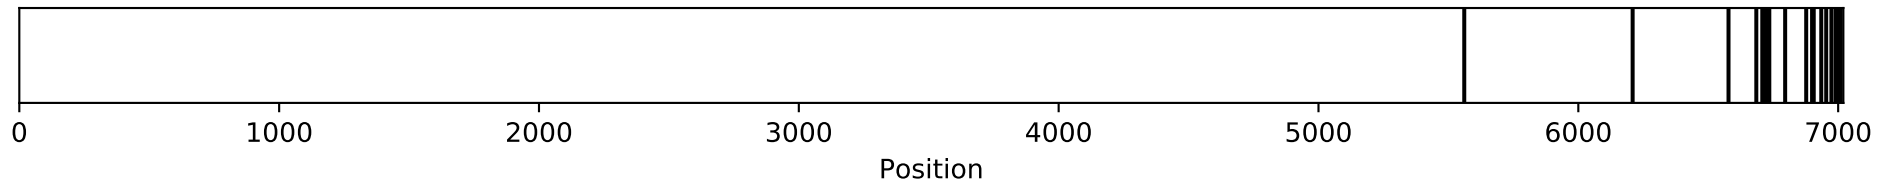

MM1 vs MM2  
Number of differences: 42

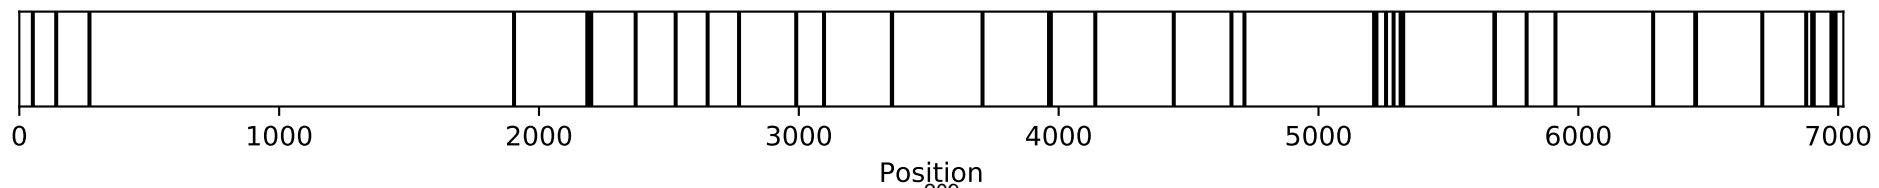

CR1 vs CR2  
Number of differences: 357

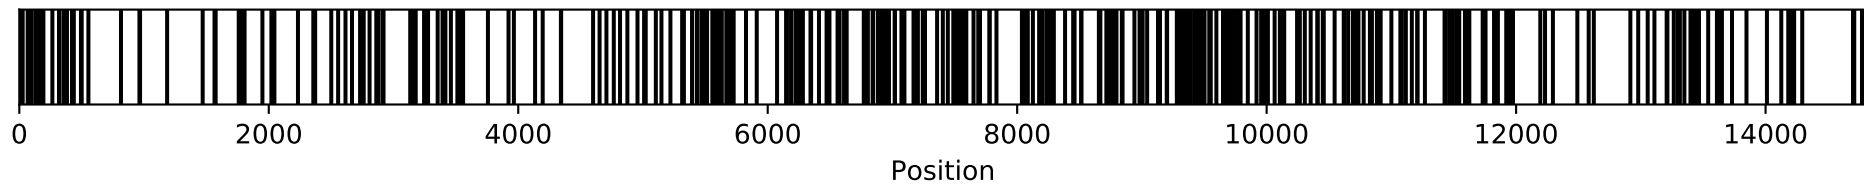

CR1 vs MM1  
Number of differences: 173

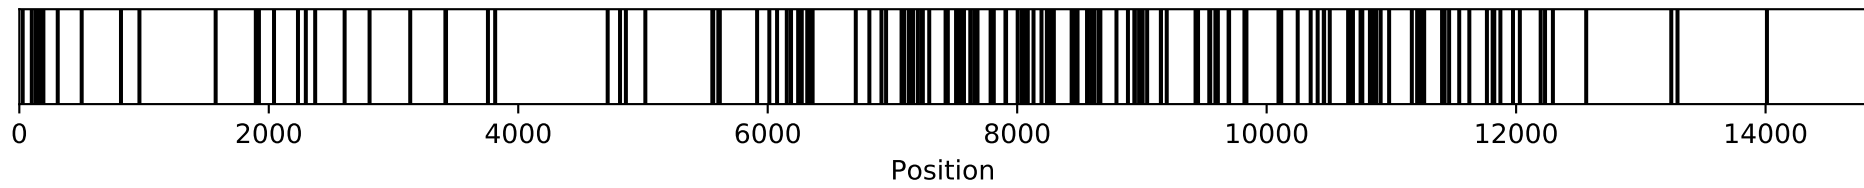

CR1 vs MM2  
Number of differences: 144

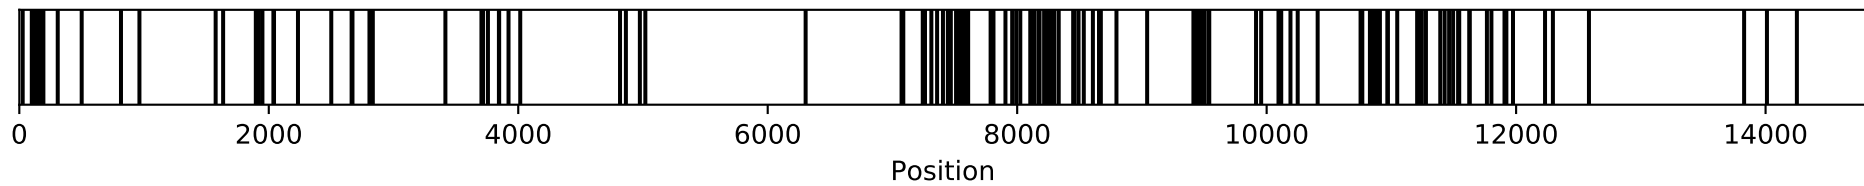

CR2 vs MM1  
Number of differences: 367

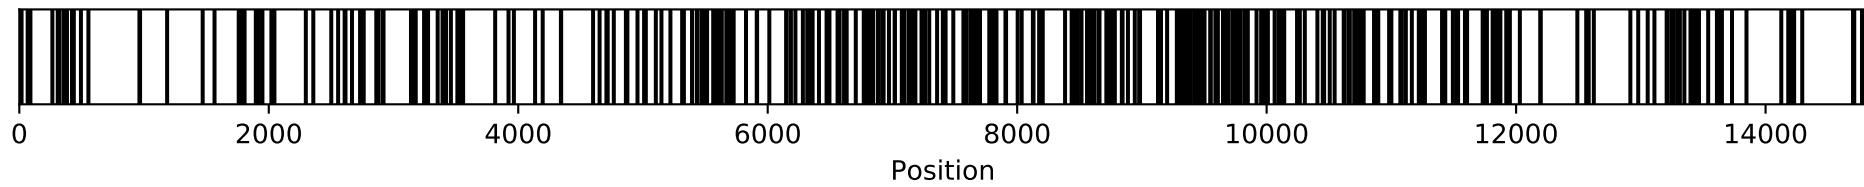

CR2 vs MM2  
Number of differences: 369

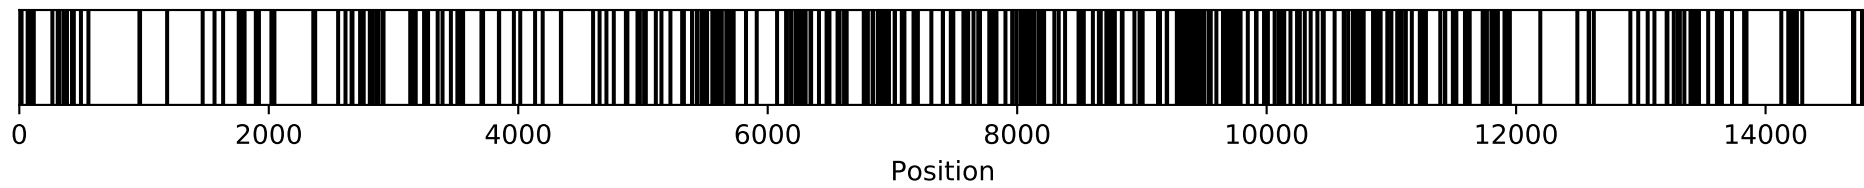

MM1 vs MM2  
Number of differences: 177

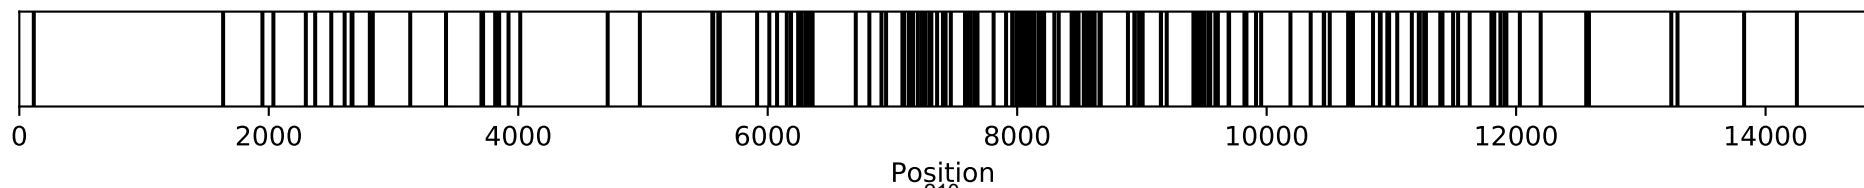

CR1 vs CR2  
Number of differences: 296

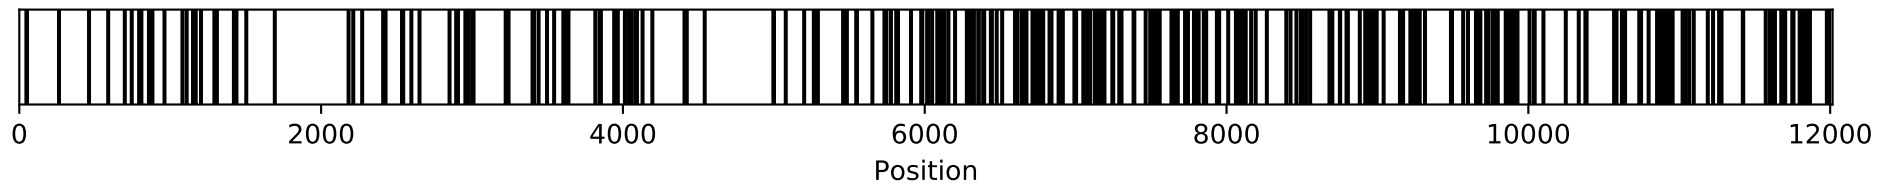

CR1 vs MM1  
Number of differences: 131

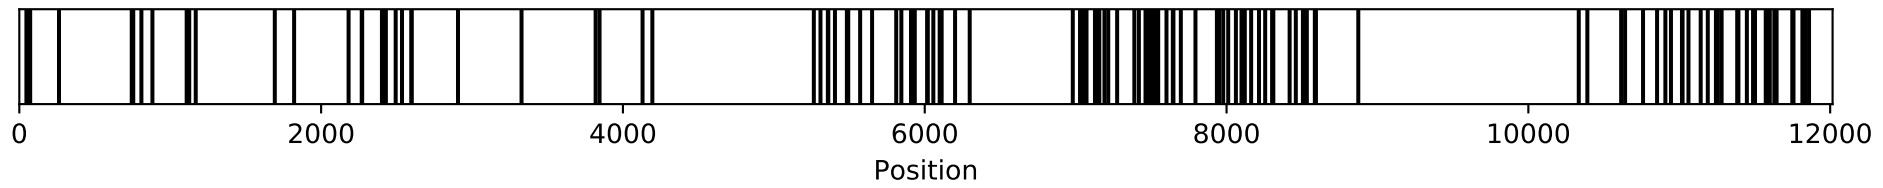

CR1 vs MM2  
Number of differences: 150

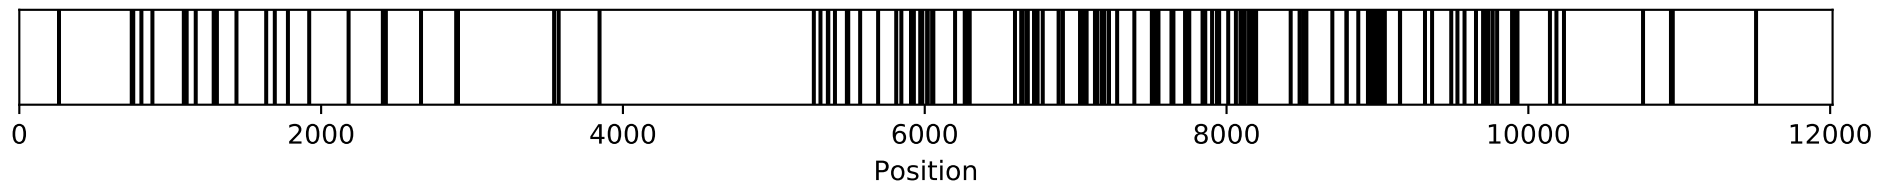

CR2 vs MM1  
Number of differences: 309

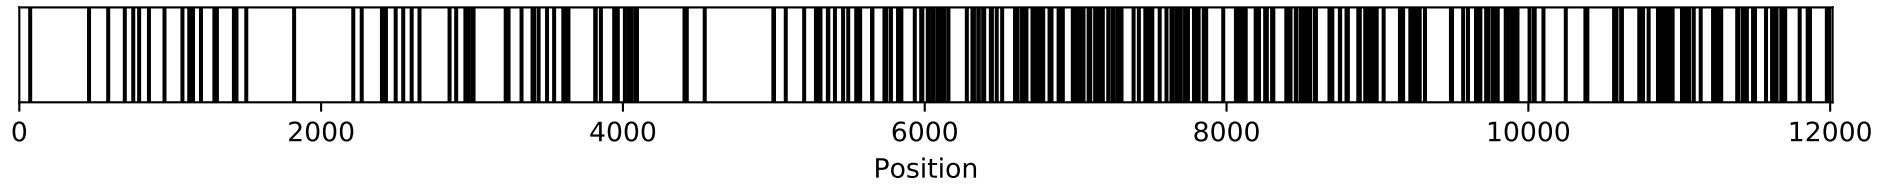

CR2 vs MM2  
Number of differences: 294

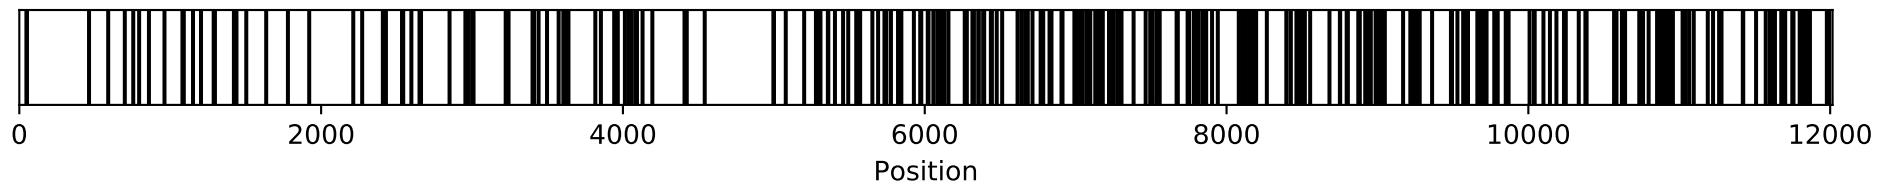

MM1 vs MM2  
Number of differences: 181

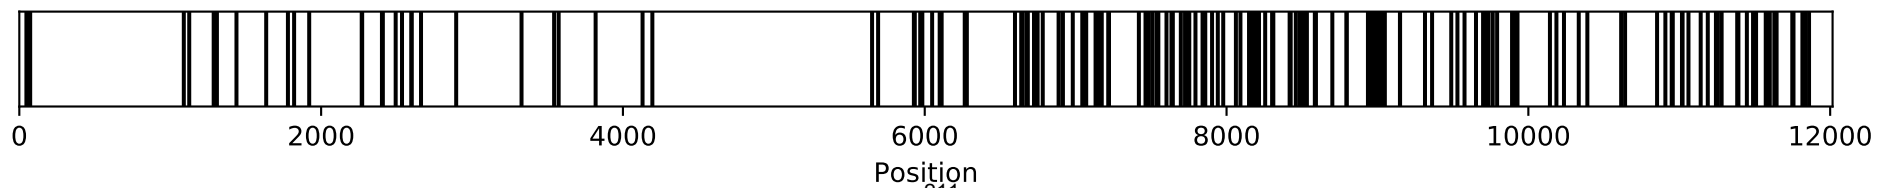

CR1 vs CR2  
Number of differences: 108

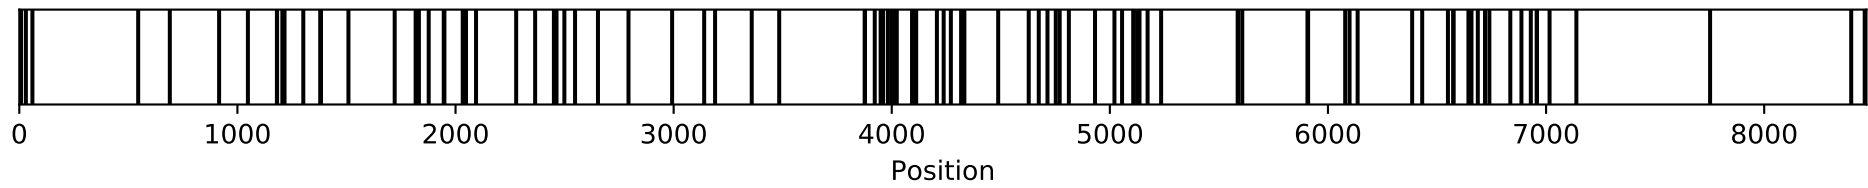

CR1 vs MM1  
Number of differences: 111

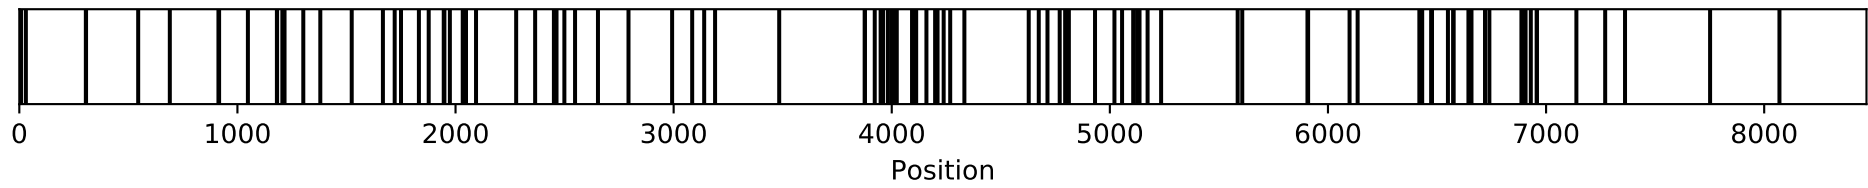

CR1 vs MM2  
Number of differences: 116

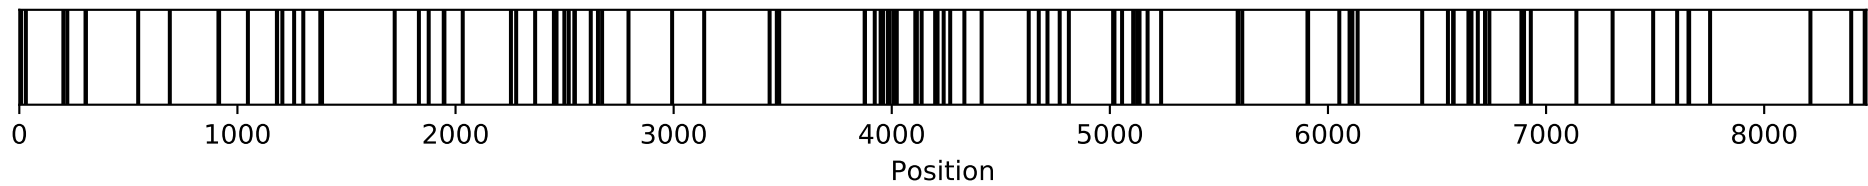

CR2 vs MM1  
Number of differences: 41

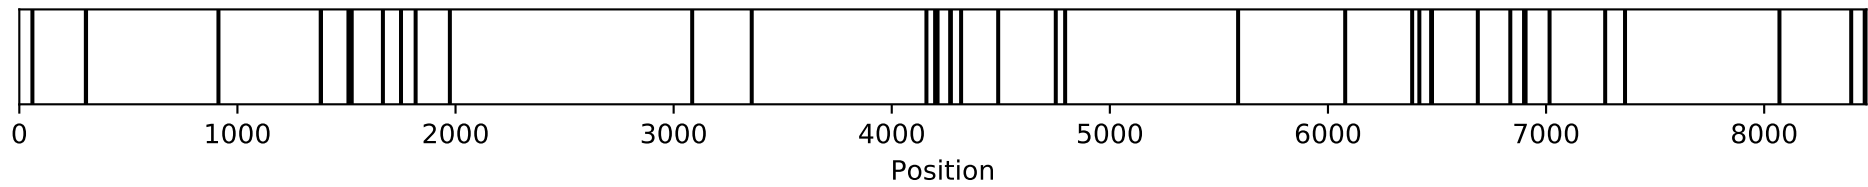

CR2 vs MM2  
Number of differences: 58

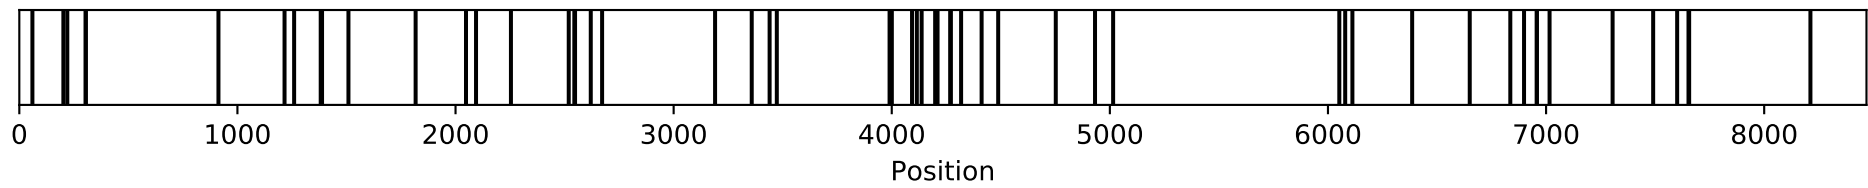

MM1 vs MM2  
Number of differences: 60

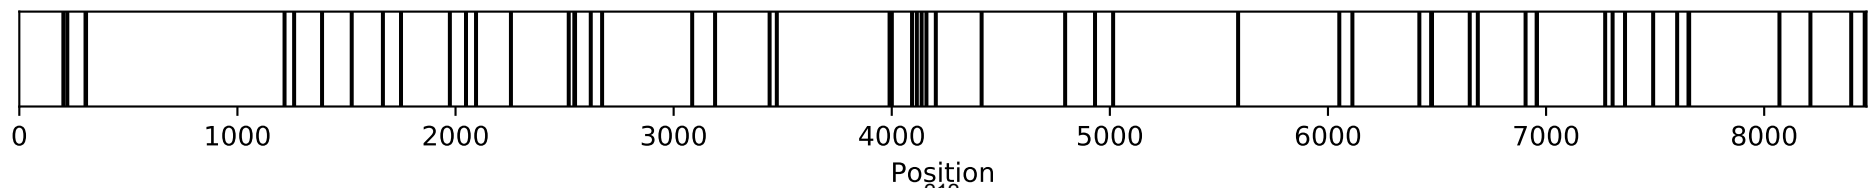

CR1 vs CR2  
Number of differences: 119

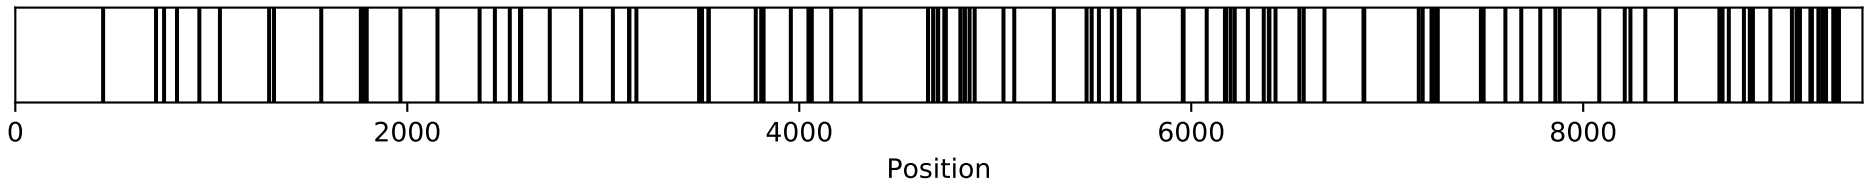

CR1 vs MM1  
Number of differences: 45

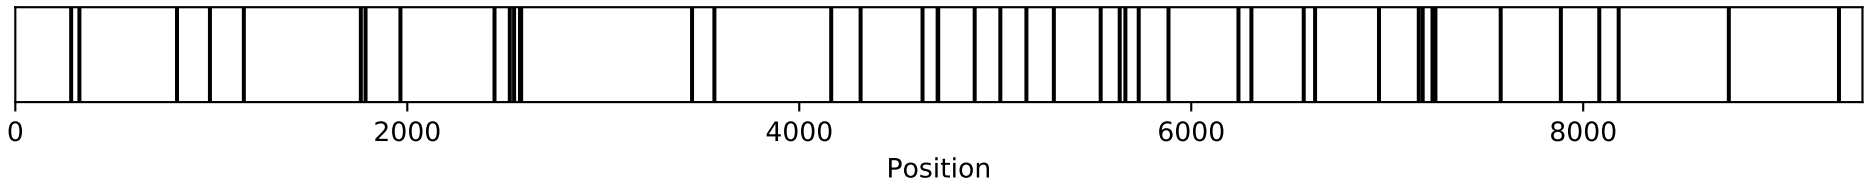

CR1 vs MM2  
Number of differences: 44

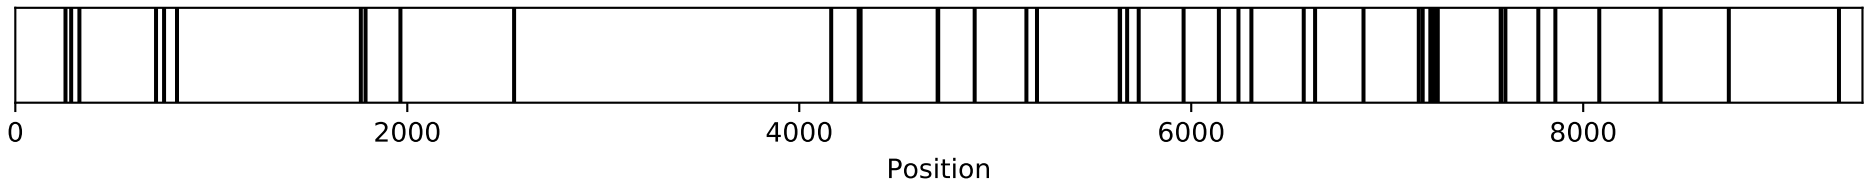

CR2 vs MM1  
Number of differences: 121

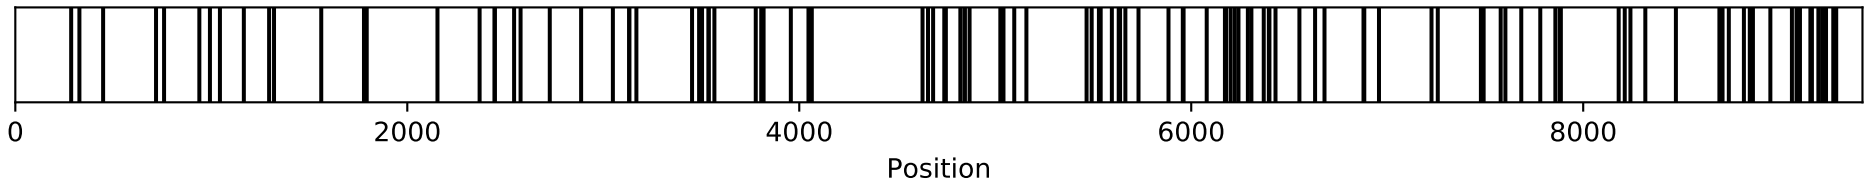

CR2 vs MM2  
Number of differences: 111

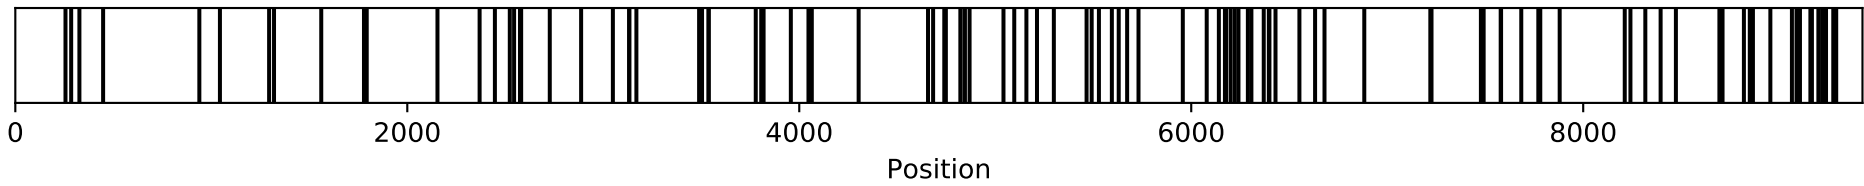

MM1 vs MM2  
Number of differences: 37

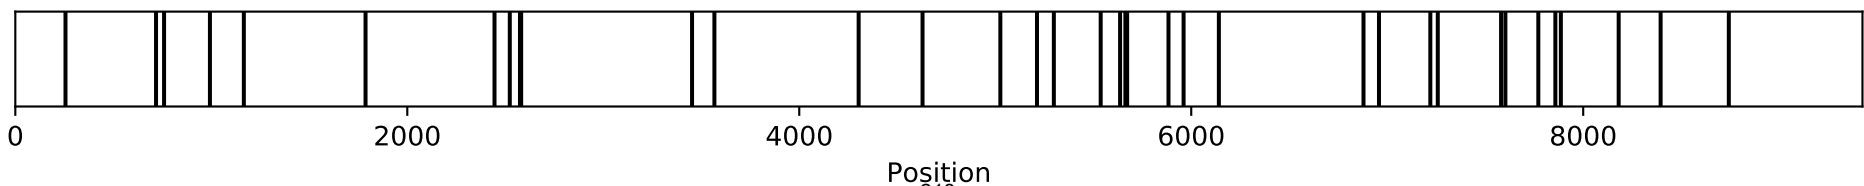

CR1 vs CR2  
Number of differences: 205

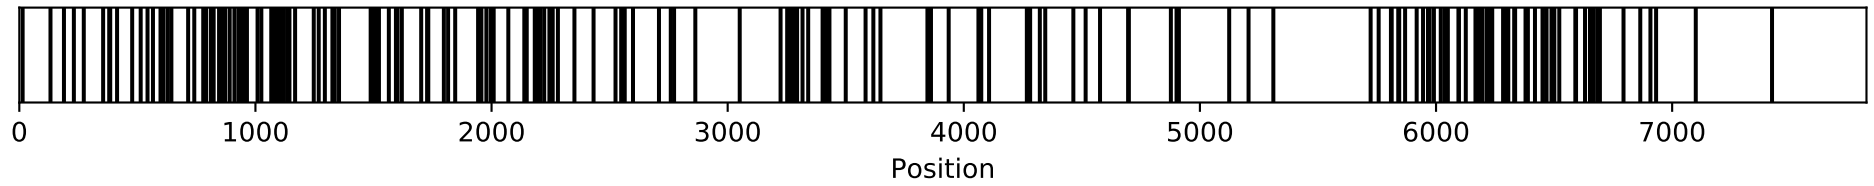

CR1 vs MM1  
Number of differences: 203

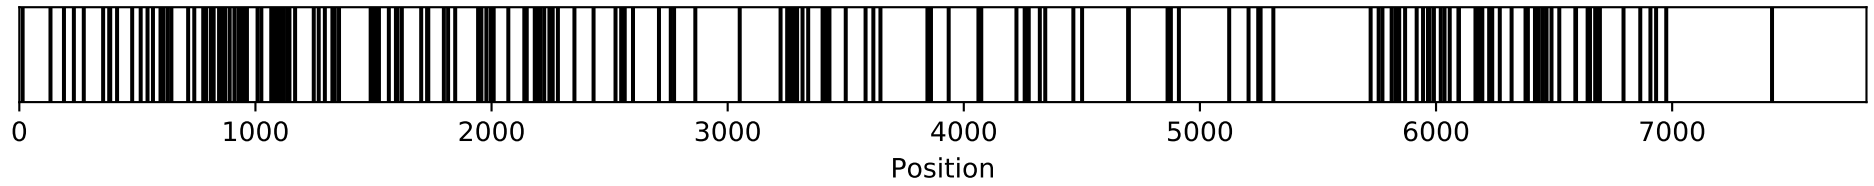

CR1 vs MM2  
Number of differences: 194

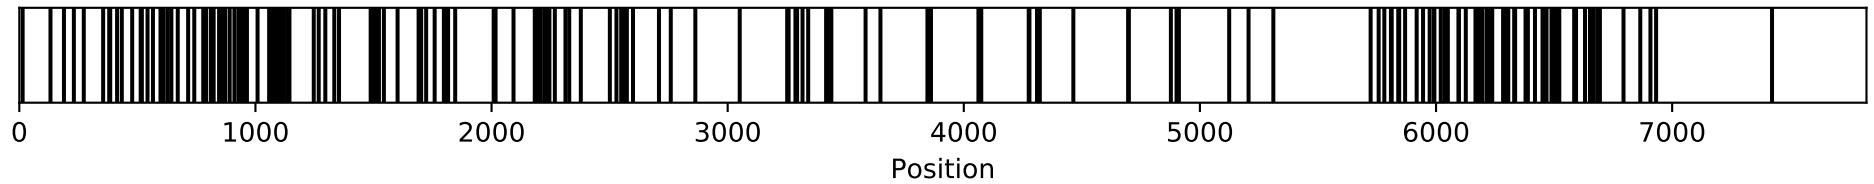

CR2 vs MM1  
Number of differences: 48

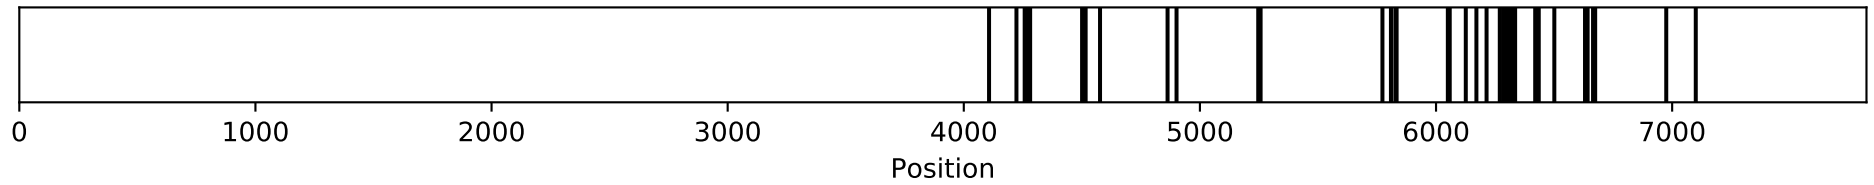

CR2 vs MM2  
Number of differences: 86

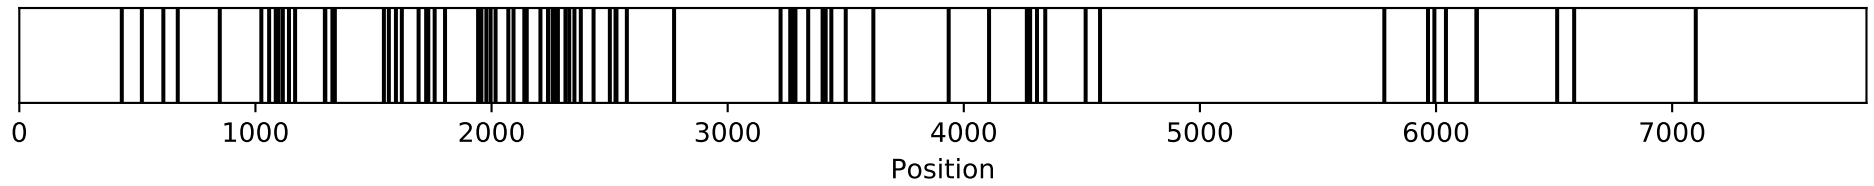

MM1 vs MM2  
Number of differences: 110

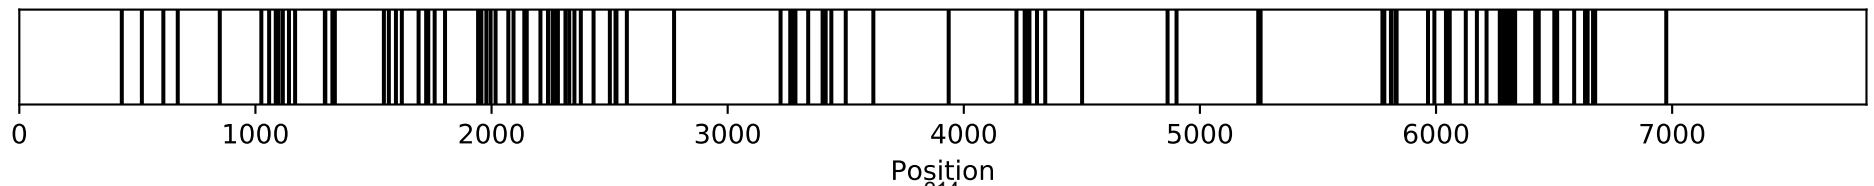

CR1 vs CR2  
Number of differences: 158

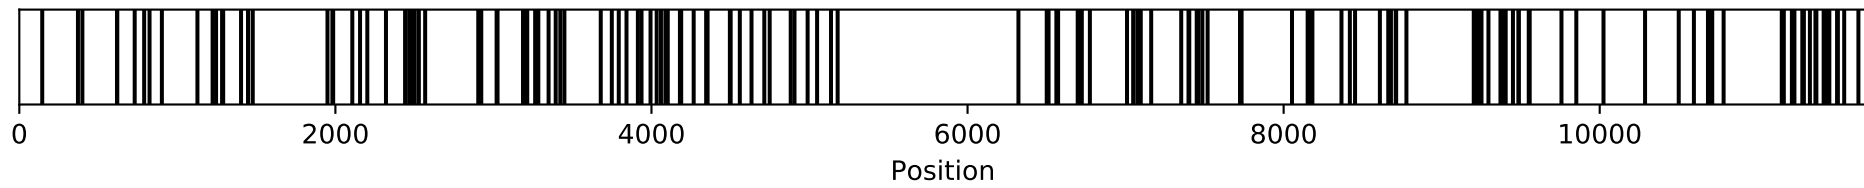

CR1 vs MM1  
Number of differences: 74

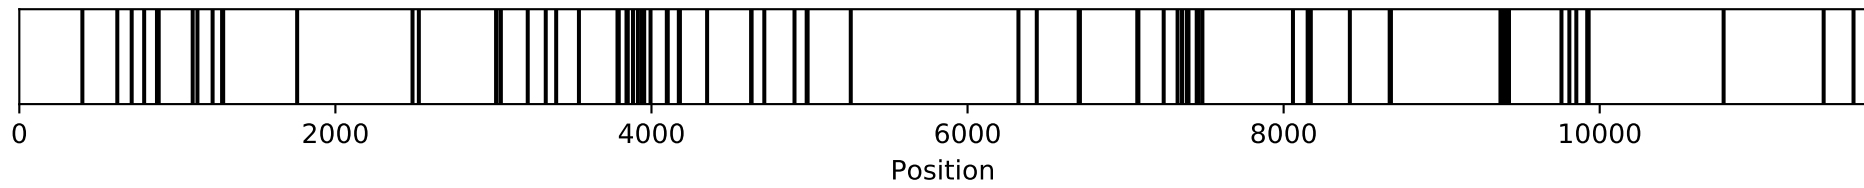

CR1 vs MM2  
Number of differences: 78

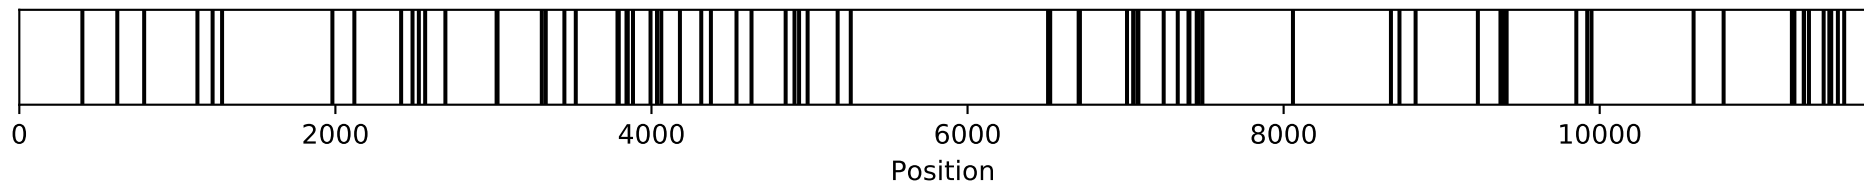

CR2 vs MM1  
Number of differences: 156

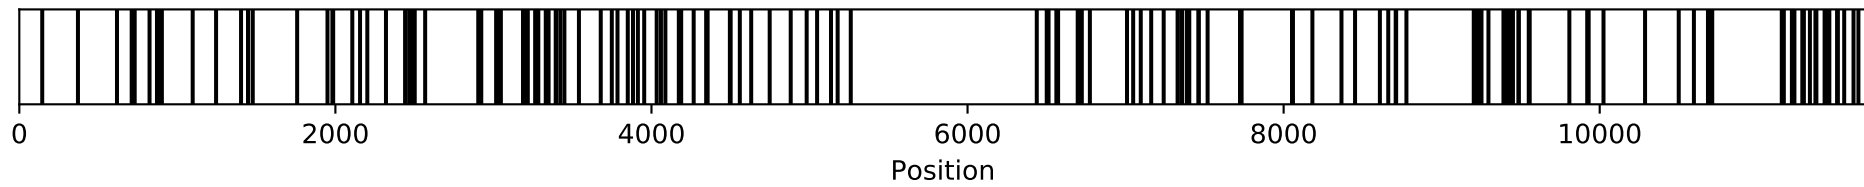

CR2 vs MM2  
Number of differences: 150

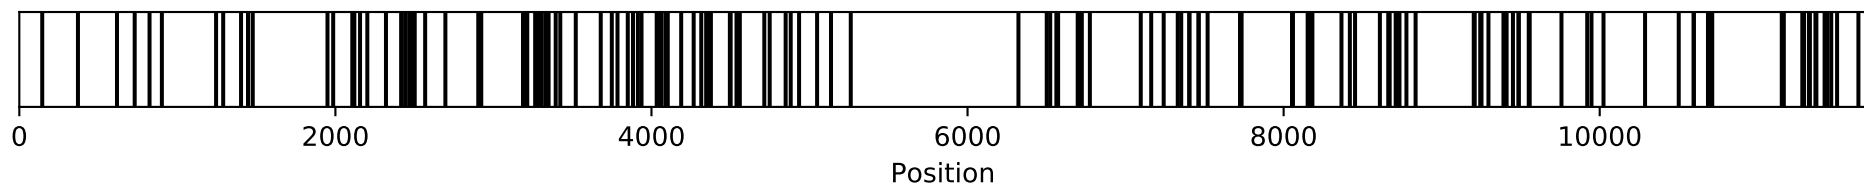

MM1 vs MM2  
Number of differences: 74

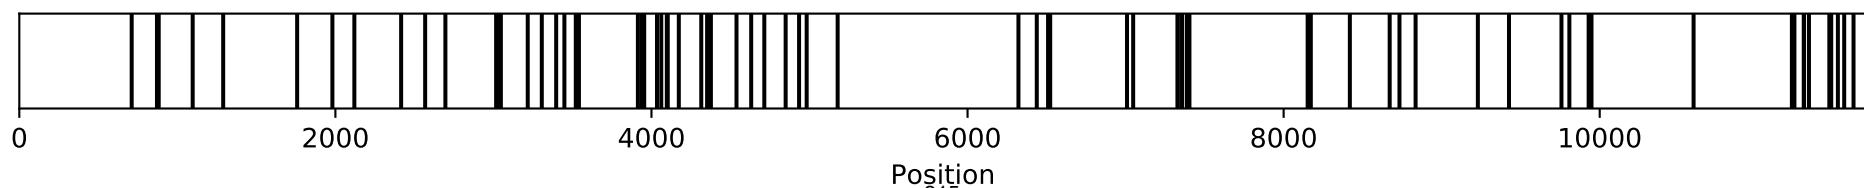



CR1 vs CR2  
Number of differences: 300

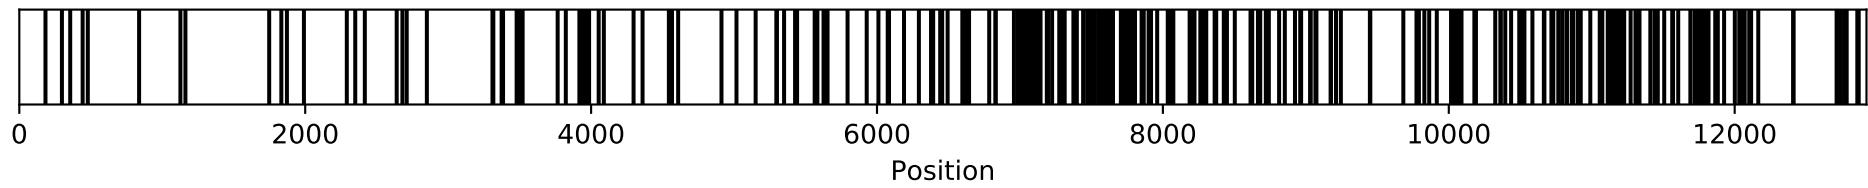

CR1 vs MM1  
Number of differences: 109

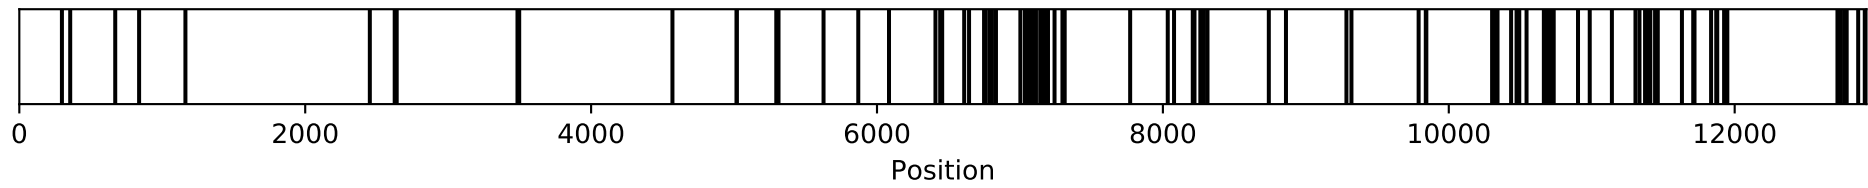

CR1 vs MM2  
Number of differences: 78

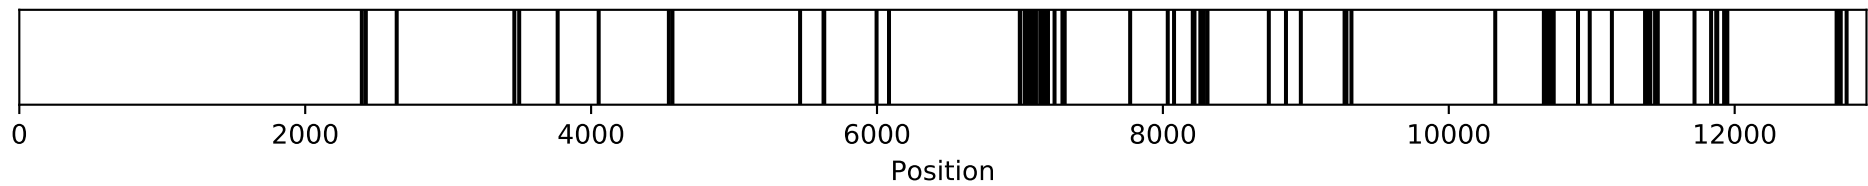

CR2 vs MM1  
Number of differences: 303

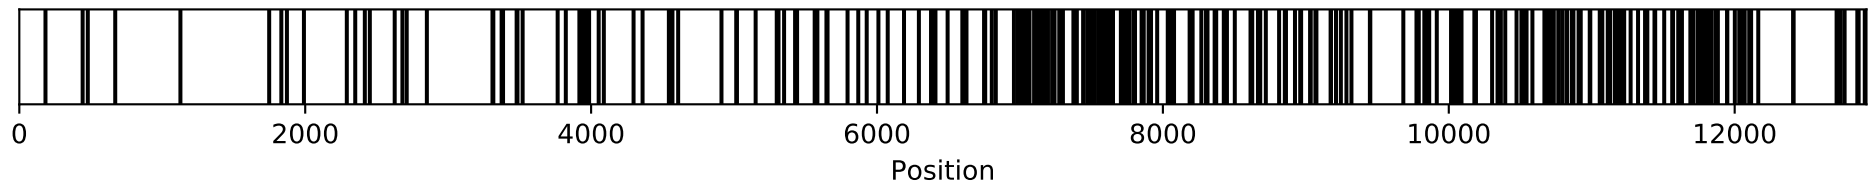

CR2 vs MM2  
Number of differences: 300

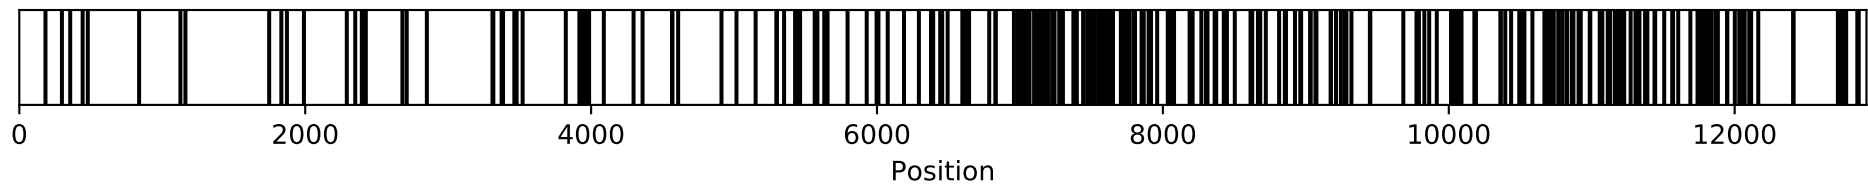

MM1 vs MM2  
Number of differences: 58

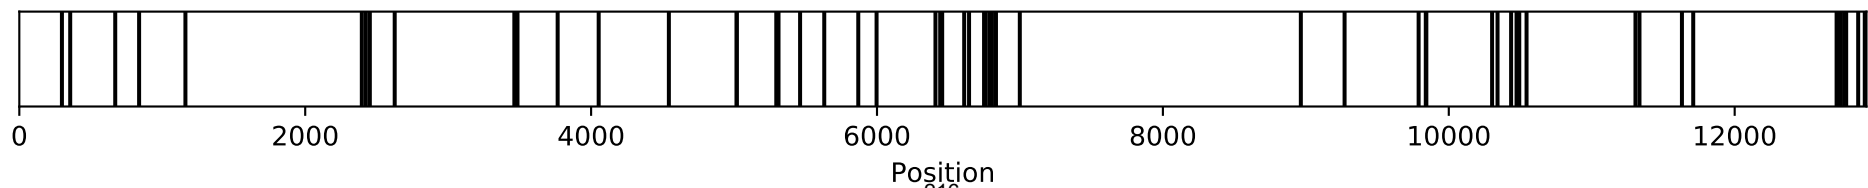

CR1 vs CR2  
Number of differences: 258

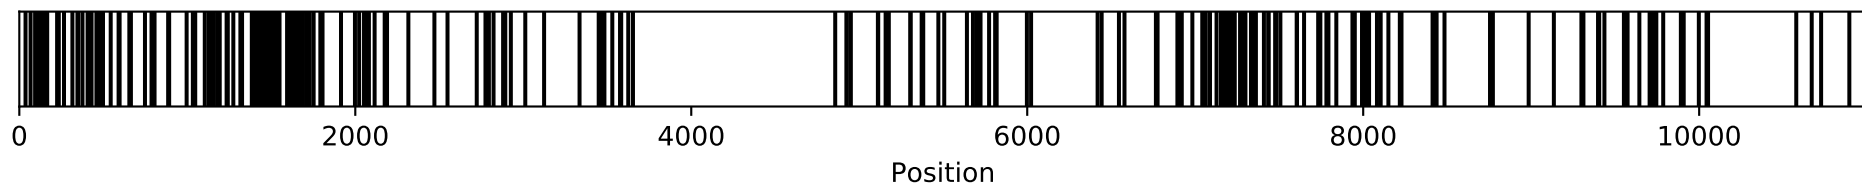

CR1 vs MM1  
Number of differences: 181

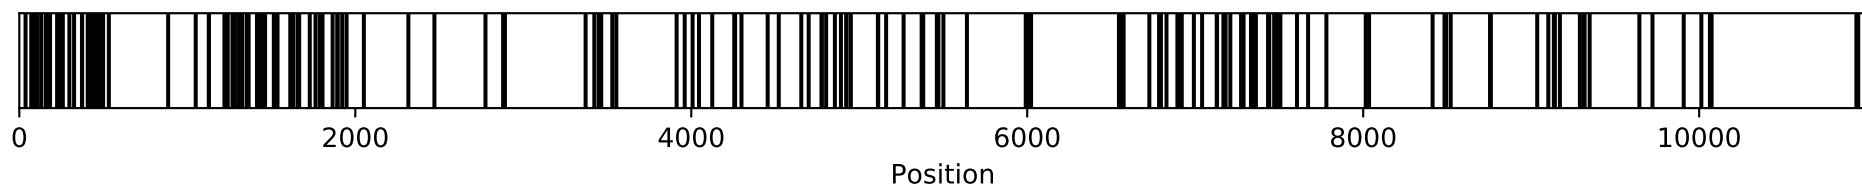

CR1 vs MM2  
Number of differences: 77

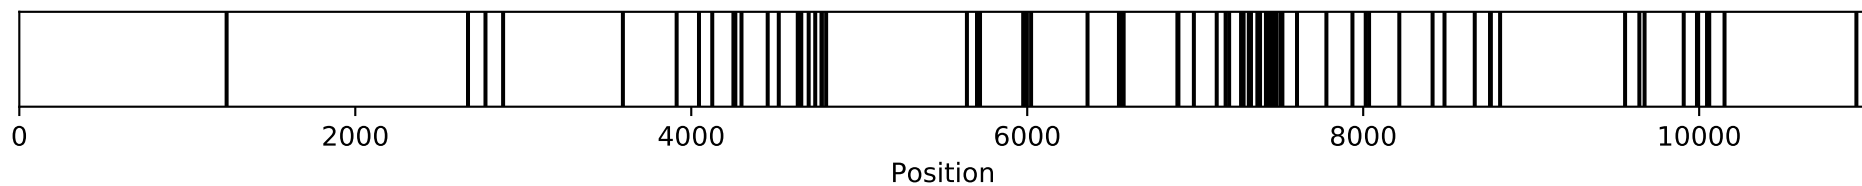

CR2 vs MM1  
Number of differences: 285

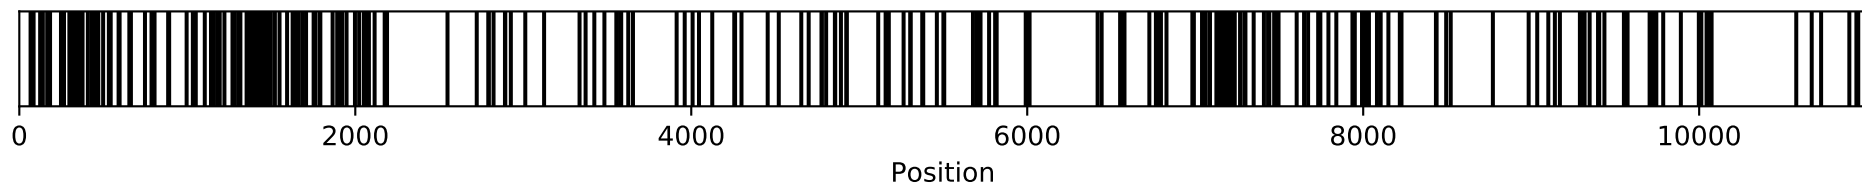

CR2 vs MM2  
Number of differences: 276

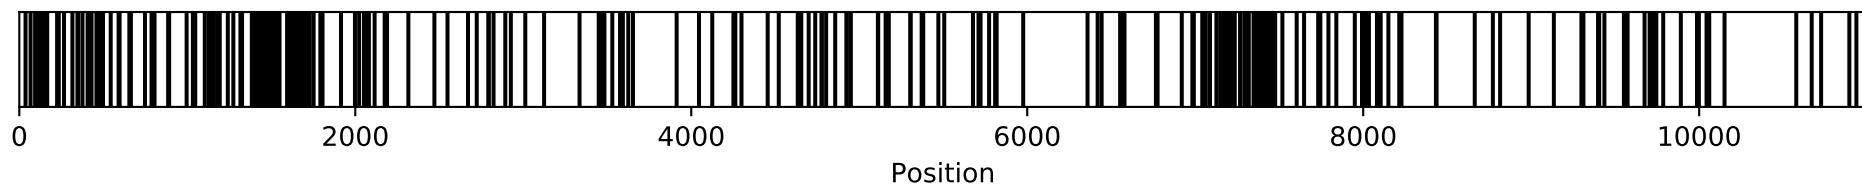

MM1 vs MM2  
Number of differences: 164

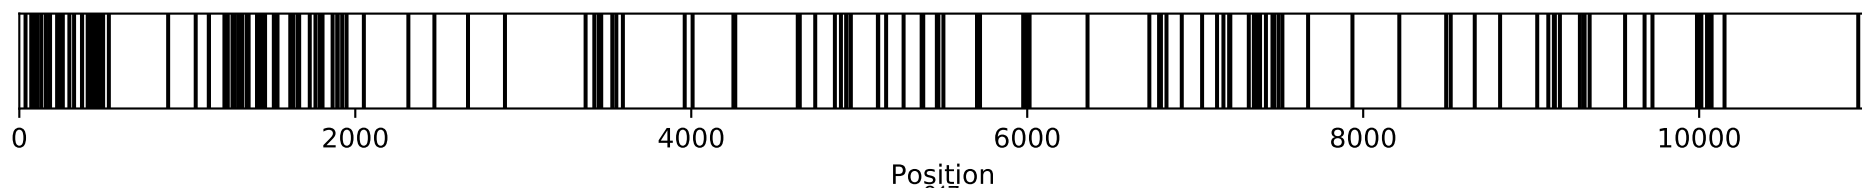

CR1 vs CR2  
Number of differences: 204

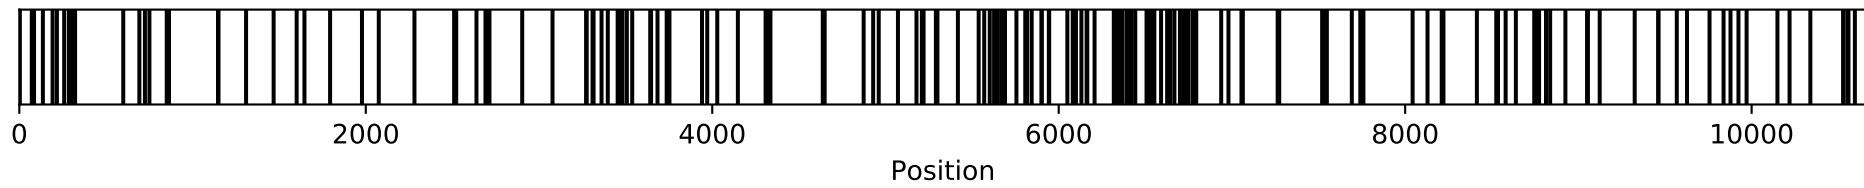

CR1 vs MM1  
Number of differences: 86

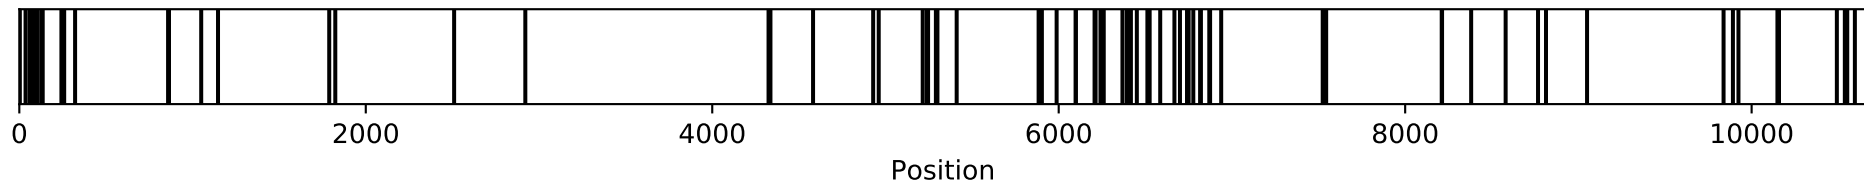

CR1 vs MM2  
Number of differences: 83

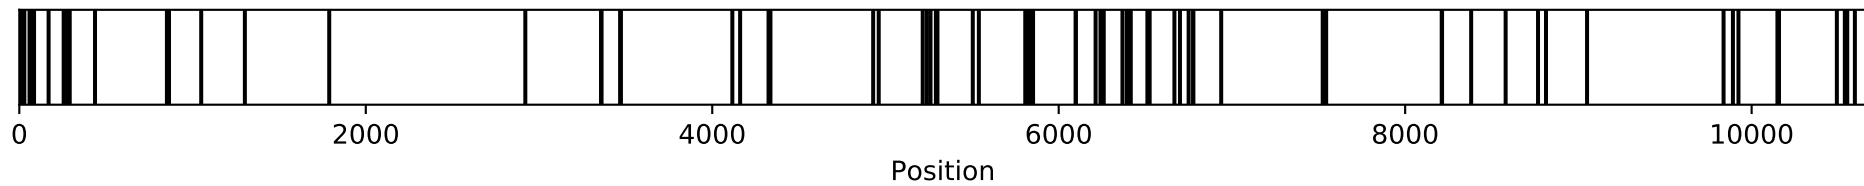

CR2 vs MM1  
Number of differences: 200

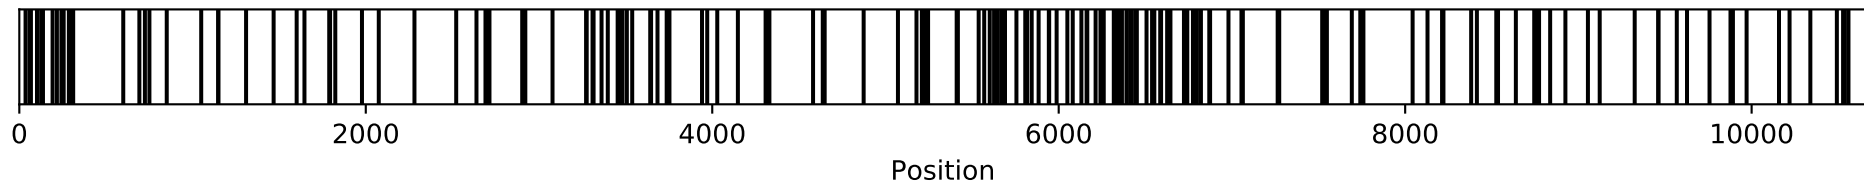

CR2 vs MM2  
Number of differences: 193

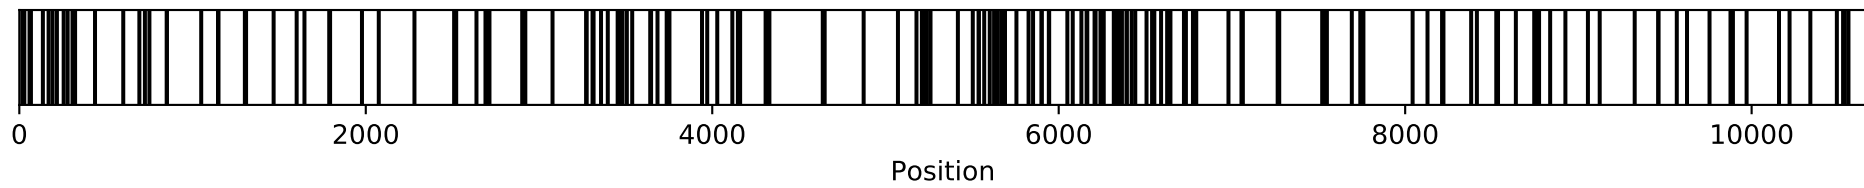

MM1 vs MM2  
Number of differences: 55

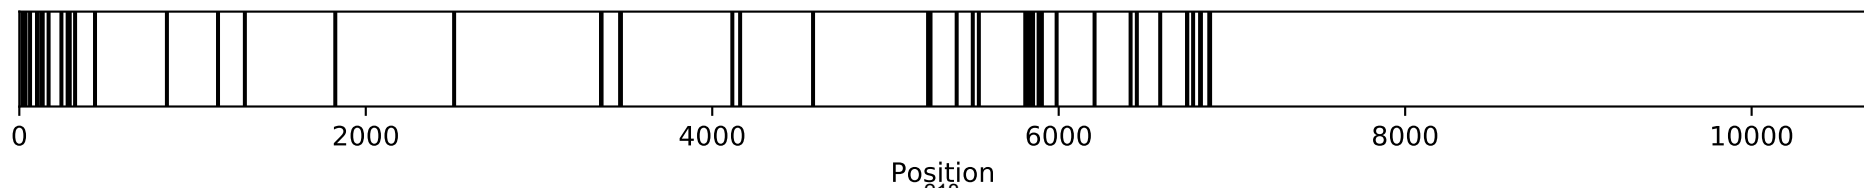

CR1 vs CR2  
Number of differences: 304

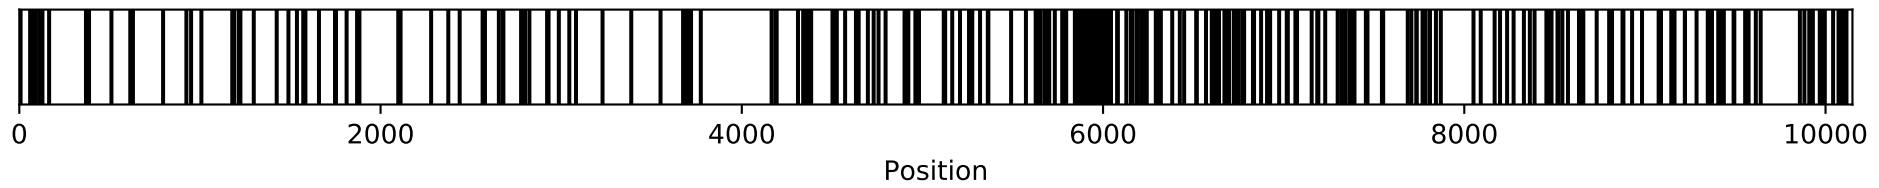

CR1 vs MM1  
Number of differences: 214

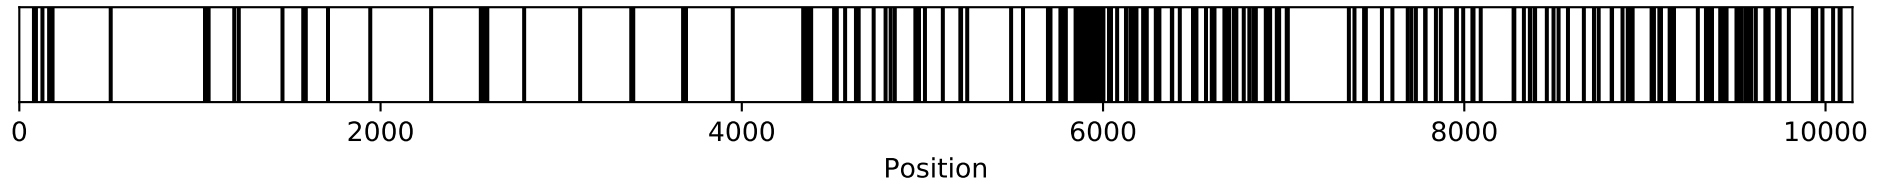

CR1 vs MM2  
Number of differences: 209

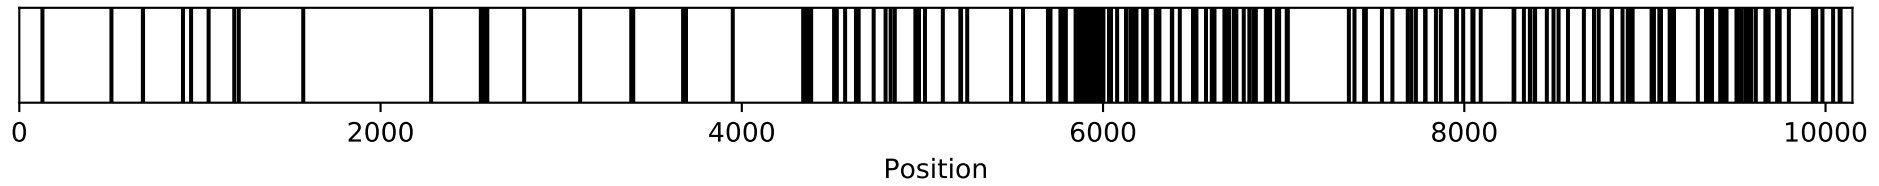

CR2 vs MM1  
Number of differences: 282

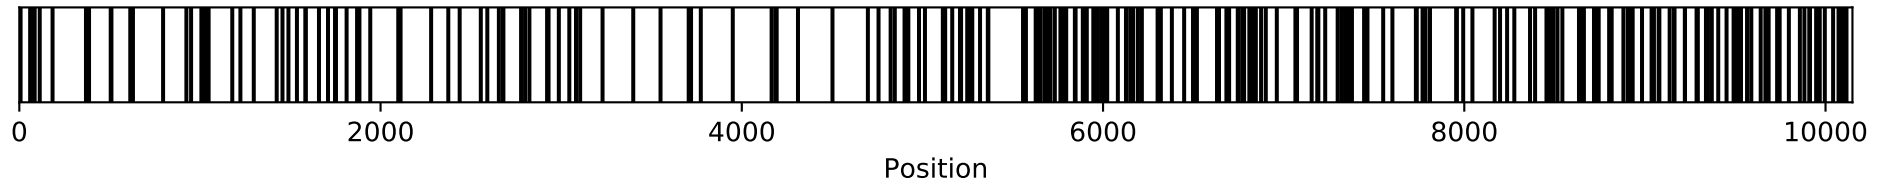

CR2 vs MM2  
Number of differences: 277

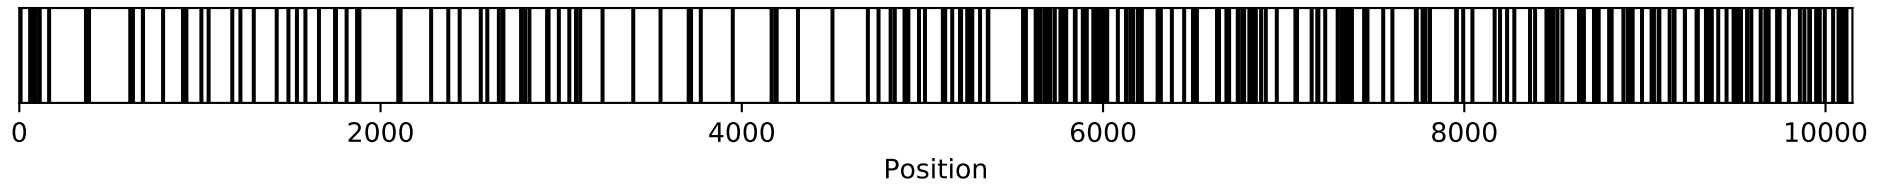

MM1 vs MM2  
Number of differences: 15

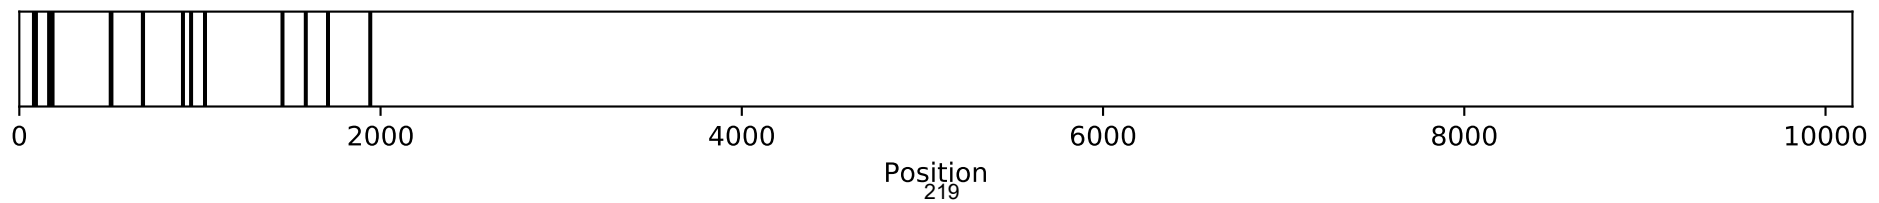

CR1 vs CR2  
Number of differences: 261

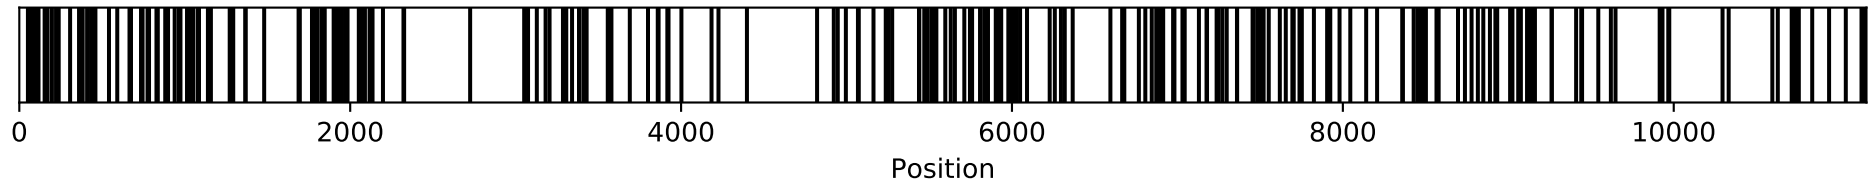

CR1 vs MM1  
Number of differences: 248

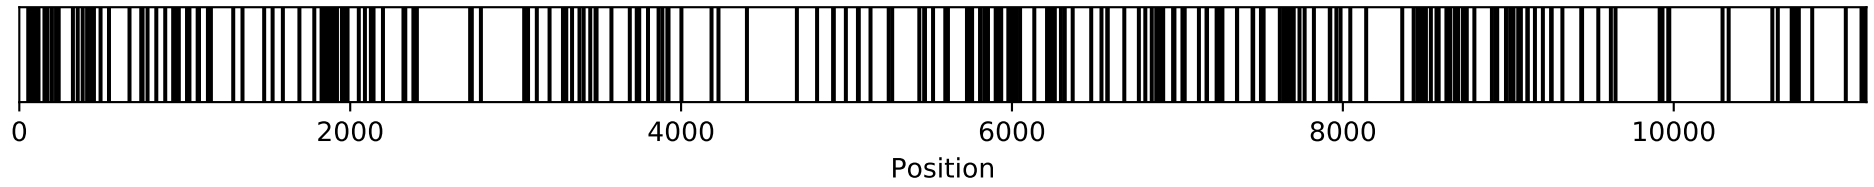

CR1 vs MM2  
Number of differences: 249

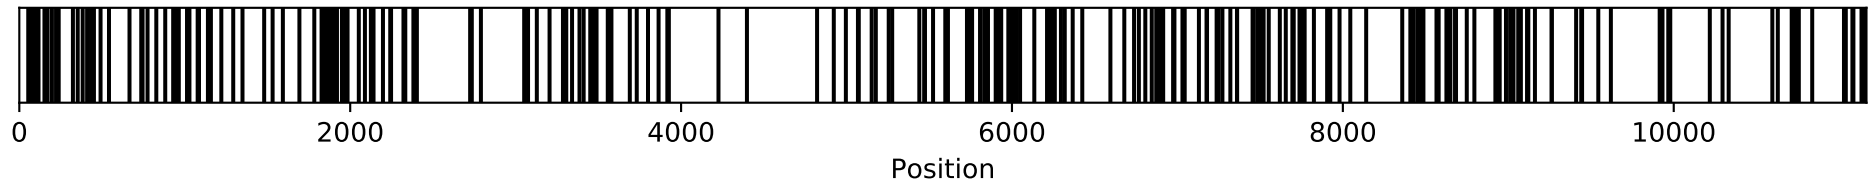

CR2 vs MM1  
Number of differences: 157

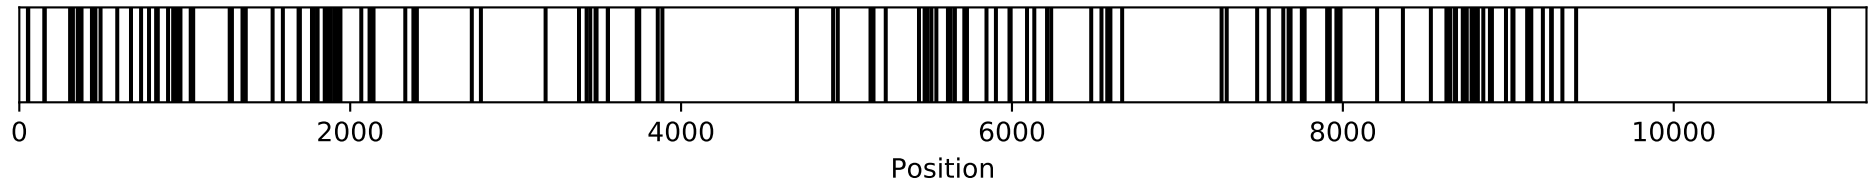

CR2 vs MM2  
Number of differences: 147

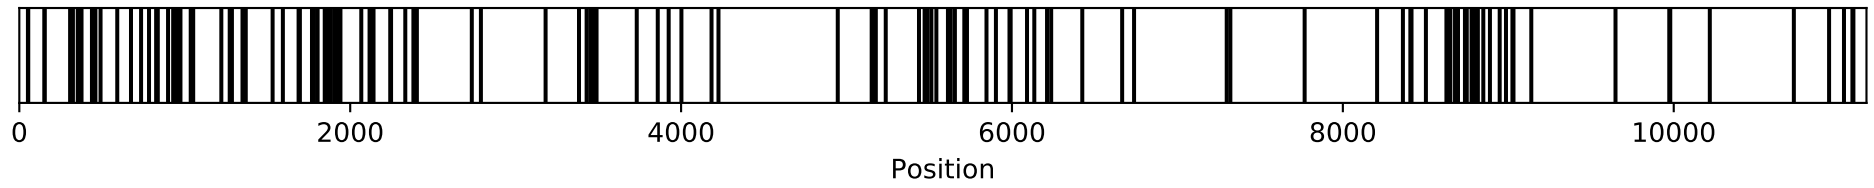

MM1 vs MM2  
Number of differences: 62

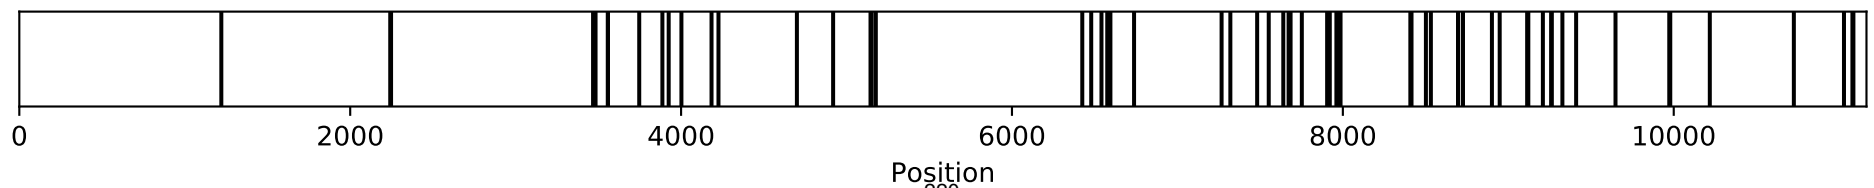

CR1 vs CR2  
Number of differences: 284

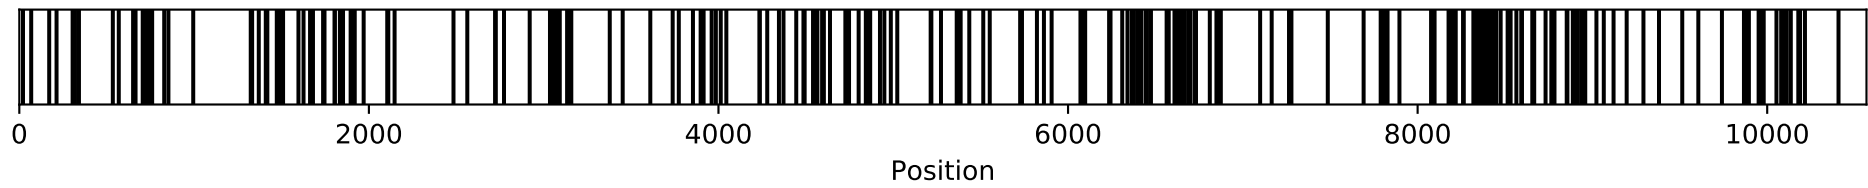

CR1 vs MM1  
Number of differences: 129

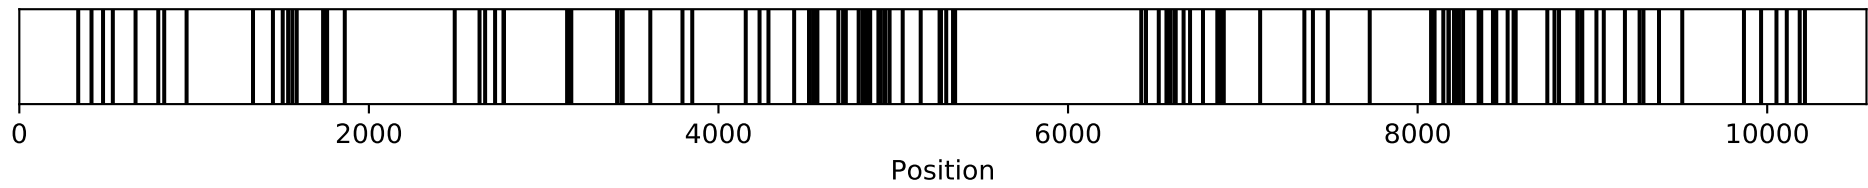

CR1 vs MM2  
Number of differences: 158

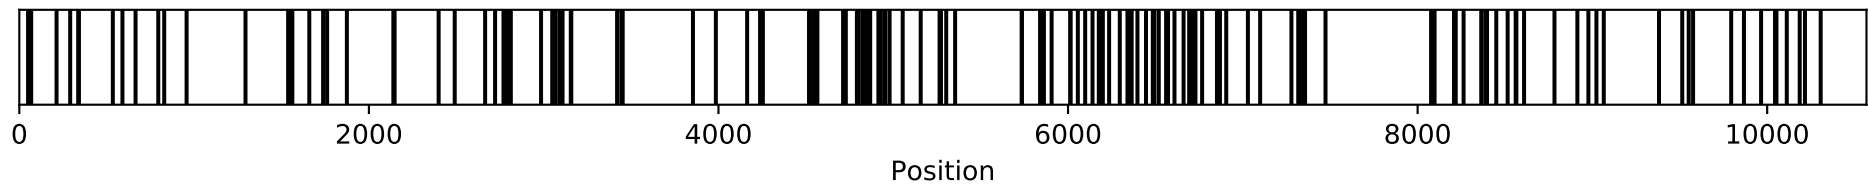

CR2 vs MM1  
Number of differences: 291

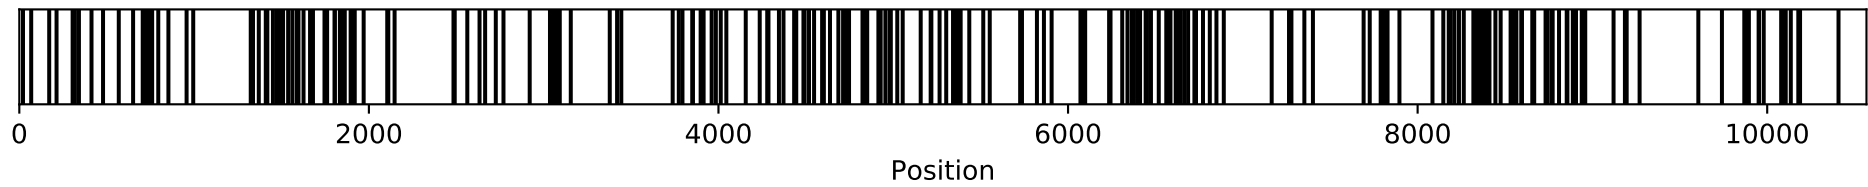

CR2 vs MM2  
Number of differences: 309

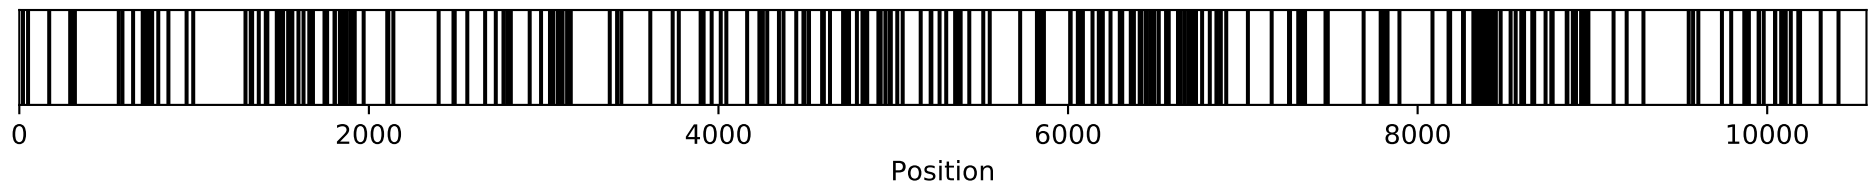

MM1 vs MM2  
Number of differences: 130

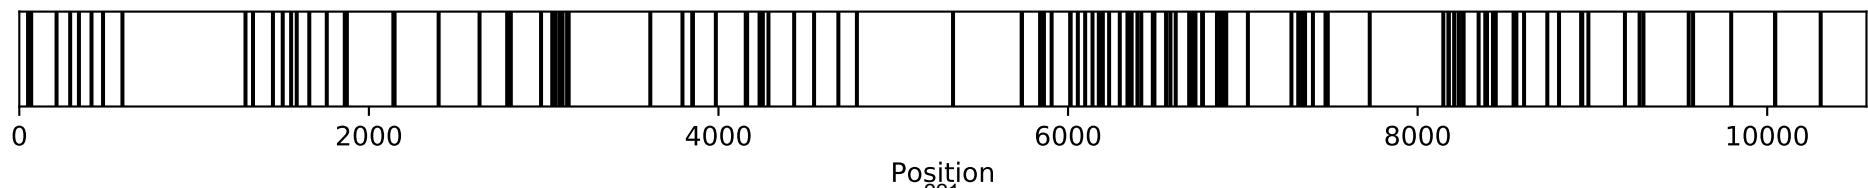

CR1 vs CR2  
Number of differences: 491

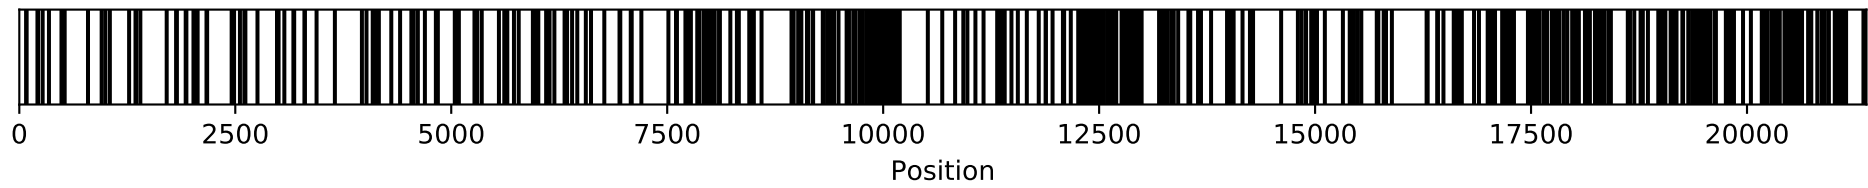

CR1 vs MM1  
Number of differences: 216

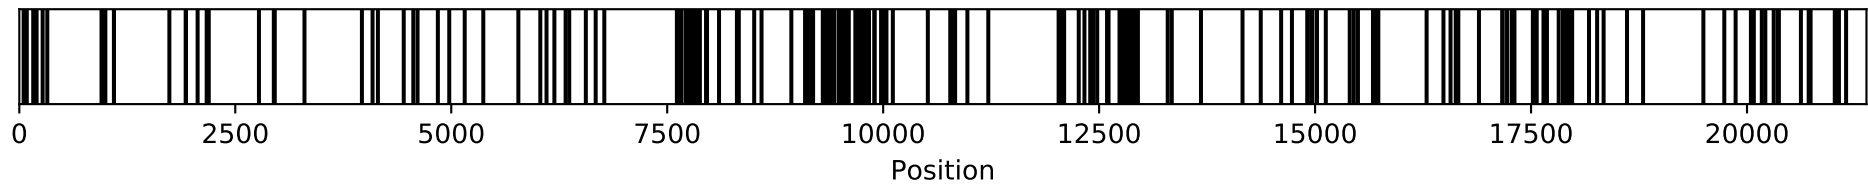

CR1 vs MM2  
Number of differences: 195

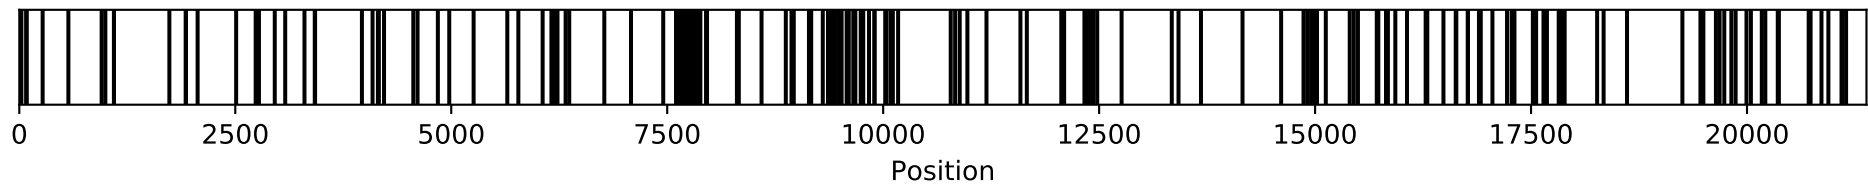

CR2 vs MM1  
Number of differences: 512

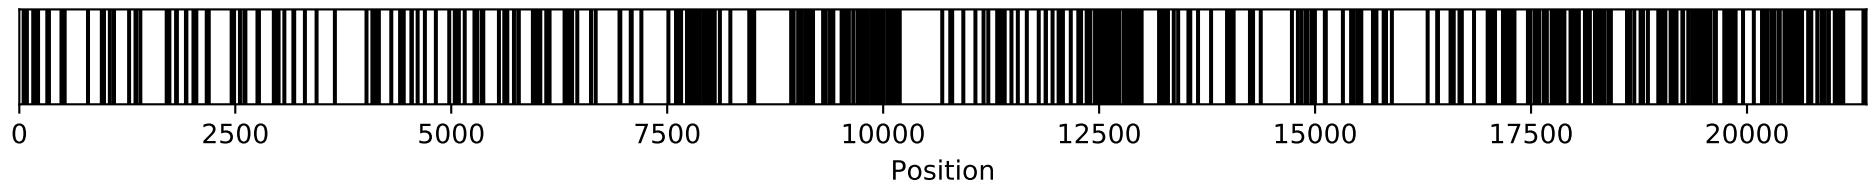

CR2 vs MM2  
Number of differences: 498

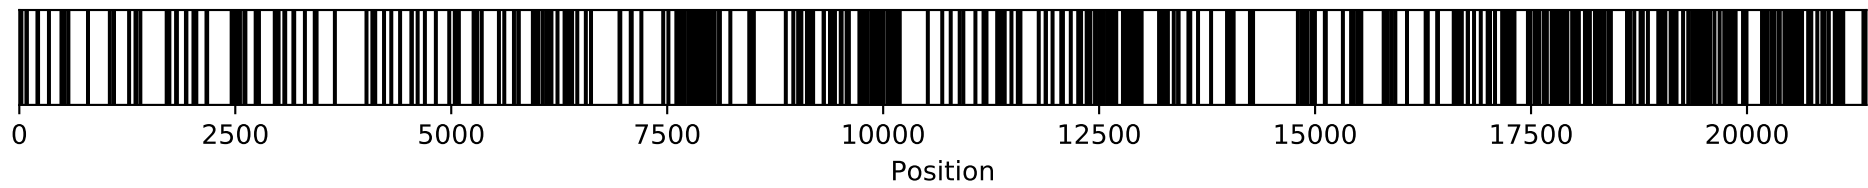

MM1 vs MM2  
Number of differences: 172

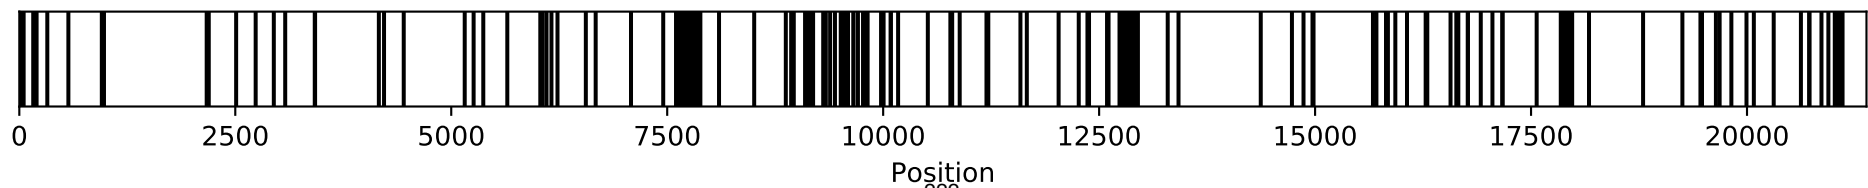

CR1 vs CR2  
Number of differences: 142

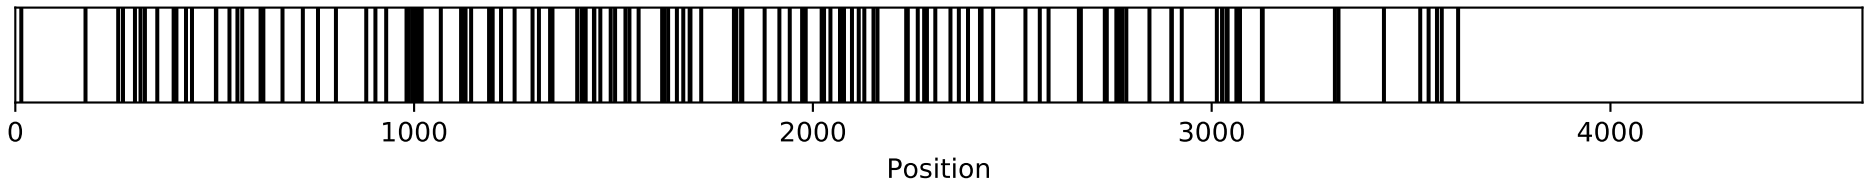

CR1 vs MM1  
Number of differences: 95

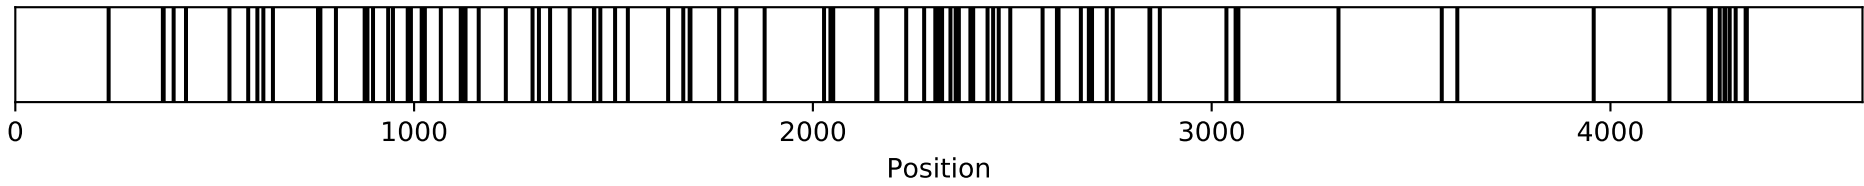

CR1 vs MM2  
Number of differences: 116

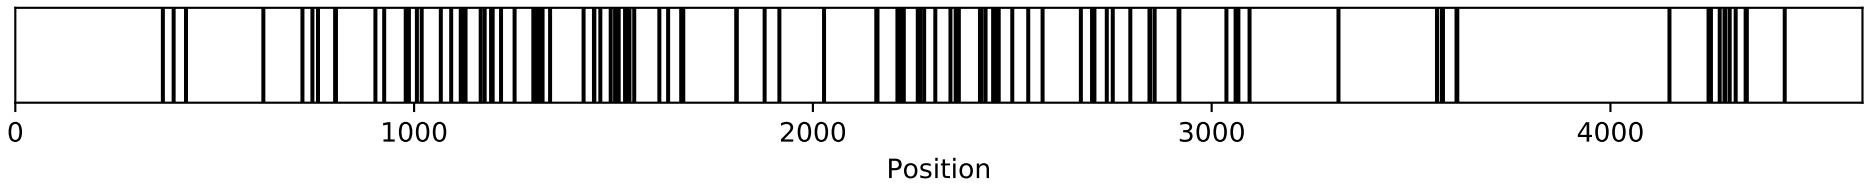

CR2 vs MM1  
Number of differences: 157

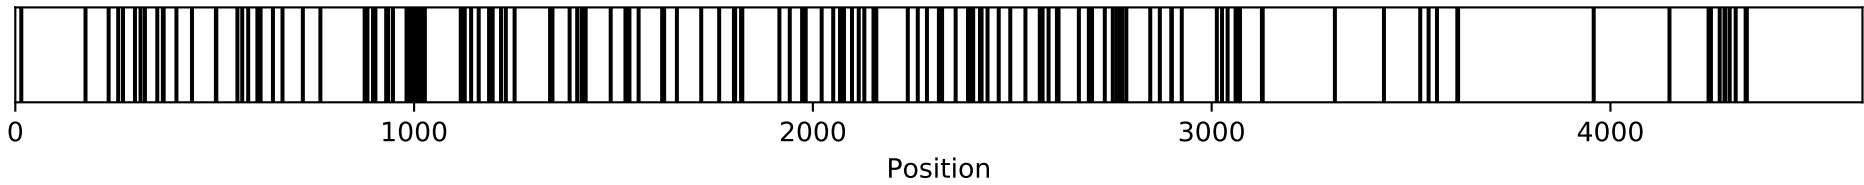

CR2 vs MM2  
Number of differences: 167

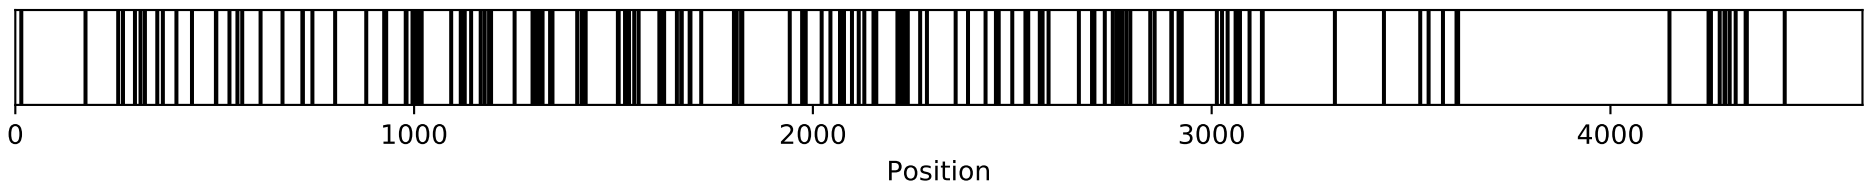

MM1 vs MM2  
Number of differences: 95

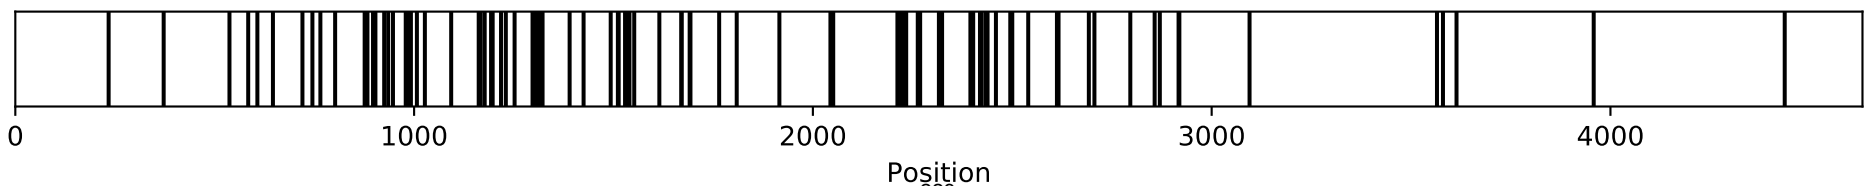



CR1 vs CR2  
Number of differences: 161

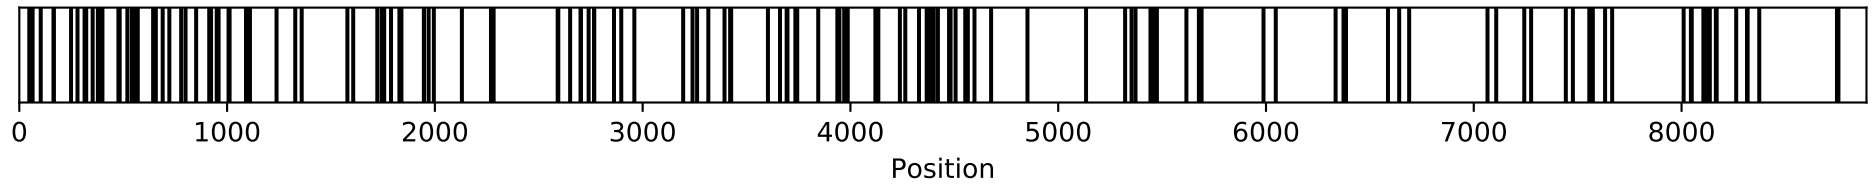

CR1 vs MM1  
Number of differences: 178

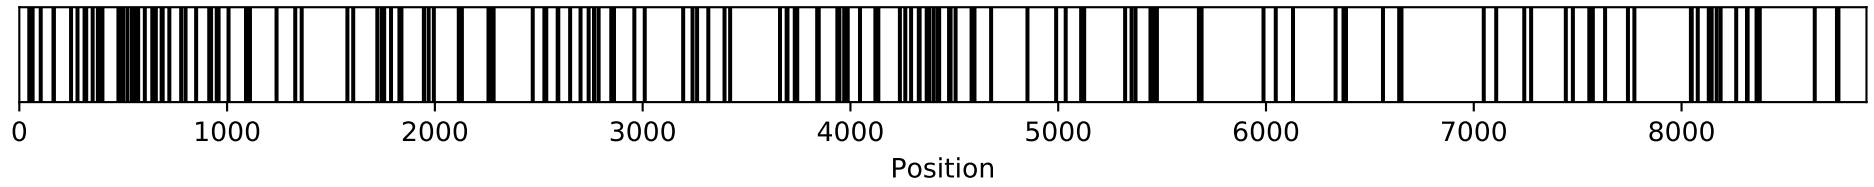

CR1 vs MM2  
Number of differences: 178

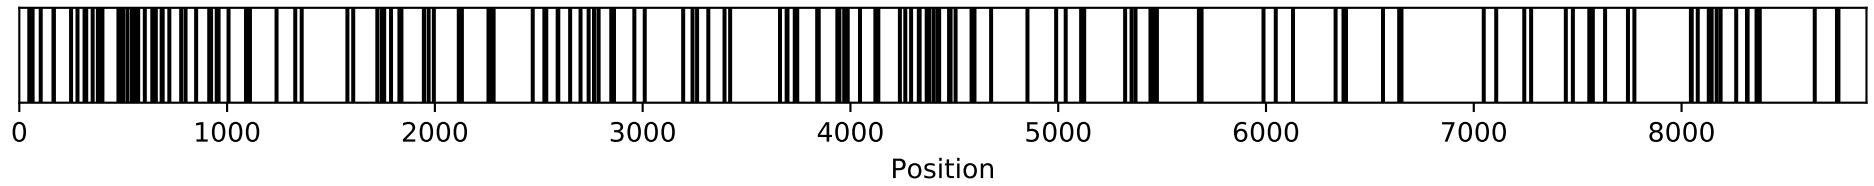

CR2 vs MM1  
Number of differences: 68

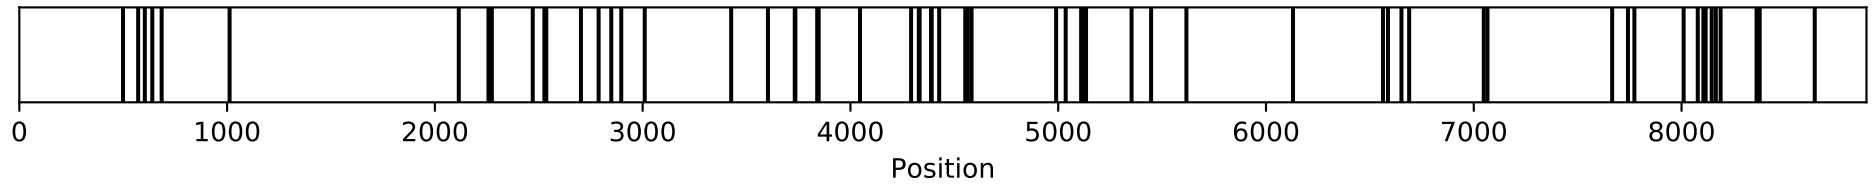

CR2 vs MM2  
Number of differences: 68

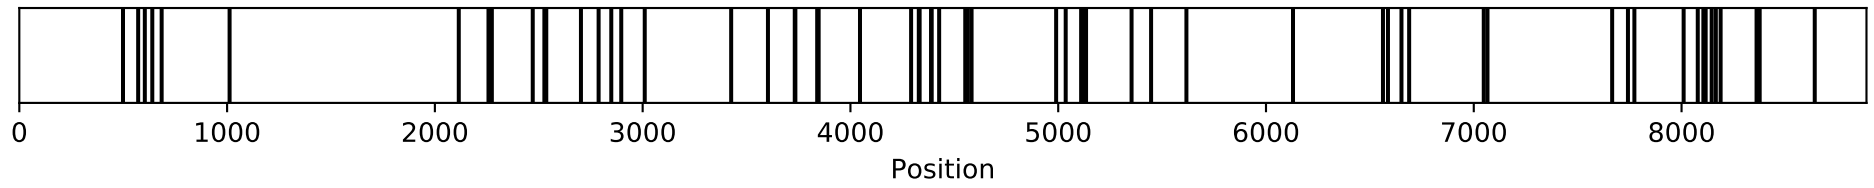

MM1 vs MM2  
Number of differences: 0

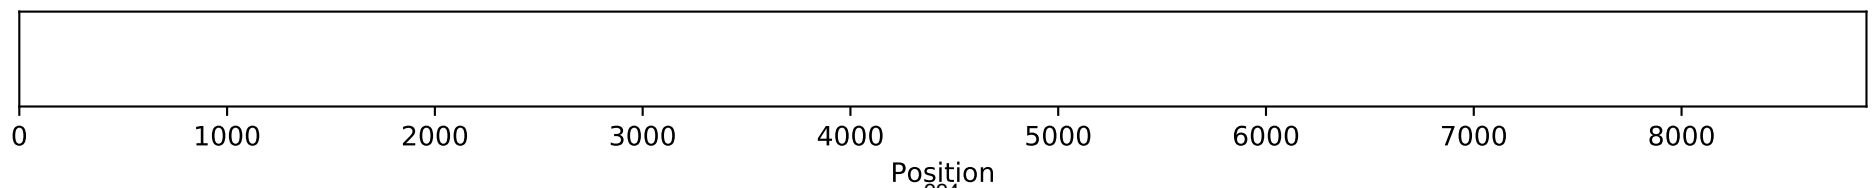

CR1 vs CR2  
Number of differences: 198

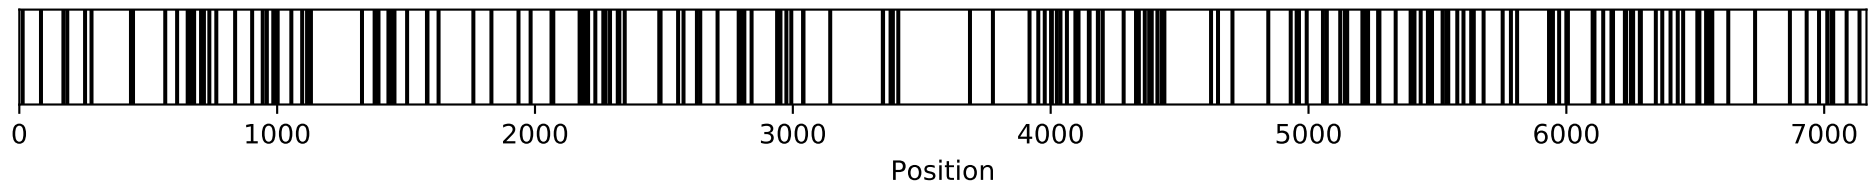

CR1 vs MM1  
Number of differences: 197

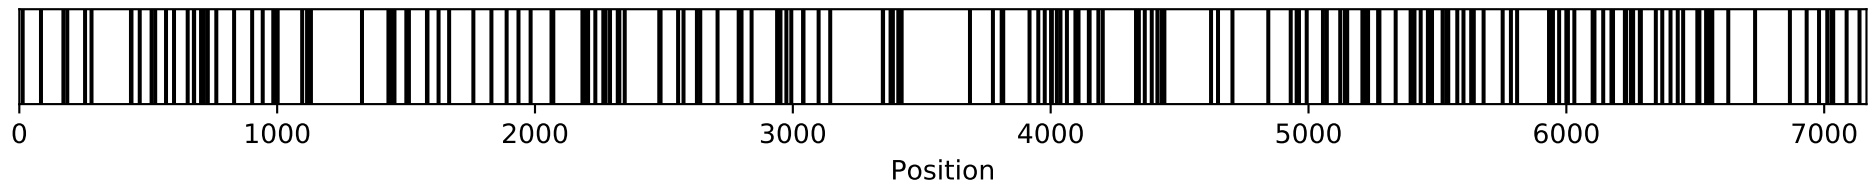

CR1 vs MM2  
Number of differences: 210

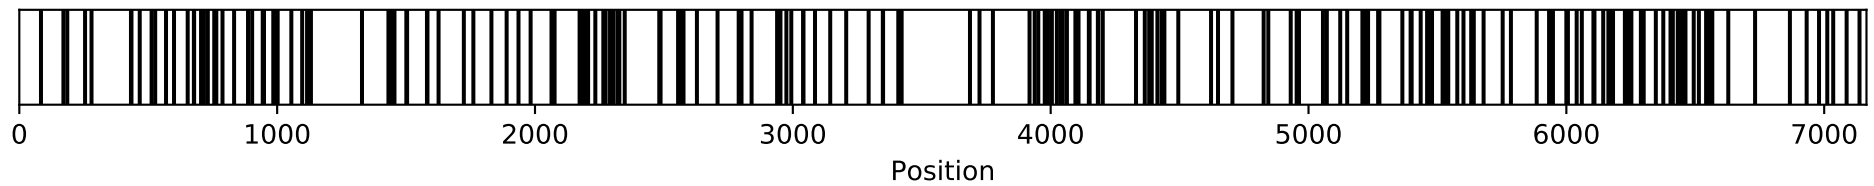

CR2 vs MM1  
Number of differences: 39

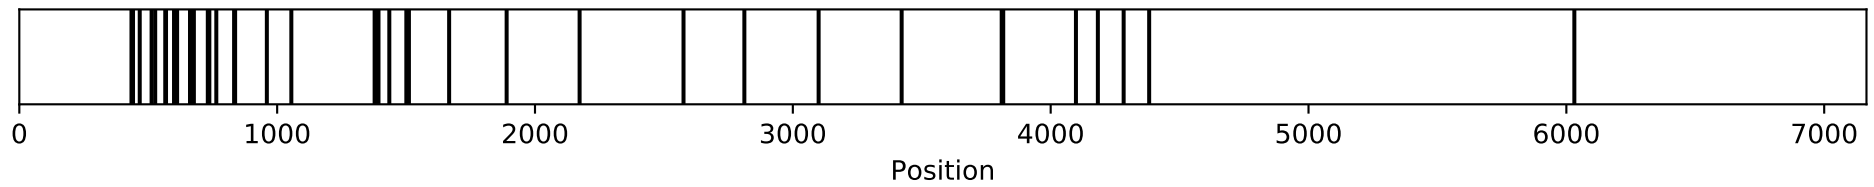

CR2 vs MM2  
Number of differences: 88

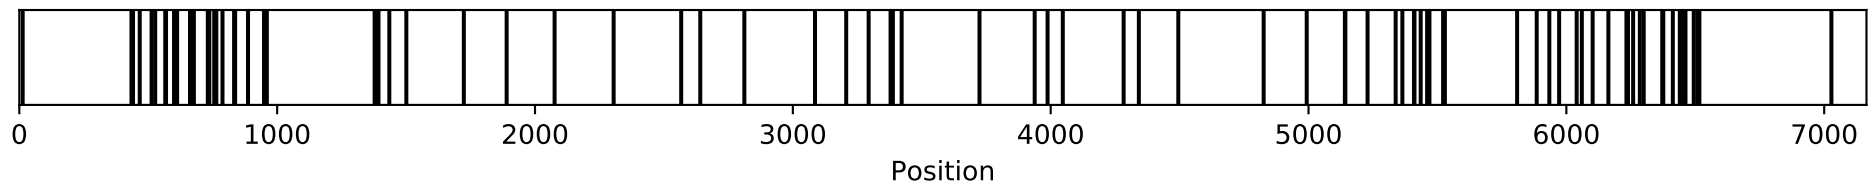

MM1 vs MM2  
Number of differences: 73

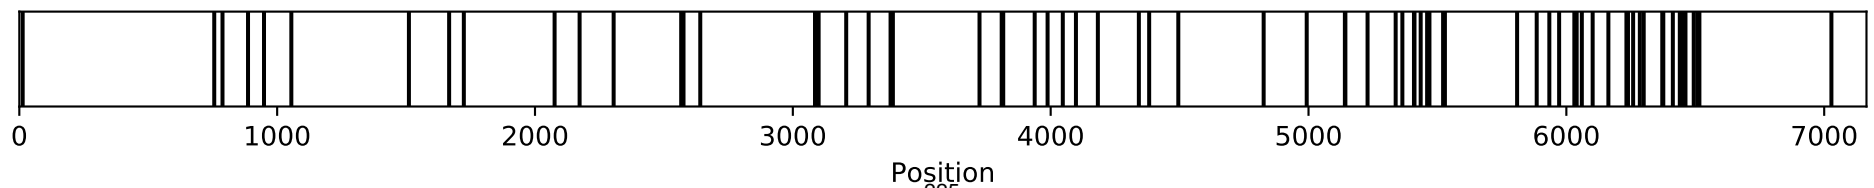

CR1 vs CR2  
Number of differences: 261

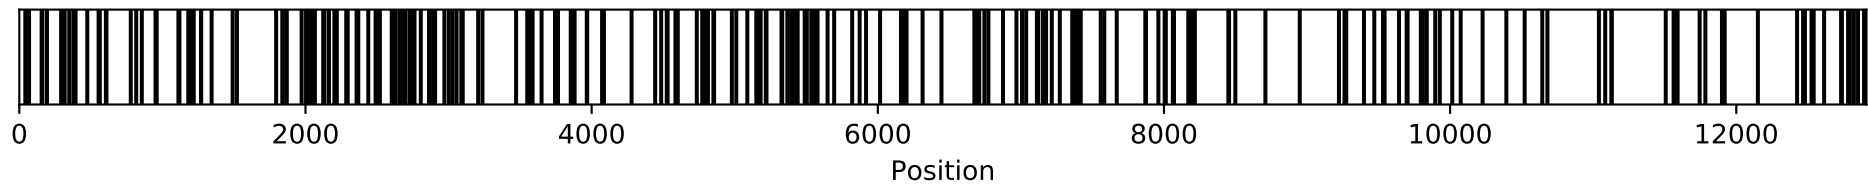

CR1 vs MM1  
Number of differences: 254

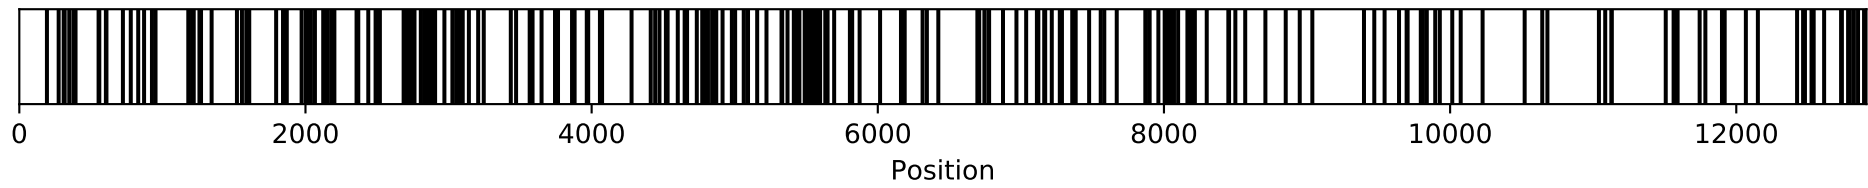

CR1 vs MM2  
Number of differences: 232

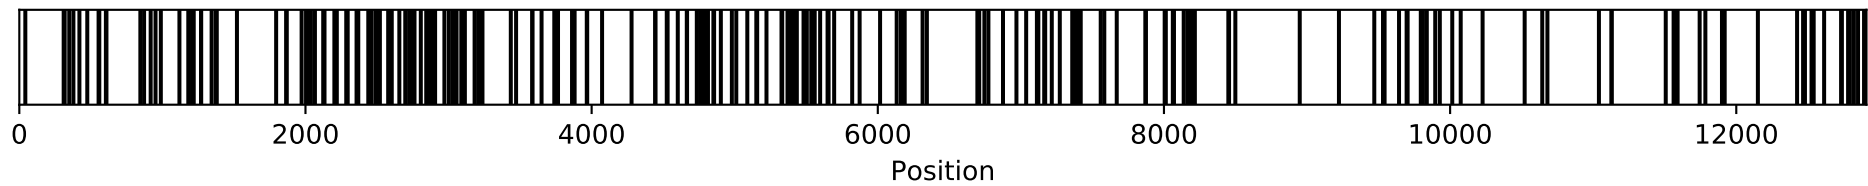

CR2 vs MM1  
Number of differences: 153

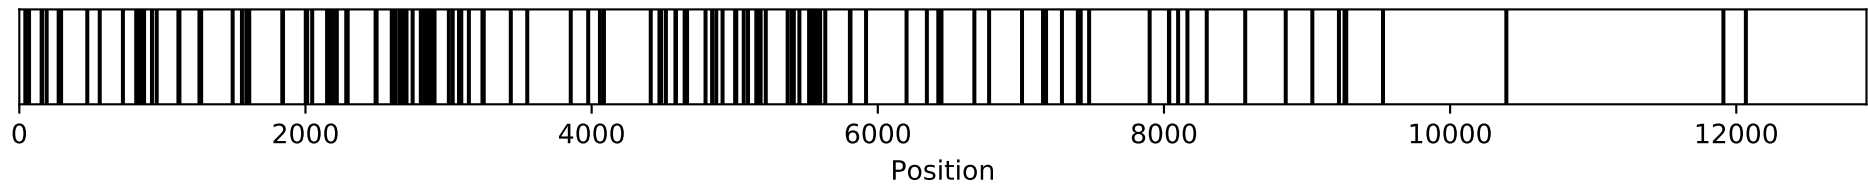

CR2 vs MM2  
Number of differences: 99

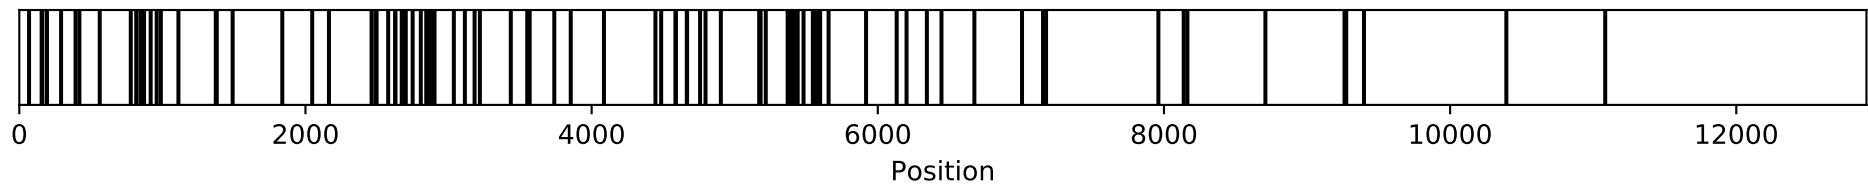

MM1 vs MM2  
Number of differences: 122

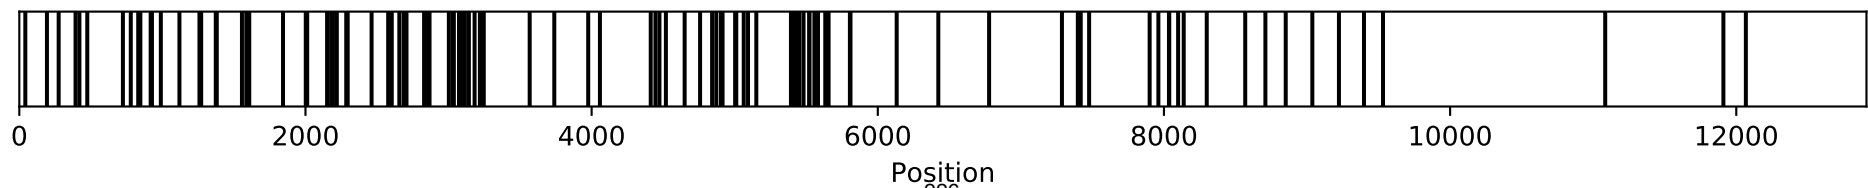

CR1 vs CR2  
Number of differences: 202

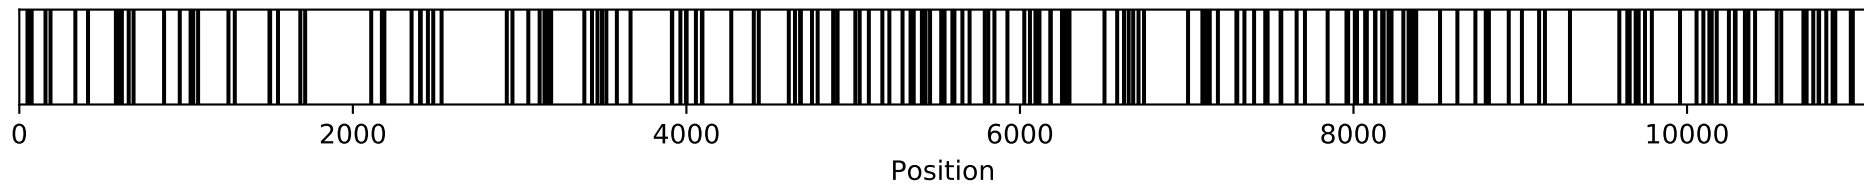

CR1 vs MM1  
Number of differences: 44

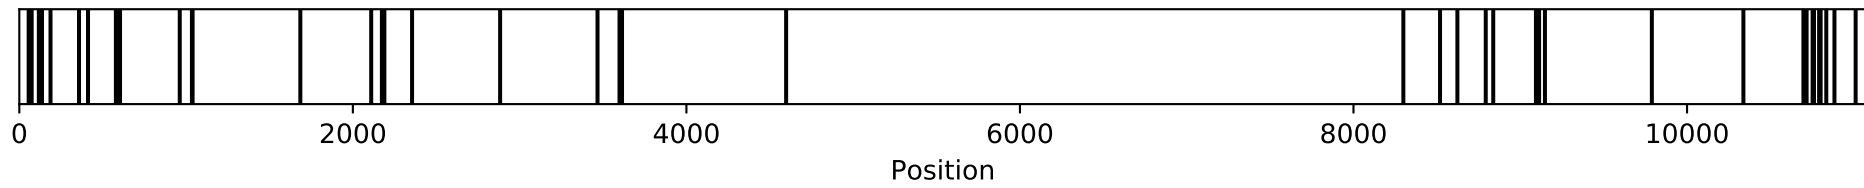

CR1 vs MM2  
Number of differences: 77

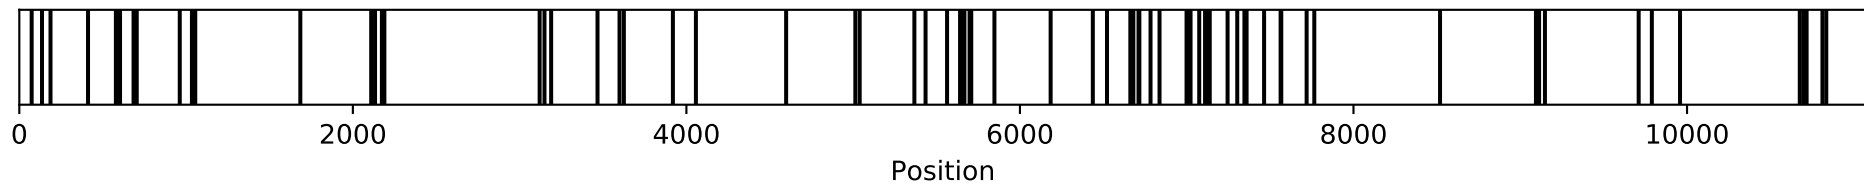

CR2 vs MM1  
Number of differences: 197

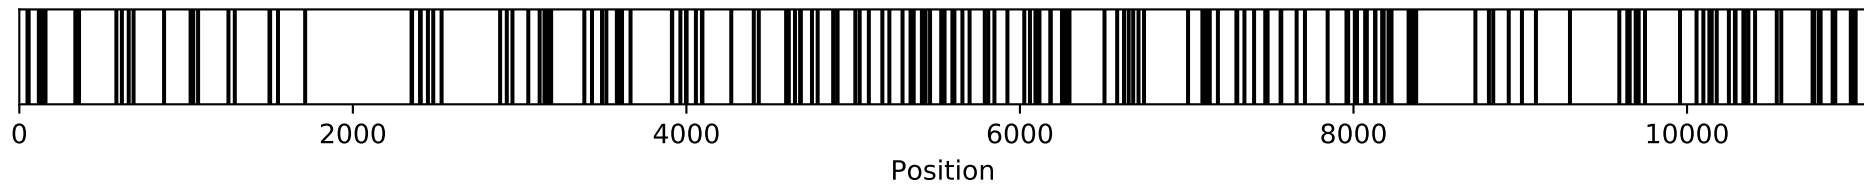

CR2 vs MM2  
Number of differences: 198

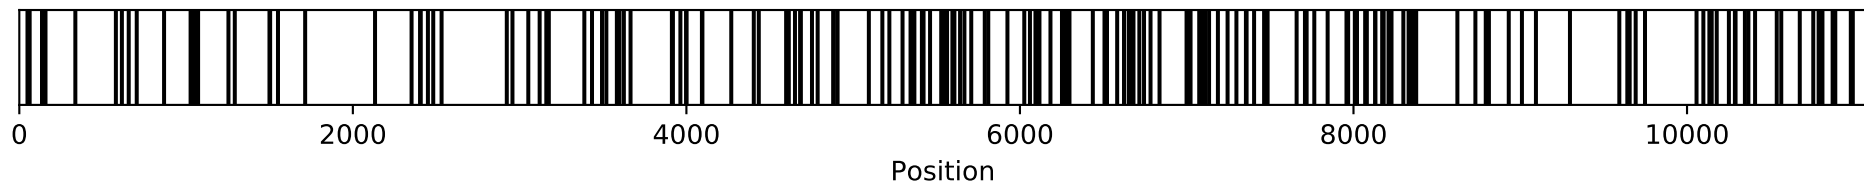

MM1 vs MM2  
Number of differences: 72

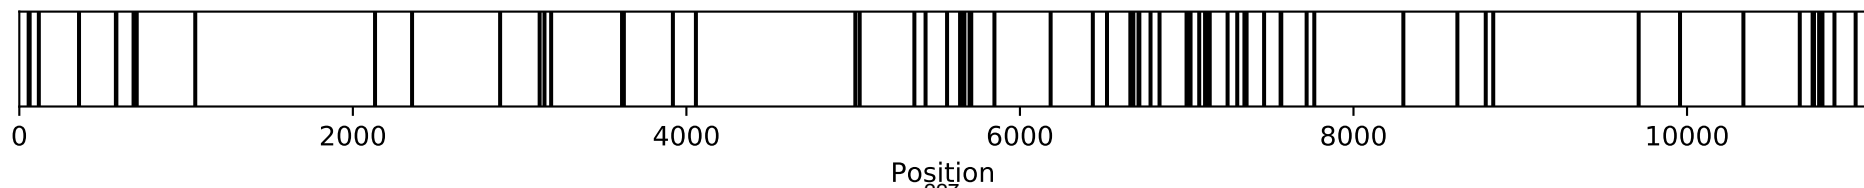

CR1 vs CR2  
Number of differences: 198

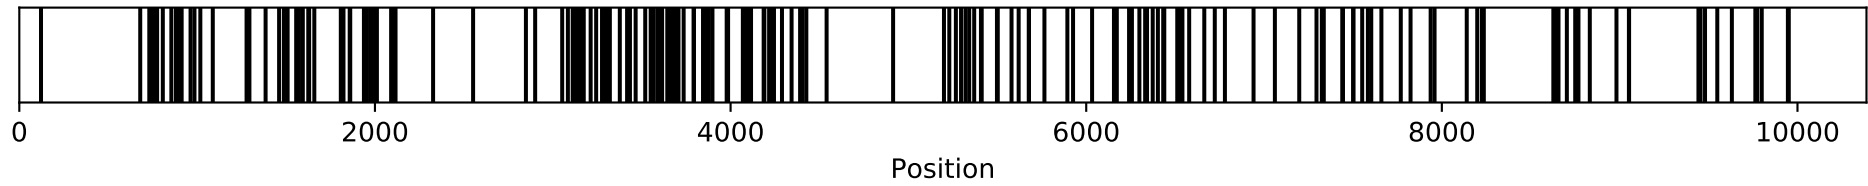

CR1 vs MM1  
Number of differences: 199

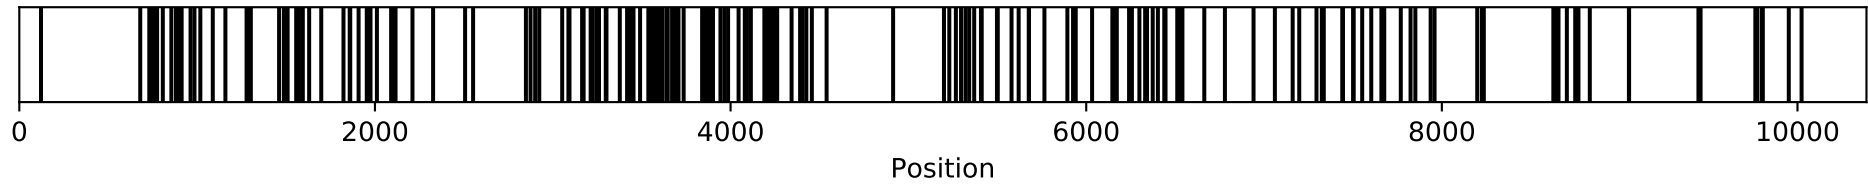

CR1 vs MM2  
Number of differences: 206

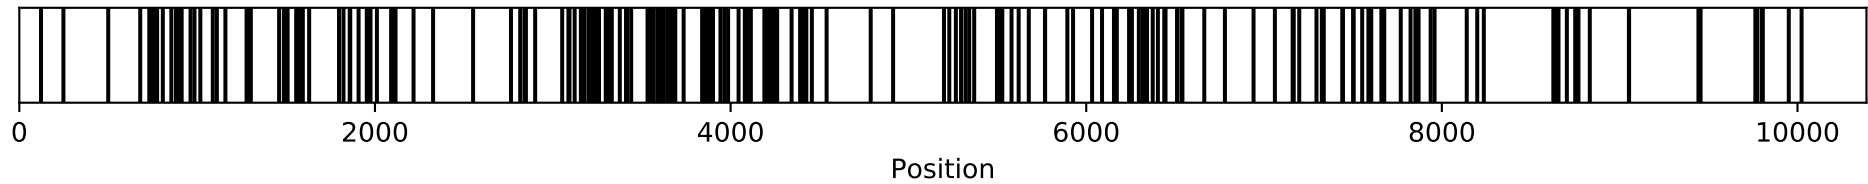

CR2 vs MM1  
Number of differences: 91

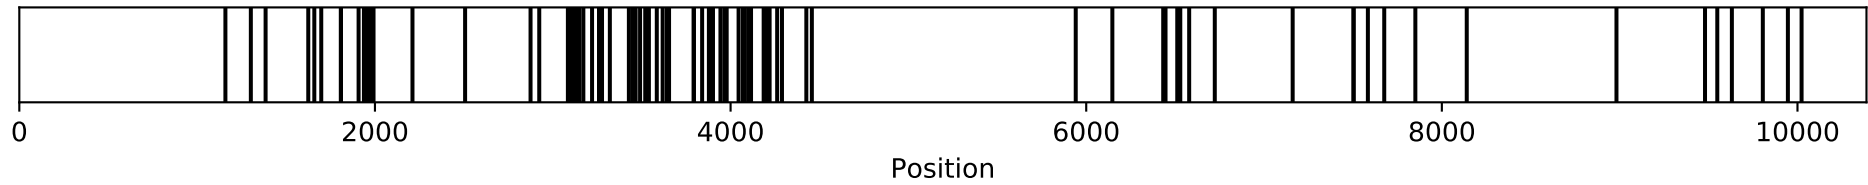

CR2 vs MM2  
Number of differences: 124

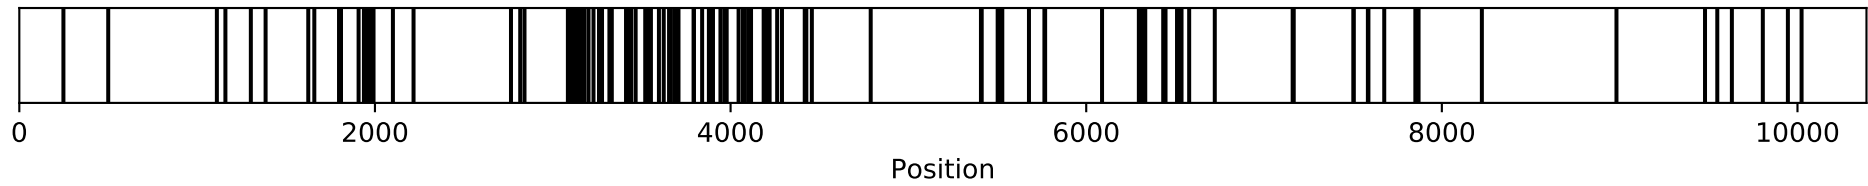

MM1 vs MM2  
Number of differences: 72

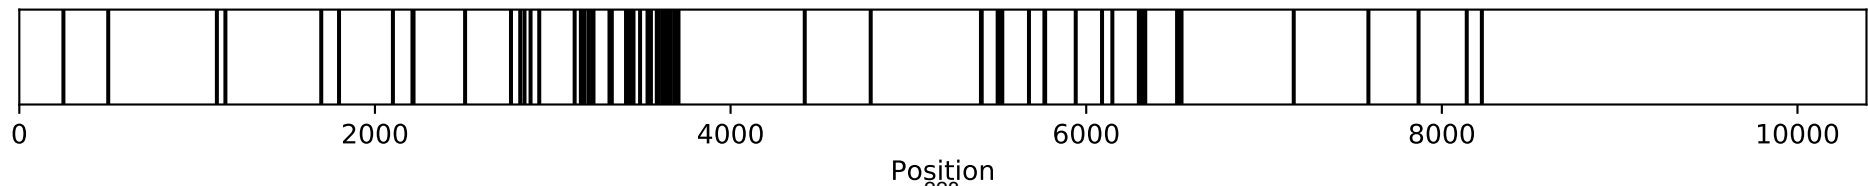

CR1 vs CR2  
Number of differences: 239

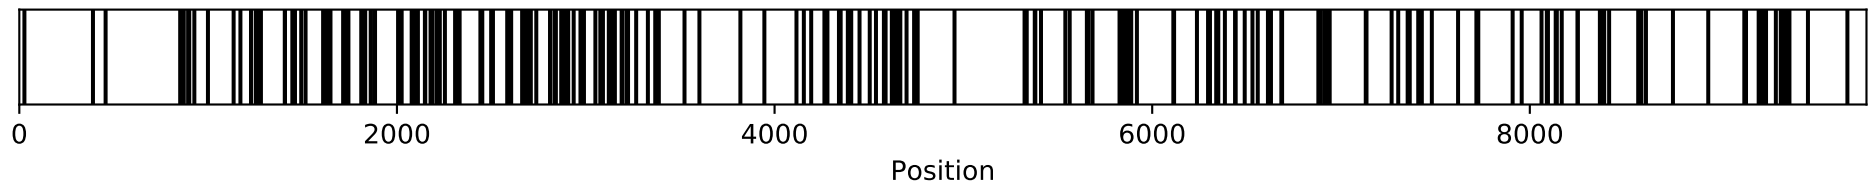

CR1 vs MM1  
Number of differences: 138

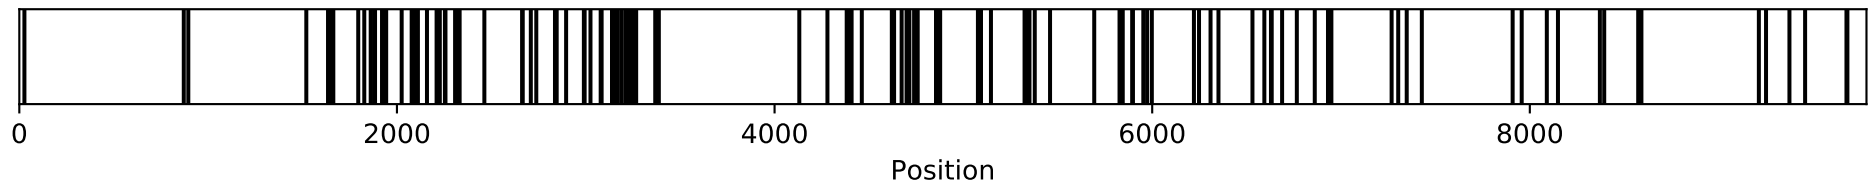

CR1 vs MM2  
Number of differences: 106

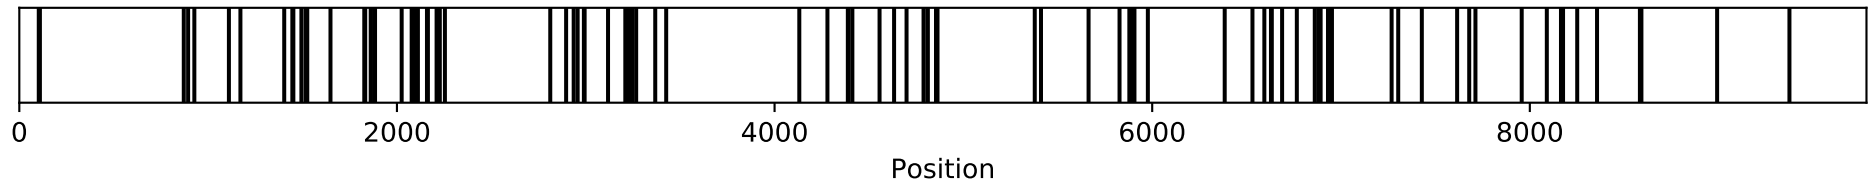

CR2 vs MM1  
Number of differences: 250

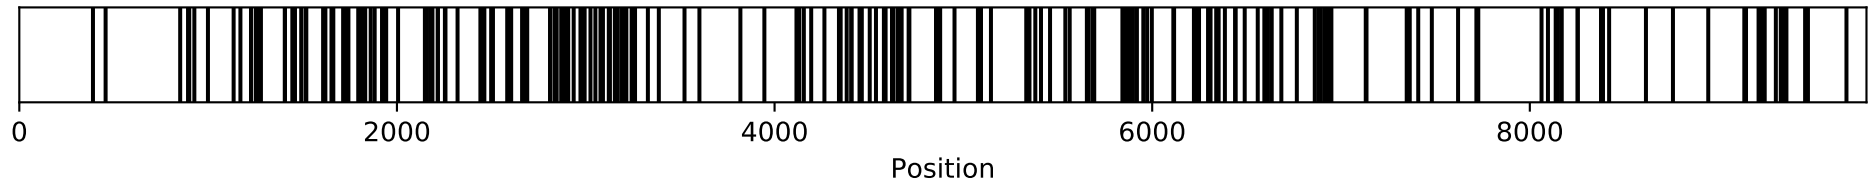

CR2 vs MM2  
Number of differences: 229

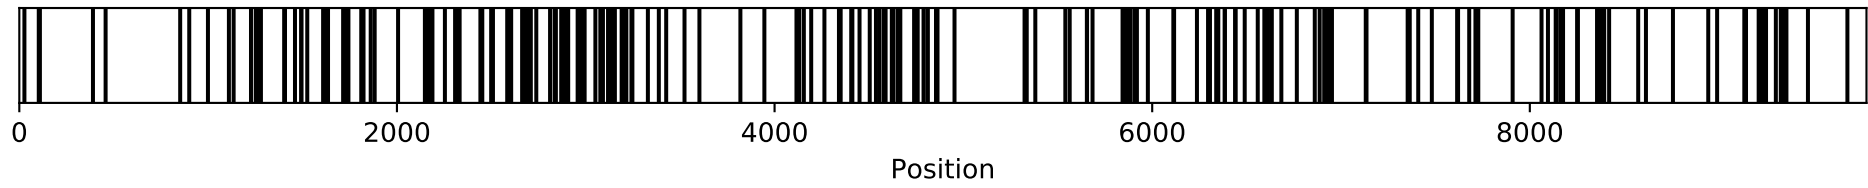

MM1 vs MM2  
Number of differences: 136

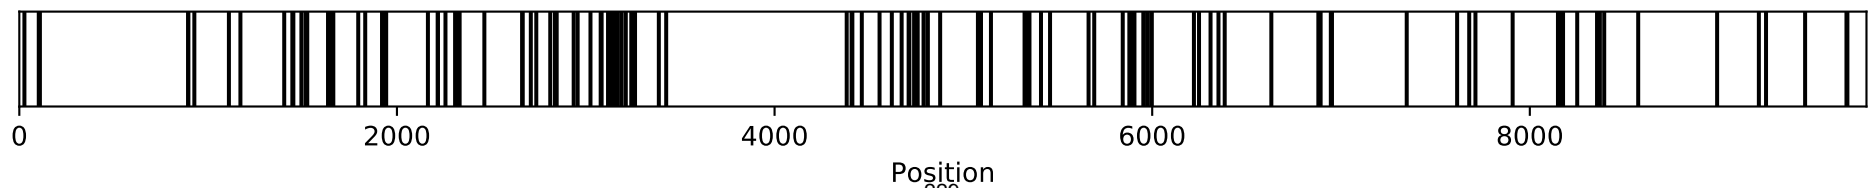

CR1 vs CR2  
Number of differences: 271

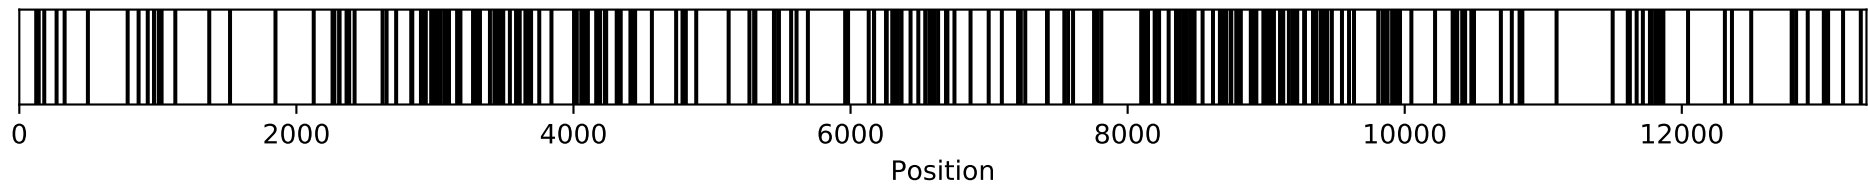

CR1 vs MM1  
Number of differences: 175

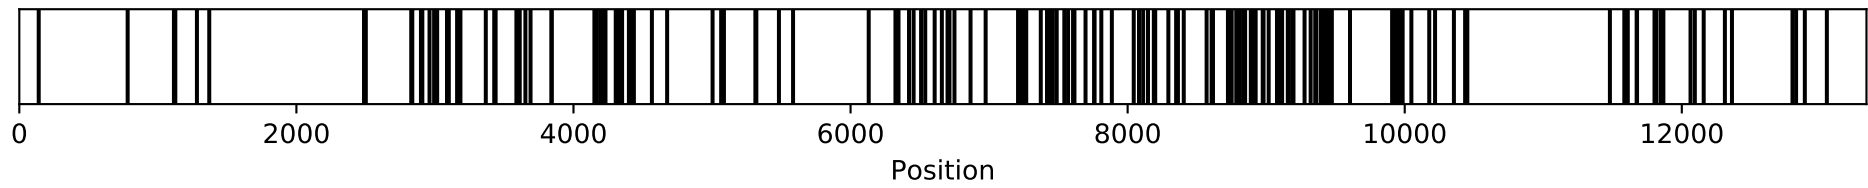

CR1 vs MM2  
Number of differences: 140

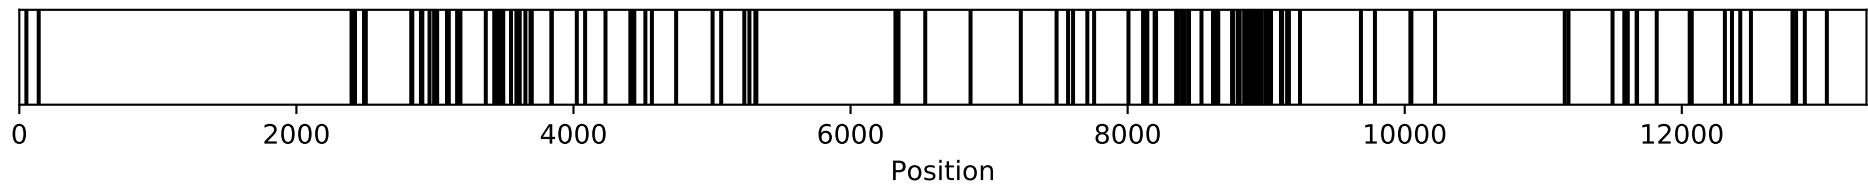

CR2 vs MM1  
Number of differences: 270

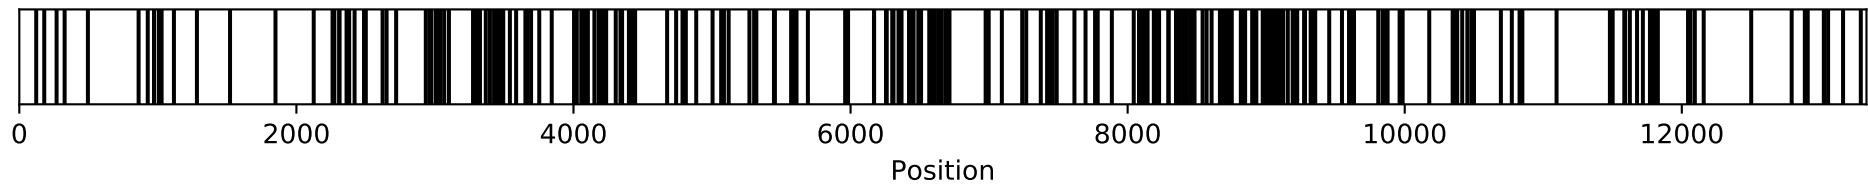

CR2 vs MM2  
Number of differences: 274

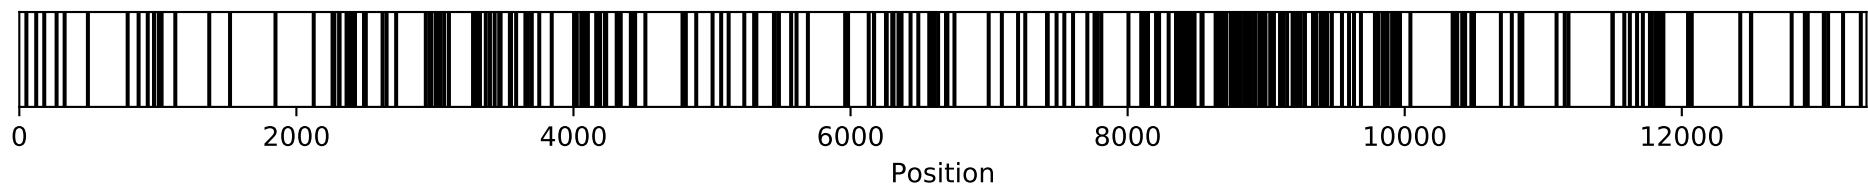

MM1 vs MM2  
Number of differences: 178

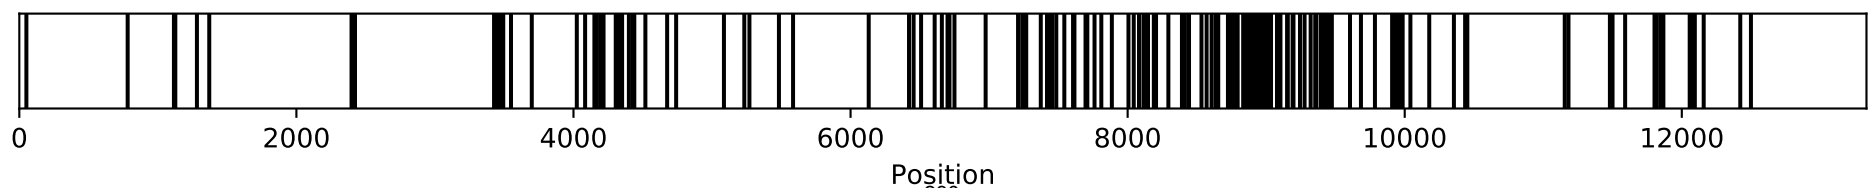

CR1 vs CR2  
Number of differences: 78

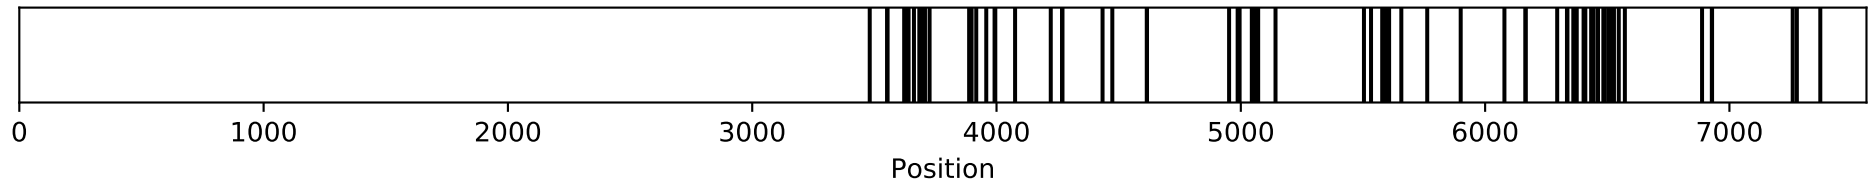

CR1 vs MM1  
Number of differences: 120

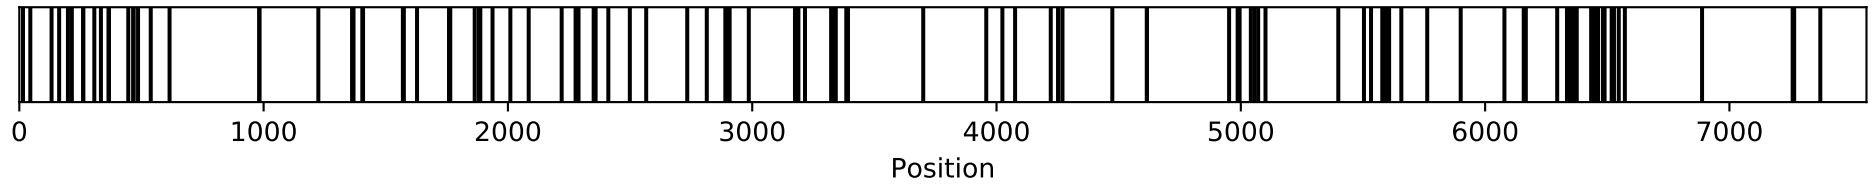

CR1 vs MM2  
Number of differences: 126

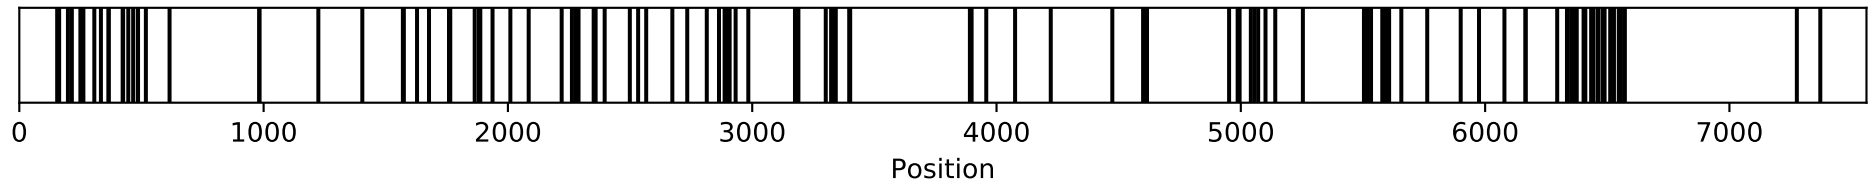

CR2 vs MM1  
Number of differences: 111

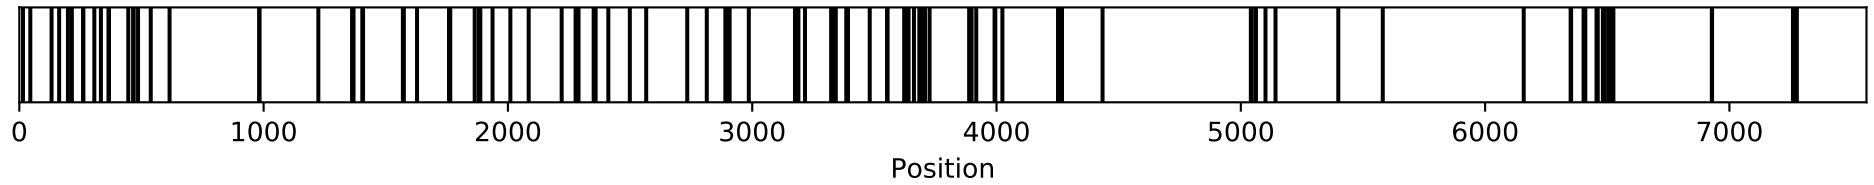

CR2 vs MM2  
Number of differences: 106

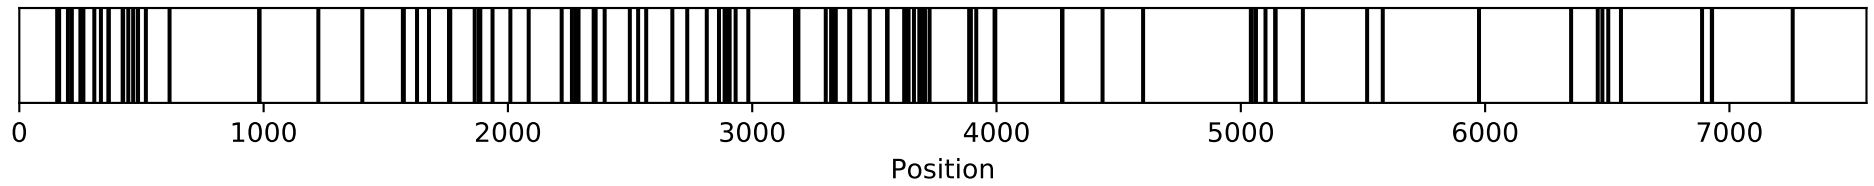

MM1 vs MM2  
Number of differences: 67

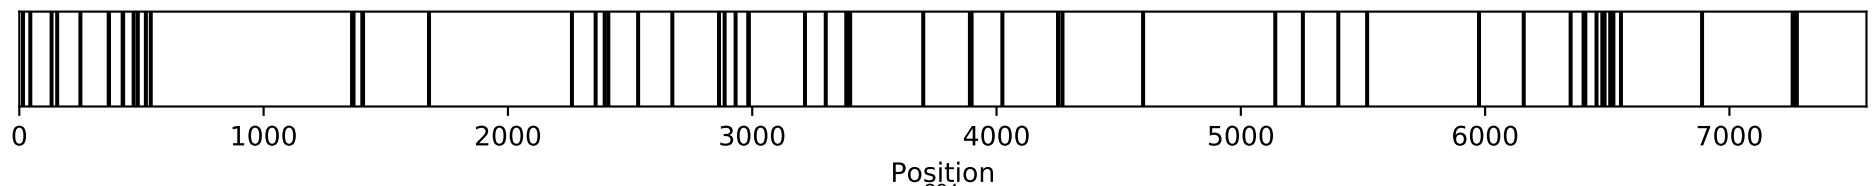



CR1 vs CR2  
Number of differences: 377

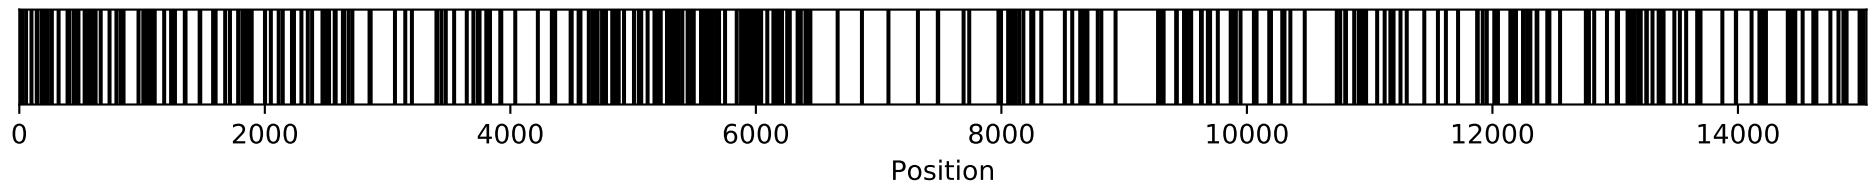

CR1 vs MM1  
Number of differences: 146

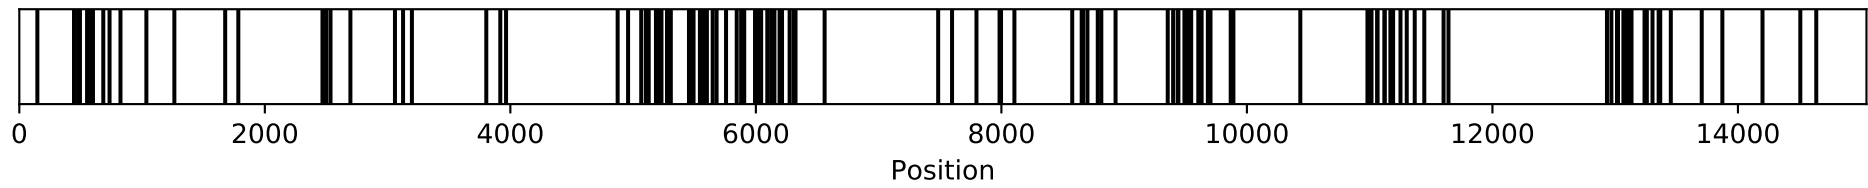

CR1 vs MM2  
Number of differences: 134

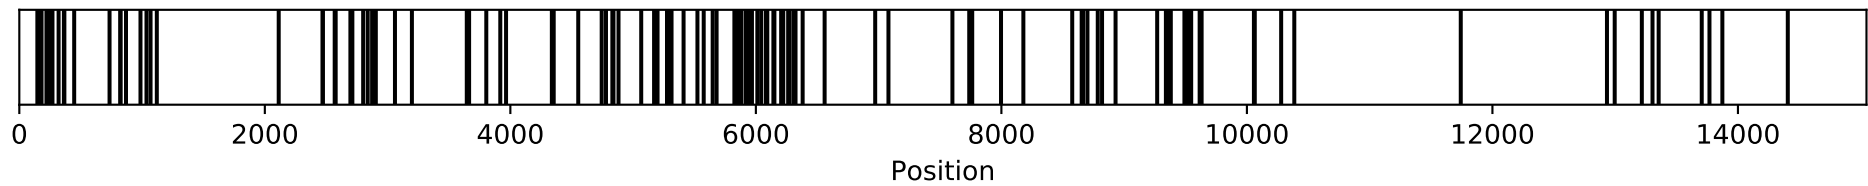

CR2 vs MM1  
Number of differences: 361

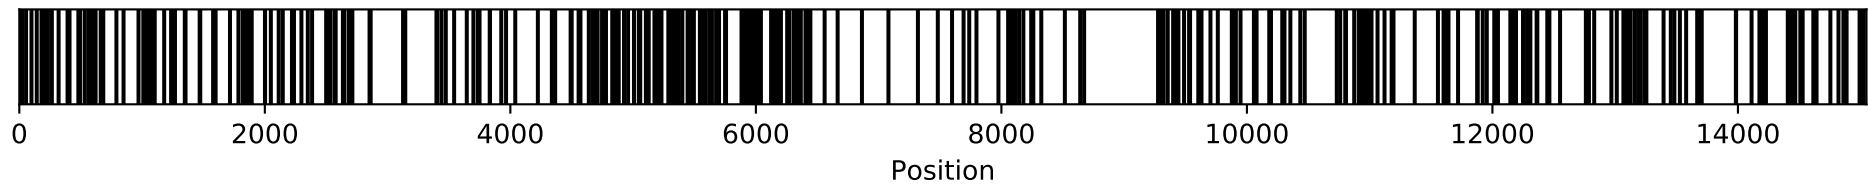

CR2 vs MM2  
Number of differences: 384

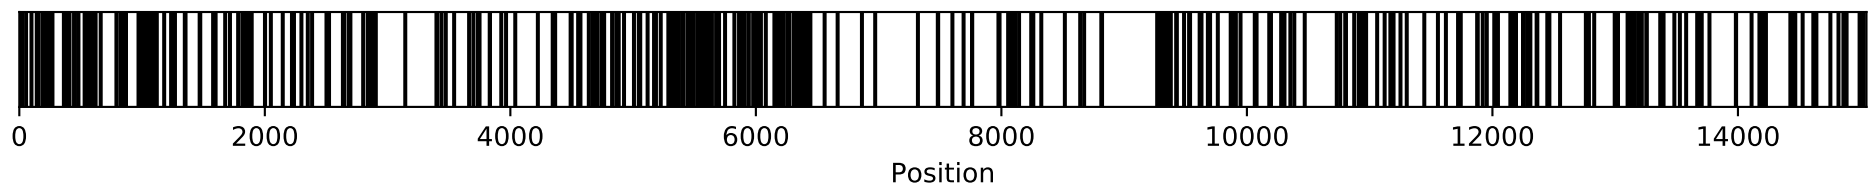

MM1 vs MM2  
Number of differences: 177

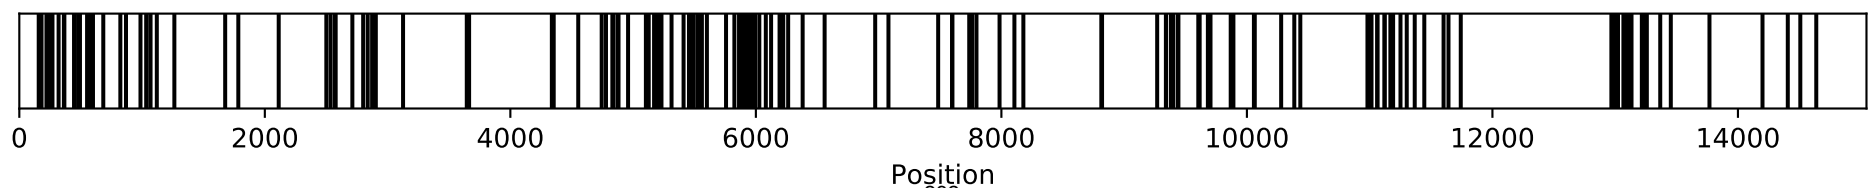

CR1 vs CR2  
Number of differences: 201

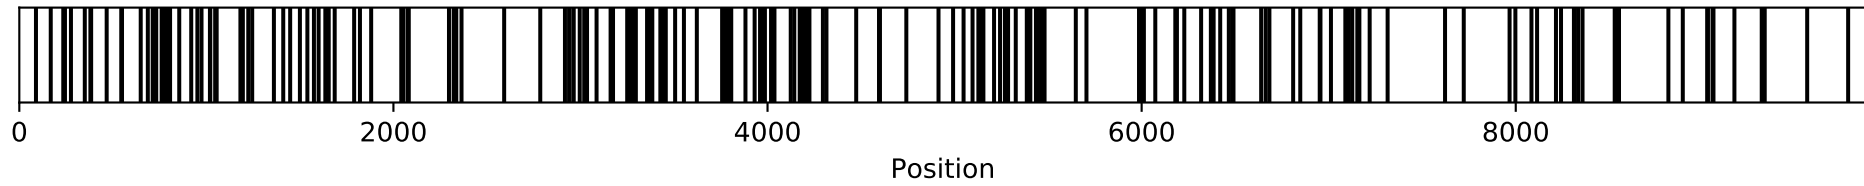

CR1 vs MM1  
Number of differences: 143

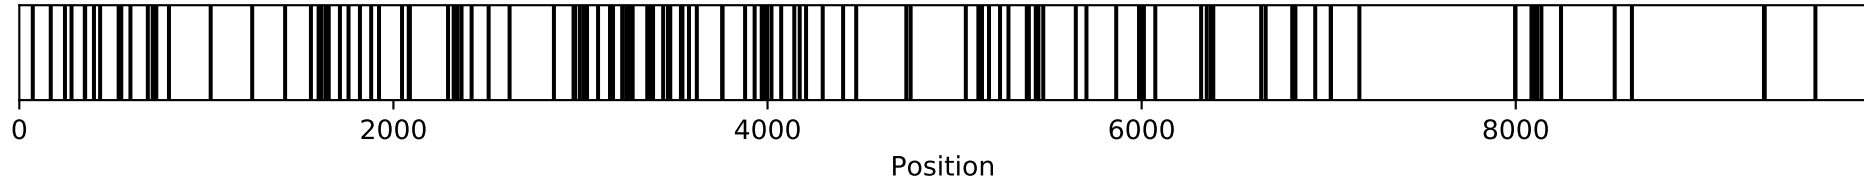

CR1 vs MM2  
Number of differences: 135

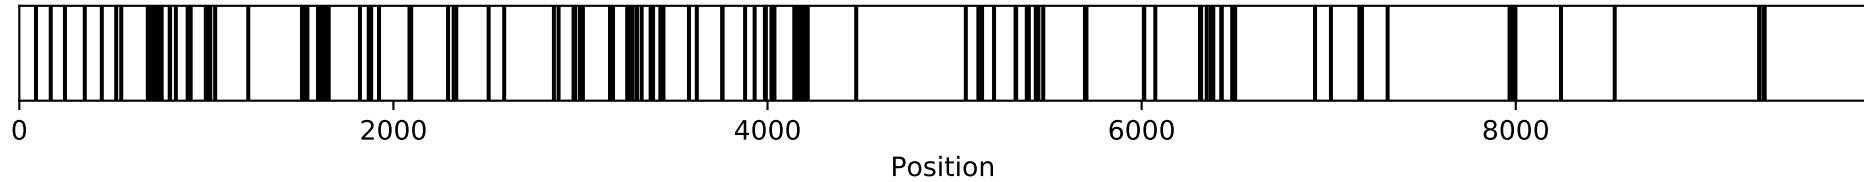

CR2 vs MM1  
Number of differences: 198

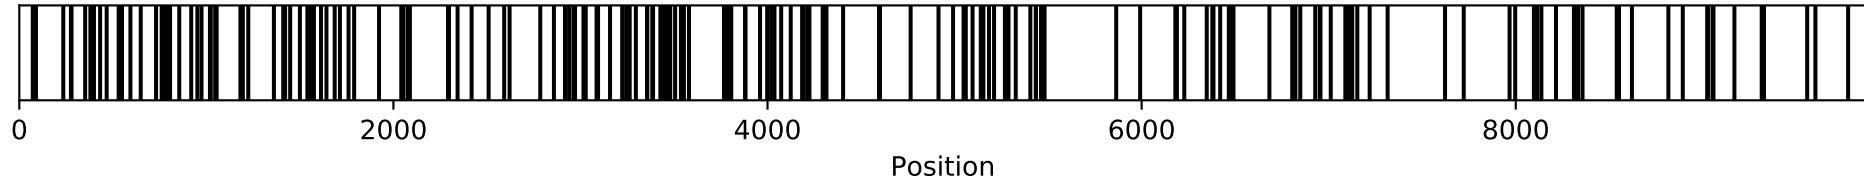

CR2 vs MM2  
Number of differences: 185

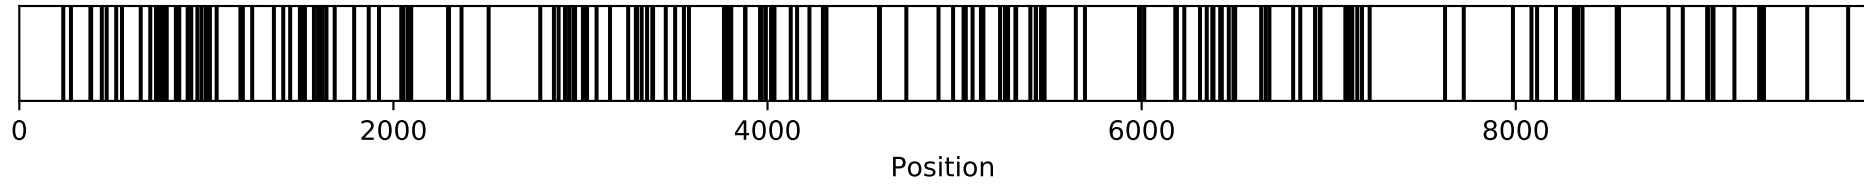

MM1 vs MM2  
Number of differences: 132

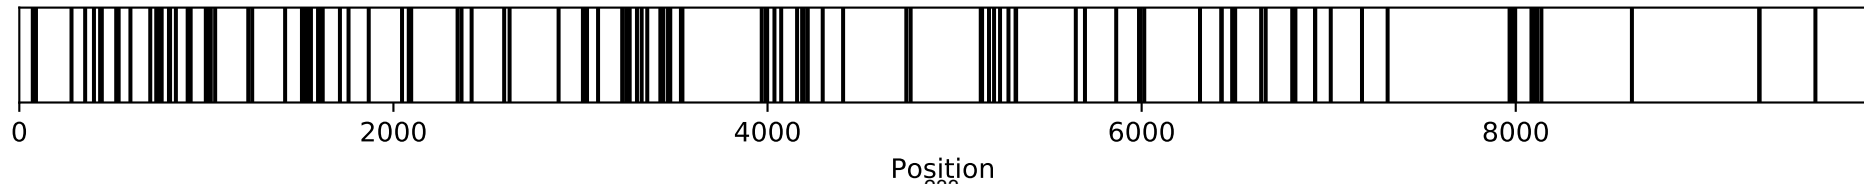

CR1 vs CR2  
Number of differences: 188

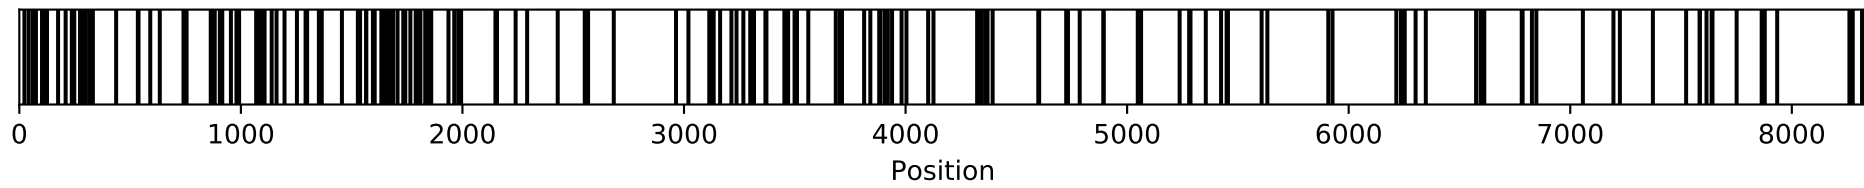

CR1 vs MM1  
Number of differences: 104

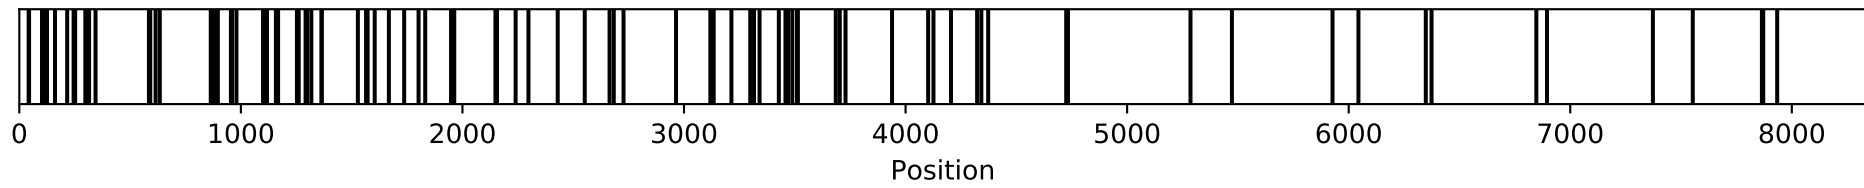

CR1 vs MM2  
Number of differences: 98

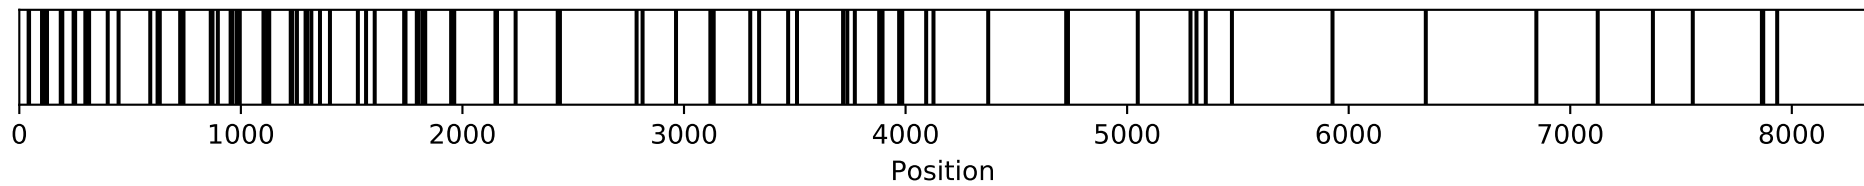

CR2 vs MM1  
Number of differences: 169

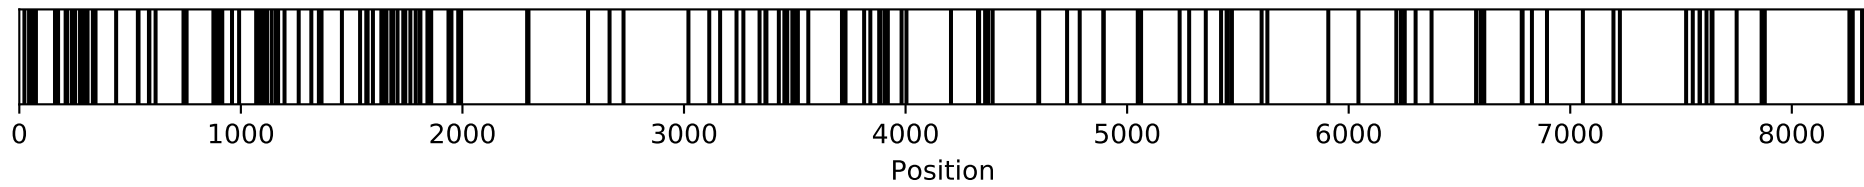

CR2 vs MM2  
Number of differences: 181

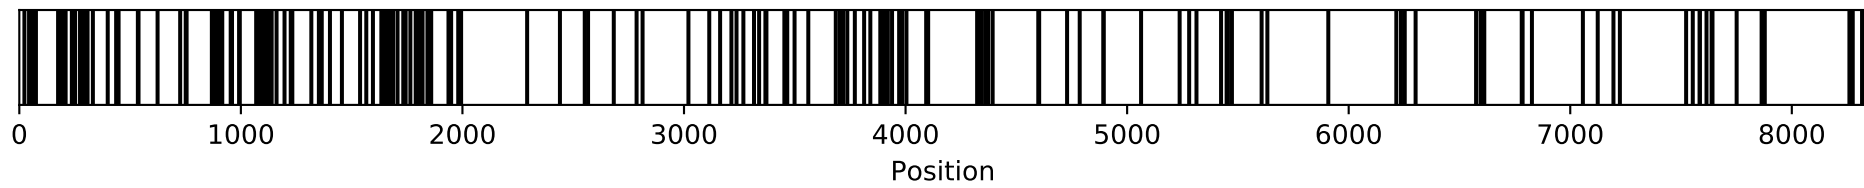

MM1 vs MM2  
Number of differences: 80

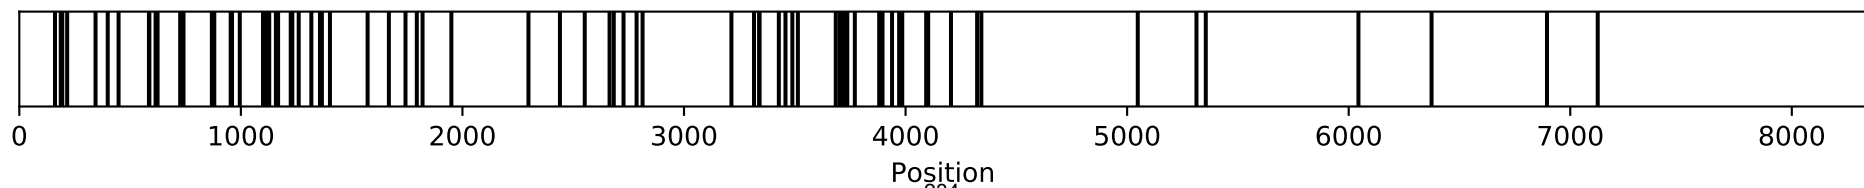

CR1 vs CR2  
Number of differences: 192

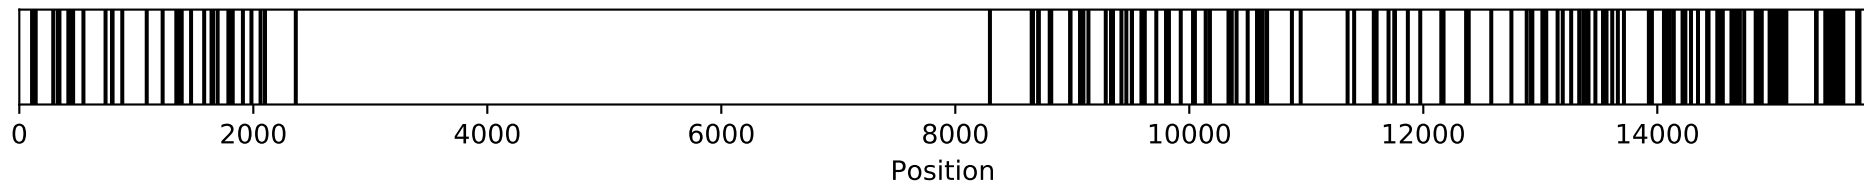

CR1 vs MM1  
Number of differences: 283

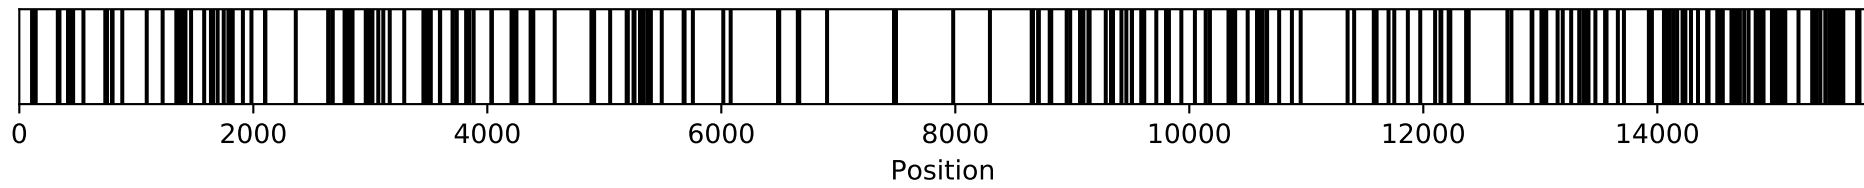

CR1 vs MM2  
Number of differences: 268

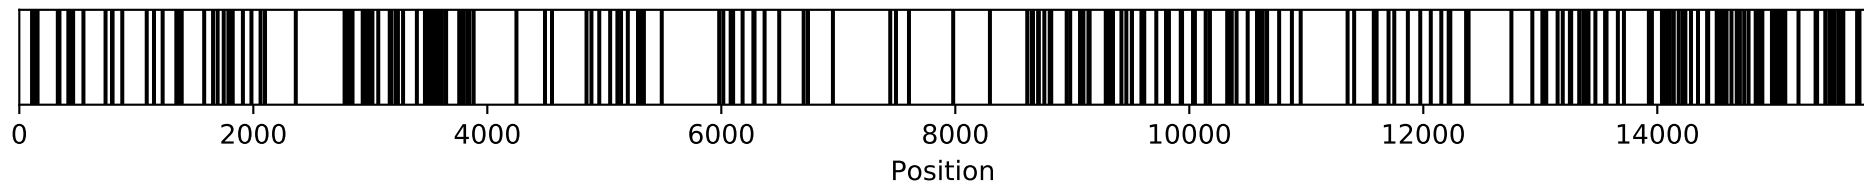

CR2 vs MM1  
Number of differences: 143

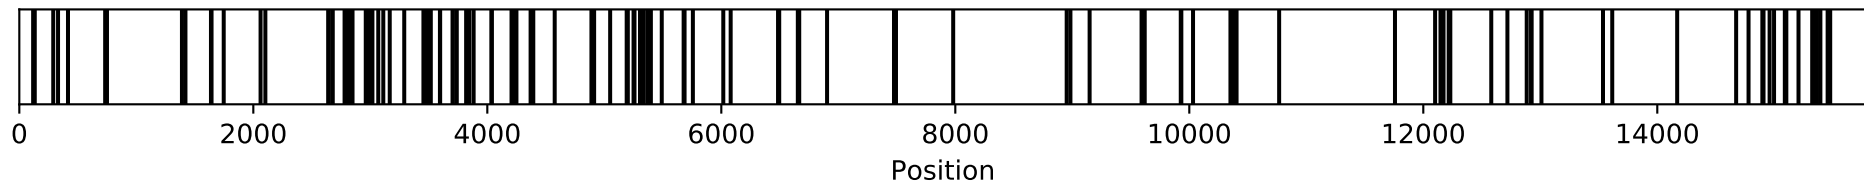

CR2 vs MM2  
Number of differences: 136

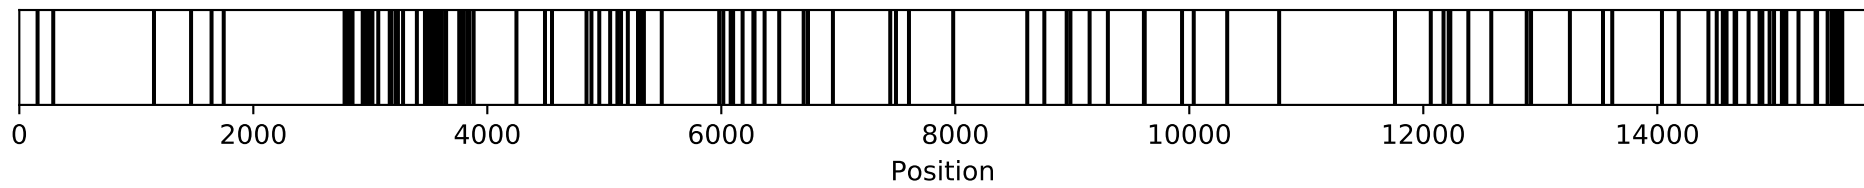

MM1 vs MM2  
Number of differences: 156

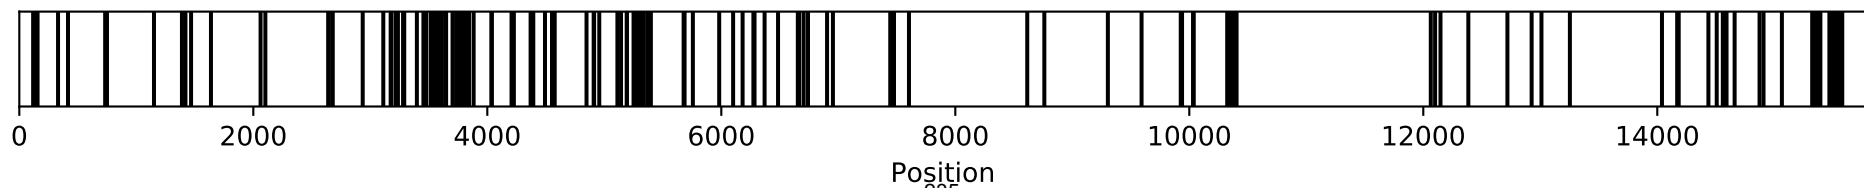

CR1 vs CR2  
Number of differences: 402

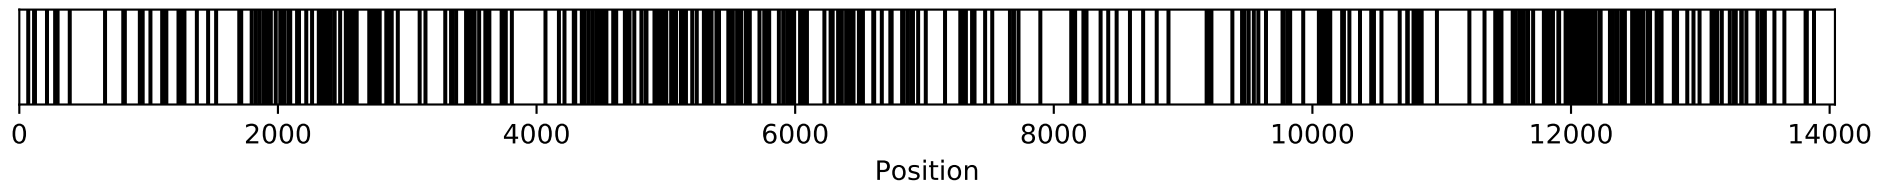

CR1 vs MM1  
Number of differences: 174

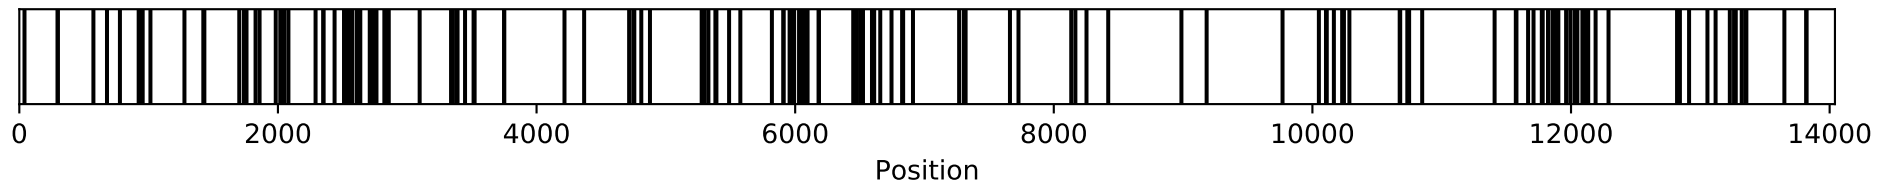

CR1 vs MM2  
Number of differences: 186

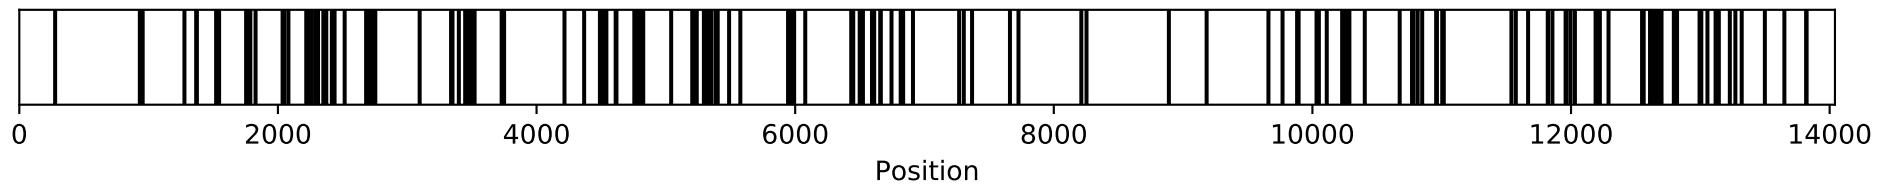

CR2 vs MM1  
Number of differences: 382

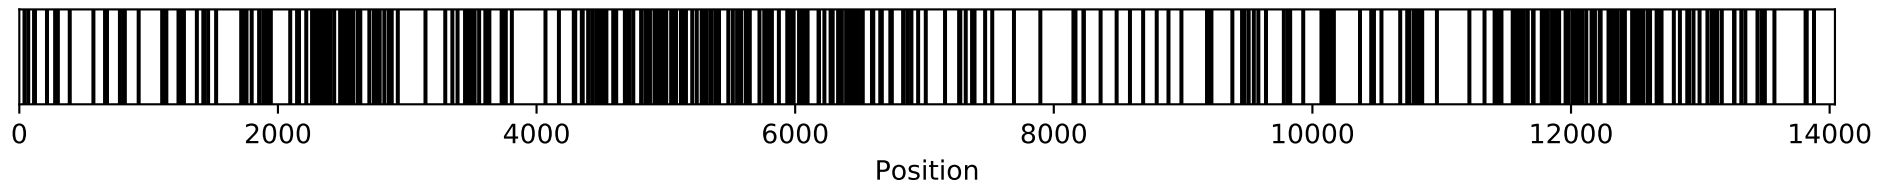

CR2 vs MM2  
Number of differences: 405

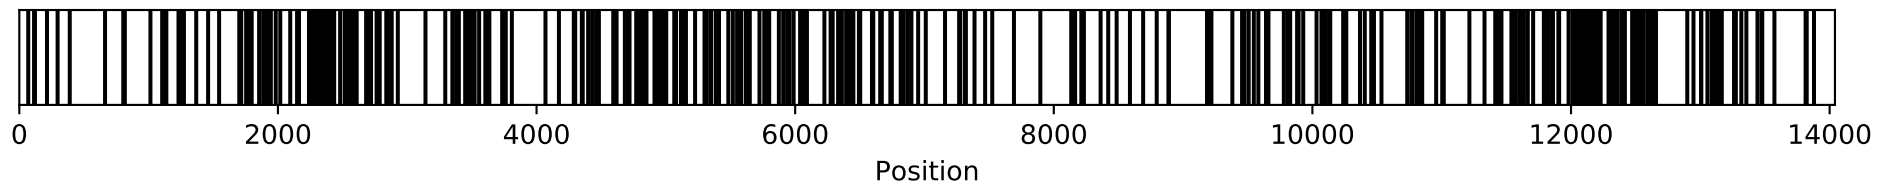

MM1 vs MM2  
Number of differences: 211

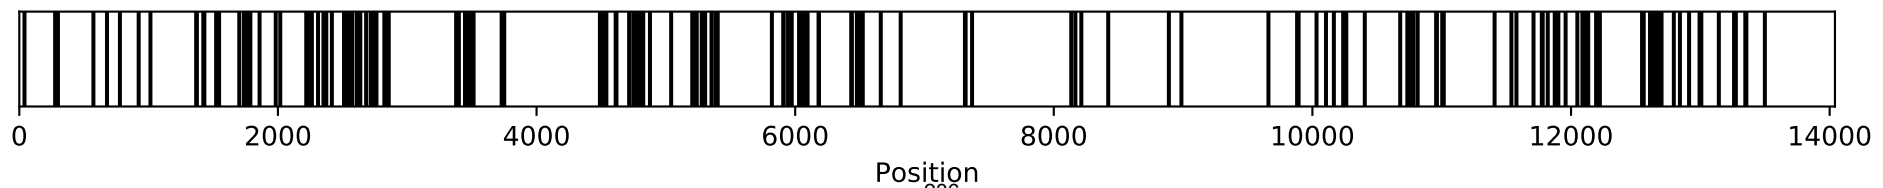

CR1 vs CR2  
Number of differences: 189

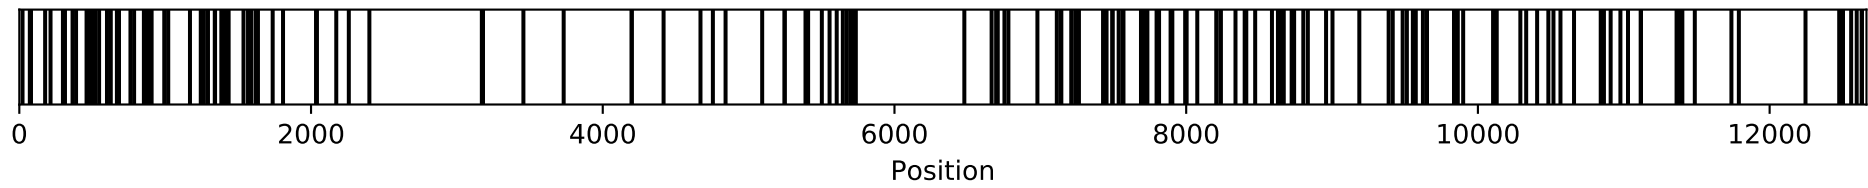

CR1 vs MM1  
Number of differences: 106

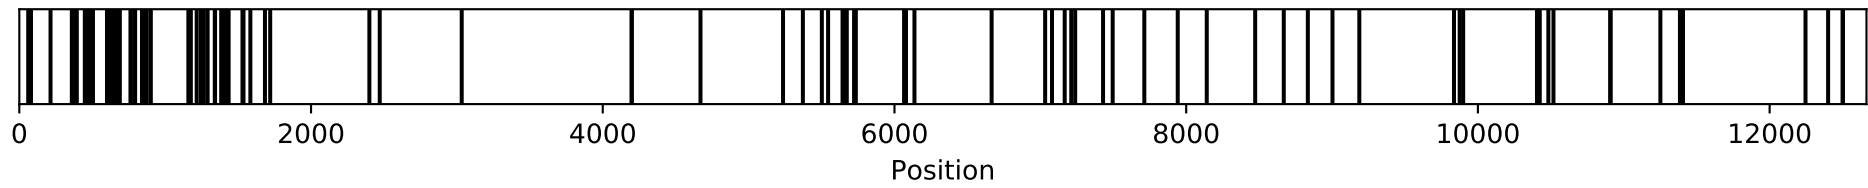

CR1 vs MM2  
Number of differences: 78

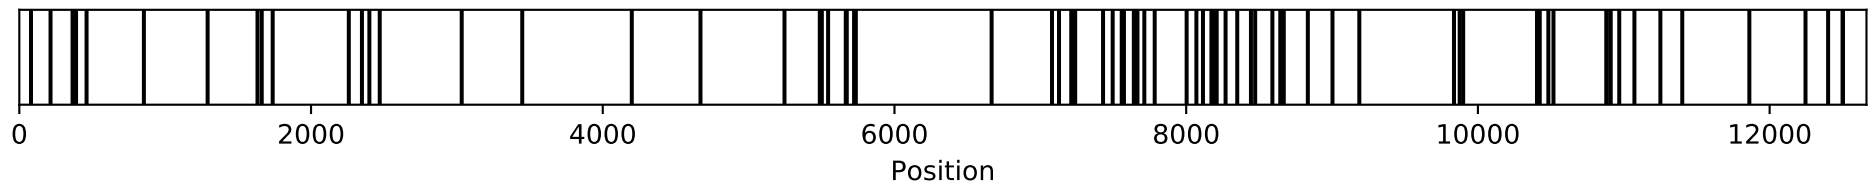

CR2 vs MM1  
Number of differences: 182

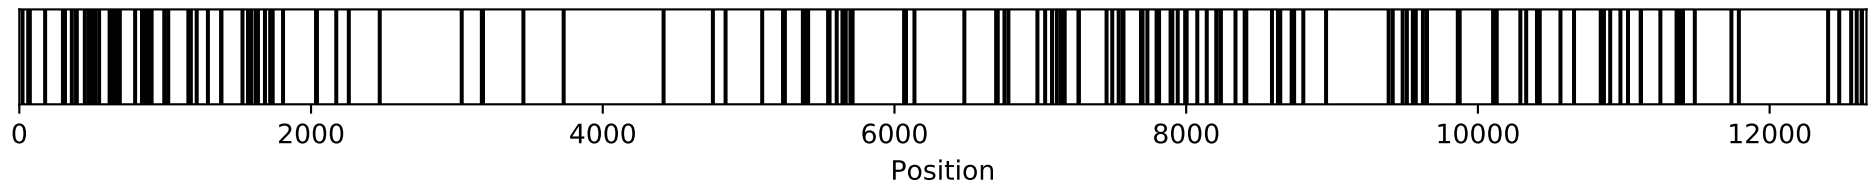

CR2 vs MM2  
Number of differences: 185

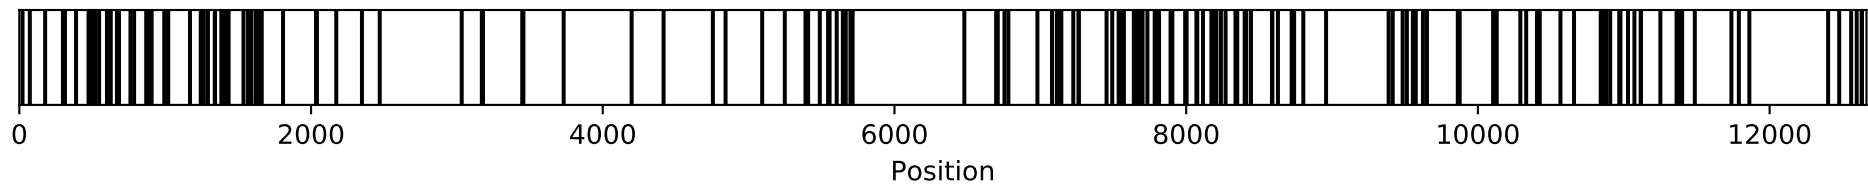

MM1 vs MM2  
Number of differences: 92

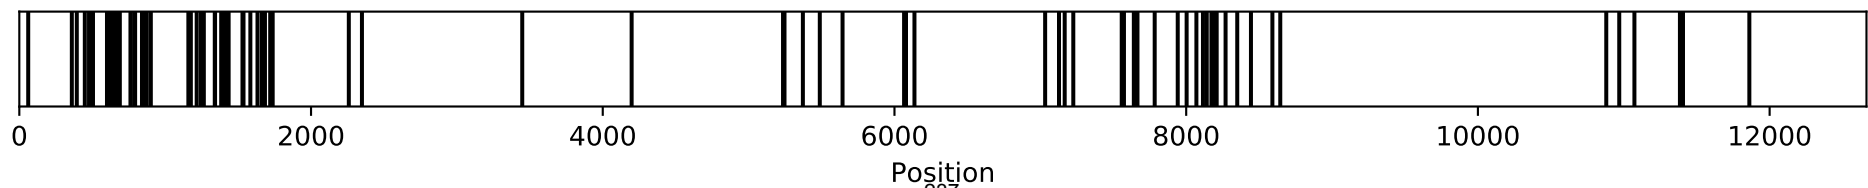

CR1 vs CR2  
Number of differences: 233

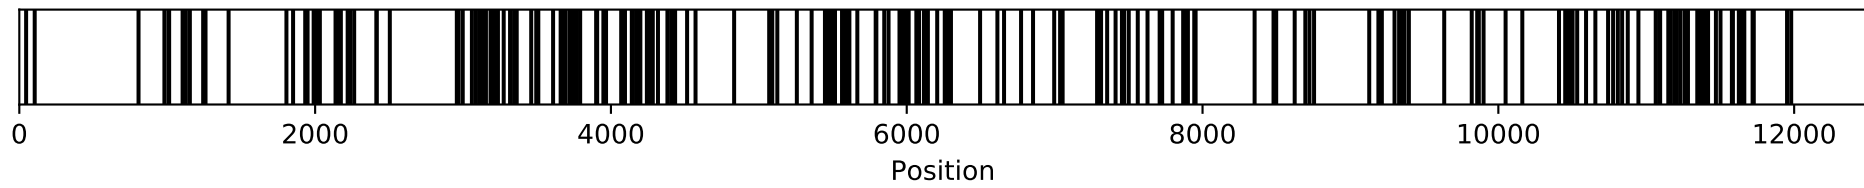

CR1 vs MM1  
Number of differences: 125

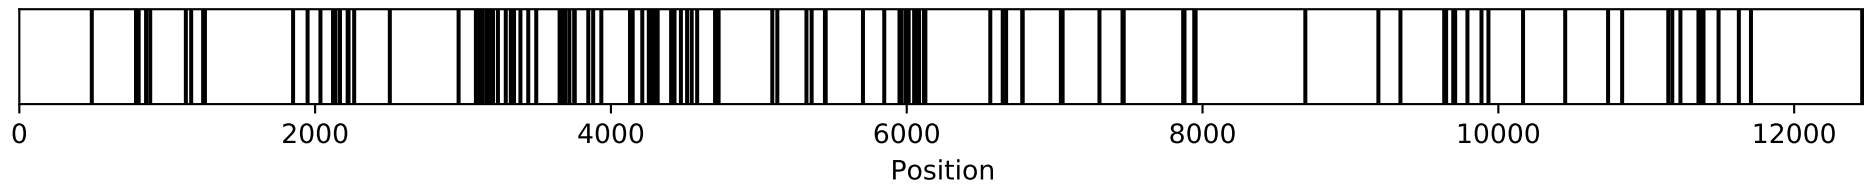

CR1 vs MM2  
Number of differences: 106

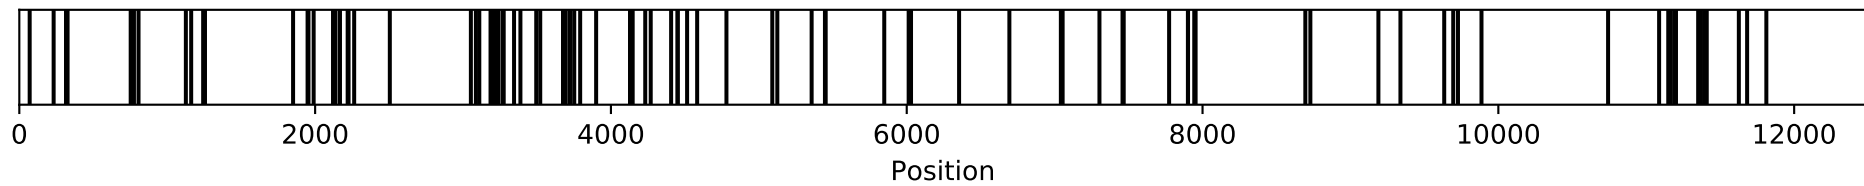

CR2 vs MM1  
Number of differences: 237

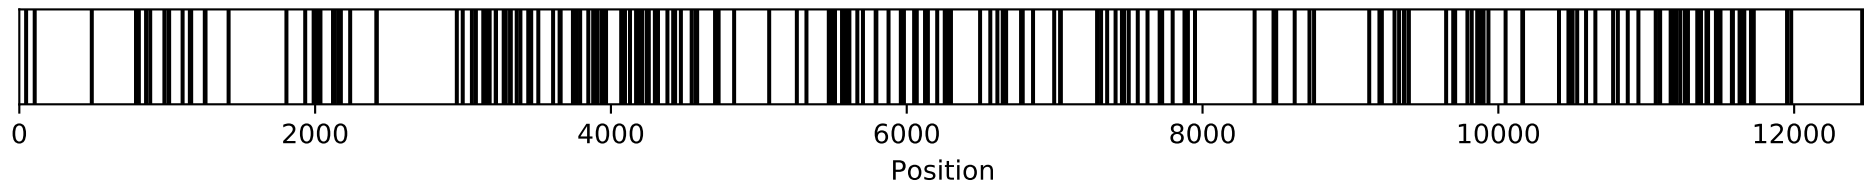

CR2 vs MM2  
Number of differences: 219

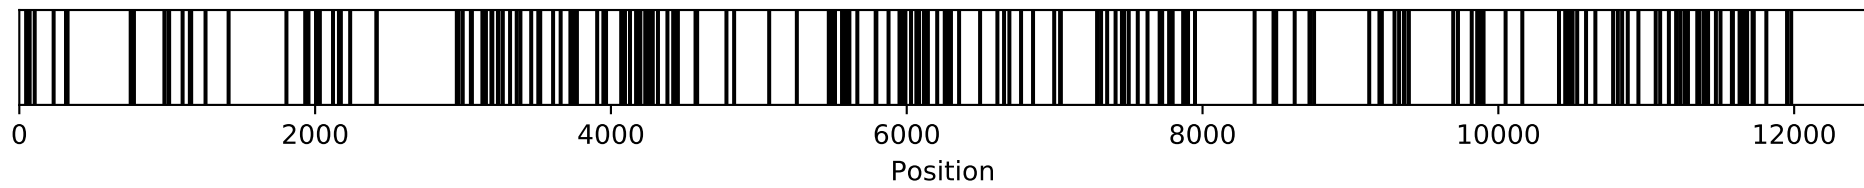

MM1 vs MM2  
Number of differences: 120

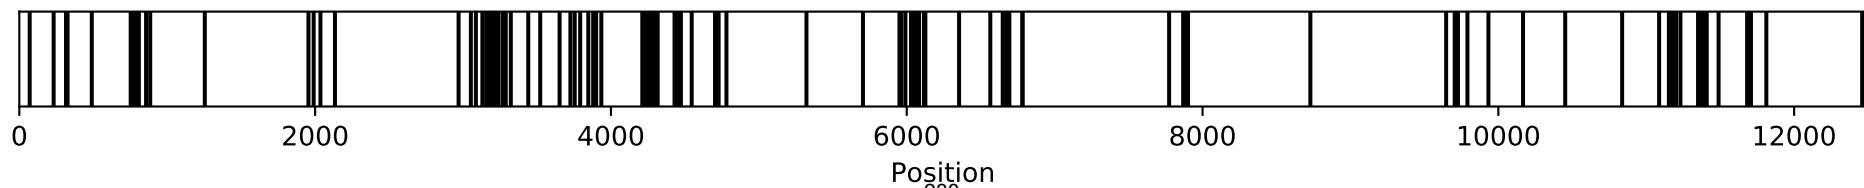

CR1 vs CR2  
Number of differences: 207

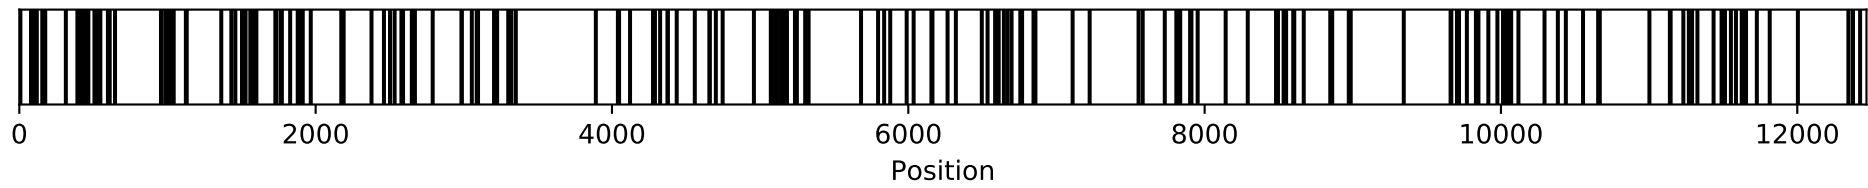

CR1 vs MM1  
Number of differences: 197

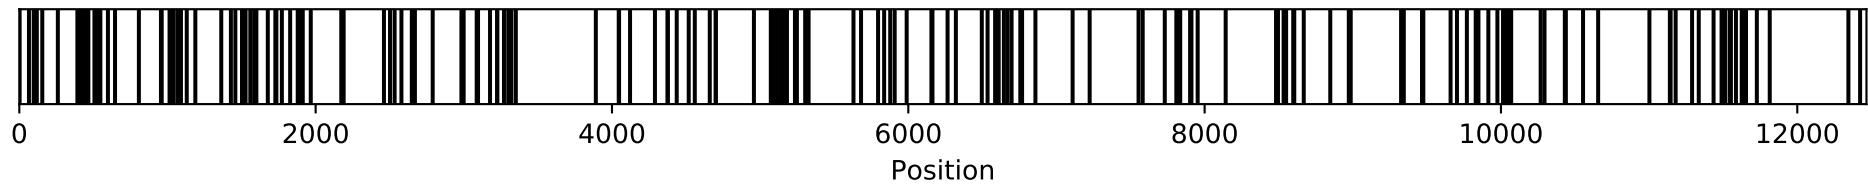

CR1 vs MM2  
Number of differences: 194

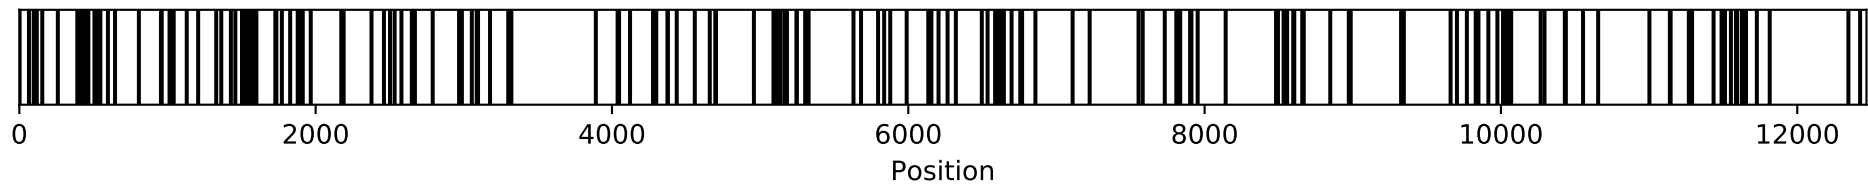

CR2 vs MM1  
Number of differences: 72

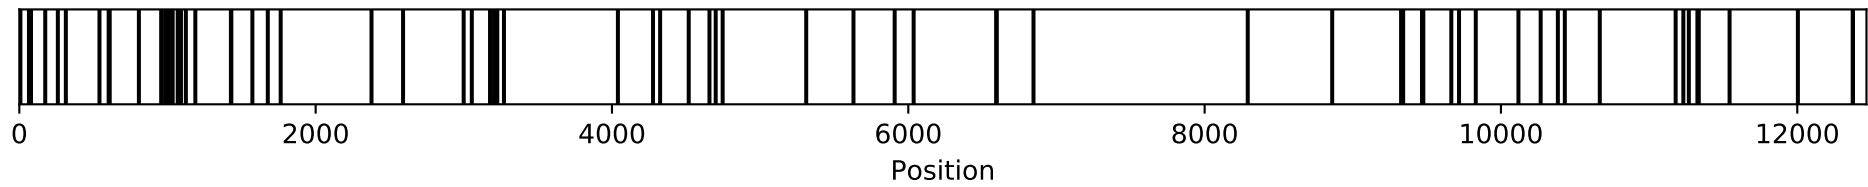

CR2 vs MM2  
Number of differences: 73

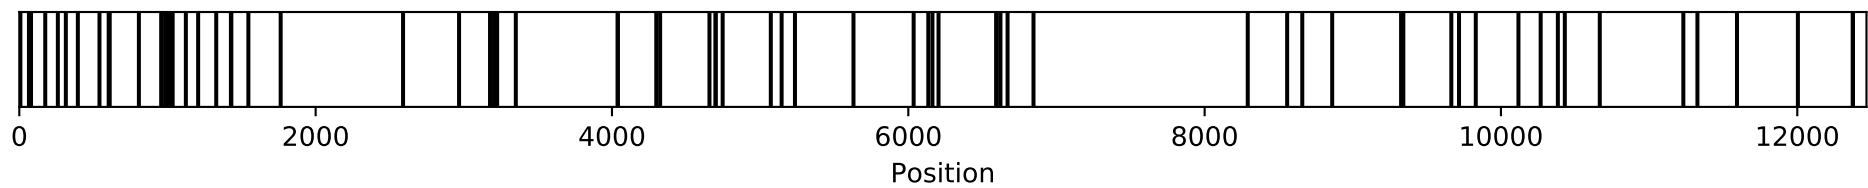

MM1 vs MM2  
Number of differences: 44

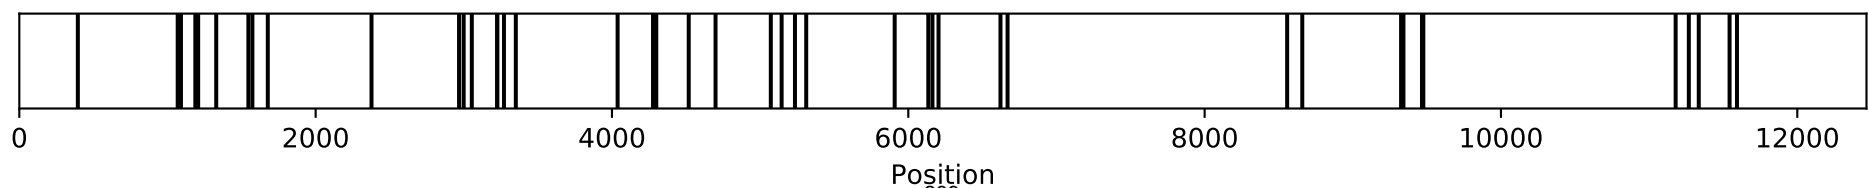



CR1 vs CR2  
Number of differences: 172

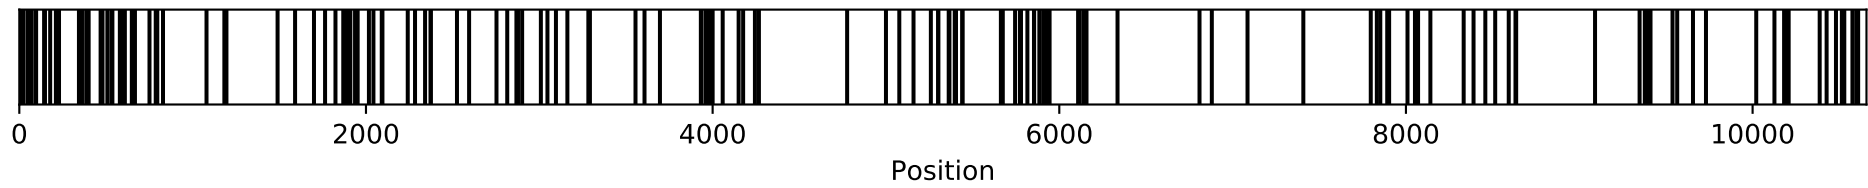

CR1 vs MM1  
Number of differences: 73

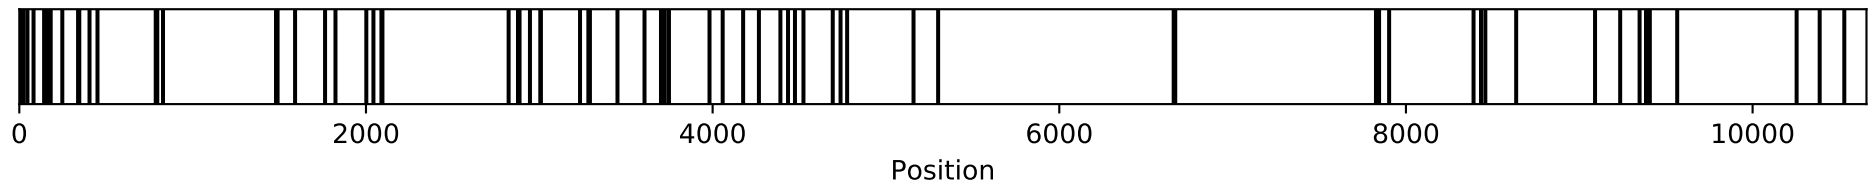

CR1 vs MM2  
Number of differences: 80

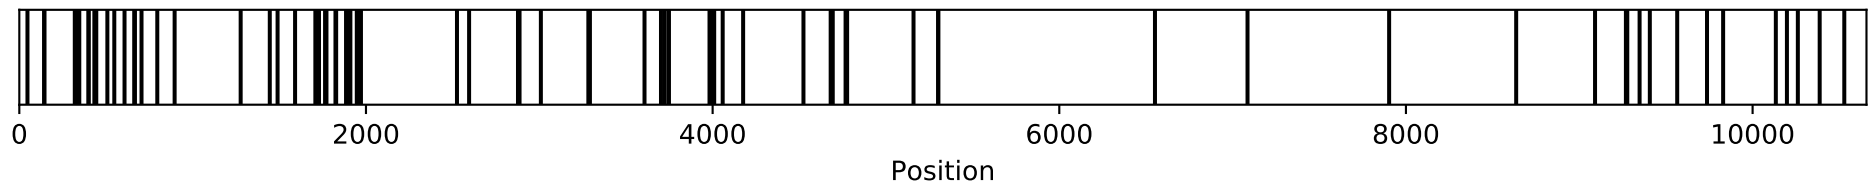

CR2 vs MM1  
Number of differences: 172

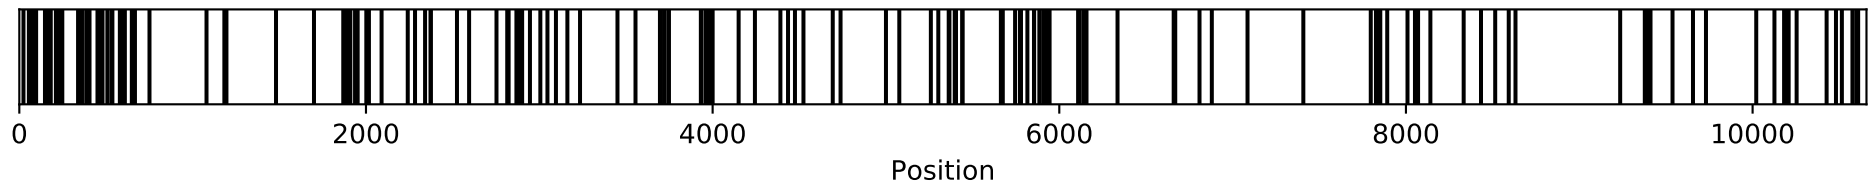

CR2 vs MM2  
Number of differences: 172

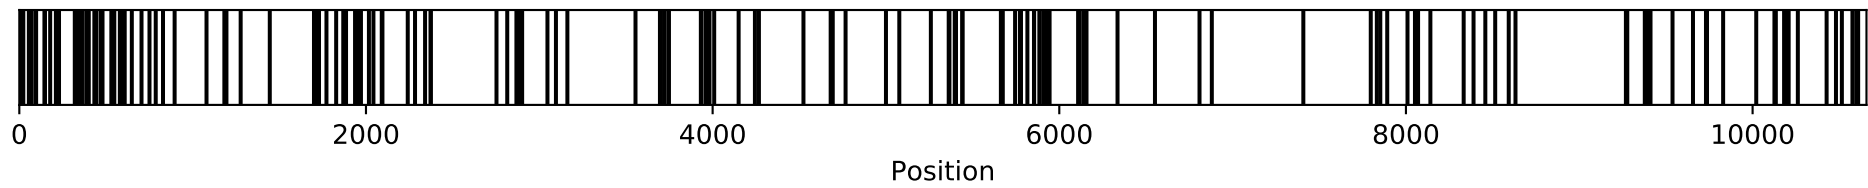

MM1 vs MM2  
Number of differences: 87

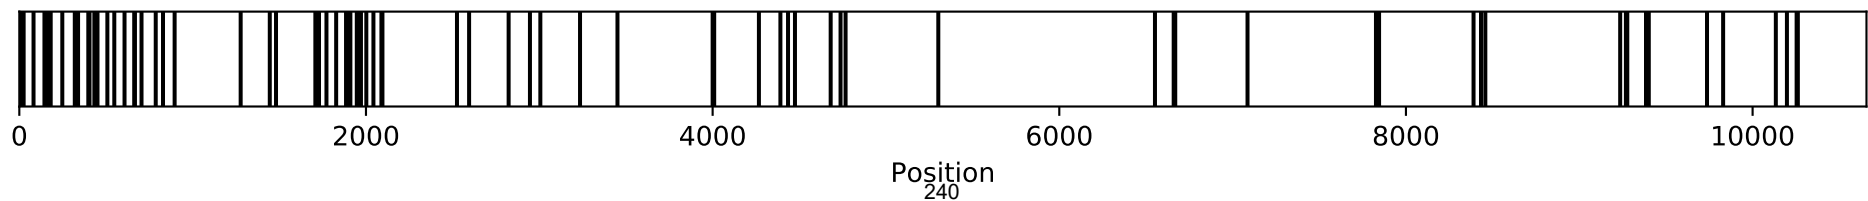

CR1 vs CR2  
Number of differences: 151

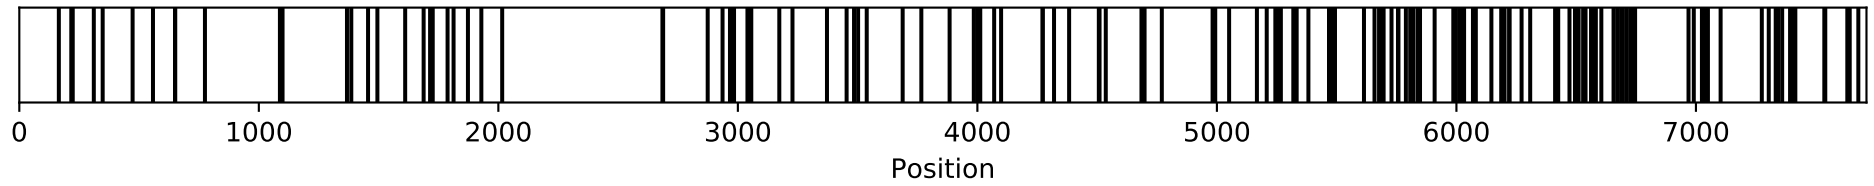

CR1 vs MM1  
Number of differences: 78

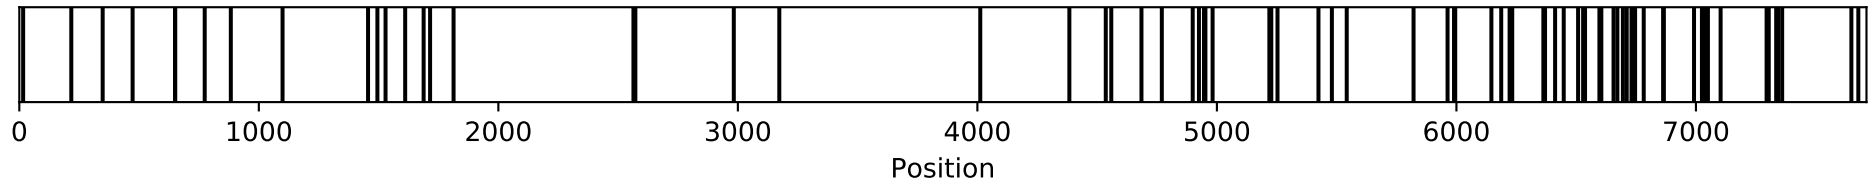

CR1 vs MM2  
Number of differences: 78

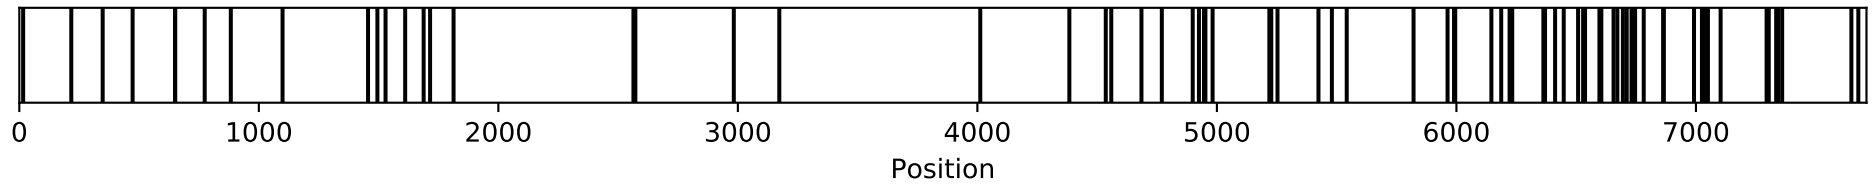

CR2 vs MM1  
Number of differences: 141

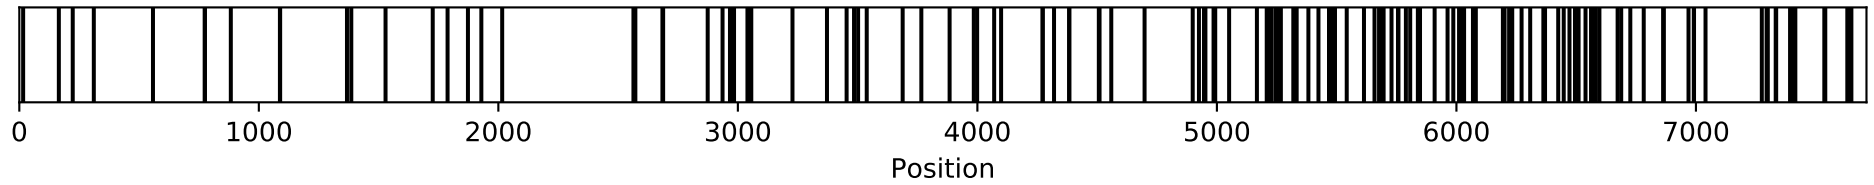

CR2 vs MM2  
Number of differences: 141

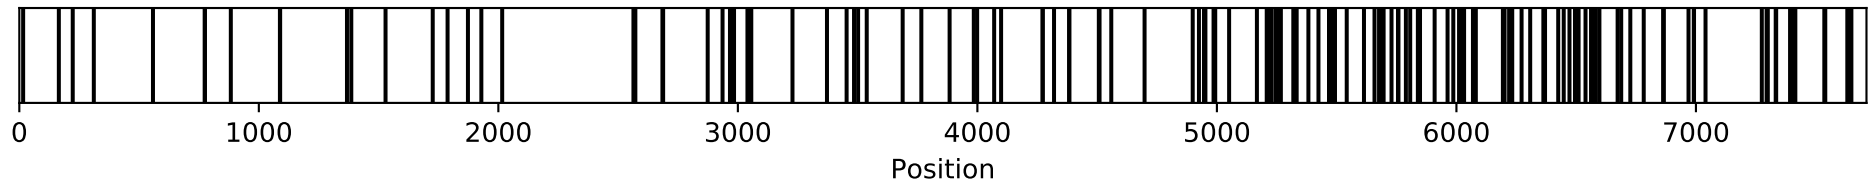

MM1 vs MM2  
Number of differences: 0

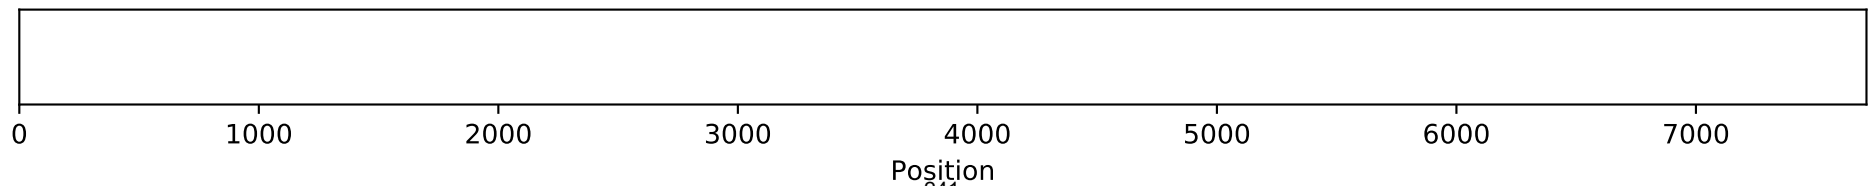

CR1 vs CR2  
Number of differences: 203

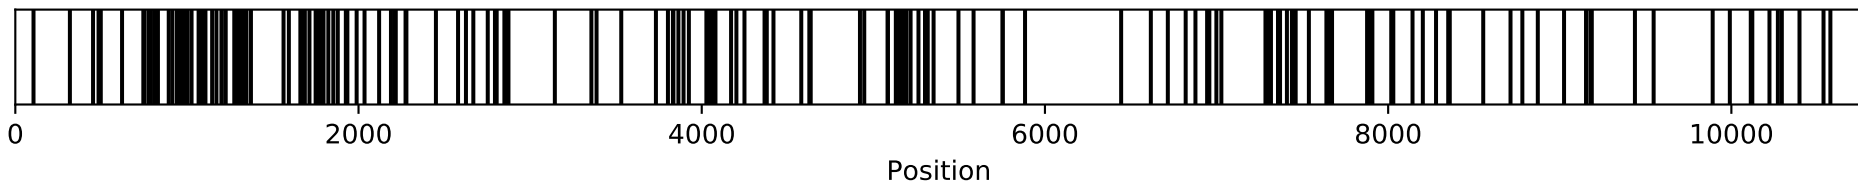

CR1 vs MM1  
Number of differences: 62

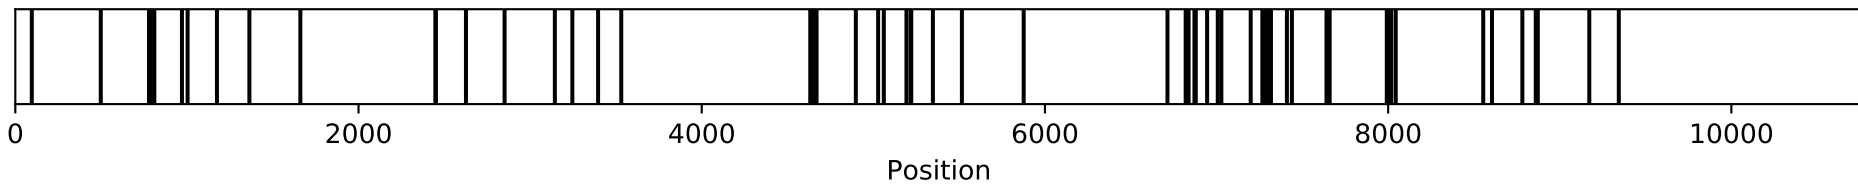

CR1 vs MM2  
Number of differences: 72

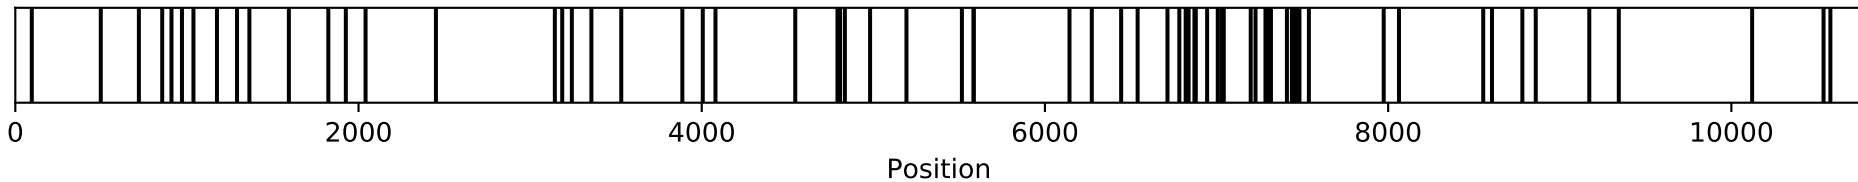

CR2 vs MM1  
Number of differences: 213

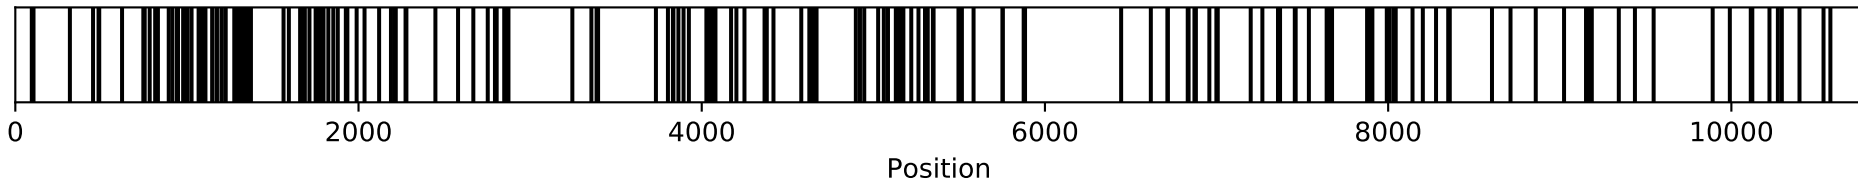

CR2 vs MM2  
Number of differences: 218

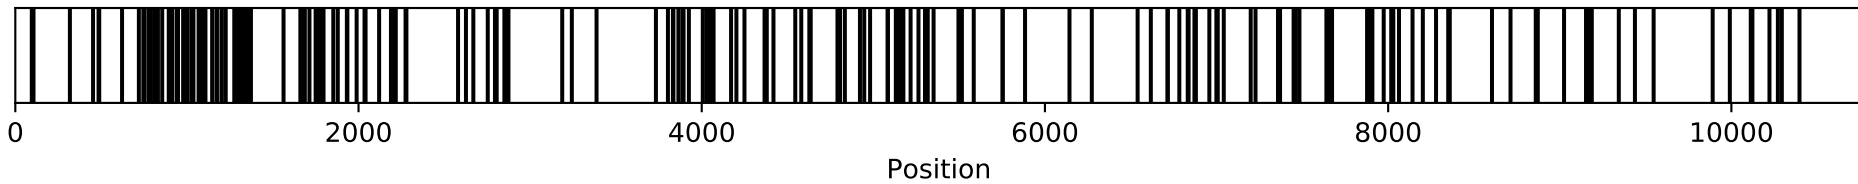

MM1 vs MM2  
Number of differences: 70

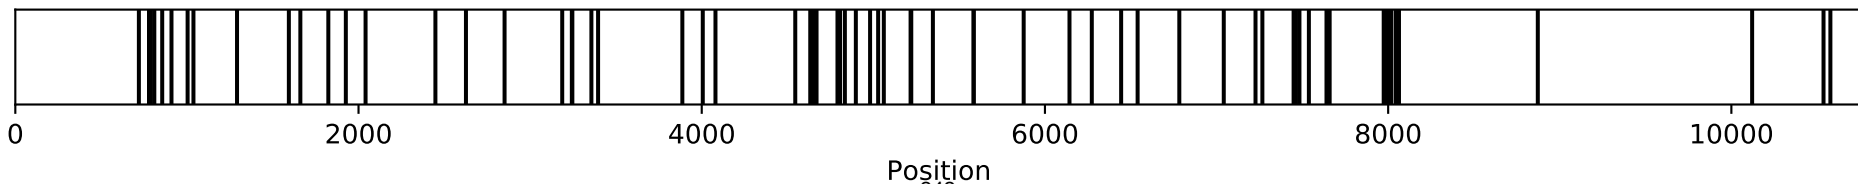

CR1 vs CR2  
Number of differences: 552

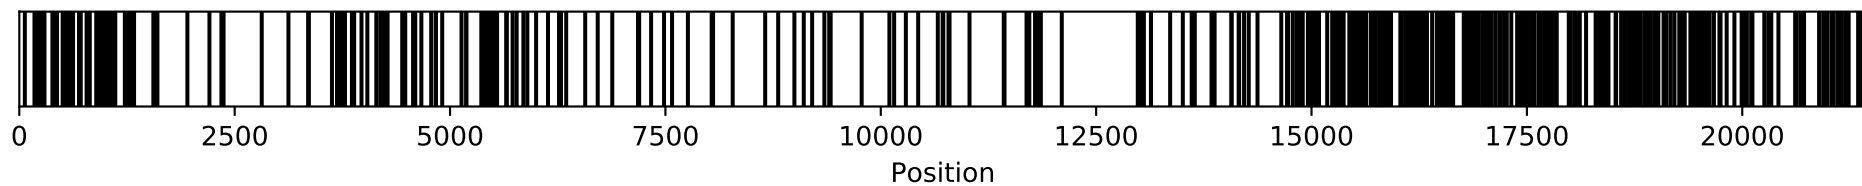

CR1 vs MM1  
Number of differences: 555

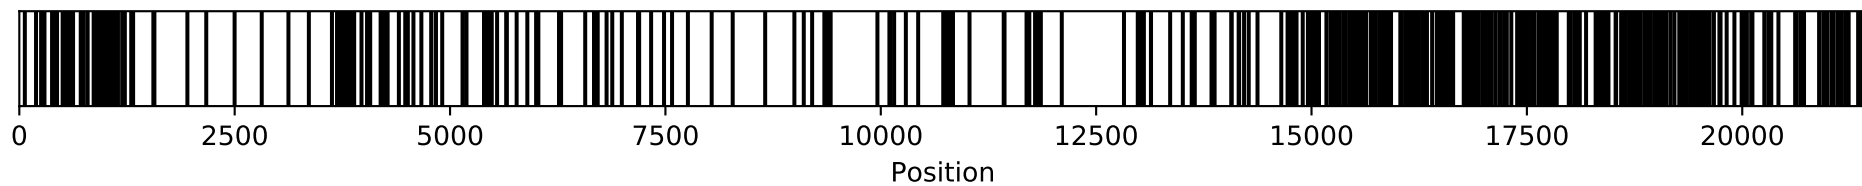

CR1 vs MM2  
Number of differences: 542

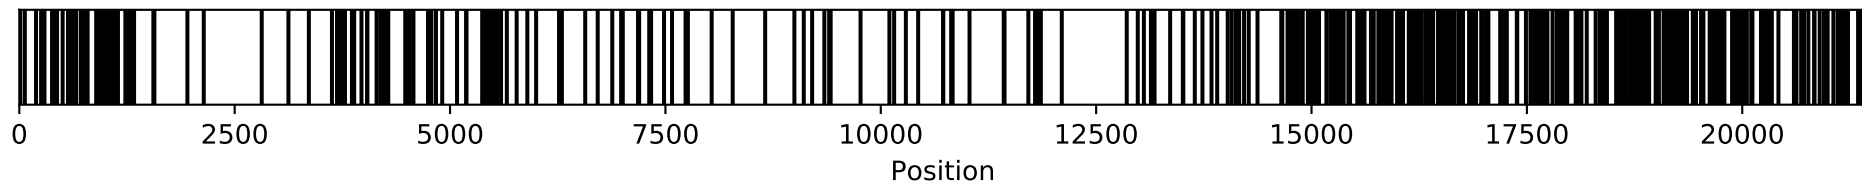

CR2 vs MM1  
Number of differences: 124

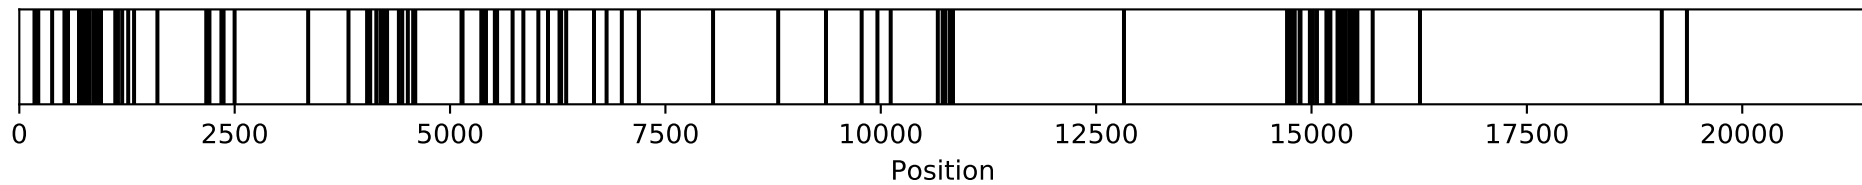

CR2 vs MM2  
Number of differences: 396

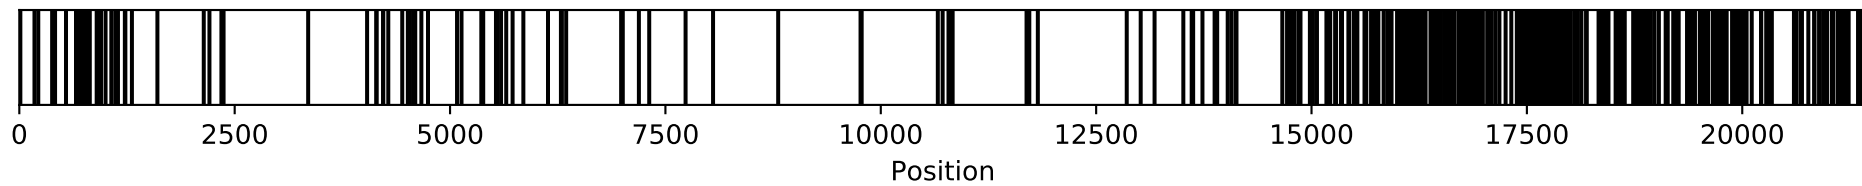

MM1 vs MM2  
Number of differences: 374

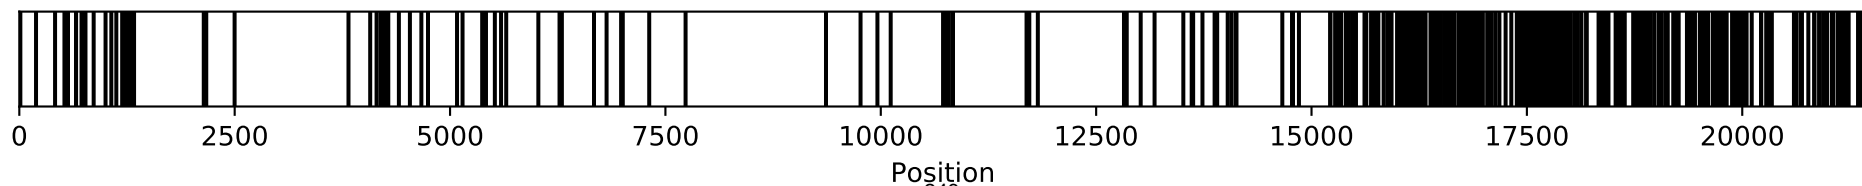

CR1 vs CR2  
Number of differences: 275

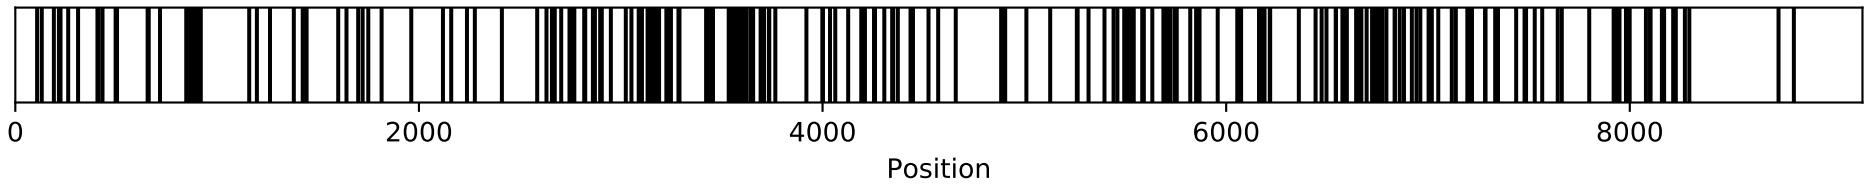

CR1 vs MM1  
Number of differences: 184

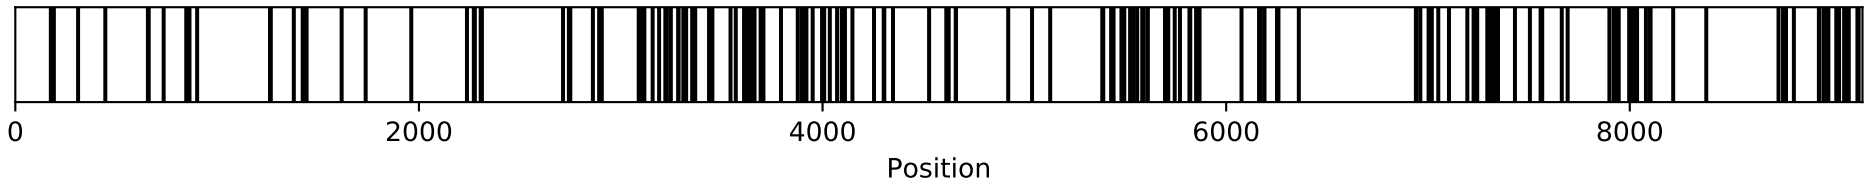

CR1 vs MM2  
Number of differences: 211

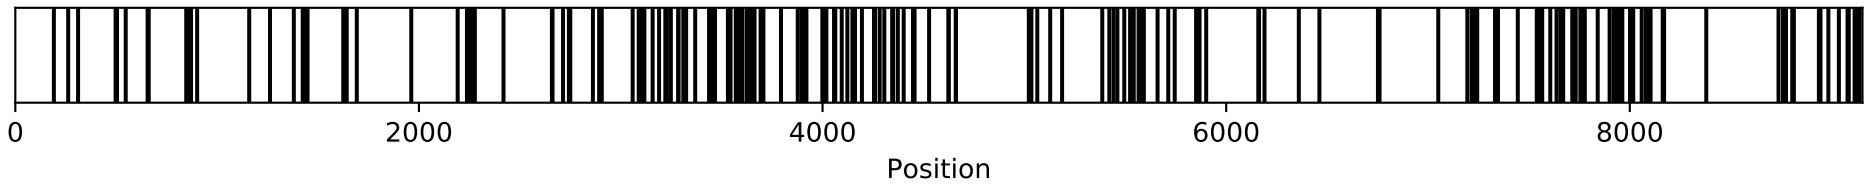

CR2 vs MM1  
Number of differences: 305

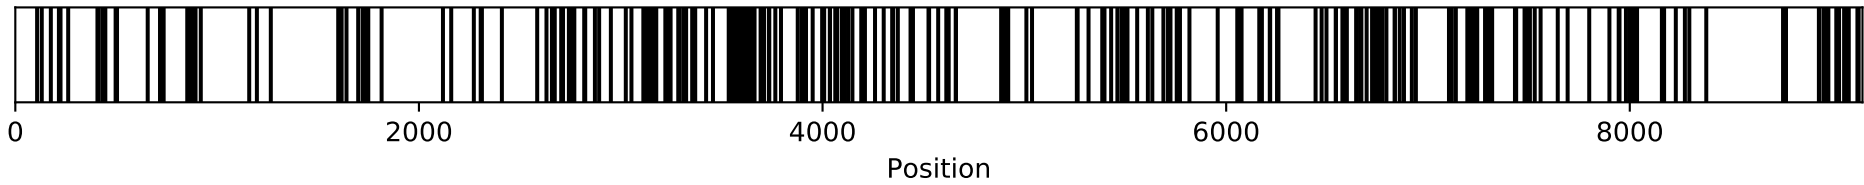

CR2 vs MM2  
Number of differences: 305

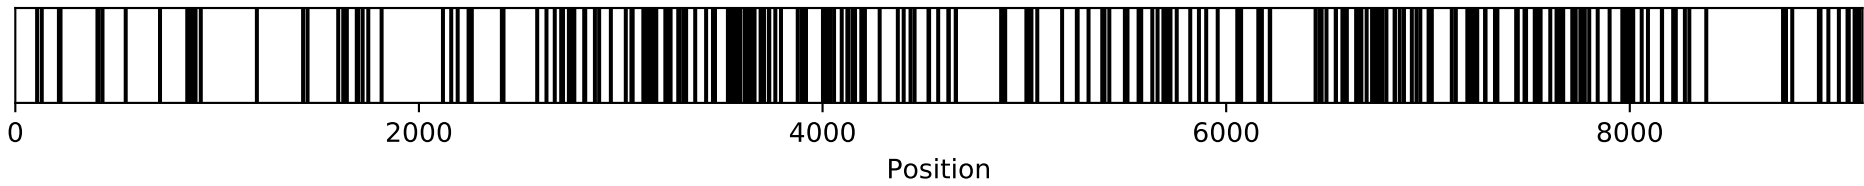

MM1 vs MM2  
Number of differences: 158

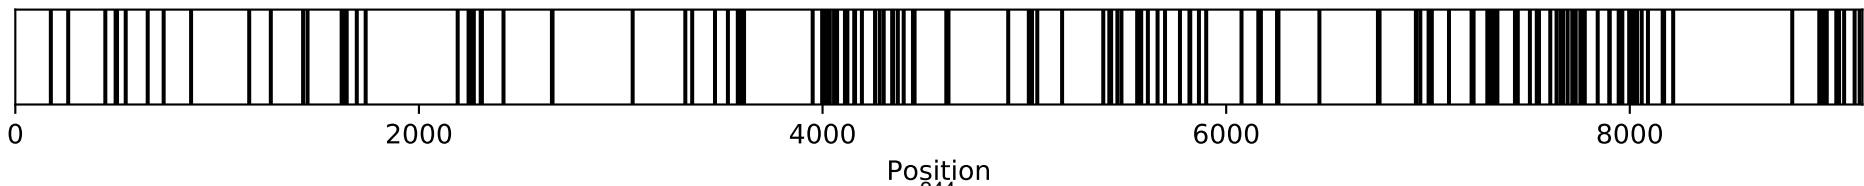

CR1 vs CR2  
Number of differences: 183

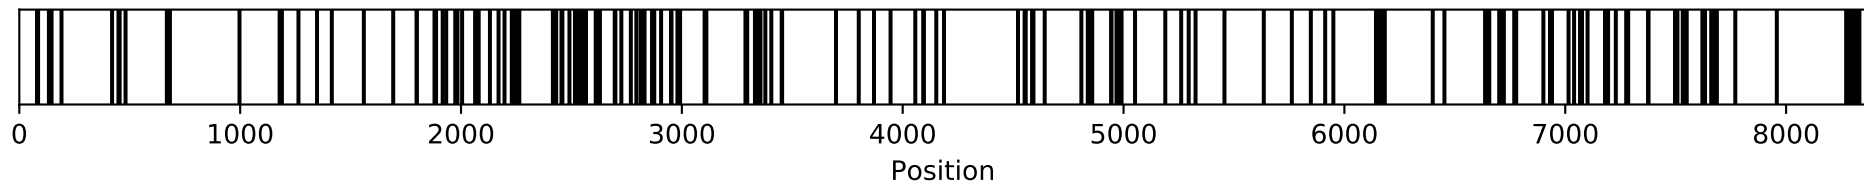

CR1 vs MM1  
Number of differences: 115

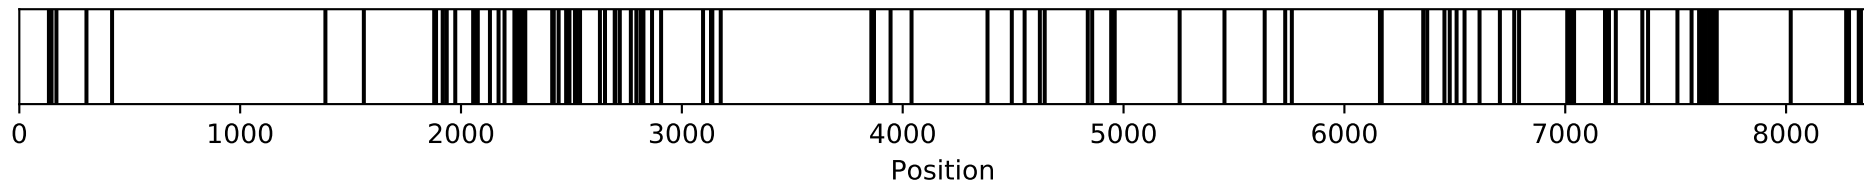

CR1 vs MM2  
Number of differences: 114

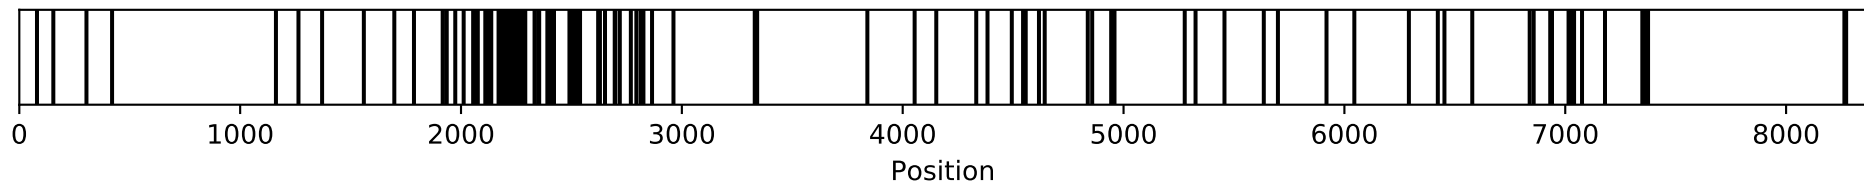

CR2 vs MM1  
Number of differences: 185

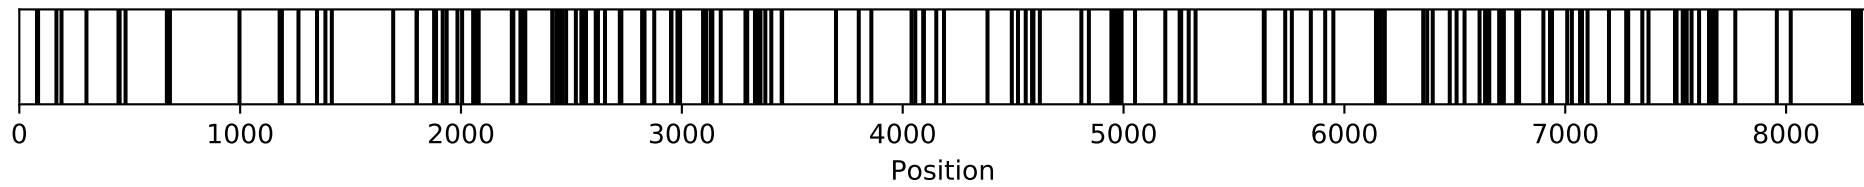

CR2 vs MM2  
Number of differences: 195

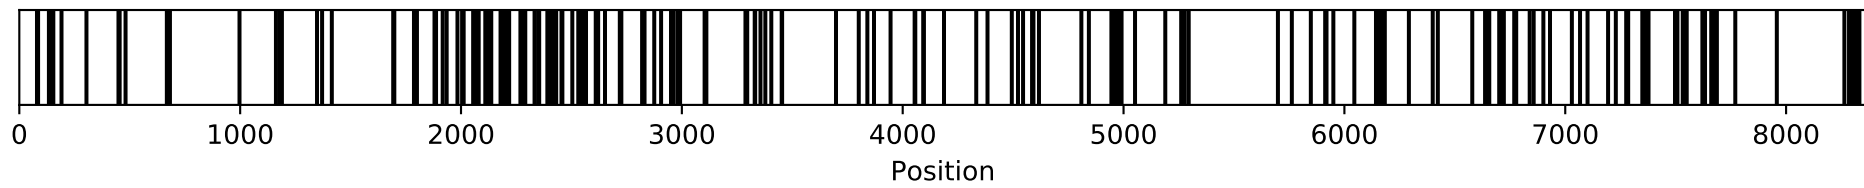

MM1 vs MM2  
Number of differences: 124

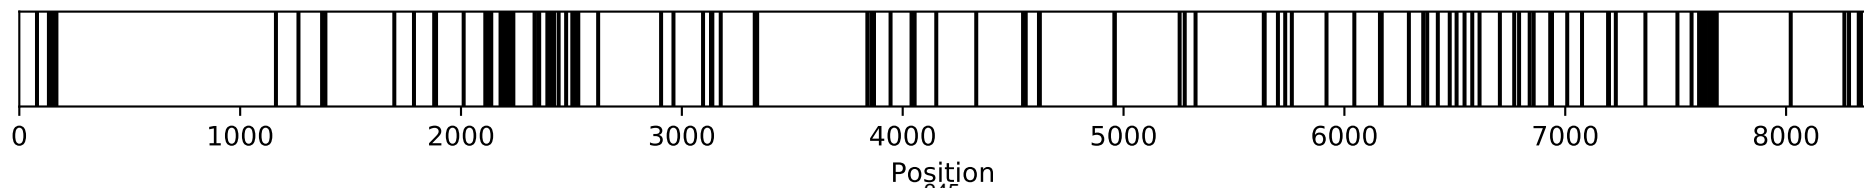

CR1 vs CR2  
Number of differences: 104

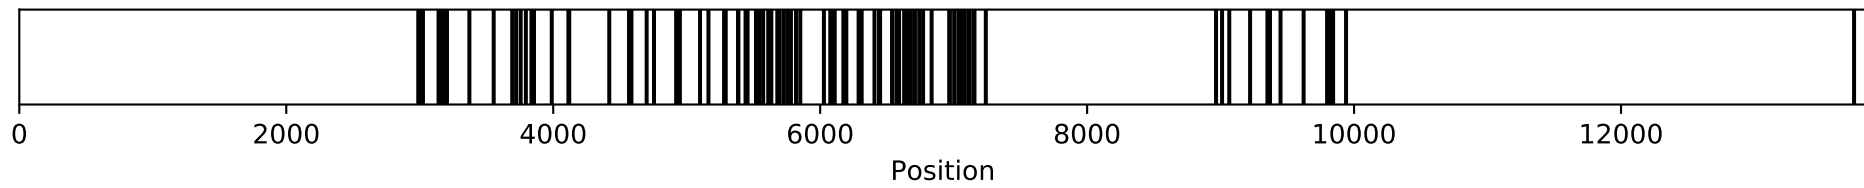

CR1 vs MM1  
Number of differences: 195

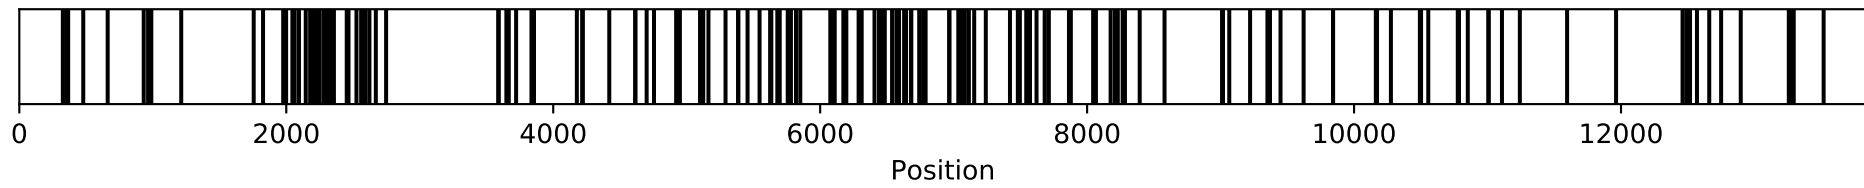

CR1 vs MM2  
Number of differences: 175

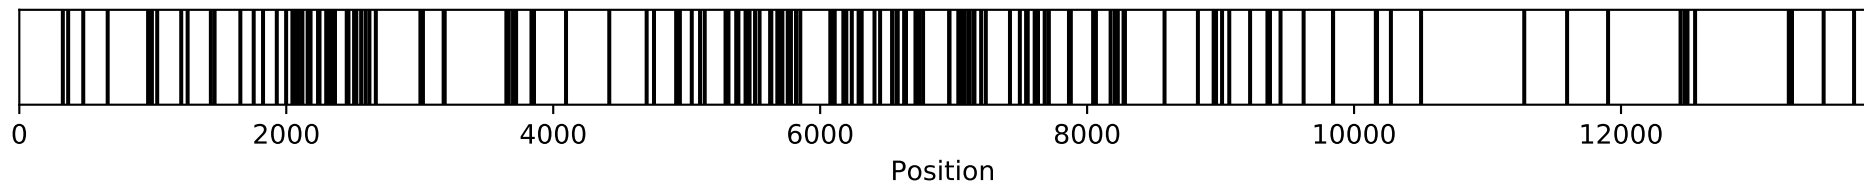

CR2 vs MM1  
Number of differences: 179

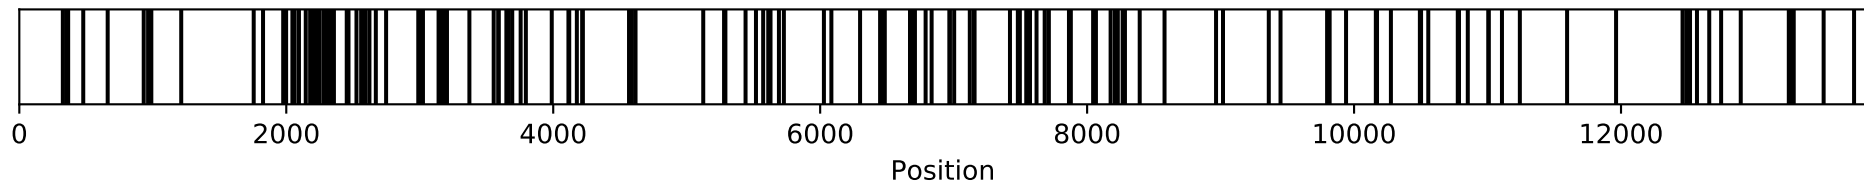

CR2 vs MM2  
Number of differences: 149

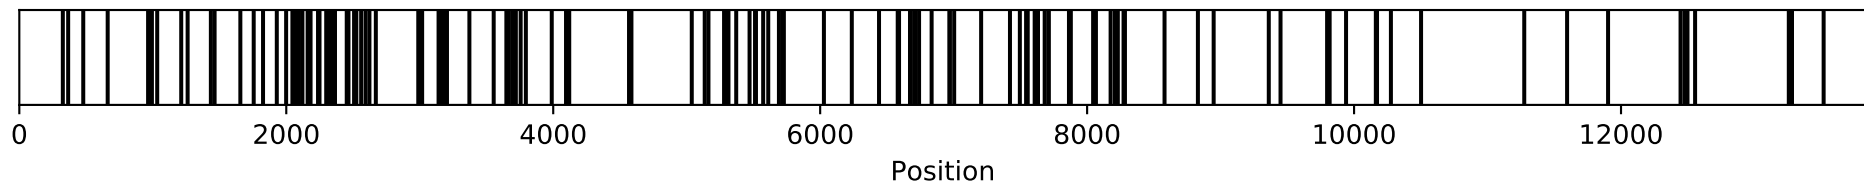

MM1 vs MM2  
Number of differences: 123

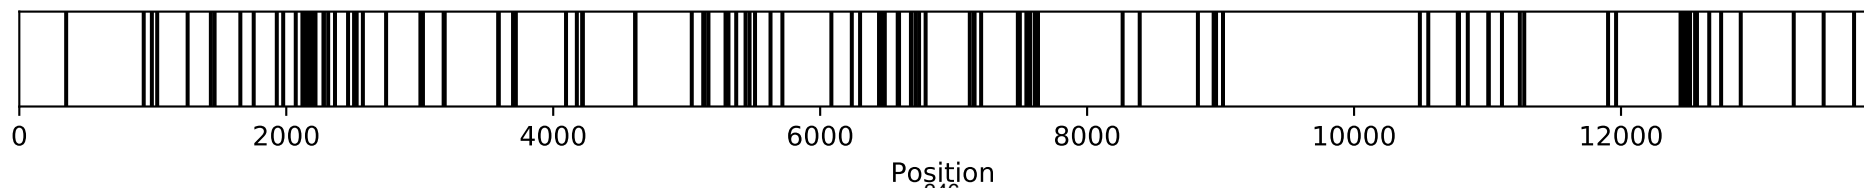

CR1 vs CR2  
Number of differences: 292

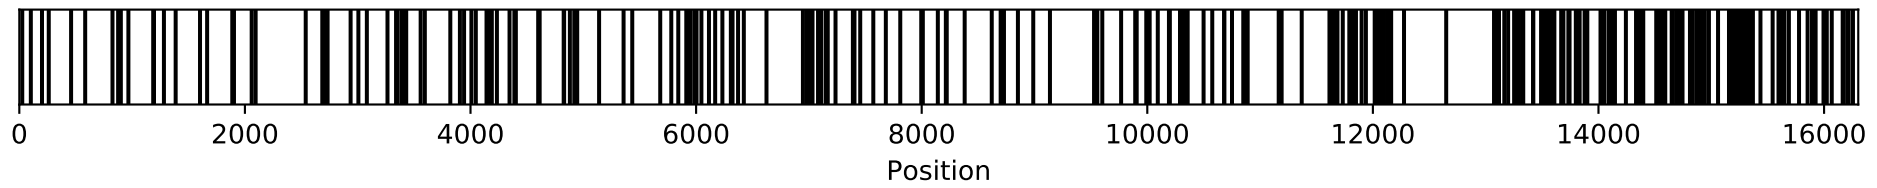

CR1 vs MM1  
Number of differences: 295

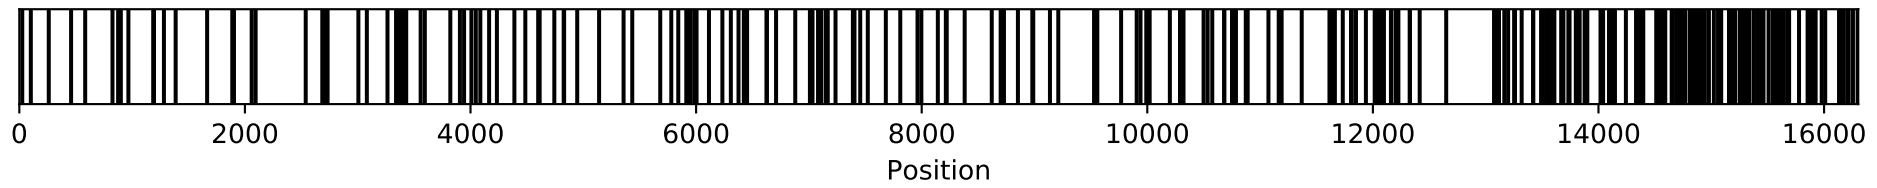

CR1 vs MM2  
Number of differences: 280

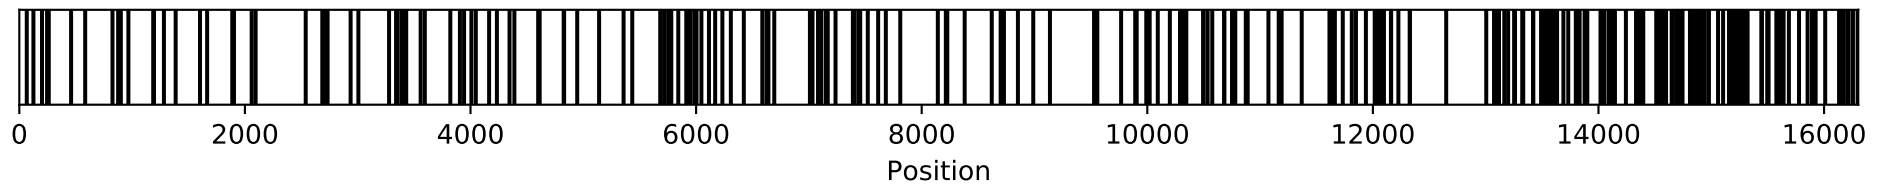

CR2 vs MM1  
Number of differences: 110

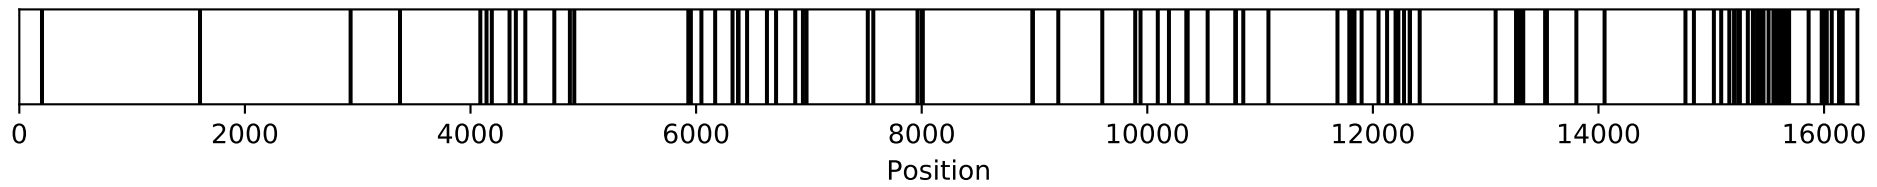

CR2 vs MM2  
Number of differences: 93

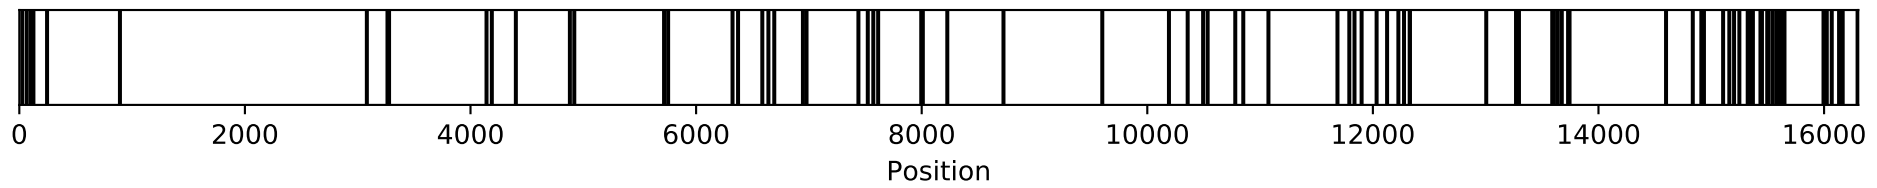

MM1 vs MM2  
Number of differences: 103

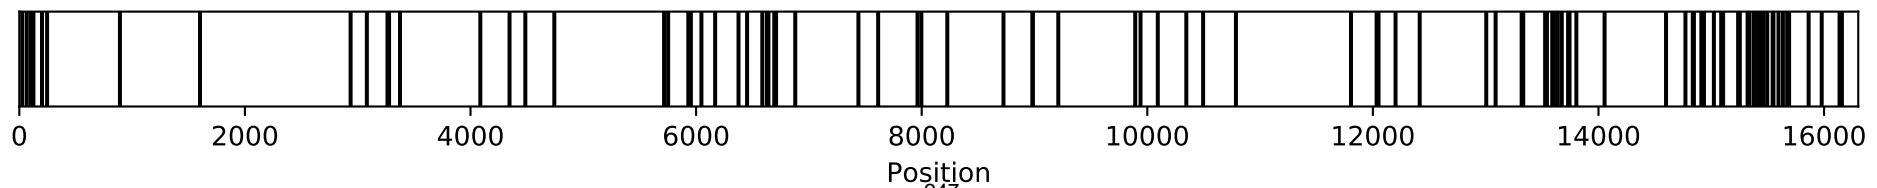



CR1 vs CR2  
Number of differences: 324

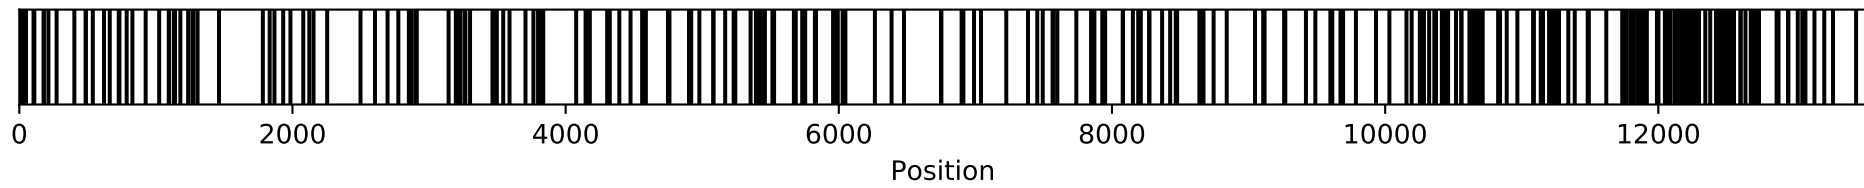

CR1 vs MM1  
Number of differences: 310

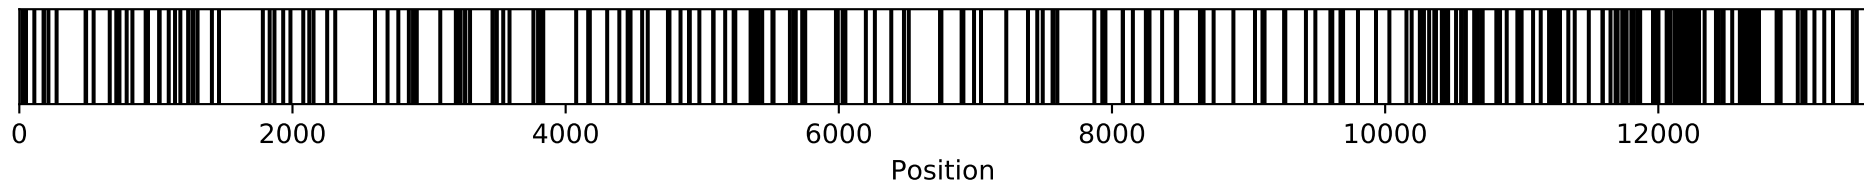

CR1 vs MM2  
Number of differences: 318

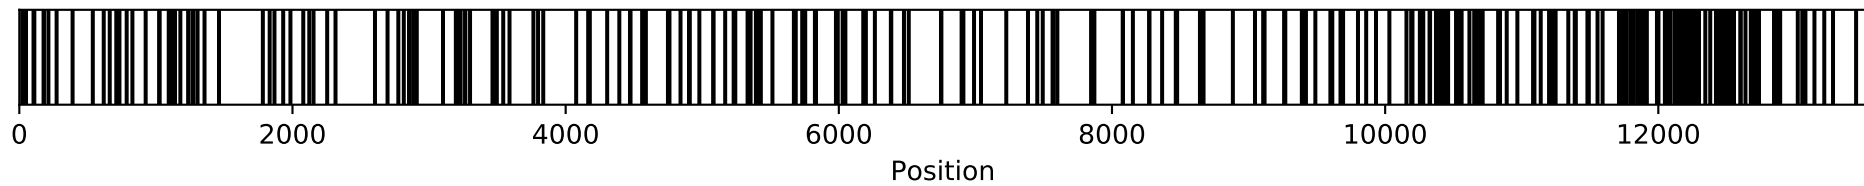

CR2 vs MM1  
Number of differences: 145

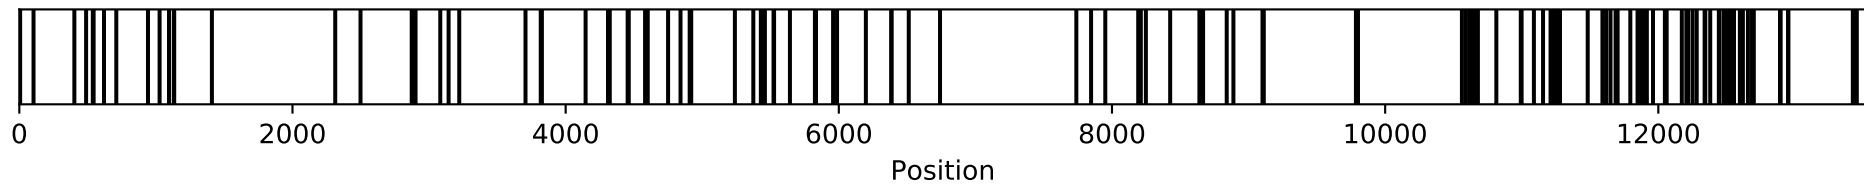

CR2 vs MM2  
Number of differences: 105

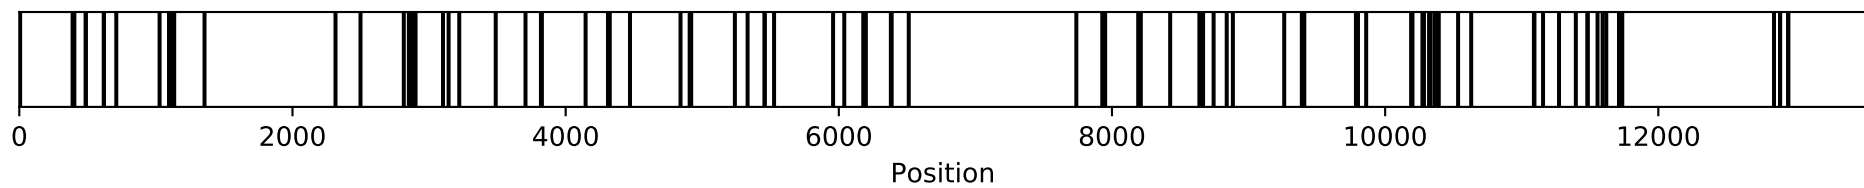

MM1 vs MM2  
Number of differences: 136

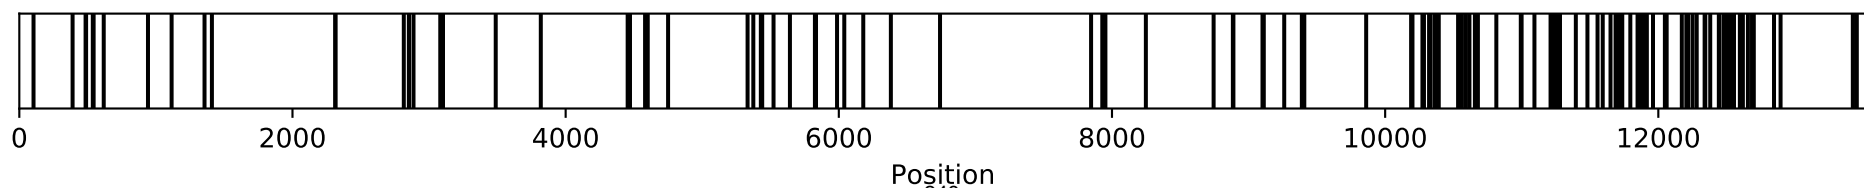

CR1 vs CR2  
Number of differences: 154

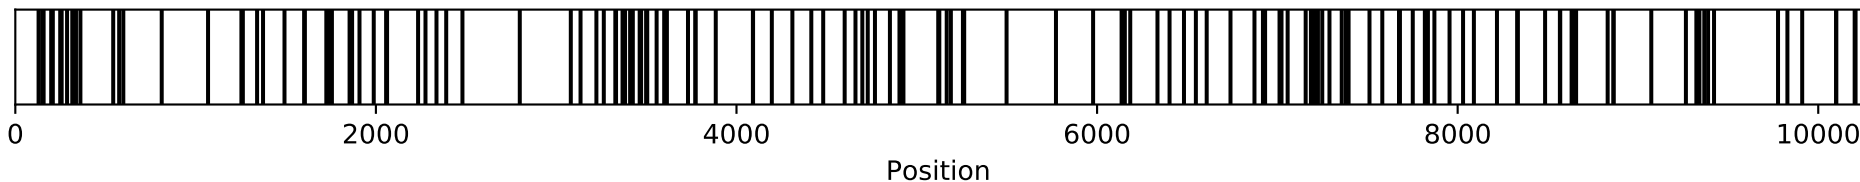

CR1 vs MM1  
Number of differences: 145

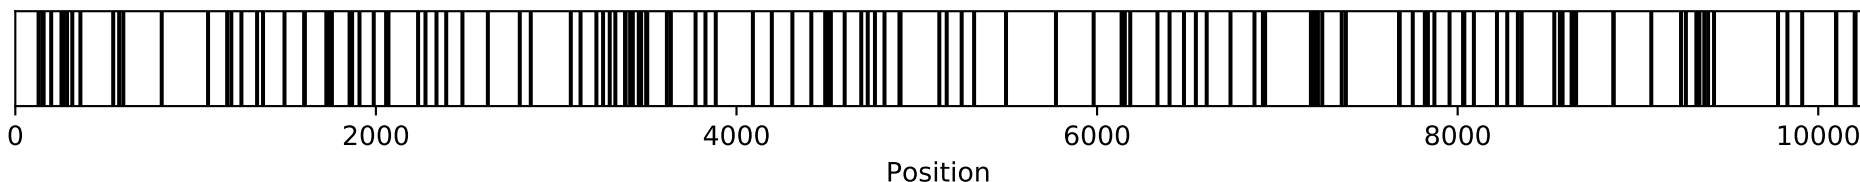

CR1 vs MM2  
Number of differences: 149

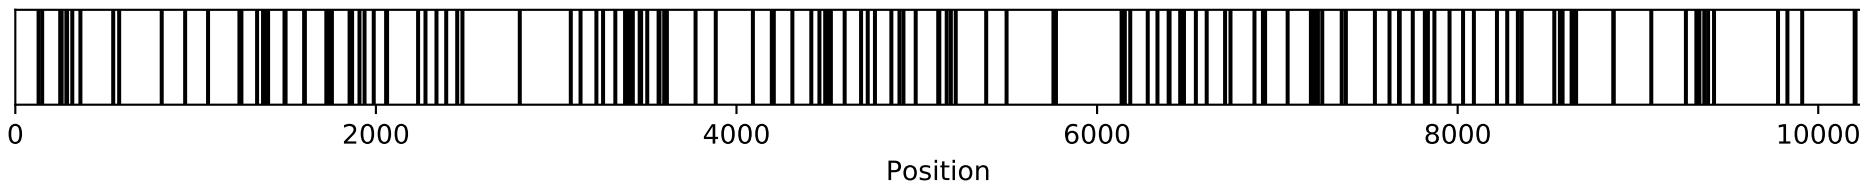

CR2 vs MM1  
Number of differences: 77

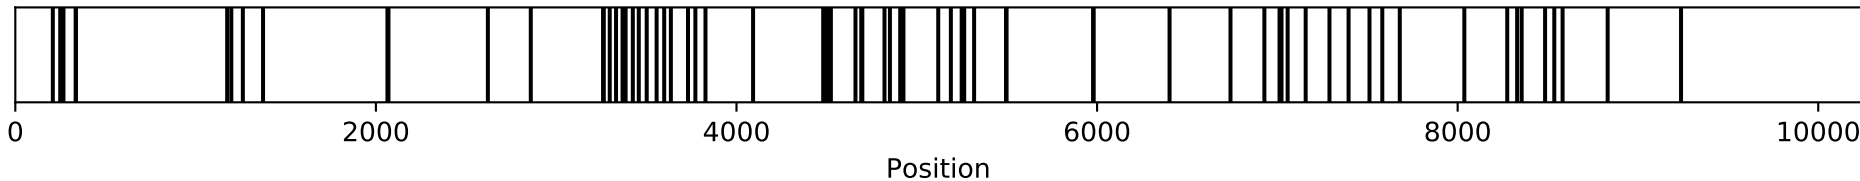

CR2 vs MM2  
Number of differences: 75

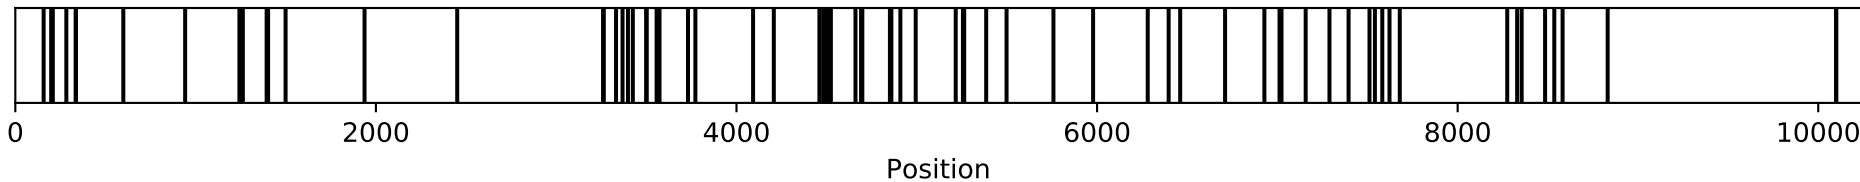

MM1 vs MM2  
Number of differences: 65

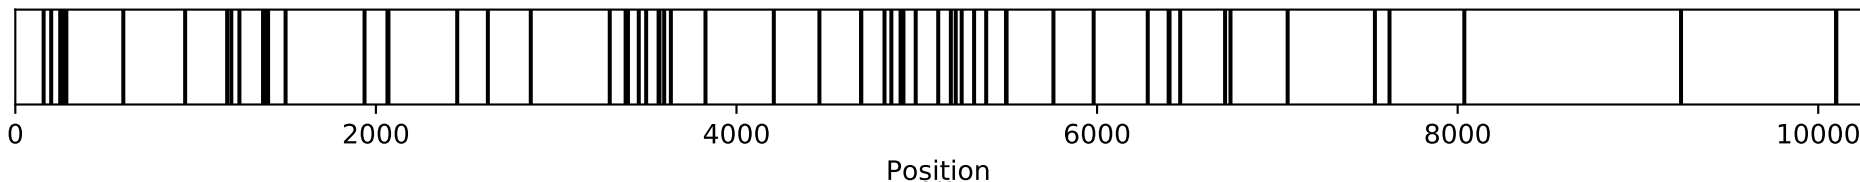

CR1 vs CR2  
Number of differences: 310

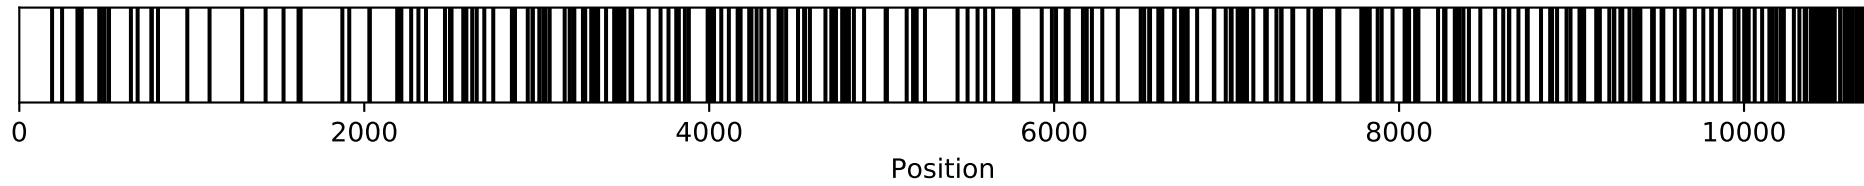

CR1 vs MM1  
Number of differences: 161

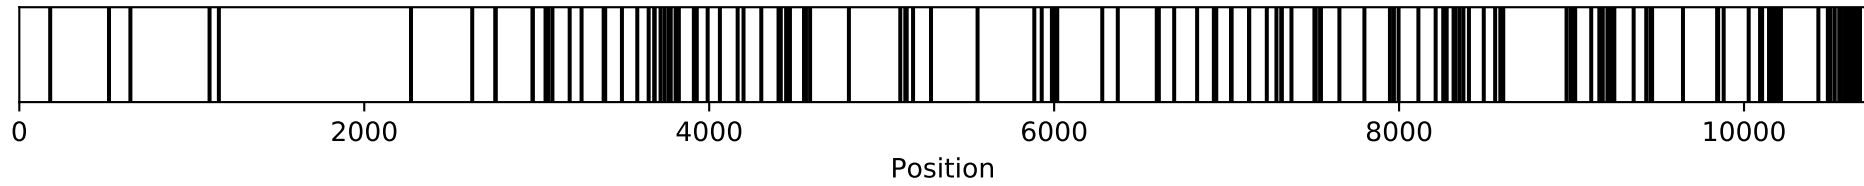

CR1 vs MM2  
Number of differences: 162

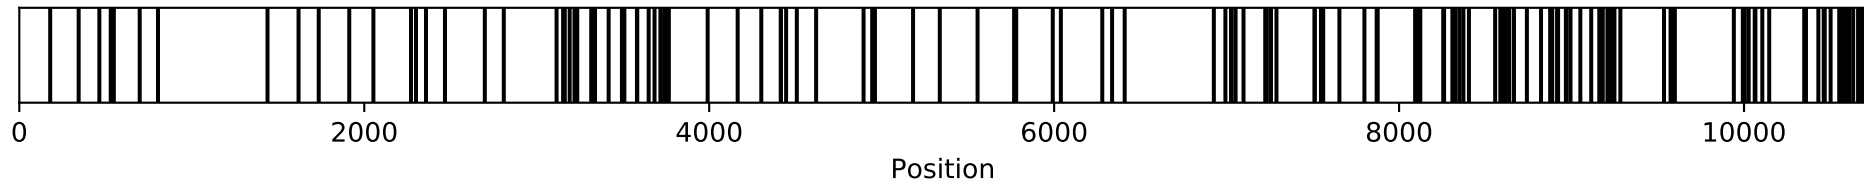

CR2 vs MM1  
Number of differences: 316

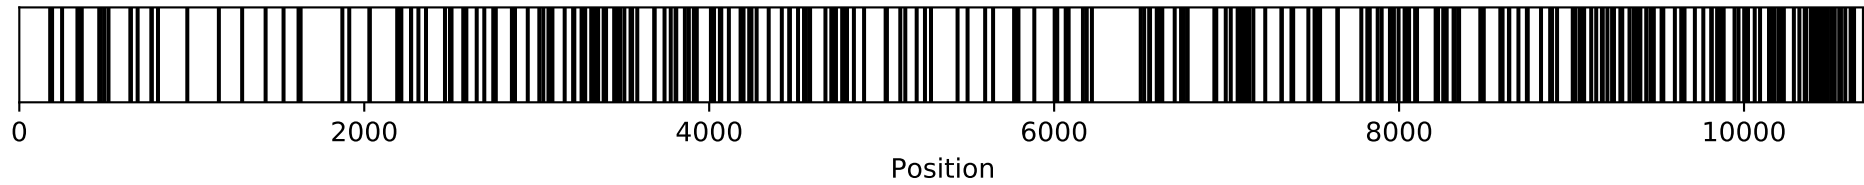

CR2 vs MM2  
Number of differences: 318

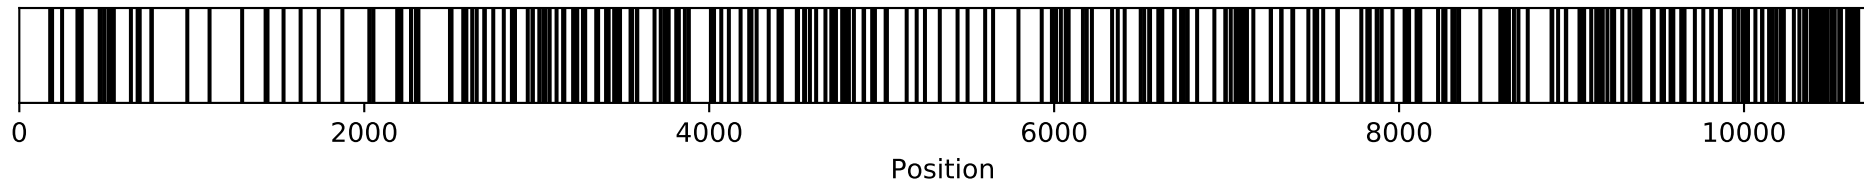

MM1 vs MM2  
Number of differences: 191

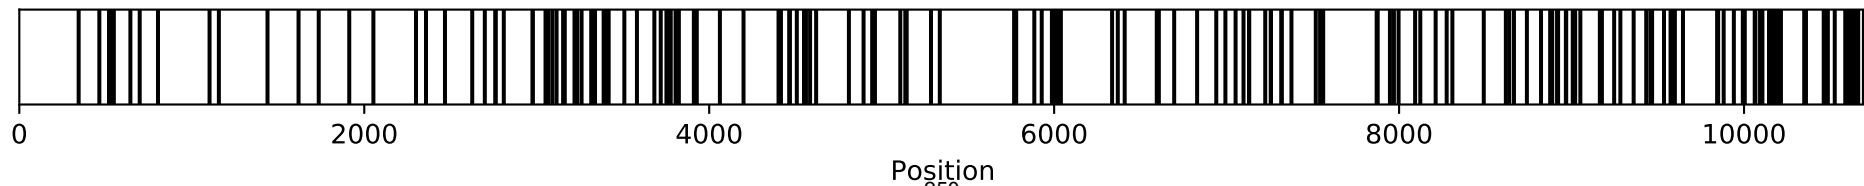

CR1 vs CR2  
Number of differences: 286

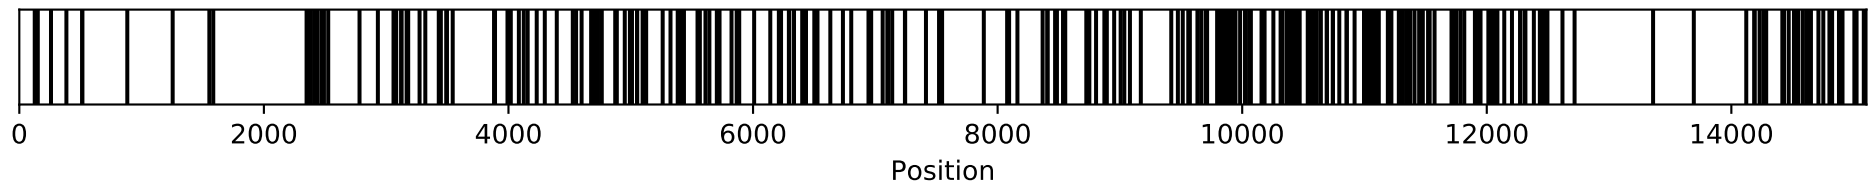

CR1 vs MM1  
Number of differences: 127

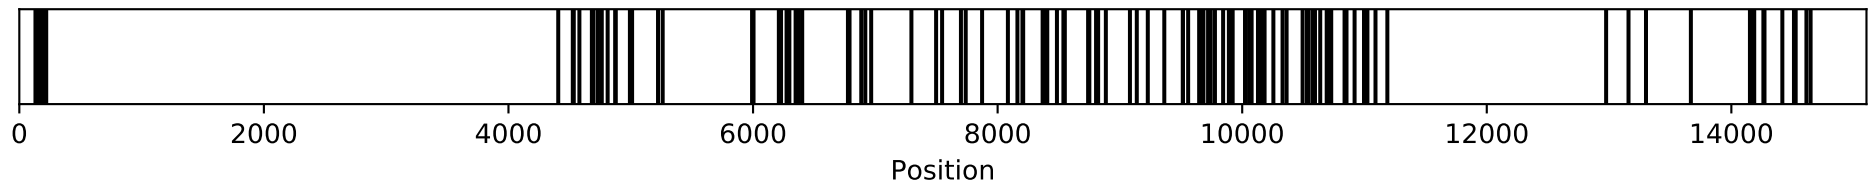

CR1 vs MM2  
Number of differences: 135

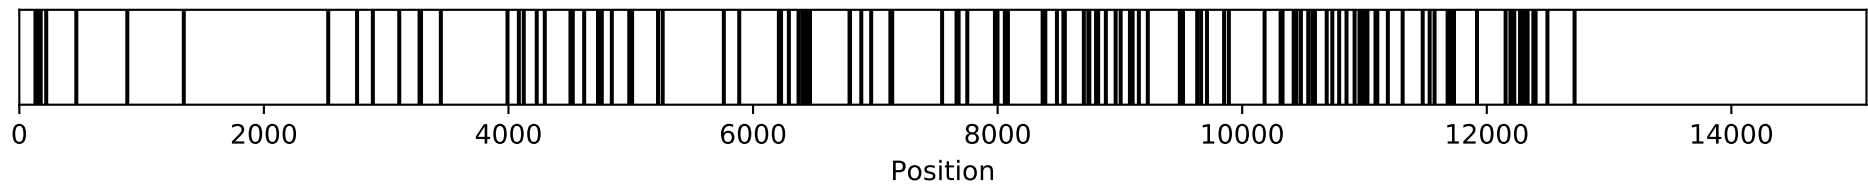

CR2 vs MM1  
Number of differences: 307

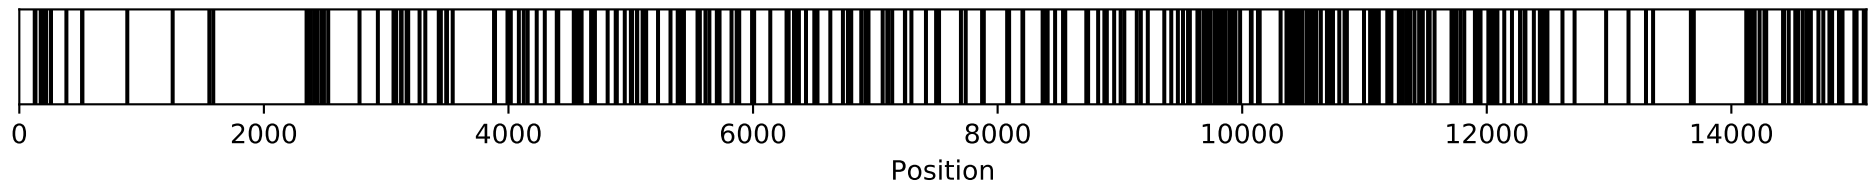

CR2 vs MM2  
Number of differences: 296

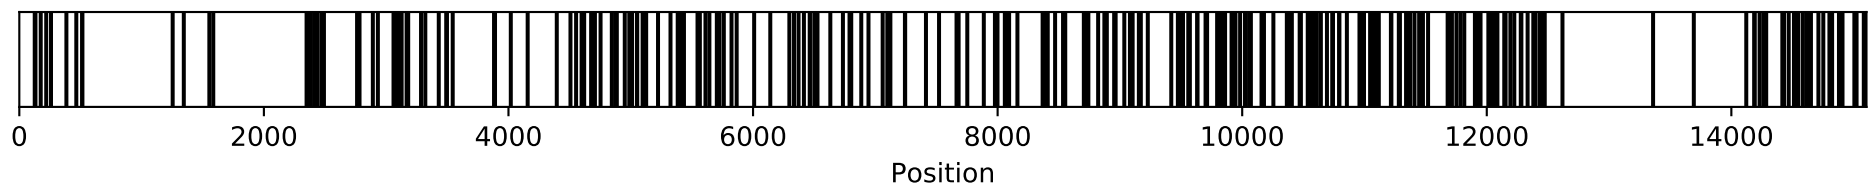

MM1 vs MM2  
Number of differences: 172

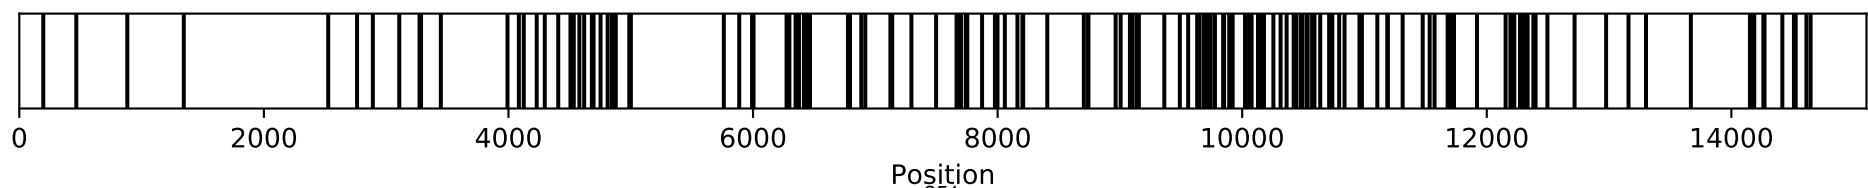

CR1 vs CR2  
Number of differences: 369

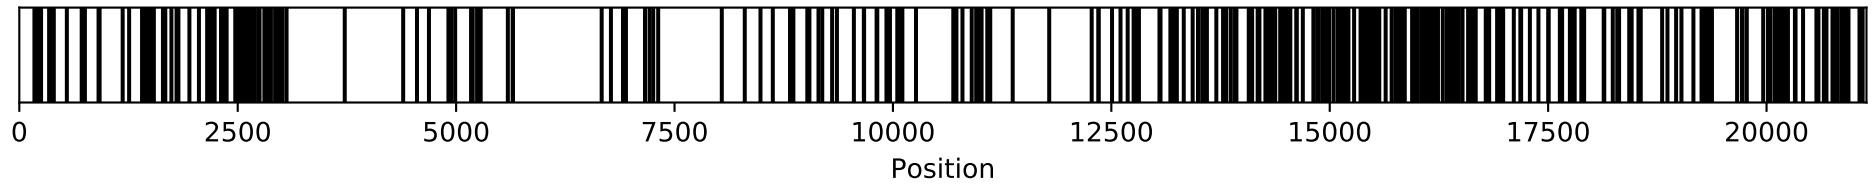

CR1 vs MM1  
Number of differences: 359

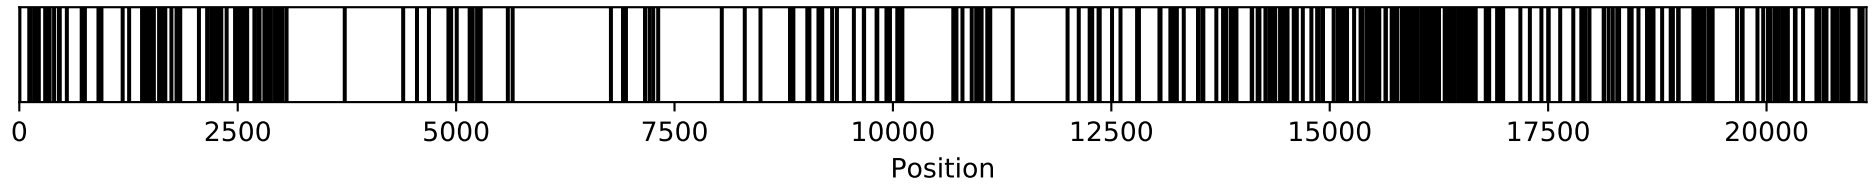

CR1 vs MM2  
Number of differences: 370

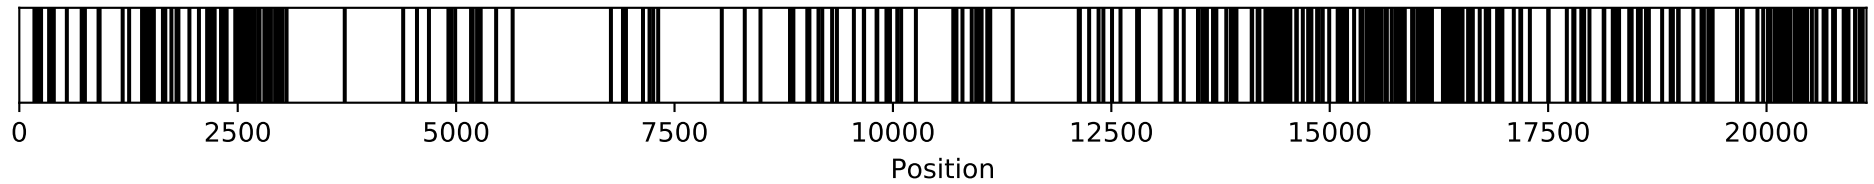

CR2 vs MM1  
Number of differences: 185

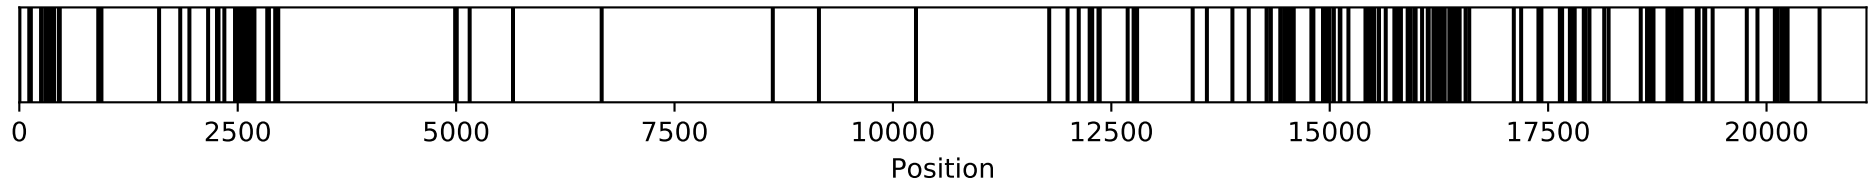

CR2 vs MM2  
Number of differences: 166

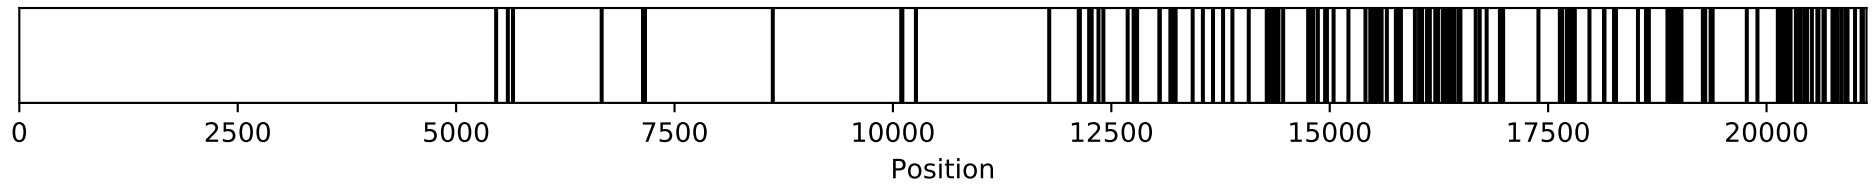

MM1 vs MM2  
Number of differences: 215

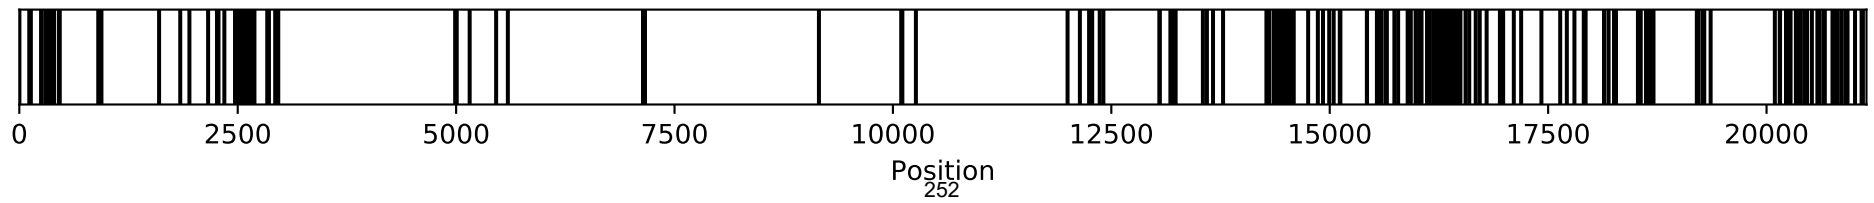

CR1 vs CR2  
Number of differences: 260

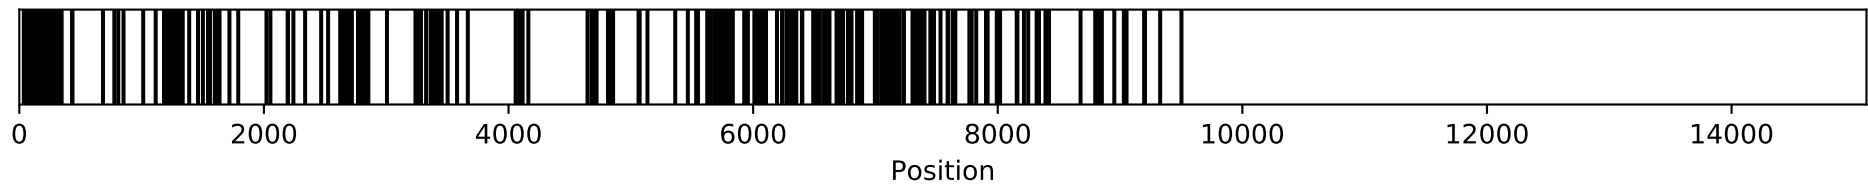

CR1 vs MM1  
Number of differences: 158

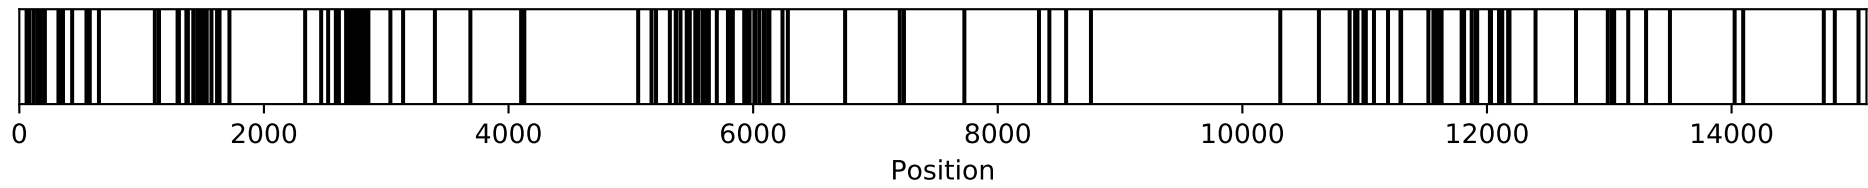

CR1 vs MM2  
Number of differences: 254

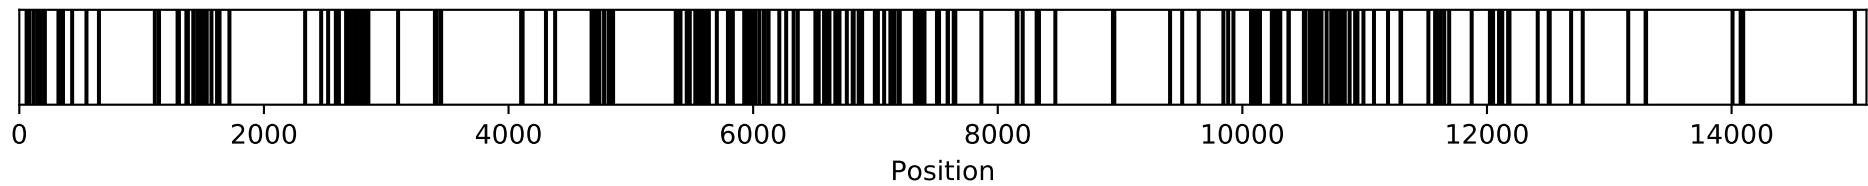

CR2 vs MM1  
Number of differences: 310

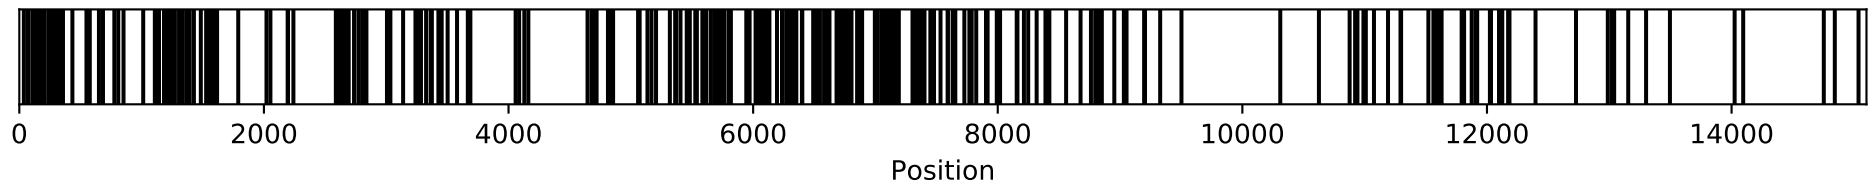

CR2 vs MM2  
Number of differences: 333

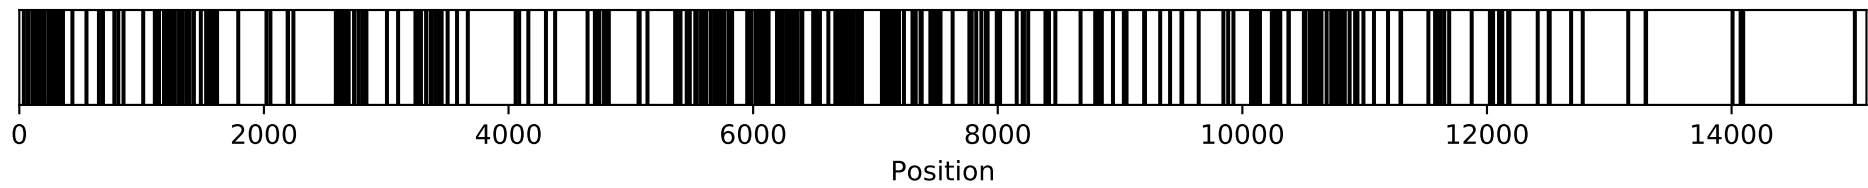

MM1 vs MM2  
Number of differences: 180

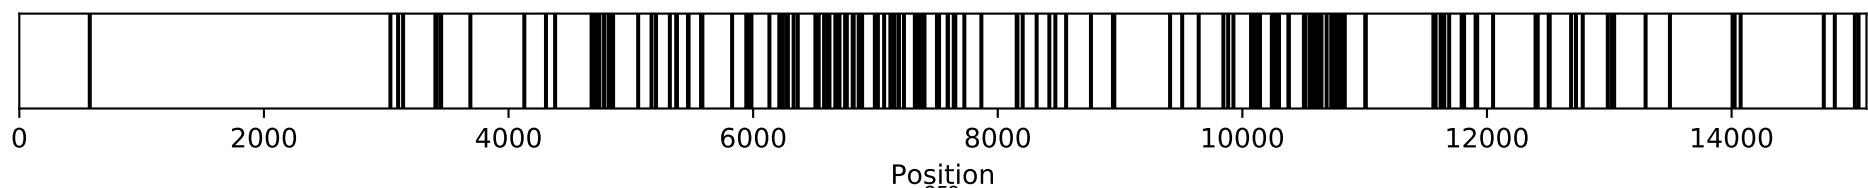

CR1 vs CR2  
Number of differences: 260

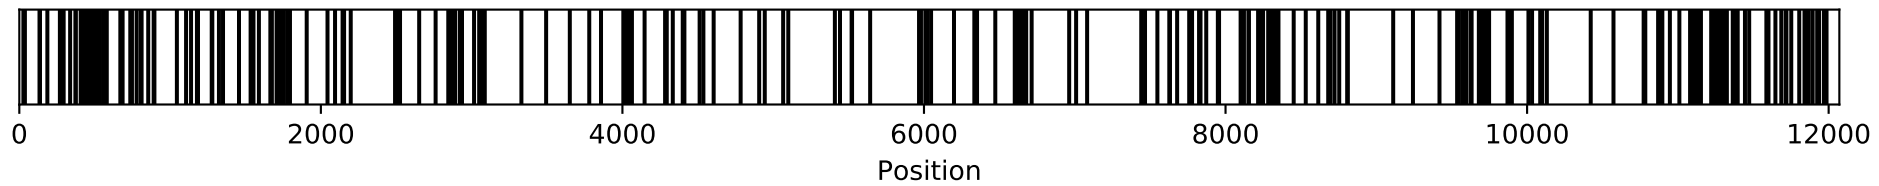

CR1 vs MM1  
Number of differences: 259

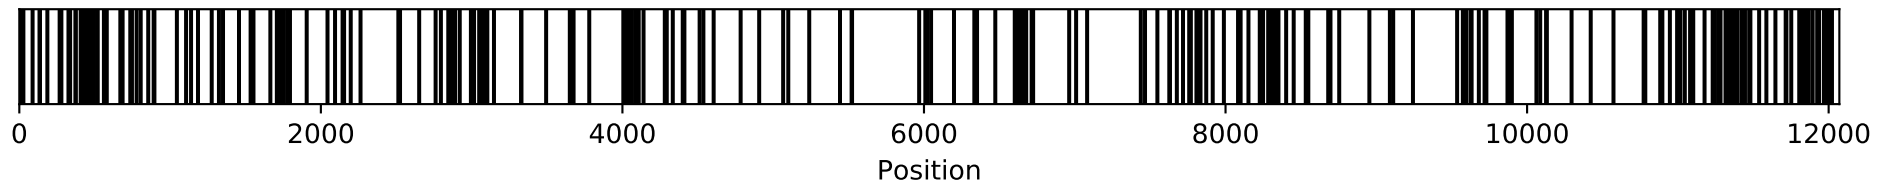

CR1 vs MM2  
Number of differences: 252

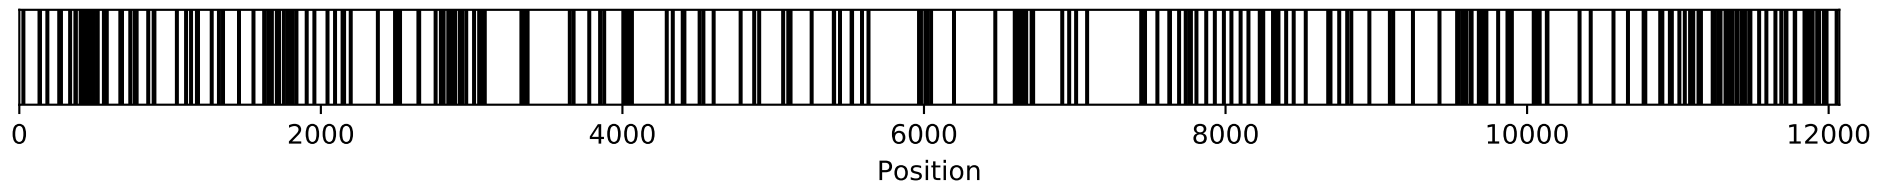

CR2 vs MM1  
Number of differences: 116

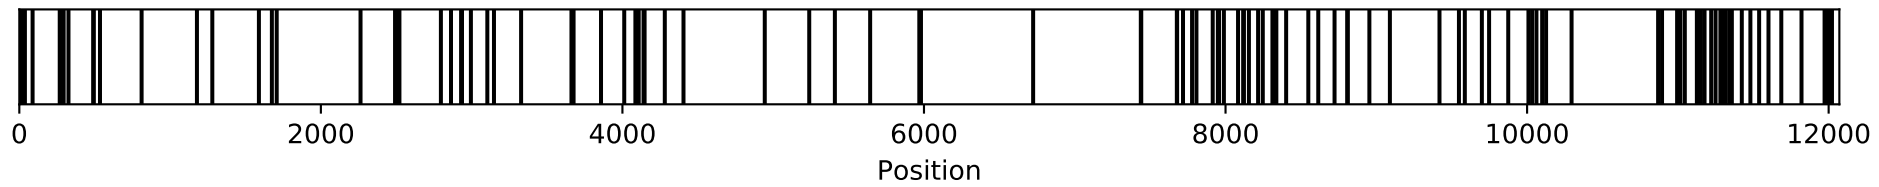

CR2 vs MM2  
Number of differences: 133

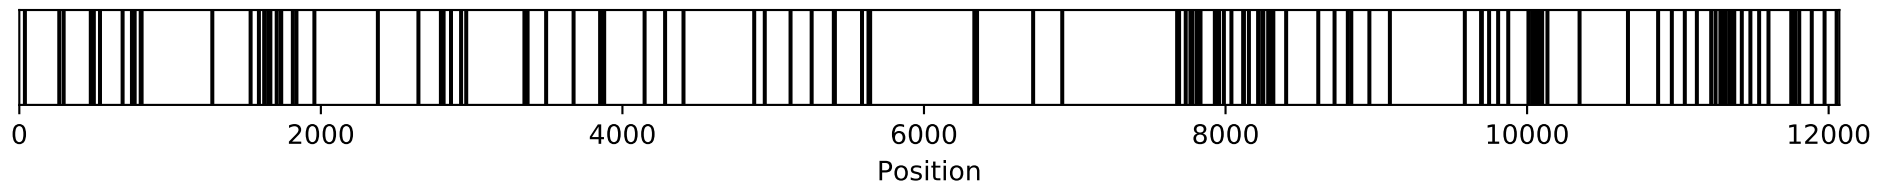

MM1 vs MM2  
Number of differences: 125

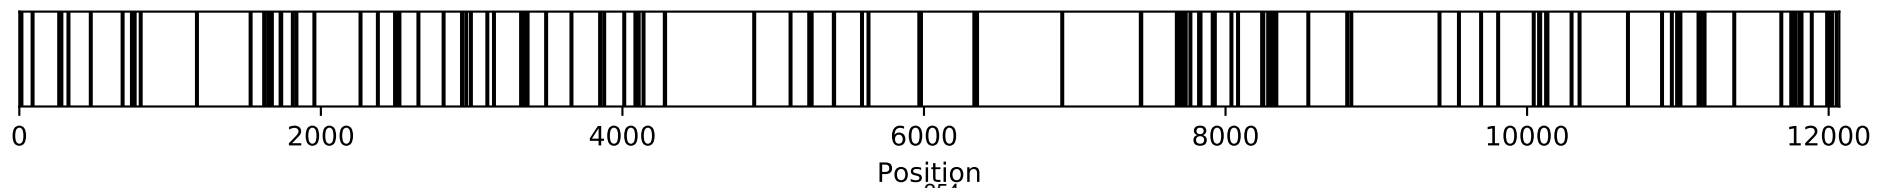

CR1 vs CR2  
Number of differences: 129

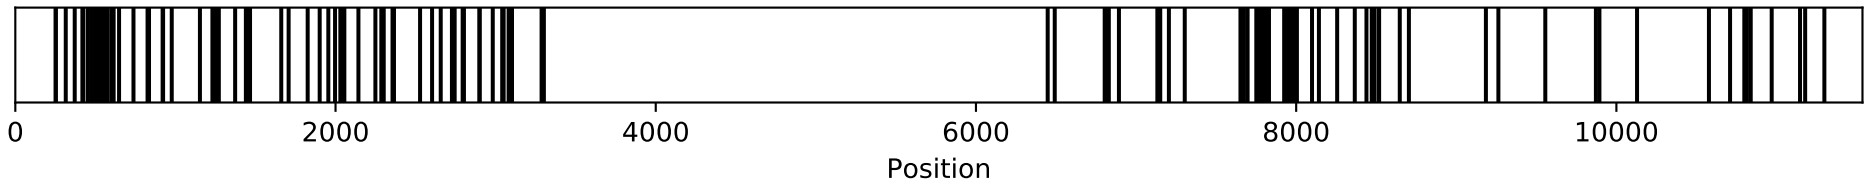

CR1 vs MM1  
Number of differences: 68

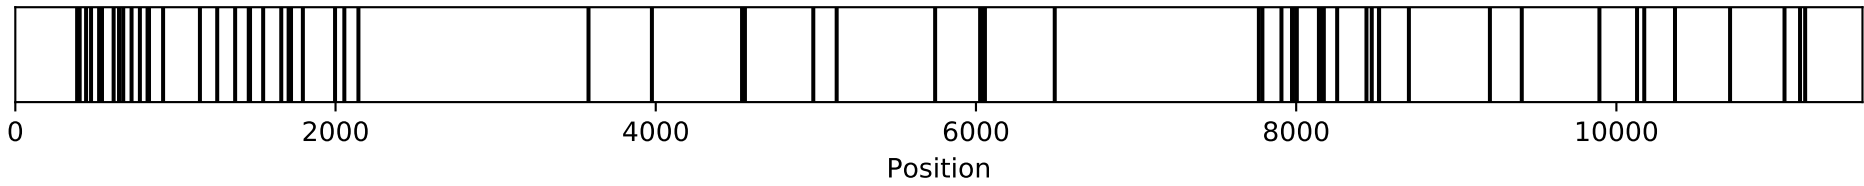

CR1 vs MM2  
Number of differences: 81

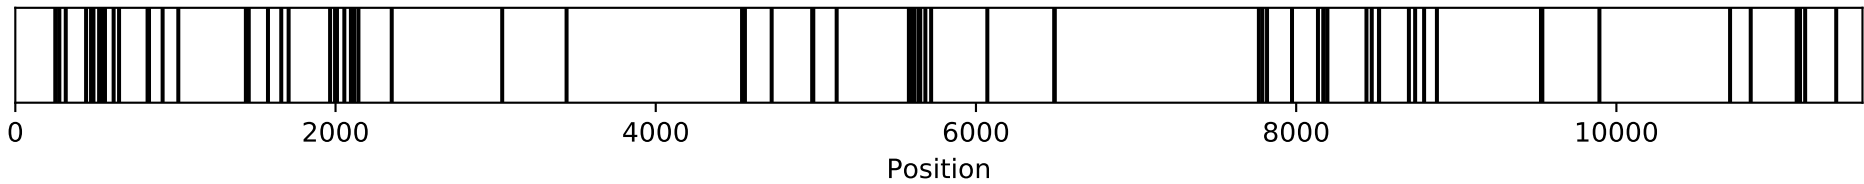

CR2 vs MM1  
Number of differences: 125

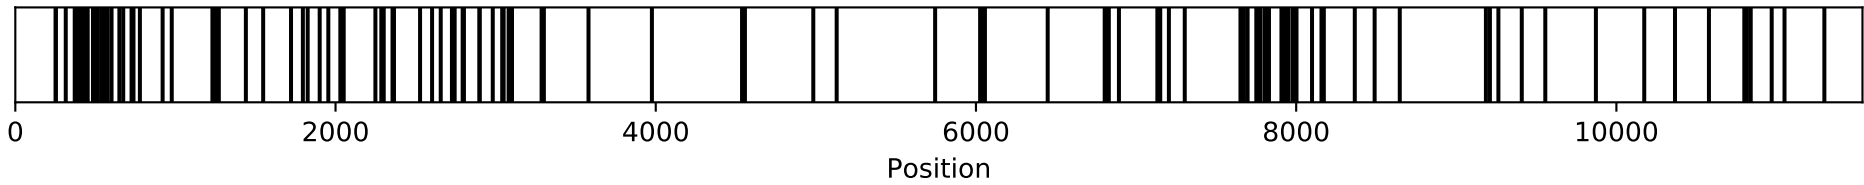

CR2 vs MM2  
Number of differences: 140

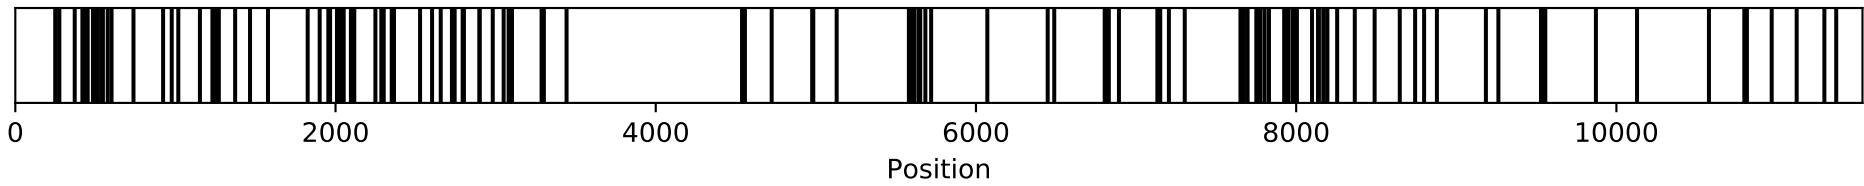

MM1 vs MM2  
Number of differences: 79

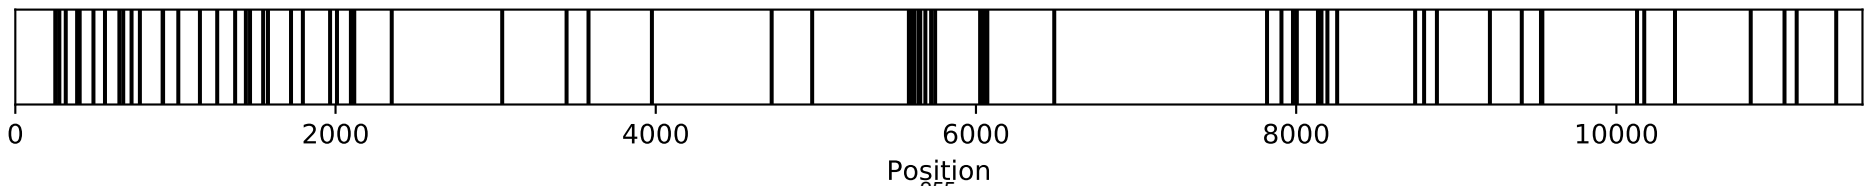



CR1 vs CR2  
Number of differences: 155

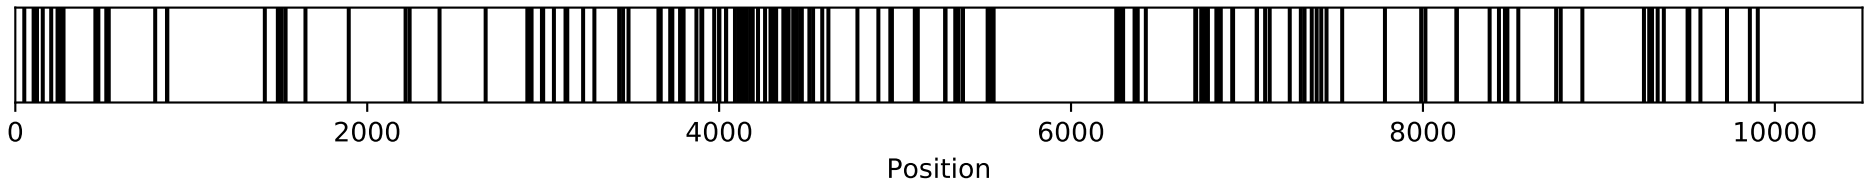

CR1 vs MM1  
Number of differences: 67

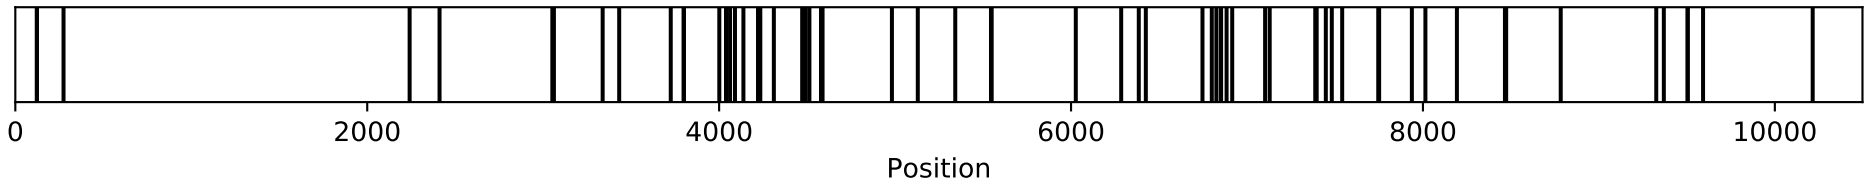

CR1 vs MM2  
Number of differences: 68

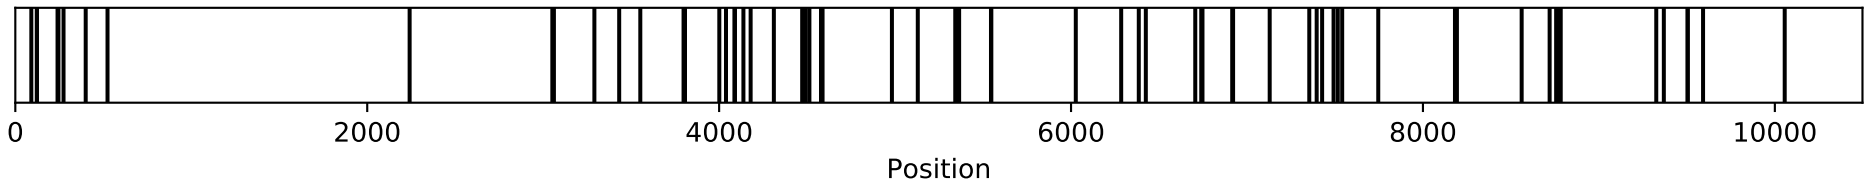

CR2 vs MM1  
Number of differences: 149

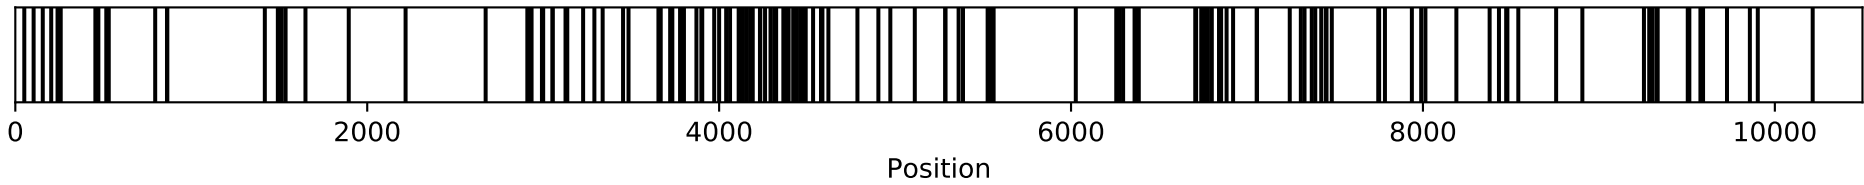

CR2 vs MM2  
Number of differences: 150

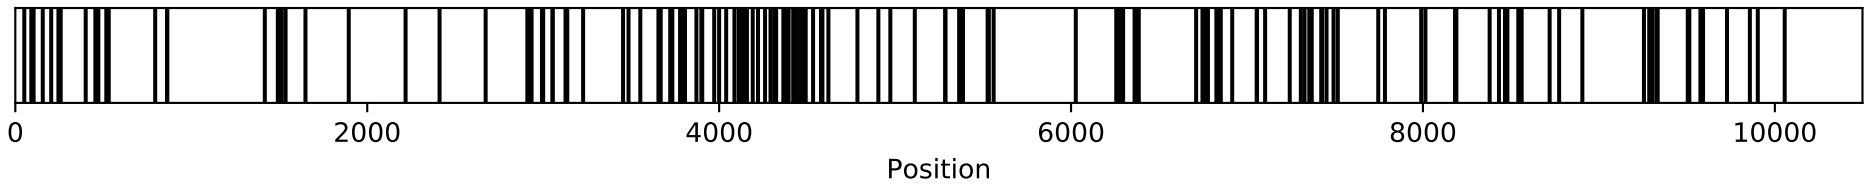

MM1 vs MM2  
Number of differences: 50

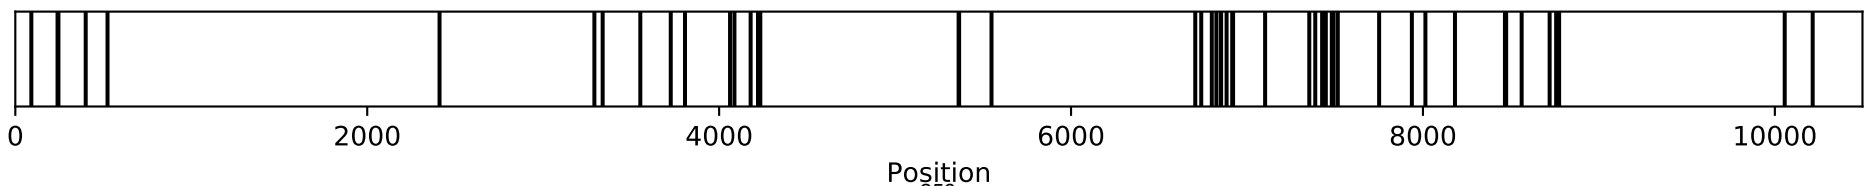

CR1 vs CR2  
Number of differences: 277

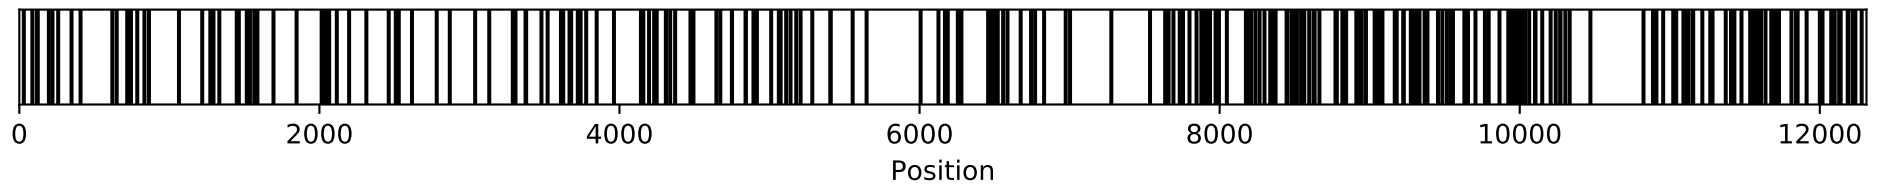

CR1 vs MM1  
Number of differences: 106

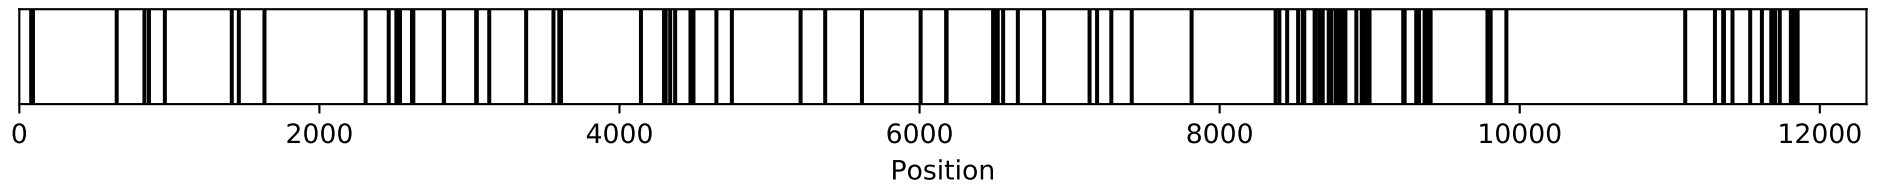

CR1 vs MM2  
Number of differences: 117

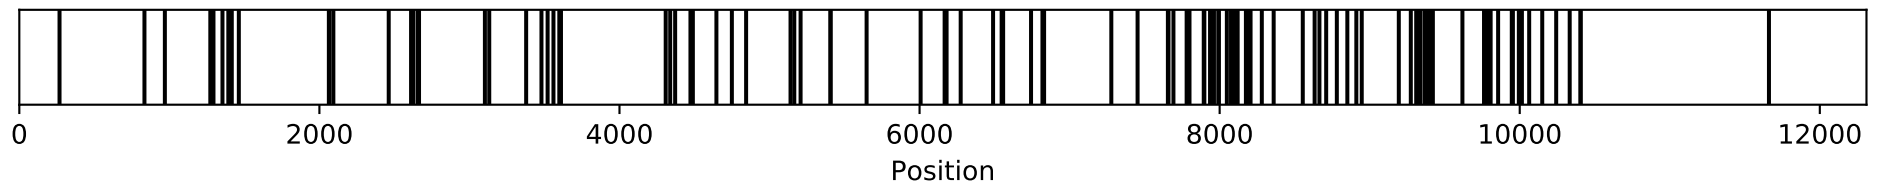

CR2 vs MM1  
Number of differences: 281

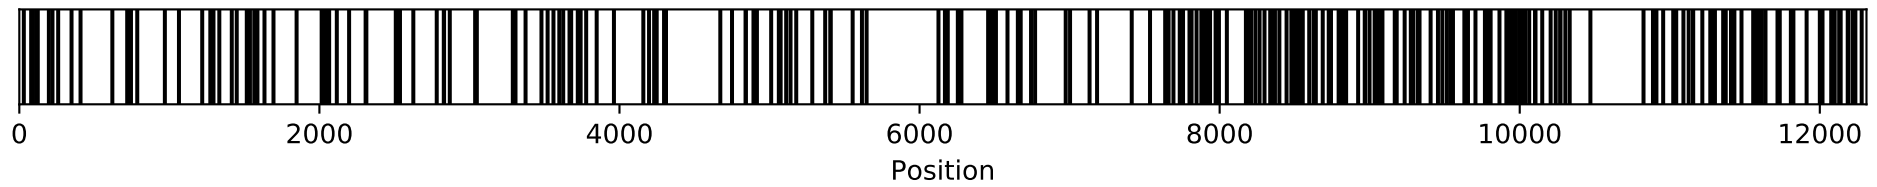

CR2 vs MM2  
Number of differences: 280

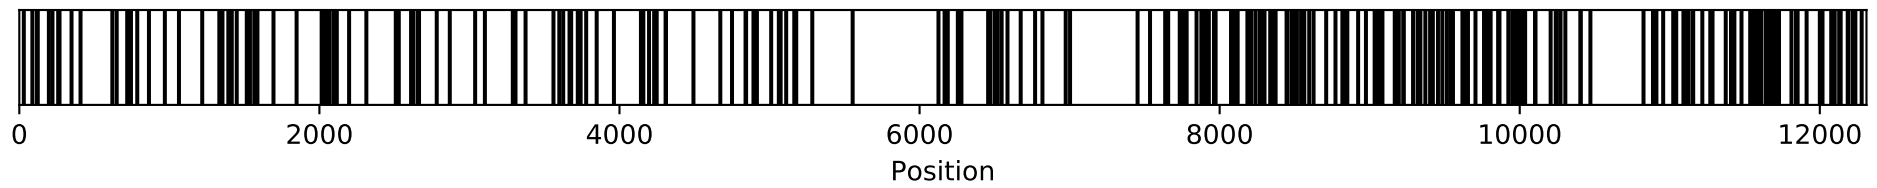

MM1 vs MM2  
Number of differences: 146

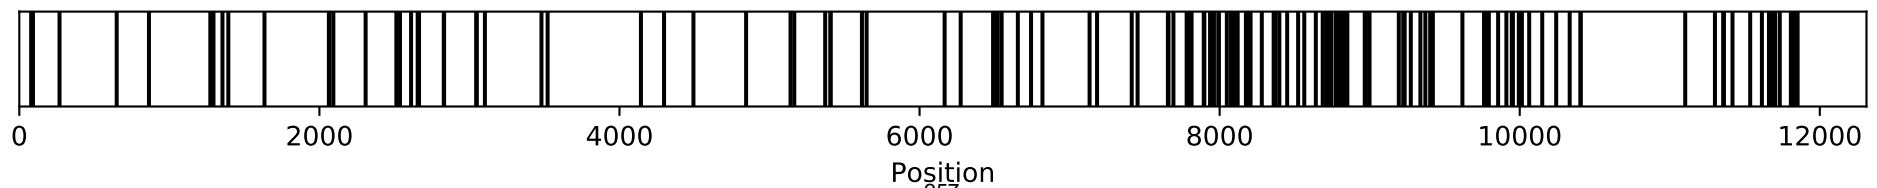

CR1 vs CR2  
Number of differences: 133

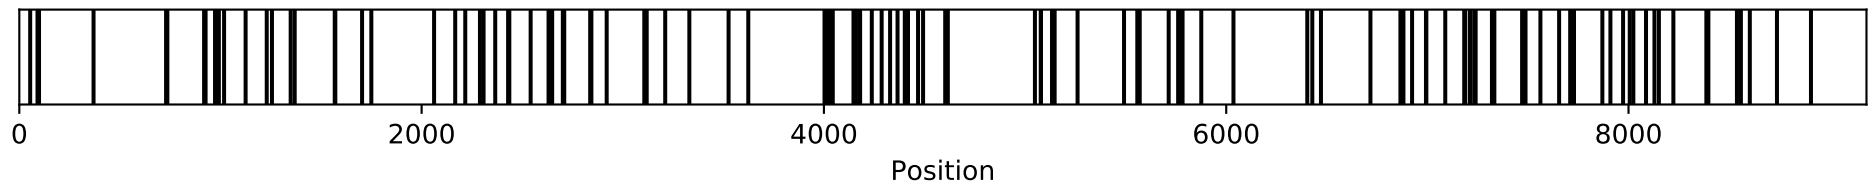

CR1 vs MM1  
Number of differences: 141

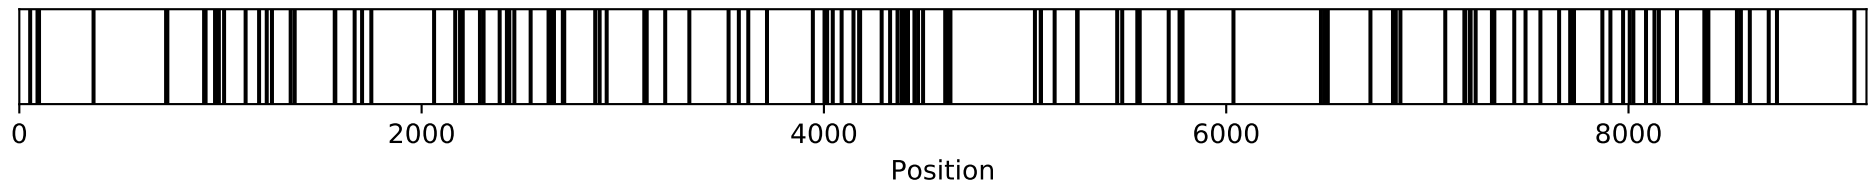

CR1 vs MM2  
Number of differences: 141

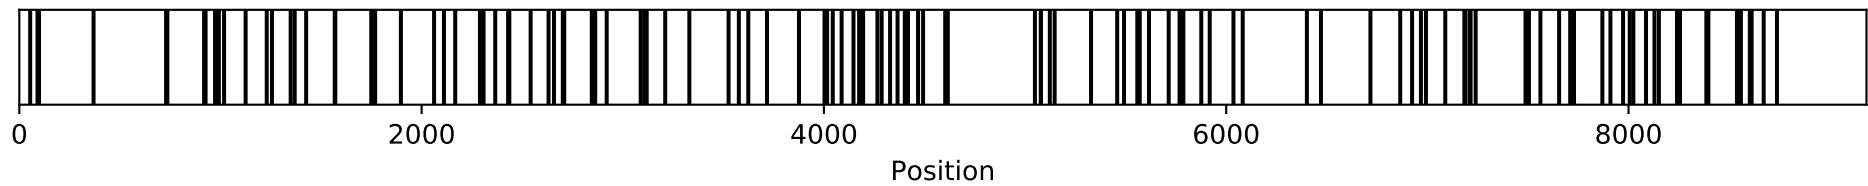

CR2 vs MM1  
Number of differences: 61

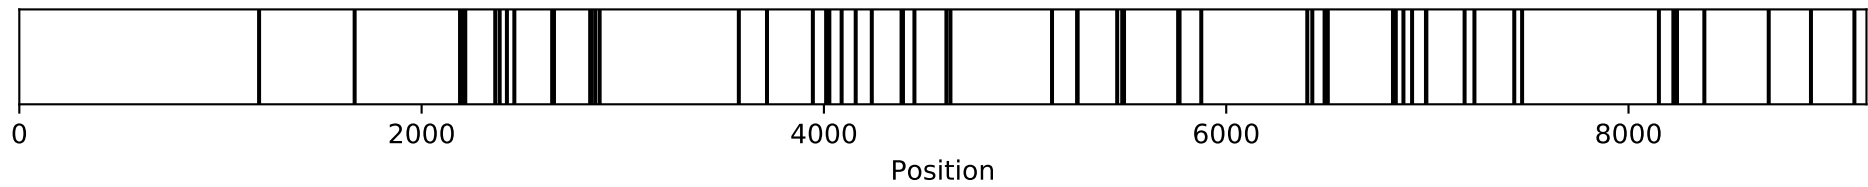

CR2 vs MM2  
Number of differences: 59

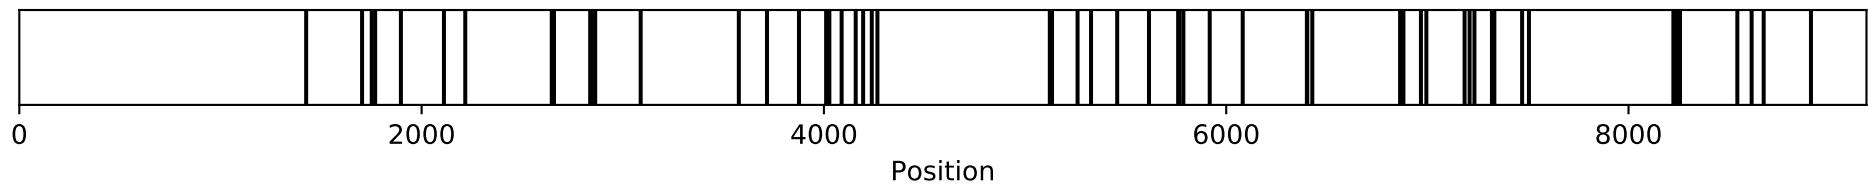

MM1 vs MM2  
Number of differences: 63

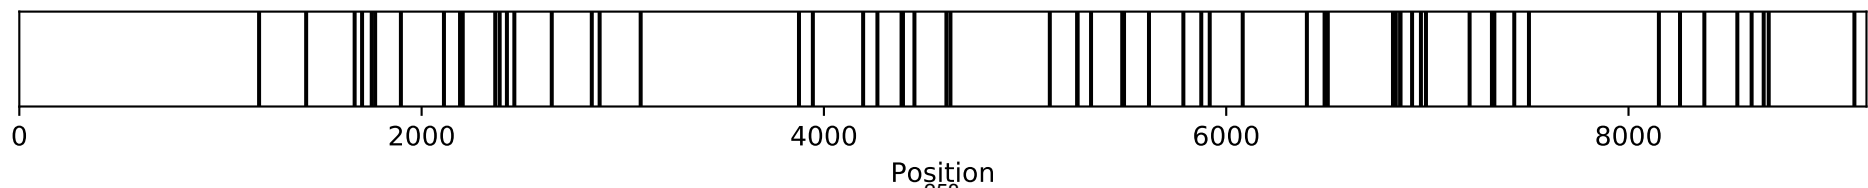

CR1 vs CR2  
Number of differences: 182

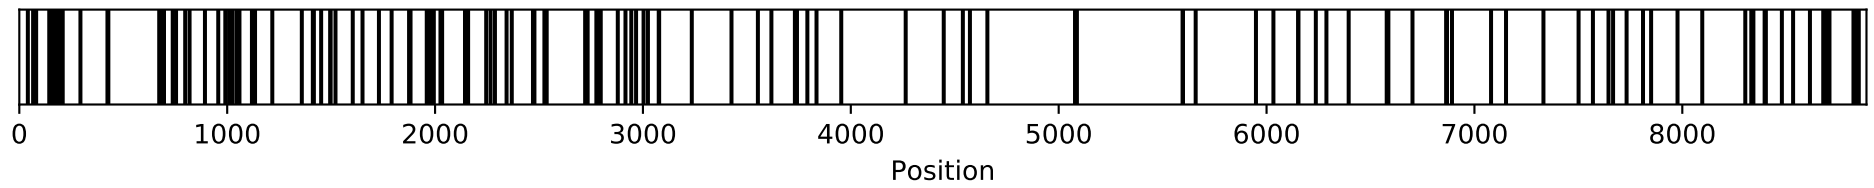

CR1 vs MM1  
Number of differences: 202

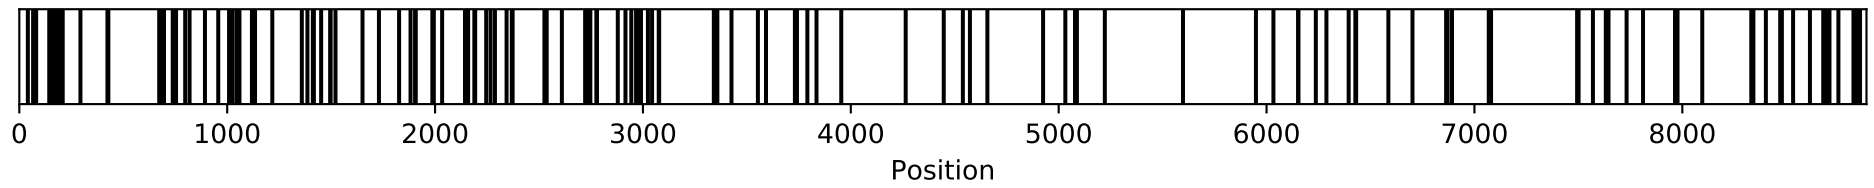

CR1 vs MM2  
Number of differences: 197

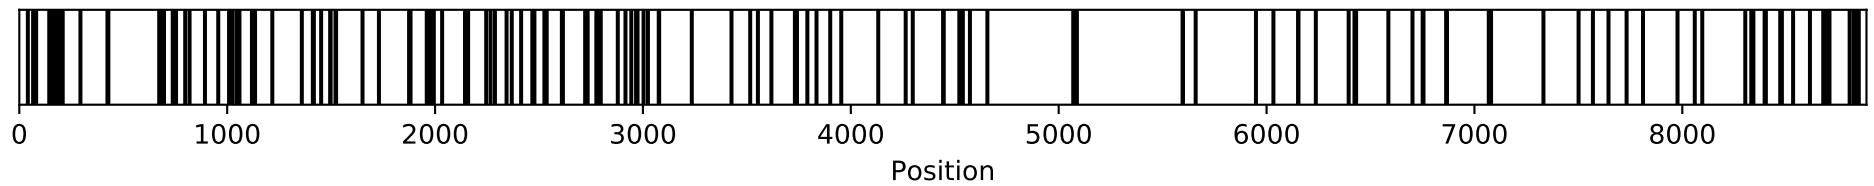

CR2 vs MM1  
Number of differences: 68

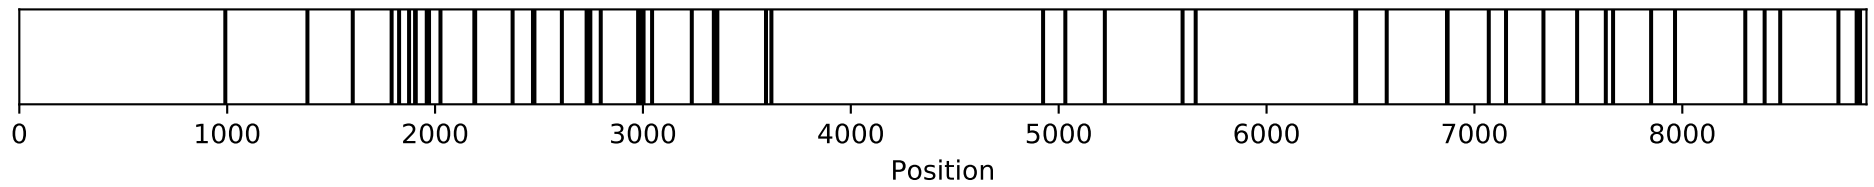

CR2 vs MM2  
Number of differences: 44

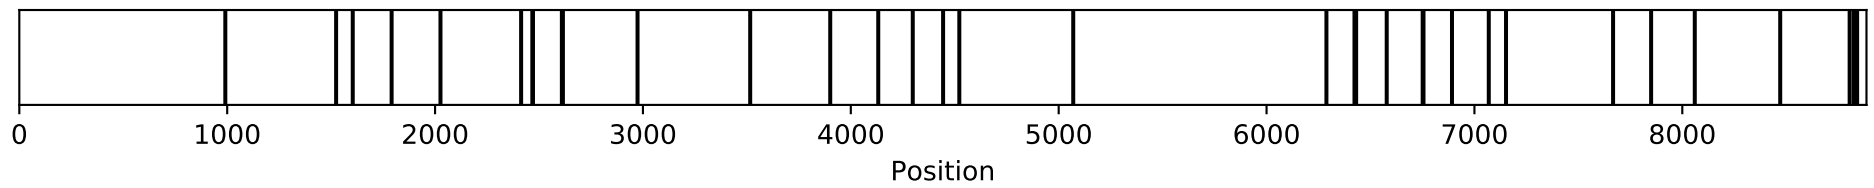

MM1 vs MM2  
Number of differences: 80

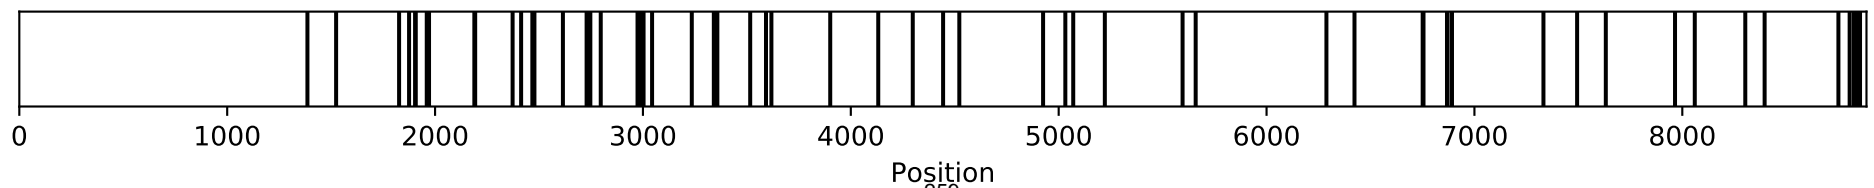

CR1 vs CR2  
Number of differences: 324

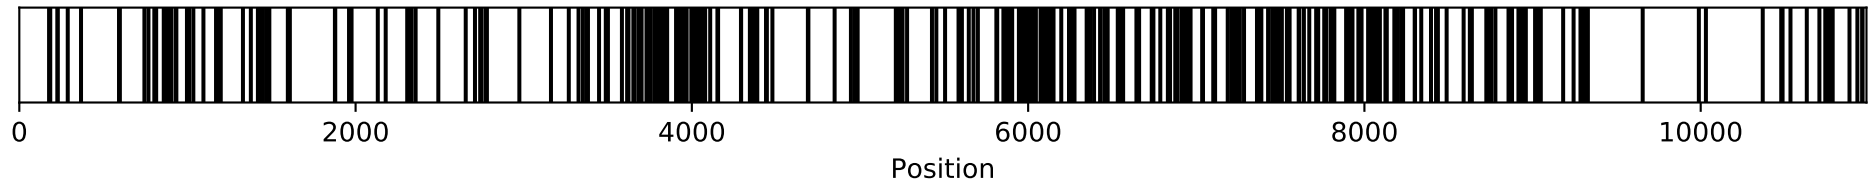

CR1 vs MM1  
Number of differences: 152

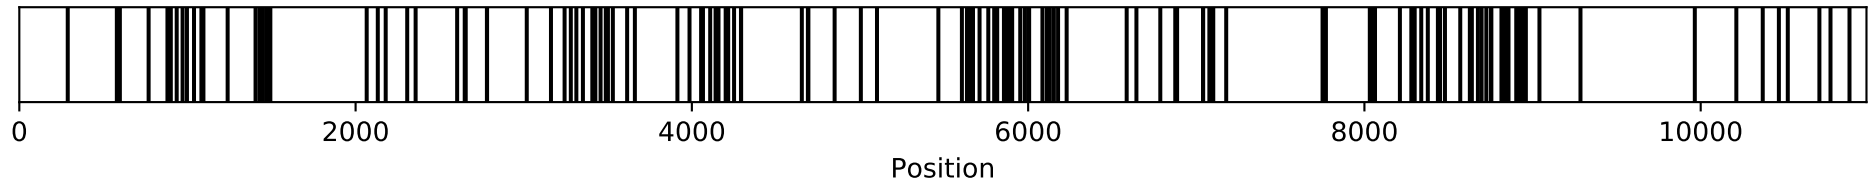

CR1 vs MM2  
Number of differences: 130

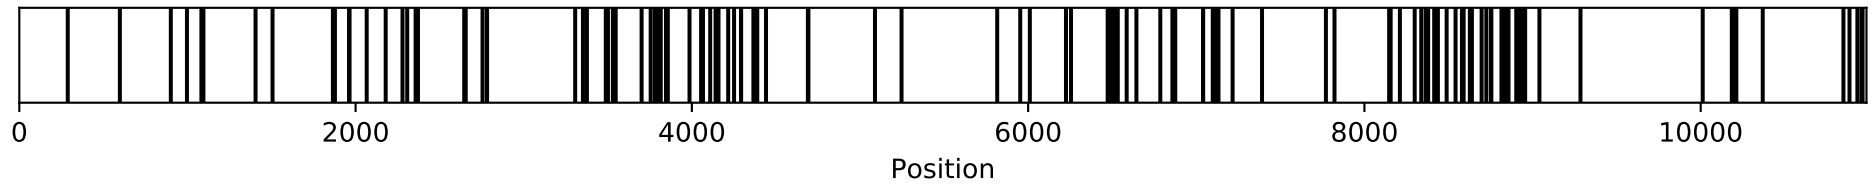

CR2 vs MM1  
Number of differences: 348

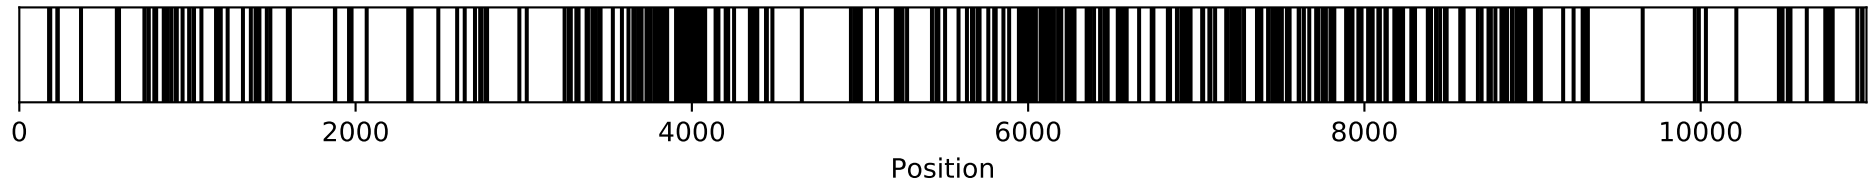

CR2 vs MM2  
Number of differences: 330

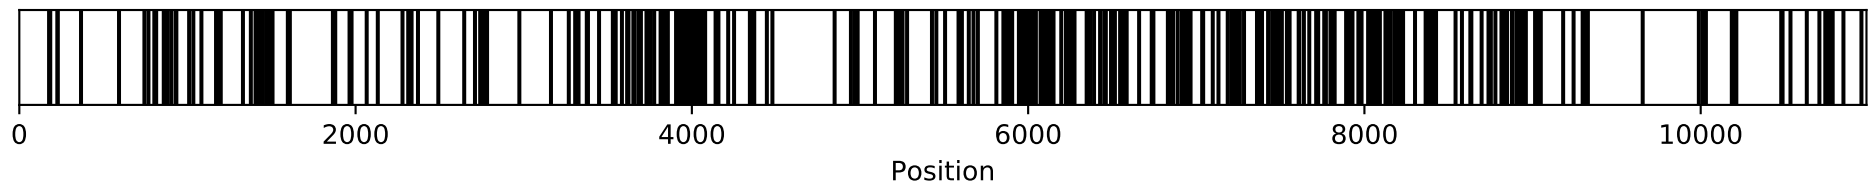

MM1 vs MM2  
Number of differences: 146

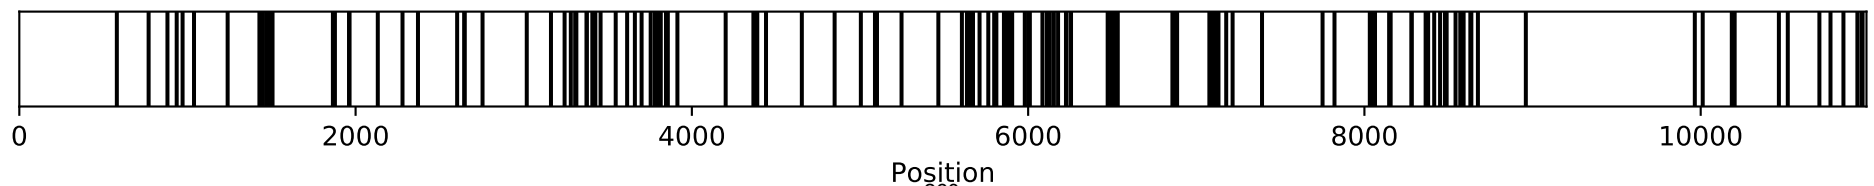

CR1 vs CR2  
Number of differences: 147

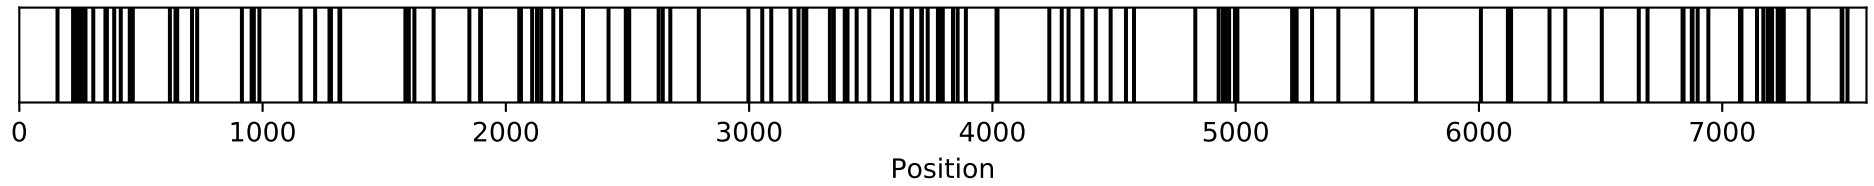

CR1 vs MM1  
Number of differences: 139

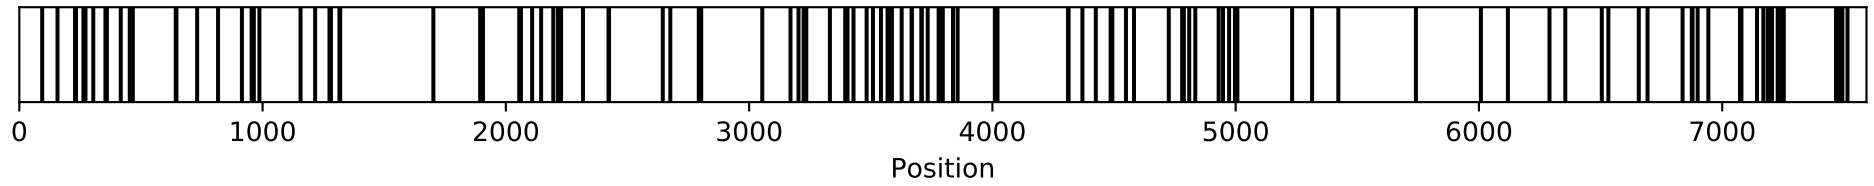

CR1 vs MM2  
Number of differences: 138

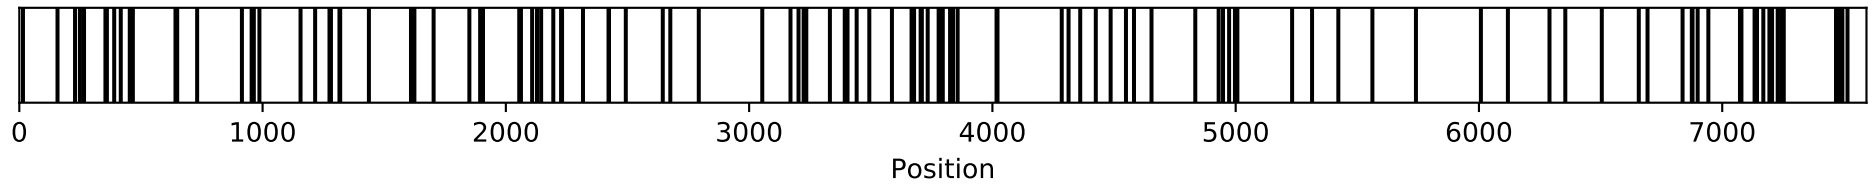

CR2 vs MM1  
Number of differences: 80

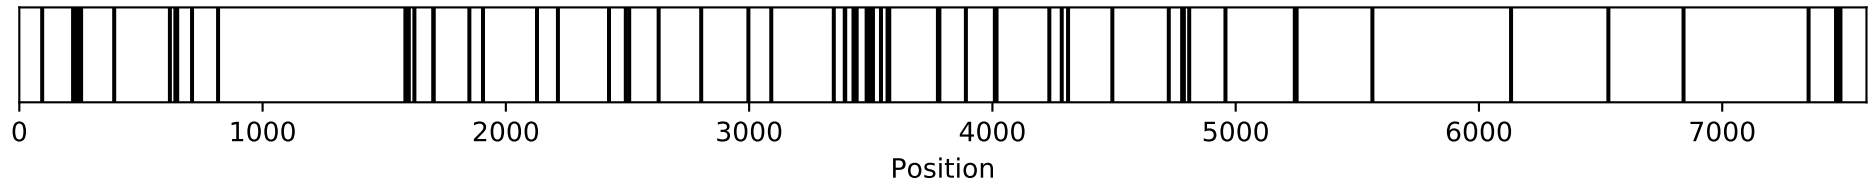

CR2 vs MM2  
Number of differences: 60

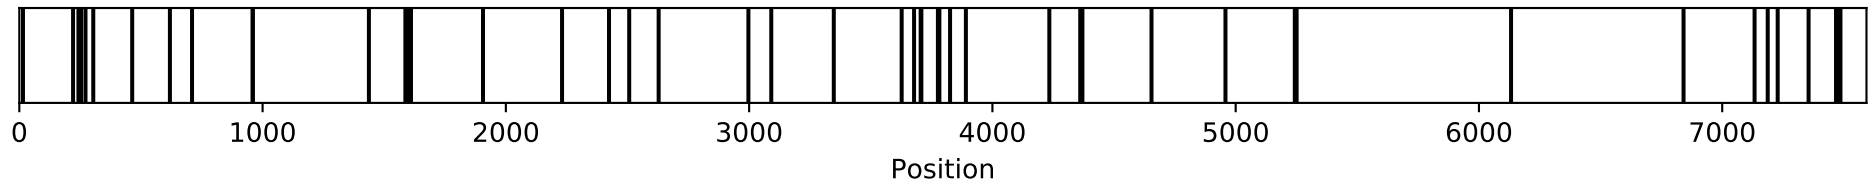

MM1 vs MM2  
Number of differences: 61

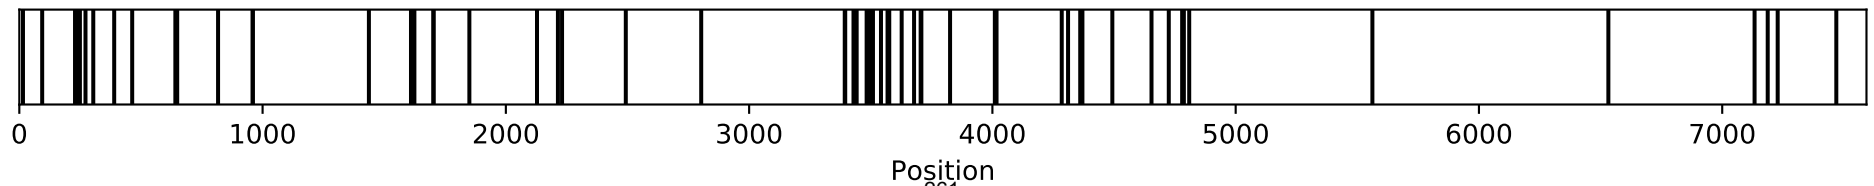

CR1 vs CR2  
Number of differences: 225

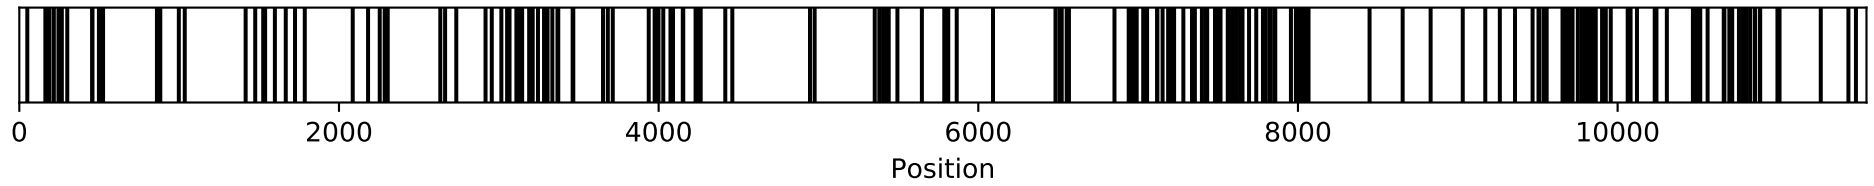

CR1 vs MM1  
Number of differences: 112

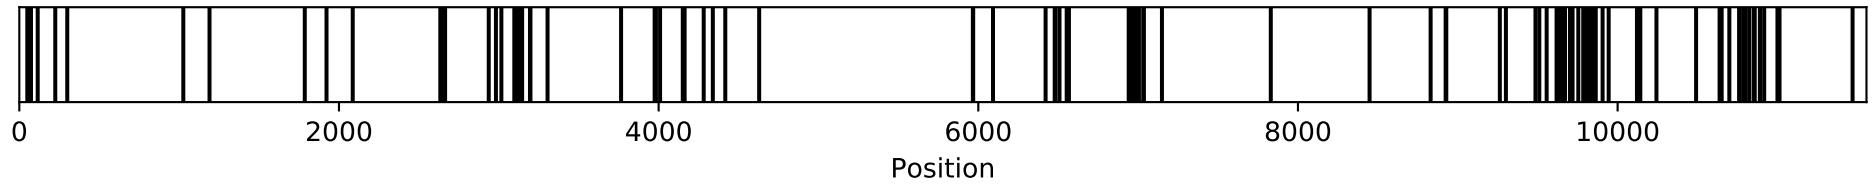

CR1 vs MM2  
Number of differences: 148

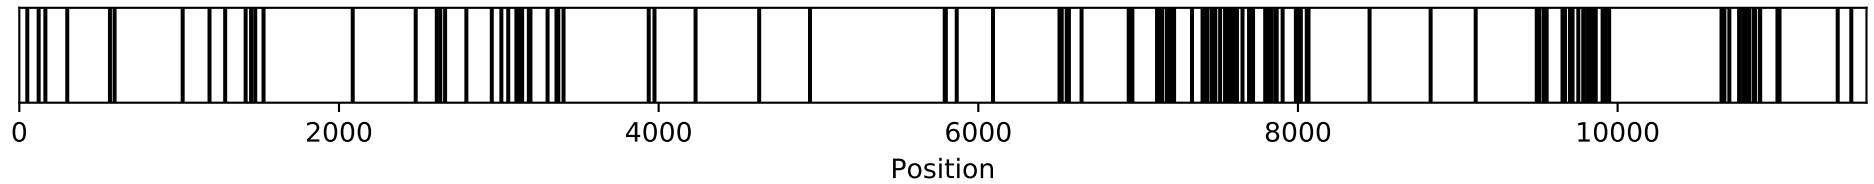

CR2 vs MM1  
Number of differences: 222

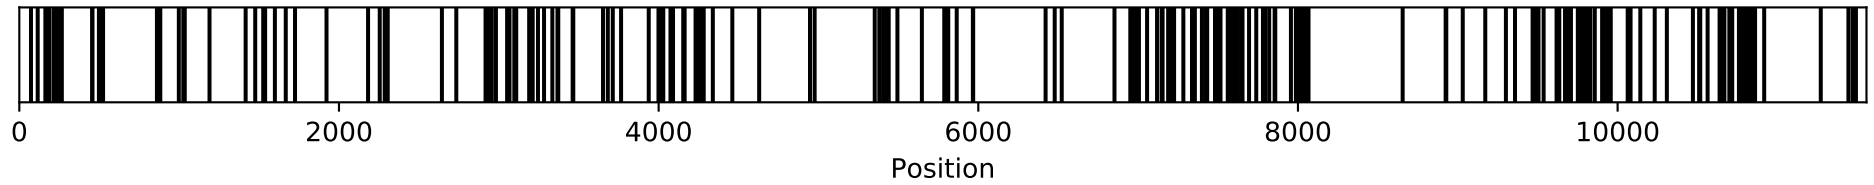

CR2 vs MM2  
Number of differences: 200

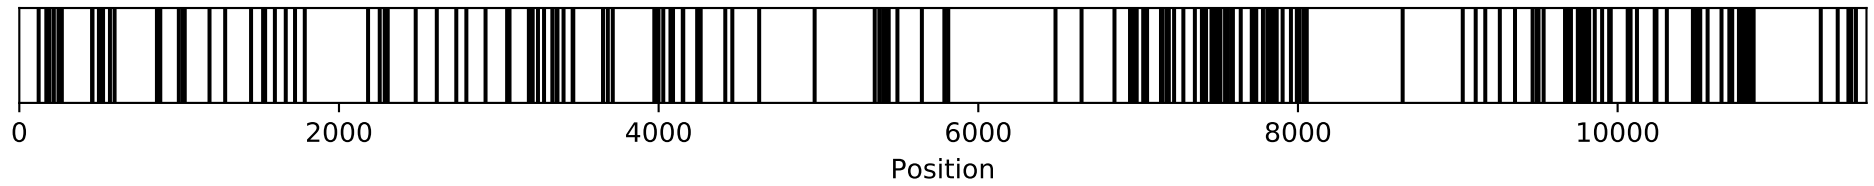

MM1 vs MM2  
Number of differences: 152

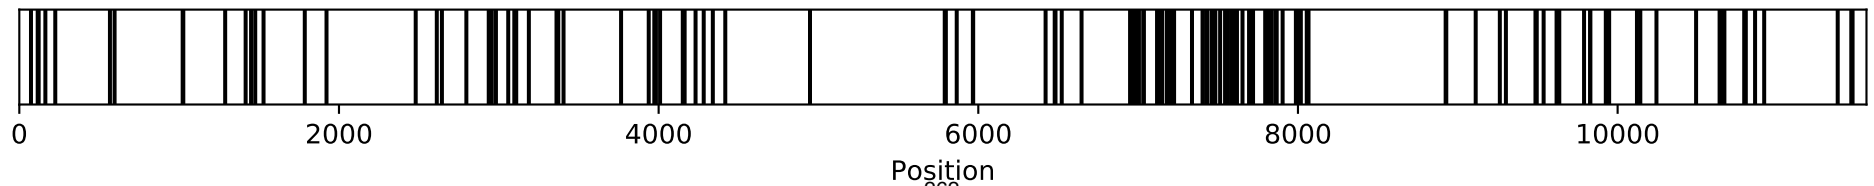

CR1 vs CR2  
Number of differences: 311

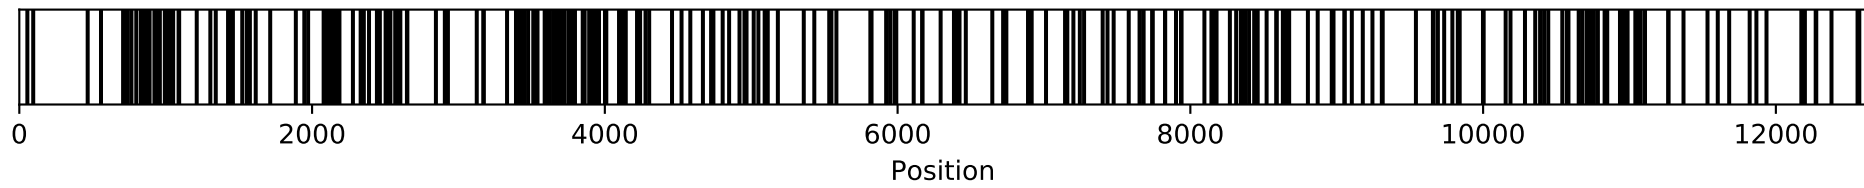

CR1 vs MM1  
Number of differences: 179

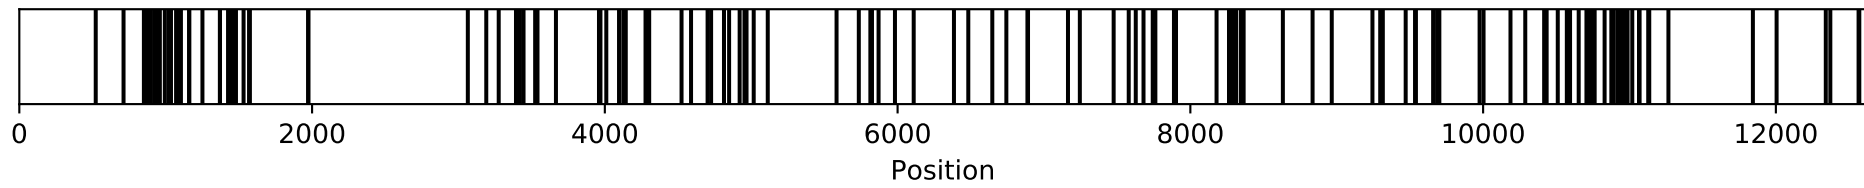

CR1 vs MM2  
Number of differences: 146

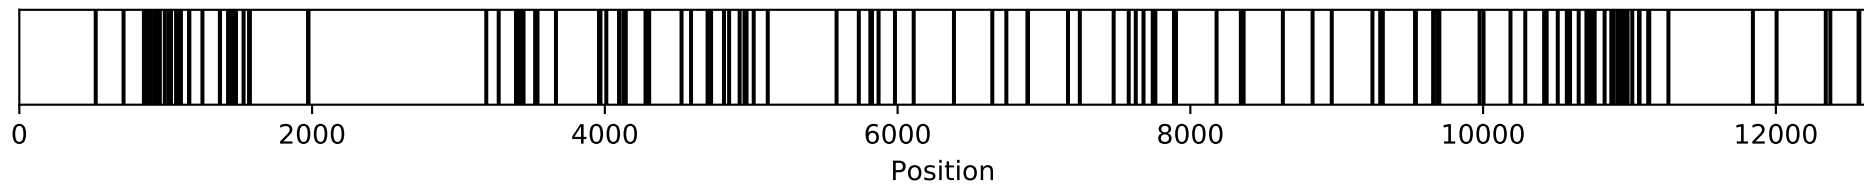

CR2 vs MM1  
Number of differences: 330

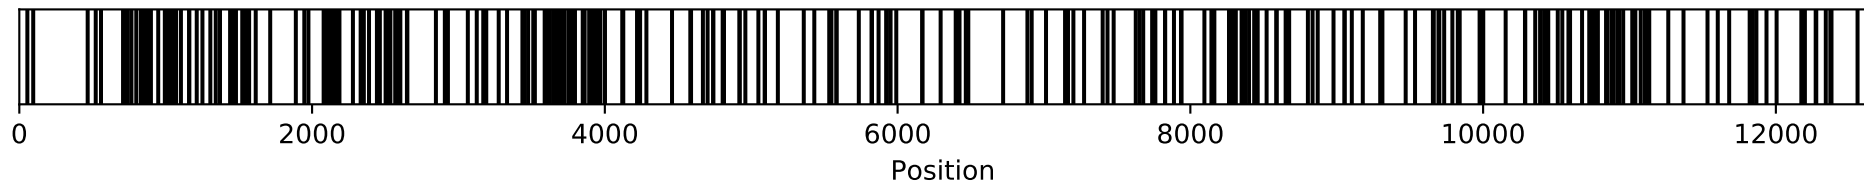

CR2 vs MM2  
Number of differences: 301

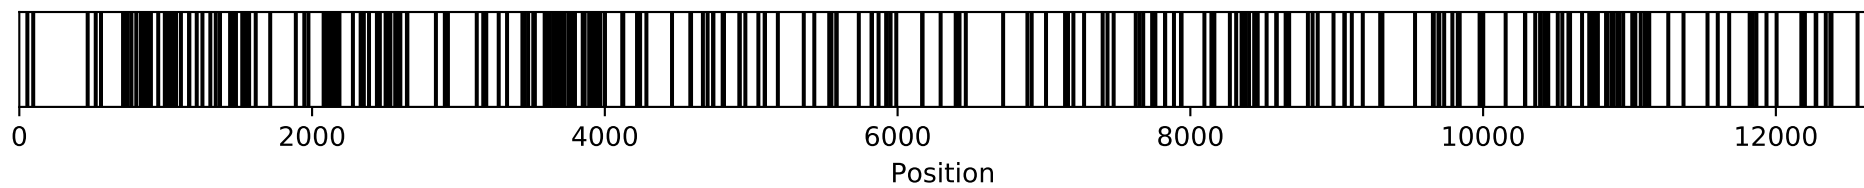

MM1 vs MM2  
Number of differences: 33

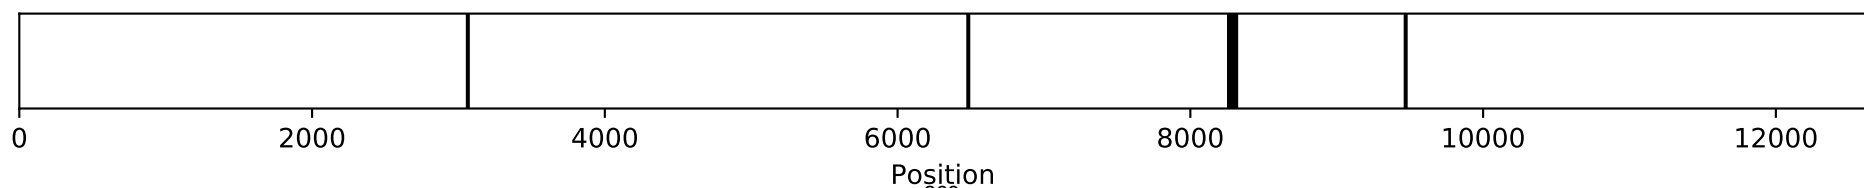



CR1 vs CR2  
Number of differences: 179

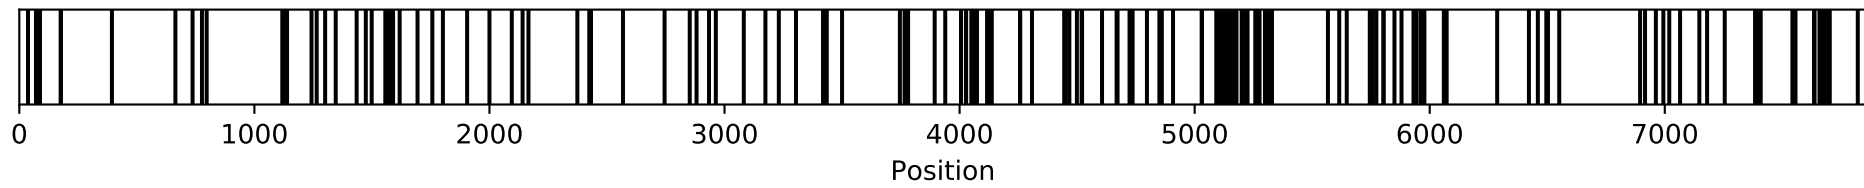

CR1 vs MM1  
Number of differences: 111

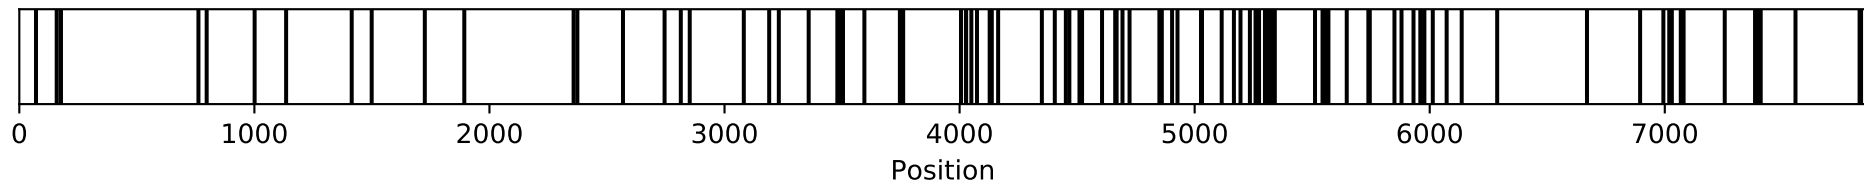

CR1 vs MM2  
Number of differences: 111

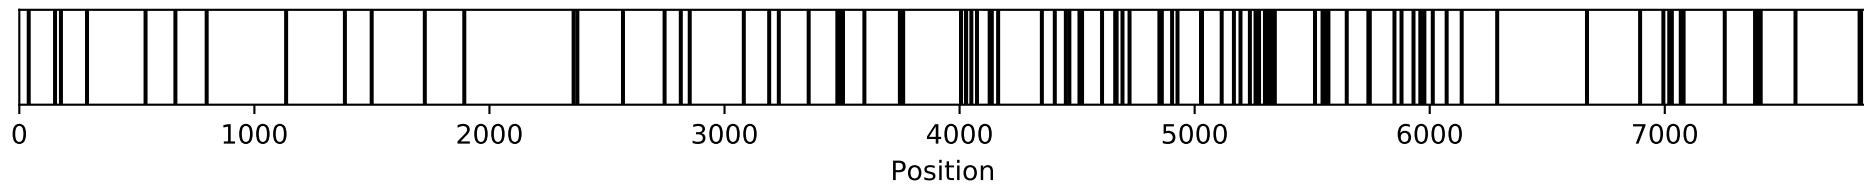

CR2 vs MM1  
Number of differences: 181

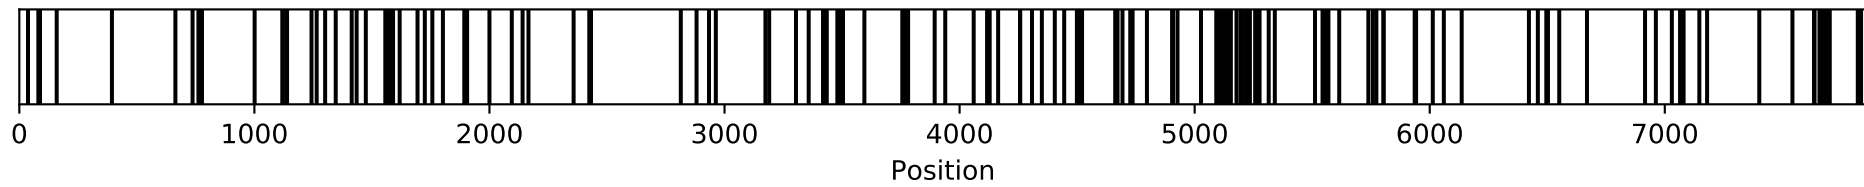

CR2 vs MM2  
Number of differences: 183

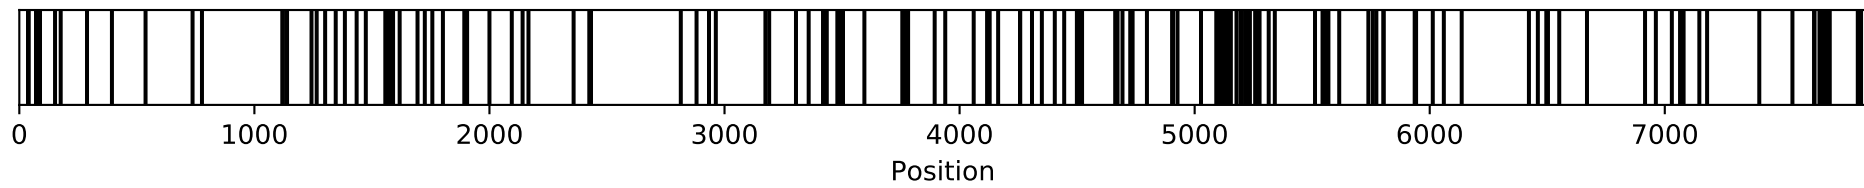

MM1 vs MM2  
Number of differences: 12

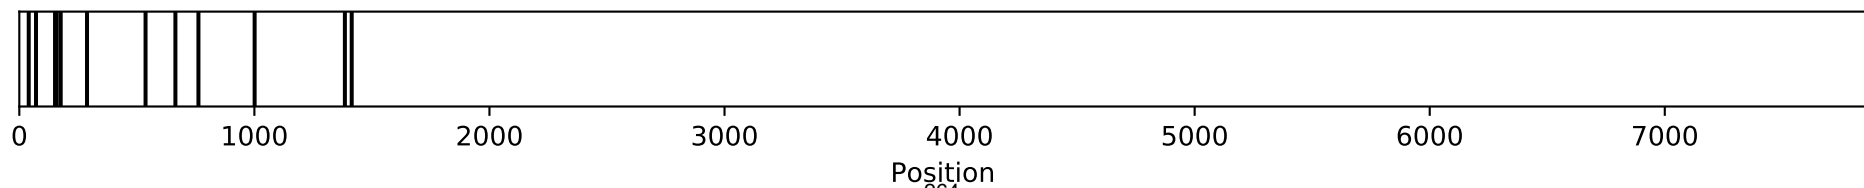

CR1 vs CR2  
Number of differences: 302

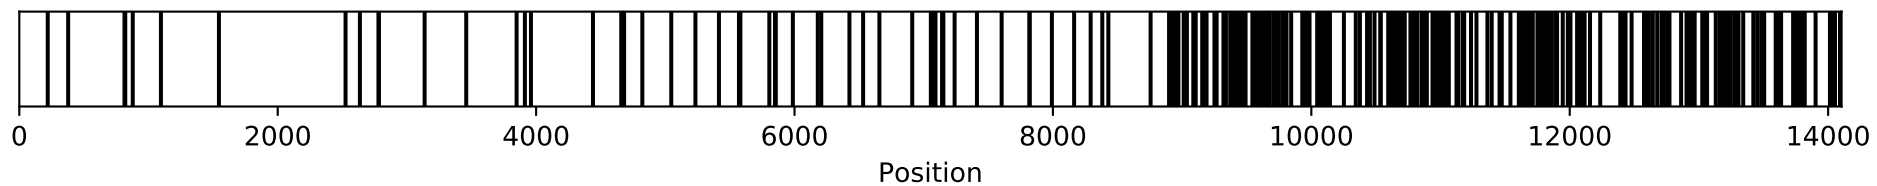

CR1 vs MM1  
Number of differences: 167

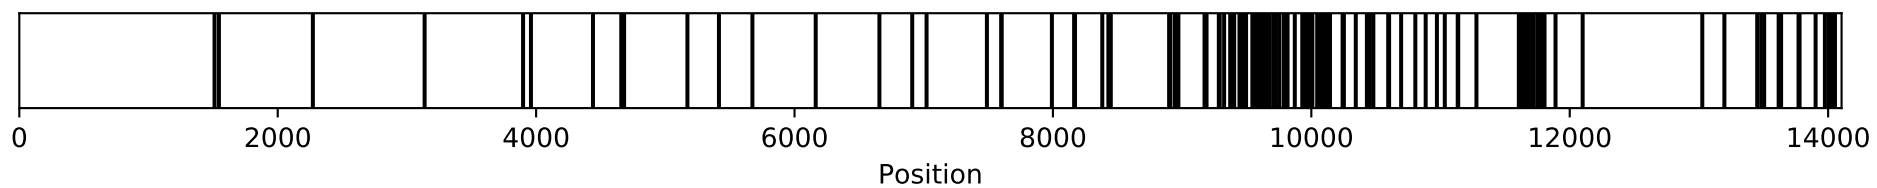

CR1 vs MM2  
Number of differences: 153

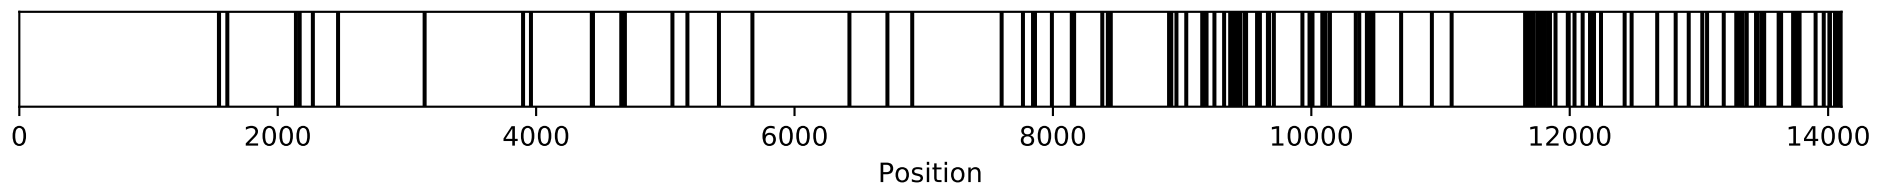

CR2 vs MM1  
Number of differences: 257

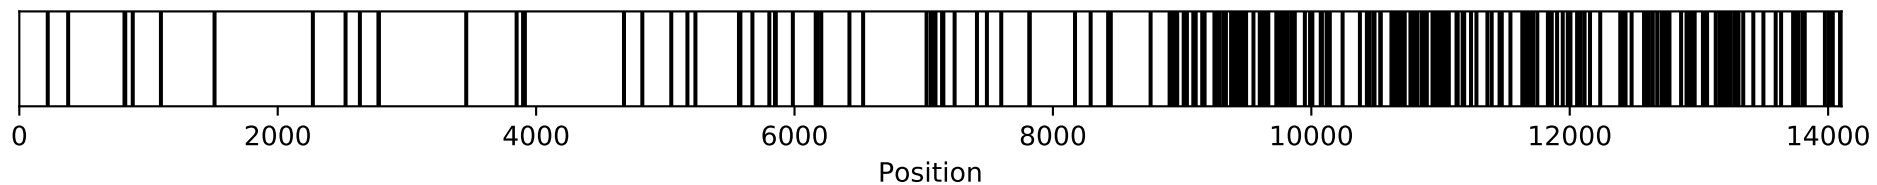

CR2 vs MM2  
Number of differences: 295

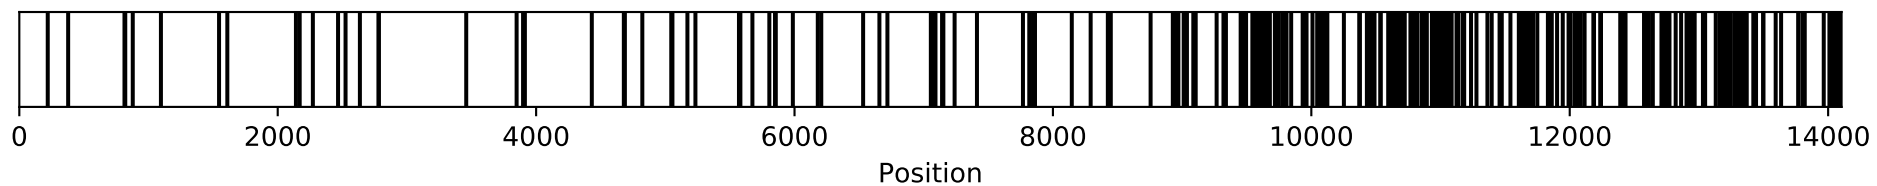

MM1 vs MM2  
Number of differences: 156

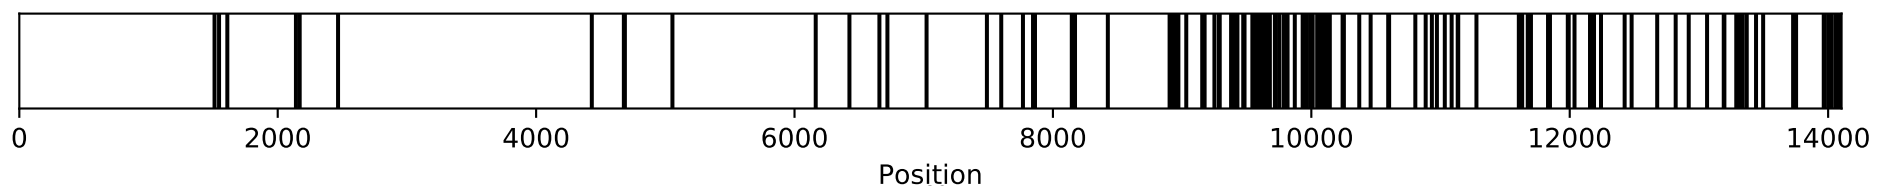

CR1 vs CR2  
Number of differences: 370

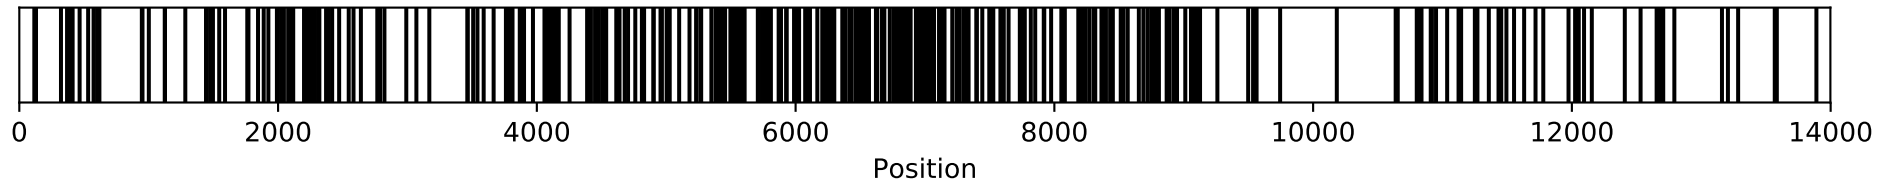

CR1 vs MM1  
Number of differences: 184

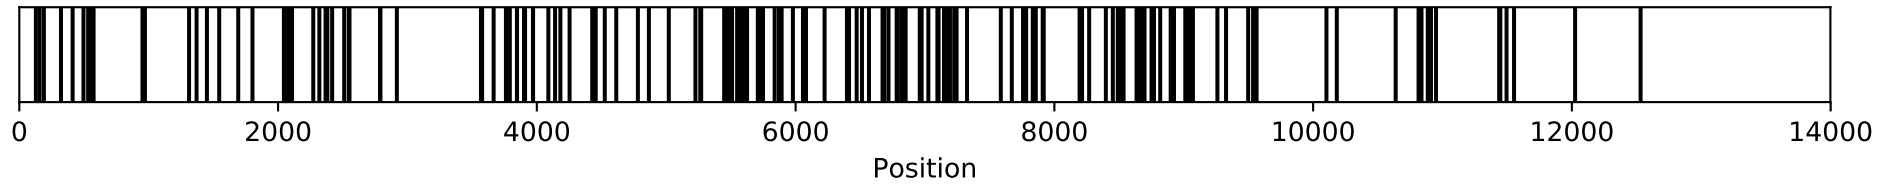

CR1 vs MM2  
Number of differences: 160

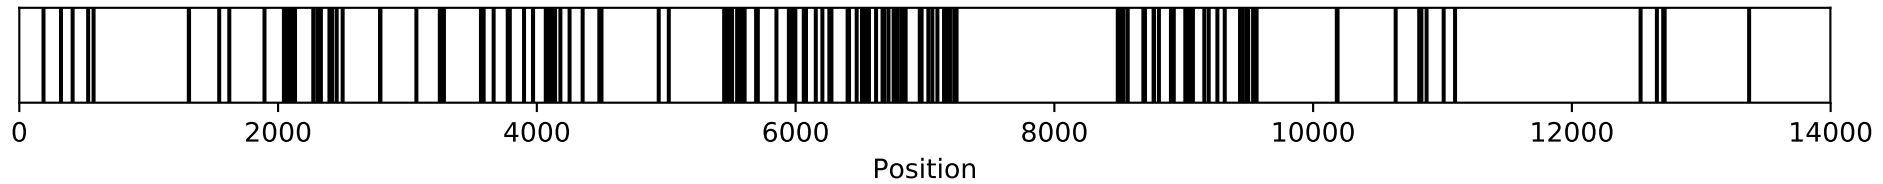

CR2 vs MM1  
Number of differences: 371

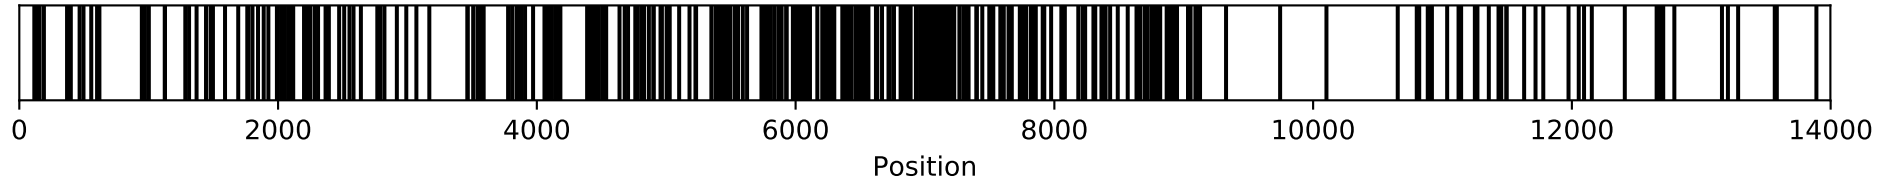

CR2 vs MM2  
Number of differences: 377

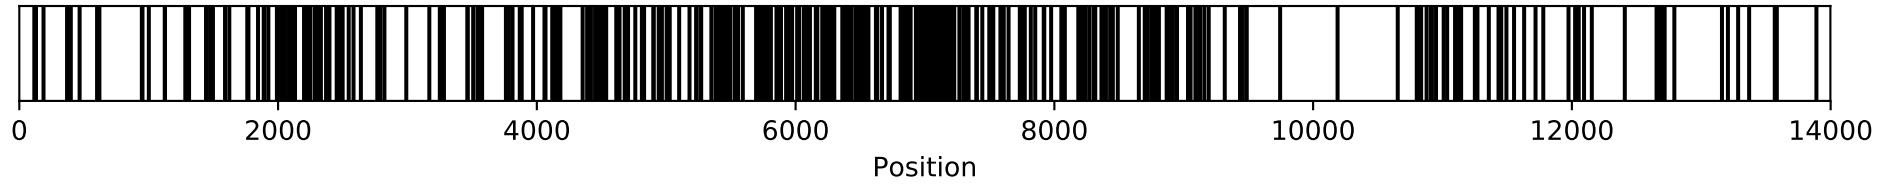

MM1 vs MM2  
Number of differences: 156

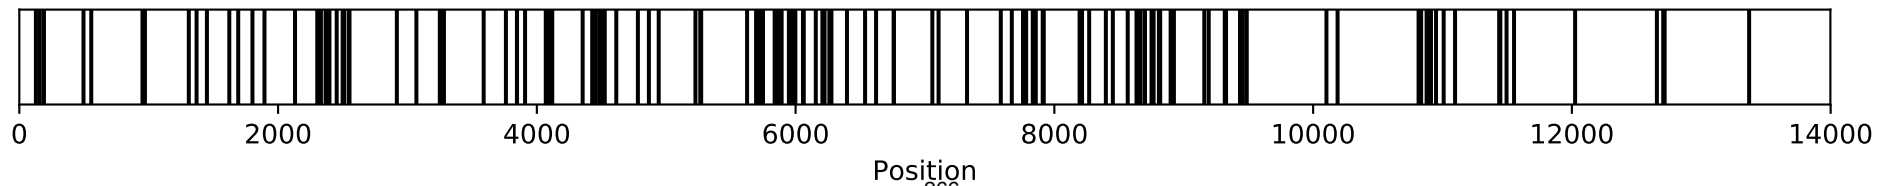

CR1 vs CR2  
Number of differences: 376

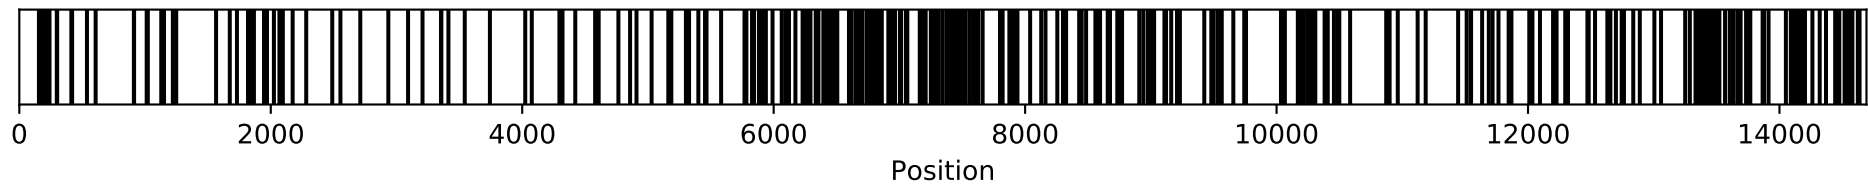

CR1 vs MM1  
Number of differences: 139

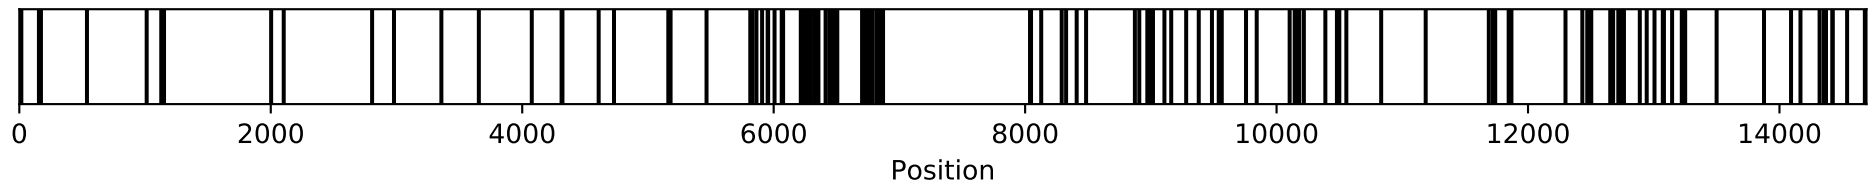

CR1 vs MM2  
Number of differences: 169

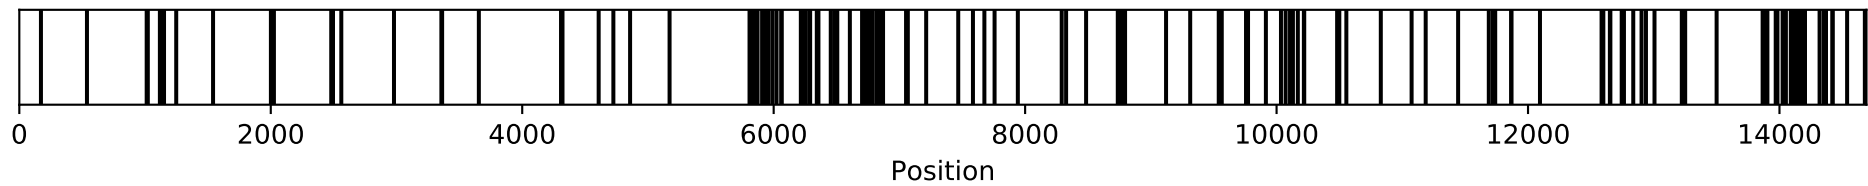

CR2 vs MM1  
Number of differences: 398

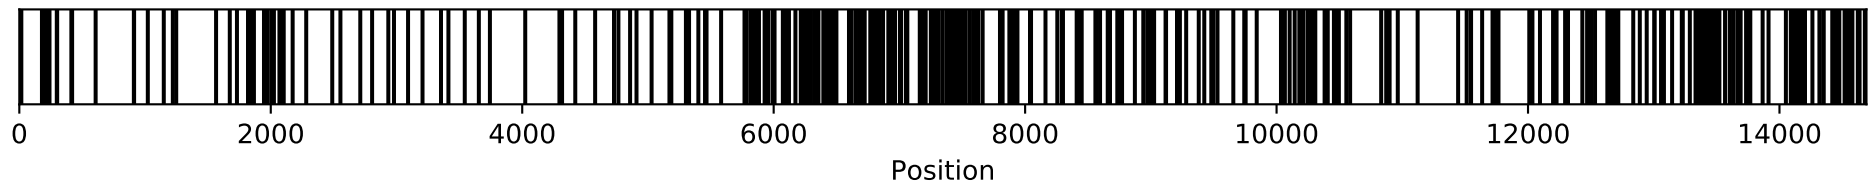

CR2 vs MM2  
Number of differences: 367

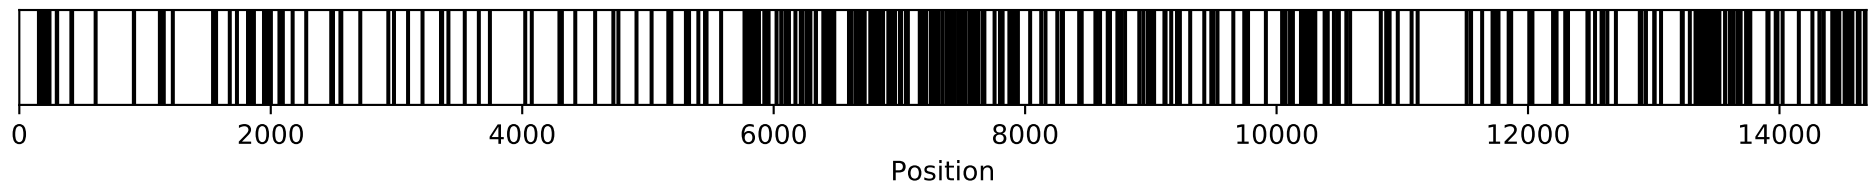

MM1 vs MM2  
Number of differences: 161

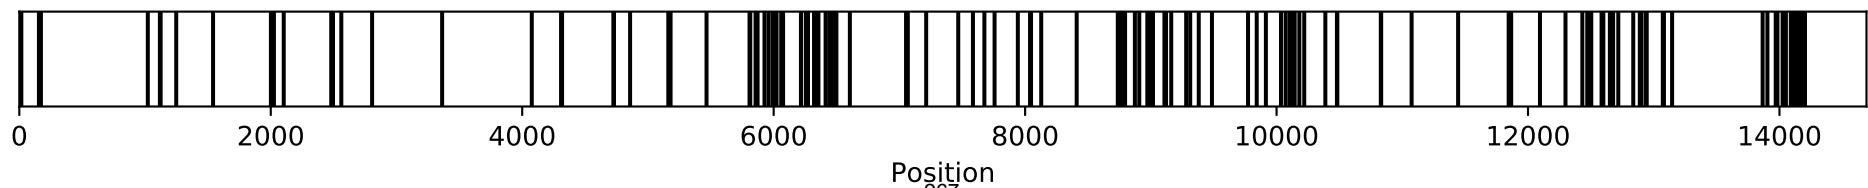

CR1 vs CR2  
Number of differences: 65

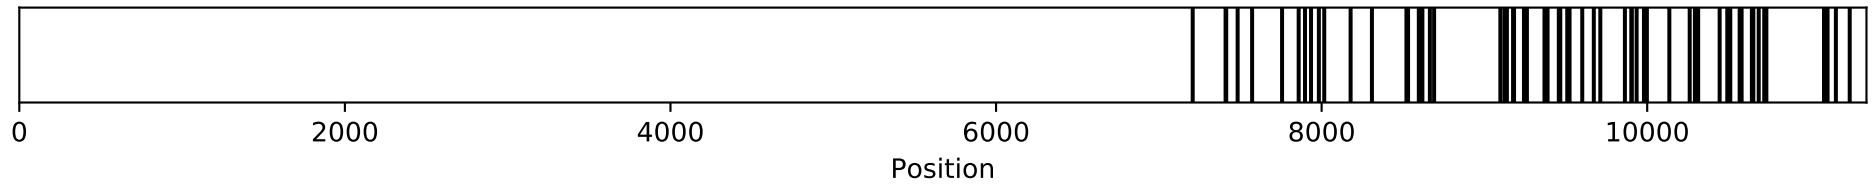

CR1 vs MM1  
Number of differences: 81

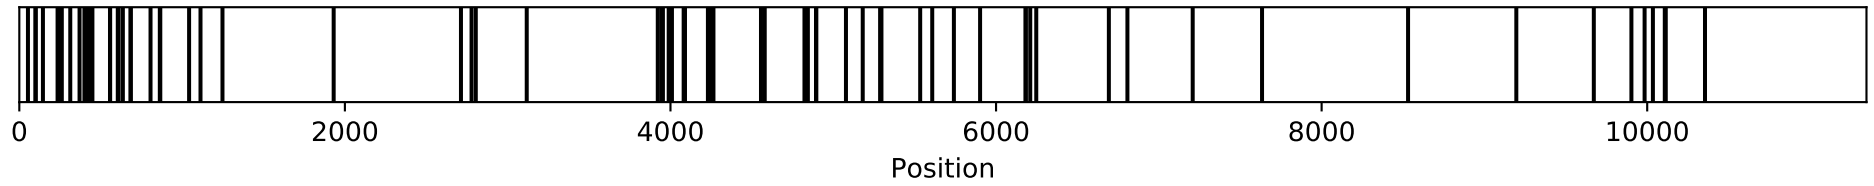

CR1 vs MM2  
Number of differences: 123

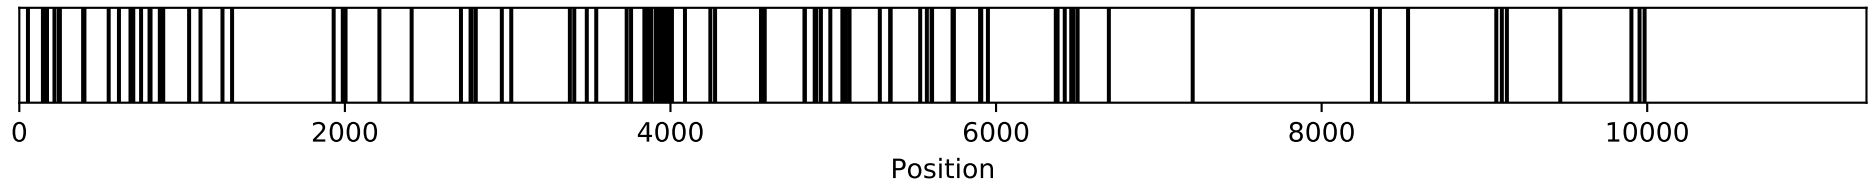

CR2 vs MM1  
Number of differences: 139

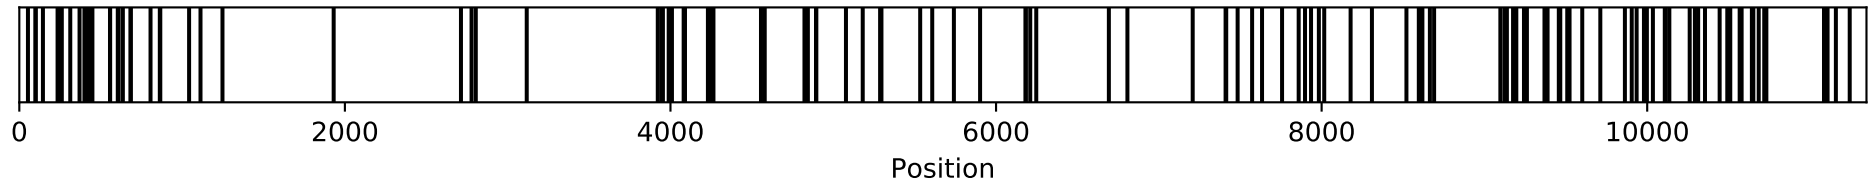

CR2 vs MM2  
Number of differences: 177

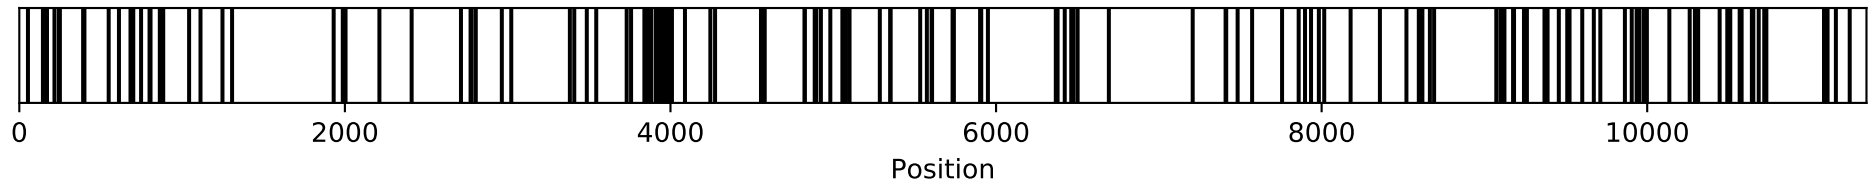

MM1 vs MM2  
Number of differences: 128

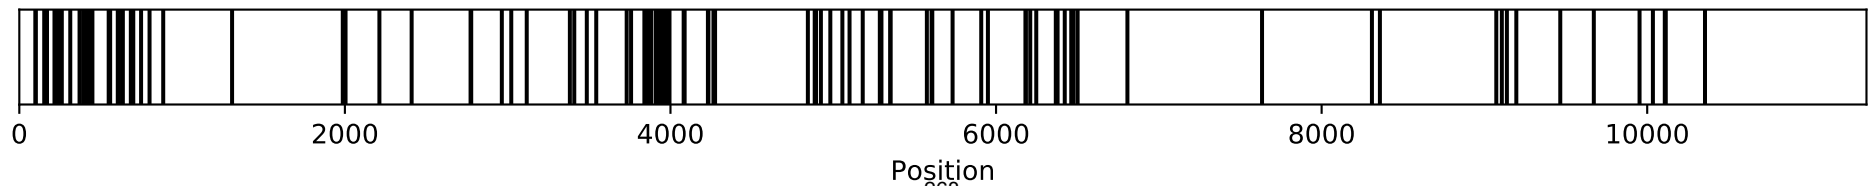

CR1 vs CR2  
Number of differences: 196

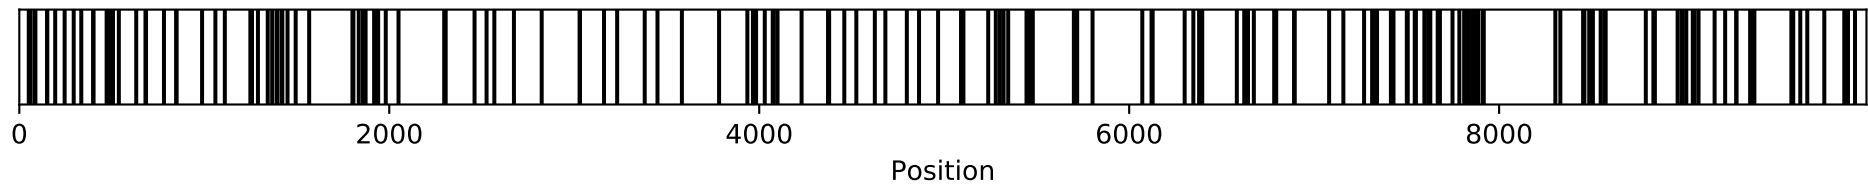

CR1 vs MM1  
Number of differences: 77

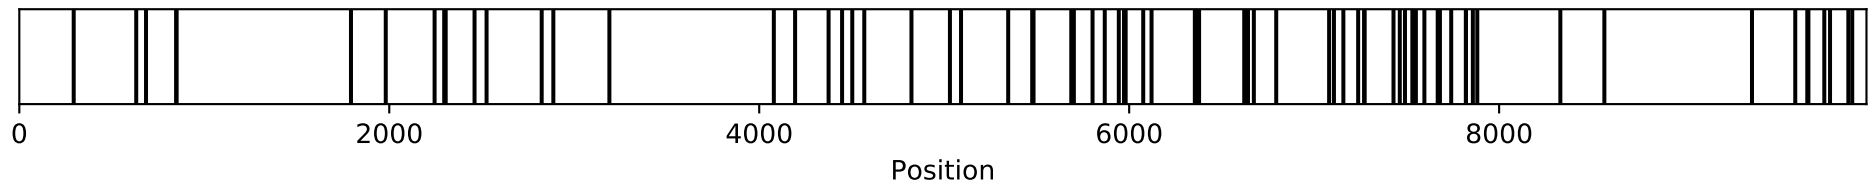

CR1 vs MM2  
Number of differences: 62

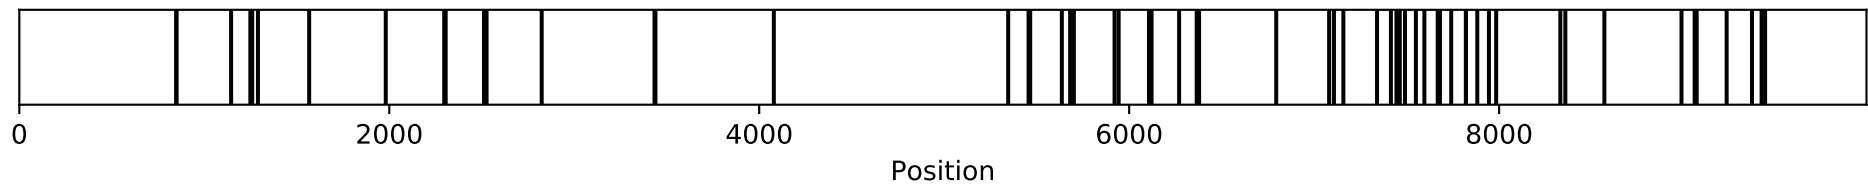

CR2 vs MM1  
Number of differences: 191

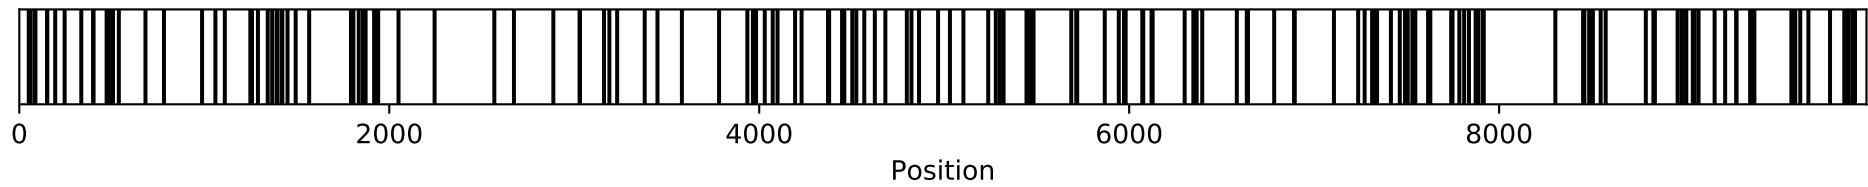

CR2 vs MM2  
Number of differences: 192

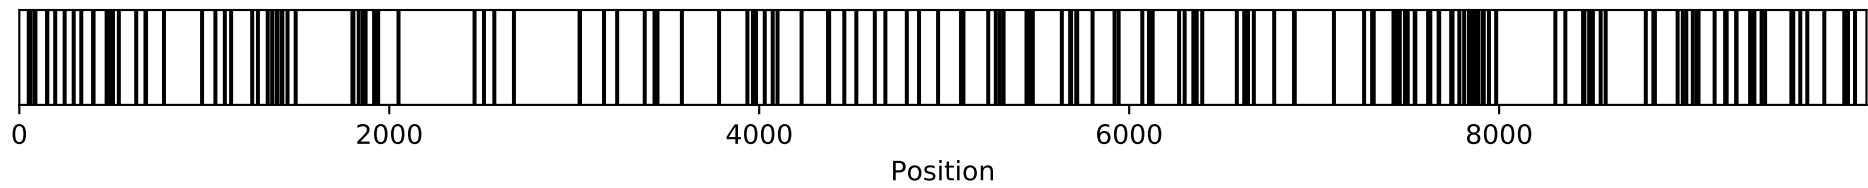

MM1 vs MM2  
Number of differences: 80

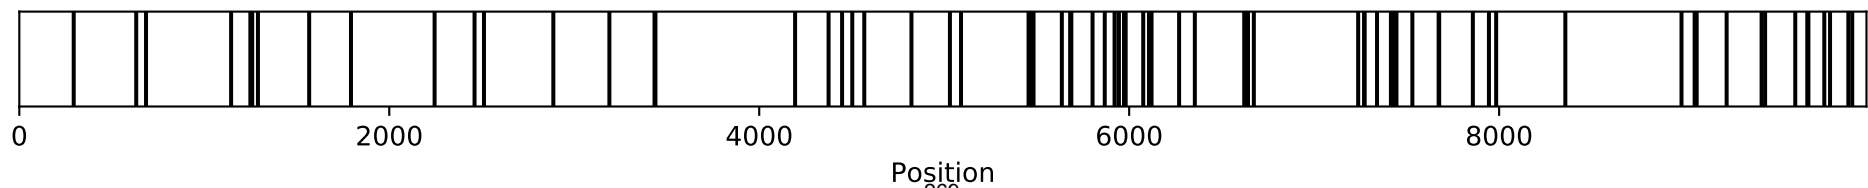

CR1 vs CR2  
Number of differences: 192

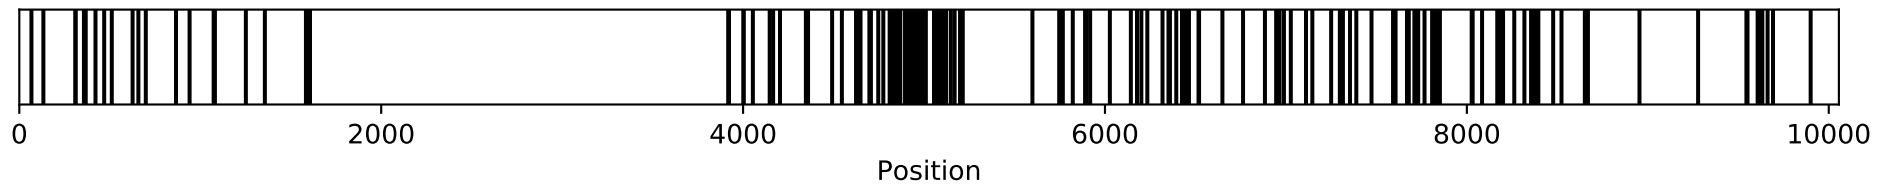

CR1 vs MM1  
Number of differences: 160

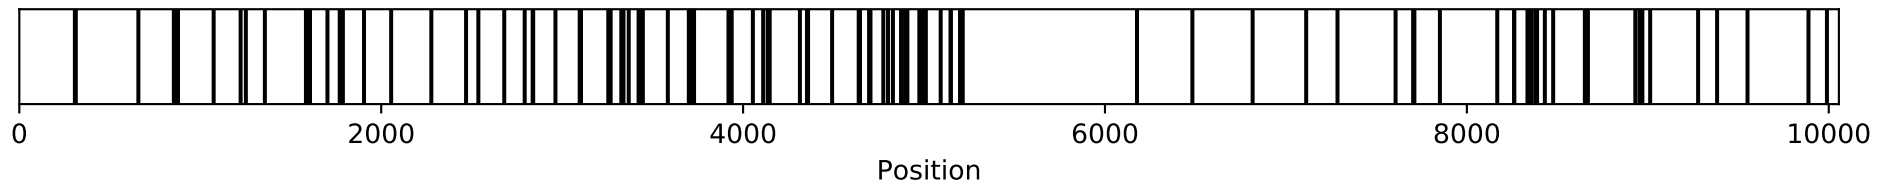

CR1 vs MM2  
Number of differences: 147

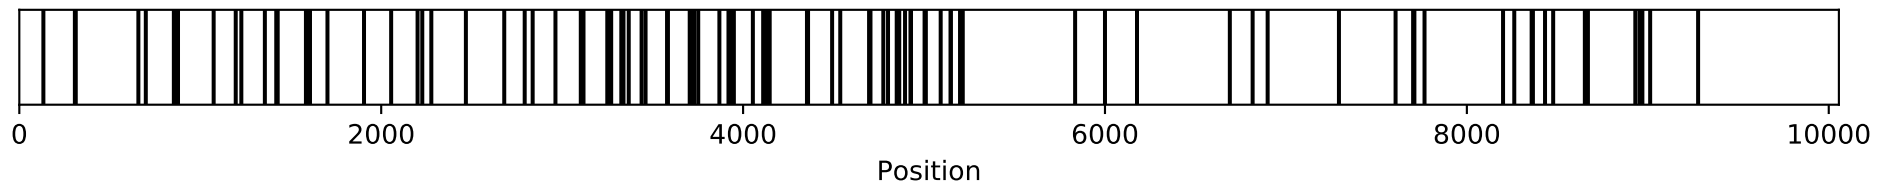

CR2 vs MM1  
Number of differences: 223

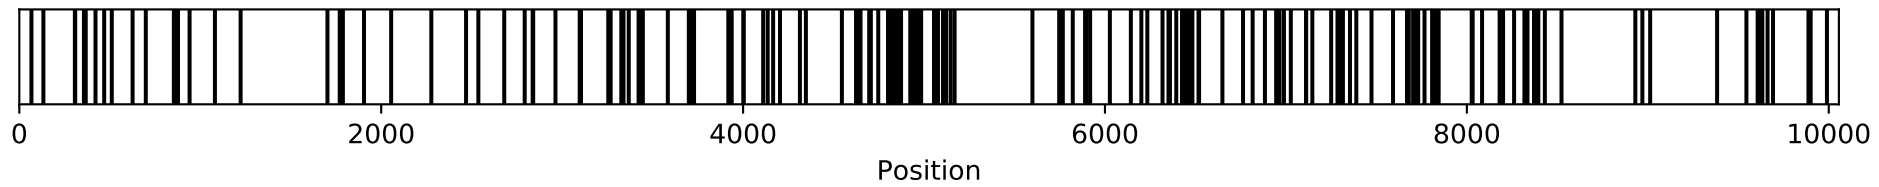

CR2 vs MM2  
Number of differences: 222

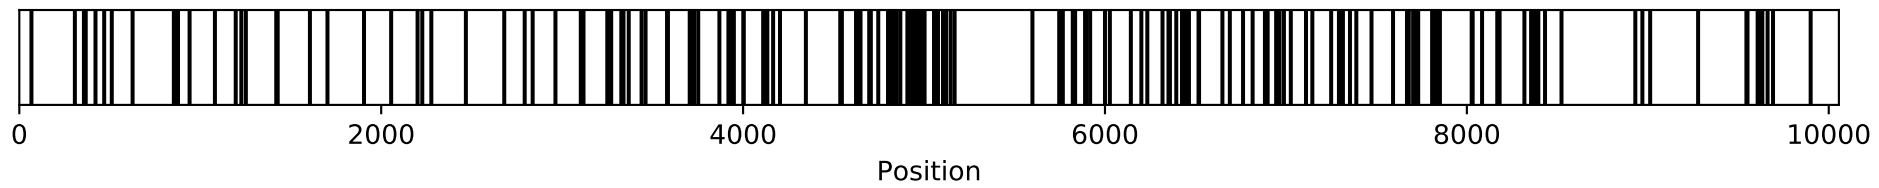

MM1 vs MM2  
Number of differences: 108

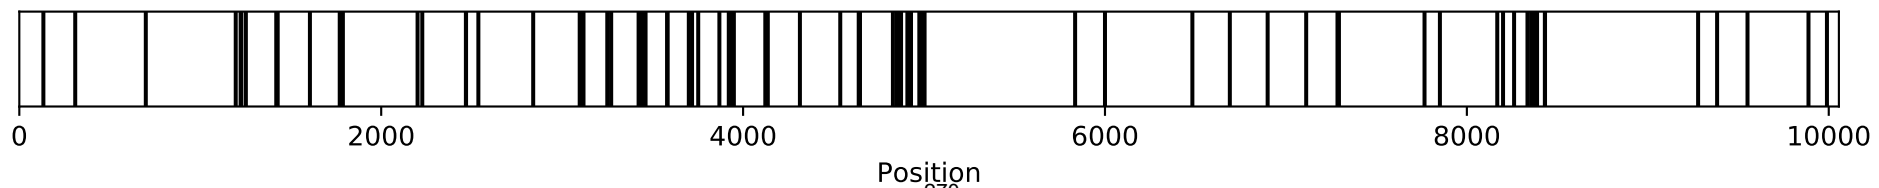

CR1 vs CR2  
Number of differences: 190

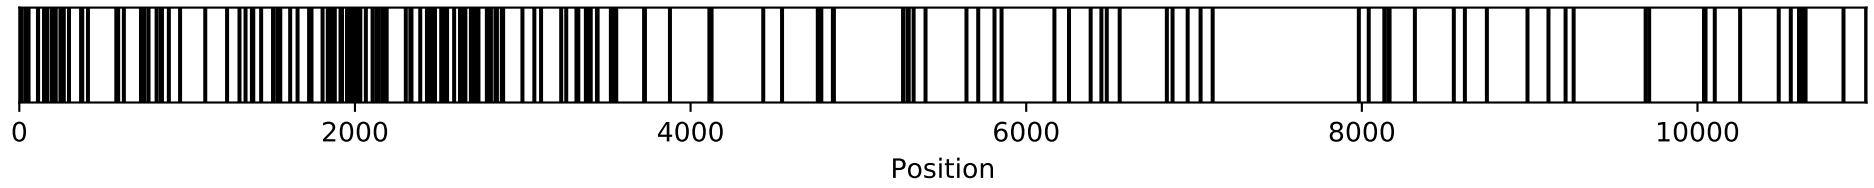

CR1 vs MM1  
Number of differences: 99

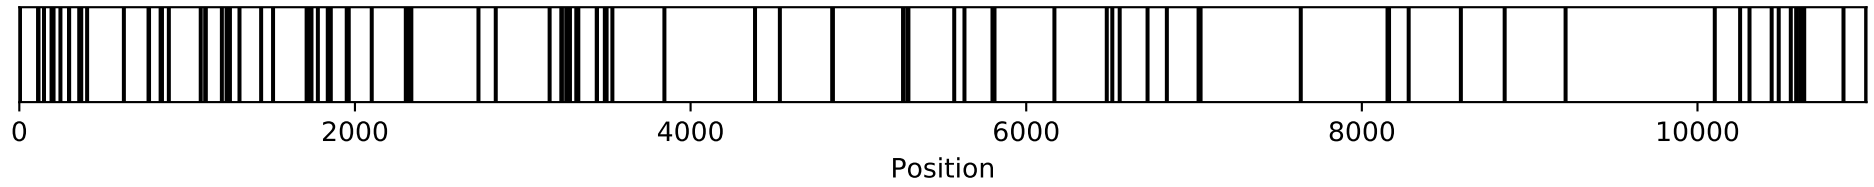

CR1 vs MM2  
Number of differences: 99

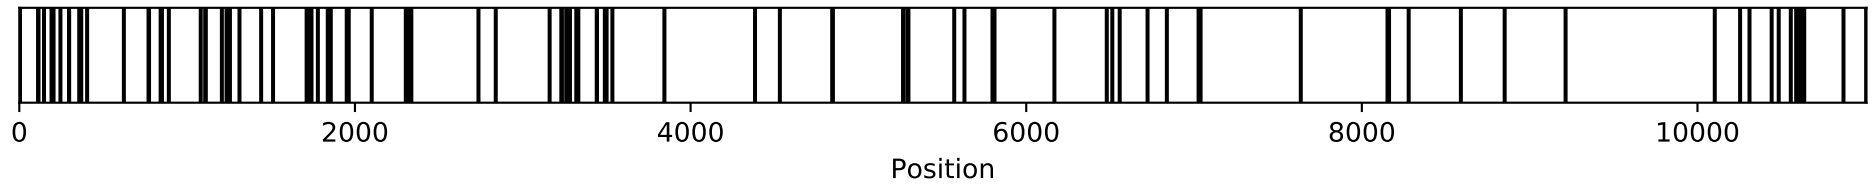

CR2 vs MM1  
Number of differences: 200

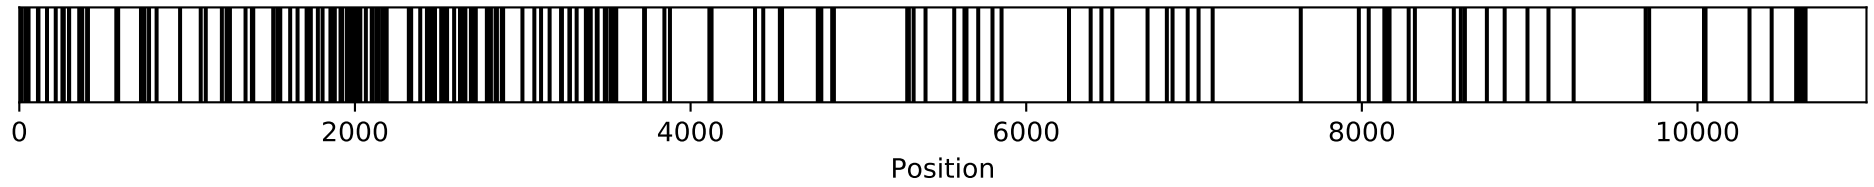

CR2 vs MM2  
Number of differences: 200

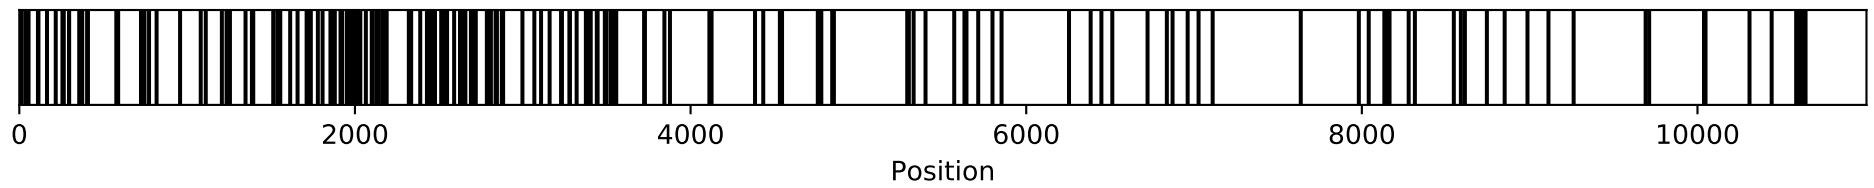

MM1 vs MM2  
Number of differences: 0

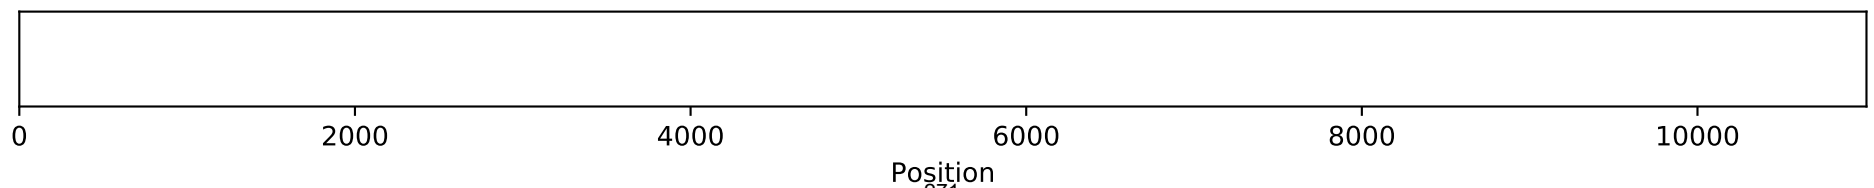



CR1 vs CR2  
Number of differences: 134

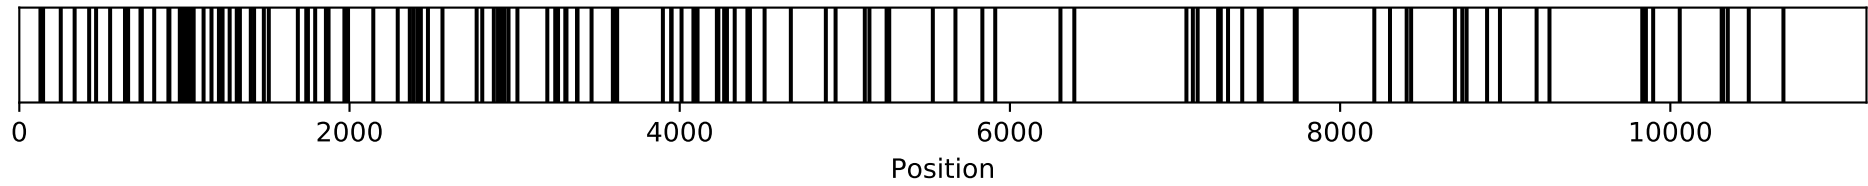

CR1 vs MM1  
Number of differences: 132

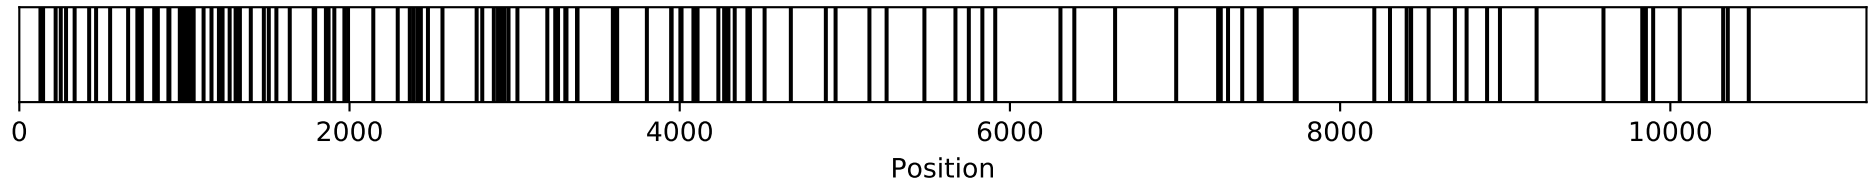

CR1 vs MM2  
Number of differences: 140

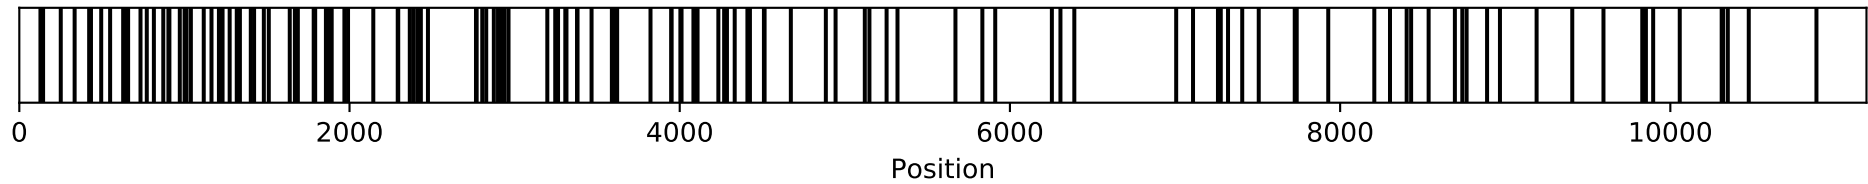

CR2 vs MM1  
Number of differences: 43

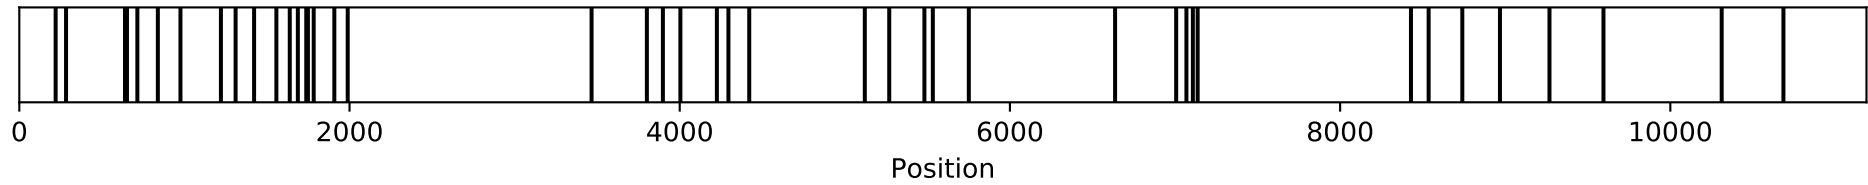

CR2 vs MM2  
Number of differences: 55

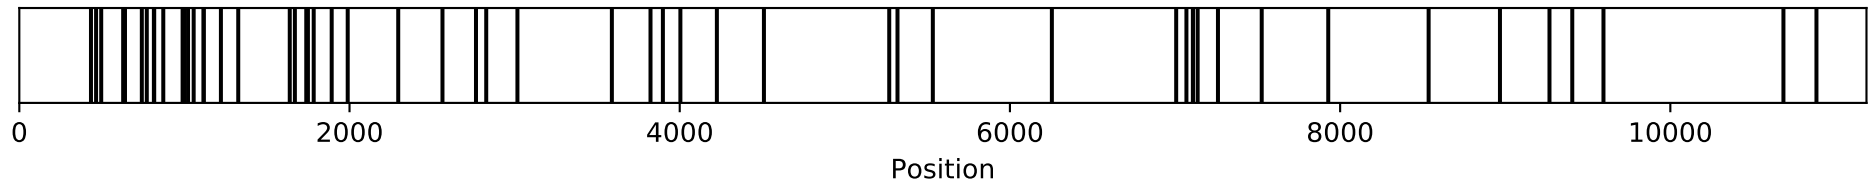

MM1 vs MM2  
Number of differences: 56

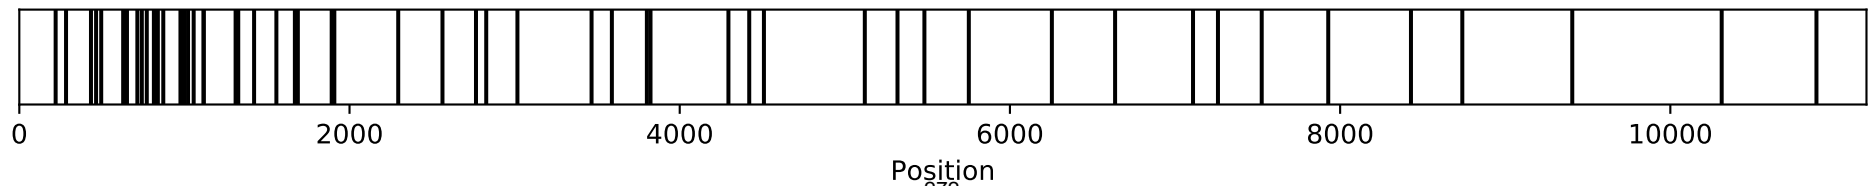

CR1 vs CR2  
Number of differences: 530

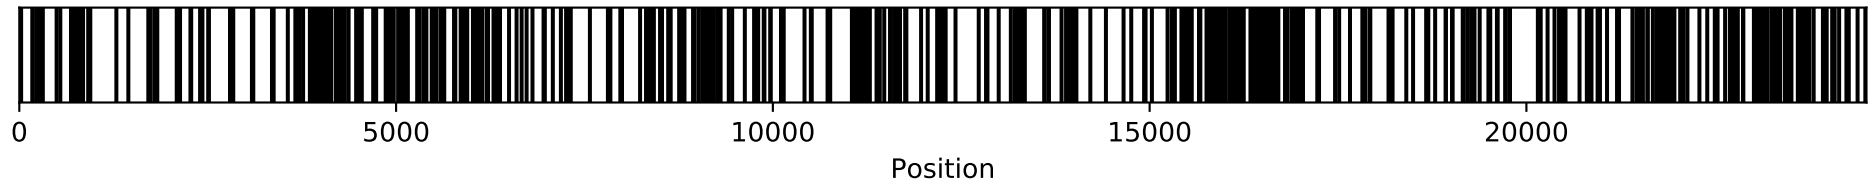

CR1 vs MM1  
Number of differences: 250

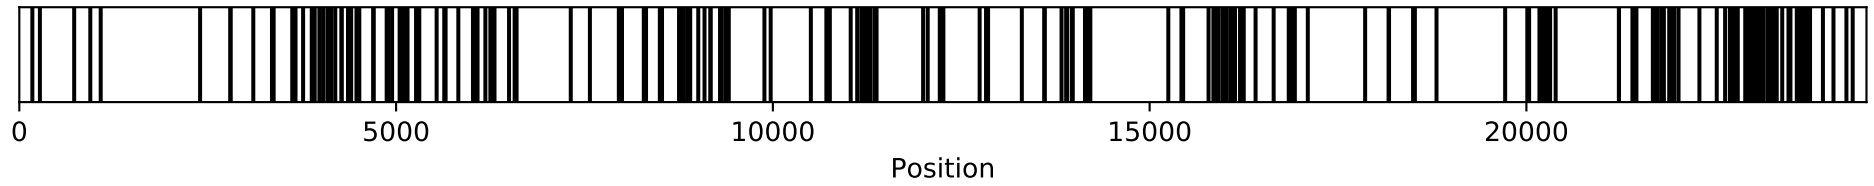

CR1 vs MM2  
Number of differences: 260

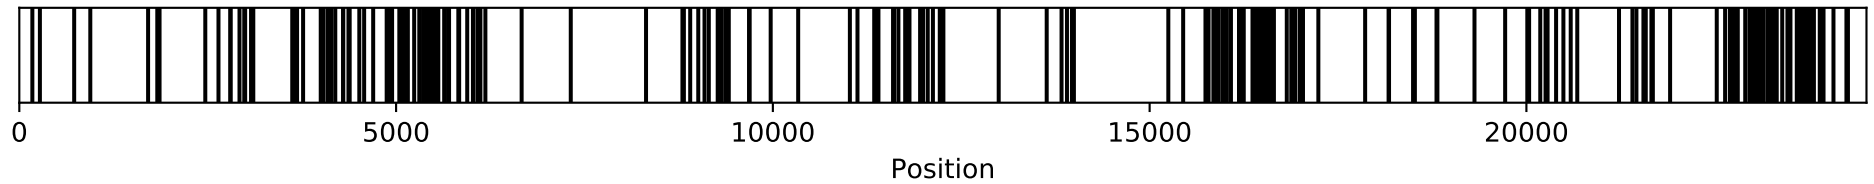

CR2 vs MM1  
Number of differences: 497

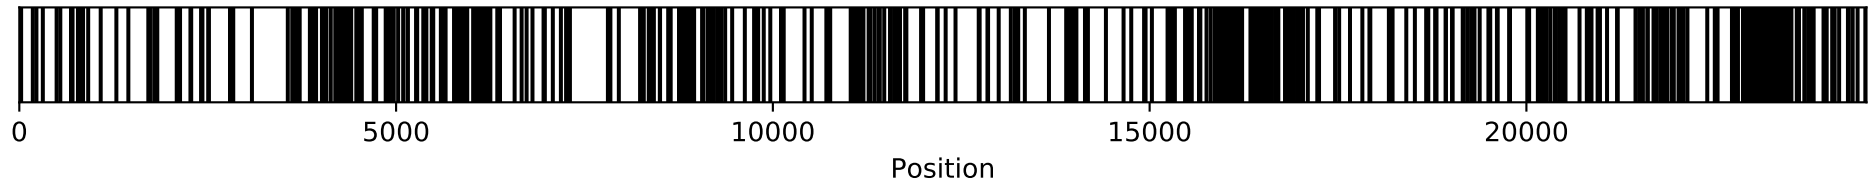

CR2 vs MM2  
Number of differences: 522

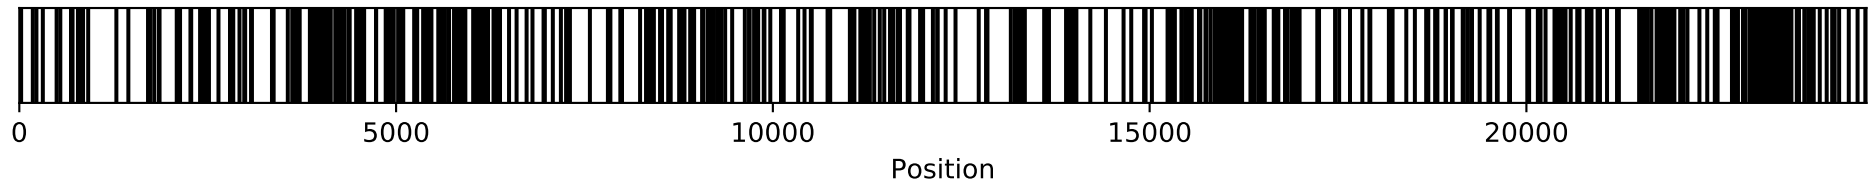

MM1 vs MM2  
Number of differences: 217

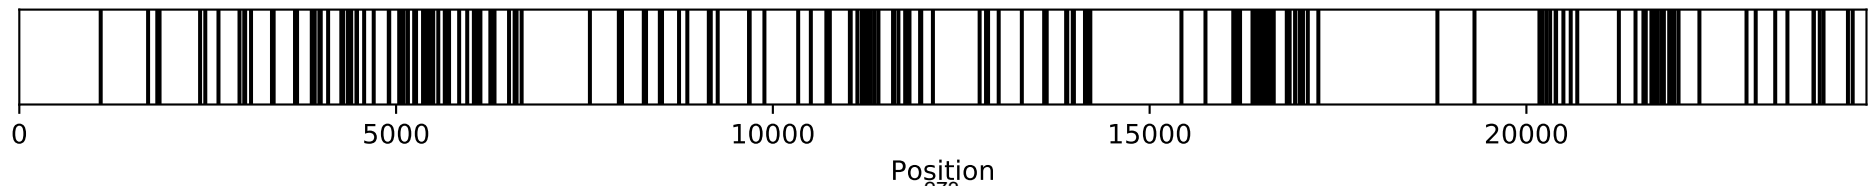

CR1 vs CR2  
Number of differences: 221

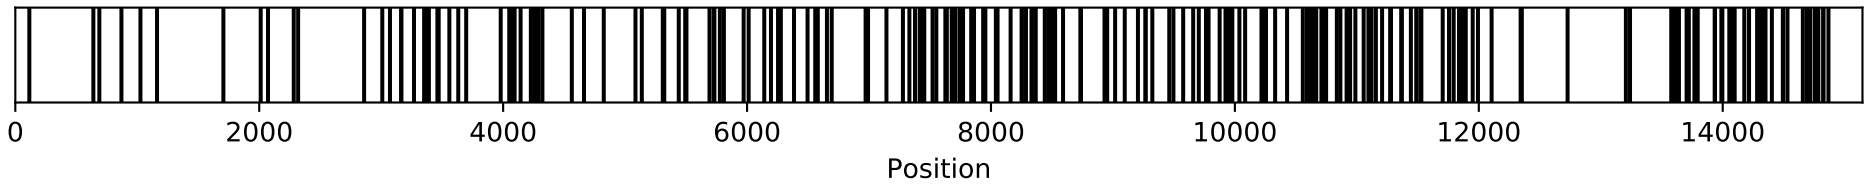

CR1 vs MM1  
Number of differences: 175

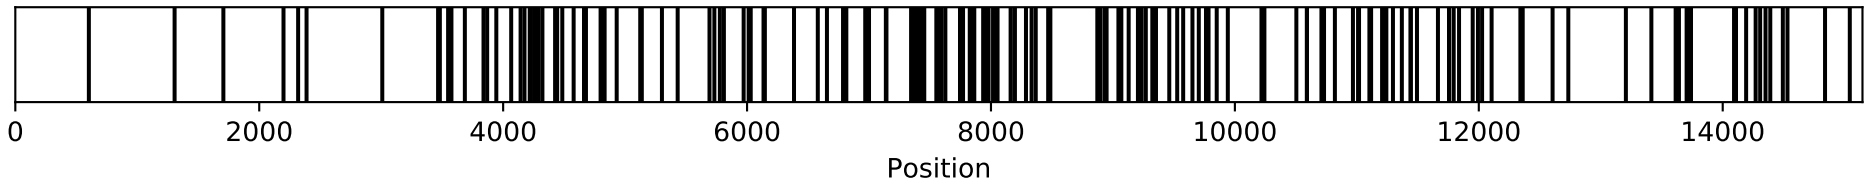

CR1 vs MM2  
Number of differences: 34

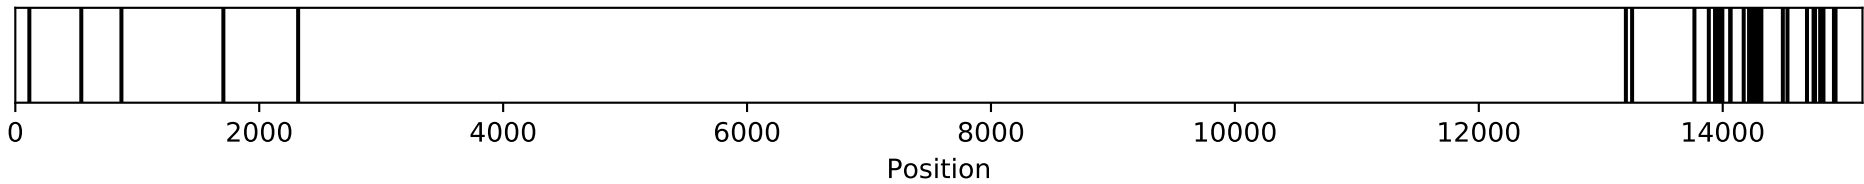

CR2 vs MM1  
Number of differences: 237

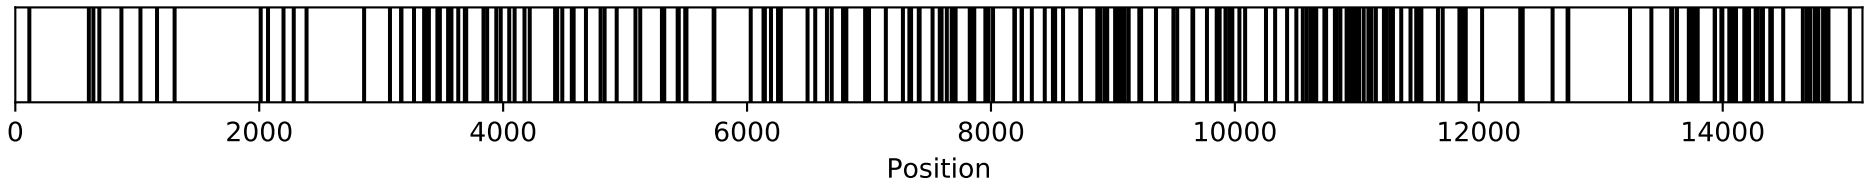

CR2 vs MM2  
Number of differences: 218

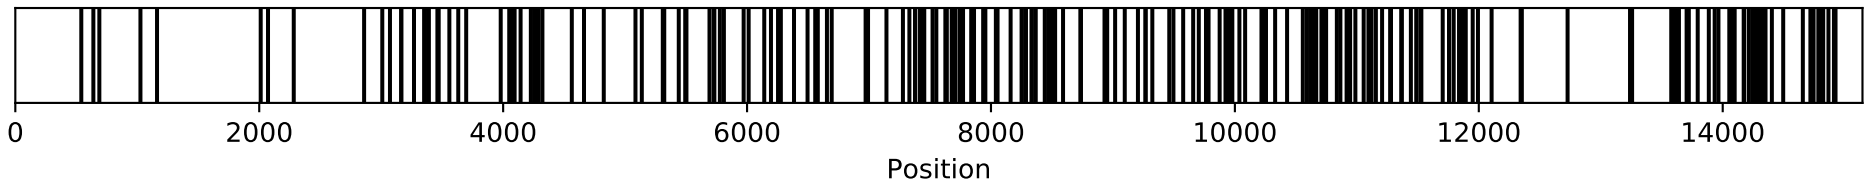

MM1 vs MM2  
Number of differences: 197

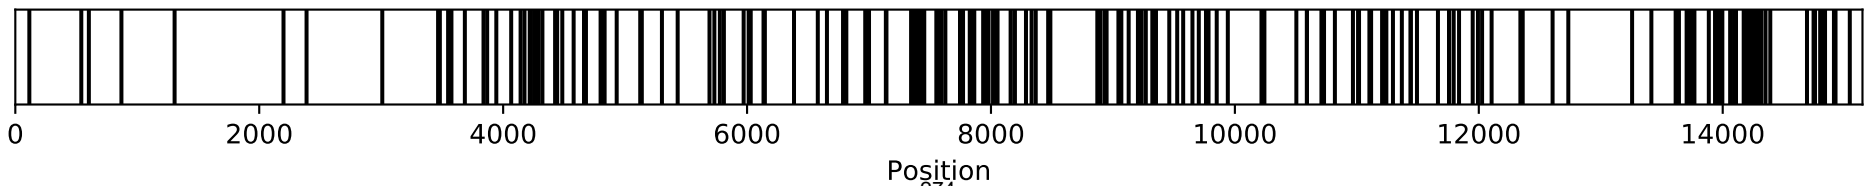

CR1 vs CR2  
Number of differences: 208

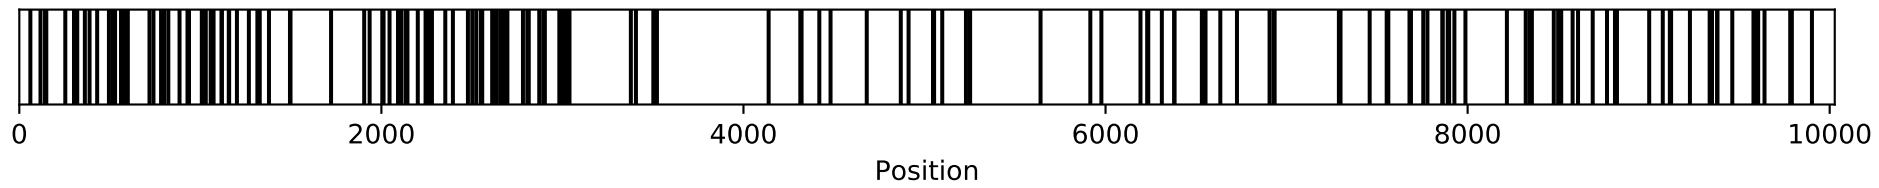

CR1 vs MM1  
Number of differences: 56

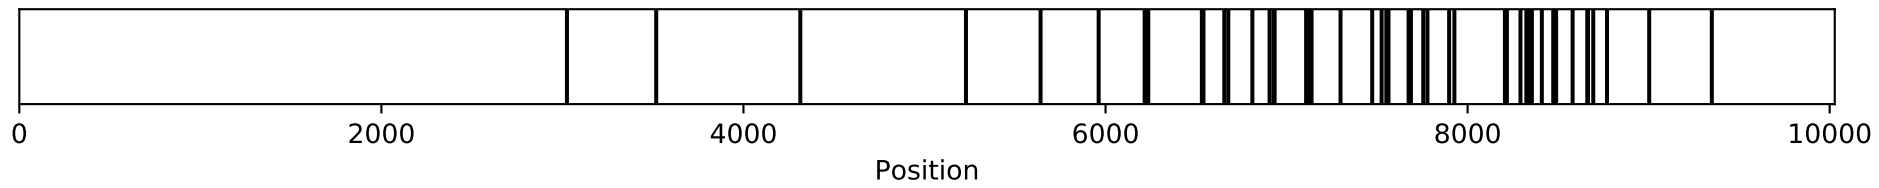

CR1 vs MM2  
Number of differences: 56

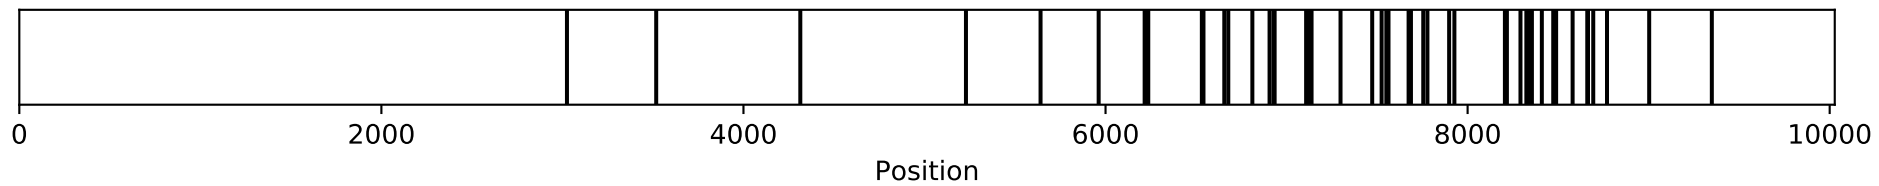

CR2 vs MM1  
Number of differences: 218

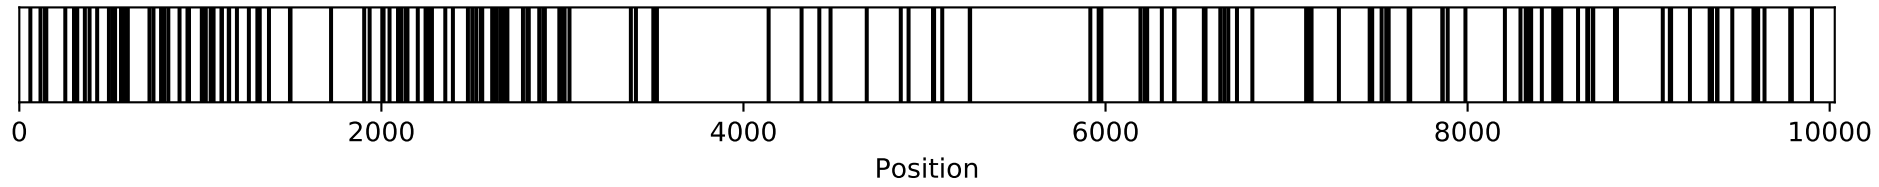

CR2 vs MM2  
Number of differences: 218

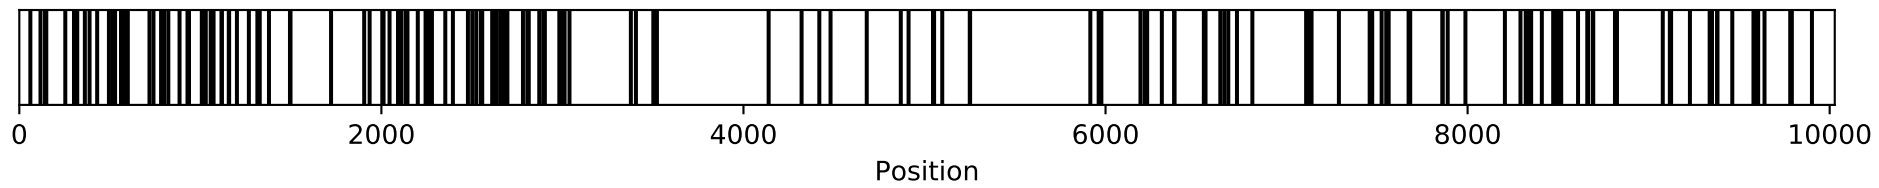

MM1 vs MM2  
Number of differences: 0

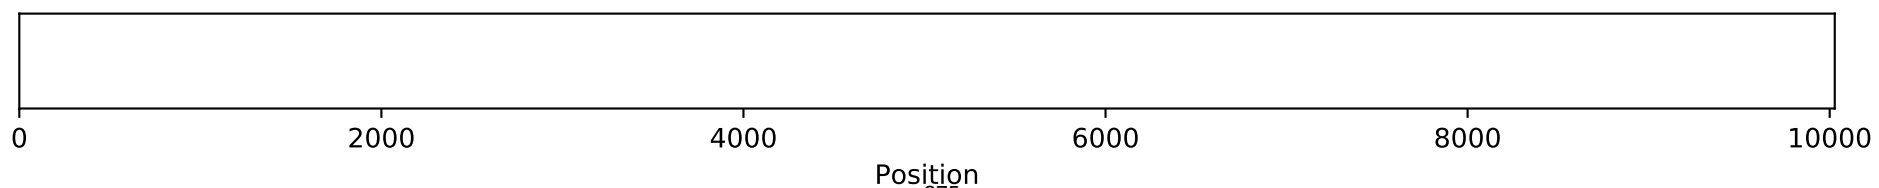

CR1 vs CR2  
Number of differences: 167

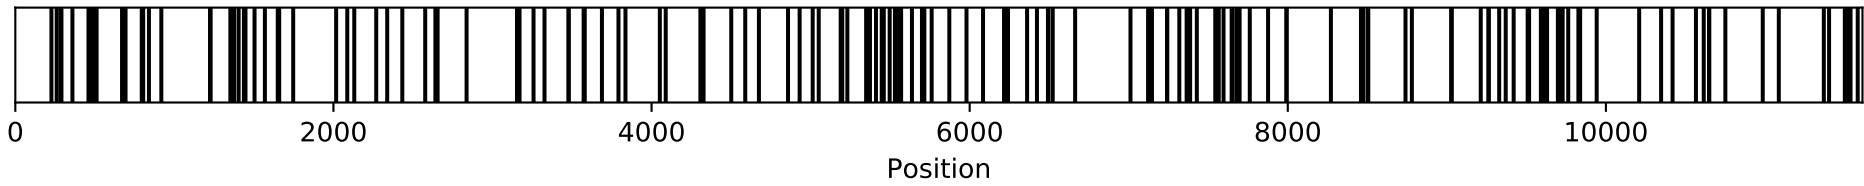

CR1 vs MM1  
Number of differences: 76

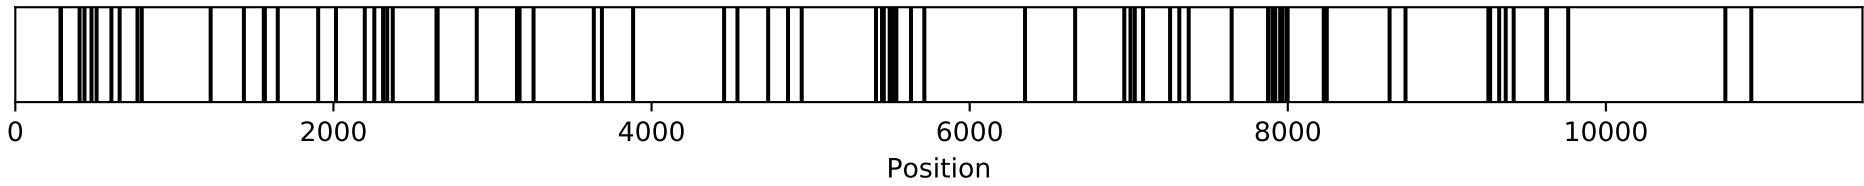

CR1 vs MM2  
Number of differences: 70

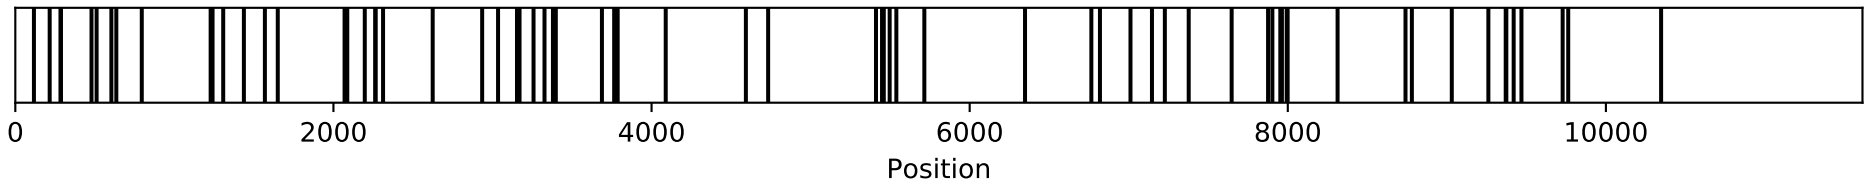

CR2 vs MM1  
Number of differences: 171

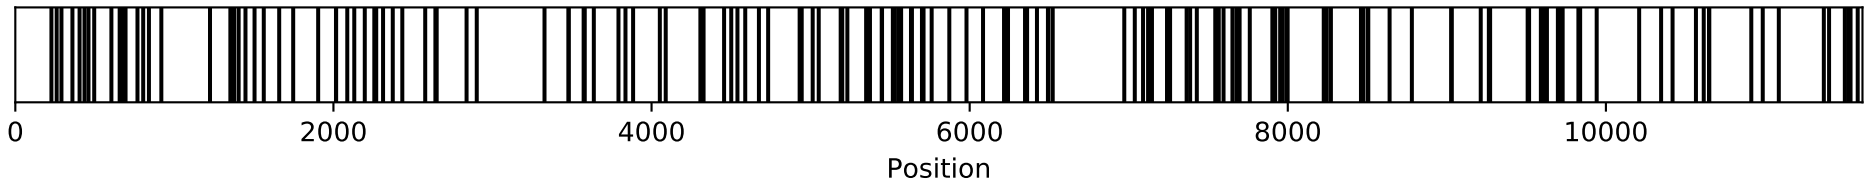

CR2 vs MM2  
Number of differences: 166

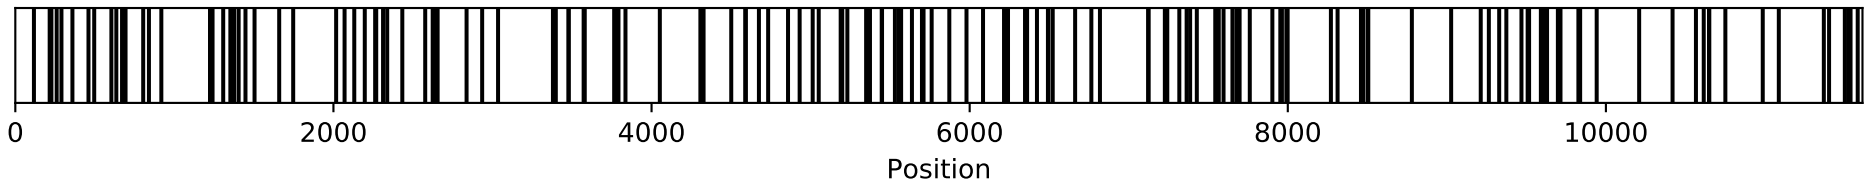

MM1 vs MM2  
Number of differences: 74

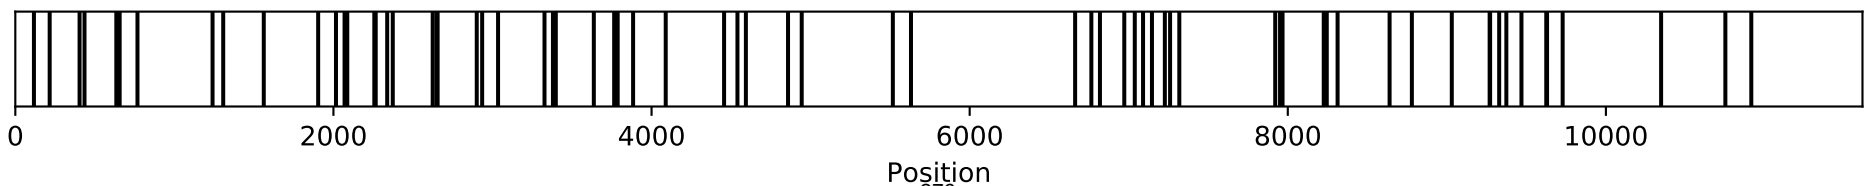

CR1 vs CR2  
Number of differences: 355

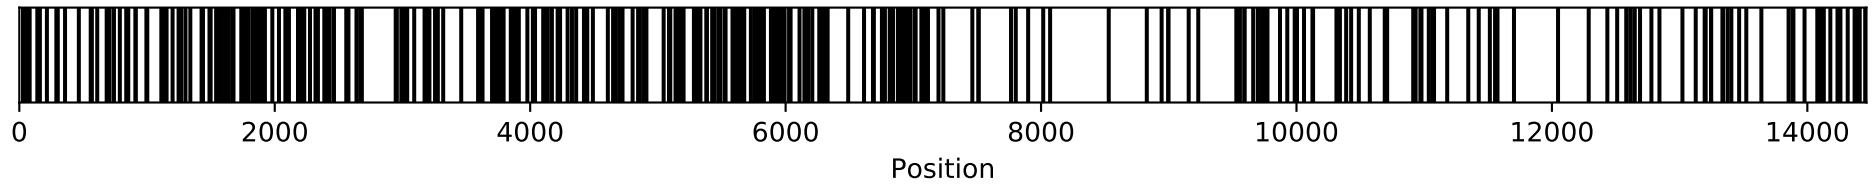

CR1 vs MM1  
Number of differences: 127

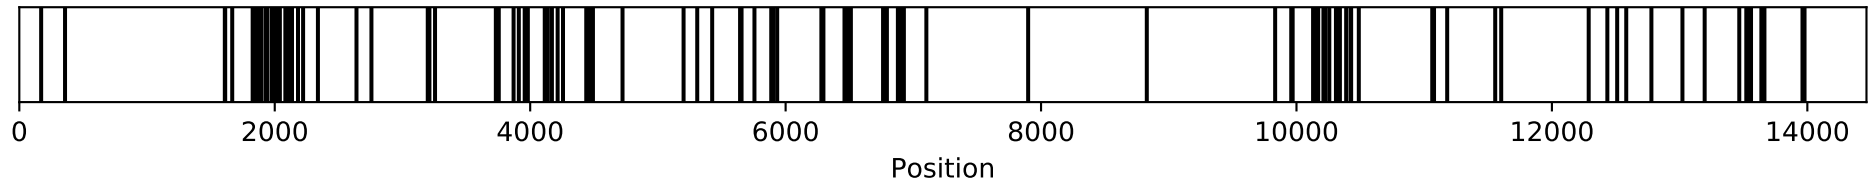

CR1 vs MM2  
Number of differences: 127

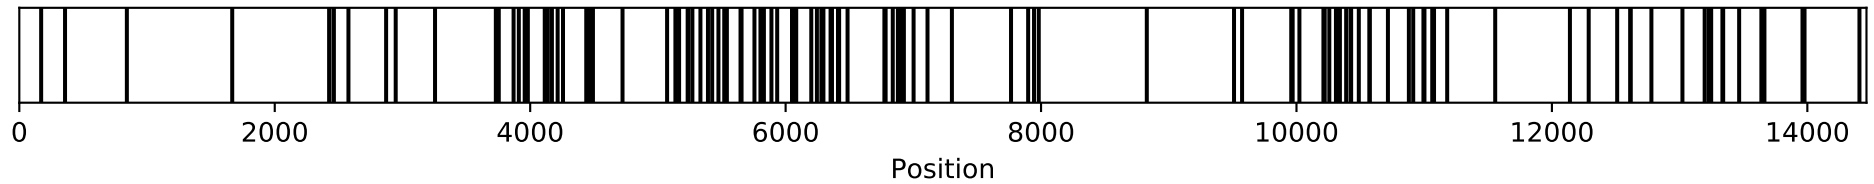

CR2 vs MM1  
Number of differences: 358

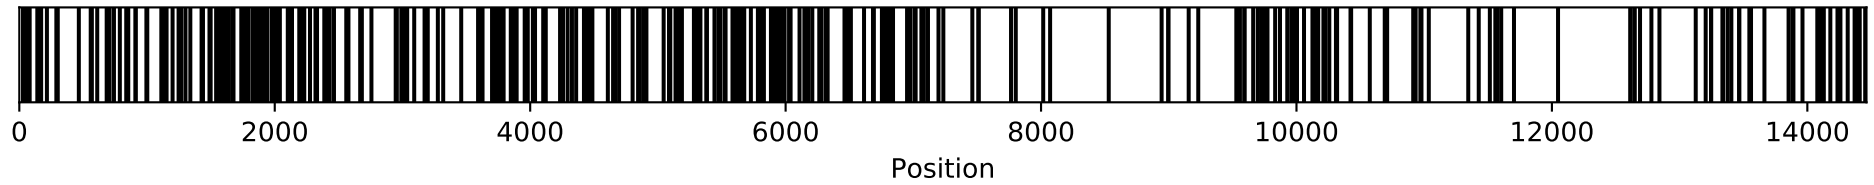

CR2 vs MM2  
Number of differences: 351

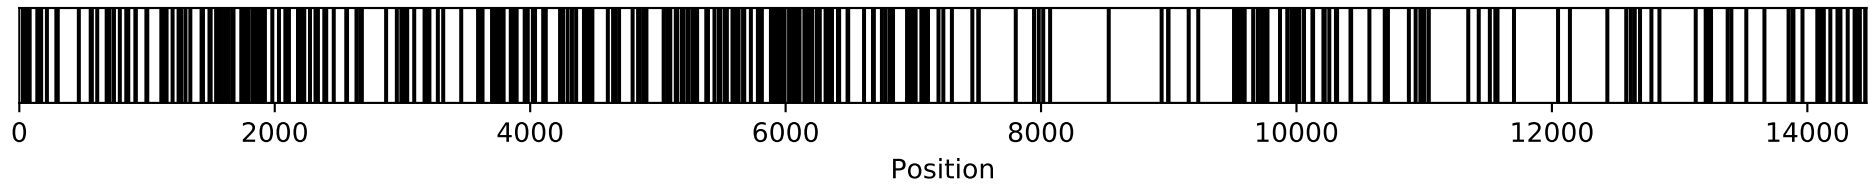

MM1 vs MM2  
Number of differences: 125

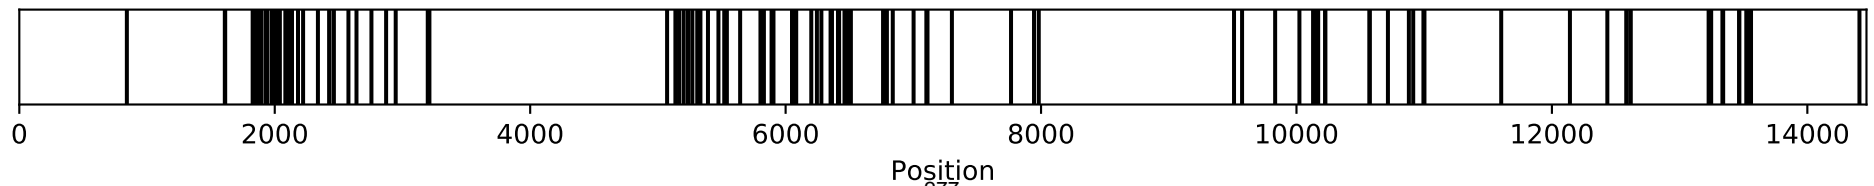

CR1 vs CR2  
Number of differences: 152

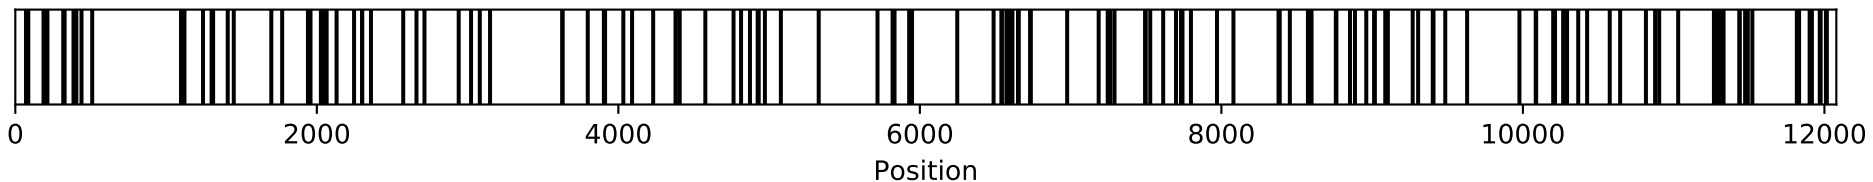

CR1 vs MM1  
Number of differences: 56

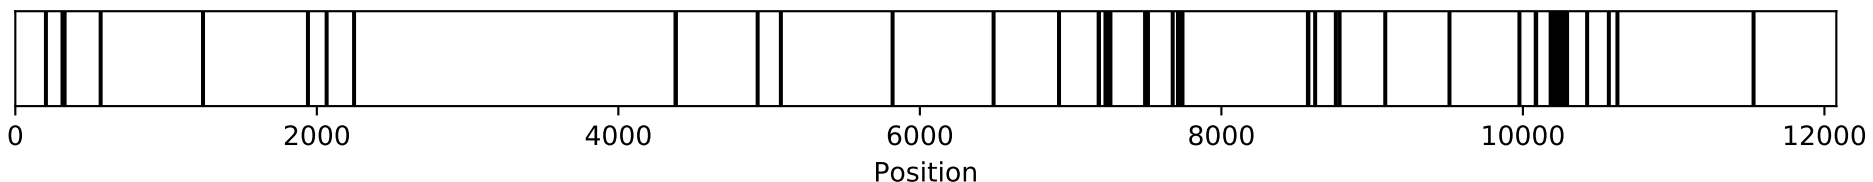

CR1 vs MM2  
Number of differences: 62

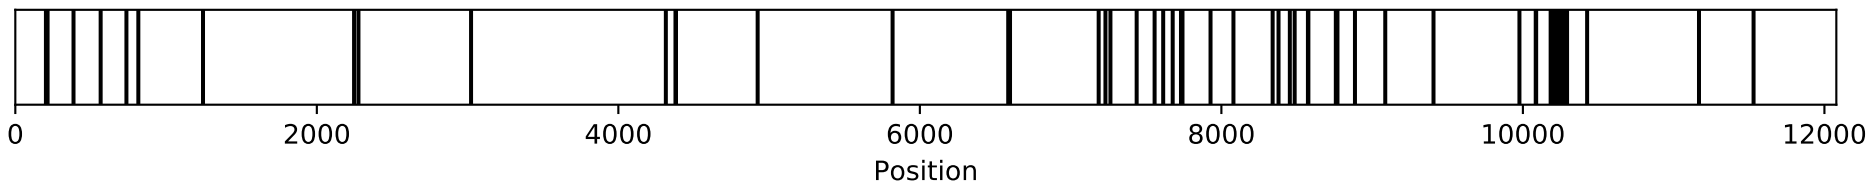

CR2 vs MM1  
Number of differences: 147

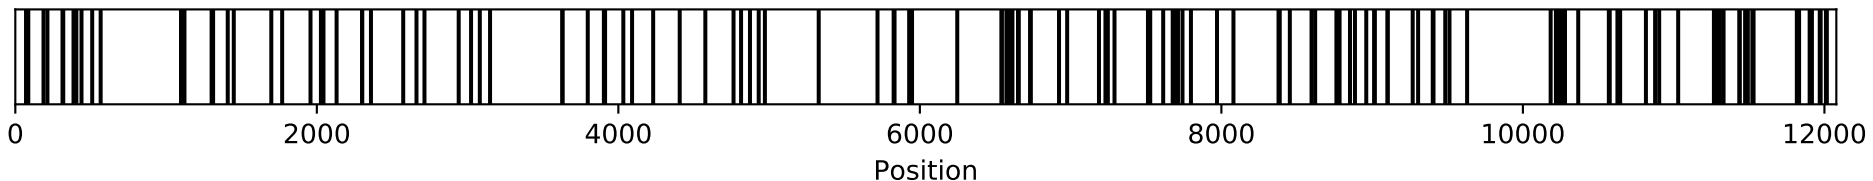

CR2 vs MM2  
Number of differences: 147

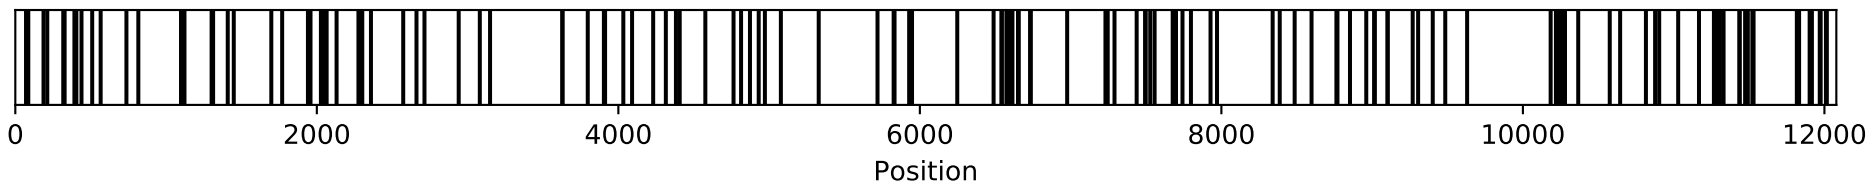

MM1 vs MM2  
Number of differences: 42

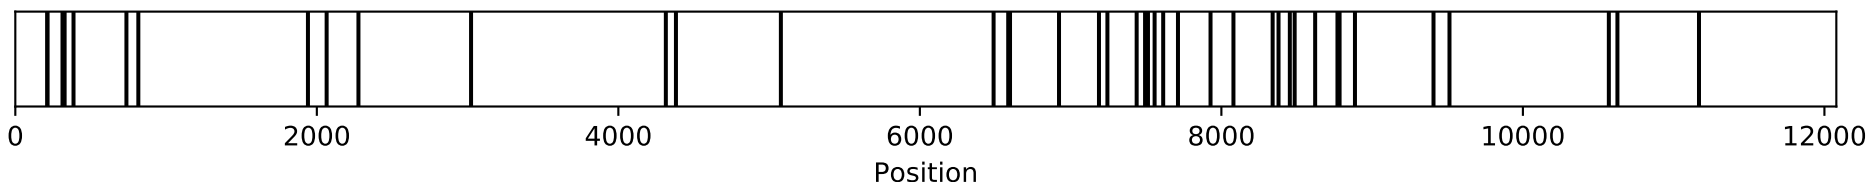

CR1 vs CR2  
Number of differences: 40

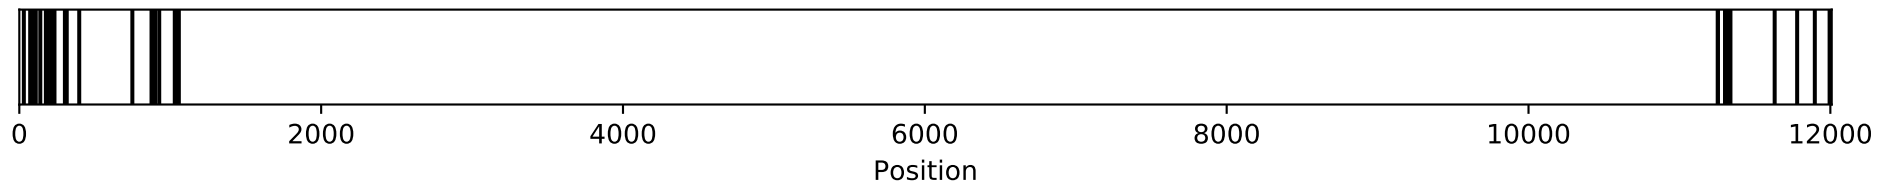

CR1 vs MM1  
Number of differences: 191

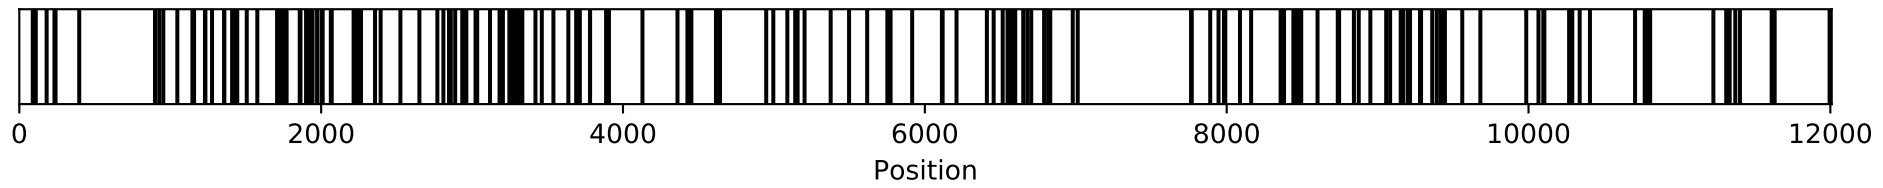

CR1 vs MM2  
Number of differences: 235

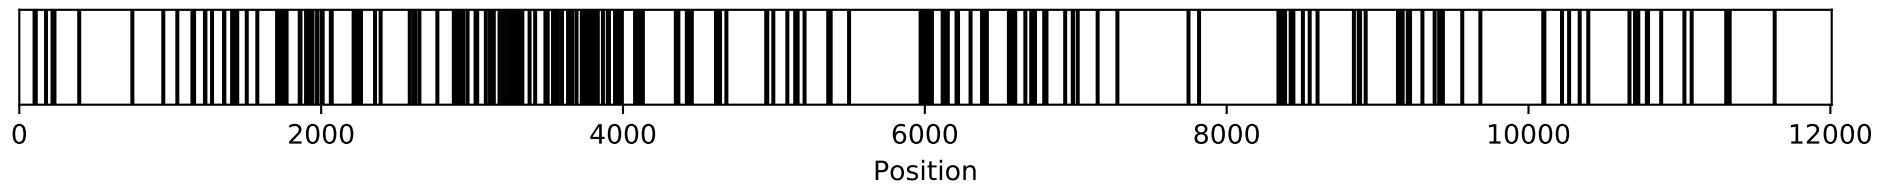

CR2 vs MM1  
Number of differences: 210

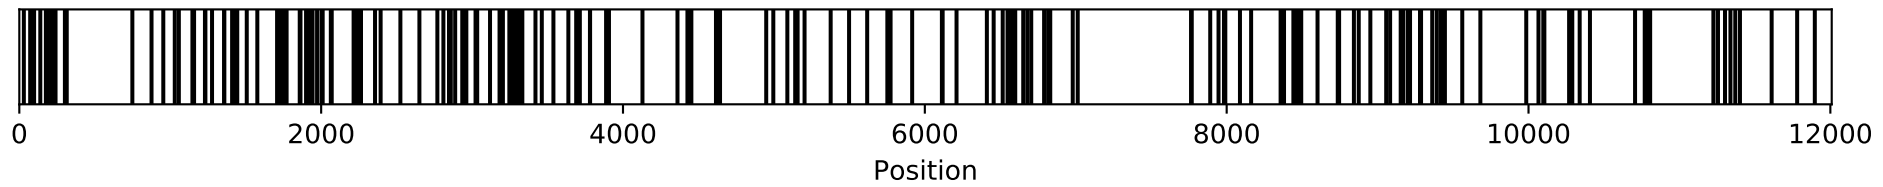

CR2 vs MM2  
Number of differences: 257

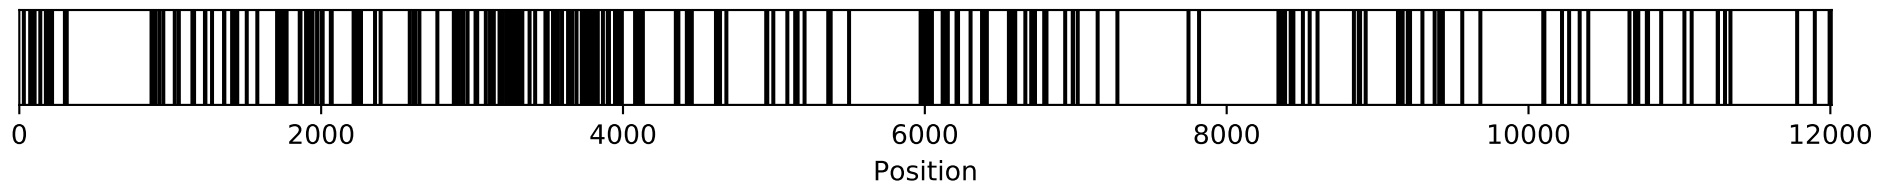

MM1 vs MM2  
Number of differences: 202

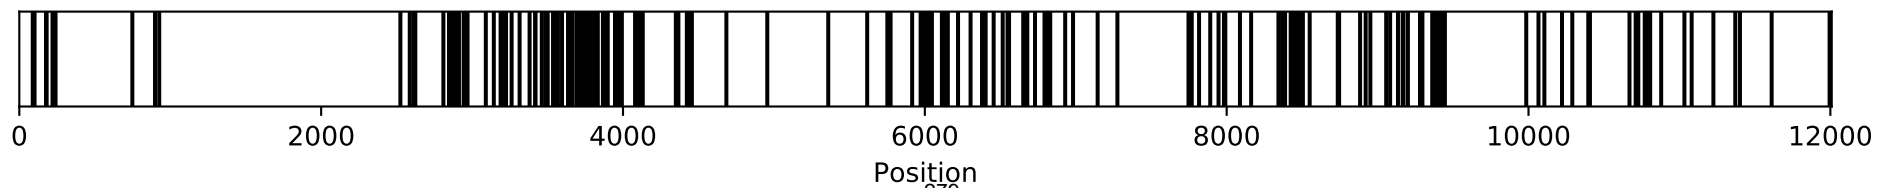



CR1 vs CR2  
Number of differences: 710

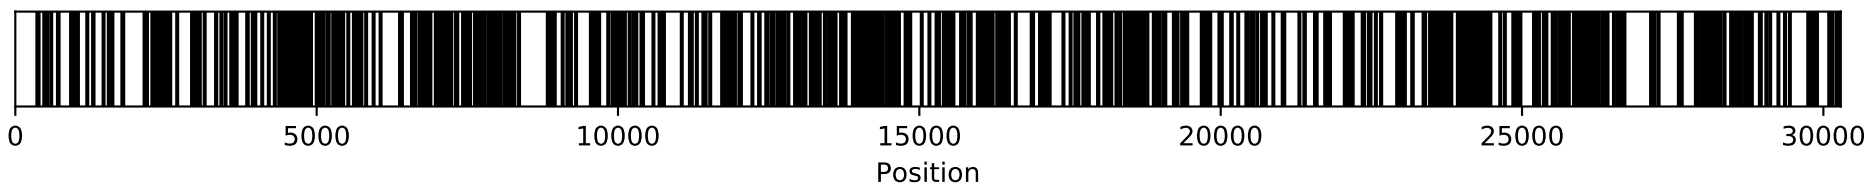

CR1 vs MM1  
Number of differences: 252

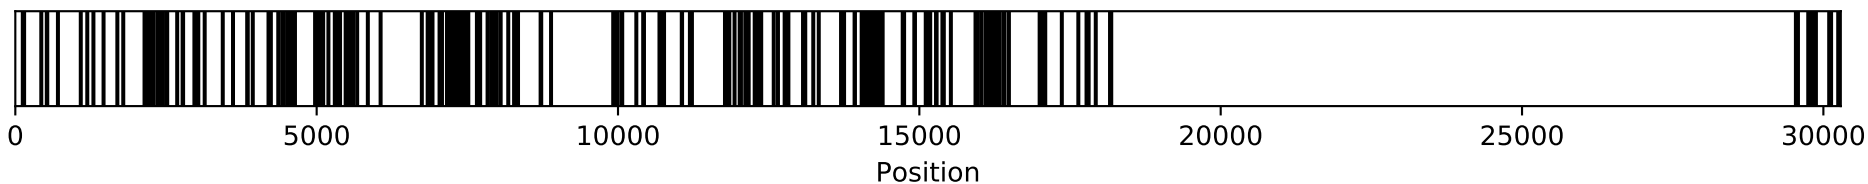

CR1 vs MM2  
Number of differences: 289

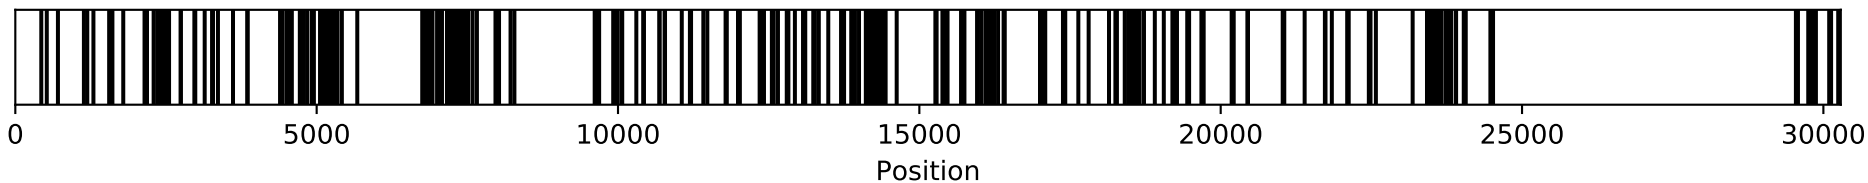

CR2 vs MM1  
Number of differences: 739

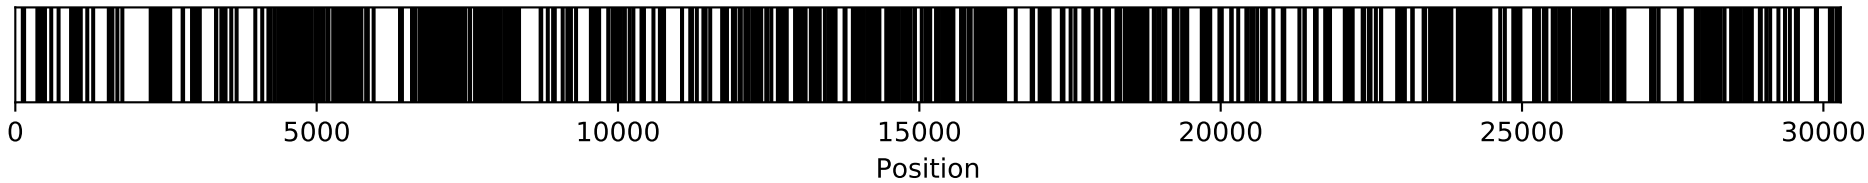

CR2 vs MM2  
Number of differences: 684

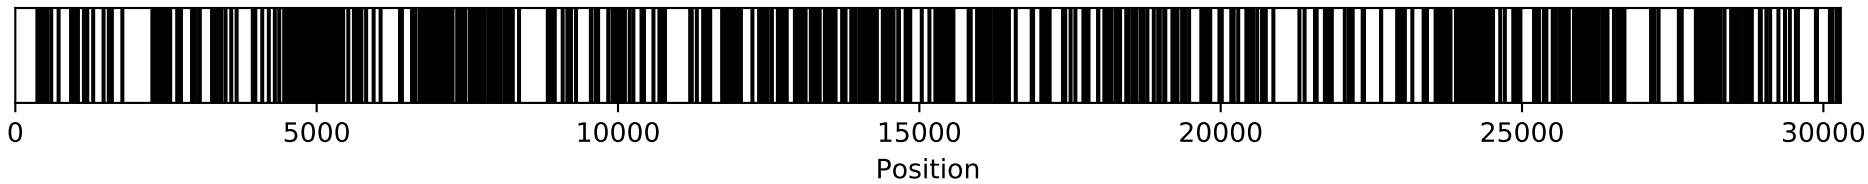

MM1 vs MM2  
Number of differences: 310

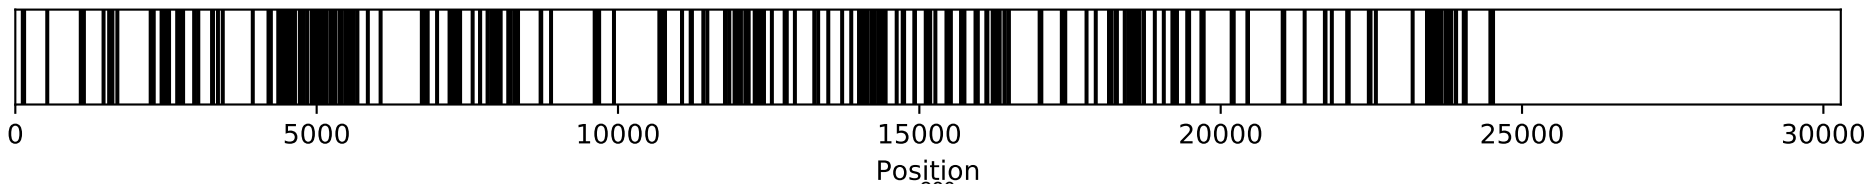

CR1 vs CR2  
Number of differences: 325

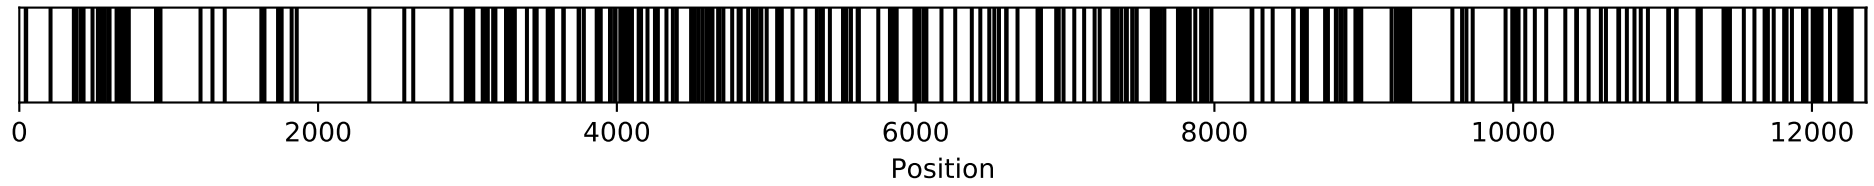

CR1 vs MM1  
Number of differences: 301

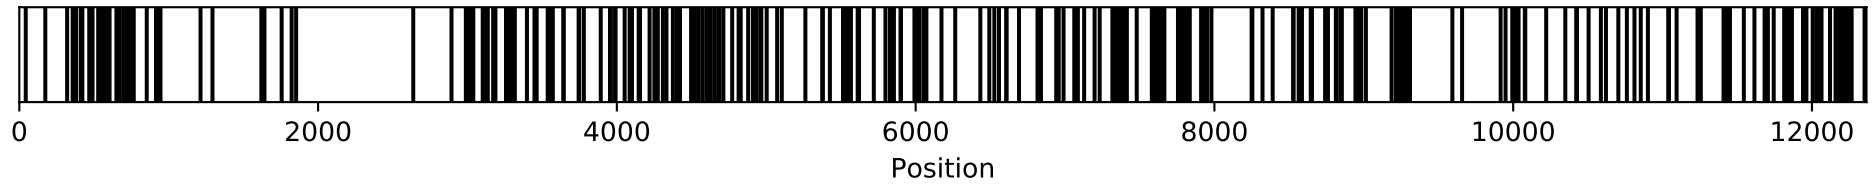

CR1 vs MM2  
Number of differences: 322

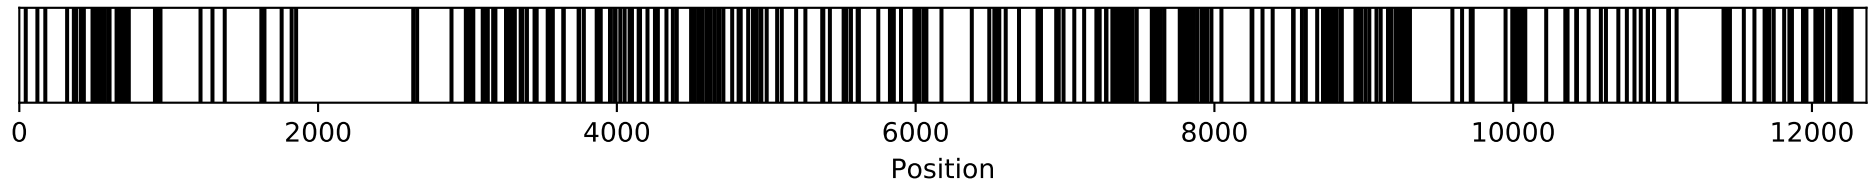

CR2 vs MM1  
Number of differences: 118

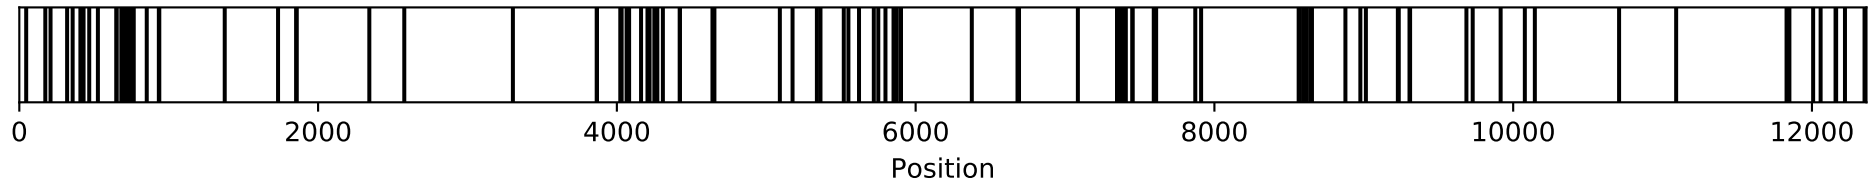

CR2 vs MM2  
Number of differences: 139

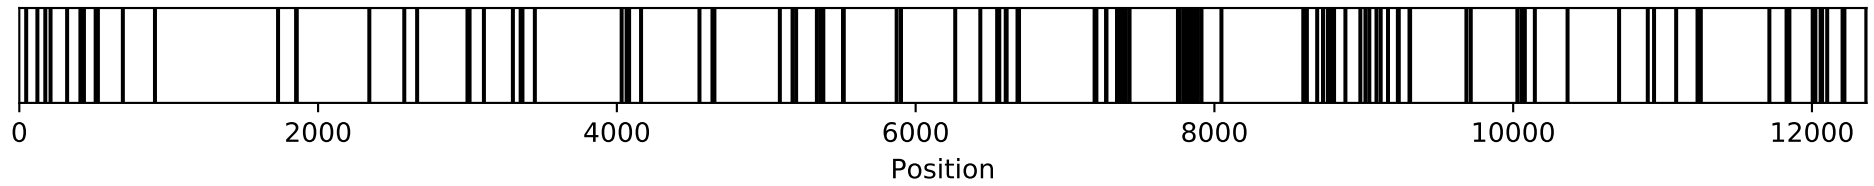

MM1 vs MM2  
Number of differences: 144

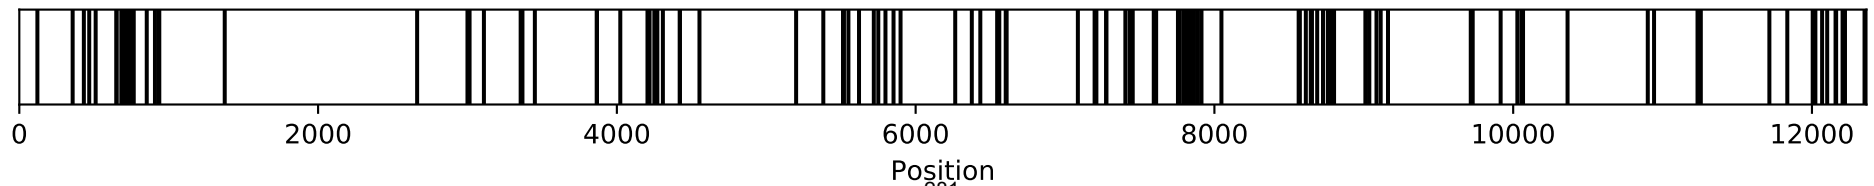

CR1 vs CR2  
Number of differences: 302

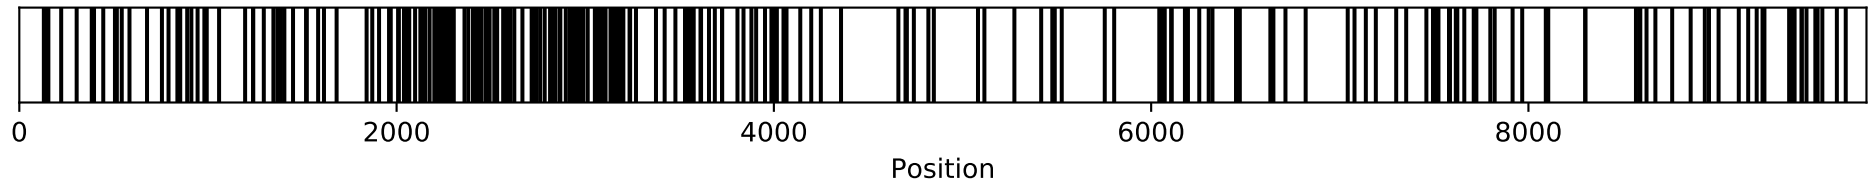

CR1 vs MM1  
Number of differences: 59

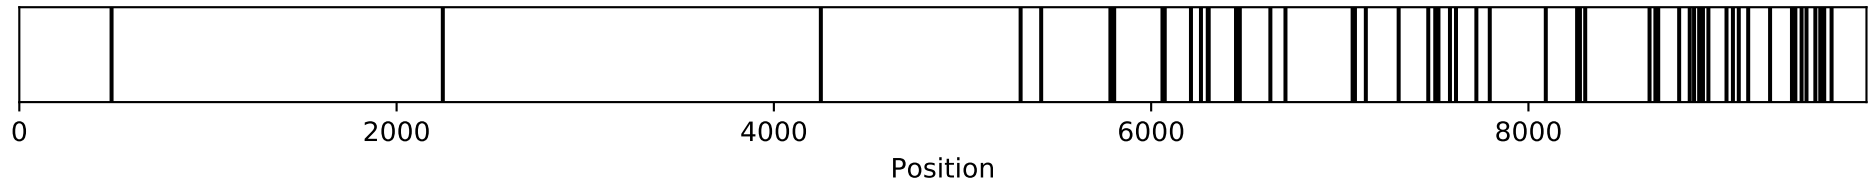

CR1 vs MM2  
Number of differences: 117

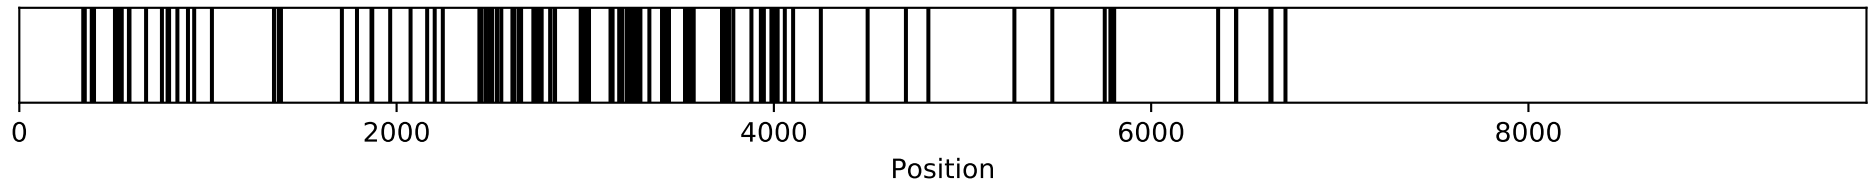

CR2 vs MM1  
Number of differences: 309

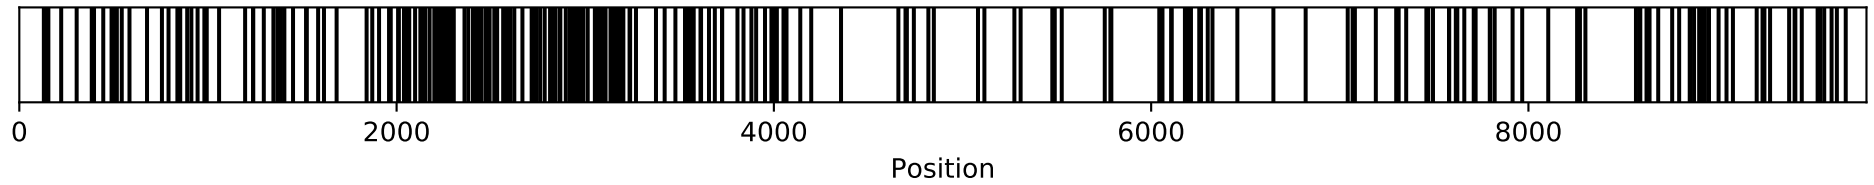

CR2 vs MM2  
Number of differences: 305

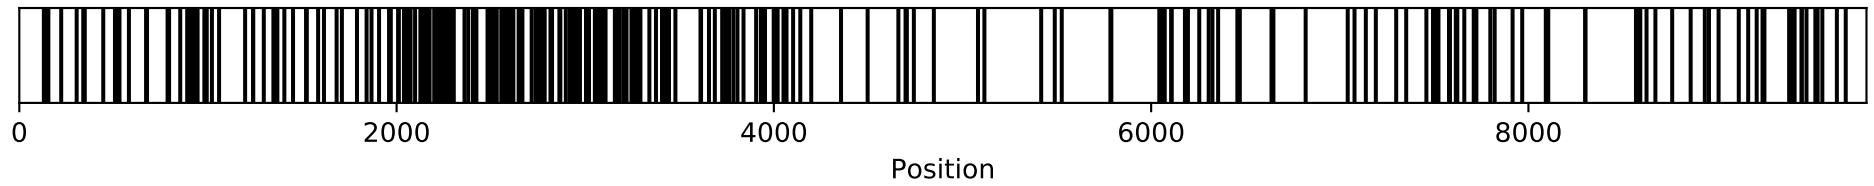

MM1 vs MM2  
Number of differences: 158

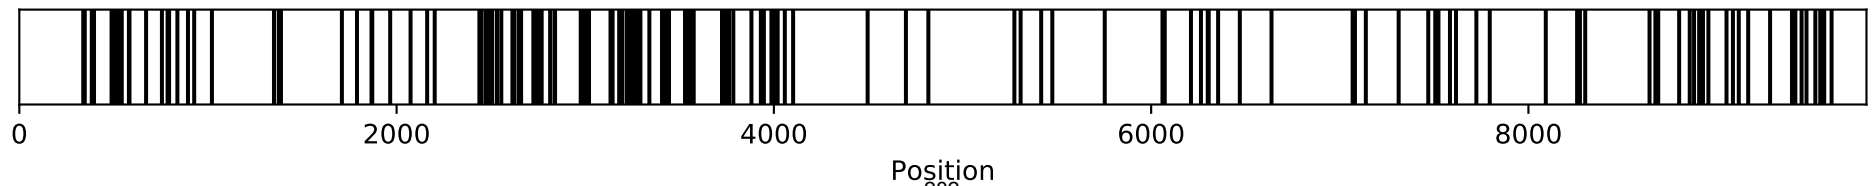

CR1 vs CR2  
Number of differences: 100

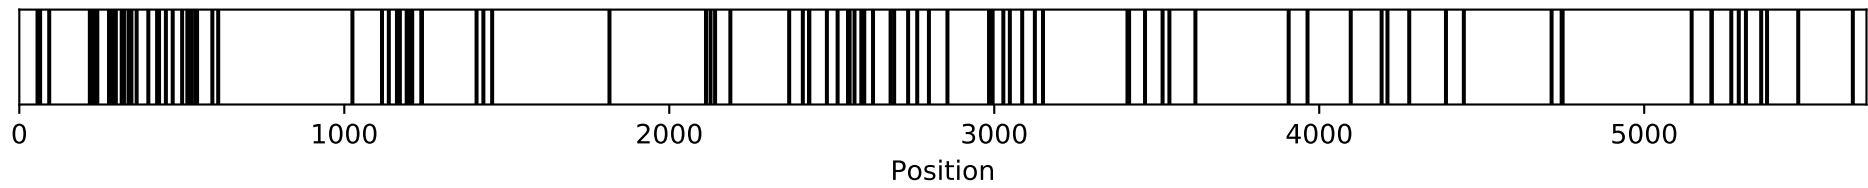

CR1 vs MM1  
Number of differences: 111

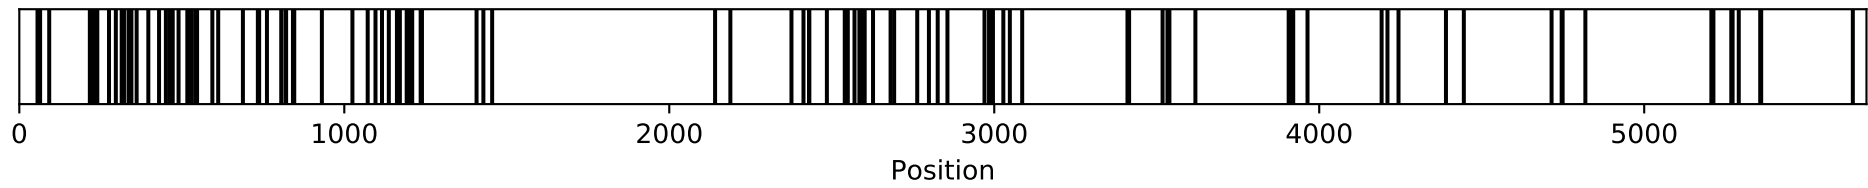

CR1 vs MM2  
Number of differences: 106

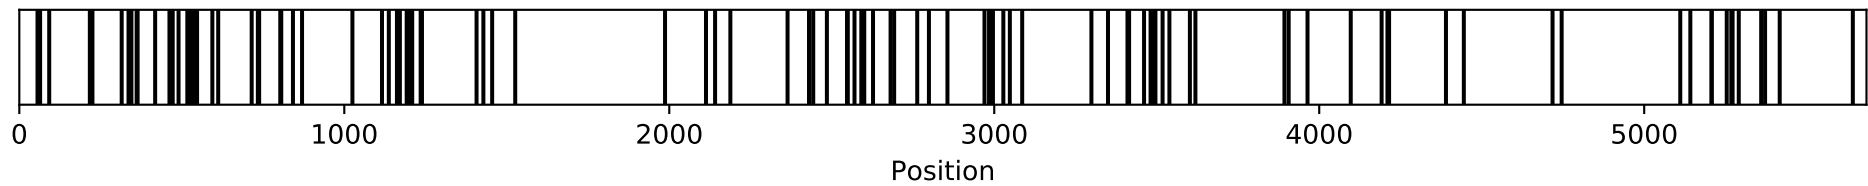

CR2 vs MM1  
Number of differences: 60

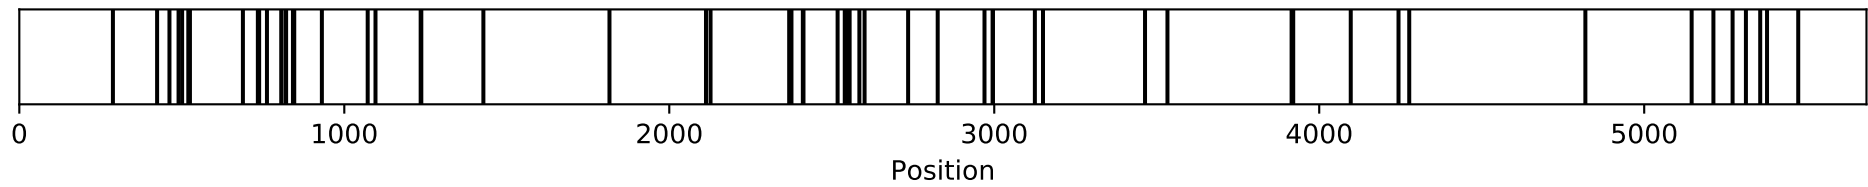

CR2 vs MM2  
Number of differences: 70

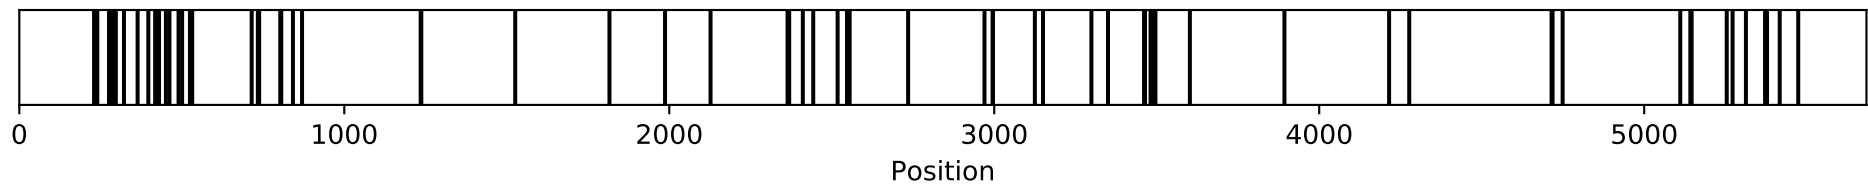

MM1 vs MM2  
Number of differences: 61

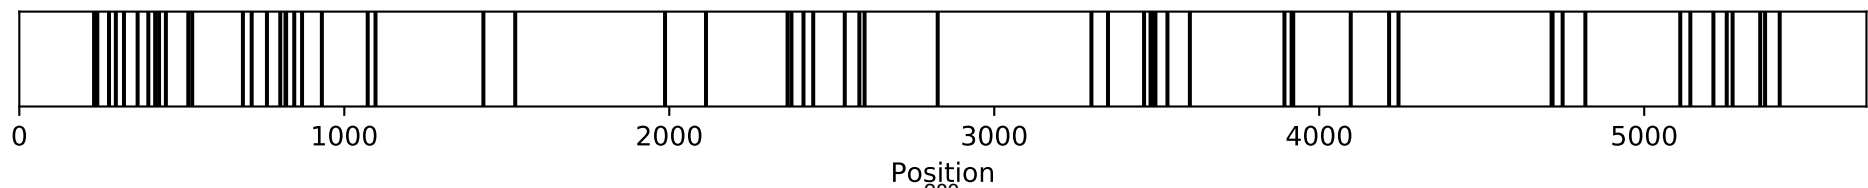

CR1 vs CR2  
Number of differences: 283

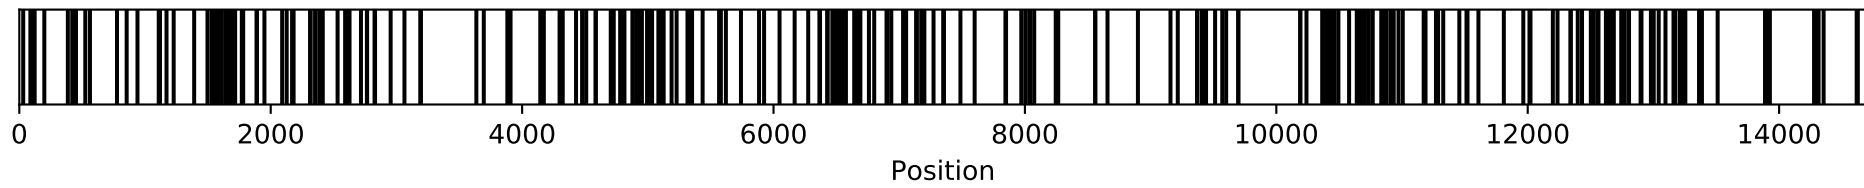

CR1 vs MM1  
Number of differences: 283

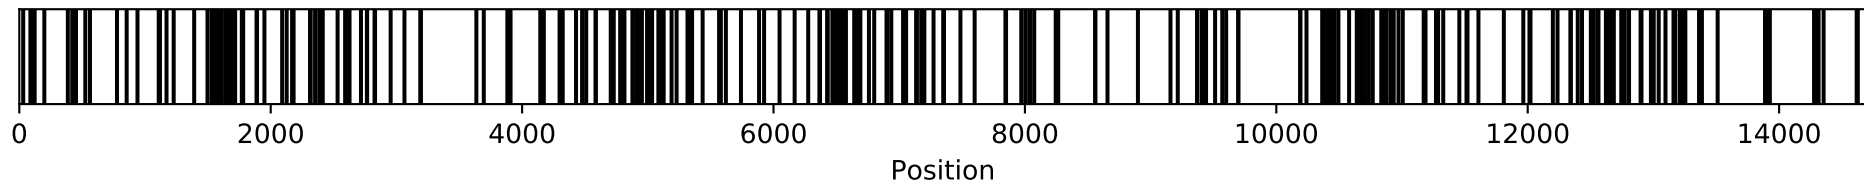

CR1 vs MM2  
Number of differences: 275

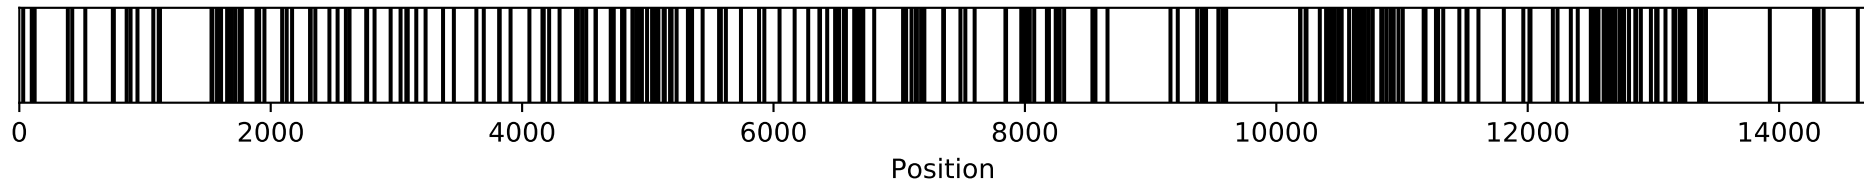

CR2 vs MM1  
Number of differences: 0

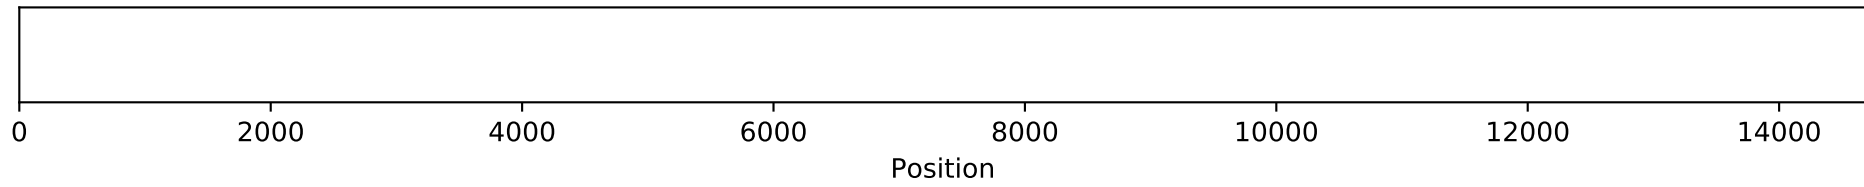

CR2 vs MM2  
Number of differences: 140

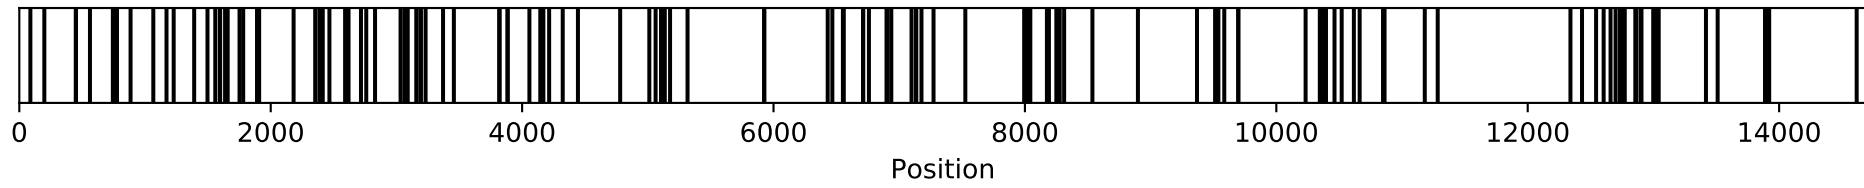

MM1 vs MM2  
Number of differences: 140

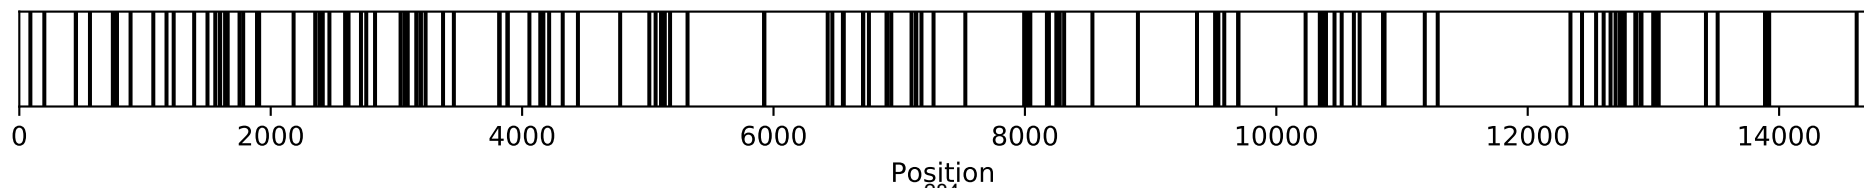

CR1 vs CR2  
Number of differences: 17

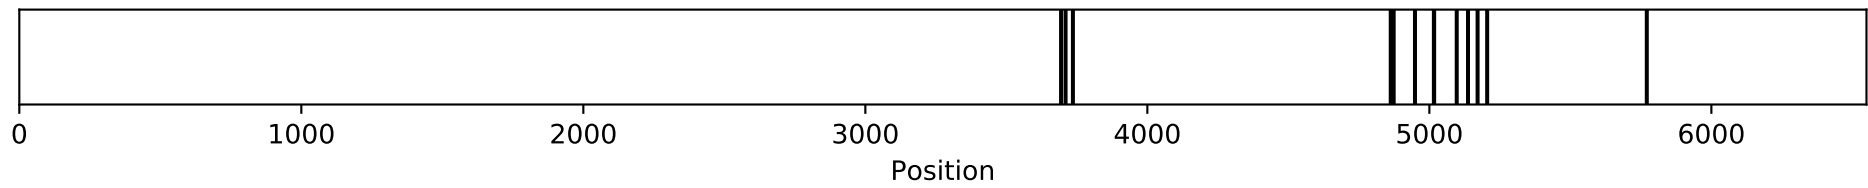

CR1 vs MM1  
Number of differences: 54

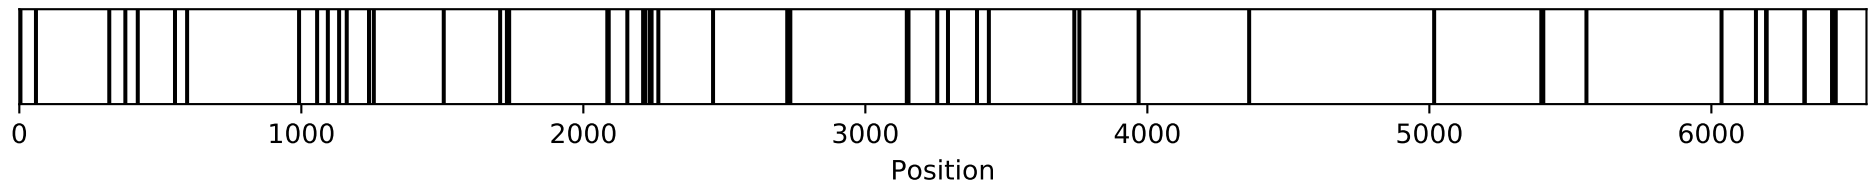

CR1 vs MM2  
Number of differences: 47

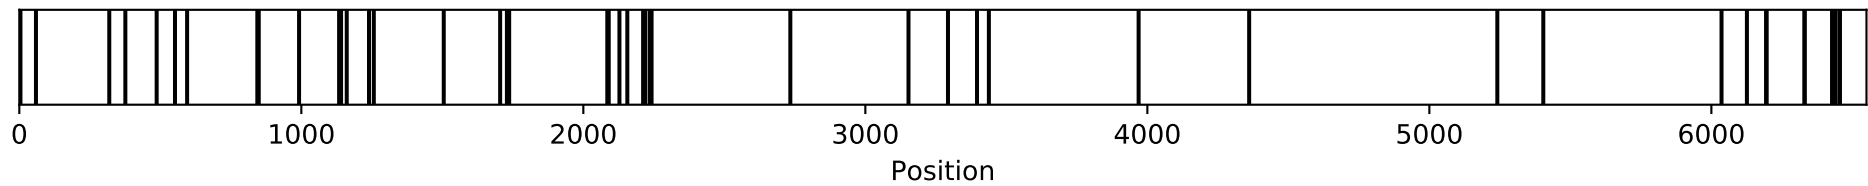

CR2 vs MM1  
Number of differences: 69

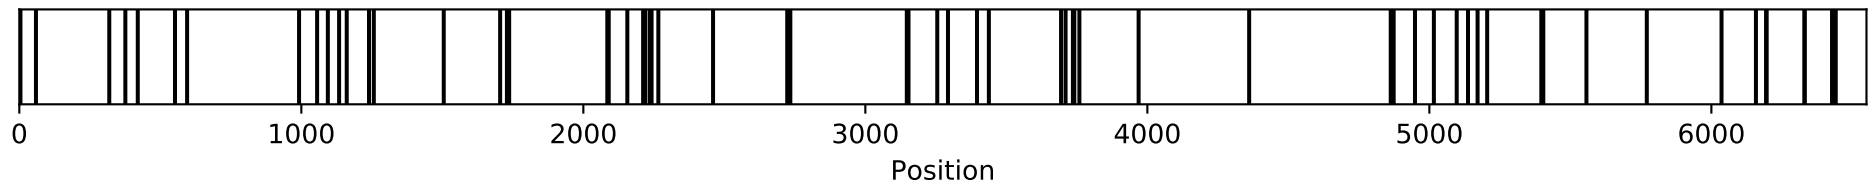

CR2 vs MM2  
Number of differences: 64

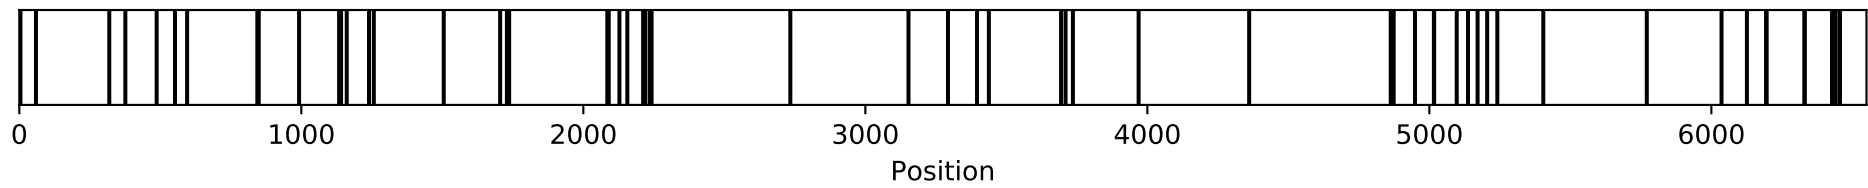

MM1 vs MM2  
Number of differences: 24

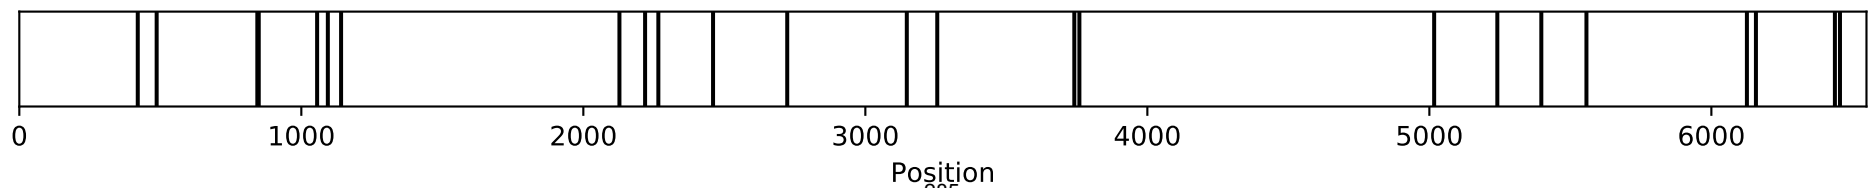

CR1 vs CR2  
Number of differences: 217

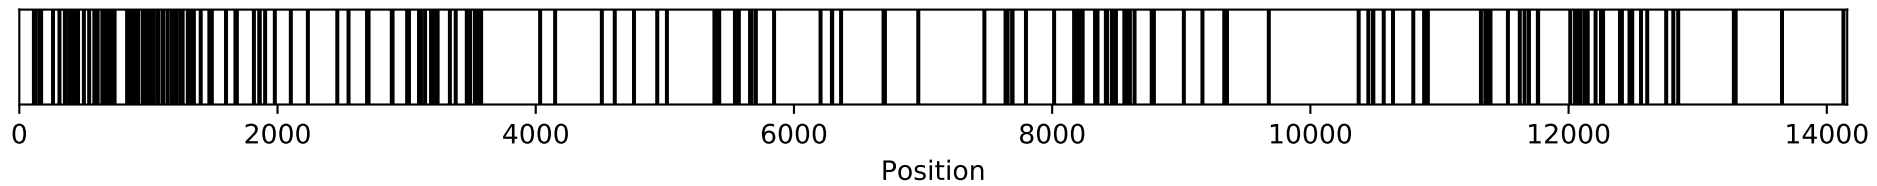

CR1 vs MM1  
Number of differences: 91

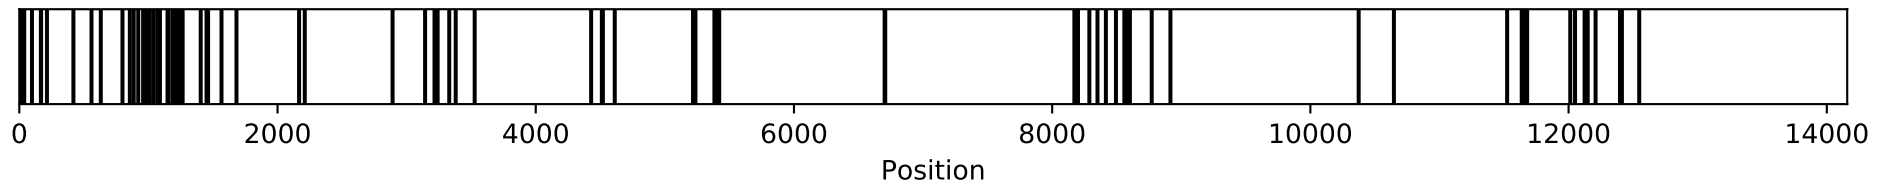

CR1 vs MM2  
Number of differences: 55

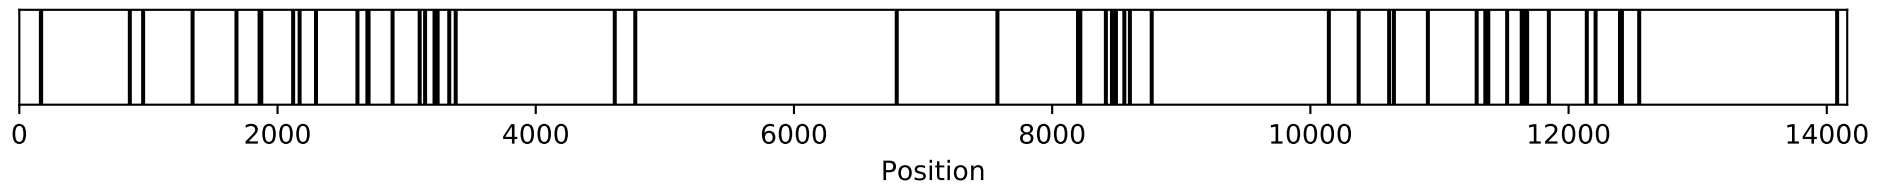

CR2 vs MM1  
Number of differences: 207

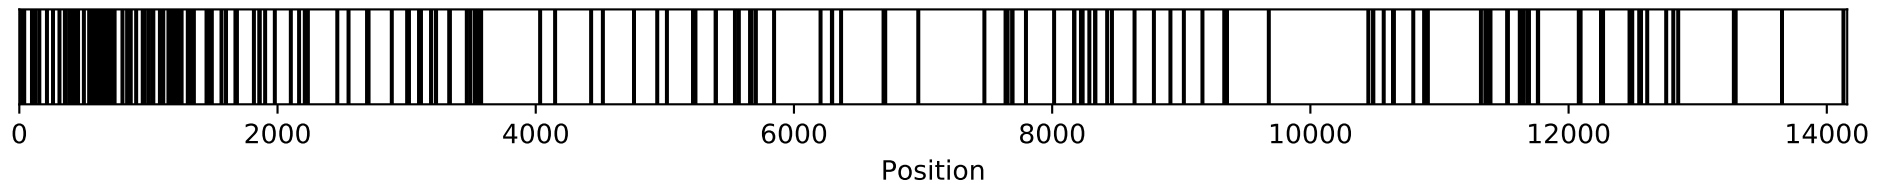

CR2 vs MM2  
Number of differences: 213

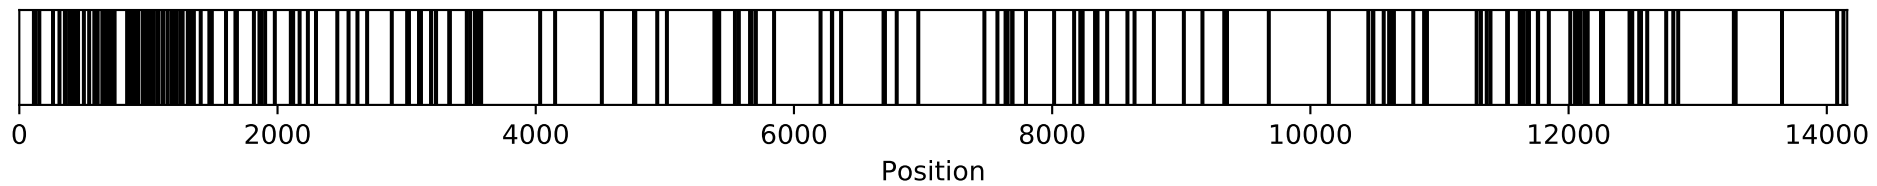

MM1 vs MM2  
Number of differences: 84

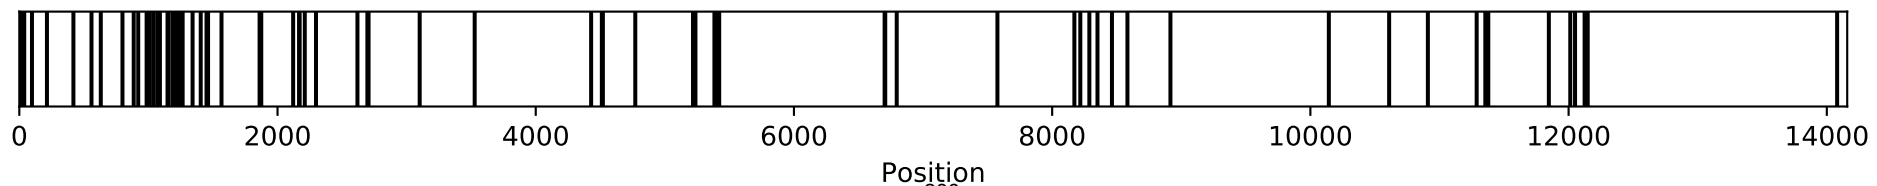

CR1 vs CR2  
Number of differences: 298

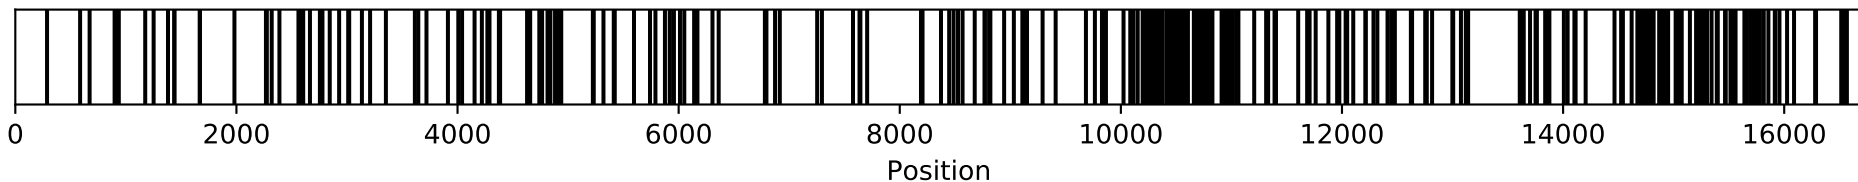

CR1 vs MM1  
Number of differences: 189

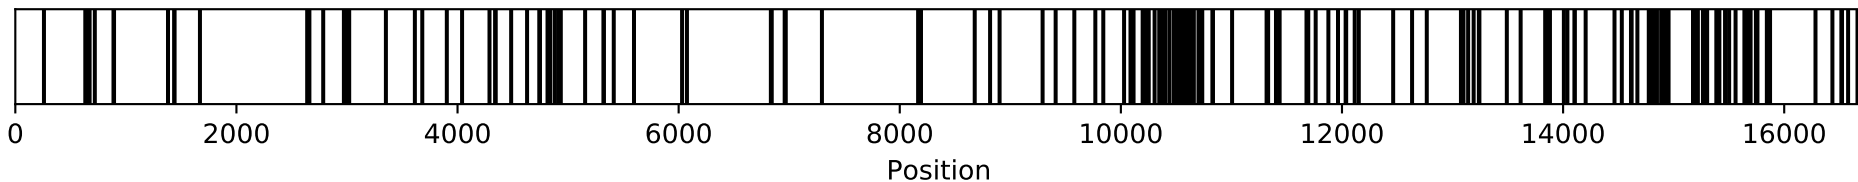

CR1 vs MM2  
Number of differences: 195

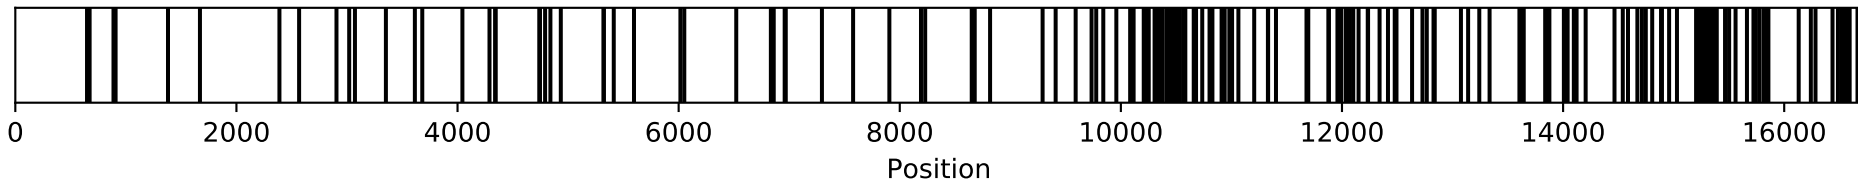

CR2 vs MM1  
Number of differences: 315

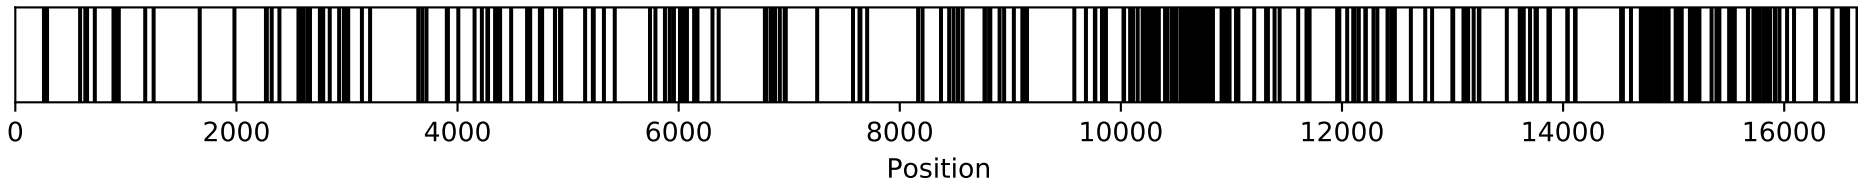

CR2 vs MM2  
Number of differences: 295

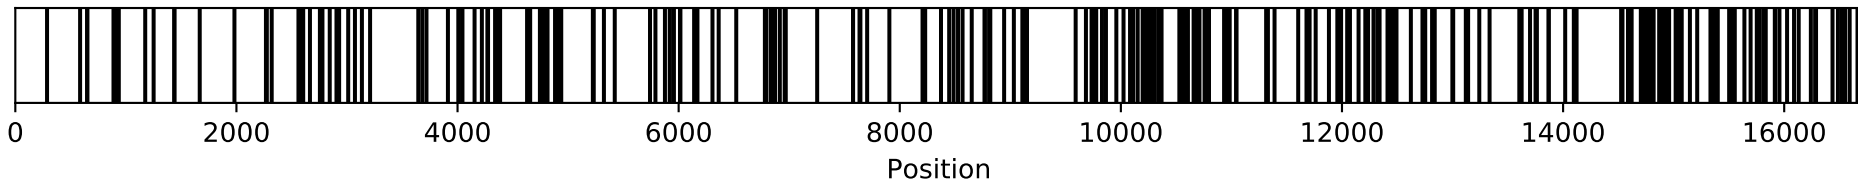

MM1 vs MM2  
Number of differences: 197

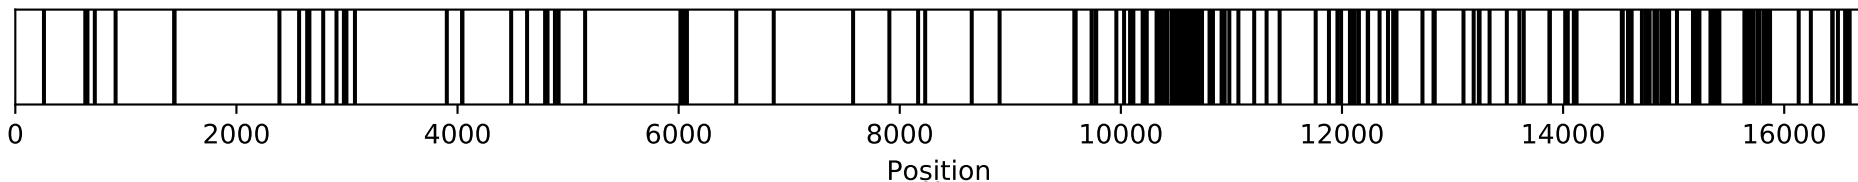



CR1 vs CR2  
Number of differences: 197

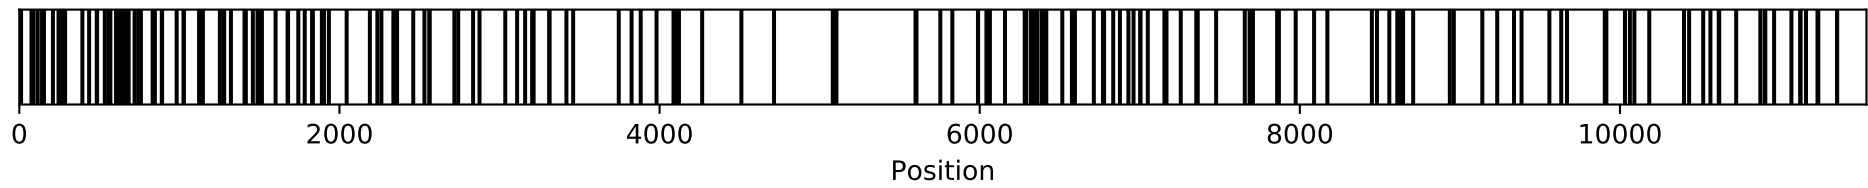

CR1 vs MM1  
Number of differences: 194

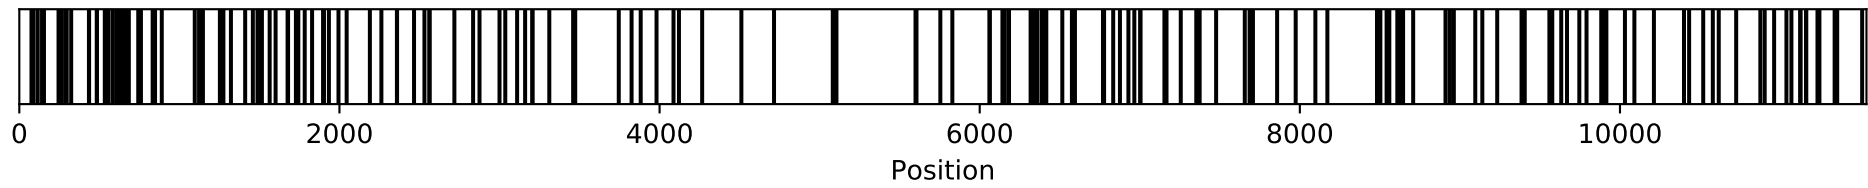

CR1 vs MM2  
Number of differences: 199

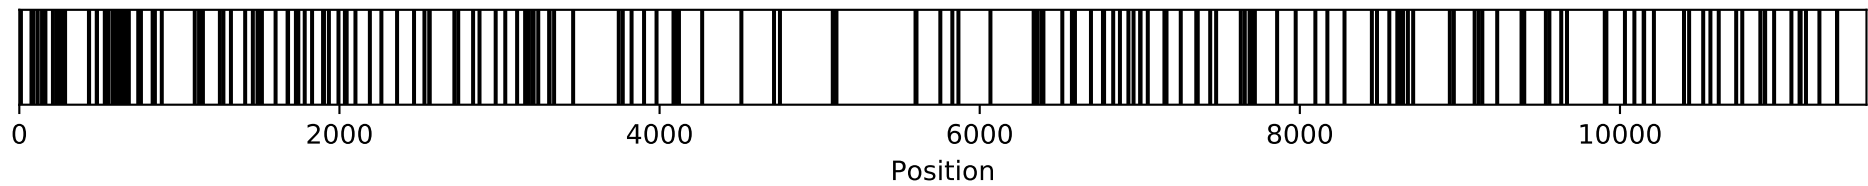

CR2 vs MM1  
Number of differences: 91

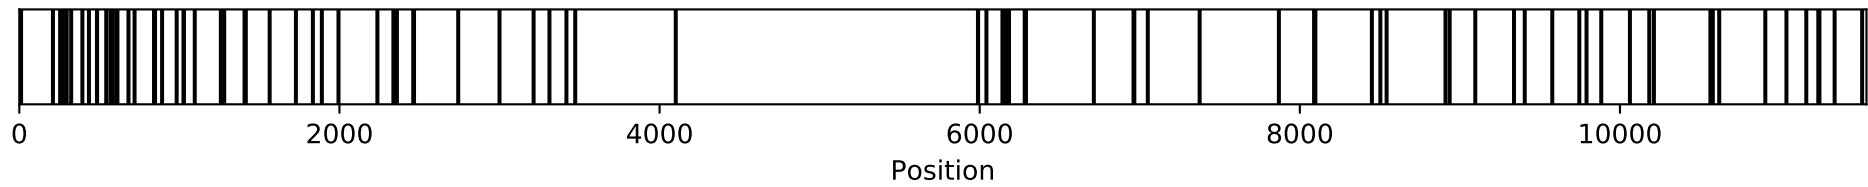

CR2 vs MM2  
Number of differences: 89

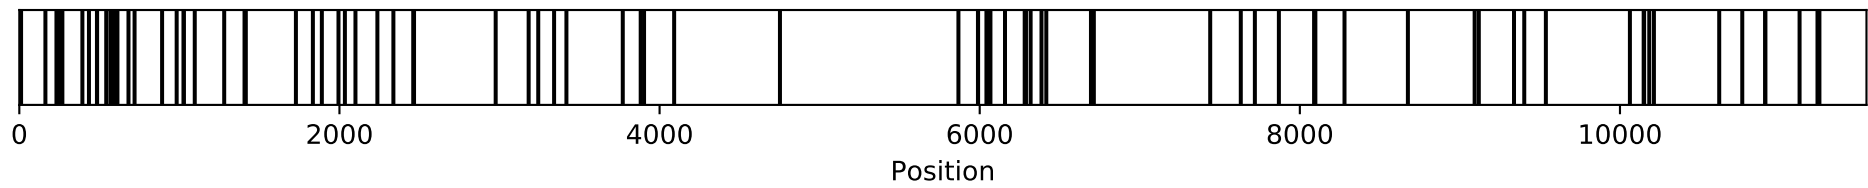

MM1 vs MM2  
Number of differences: 83

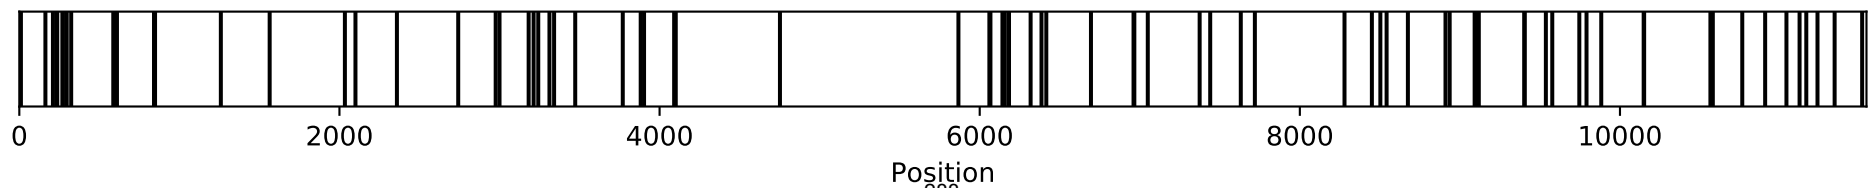

CR1 vs CR2  
Number of differences: 199

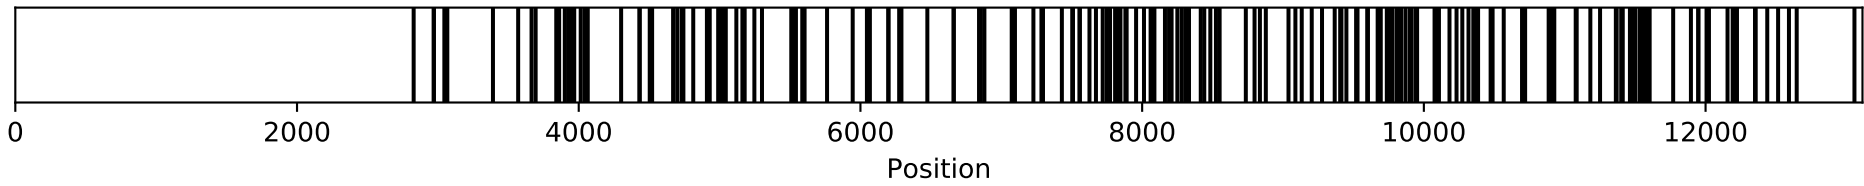

CR1 vs MM1  
Number of differences: 108

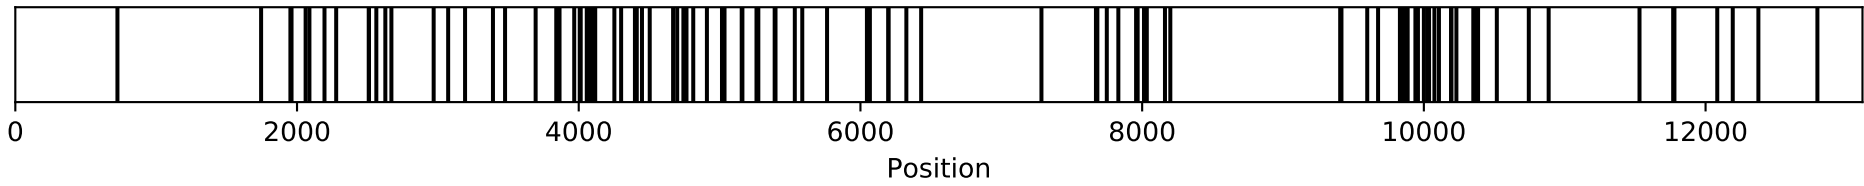

CR1 vs MM2  
Number of differences: 73

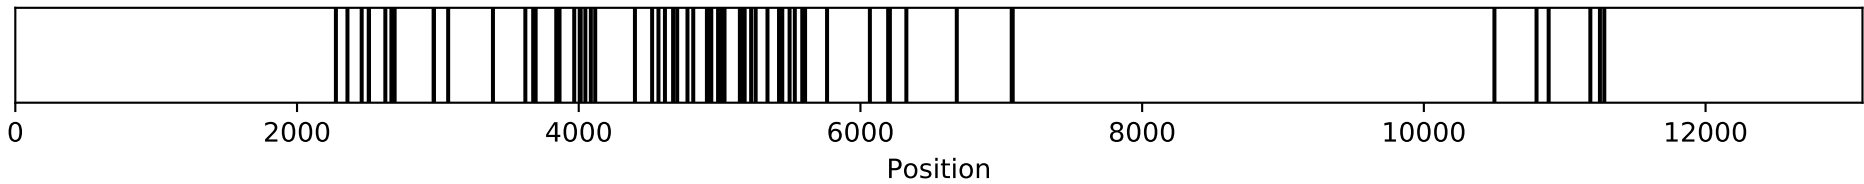

CR2 vs MM1  
Number of differences: 213

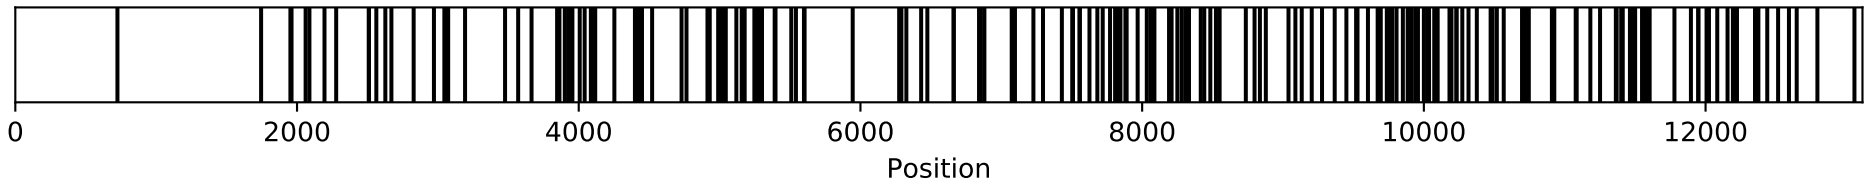

CR2 vs MM2  
Number of differences: 214

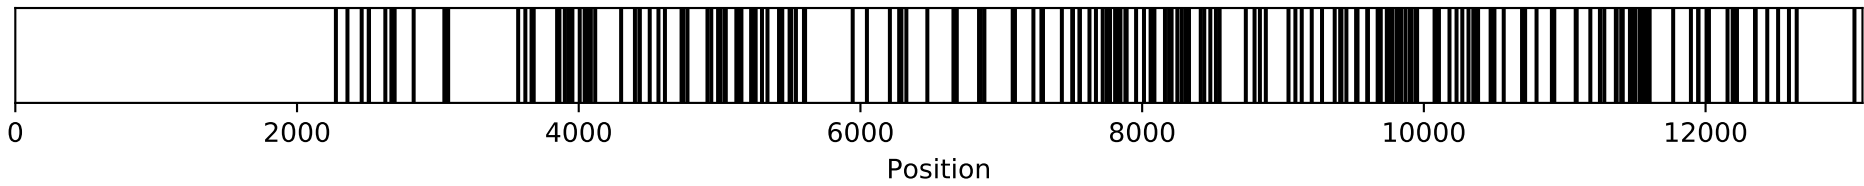

MM1 vs MM2  
Number of differences: 111

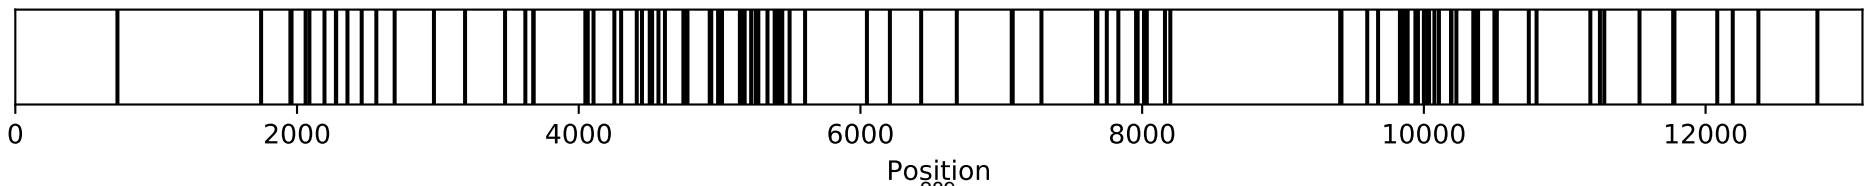

CR1 vs CR2  
Number of differences: 195

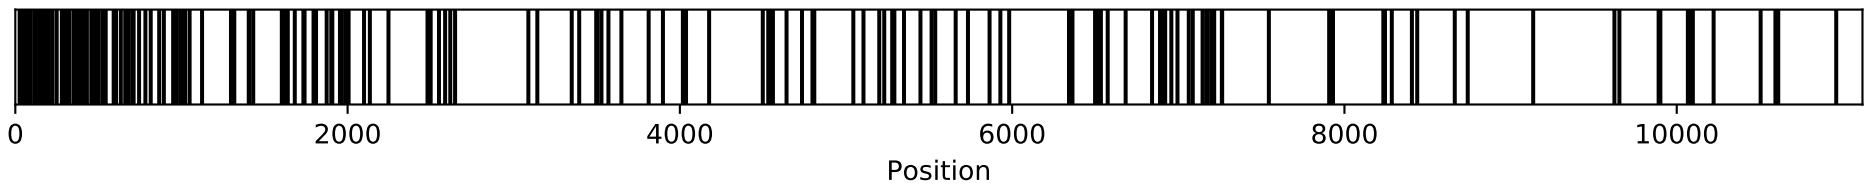

CR1 vs MM1  
Number of differences: 206

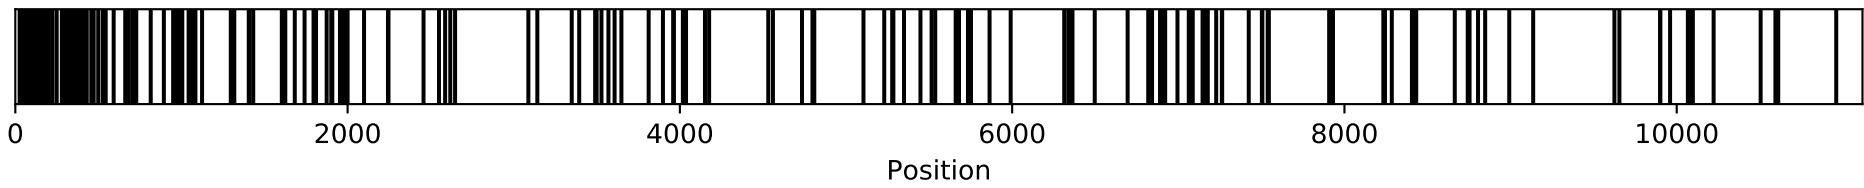

CR1 vs MM2  
Number of differences: 199

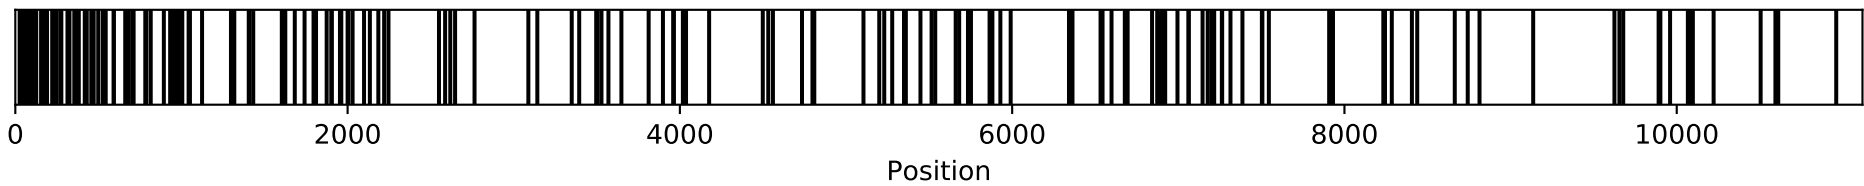

CR2 vs MM1  
Number of differences: 105

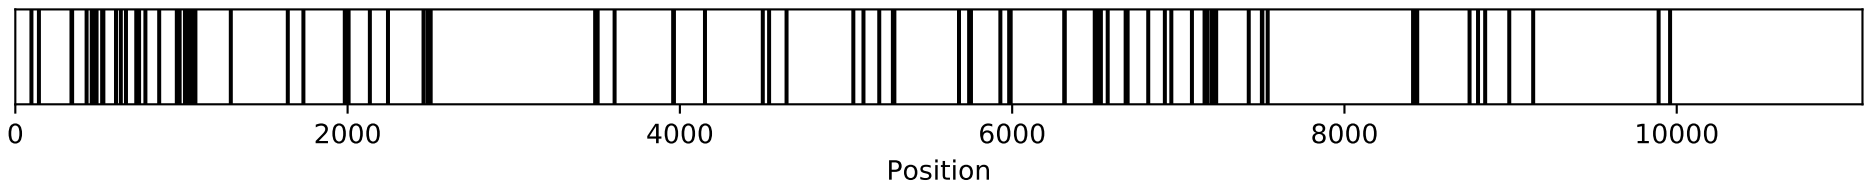

CR2 vs MM2  
Number of differences: 97

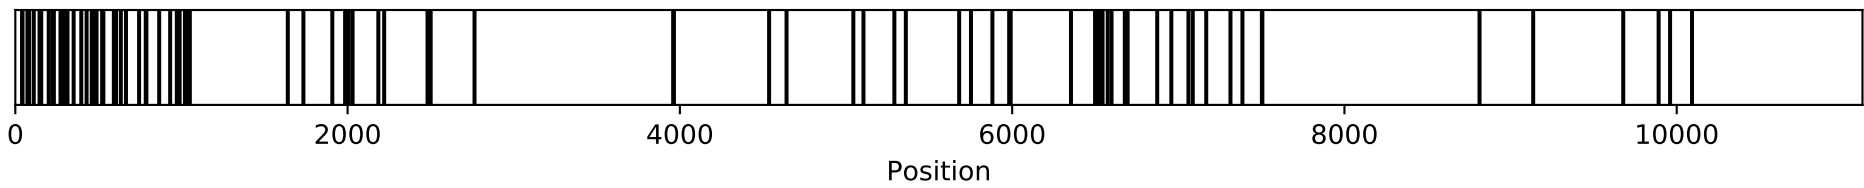

MM1 vs MM2  
Number of differences: 102

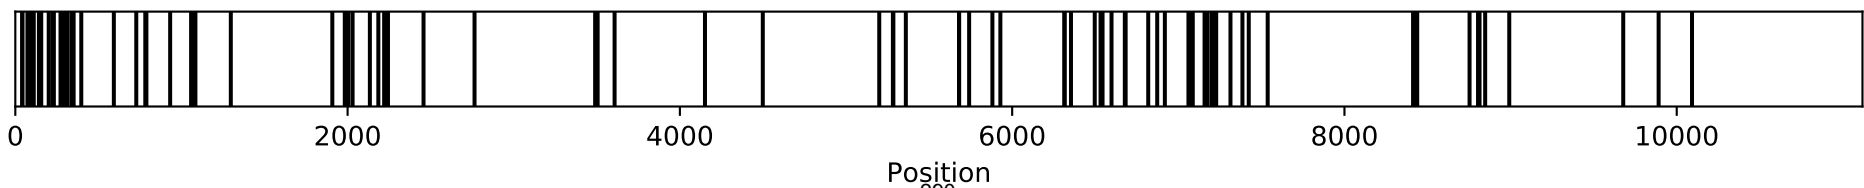

CR1 vs CR2  
Number of differences: 286

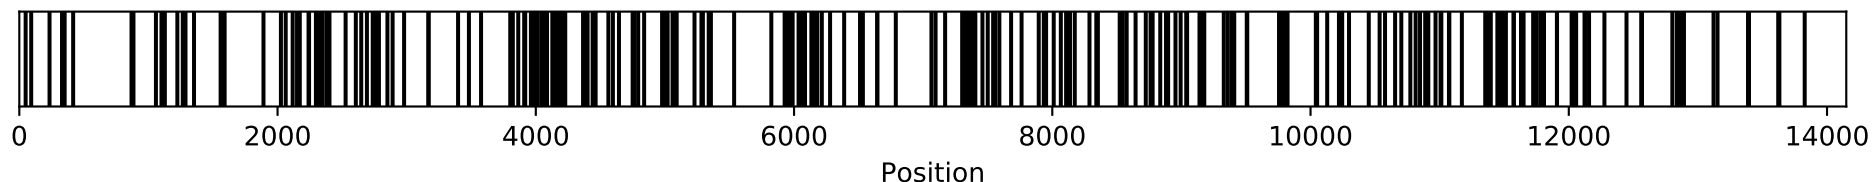

CR1 vs MM1  
Number of differences: 105

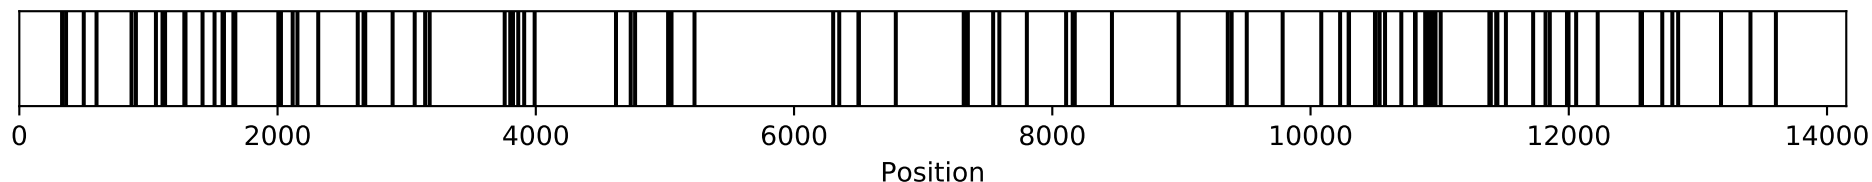

CR1 vs MM2  
Number of differences: 106

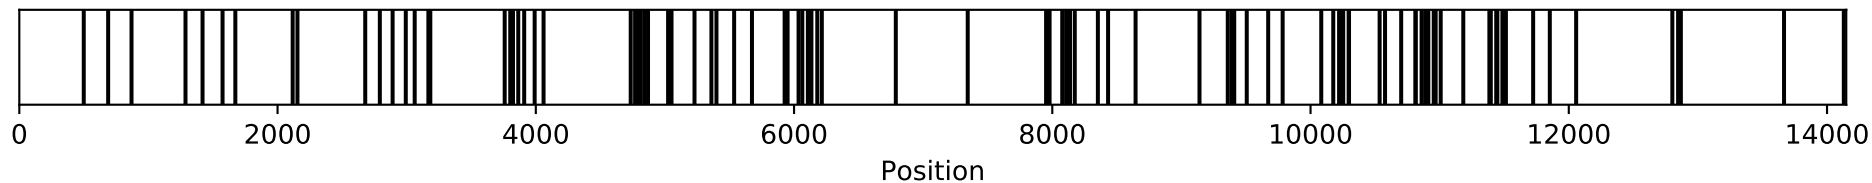

CR2 vs MM1  
Number of differences: 296

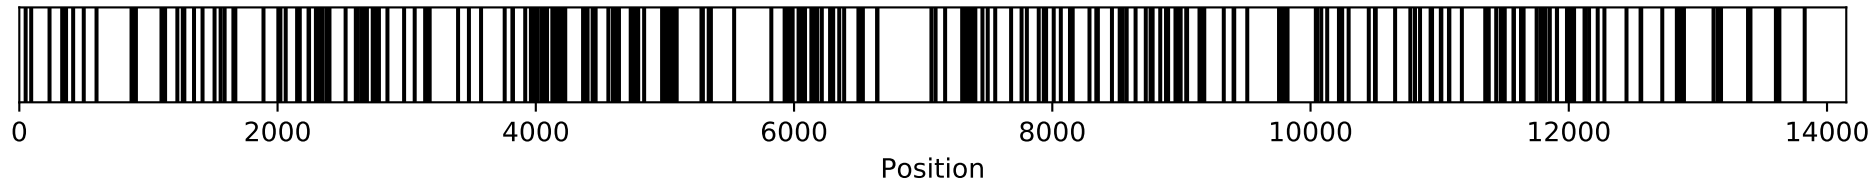

CR2 vs MM2  
Number of differences: 277

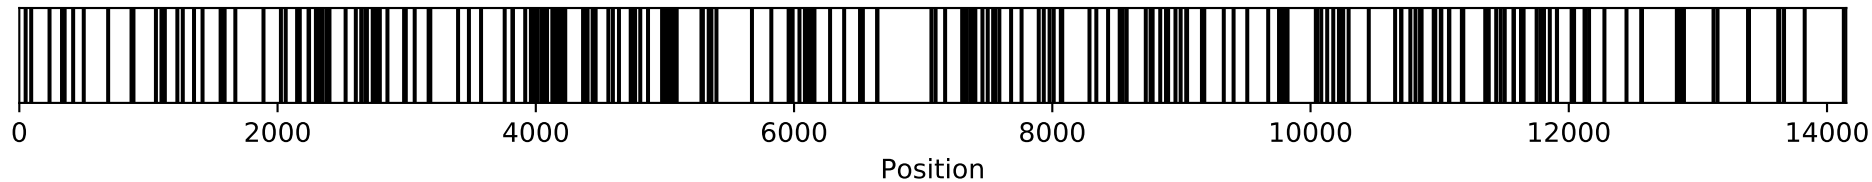

MM1 vs MM2  
Number of differences: 101

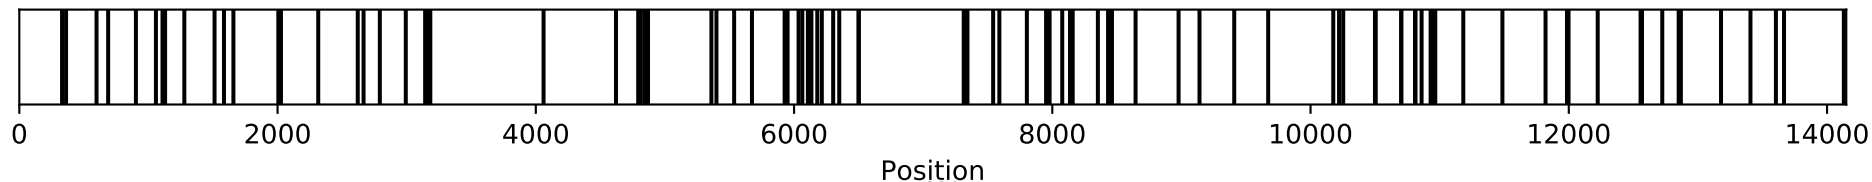

CR1 vs CR2  
Number of differences: 200

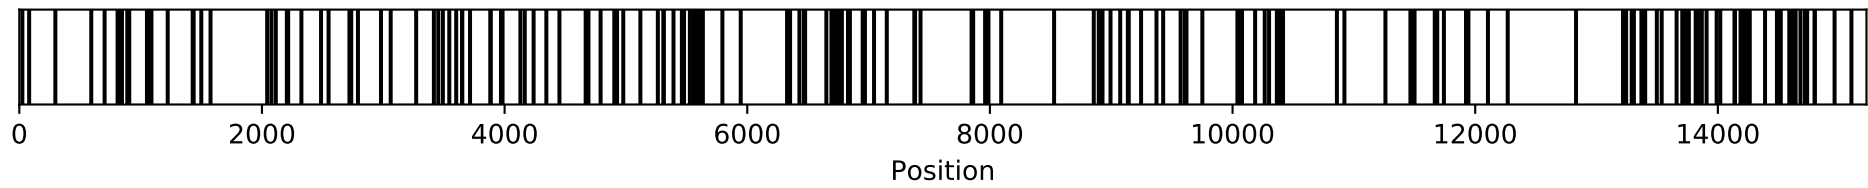

CR1 vs MM1  
Number of differences: 207

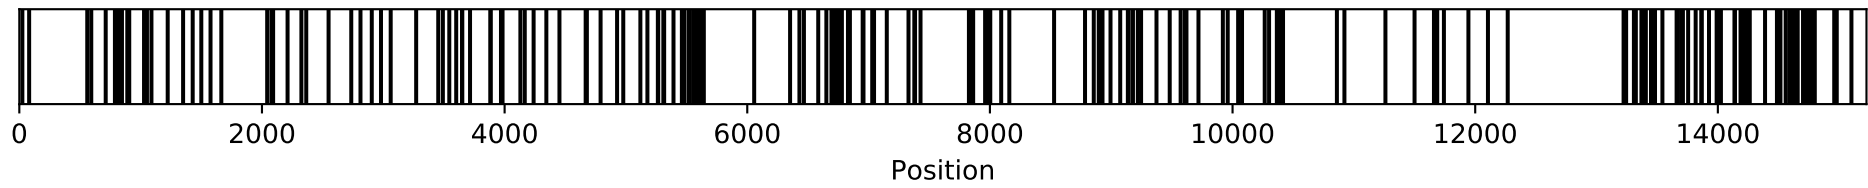

CR1 vs MM2  
Number of differences: 207

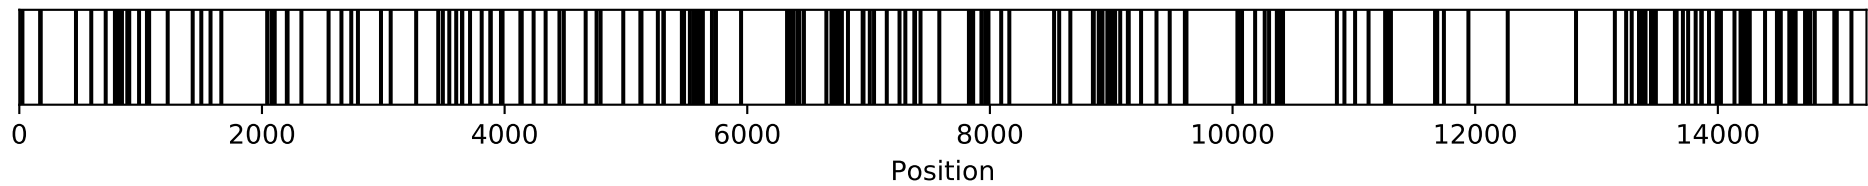

CR2 vs MM1  
Number of differences: 110

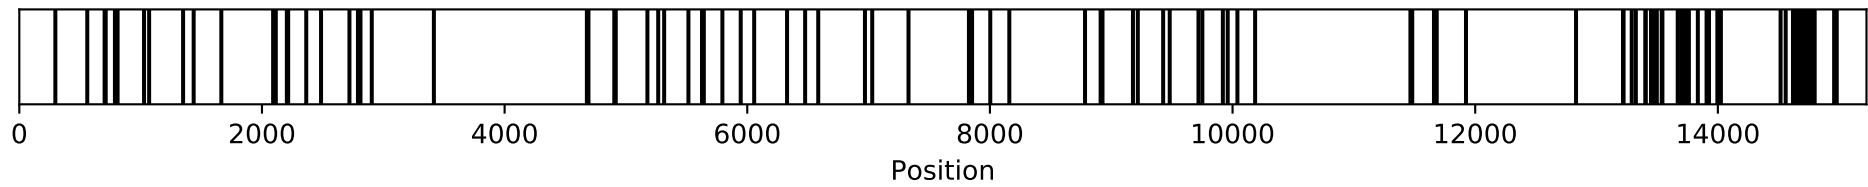

CR2 vs MM2  
Number of differences: 116

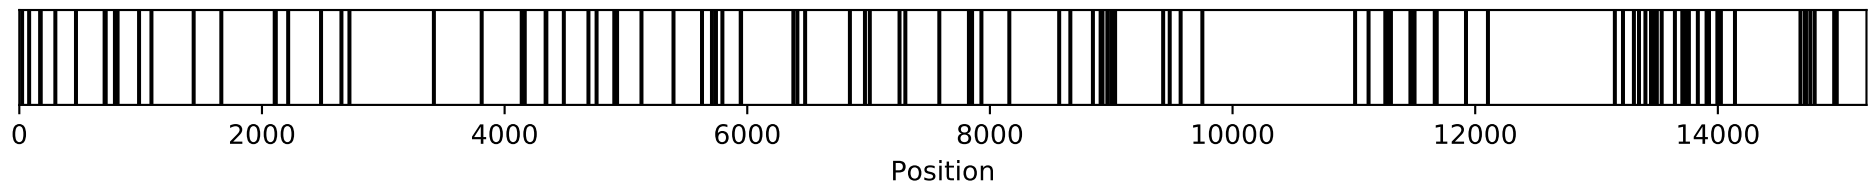

MM1 vs MM2  
Number of differences: 104

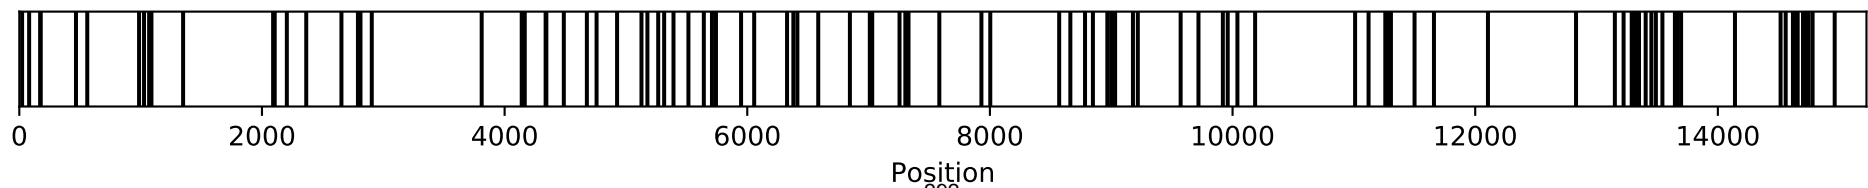

CR1 vs CR2  
Number of differences: 165

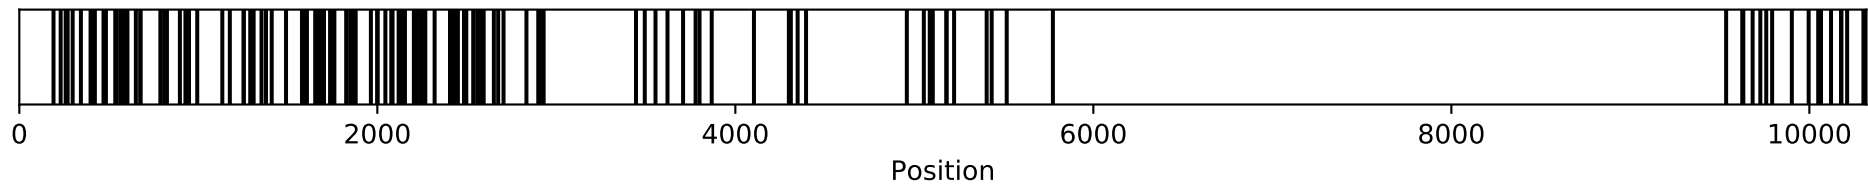

CR1 vs MM1  
Number of differences: 110

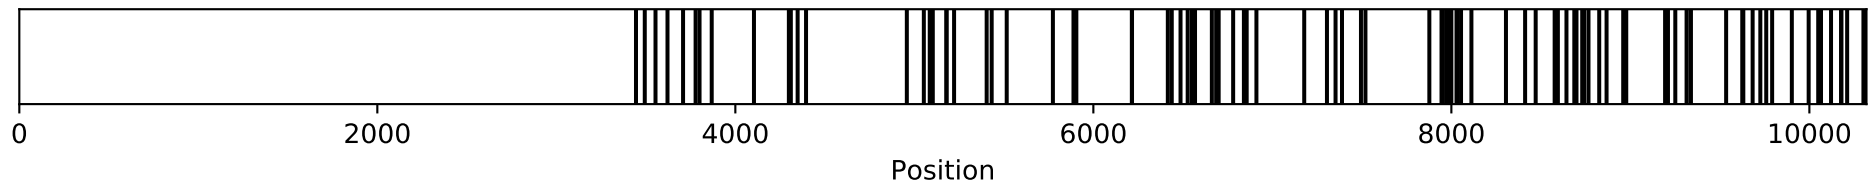

CR1 vs MM2  
Number of differences: 150

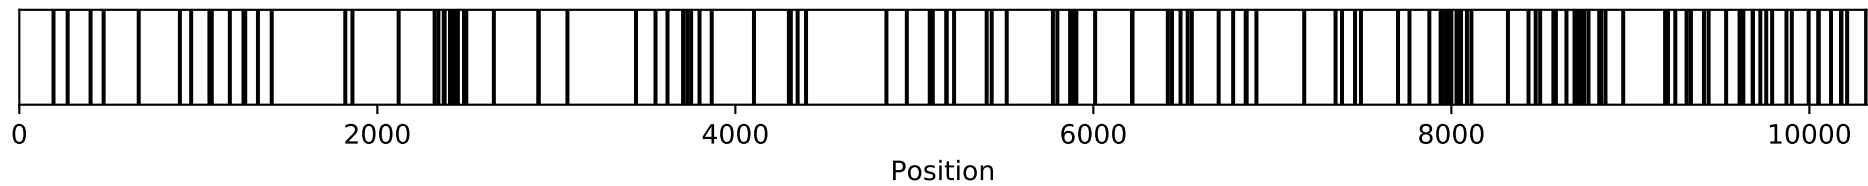

CR2 vs MM1  
Number of differences: 189

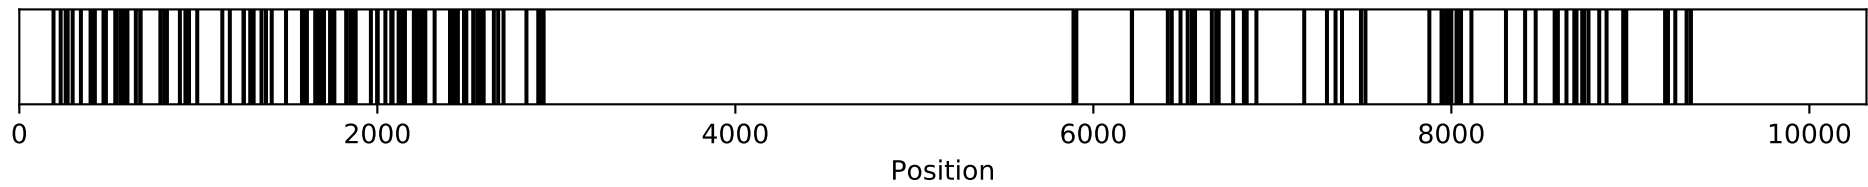

CR2 vs MM2  
Number of differences: 197

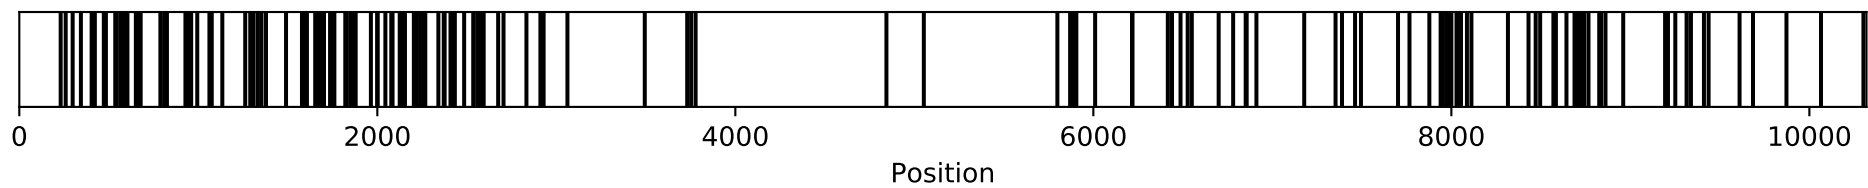

MM1 vs MM2  
Number of differences: 93

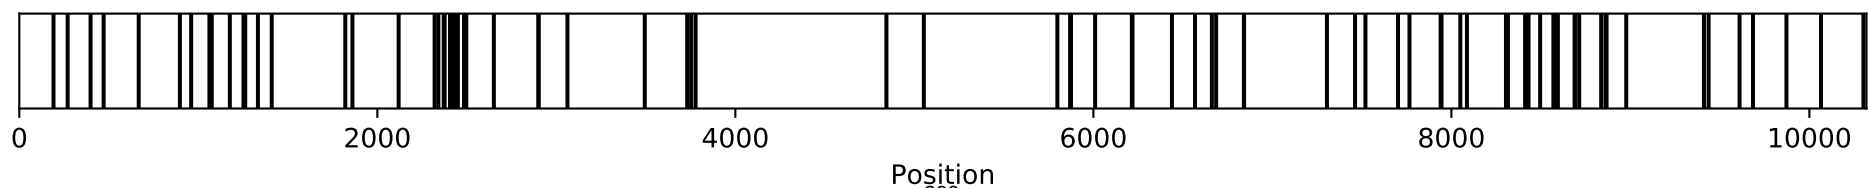

CR1 vs CR2  
Number of differences: 215

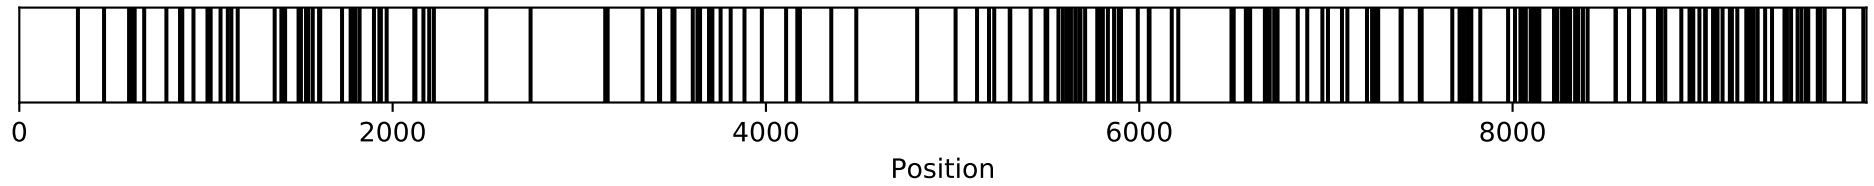

CR1 vs MM1  
Number of differences: 217

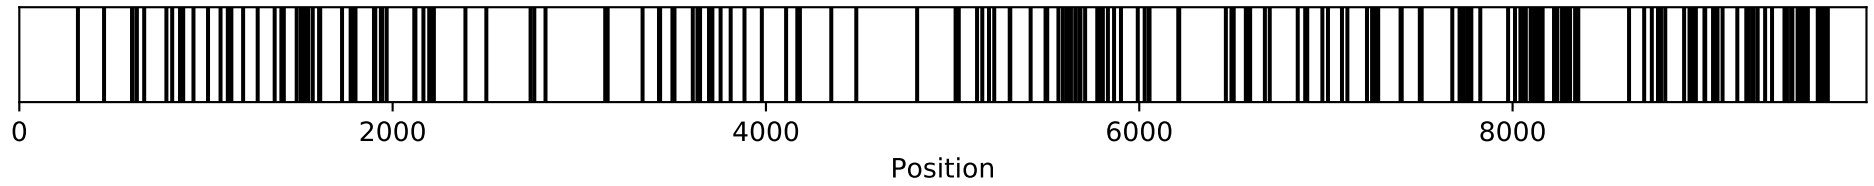

CR1 vs MM2  
Number of differences: 206

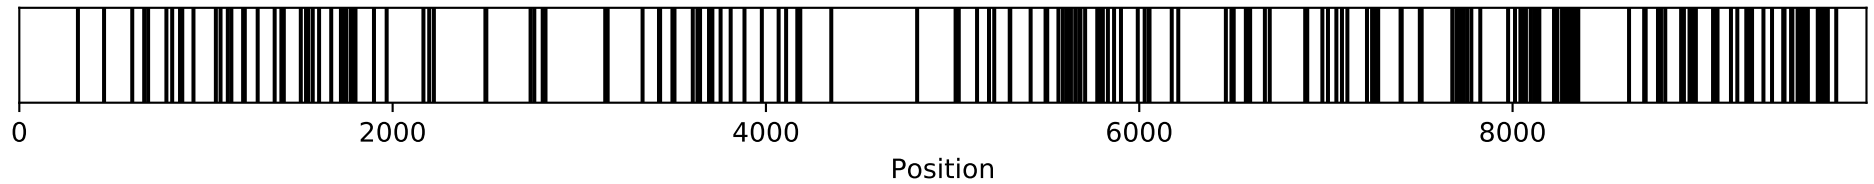

CR2 vs MM1  
Number of differences: 73

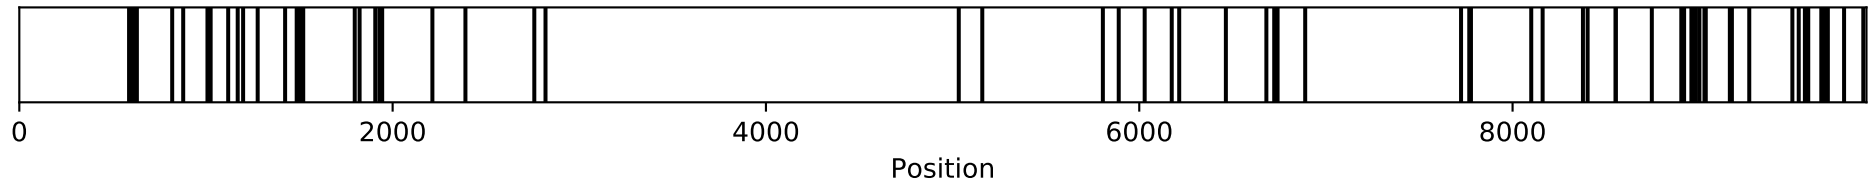

CR2 vs MM2  
Number of differences: 97

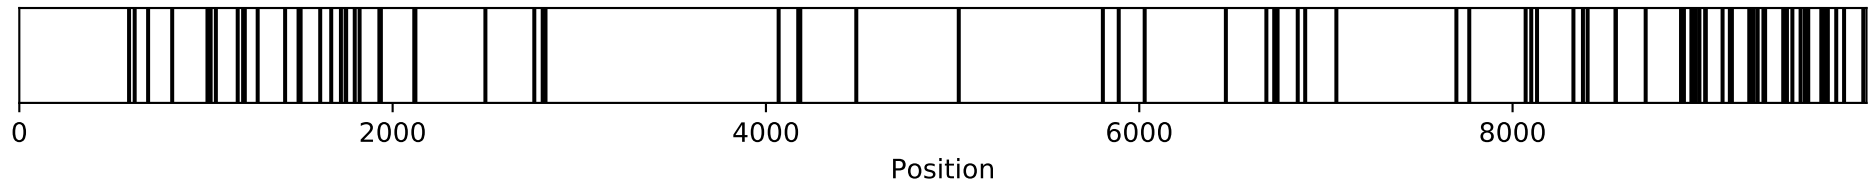

MM1 vs MM2  
Number of differences: 69

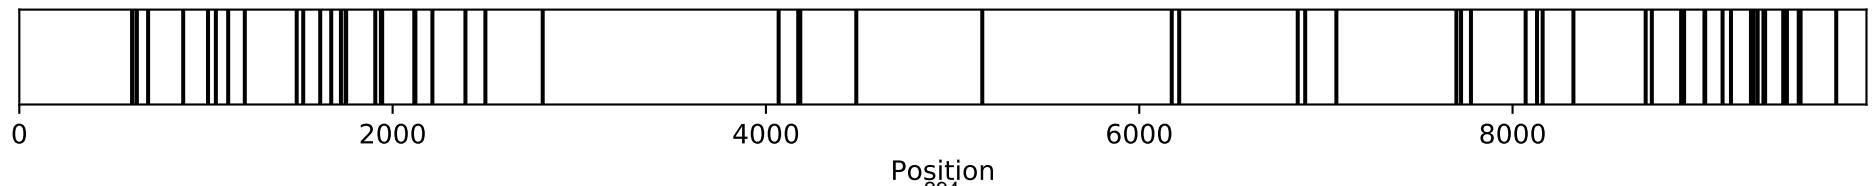

CR1 vs CR2  
Number of differences: 168

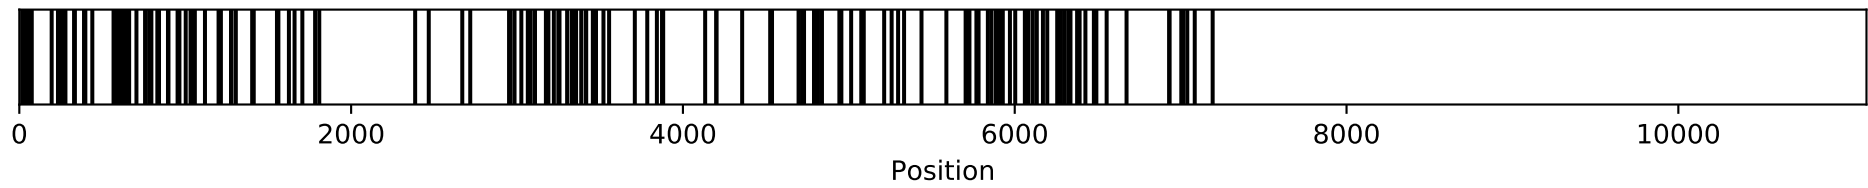

CR1 vs MM1  
Number of differences: 101

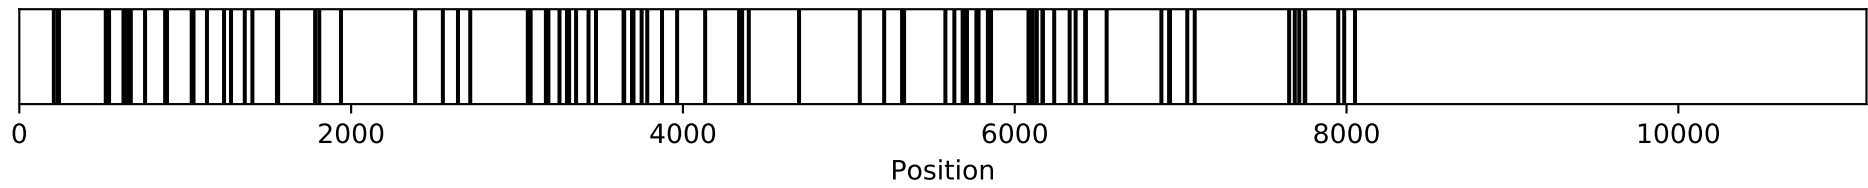

CR1 vs MM2  
Number of differences: 137

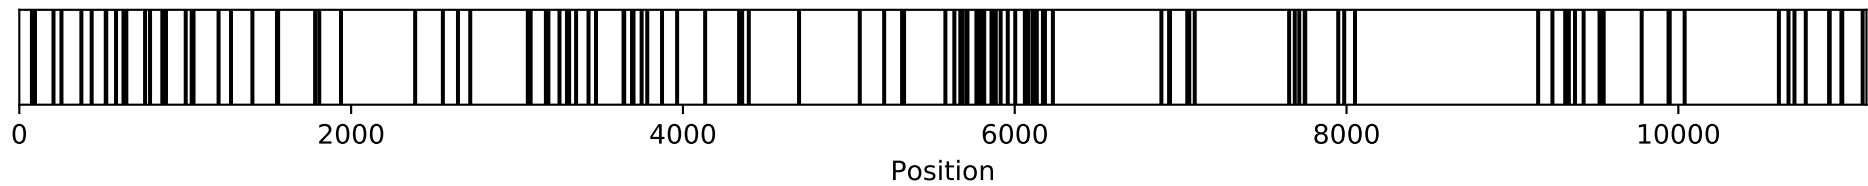

CR2 vs MM1  
Number of differences: 172

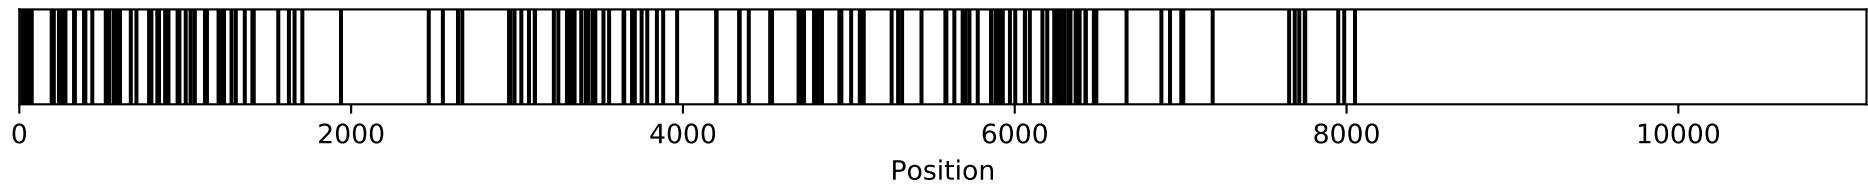

CR2 vs MM2  
Number of differences: 208

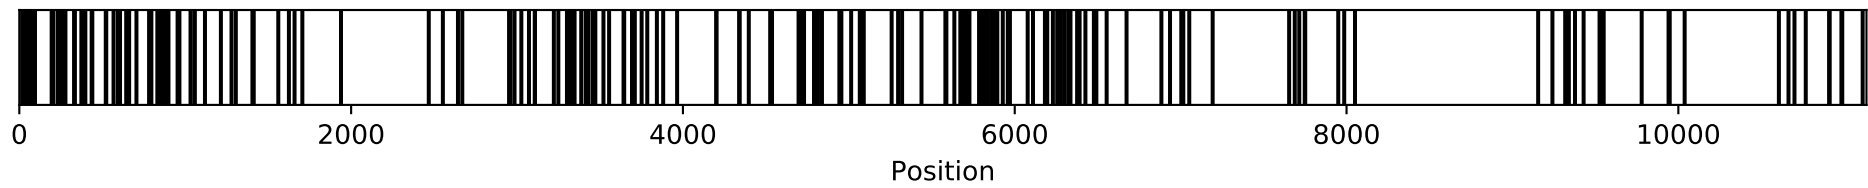

MM1 vs MM2  
Number of differences: 91

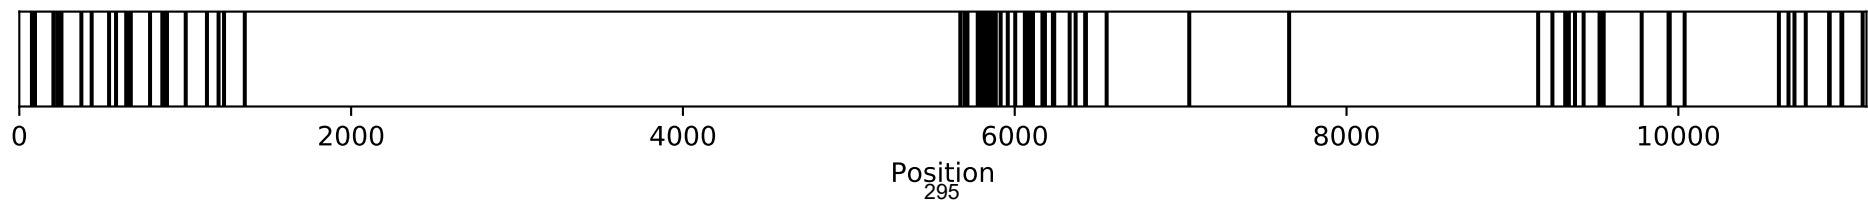



CR1 vs CR2  
Number of differences: 183

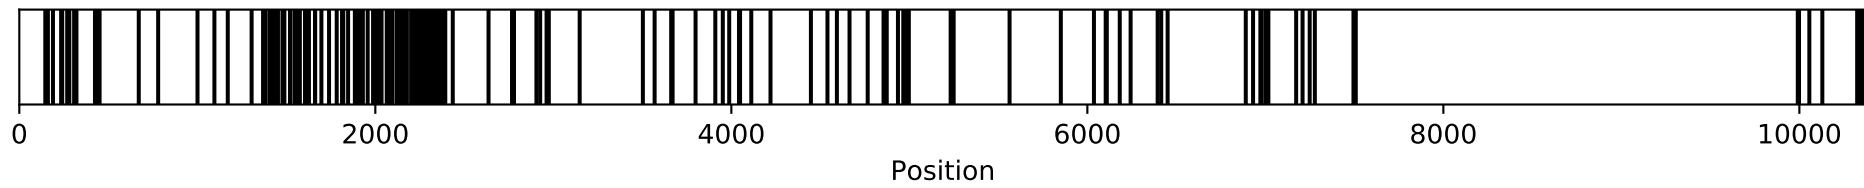

CR1 vs MM1  
Number of differences: 123

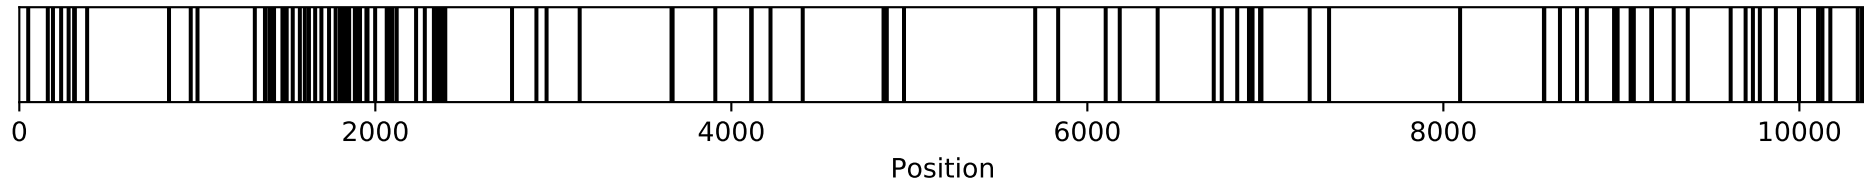

CR1 vs MM2  
Number of differences: 132

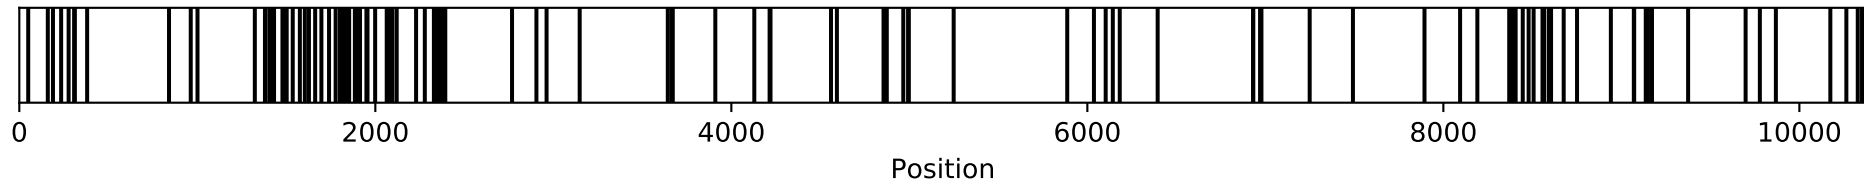

CR2 vs MM1  
Number of differences: 179

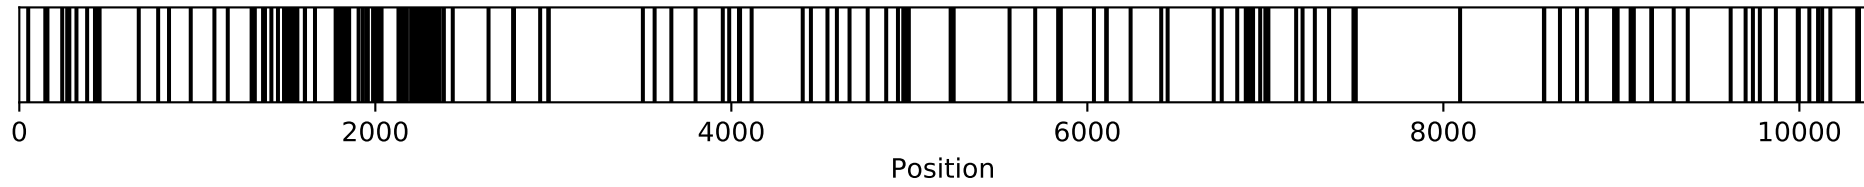

CR2 vs MM2  
Number of differences: 180

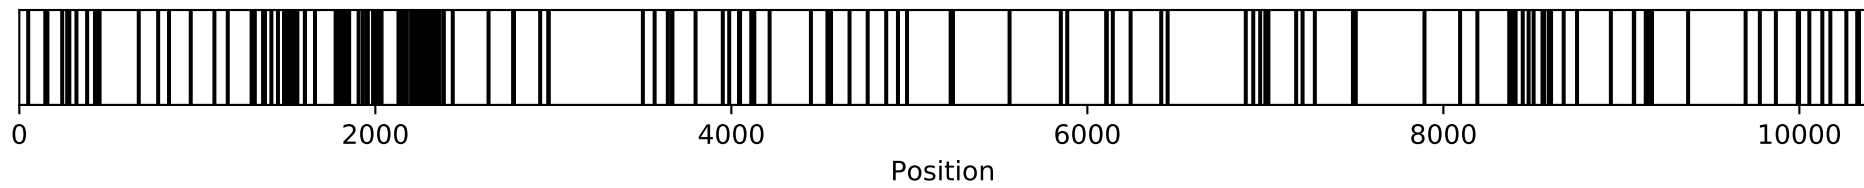

MM1 vs MM2  
Number of differences: 63

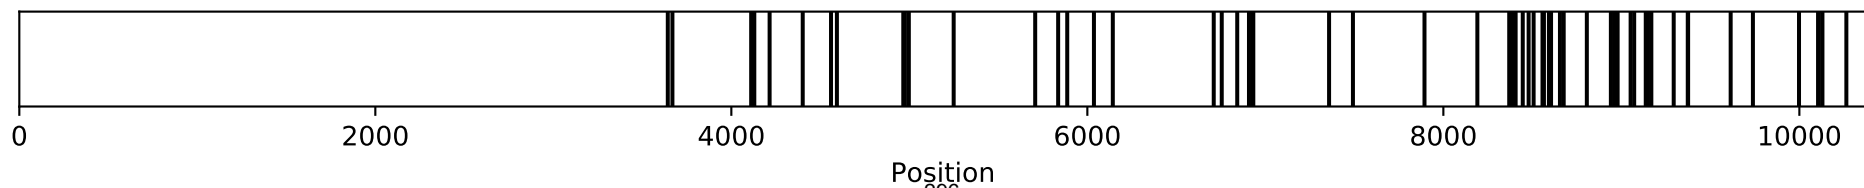

CR1 vs CR2  
Number of differences: 251

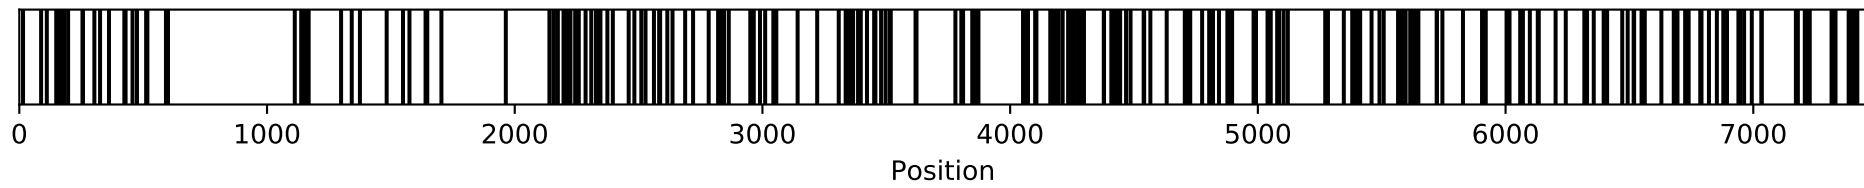

CR1 vs MM1  
Number of differences: 249

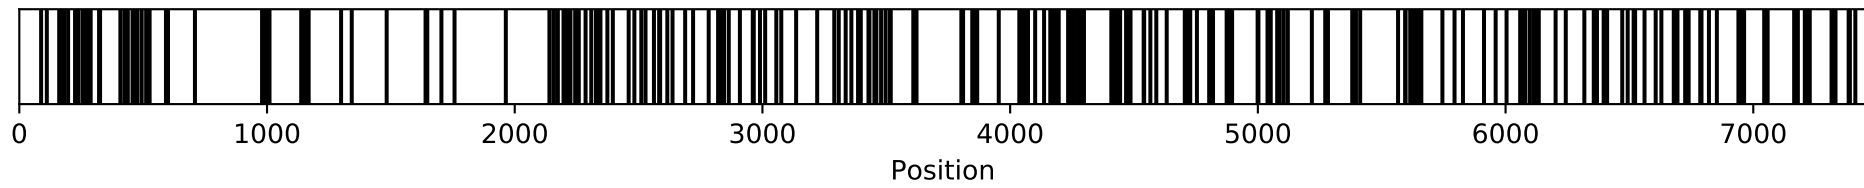

CR1 vs MM2  
Number of differences: 249

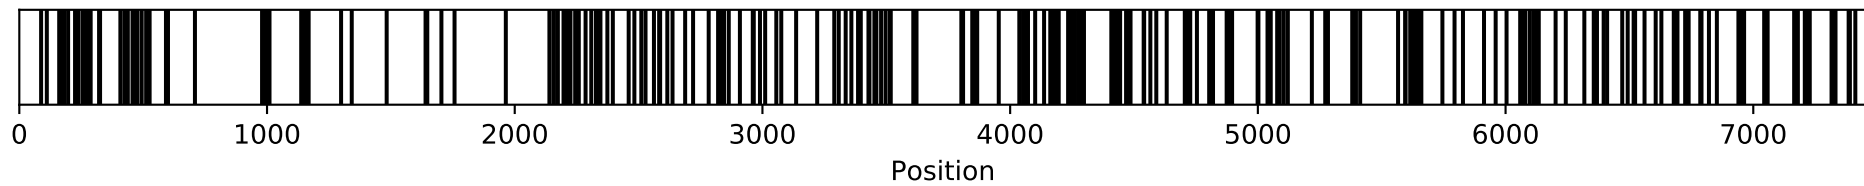

CR2 vs MM1  
Number of differences: 122

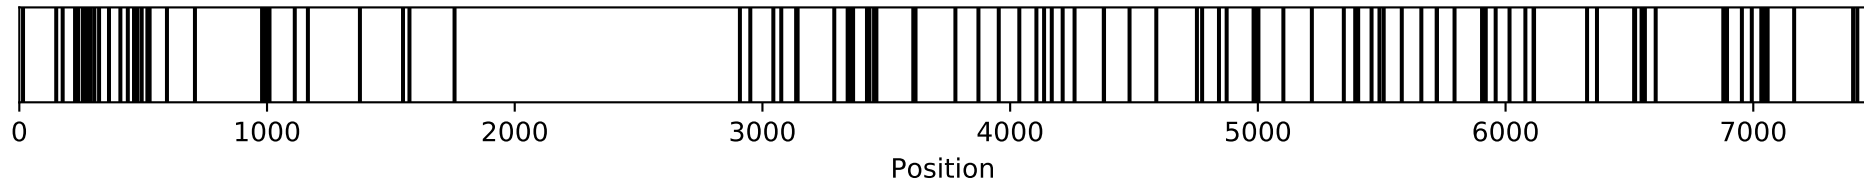

CR2 vs MM2  
Number of differences: 122

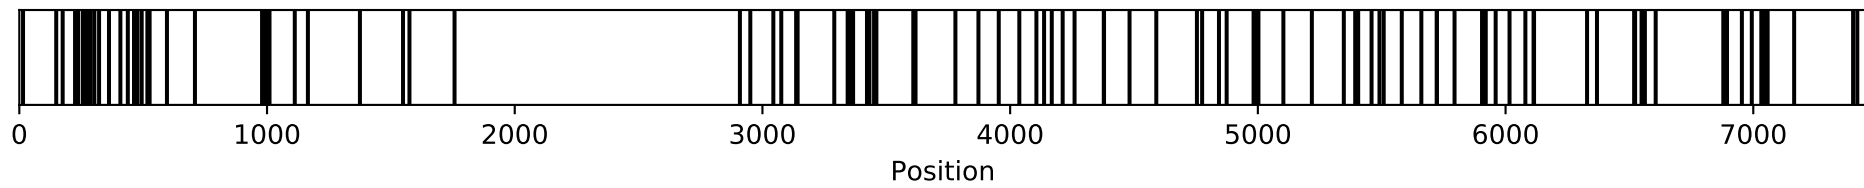

MM1 vs MM2  
Number of differences: 0

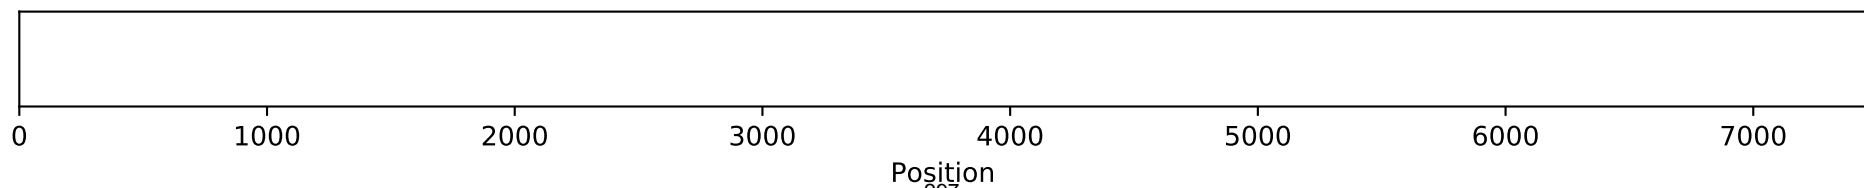

CR1 vs CR2  
Number of differences: 228

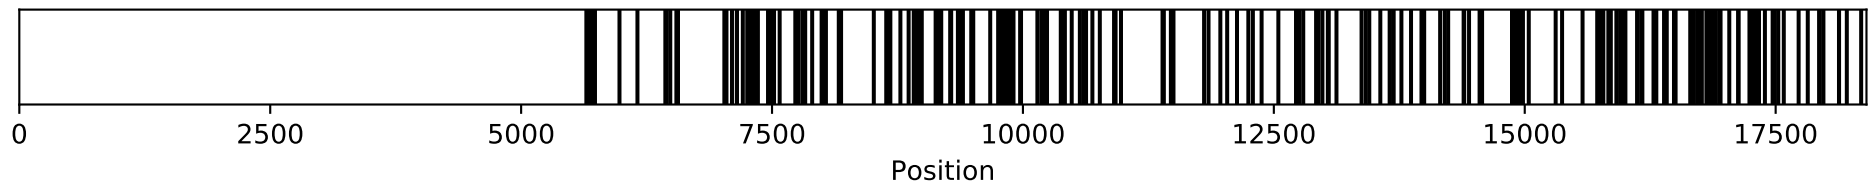

CR1 vs MM1  
Number of differences: 276

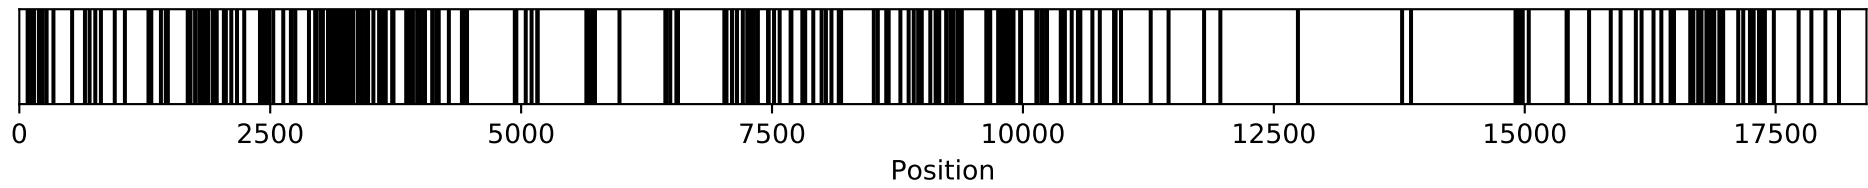

CR1 vs MM2  
Number of differences: 259

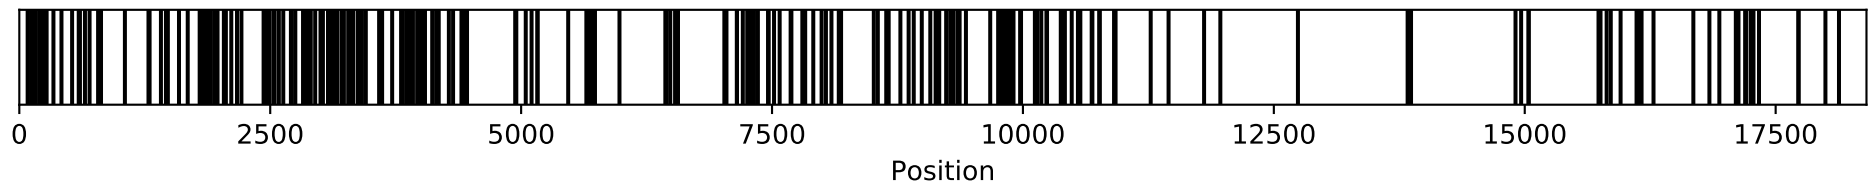

CR2 vs MM1  
Number of differences: 286

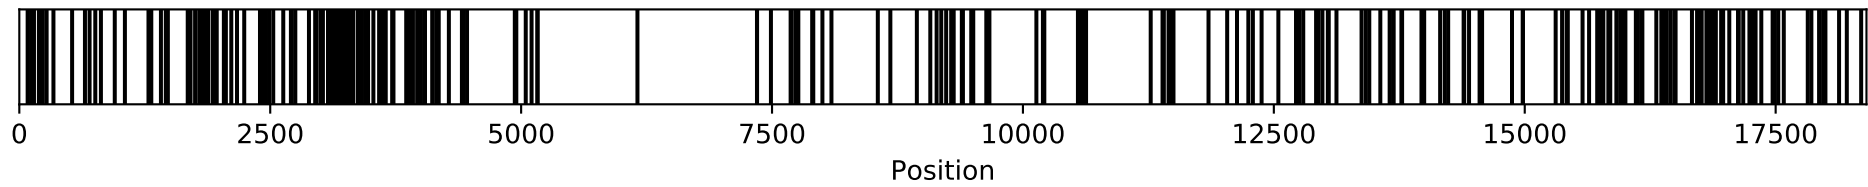

CR2 vs MM2  
Number of differences: 297

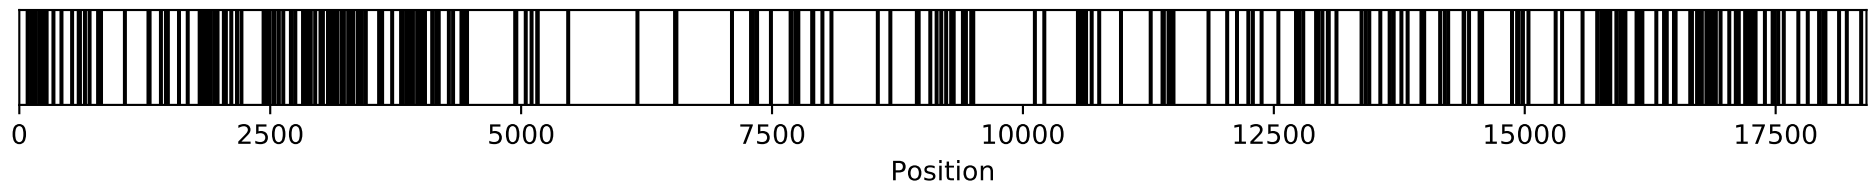

MM1 vs MM2  
Number of differences: 151

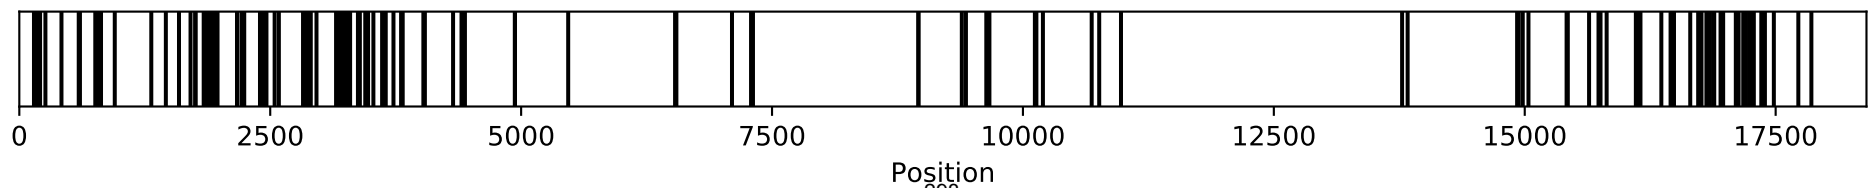

CR1 vs CR2  
Number of differences: 289

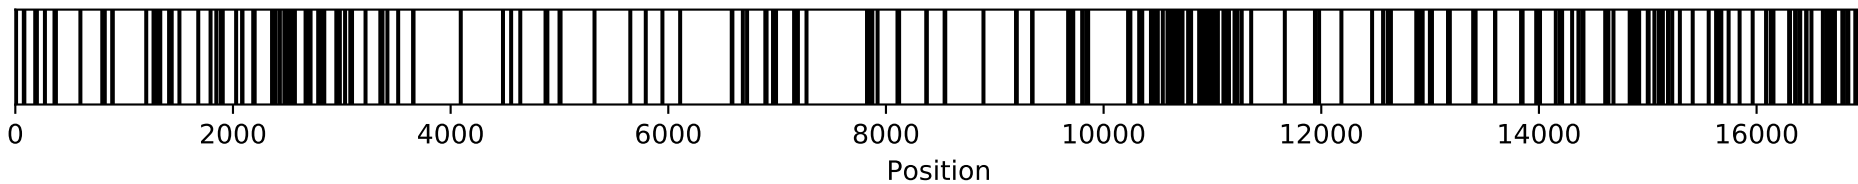

CR1 vs MM1  
Number of differences: 119

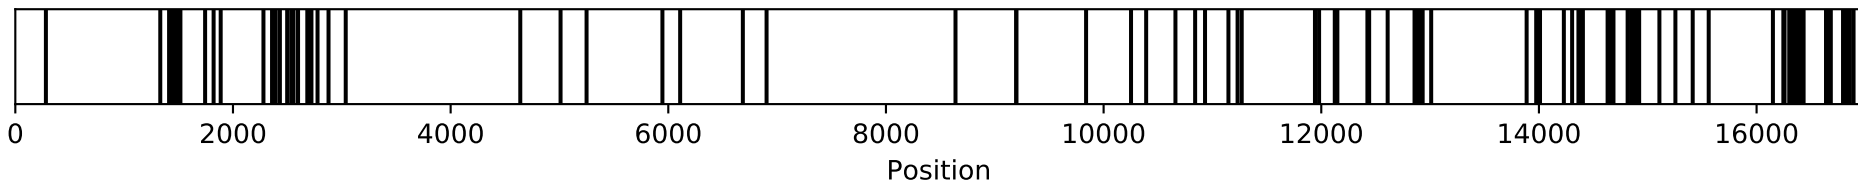

CR1 vs MM2  
Number of differences: 113

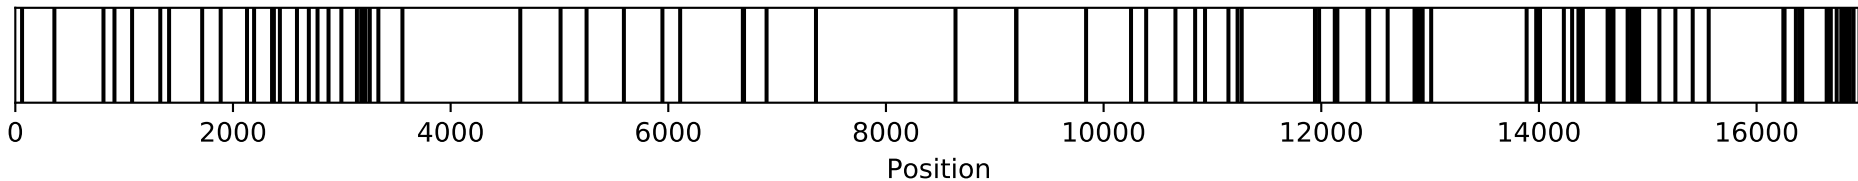

CR2 vs MM1  
Number of differences: 296

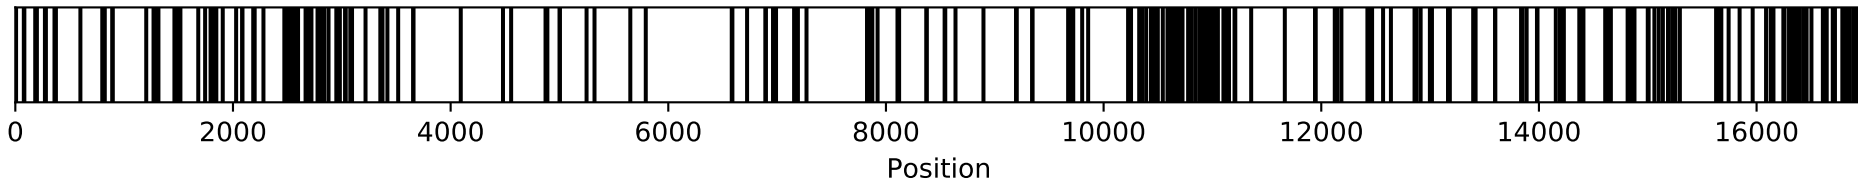

CR2 vs MM2  
Number of differences: 296

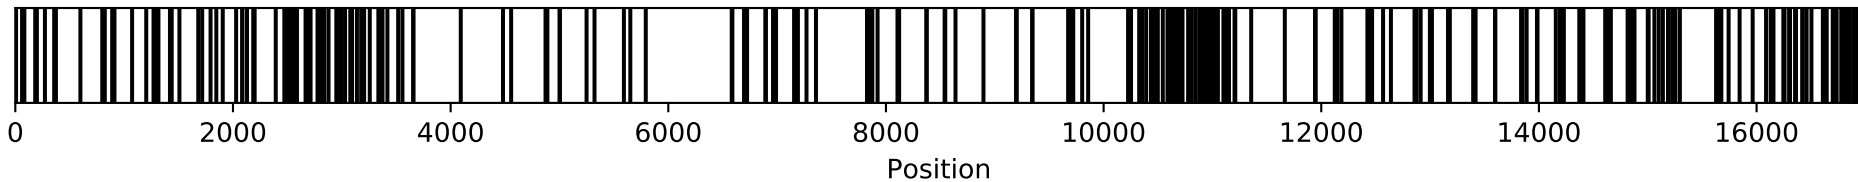

MM1 vs MM2  
Number of differences: 62

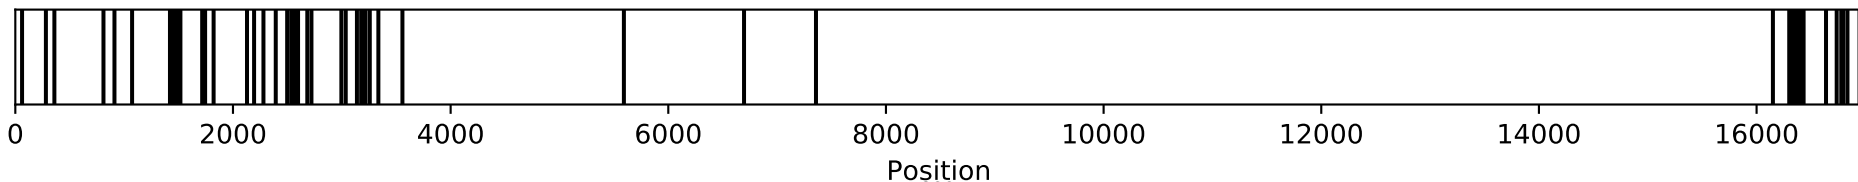

CR1 vs CR2  
Number of differences: 100

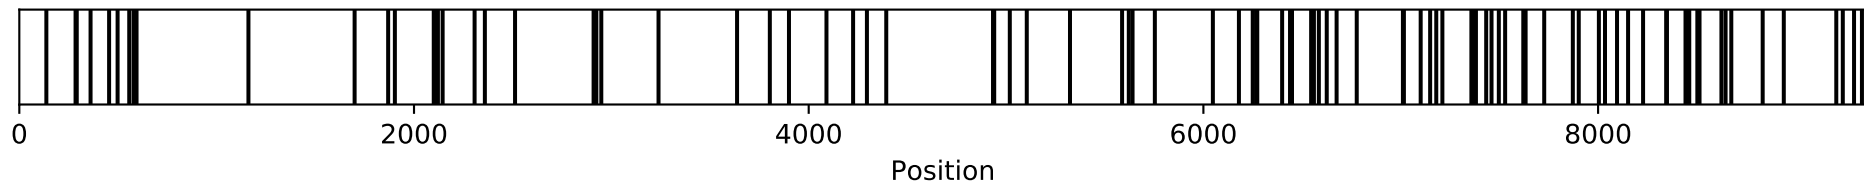

CR1 vs MM1  
Number of differences: 47

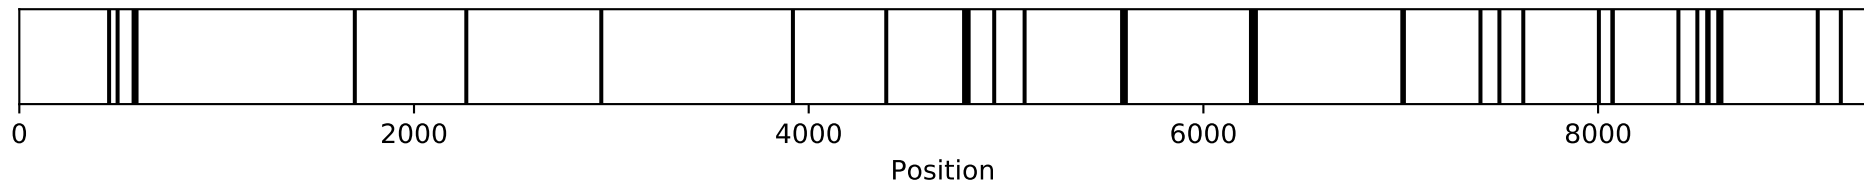

CR1 vs MM2  
Number of differences: 42

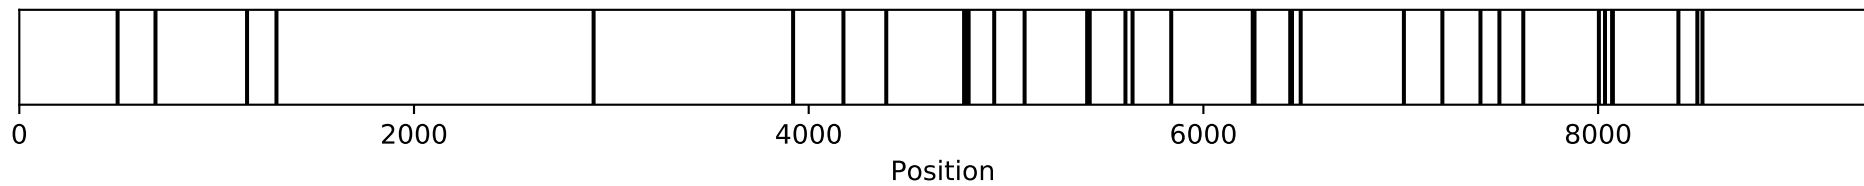

CR2 vs MM1  
Number of differences: 119

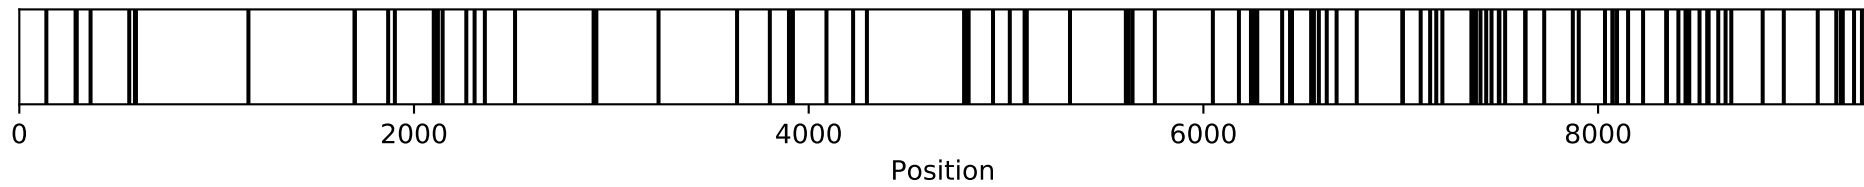

CR2 vs MM2  
Number of differences: 116

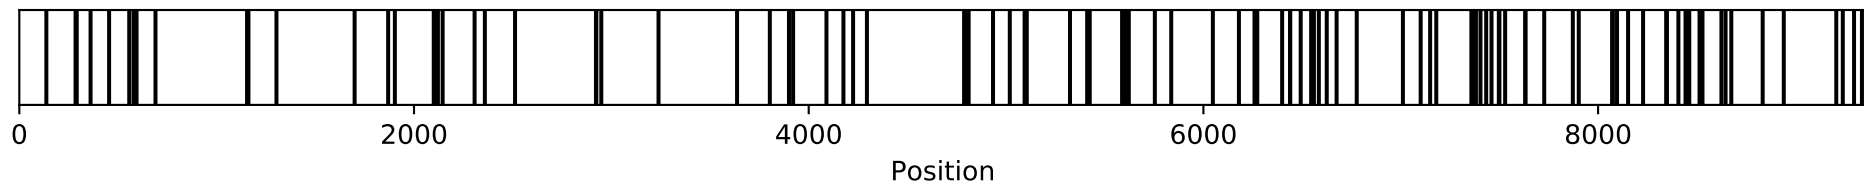

MM1 vs MM2  
Number of differences: 43

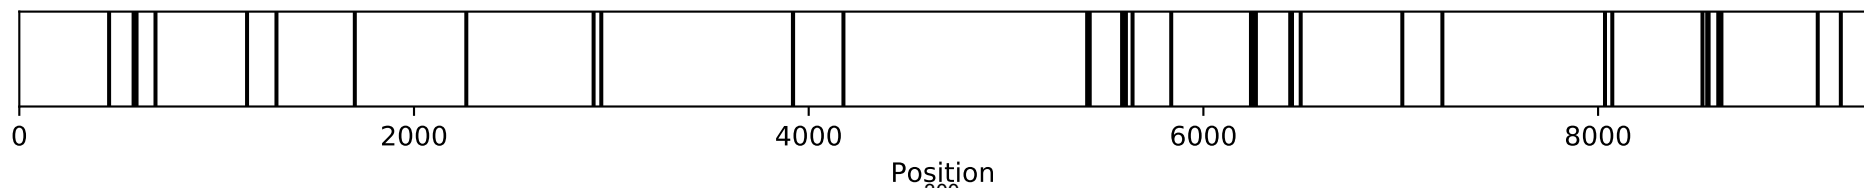

CR1 vs CR2  
Number of differences: 216

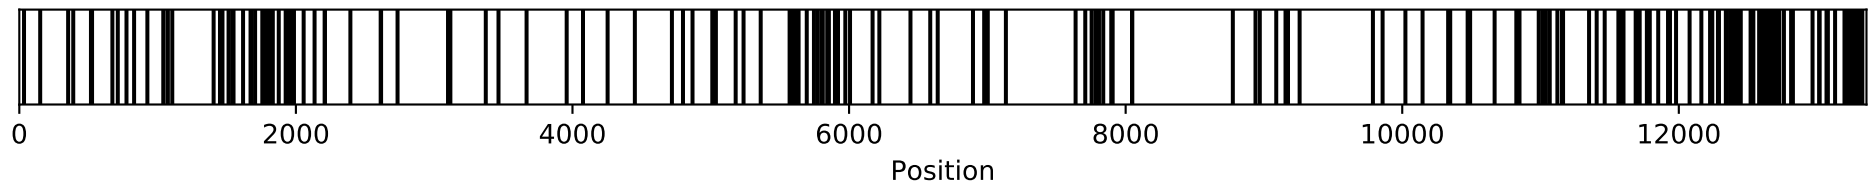

CR1 vs MM1  
Number of differences: 106

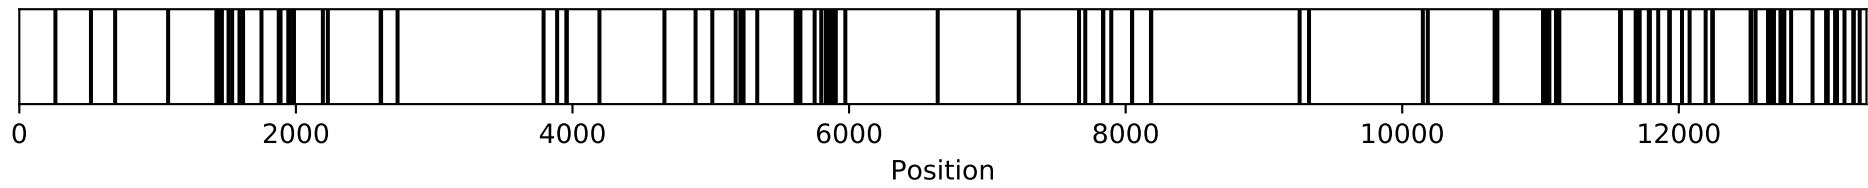

CR1 vs MM2  
Number of differences: 102

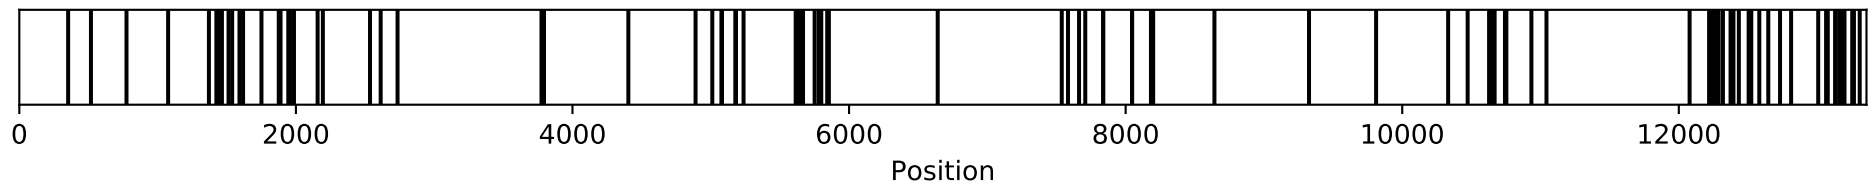

CR2 vs MM1  
Number of differences: 227

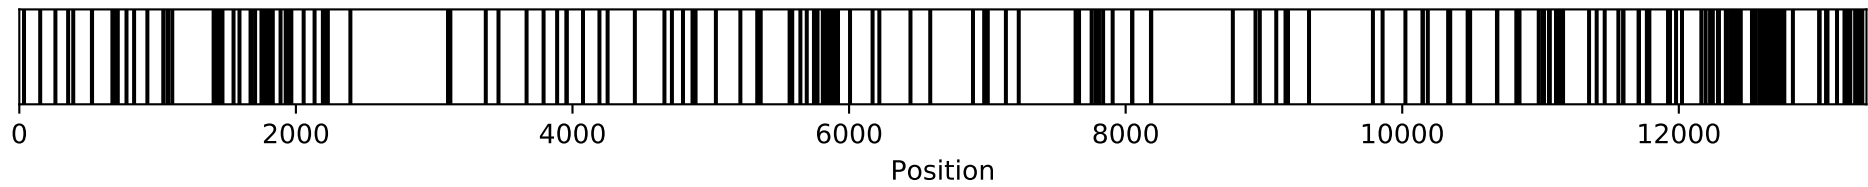

CR2 vs MM2  
Number of differences: 237

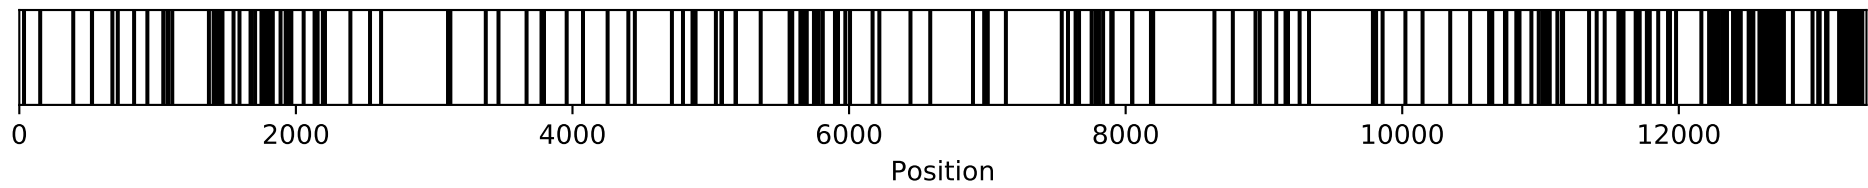

MM1 vs MM2  
Number of differences: 106

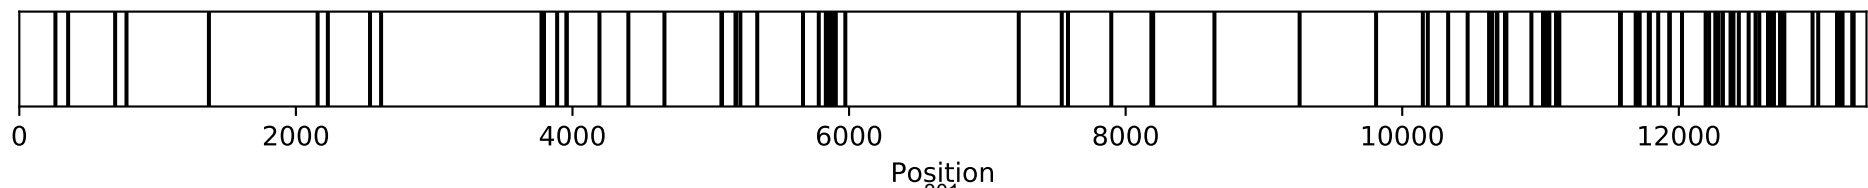

CR1 vs CR2  
Number of differences: 55

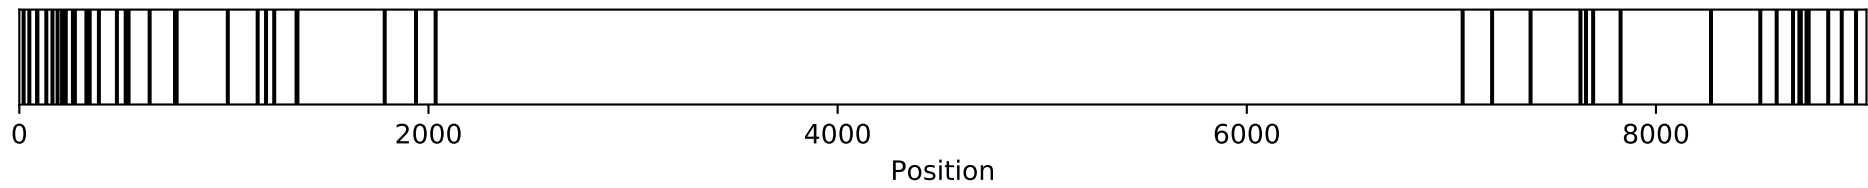

CR1 vs MM1  
Number of differences: 183

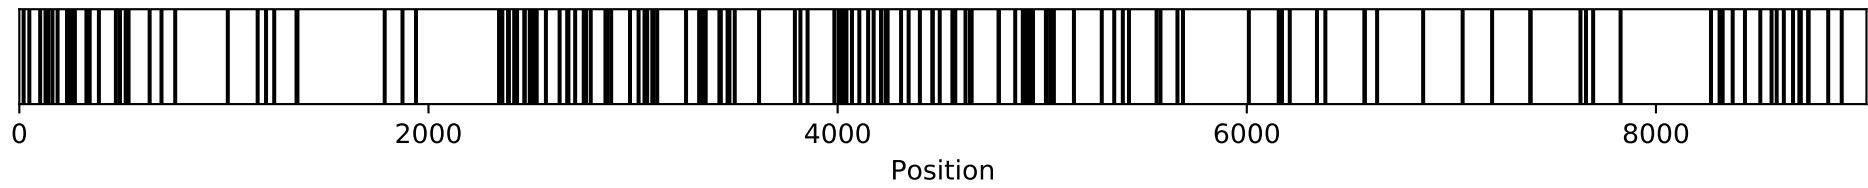

CR1 vs MM2  
Number of differences: 182

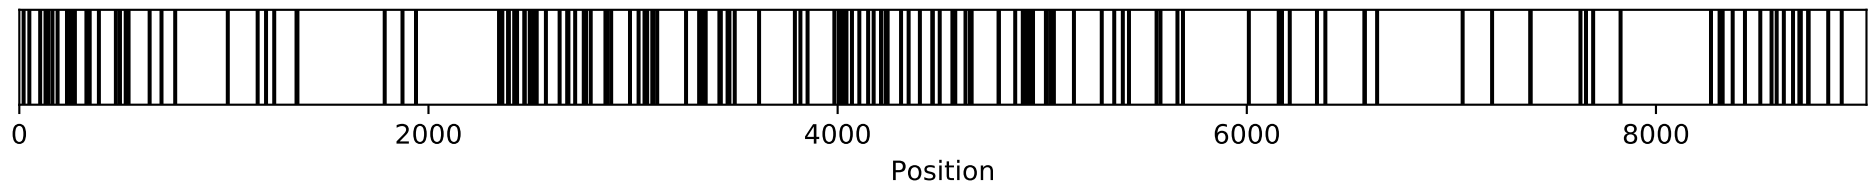

CR2 vs MM1  
Number of differences: 151

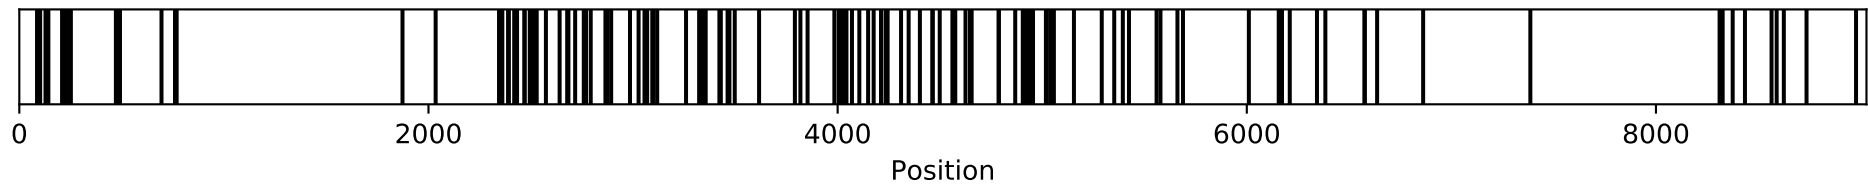

CR2 vs MM2  
Number of differences: 150

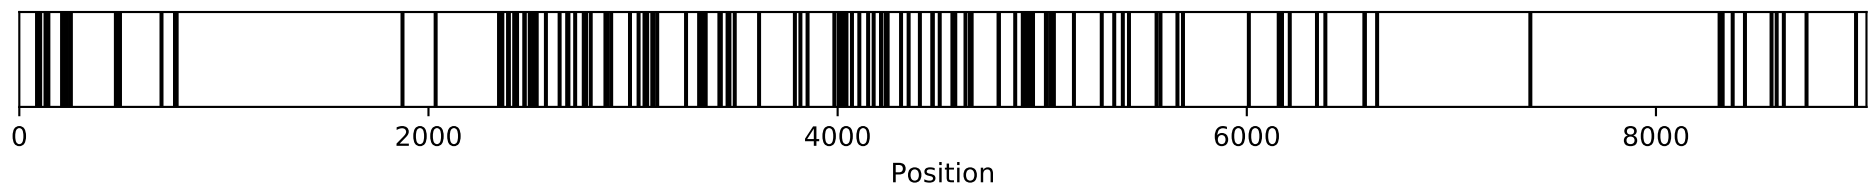

MM1 vs MM2  
Number of differences: 1

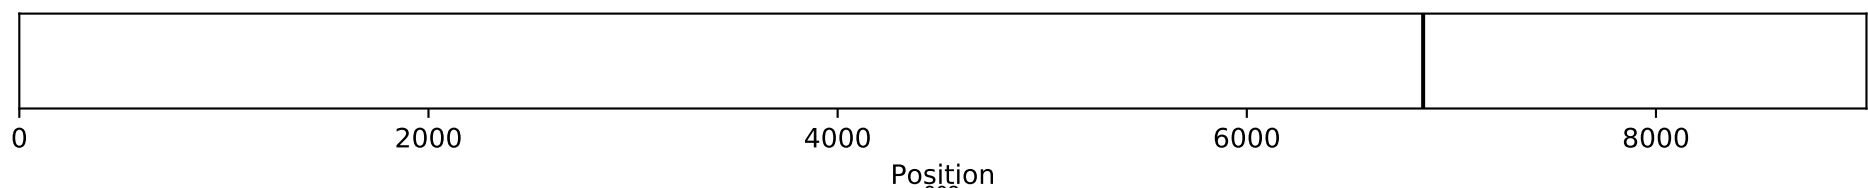

CR1 vs CR2  
Number of differences: 34

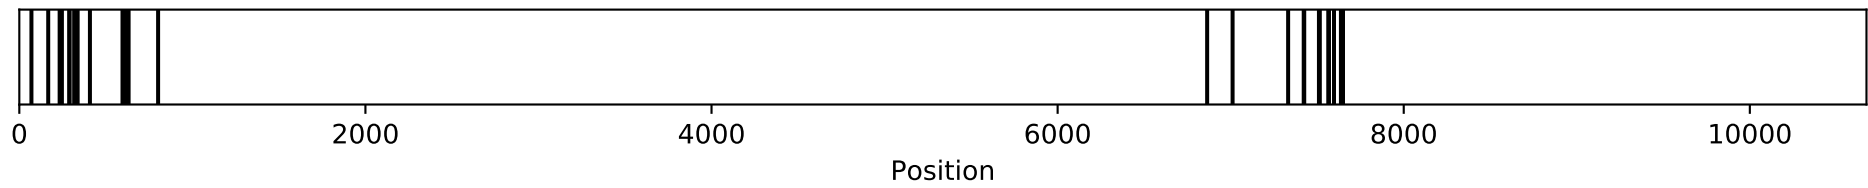

CR1 vs MM1  
Number of differences: 143

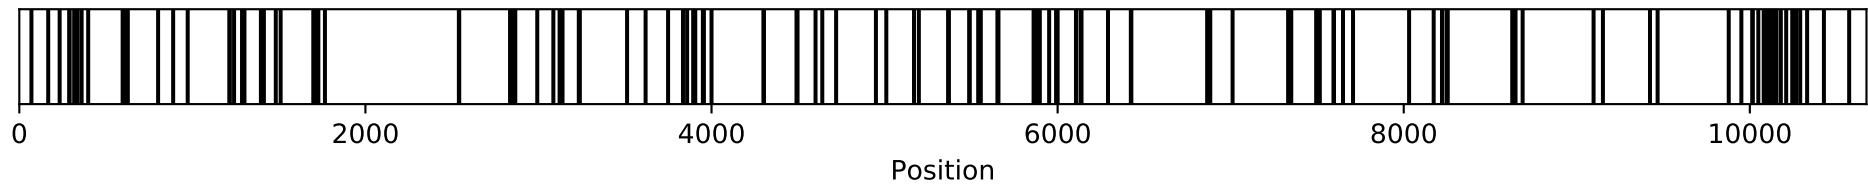

CR1 vs MM2  
Number of differences: 162

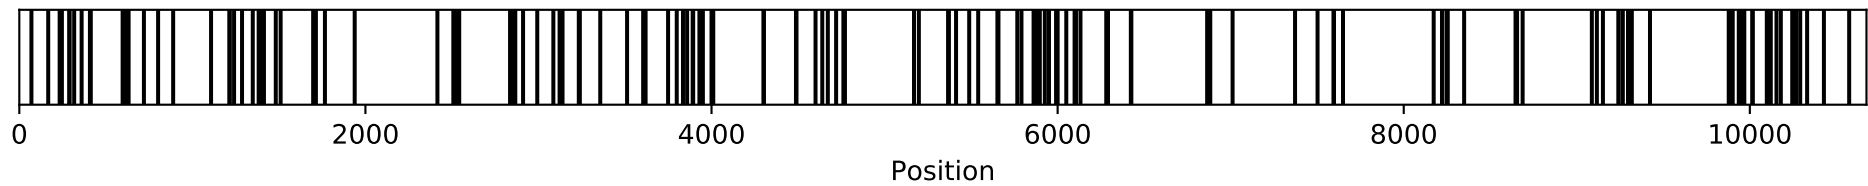

CR2 vs MM1  
Number of differences: 140

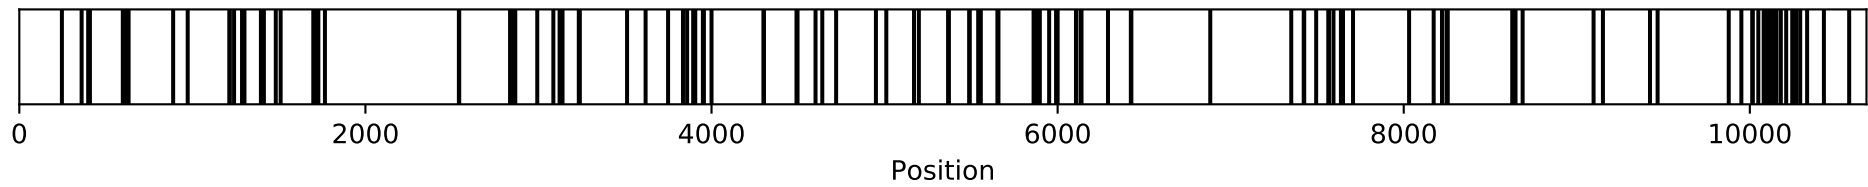

CR2 vs MM2  
Number of differences: 152

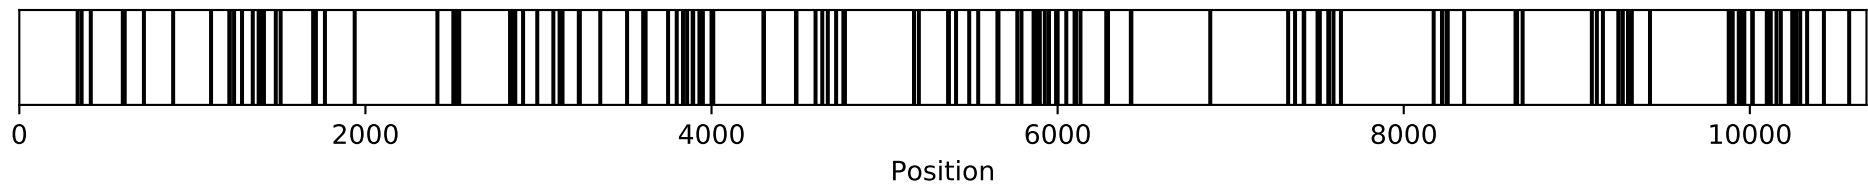

MM1 vs MM2  
Number of differences: 94

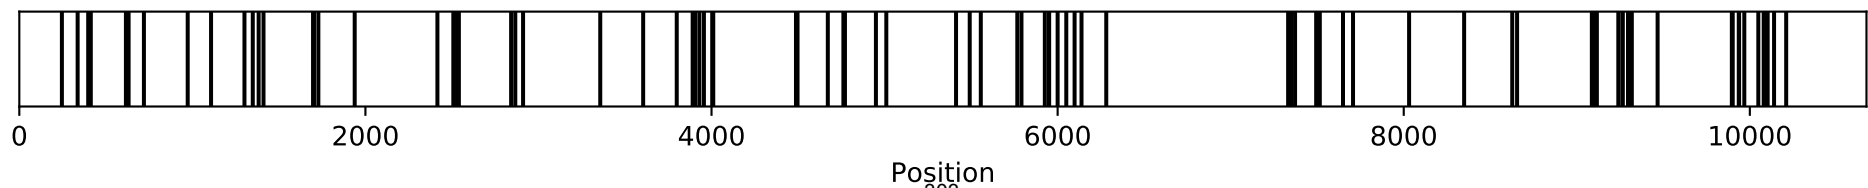



CR1 vs CR2  
Number of differences: 231

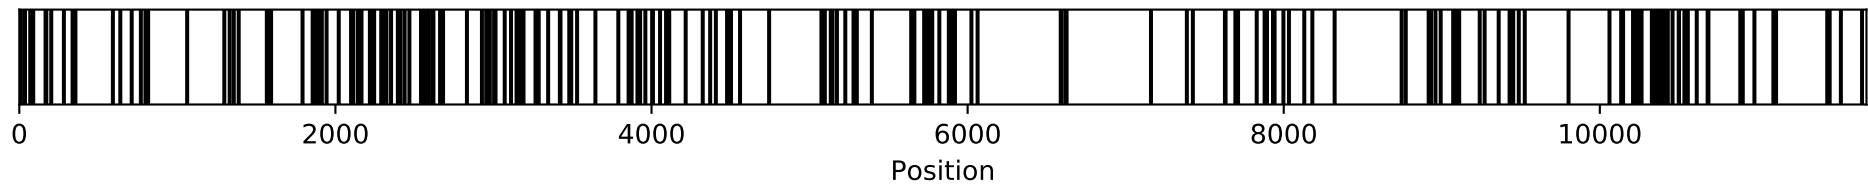

CR1 vs MM1  
Number of differences: 154

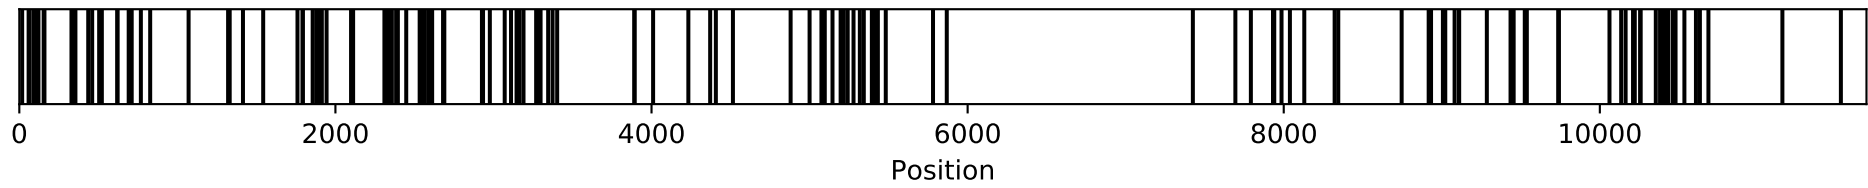

CR1 vs MM2  
Number of differences: 121

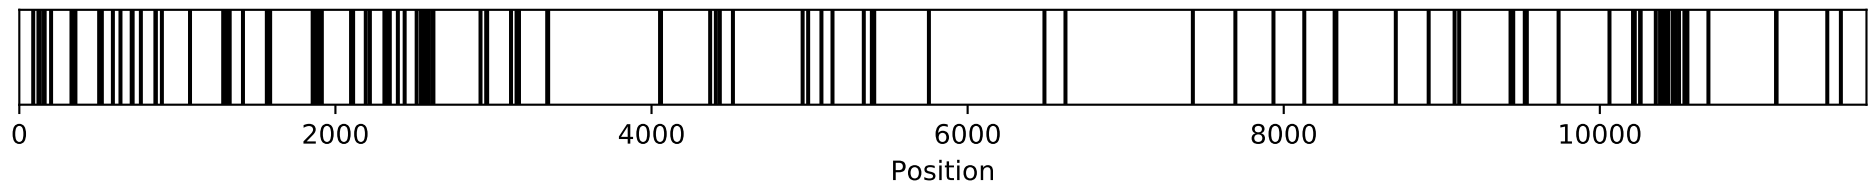

CR2 vs MM1  
Number of differences: 256

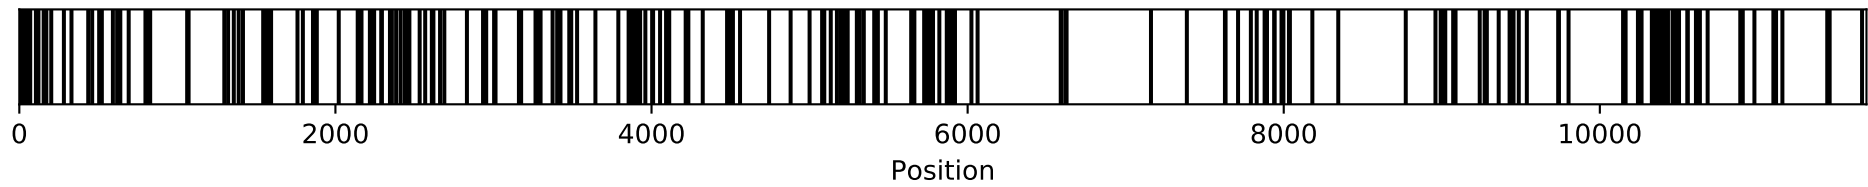

CR2 vs MM2  
Number of differences: 225

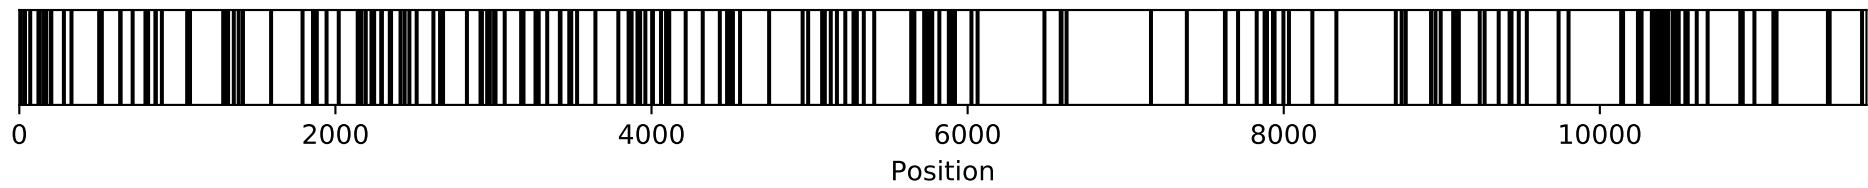

MM1 vs MM2  
Number of differences: 131

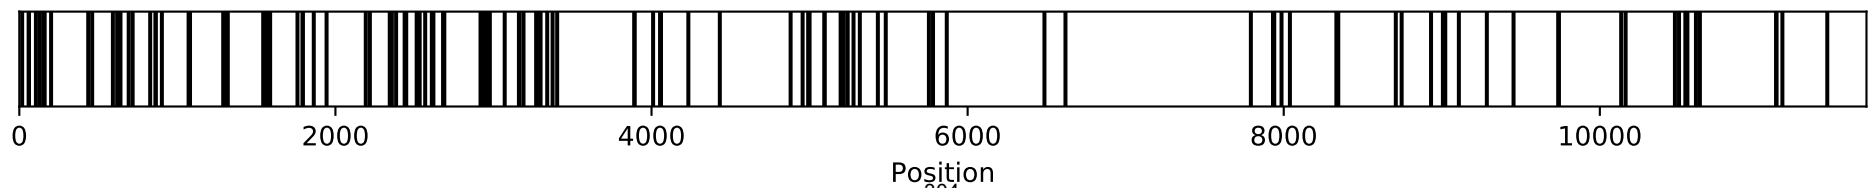

CR1 vs CR2  
Number of differences: 272

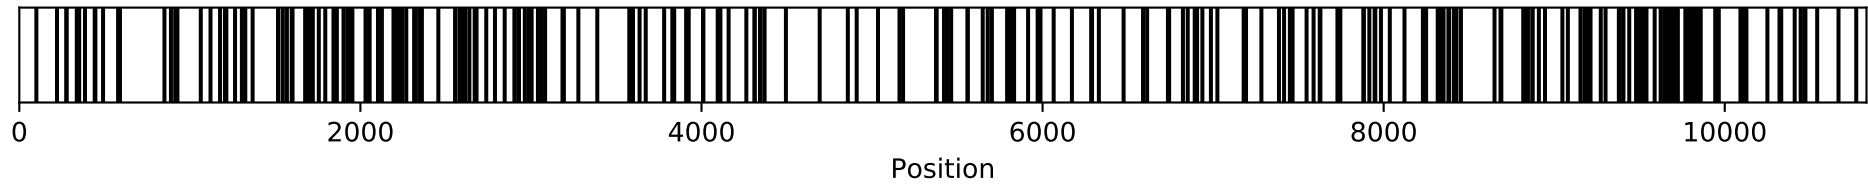

CR1 vs MM1  
Number of differences: 135

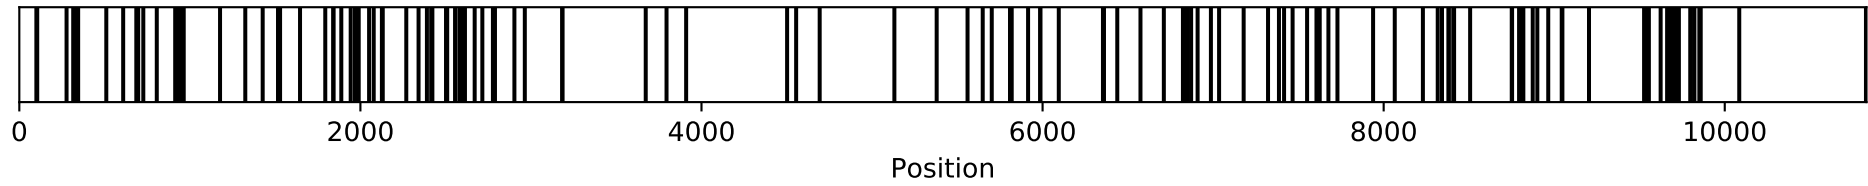

CR1 vs MM2  
Number of differences: 125

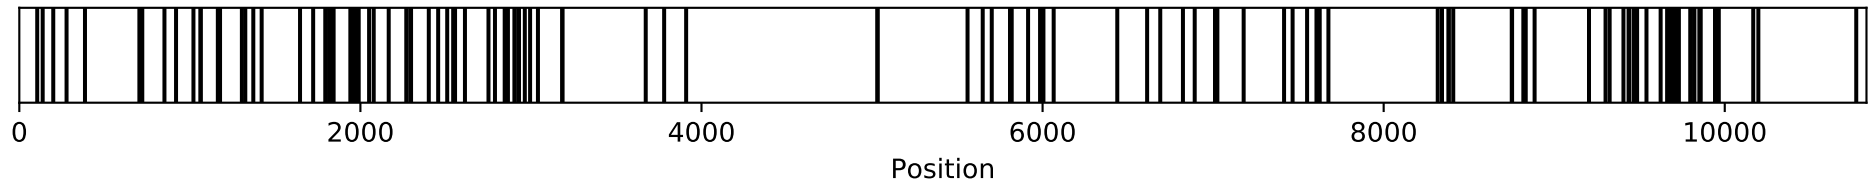

CR2 vs MM1  
Number of differences: 286

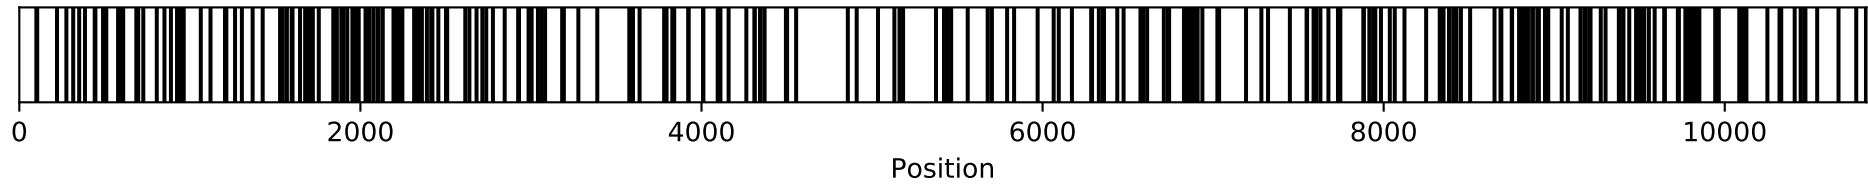

CR2 vs MM2  
Number of differences: 274

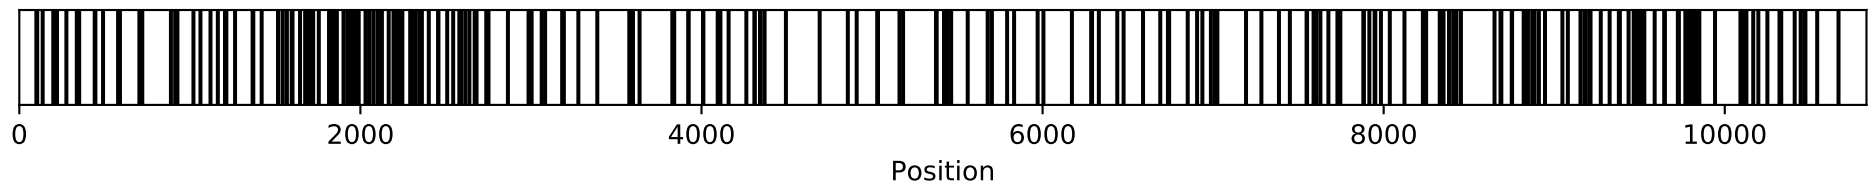

MM1 vs MM2  
Number of differences: 134

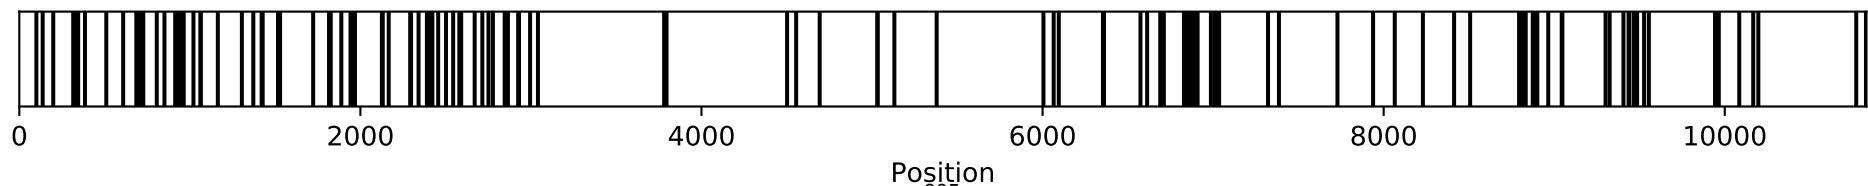

CR1 vs CR2  
Number of differences: 325

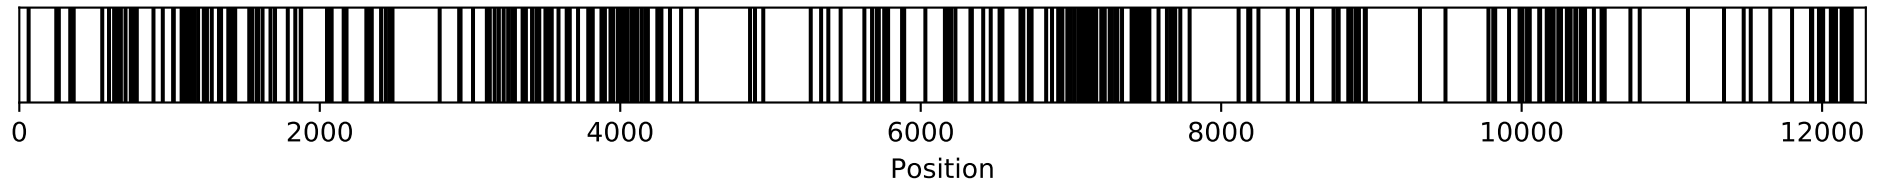

CR1 vs MM1  
Number of differences: 172

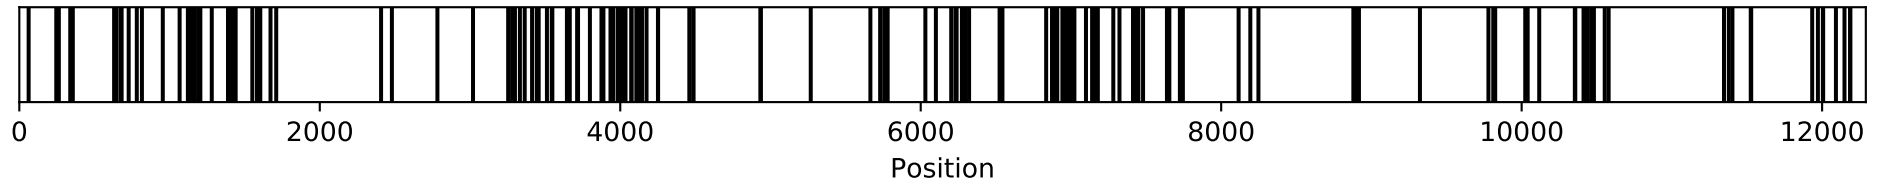

CR1 vs MM2  
Number of differences: 193

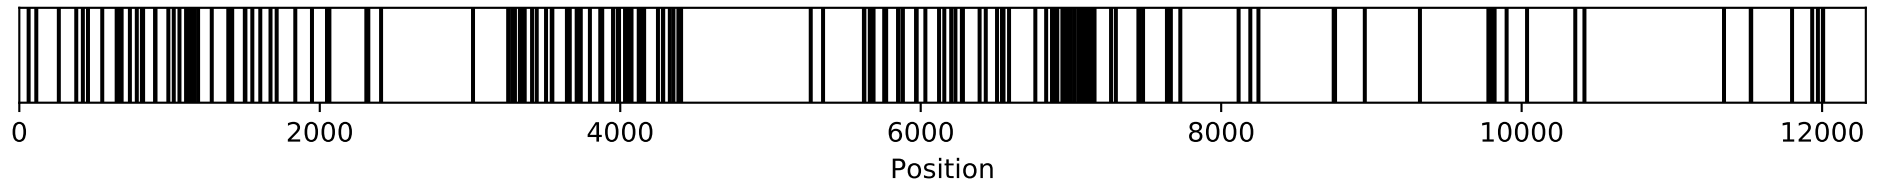

CR2 vs MM1  
Number of differences: 312

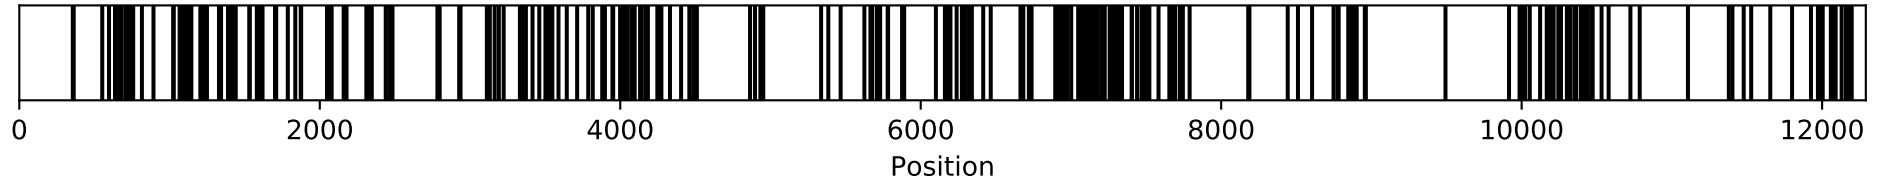

CR2 vs MM2  
Number of differences: 324

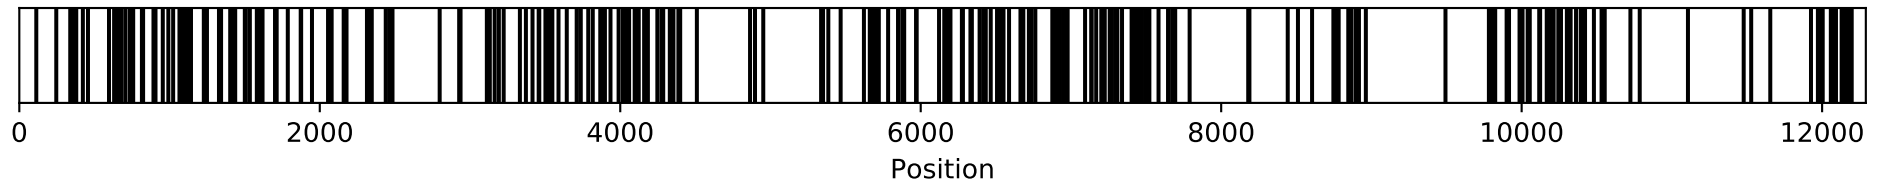

MM1 vs MM2  
Number of differences: 191

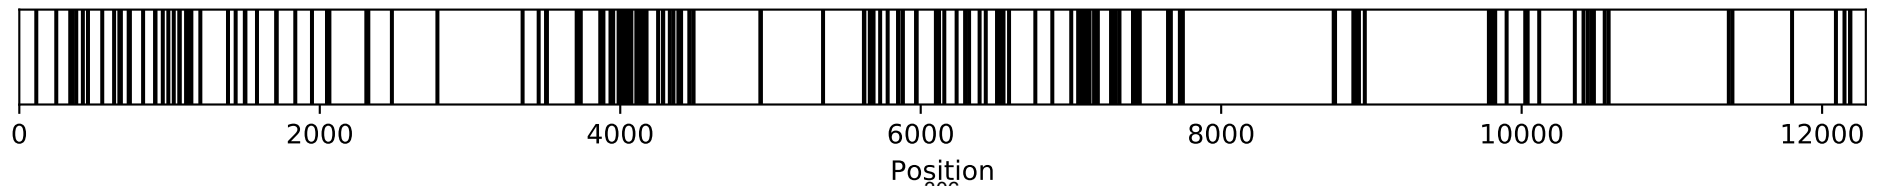

CR1 vs CR2  
Number of differences: 182

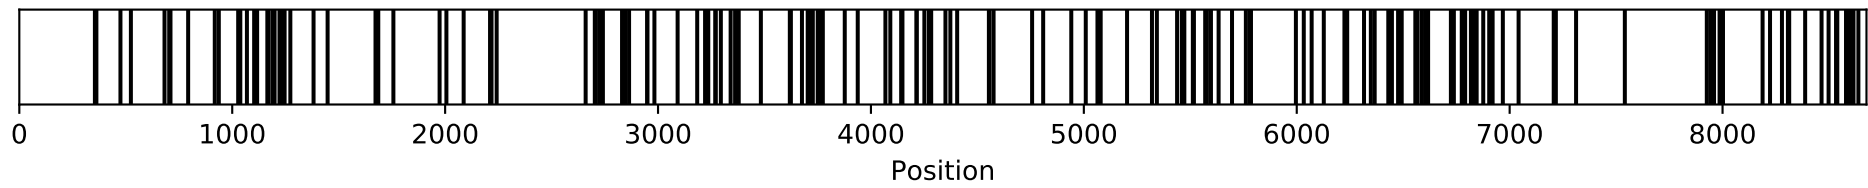

CR1 vs MM1  
Number of differences: 80

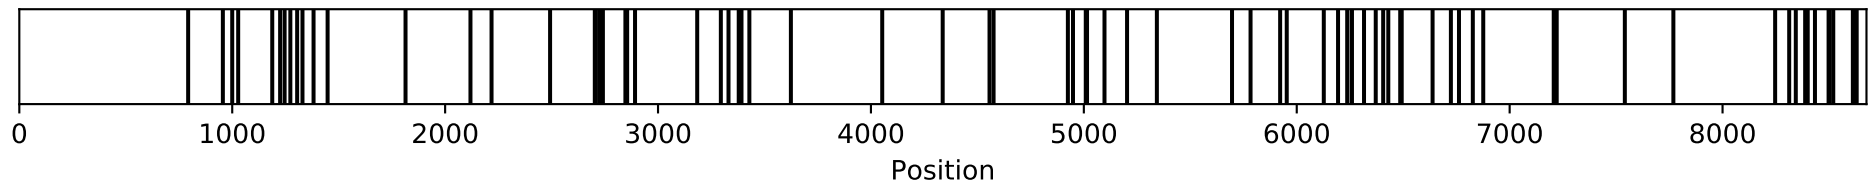

CR1 vs MM2  
Number of differences: 77

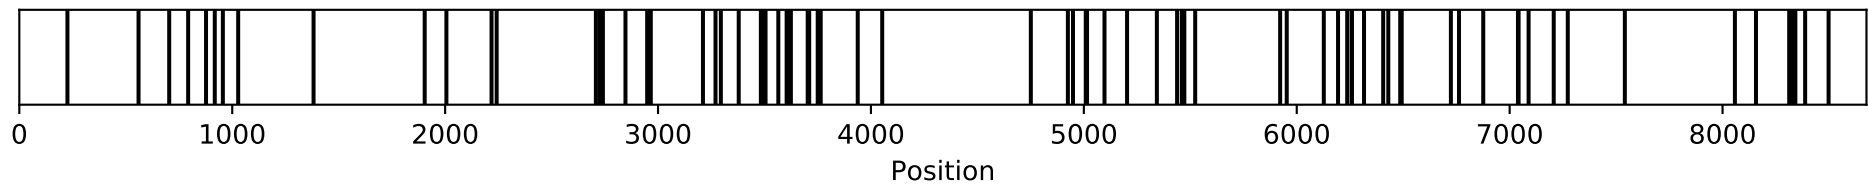

CR2 vs MM1  
Number of differences: 187

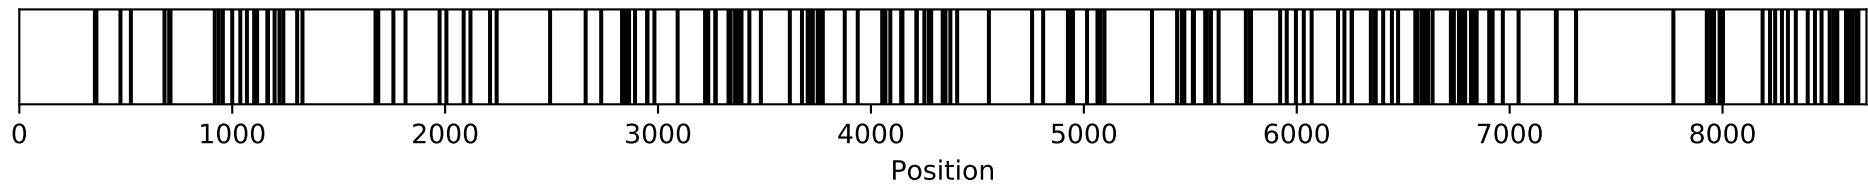

CR2 vs MM2  
Number of differences: 175

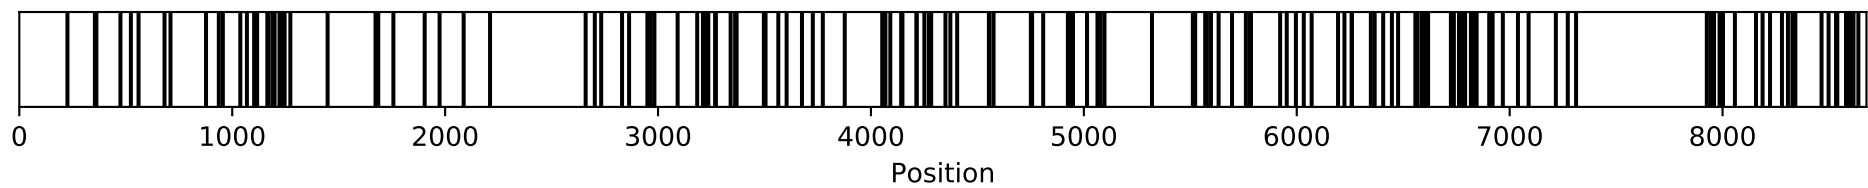

MM1 vs MM2  
Number of differences: 76

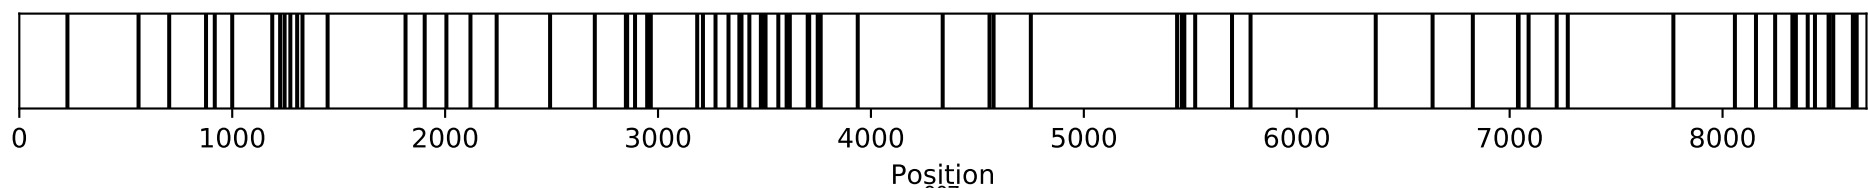

CR1 vs CR2  
Number of differences: 280

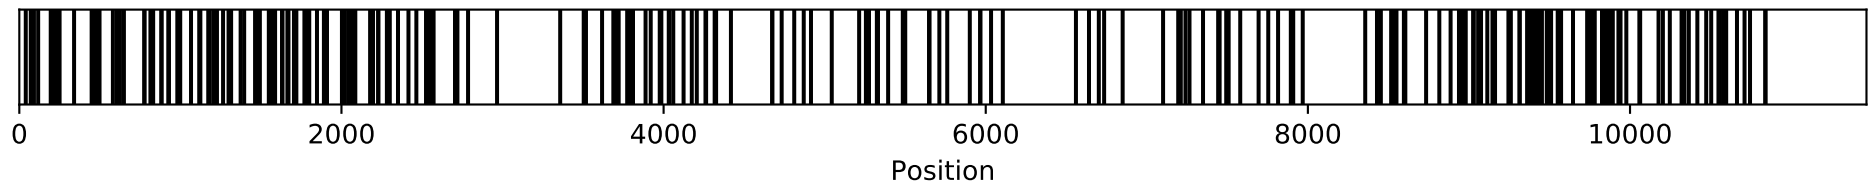

CR1 vs MM1  
Number of differences: 140

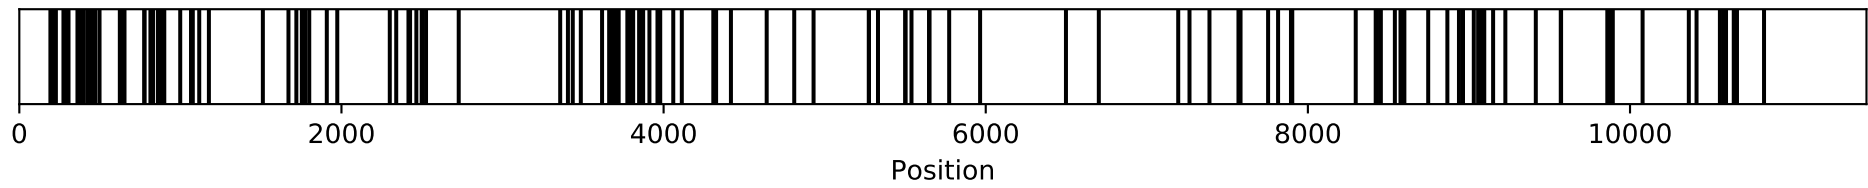

CR1 vs MM2  
Number of differences: 93

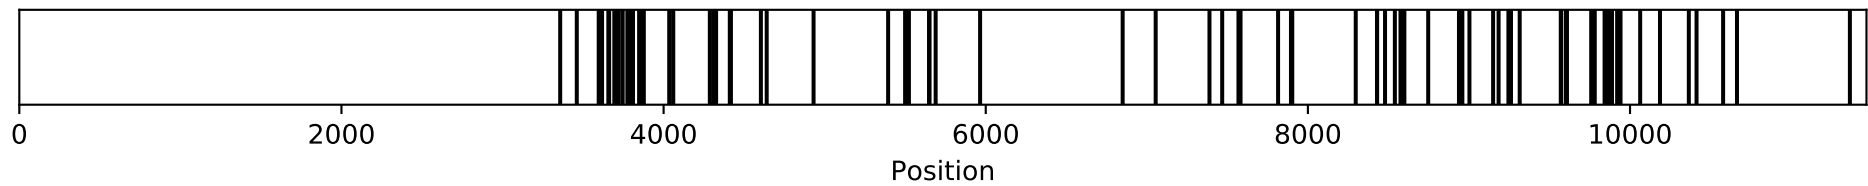

CR2 vs MM1  
Number of differences: 281

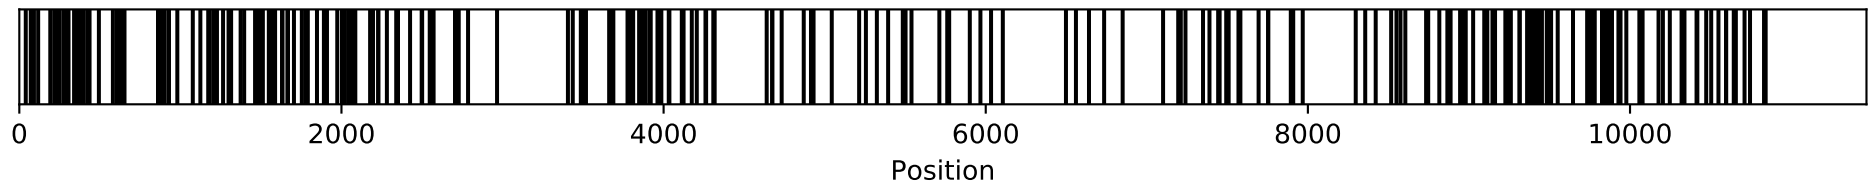

CR2 vs MM2  
Number of differences: 288

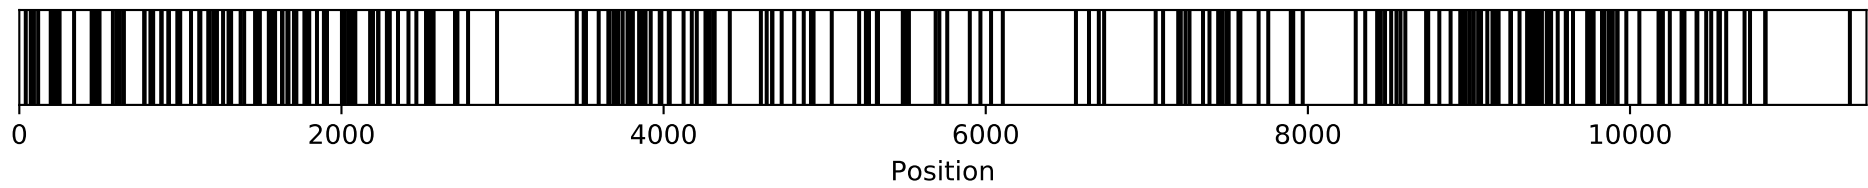

MM1 vs MM2  
Number of differences: 136

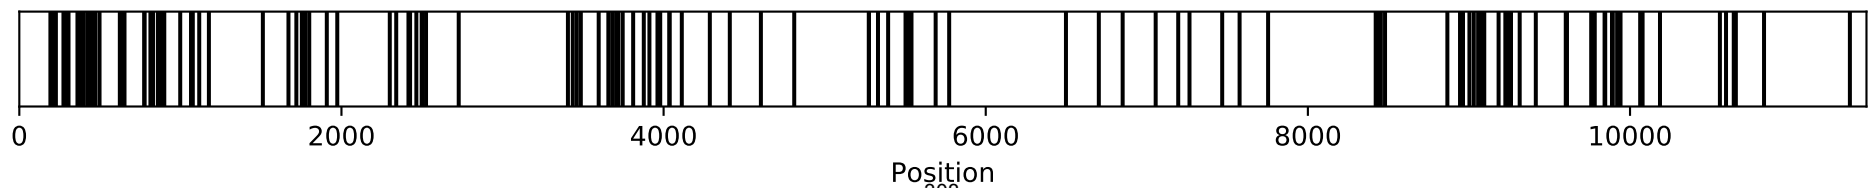

CR1 vs CR2  
Number of differences: 354

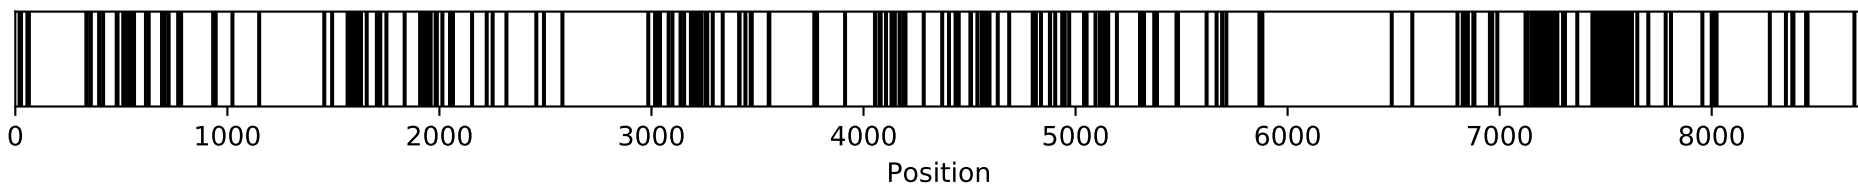

CR1 vs MM1  
Number of differences: 107

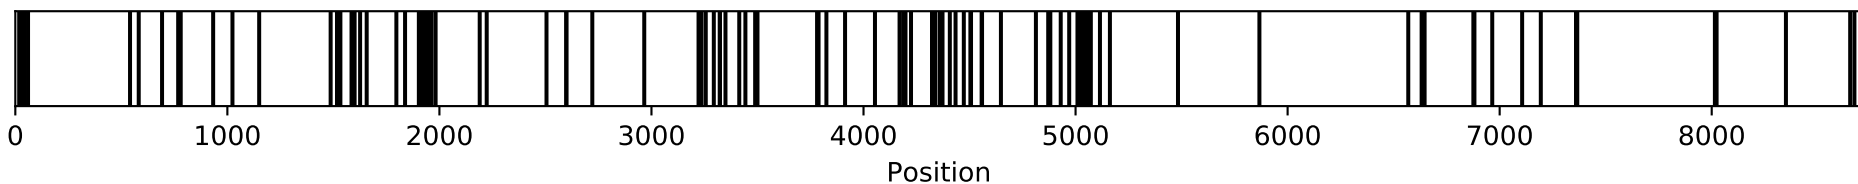

CR1 vs MM2  
Number of differences: 102

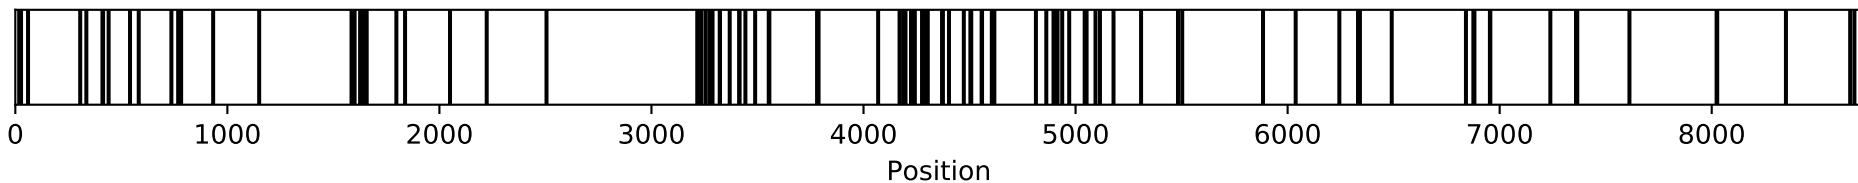

CR2 vs MM1  
Number of differences: 357

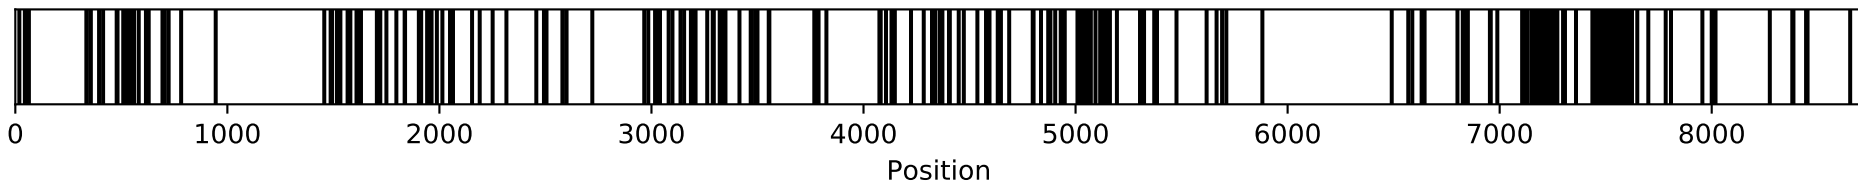

CR2 vs MM2  
Number of differences: 350

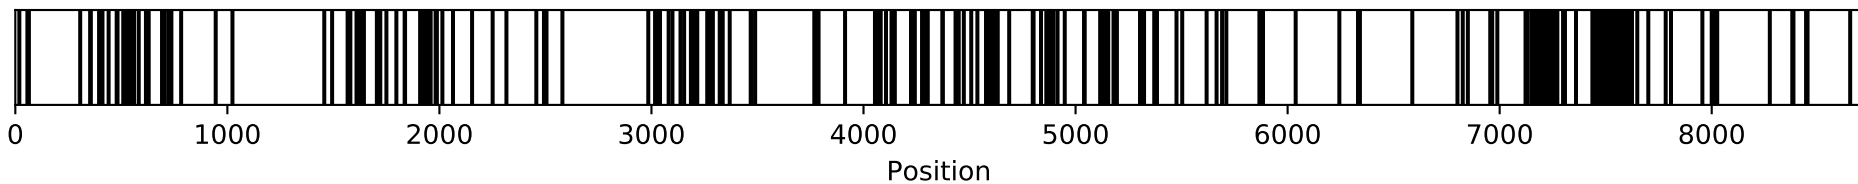

MM1 vs MM2  
Number of differences: 103

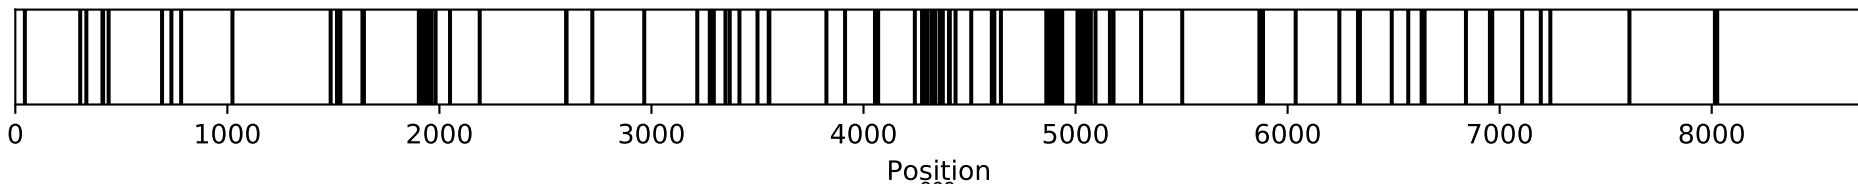

CR1 vs CR2  
Number of differences: 152

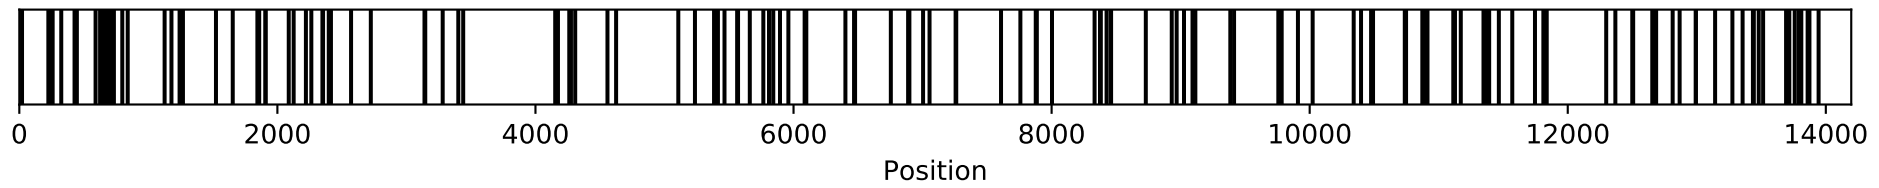

CR1 vs MM1  
Number of differences: 47

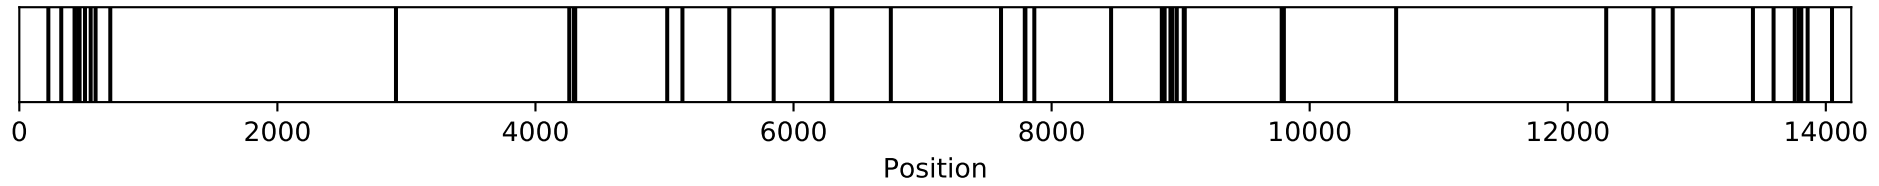

CR1 vs MM2  
Number of differences: 7

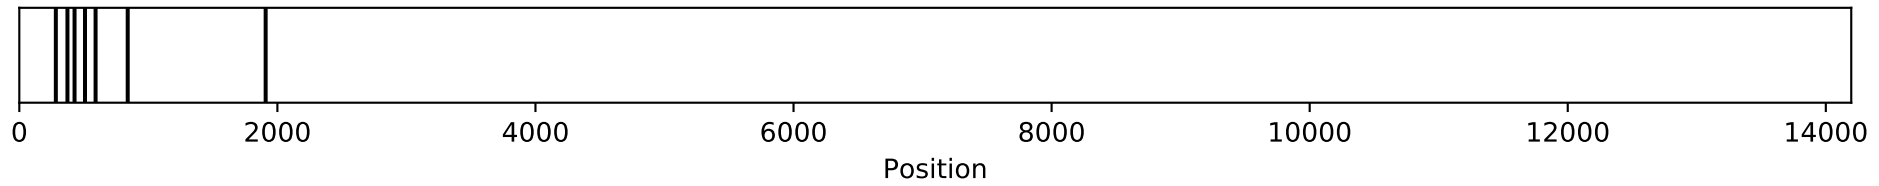

CR2 vs MM1  
Number of differences: 159

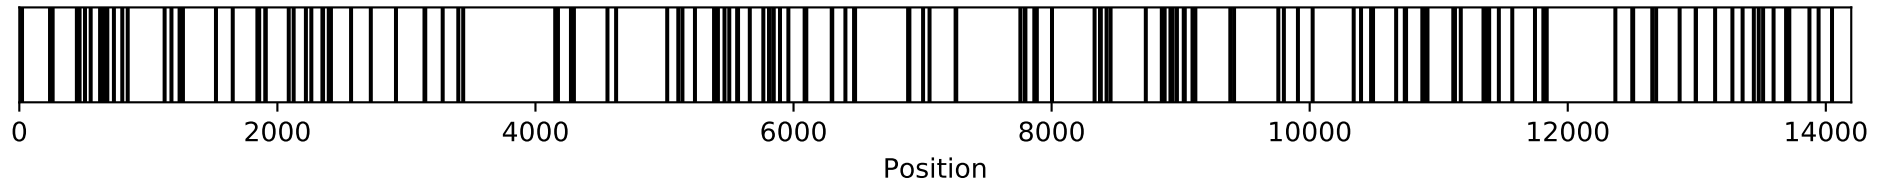

CR2 vs MM2  
Number of differences: 151

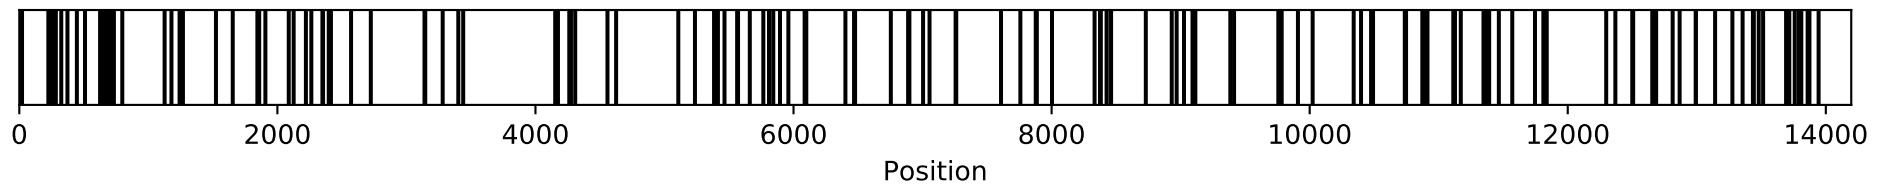

MM1 vs MM2  
Number of differences: 48

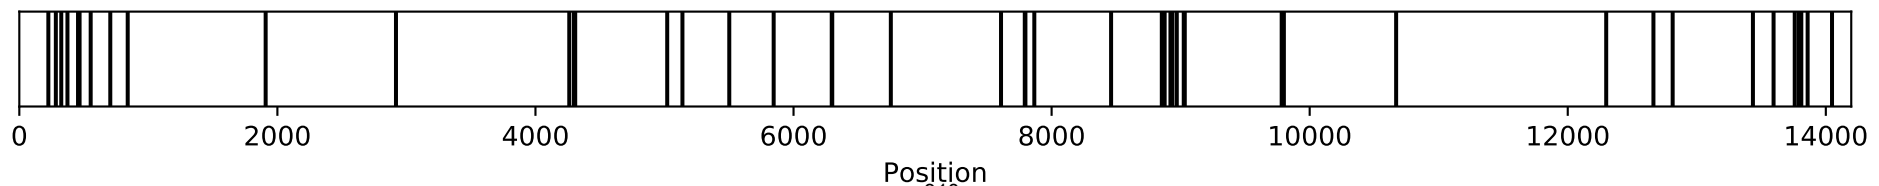

CR1 vs CR2  
Number of differences: 206

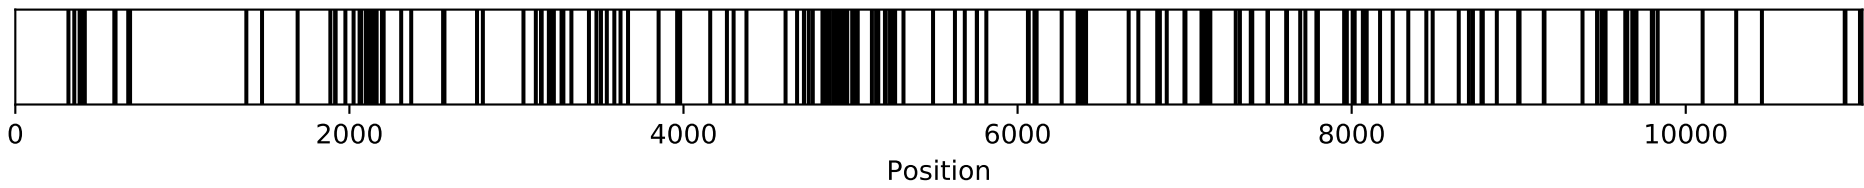

CR1 vs MM1  
Number of differences: 121

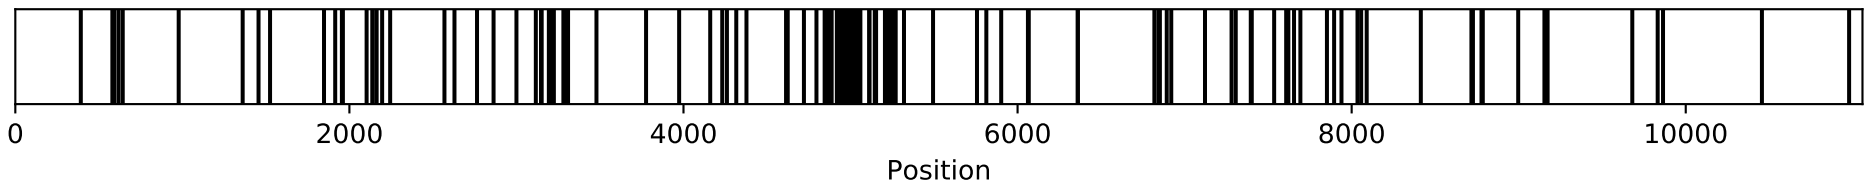

CR1 vs MM2  
Number of differences: 125

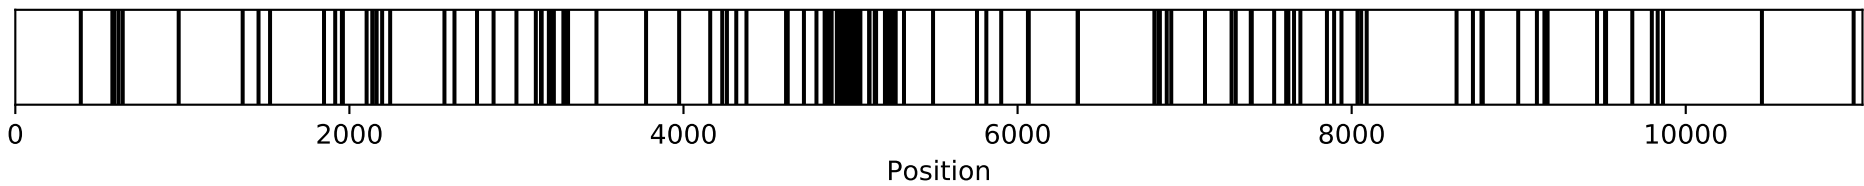

CR2 vs MM1  
Number of differences: 195

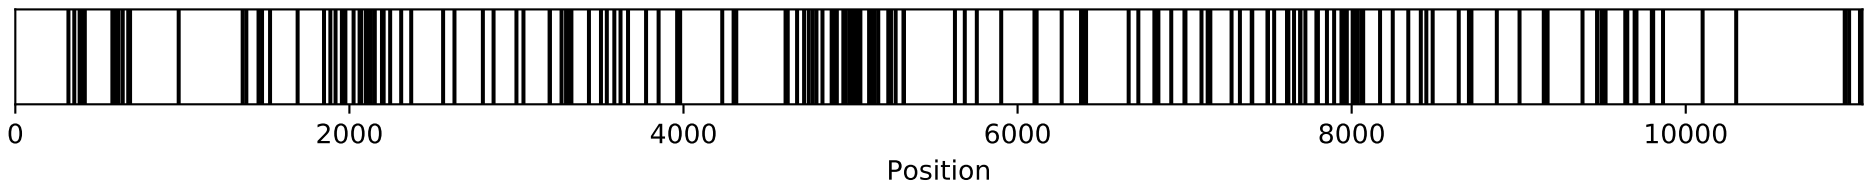

CR2 vs MM2  
Number of differences: 195

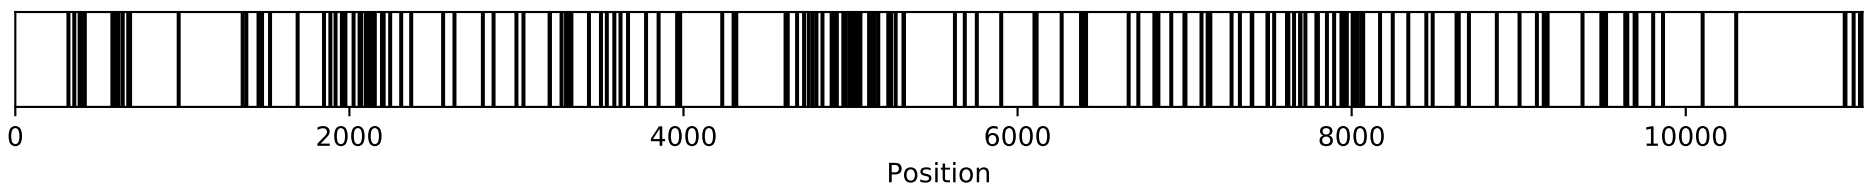

MM1 vs MM2  
Number of differences: 10

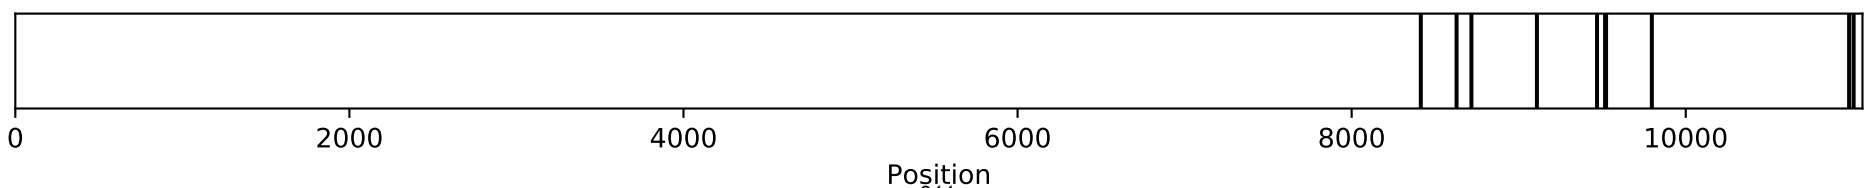



CR1 vs CR2  
Number of differences: 182

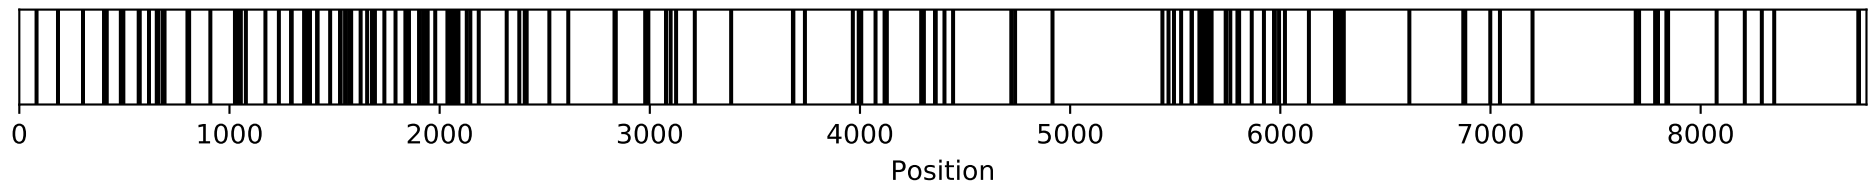

CR1 vs MM1  
Number of differences: 104

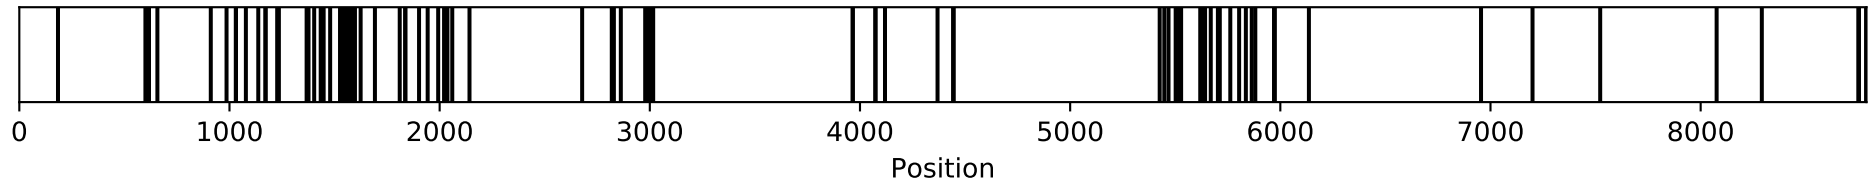

CR1 vs MM2  
Number of differences: 61

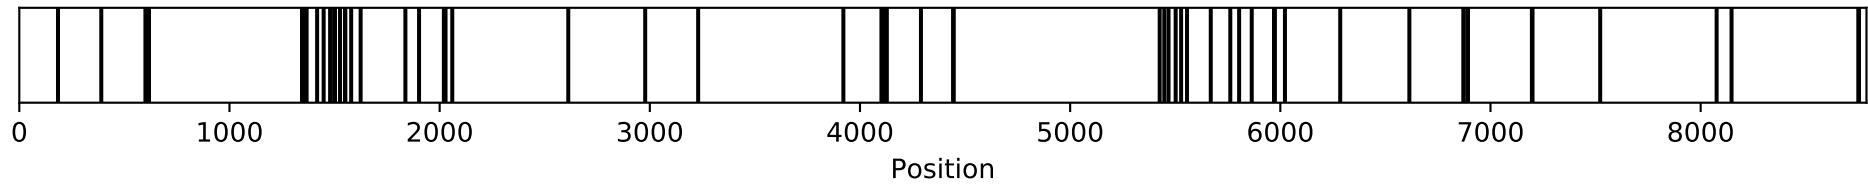

CR2 vs MM1  
Number of differences: 202

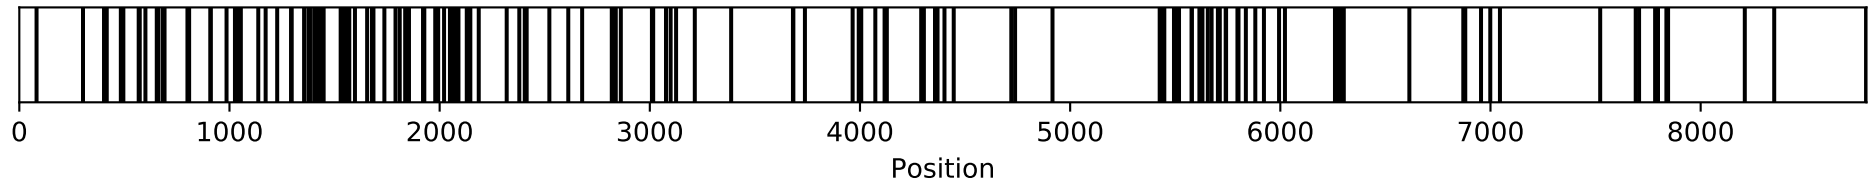

CR2 vs MM2  
Number of differences: 170

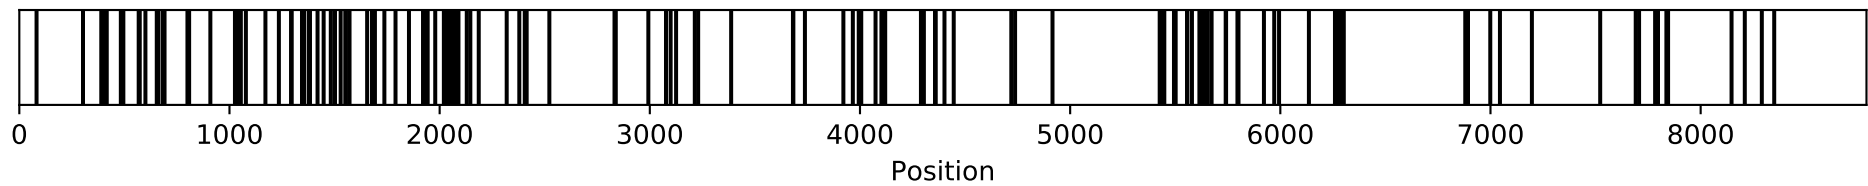

MM1 vs MM2  
Number of differences: 99

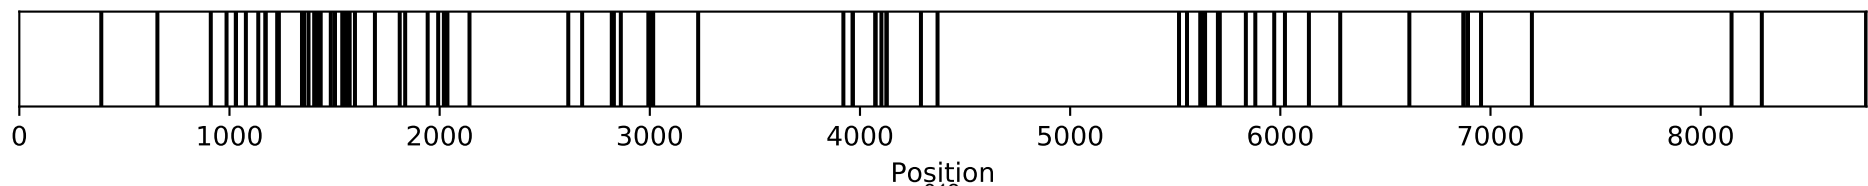

CR1 vs CR2  
Number of differences: 98

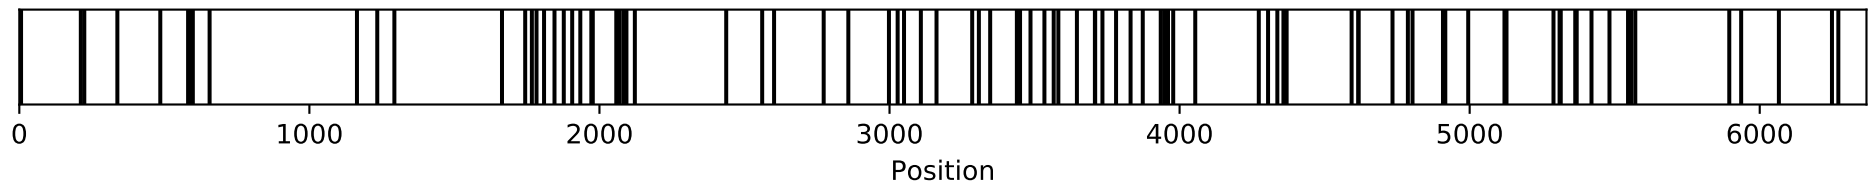

CR1 vs MM1  
Number of differences: 44

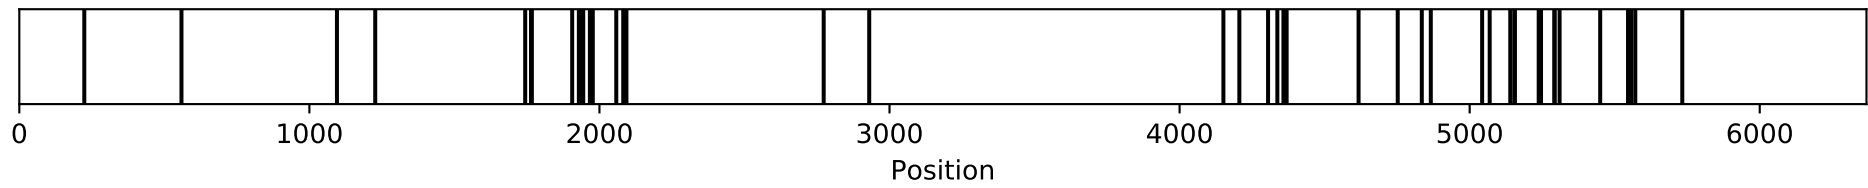

CR1 vs MM2  
Number of differences: 0

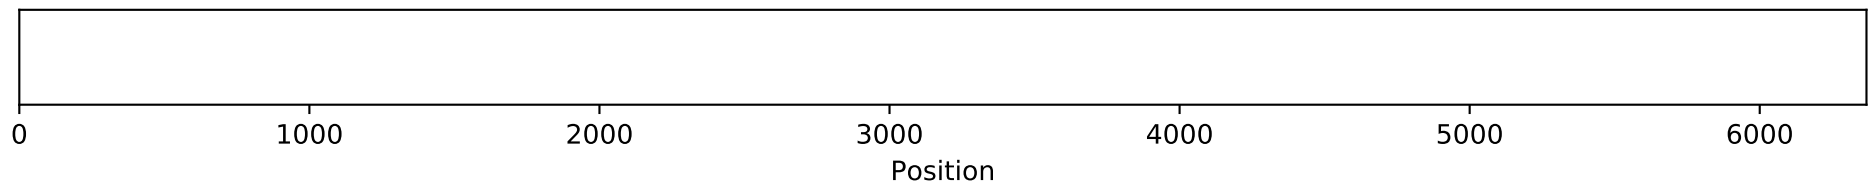

CR2 vs MM1  
Number of differences: 102

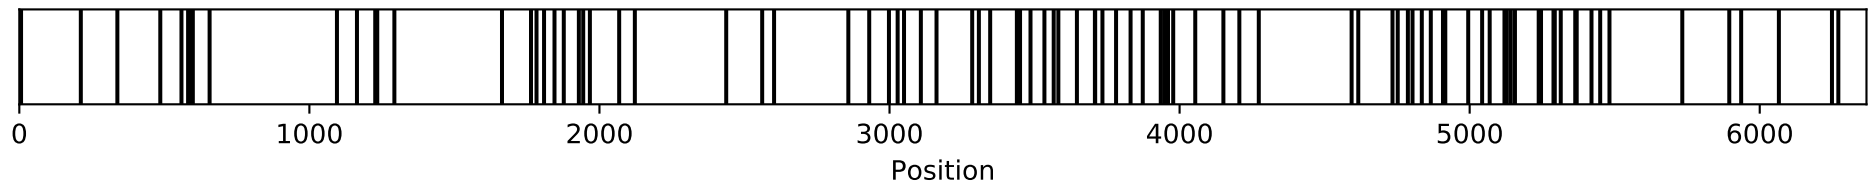

CR2 vs MM2  
Number of differences: 98

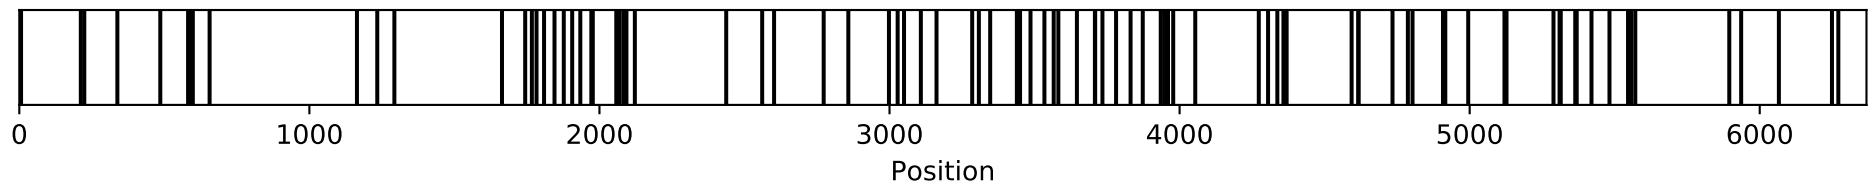

MM1 vs MM2  
Number of differences: 44

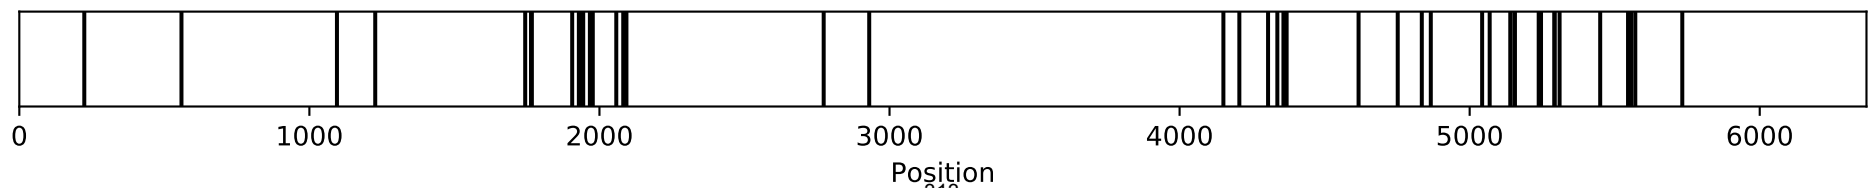

CR1 vs CR2  
Number of differences: 177

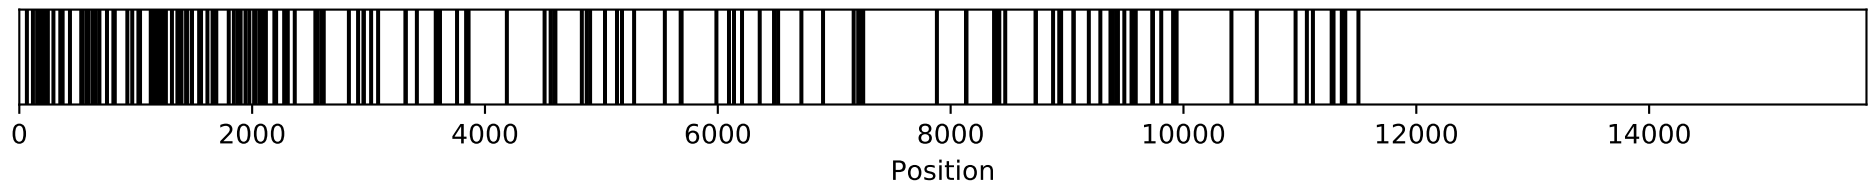

CR1 vs MM1  
Number of differences: 92

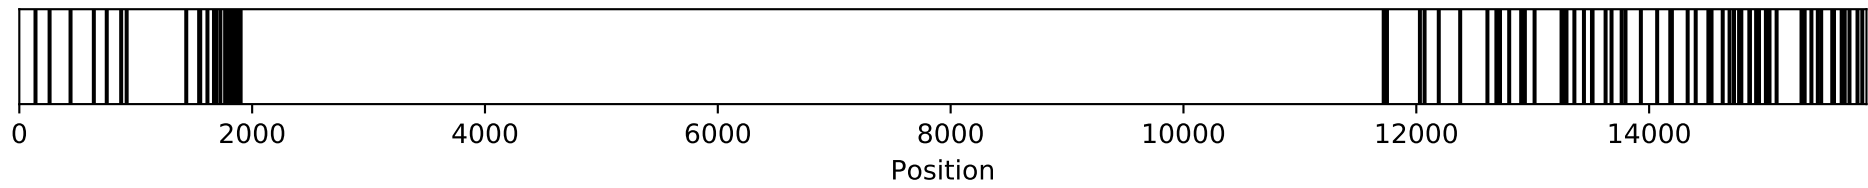

CR1 vs MM2  
Number of differences: 135

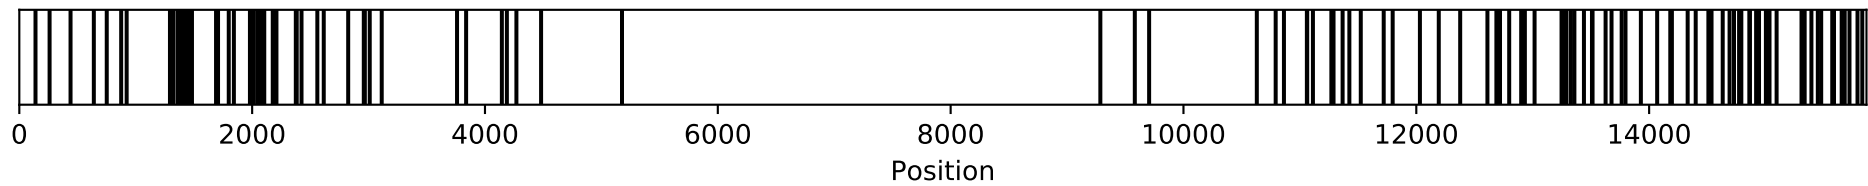

CR2 vs MM1  
Number of differences: 243

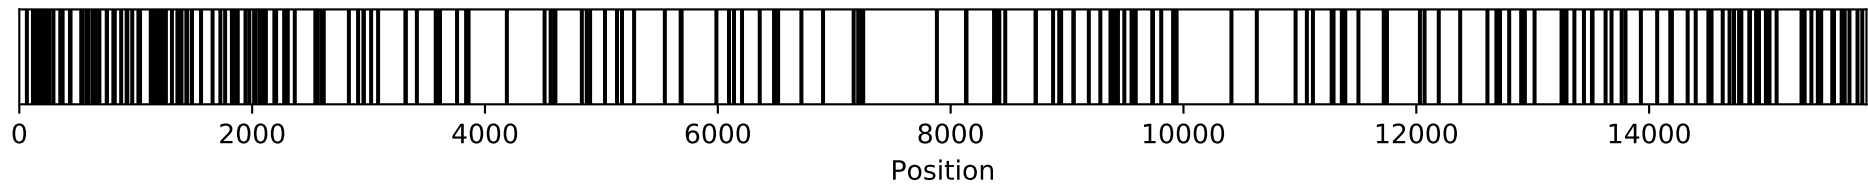

CR2 vs MM2  
Number of differences: 252

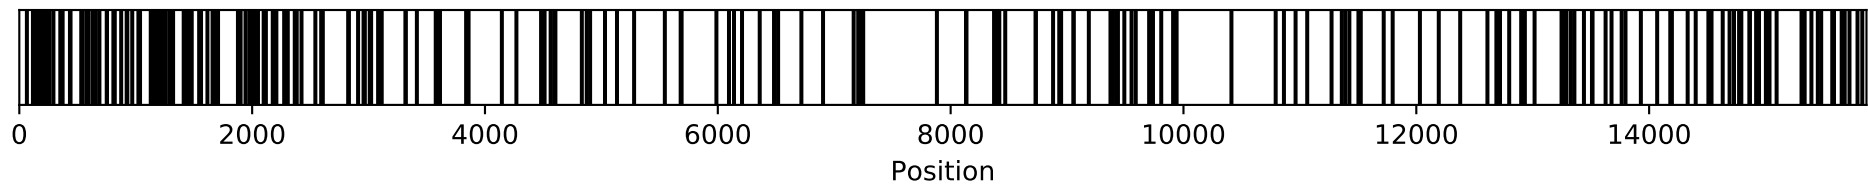

MM1 vs MM2  
Number of differences: 79

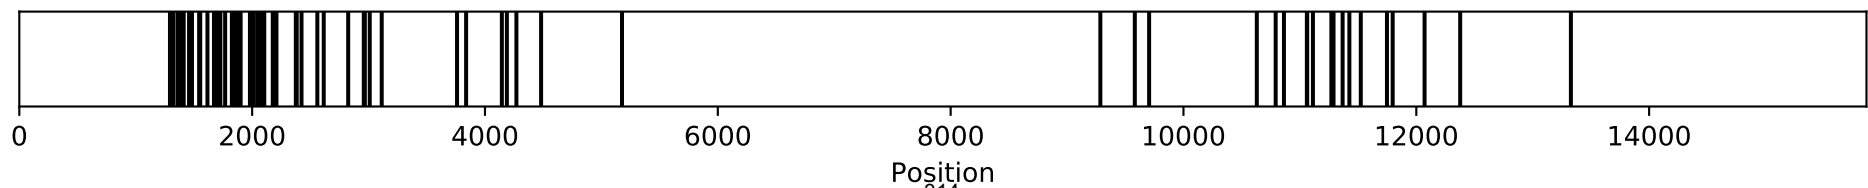

CR1 vs CR2  
Number of differences: 235

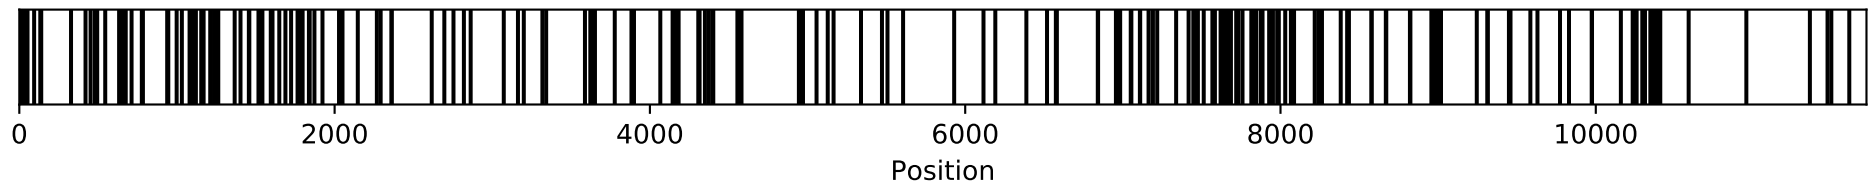

CR1 vs MM1  
Number of differences: 3

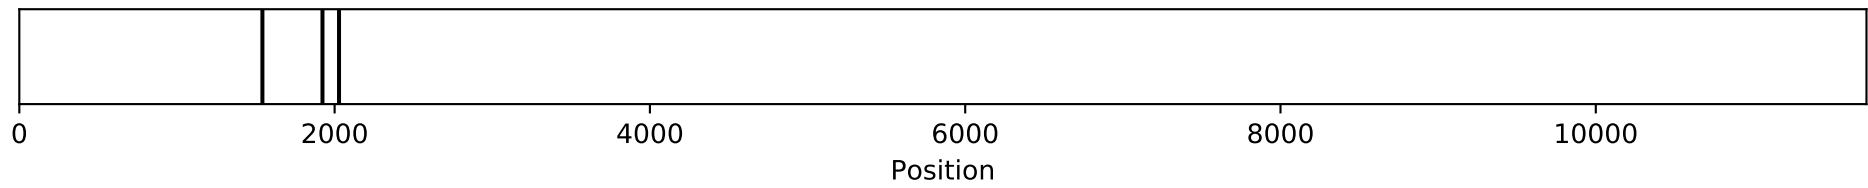

CR1 vs MM2  
Number of differences: 107

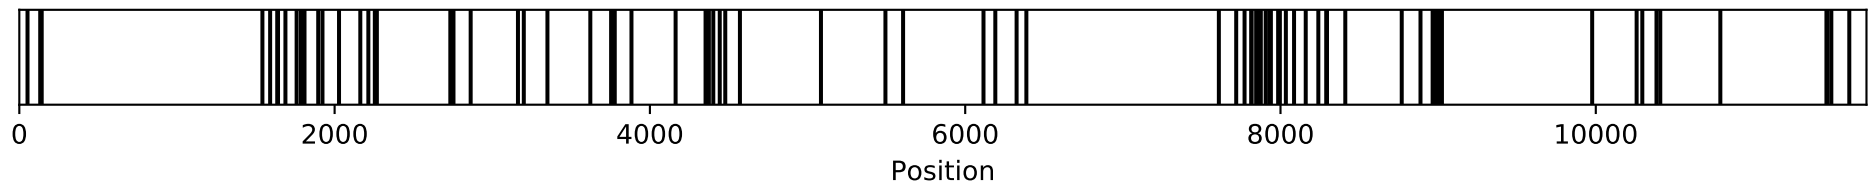

CR2 vs MM1  
Number of differences: 232

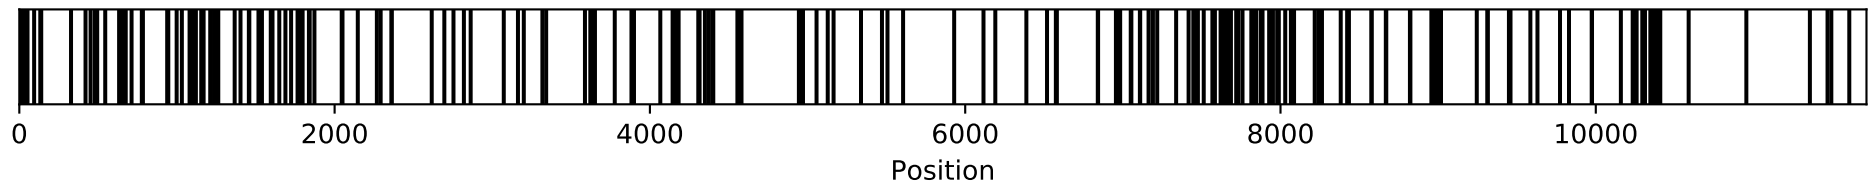

CR2 vs MM2  
Number of differences: 236

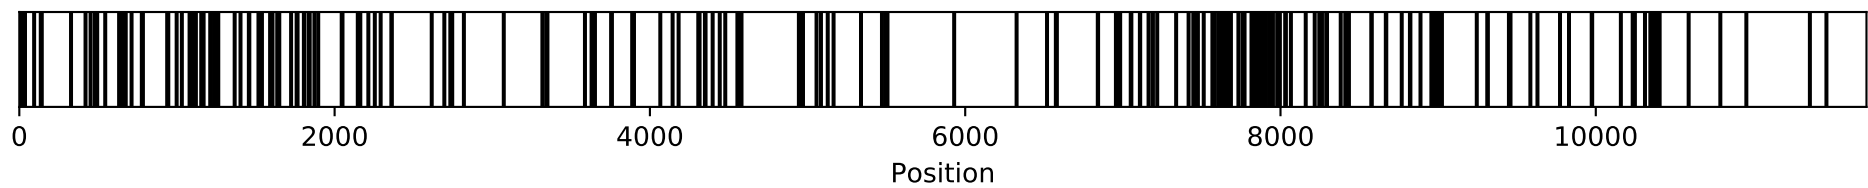

MM1 vs MM2  
Number of differences: 104

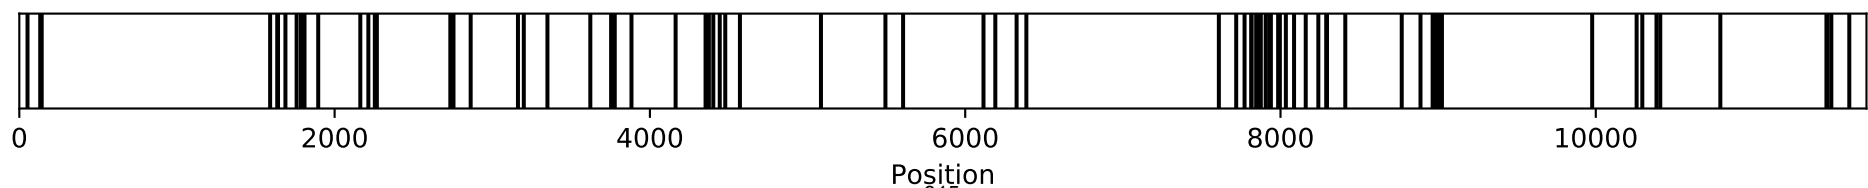

CR1 vs CR2  
Number of differences: 359

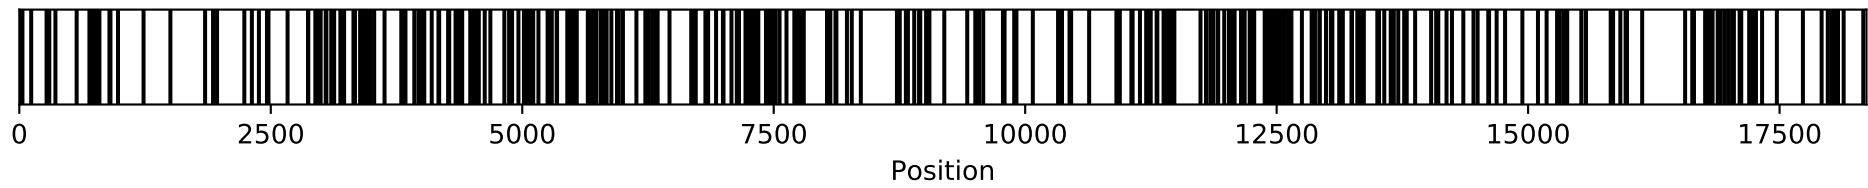

CR1 vs MM1  
Number of differences: 156

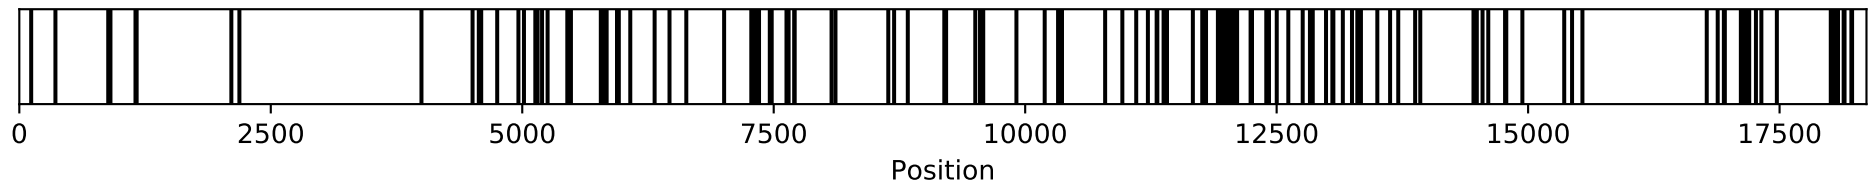

CR1 vs MM2  
Number of differences: 149

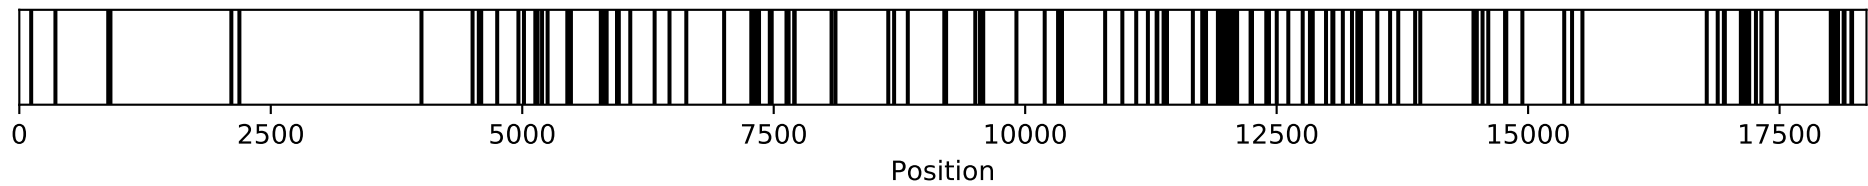

CR2 vs MM1  
Number of differences: 359

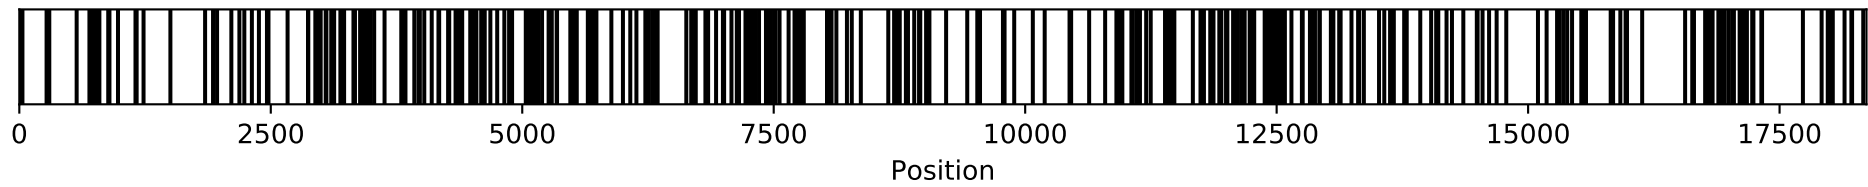

CR2 vs MM2  
Number of differences: 352

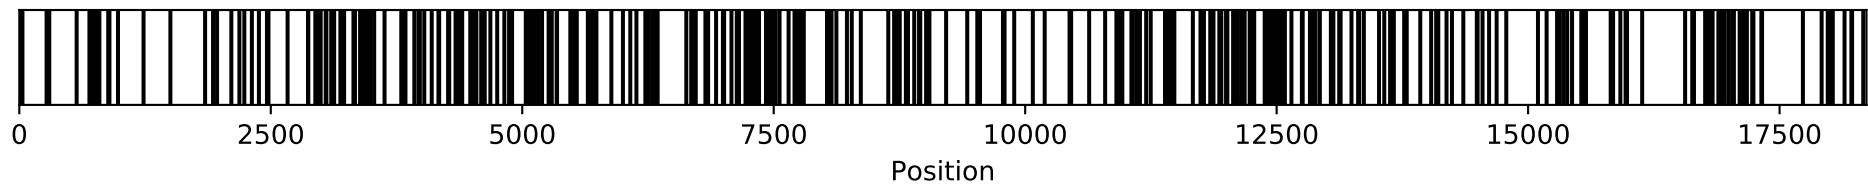

MM1 vs MM2  
Number of differences: 7

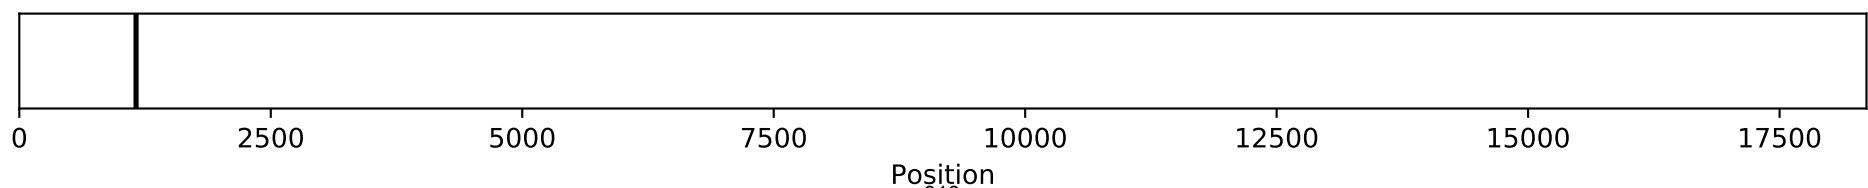

CR1 vs CR2  
Number of differences: 201

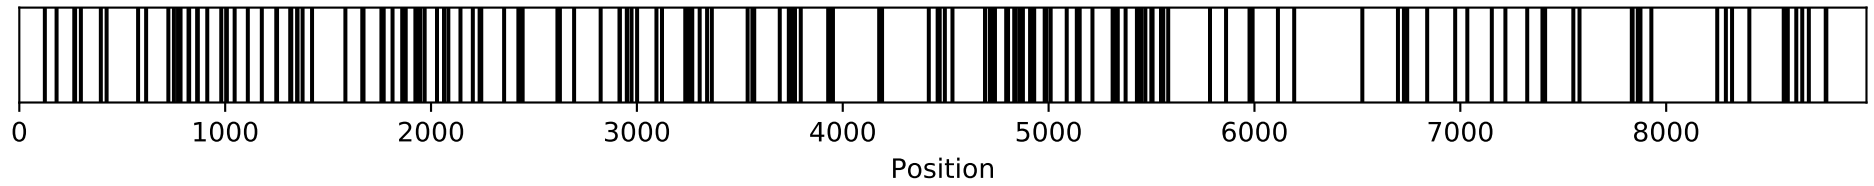

CR1 vs MM1  
Number of differences: 203

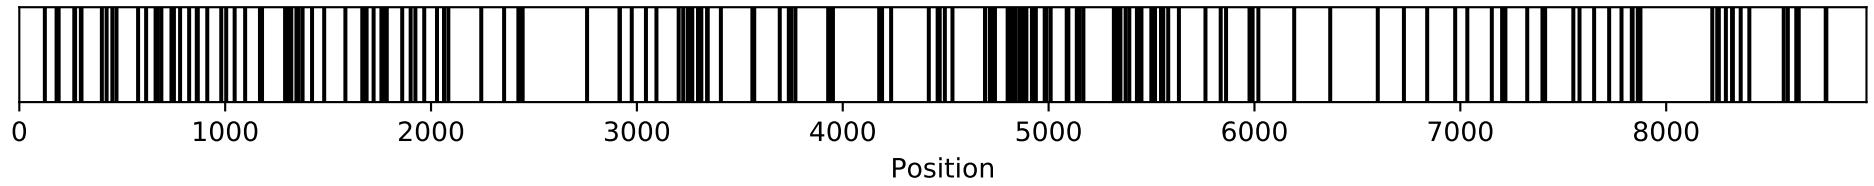

CR1 vs MM2  
Number of differences: 205

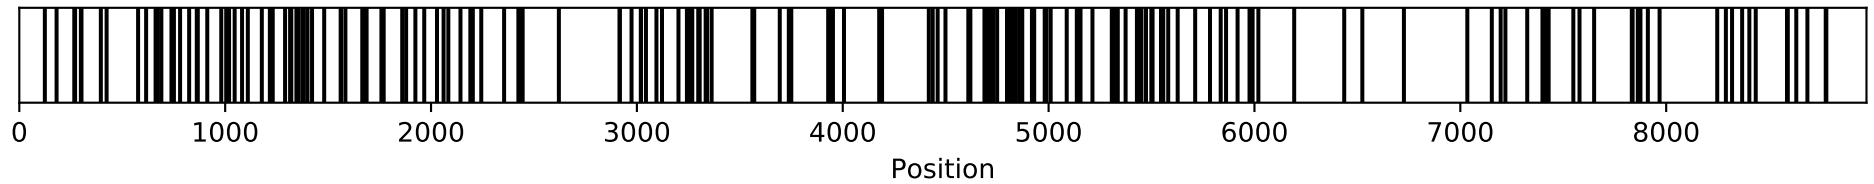

CR2 vs MM1  
Number of differences: 143

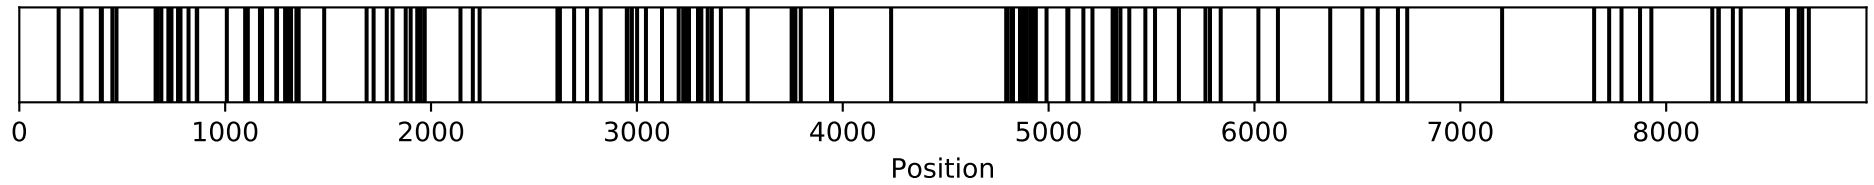

CR2 vs MM2  
Number of differences: 134

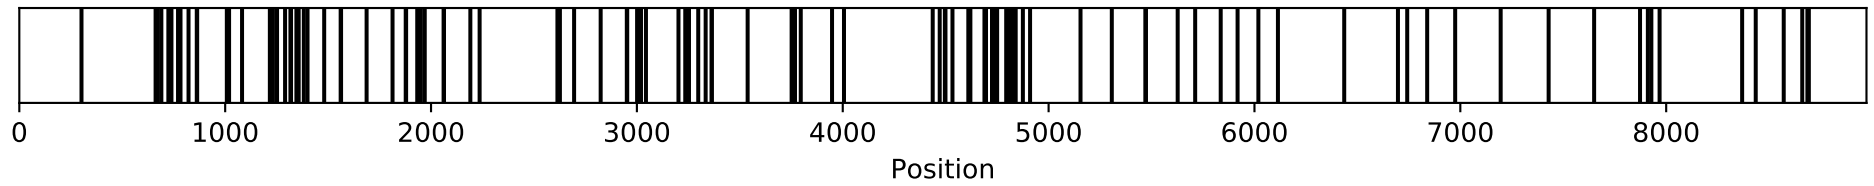

MM1 vs MM2  
Number of differences: 133

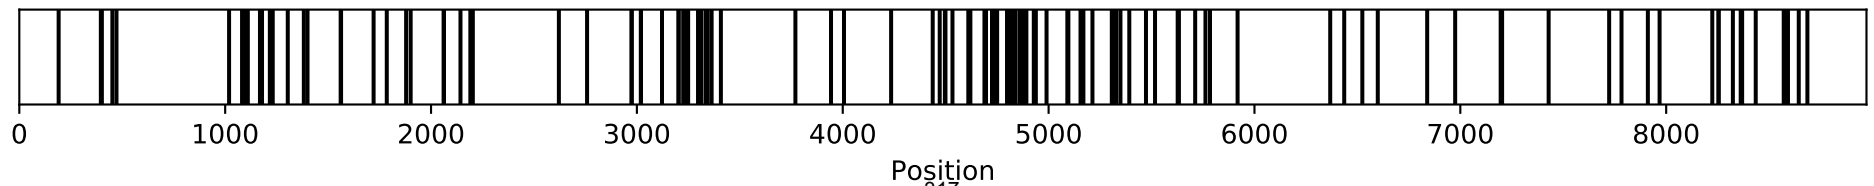

CR1 vs CR2  
Number of differences: 157

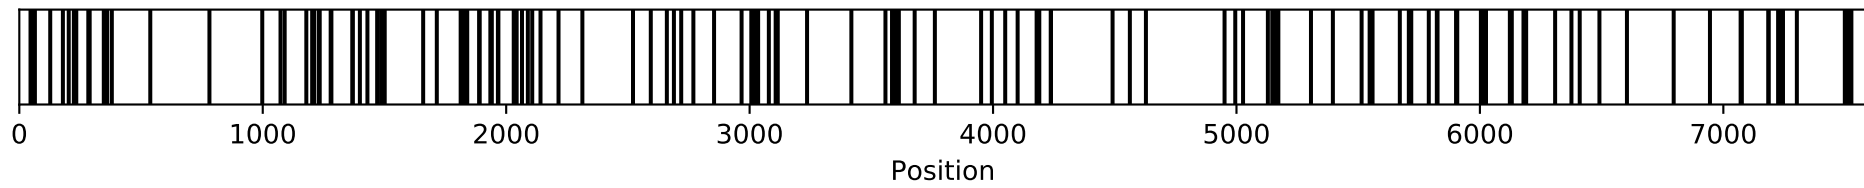

CR1 vs MM1  
Number of differences: 6

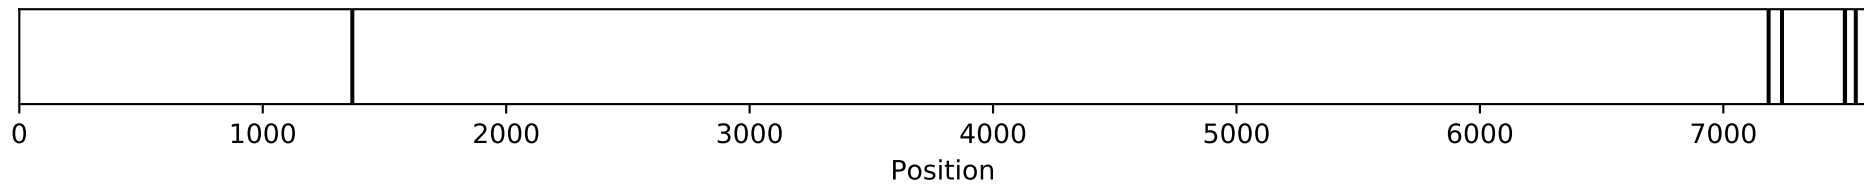

CR1 vs MM2  
Number of differences: 67

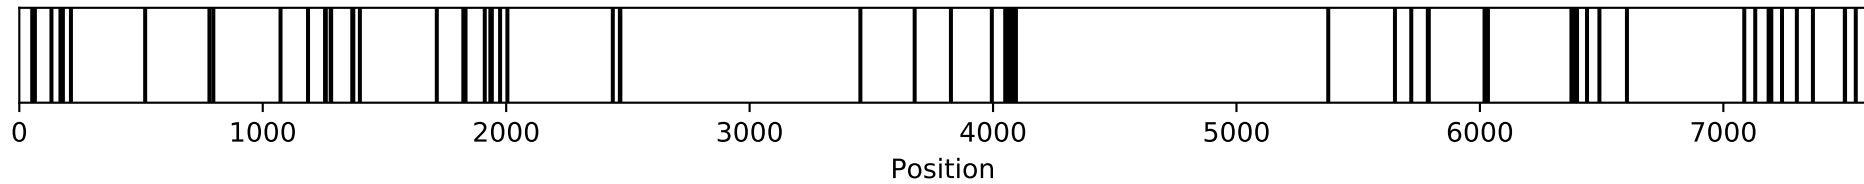

CR2 vs MM1  
Number of differences: 155

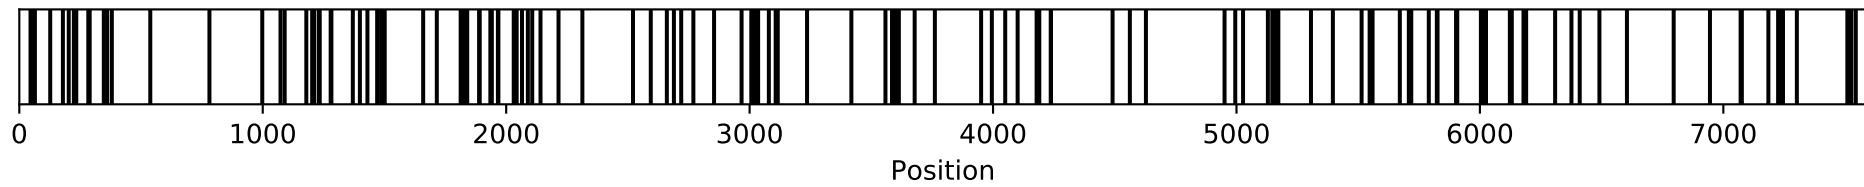

CR2 vs MM2  
Number of differences: 173

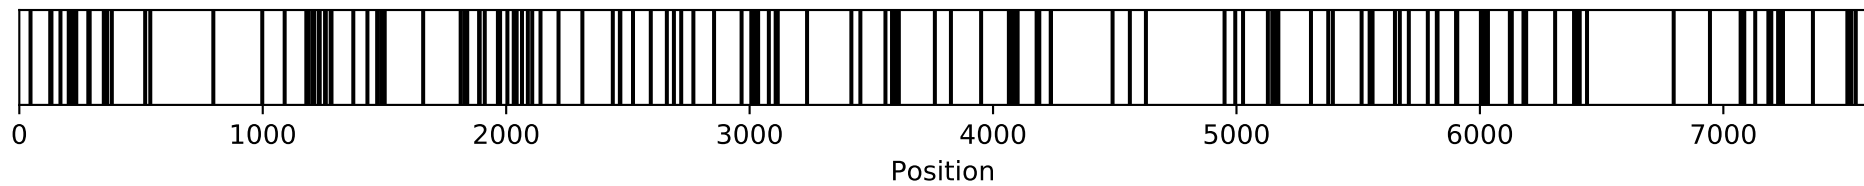

MM1 vs MM2  
Number of differences: 61

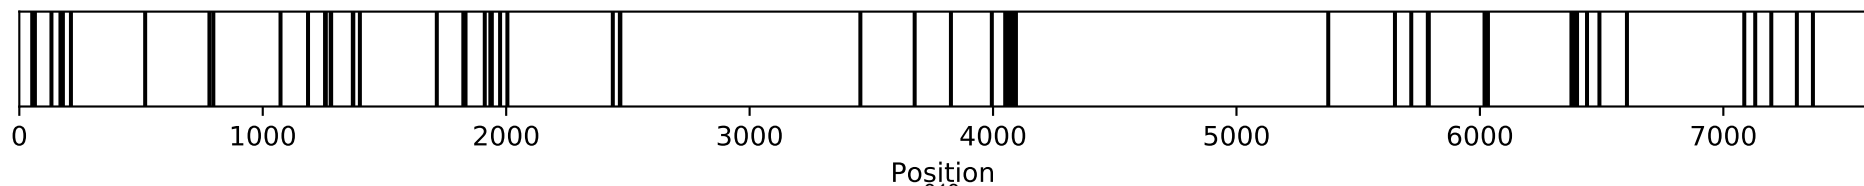

CR1 vs CR2  
Number of differences: 210

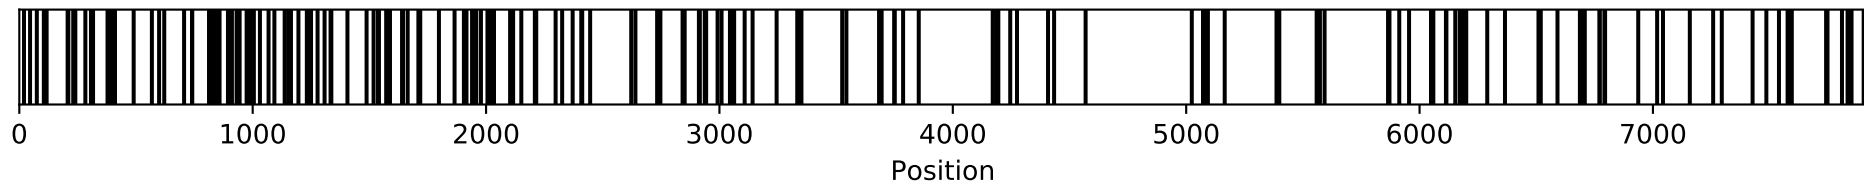

CR1 vs MM1  
Number of differences: 111

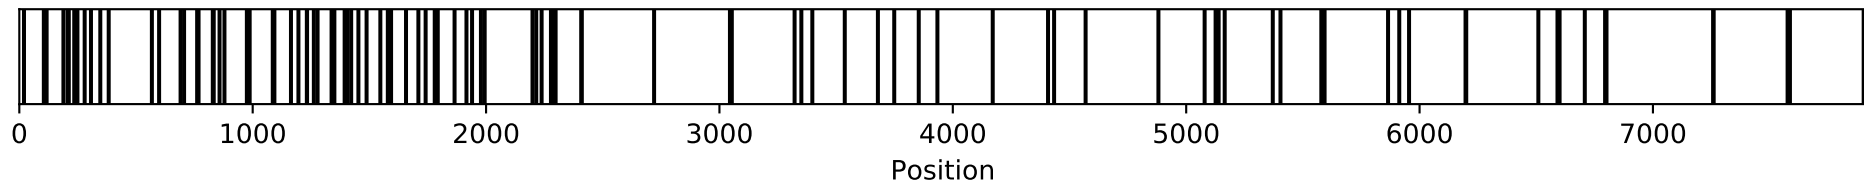

CR1 vs MM2  
Number of differences: 121

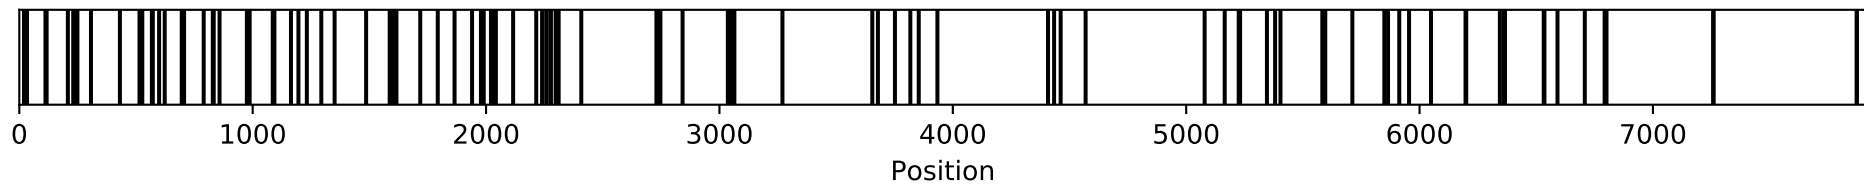

CR2 vs MM1  
Number of differences: 210

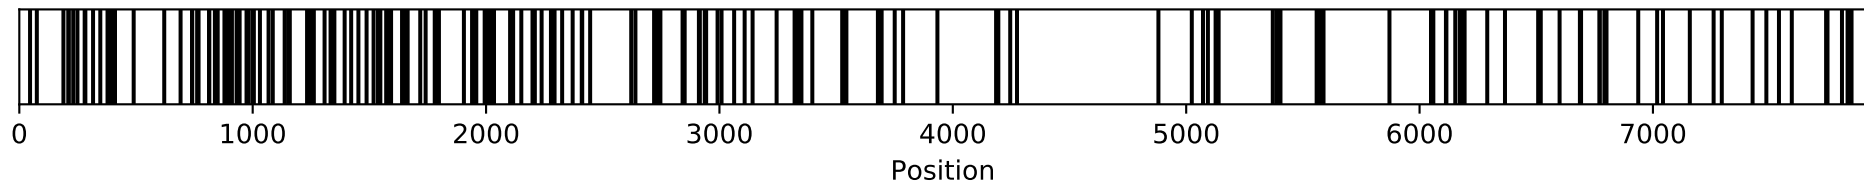

CR2 vs MM2  
Number of differences: 229

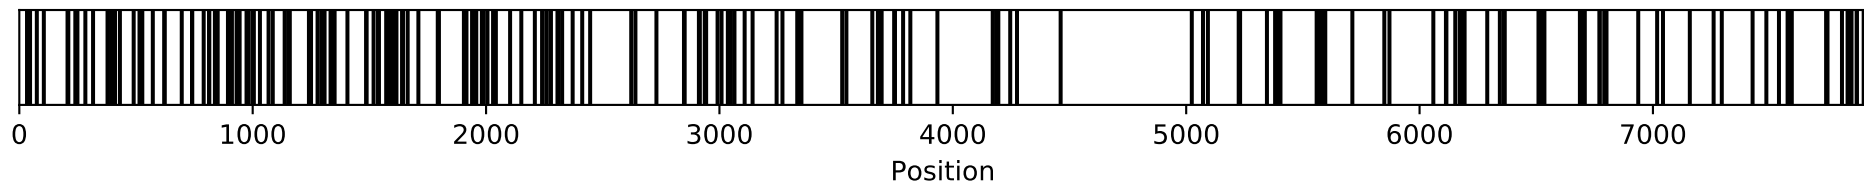

MM1 vs MM2  
Number of differences: 123

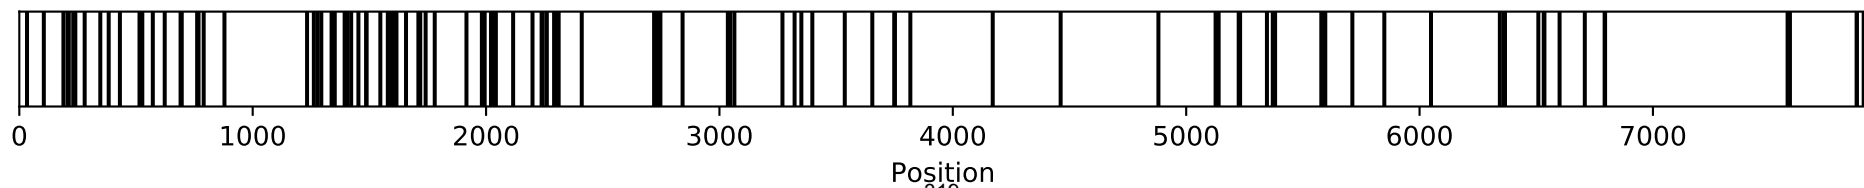



CR1 vs CR2  
Number of differences: 318

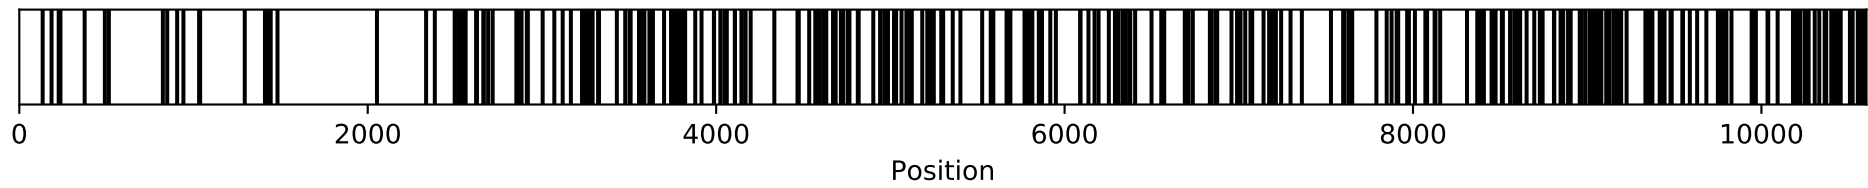

CR1 vs MM1  
Number of differences: 124

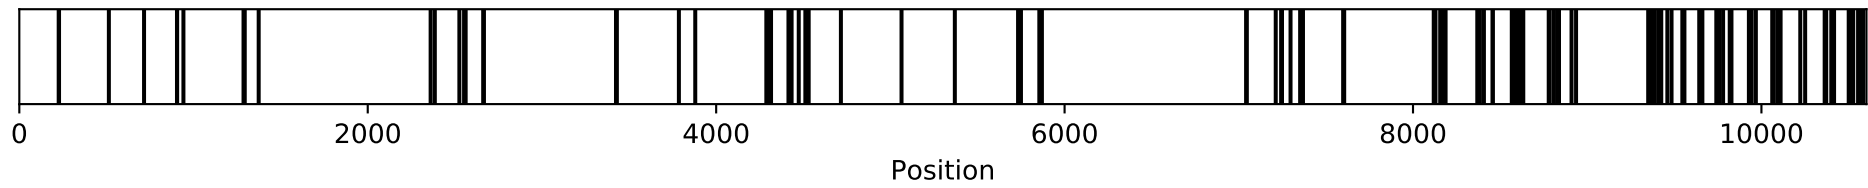

CR1 vs MM2  
Number of differences: 177

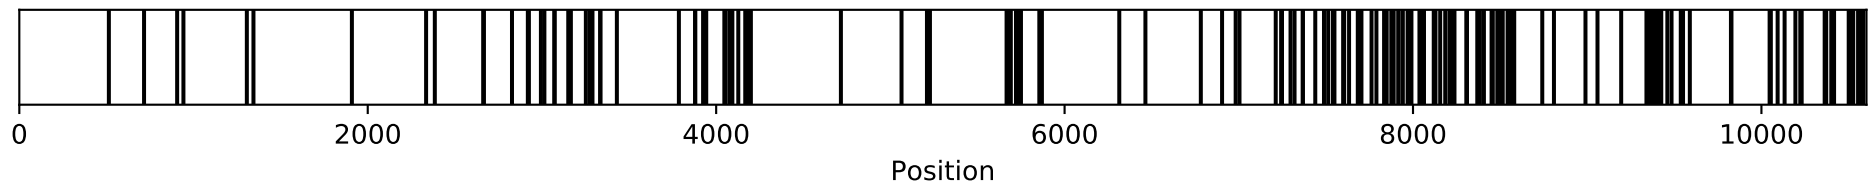

CR2 vs MM1  
Number of differences: 334

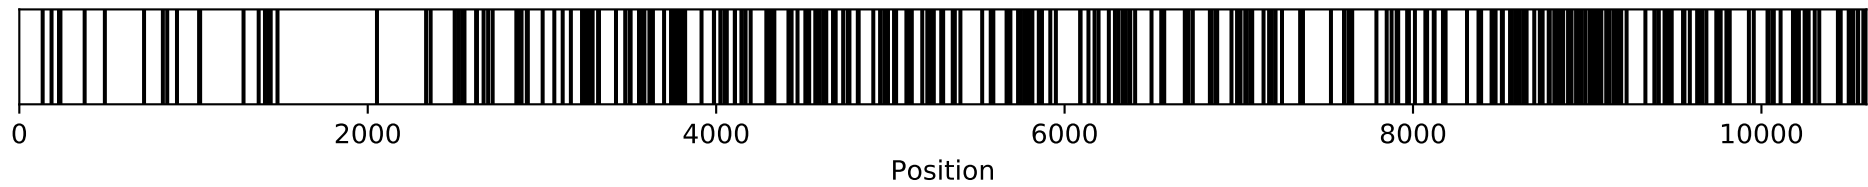

CR2 vs MM2  
Number of differences: 343

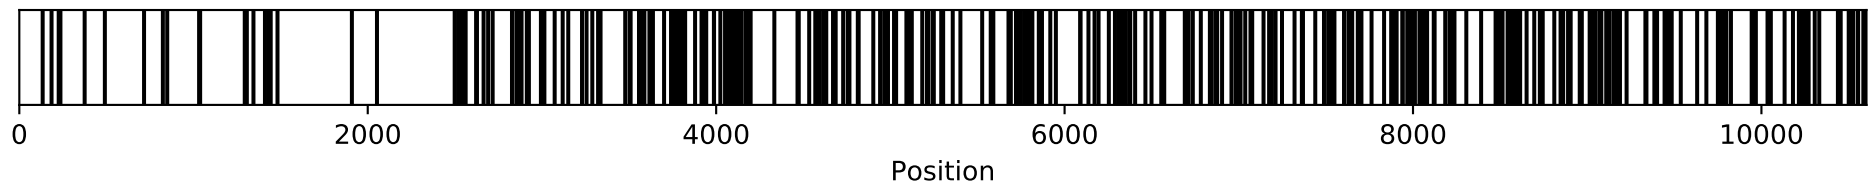

MM1 vs MM2  
Number of differences: 175

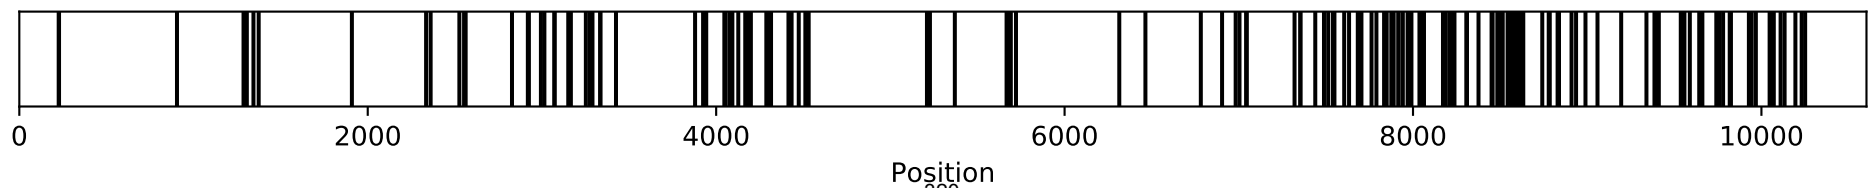

CR1 vs CR2  
Number of differences: 131

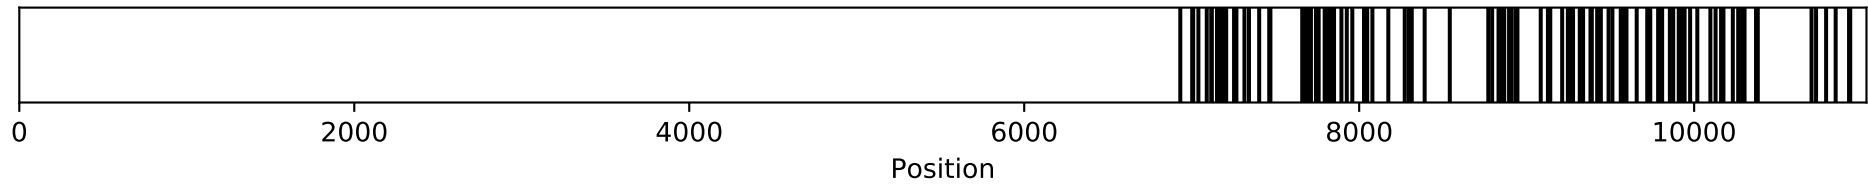

CR1 vs MM1  
Number of differences: 256

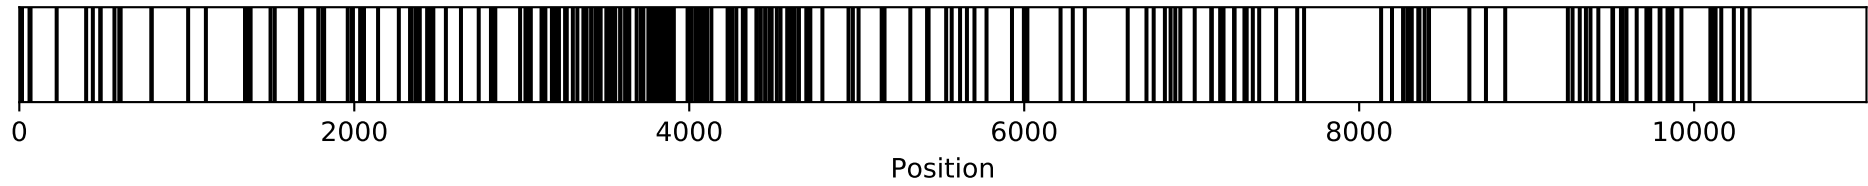

CR1 vs MM2  
Number of differences: 252

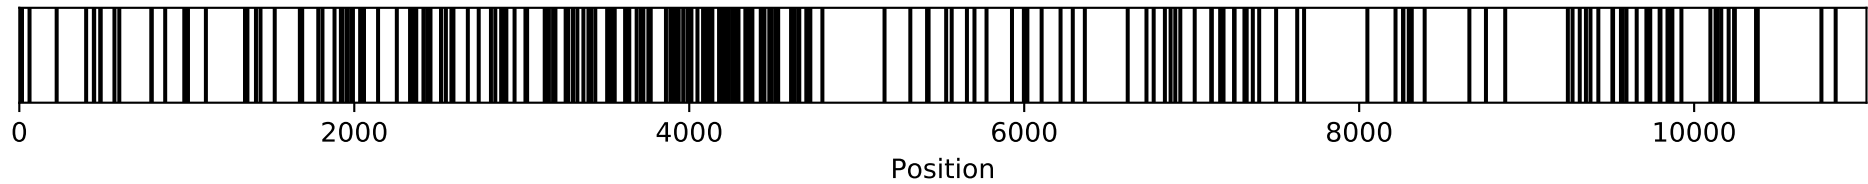

CR2 vs MM1  
Number of differences: 318

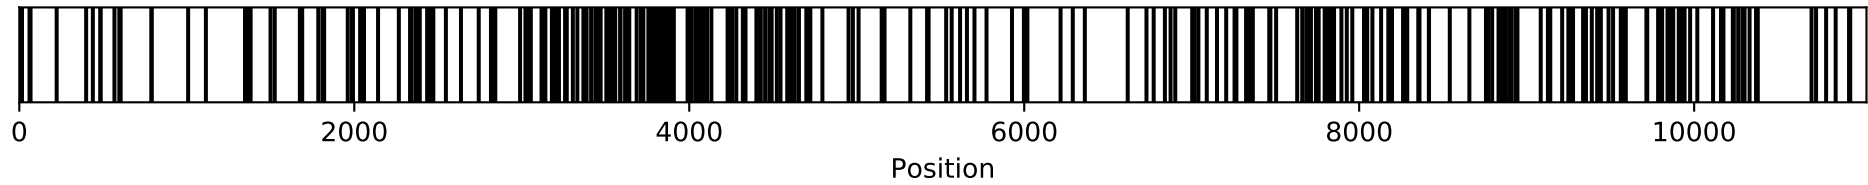

CR2 vs MM2  
Number of differences: 308

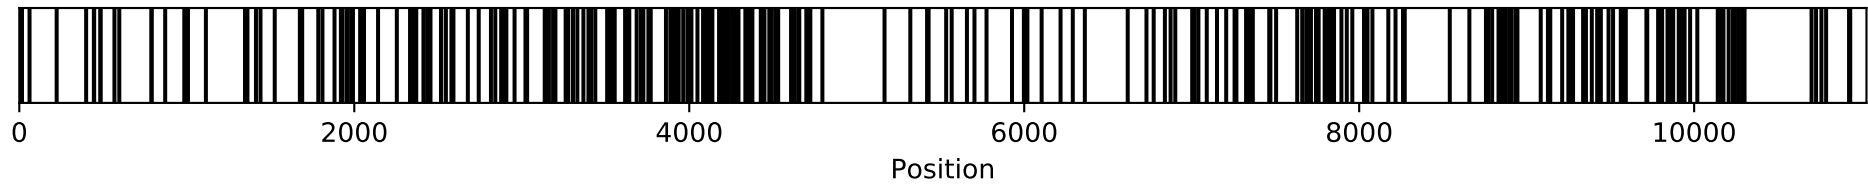

MM1 vs MM2  
Number of differences: 174

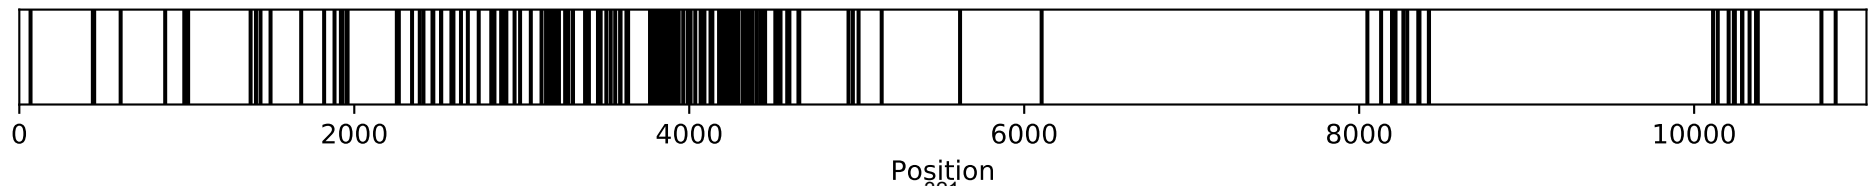

CR1 vs CR2  
Number of differences: 251

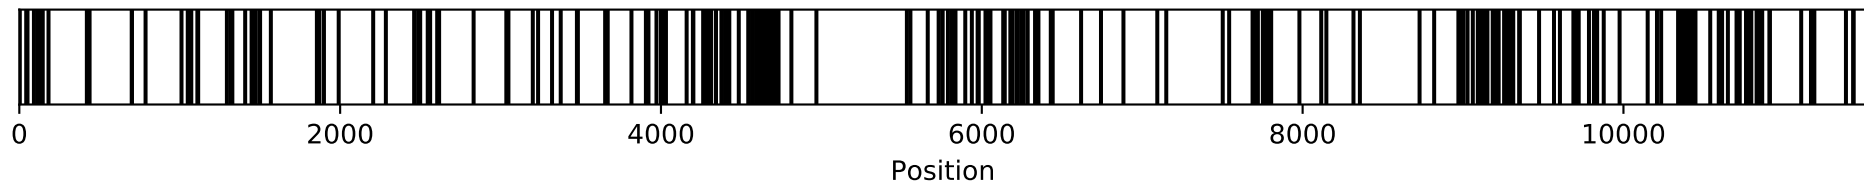

CR1 vs MM1  
Number of differences: 191

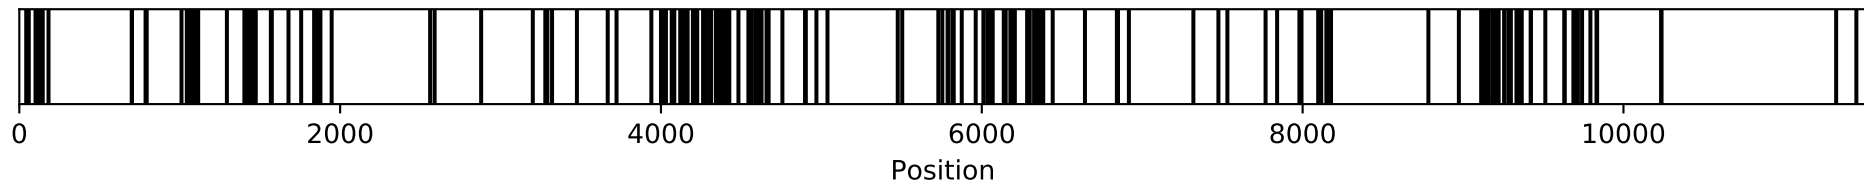

CR1 vs MM2  
Number of differences: 189

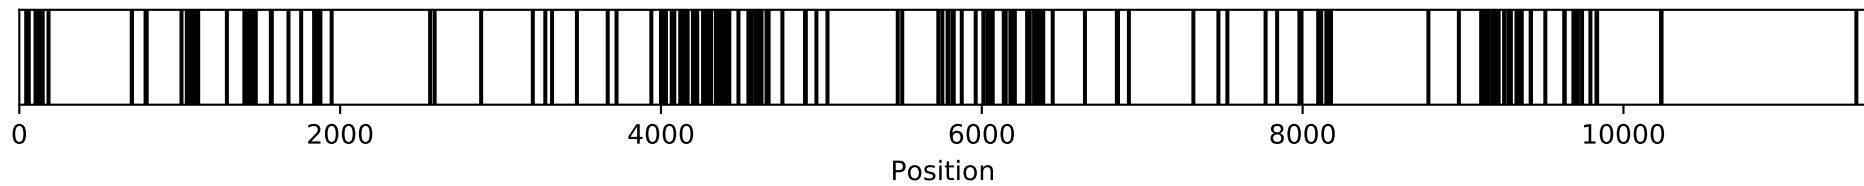

CR2 vs MM1  
Number of differences: 286

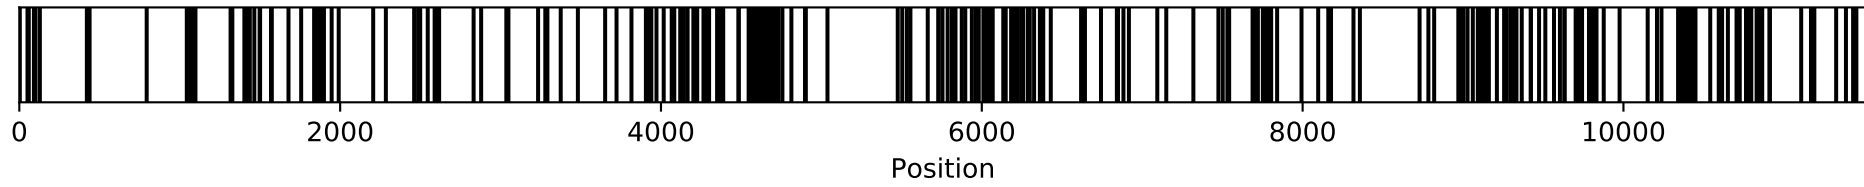

CR2 vs MM2  
Number of differences: 284

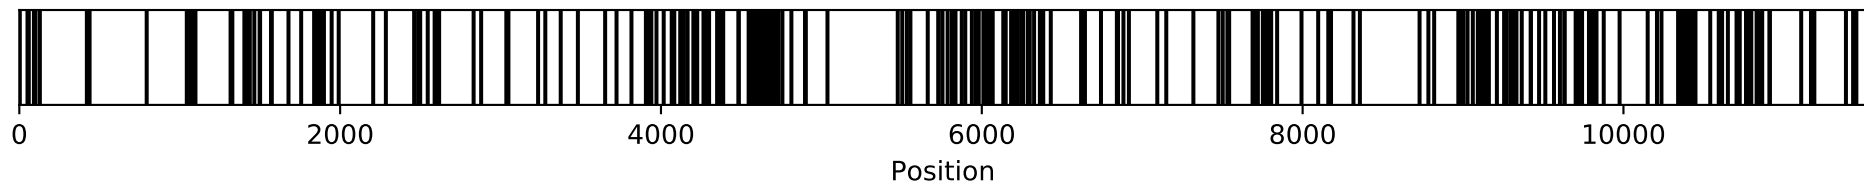

MM1 vs MM2  
Number of differences: 2

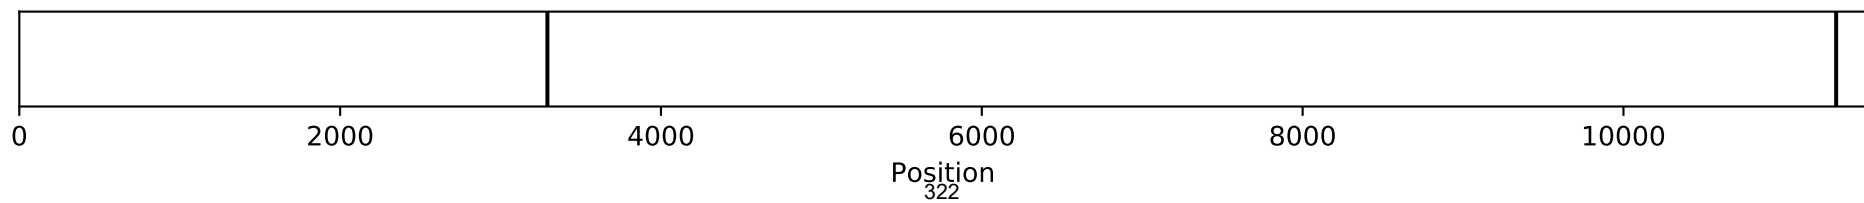

CR1 vs CR2  
Number of differences: 139

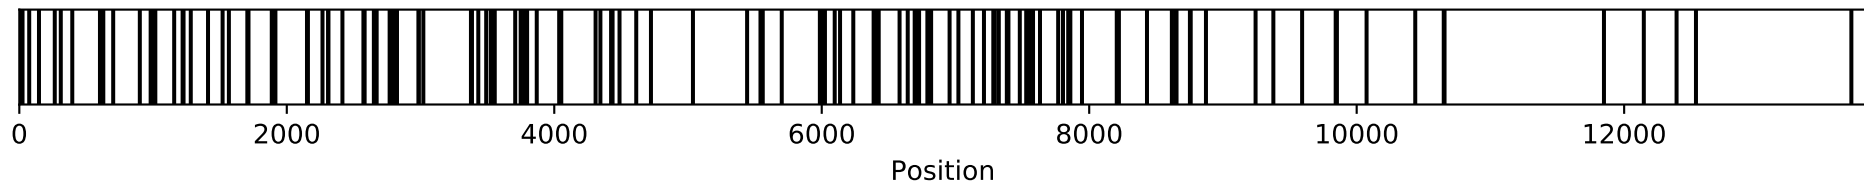

CR1 vs MM1  
Number of differences: 31

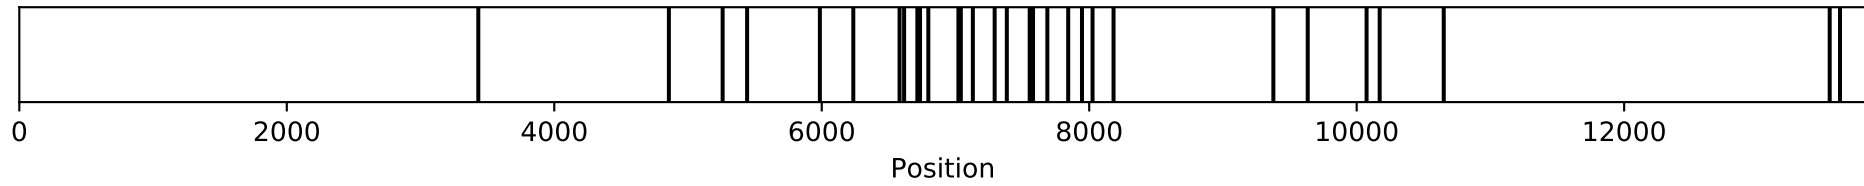

CR1 vs MM2  
Number of differences: 69

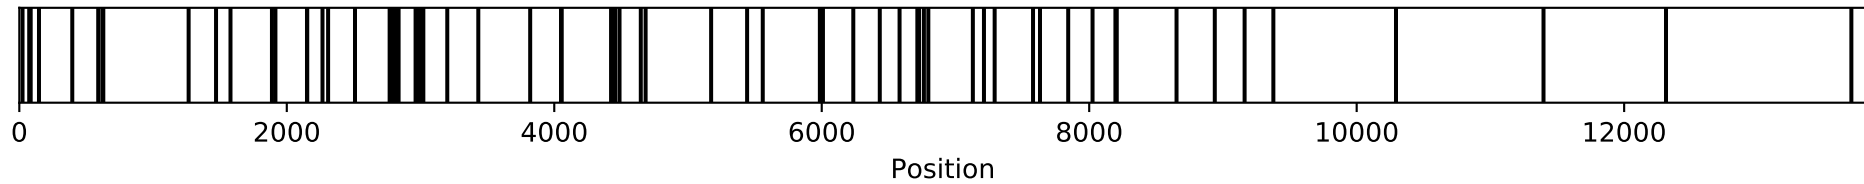

CR2 vs MM1  
Number of differences: 132

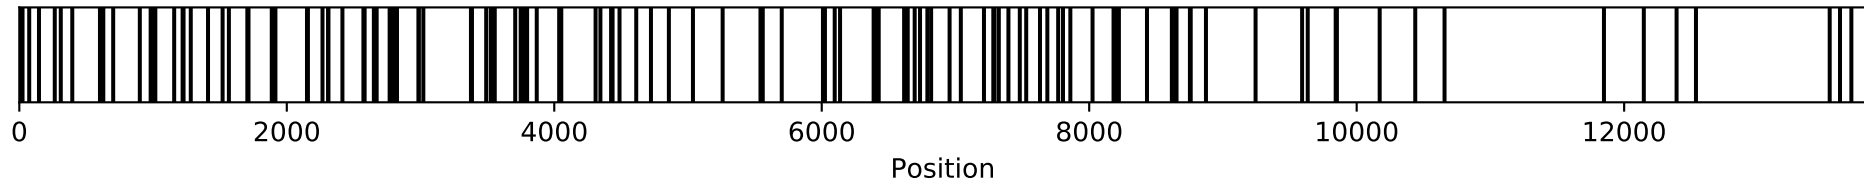

CR2 vs MM2  
Number of differences: 126

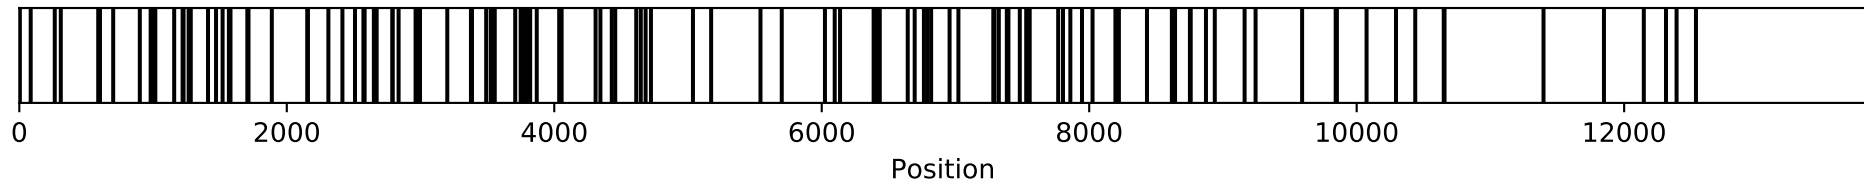

MM1 vs MM2  
Number of differences: 72

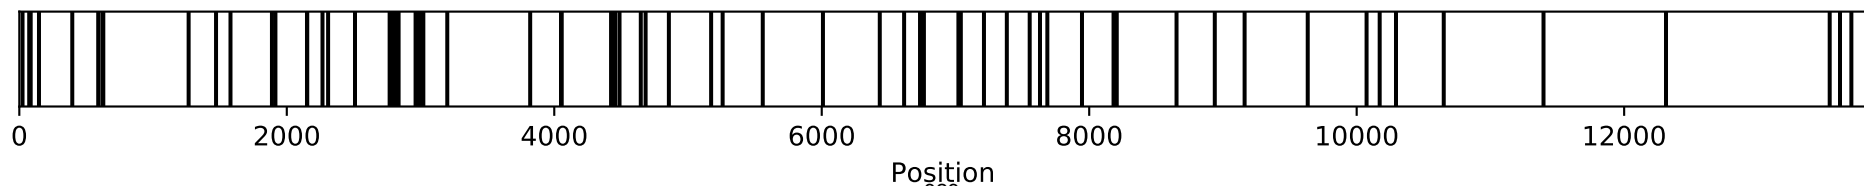

CR1 vs CR2  
Number of differences: 408

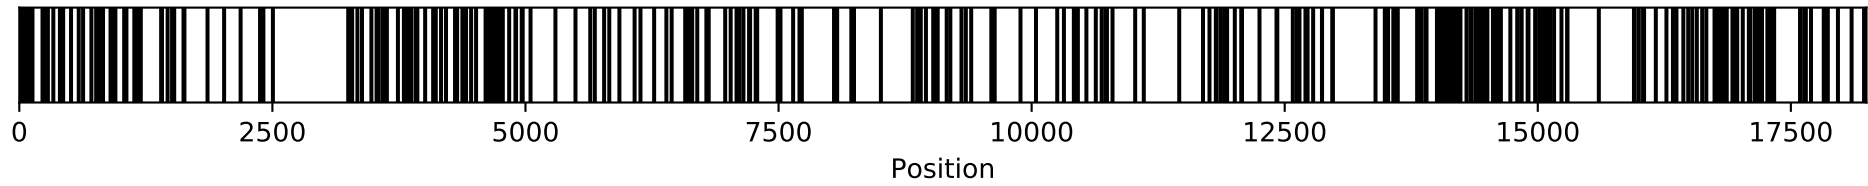

CR1 vs MM1  
Number of differences: 188

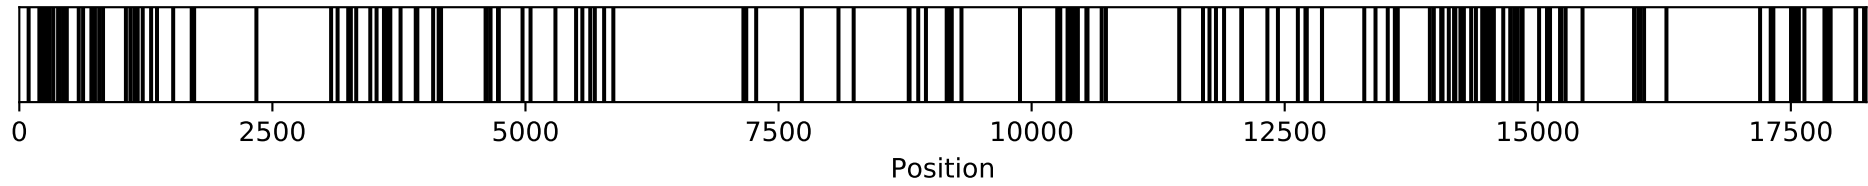

CR1 vs MM2  
Number of differences: 169

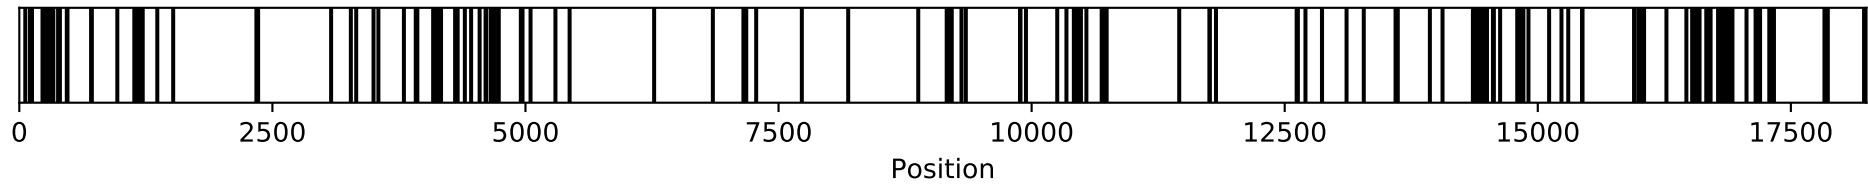

CR2 vs MM1  
Number of differences: 410

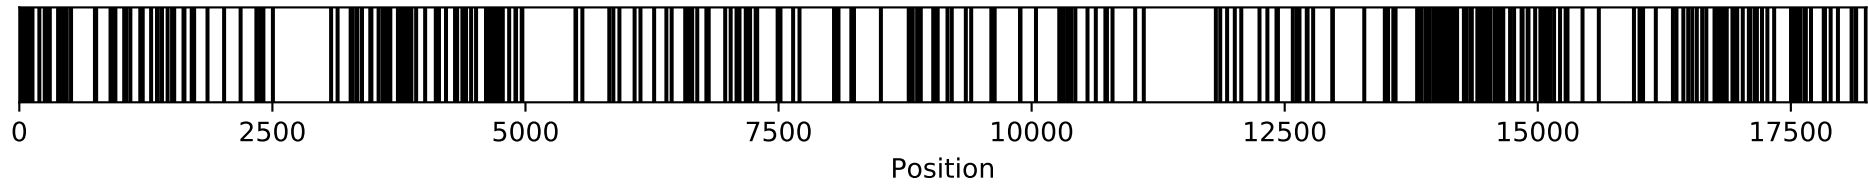

CR2 vs MM2  
Number of differences: 398

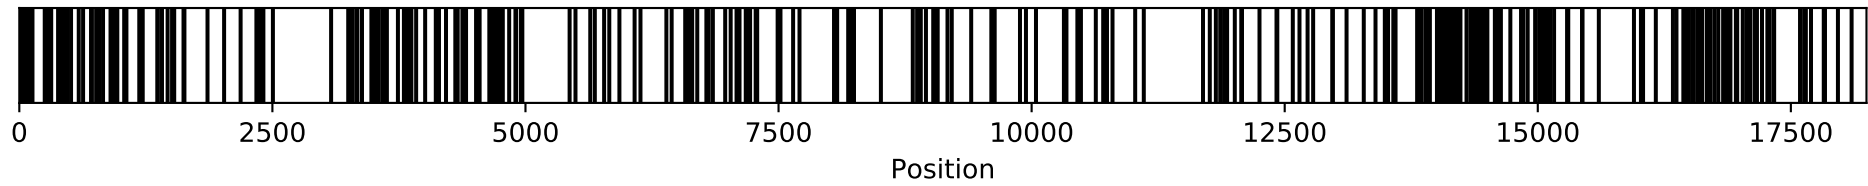

MM1 vs MM2  
Number of differences: 187

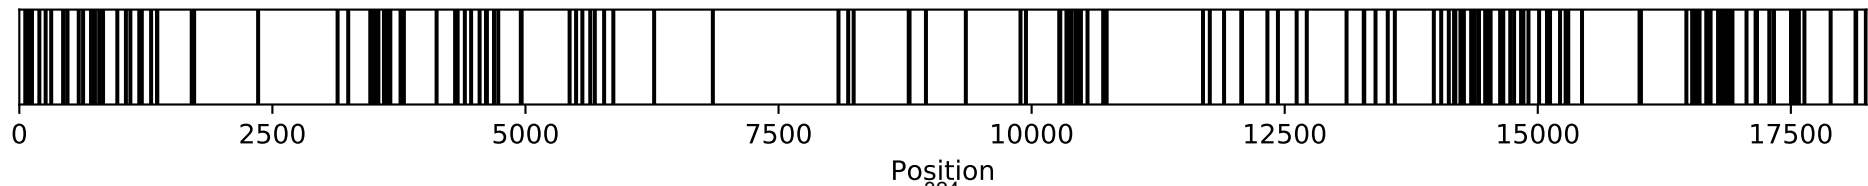

CR1 vs CR2  
Number of differences: 294

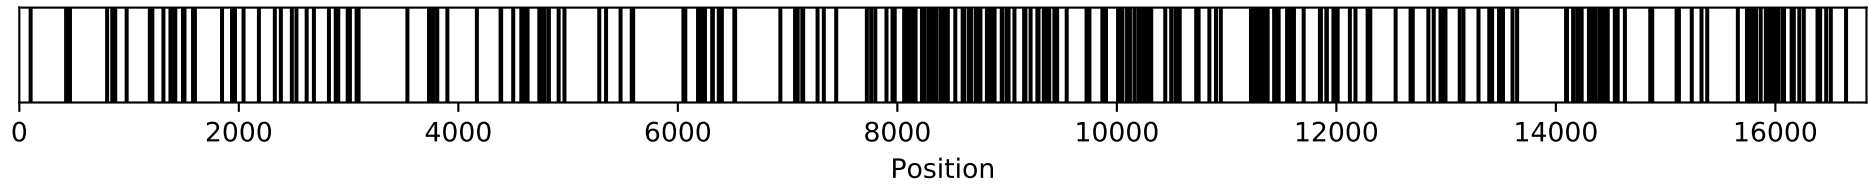

CR1 vs MM1  
Number of differences: 312

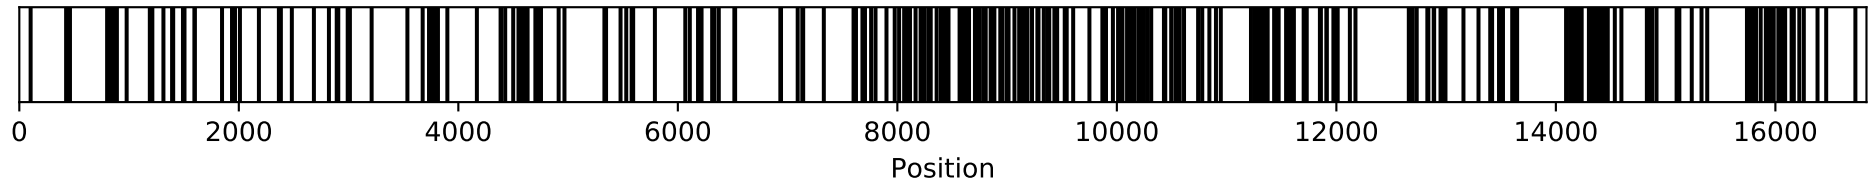

CR1 vs MM2  
Number of differences: 339

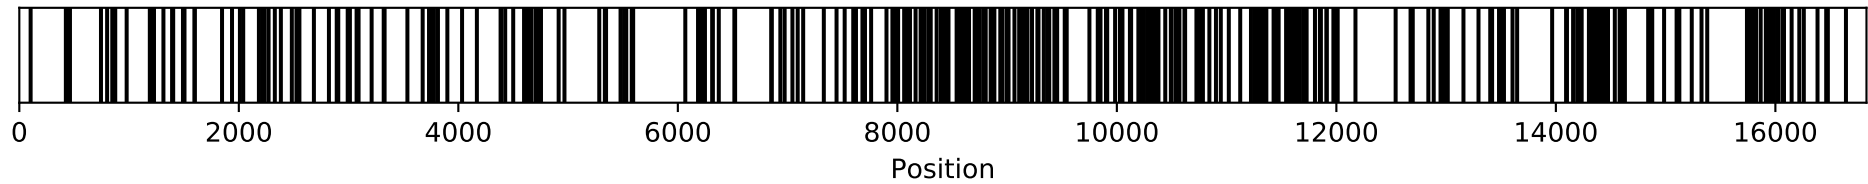

CR2 vs MM1  
Number of differences: 154

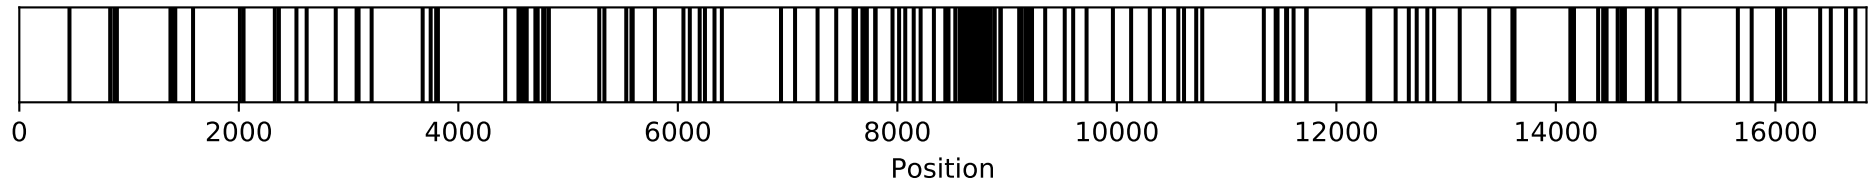

CR2 vs MM2  
Number of differences: 187

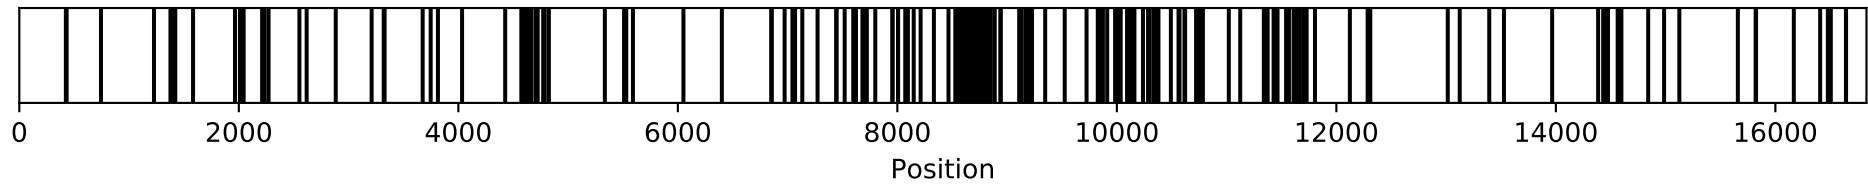

MM1 vs MM2  
Number of differences: 141

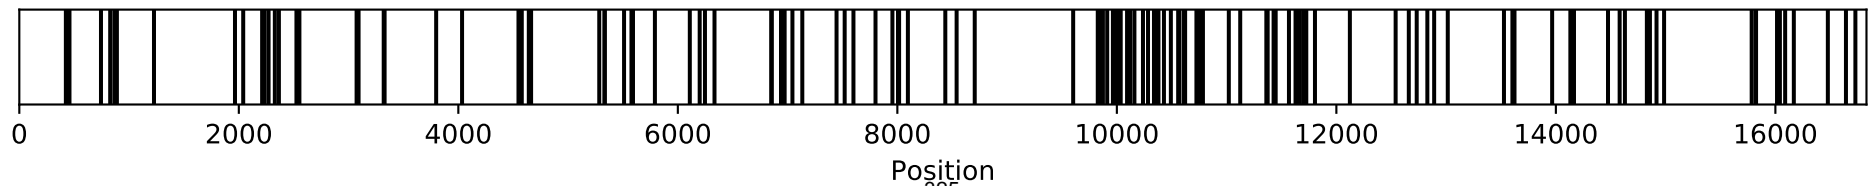

CR1 vs CR2  
Number of differences: 83

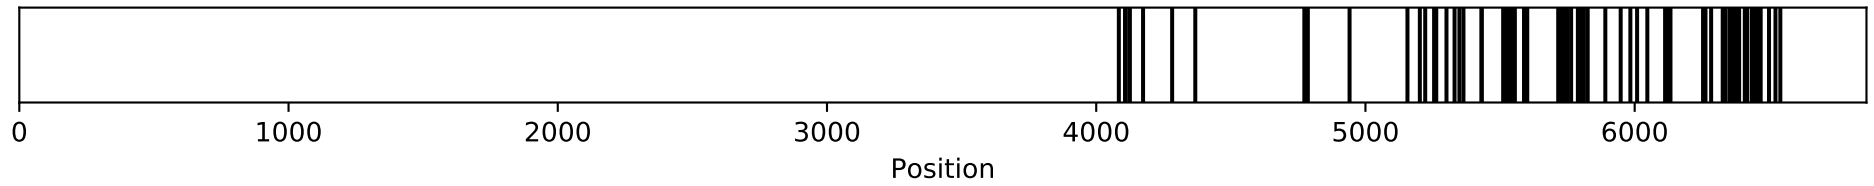

CR1 vs MM1  
Number of differences: 147

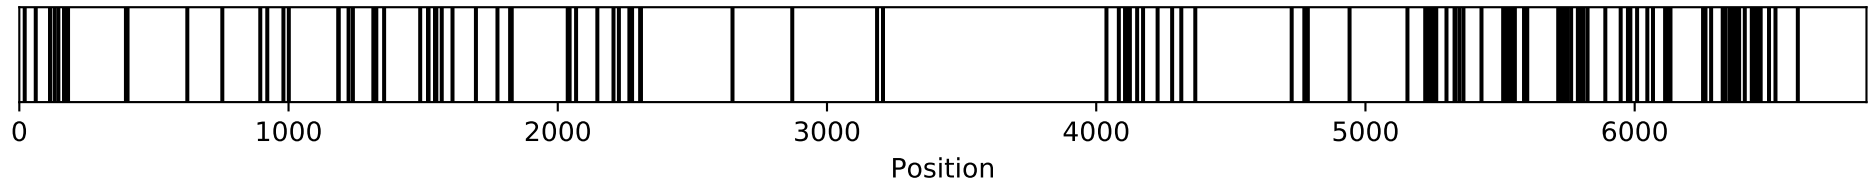

CR1 vs MM2  
Number of differences: 147

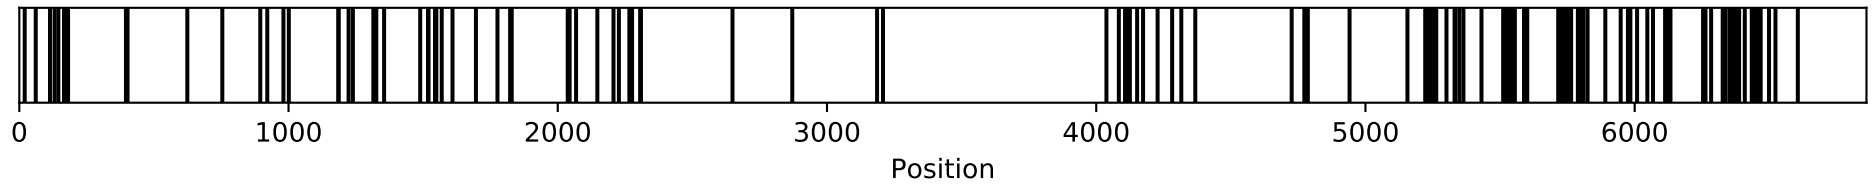

CR2 vs MM1  
Number of differences: 81

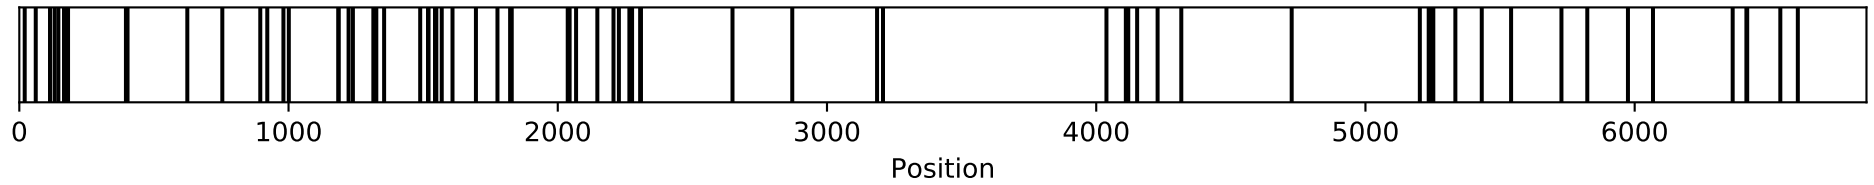

CR2 vs MM2  
Number of differences: 81

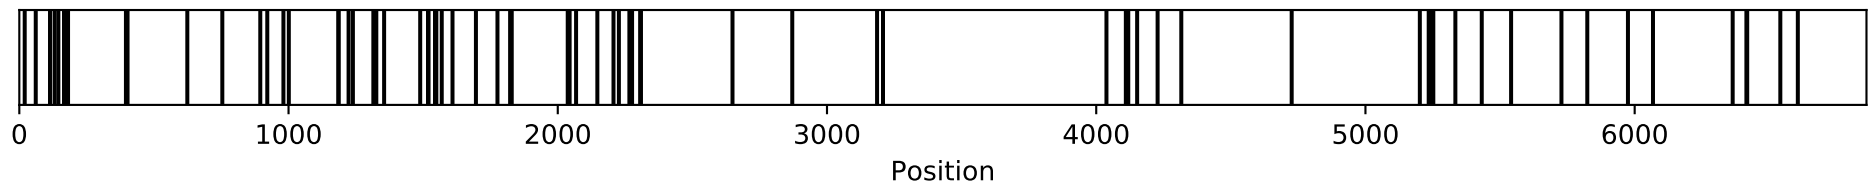

MM1 vs MM2  
Number of differences: 0

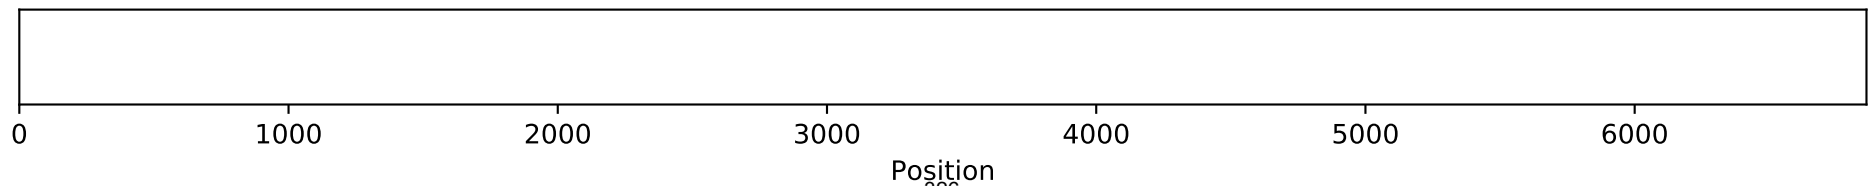

CR1 vs CR2  
Number of differences: 80

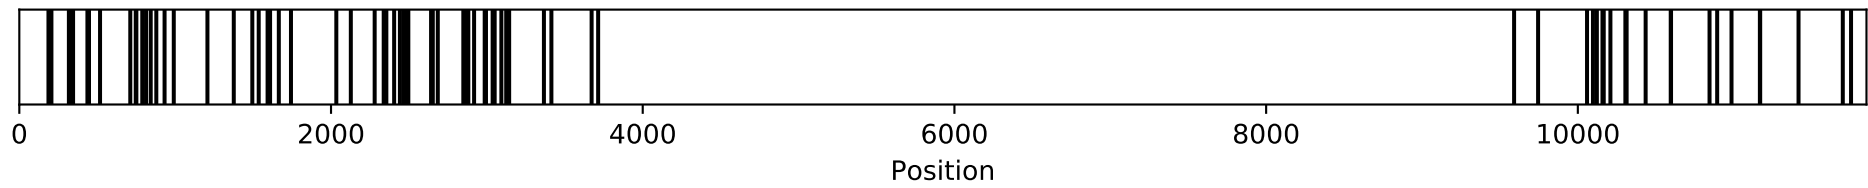

CR1 vs MM1  
Number of differences: 105

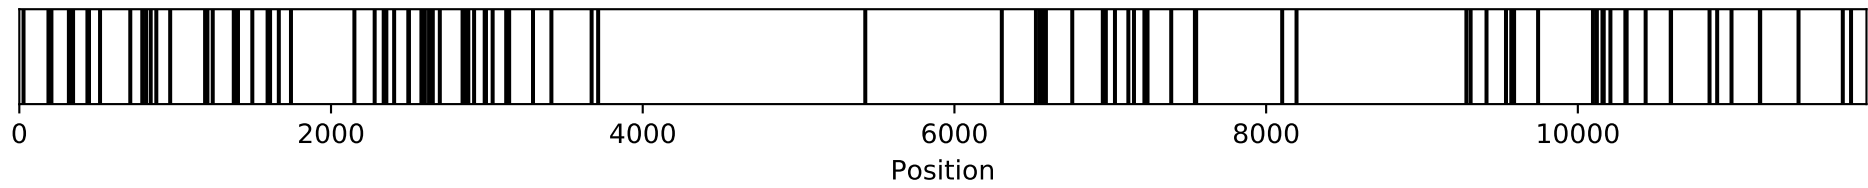

CR1 vs MM2  
Number of differences: 143

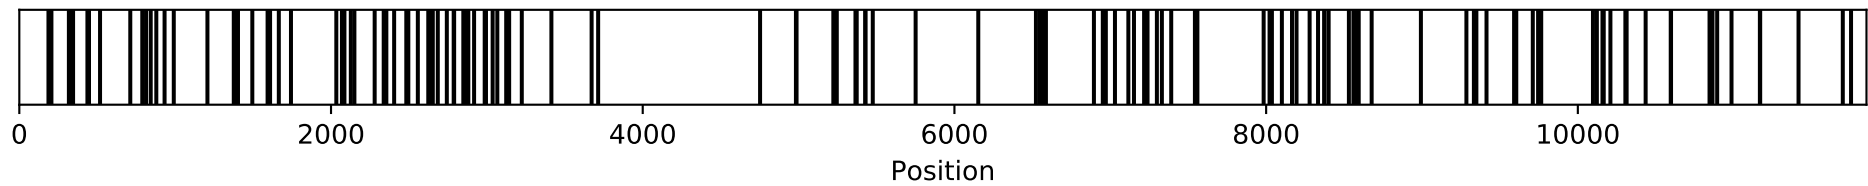

CR2 vs MM1  
Number of differences: 57

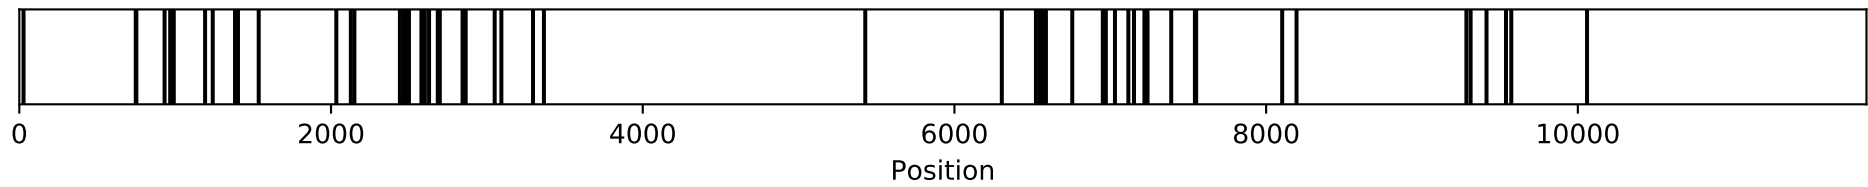

CR2 vs MM2  
Number of differences: 85

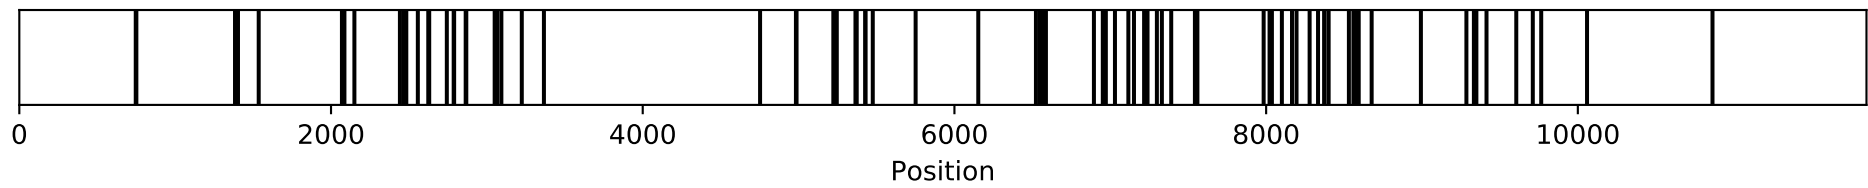

MM1 vs MM2  
Number of differences: 76

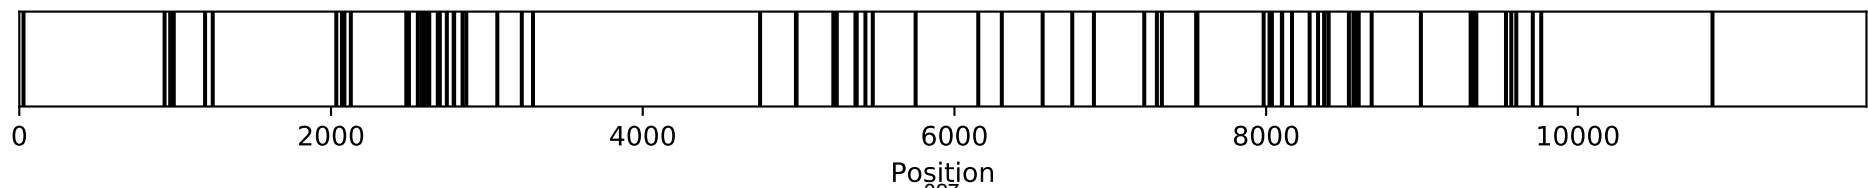



CR1 vs CR2  
Number of differences: 92

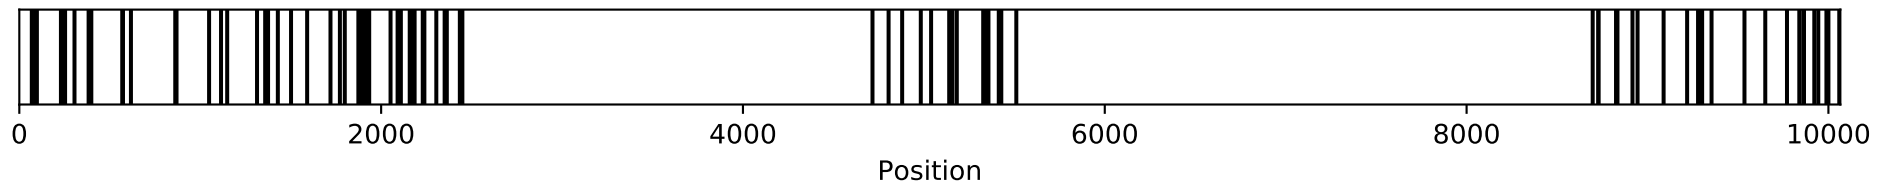

CR1 vs MM1  
Number of differences: 193

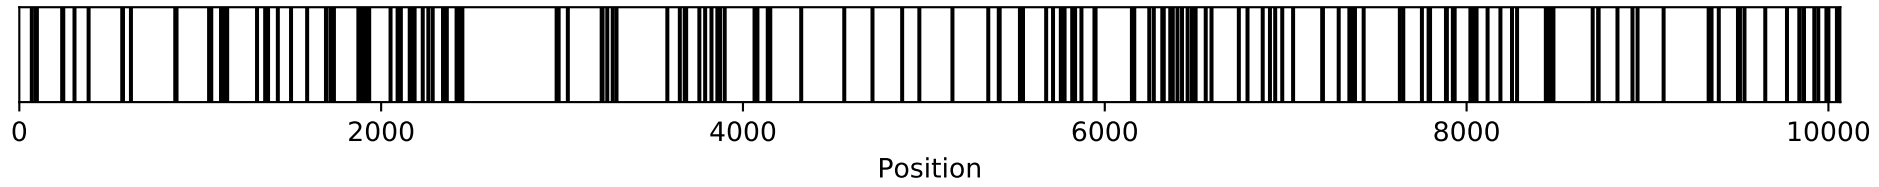

CR1 vs MM2  
Number of differences: 193

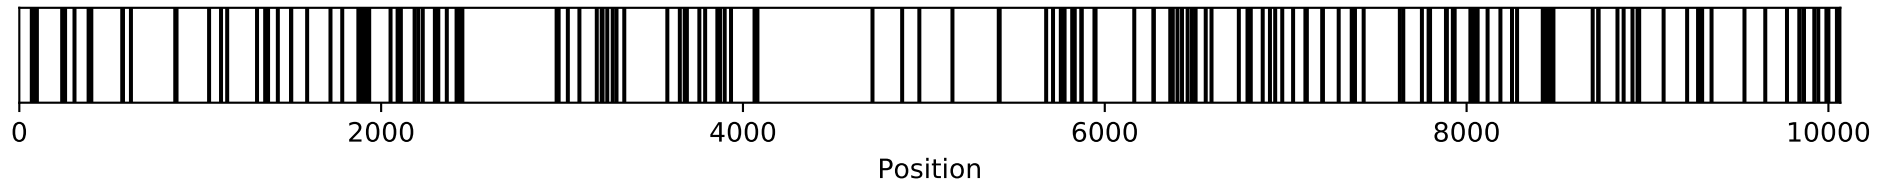

CR2 vs MM1  
Number of differences: 153

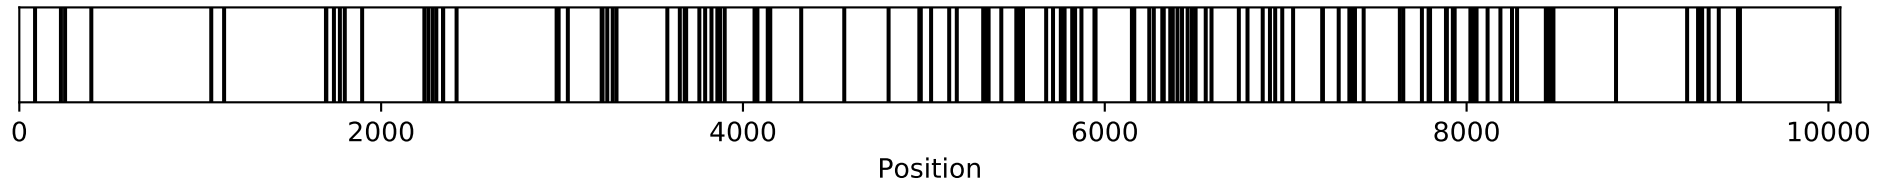

CR2 vs MM2  
Number of differences: 141

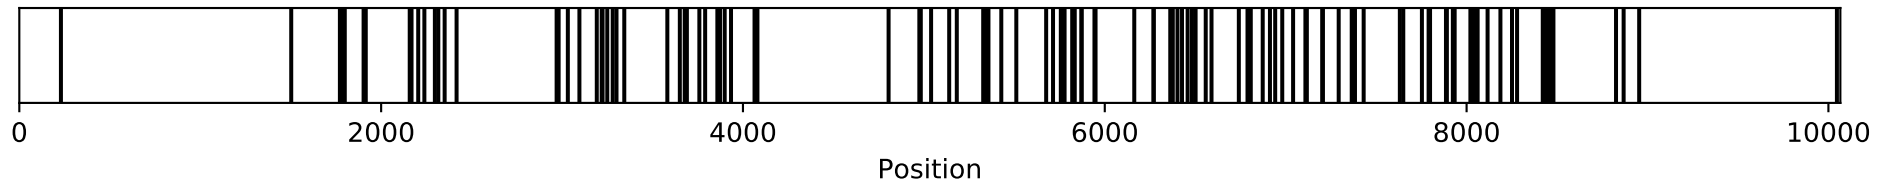

MM1 vs MM2  
Number of differences: 65

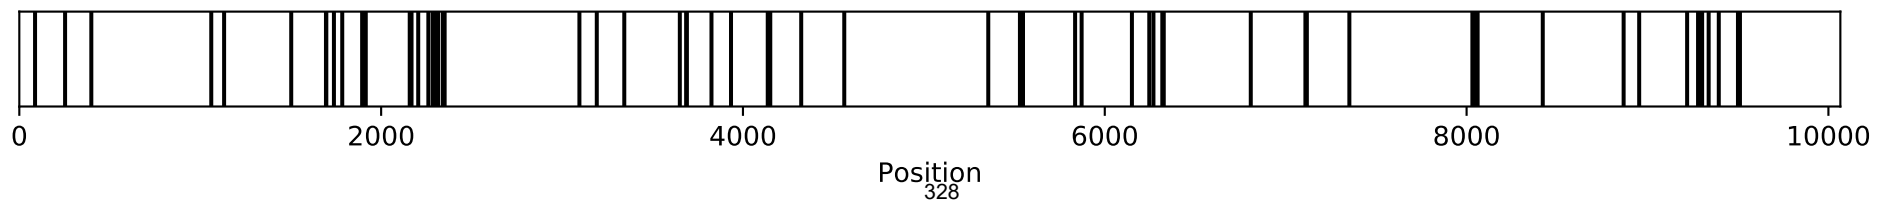

CR1 vs CR2  
Number of differences: 393

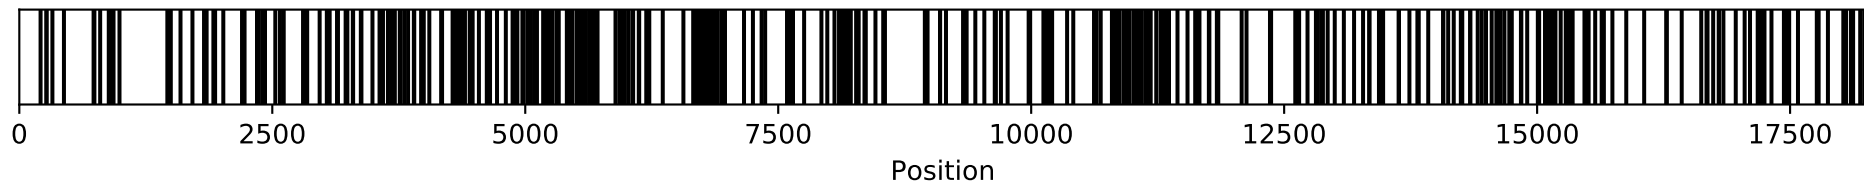

CR1 vs MM1  
Number of differences: 394

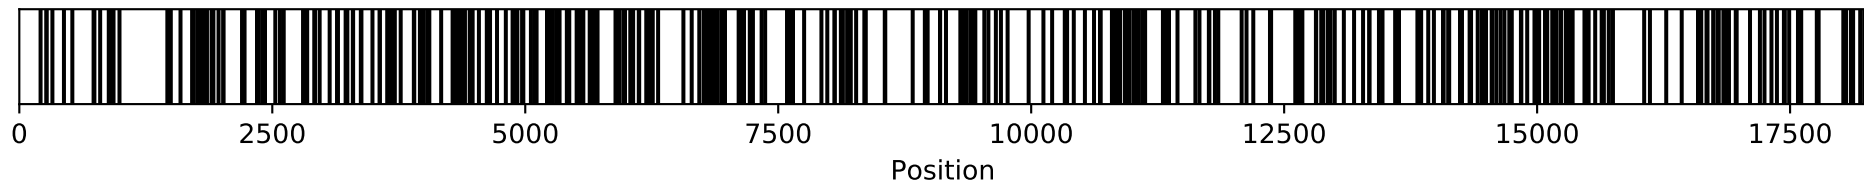

CR1 vs MM2  
Number of differences: 389

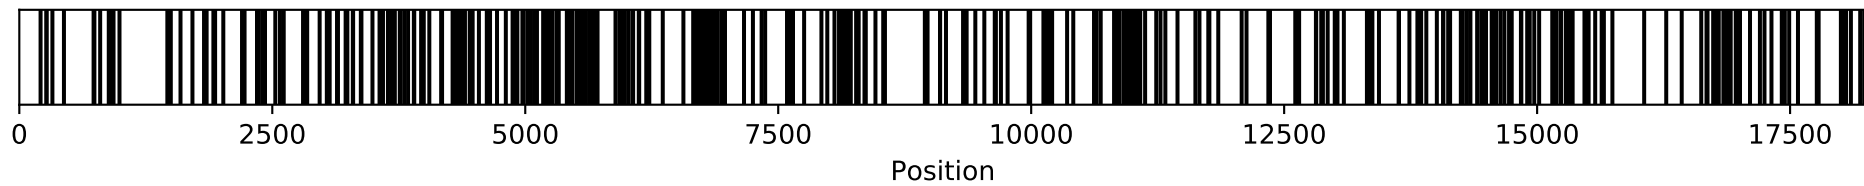

CR2 vs MM1  
Number of differences: 182

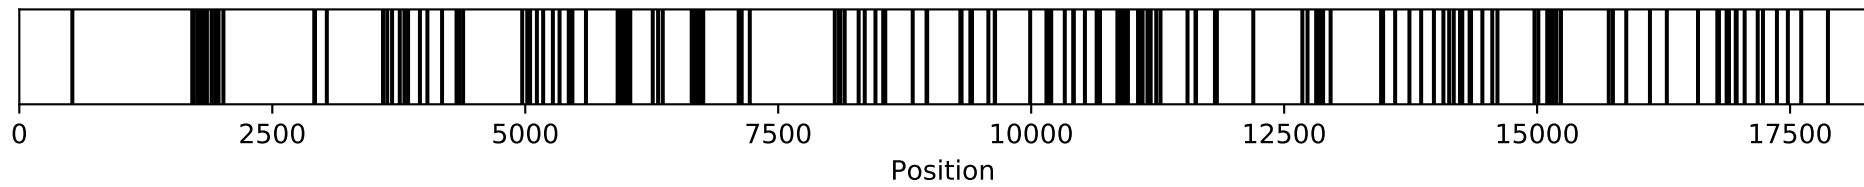

CR2 vs MM2  
Number of differences: 83

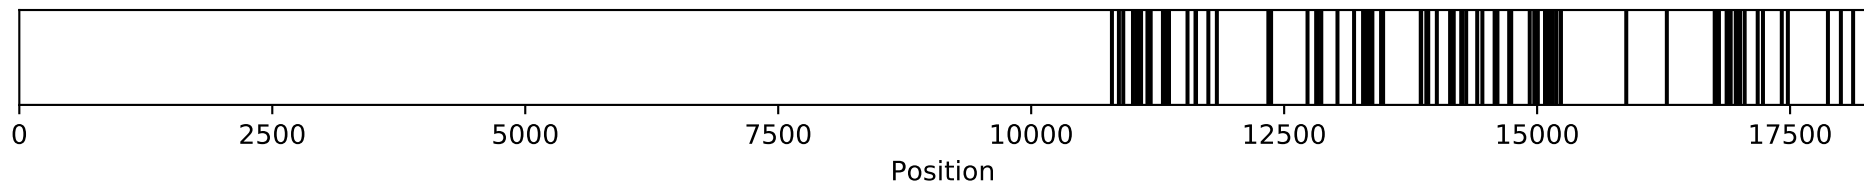

MM1 vs MM2  
Number of differences: 180

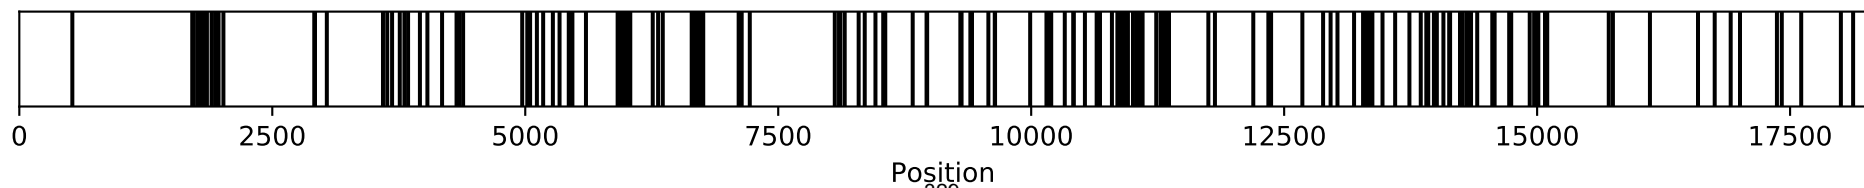

CR1 vs CR2  
Number of differences: 137

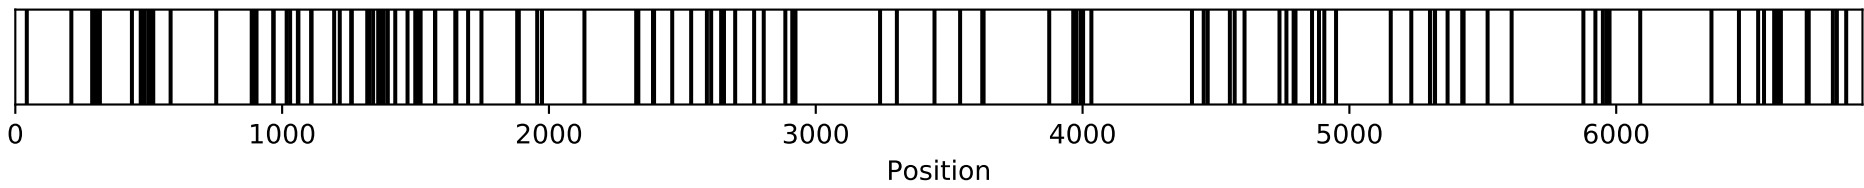

CR1 vs MM1  
Number of differences: 97

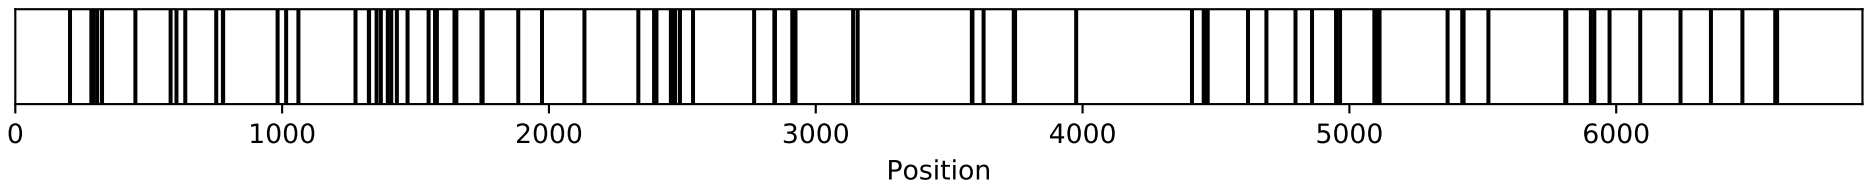

CR1 vs MM2  
Number of differences: 98

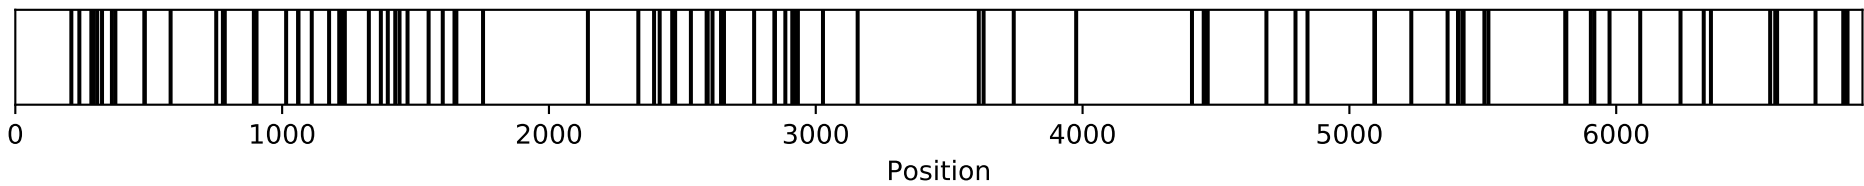

CR2 vs MM1  
Number of differences: 162

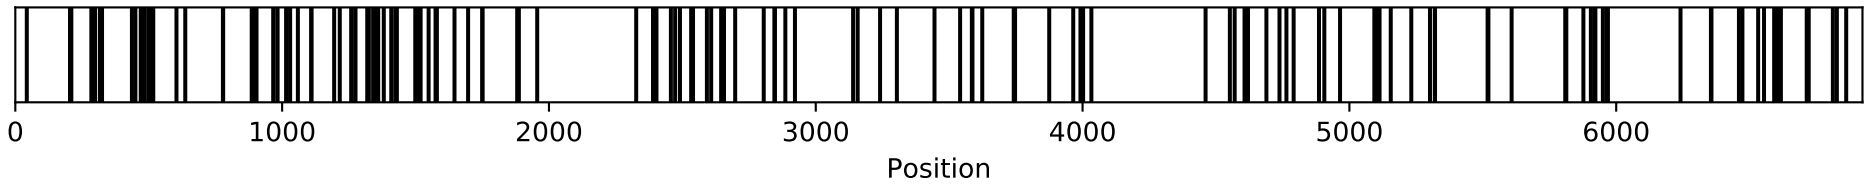

CR2 vs MM2  
Number of differences: 161

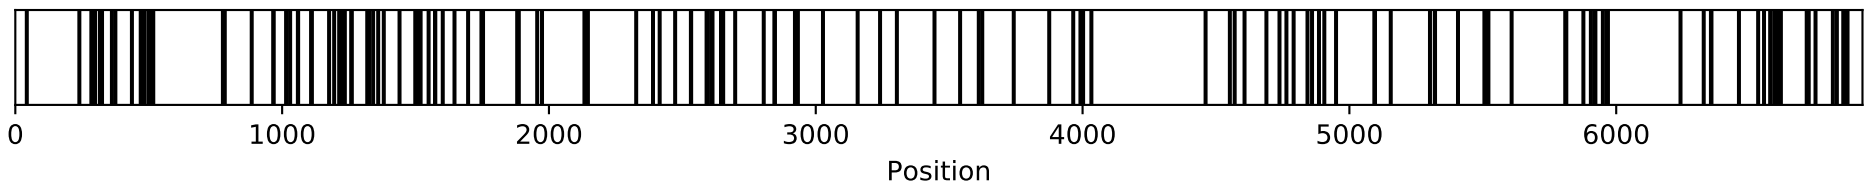

MM1 vs MM2  
Number of differences: 86

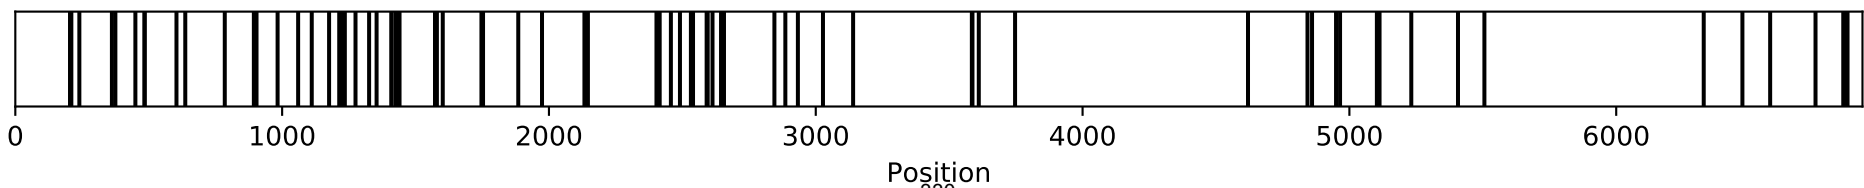

CR1 vs CR2  
Number of differences: 287

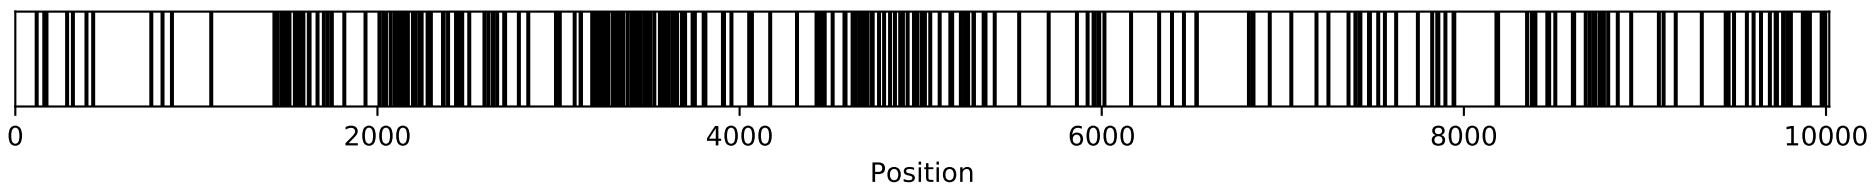

CR1 vs MM1  
Number of differences: 180

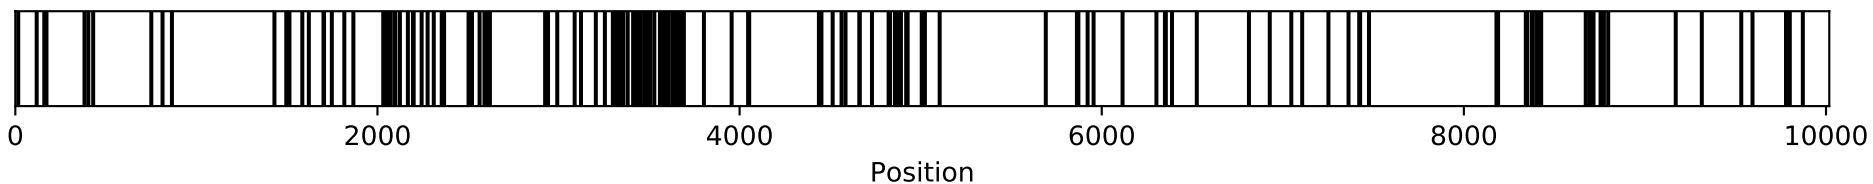

CR1 vs MM2  
Number of differences: 181

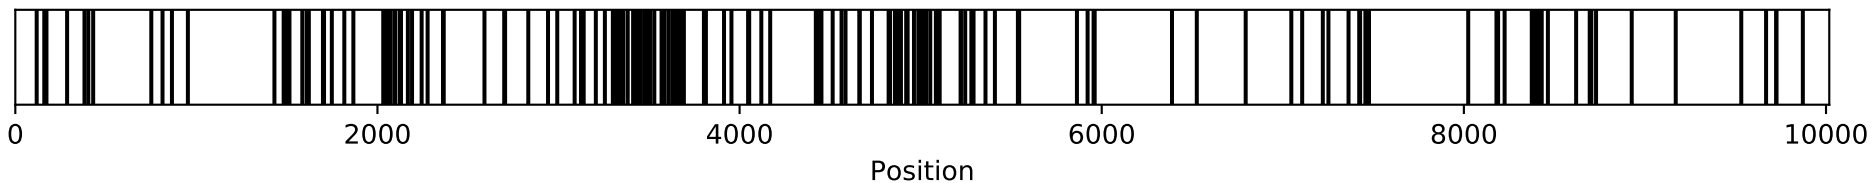

CR2 vs MM1  
Number of differences: 238

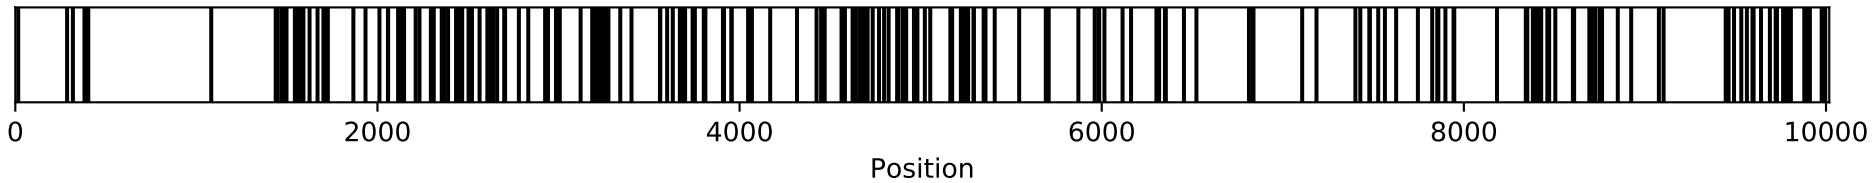

CR2 vs MM2  
Number of differences: 232

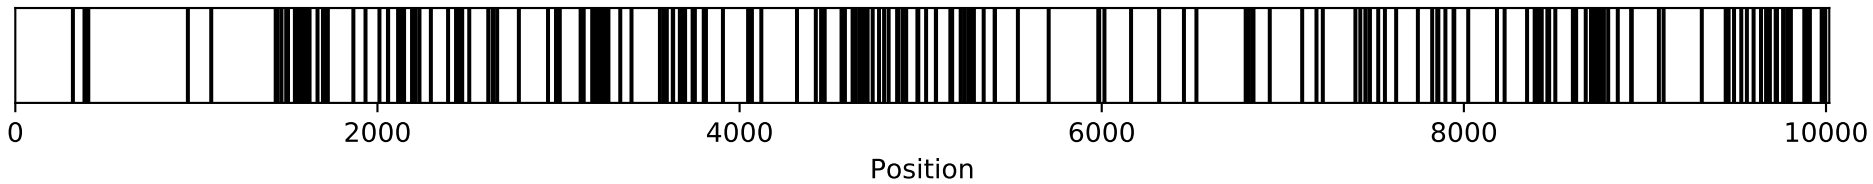

MM1 vs MM2  
Number of differences: 112

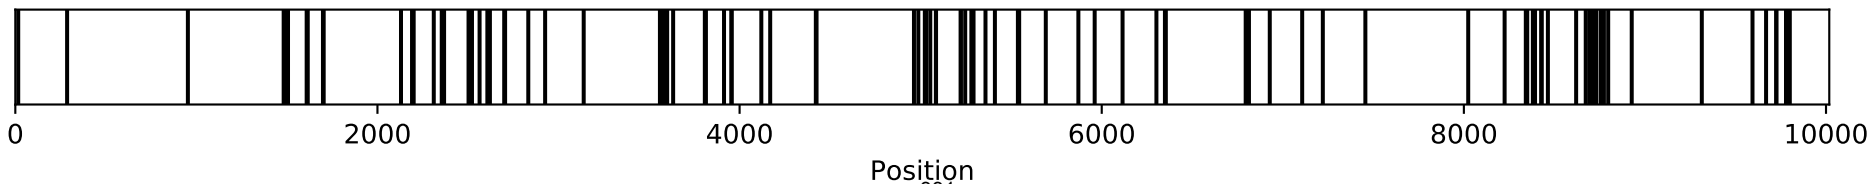

CR1 vs CR2  
Number of differences: 203

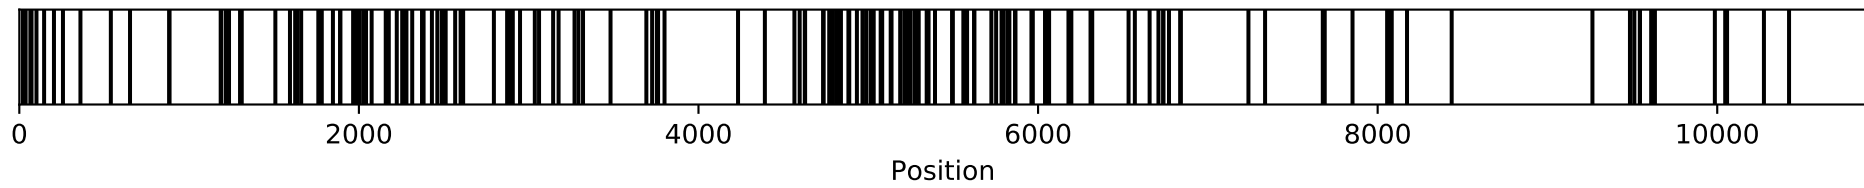

CR1 vs MM1  
Number of differences: 108

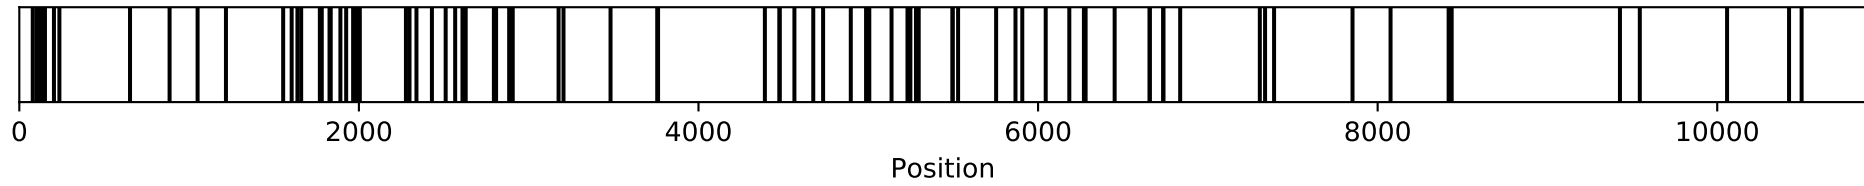

CR1 vs MM2  
Number of differences: 106

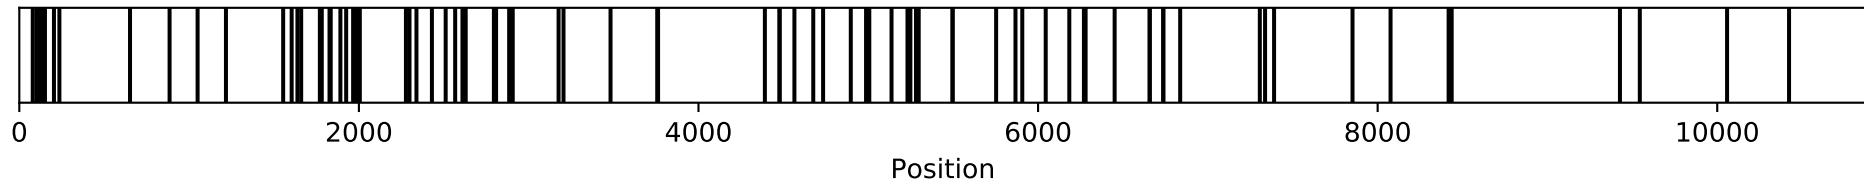

CR2 vs MM1  
Number of differences: 181

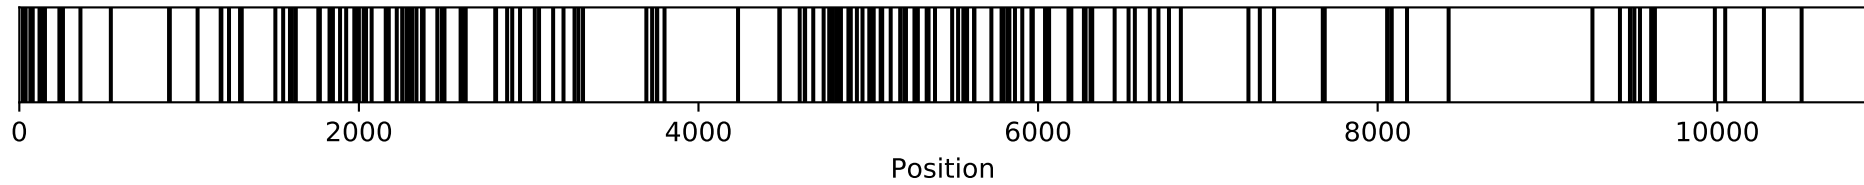

CR2 vs MM2  
Number of differences: 179

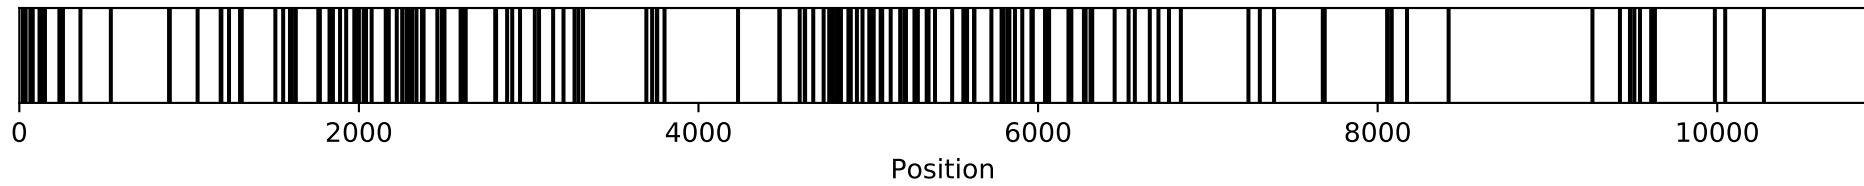

MM1 vs MM2  
Number of differences: 2

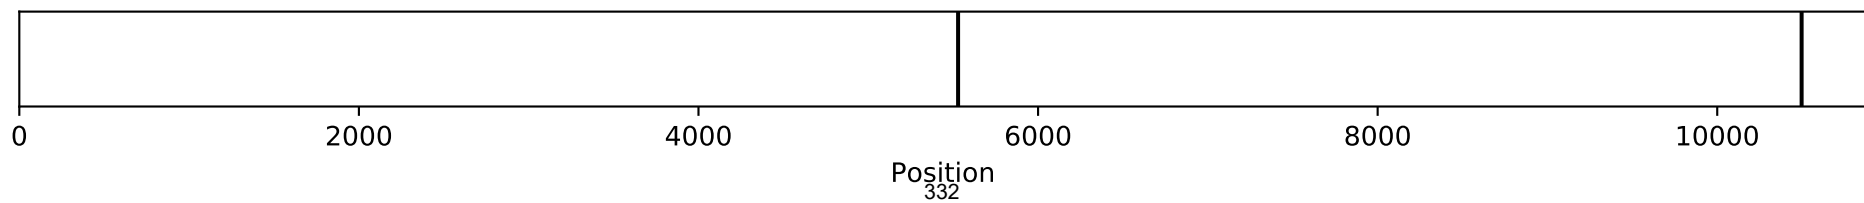

CR1 vs CR2  
Number of differences: 224

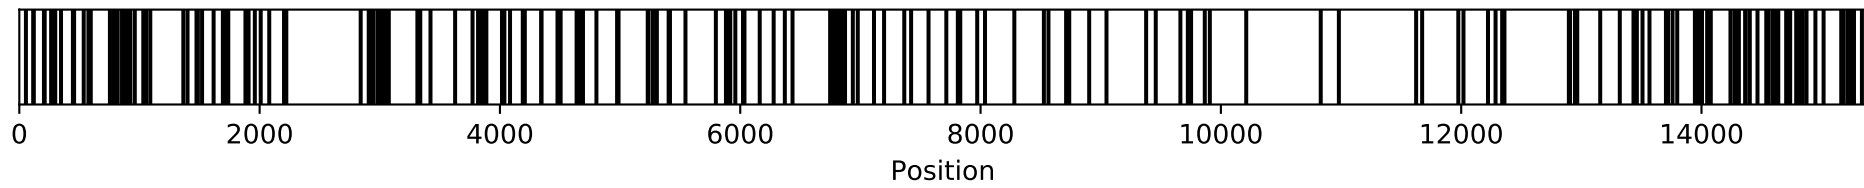

CR1 vs MM1  
Number of differences: 212

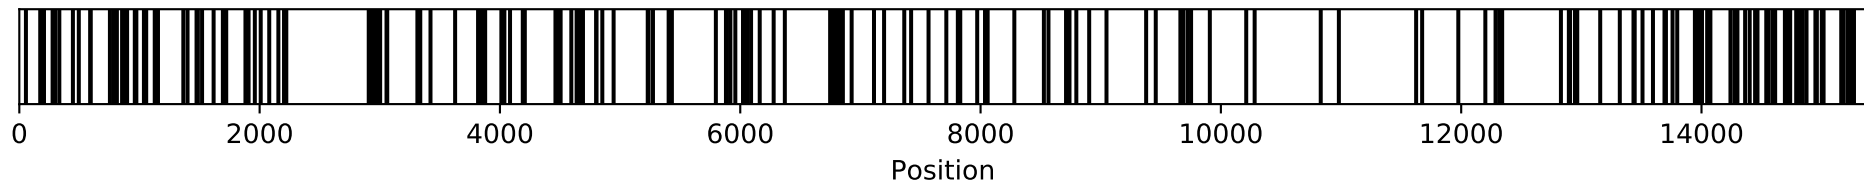

CR1 vs MM2  
Number of differences: 215

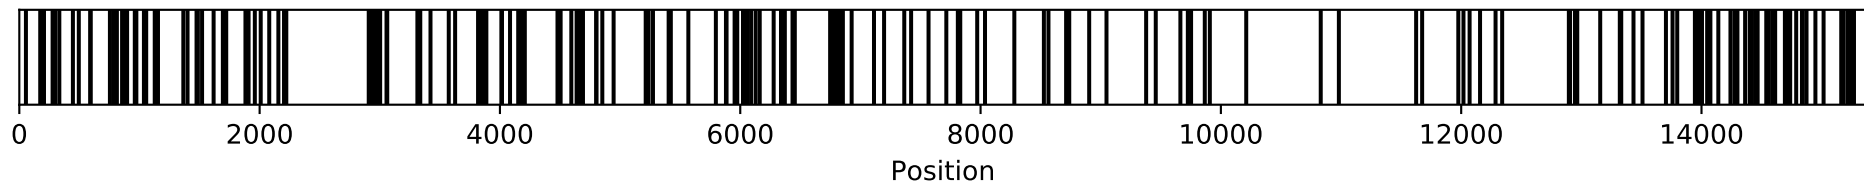

CR2 vs MM1  
Number of differences: 114

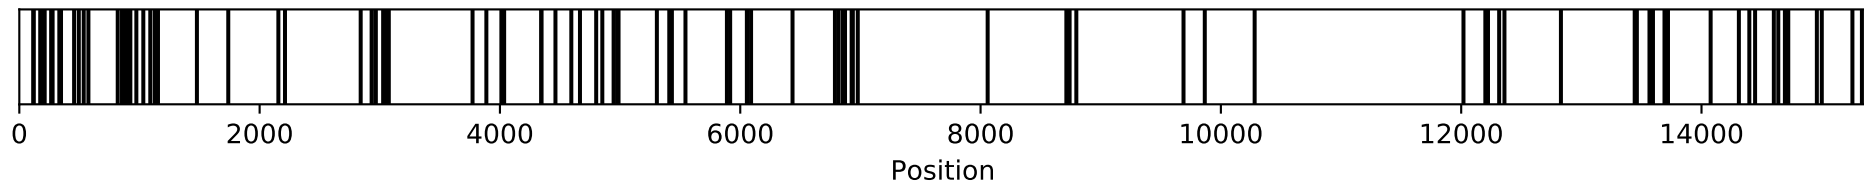

CR2 vs MM2  
Number of differences: 121

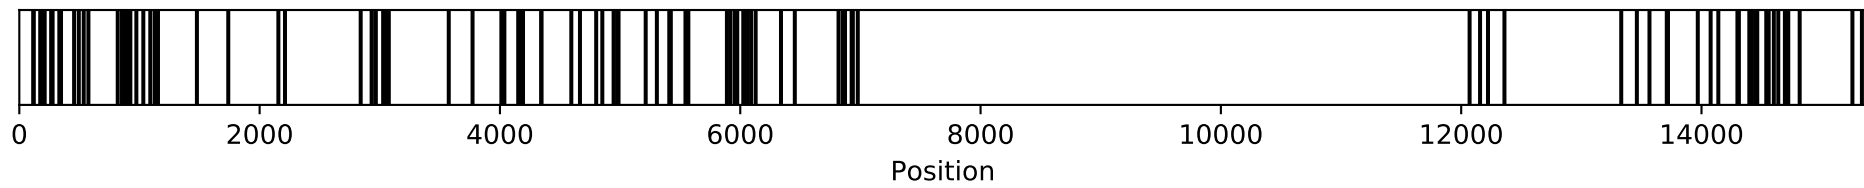

MM1 vs MM2  
Number of differences: 57

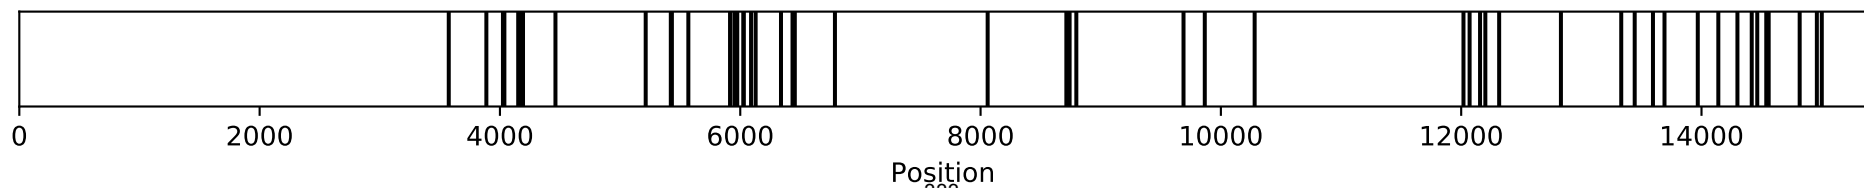

CR1 vs CR2  
Number of differences: 509

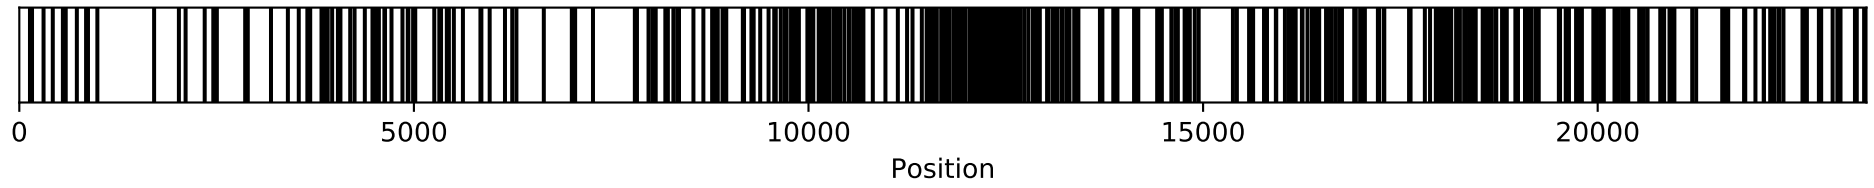

CR1 vs MM1  
Number of differences: 524

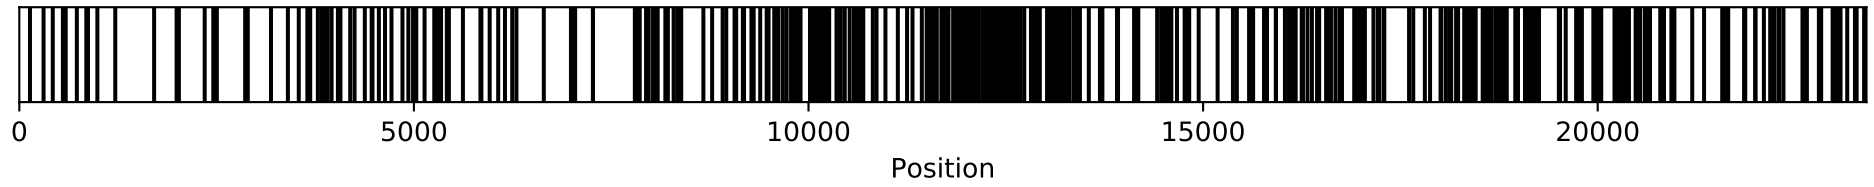

CR1 vs MM2  
Number of differences: 510

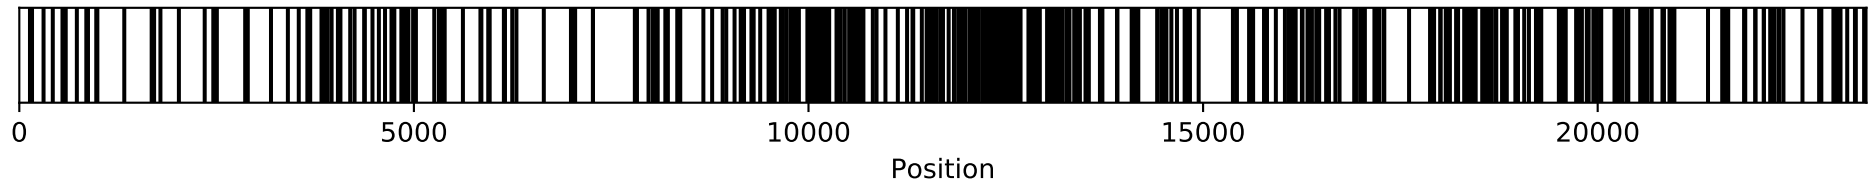

CR2 vs MM1  
Number of differences: 223

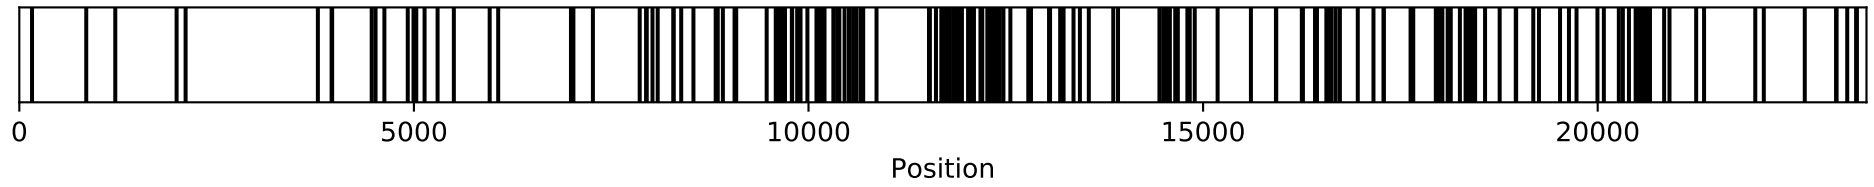

CR2 vs MM2  
Number of differences: 232

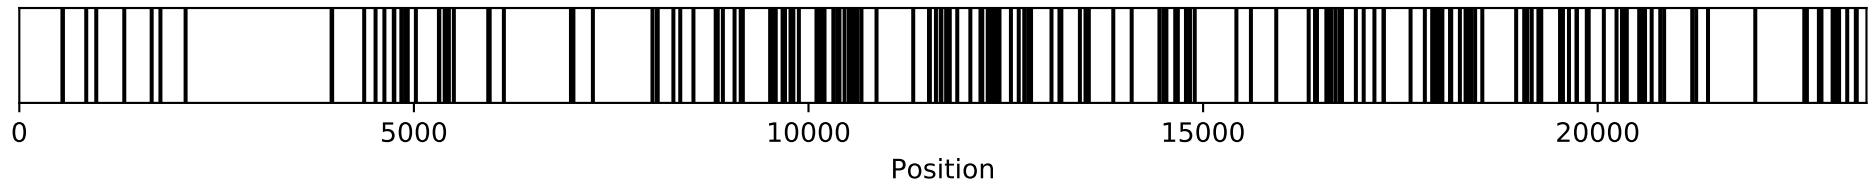

MM1 vs MM2  
Number of differences: 214

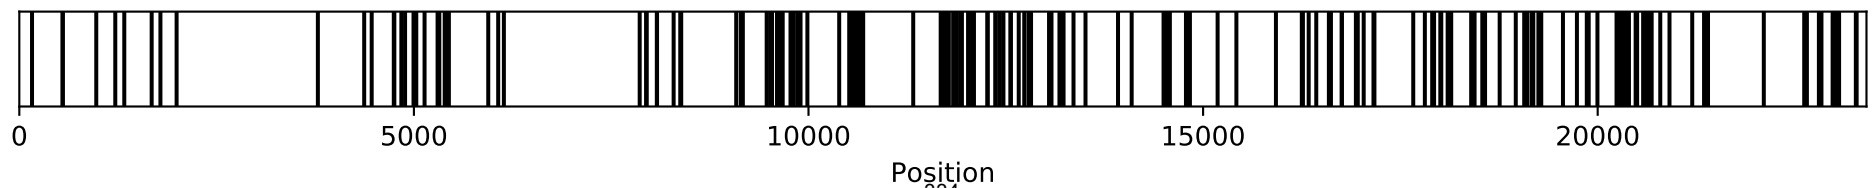

CR1 vs CR2  
Number of differences: 152

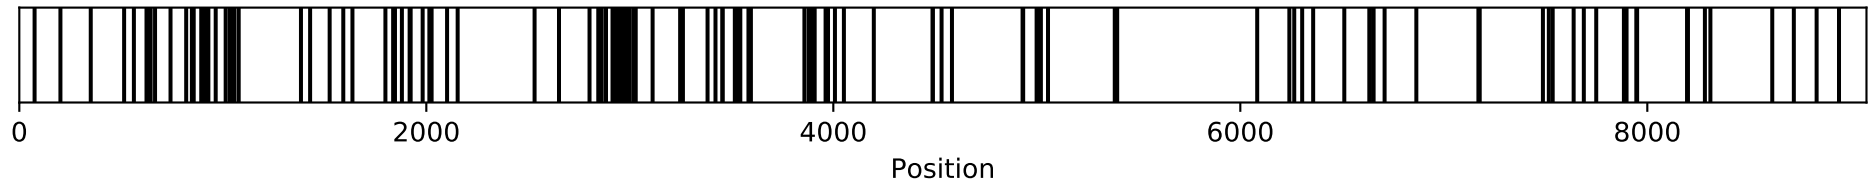

CR1 vs MM1  
Number of differences: 129

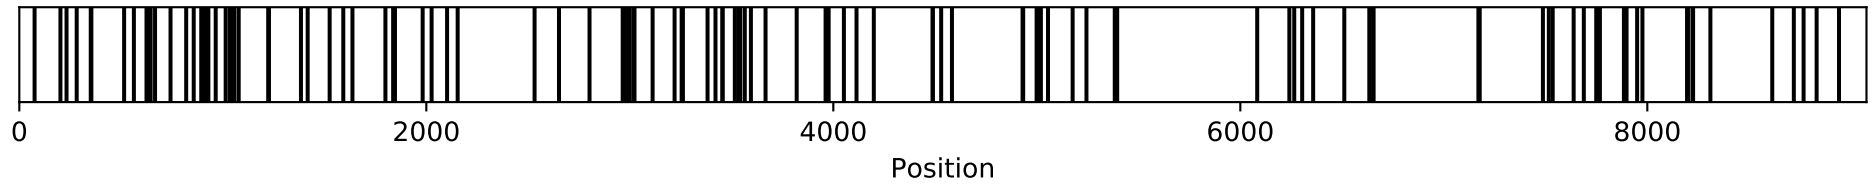

CR1 vs MM2  
Number of differences: 125

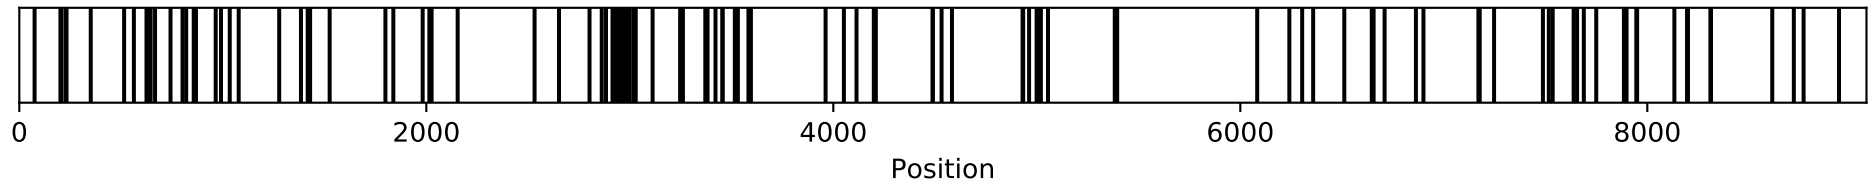

CR2 vs MM1  
Number of differences: 69

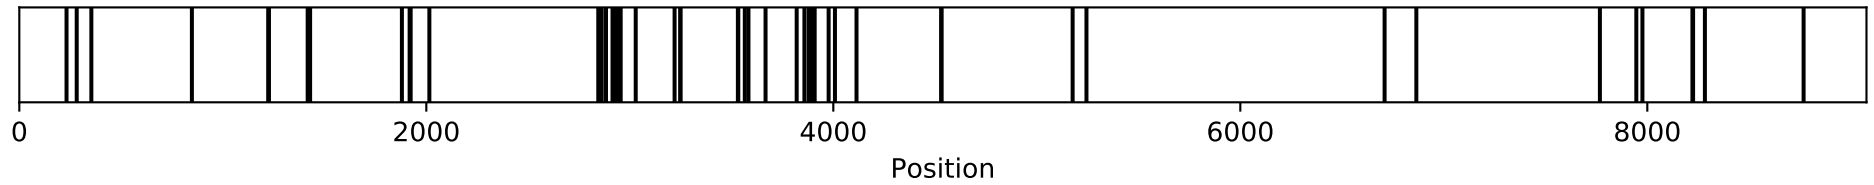

CR2 vs MM2  
Number of differences: 68

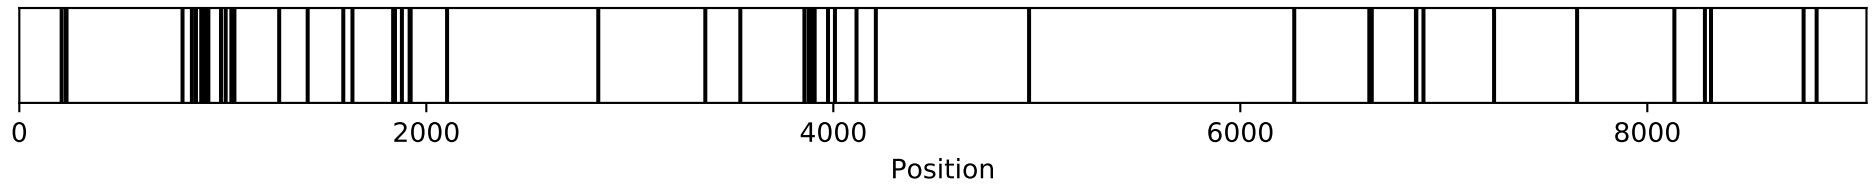

MM1 vs MM2  
Number of differences: 75

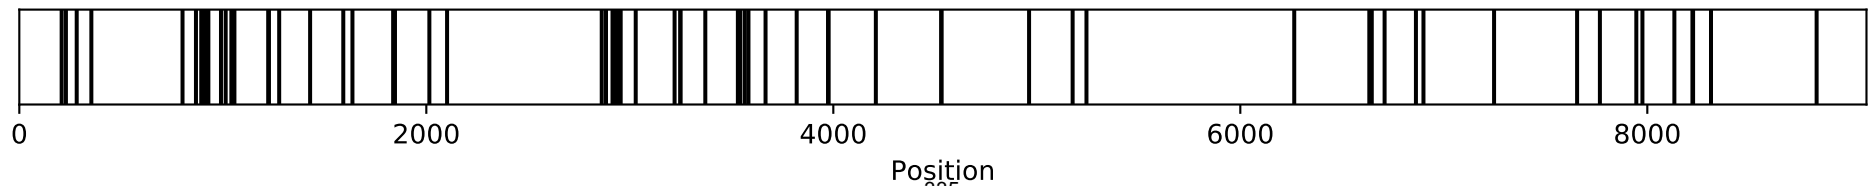



CR1 vs CR2  
Number of differences: 288

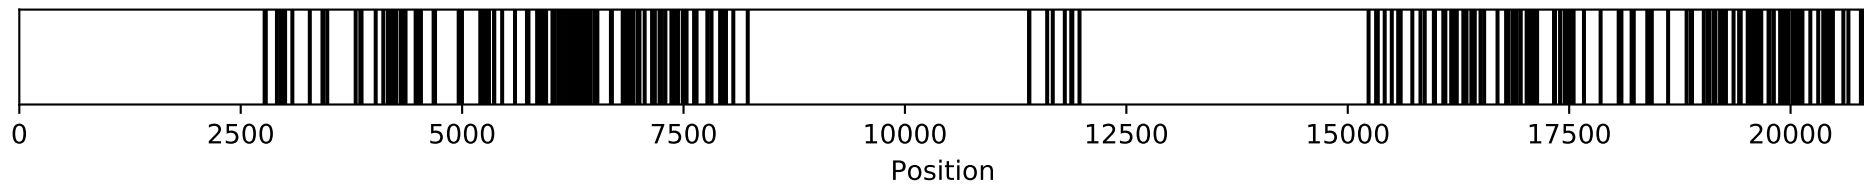

CR1 vs MM1  
Number of differences: 327

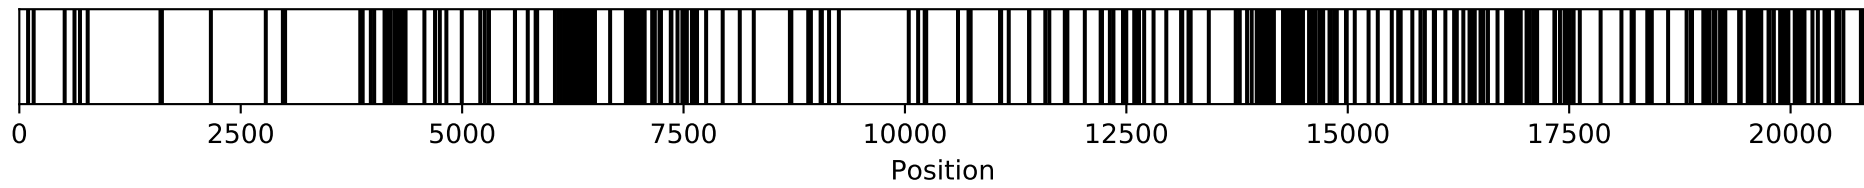

CR1 vs MM2  
Number of differences: 330

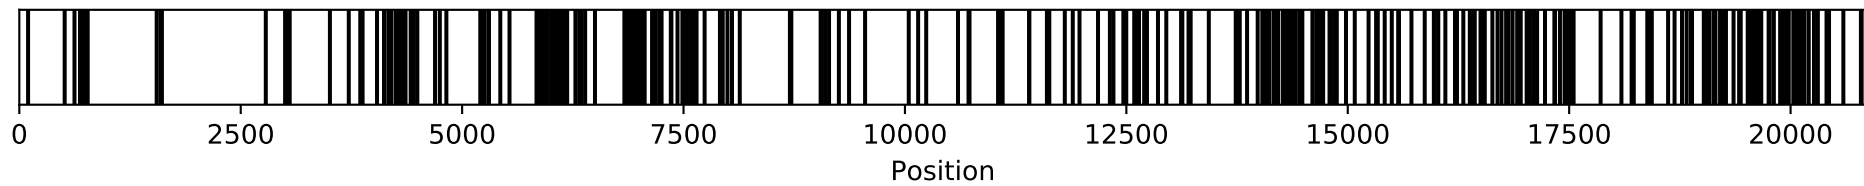

CR2 vs MM1  
Number of differences: 302

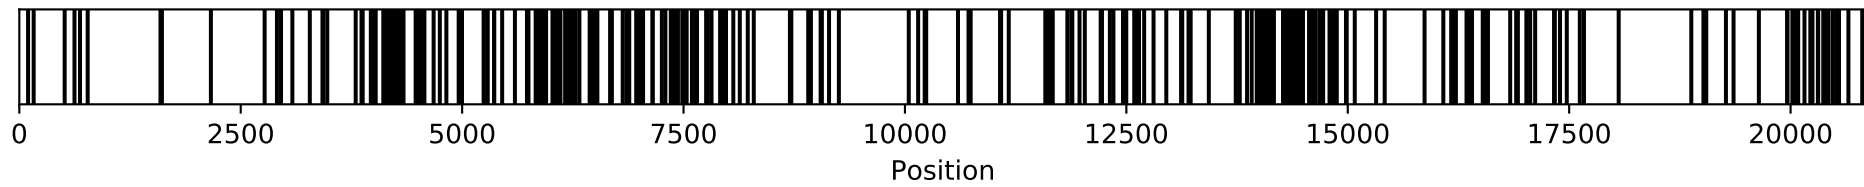

CR2 vs MM2  
Number of differences: 313

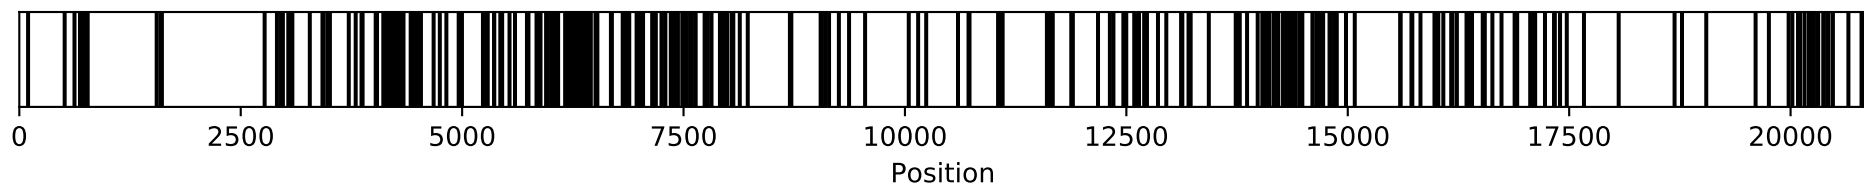

MM1 vs MM2  
Number of differences: 201

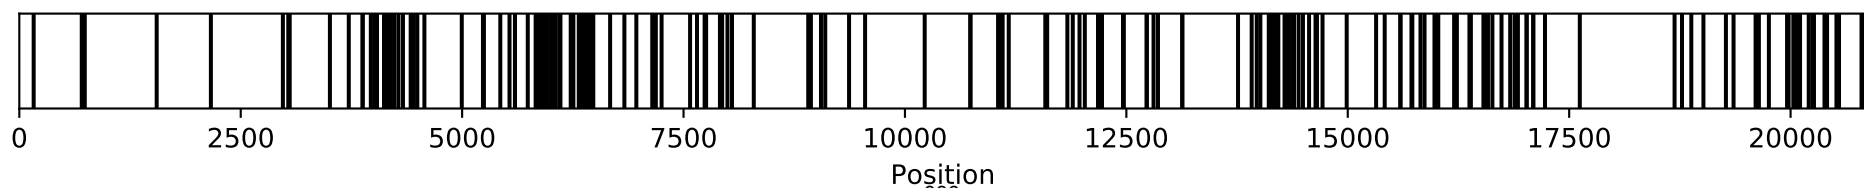

CR1 vs CR2  
Number of differences: 281

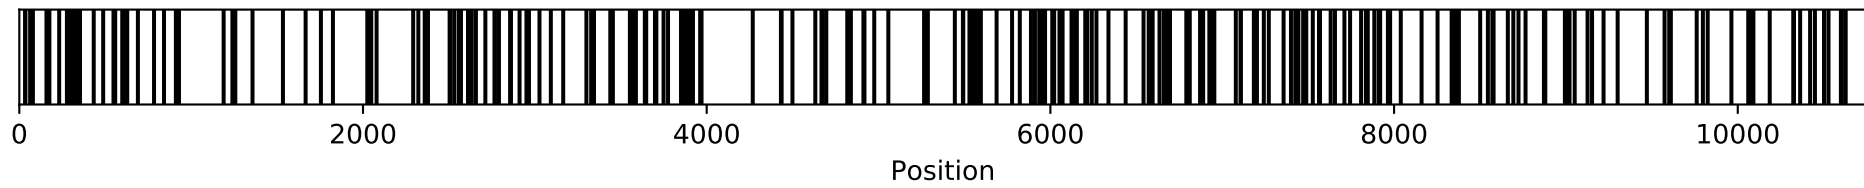

CR1 vs MM1  
Number of differences: 138

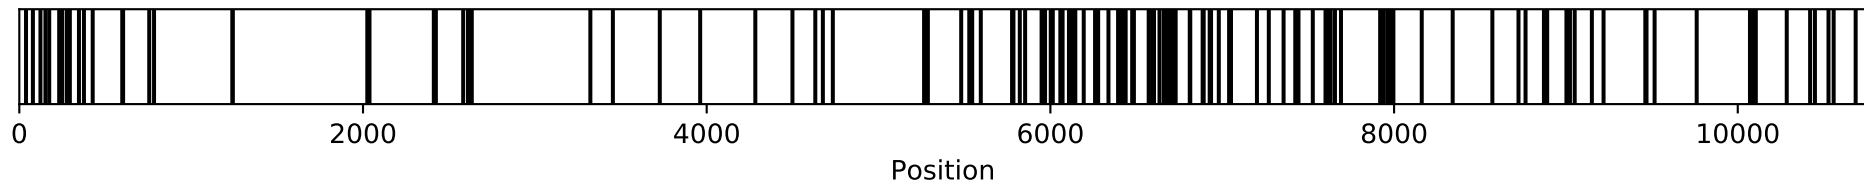

CR1 vs MM2  
Number of differences: 82

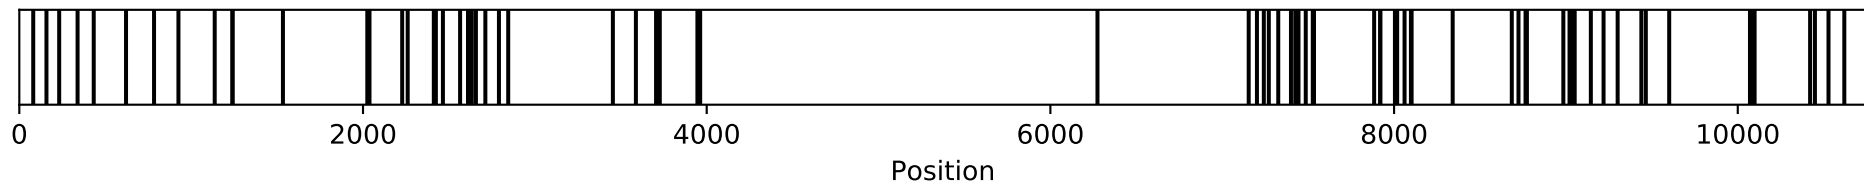

CR2 vs MM1  
Number of differences: 288

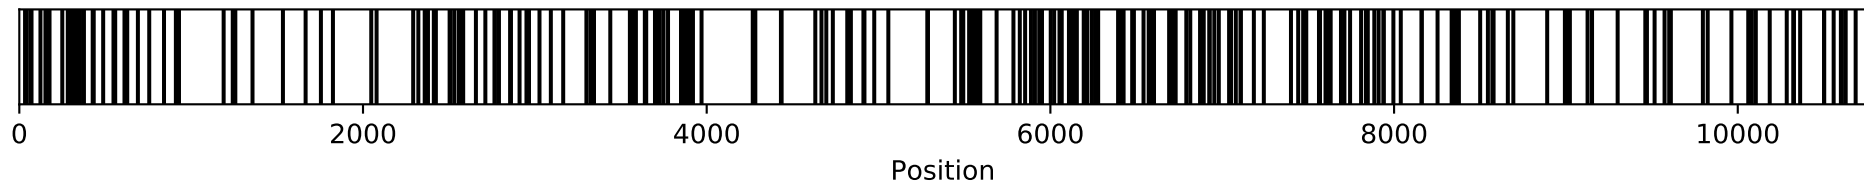

CR2 vs MM2  
Number of differences: 279

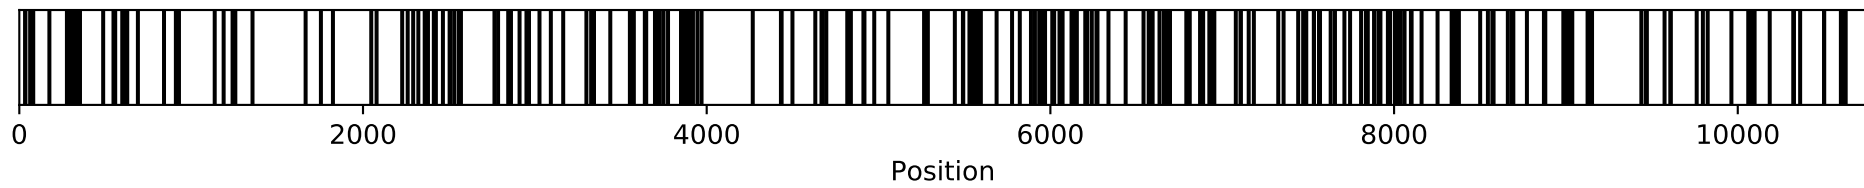

MM1 vs MM2  
Number of differences: 157

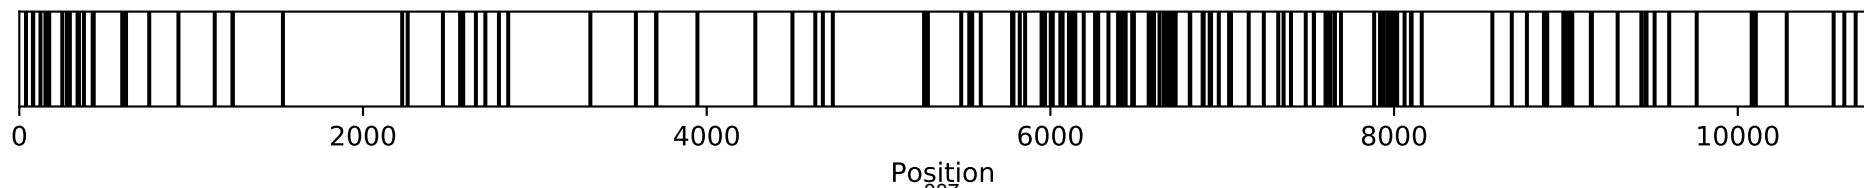

CR1 vs CR2  
Number of differences: 184

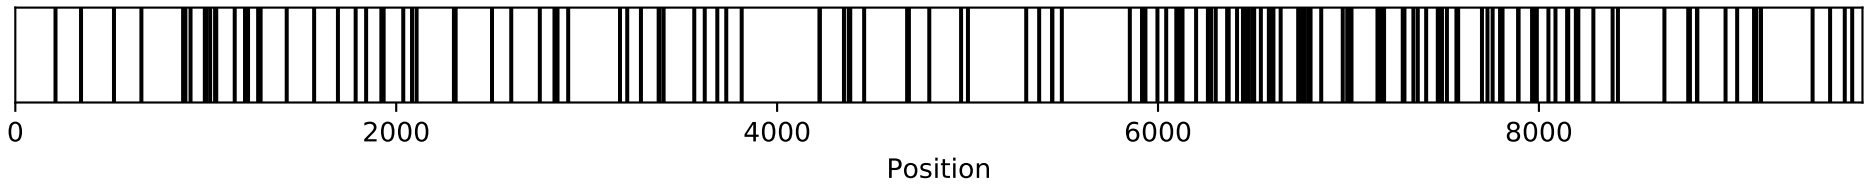

CR1 vs MM1  
Number of differences: 43

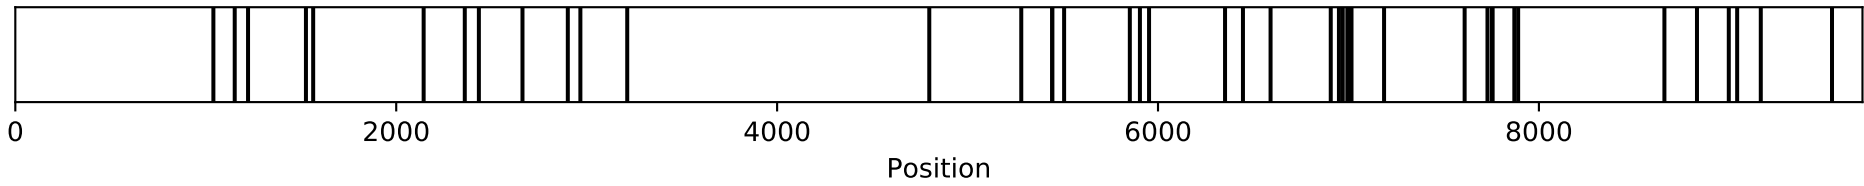

CR1 vs MM2  
Number of differences: 43

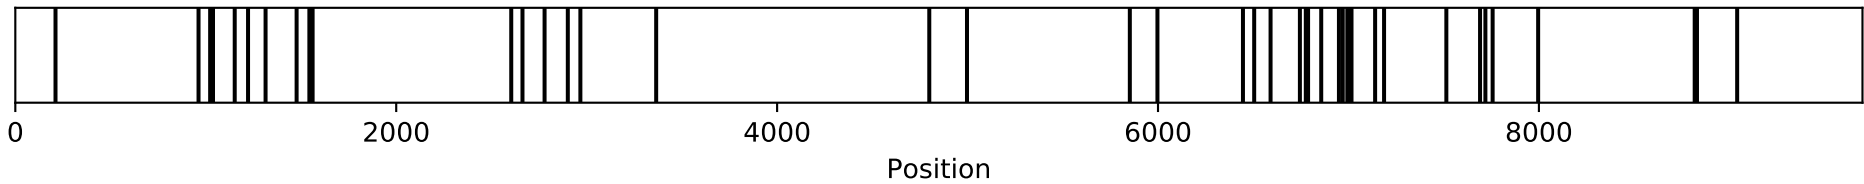

CR2 vs MM1  
Number of differences: 185

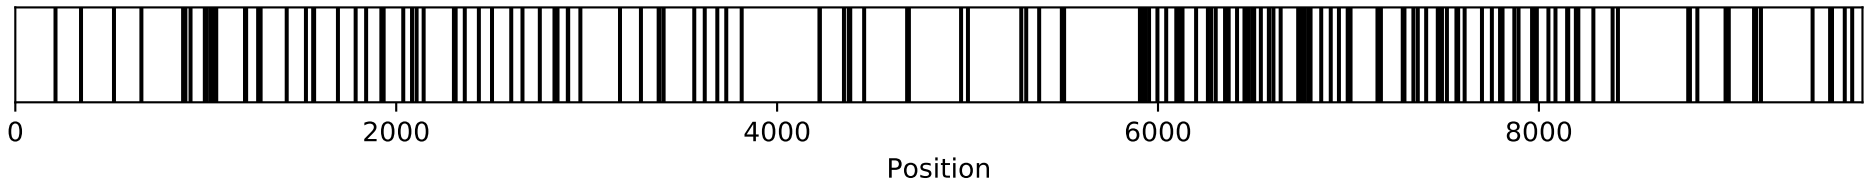

CR2 vs MM2  
Number of differences: 183

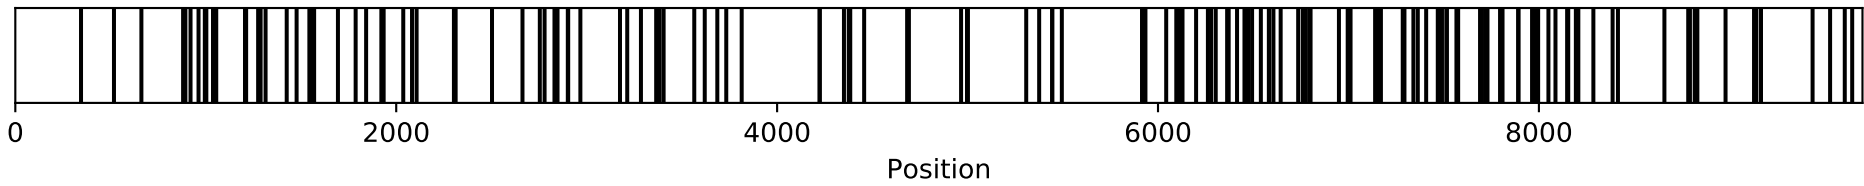

MM1 vs MM2  
Number of differences: 48

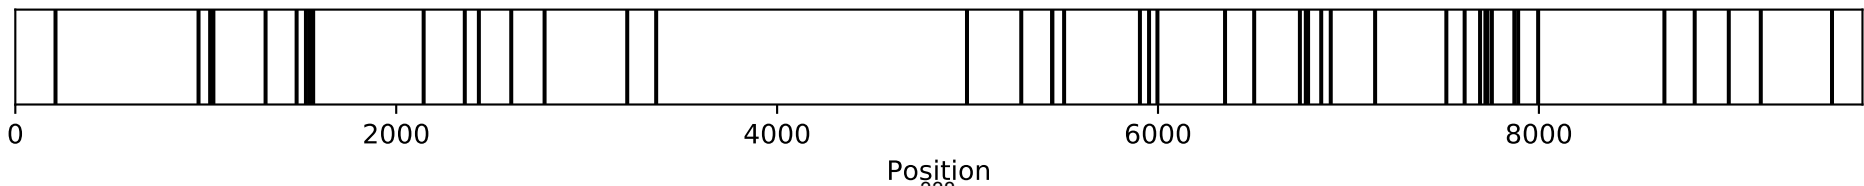

CR1 vs CR2  
Number of differences: 313

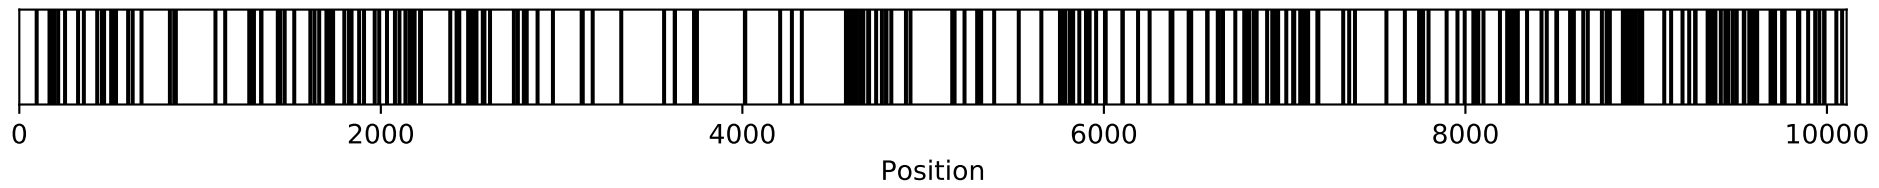

CR1 vs MM1  
Number of differences: 132

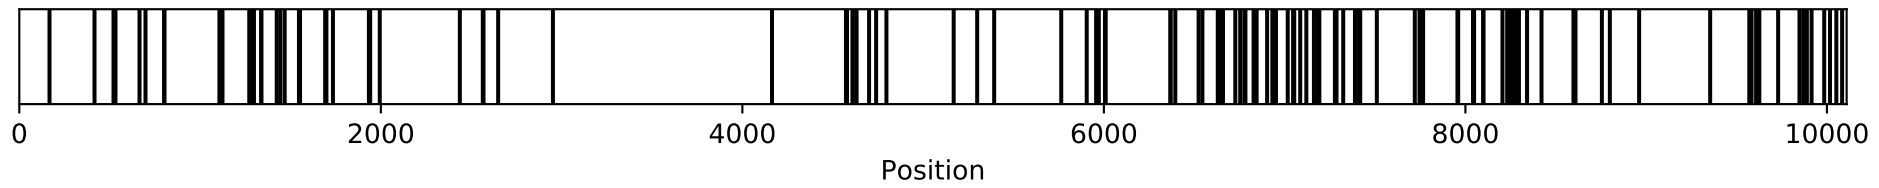

CR1 vs MM2  
Number of differences: 142

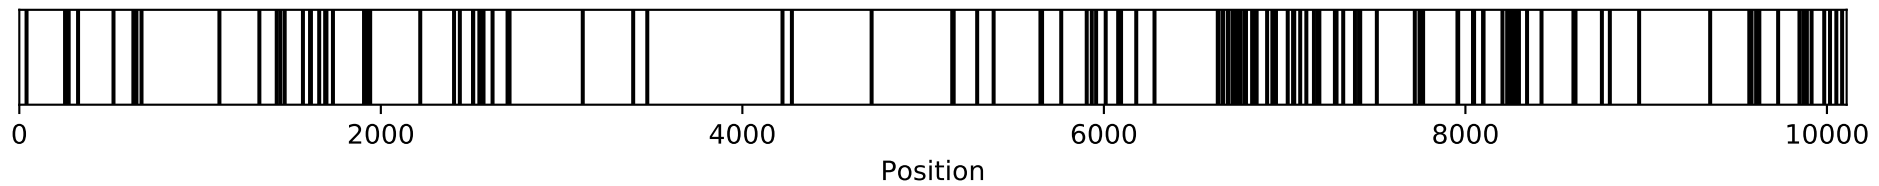

CR2 vs MM1  
Number of differences: 304

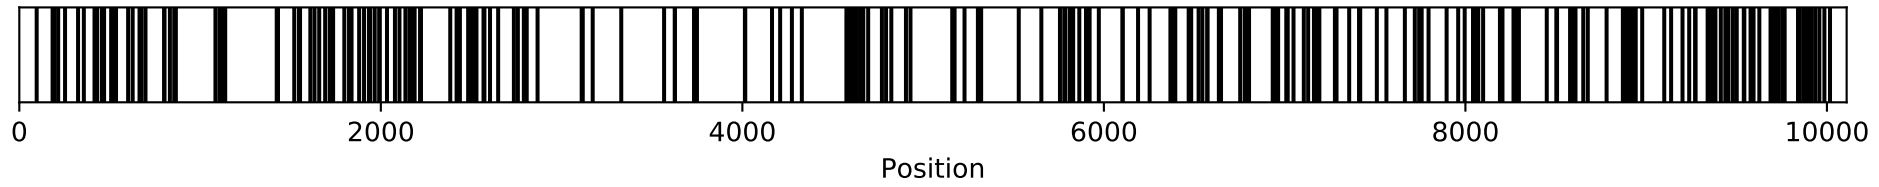

CR2 vs MM2  
Number of differences: 323

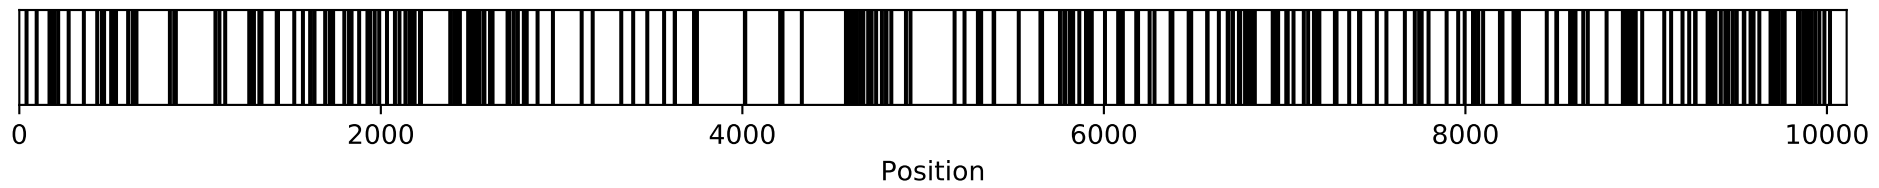

MM1 vs MM2  
Number of differences: 85

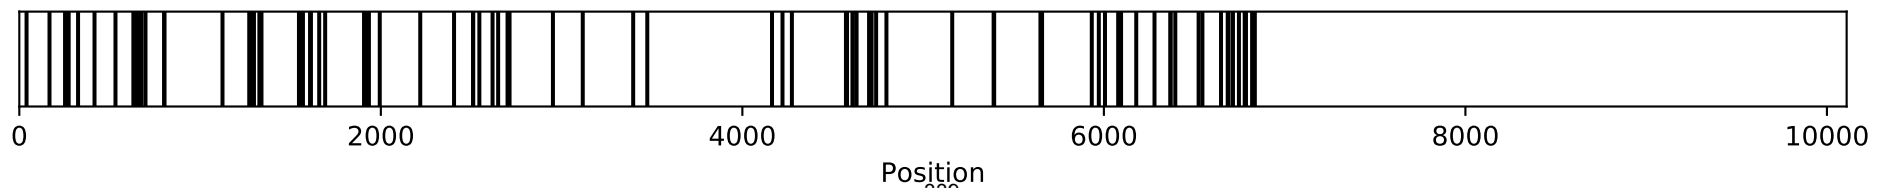

CR1 vs CR2  
Number of differences: 208

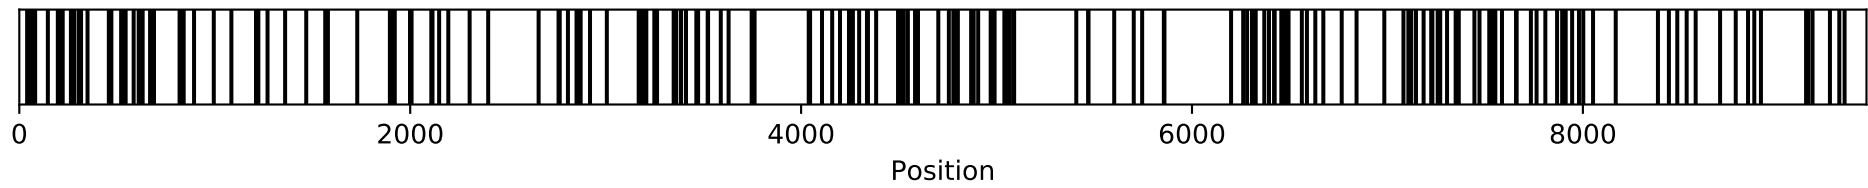

CR1 vs MM1  
Number of differences: 90

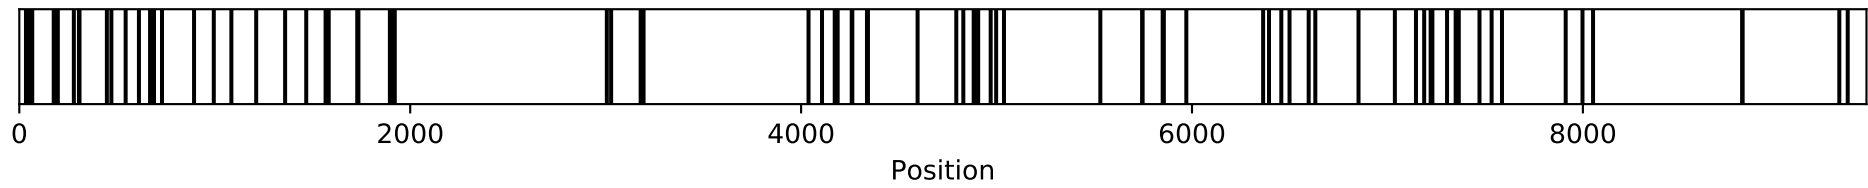

CR1 vs MM2  
Number of differences: 76

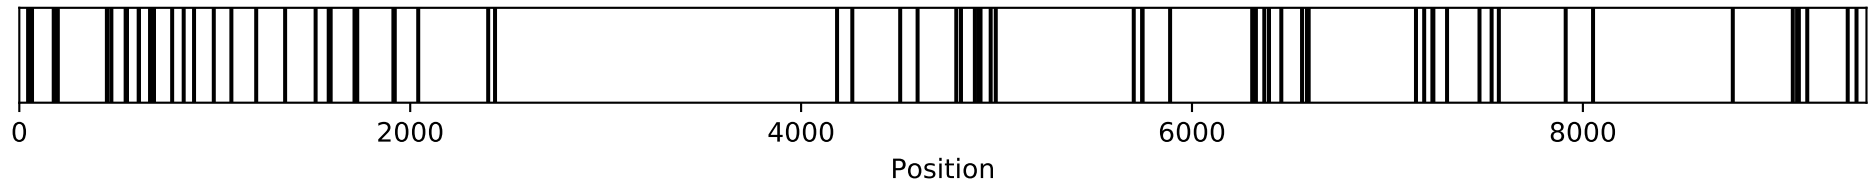

CR2 vs MM1  
Number of differences: 198

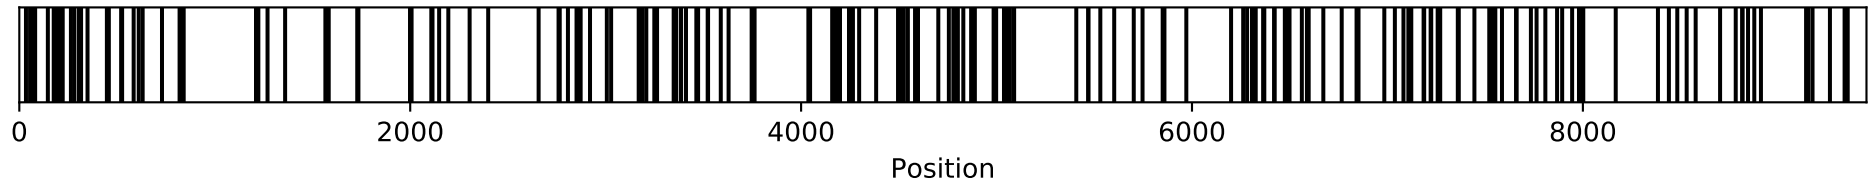

CR2 vs MM2  
Number of differences: 210

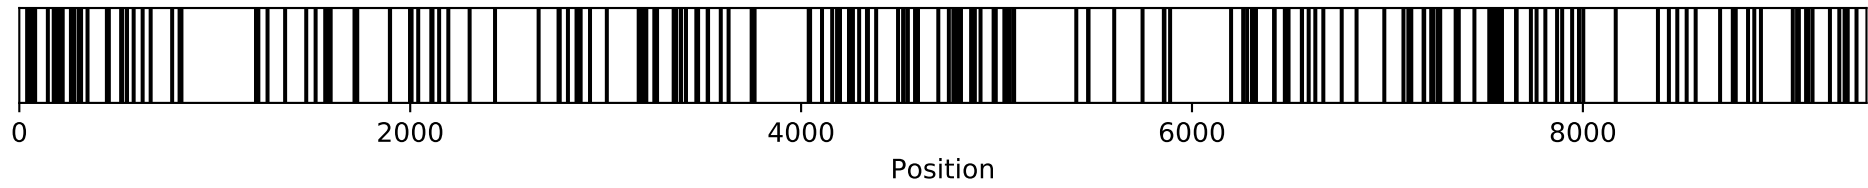

MM1 vs MM2  
Number of differences: 80

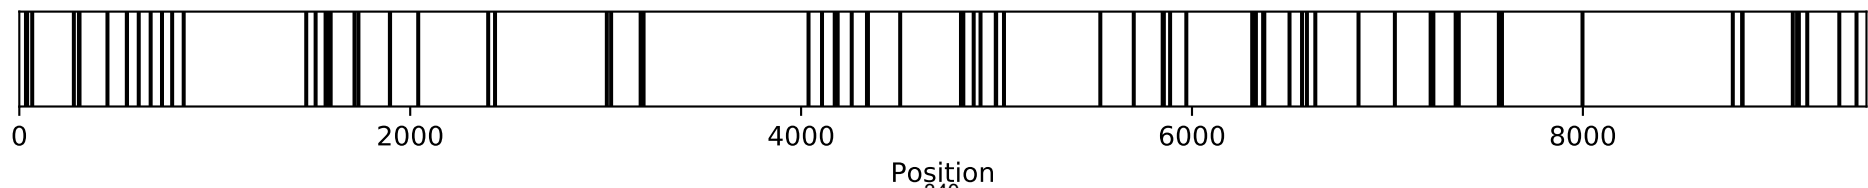

CR1 vs CR2  
Number of differences: 297

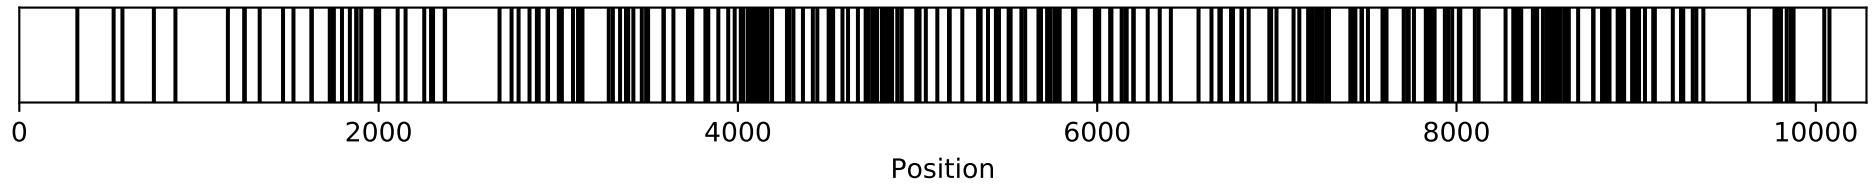

CR1 vs MM1  
Number of differences: 307

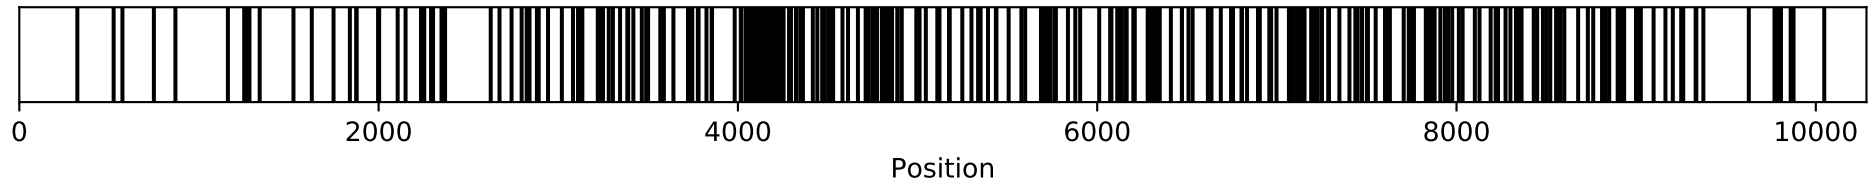

CR1 vs MM2  
Number of differences: 318

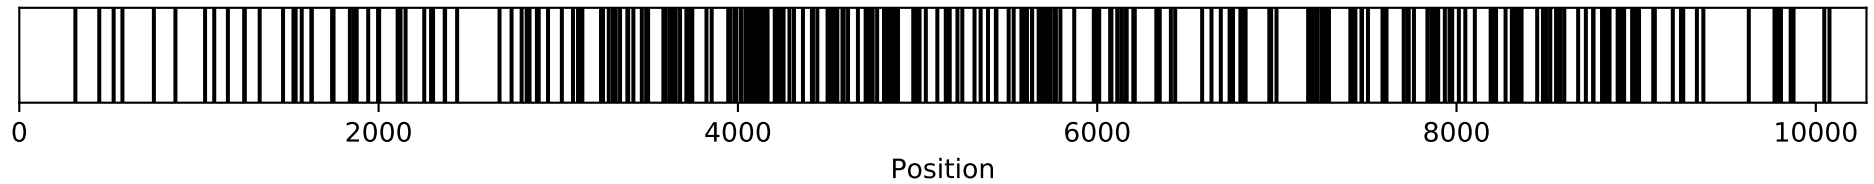

CR2 vs MM1  
Number of differences: 177

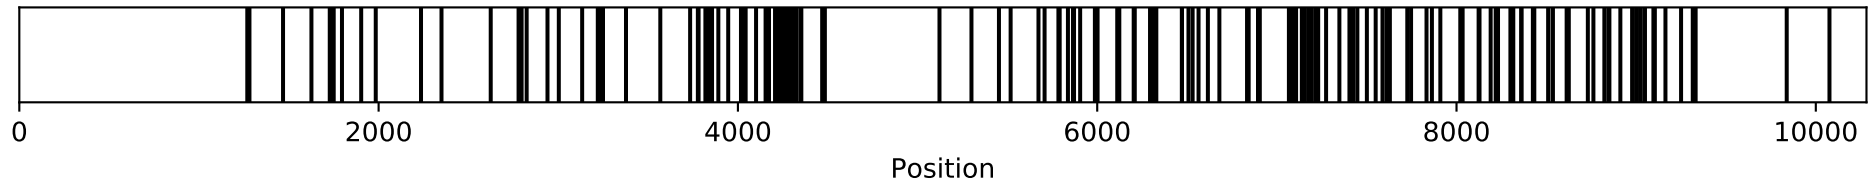

CR2 vs MM2  
Number of differences: 179

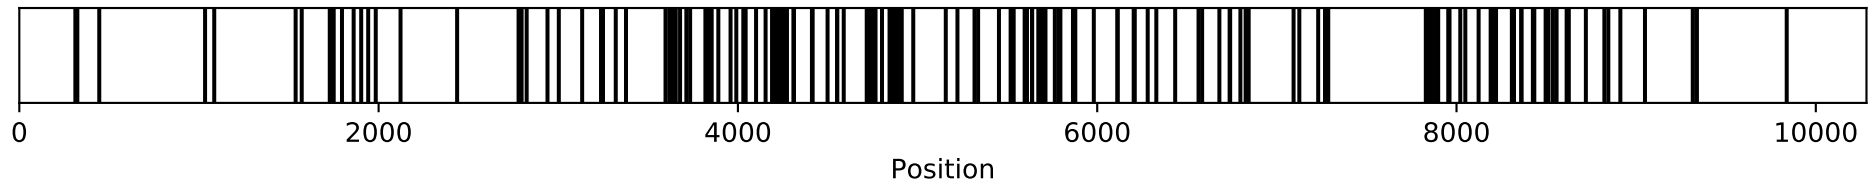

MM1 vs MM2  
Number of differences: 187

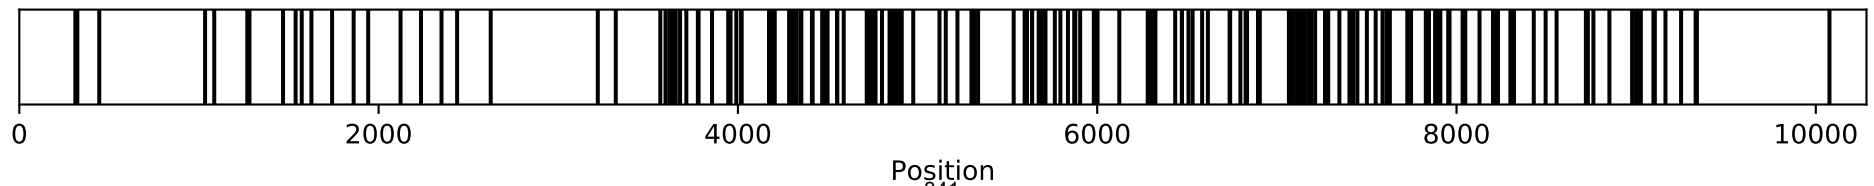

CR1 vs CR2  
Number of differences: 155

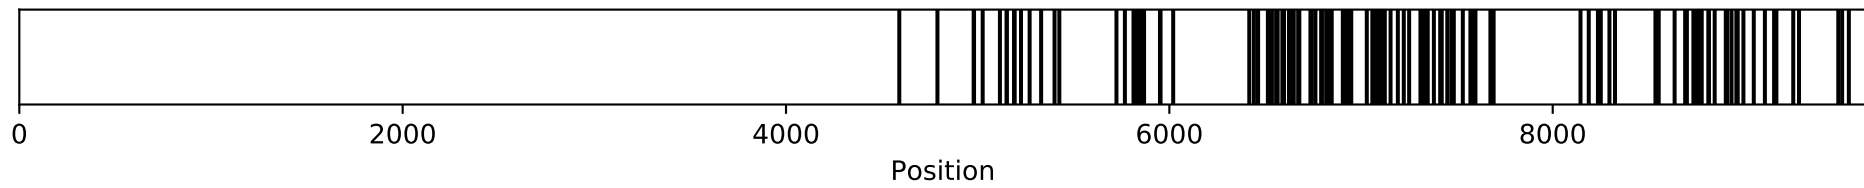

CR1 vs MM1  
Number of differences: 197

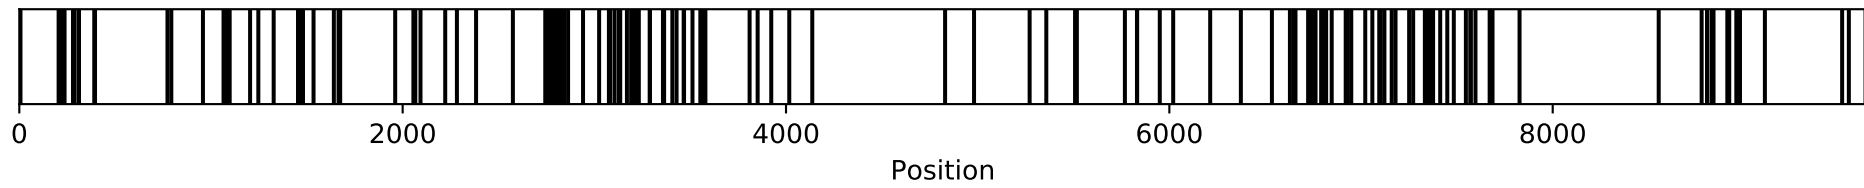

CR1 vs MM2  
Number of differences: 142

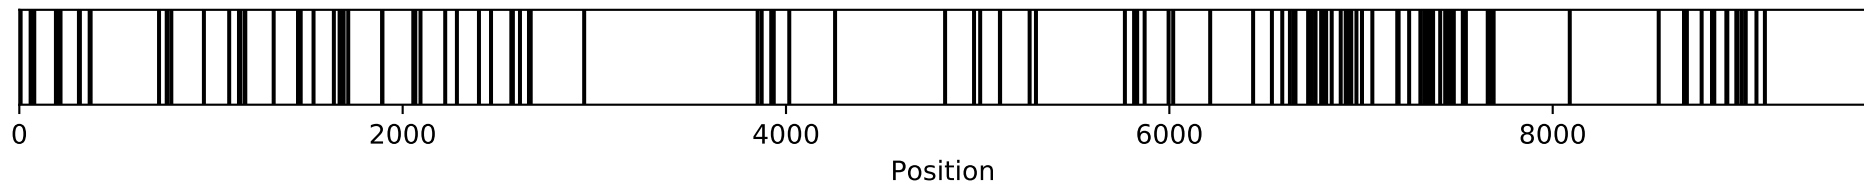

CR2 vs MM1  
Number of differences: 283

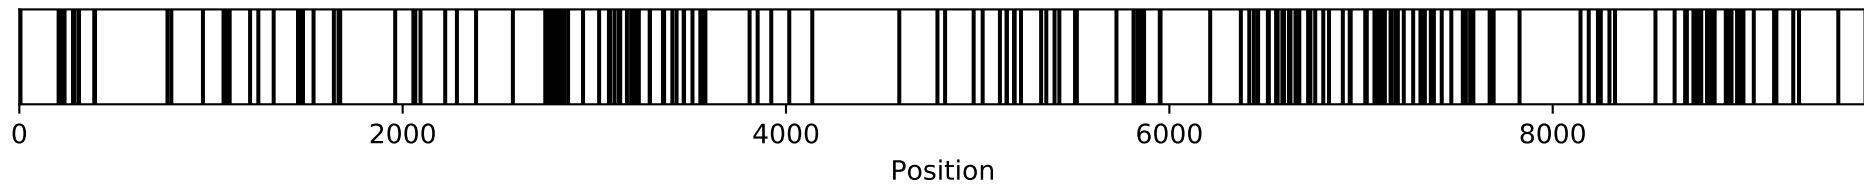

CR2 vs MM2  
Number of differences: 216

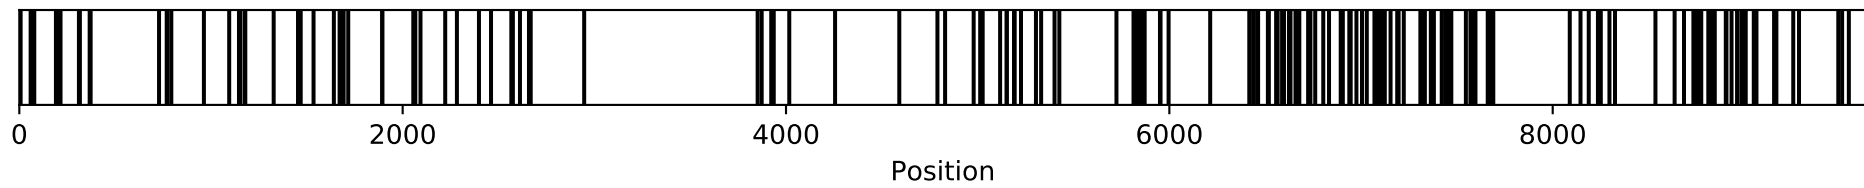

MM1 vs MM2  
Number of differences: 216

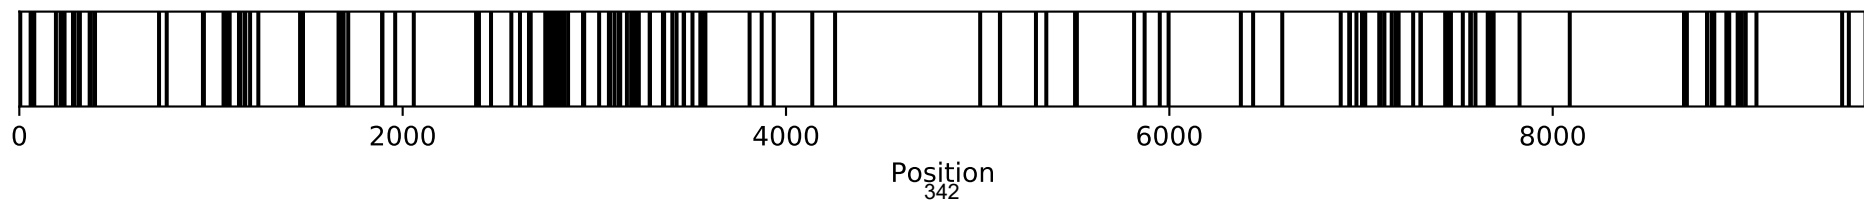

CR1 vs CR2  
Number of differences: 348

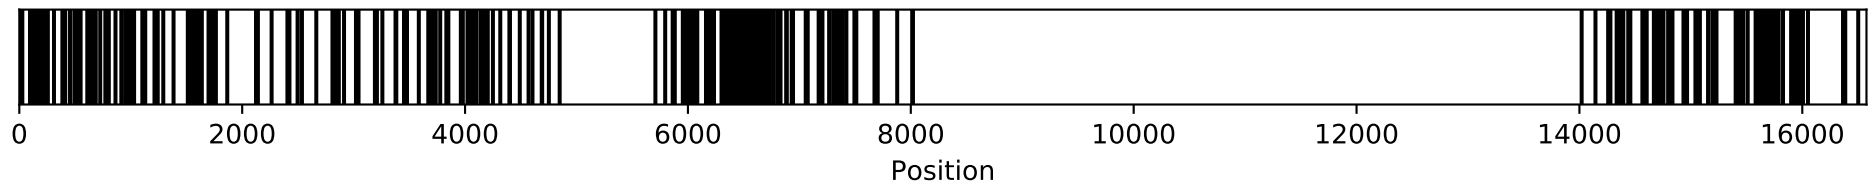

CR1 vs MM1  
Number of differences: 306

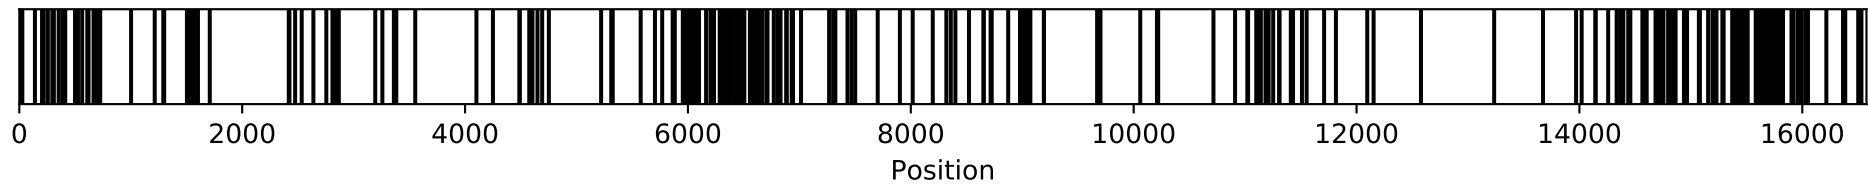

CR1 vs MM2  
Number of differences: 333

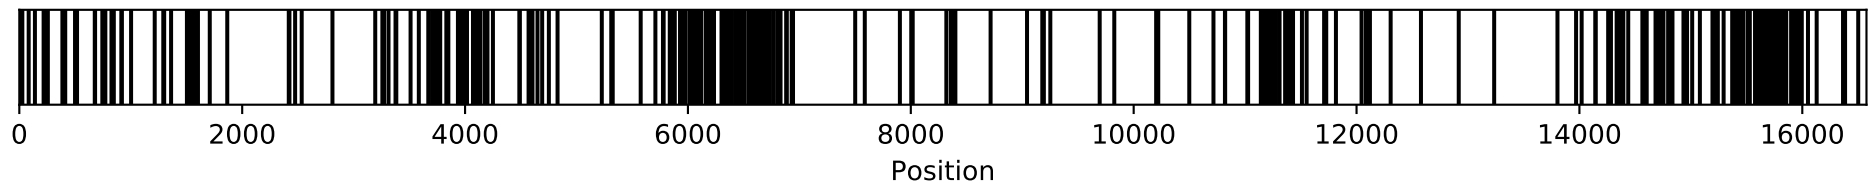

CR2 vs MM1  
Number of differences: 281

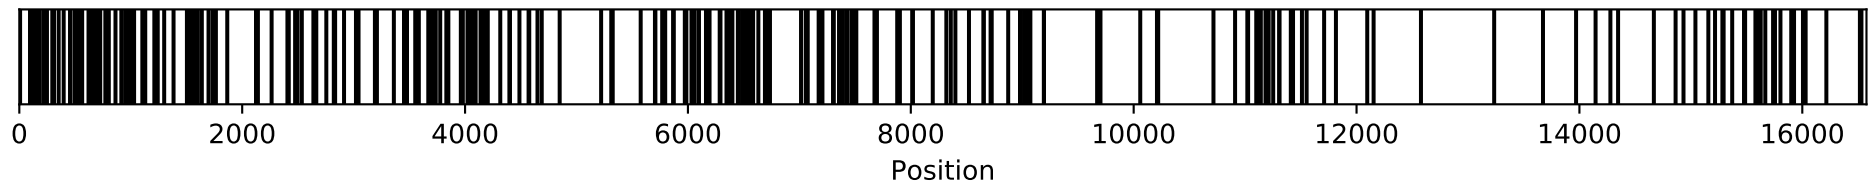

CR2 vs MM2  
Number of differences: 288

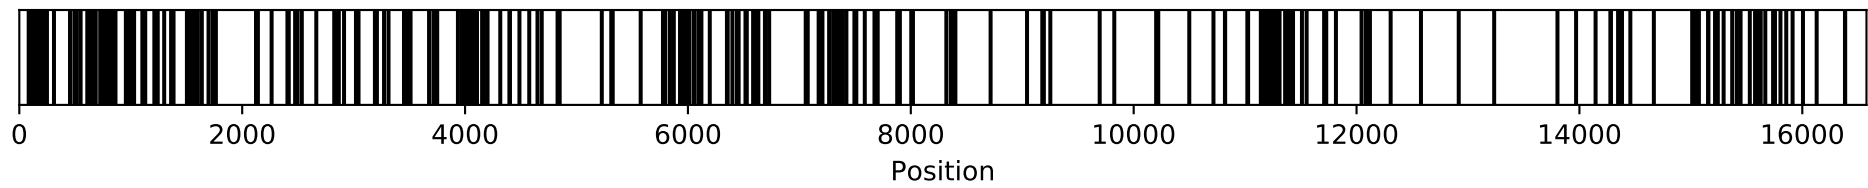

MM1 vs MM2  
Number of differences: 204

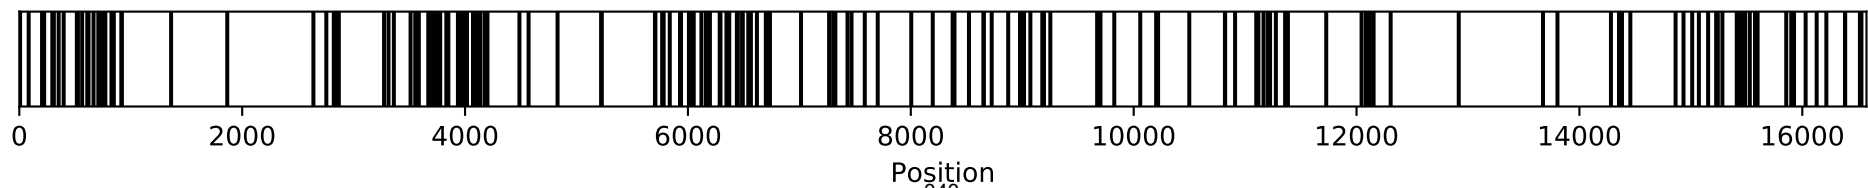



CR1 vs CR2  
Number of differences: 159

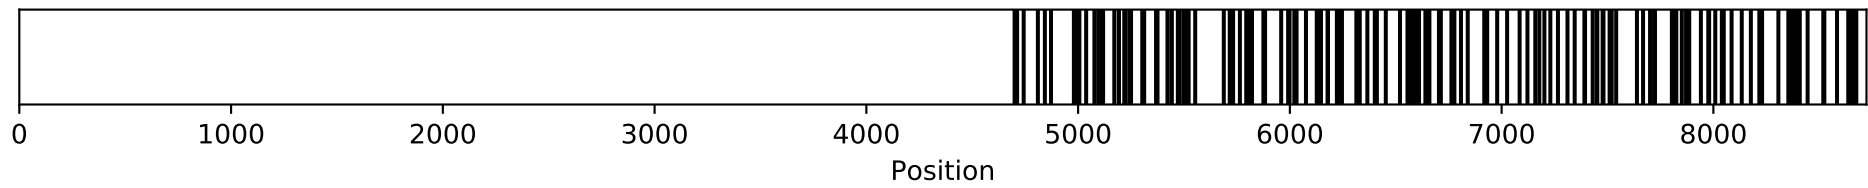

CR1 vs MM1  
Number of differences: 169

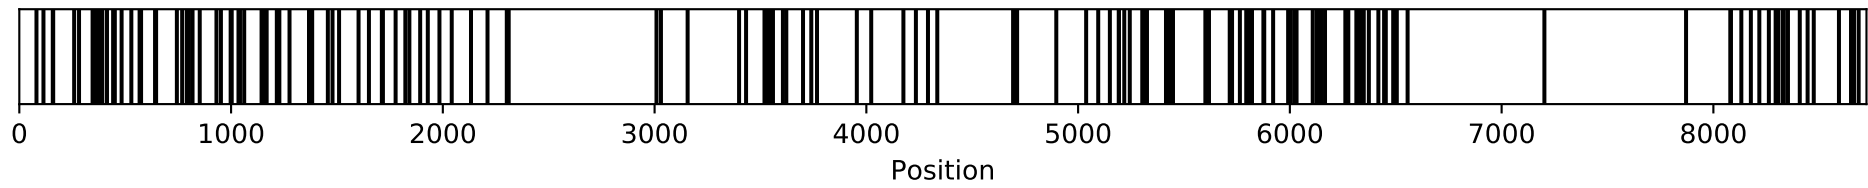

CR1 vs MM2  
Number of differences: 169

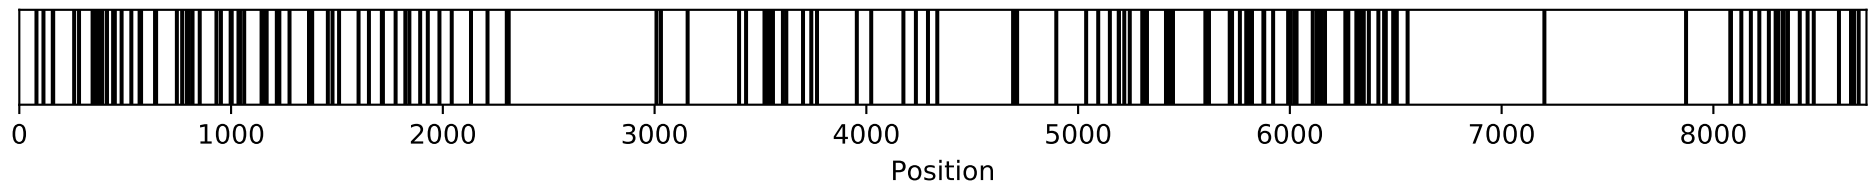

CR2 vs MM1  
Number of differences: 243

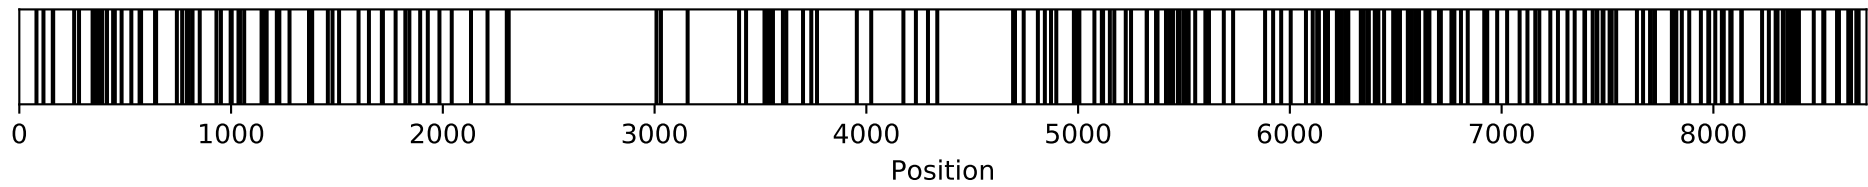

CR2 vs MM2  
Number of differences: 243

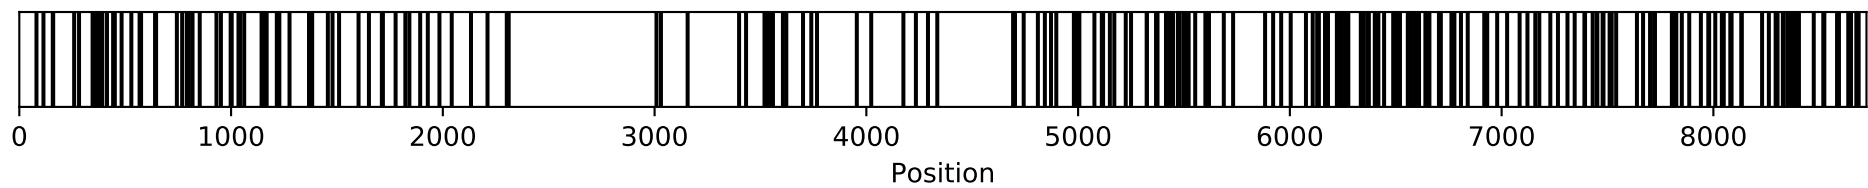

MM1 vs MM2  
Number of differences: 0

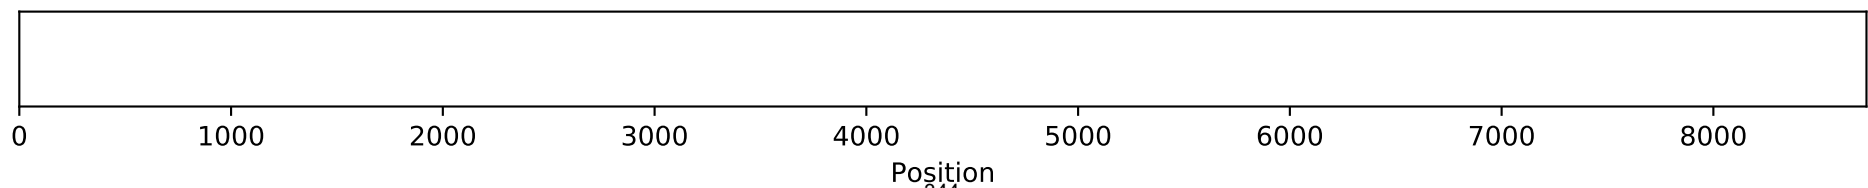

CR1 vs CR2  
Number of differences: 220

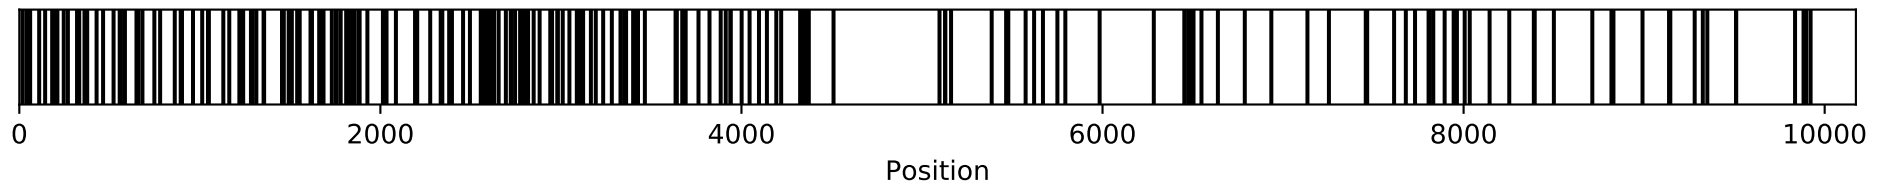

CR1 vs MM1  
Number of differences: 62

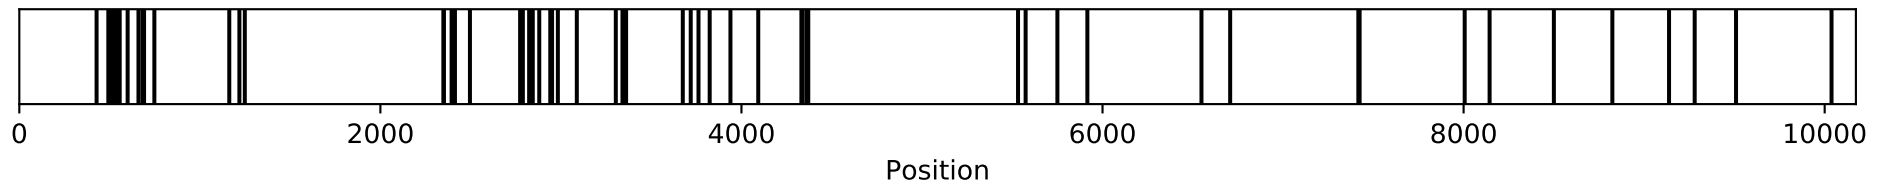

CR1 vs MM2  
Number of differences: 113

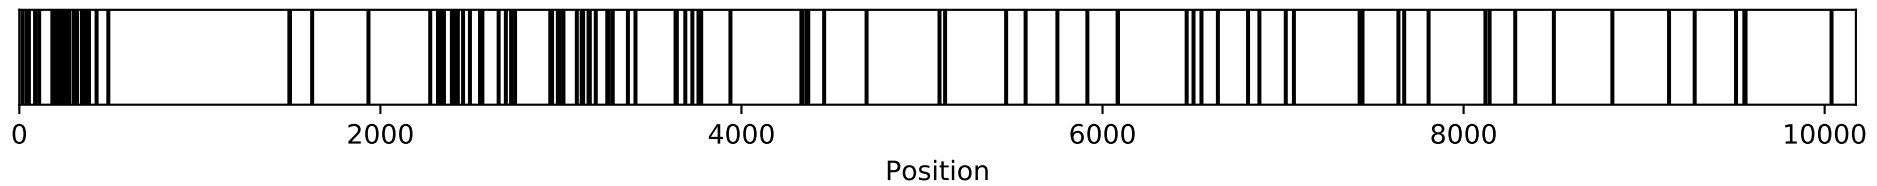

CR2 vs MM1  
Number of differences: 216

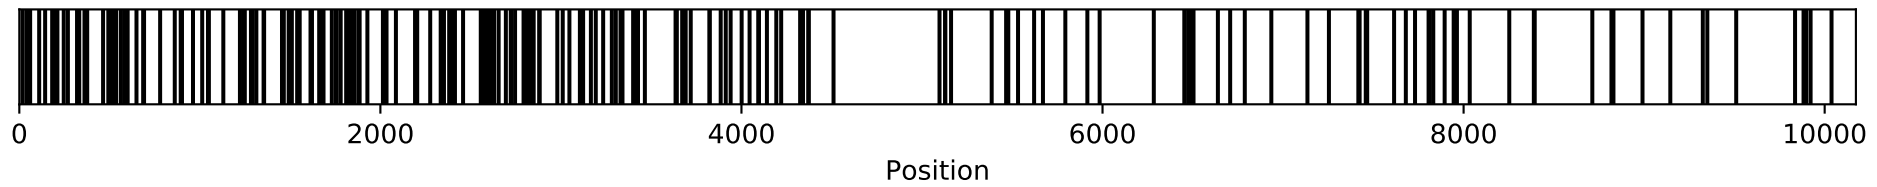

CR2 vs MM2  
Number of differences: 240

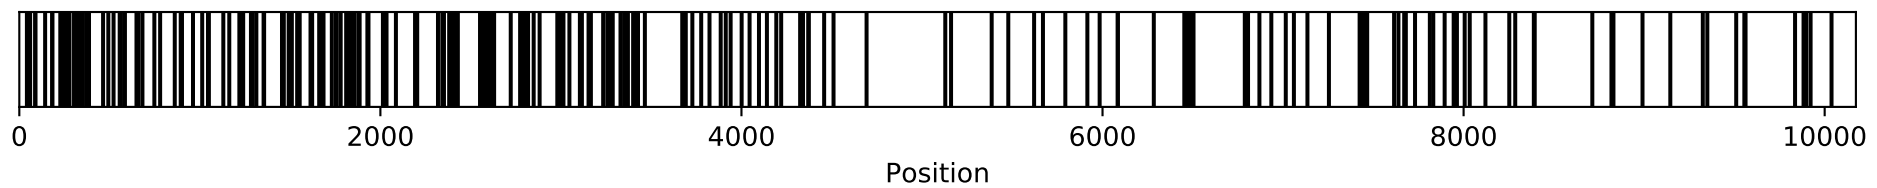

MM1 vs MM2  
Number of differences: 117

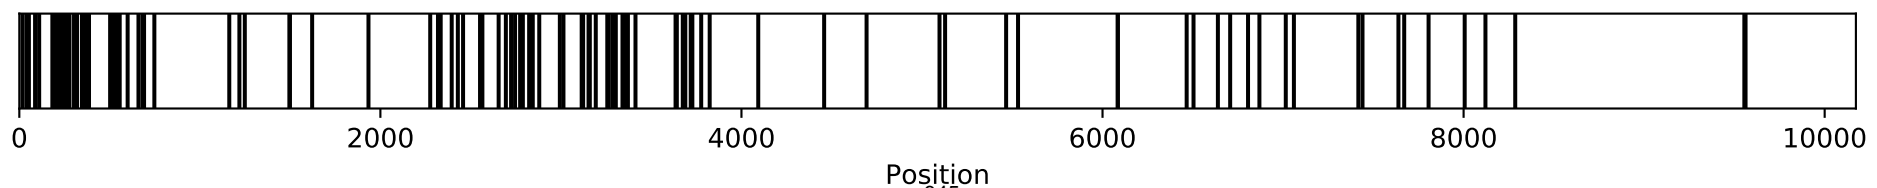

CR1 vs CR2  
Number of differences: 276

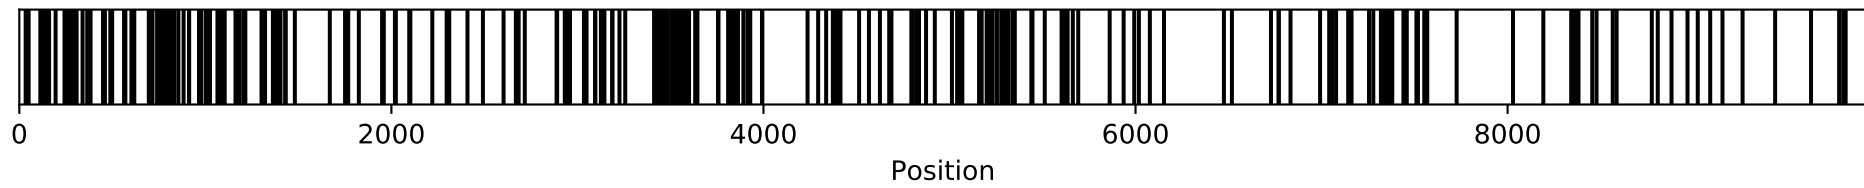

CR1 vs MM1  
Number of differences: 274

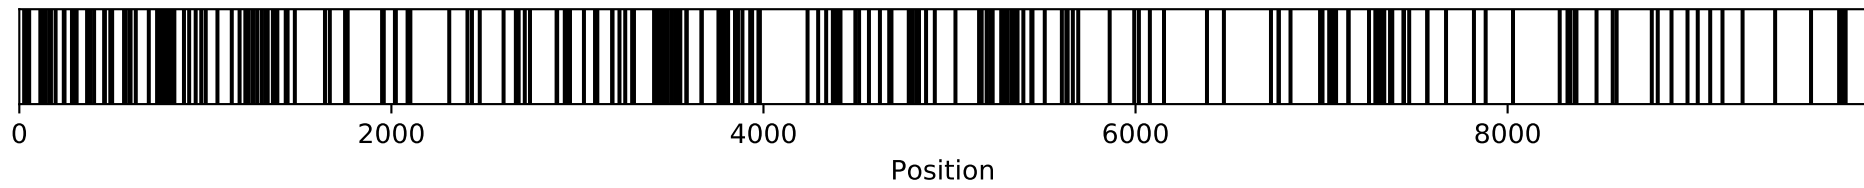

CR1 vs MM2  
Number of differences: 275

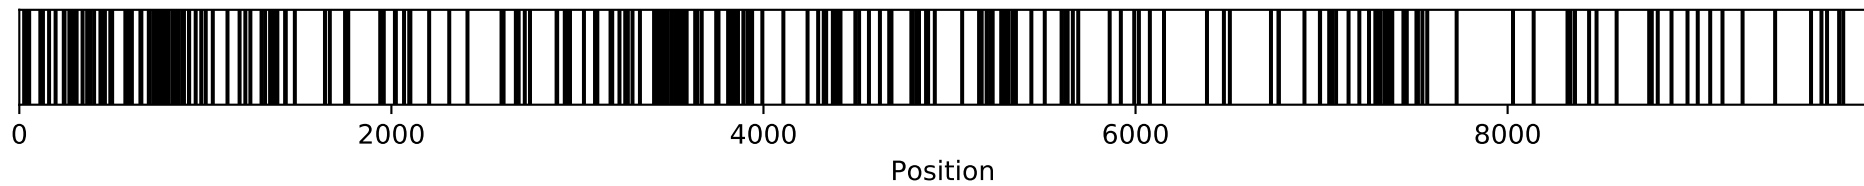

CR2 vs MM1  
Number of differences: 172

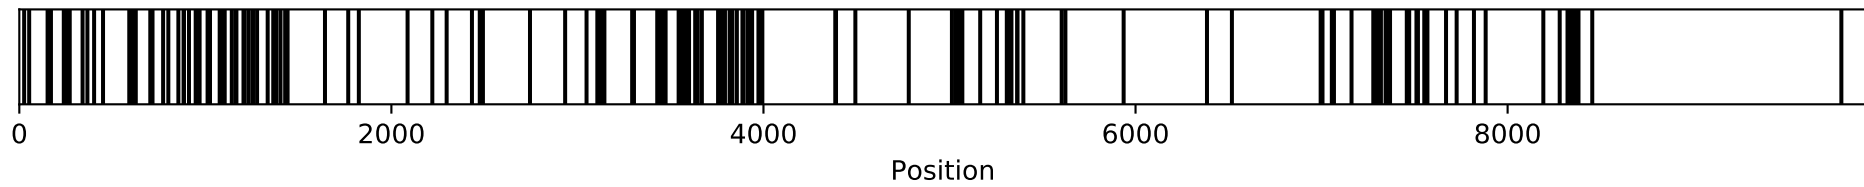

CR2 vs MM2  
Number of differences: 161

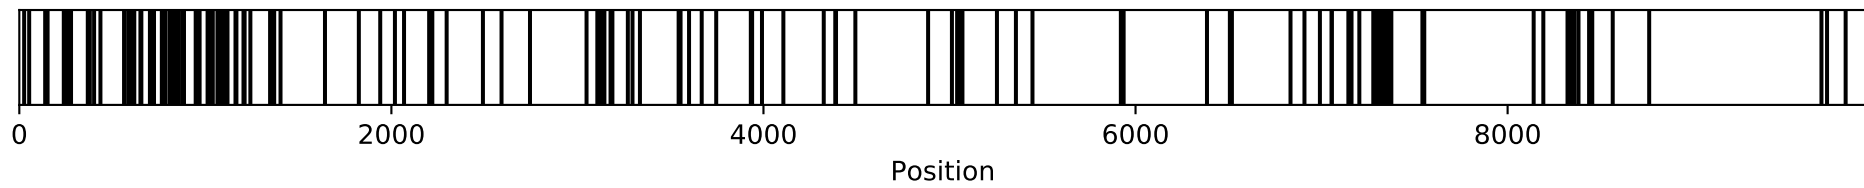

MM1 vs MM2  
Number of differences: 164

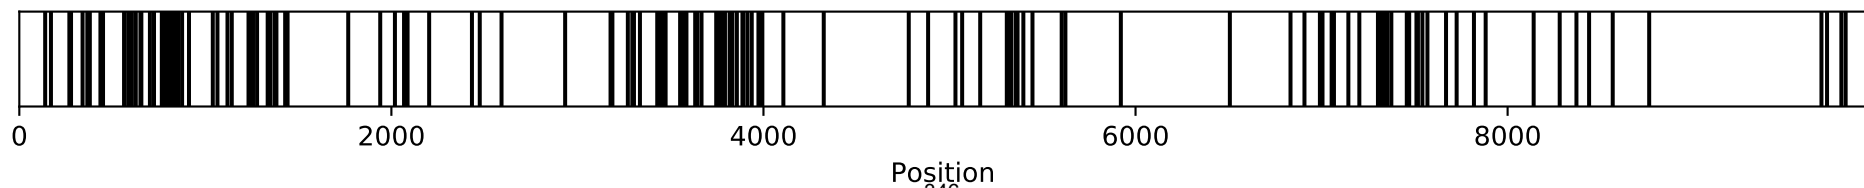

CR1 vs CR2  
Number of differences: 316

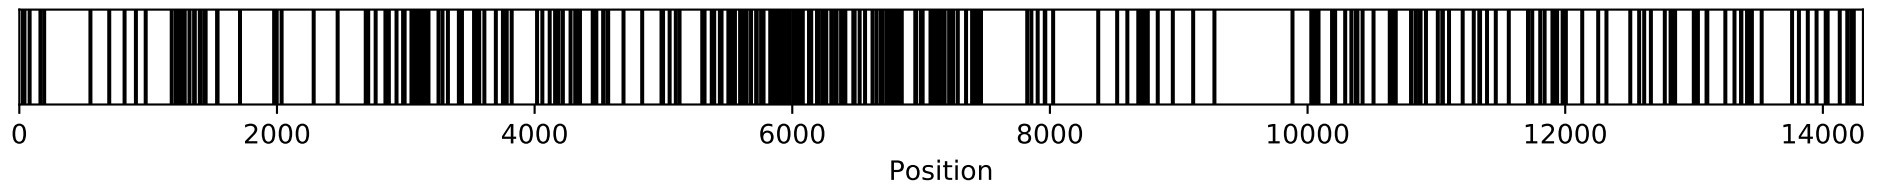

CR1 vs MM1  
Number of differences: 151

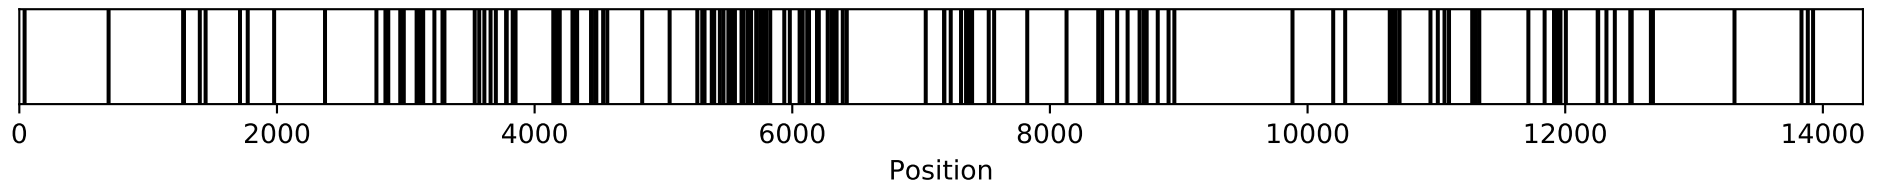

CR1 vs MM2  
Number of differences: 168

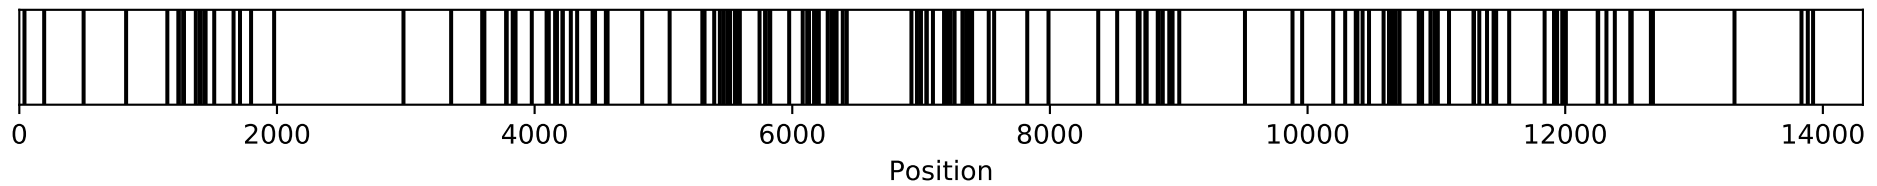

CR2 vs MM1  
Number of differences: 287

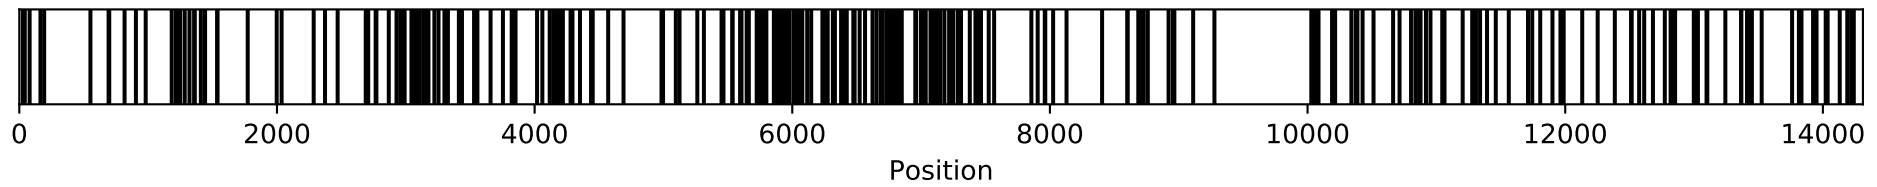

CR2 vs MM2  
Number of differences: 312

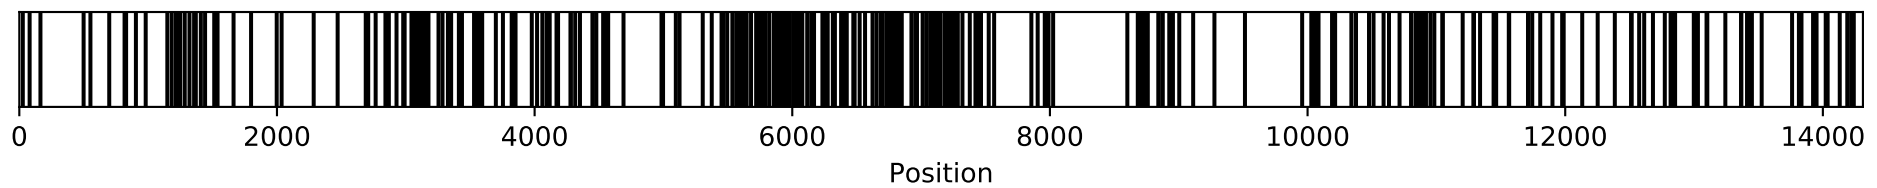

MM1 vs MM2  
Number of differences: 137

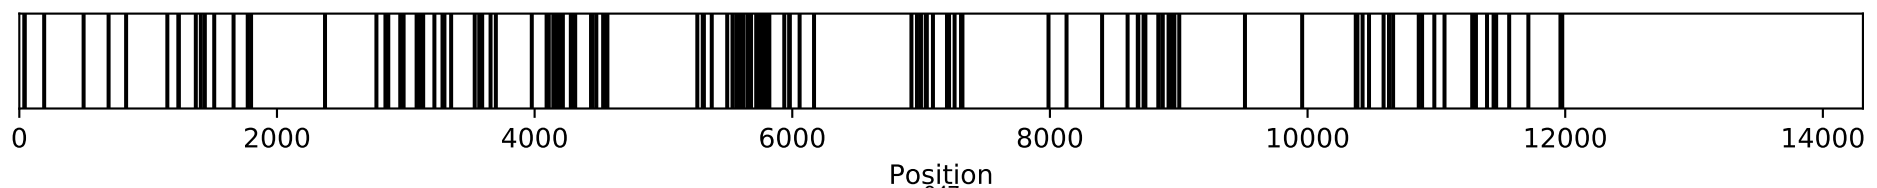

CR1 vs CR2  
Number of differences: 387

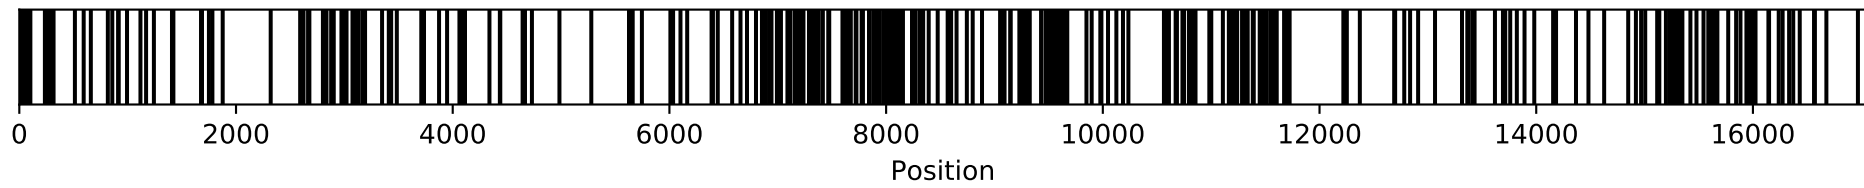

CR1 vs MM1  
Number of differences: 224

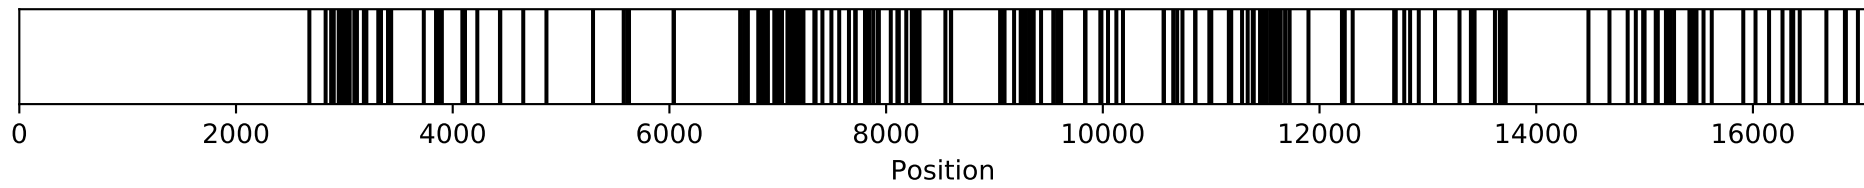

CR1 vs MM2  
Number of differences: 60

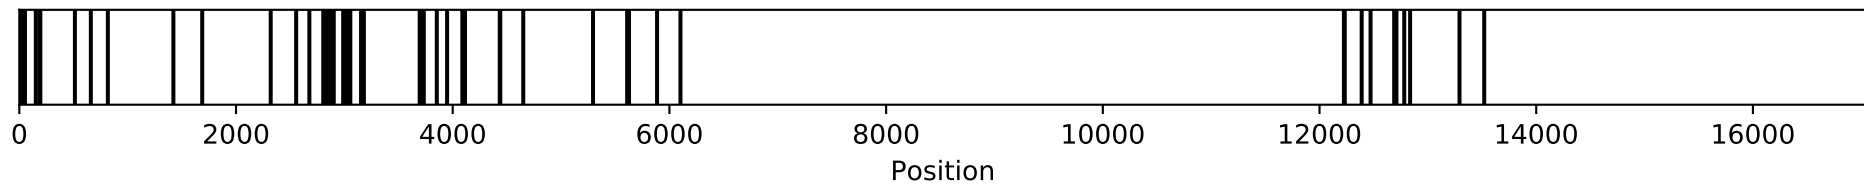

CR2 vs MM1  
Number of differences: 391

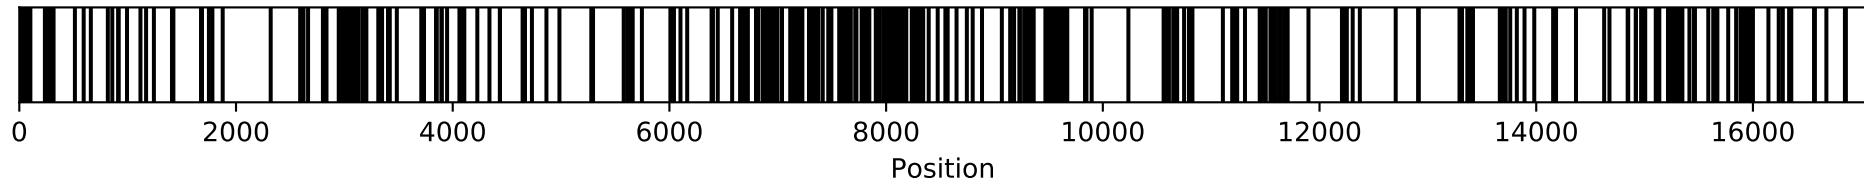

CR2 vs MM2  
Number of differences: 385

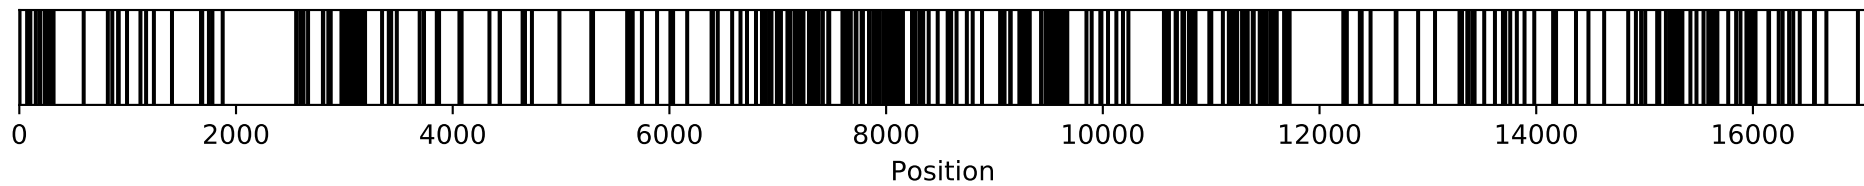

MM1 vs MM2  
Number of differences: 225

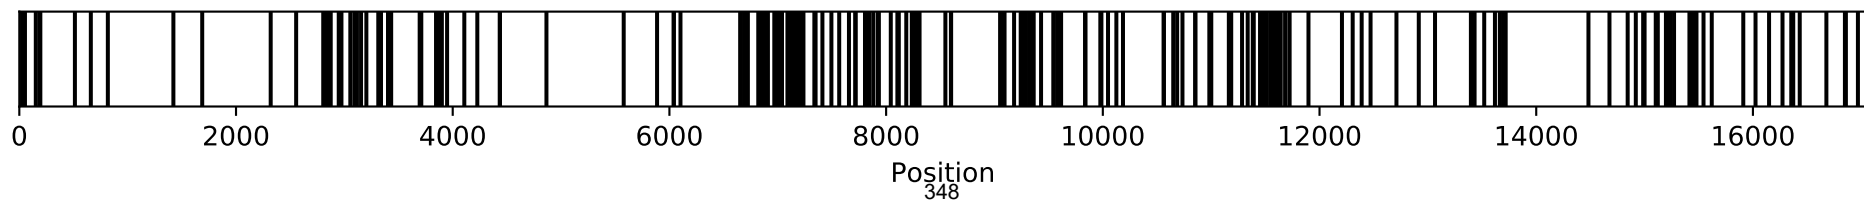

CR1 vs CR2  
Number of differences: 351

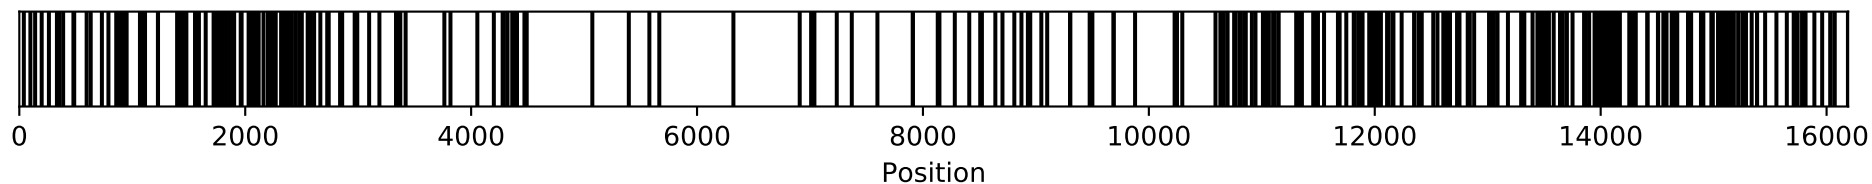

CR1 vs MM1  
Number of differences: 229

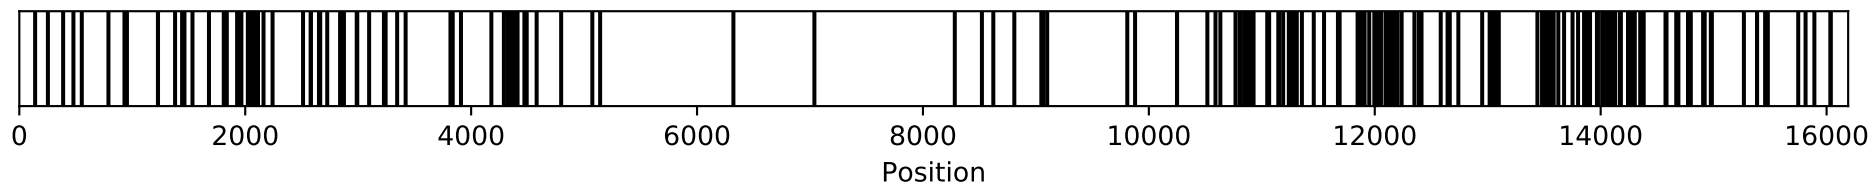

CR1 vs MM2  
Number of differences: 194

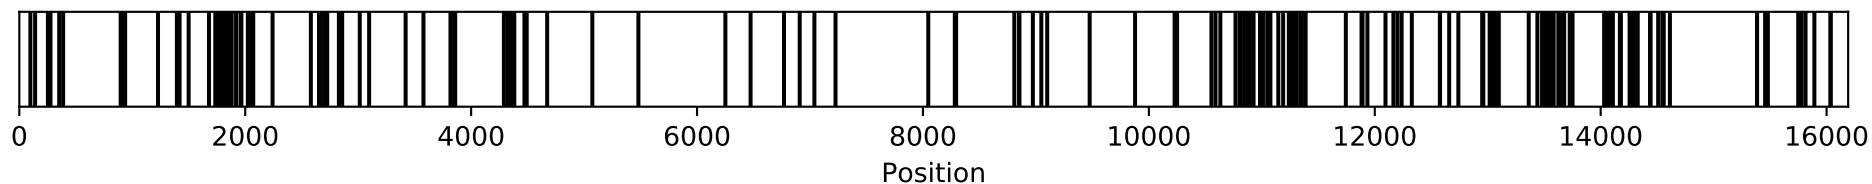

CR2 vs MM1  
Number of differences: 342

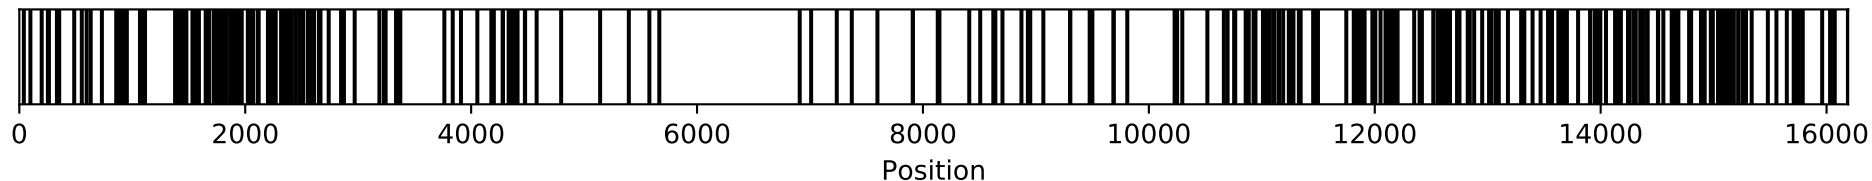

CR2 vs MM2  
Number of differences: 356

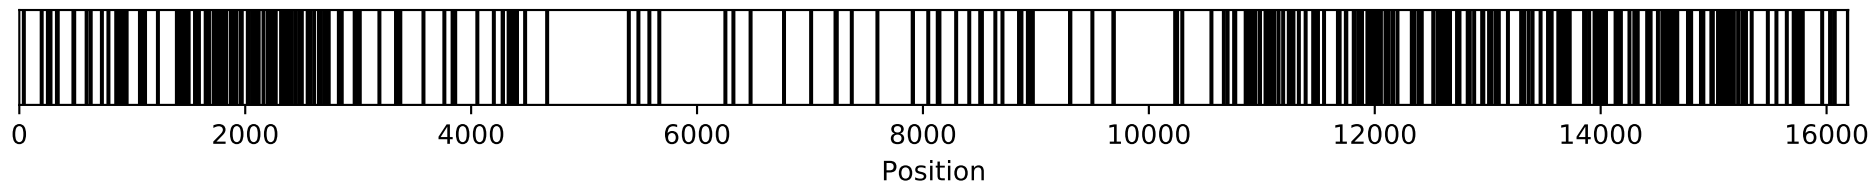

MM1 vs MM2  
Number of differences: 194

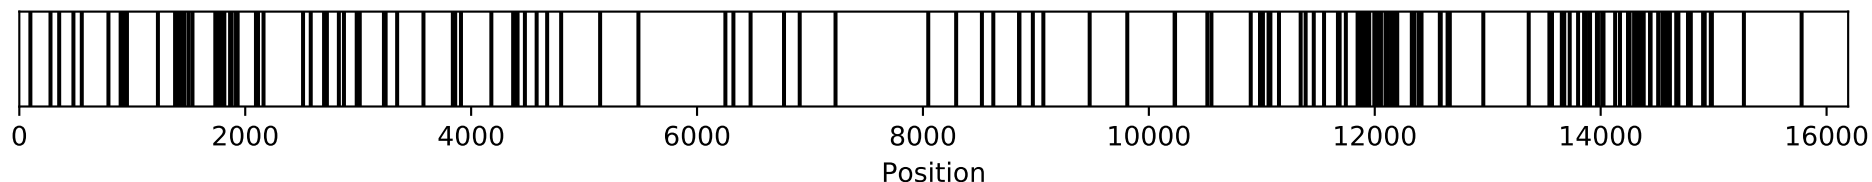

CR1 vs CR2  
Number of differences: 418

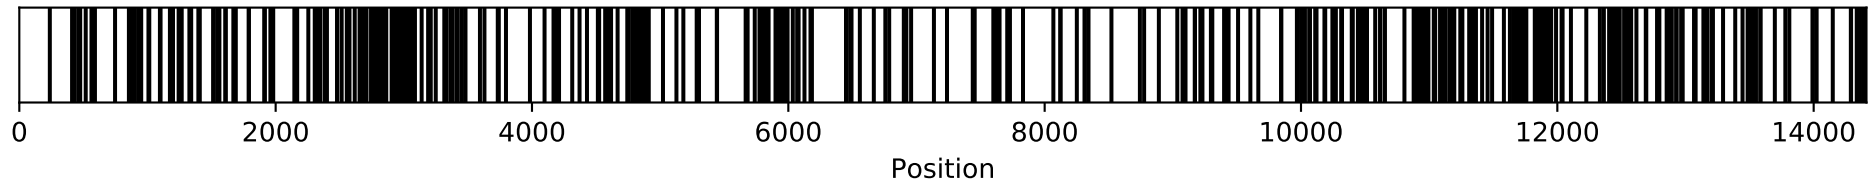

CR1 vs MM1  
Number of differences: 148

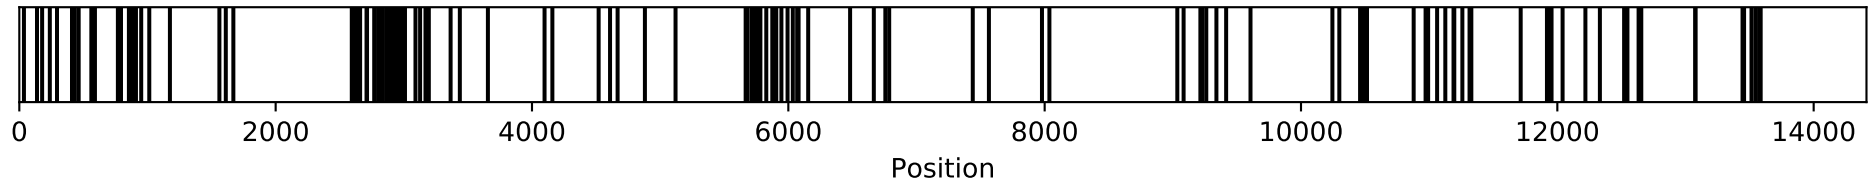

CR1 vs MM2  
Number of differences: 164

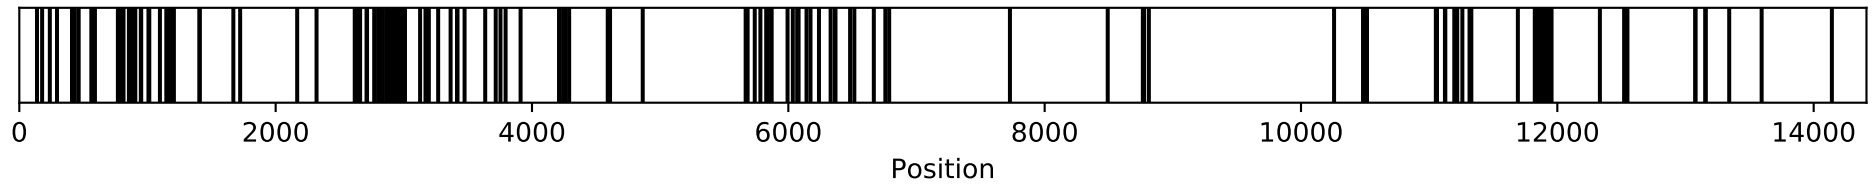

CR2 vs MM1  
Number of differences: 401

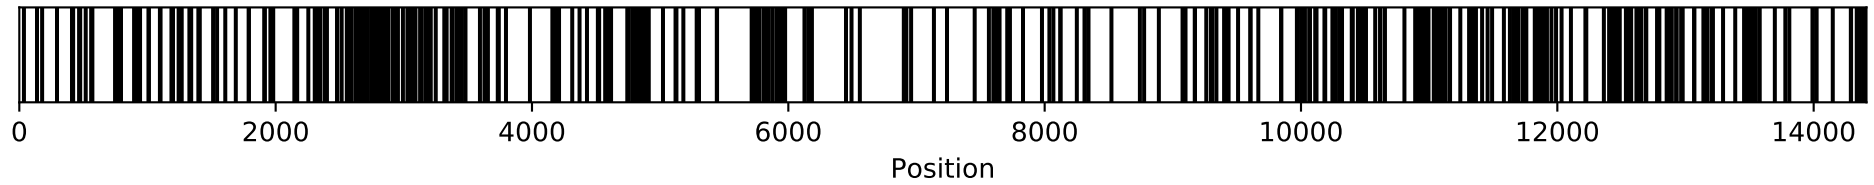

CR2 vs MM2  
Number of differences: 424

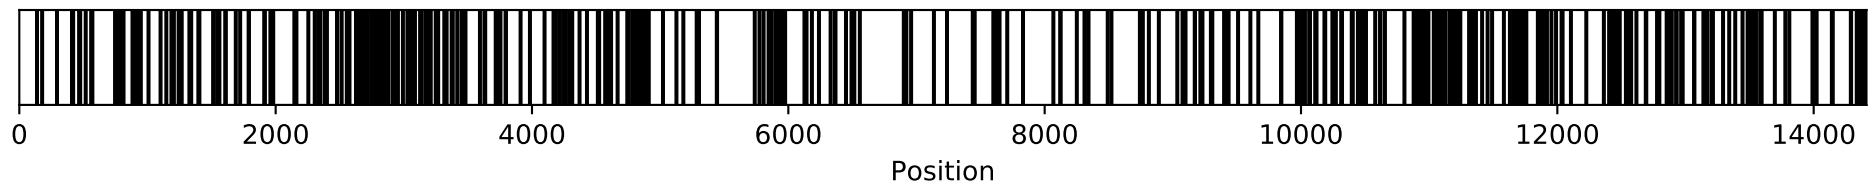

MM1 vs MM2  
Number of differences: 132

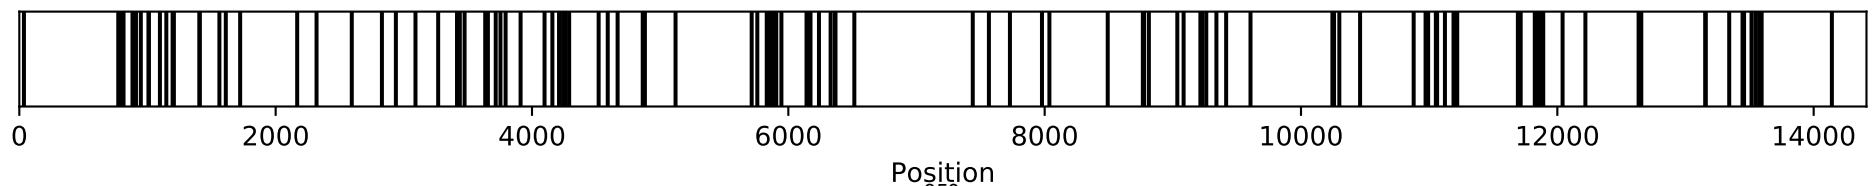

CR1 vs CR2  
Number of differences: 238

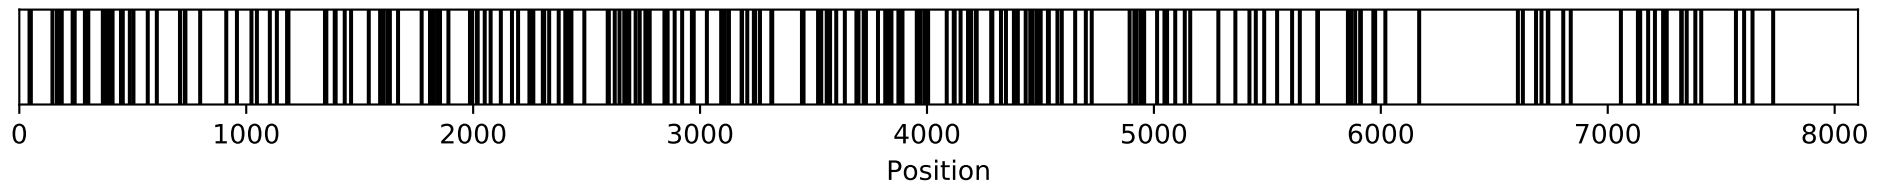

CR1 vs MM1  
Number of differences: 118

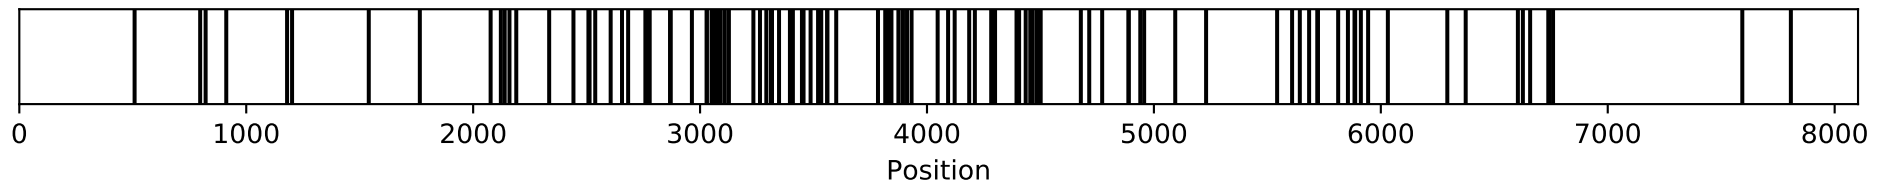

CR1 vs MM2  
Number of differences: 117

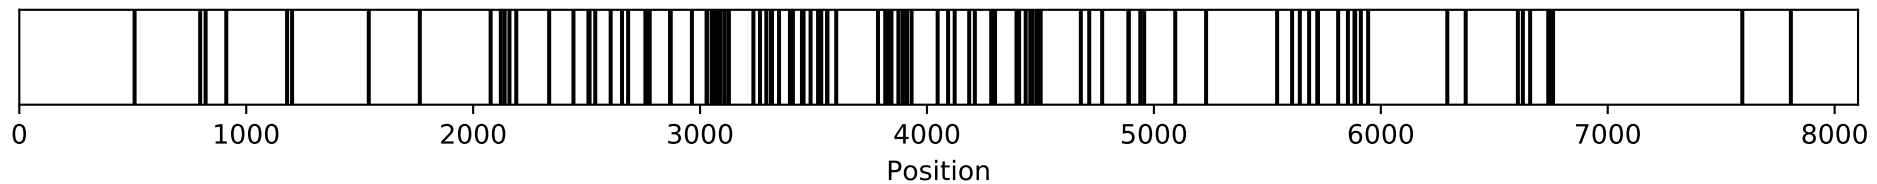

CR2 vs MM1  
Number of differences: 248

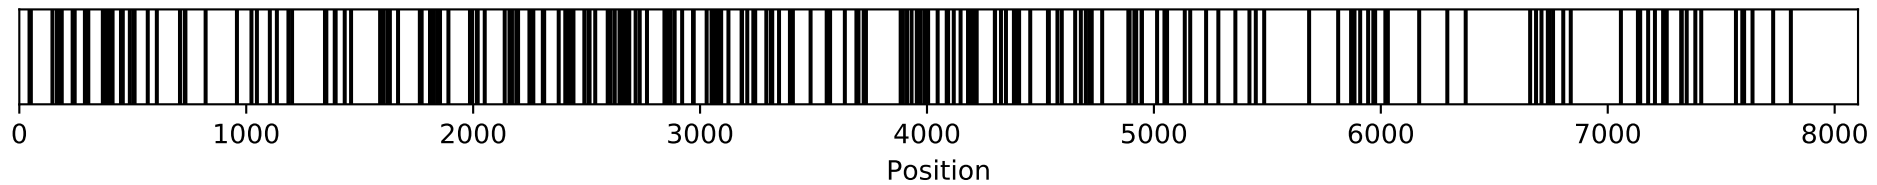

CR2 vs MM2  
Number of differences: 247

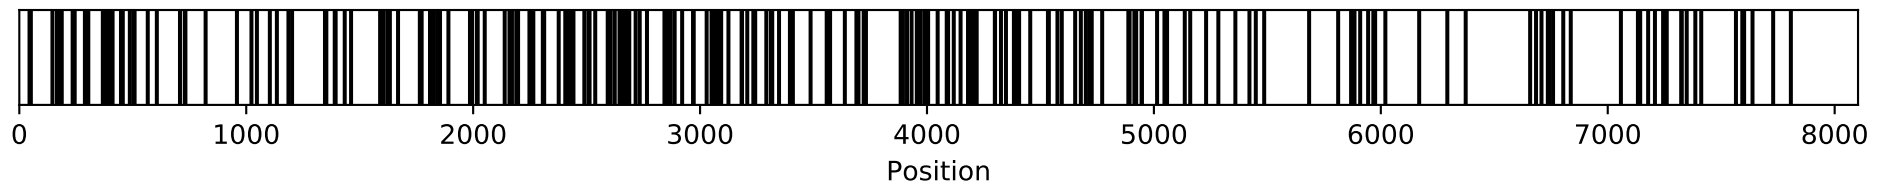

MM1 vs MM2  
Number of differences: 1

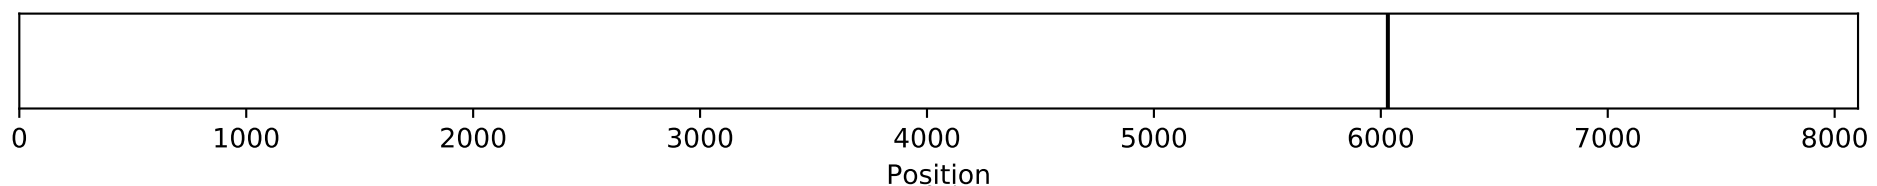



CR1 vs CR2  
Number of differences: 324

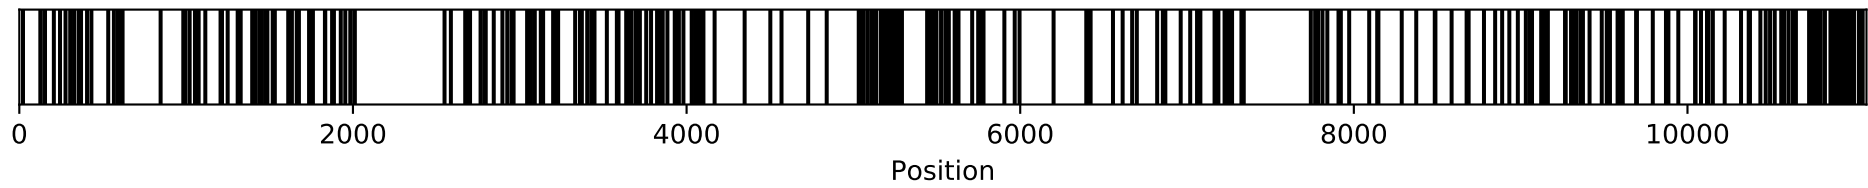

CR1 vs MM1  
Number of differences: 217

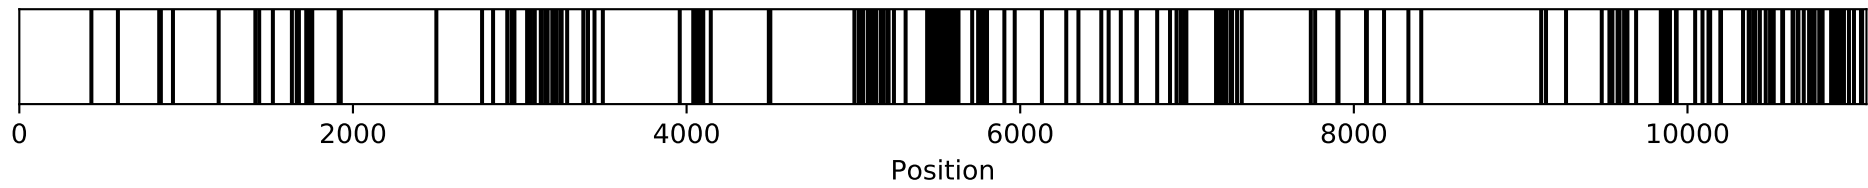

CR1 vs MM2  
Number of differences: 198

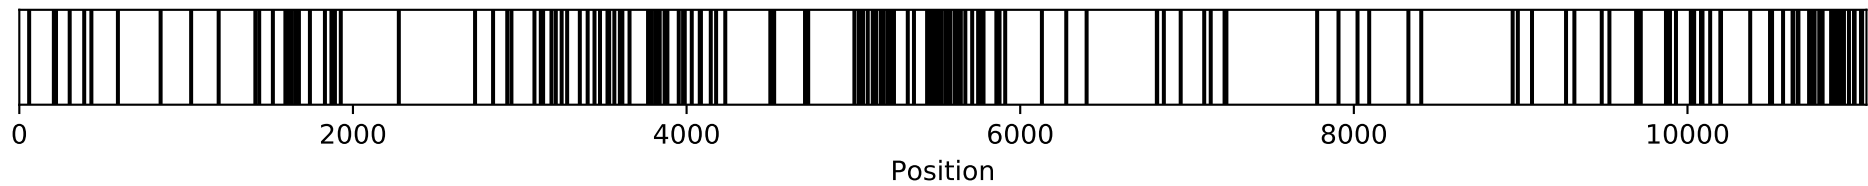

CR2 vs MM1  
Number of differences: 335

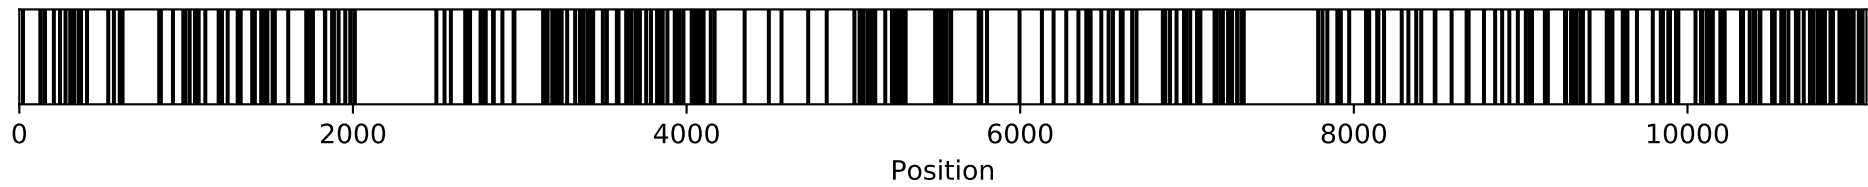

CR2 vs MM2  
Number of differences: 342

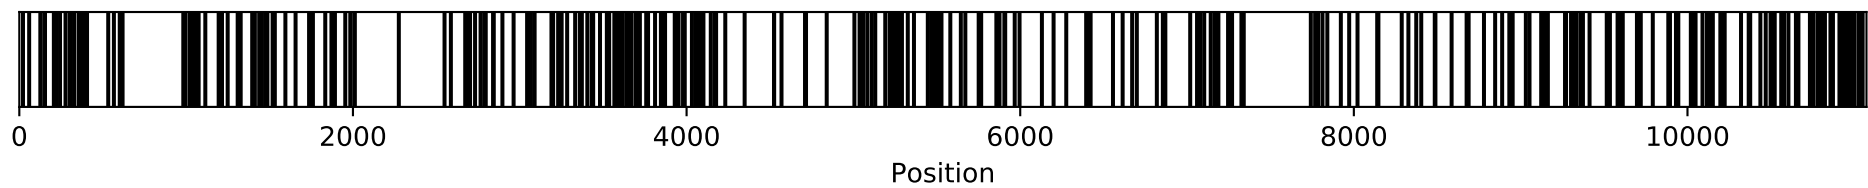

MM1 vs MM2  
Number of differences: 191

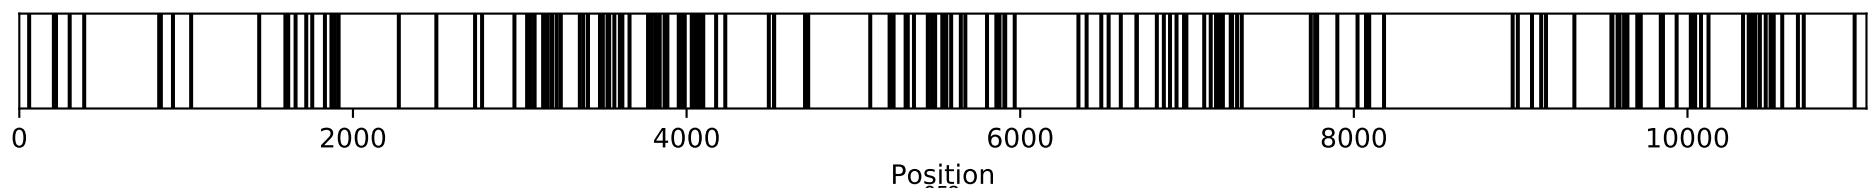

CR1 vs CR2  
Number of differences: 84

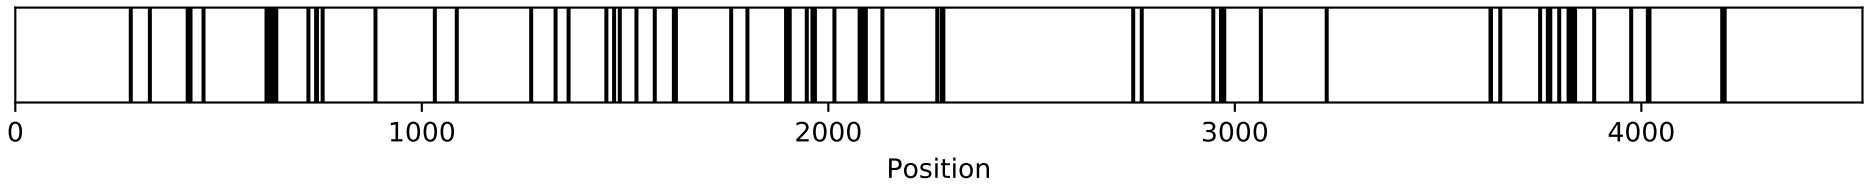

CR1 vs MM1  
Number of differences: 22

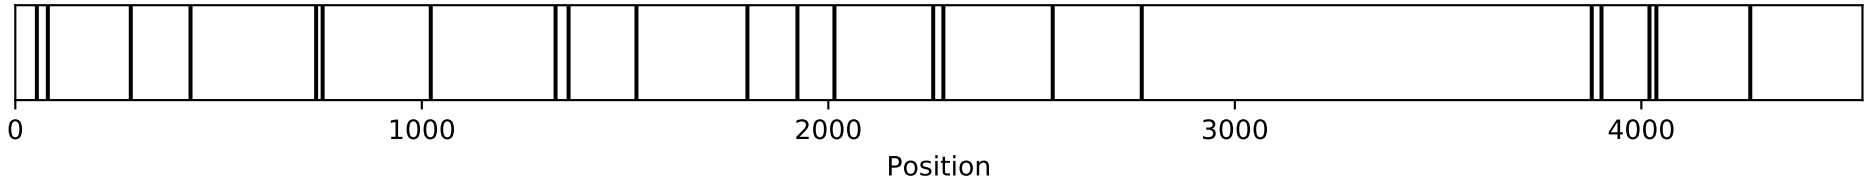

CR1 vs MM2  
Number of differences: 18

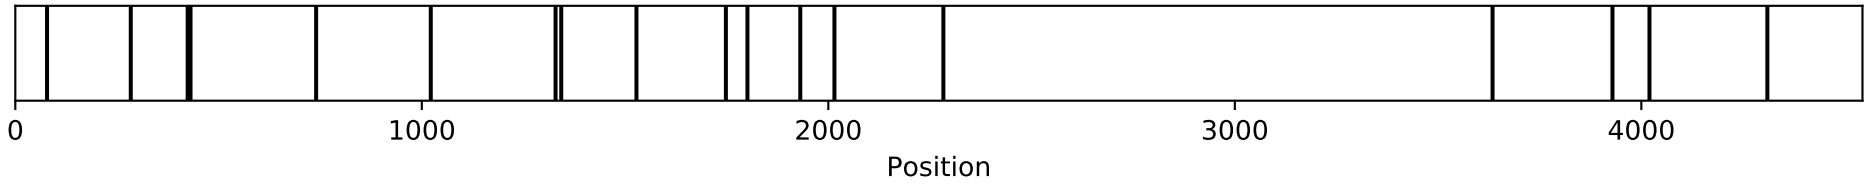

CR2 vs MM1  
Number of differences: 83

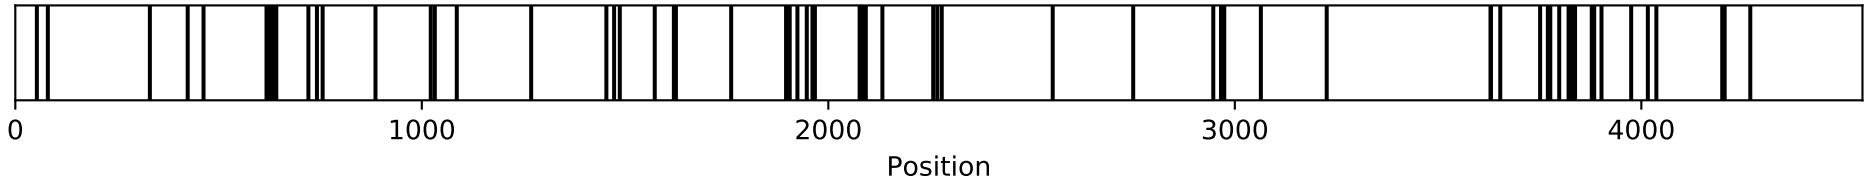

CR2 vs MM2  
Number of differences: 82

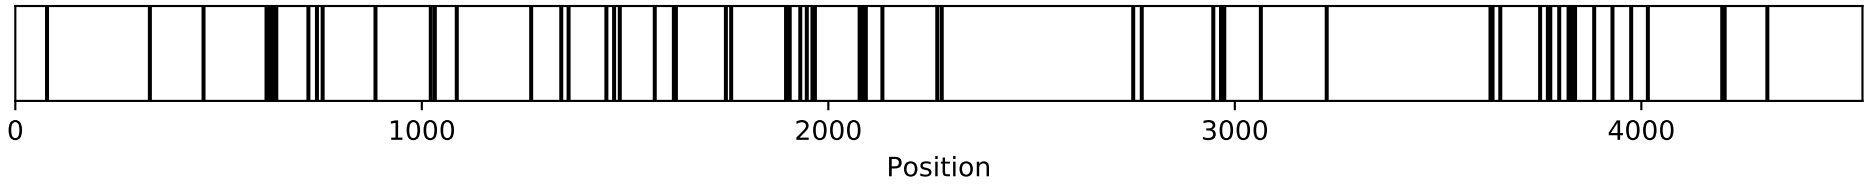

MM1 vs MM2  
Number of differences: 20

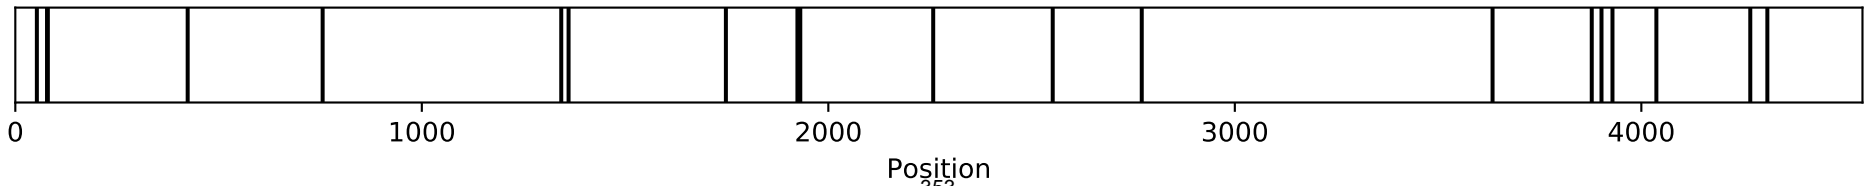

CR1 vs CR2  
Number of differences: 17

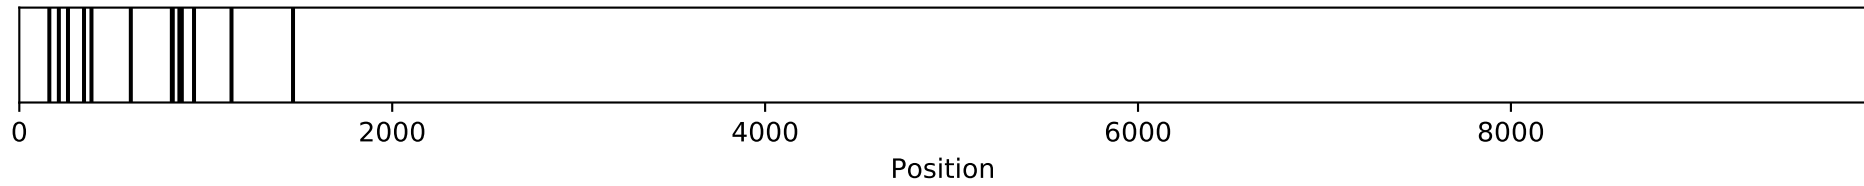

CR1 vs MM1  
Number of differences: 0

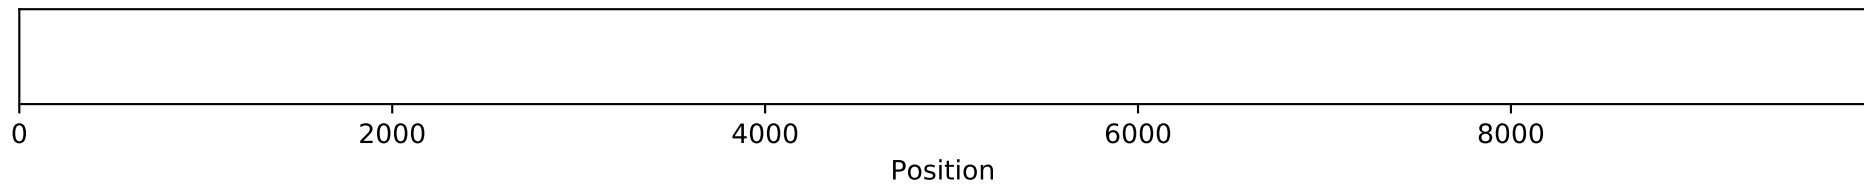

CR1 vs MM2  
Number of differences: 71

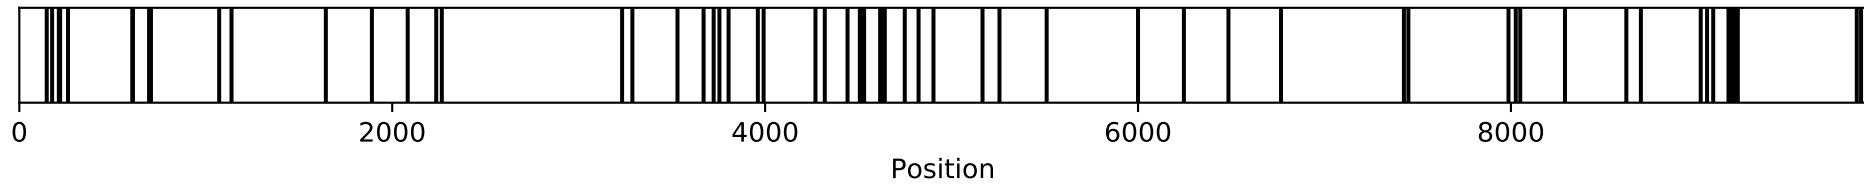

CR2 vs MM1  
Number of differences: 17

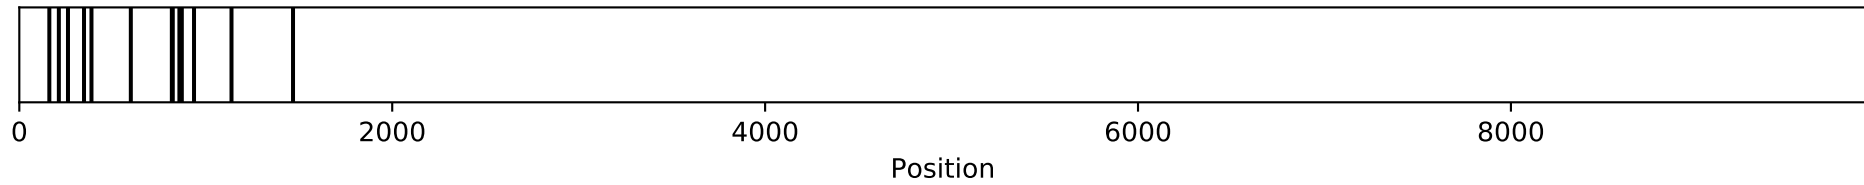

CR2 vs MM2  
Number of differences: 82

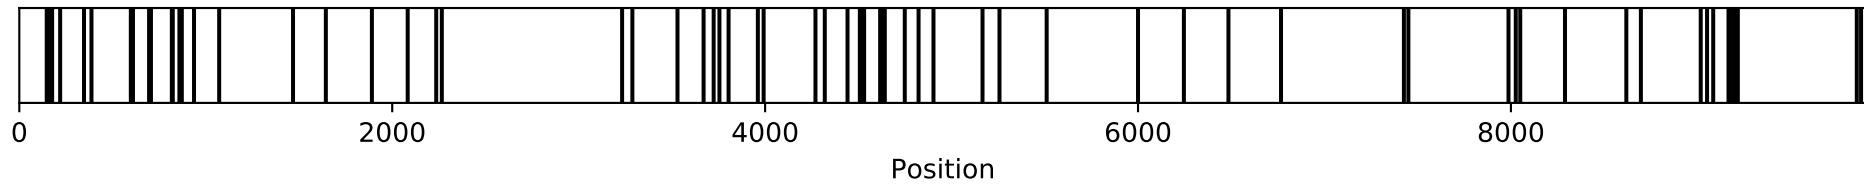

MM1 vs MM2  
Number of differences: 71

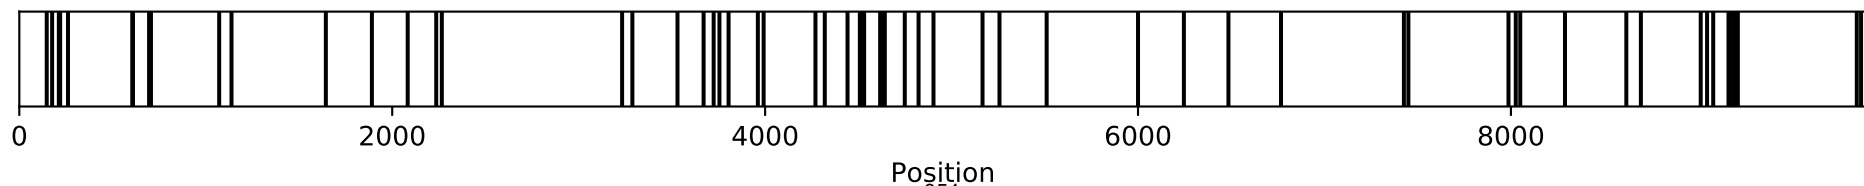

CR1 vs CR2  
Number of differences: 347

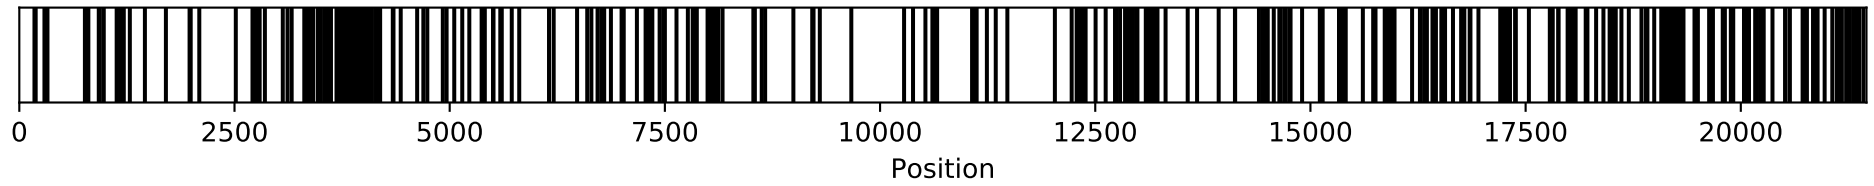

CR1 vs MM1  
Number of differences: 181

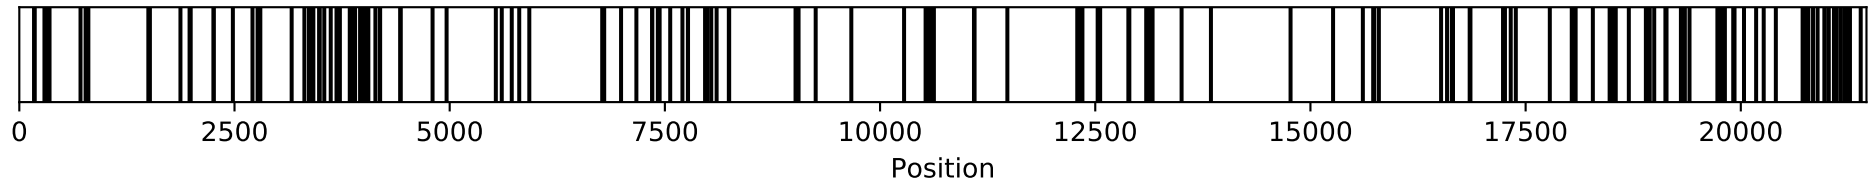

CR1 vs MM2  
Number of differences: 173

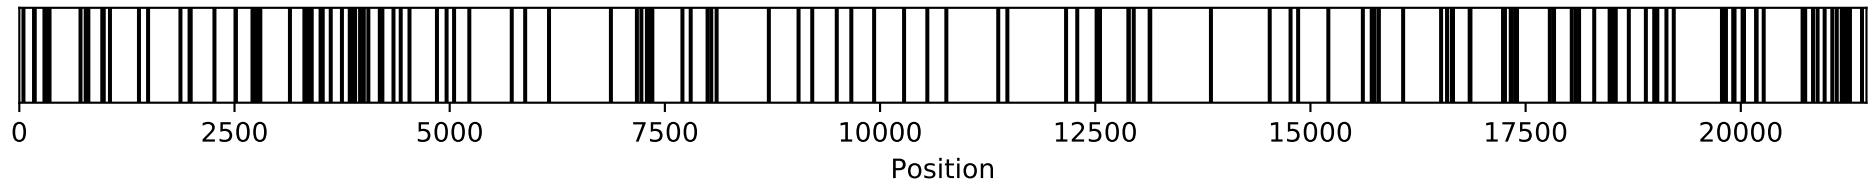

CR2 vs MM1  
Number of differences: 330

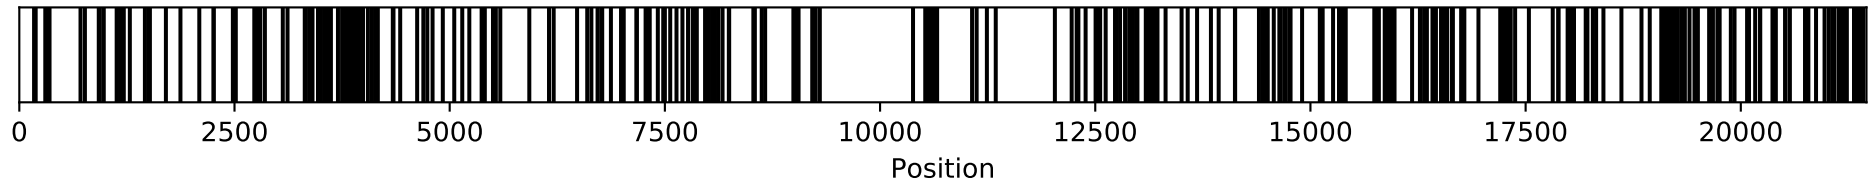

CR2 vs MM2  
Number of differences: 354

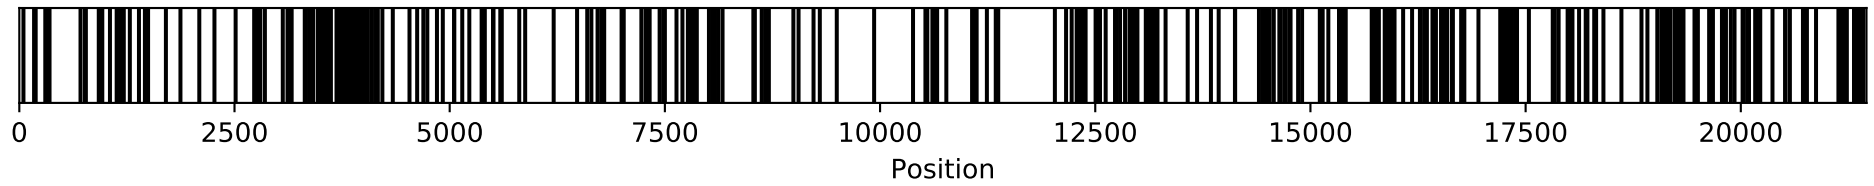

MM1 vs MM2  
Number of differences: 160

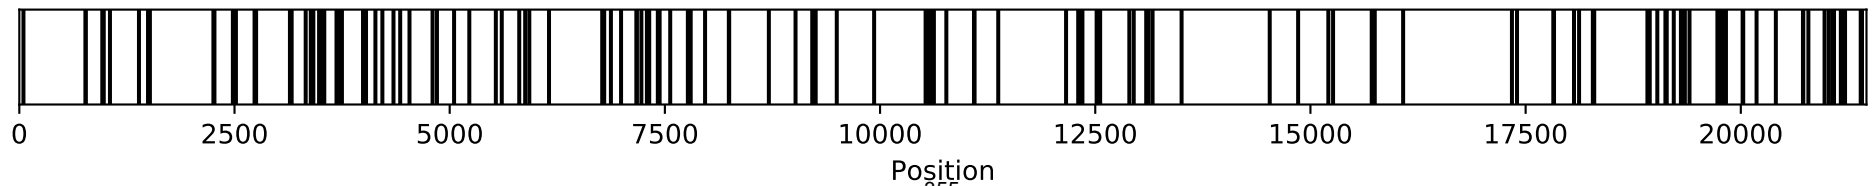

CR1 vs CR2  
Number of differences: 228

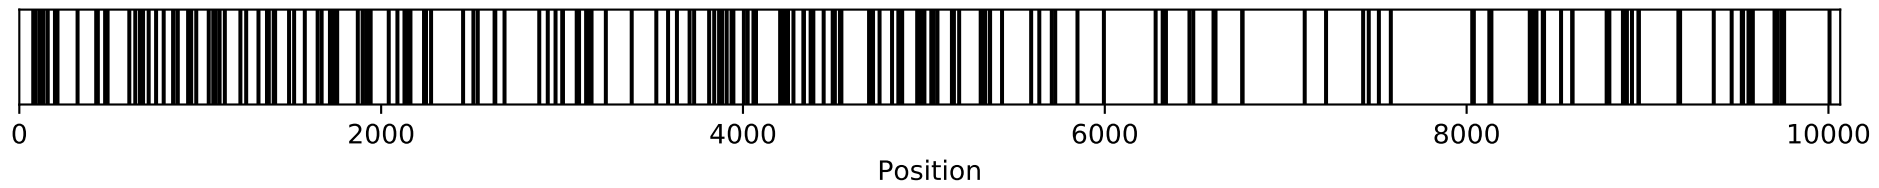

CR1 vs MM1  
Number of differences: 123

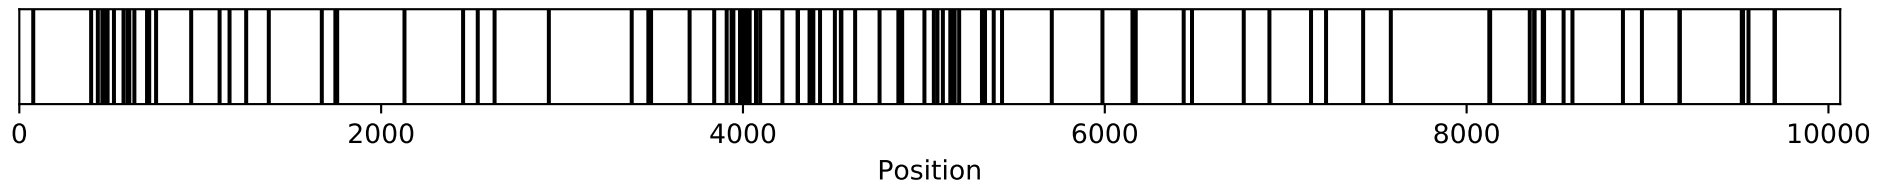

CR1 vs MM2  
Number of differences: 114

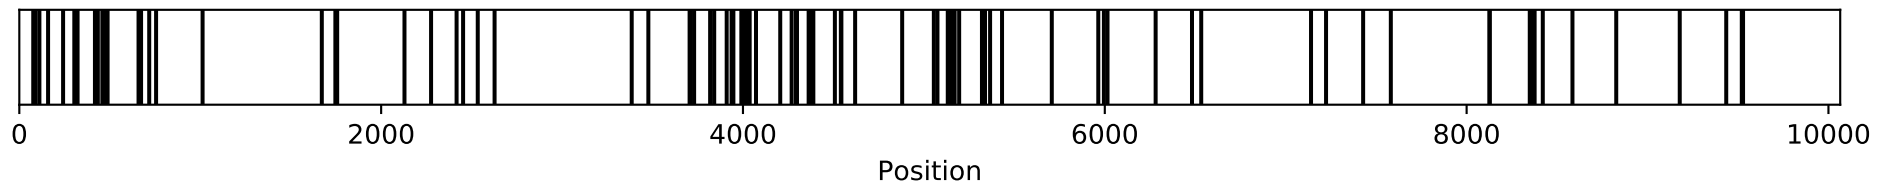

CR2 vs MM1  
Number of differences: 213

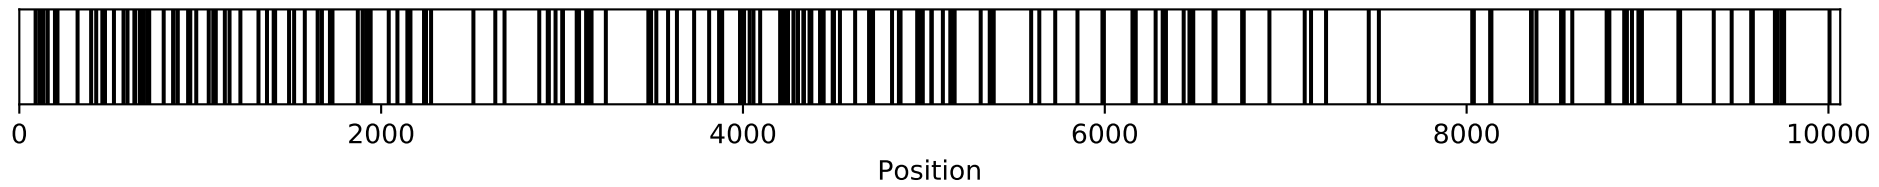

CR2 vs MM2  
Number of differences: 209

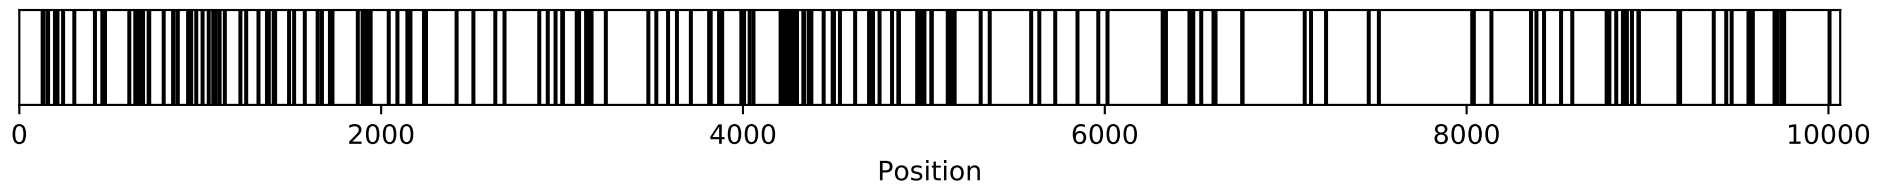

MM1 vs MM2  
Number of differences: 81

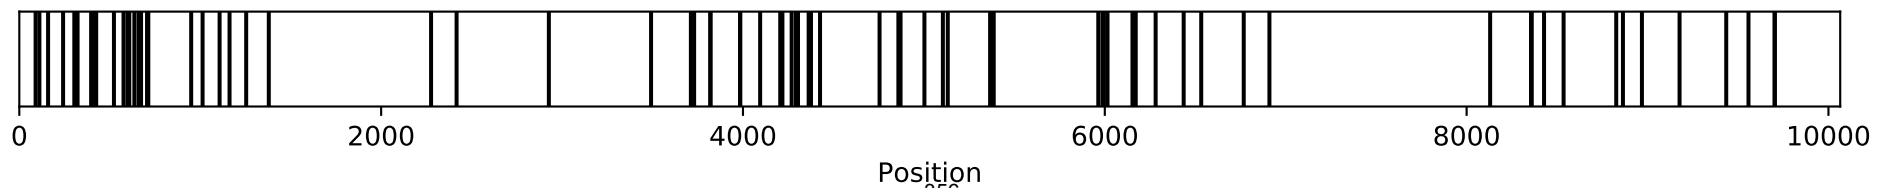

CR1 vs CR2  
Number of differences: 135

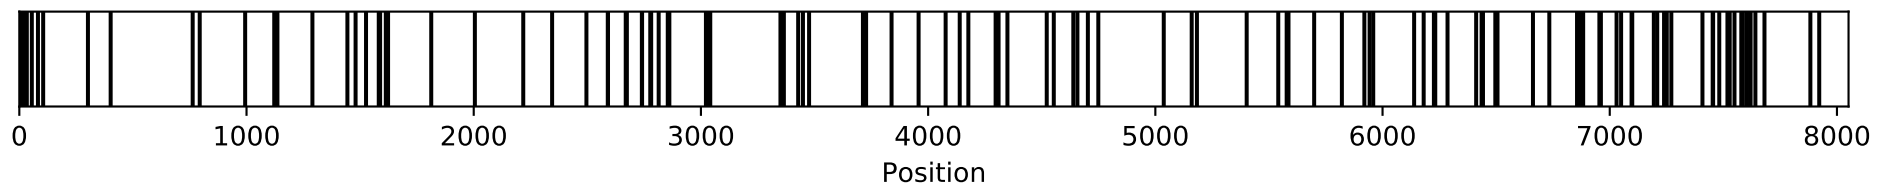

CR1 vs MM1  
Number of differences: 125

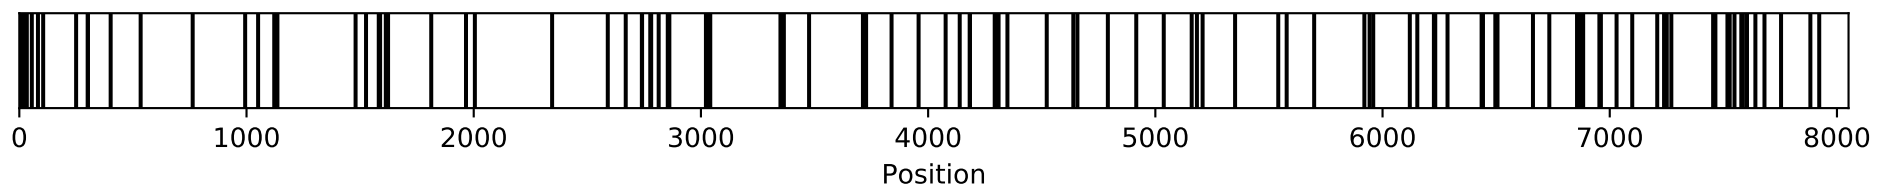

CR1 vs MM2  
Number of differences: 140

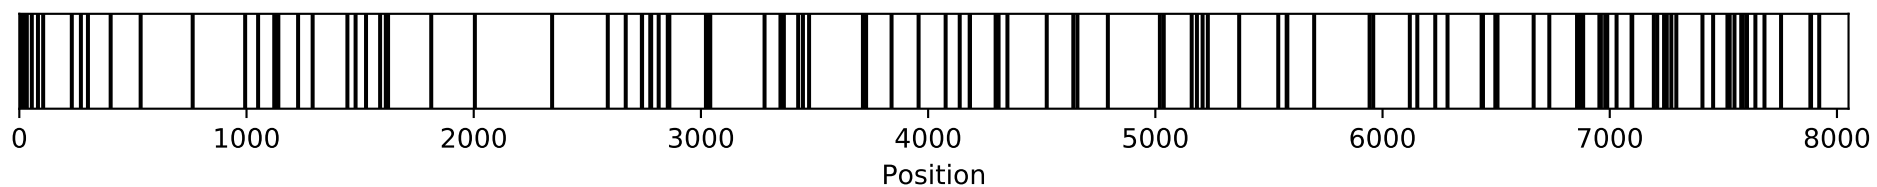

CR2 vs MM1  
Number of differences: 44

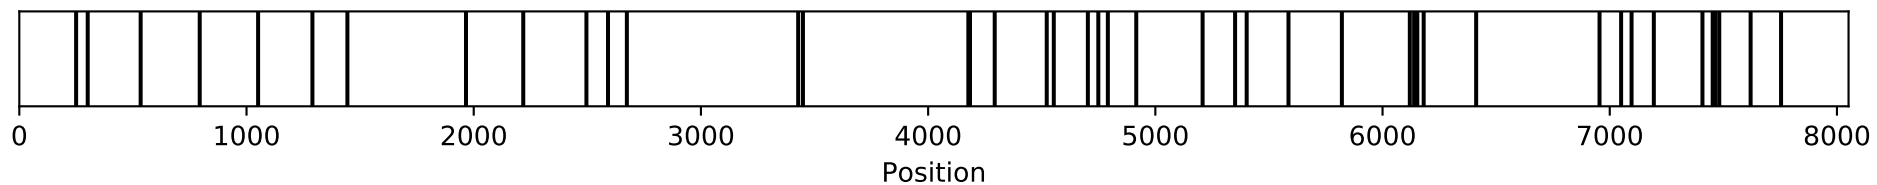

CR2 vs MM2  
Number of differences: 57

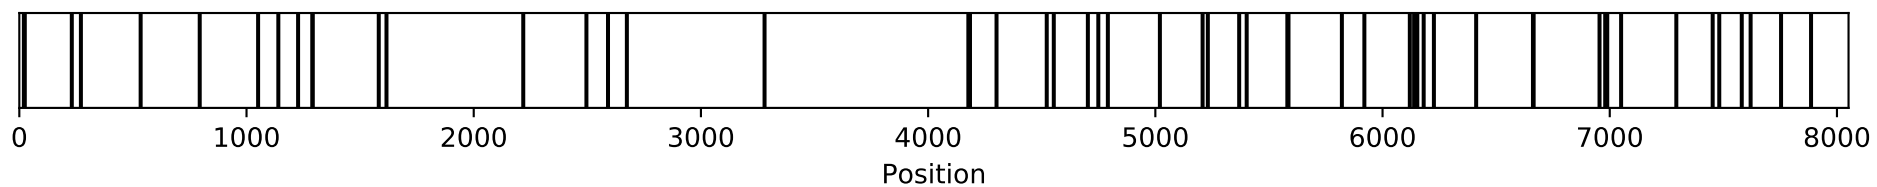

MM1 vs MM2  
Number of differences: 39

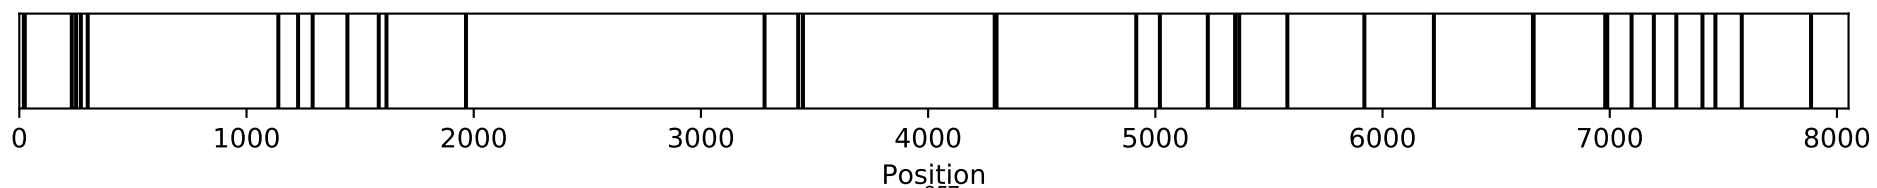

CR1 vs CR2  
Number of differences: 288

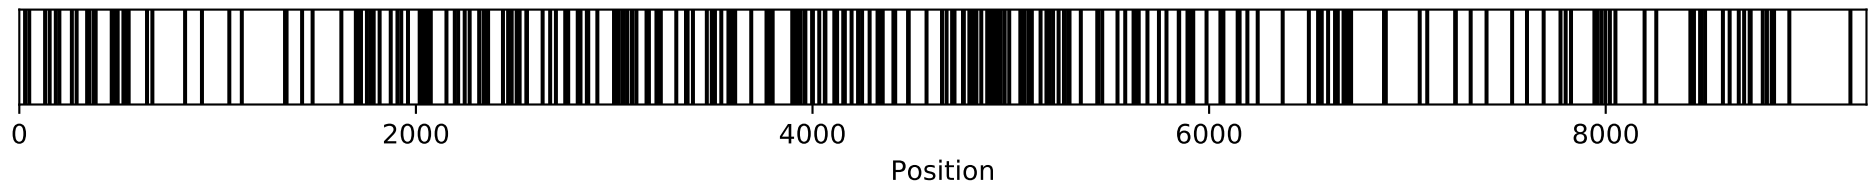

CR1 vs MM1  
Number of differences: 118

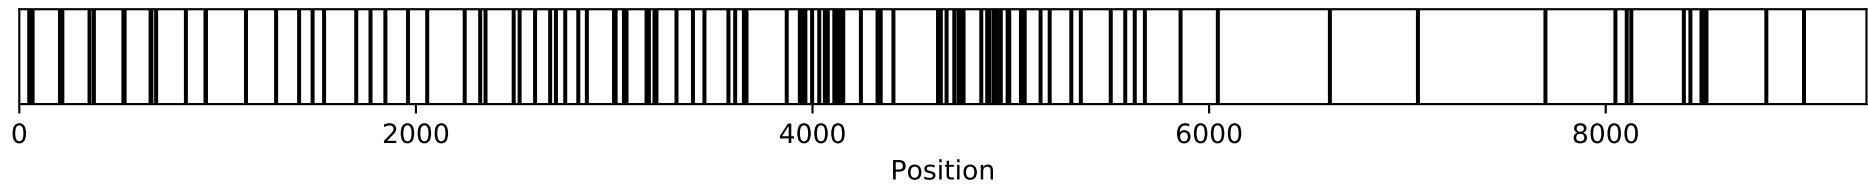

CR1 vs MM2  
Number of differences: 125

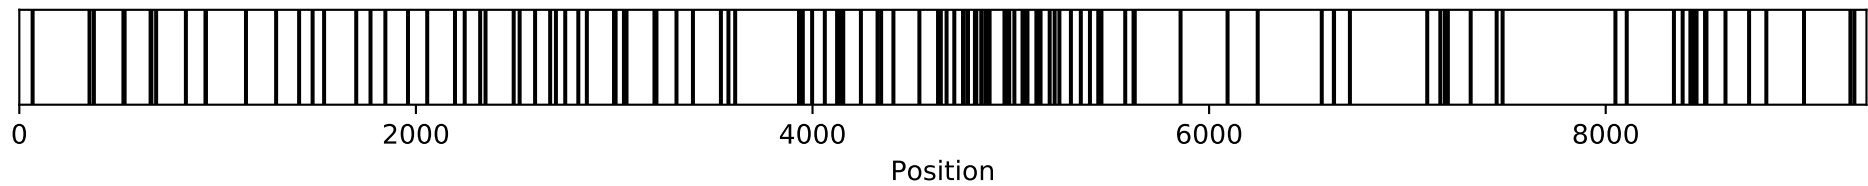

CR2 vs MM1  
Number of differences: 285

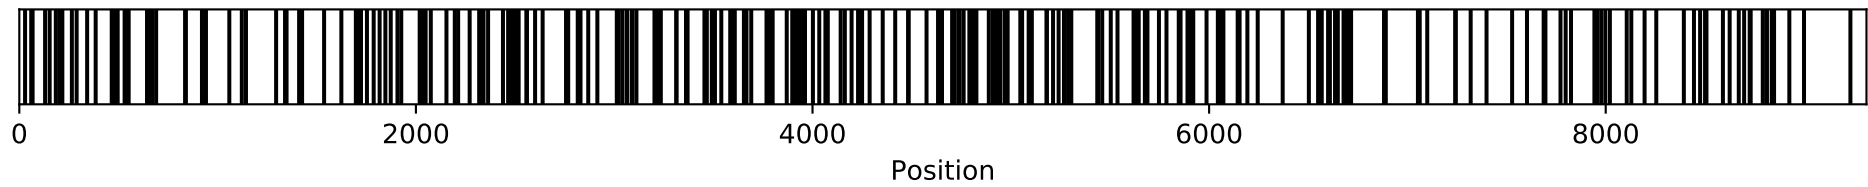

CR2 vs MM2  
Number of differences: 294

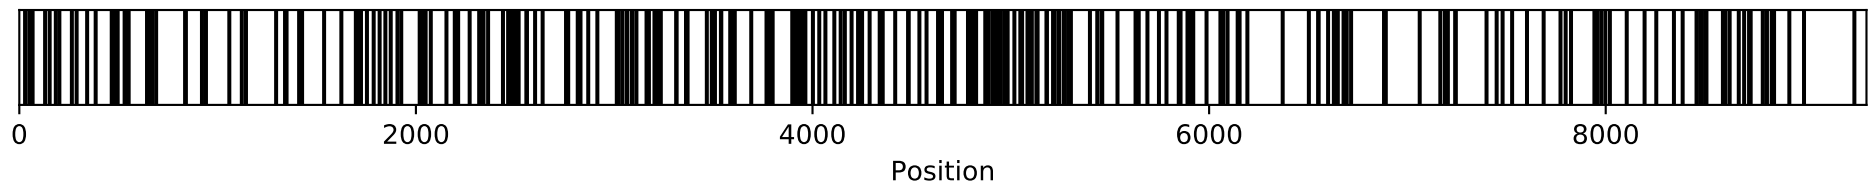

MM1 vs MM2  
Number of differences: 87

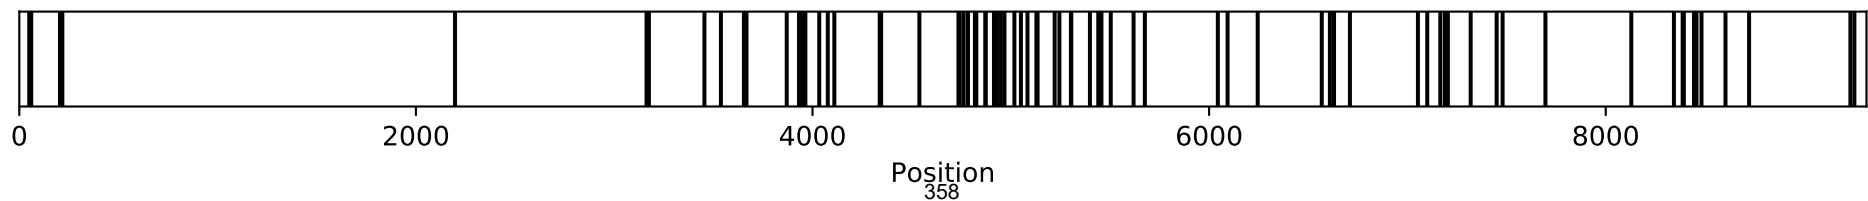

CR1 vs CR2  
Number of differences: 331

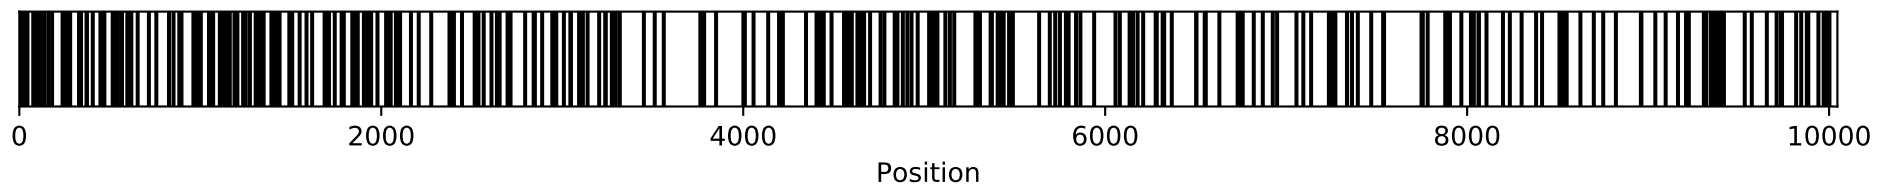

CR1 vs MM1  
Number of differences: 162

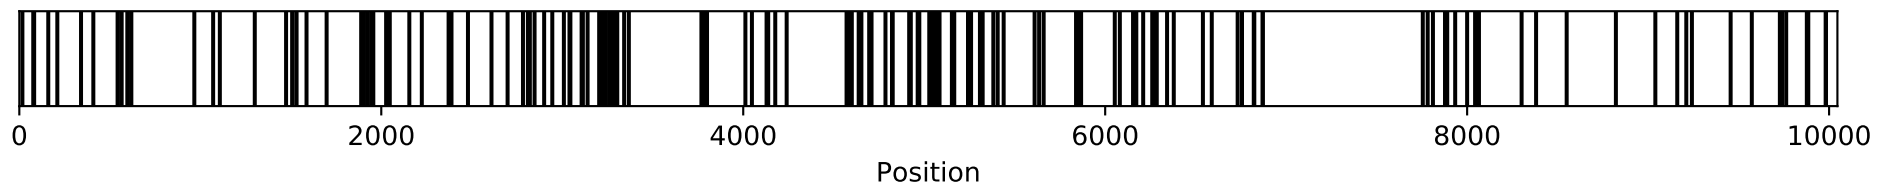

CR1 vs MM2  
Number of differences: 145

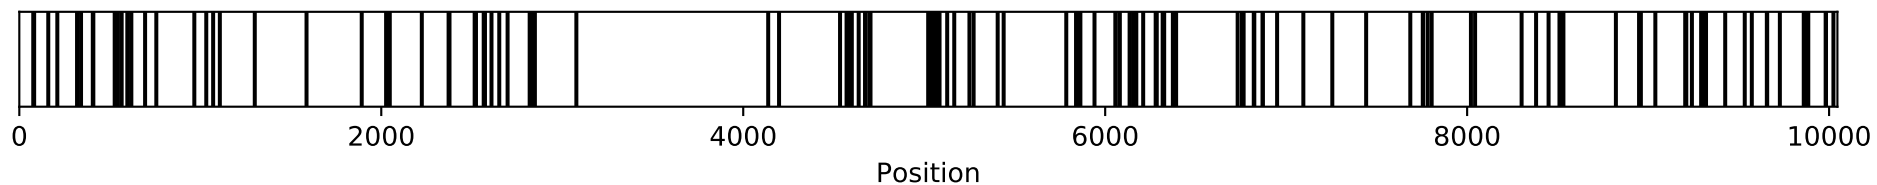

CR2 vs MM1  
Number of differences: 332

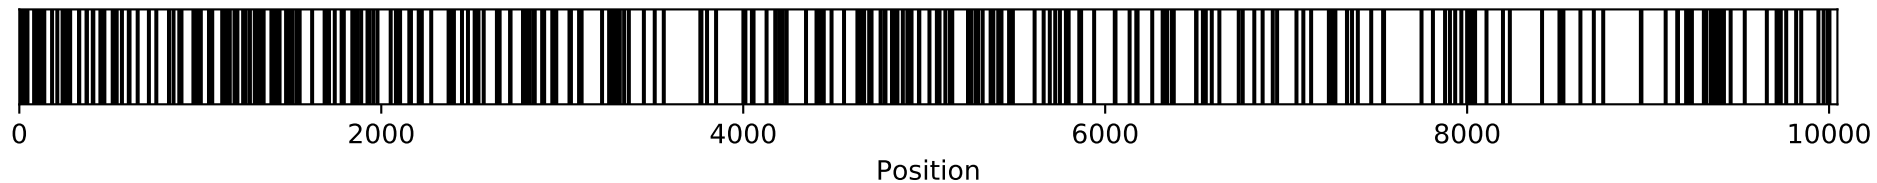

CR2 vs MM2  
Number of differences: 301

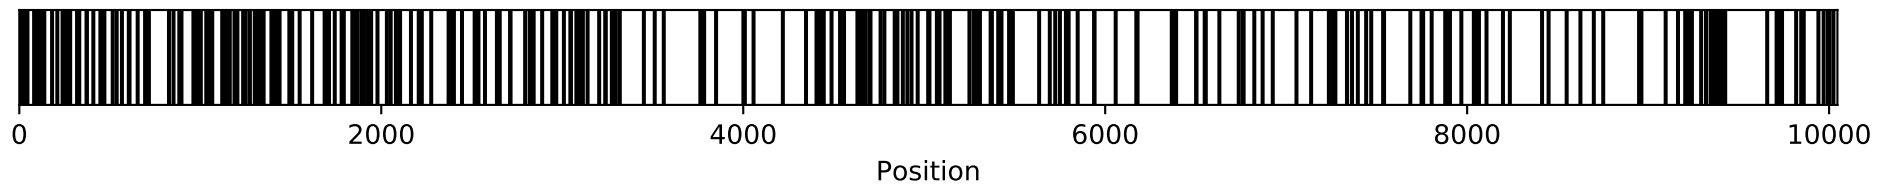

MM1 vs MM2  
Number of differences: 161

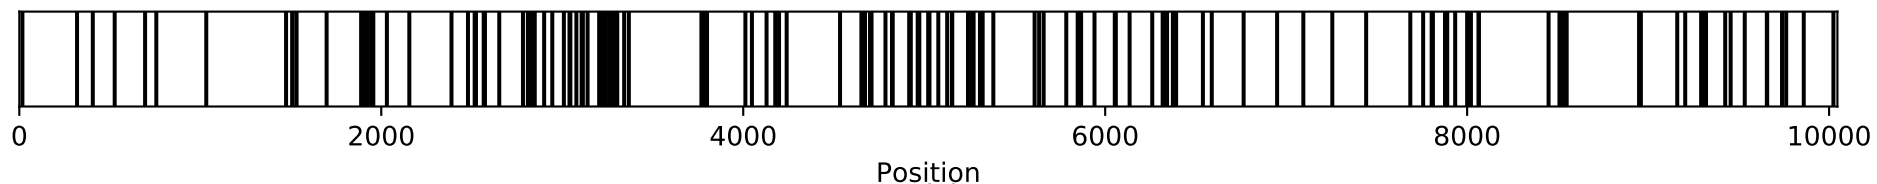



CR1 vs CR2  
Number of differences: 223

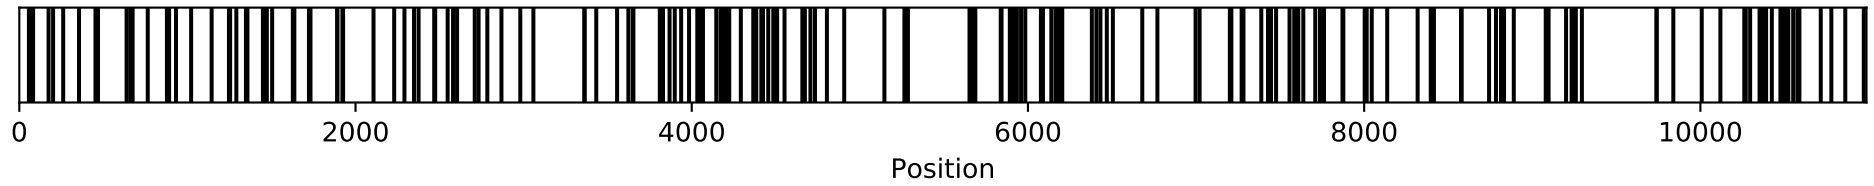

CR1 vs MM1  
Number of differences: 130

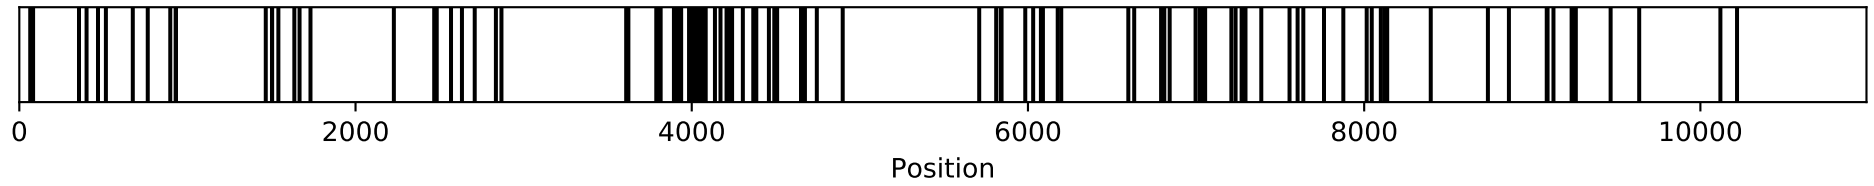

CR1 vs MM2  
Number of differences: 105

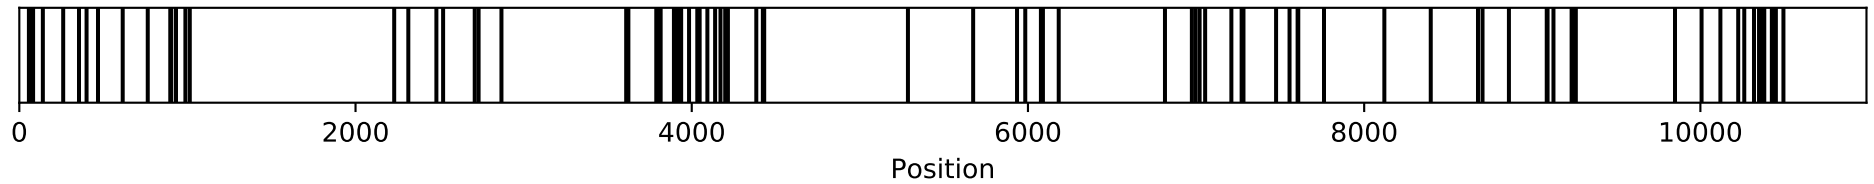

CR2 vs MM1  
Number of differences: 226

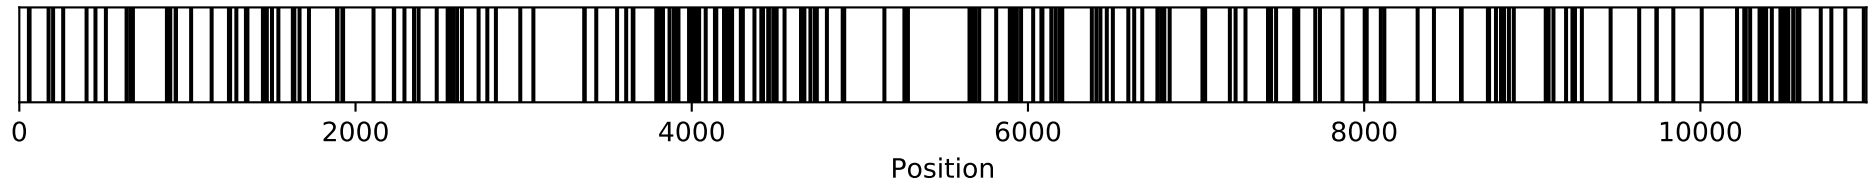

CR2 vs MM2  
Number of differences: 218

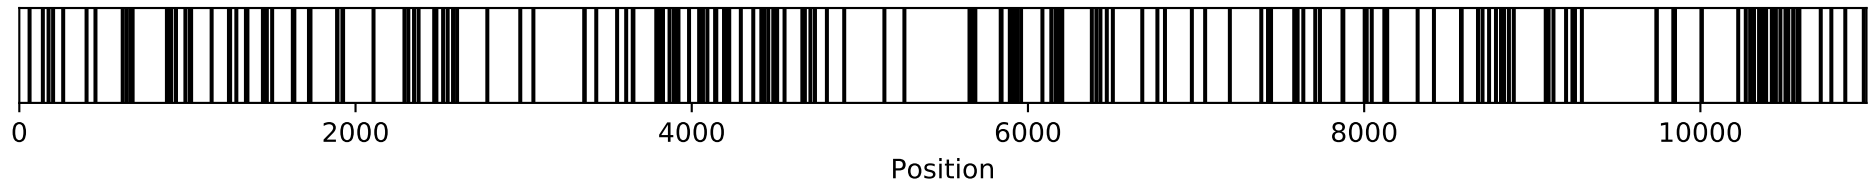

MM1 vs MM2  
Number of differences: 112

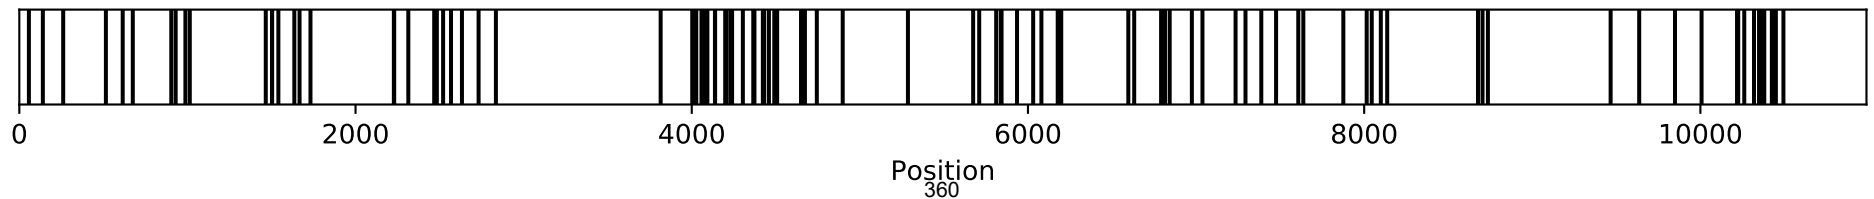

CR1 vs CR2  
Number of differences: 139

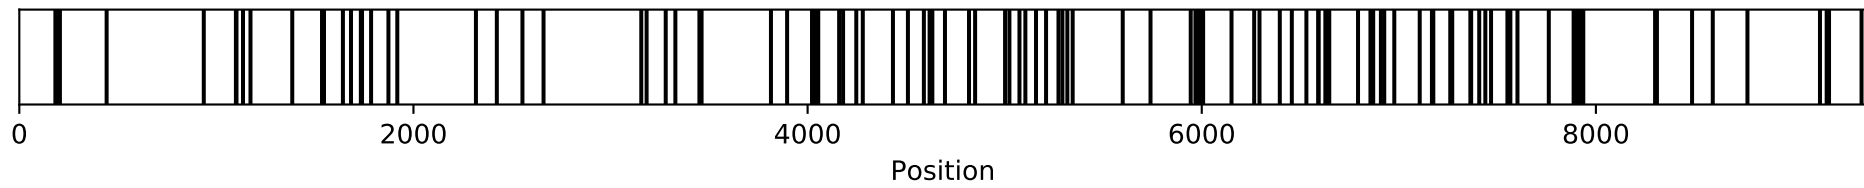

CR1 vs MM1  
Number of differences: 71

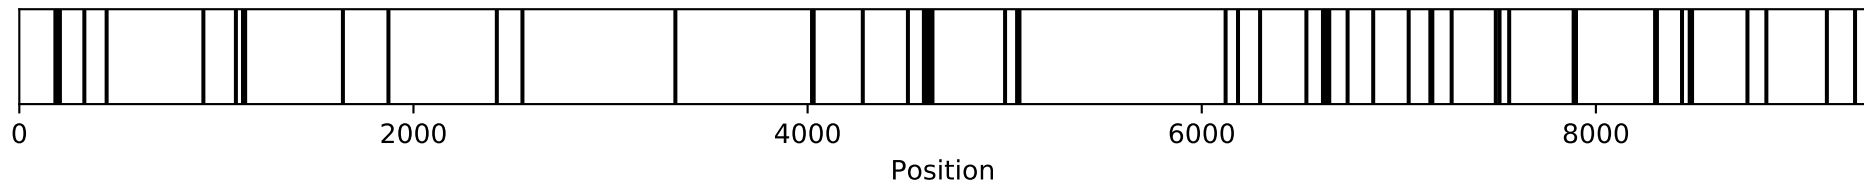

CR1 vs MM2  
Number of differences: 72

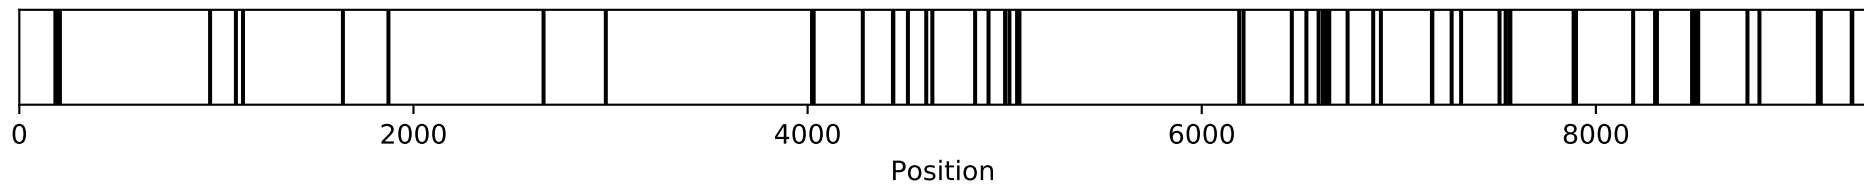

CR2 vs MM1  
Number of differences: 121

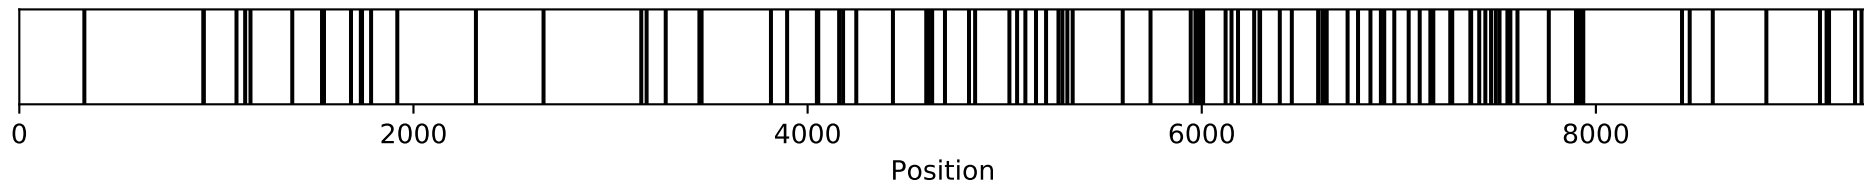

CR2 vs MM2  
Number of differences: 118

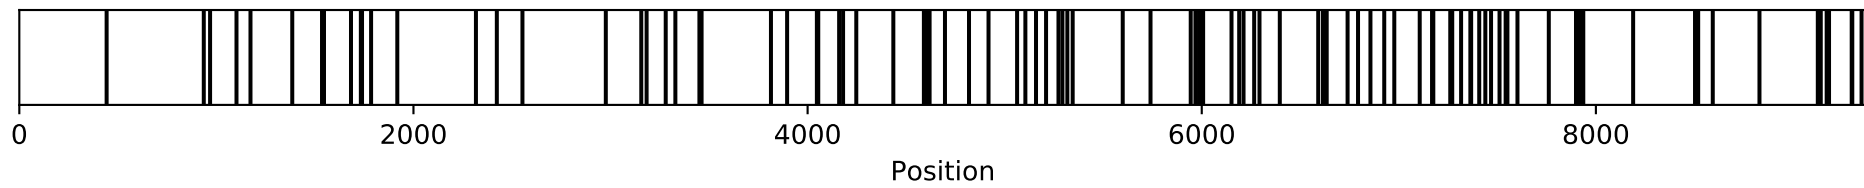

MM1 vs MM2  
Number of differences: 49

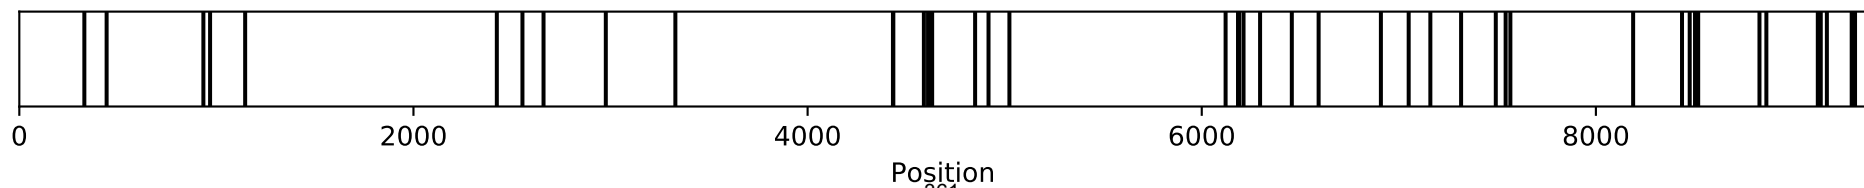

CR1 vs CR2  
Number of differences: 218

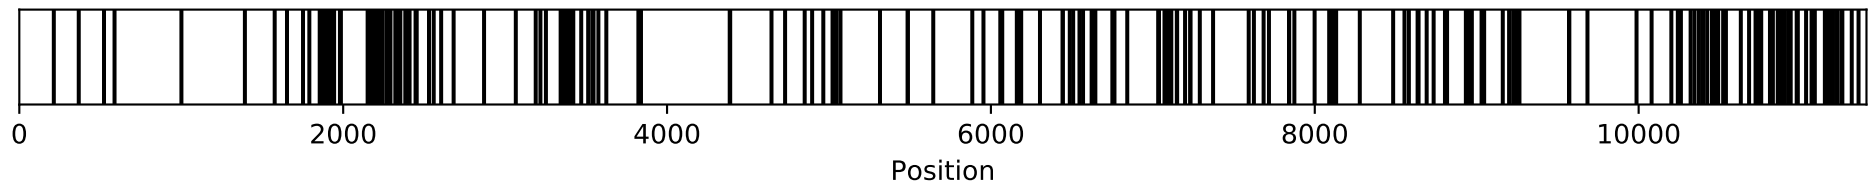

CR1 vs MM1  
Number of differences: 110

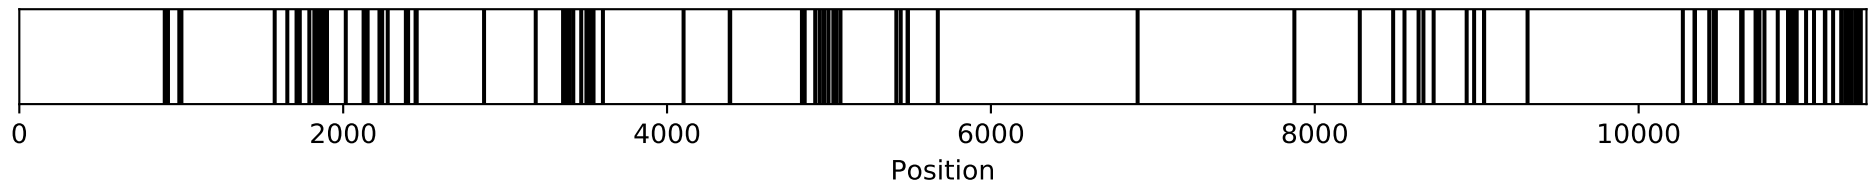

CR1 vs MM2  
Number of differences: 90

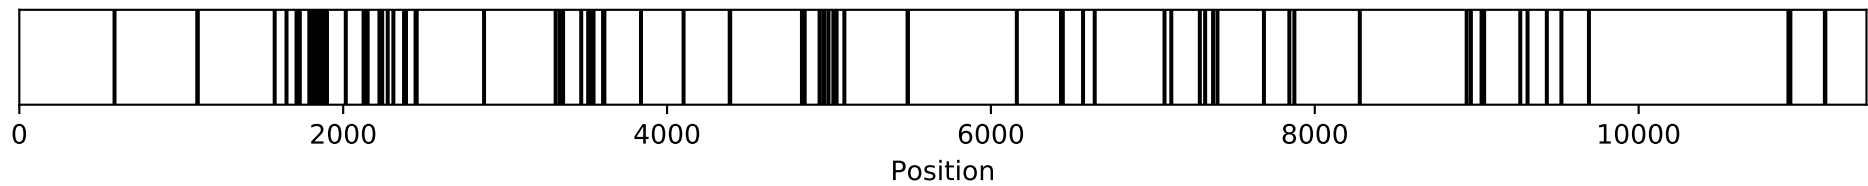

CR2 vs MM1  
Number of differences: 218

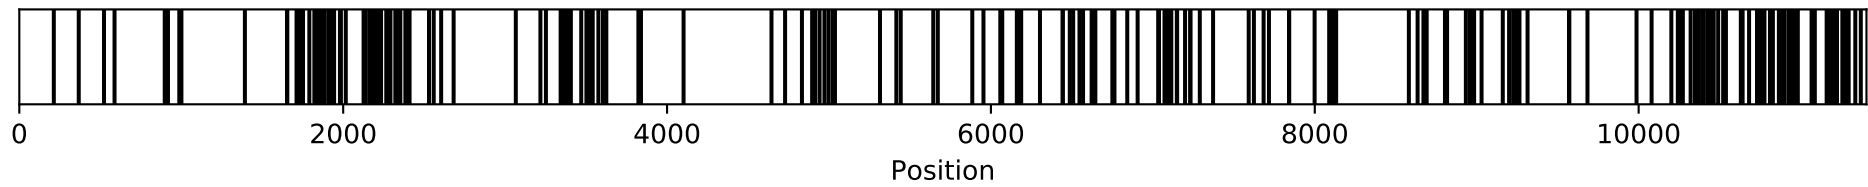

CR2 vs MM2  
Number of differences: 224

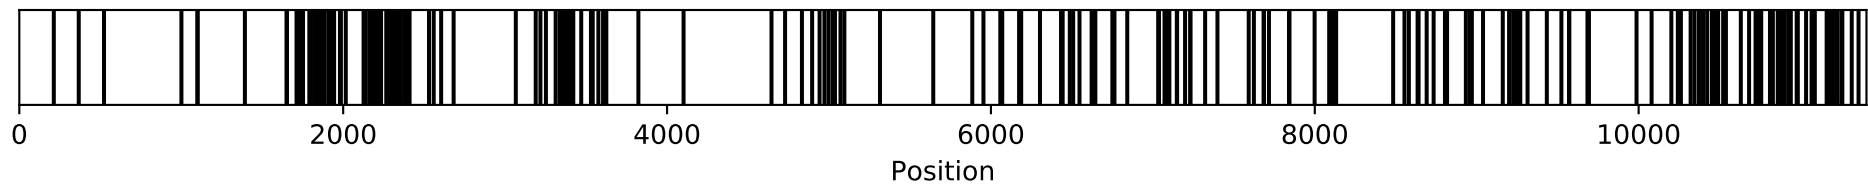

MM1 vs MM2  
Number of differences: 96

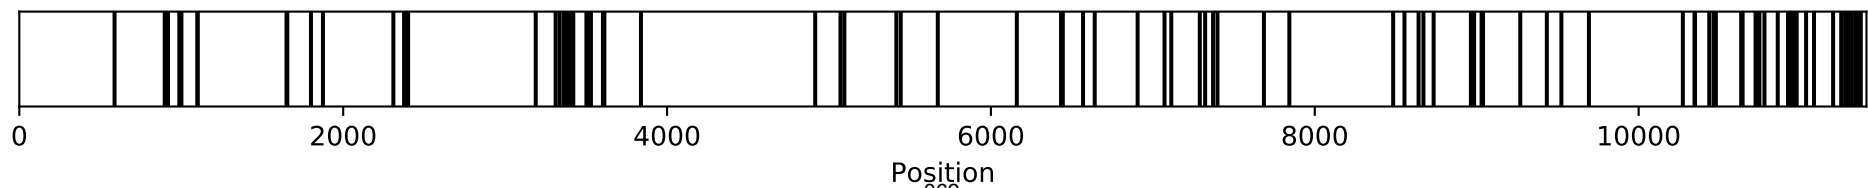

CR1 vs CR2  
Number of differences: 293

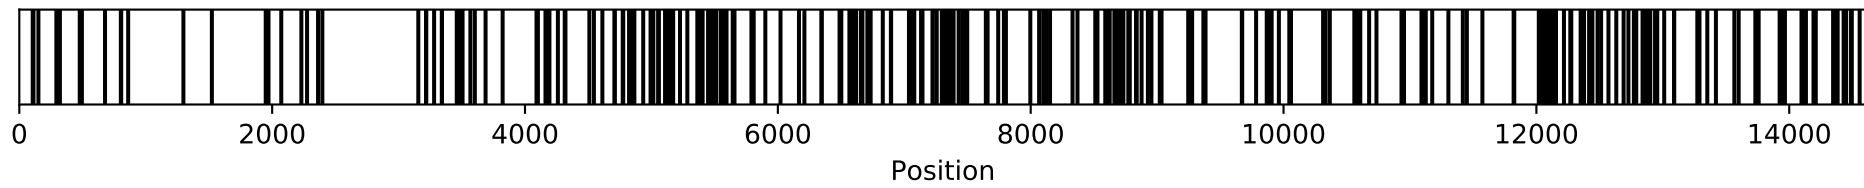

CR1 vs MM1  
Number of differences: 309

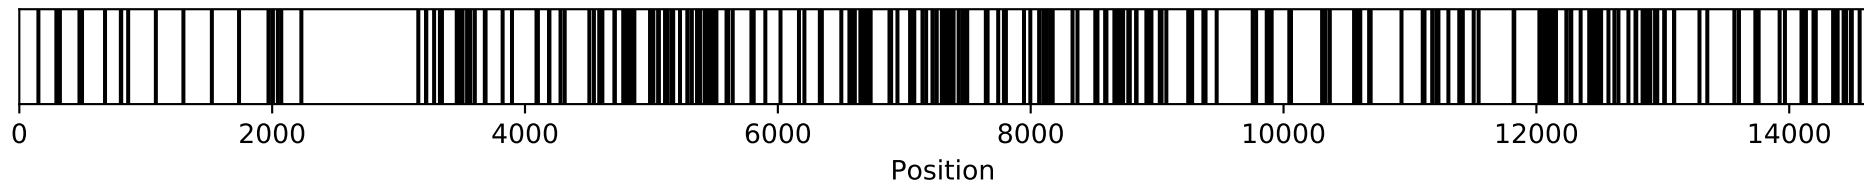

CR1 vs MM2  
Number of differences: 295

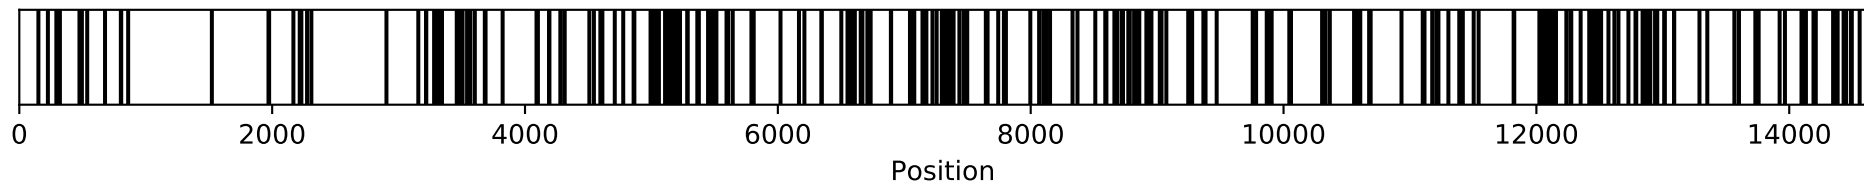

CR2 vs MM1  
Number of differences: 142

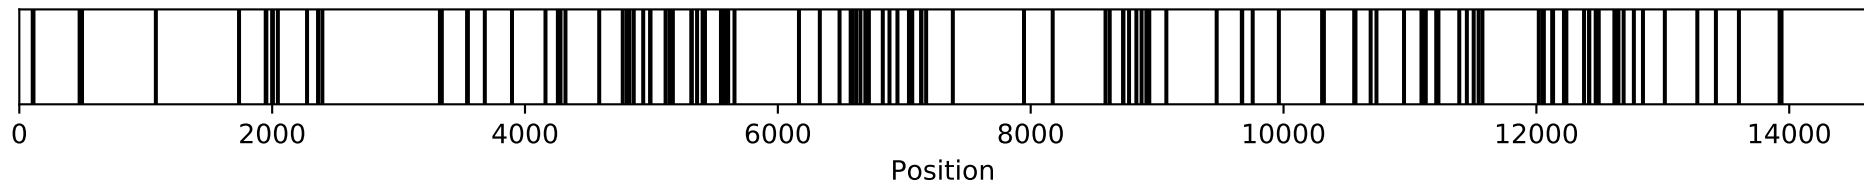

CR2 vs MM2  
Number of differences: 145

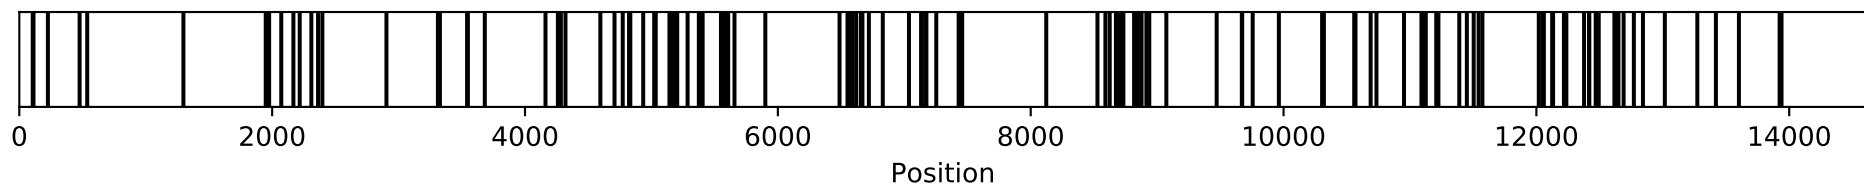

MM1 vs MM2  
Number of differences: 84

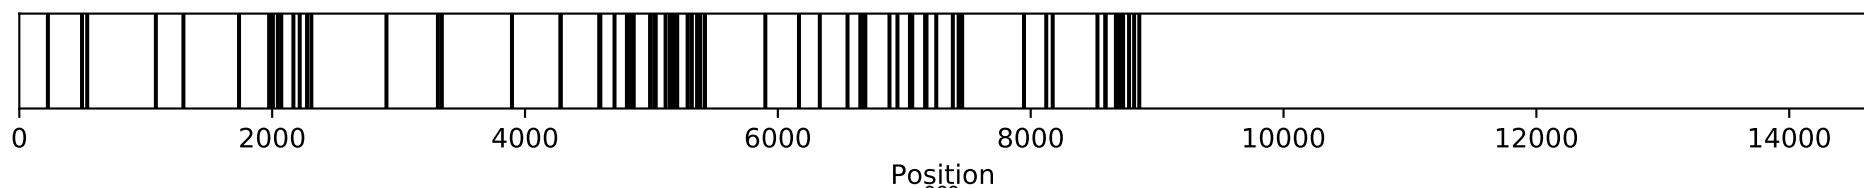

CR1 vs CR2  
Number of differences: 185

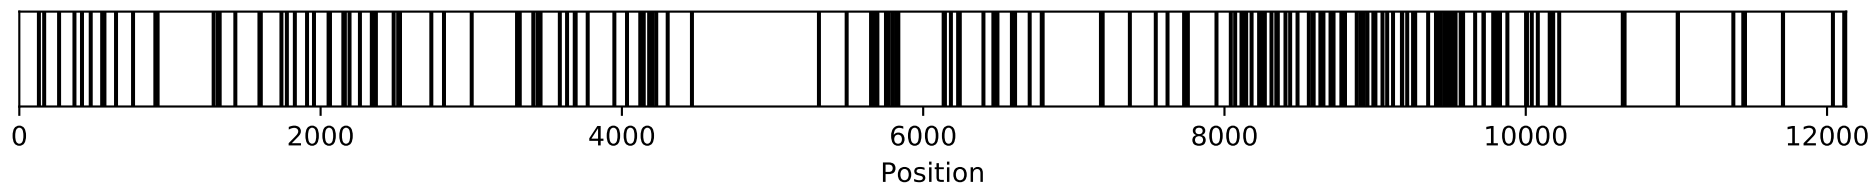

CR1 vs MM1  
Number of differences: 66

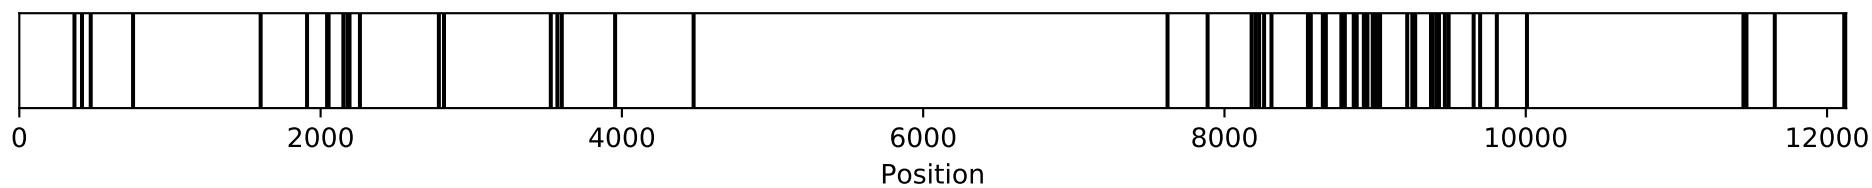

CR1 vs MM2  
Number of differences: 95

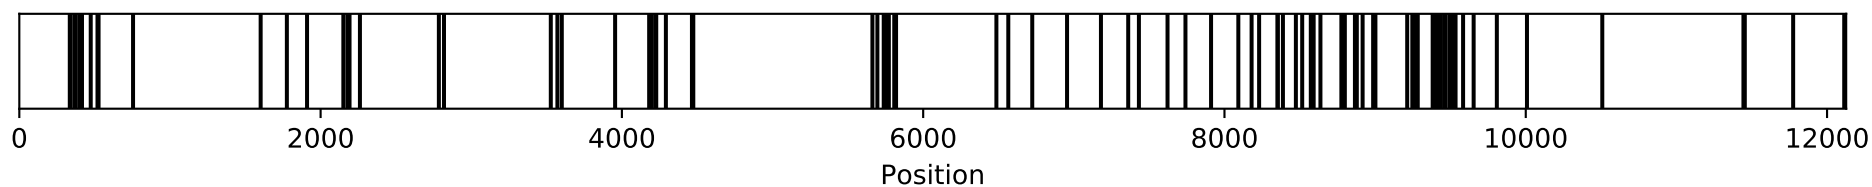

CR2 vs MM1  
Number of differences: 185

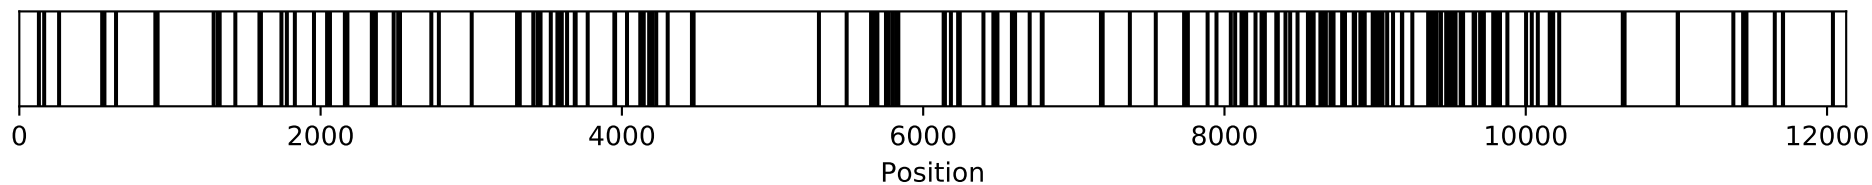

CR2 vs MM2  
Number of differences: 186

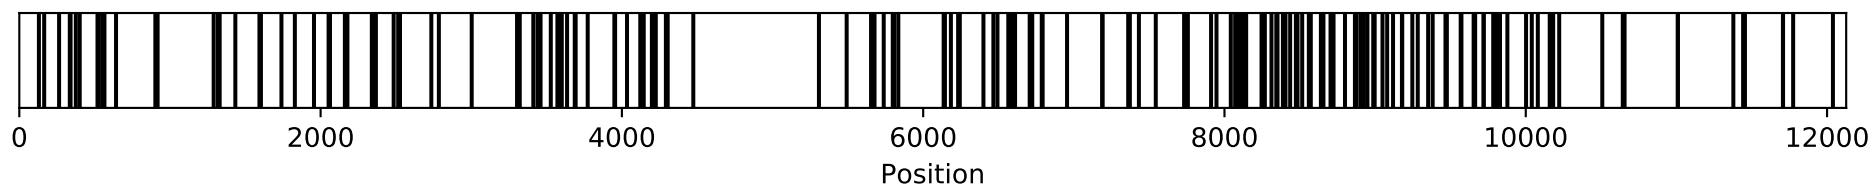

MM1 vs MM2  
Number of differences: 83

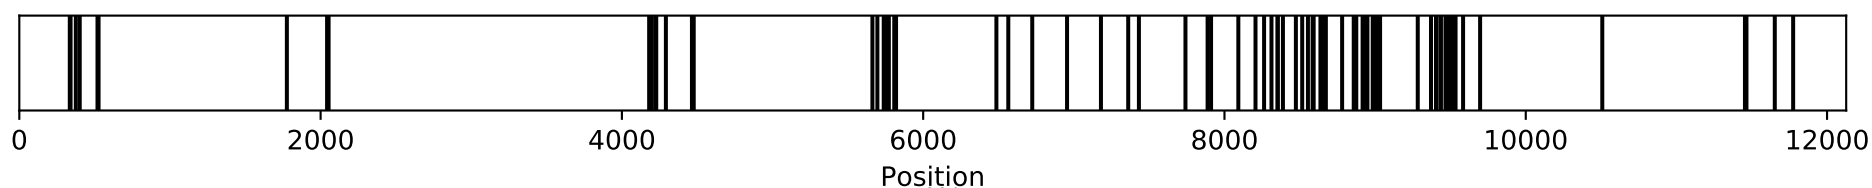

CR1 vs CR2  
Number of differences: 0

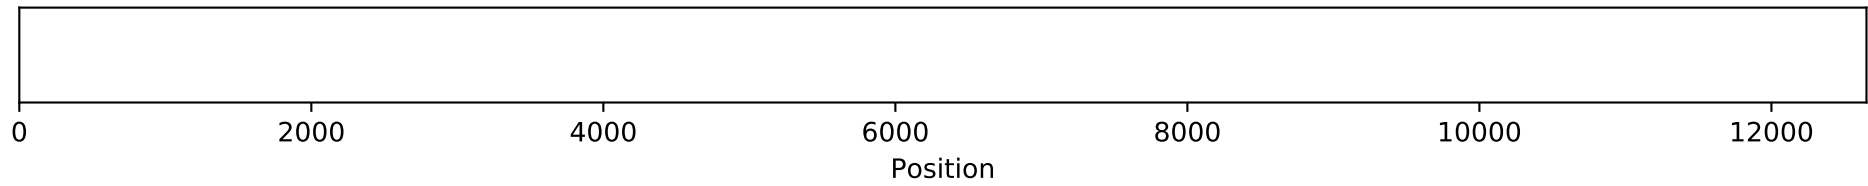

CR1 vs MM1  
Number of differences: 361

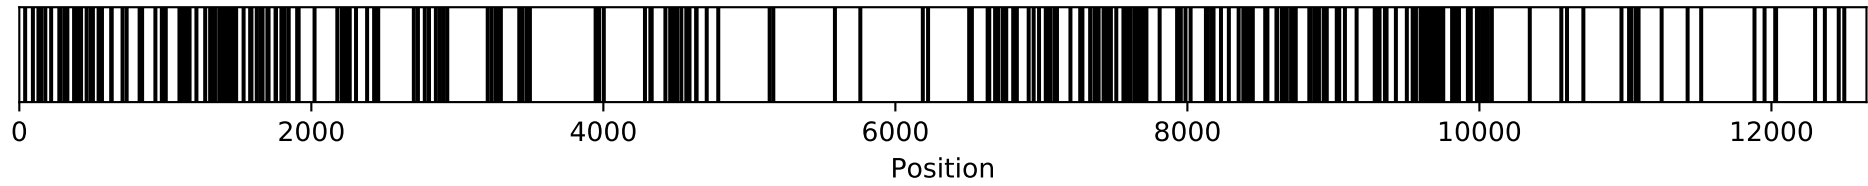

CR1 vs MM2  
Number of differences: 378

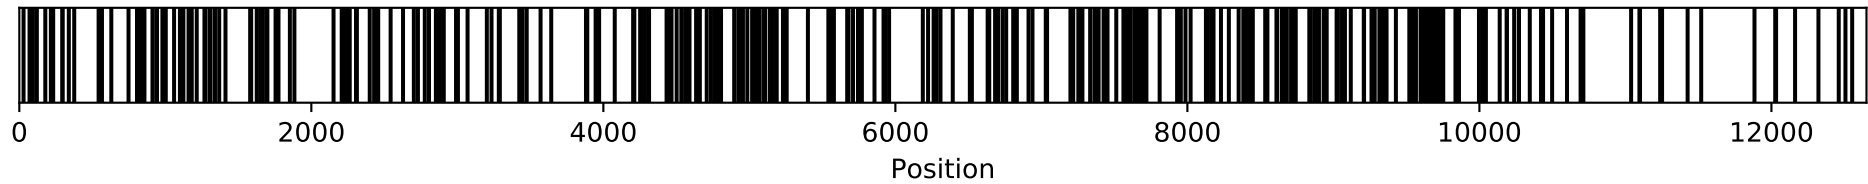

CR2 vs MM1  
Number of differences: 361

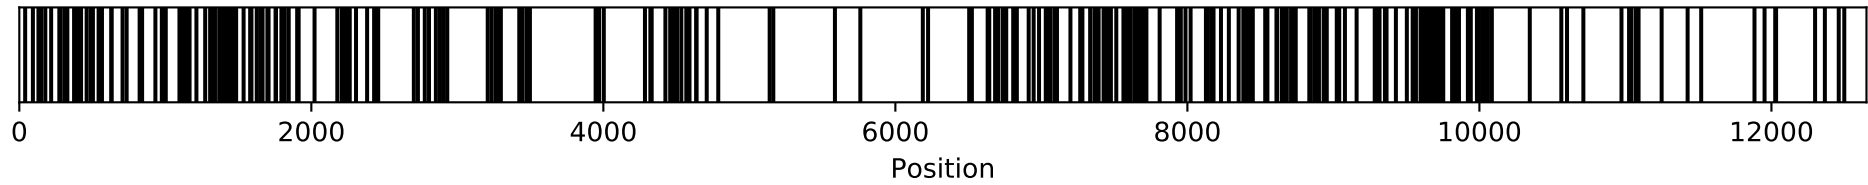

CR2 vs MM2  
Number of differences: 378

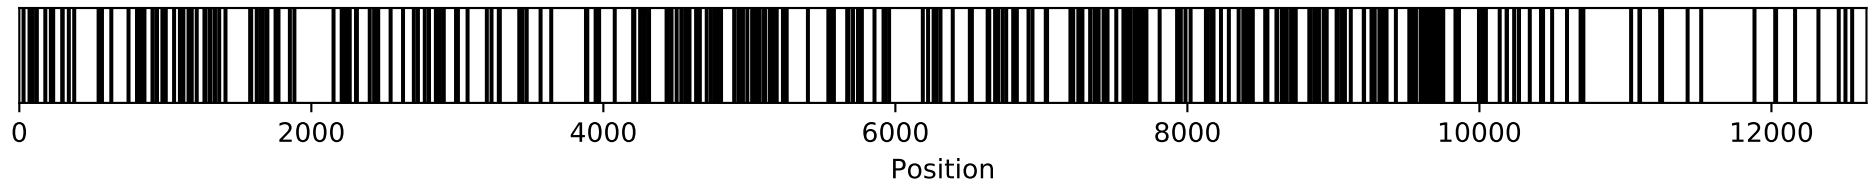

MM1 vs MM2  
Number of differences: 272

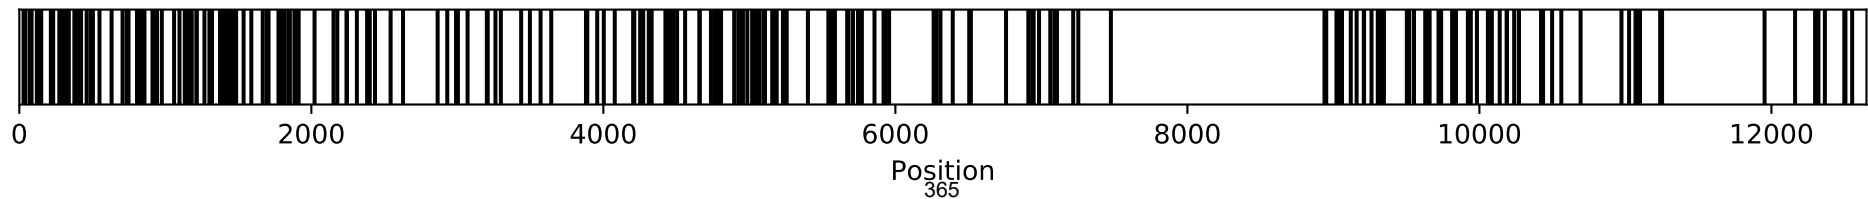

CR1 vs CR2  
Number of differences: 117

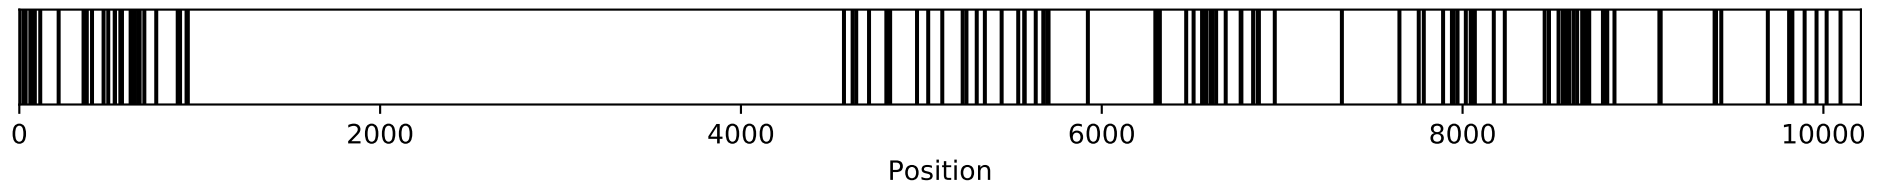

CR1 vs MM1  
Number of differences: 201

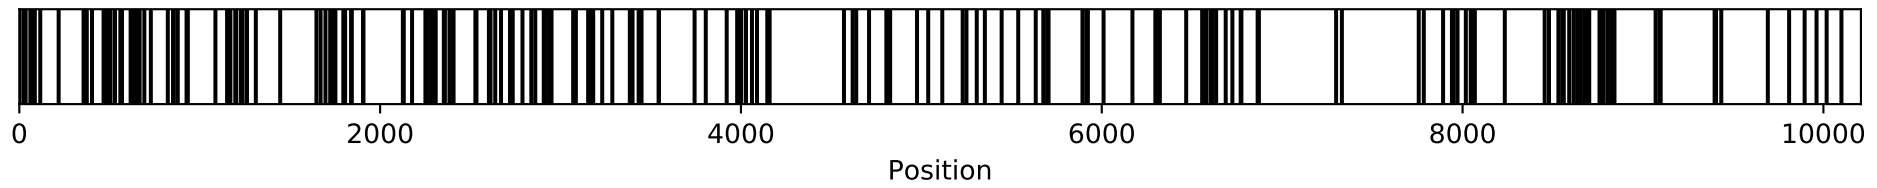

CR1 vs MM2  
Number of differences: 221

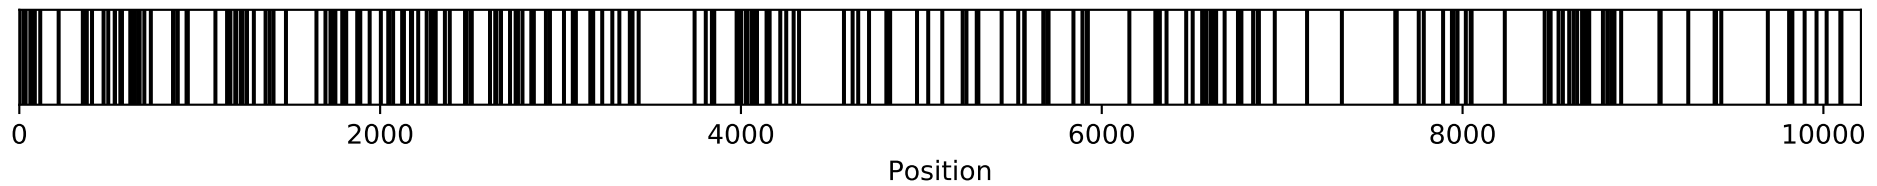

CR2 vs MM1  
Number of differences: 121

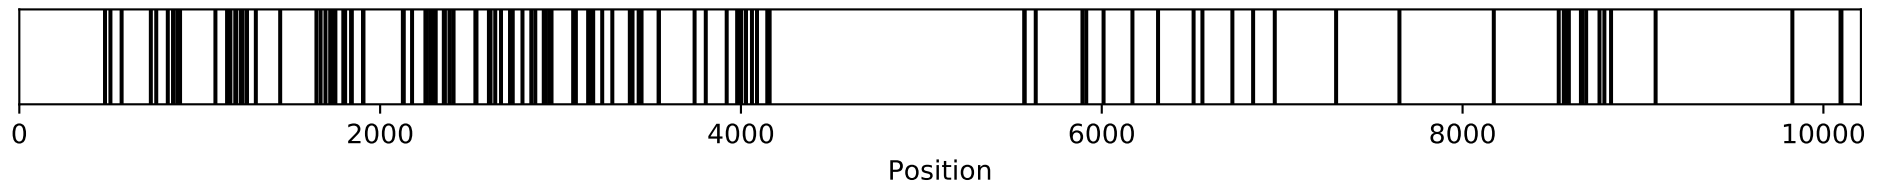

CR2 vs MM2  
Number of differences: 140

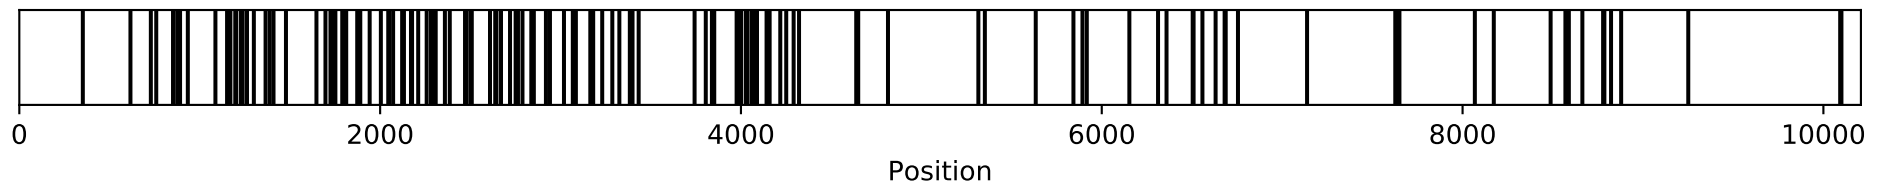

MM1 vs MM2  
Number of differences: 127

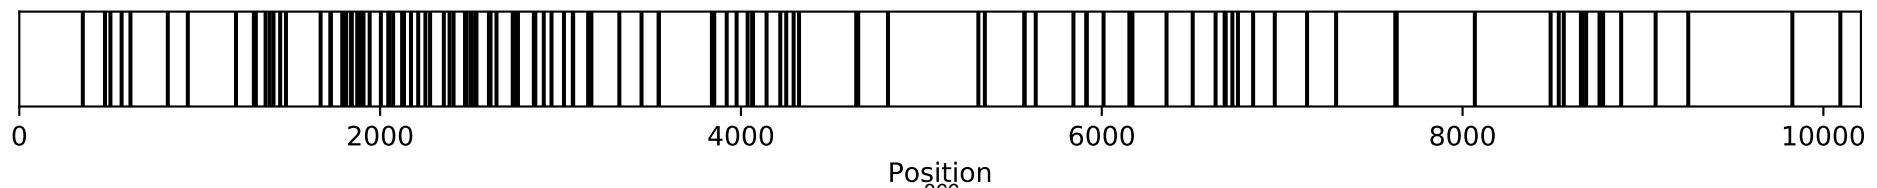

CR1 vs CR2  
Number of differences: 157

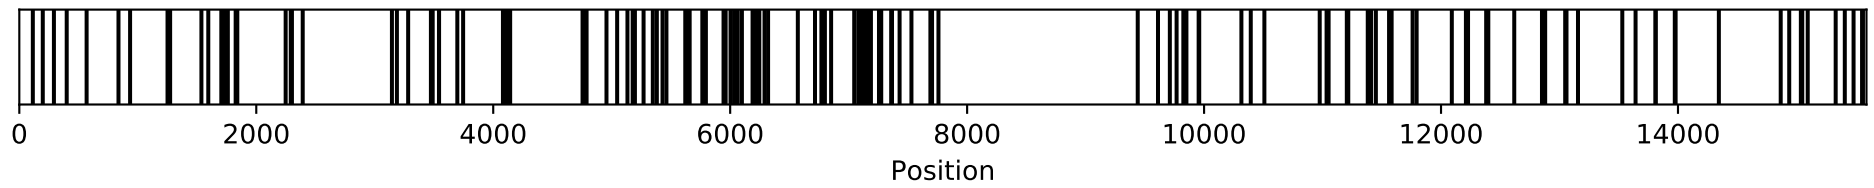

CR1 vs MM1  
Number of differences: 184

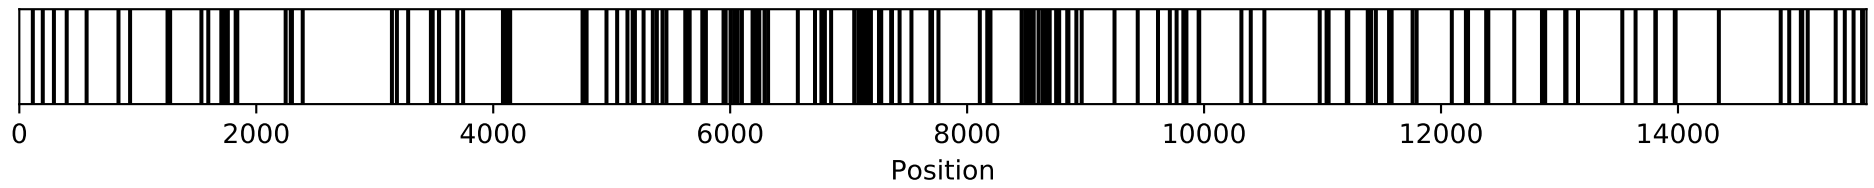

CR1 vs MM2  
Number of differences: 184

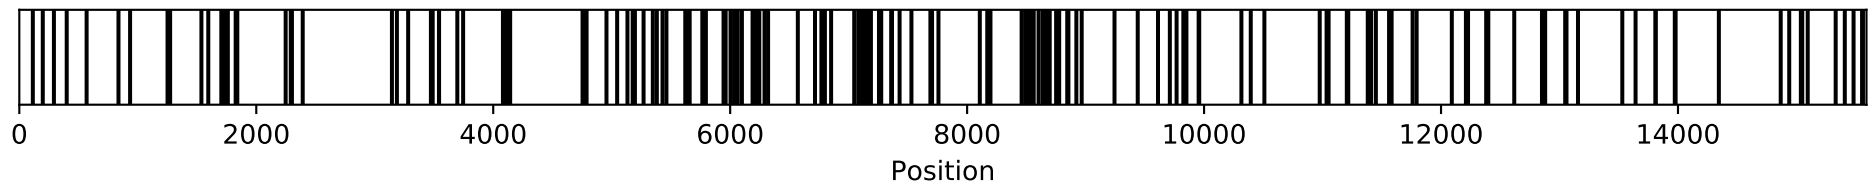

CR2 vs MM1  
Number of differences: 27

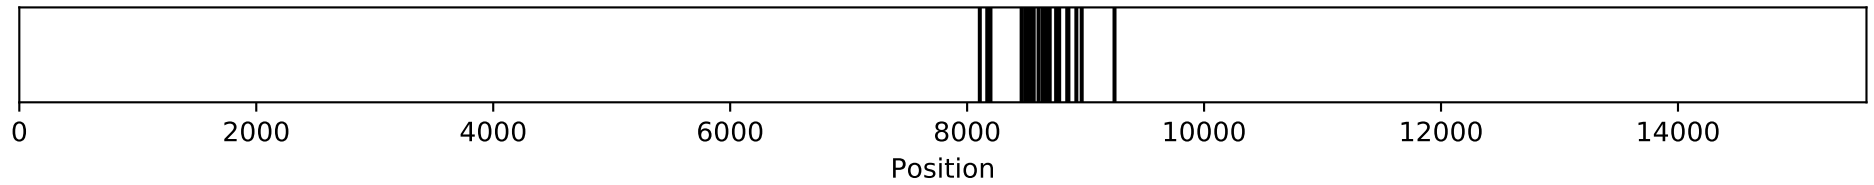

CR2 vs MM2  
Number of differences: 27

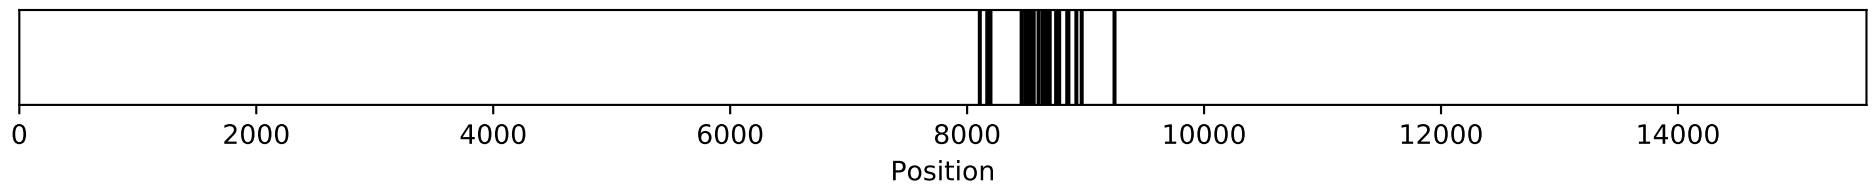

MM1 vs MM2  
Number of differences: 0

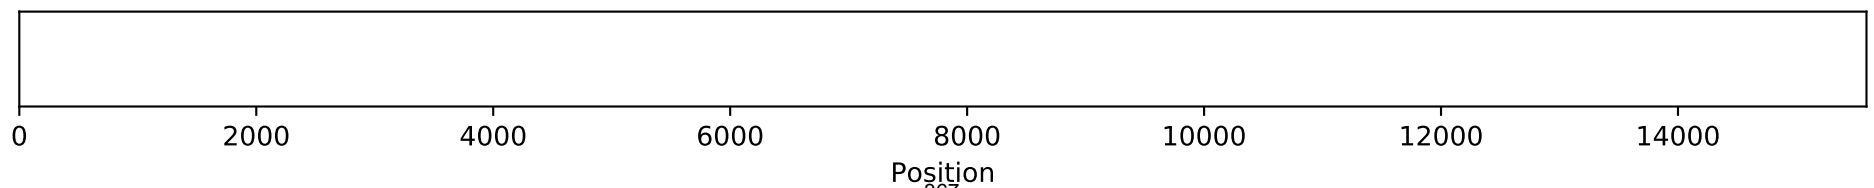



CR1 vs CR2  
Number of differences: 266

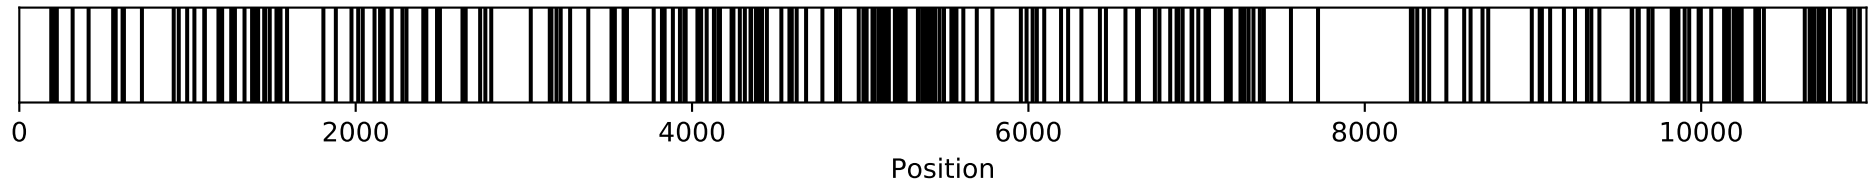

CR1 vs MM1  
Number of differences: 124

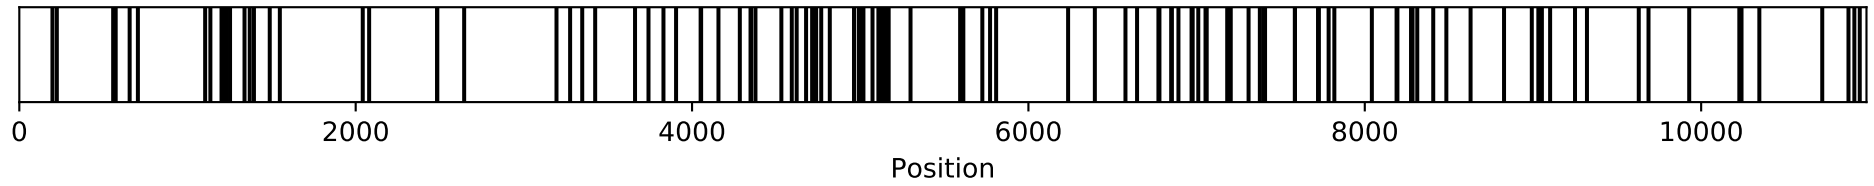

CR1 vs MM2  
Number of differences: 129

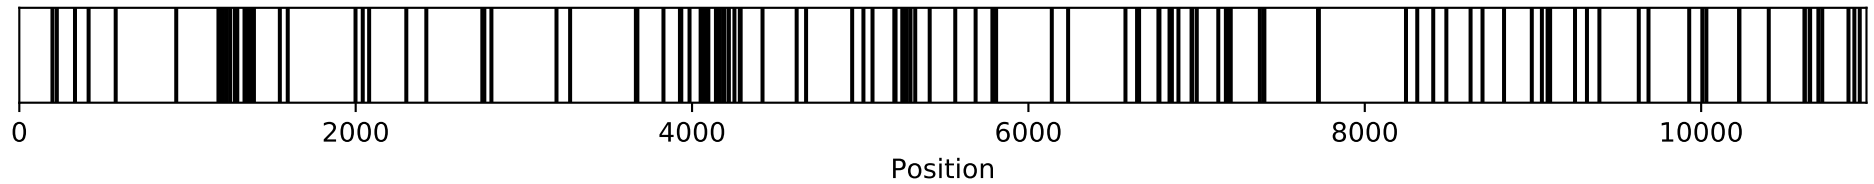

CR2 vs MM1  
Number of differences: 251

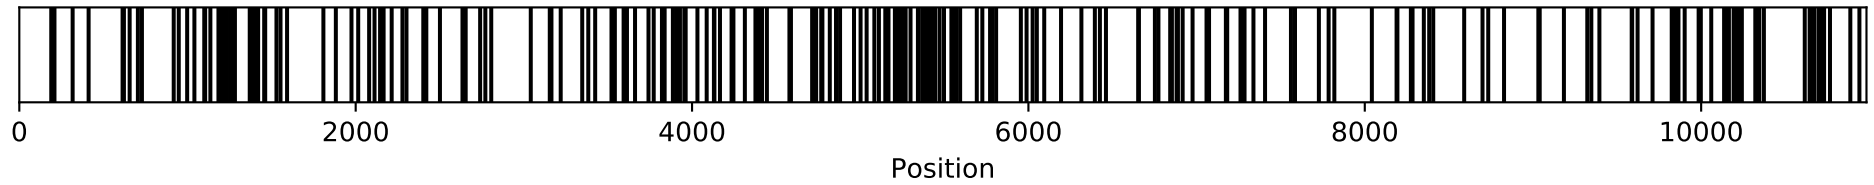

CR2 vs MM2  
Number of differences: 264

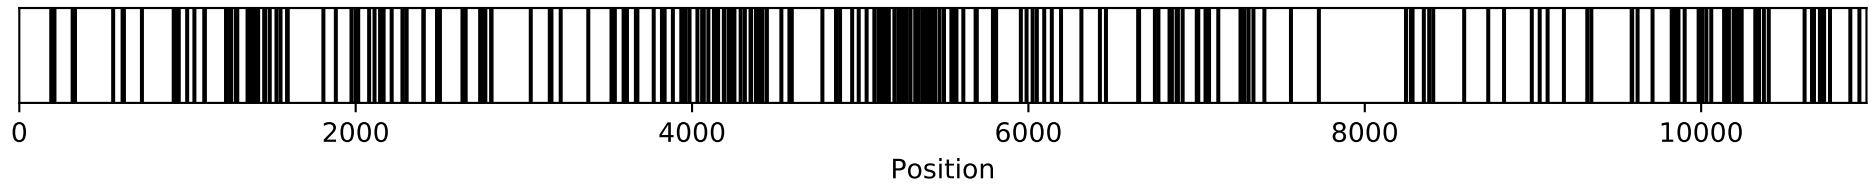

MM1 vs MM2  
Number of differences: 136

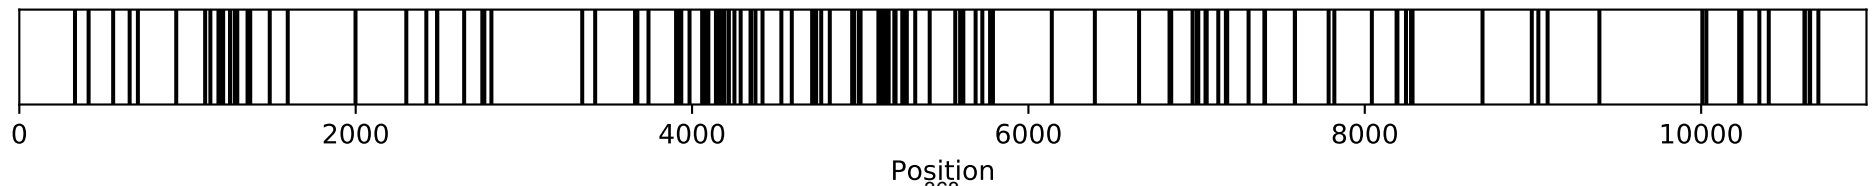

CR1 vs CR2  
Number of differences: 275

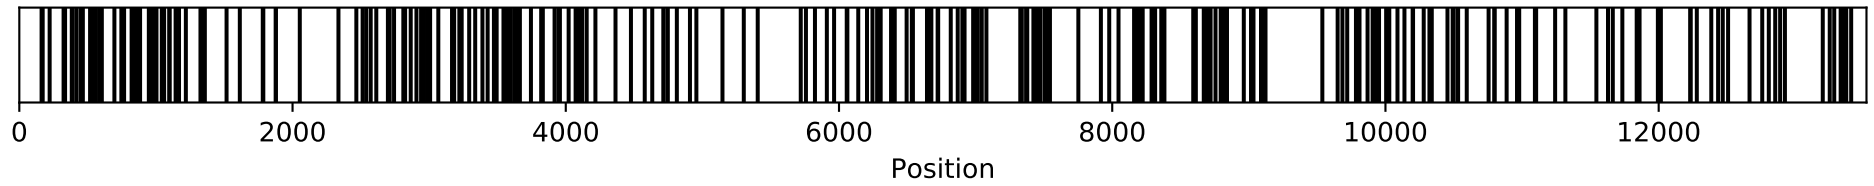

CR1 vs MM1  
Number of differences: 47

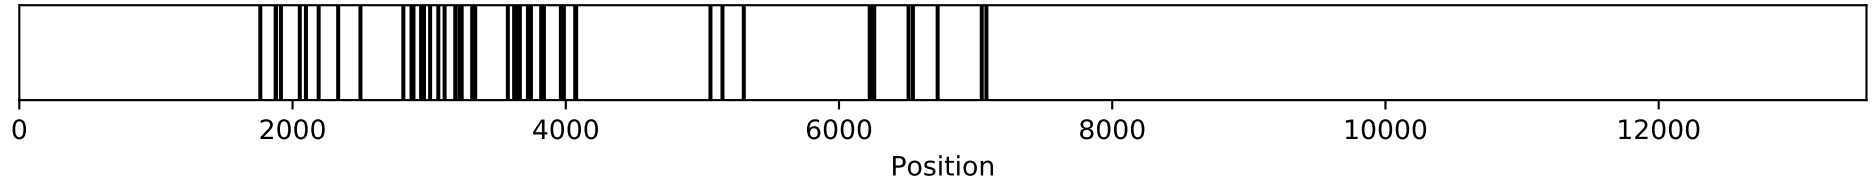

CR1 vs MM2  
Number of differences: 126

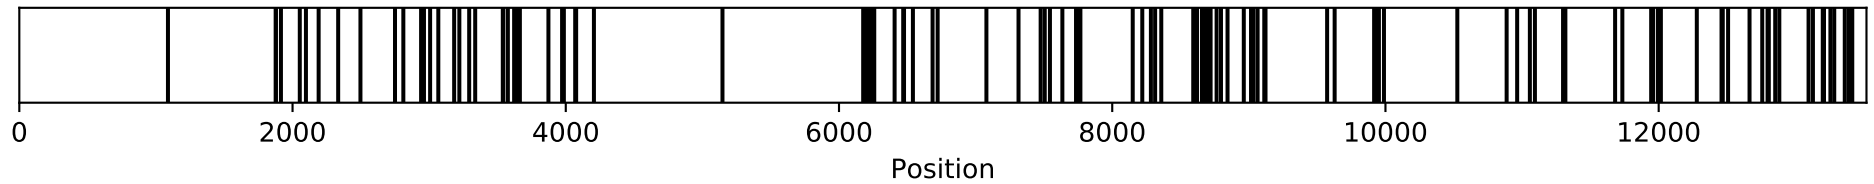

CR2 vs MM1  
Number of differences: 277

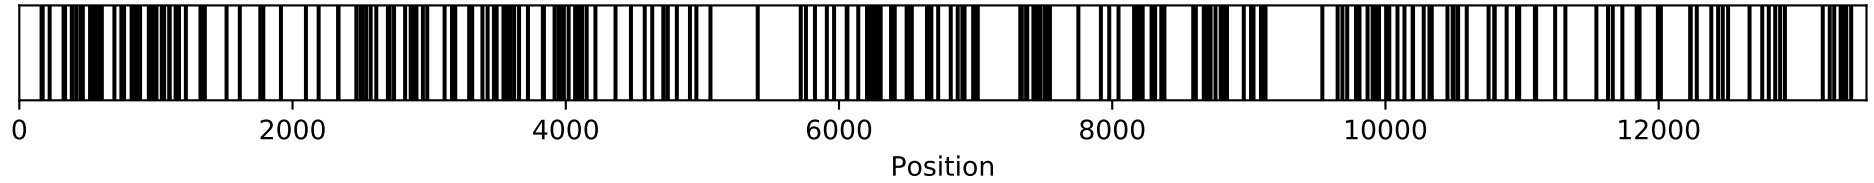

CR2 vs MM2  
Number of differences: 275

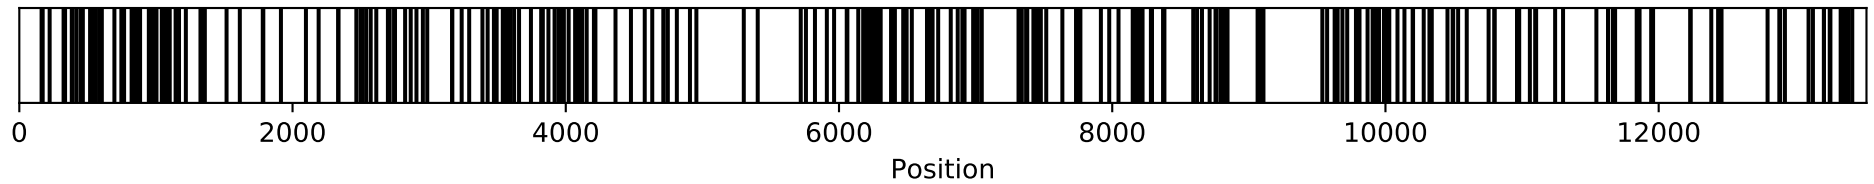

MM1 vs MM2  
Number of differences: 111

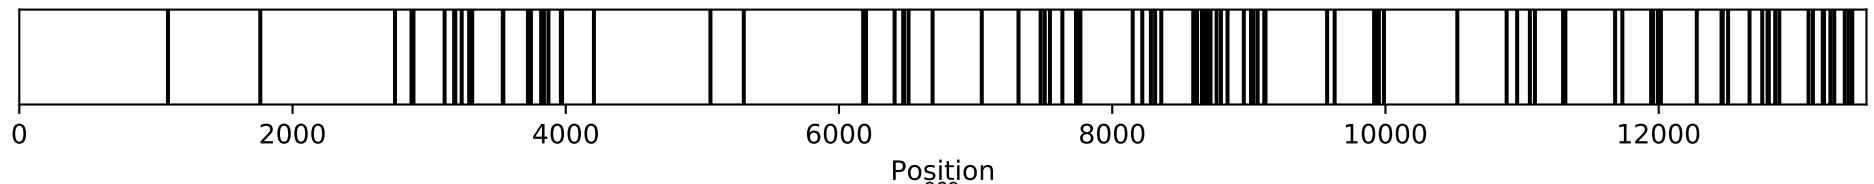

CR1 vs CR2  
Number of differences: 362

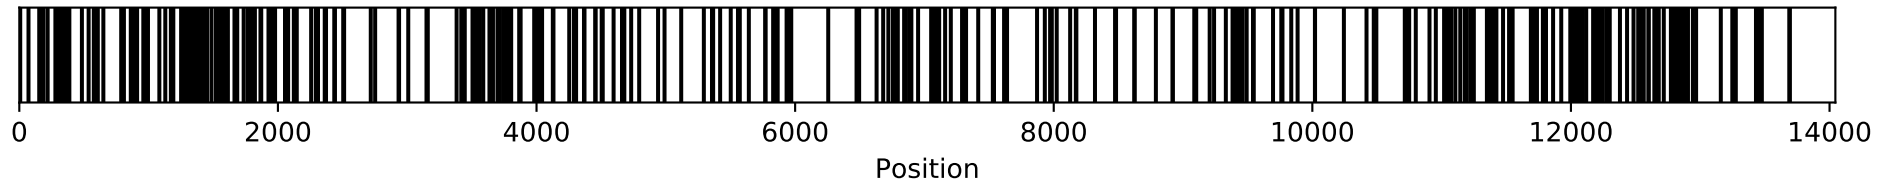

CR1 vs MM1  
Number of differences: 238

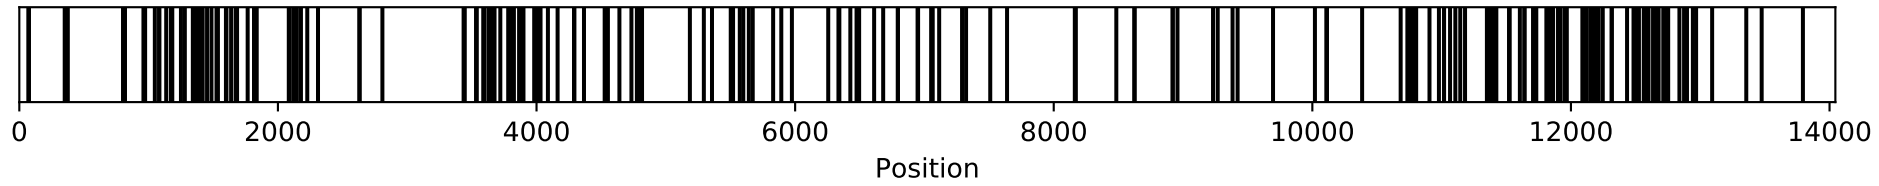

CR1 vs MM2  
Number of differences: 227

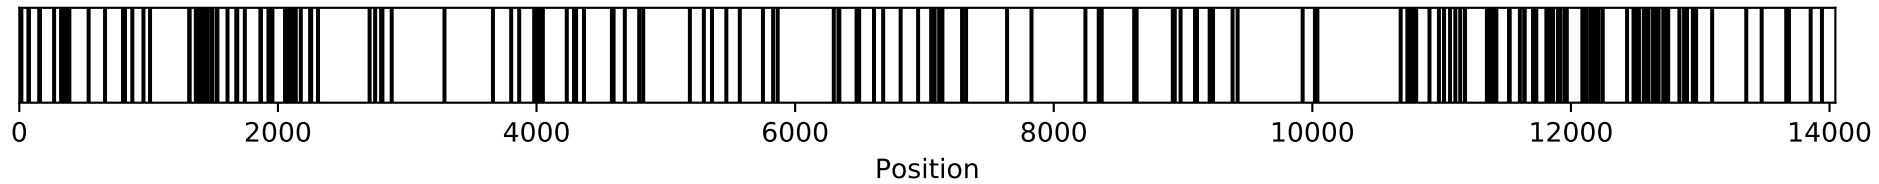

CR2 vs MM1  
Number of differences: 375

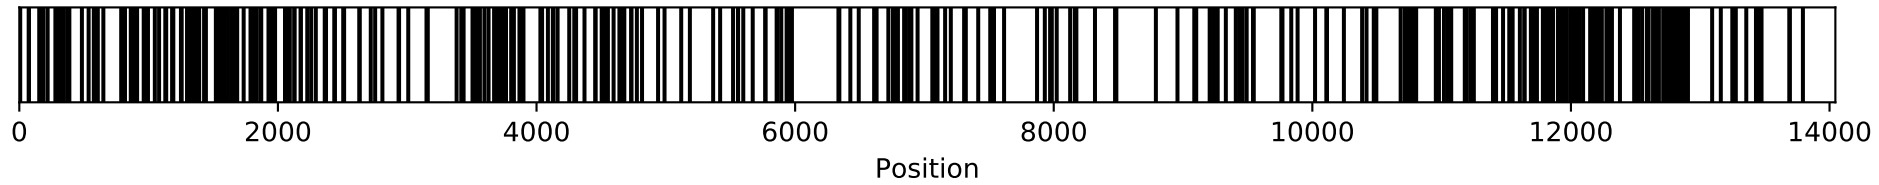

CR2 vs MM2  
Number of differences: 369

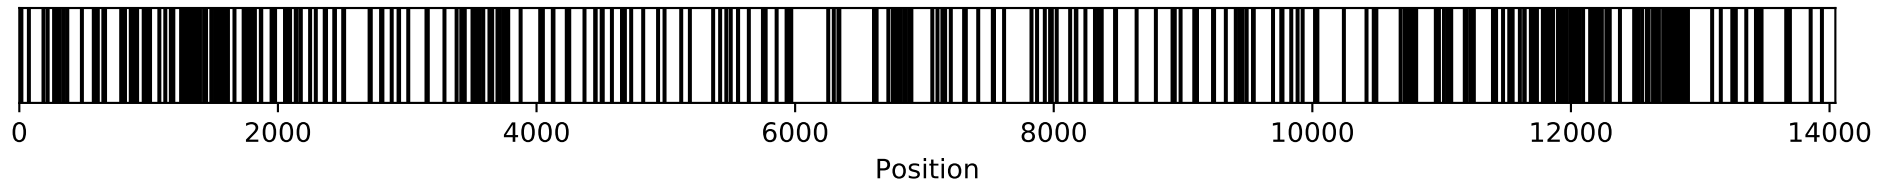

MM1 vs MM2  
Number of differences: 169

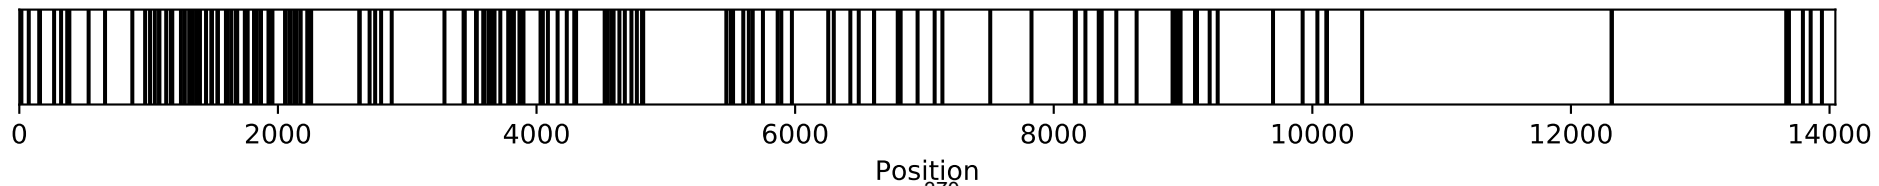

CR1 vs CR2  
Number of differences: 223

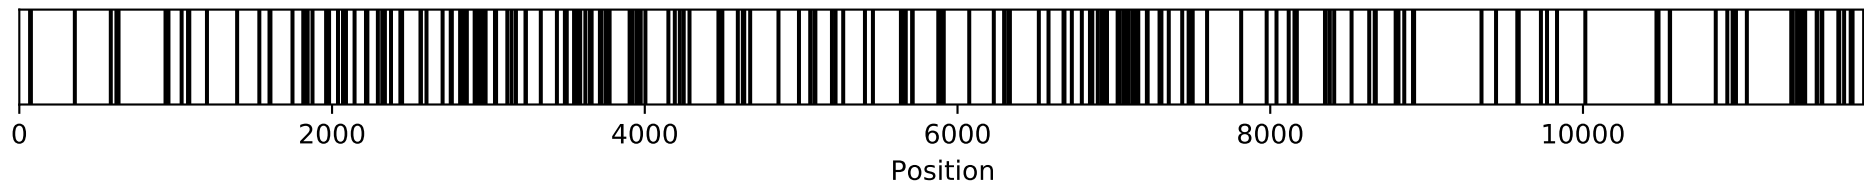

CR1 vs MM1  
Number of differences: 100

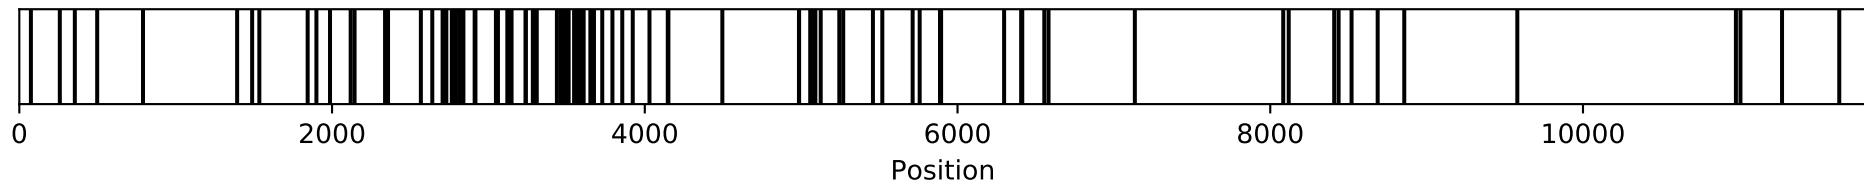

CR1 vs MM2  
Number of differences: 92

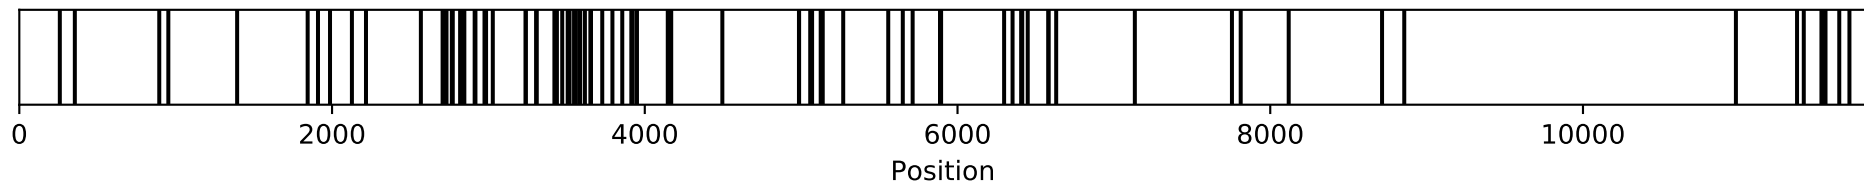

CR2 vs MM1  
Number of differences: 237

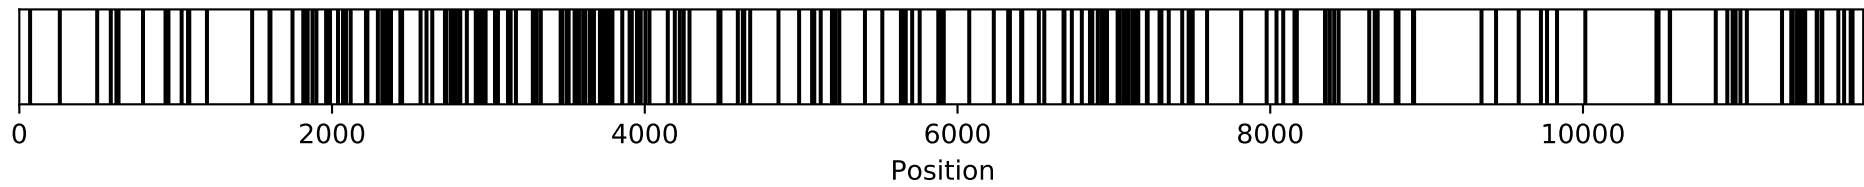

CR2 vs MM2  
Number of differences: 230

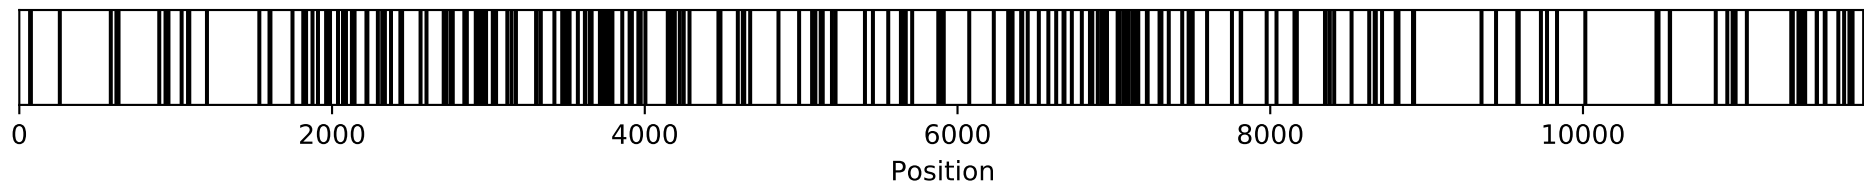

MM1 vs MM2  
Number of differences: 90

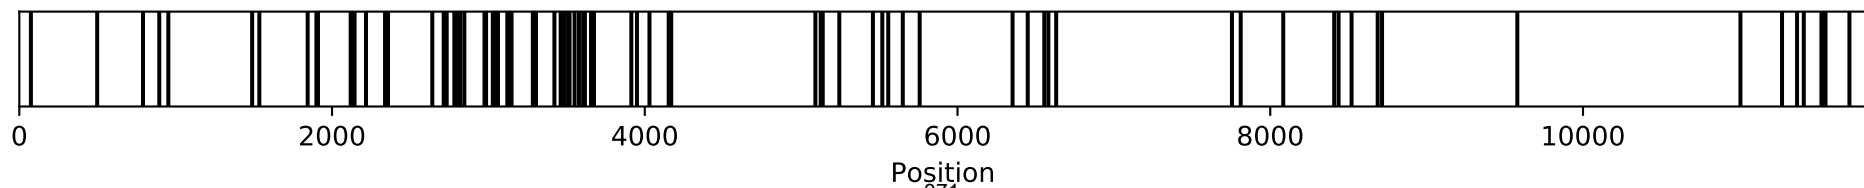

CR1 vs CR2  
Number of differences: 196

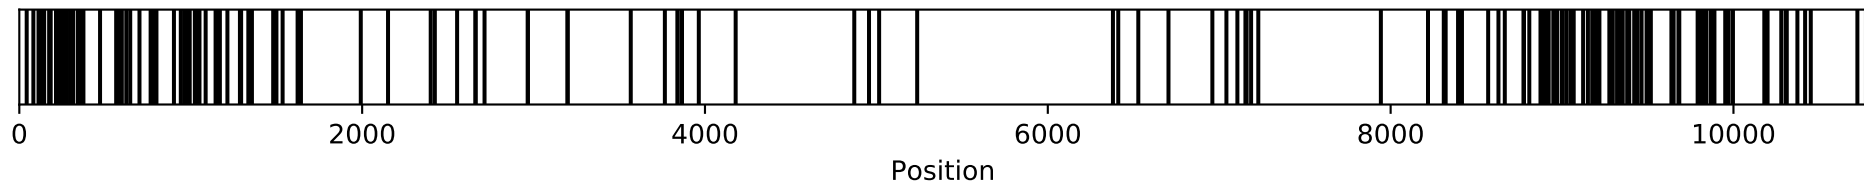

CR1 vs MM1  
Number of differences: 189

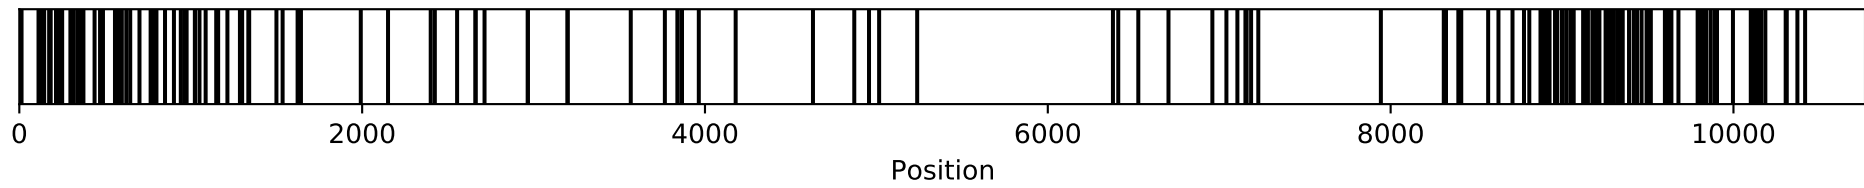

CR1 vs MM2  
Number of differences: 199

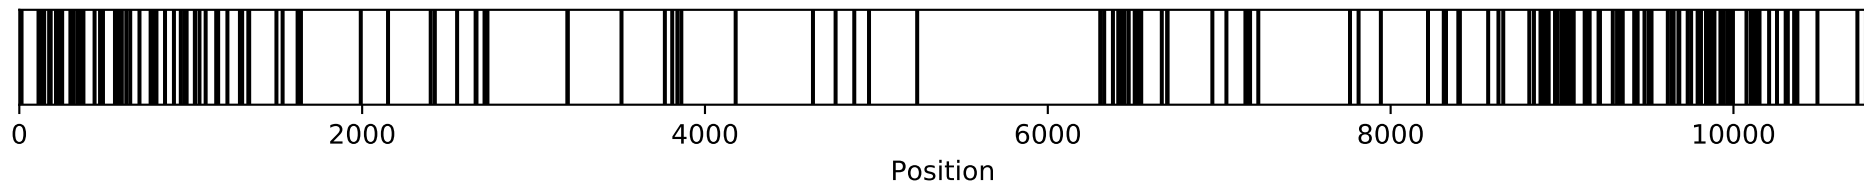

CR2 vs MM1  
Number of differences: 85

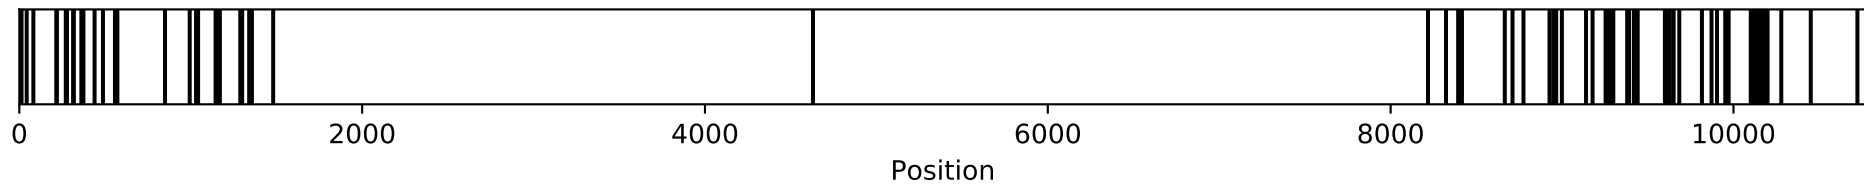

CR2 vs MM2  
Number of differences: 135

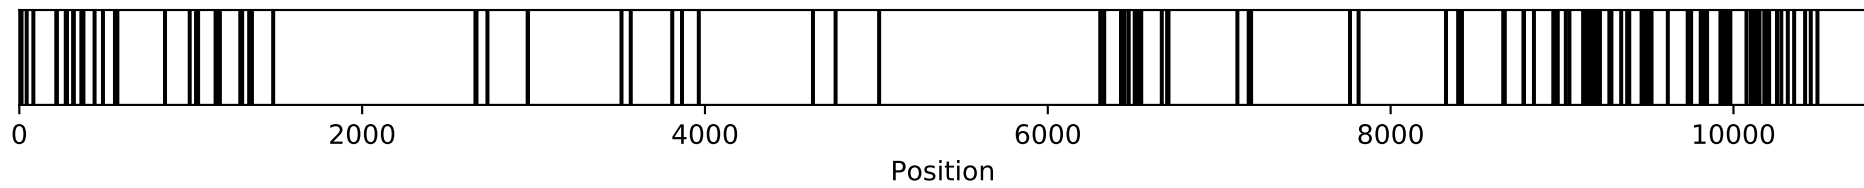

MM1 vs MM2  
Number of differences: 112

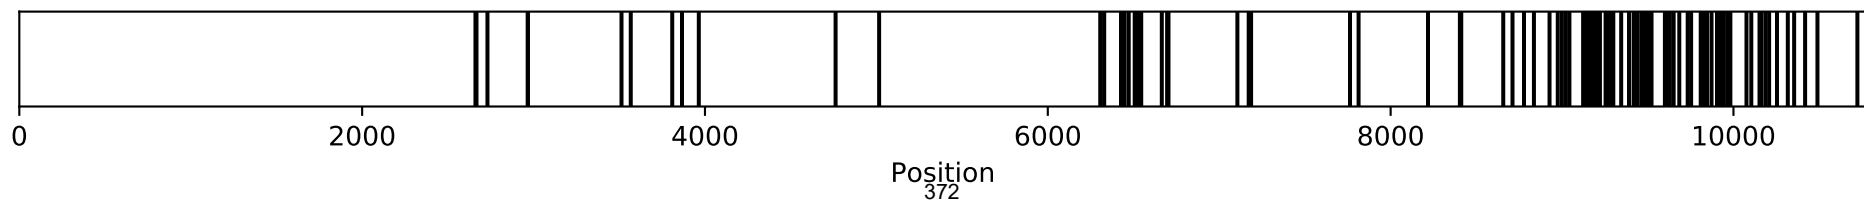

CR1 vs CR2  
Number of differences: 444

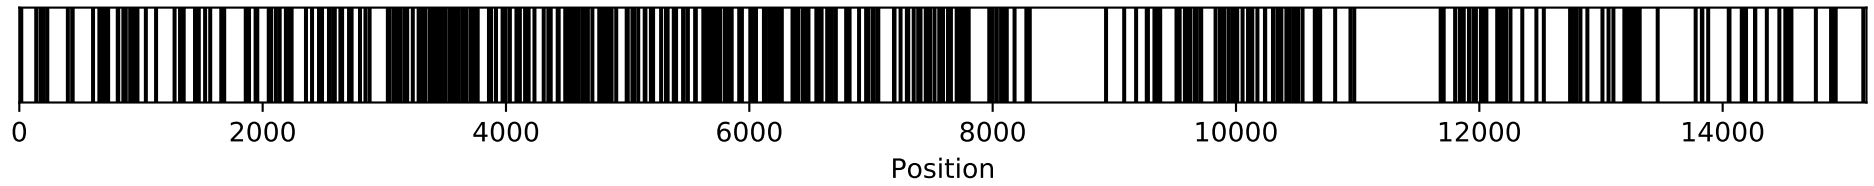

CR1 vs MM1  
Number of differences: 181

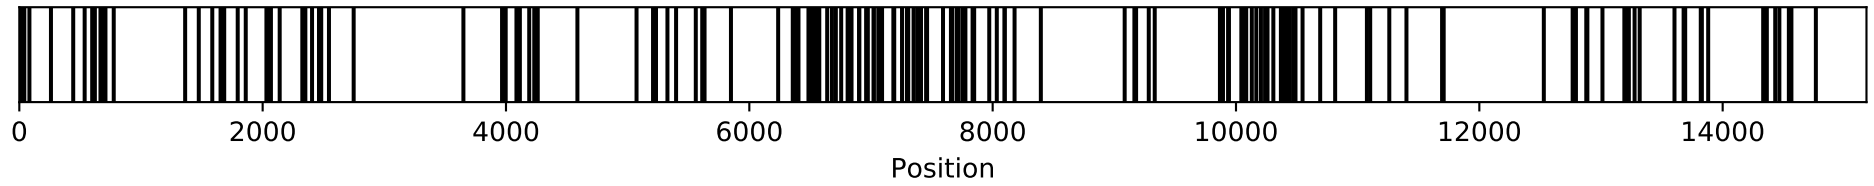

CR1 vs MM2  
Number of differences: 204

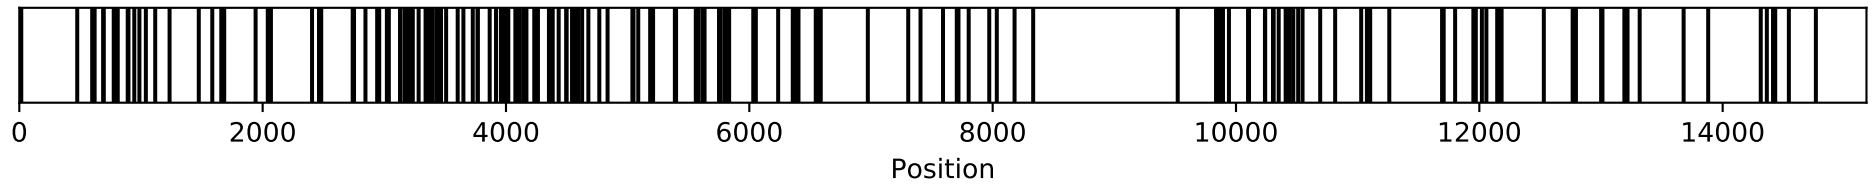

CR2 vs MM1  
Number of differences: 445

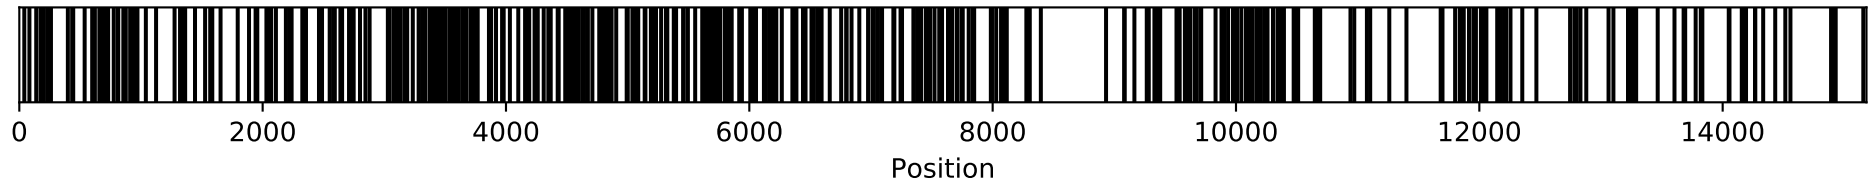

CR2 vs MM2  
Number of differences: 421

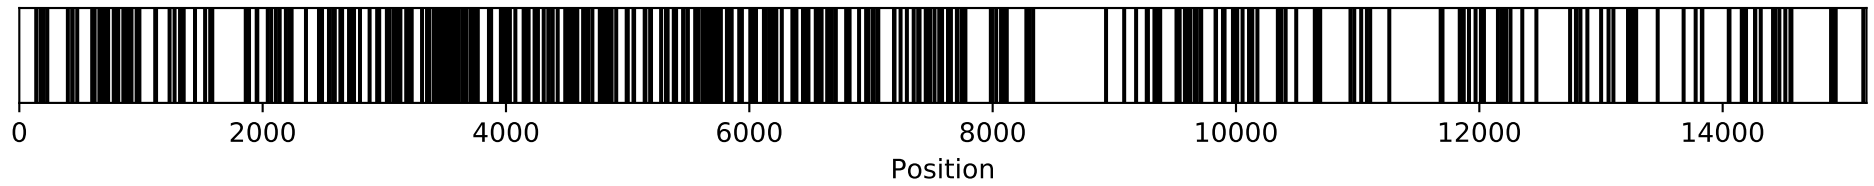

MM1 vs MM2  
Number of differences: 231

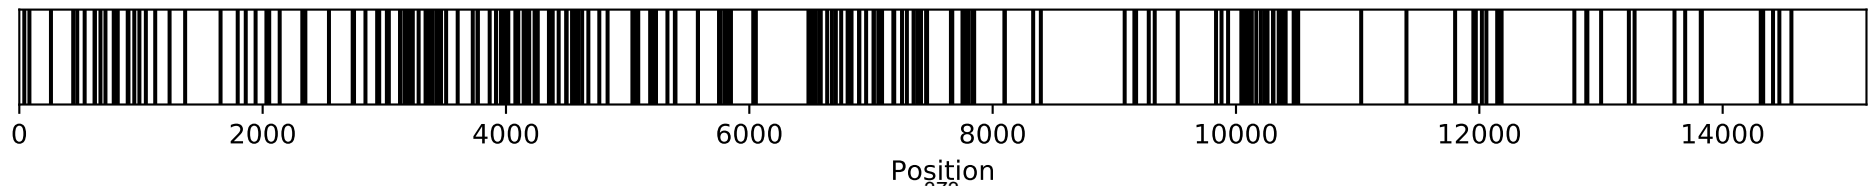

CR1 vs CR2  
Number of differences: 352

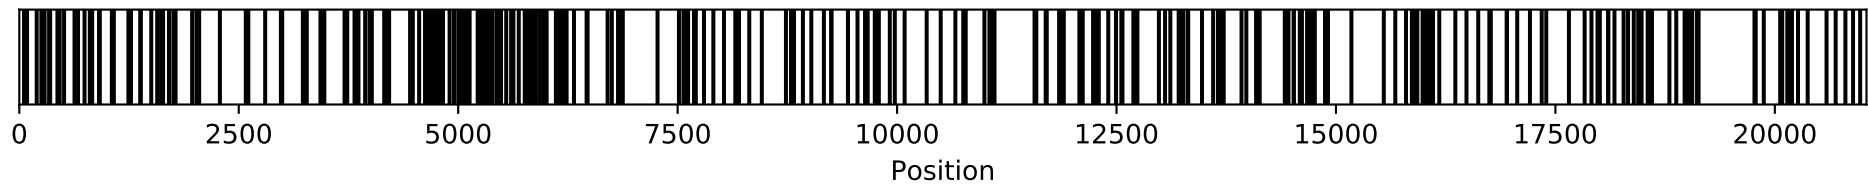

CR1 vs MM1  
Number of differences: 160

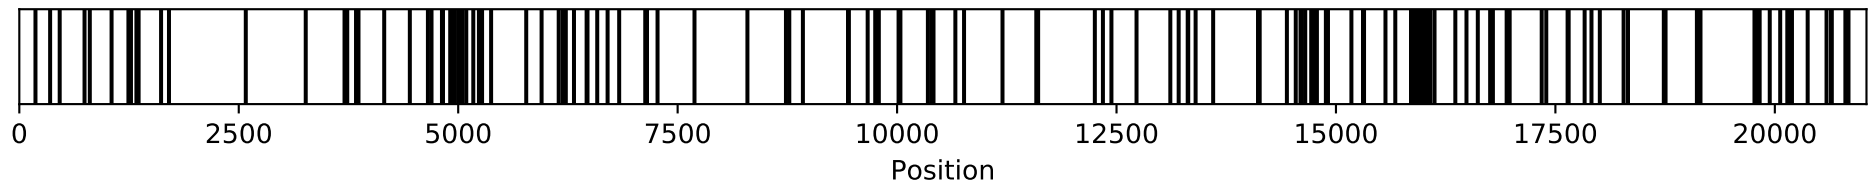

CR1 vs MM2  
Number of differences: 163

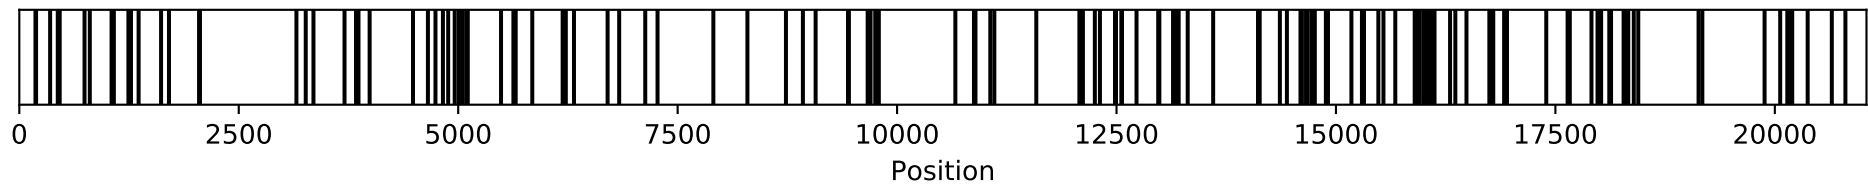

CR2 vs MM1  
Number of differences: 339

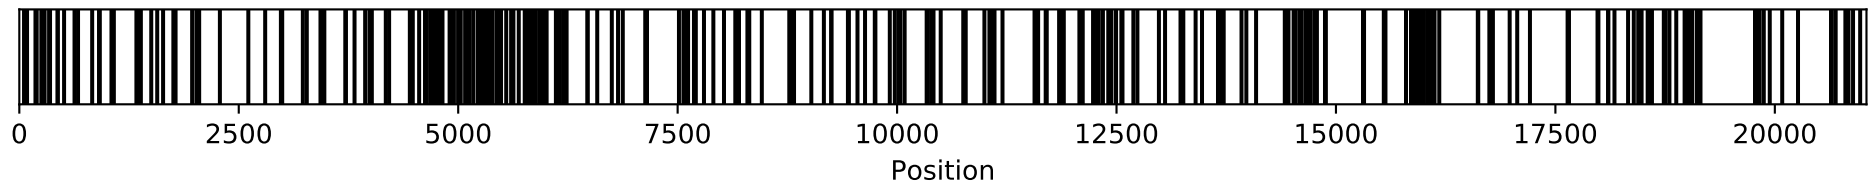

CR2 vs MM2  
Number of differences: 339

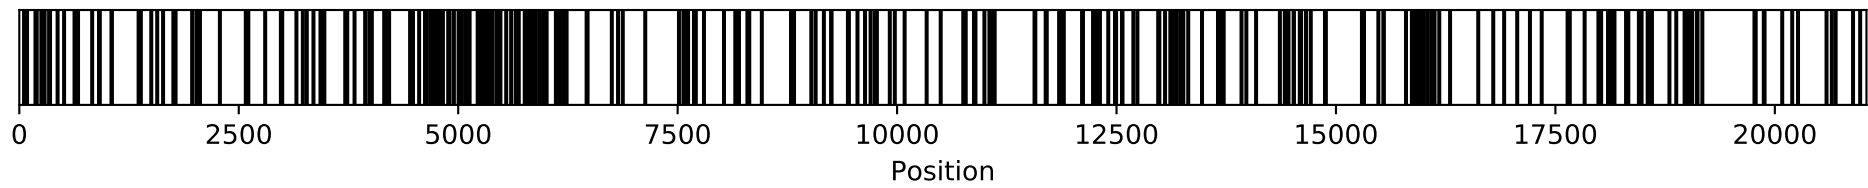

MM1 vs MM2  
Number of differences: 158

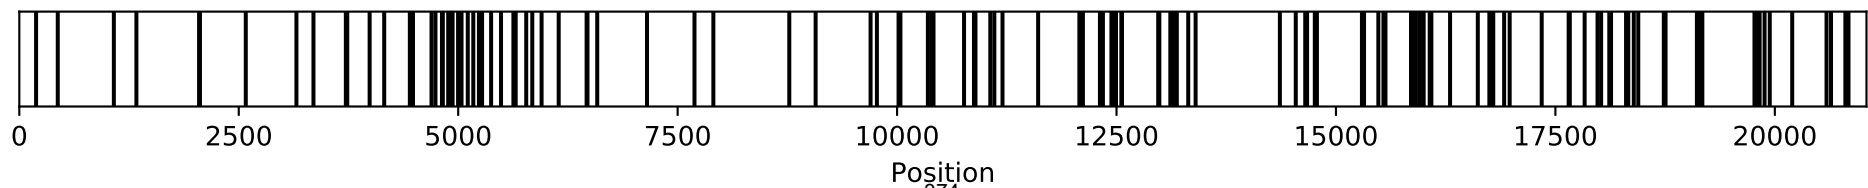

CR1 vs CR2  
Number of differences: 224

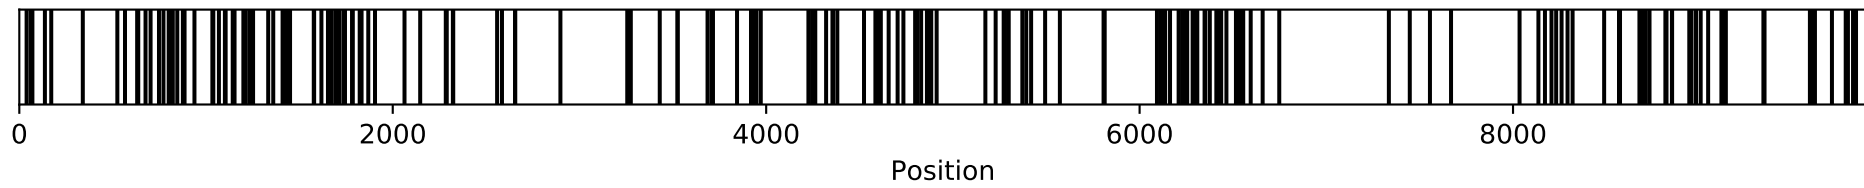

CR1 vs MM1  
Number of differences: 150

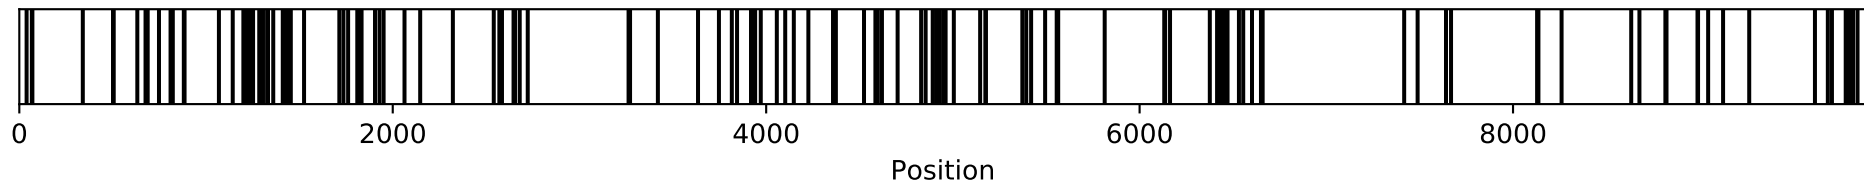

CR1 vs MM2  
Number of differences: 164

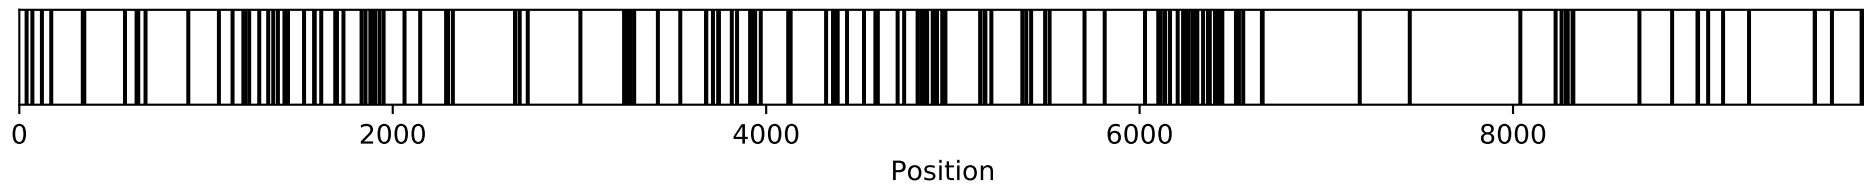

CR2 vs MM1  
Number of differences: 222

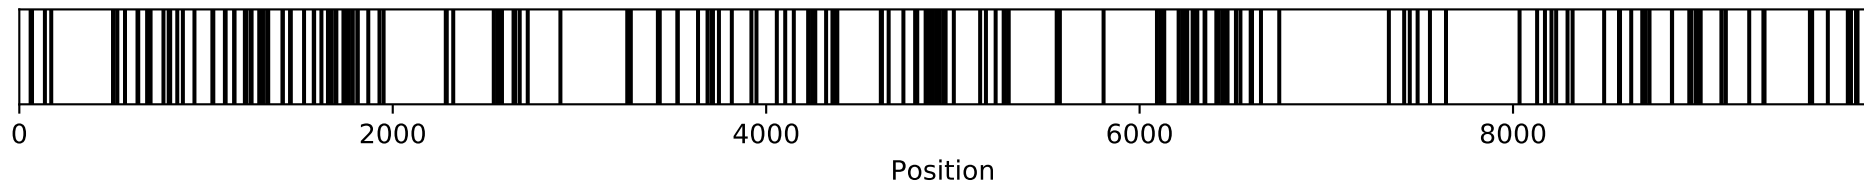

CR2 vs MM2  
Number of differences: 239

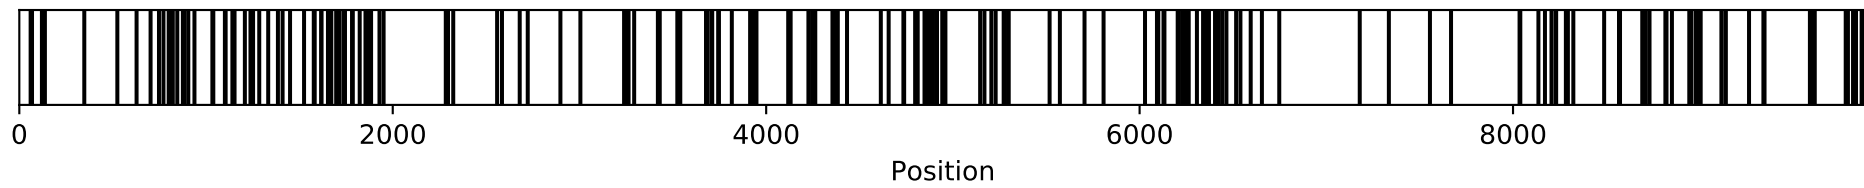

MM1 vs MM2  
Number of differences: 173

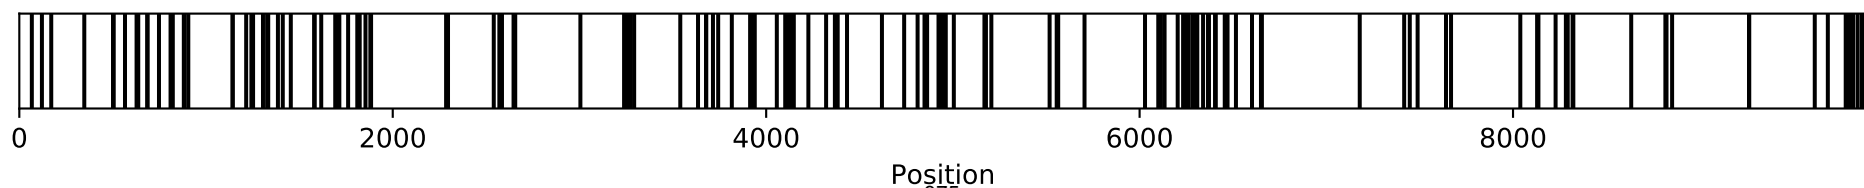



CR1 vs CR2  
Number of differences: 337

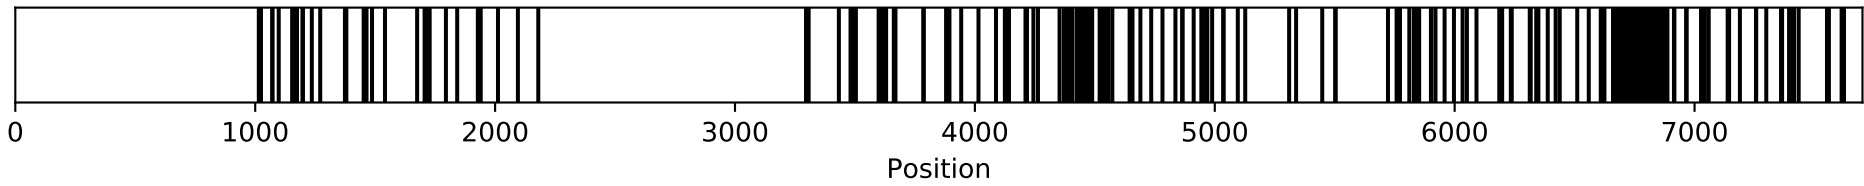

CR1 vs MM1  
Number of differences: 123

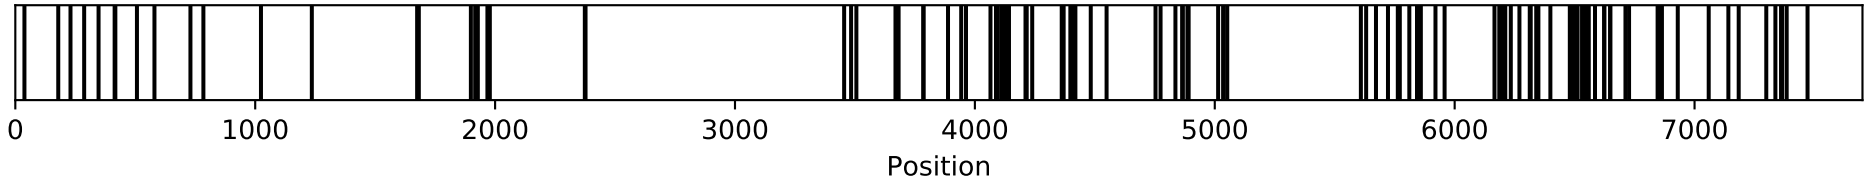

CR1 vs MM2  
Number of differences: 117

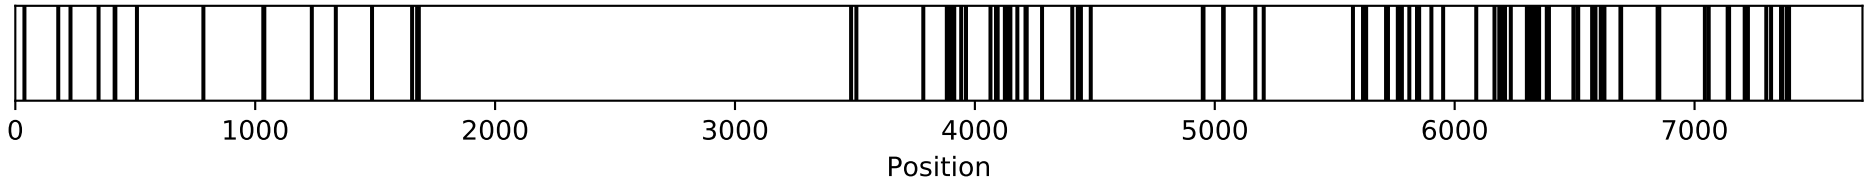

CR2 vs MM1  
Number of differences: 366

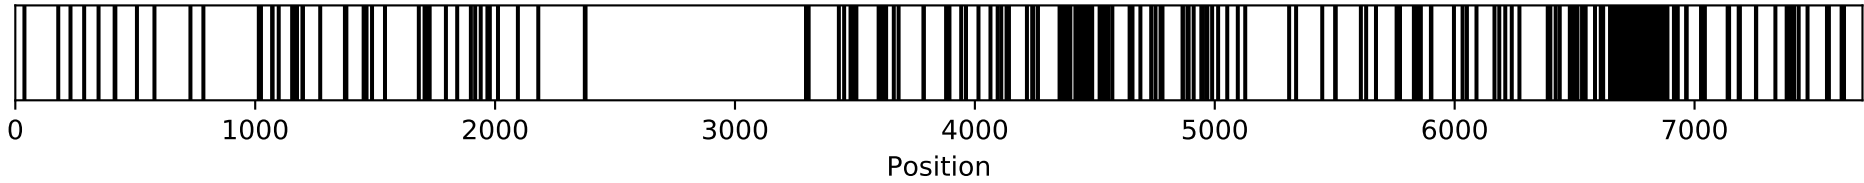

CR2 vs MM2  
Number of differences: 360

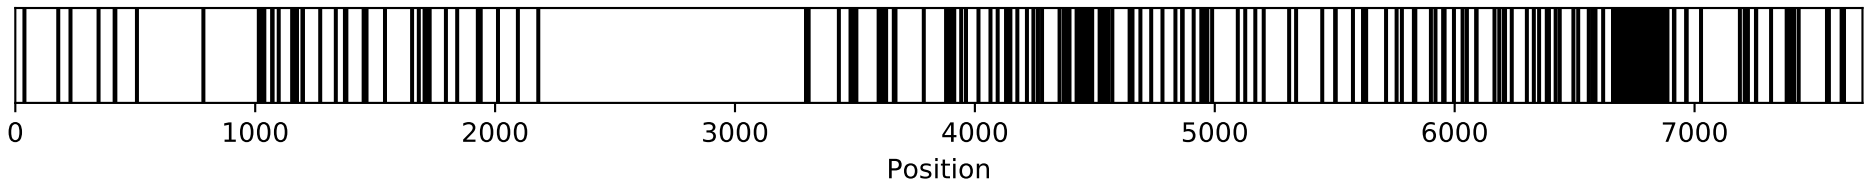

MM1 vs MM2  
Number of differences: 124

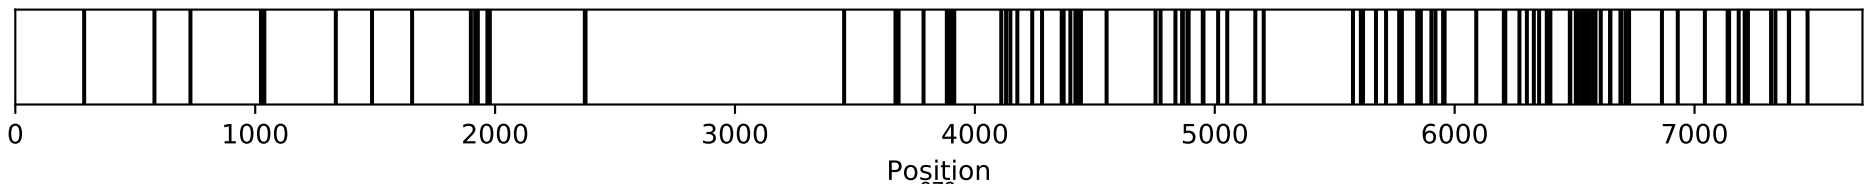

CR1 vs CR2  
Number of differences: 231

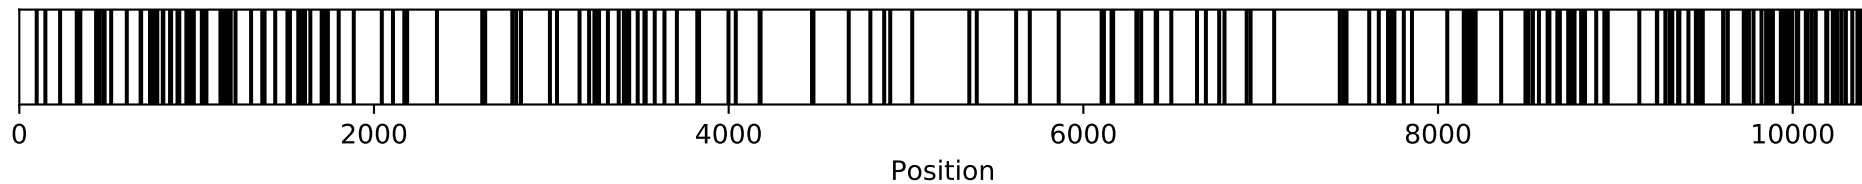

CR1 vs MM1  
Number of differences: 134

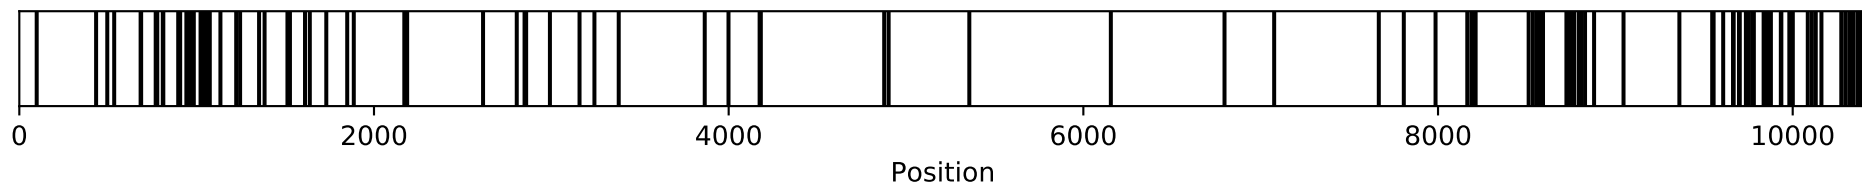

CR1 vs MM2  
Number of differences: 124

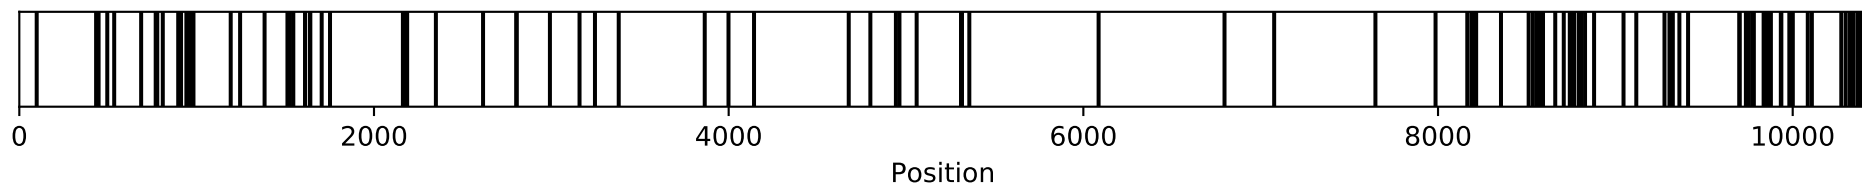

CR2 vs MM1  
Number of differences: 217

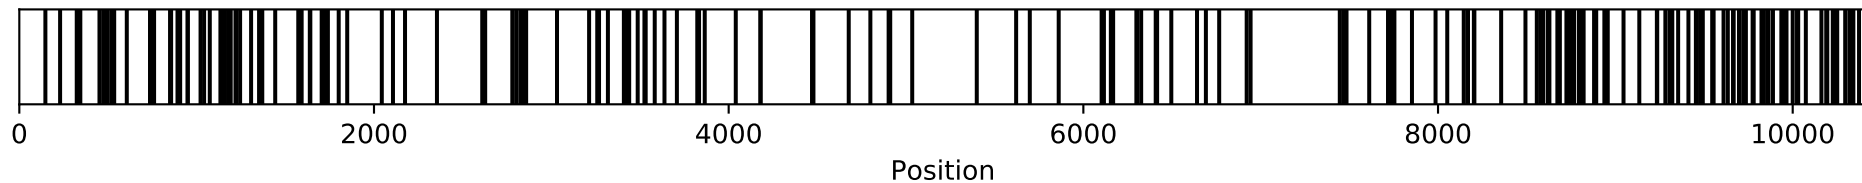

CR2 vs MM2  
Number of differences: 230

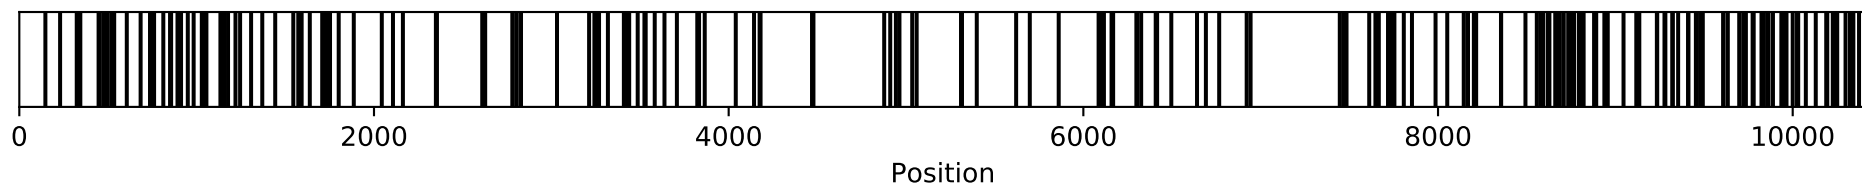

MM1 vs MM2  
Number of differences: 76

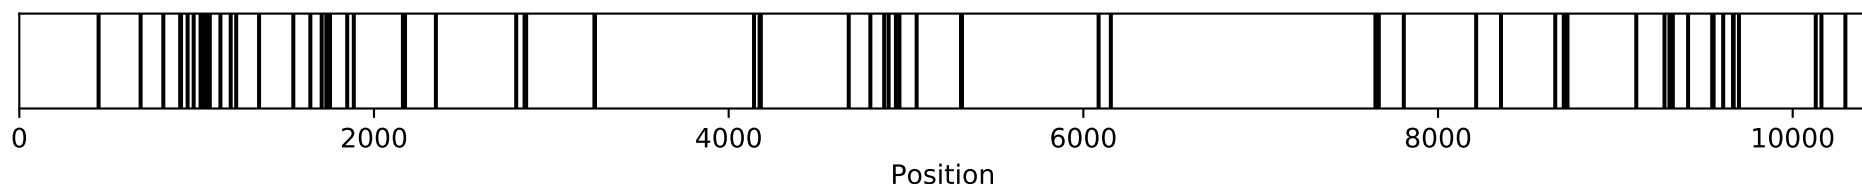

CR1 vs CR2  
Number of differences: 0

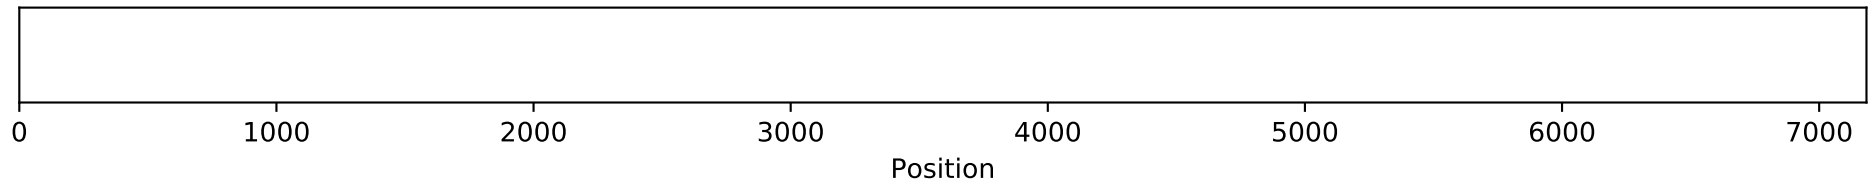

CR1 vs MM1  
Number of differences: 255

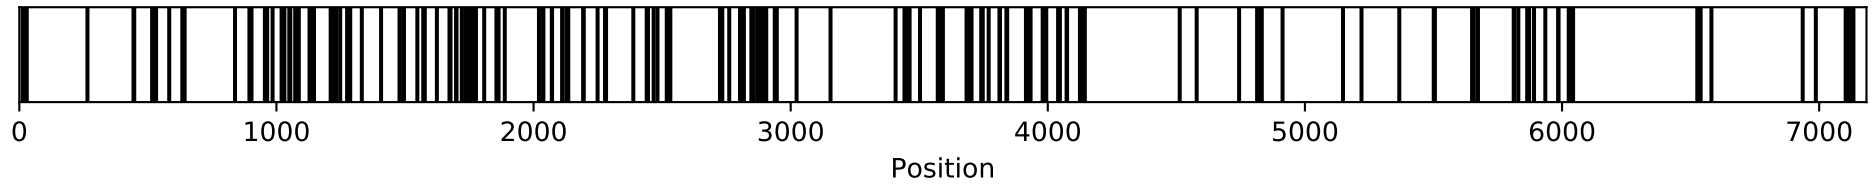

CR1 vs MM2  
Number of differences: 130

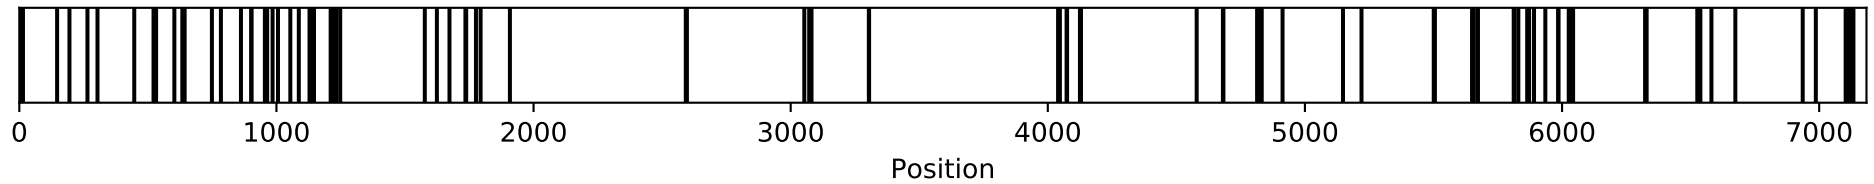

CR2 vs MM1  
Number of differences: 255

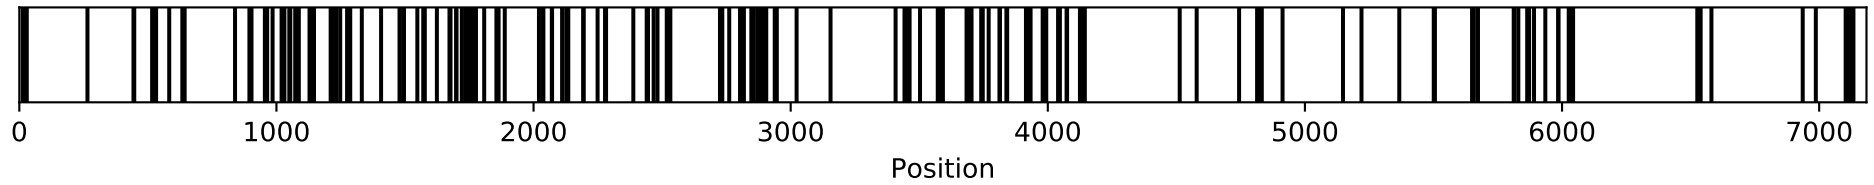

CR2 vs MM2  
Number of differences: 130

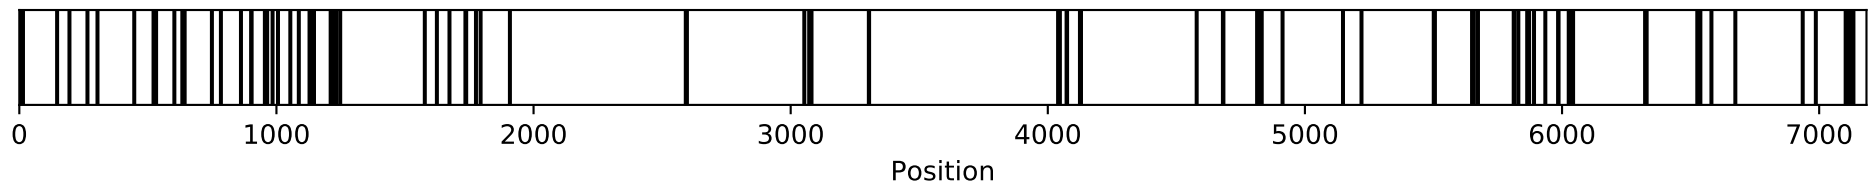

MM1 vs MM2  
Number of differences: 190

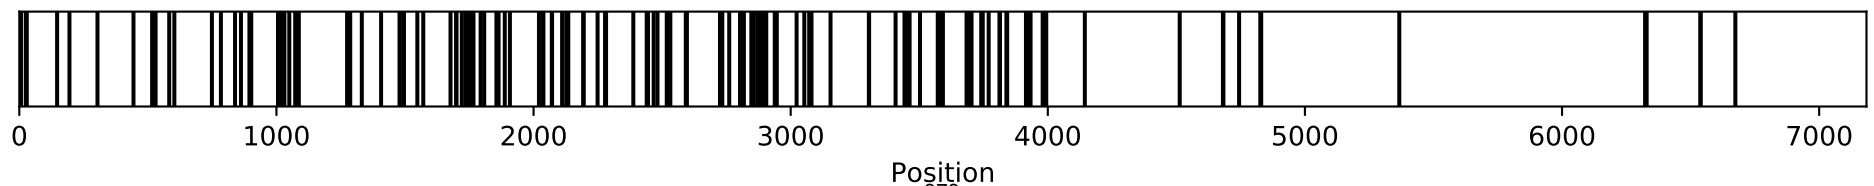

CR1 vs CR2  
Number of differences: 241

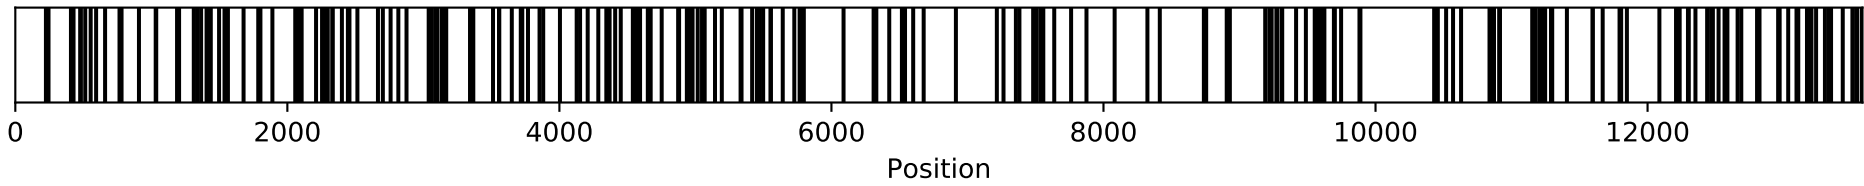

CR1 vs MM1  
Number of differences: 104

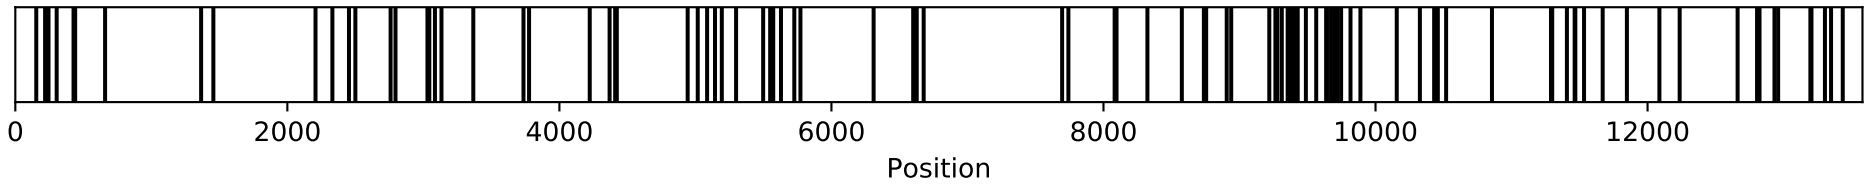

CR1 vs MM2  
Number of differences: 104

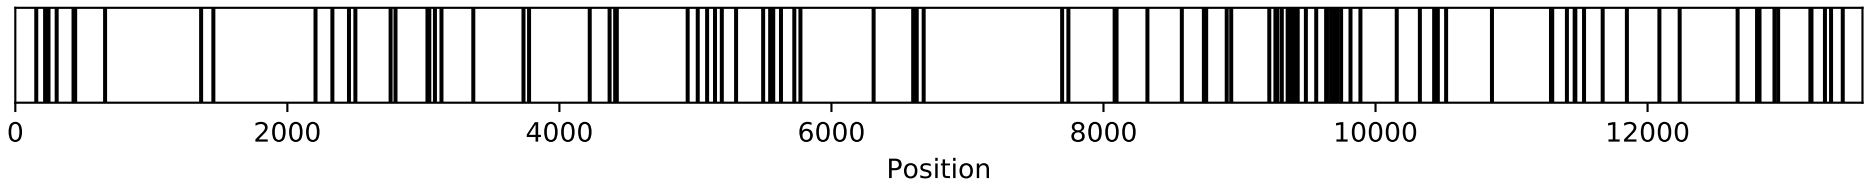

CR2 vs MM1  
Number of differences: 237

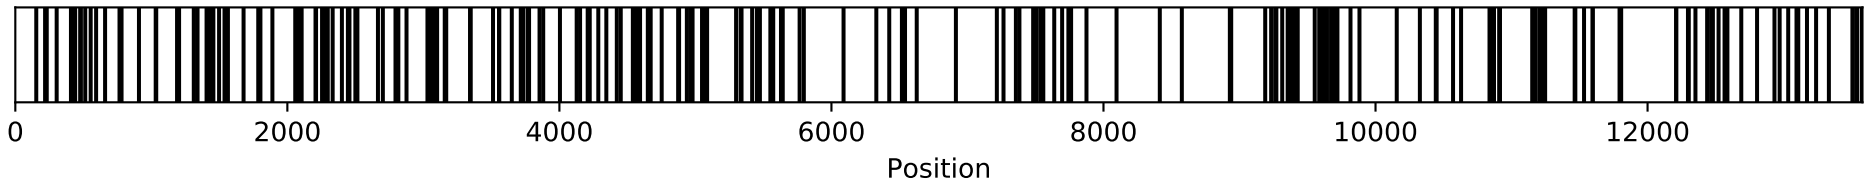

CR2 vs MM2  
Number of differences: 237

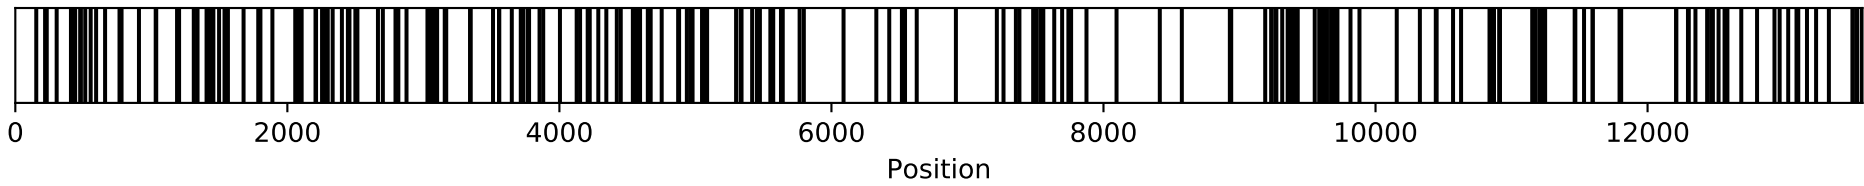

MM1 vs MM2  
Number of differences: 0

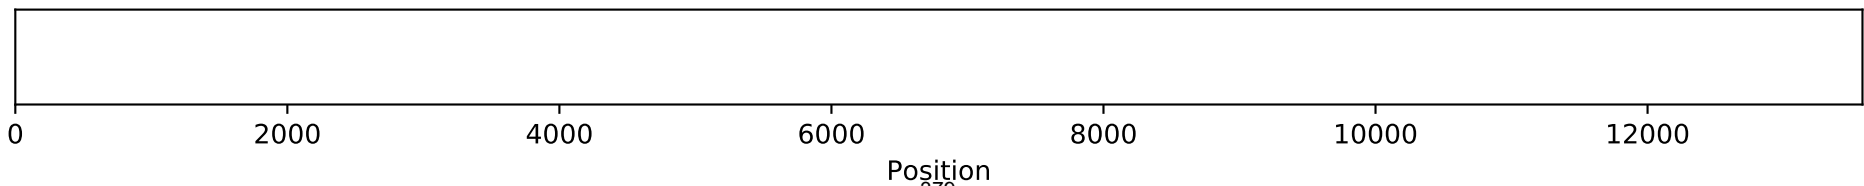

CR1 vs CR2  
Number of differences: 465

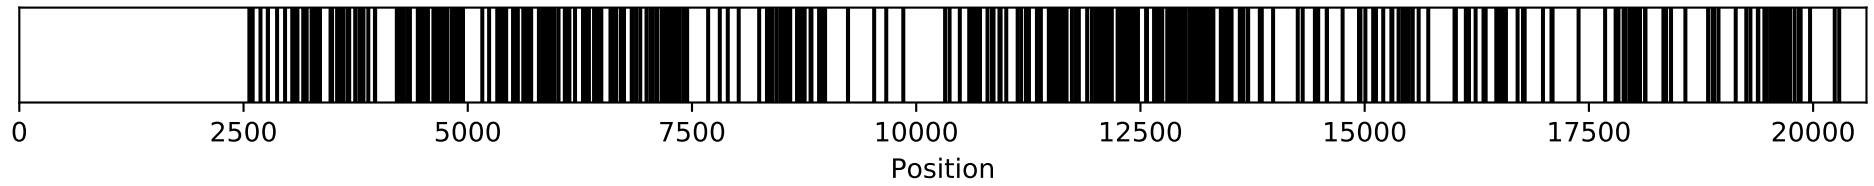

CR1 vs MM1  
Number of differences: 274

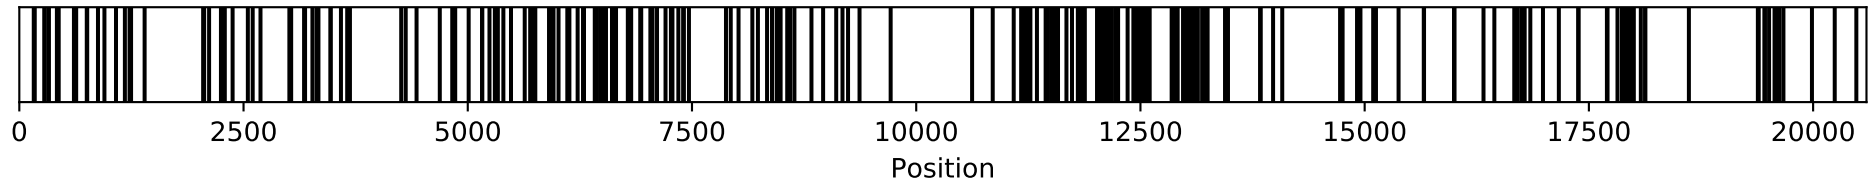

CR1 vs MM2  
Number of differences: 320

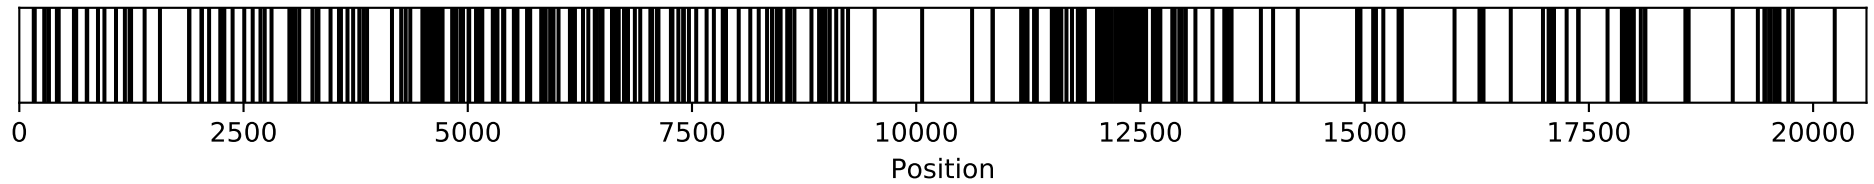

CR2 vs MM1  
Number of differences: 501

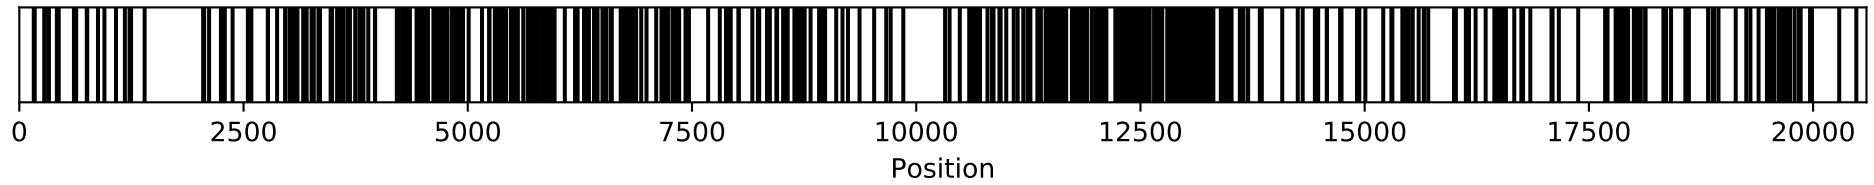

CR2 vs MM2  
Number of differences: 495

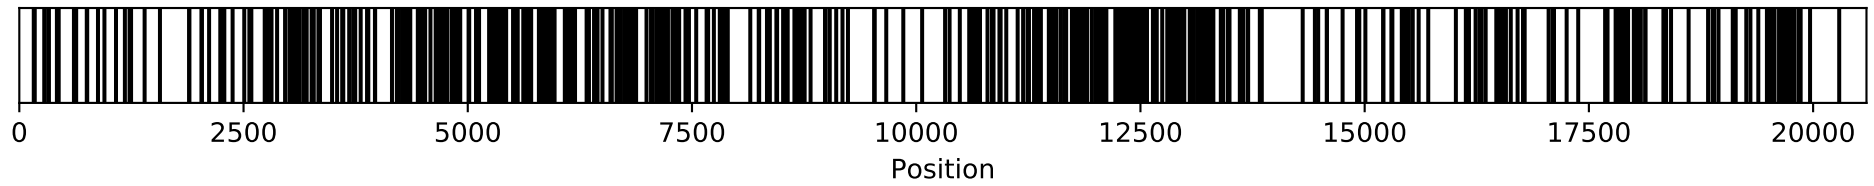

MM1 vs MM2  
Number of differences: 269

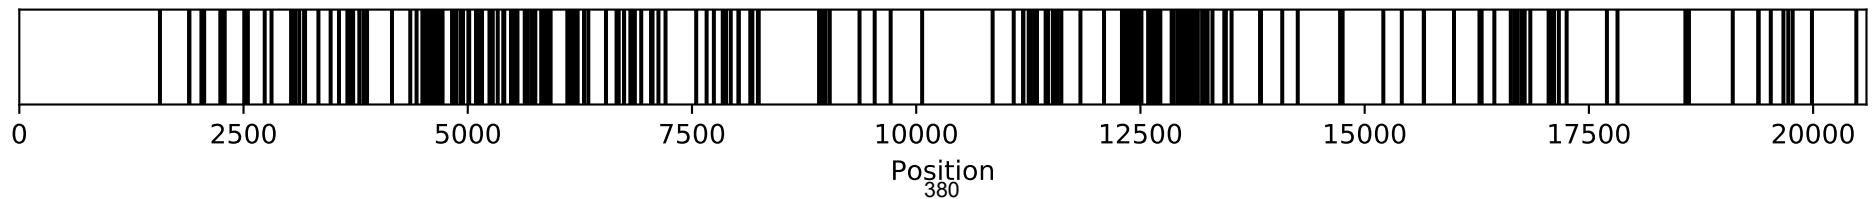

CR1 vs CR2  
Number of differences: 245

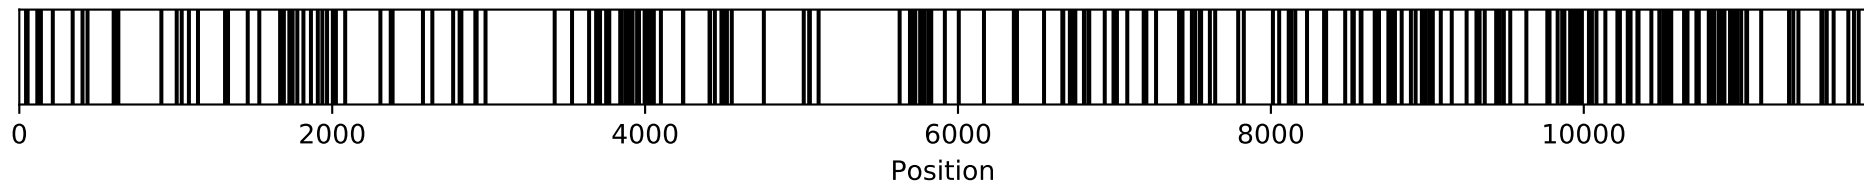

CR1 vs MM1  
Number of differences: 145

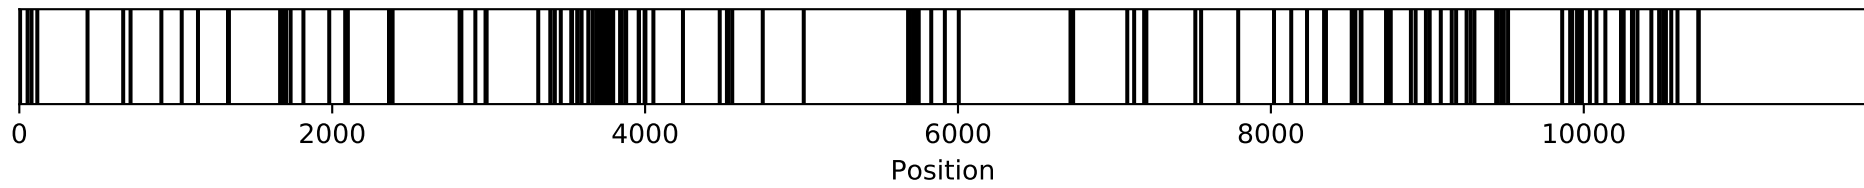

CR1 vs MM2  
Number of differences: 135

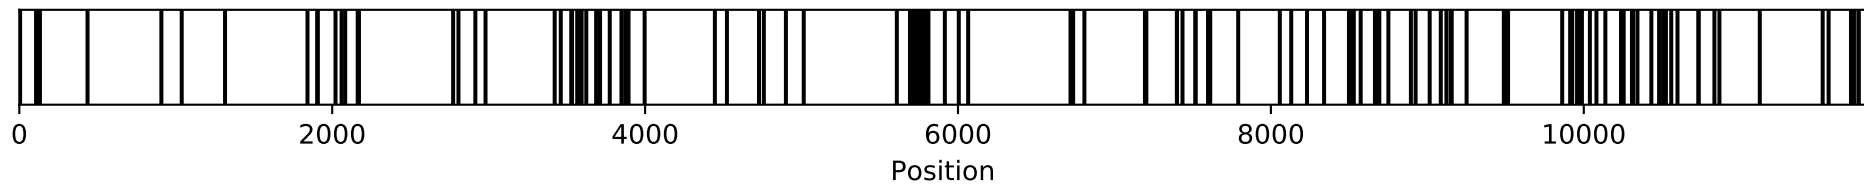

CR2 vs MM1  
Number of differences: 223

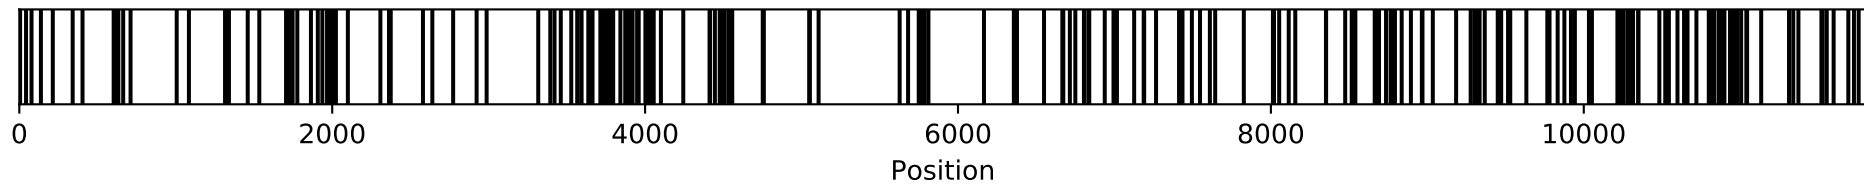

CR2 vs MM2  
Number of differences: 227

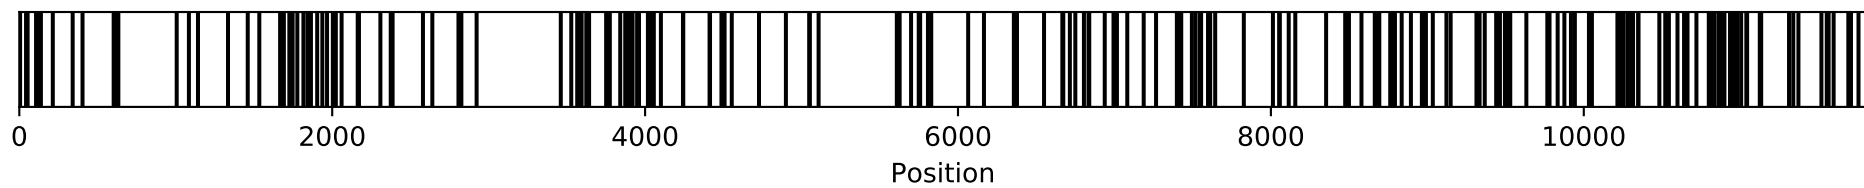

MM1 vs MM2  
Number of differences: 130

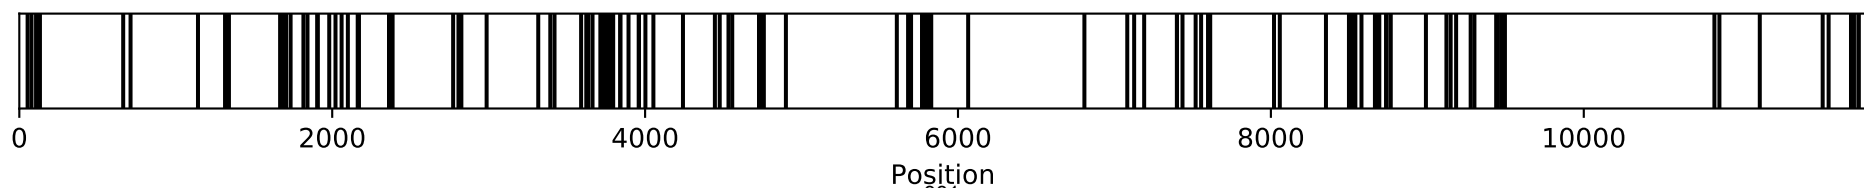

CR1 vs CR2  
Number of differences: 28

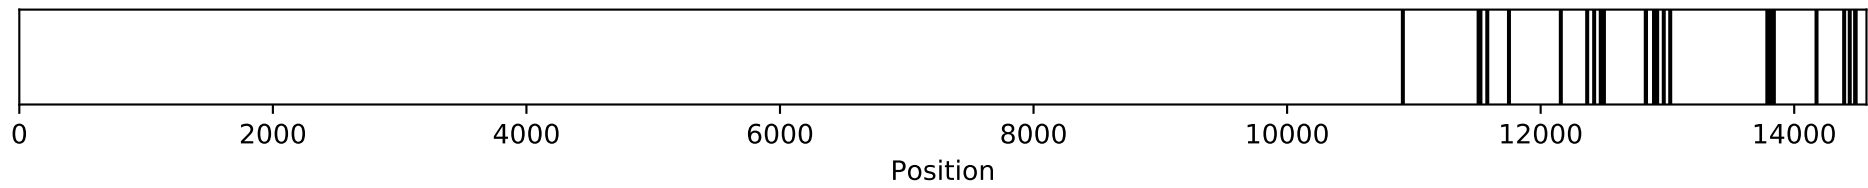

CR1 vs MM1  
Number of differences: 197

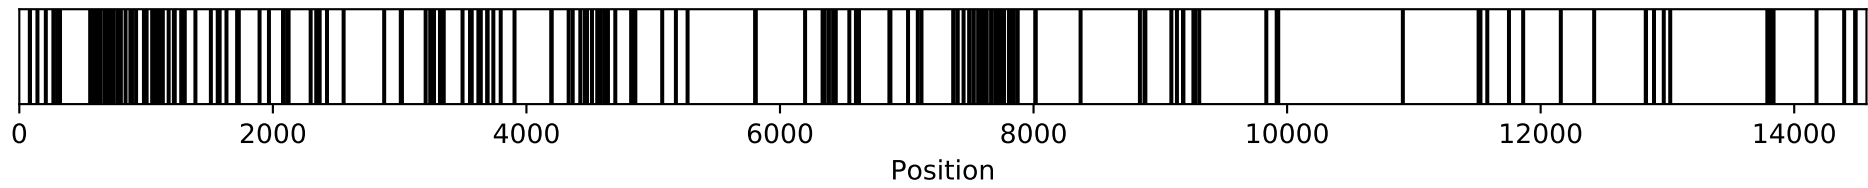

CR1 vs MM2  
Number of differences: 214

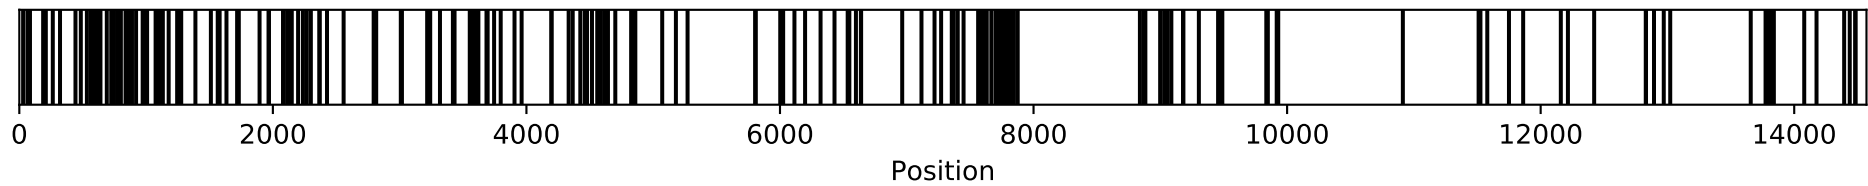

CR2 vs MM1  
Number of differences: 183

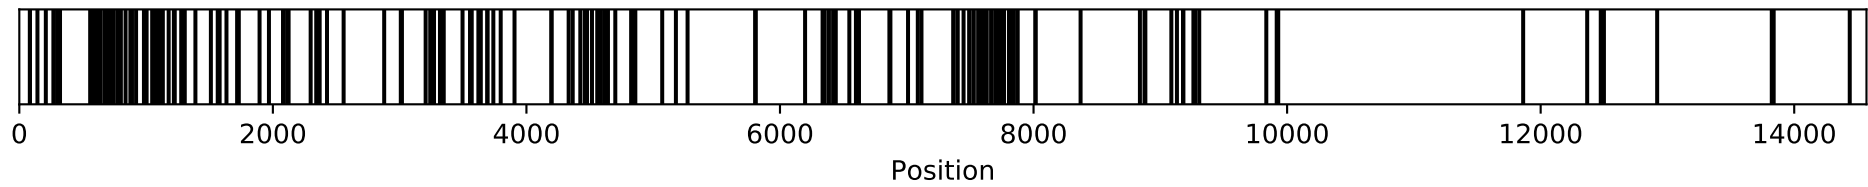

CR2 vs MM2  
Number of differences: 194

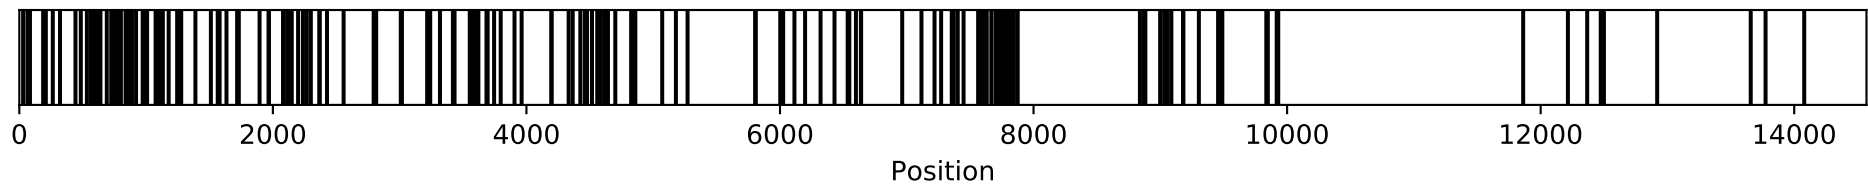

MM1 vs MM2  
Number of differences: 133

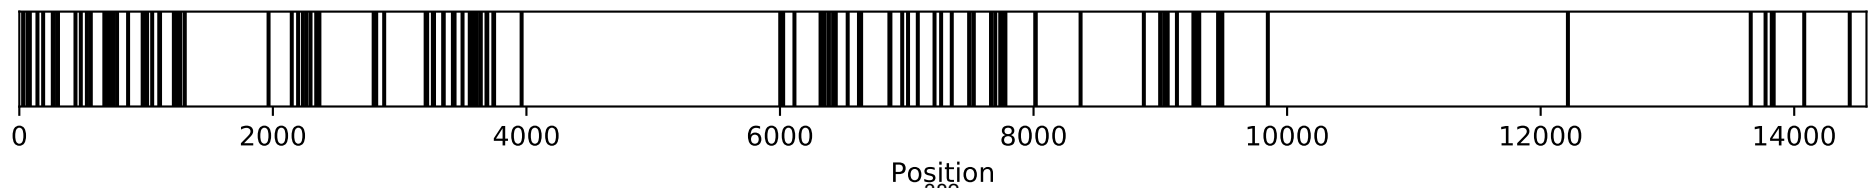

CR1 vs CR2  
Number of differences: 162

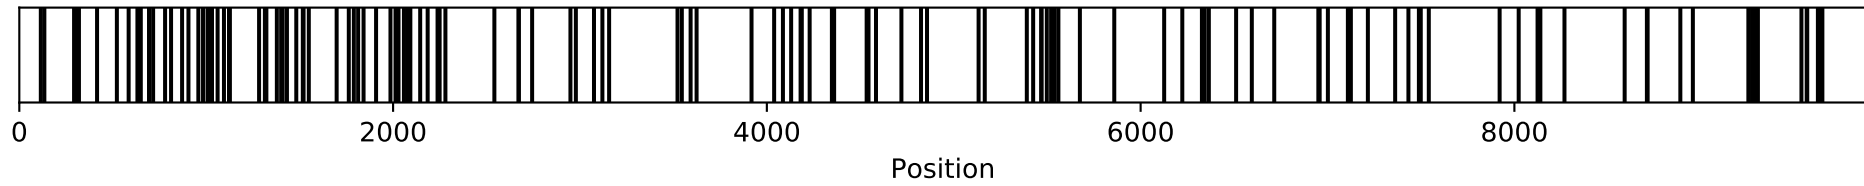

CR1 vs MM1  
Number of differences: 81

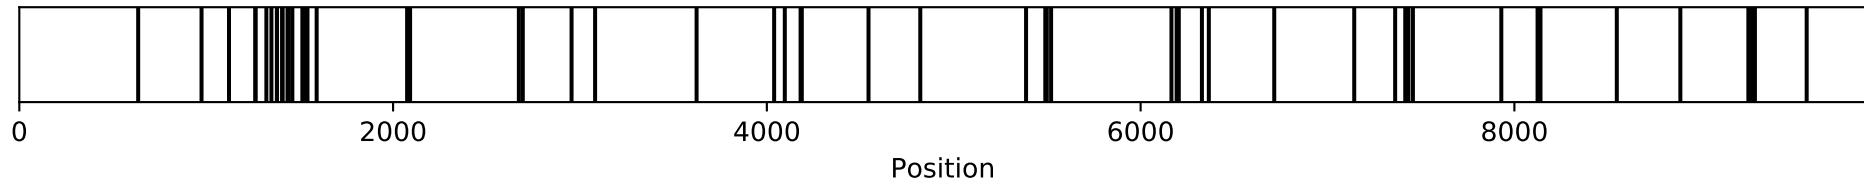

CR1 vs MM2  
Number of differences: 61

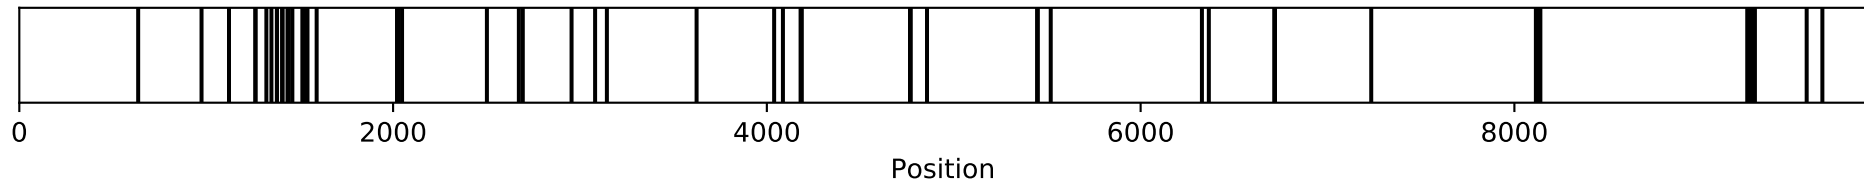

CR2 vs MM1  
Number of differences: 163

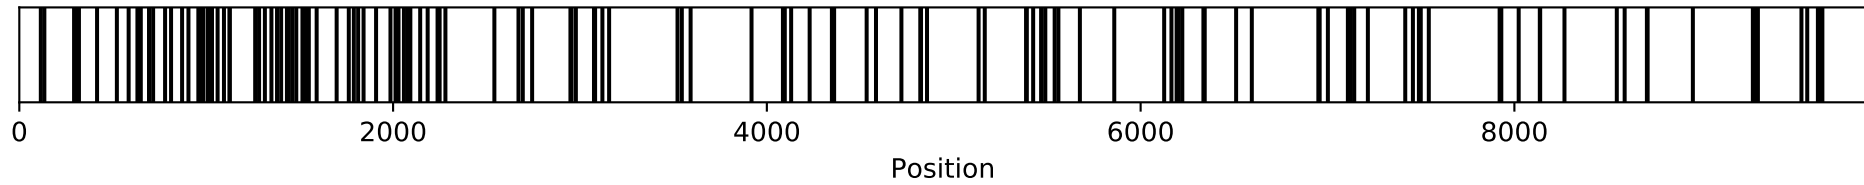

CR2 vs MM2  
Number of differences: 159

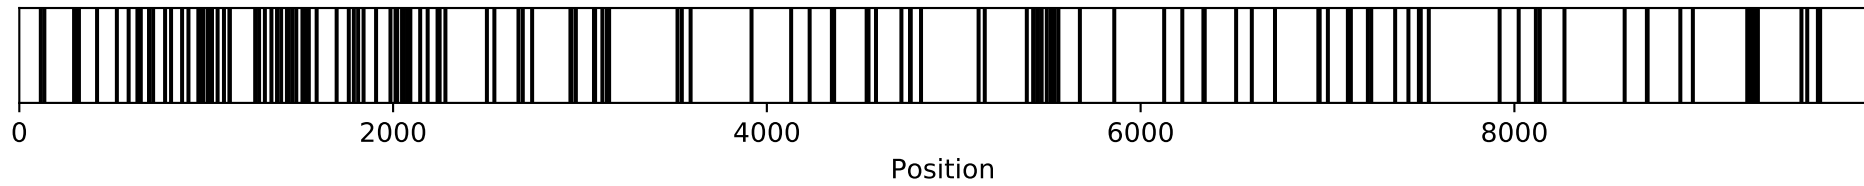

MM1 vs MM2  
Number of differences: 56

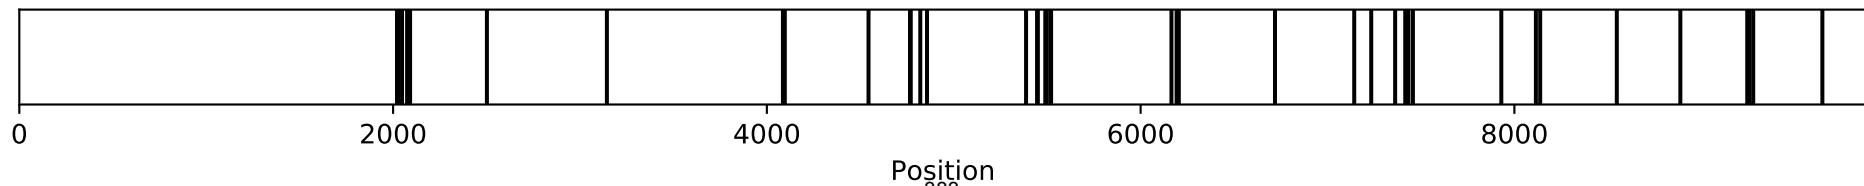



CR1 vs CR2  
Number of differences: 618

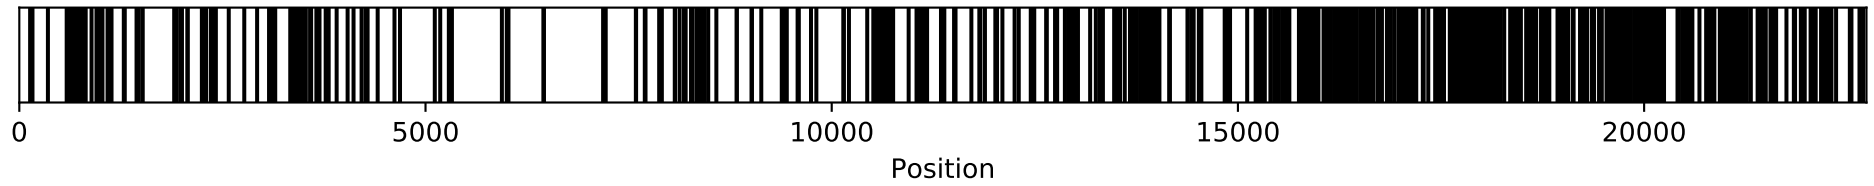

CR1 vs MM1  
Number of differences: 260

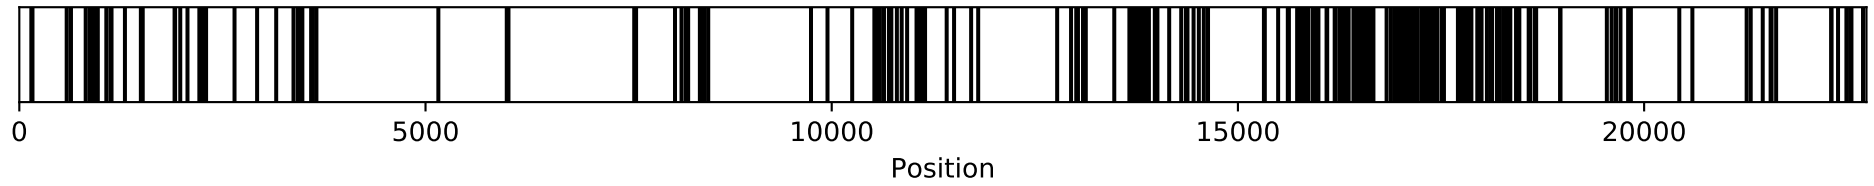

CR1 vs MM2  
Number of differences: 211

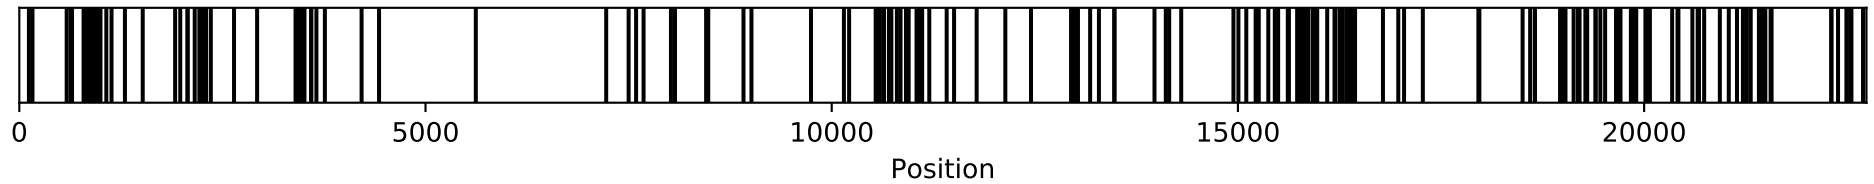

CR2 vs MM1  
Number of differences: 571

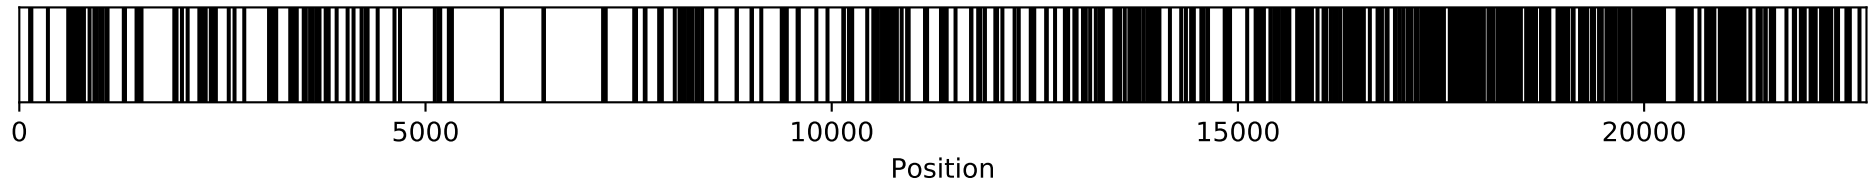

CR2 vs MM2  
Number of differences: 612

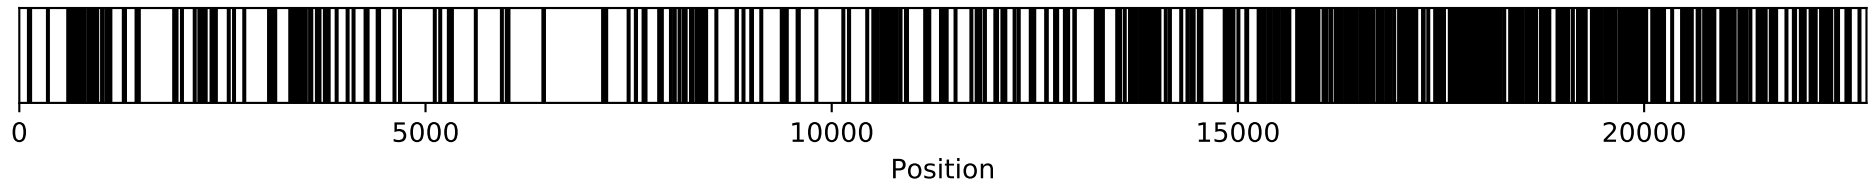

MM1 vs MM2  
Number of differences: 284

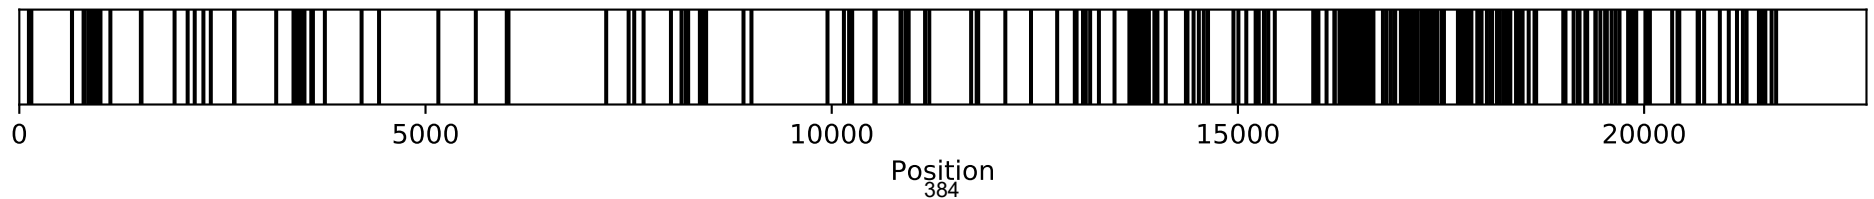

CR1 vs CR2  
Number of differences: 170

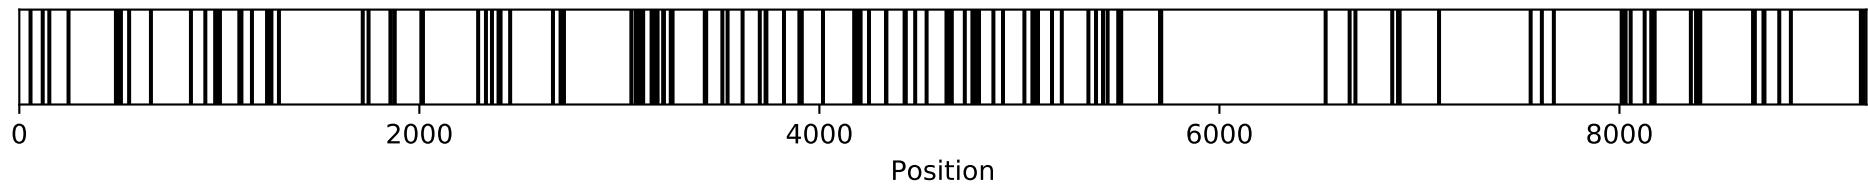

CR1 vs MM1  
Number of differences: 66

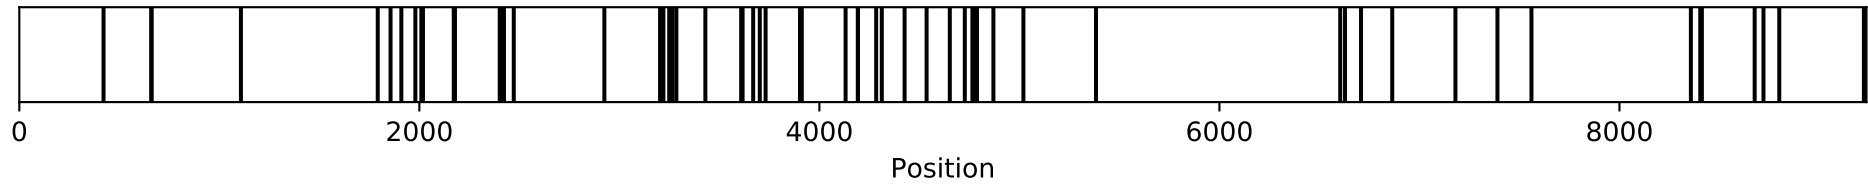

CR1 vs MM2  
Number of differences: 54

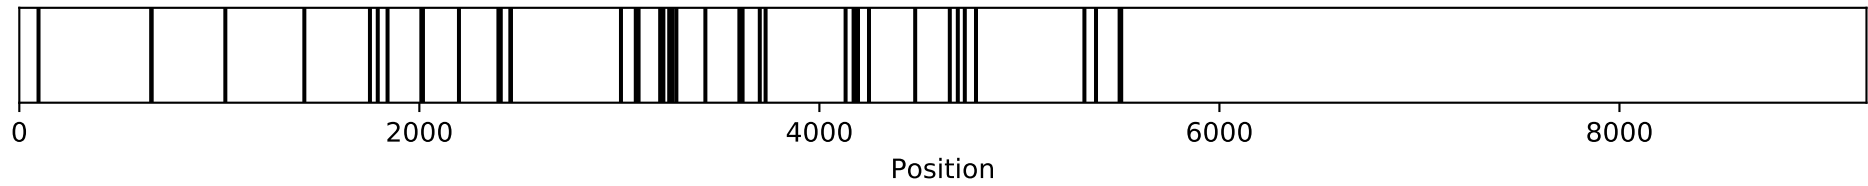

CR2 vs MM1  
Number of differences: 180

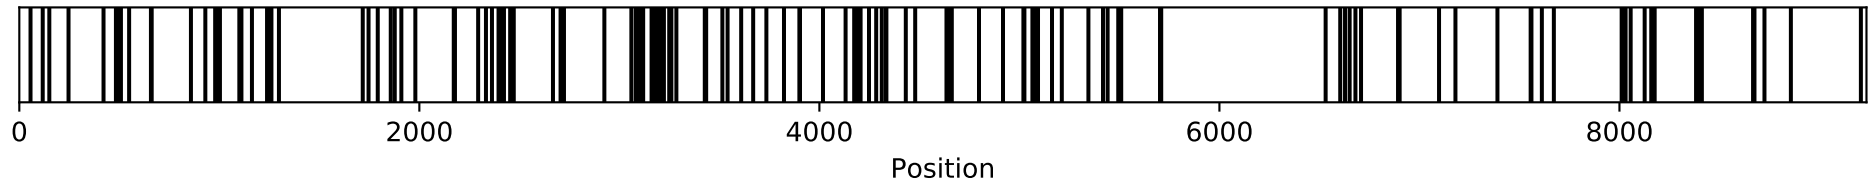

CR2 vs MM2  
Number of differences: 177

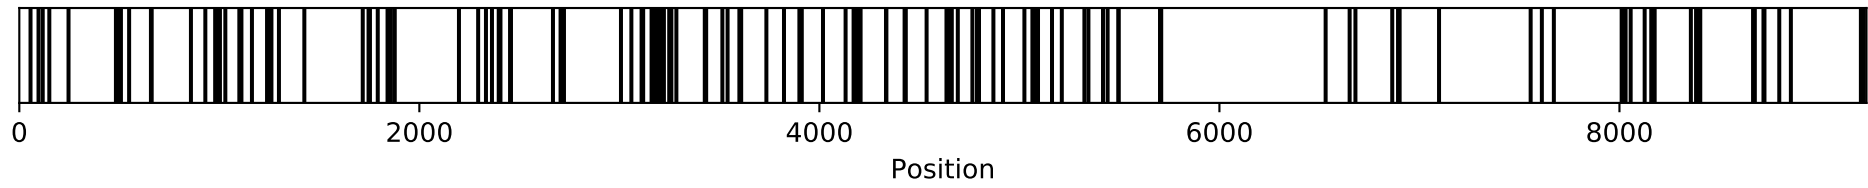

MM1 vs MM2  
Number of differences: 64

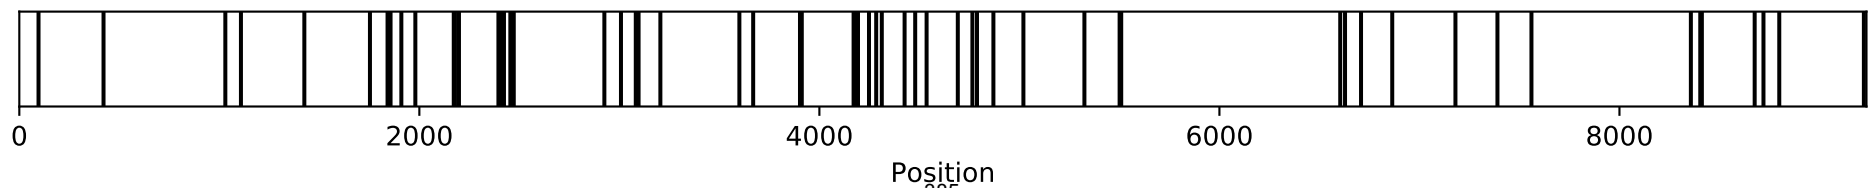

CR1 vs CR2  
Number of differences: 408

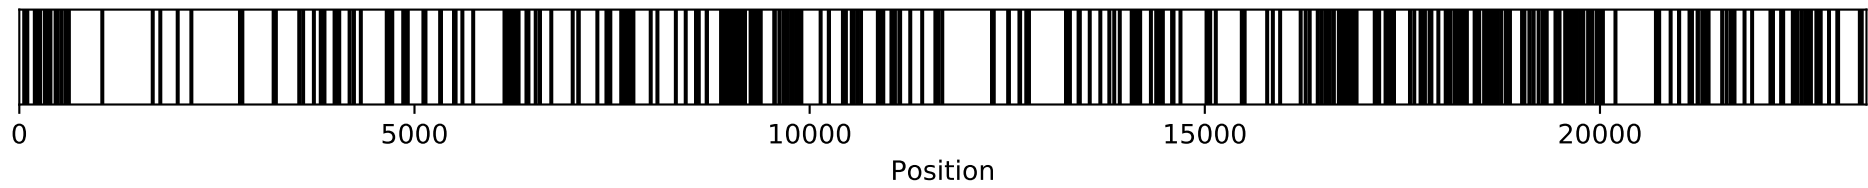

CR1 vs MM1  
Number of differences: 132

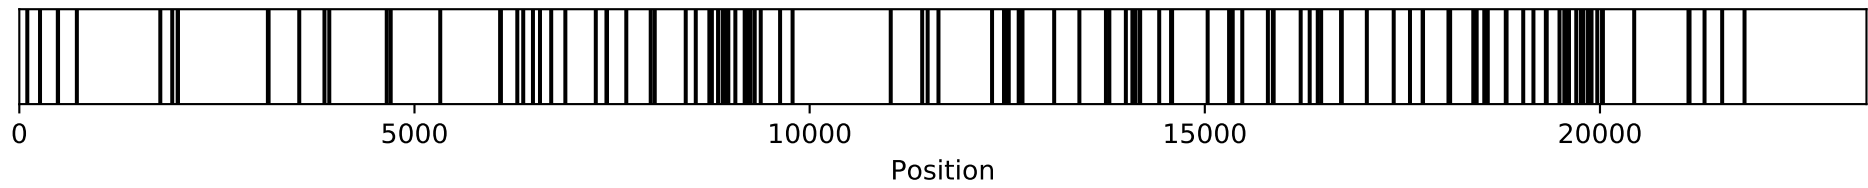

CR1 vs MM2  
Number of differences: 155

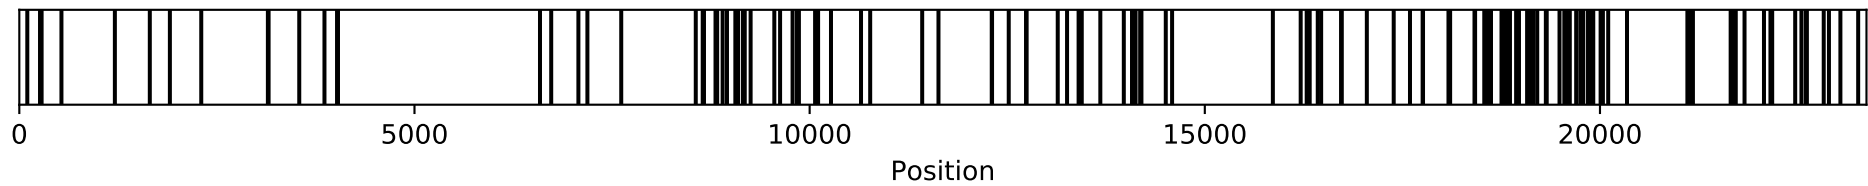

CR2 vs MM1  
Number of differences: 408

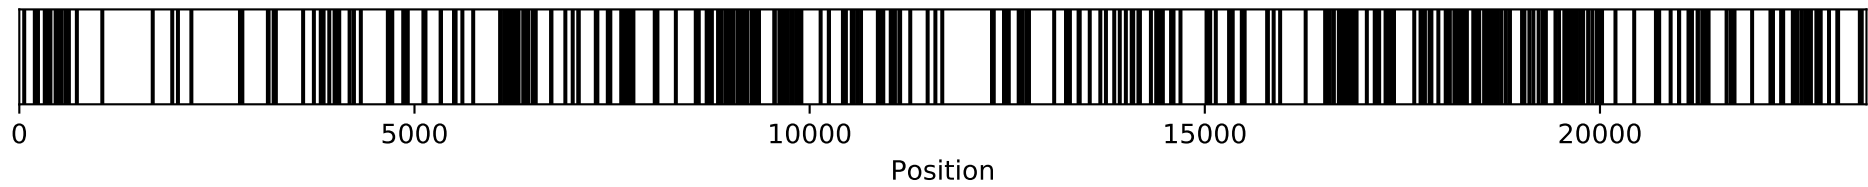

CR2 vs MM2  
Number of differences: 422

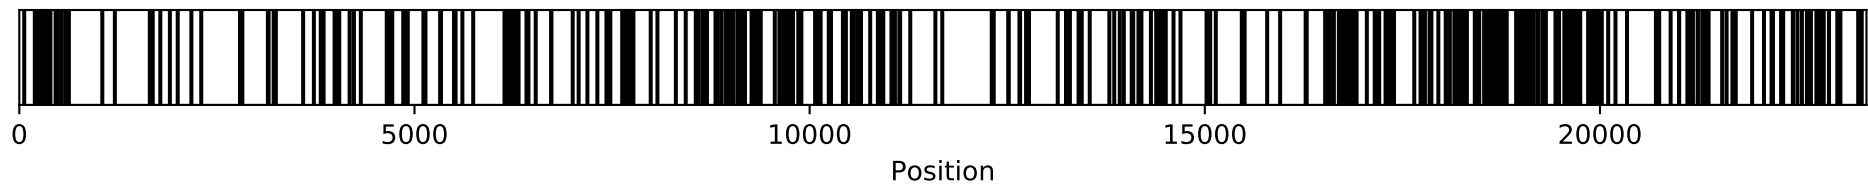

MM1 vs MM2  
Number of differences: 163

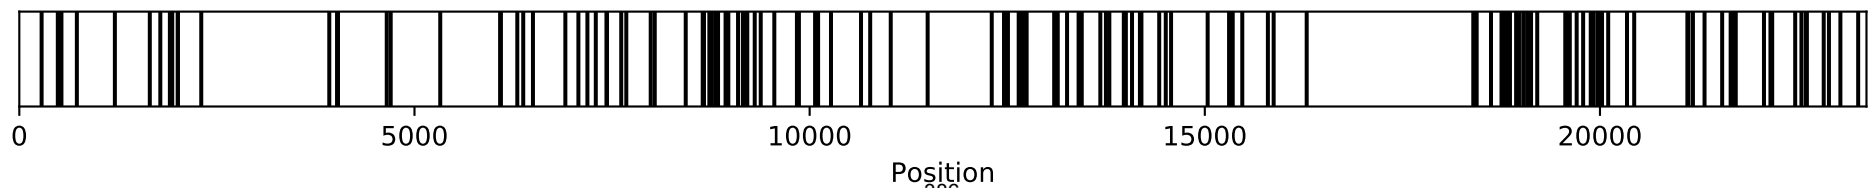

CR1 vs CR2  
Number of differences: 150

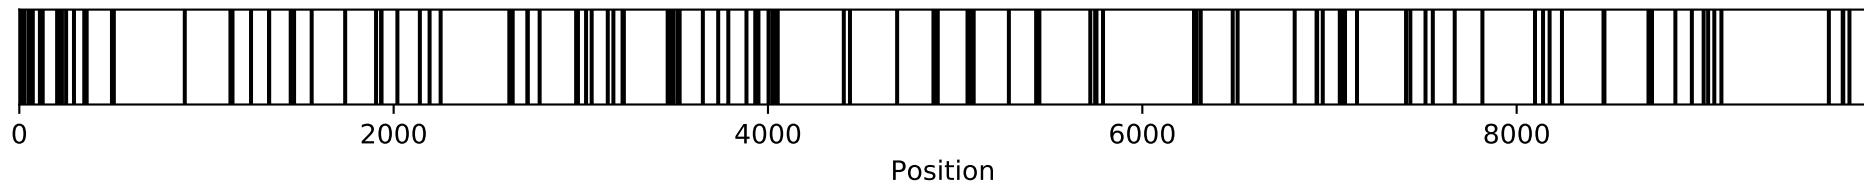

CR1 vs MM1  
Number of differences: 160

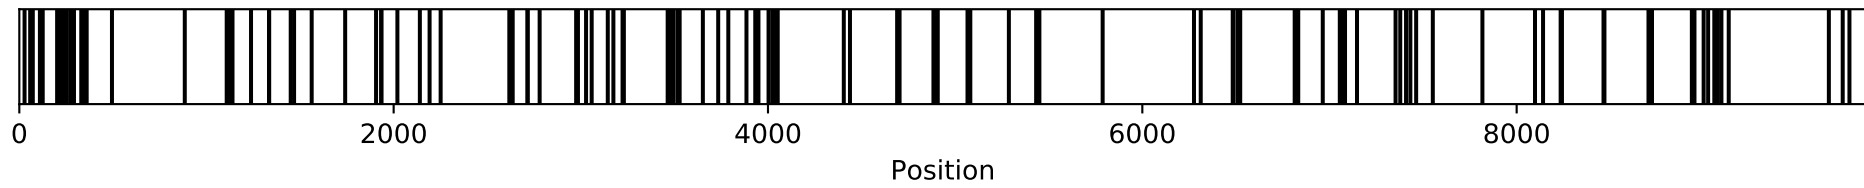

CR1 vs MM2  
Number of differences: 148

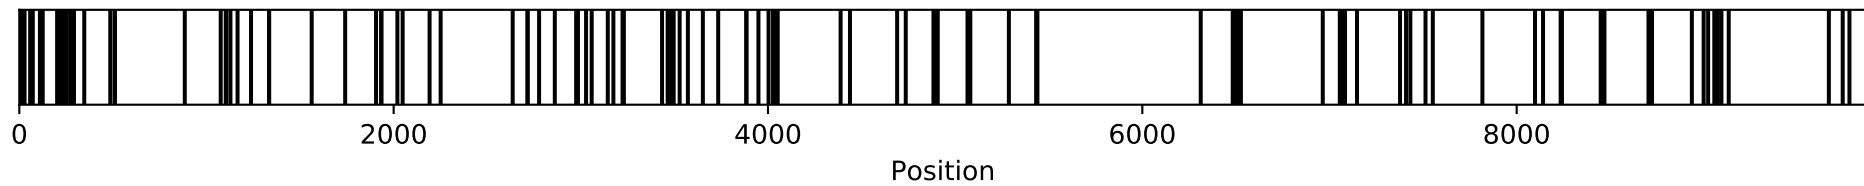

CR2 vs MM1  
Number of differences: 55

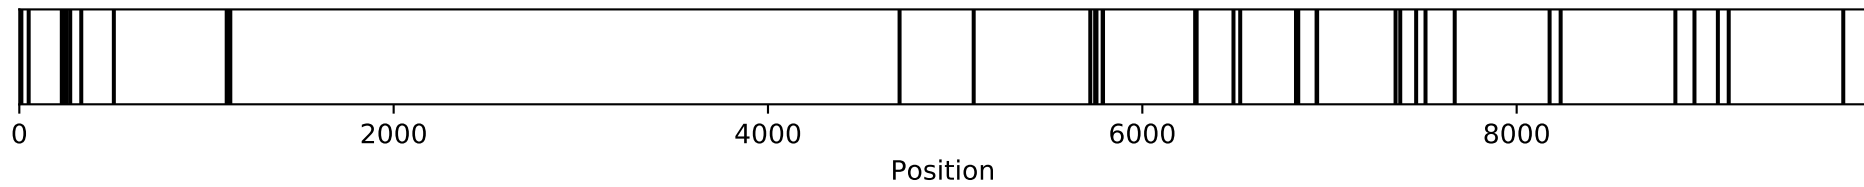

CR2 vs MM2  
Number of differences: 71

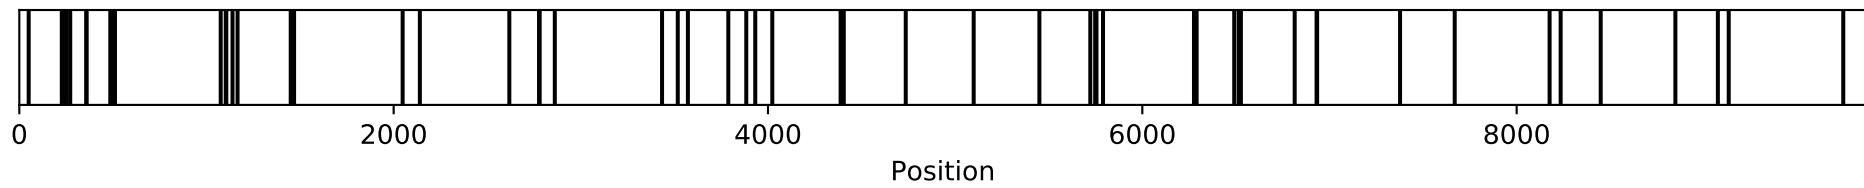

MM1 vs MM2  
Number of differences: 69

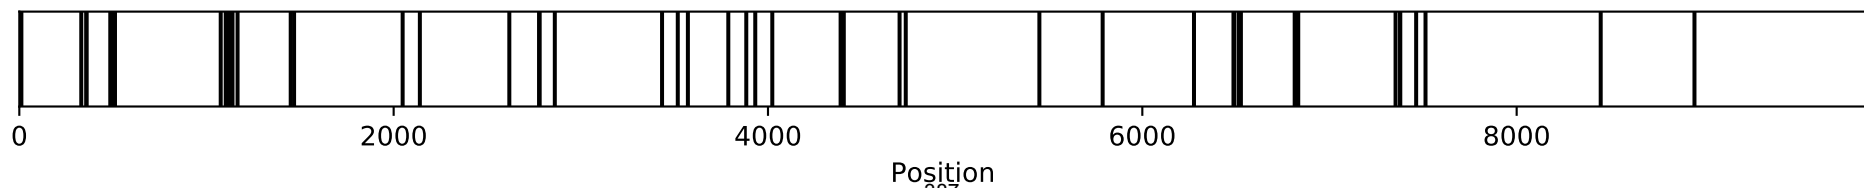

CR1 vs CR2  
Number of differences: 237

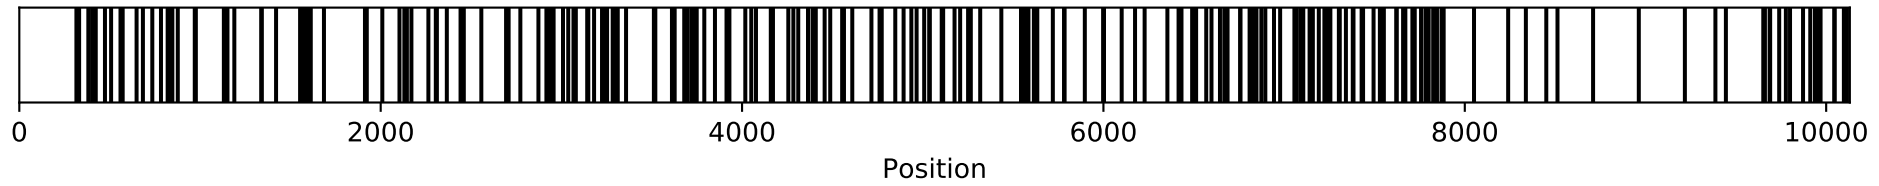

CR1 vs MM1  
Number of differences: 227

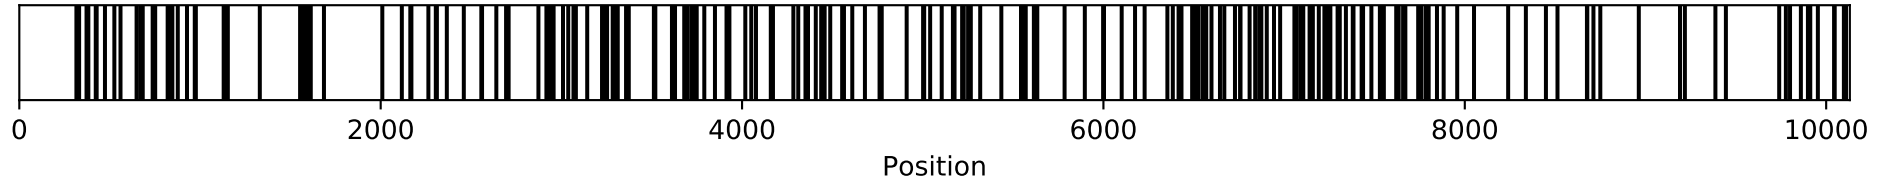

CR1 vs MM2  
Number of differences: 235

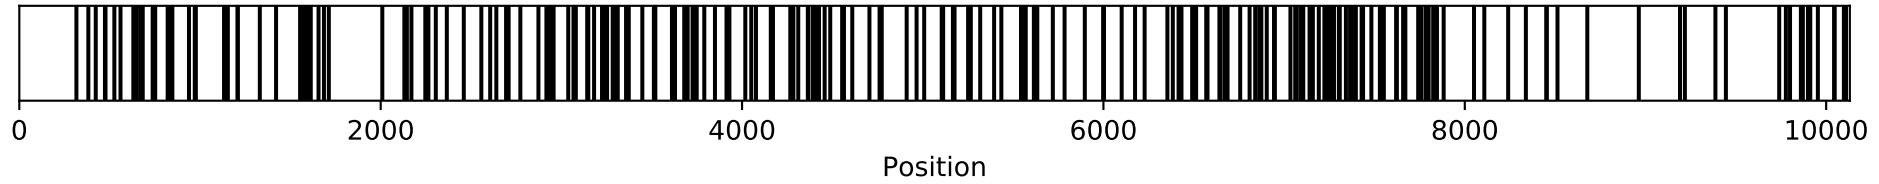

CR2 vs MM1  
Number of differences: 112

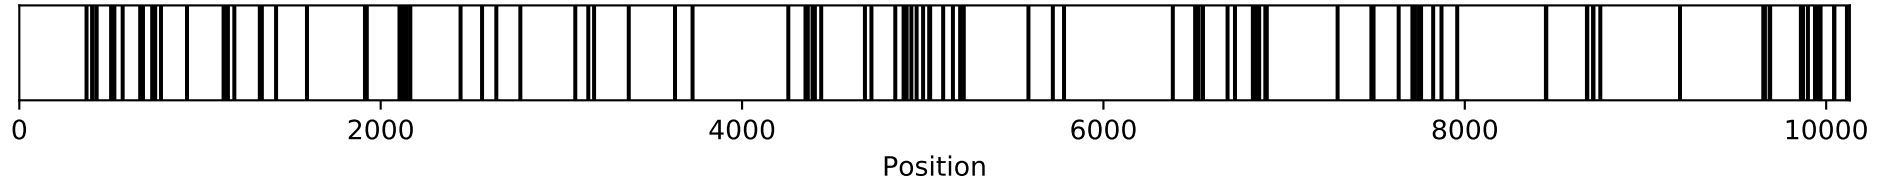

CR2 vs MM2  
Number of differences: 115

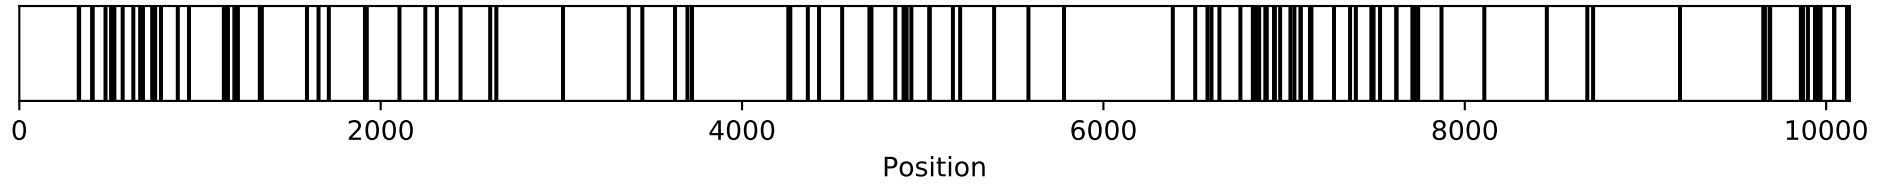

MM1 vs MM2  
Number of differences: 88

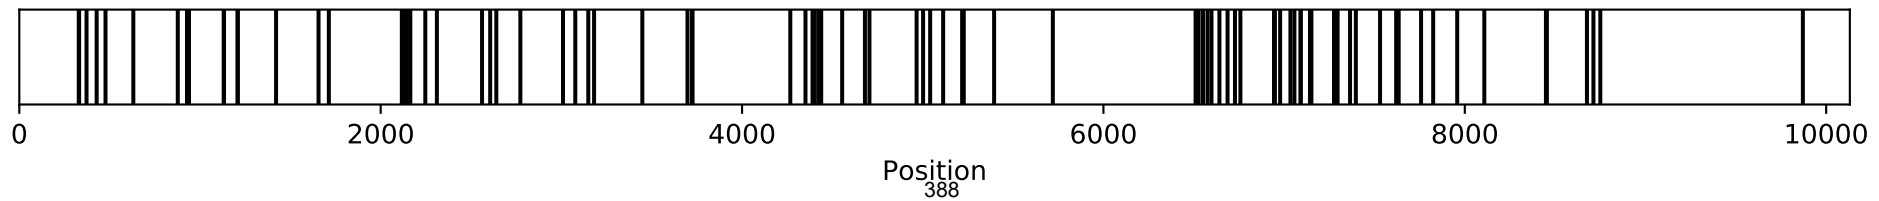

CR1 vs CR2  
Number of differences: 50

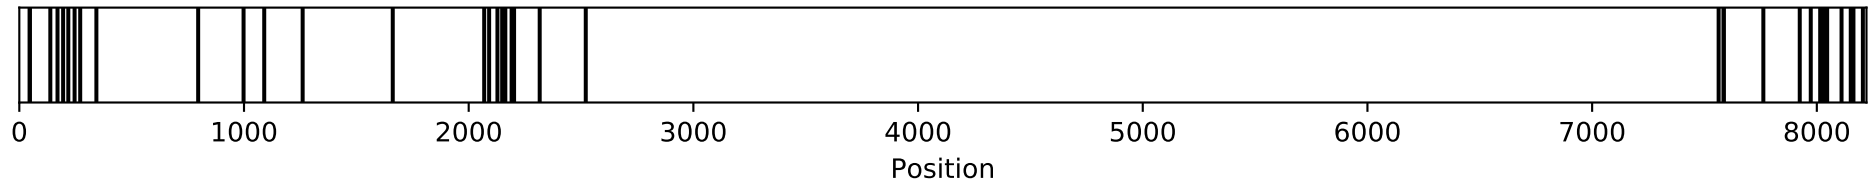

CR1 vs MM1  
Number of differences: 97

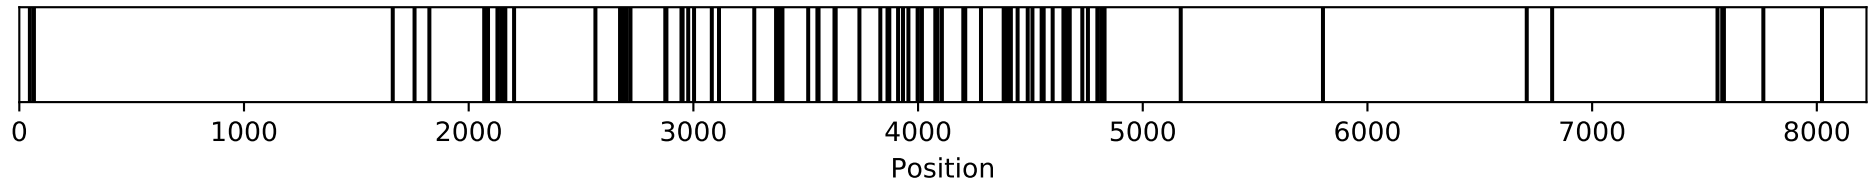

CR1 vs MM2  
Number of differences: 92

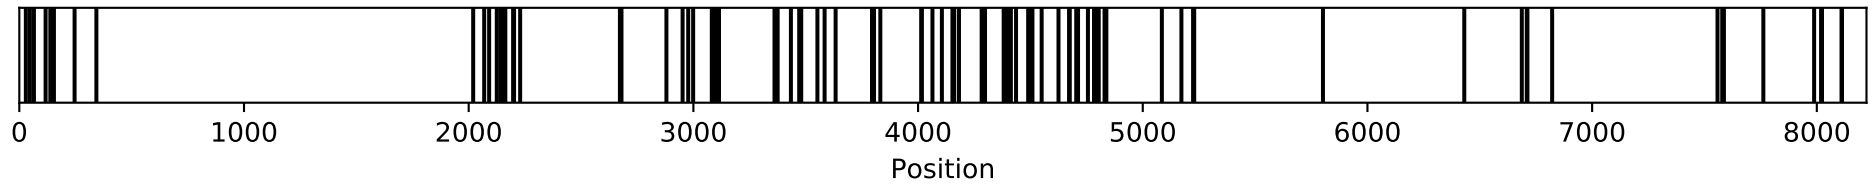

CR2 vs MM1  
Number of differences: 128

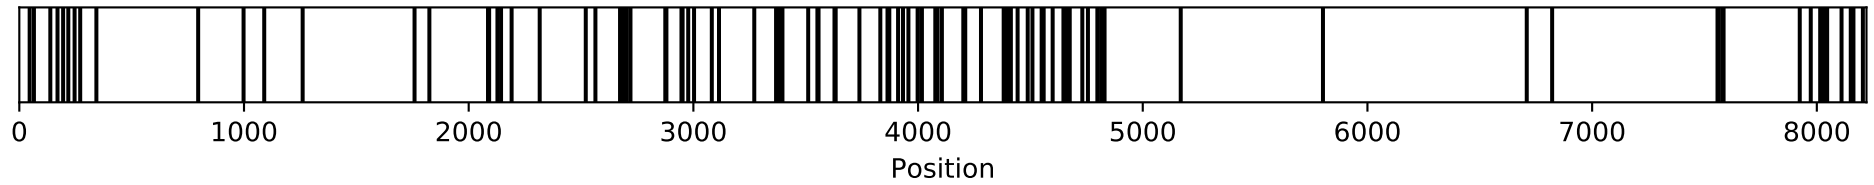

CR2 vs MM2  
Number of differences: 114

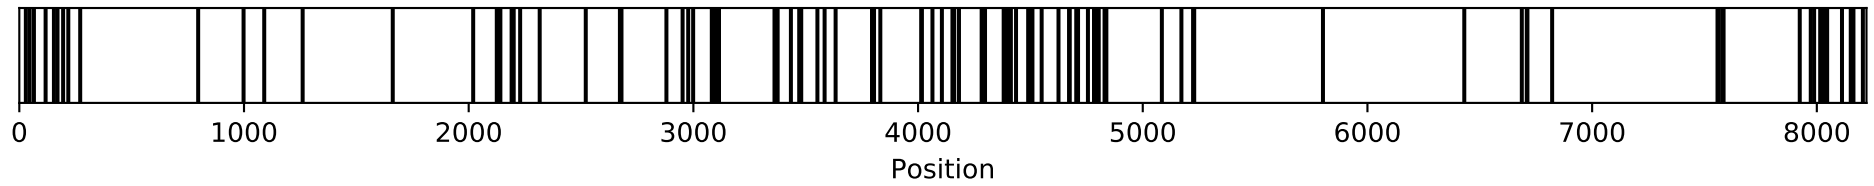

MM1 vs MM2  
Number of differences: 108

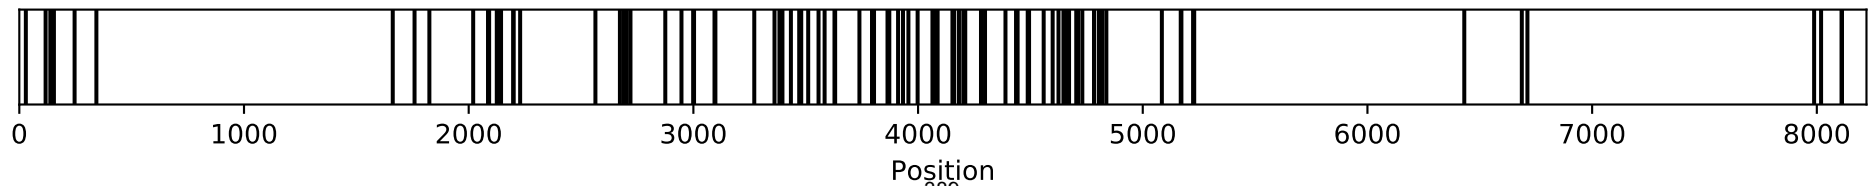

CR1 vs CR2  
Number of differences: 231

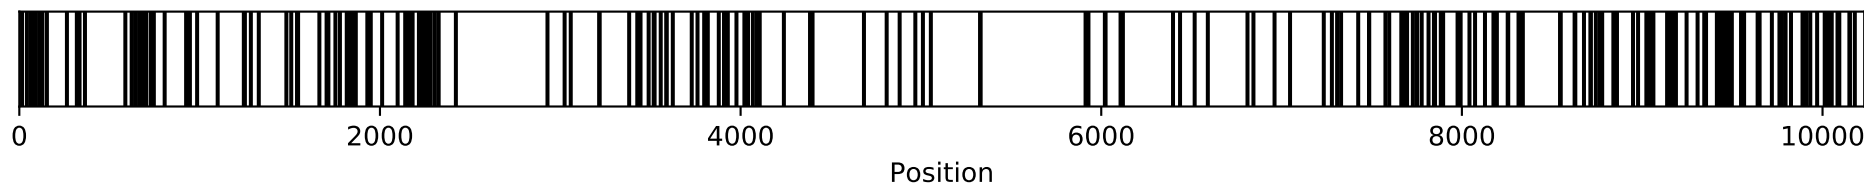

CR1 vs MM1  
Number of differences: 113

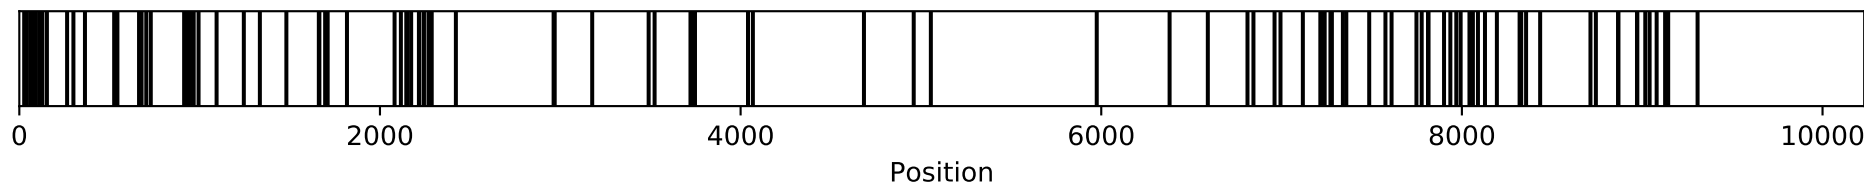

CR1 vs MM2  
Number of differences: 127

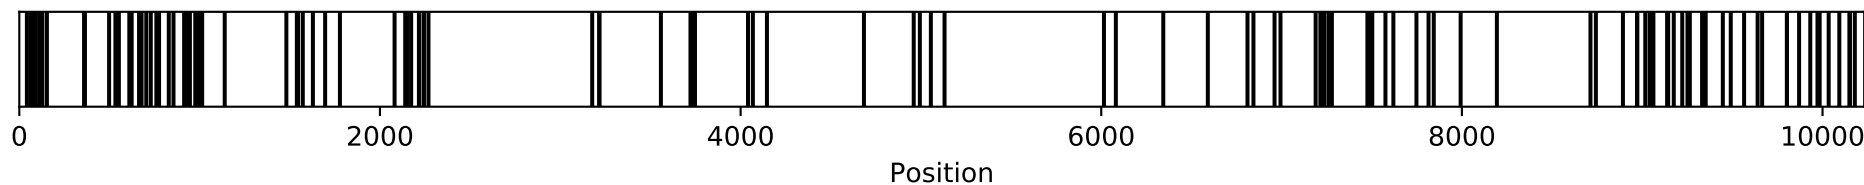

CR2 vs MM1  
Number of differences: 234

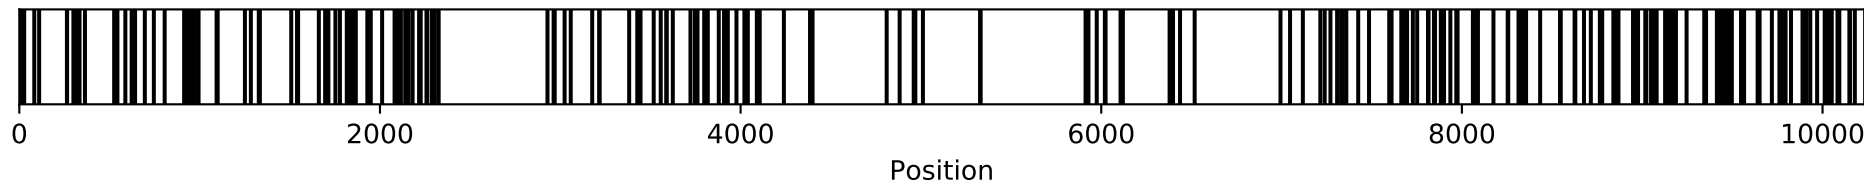

CR2 vs MM2  
Number of differences: 235

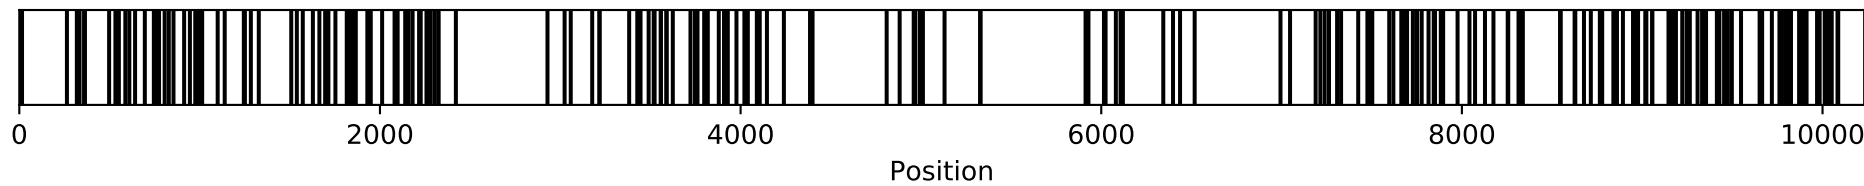

MM1 vs MM2  
Number of differences: 127

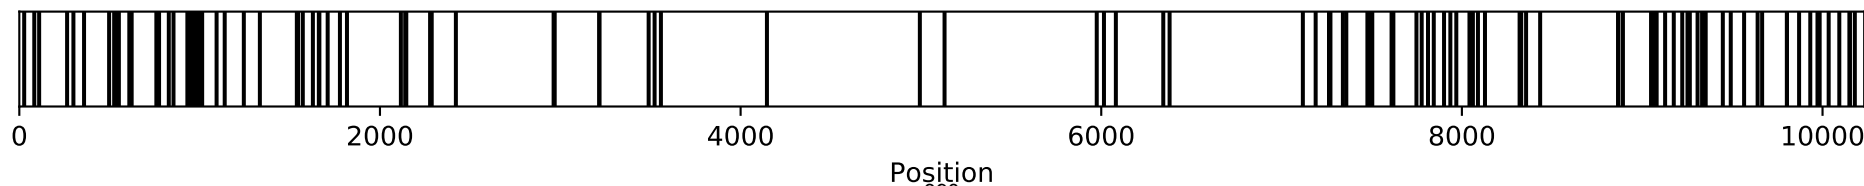

CR1 vs CR2  
Number of differences: 224

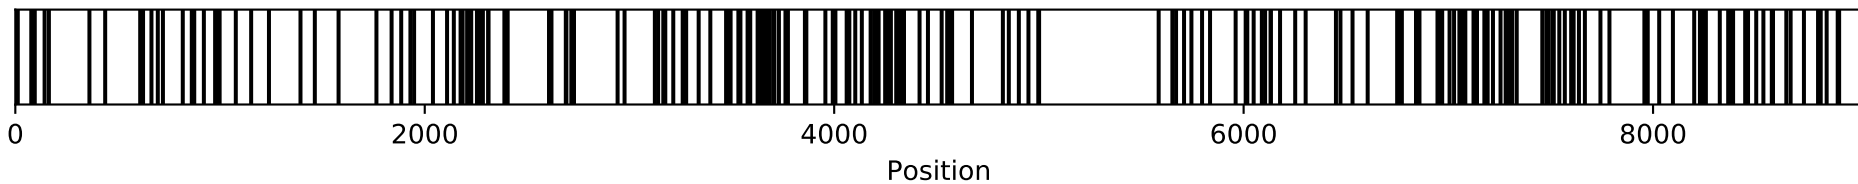

CR1 vs MM1  
Number of differences: 54

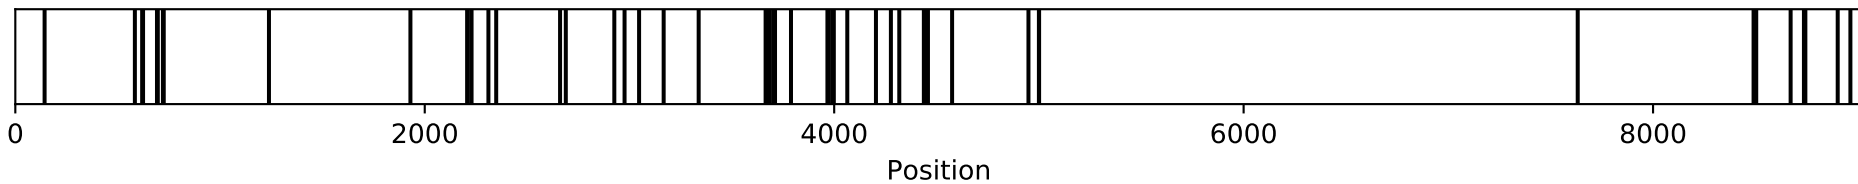

CR1 vs MM2  
Number of differences: 101

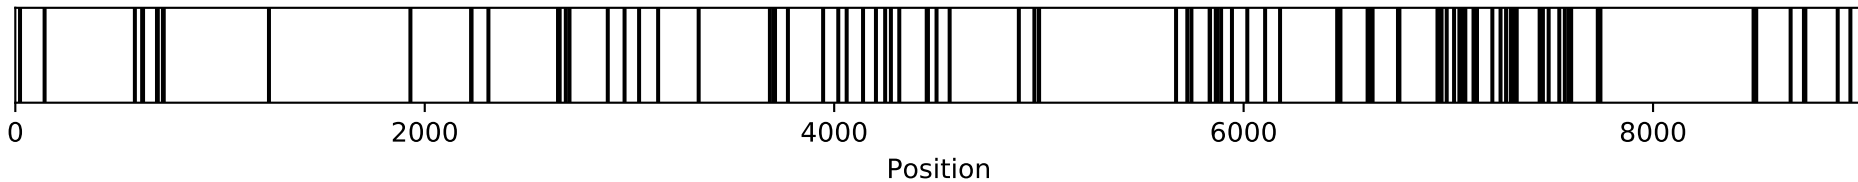

CR2 vs MM1  
Number of differences: 218

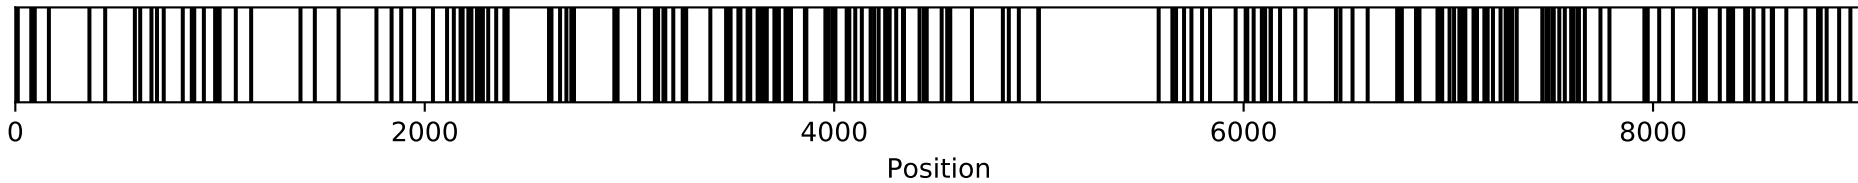

CR2 vs MM2  
Number of differences: 207

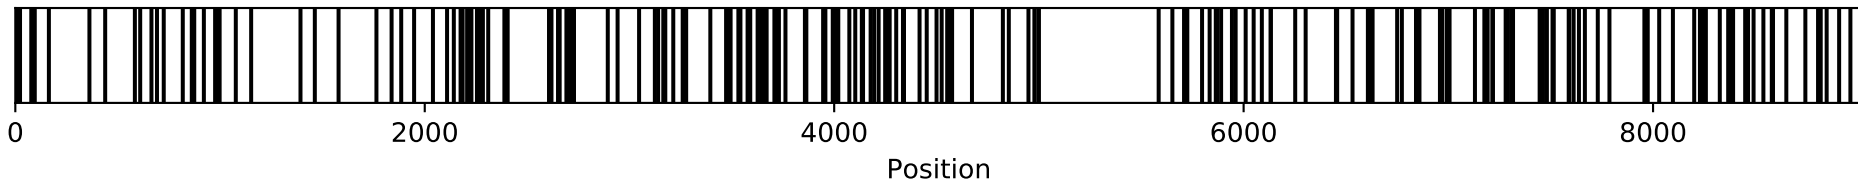

MM1 vs MM2  
Number of differences: 85

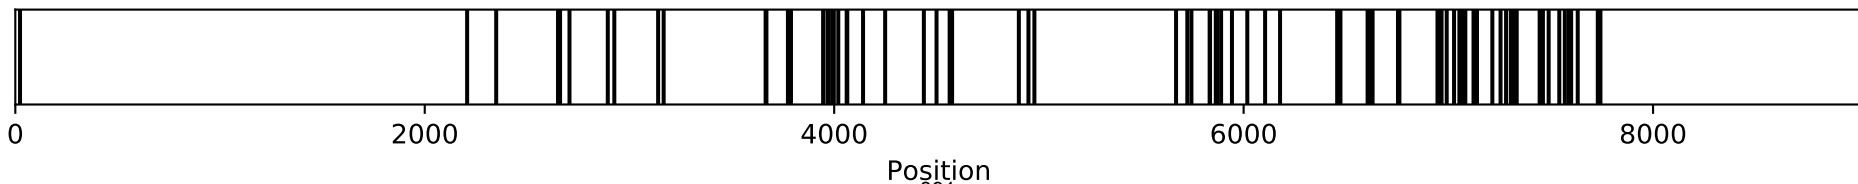



CR1 vs CR2  
Number of differences: 473

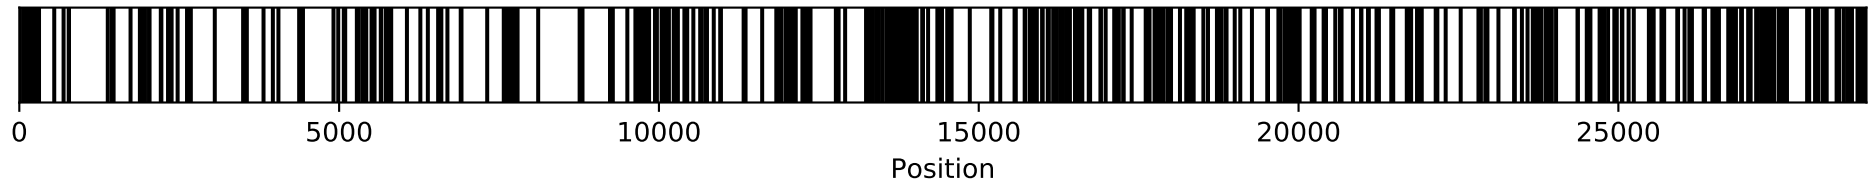

CR1 vs MM1  
Number of differences: 275

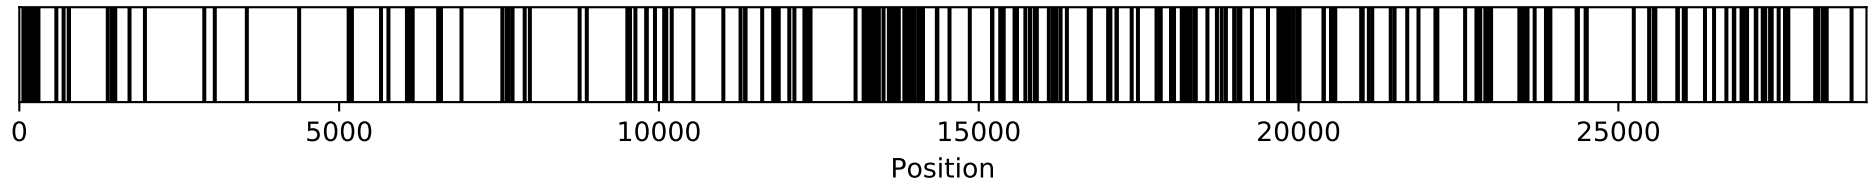

CR1 vs MM2  
Number of differences: 281

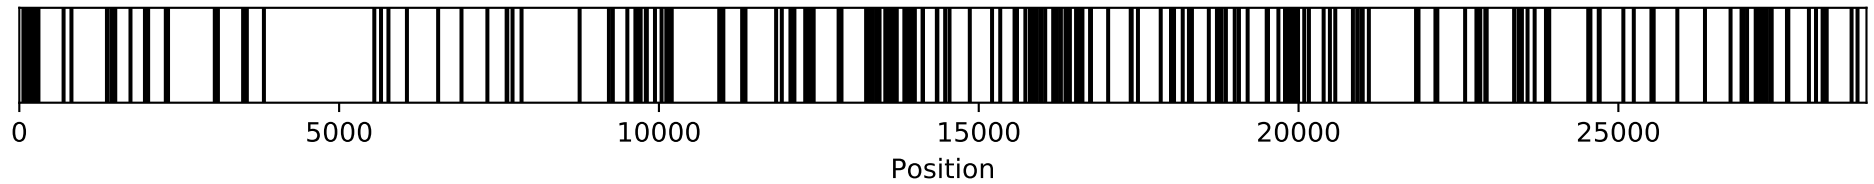

CR2 vs MM1  
Number of differences: 462

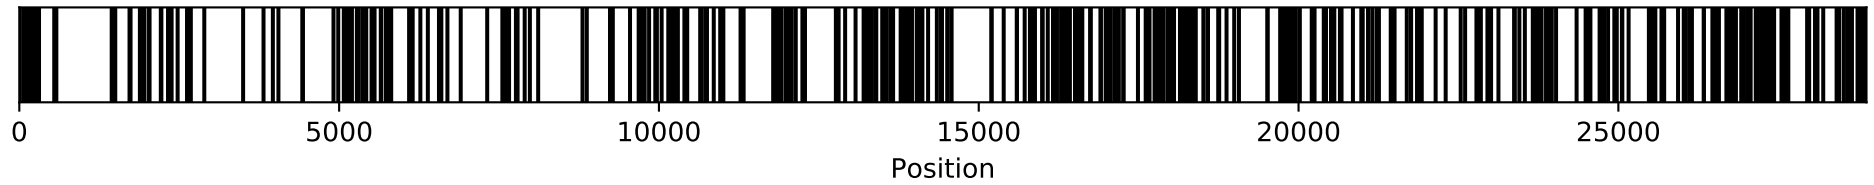

CR2 vs MM2  
Number of differences: 452

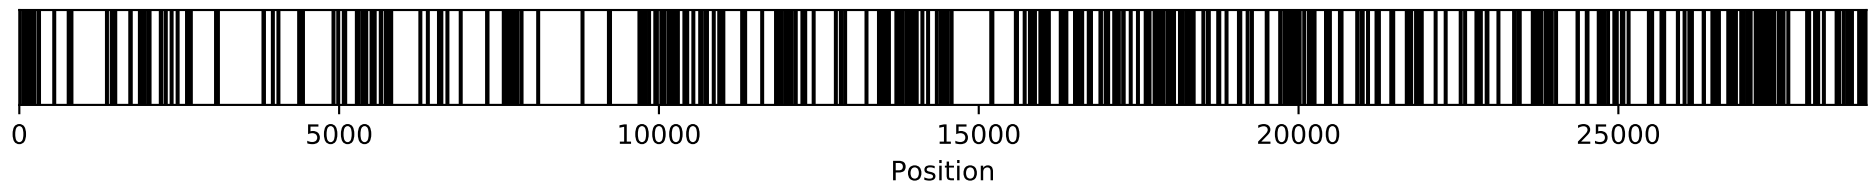

MM1 vs MM2  
Number of differences: 253

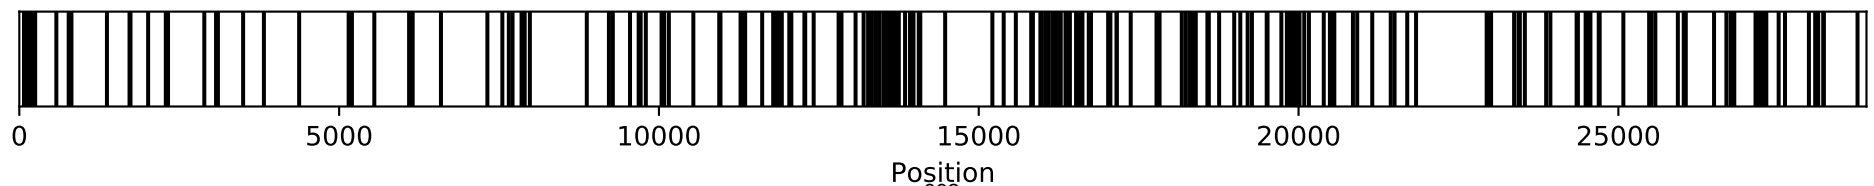

CR1 vs CR2  
Number of differences: 217

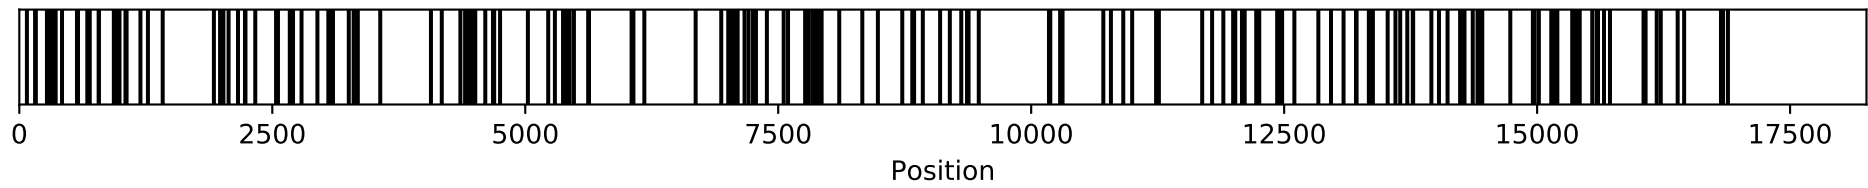

CR1 vs MM1  
Number of differences: 225

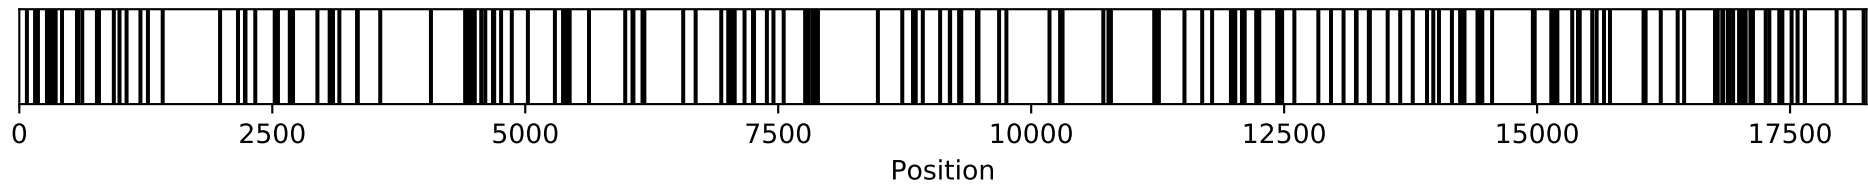

CR1 vs MM2  
Number of differences: 226

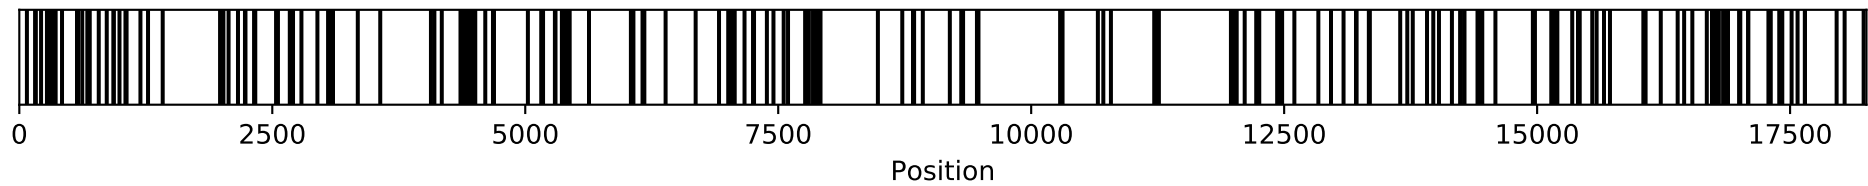

CR2 vs MM1  
Number of differences: 123

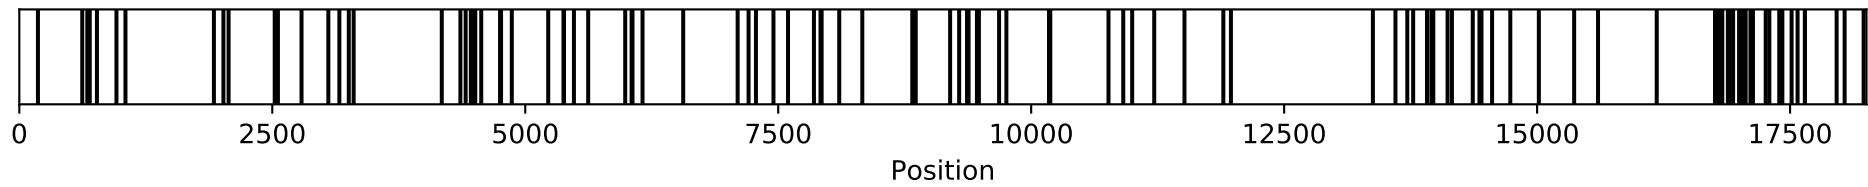

CR2 vs MM2  
Number of differences: 118

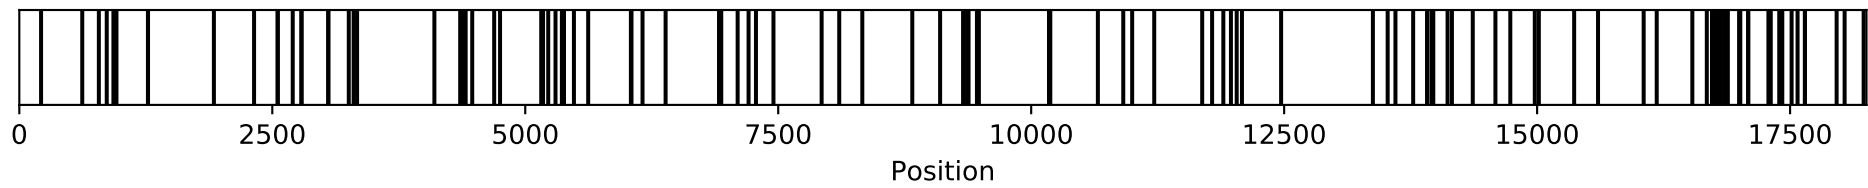

MM1 vs MM2  
Number of differences: 98

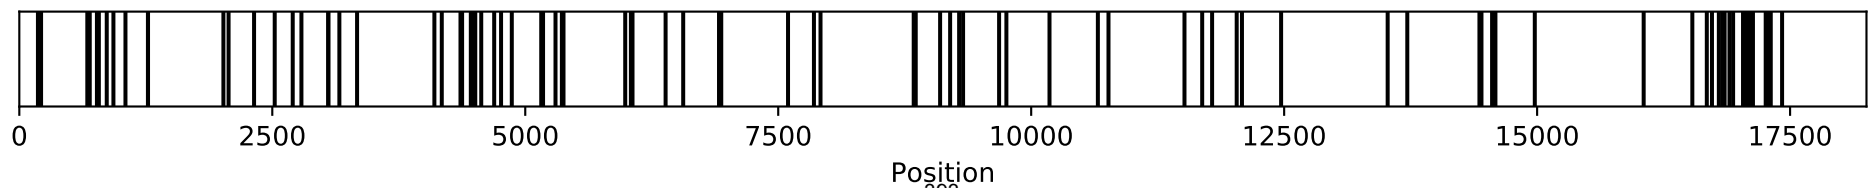

CR1 vs CR2  
Number of differences: 540

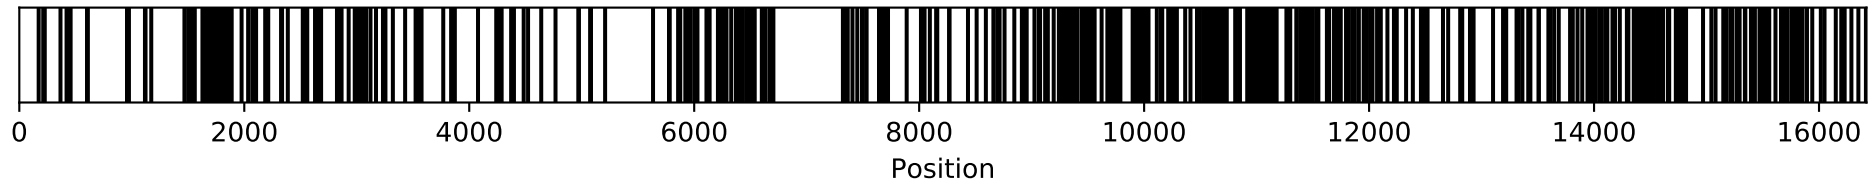

CR1 vs MM1  
Number of differences: 559

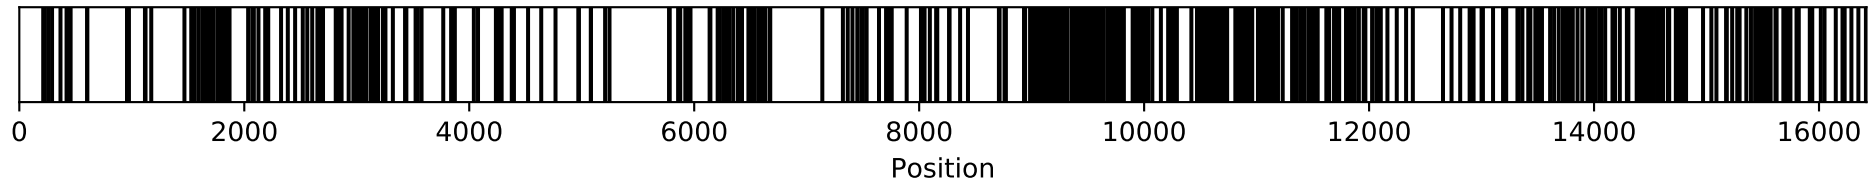

CR1 vs MM2  
Number of differences: 526

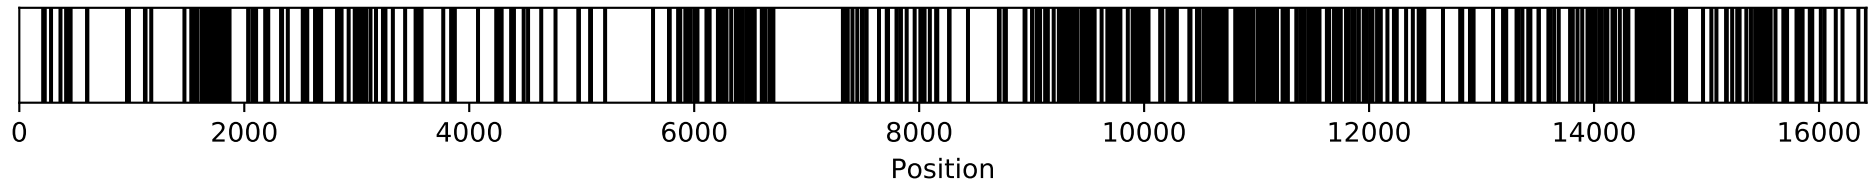

CR2 vs MM1  
Number of differences: 368

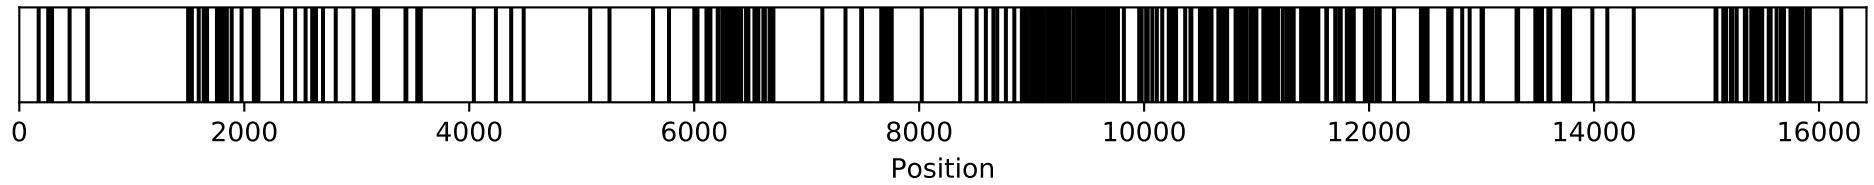

CR2 vs MM2  
Number of differences: 143

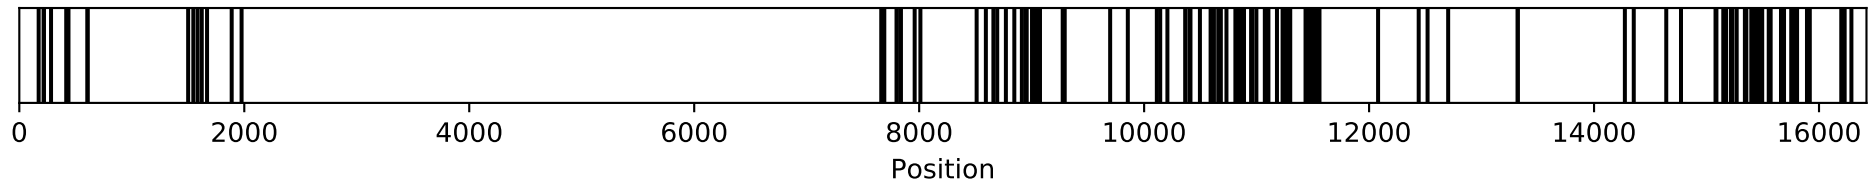

MM1 vs MM2  
Number of differences: 326

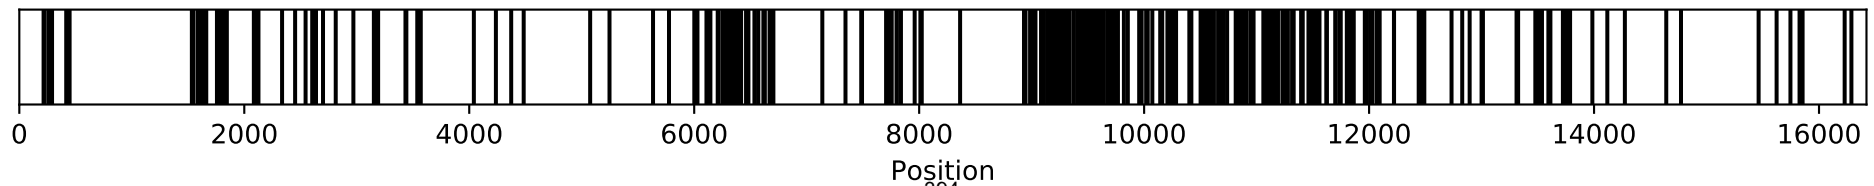

CR1 vs CR2  
Number of differences: 318

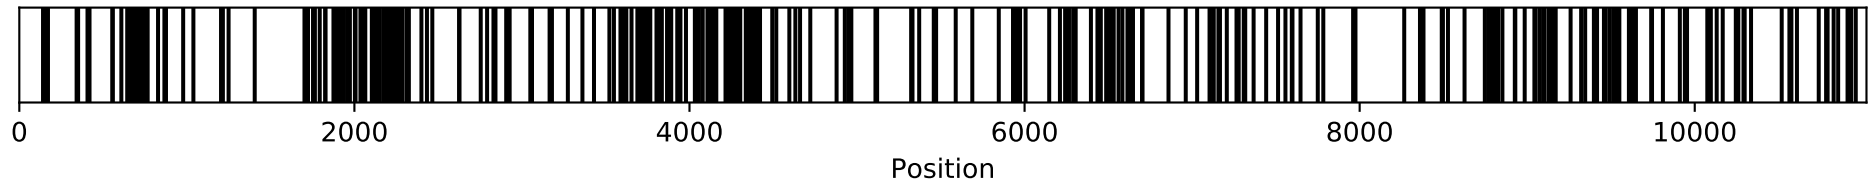

CR1 vs MM1  
Number of differences: 109

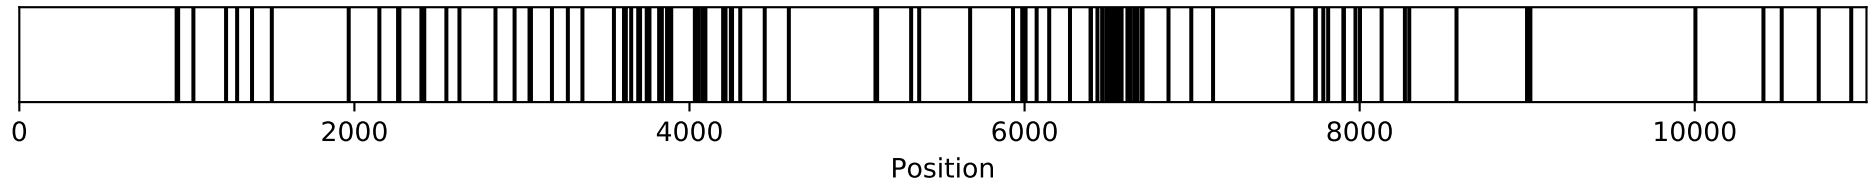

CR1 vs MM2  
Number of differences: 149

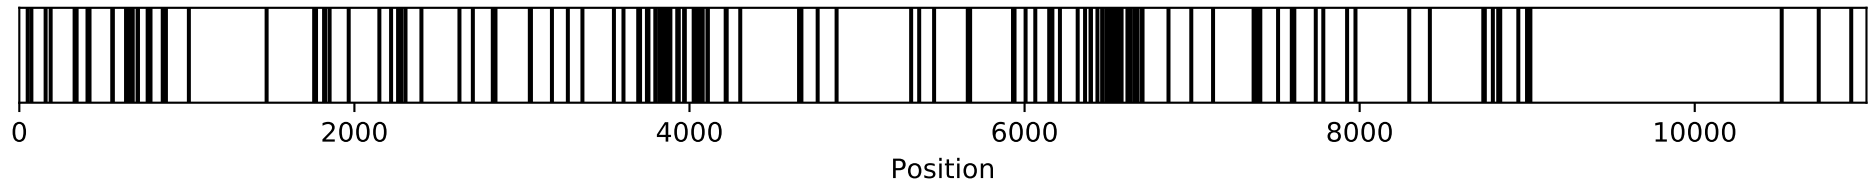

CR2 vs MM1  
Number of differences: 323

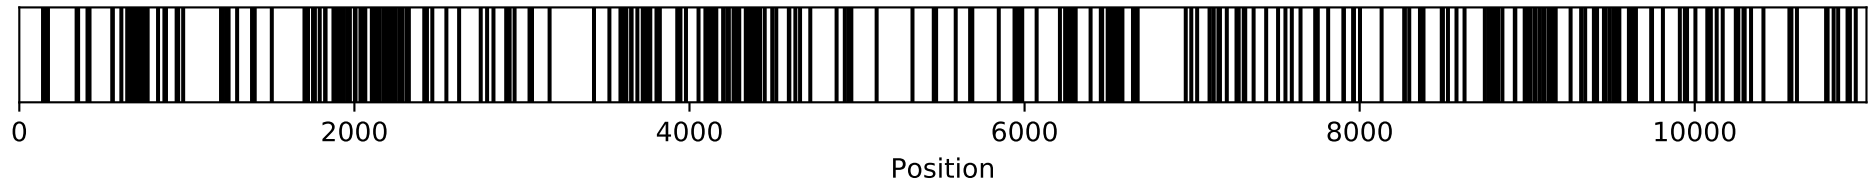

CR2 vs MM2  
Number of differences: 311

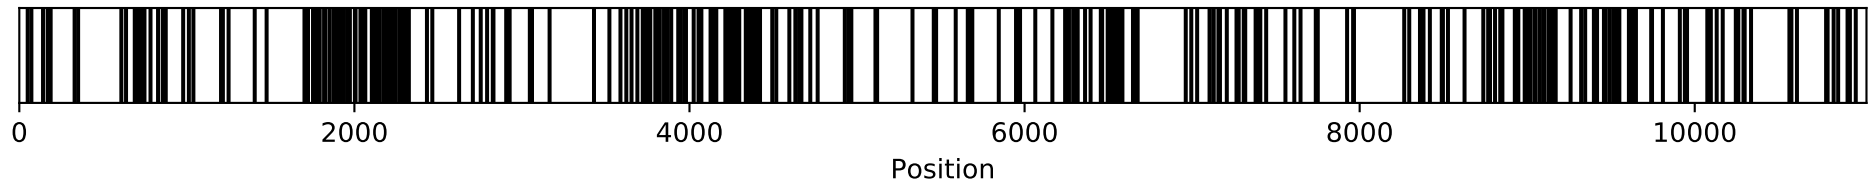

MM1 vs MM2  
Number of differences: 123

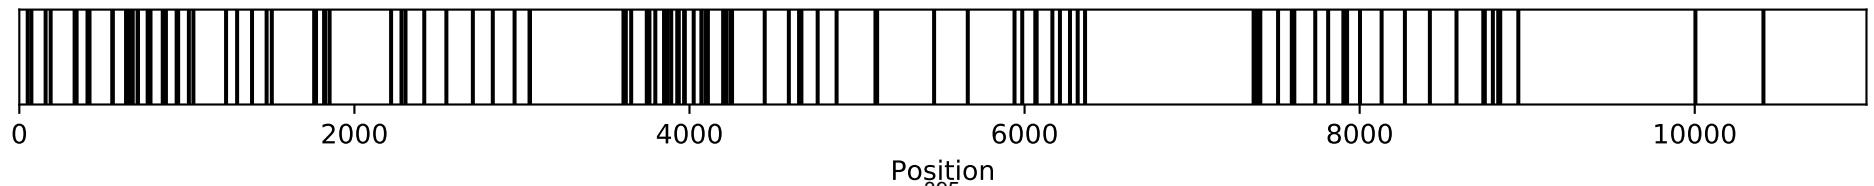

CR1 vs CR2  
Number of differences: 356

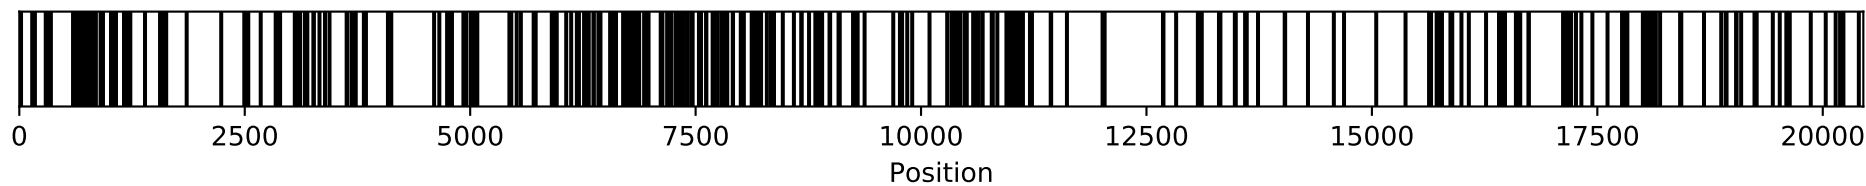

CR1 vs MM1  
Number of differences: 165

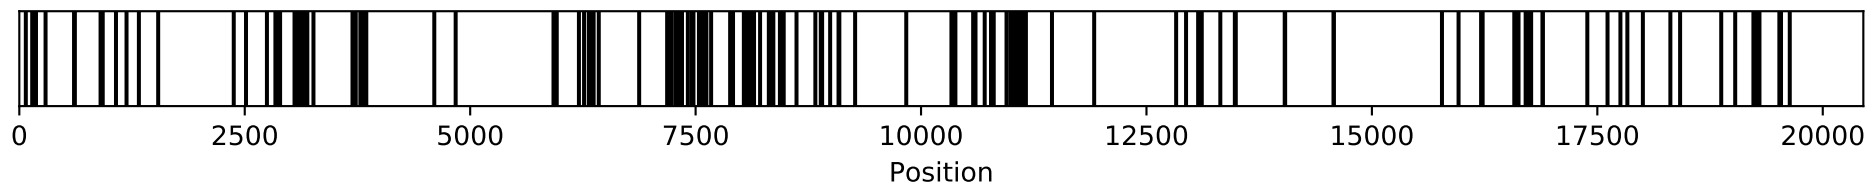

CR1 vs MM2  
Number of differences: 236

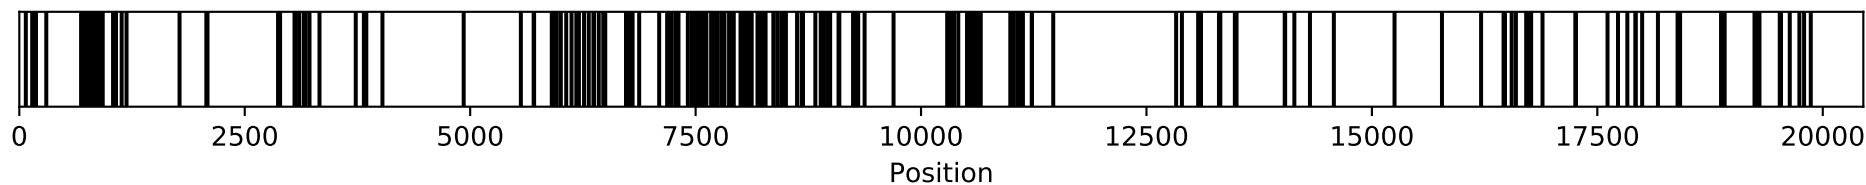

CR2 vs MM1  
Number of differences: 351

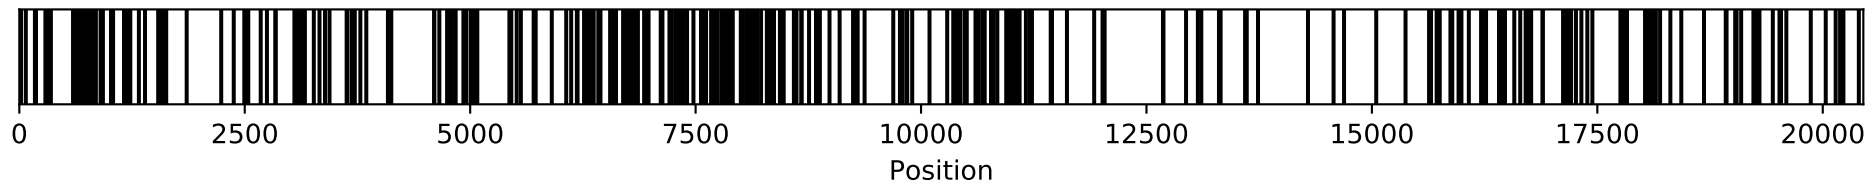

CR2 vs MM2  
Number of differences: 376

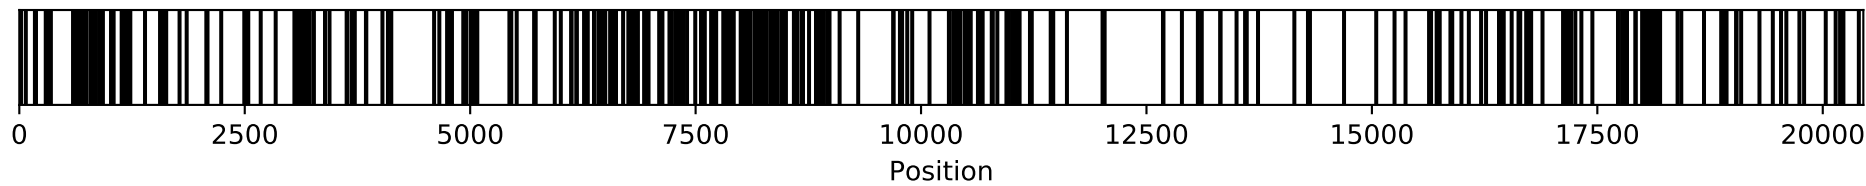

MM1 vs MM2  
Number of differences: 214

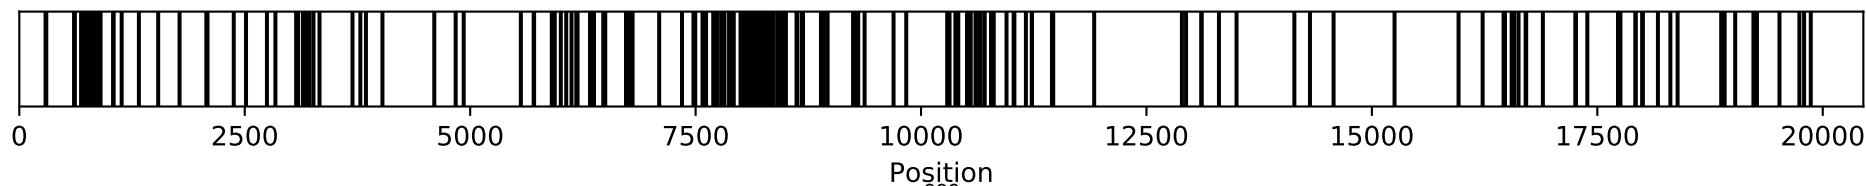

CR1 vs CR2  
Number of differences: 192

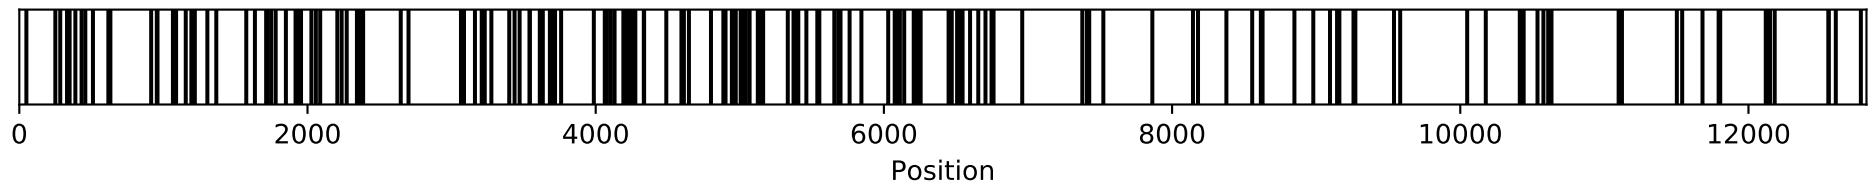

CR1 vs MM1  
Number of differences: 88

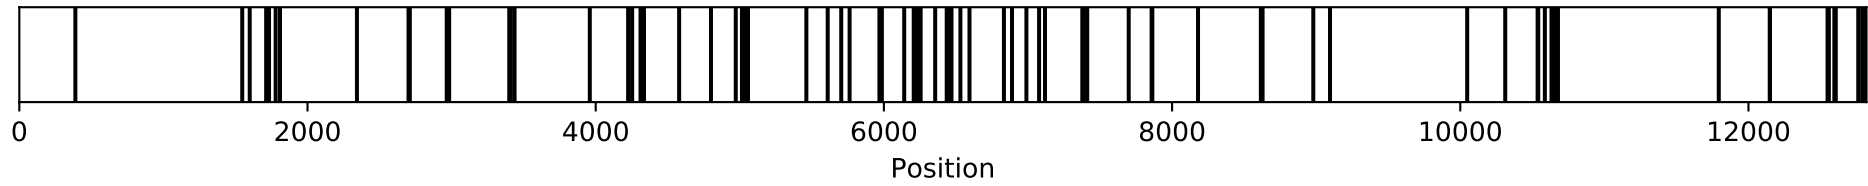

CR1 vs MM2  
Number of differences: 91

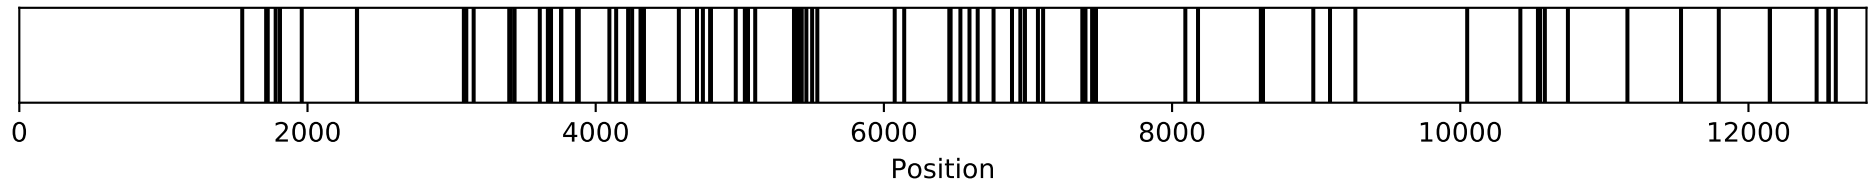

CR2 vs MM1  
Number of differences: 210

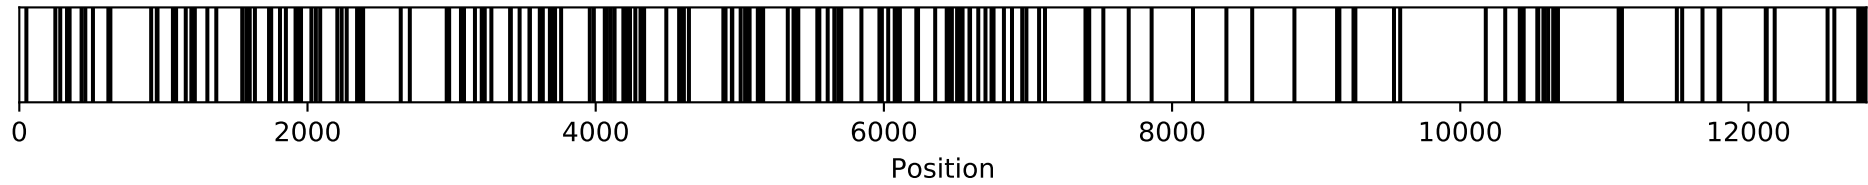

CR2 vs MM2  
Number of differences: 206

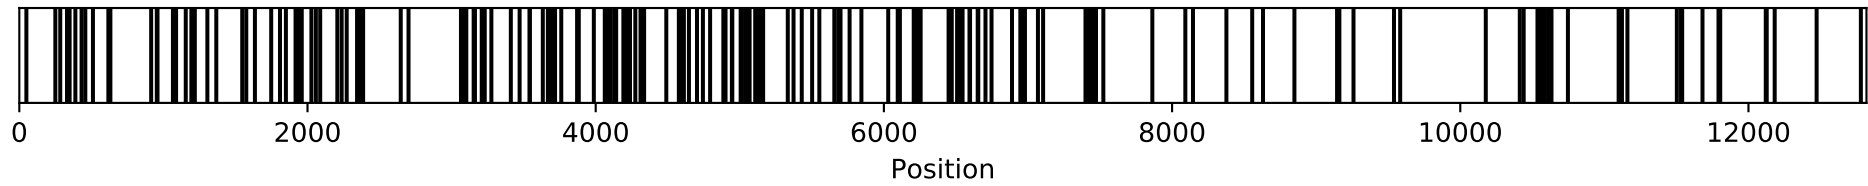

MM1 vs MM2  
Number of differences: 93

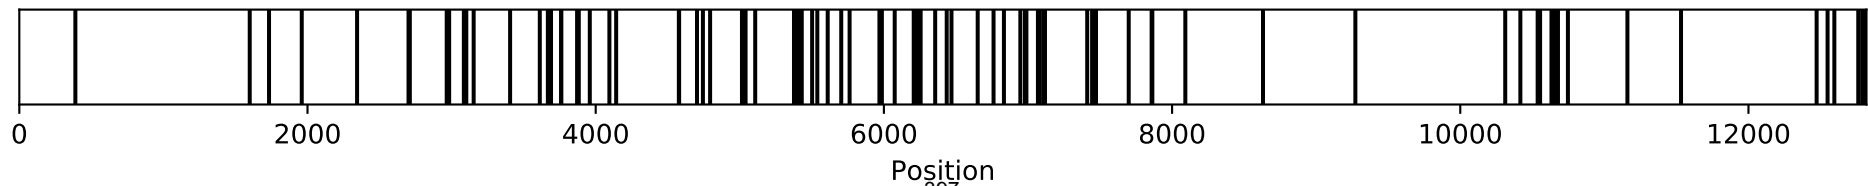

CR1 vs CR2  
Number of differences: 294

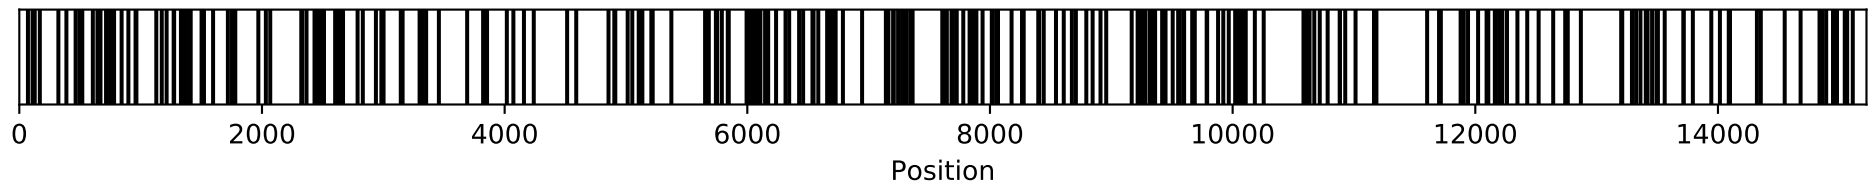

CR1 vs MM1  
Number of differences: 135

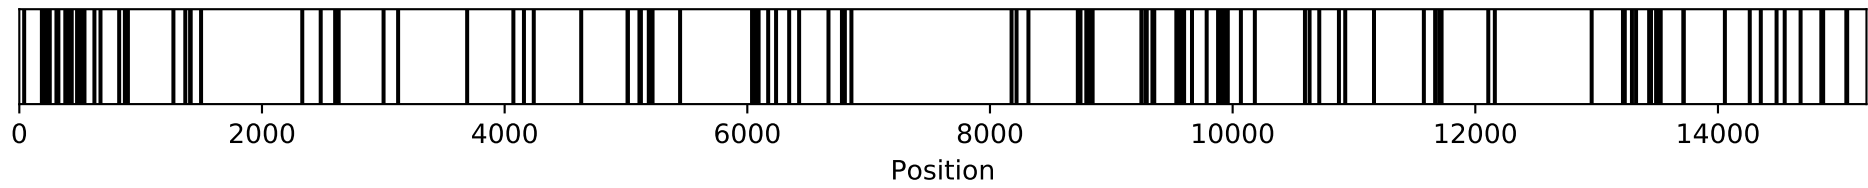

CR1 vs MM2  
Number of differences: 151

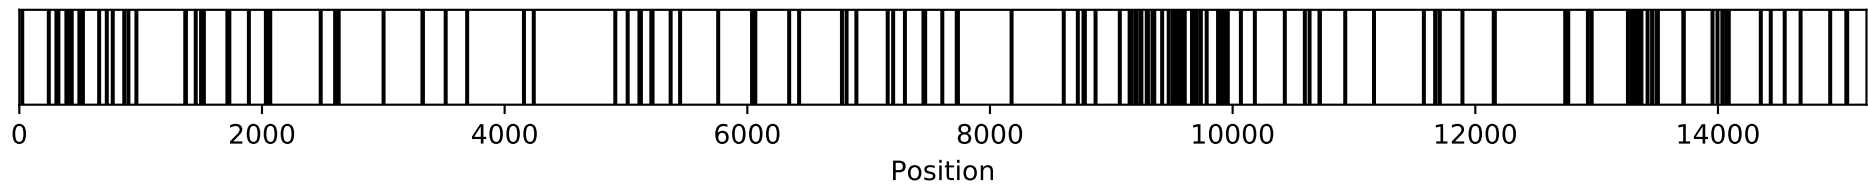

CR2 vs MM1  
Number of differences: 308

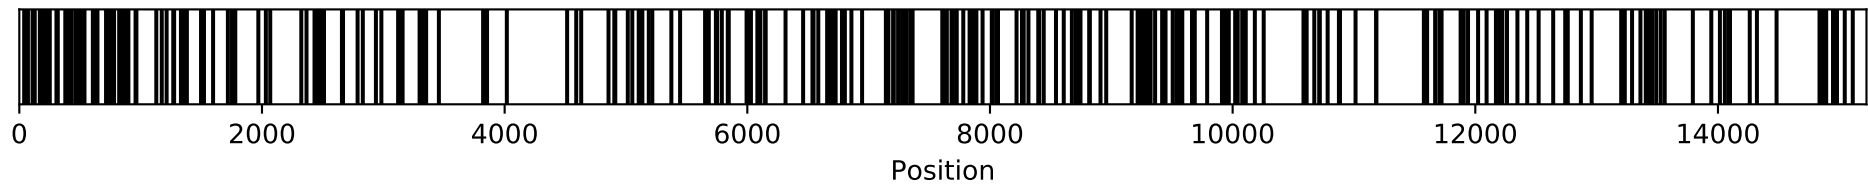

CR2 vs MM2  
Number of differences: 301

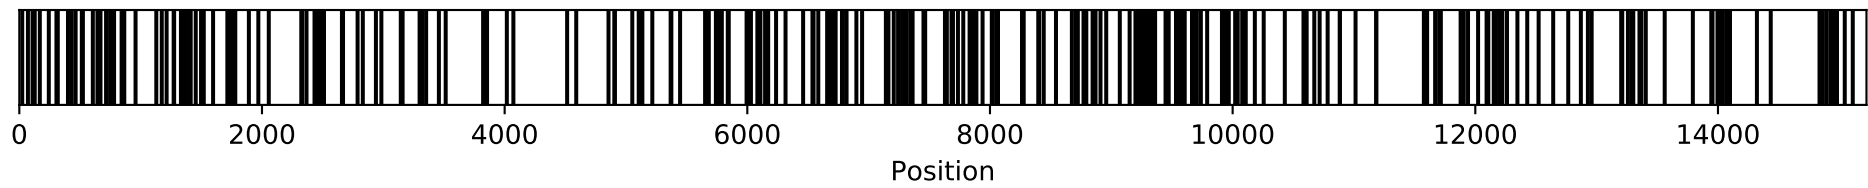

MM1 vs MM2  
Number of differences: 156

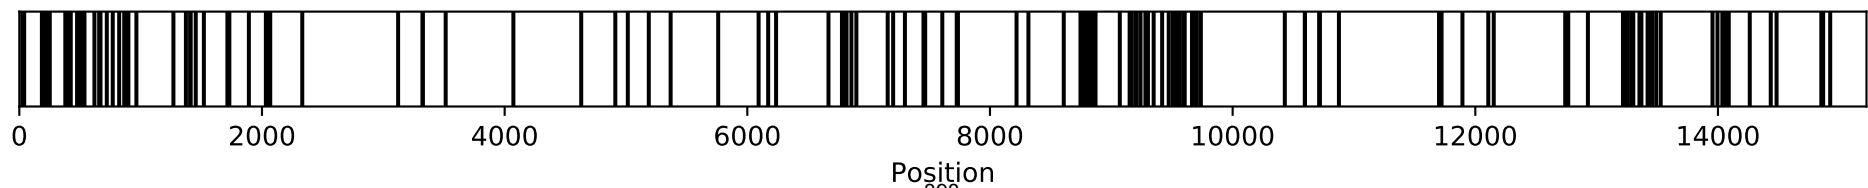

CR1 vs CR2  
Number of differences: 331

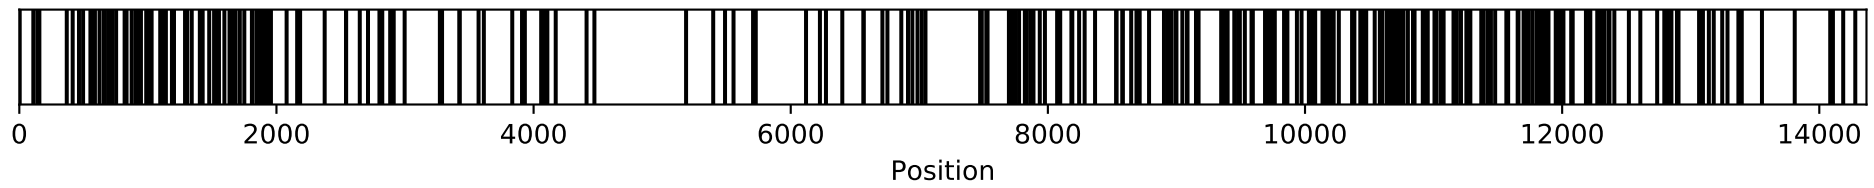

CR1 vs MM1  
Number of differences: 206

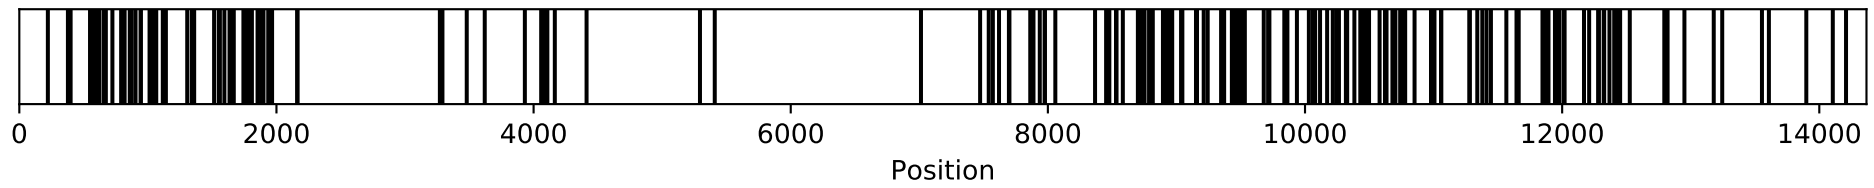

CR1 vs MM2  
Number of differences: 195

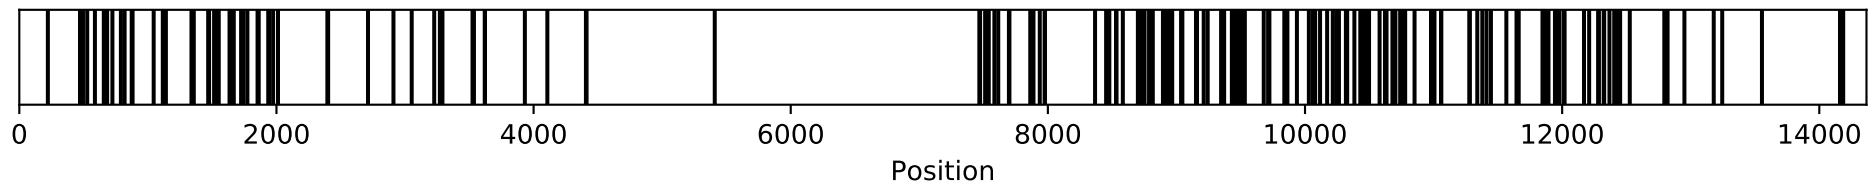

CR2 vs MM1  
Number of differences: 334

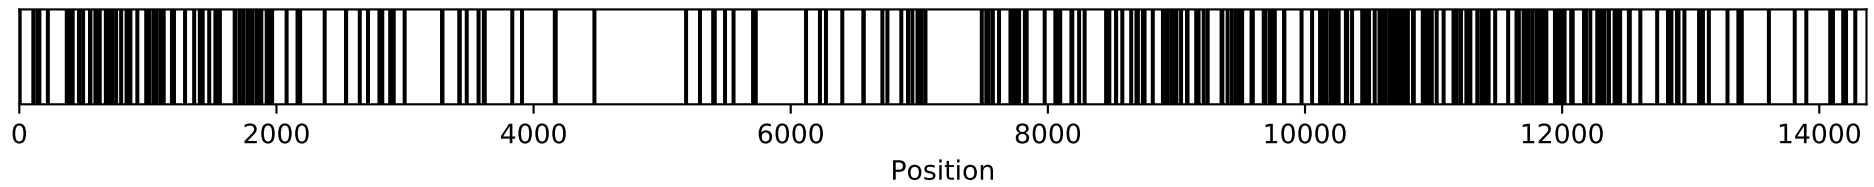

CR2 vs MM2  
Number of differences: 345

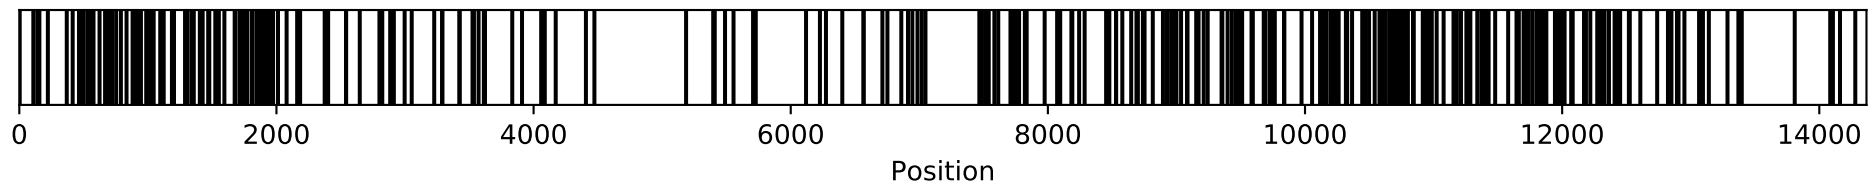

MM1 vs MM2  
Number of differences: 81

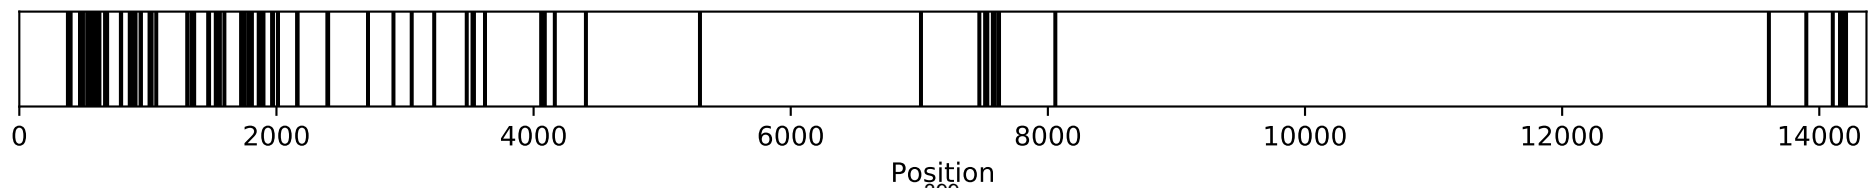



CR1 vs CR2  
Number of differences: 146

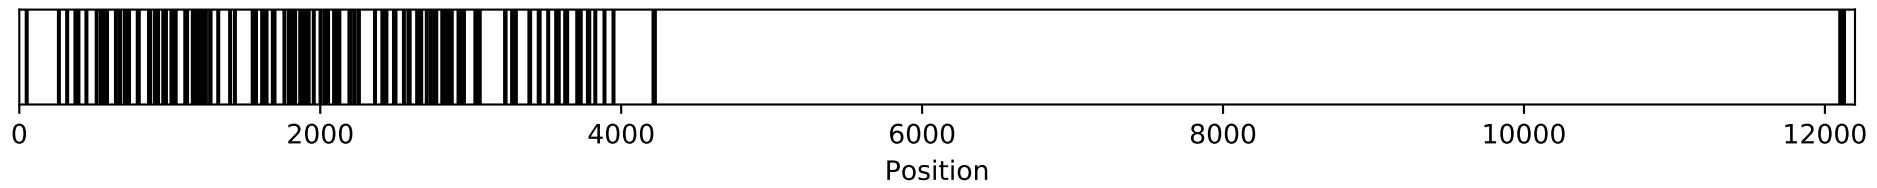

CR1 vs MM1  
Number of differences: 224

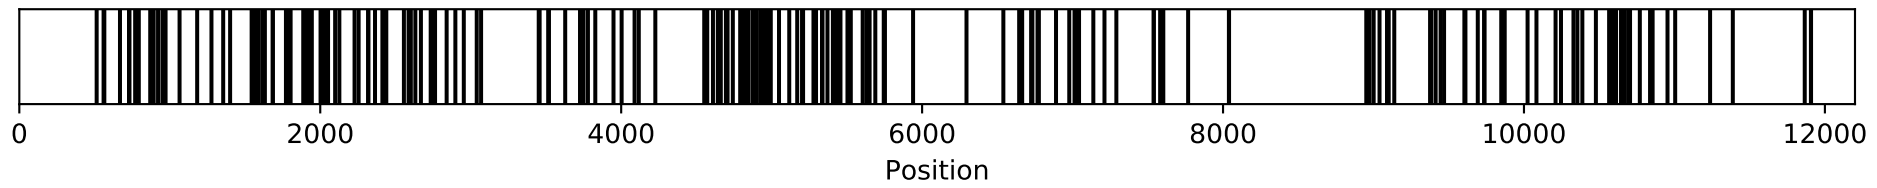

CR1 vs MM2  
Number of differences: 218

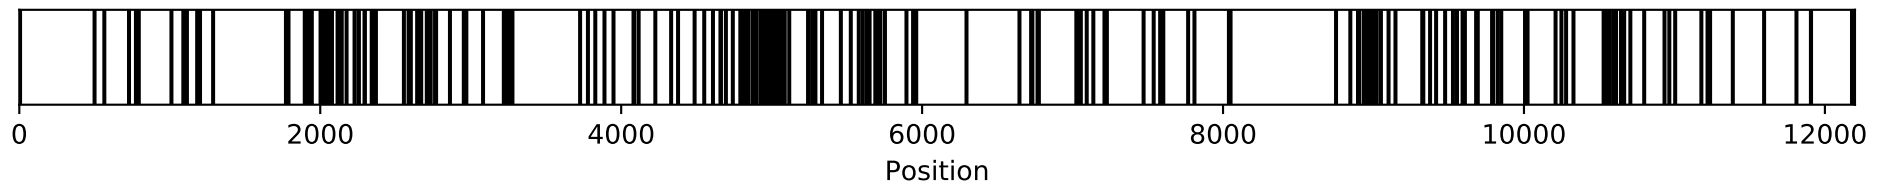

CR2 vs MM1  
Number of differences: 282

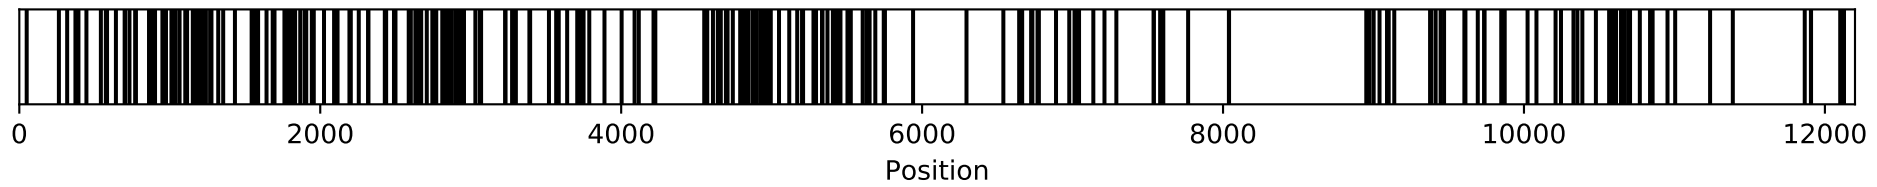

CR2 vs MM2  
Number of differences: 295

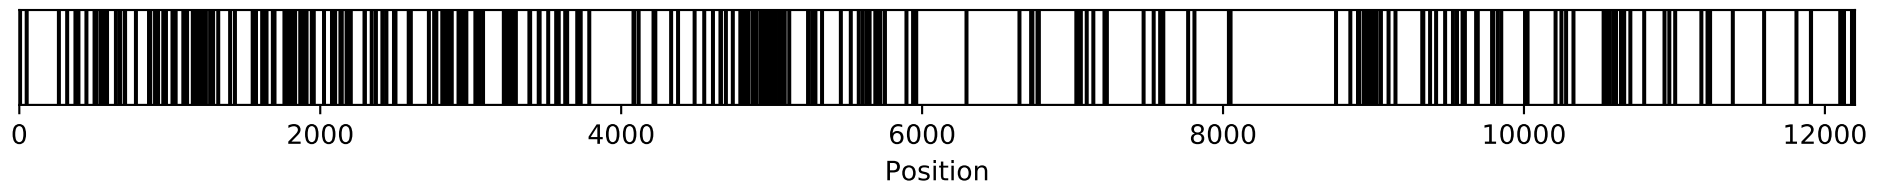

MM1 vs MM2  
Number of differences: 233

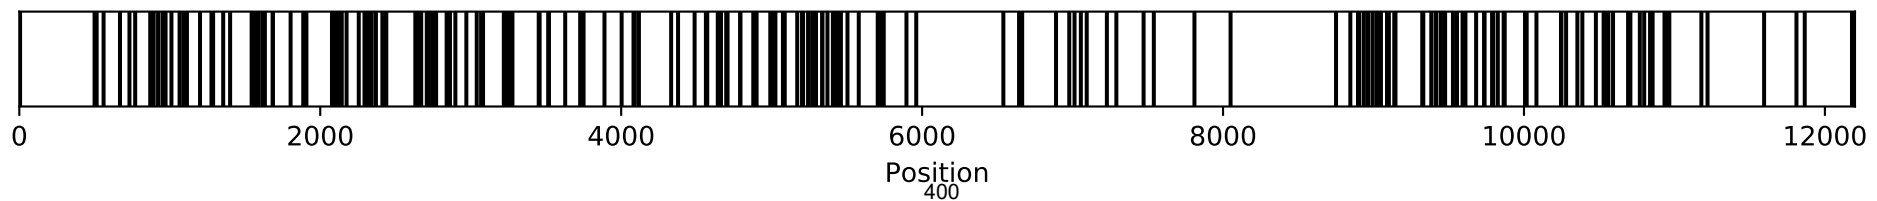

CR1 vs CR2  
Number of differences: 79

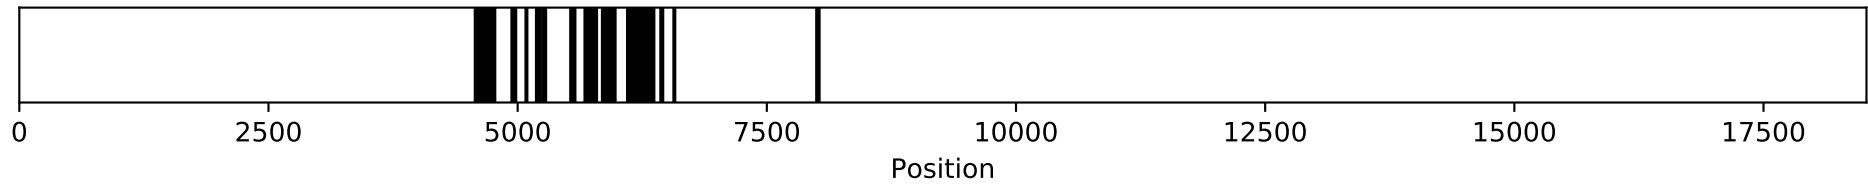

CR1 vs MM1  
Number of differences: 490

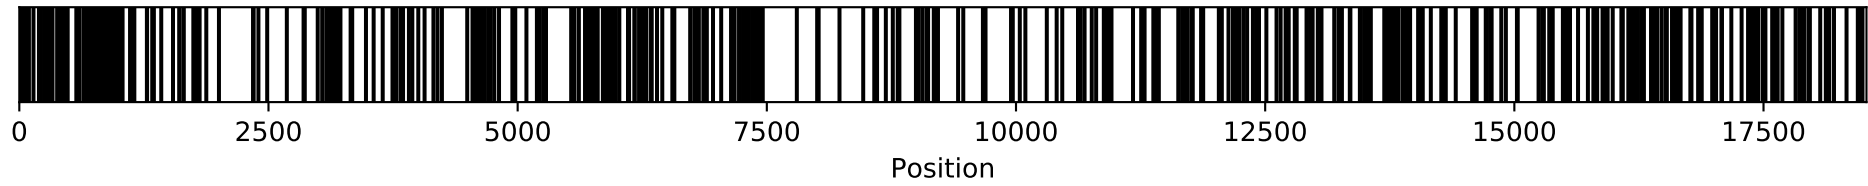

CR1 vs MM2  
Number of differences: 517

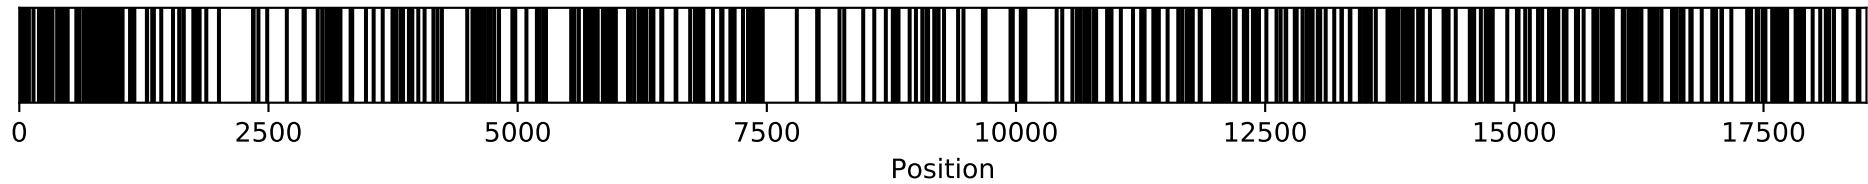

CR2 vs MM1  
Number of differences: 454

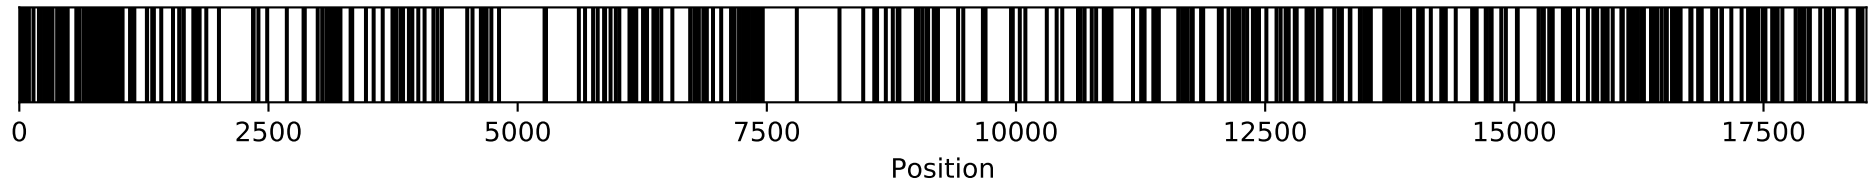

CR2 vs MM2  
Number of differences: 477

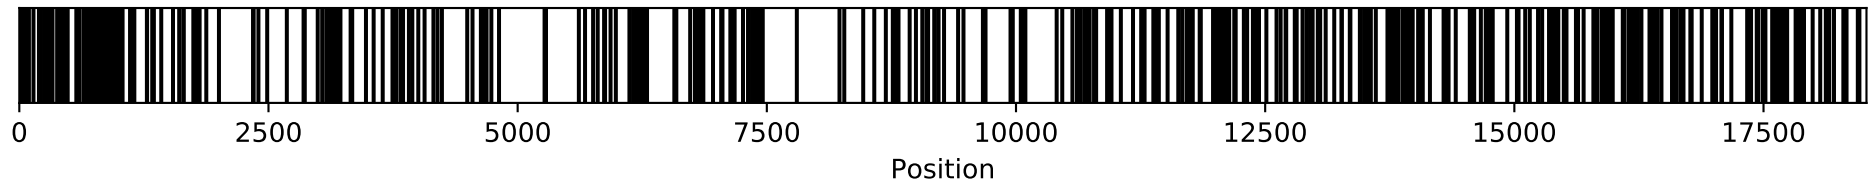

MM1 vs MM2  
Number of differences: 177

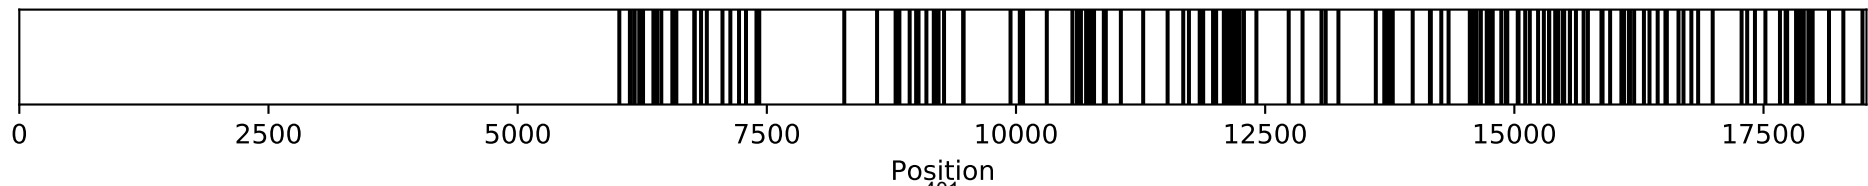

CR1 vs CR2  
Number of differences: 180

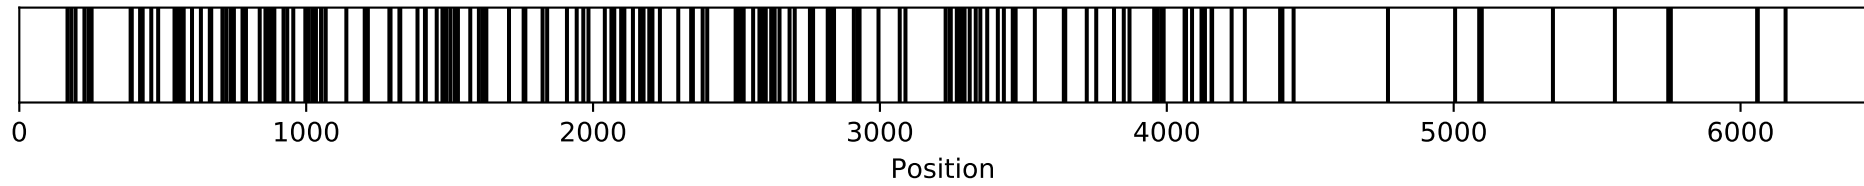

CR1 vs MM1  
Number of differences: 184

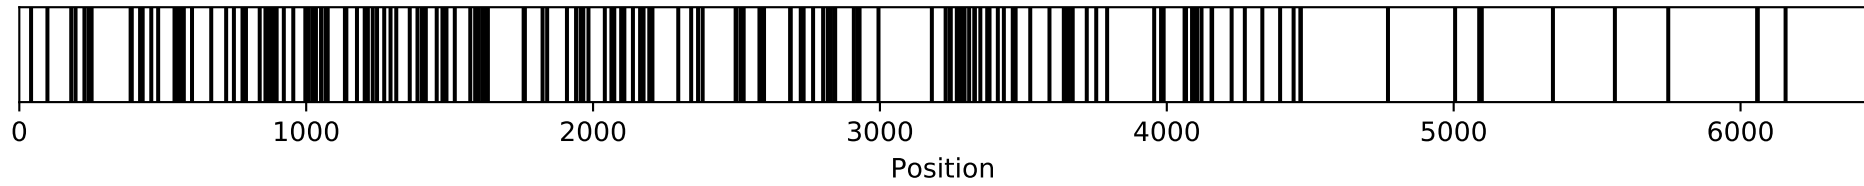

CR1 vs MM2  
Number of differences: 180

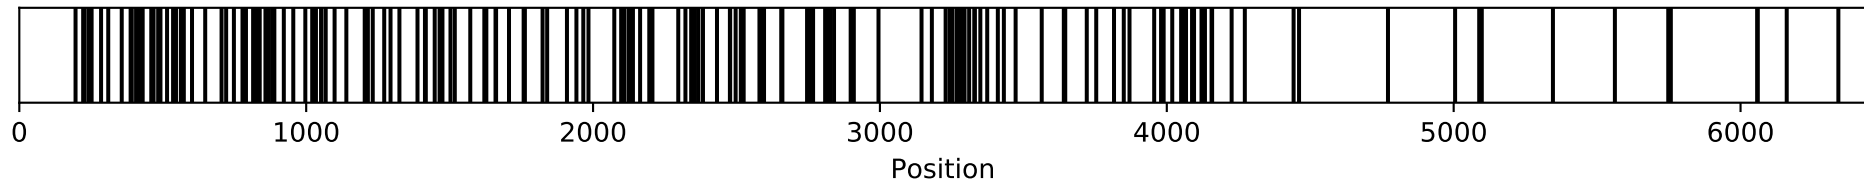

CR2 vs MM1  
Number of differences: 90

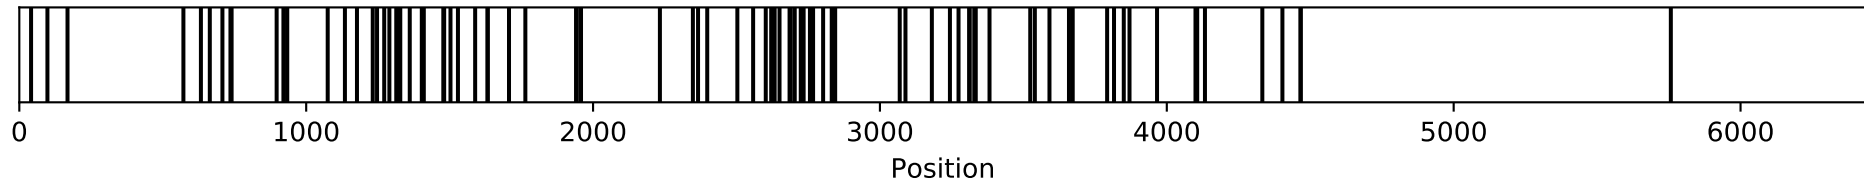

CR2 vs MM2  
Number of differences: 111

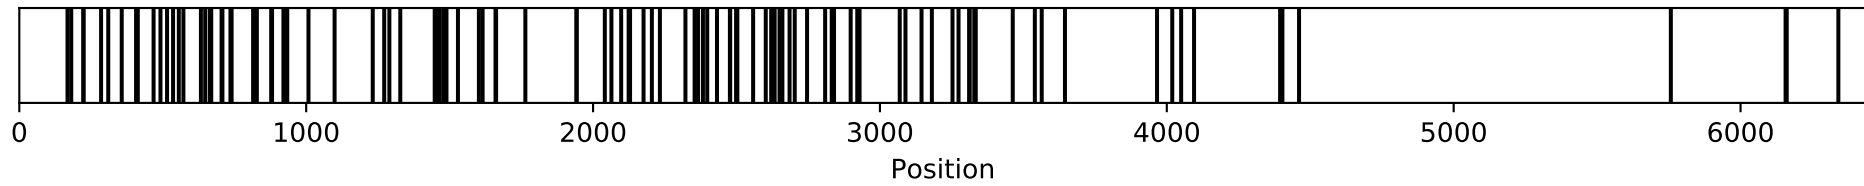

MM1 vs MM2  
Number of differences: 113

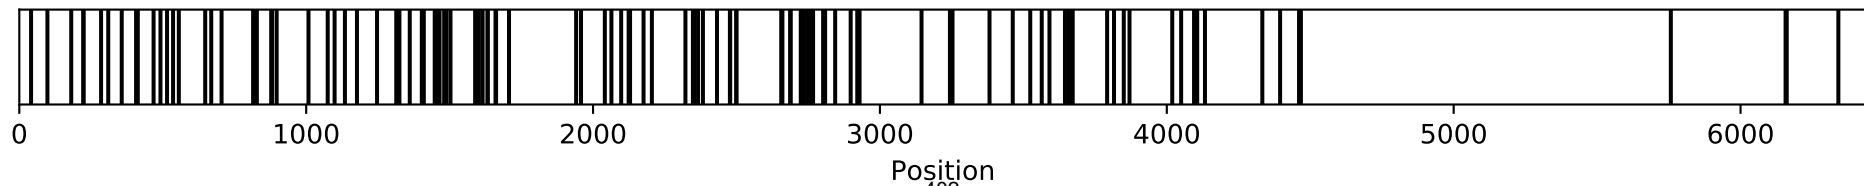

CR1 vs CR2  
Number of differences: 337

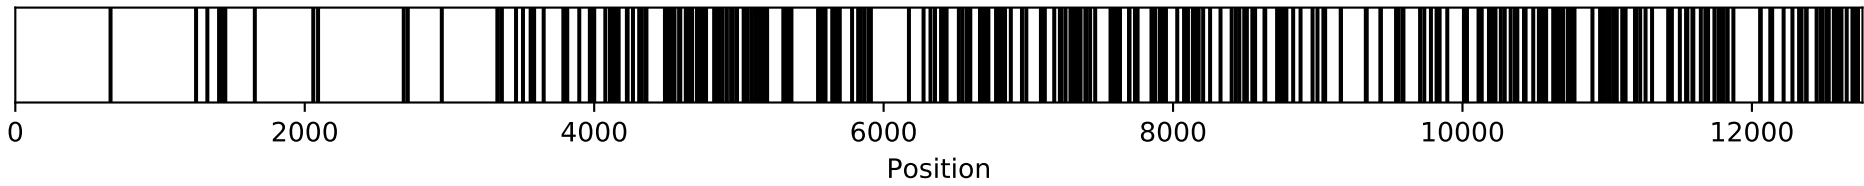

CR1 vs MM1  
Number of differences: 387

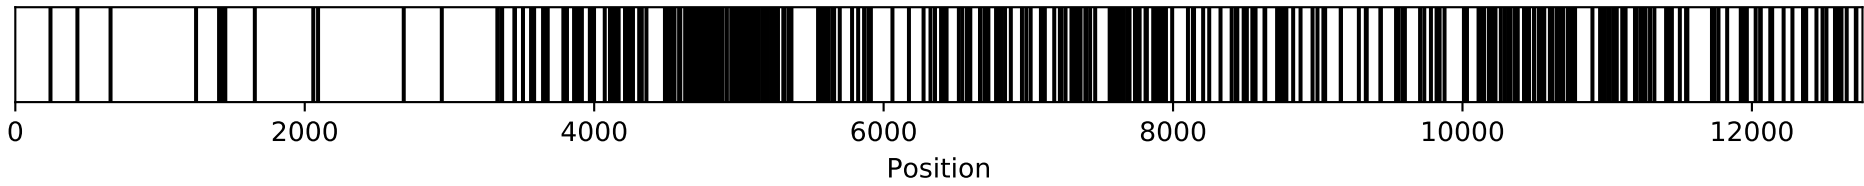

CR1 vs MM2  
Number of differences: 347

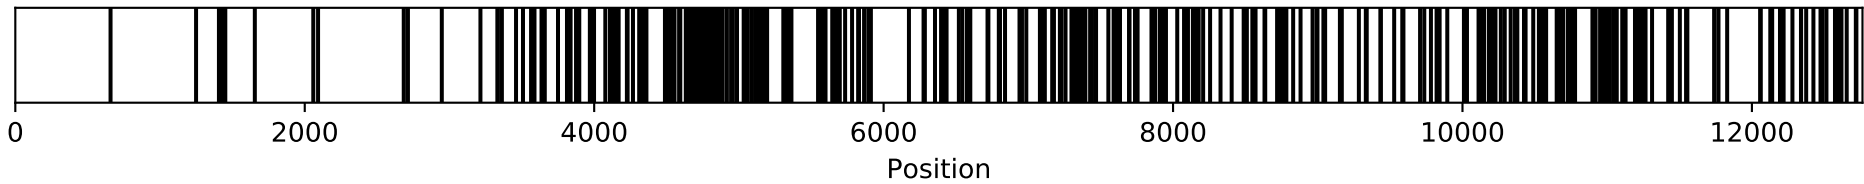

CR2 vs MM1  
Number of differences: 195

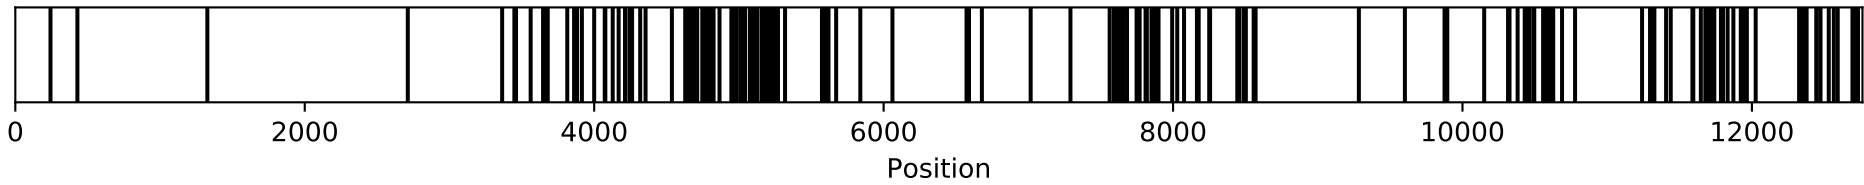

CR2 vs MM2  
Number of differences: 118

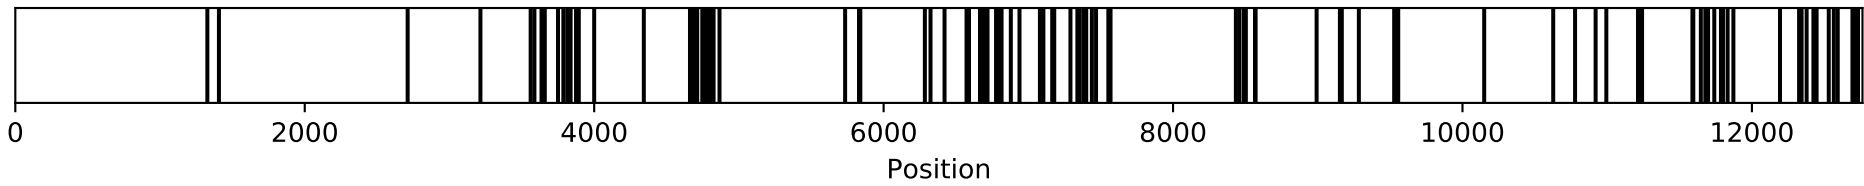

MM1 vs MM2  
Number of differences: 199

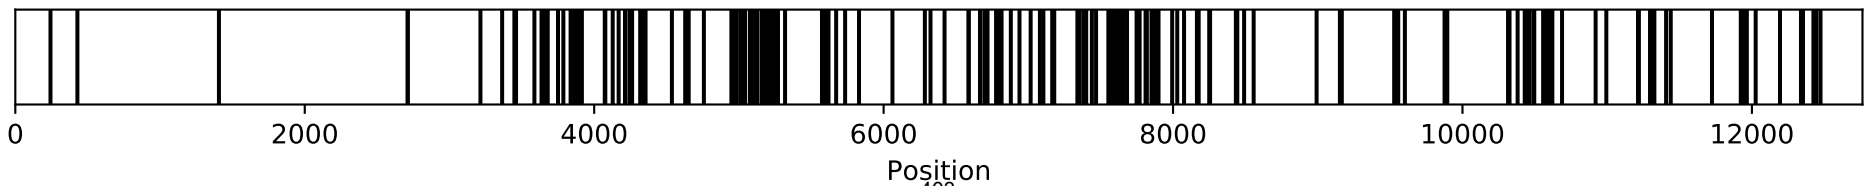

CR1 vs CR2  
Number of differences: 0

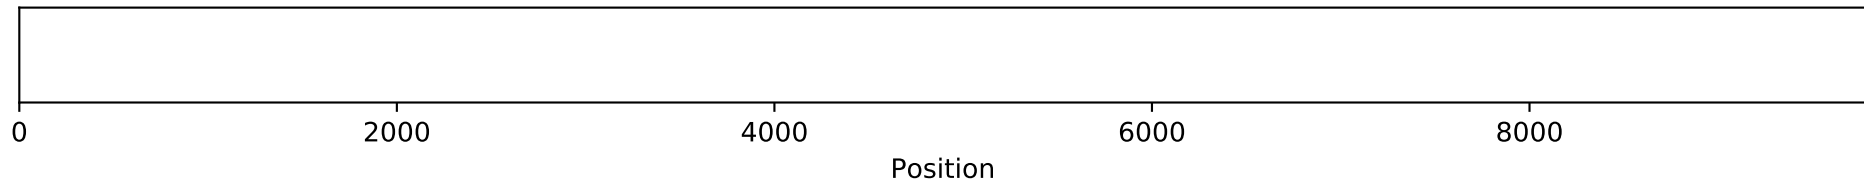

CR1 vs MM1  
Number of differences: 95

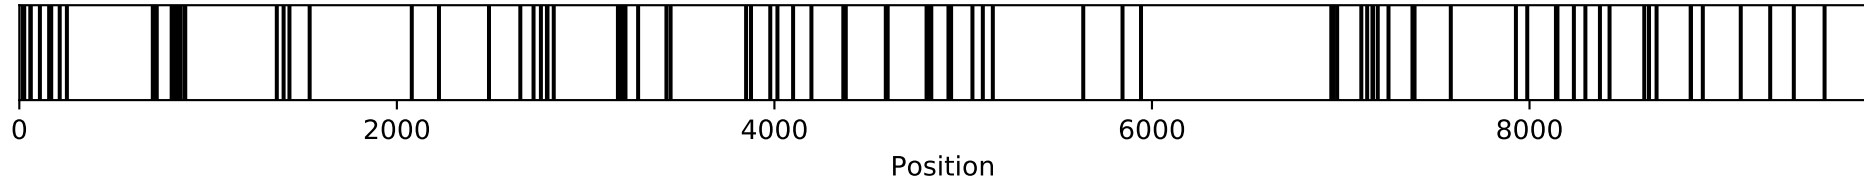

CR1 vs MM2  
Number of differences: 125

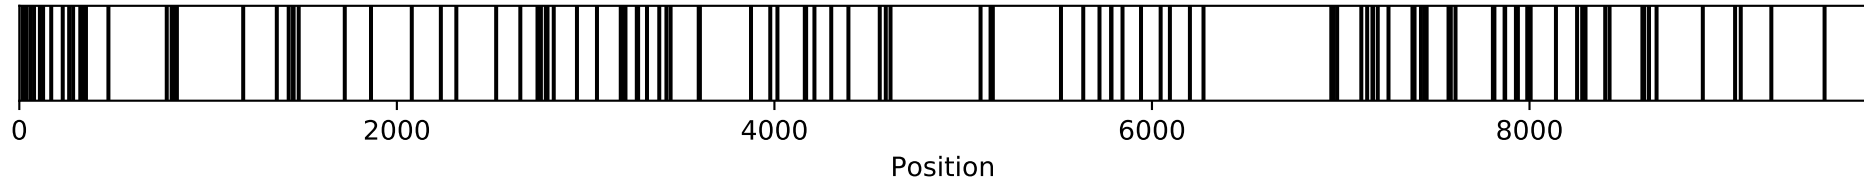

CR2 vs MM1  
Number of differences: 95

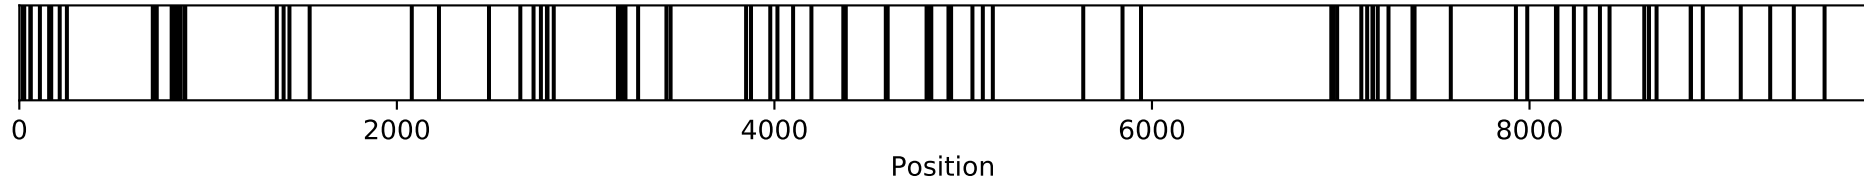

CR2 vs MM2  
Number of differences: 125

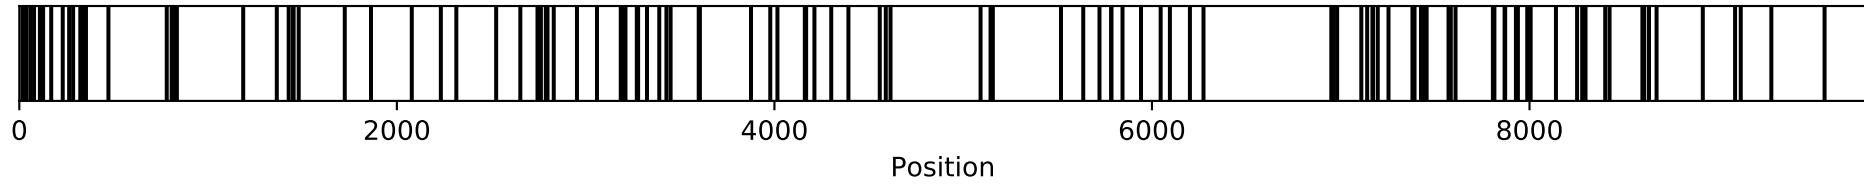

MM1 vs MM2  
Number of differences: 111

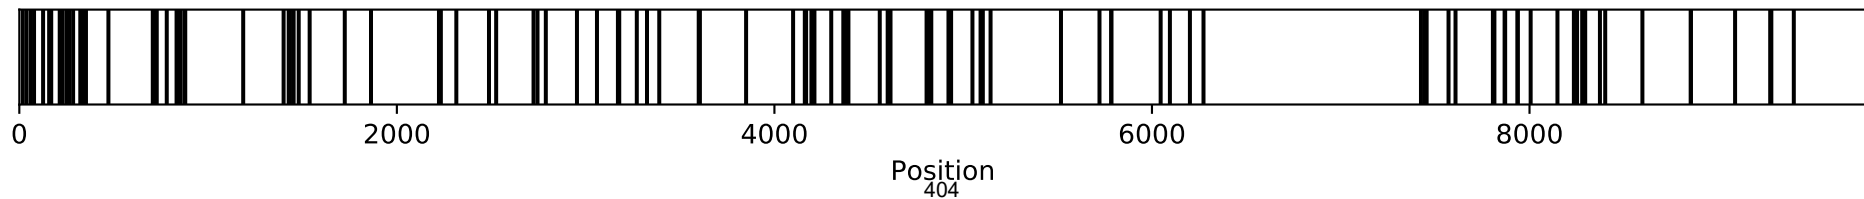

CR1 vs CR2  
Number of differences: 205

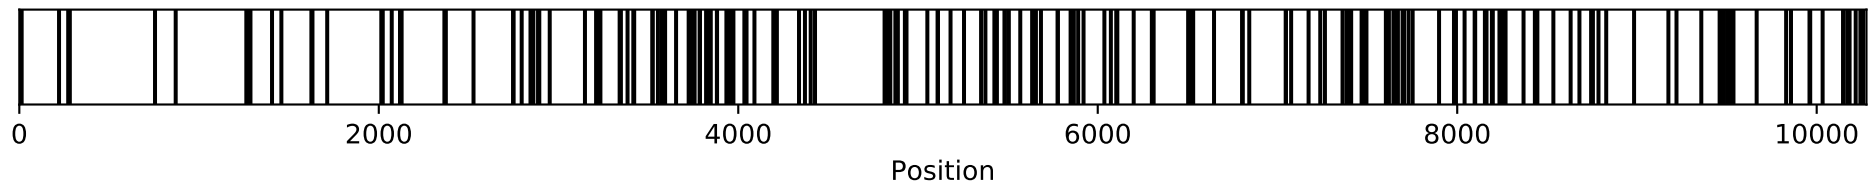

CR1 vs MM1  
Number of differences: 85

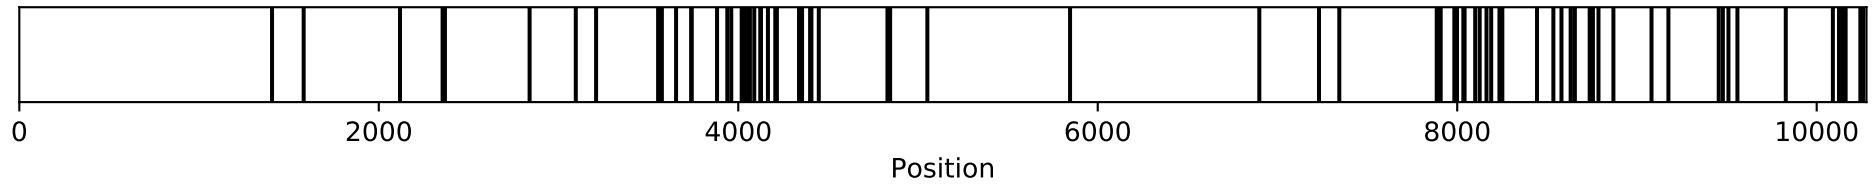

CR1 vs MM2  
Number of differences: 108

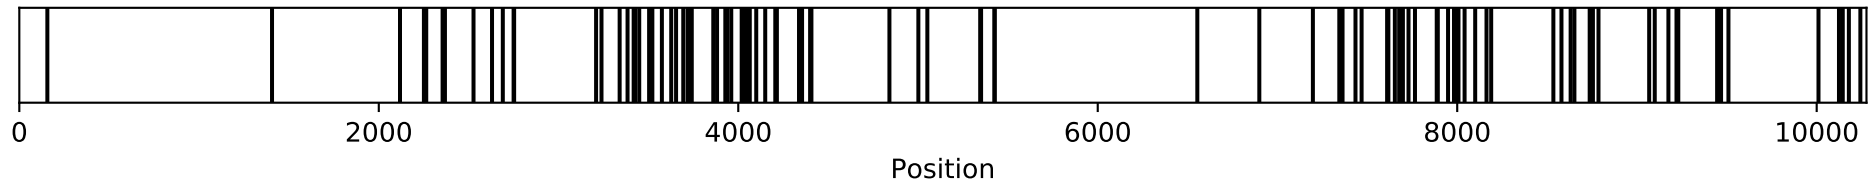

CR2 vs MM1  
Number of differences: 222

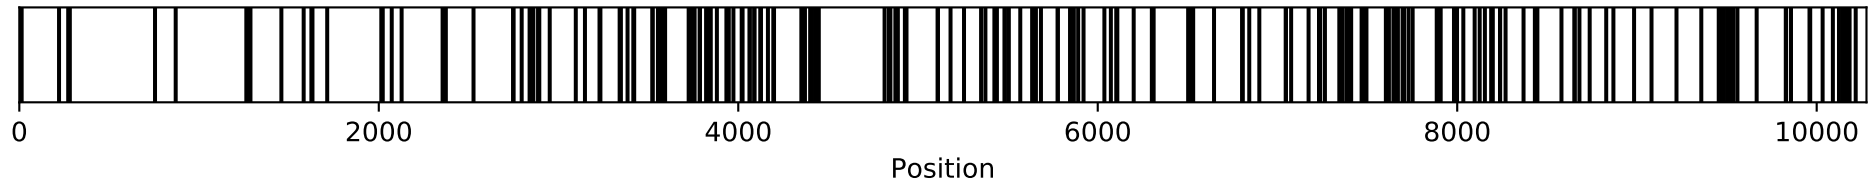

CR2 vs MM2  
Number of differences: 218

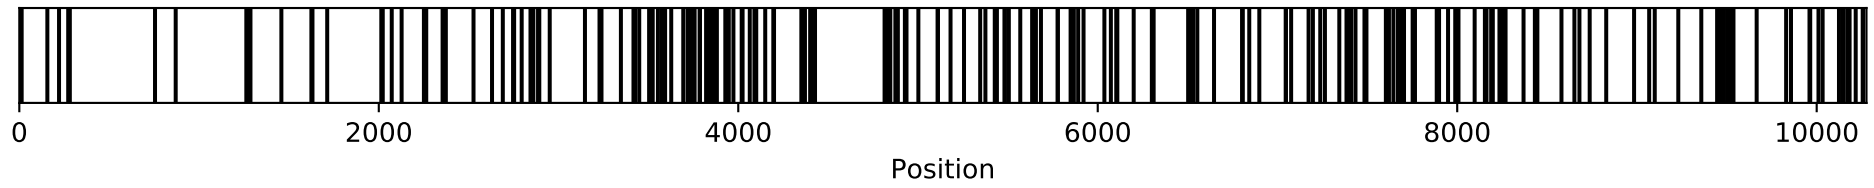

MM1 vs MM2  
Number of differences: 97

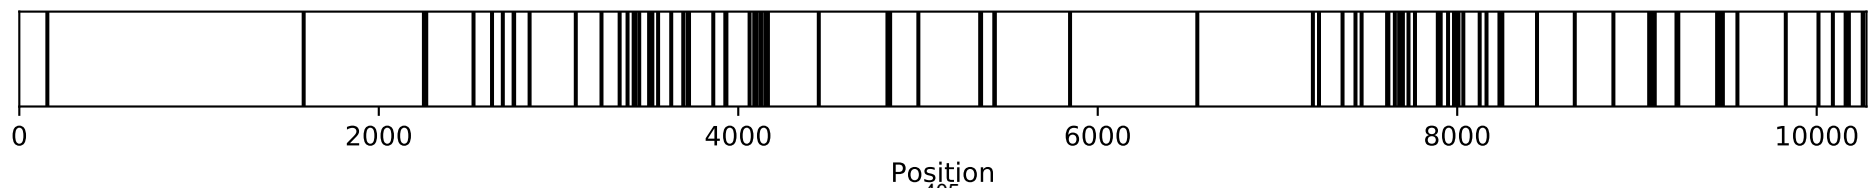

CR1 vs CR2  
Number of differences: 230

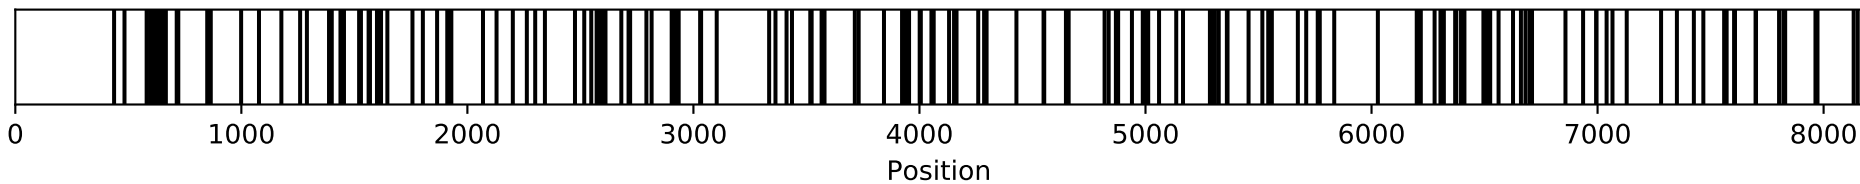

CR1 vs MM1  
Number of differences: 64

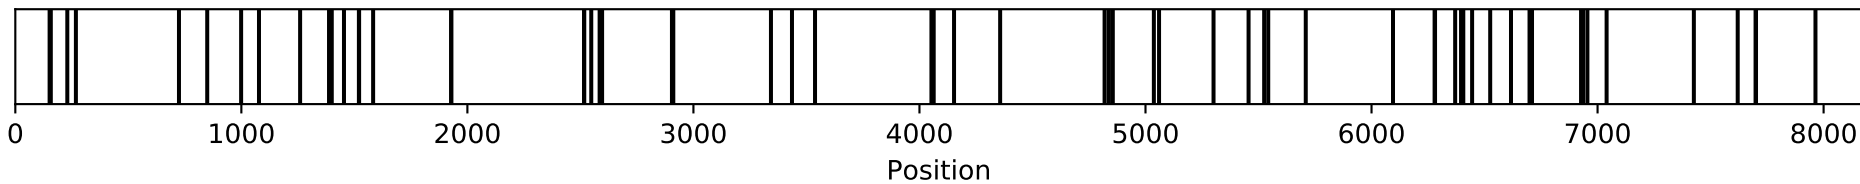

CR1 vs MM2  
Number of differences: 52

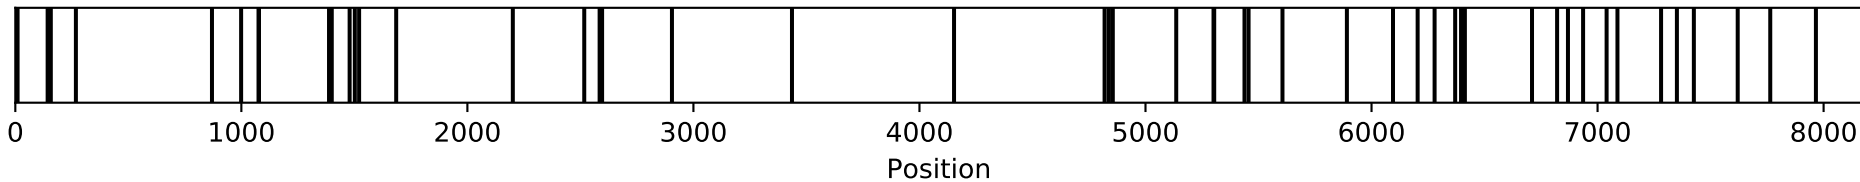

CR2 vs MM1  
Number of differences: 220

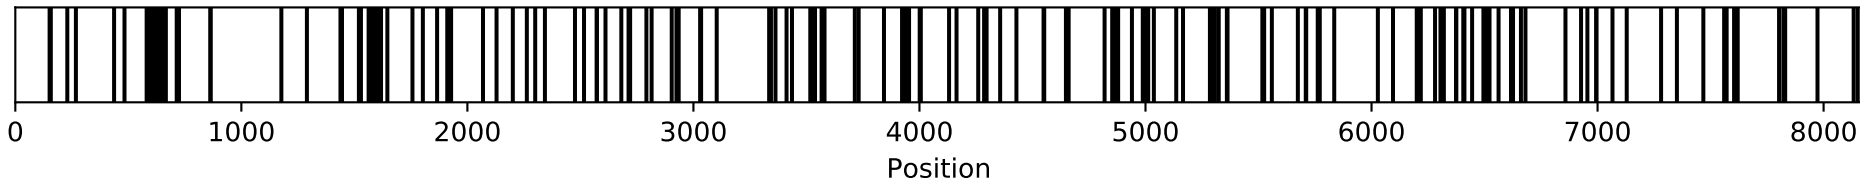

CR2 vs MM2  
Number of differences: 228

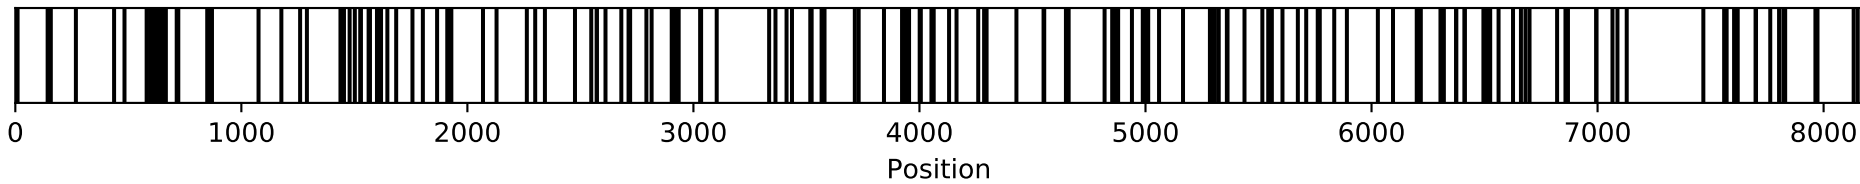

MM1 vs MM2  
Number of differences: 58

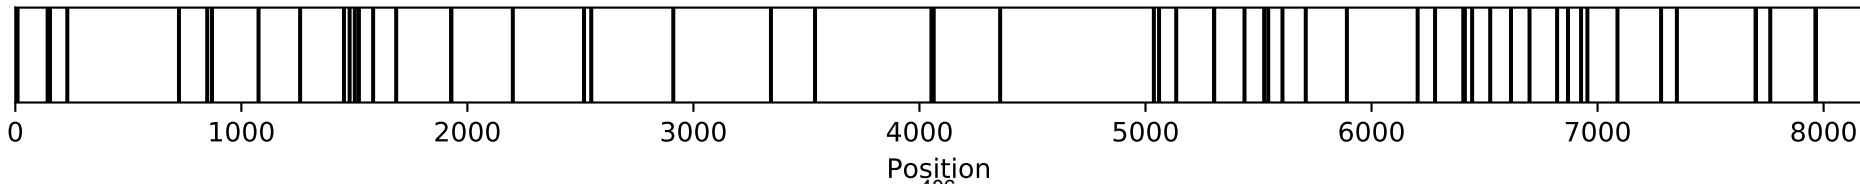

CR1 vs CR2  
Number of differences: 322

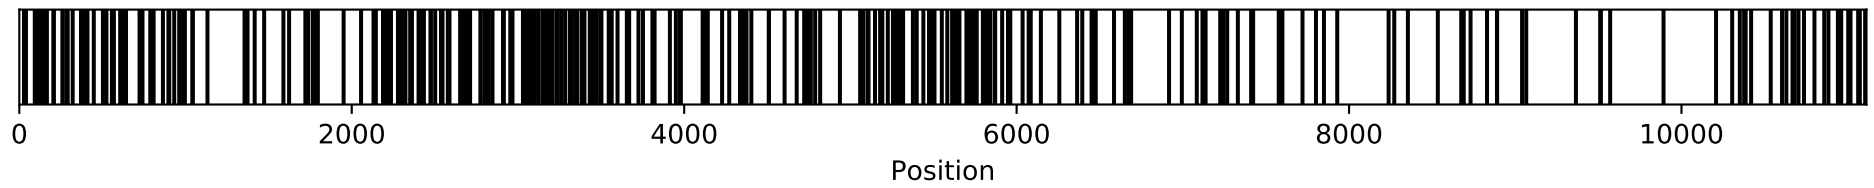

CR1 vs MM1  
Number of differences: 173

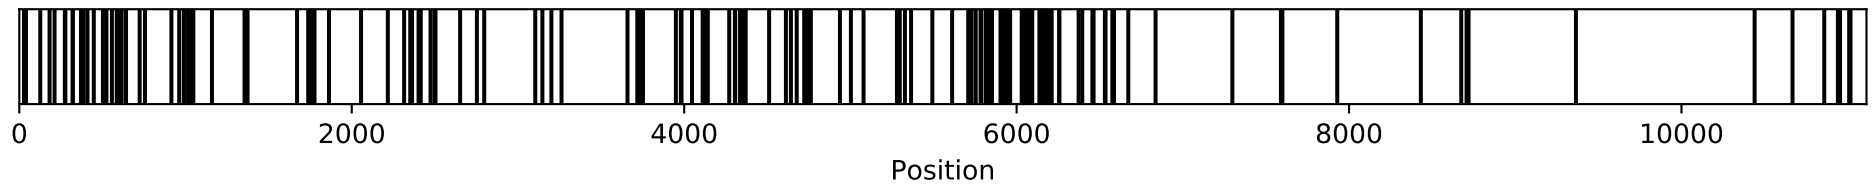

CR1 vs MM2  
Number of differences: 203

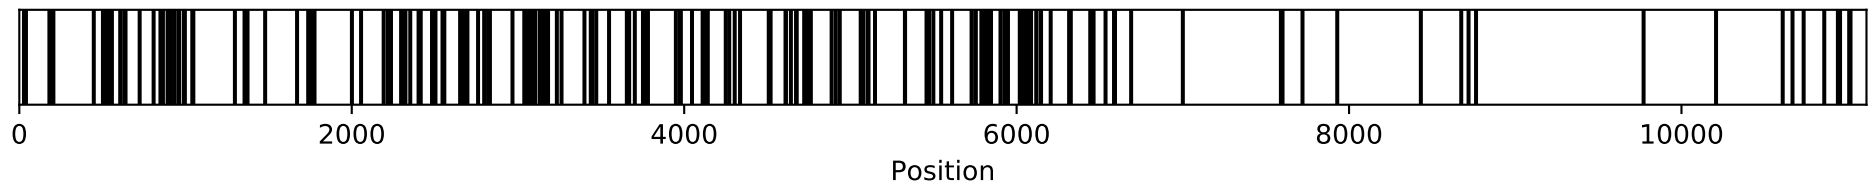

CR2 vs MM1  
Number of differences: 318

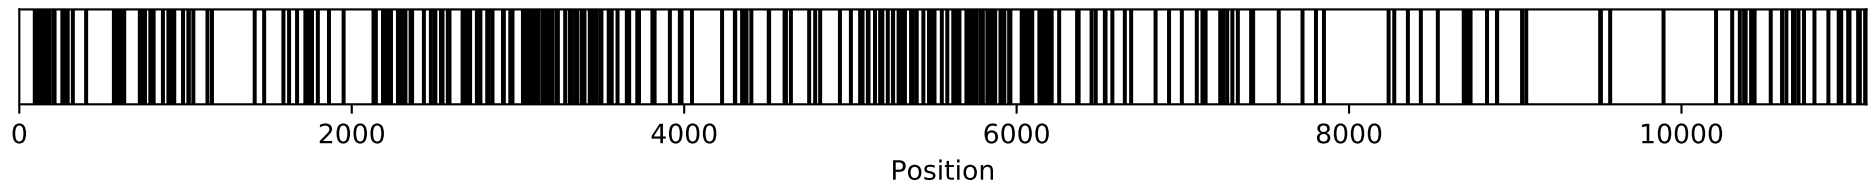

CR2 vs MM2  
Number of differences: 290

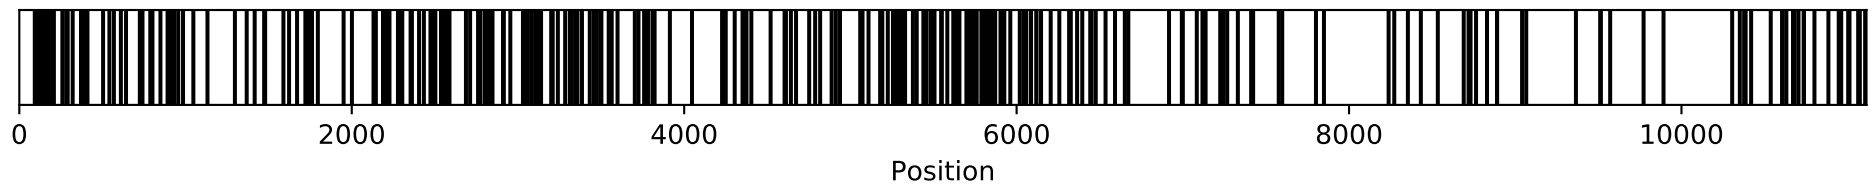

MM1 vs MM2  
Number of differences: 189

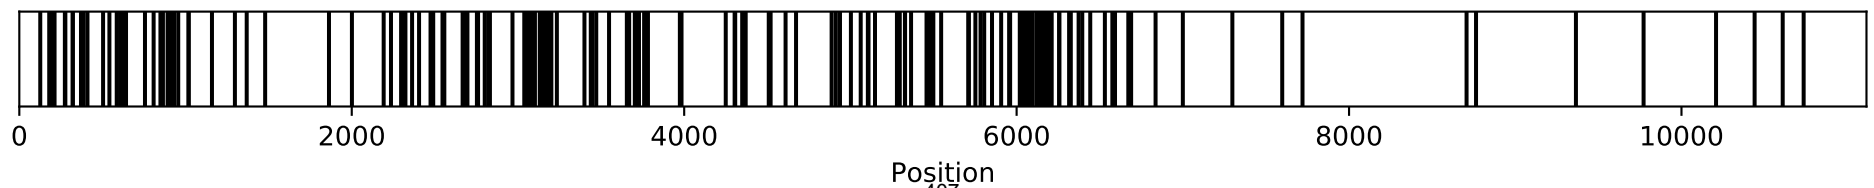



CR1 vs CR2  
Number of differences: 0

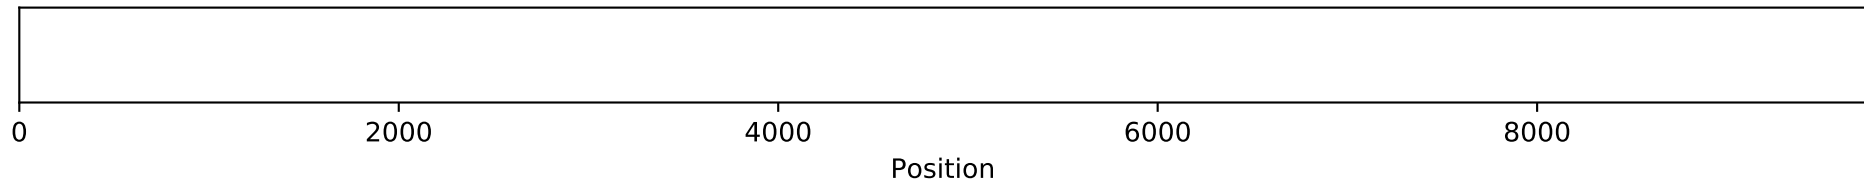

CR1 vs MM1  
Number of differences: 91

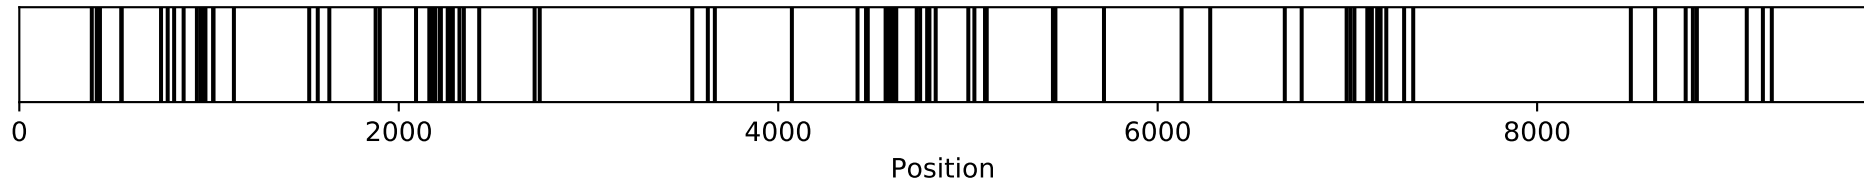

CR1 vs MM2  
Number of differences: 136

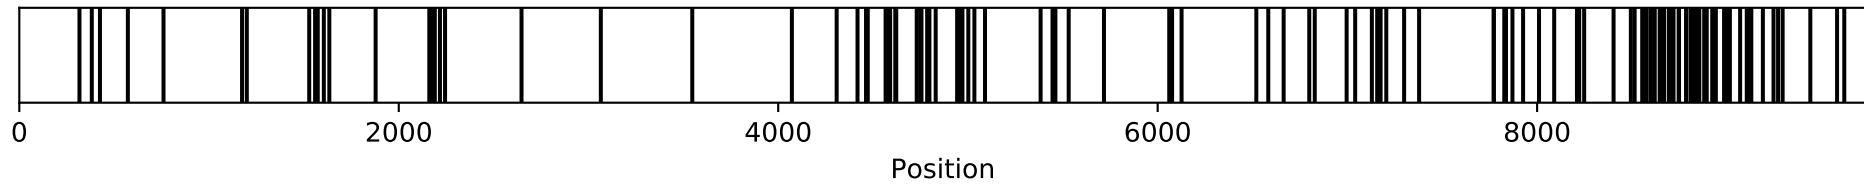

CR2 vs MM1  
Number of differences: 91

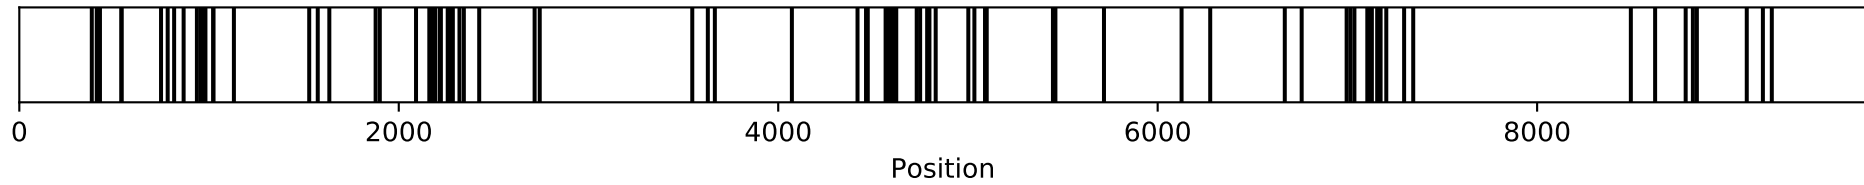

CR2 vs MM2  
Number of differences: 136

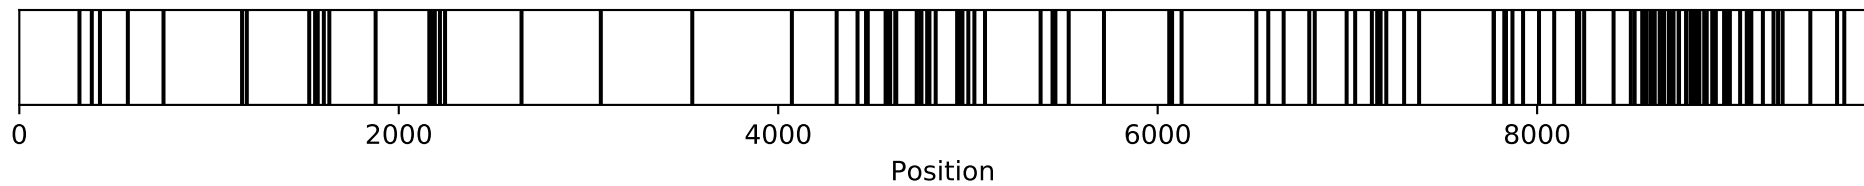

MM1 vs MM2  
Number of differences: 129

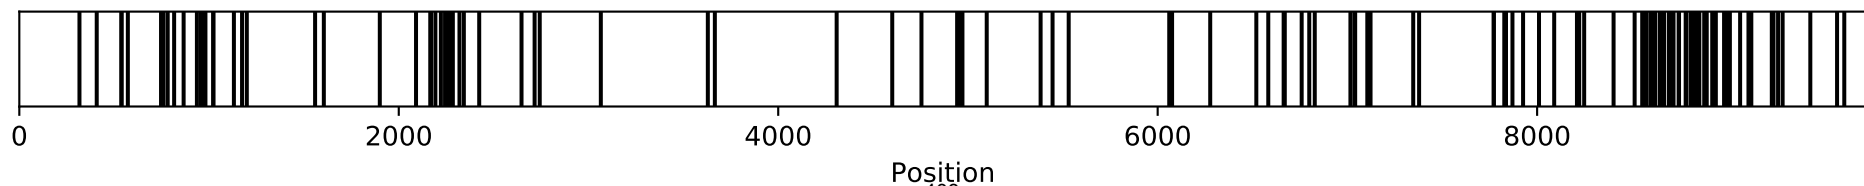

CR1 vs CR2  
Number of differences: 219

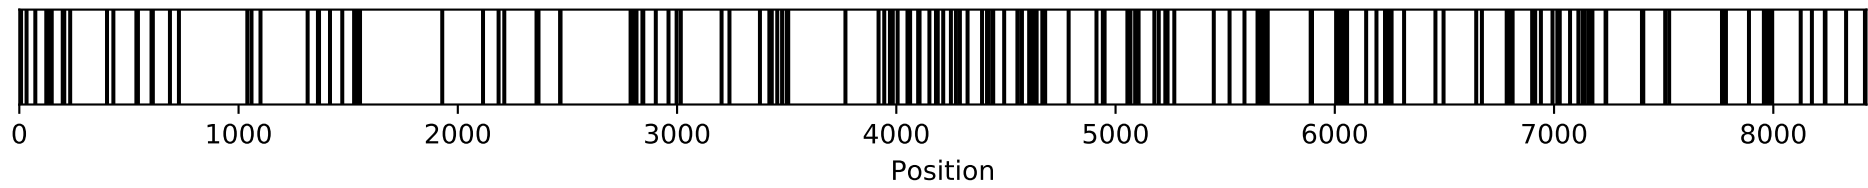

CR1 vs MM1  
Number of differences: 93

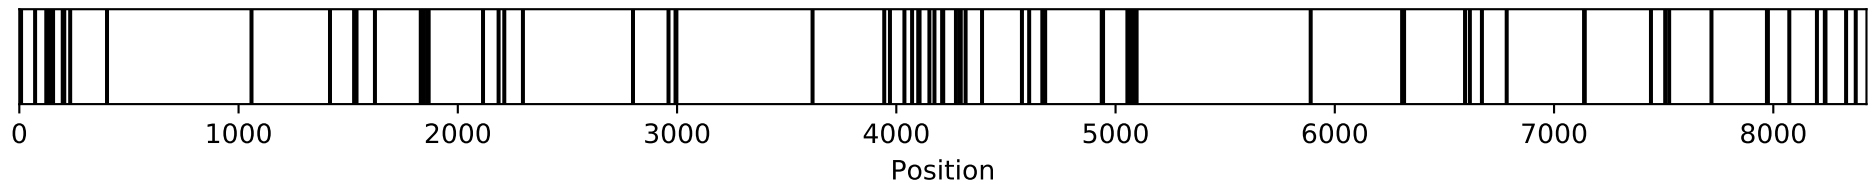

CR1 vs MM2  
Number of differences: 76

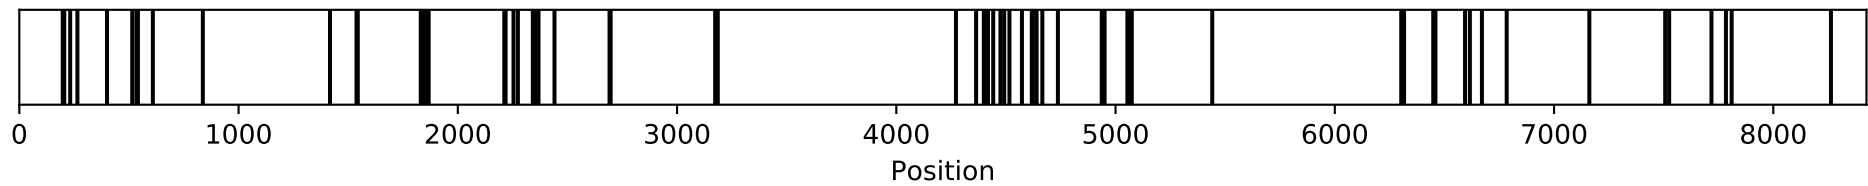

CR2 vs MM1  
Number of differences: 210

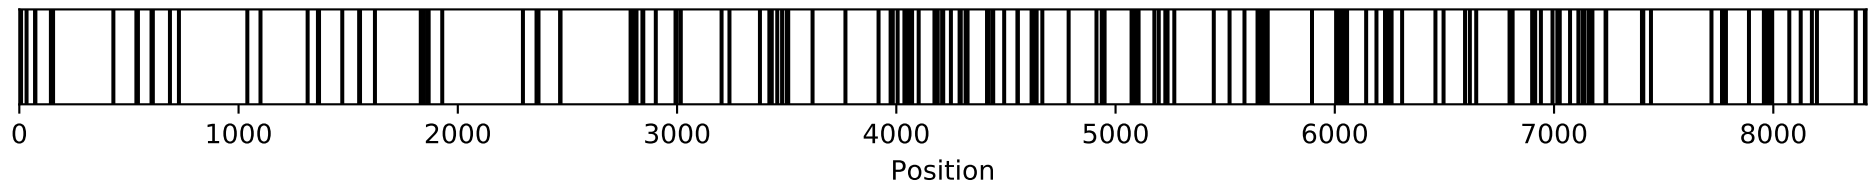

CR2 vs MM2  
Number of differences: 231

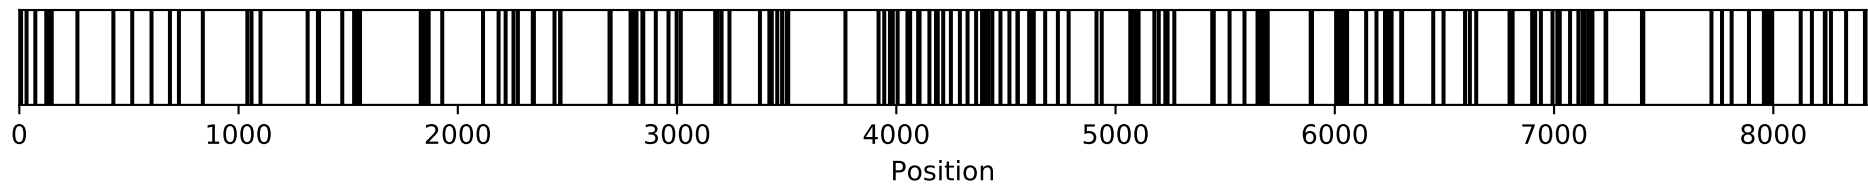

MM1 vs MM2  
Number of differences: 112

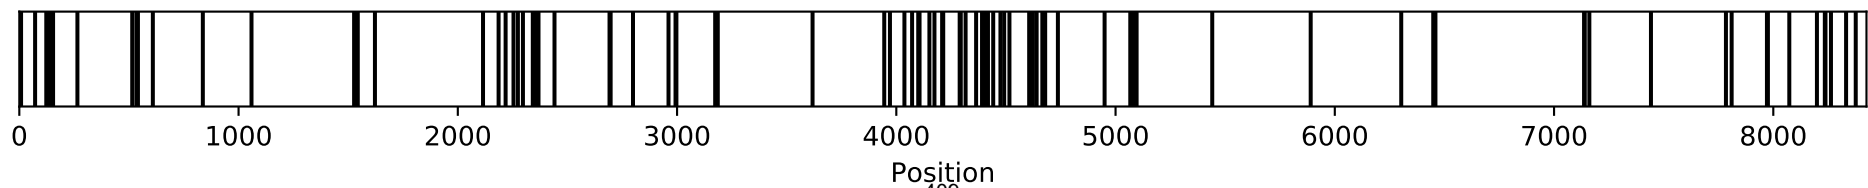

CR1 vs CR2  
Number of differences: 135

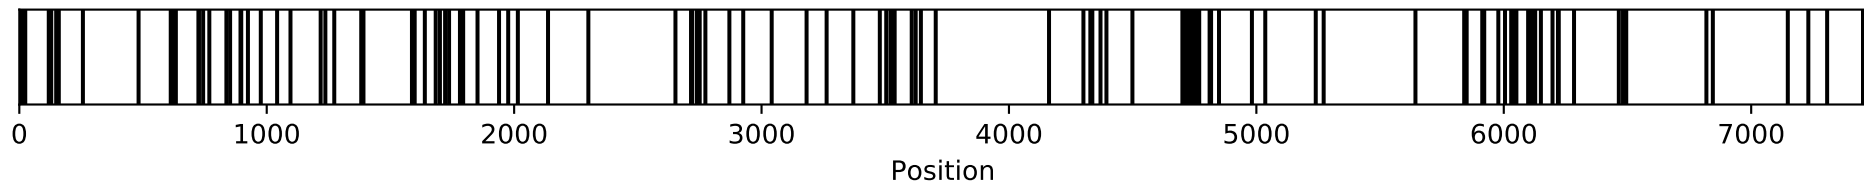

CR1 vs MM1  
Number of differences: 43

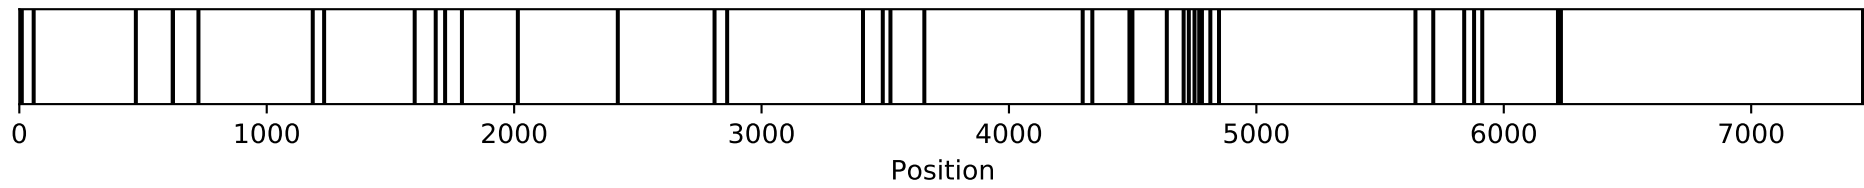

CR1 vs MM2  
Number of differences: 59

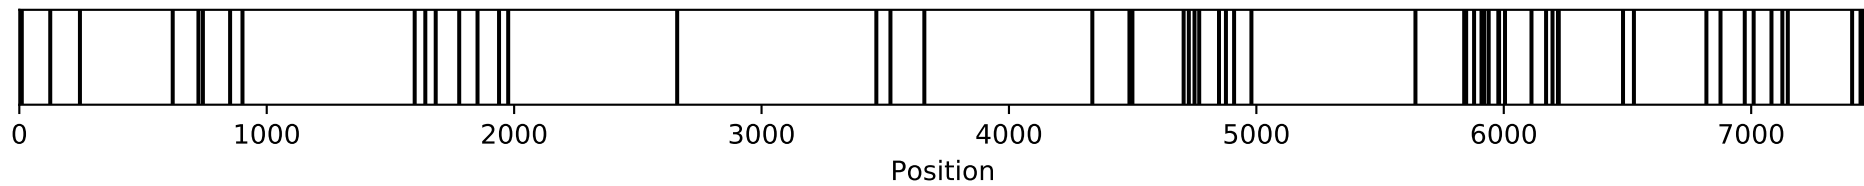

CR2 vs MM1  
Number of differences: 134

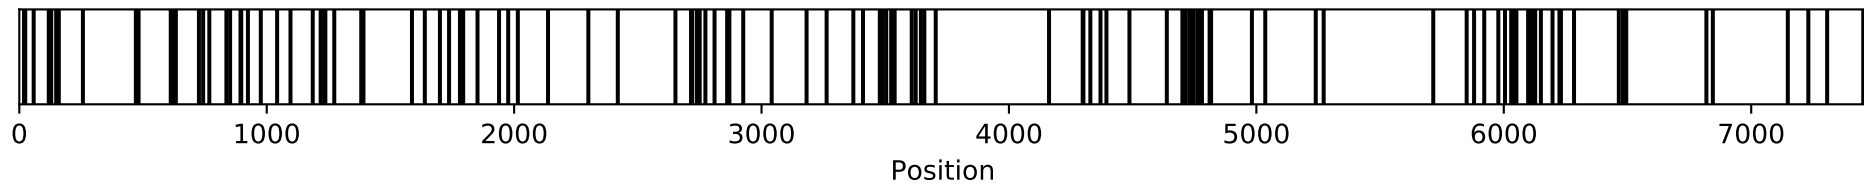

CR2 vs MM2  
Number of differences: 135

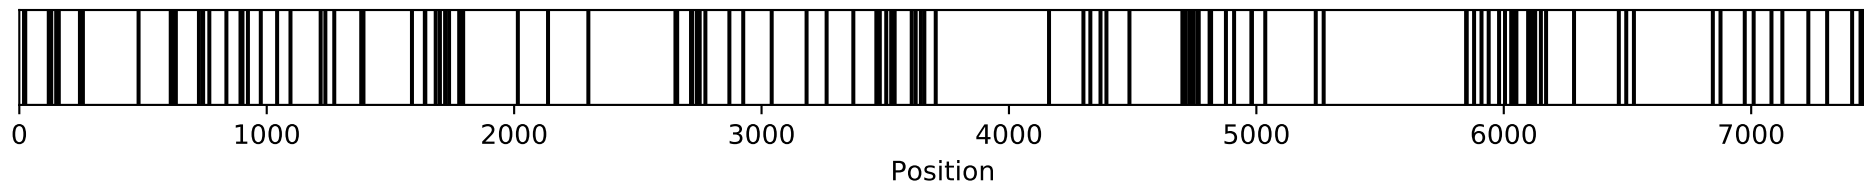

MM1 vs MM2  
Number of differences: 57

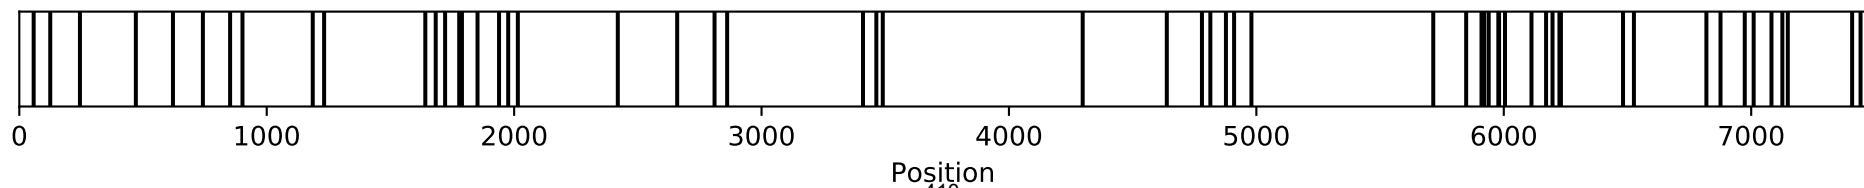

CR1 vs CR2  
Number of differences: 365

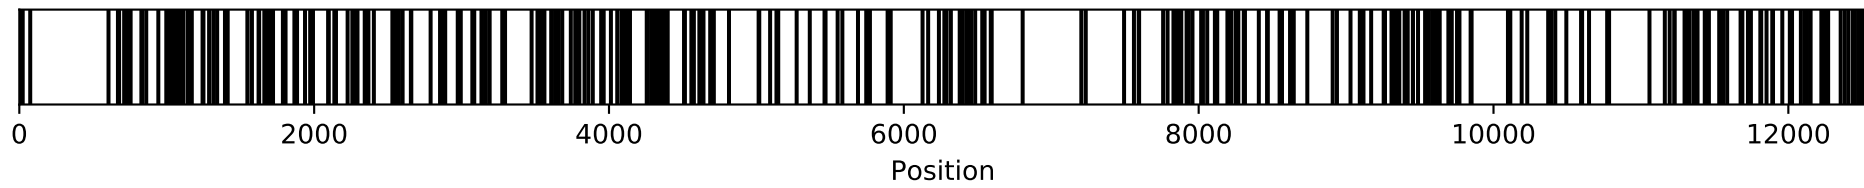

CR1 vs MM1  
Number of differences: 169

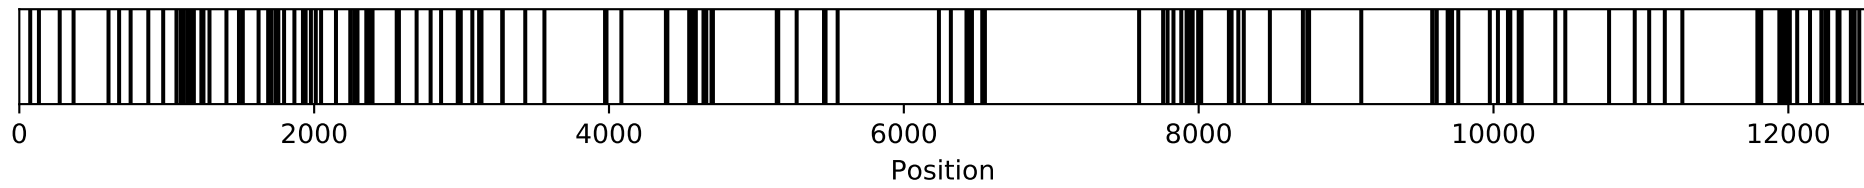

CR1 vs MM2  
Number of differences: 154

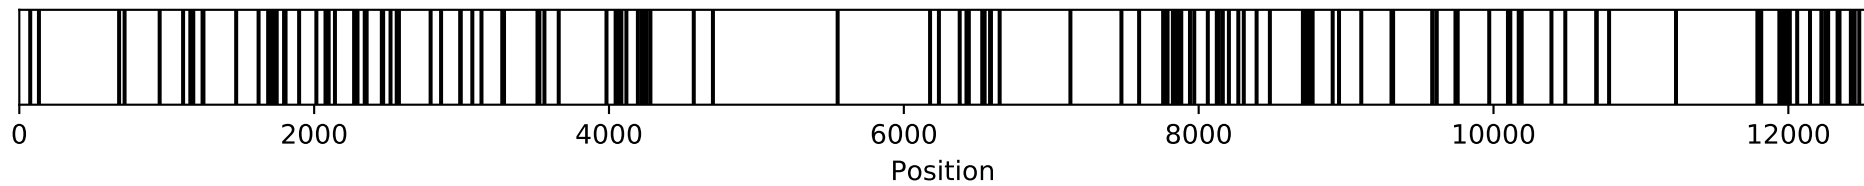

CR2 vs MM1  
Number of differences: 361

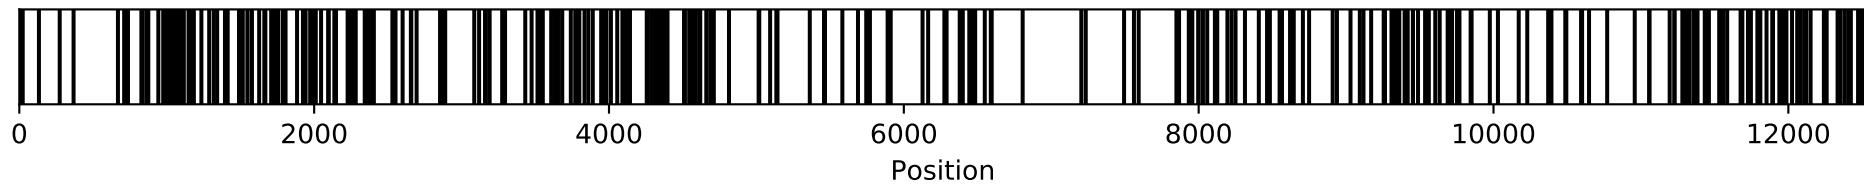

CR2 vs MM2  
Number of differences: 366

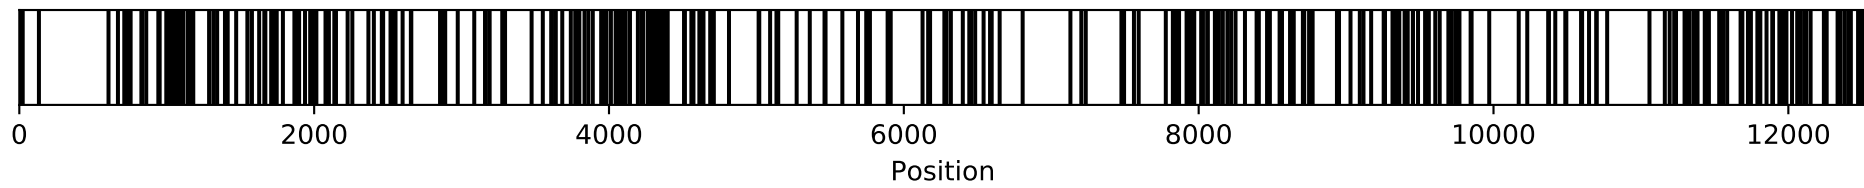

MM1 vs MM2  
Number of differences: 159

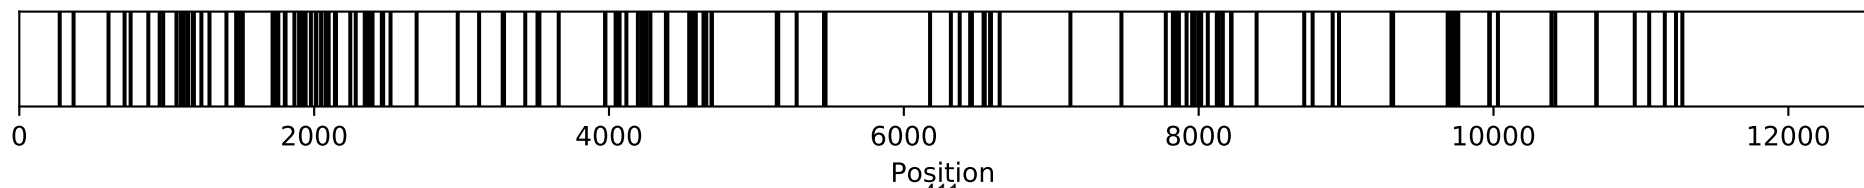

CR1 vs CR2  
Number of differences: 280

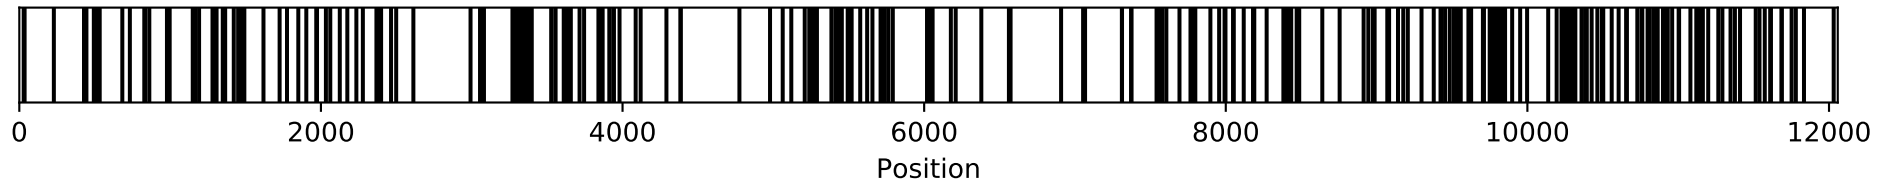

CR1 vs MM1  
Number of differences: 143

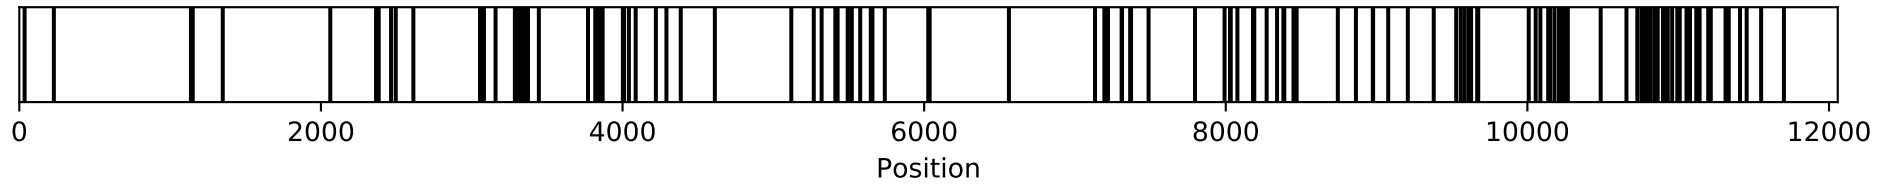

CR1 vs MM2  
Number of differences: 141

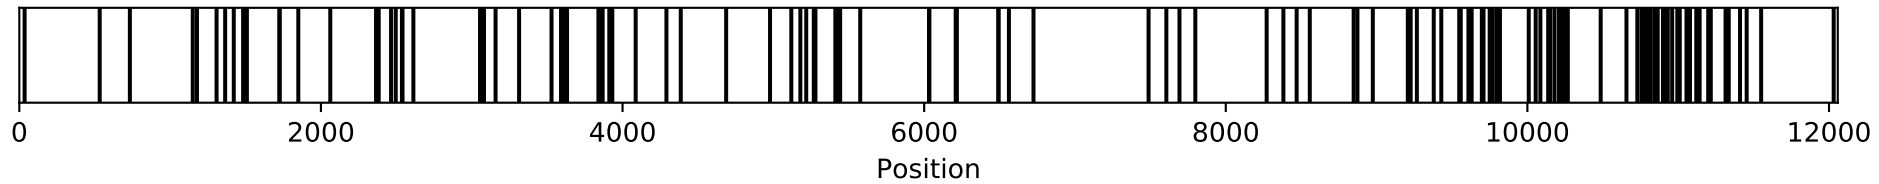

CR2 vs MM1  
Number of differences: 276

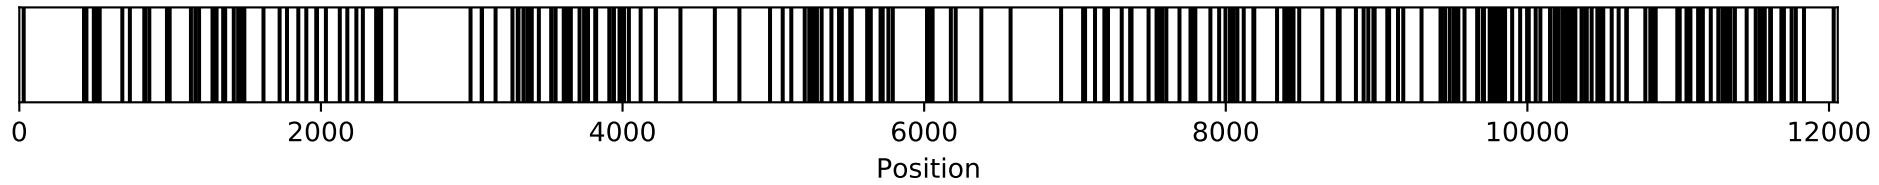

CR2 vs MM2  
Number of differences: 262

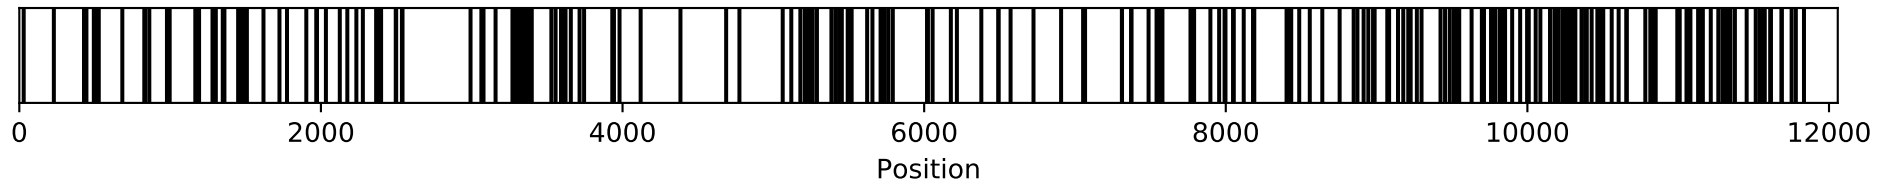

MM1 vs MM2  
Number of differences: 123

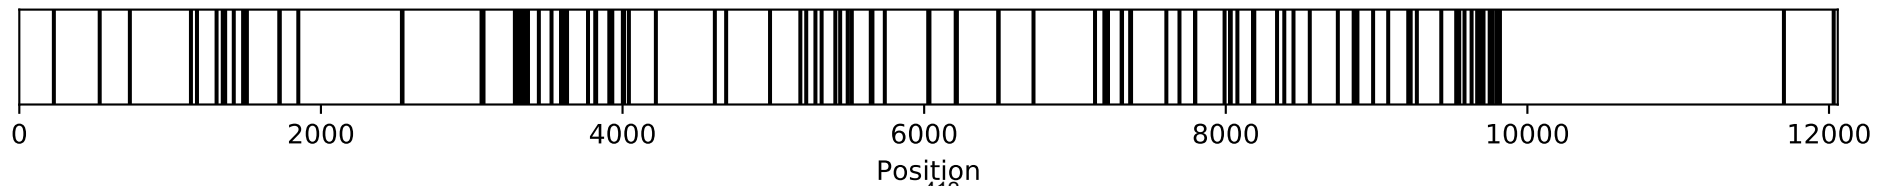

CR1 vs CR2  
Number of differences: 186

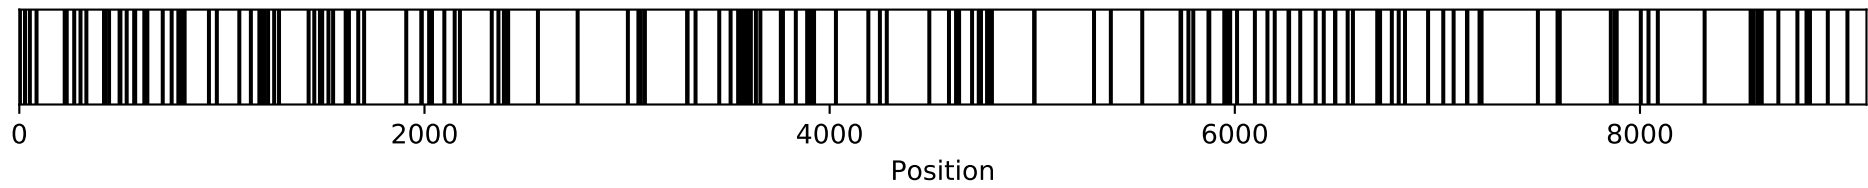

CR1 vs MM1  
Number of differences: 203

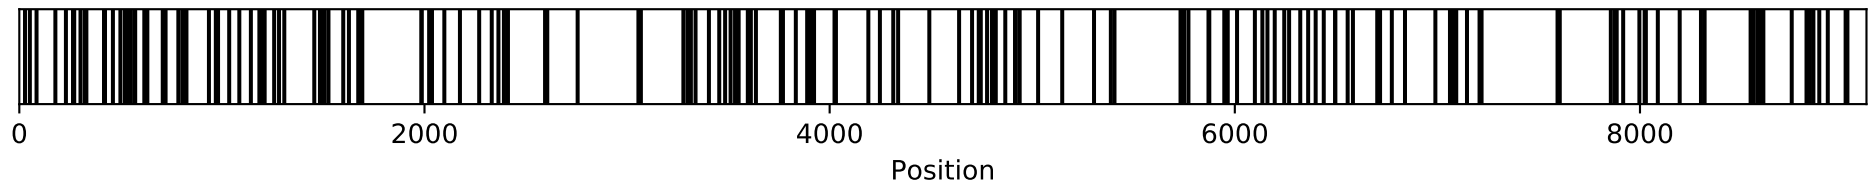

CR1 vs MM2  
Number of differences: 193

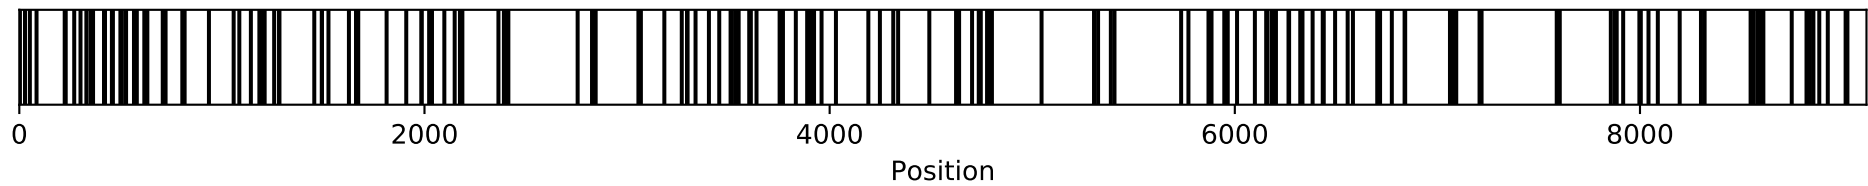

CR2 vs MM1  
Number of differences: 149

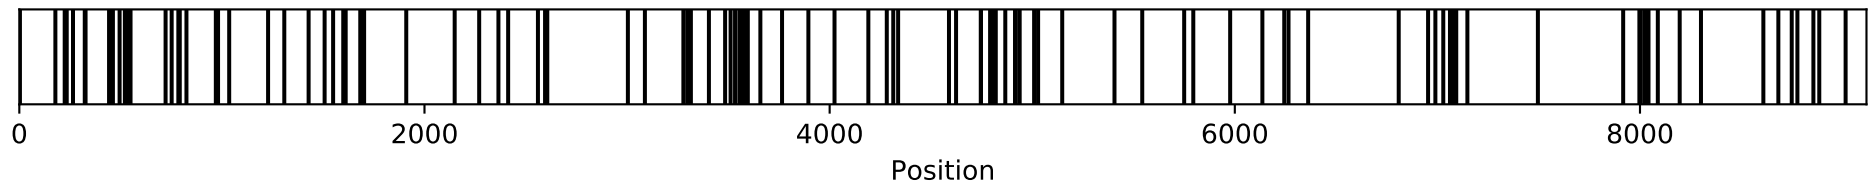

CR2 vs MM2  
Number of differences: 135

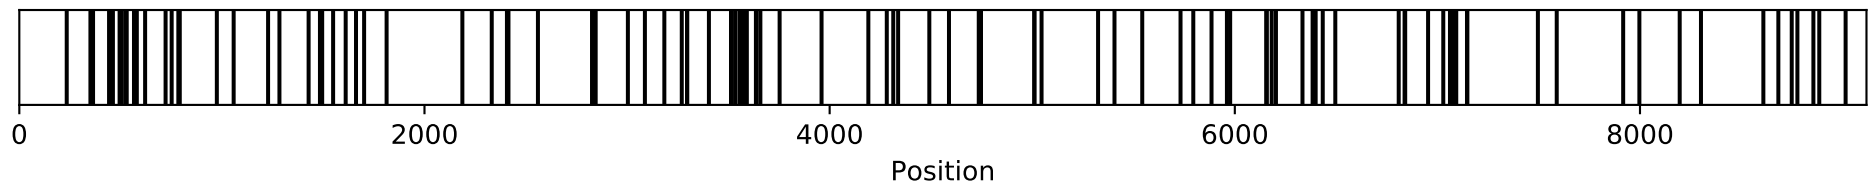

MM1 vs MM2  
Number of differences: 116

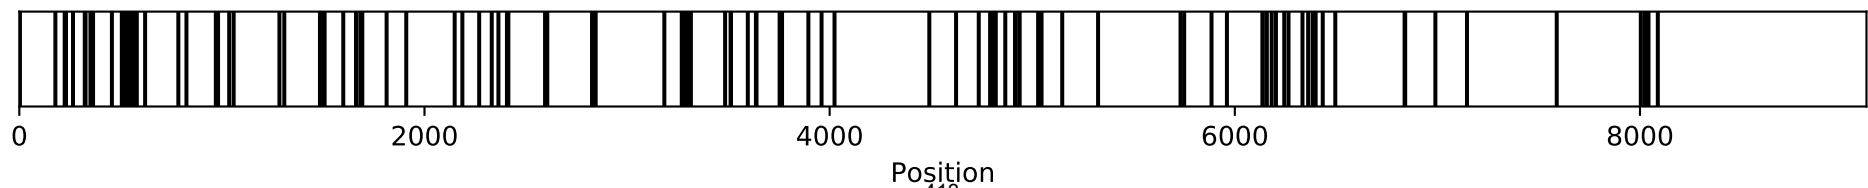

CR1 vs CR2  
Number of differences: 324

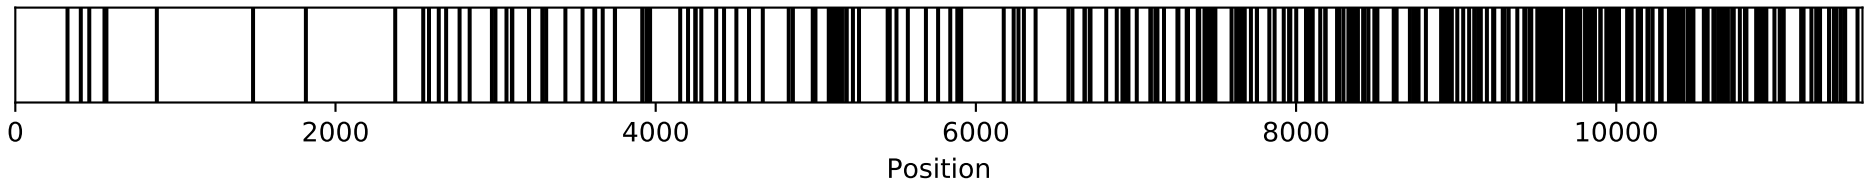

CR1 vs MM1  
Number of differences: 178

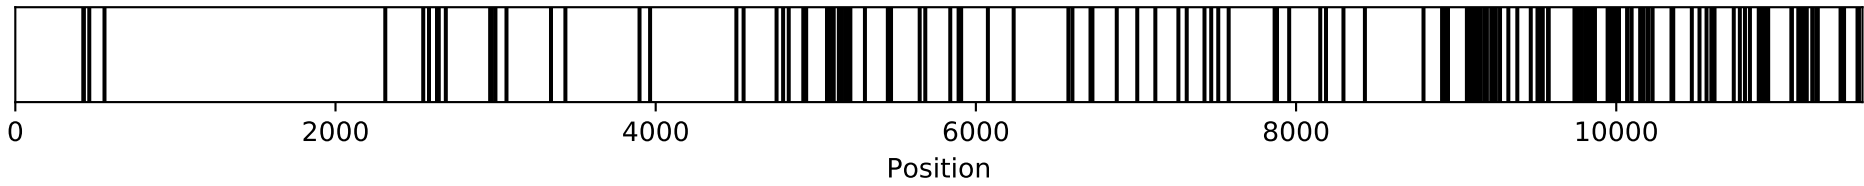

CR1 vs MM2  
Number of differences: 151

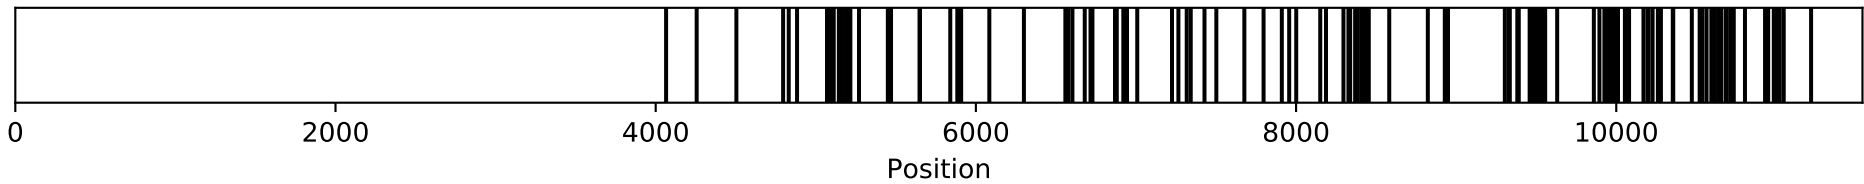

CR2 vs MM1  
Number of differences: 323

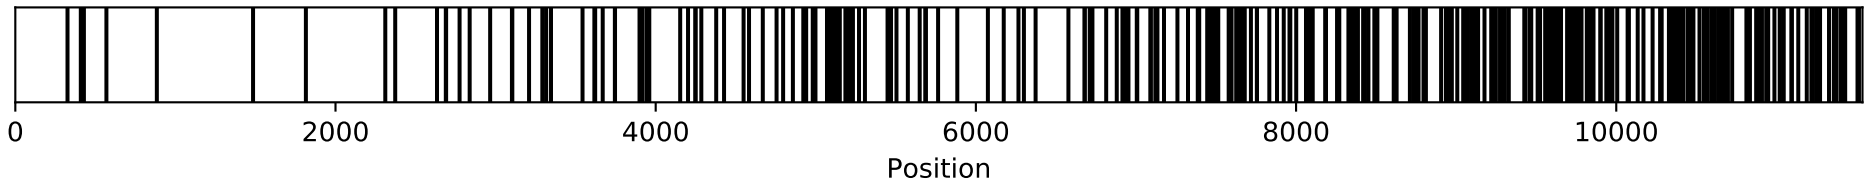

CR2 vs MM2  
Number of differences: 334

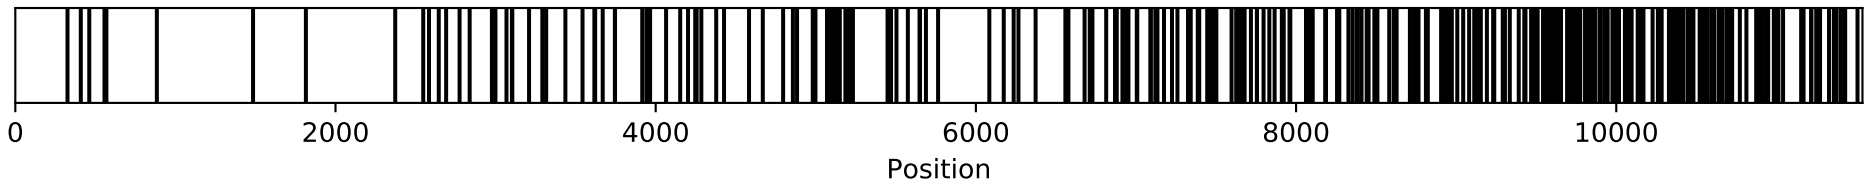

MM1 vs MM2  
Number of differences: 187

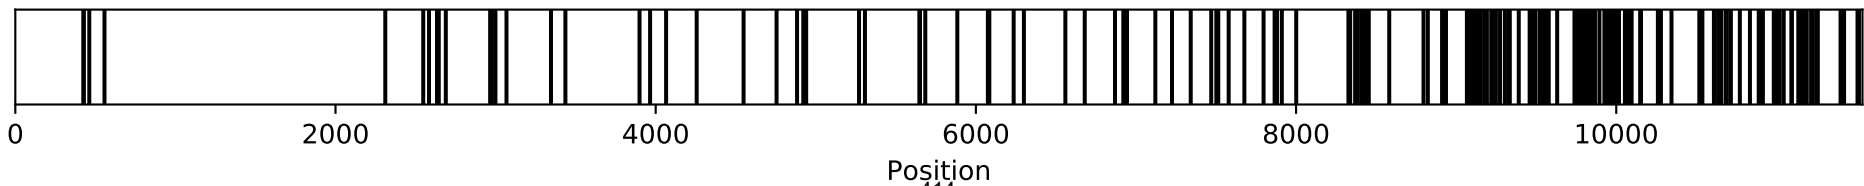

CR1 vs CR2  
Number of differences: 239

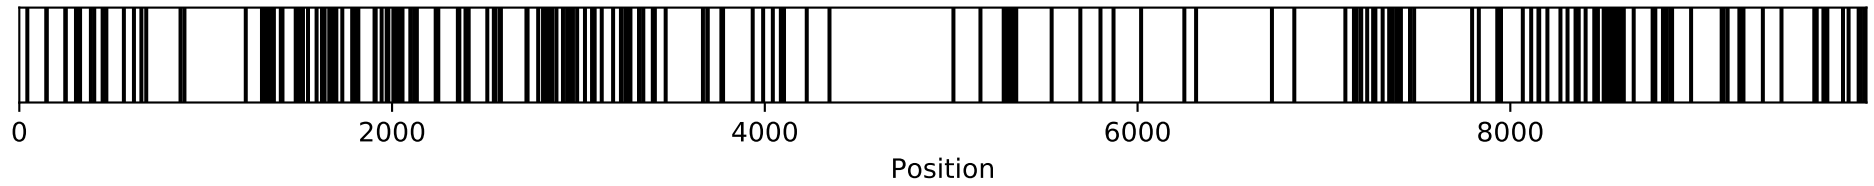

CR1 vs MM1  
Number of differences: 123

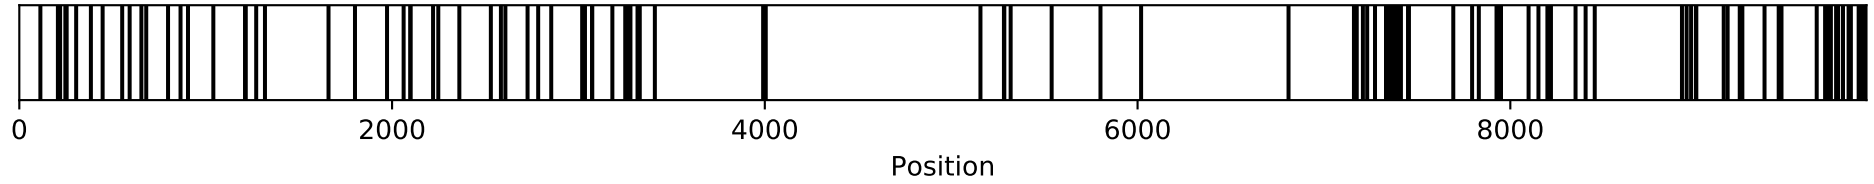

CR1 vs MM2  
Number of differences: 73

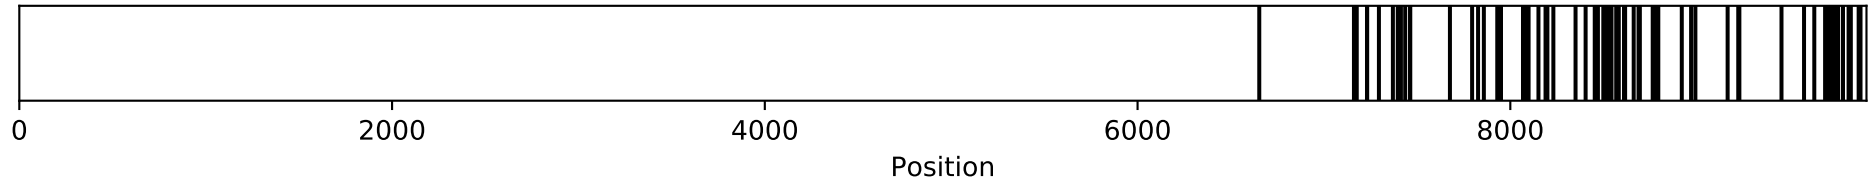

CR2 vs MM1  
Number of differences: 244

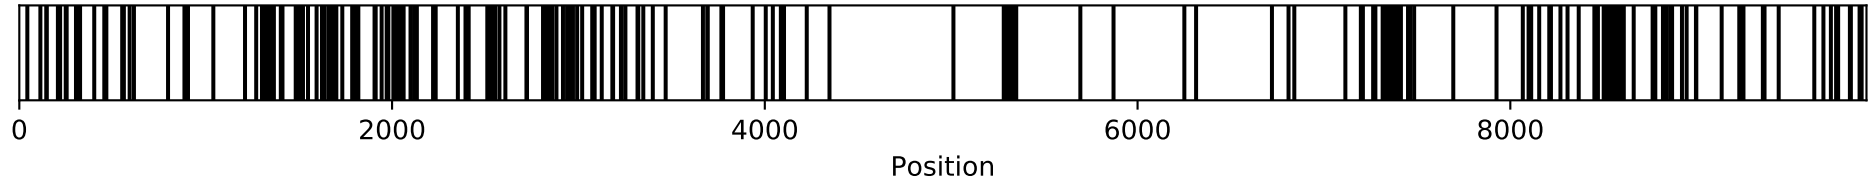

CR2 vs MM2  
Number of differences: 235

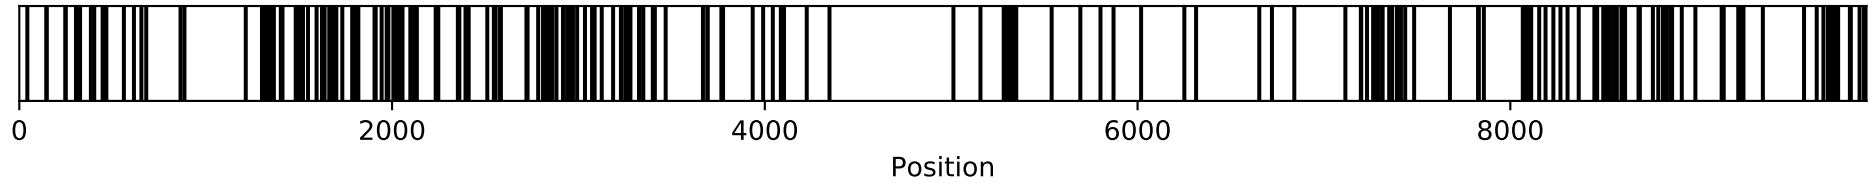

MM1 vs MM2  
Number of differences: 138

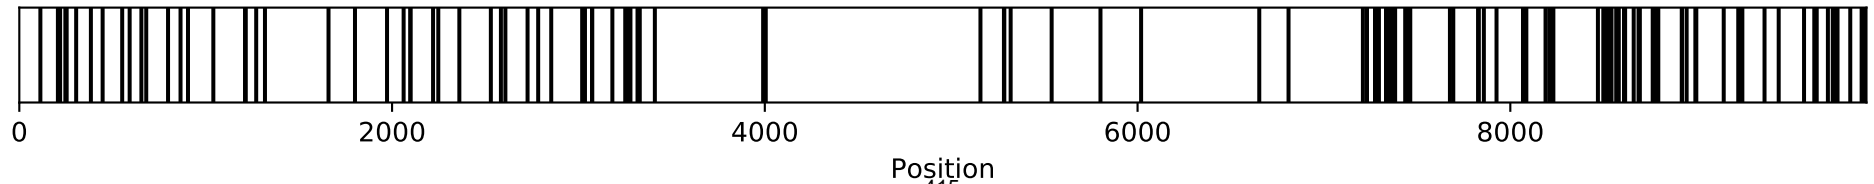



CR1 vs CR2  
Number of differences: 439

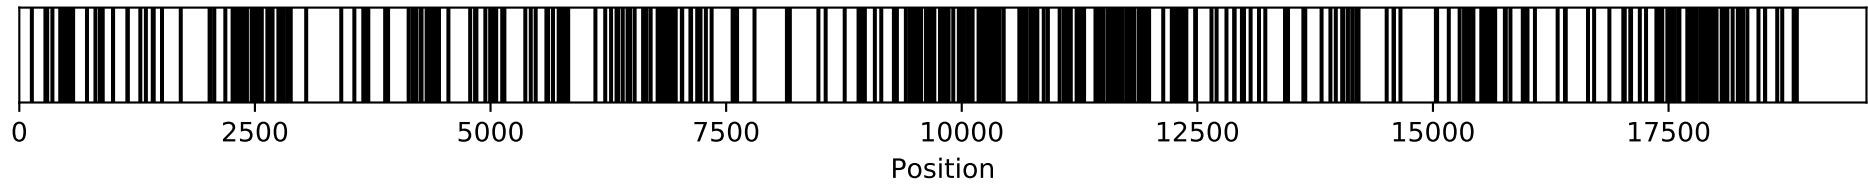

CR1 vs MM1  
Number of differences: 221

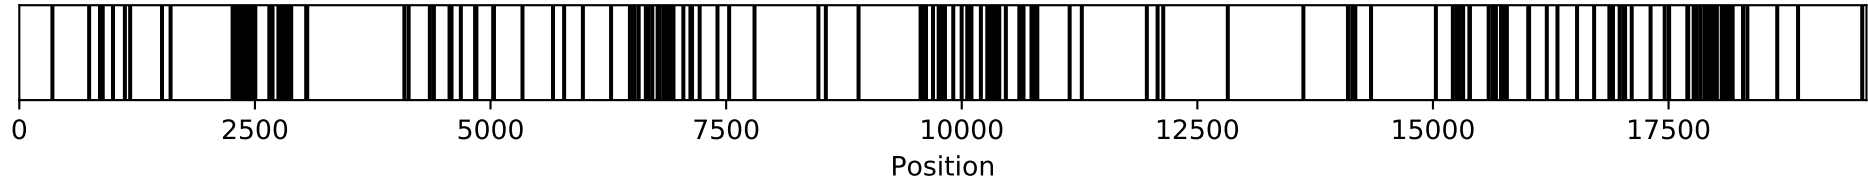

CR1 vs MM2  
Number of differences: 222

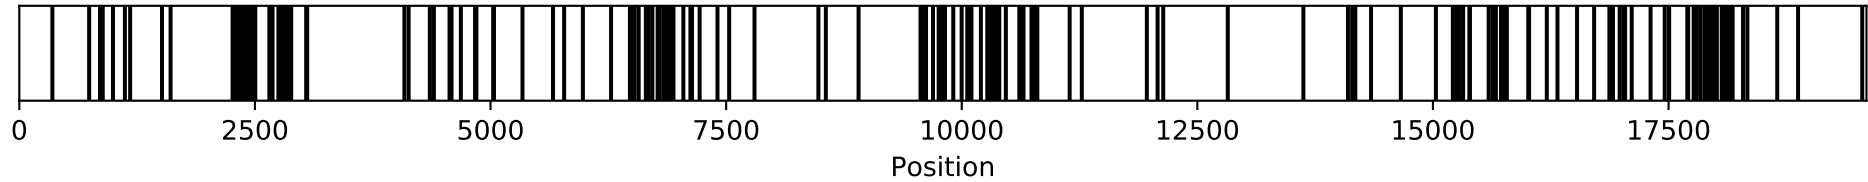

CR2 vs MM1  
Number of differences: 421

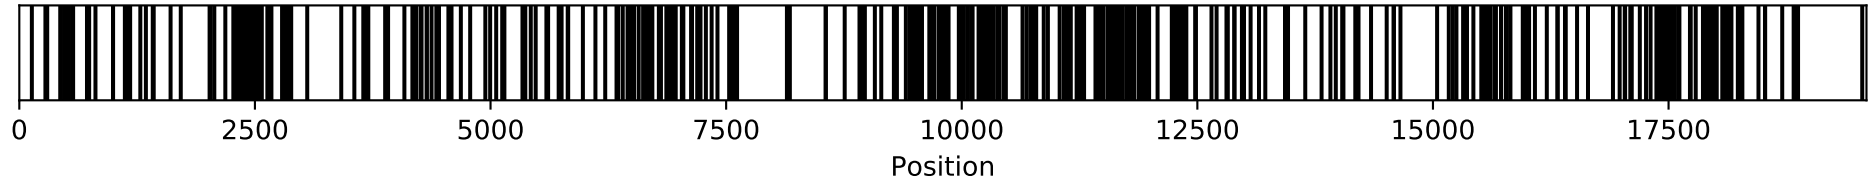

CR2 vs MM2  
Number of differences: 422

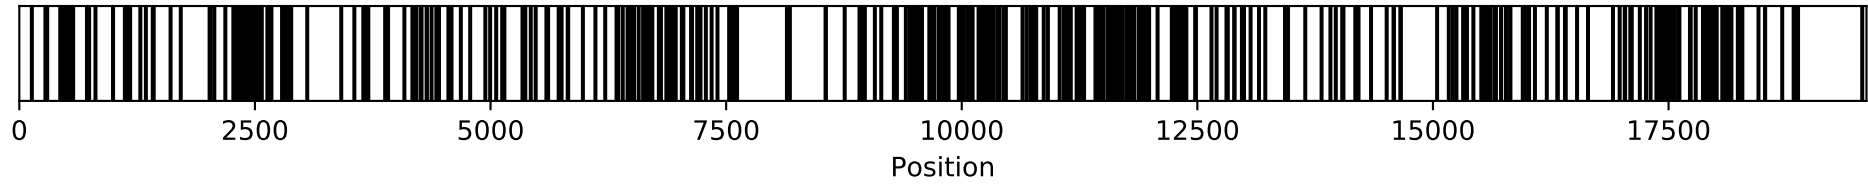

MM1 vs MM2  
Number of differences: 1

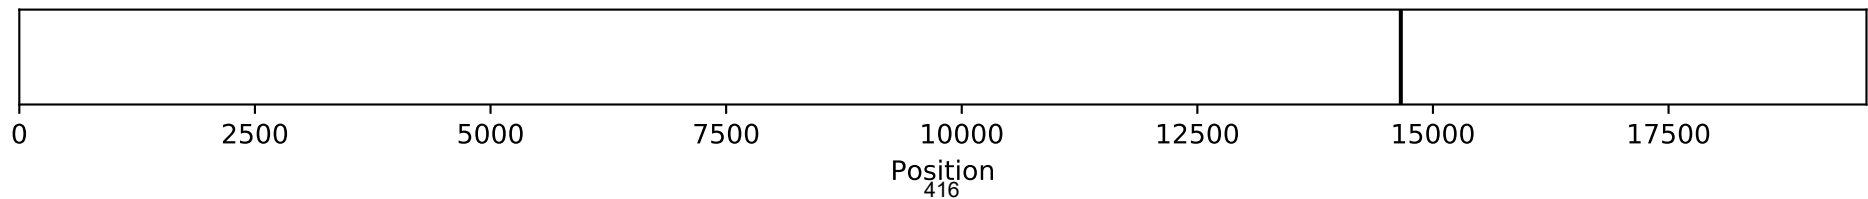

CR1 vs CR2  
Number of differences: 450

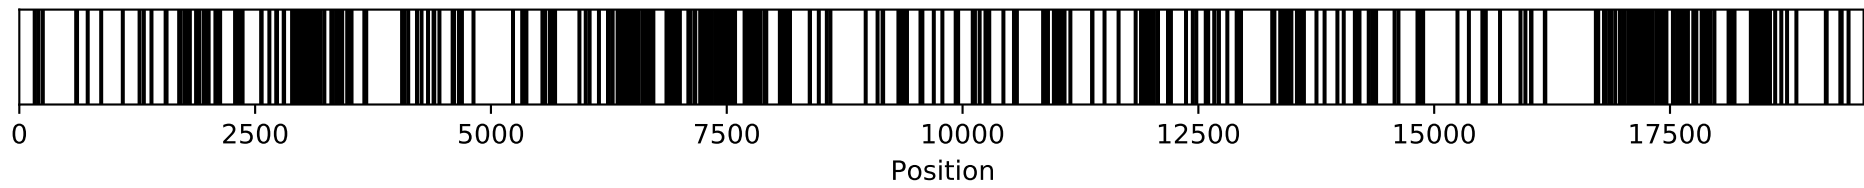

CR1 vs MM1  
Number of differences: 441

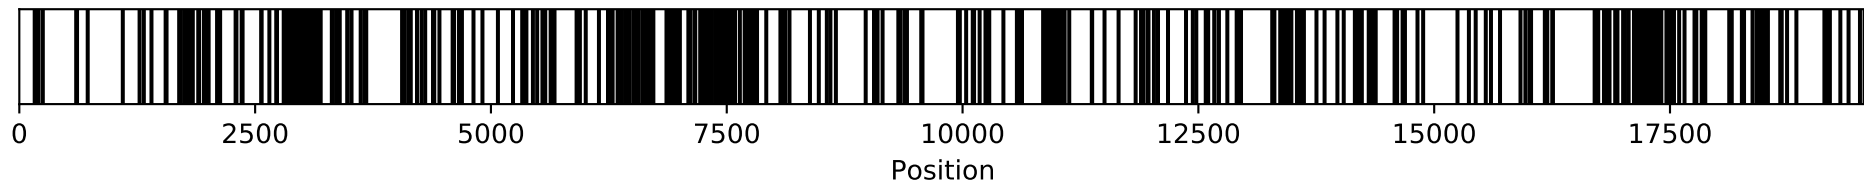

CR1 vs MM2  
Number of differences: 424

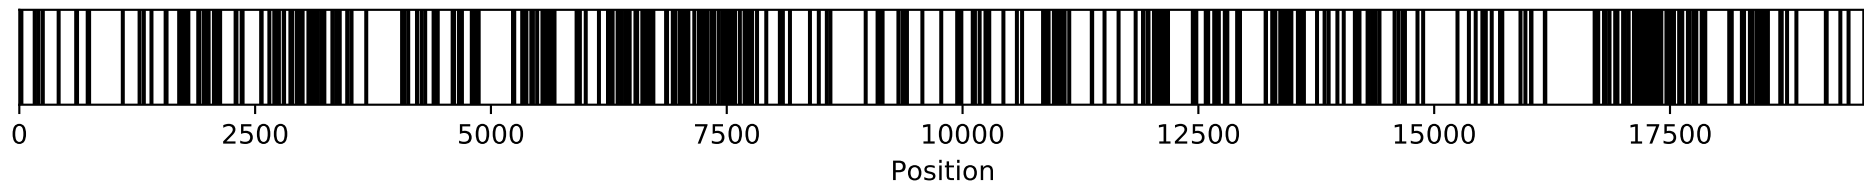

CR2 vs MM1  
Number of differences: 217

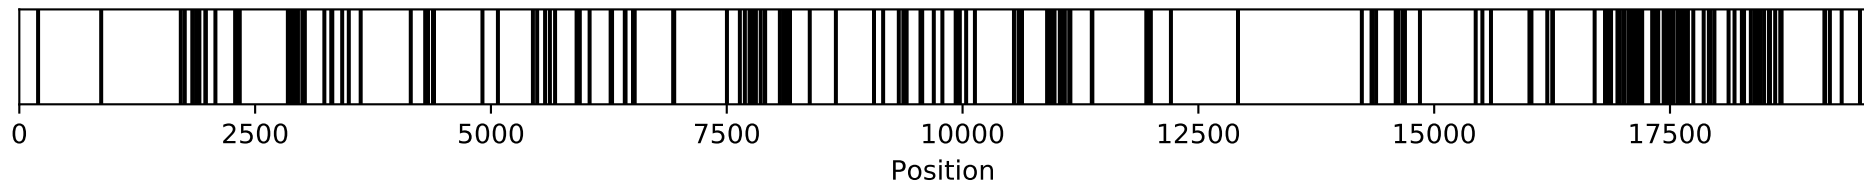

CR2 vs MM2  
Number of differences: 292

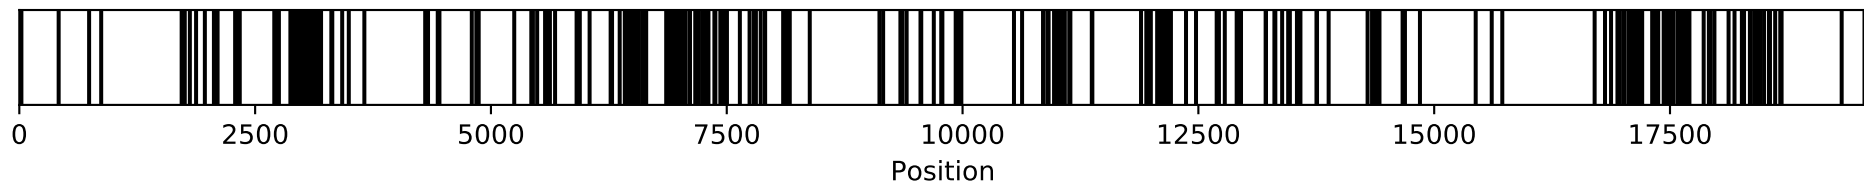

MM1 vs MM2  
Number of differences: 235

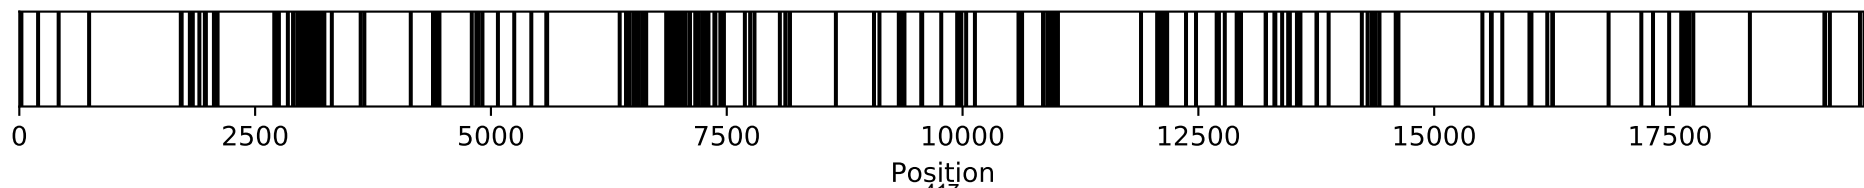

CR1 vs CR2  
Number of differences: 203

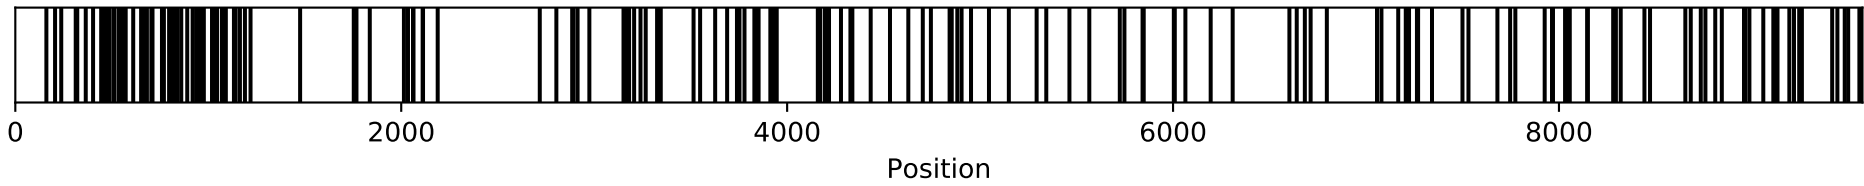

CR1 vs MM1  
Number of differences: 108

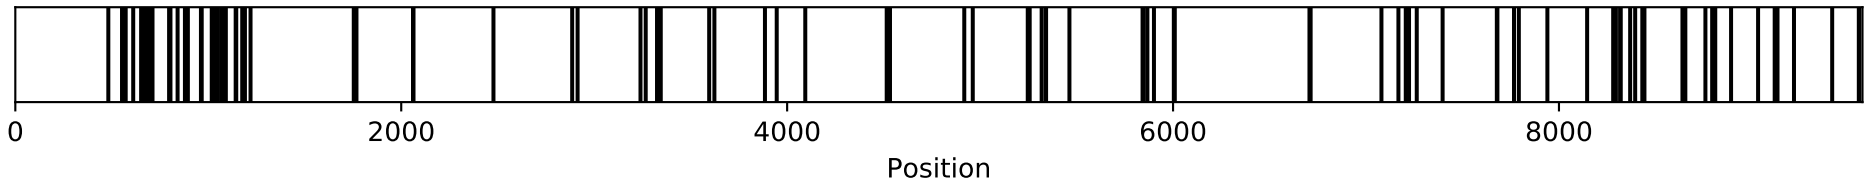

CR1 vs MM2  
Number of differences: 88

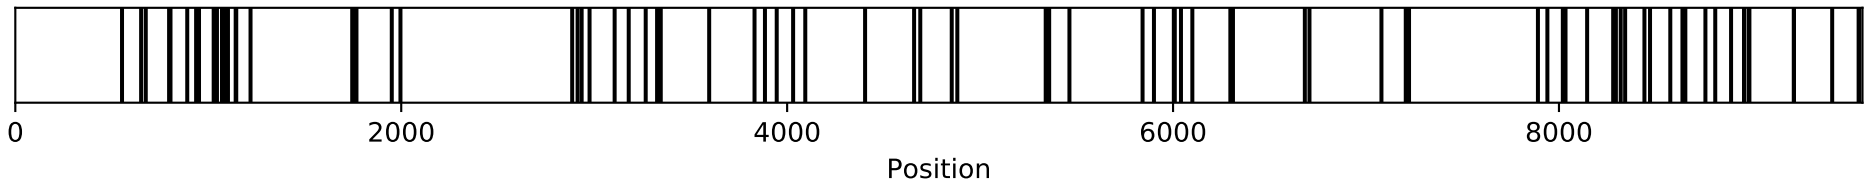

CR2 vs MM1  
Number of differences: 178

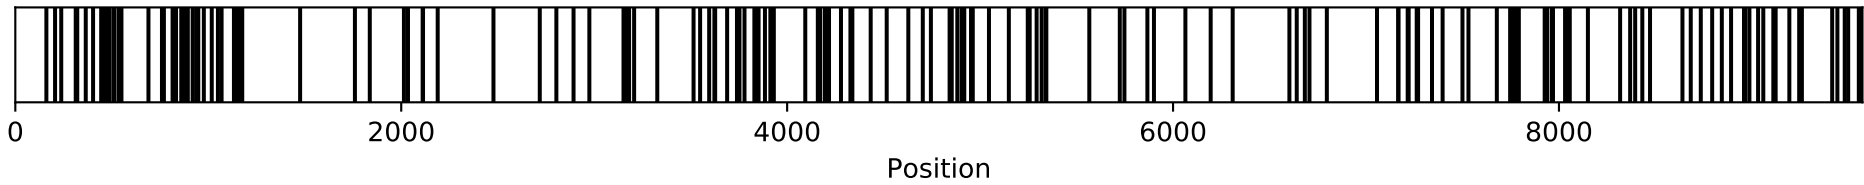

CR2 vs MM2  
Number of differences: 194

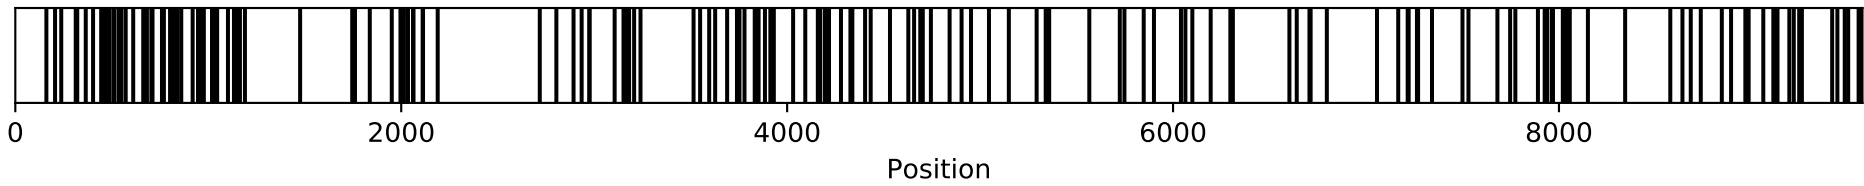

MM1 vs MM2  
Number of differences: 100

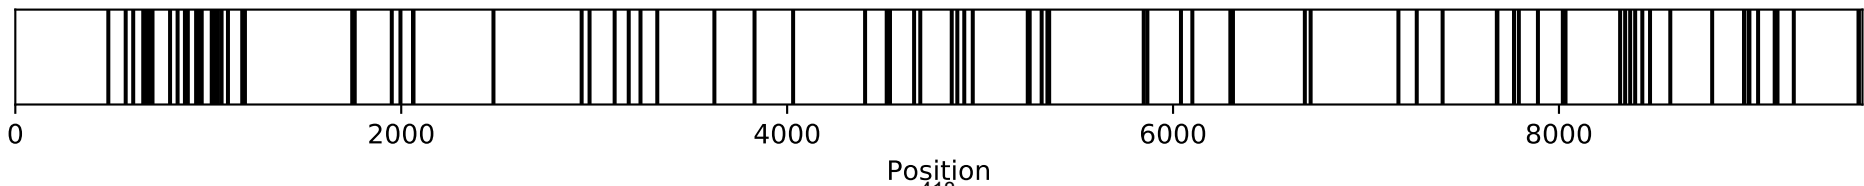

CR1 vs CR2  
Number of differences: 237

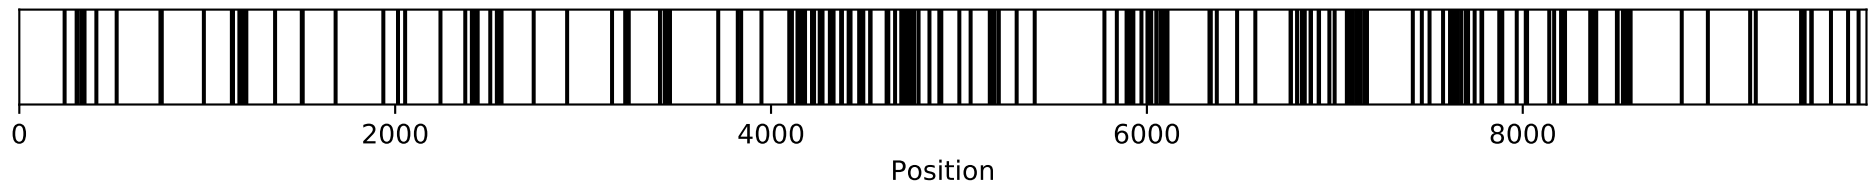

CR1 vs MM1  
Number of differences: 117

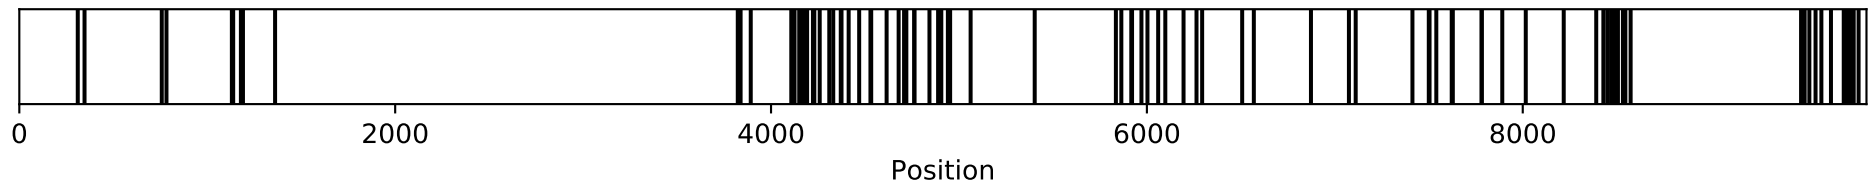

CR1 vs MM2  
Number of differences: 102

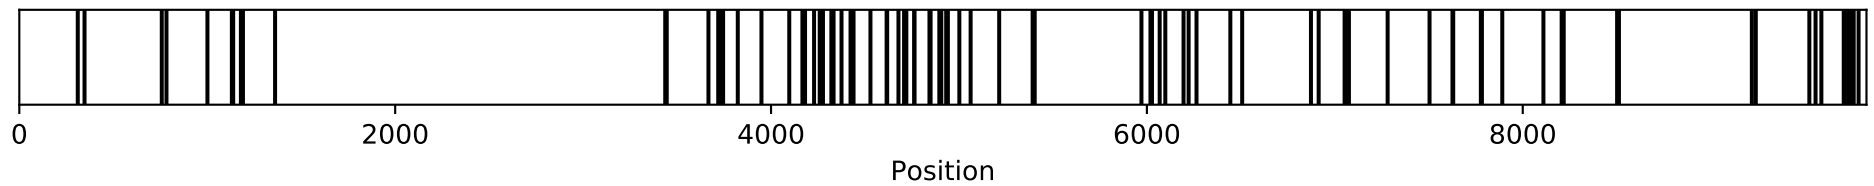

CR2 vs MM1  
Number of differences: 246

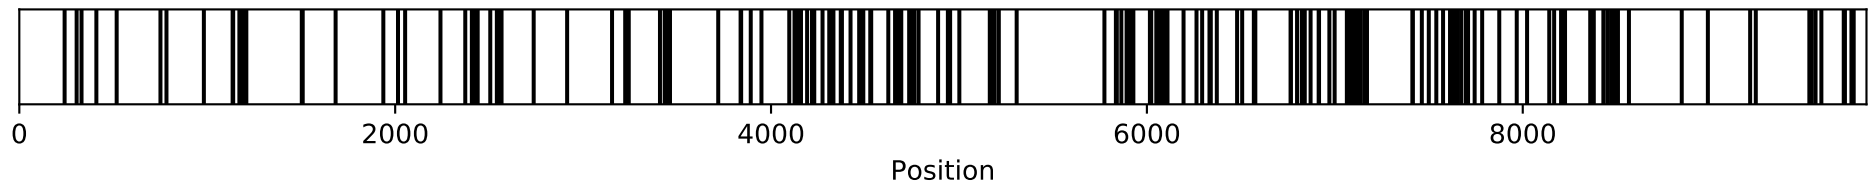

CR2 vs MM2  
Number of differences: 229

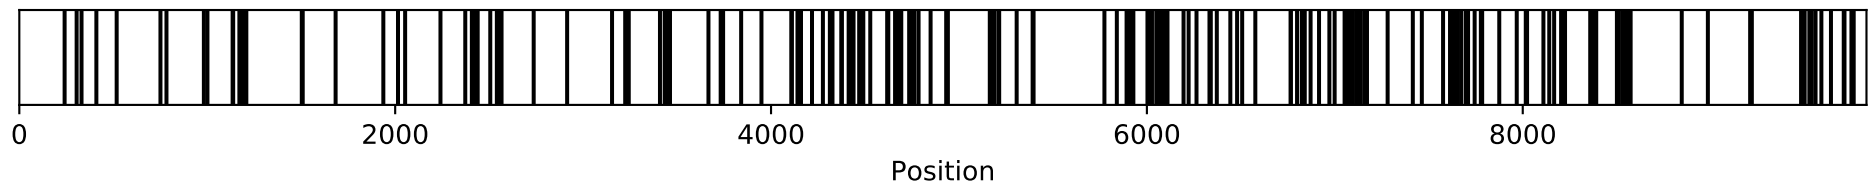

MM1 vs MM2  
Number of differences: 106

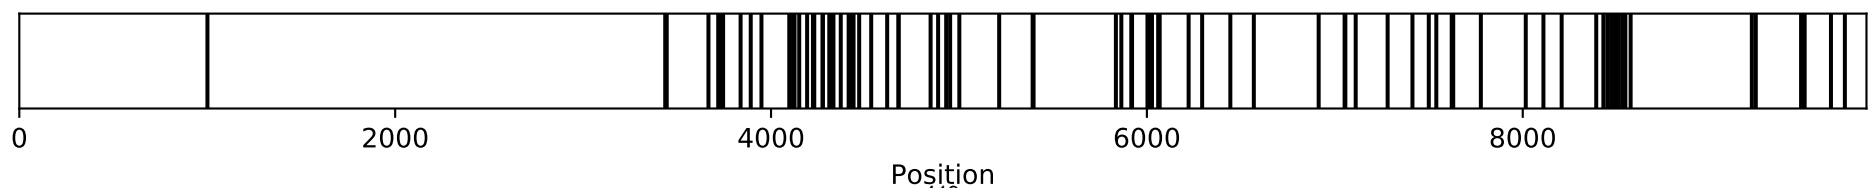

CR1 vs CR2  
Number of differences: 367

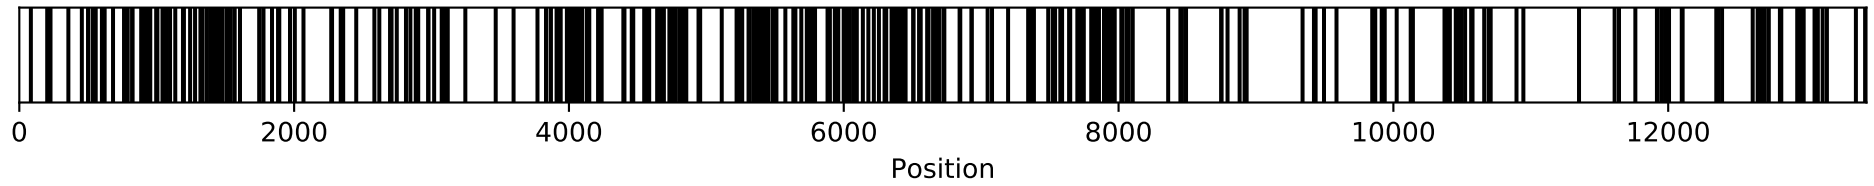

CR1 vs MM1  
Number of differences: 193

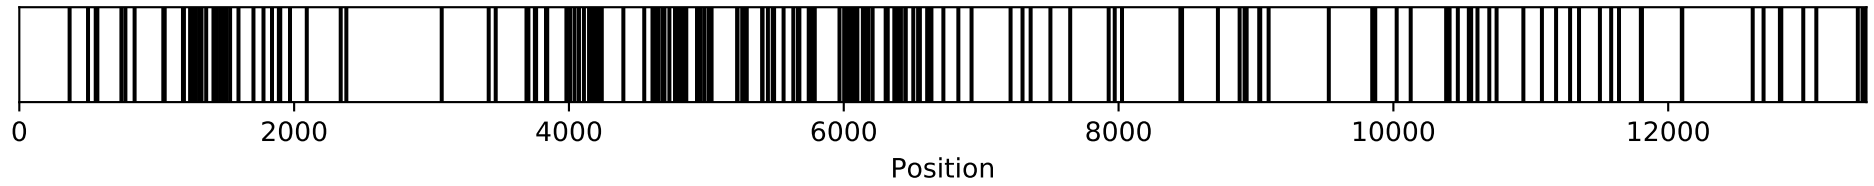

CR1 vs MM2  
Number of differences: 180

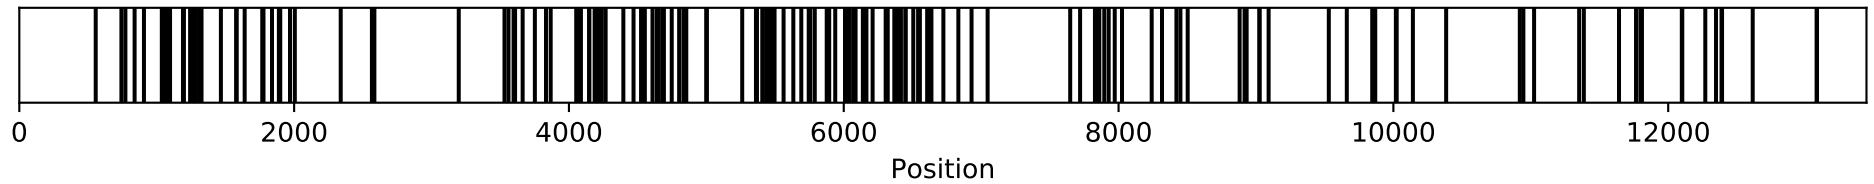

CR2 vs MM1  
Number of differences: 386

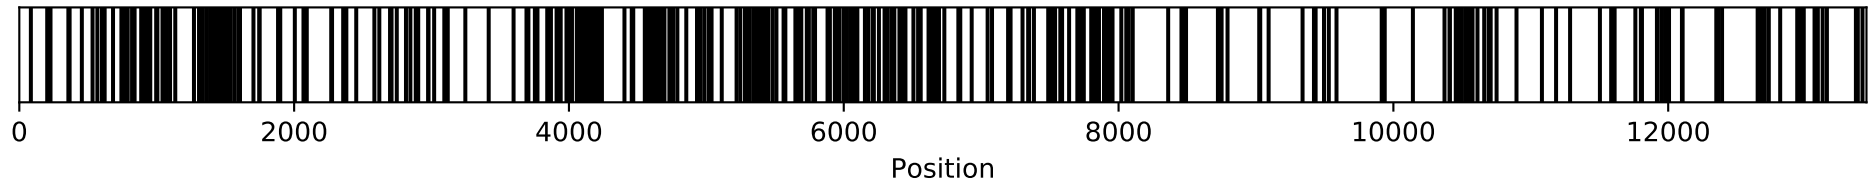

CR2 vs MM2  
Number of differences: 365

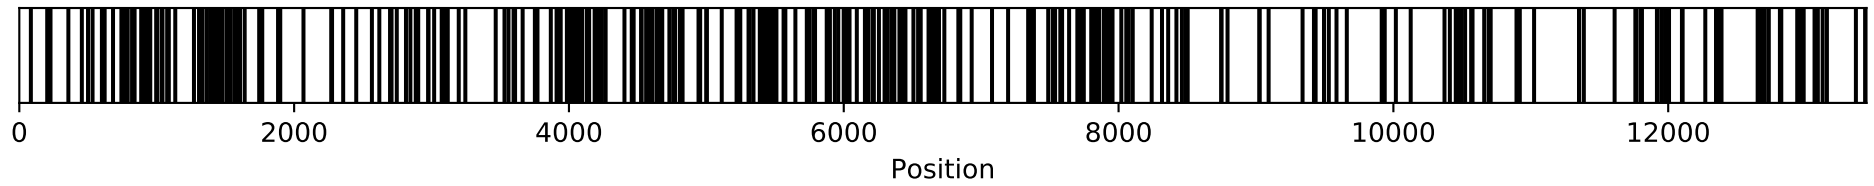

MM1 vs MM2  
Number of differences: 178

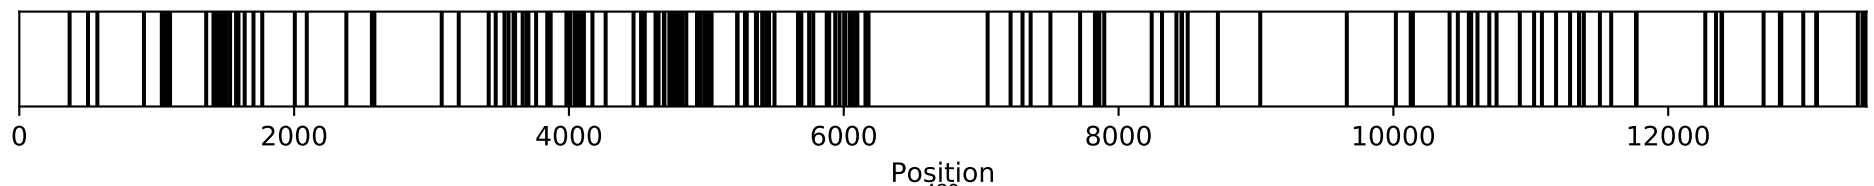

CR1 vs CR2  
Number of differences: 286

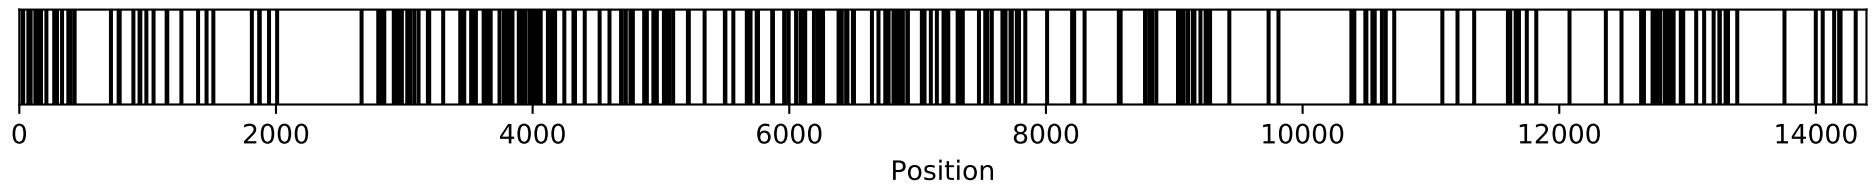

CR1 vs MM1  
Number of differences: 287

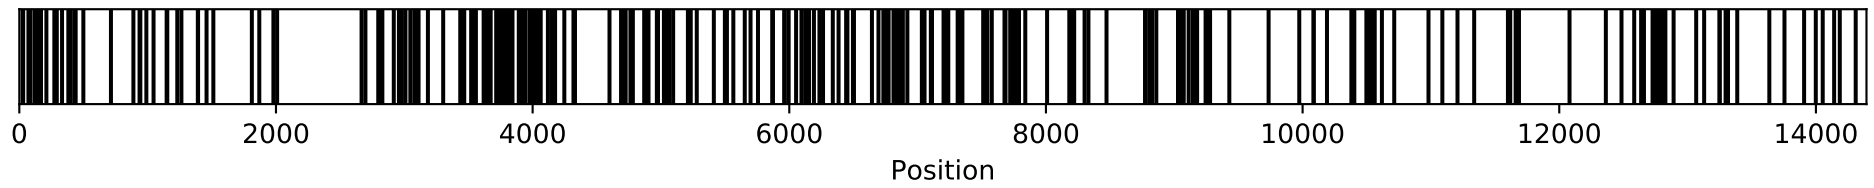

CR1 vs MM2  
Number of differences: 278

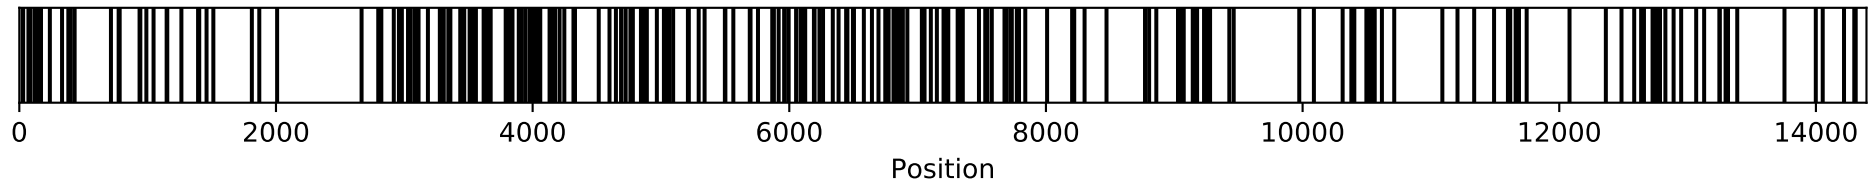

CR2 vs MM1  
Number of differences: 115

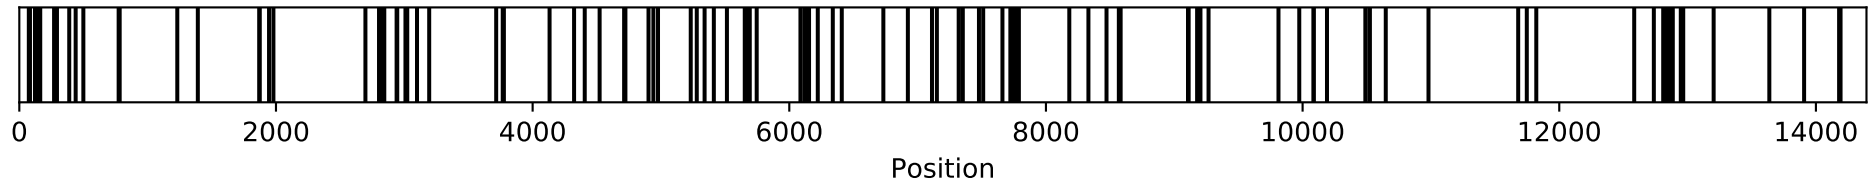

CR2 vs MM2  
Number of differences: 116

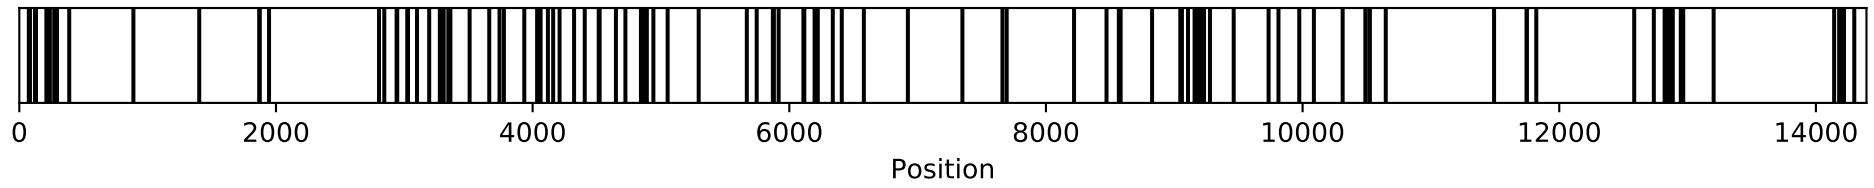

MM1 vs MM2  
Number of differences: 113

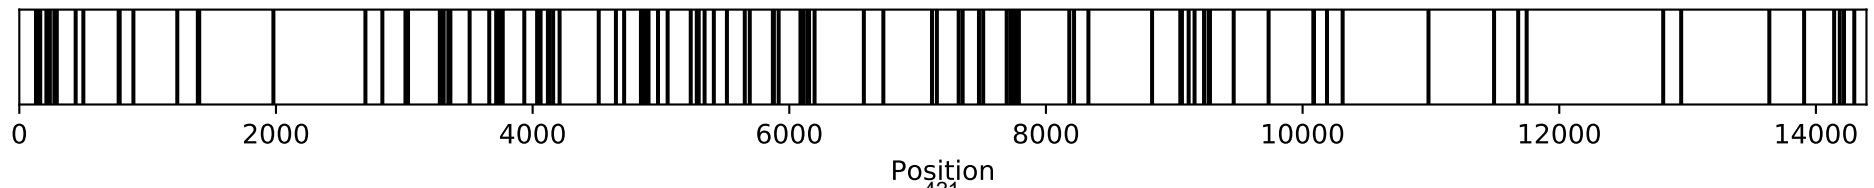

CR1 vs CR2  
Number of differences: 32

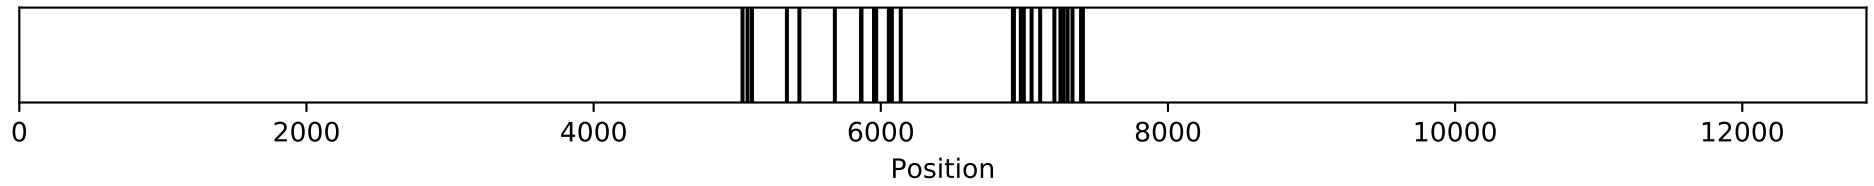

CR1 vs MM1  
Number of differences: 202

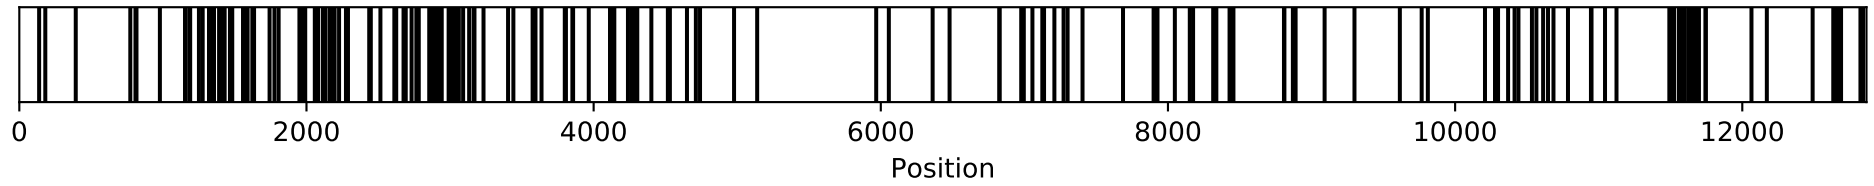

CR1 vs MM2  
Number of differences: 184

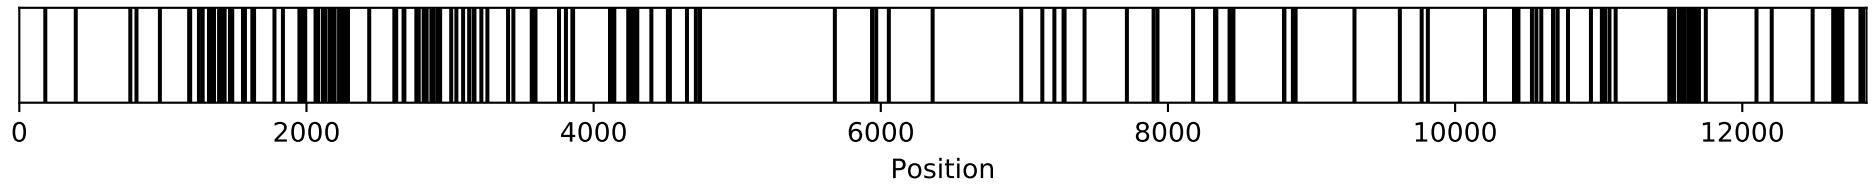

CR2 vs MM1  
Number of differences: 219

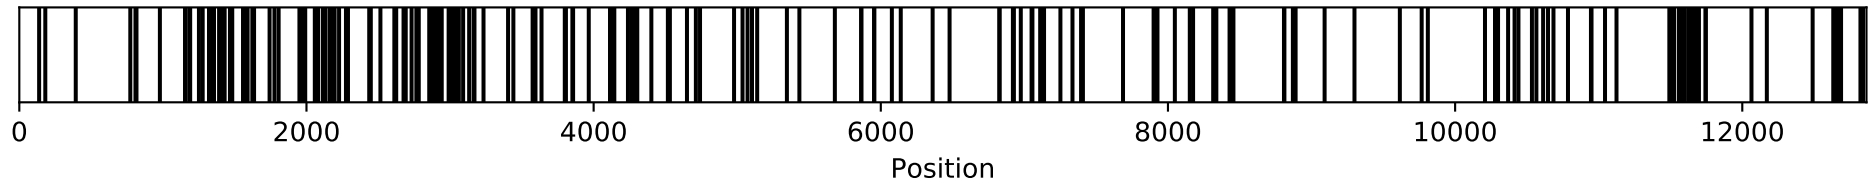

CR2 vs MM2  
Number of differences: 204

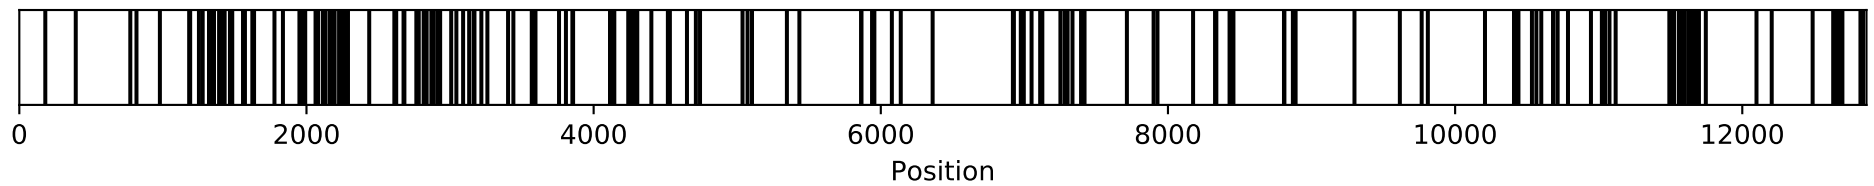

MM1 vs MM2  
Number of differences: 103

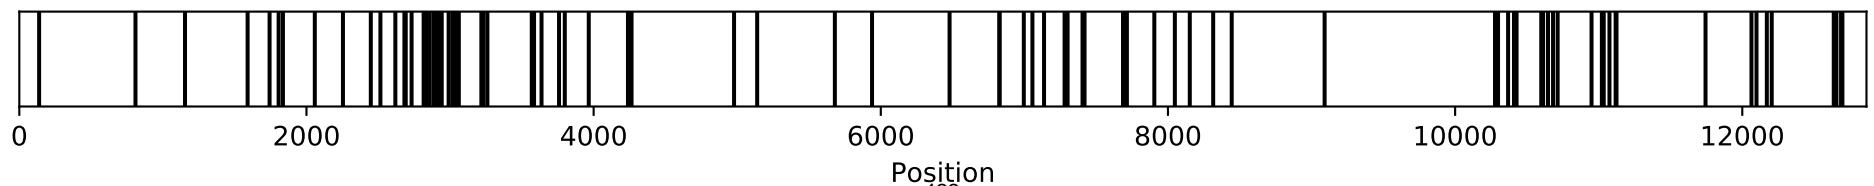

CR1 vs CR2  
Number of differences: 256

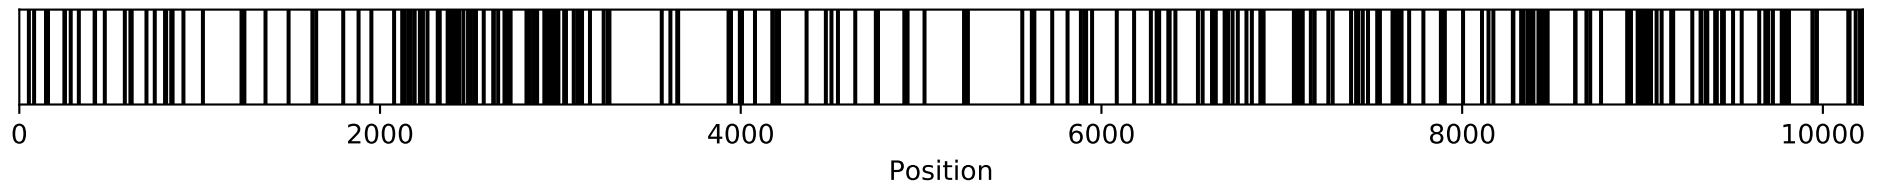

CR1 vs MM1  
Number of differences: 3

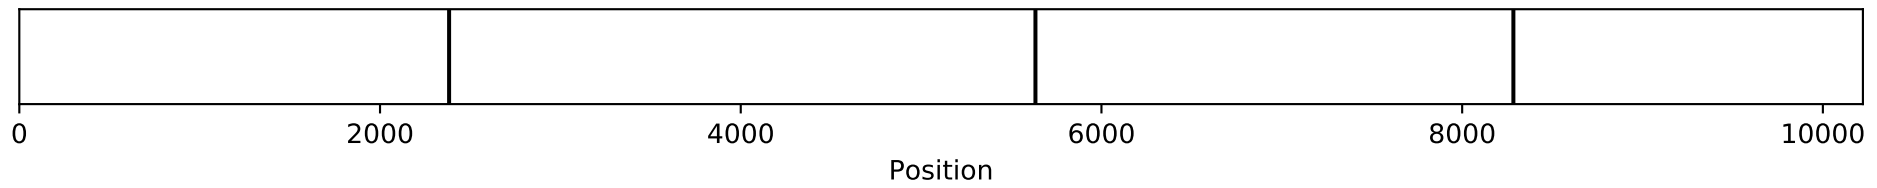

CR1 vs MM2  
Number of differences: 131

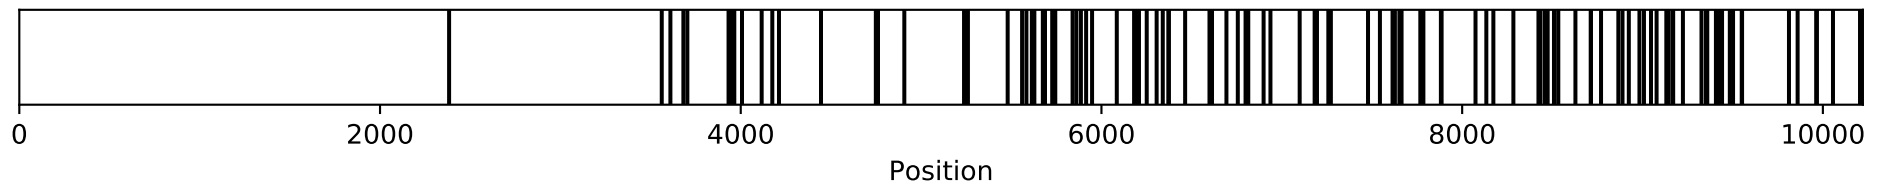

CR2 vs MM1  
Number of differences: 257

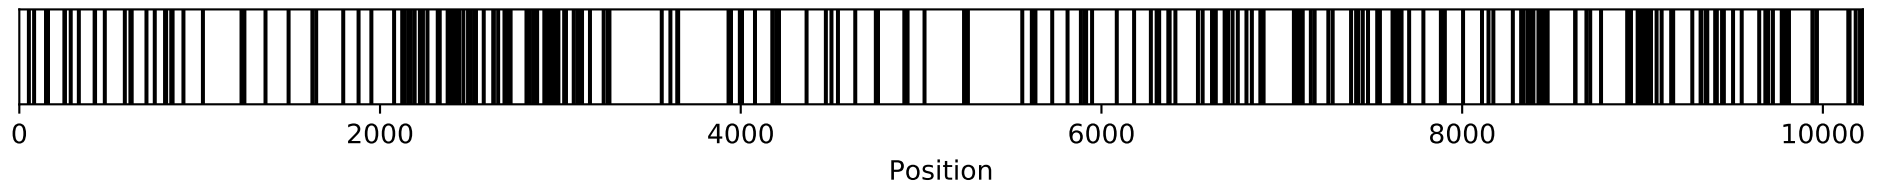

CR2 vs MM2  
Number of differences: 251

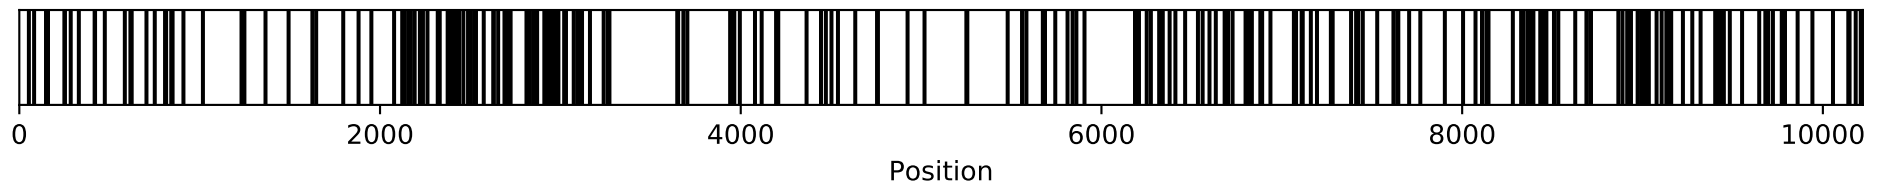

MM1 vs MM2  
Number of differences: 130

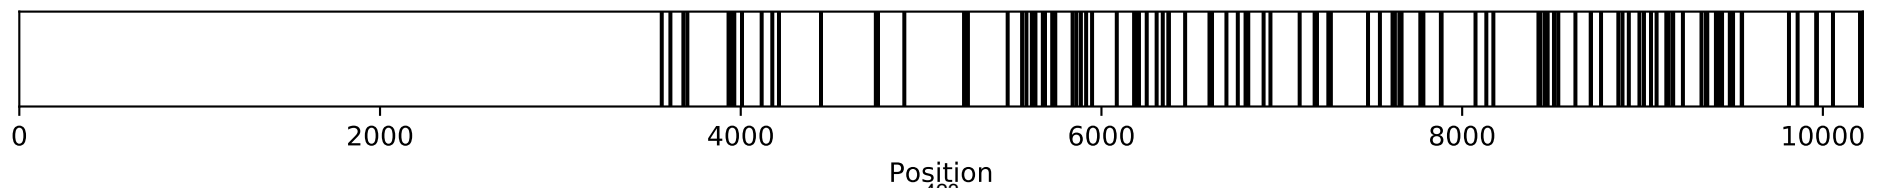



CR1 vs CR2  
Number of differences: 0

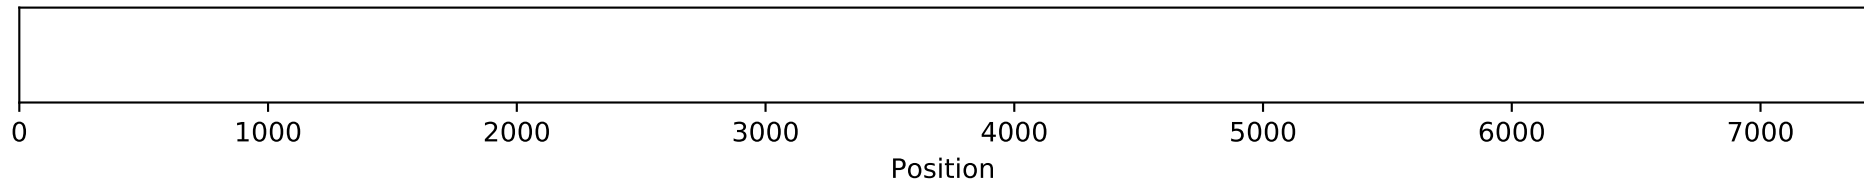

CR1 vs MM1  
Number of differences: 200

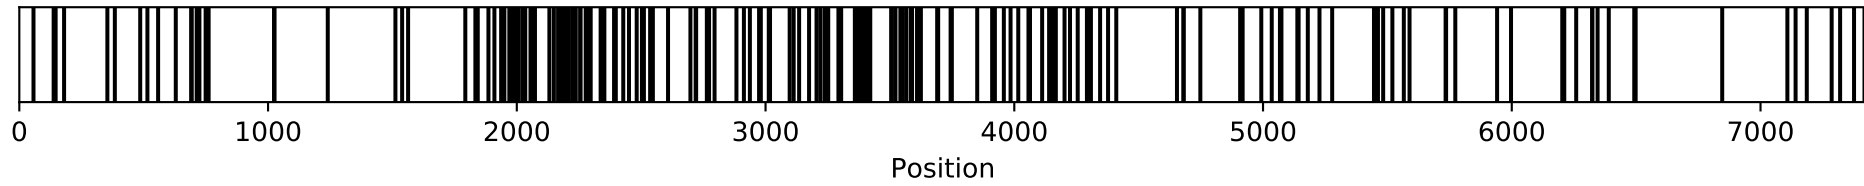

CR1 vs MM2  
Number of differences: 188

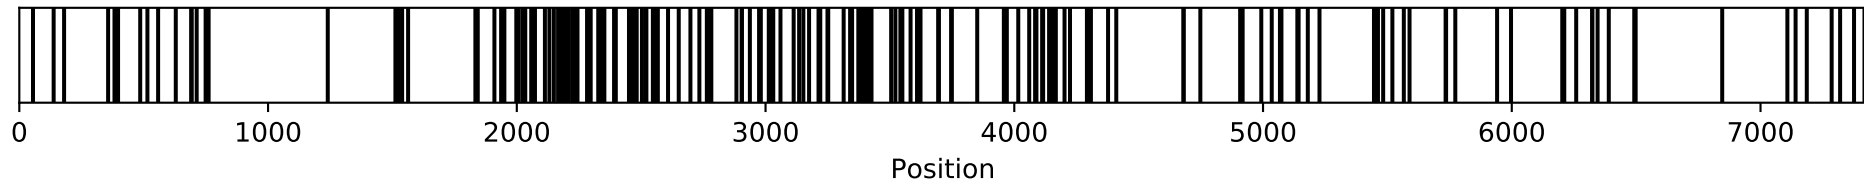

CR2 vs MM1  
Number of differences: 200

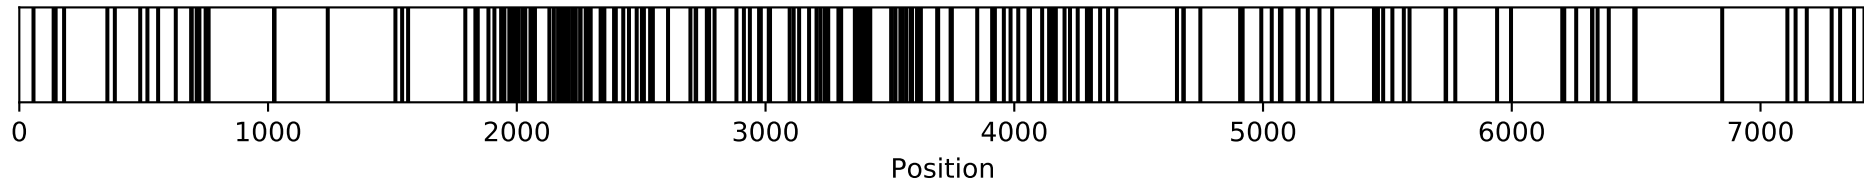

CR2 vs MM2  
Number of differences: 188

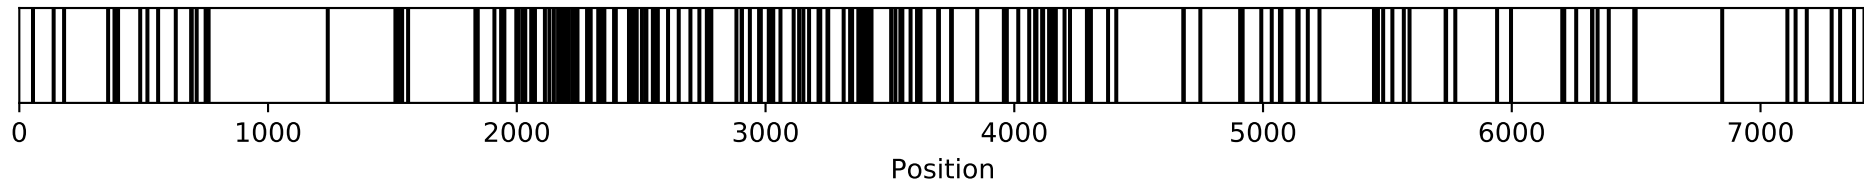

MM1 vs MM2  
Number of differences: 98

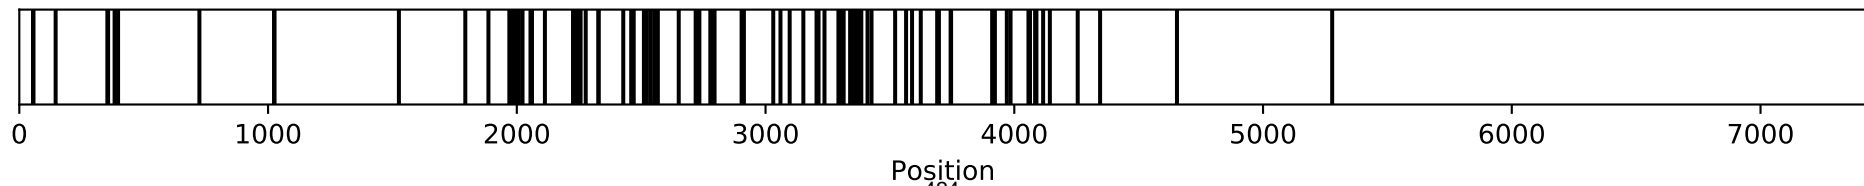

CR1 vs CR2  
Number of differences: 256

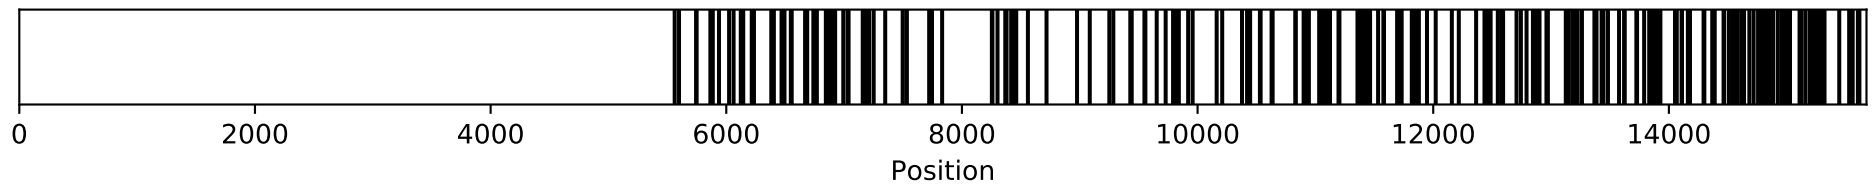

CR1 vs MM1  
Number of differences: 218

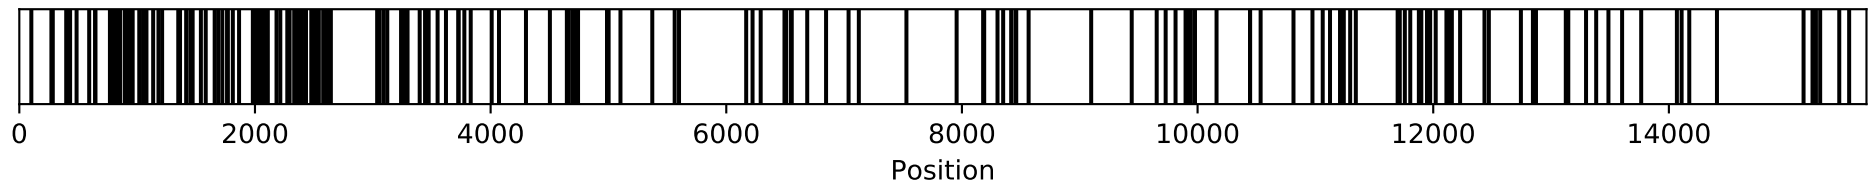

CR1 vs MM2  
Number of differences: 195

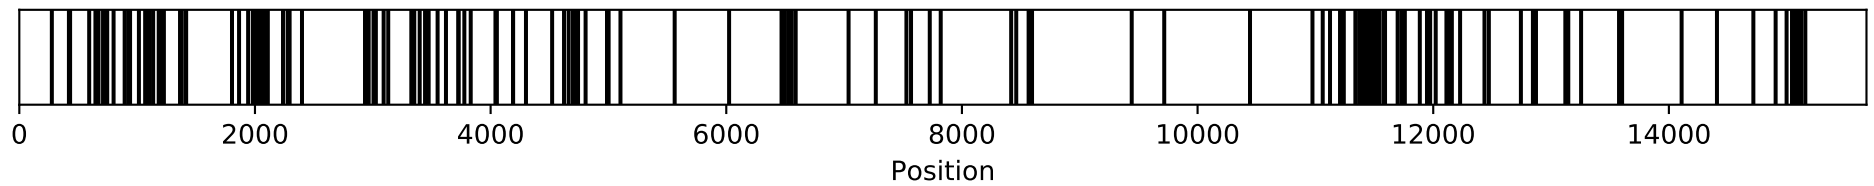

CR2 vs MM1  
Number of differences: 391

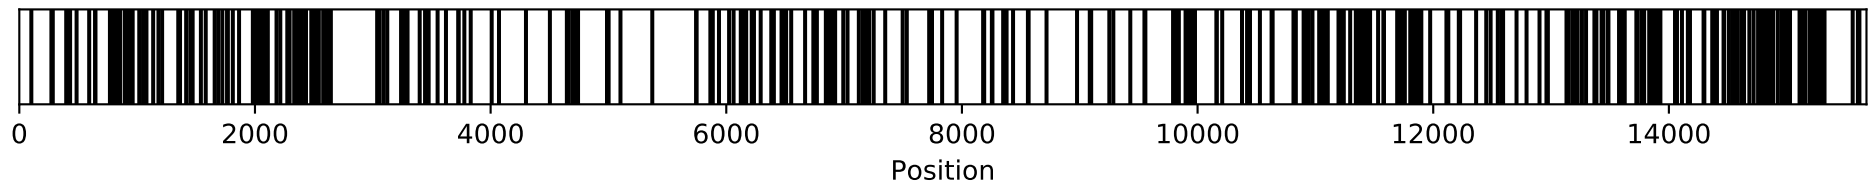

CR2 vs MM2  
Number of differences: 375

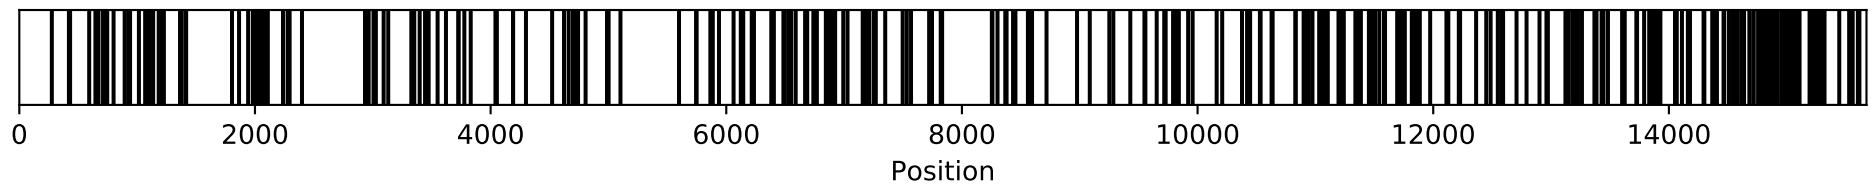

MM1 vs MM2  
Number of differences: 214

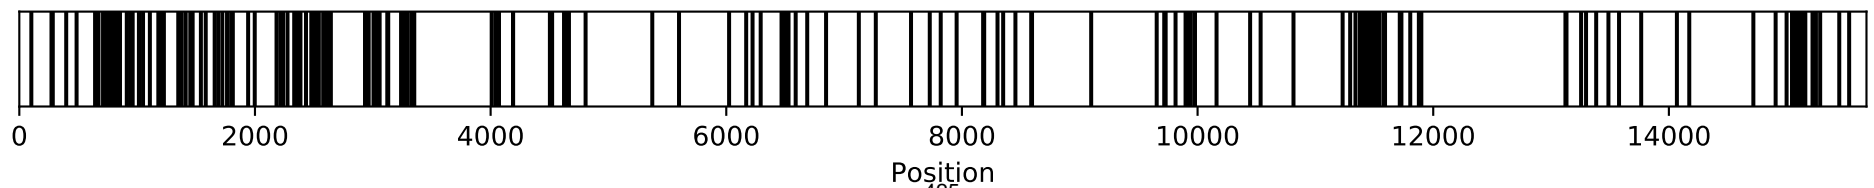

CR1 vs CR2  
Number of differences: 103

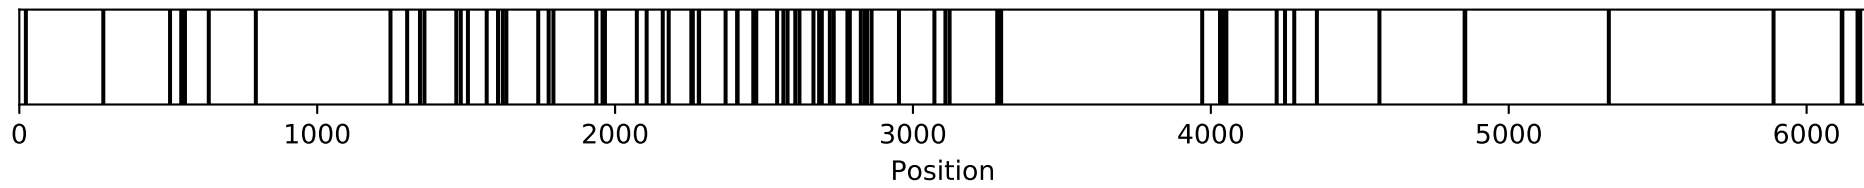

CR1 vs MM1  
Number of differences: 71

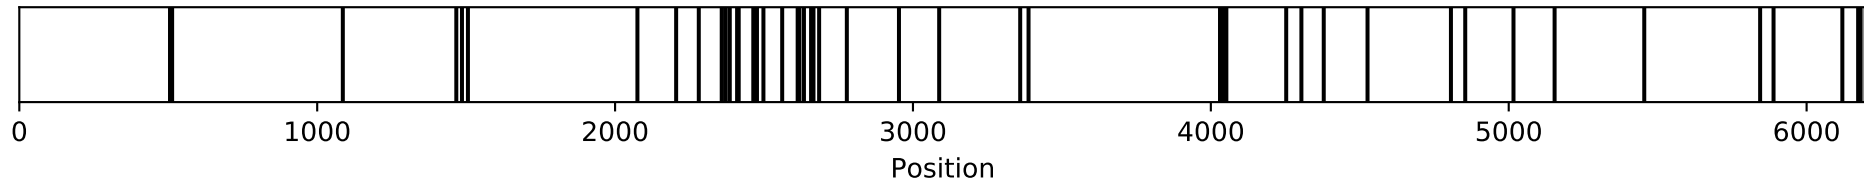

CR1 vs MM2  
Number of differences: 65

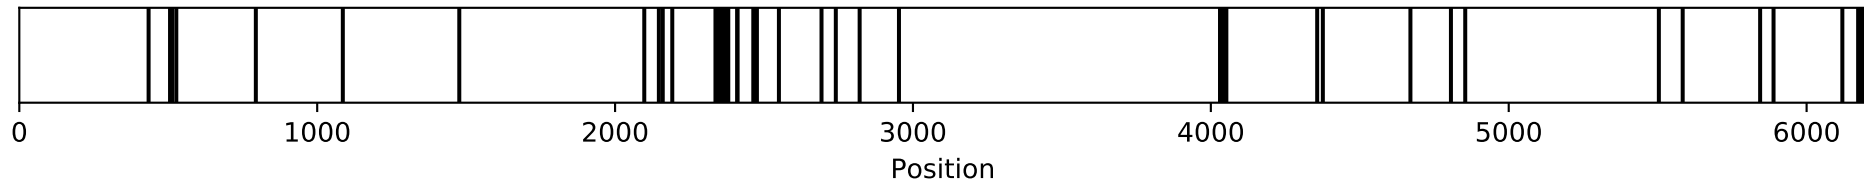

CR2 vs MM1  
Number of differences: 104

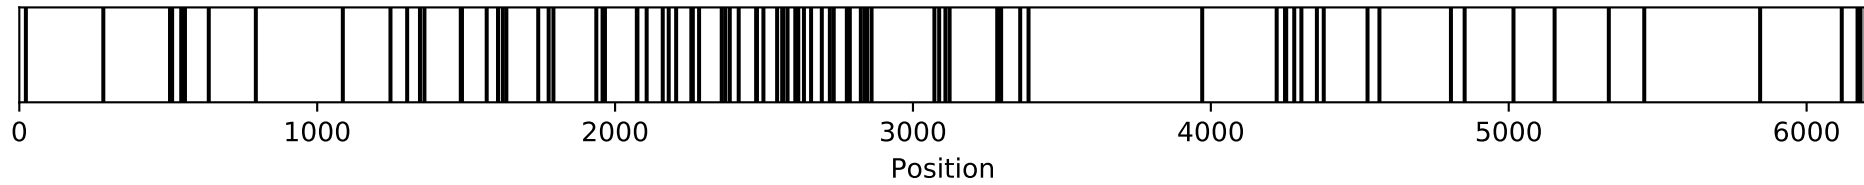

CR2 vs MM2  
Number of differences: 106

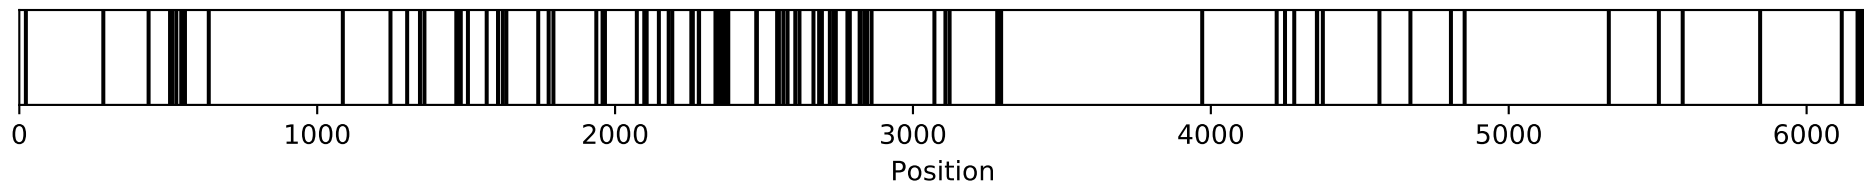

MM1 vs MM2  
Number of differences: 61

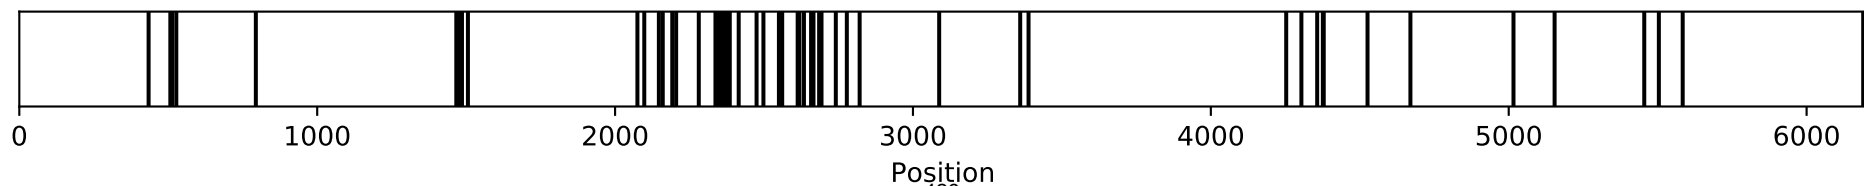

CR1 vs CR2  
Number of differences: 237

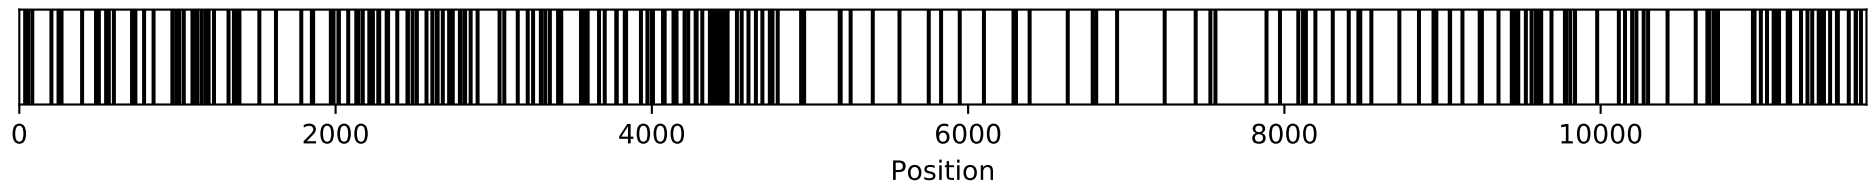

CR1 vs MM1  
Number of differences: 107

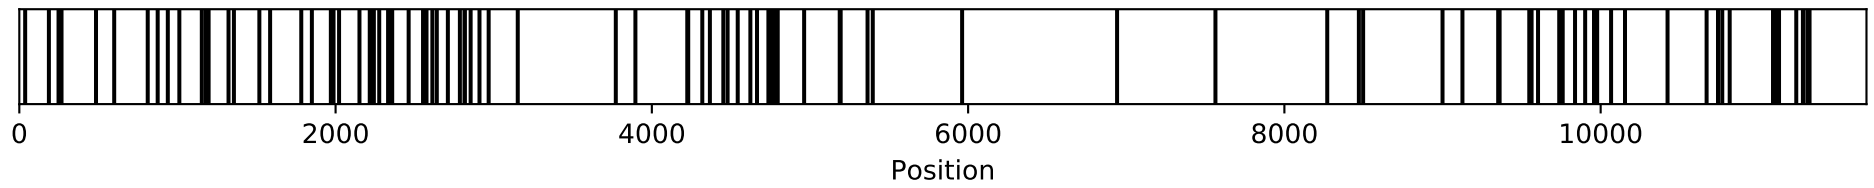

CR1 vs MM2  
Number of differences: 107

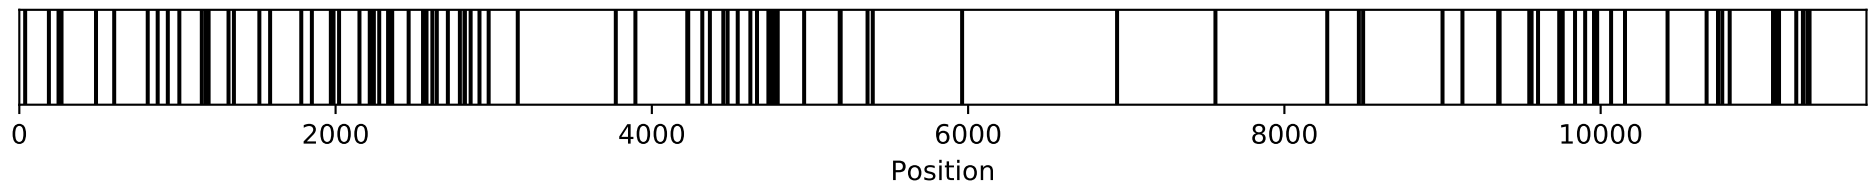

CR2 vs MM1  
Number of differences: 236

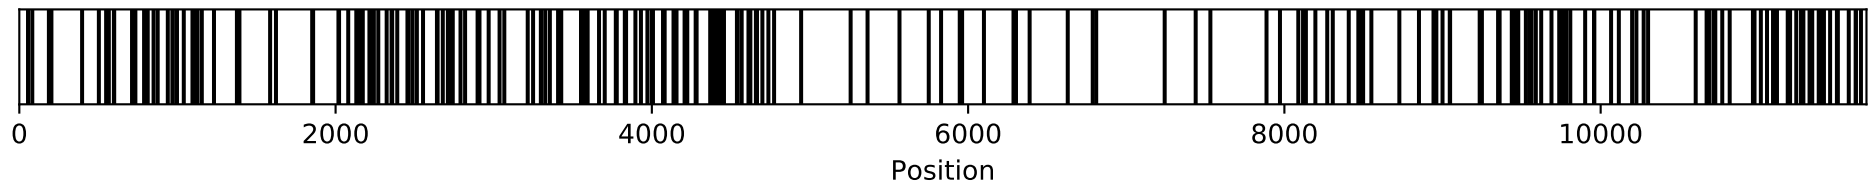

CR2 vs MM2  
Number of differences: 236

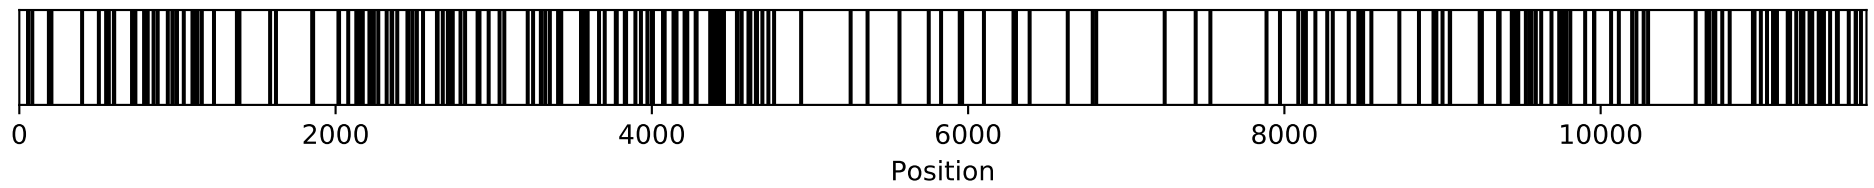

MM1 vs MM2  
Number of differences: 0

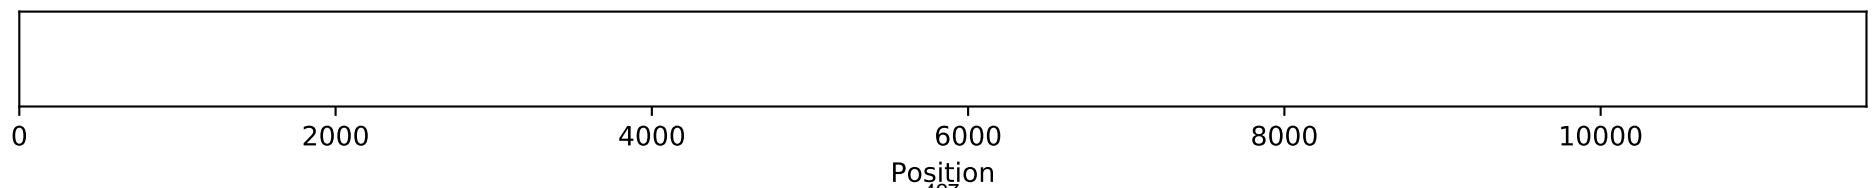

CR1 vs CR2  
Number of differences: 3

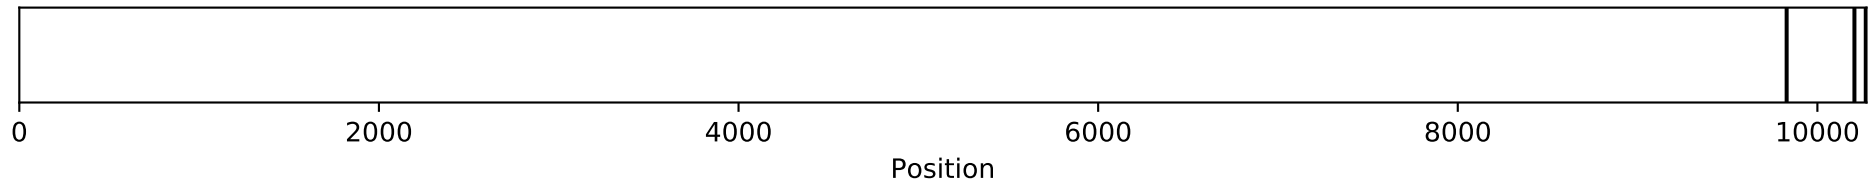

CR1 vs MM1  
Number of differences: 179

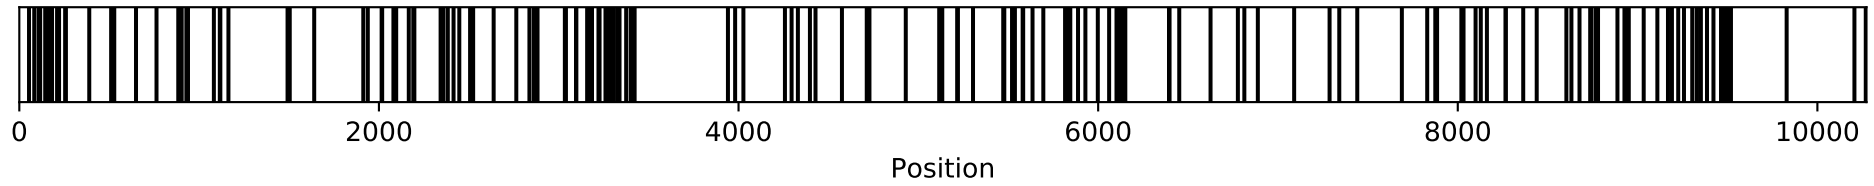

CR1 vs MM2  
Number of differences: 197

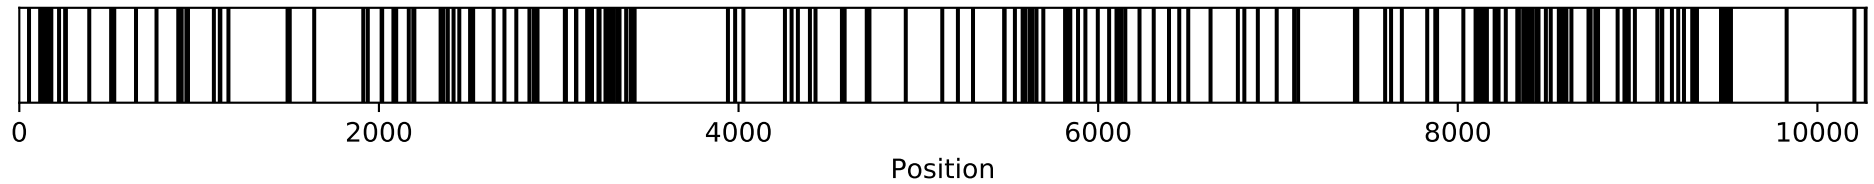

CR2 vs MM1  
Number of differences: 176

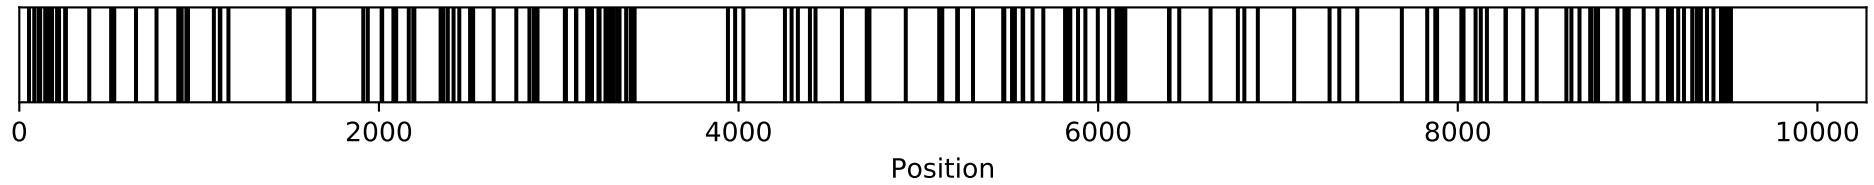

CR2 vs MM2  
Number of differences: 194

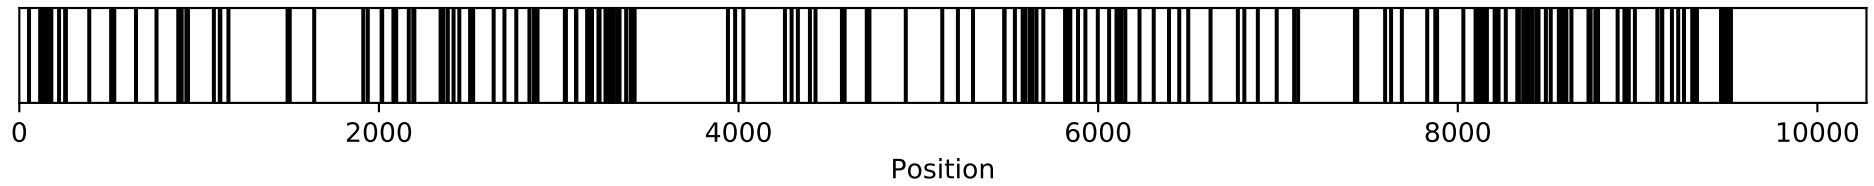

MM1 vs MM2  
Number of differences: 76

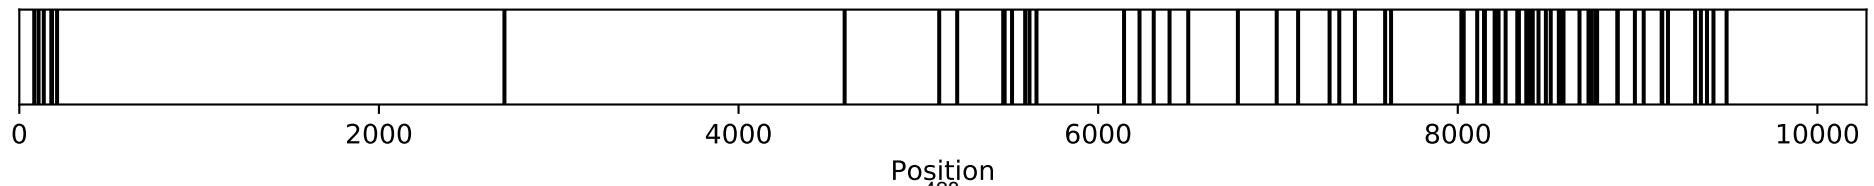

CR1 vs CR2  
Number of differences: 190

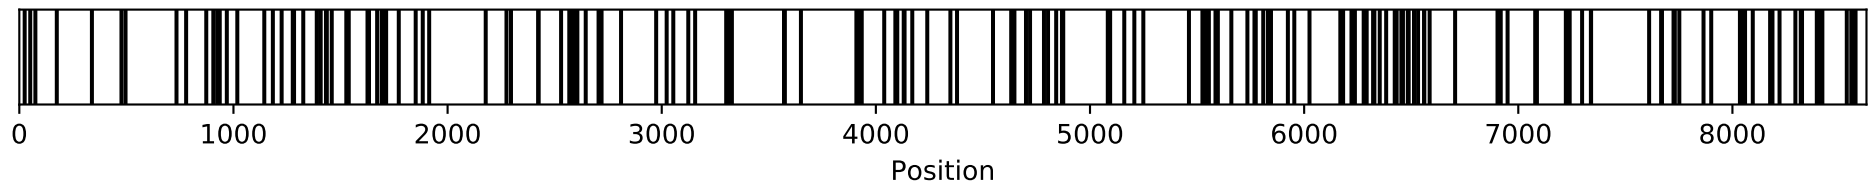

CR1 vs MM1  
Number of differences: 101

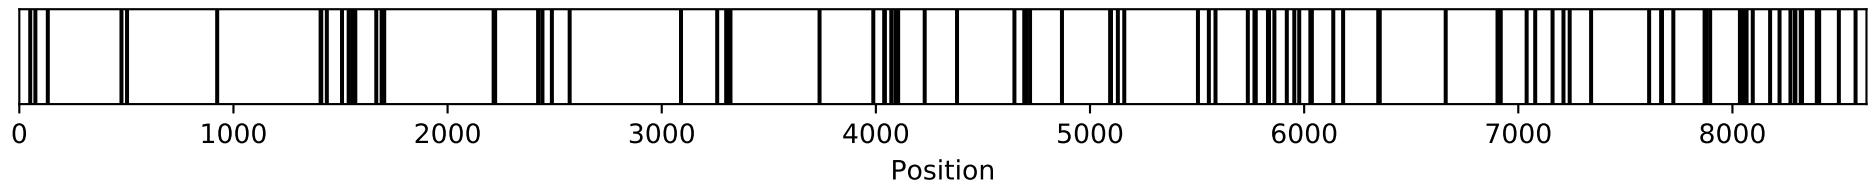

CR1 vs MM2  
Number of differences: 96

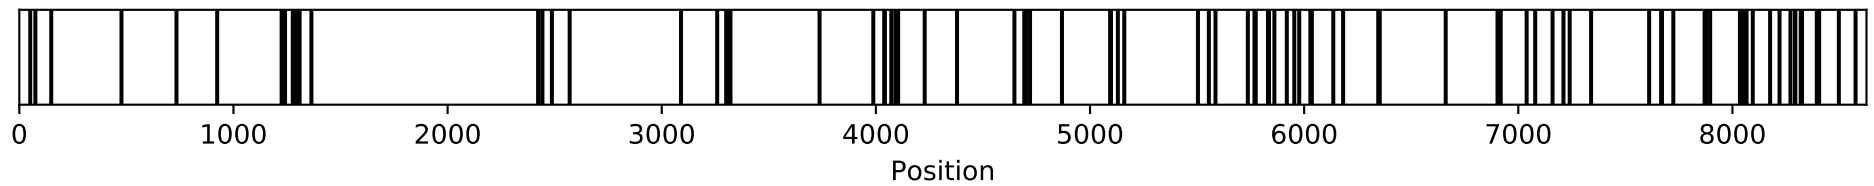

CR2 vs MM1  
Number of differences: 183

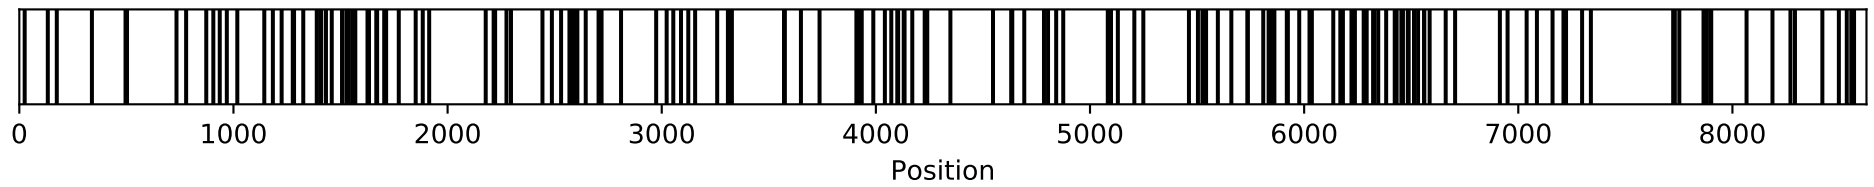

CR2 vs MM2  
Number of differences: 181

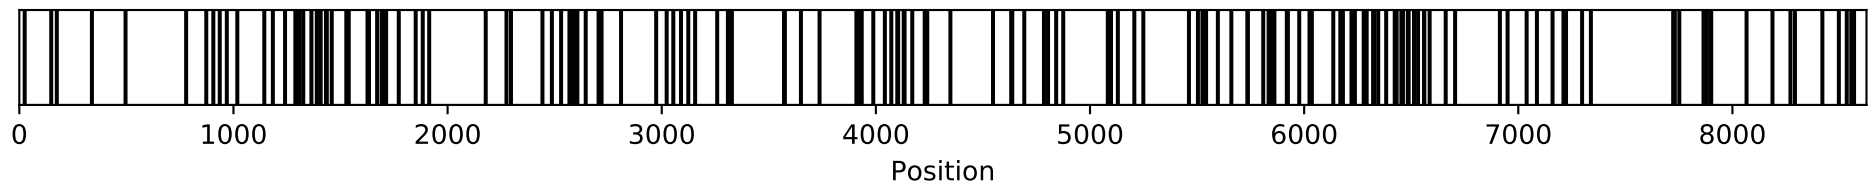

MM1 vs MM2  
Number of differences: 25

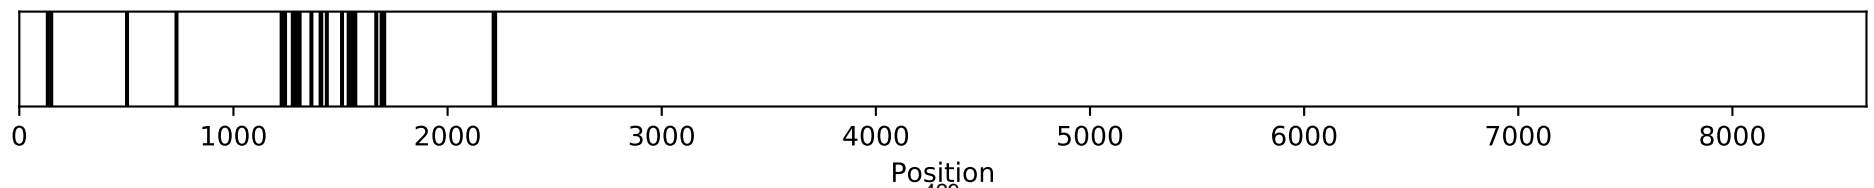

CR1 vs CR2  
Number of differences: 170

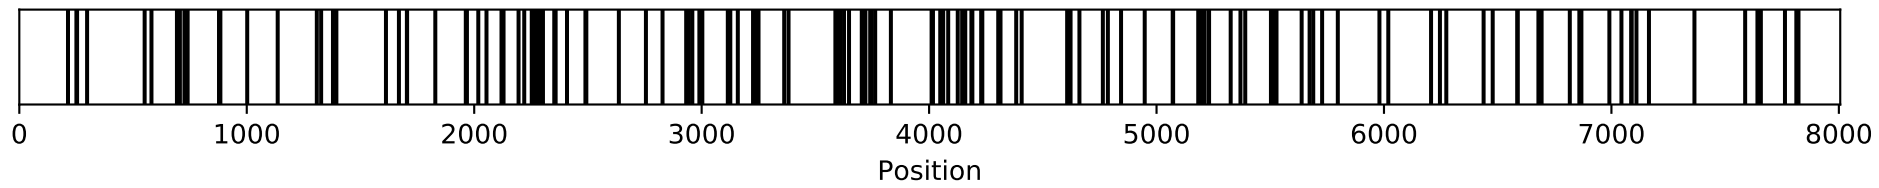

CR1 vs MM1  
Number of differences: 66

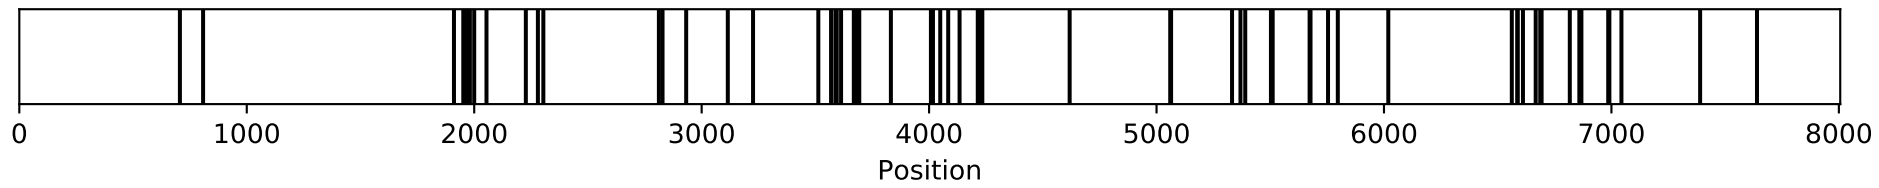

CR1 vs MM2  
Number of differences: 79

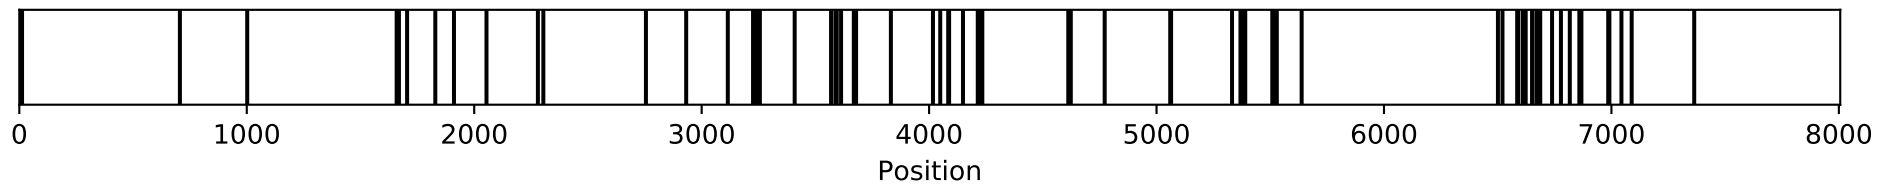

CR2 vs MM1  
Number of differences: 179

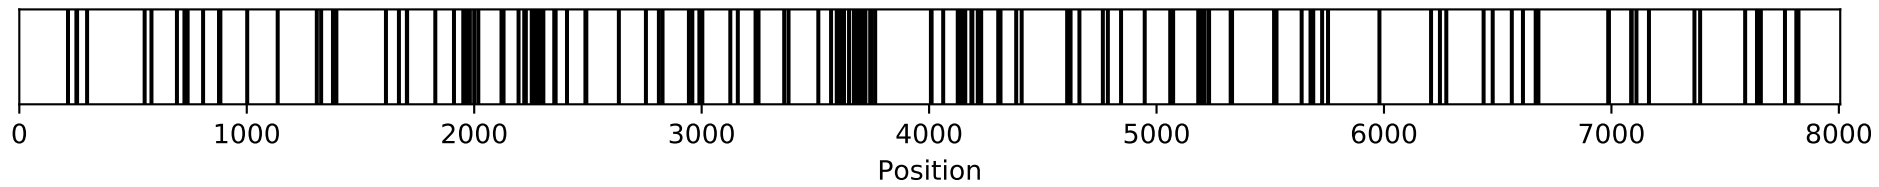

CR2 vs MM2  
Number of differences: 177

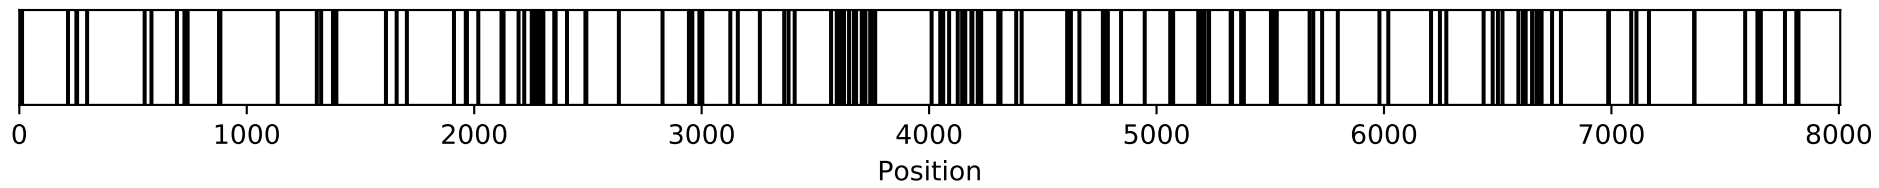

MM1 vs MM2  
Number of differences: 64

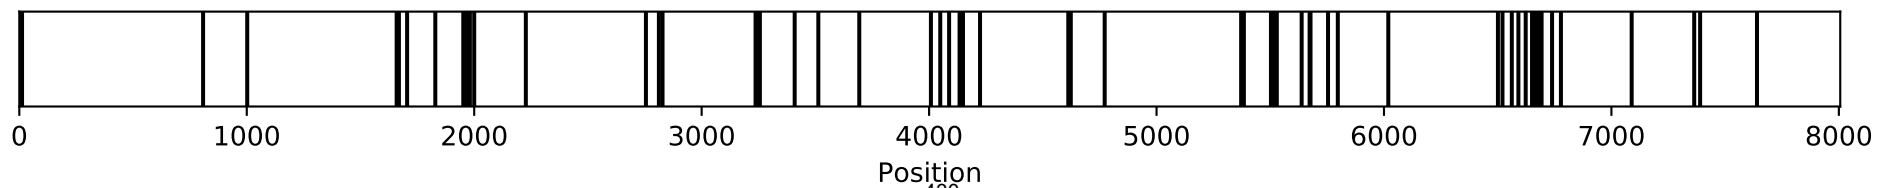

CR1 vs CR2  
Number of differences: 382

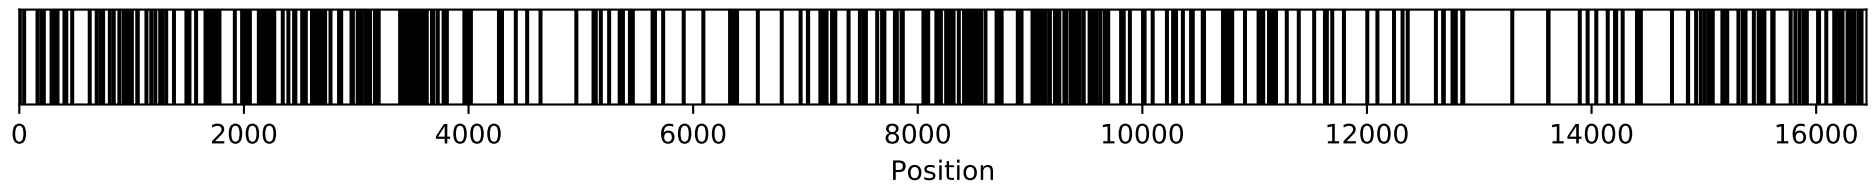

CR1 vs MM1  
Number of differences: 164

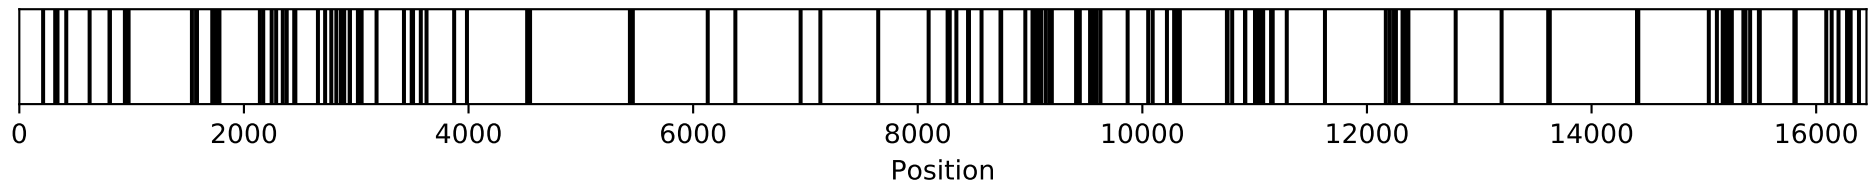

CR1 vs MM2  
Number of differences: 147

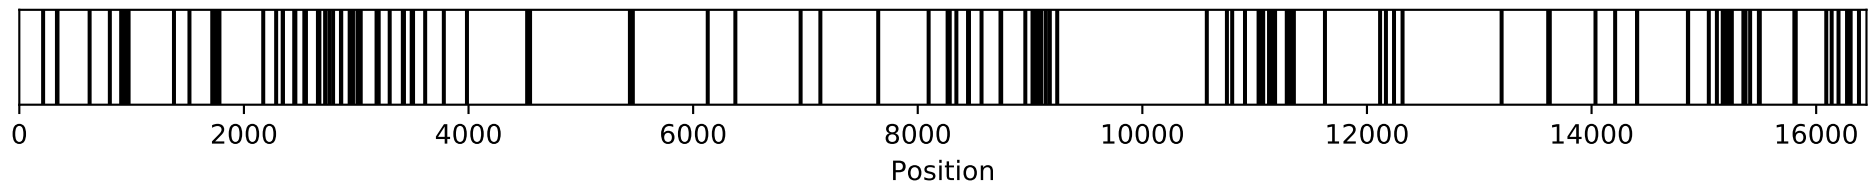

CR2 vs MM1  
Number of differences: 369

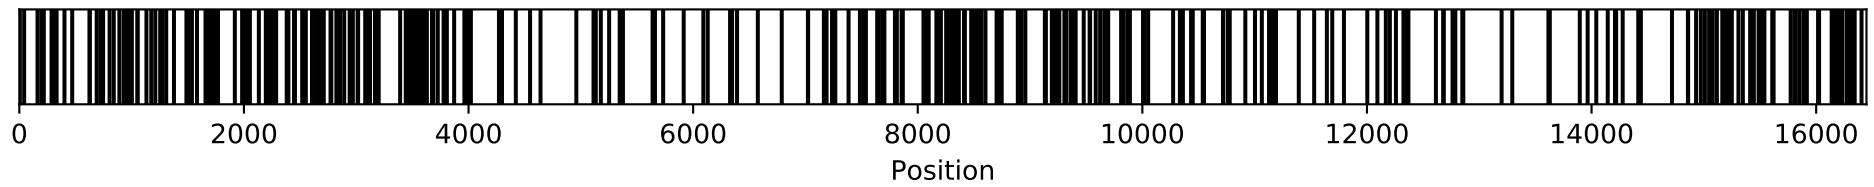

CR2 vs MM2  
Number of differences: 364

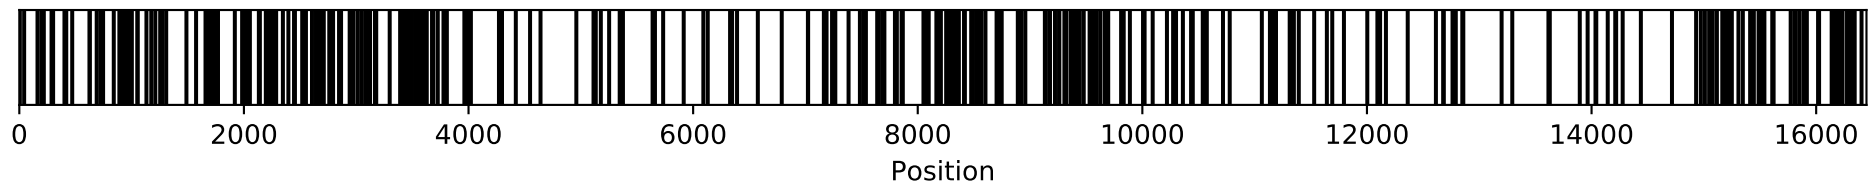

MM1 vs MM2  
Number of differences: 86

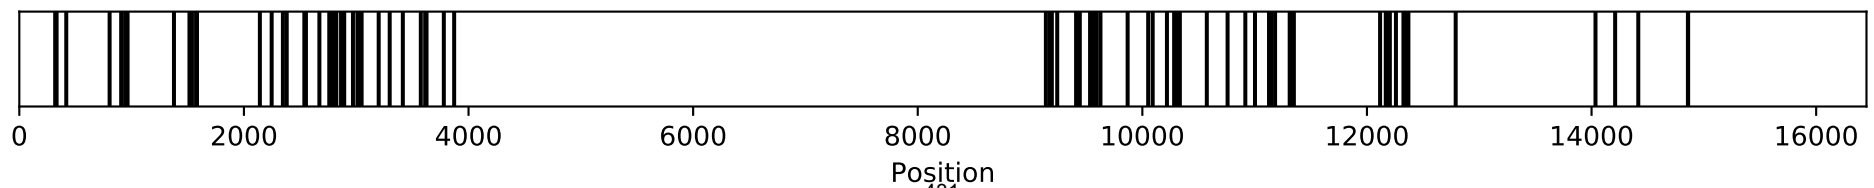



CR1 vs CR2  
Number of differences: 231

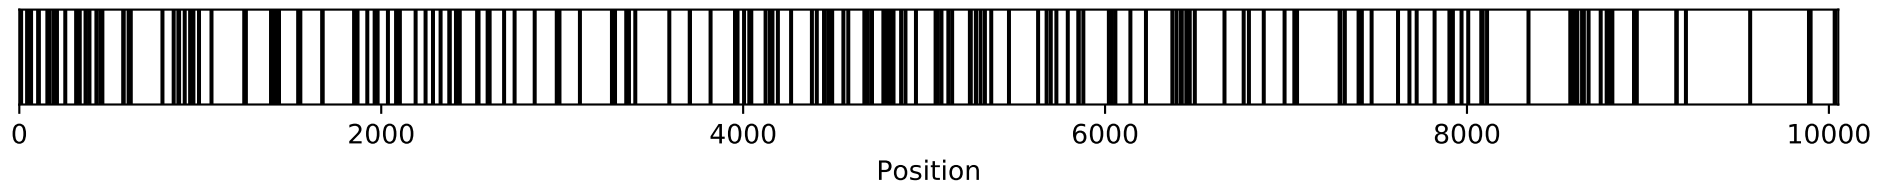

CR1 vs MM1  
Number of differences: 212

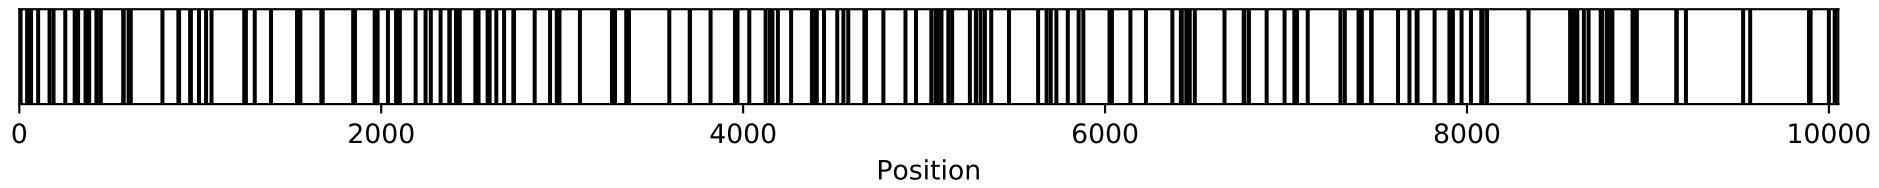

CR1 vs MM2  
Number of differences: 203

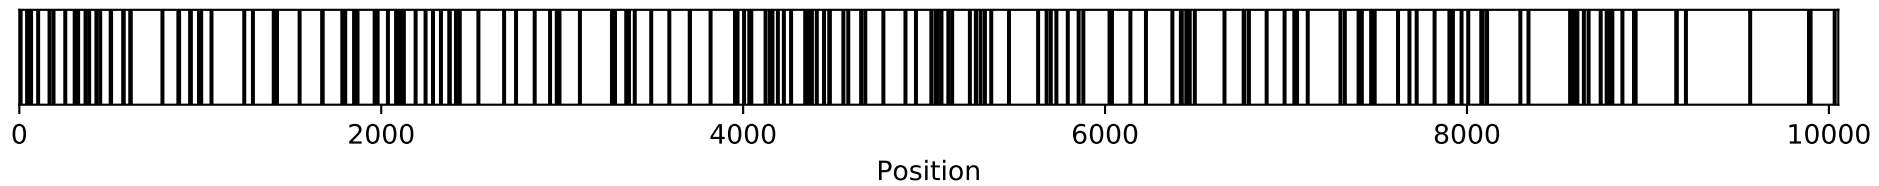

CR2 vs MM1  
Number of differences: 104

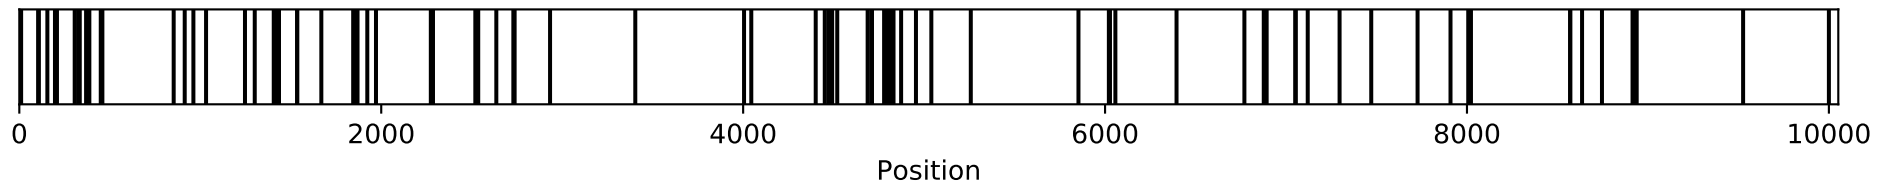

CR2 vs MM2  
Number of differences: 100

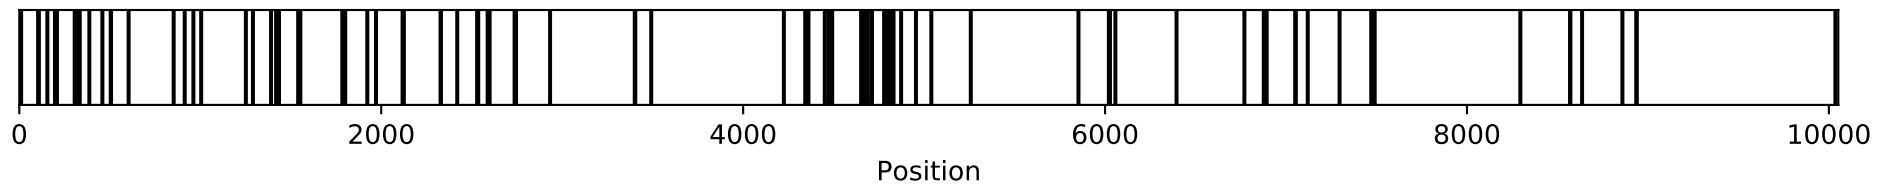

MM1 vs MM2  
Number of differences: 77

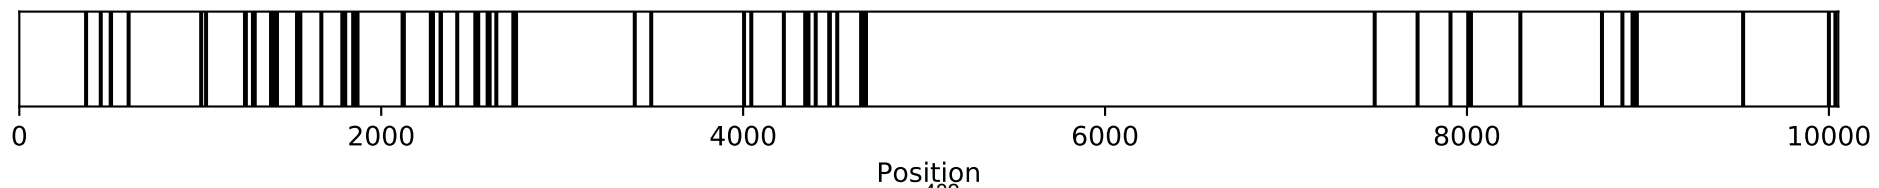

CR1 vs CR2  
Number of differences: 257

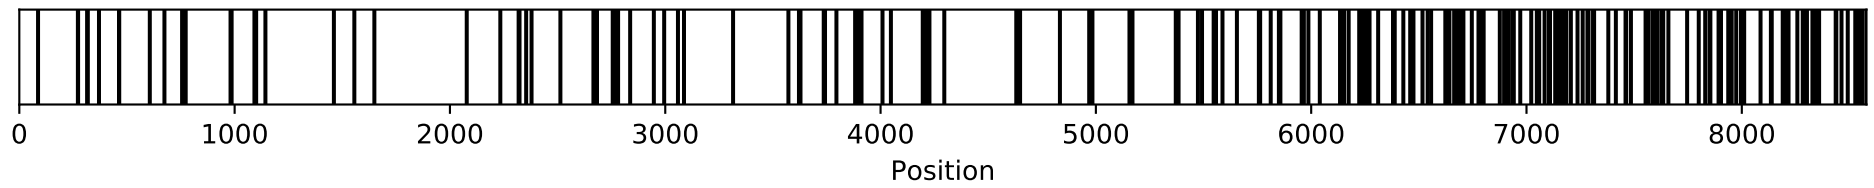

CR1 vs MM1  
Number of differences: 257

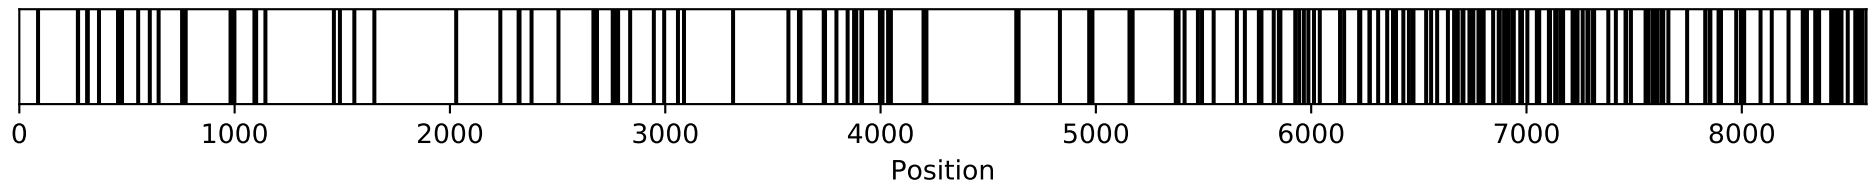

CR1 vs MM2  
Number of differences: 241

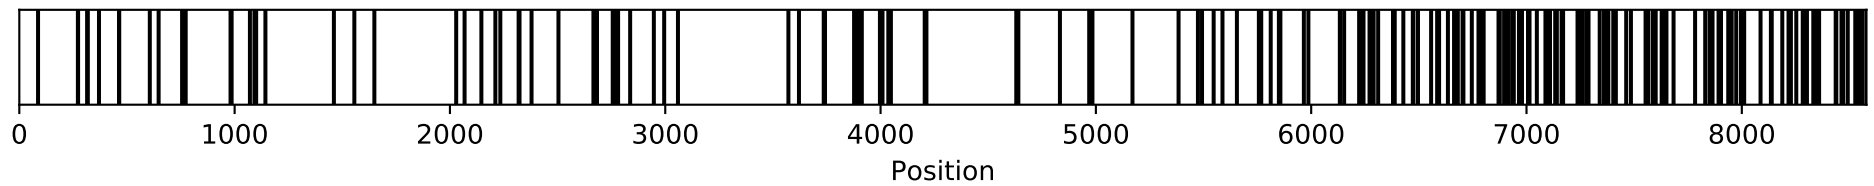

CR2 vs MM1  
Number of differences: 111

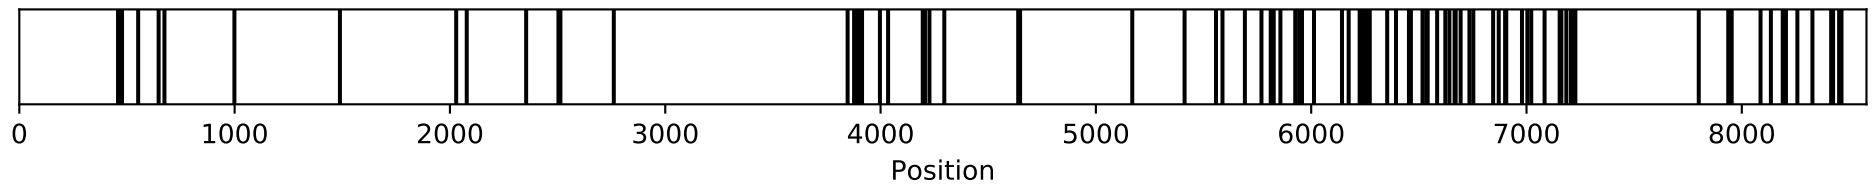

CR2 vs MM2  
Number of differences: 113

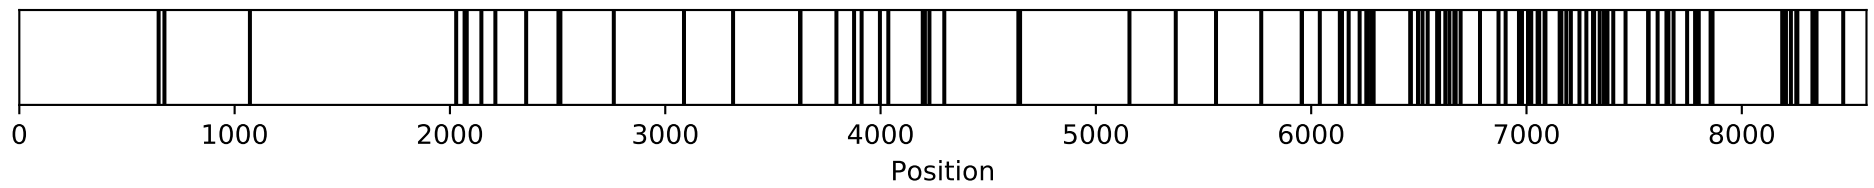

MM1 vs MM2  
Number of differences: 124

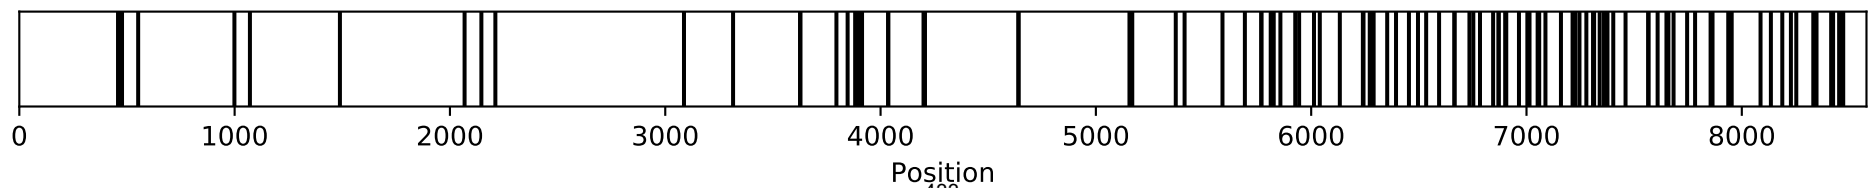

CR1 vs CR2  
Number of differences: 247

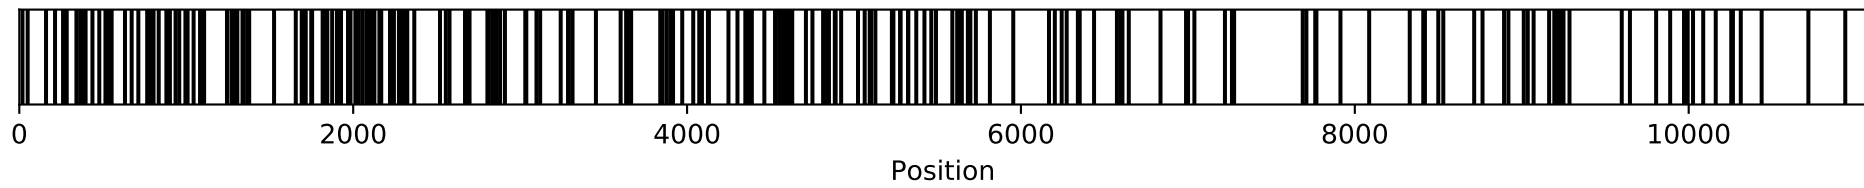

CR1 vs MM1  
Number of differences: 111

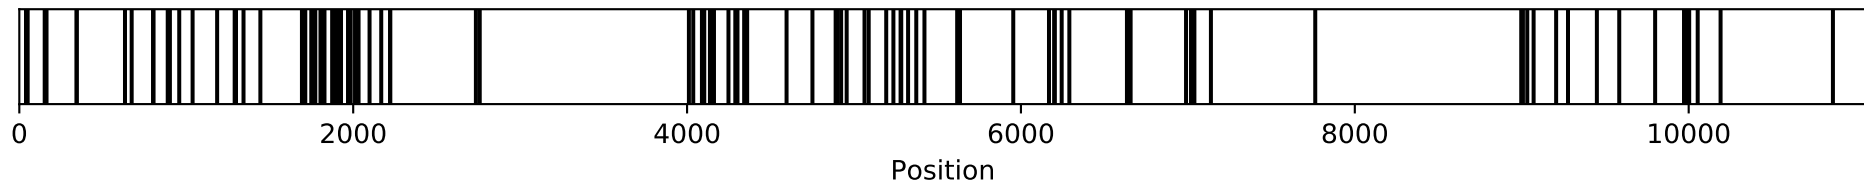

CR1 vs MM2  
Number of differences: 131

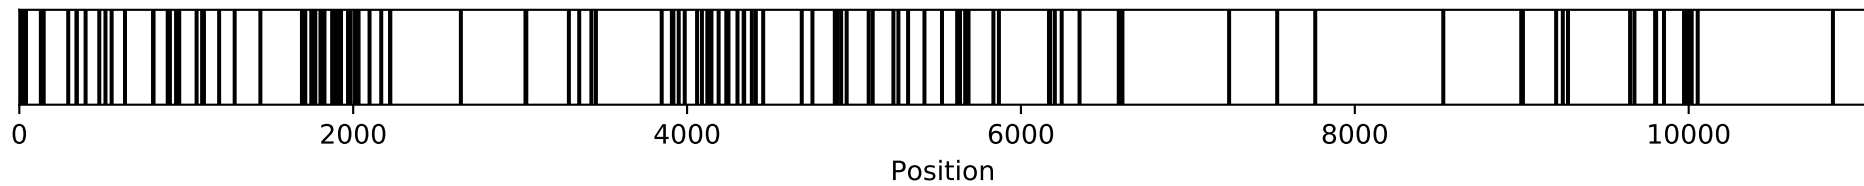

CR2 vs MM1  
Number of differences: 244

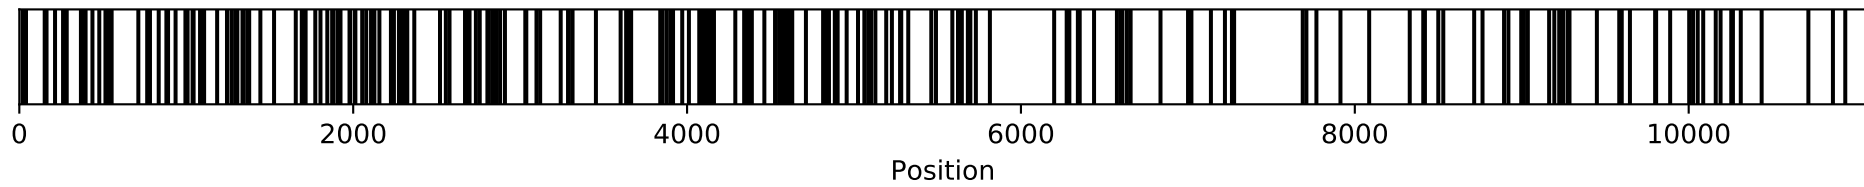

CR2 vs MM2  
Number of differences: 253

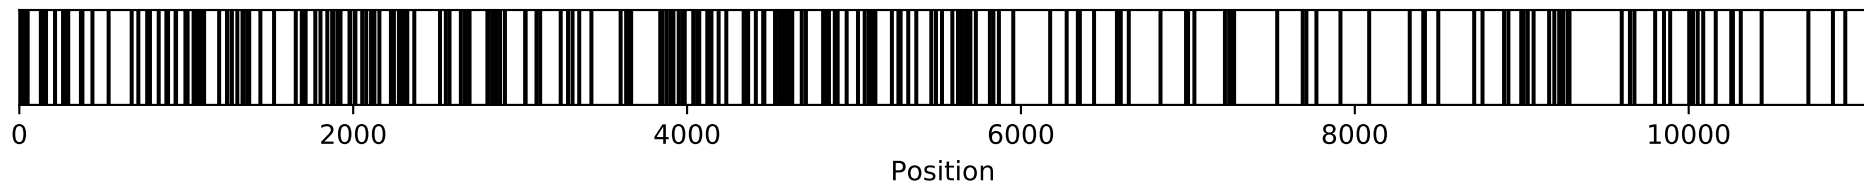

MM1 vs MM2  
Number of differences: 103

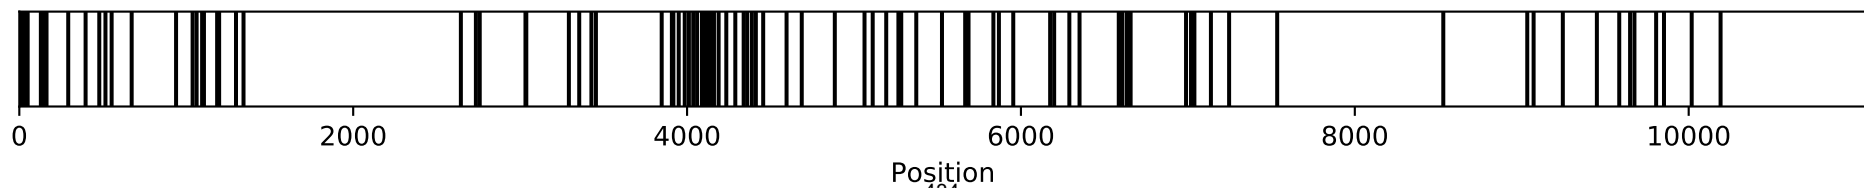

CR1 vs CR2  
Number of differences: 251

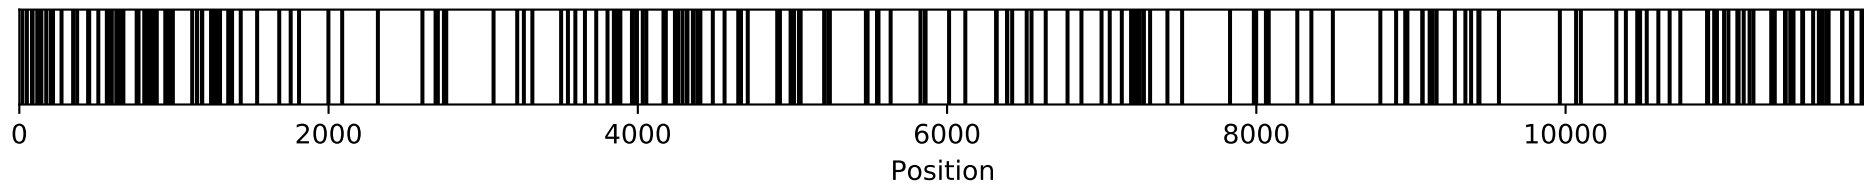

CR1 vs MM1  
Number of differences: 120

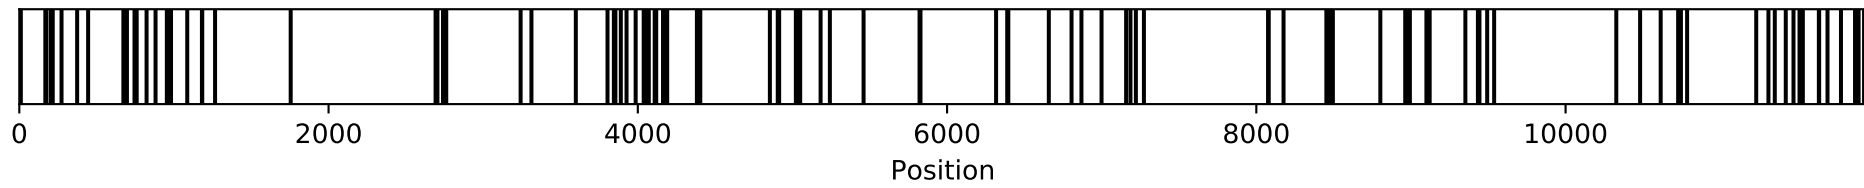

CR1 vs MM2  
Number of differences: 121

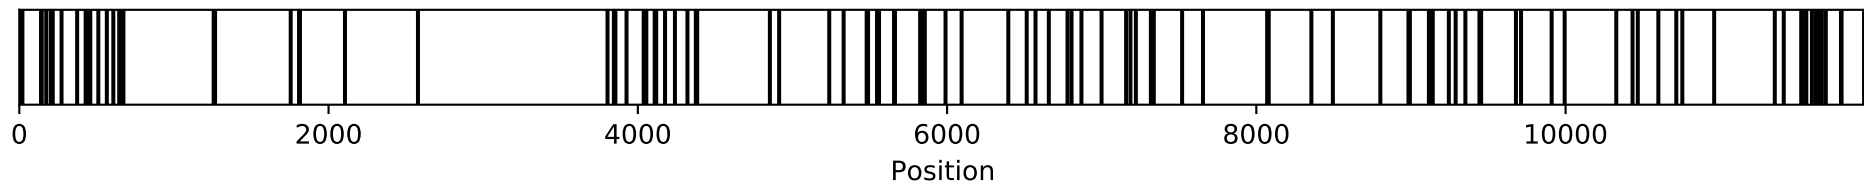

CR2 vs MM1  
Number of differences: 263

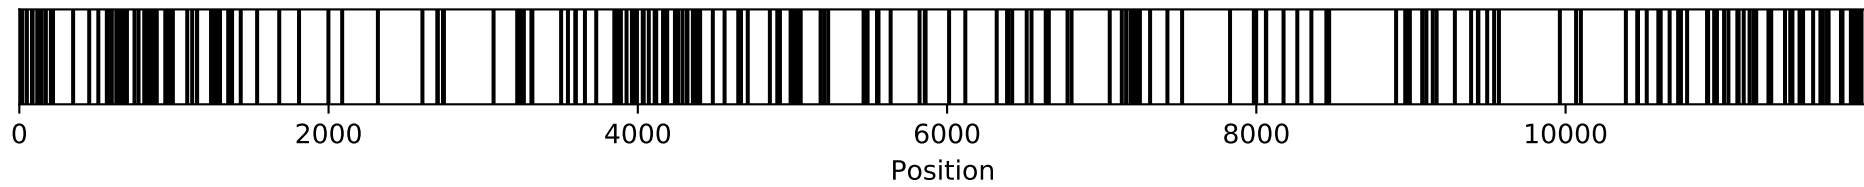

CR2 vs MM2  
Number of differences: 264

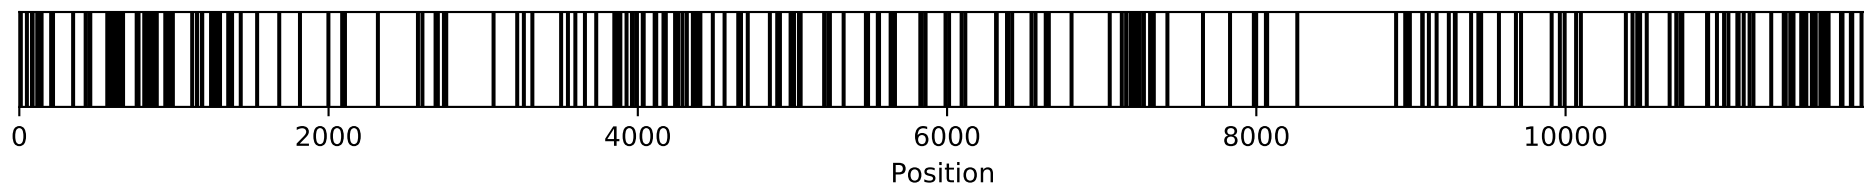

MM1 vs MM2  
Number of differences: 139

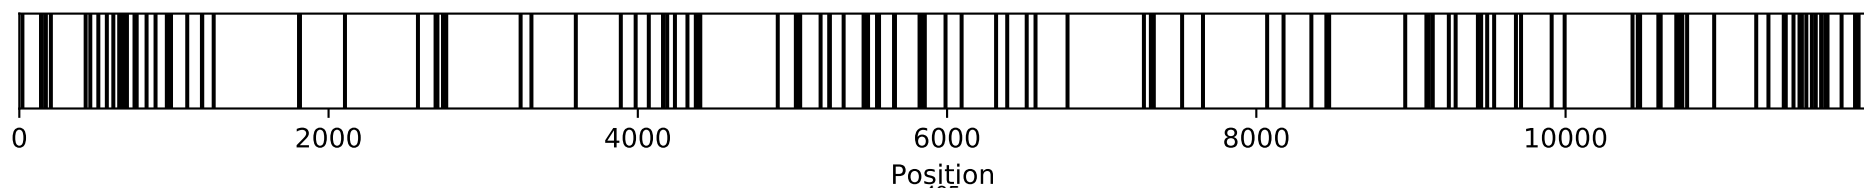

CR1 vs CR2  
Number of differences: 0

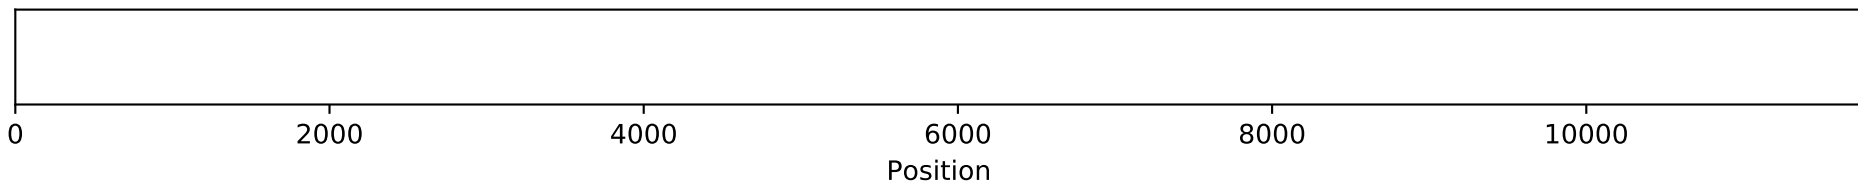

CR1 vs MM1  
Number of differences: 212

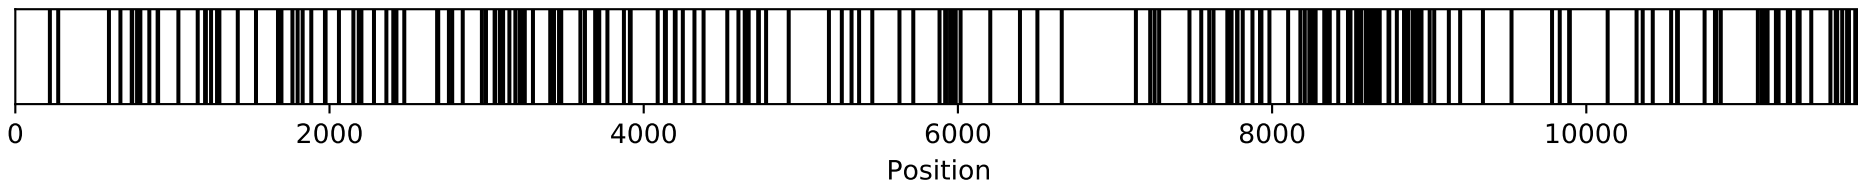

CR1 vs MM2  
Number of differences: 197

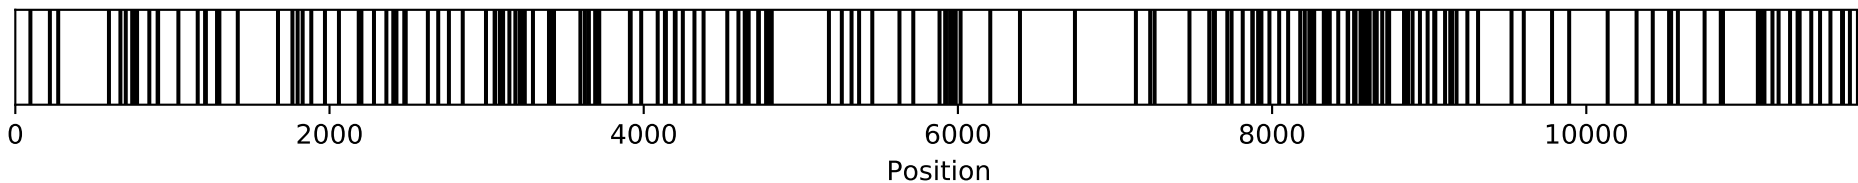

CR2 vs MM1  
Number of differences: 212

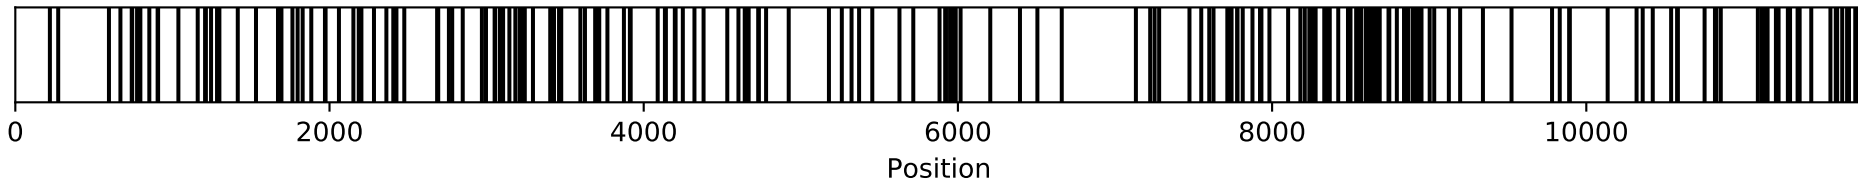

CR2 vs MM2  
Number of differences: 197

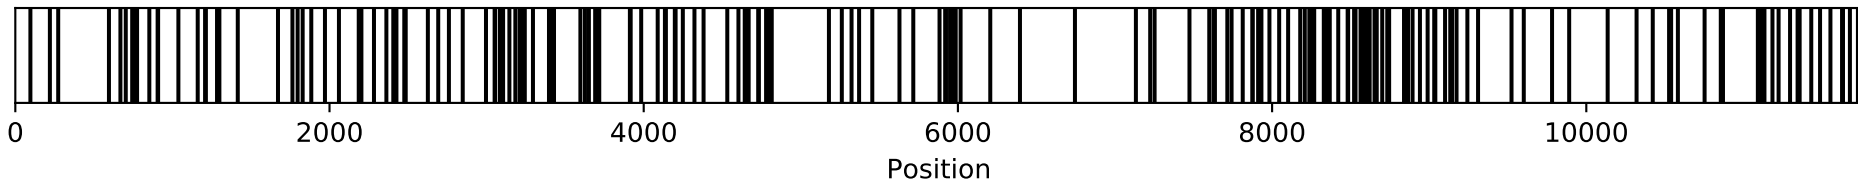

MM1 vs MM2  
Number of differences: 114

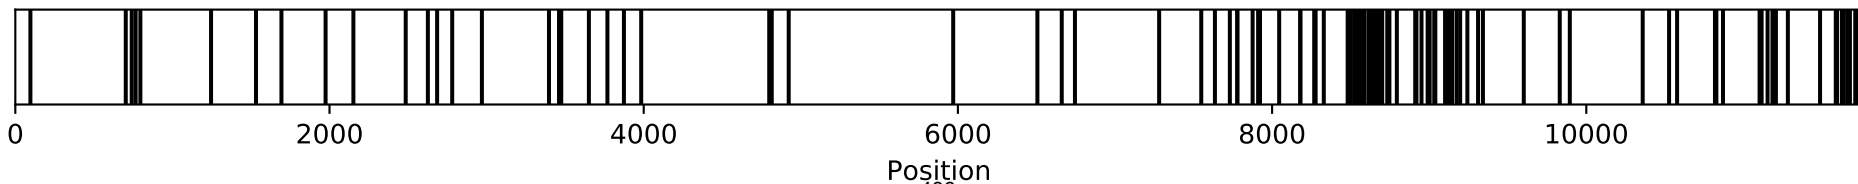

CR1 vs CR2  
Number of differences: 296

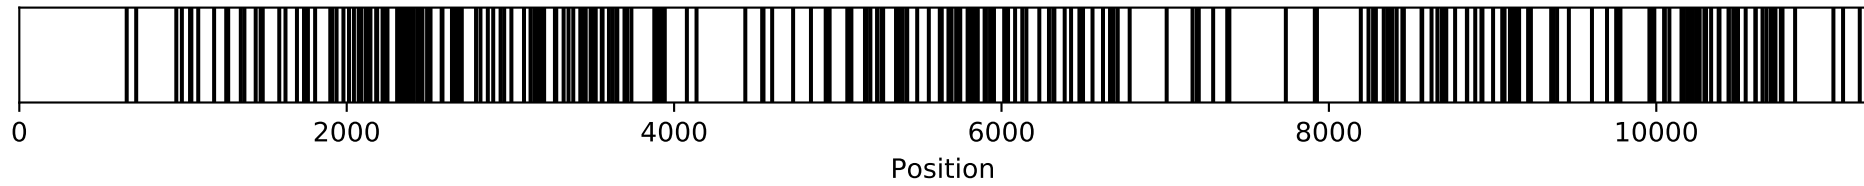

CR1 vs MM1  
Number of differences: 257

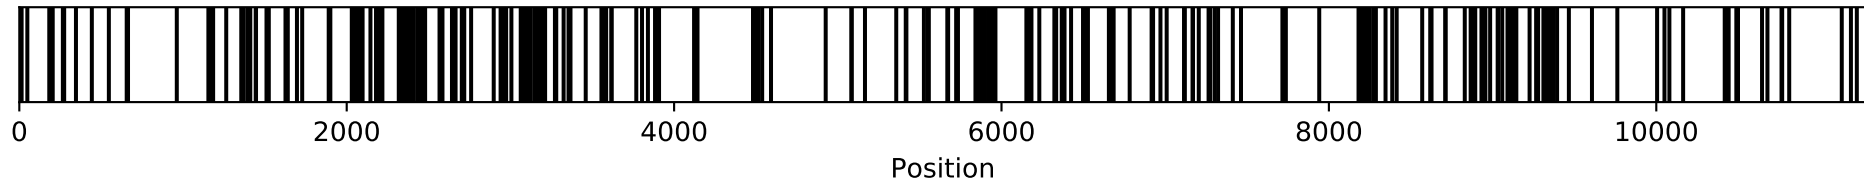

CR1 vs MM2  
Number of differences: 228

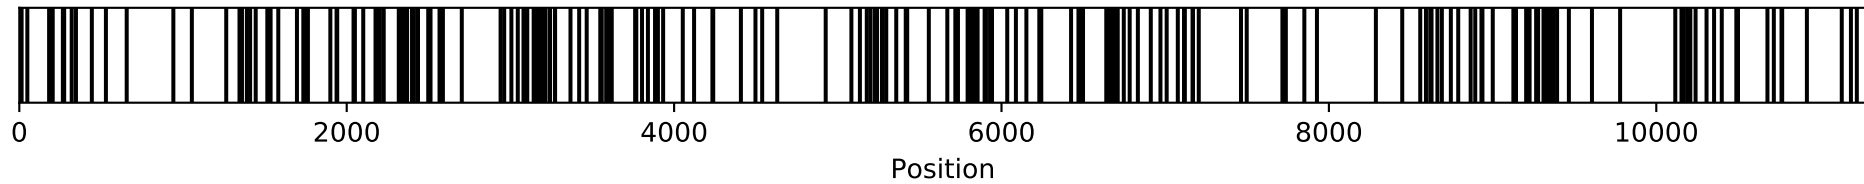

CR2 vs MM1  
Number of differences: 359

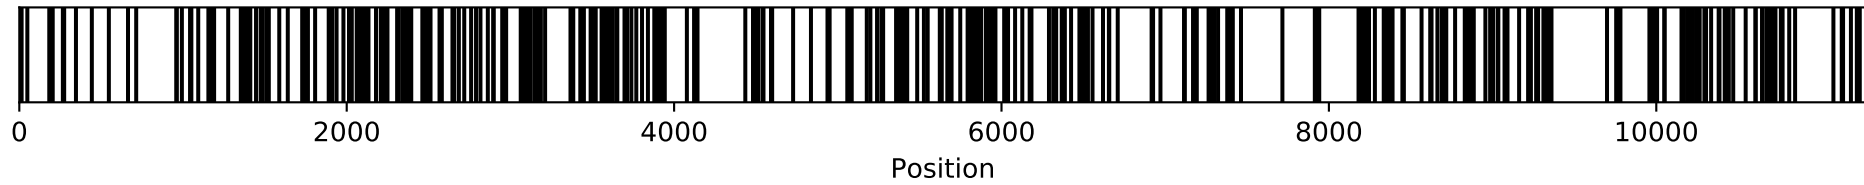

CR2 vs MM2  
Number of differences: 344

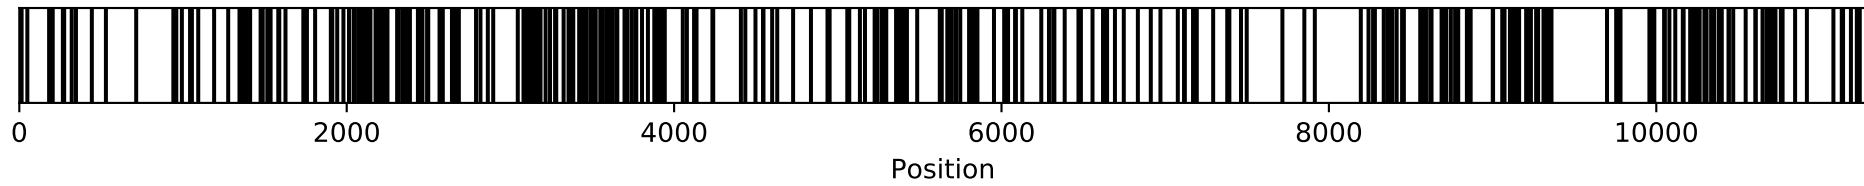

MM1 vs MM2  
Number of differences: 244

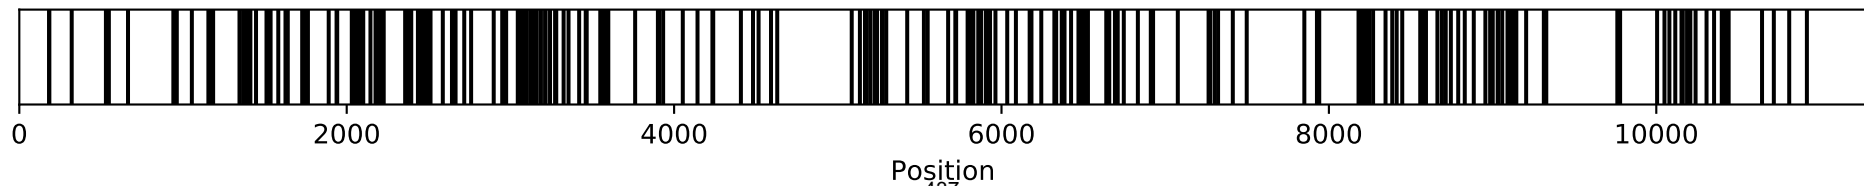

CR1 vs CR2  
Number of differences: 143

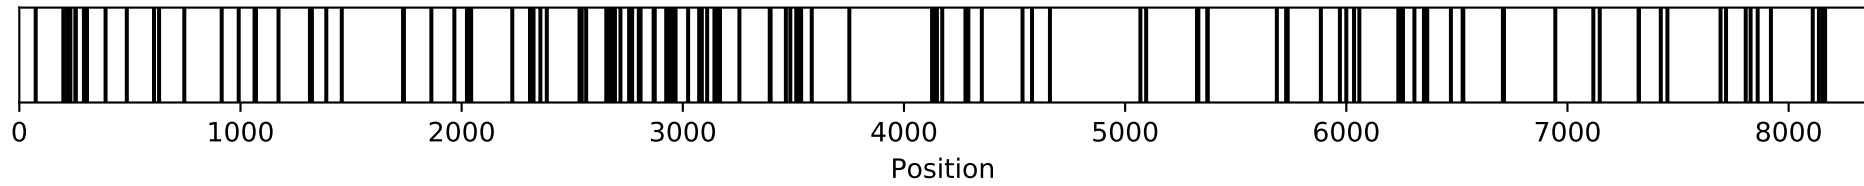

CR1 vs MM1  
Number of differences: 80

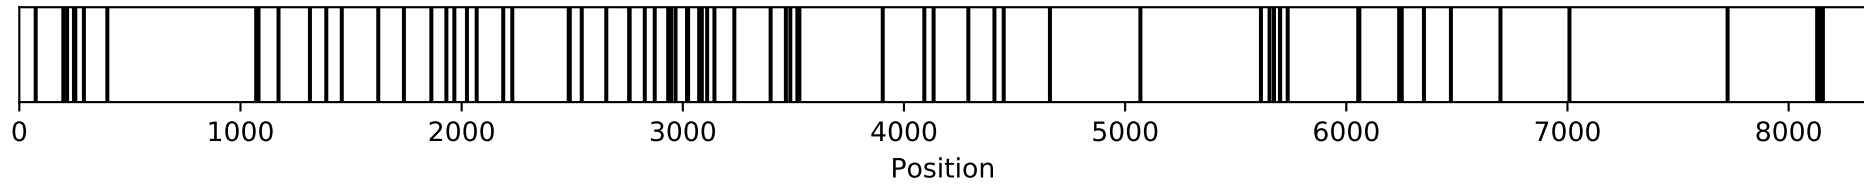

CR1 vs MM2  
Number of differences: 79

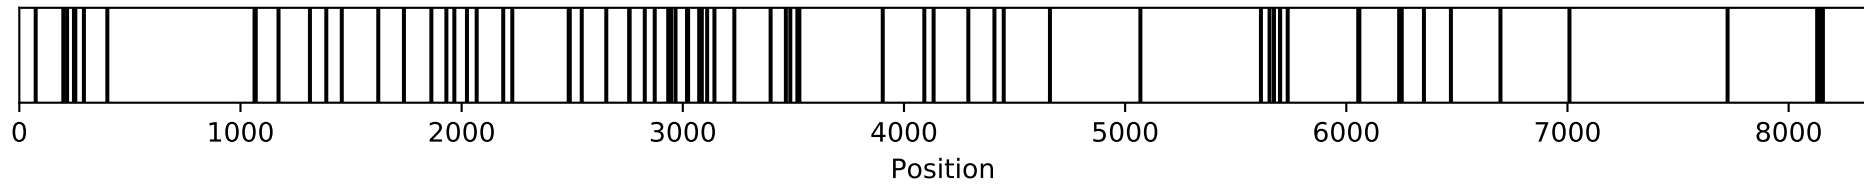

CR2 vs MM1  
Number of differences: 142

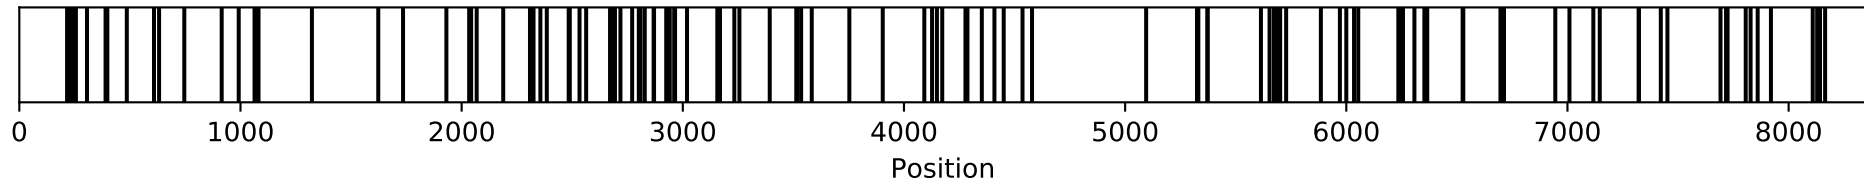

CR2 vs MM2  
Number of differences: 135

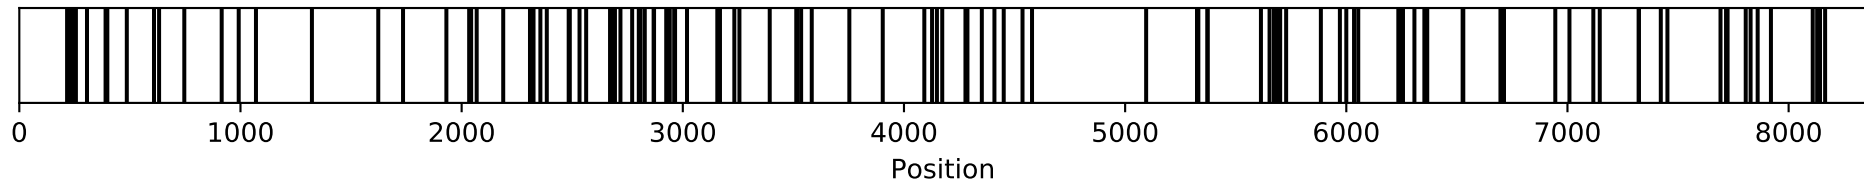

MM1 vs MM2  
Number of differences: 7

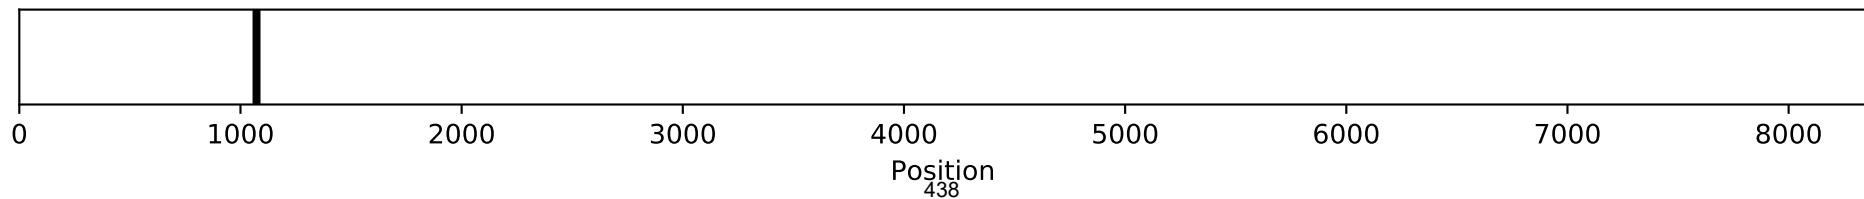

CR1 vs CR2  
Number of differences: 149

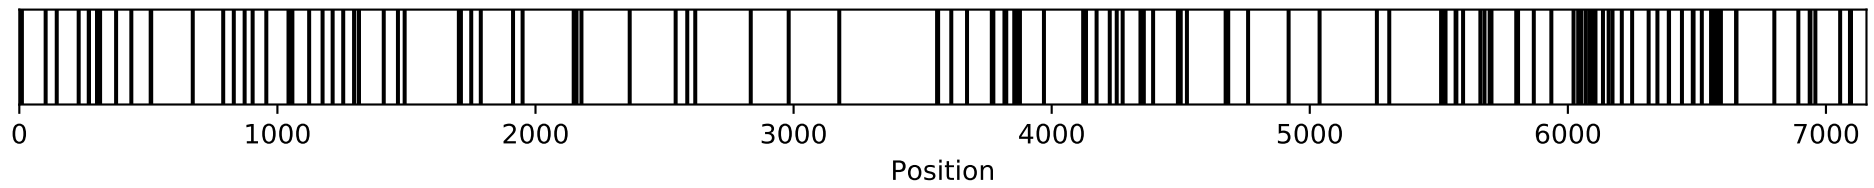

CR1 vs MM1  
Number of differences: 169

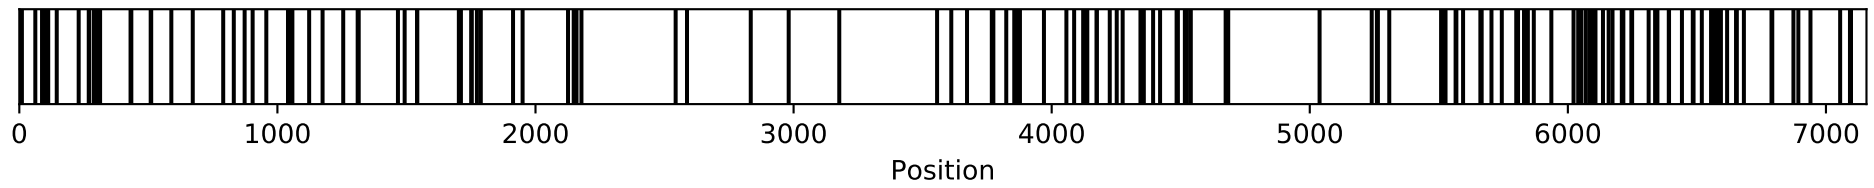

CR1 vs MM2  
Number of differences: 150

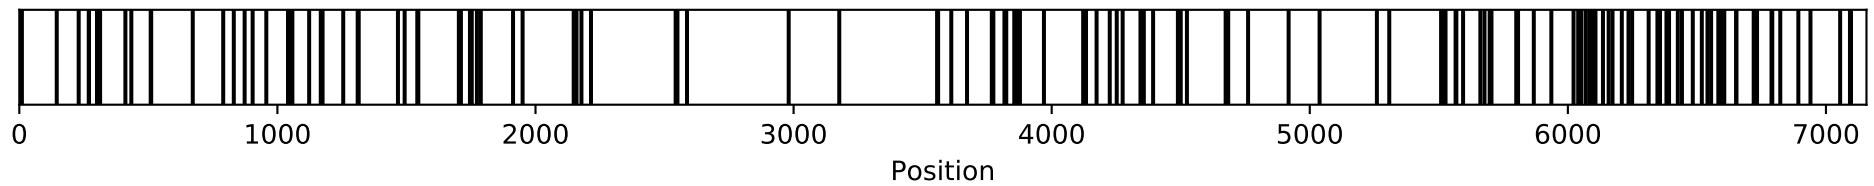

CR2 vs MM1  
Number of differences: 64

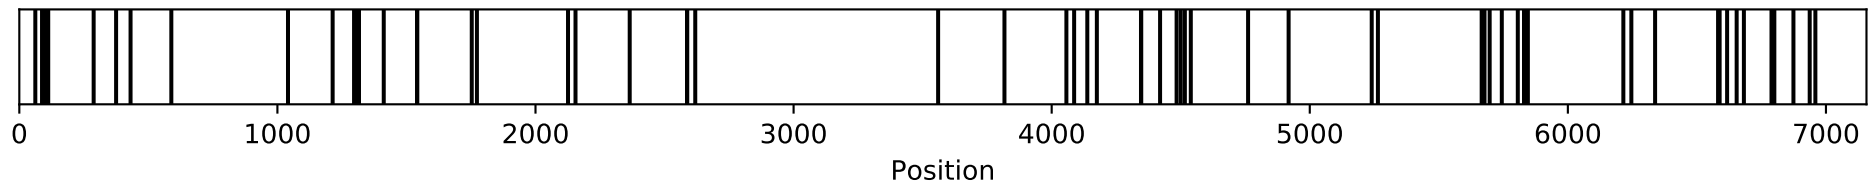

CR2 vs MM2  
Number of differences: 49

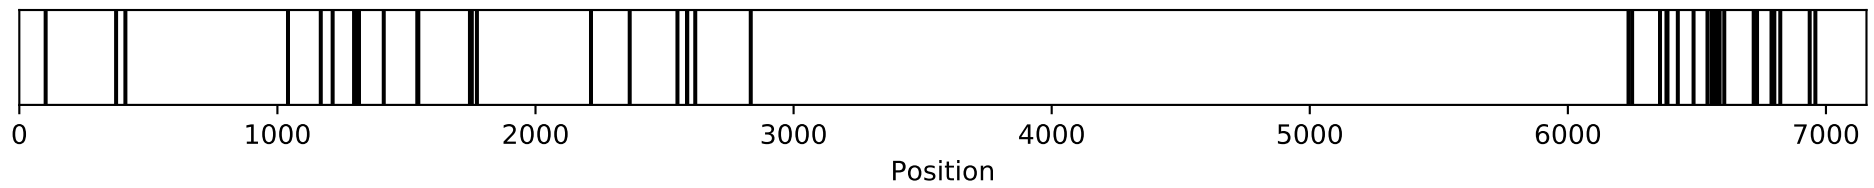

MM1 vs MM2  
Number of differences: 69

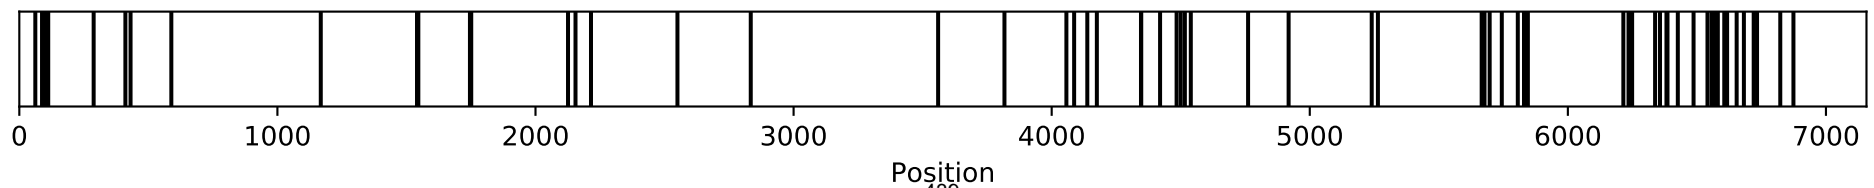



CR1 vs CR2  
Number of differences: 275

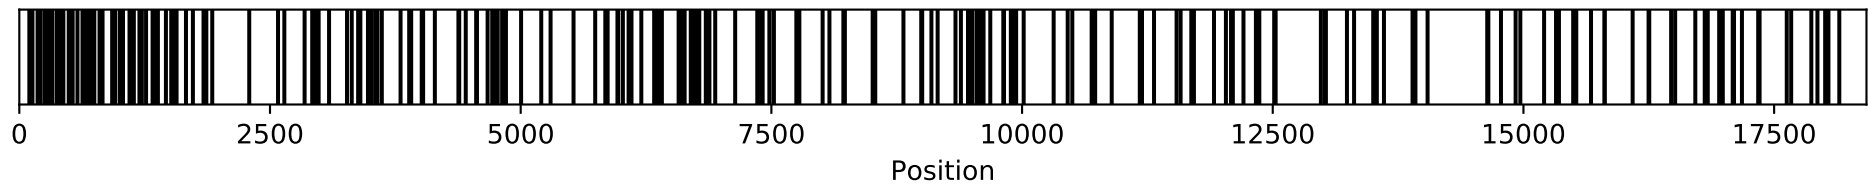

CR1 vs MM1  
Number of differences: 48

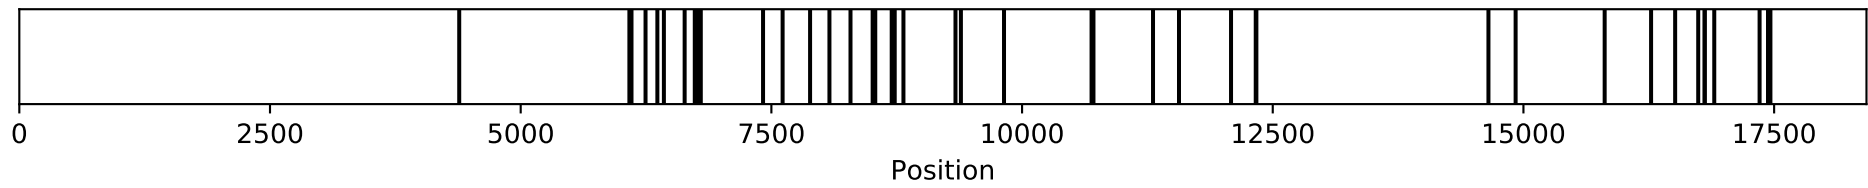

CR1 vs MM2  
Number of differences: 51

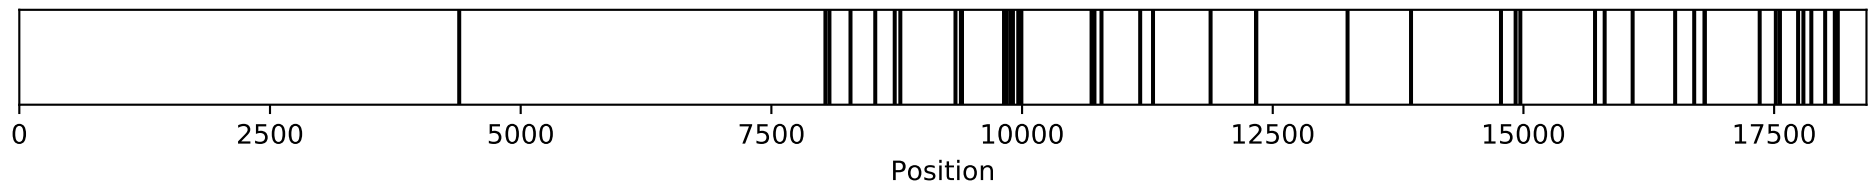

CR2 vs MM1  
Number of differences: 276

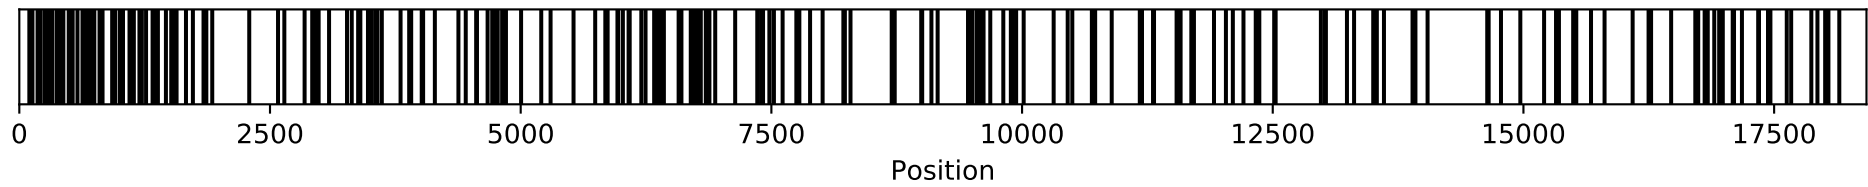

CR2 vs MM2  
Number of differences: 281

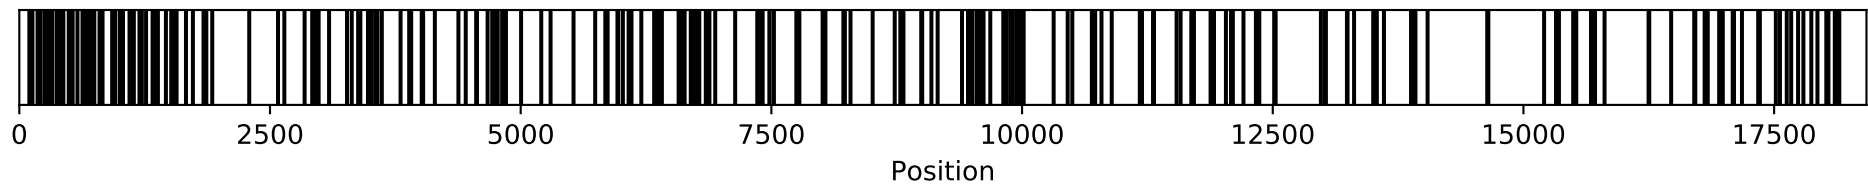

MM1 vs MM2  
Number of differences: 59

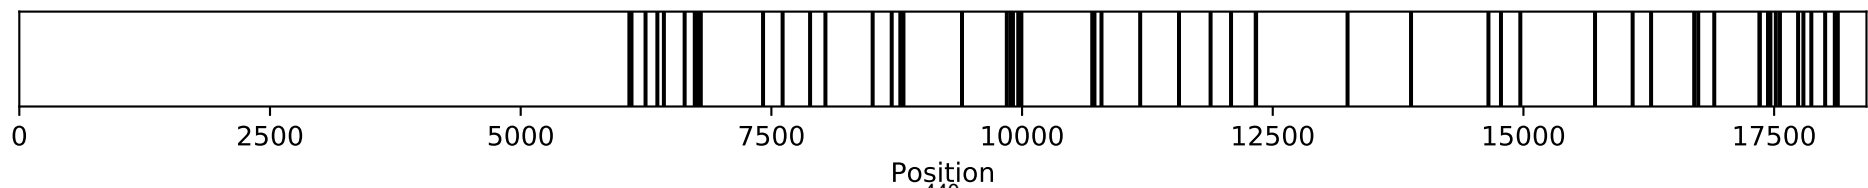

CR1 vs CR2  
Number of differences: 228

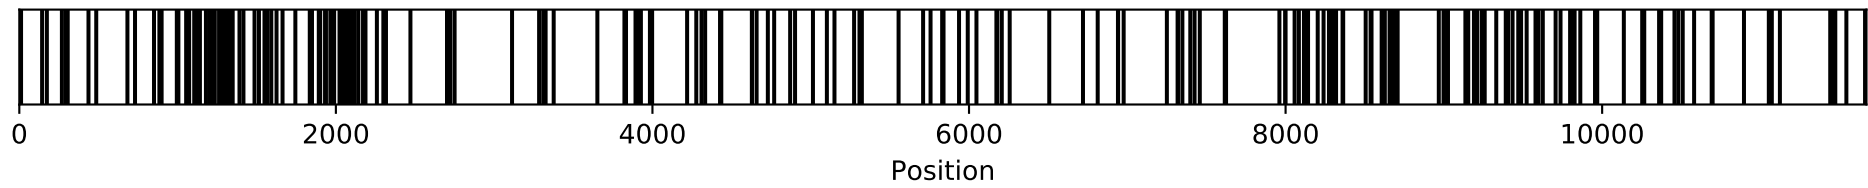

CR1 vs MM1  
Number of differences: 206

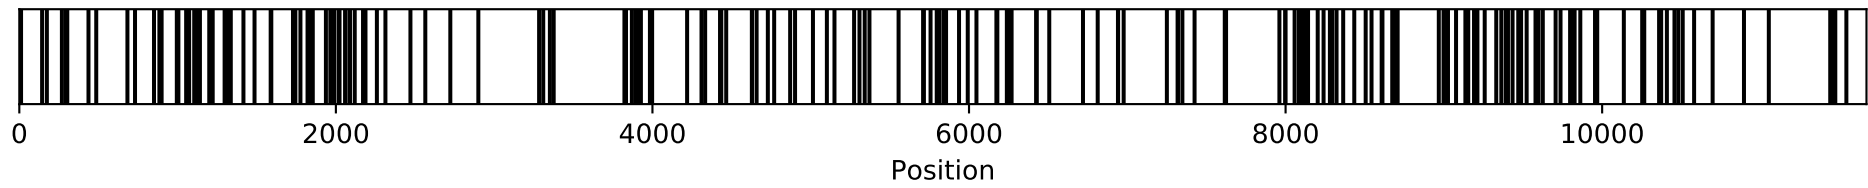

CR1 vs MM2  
Number of differences: 221

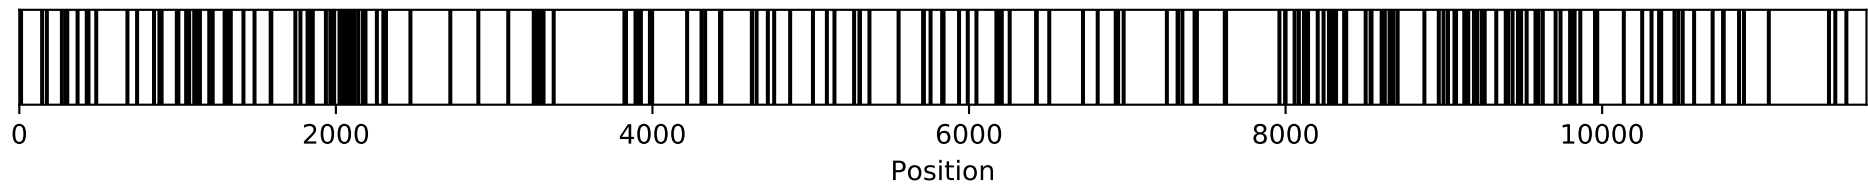

CR2 vs MM1  
Number of differences: 91

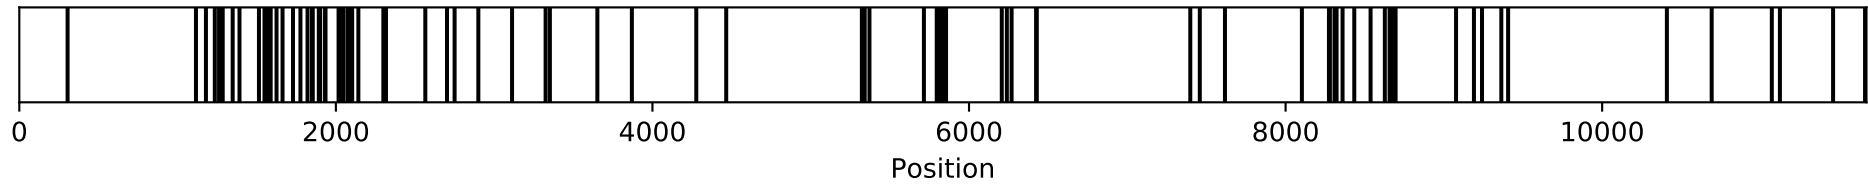

CR2 vs MM2  
Number of differences: 77

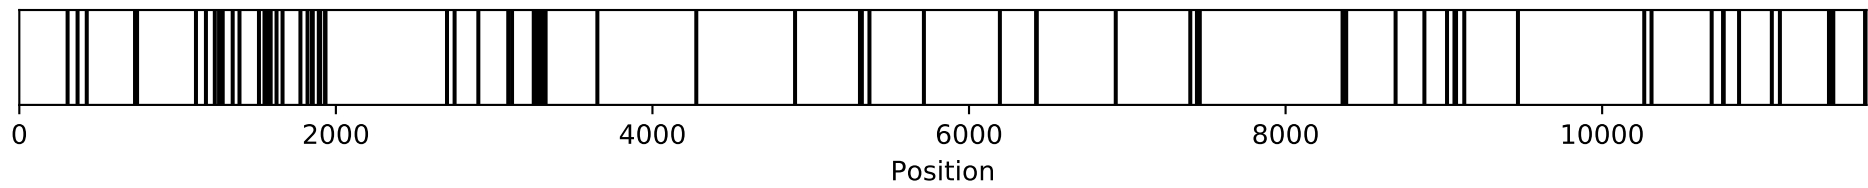

MM1 vs MM2  
Number of differences: 80

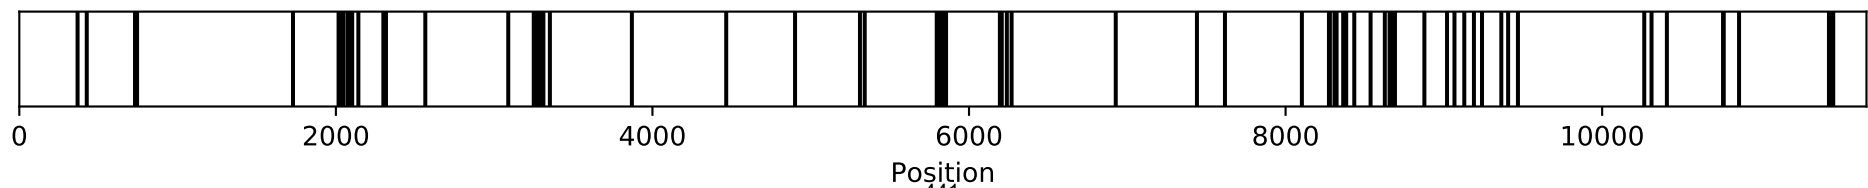

CR1 vs CR2  
Number of differences: 124

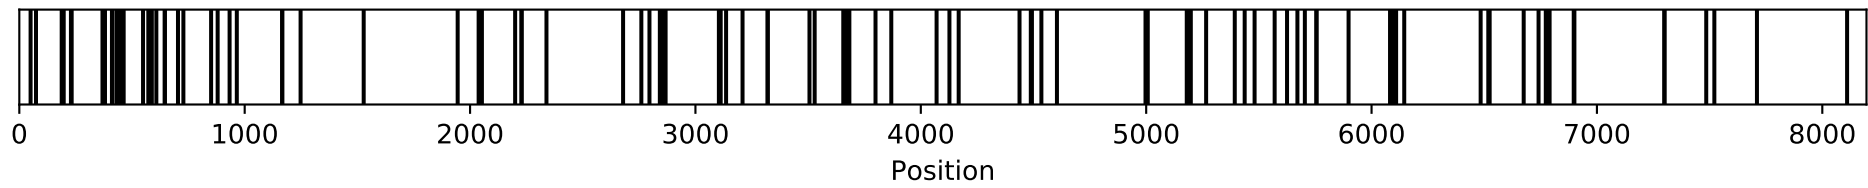

CR1 vs MM1  
Number of differences: 45

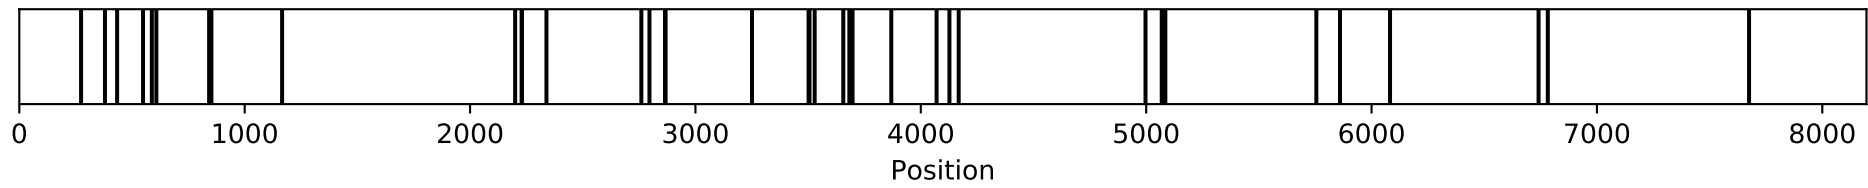

CR1 vs MM2  
Number of differences: 24

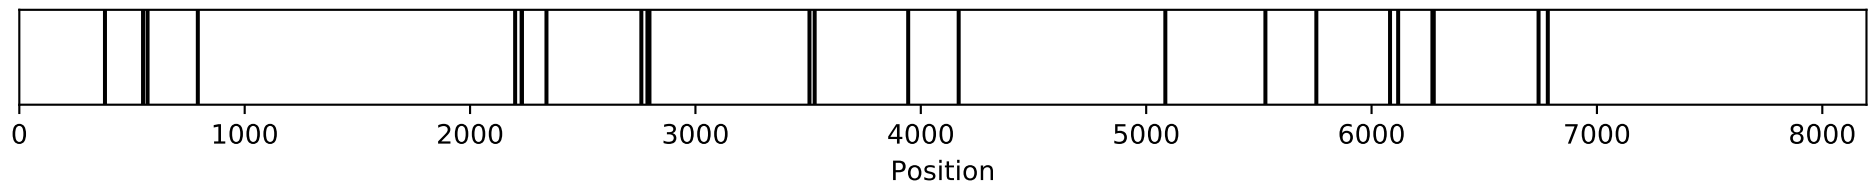

CR2 vs MM1  
Number of differences: 118

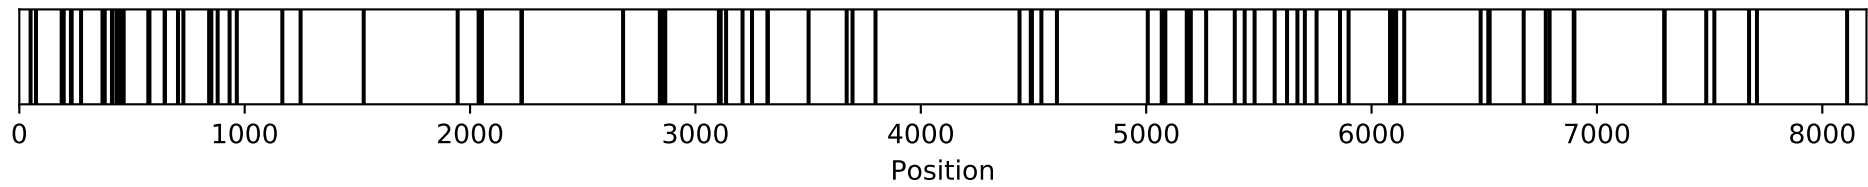

CR2 vs MM2  
Number of differences: 120

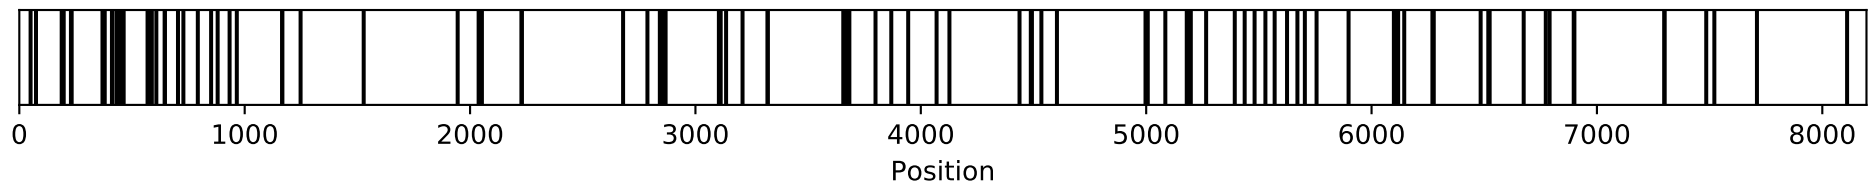

MM1 vs MM2  
Number of differences: 38

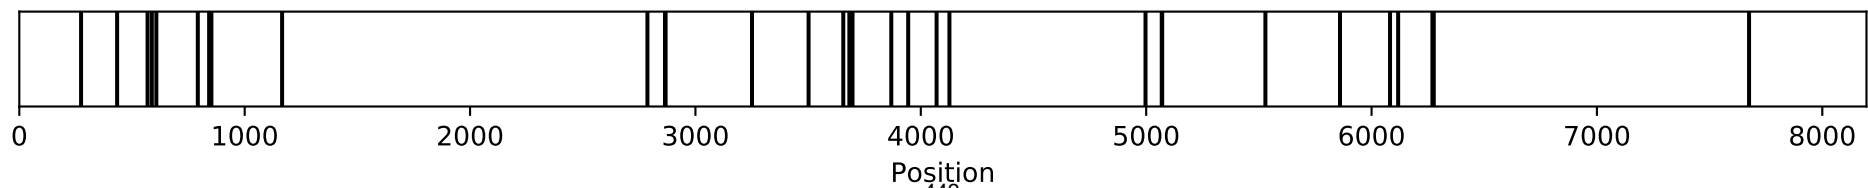

CR1 vs CR2  
Number of differences: 520

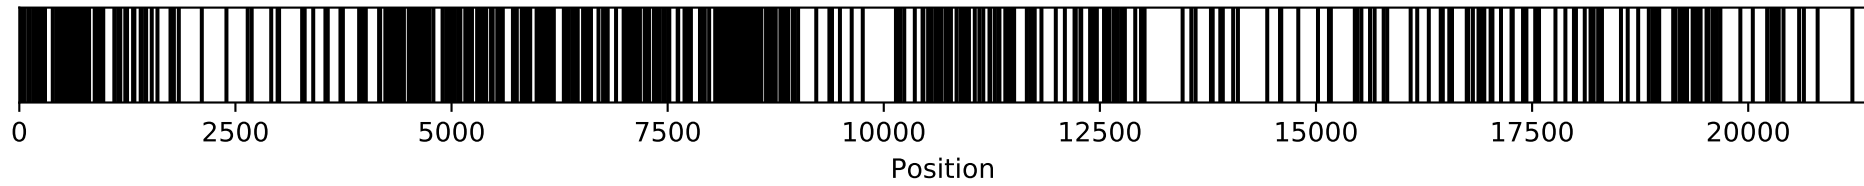

CR1 vs MM1  
Number of differences: 230

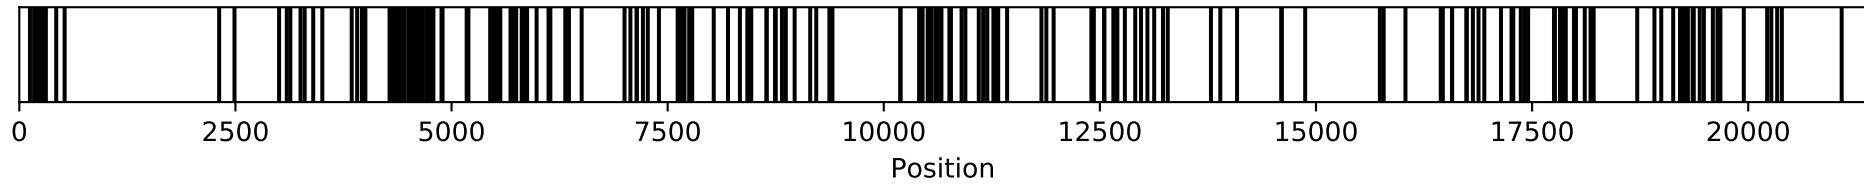

CR1 vs MM2  
Number of differences: 259

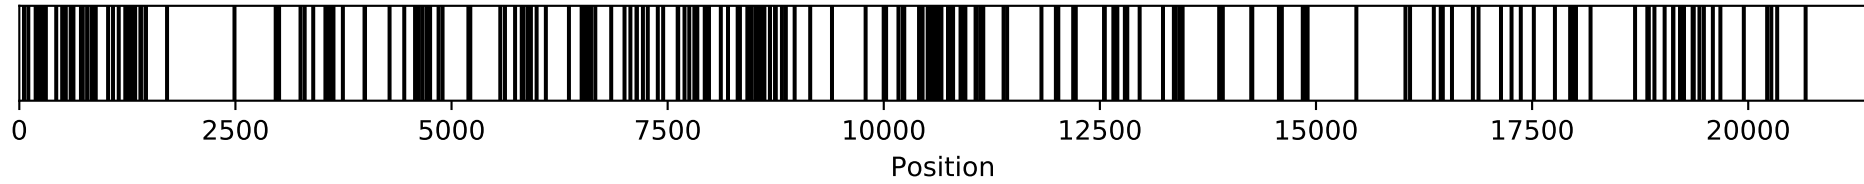

CR2 vs MM1  
Number of differences: 492

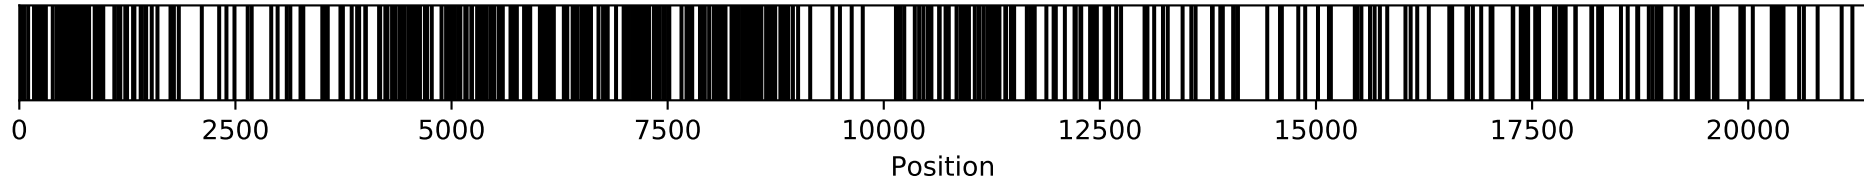

CR2 vs MM2  
Number of differences: 513

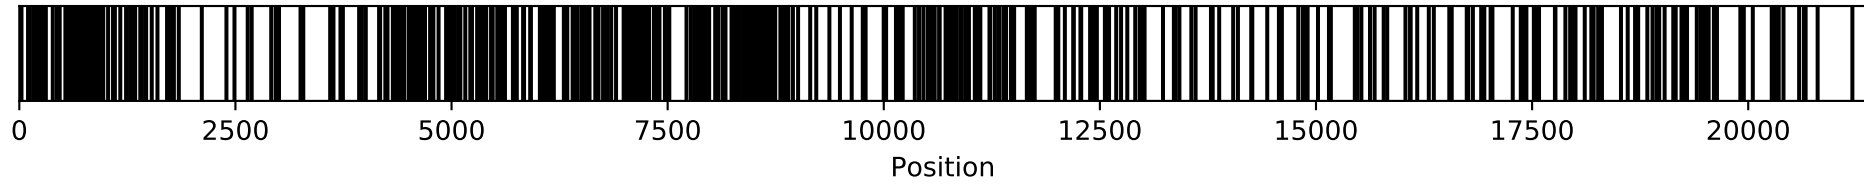

MM1 vs MM2  
Number of differences: 255

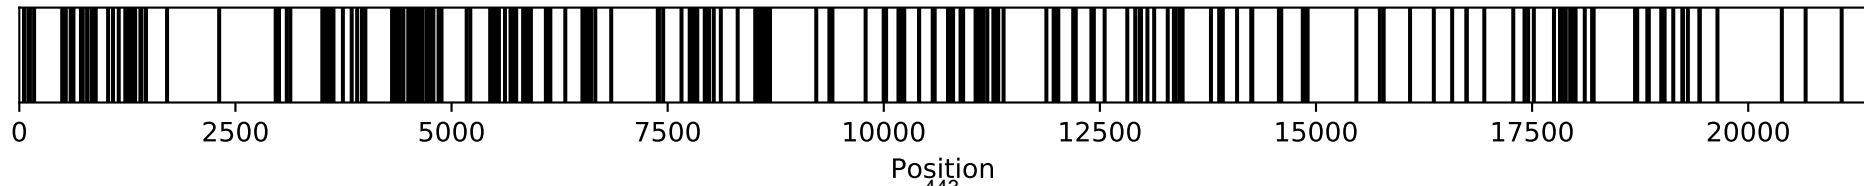

CR1 vs CR2  
Number of differences: 181

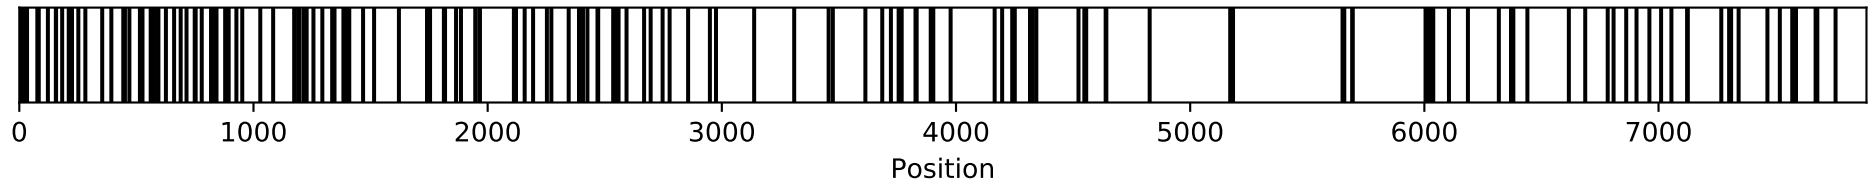

CR1 vs MM1  
Number of differences: 71

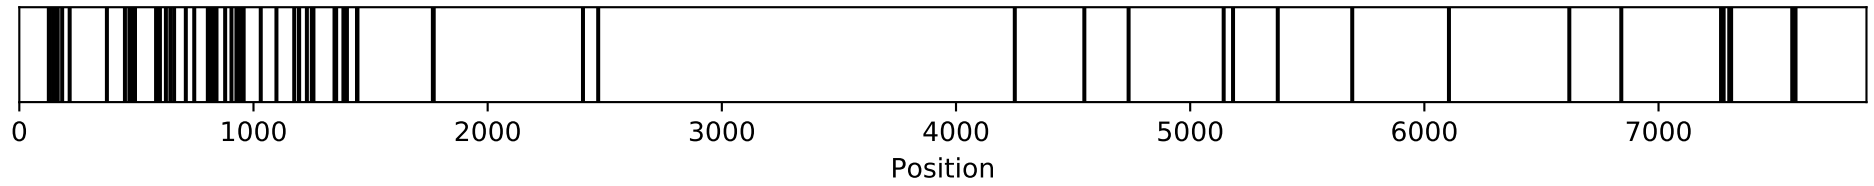

CR1 vs MM2  
Number of differences: 55

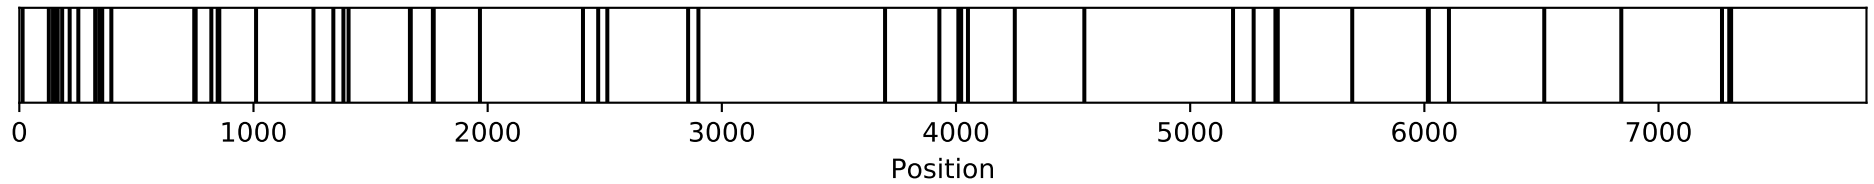

CR2 vs MM1  
Number of differences: 188

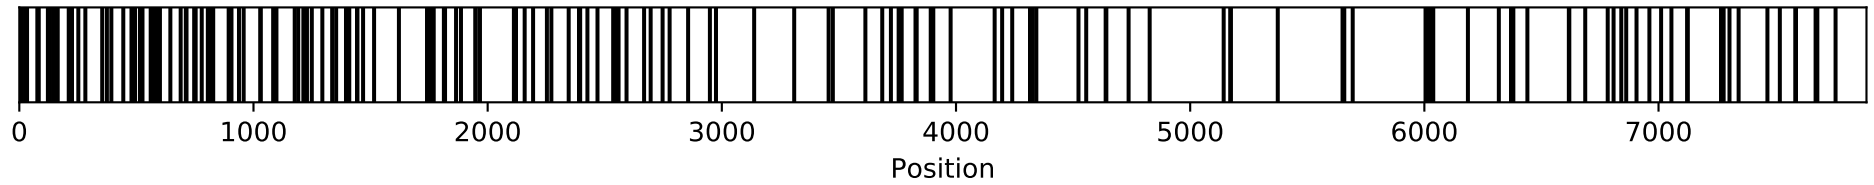

CR2 vs MM2  
Number of differences: 192

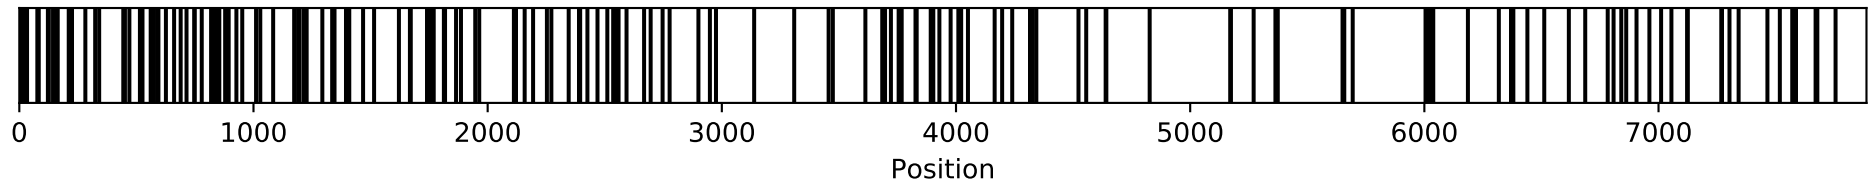

MM1 vs MM2  
Number of differences: 79

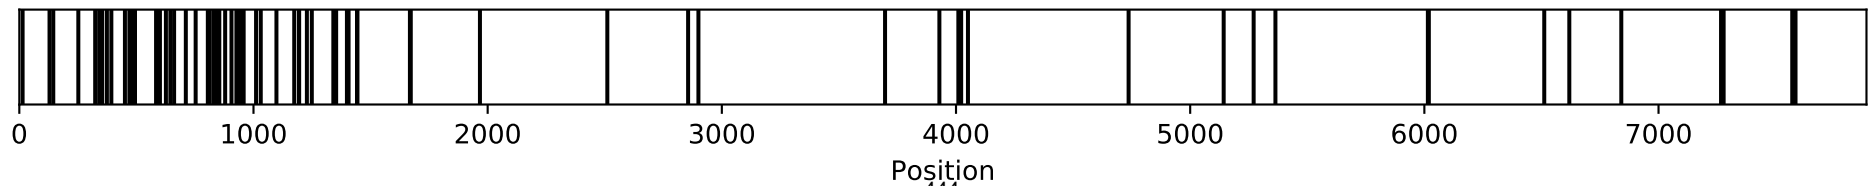

CR1 vs CR2  
Number of differences: 318

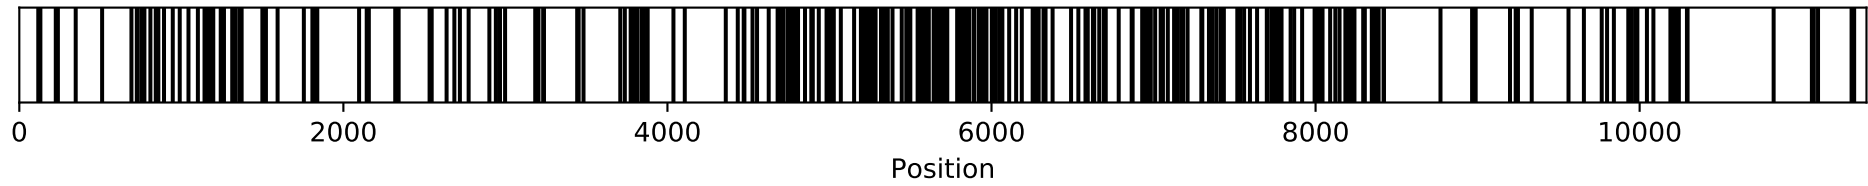

CR1 vs MM1  
Number of differences: 205

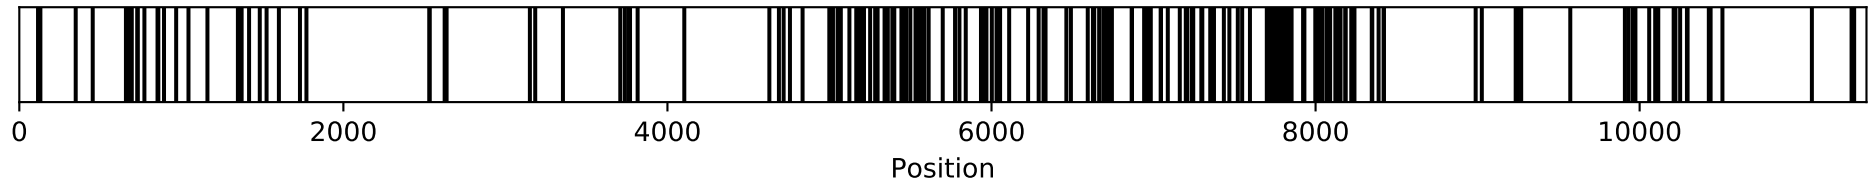

CR1 vs MM2  
Number of differences: 246

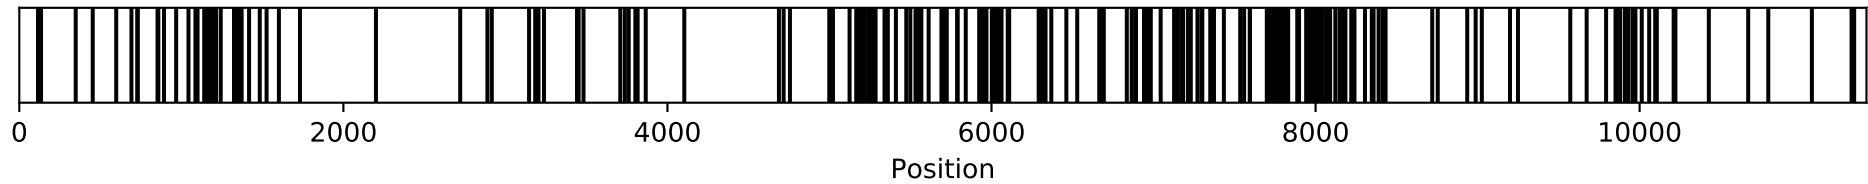

CR2 vs MM1  
Number of differences: 307

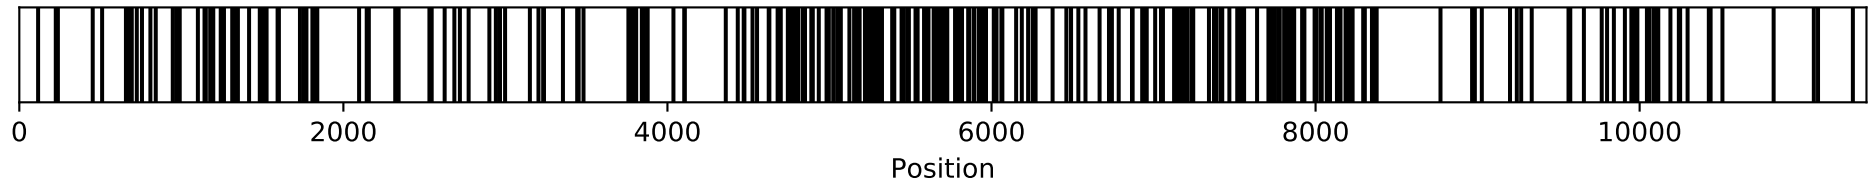

CR2 vs MM2  
Number of differences: 309

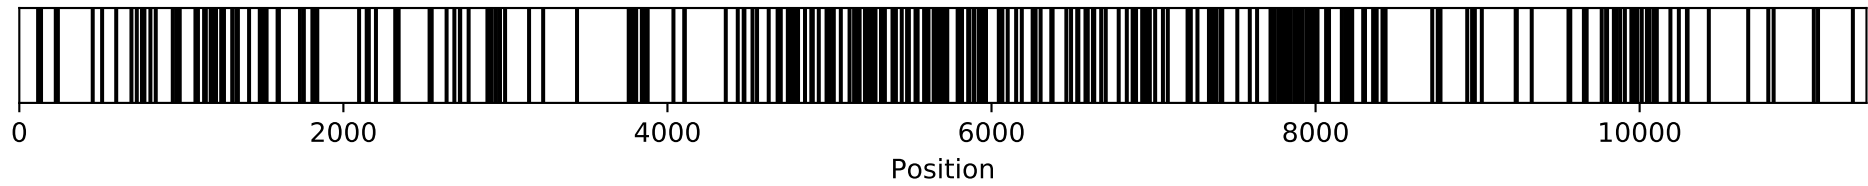

MM1 vs MM2  
Number of differences: 199

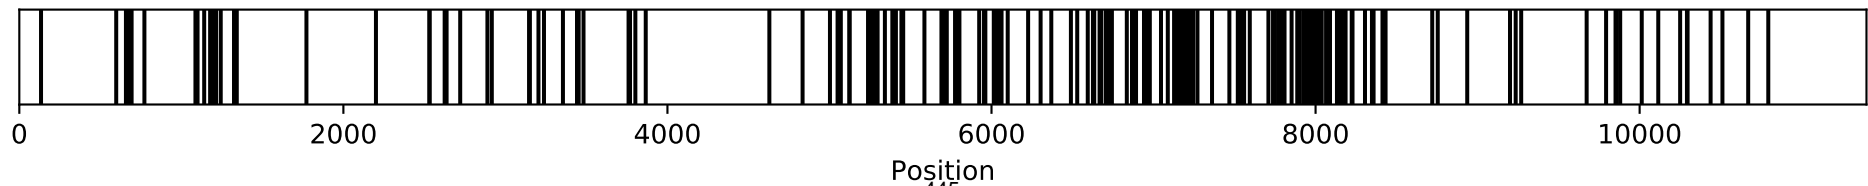

# Region: 6

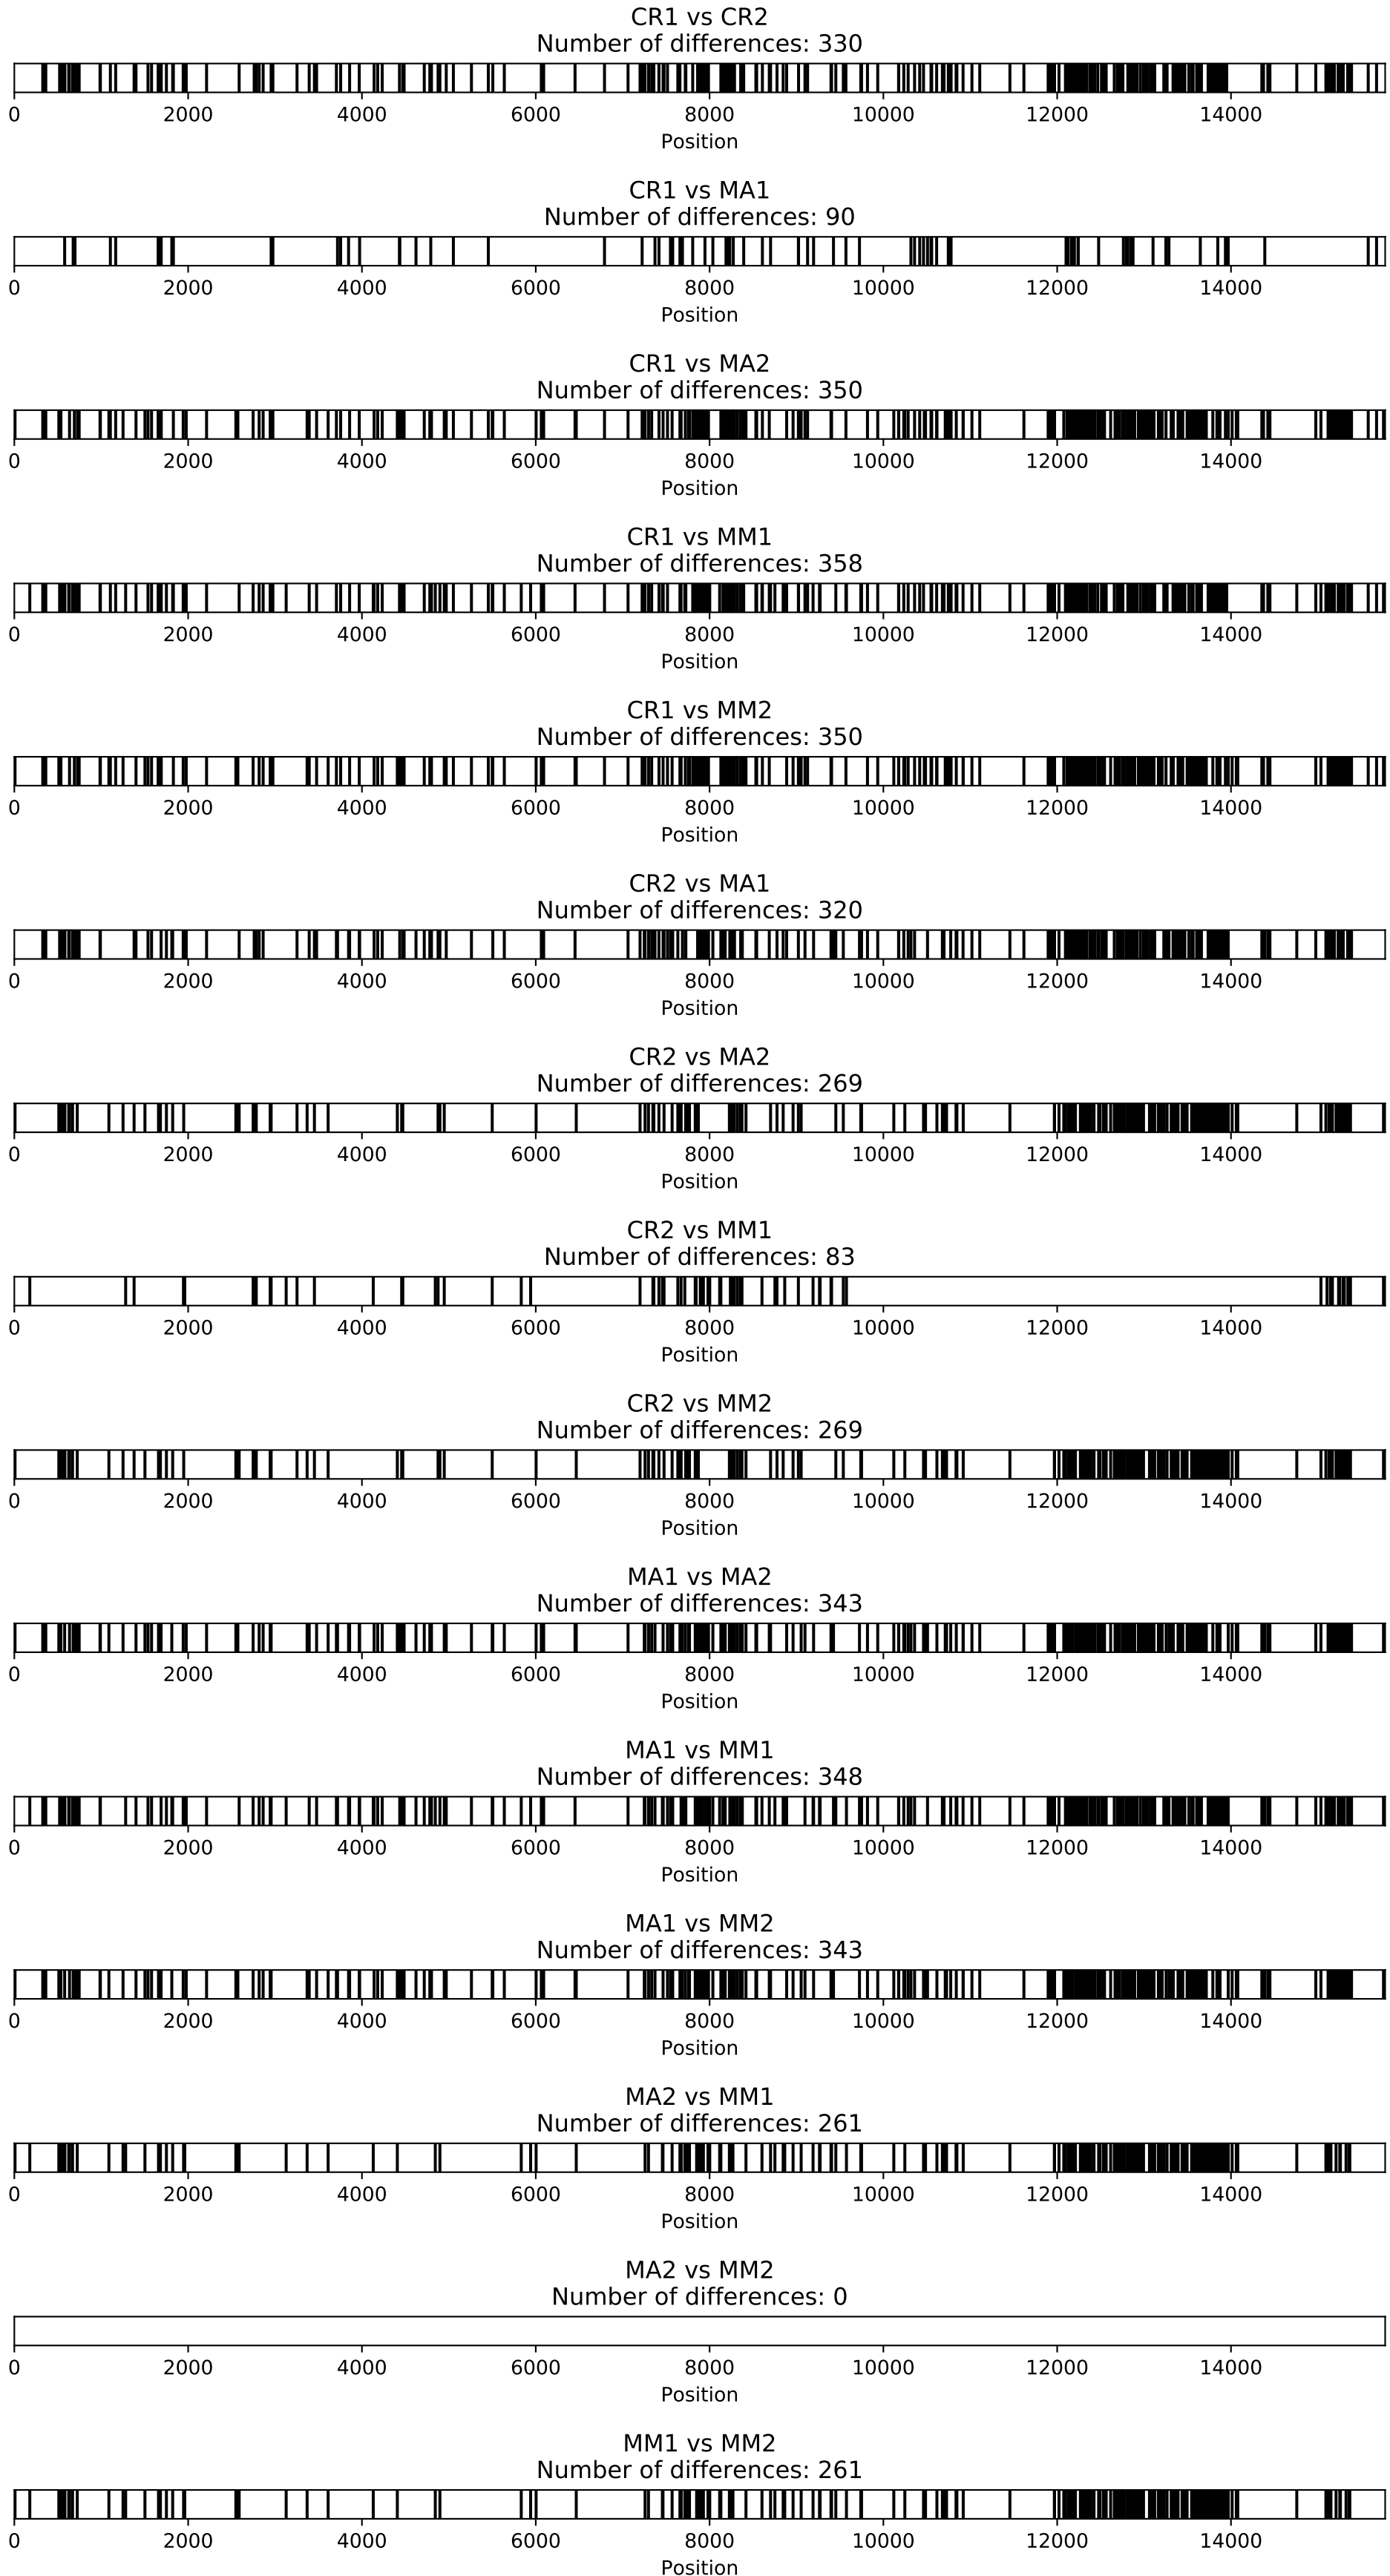

# Region: 7

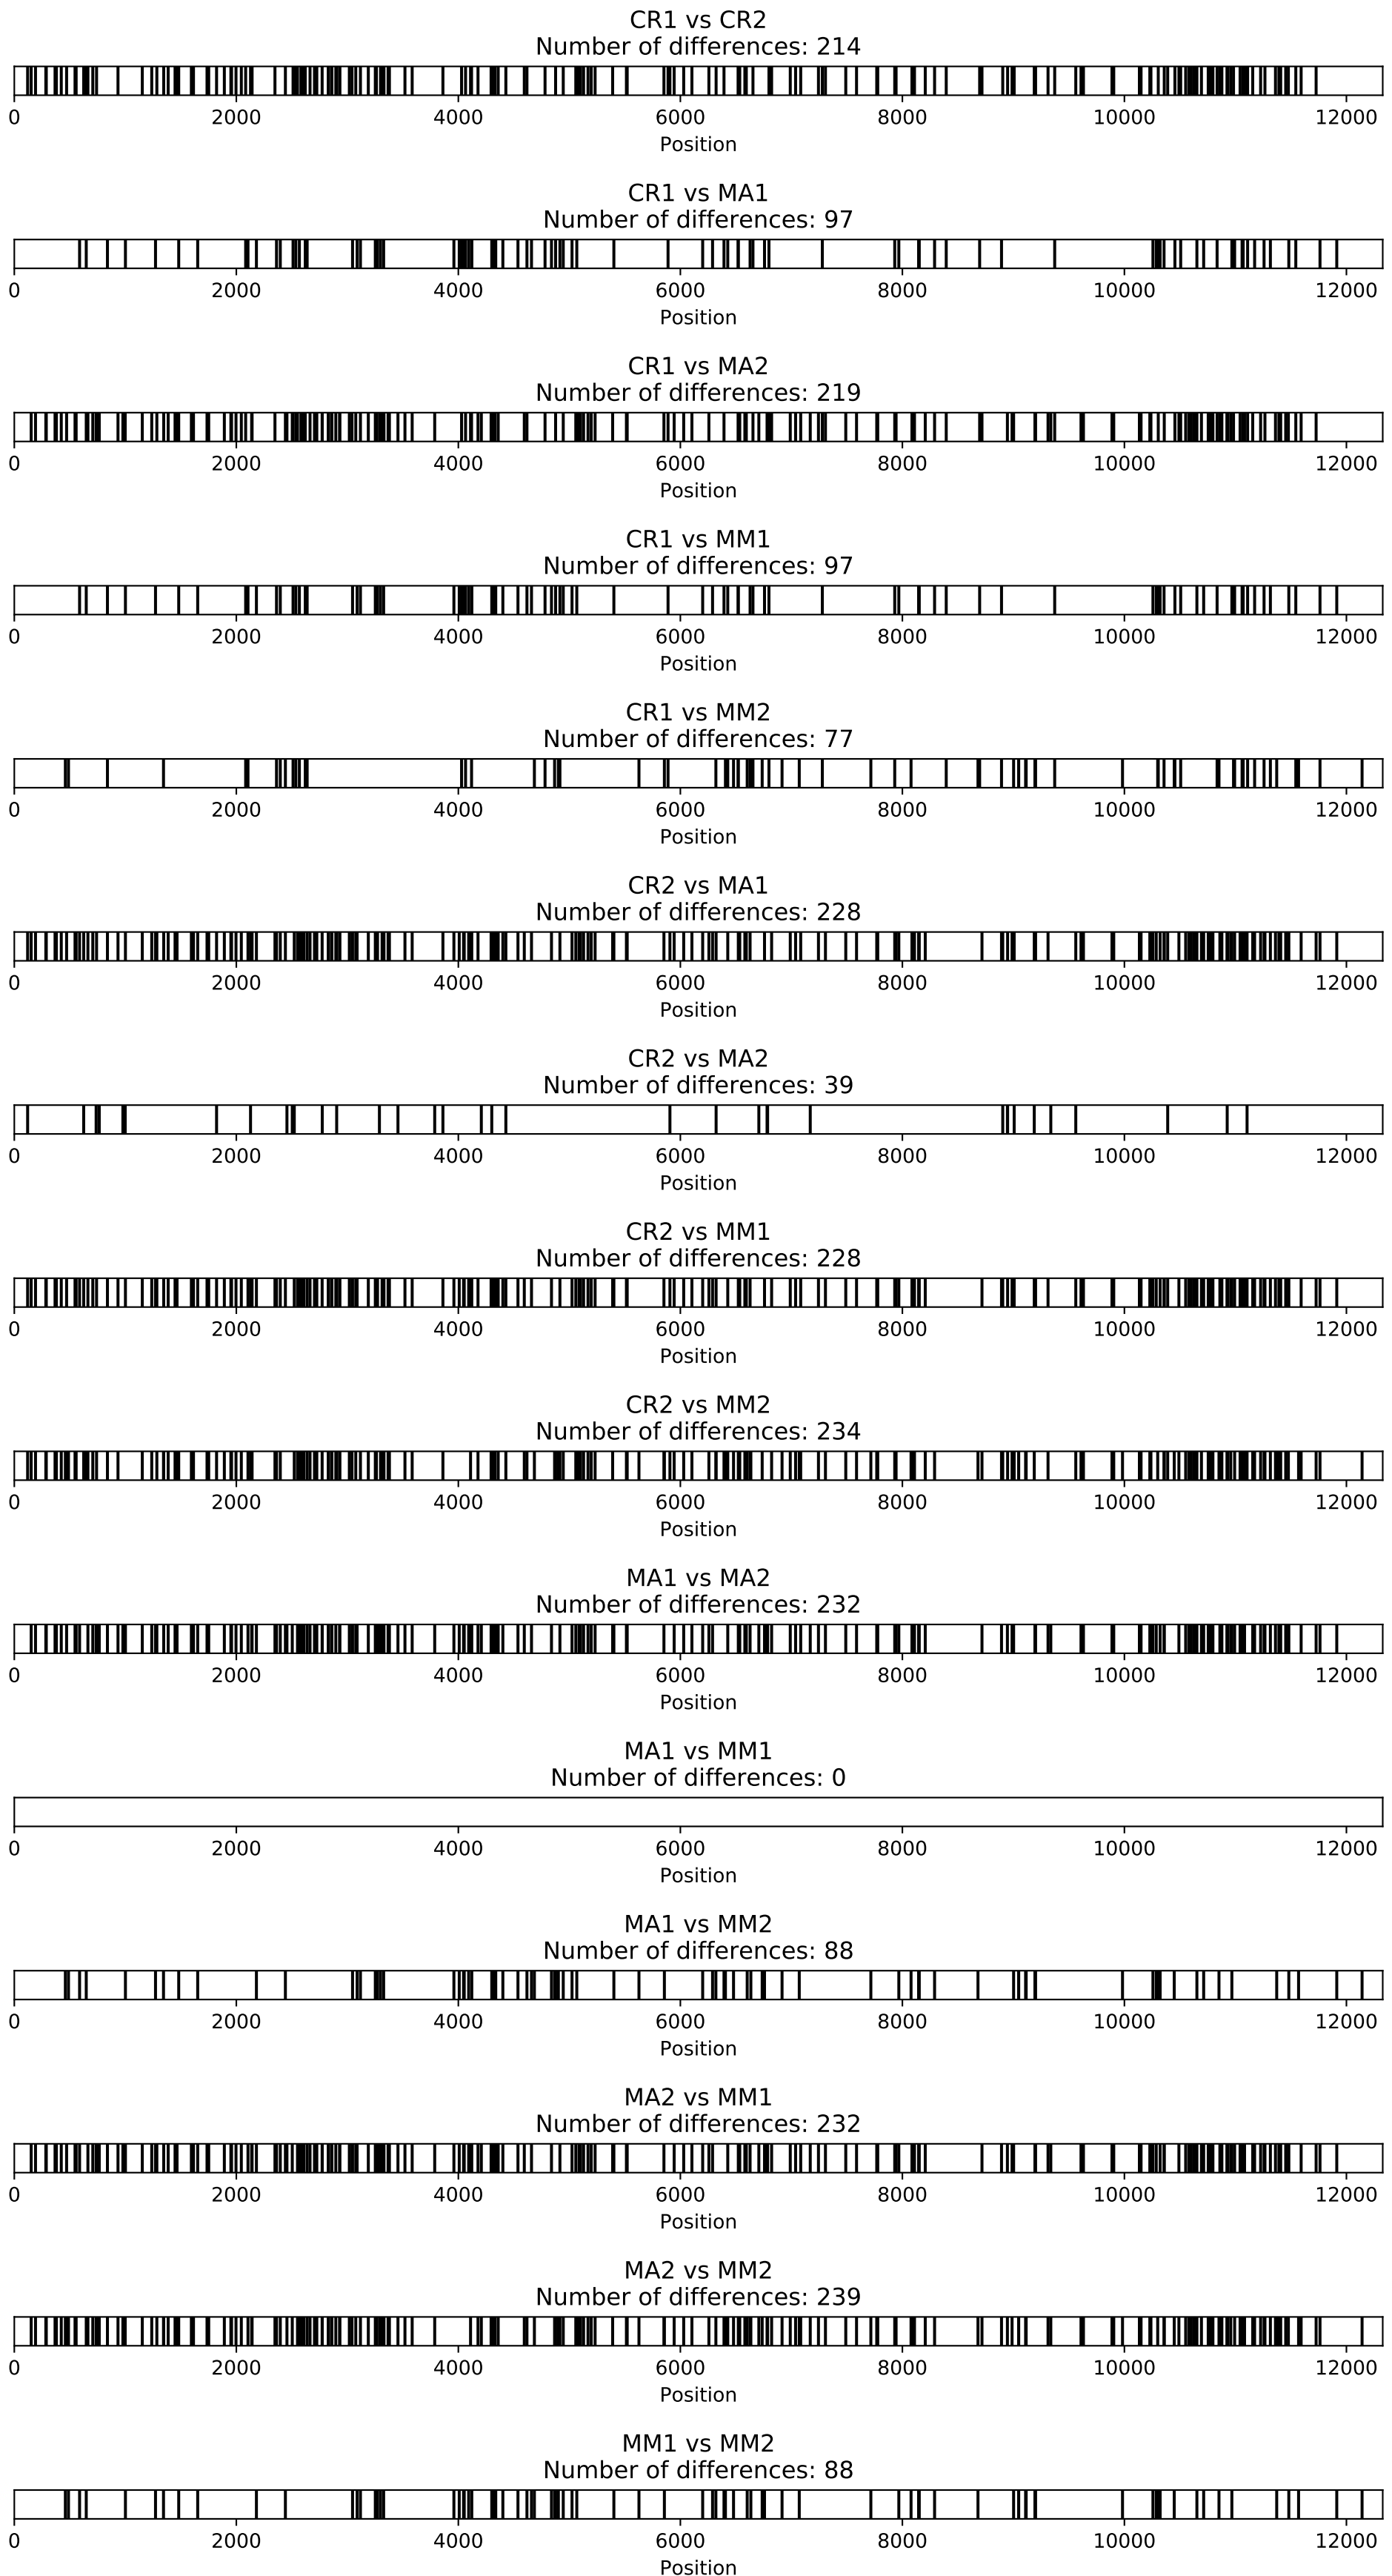



# Region: 8

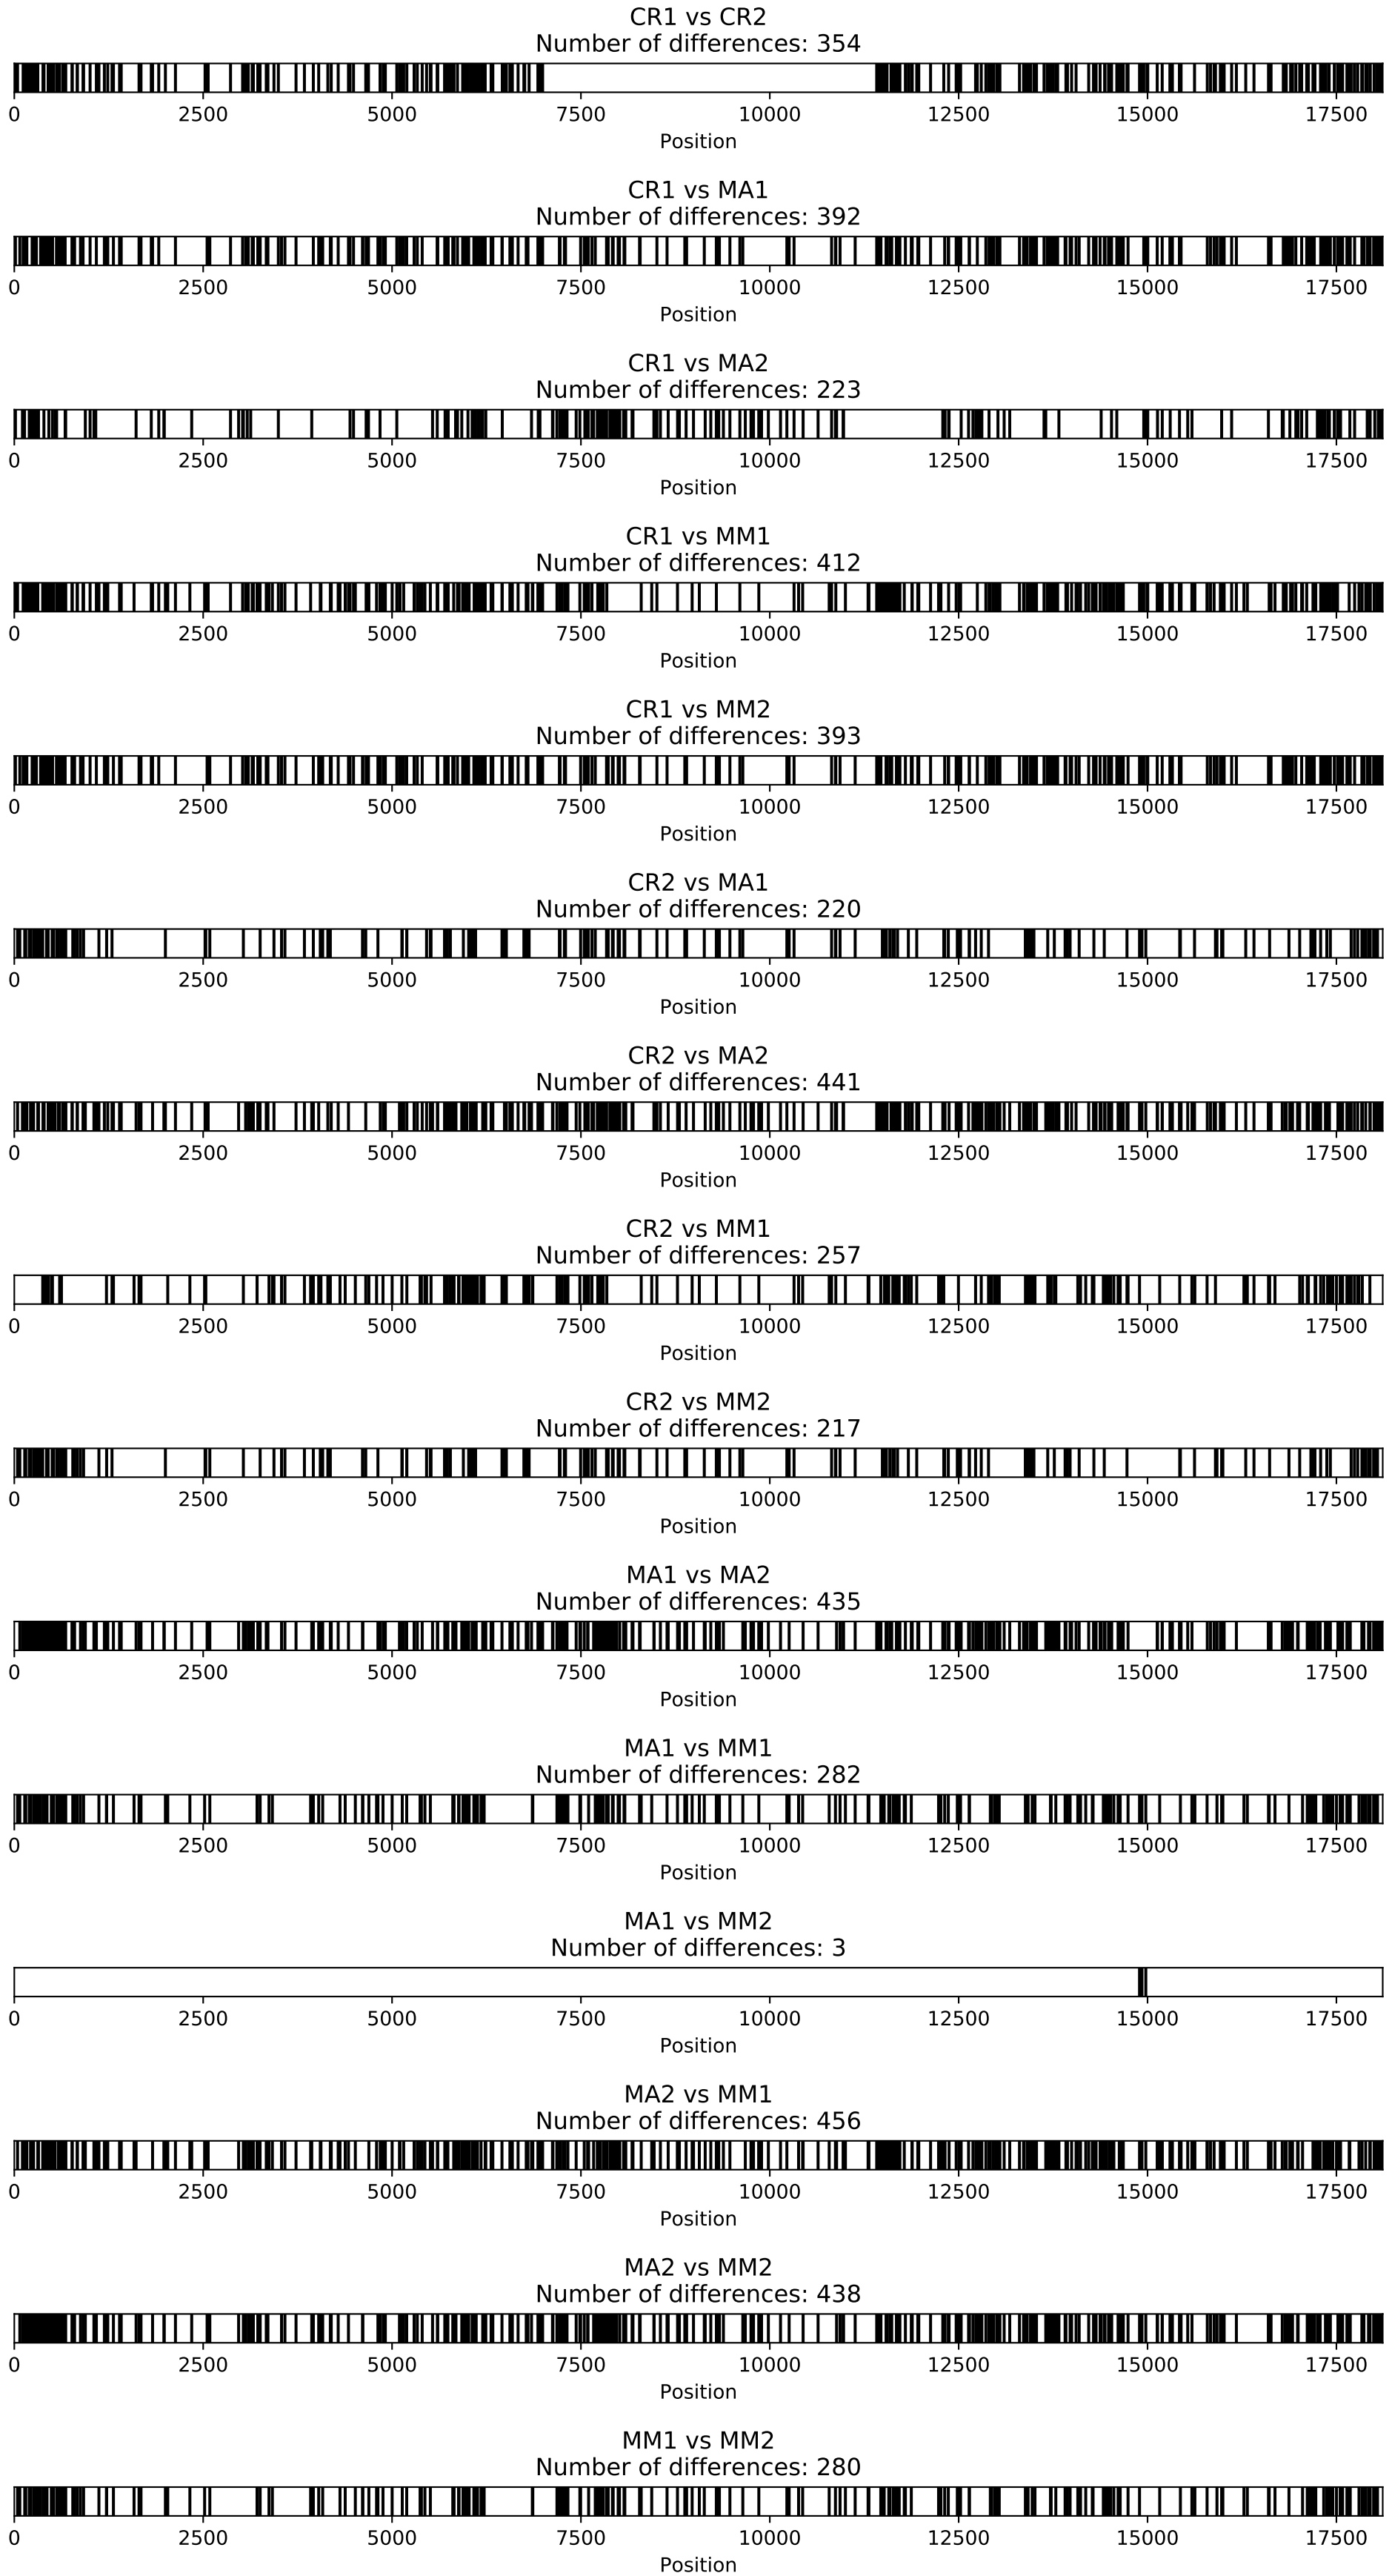

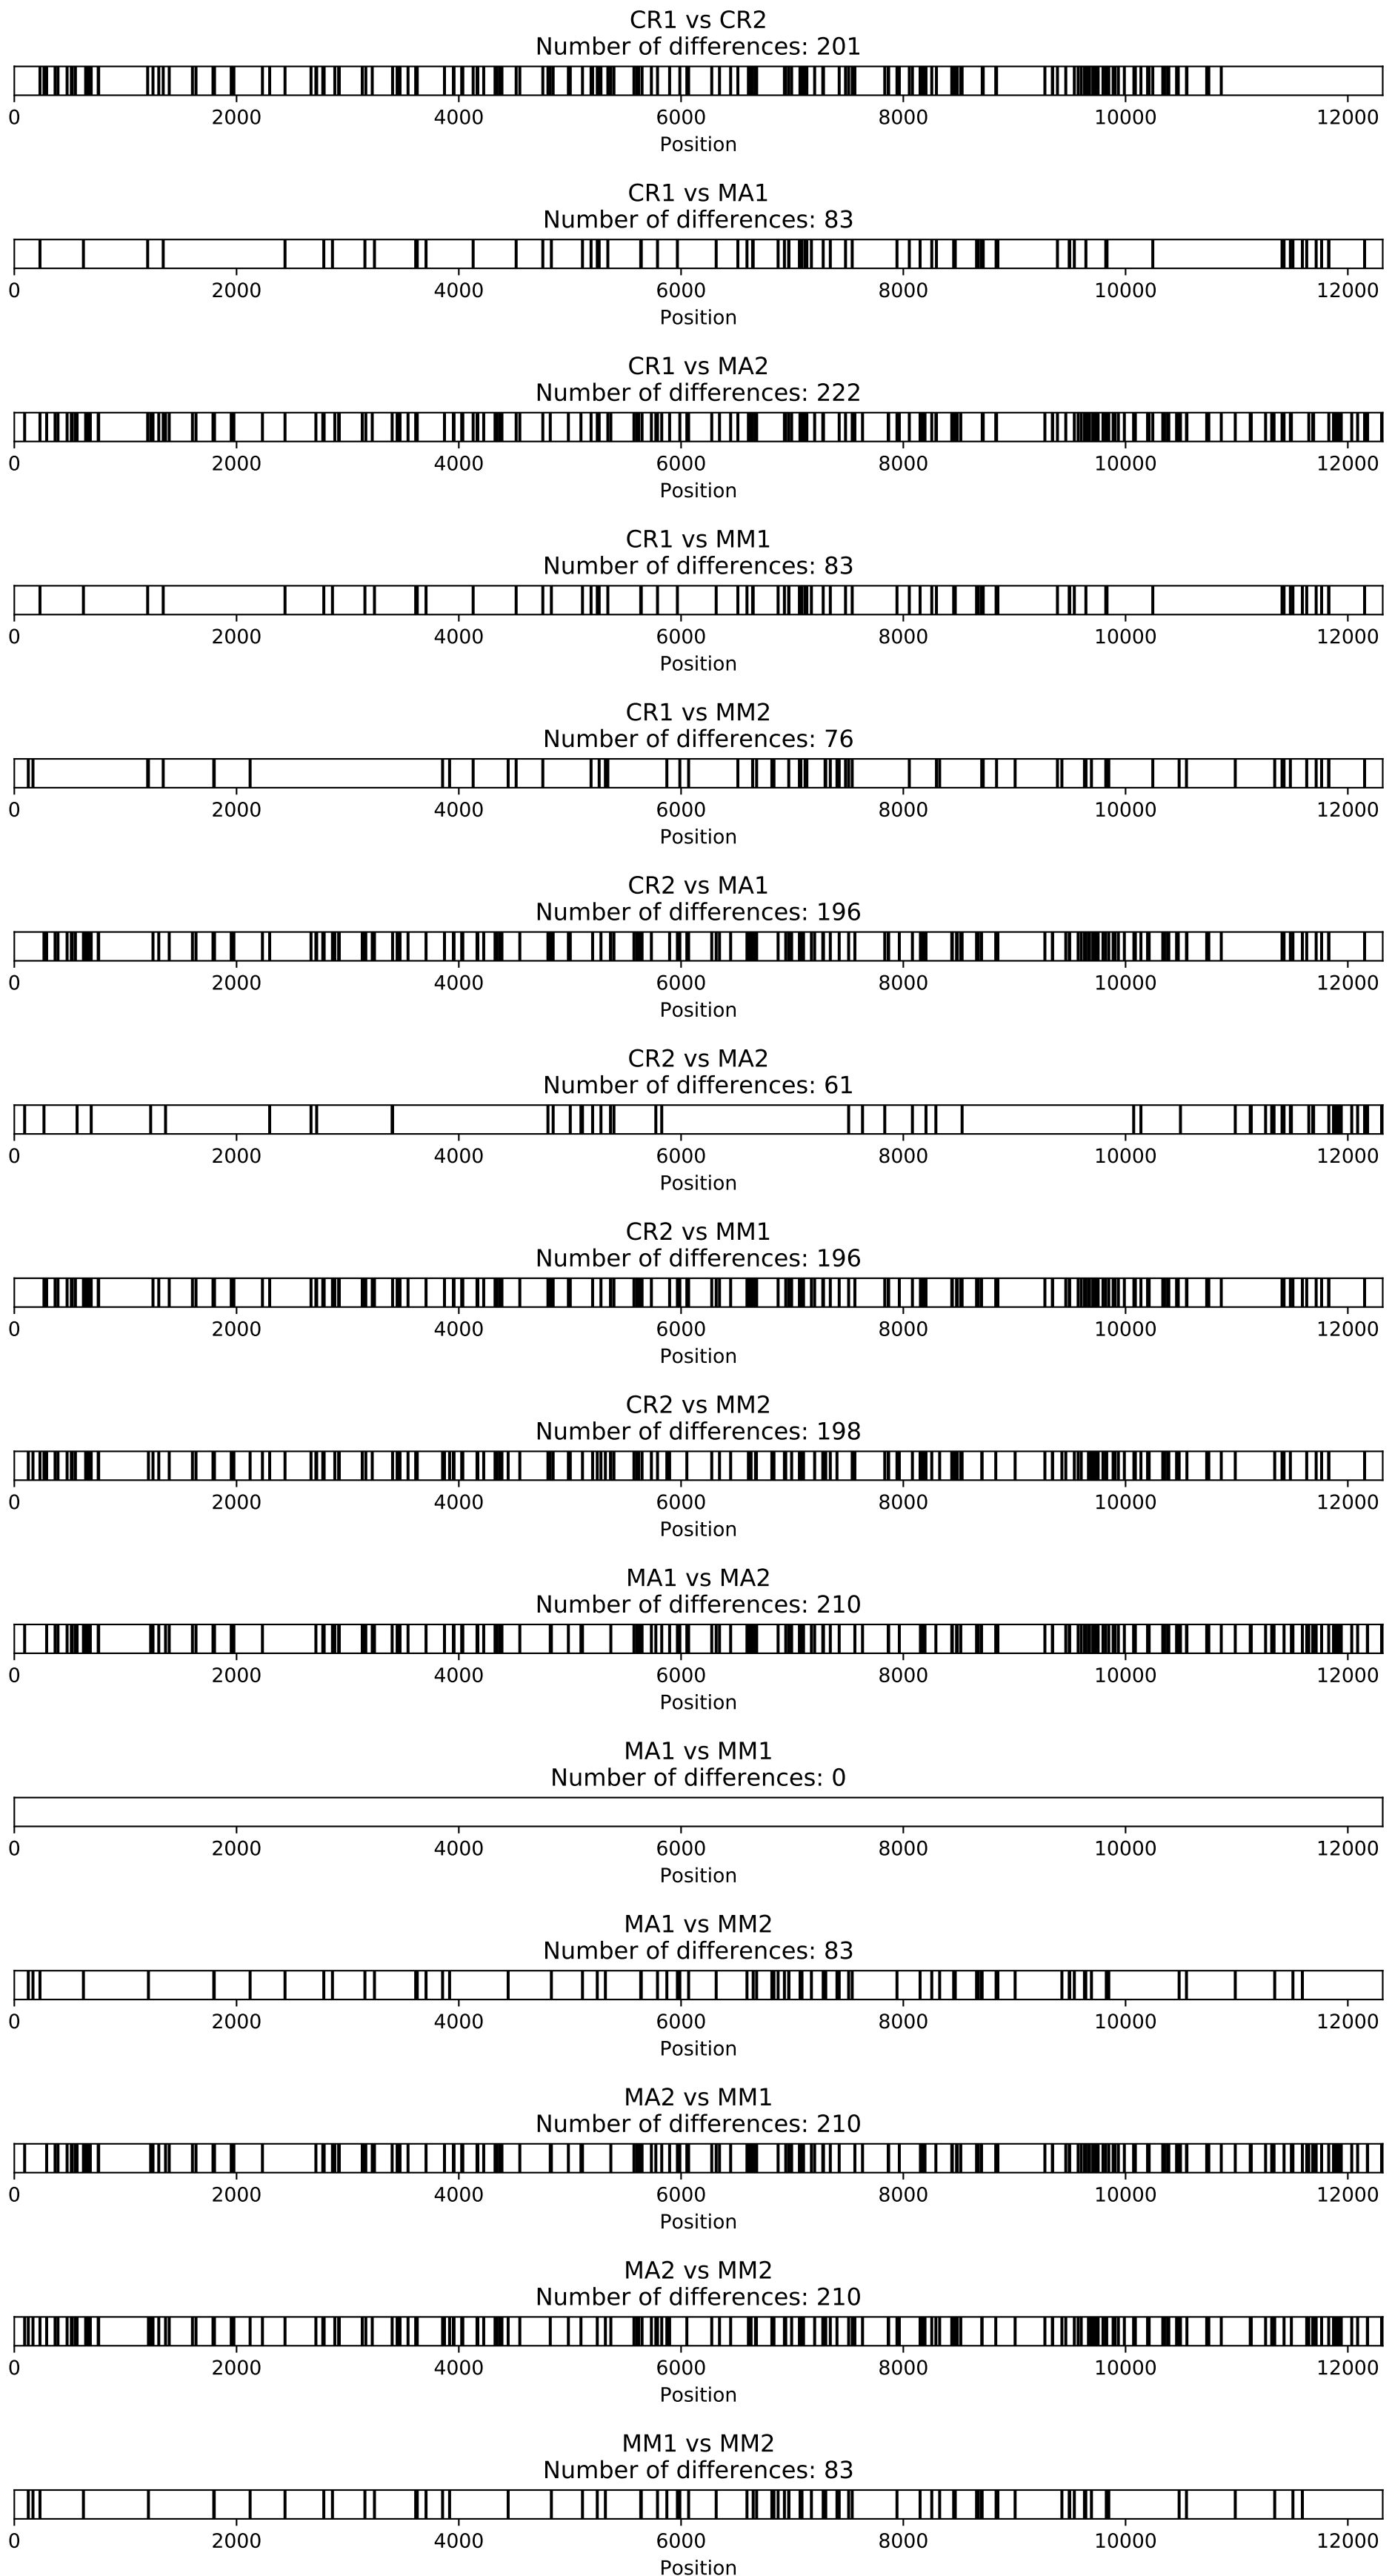

# Region: 12

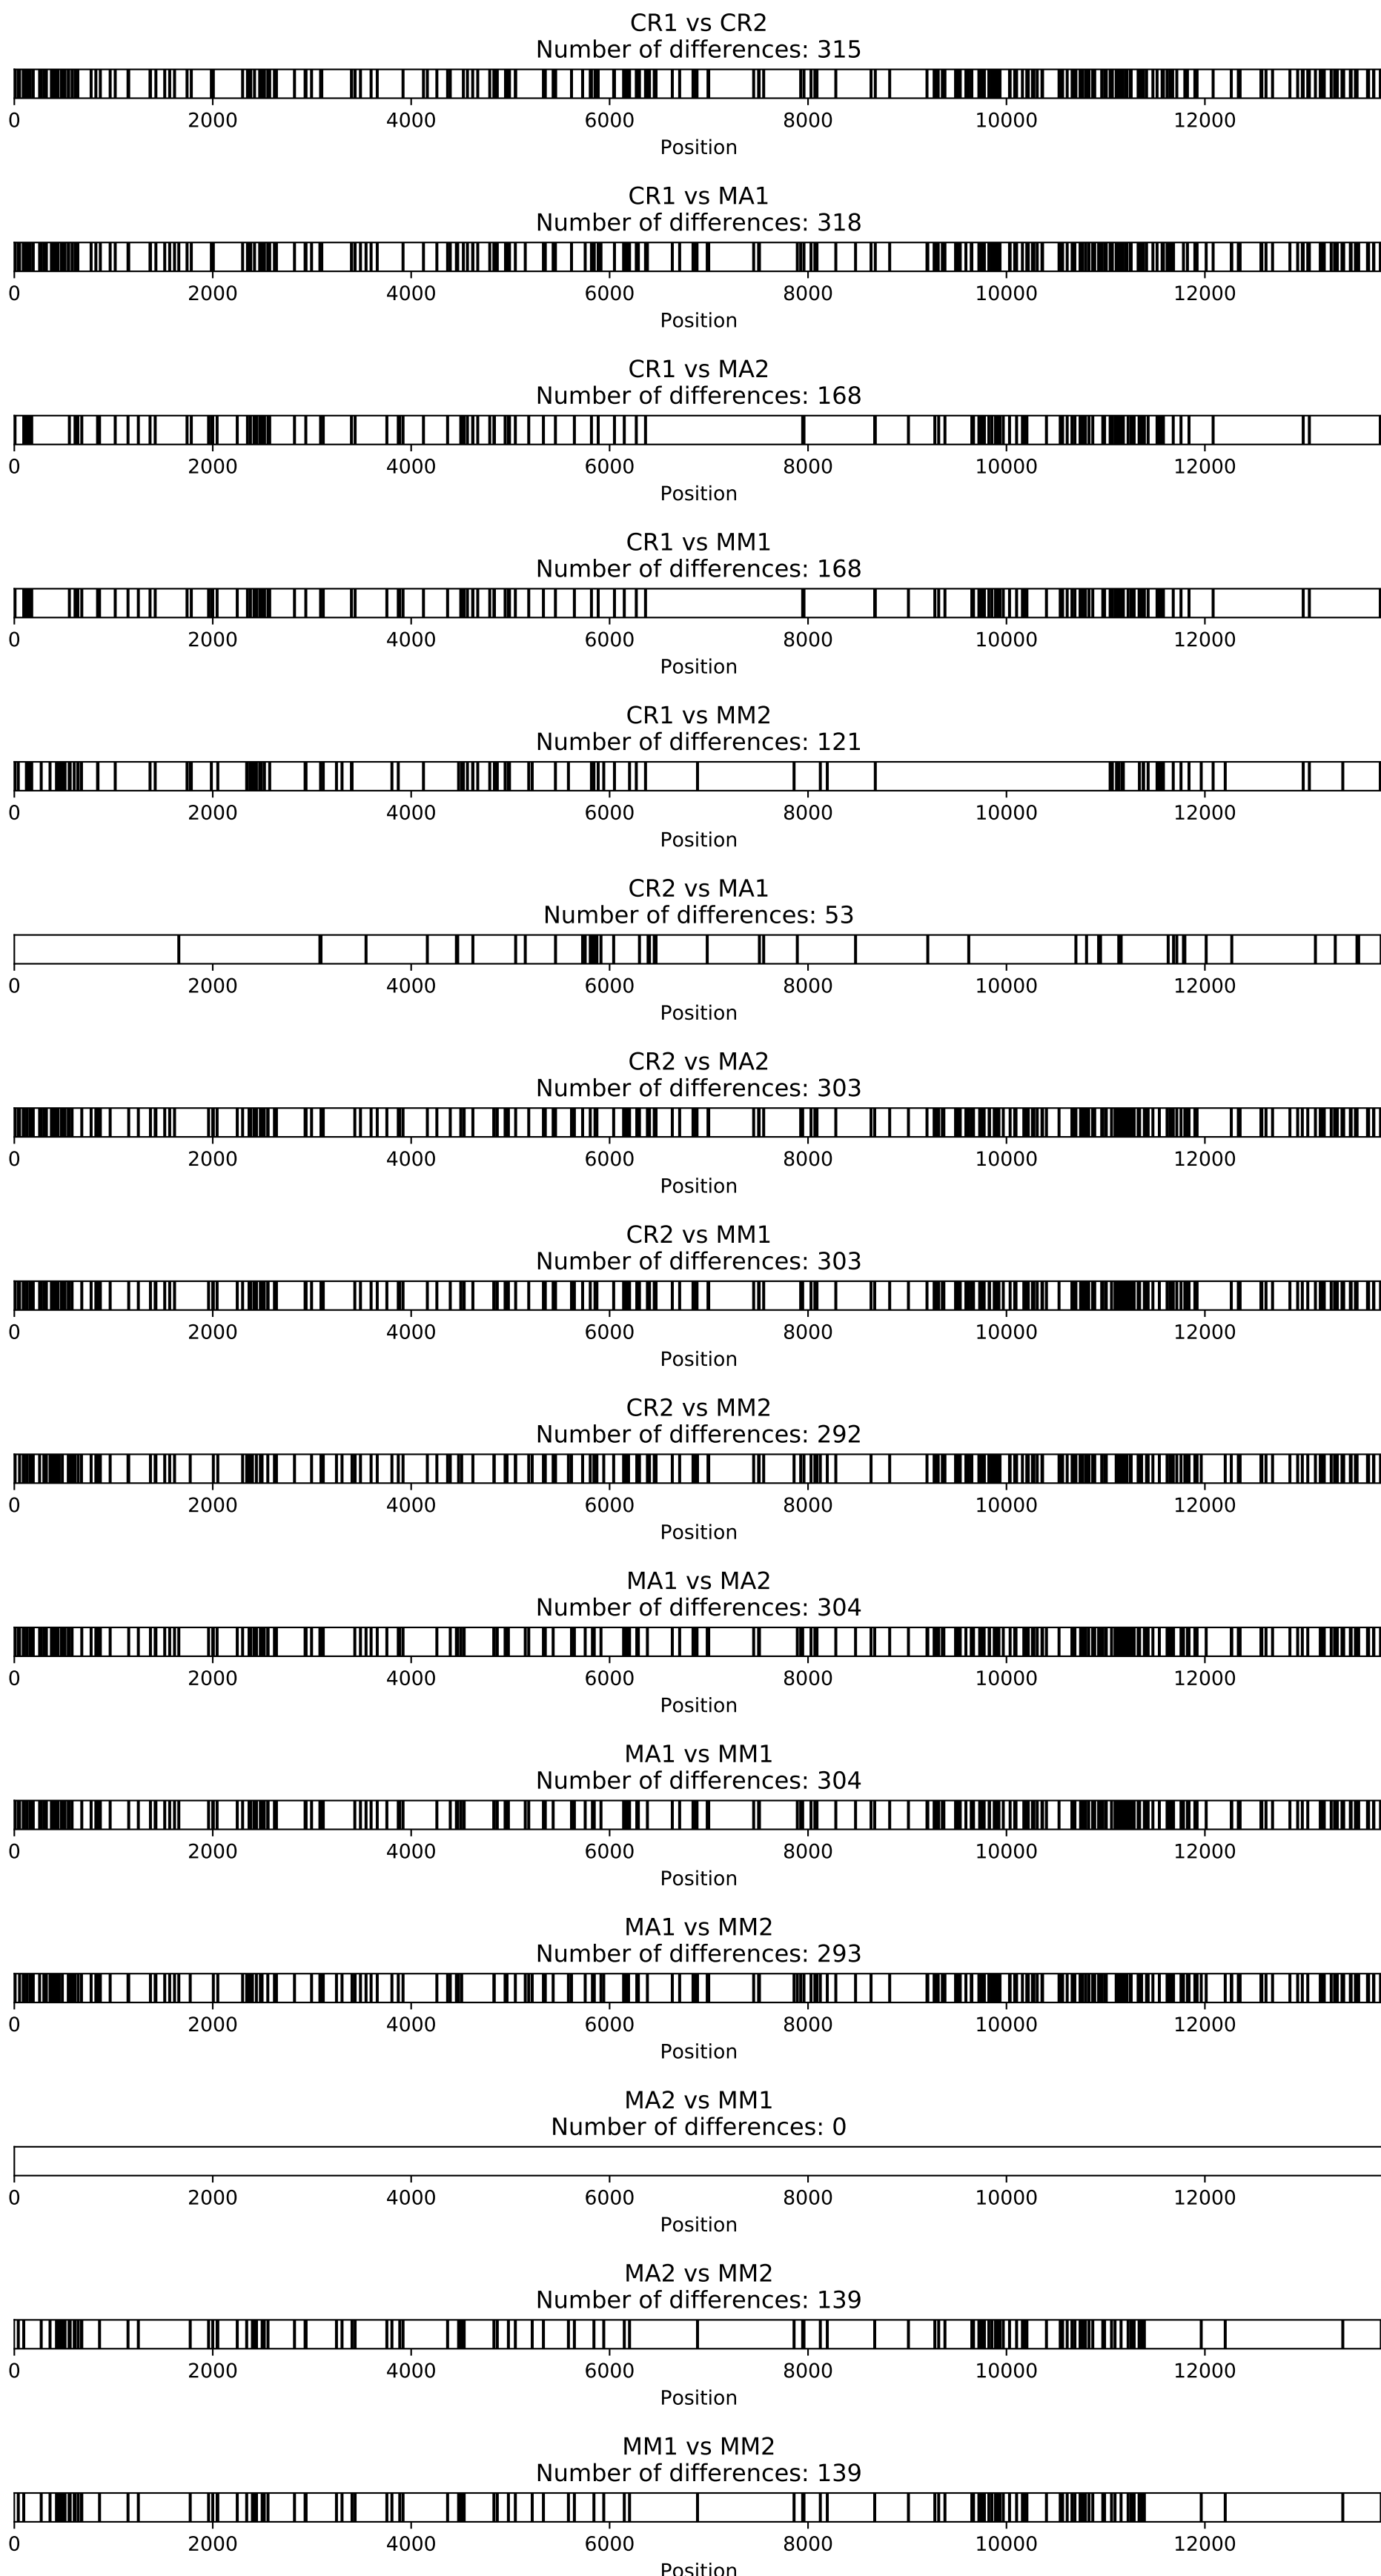

# Region: 13

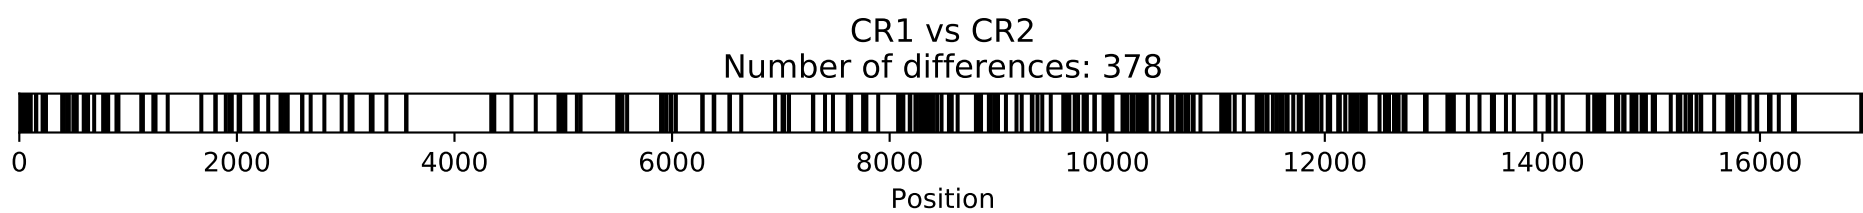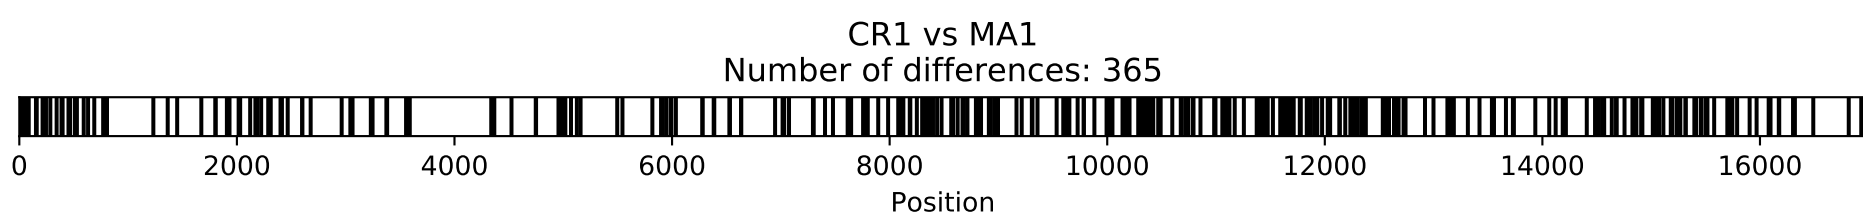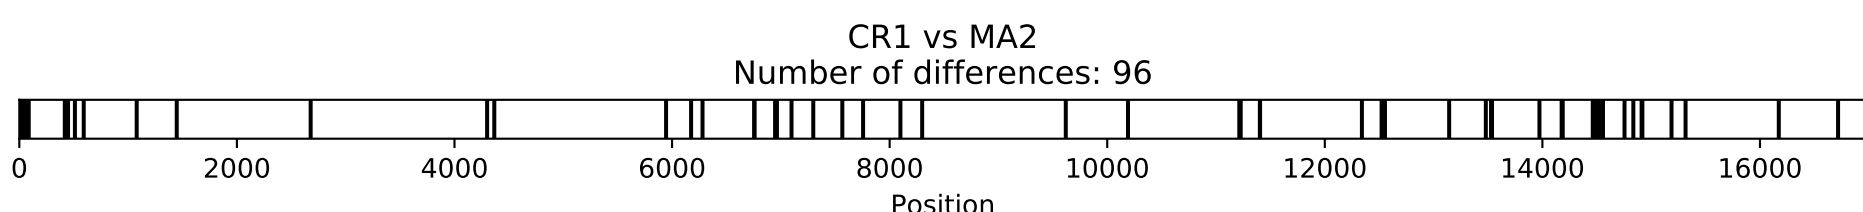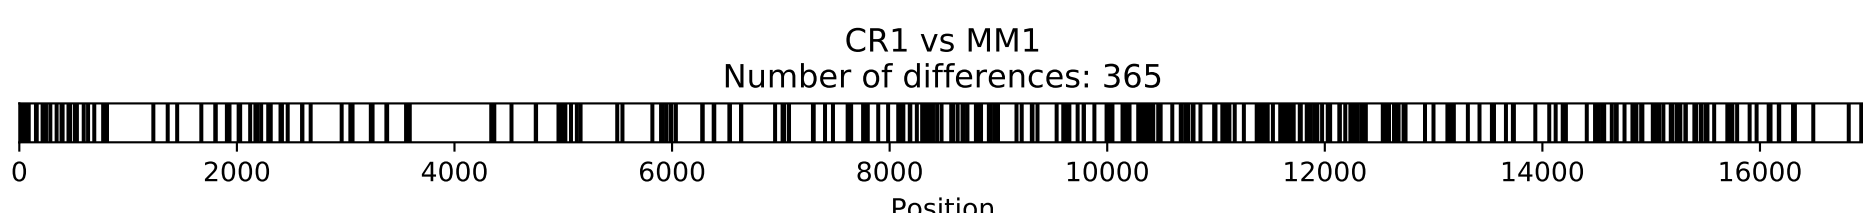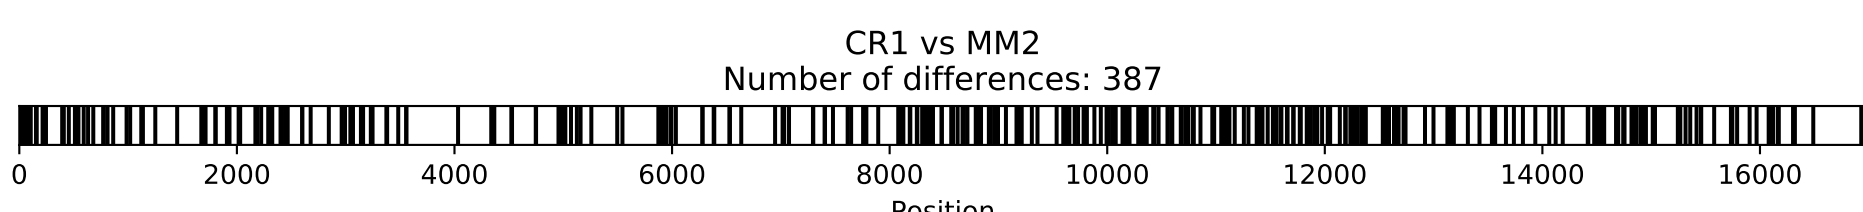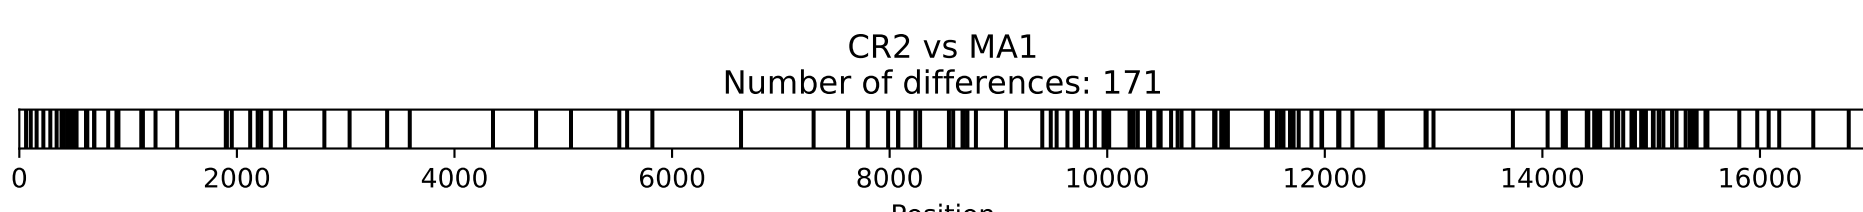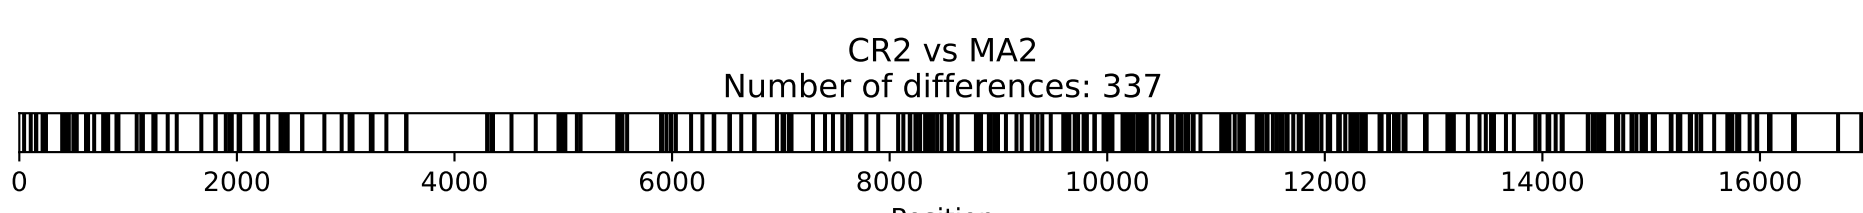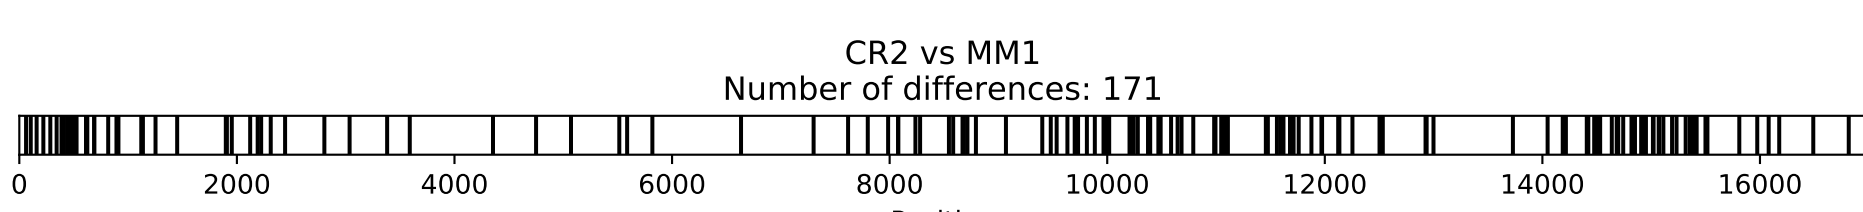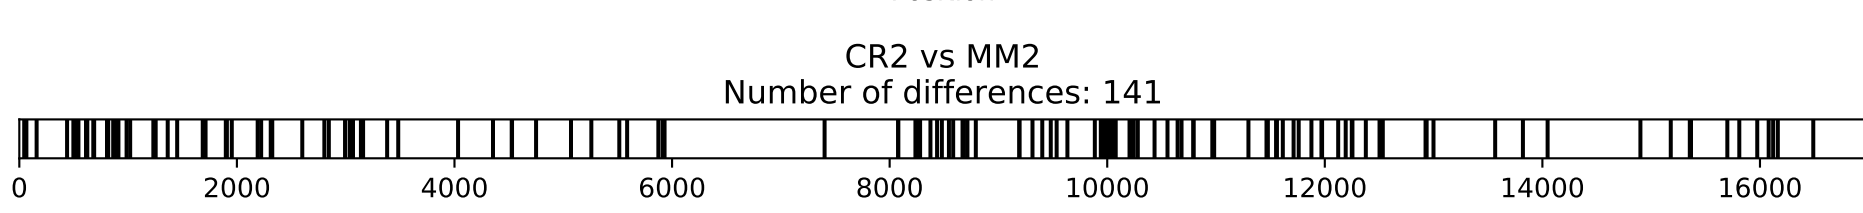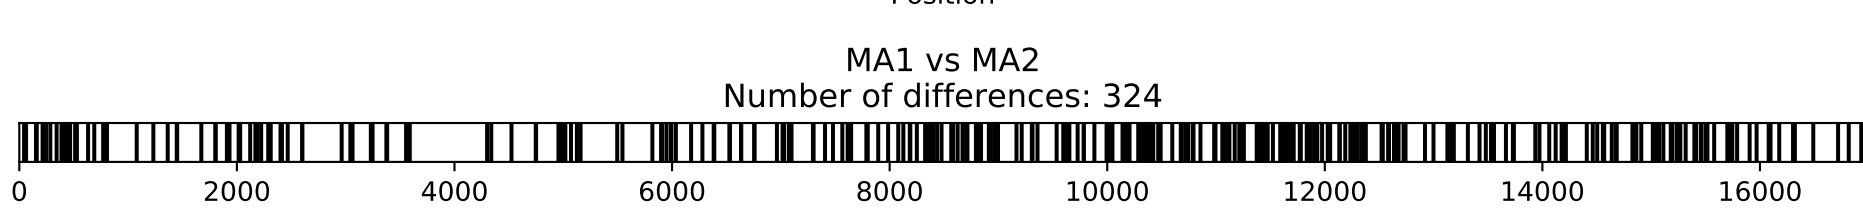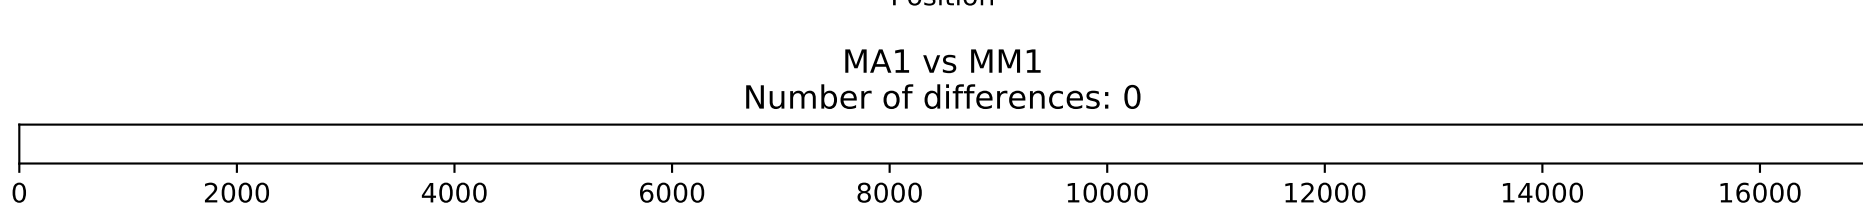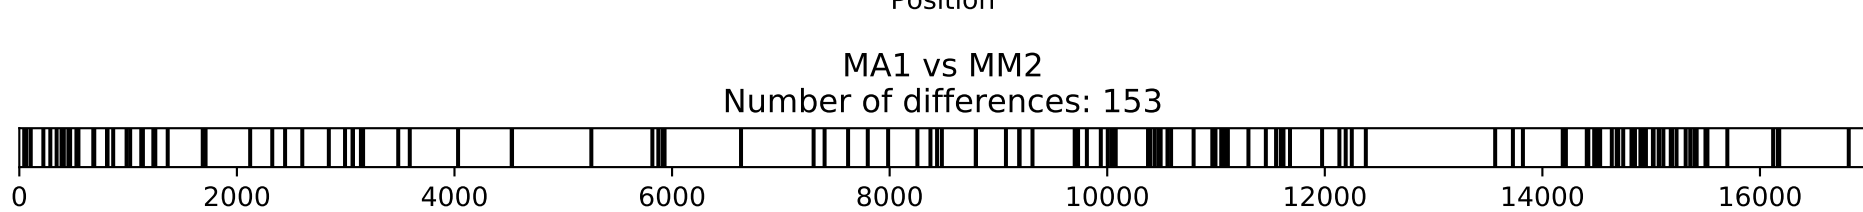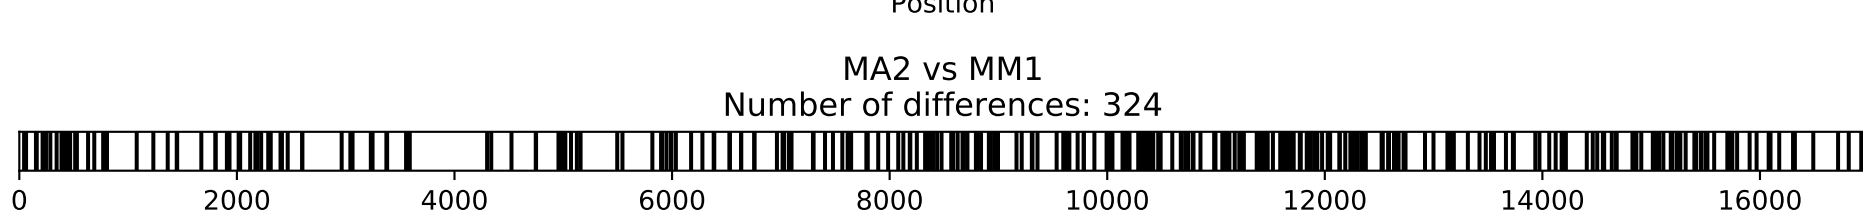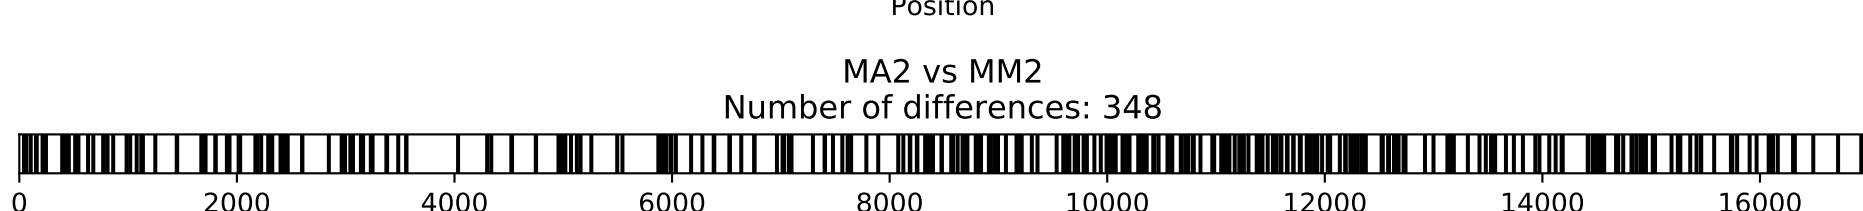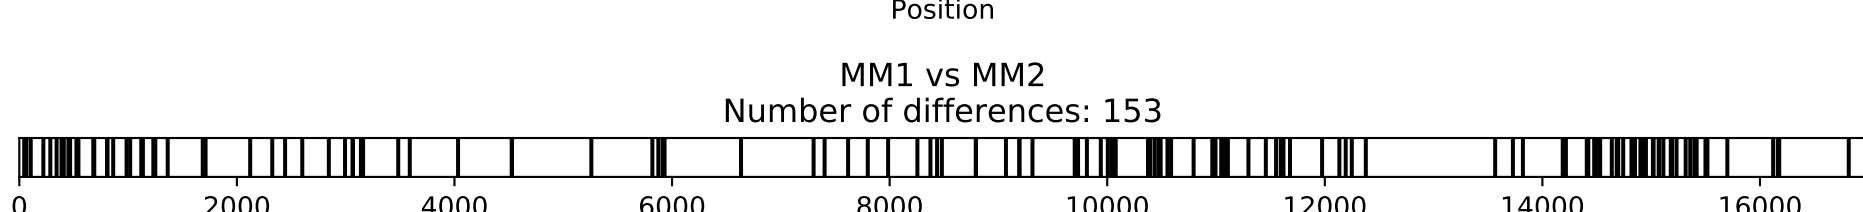

# Region: 14

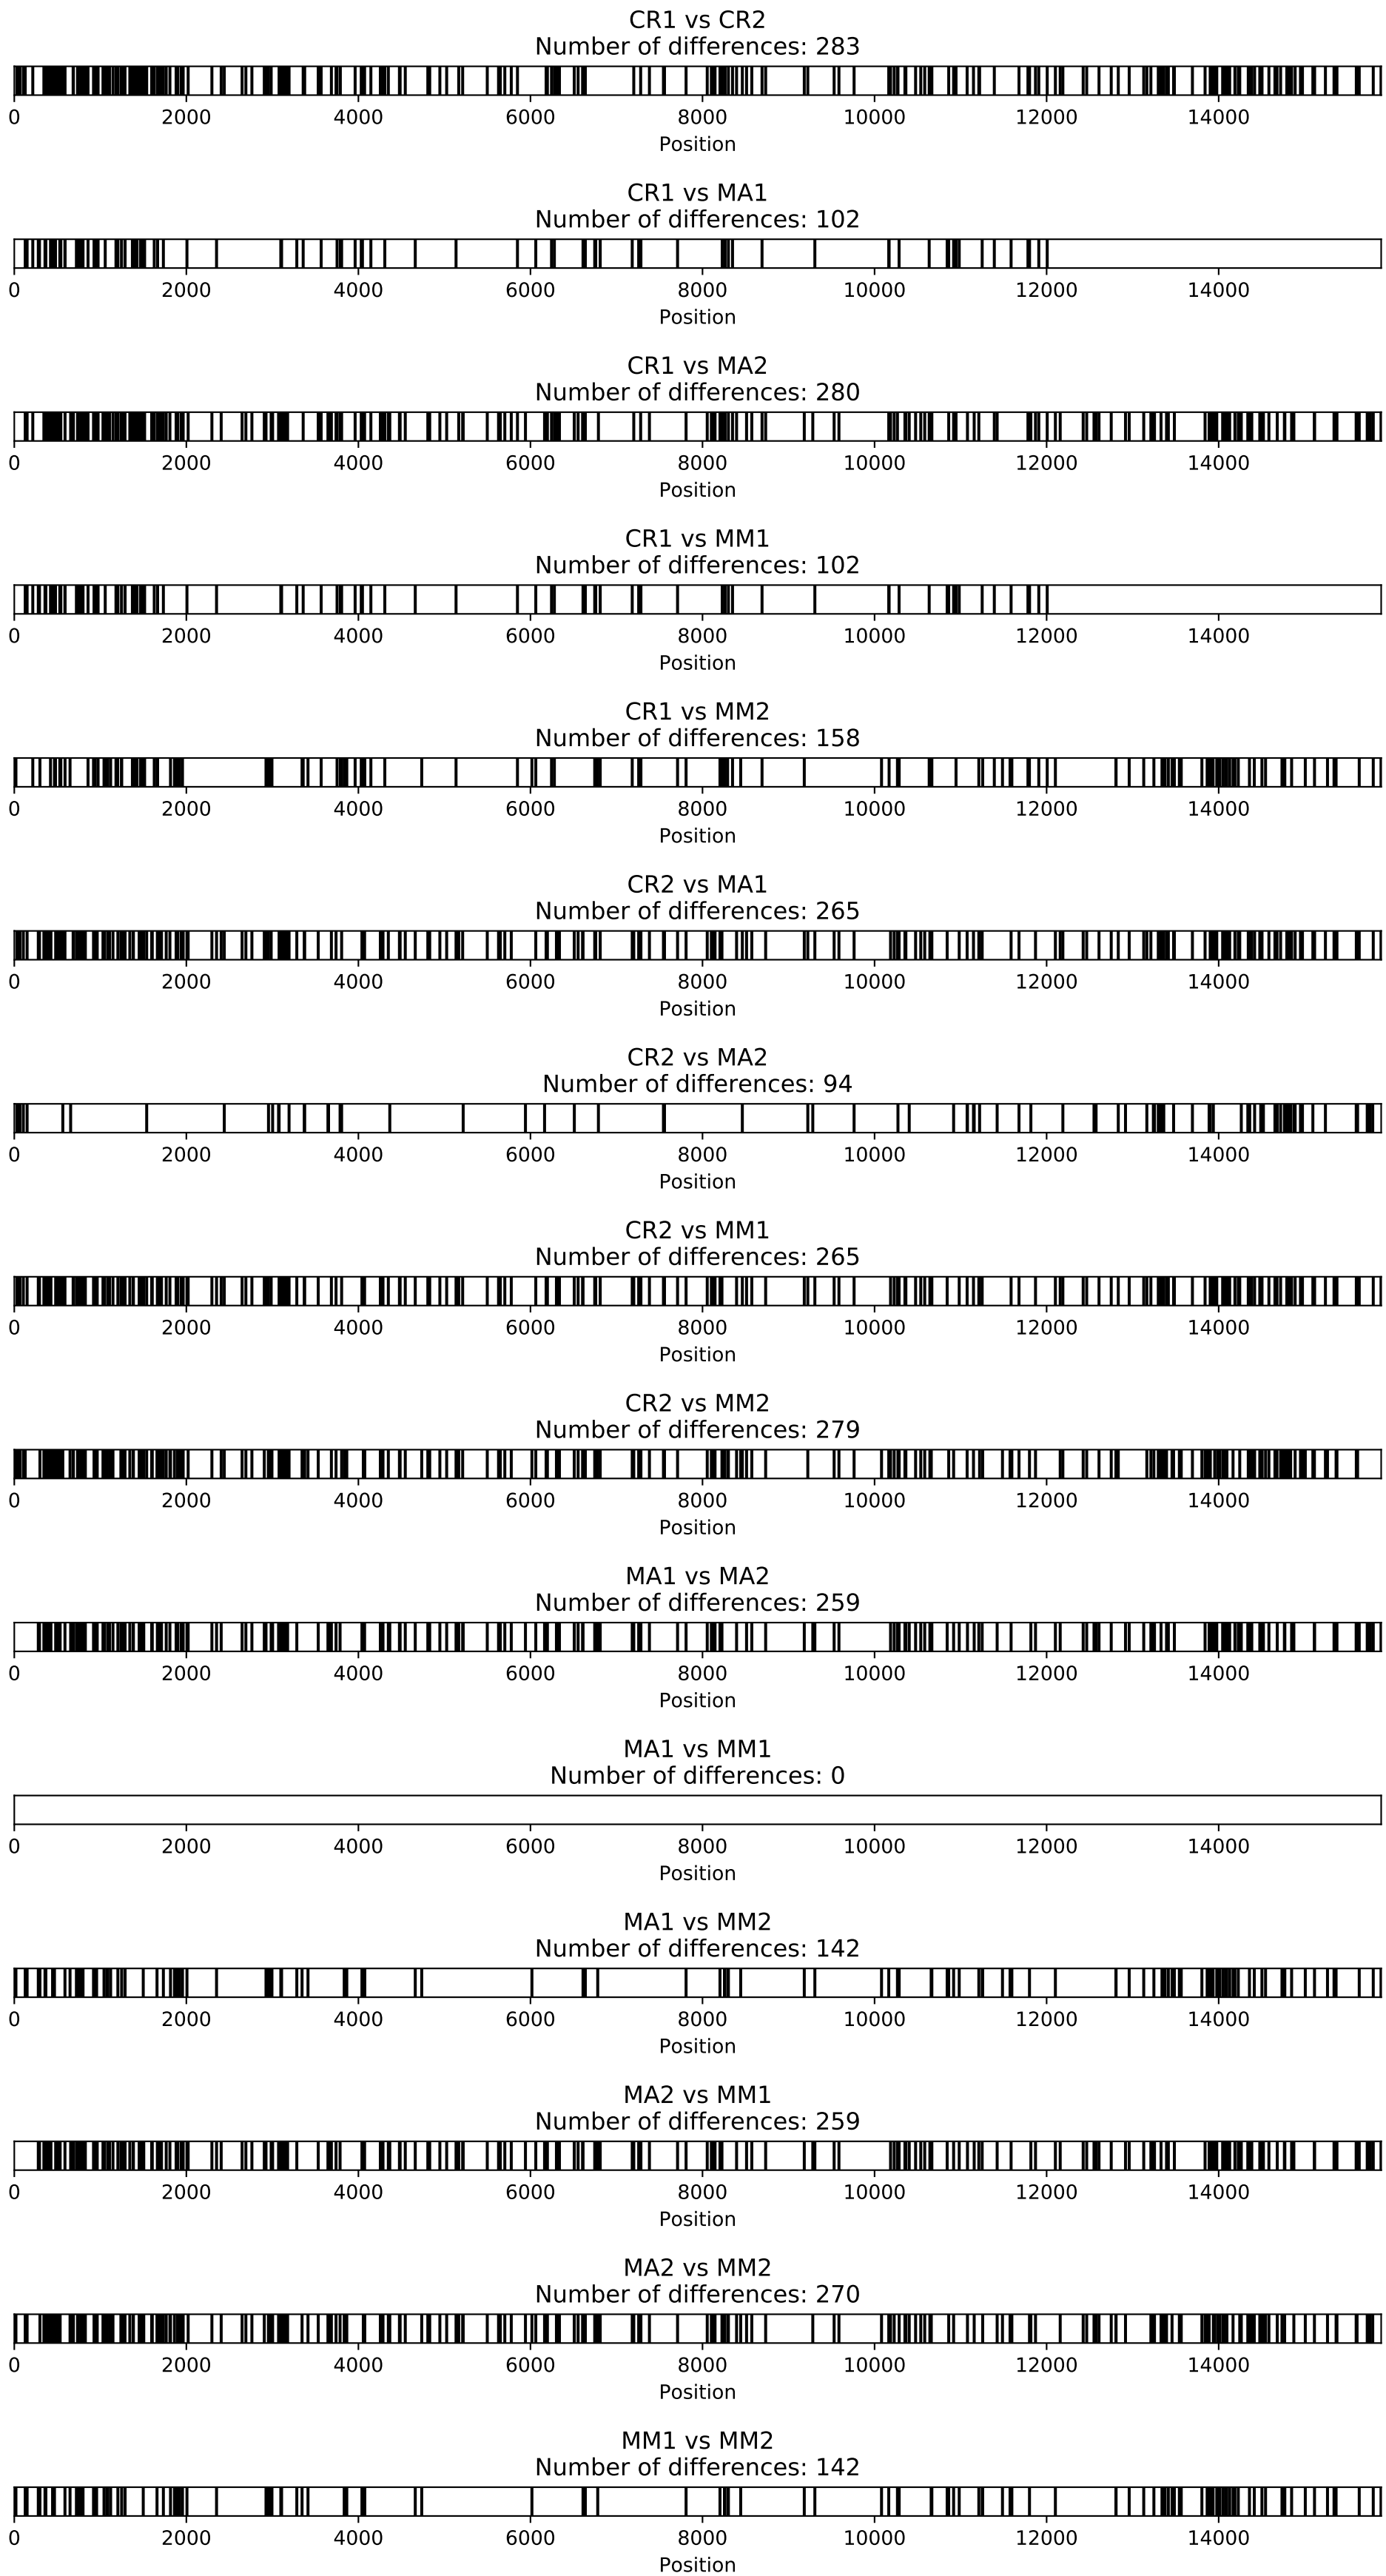

# Region: 15

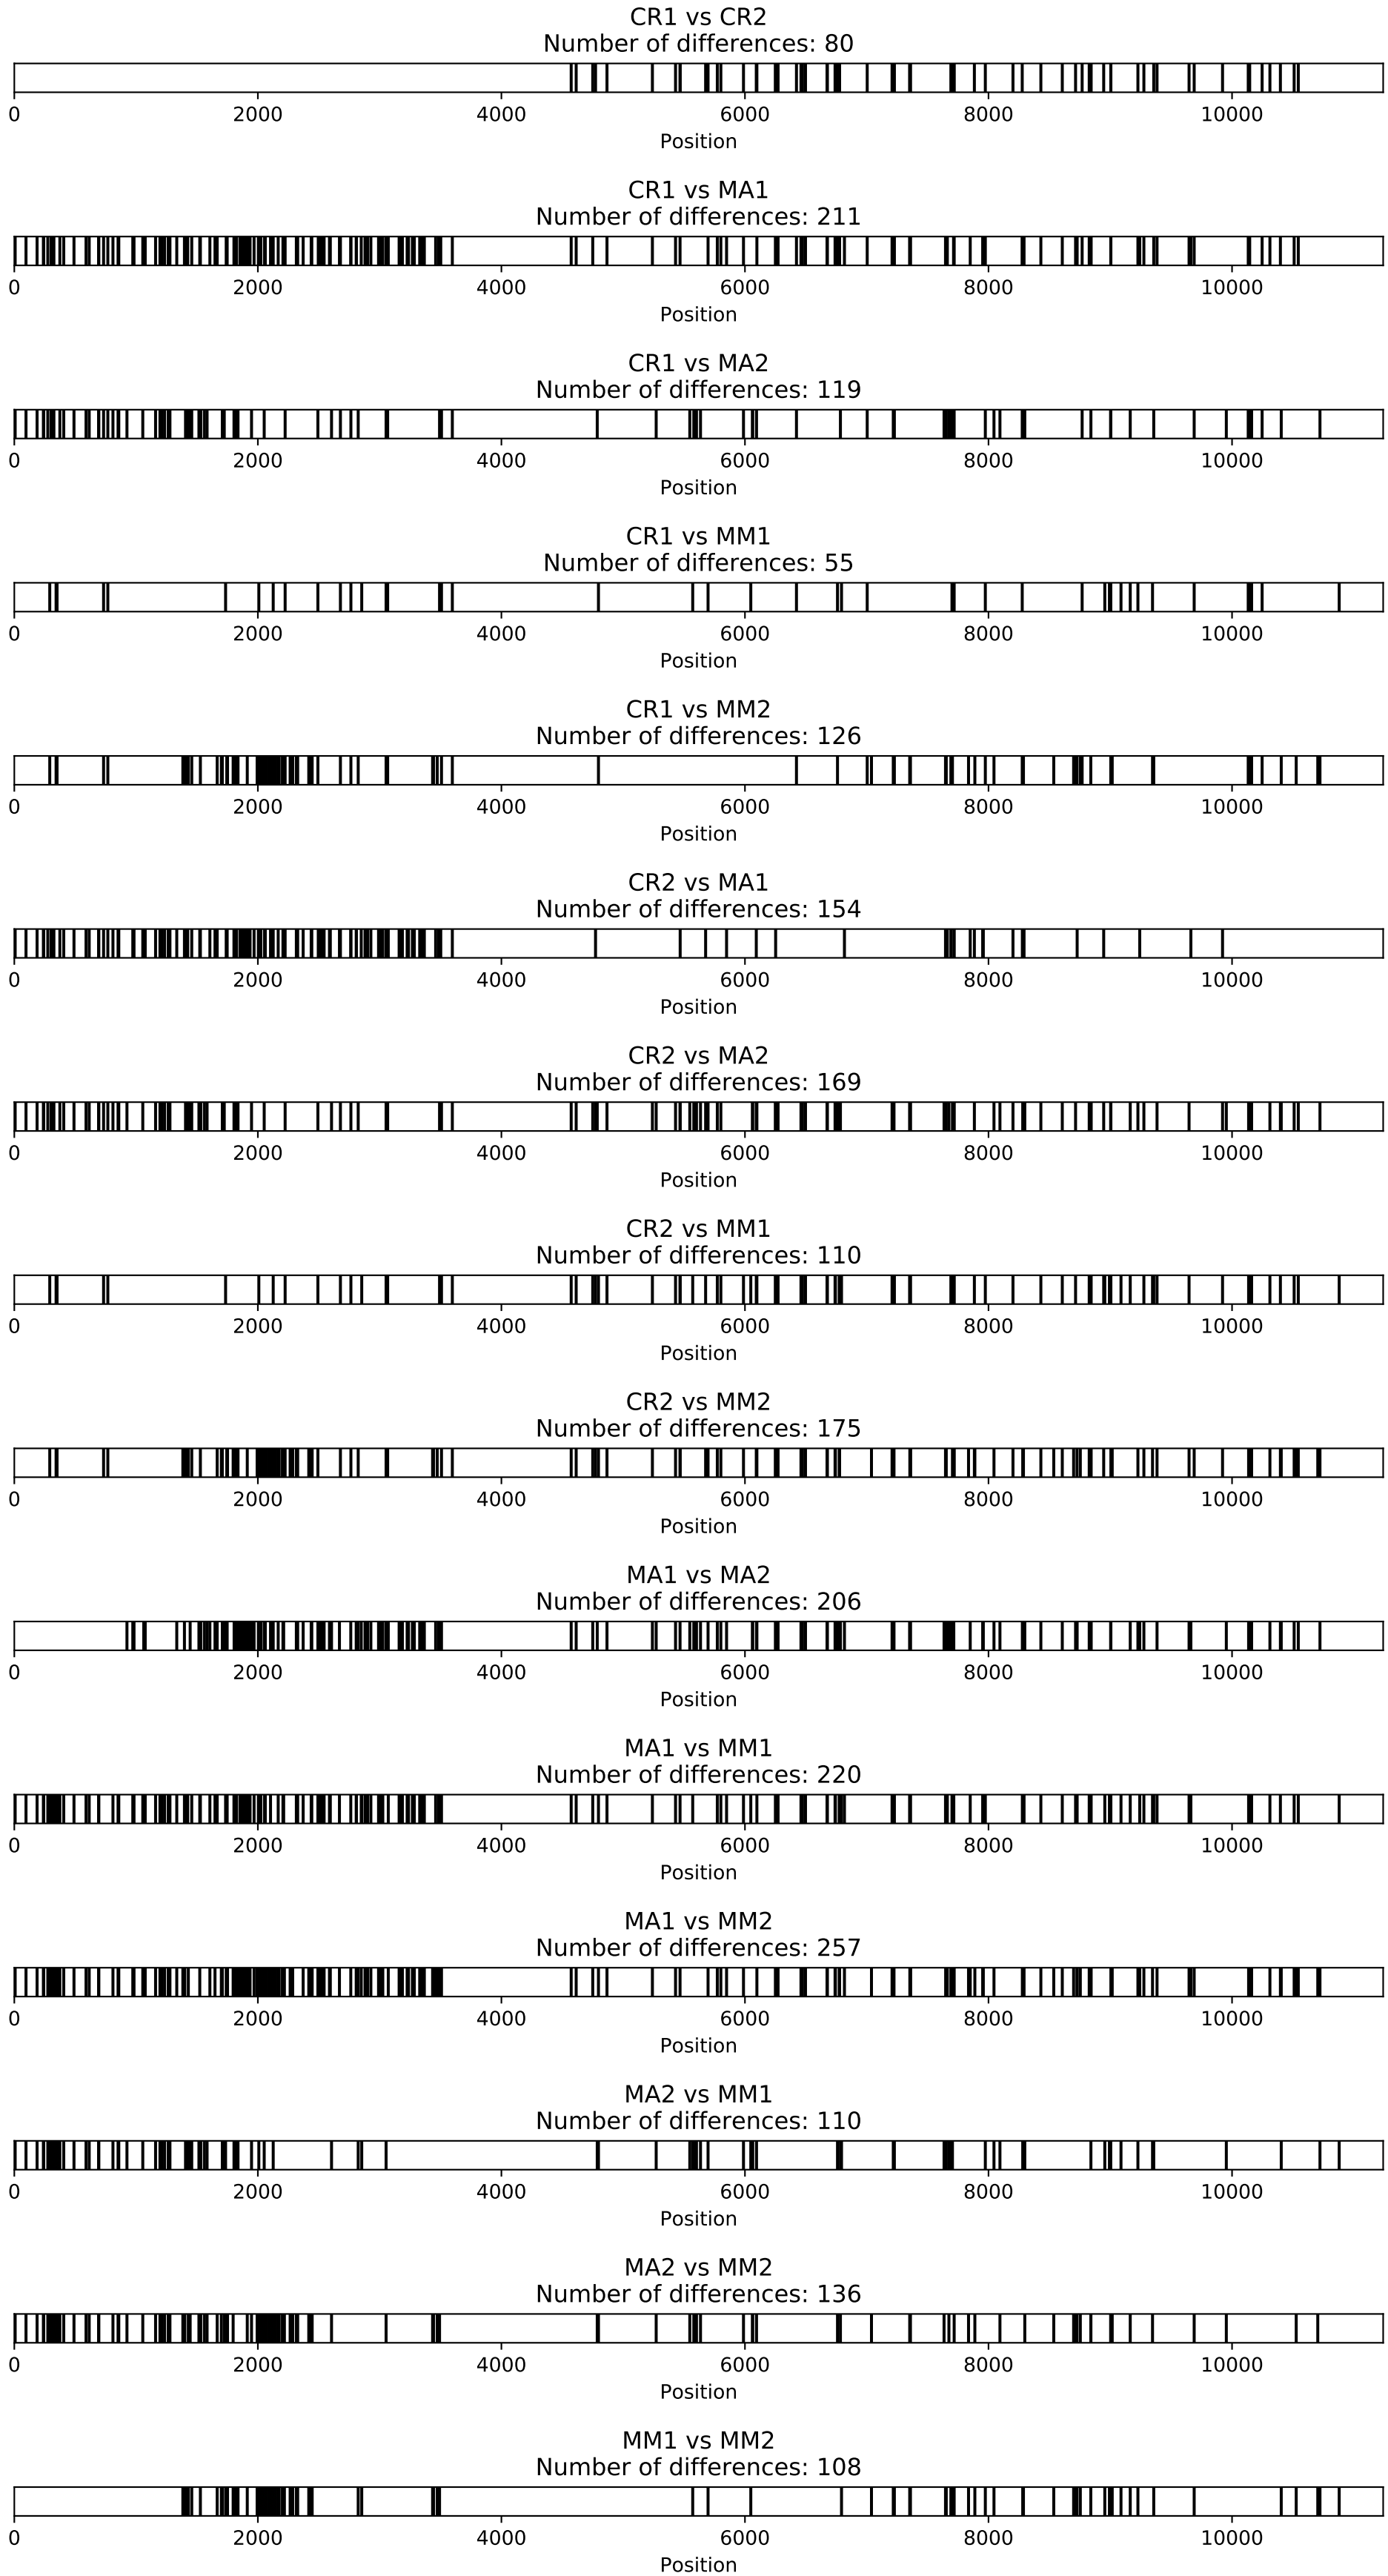

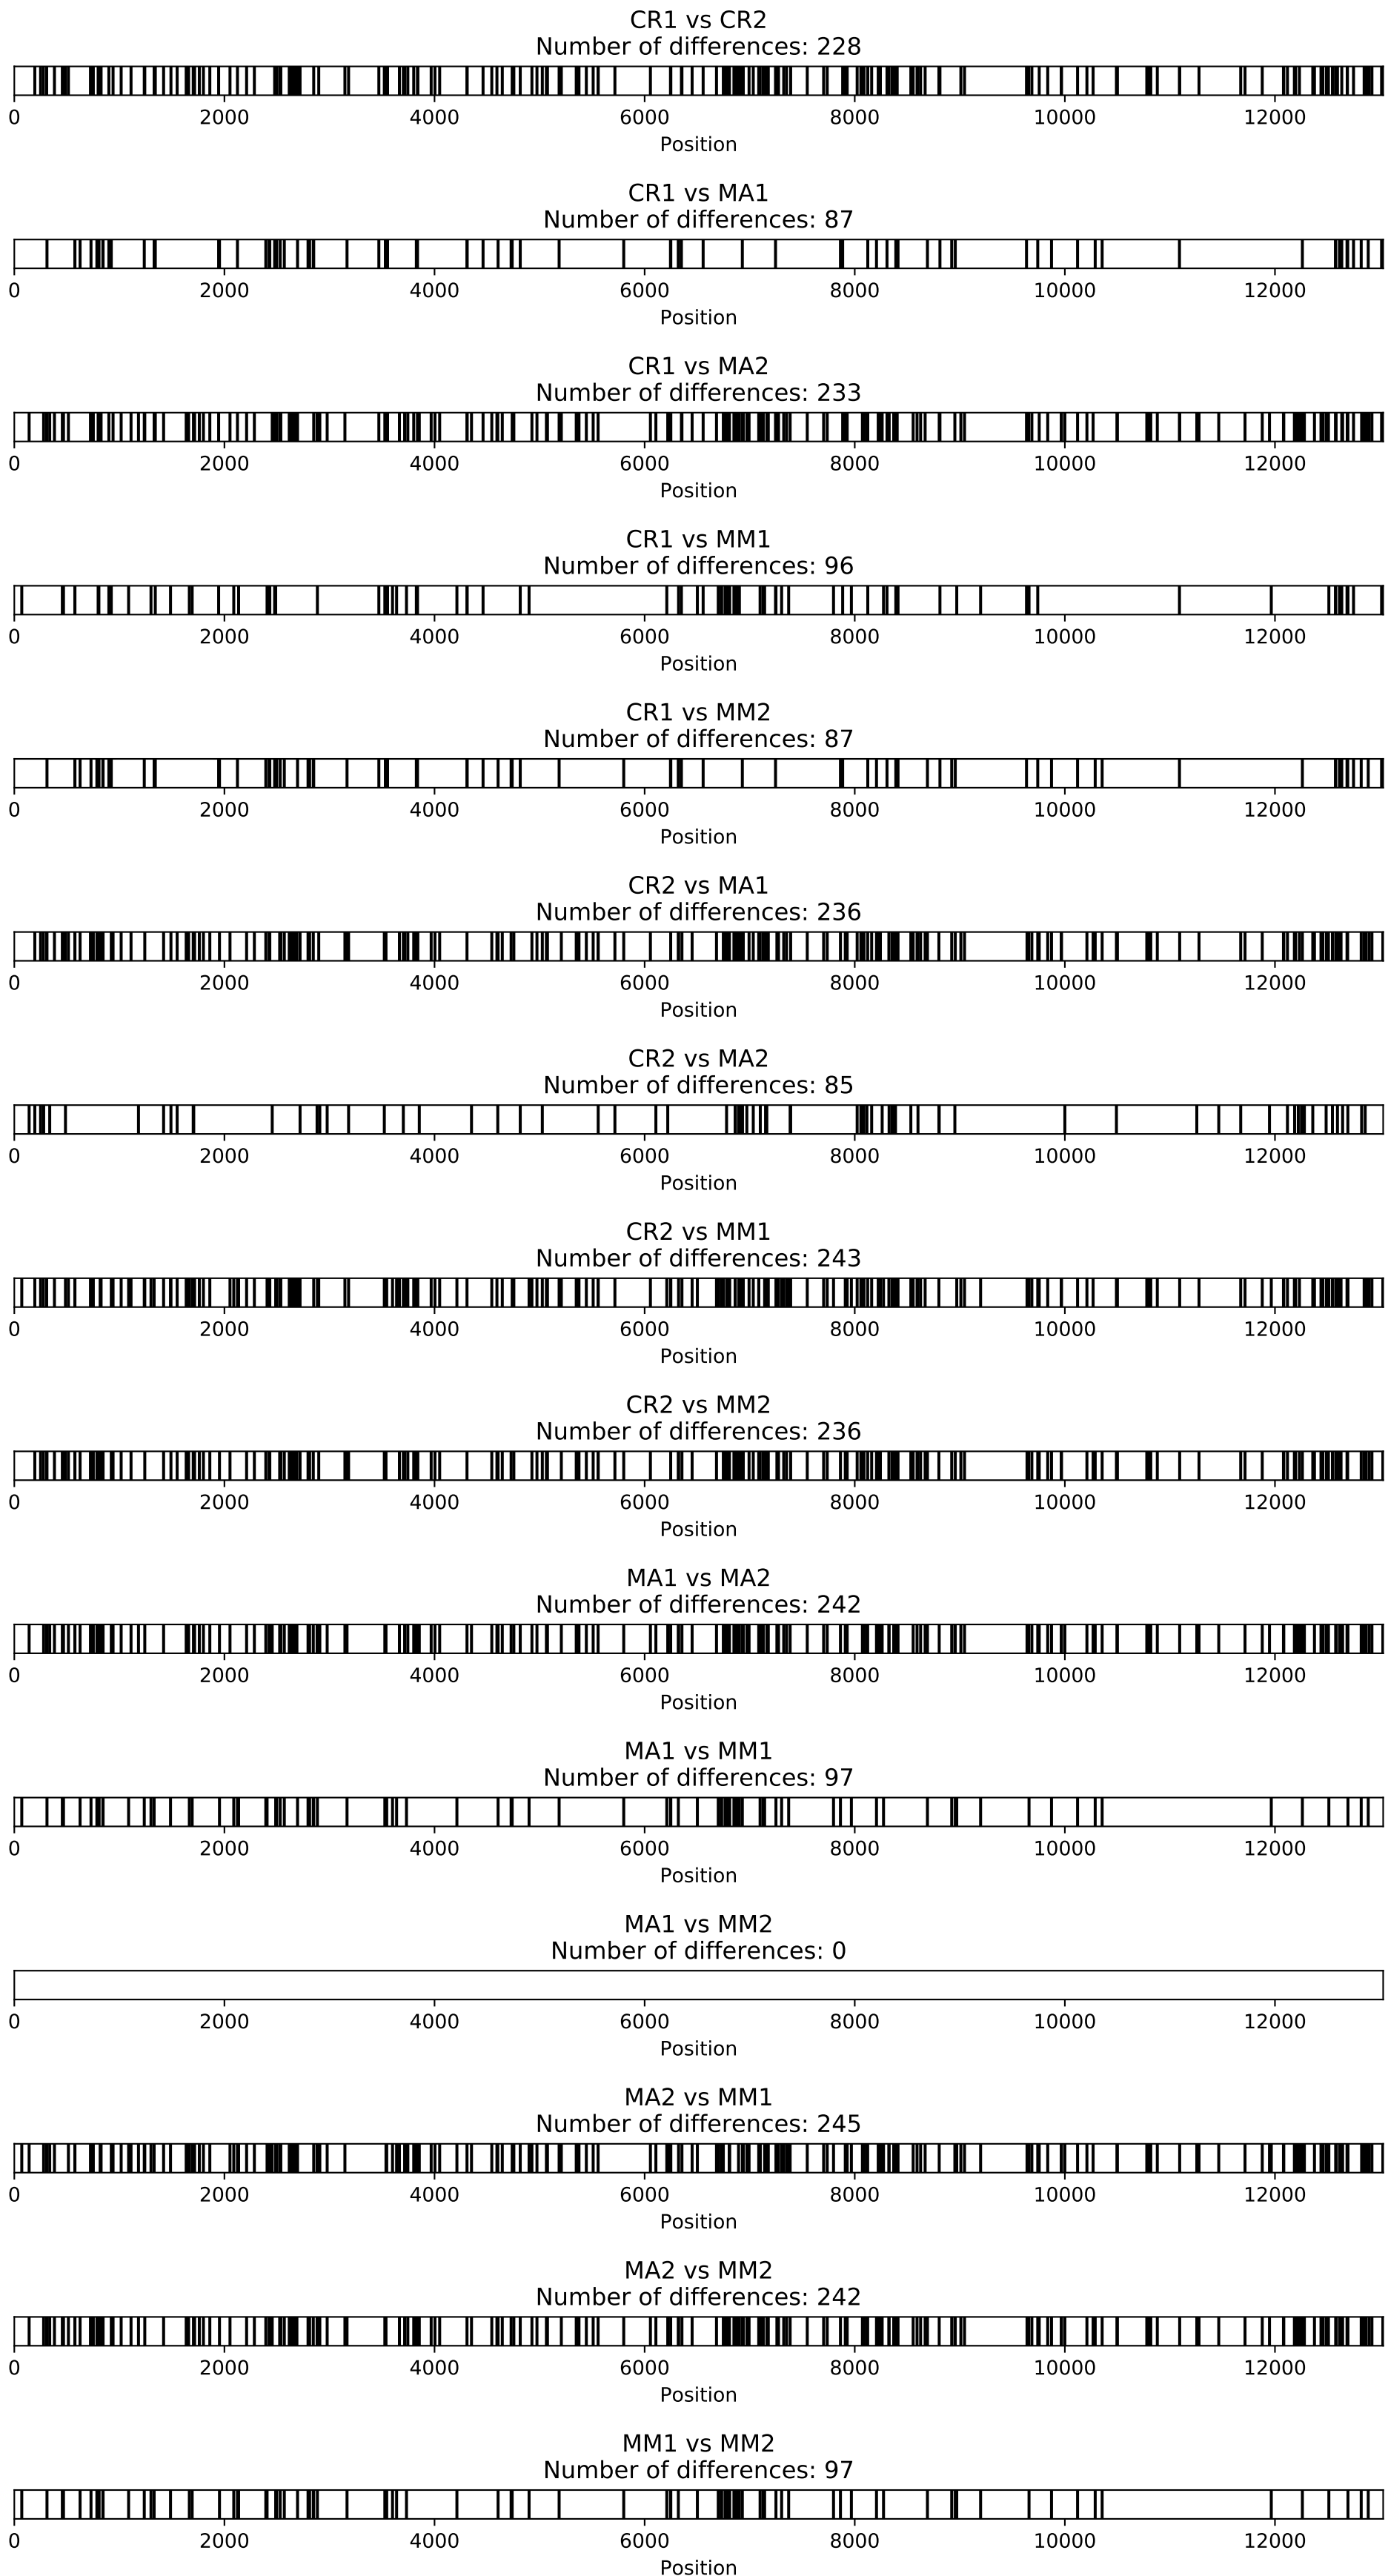

# Region: 20

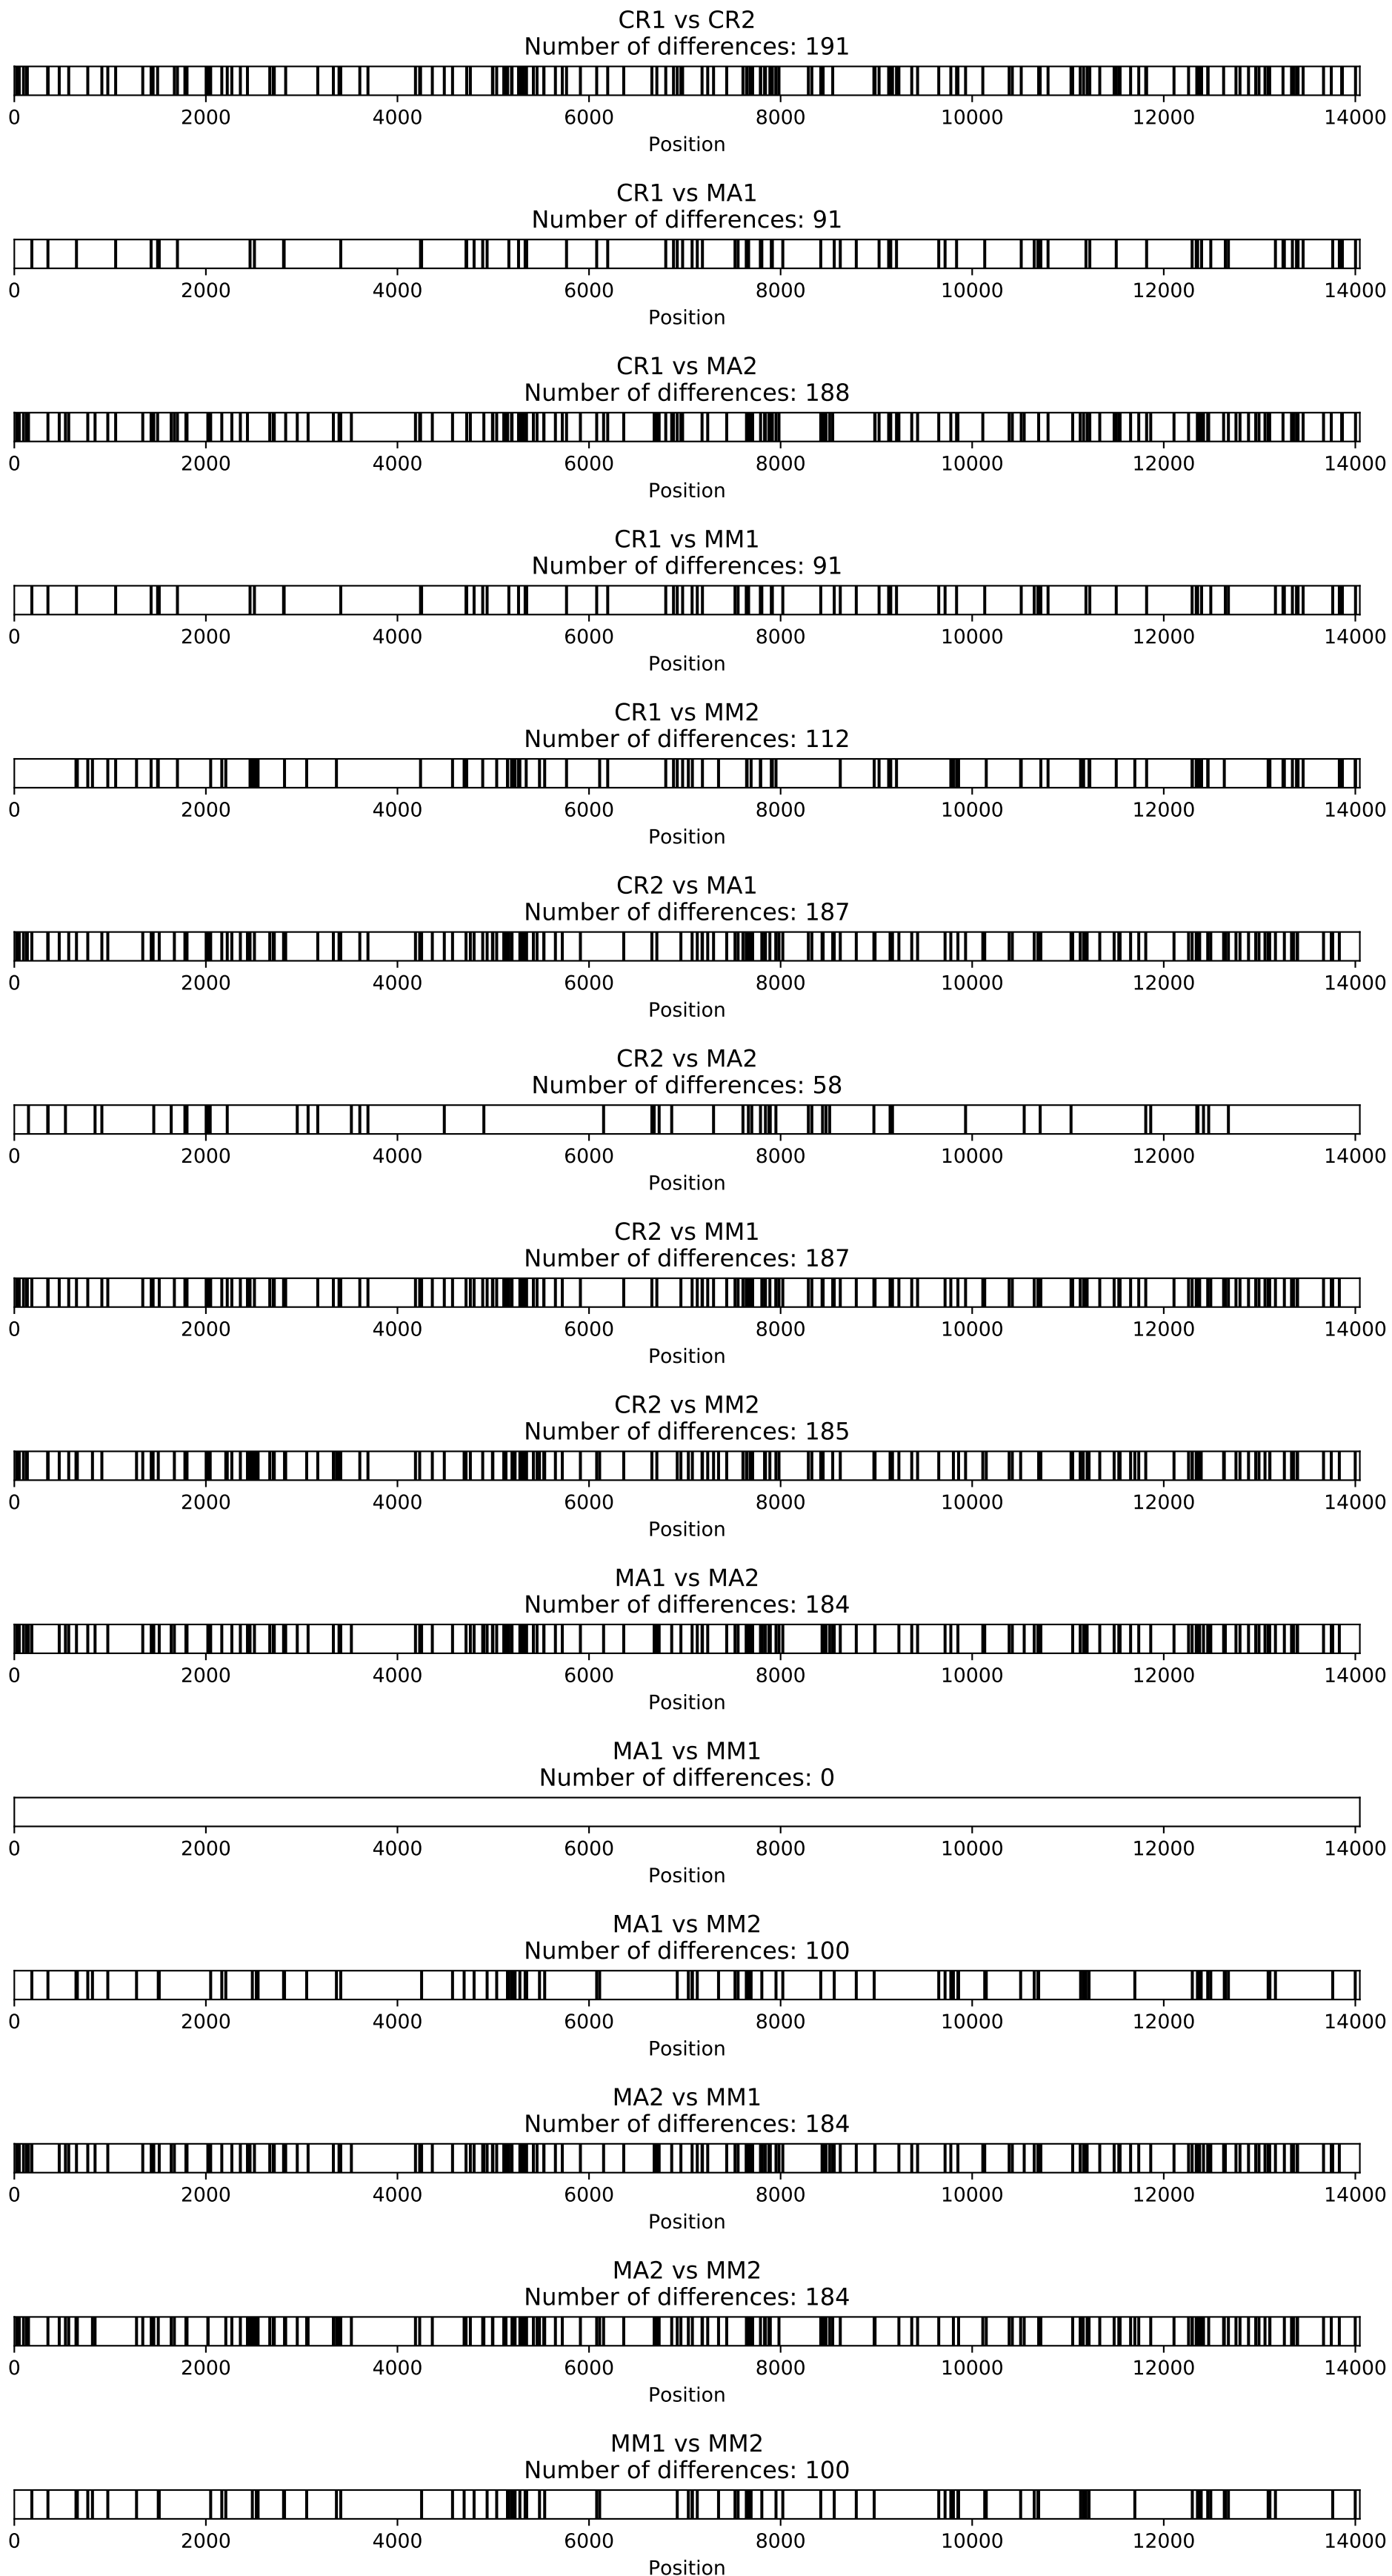



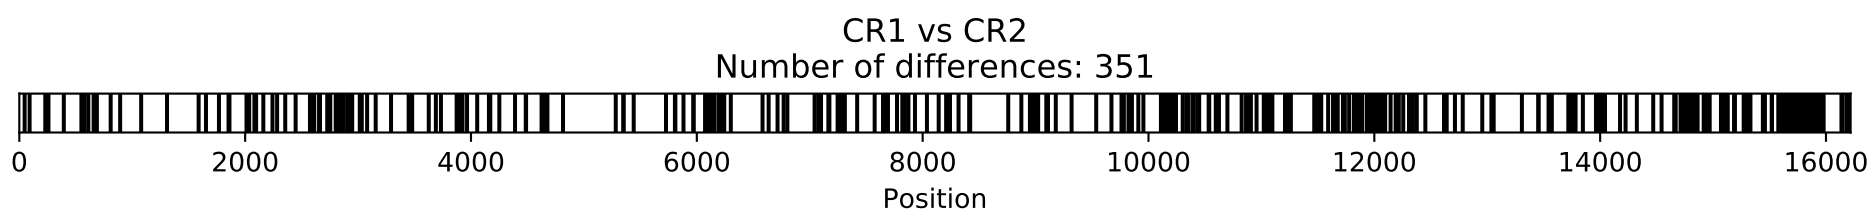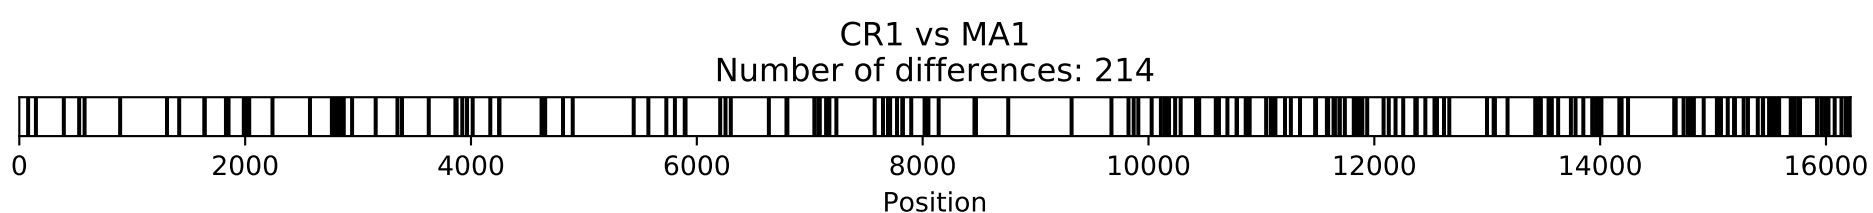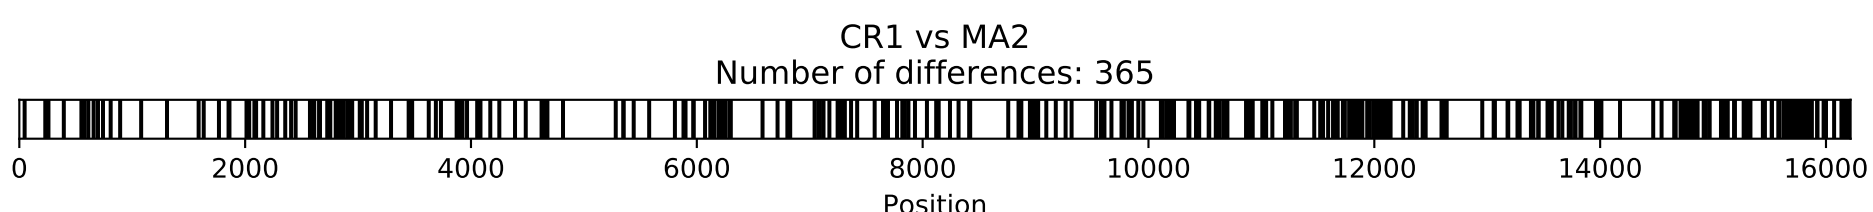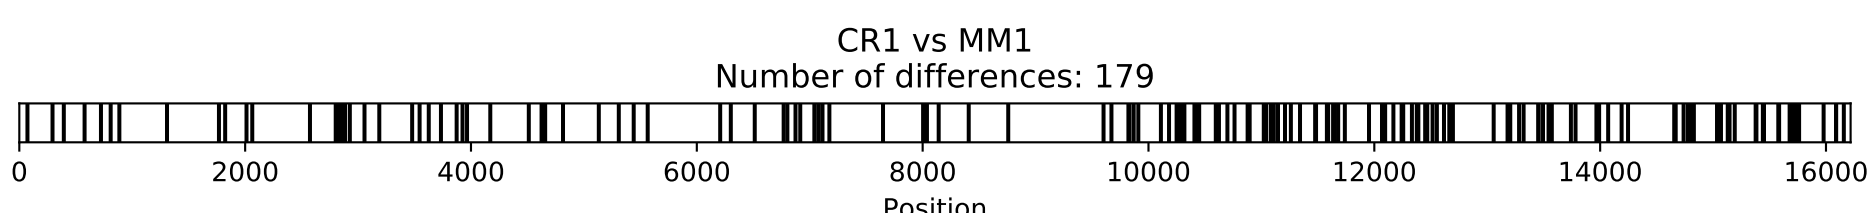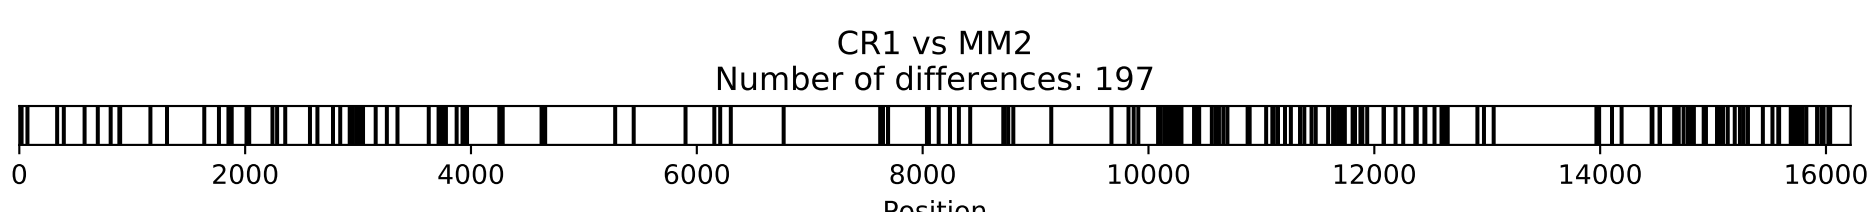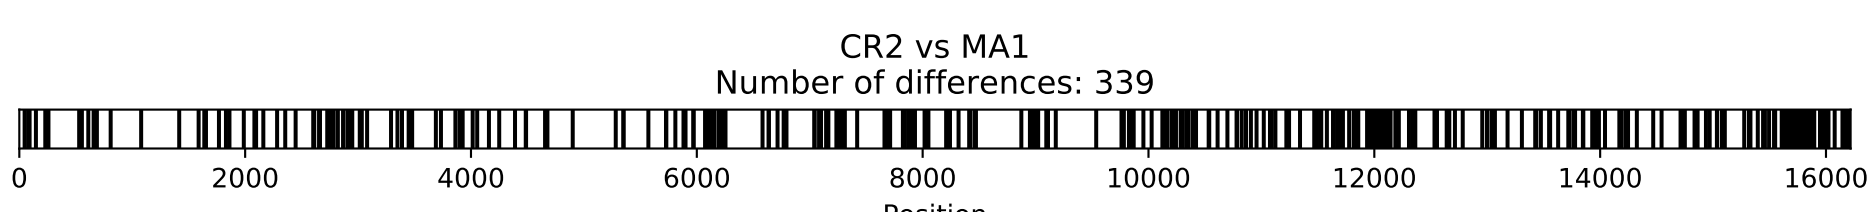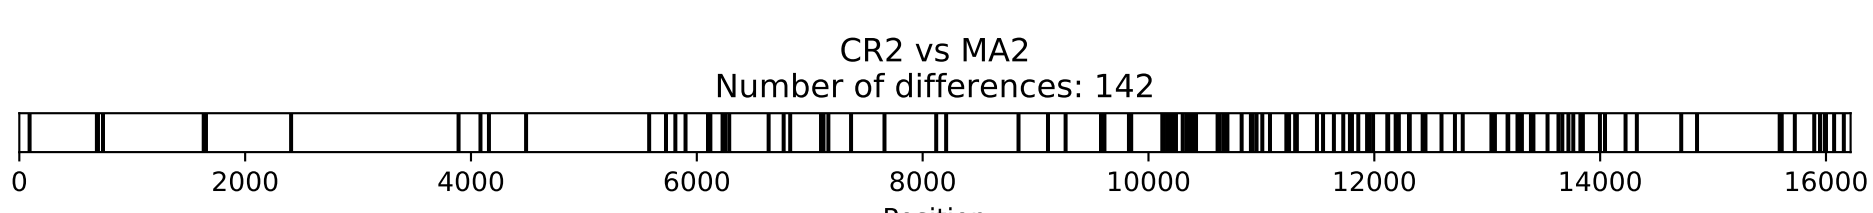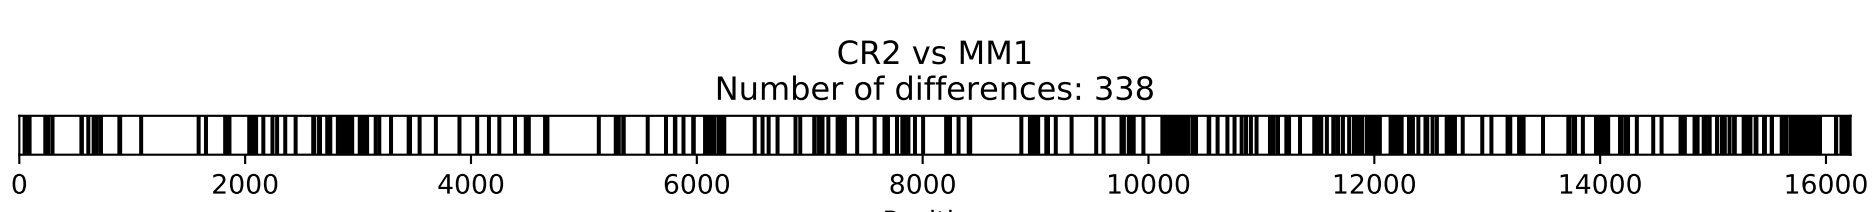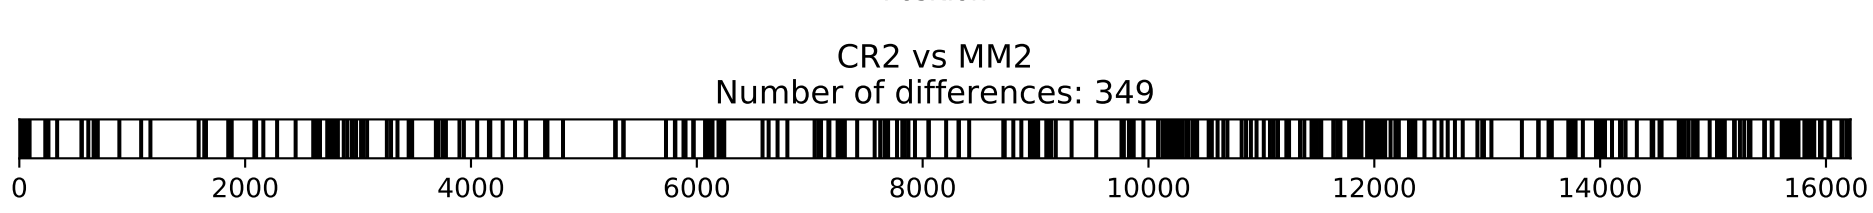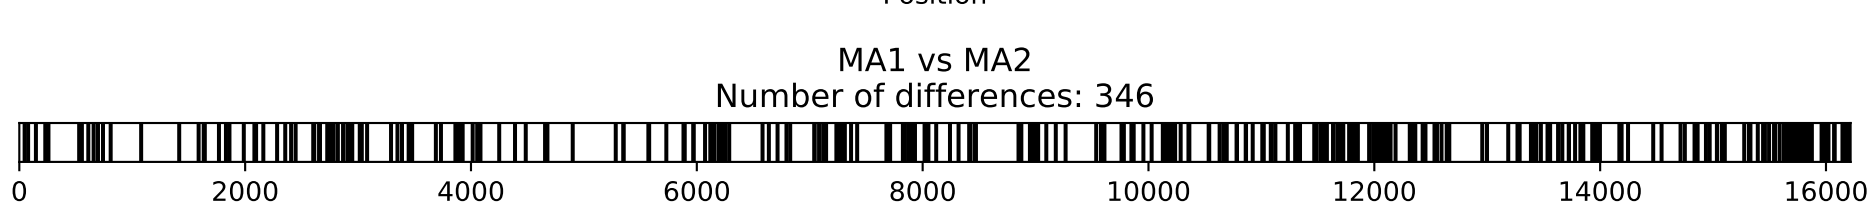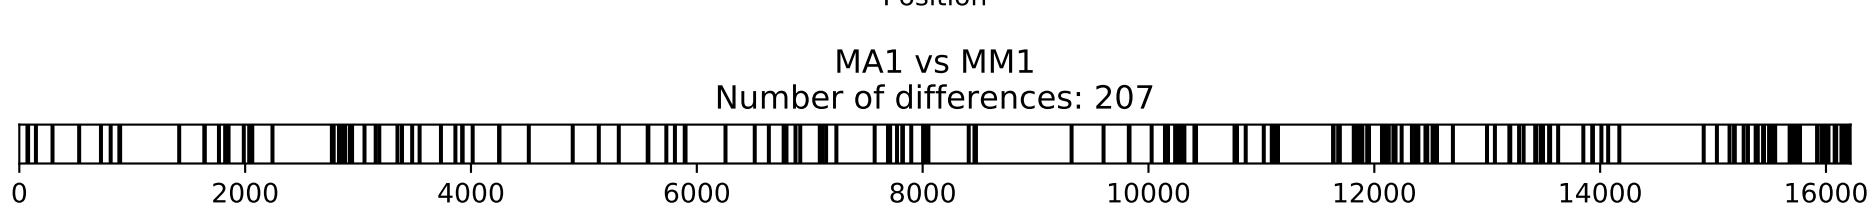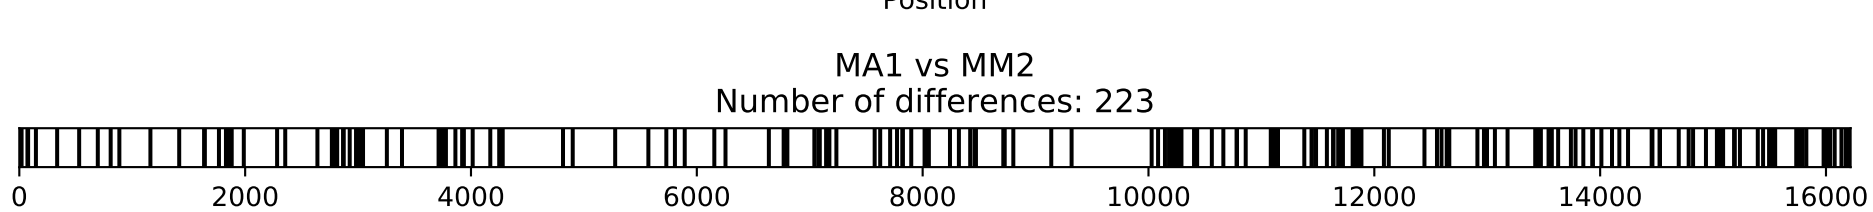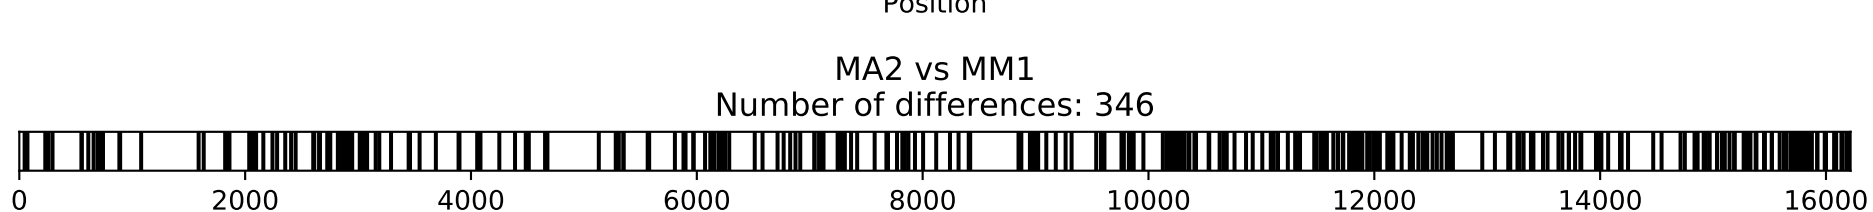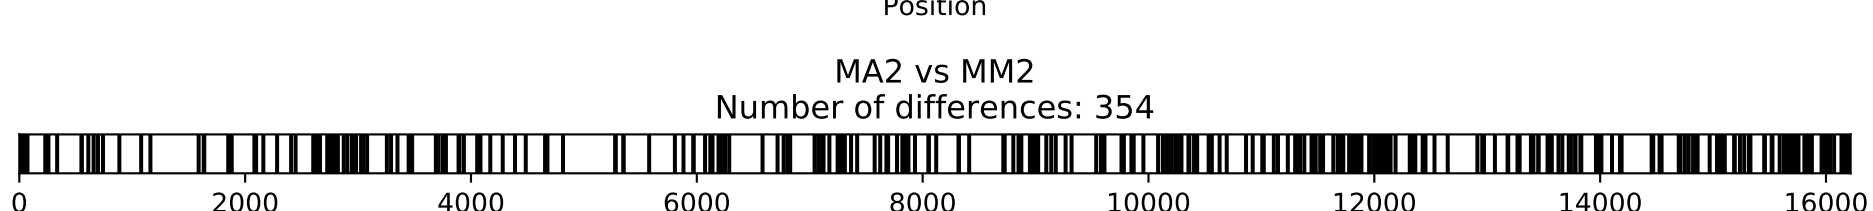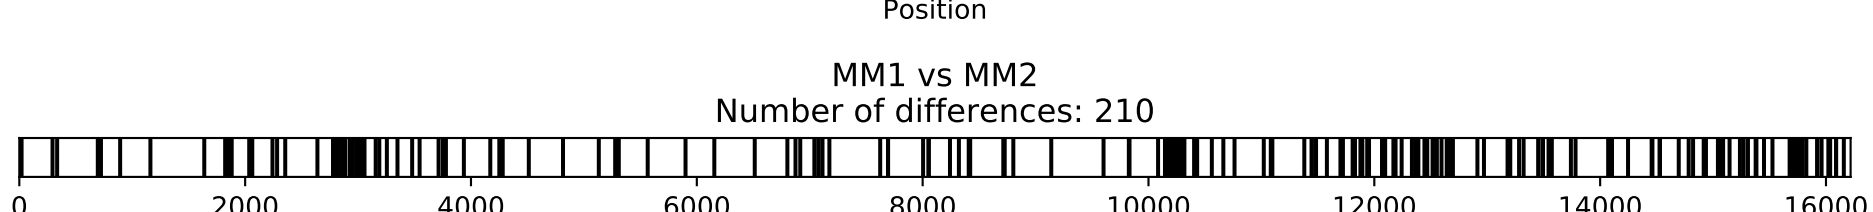

# Region: 25

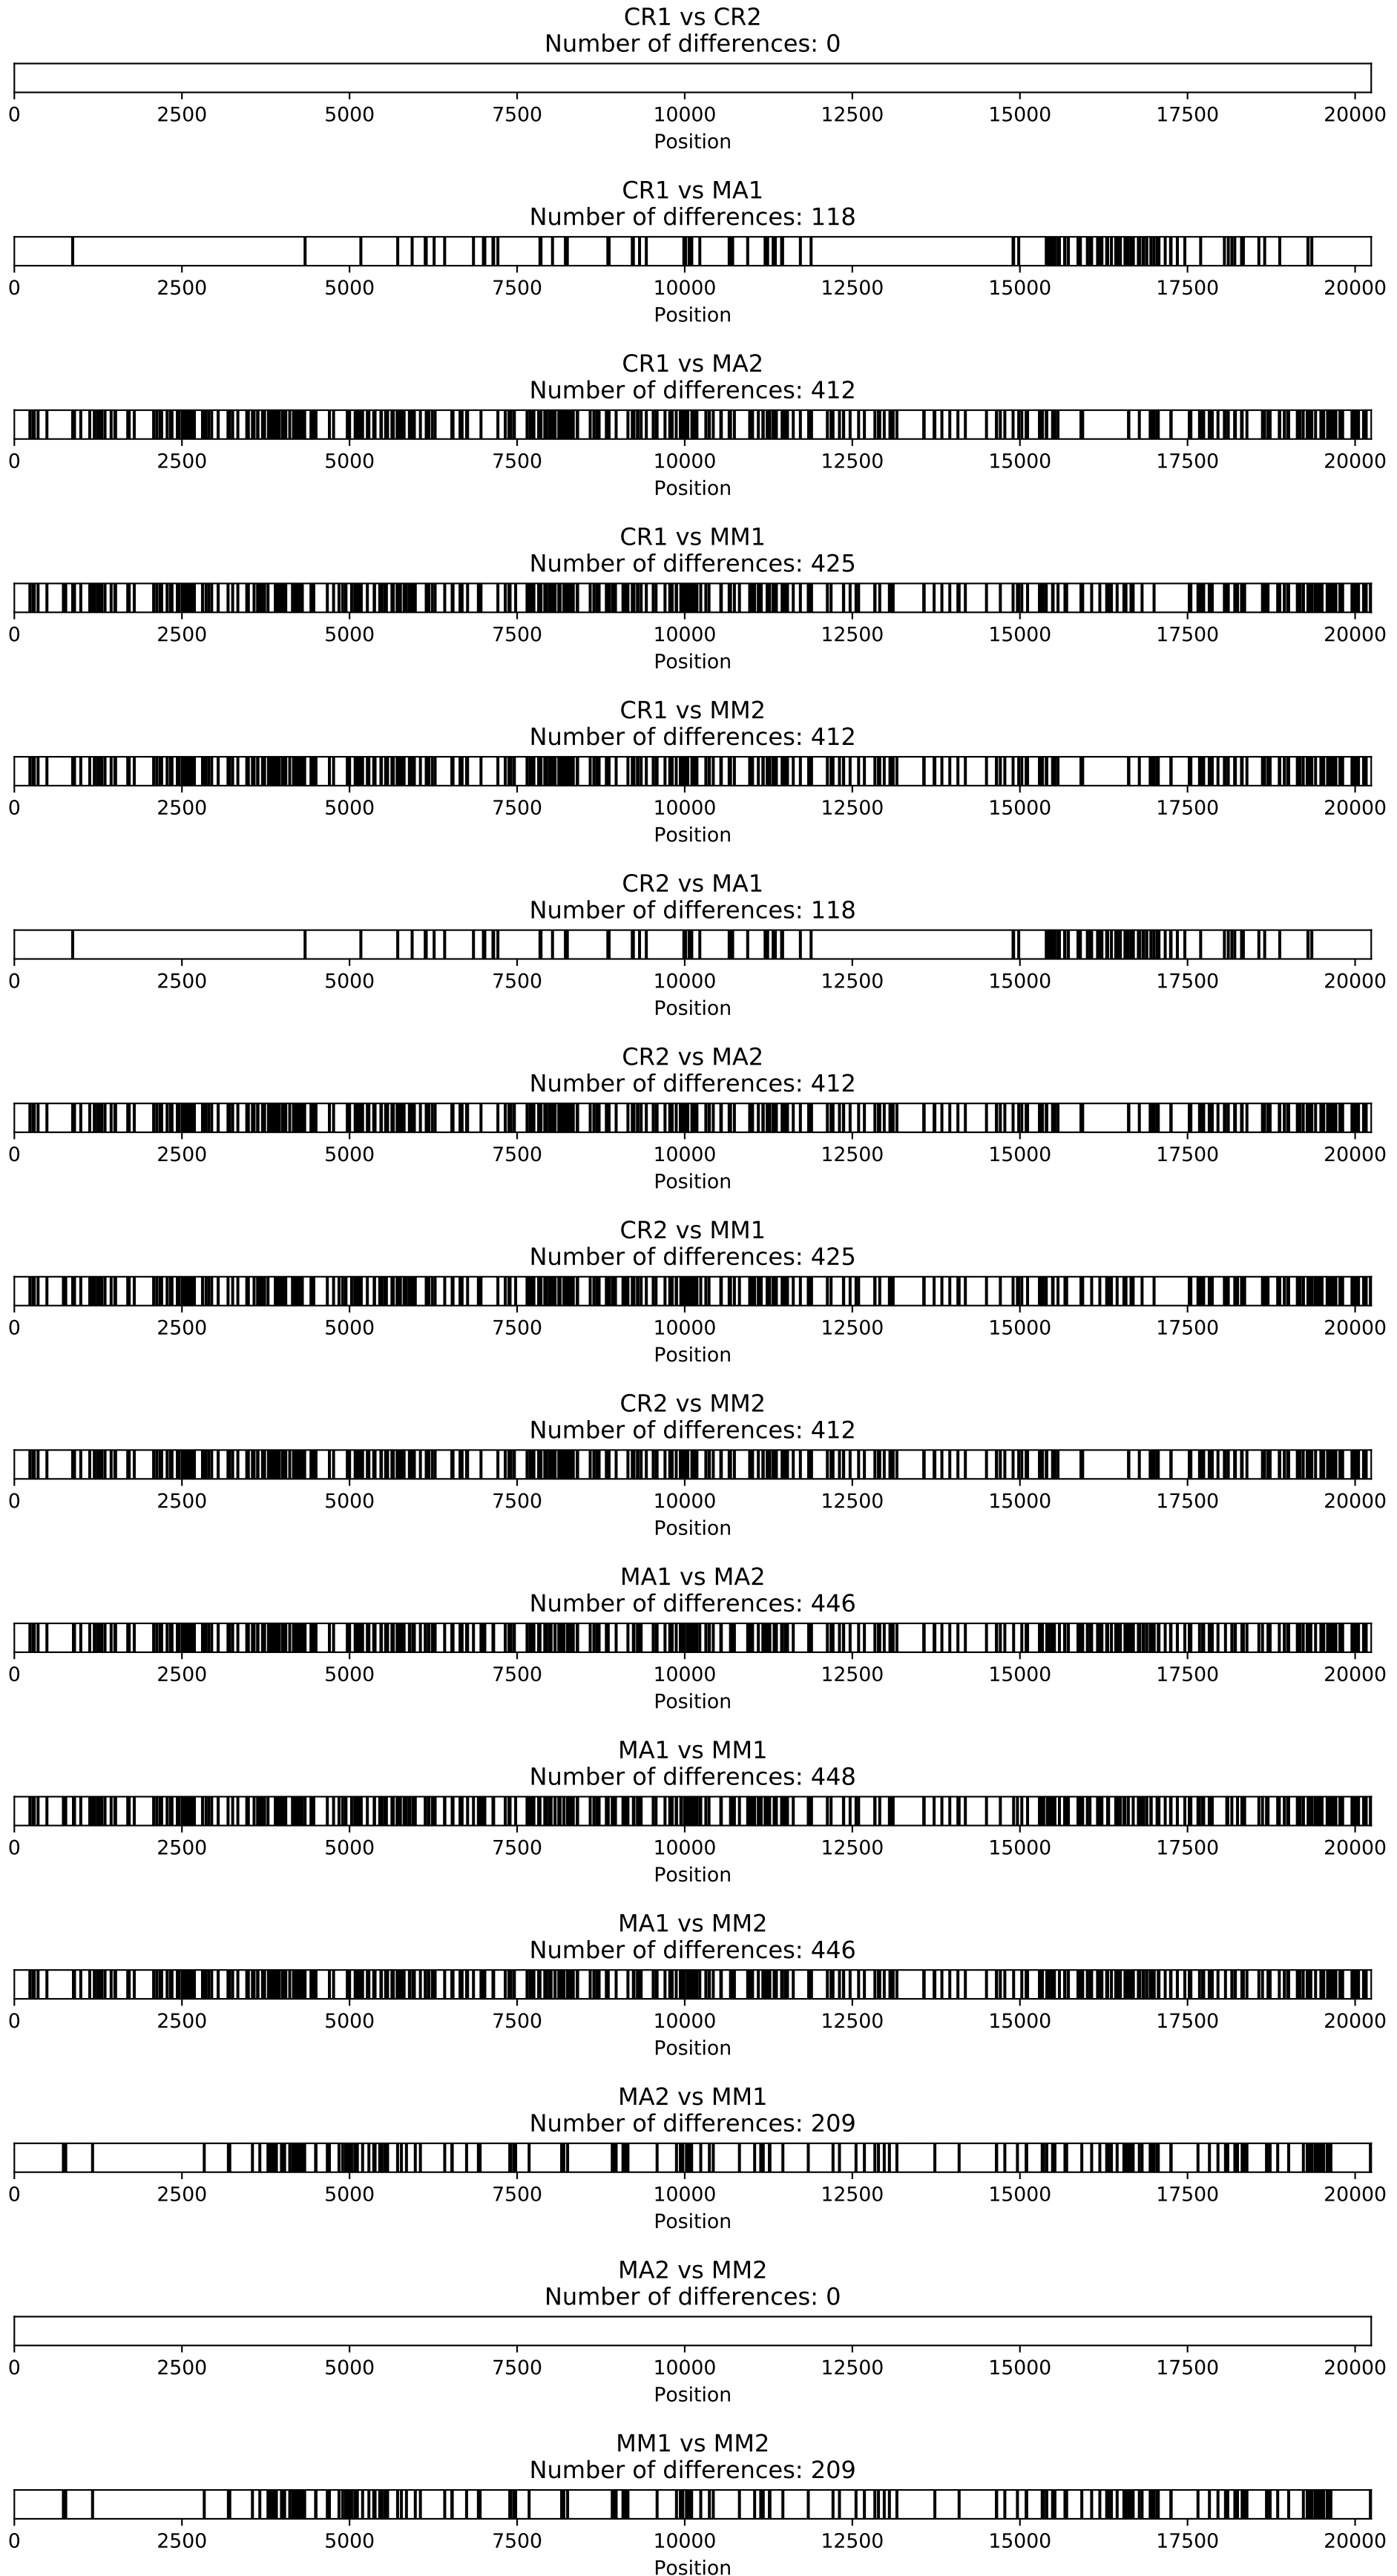

# Region: 27

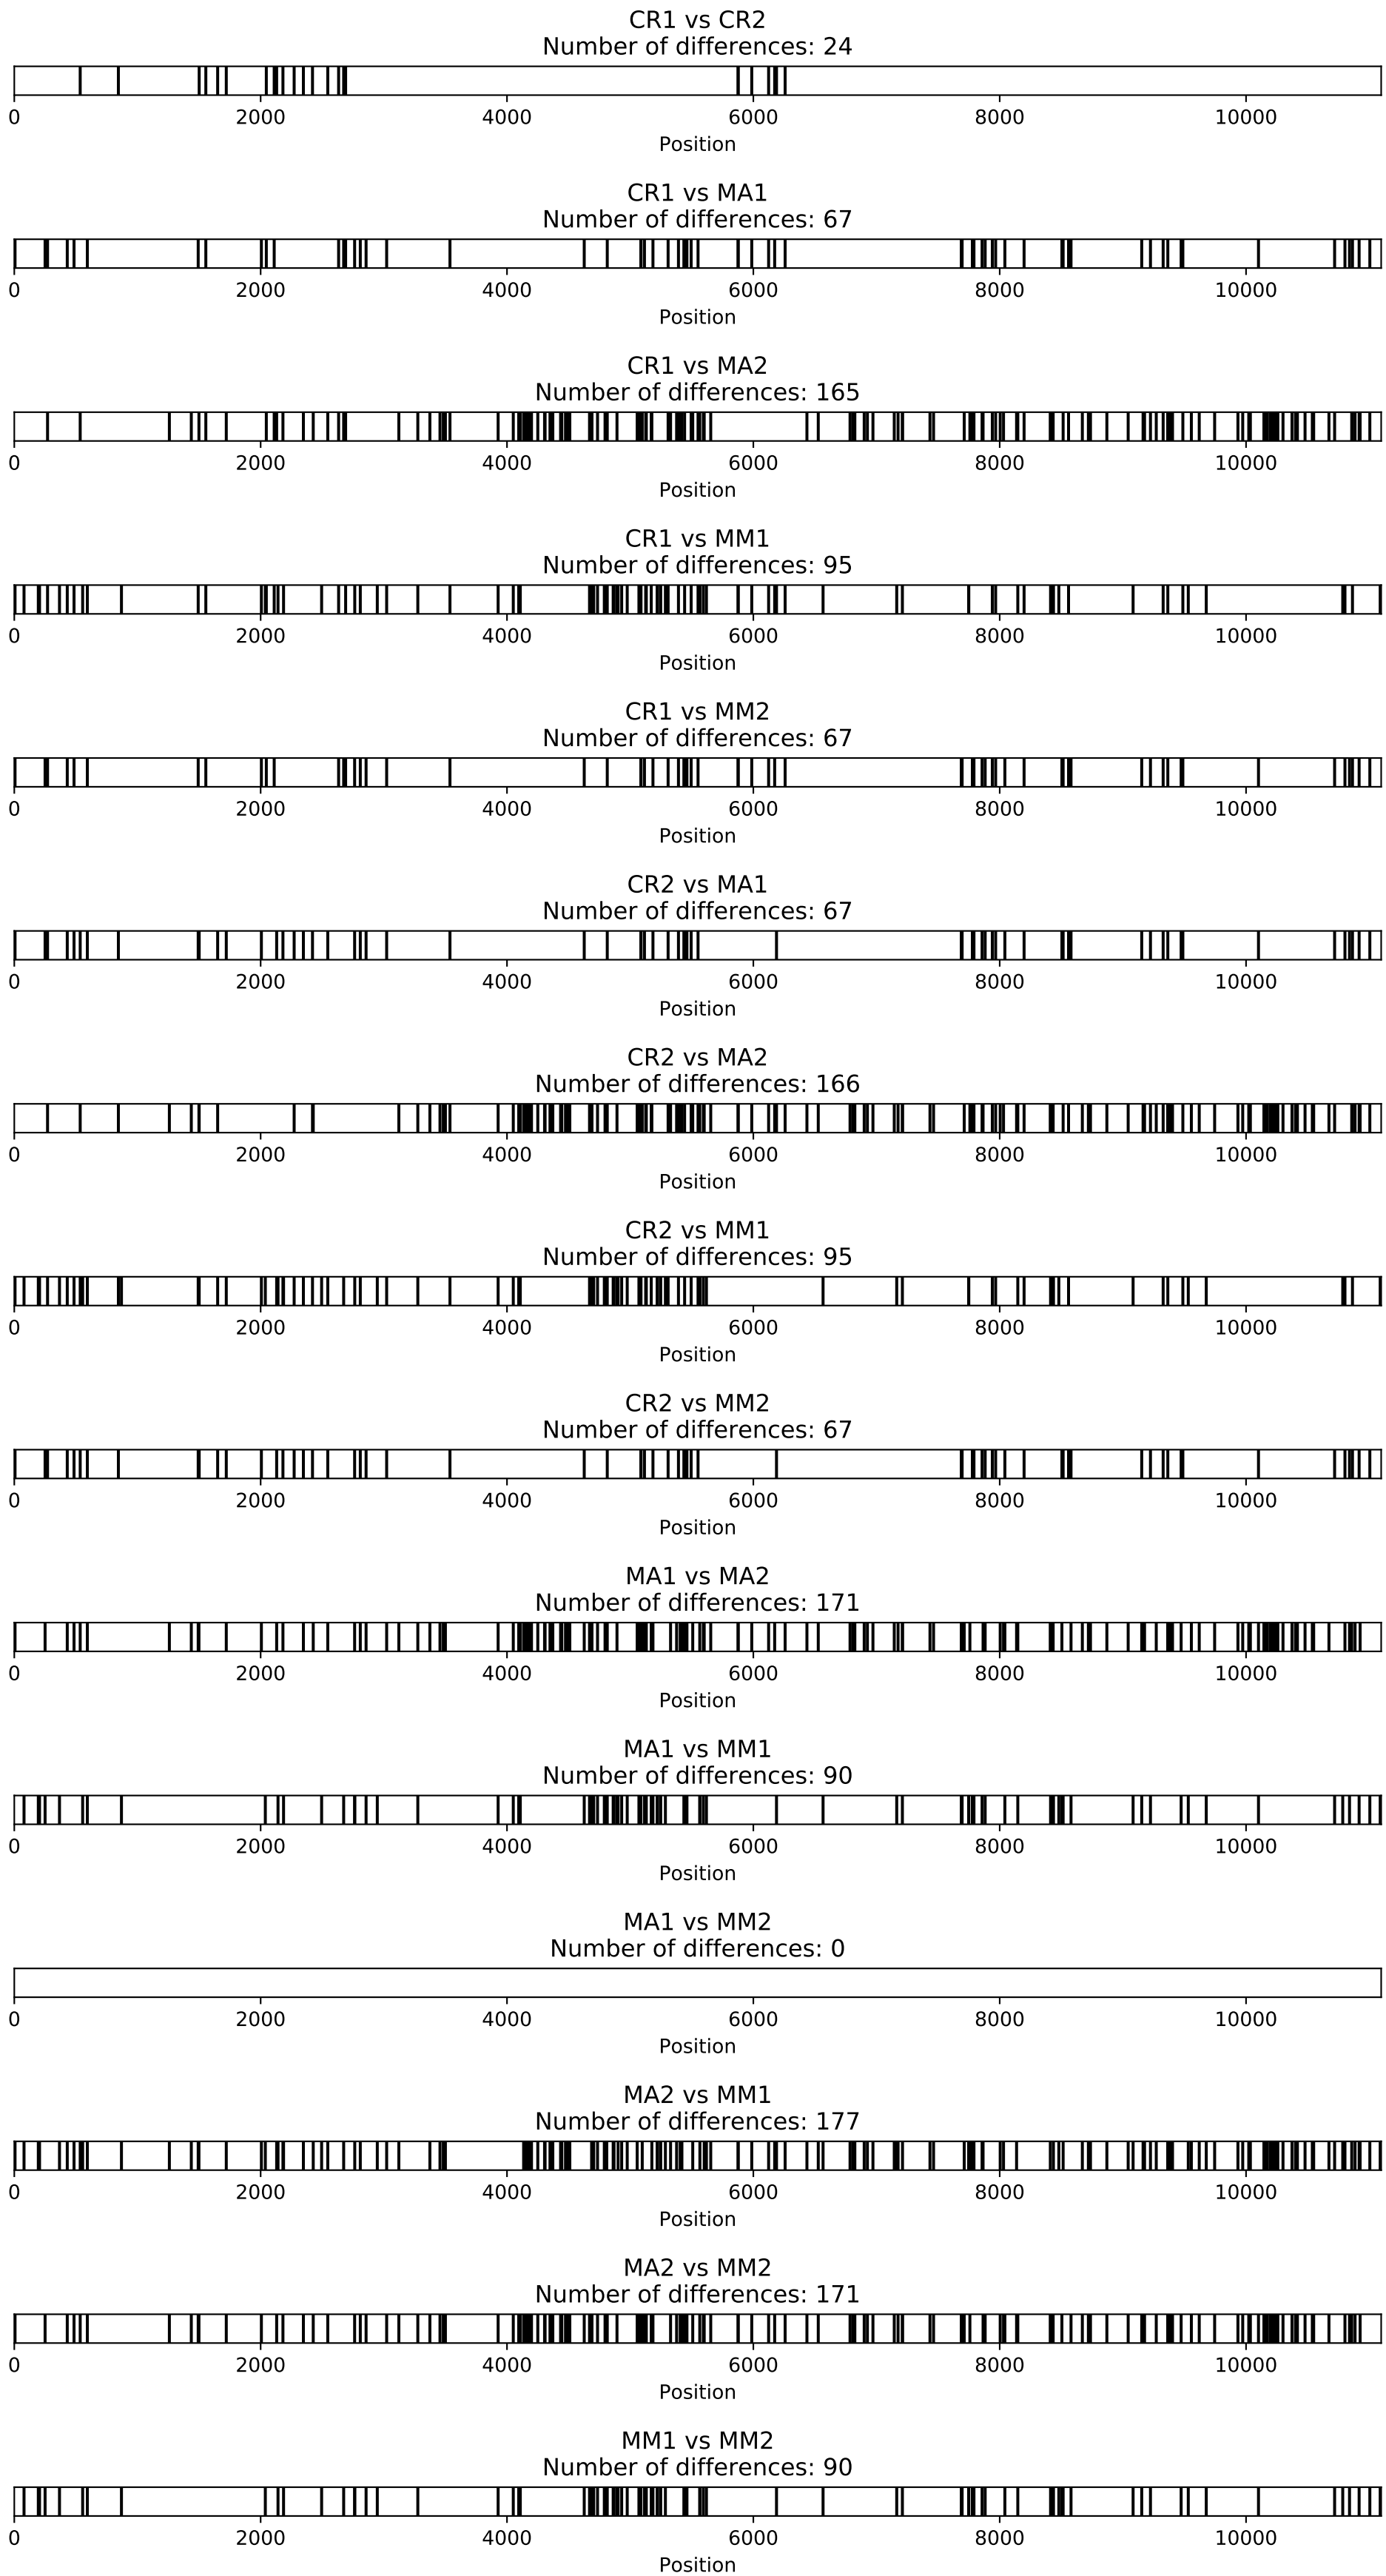

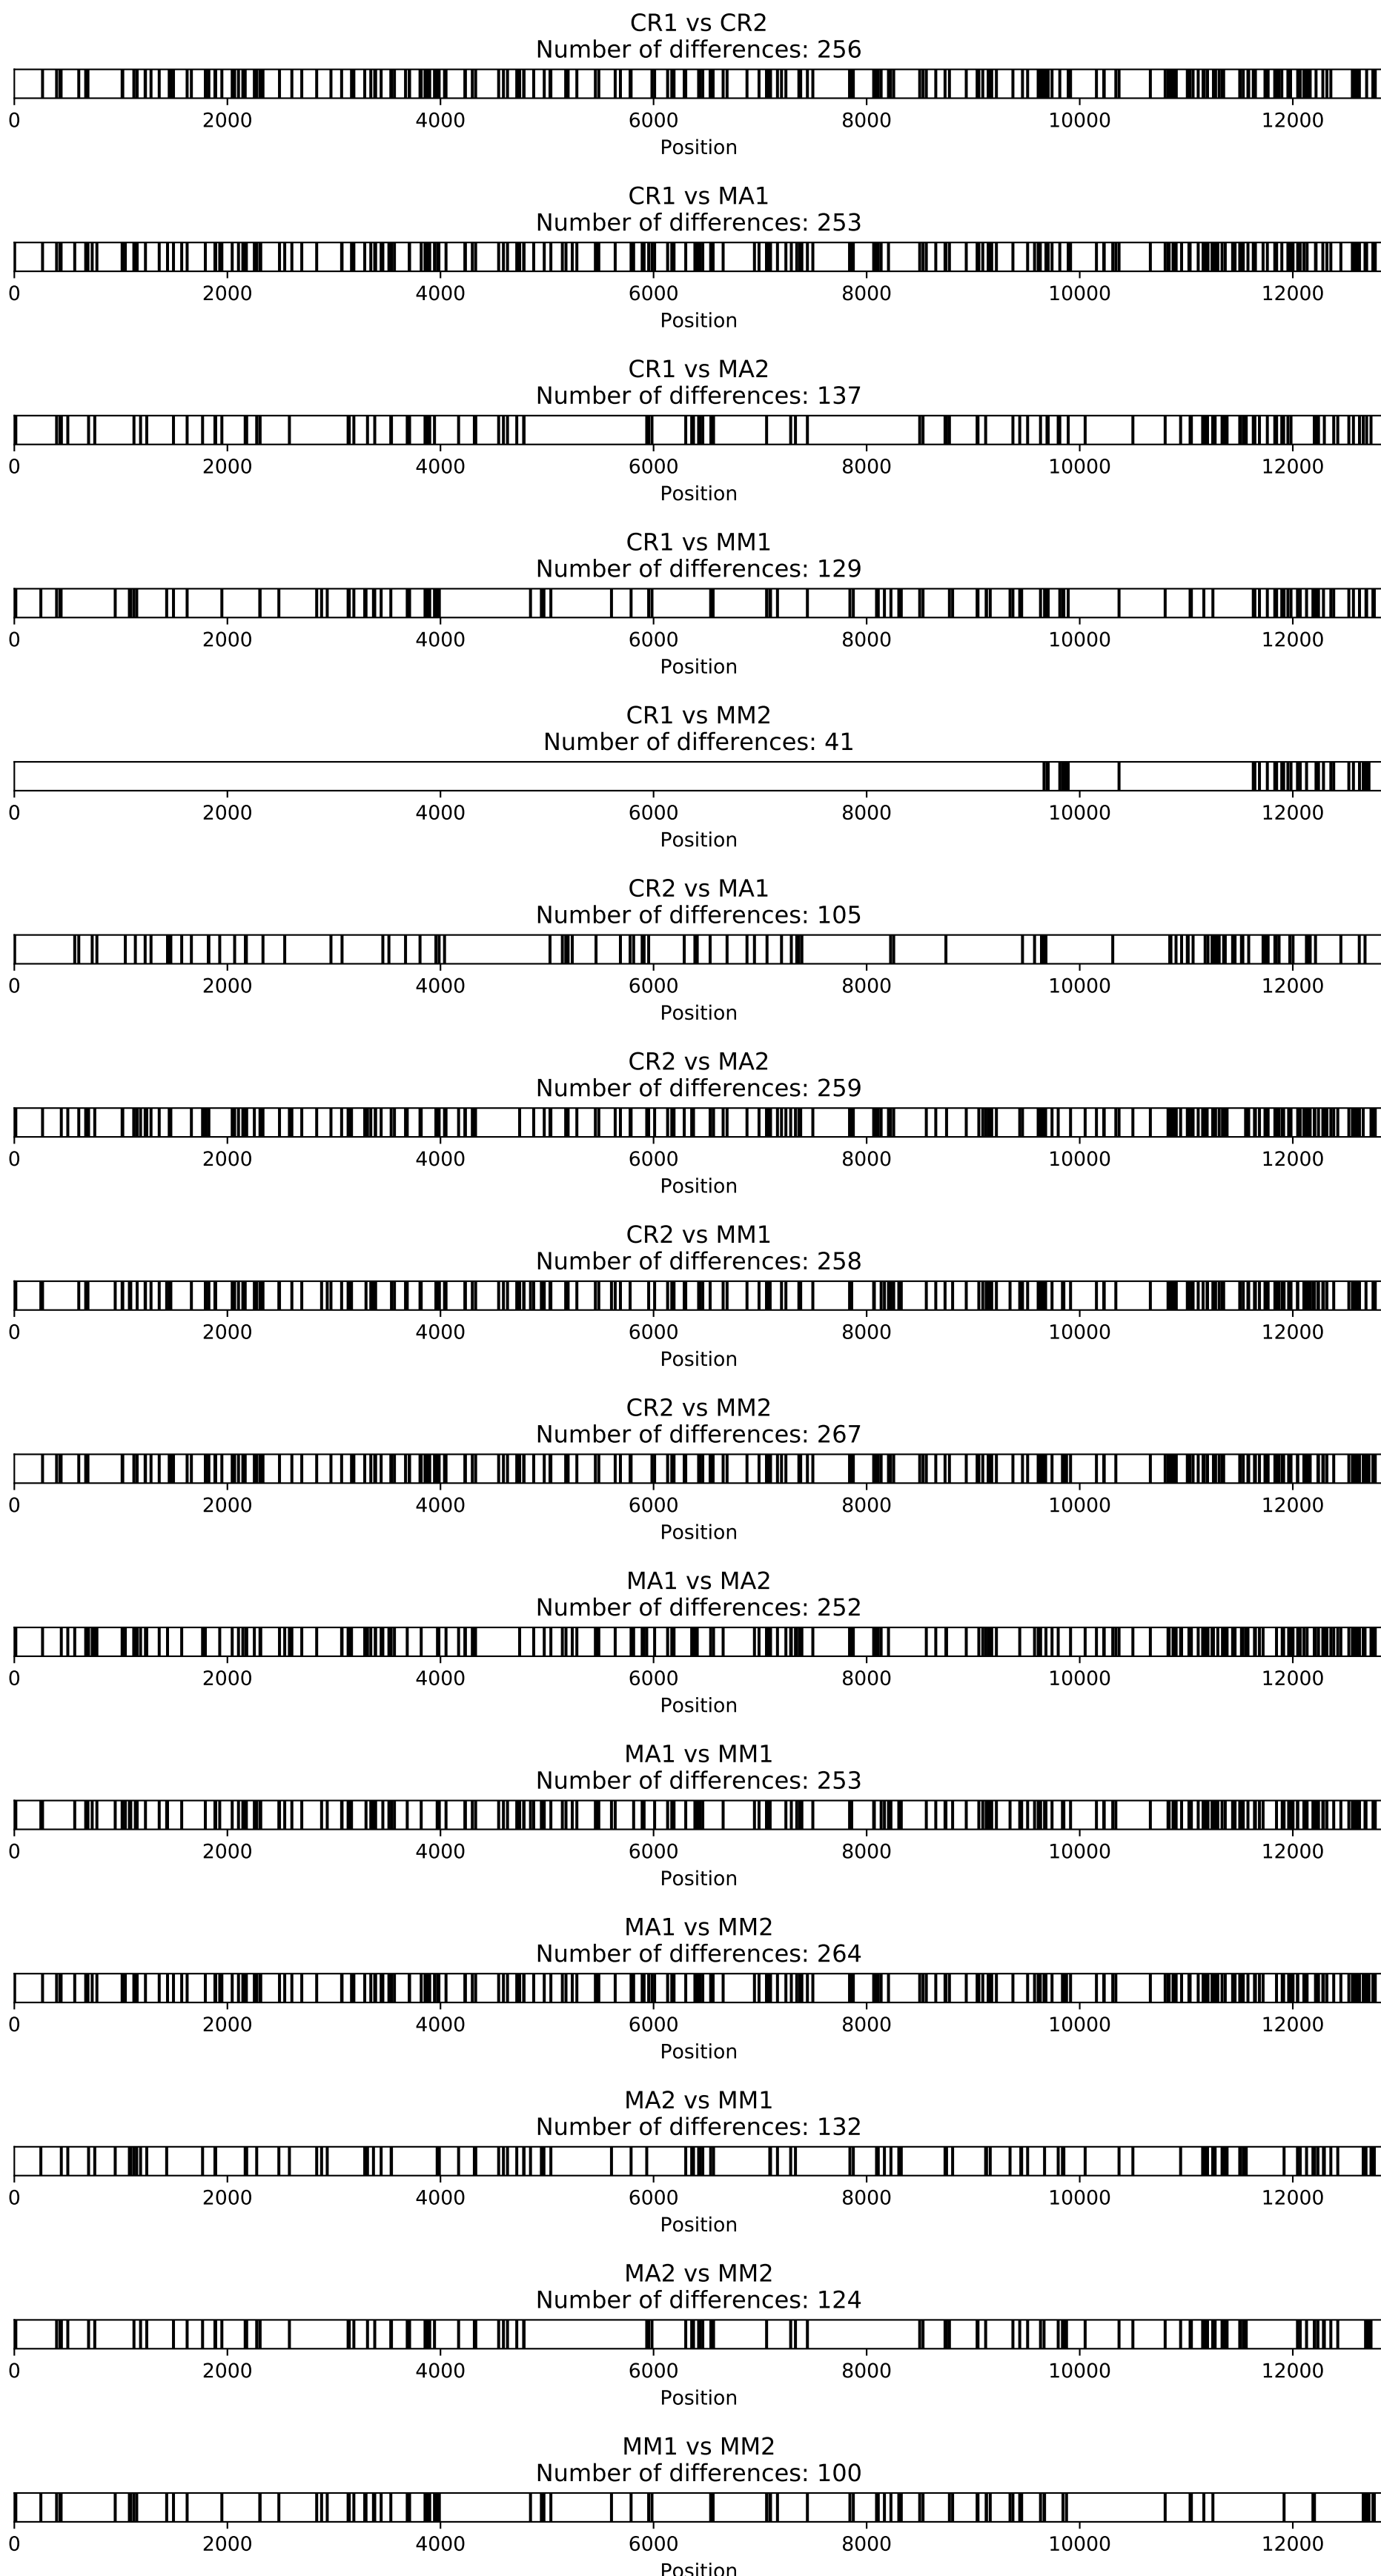

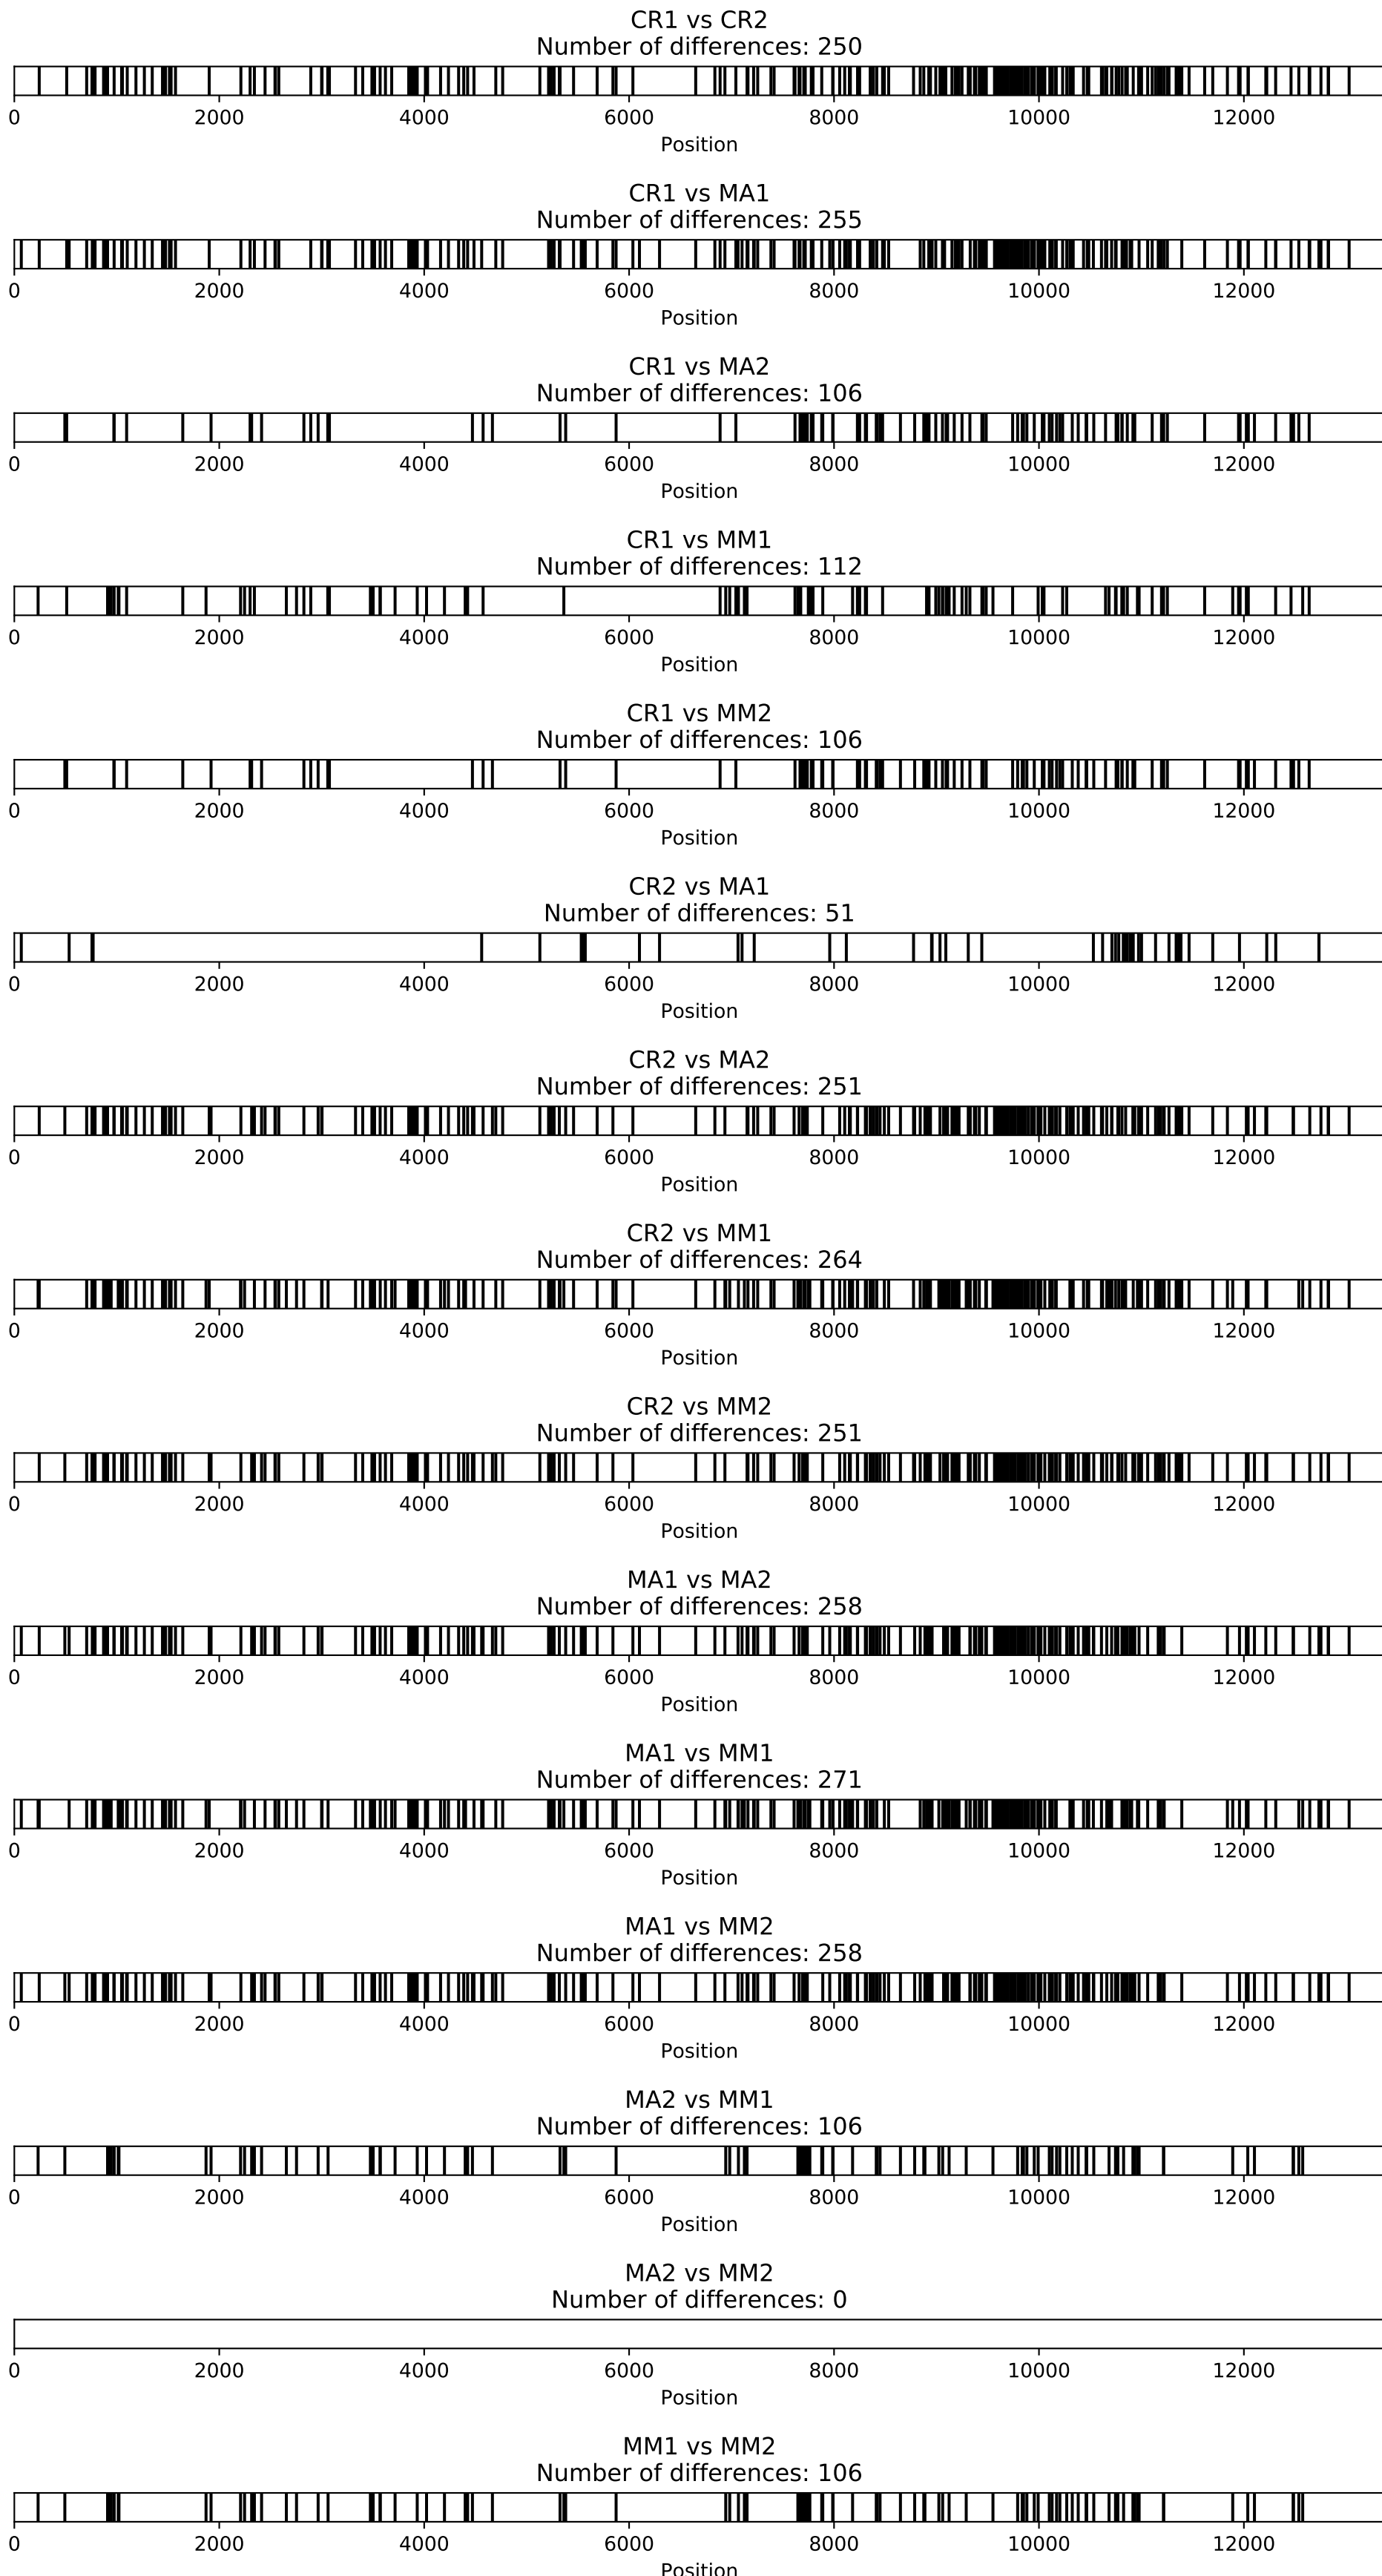

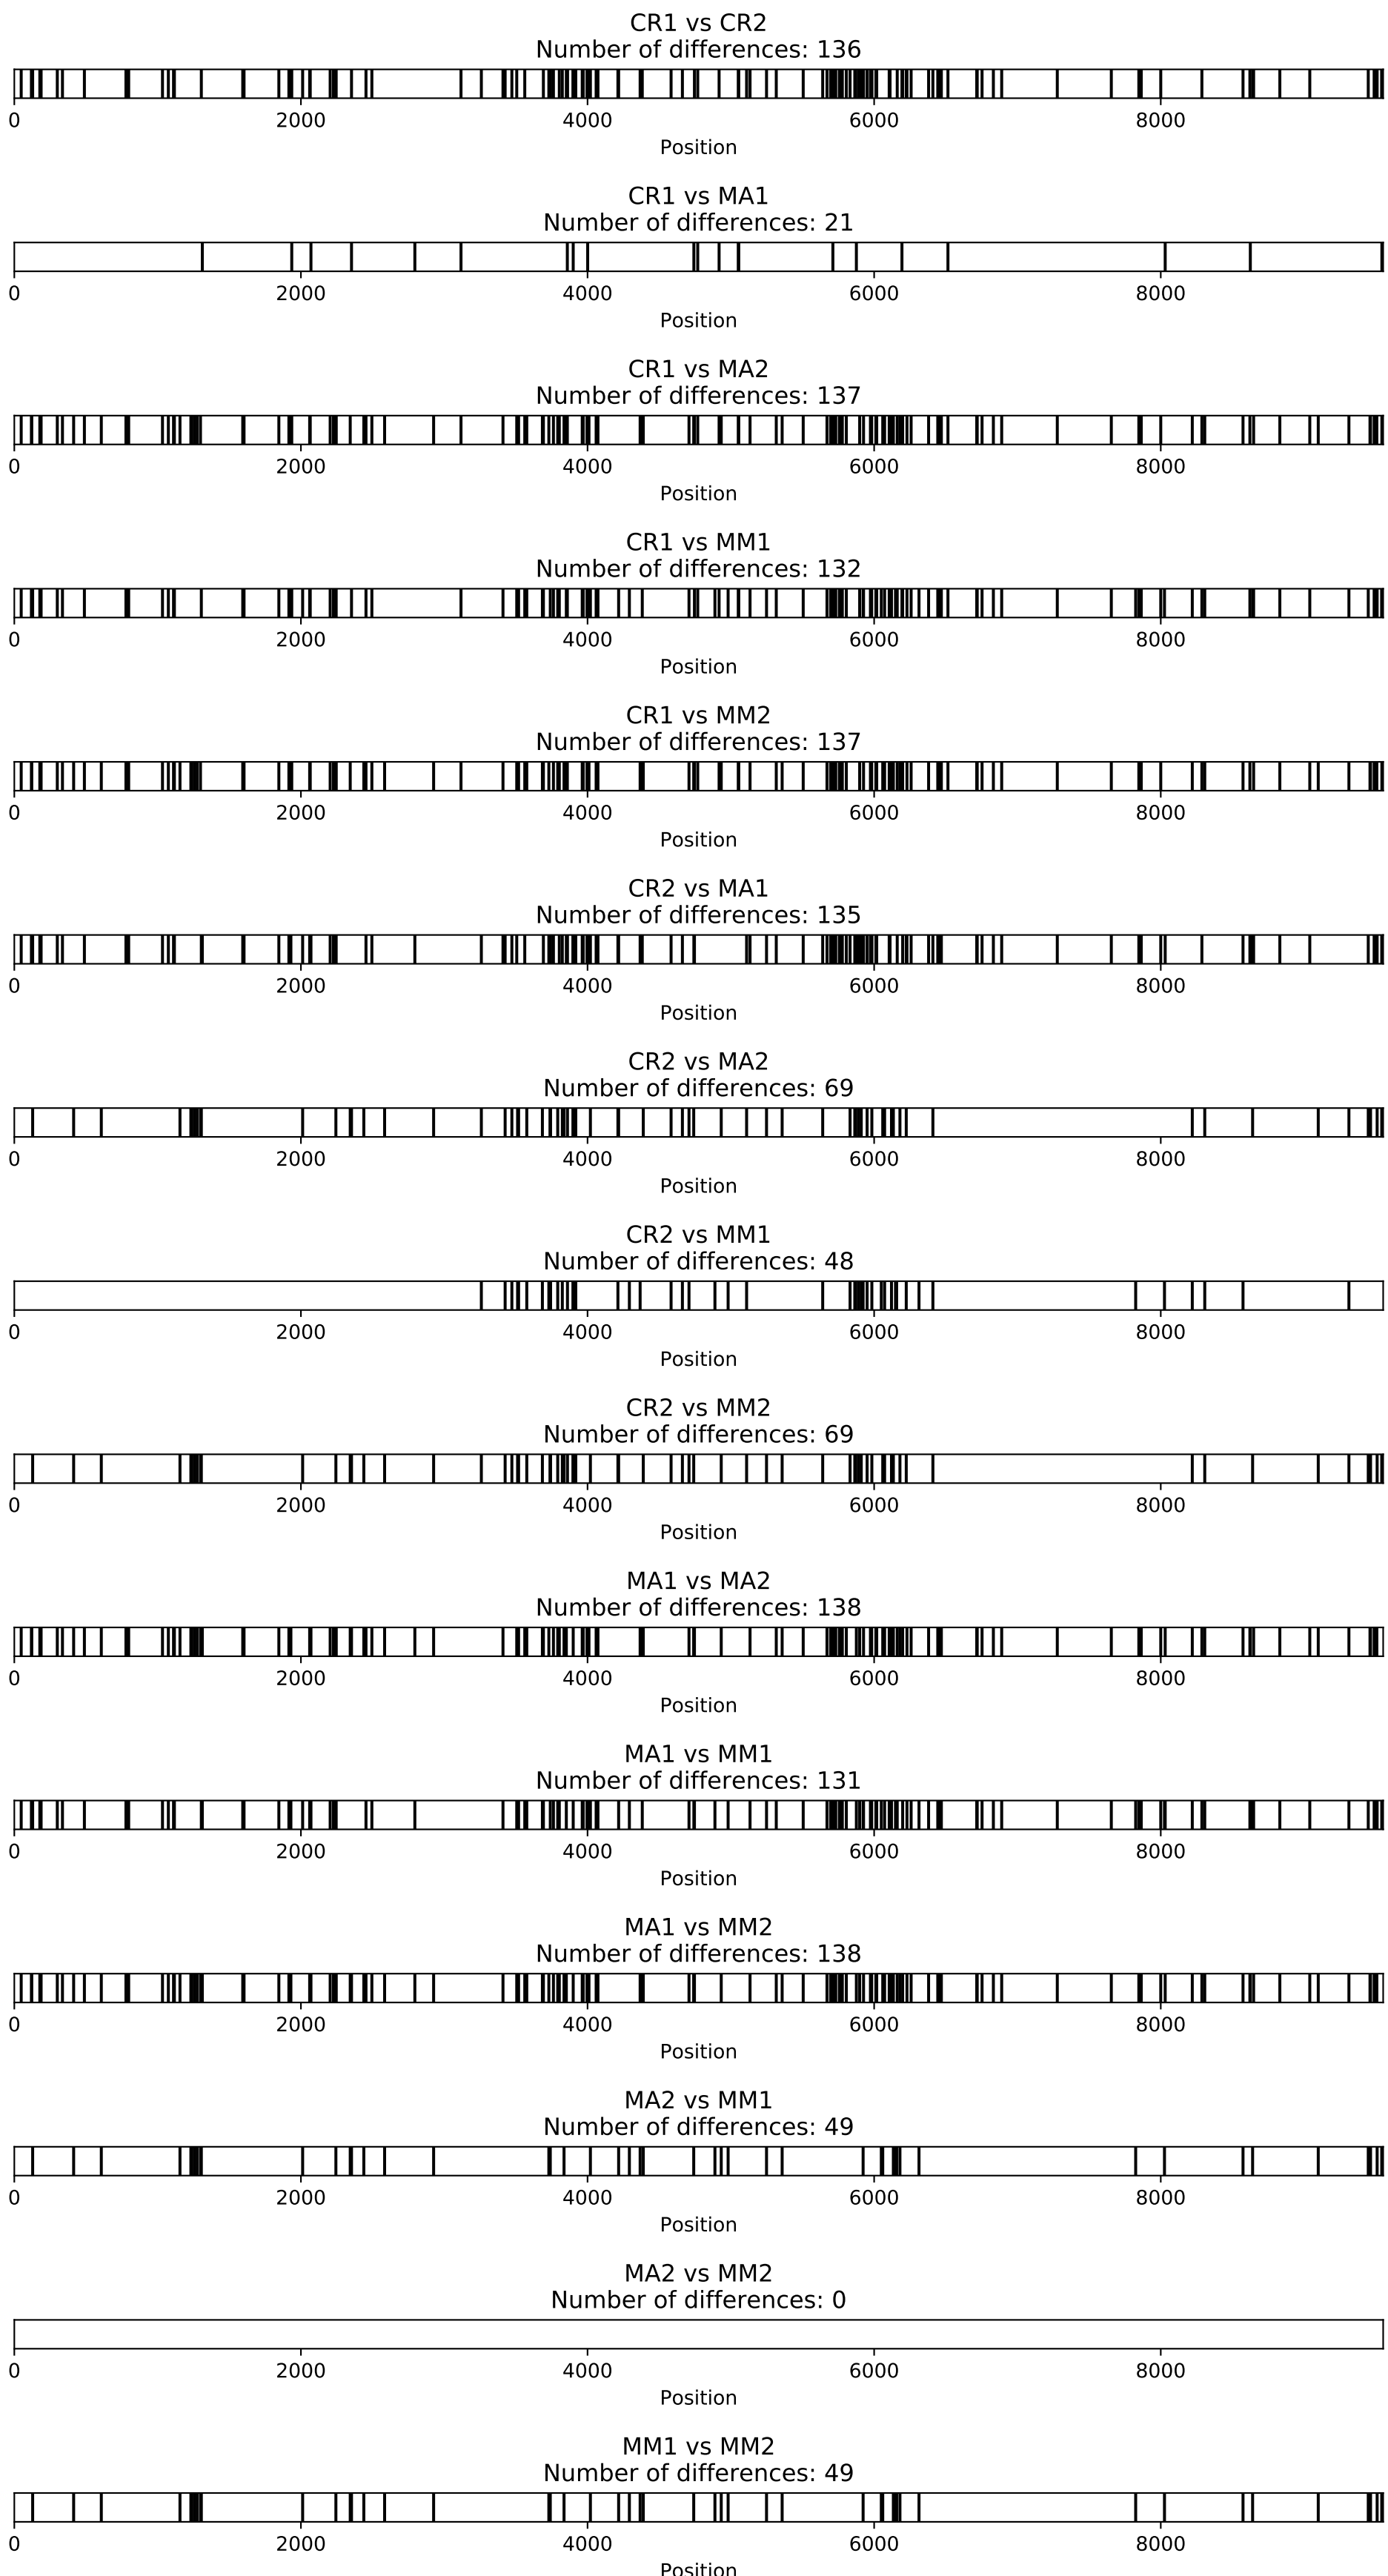

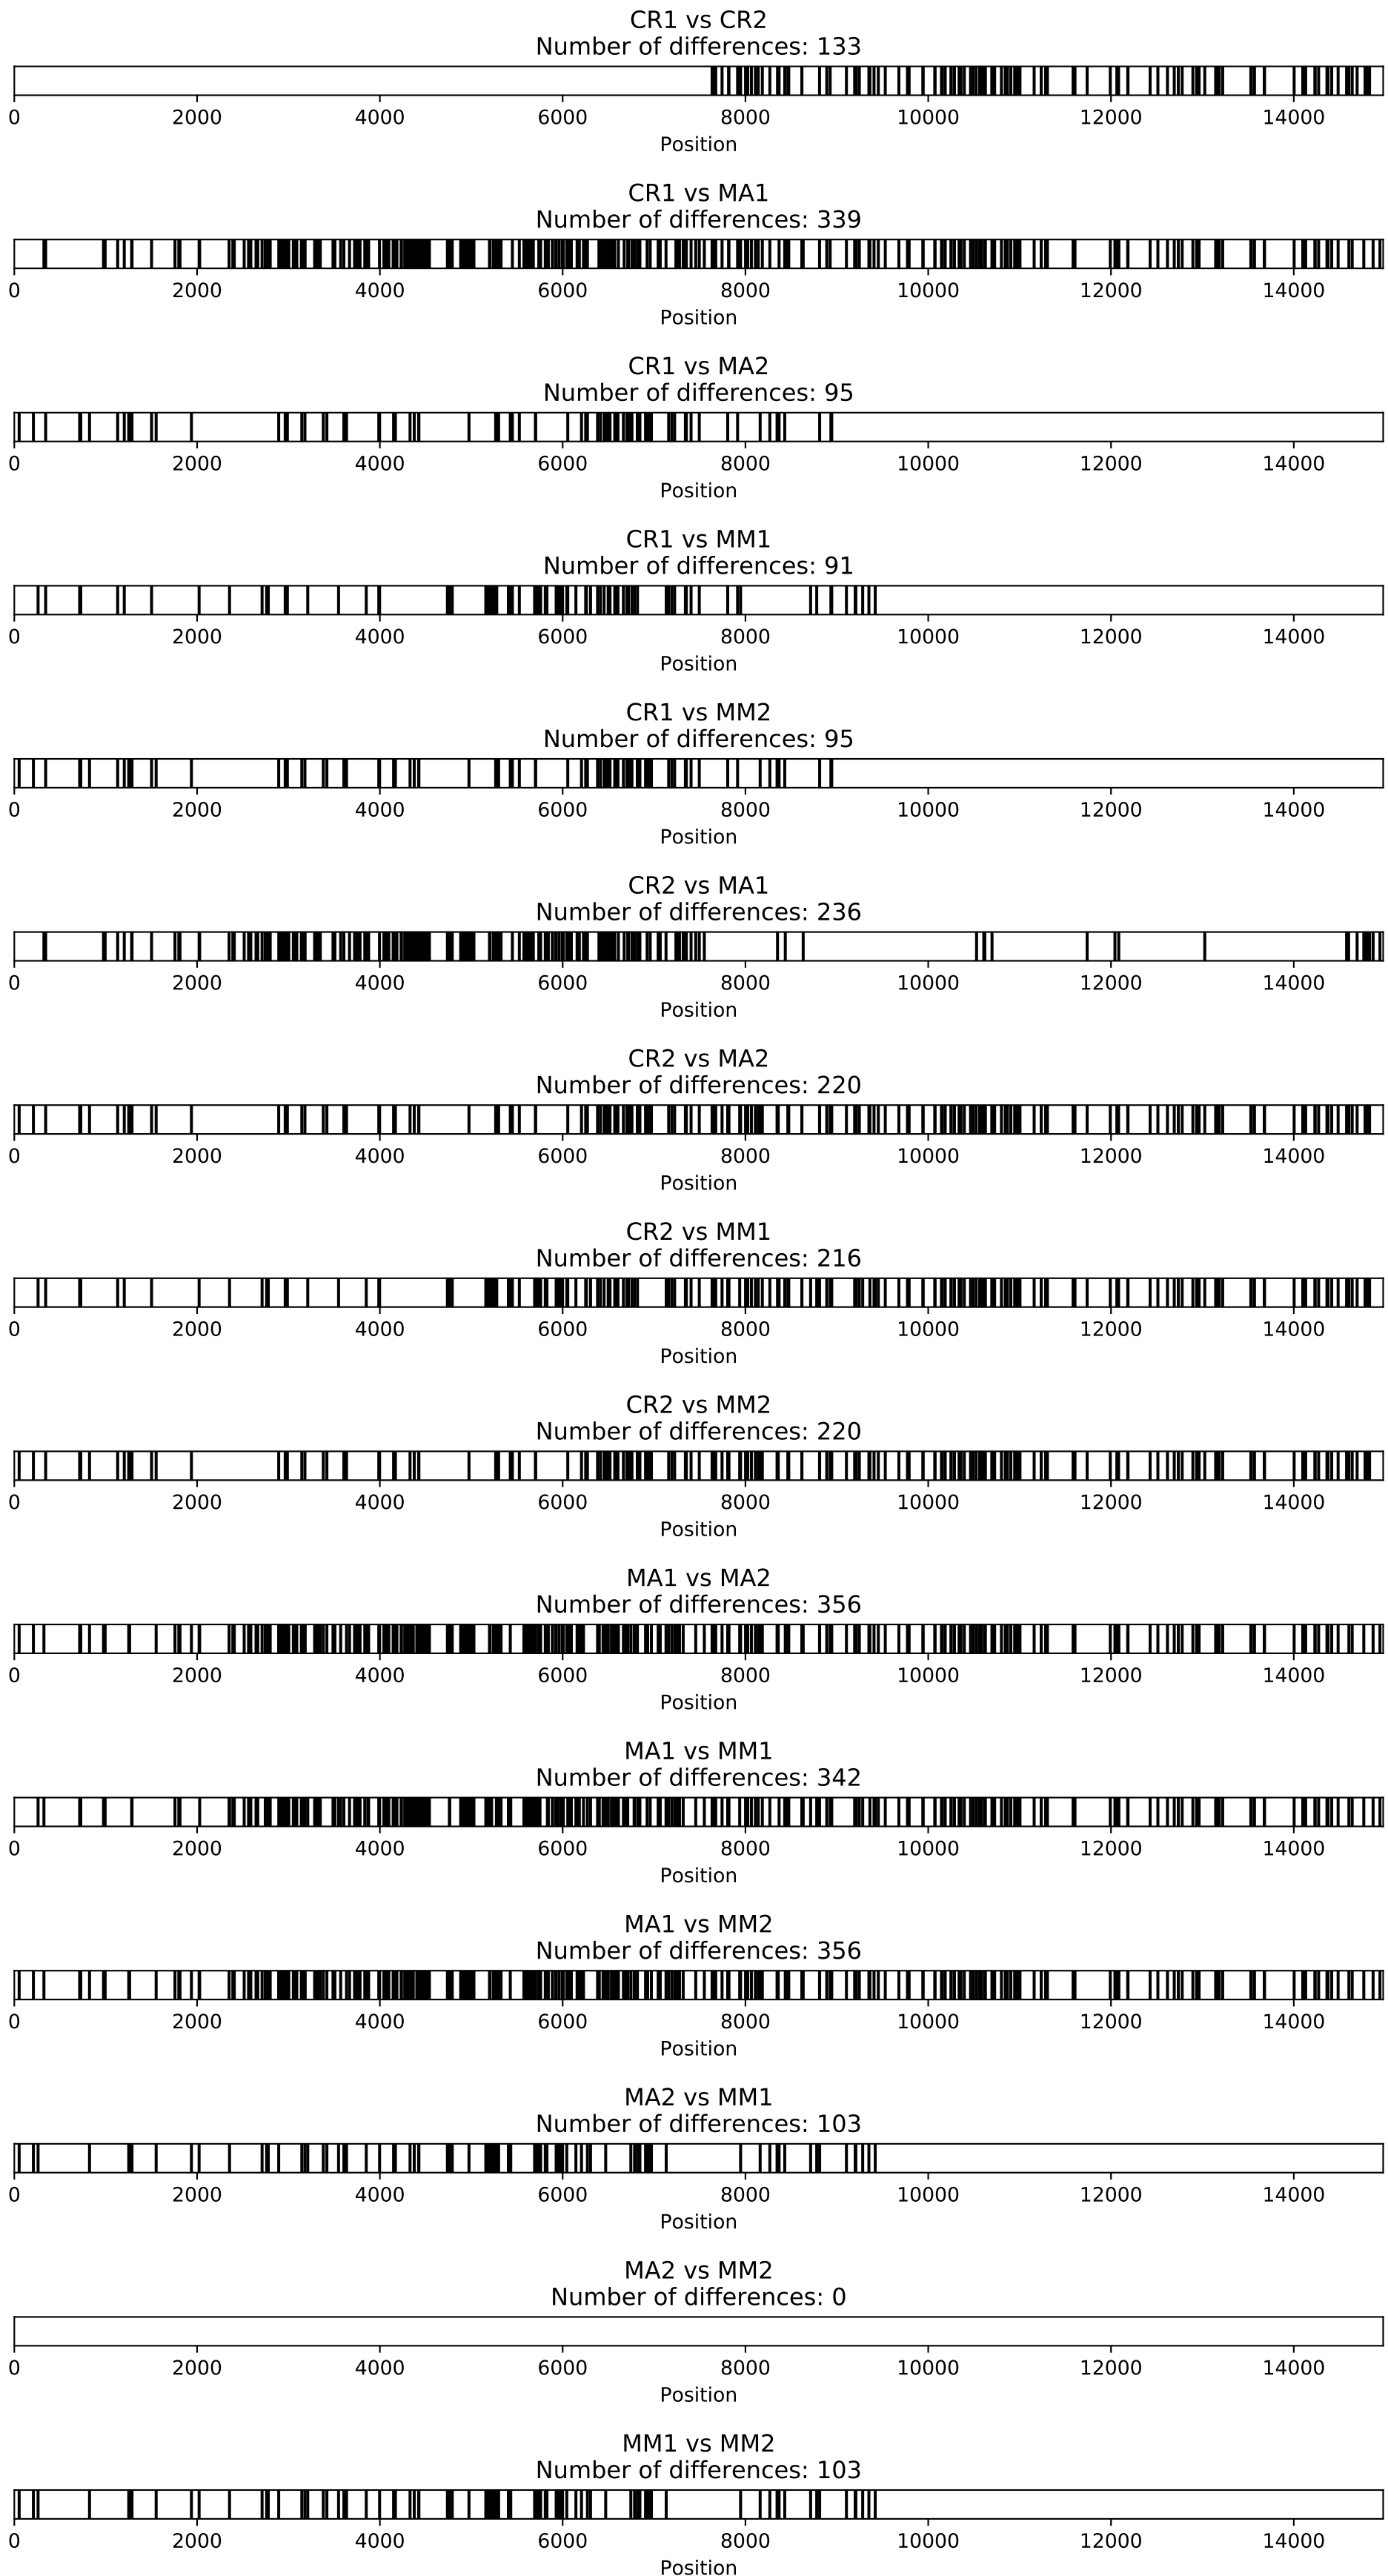

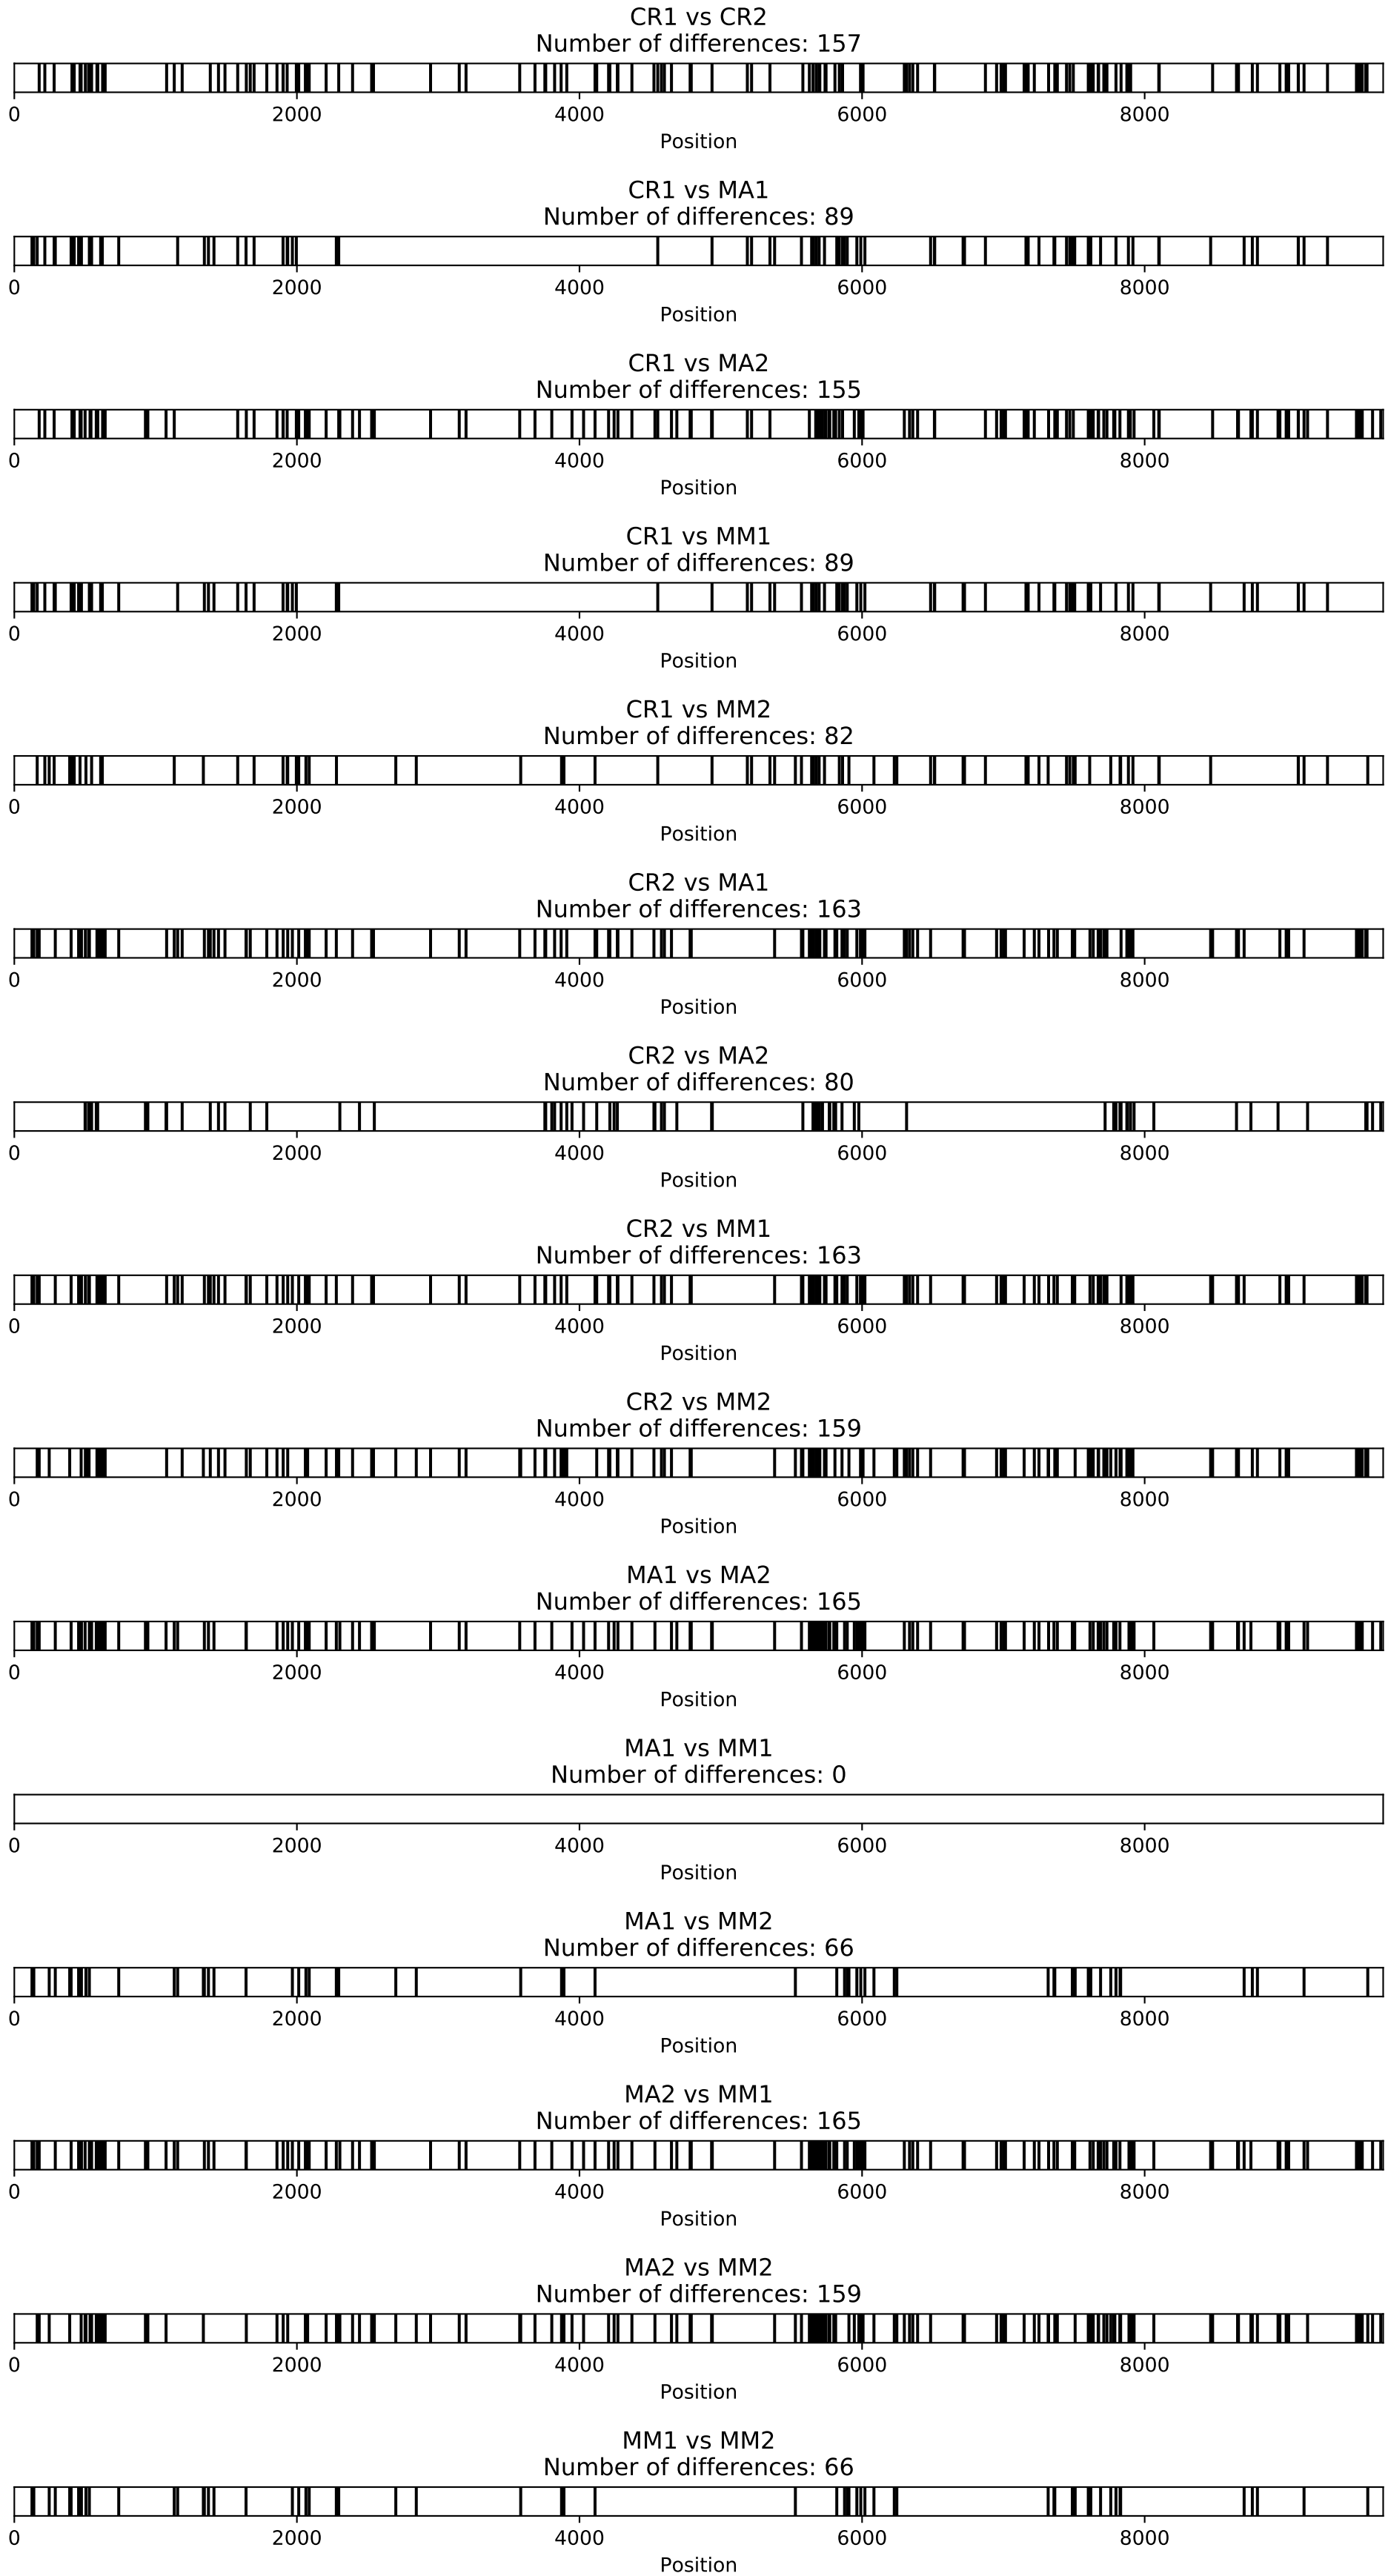



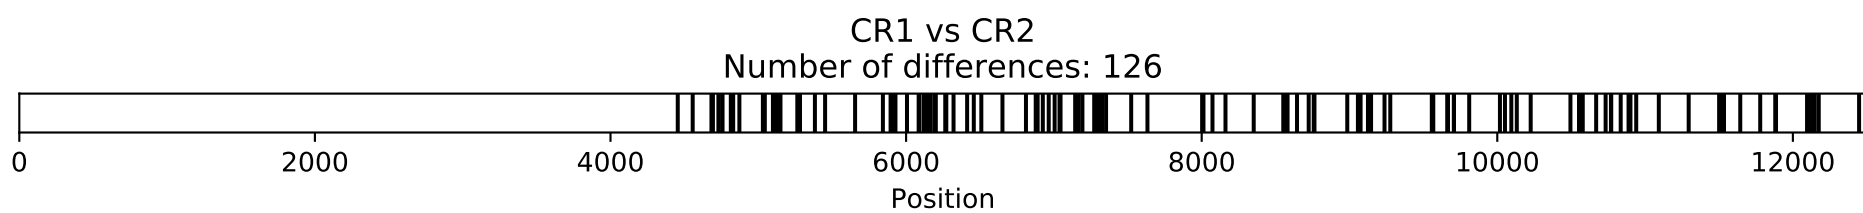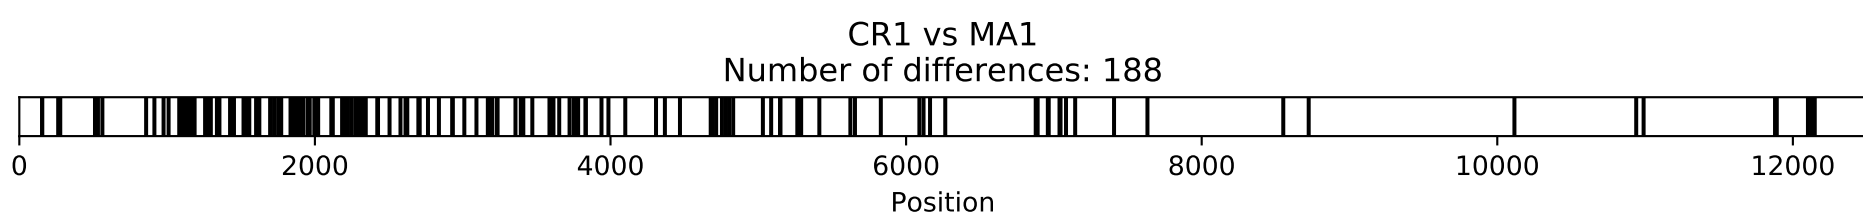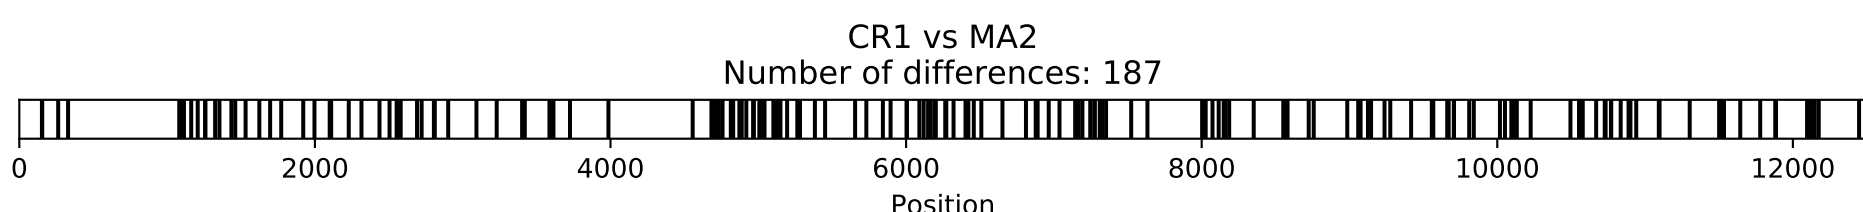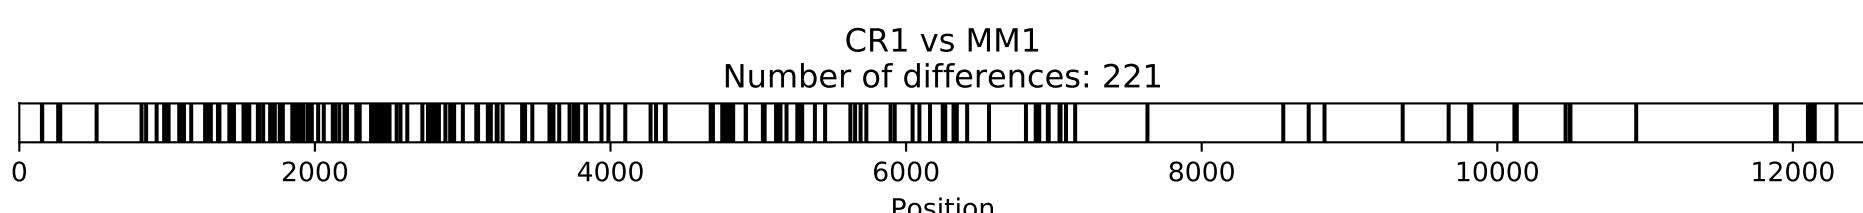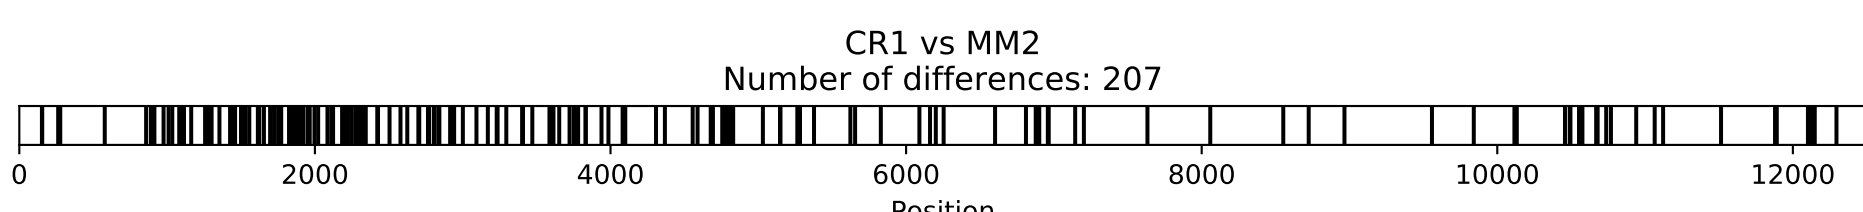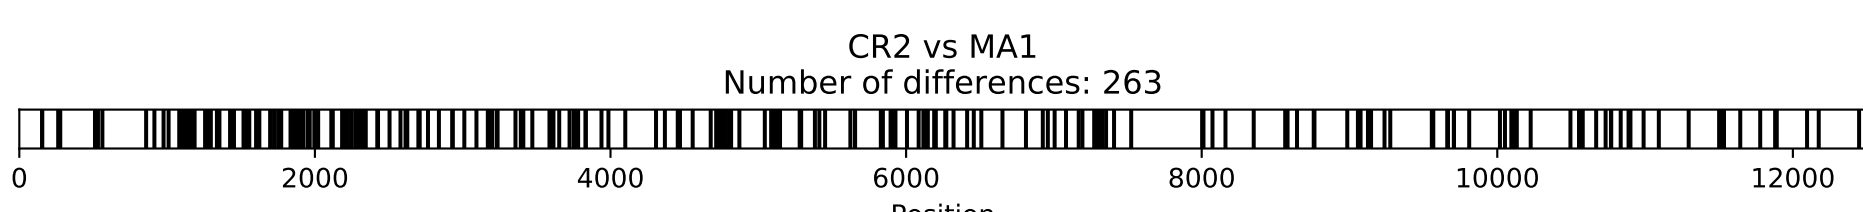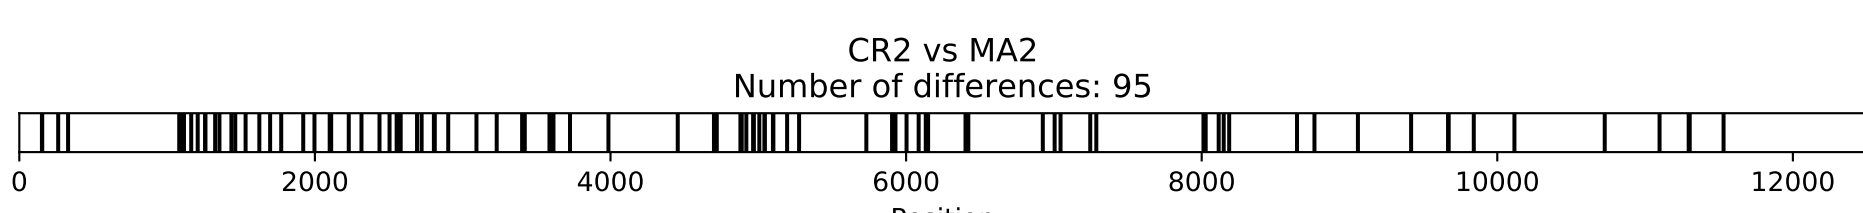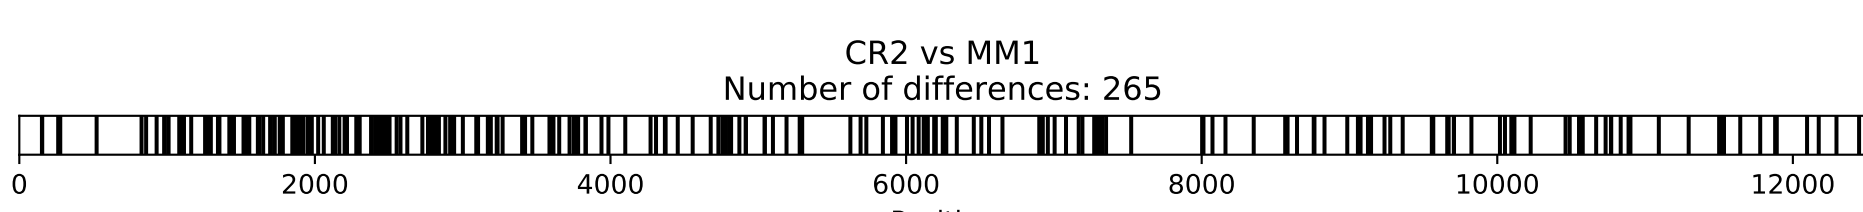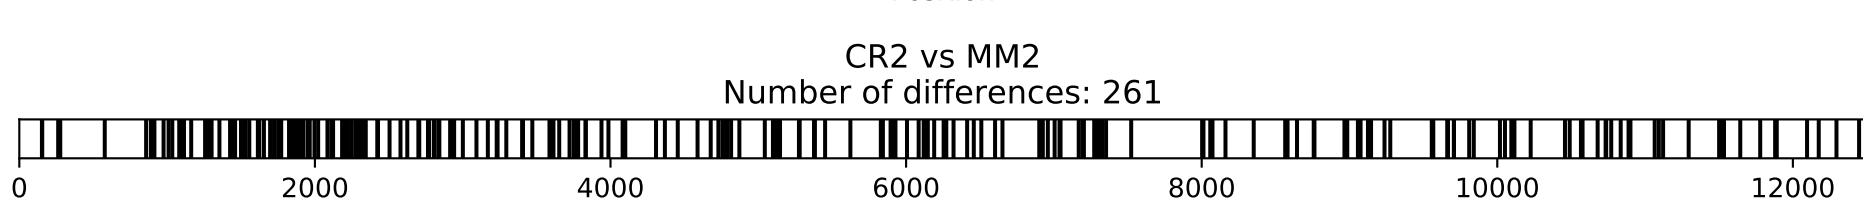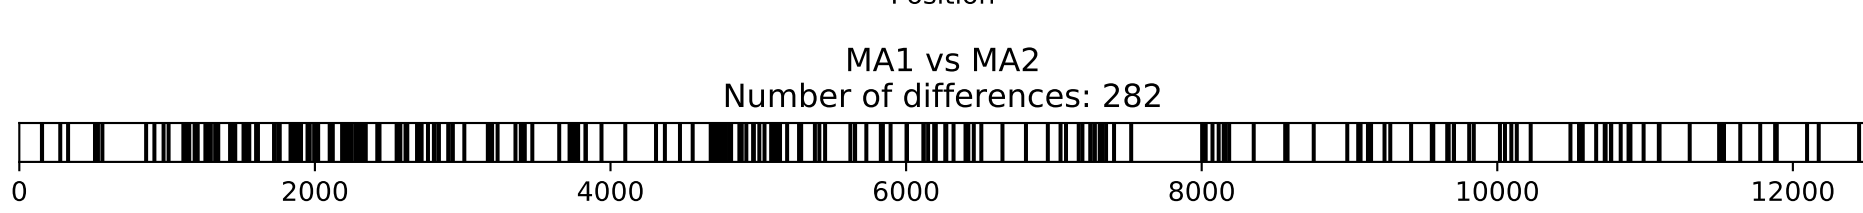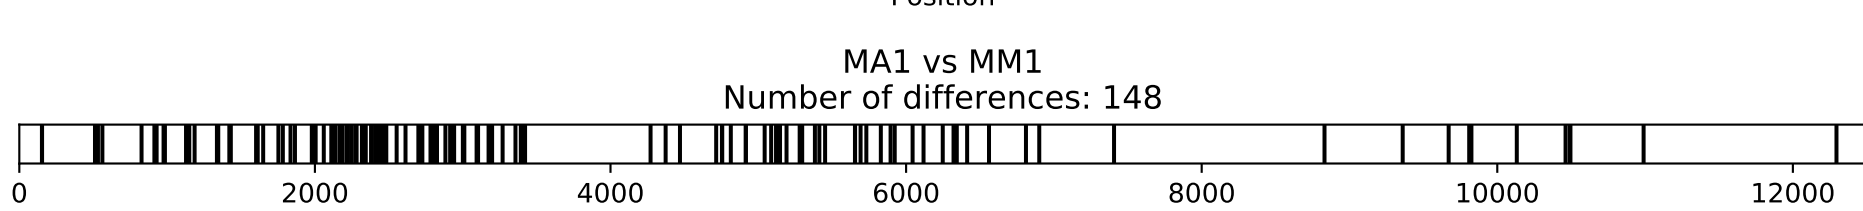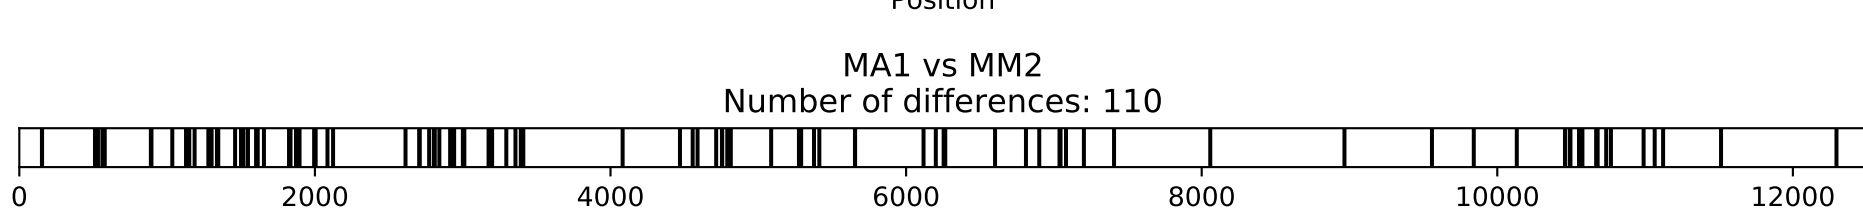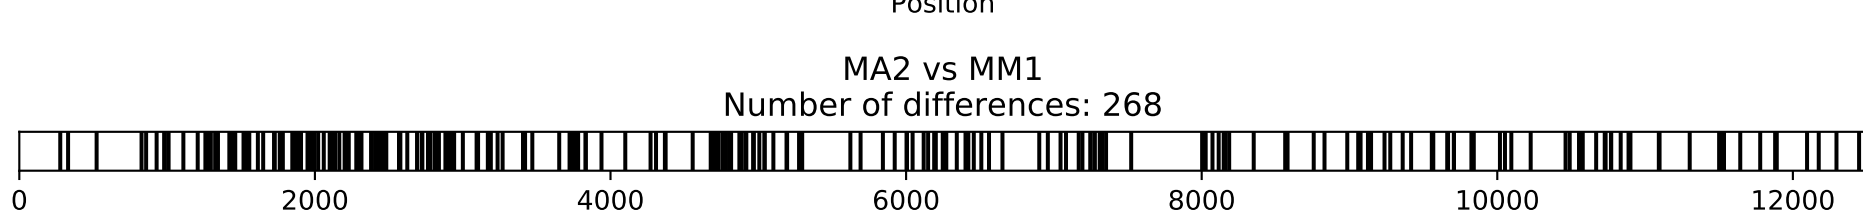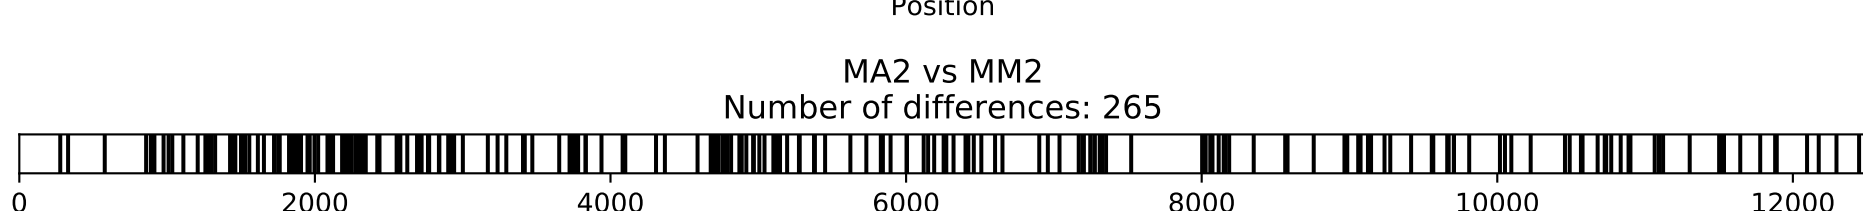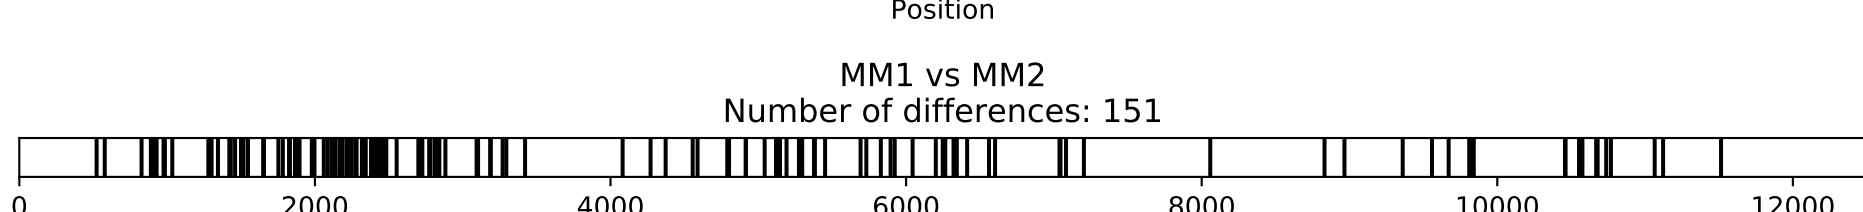

# Region: 37

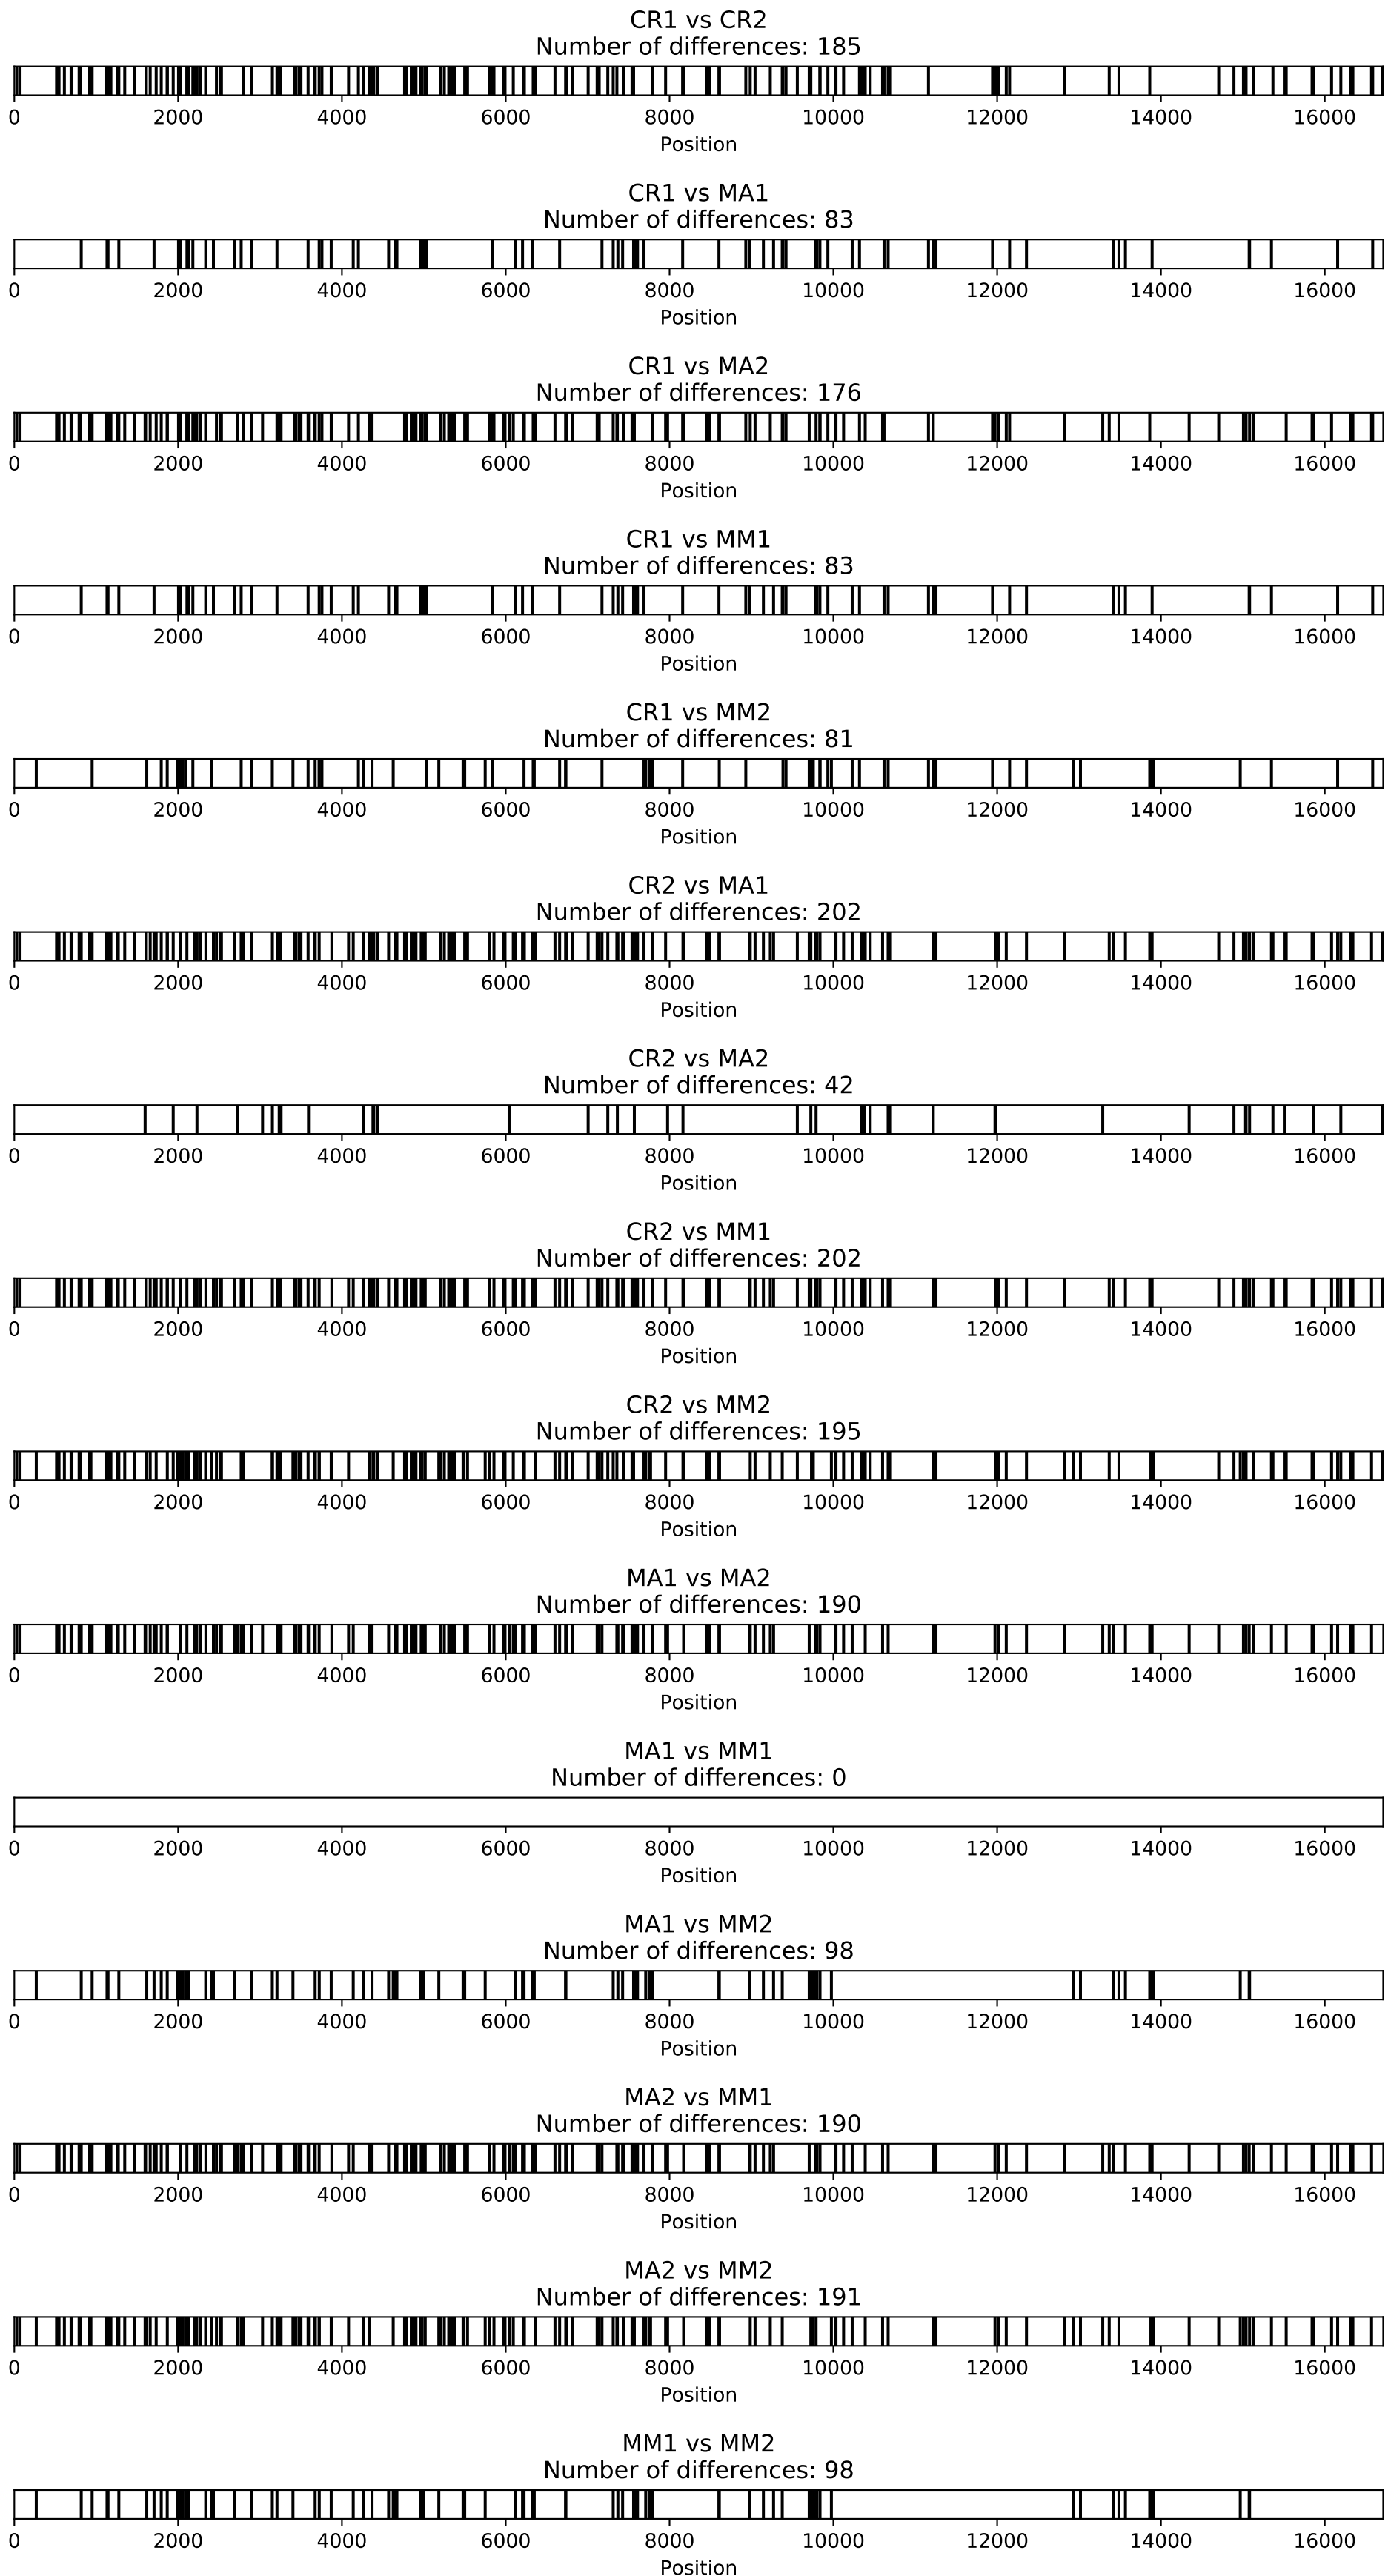

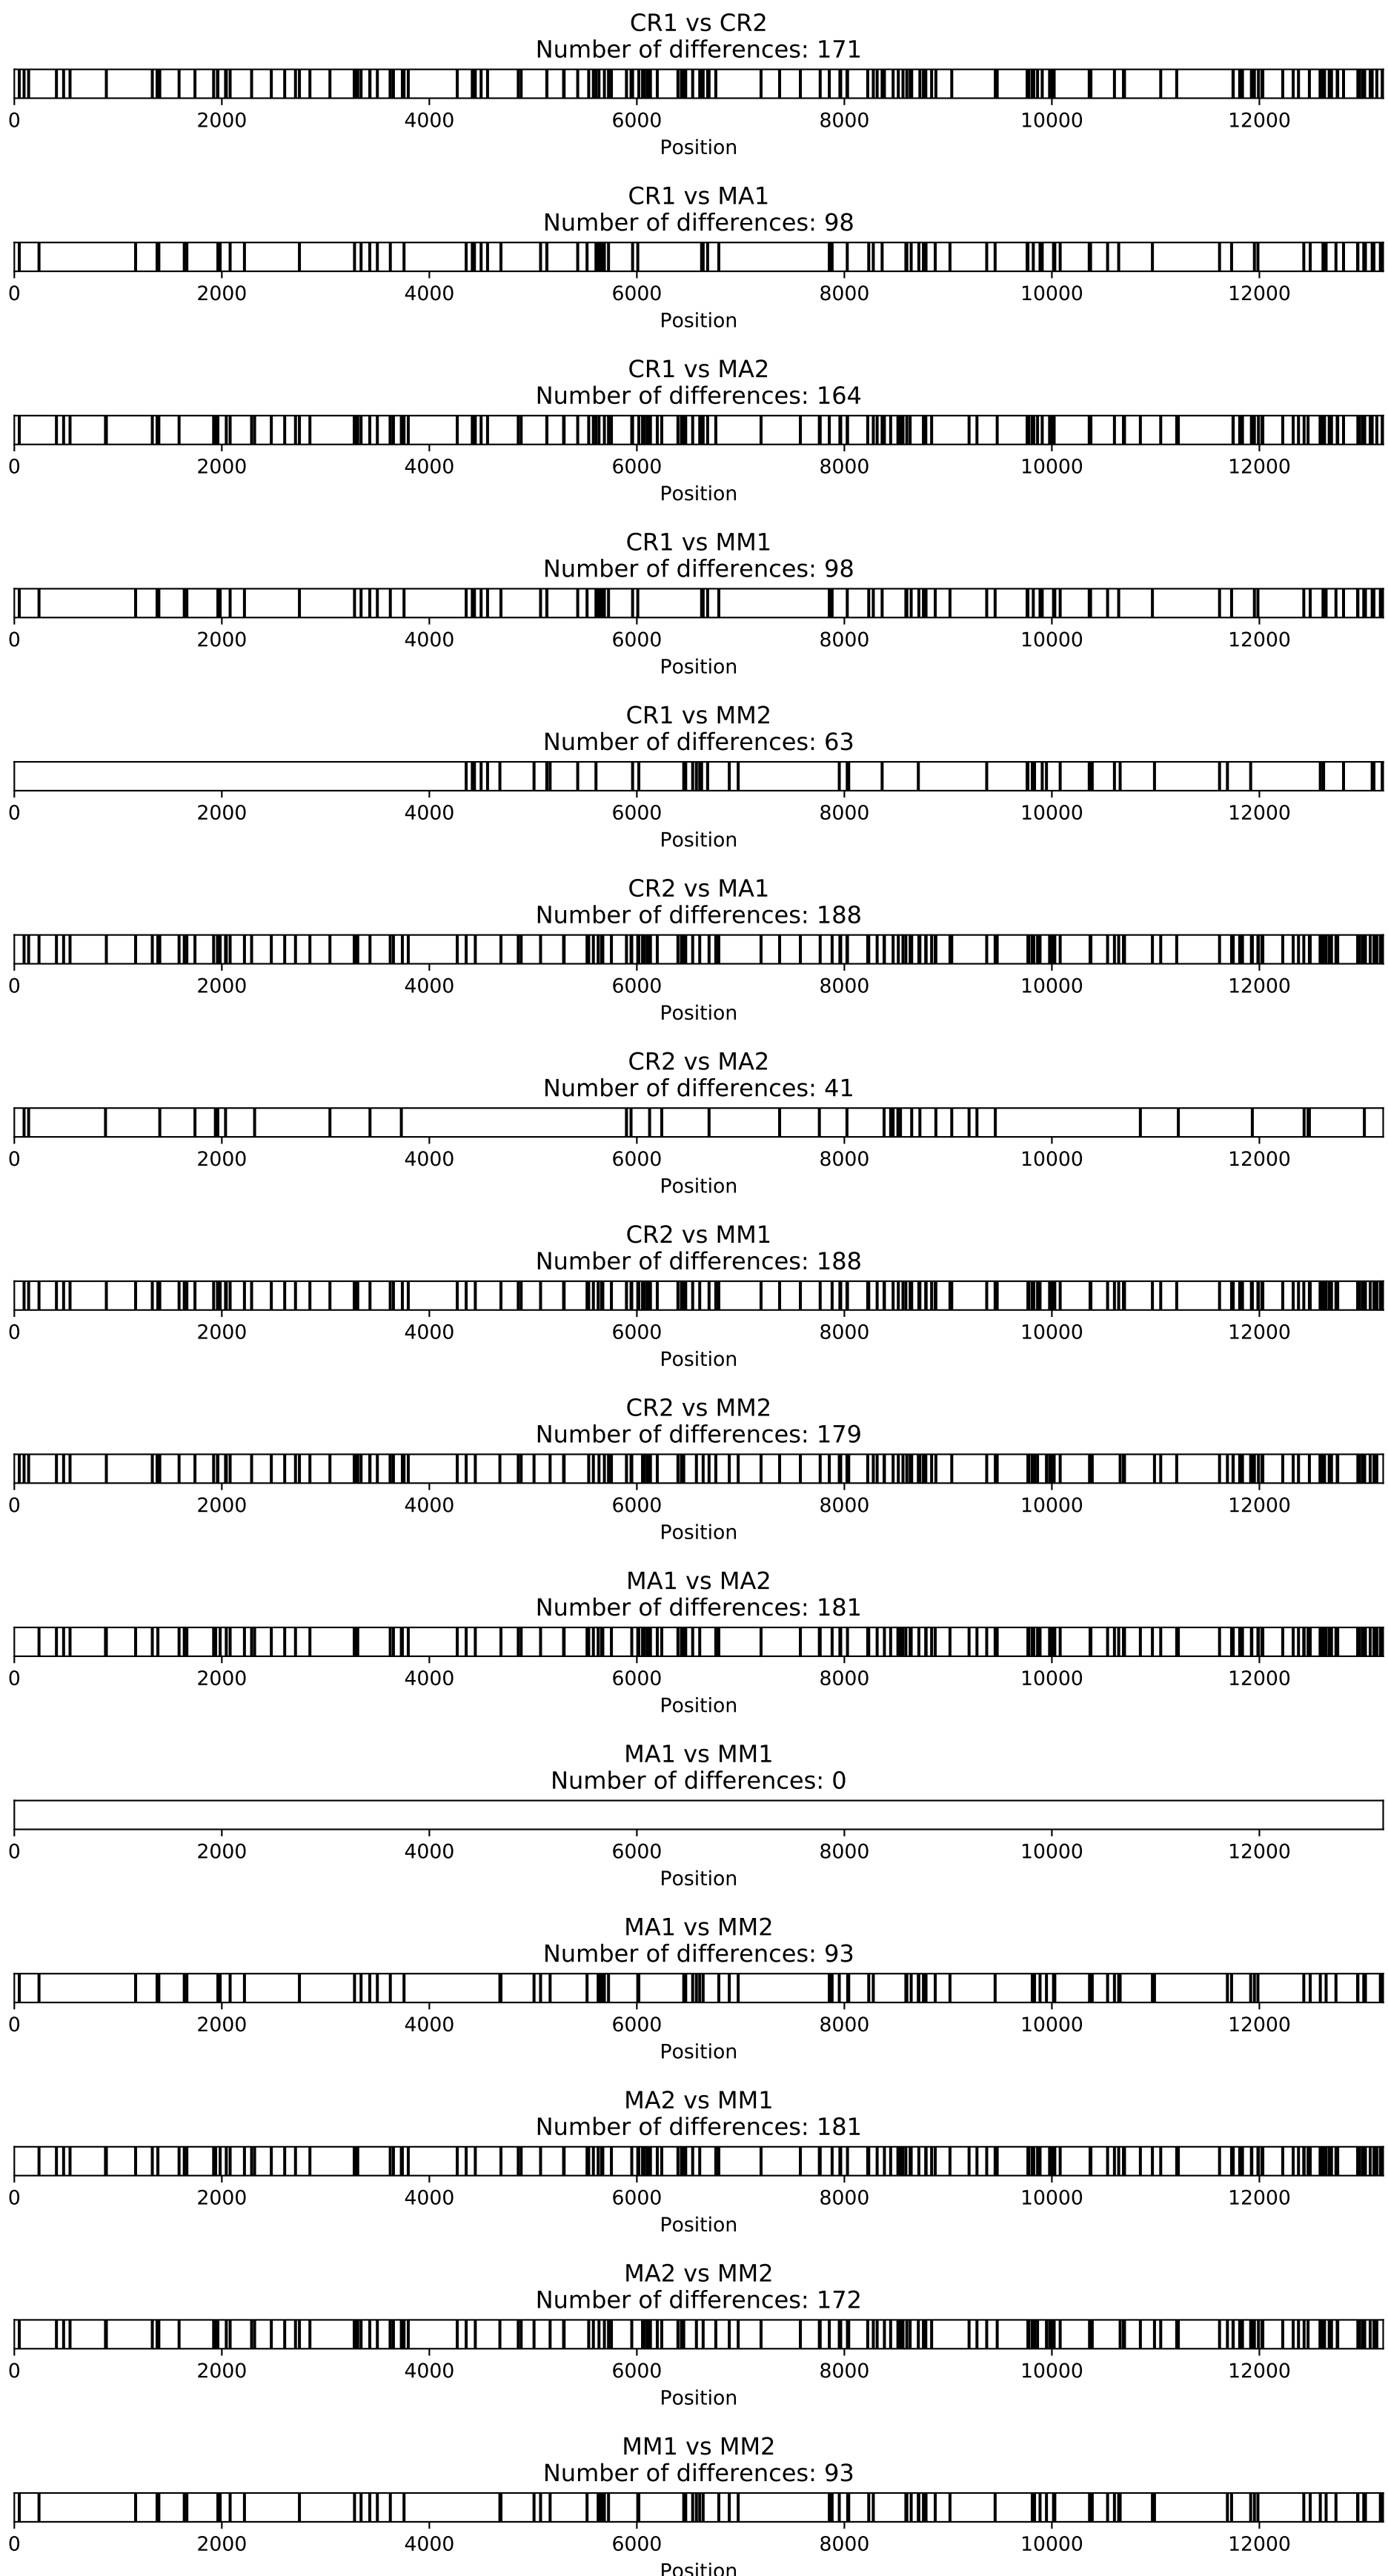

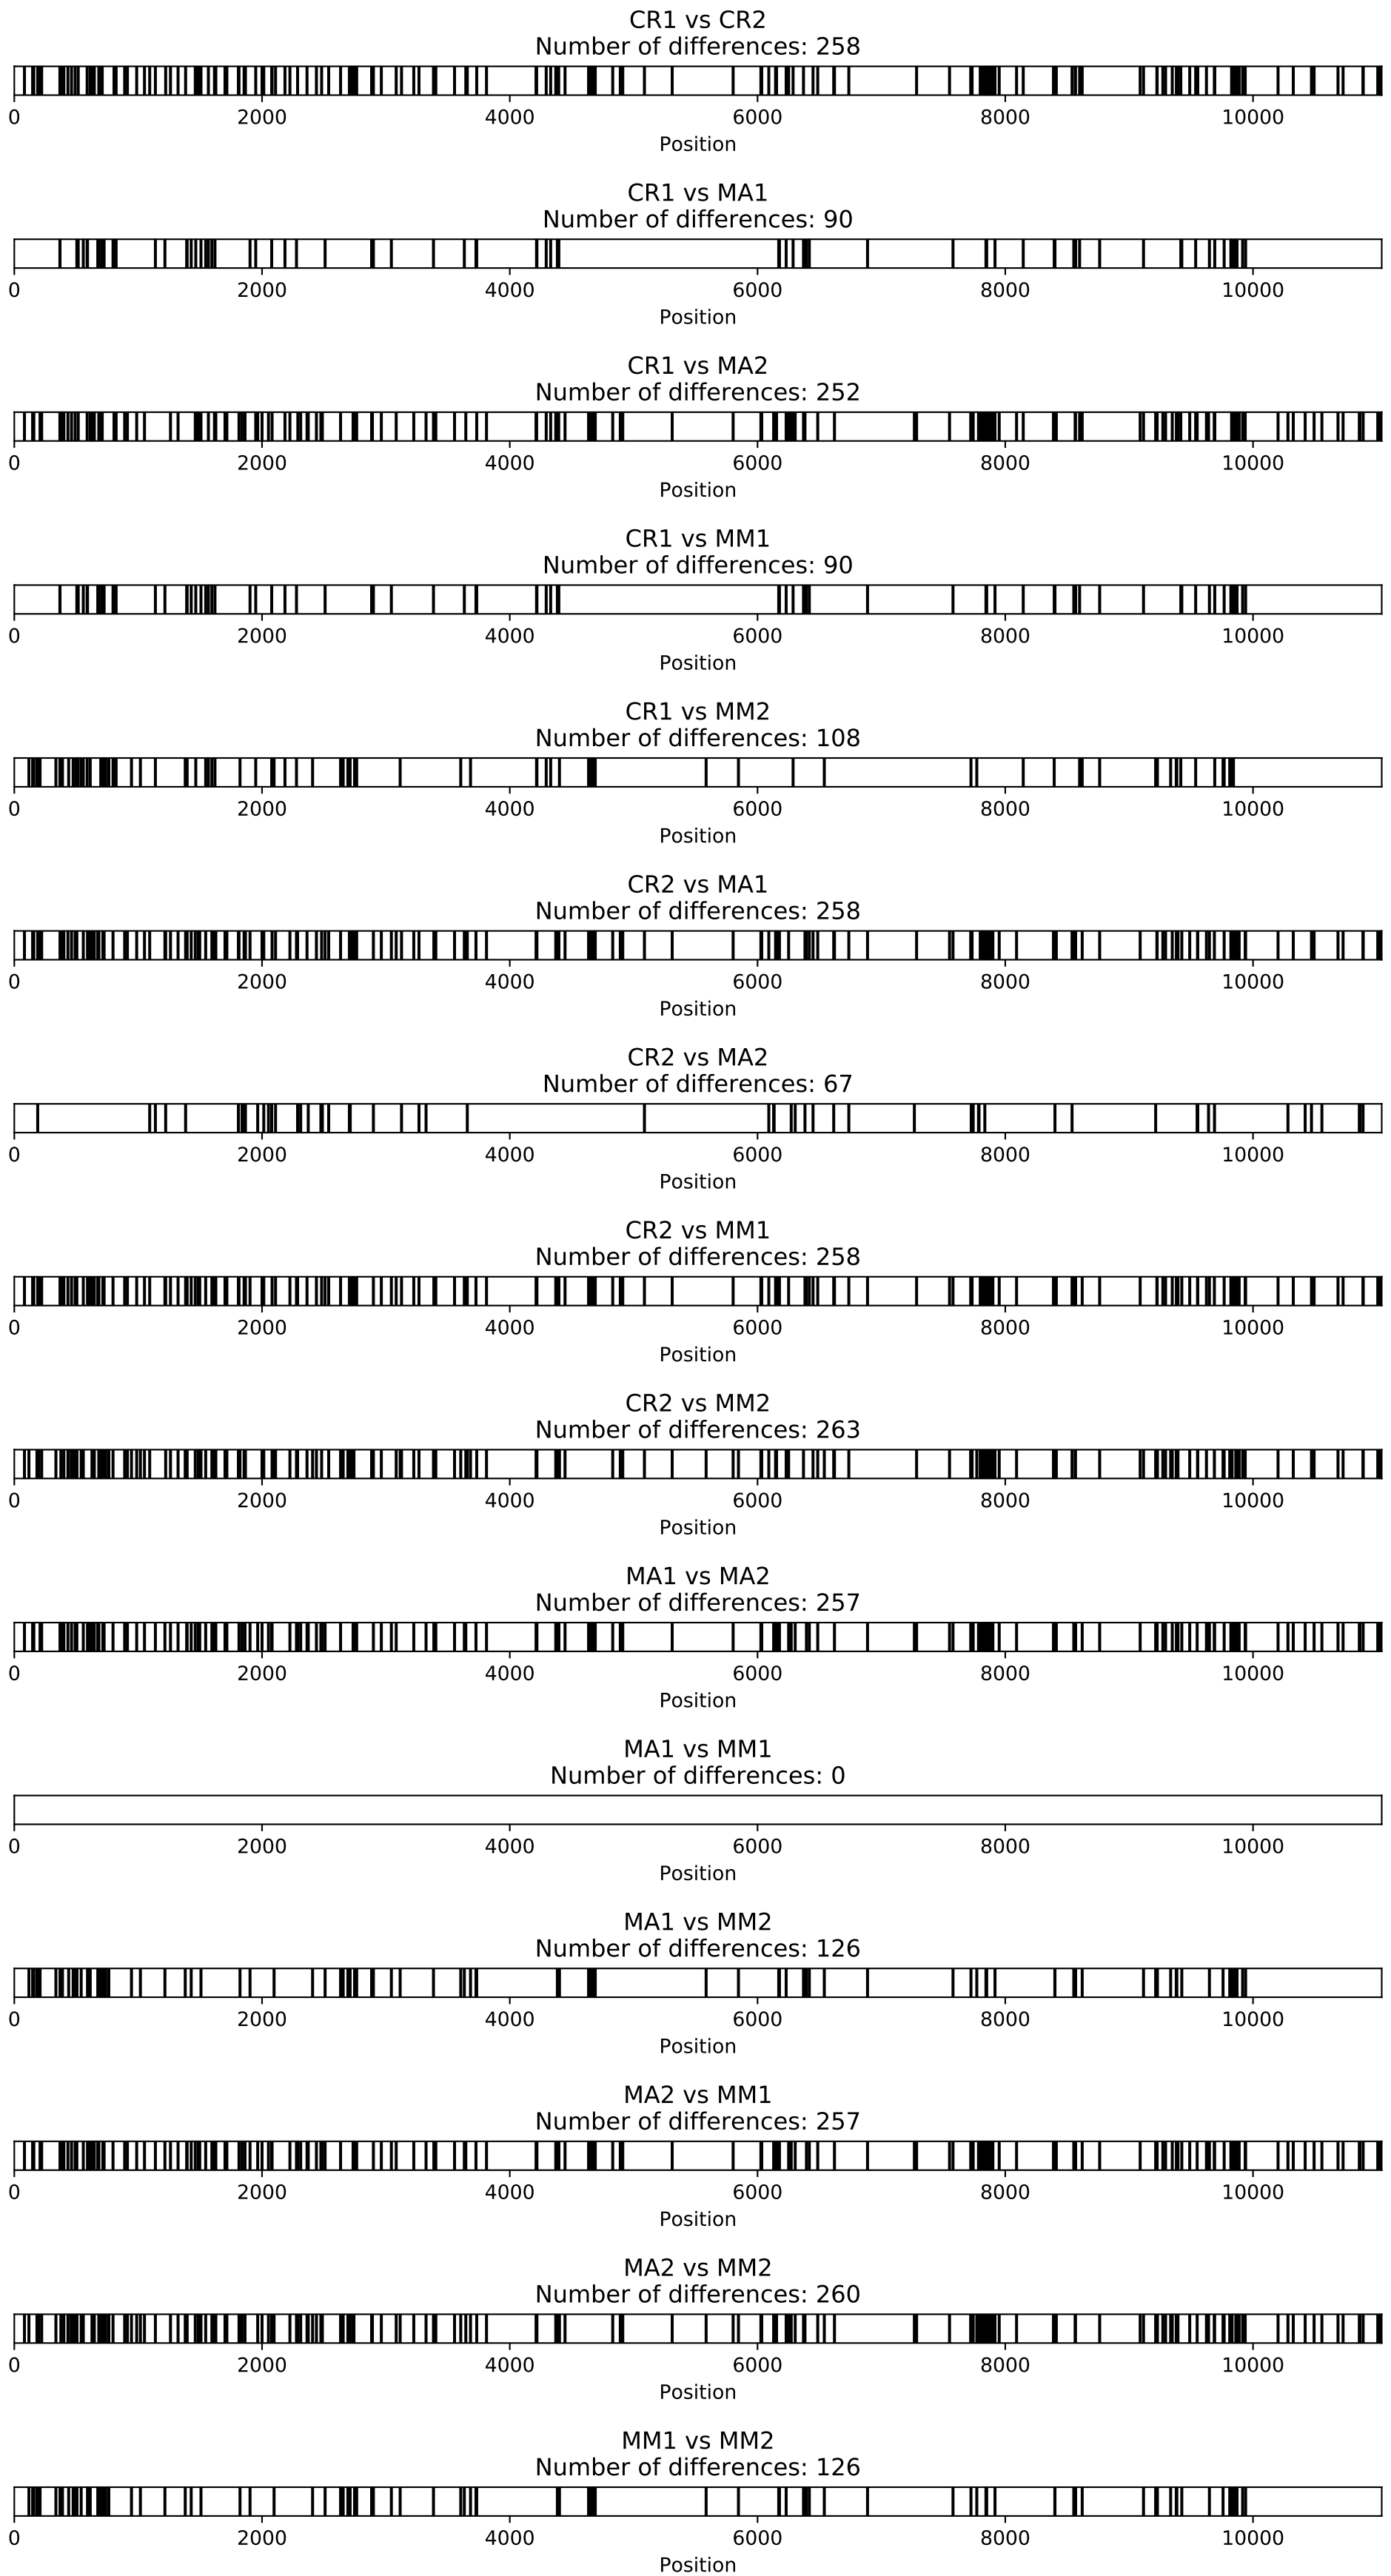

# Region: 40

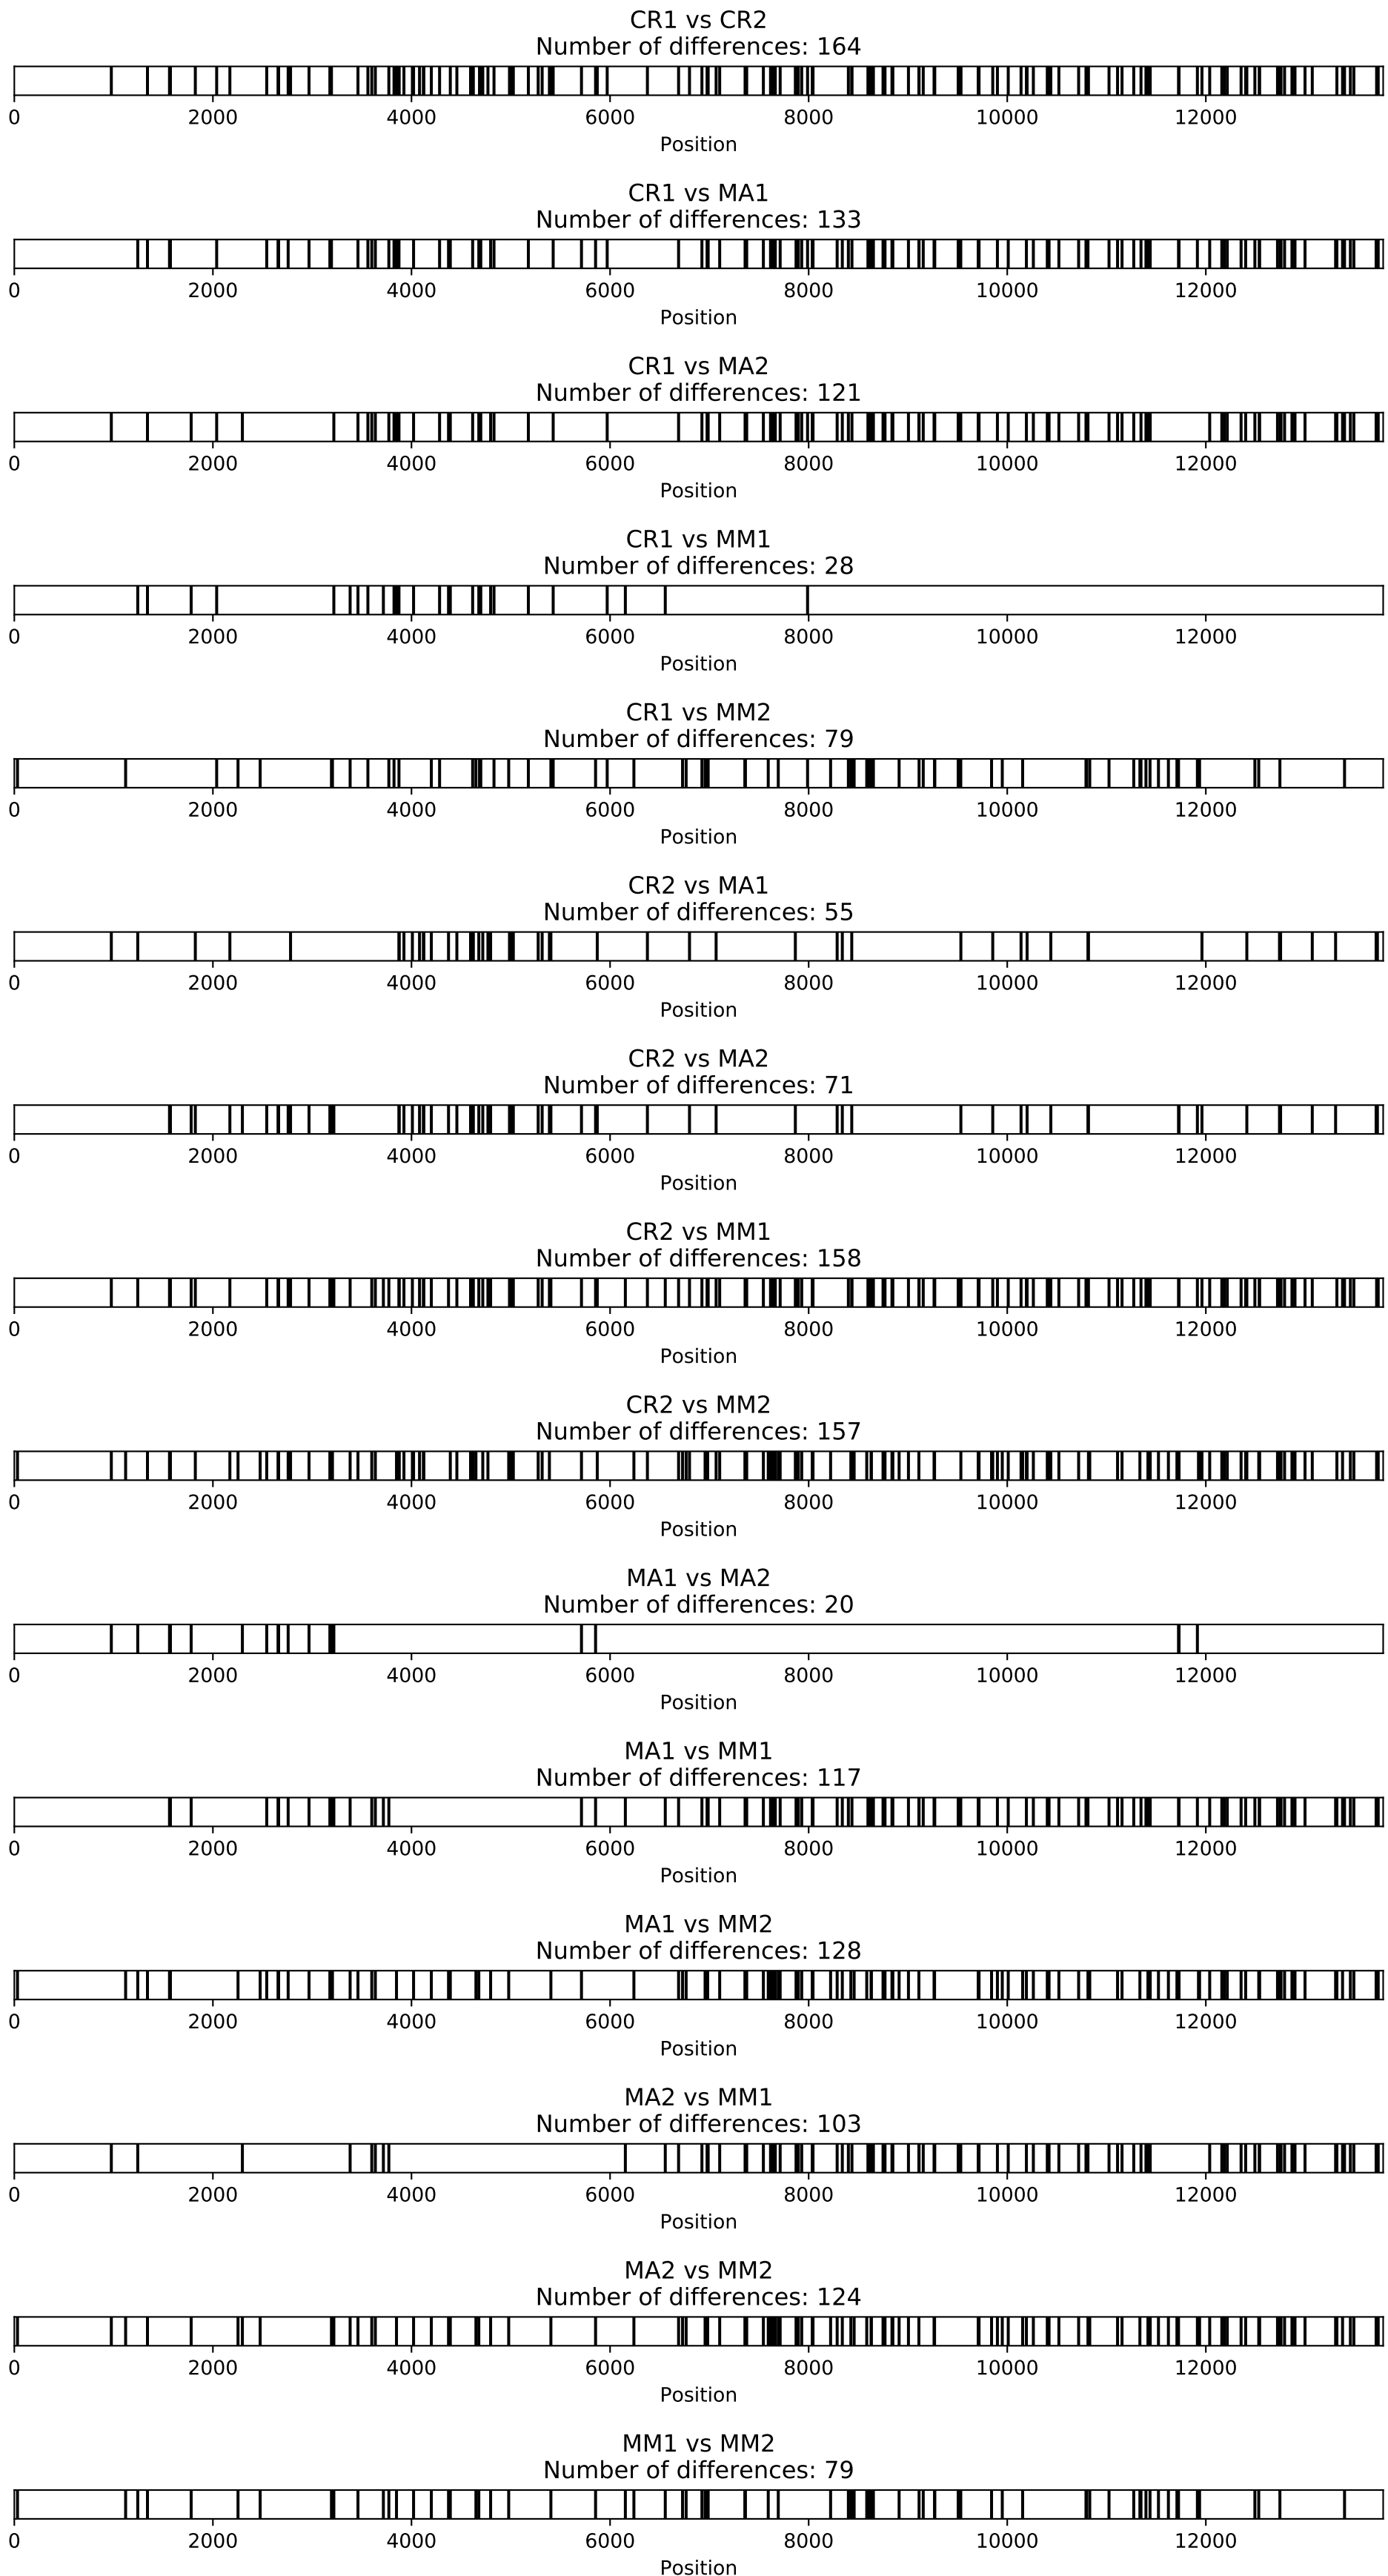

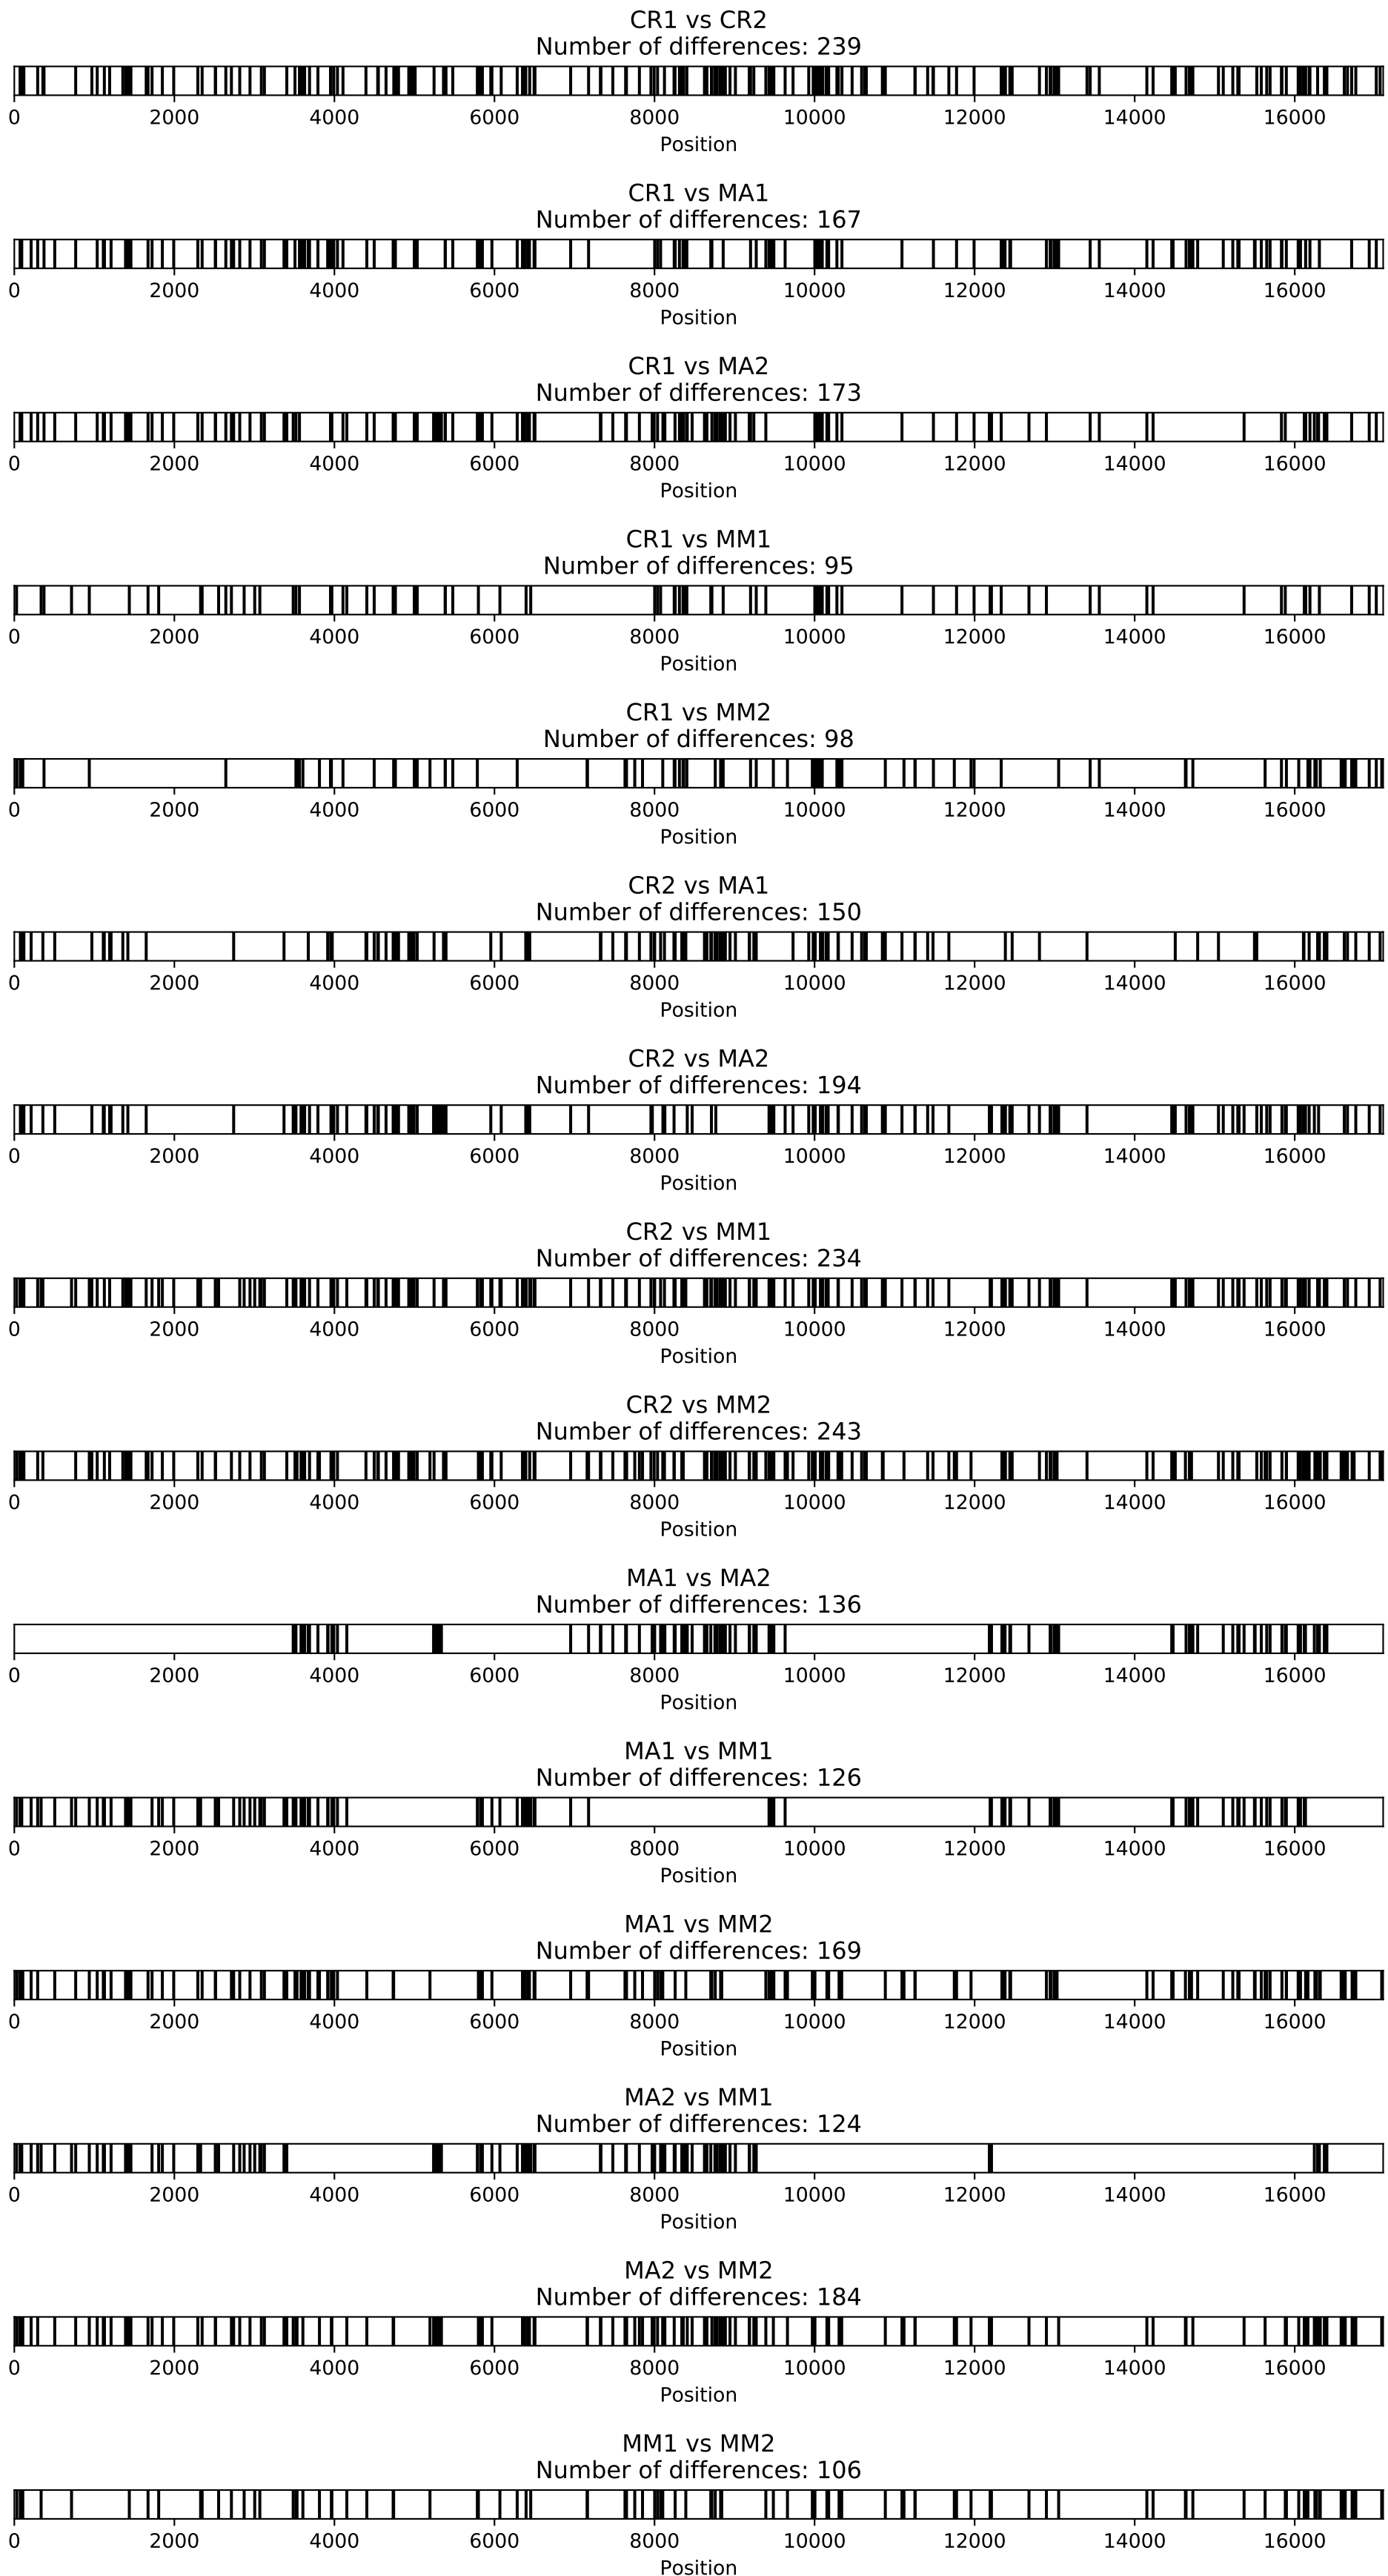

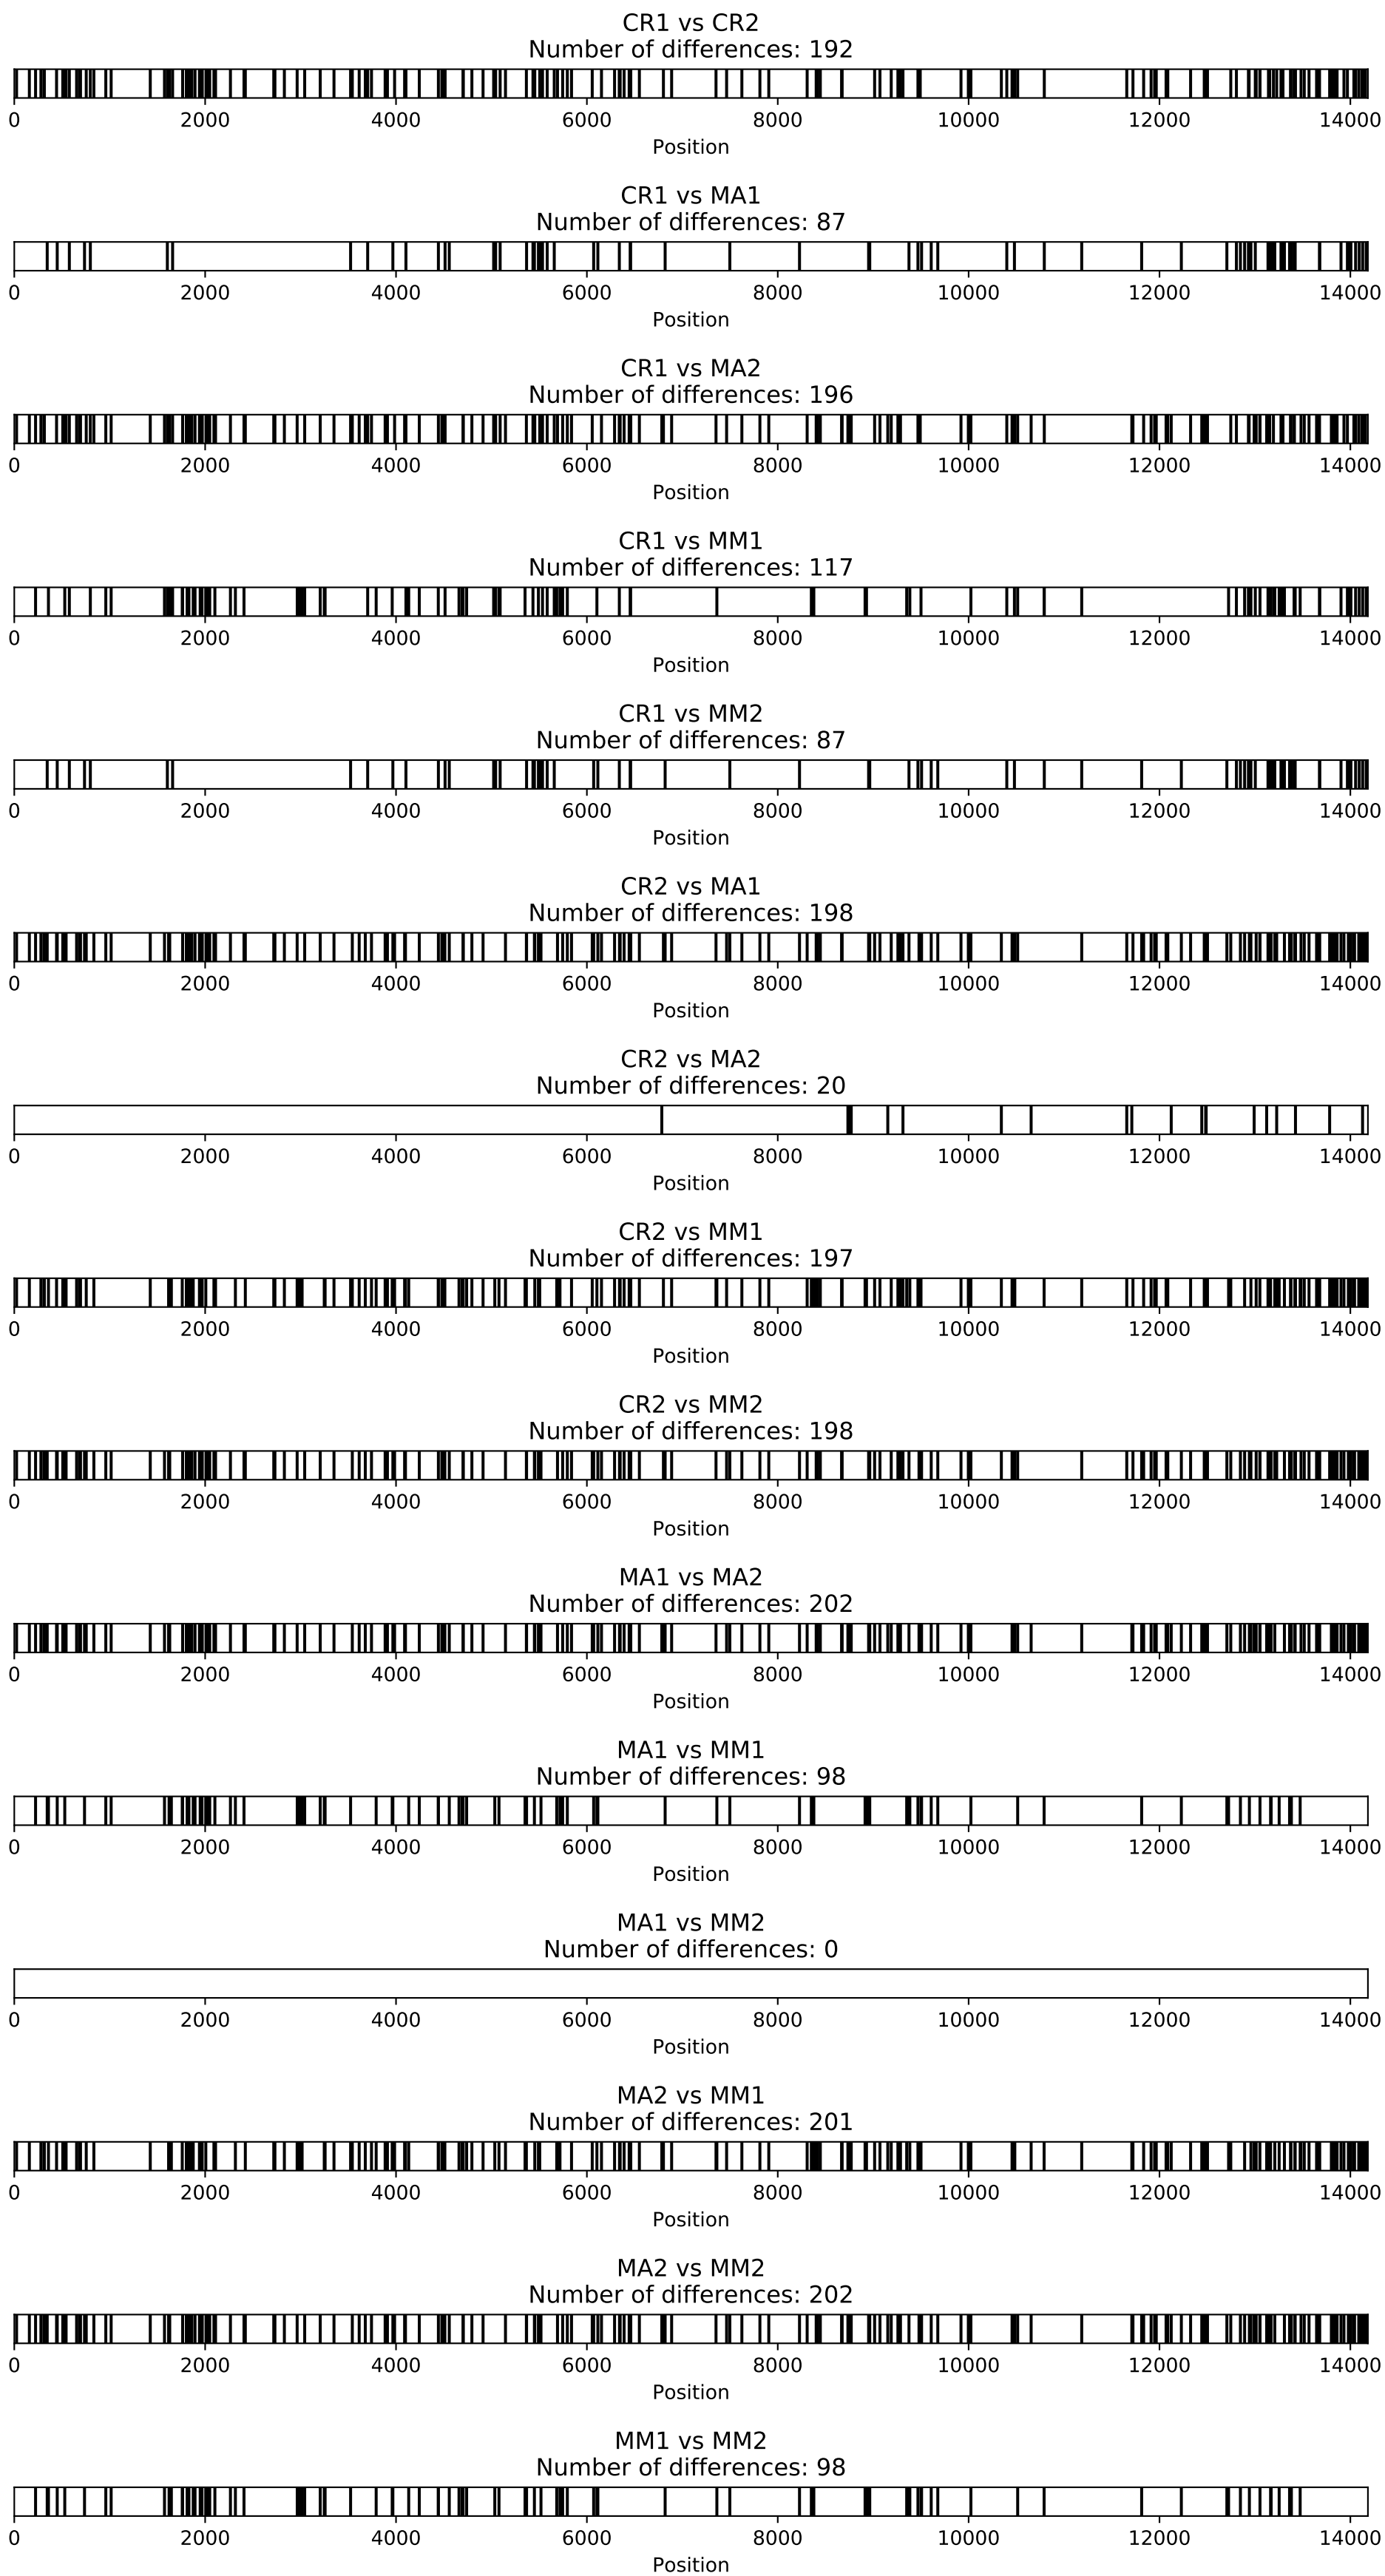

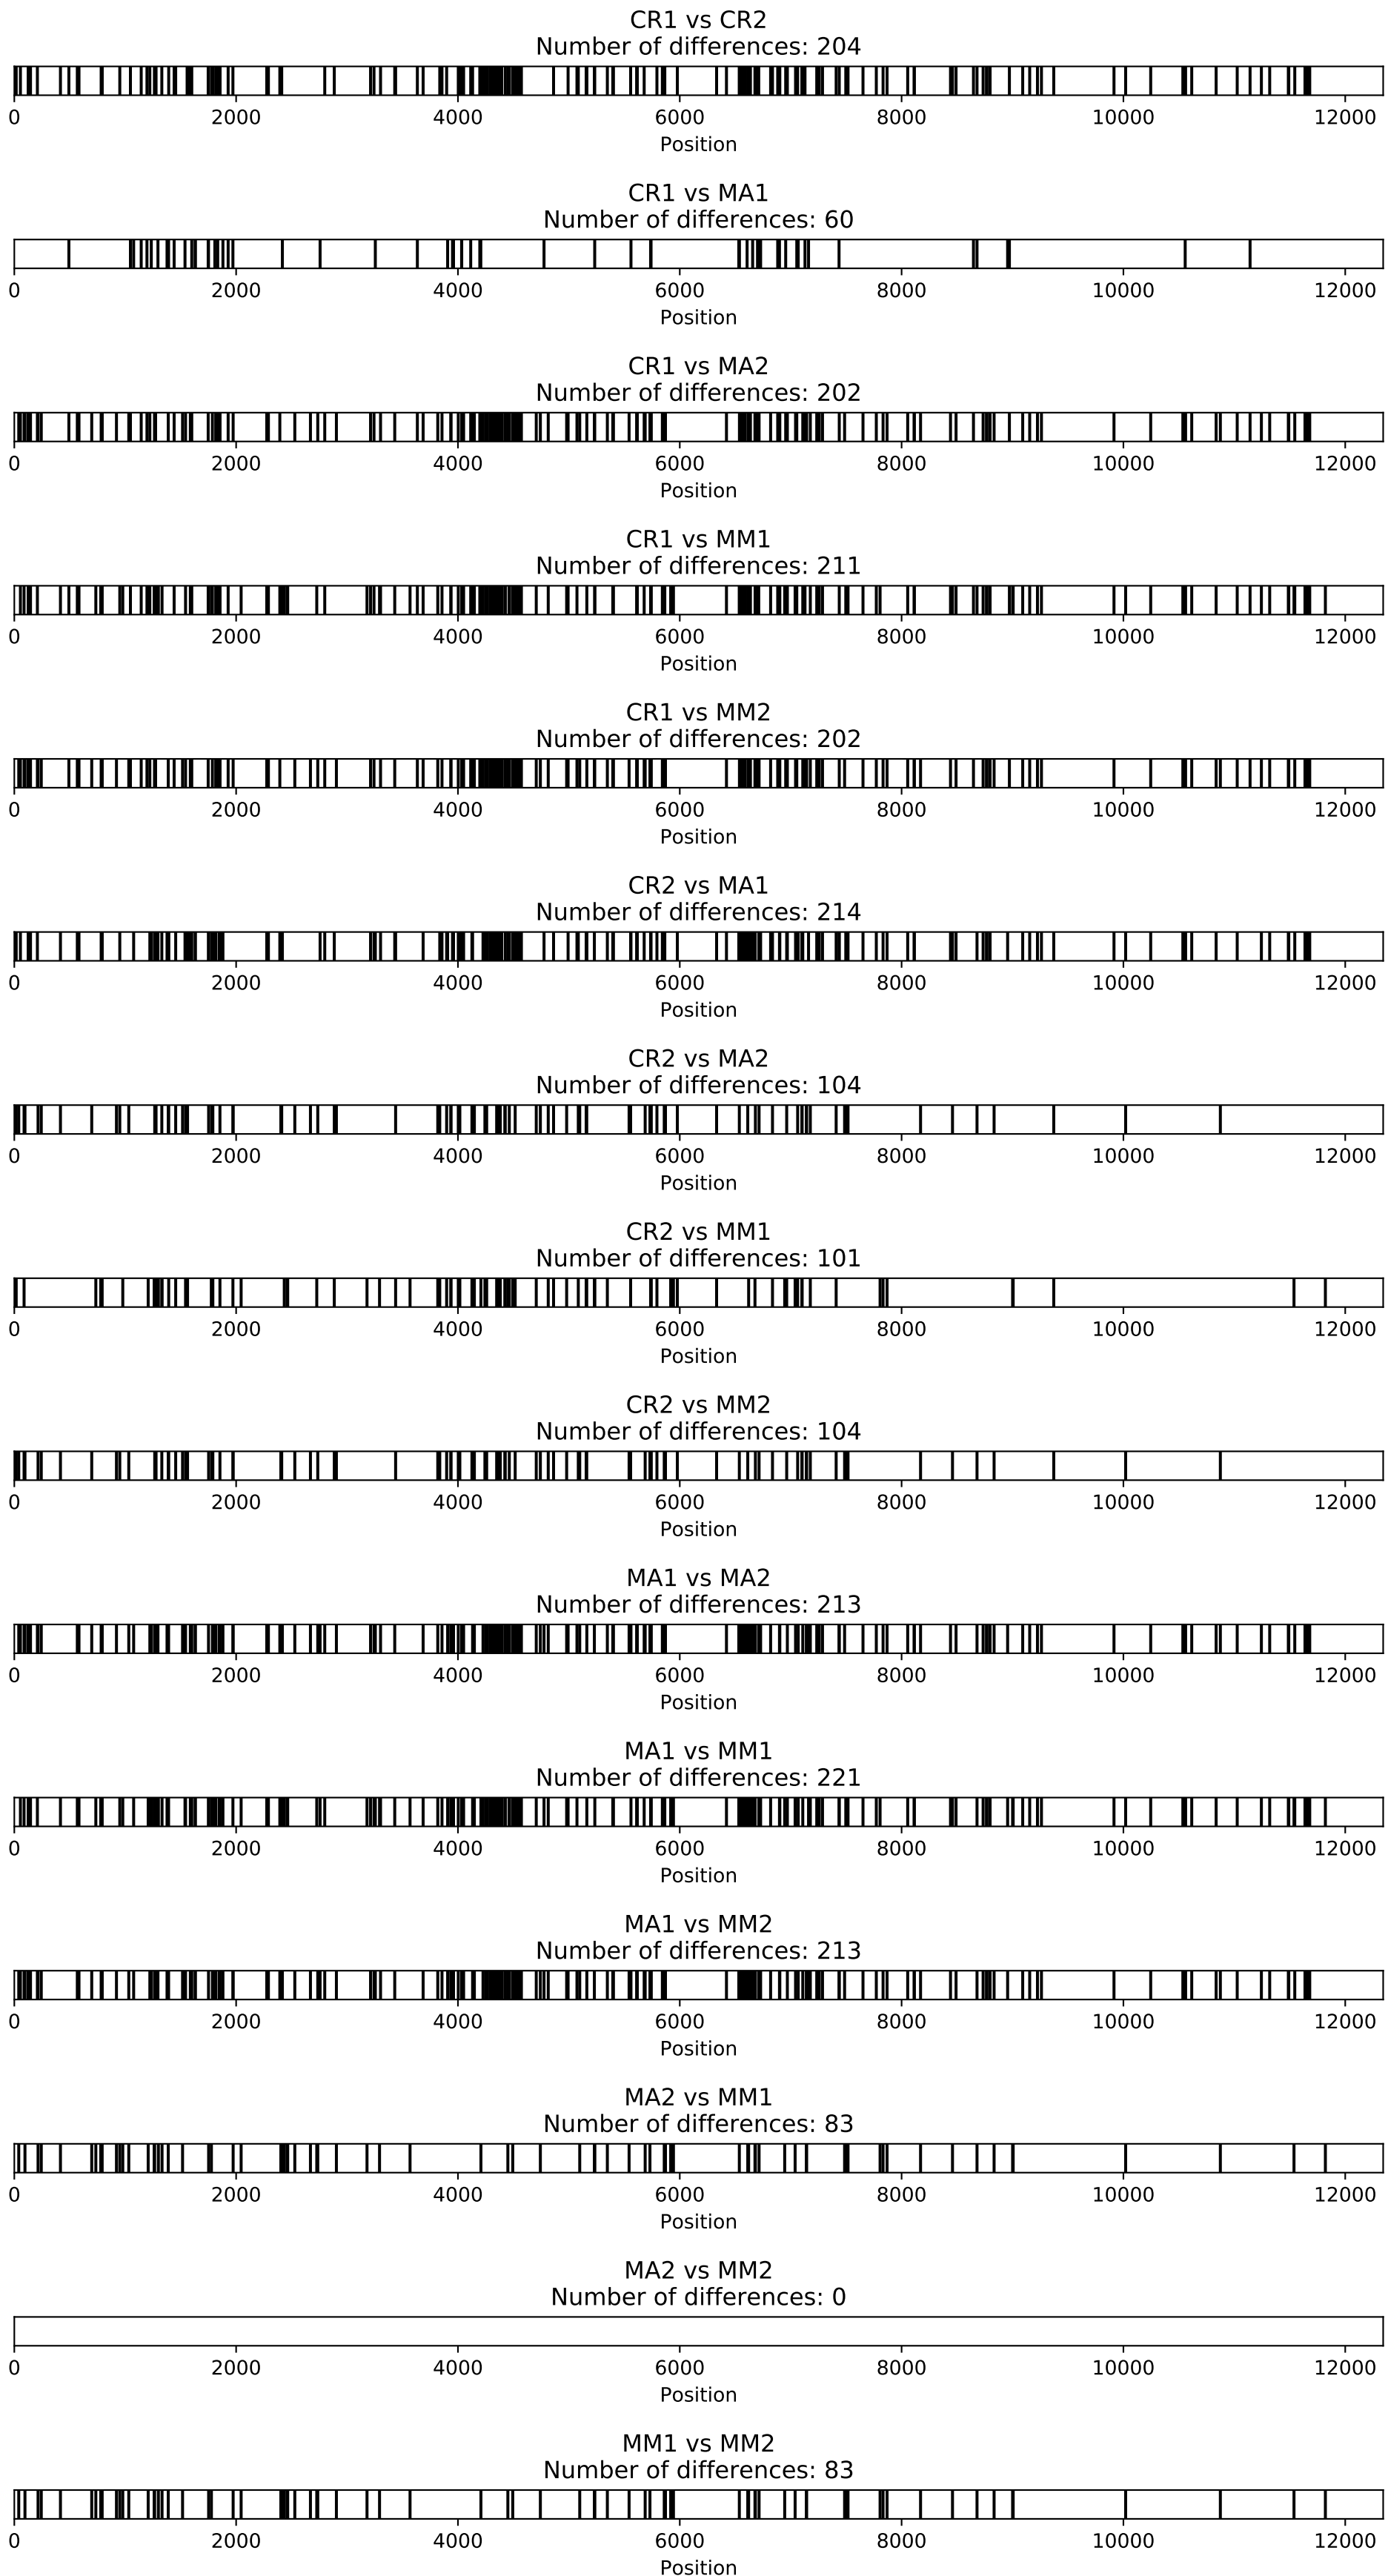



# Region: 47

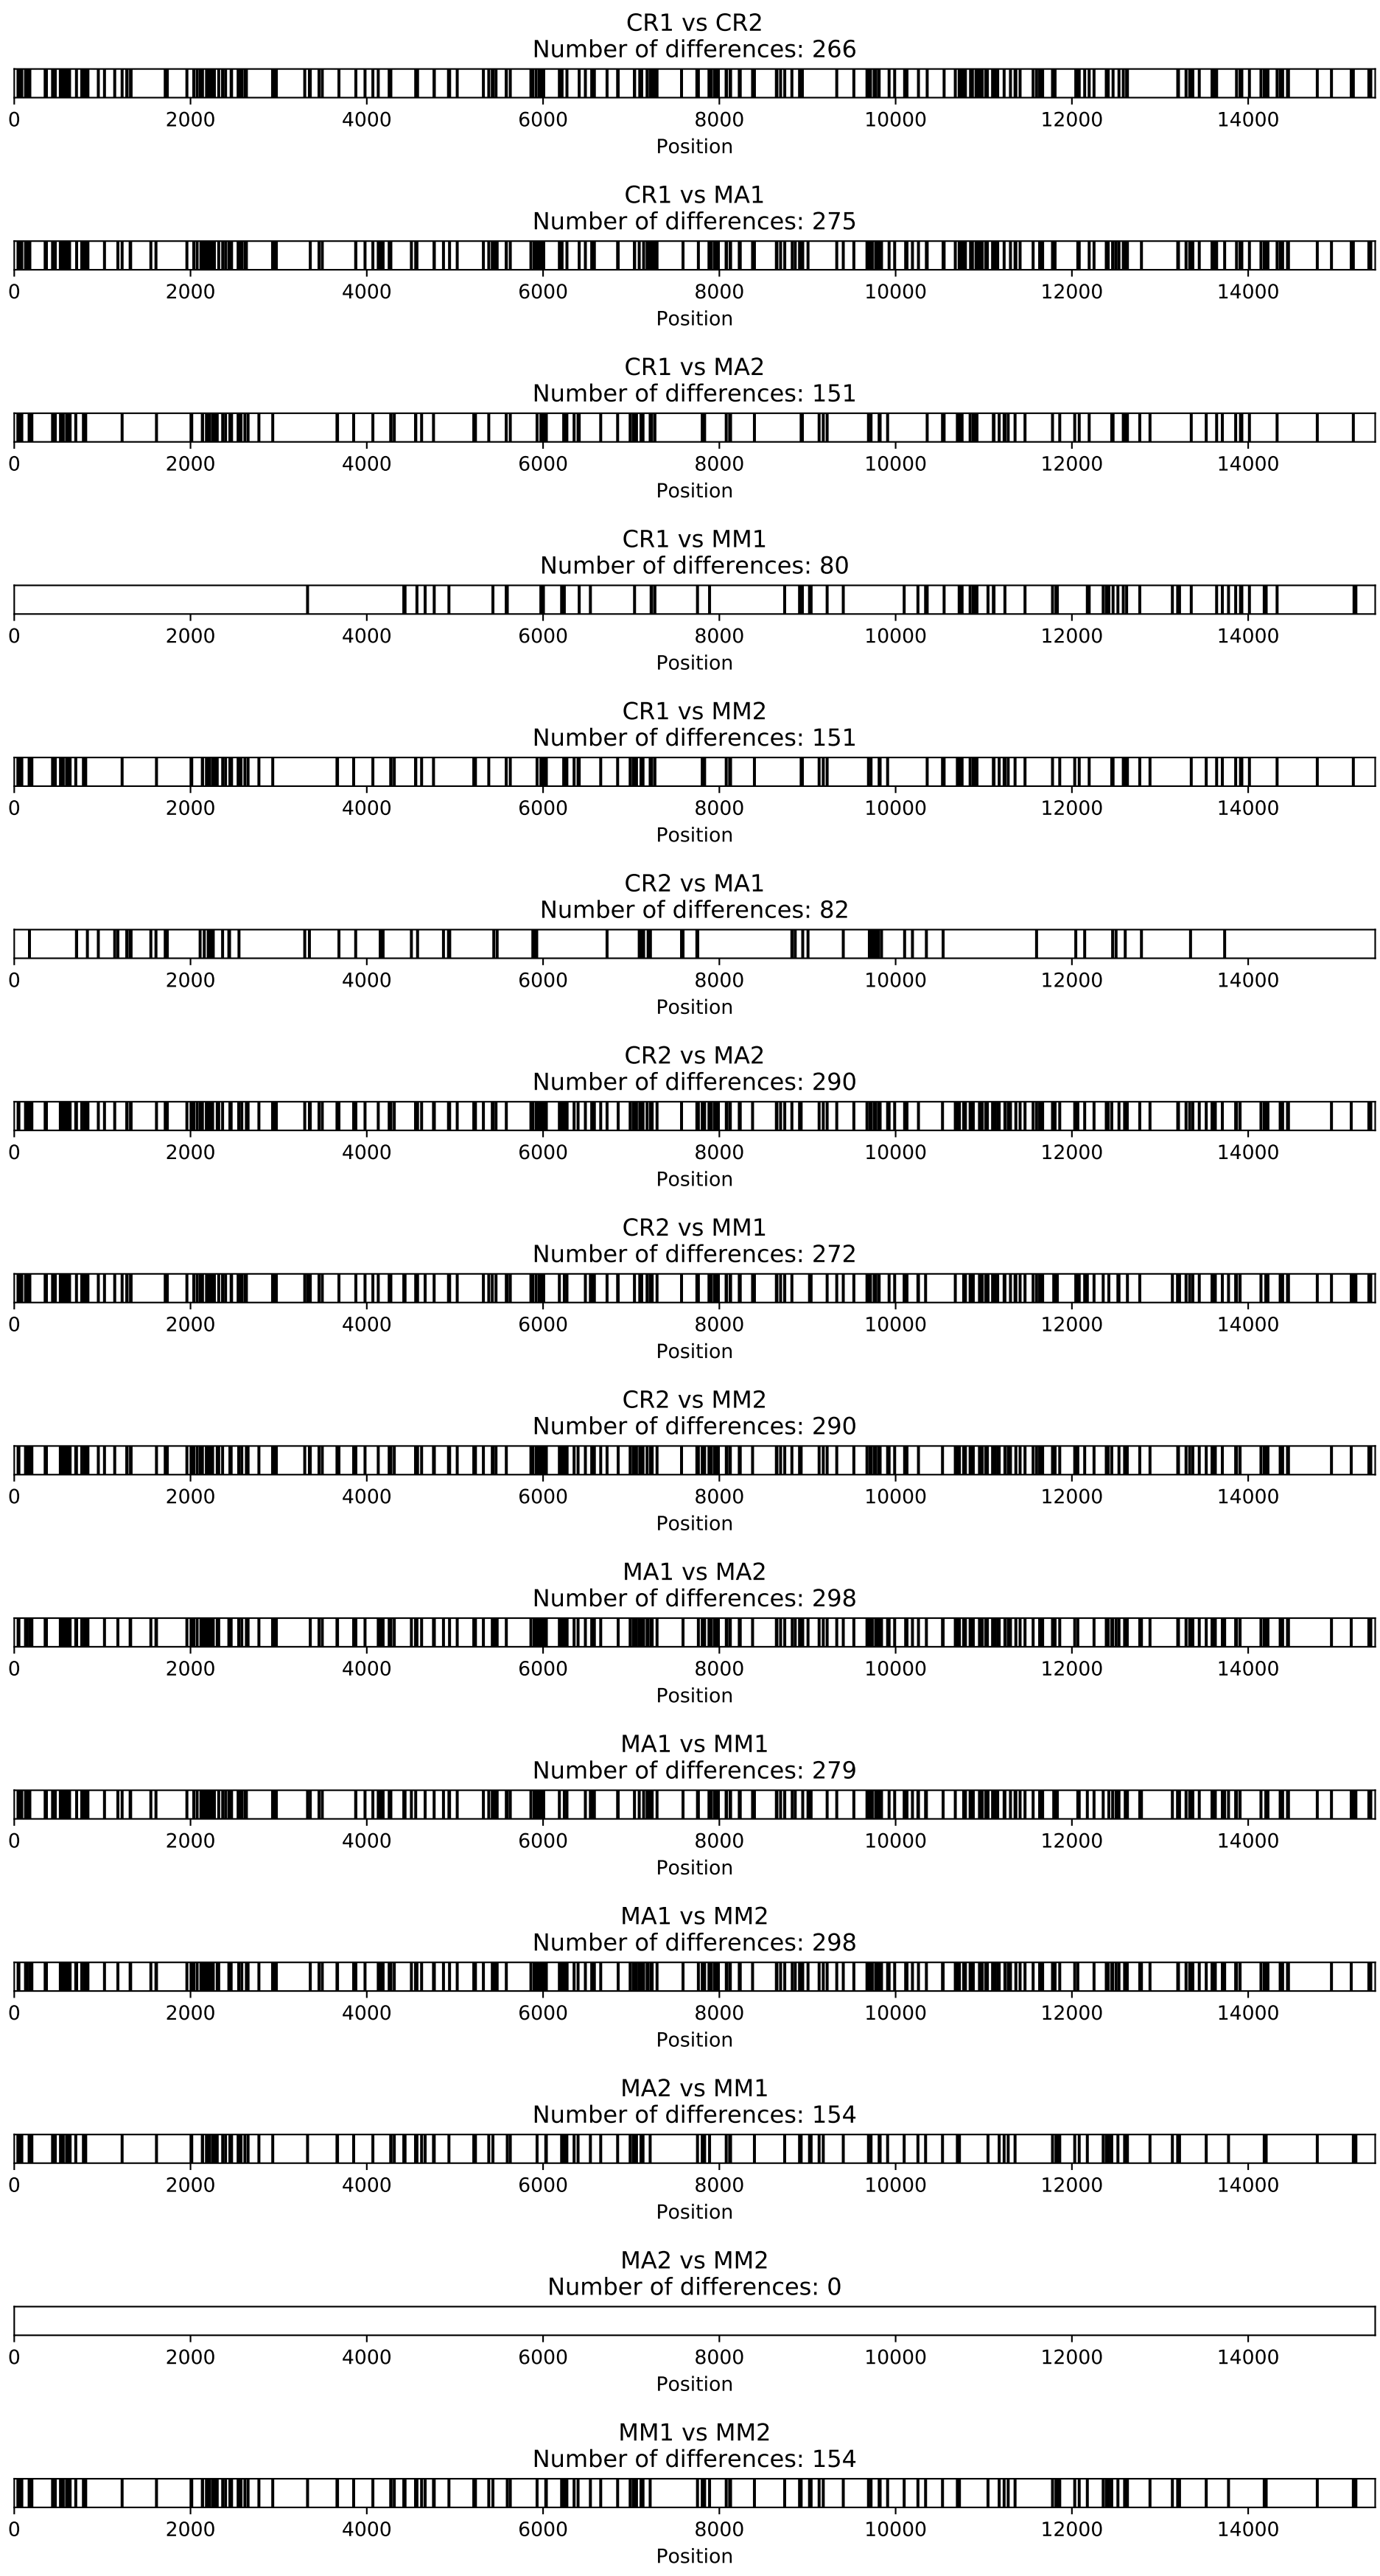

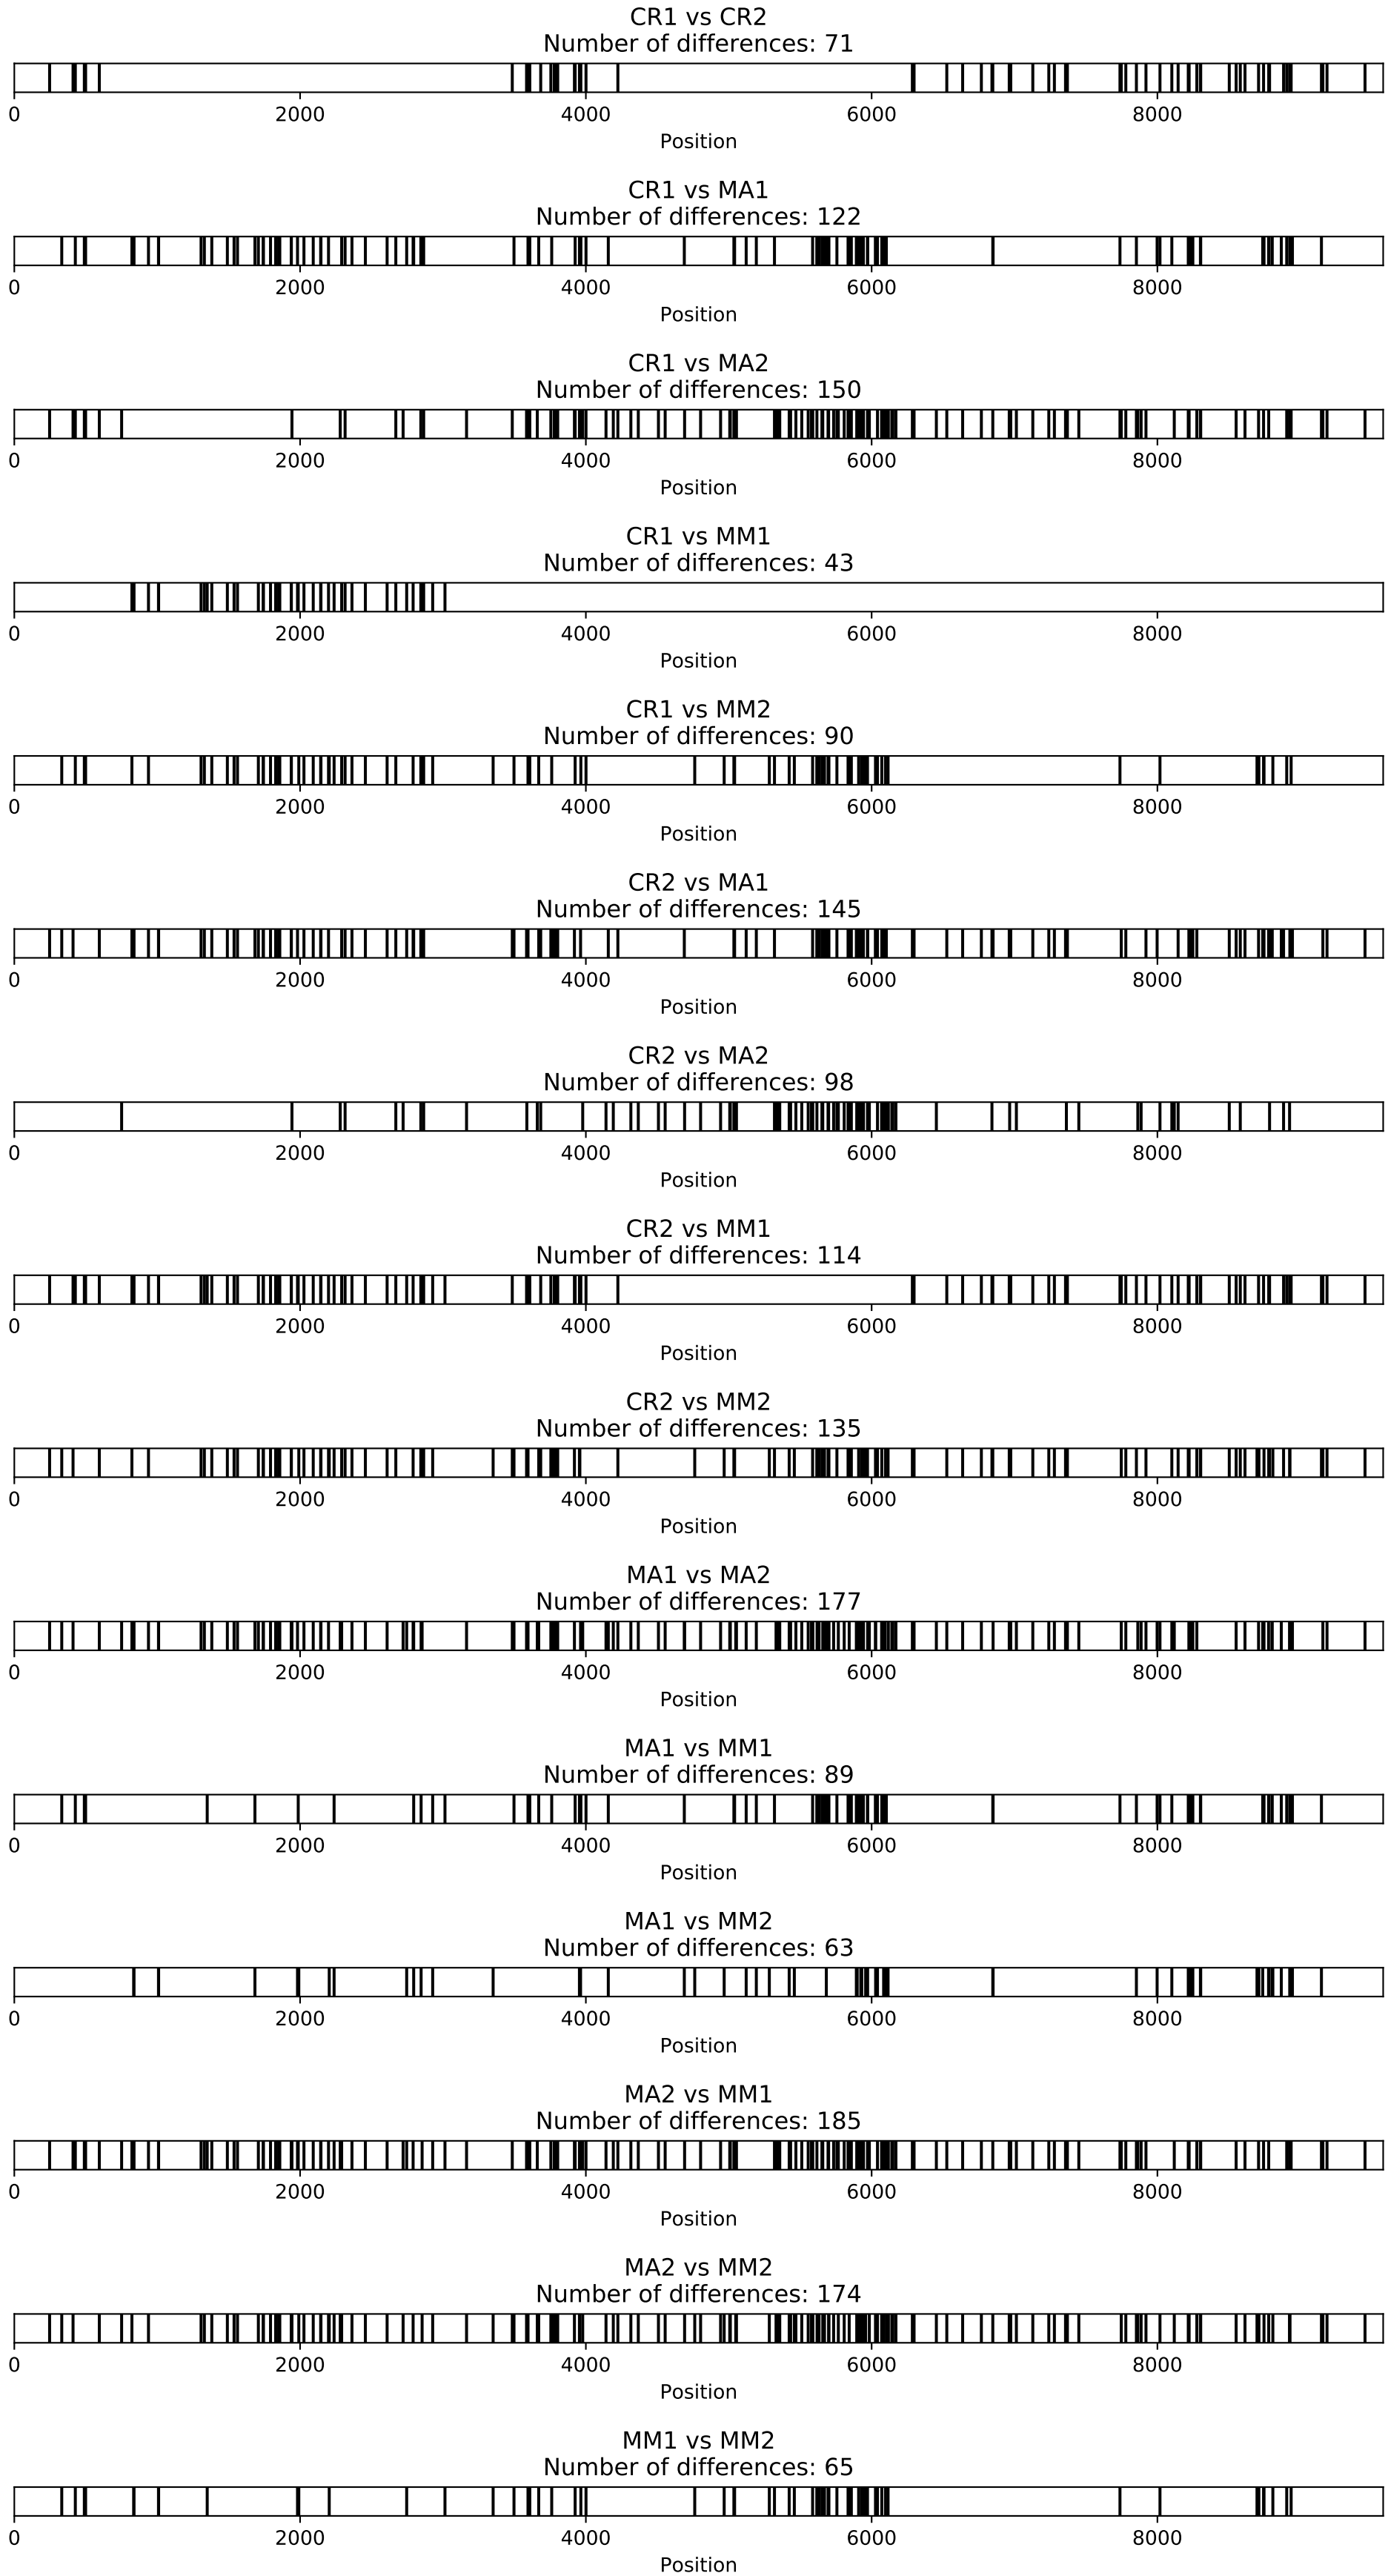

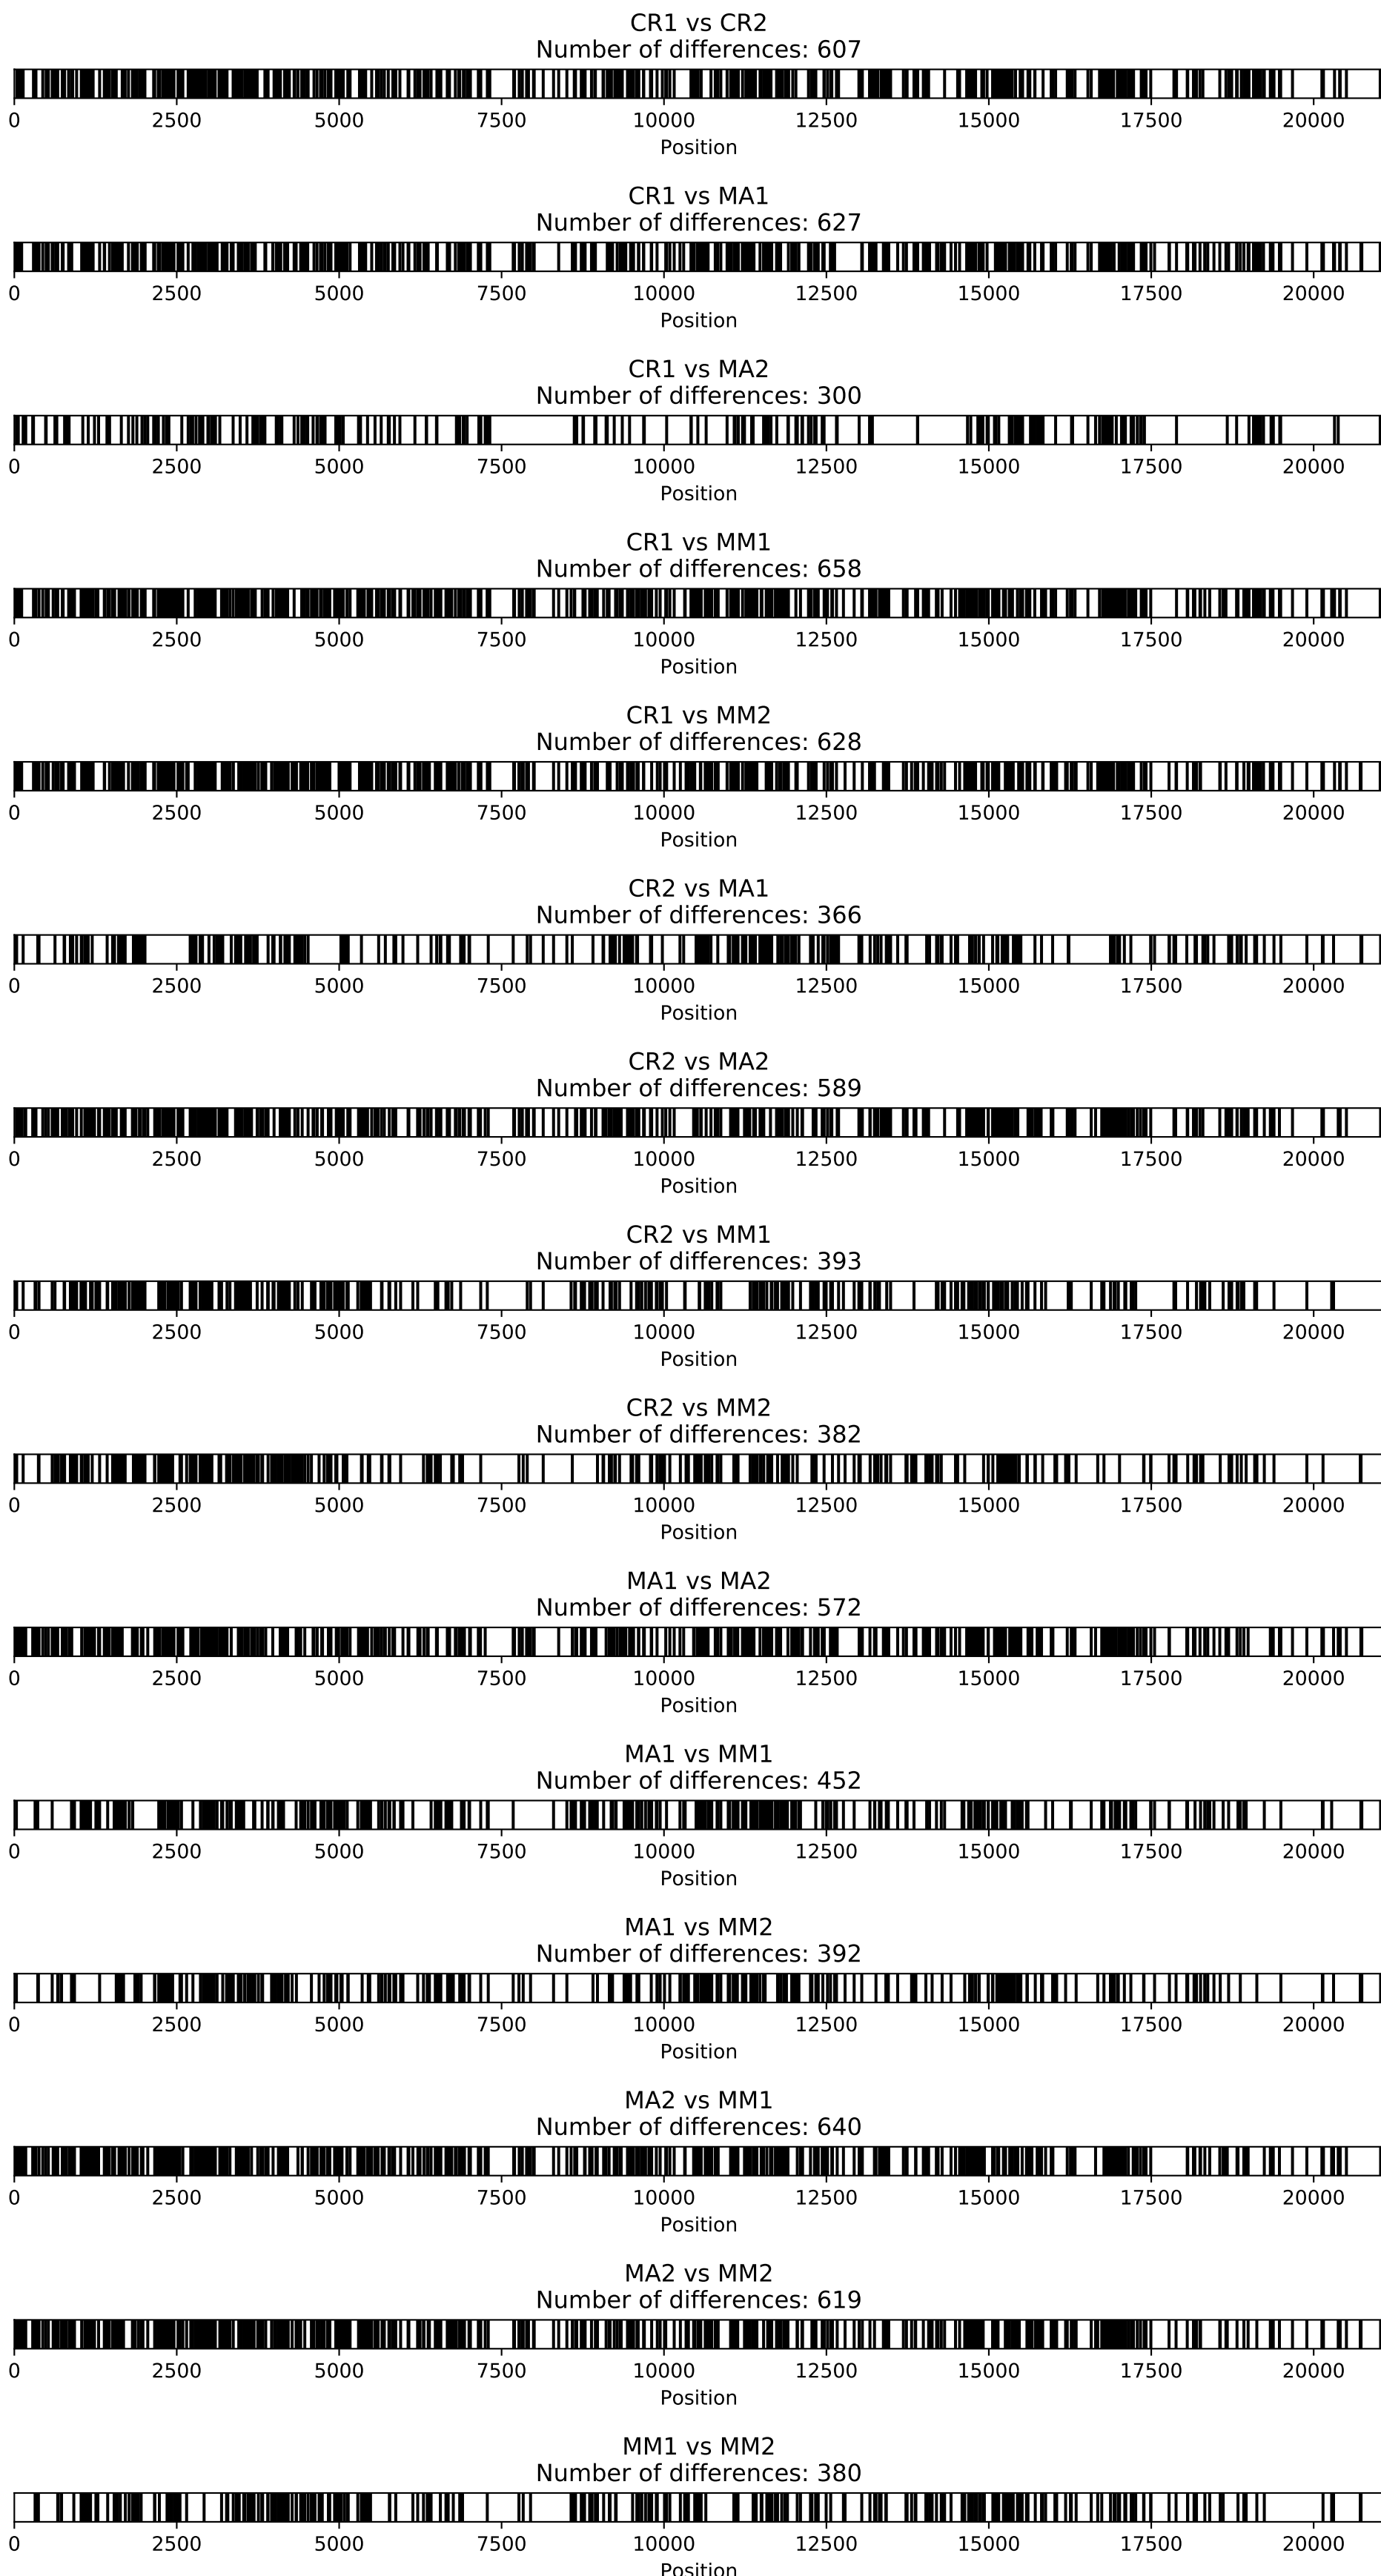

# Region: 51

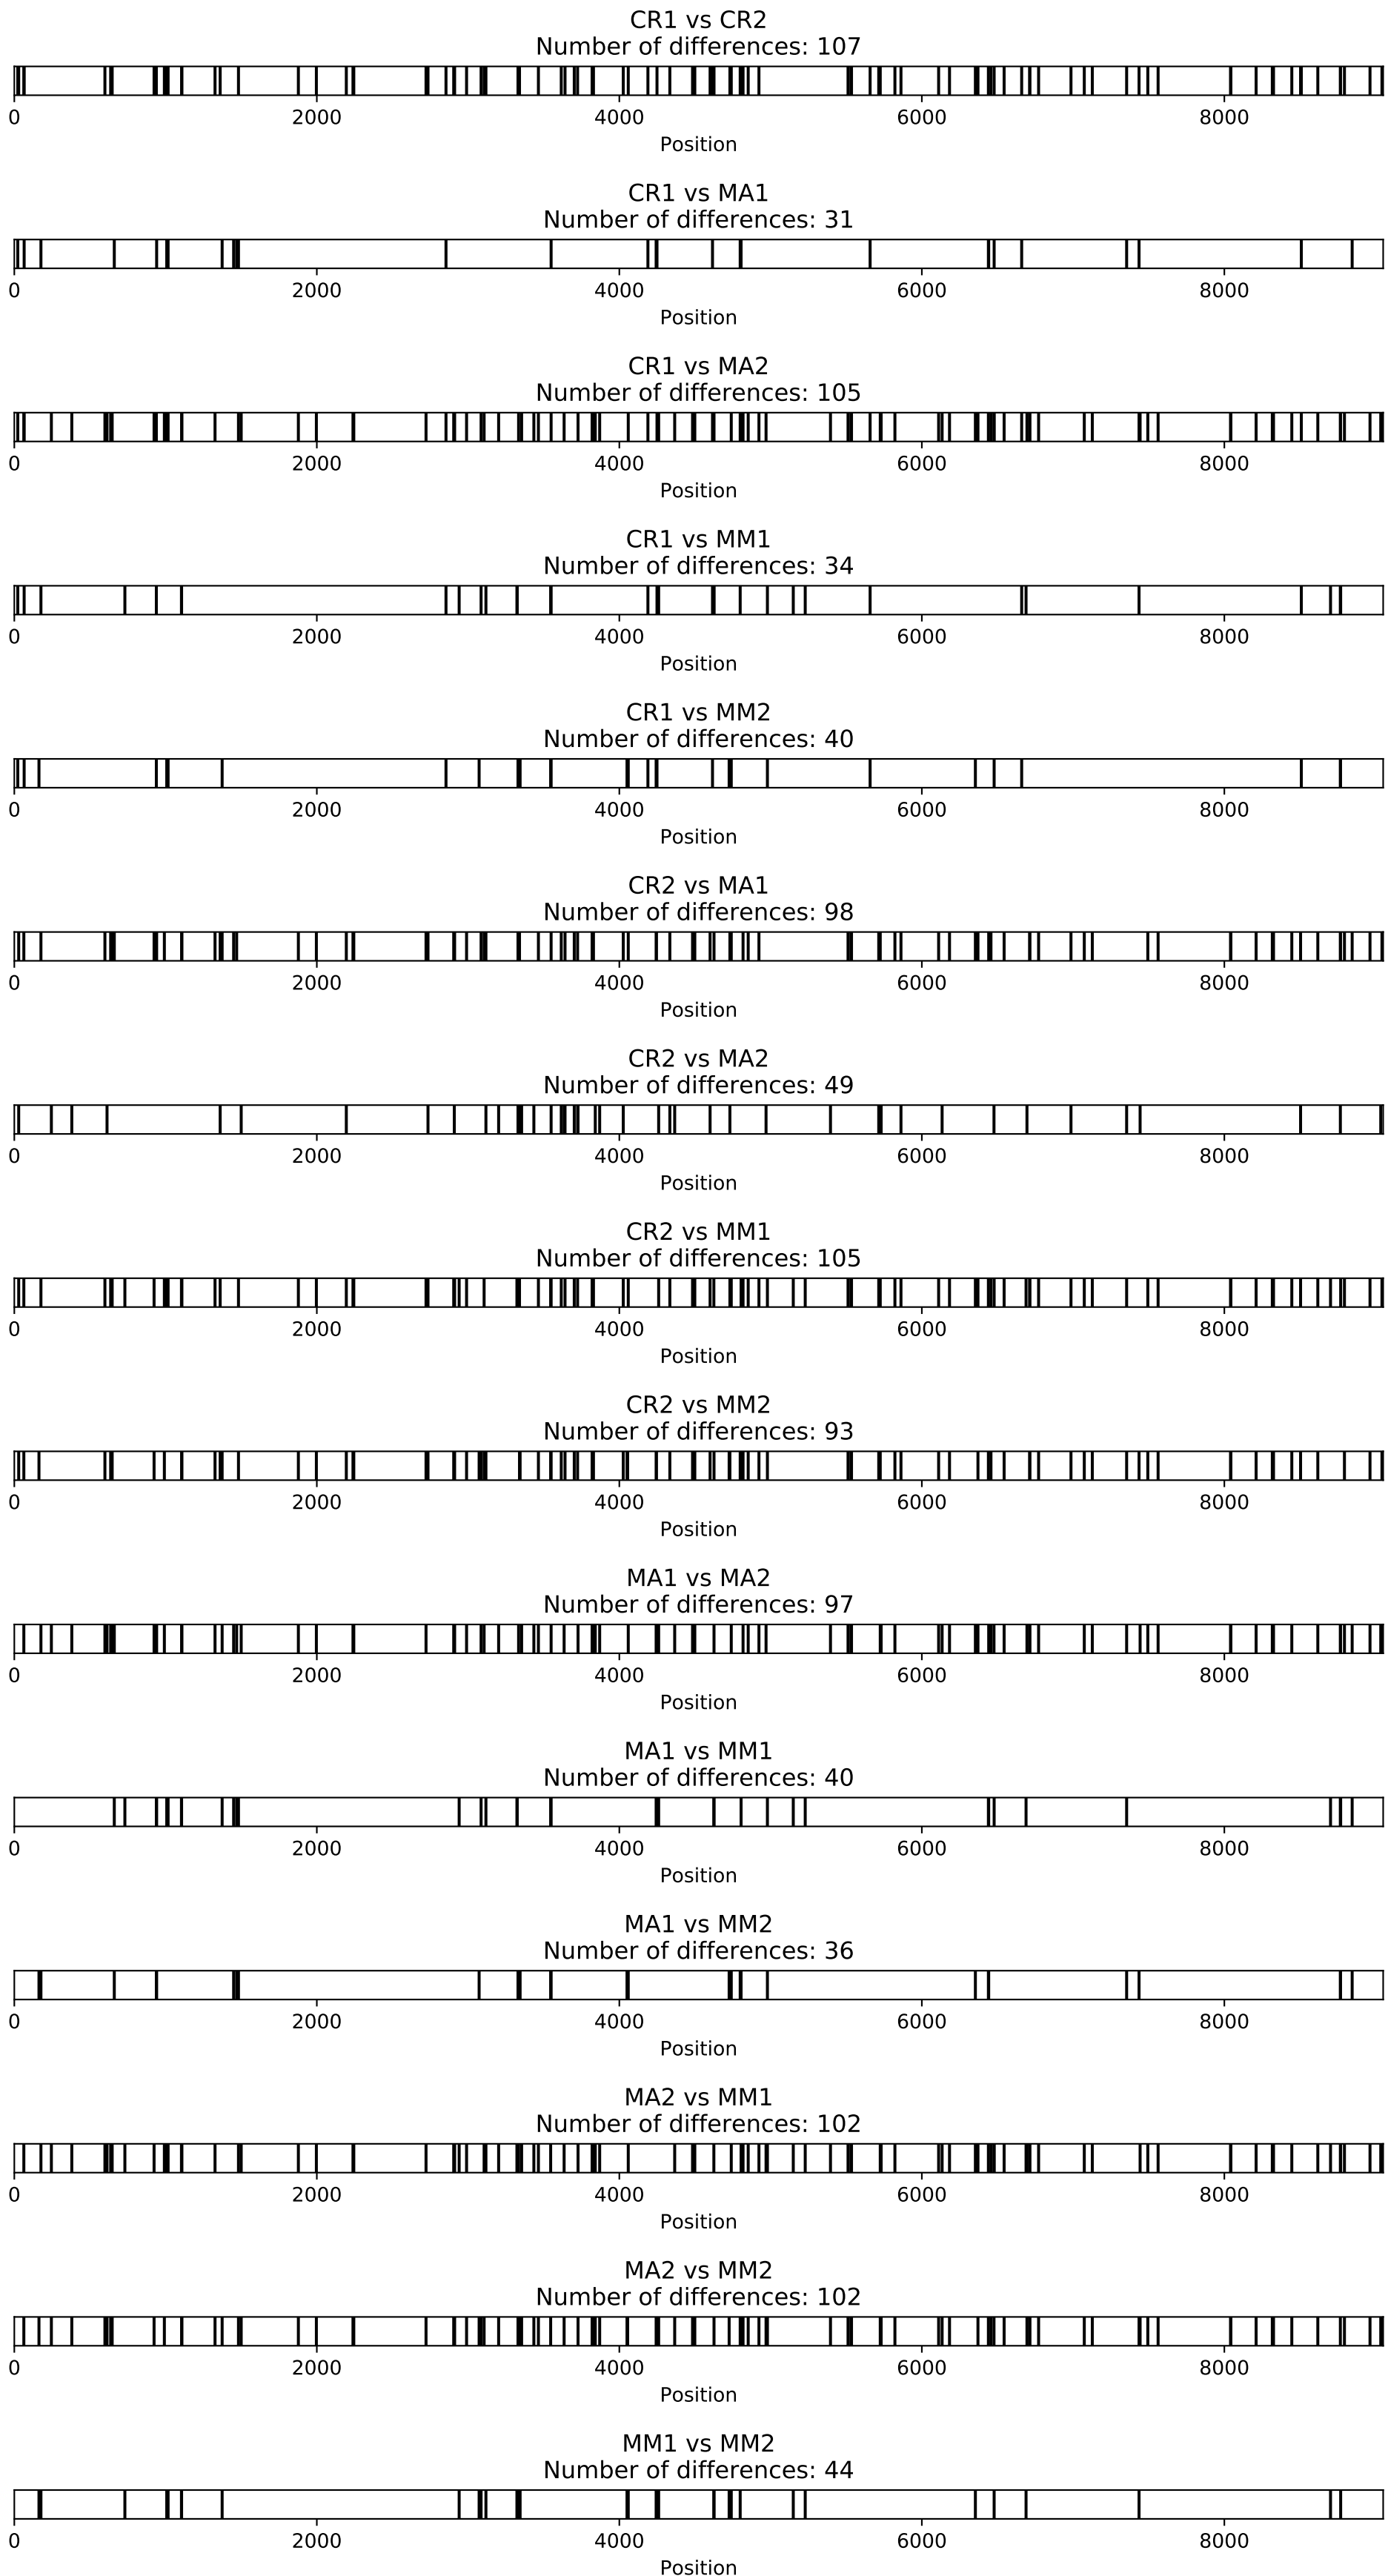

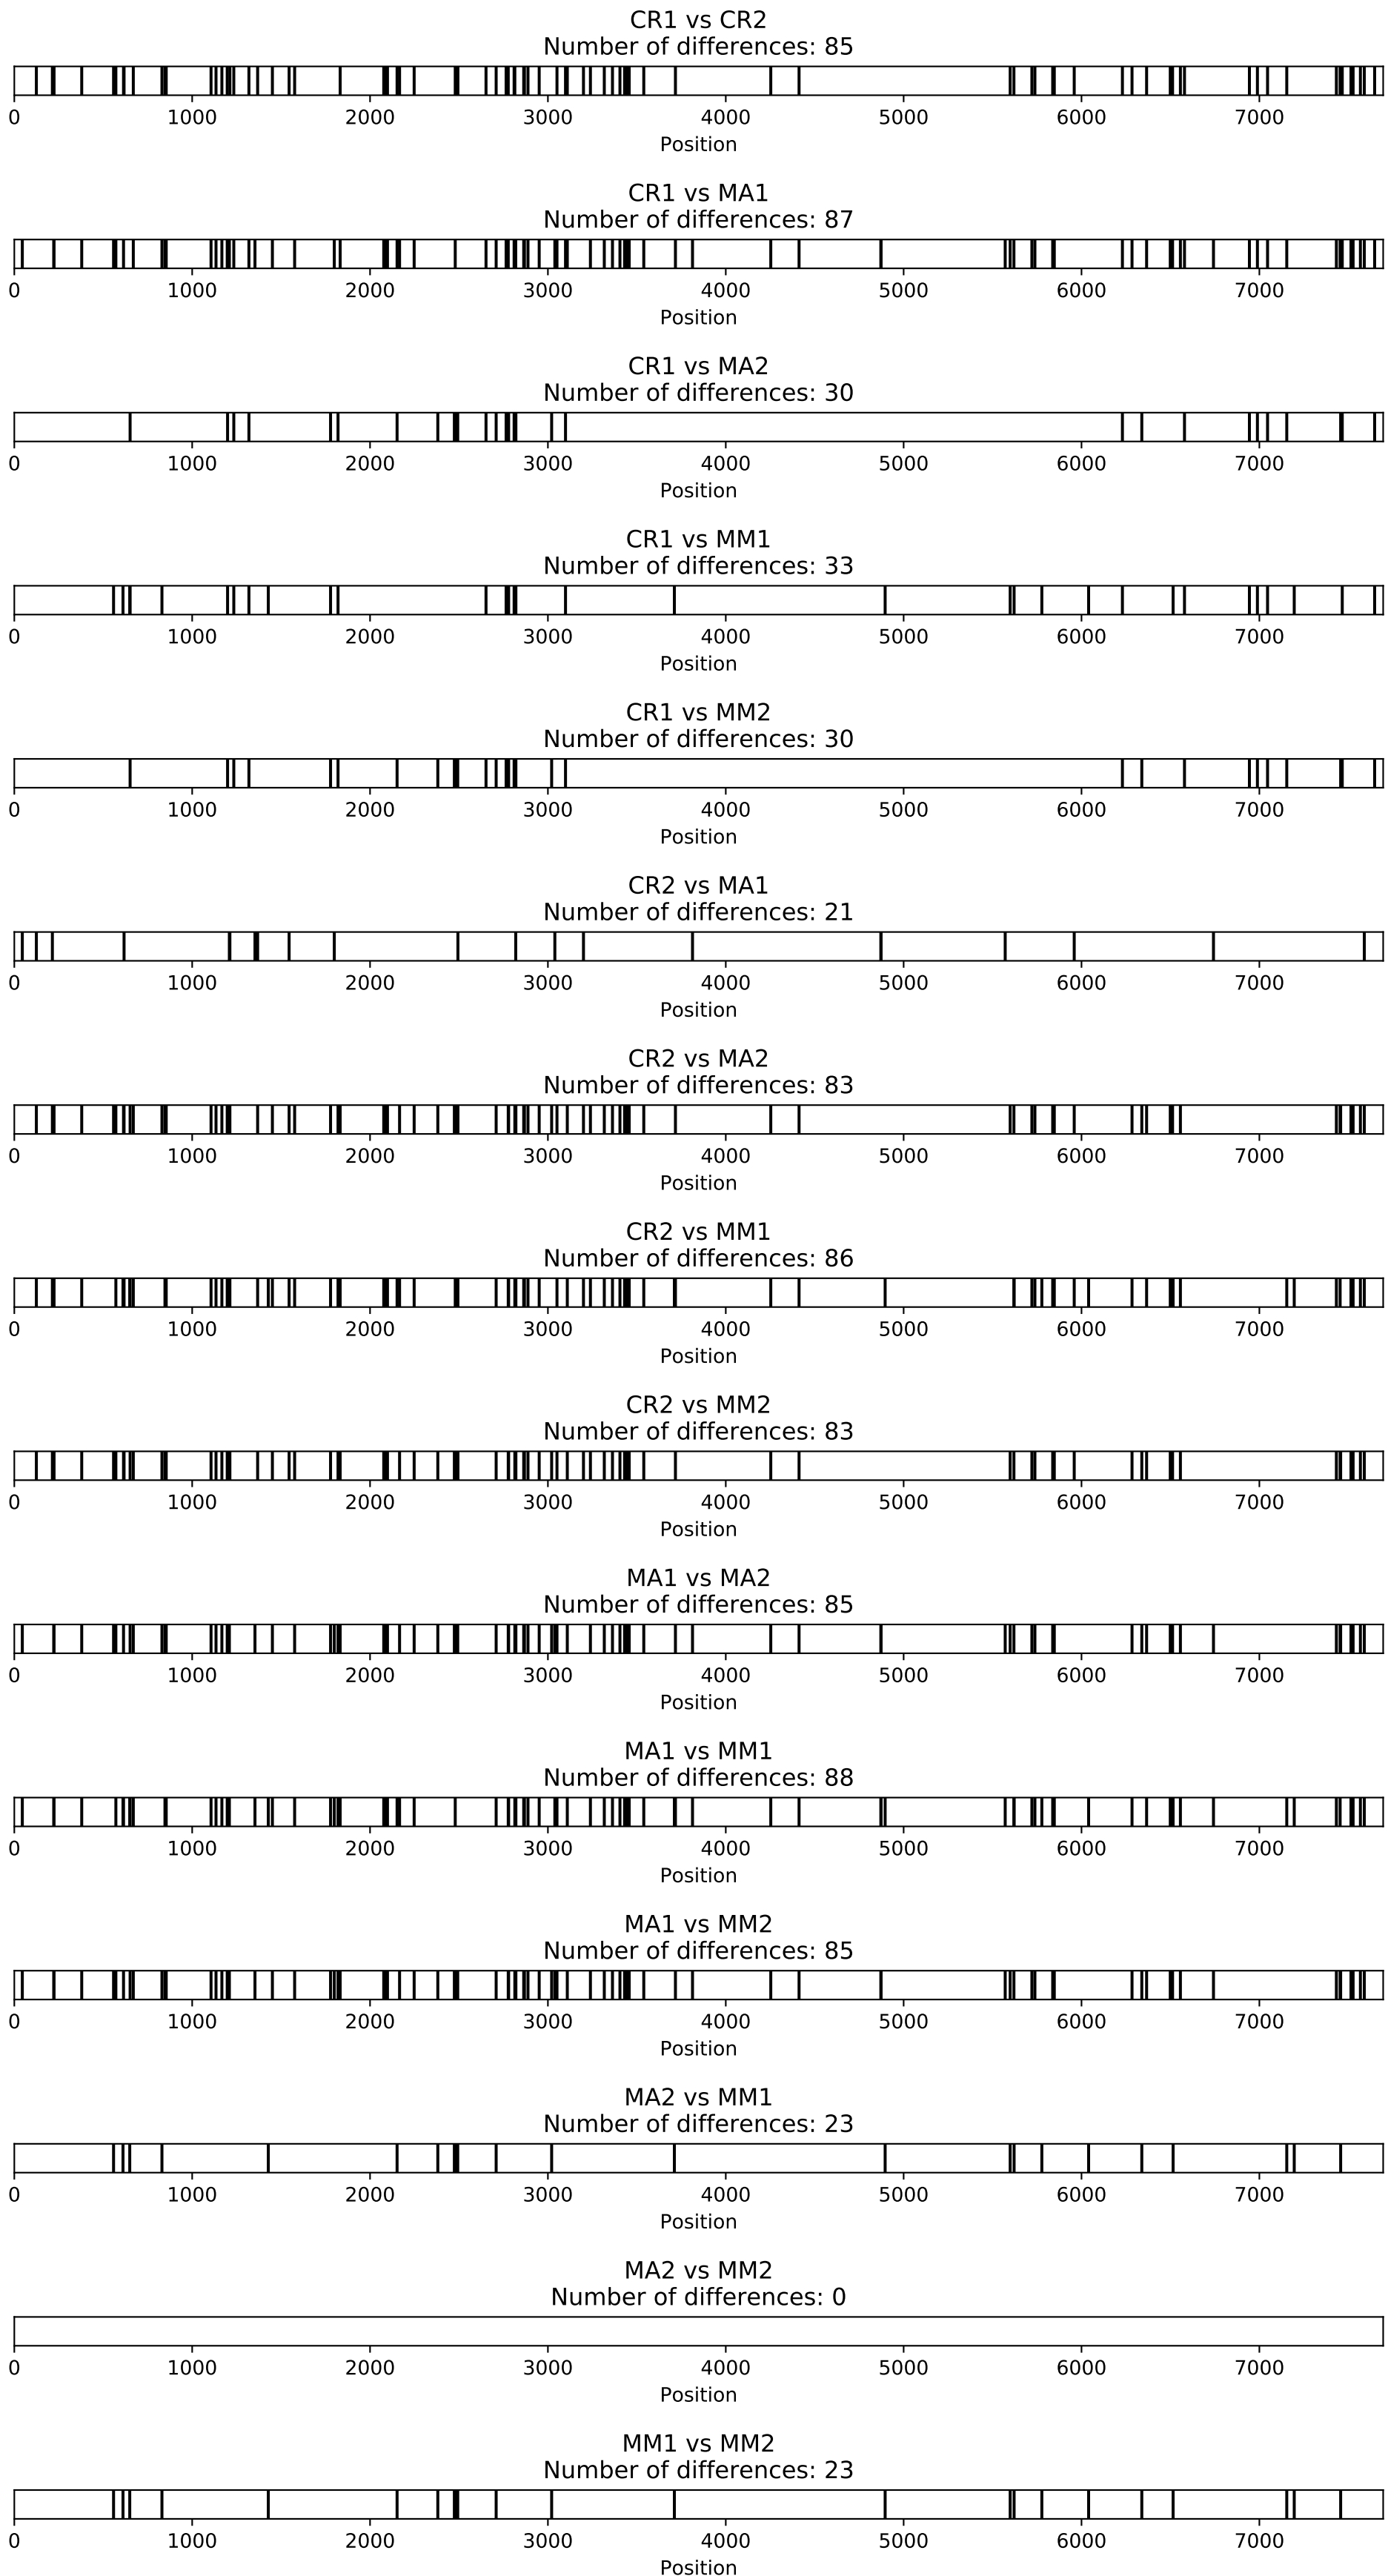

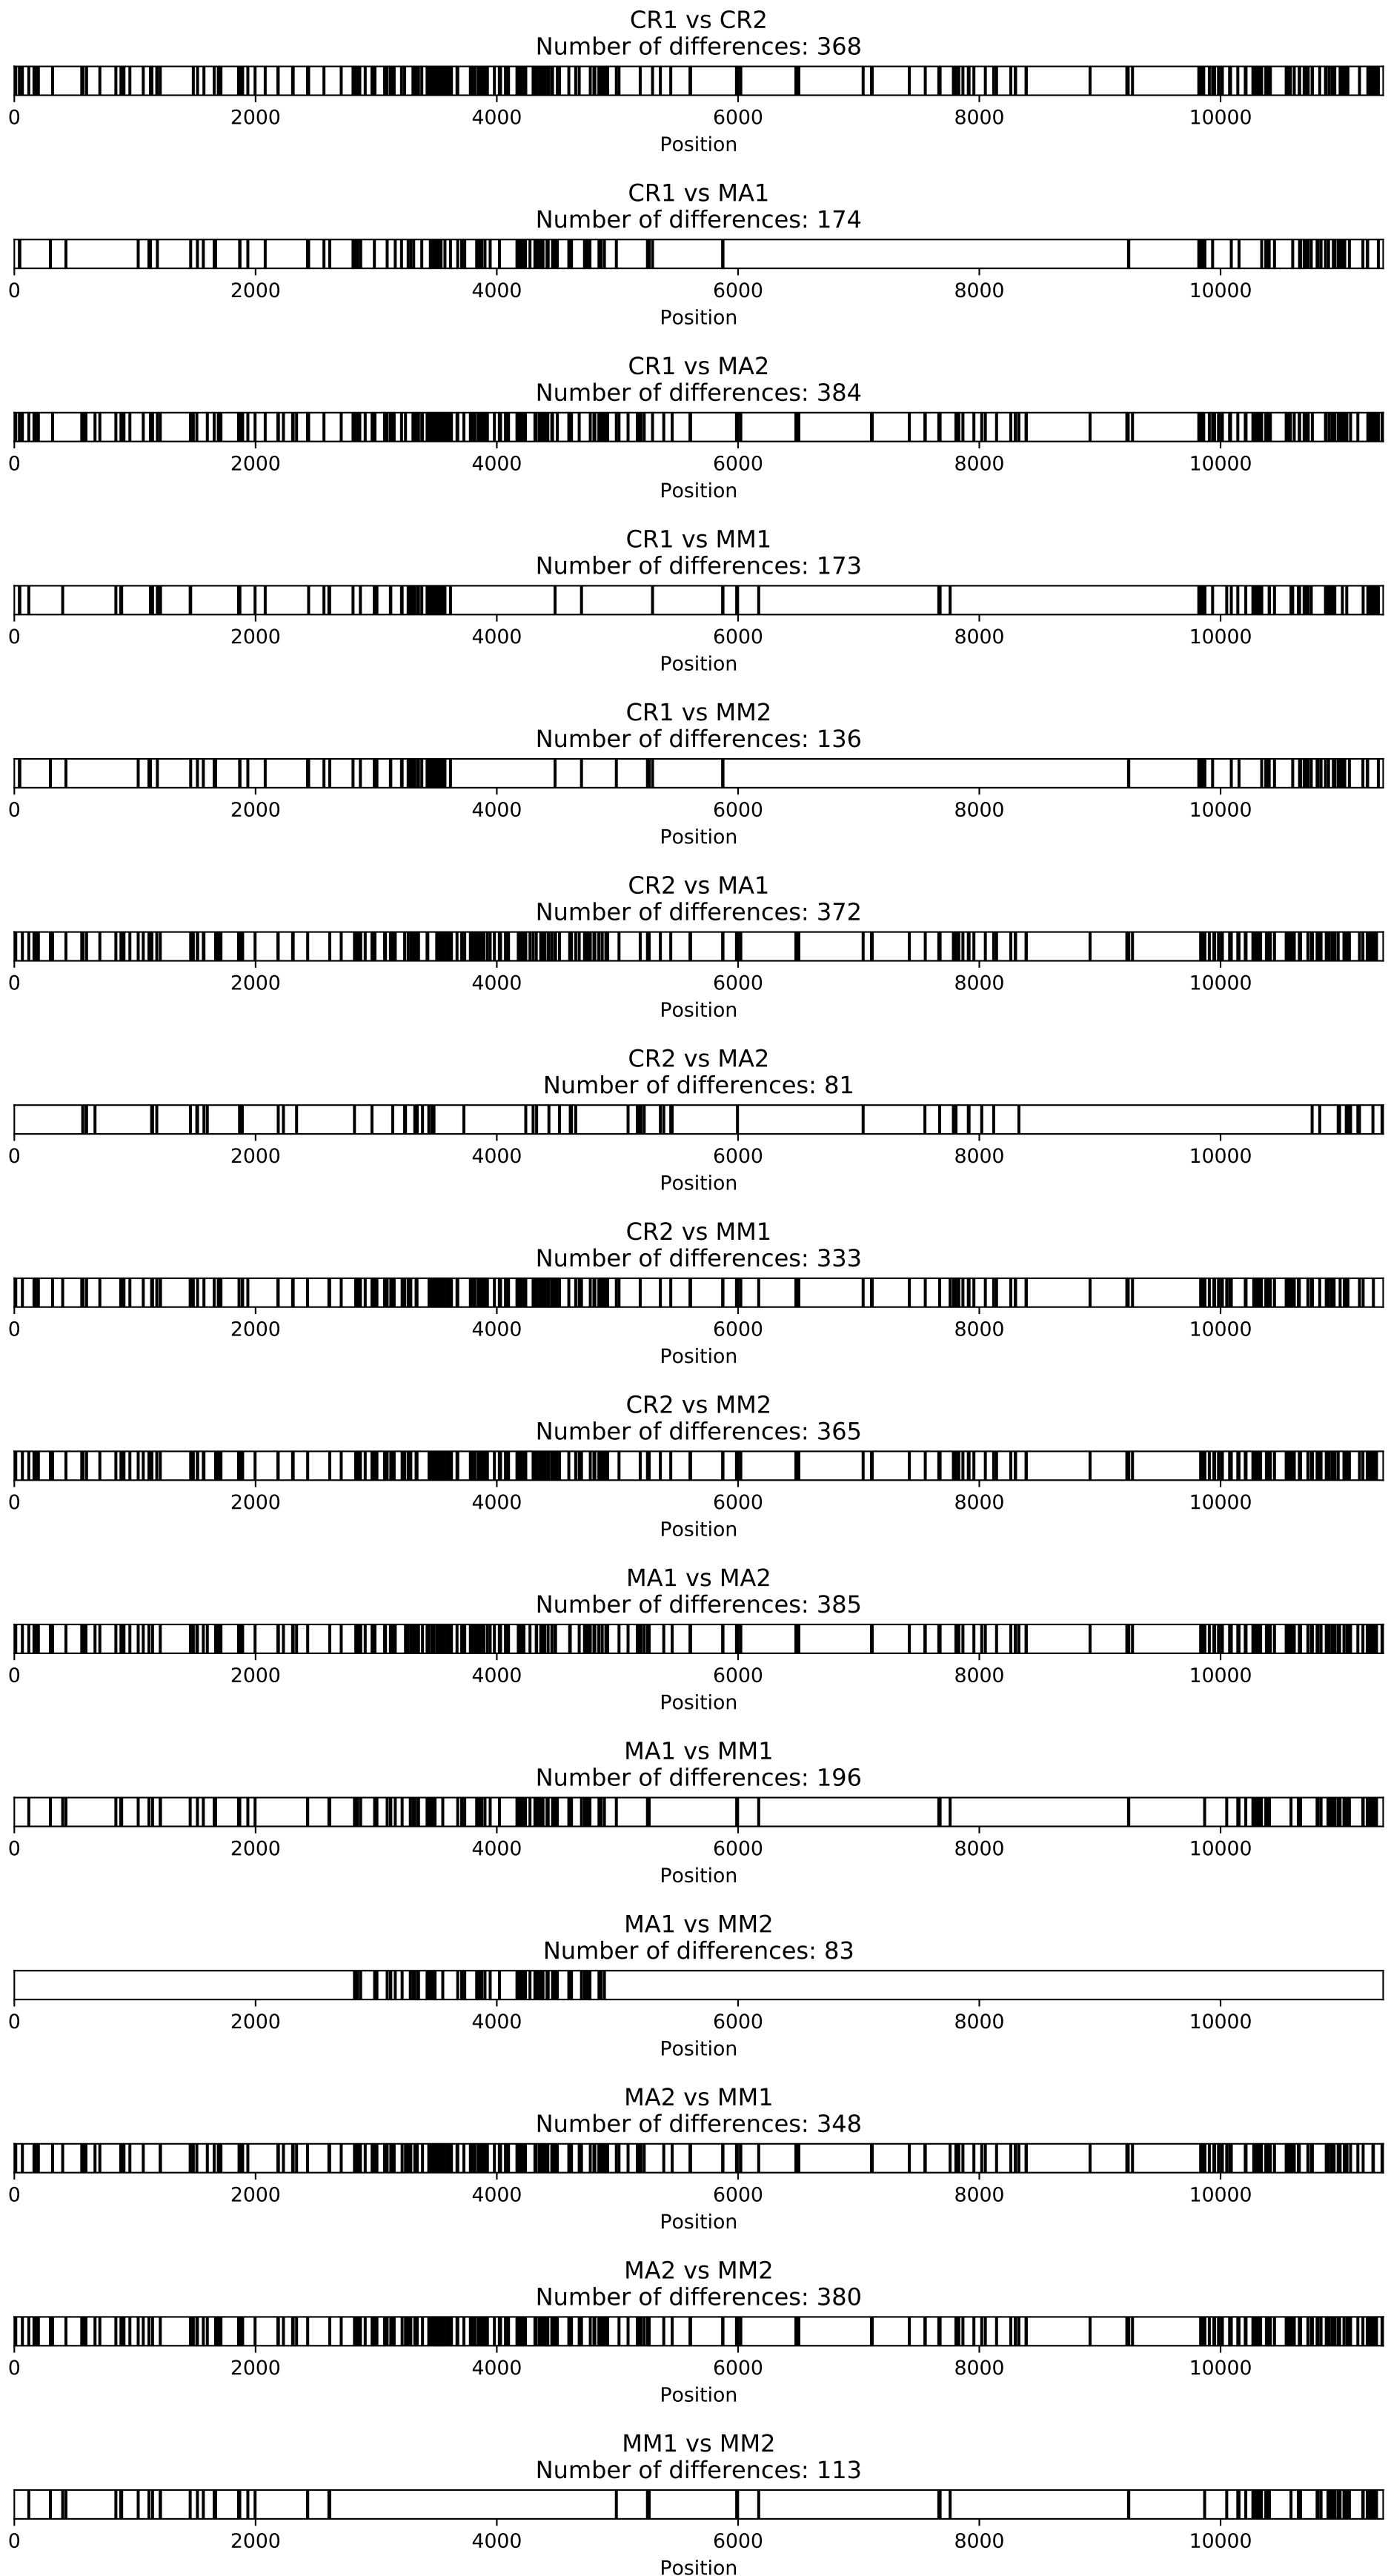

# Region: 54

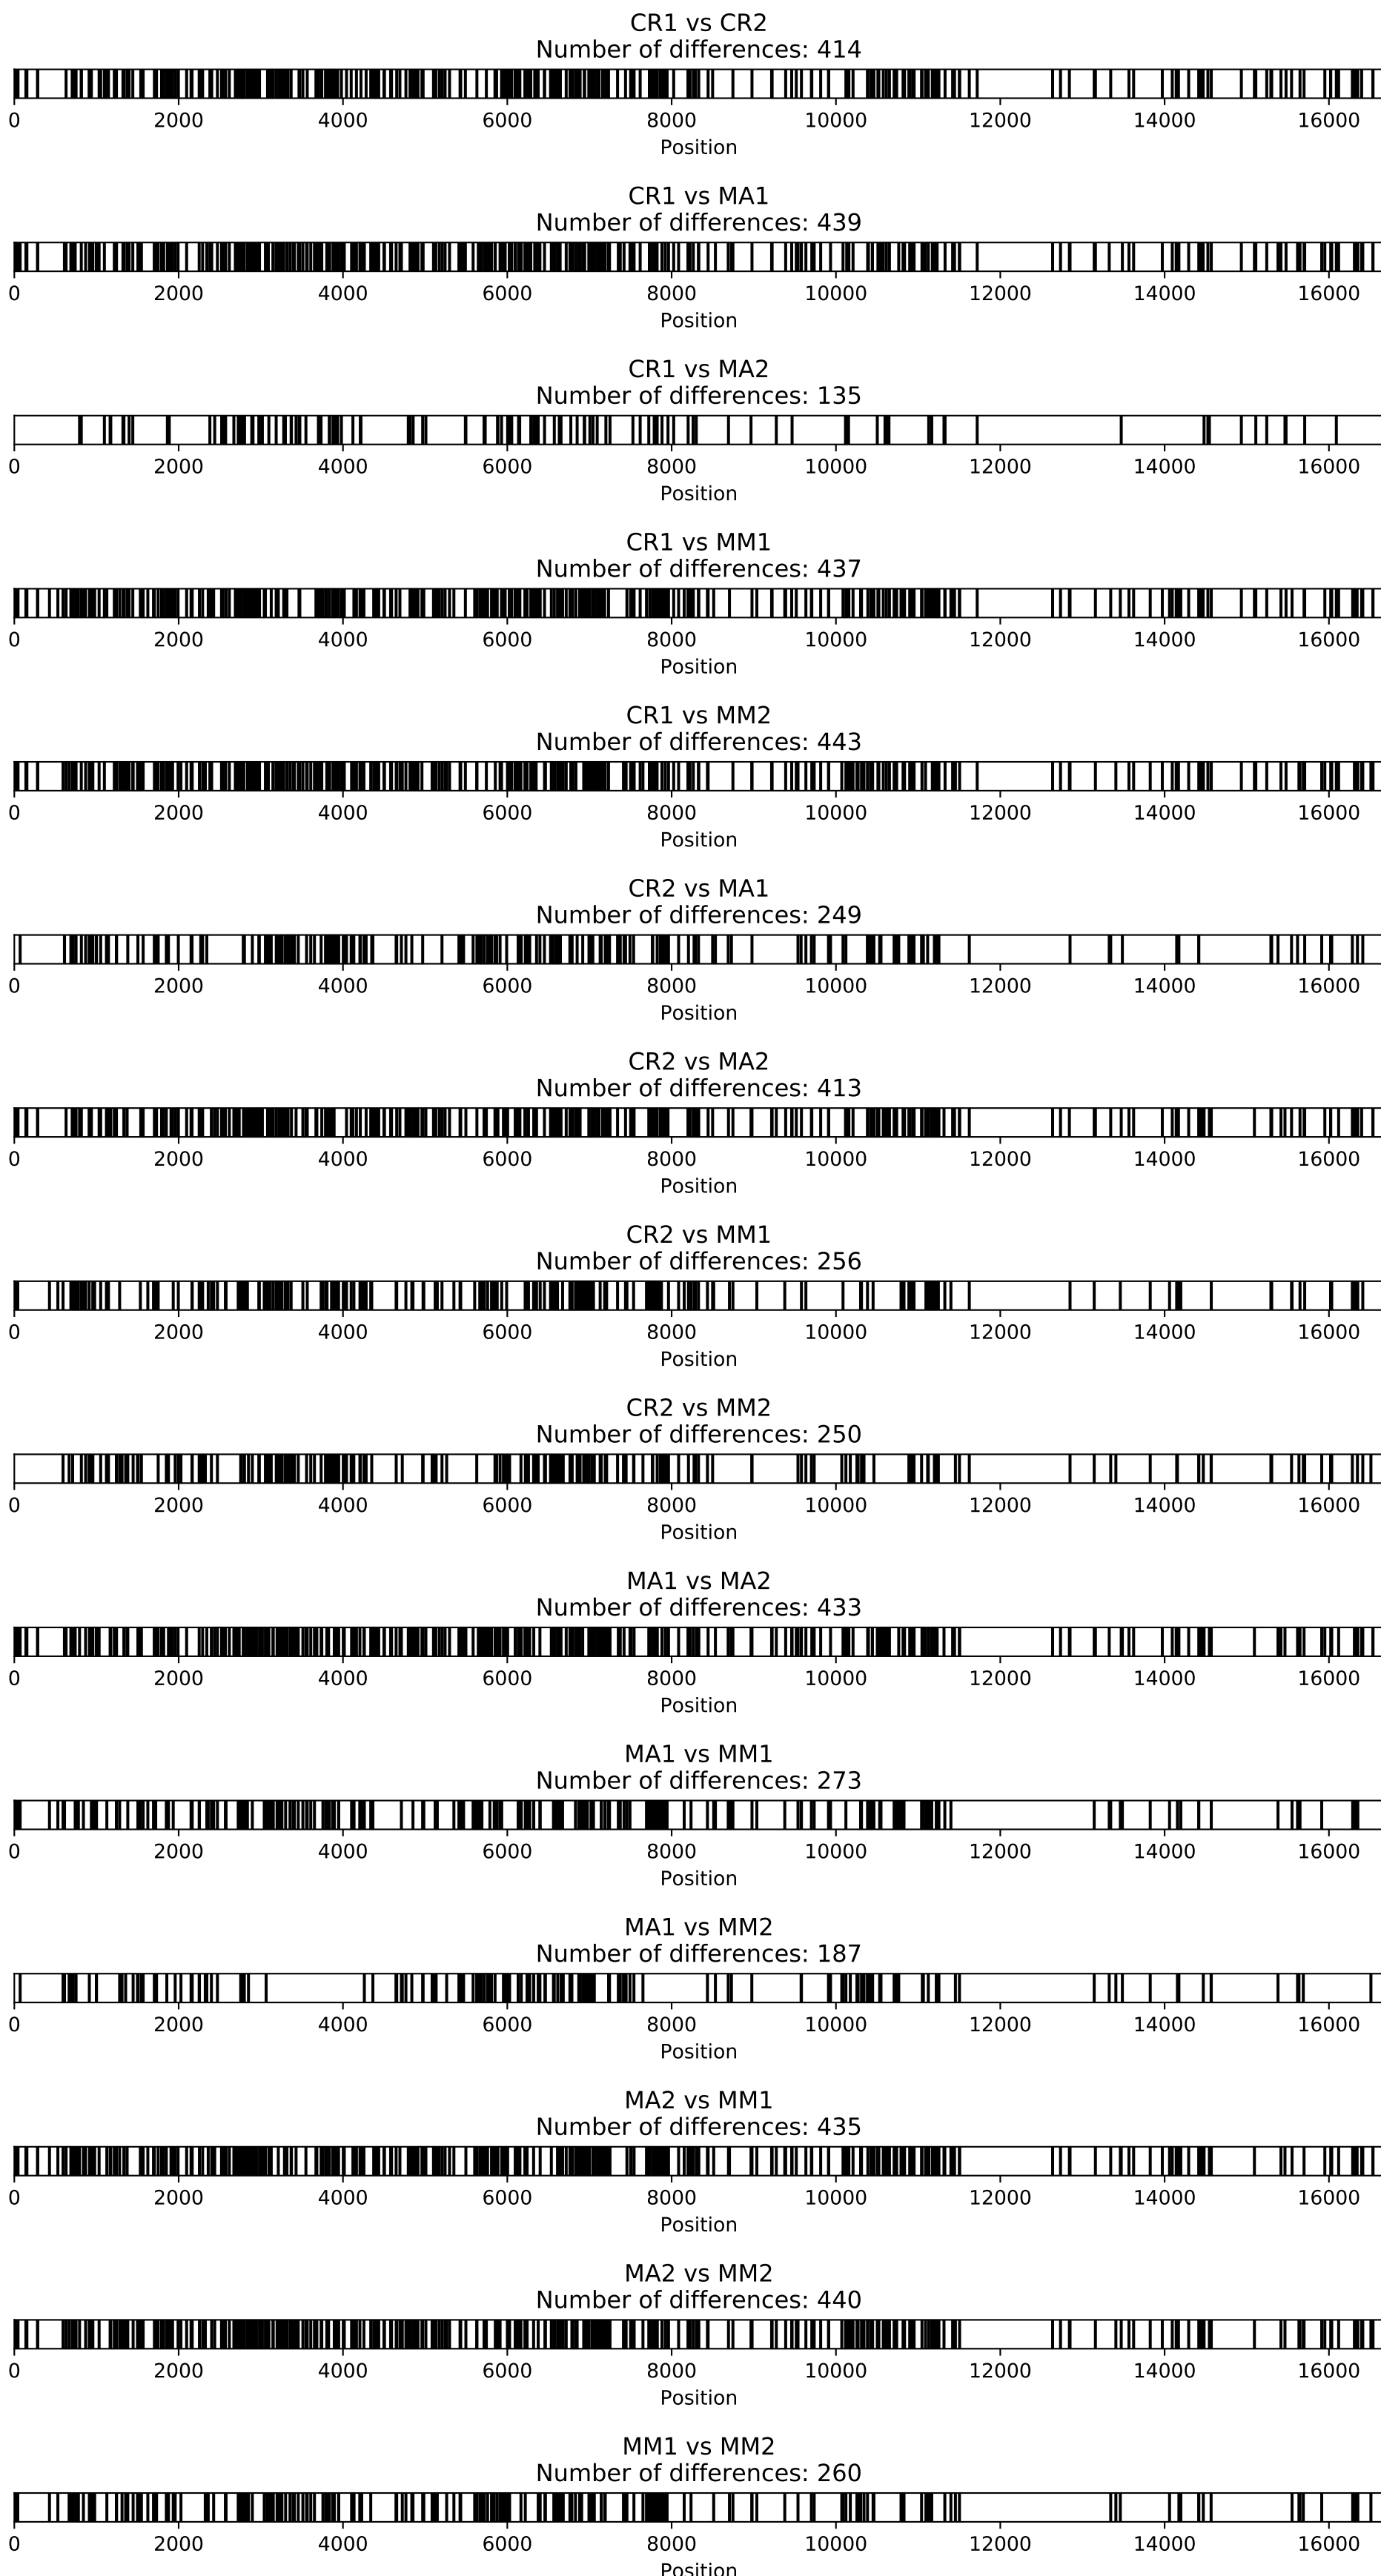

# Region: 55

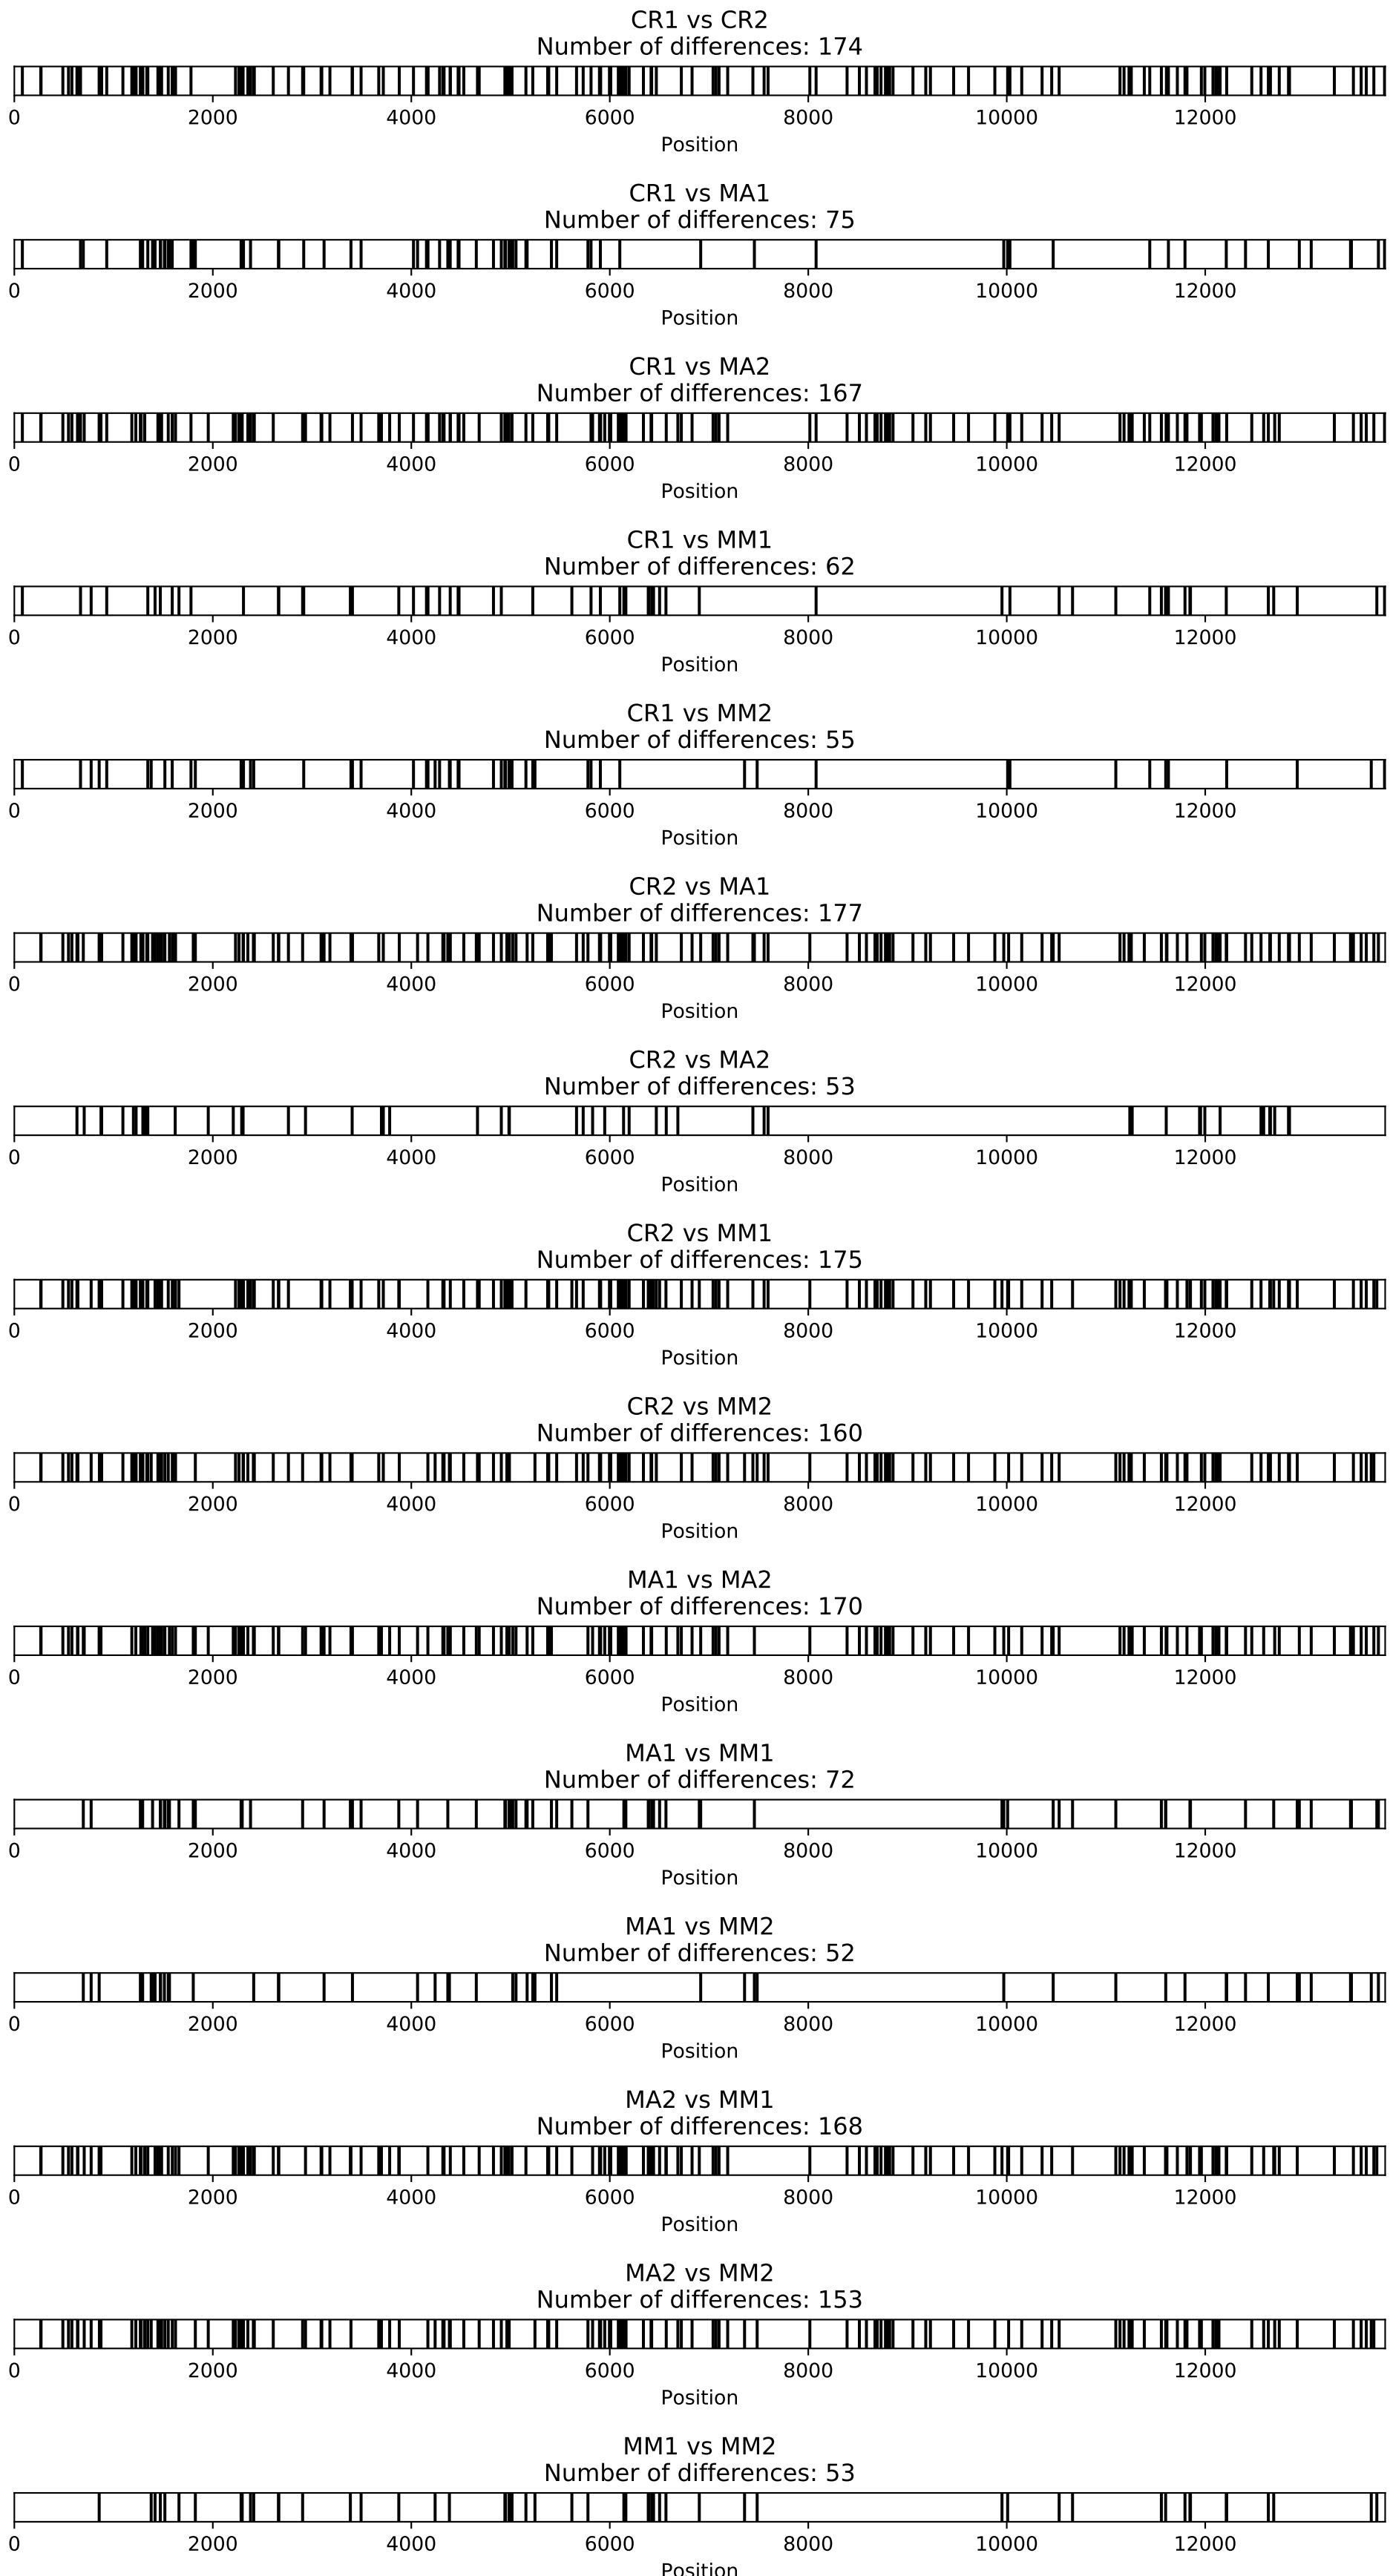



# Region: 57

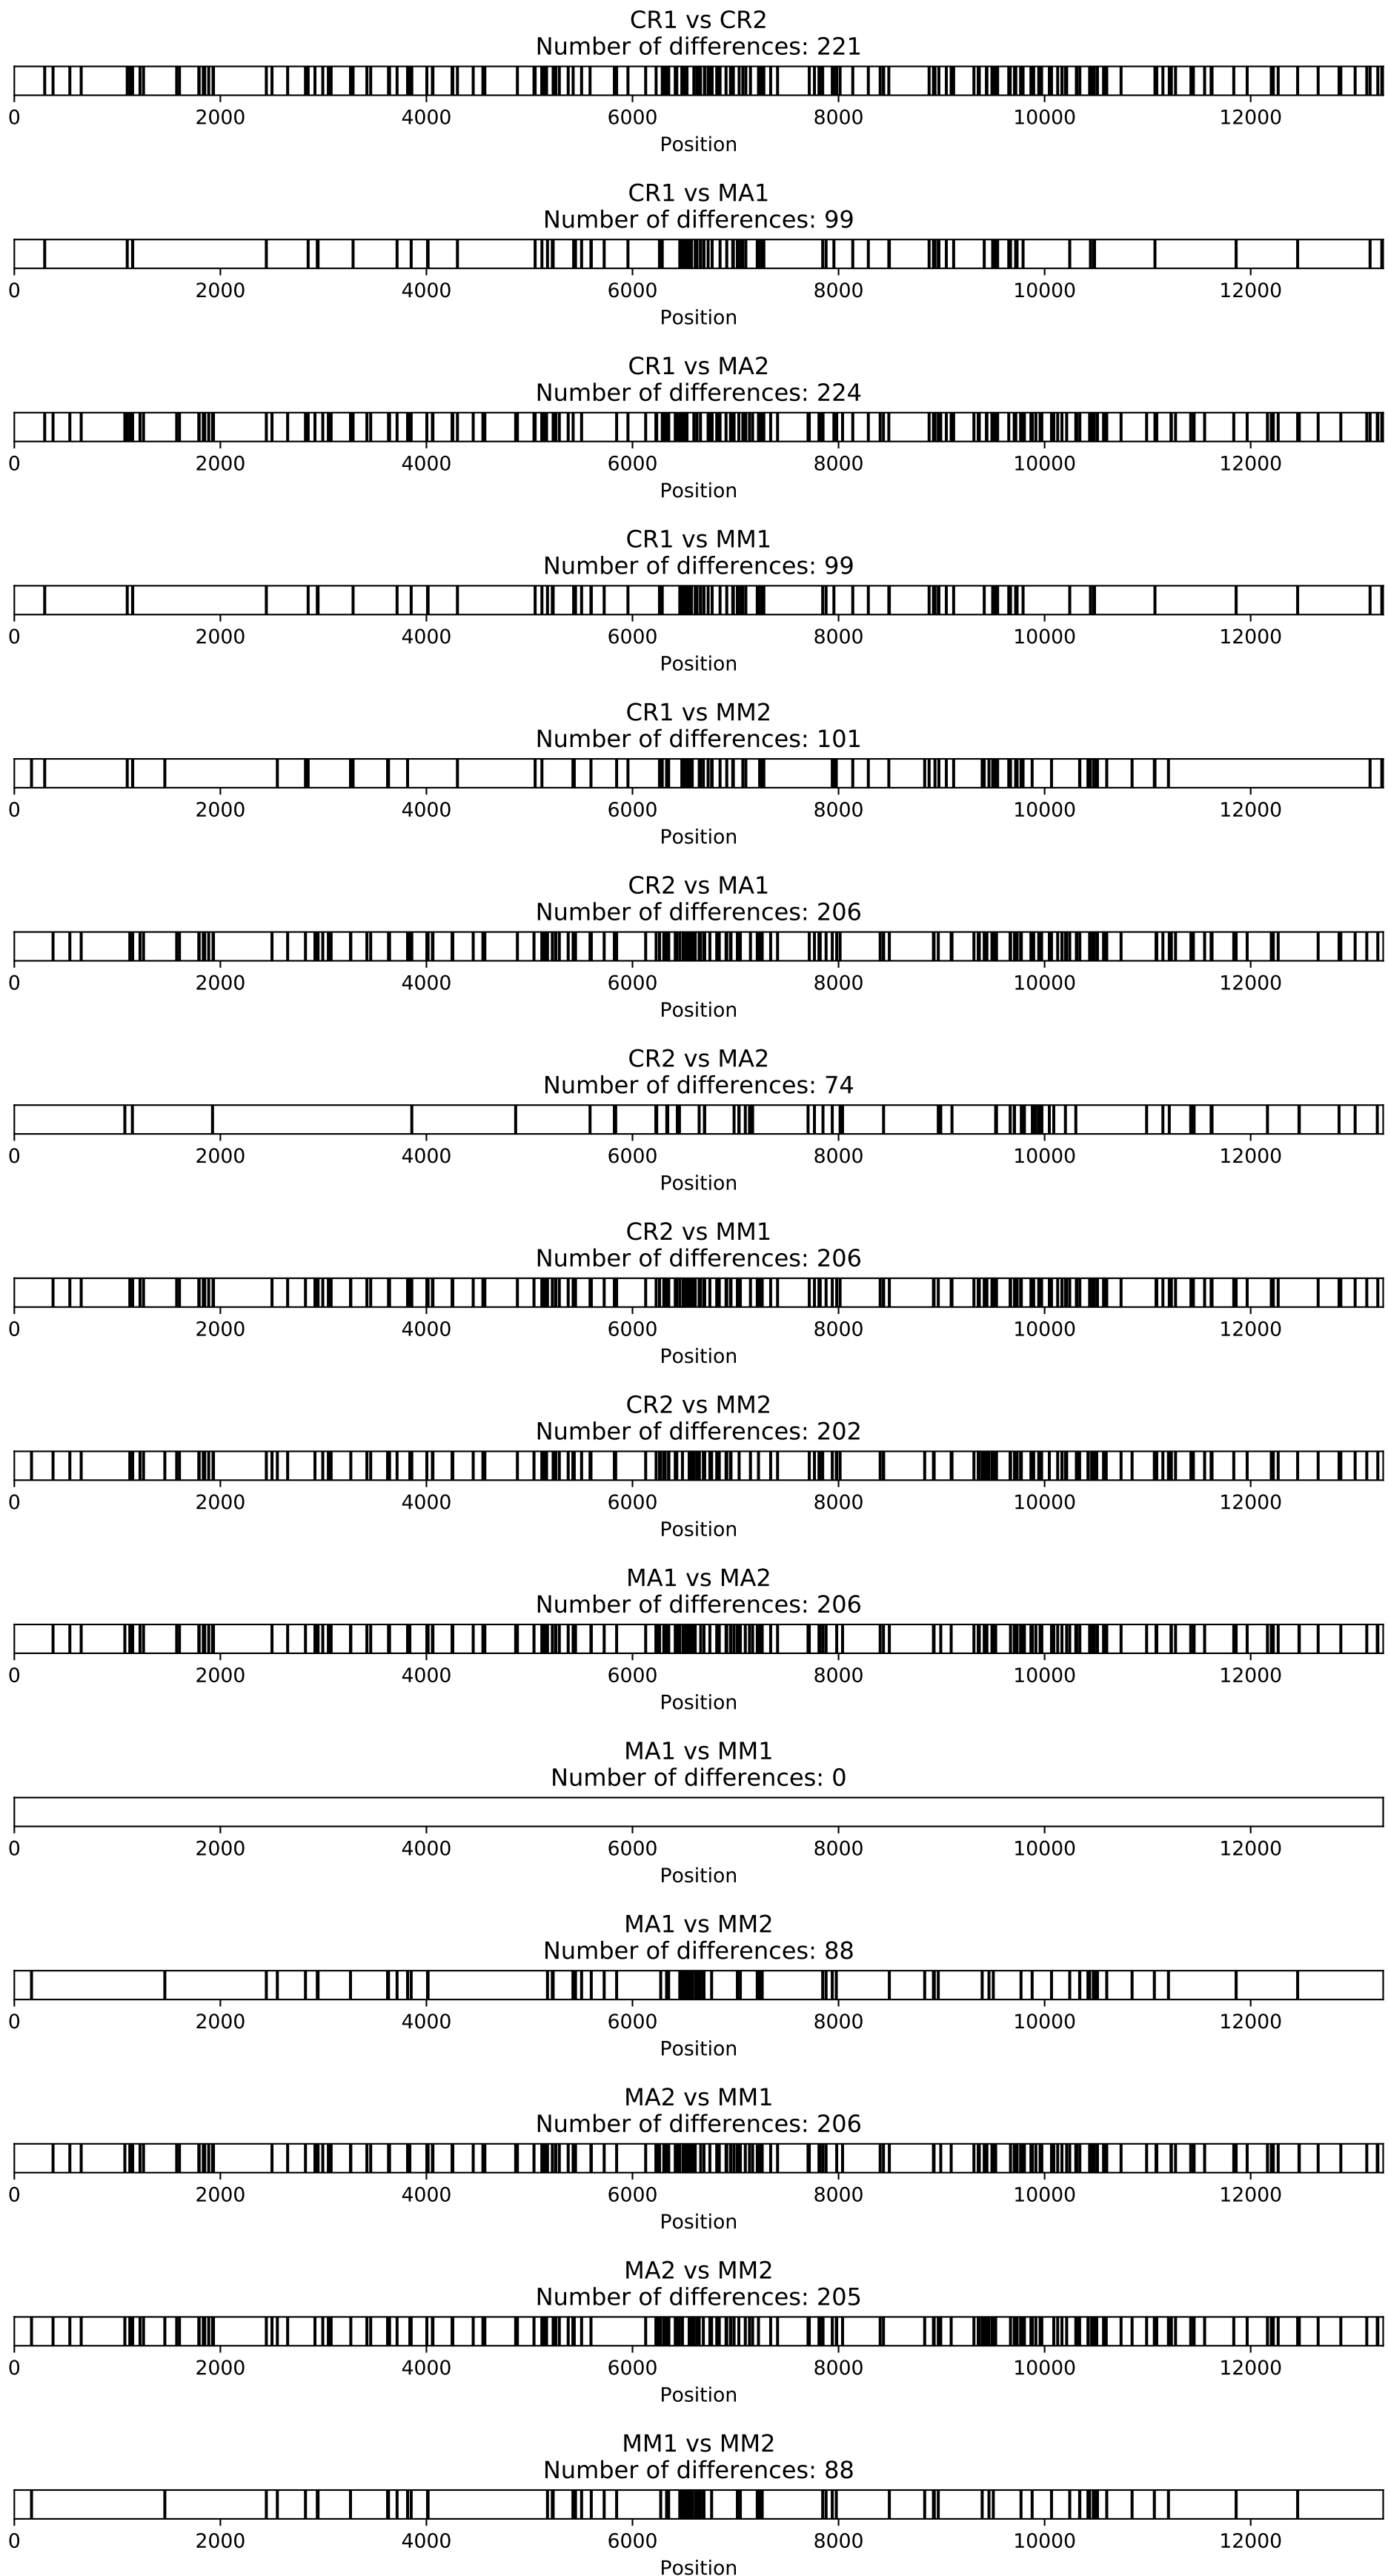

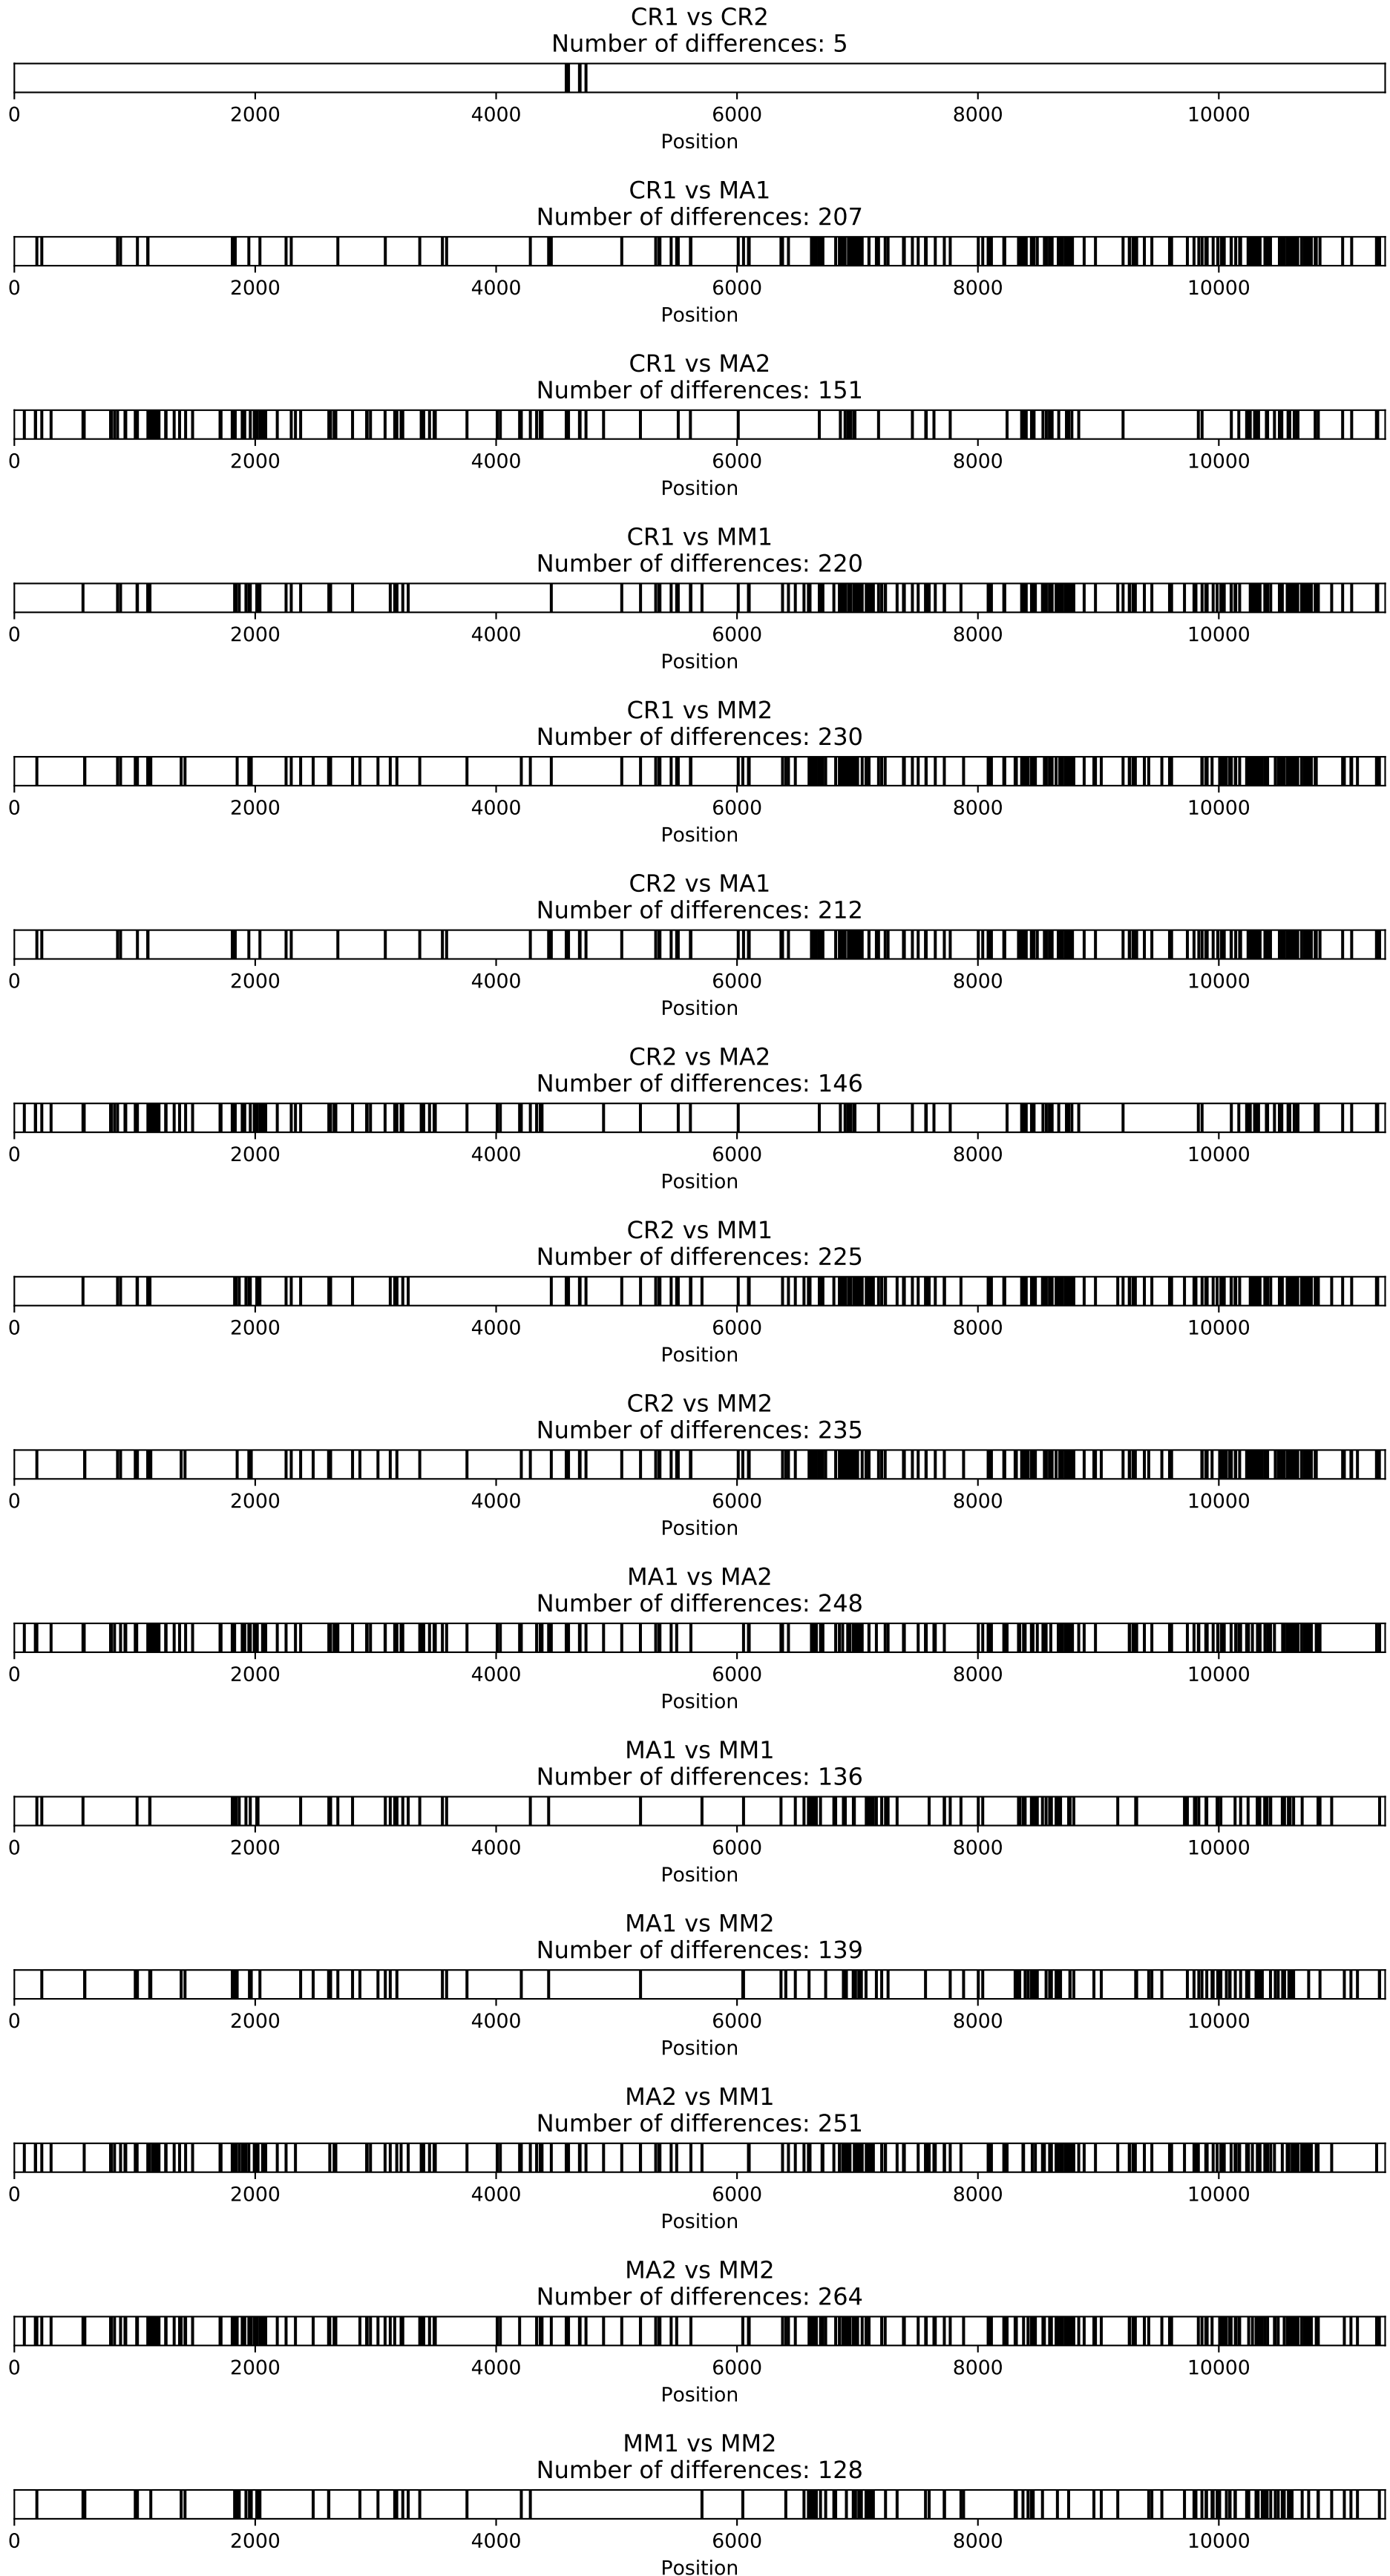

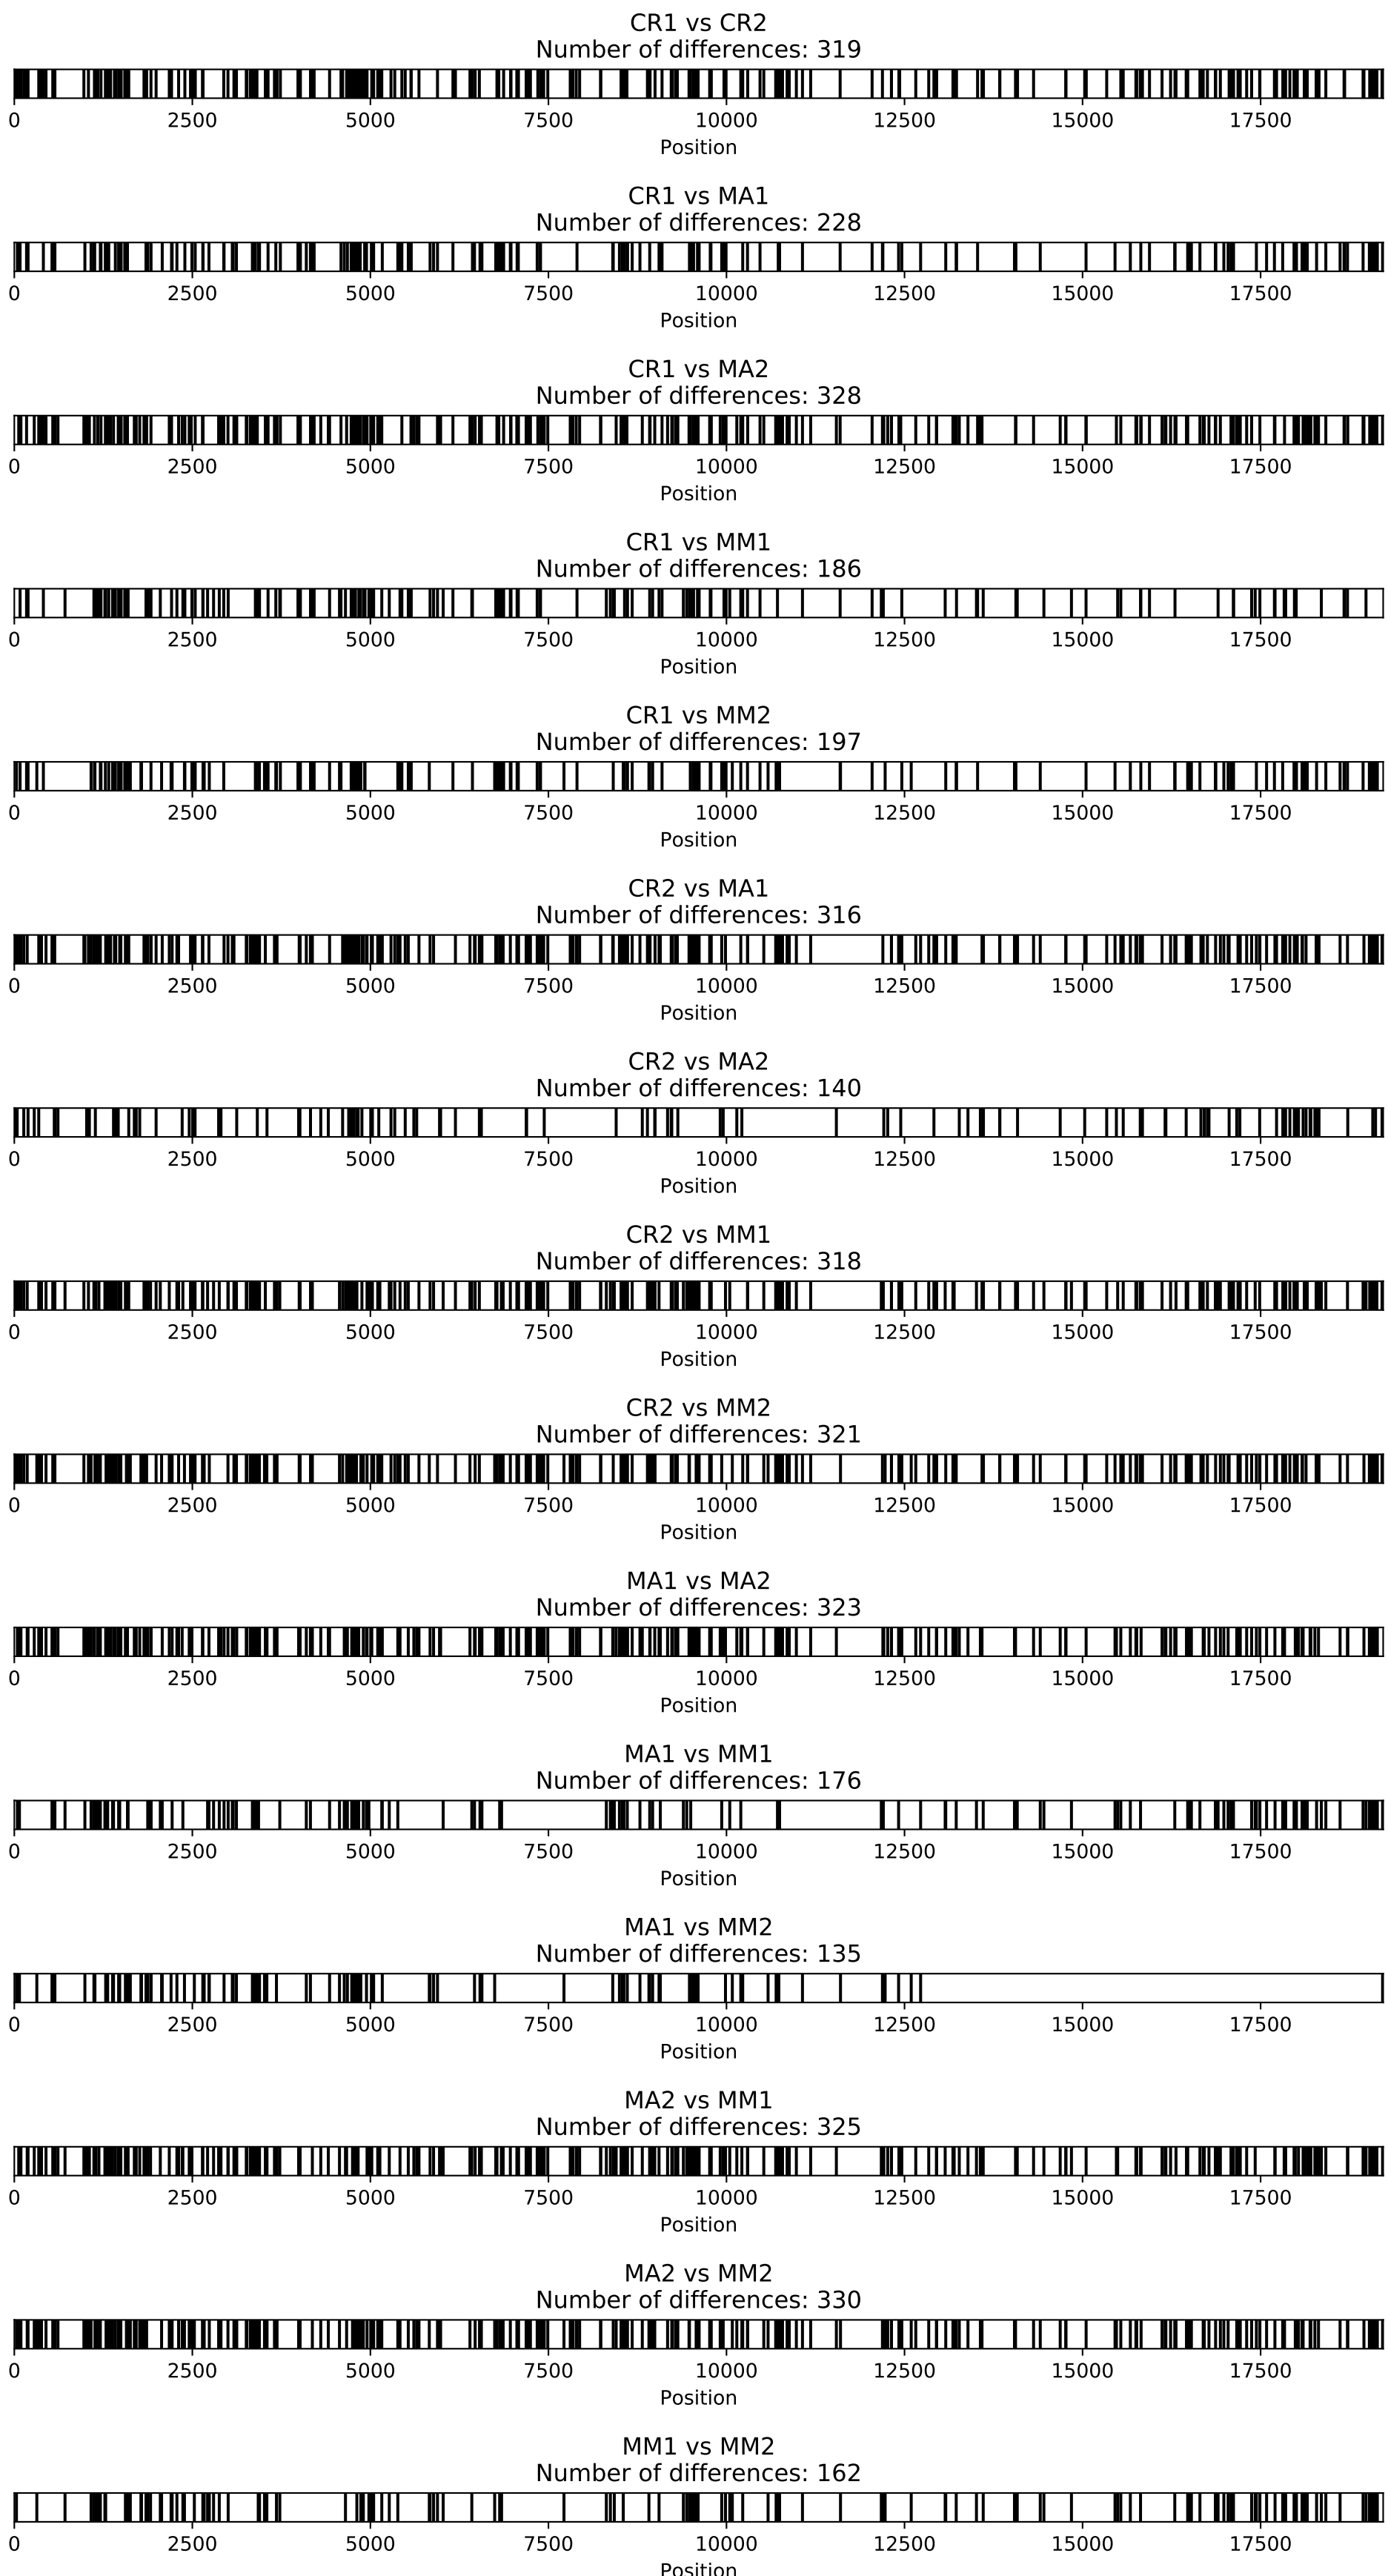

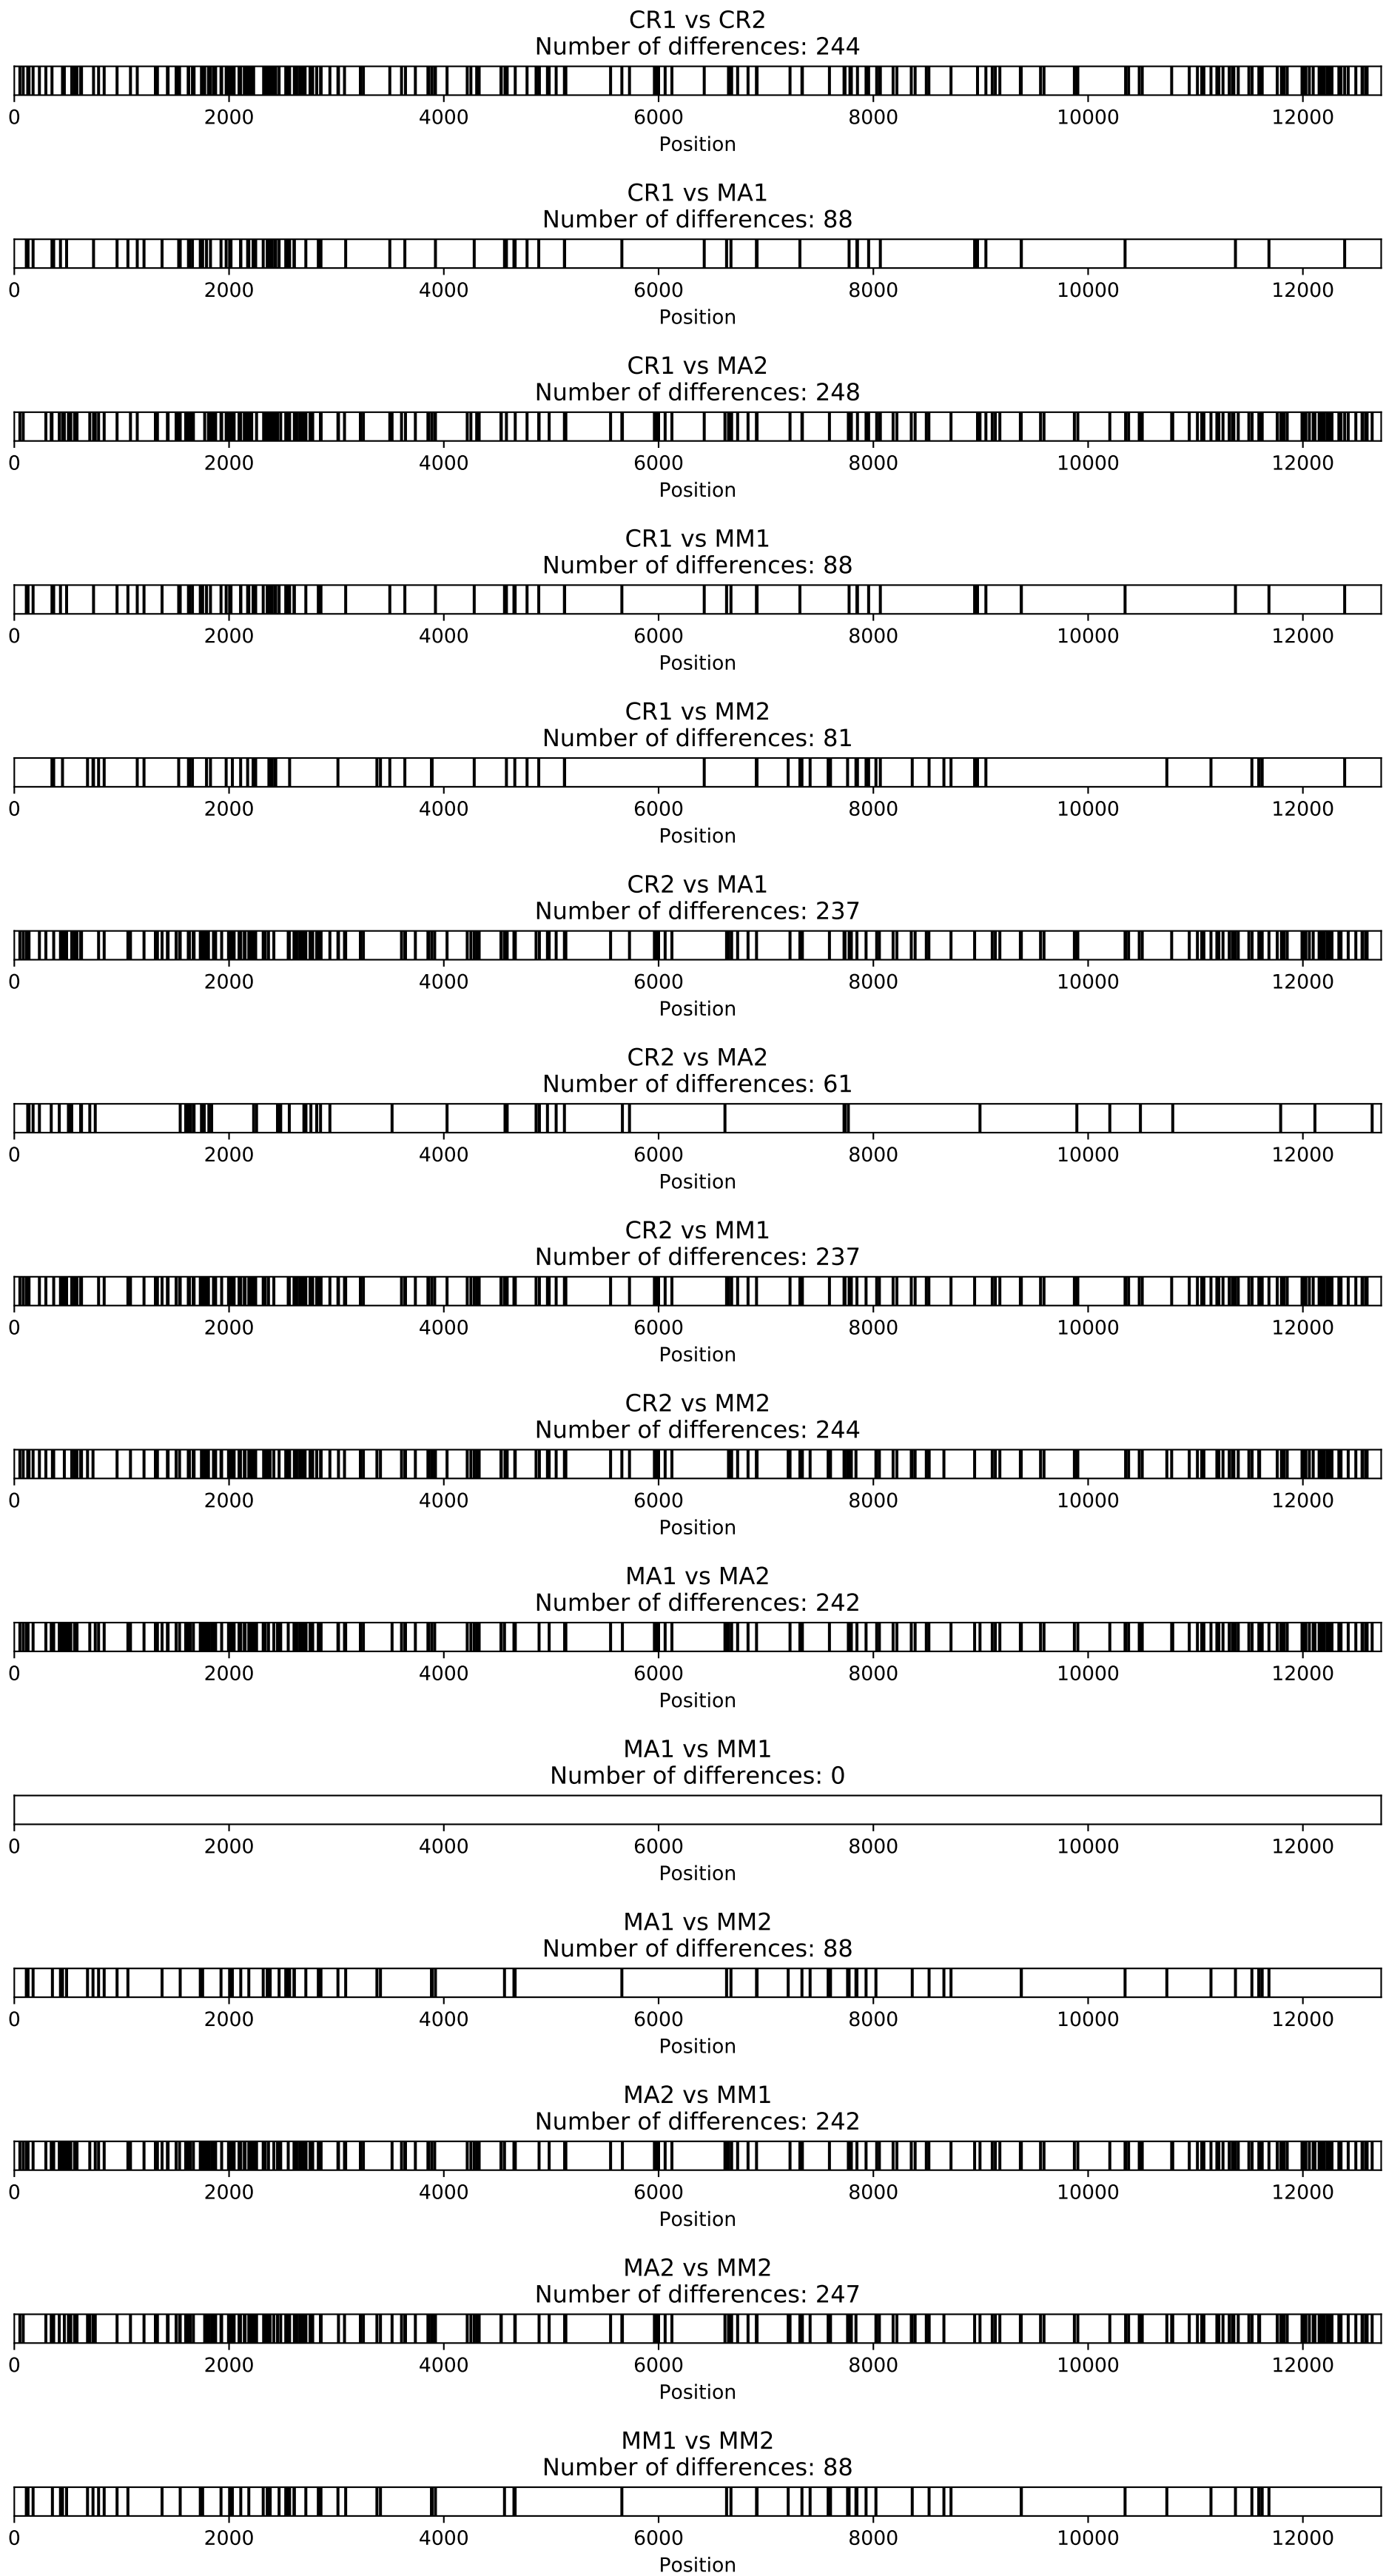

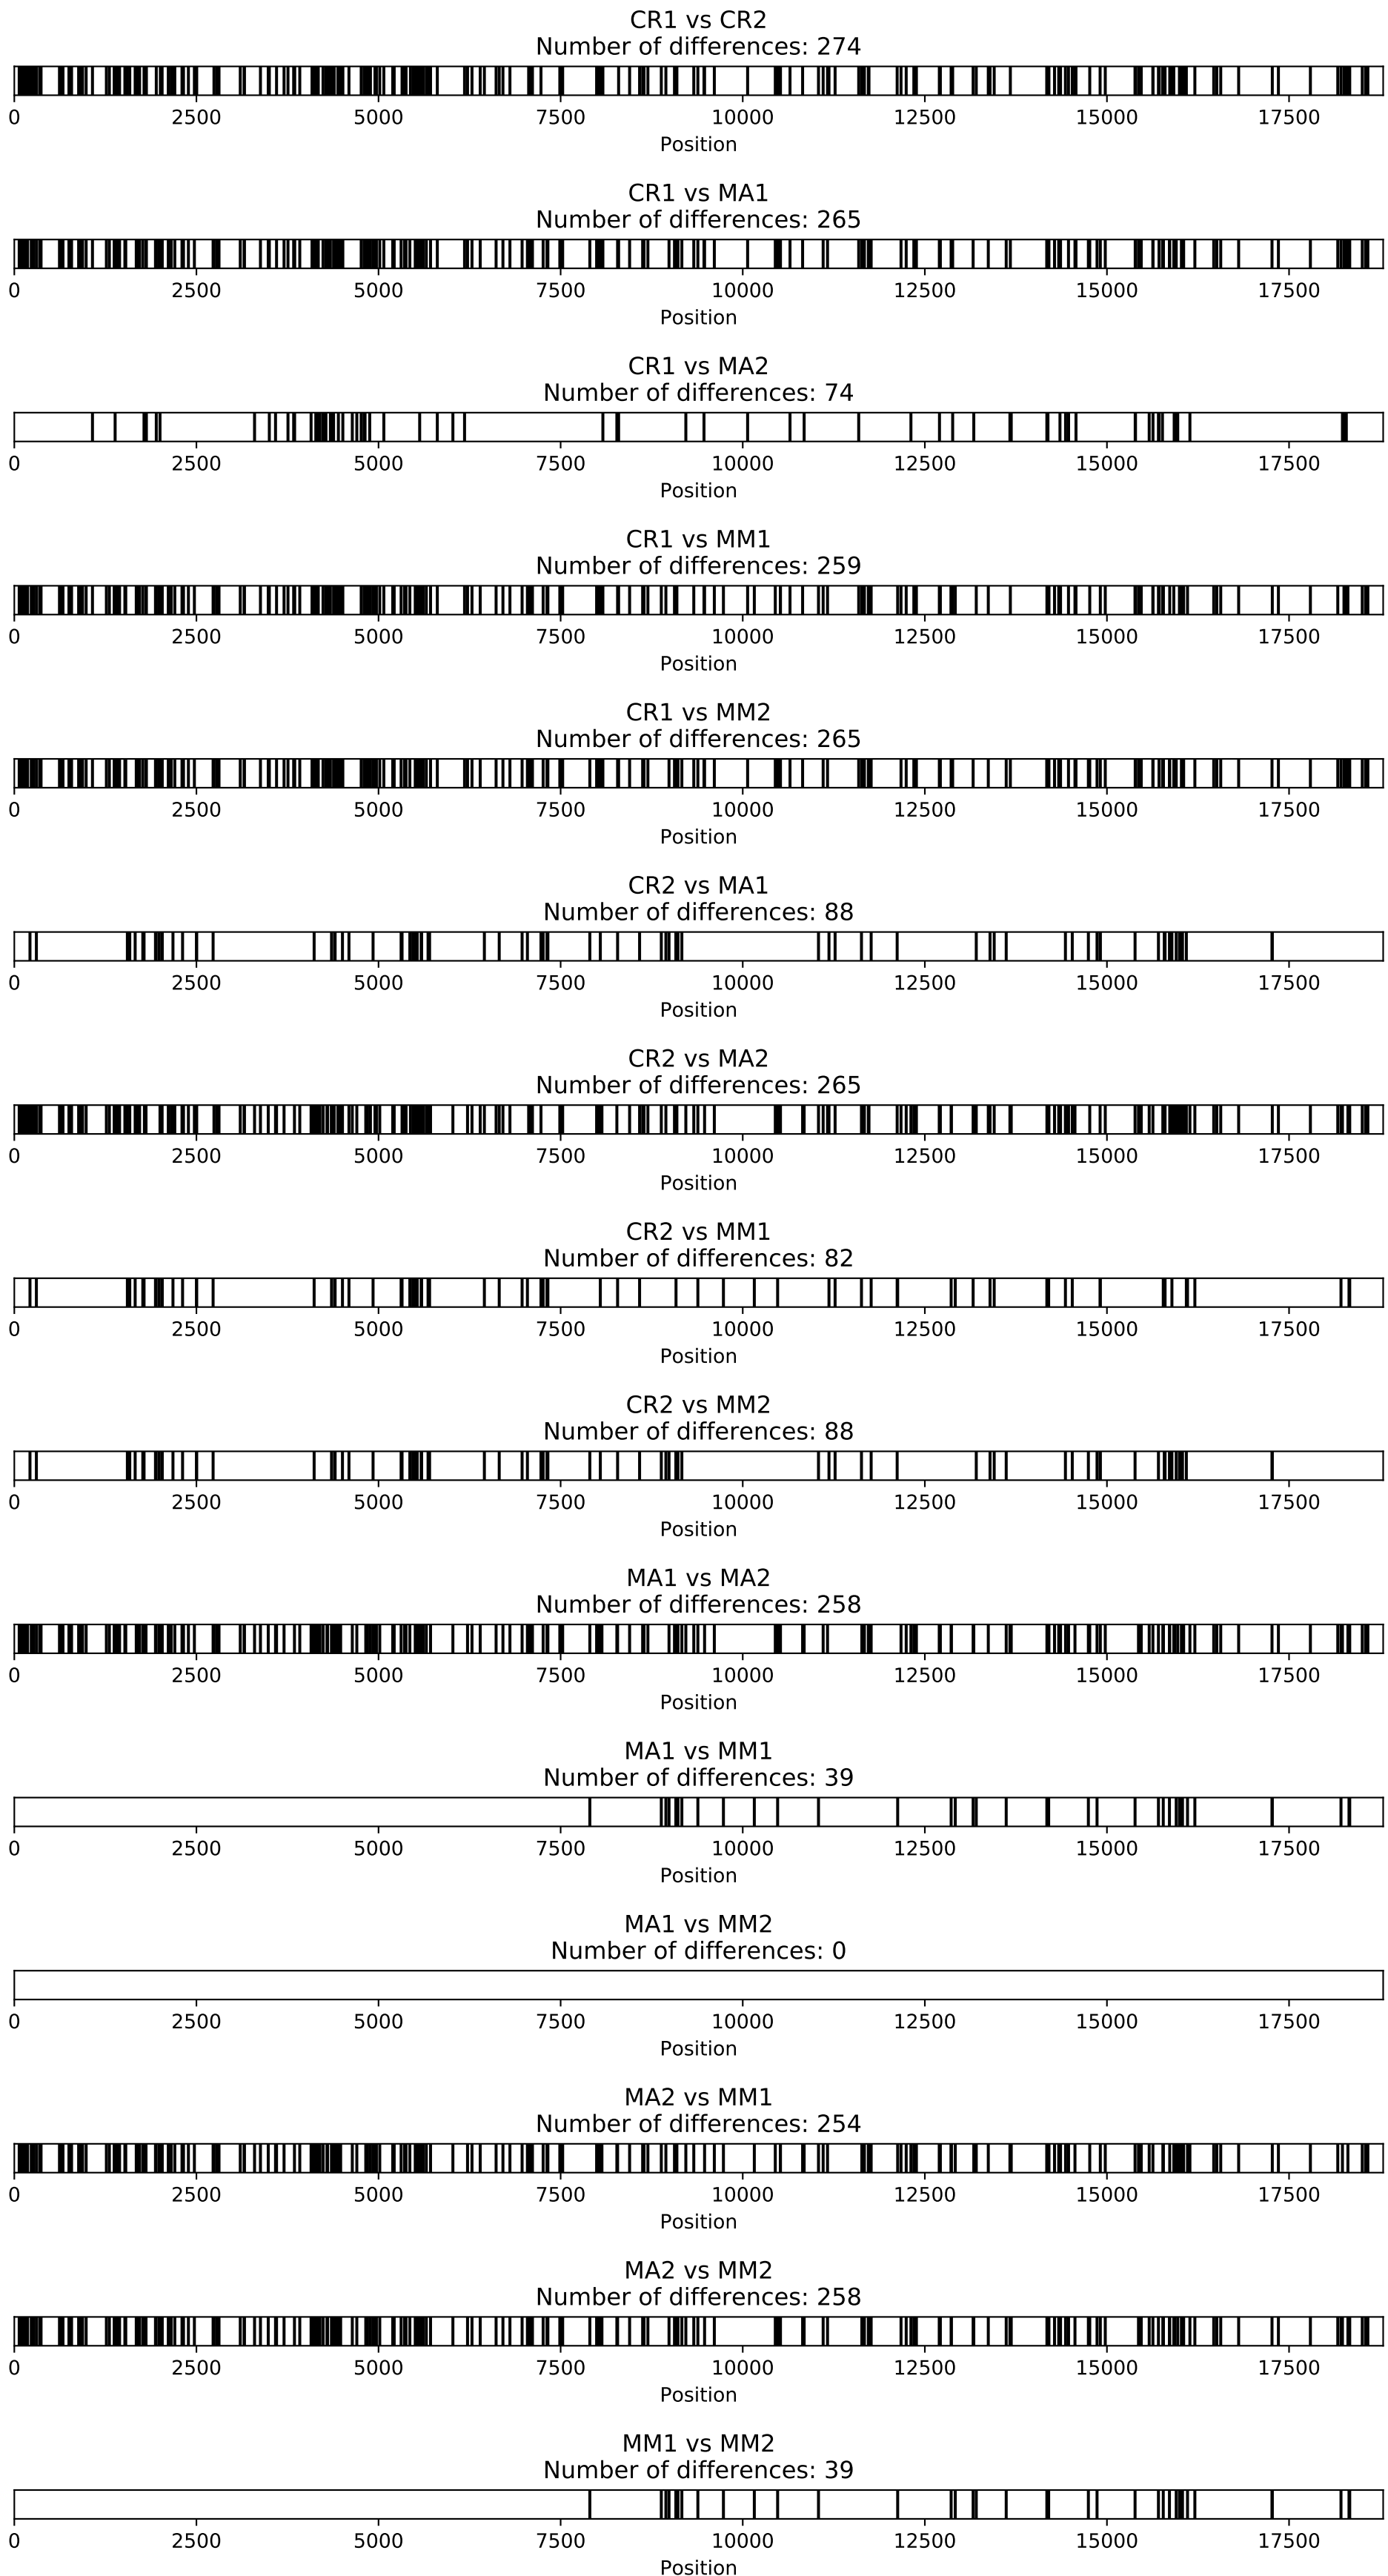

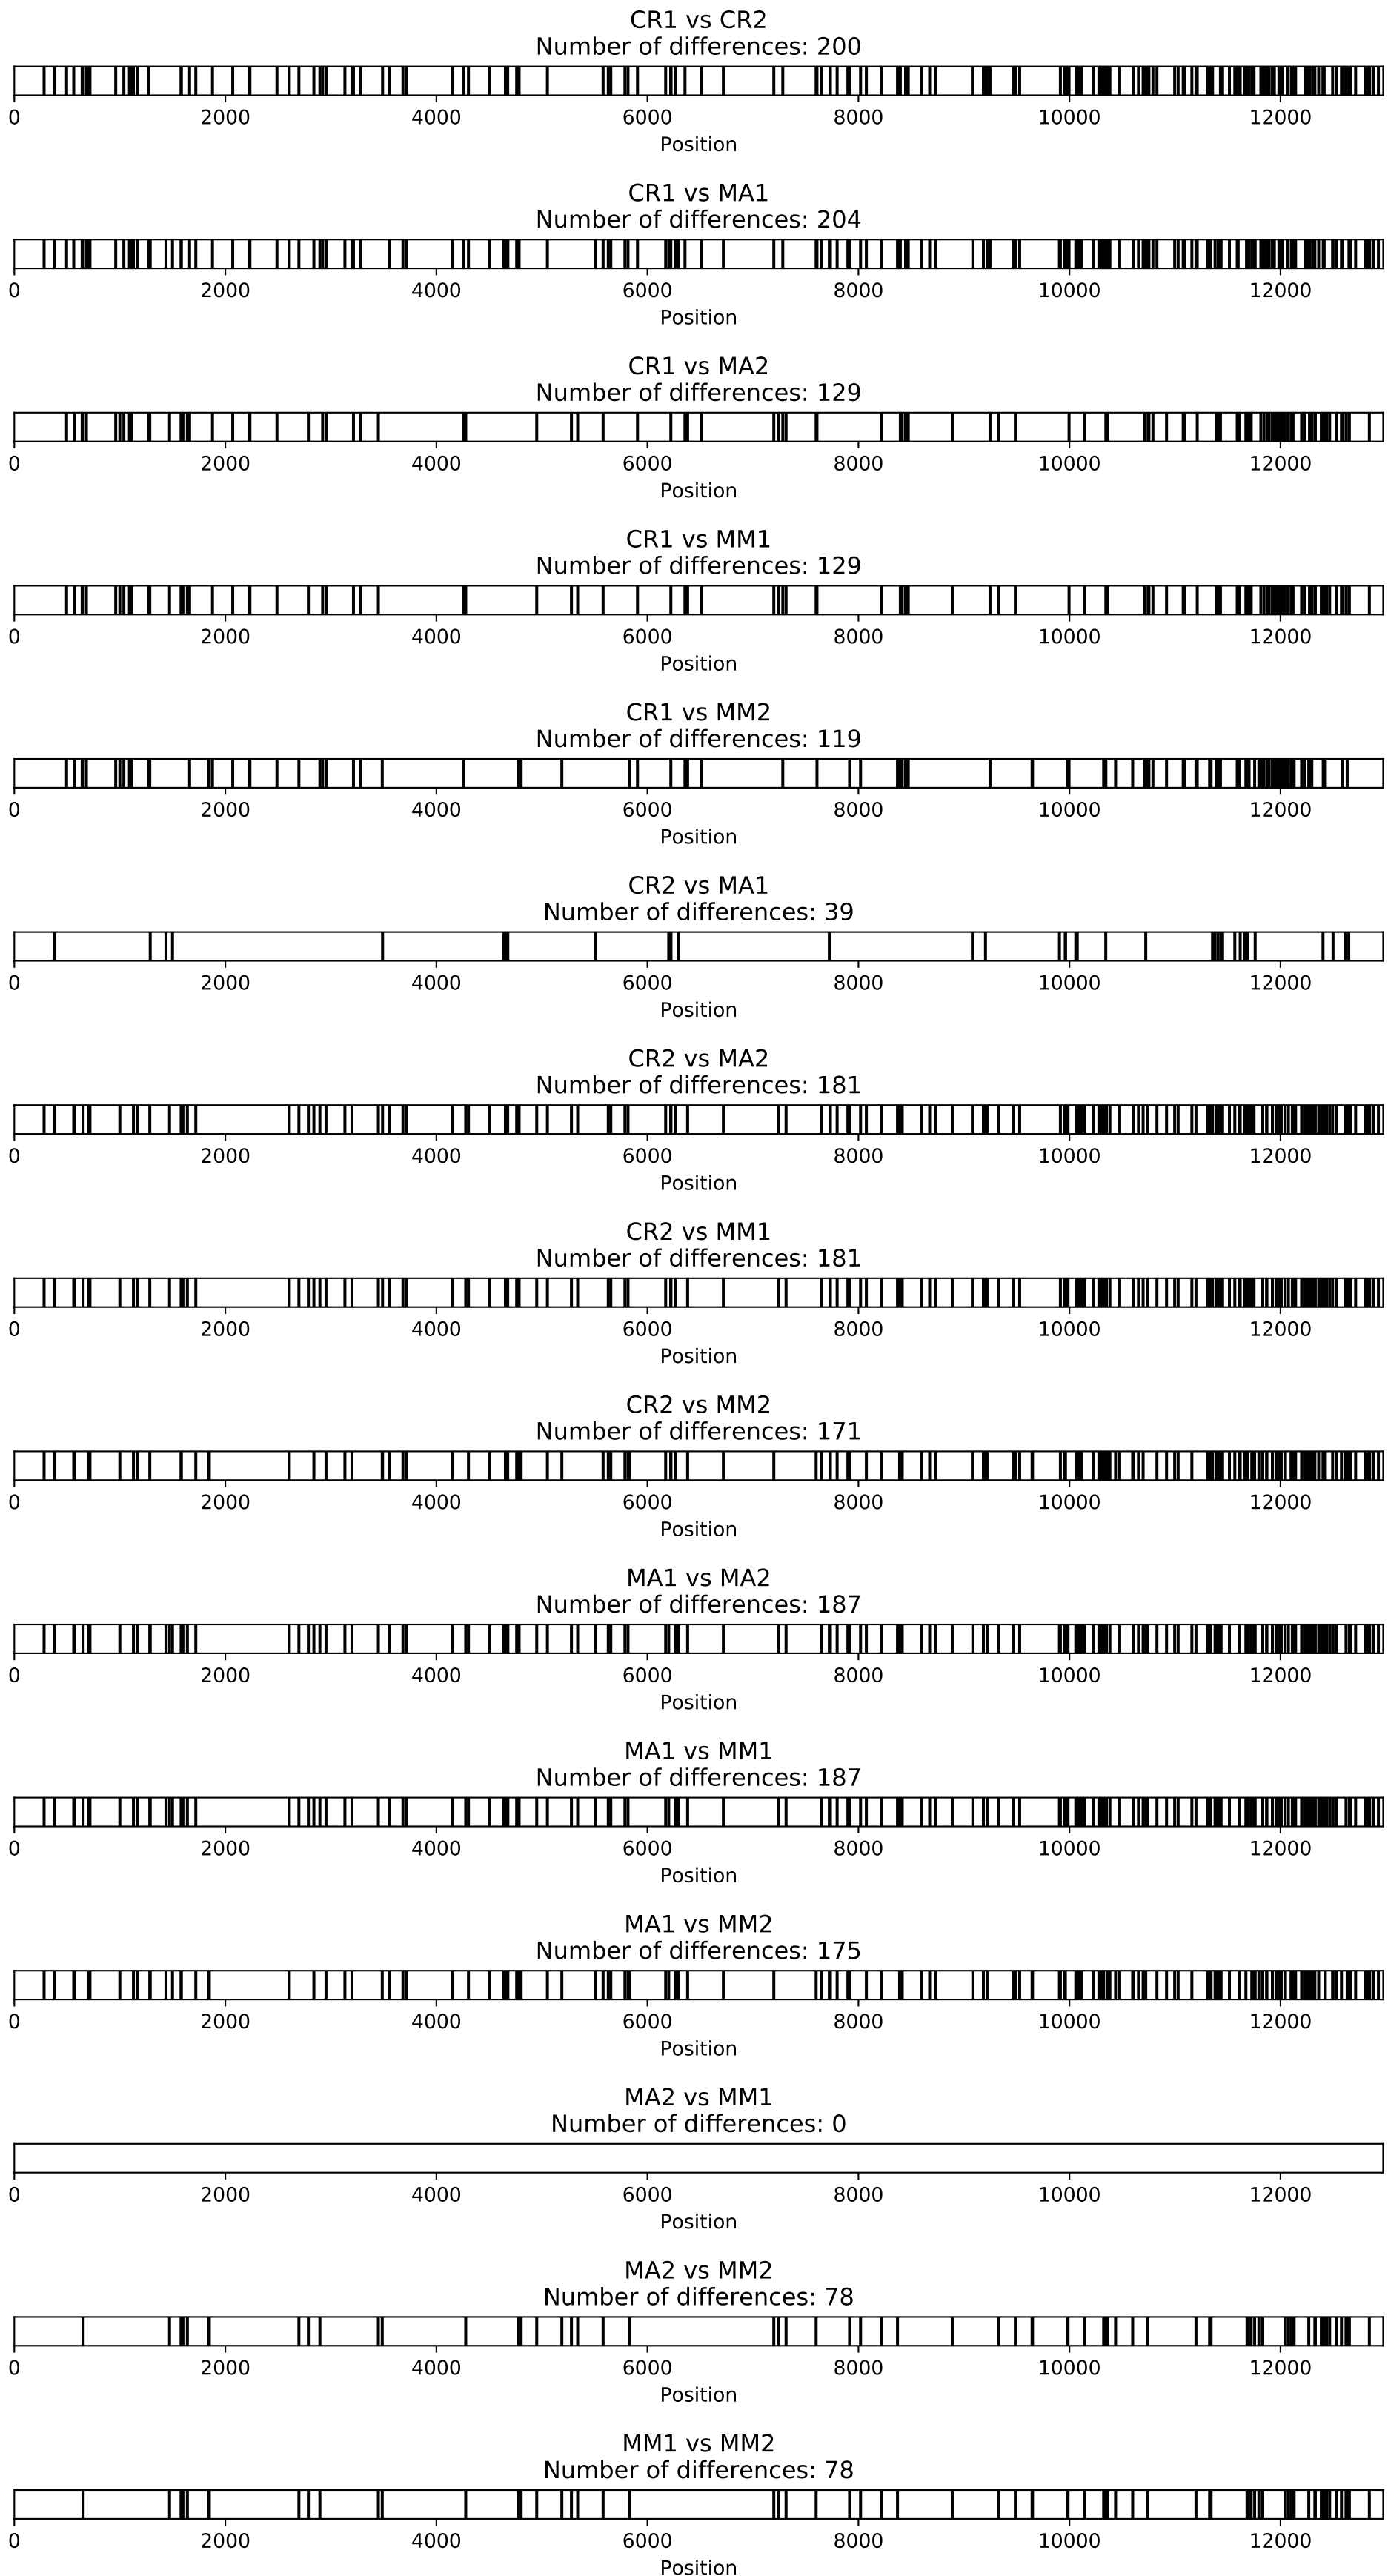

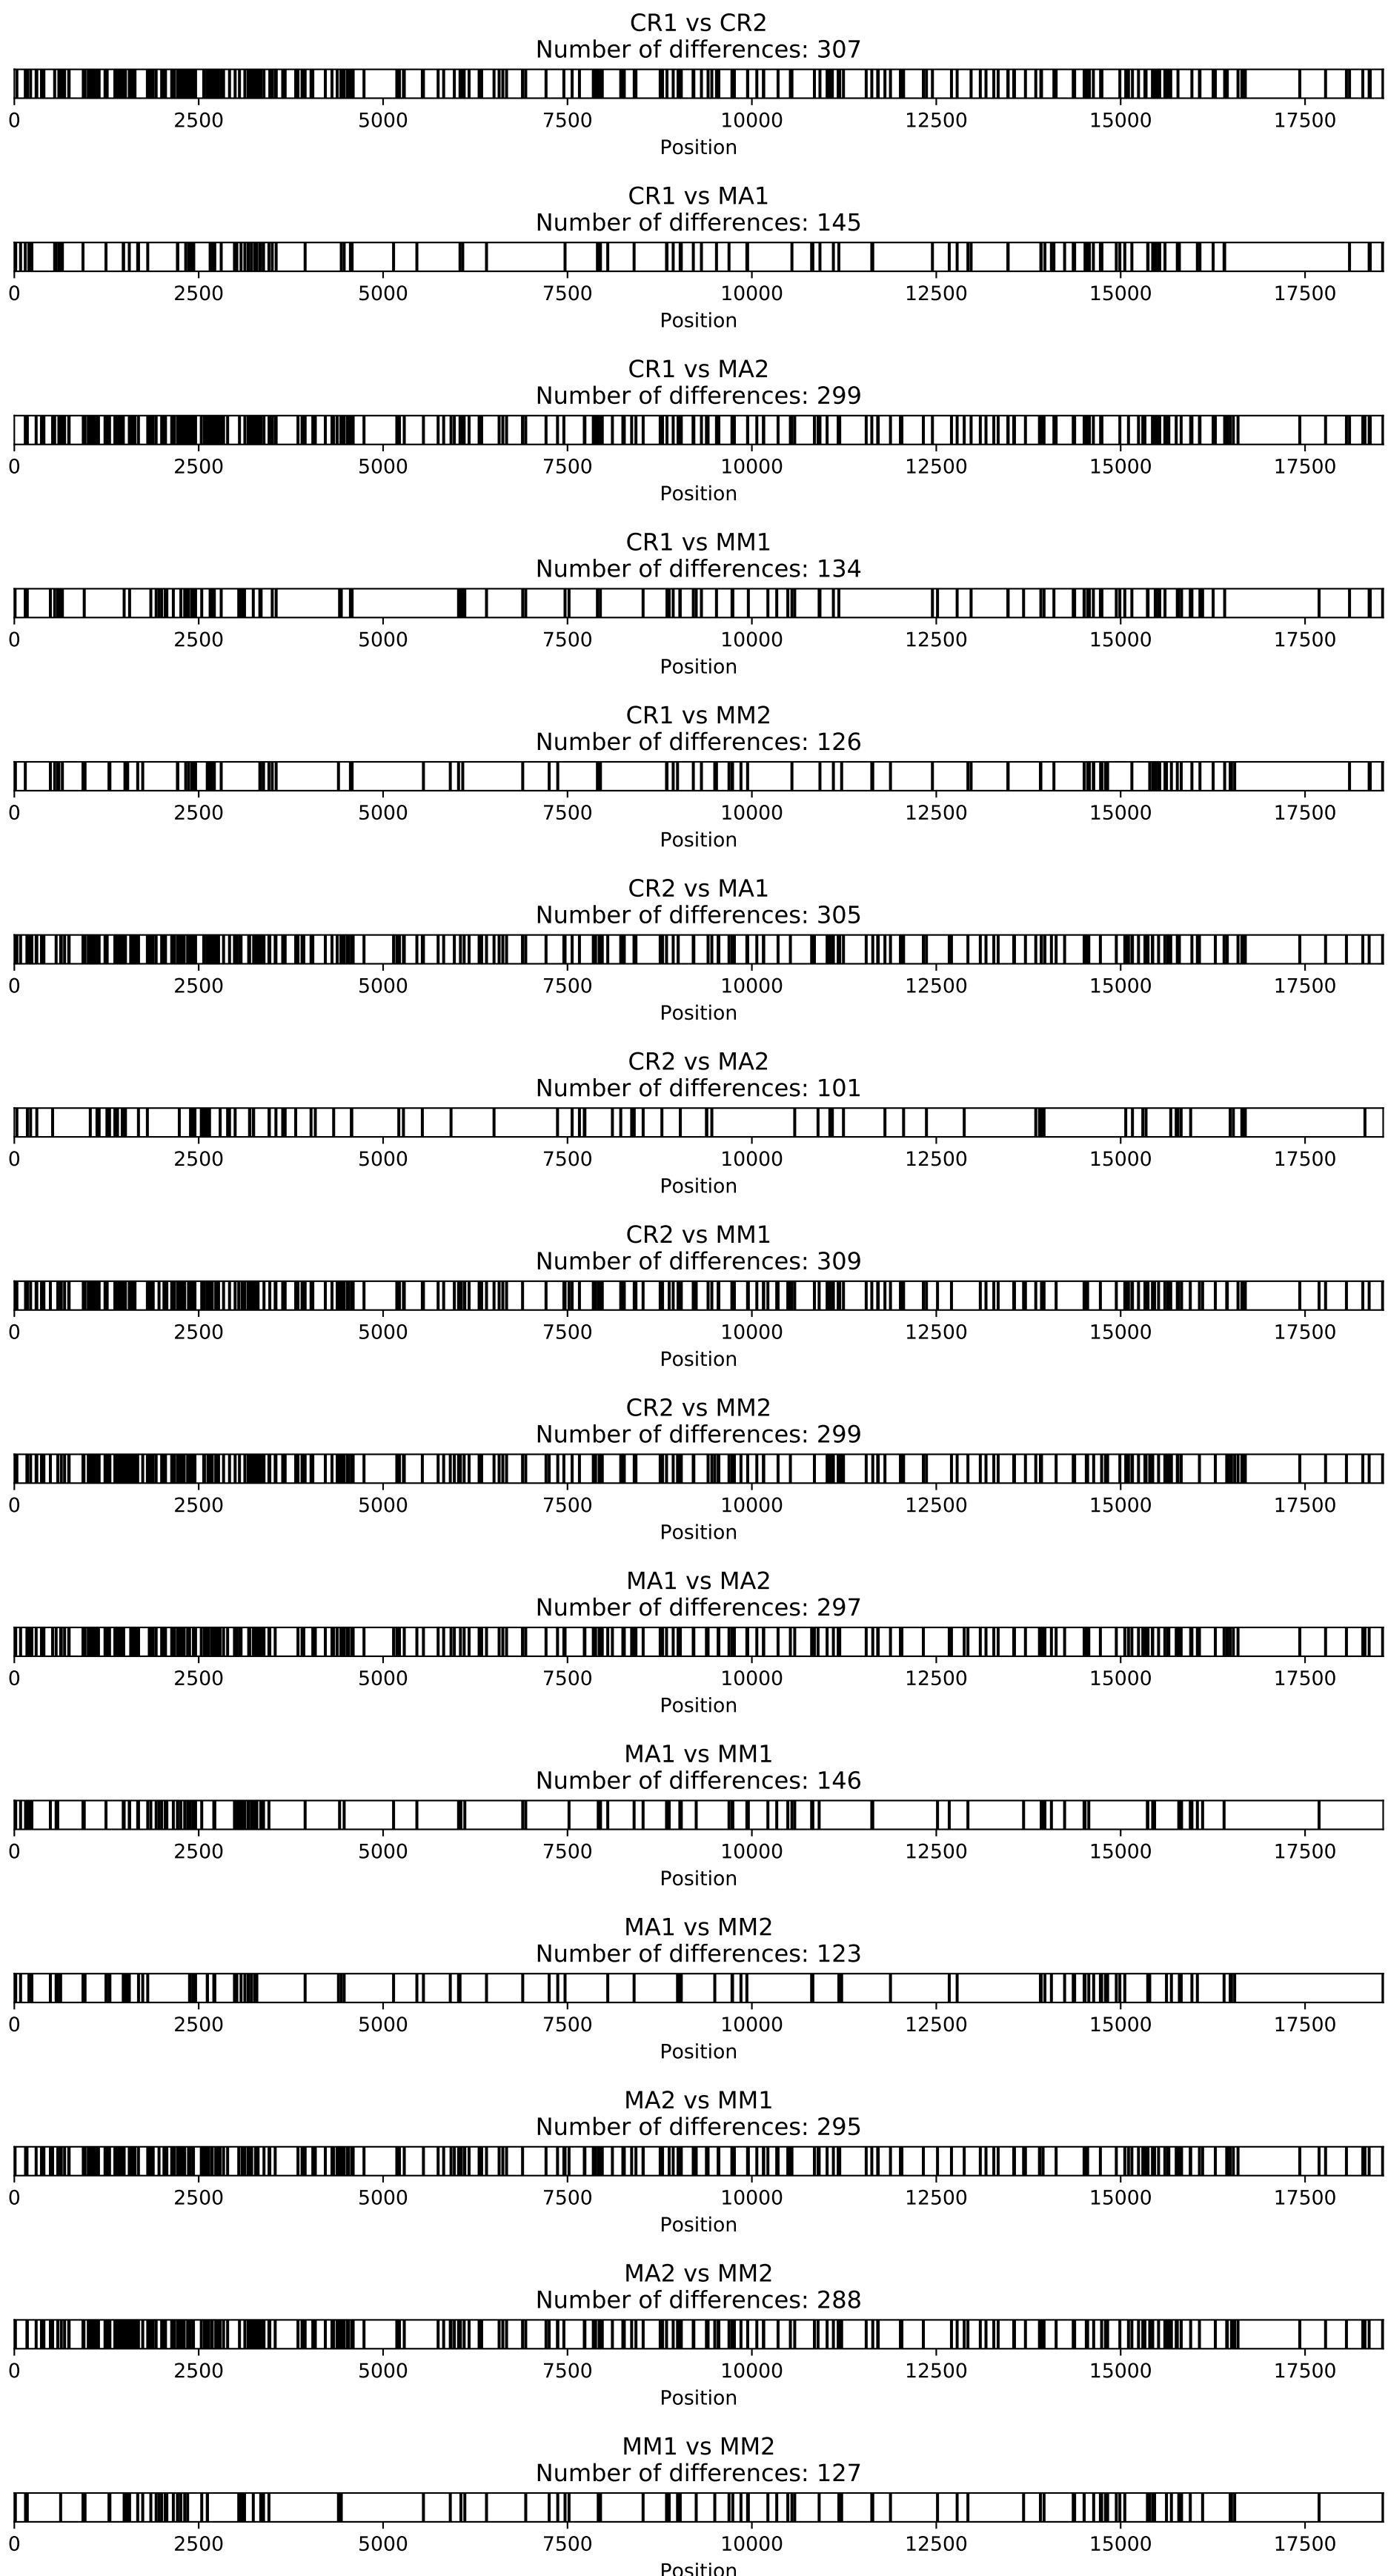

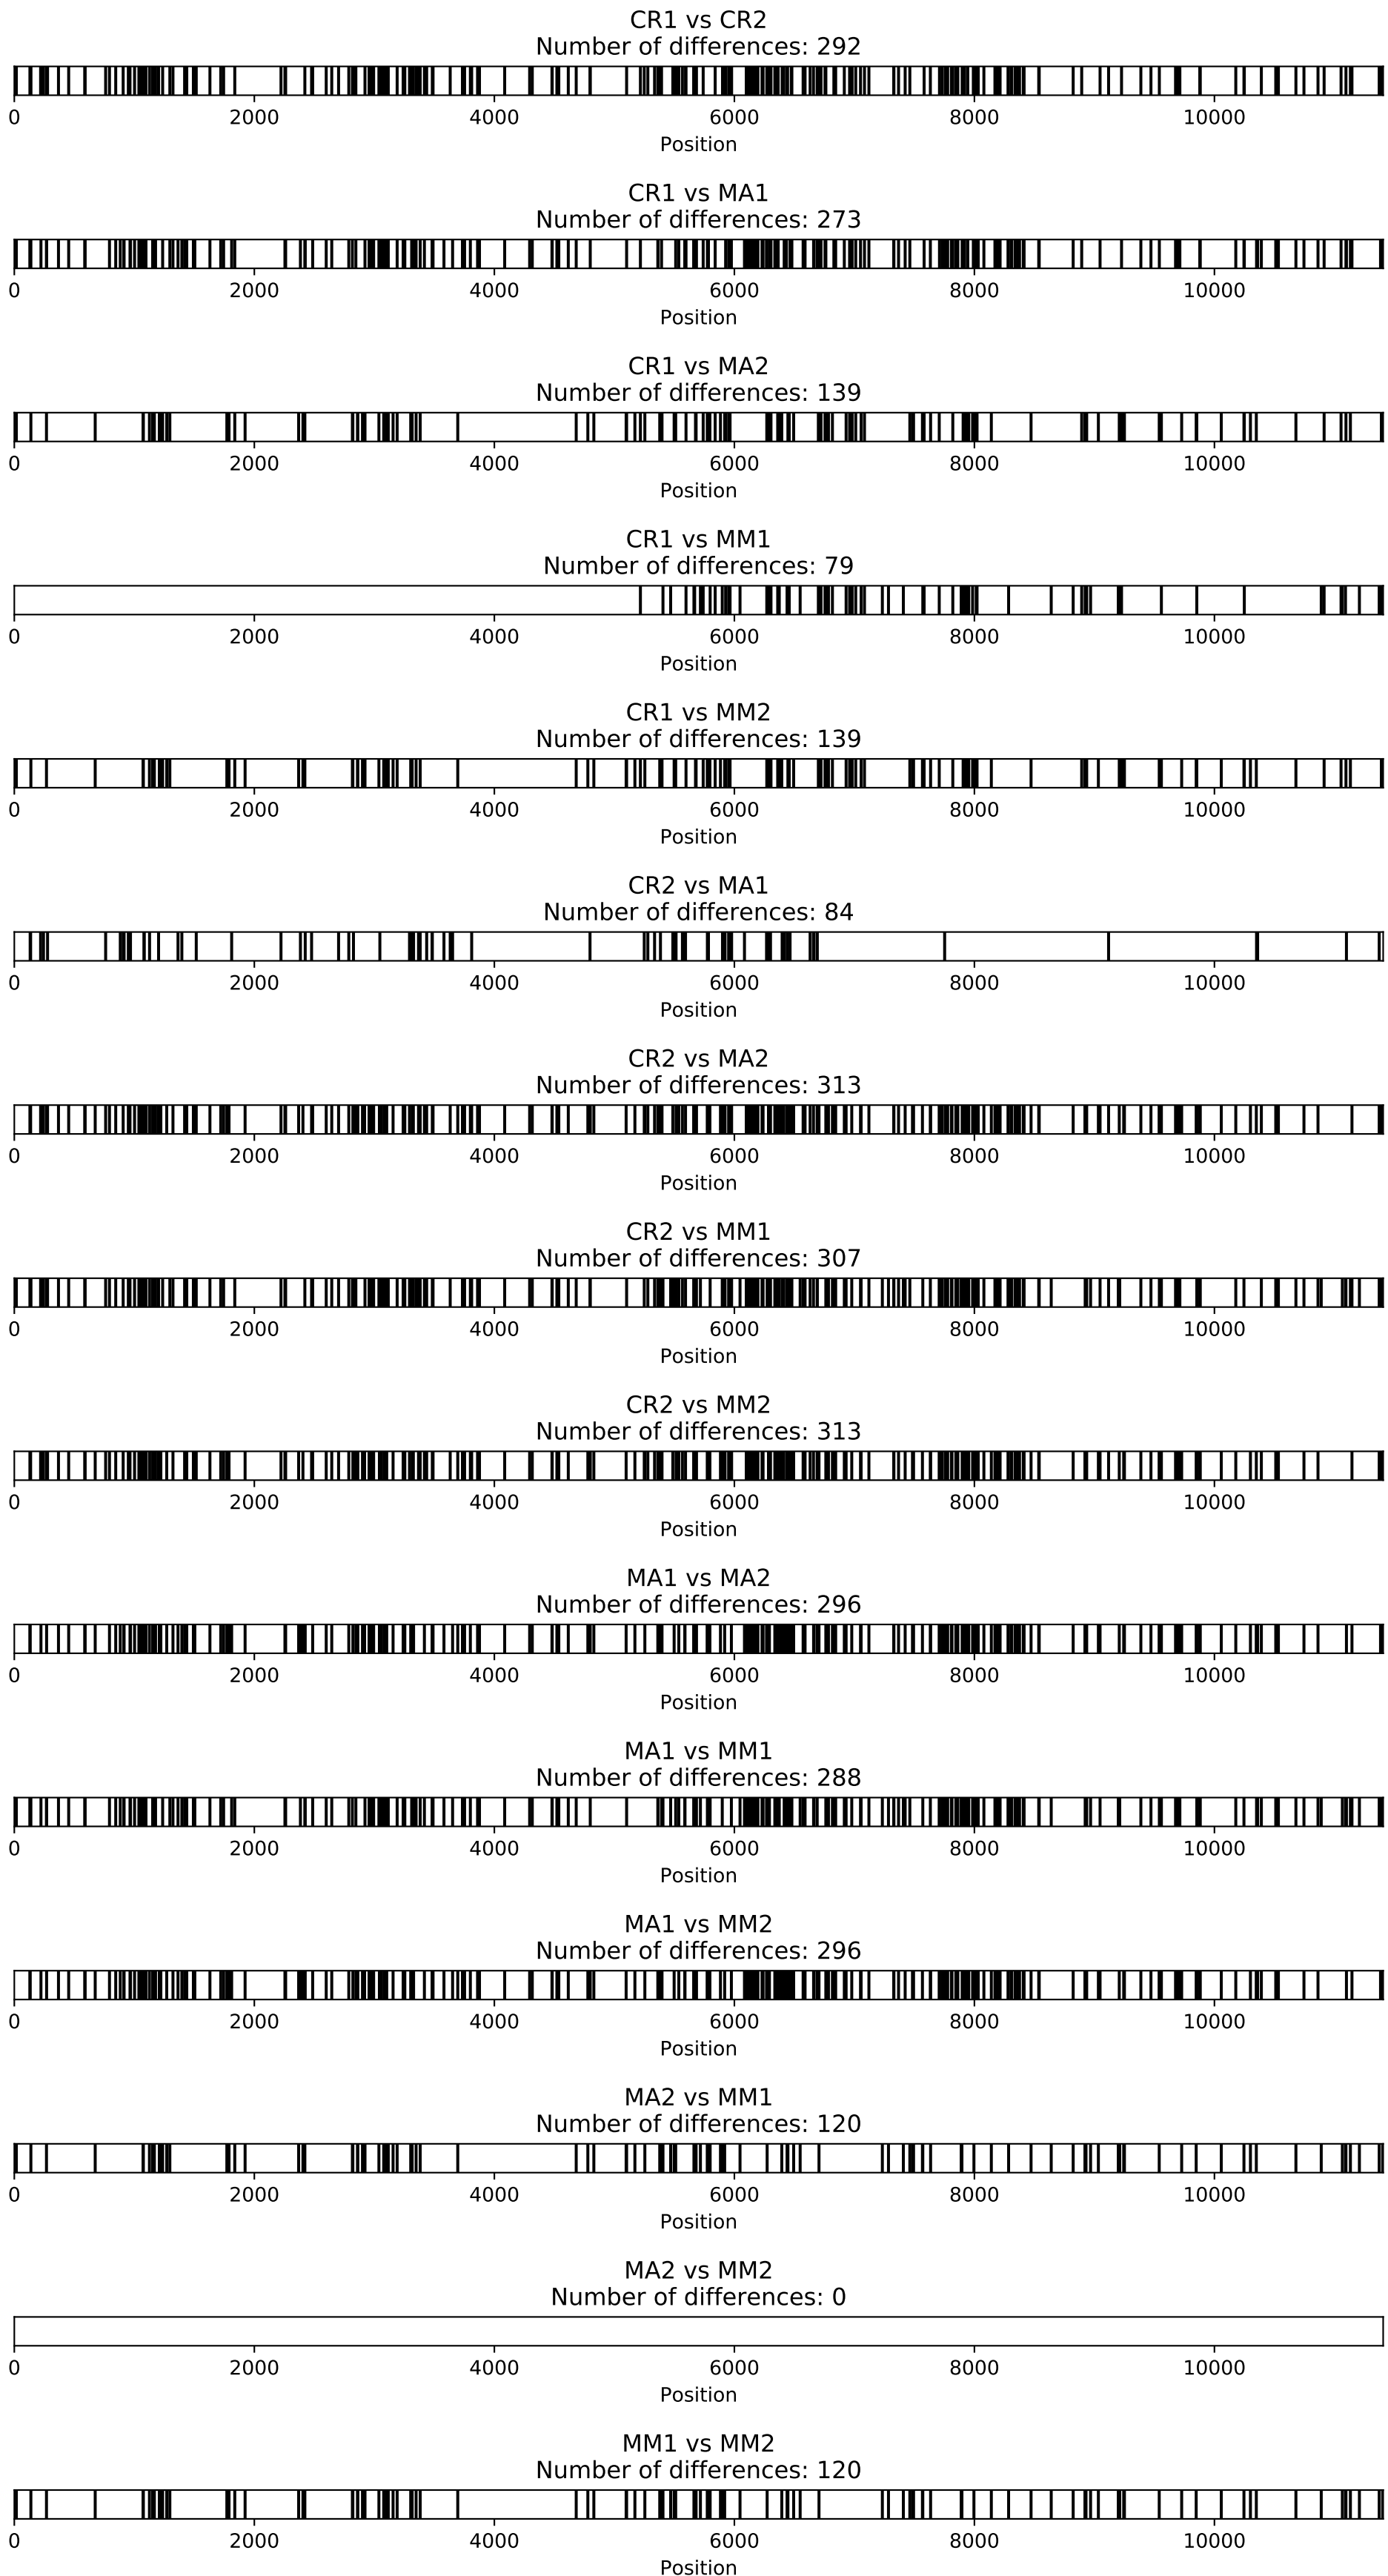



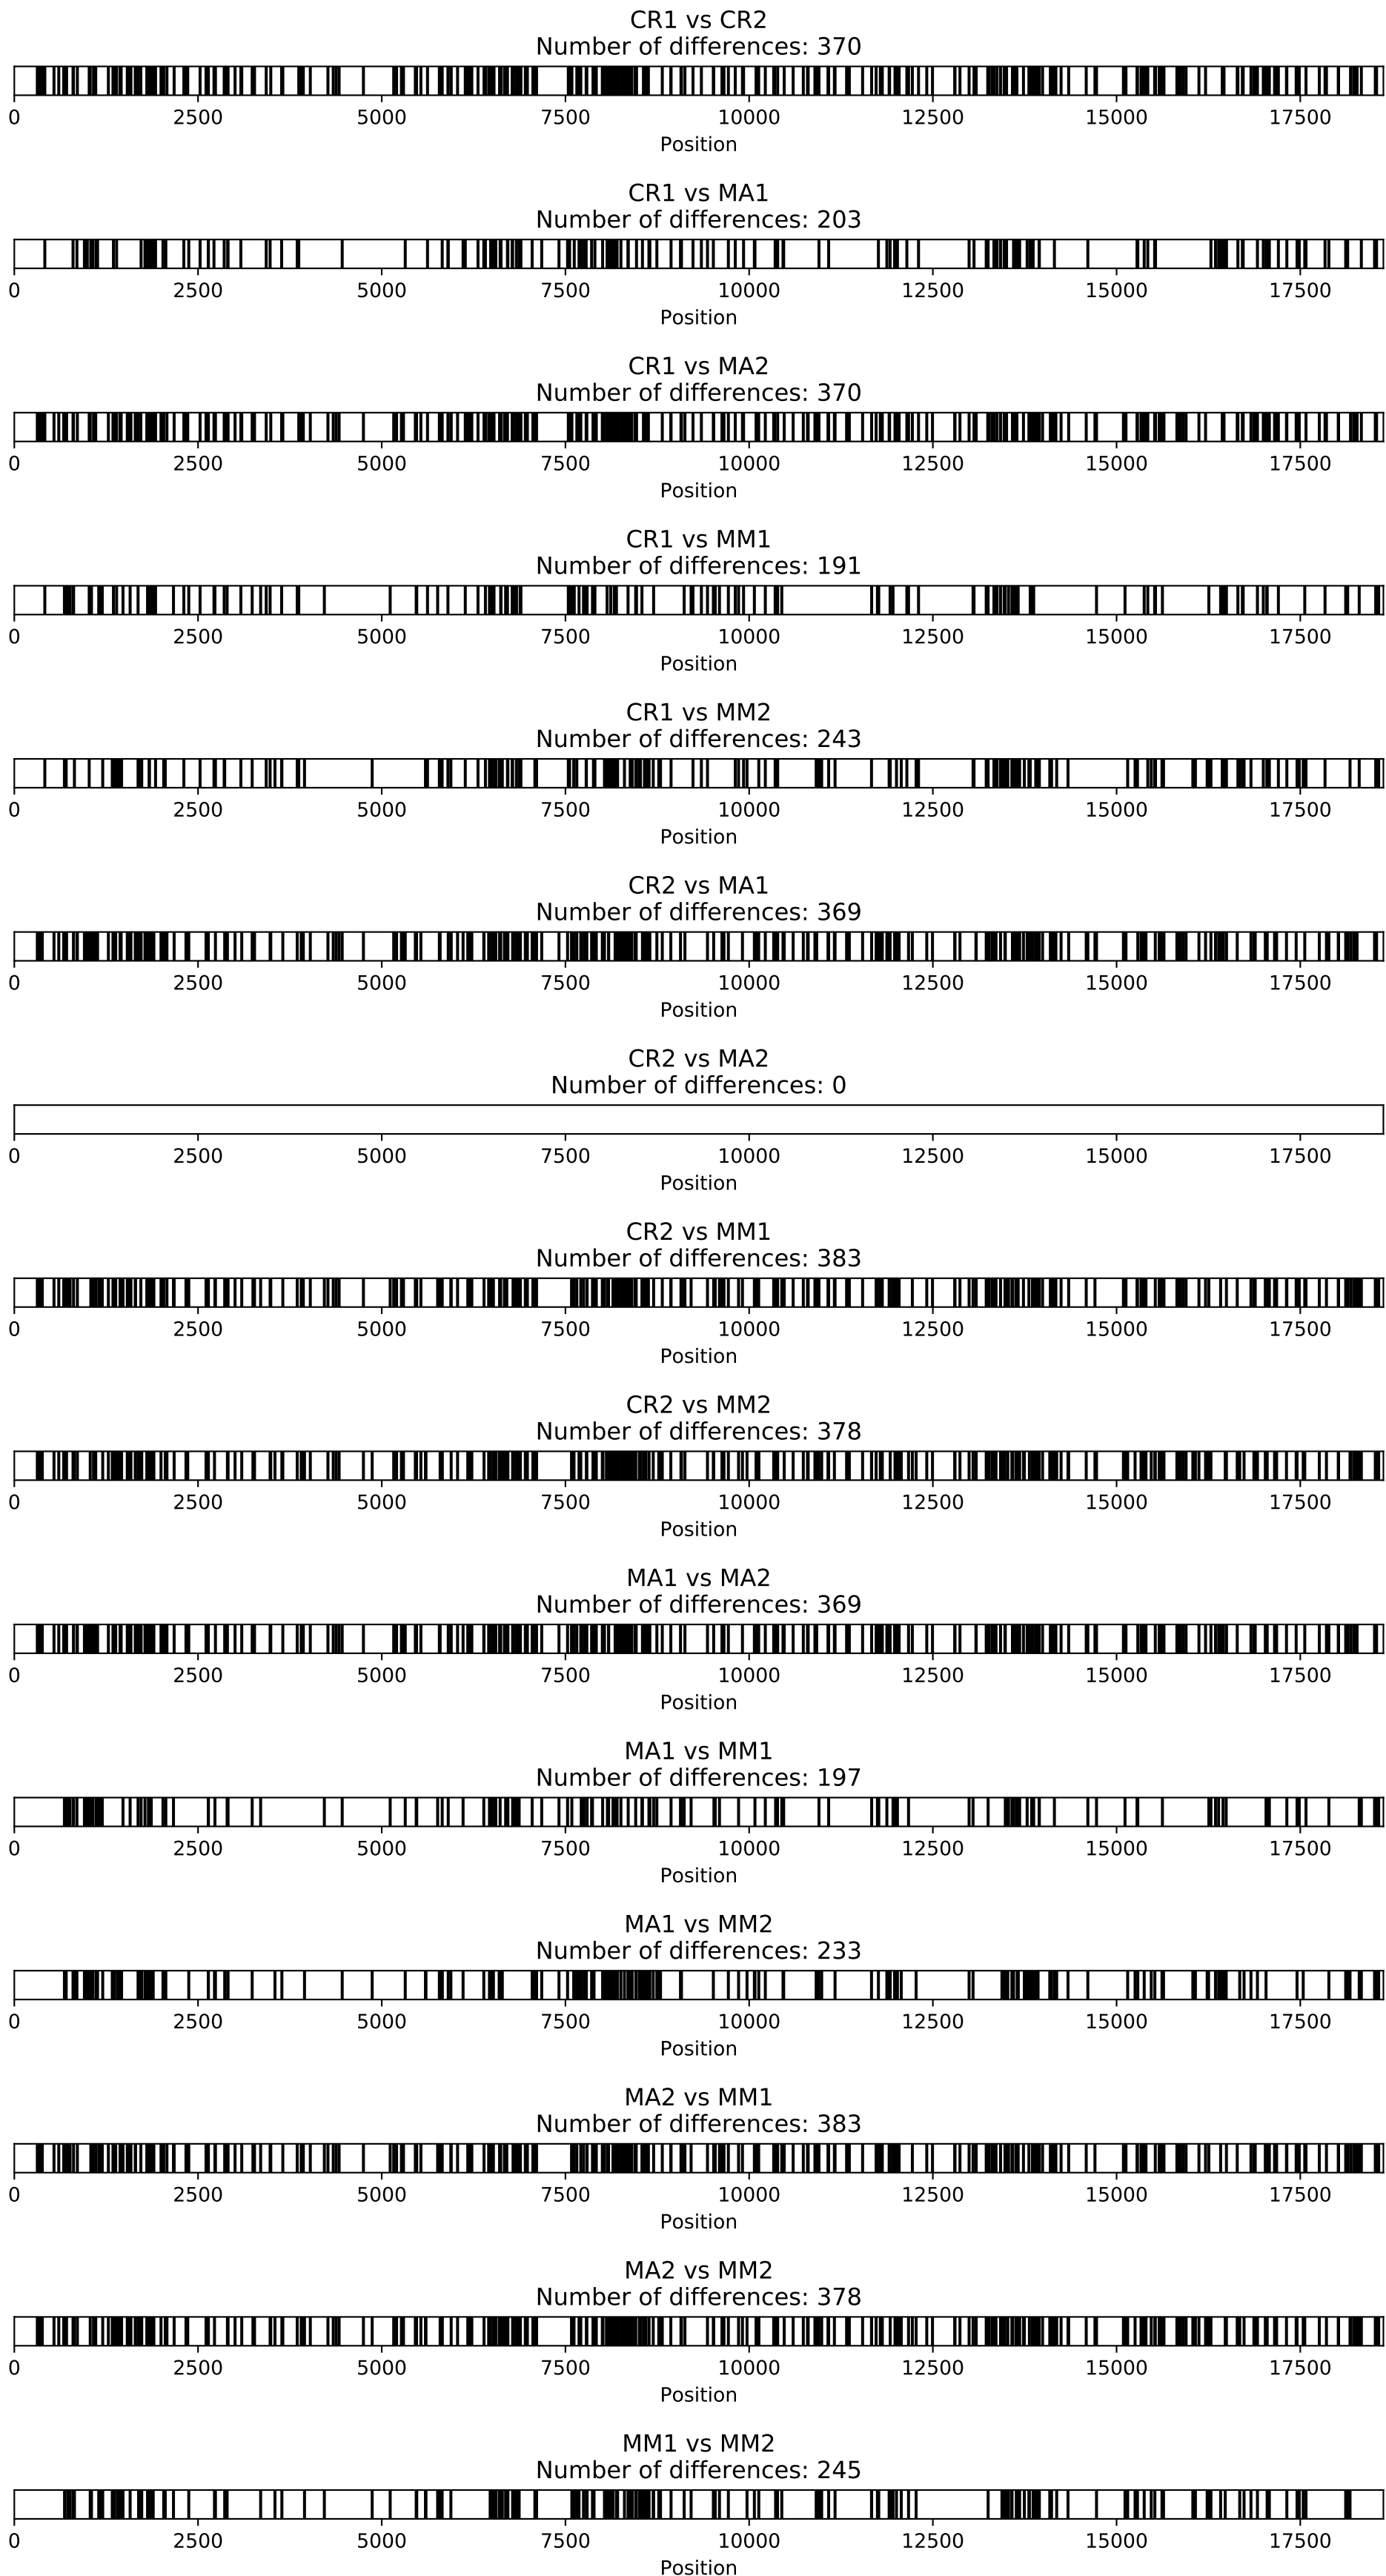

# Region: 75

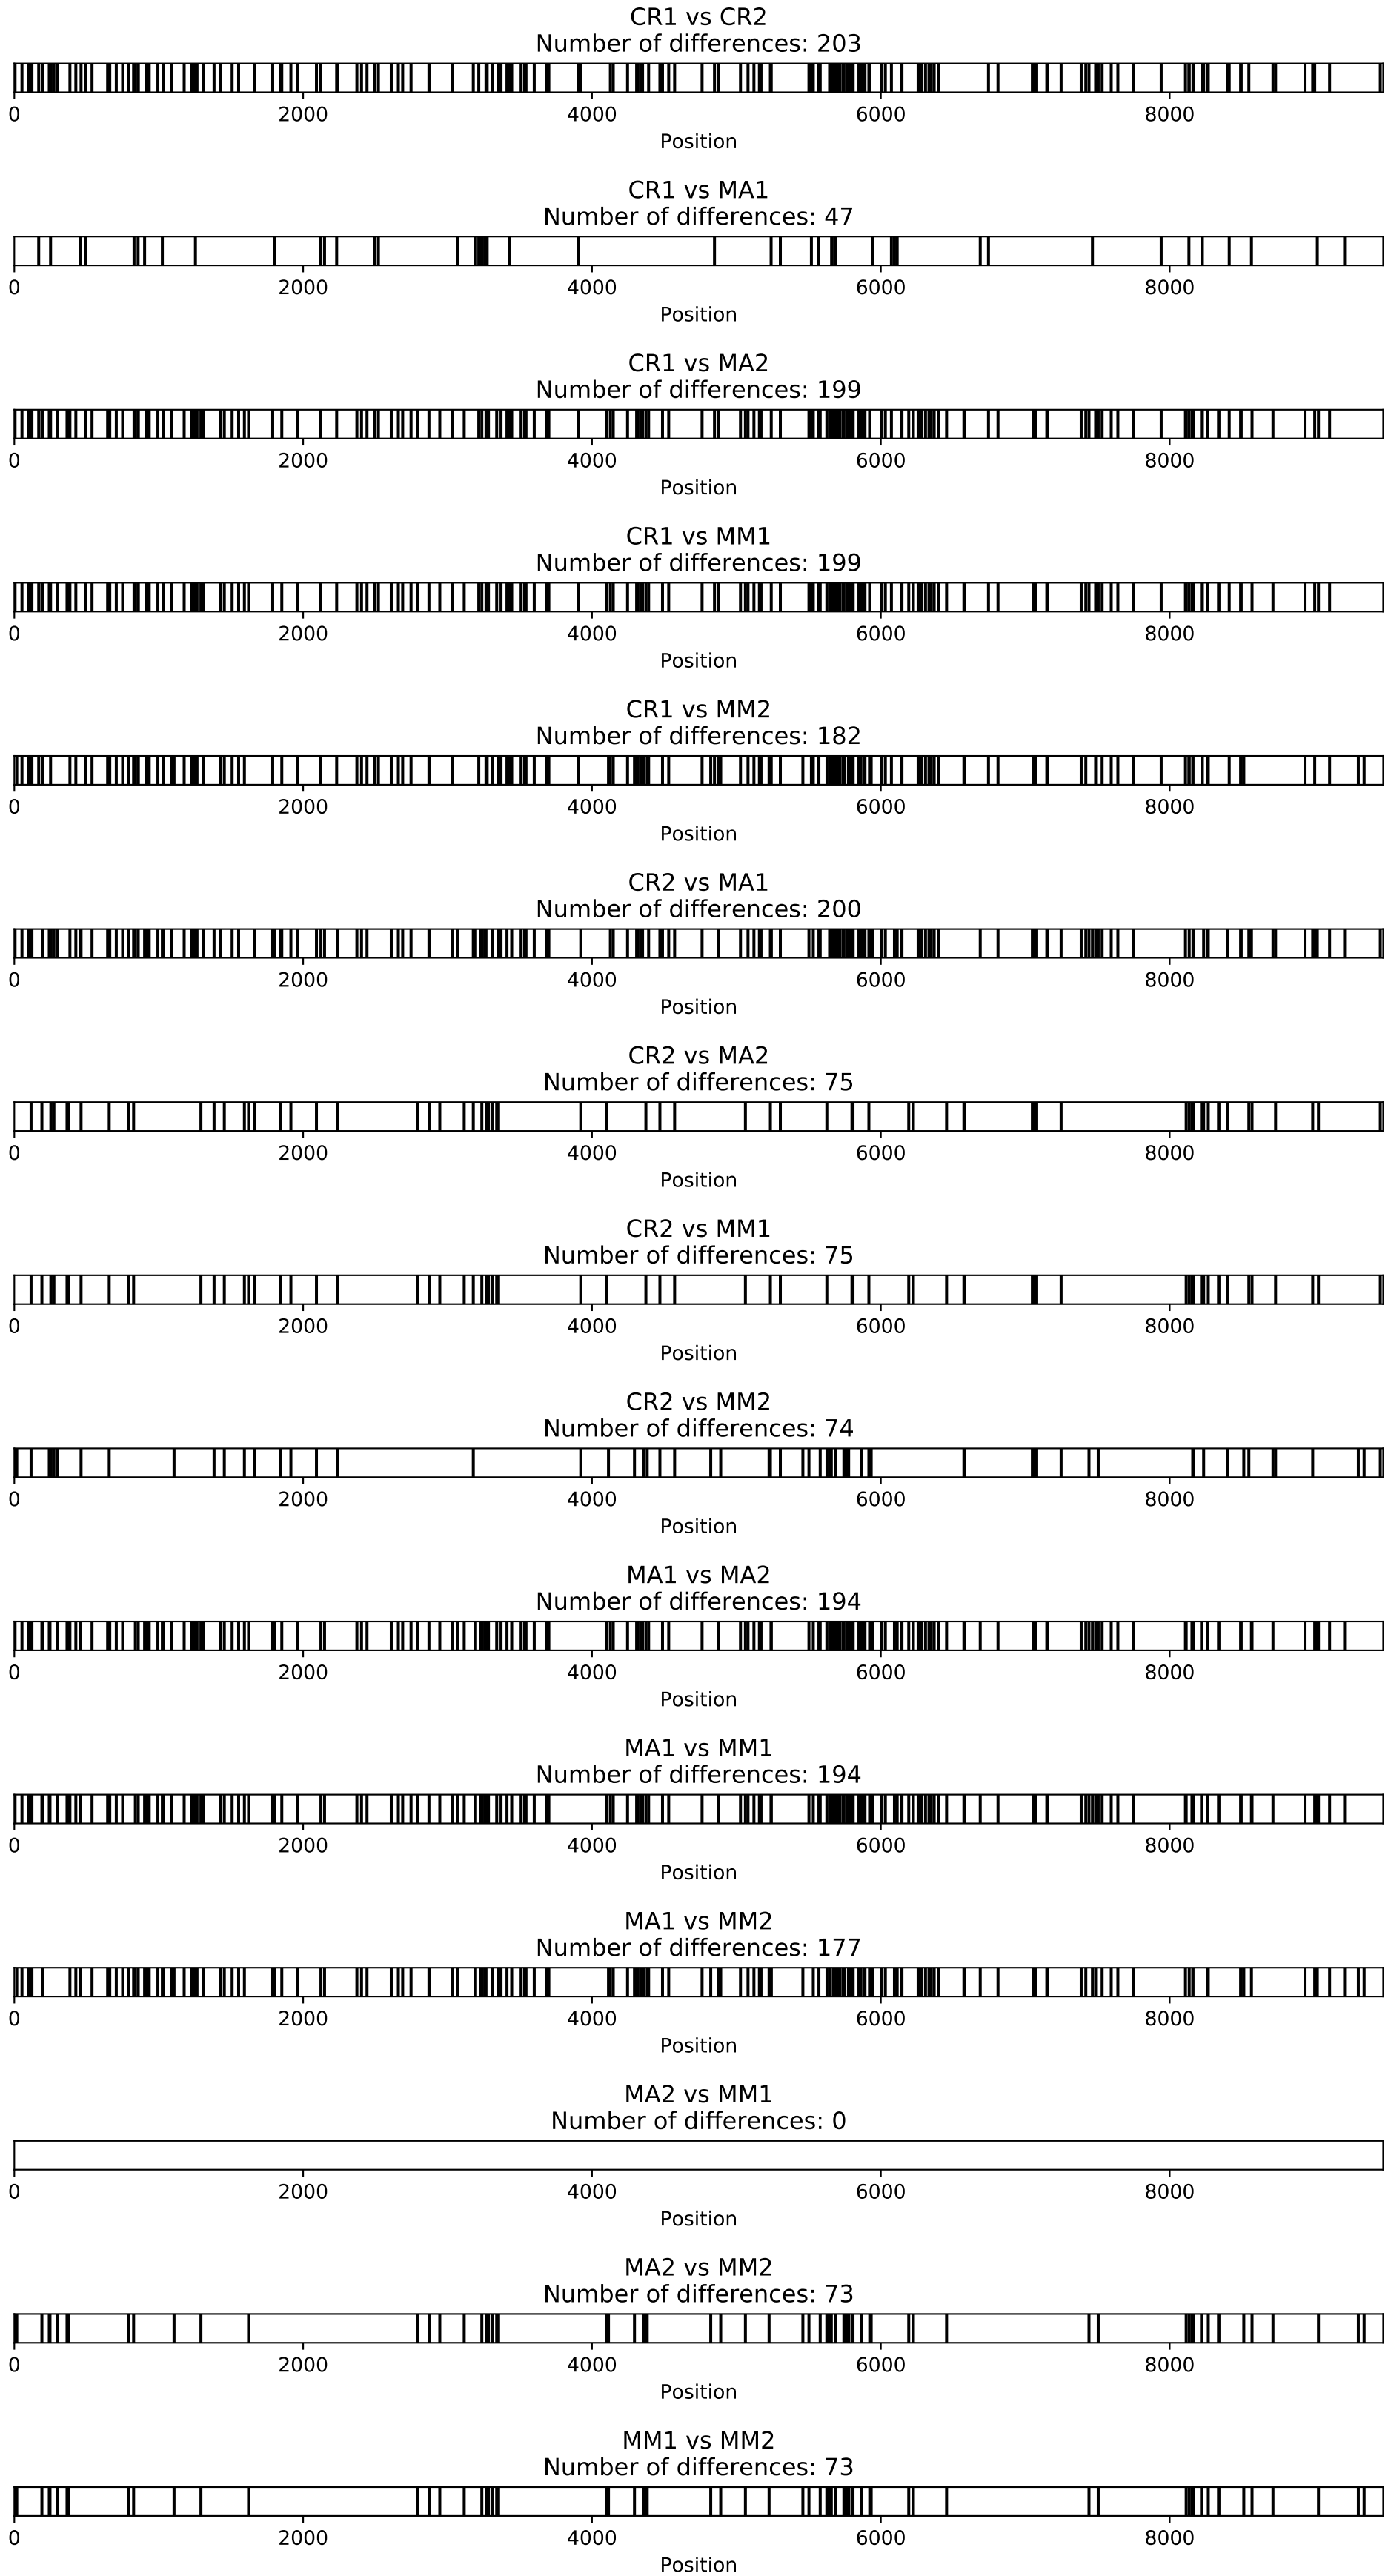

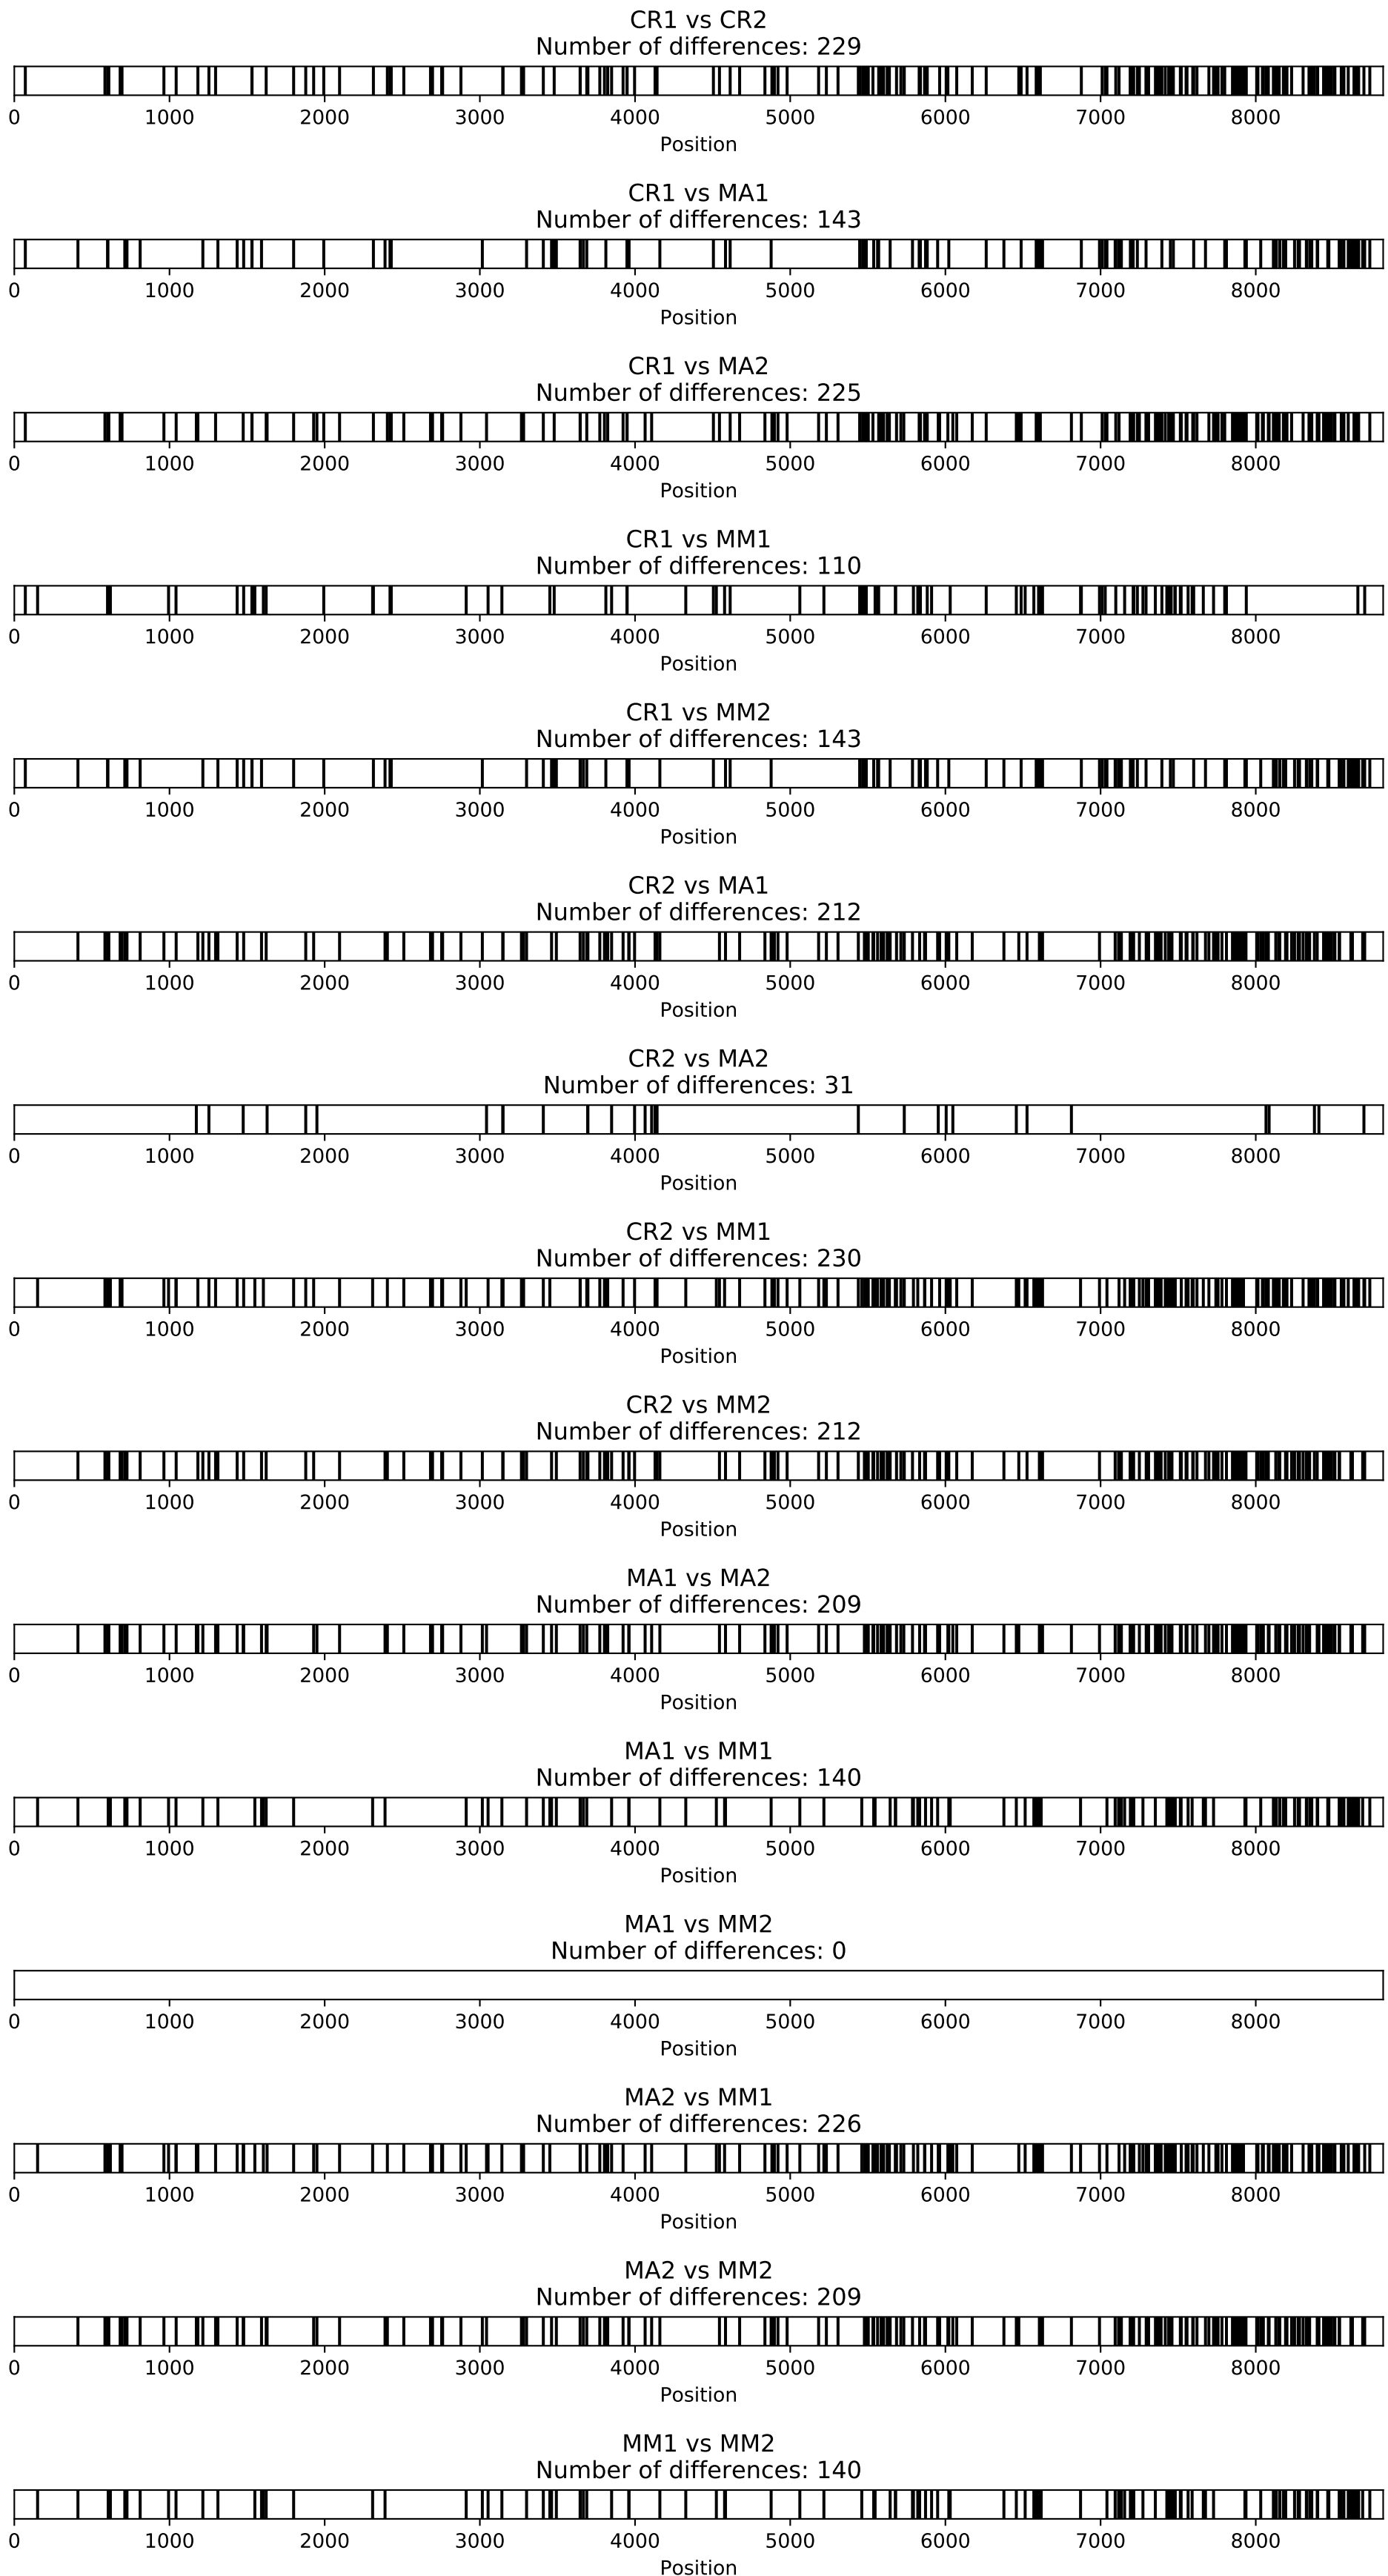

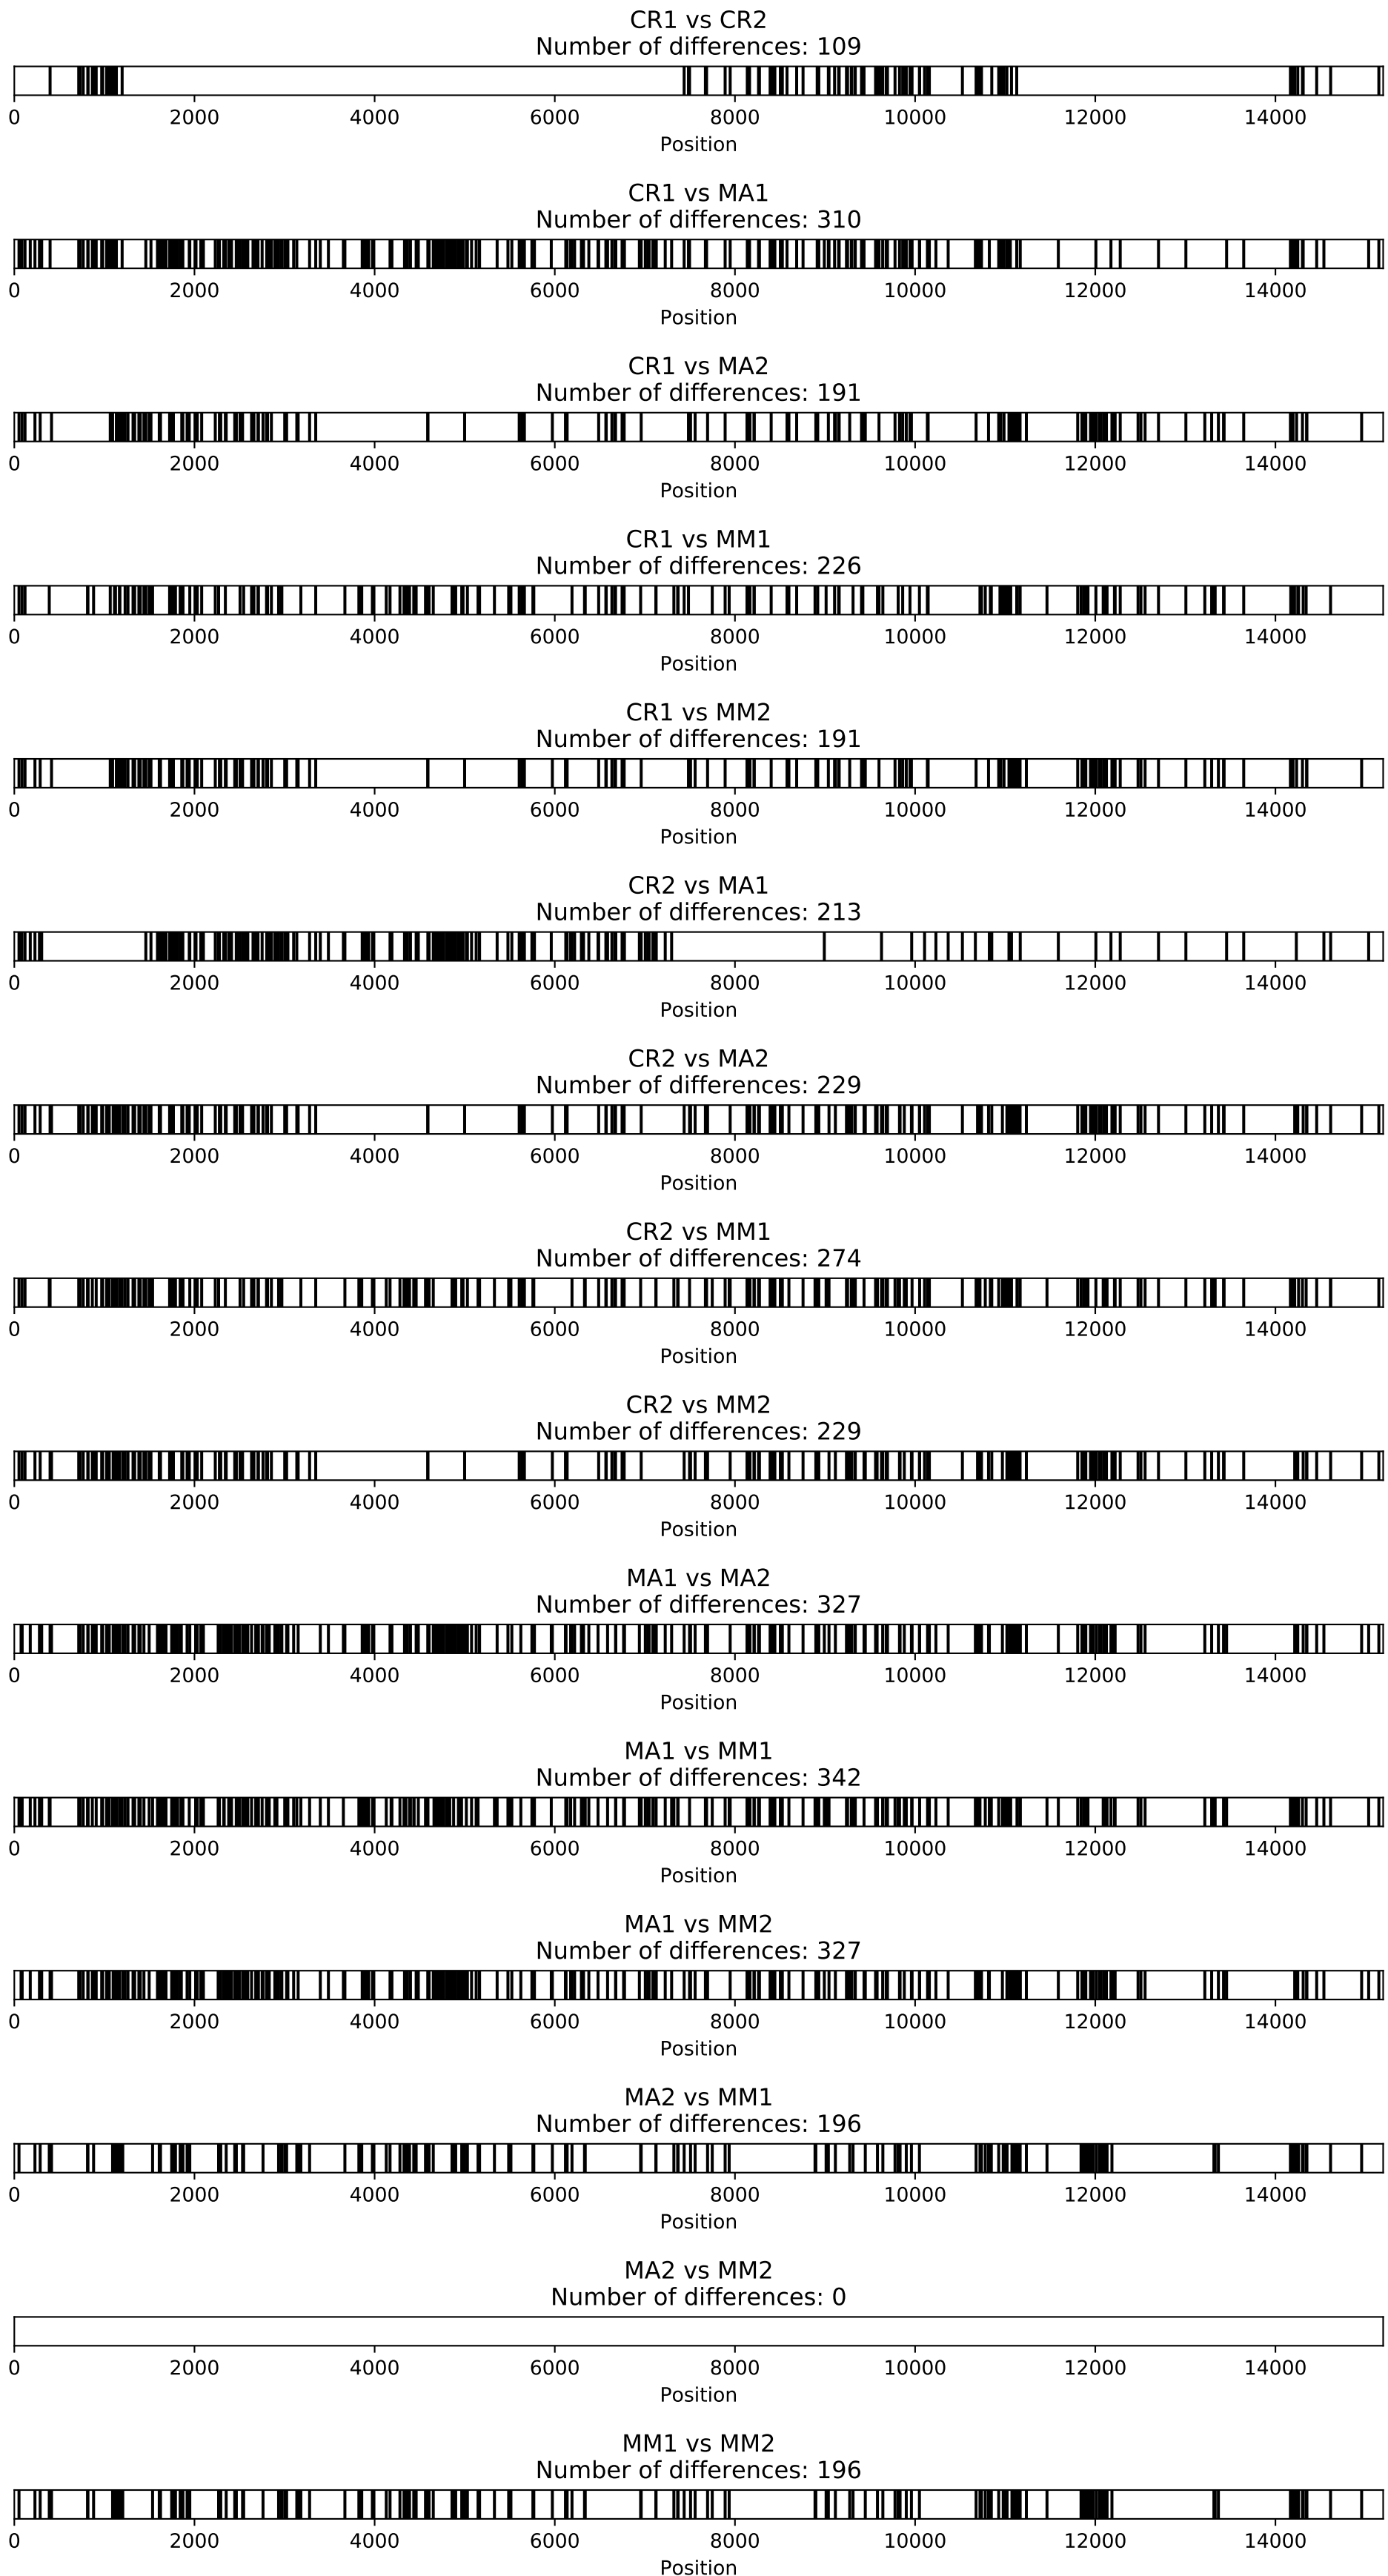

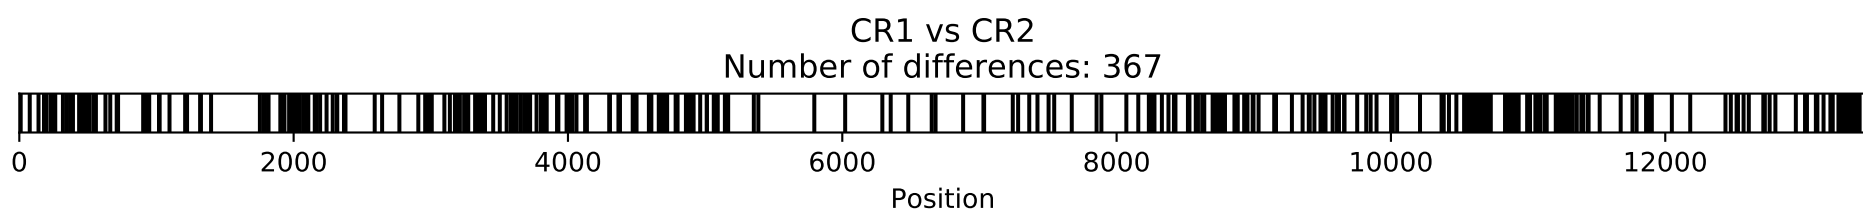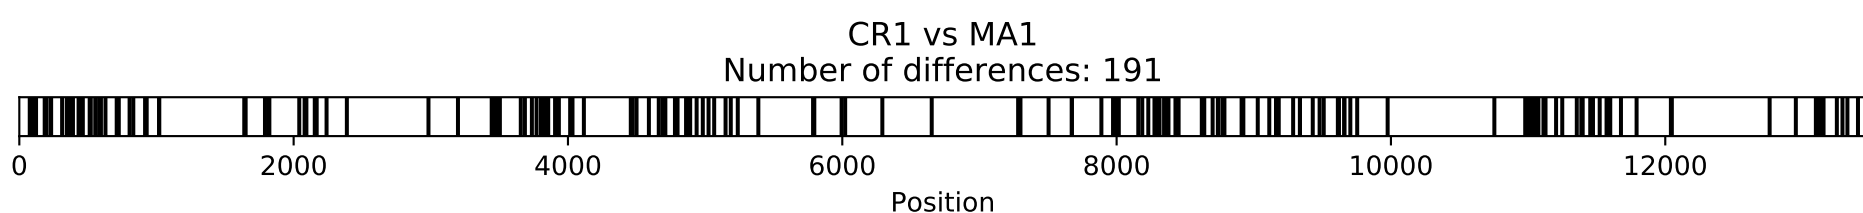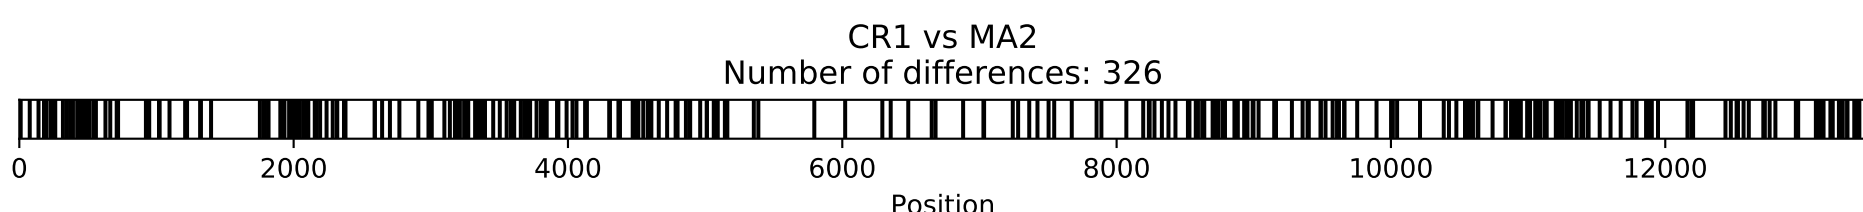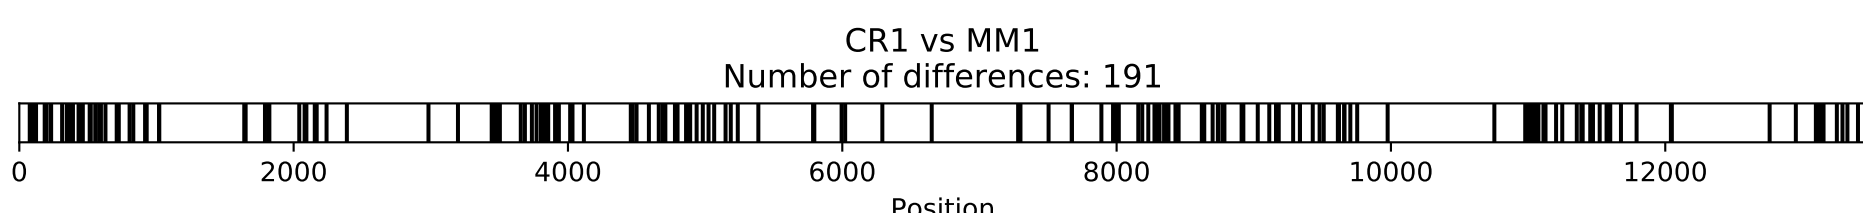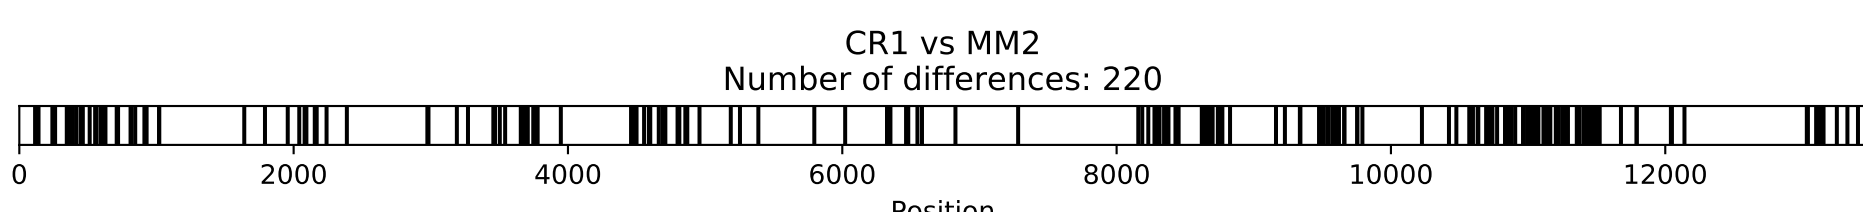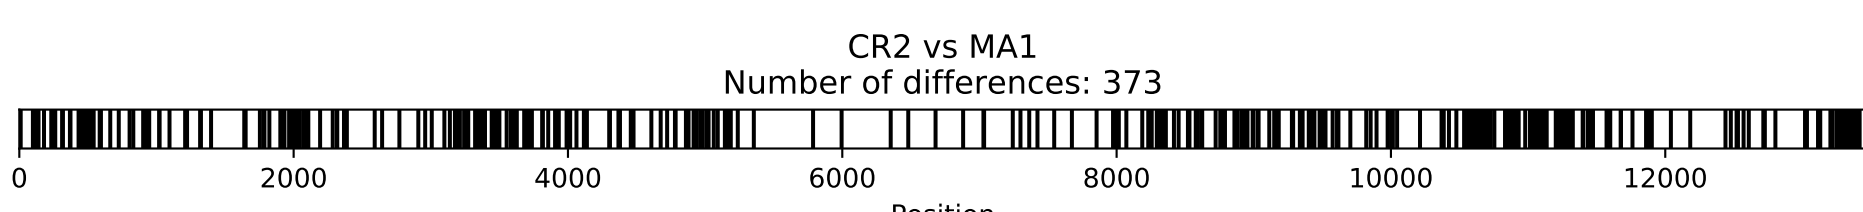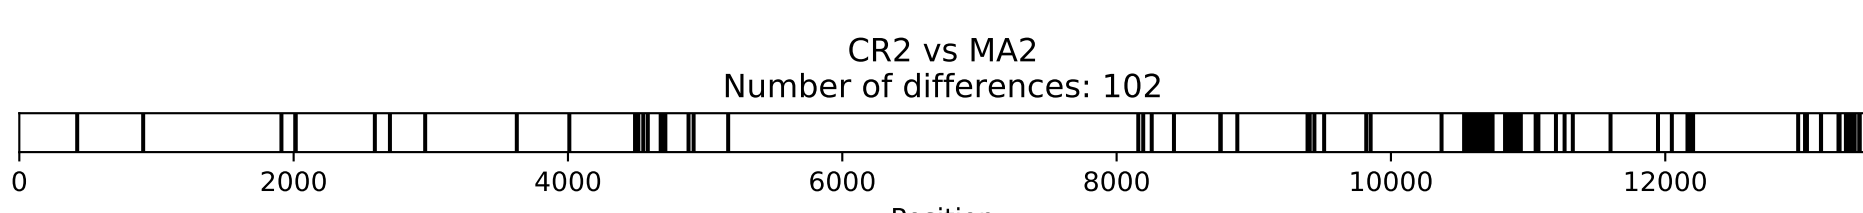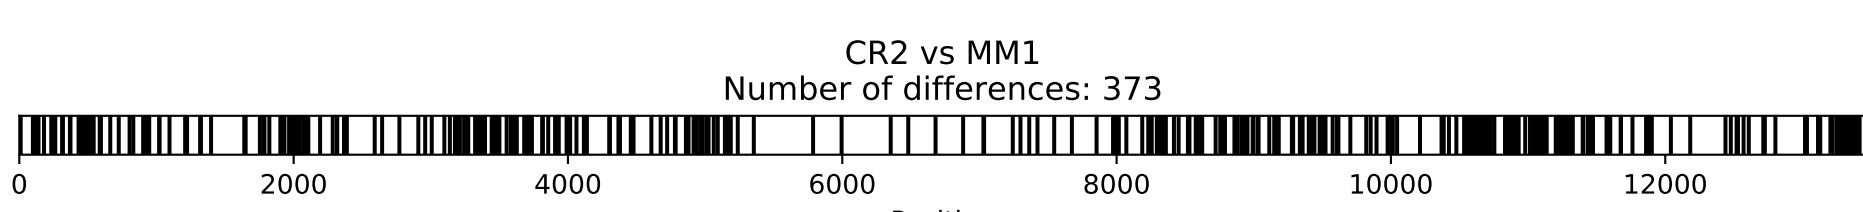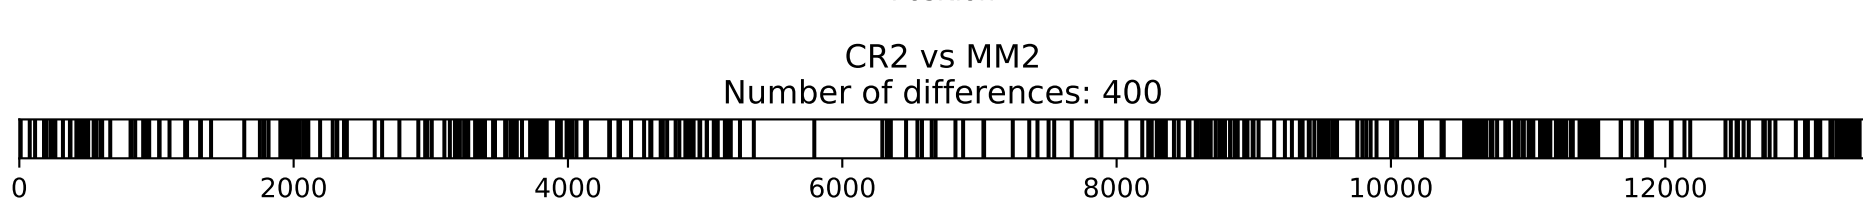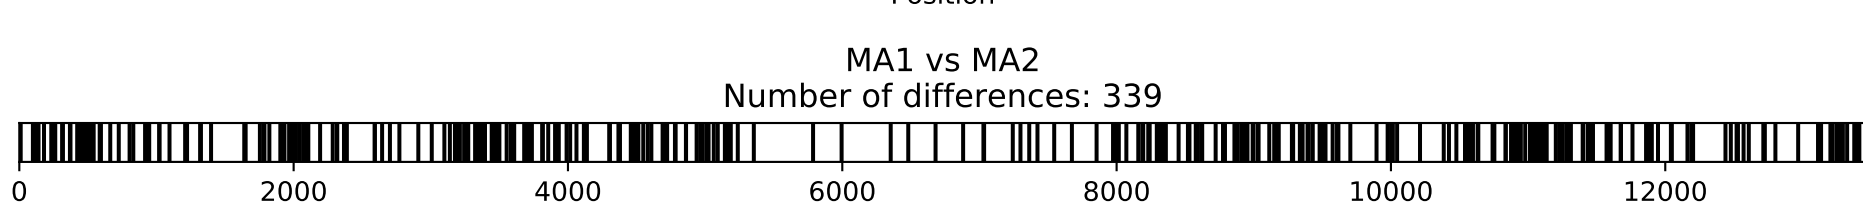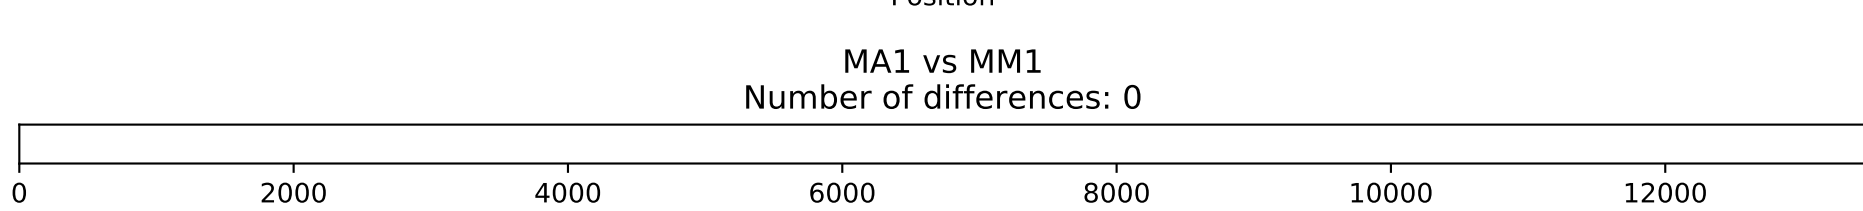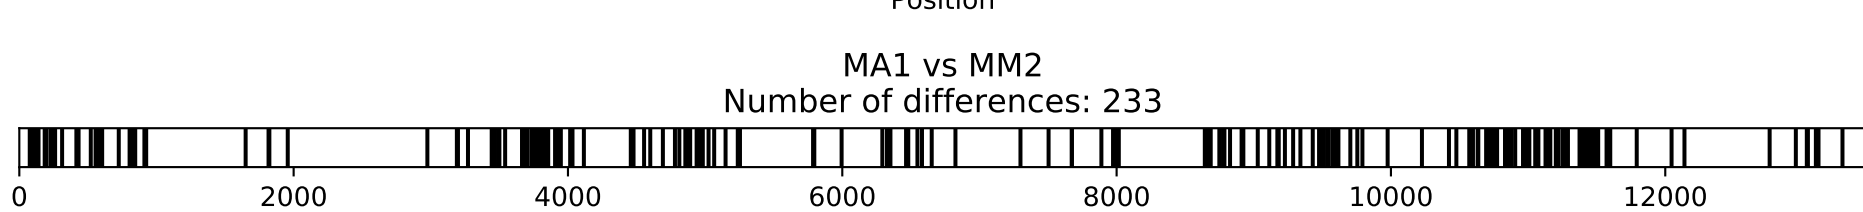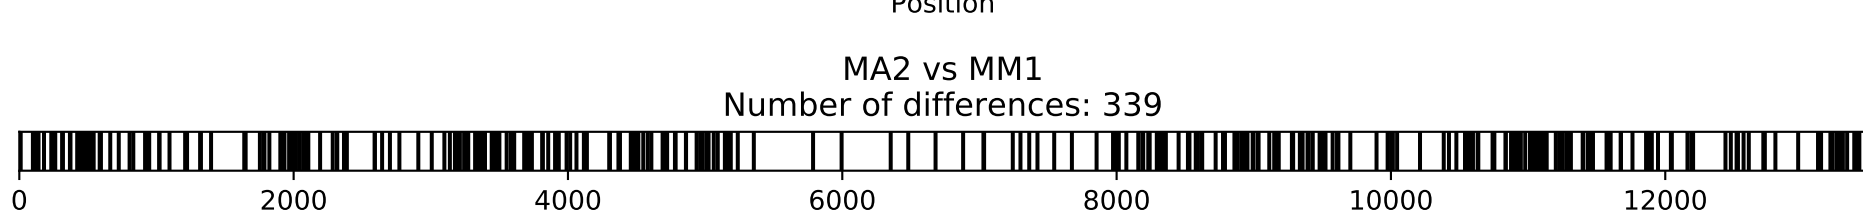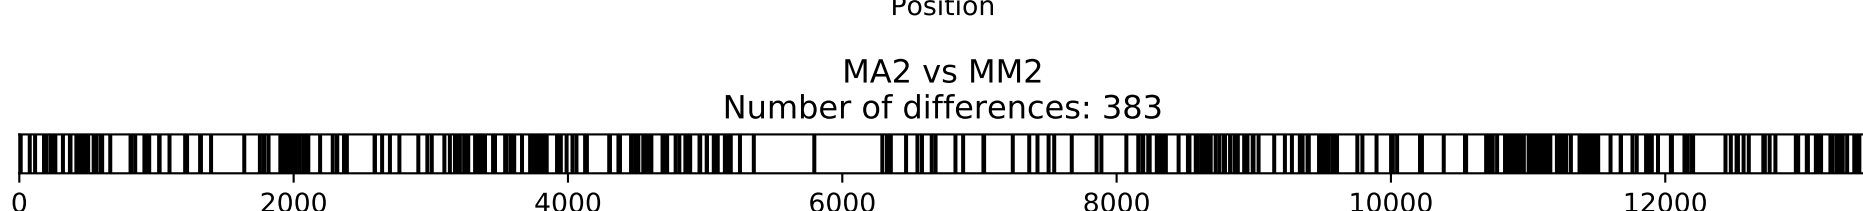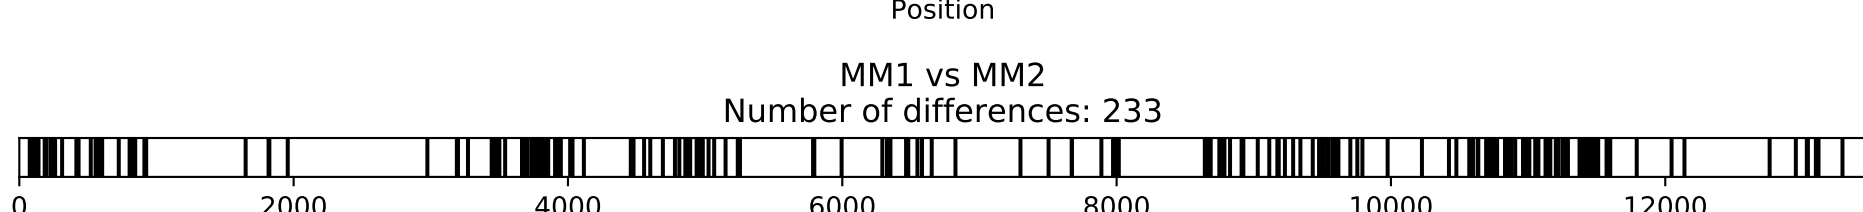

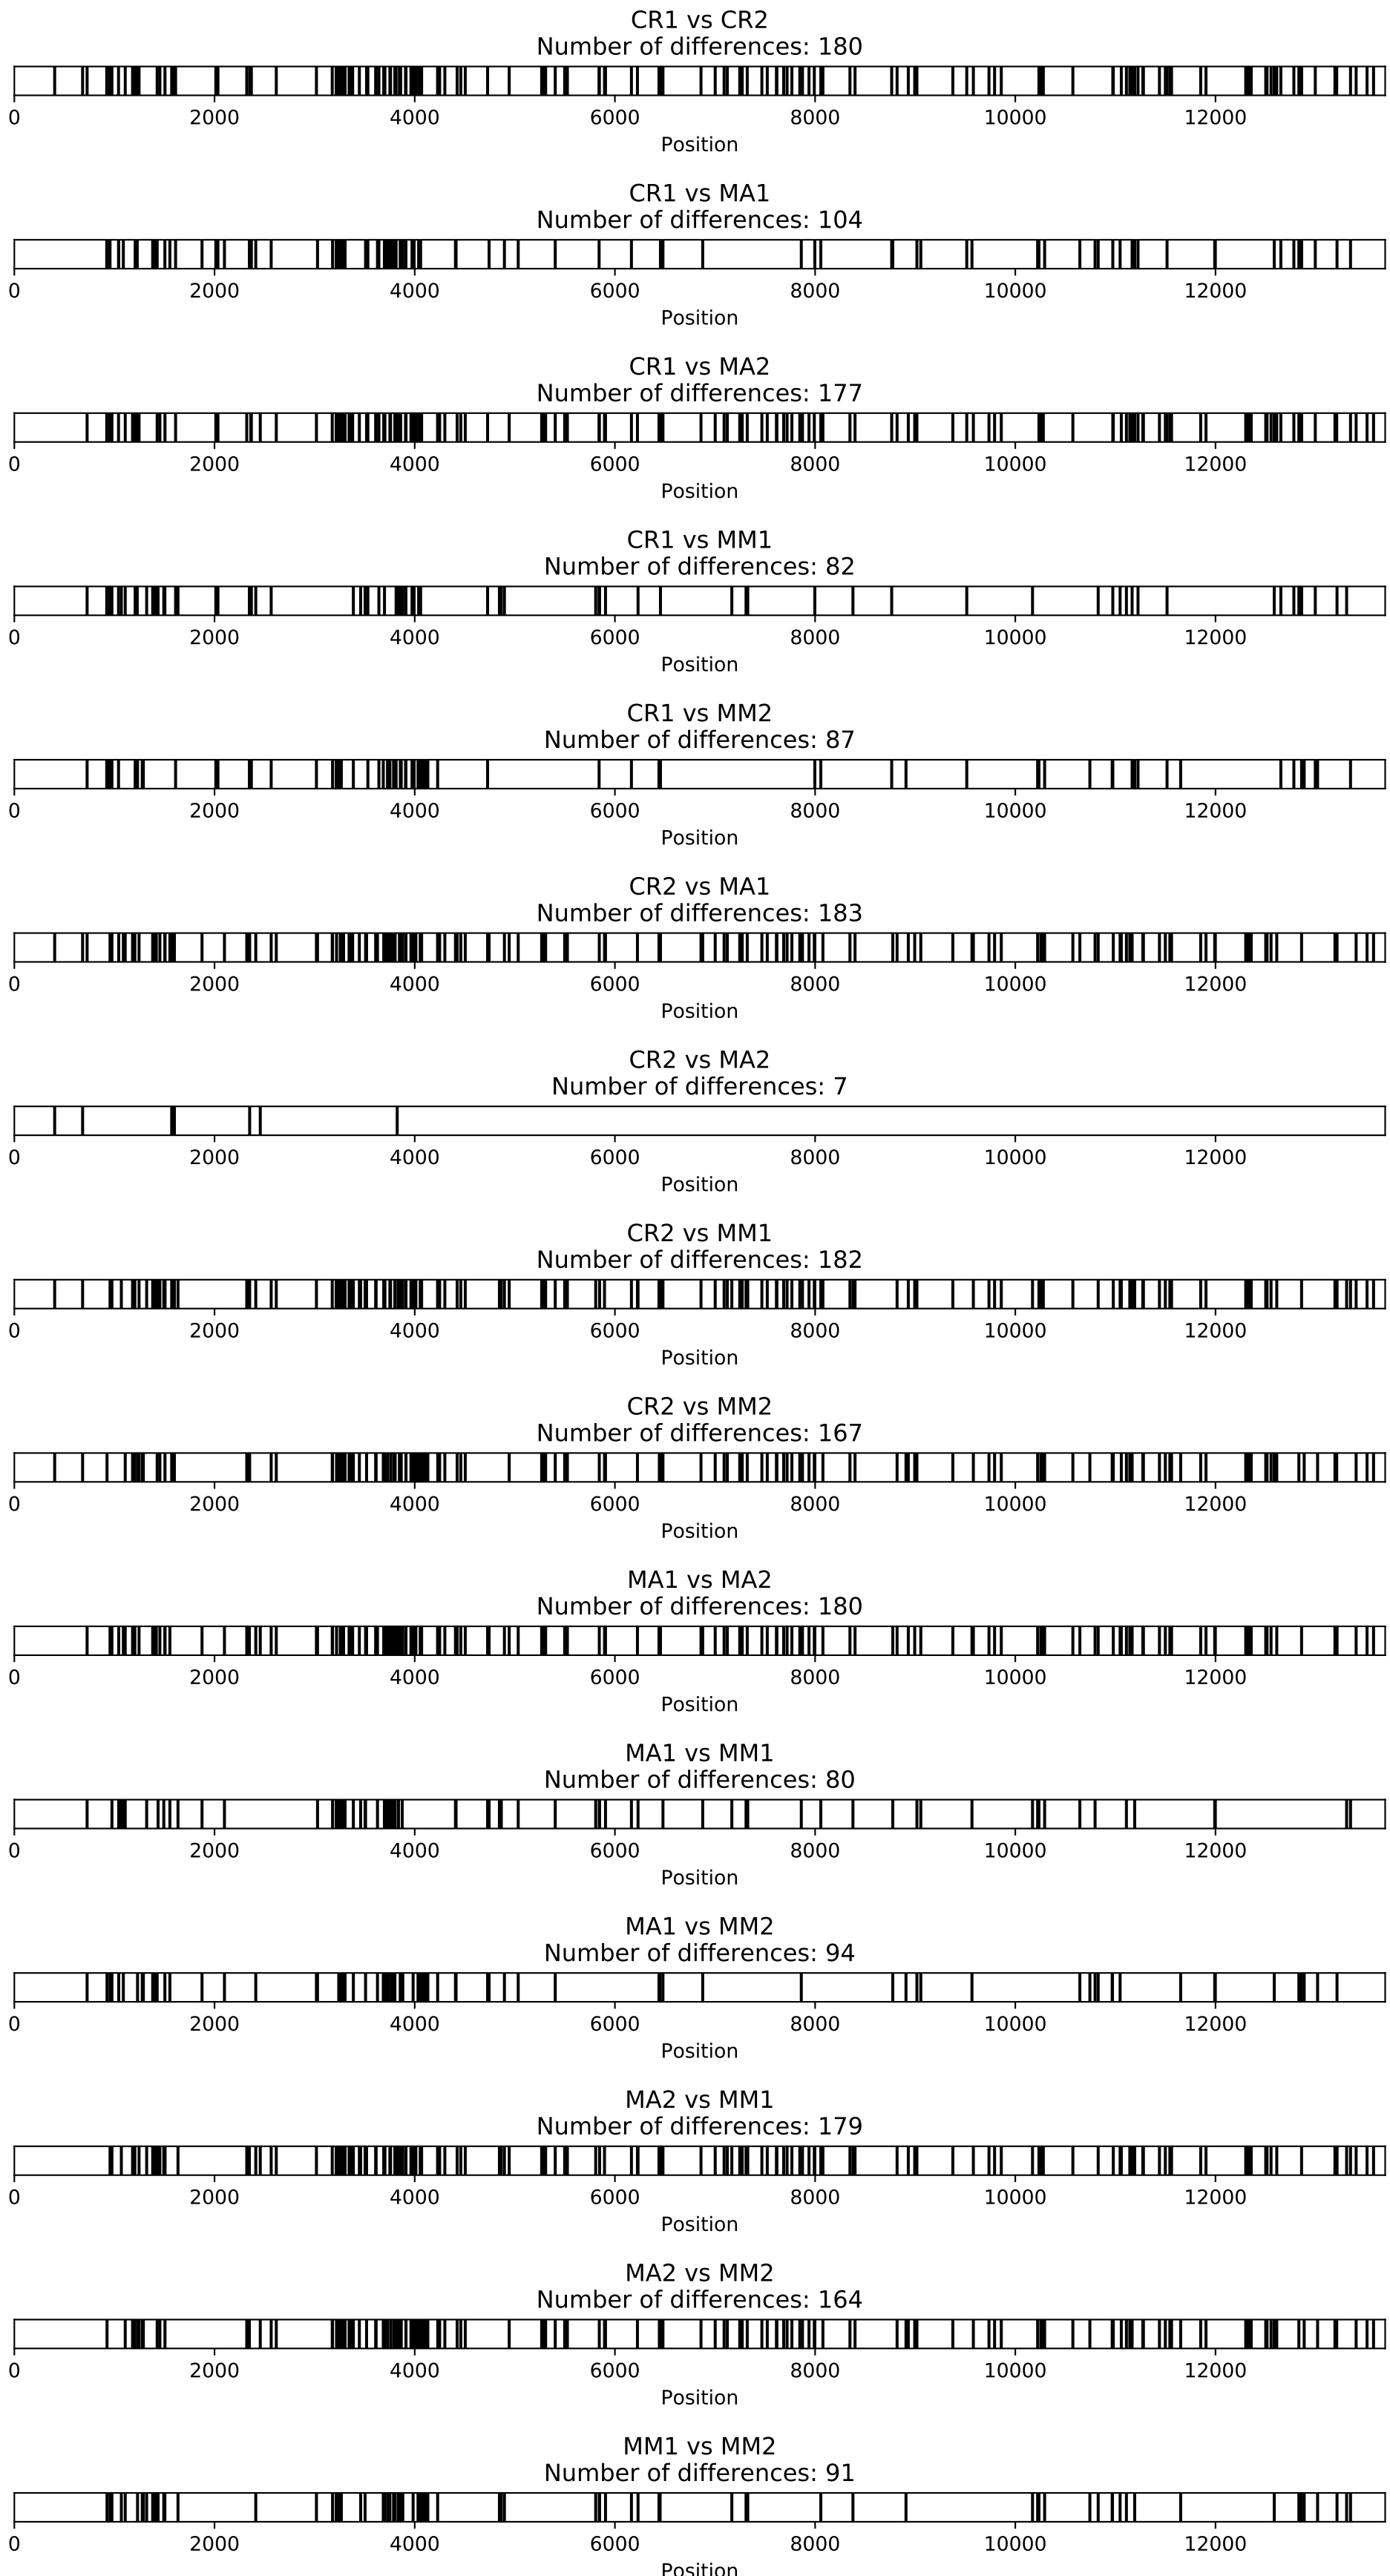

# Region: 81

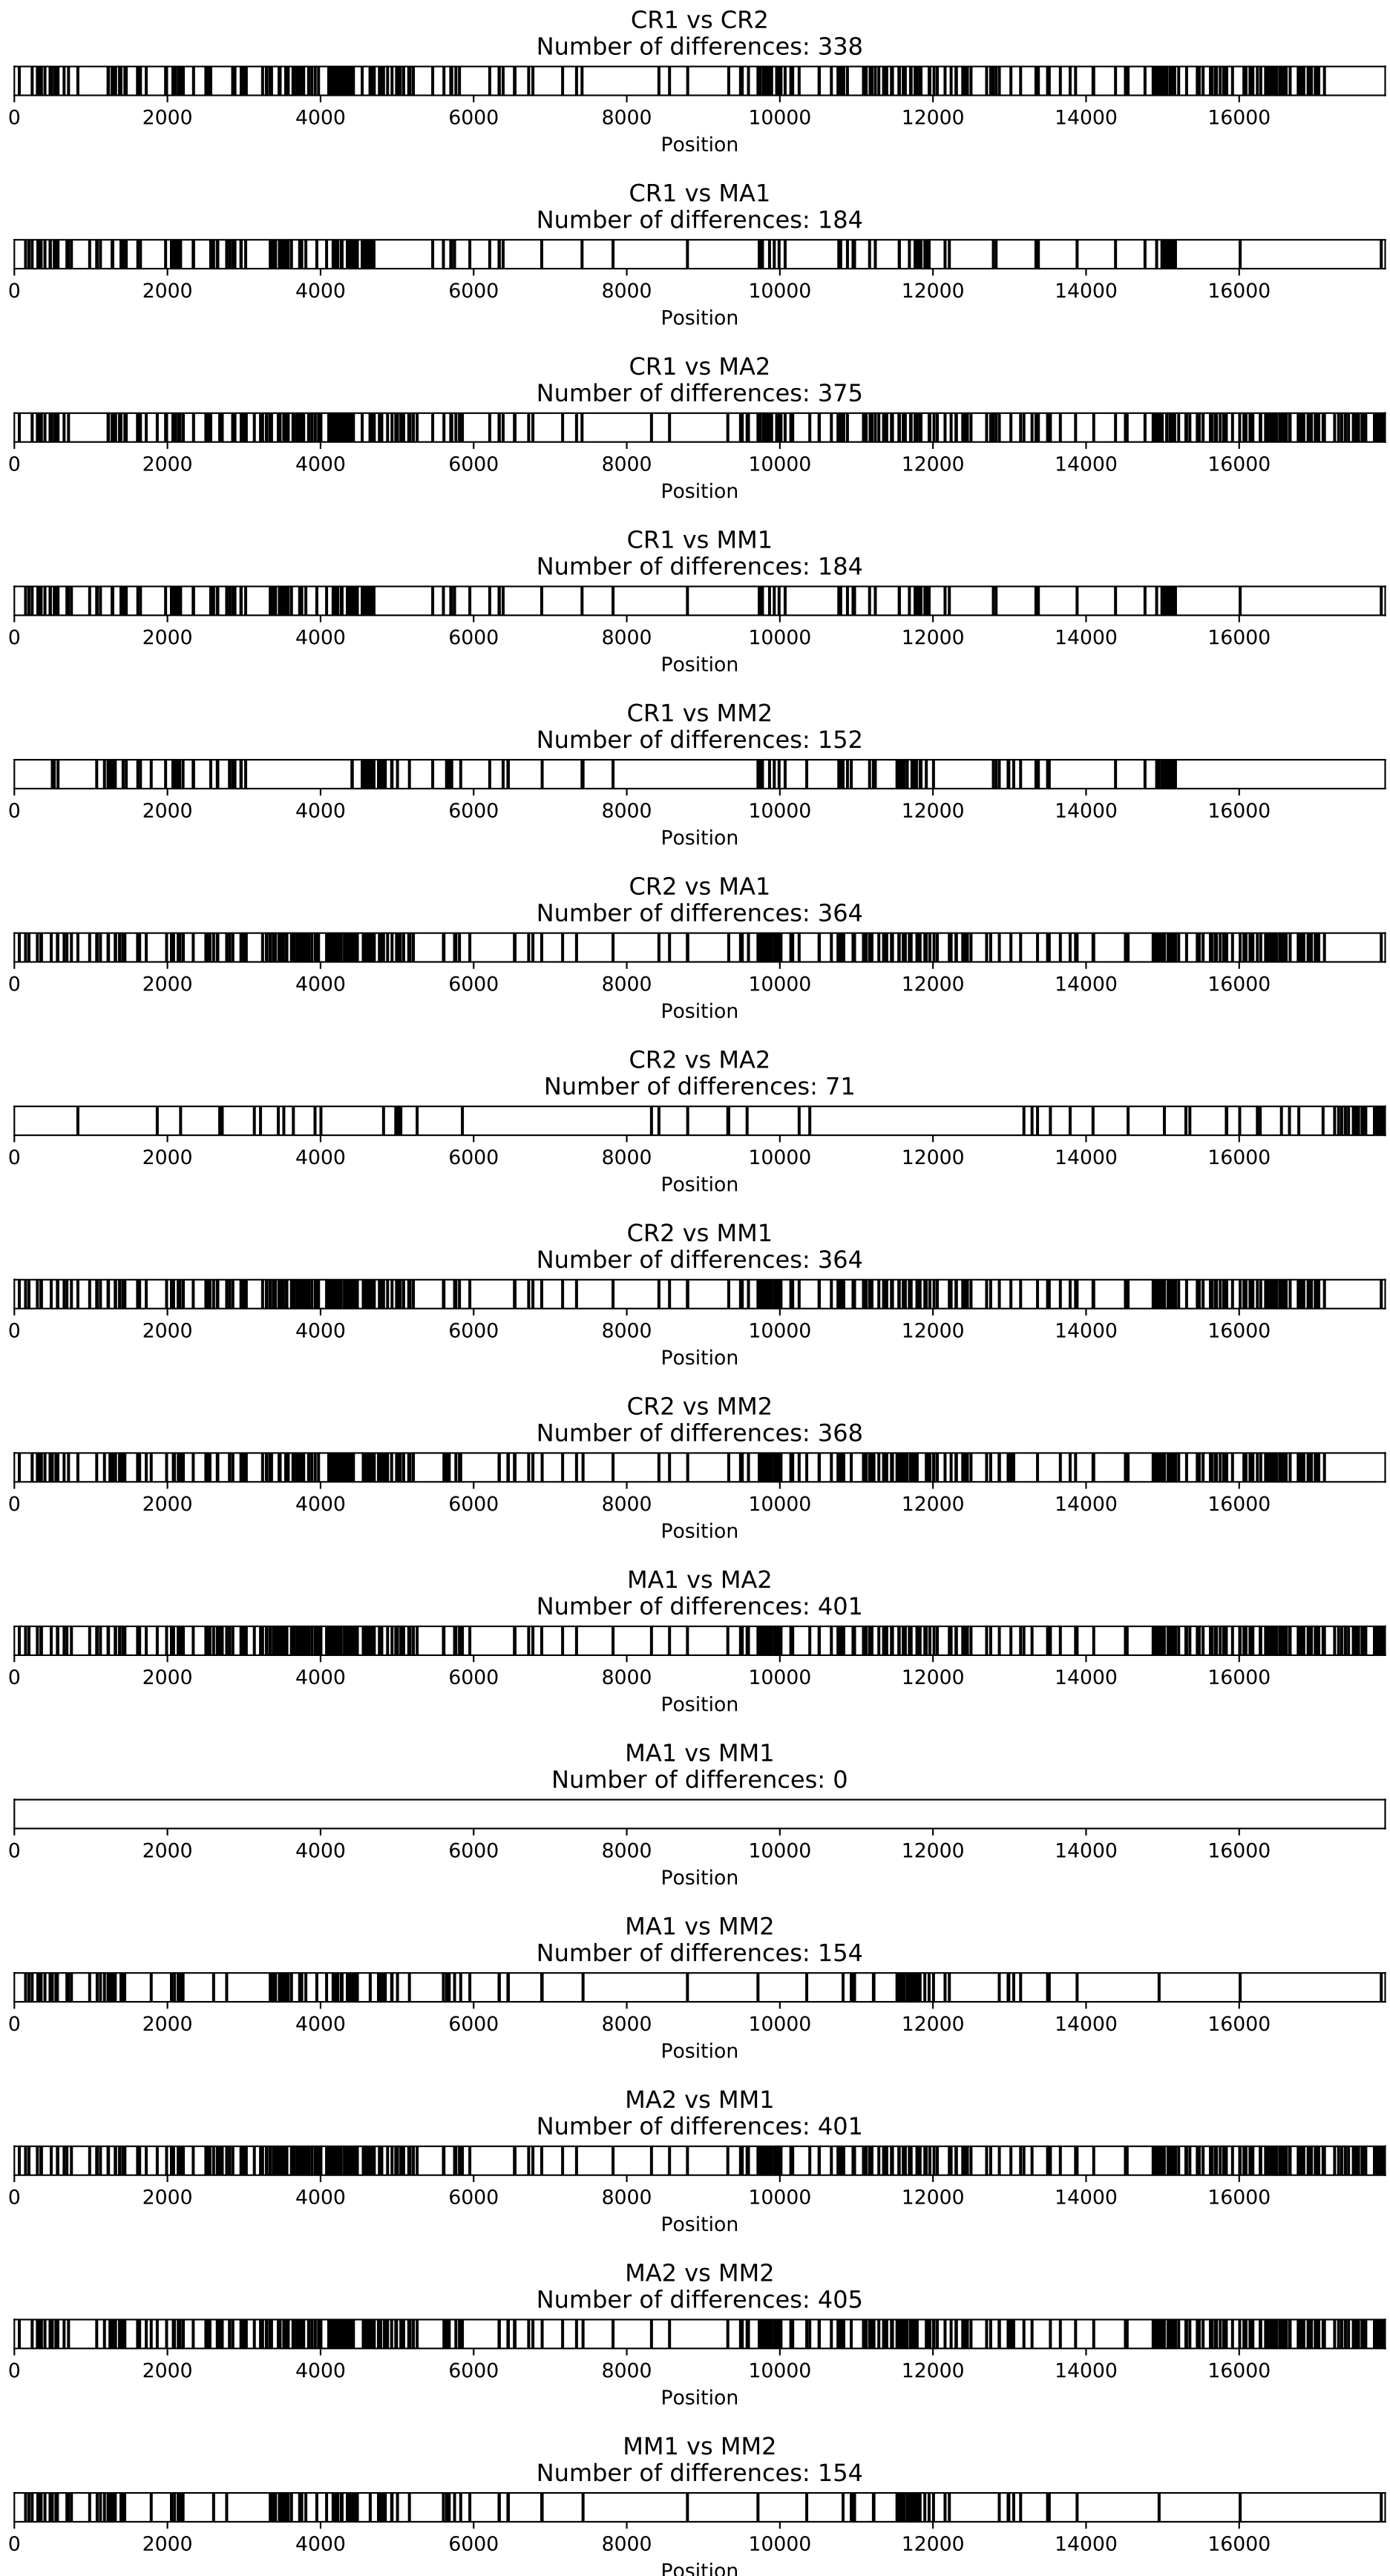

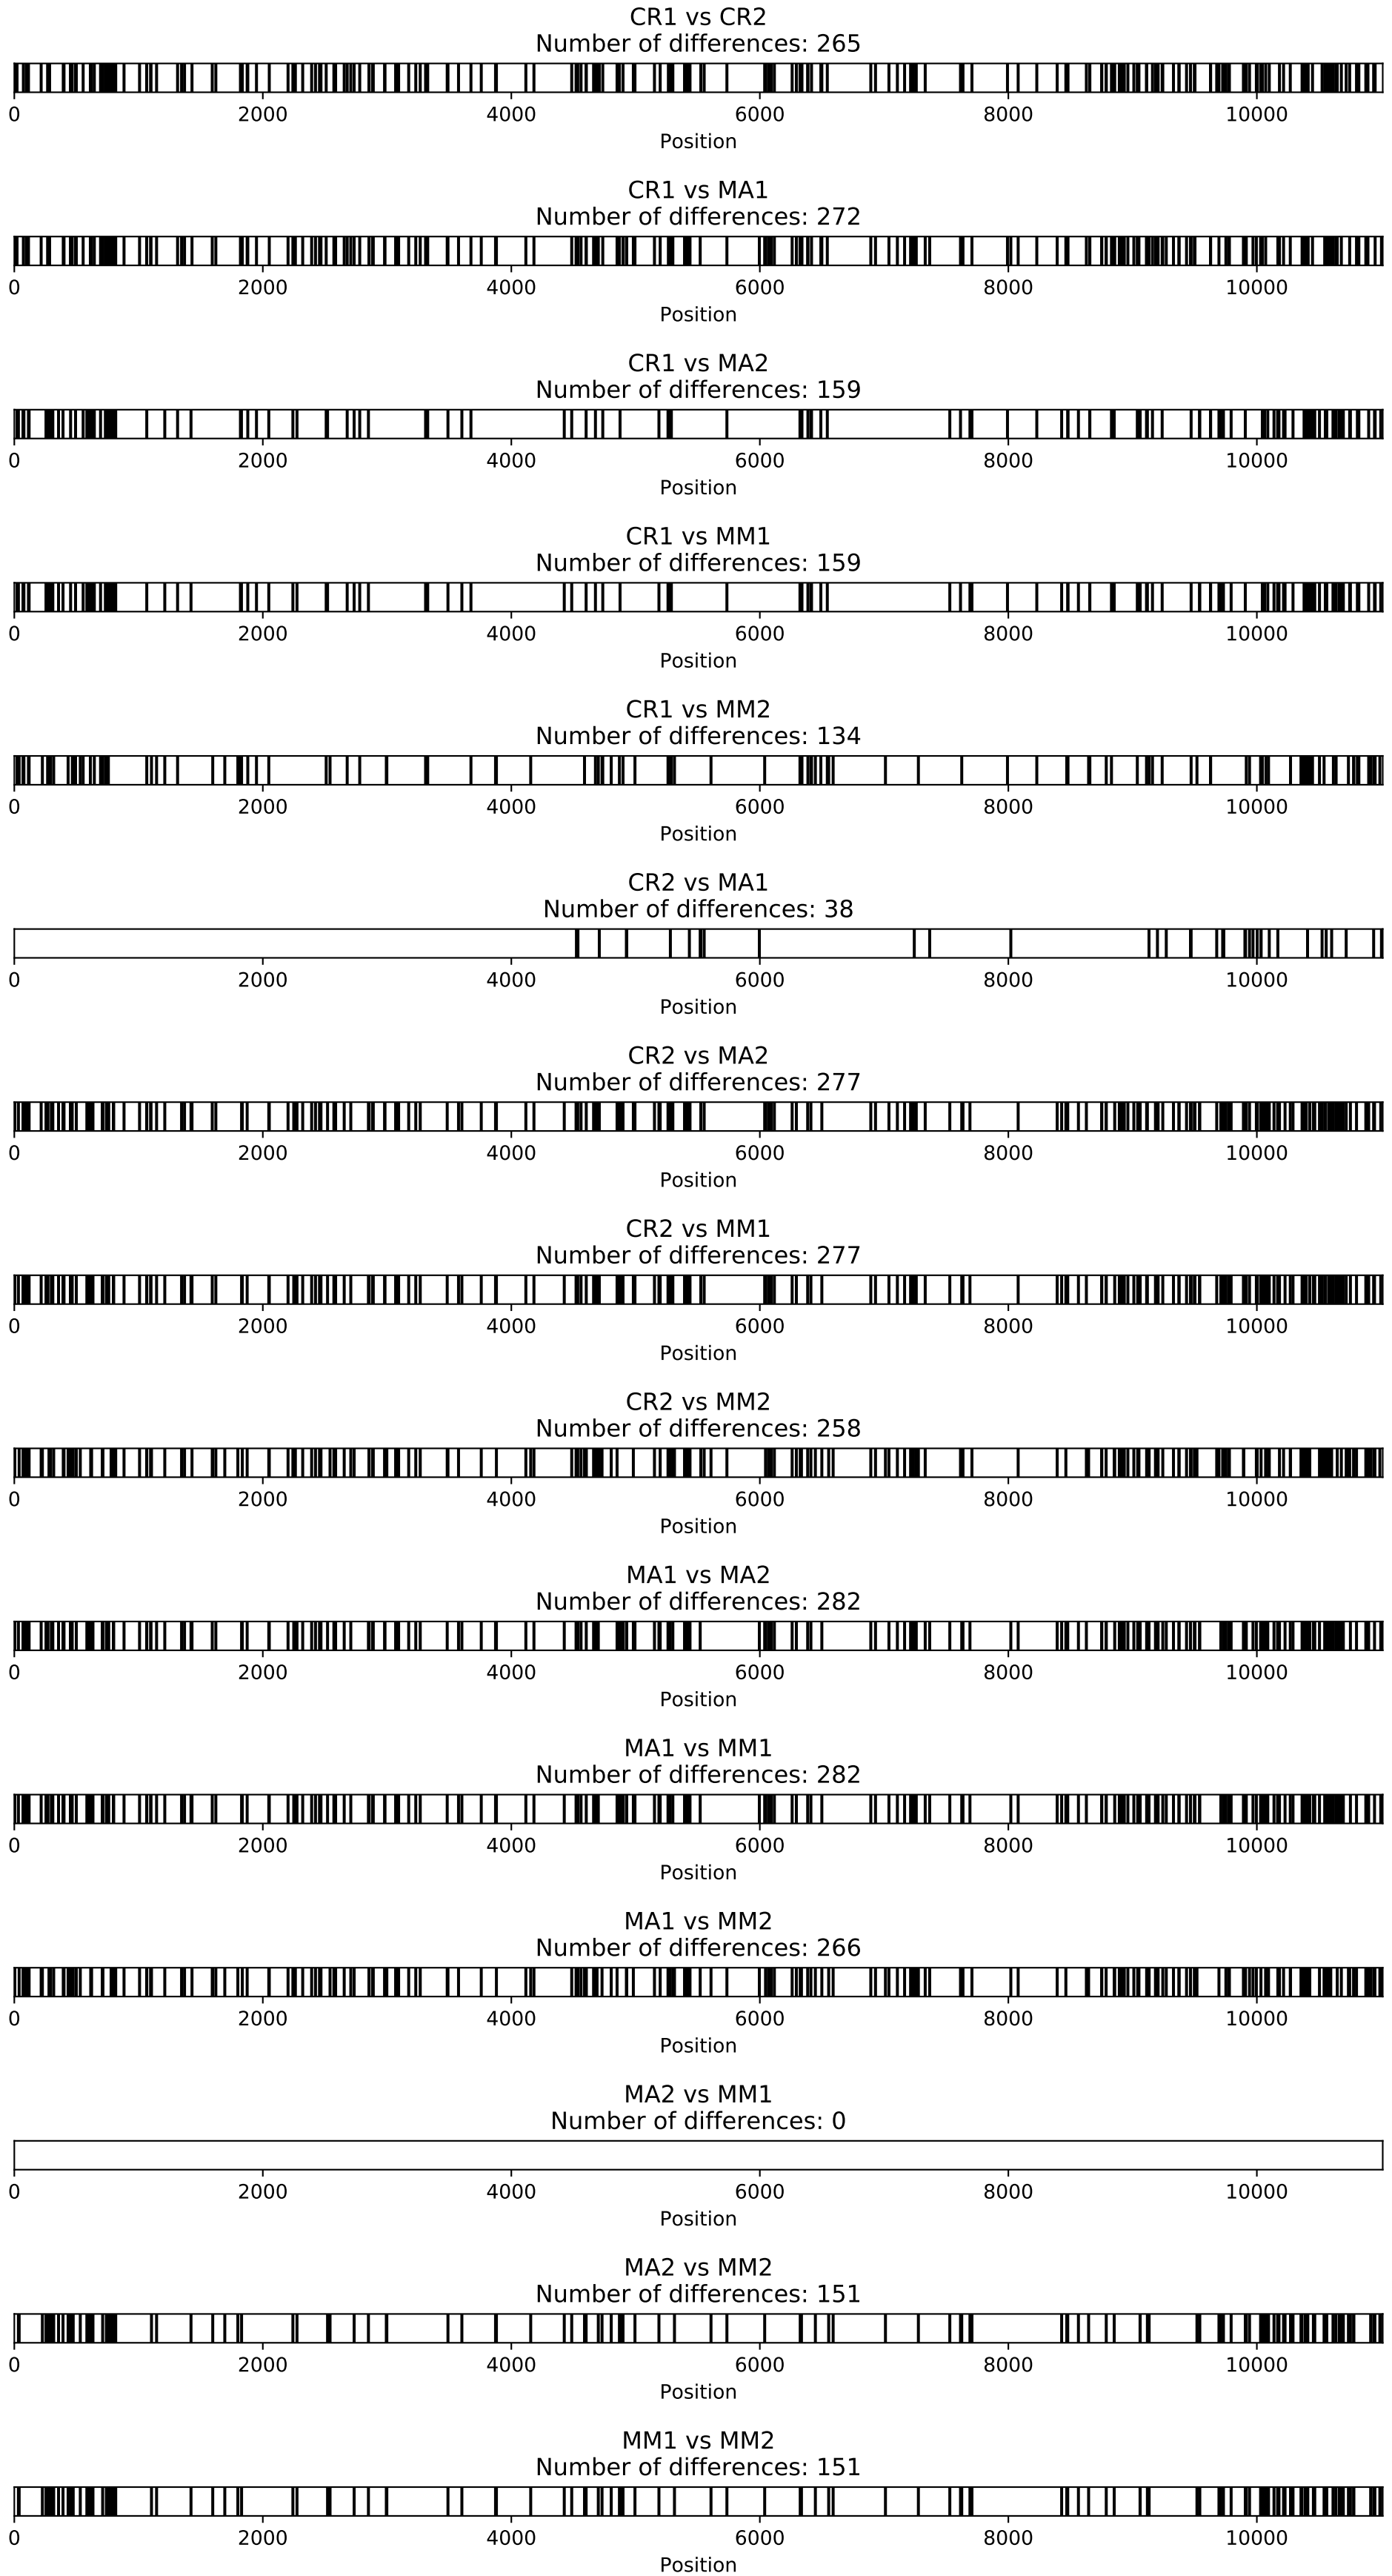



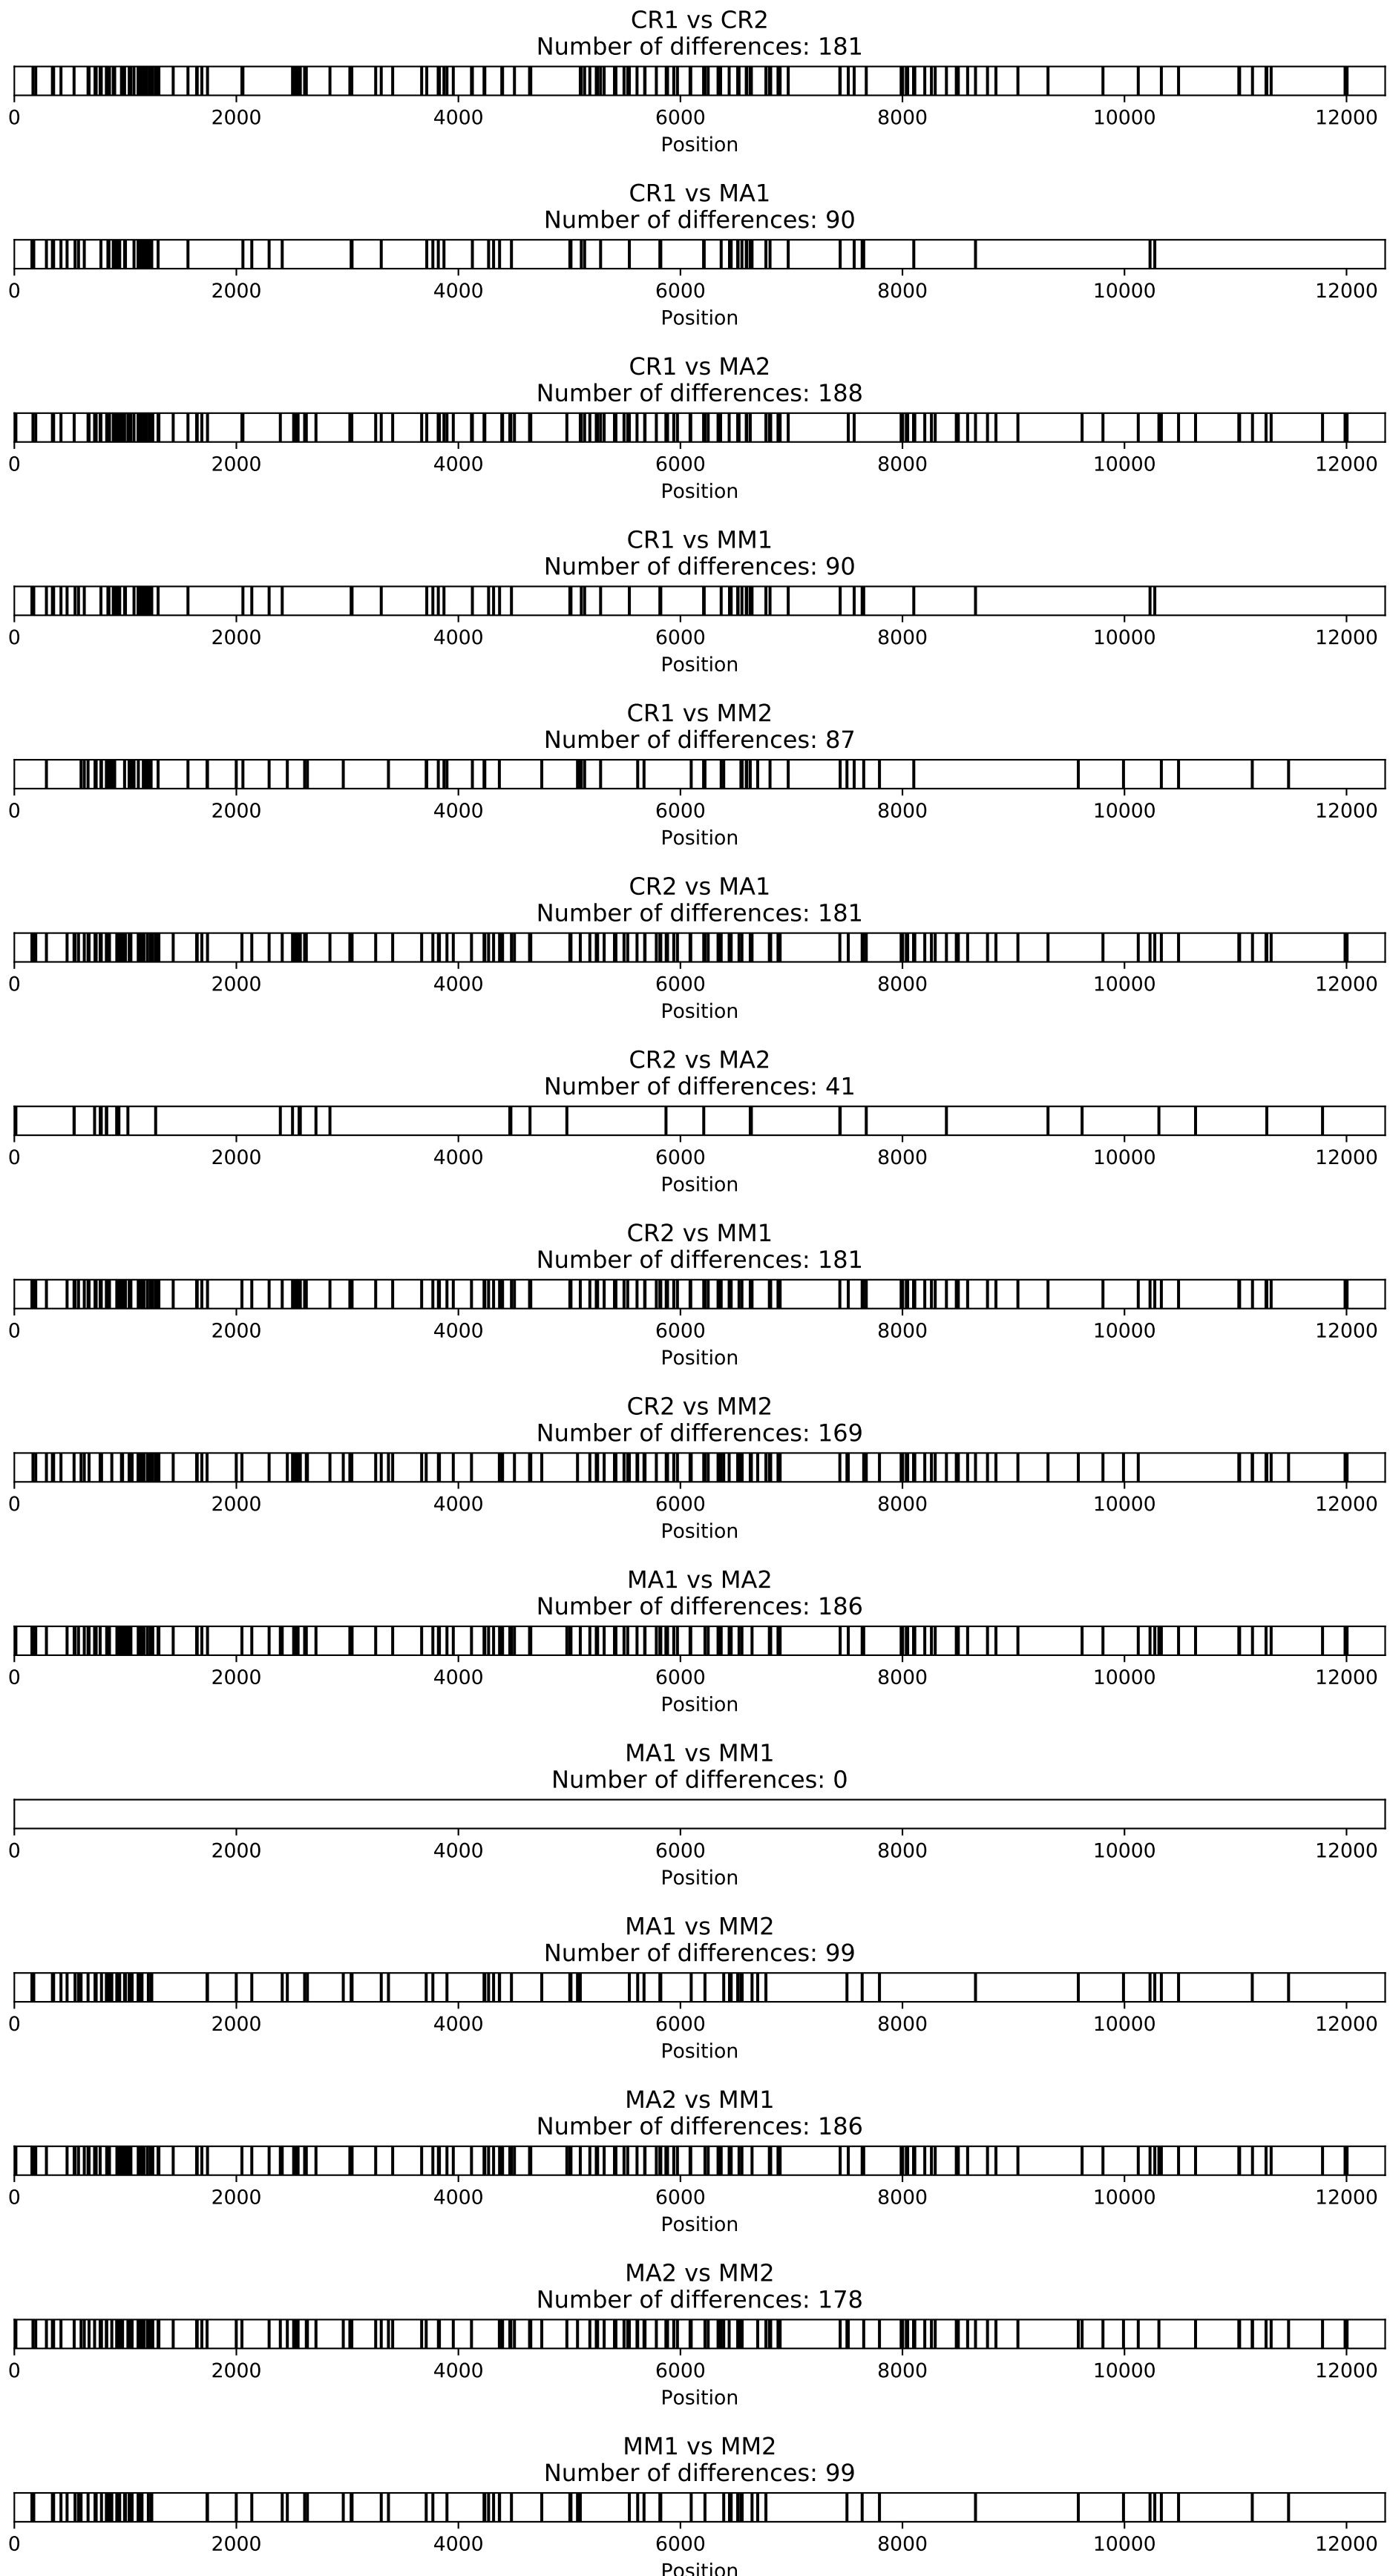

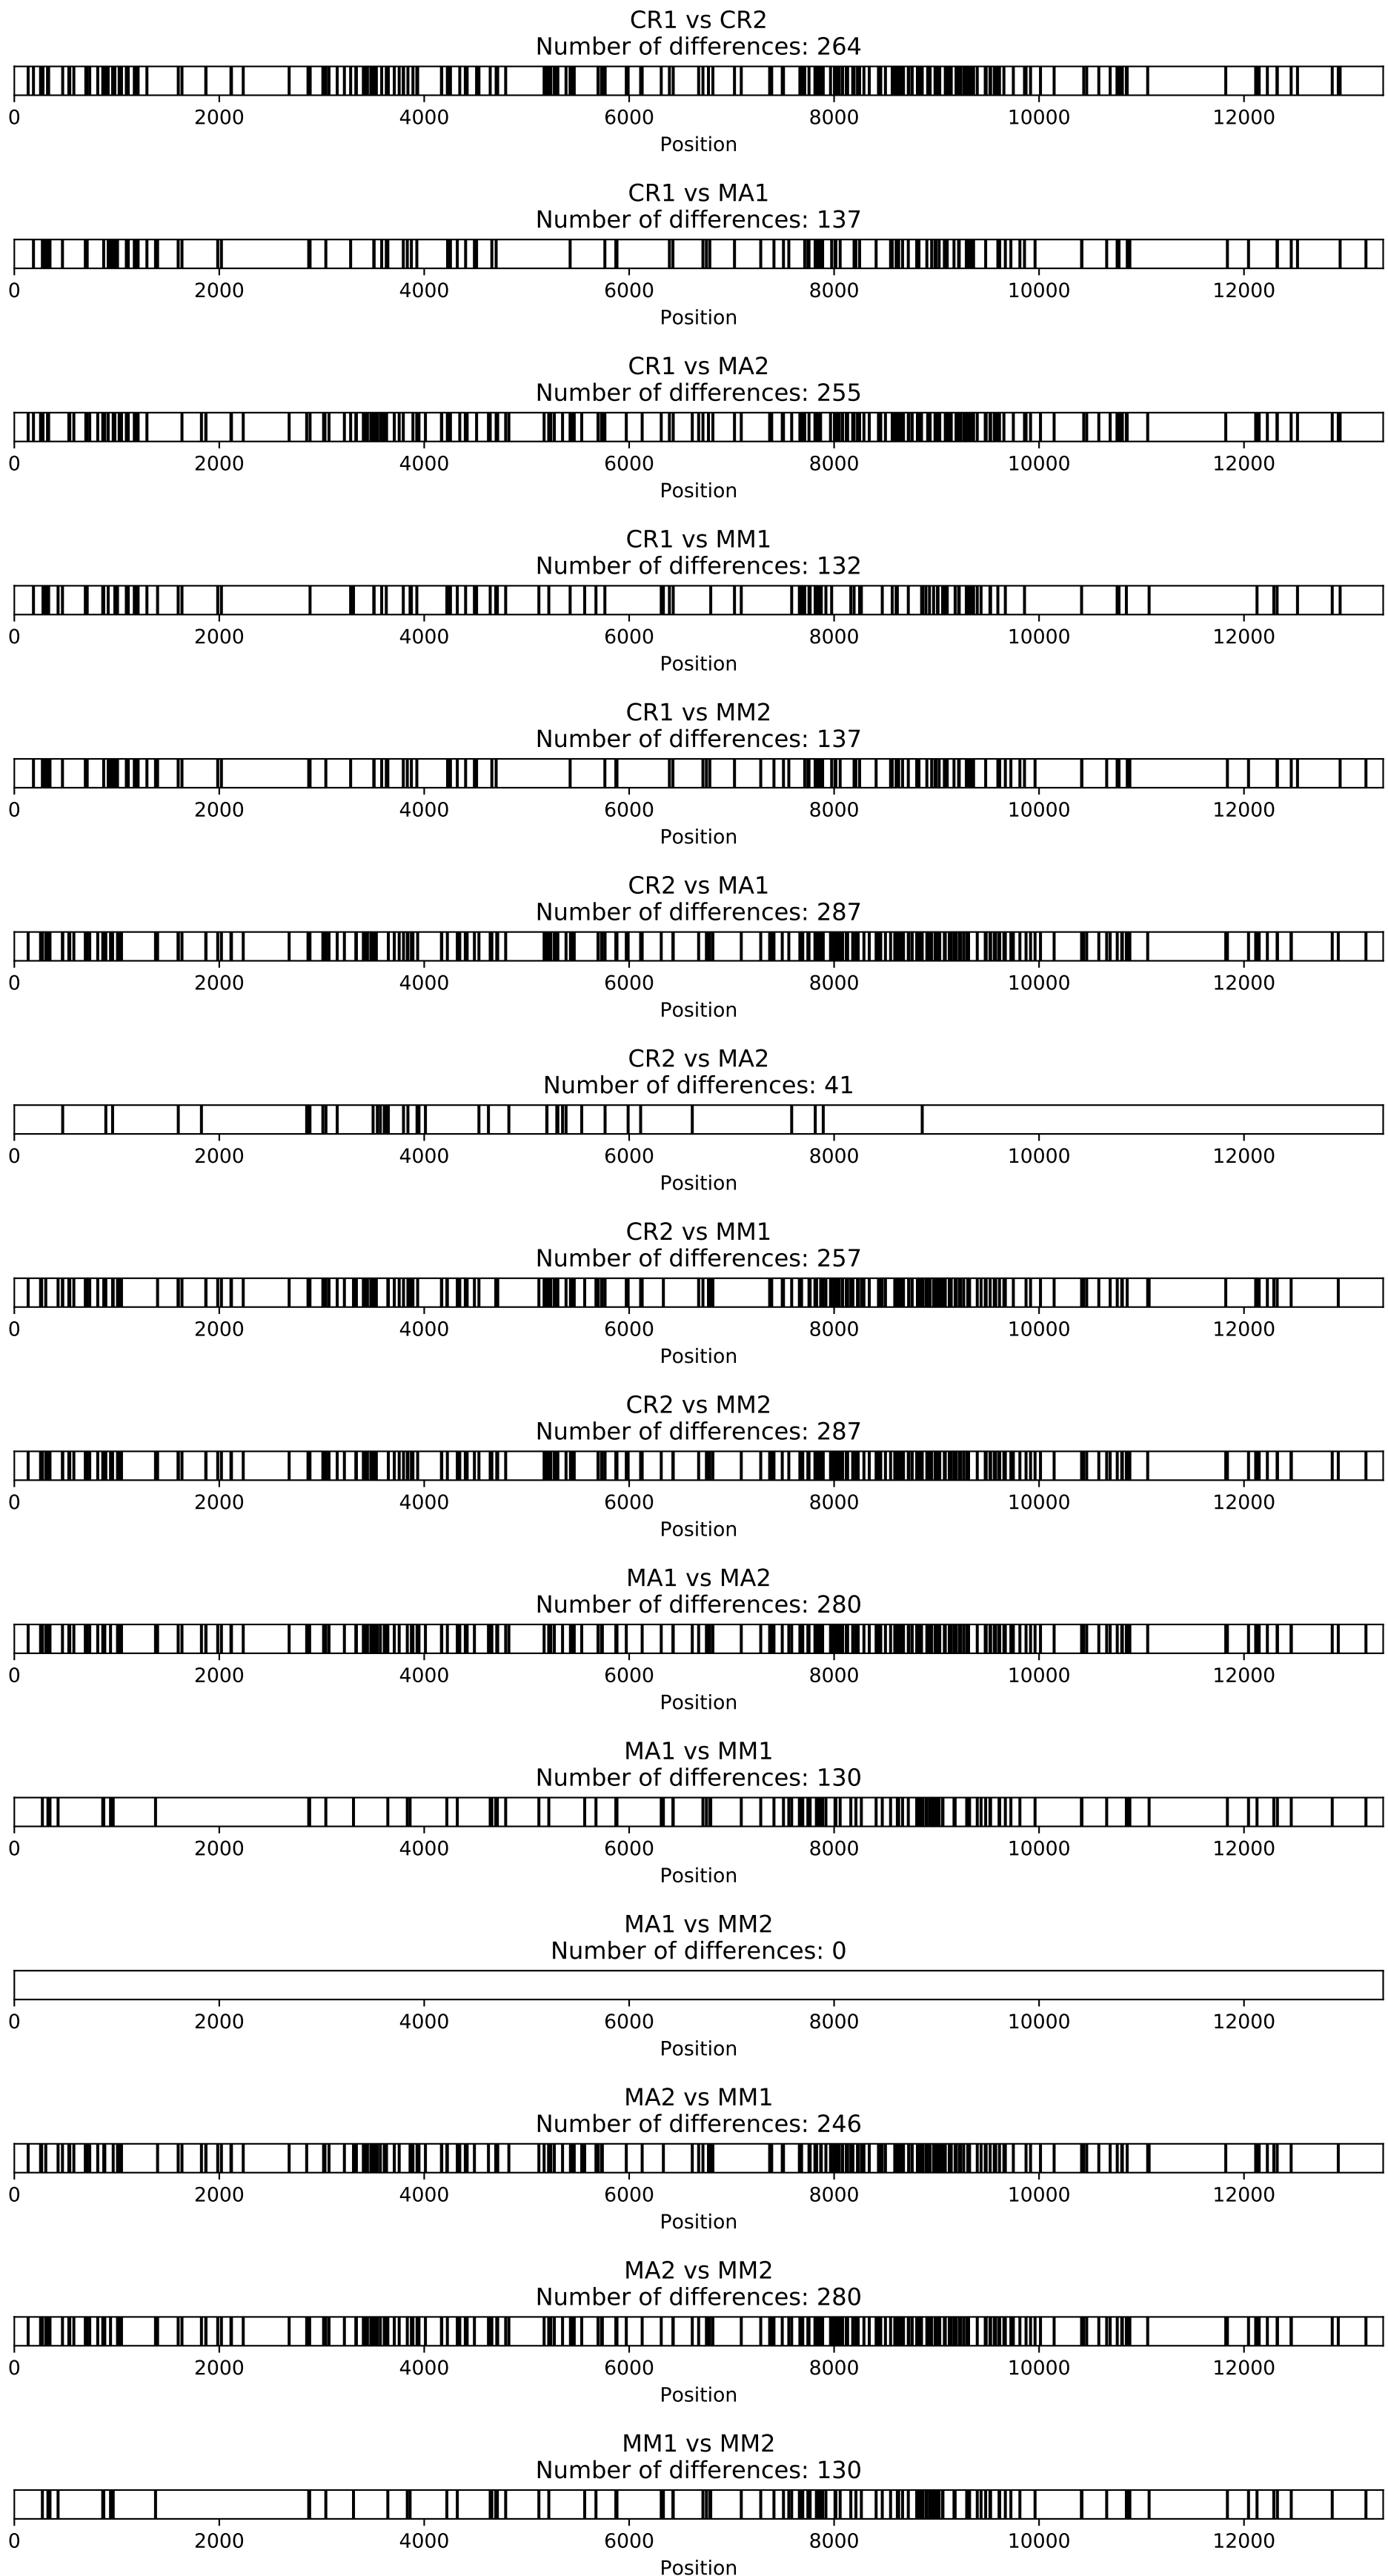

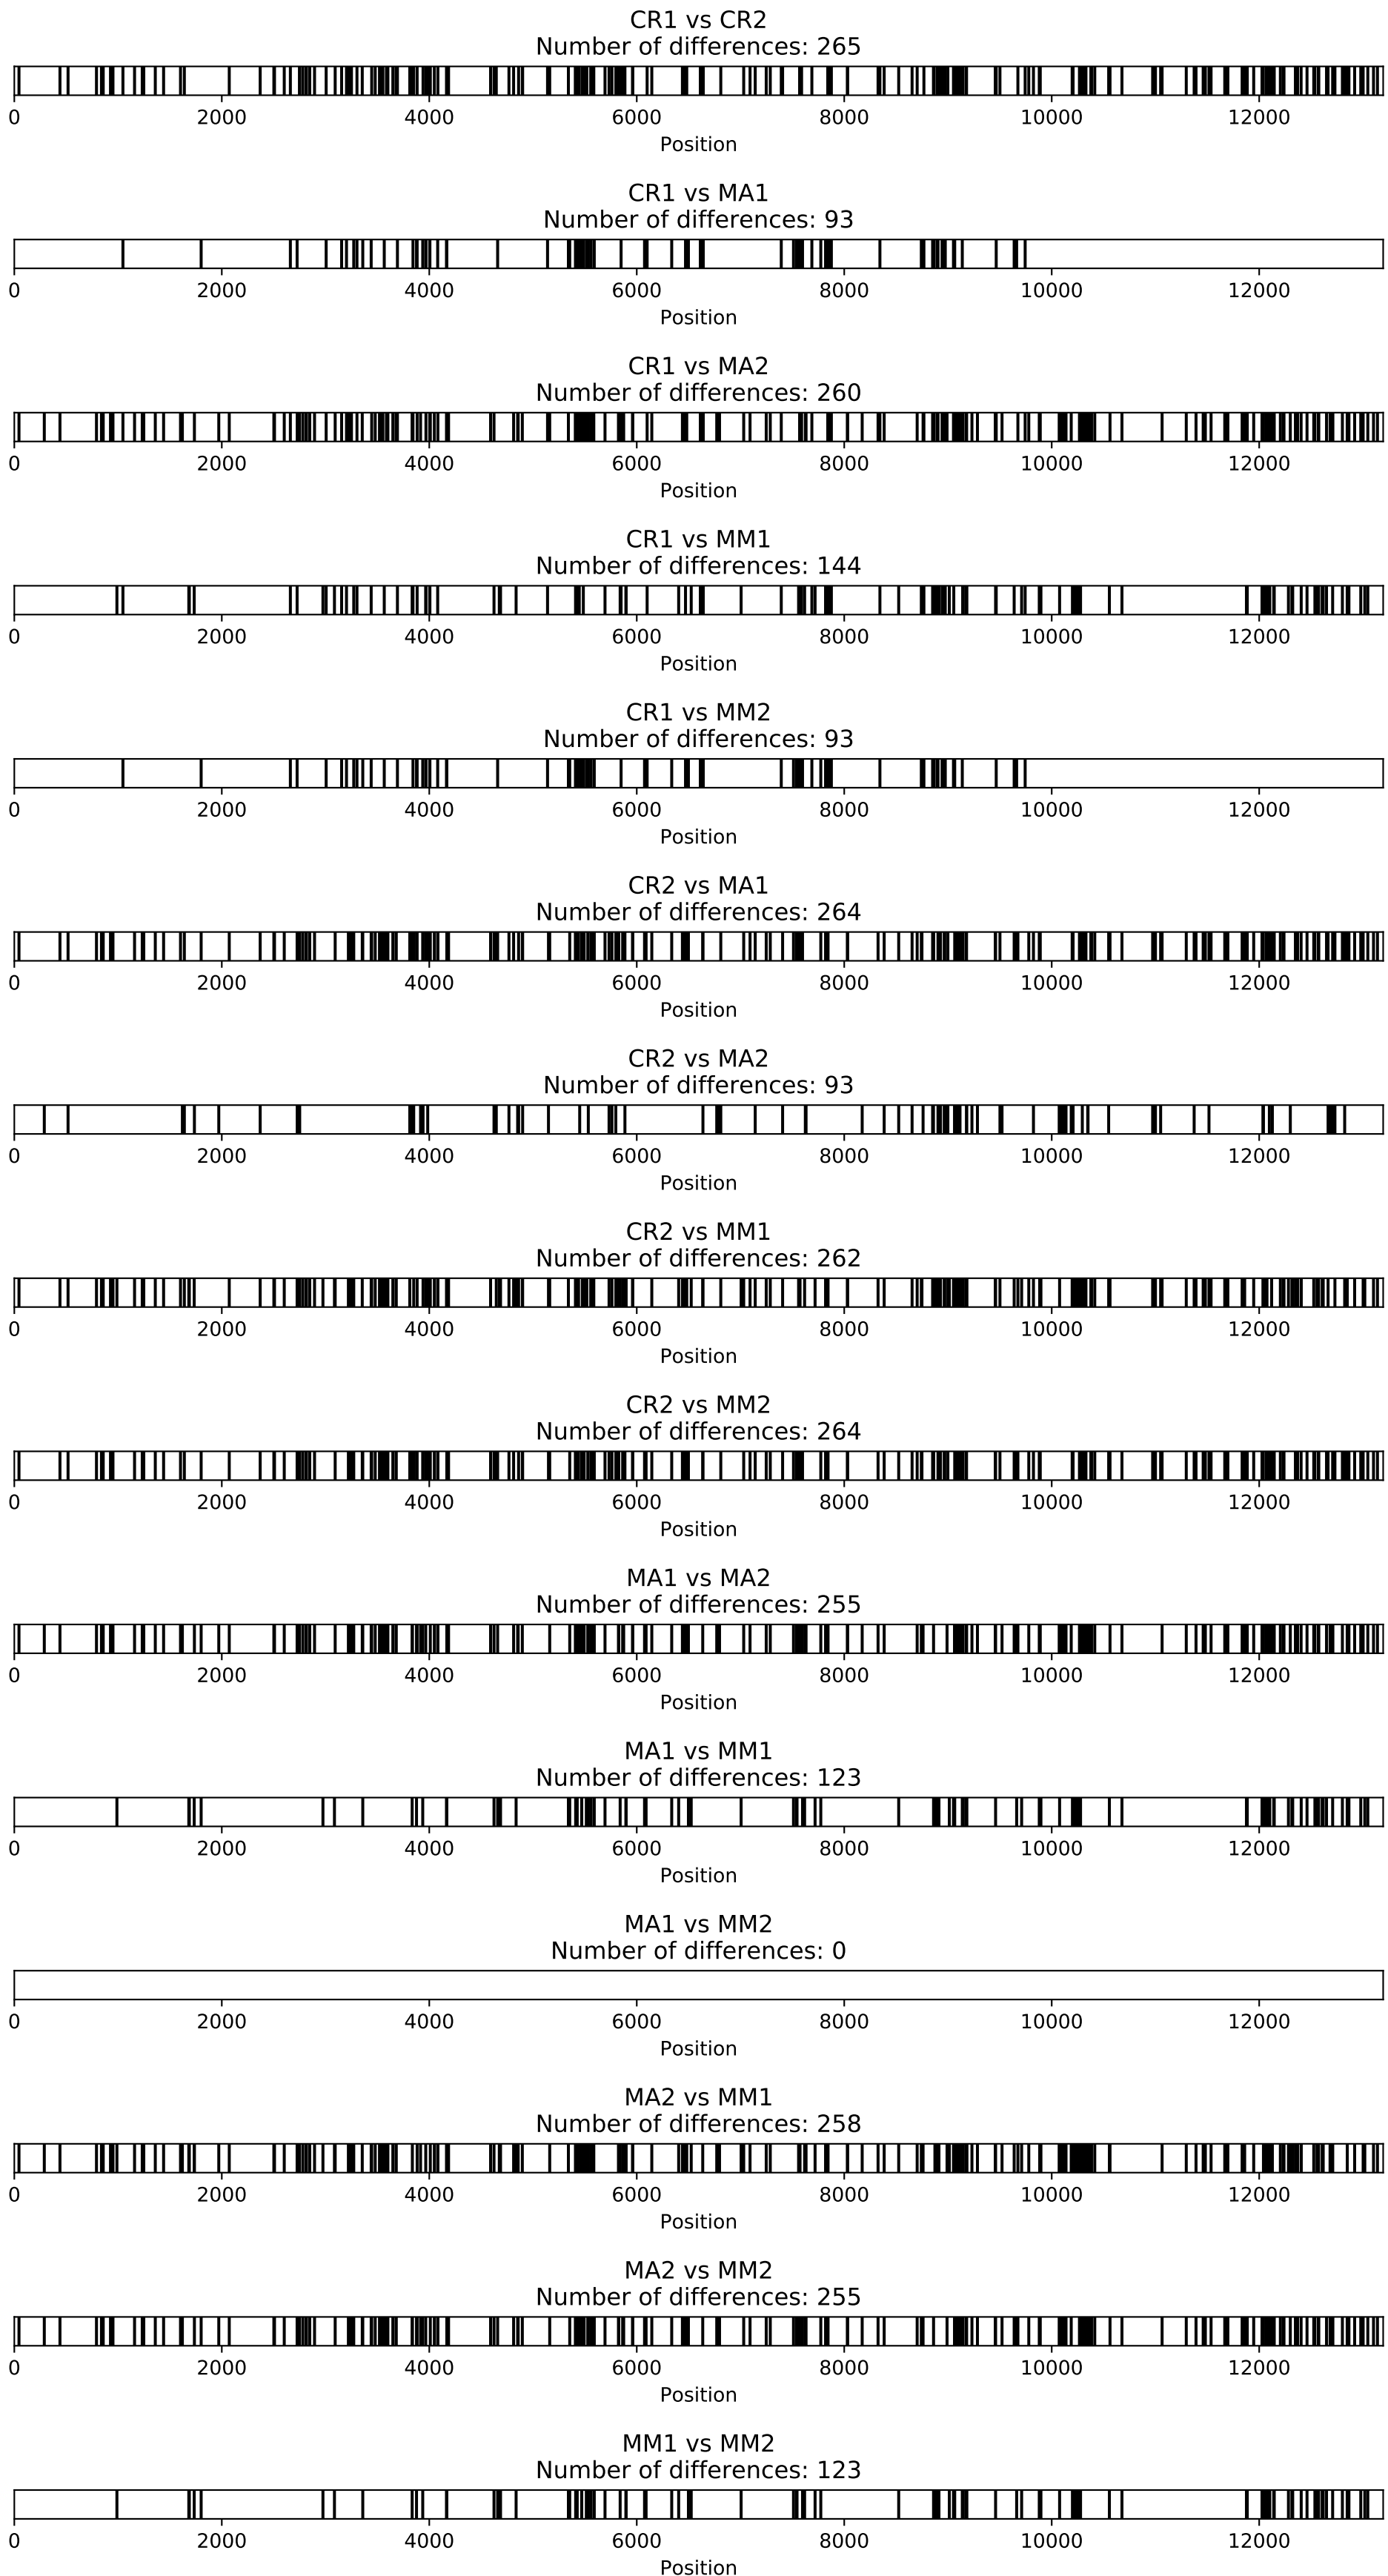

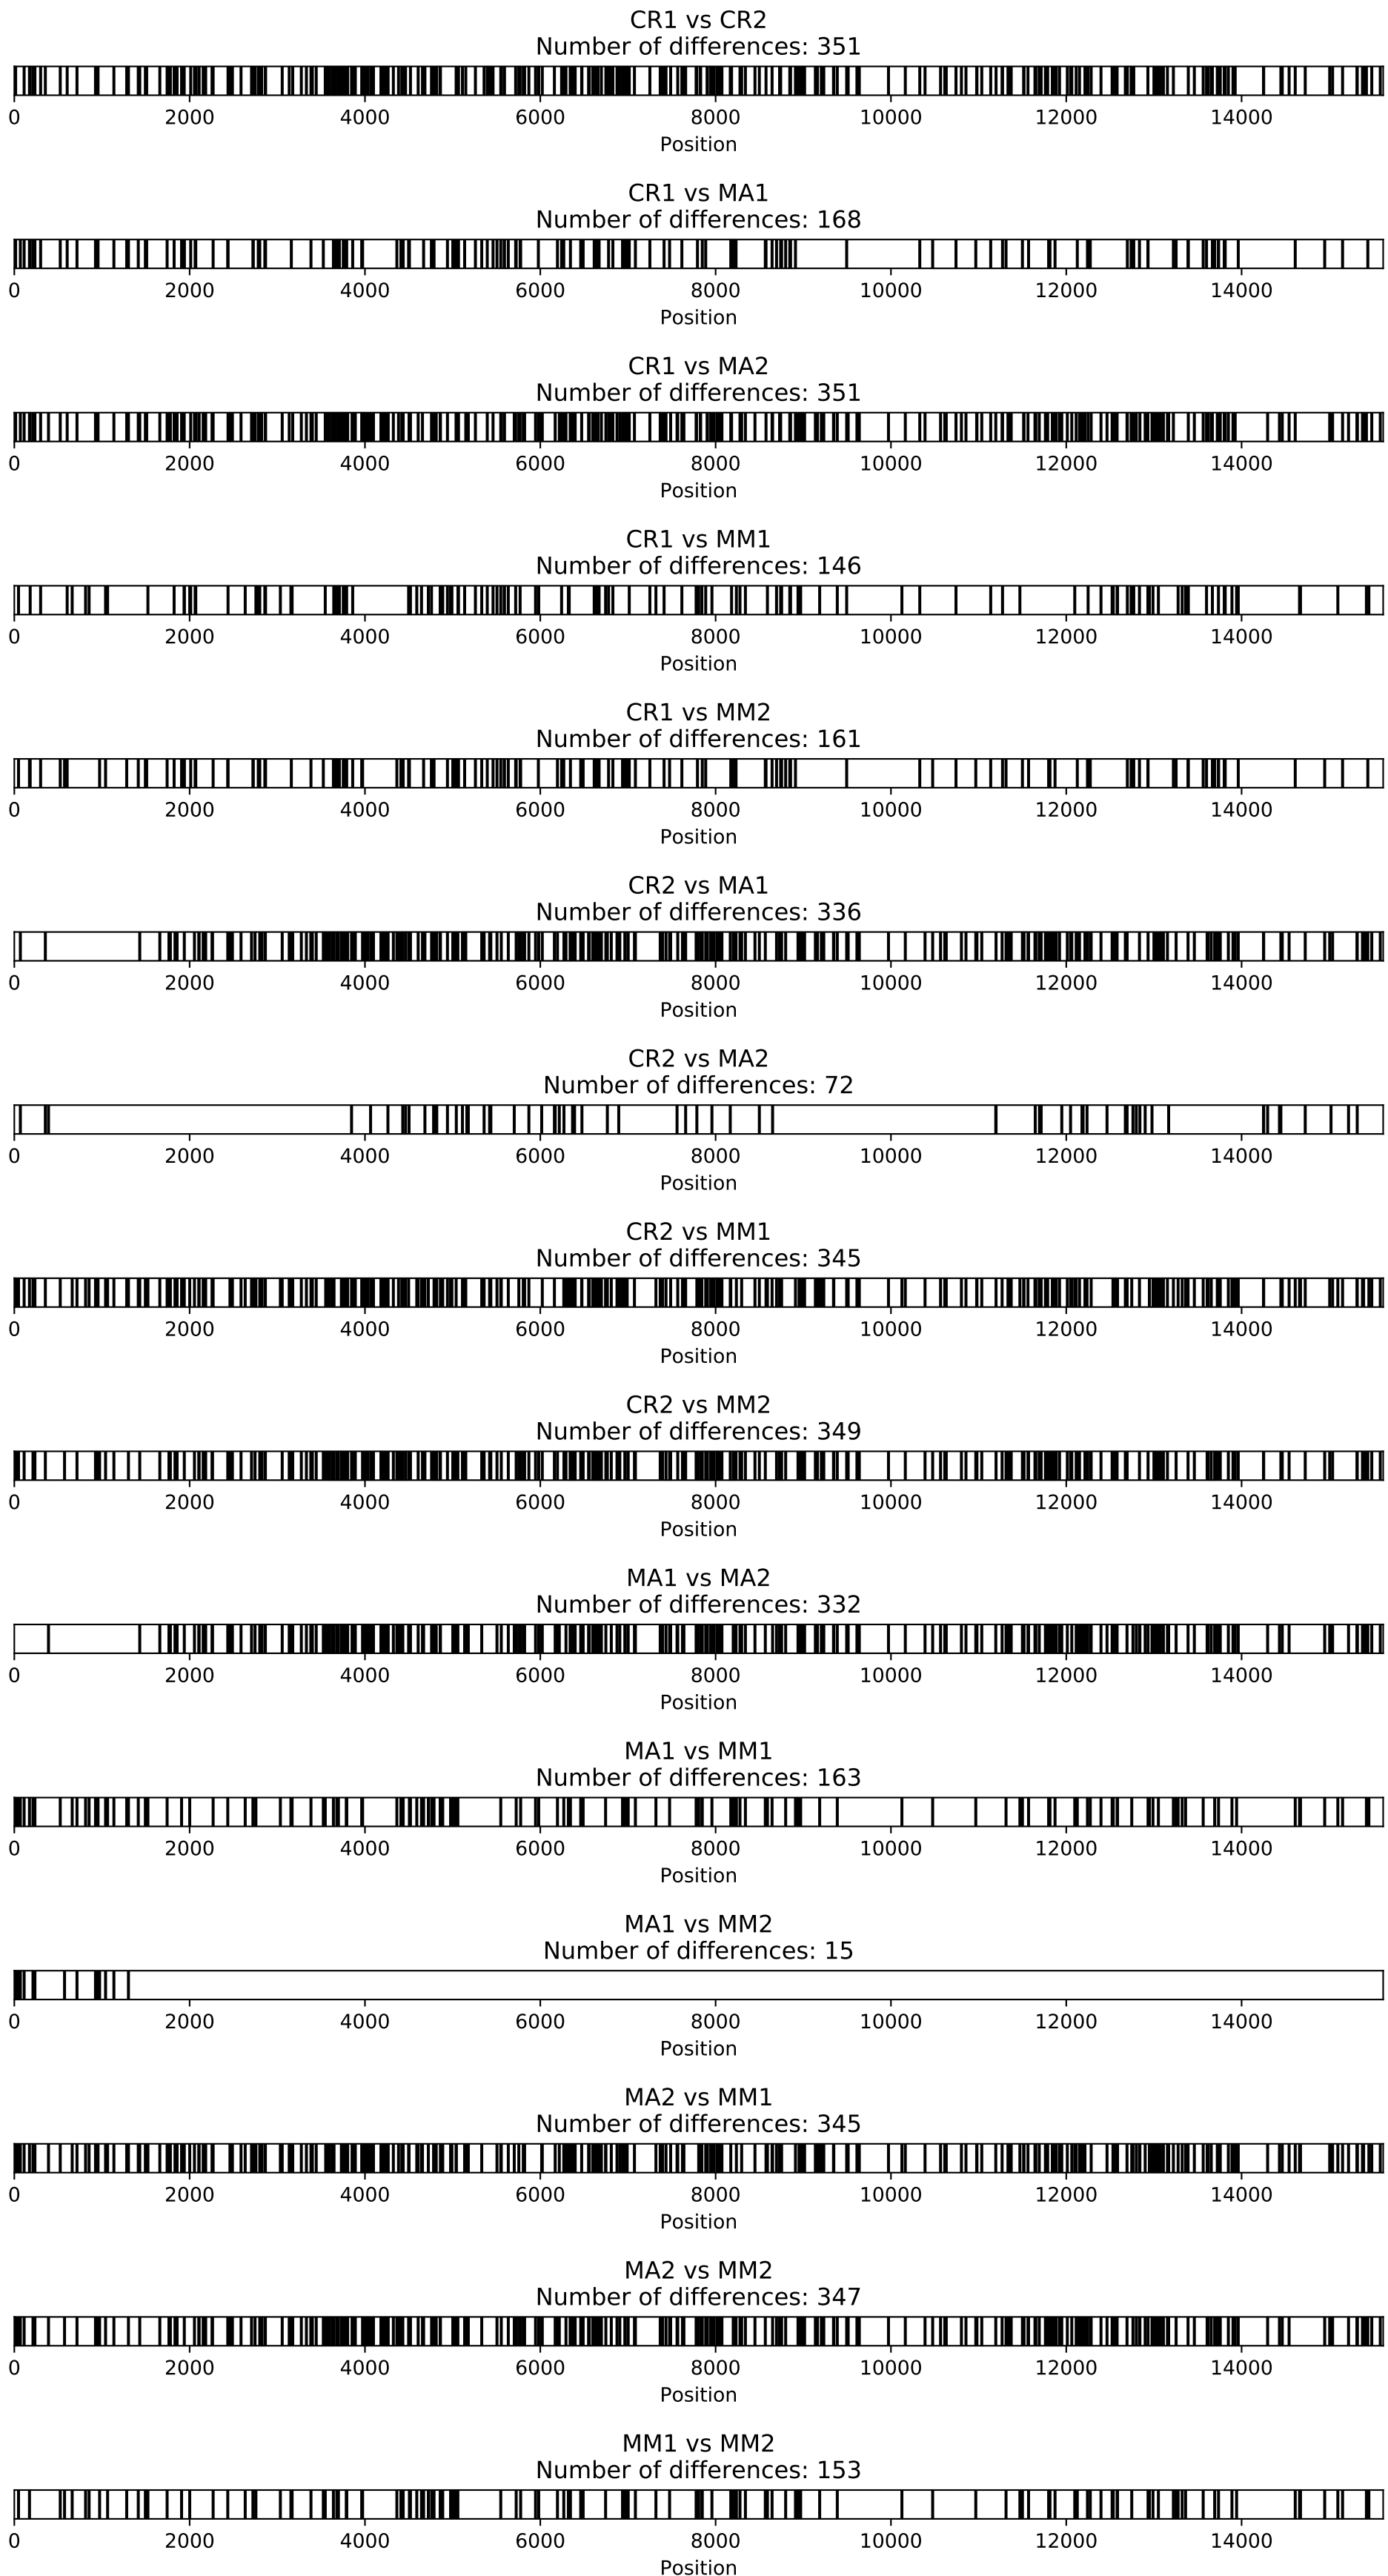

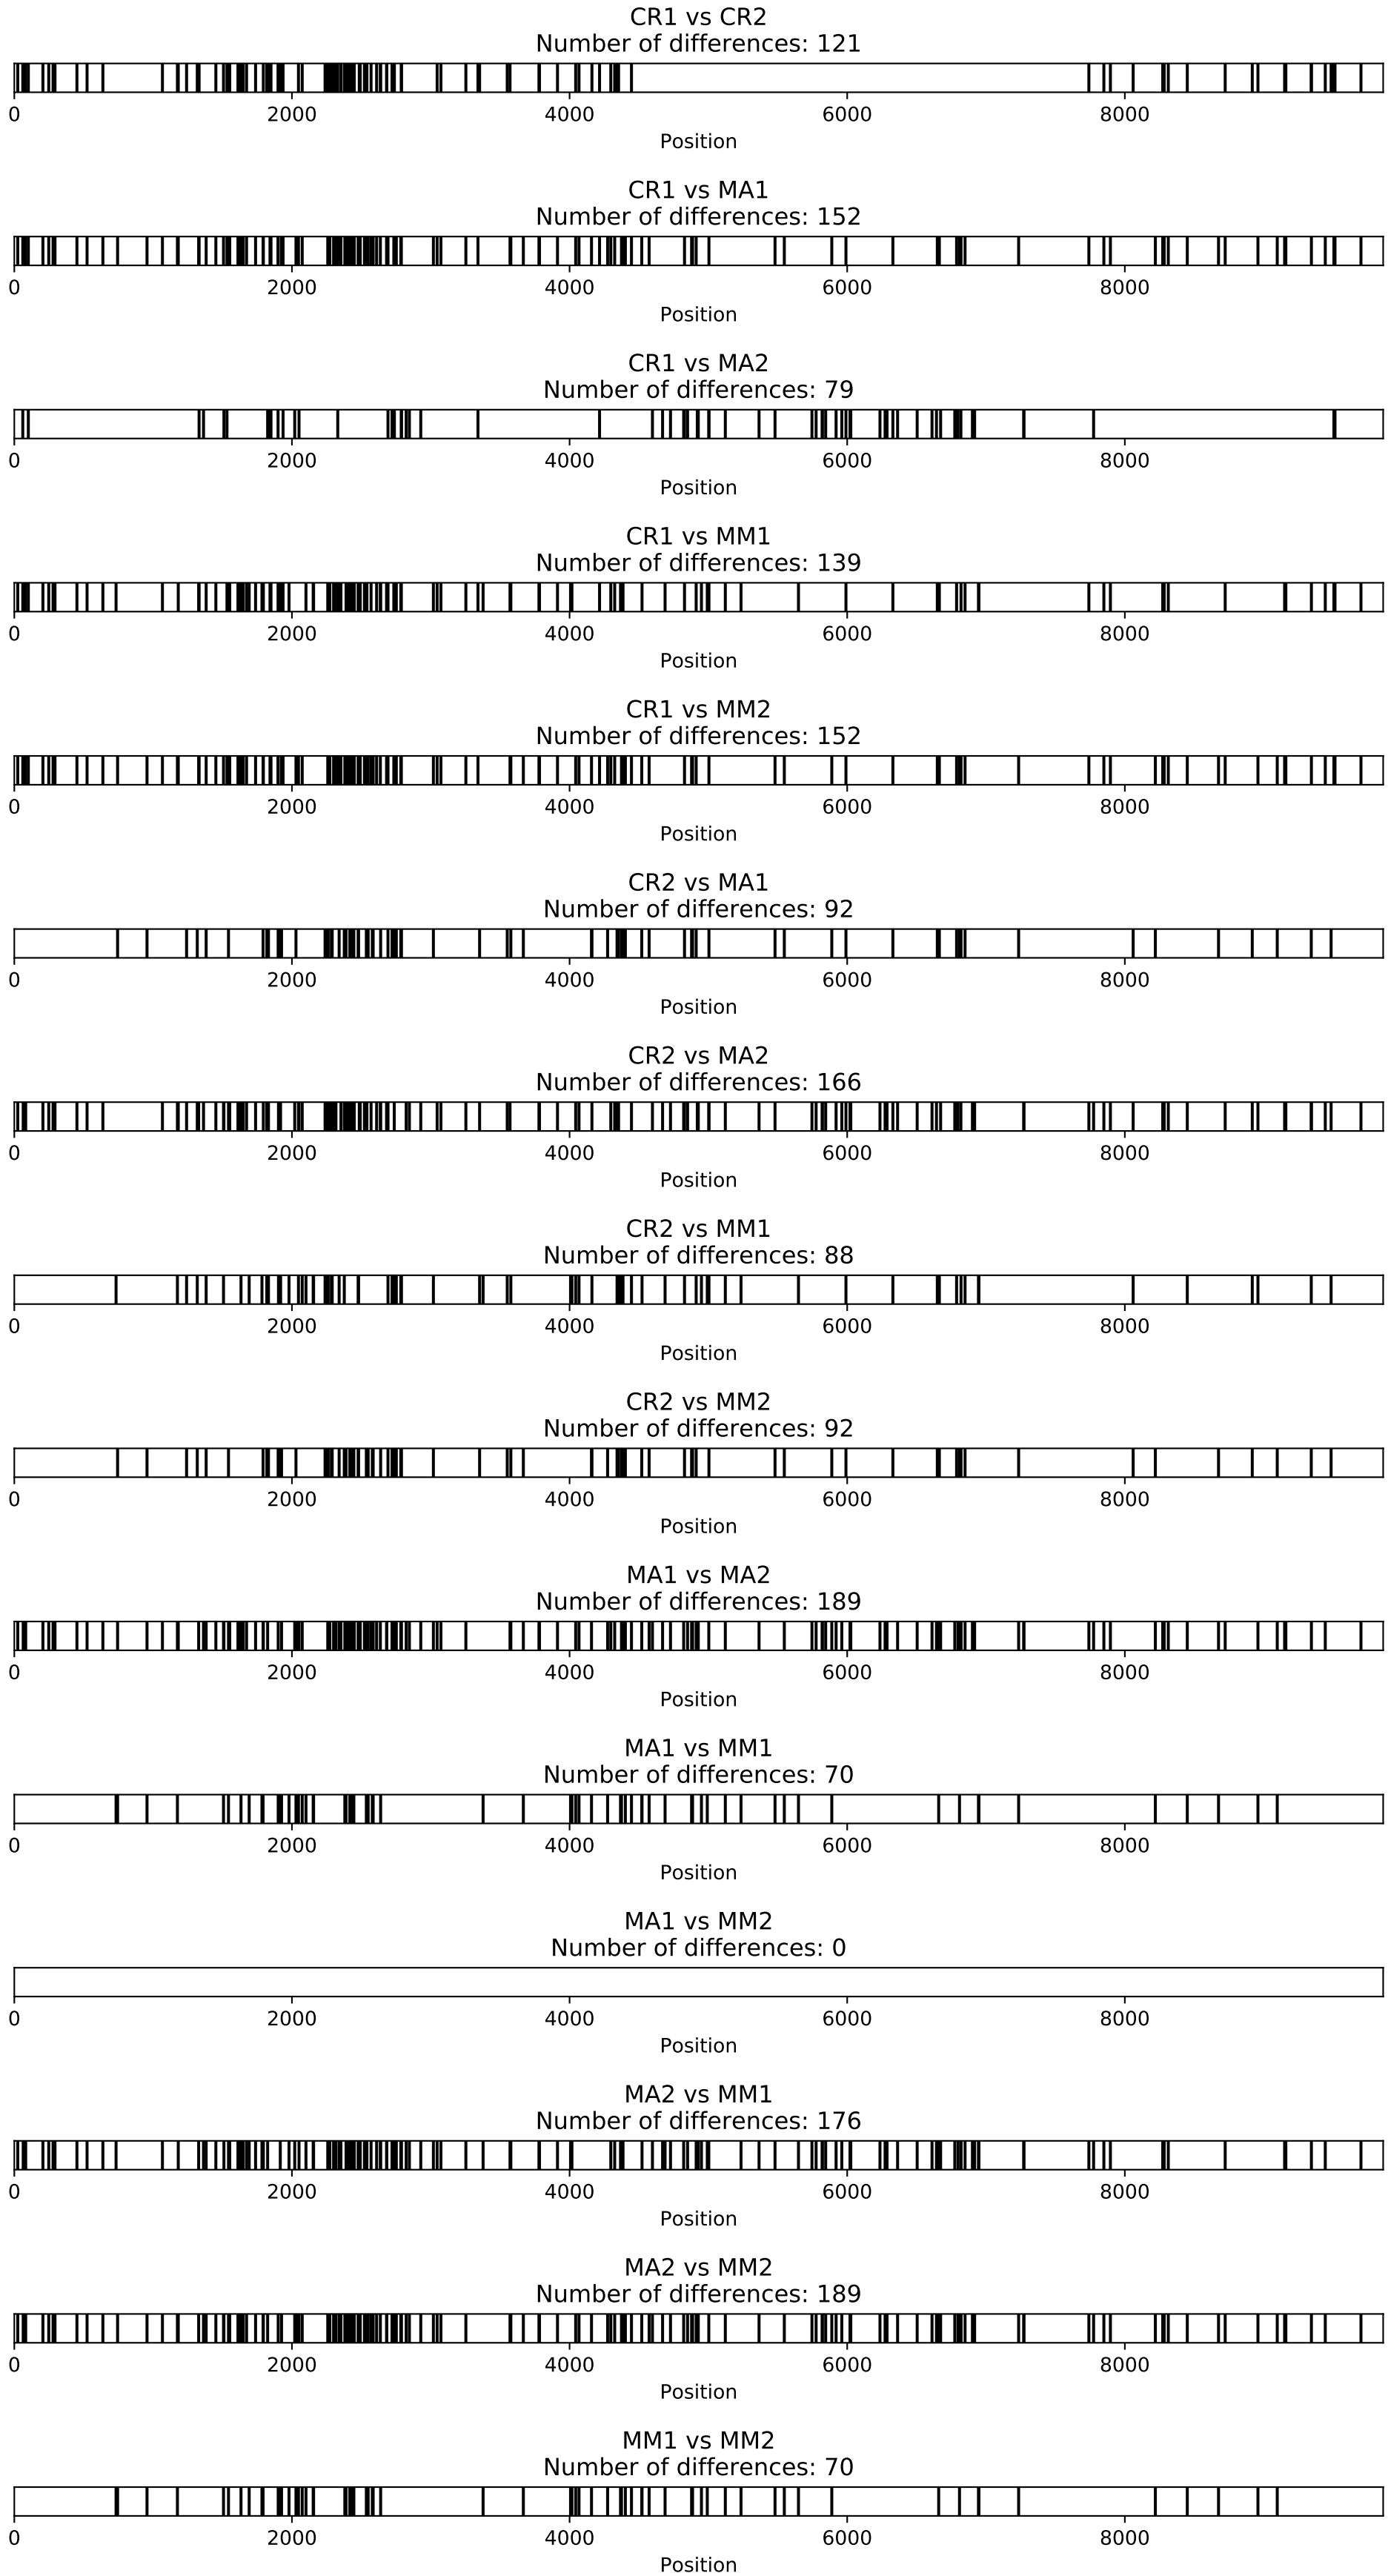

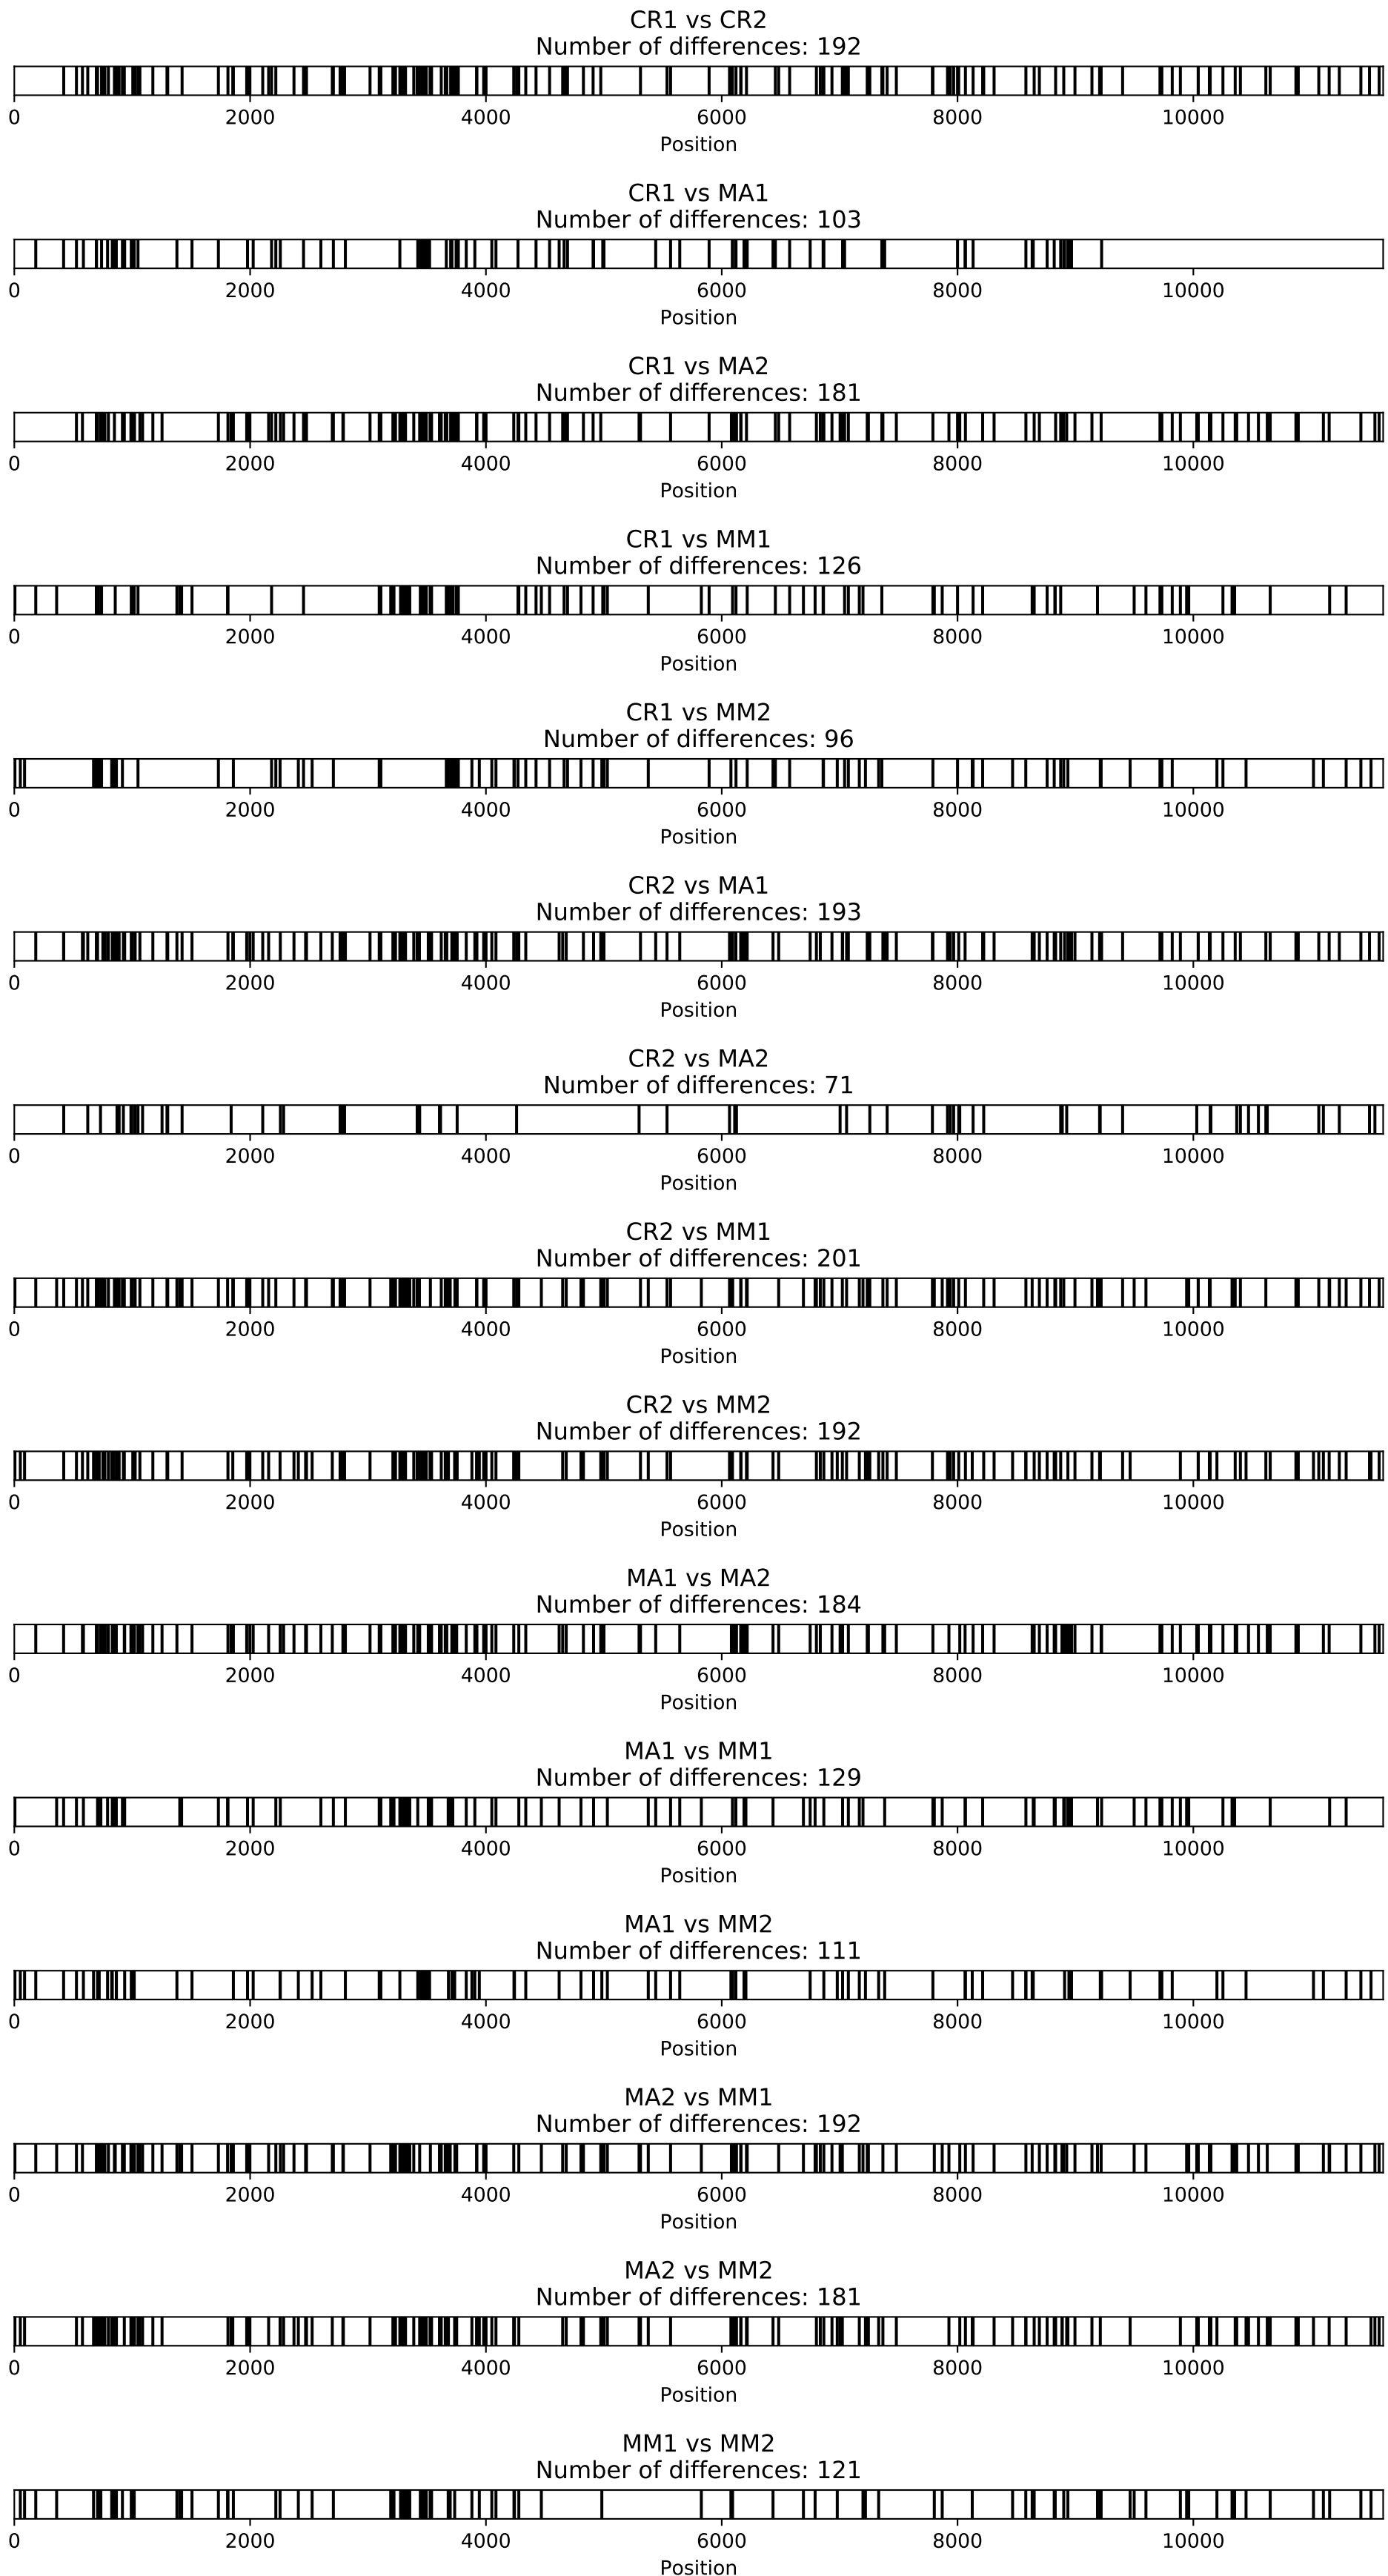

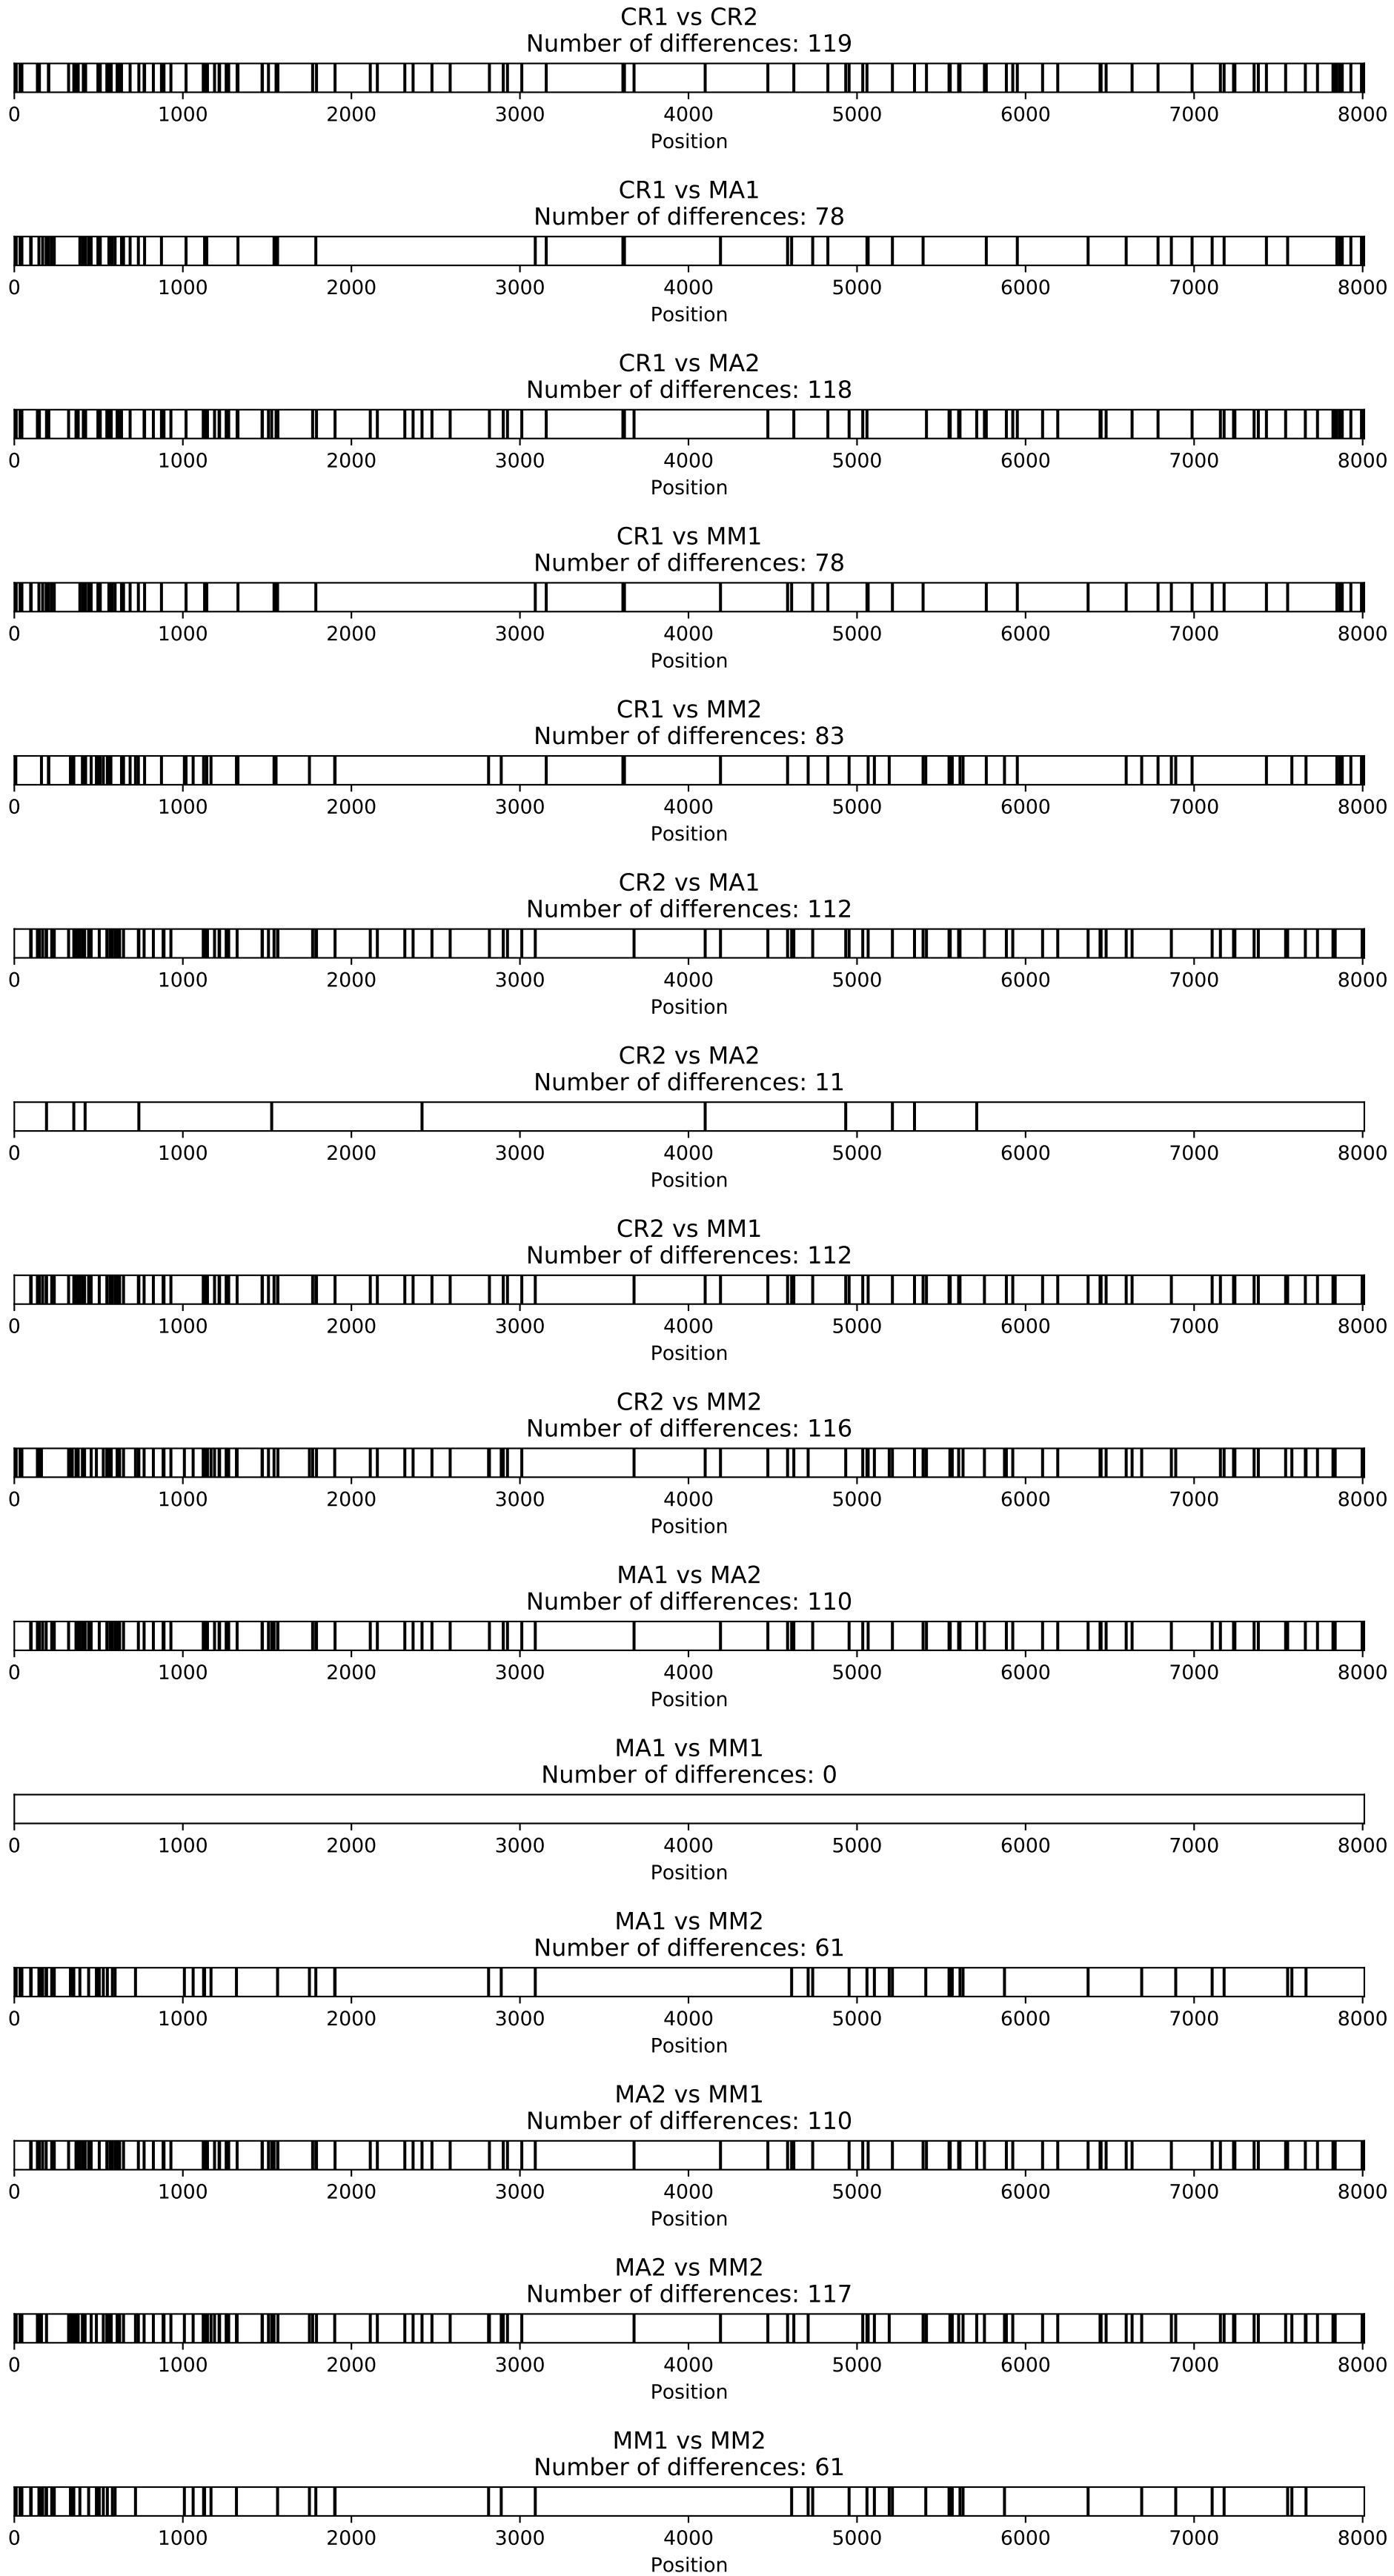

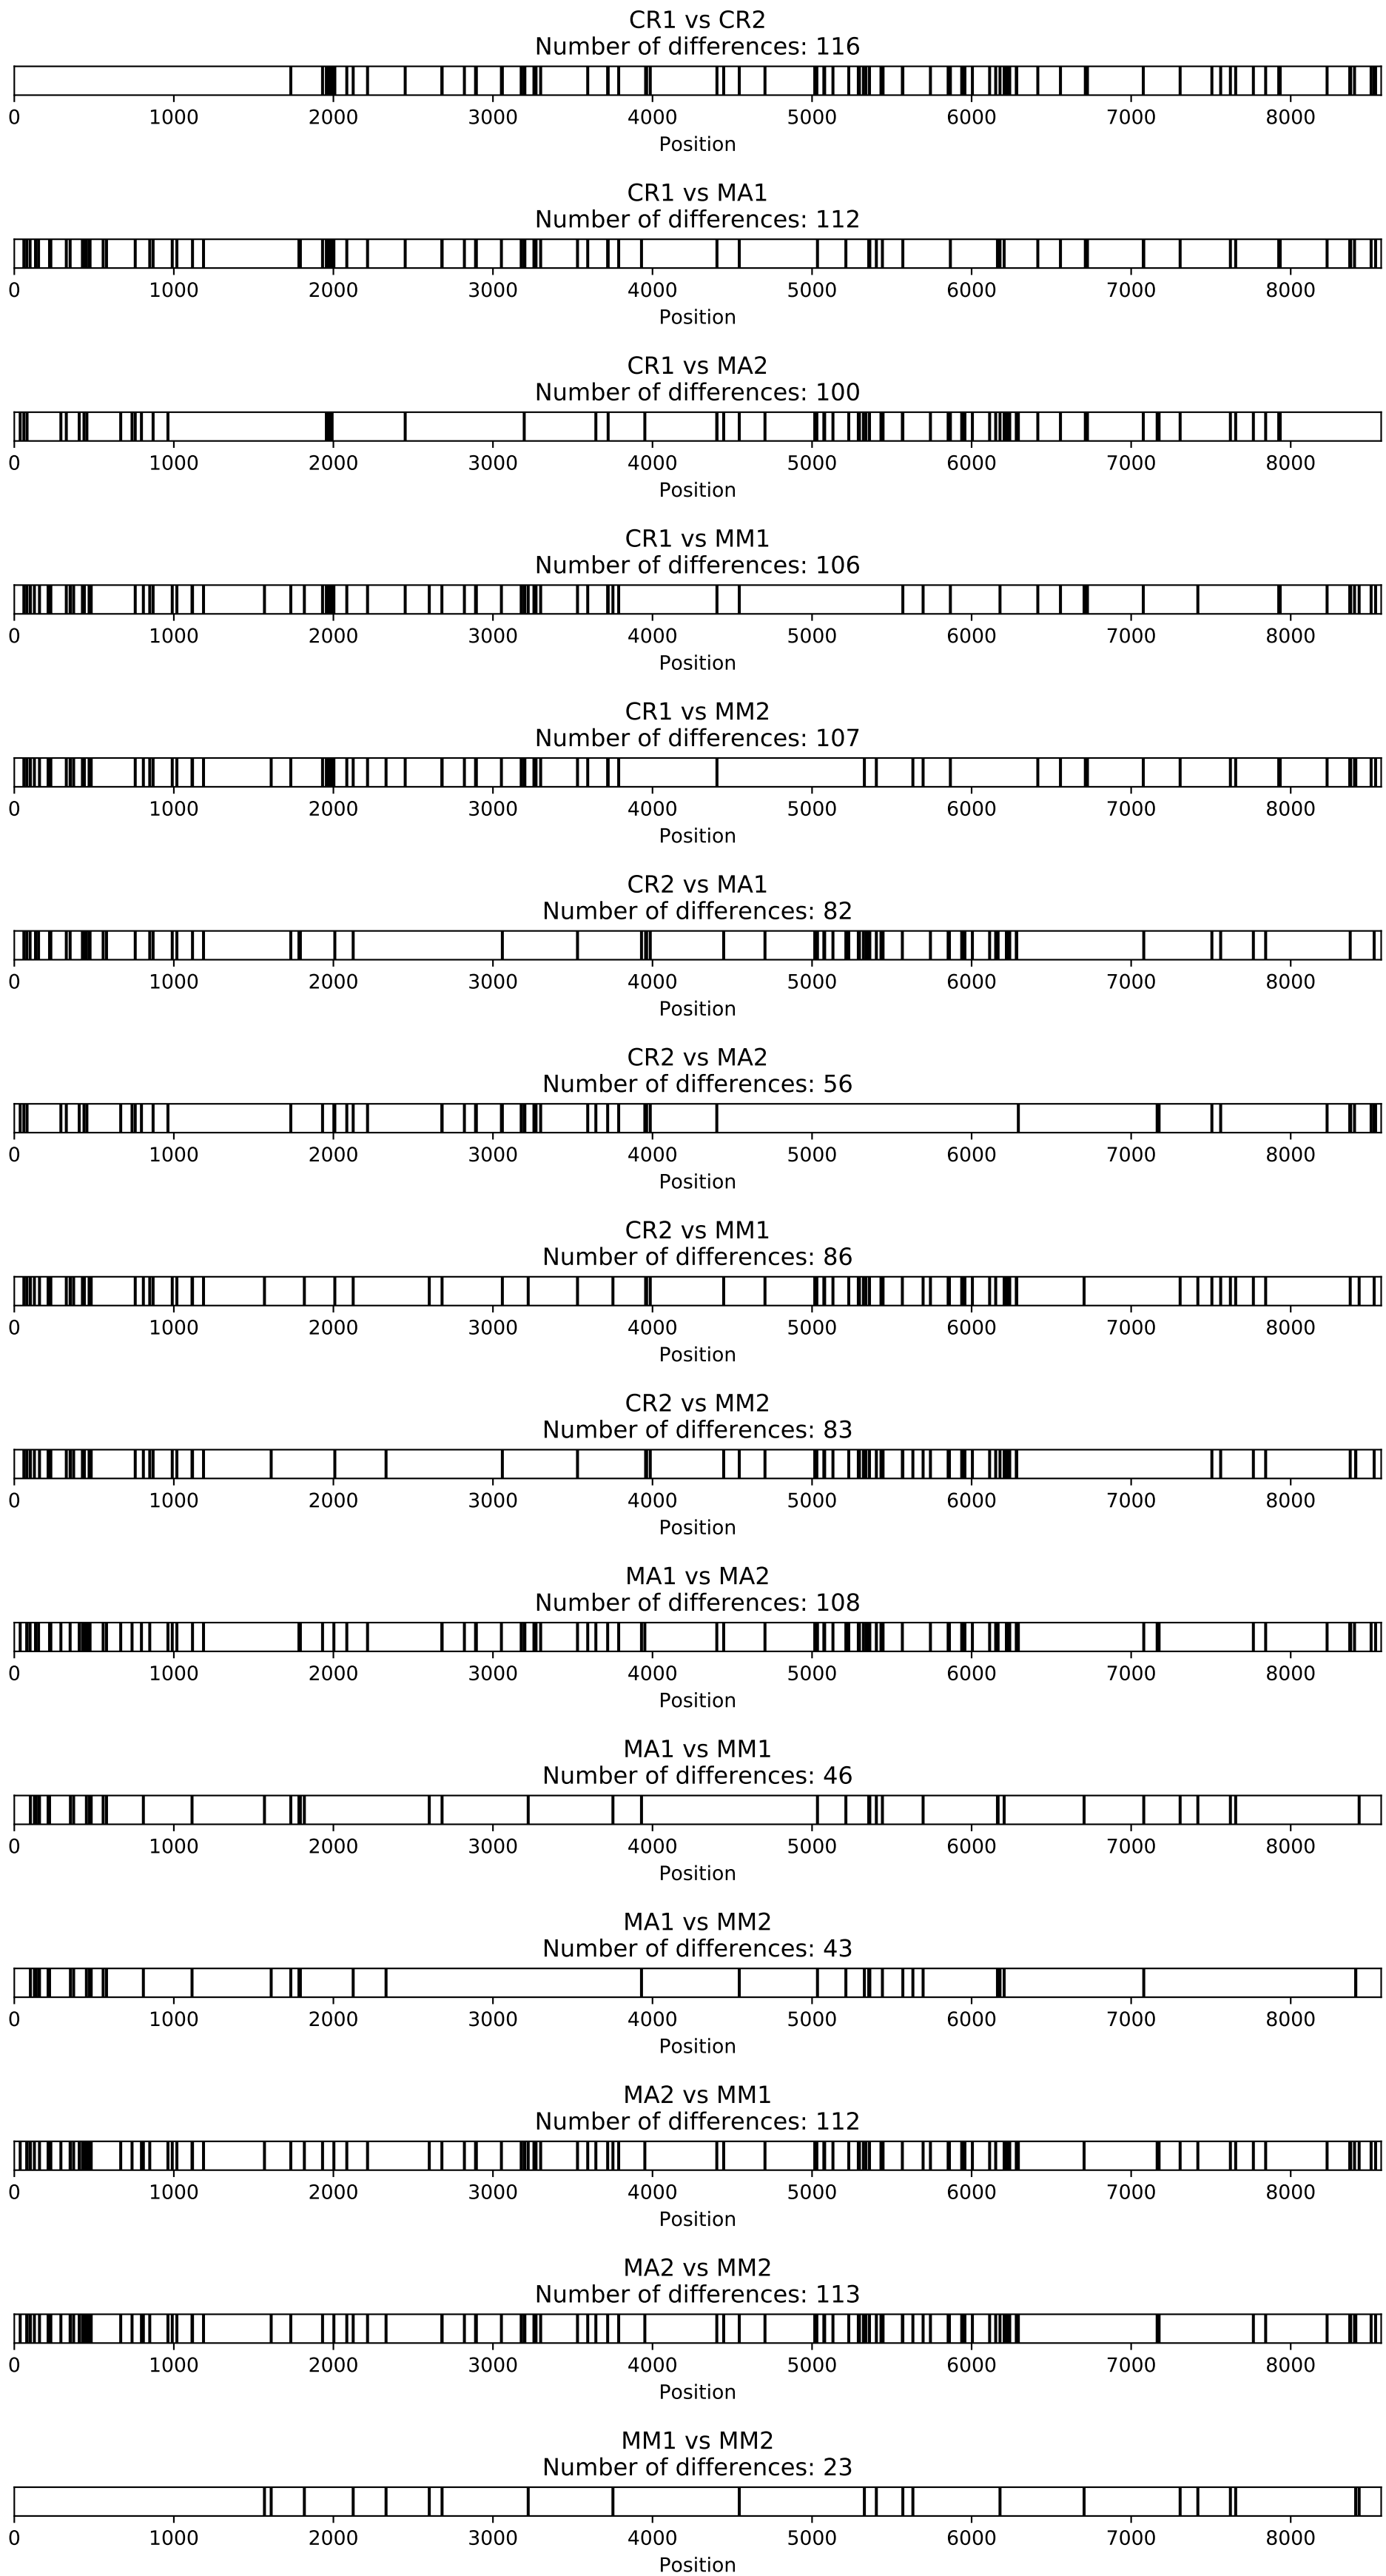



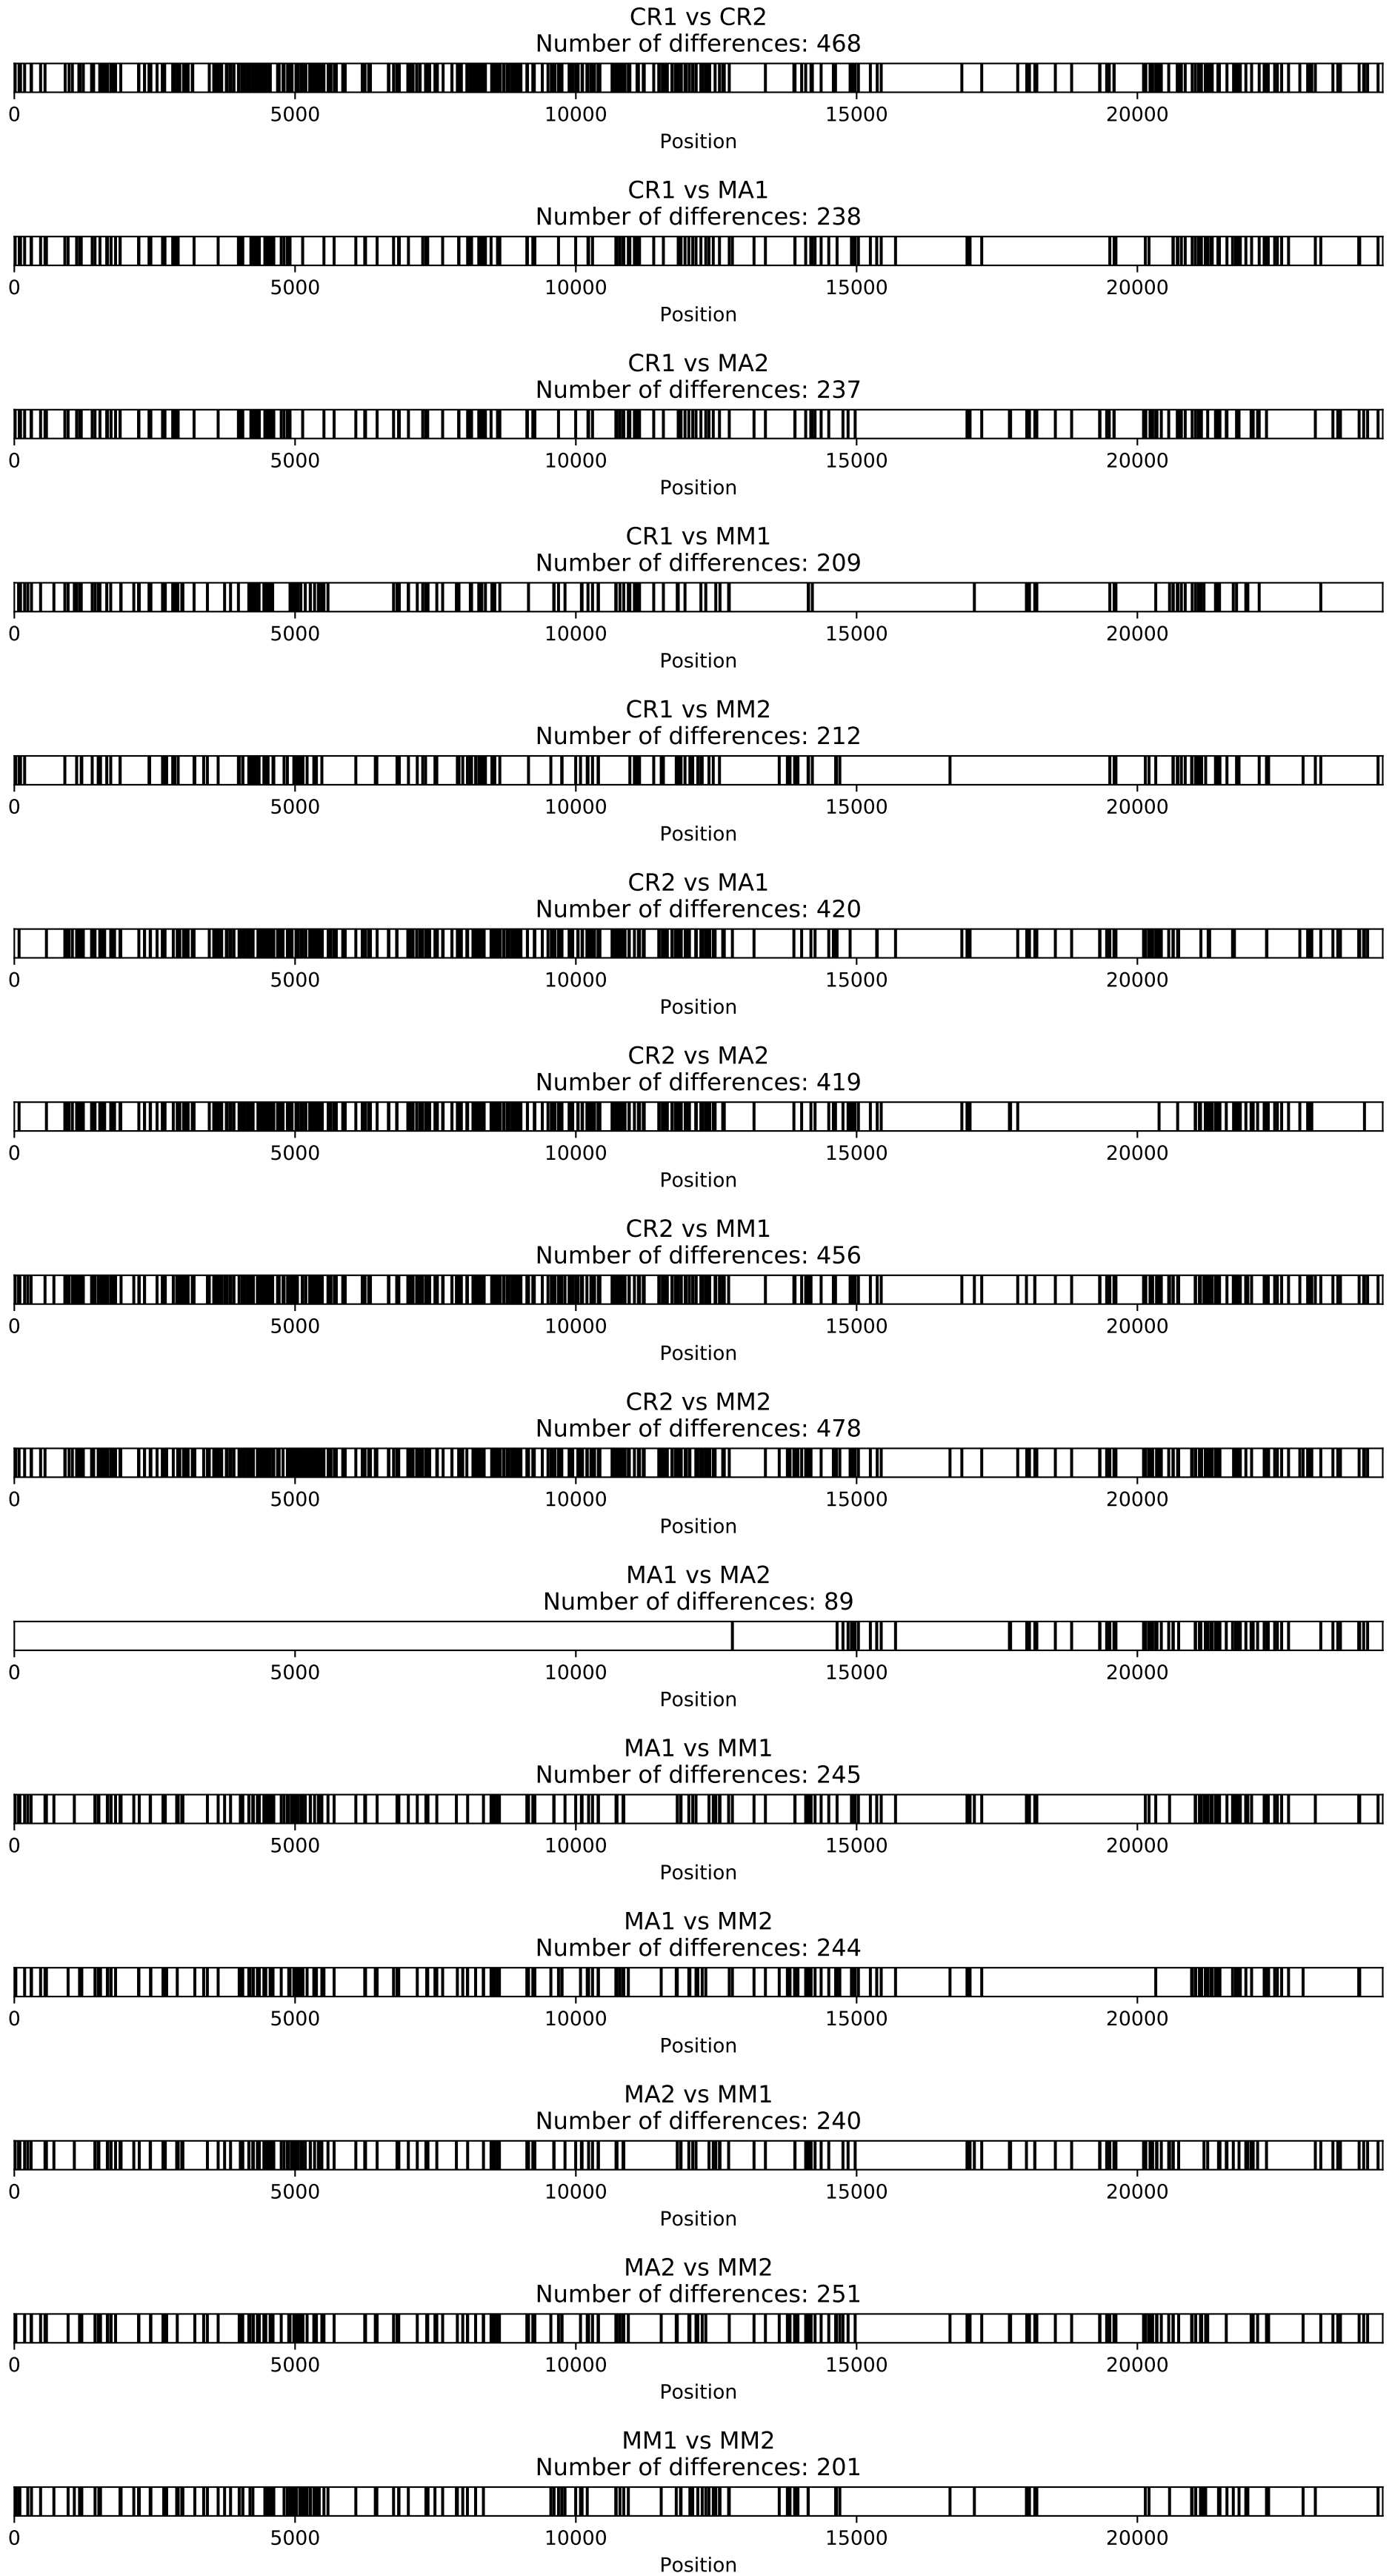

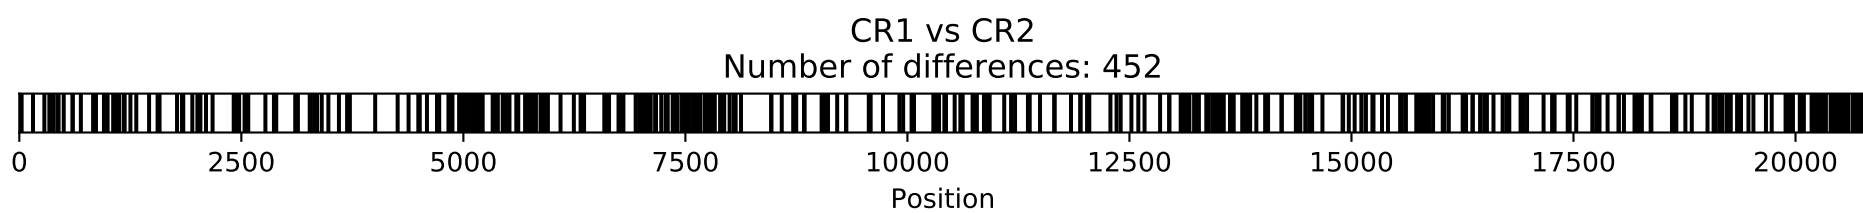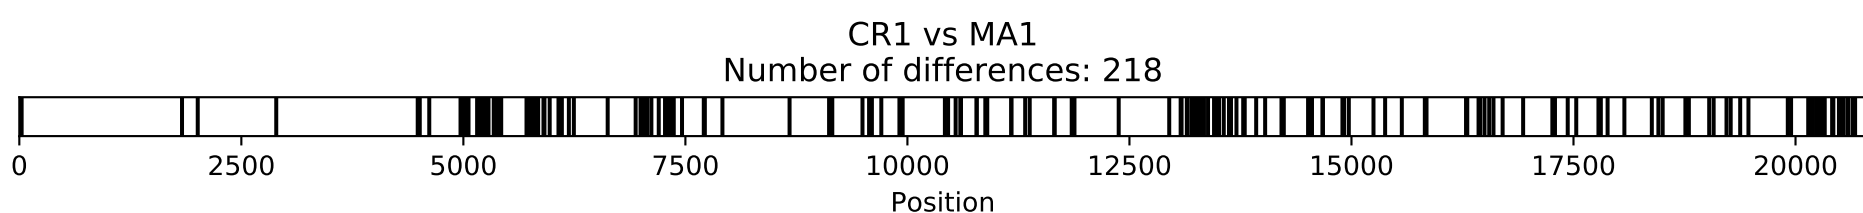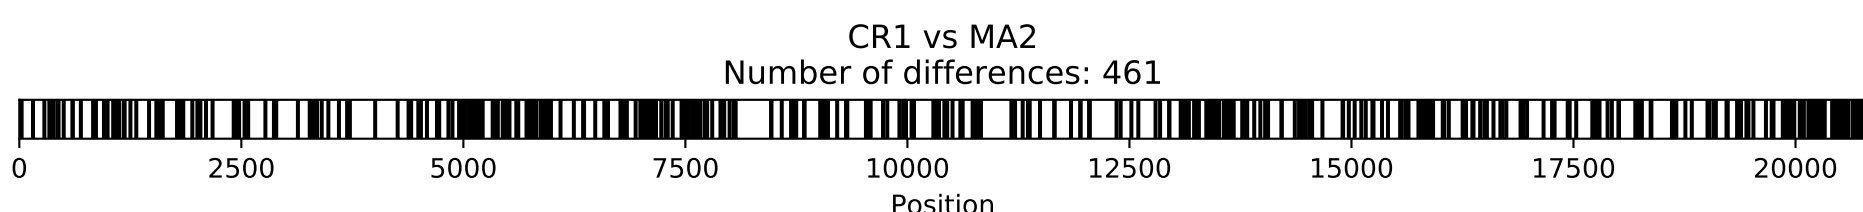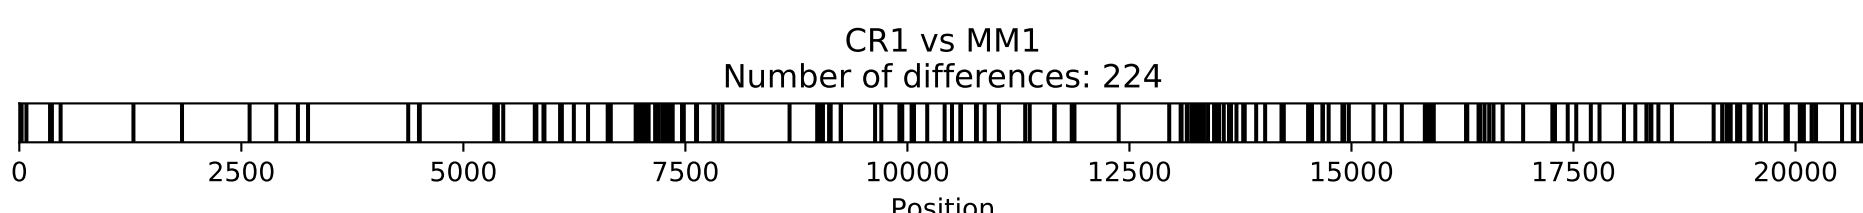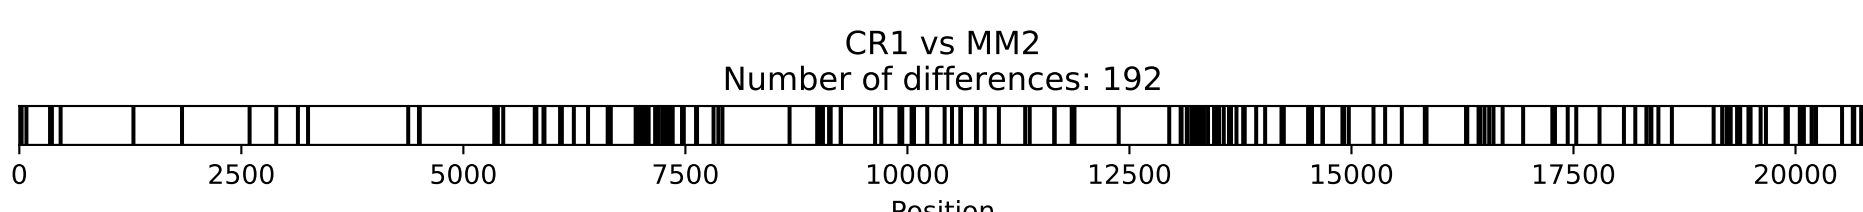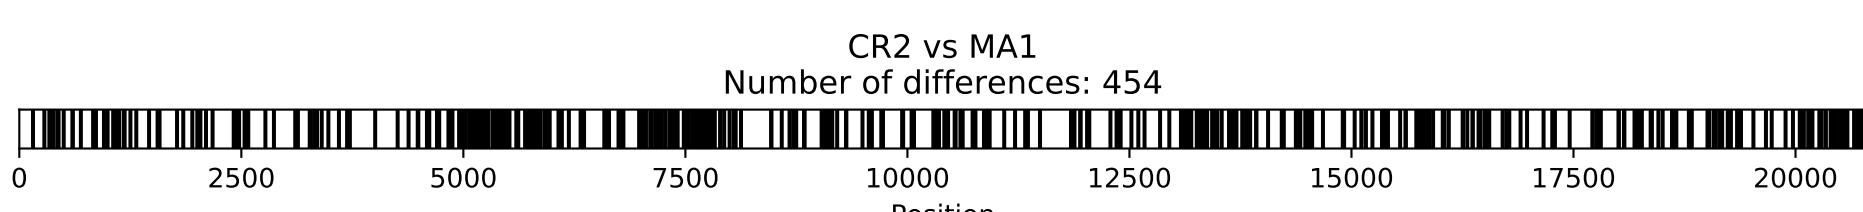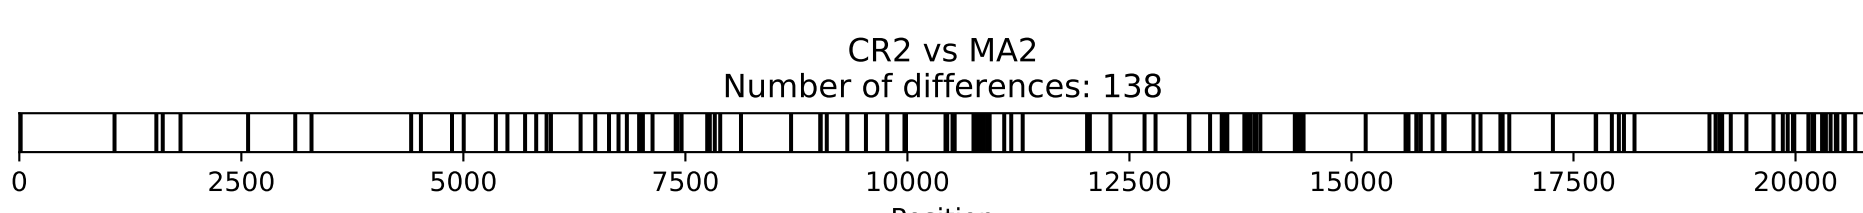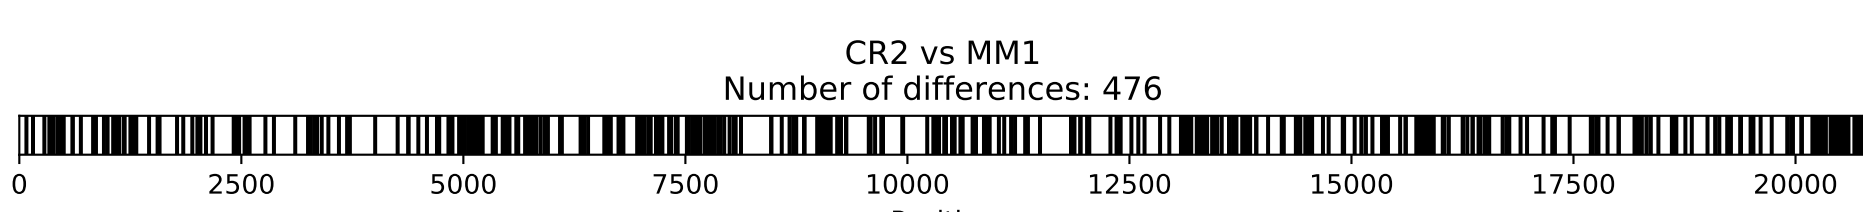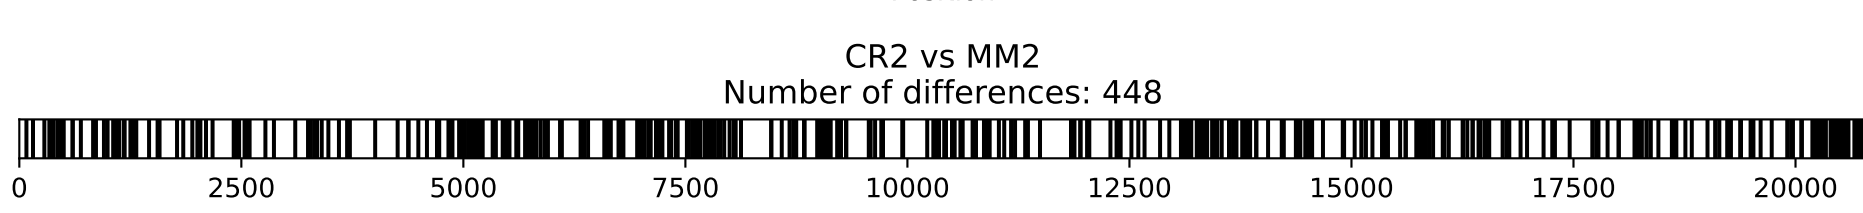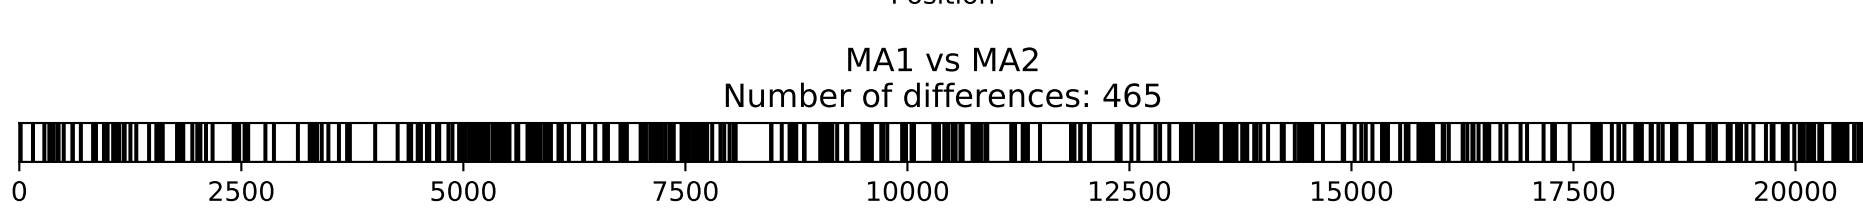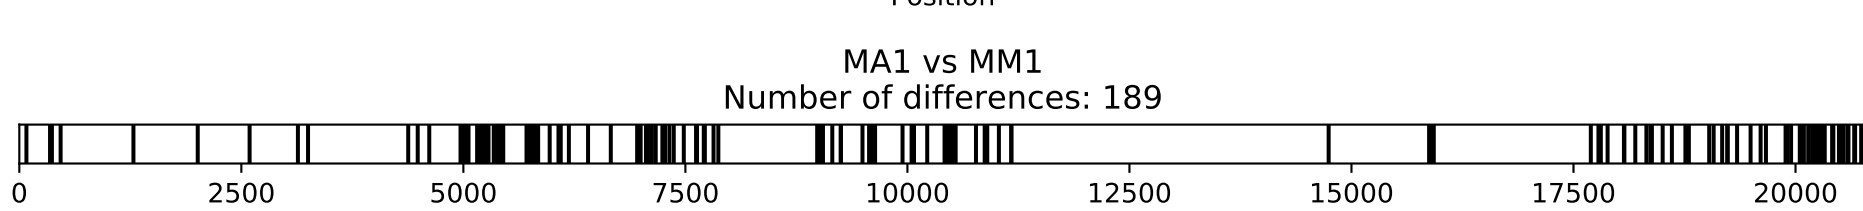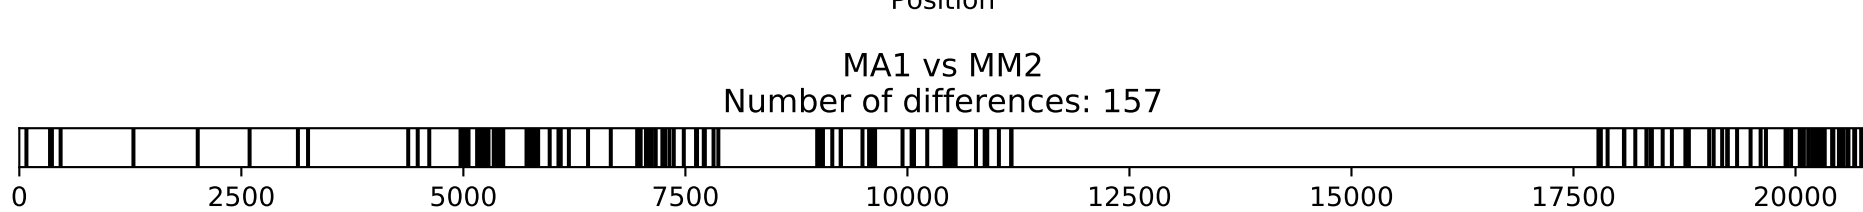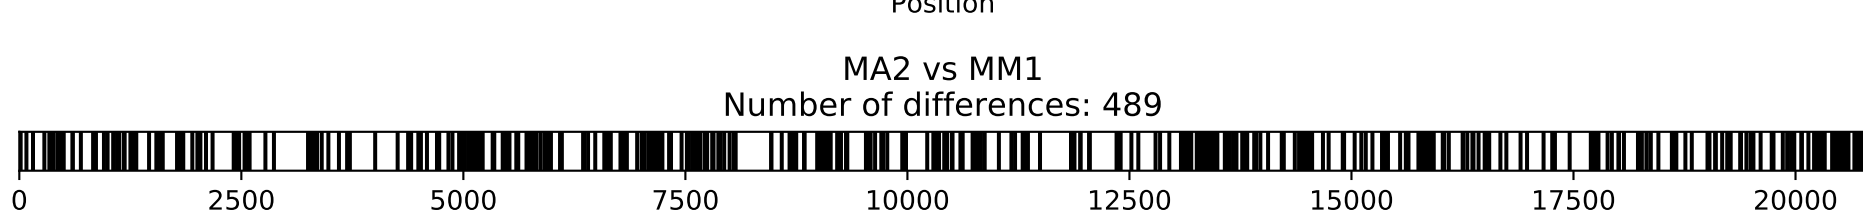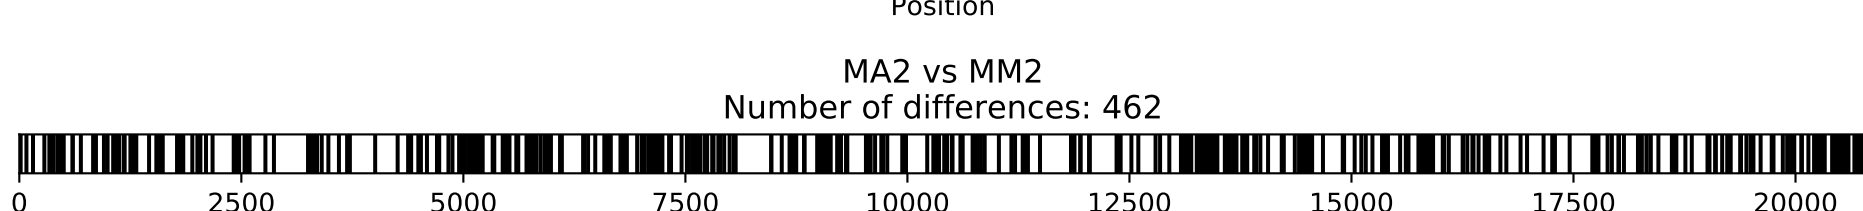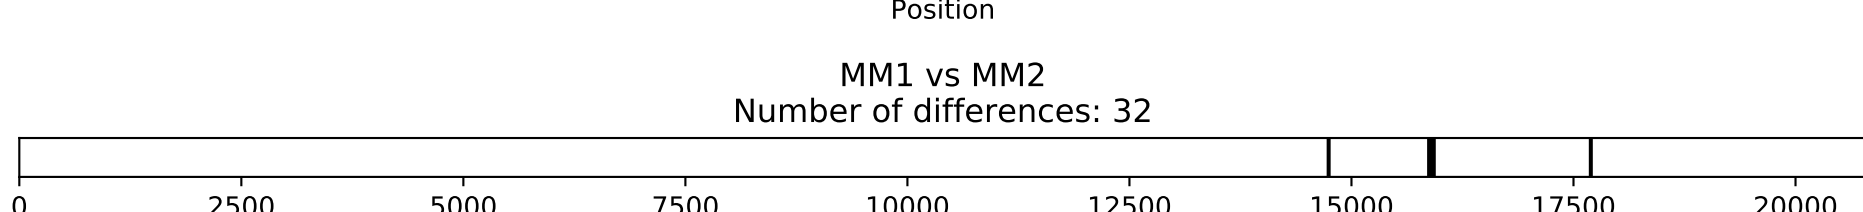

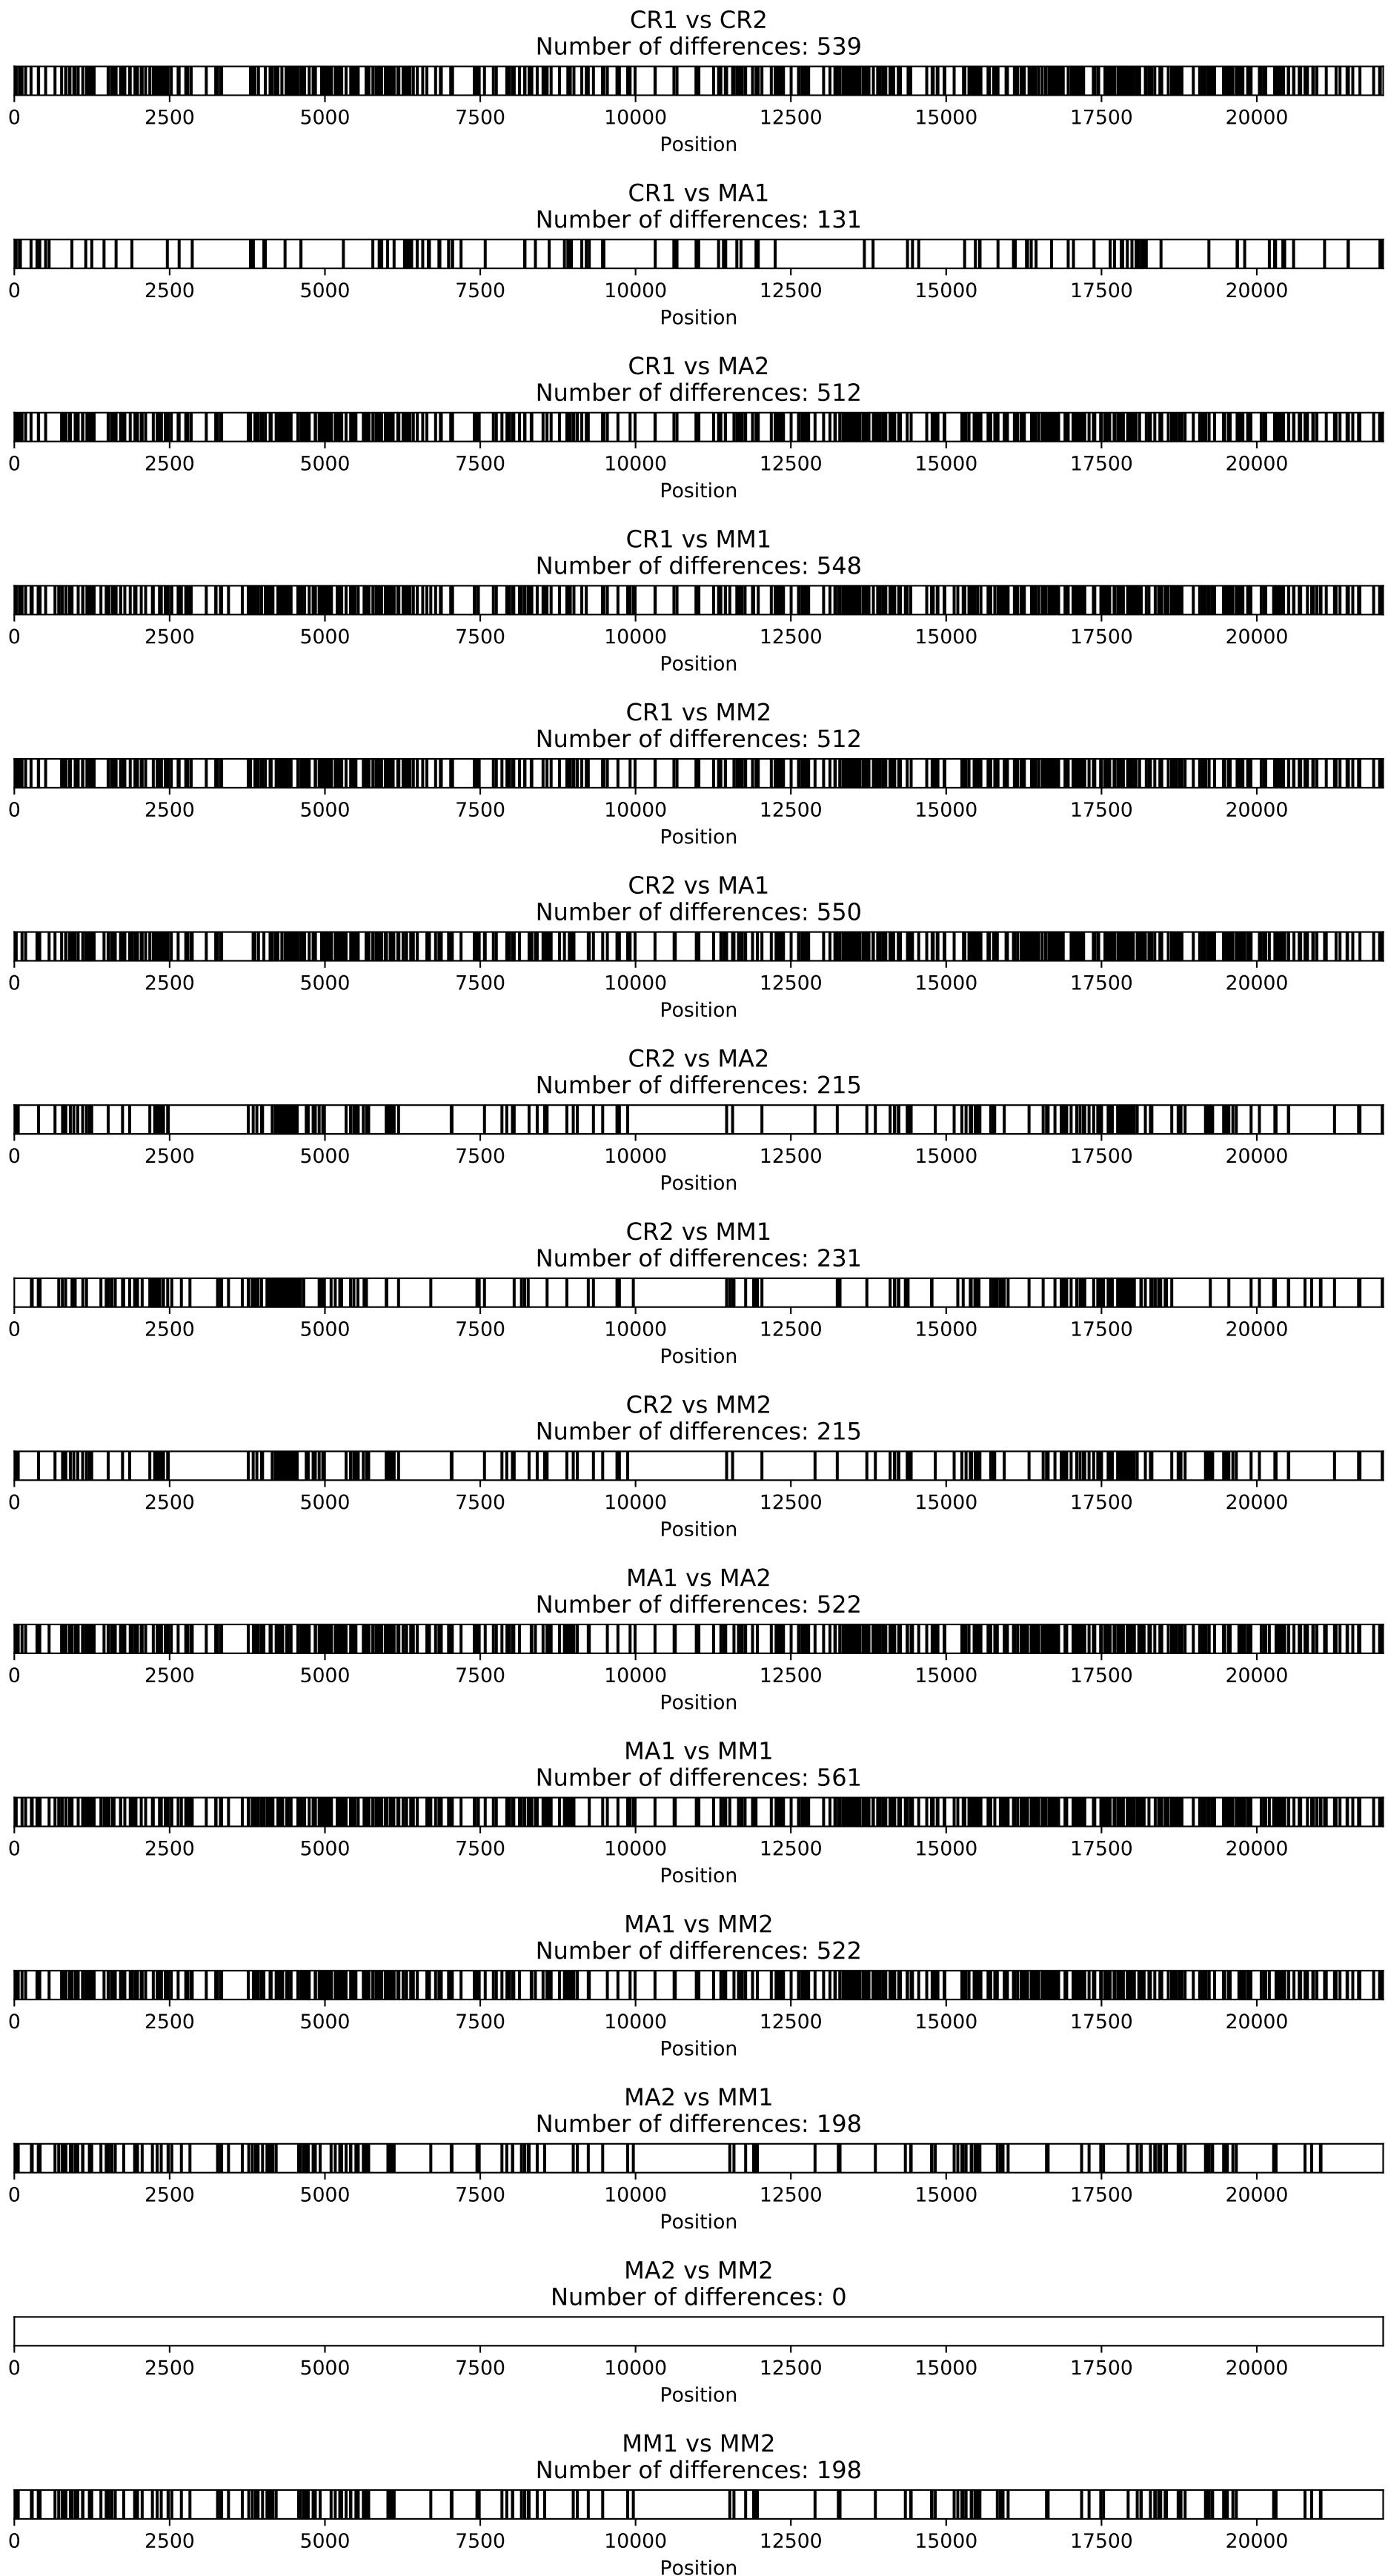

# Region: 101

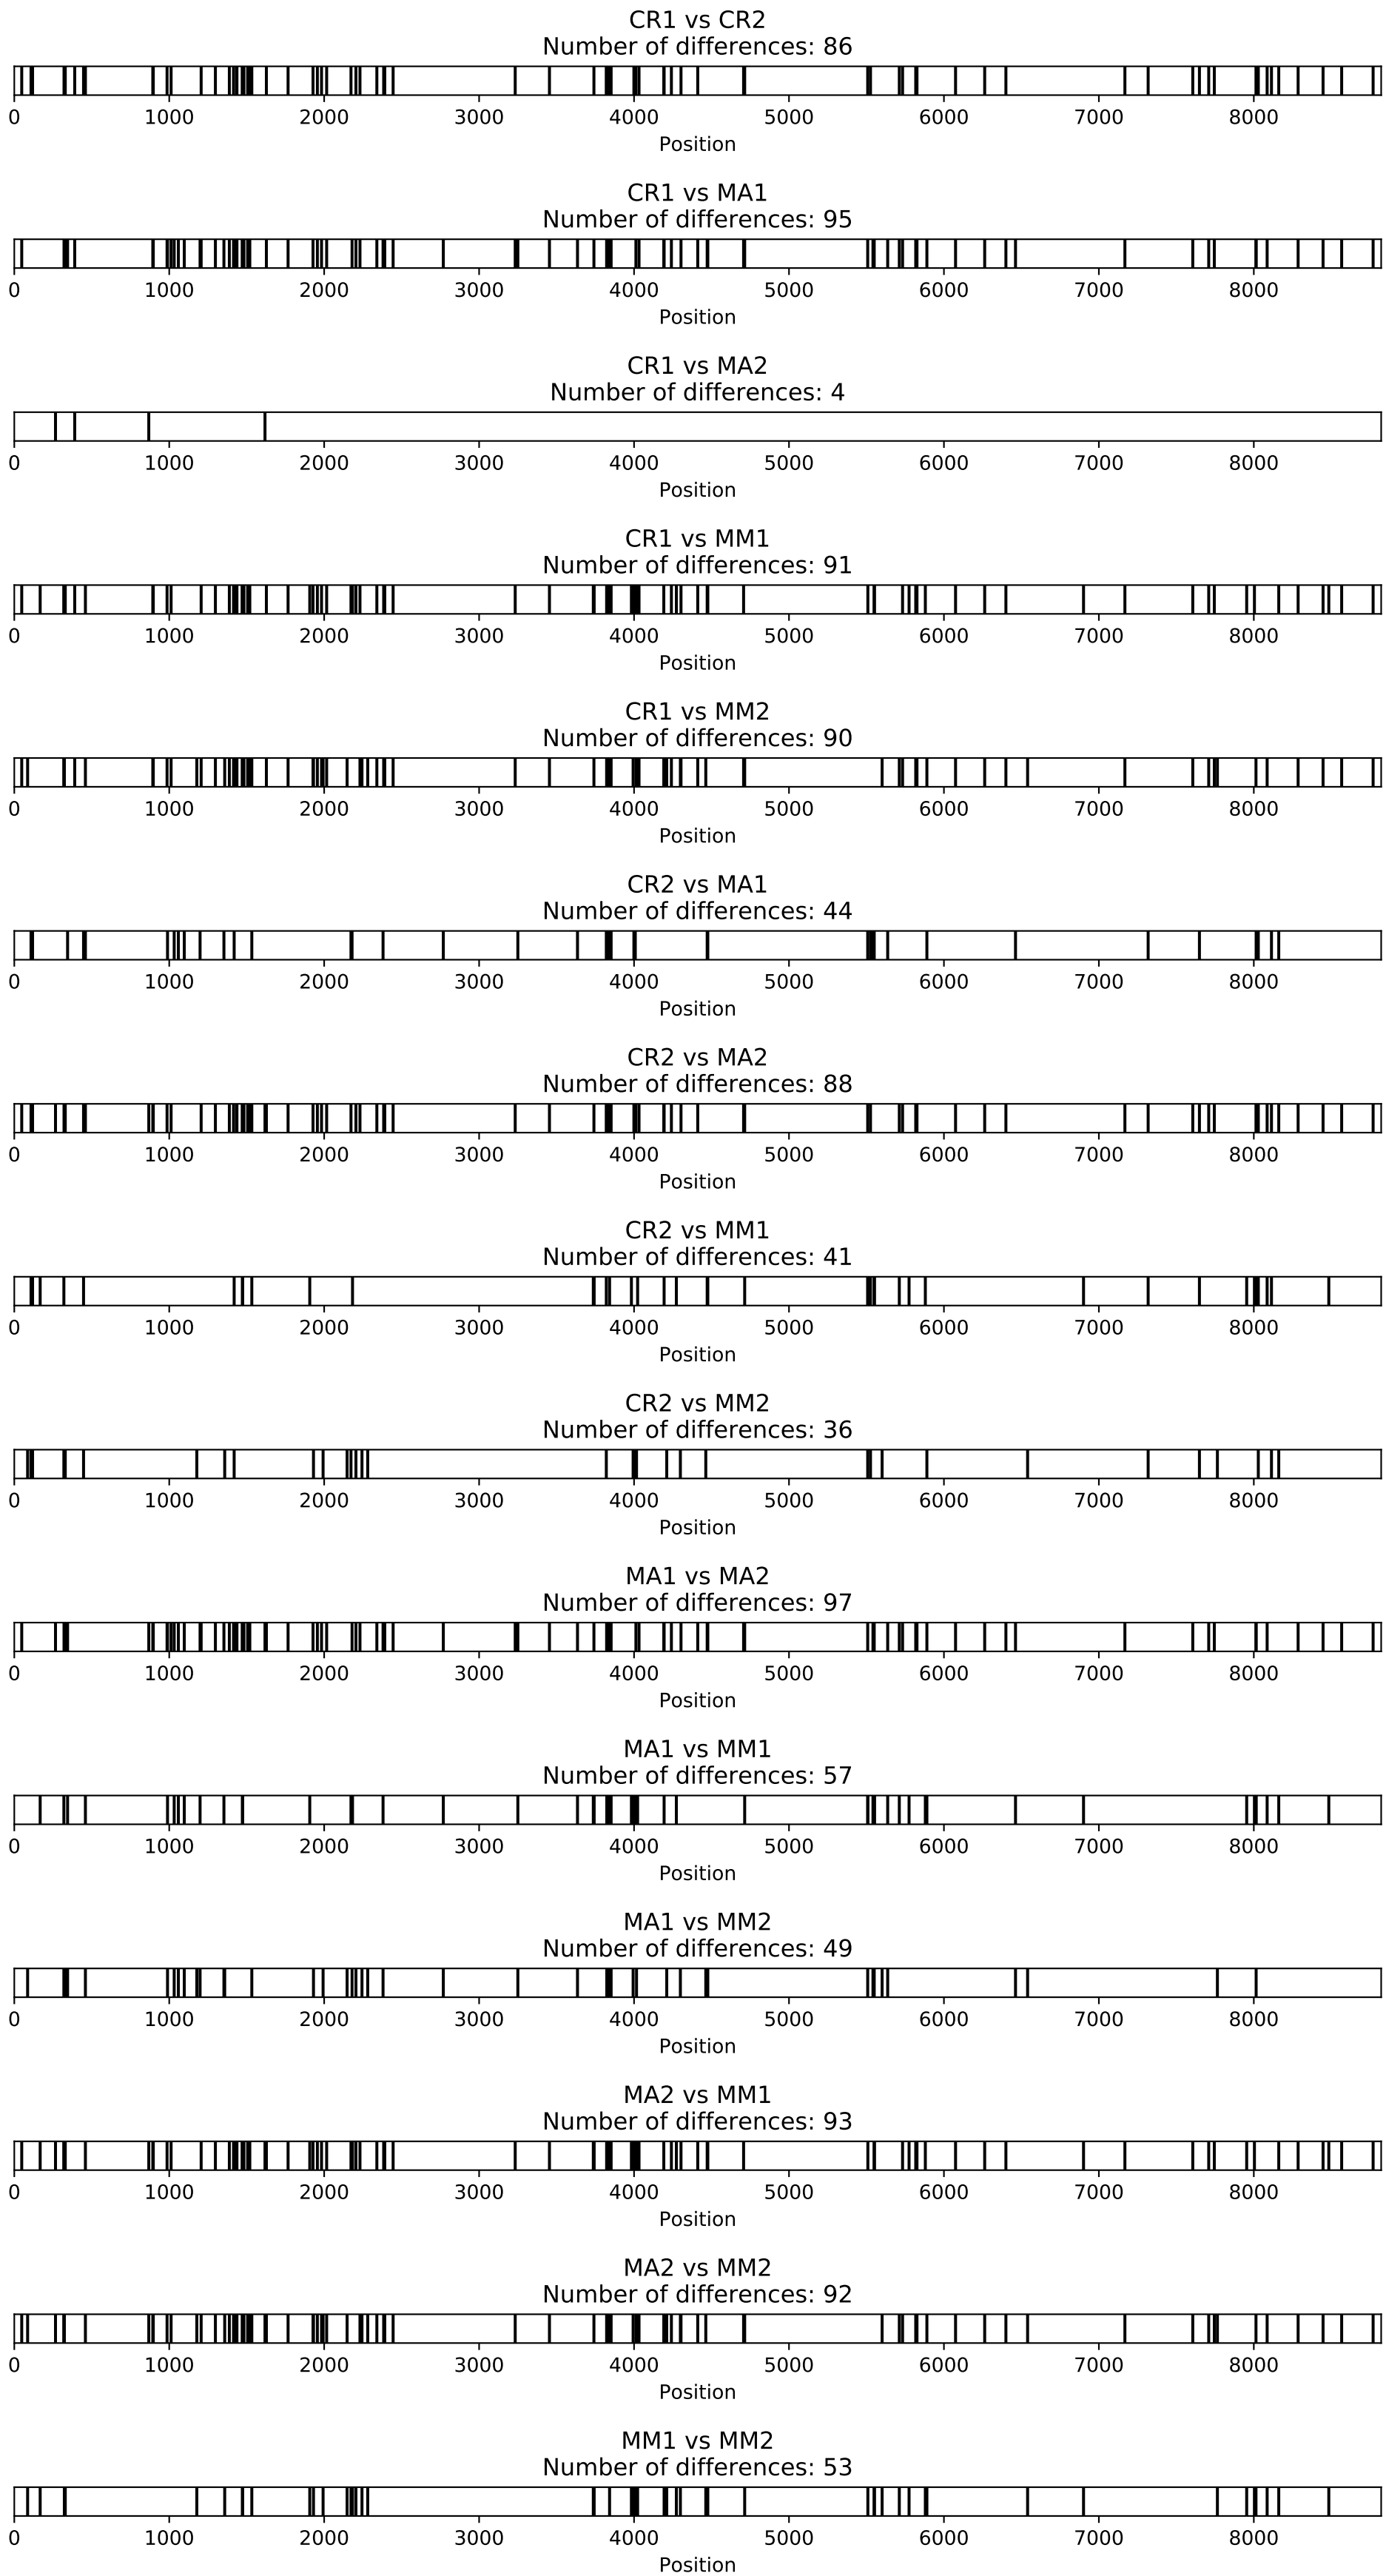

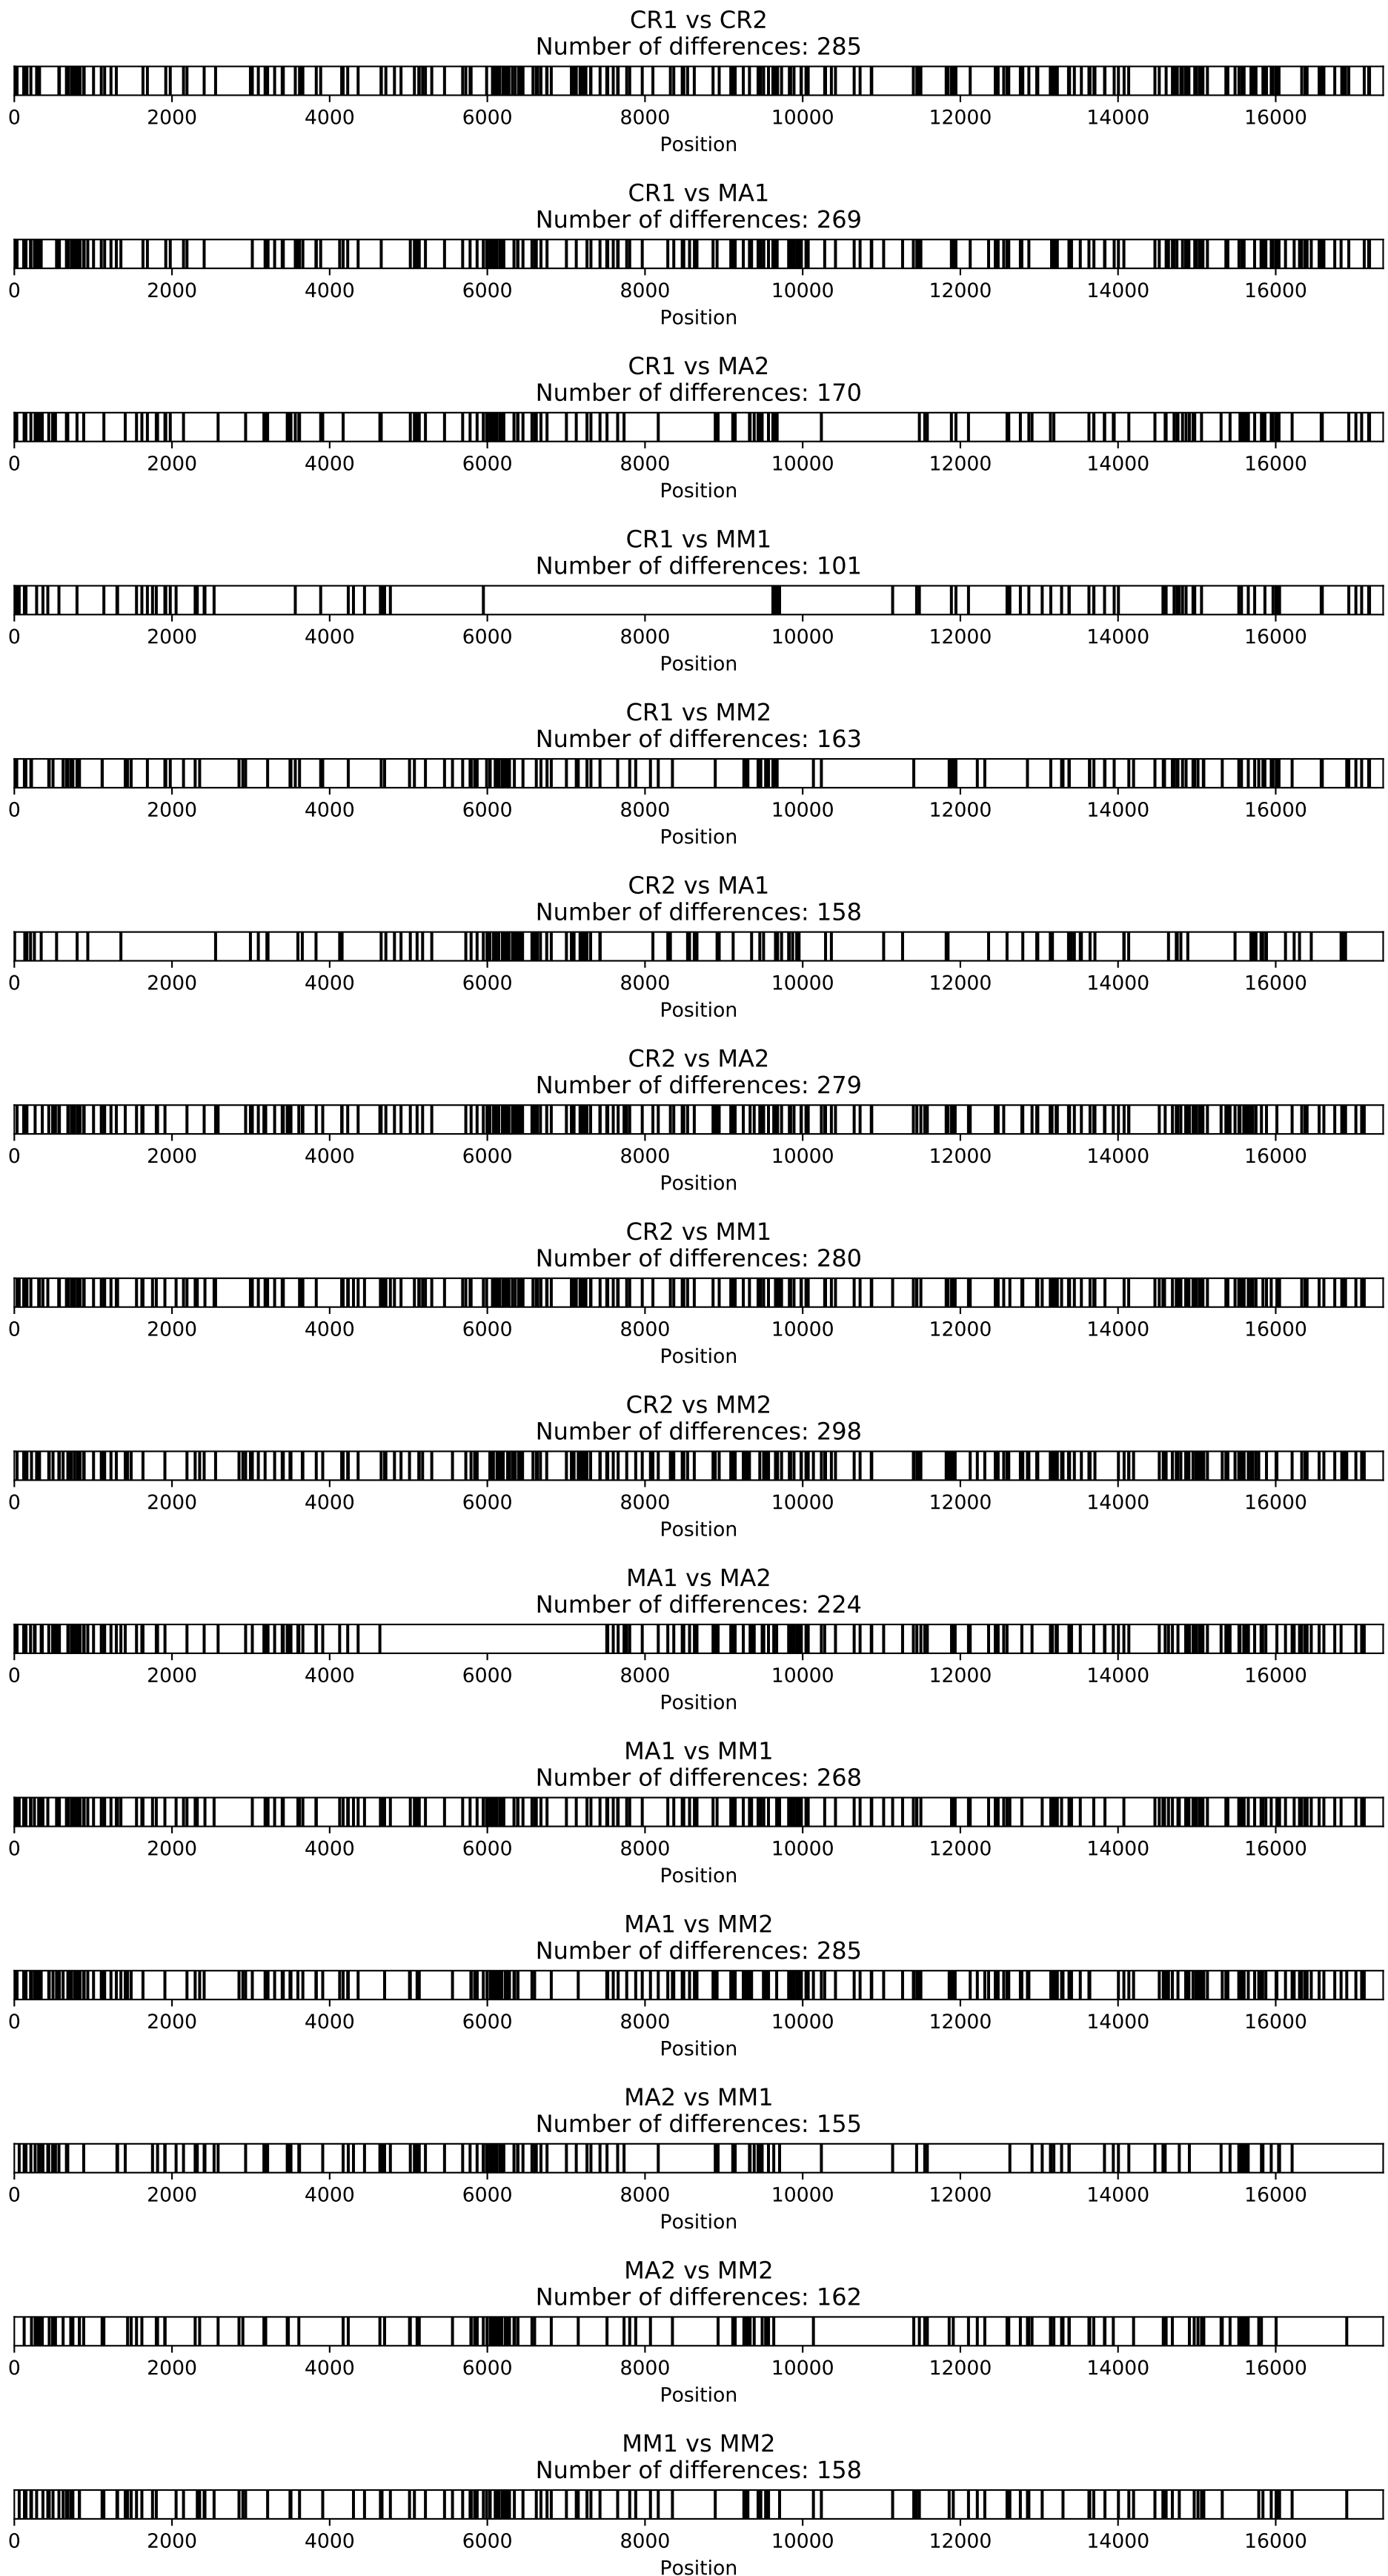

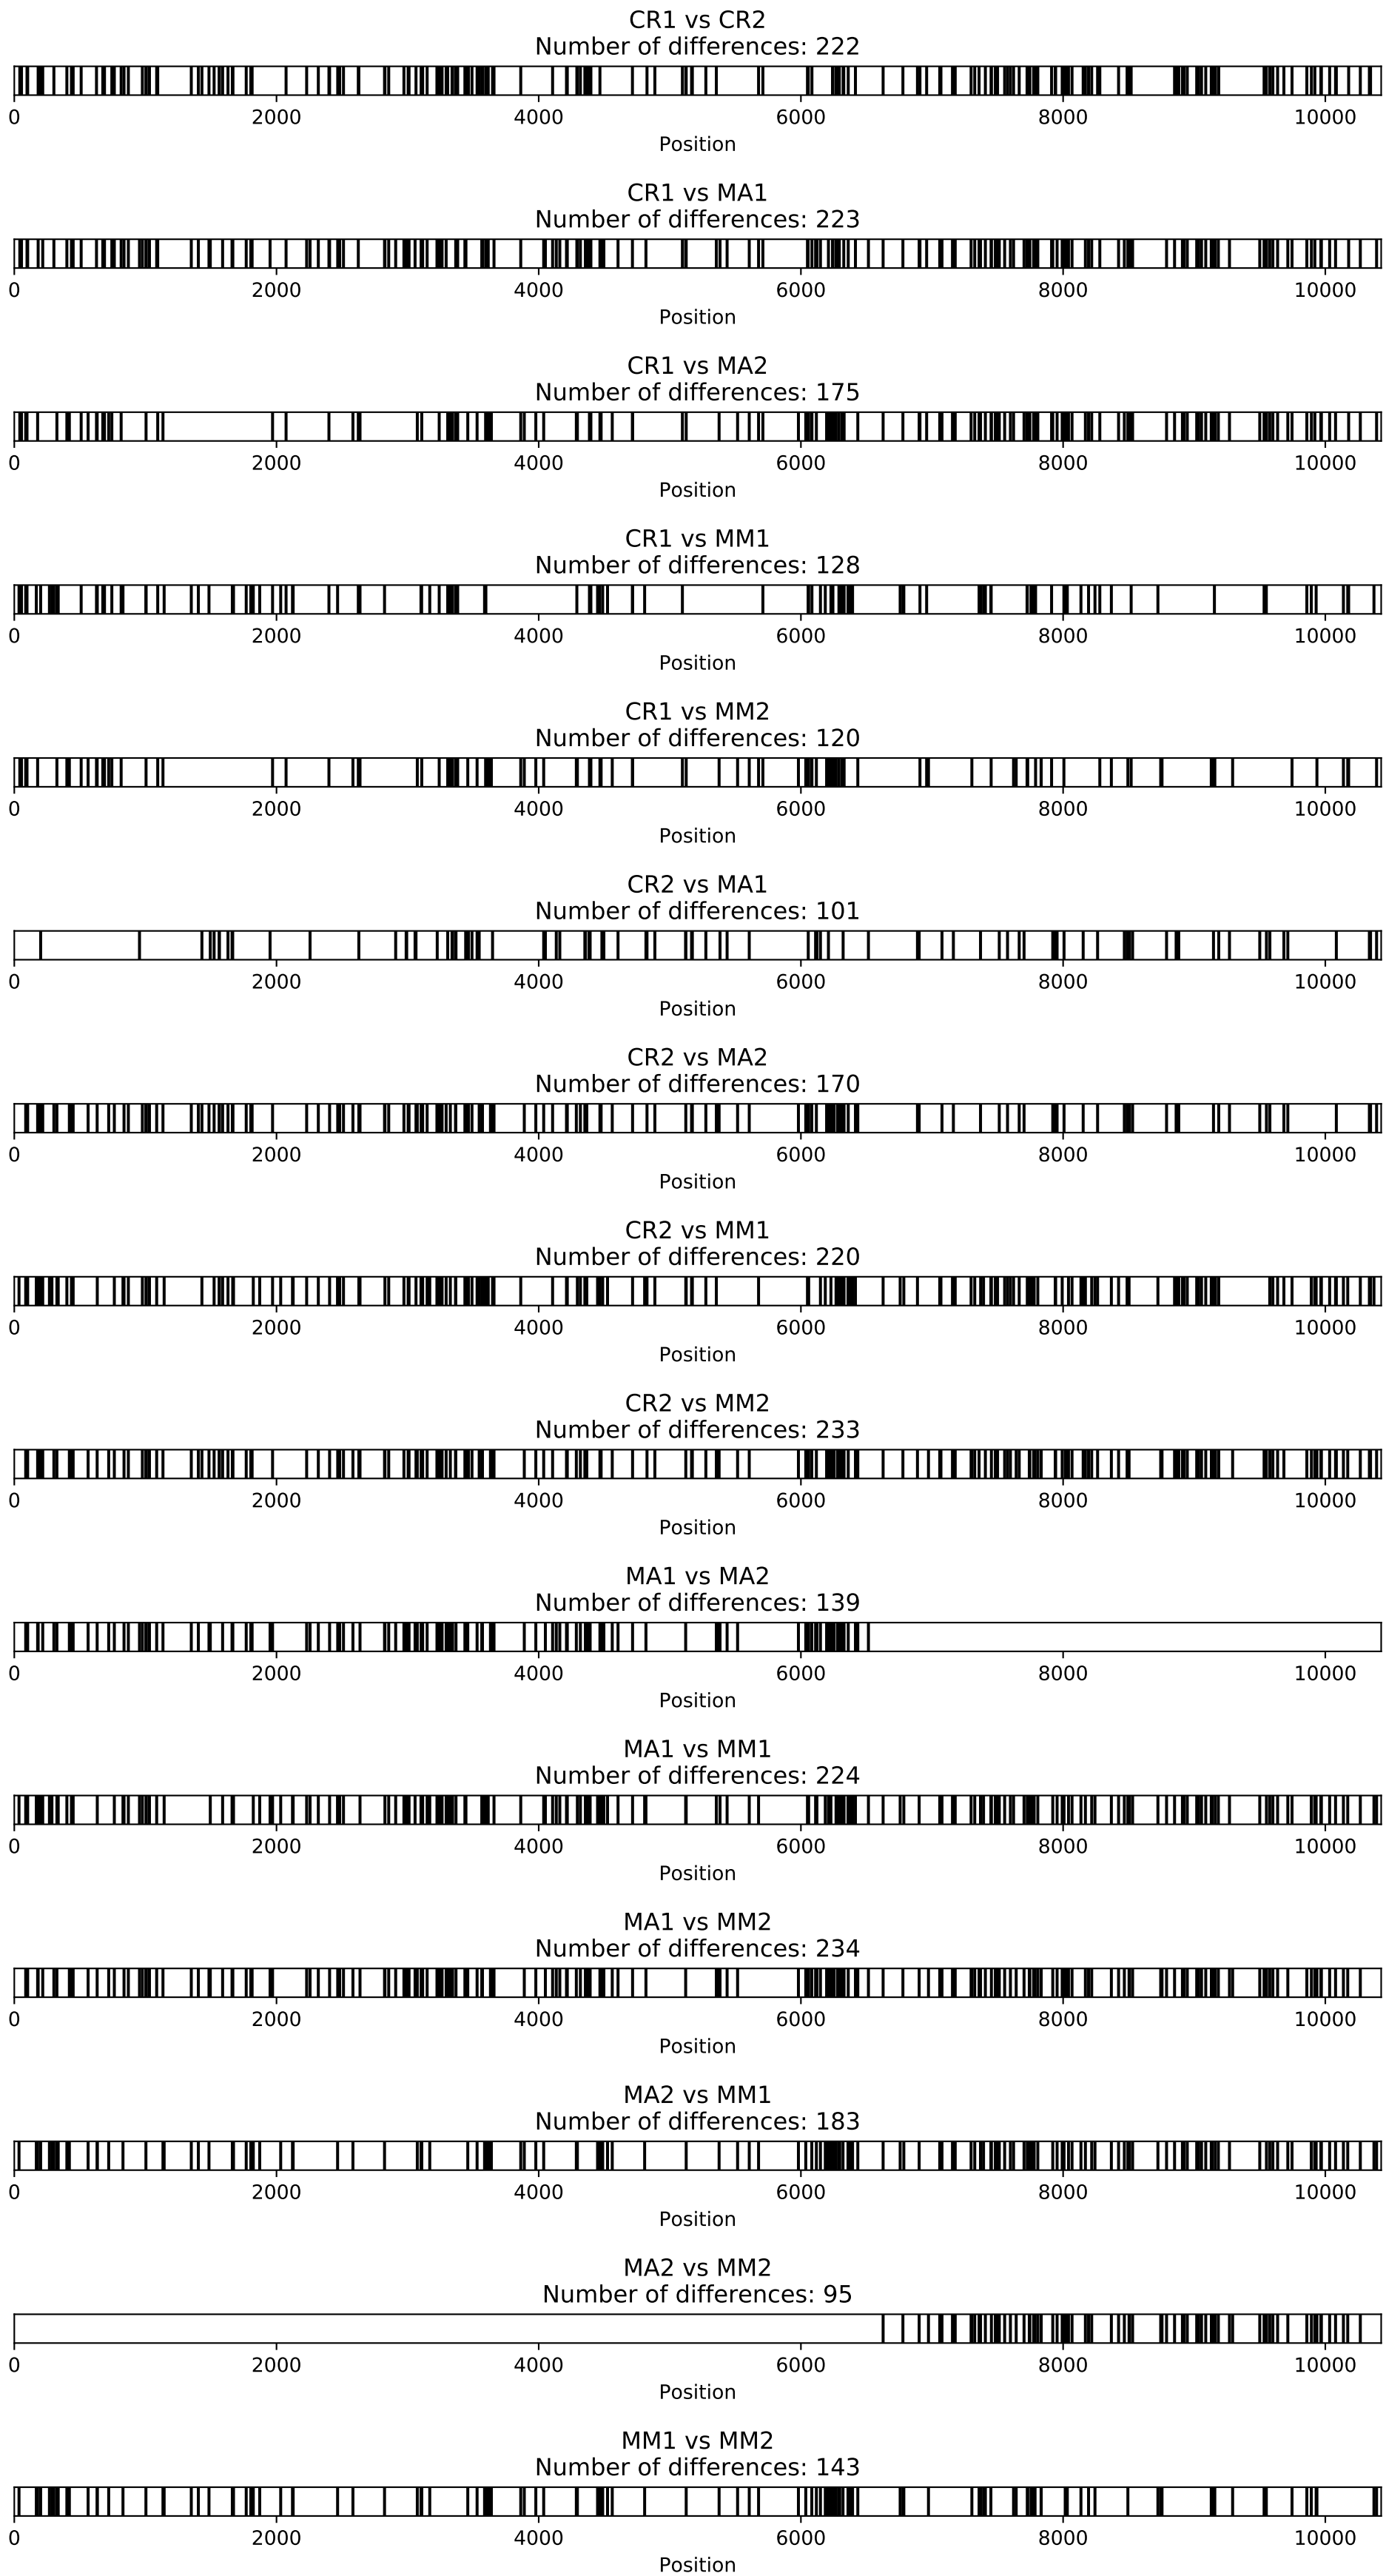

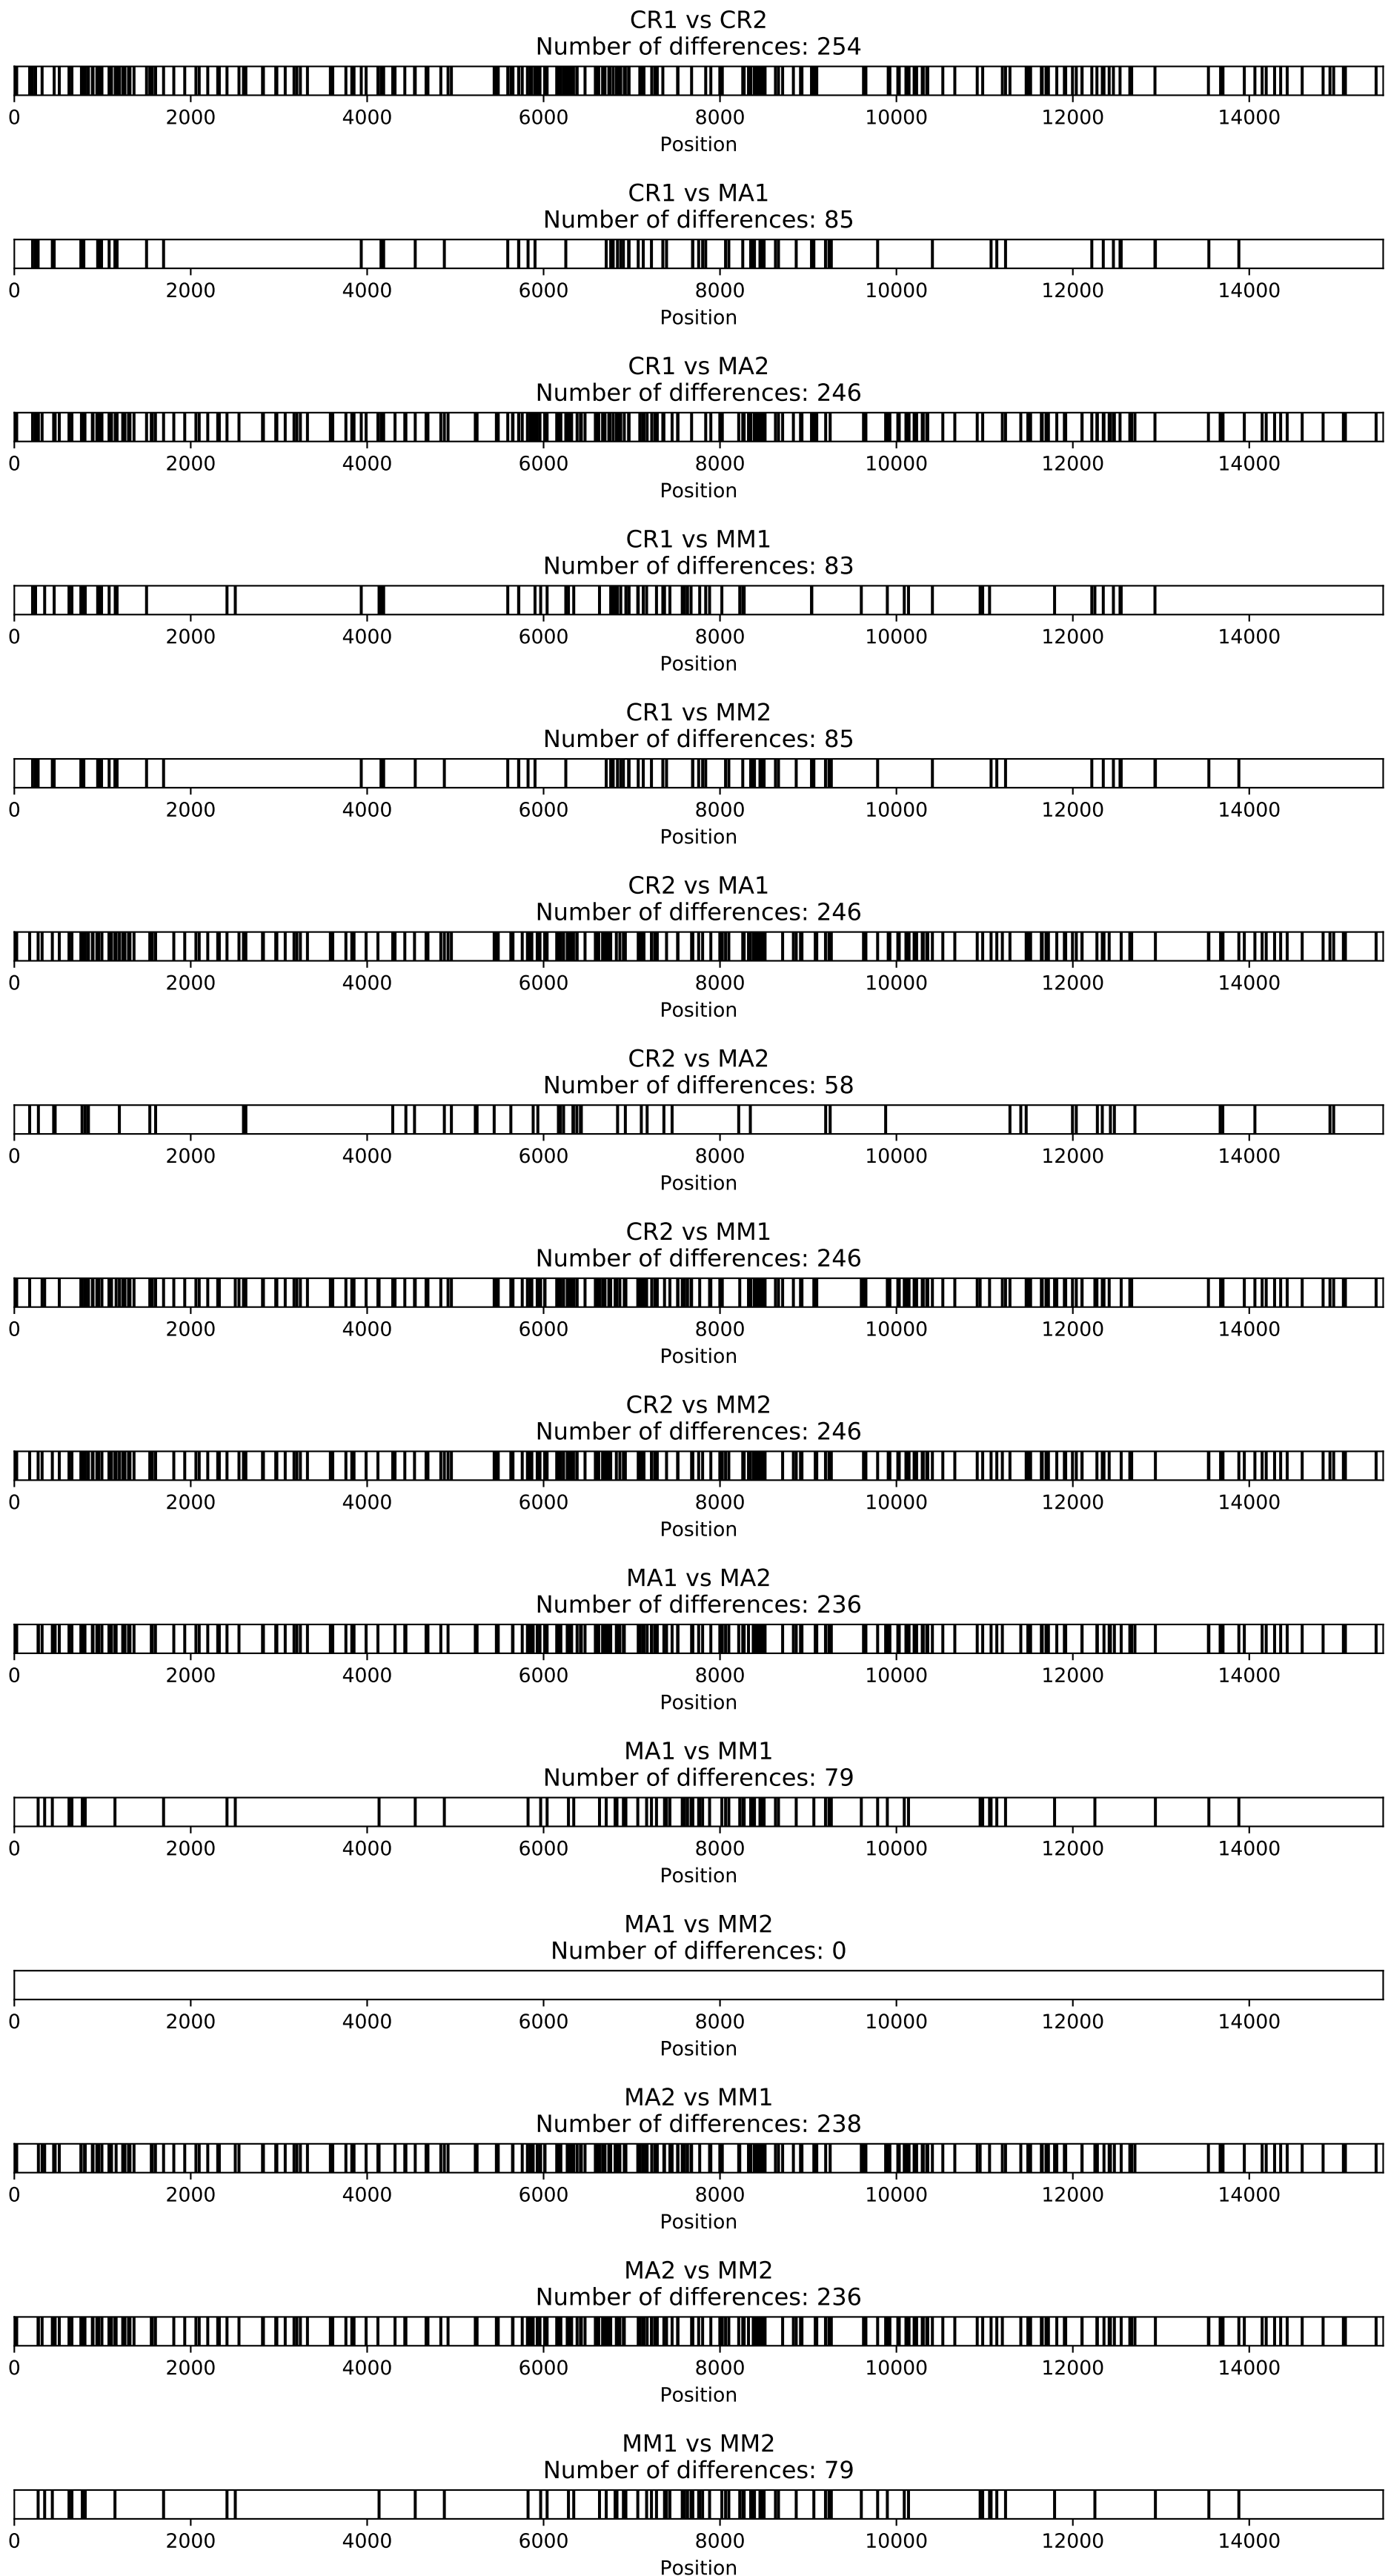

# Region: 105

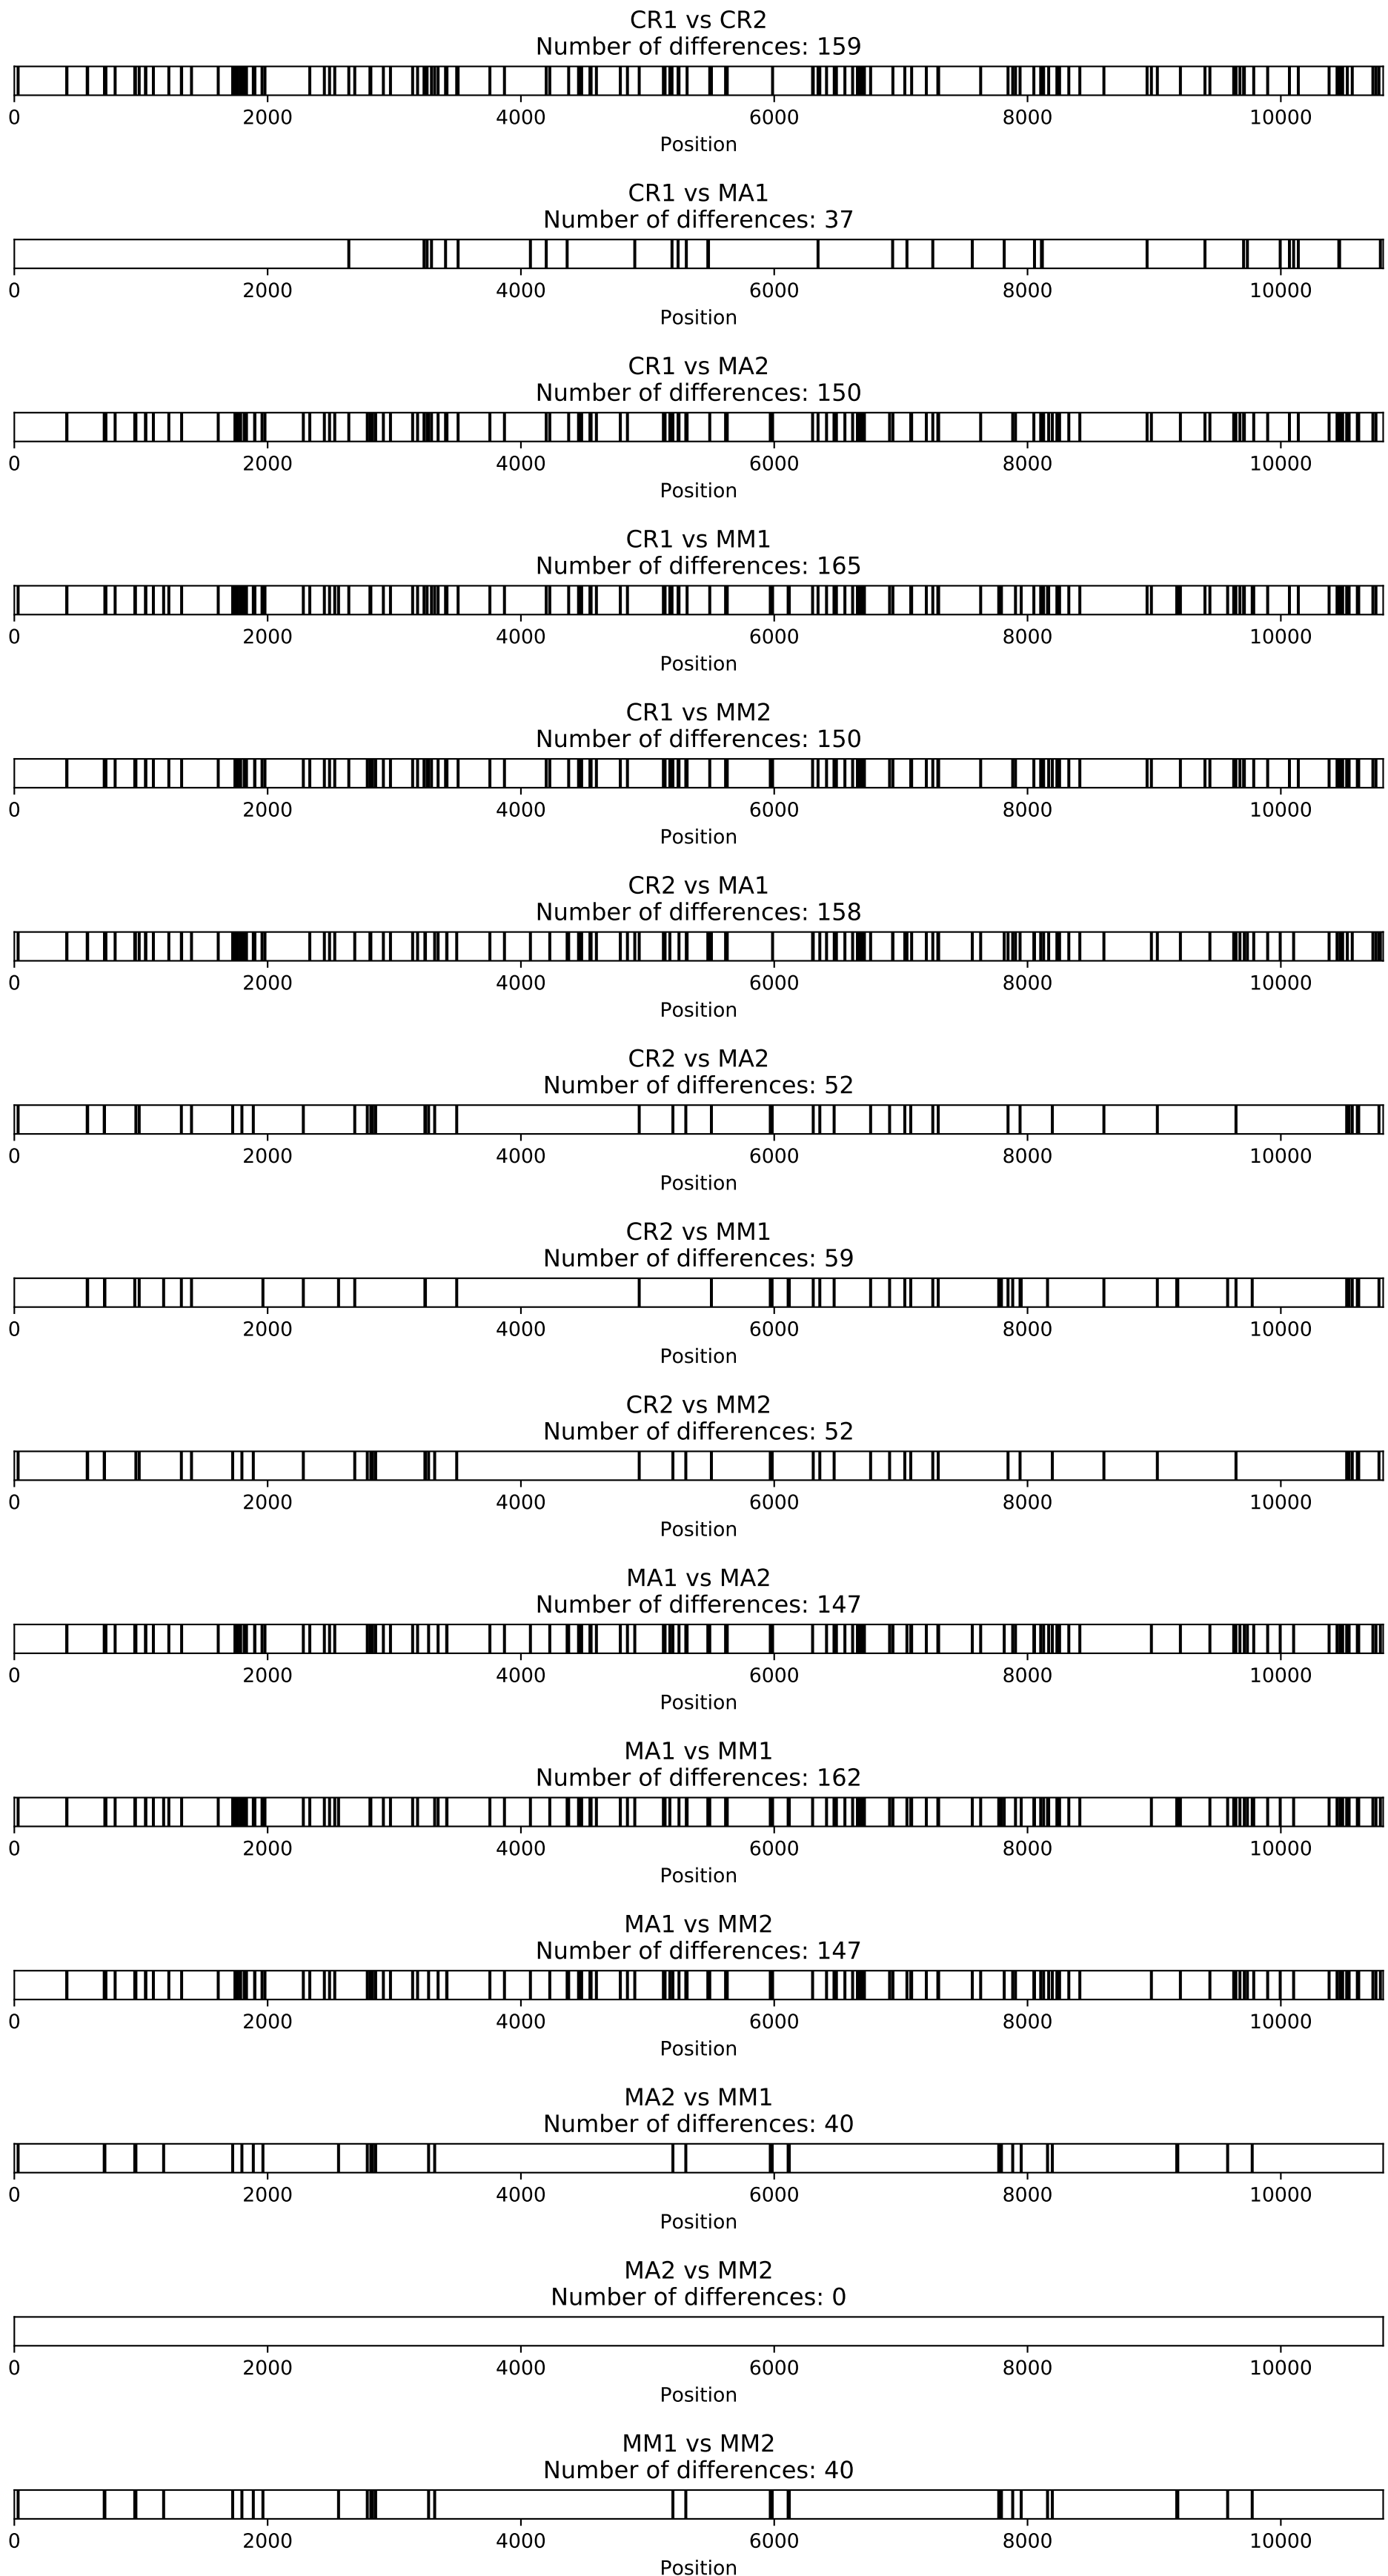



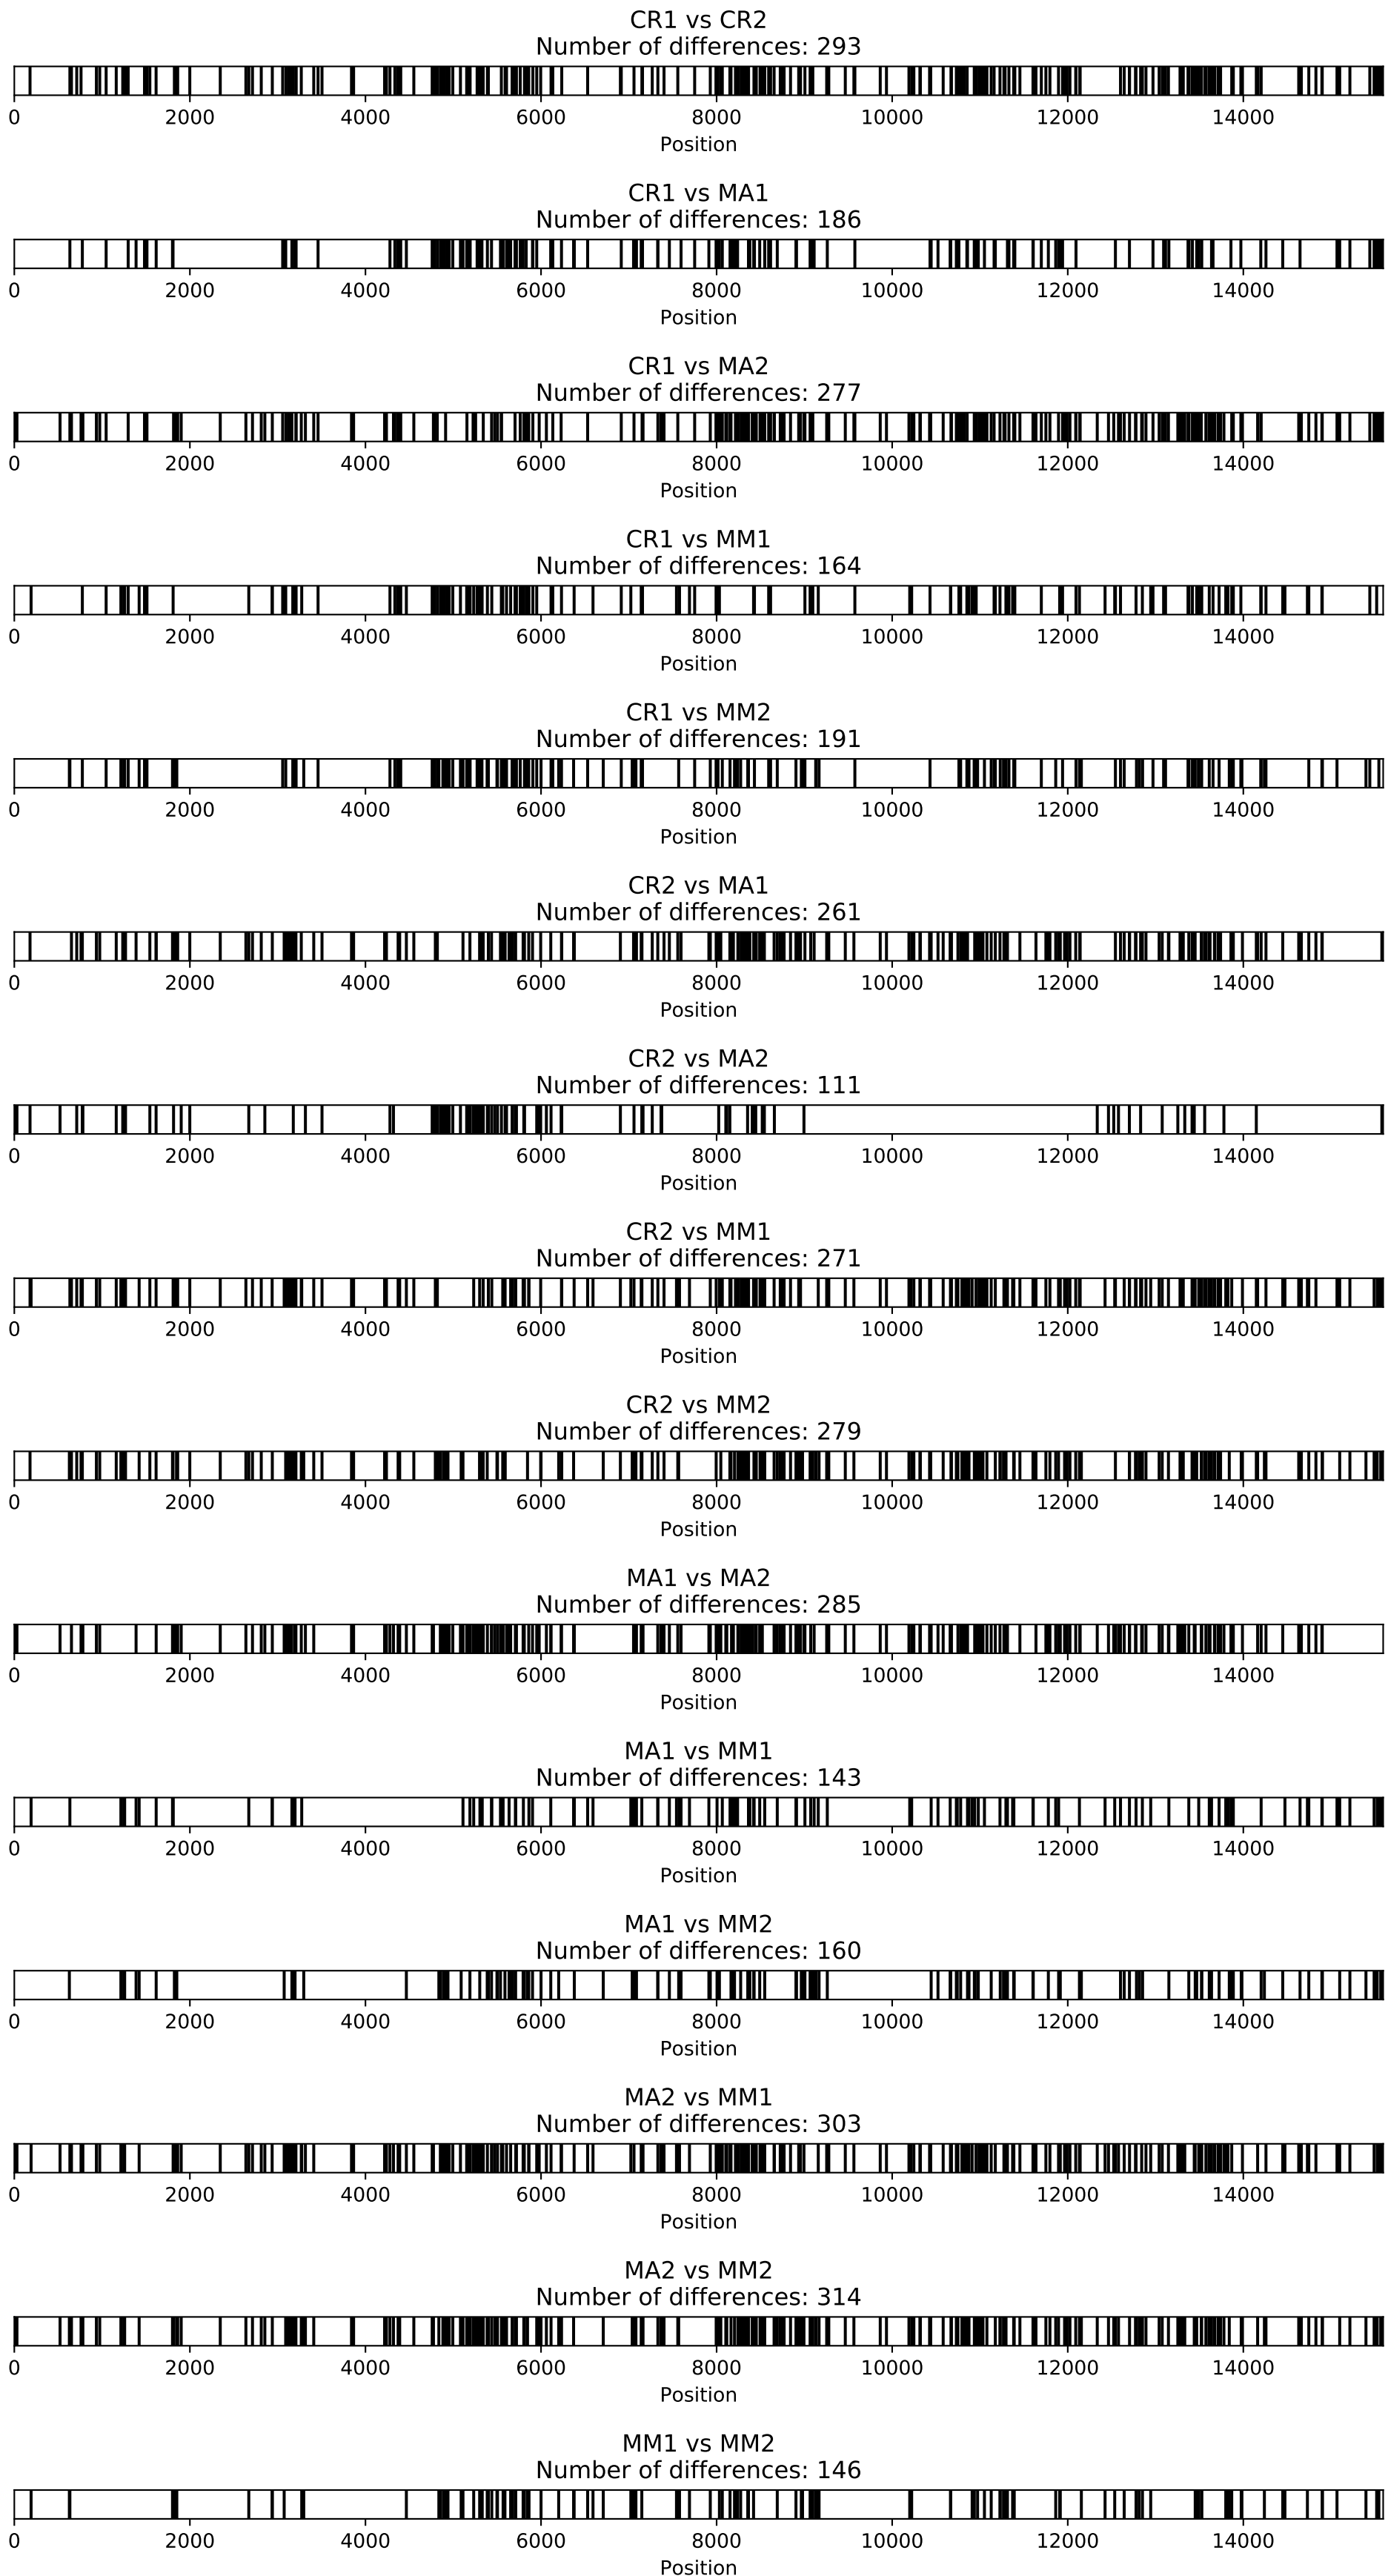

# Region: 111

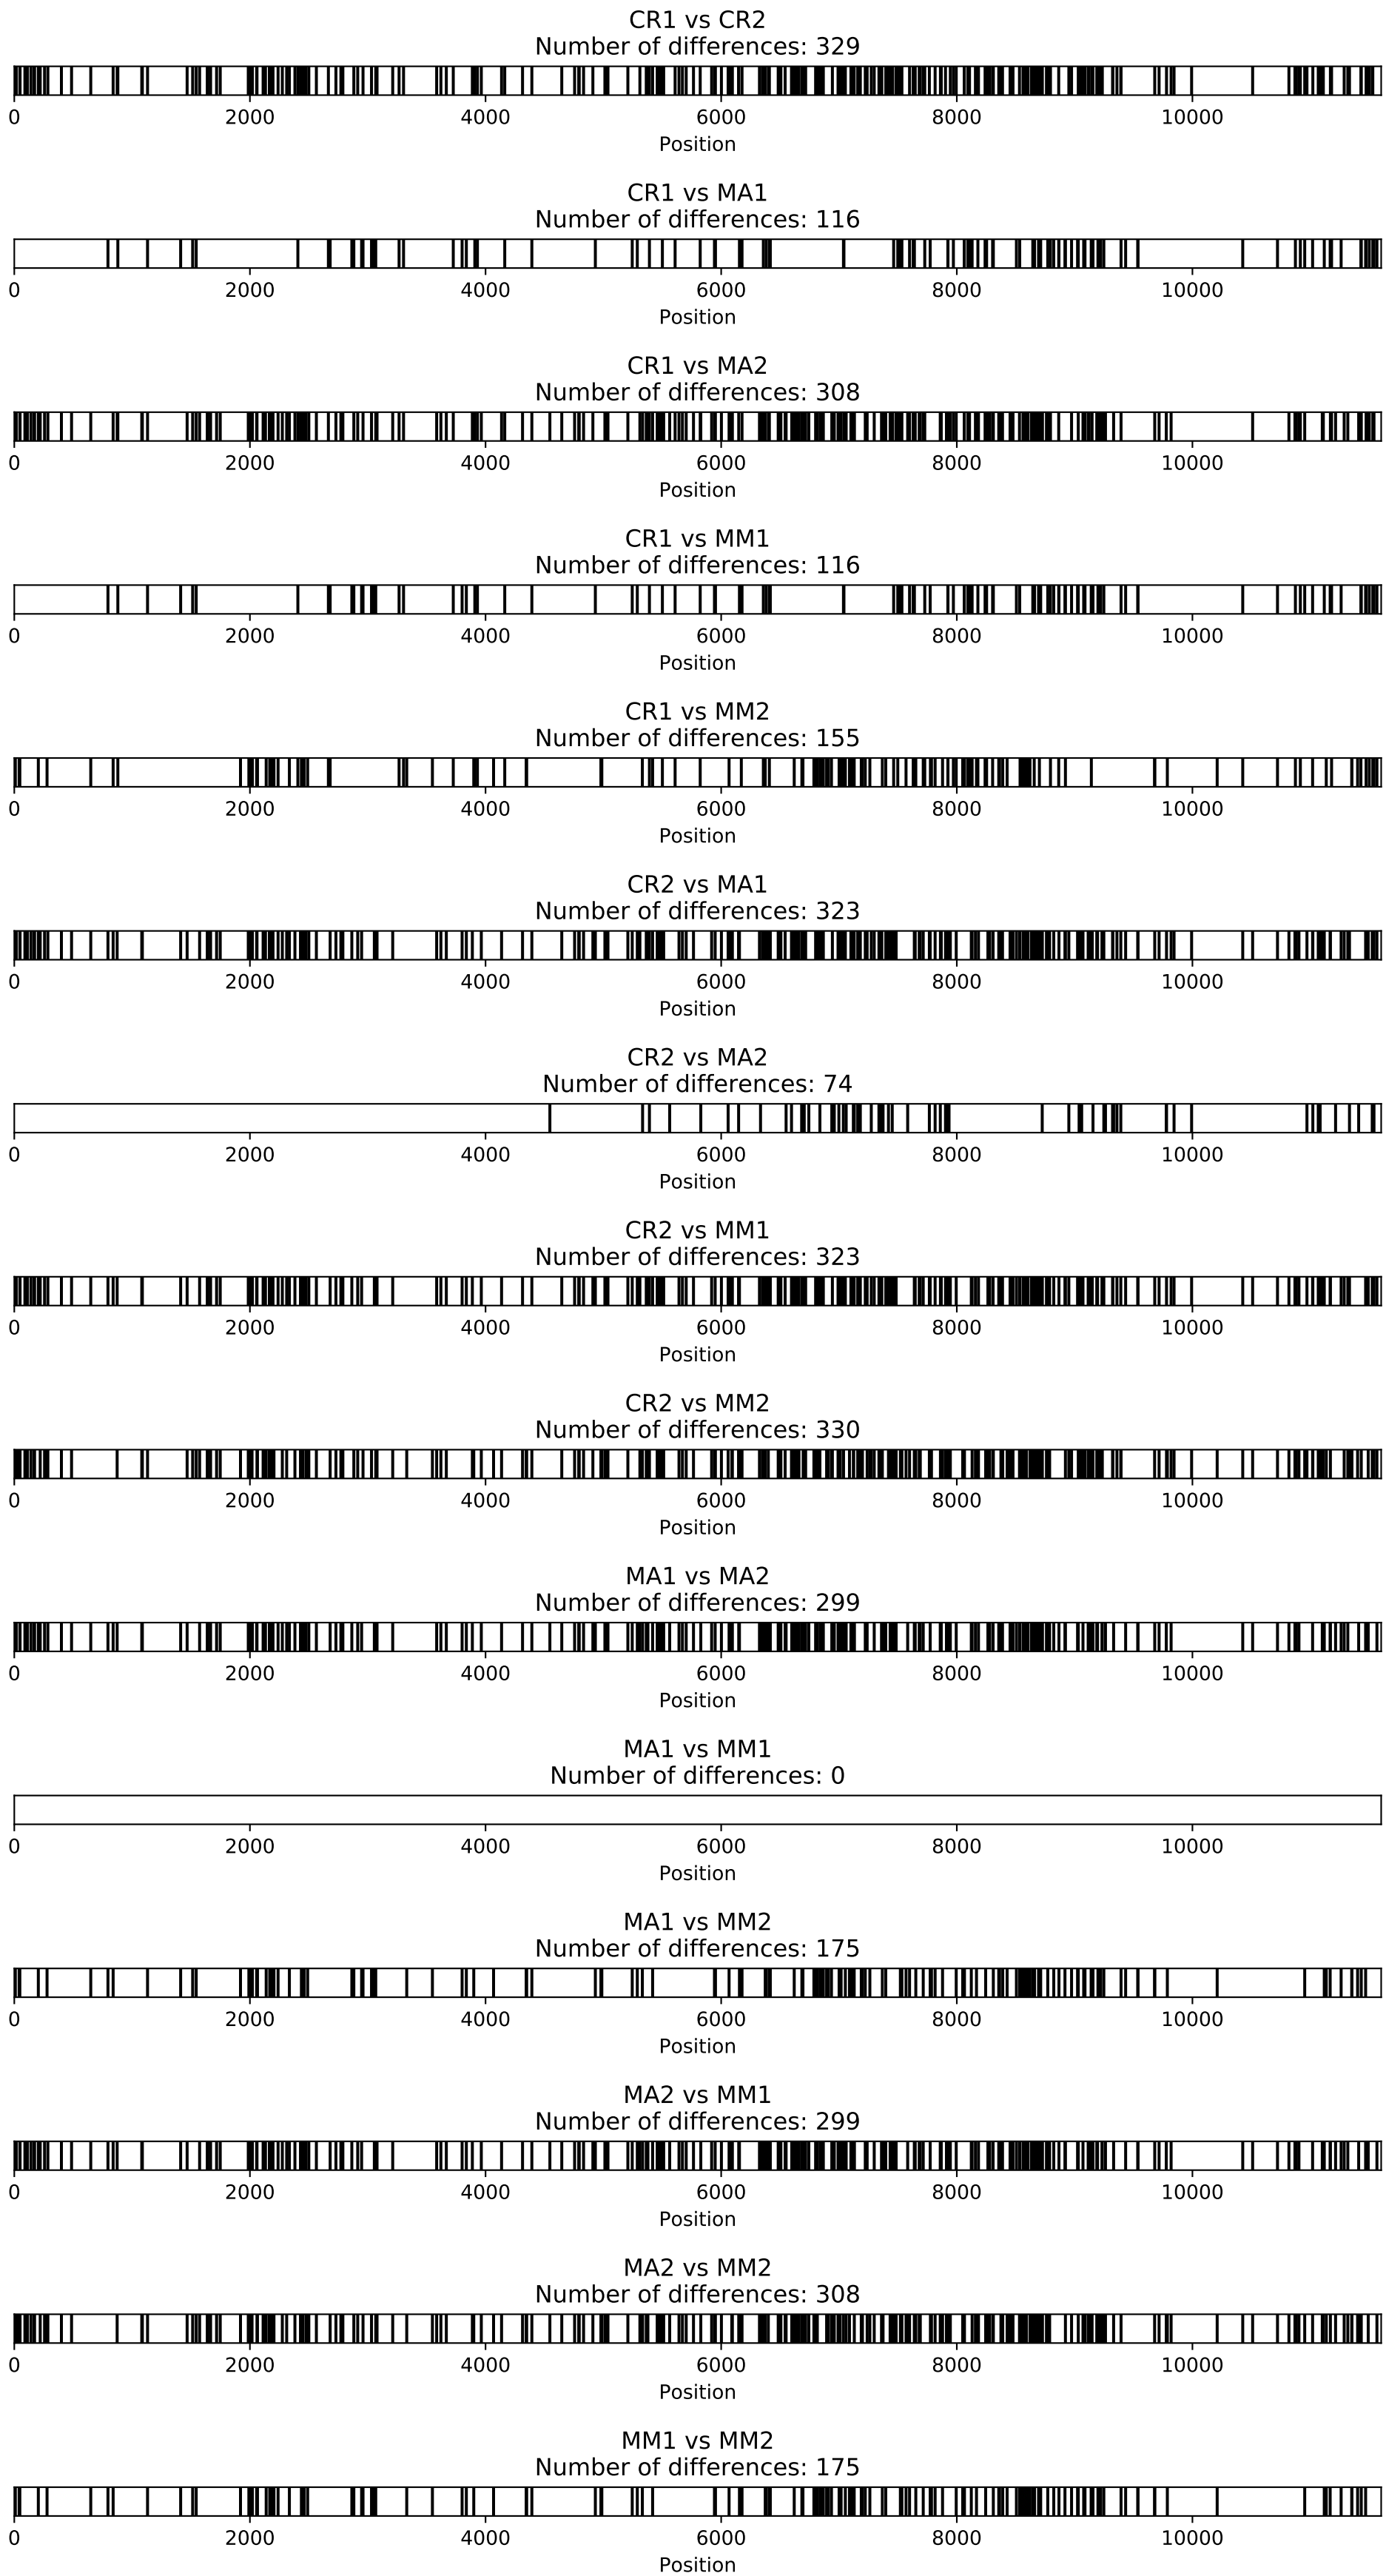

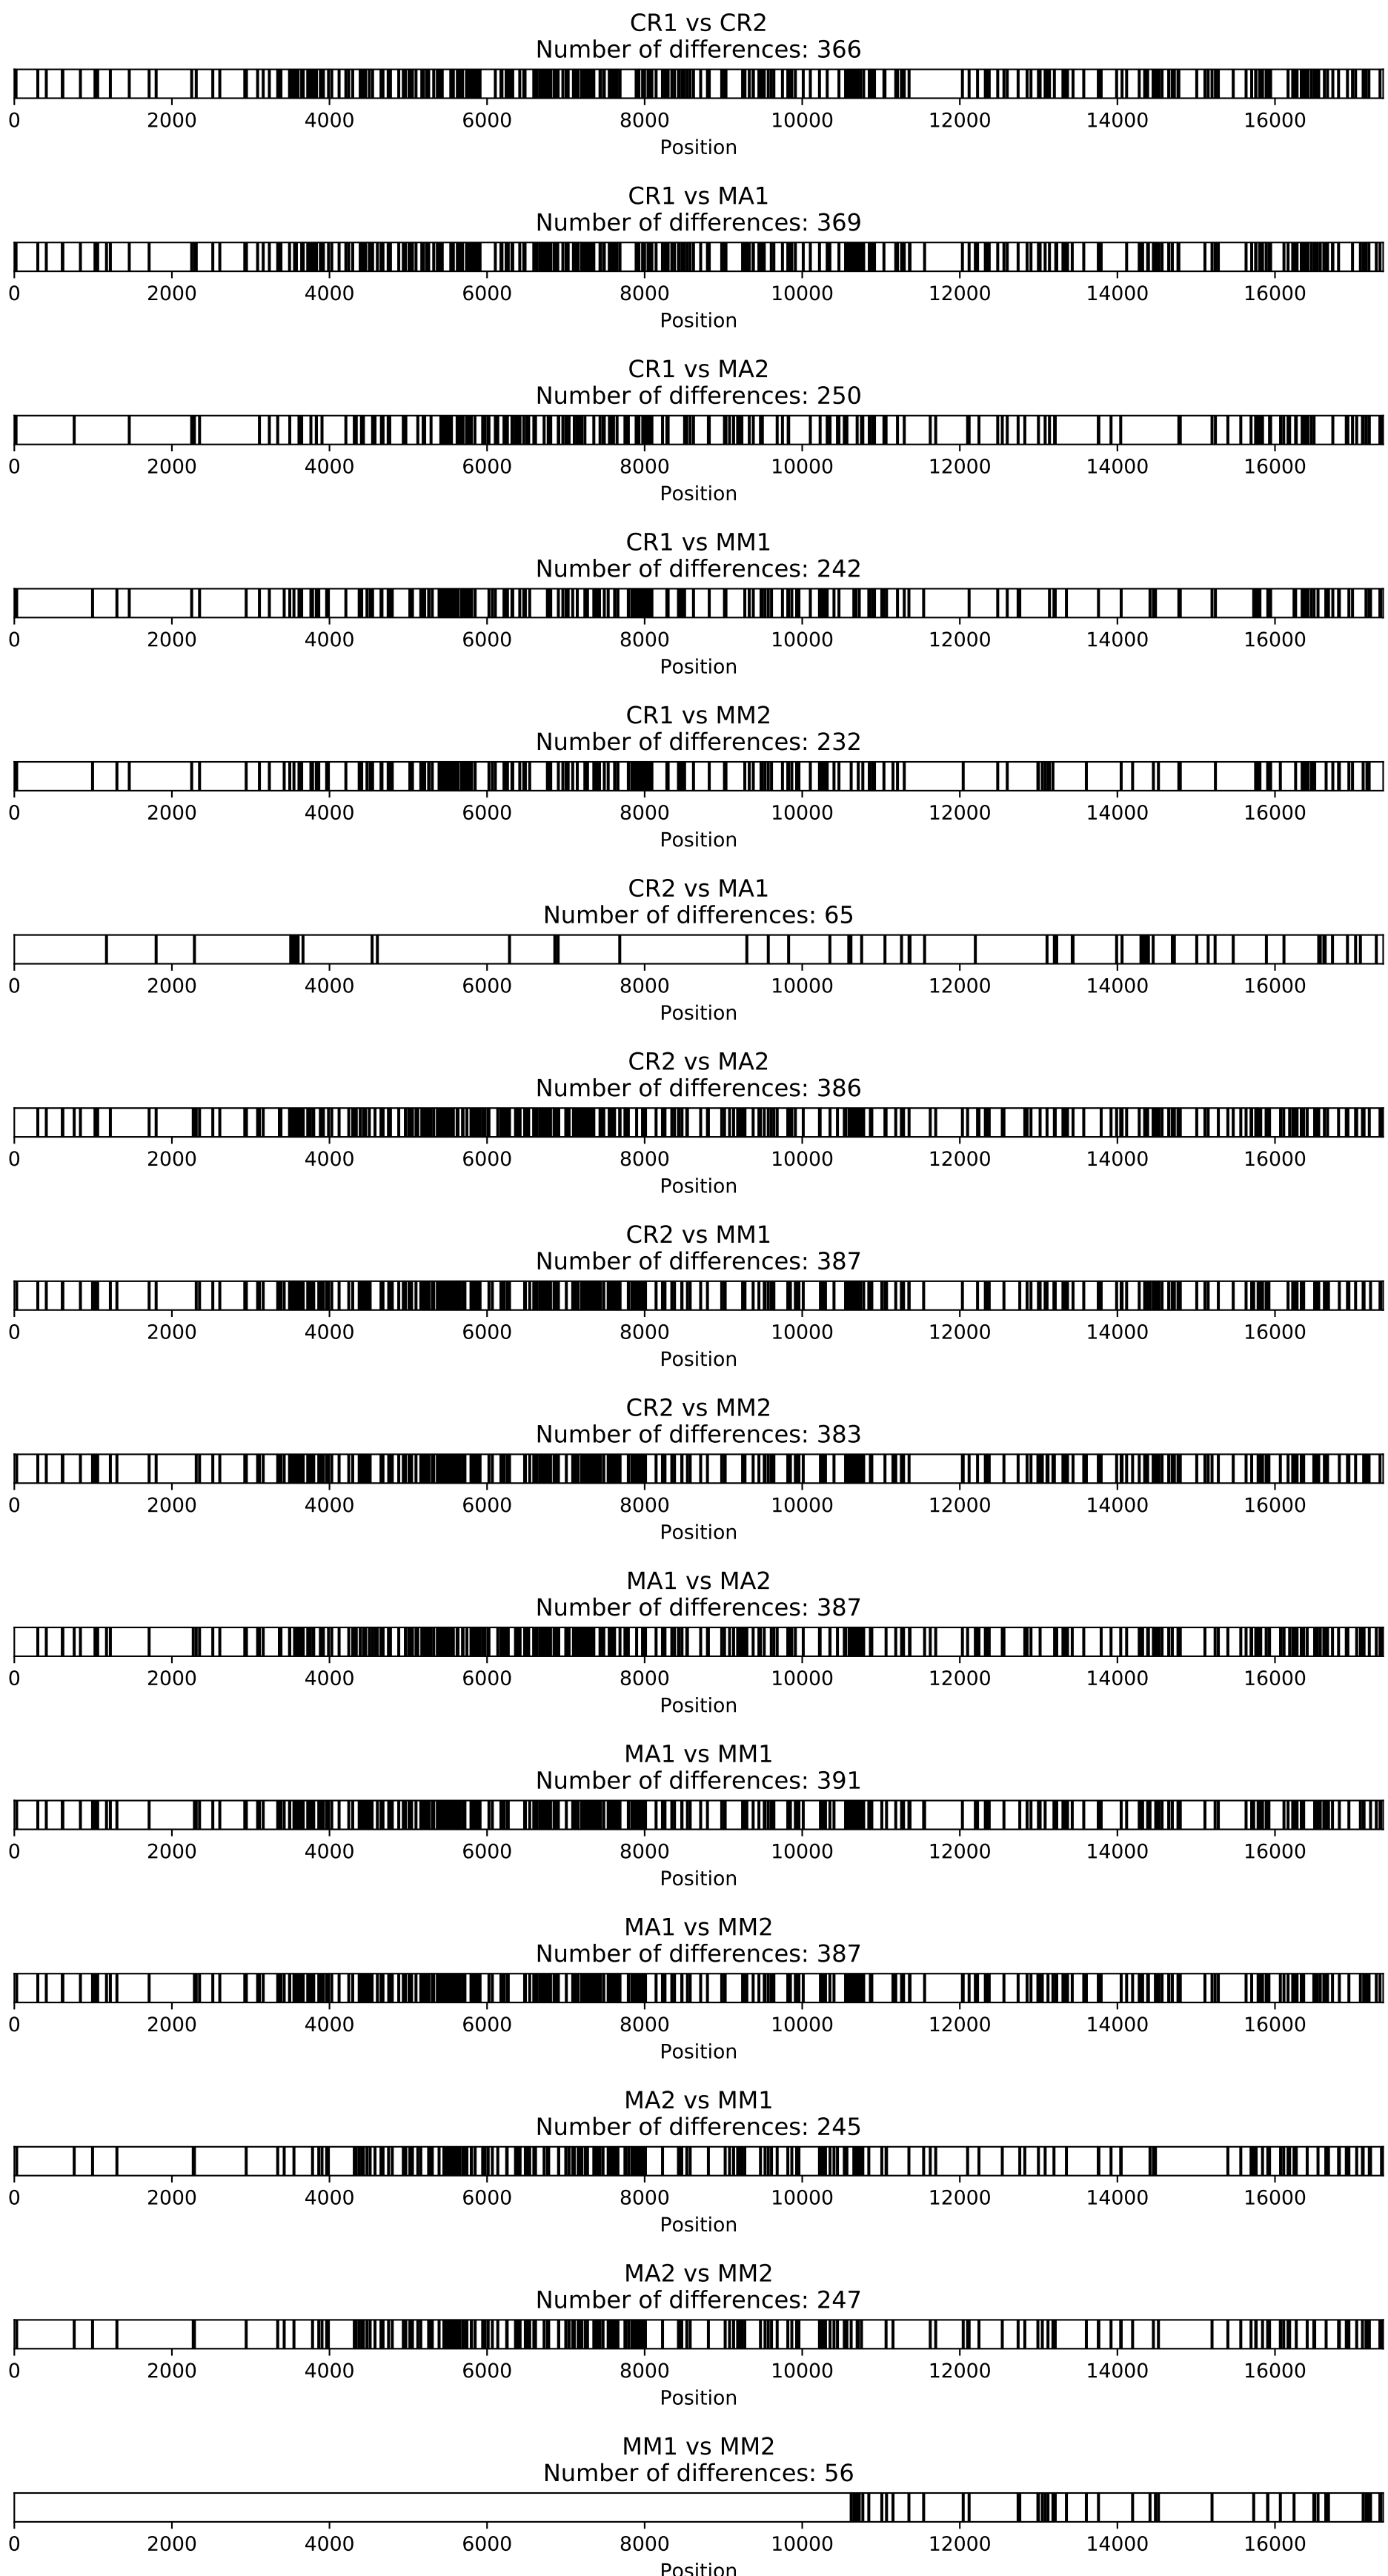

# Region: 114

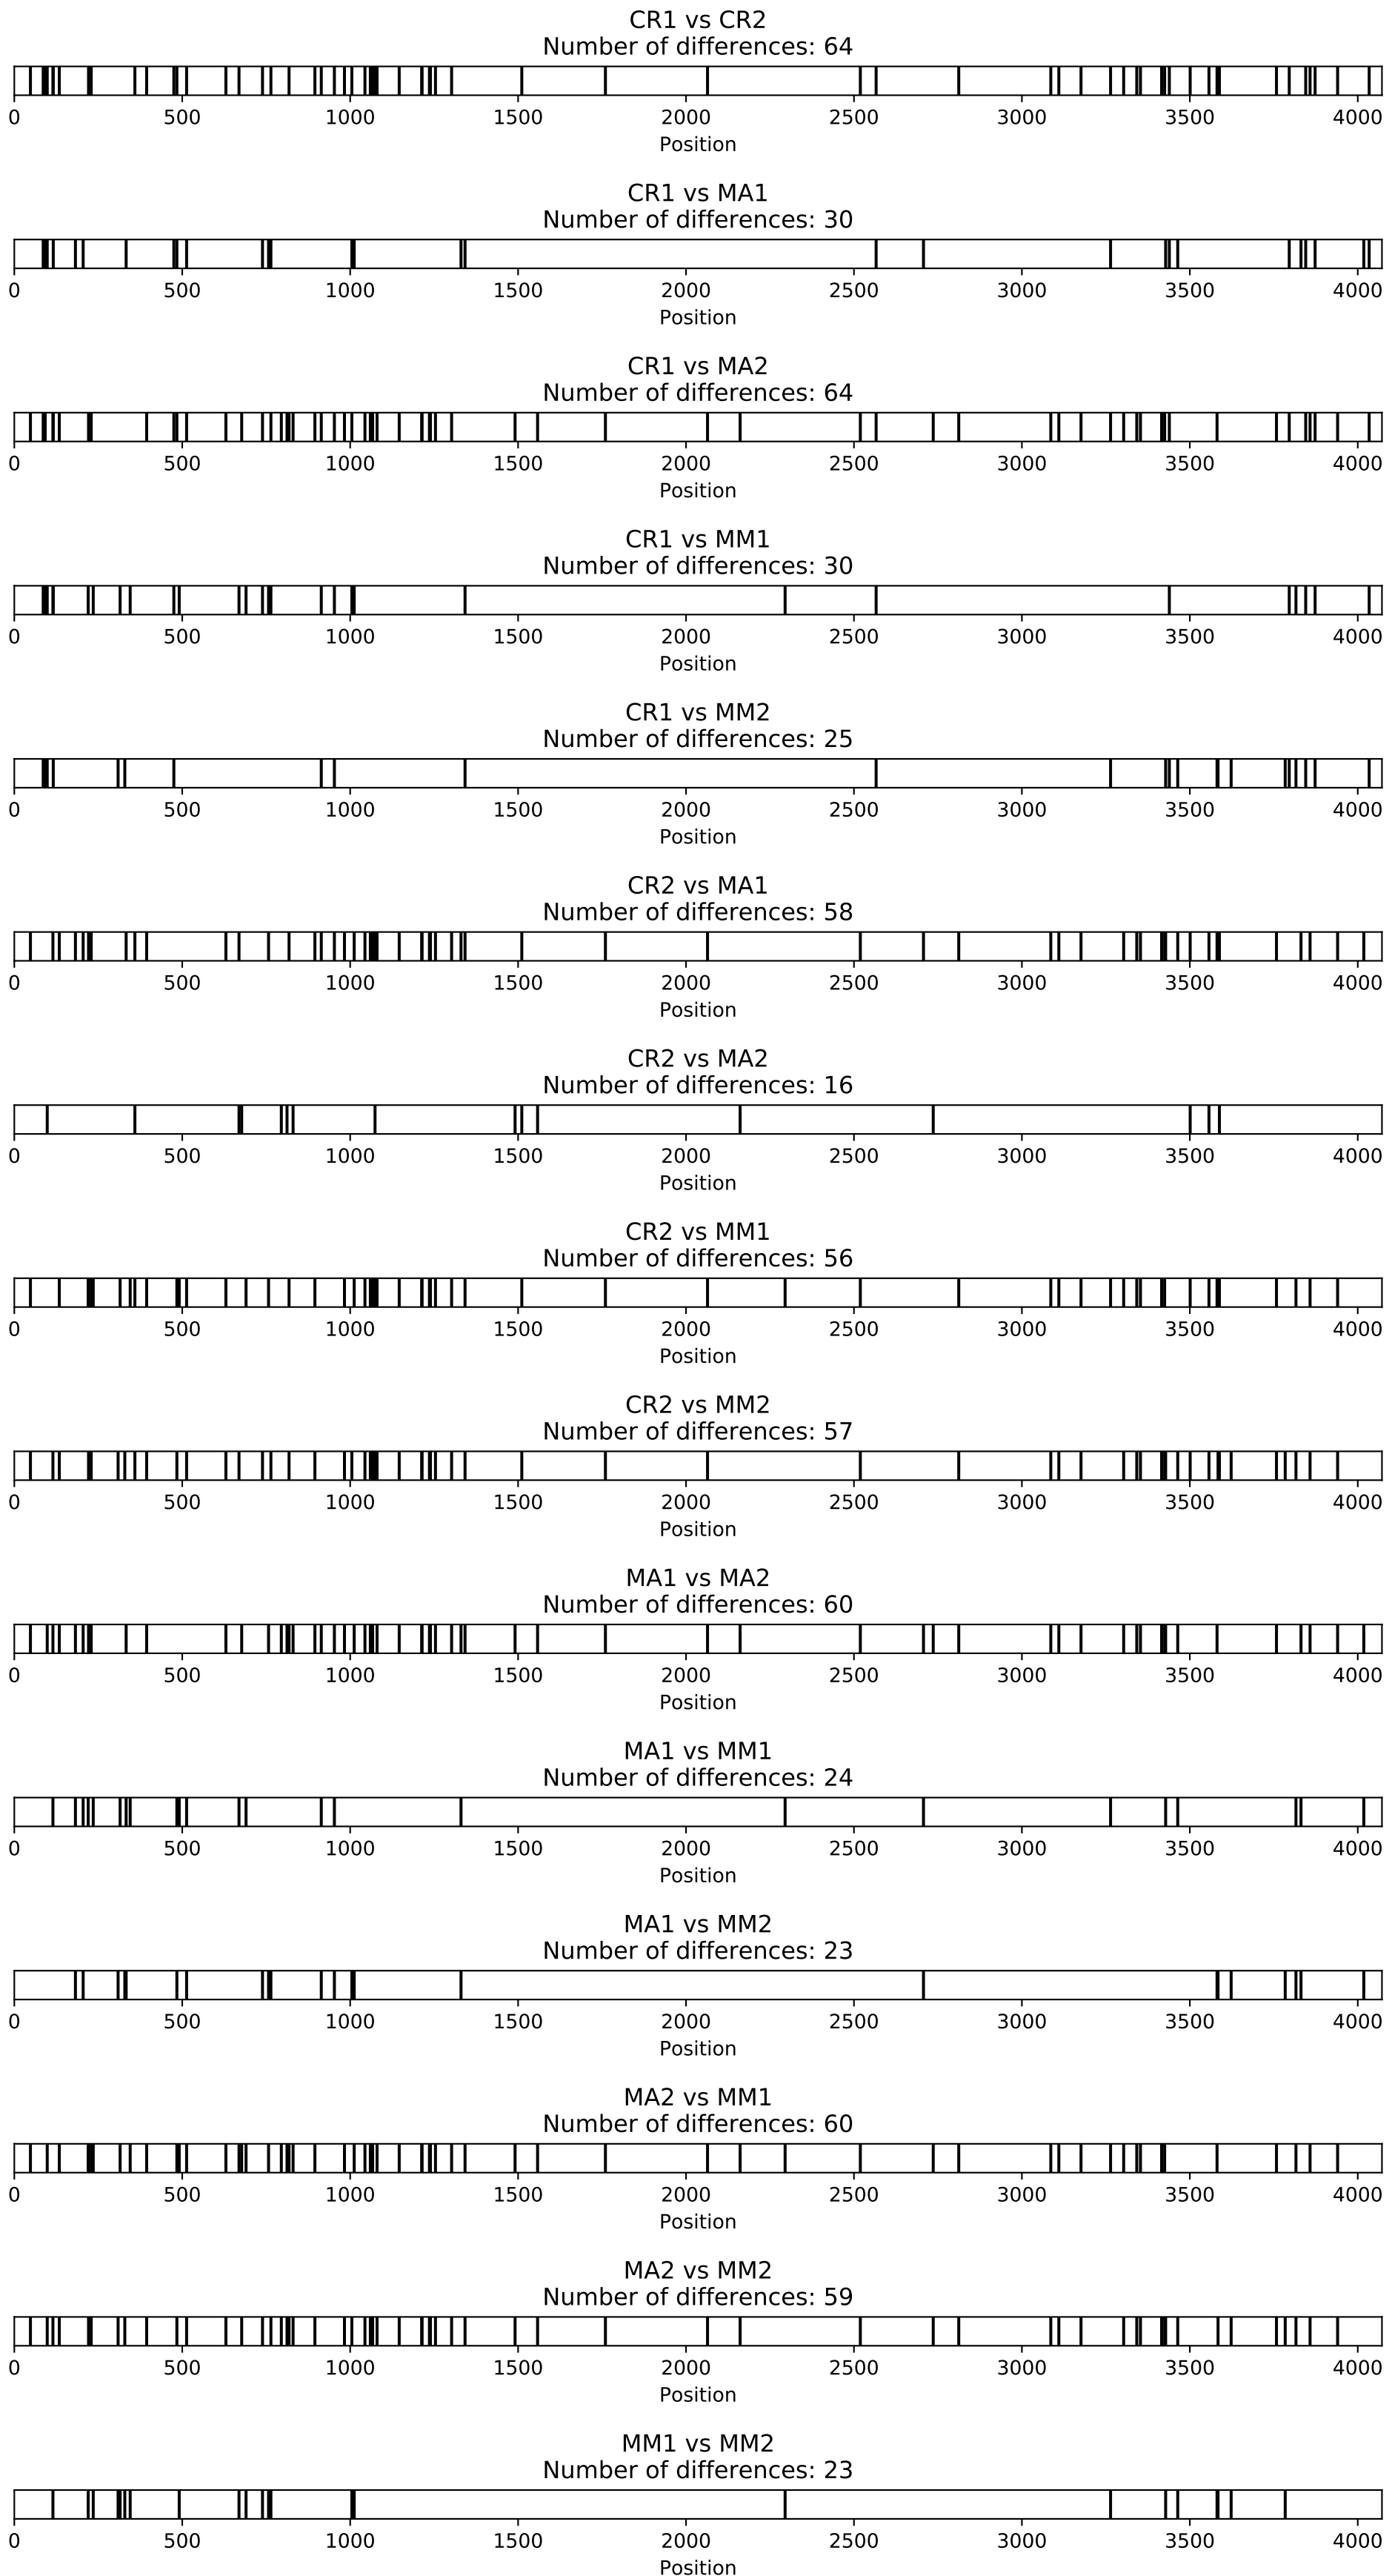

# Region: 115

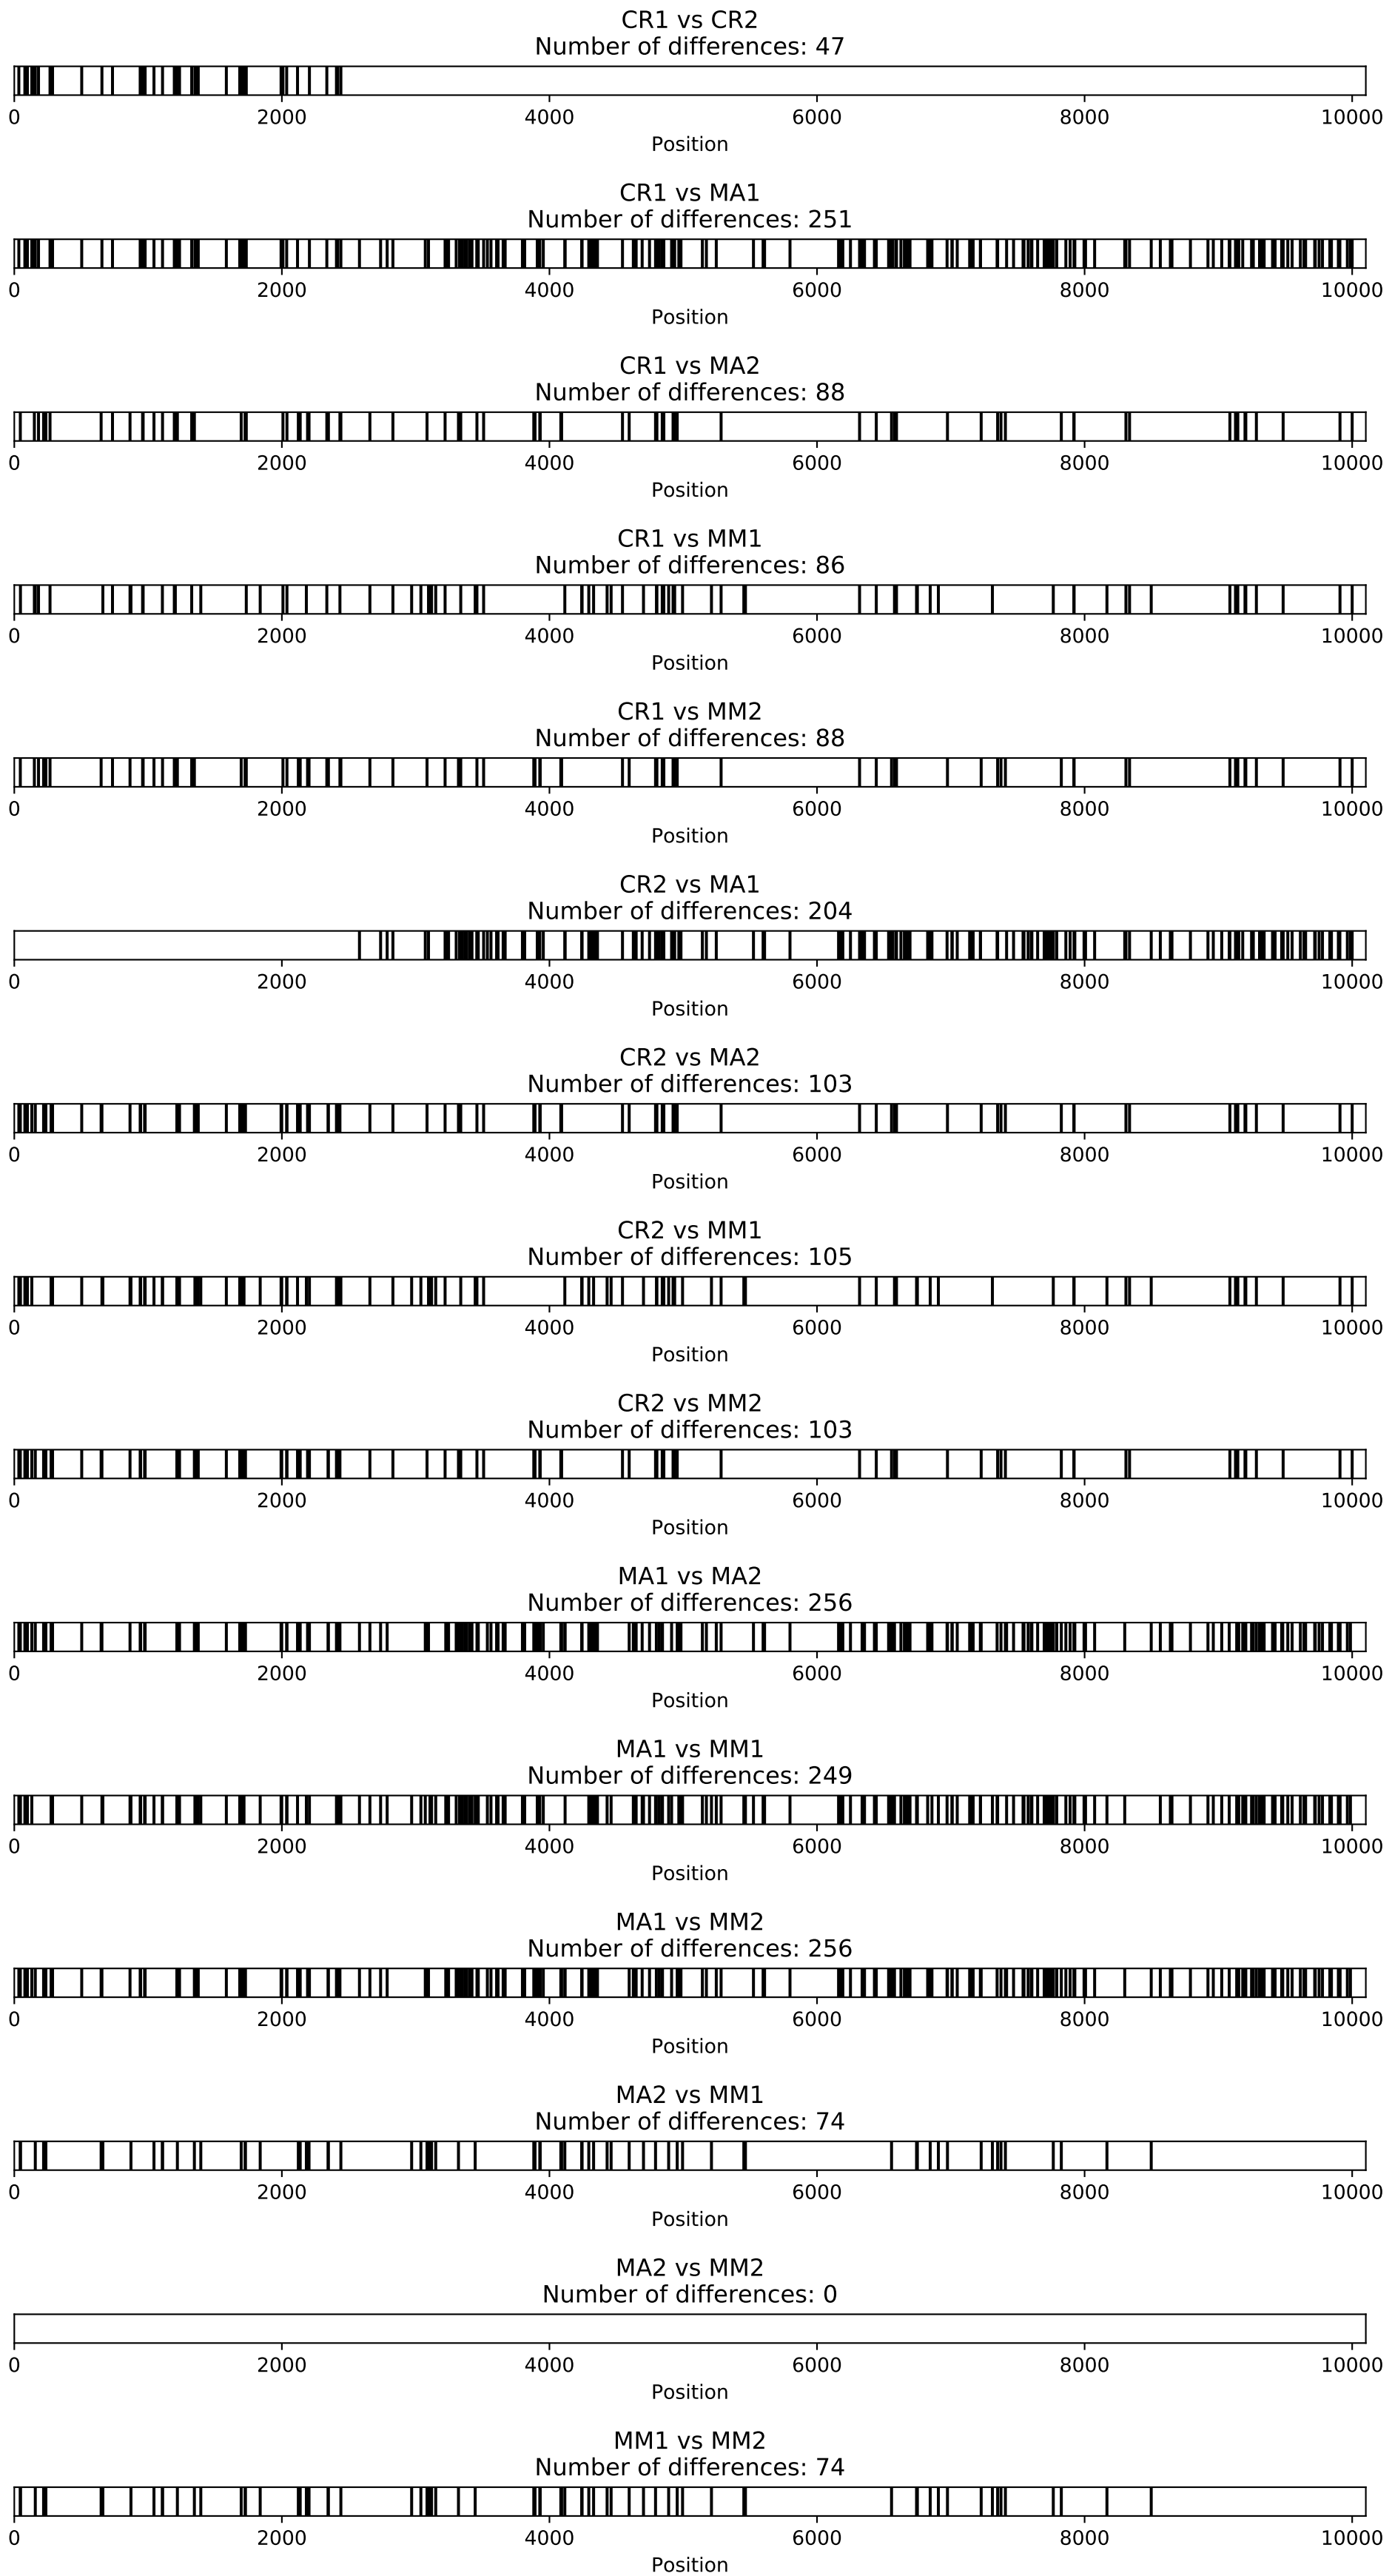

# Region: 116

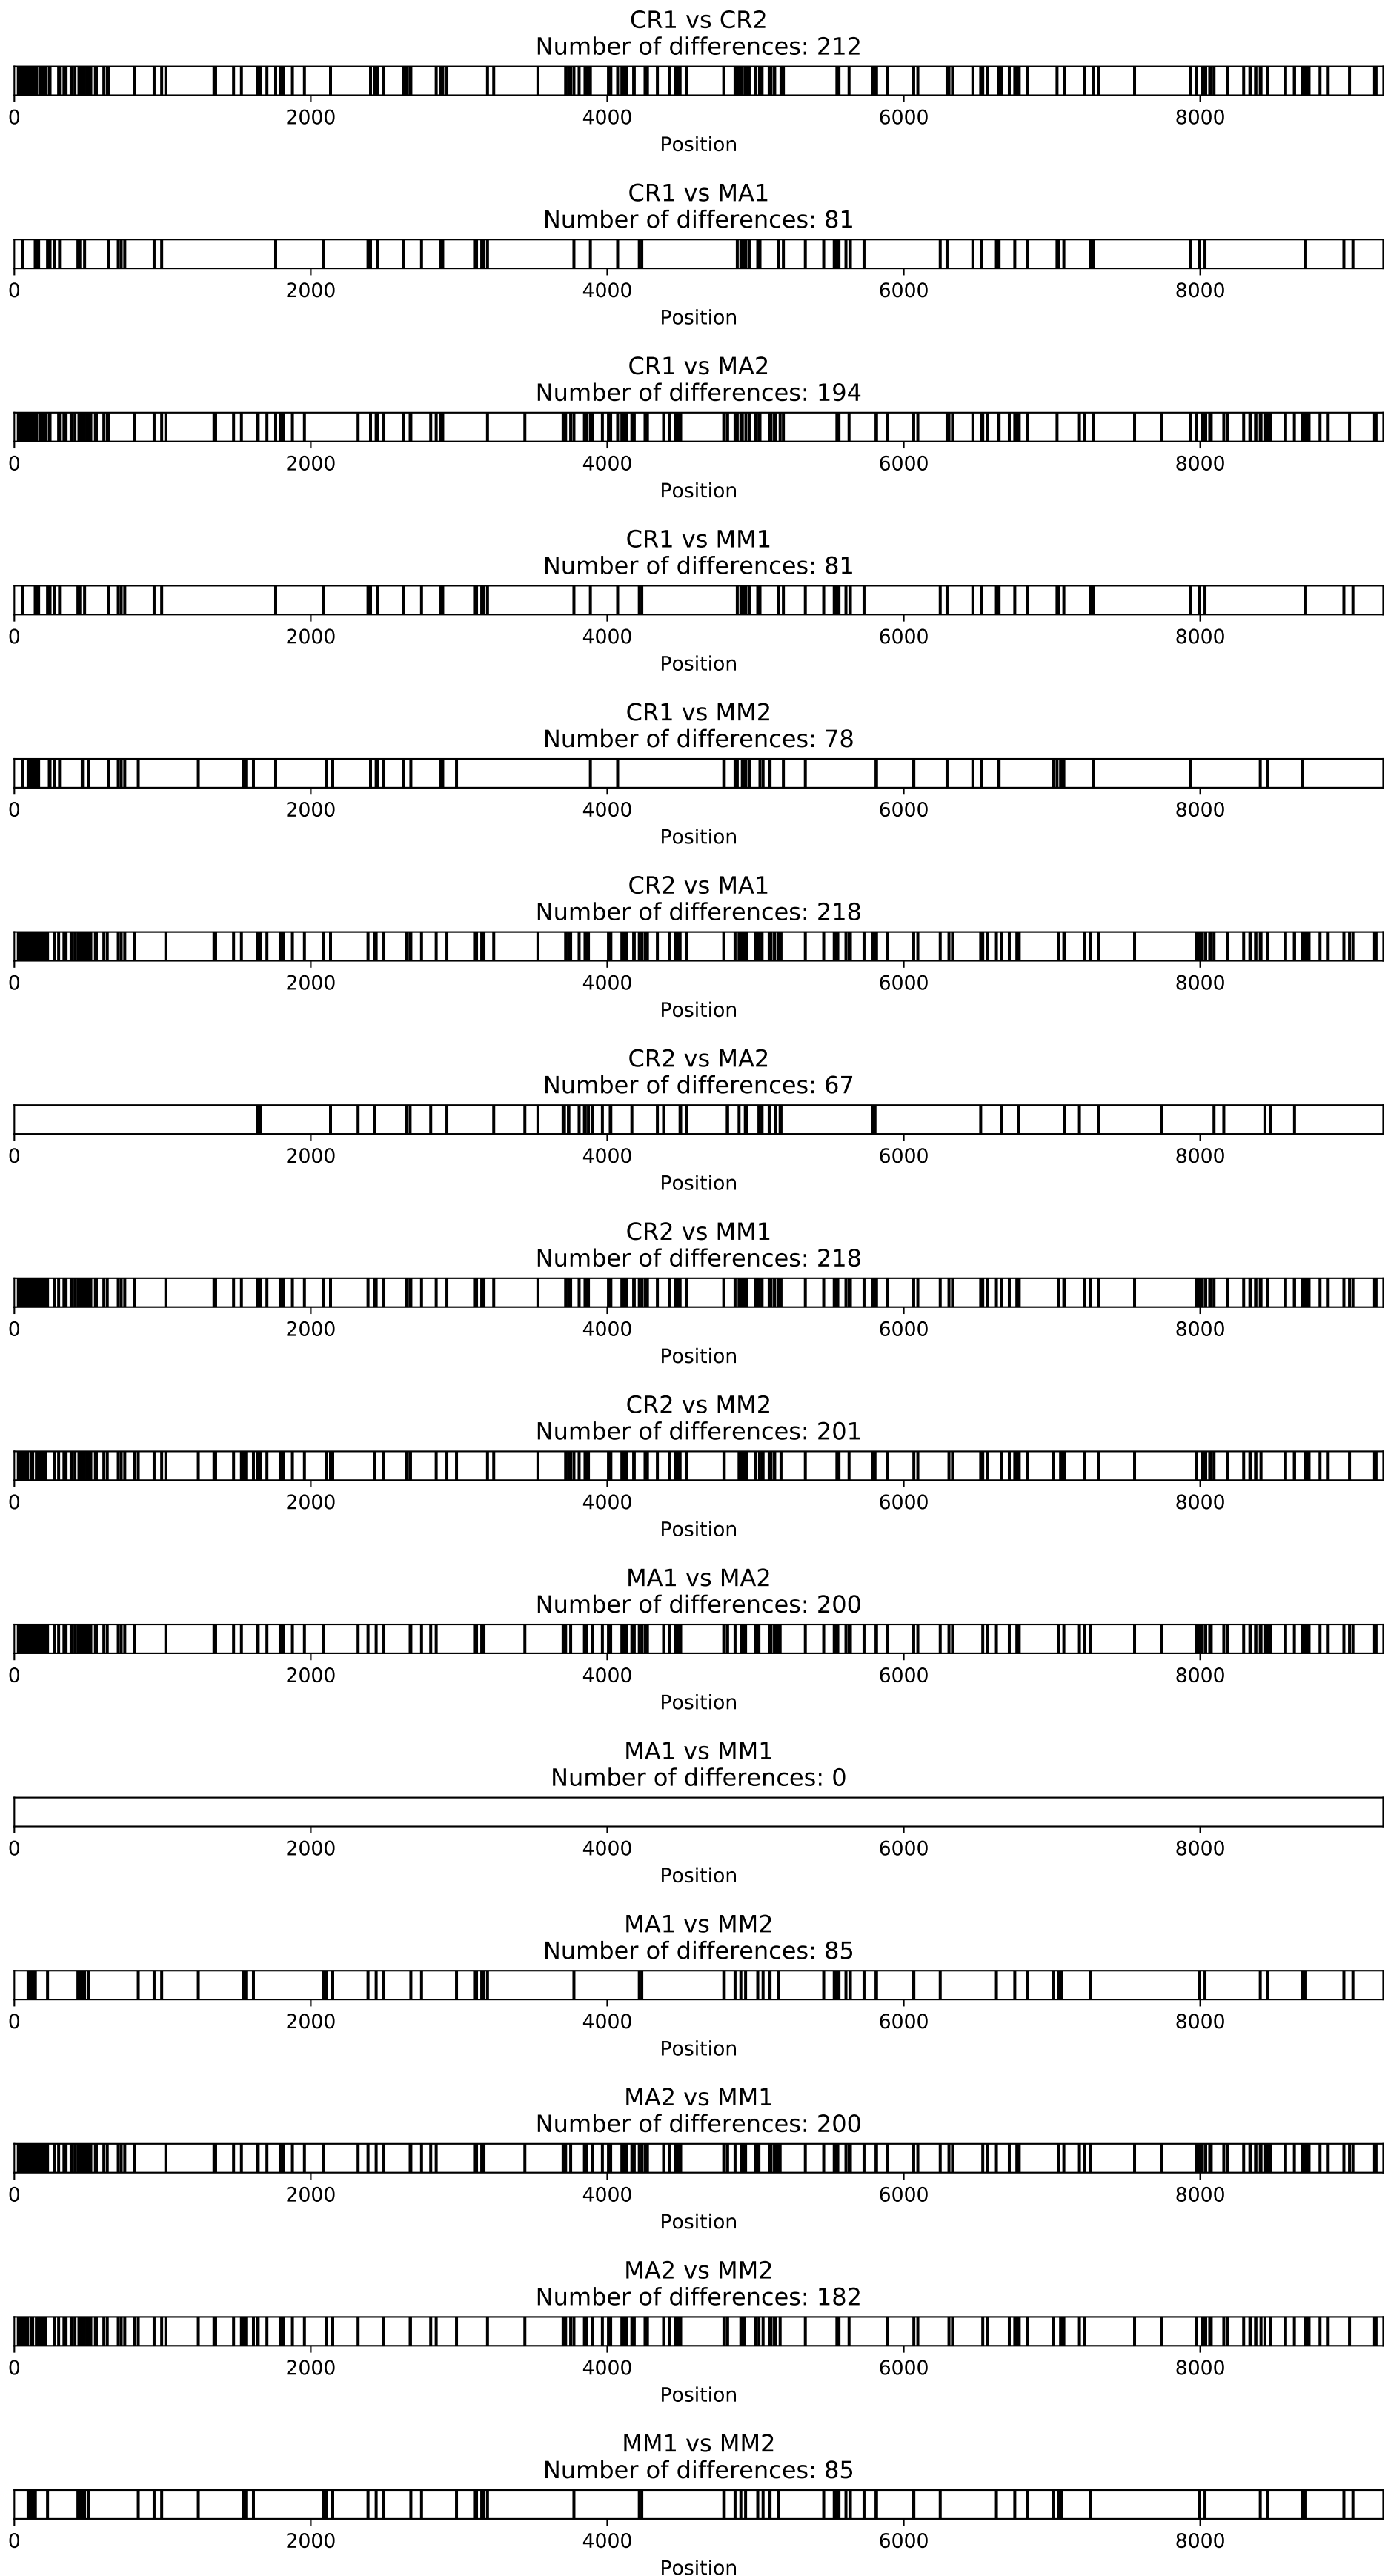

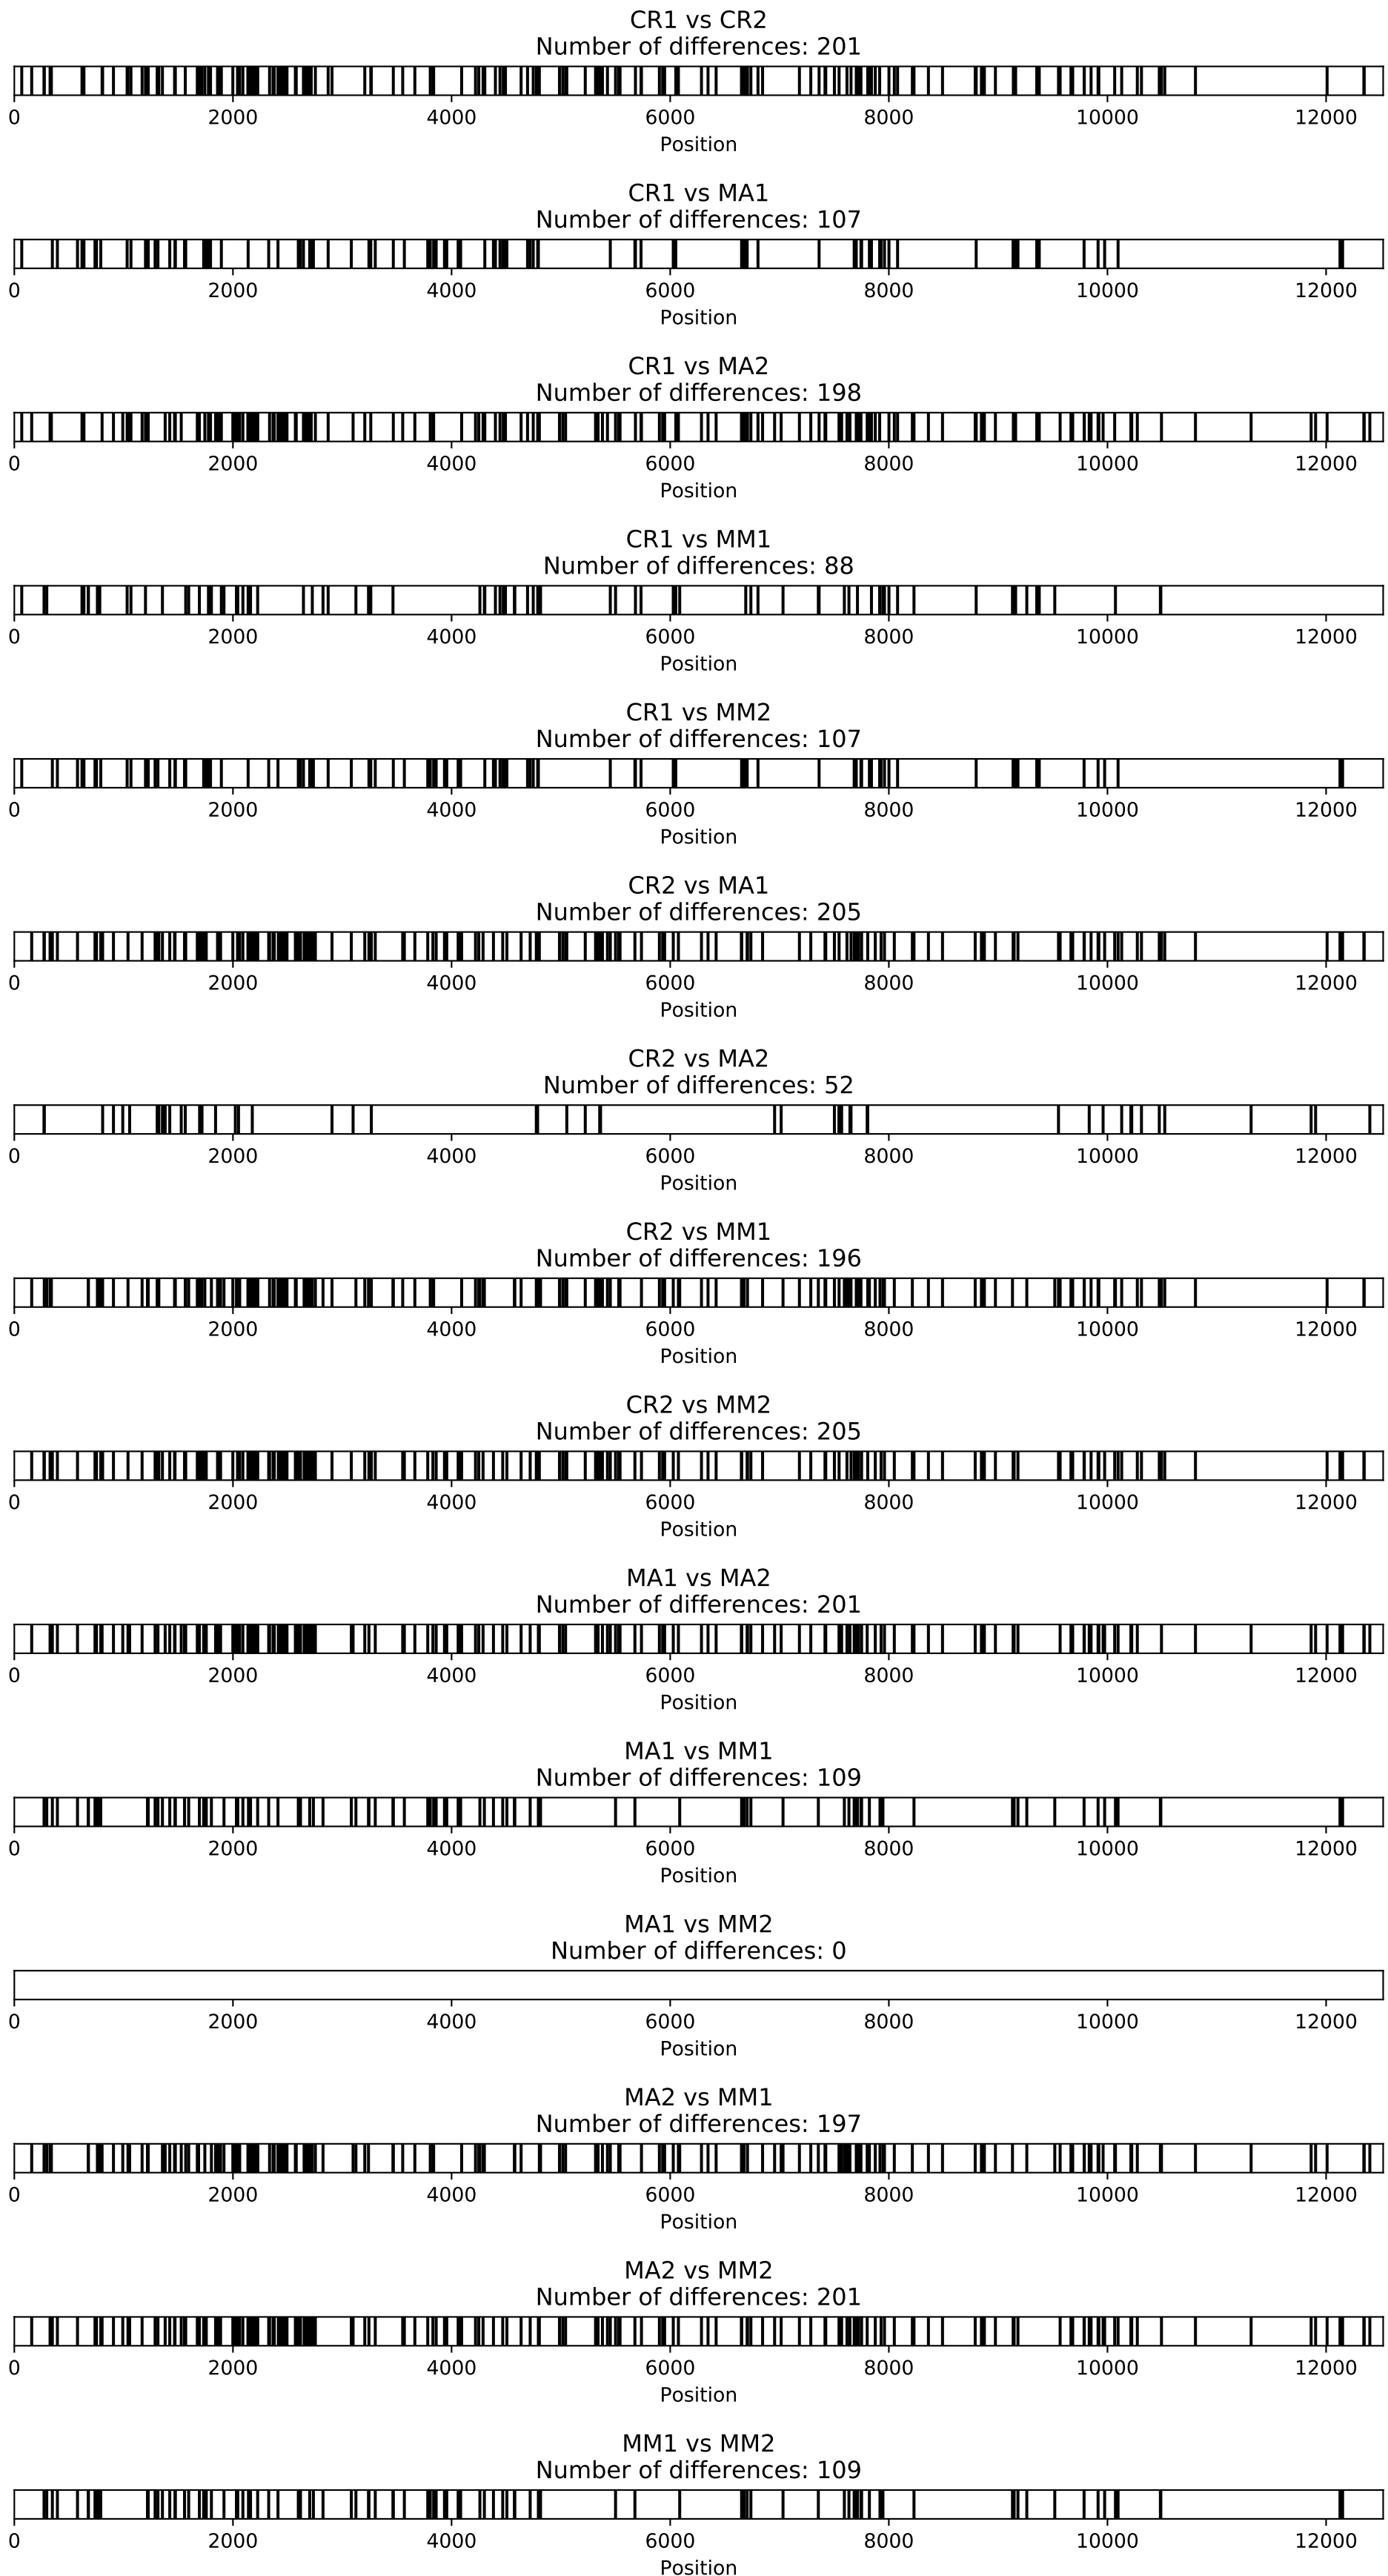

# Region: 120

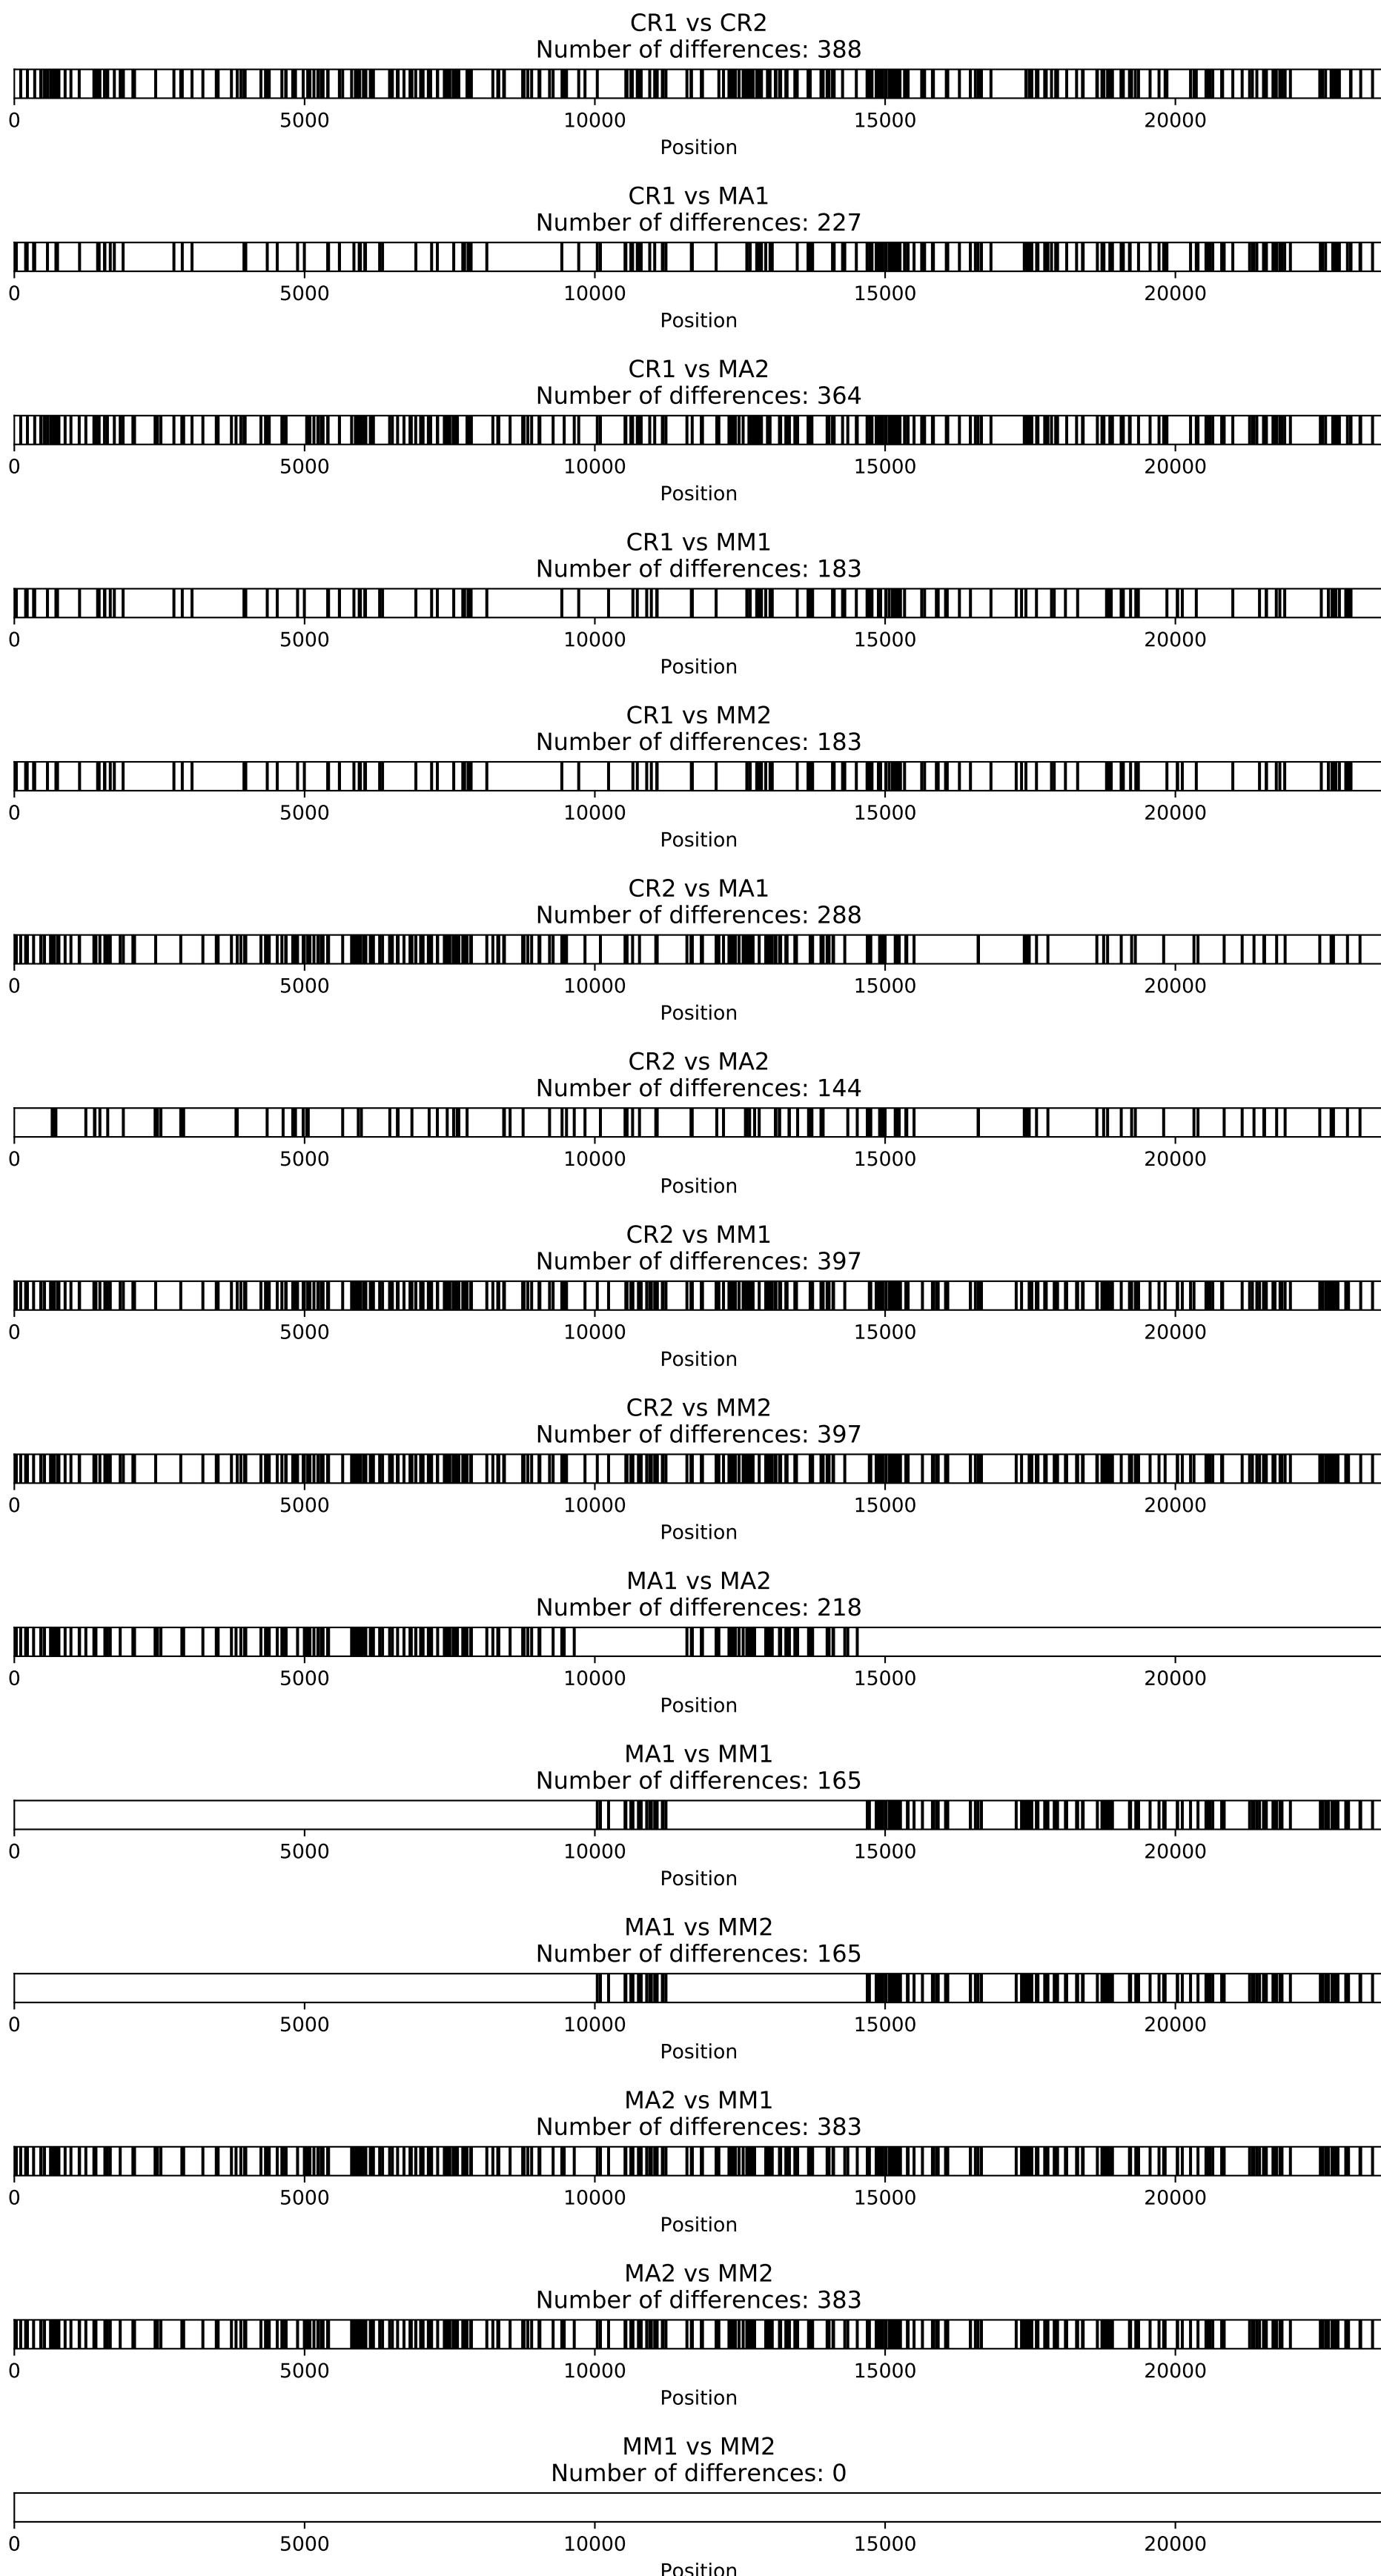



# Region: 122

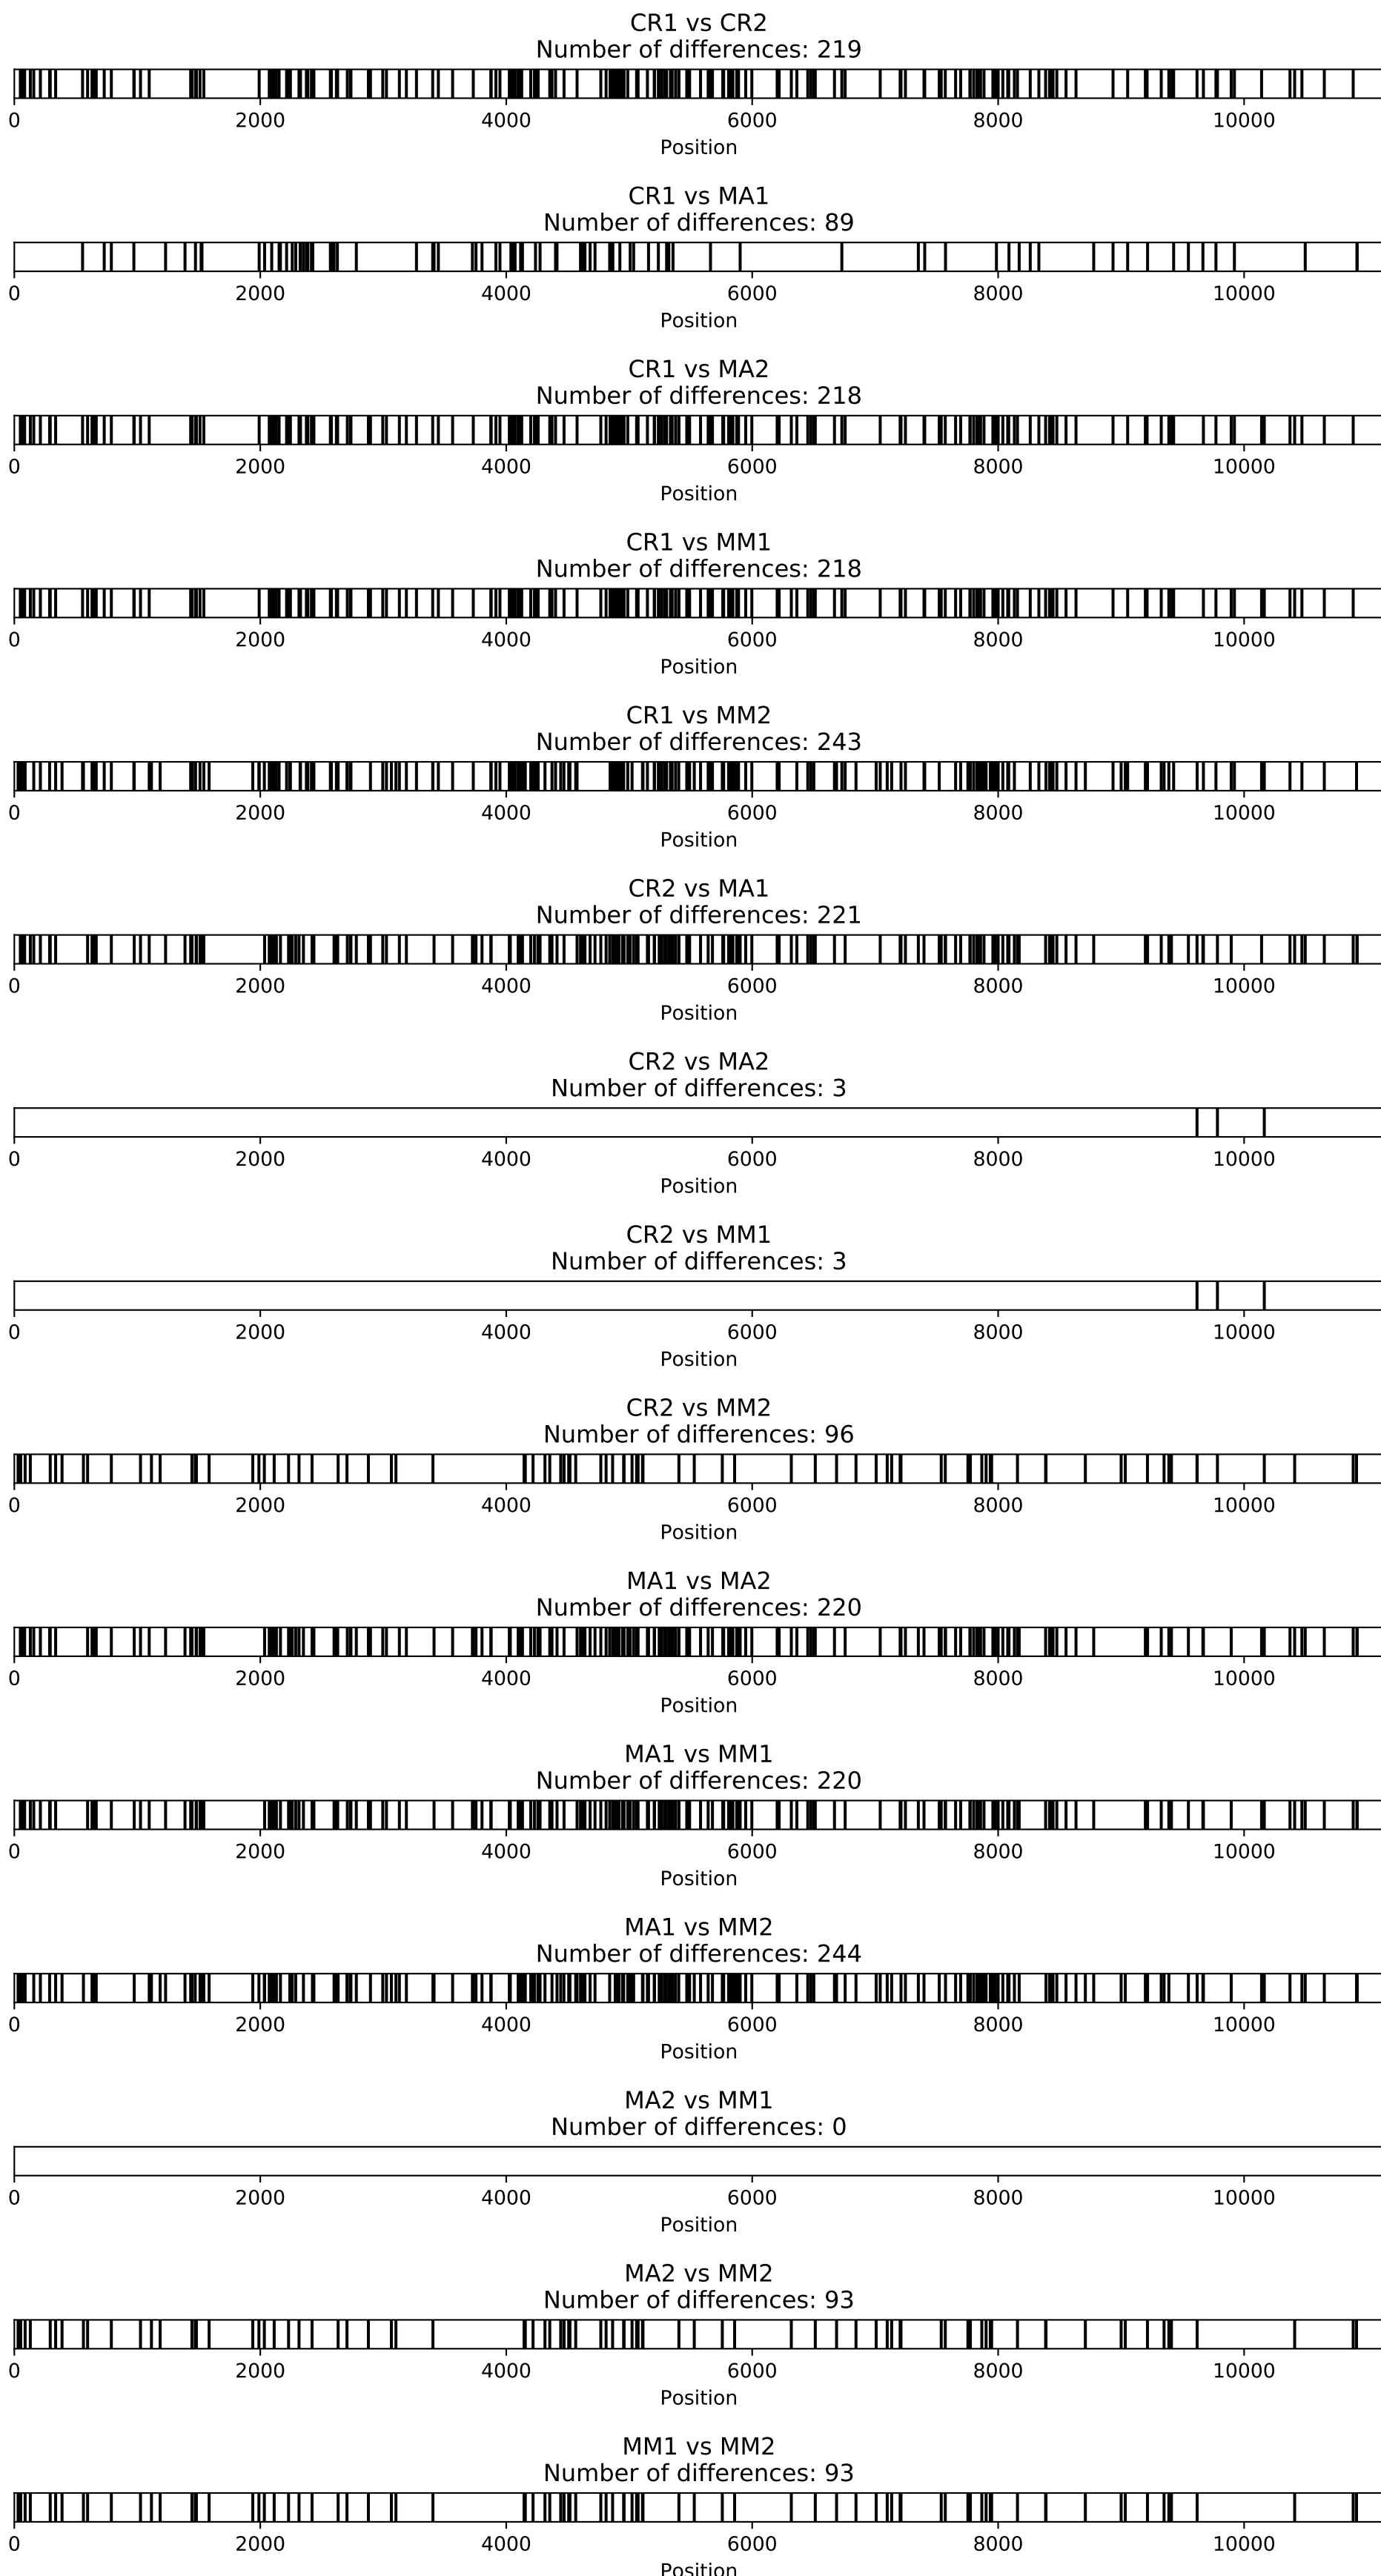

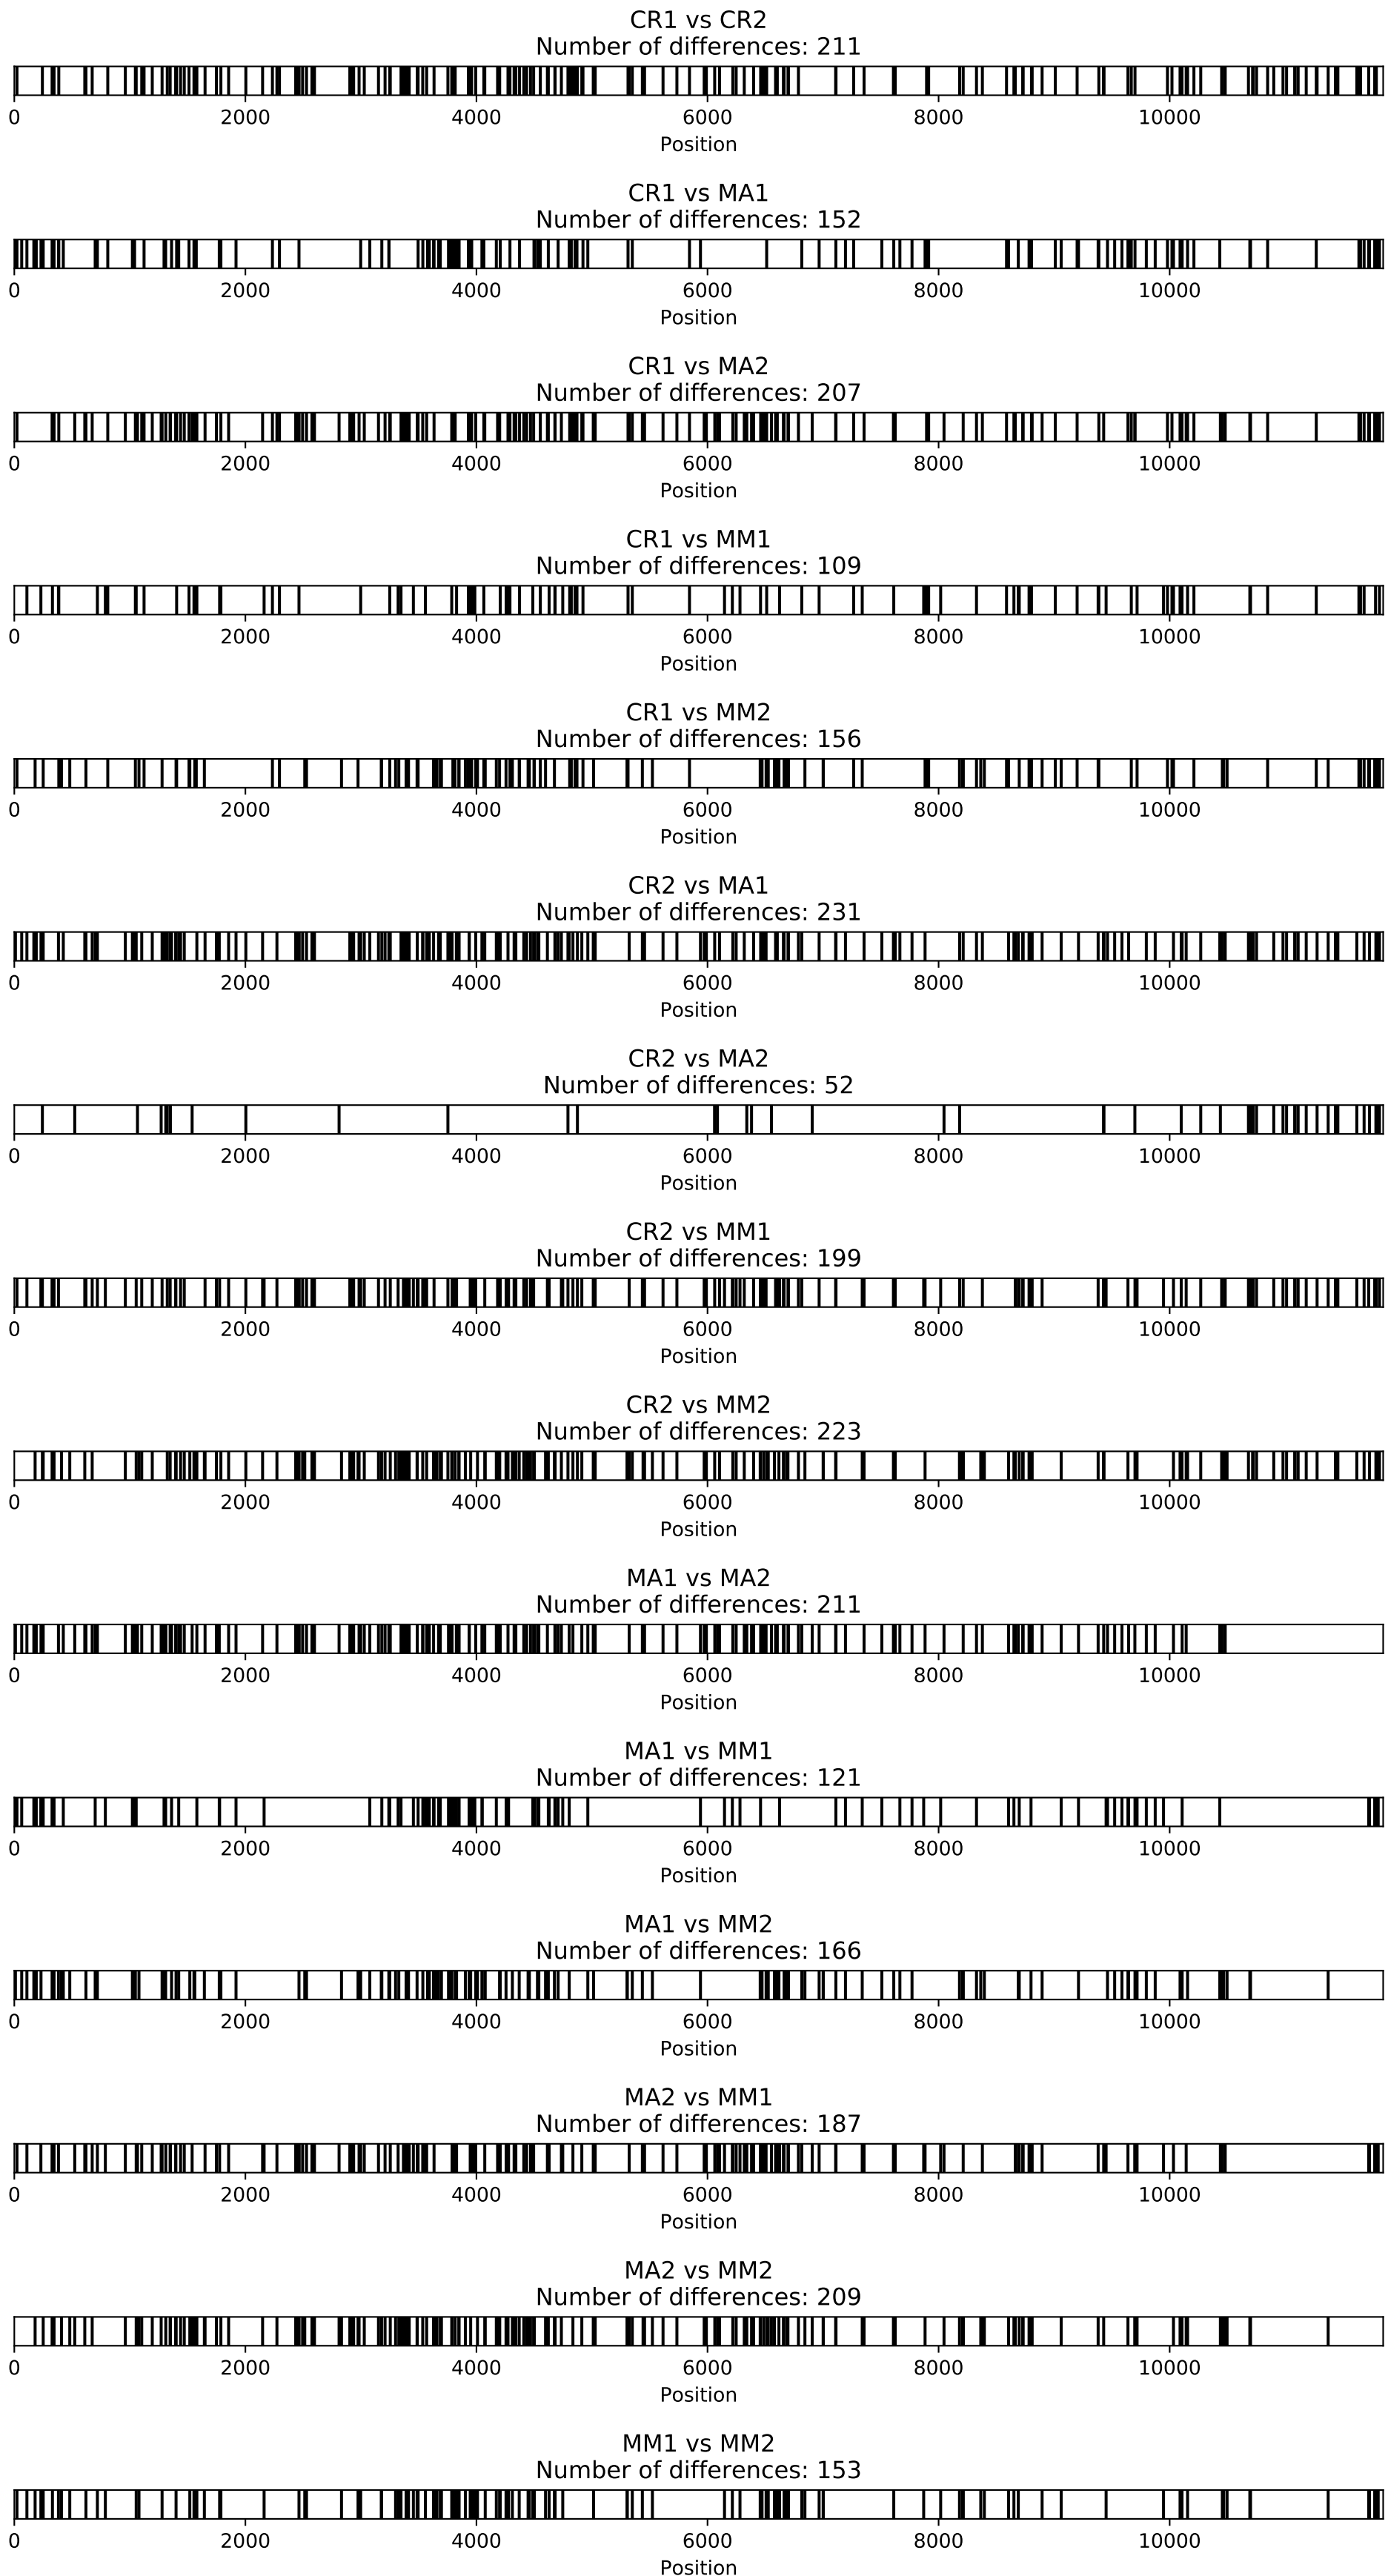

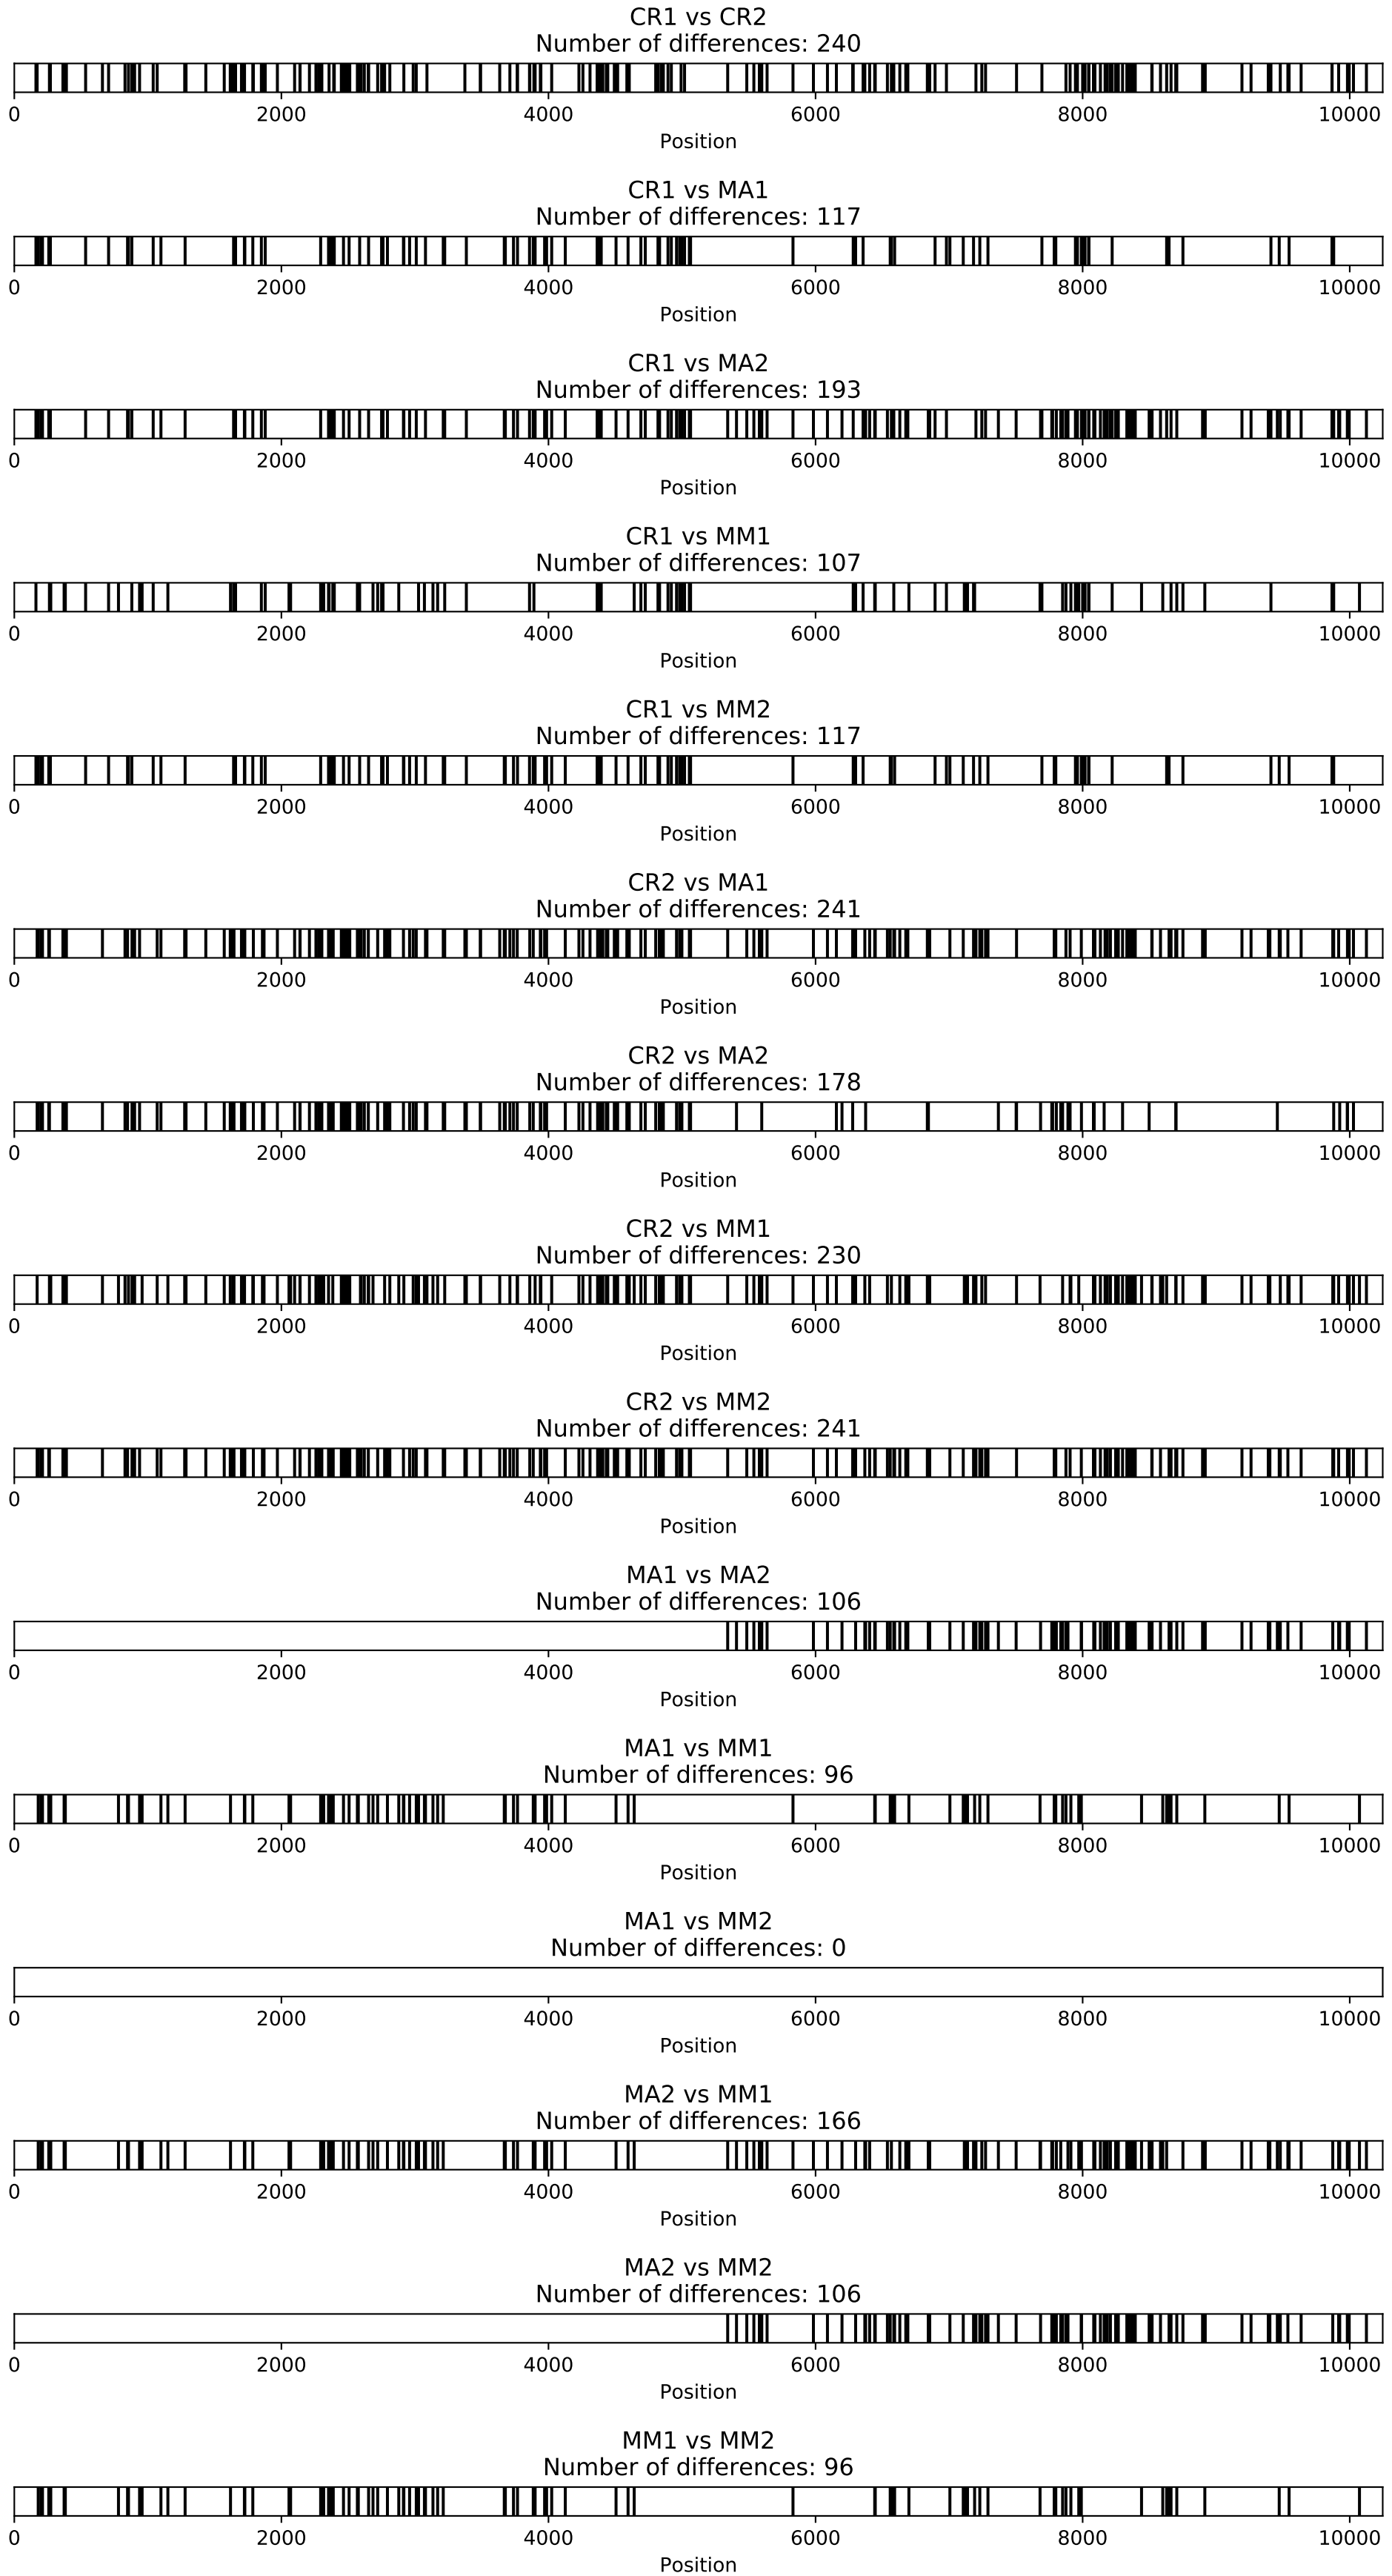

# Region: 125

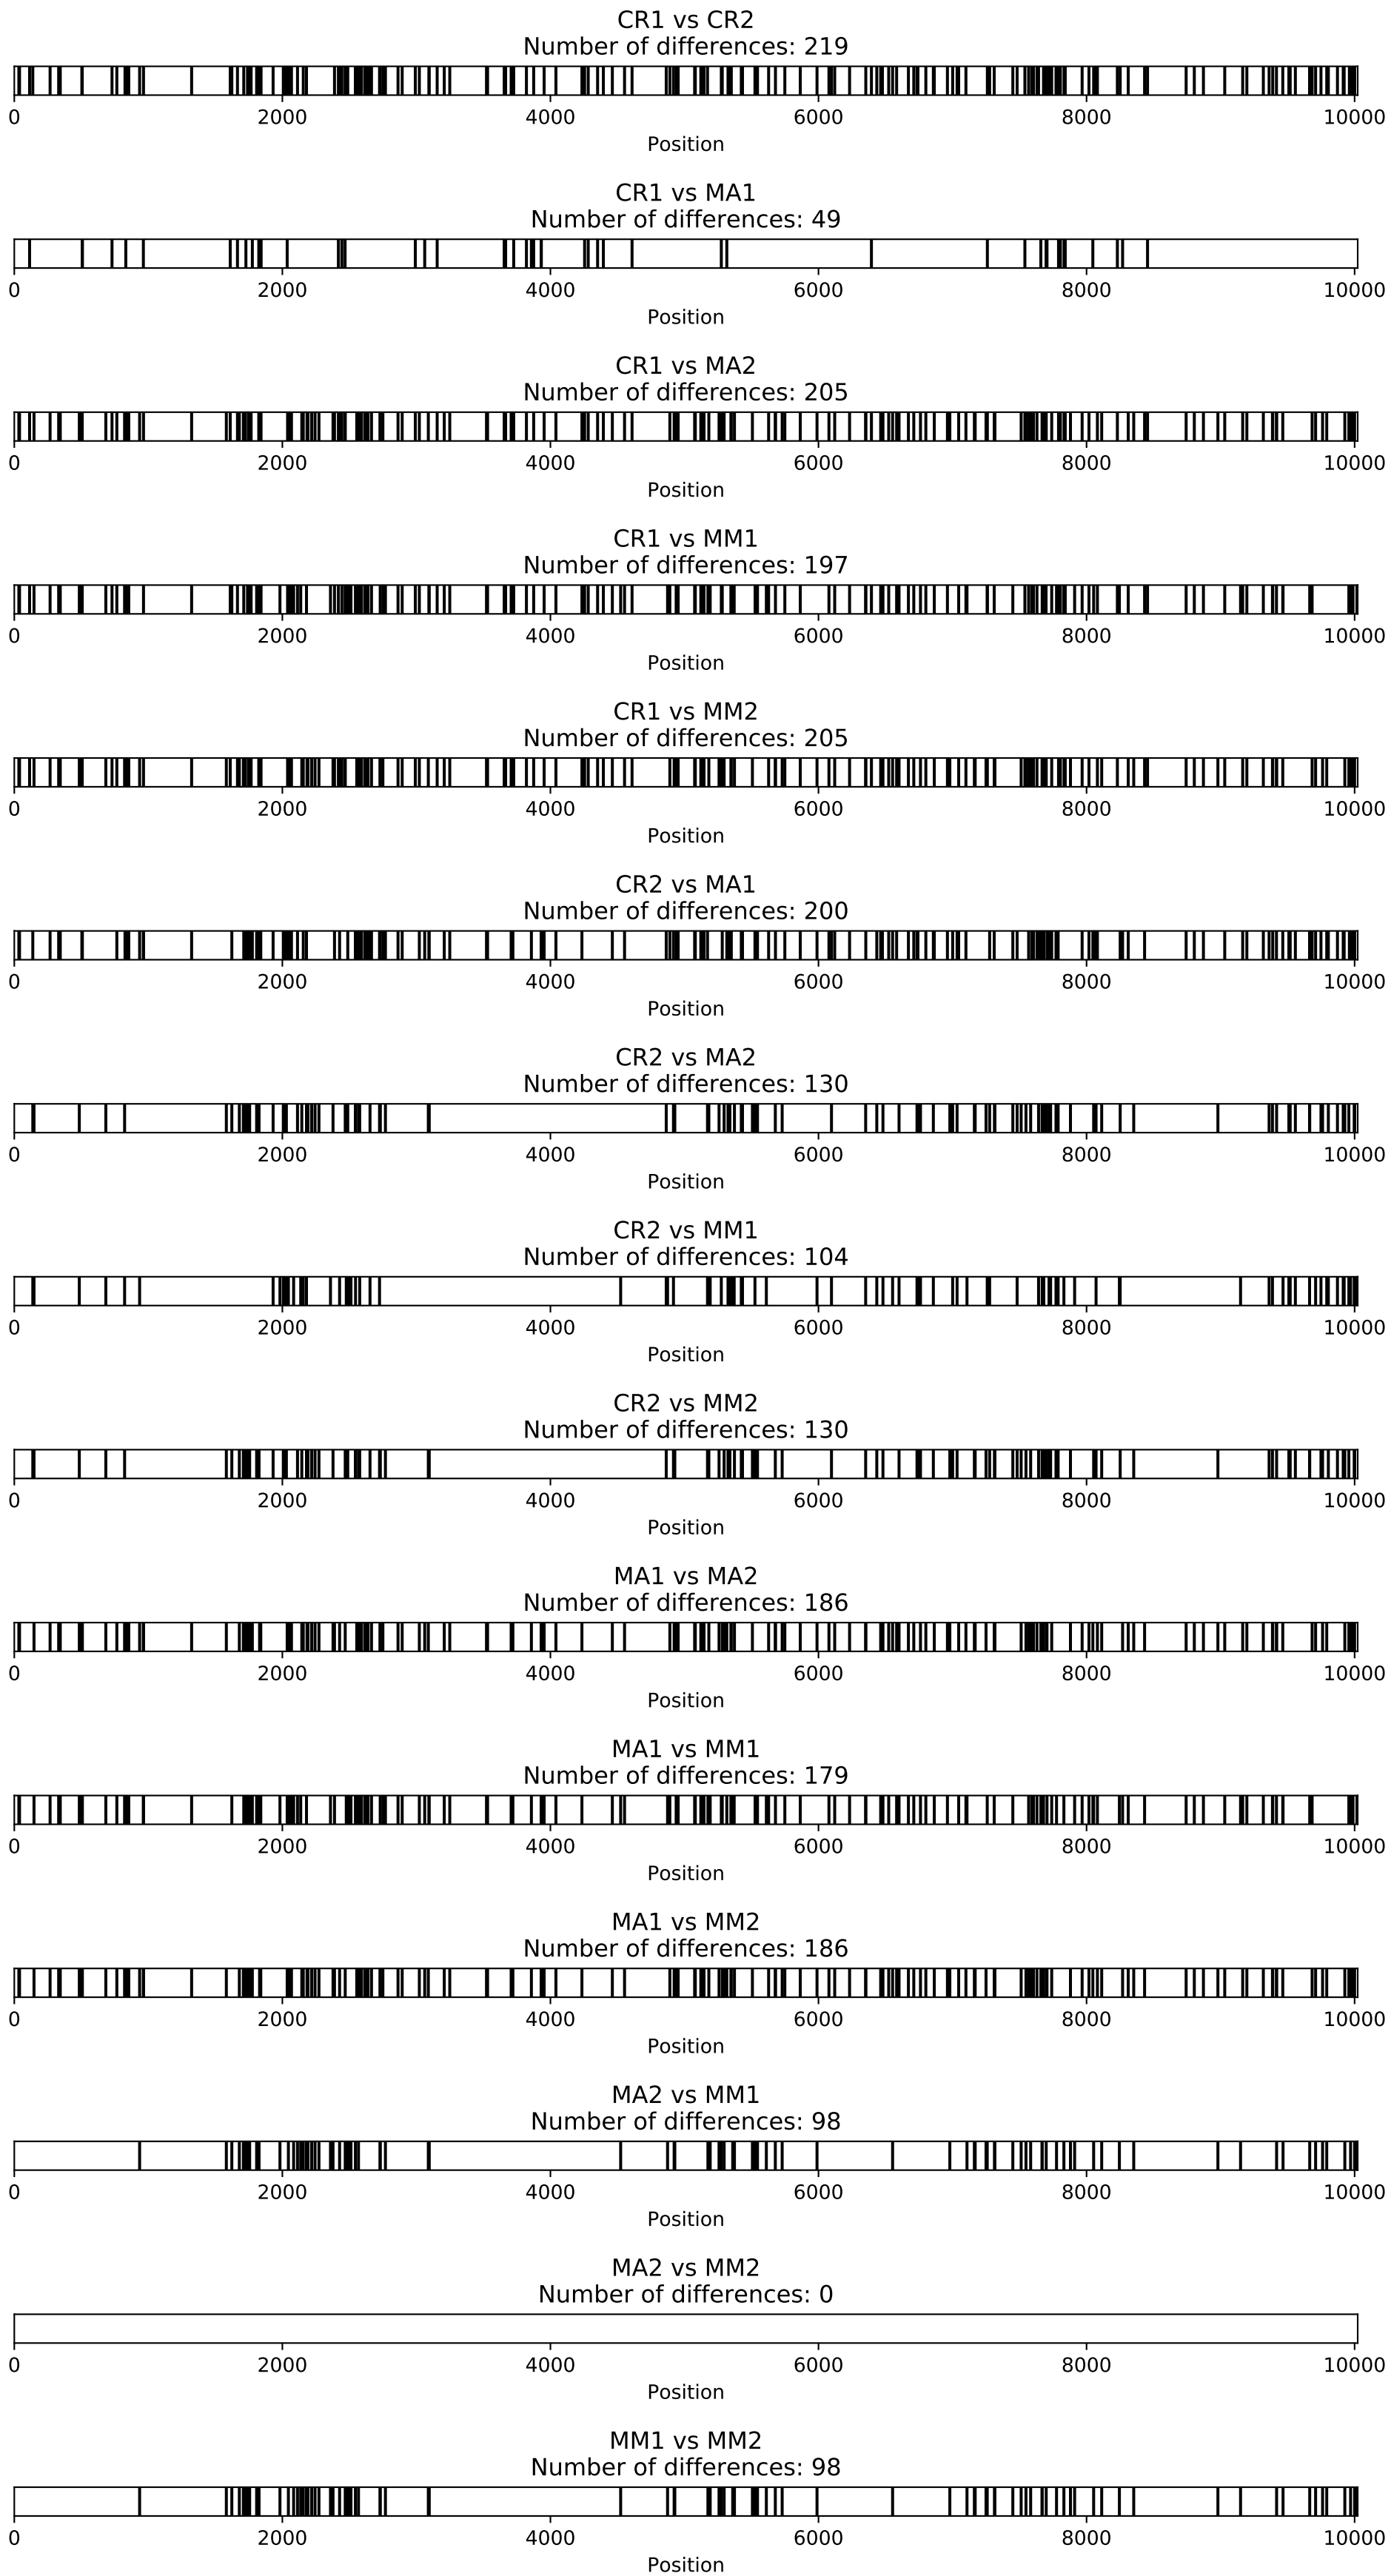

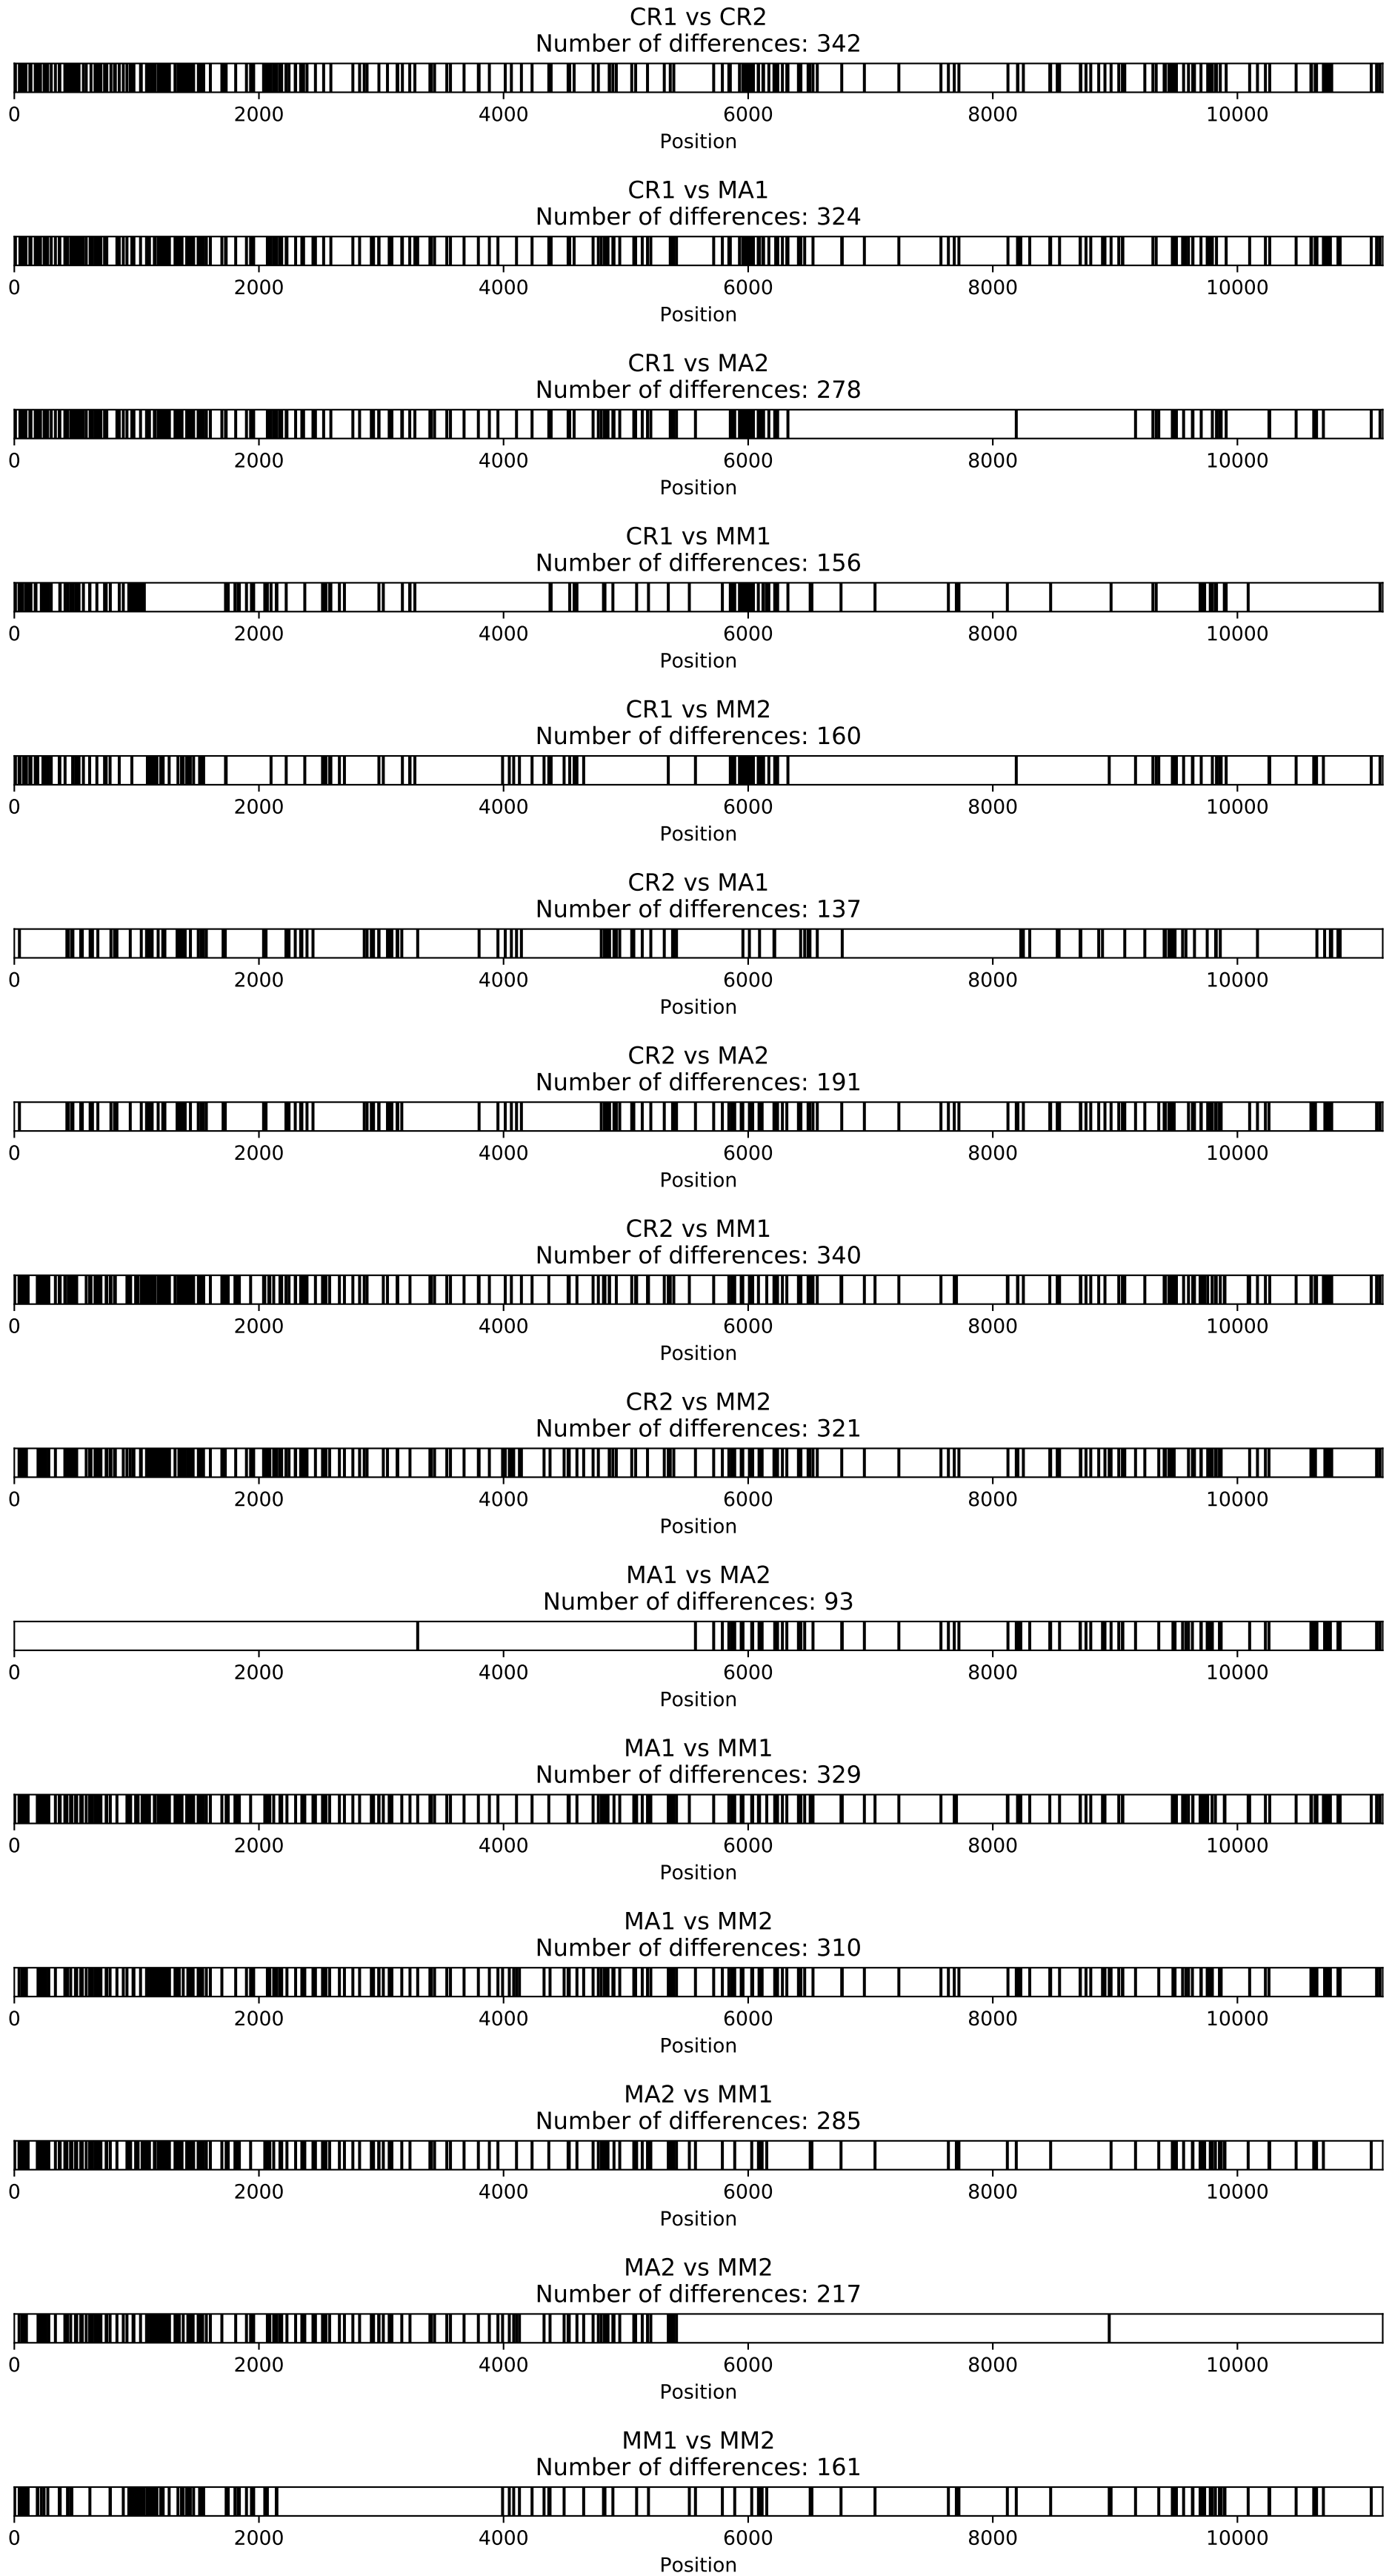

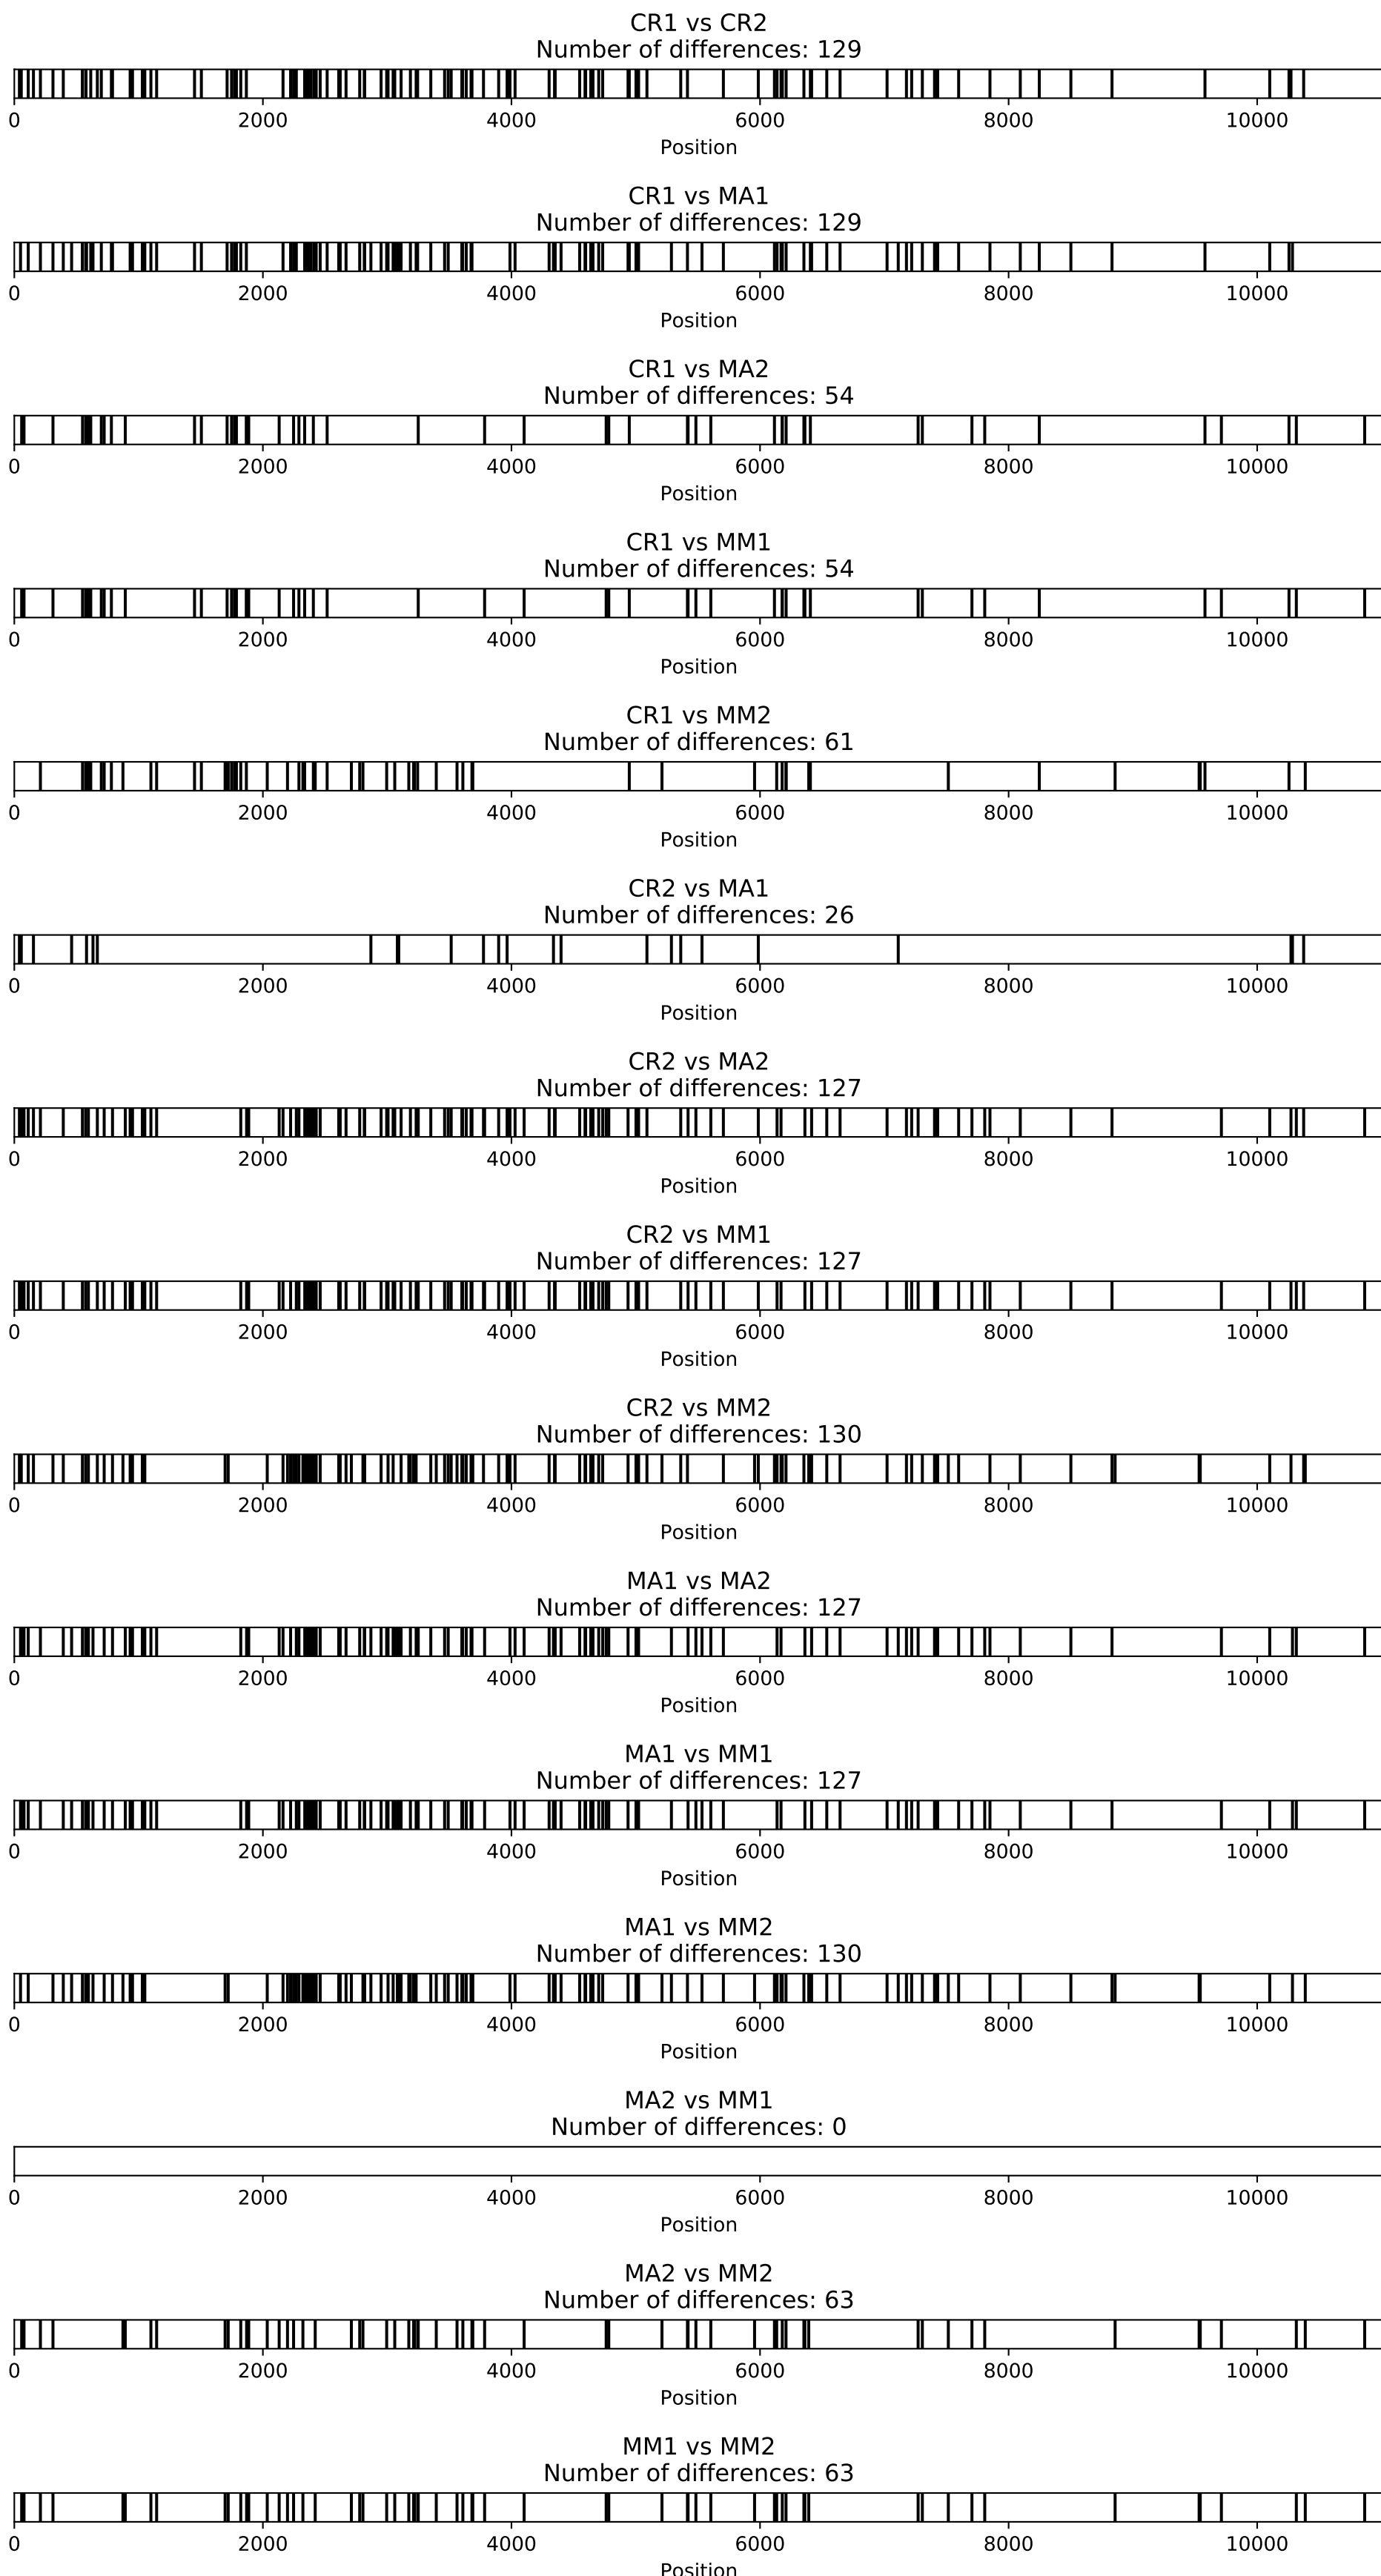

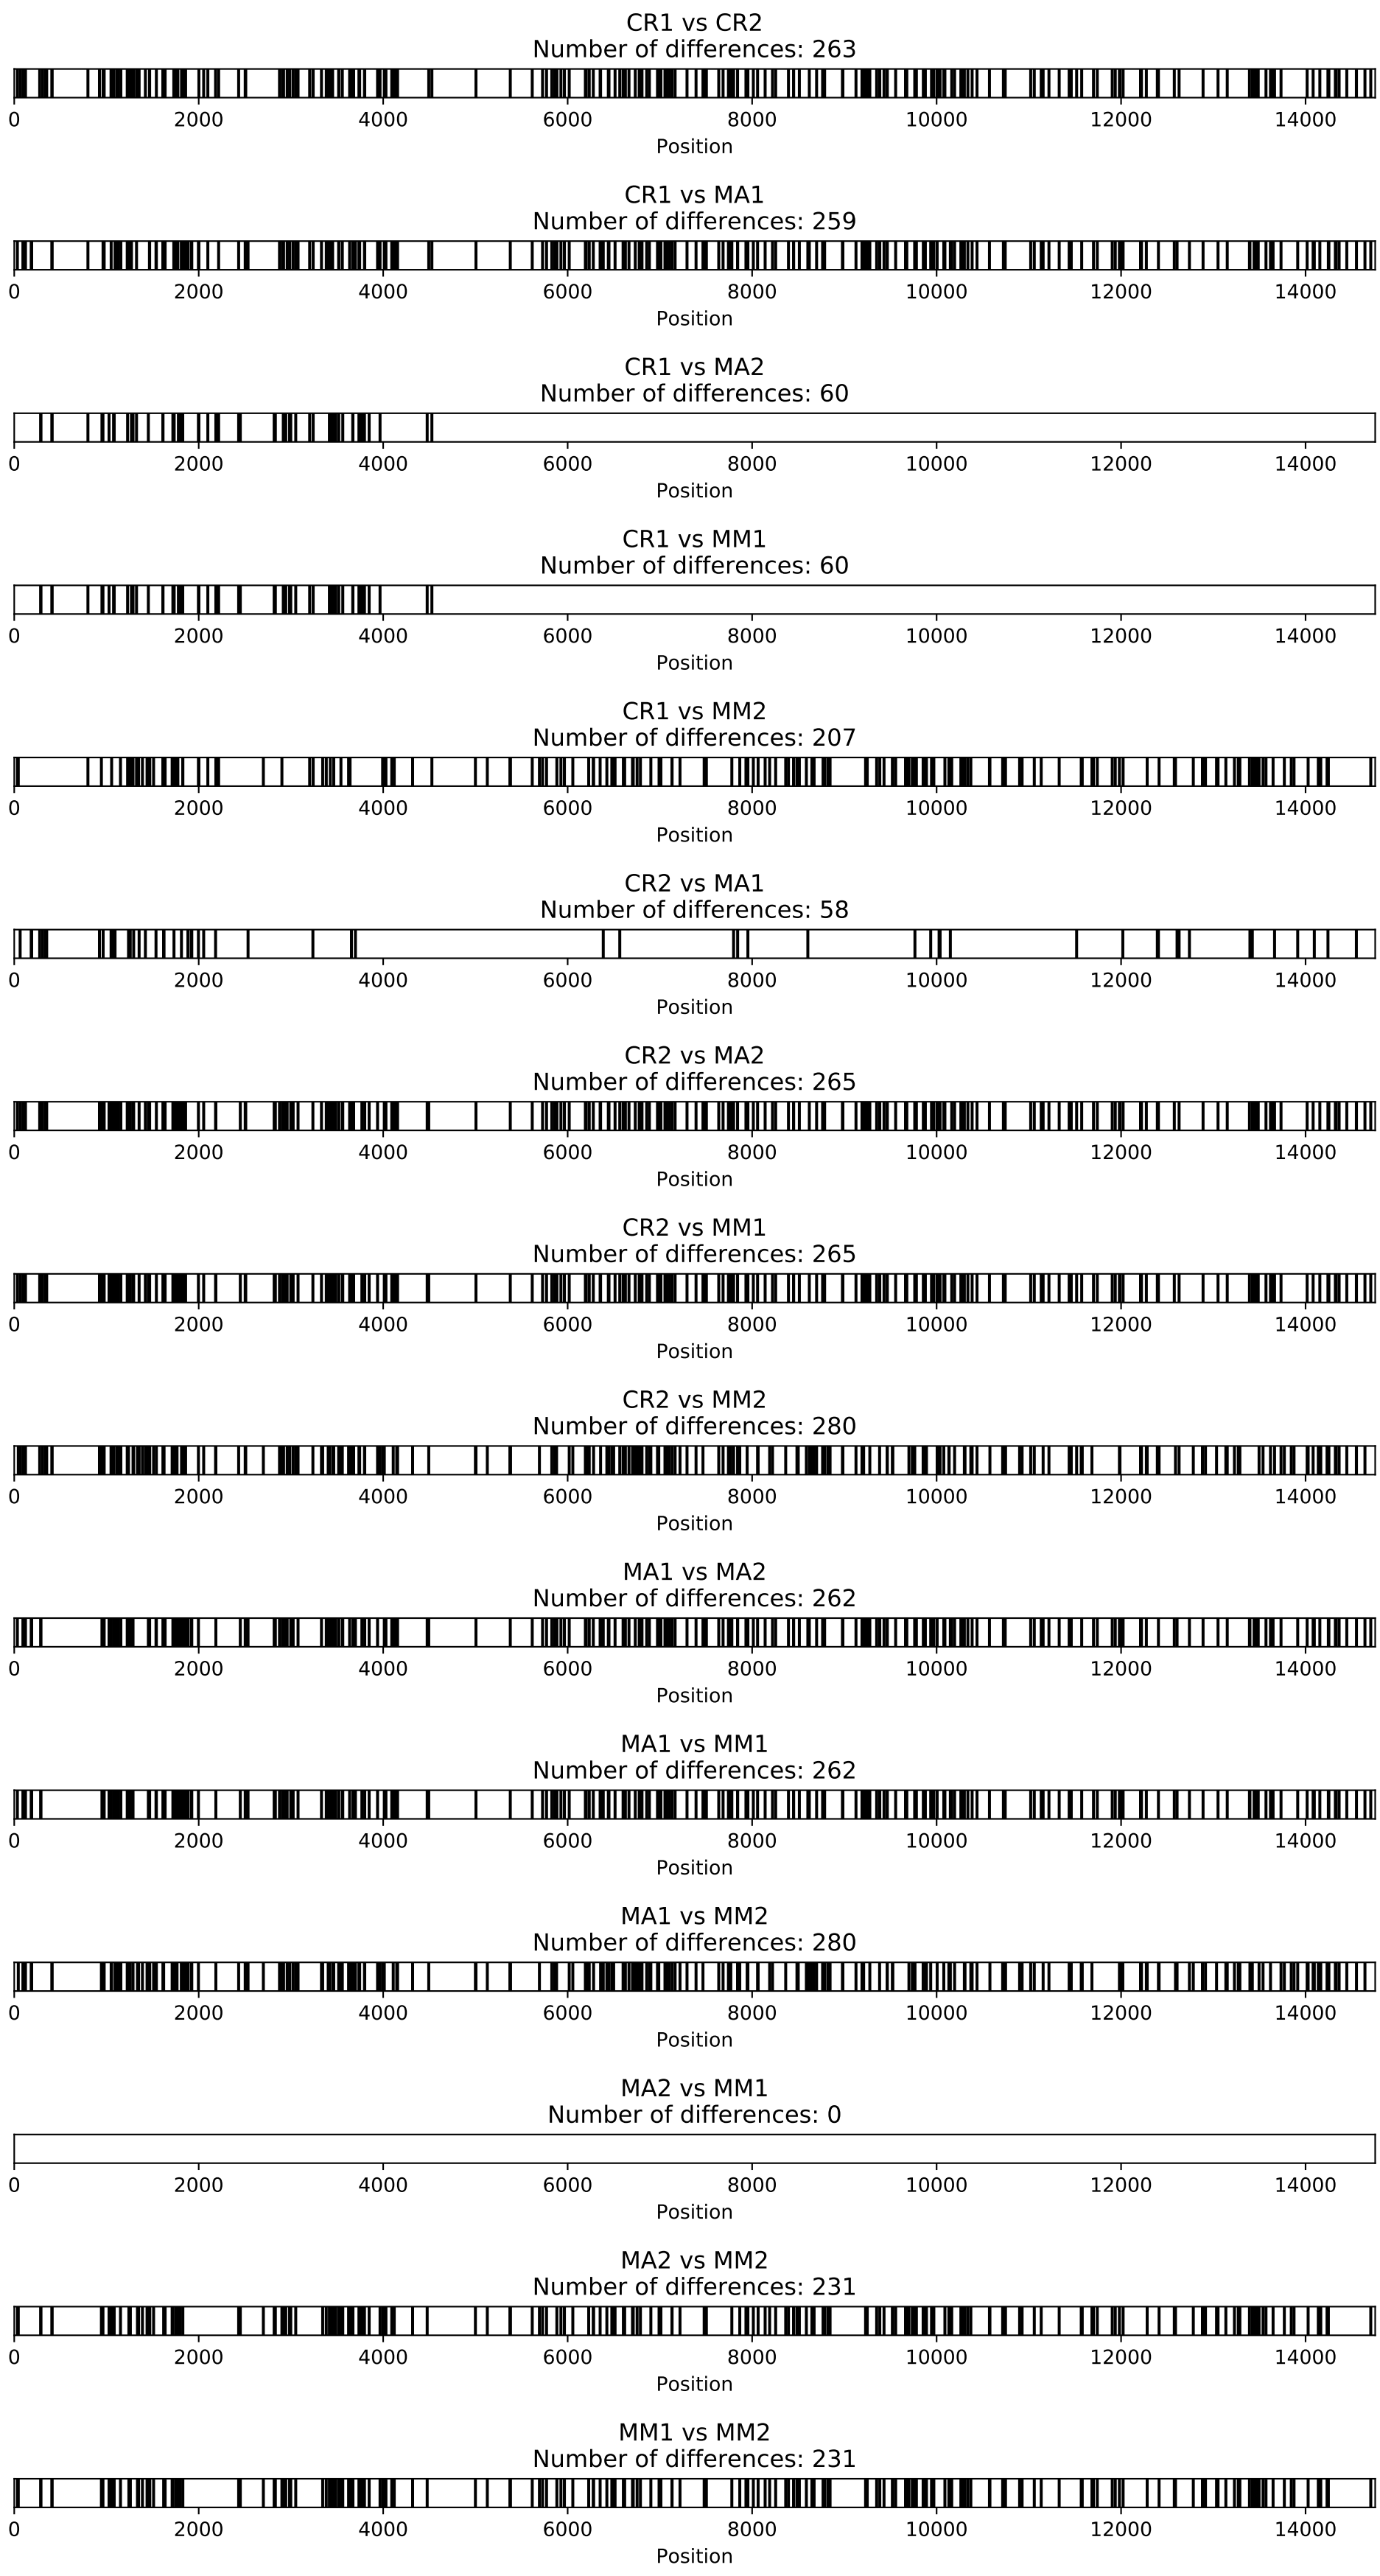

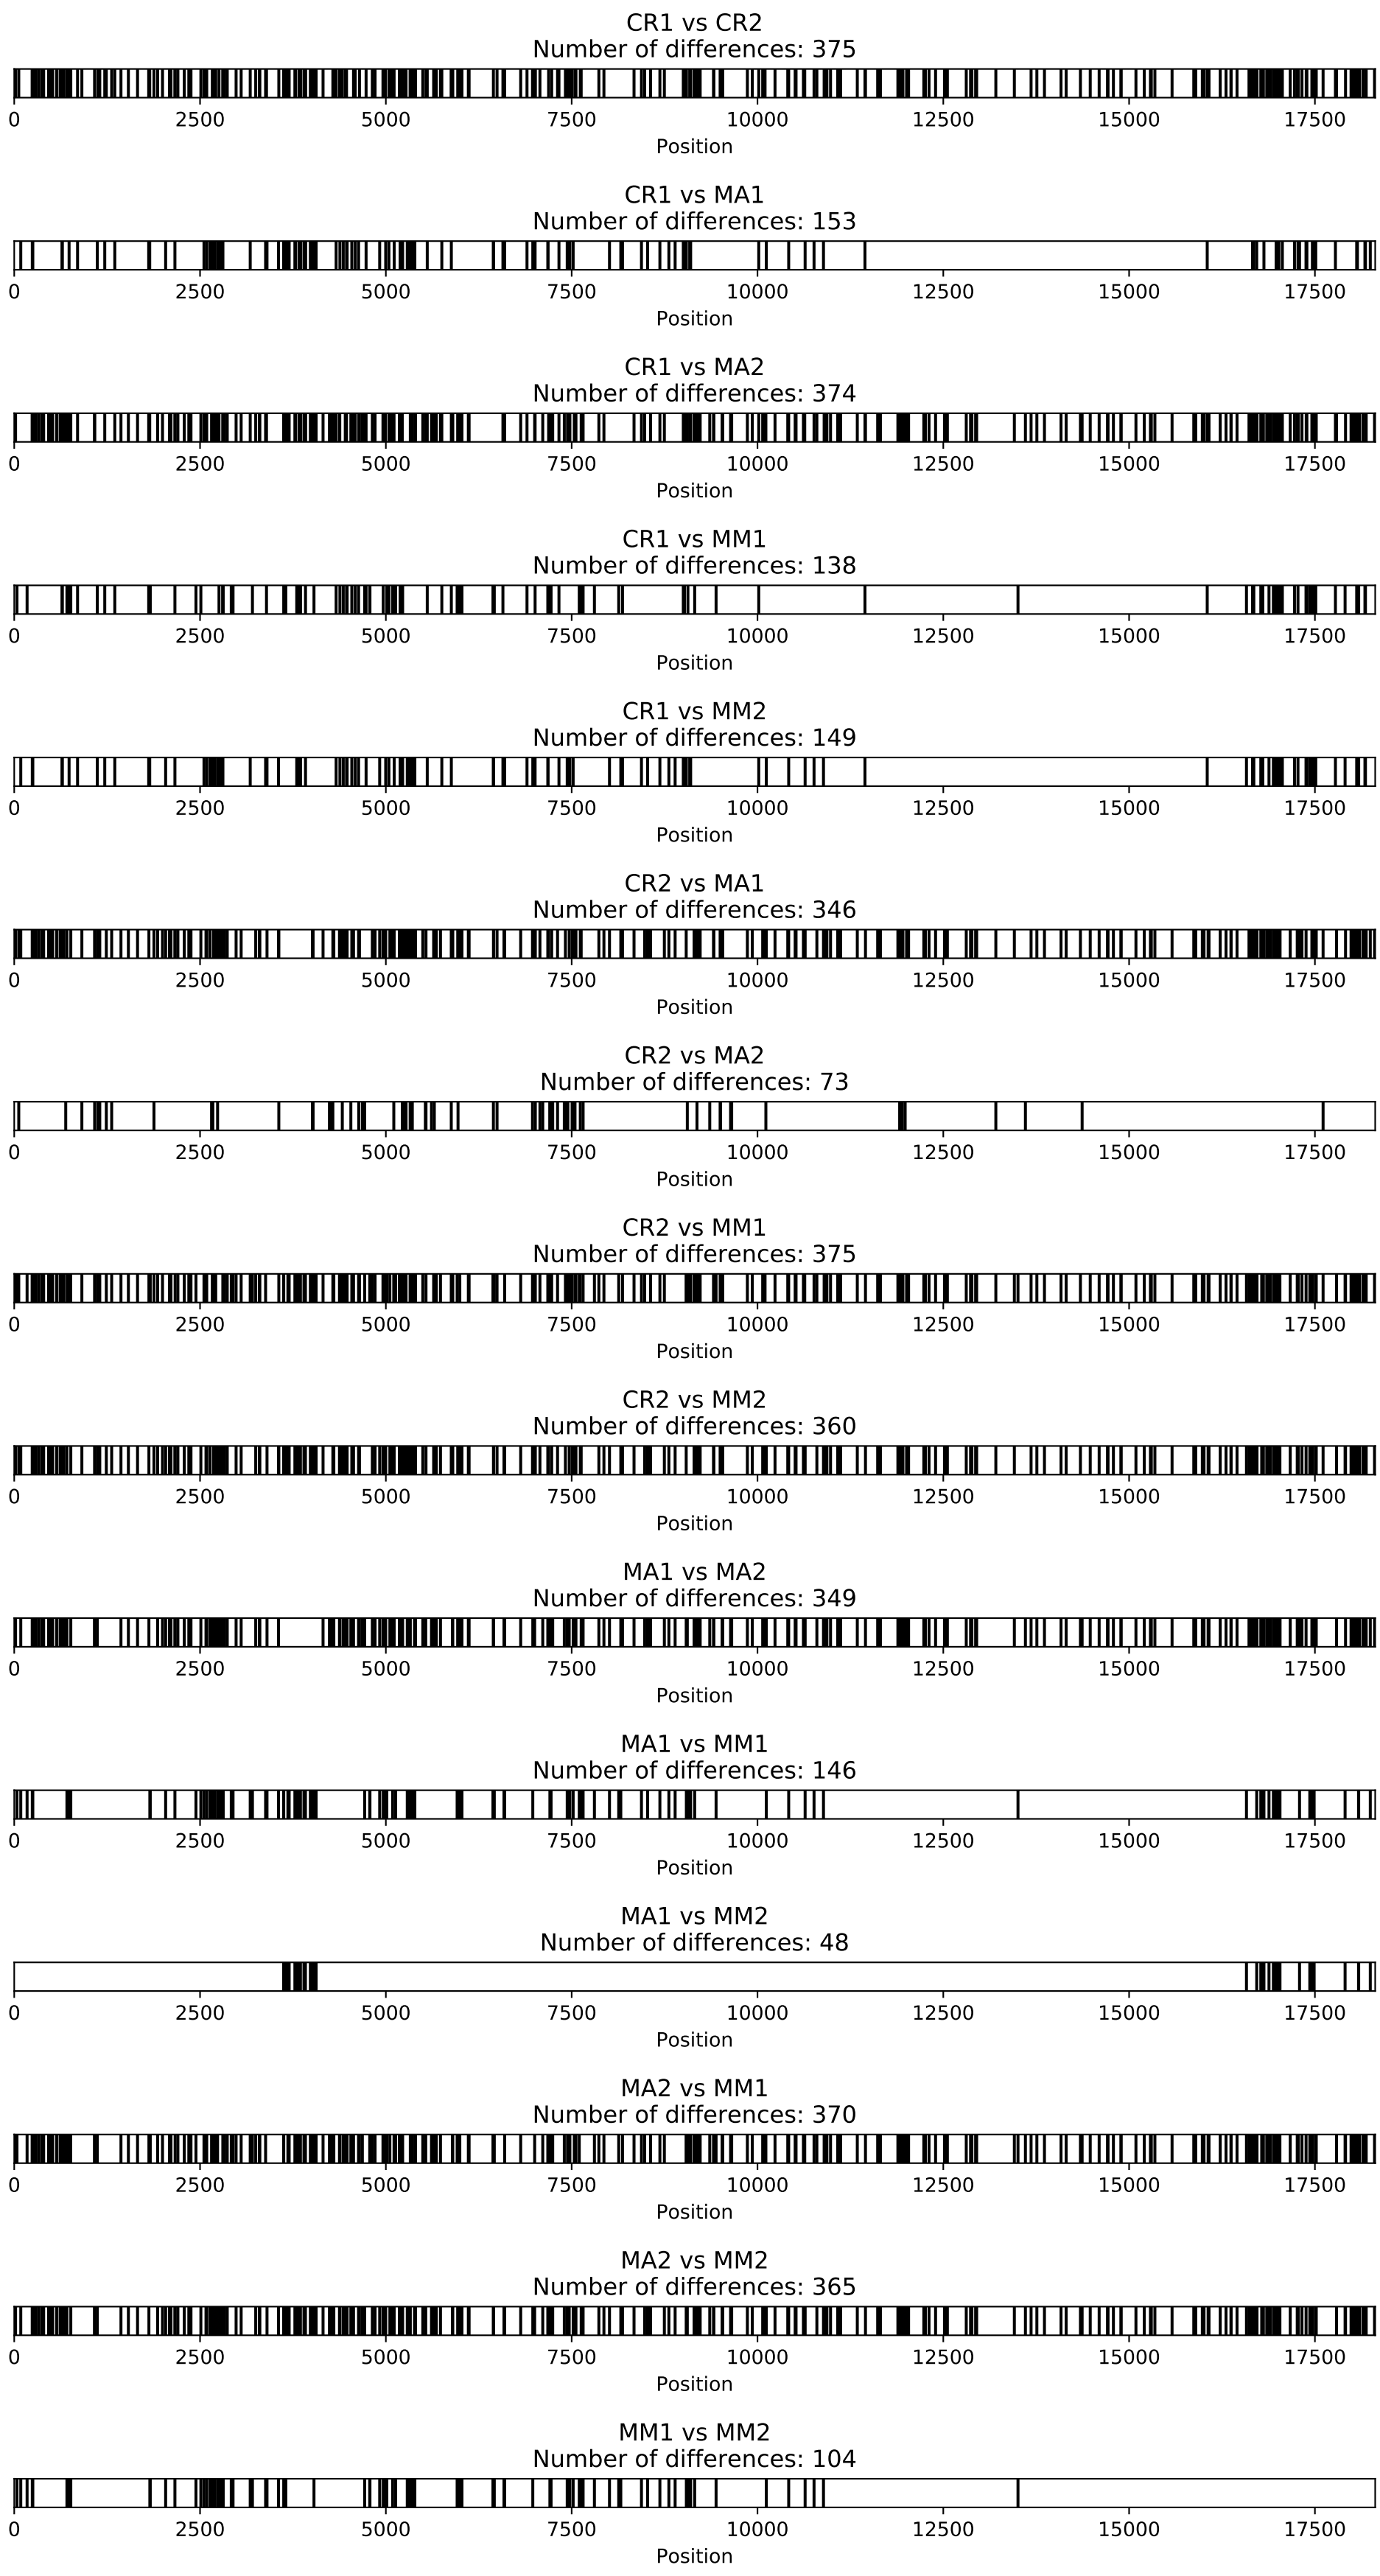



# Region: 132

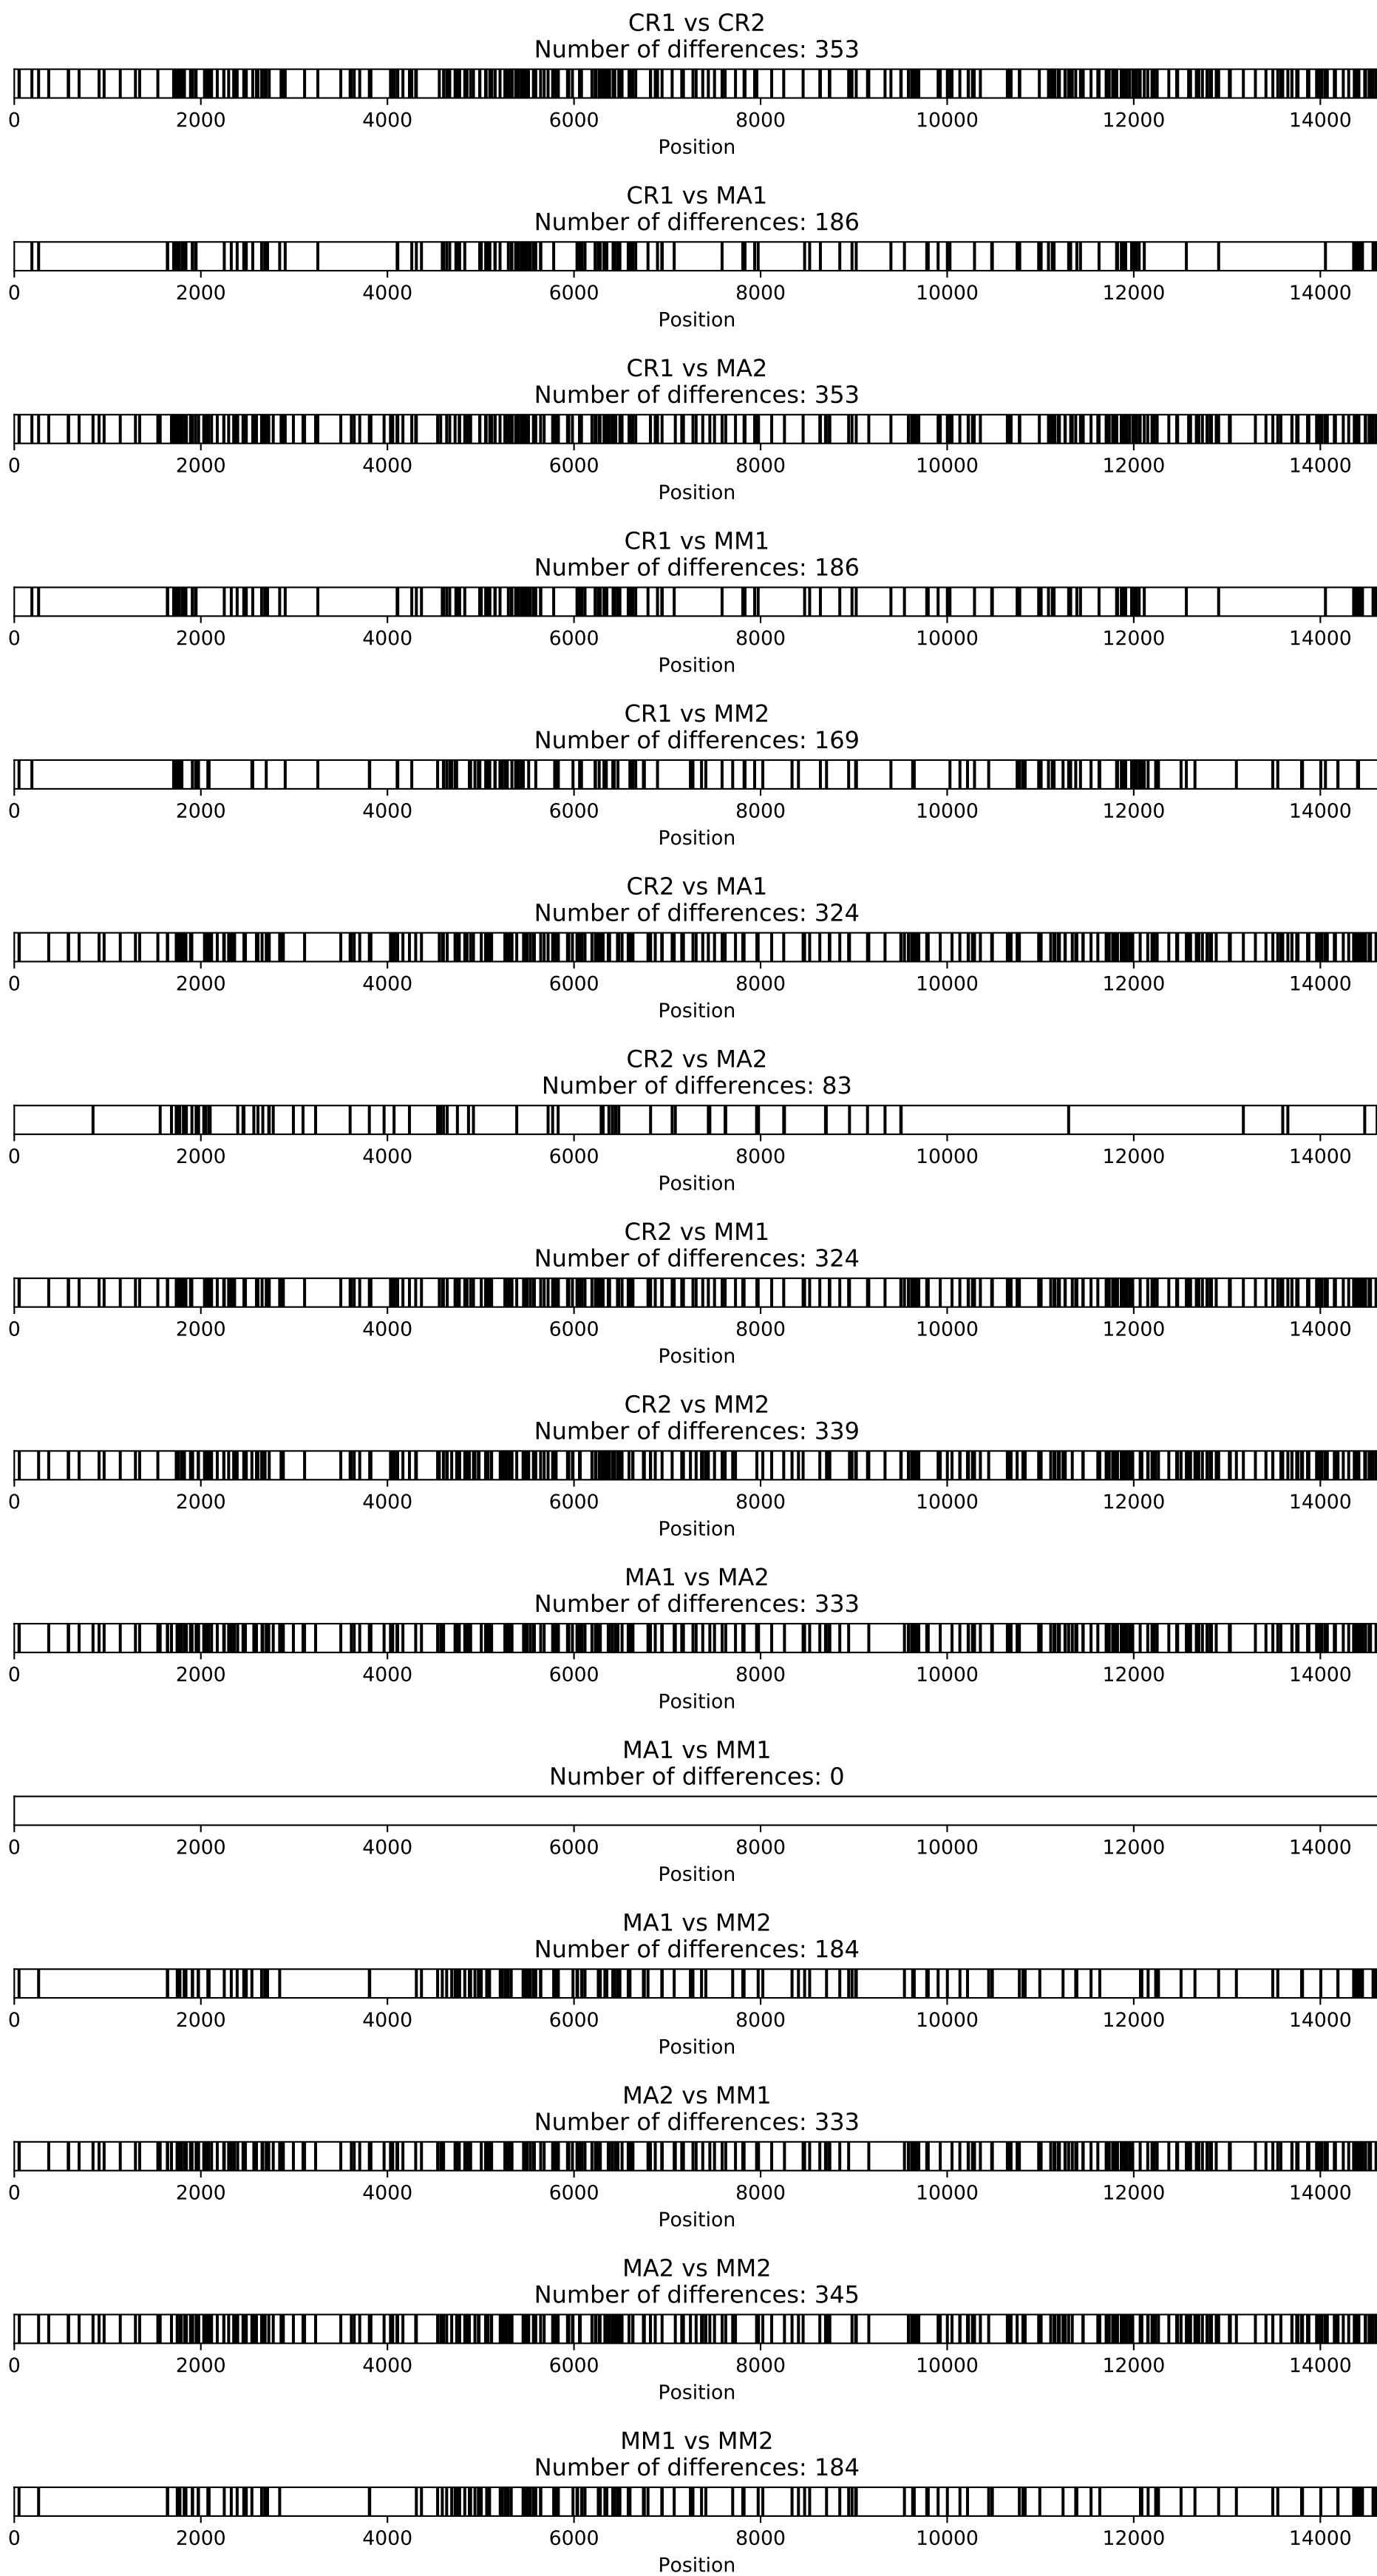

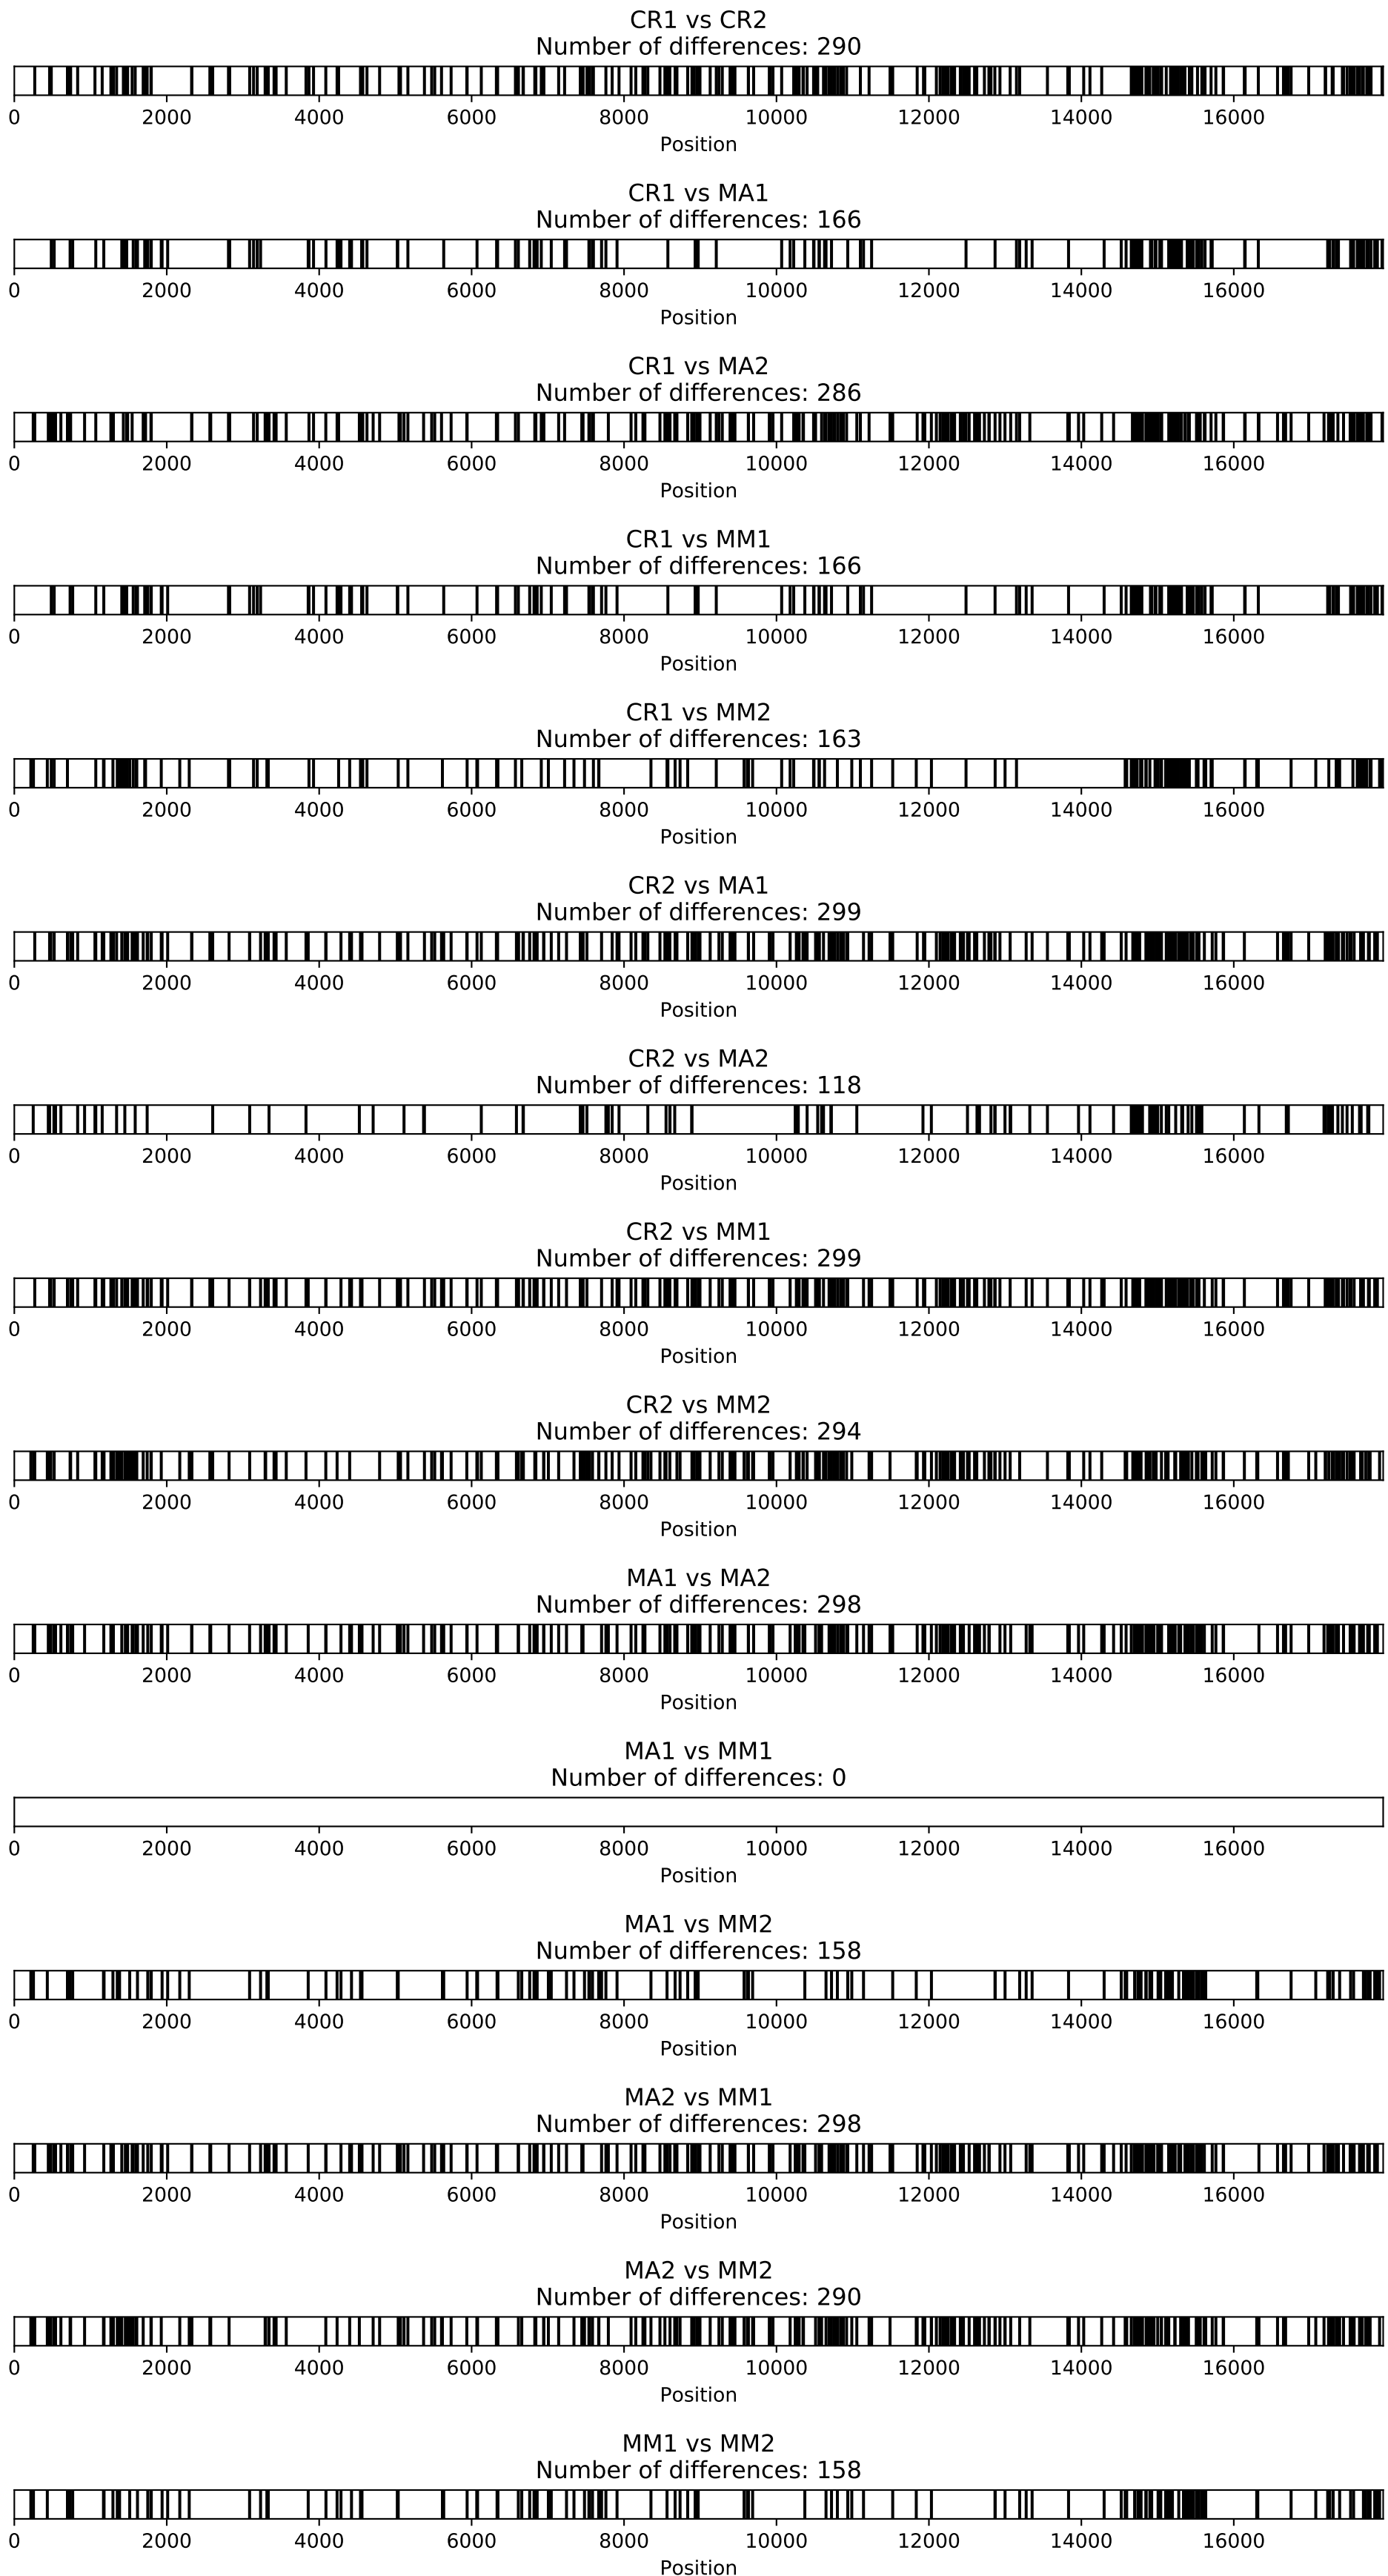

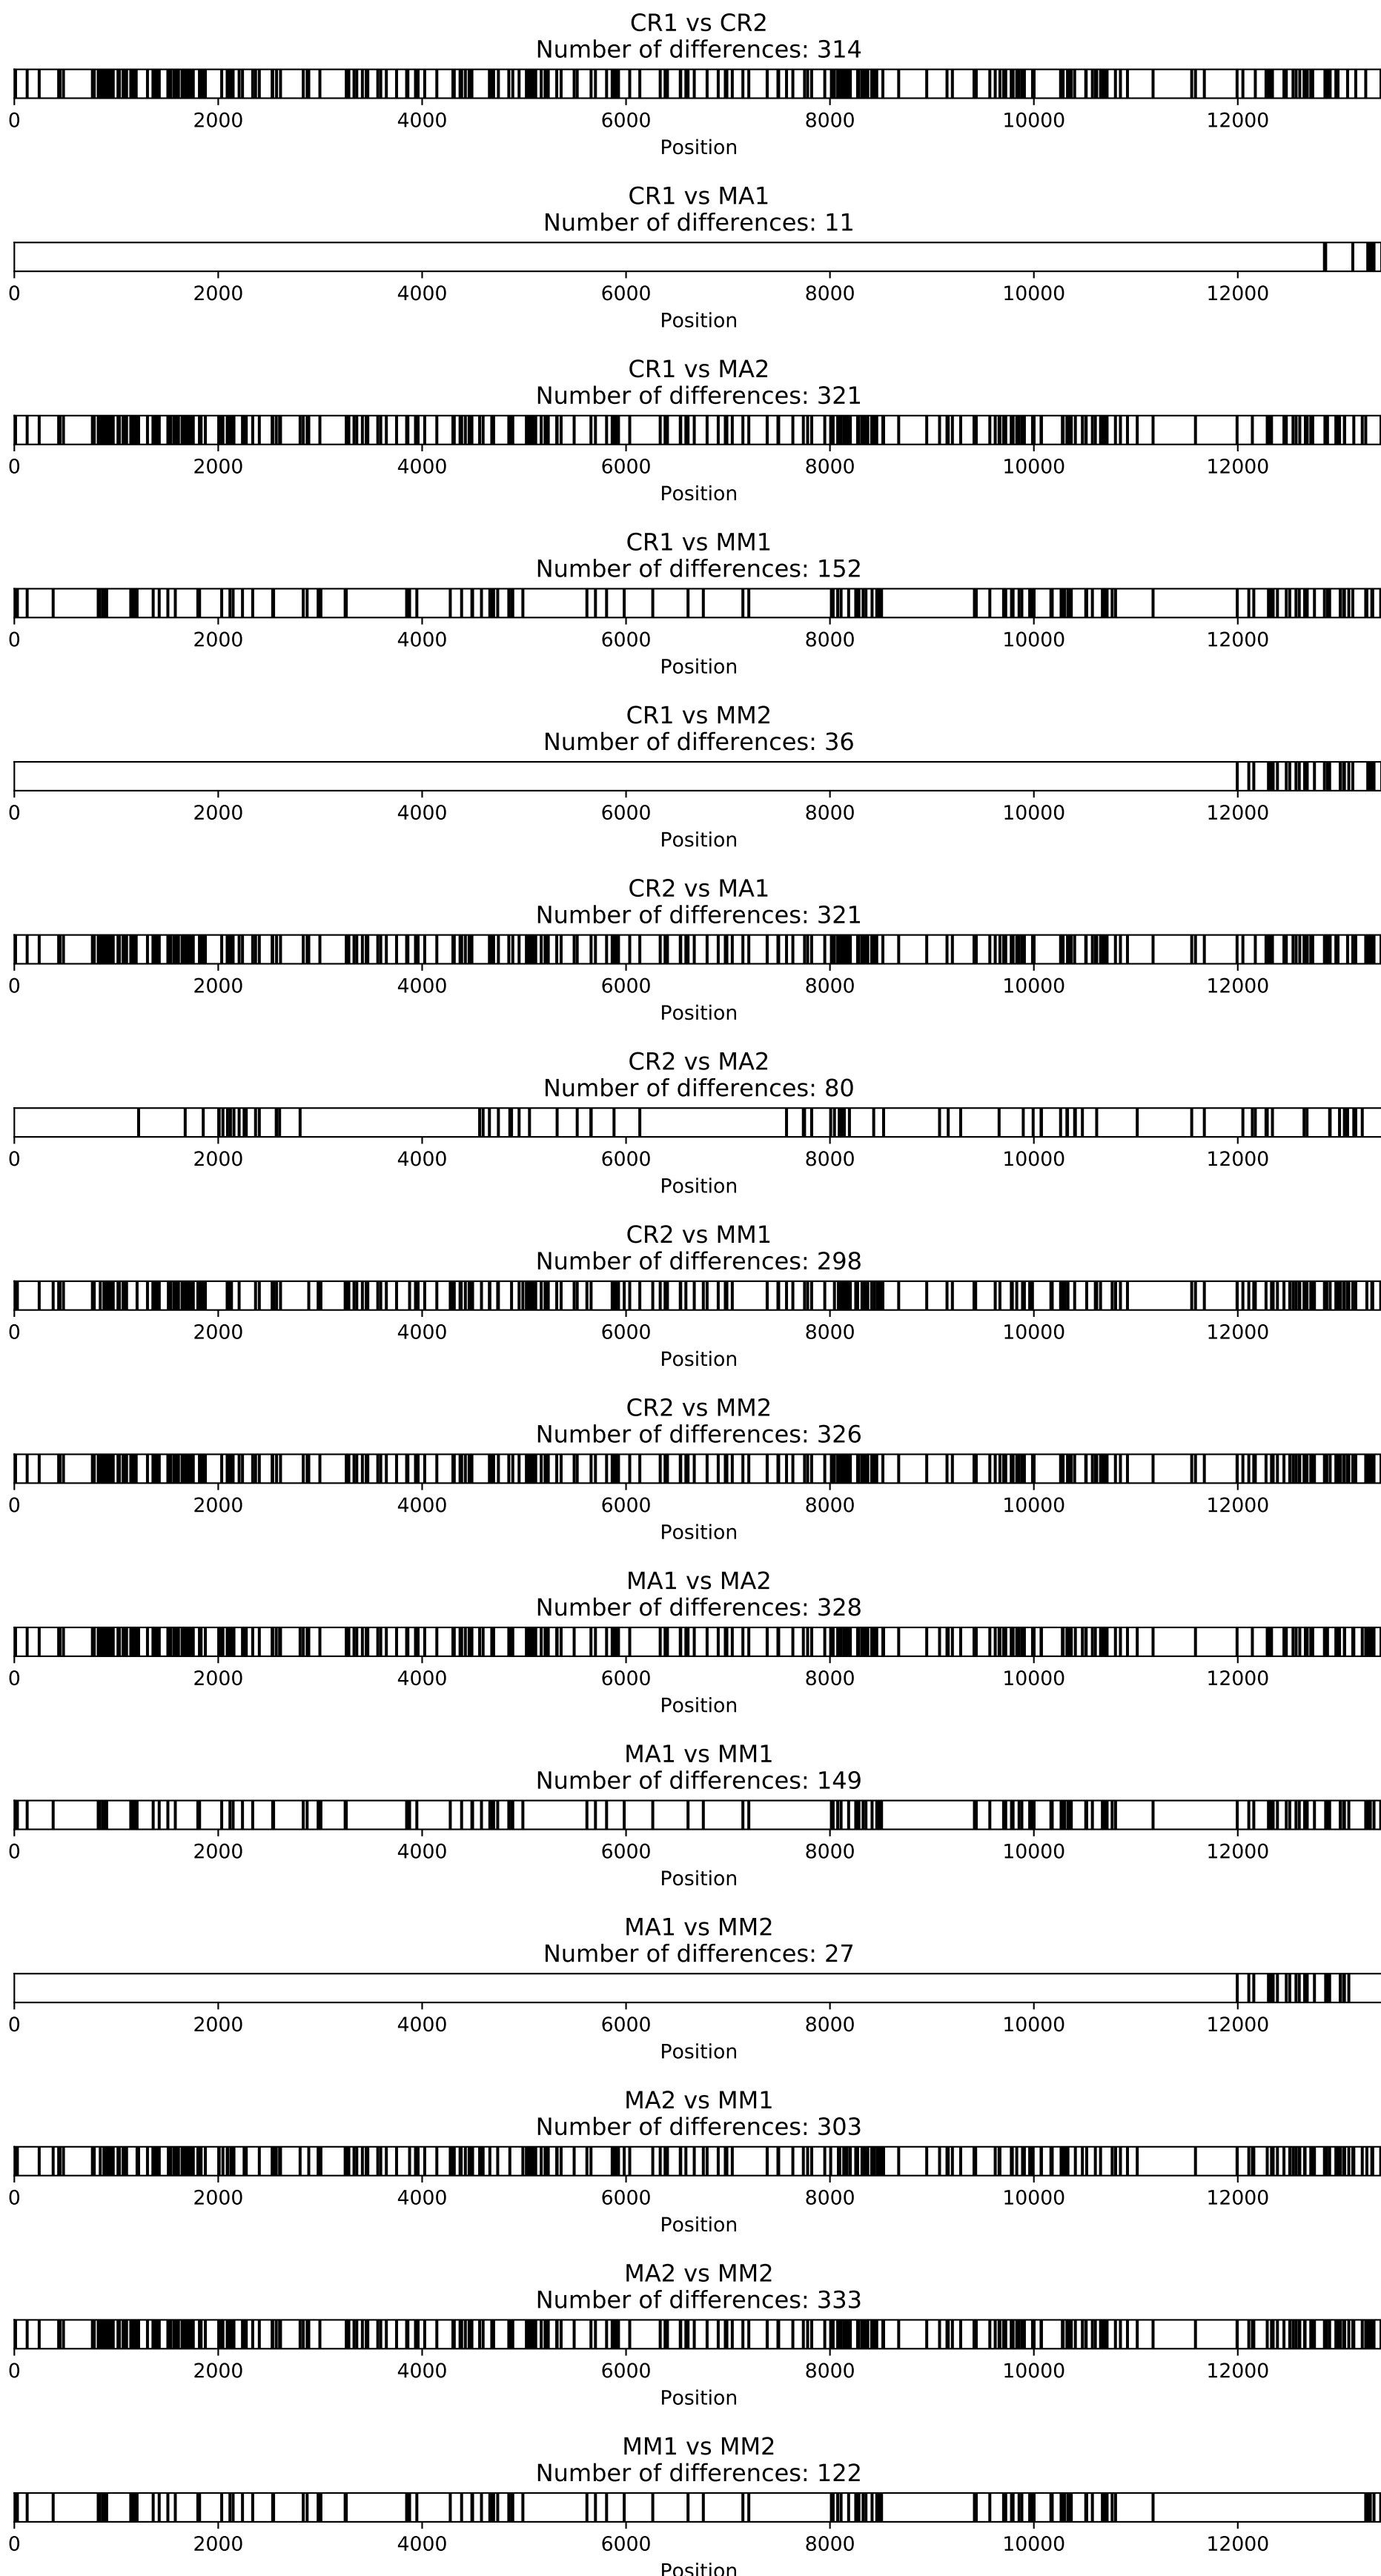

# Region: 137

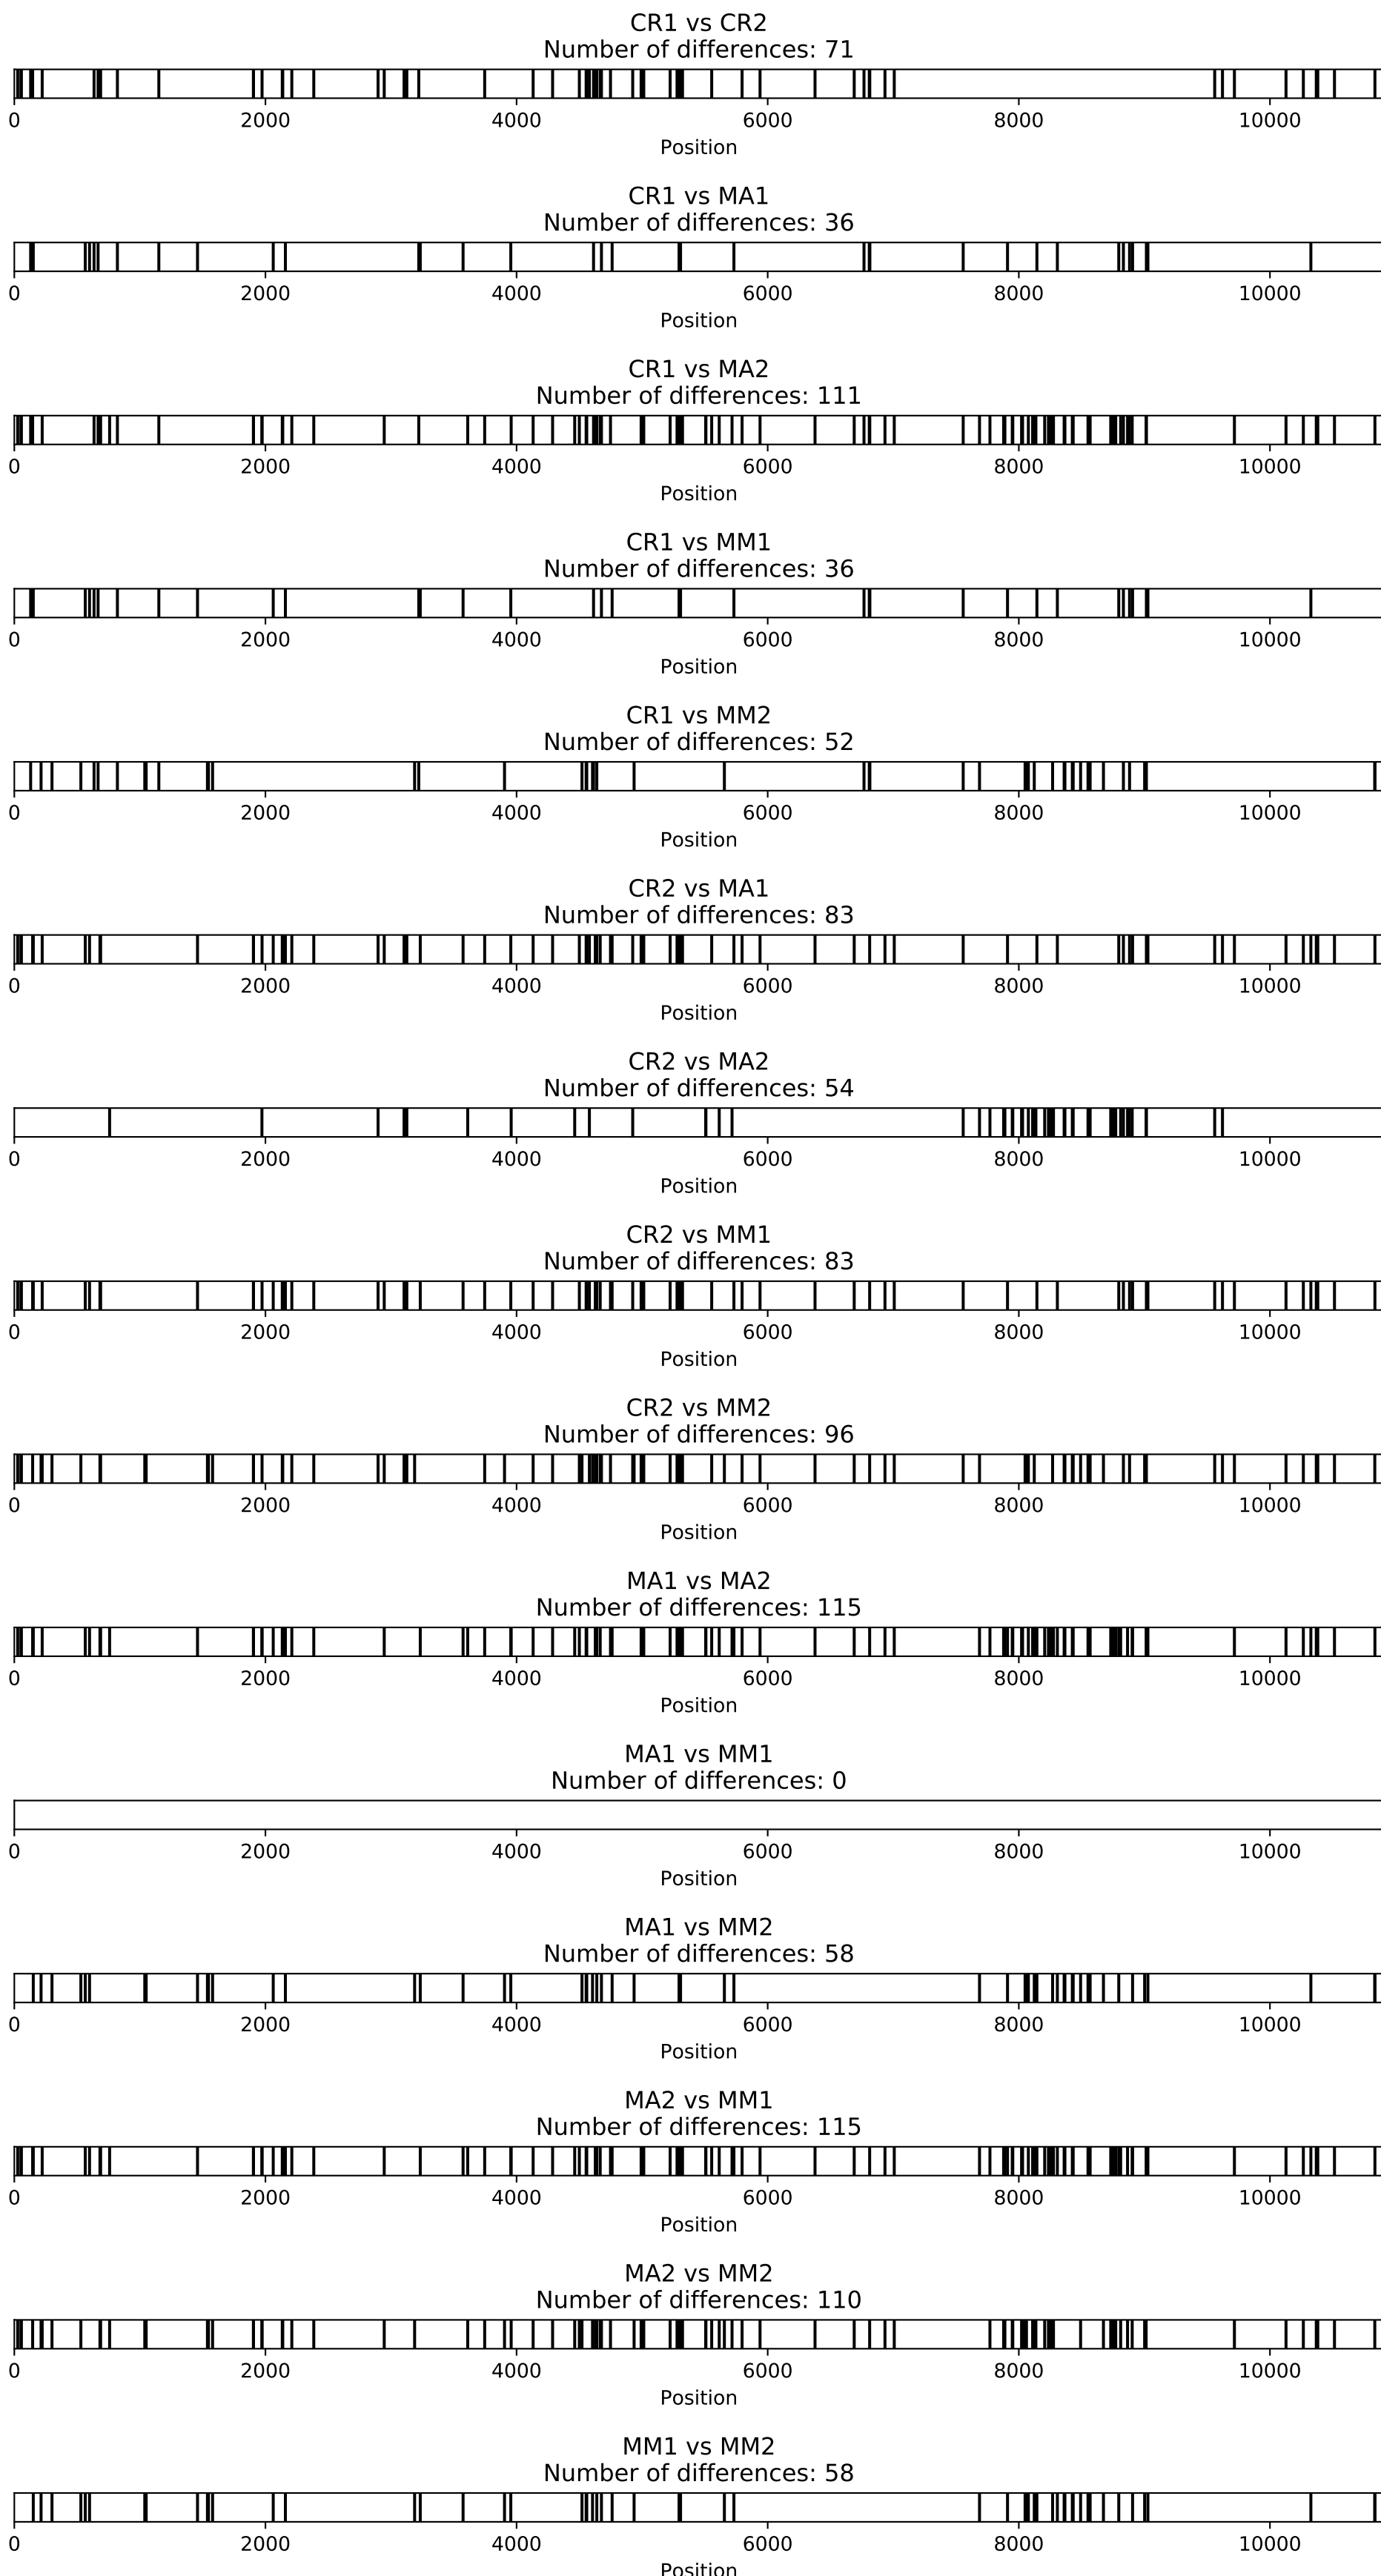

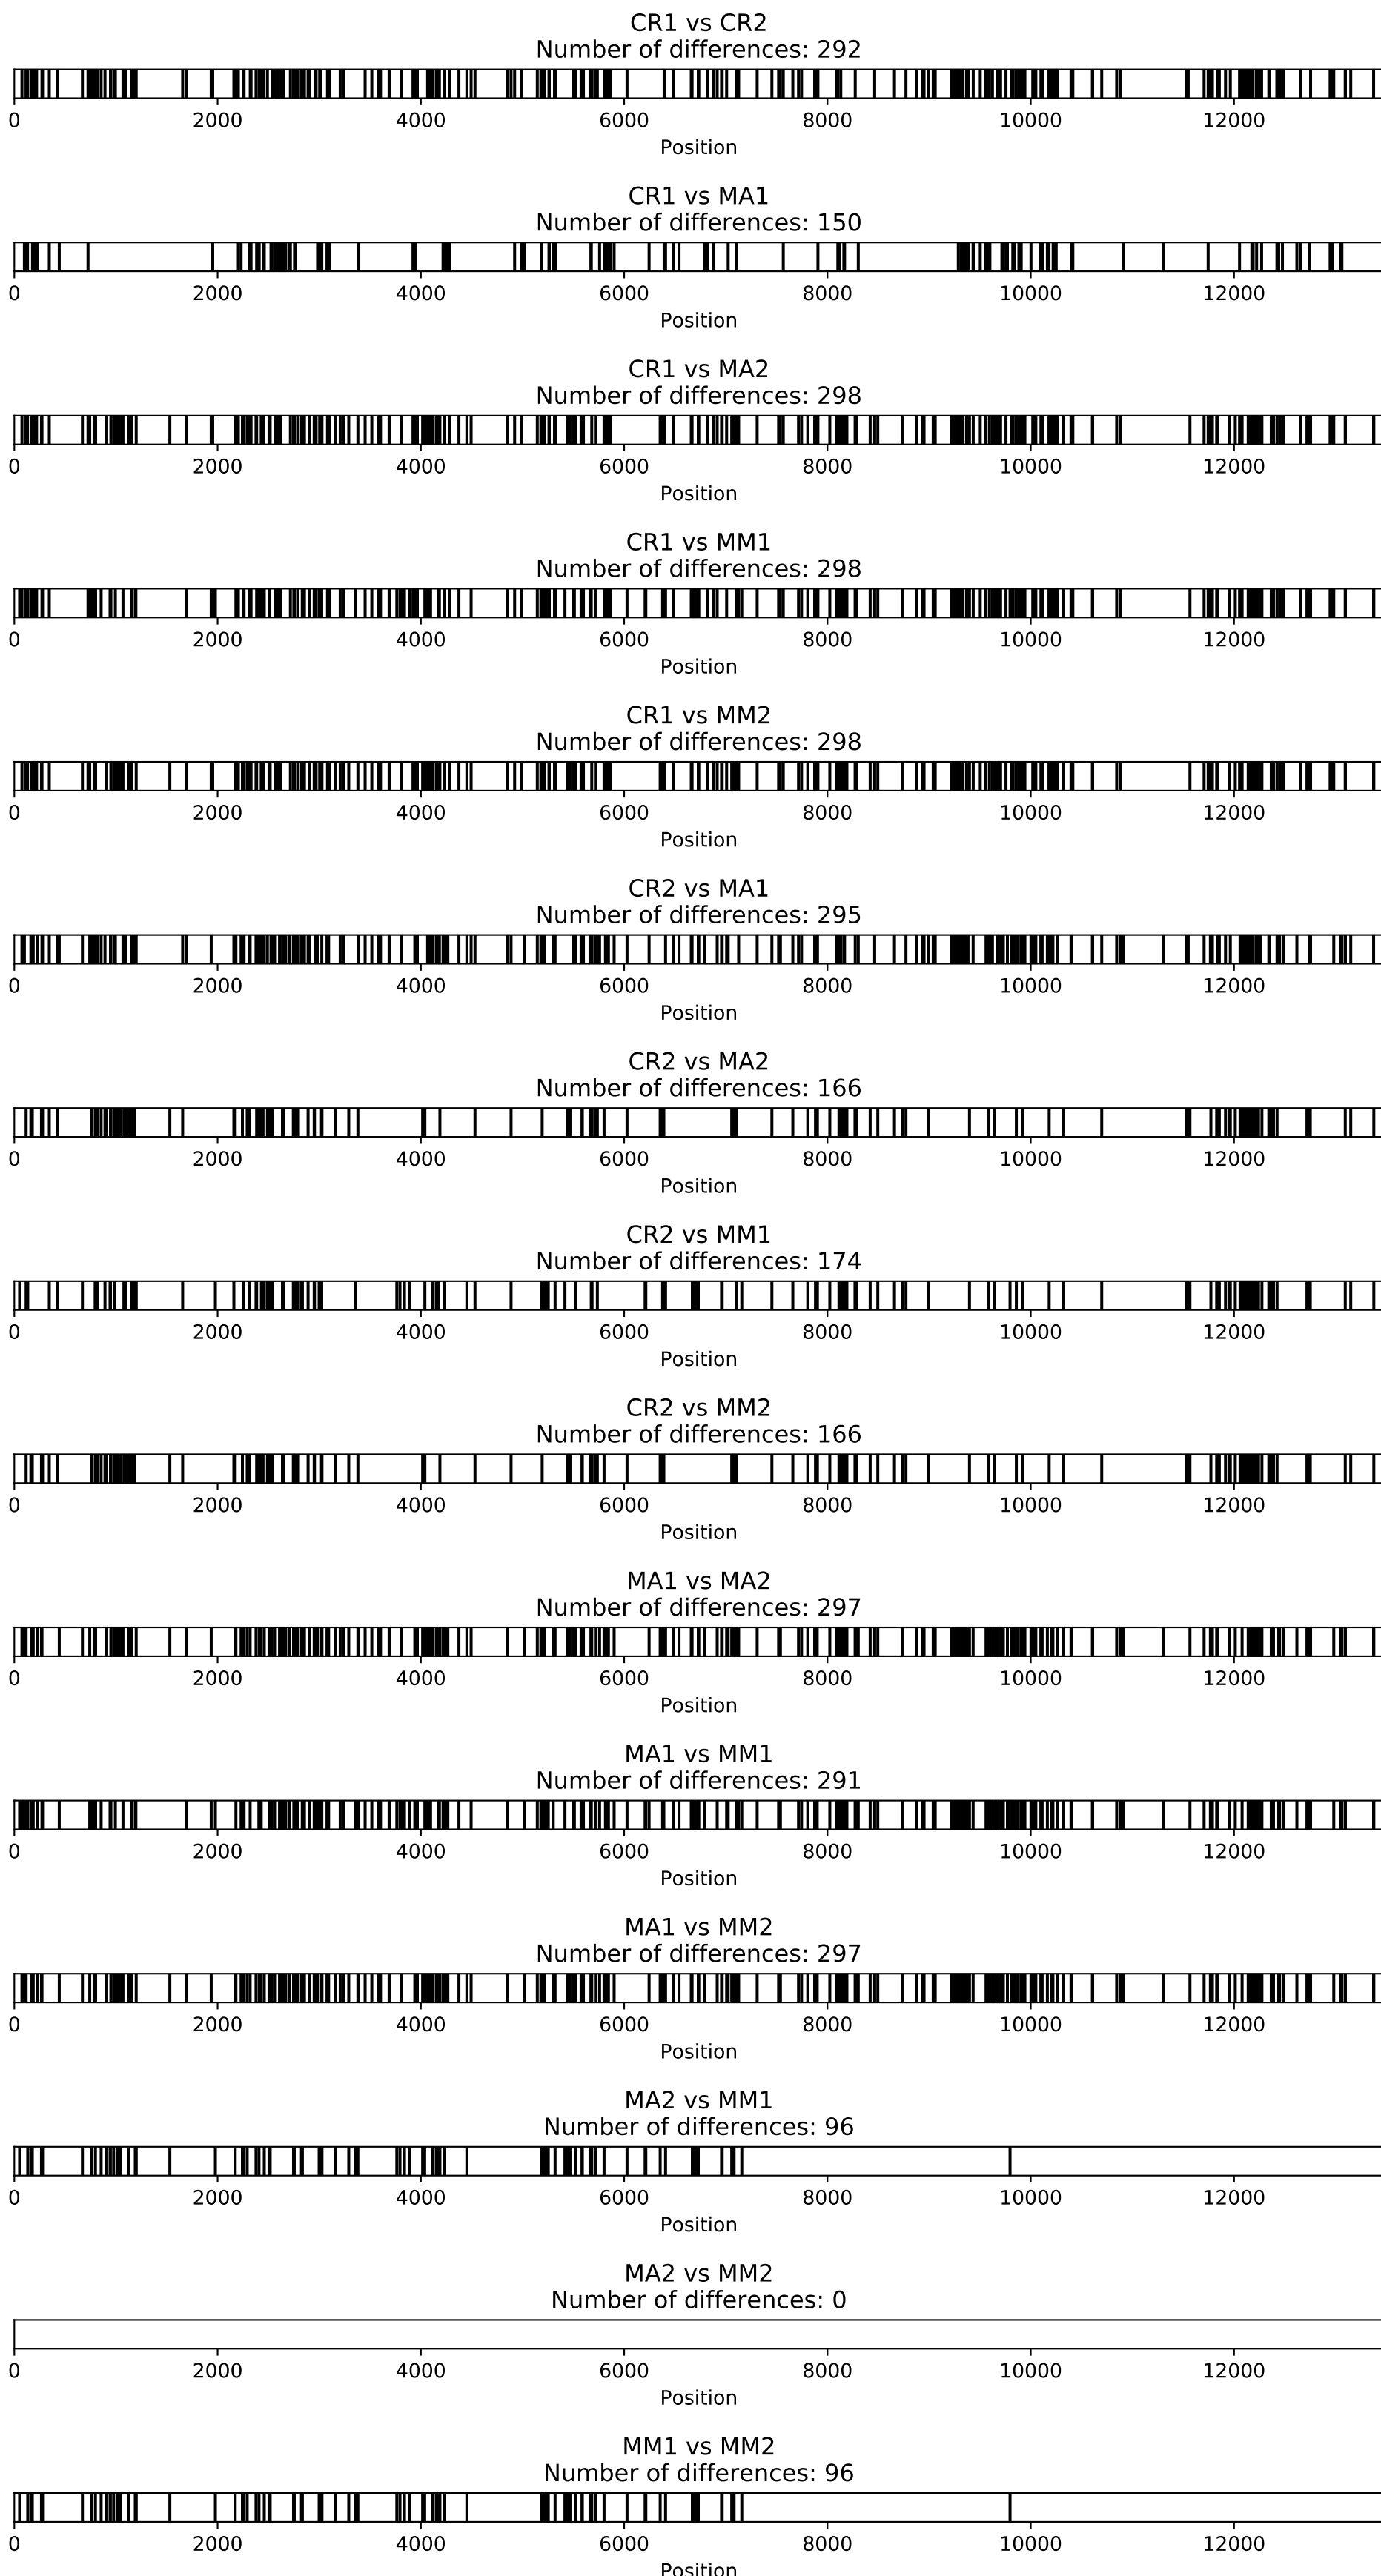

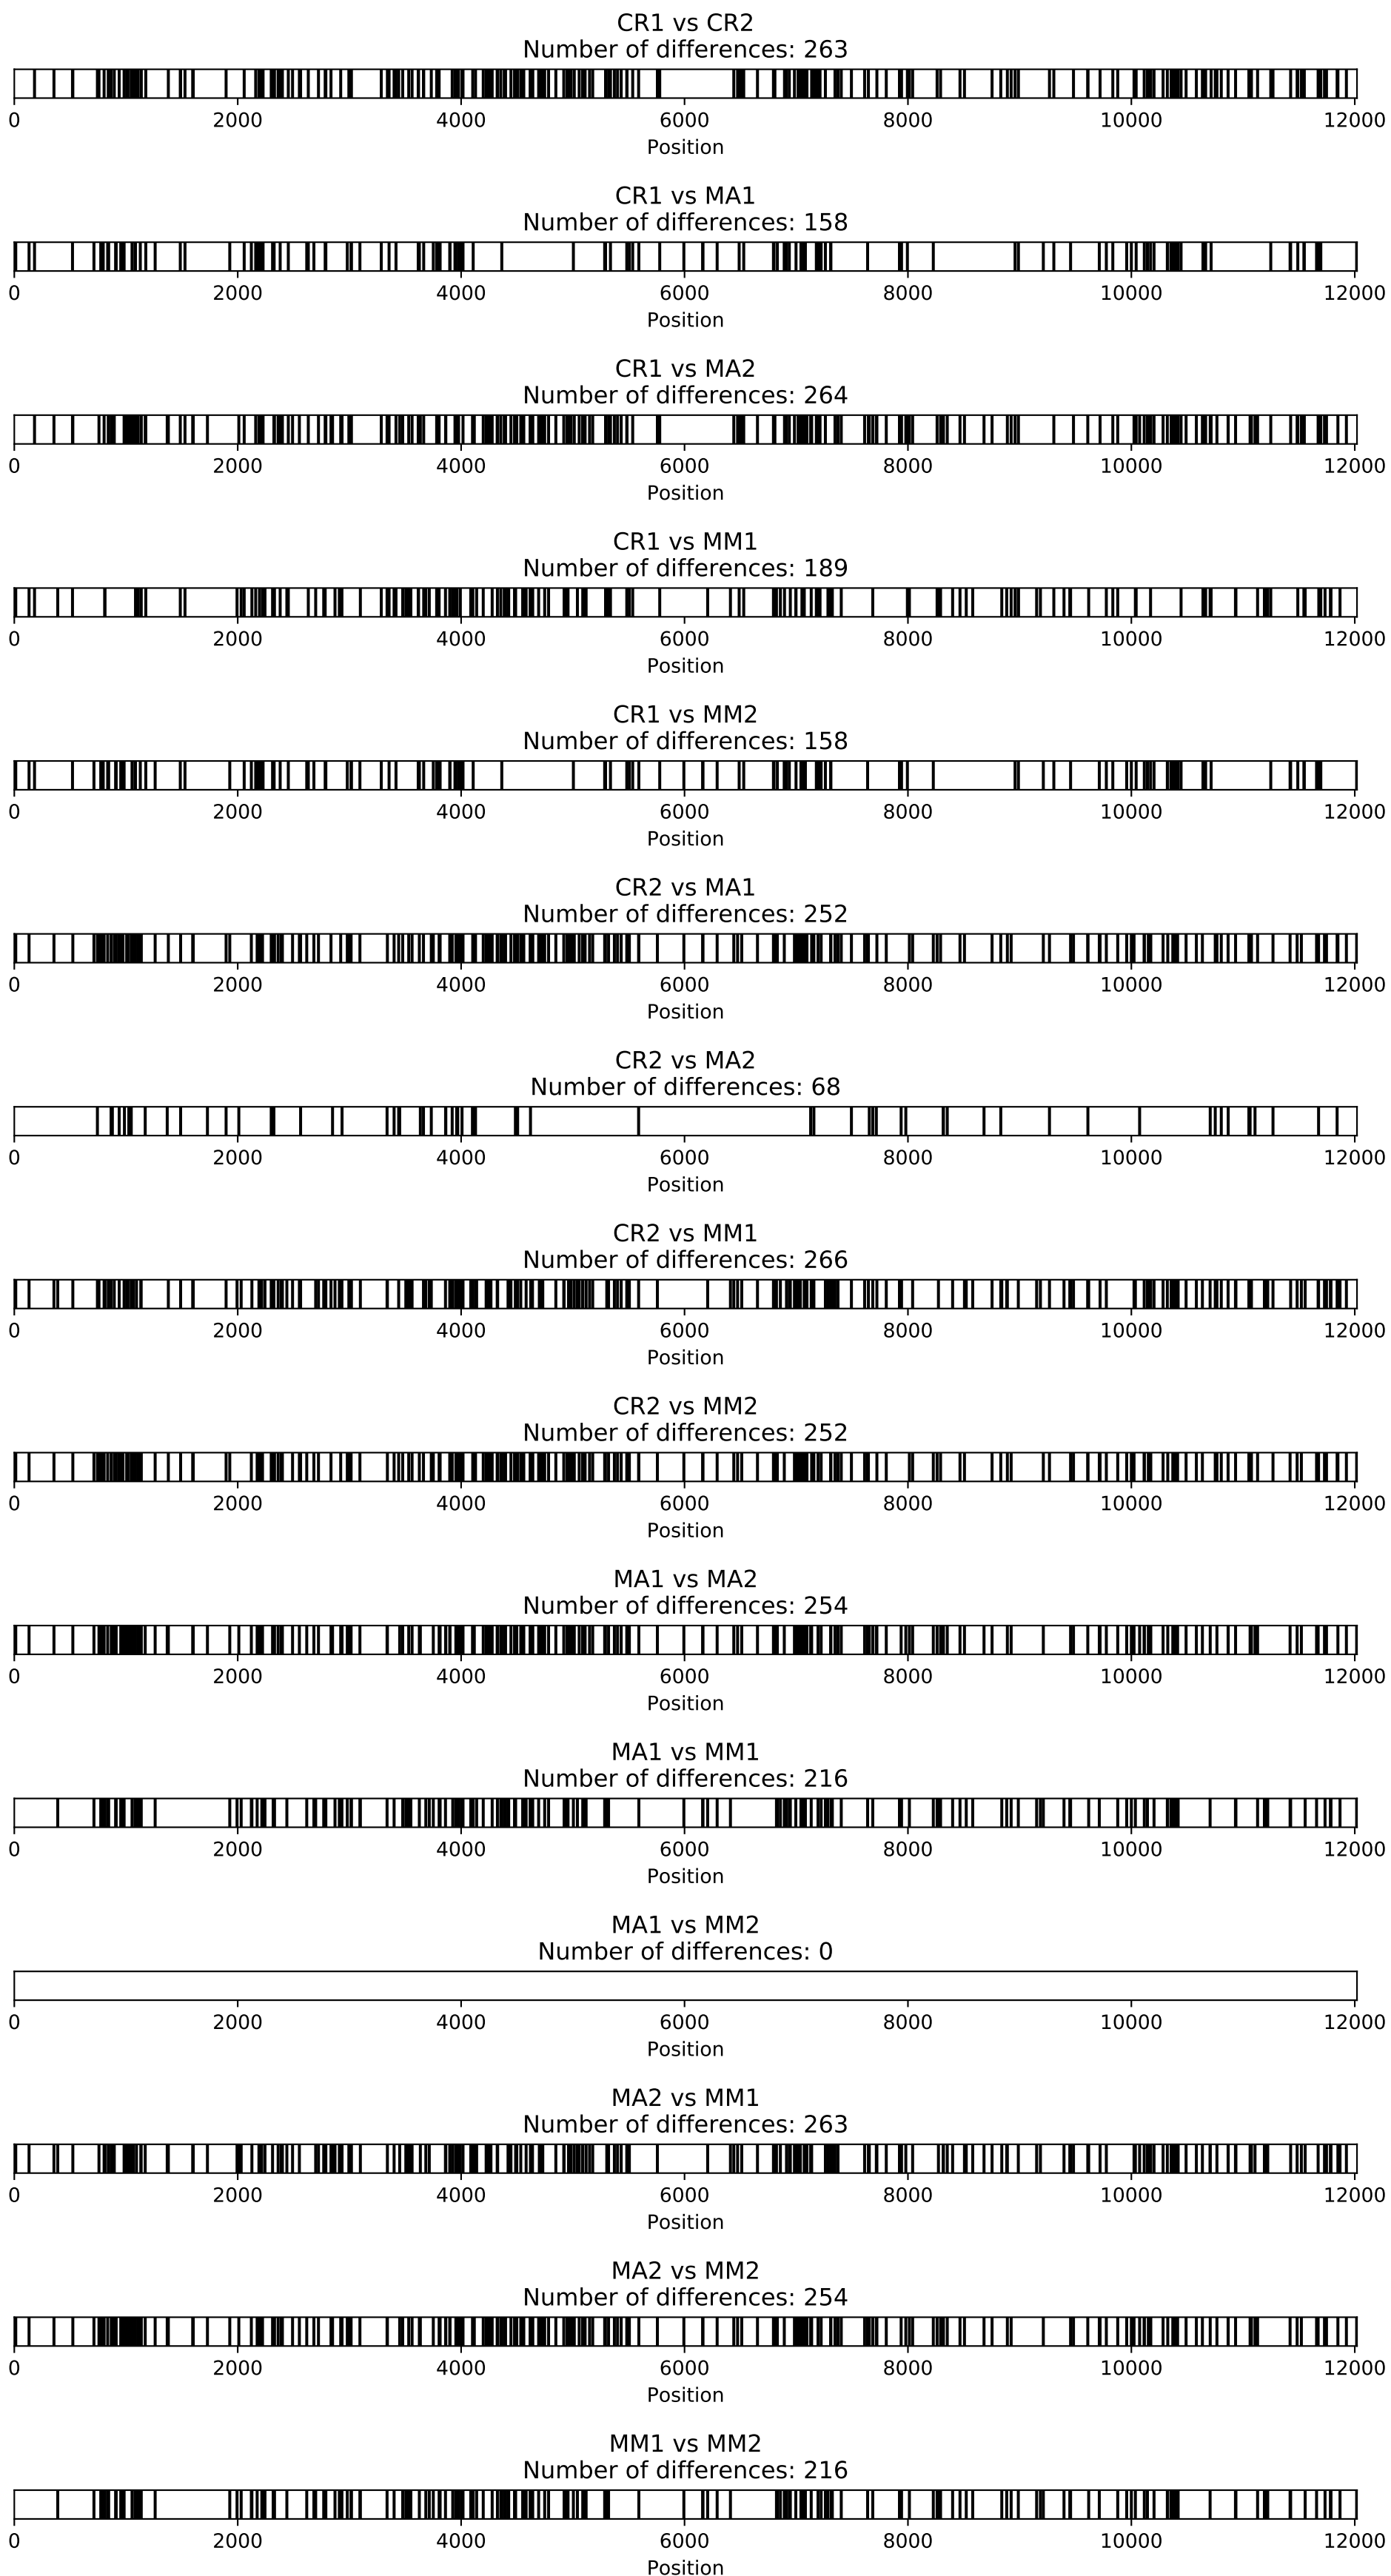

# Region: 140

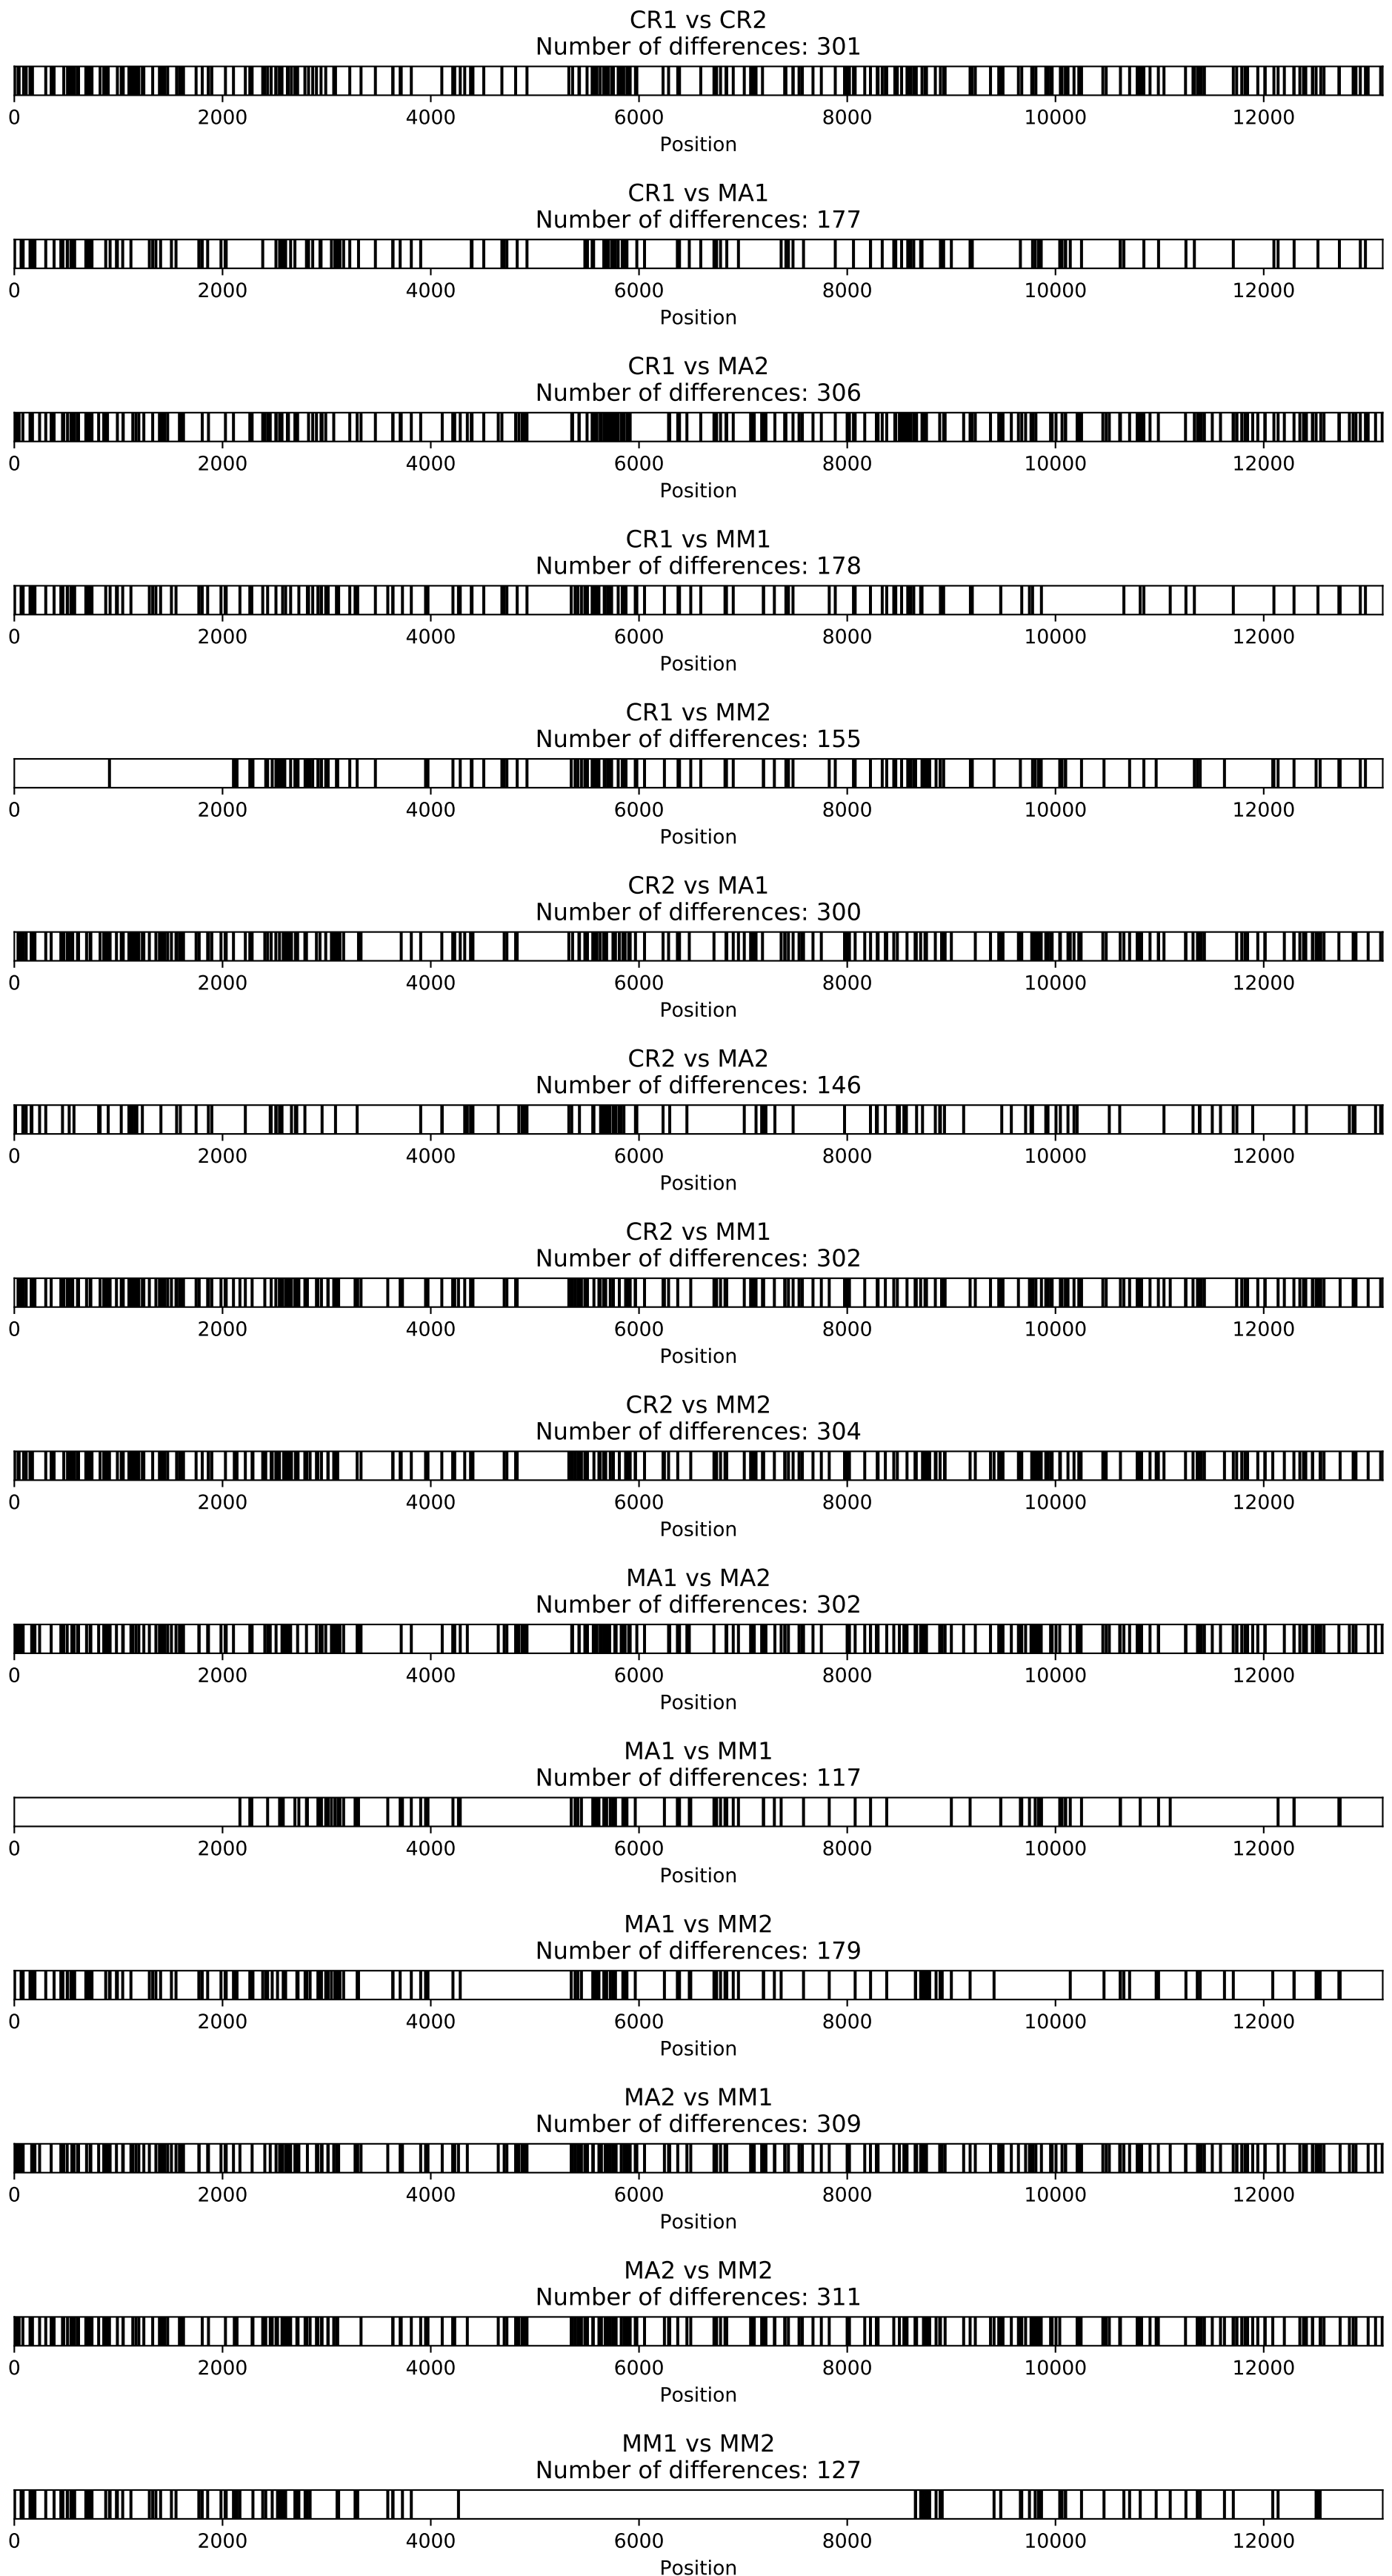

# Region: 141

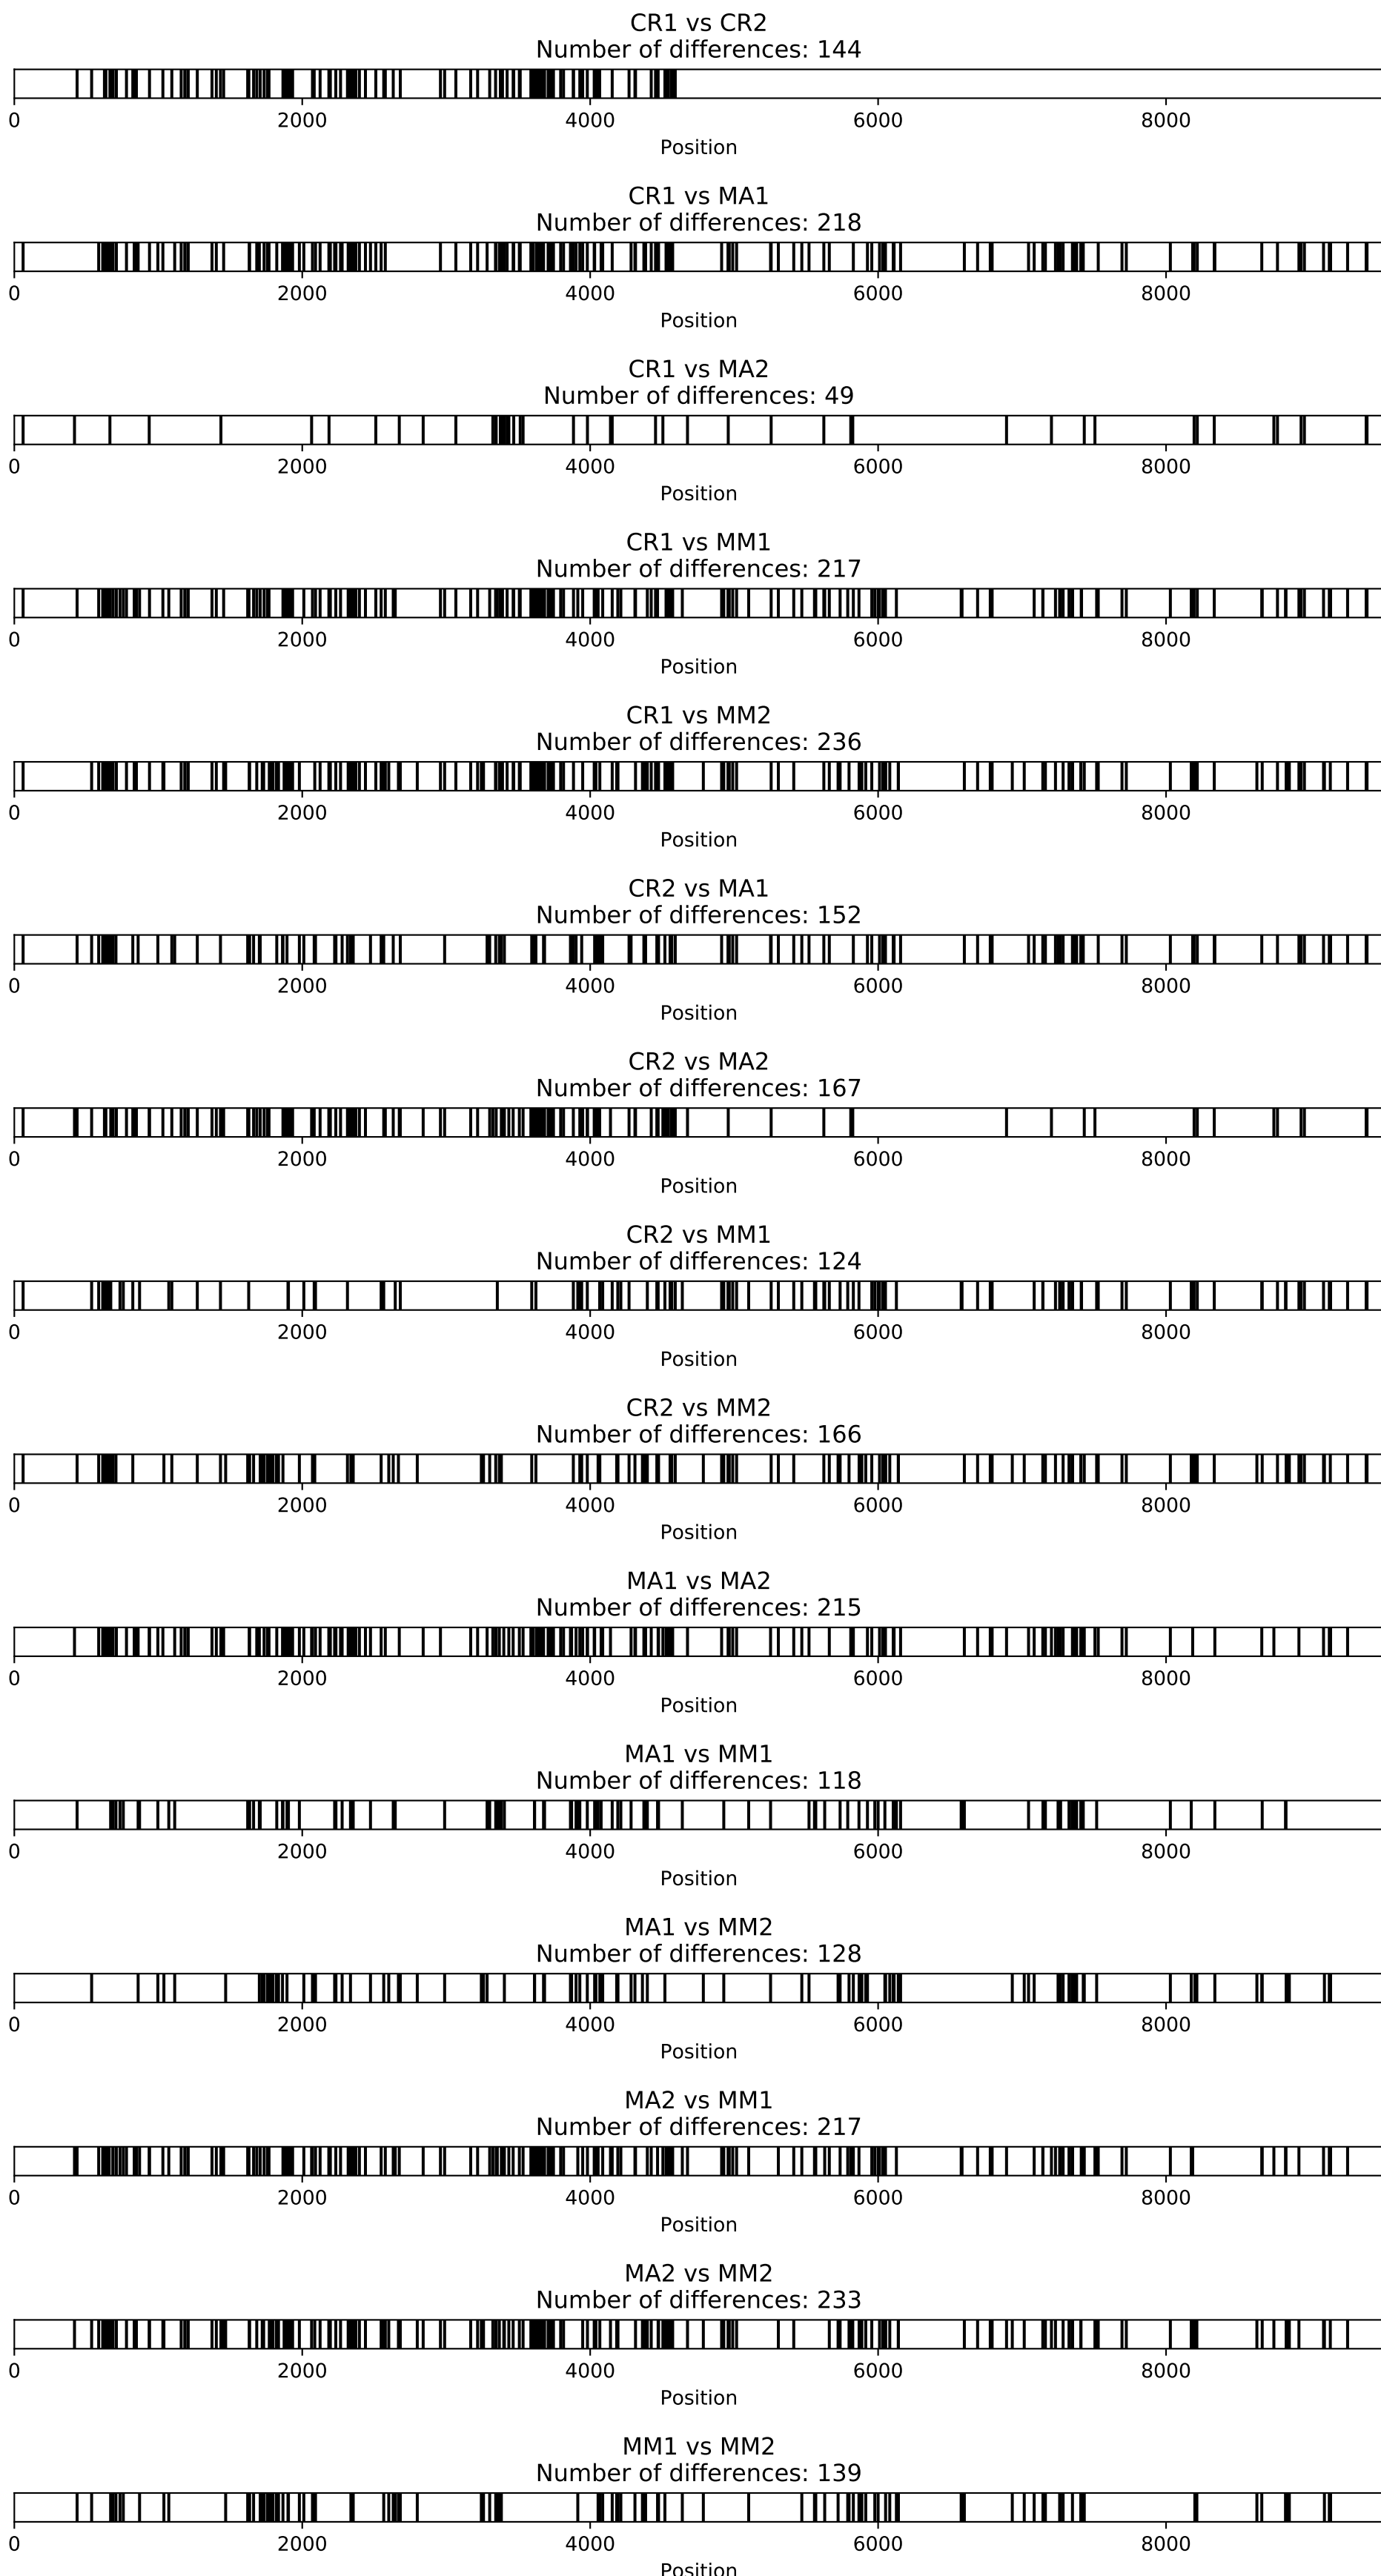



# Region: 142

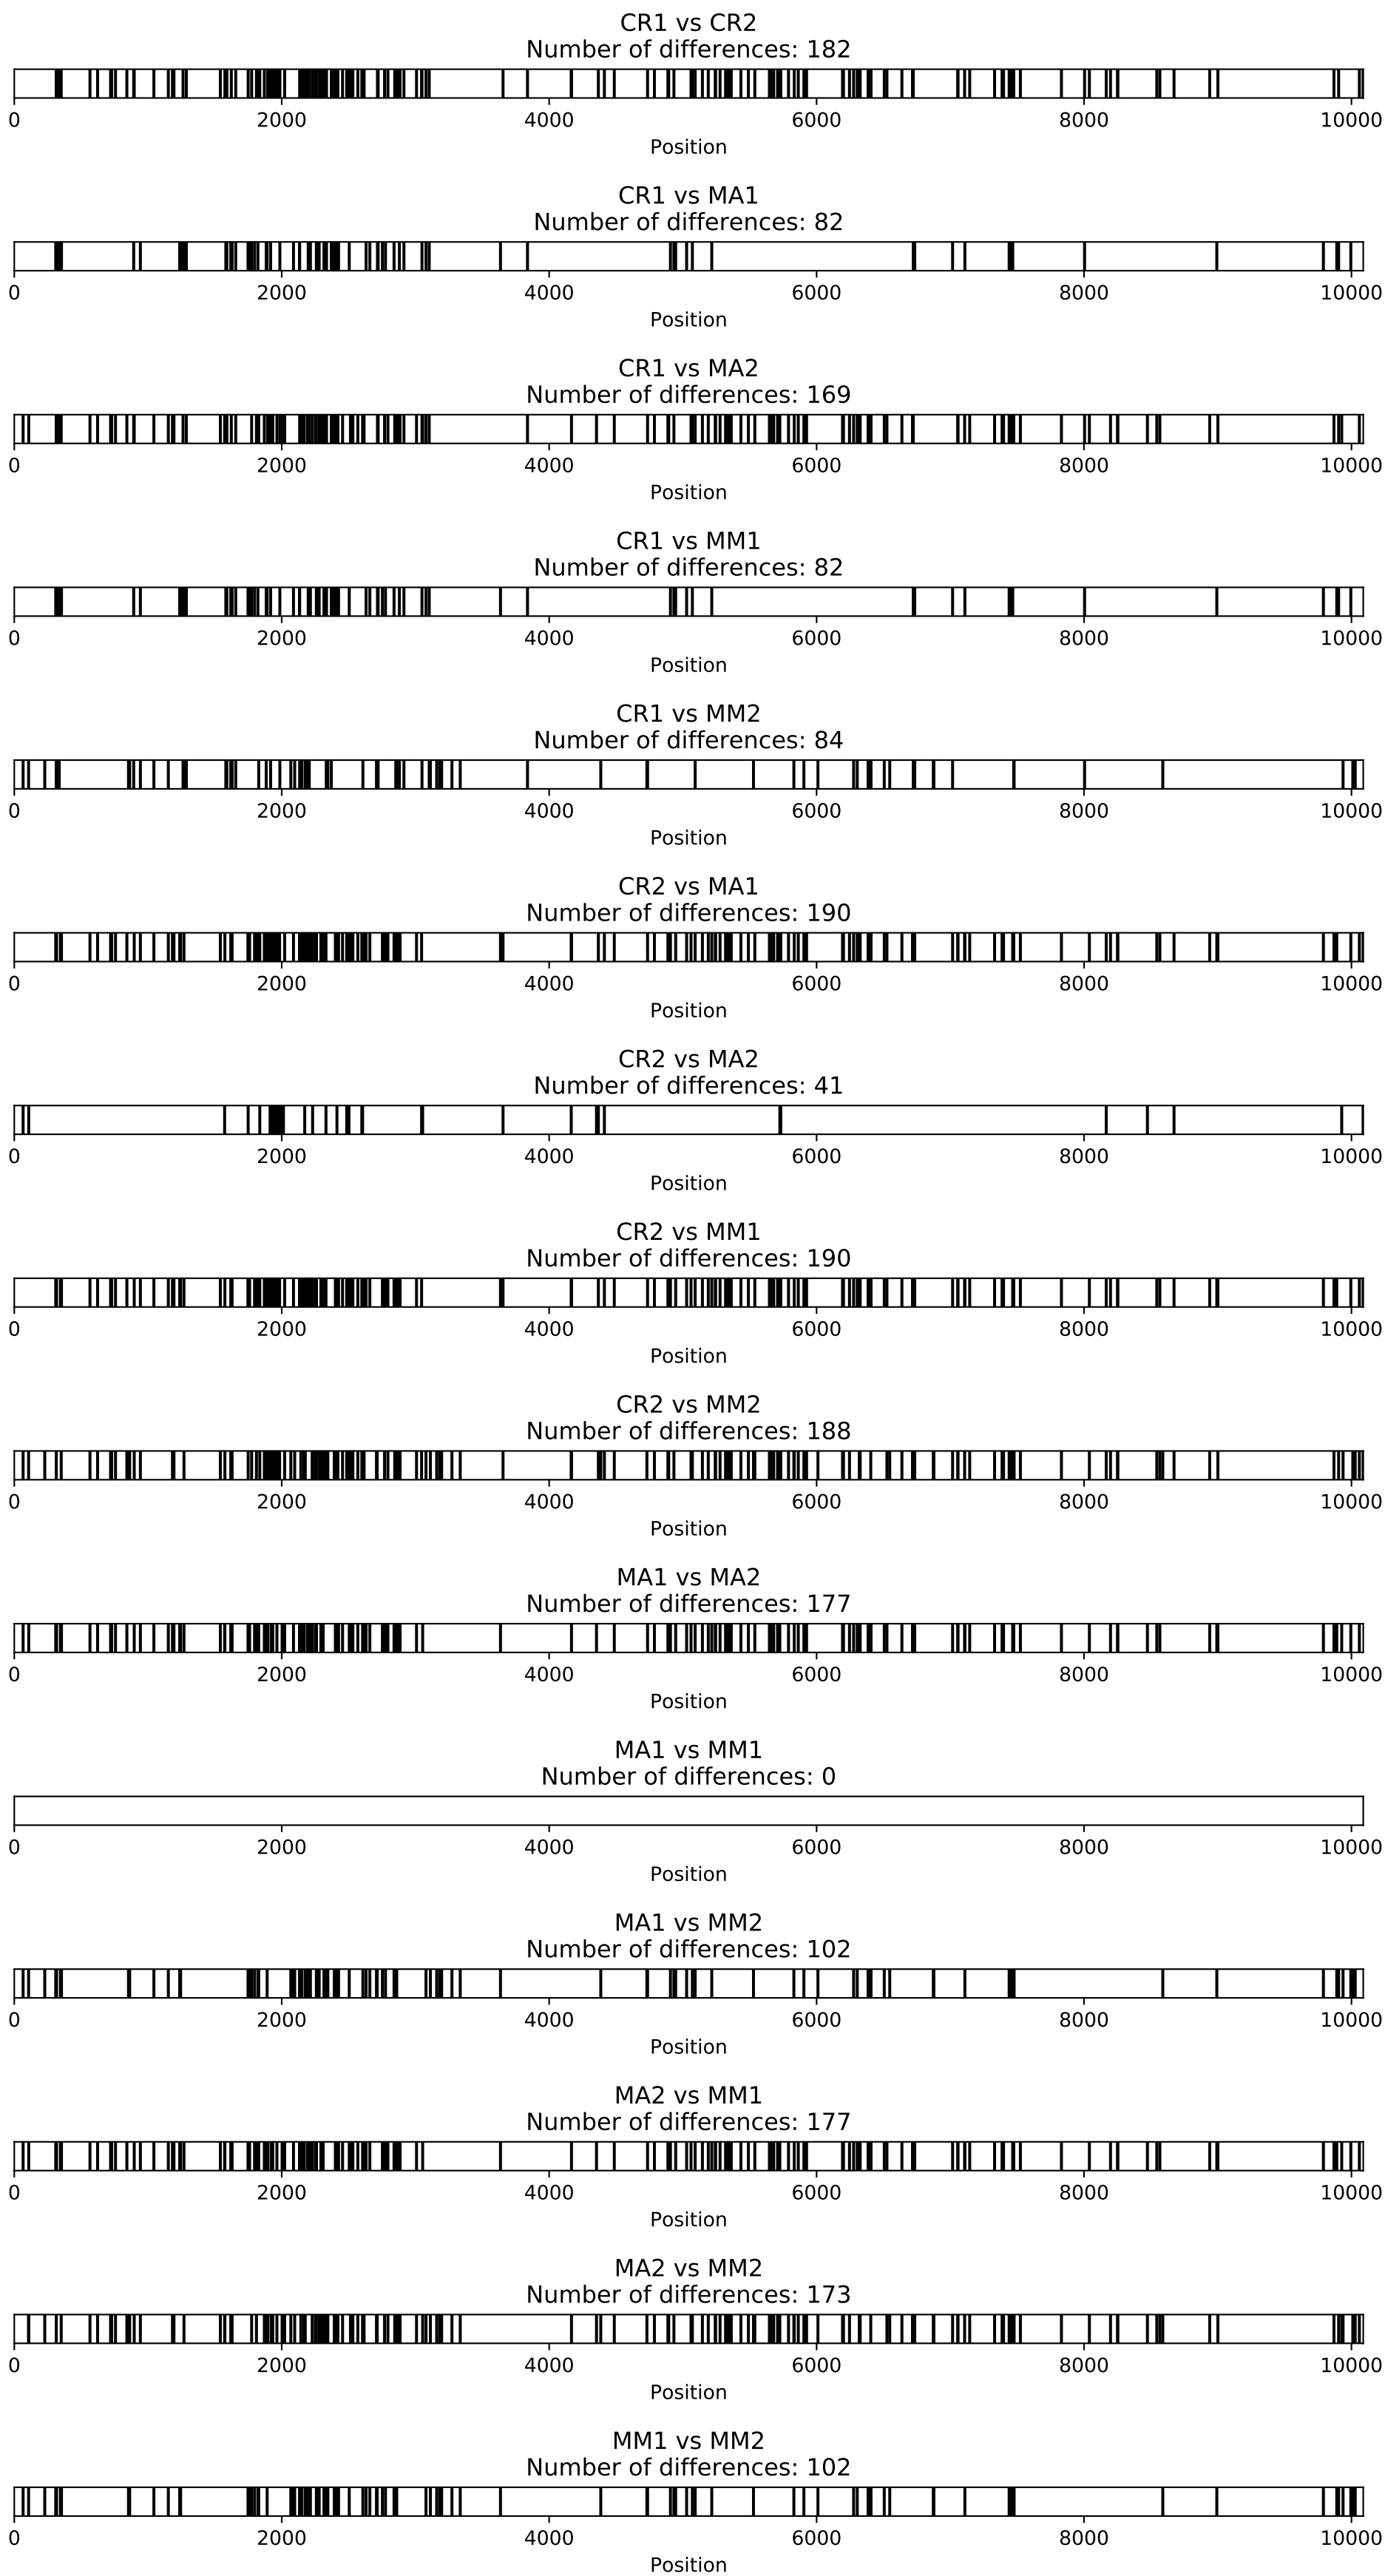

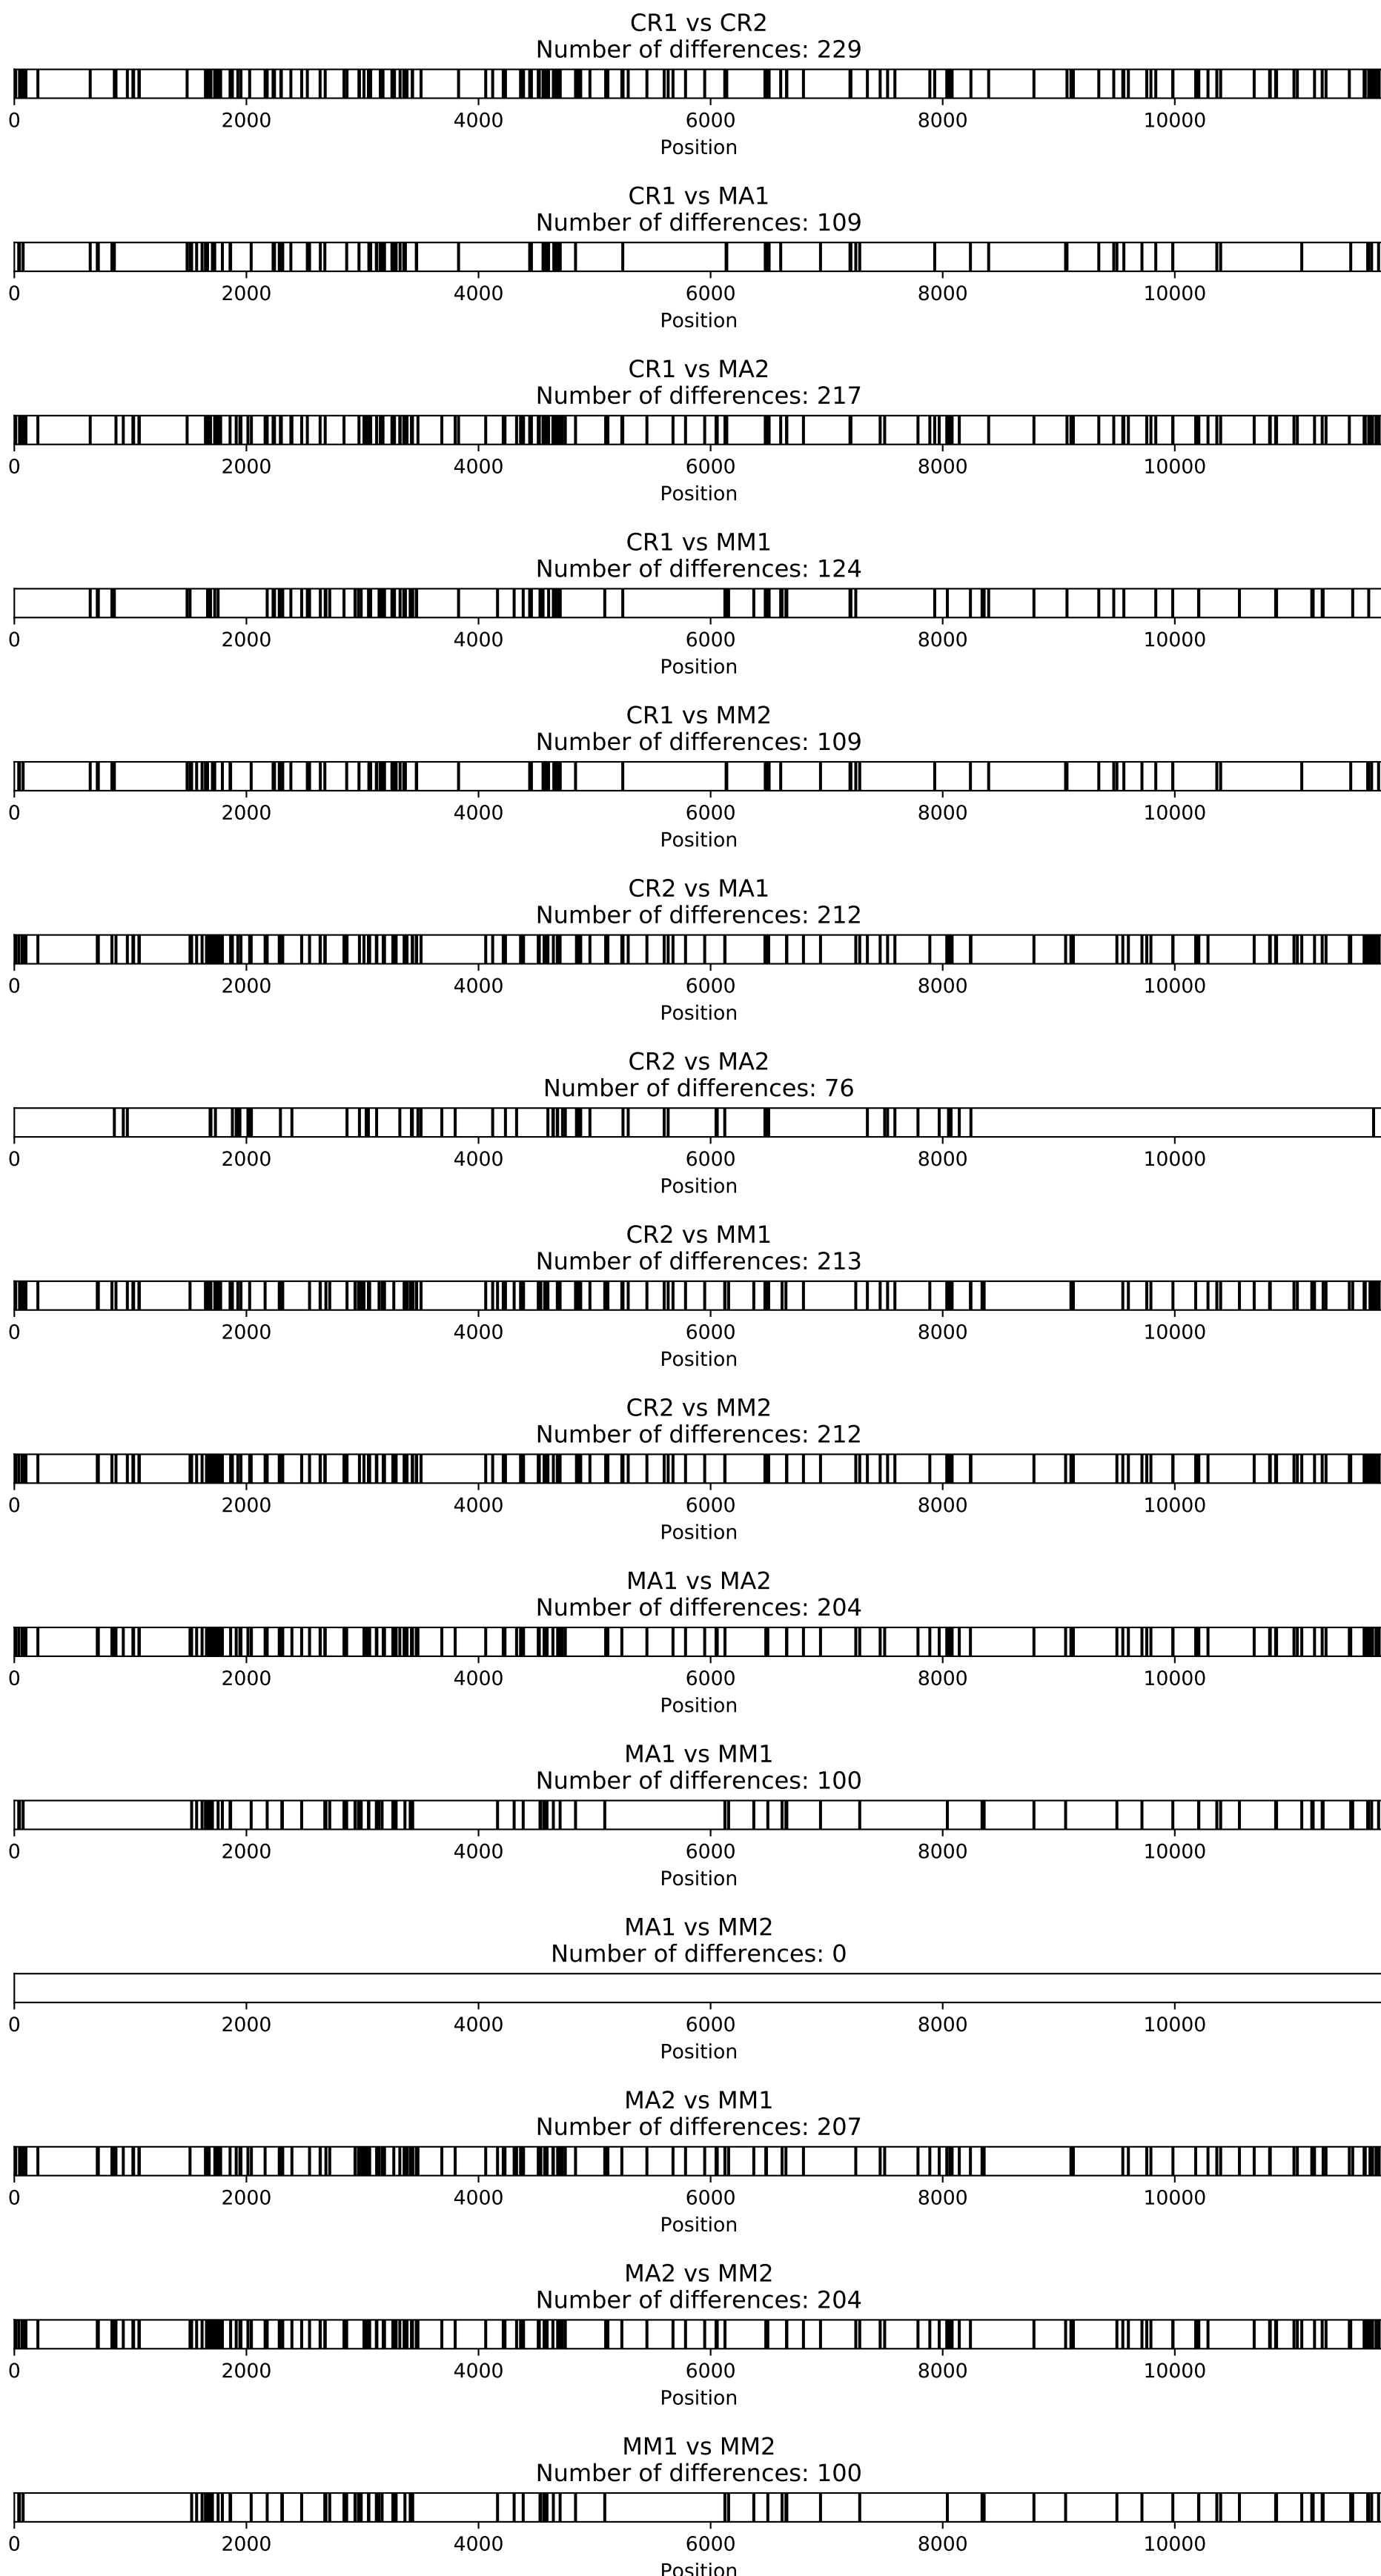

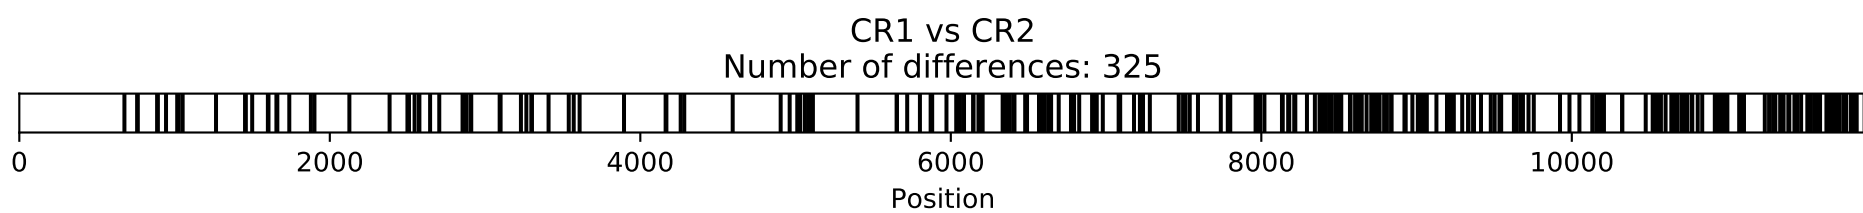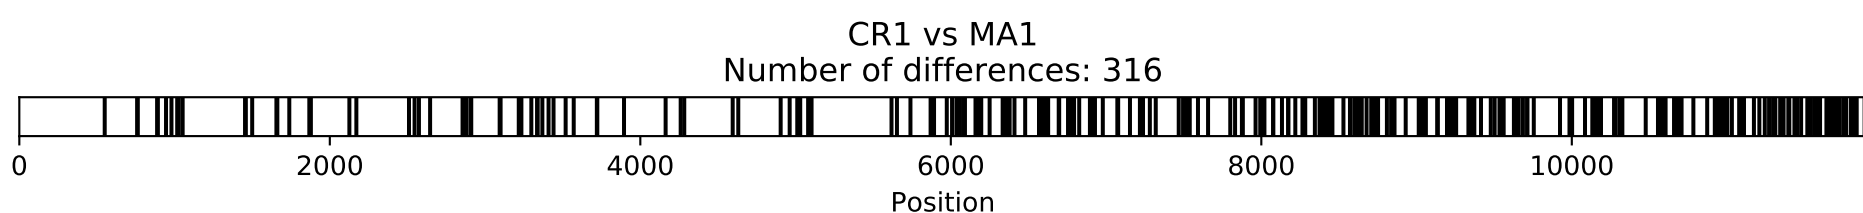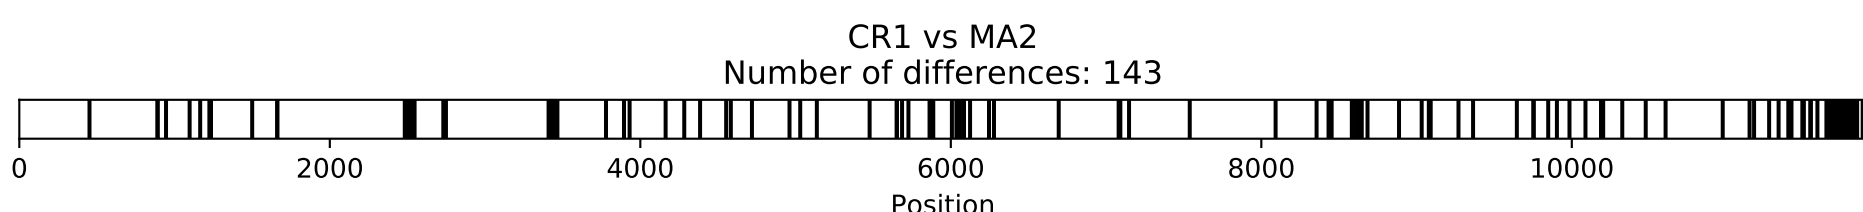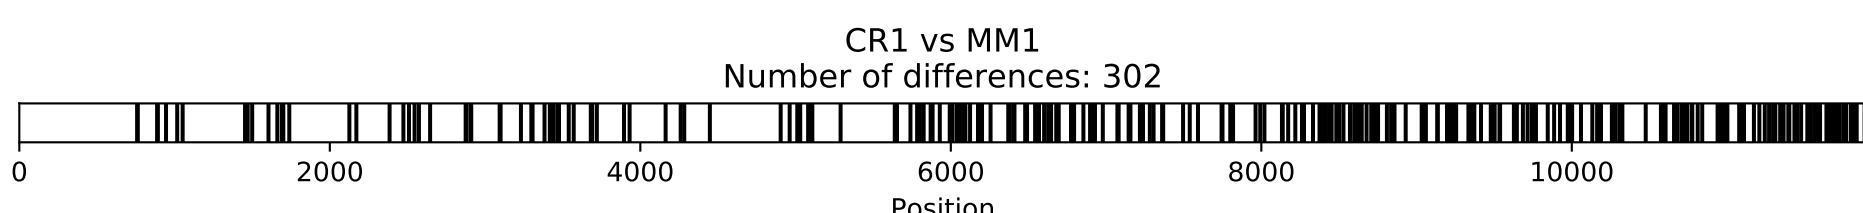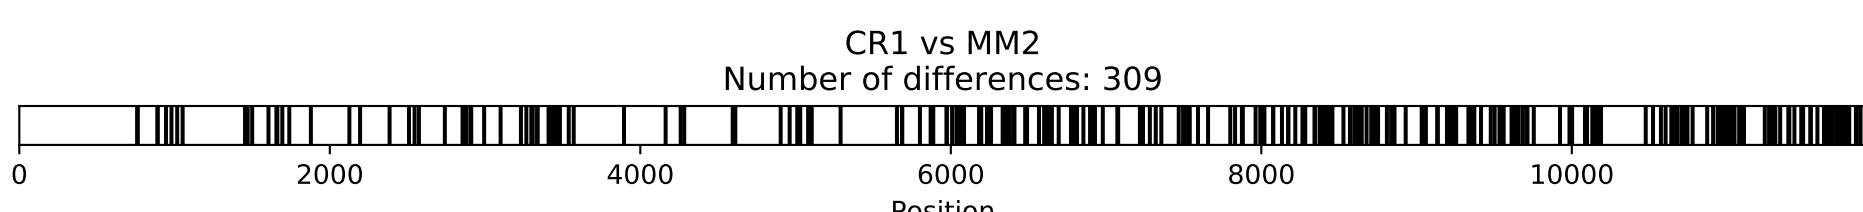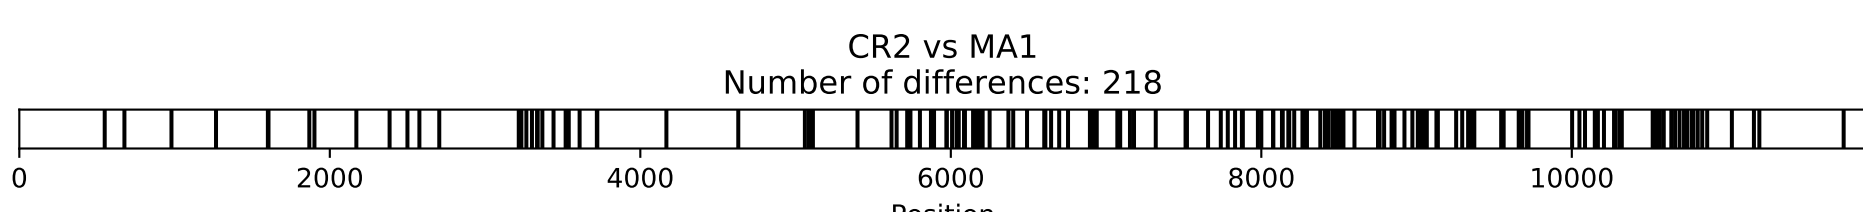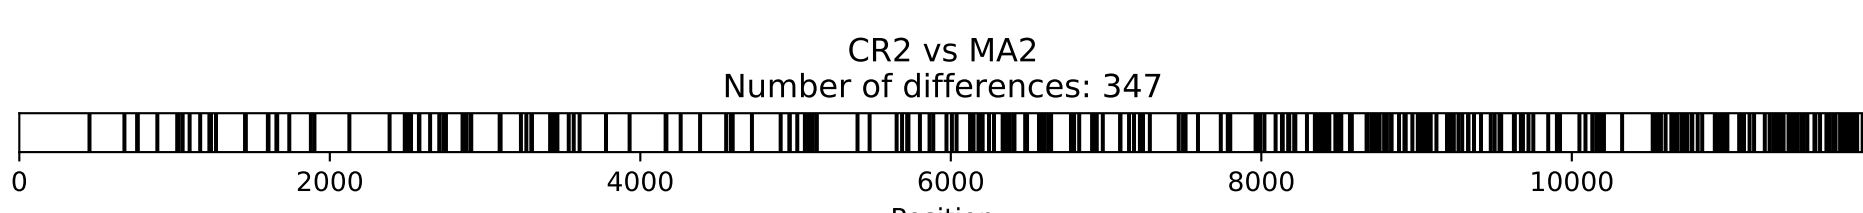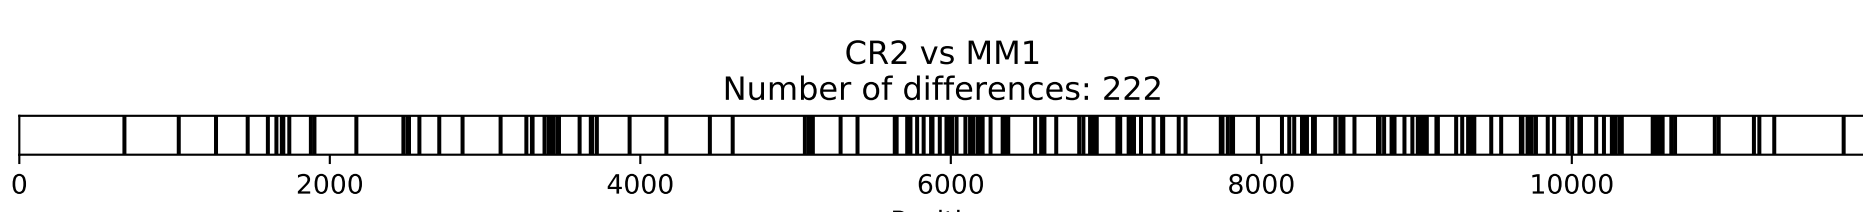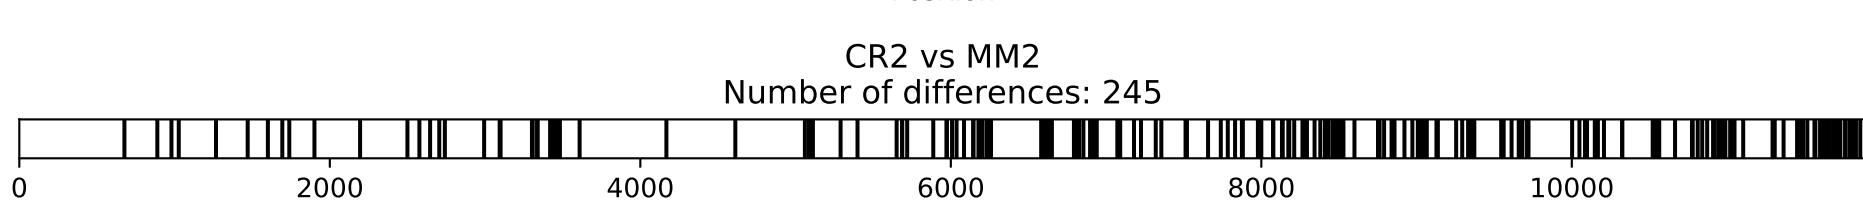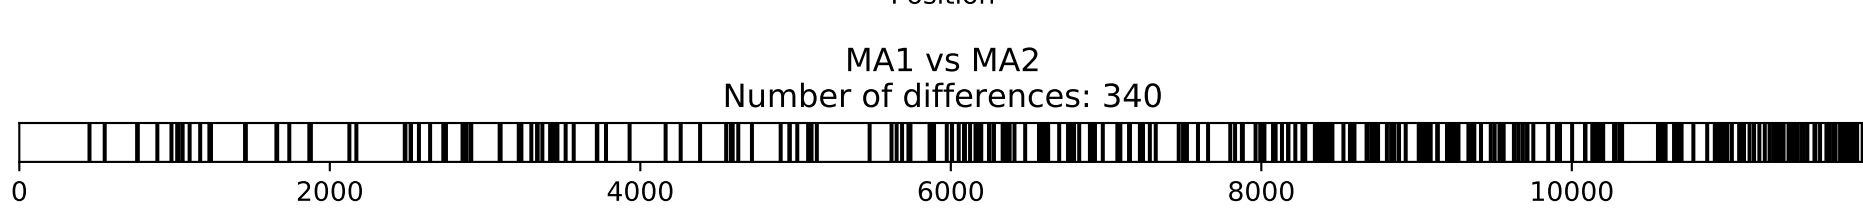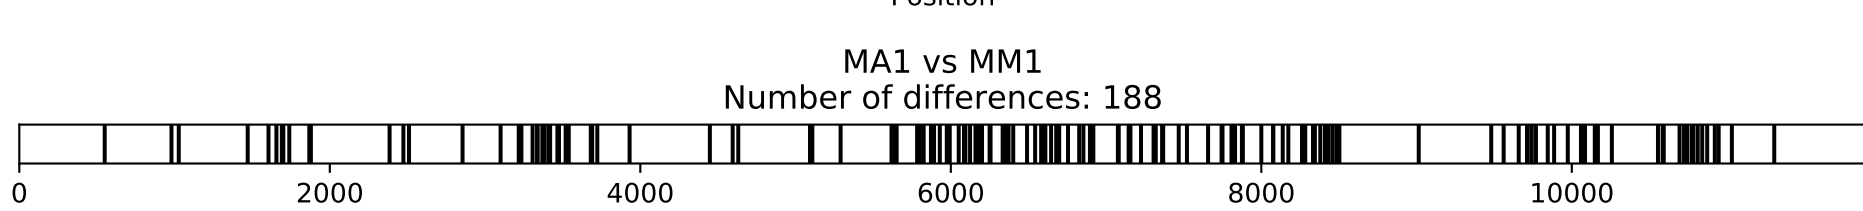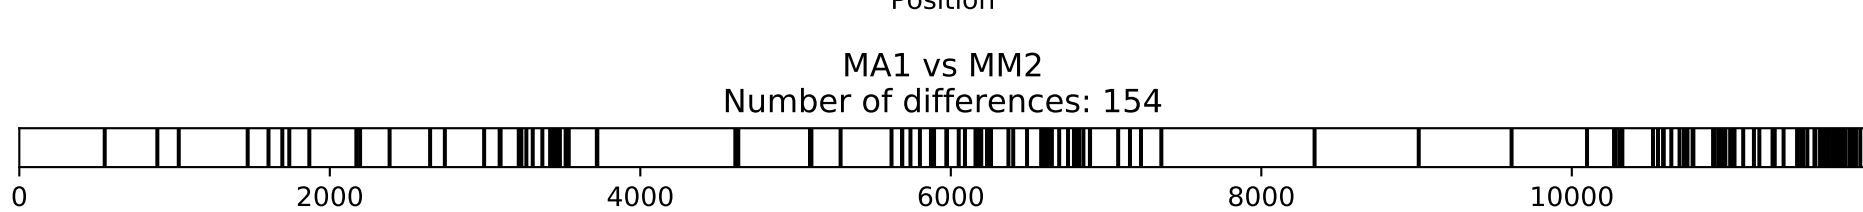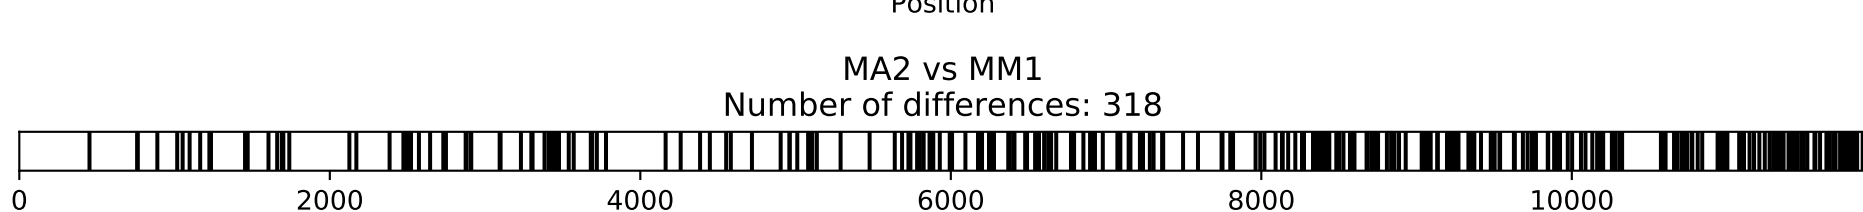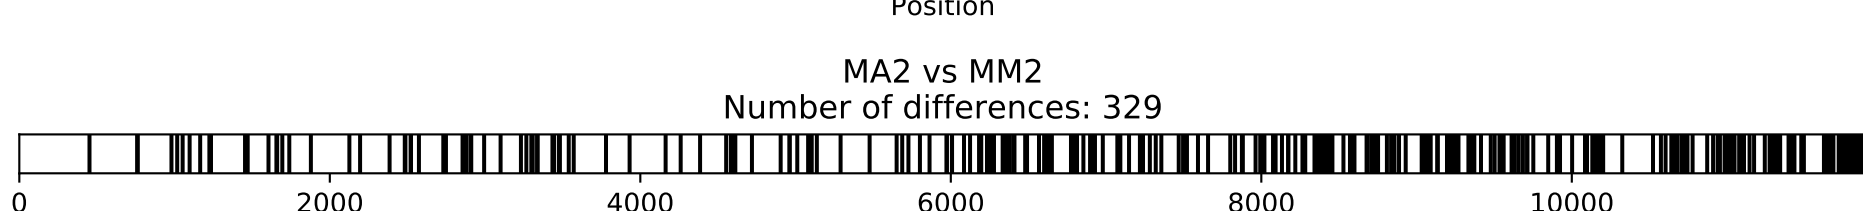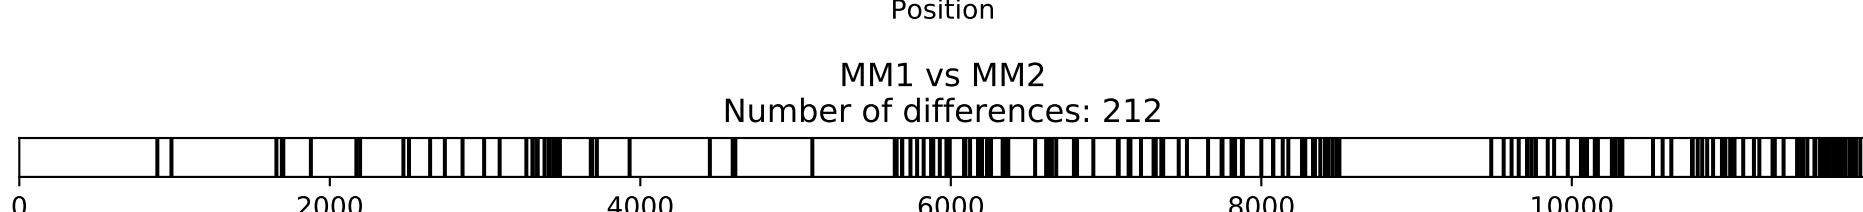

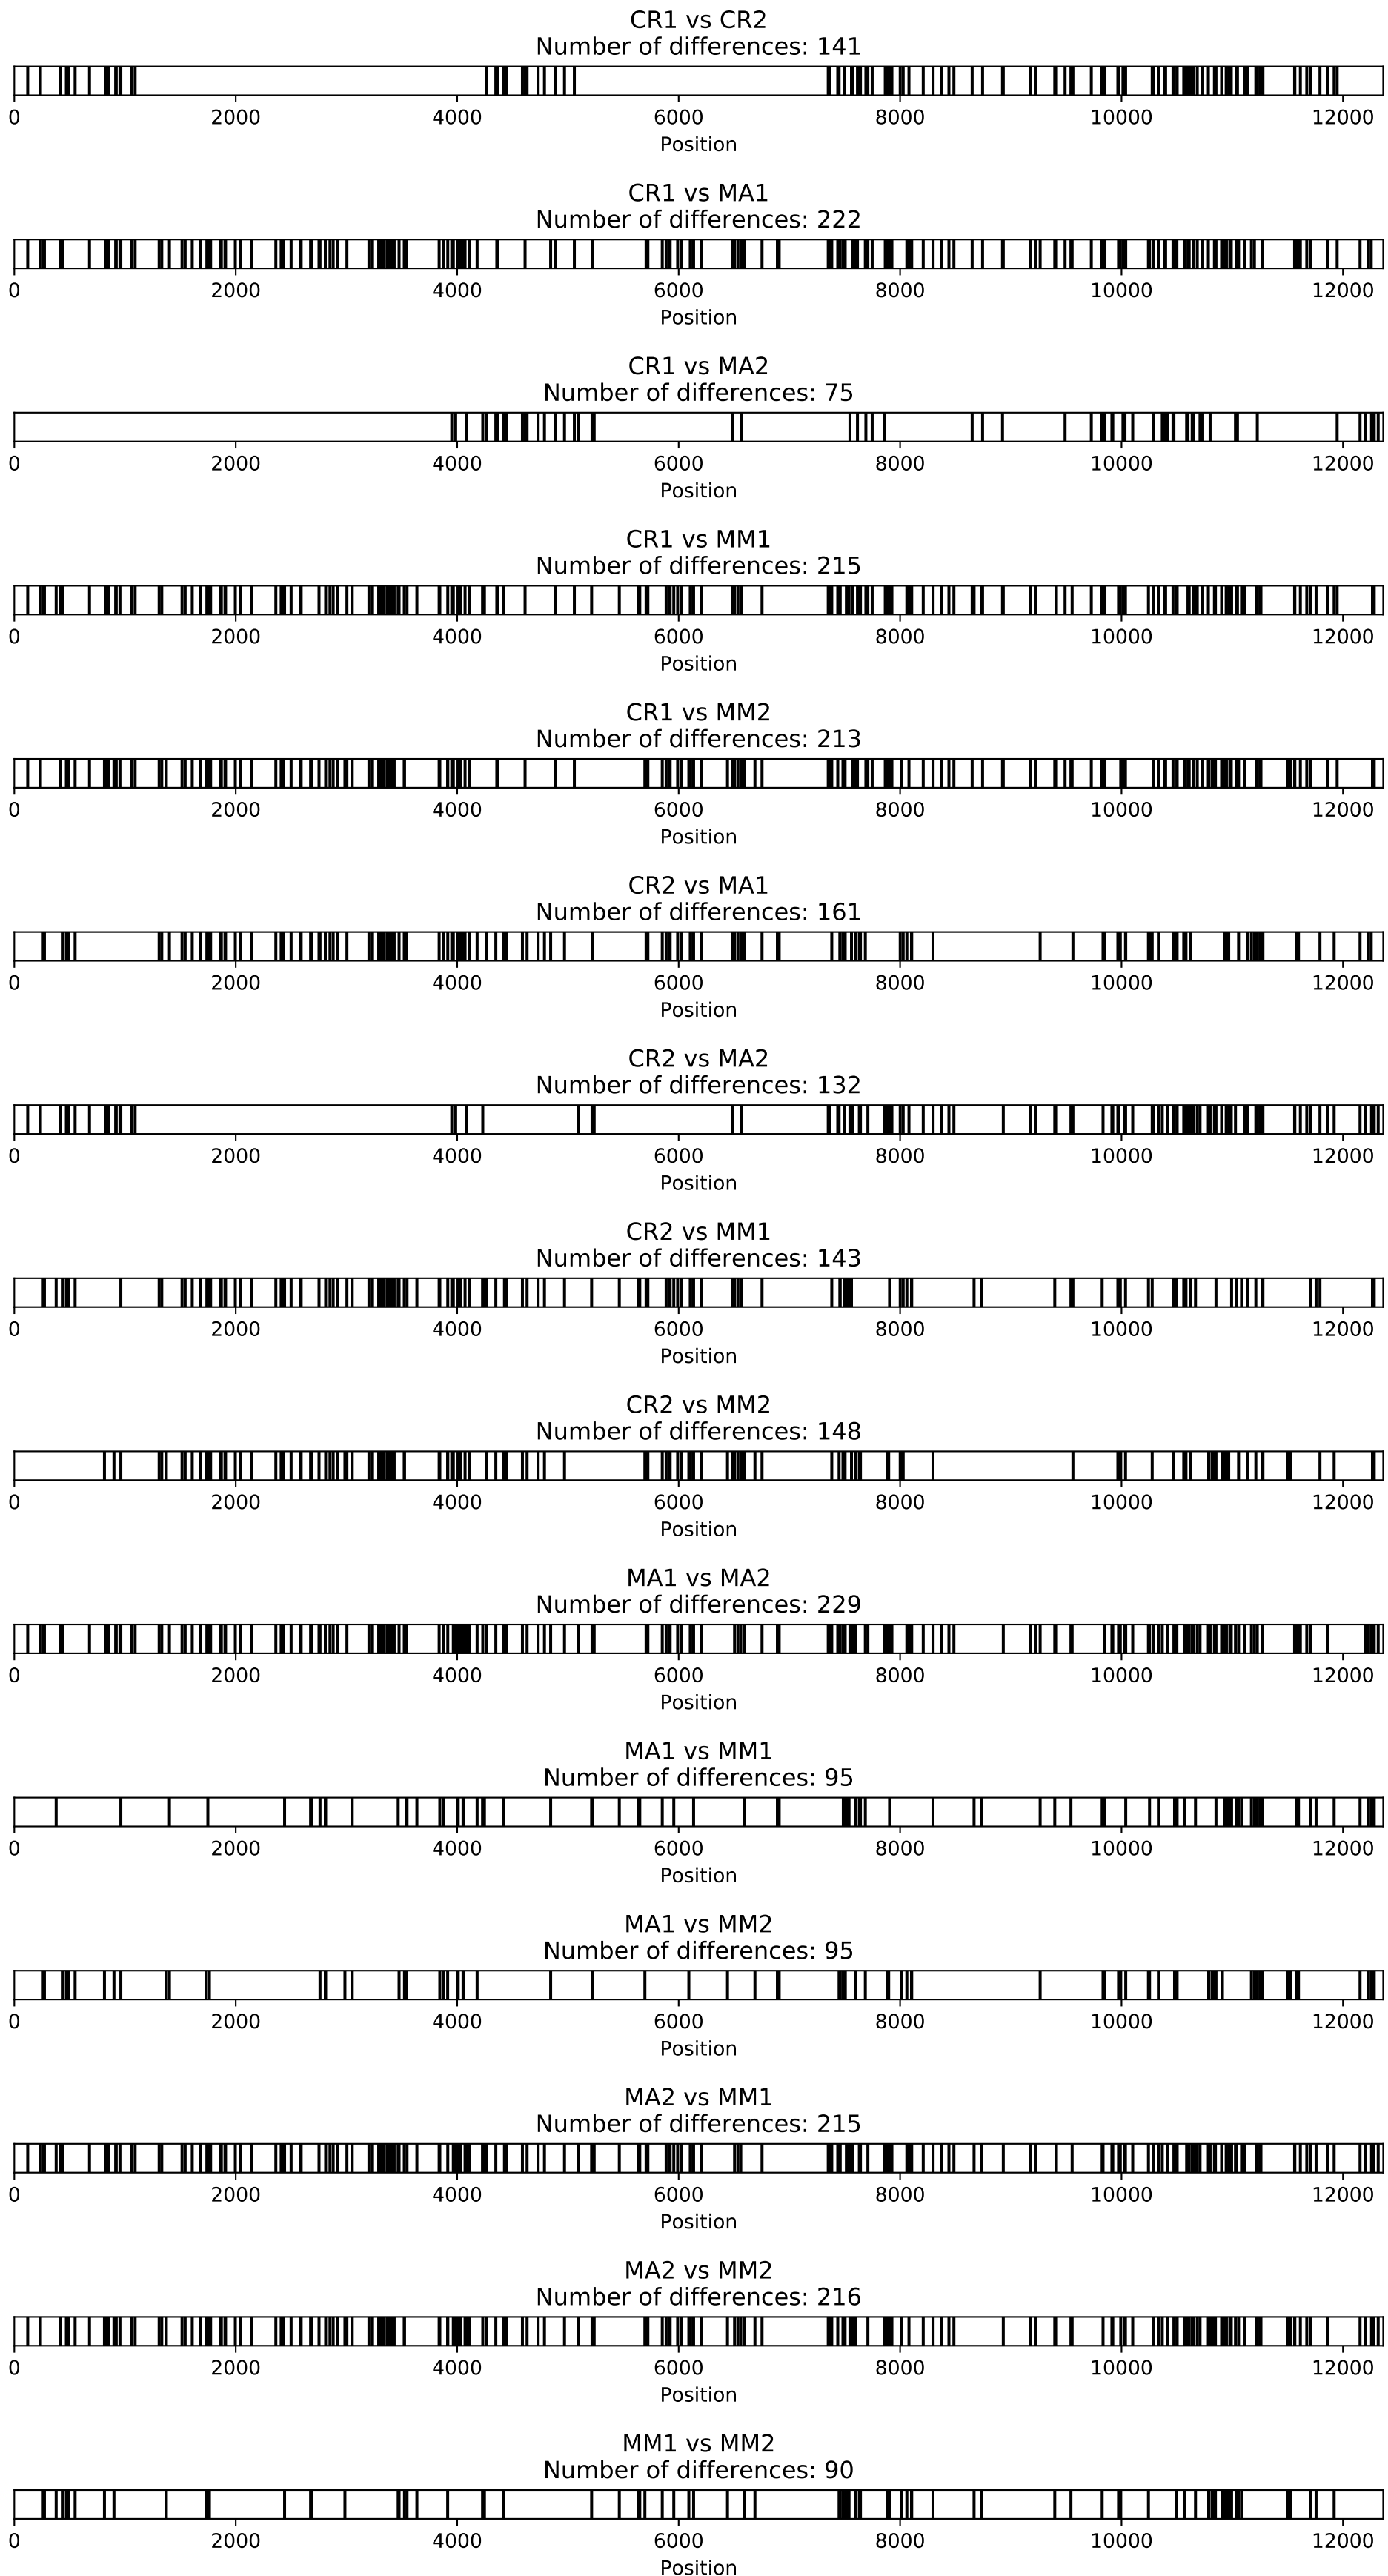

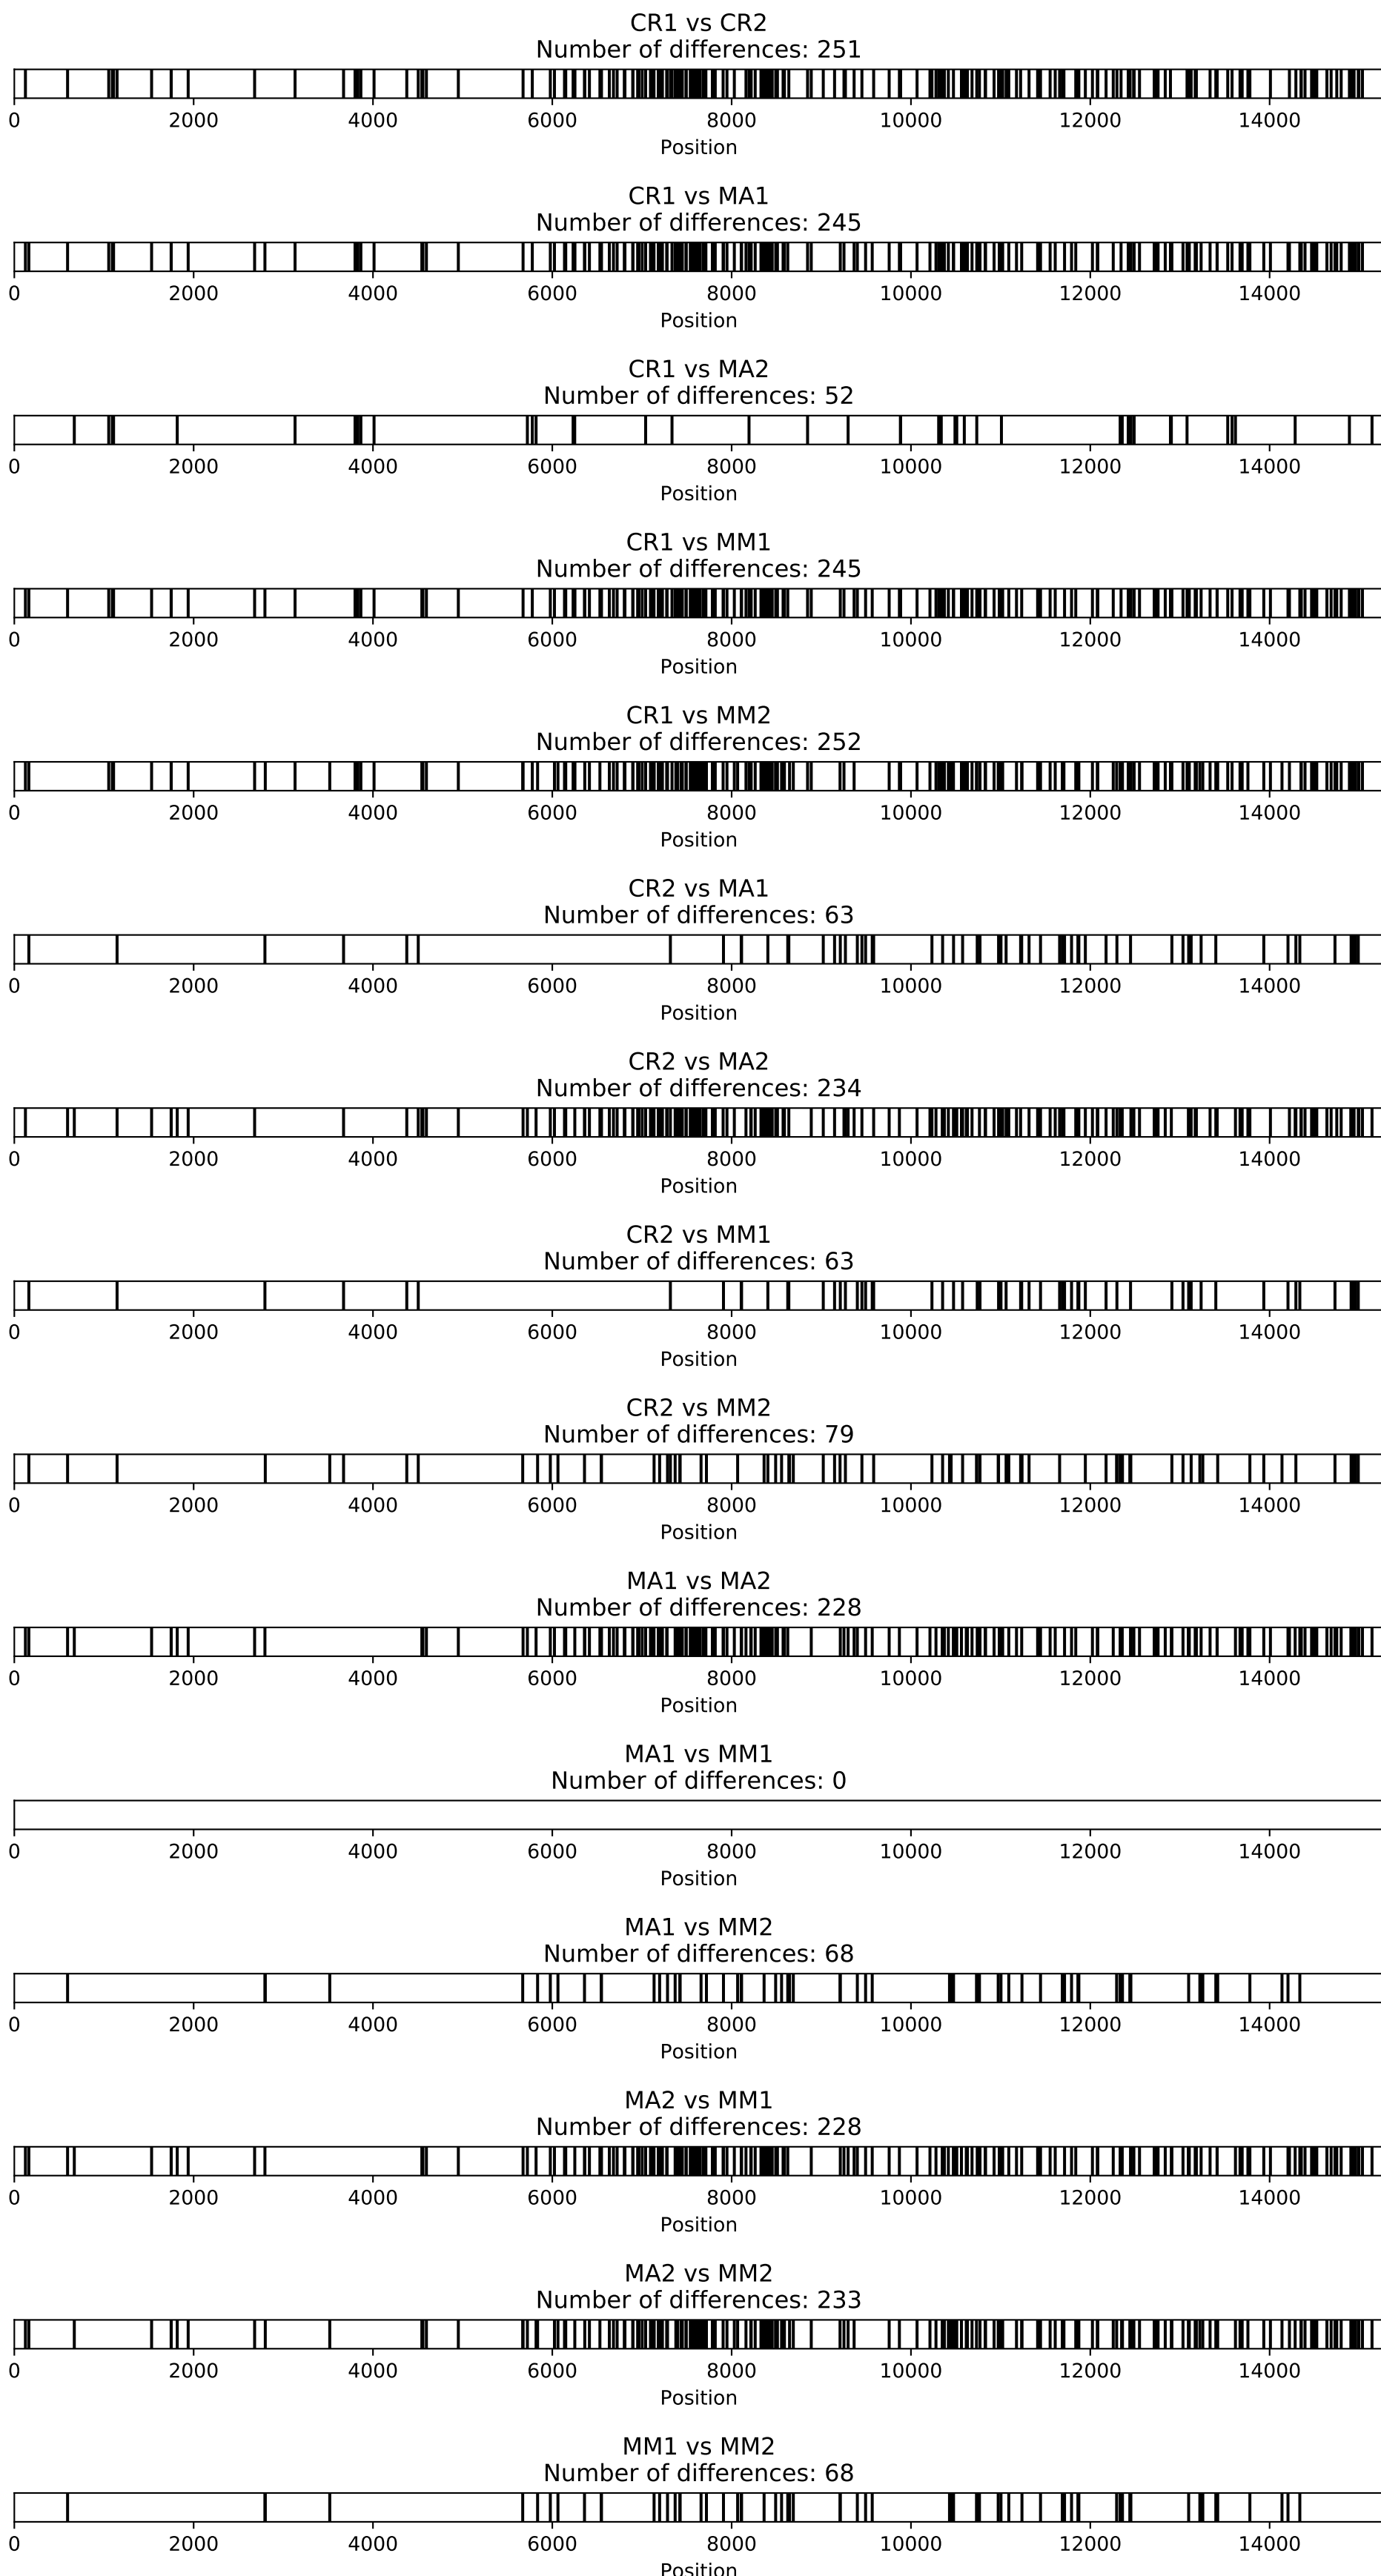

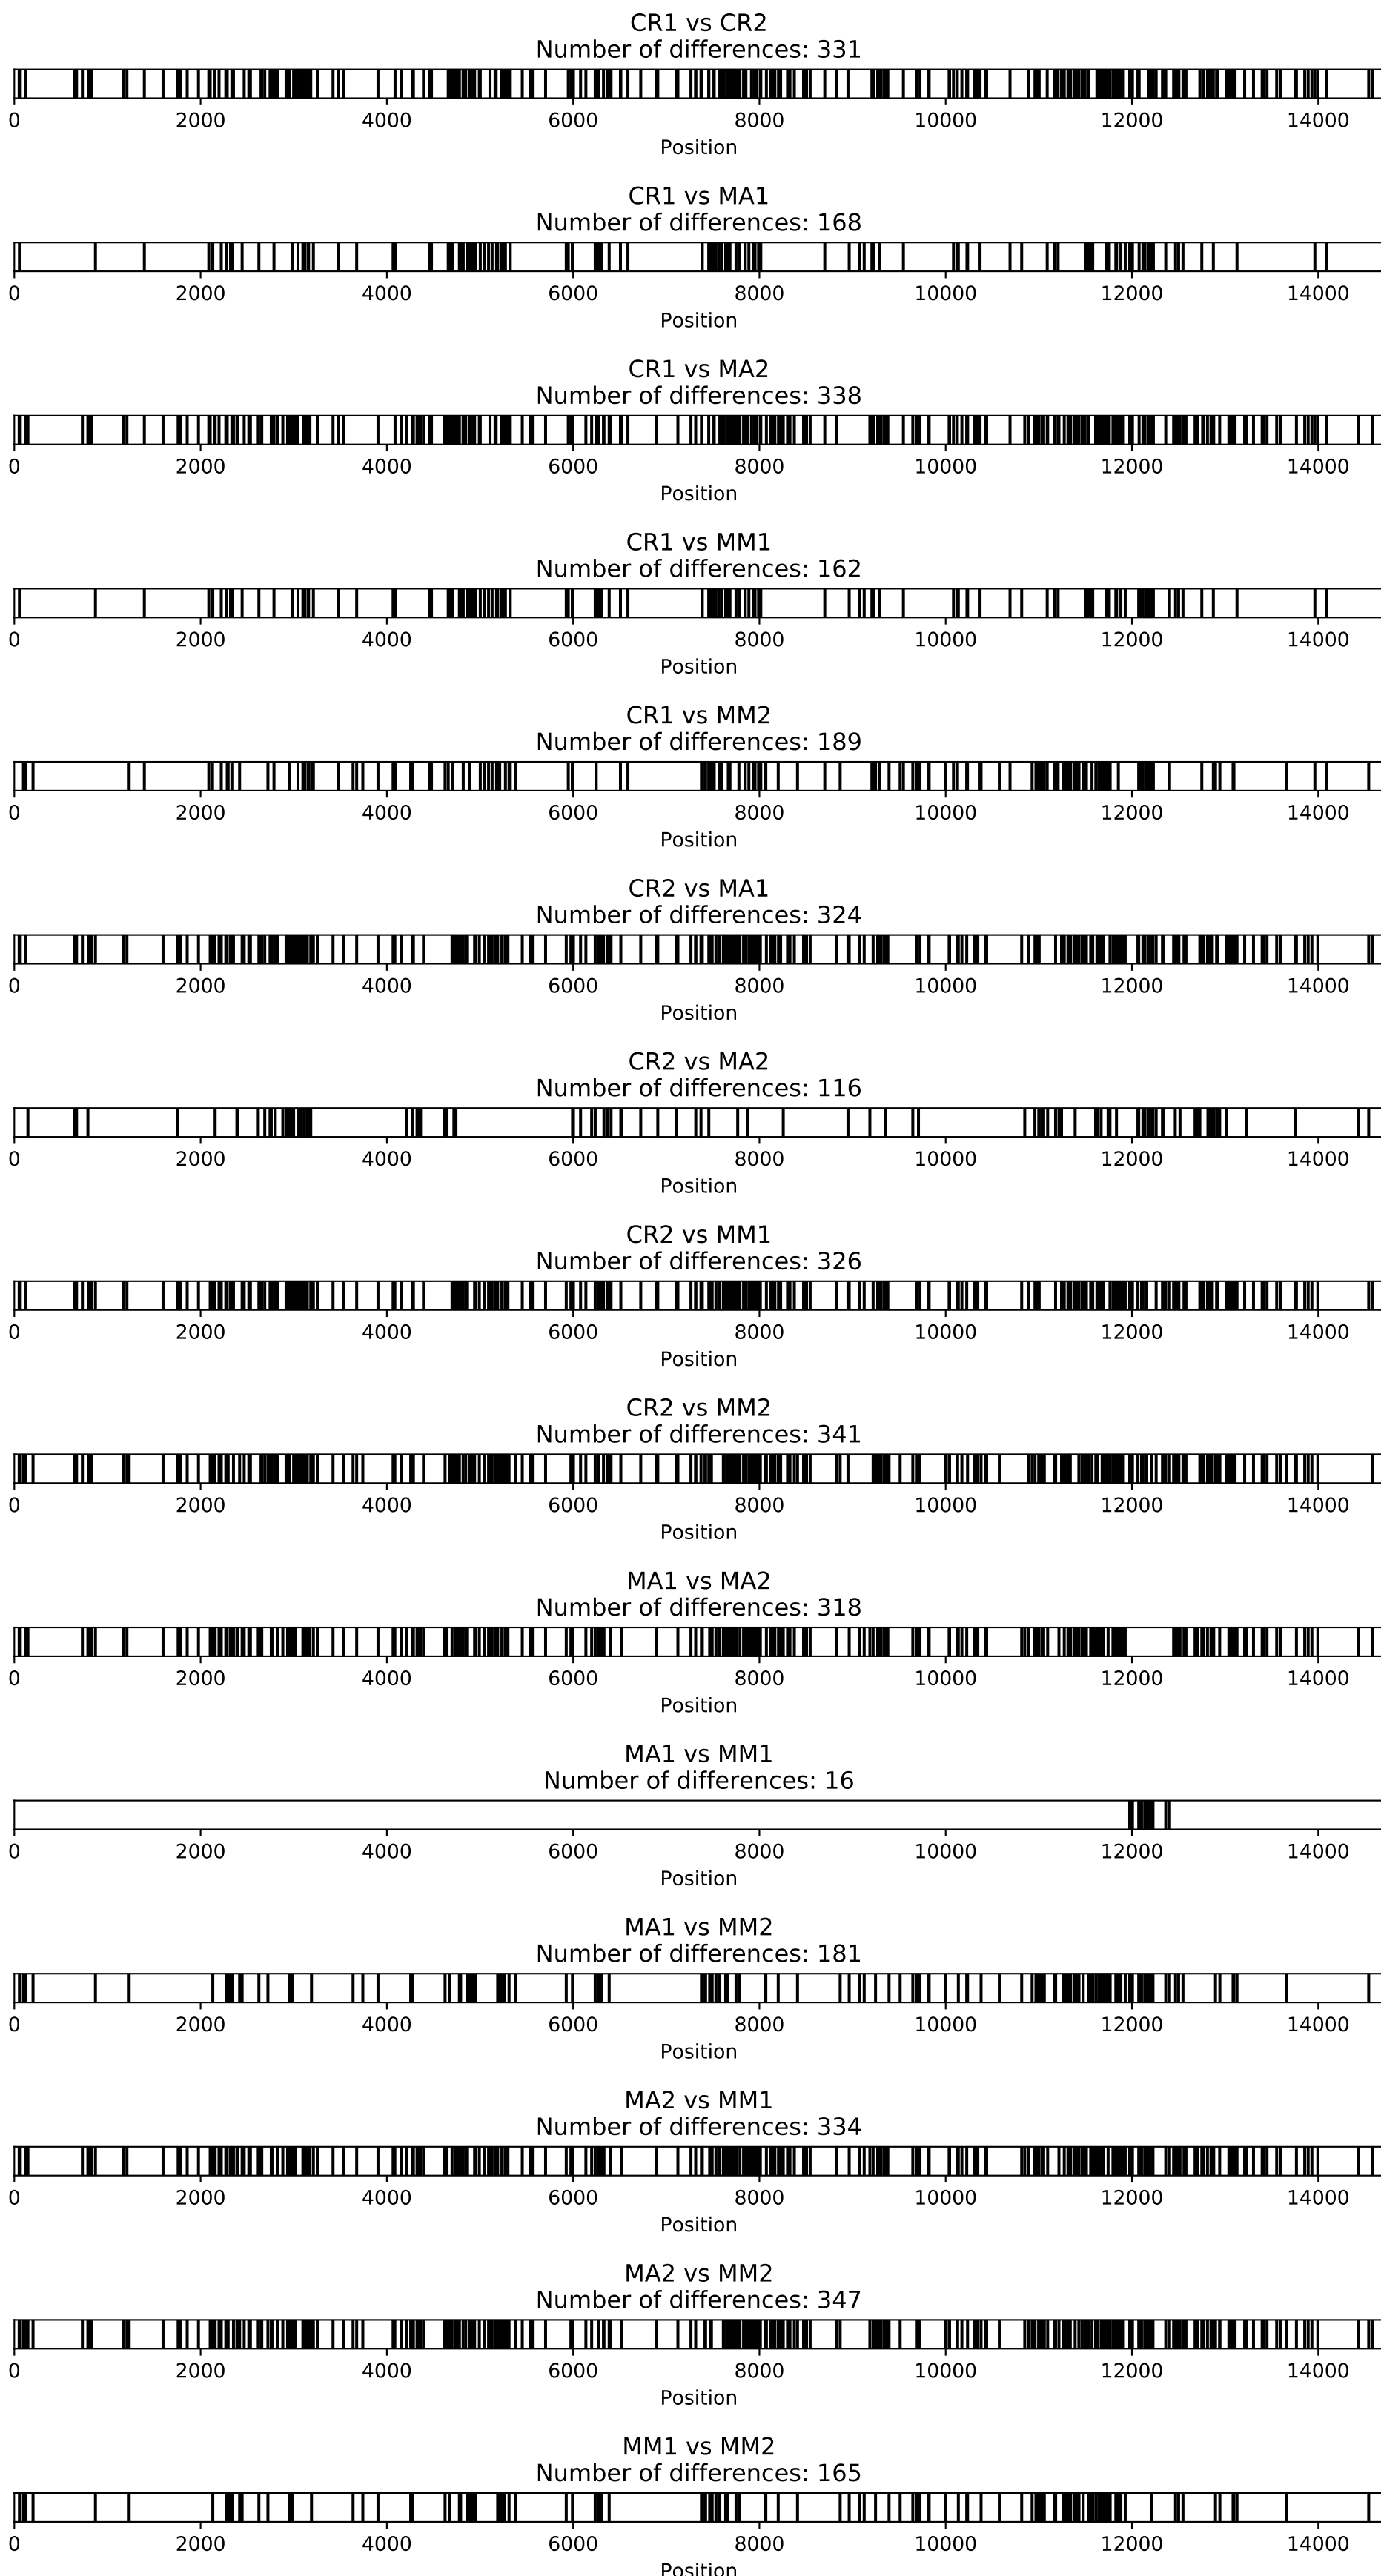

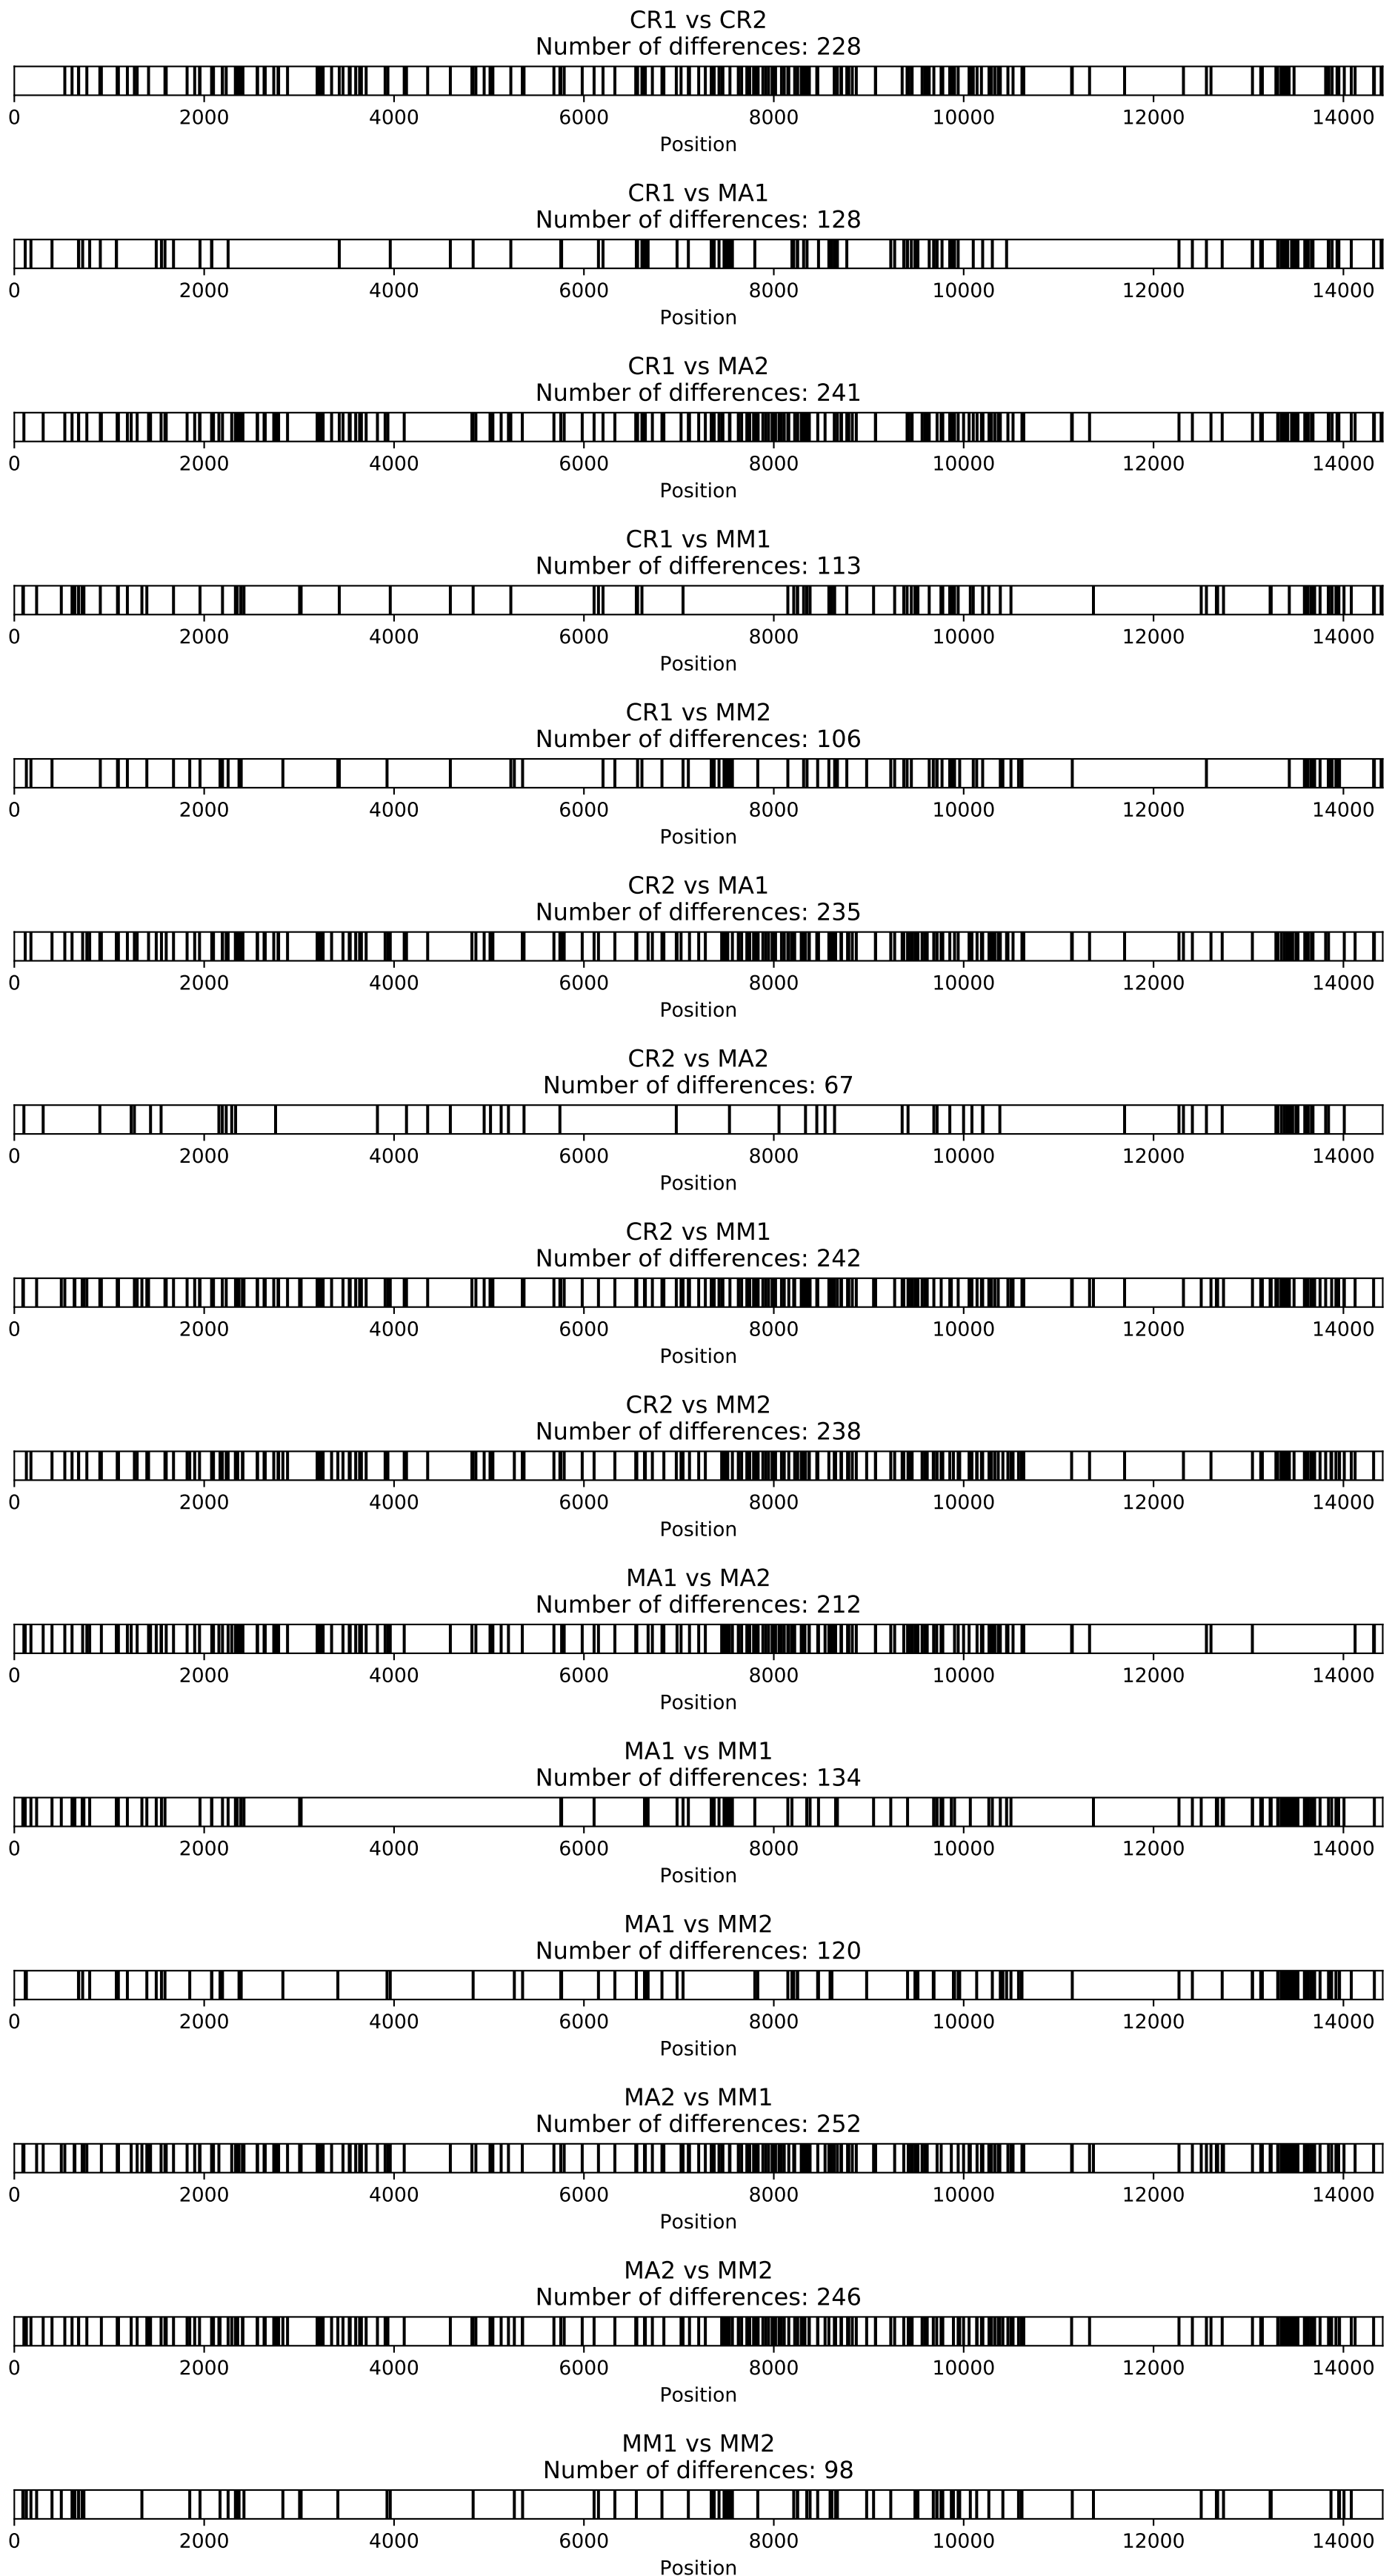

# Region: 154

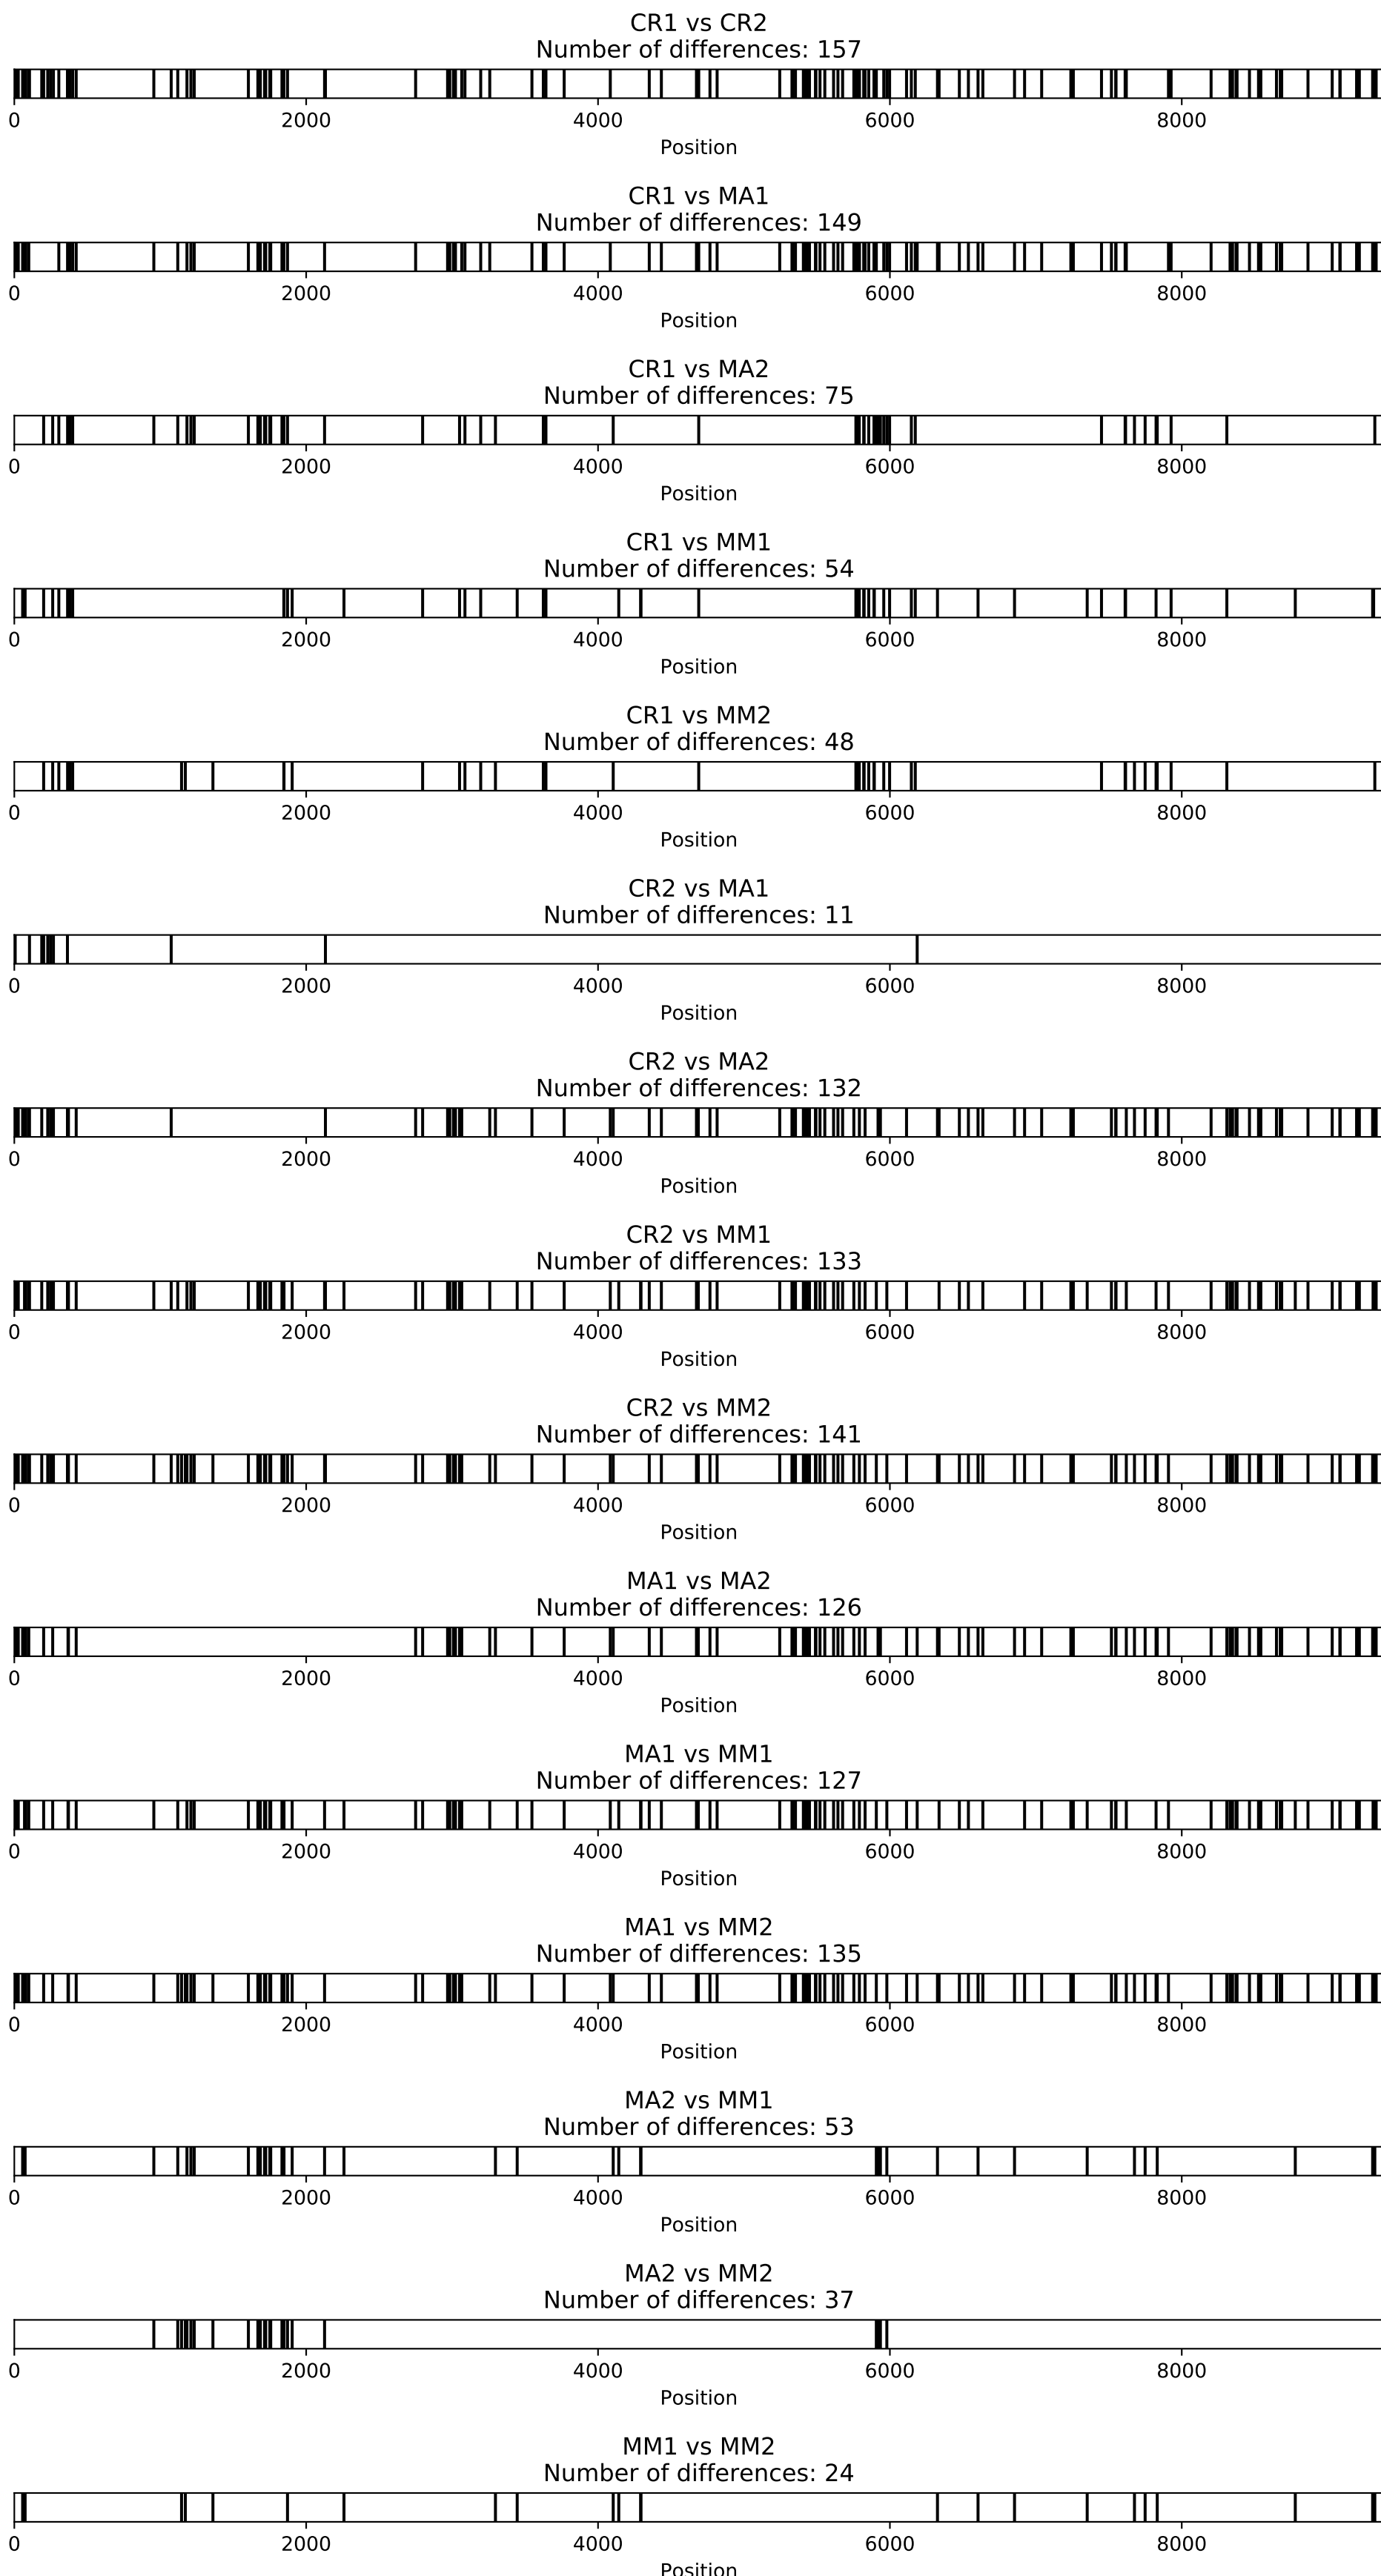



# Region: 156

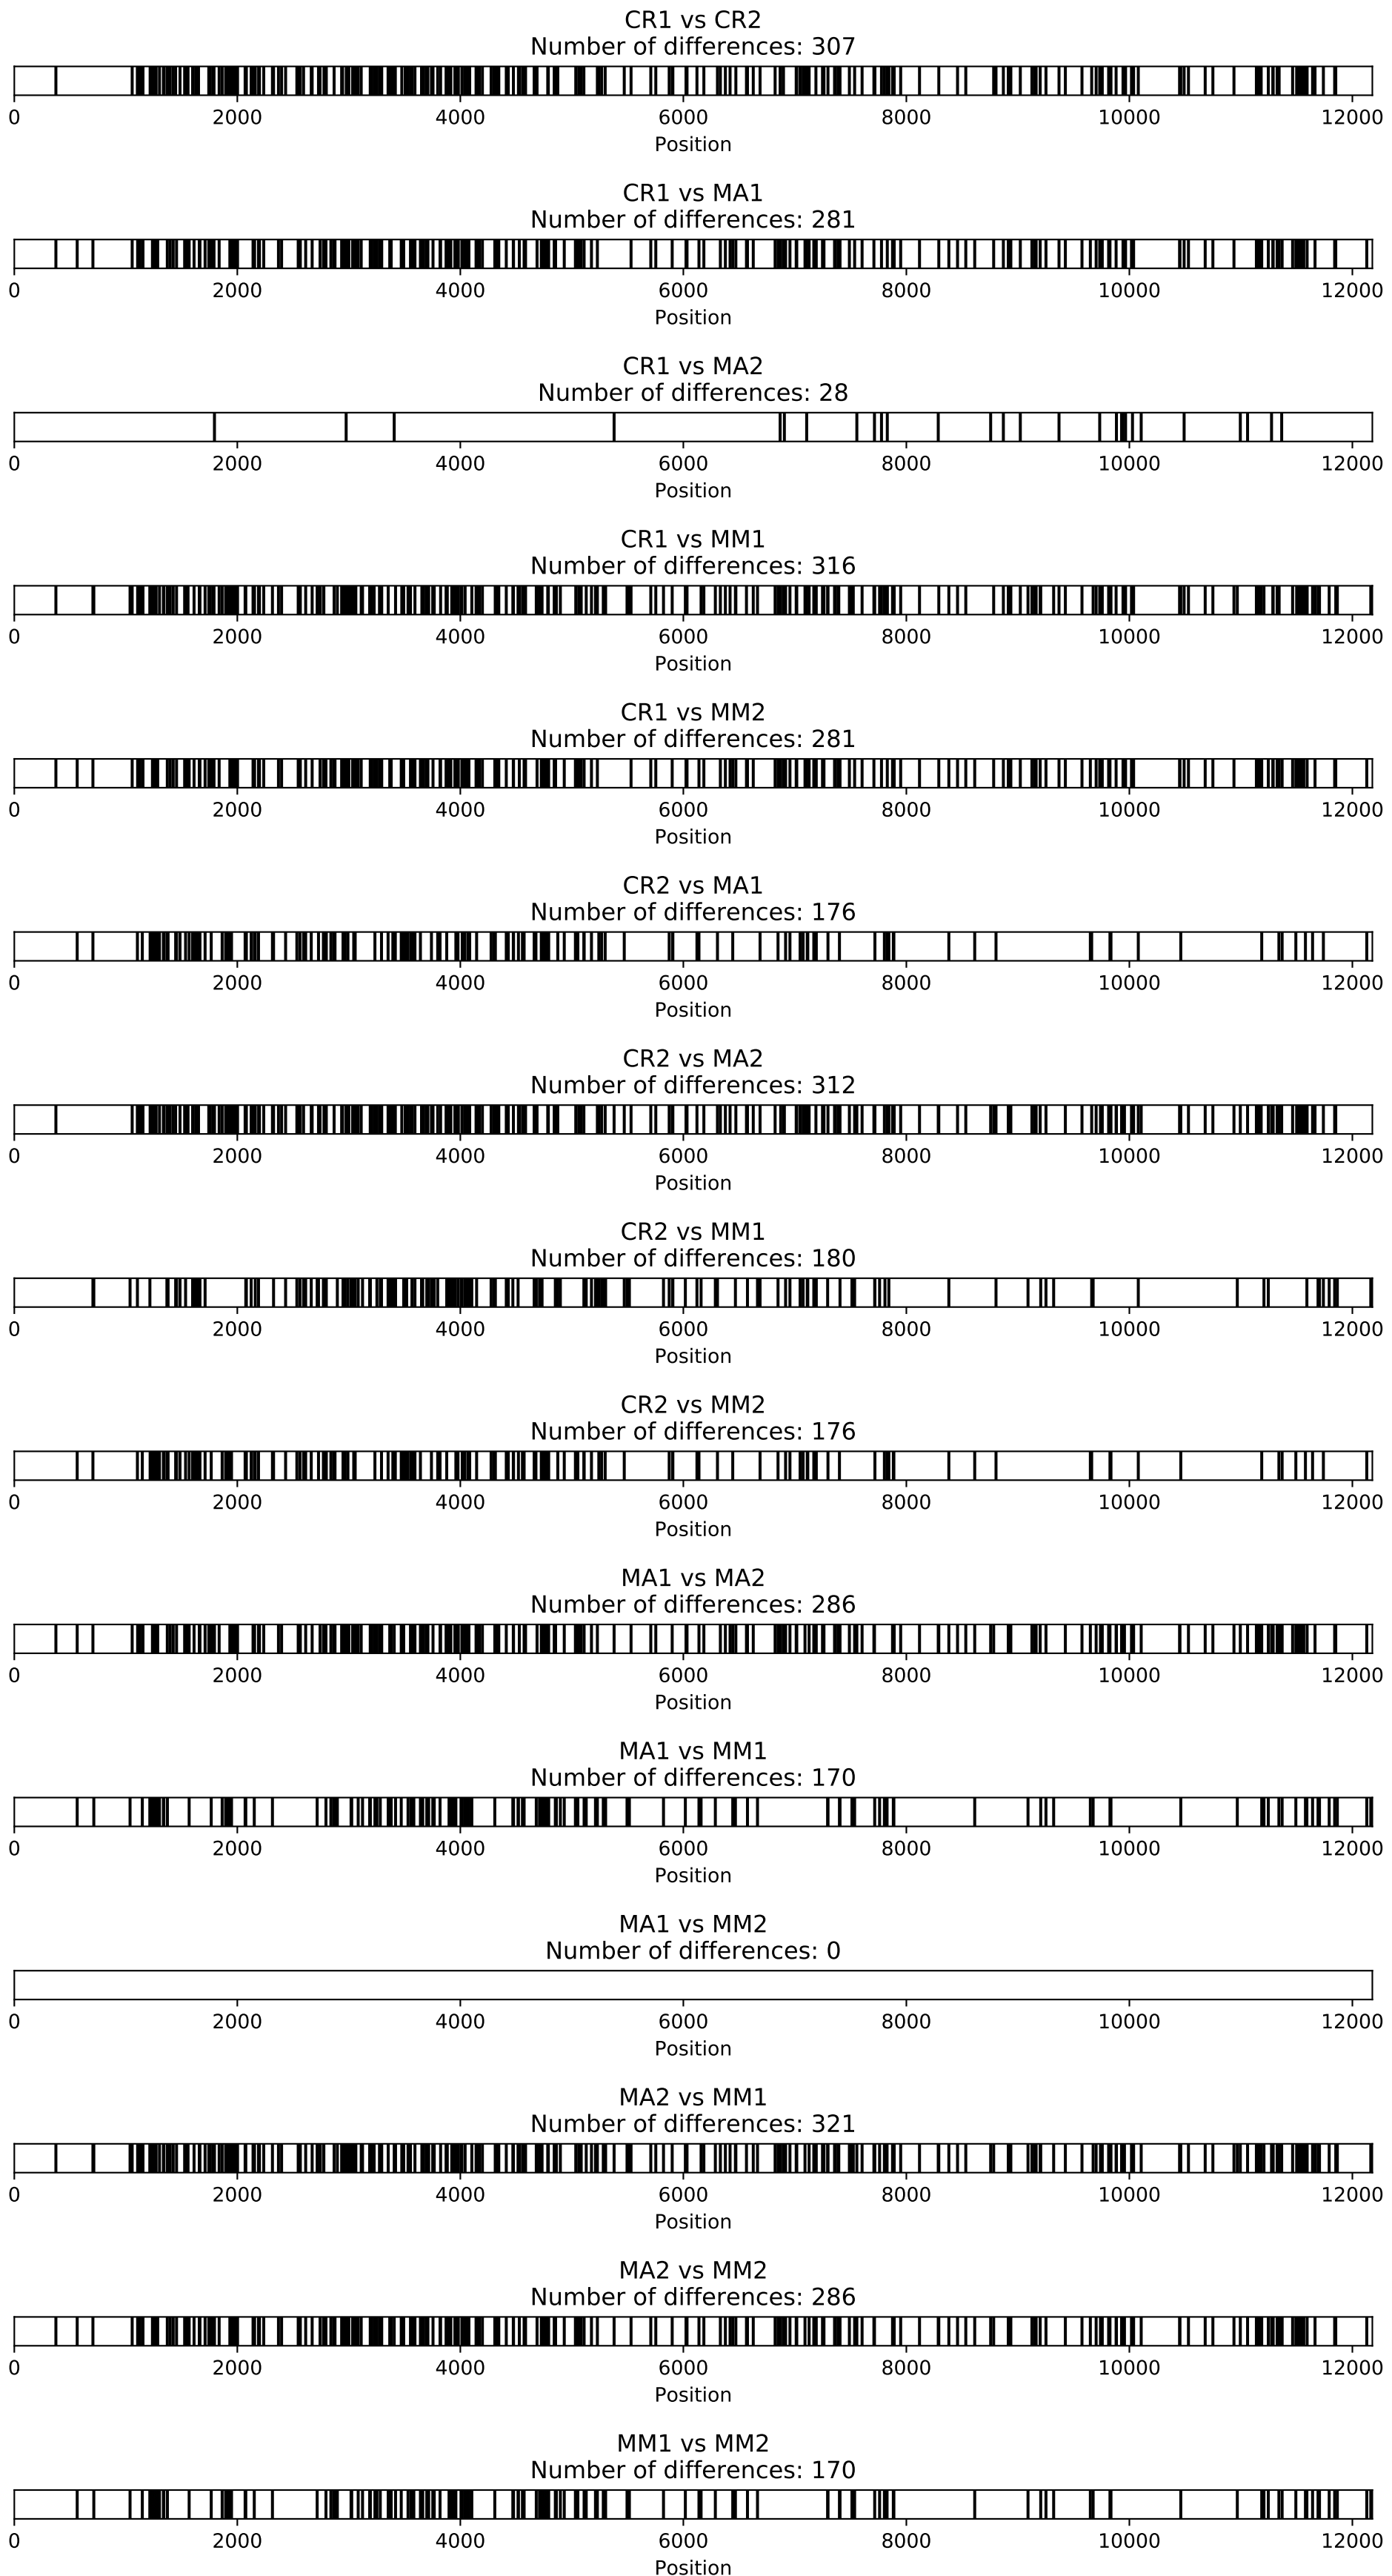



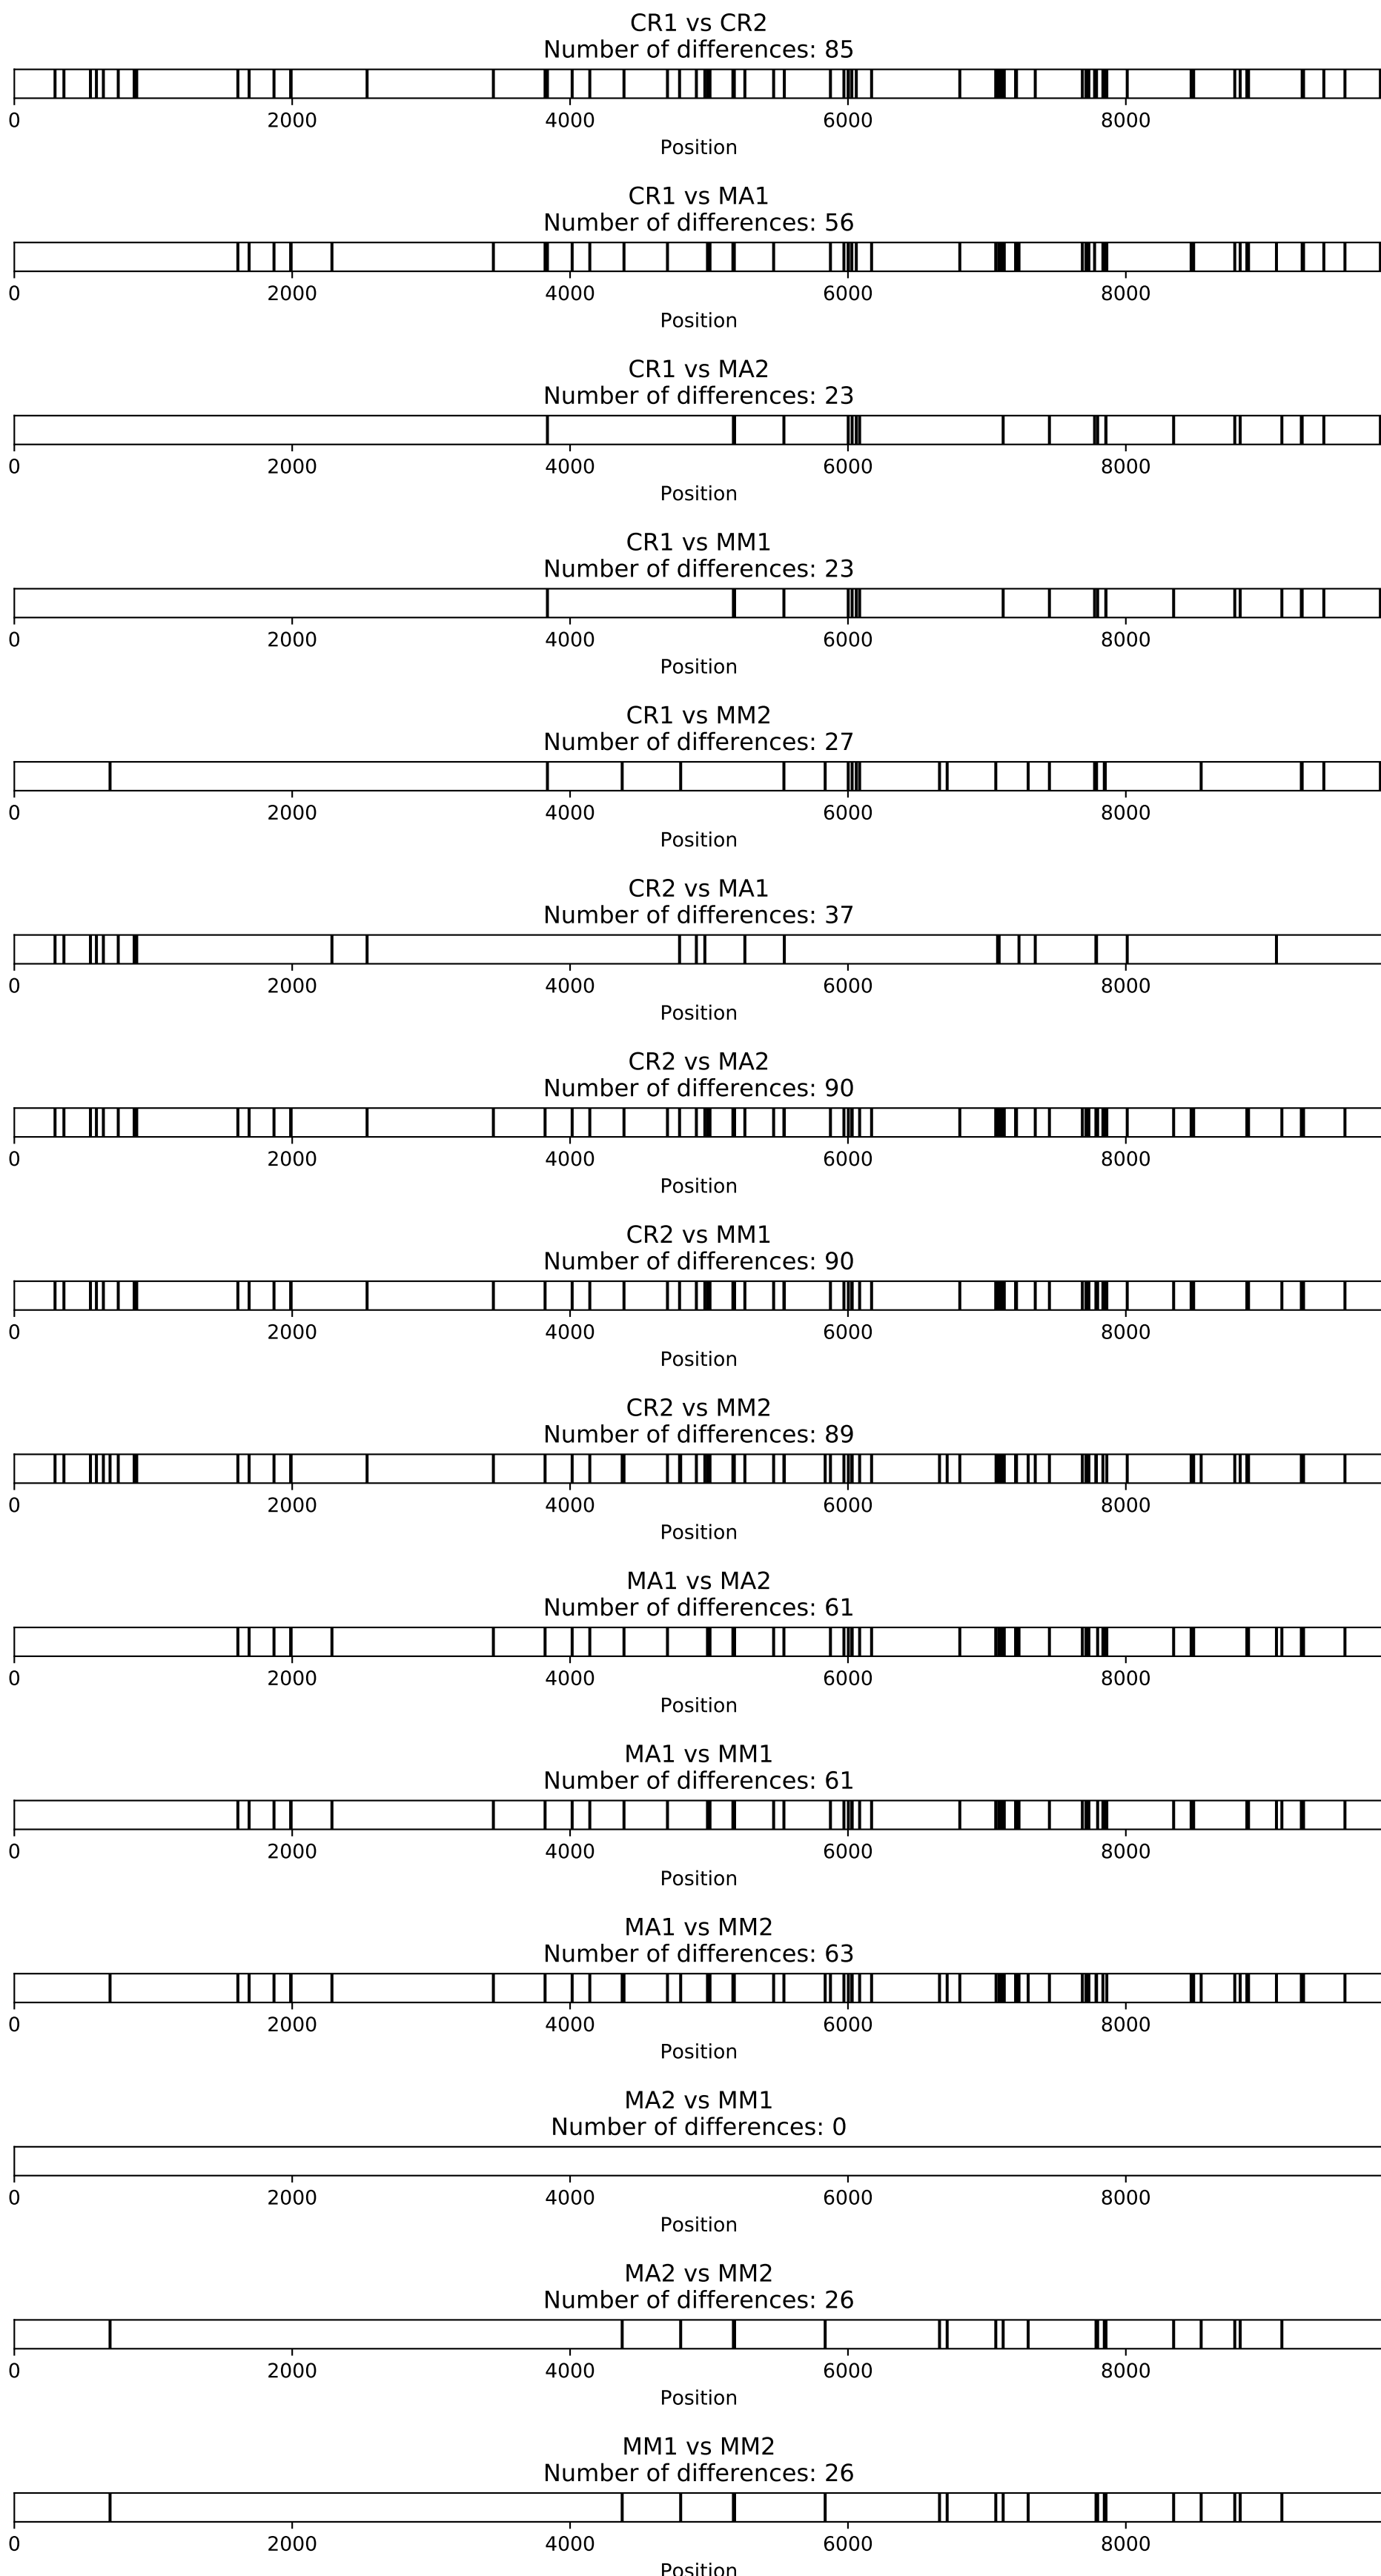

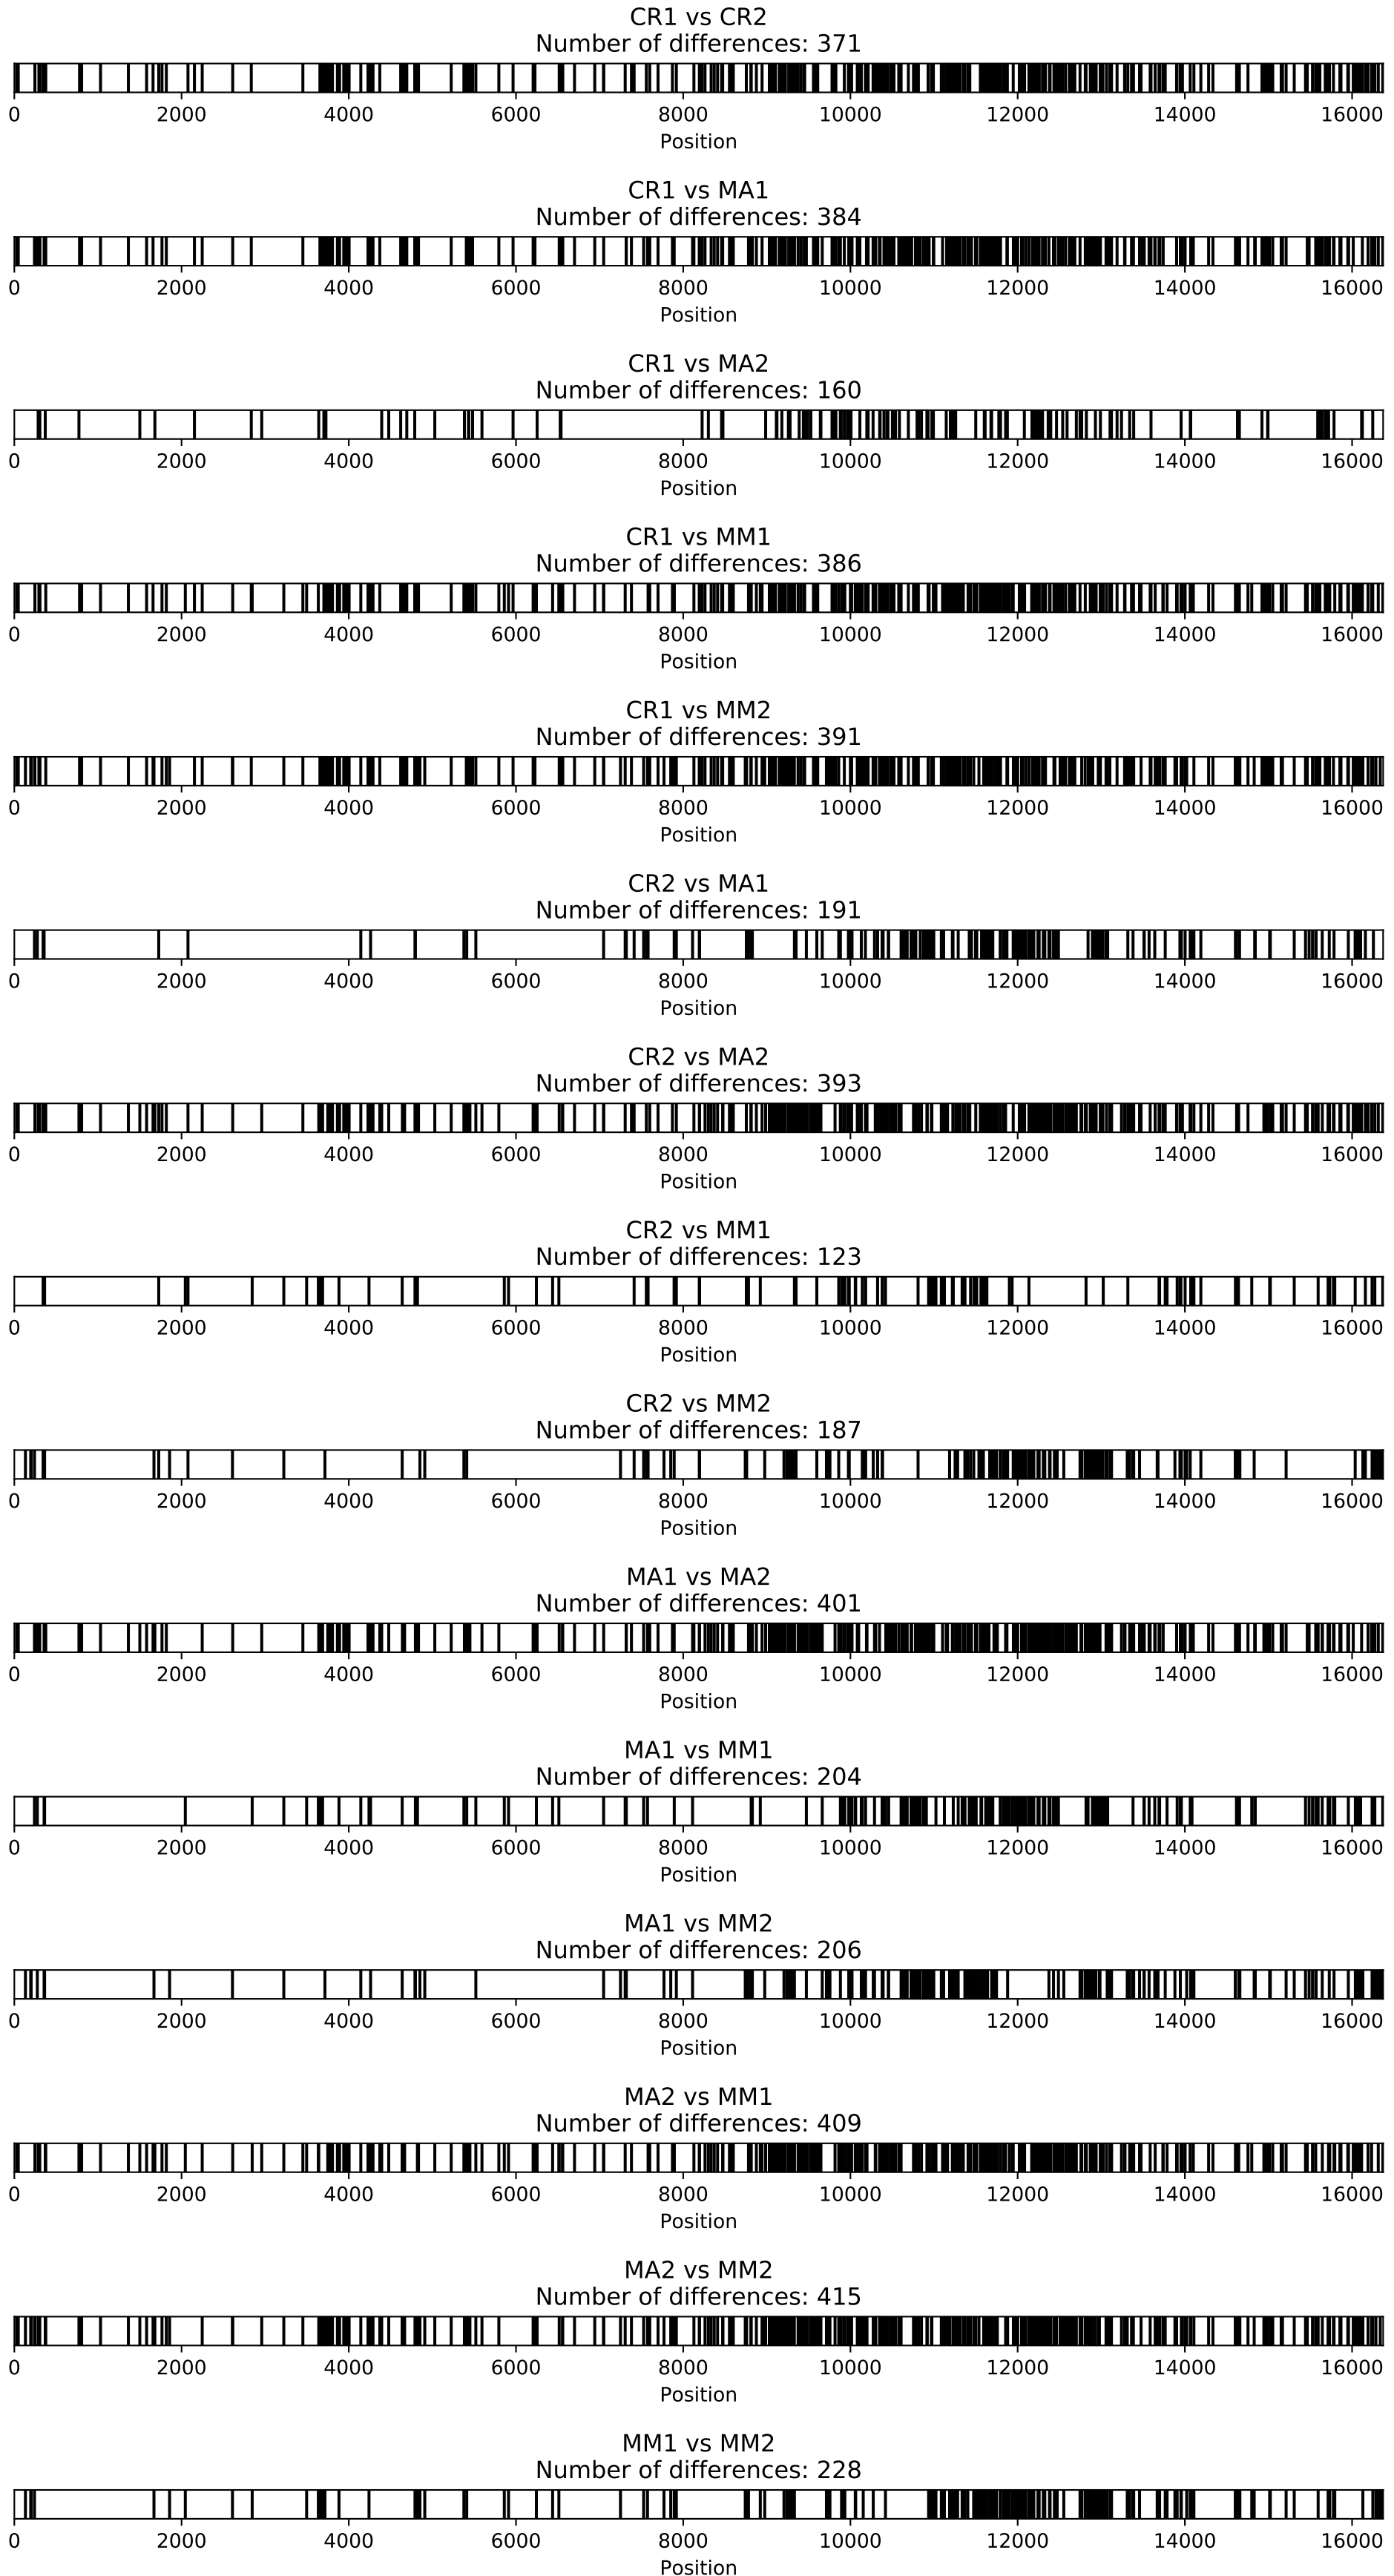

# Region: 165

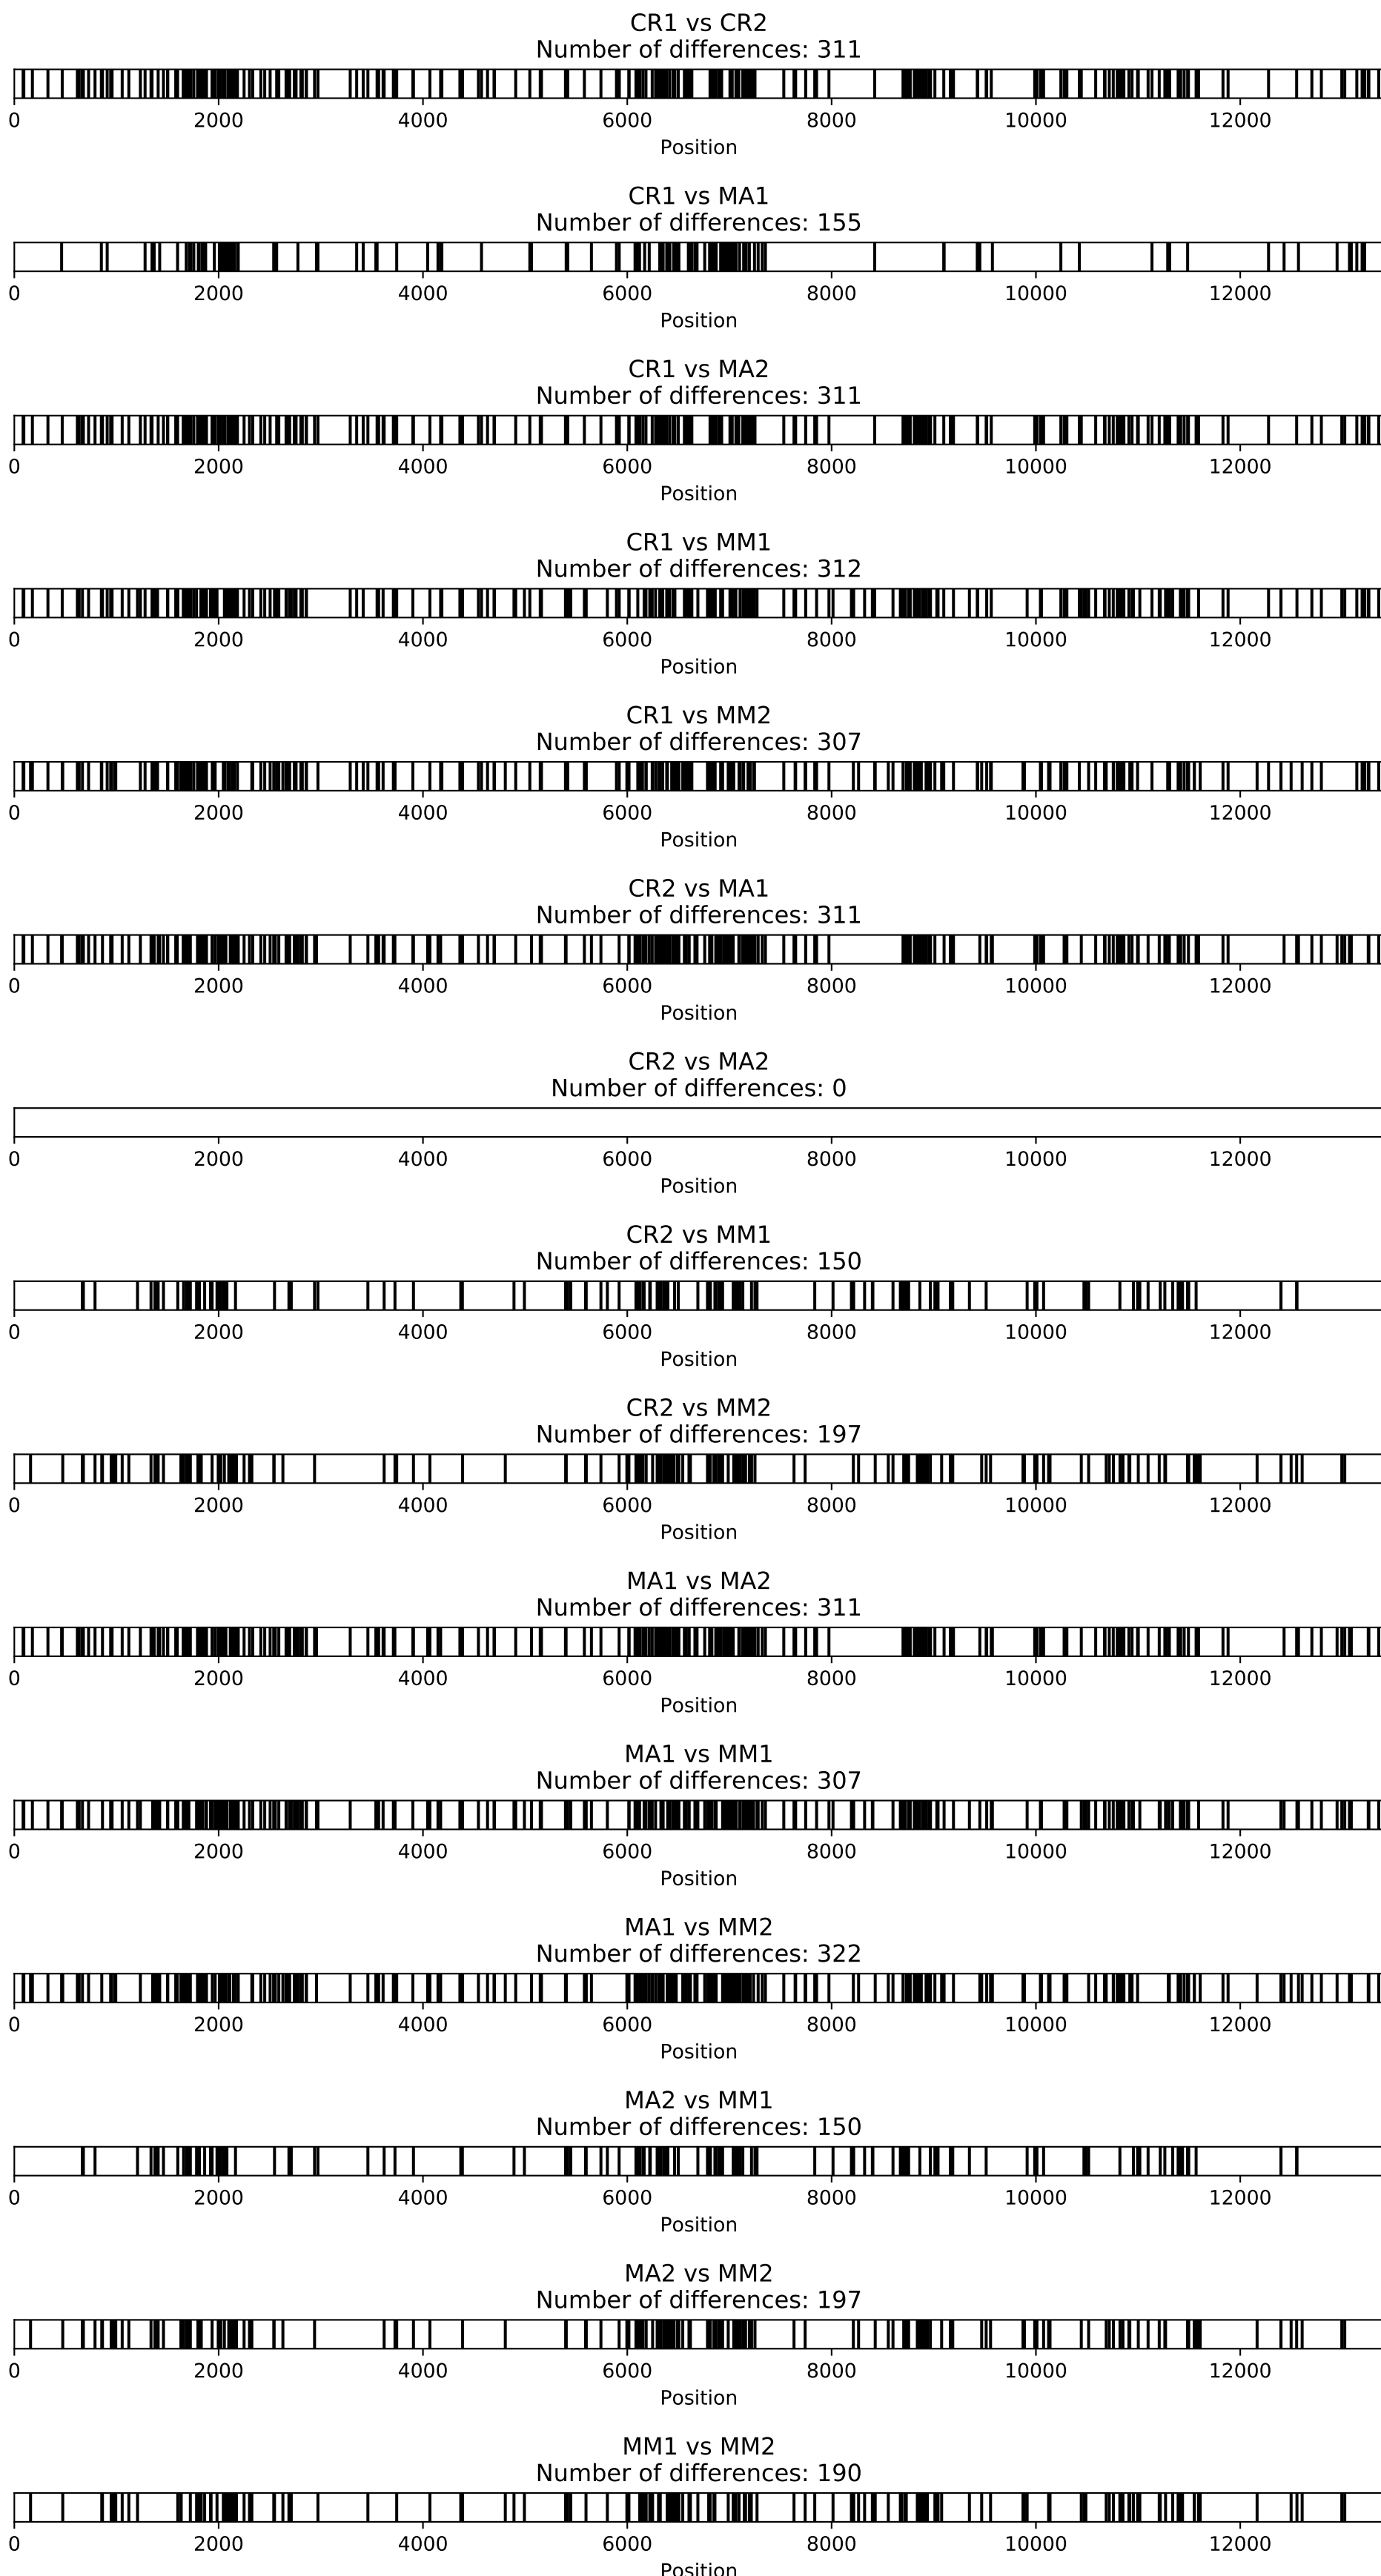

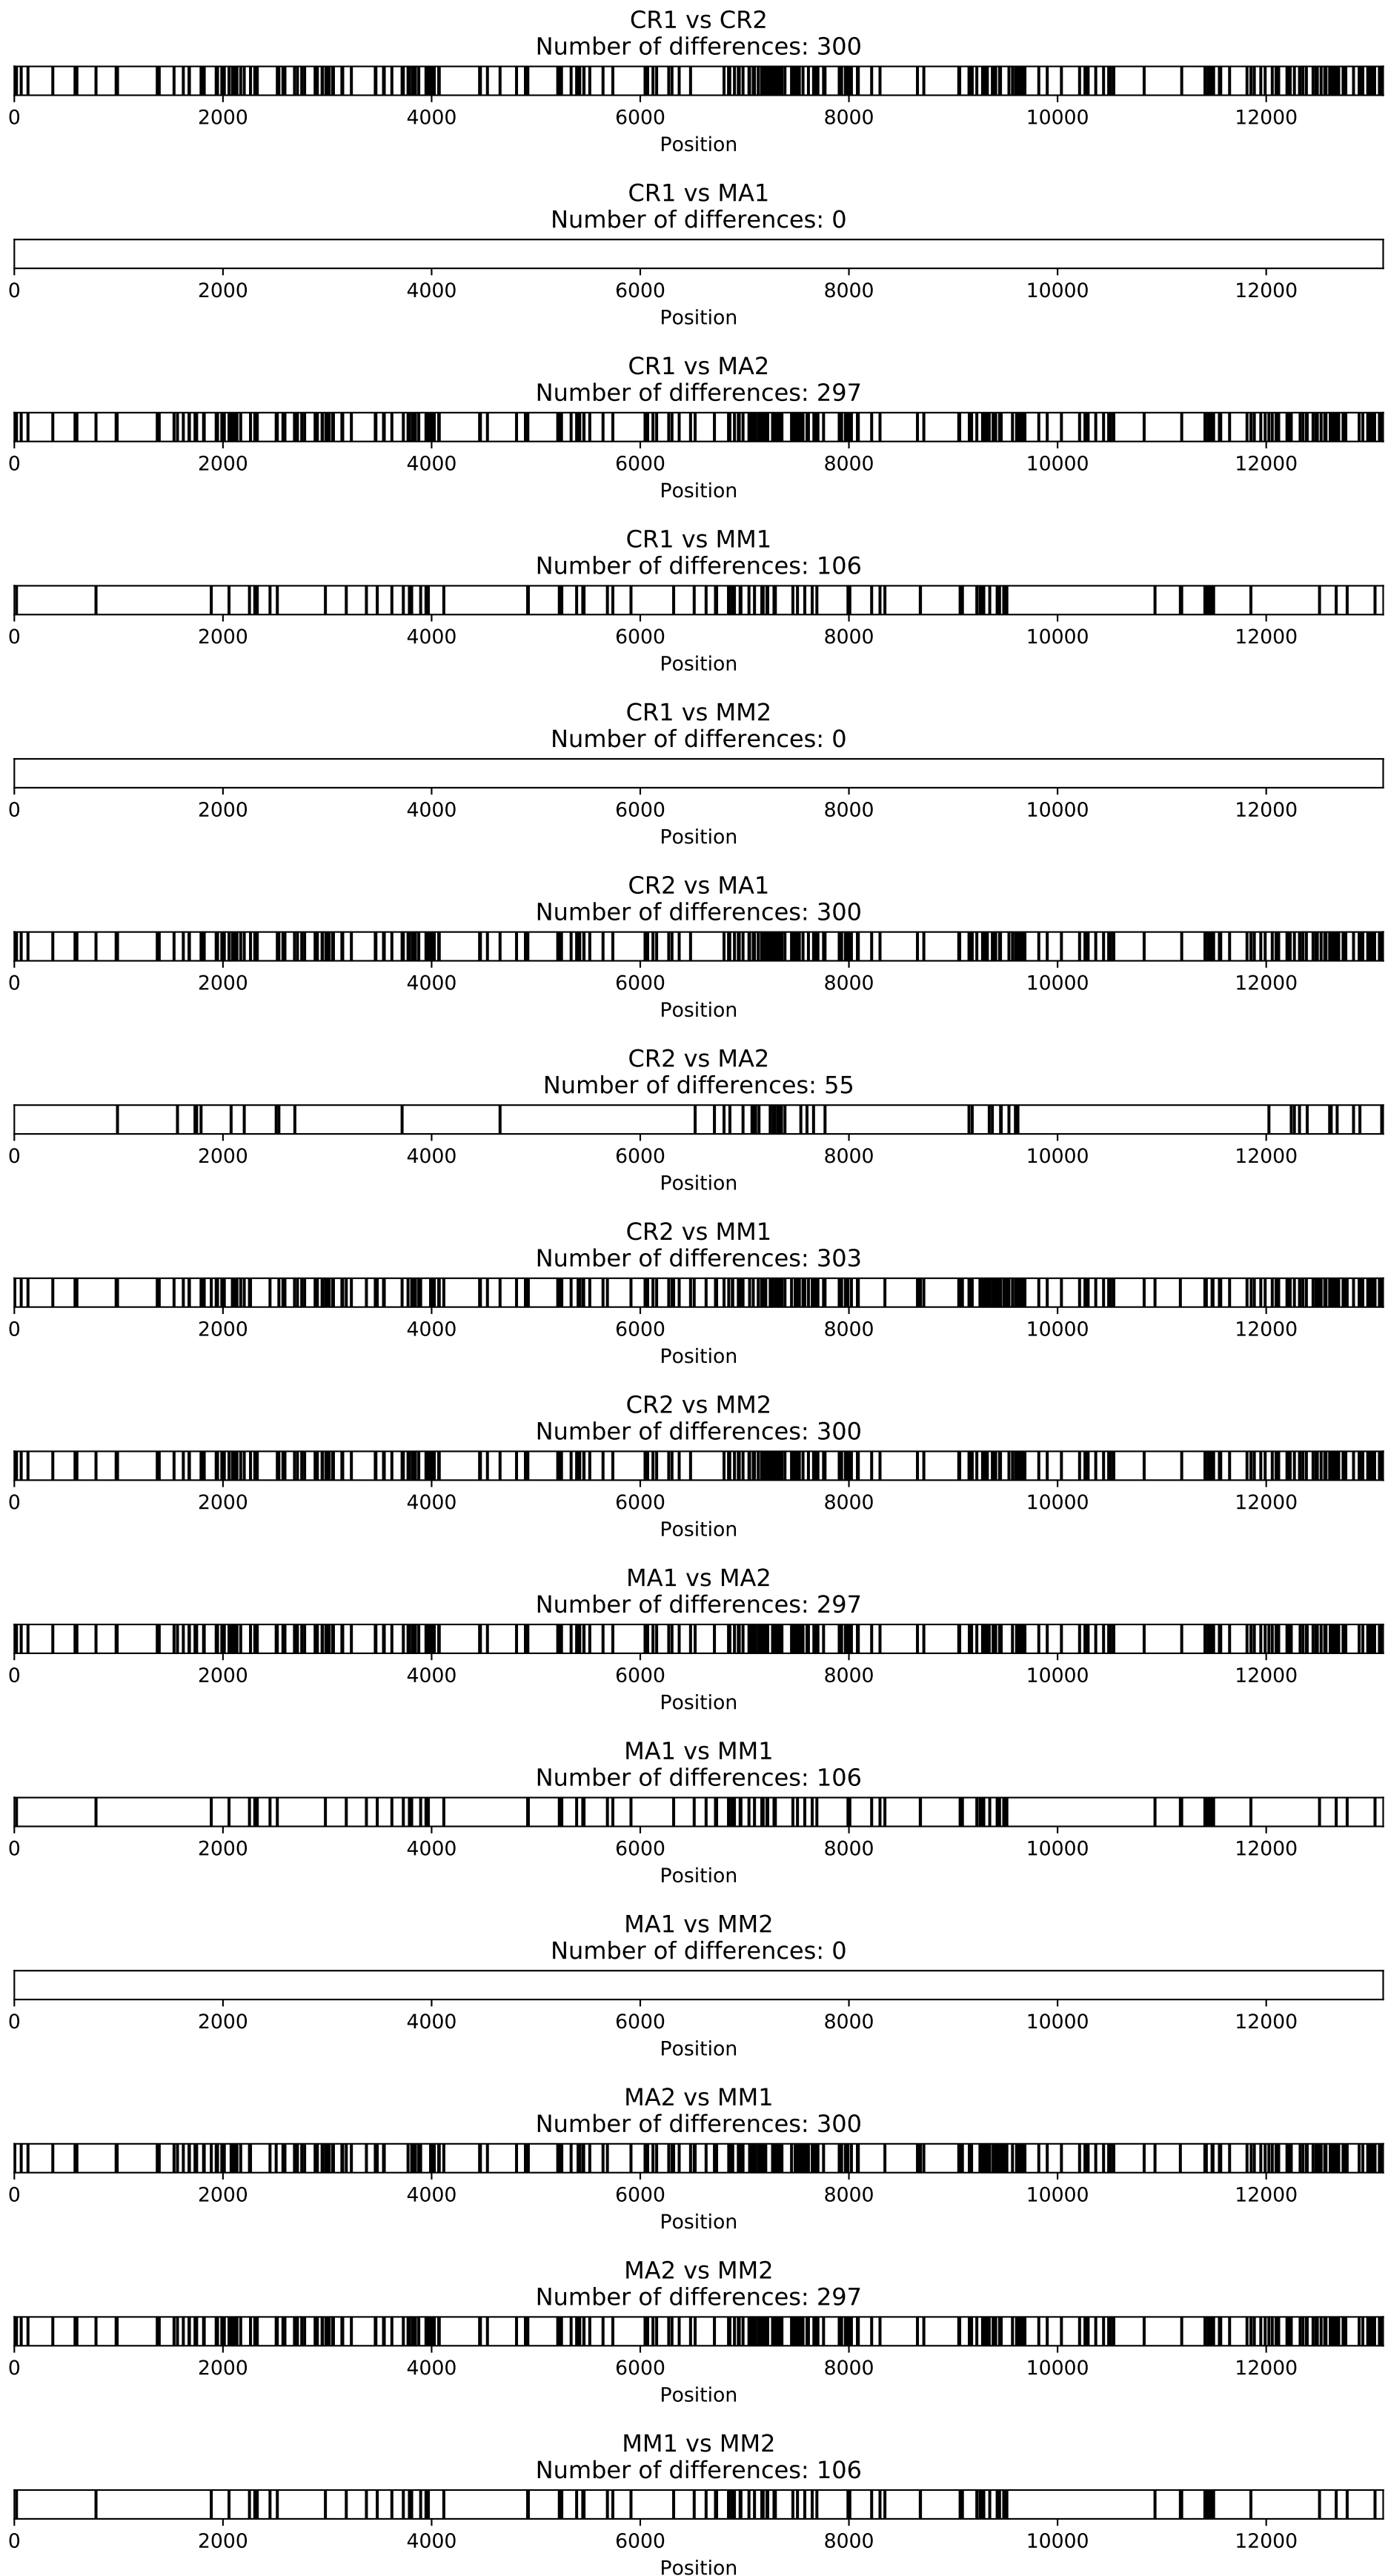

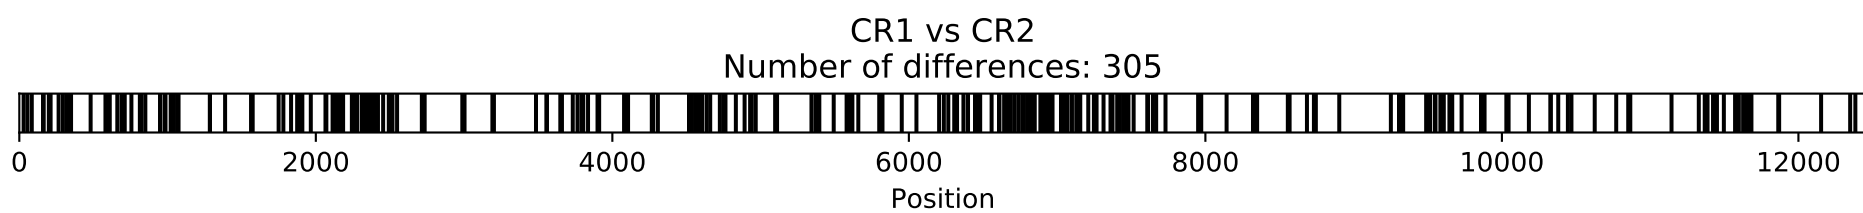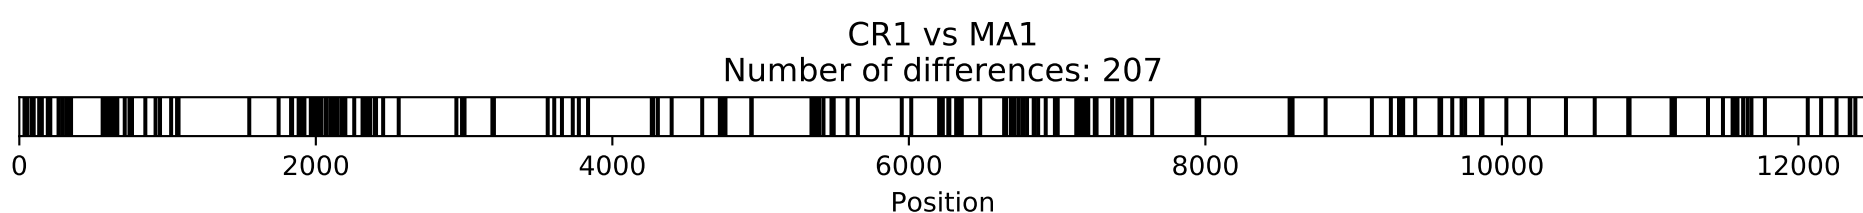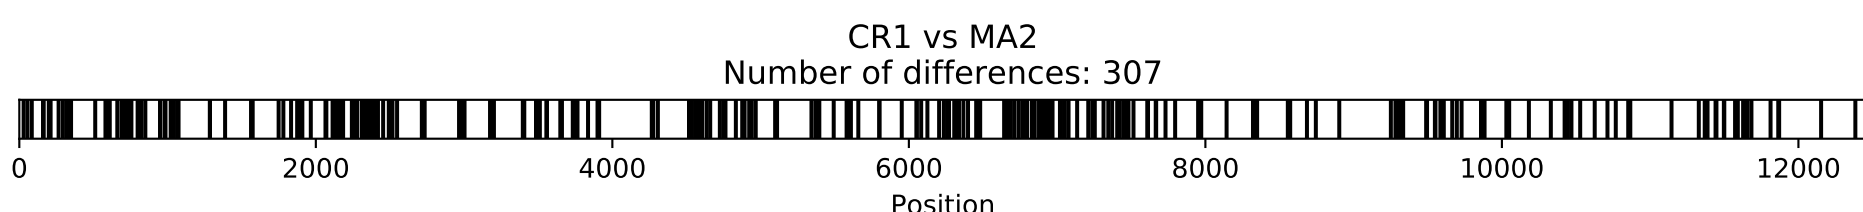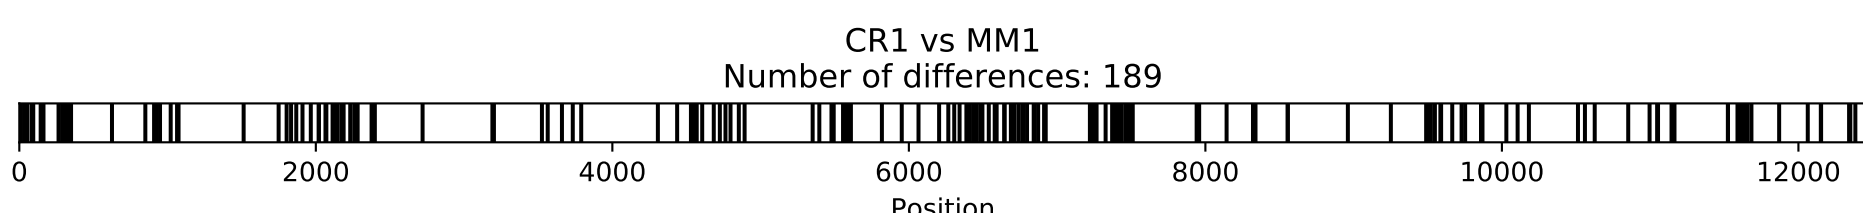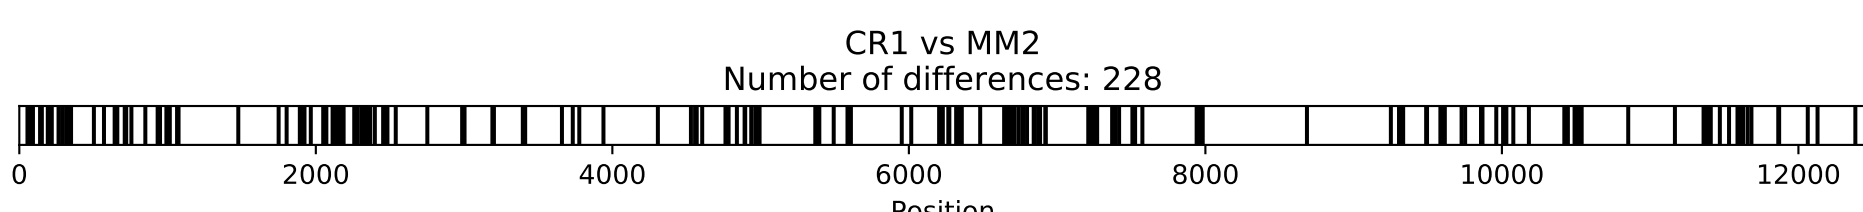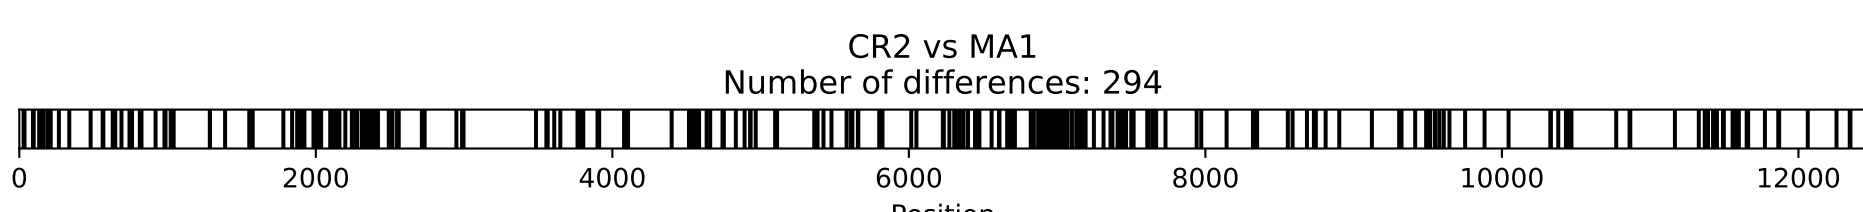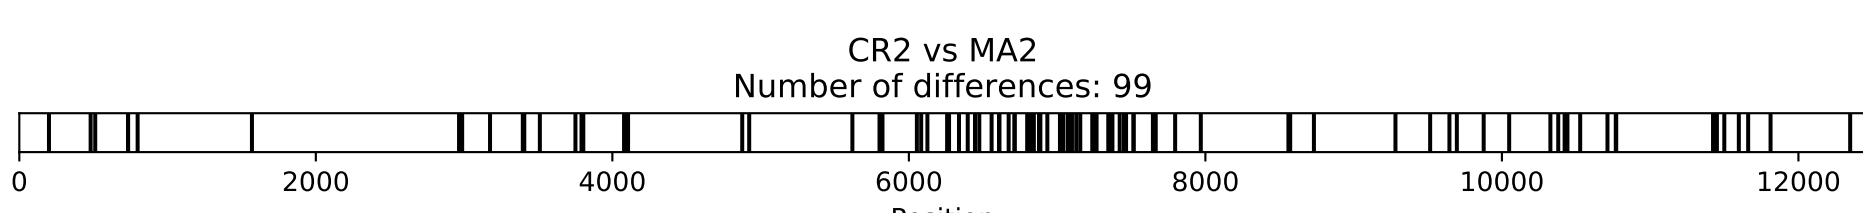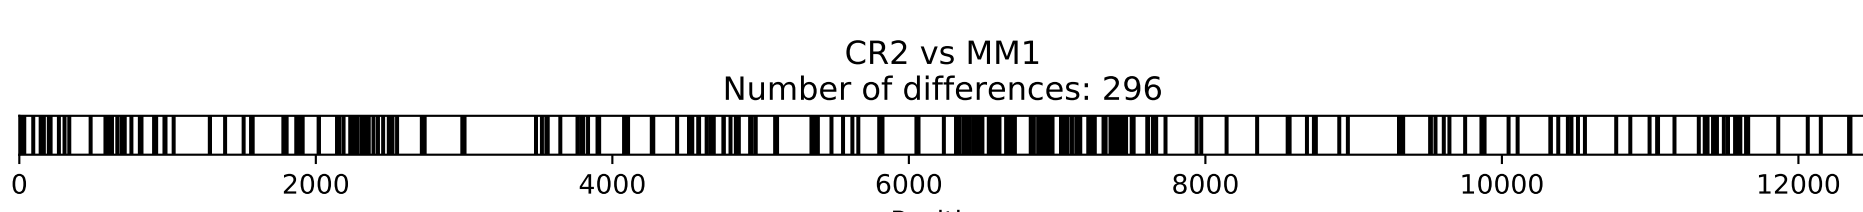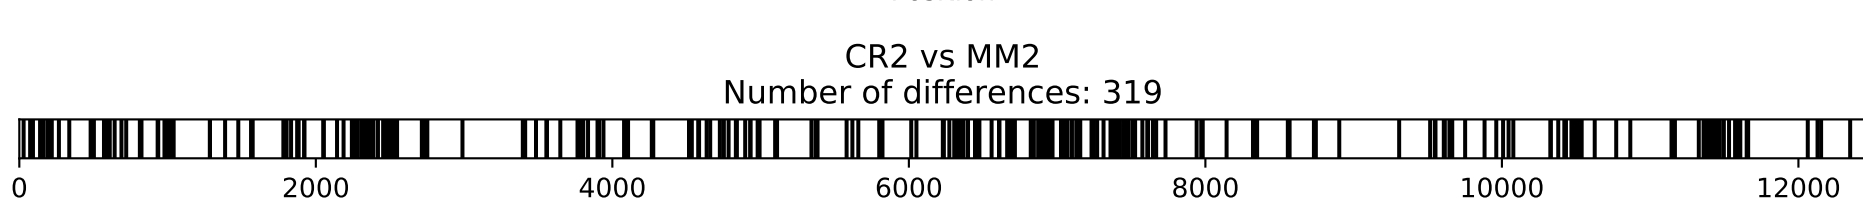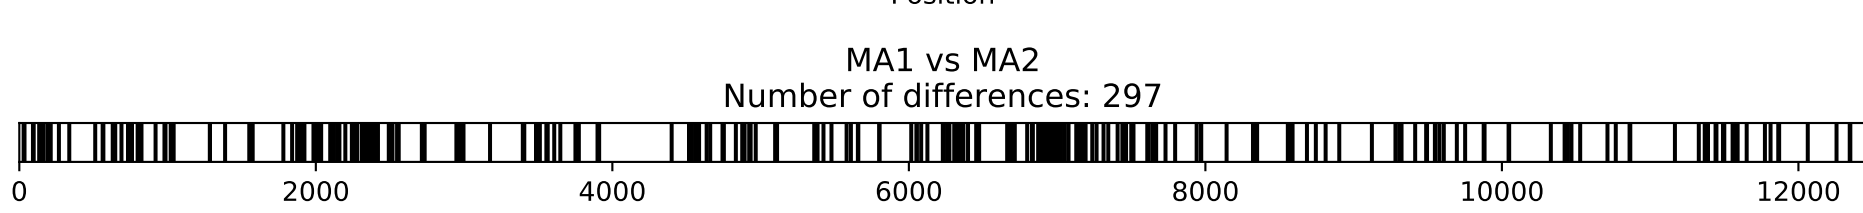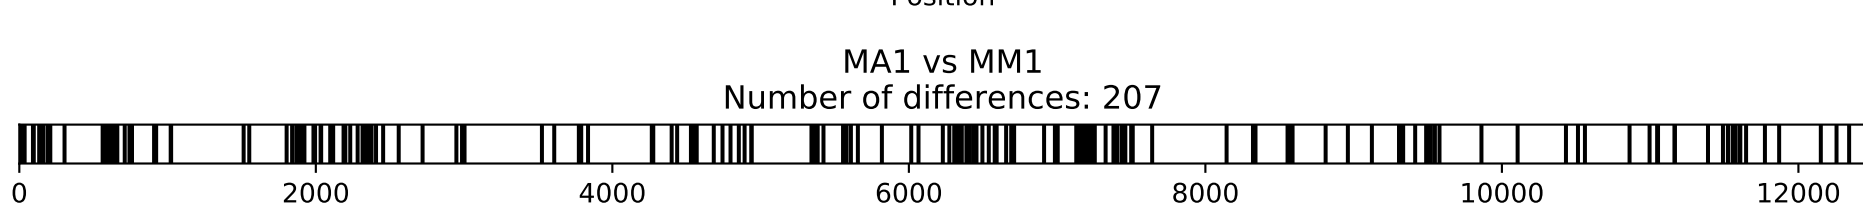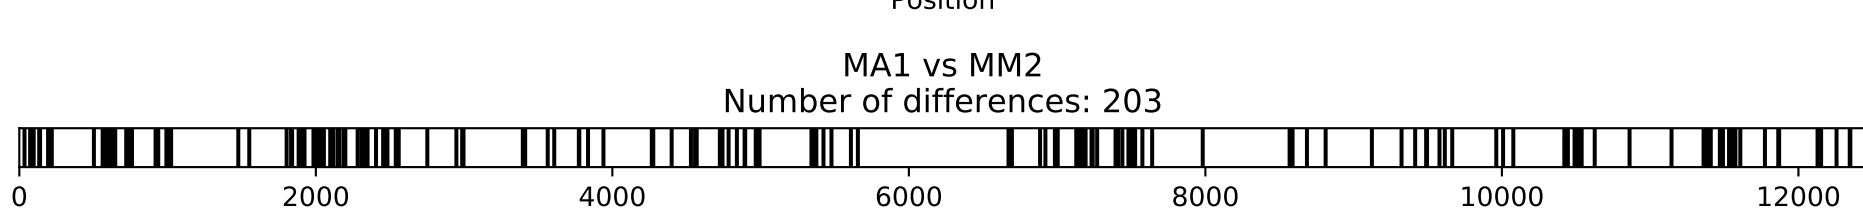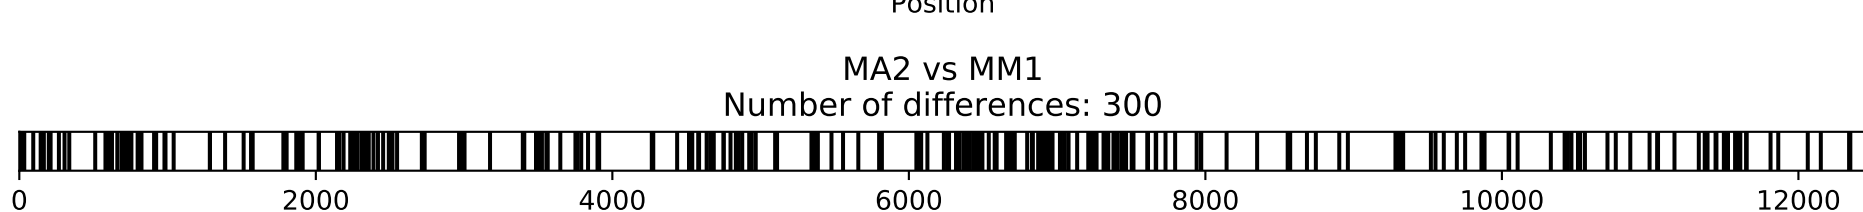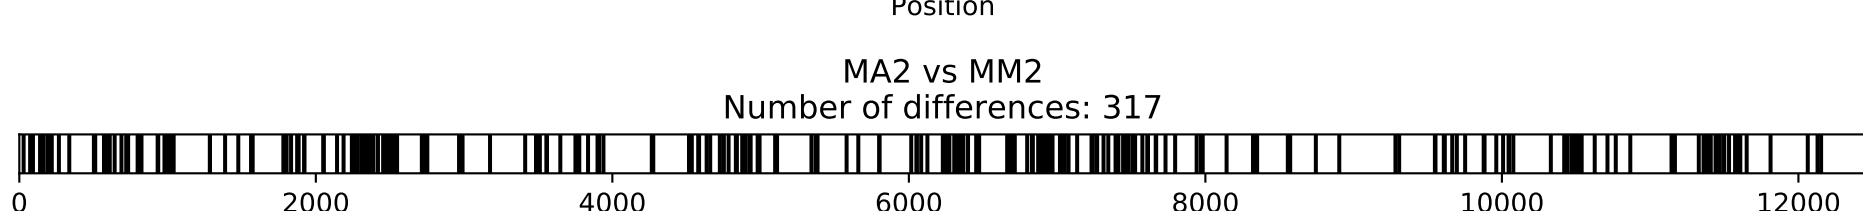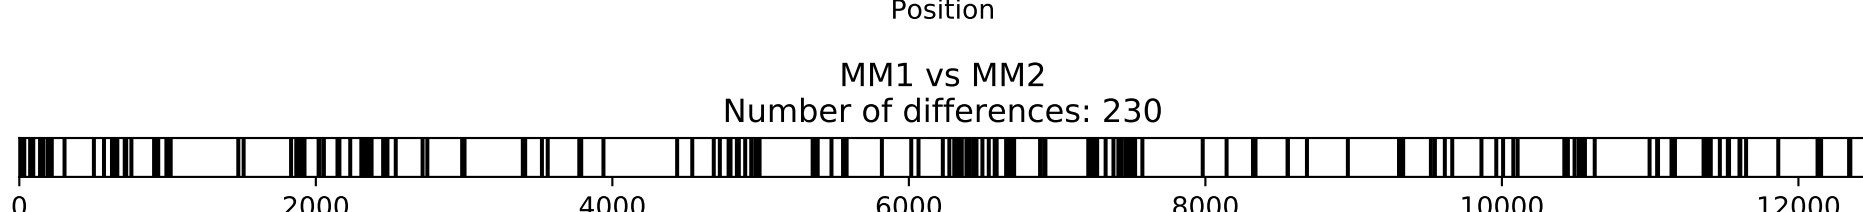

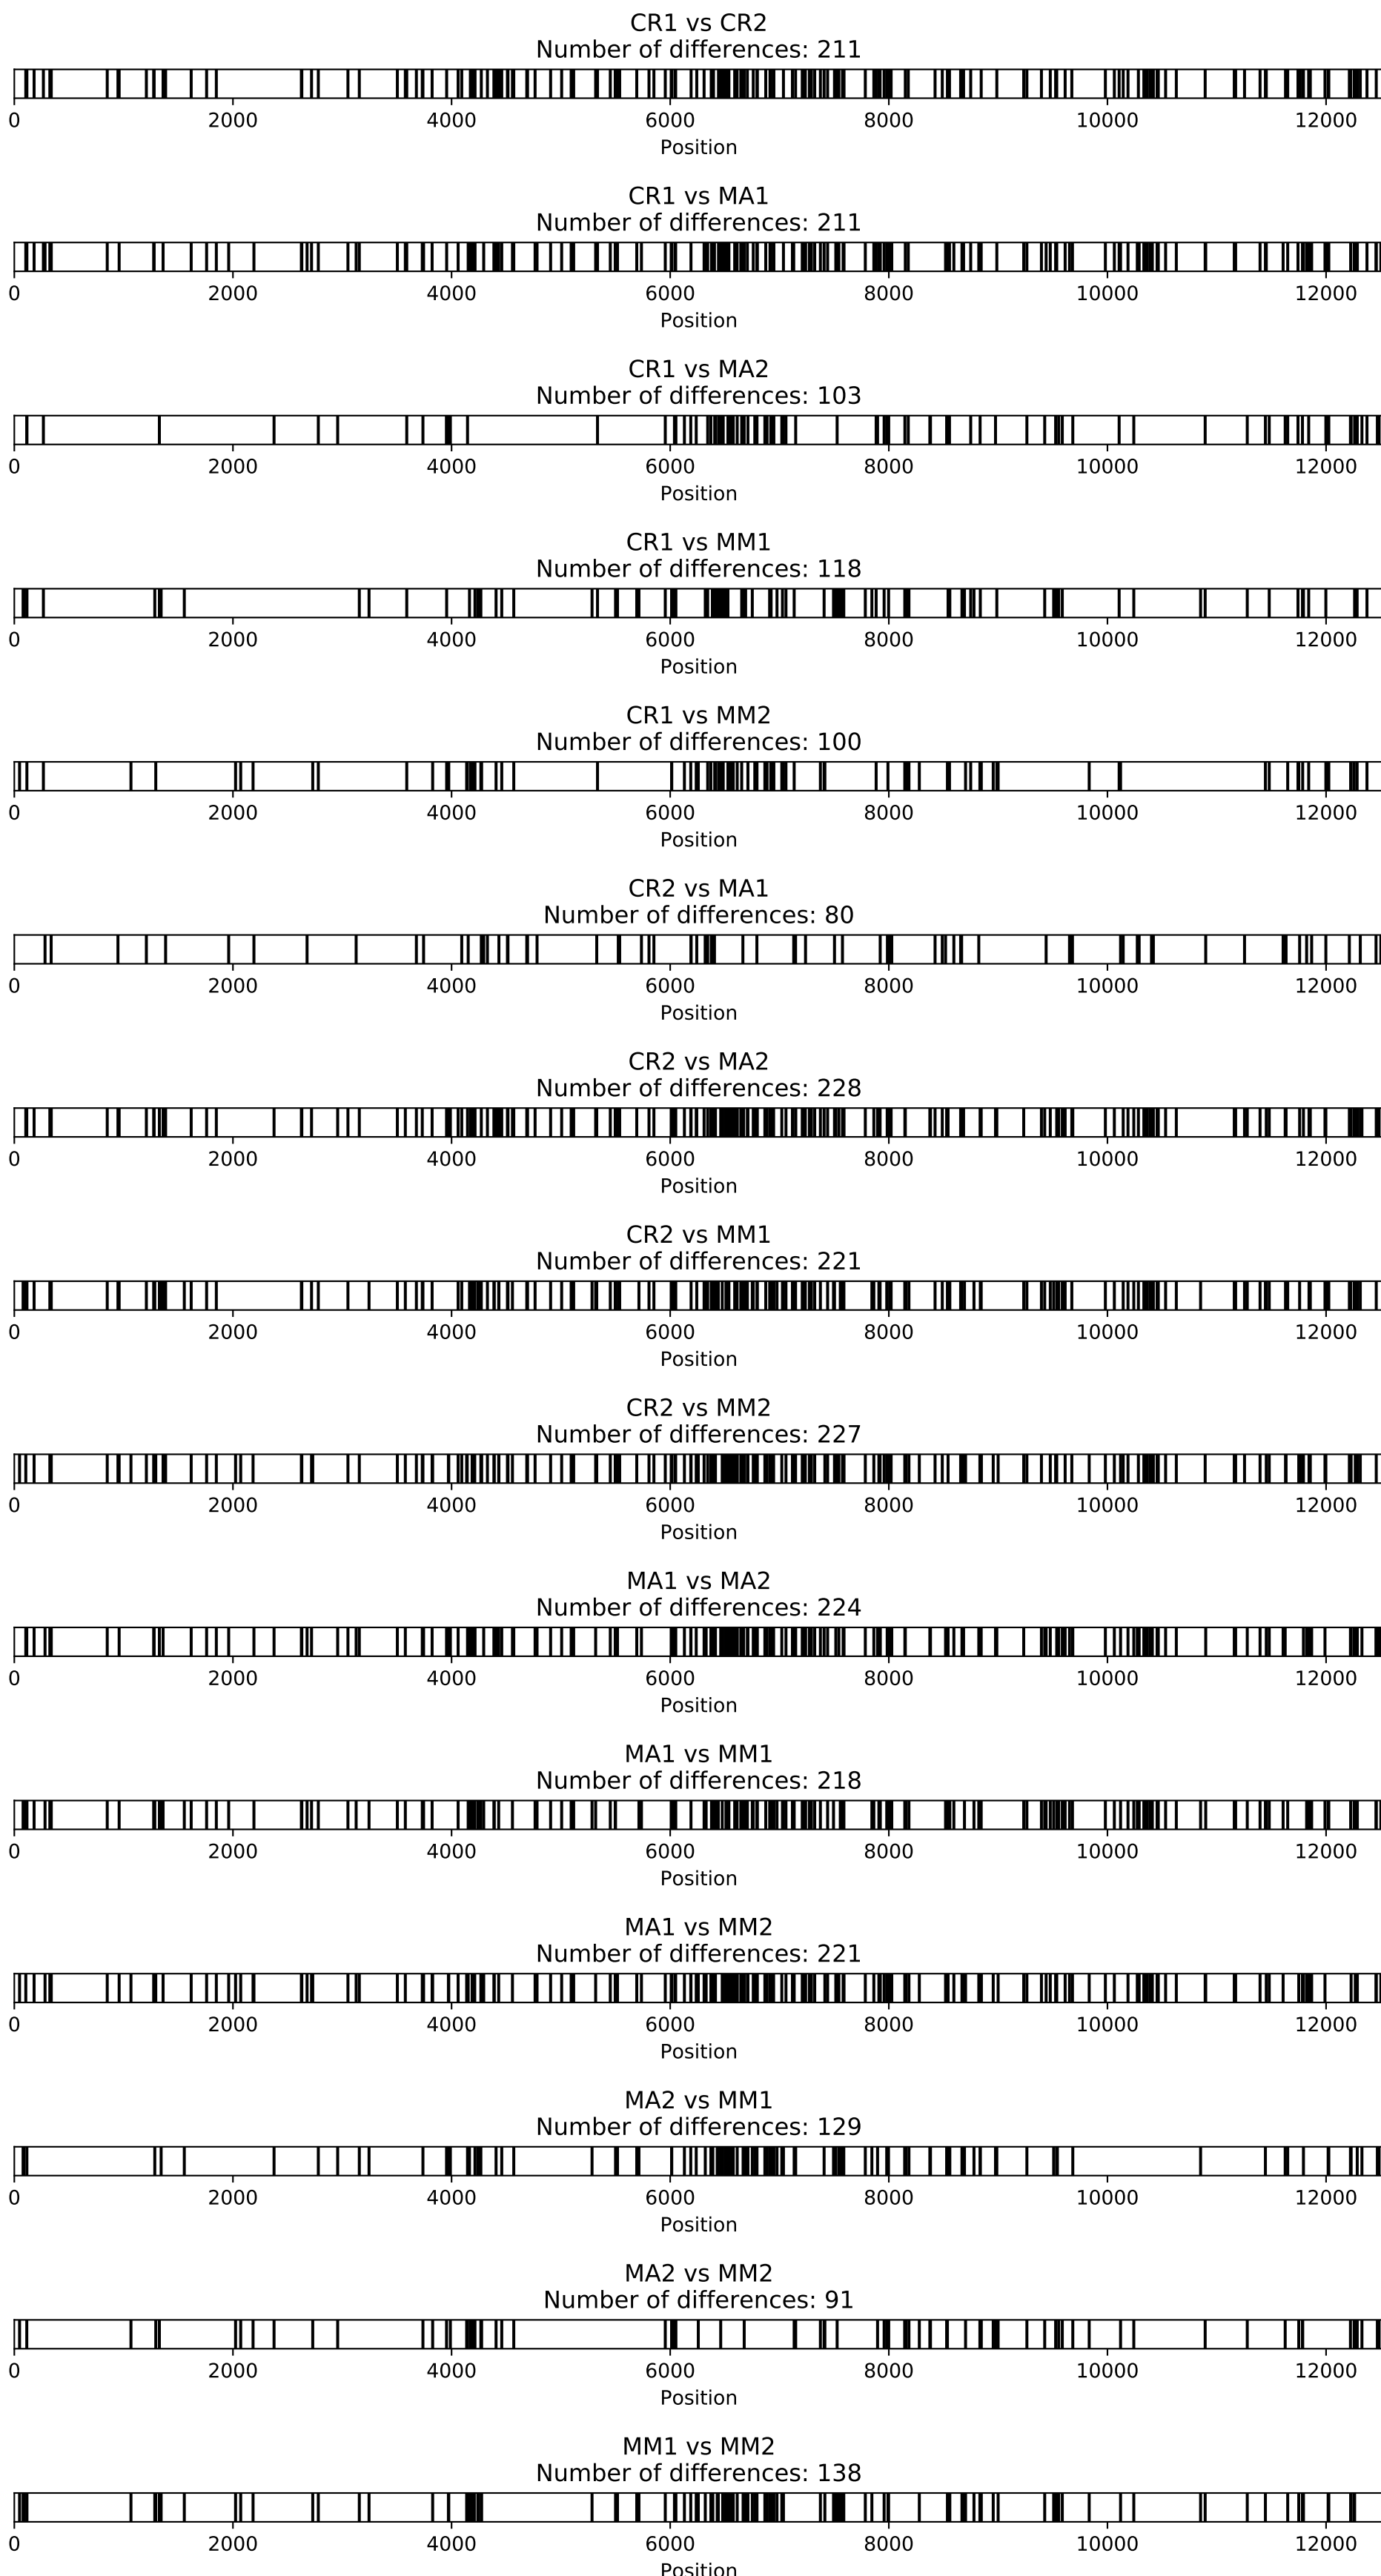



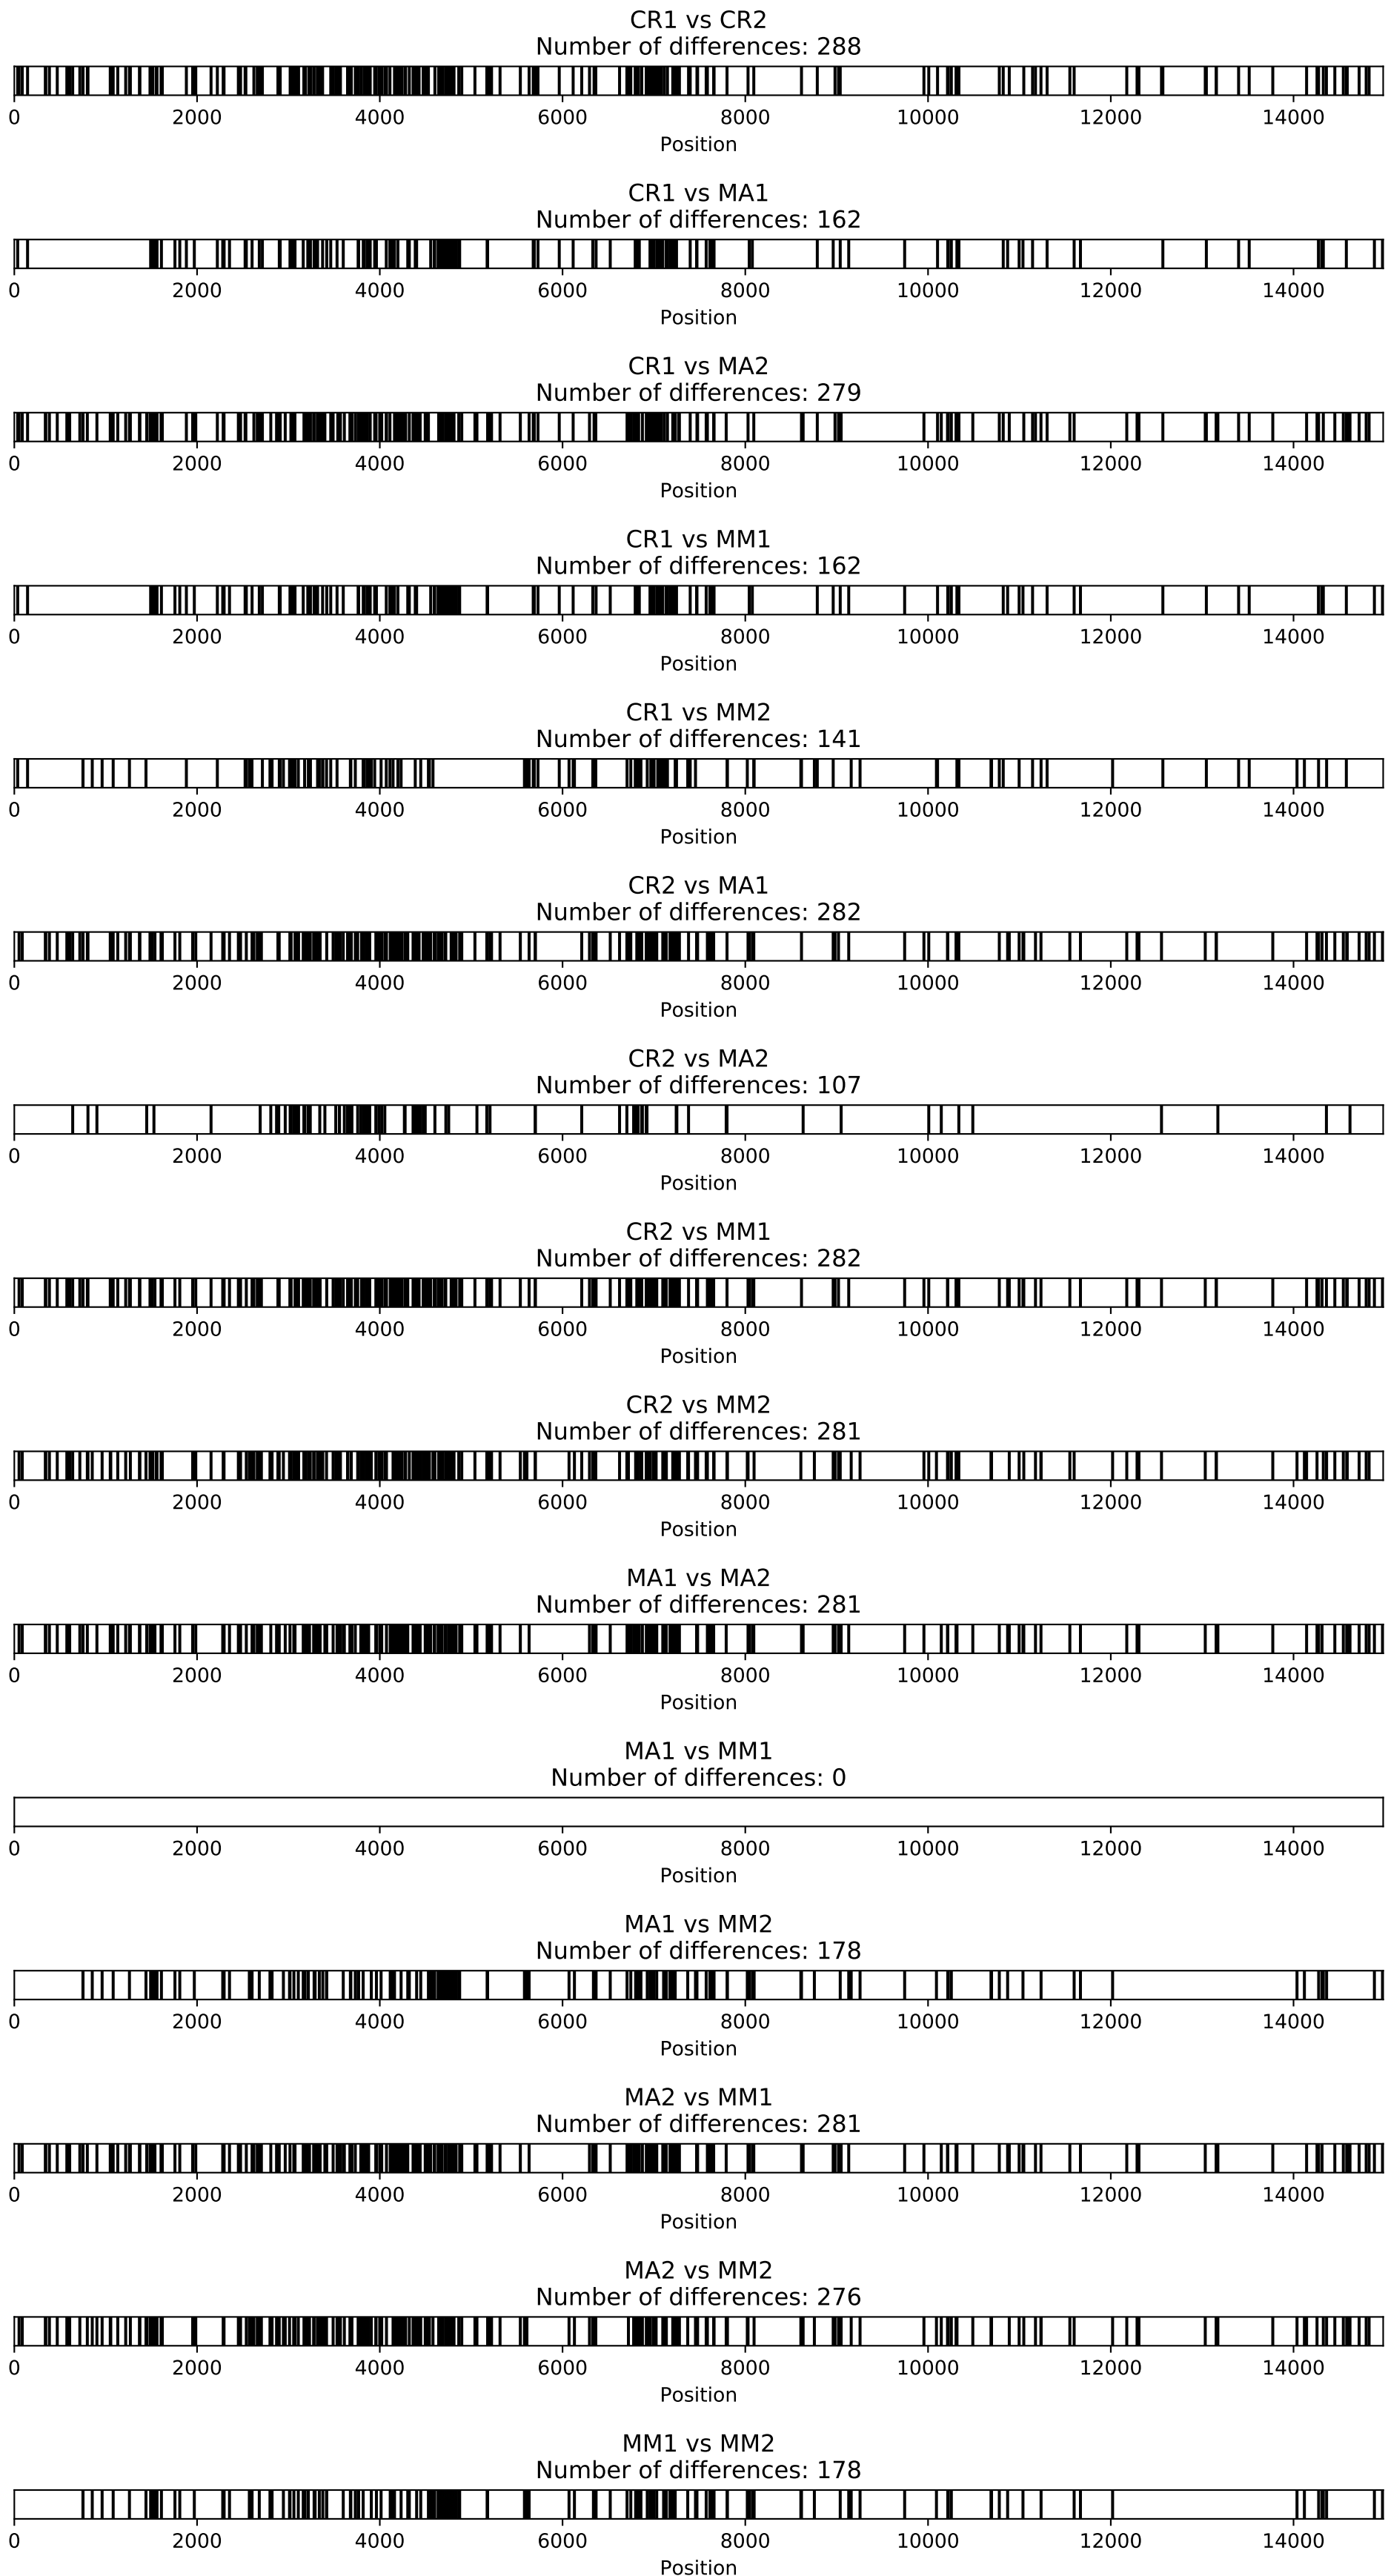

# Region: 173

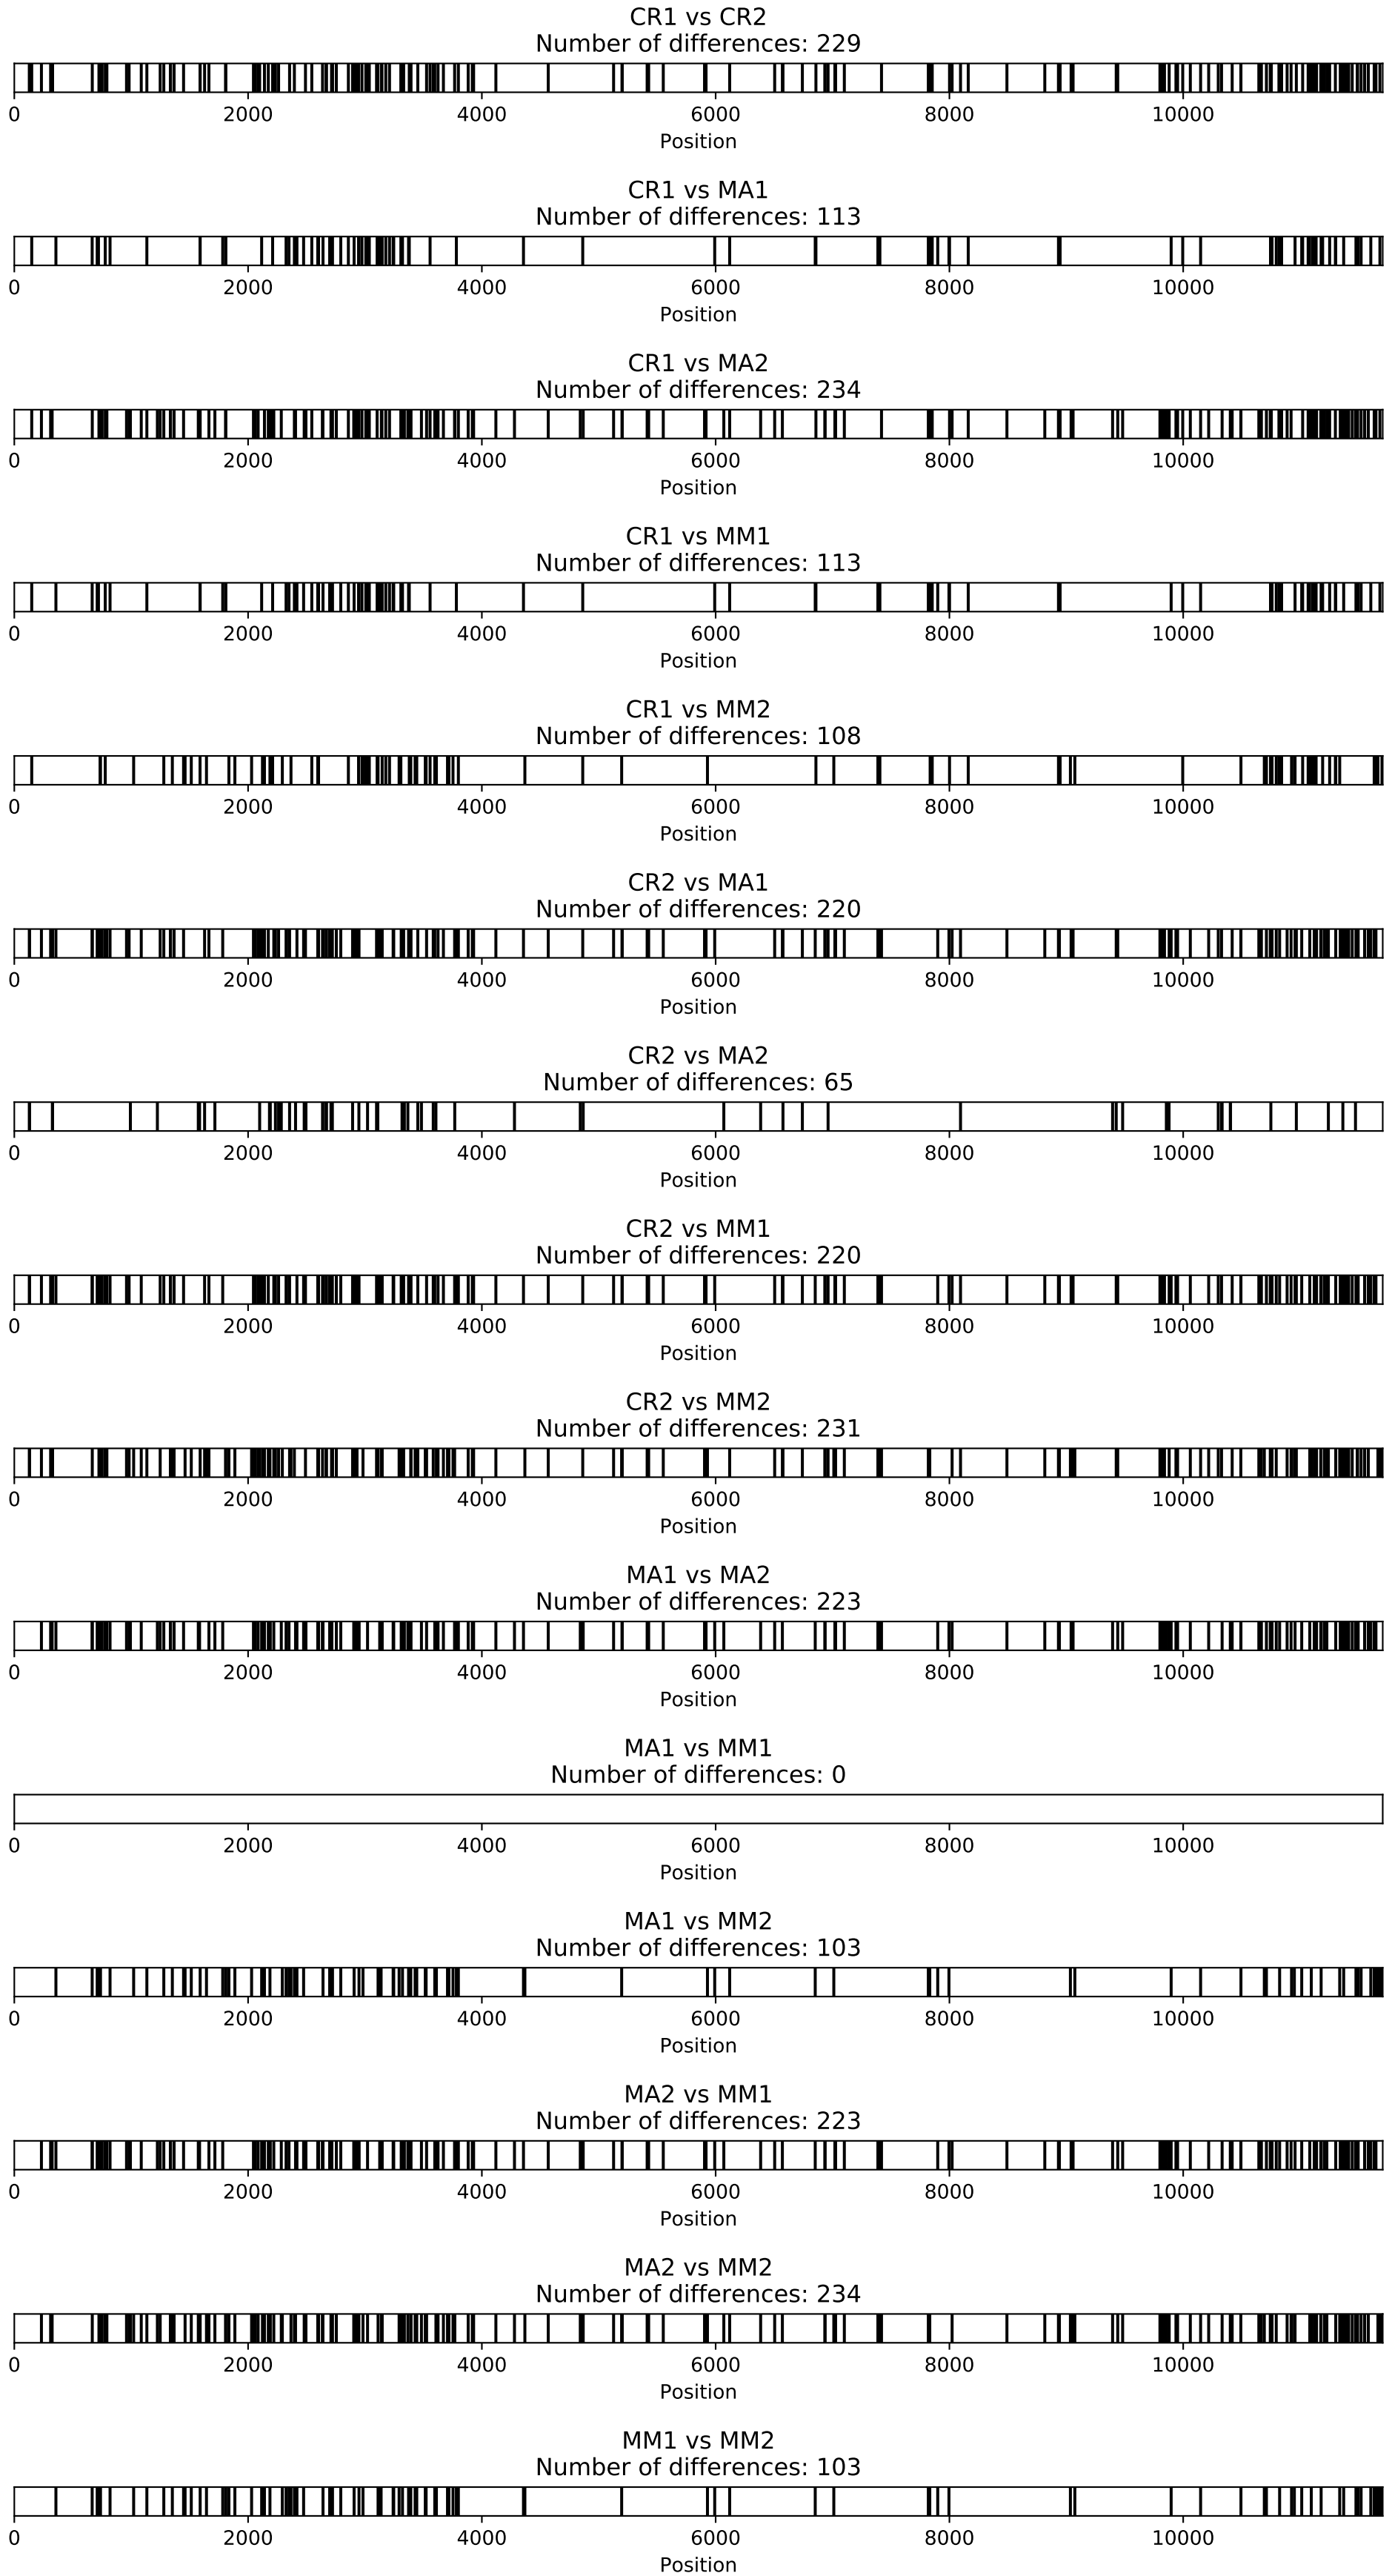

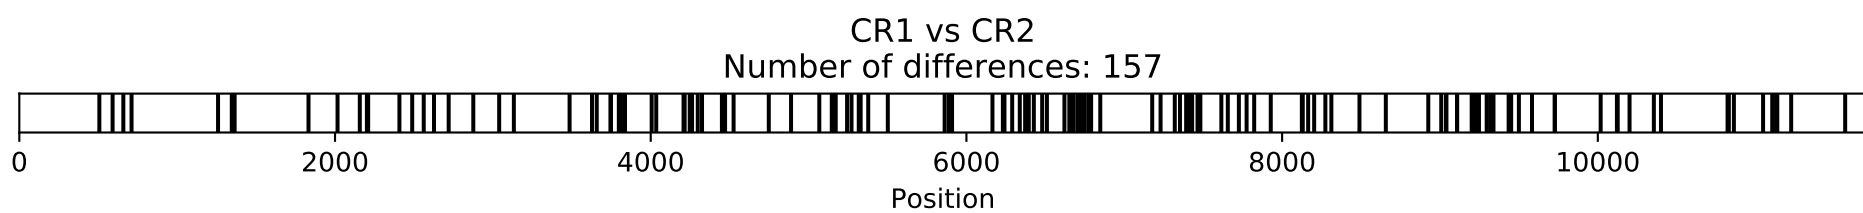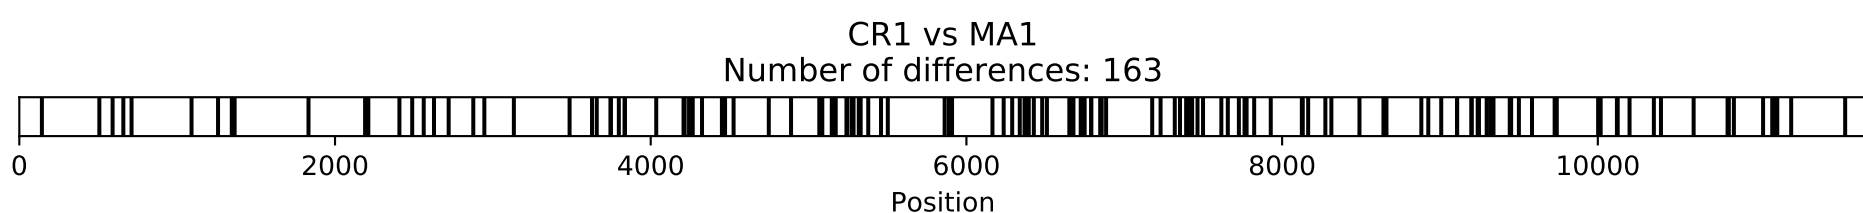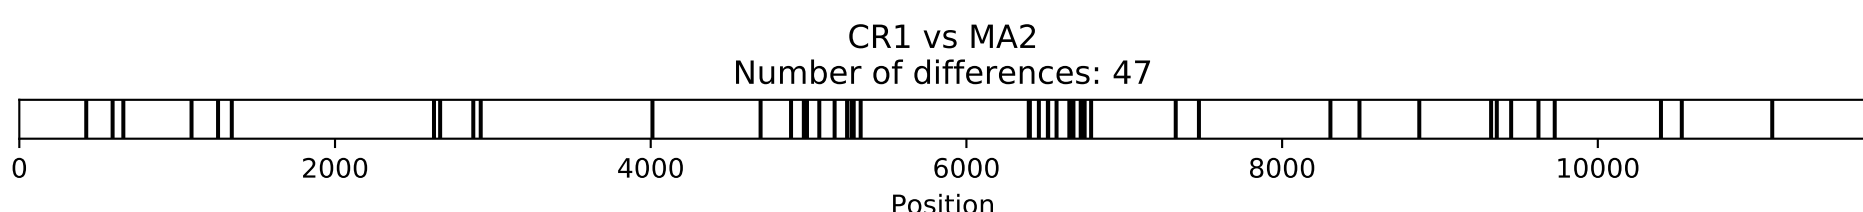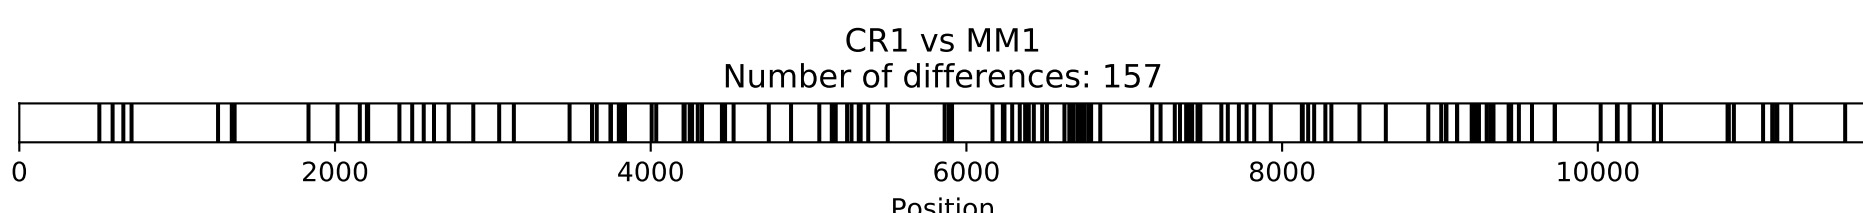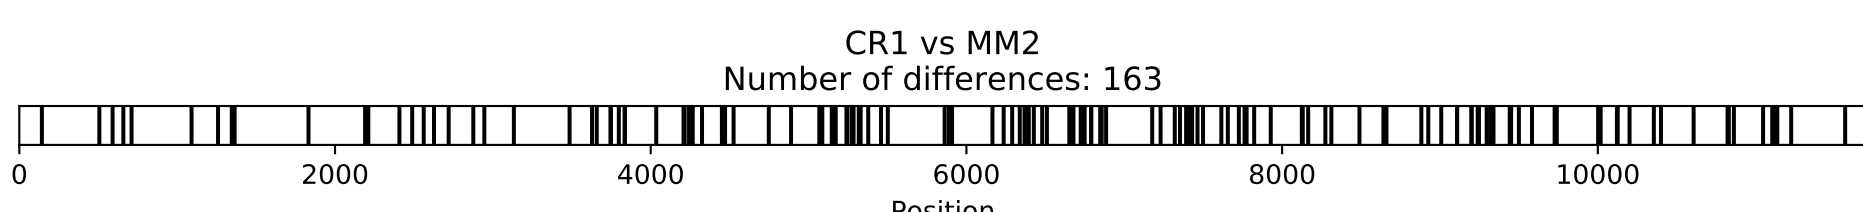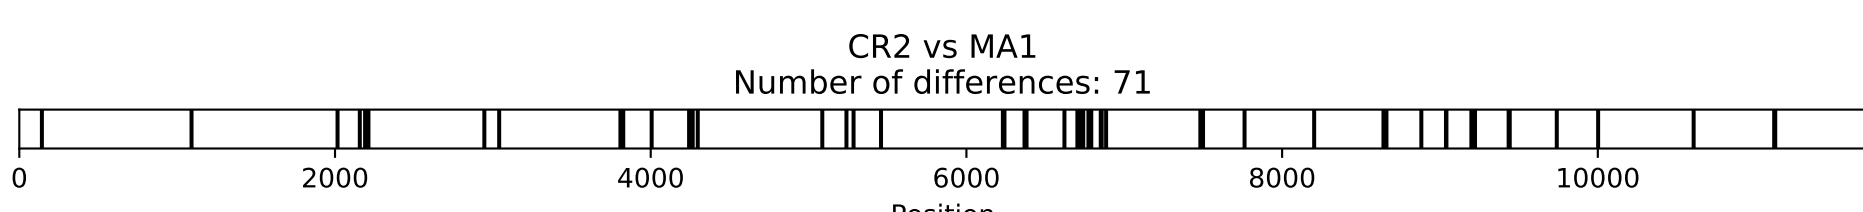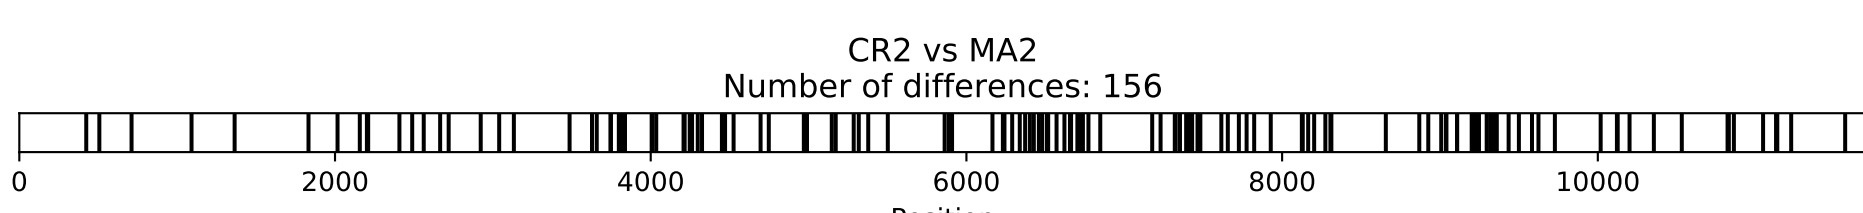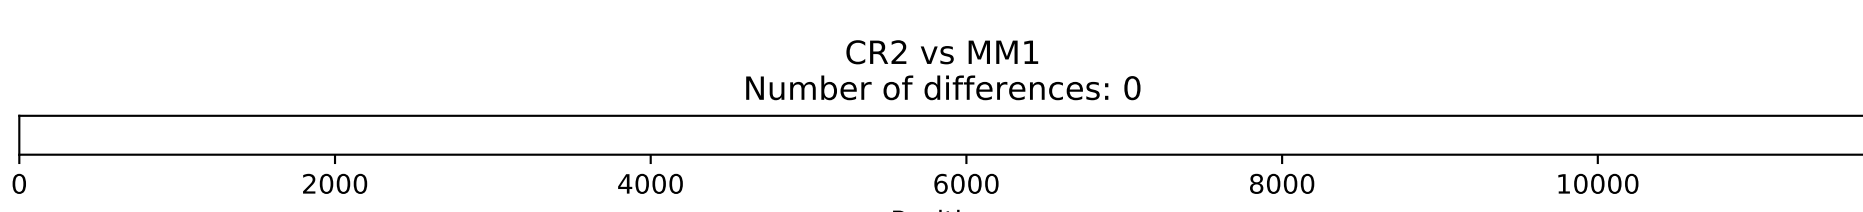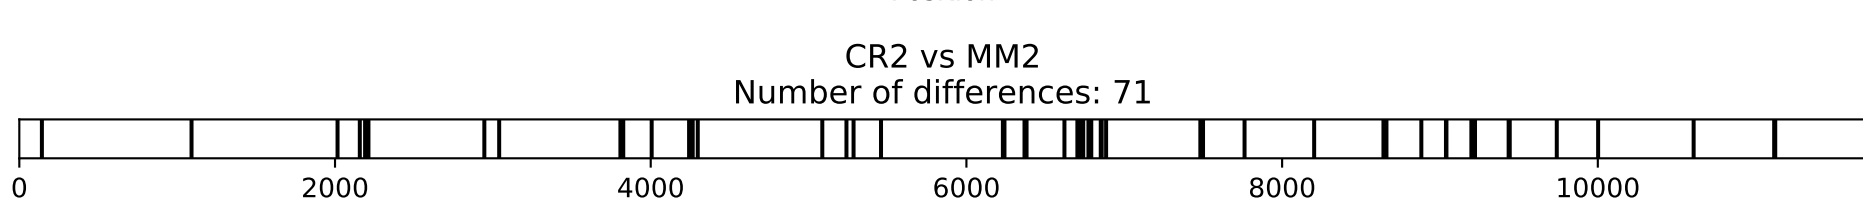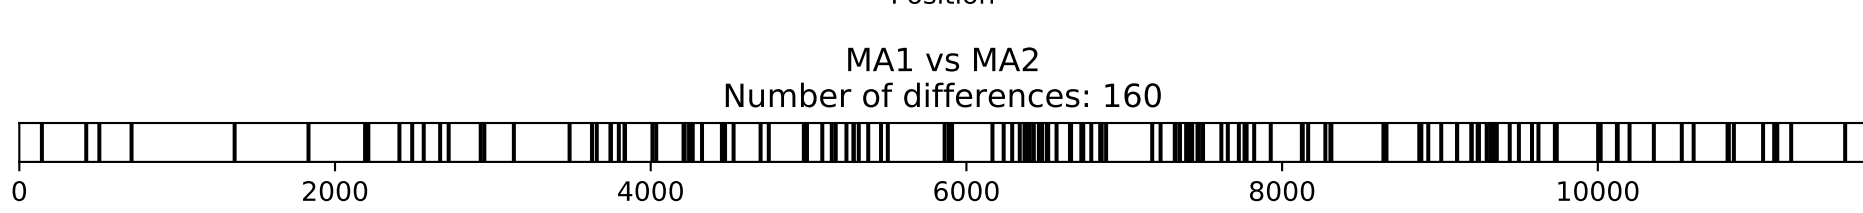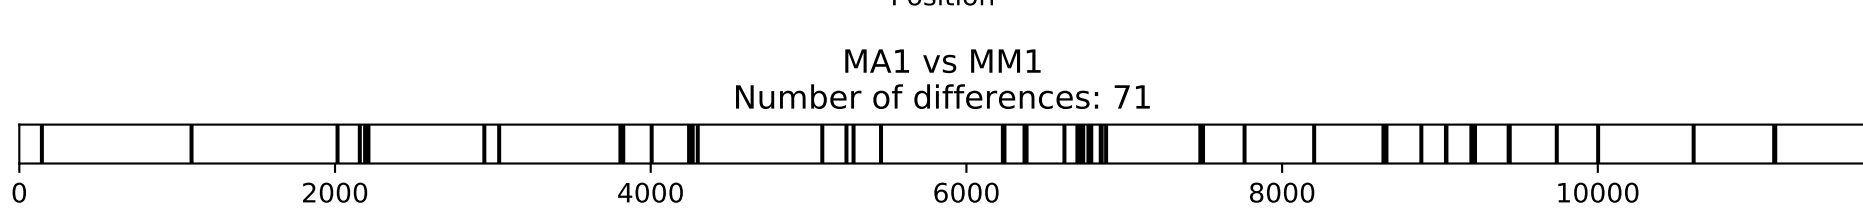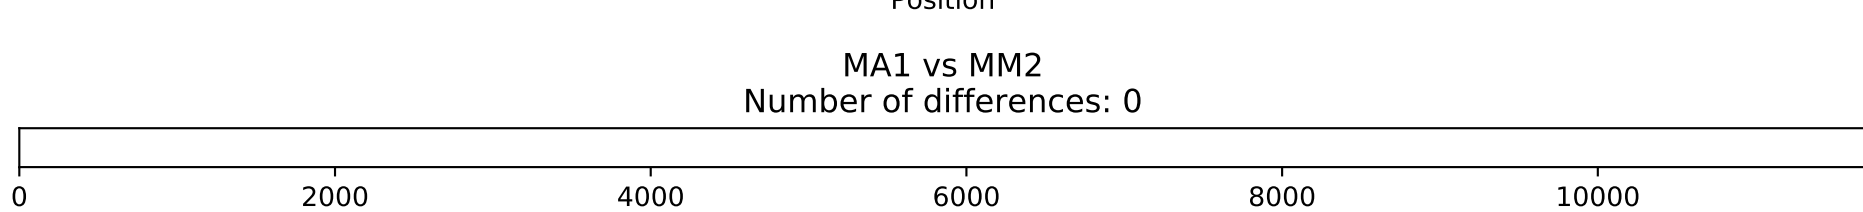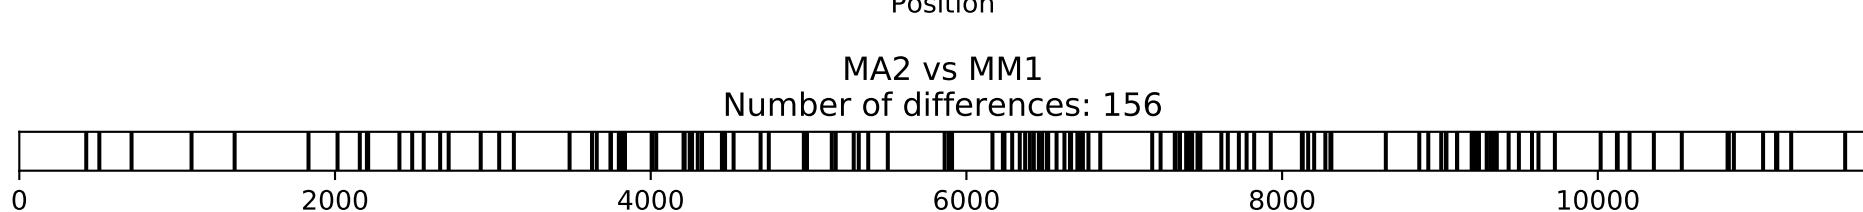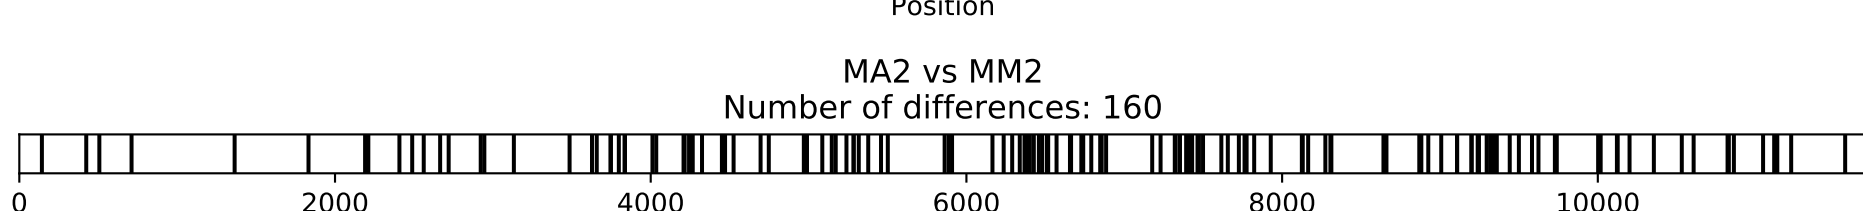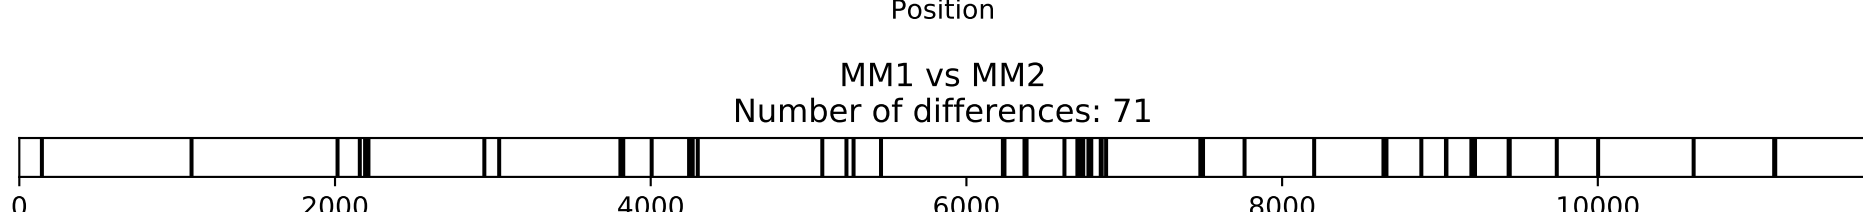

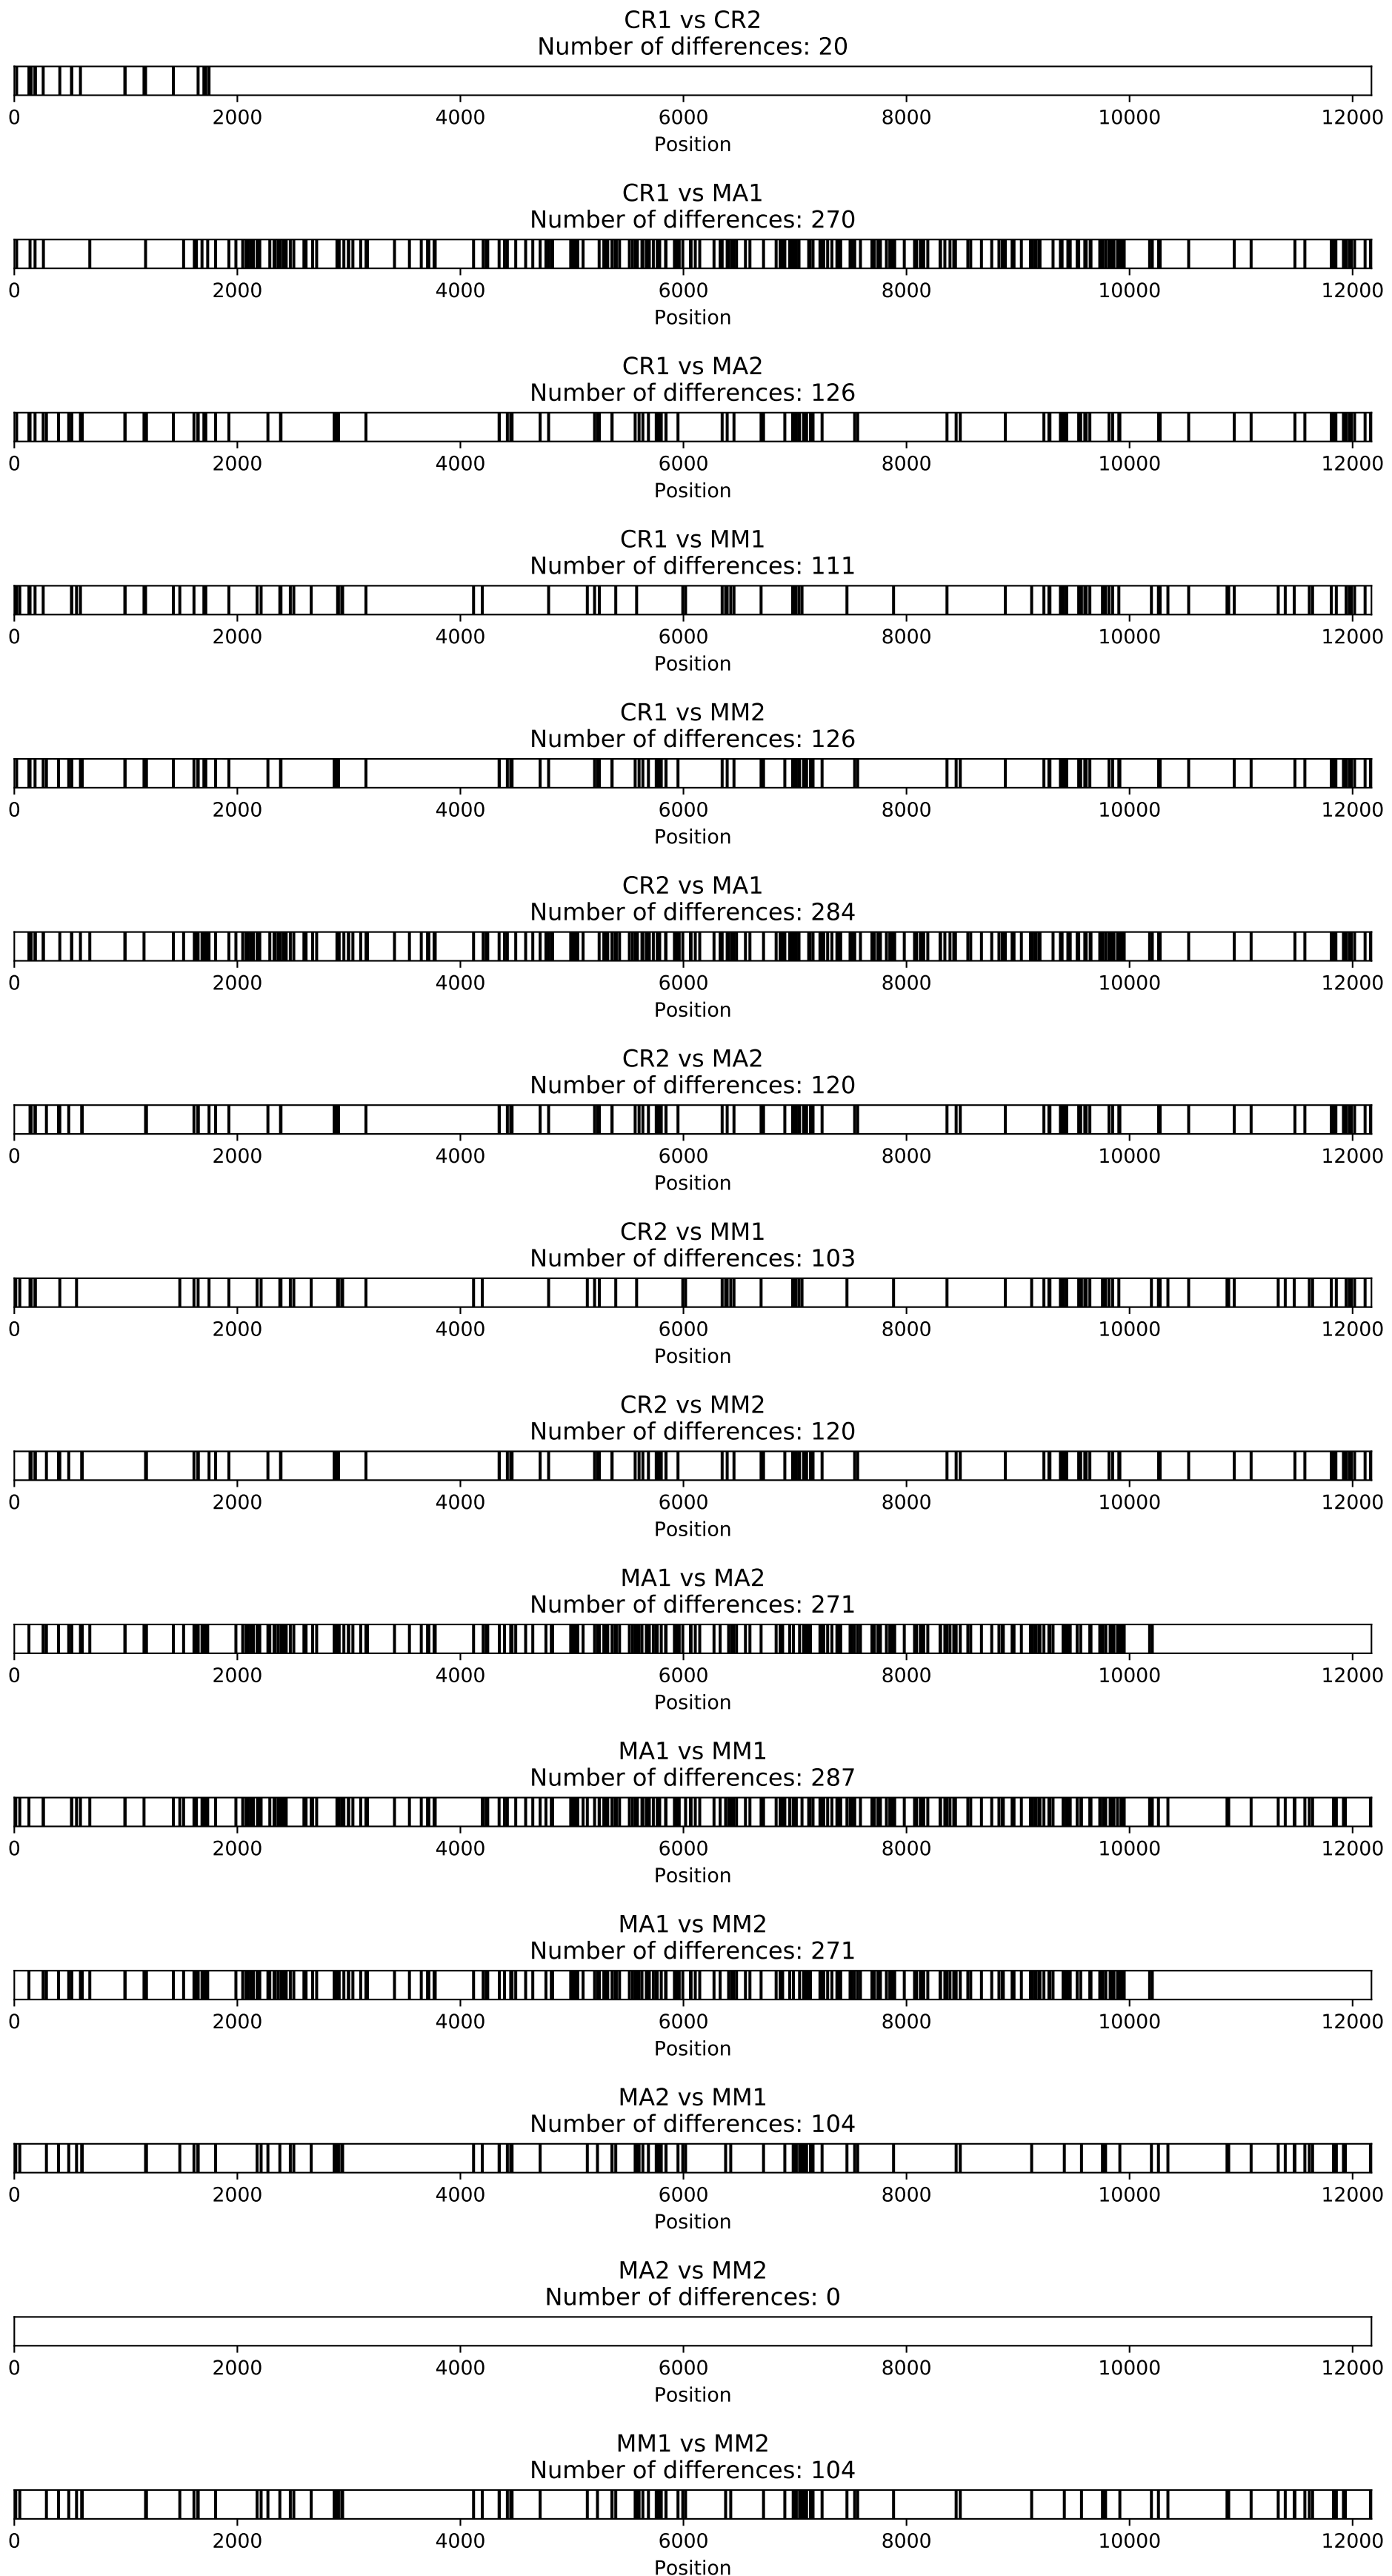

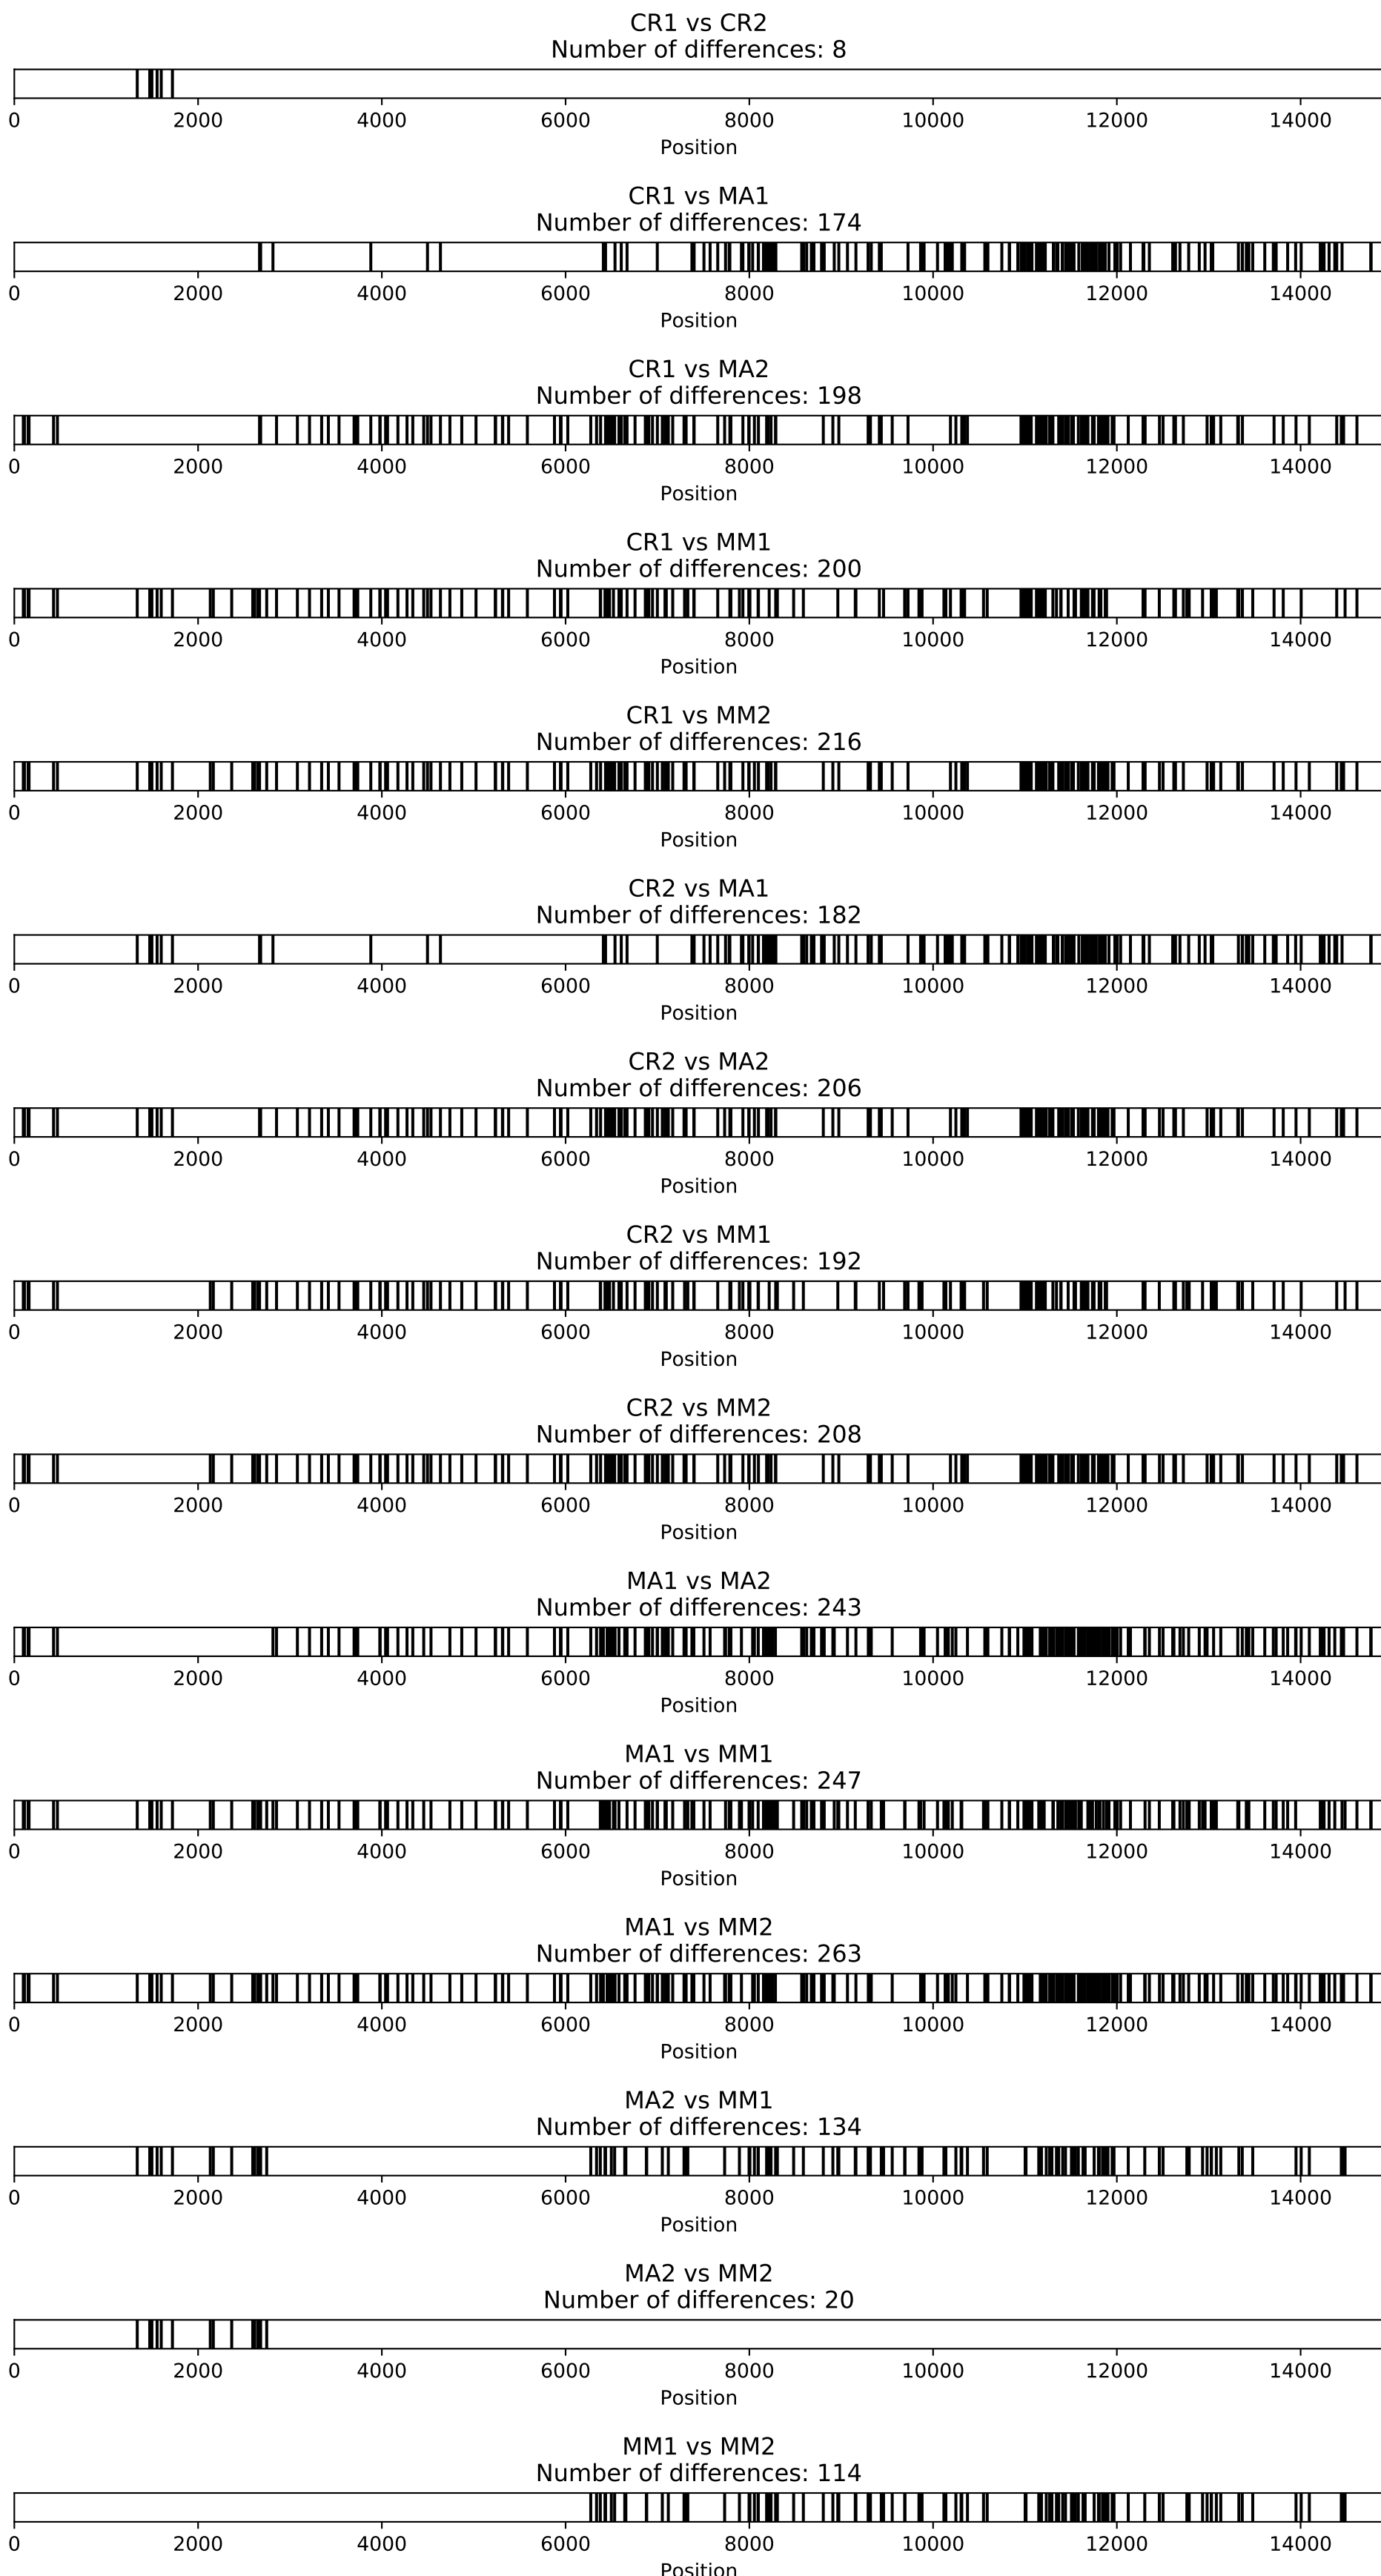

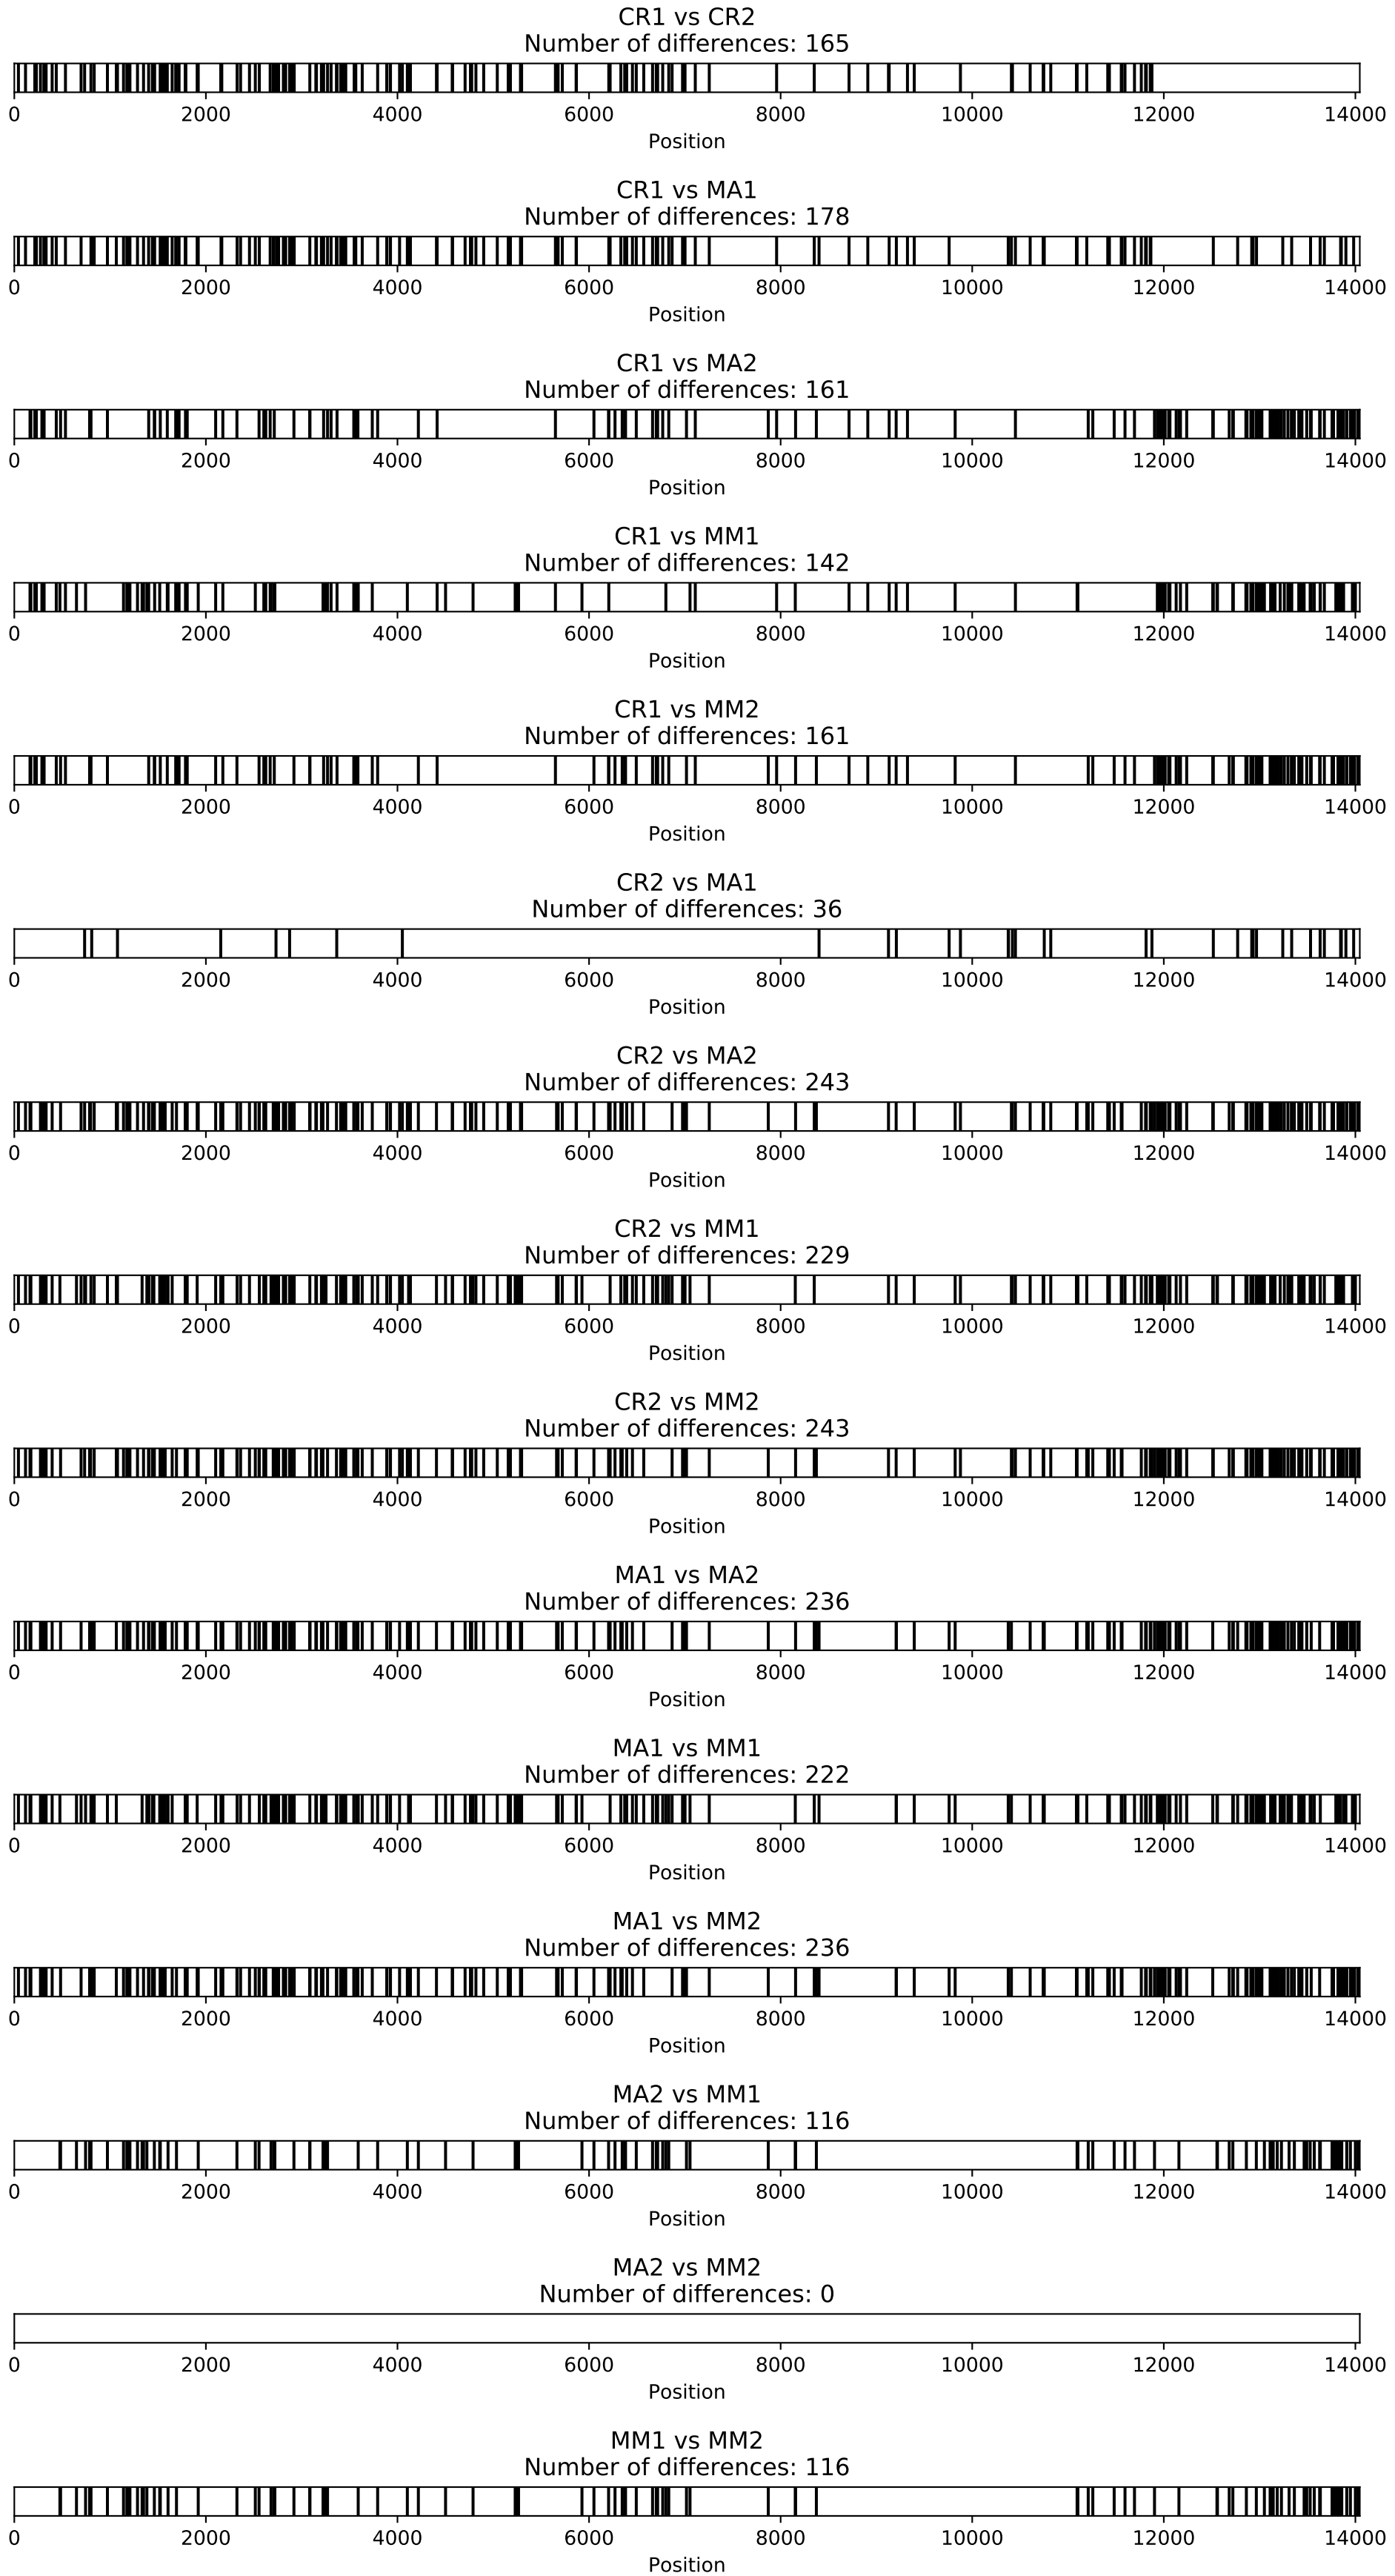

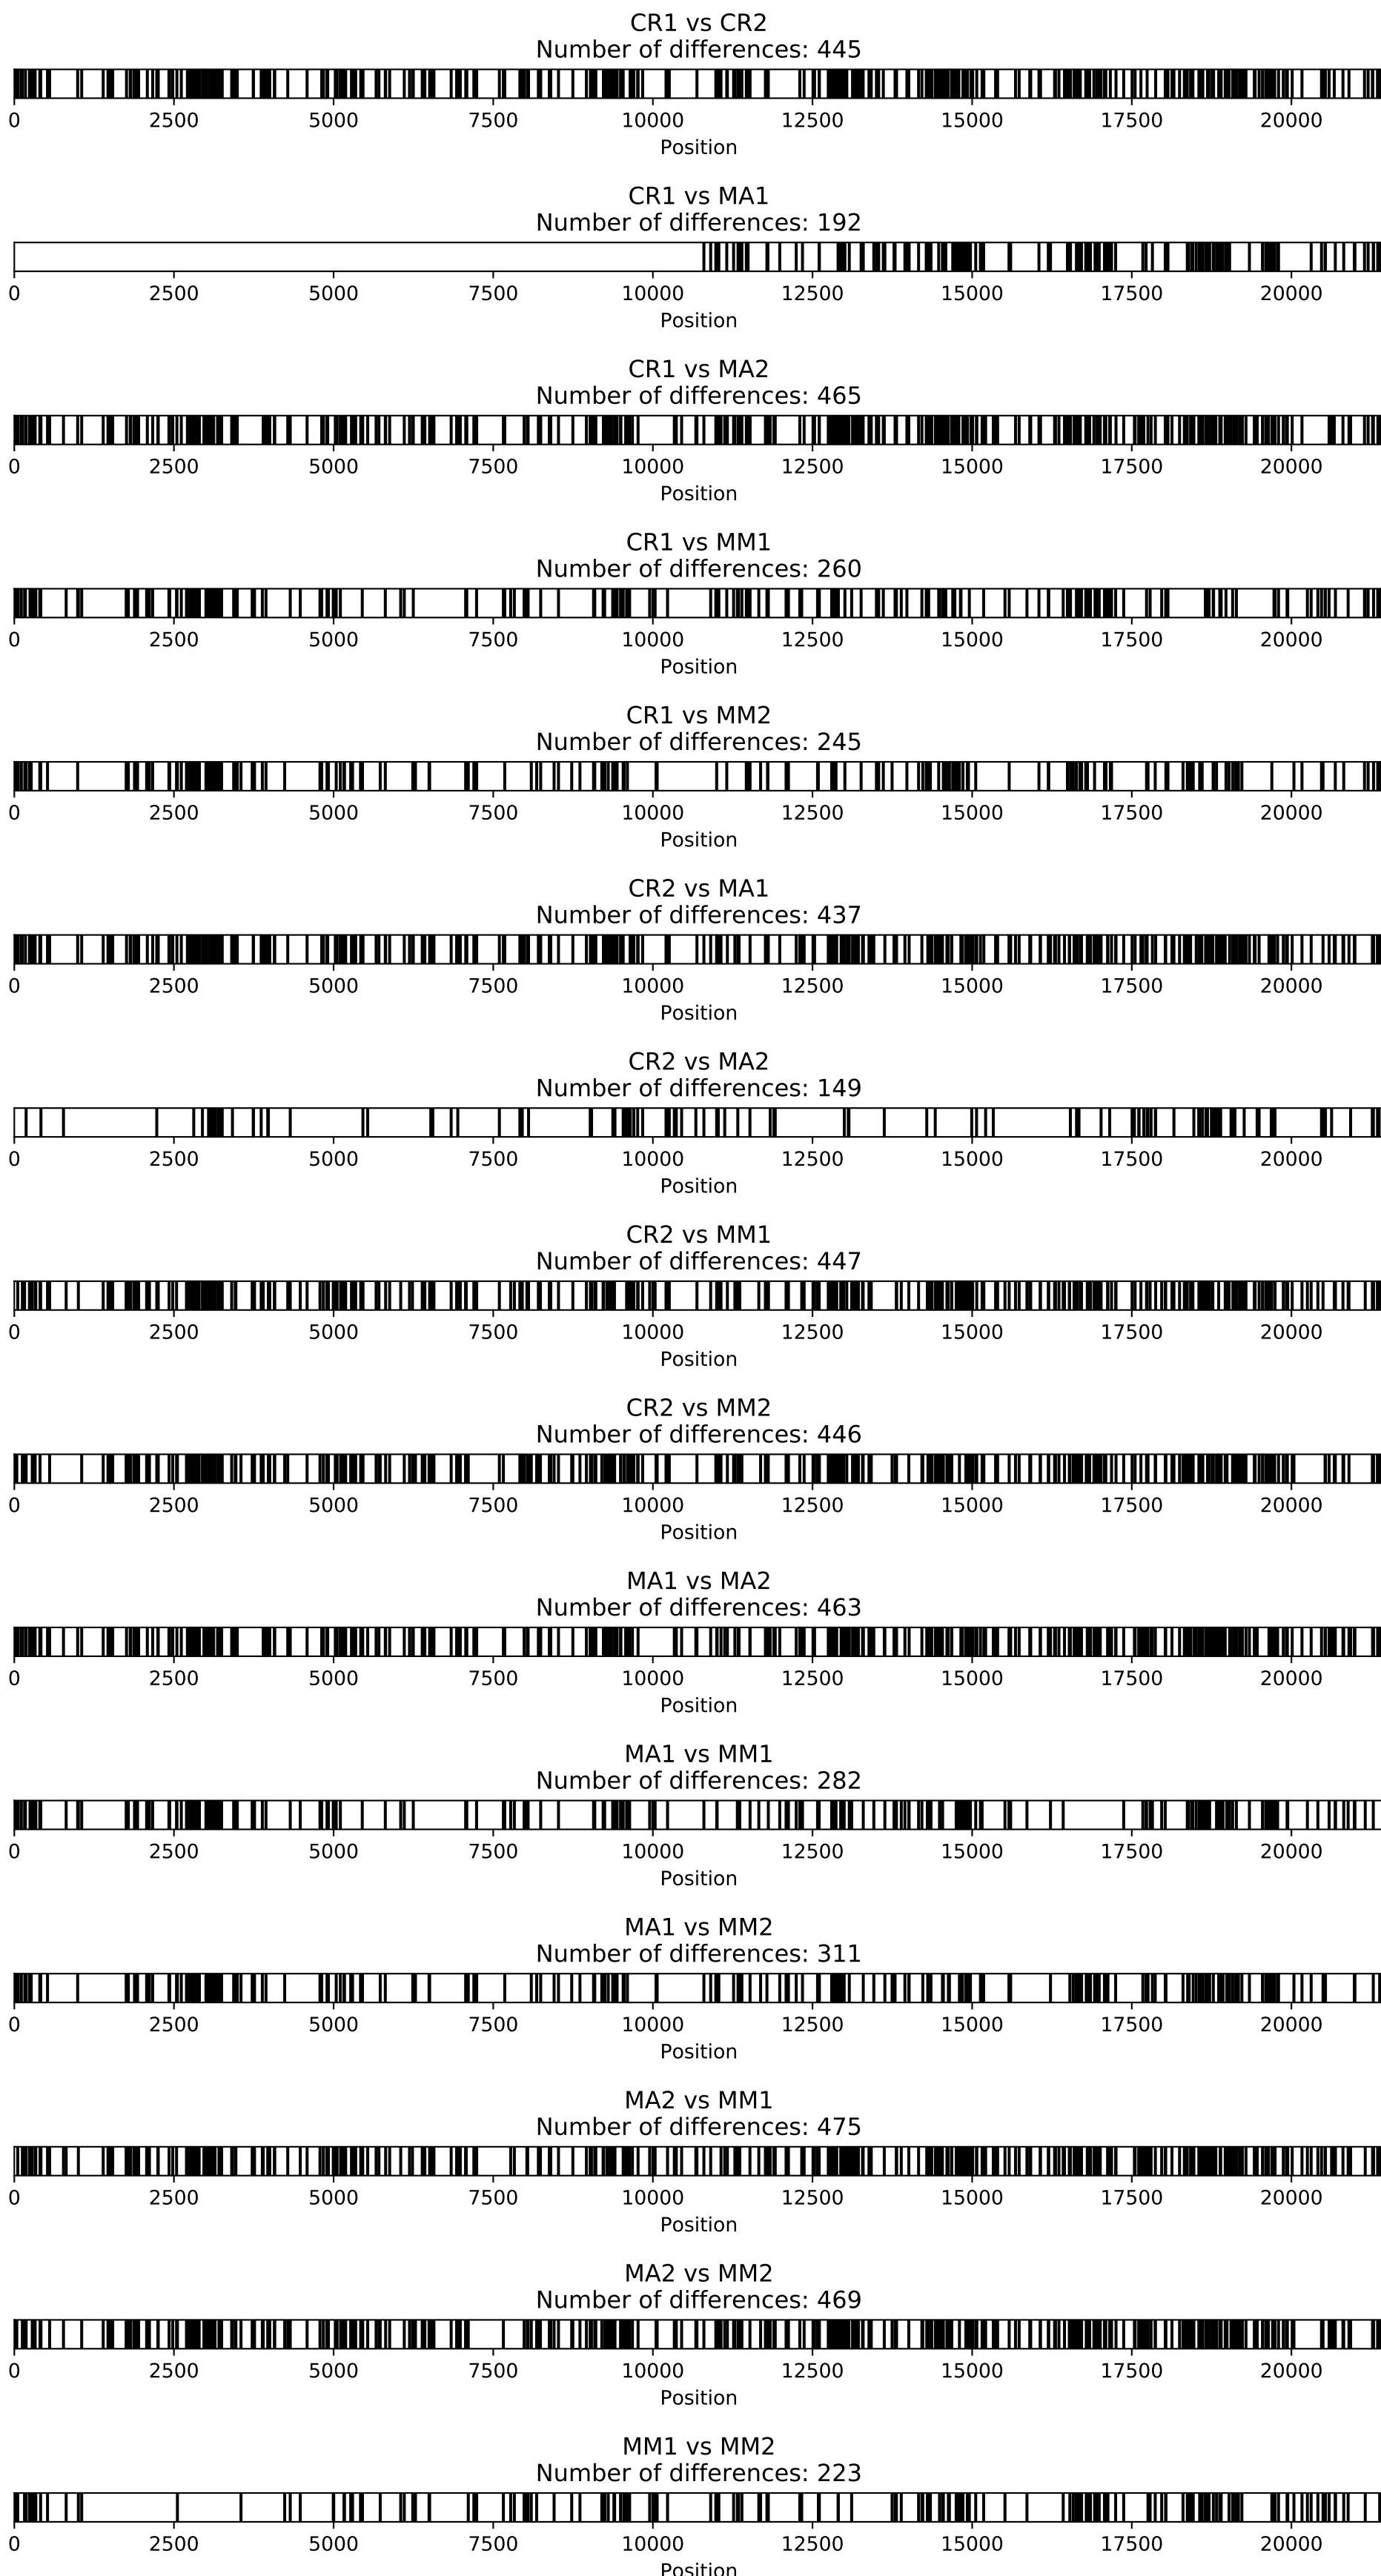

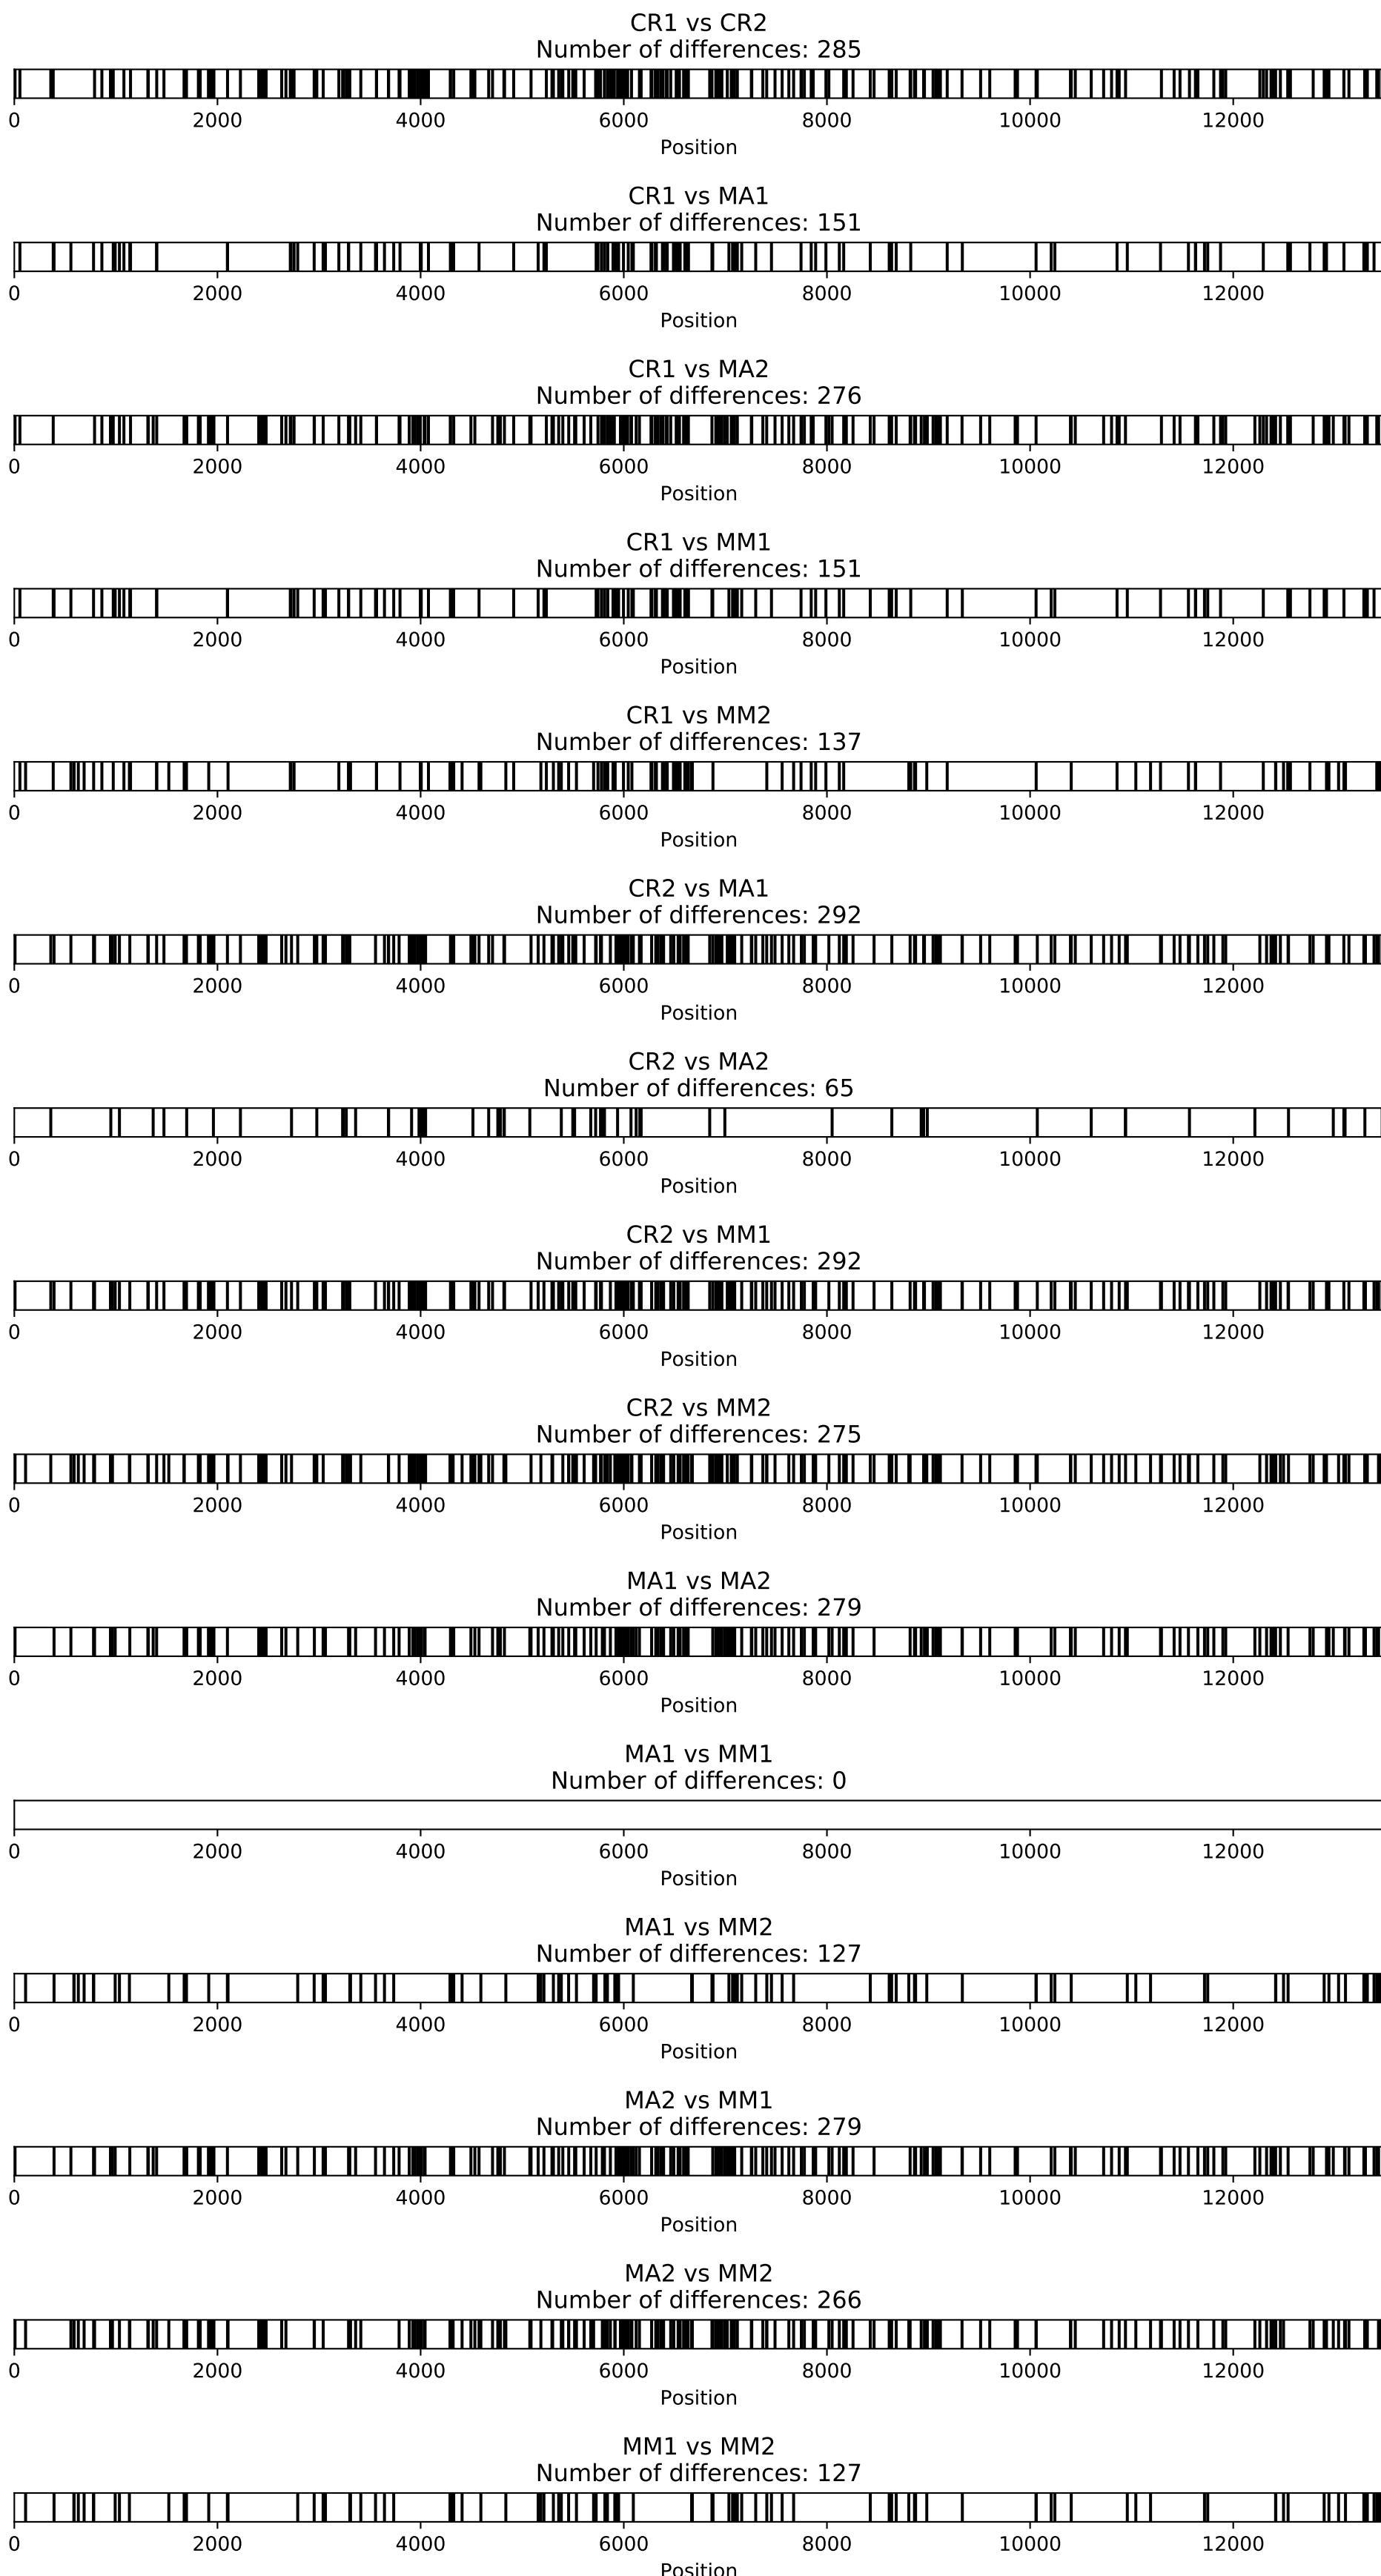



# Region: 180

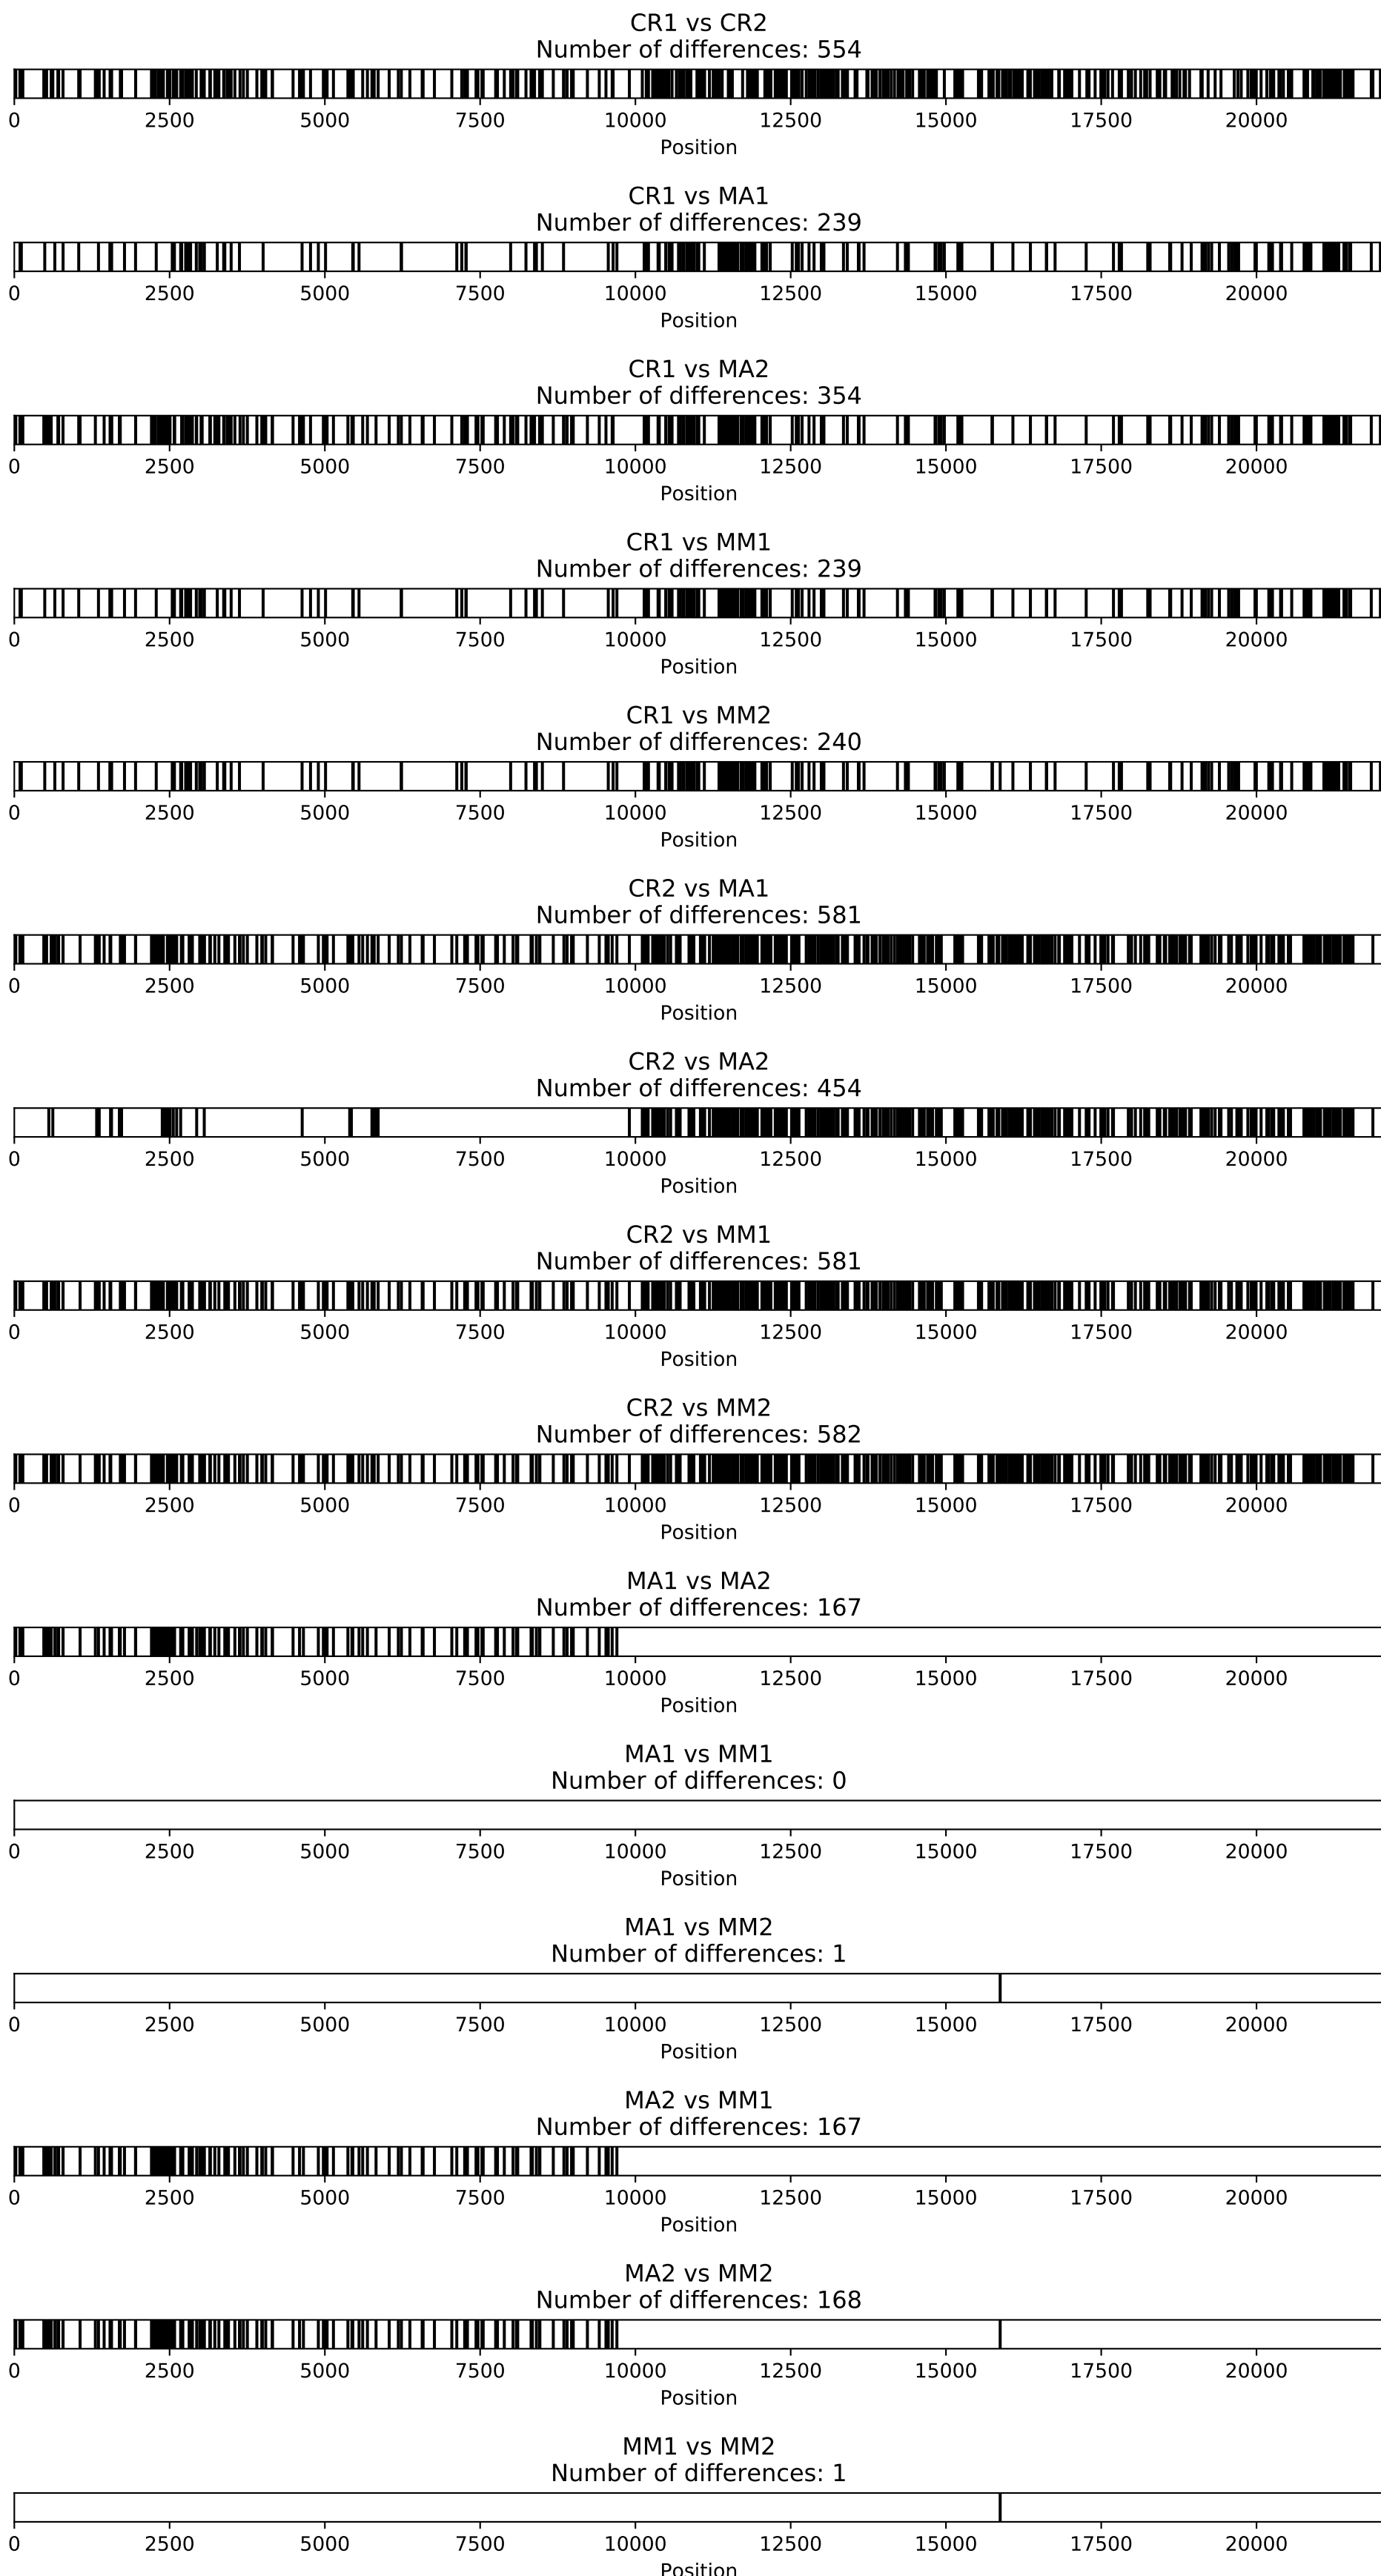

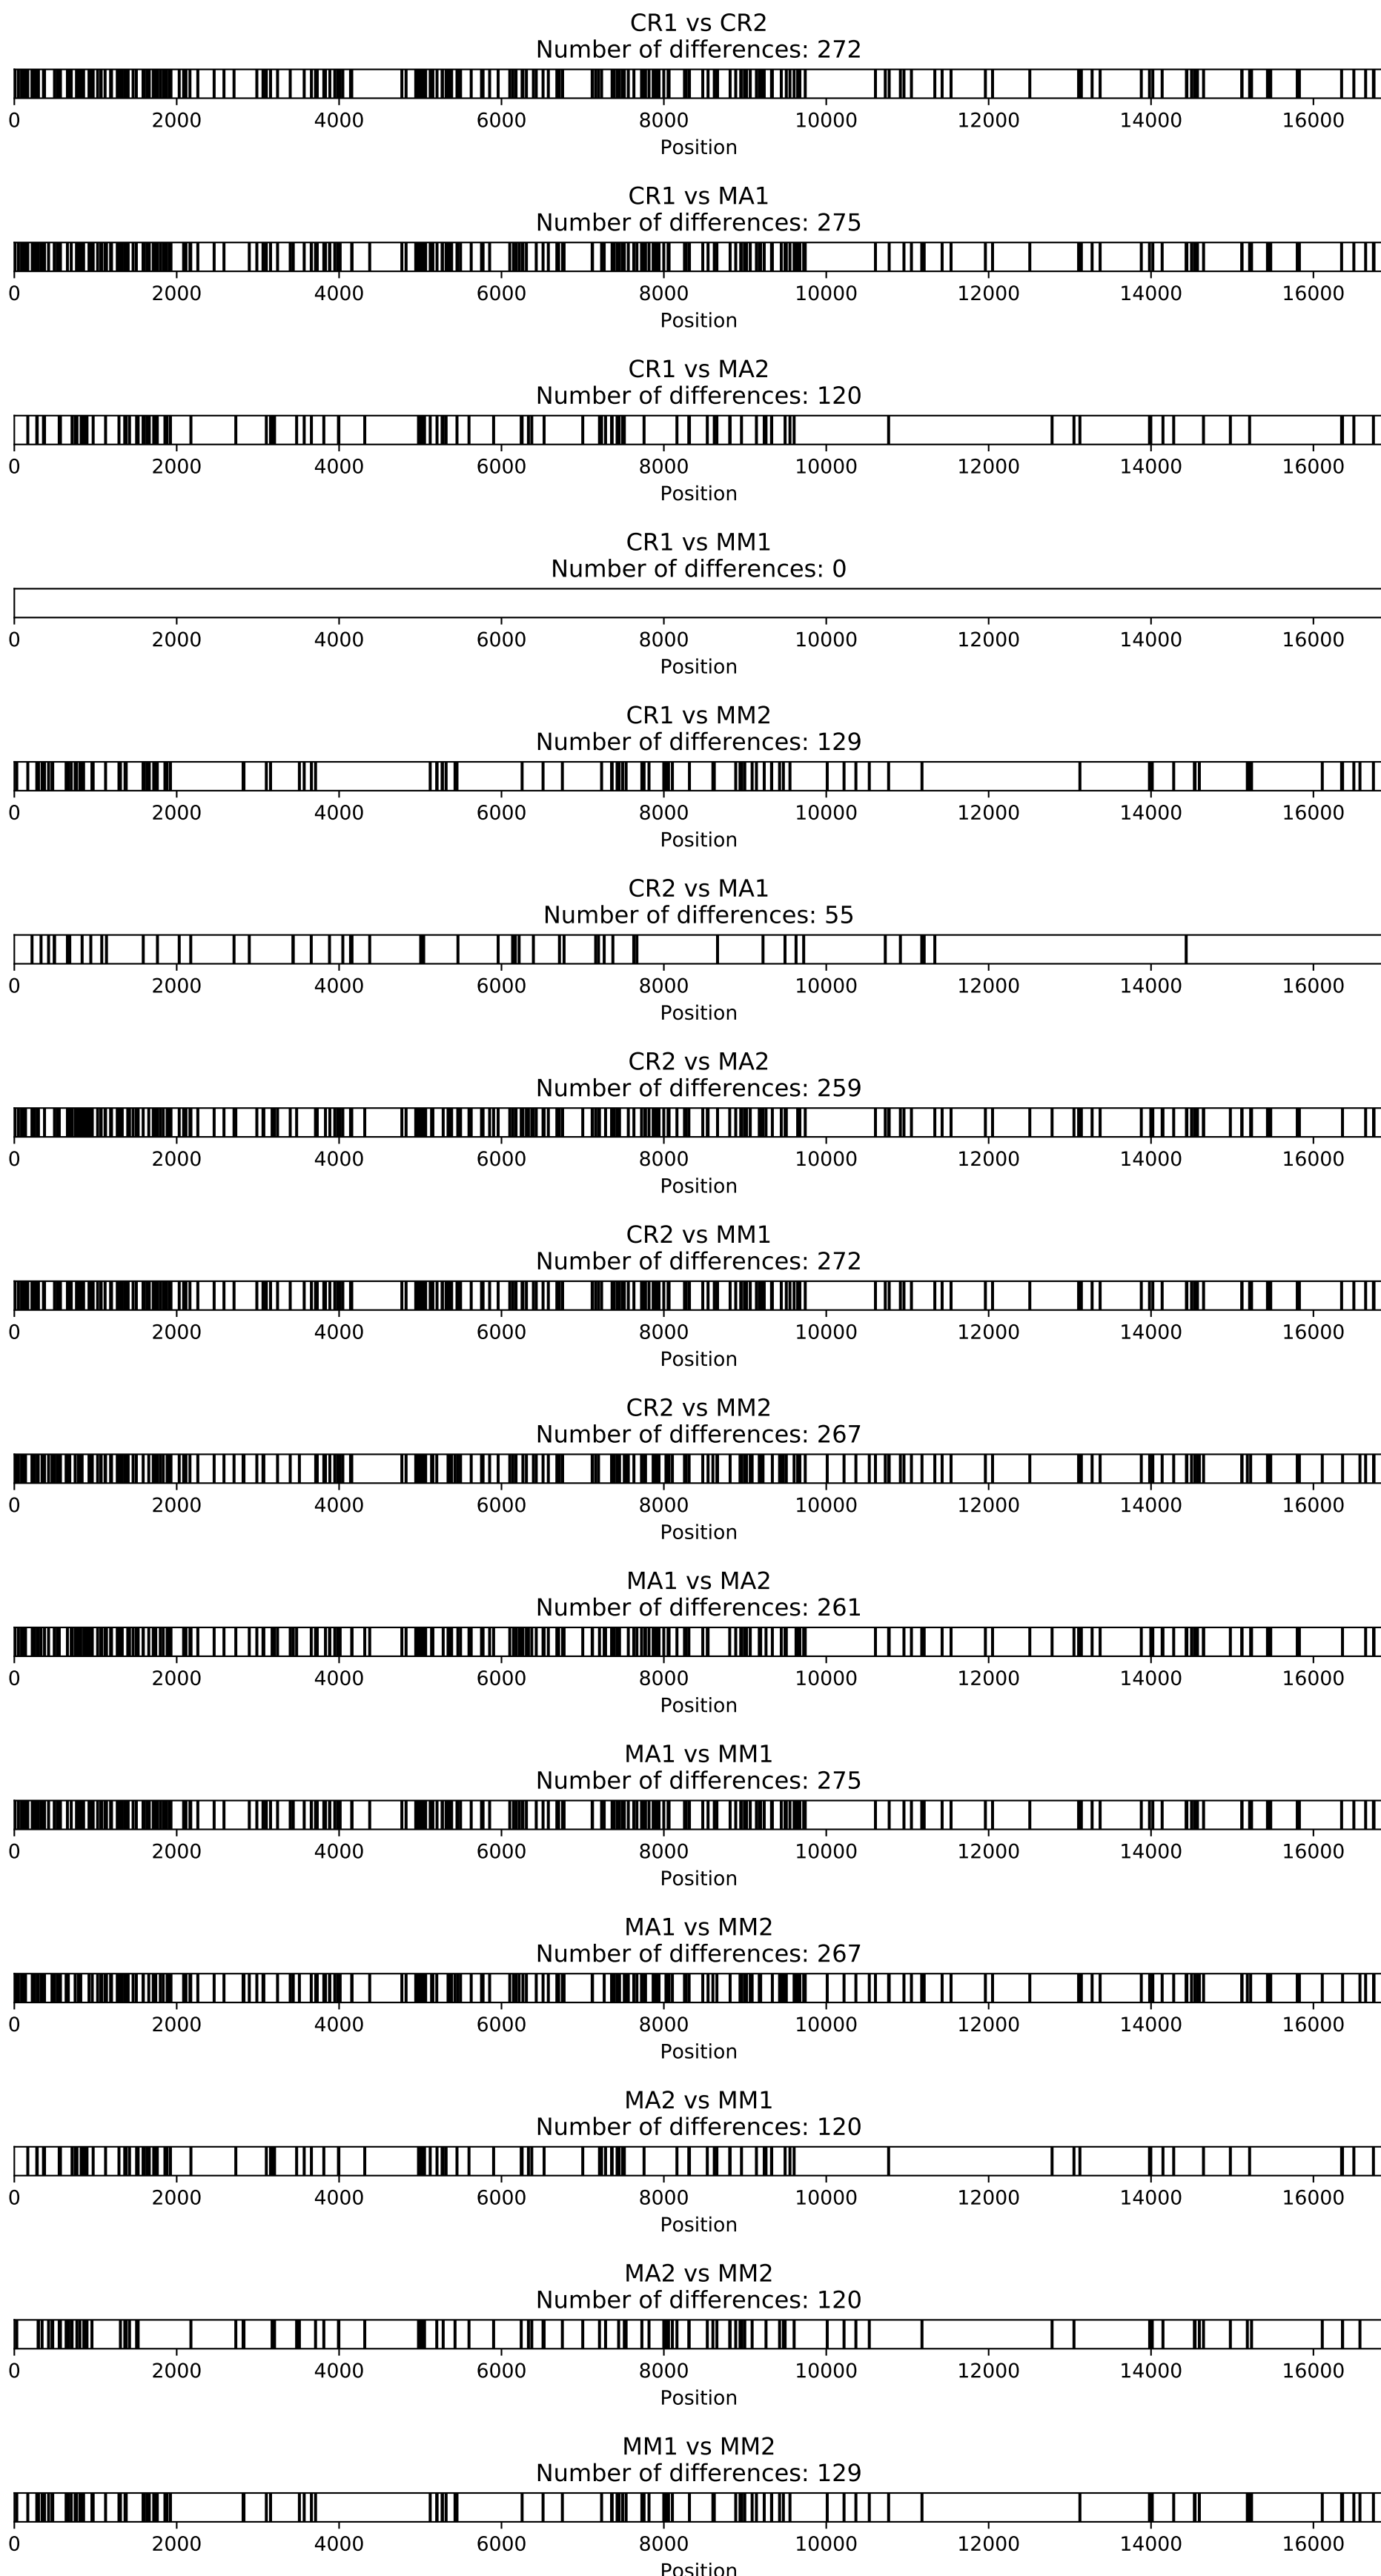

# Region: 183

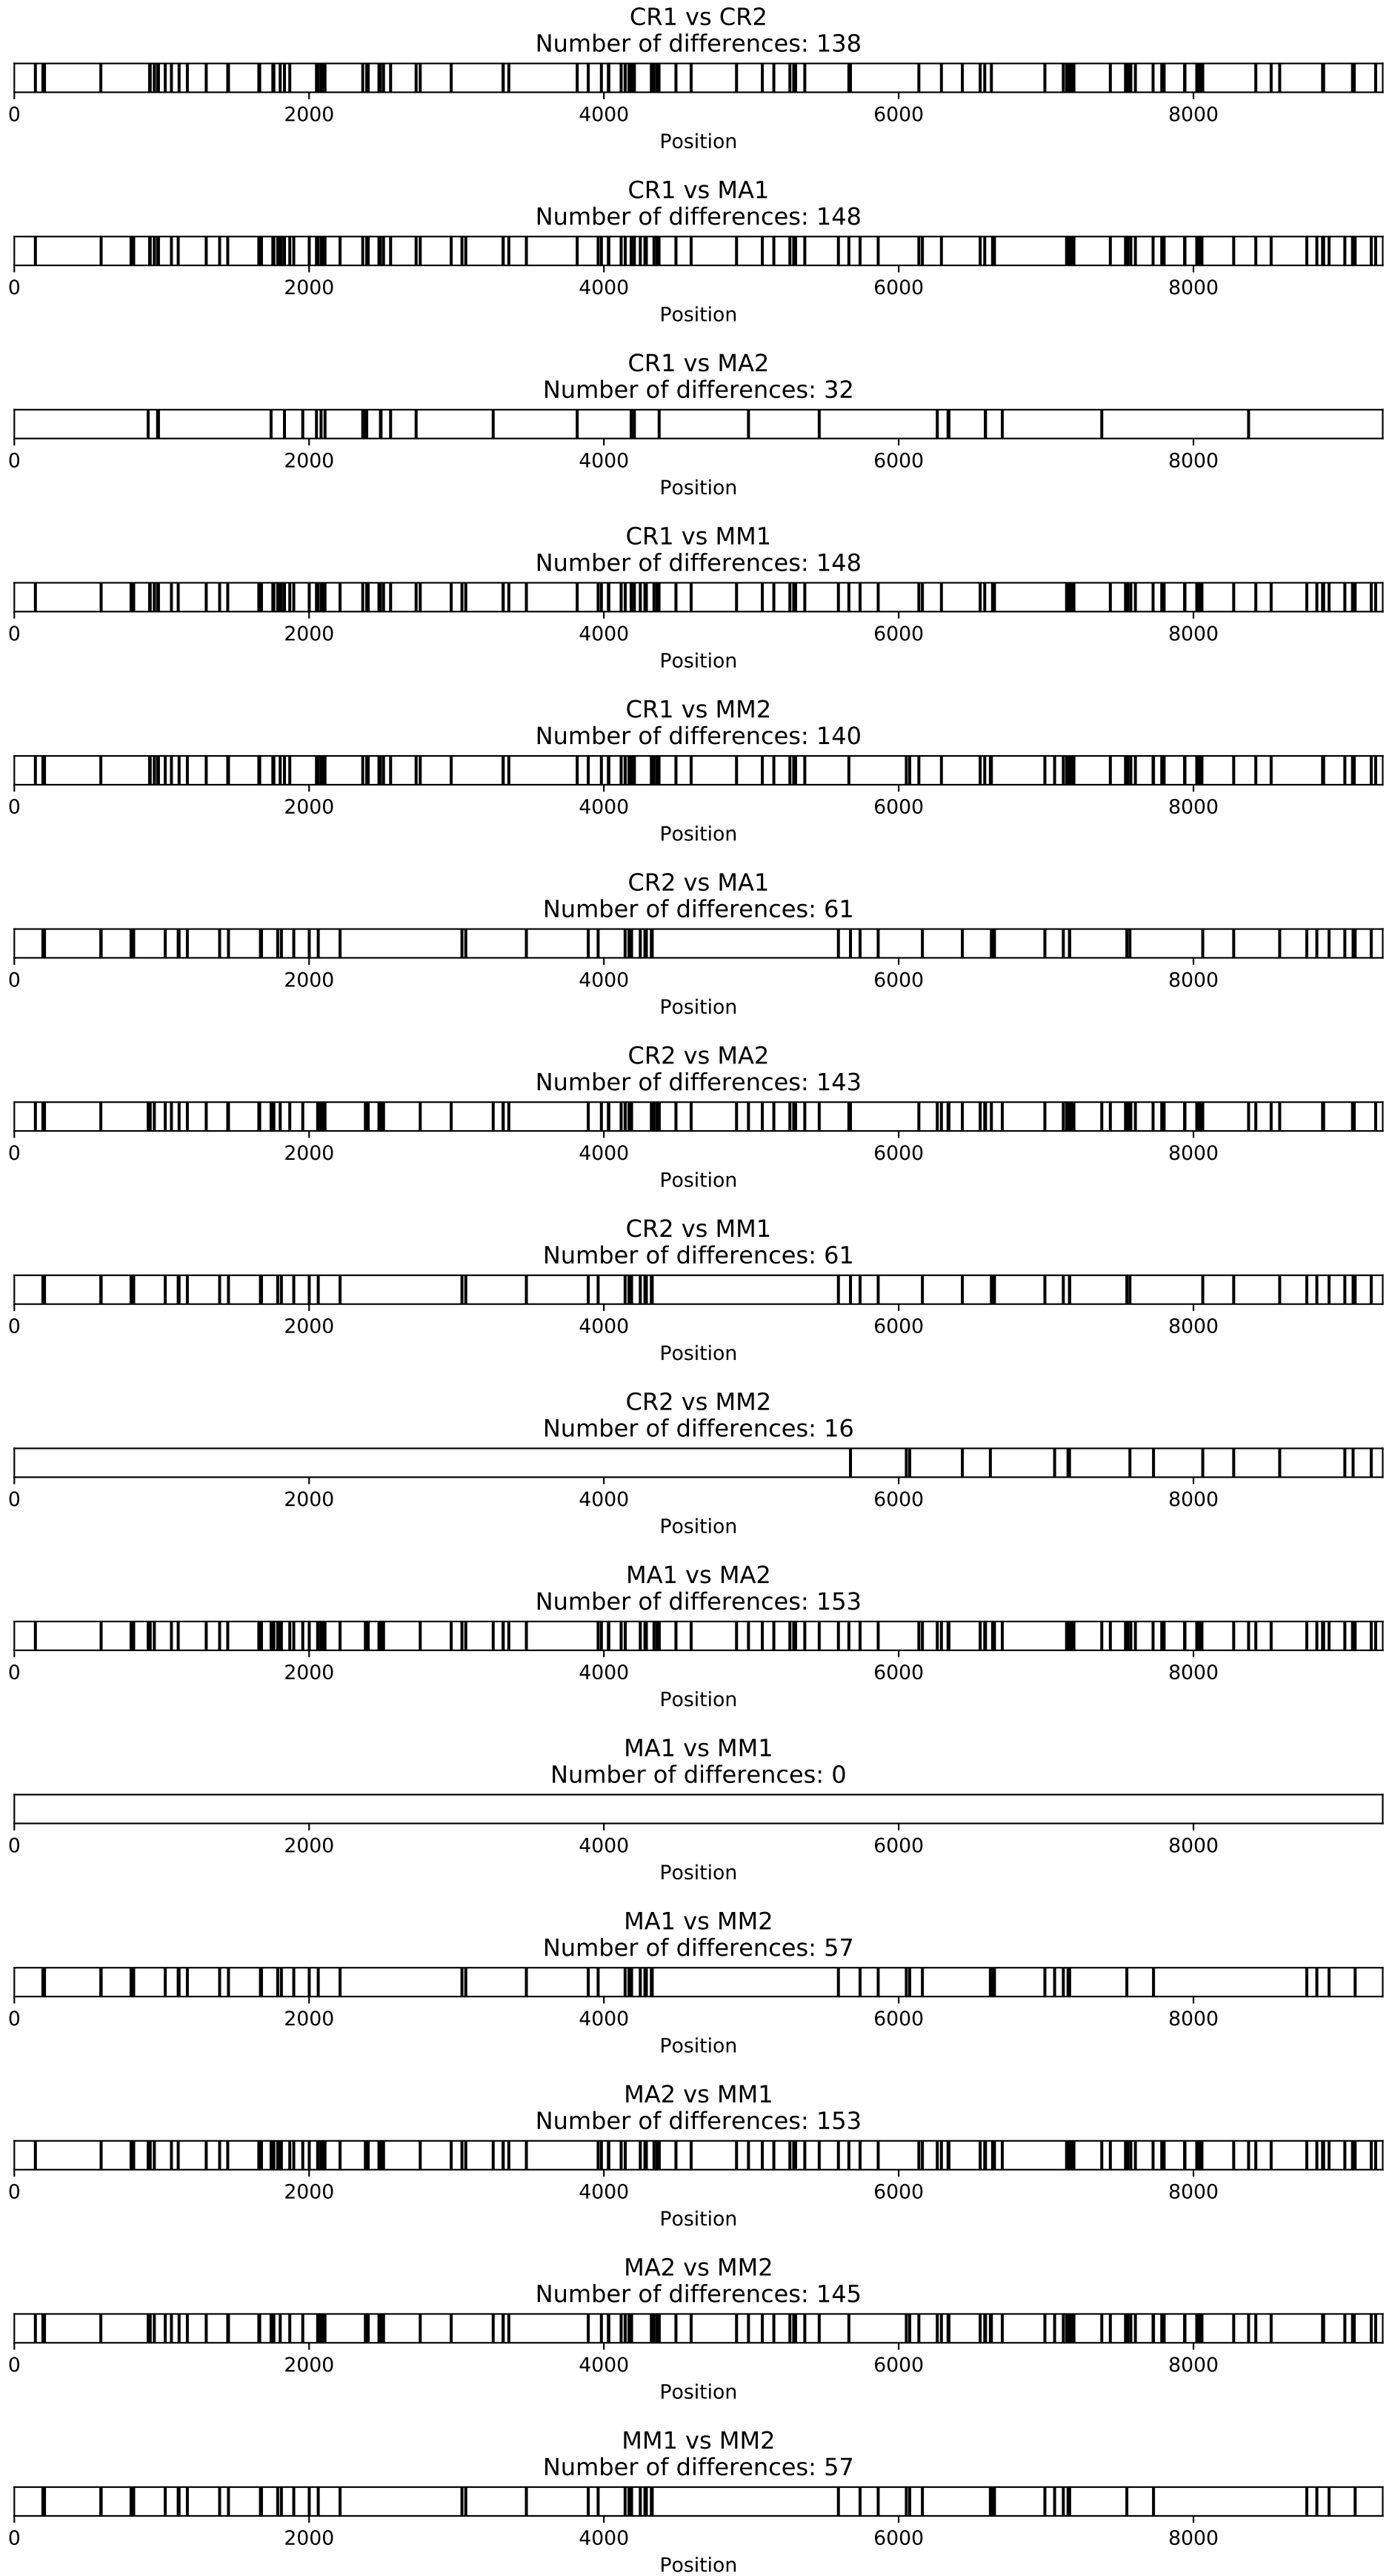

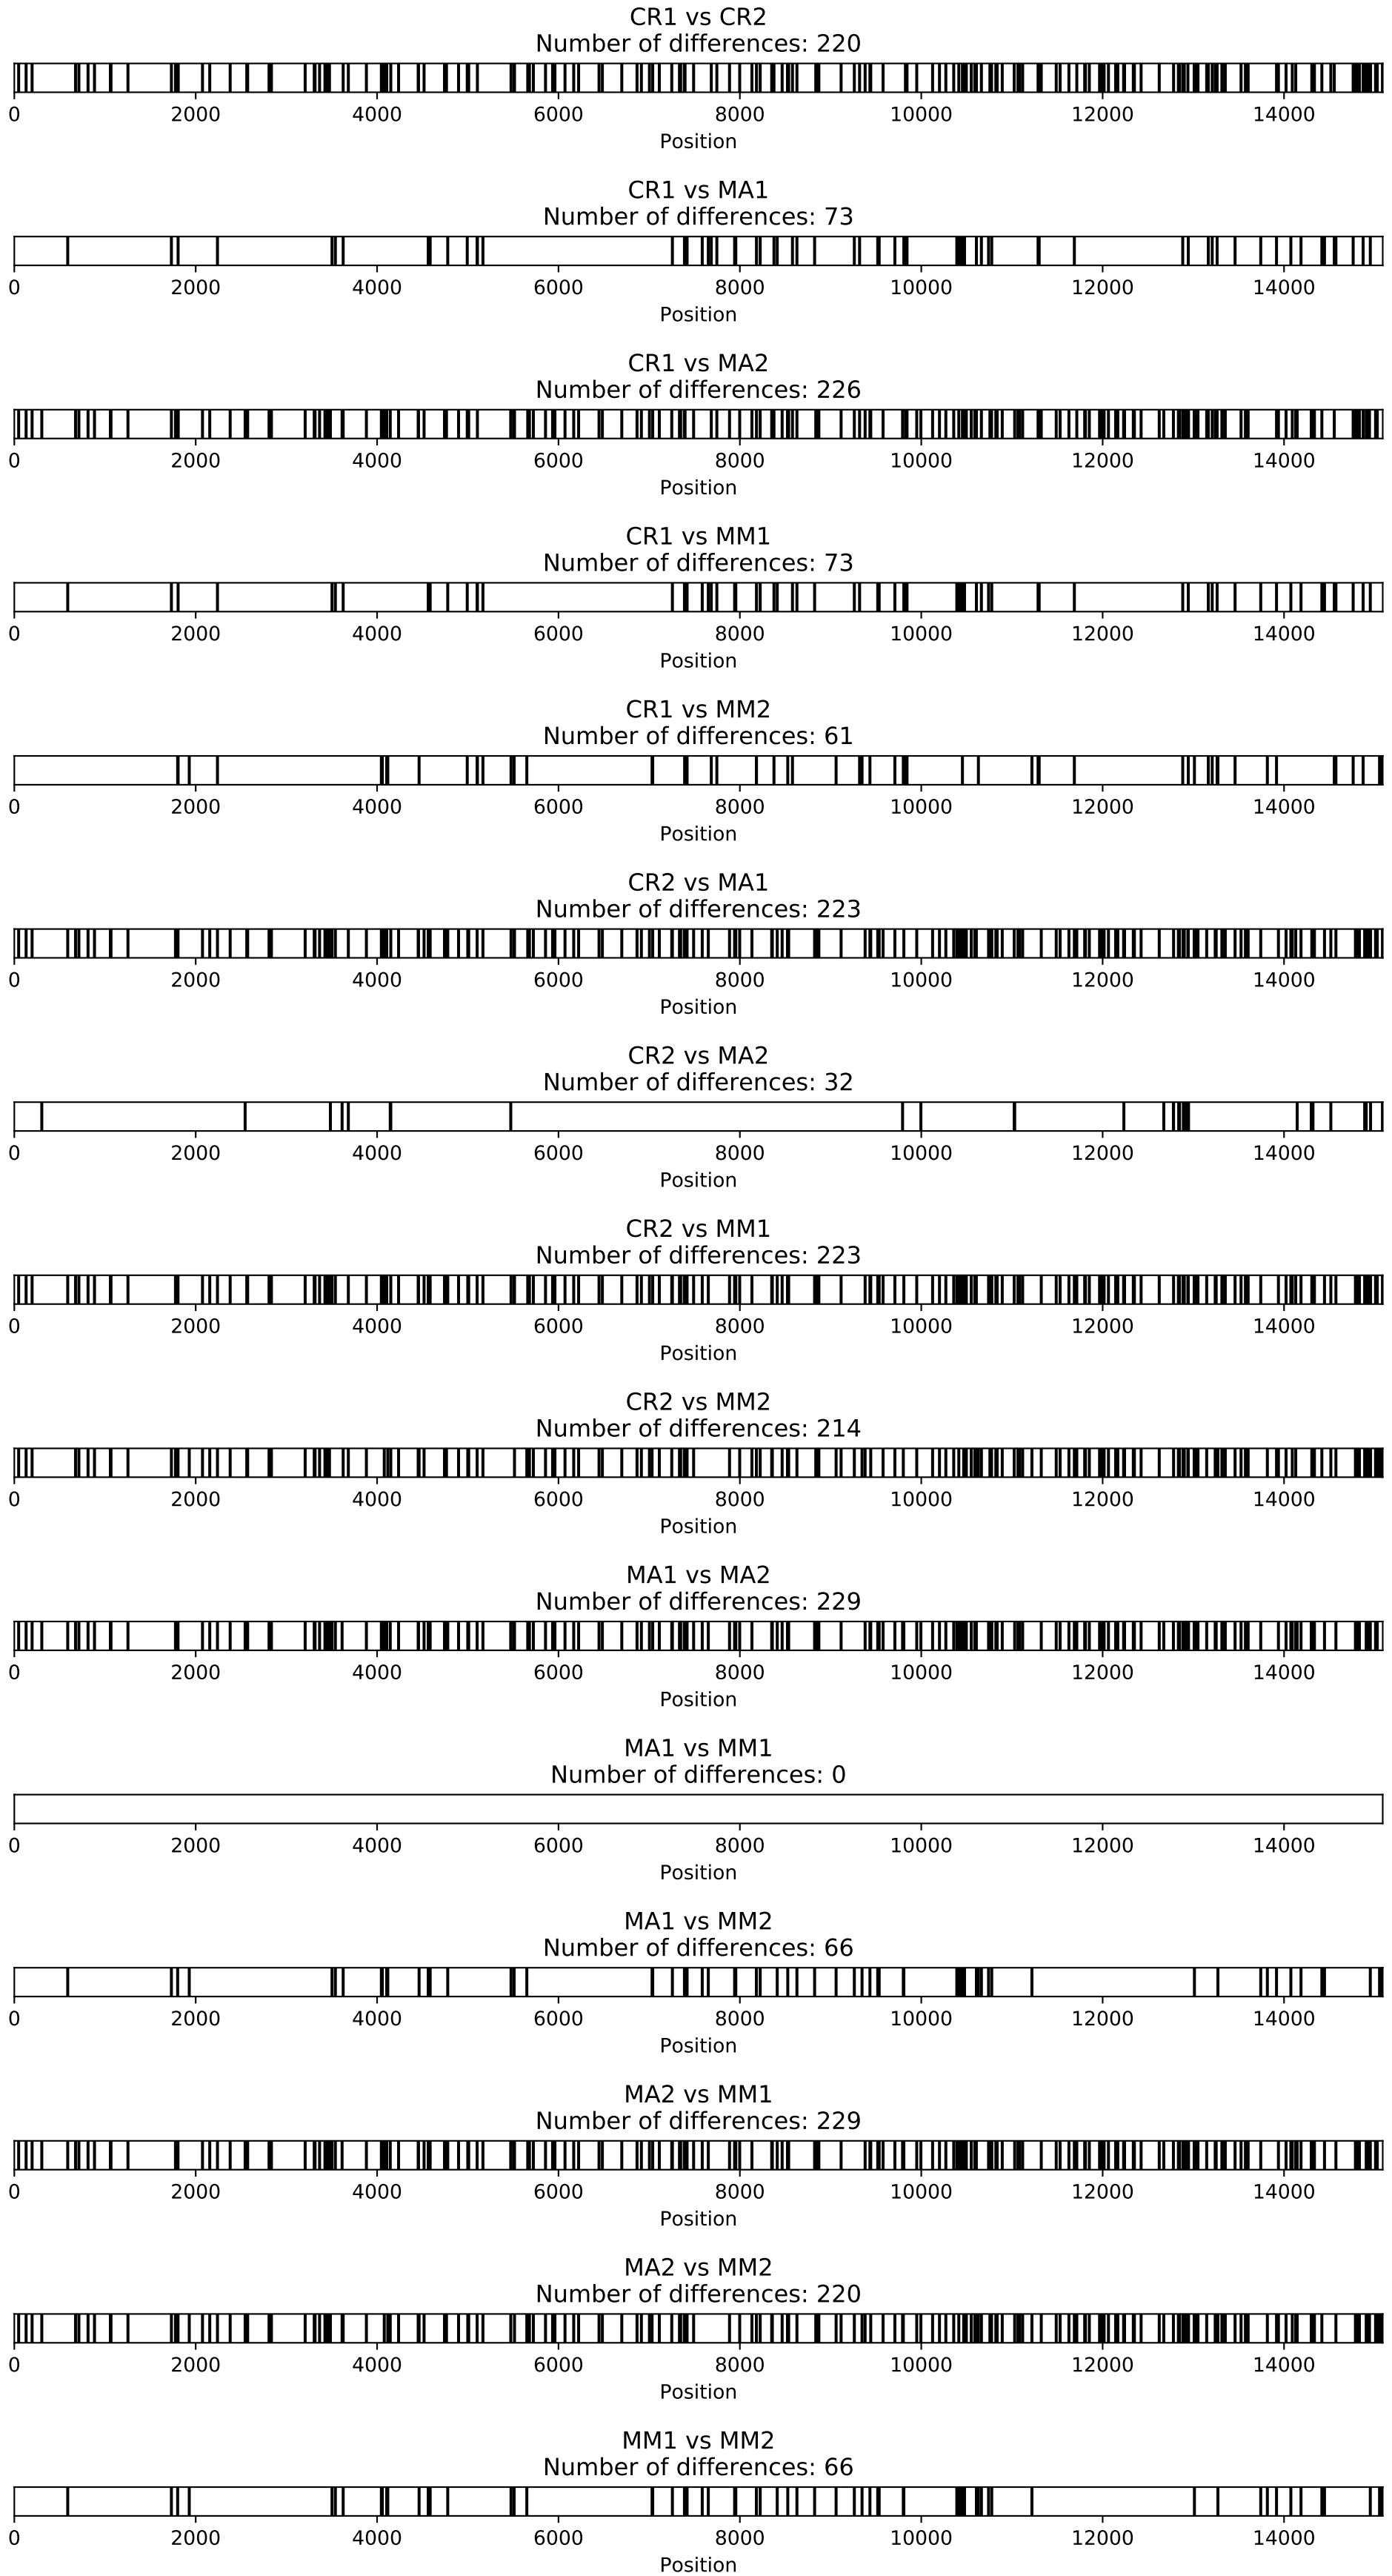

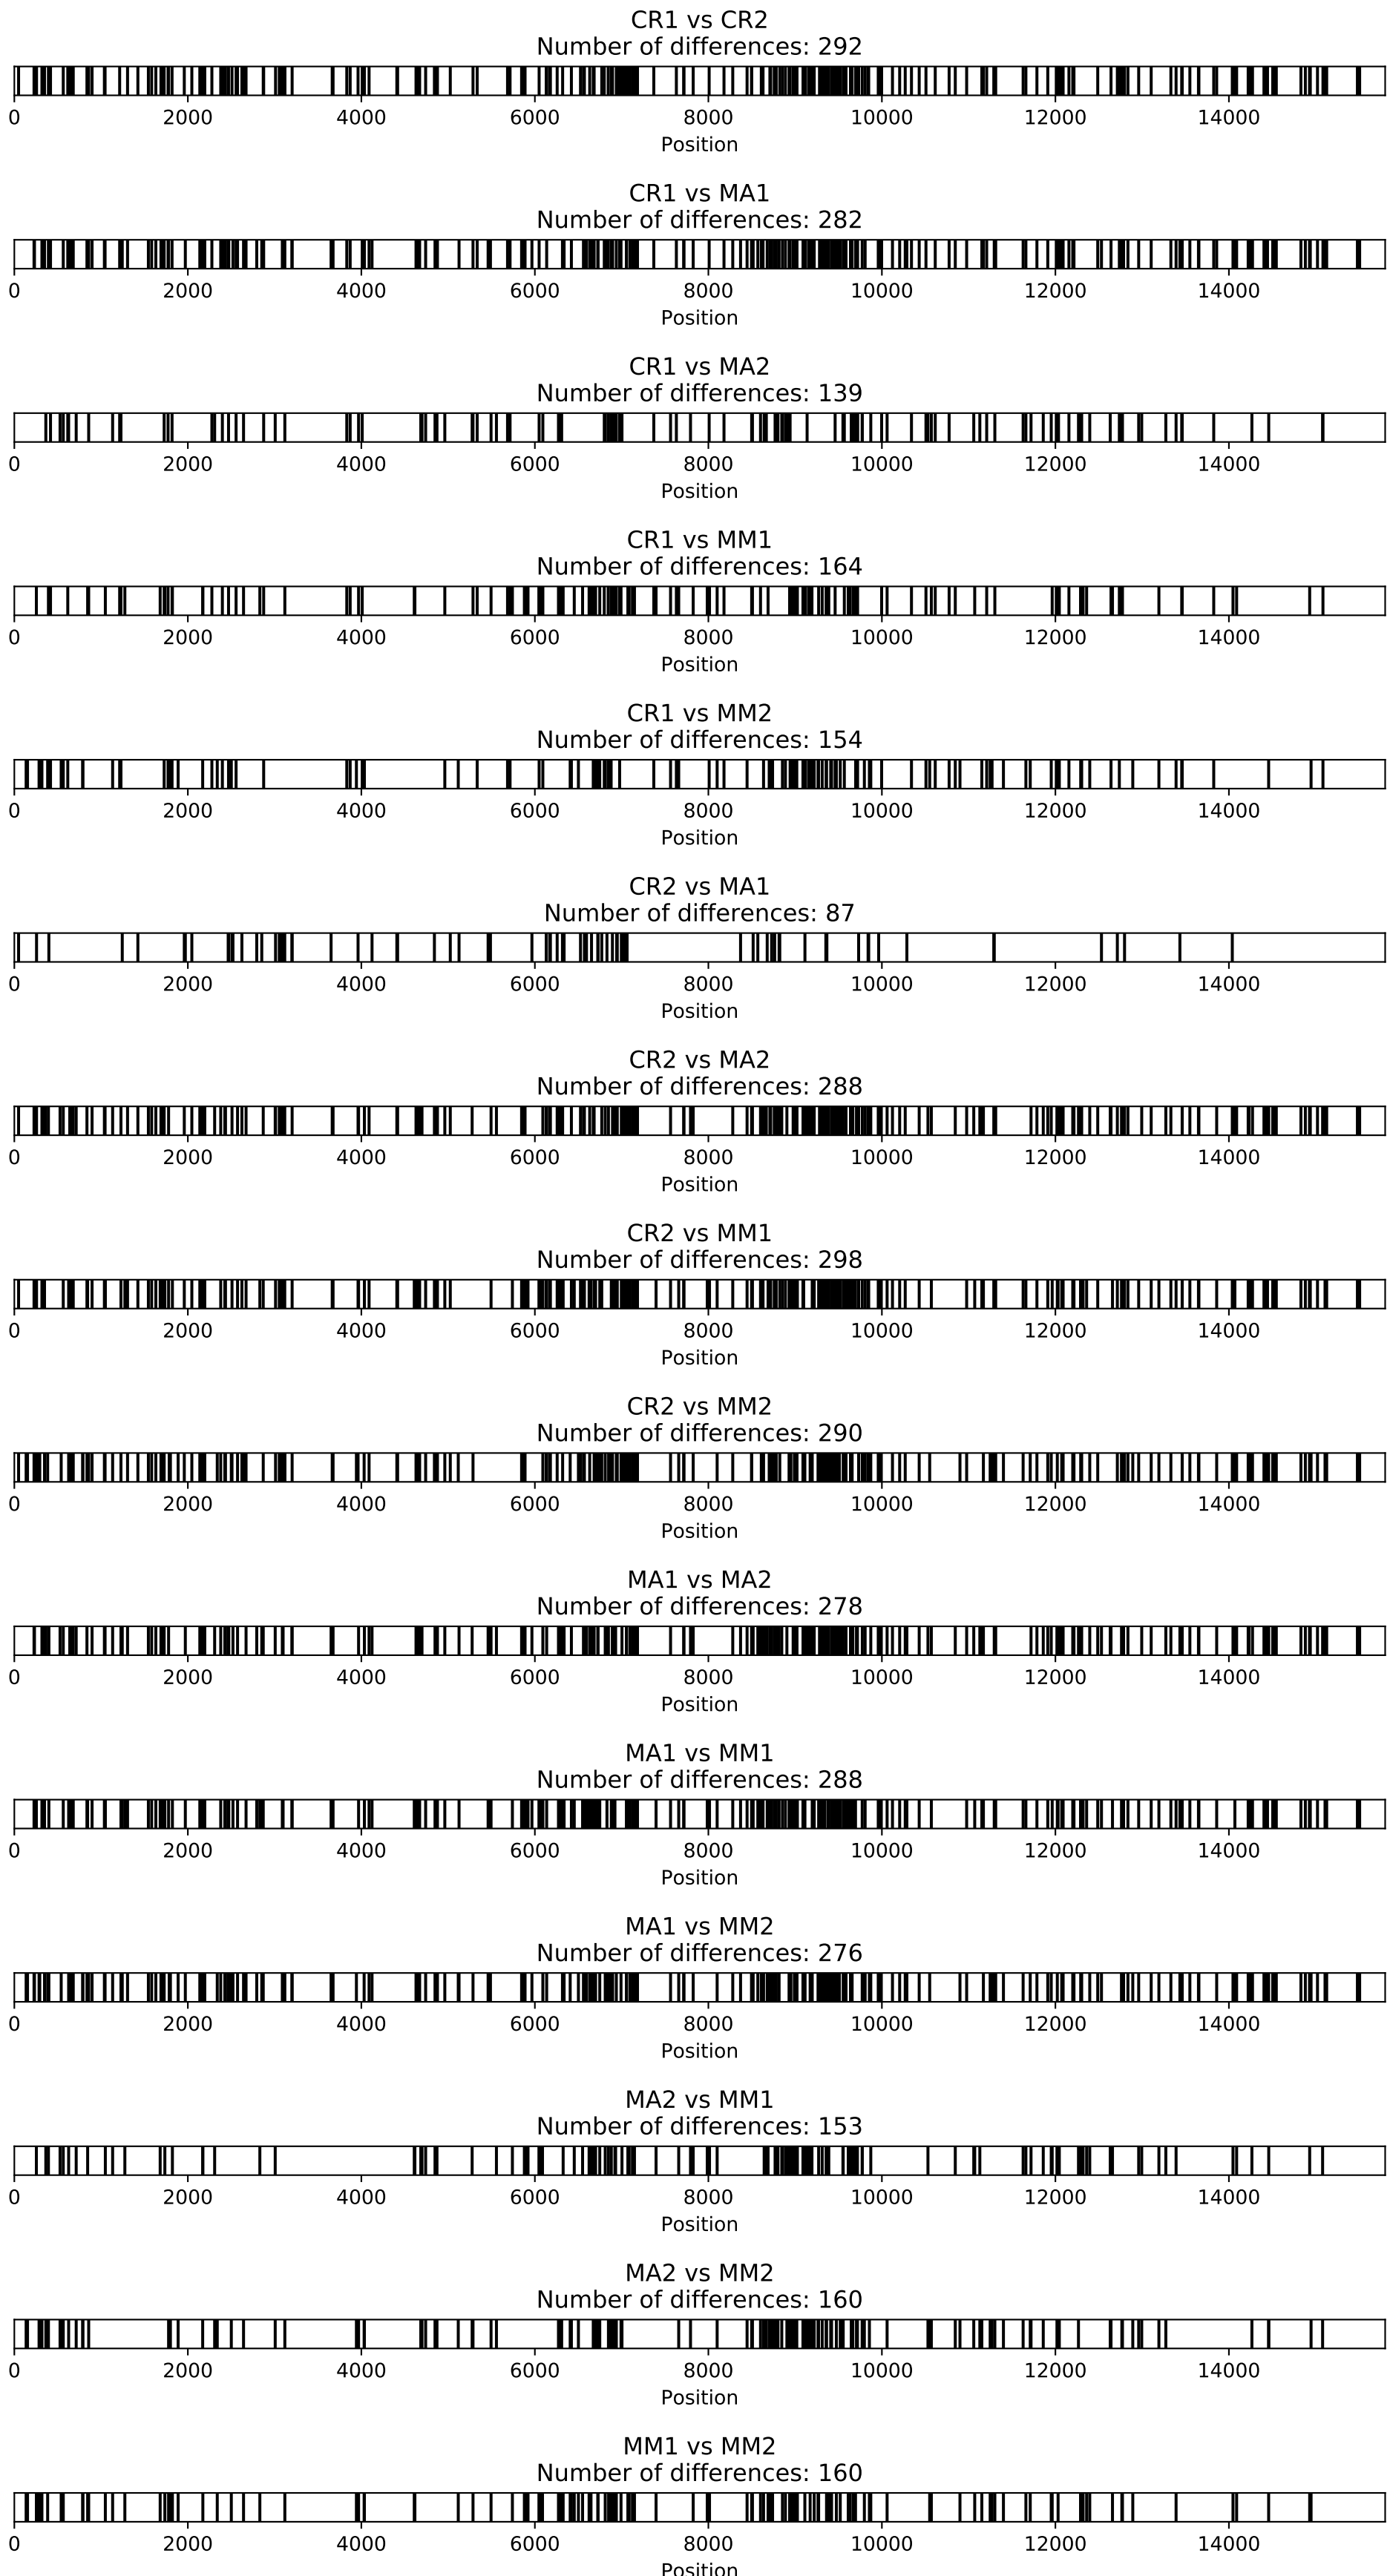

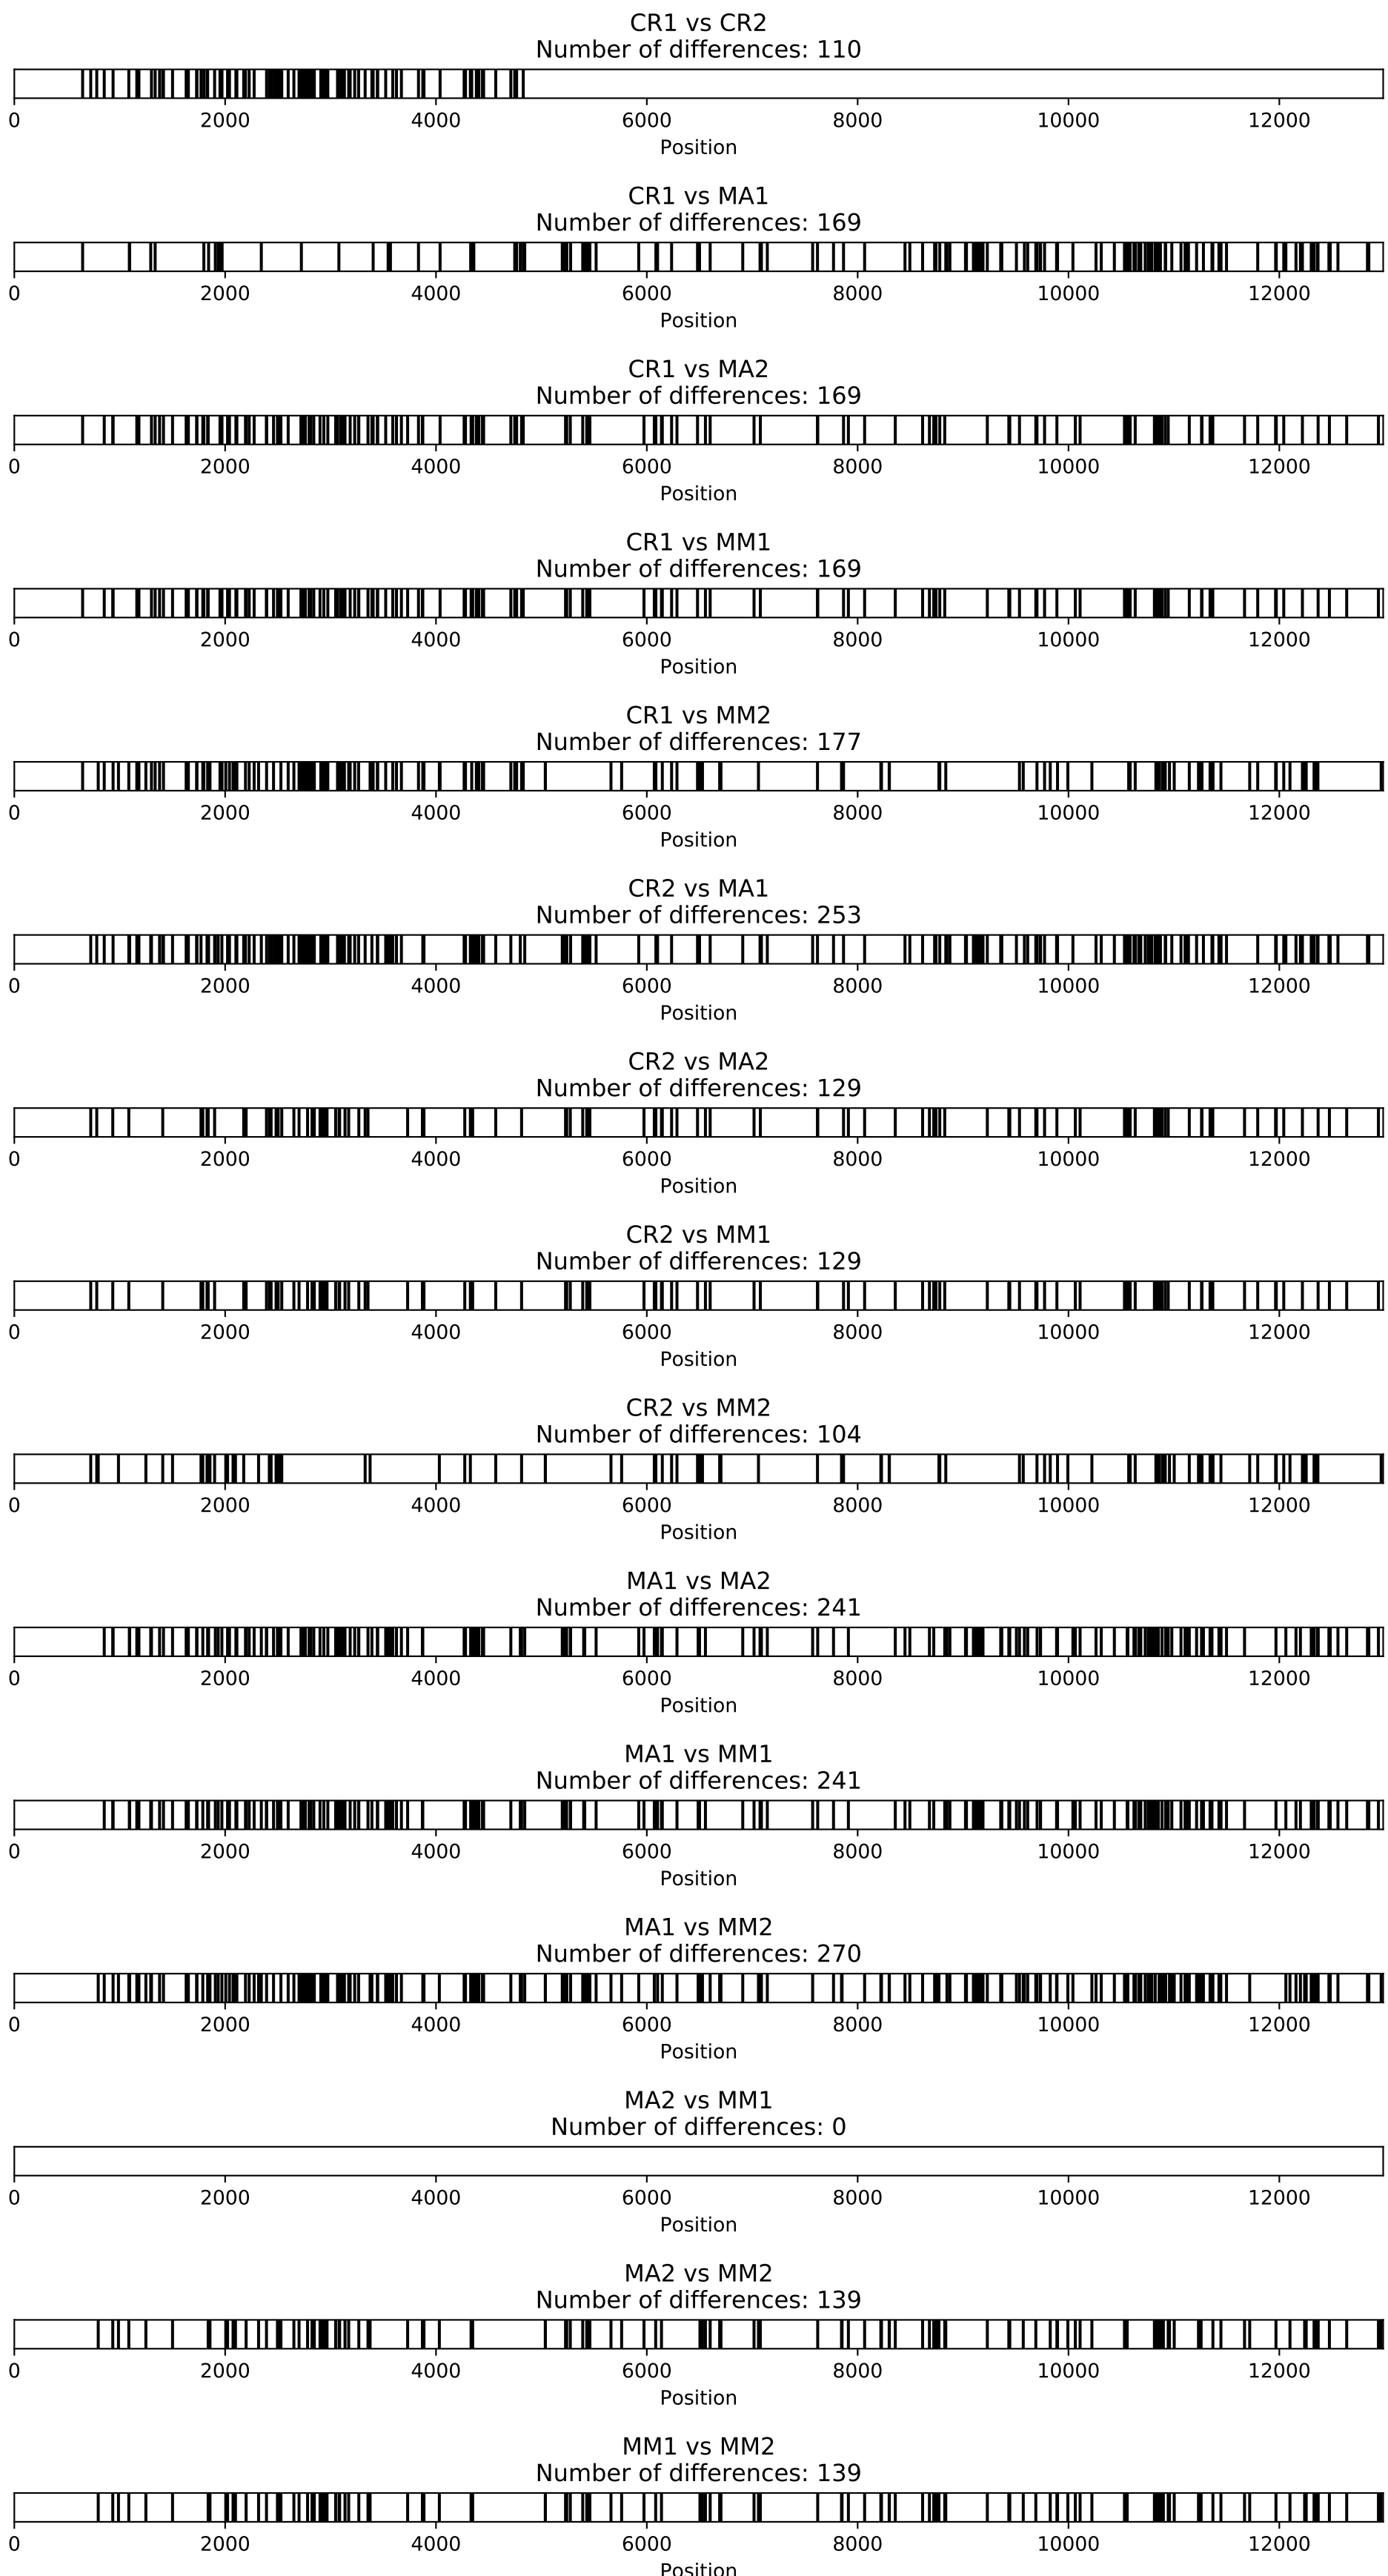

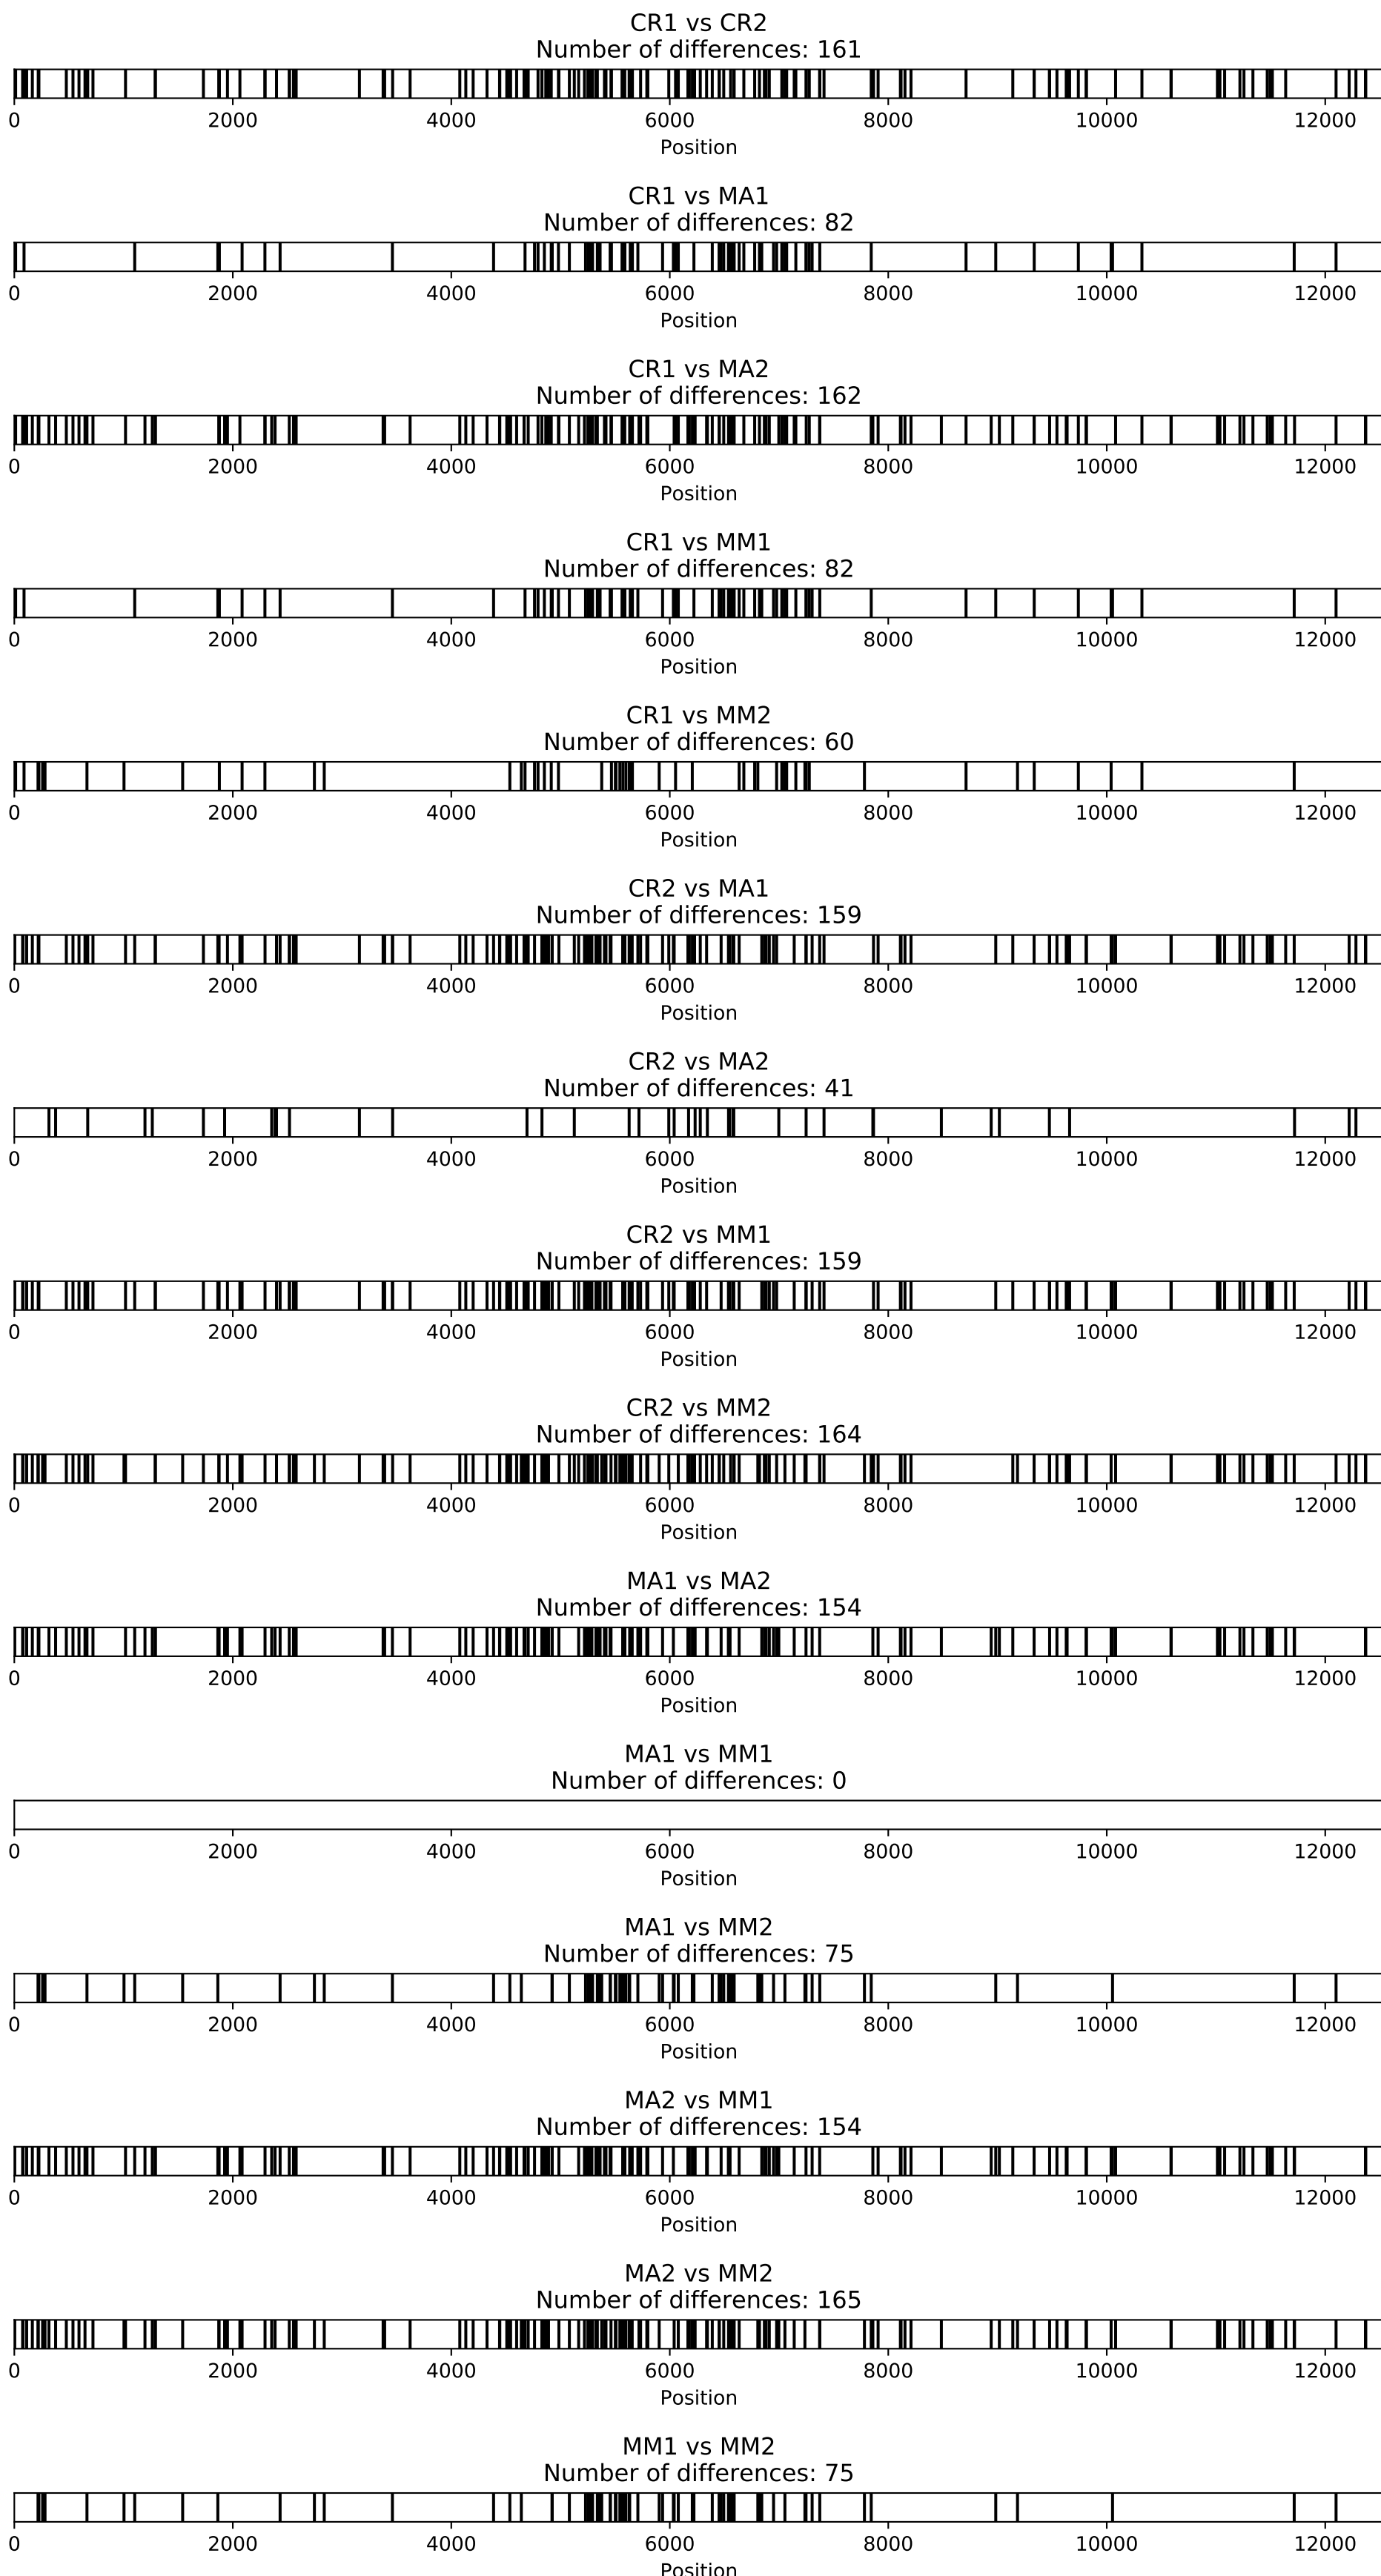

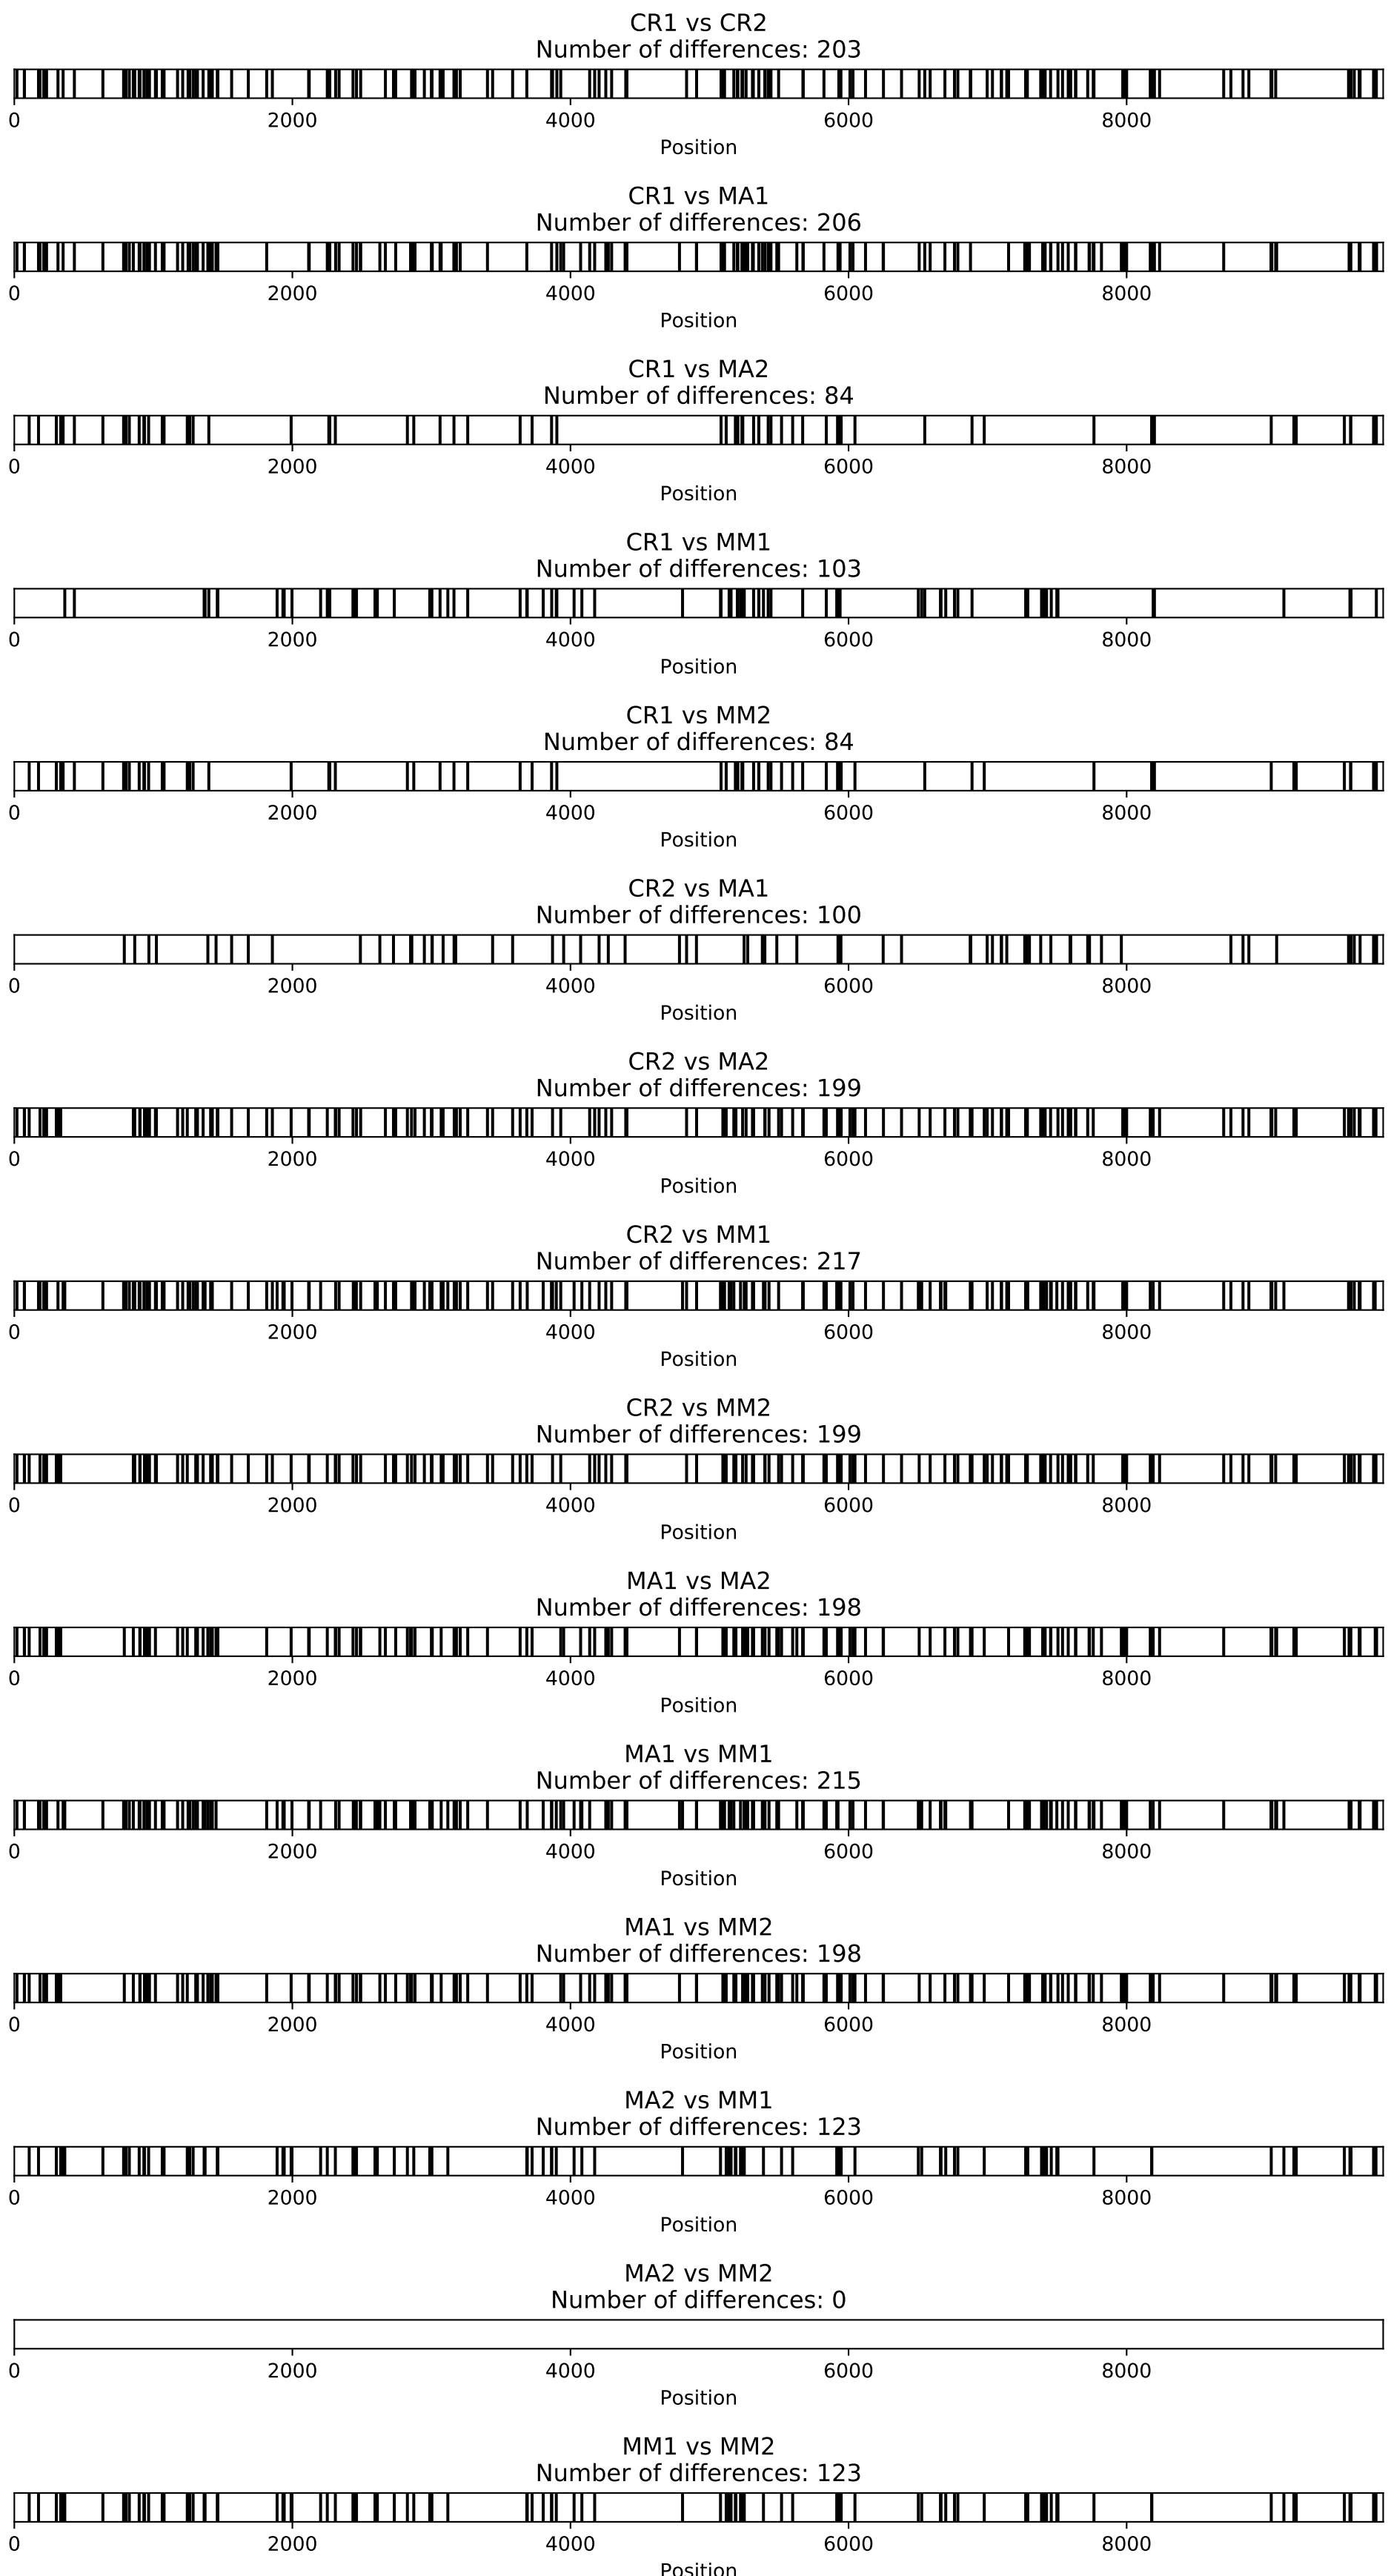



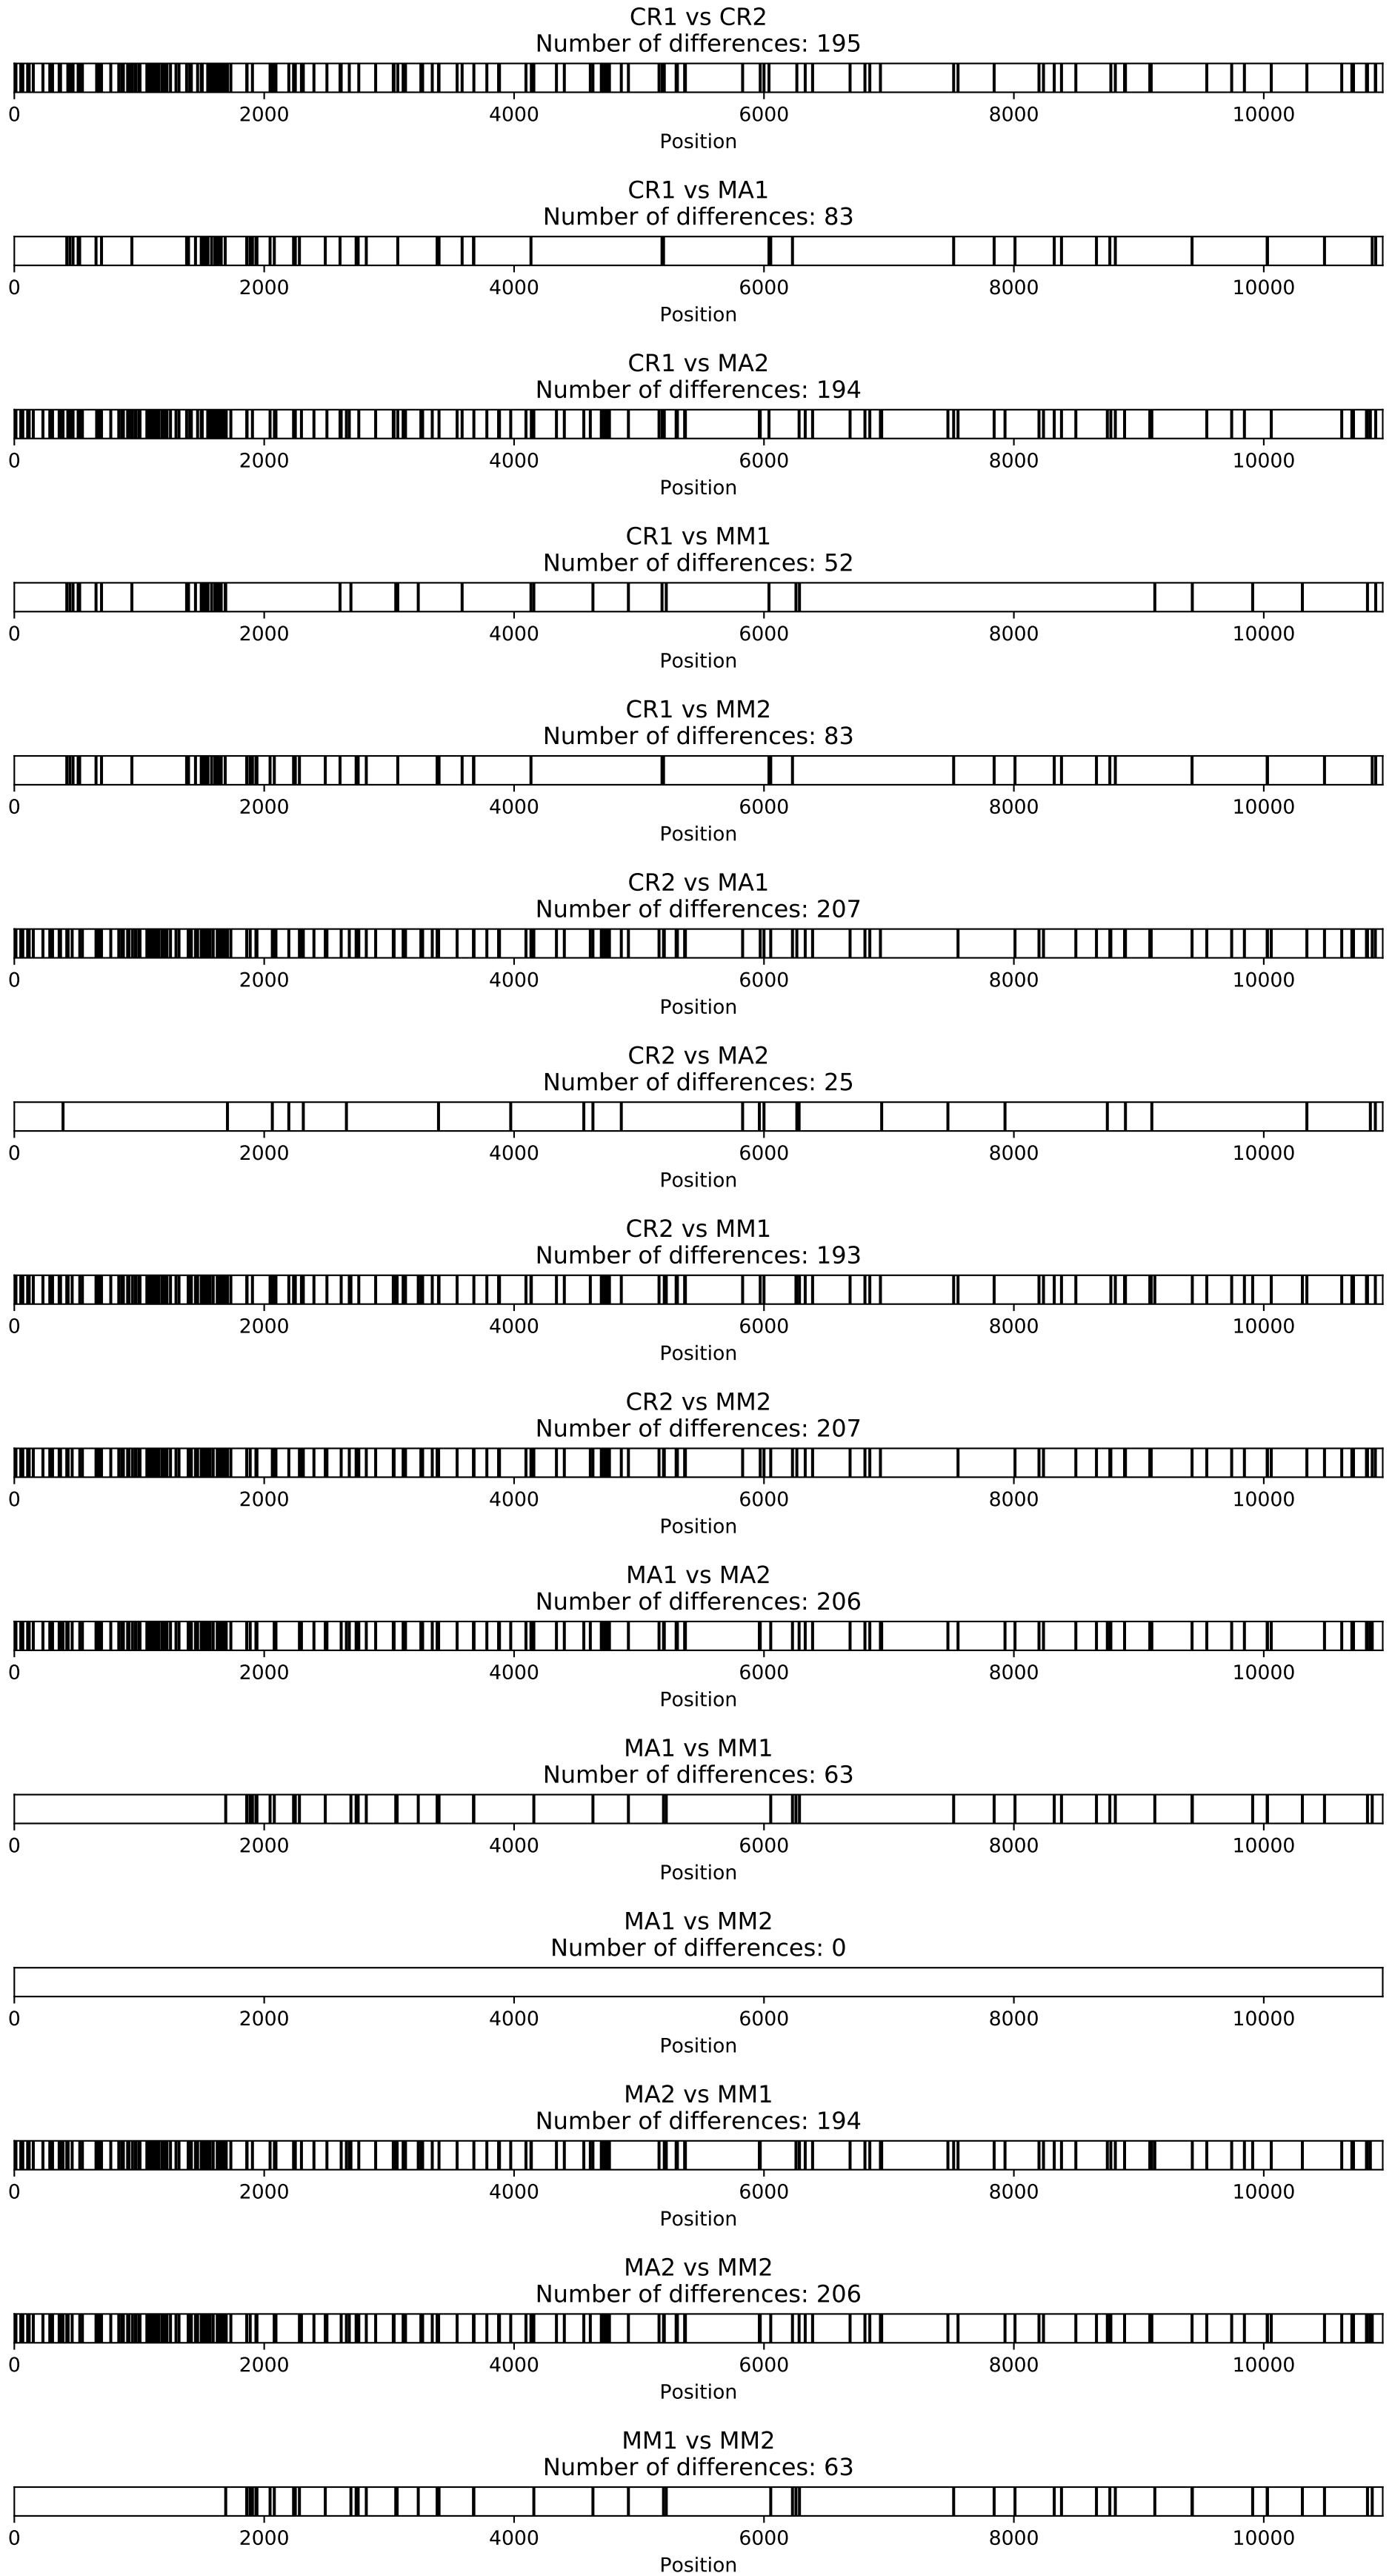

# Region: 199

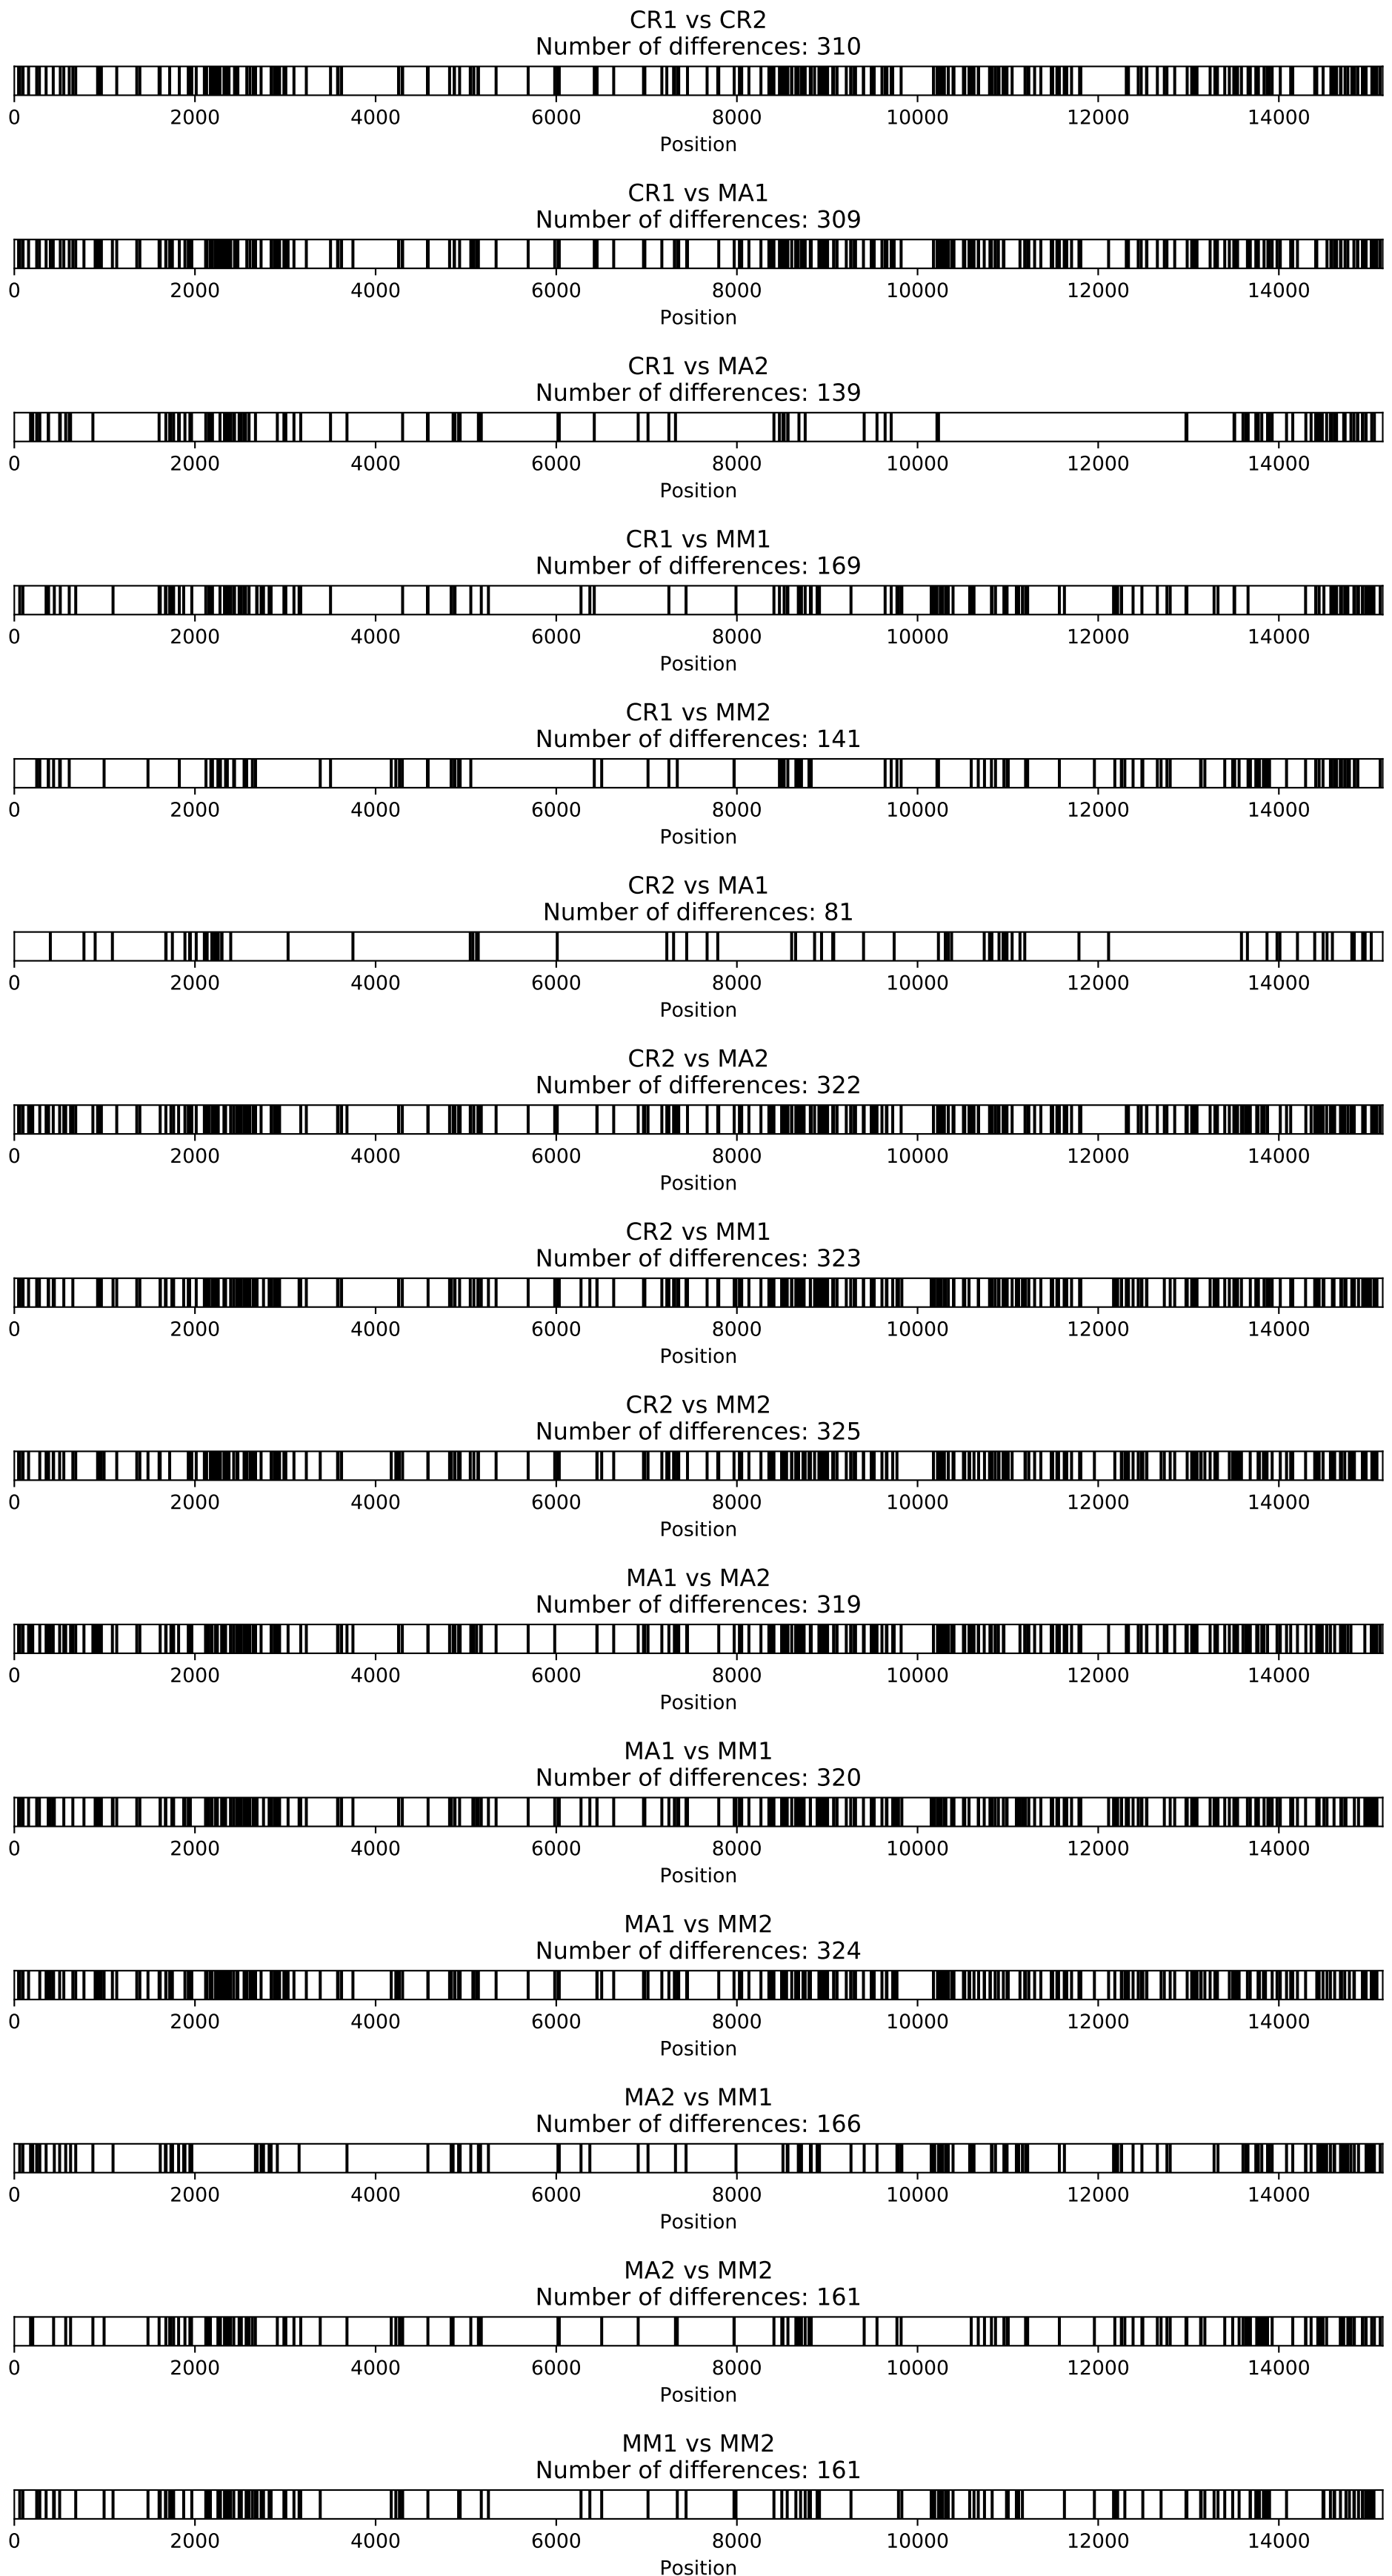

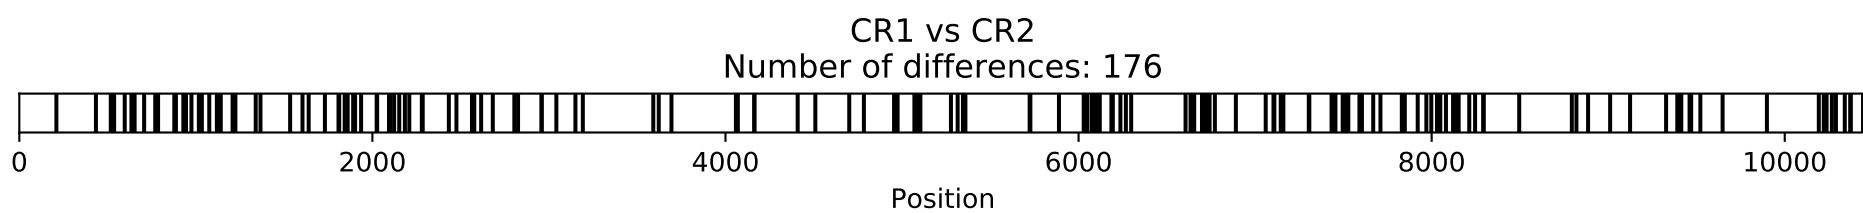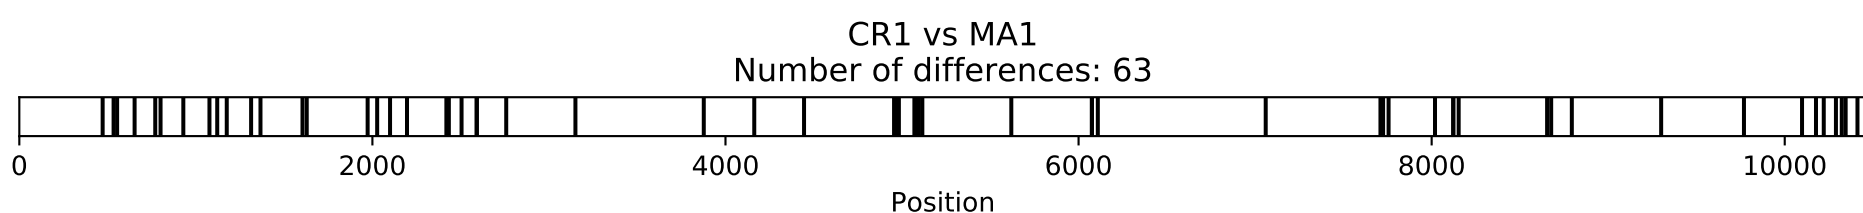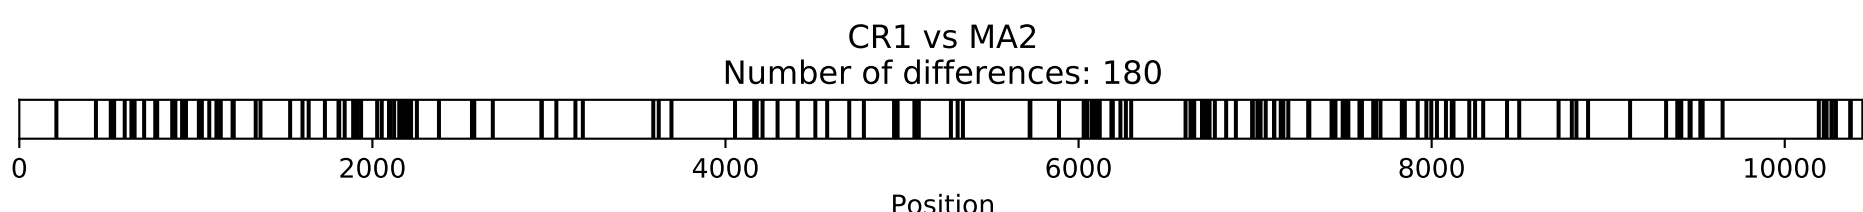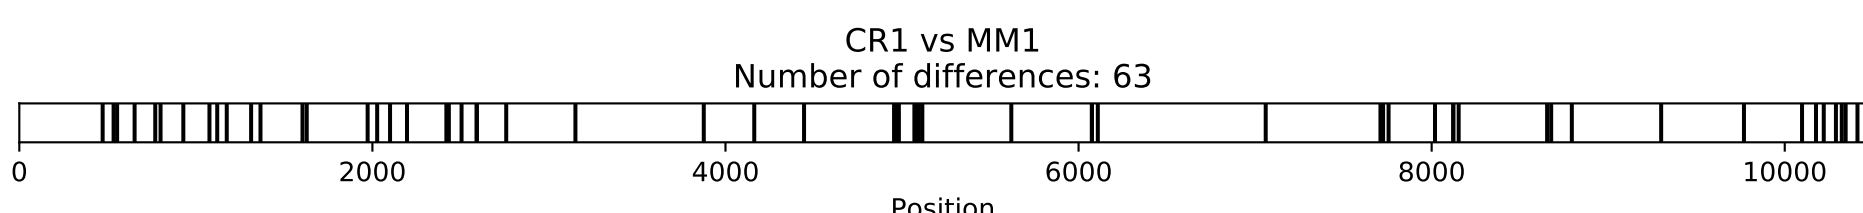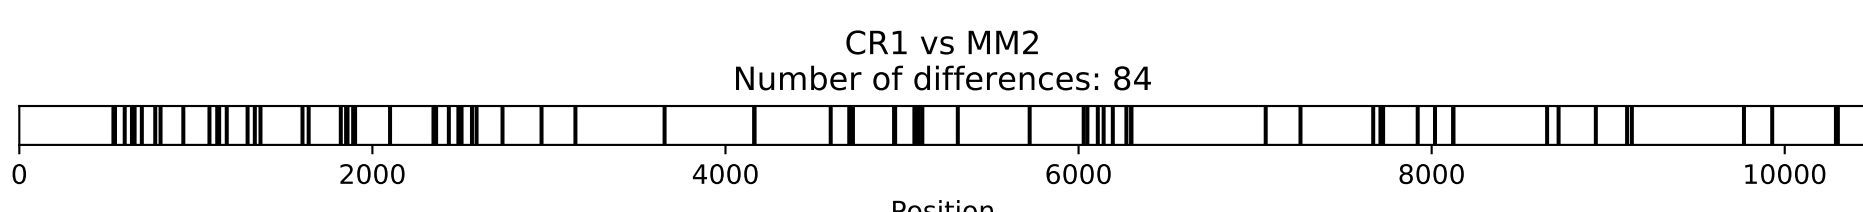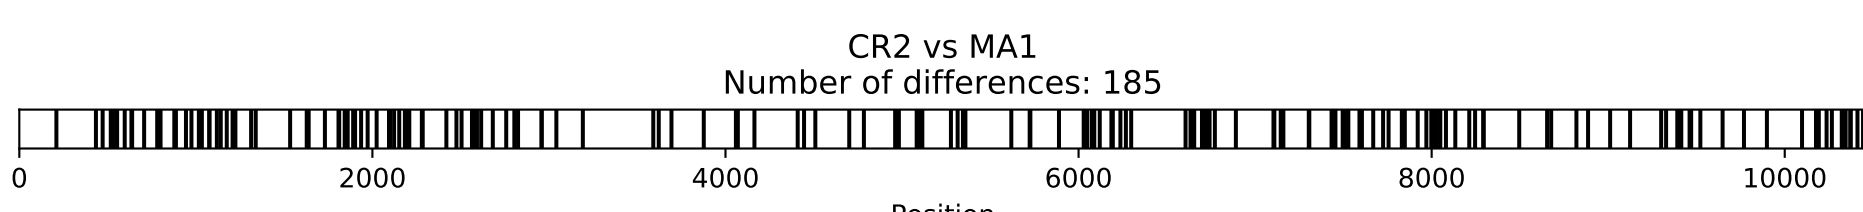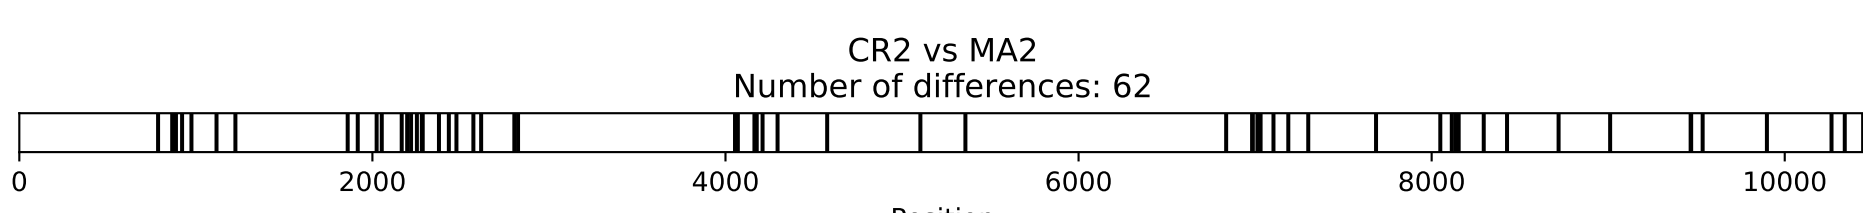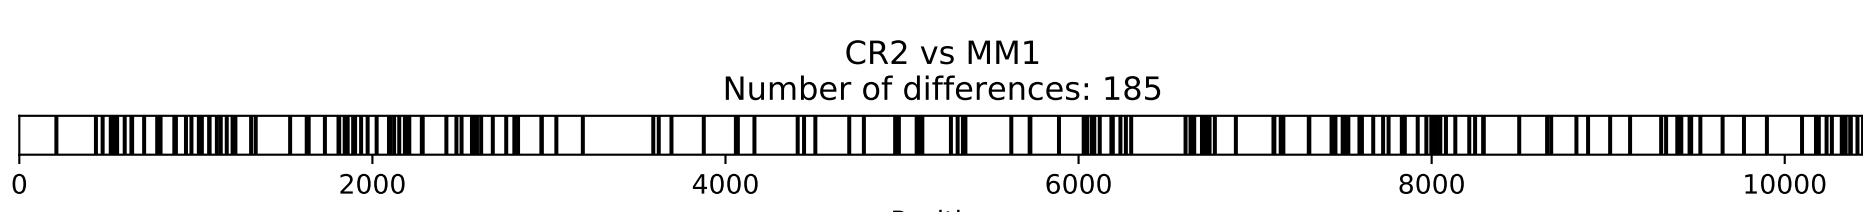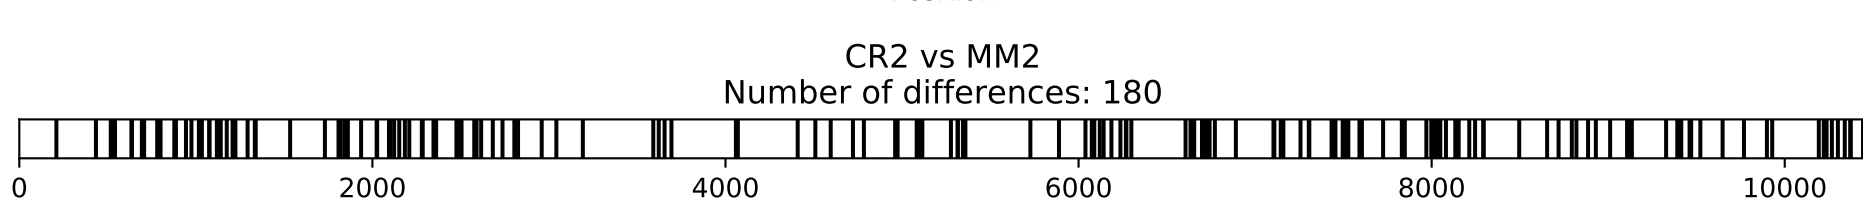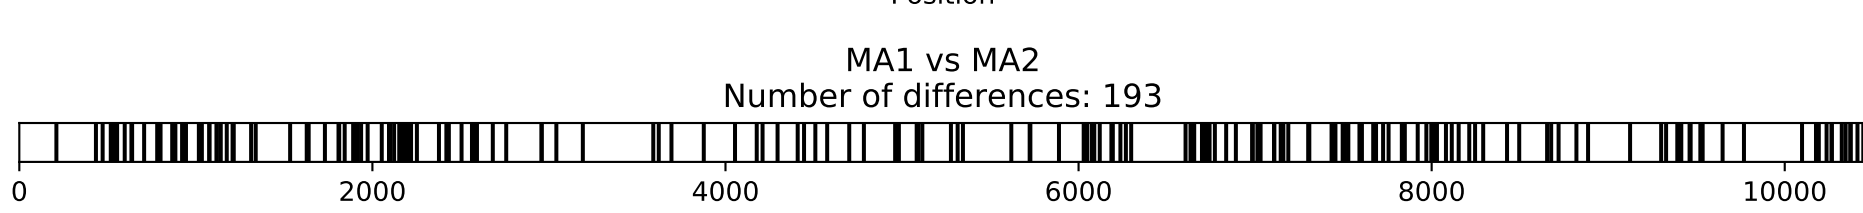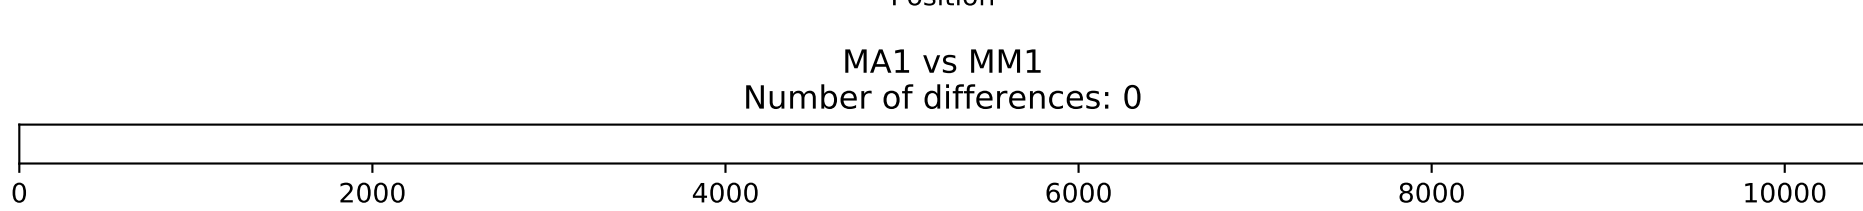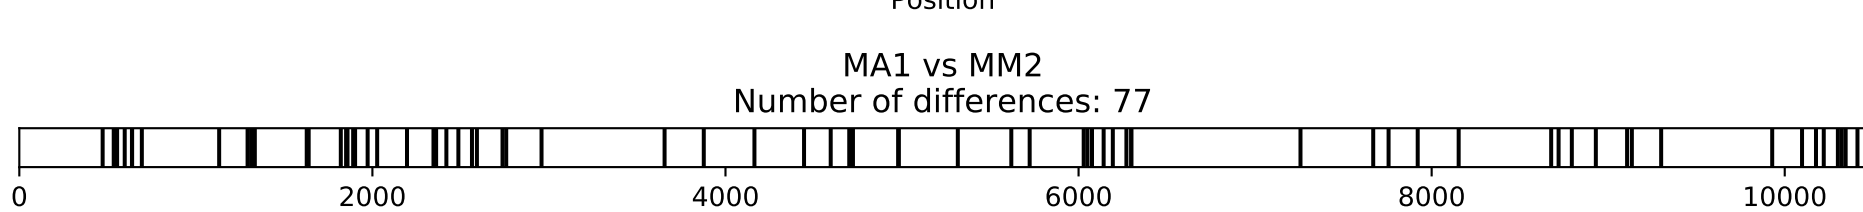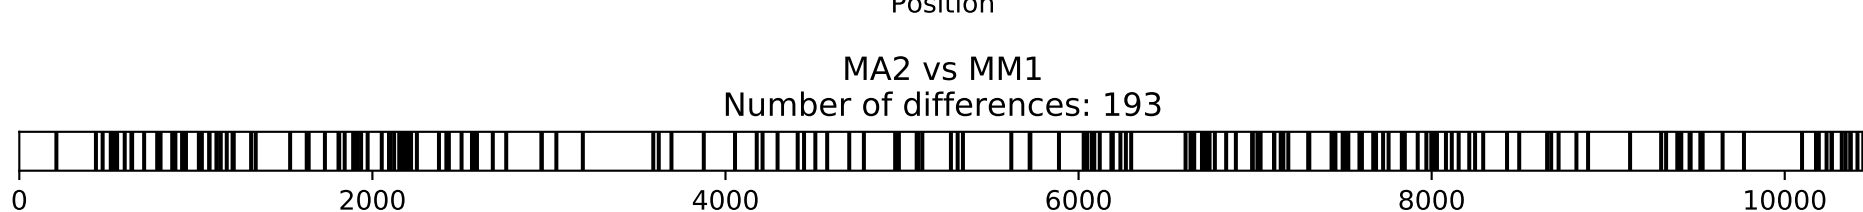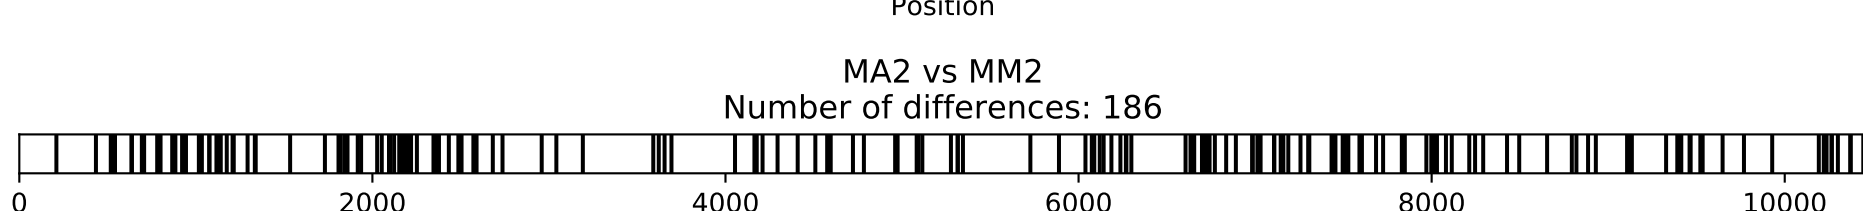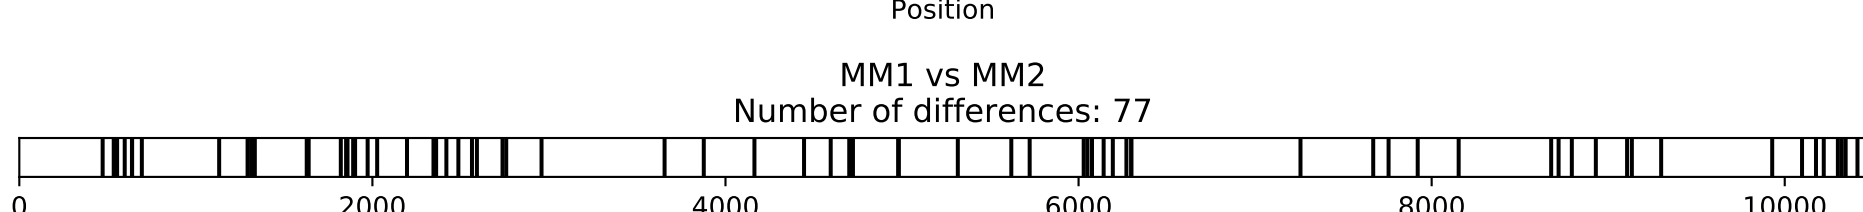

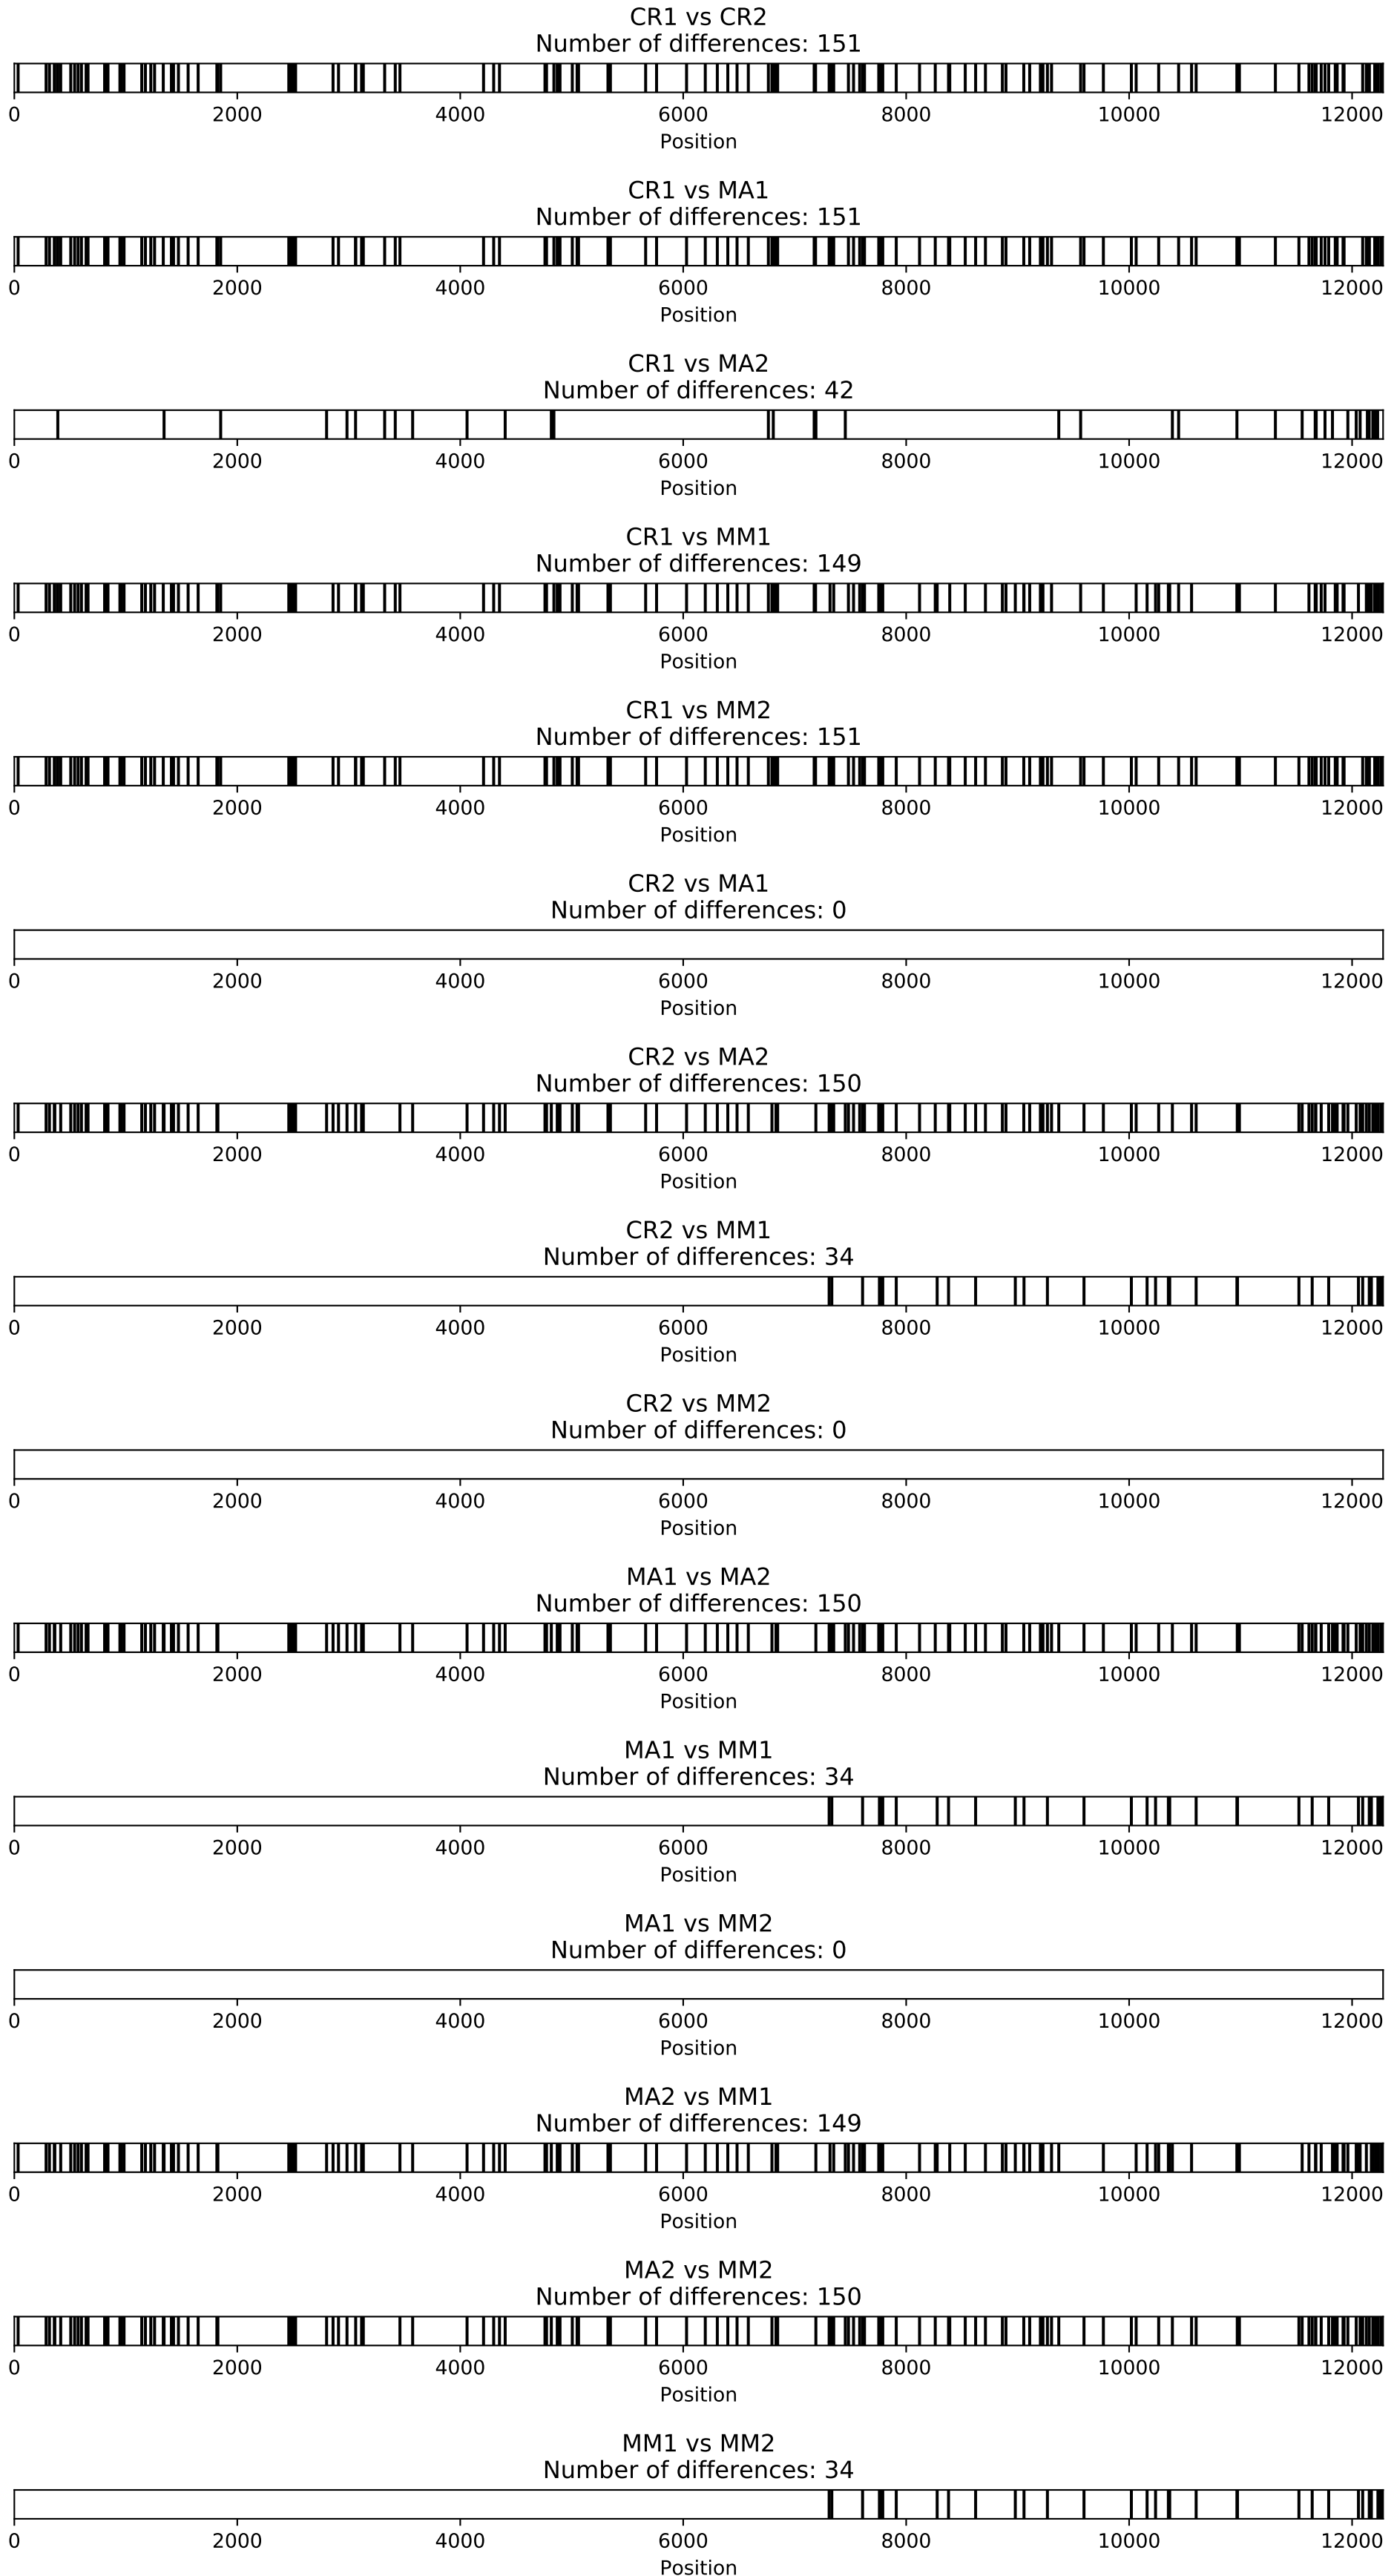

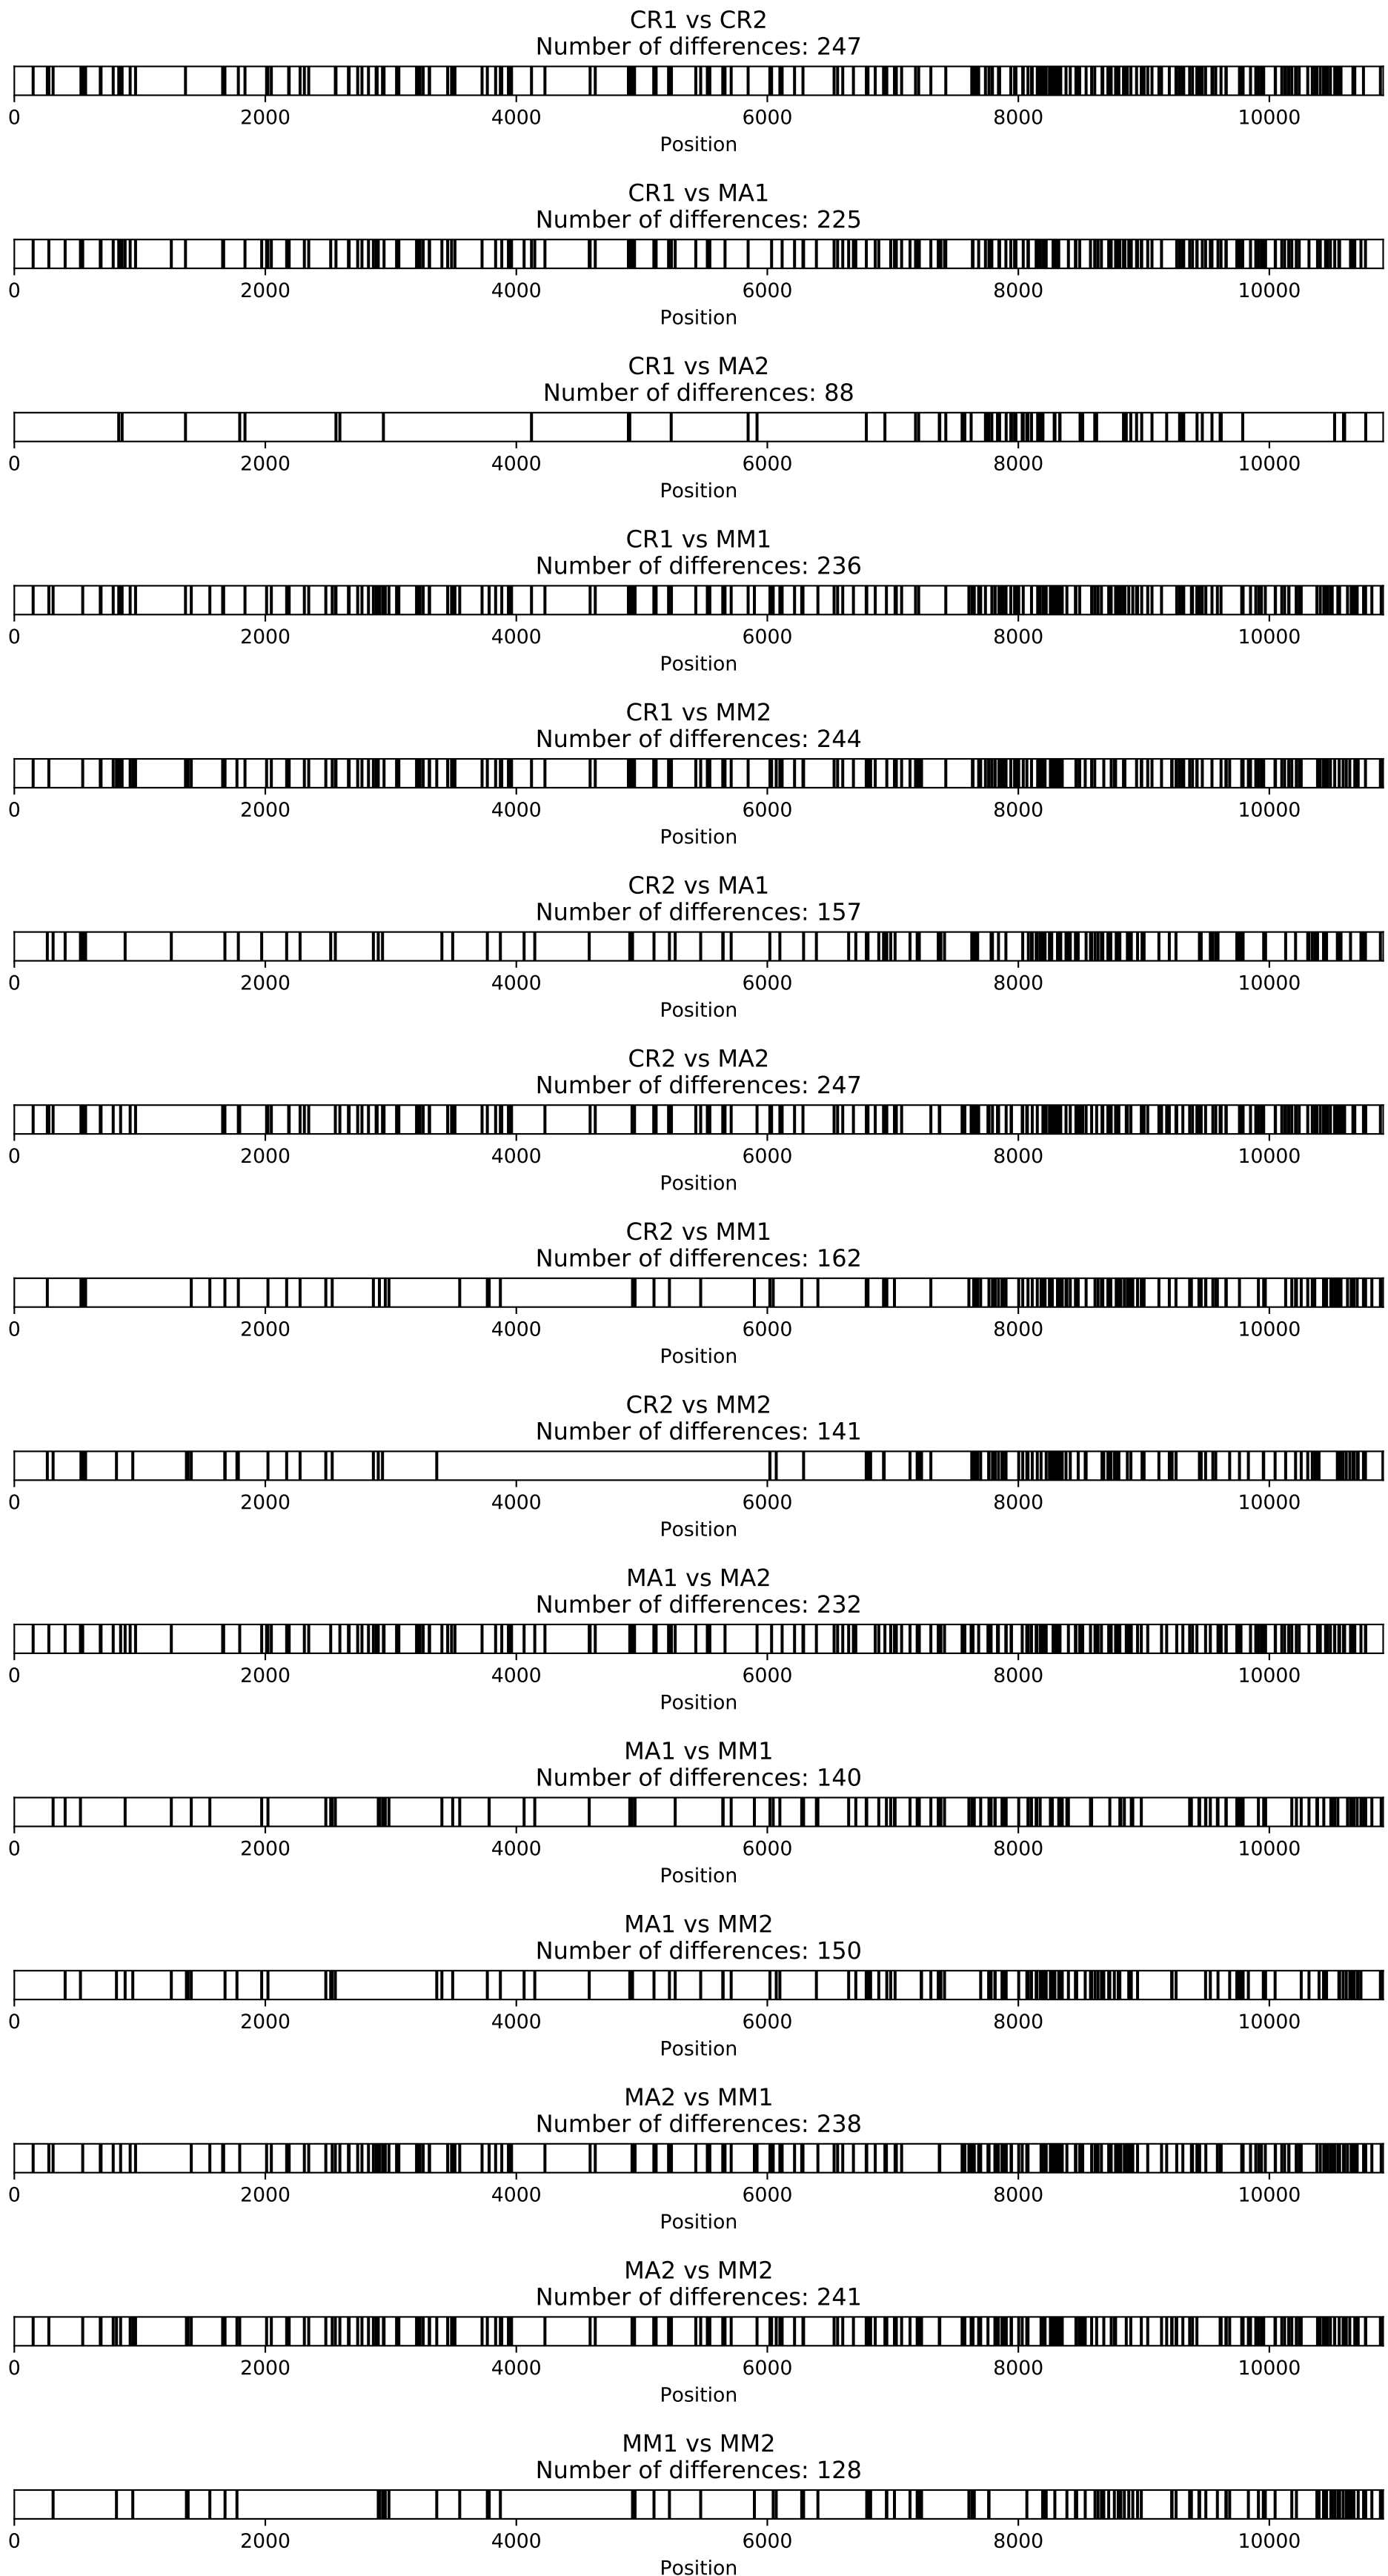

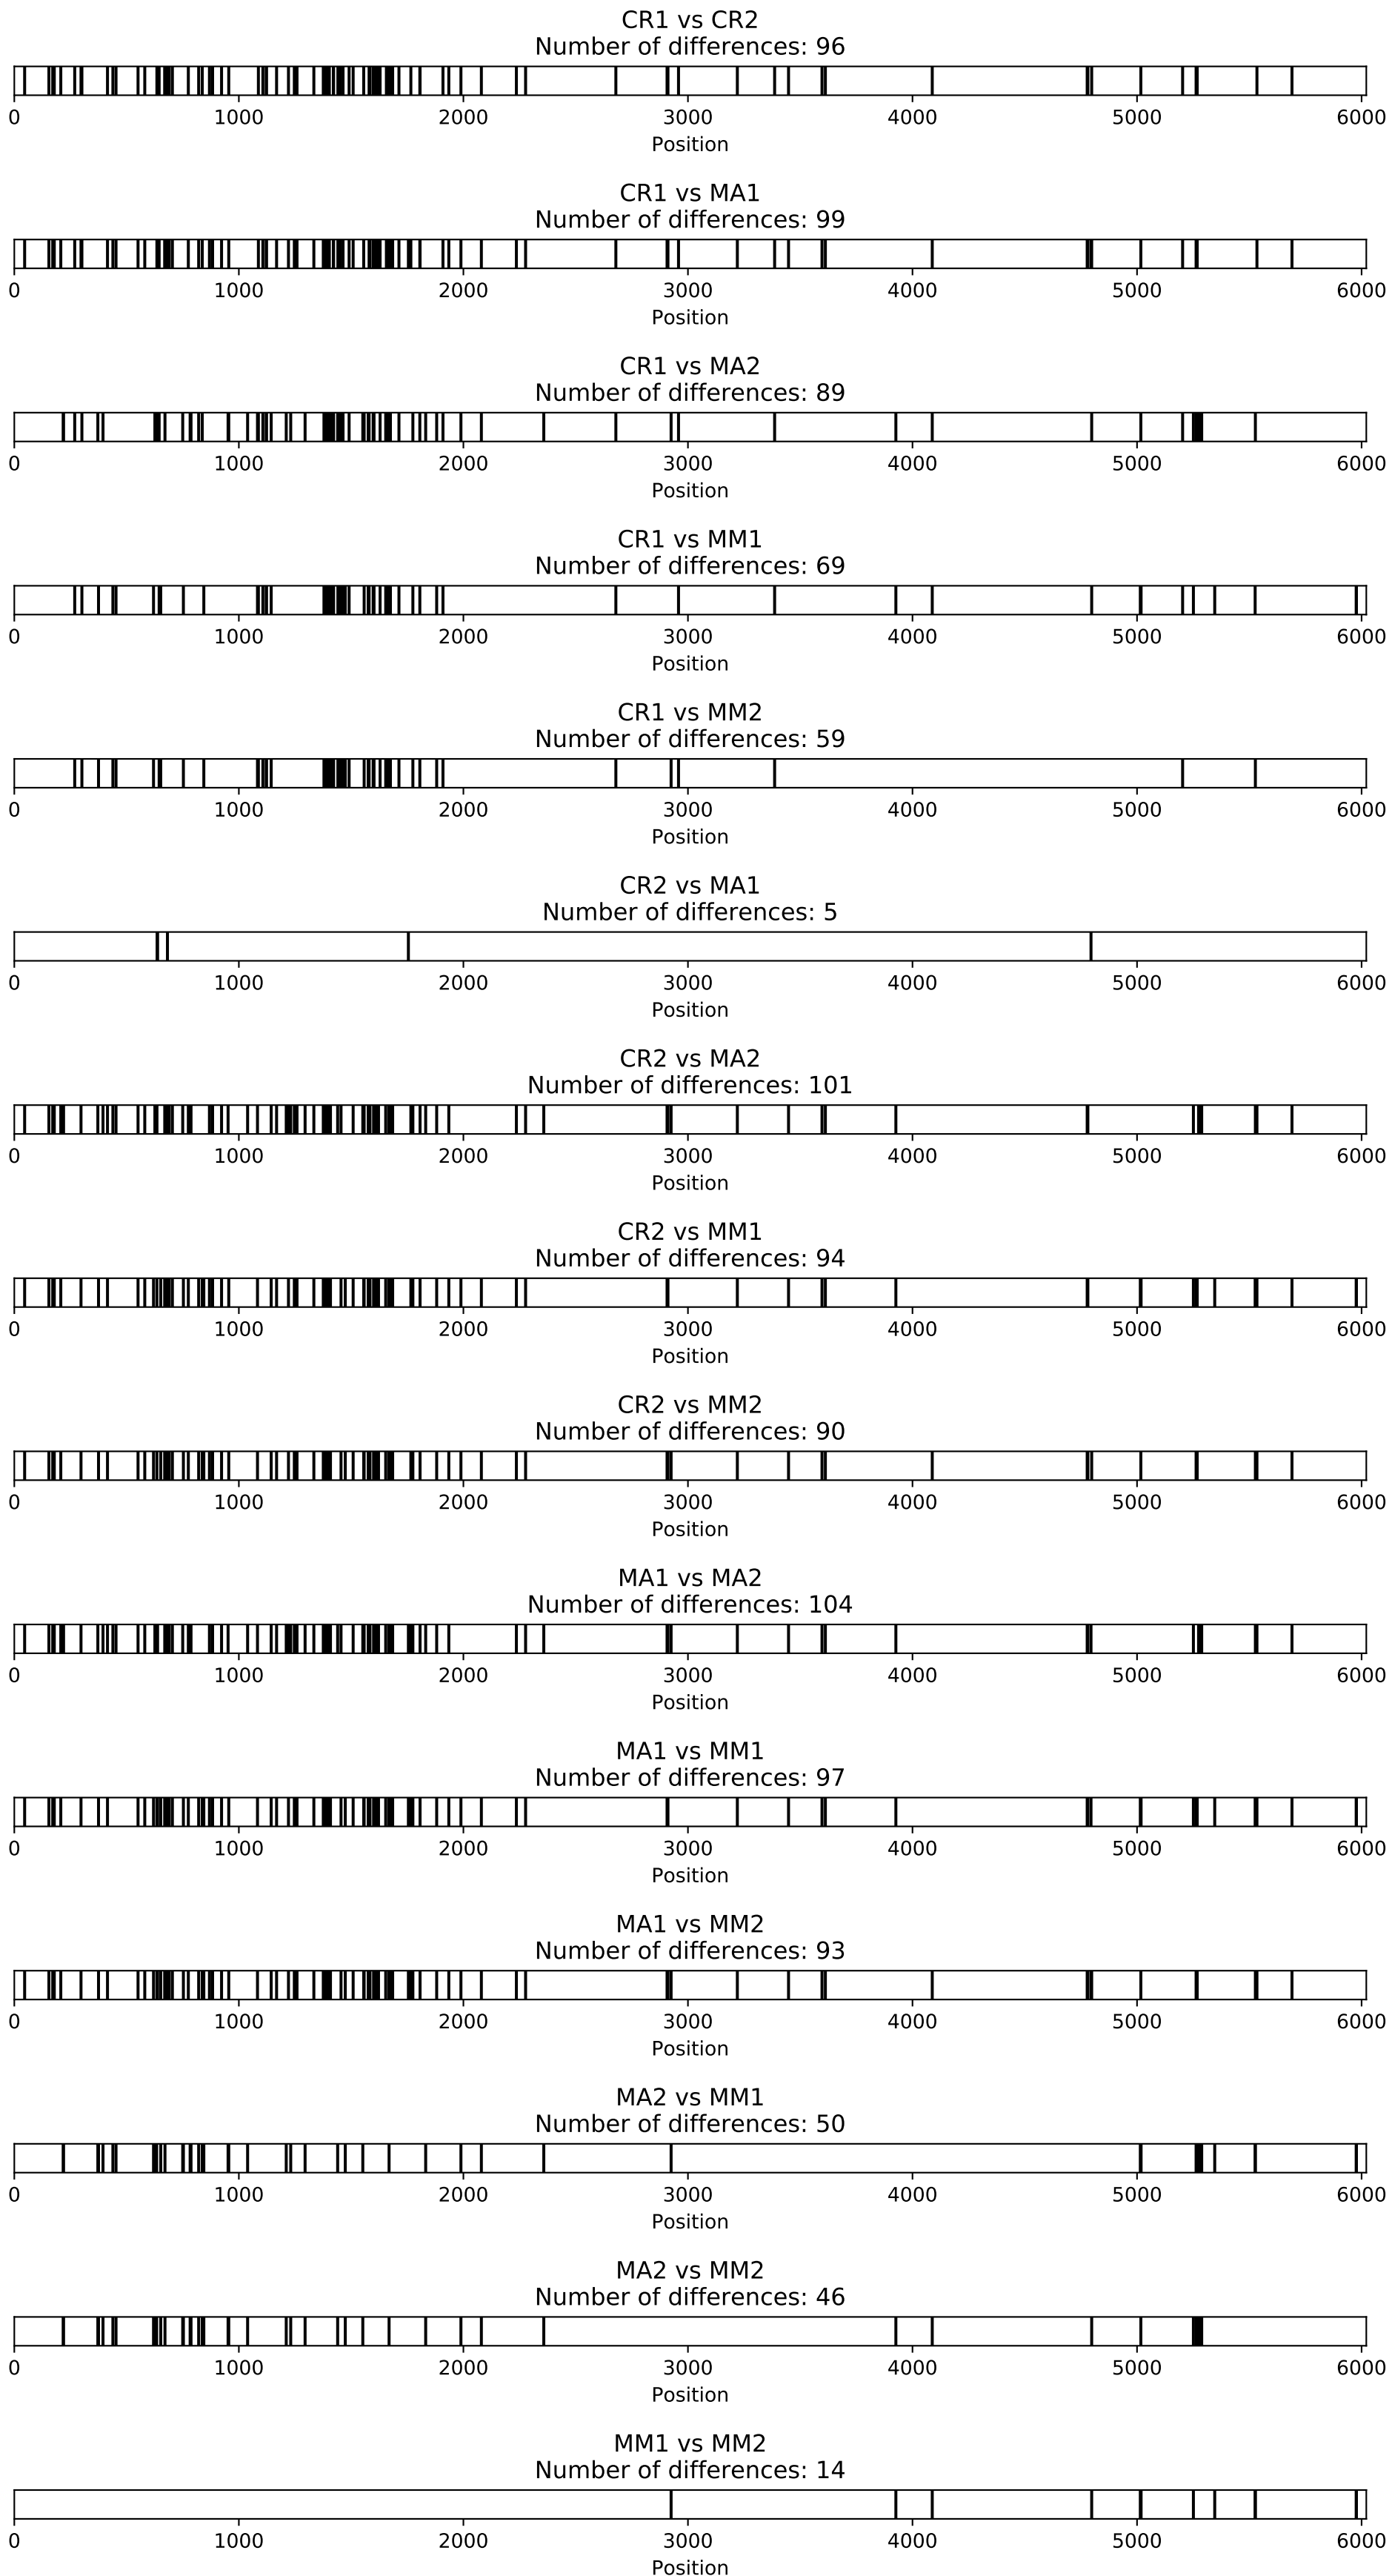

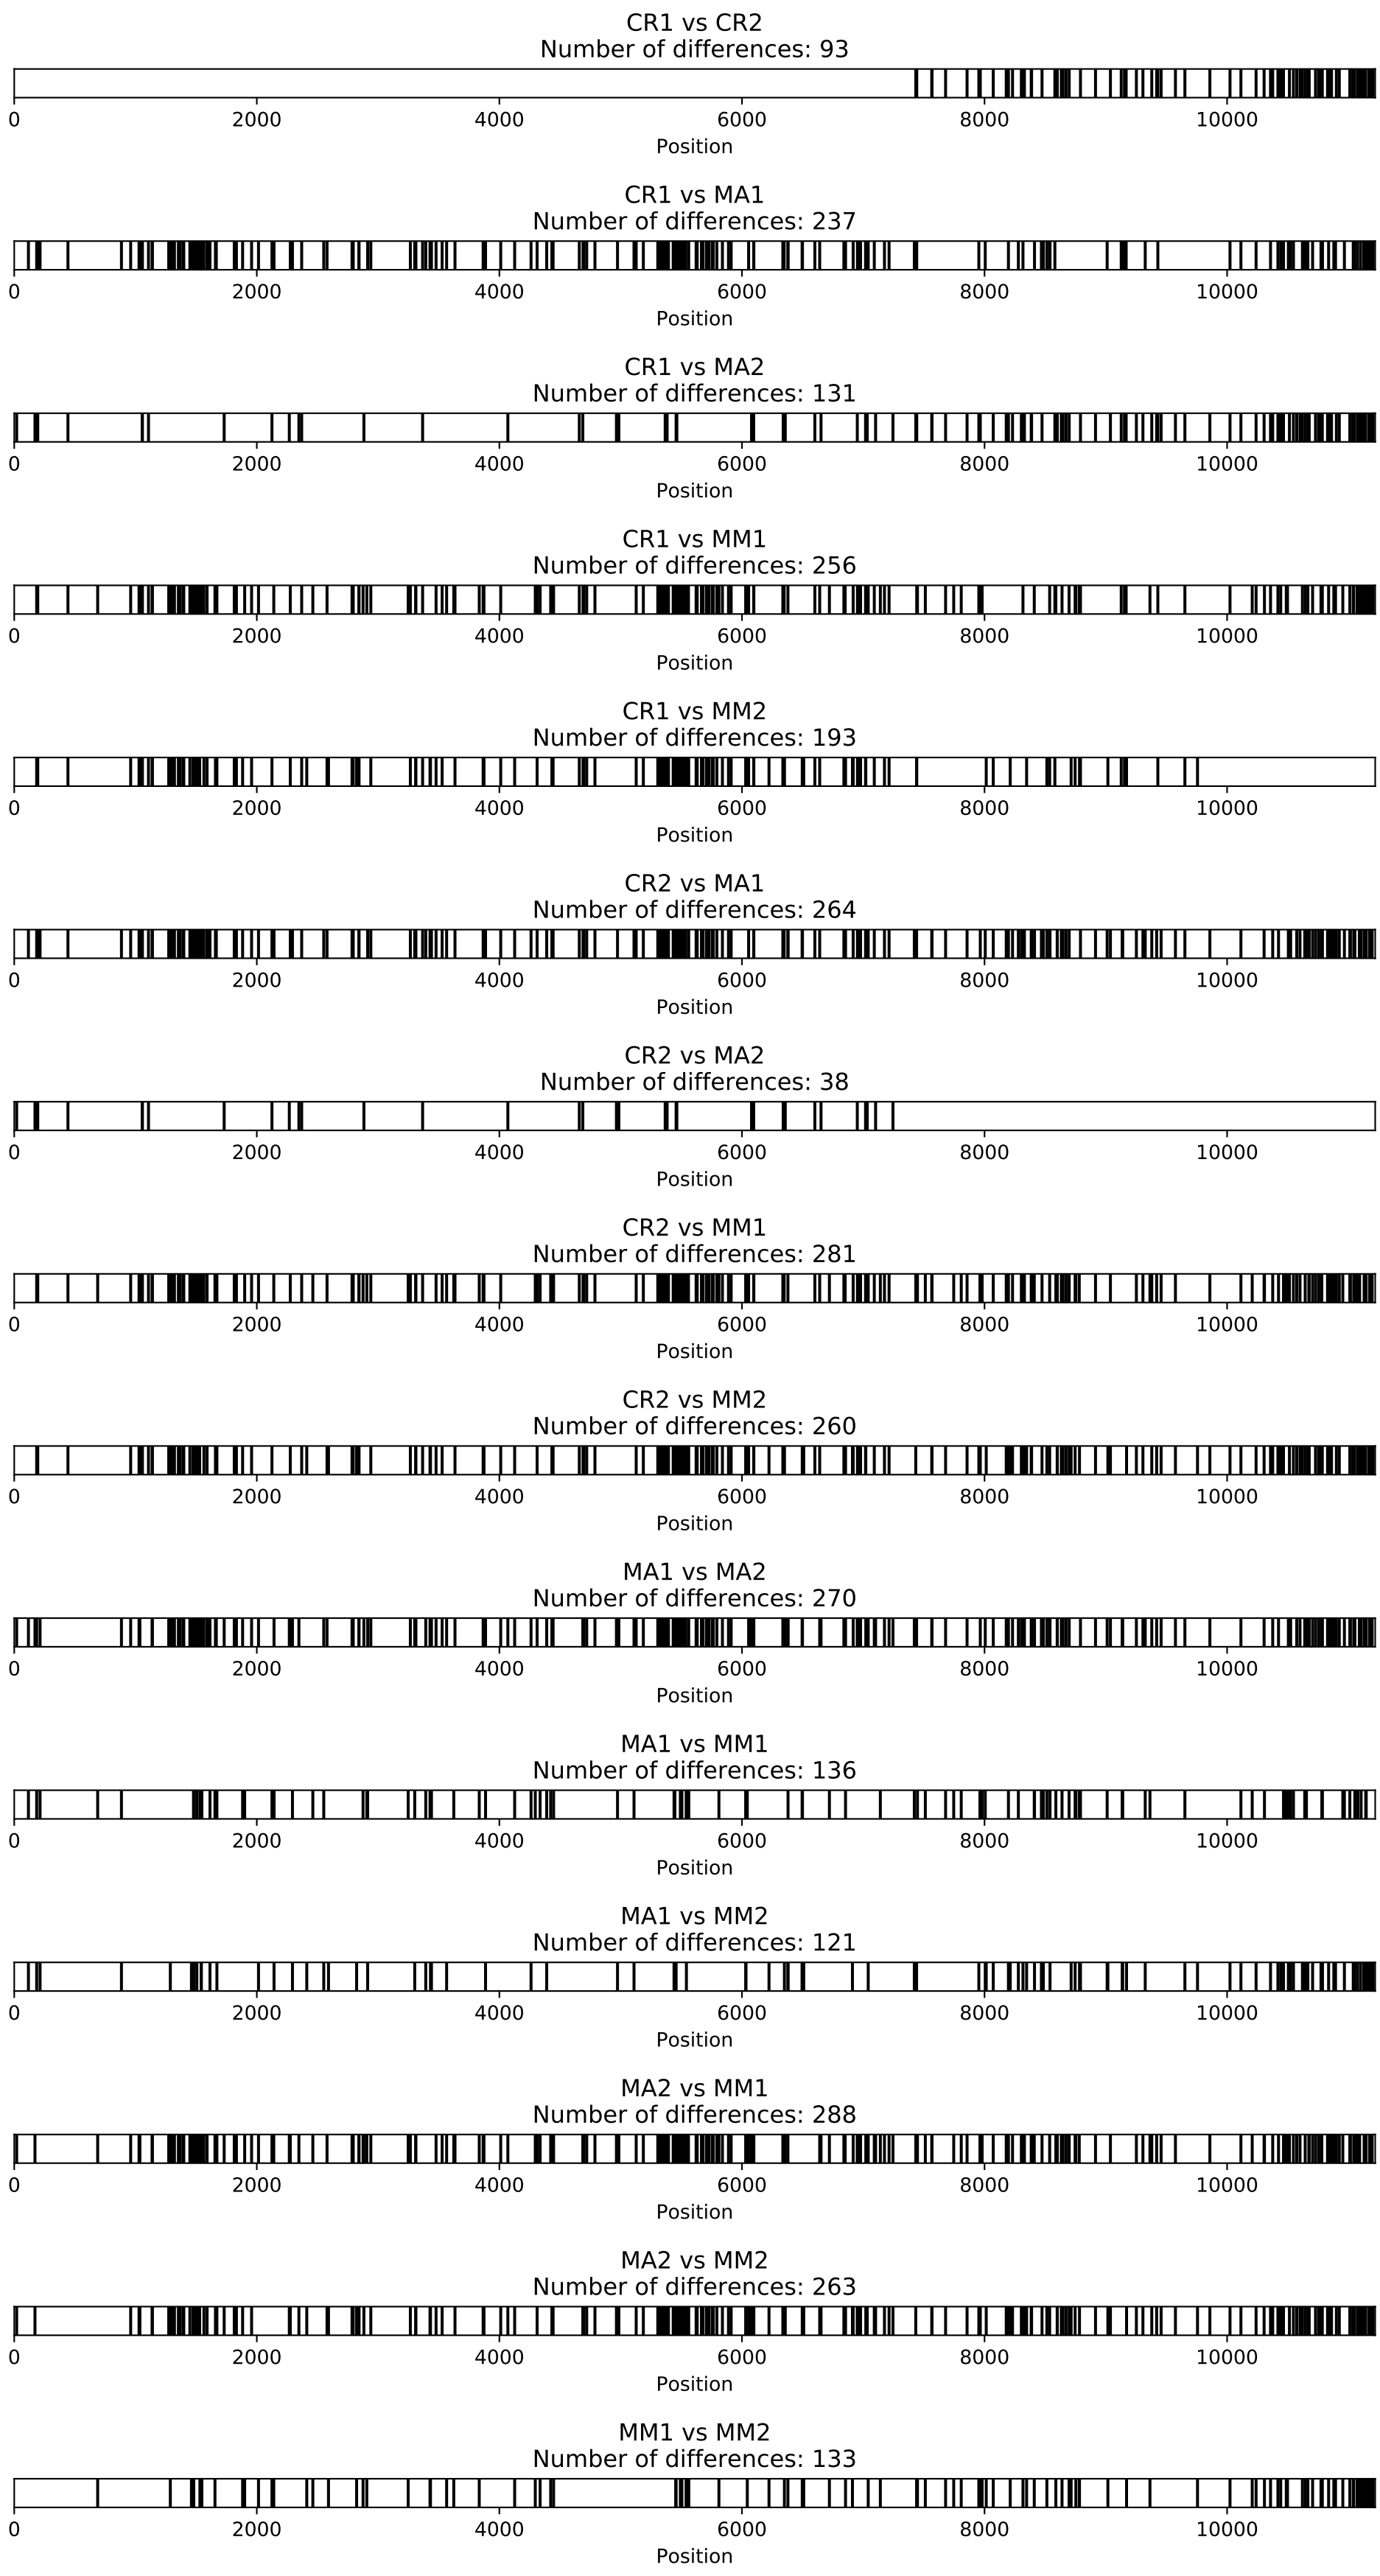

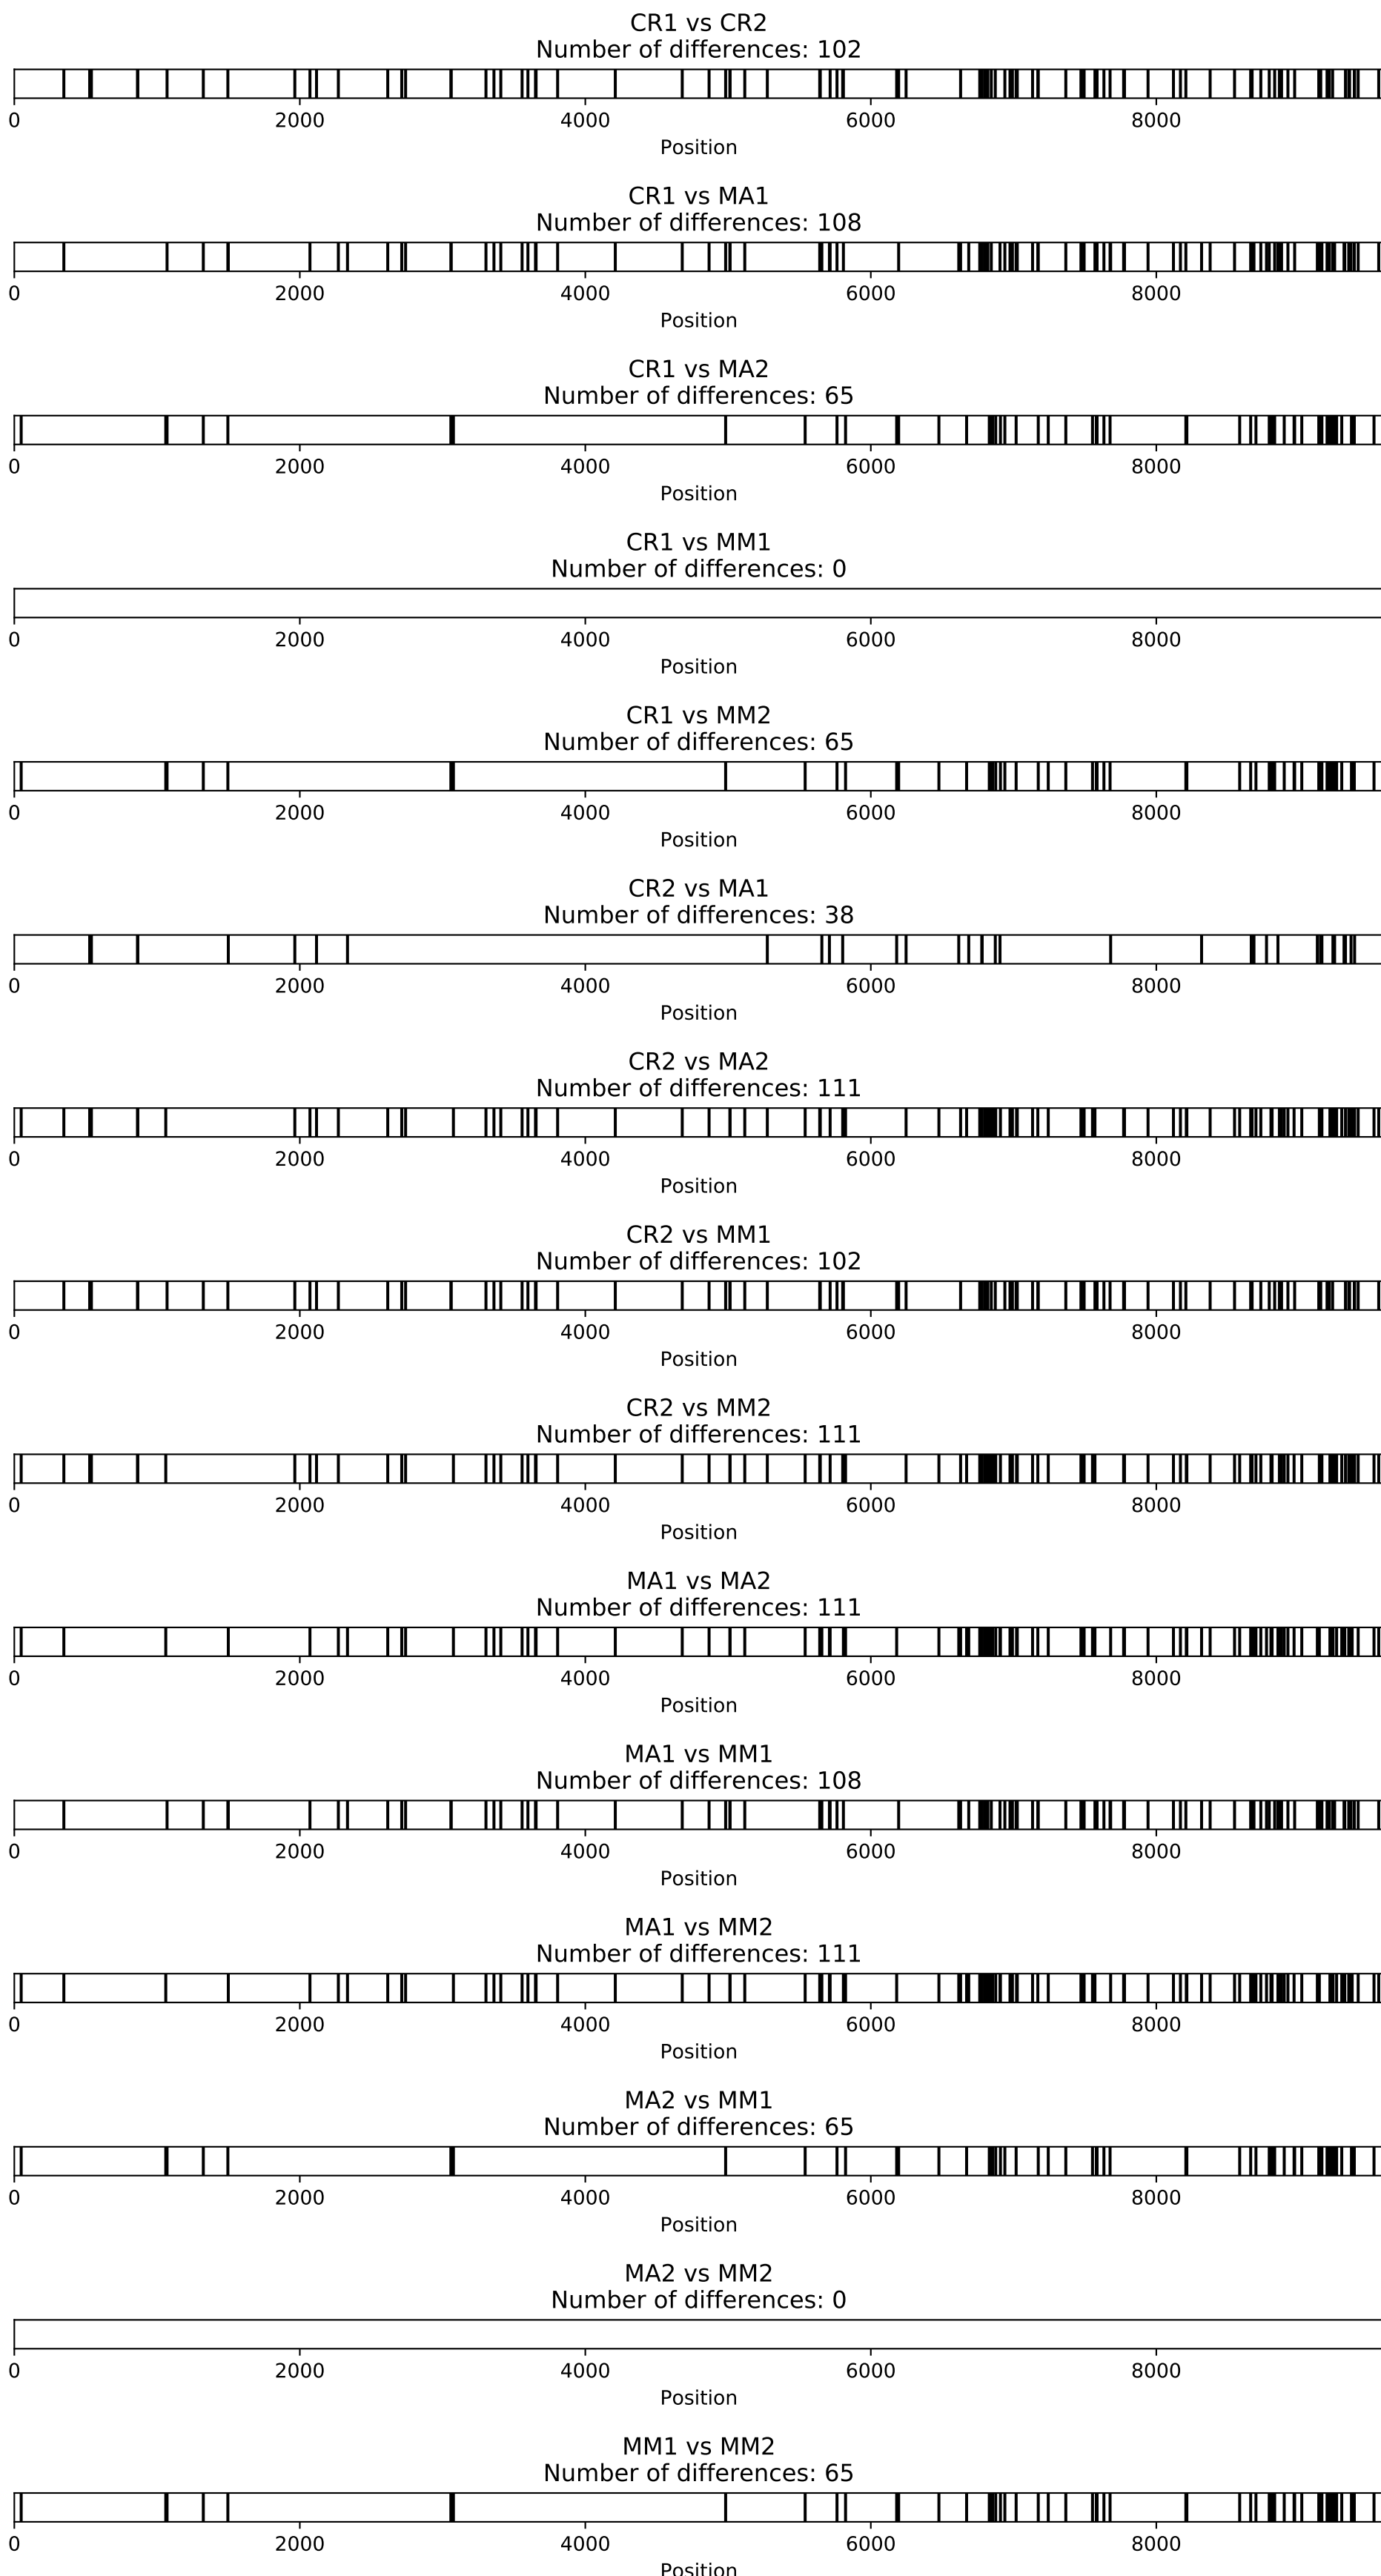



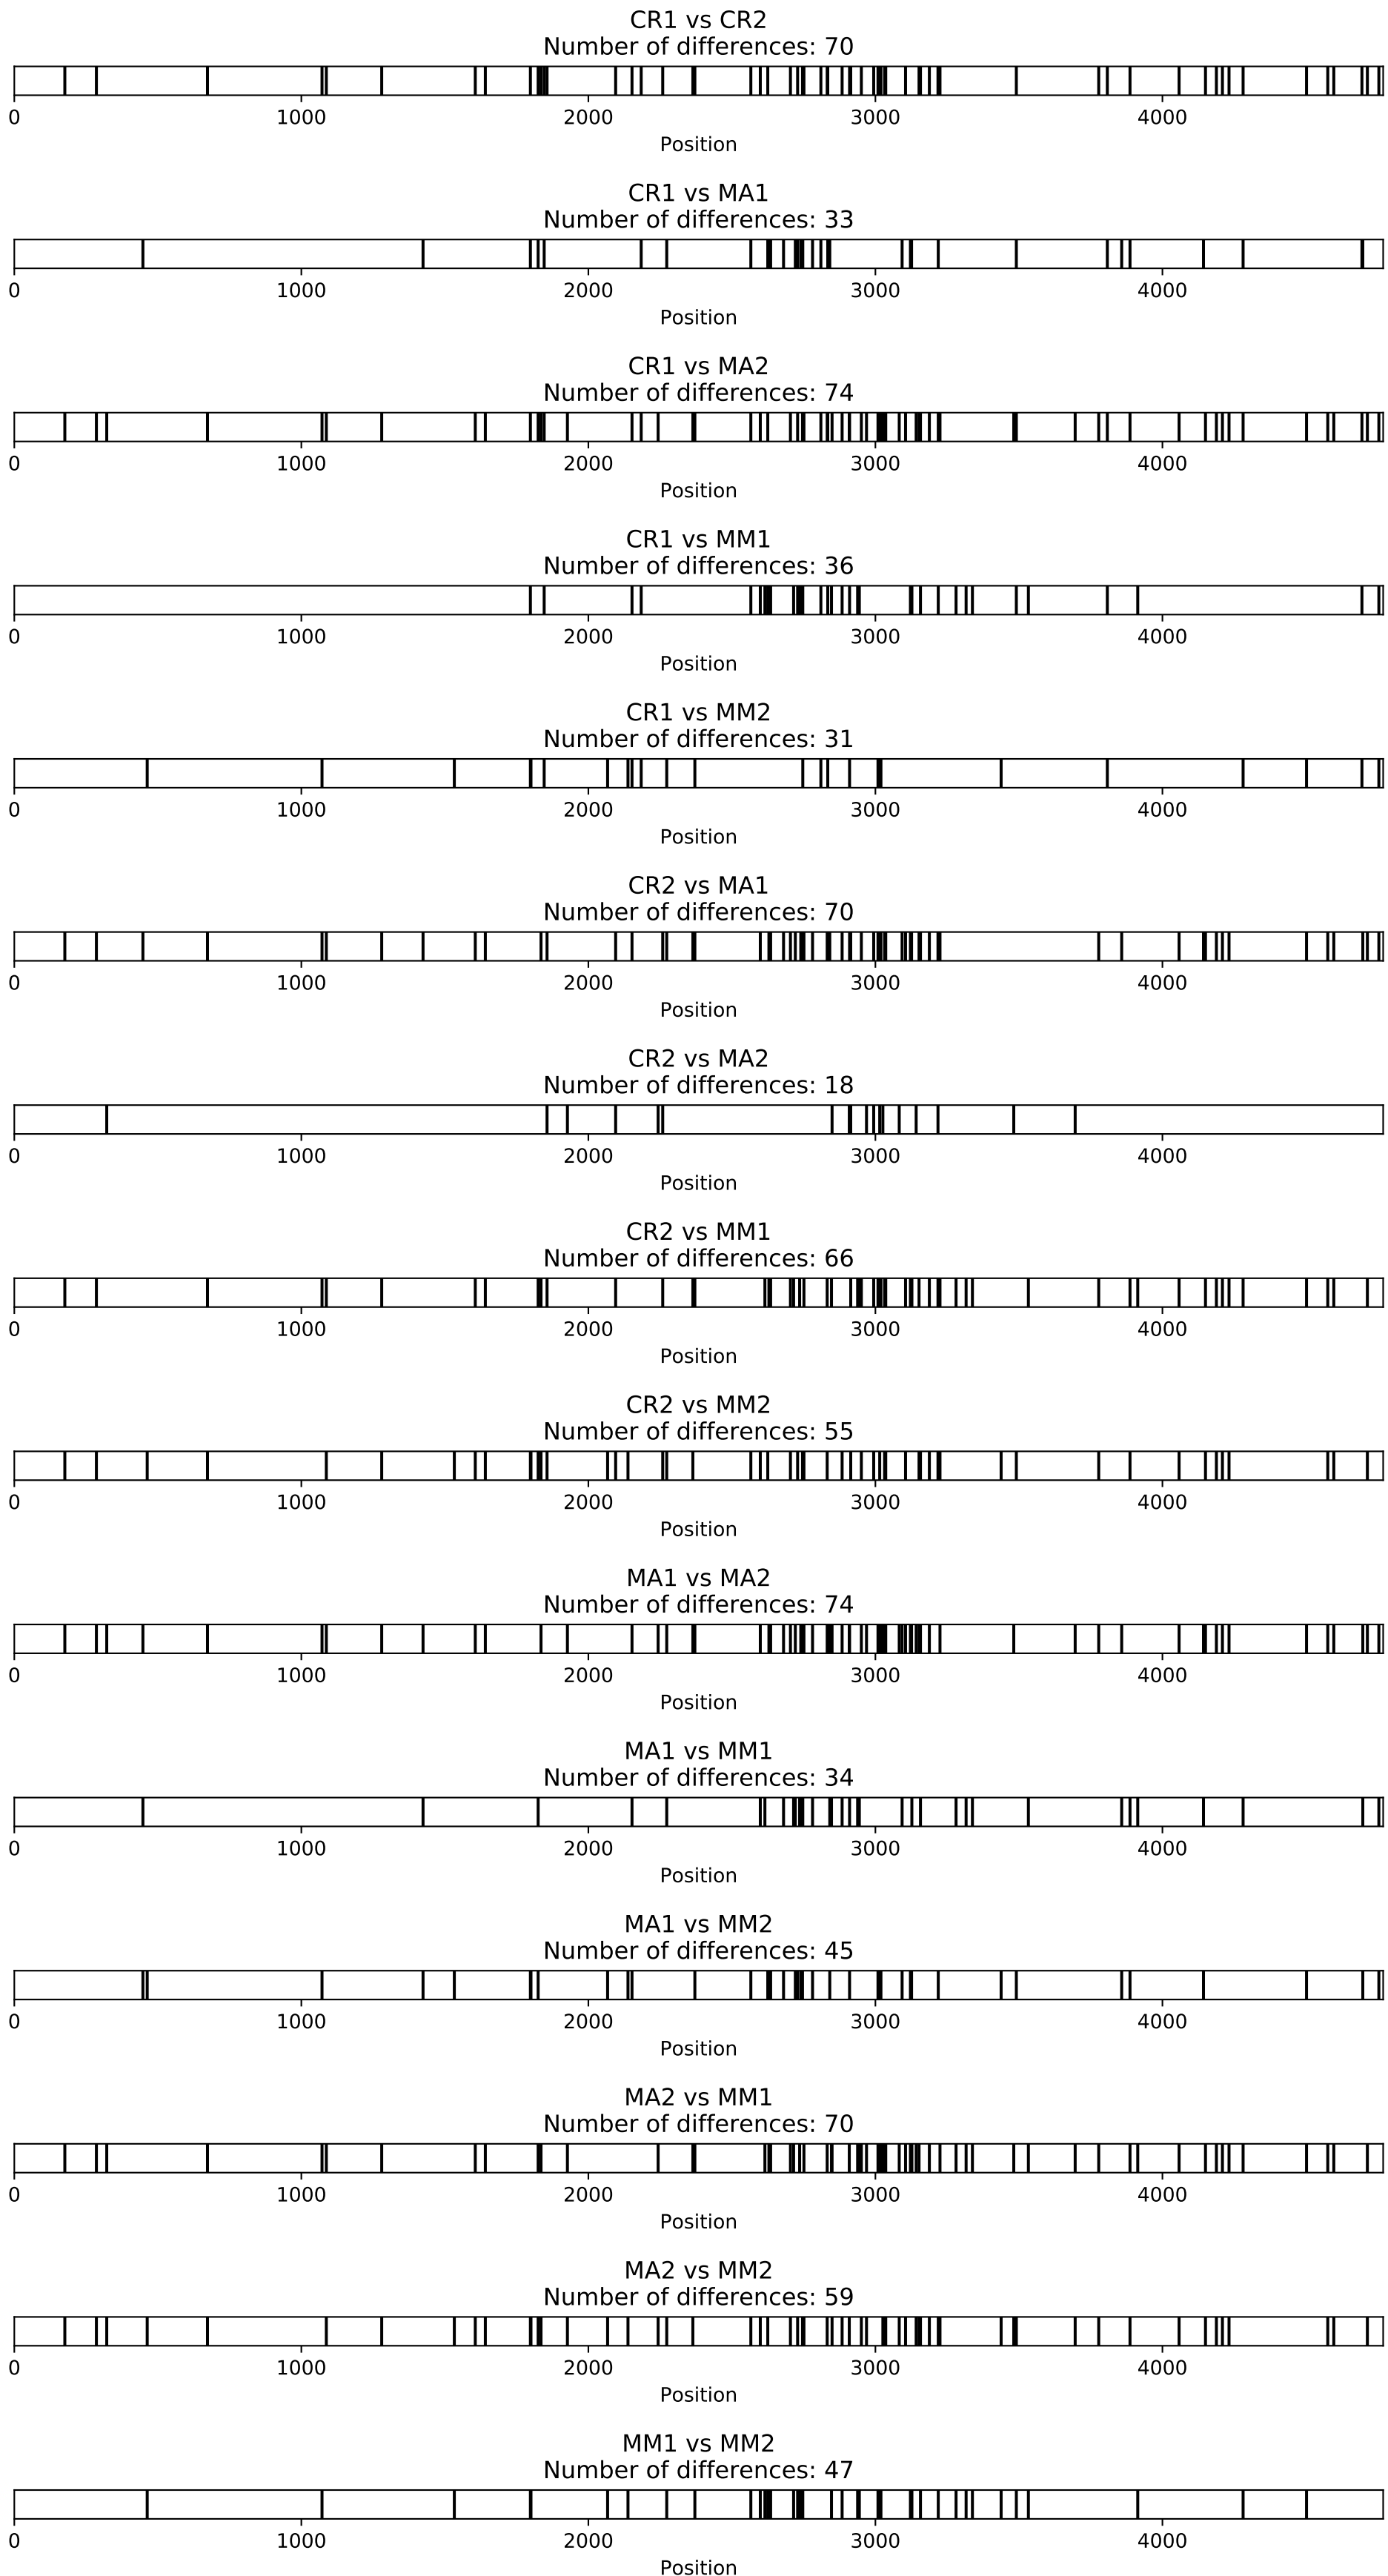

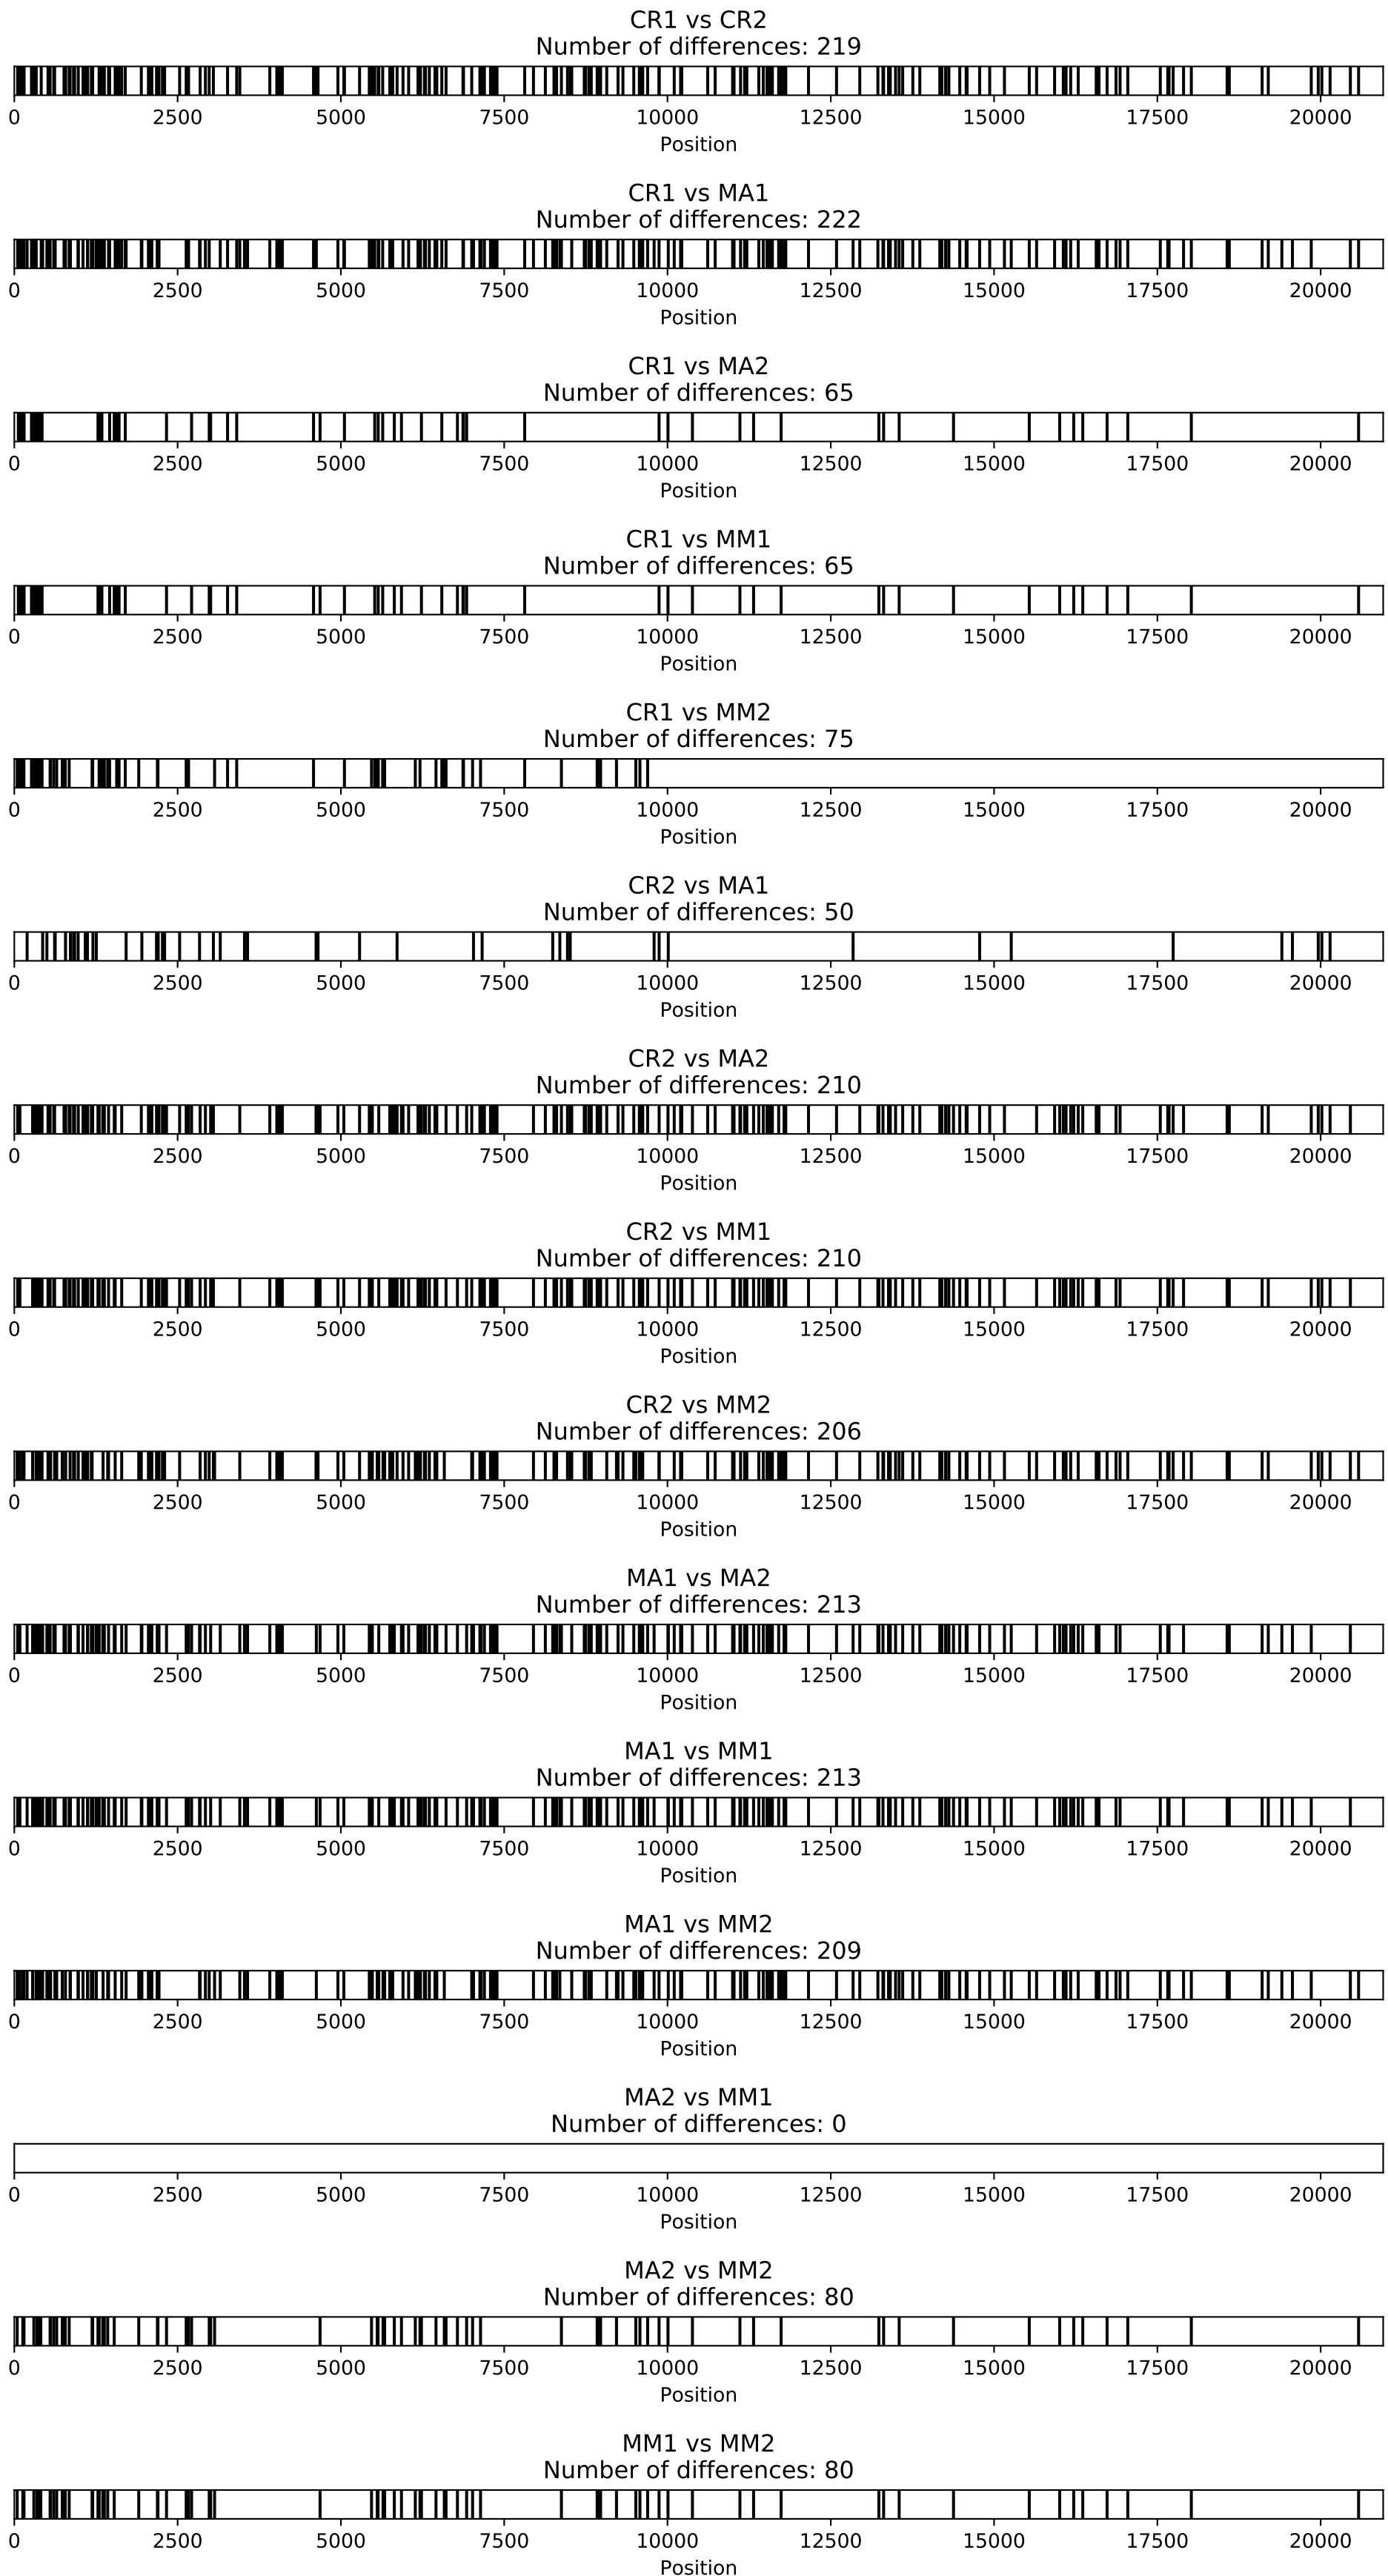

# Region: 210

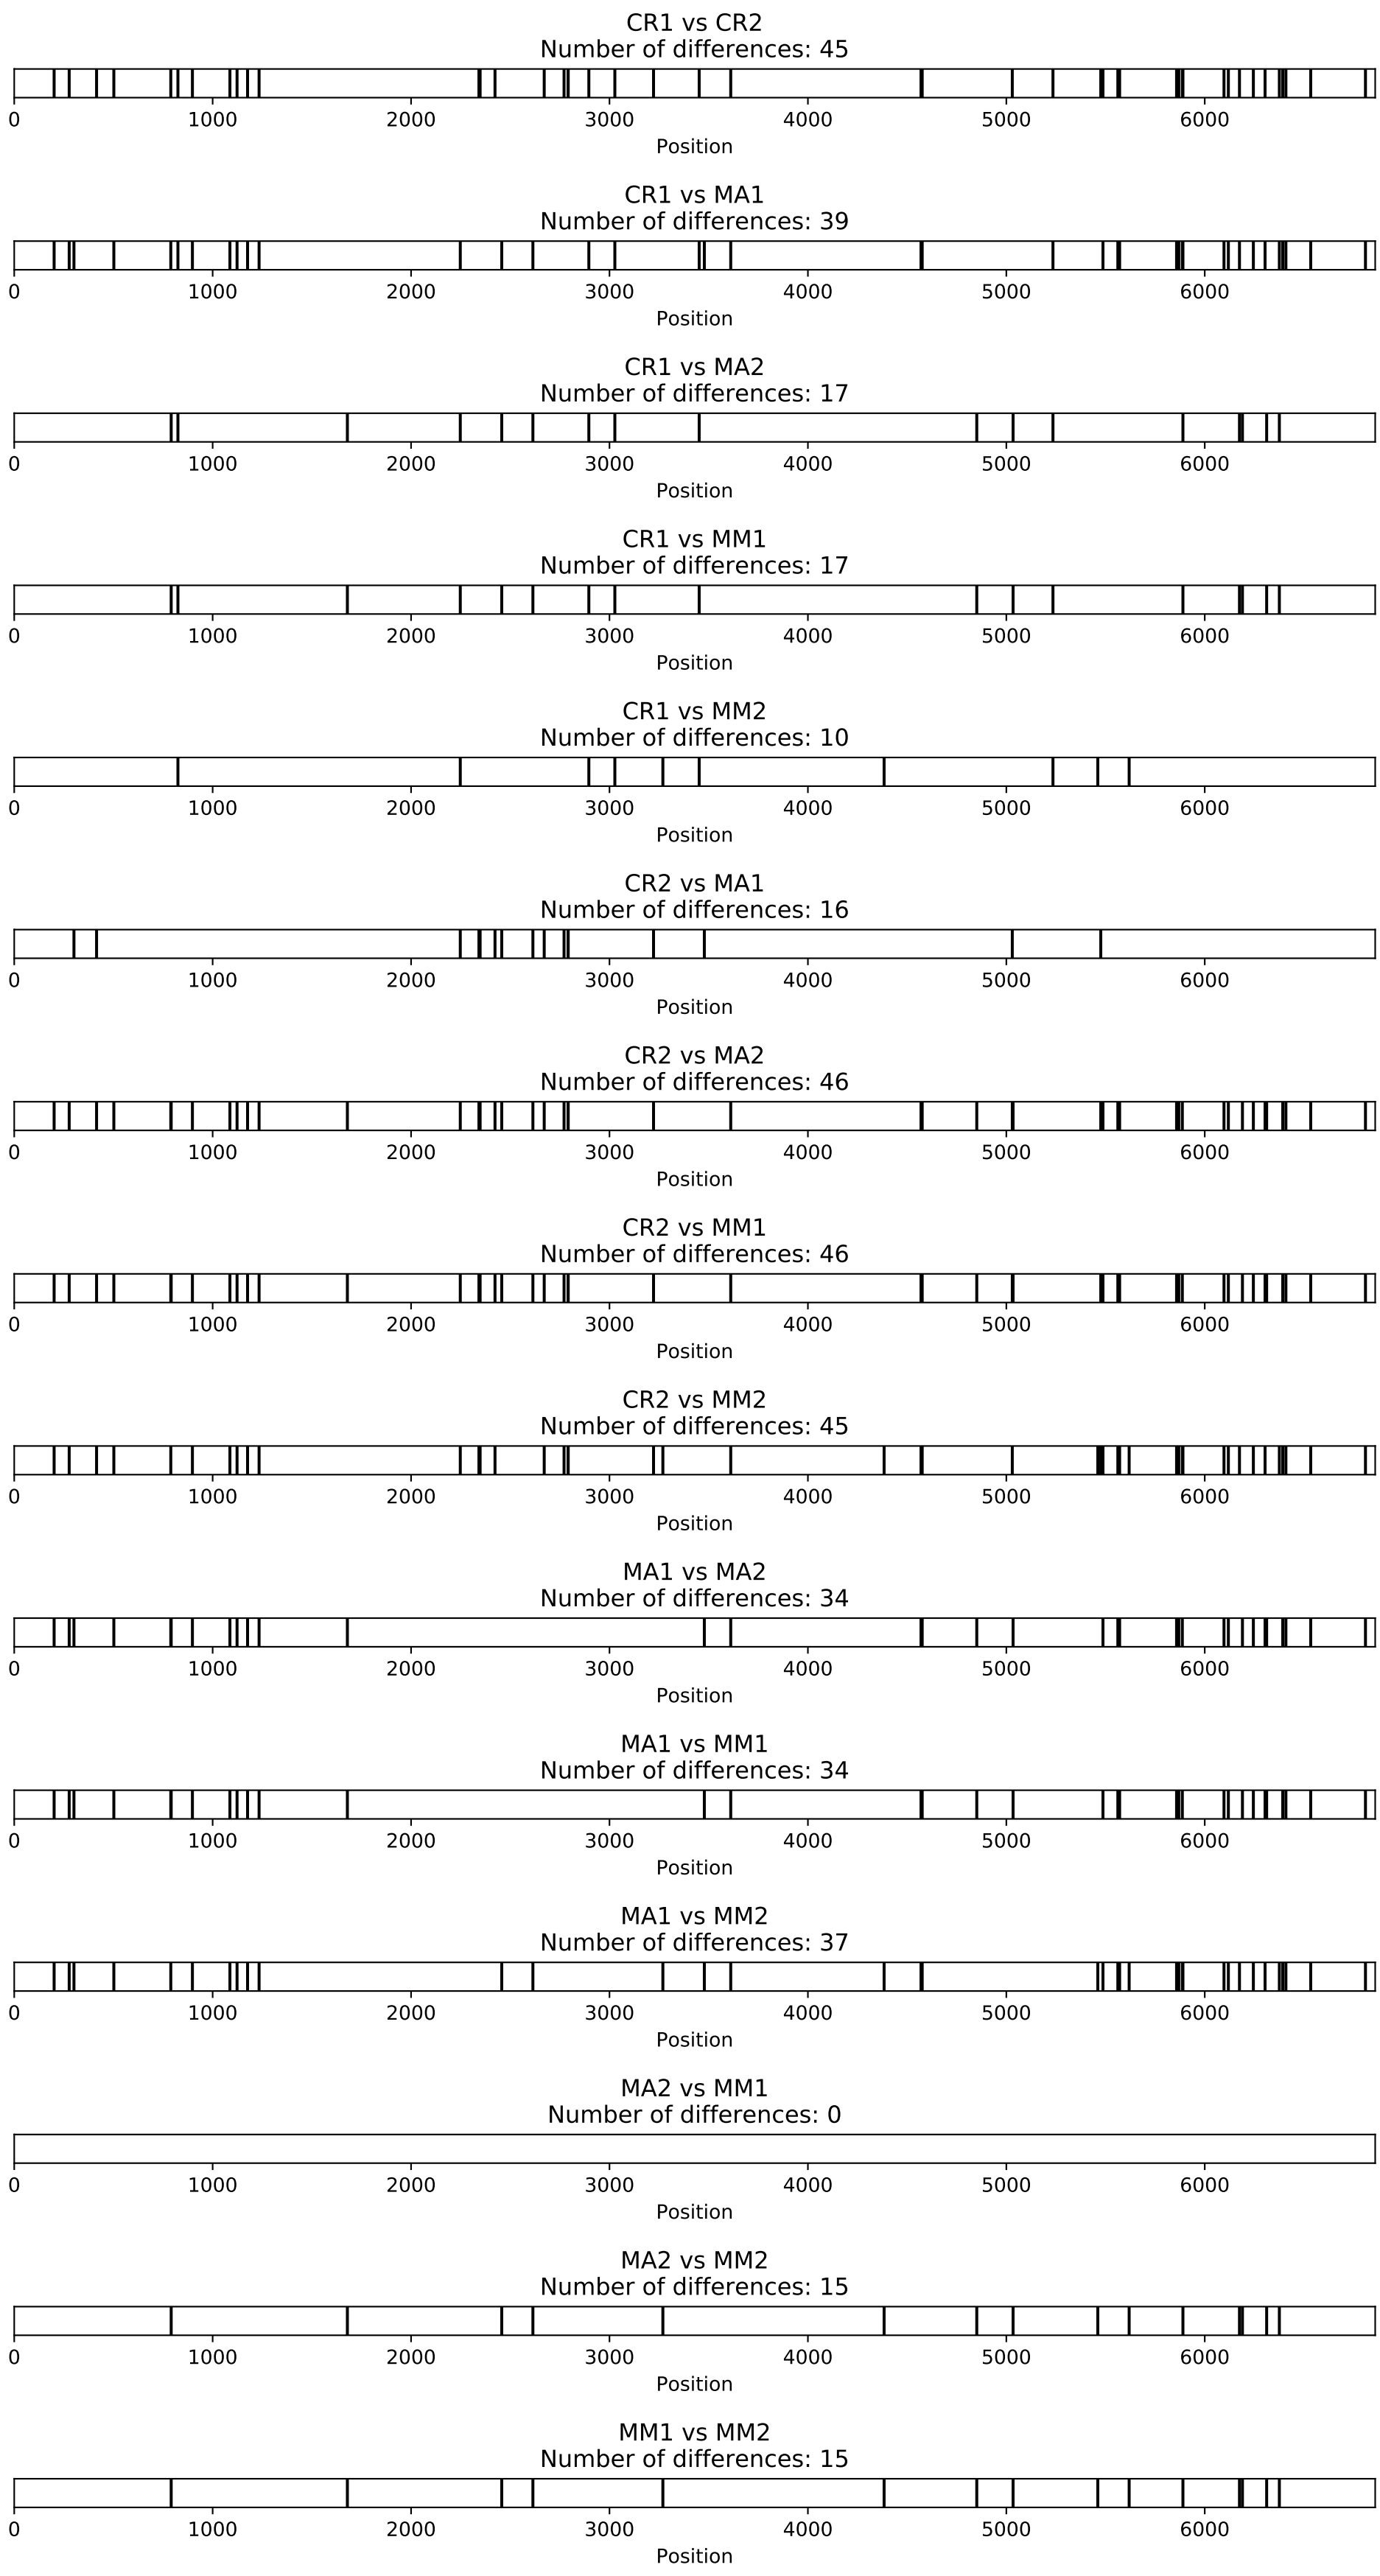

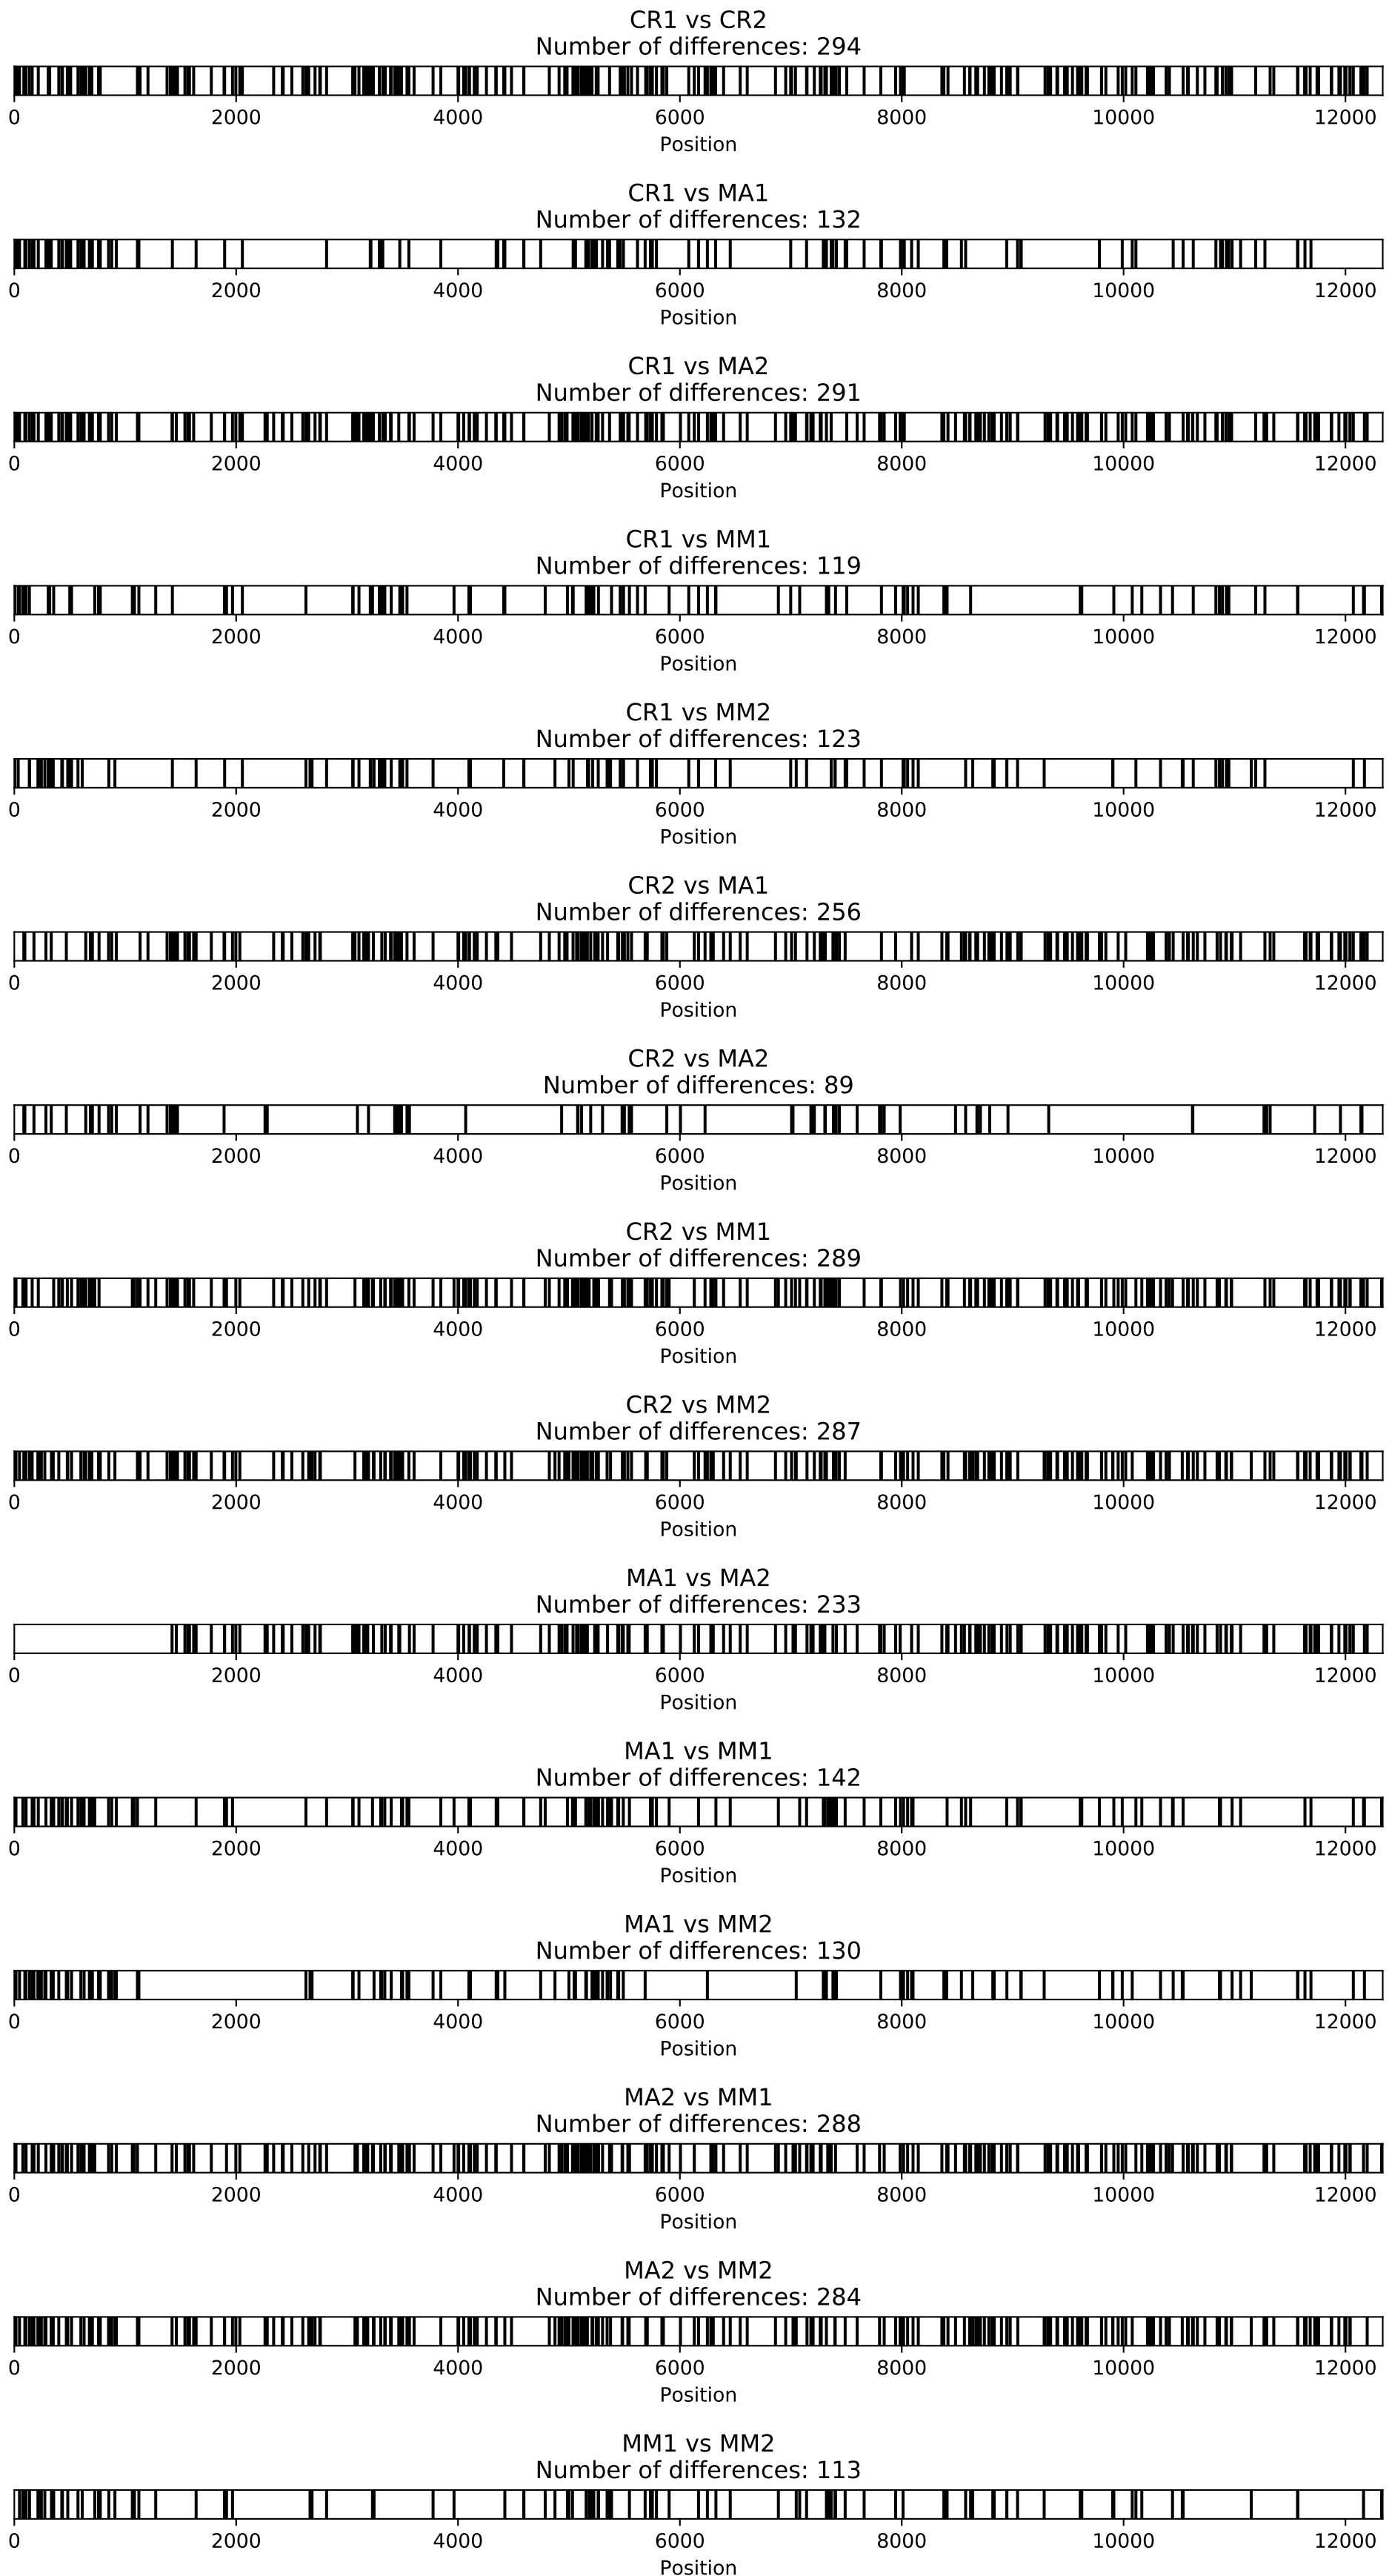

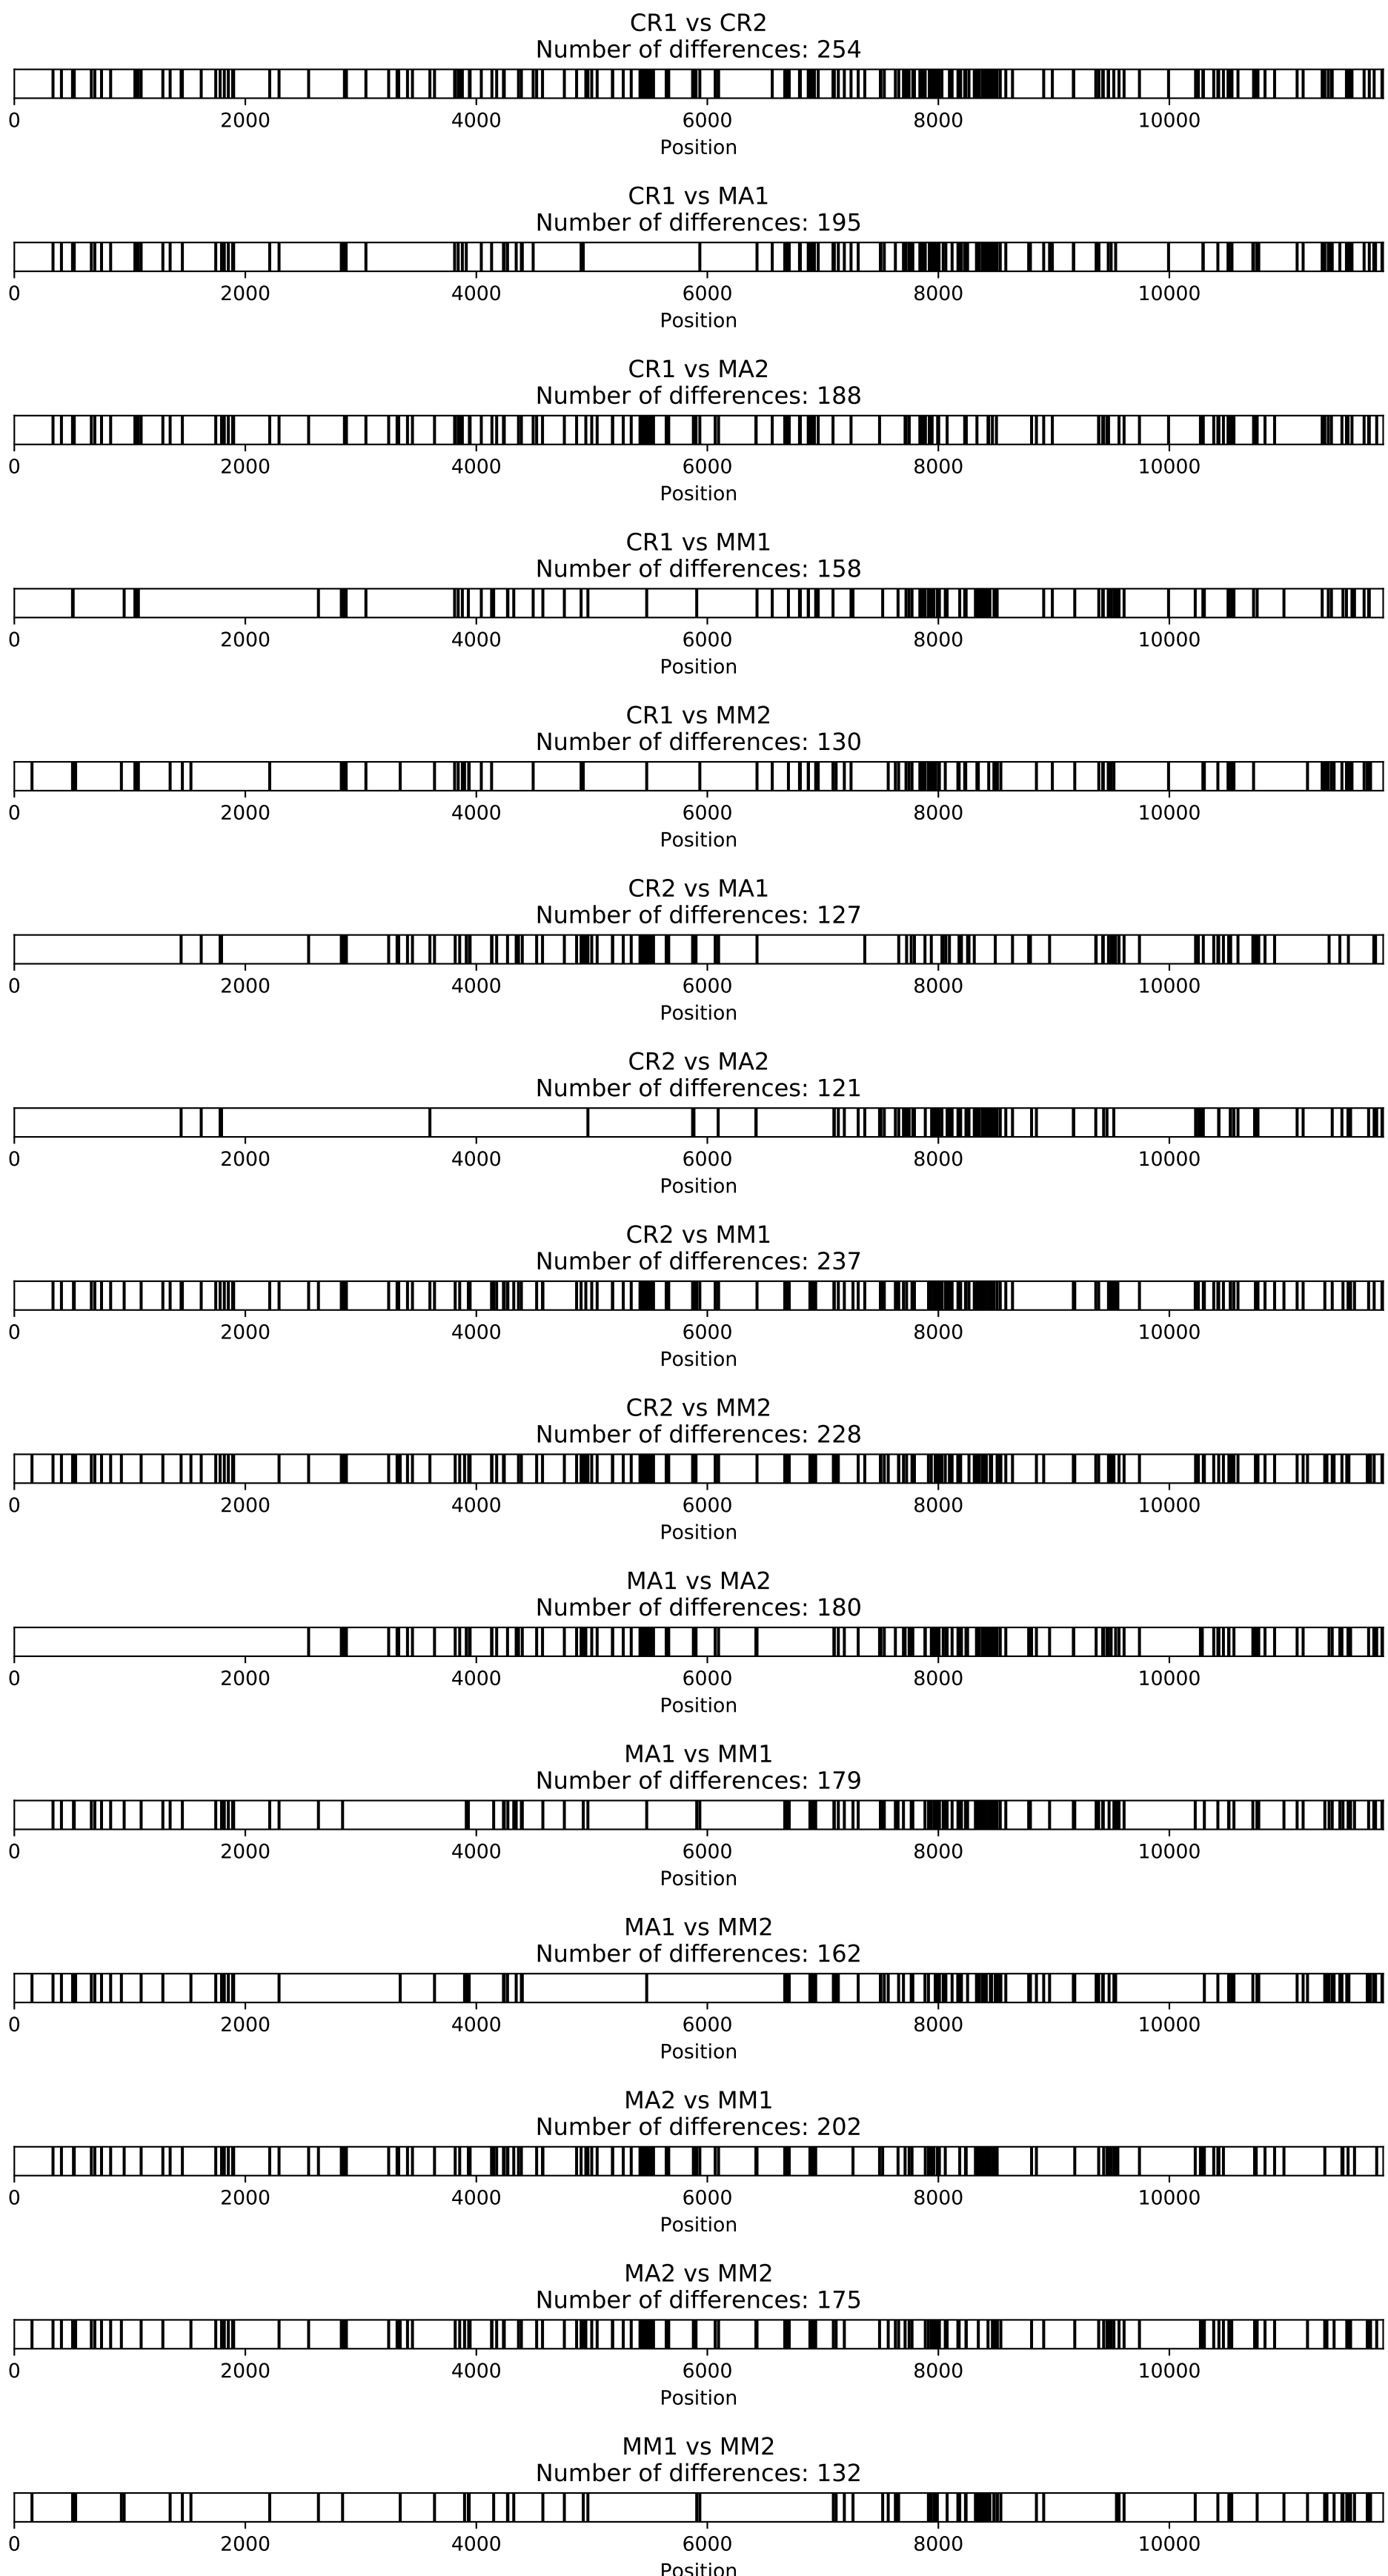

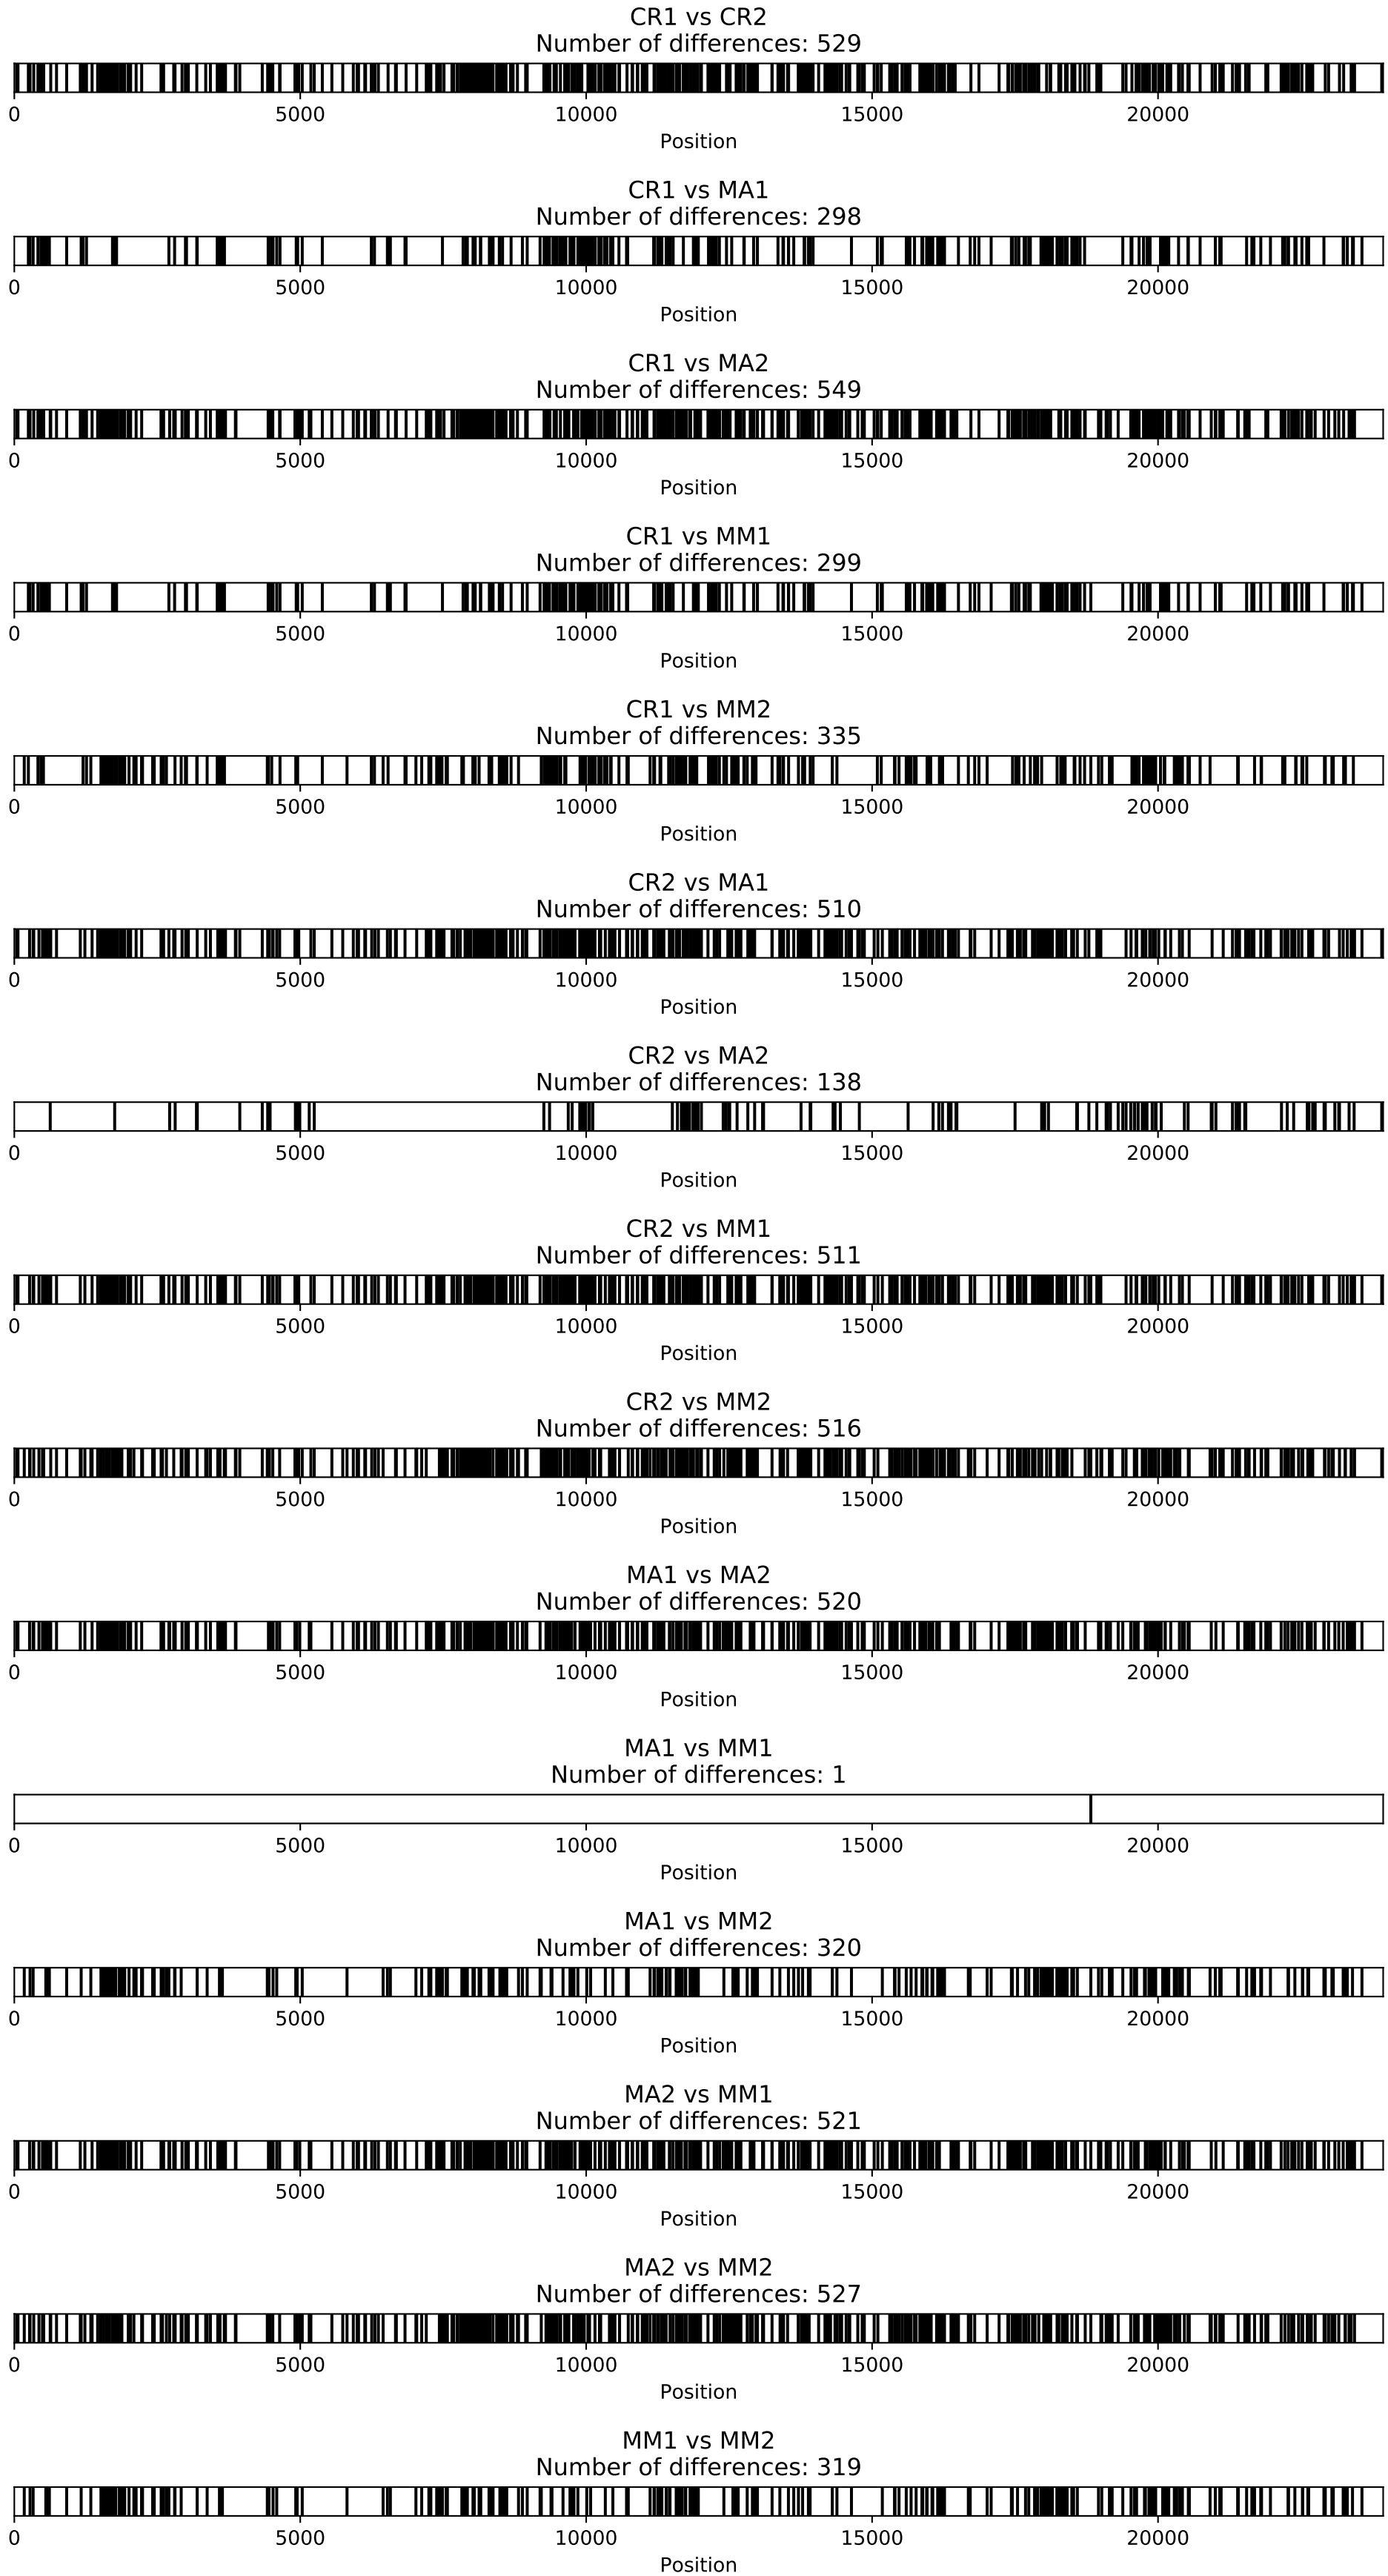

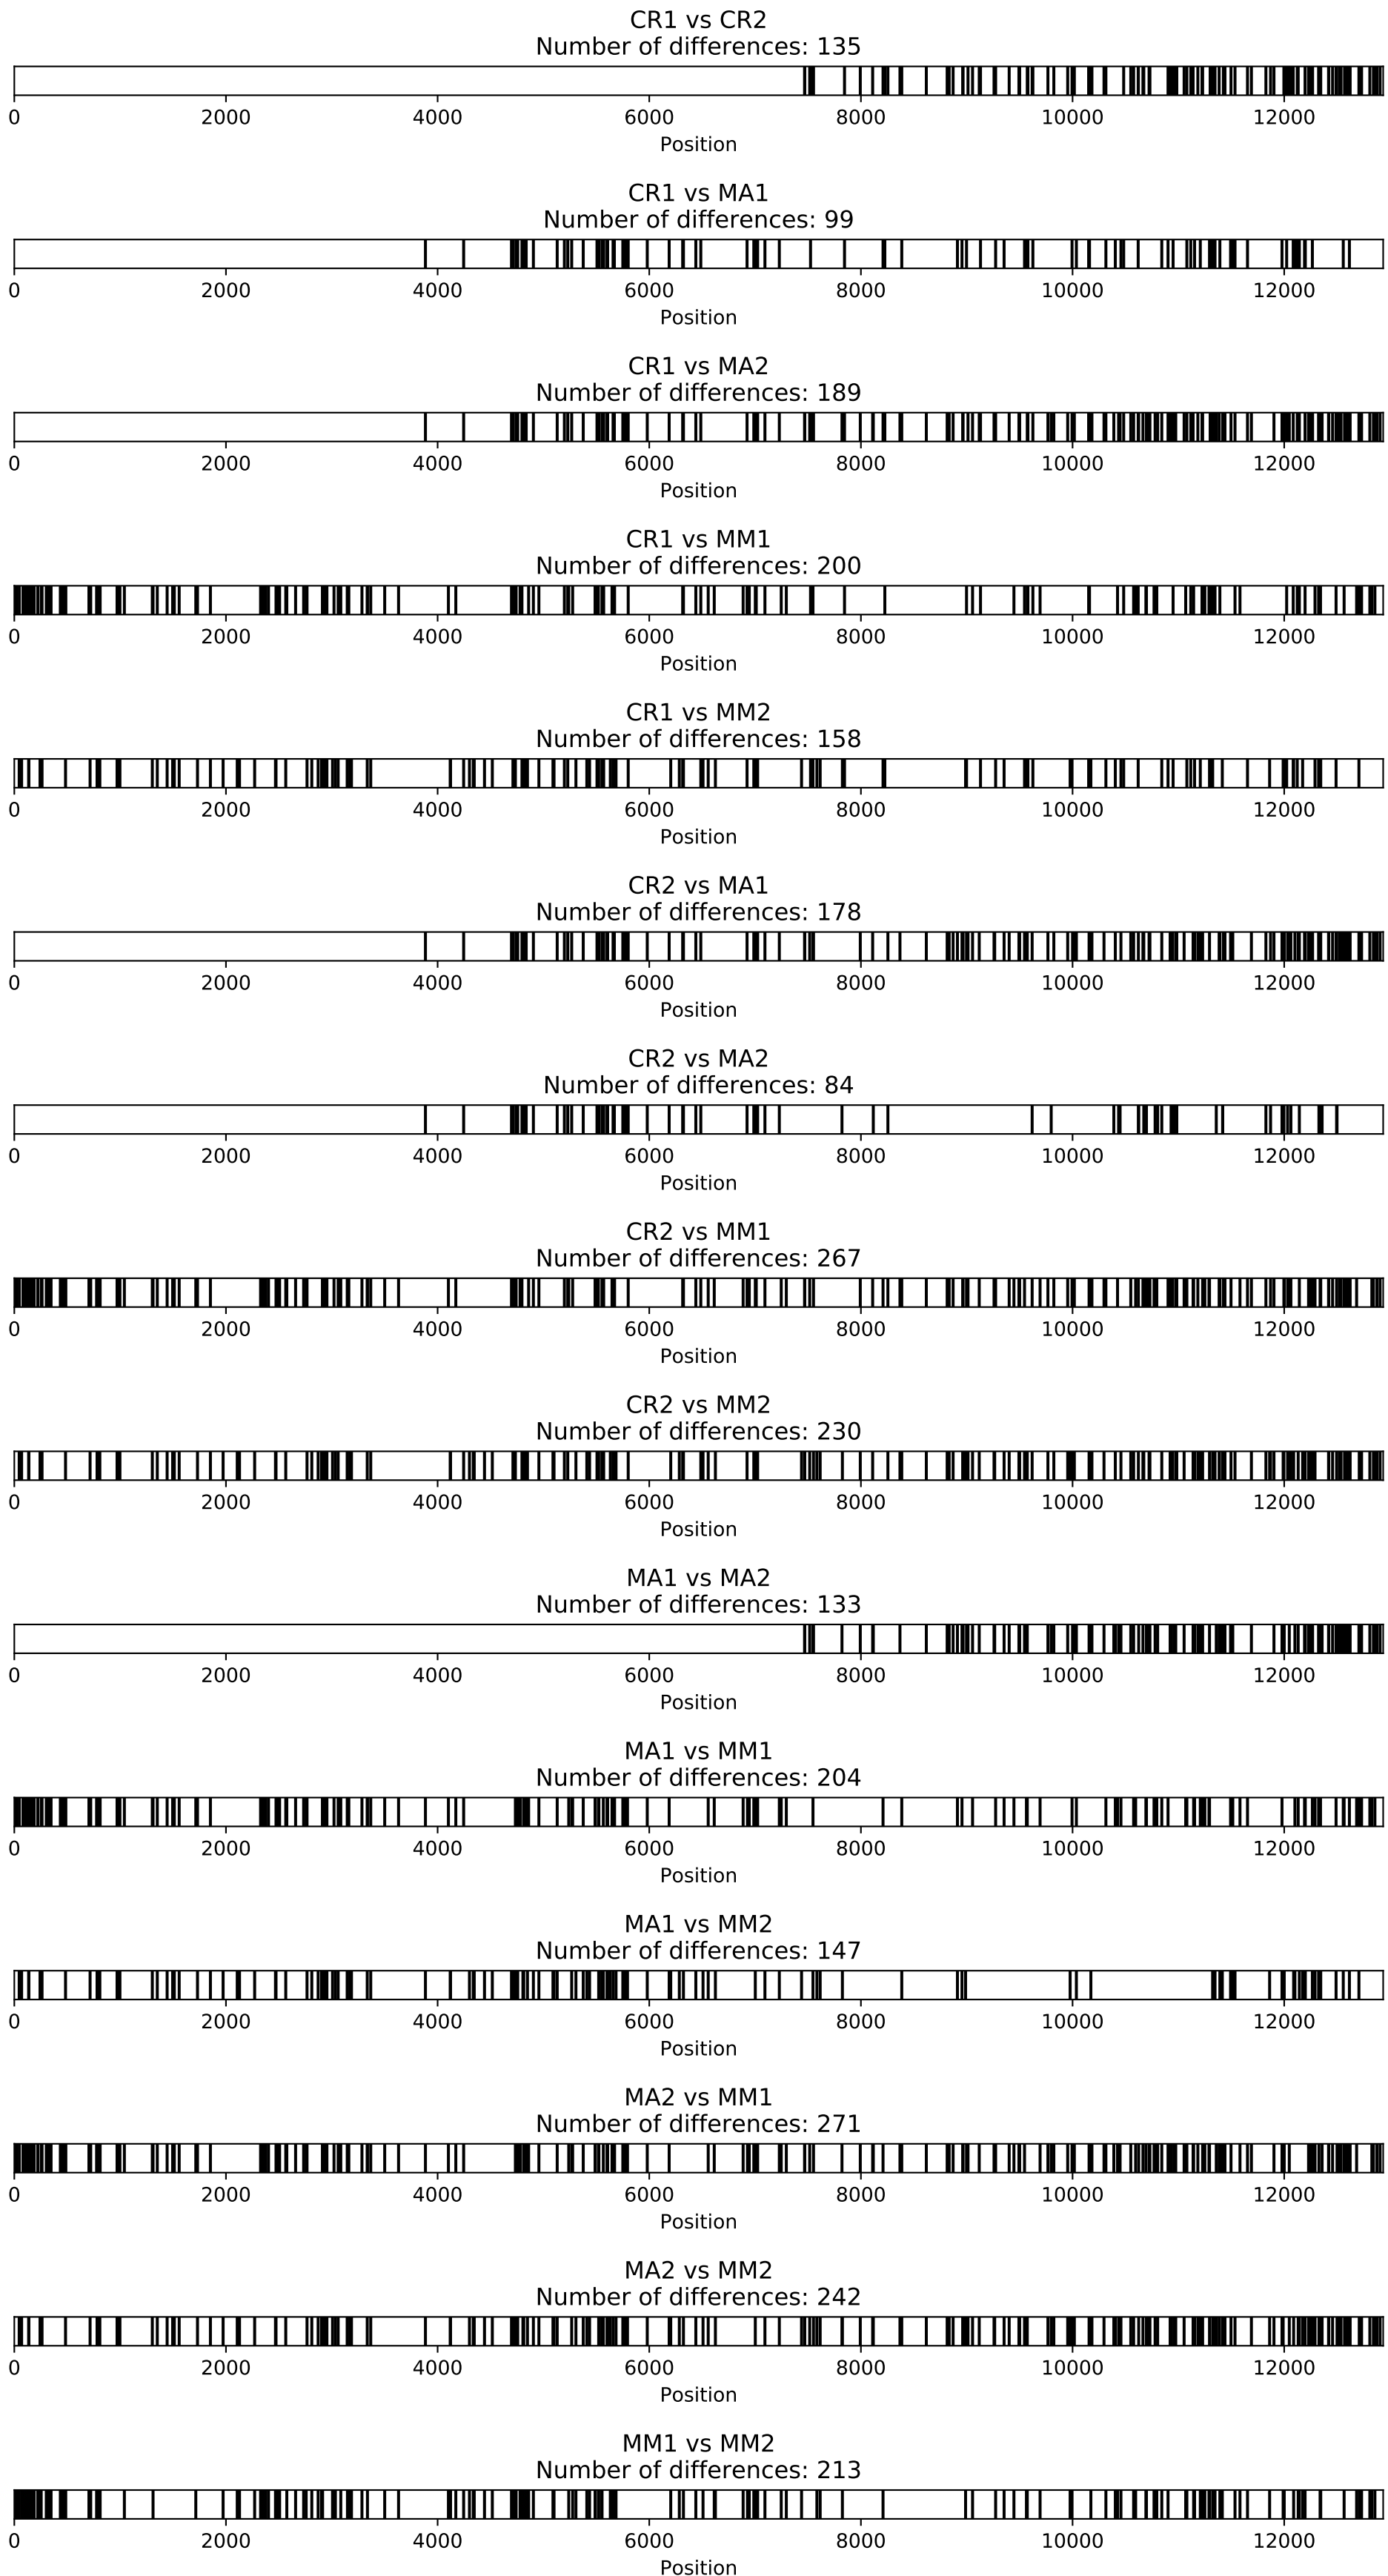

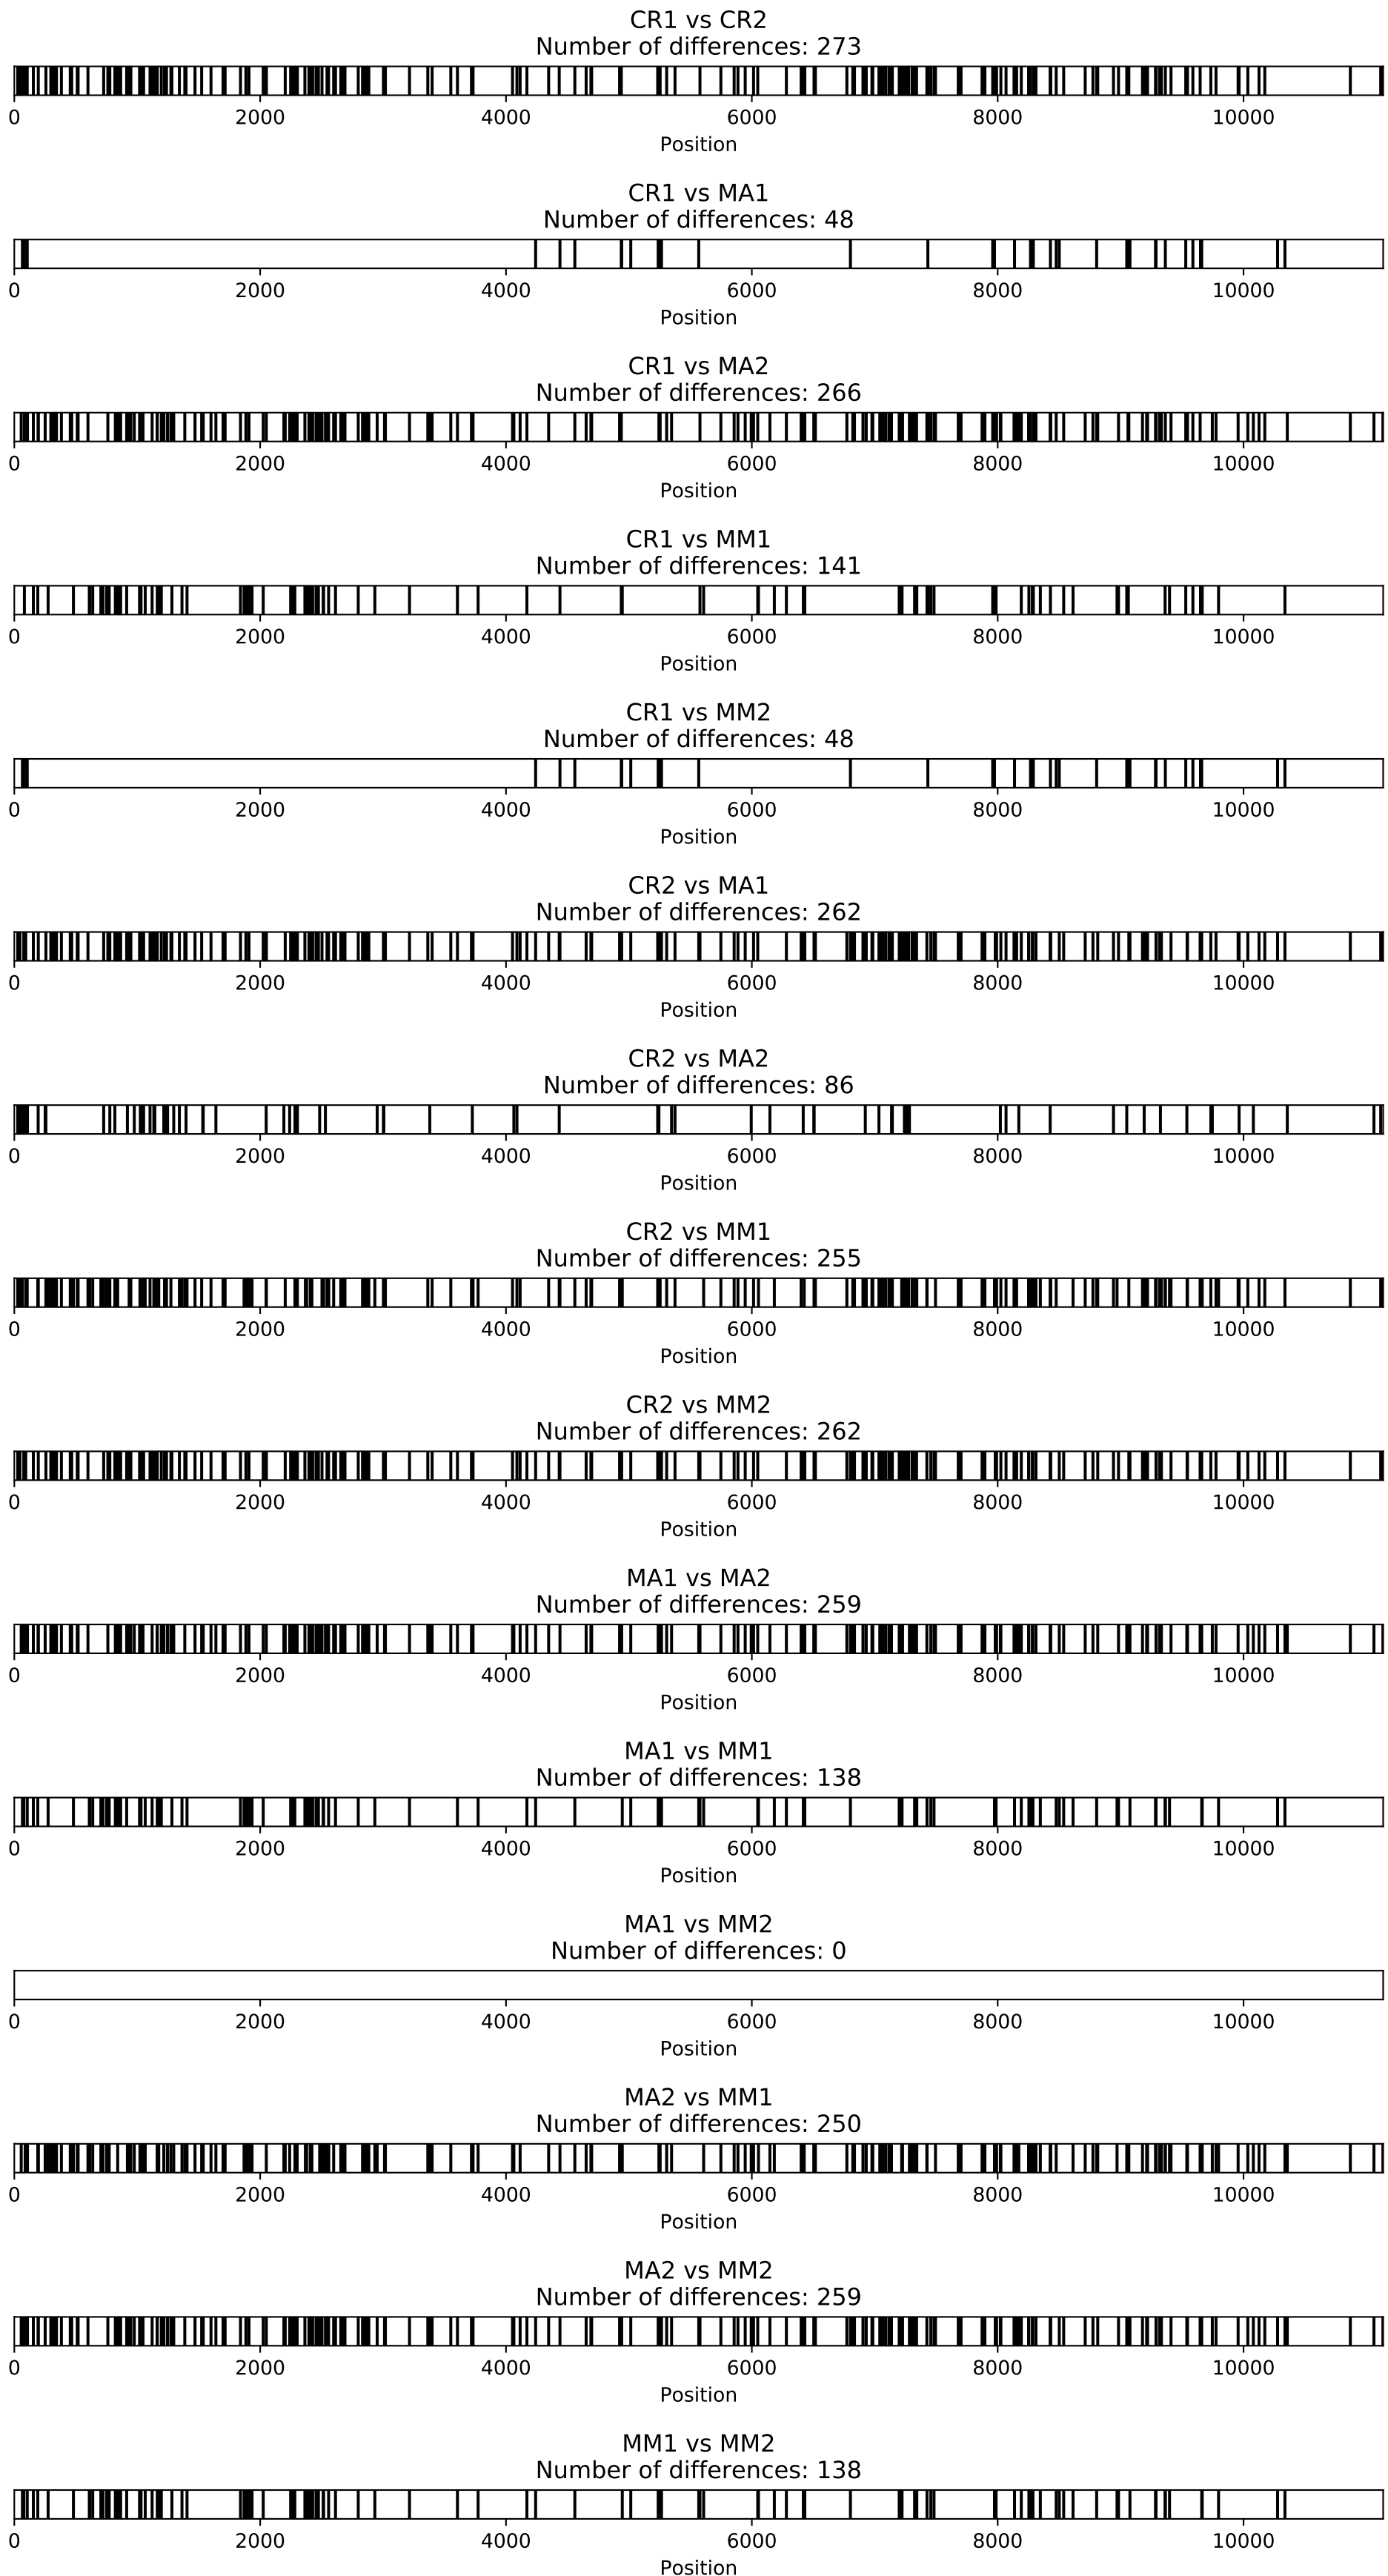



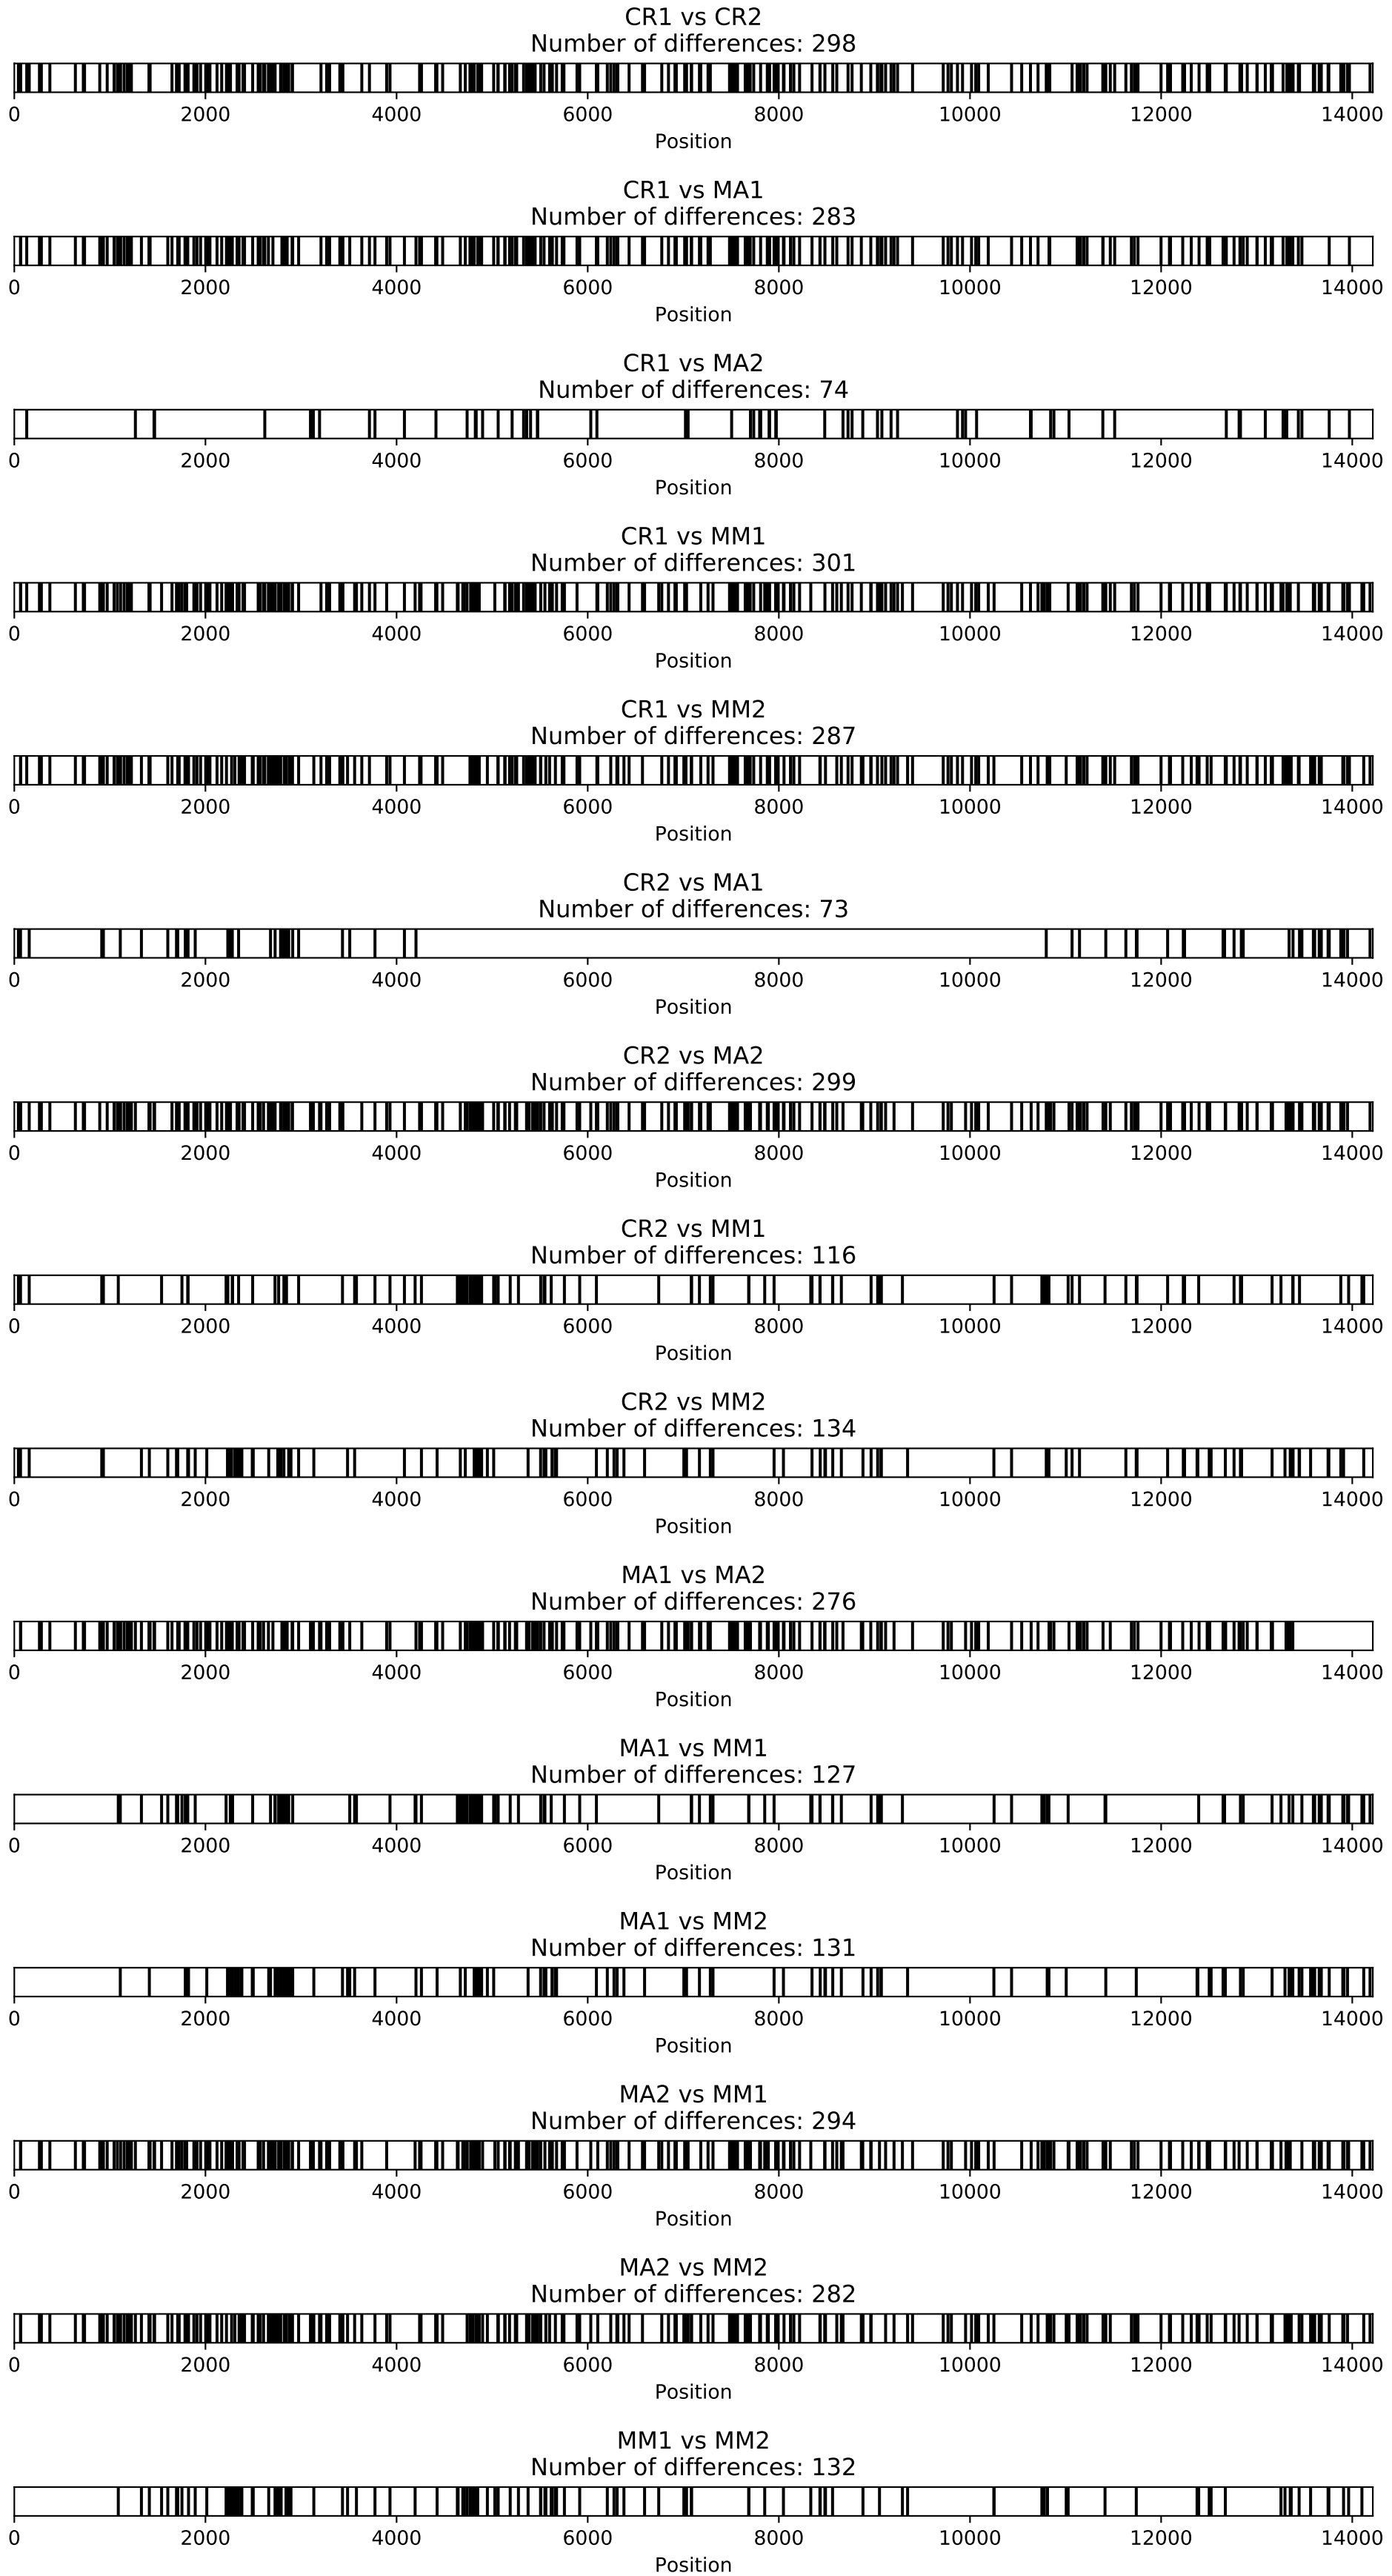

# Region: 220

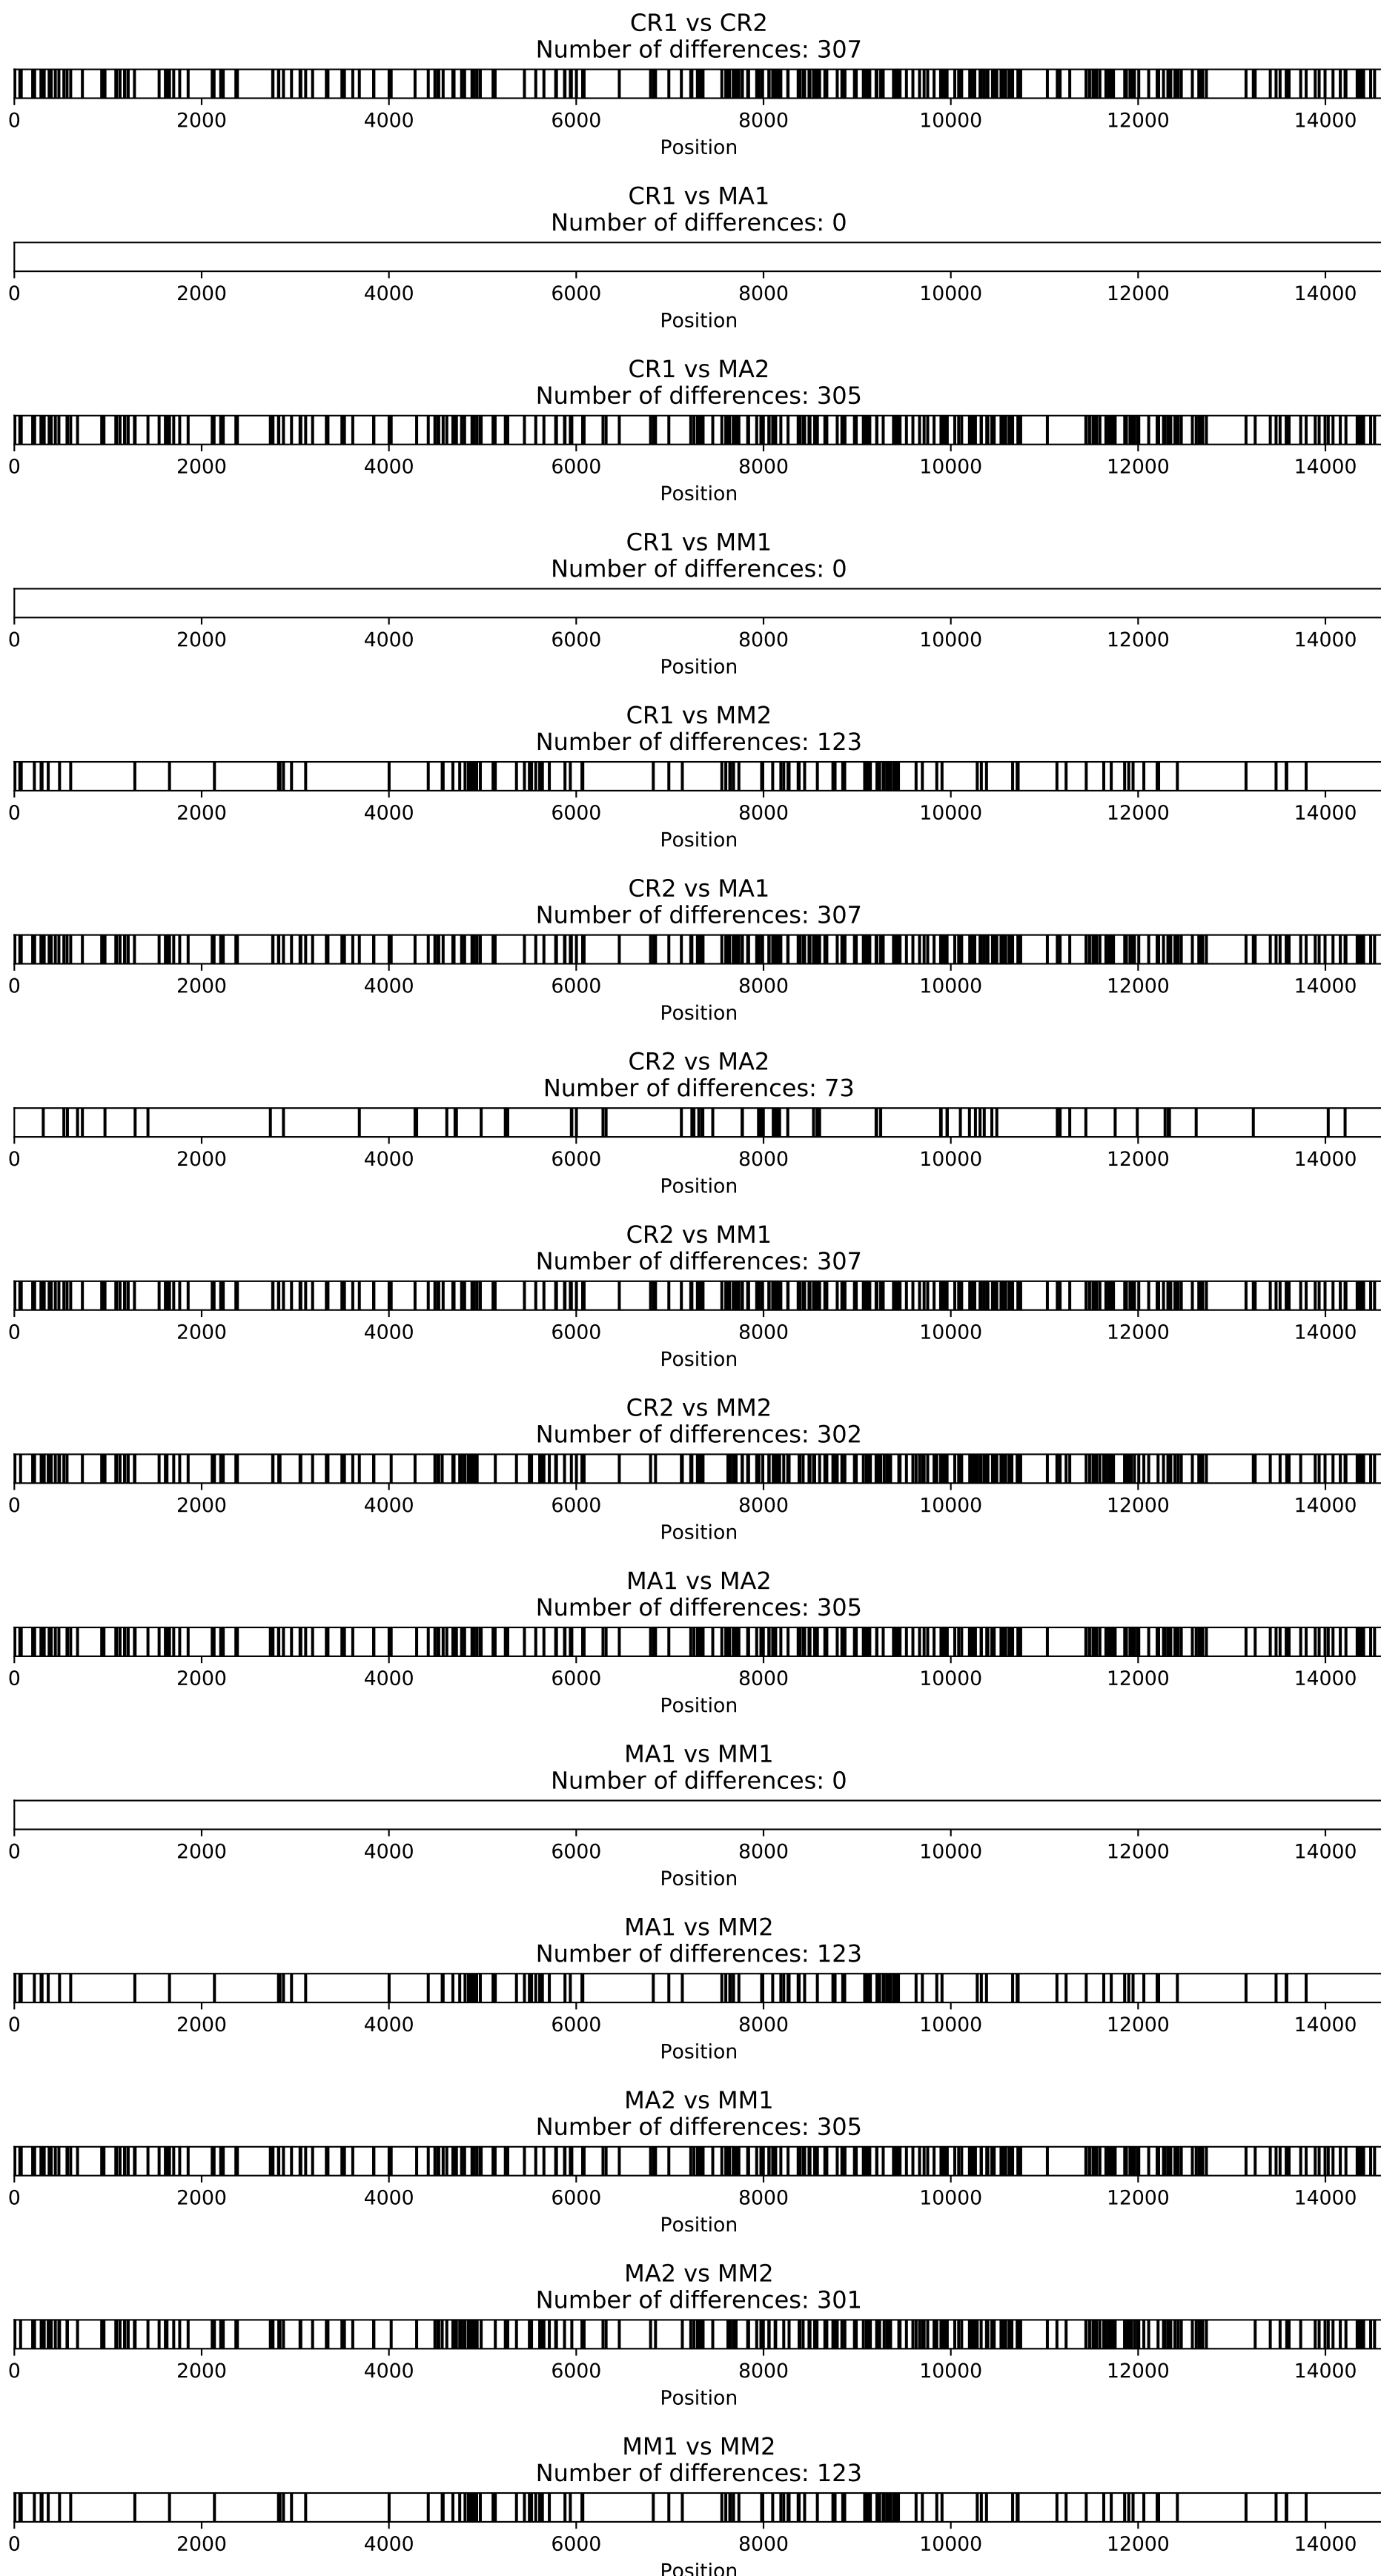

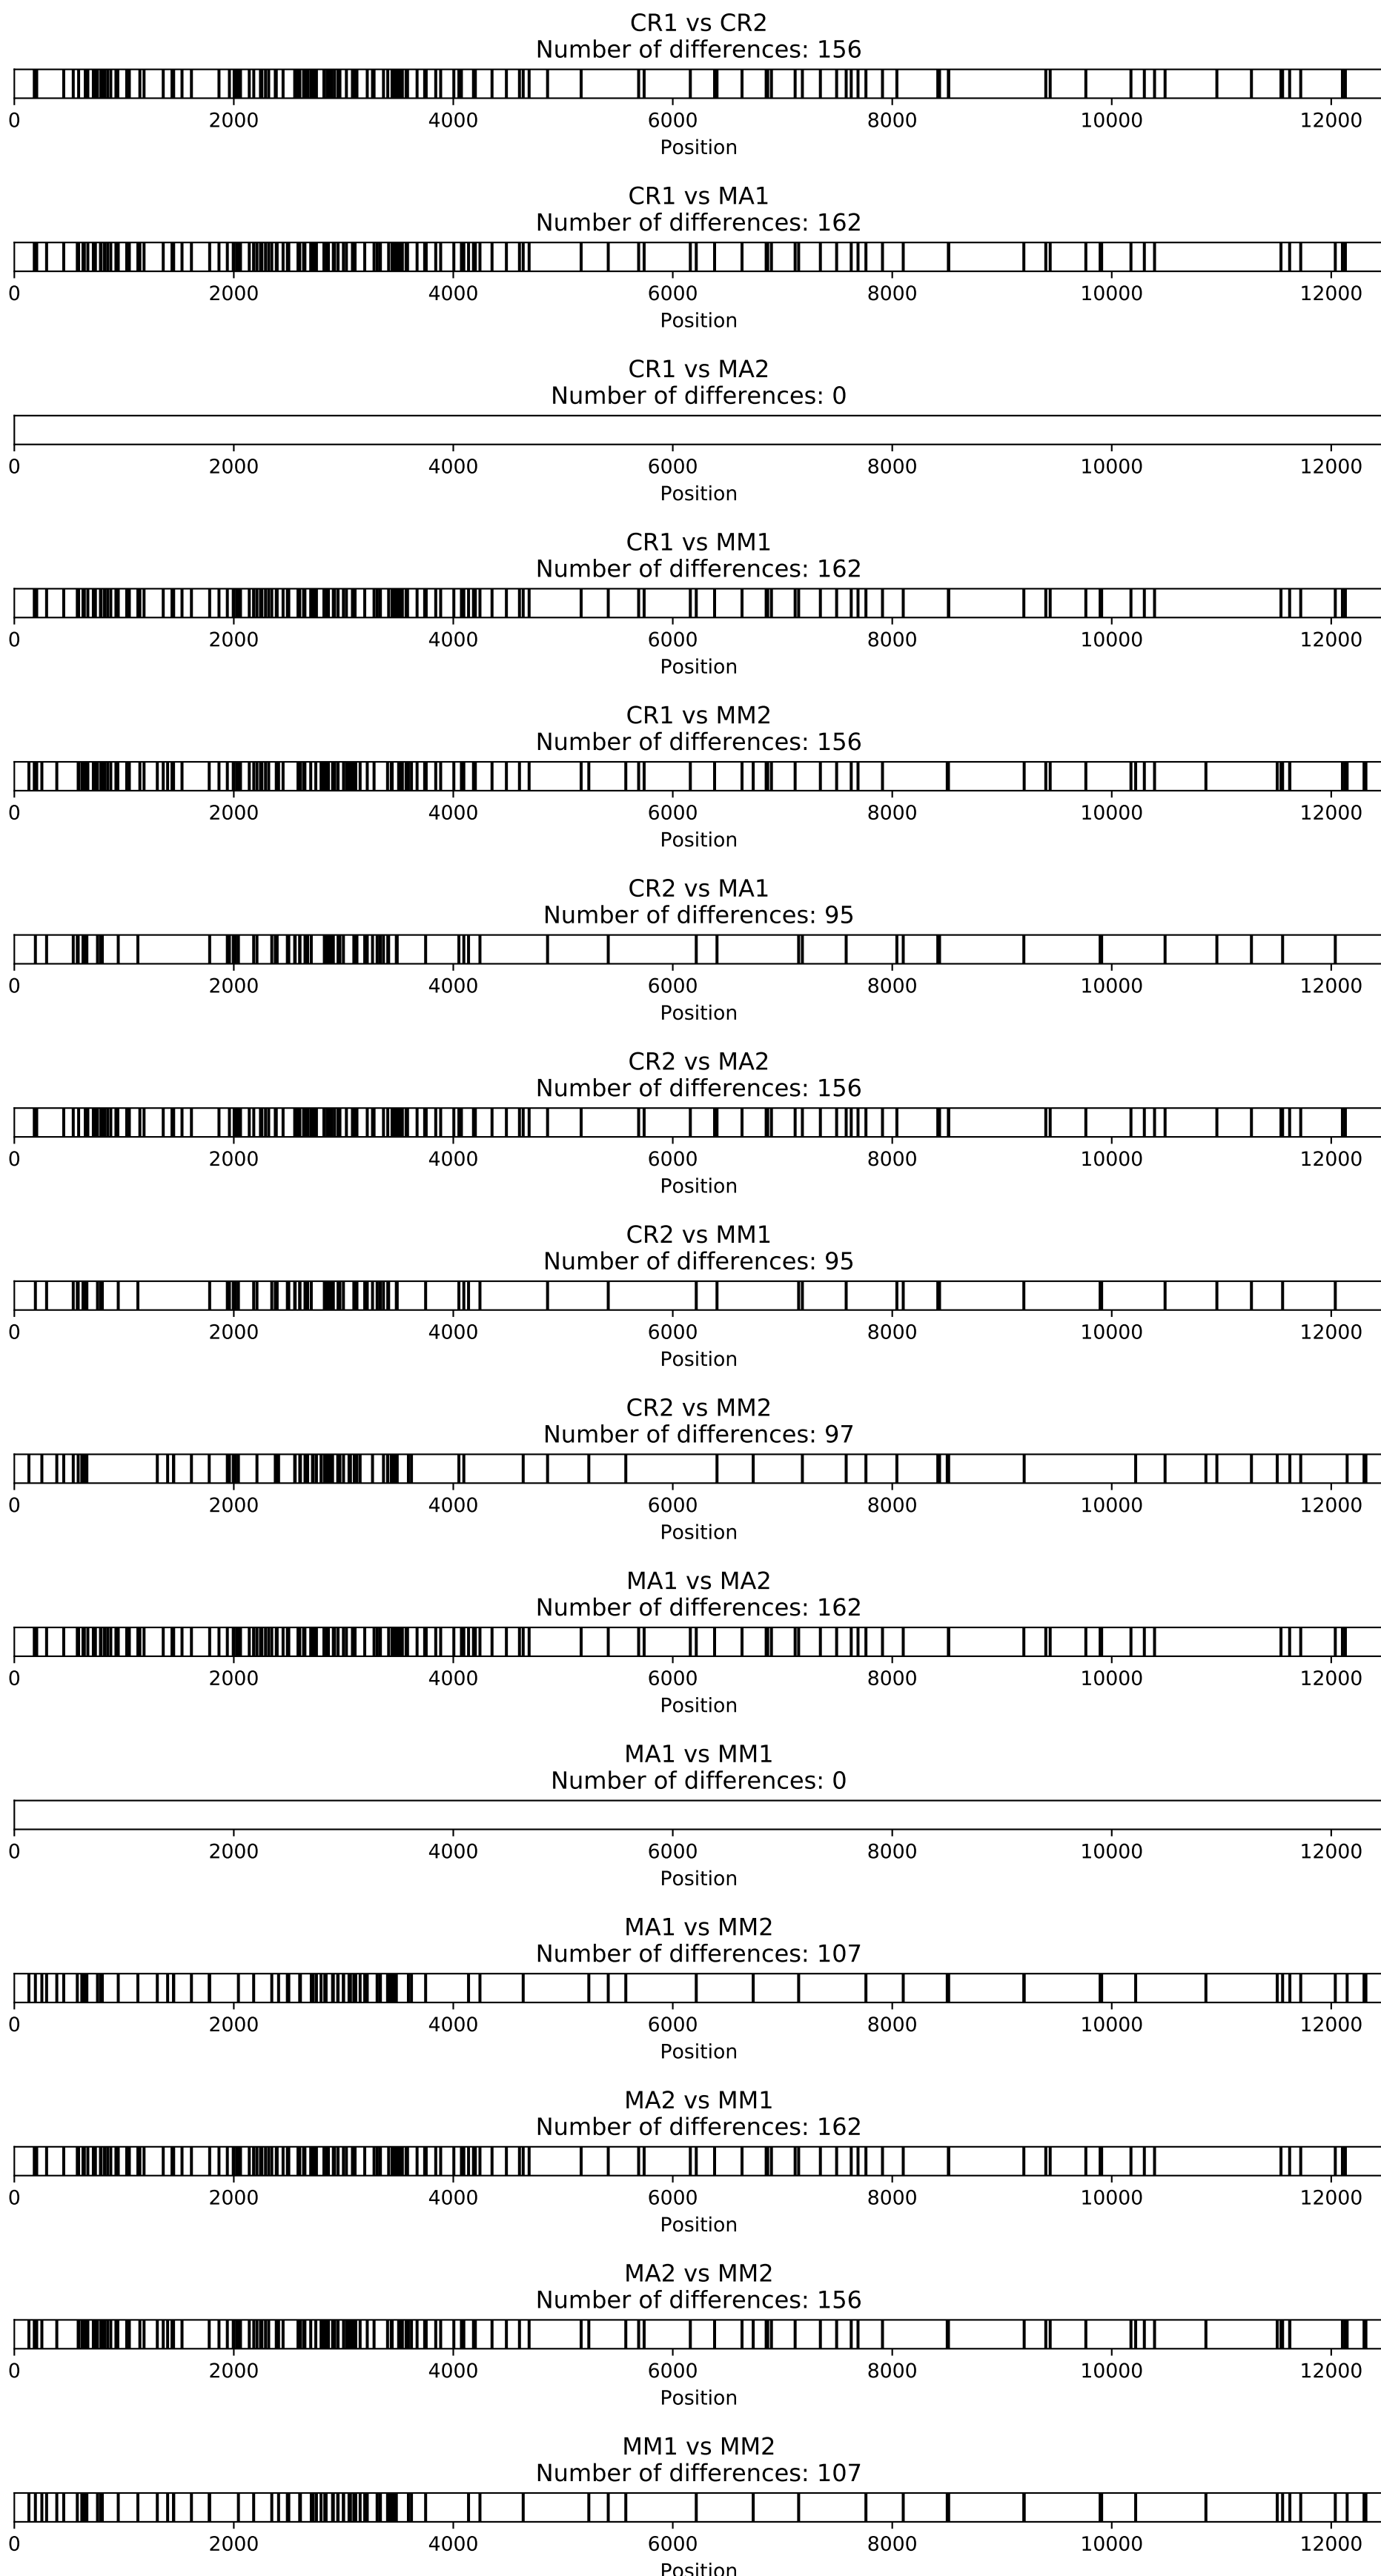

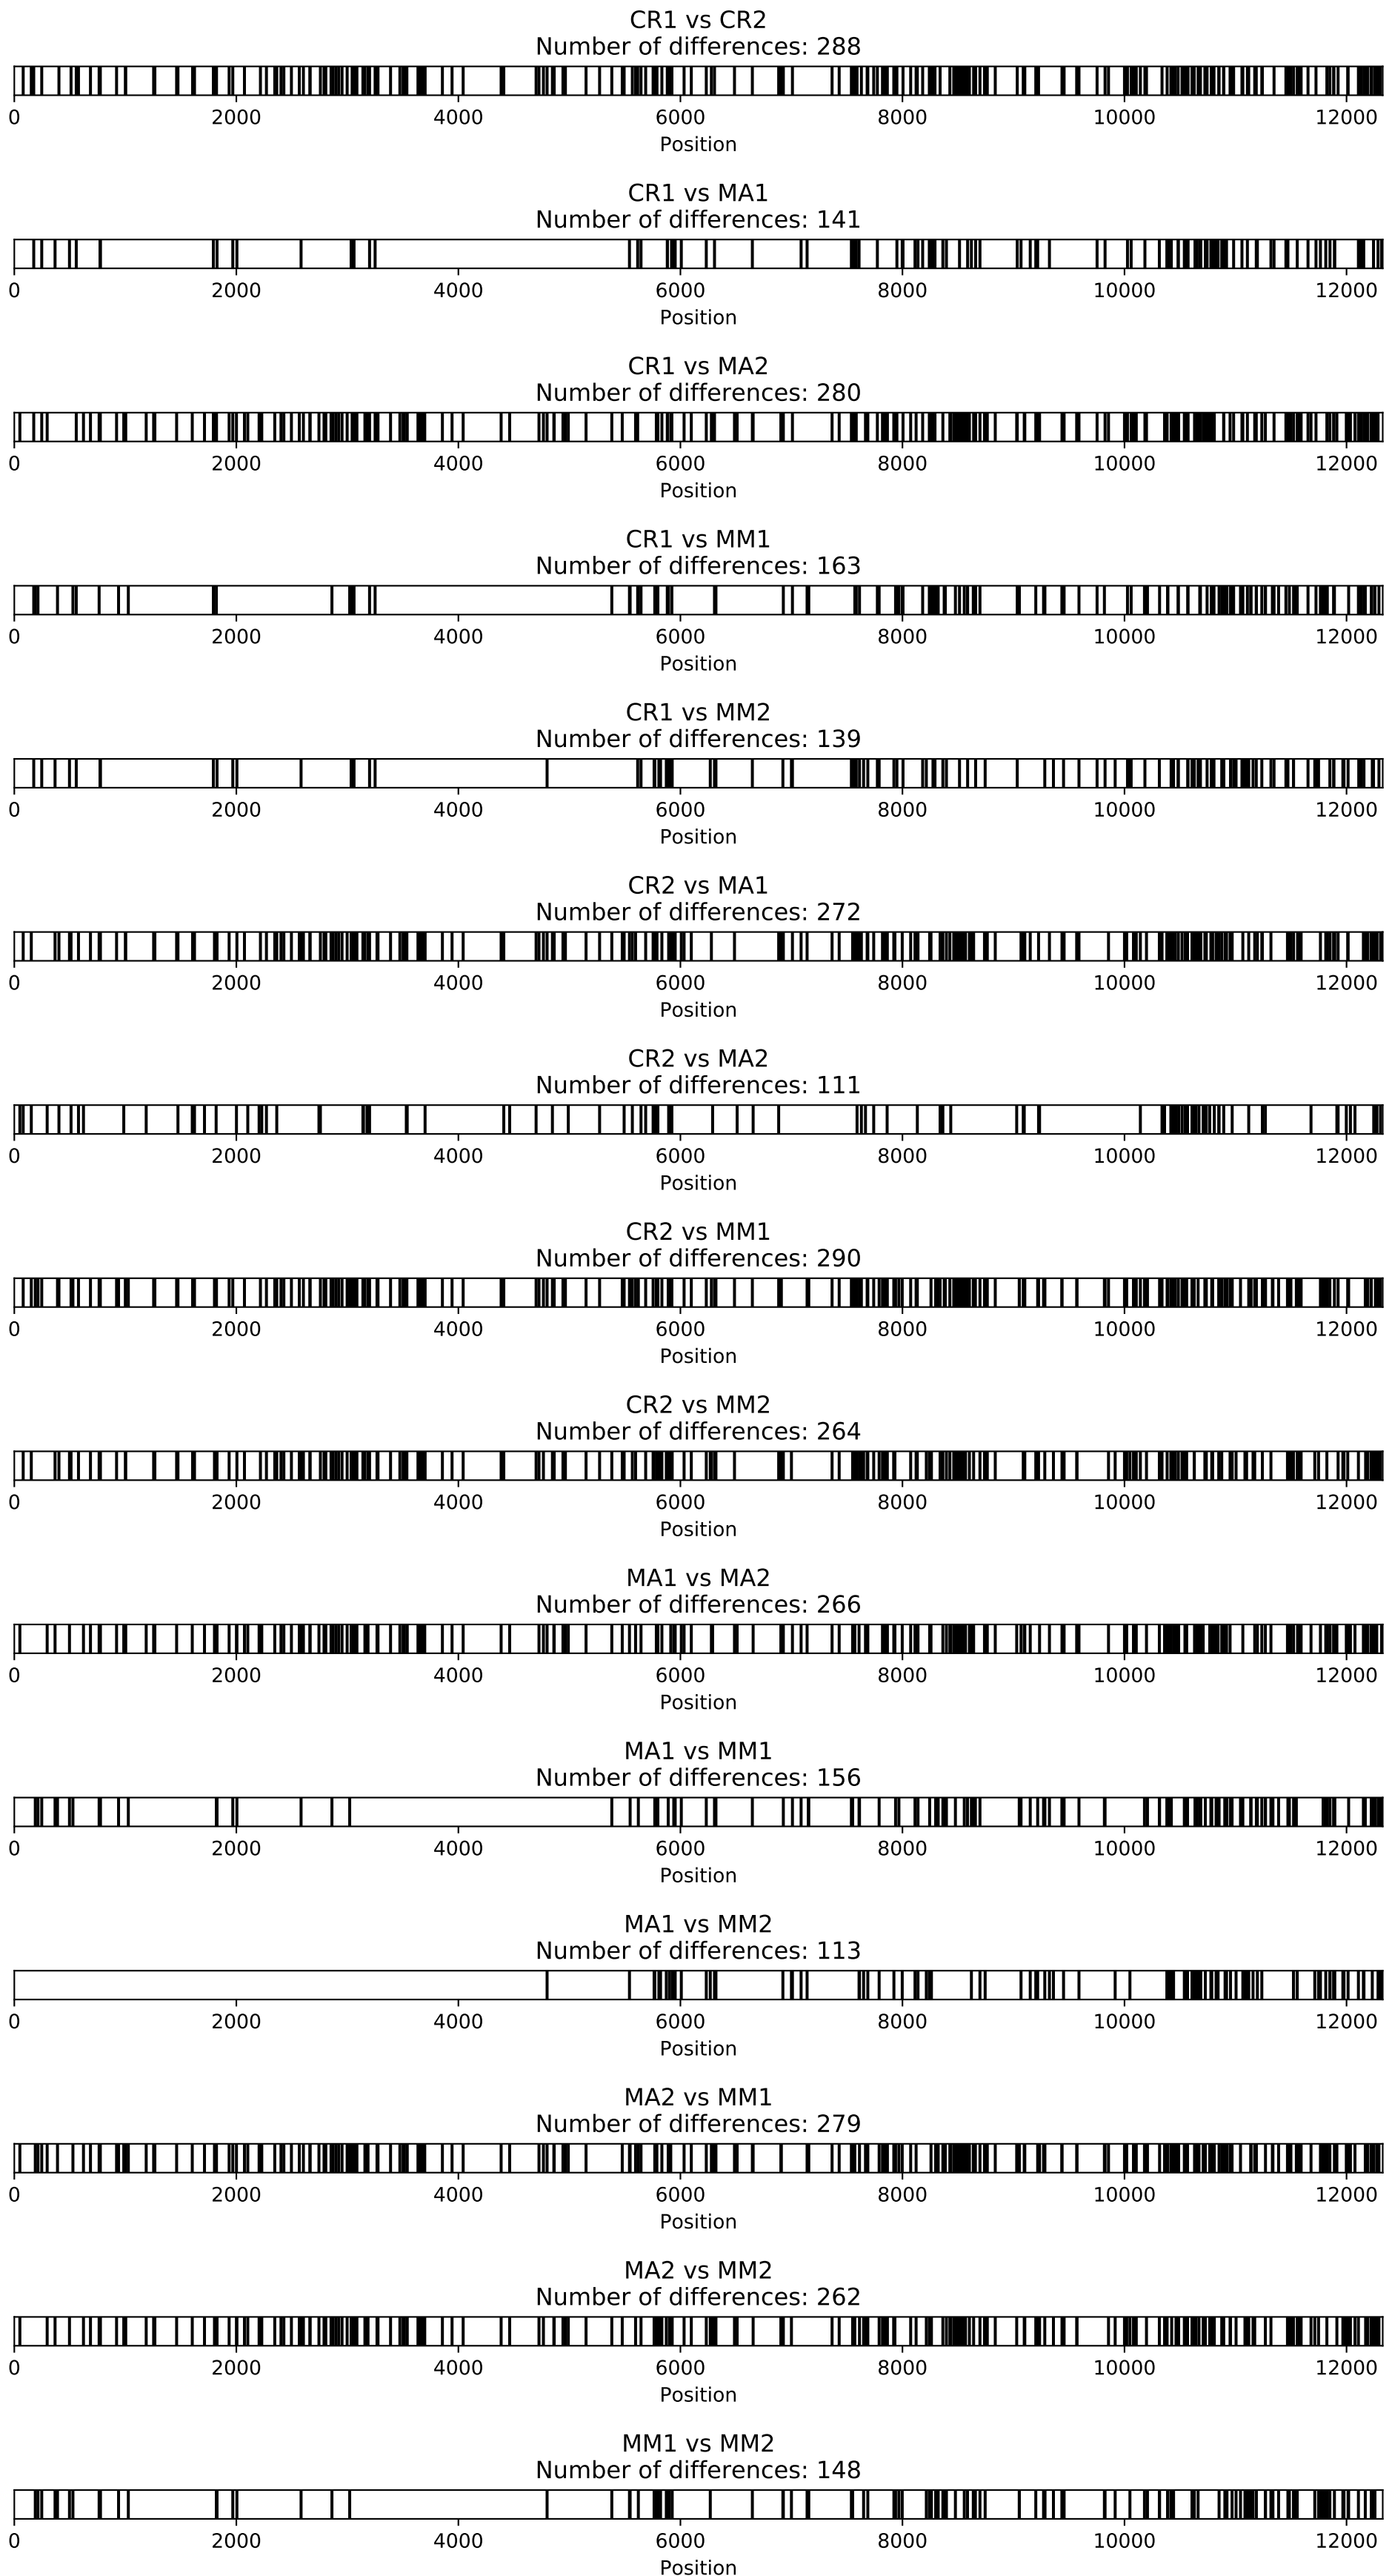

# Region: 224

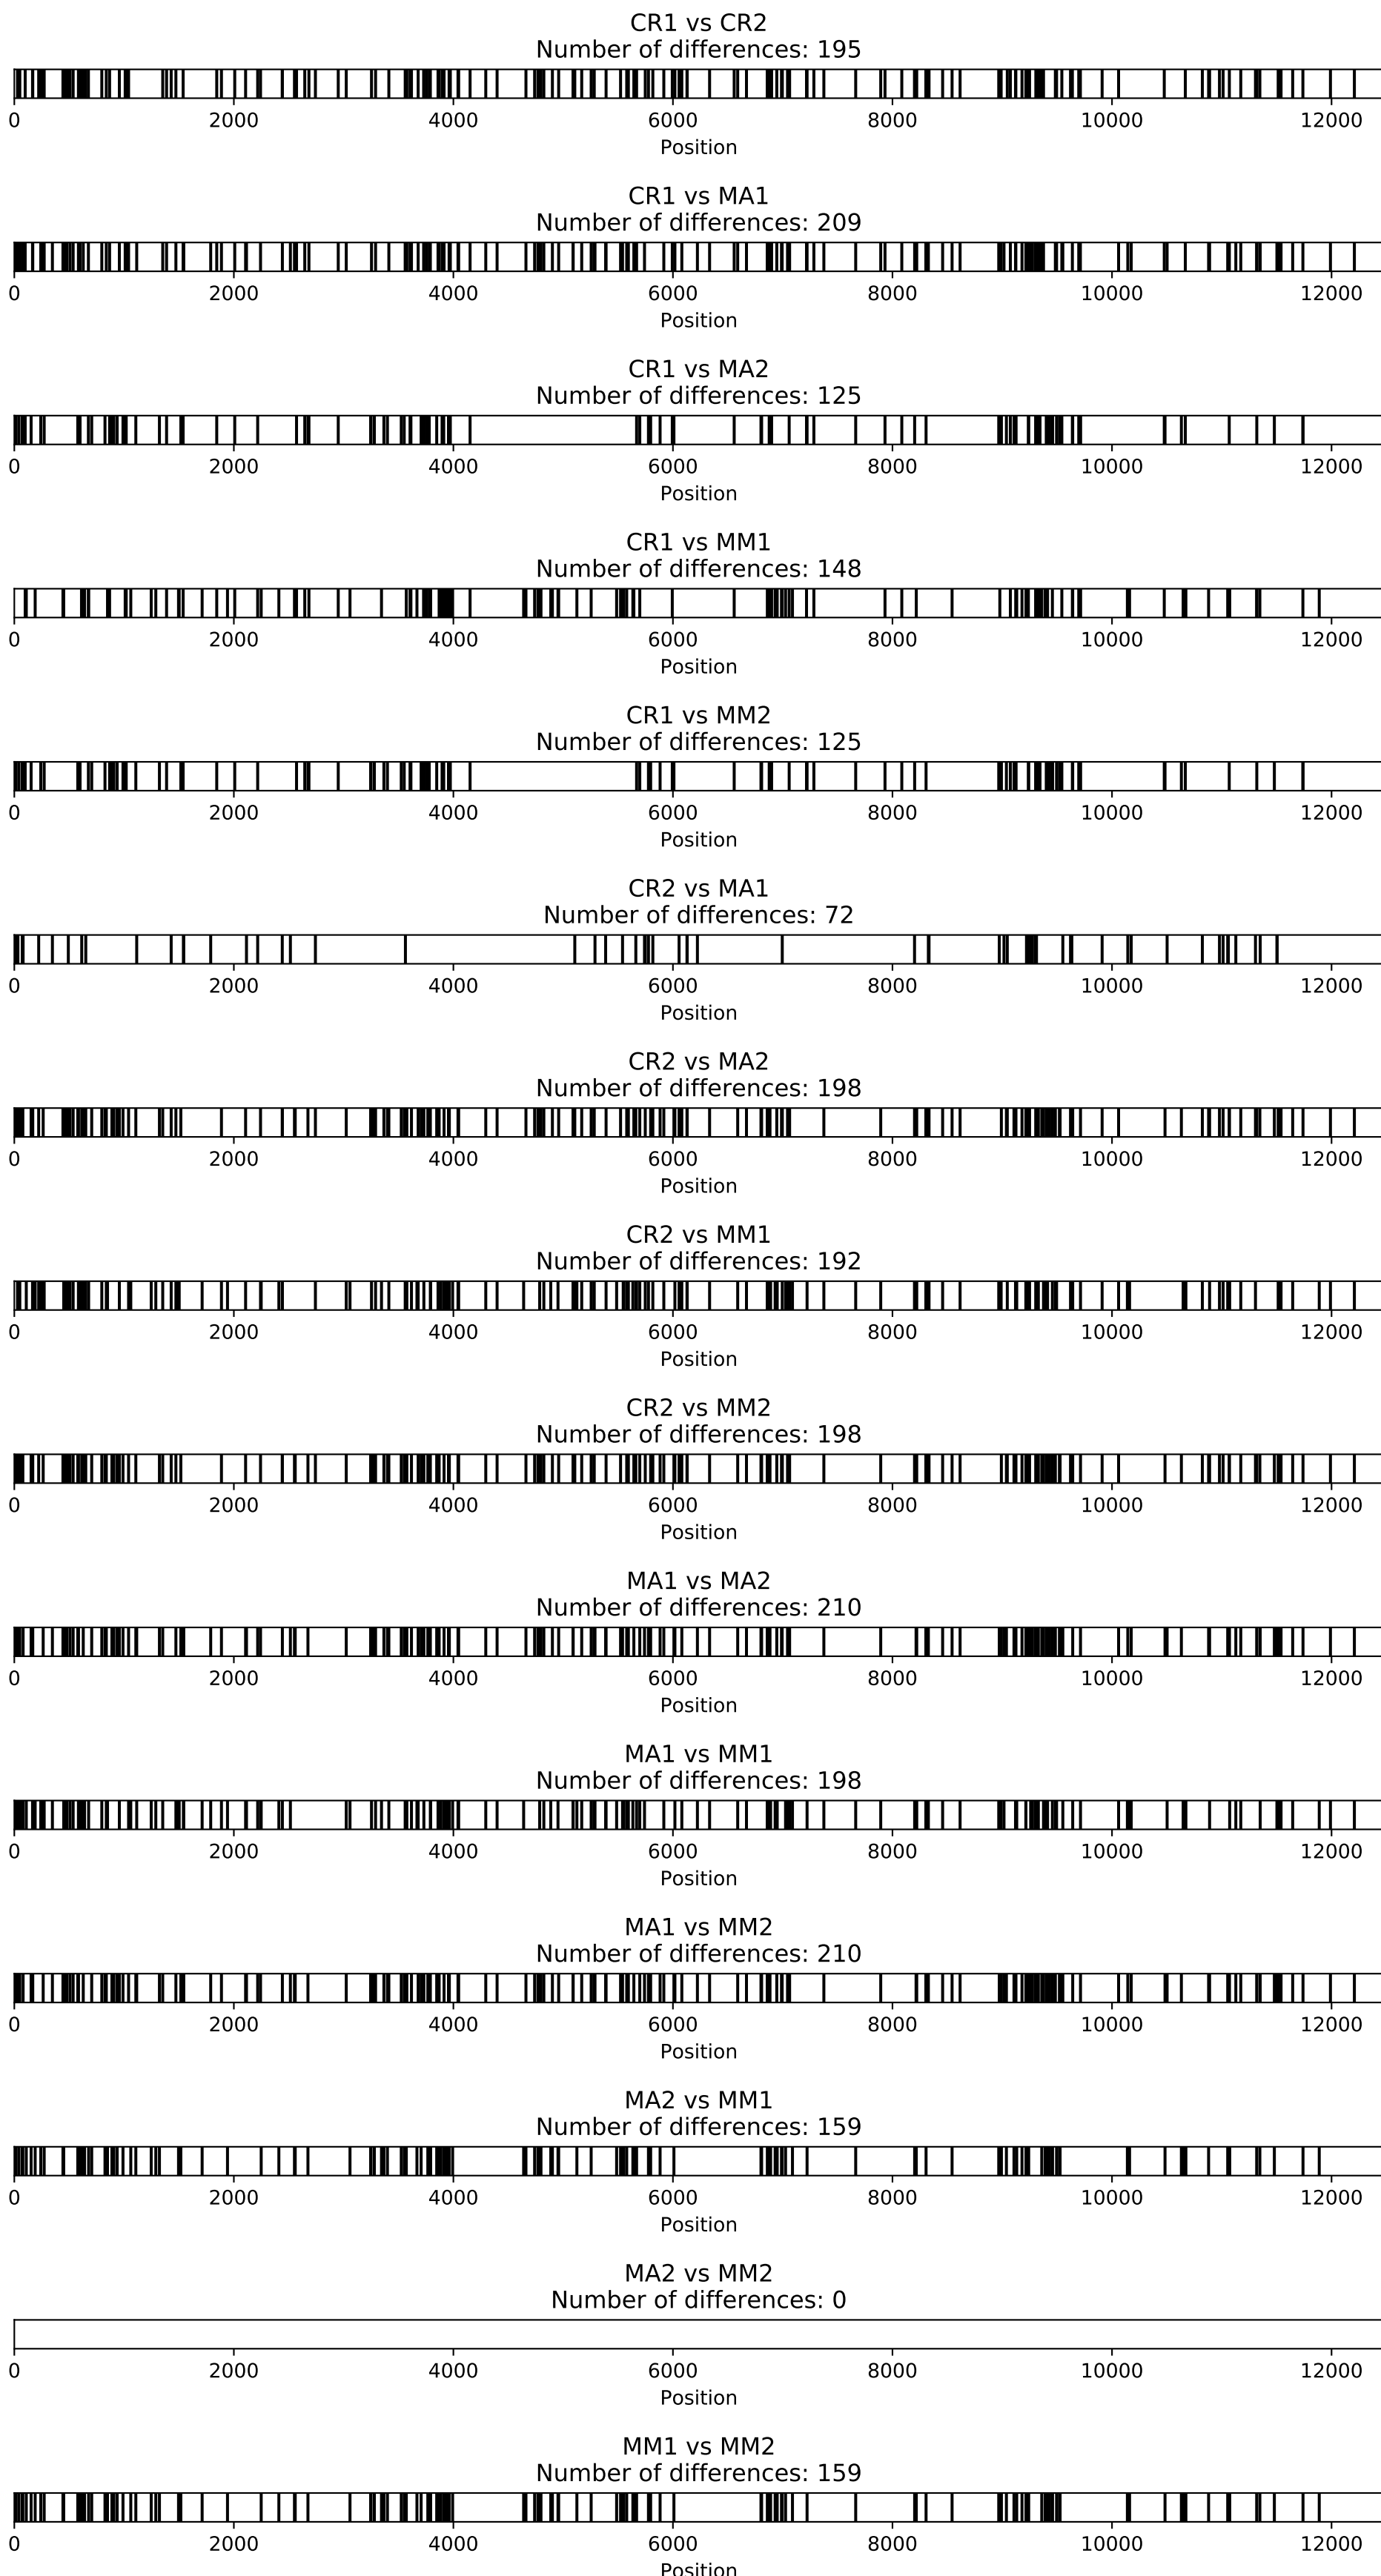

# Region: 227

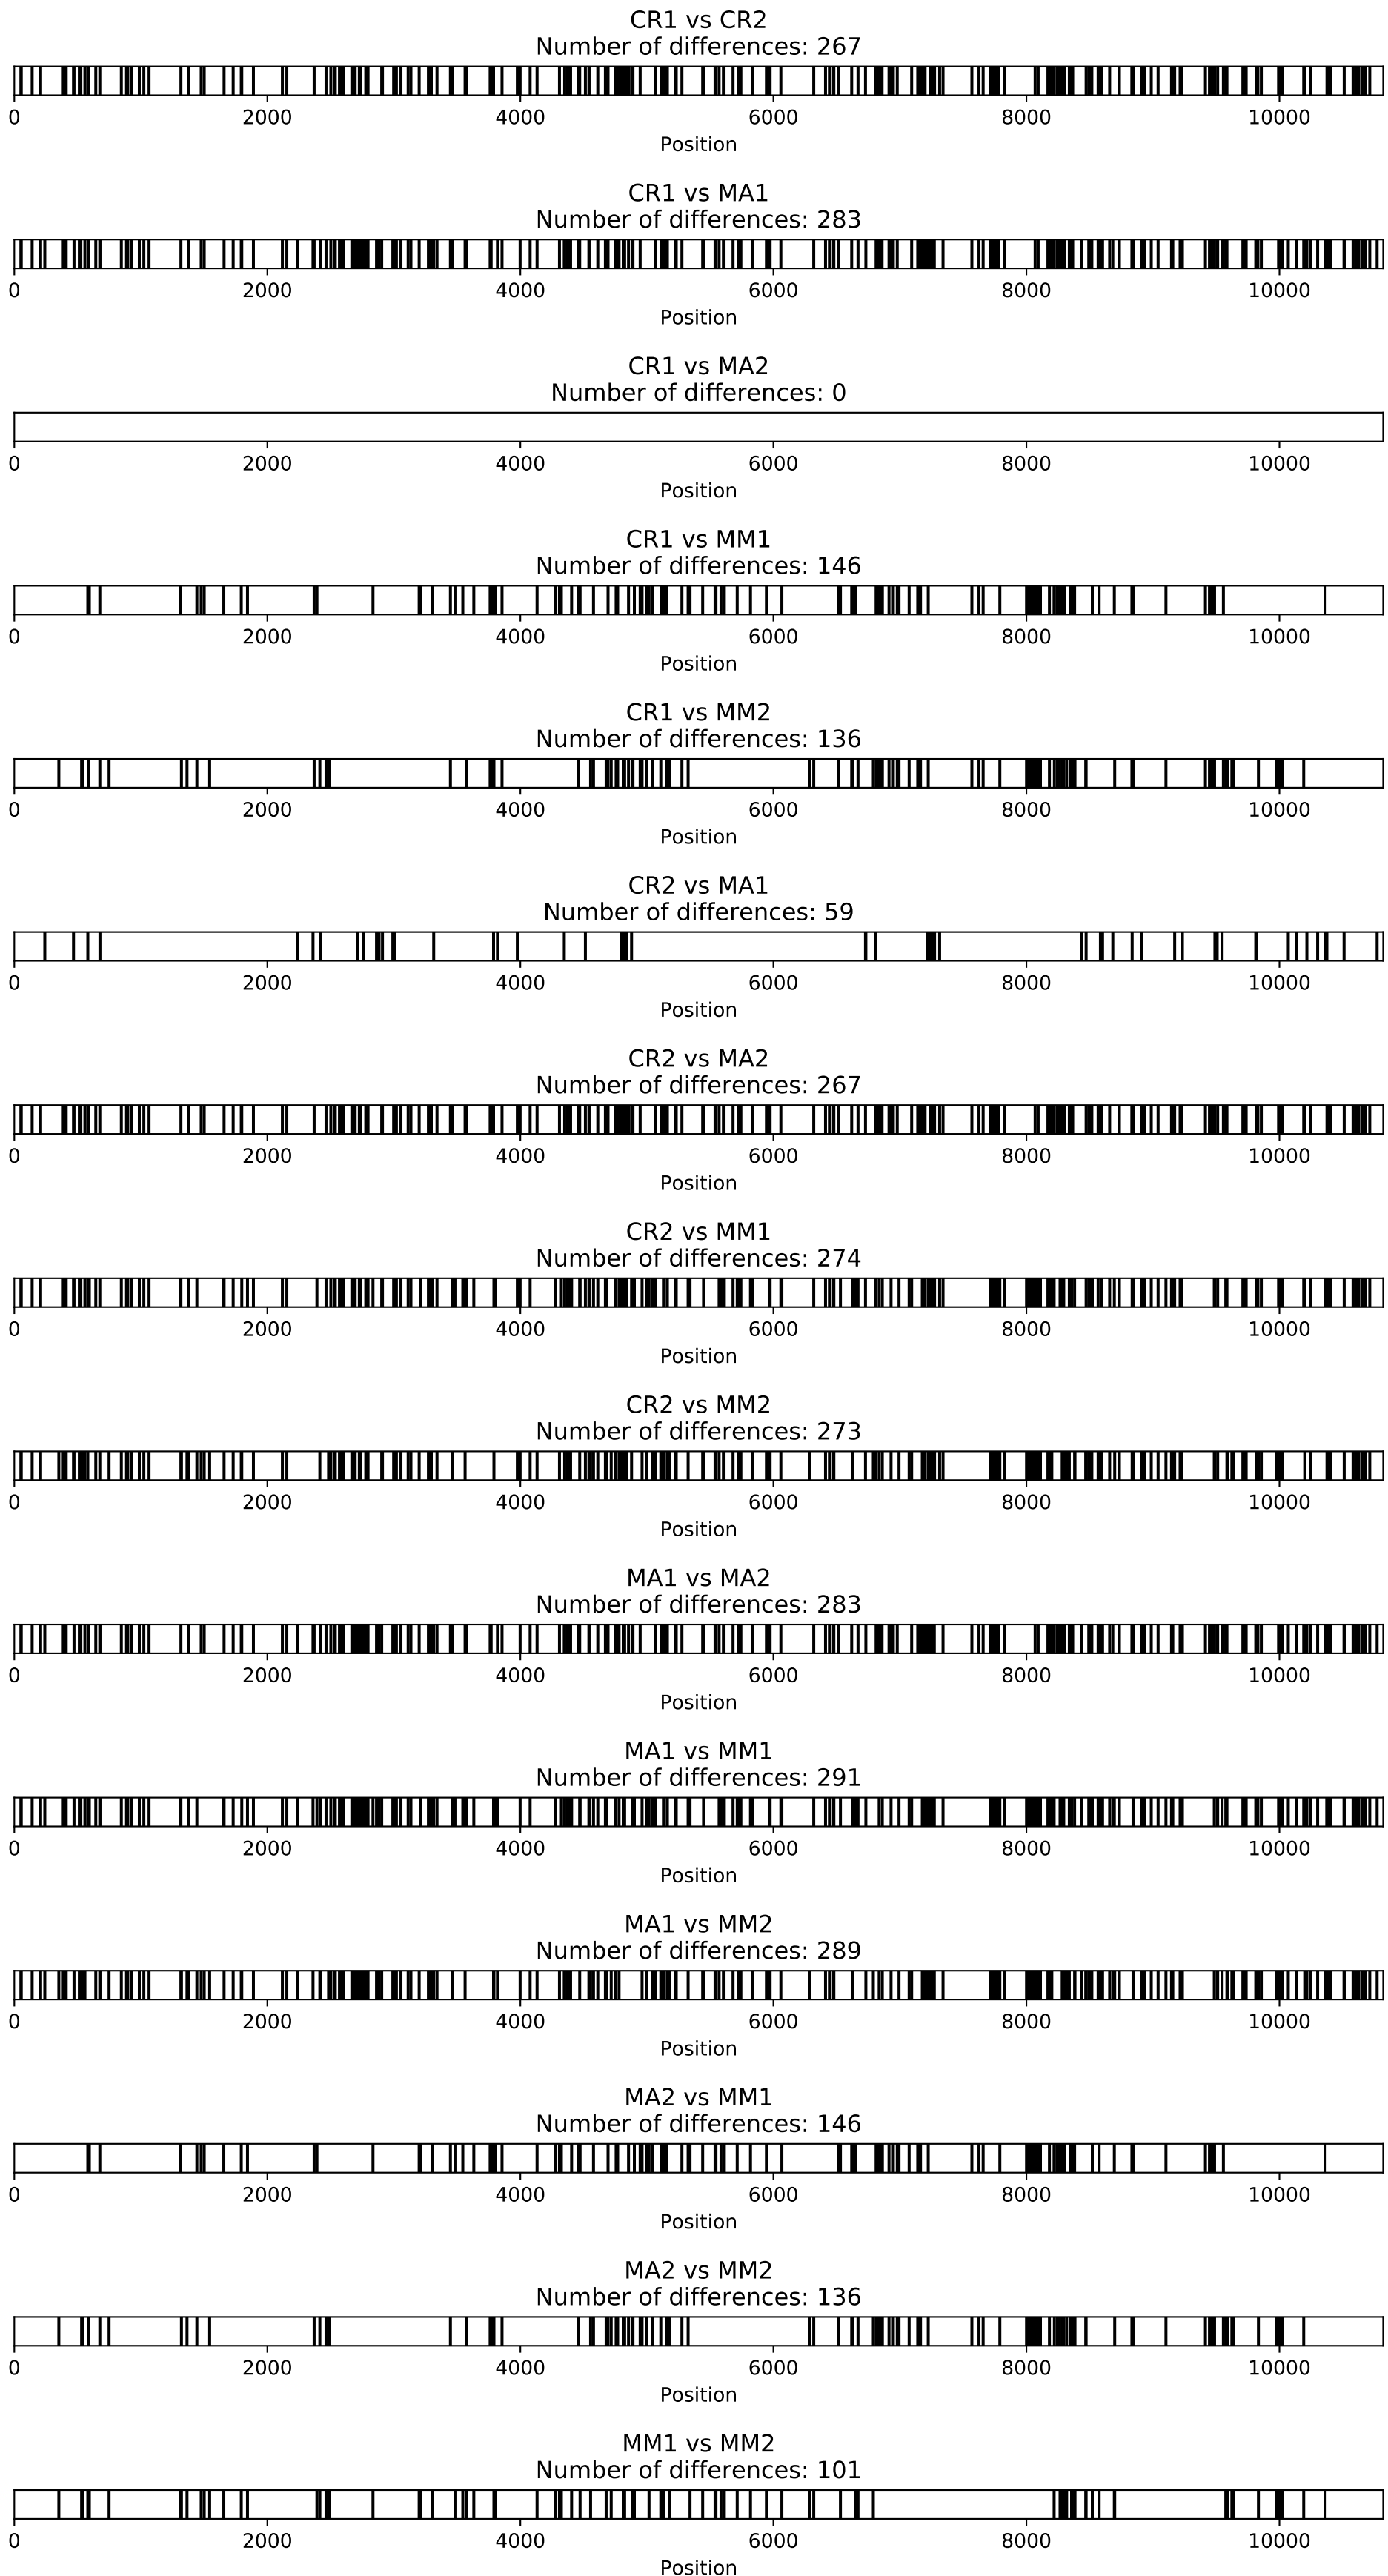

# Region: 228

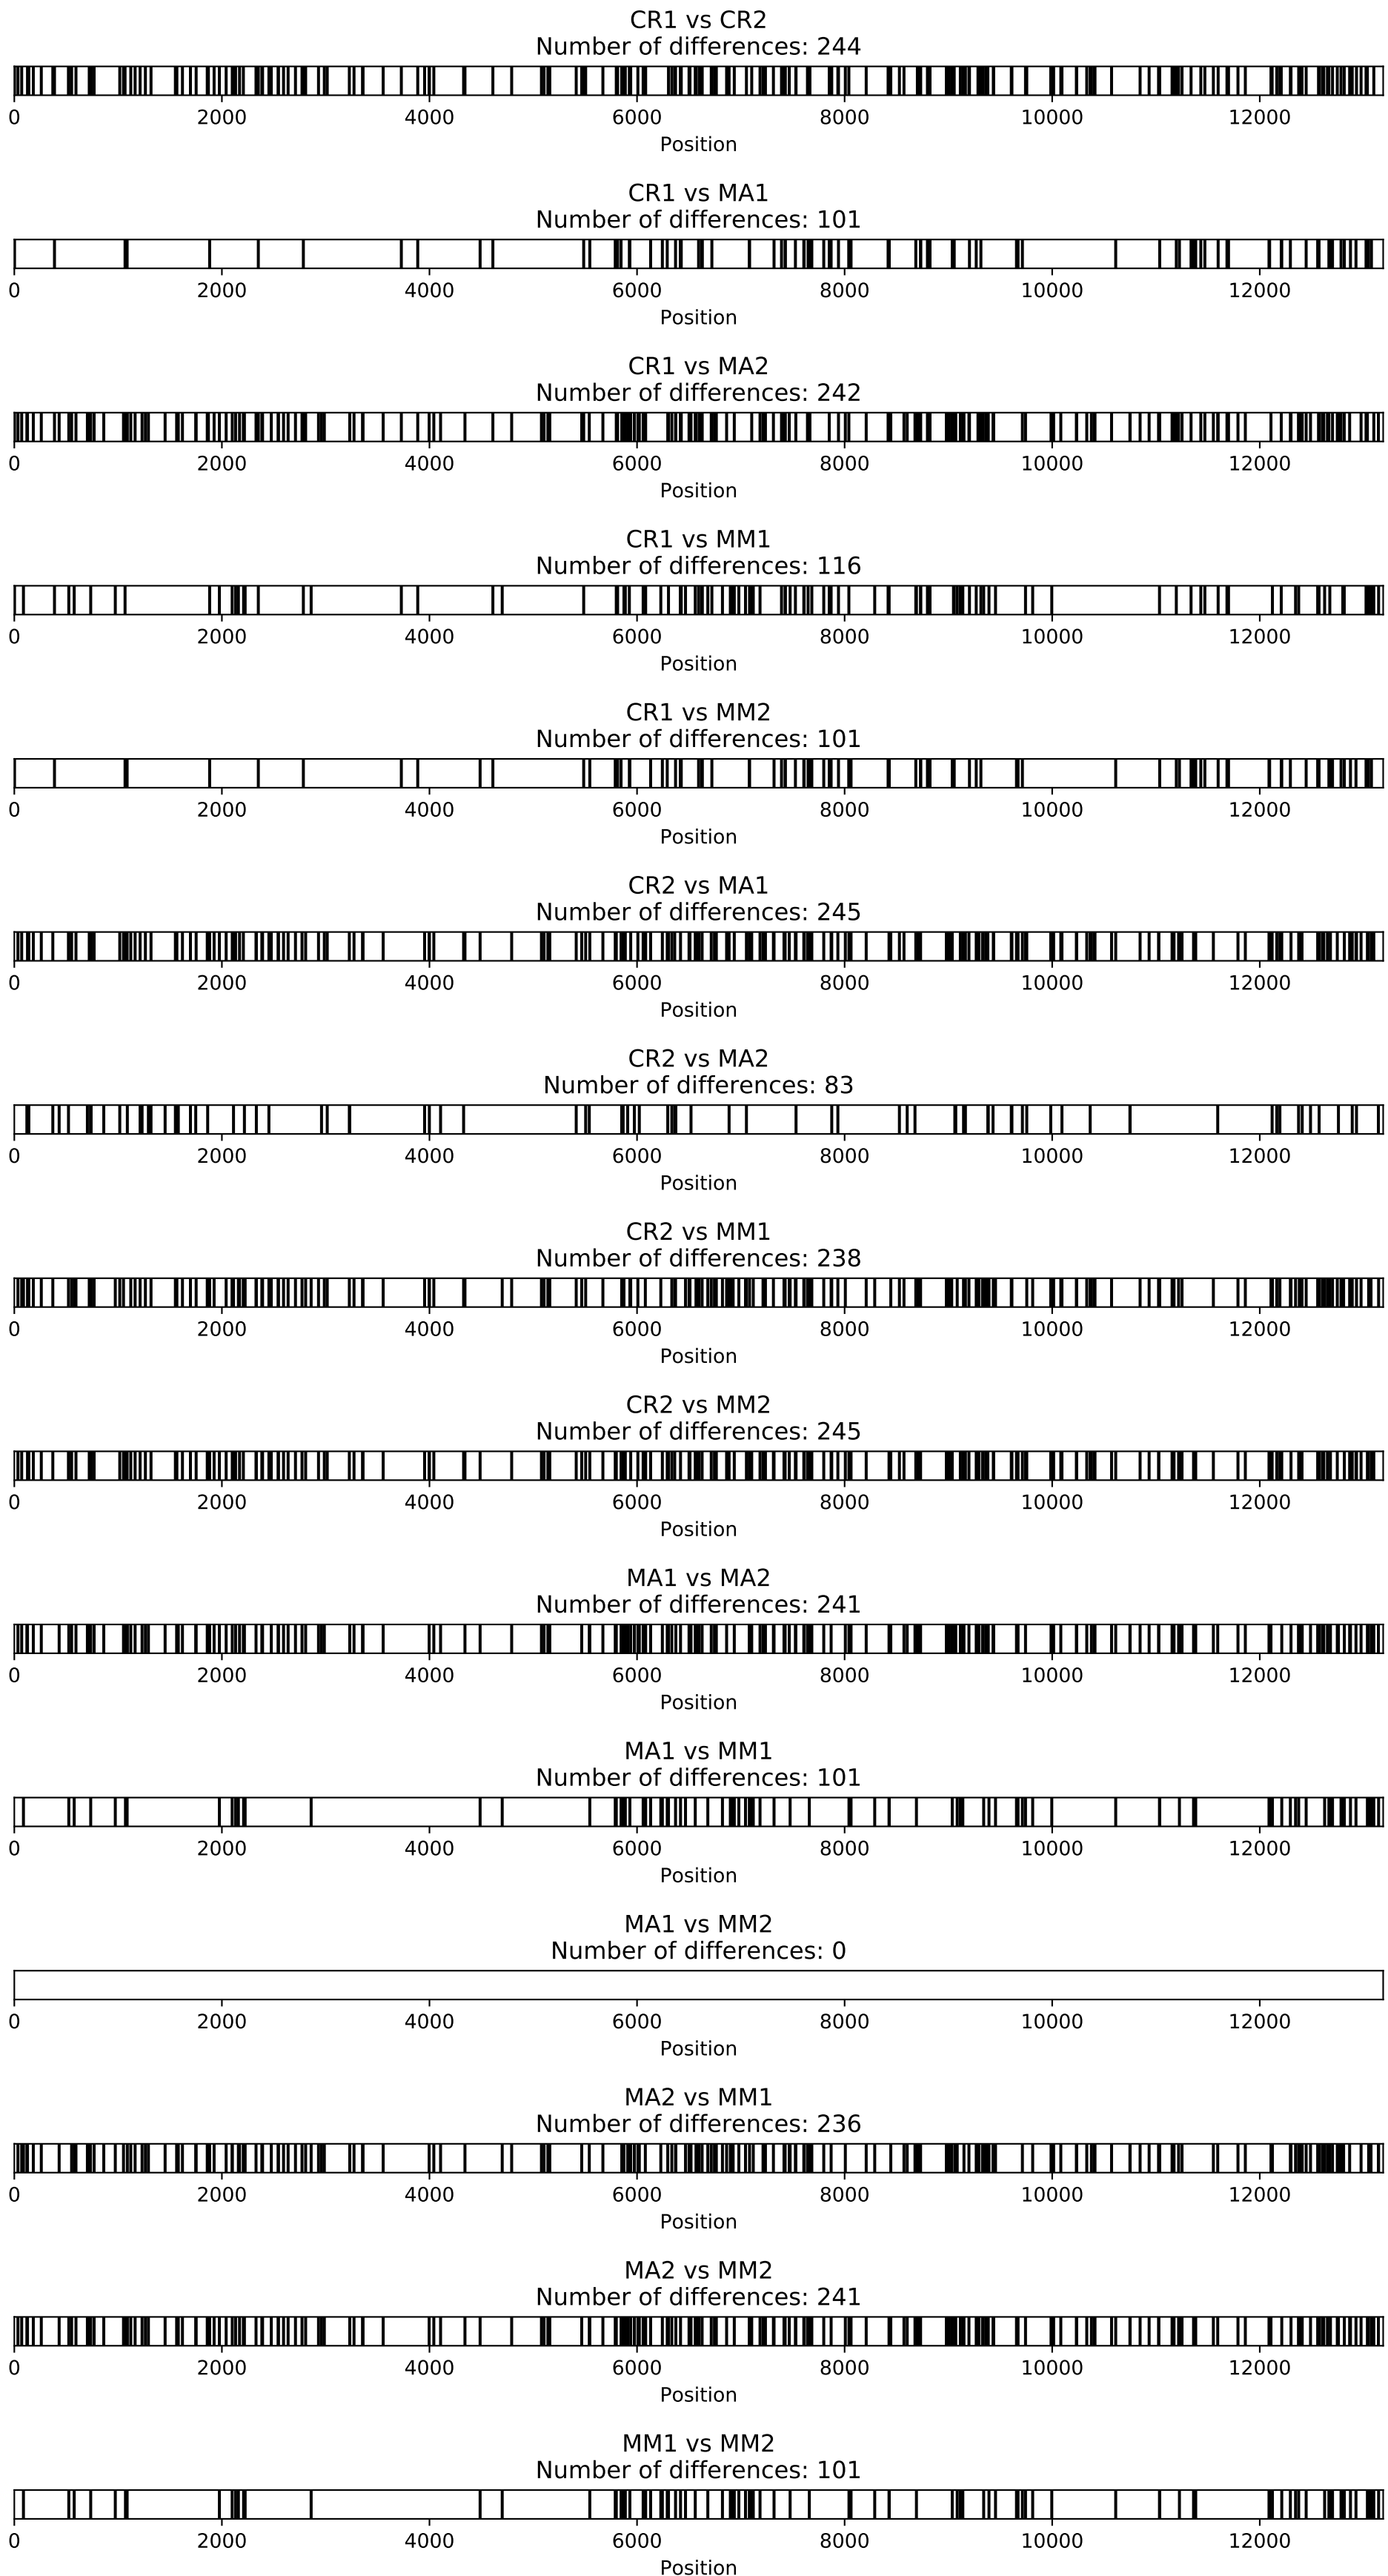

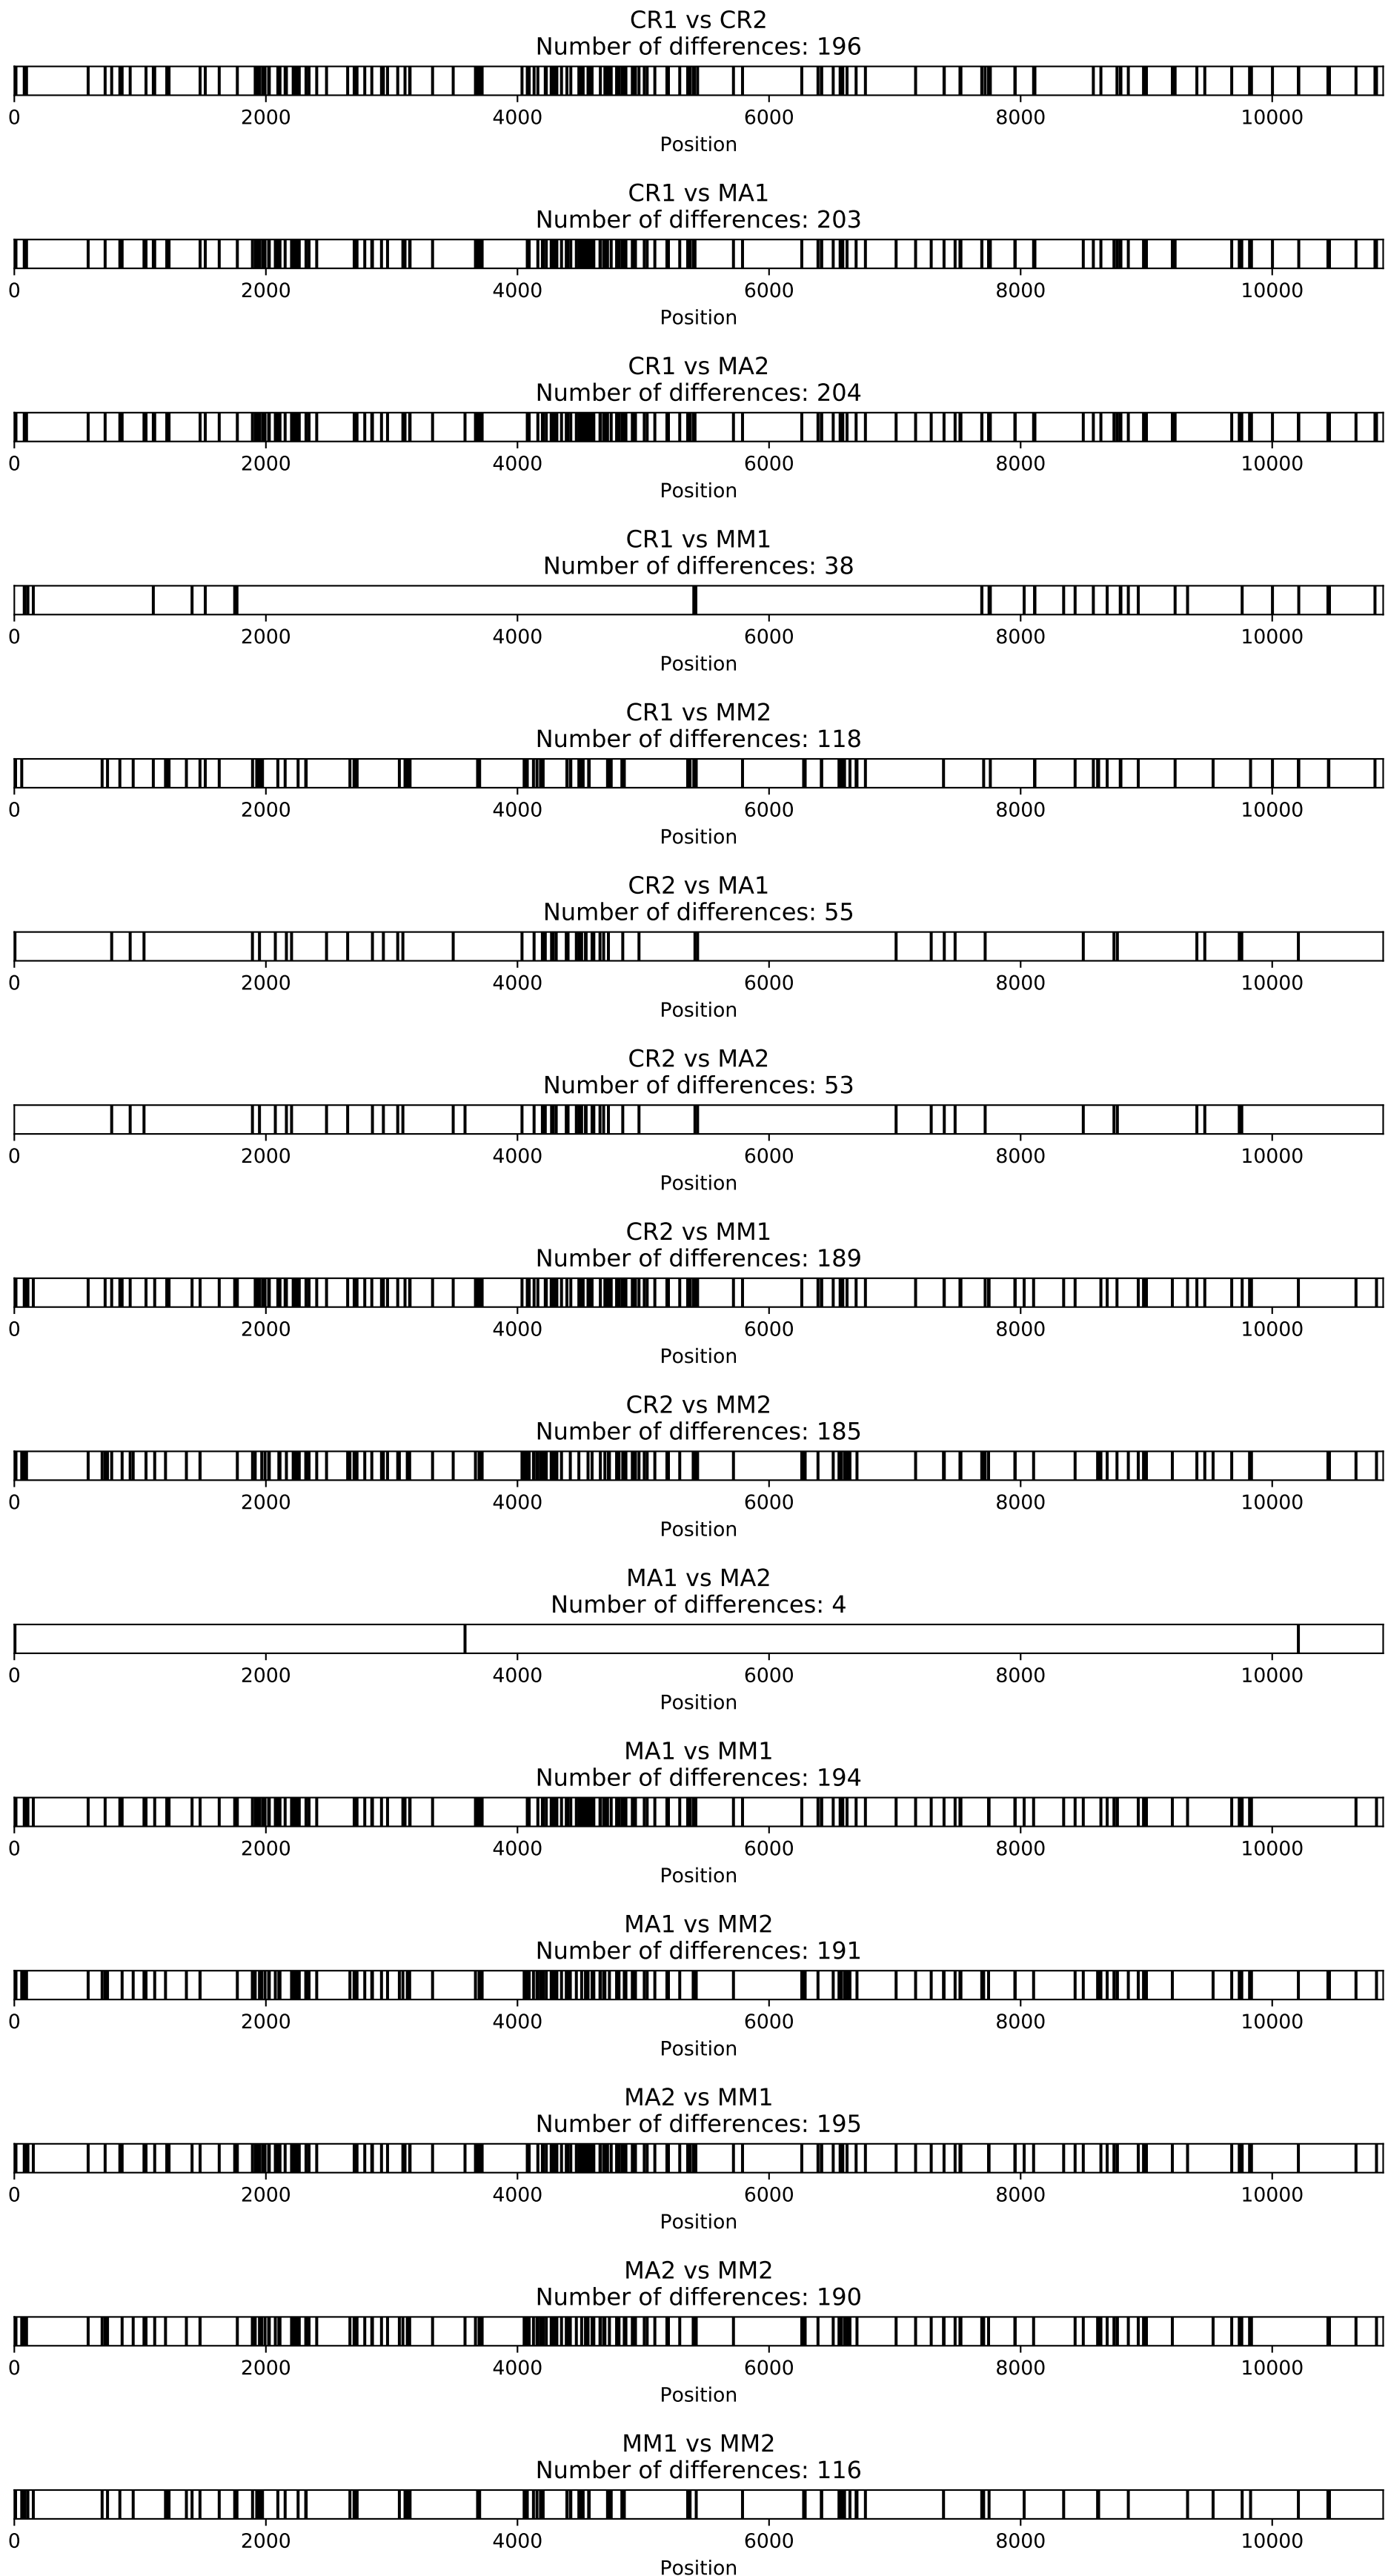



# Region: 232

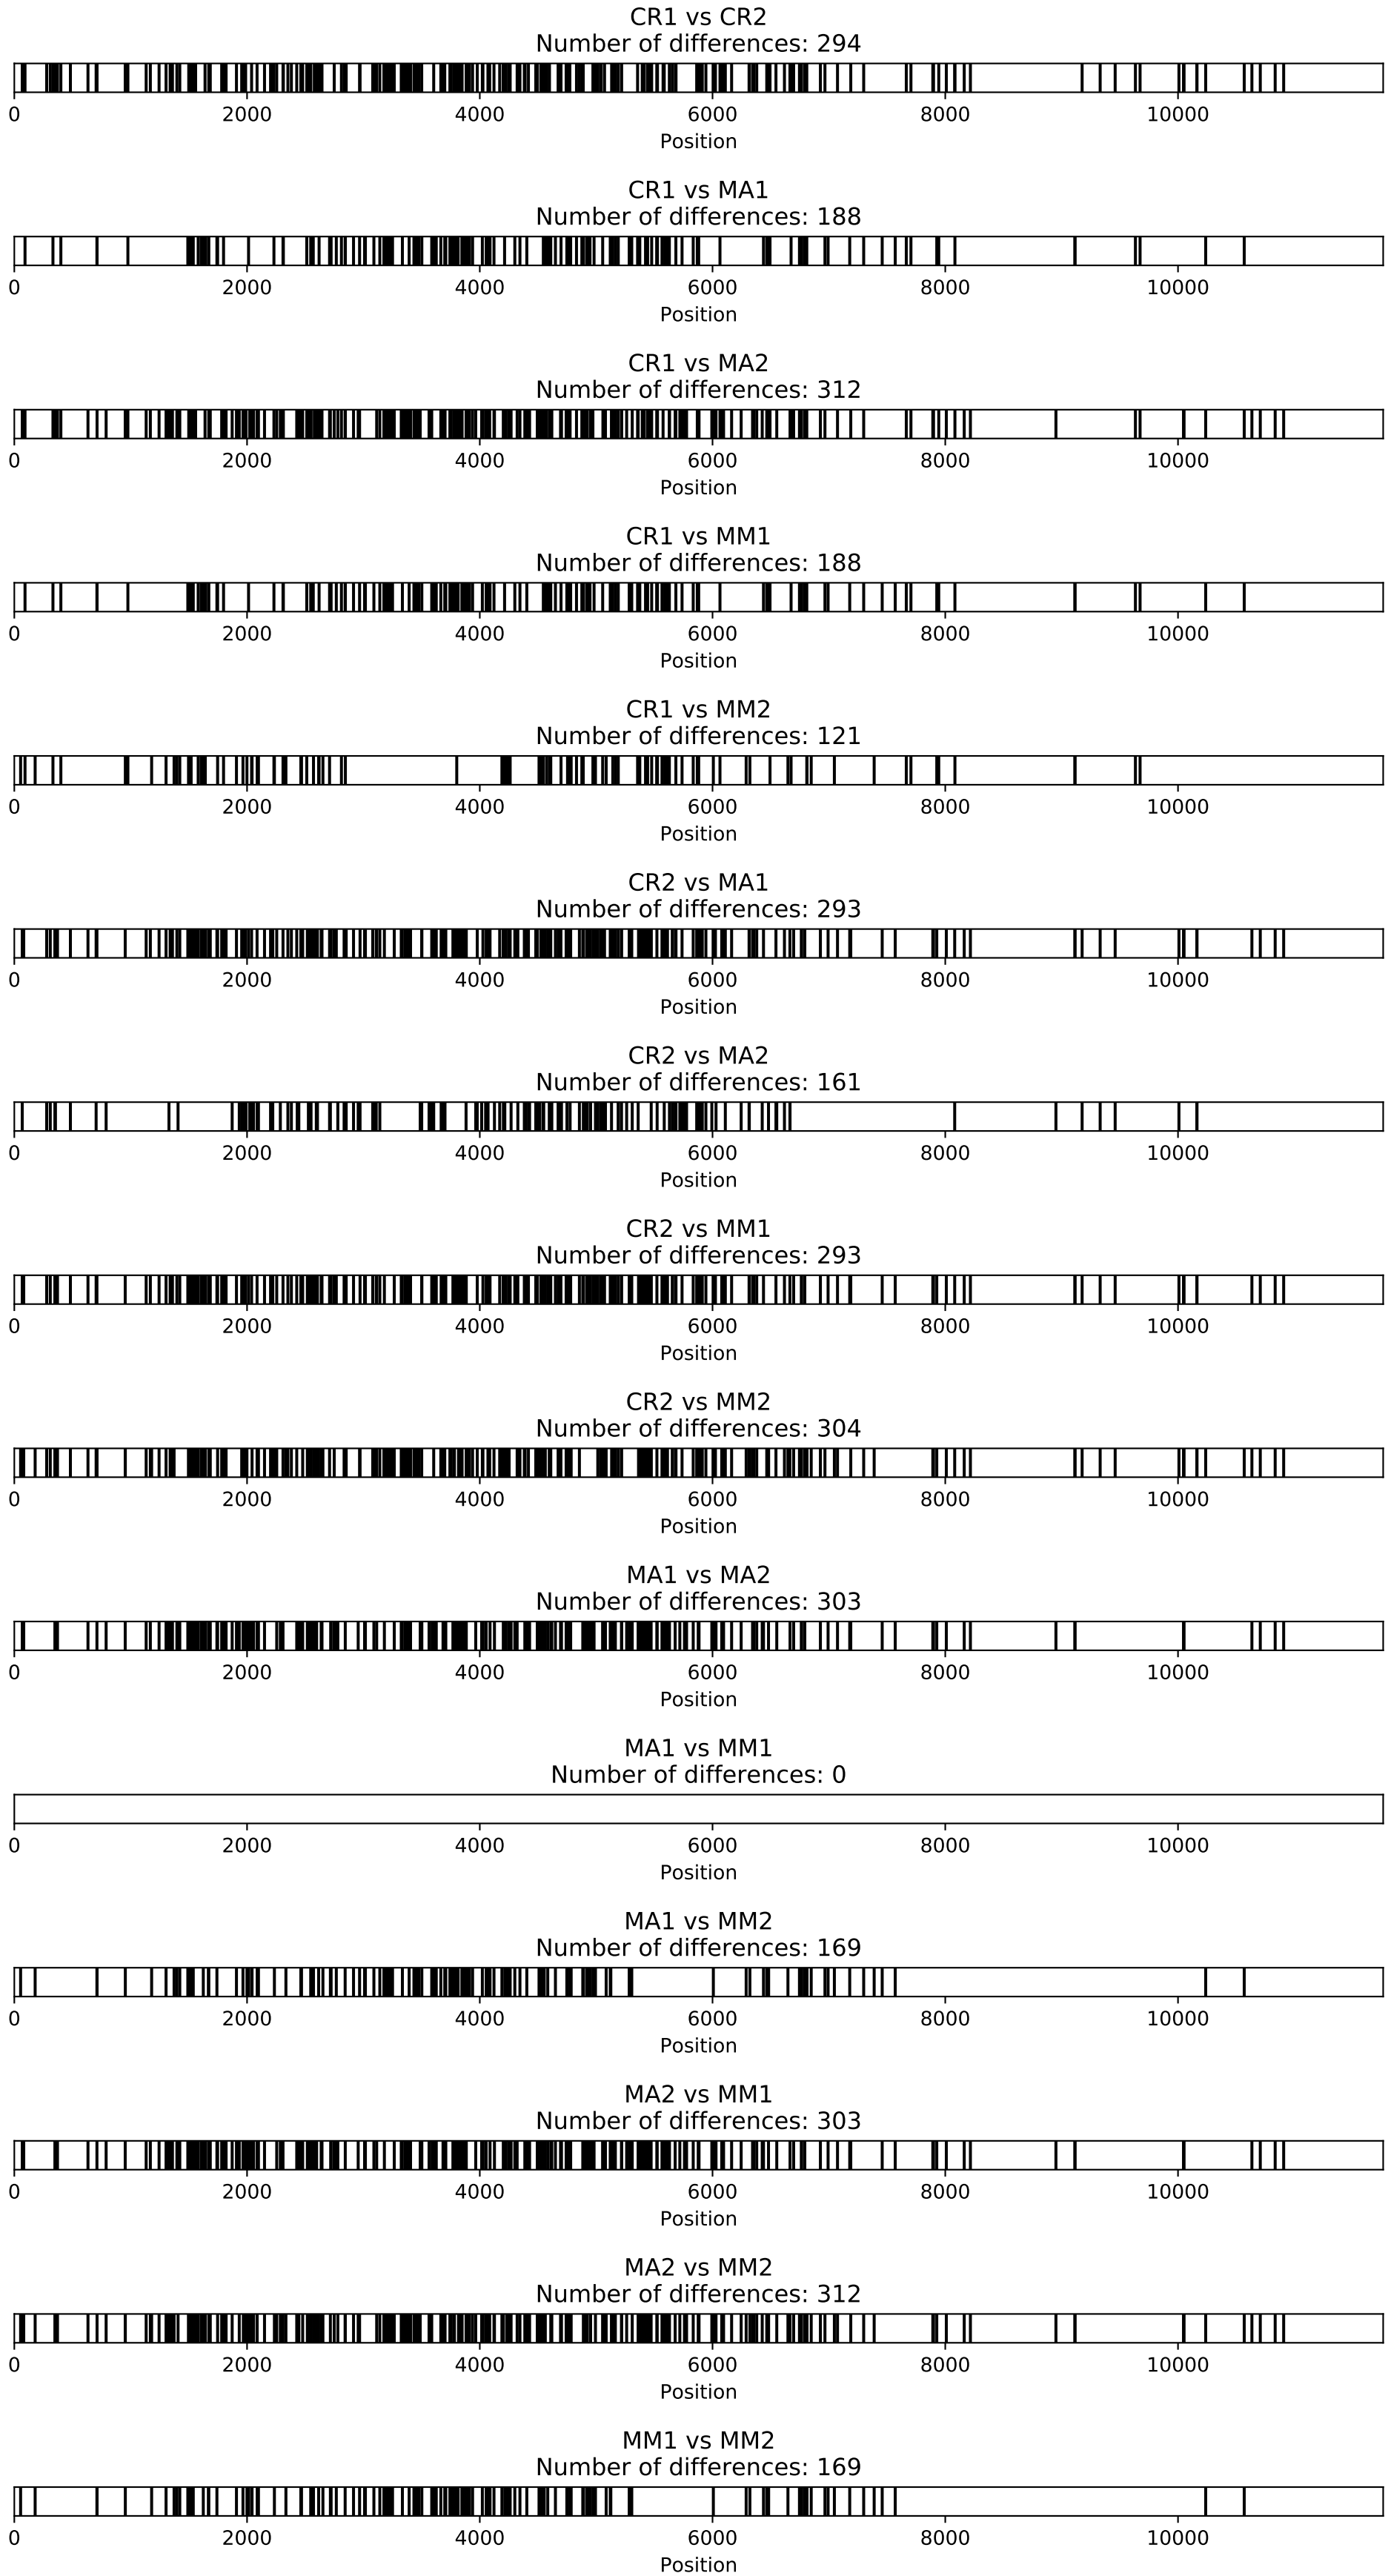

# Region: 233

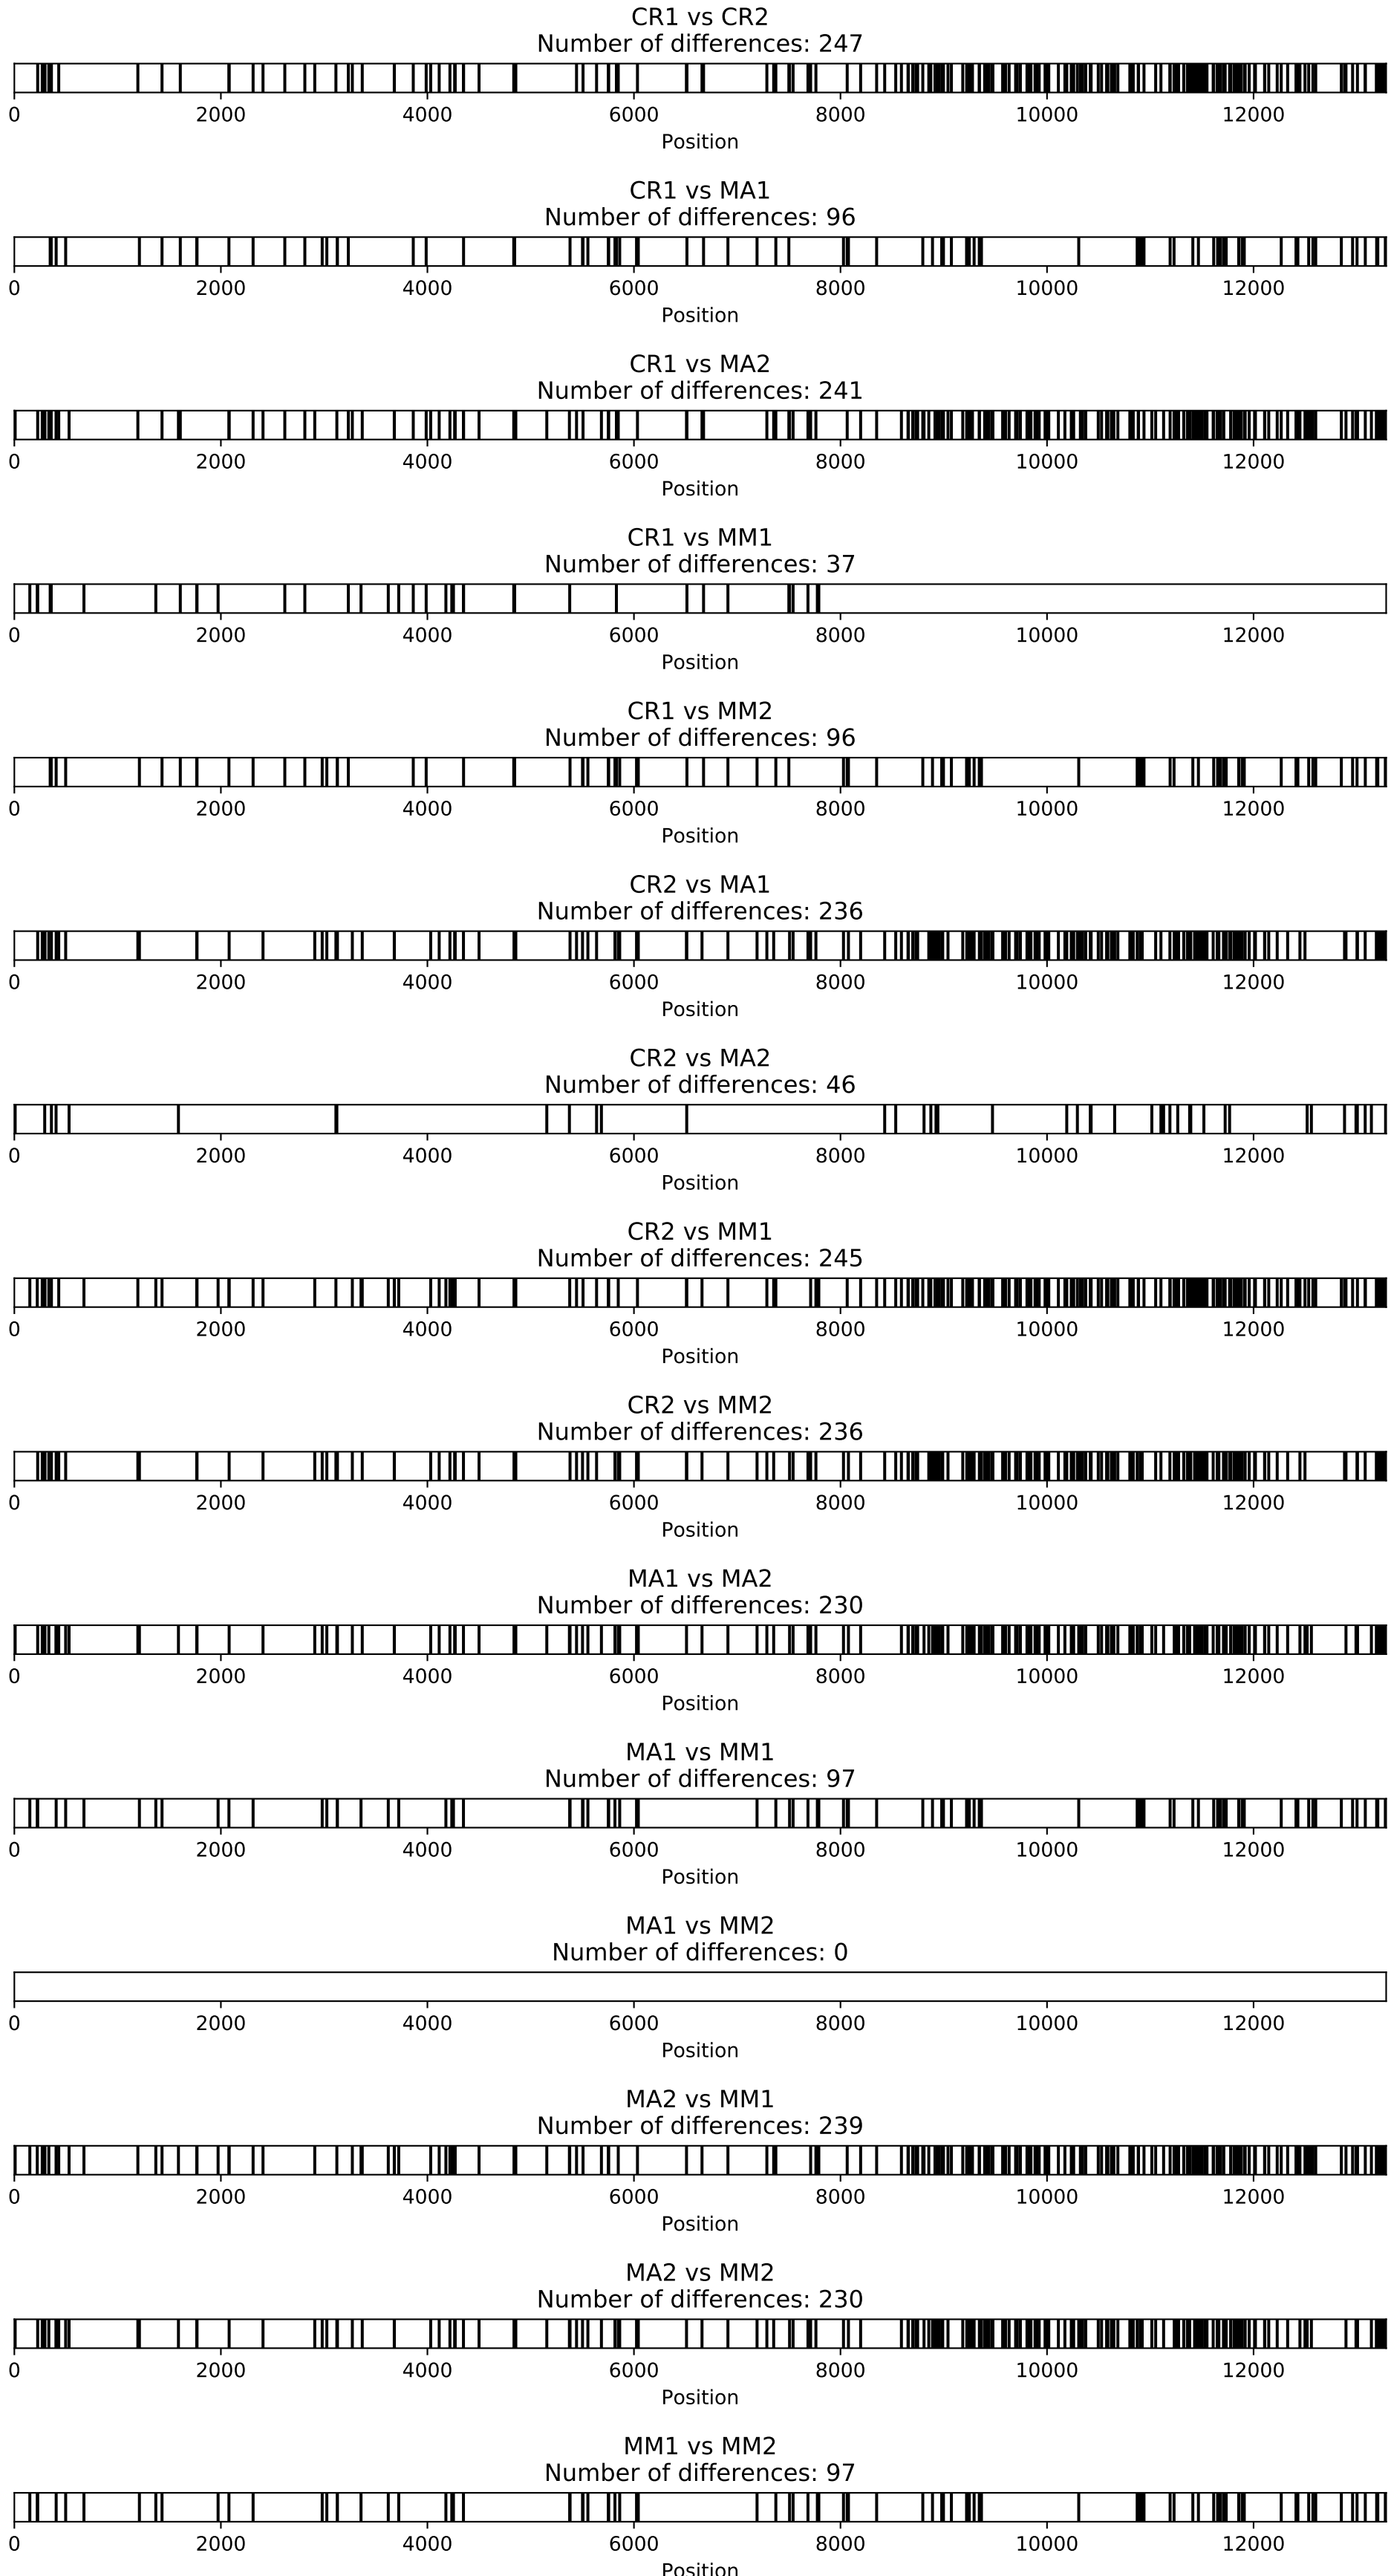

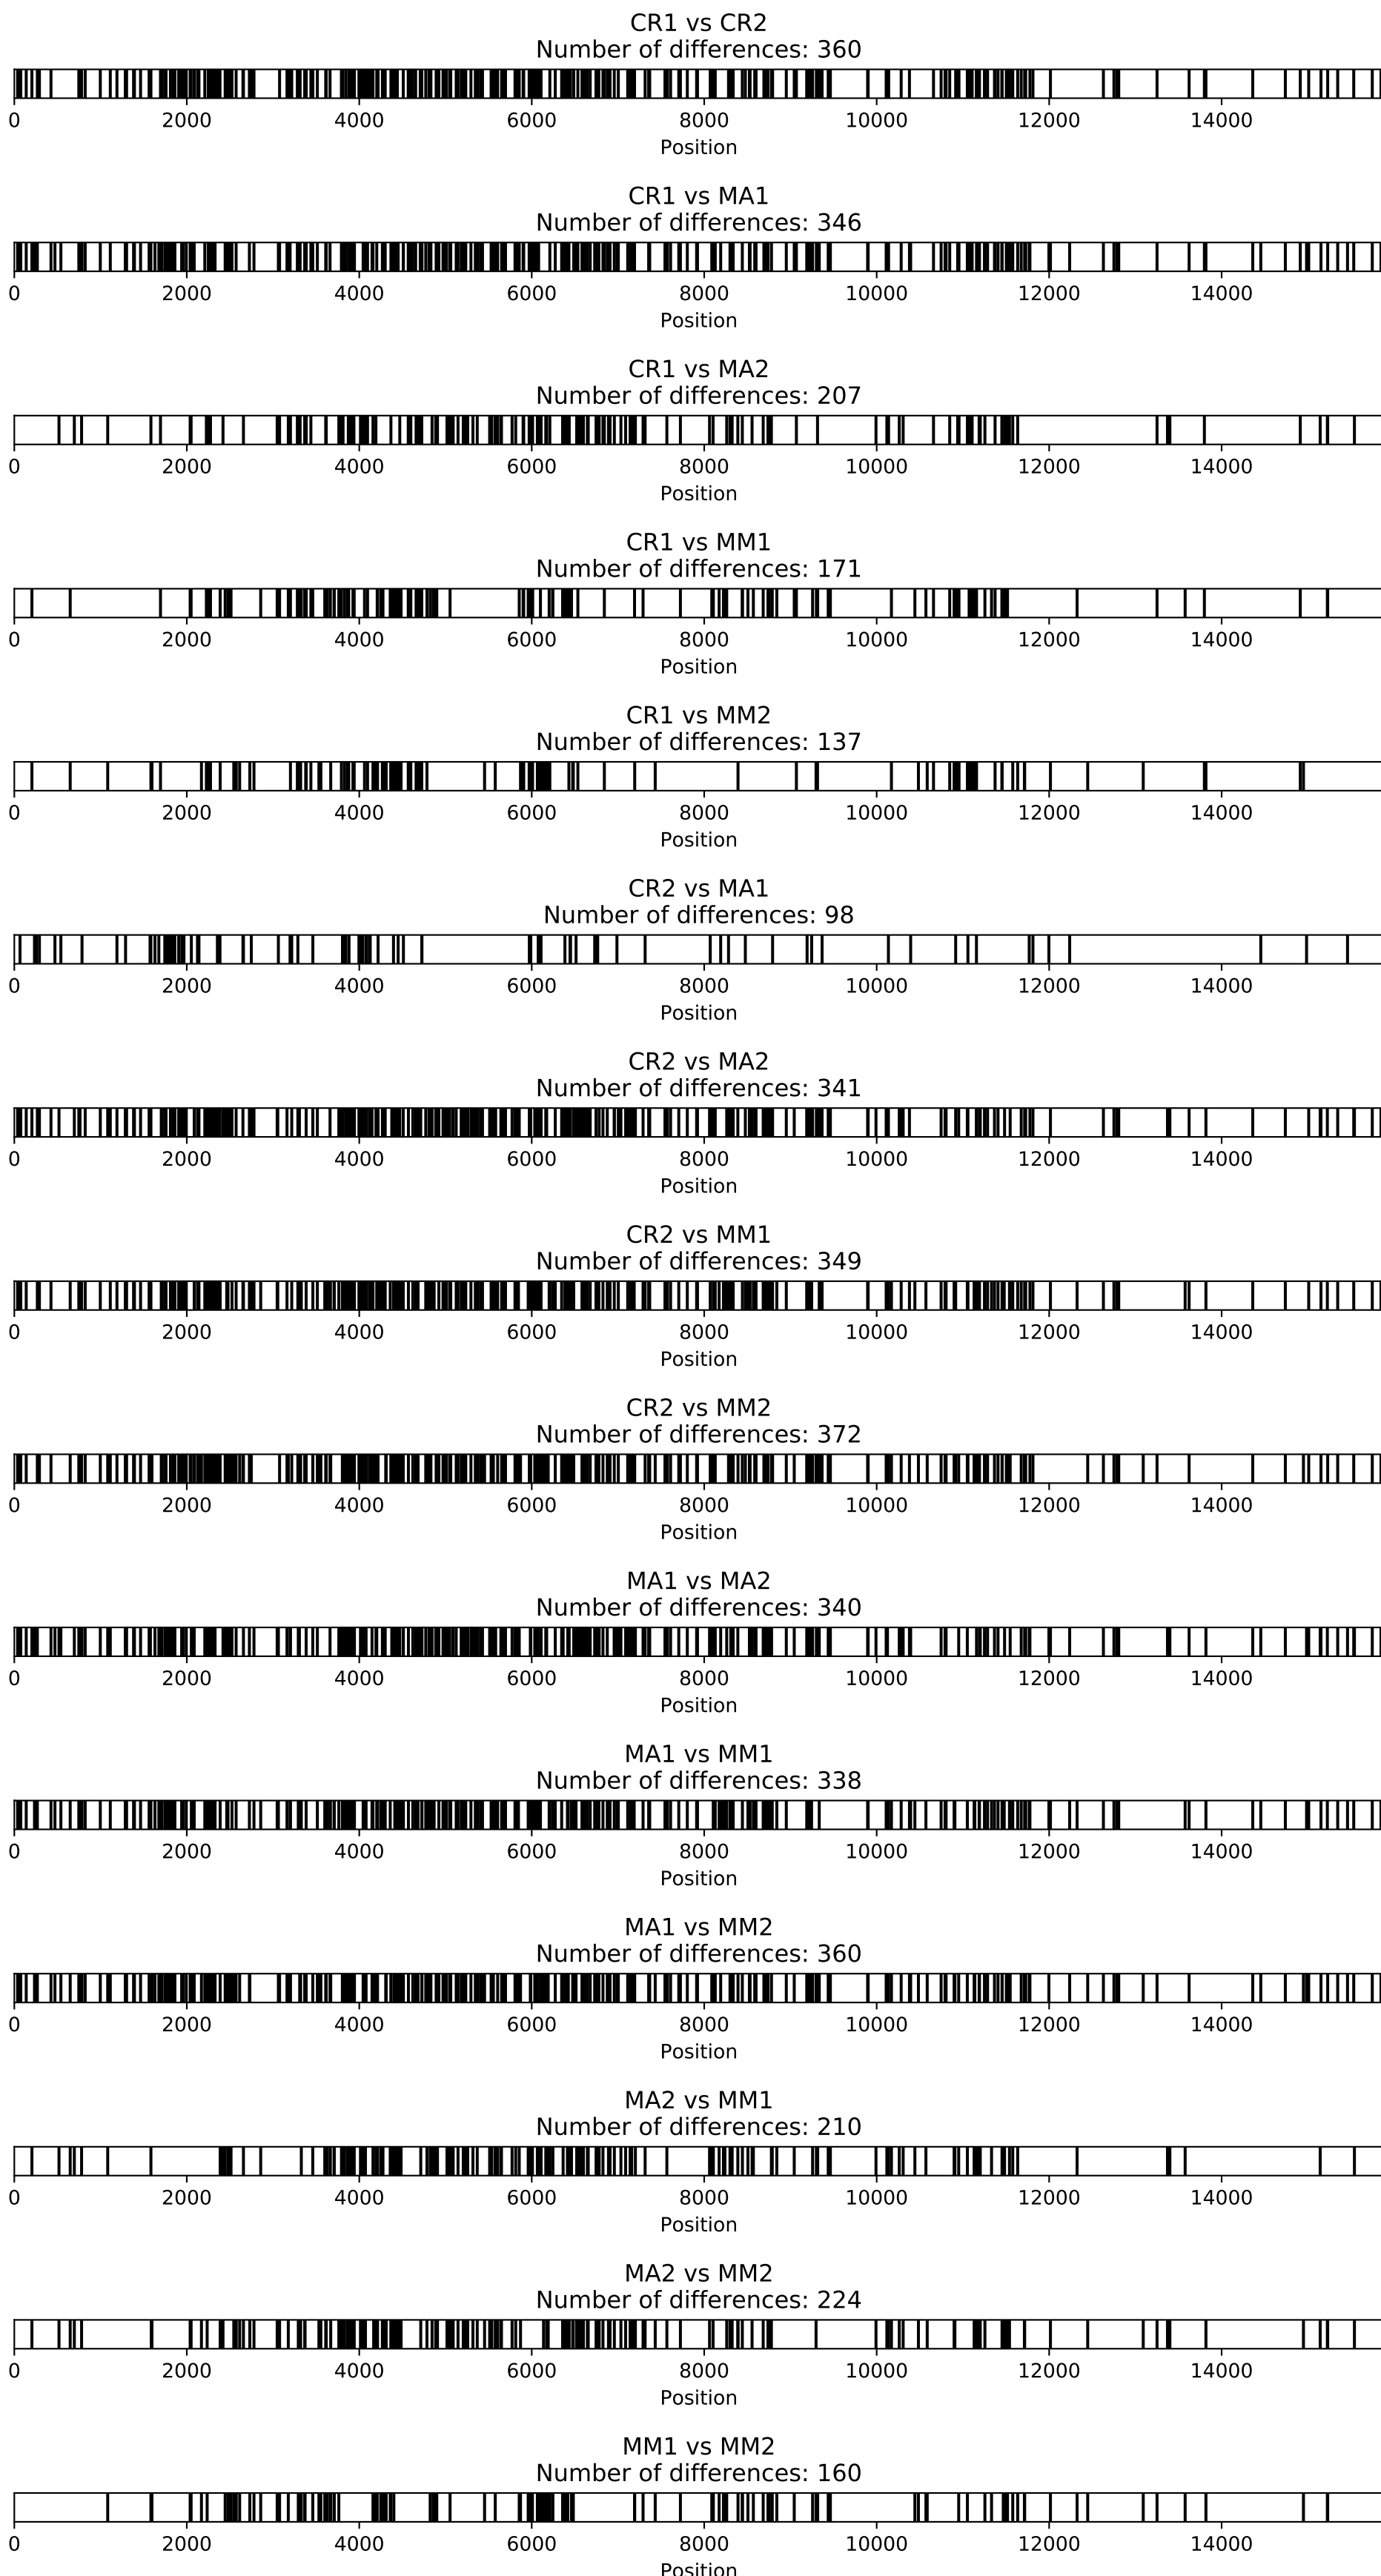

# Region: 237

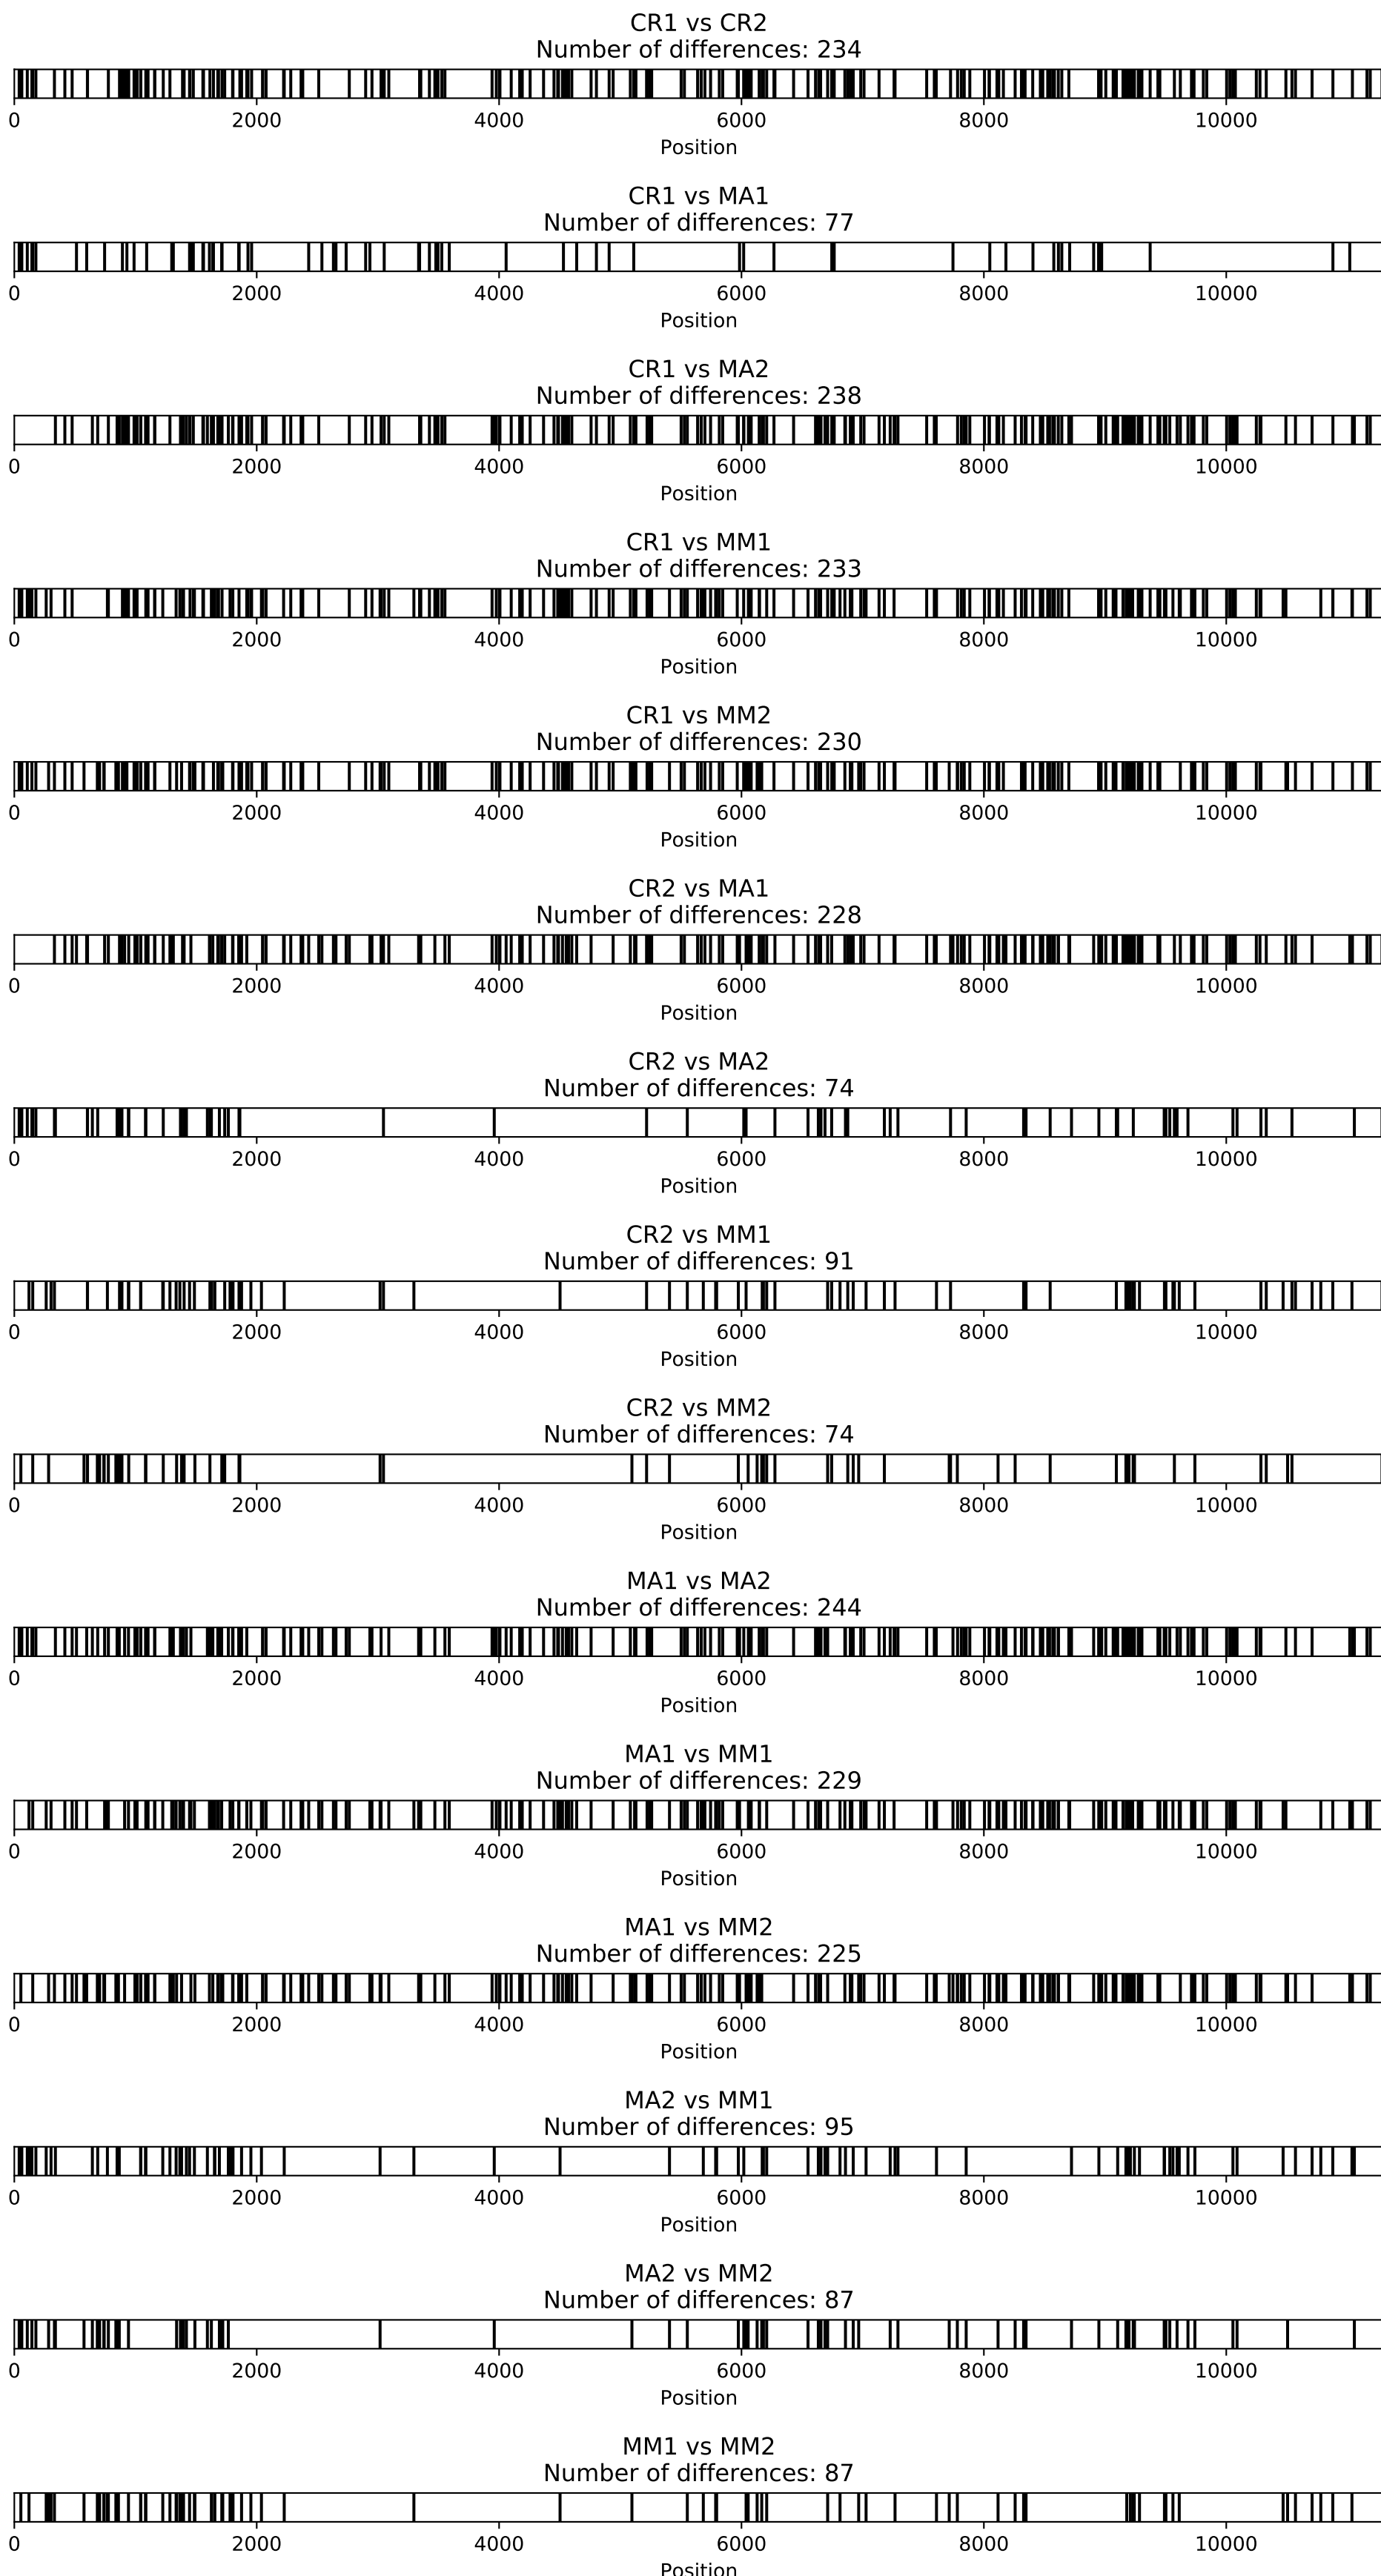

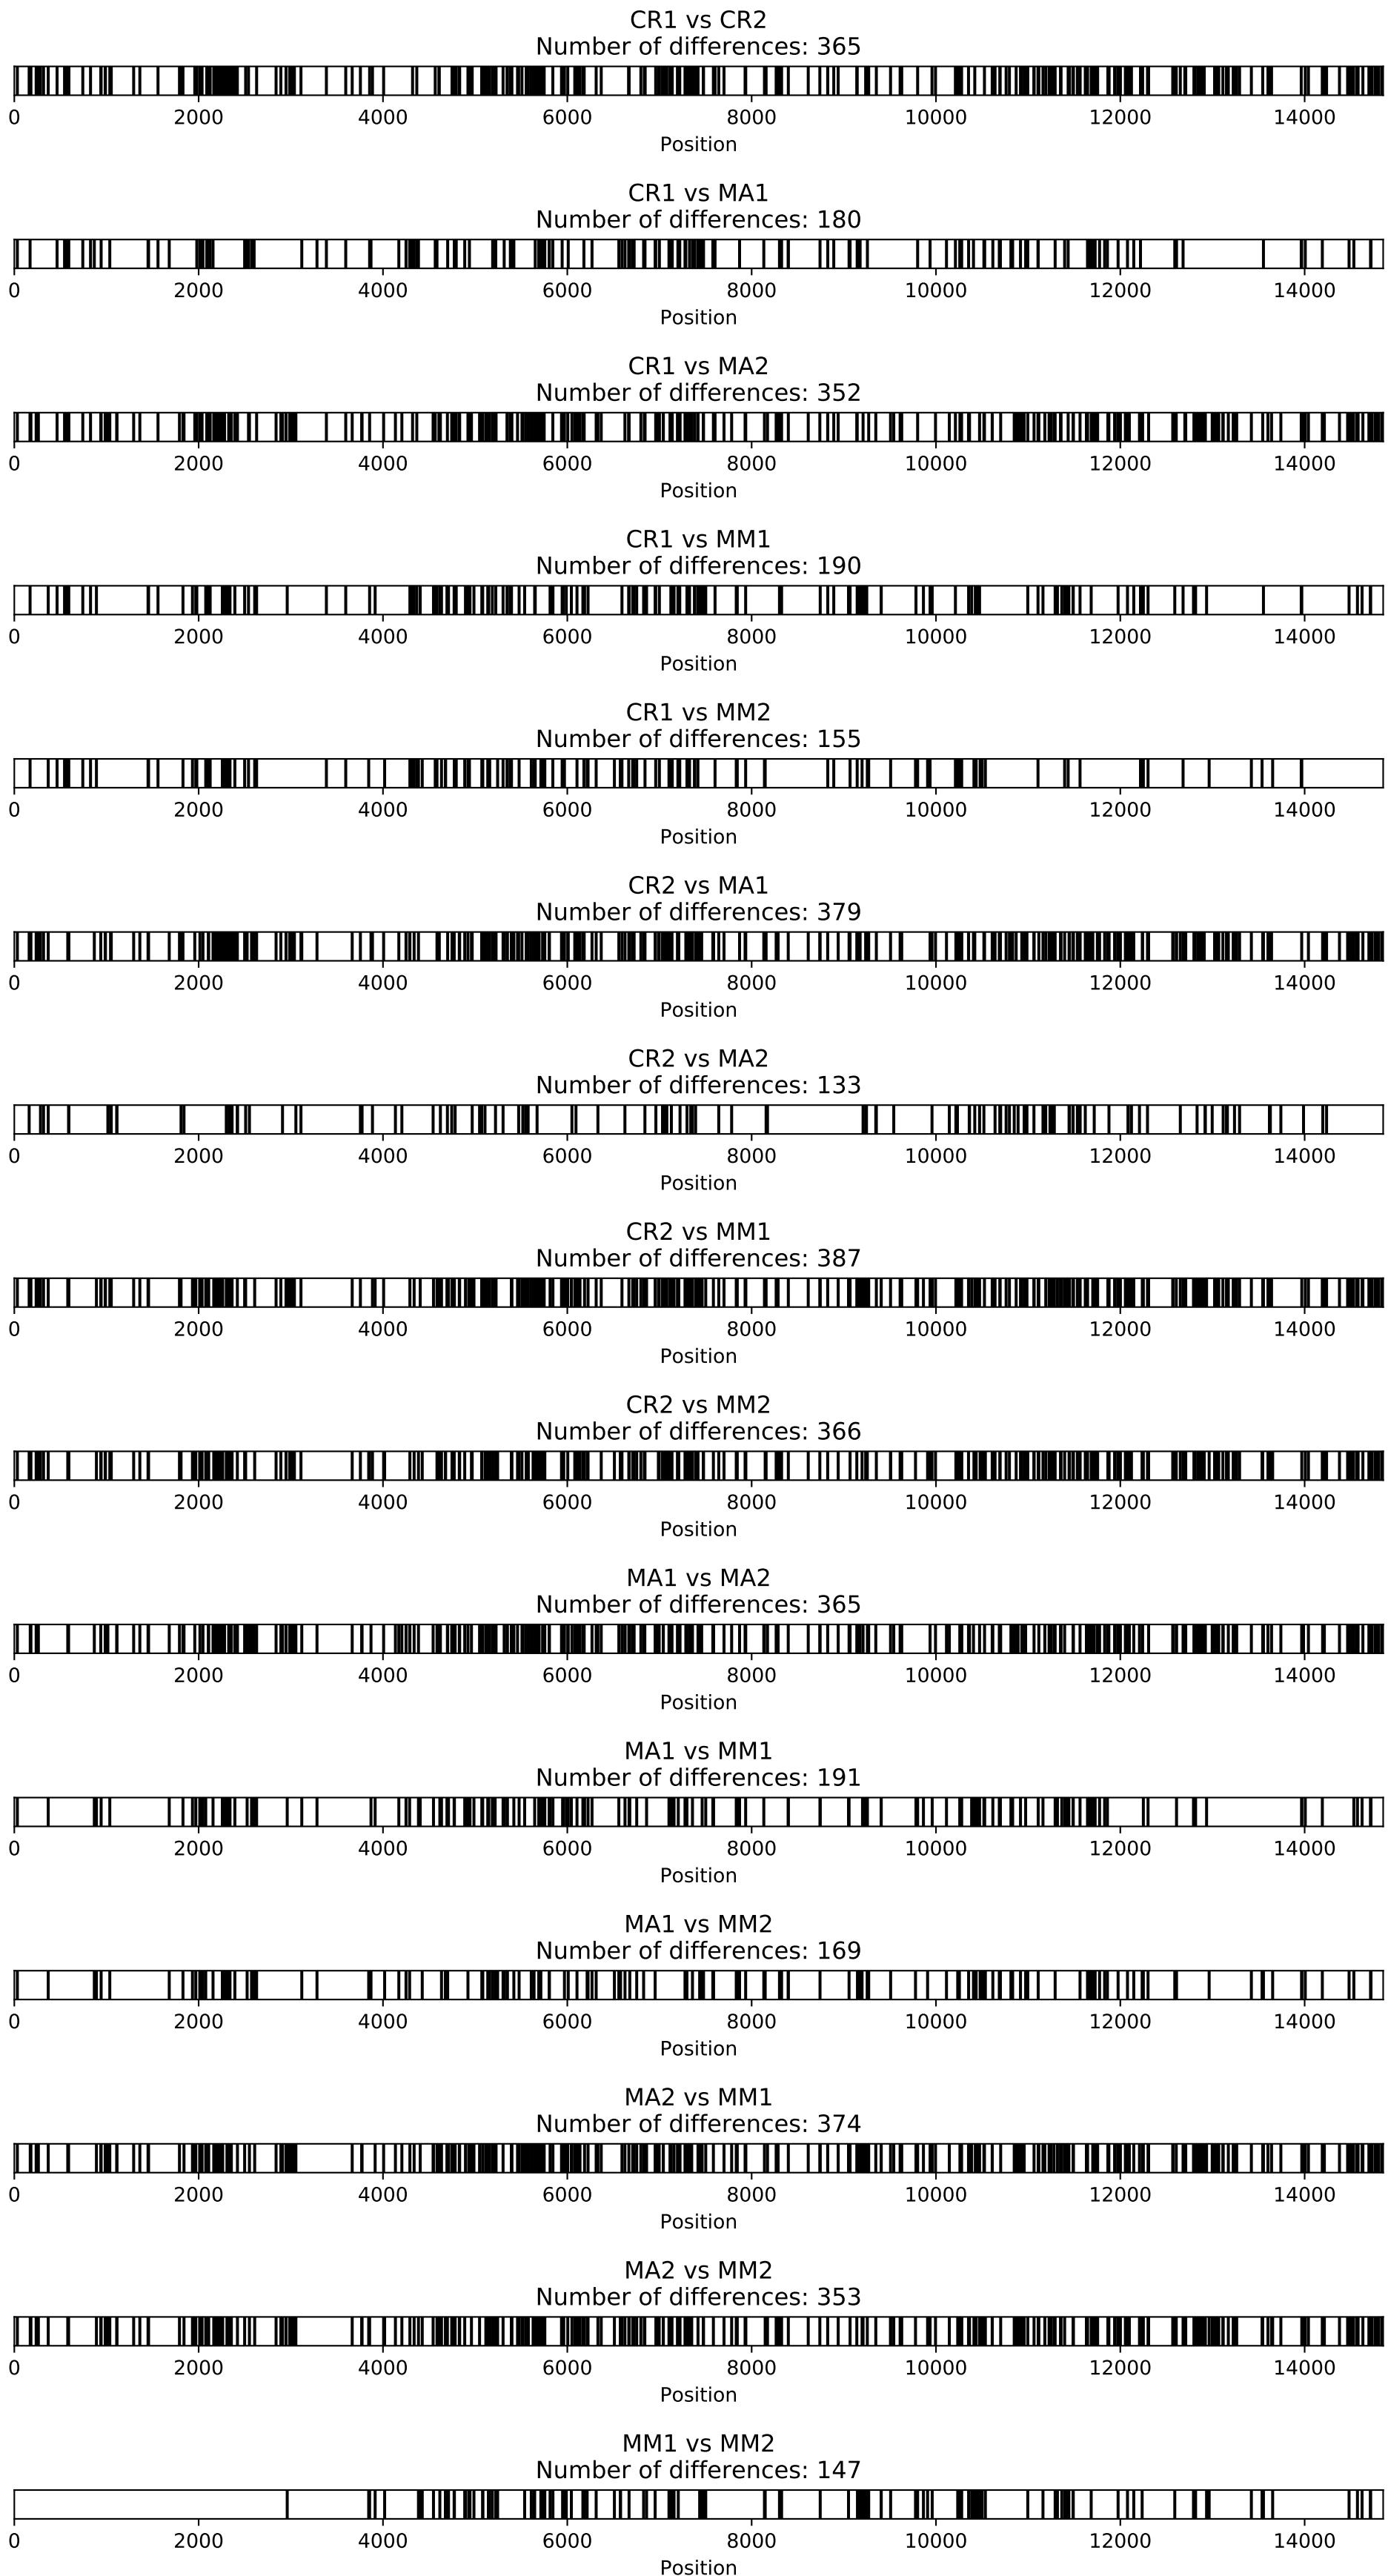

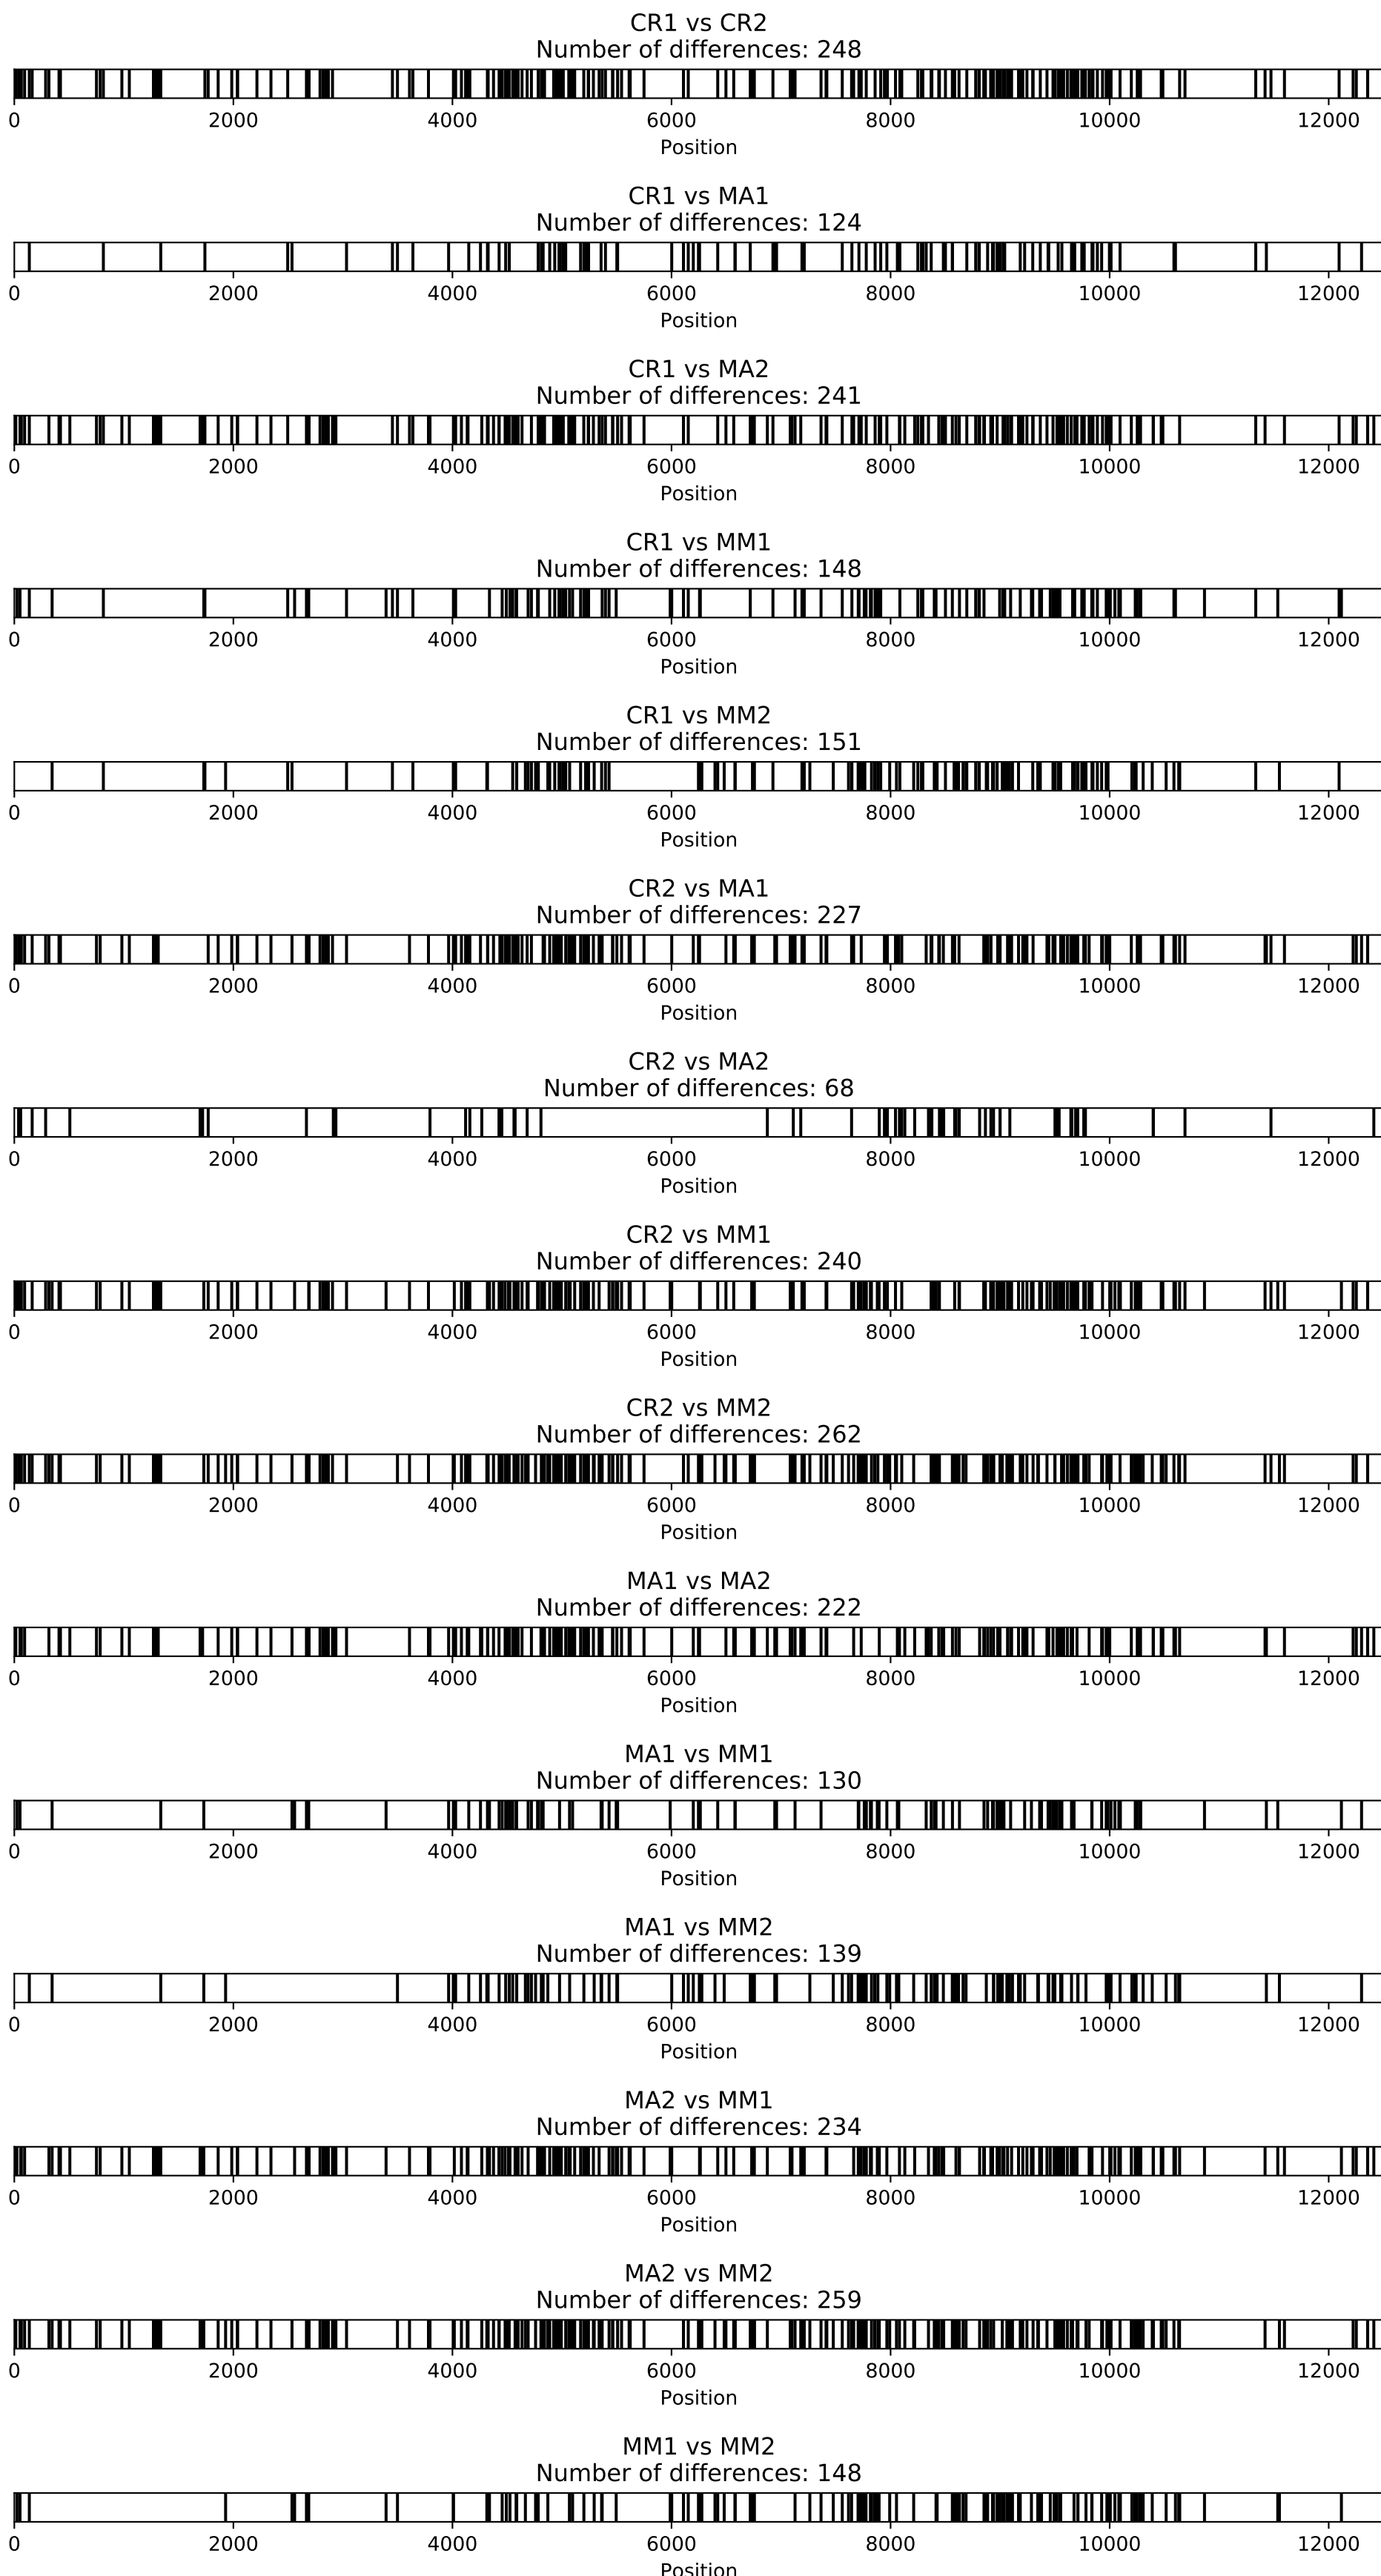

# Region: 242

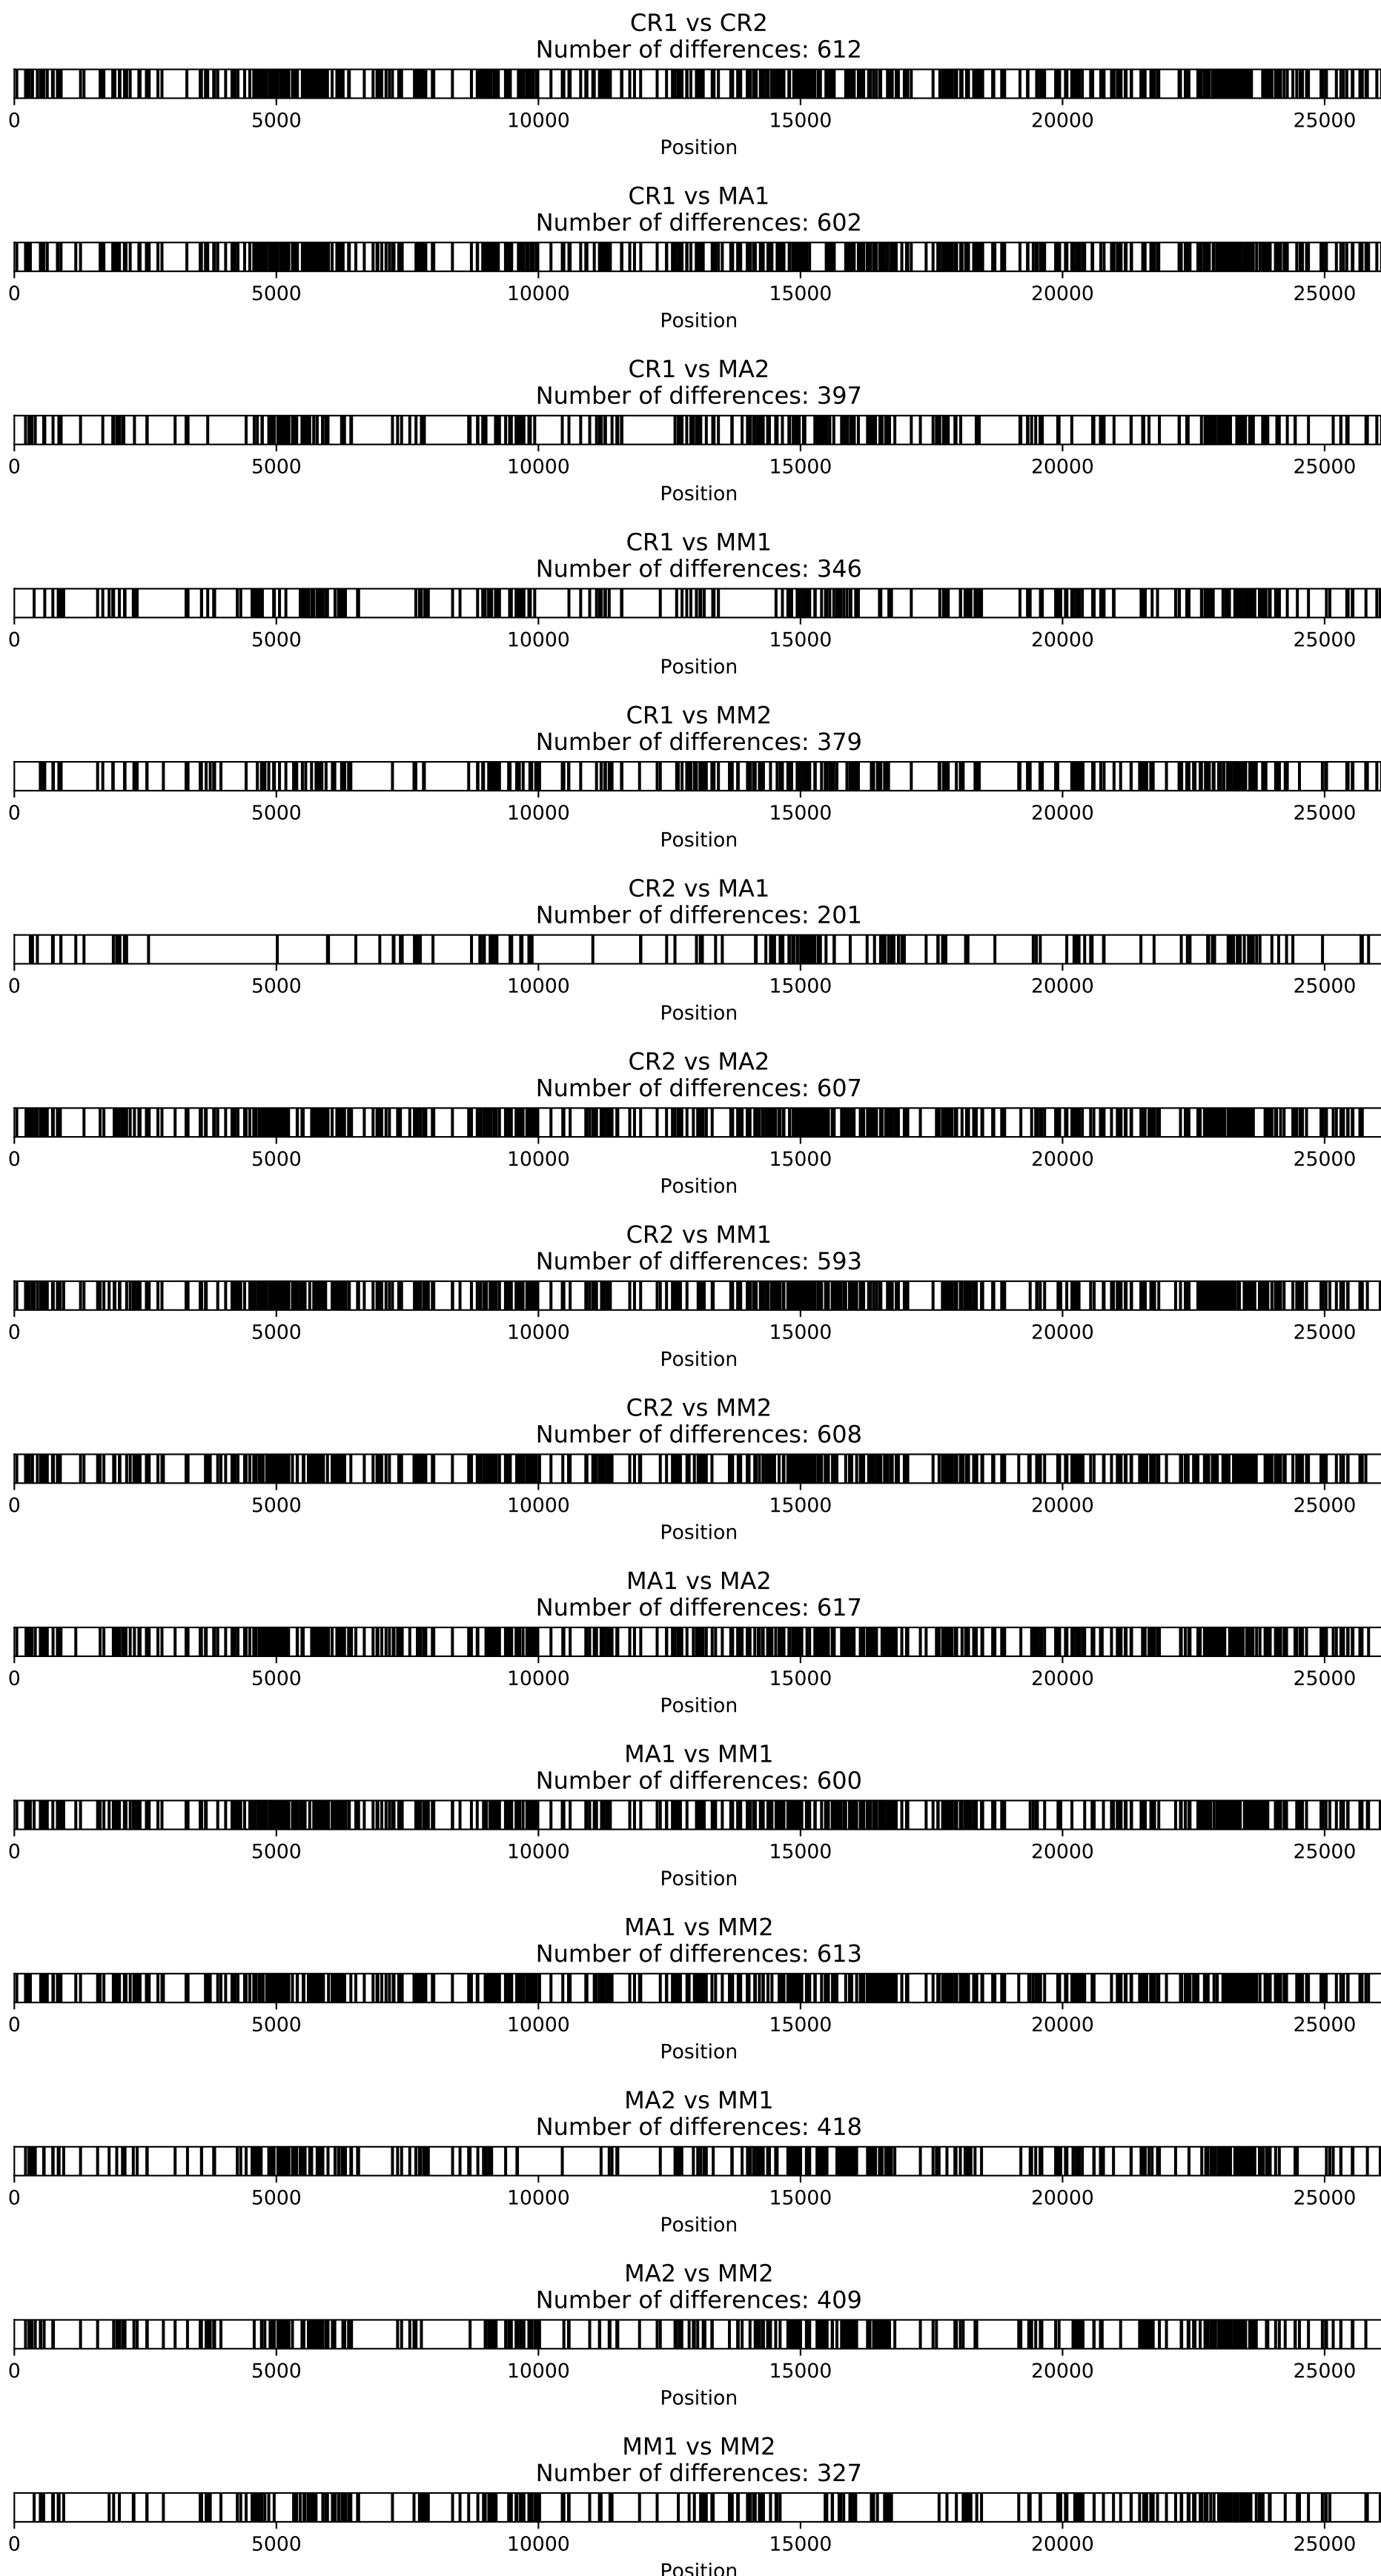

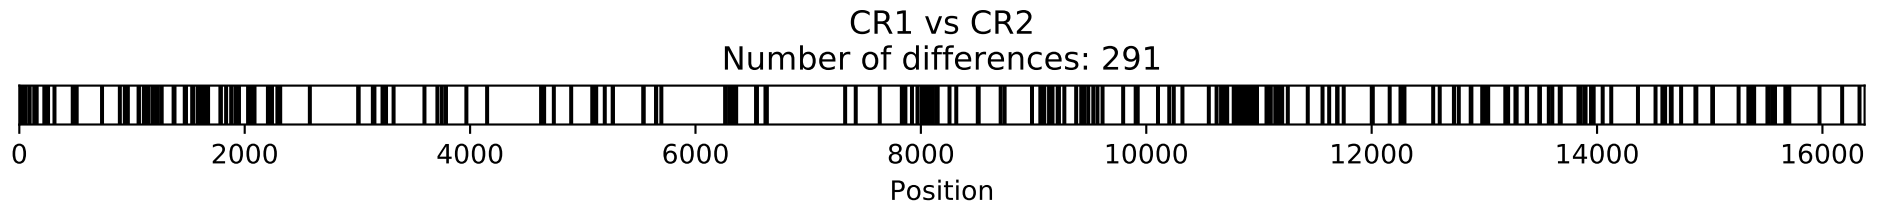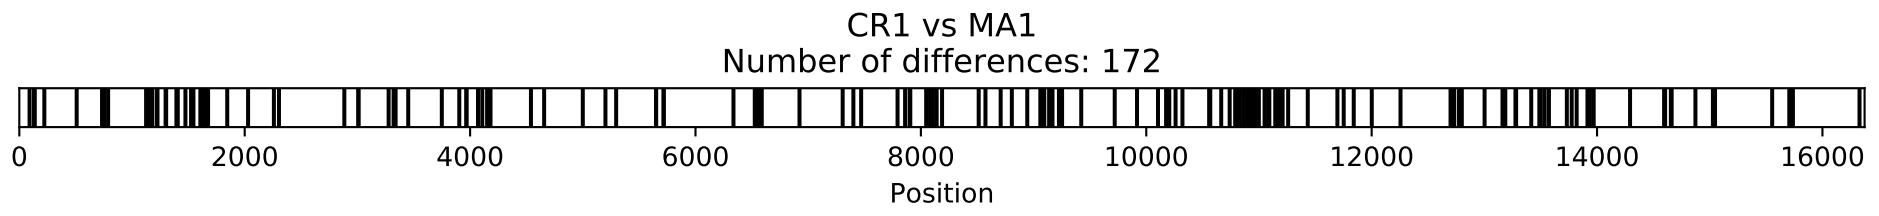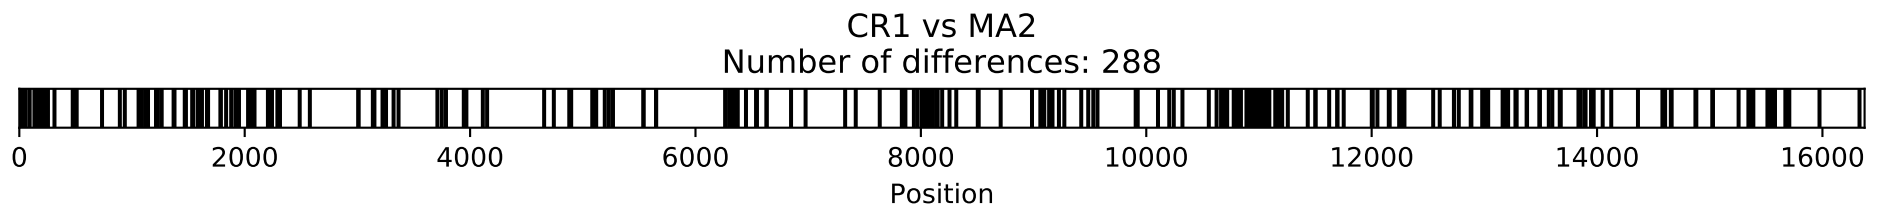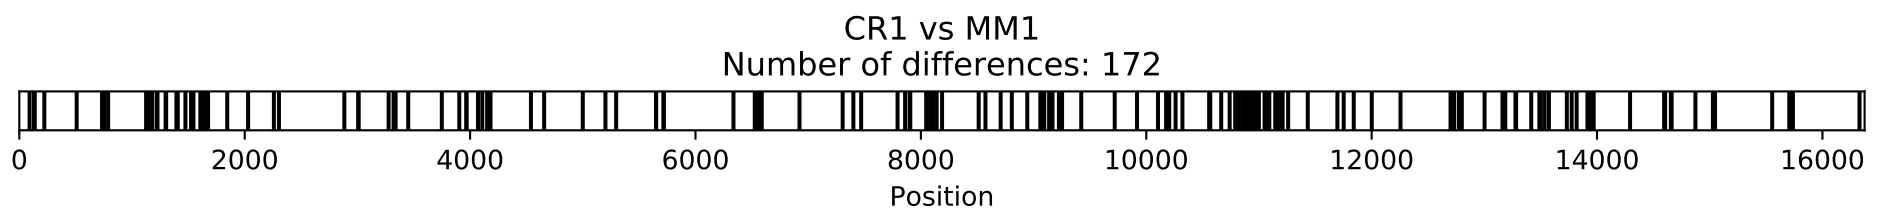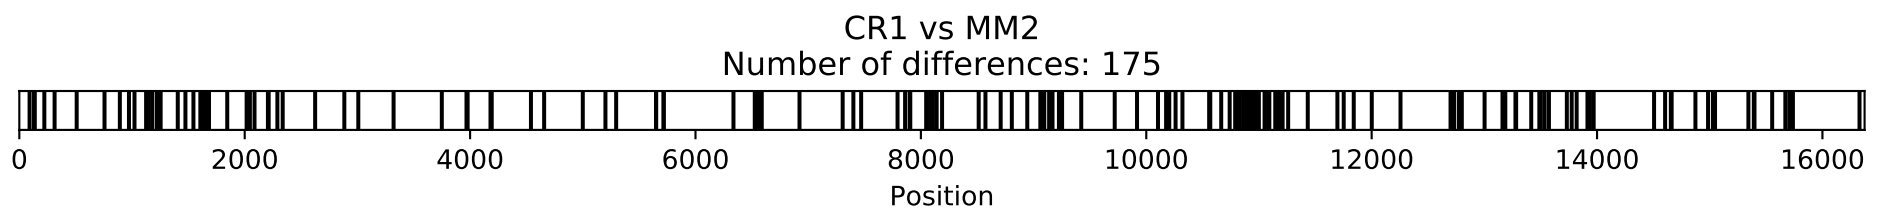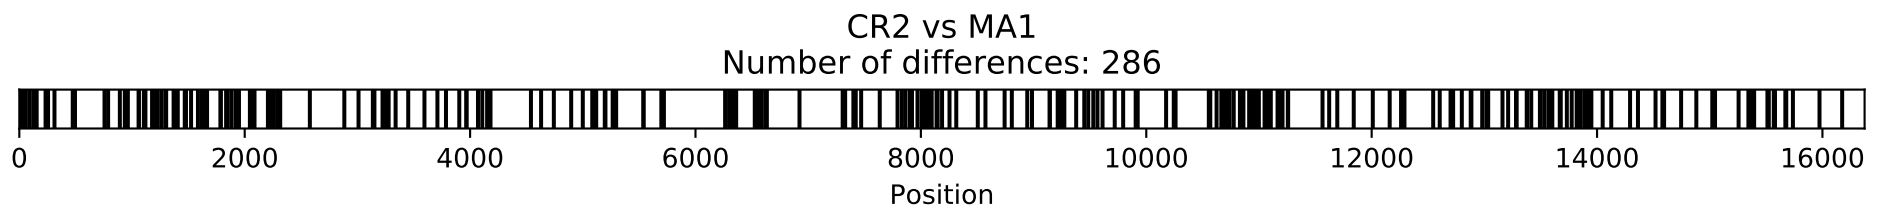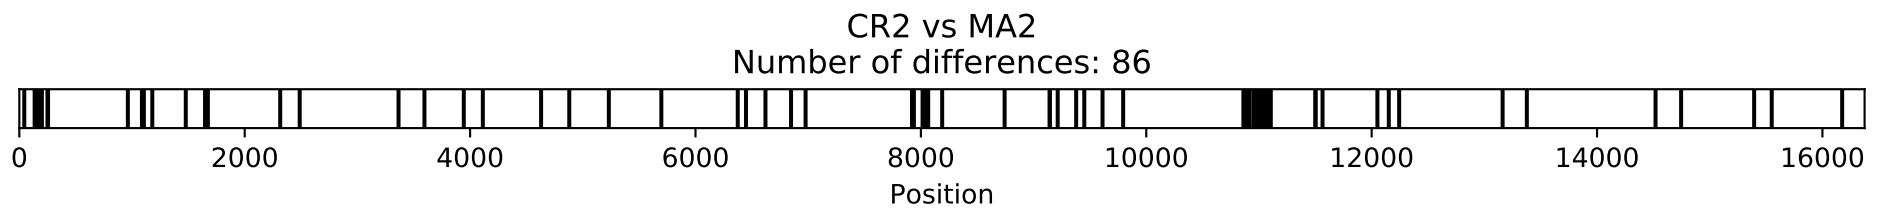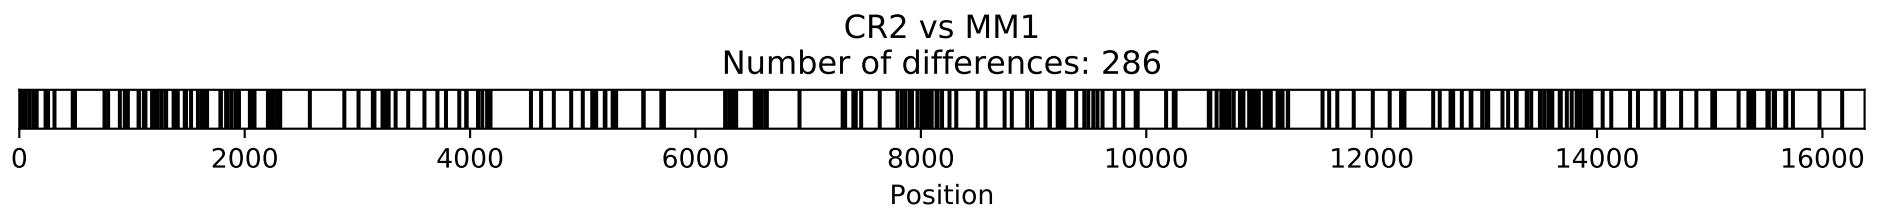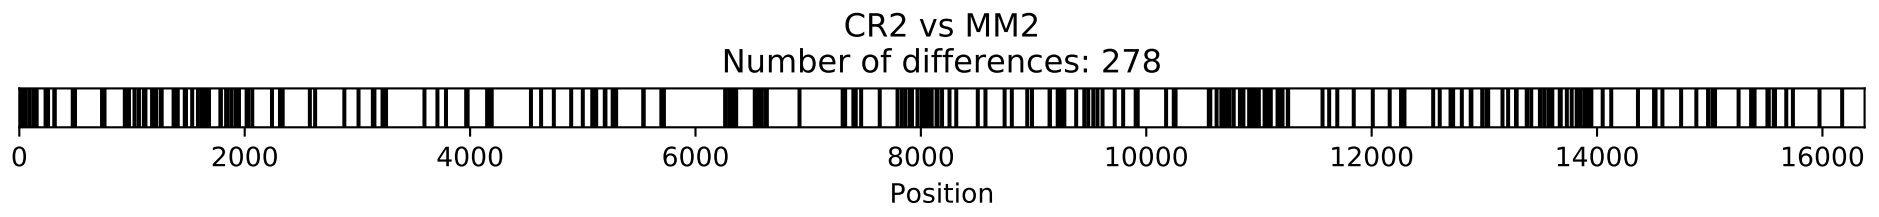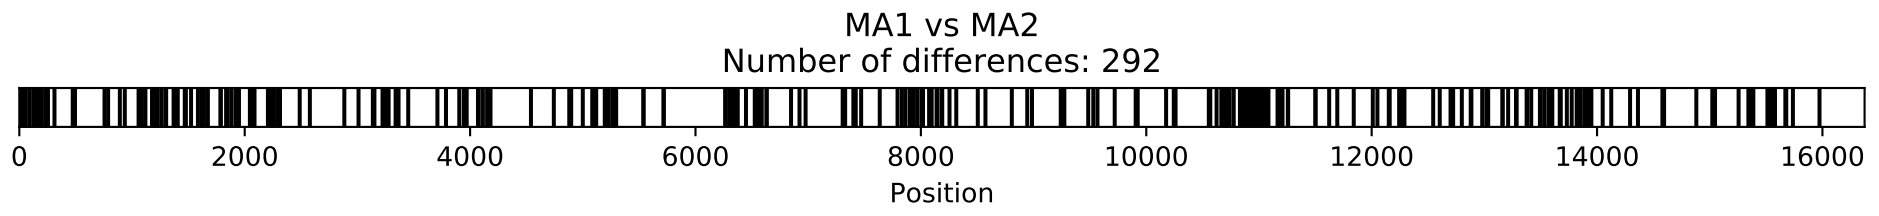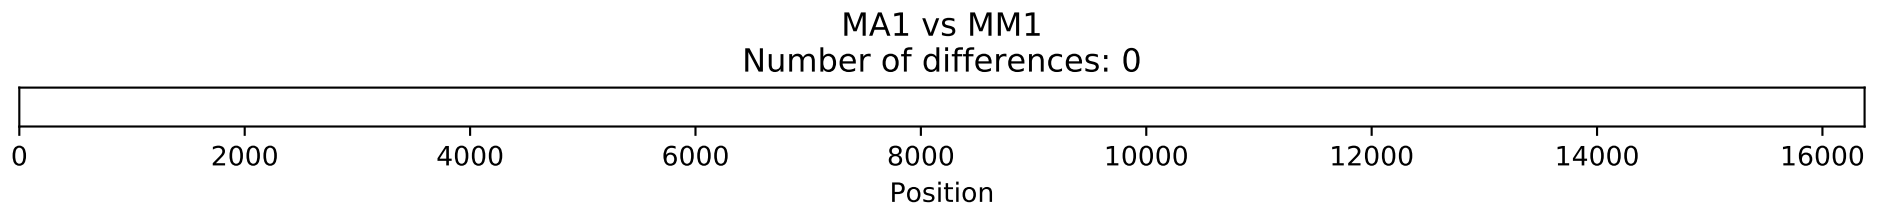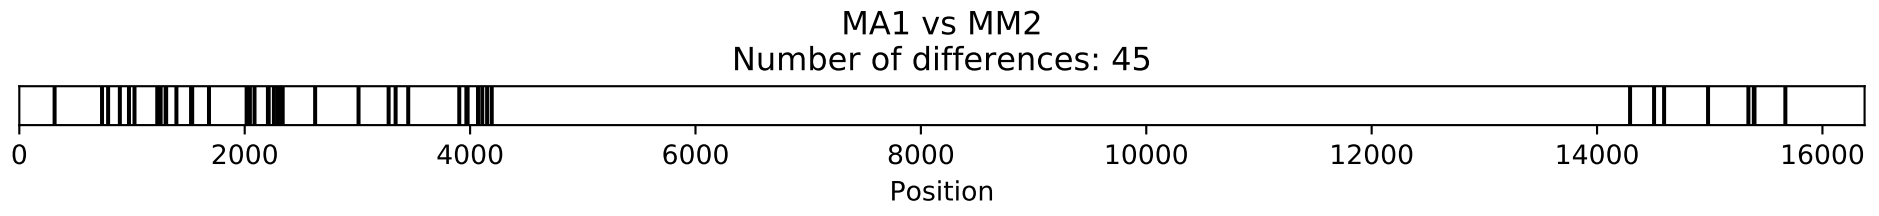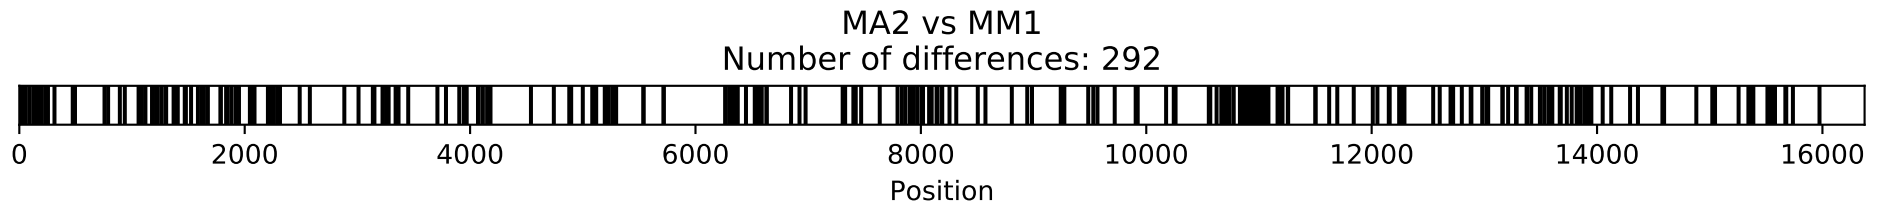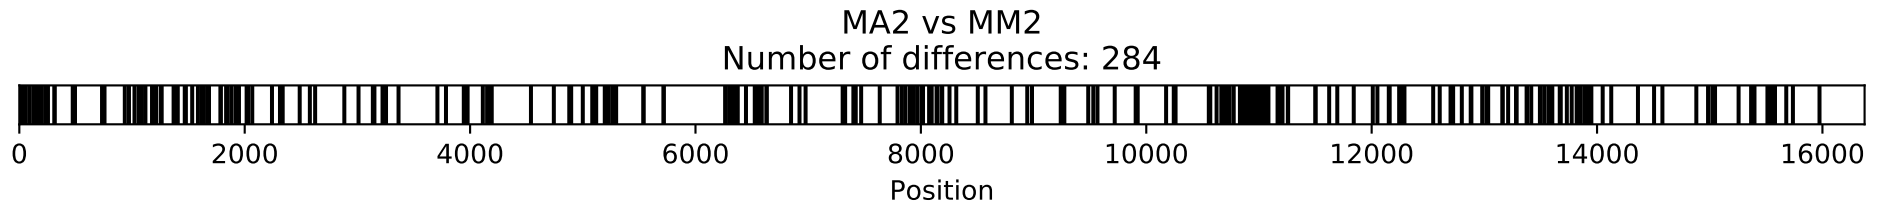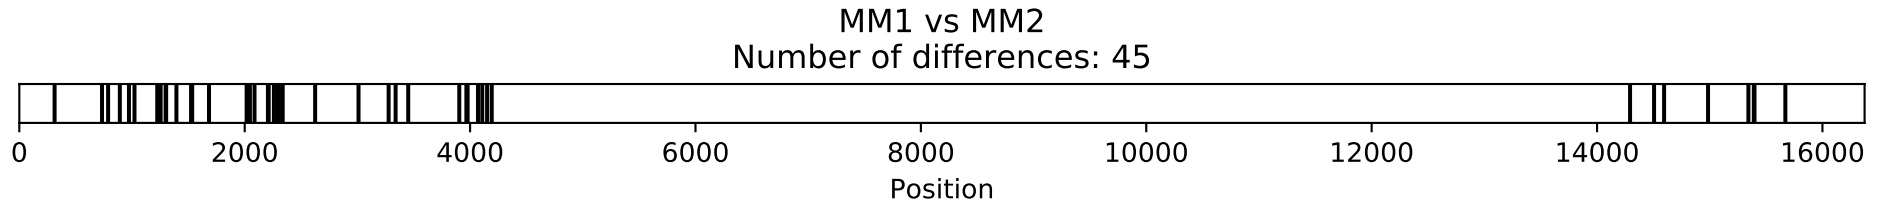



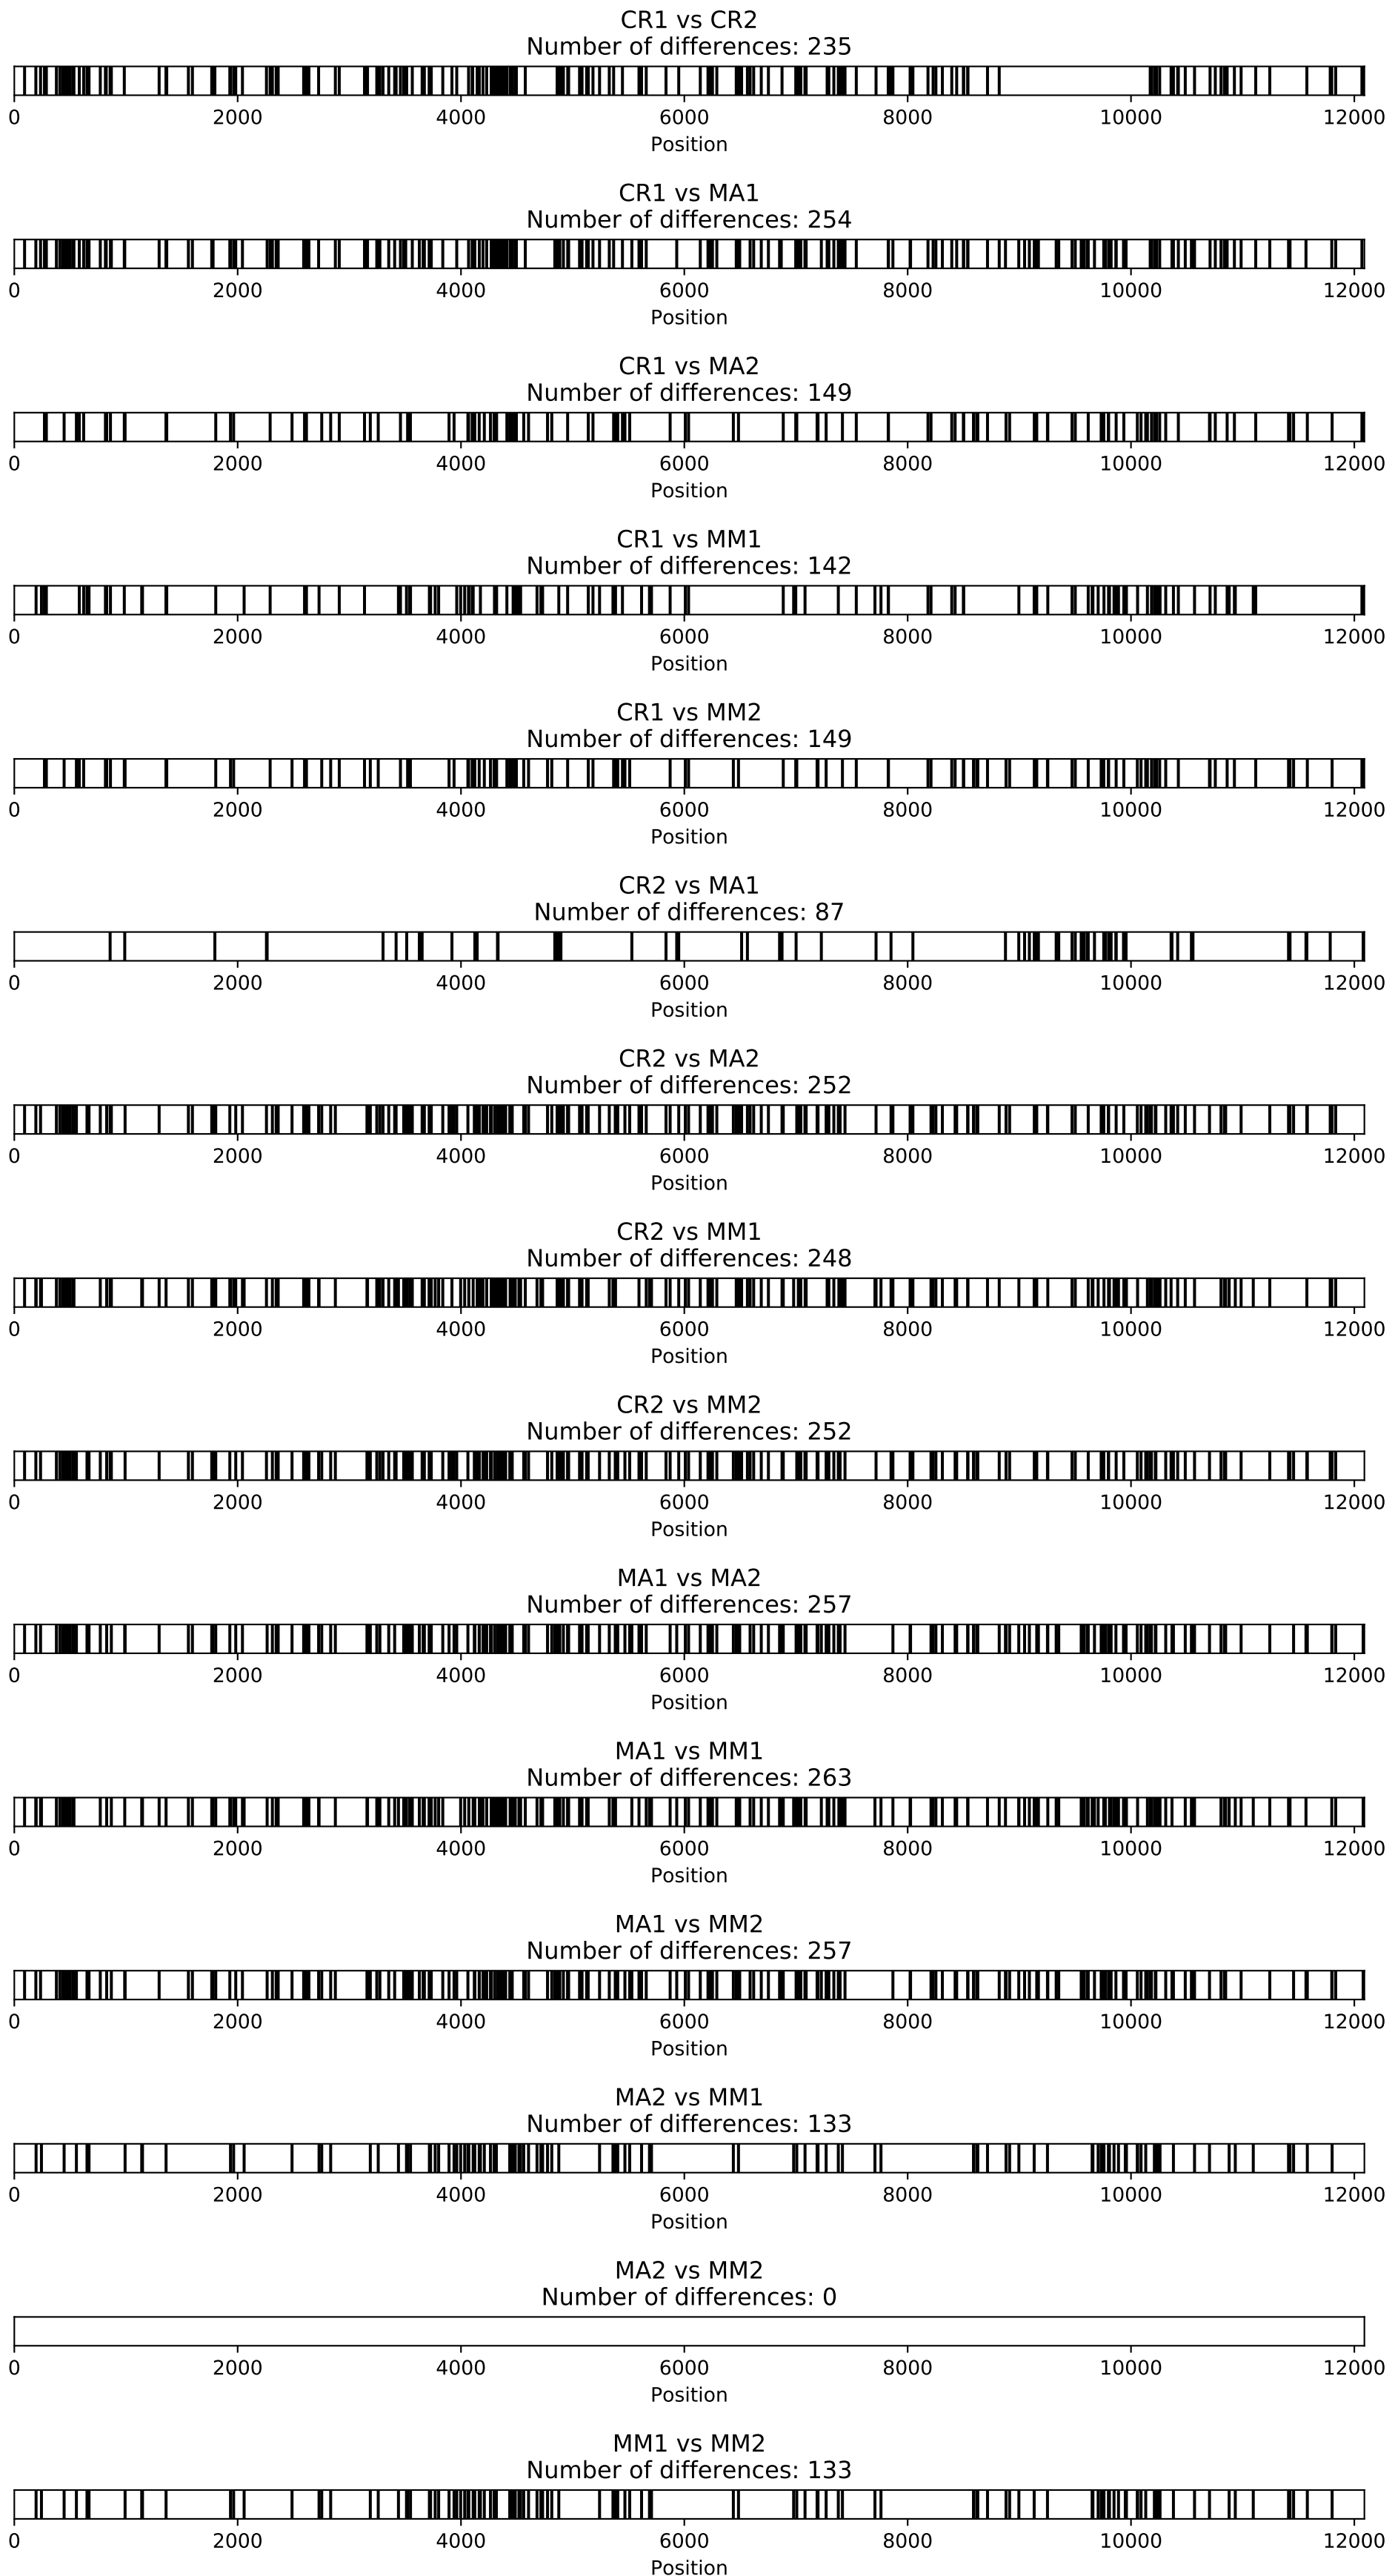

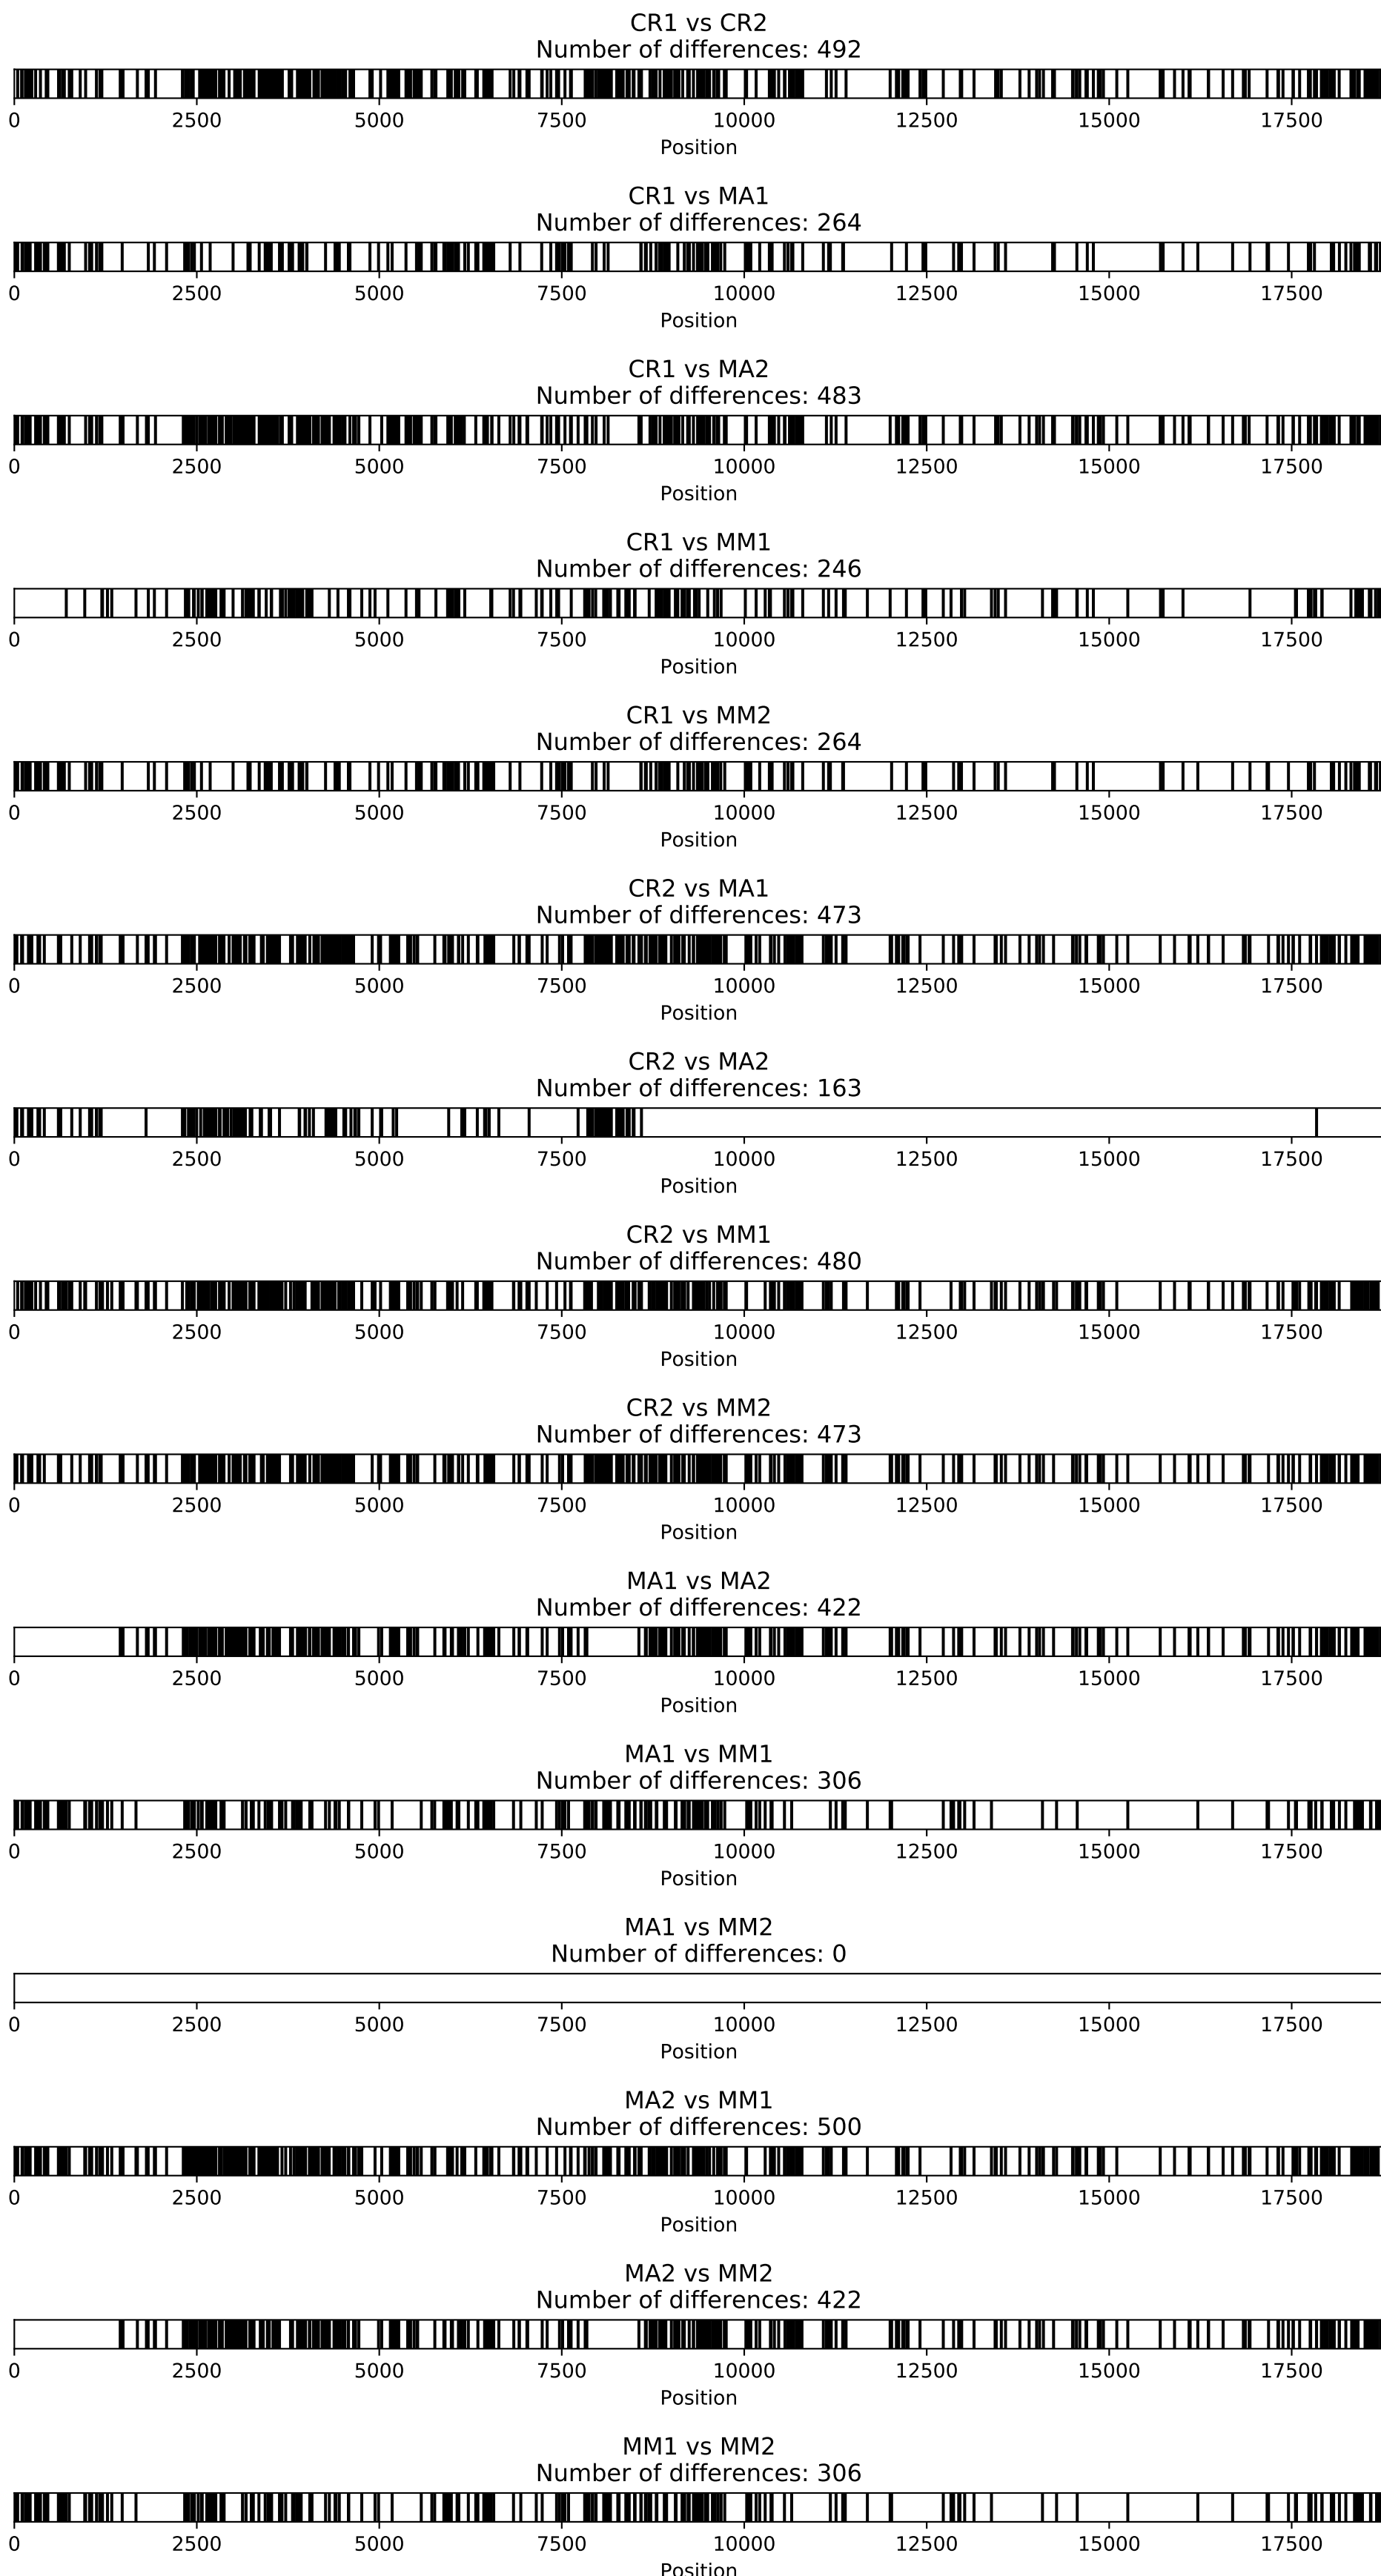

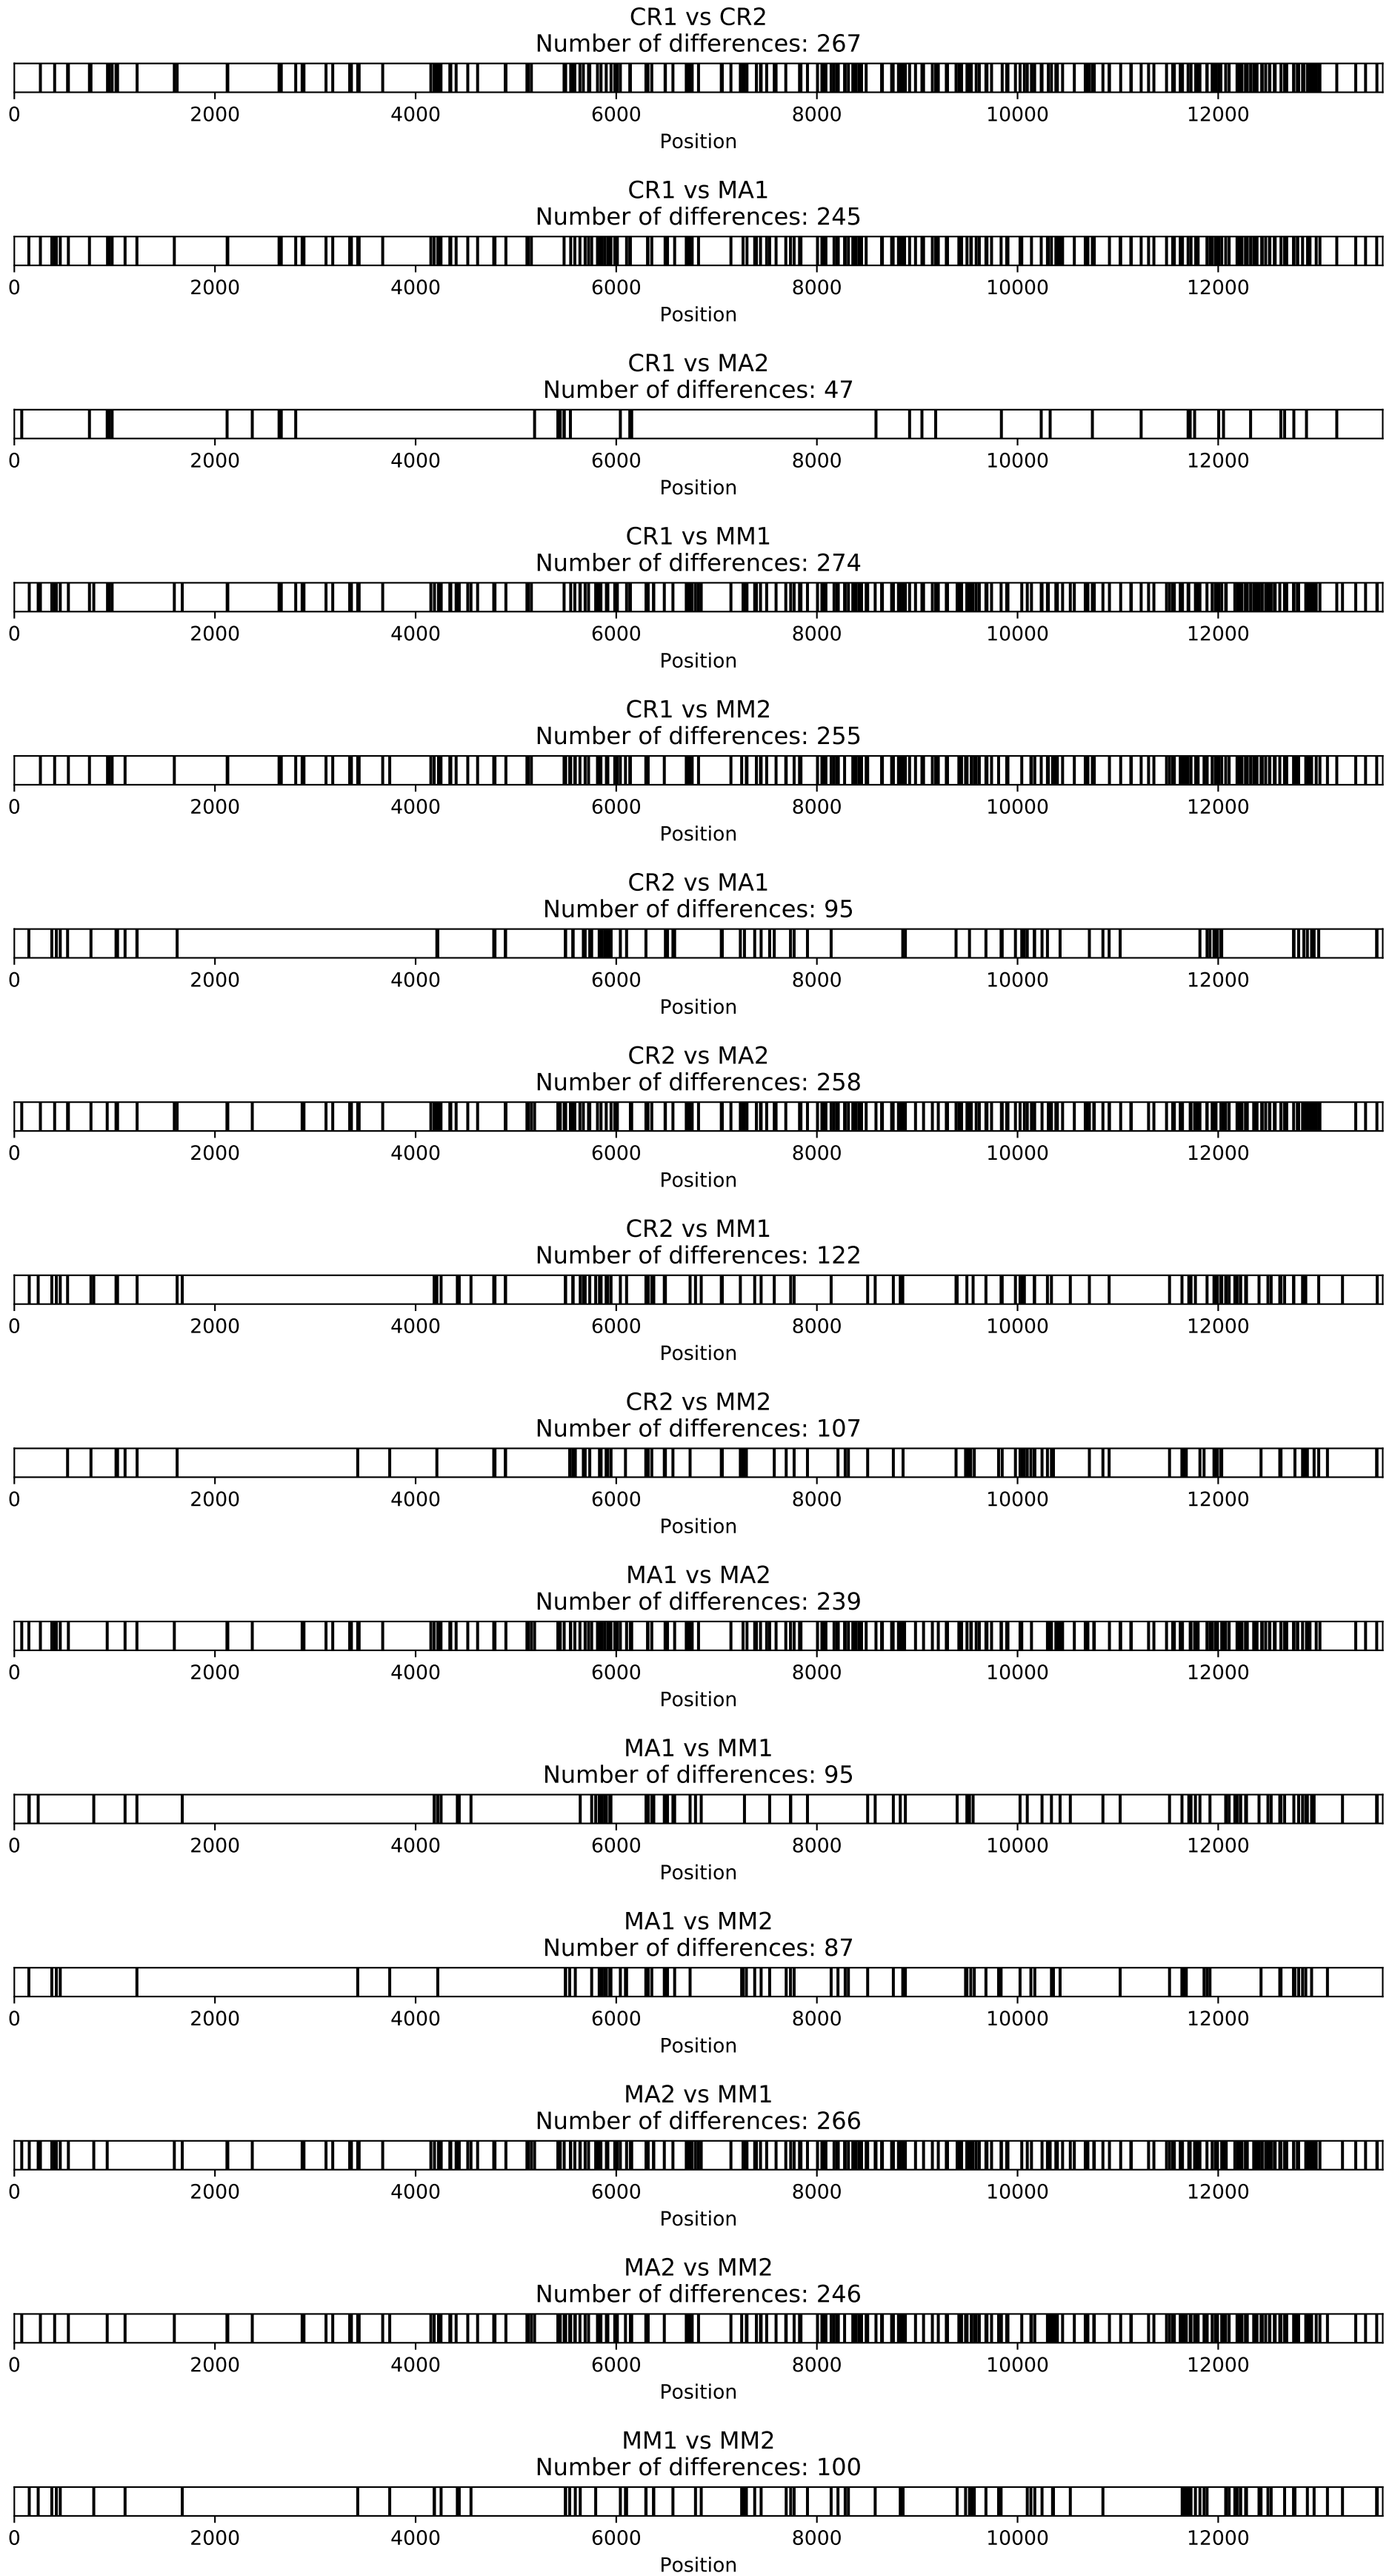

# Region: 248

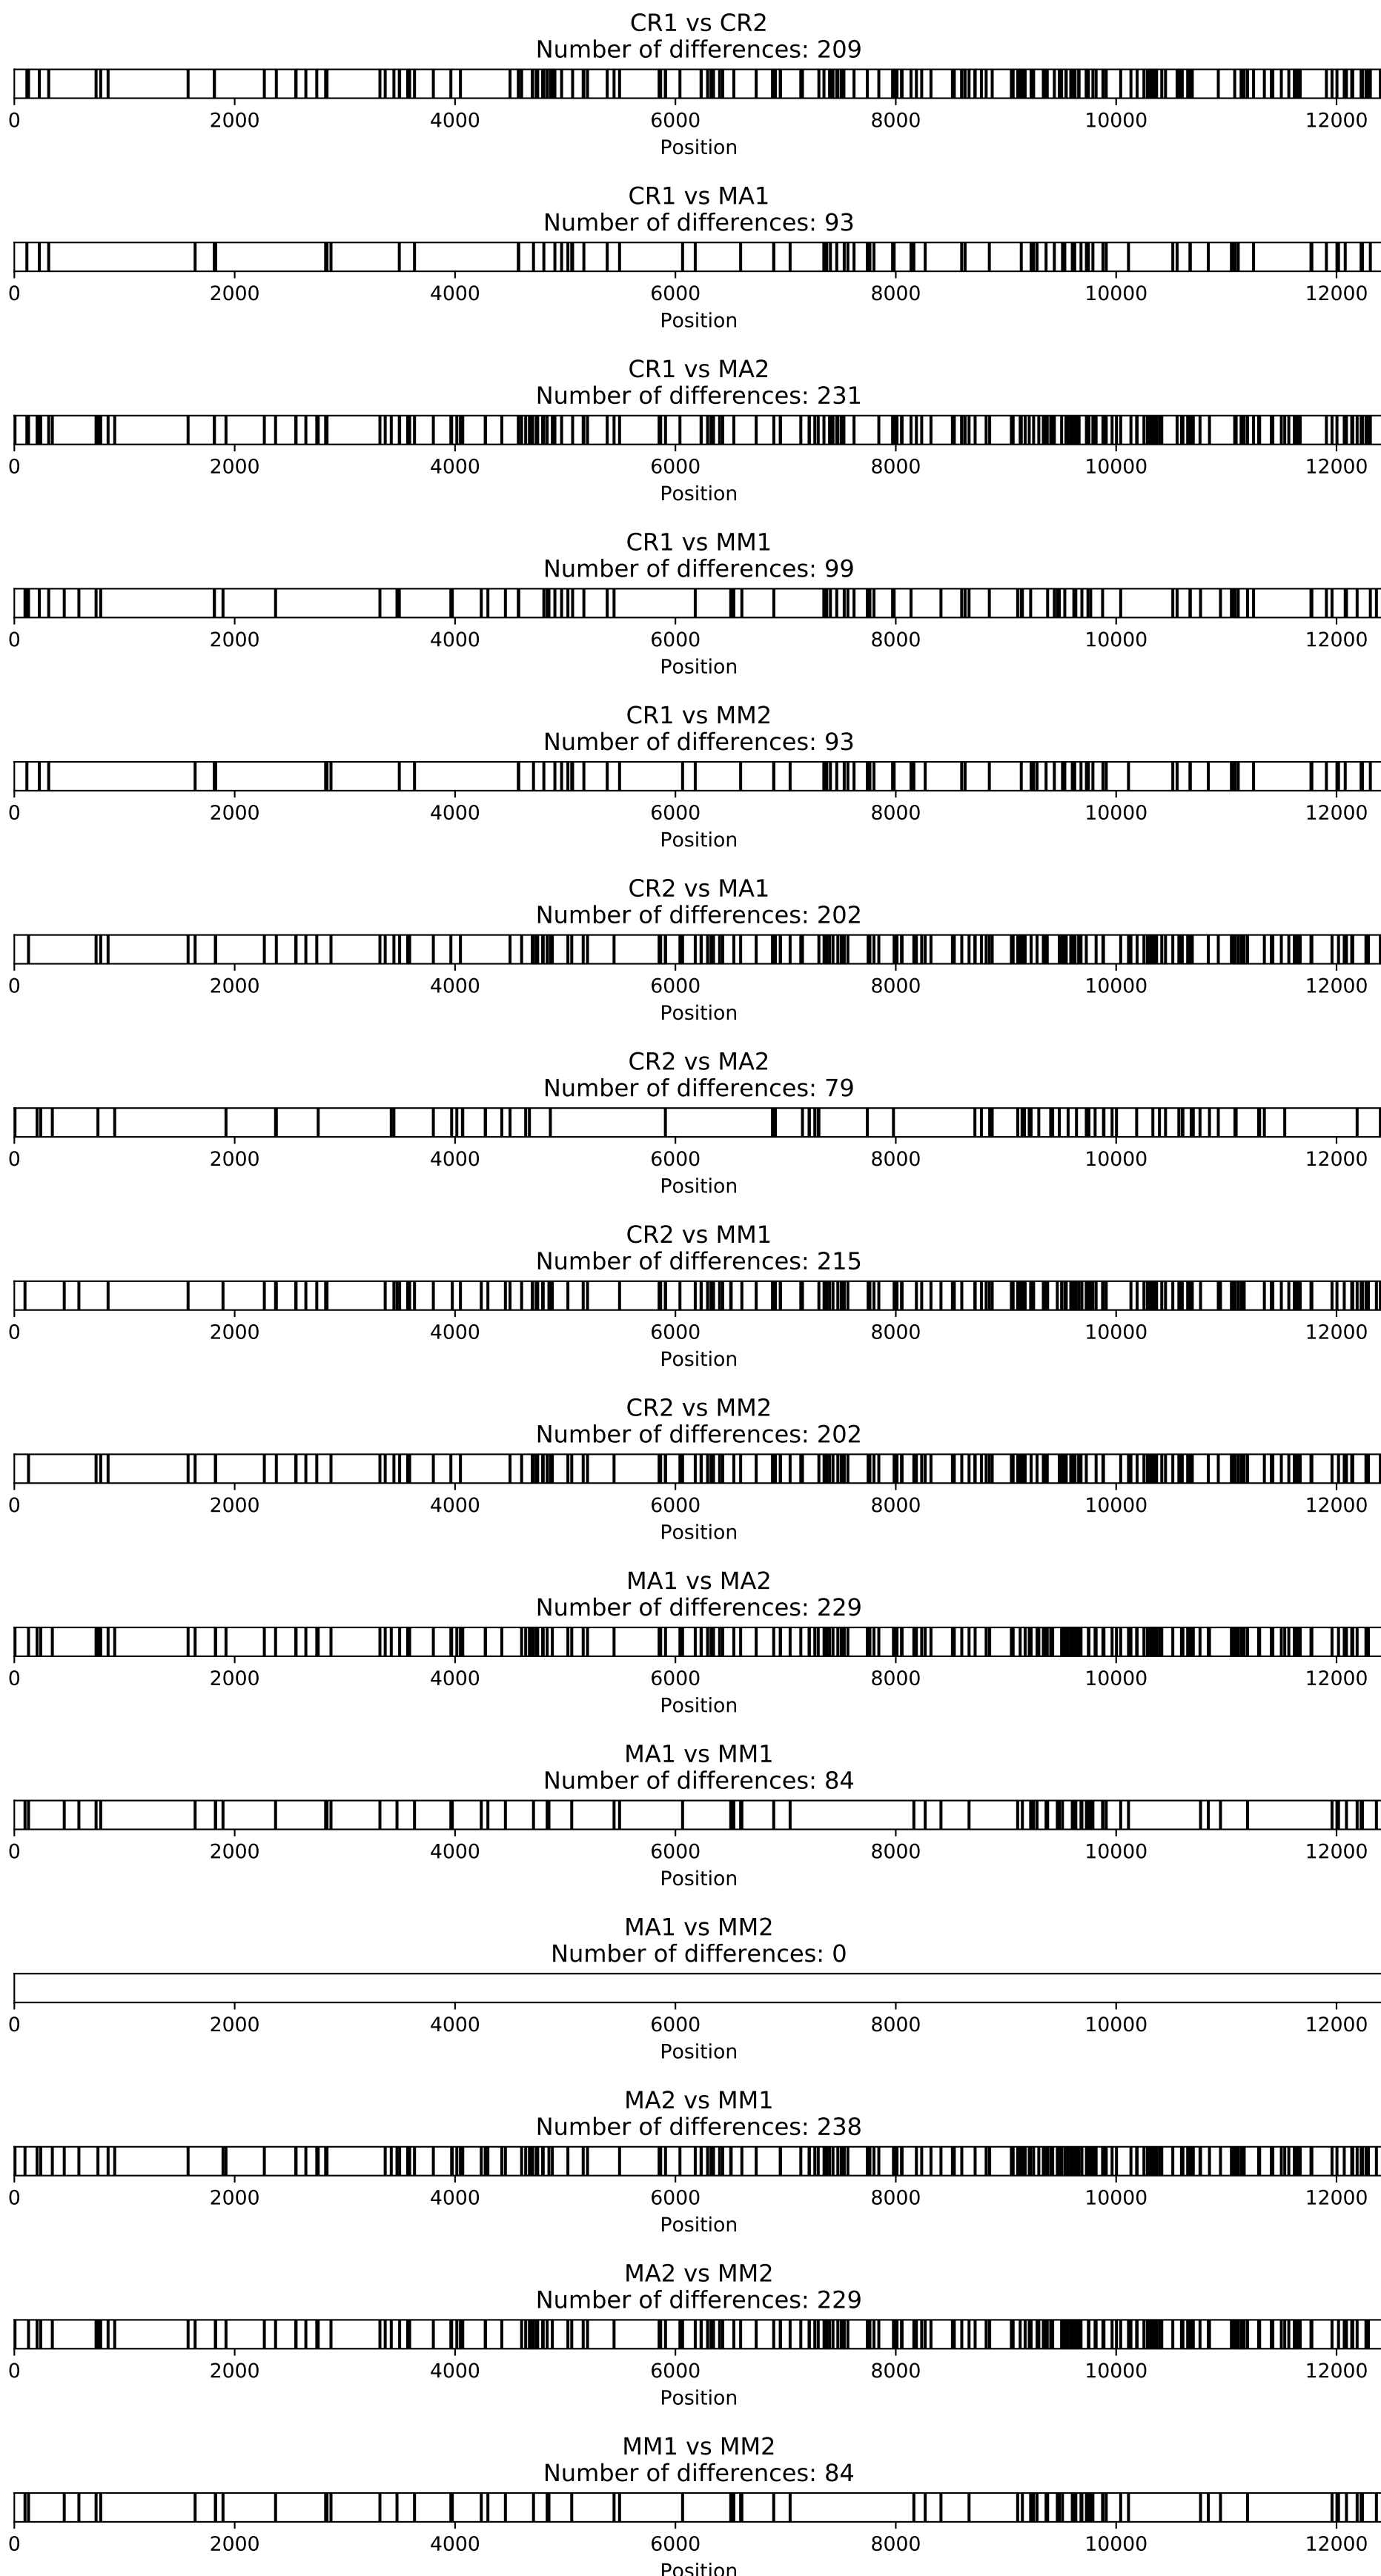

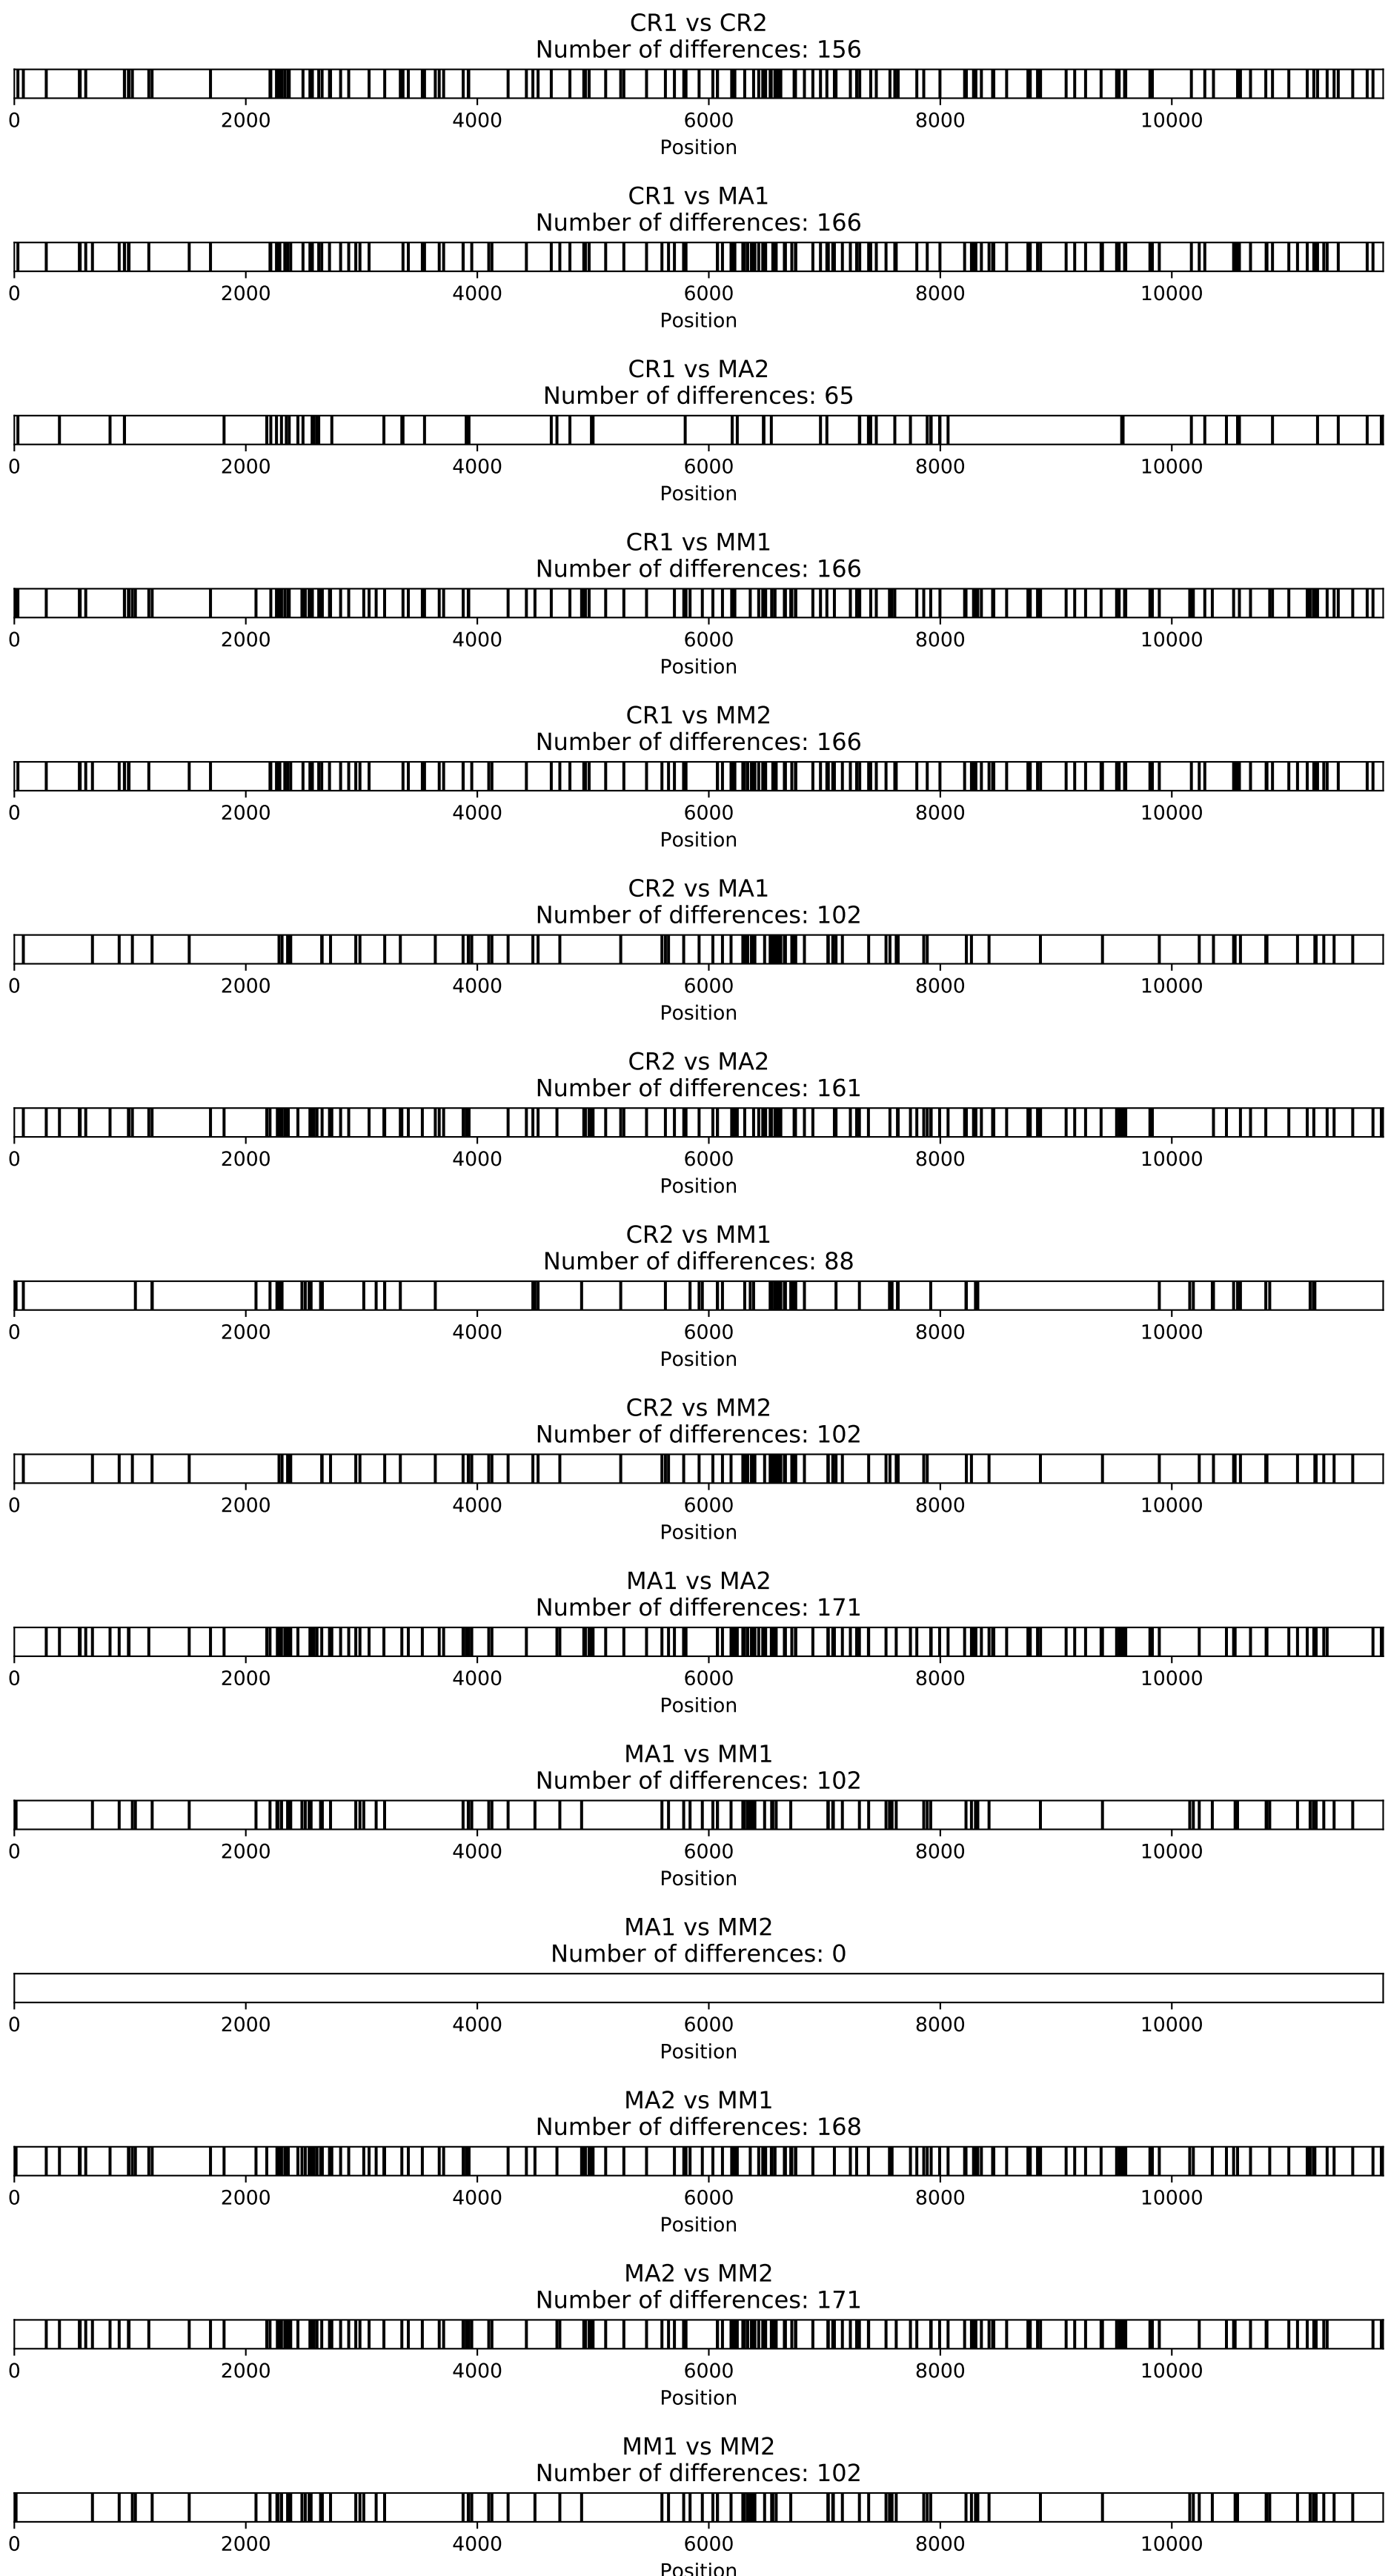

# Region: 250

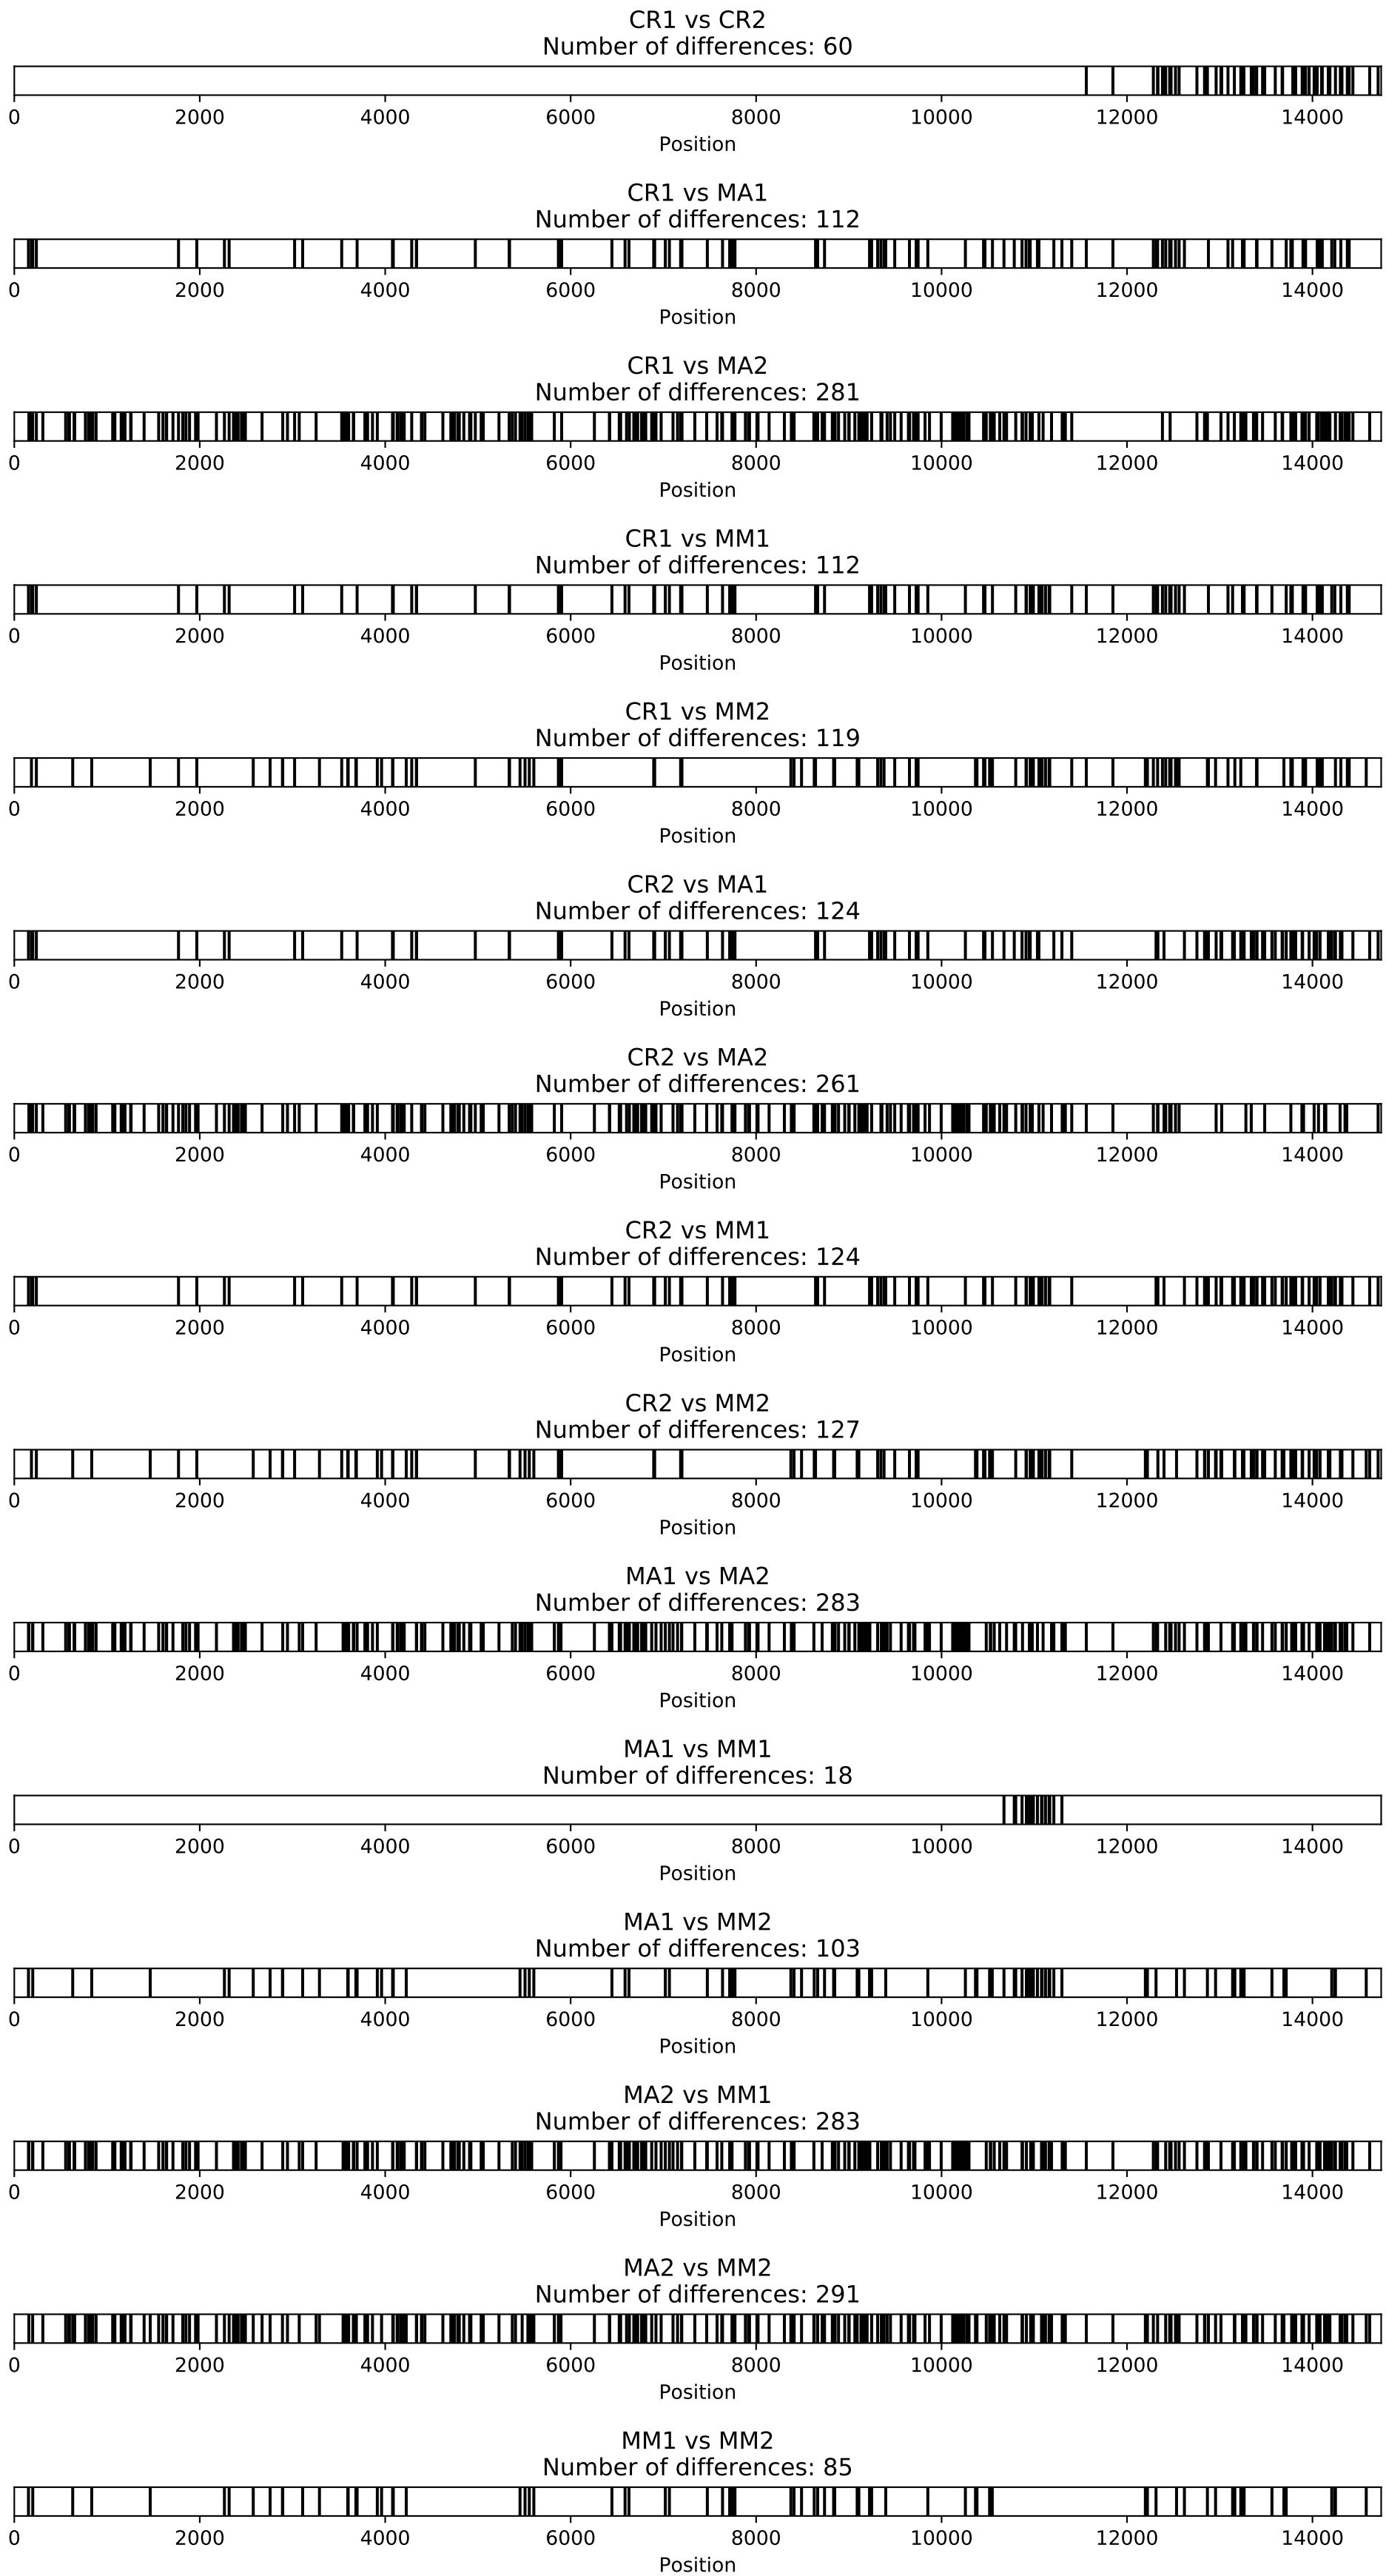

# Region: 251

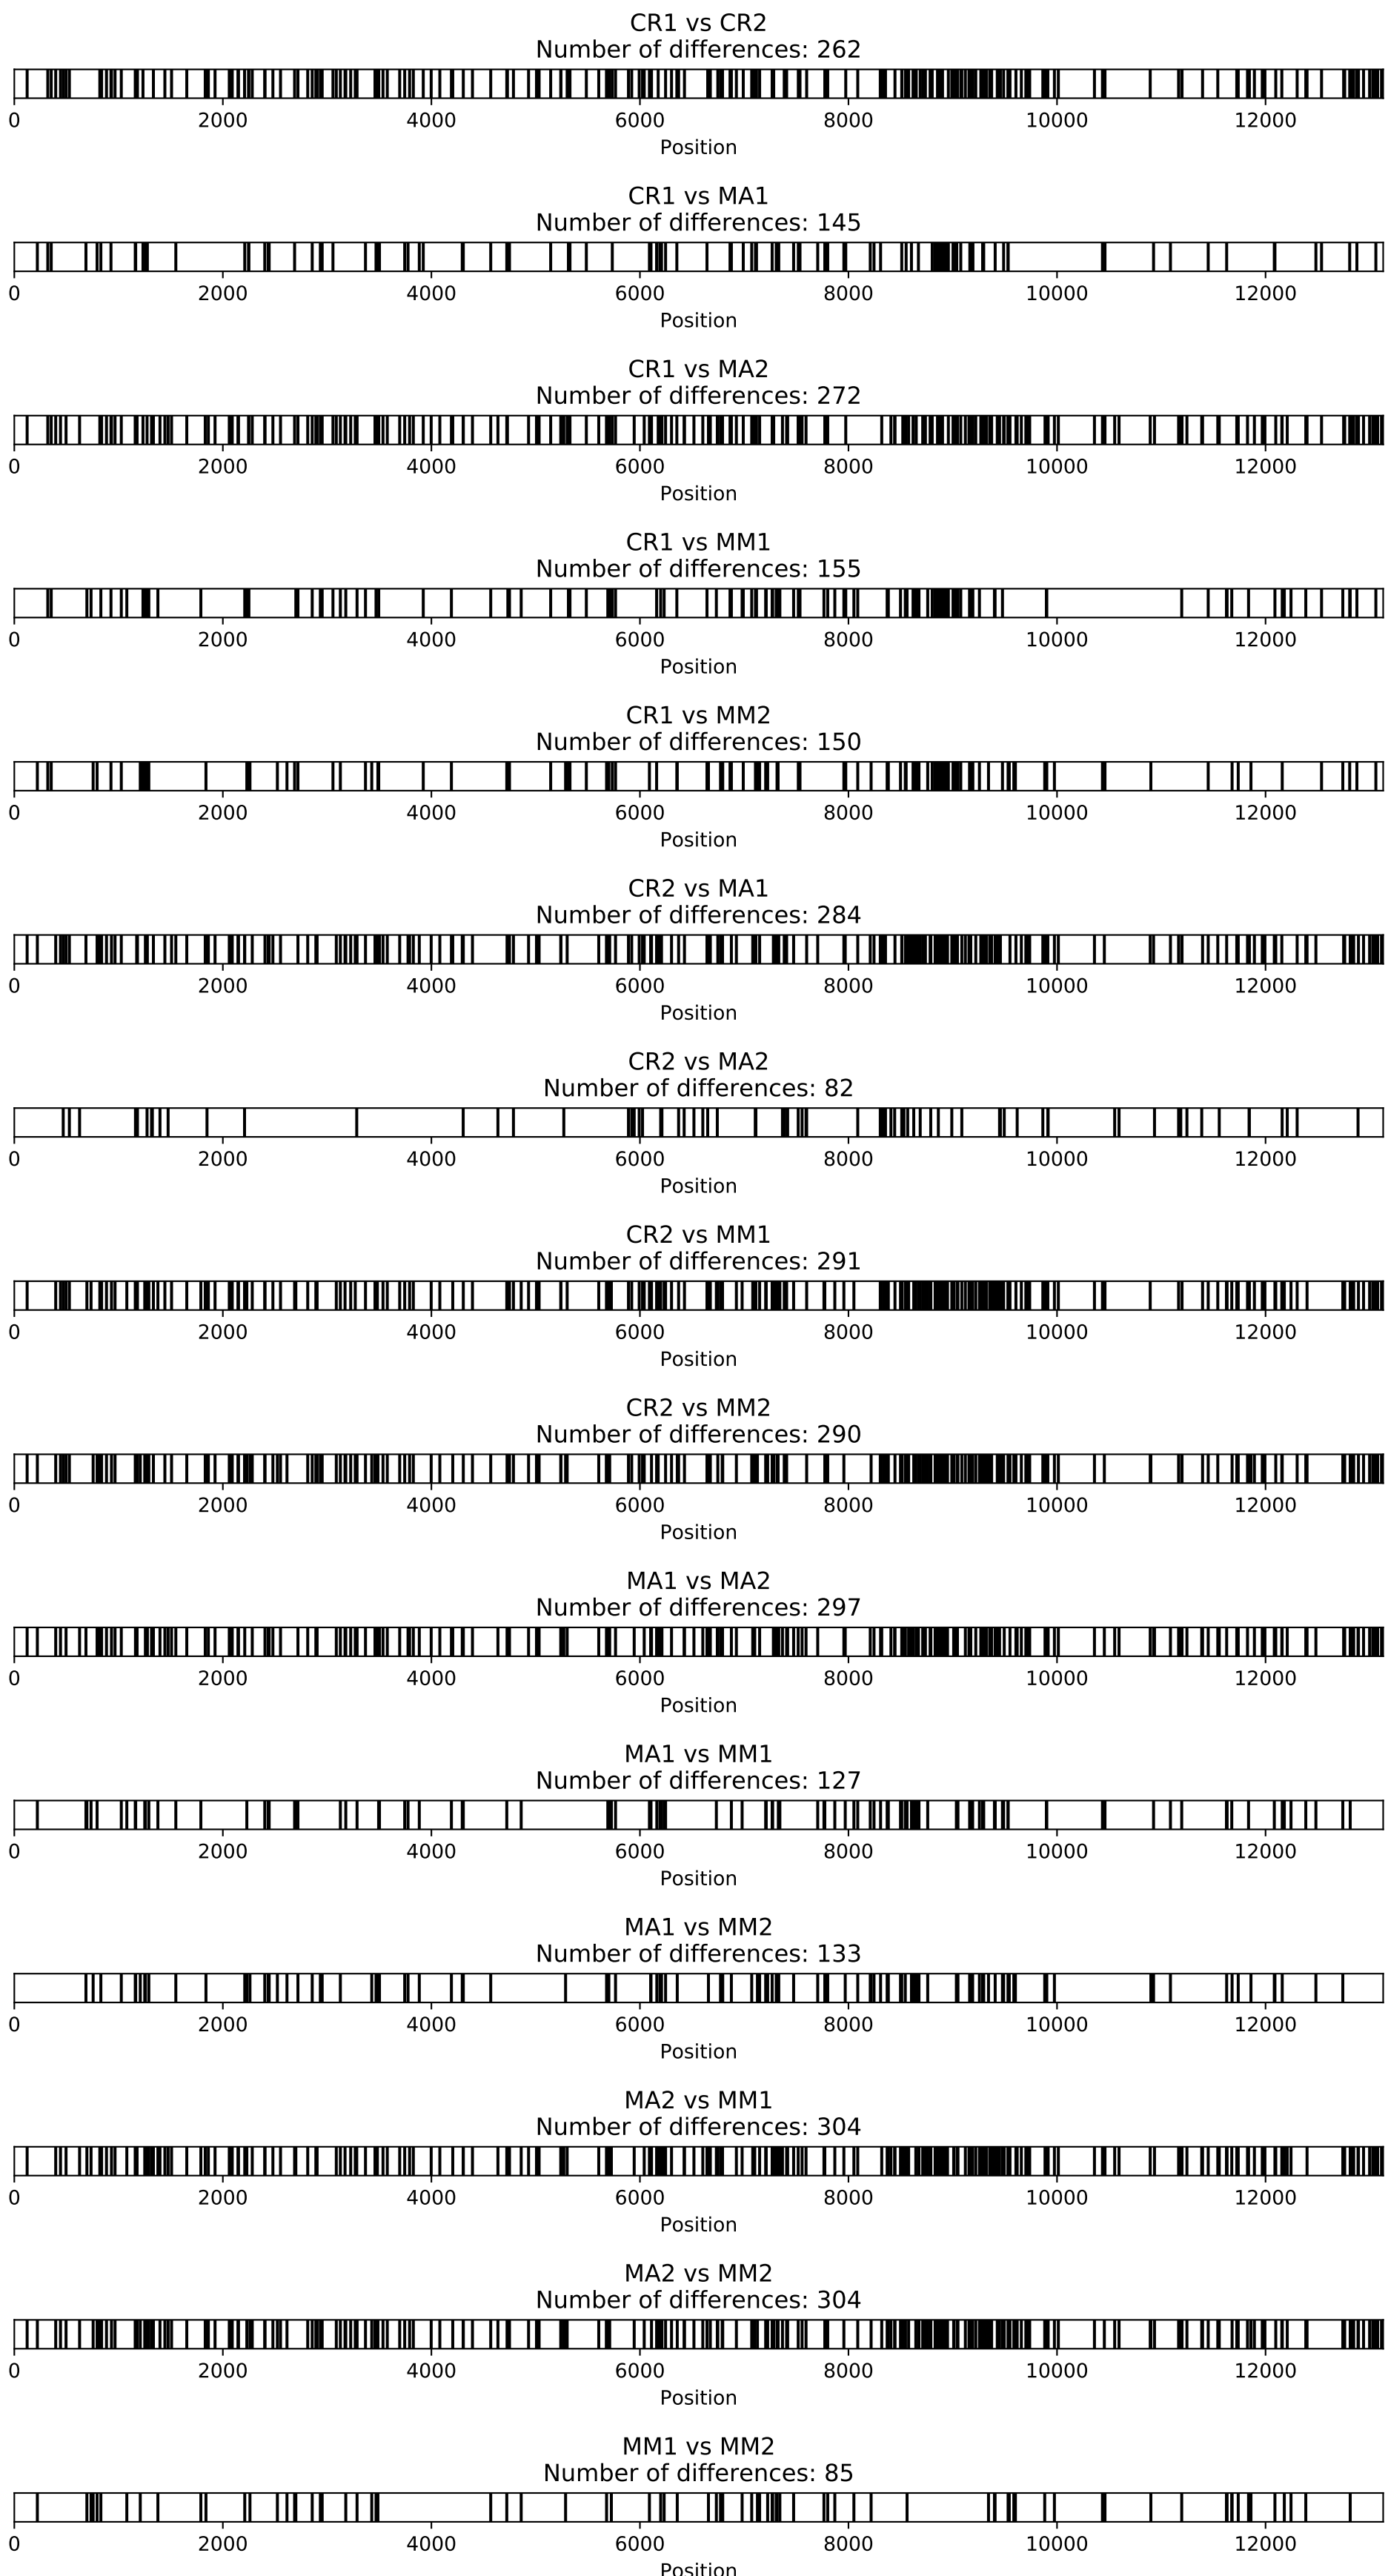

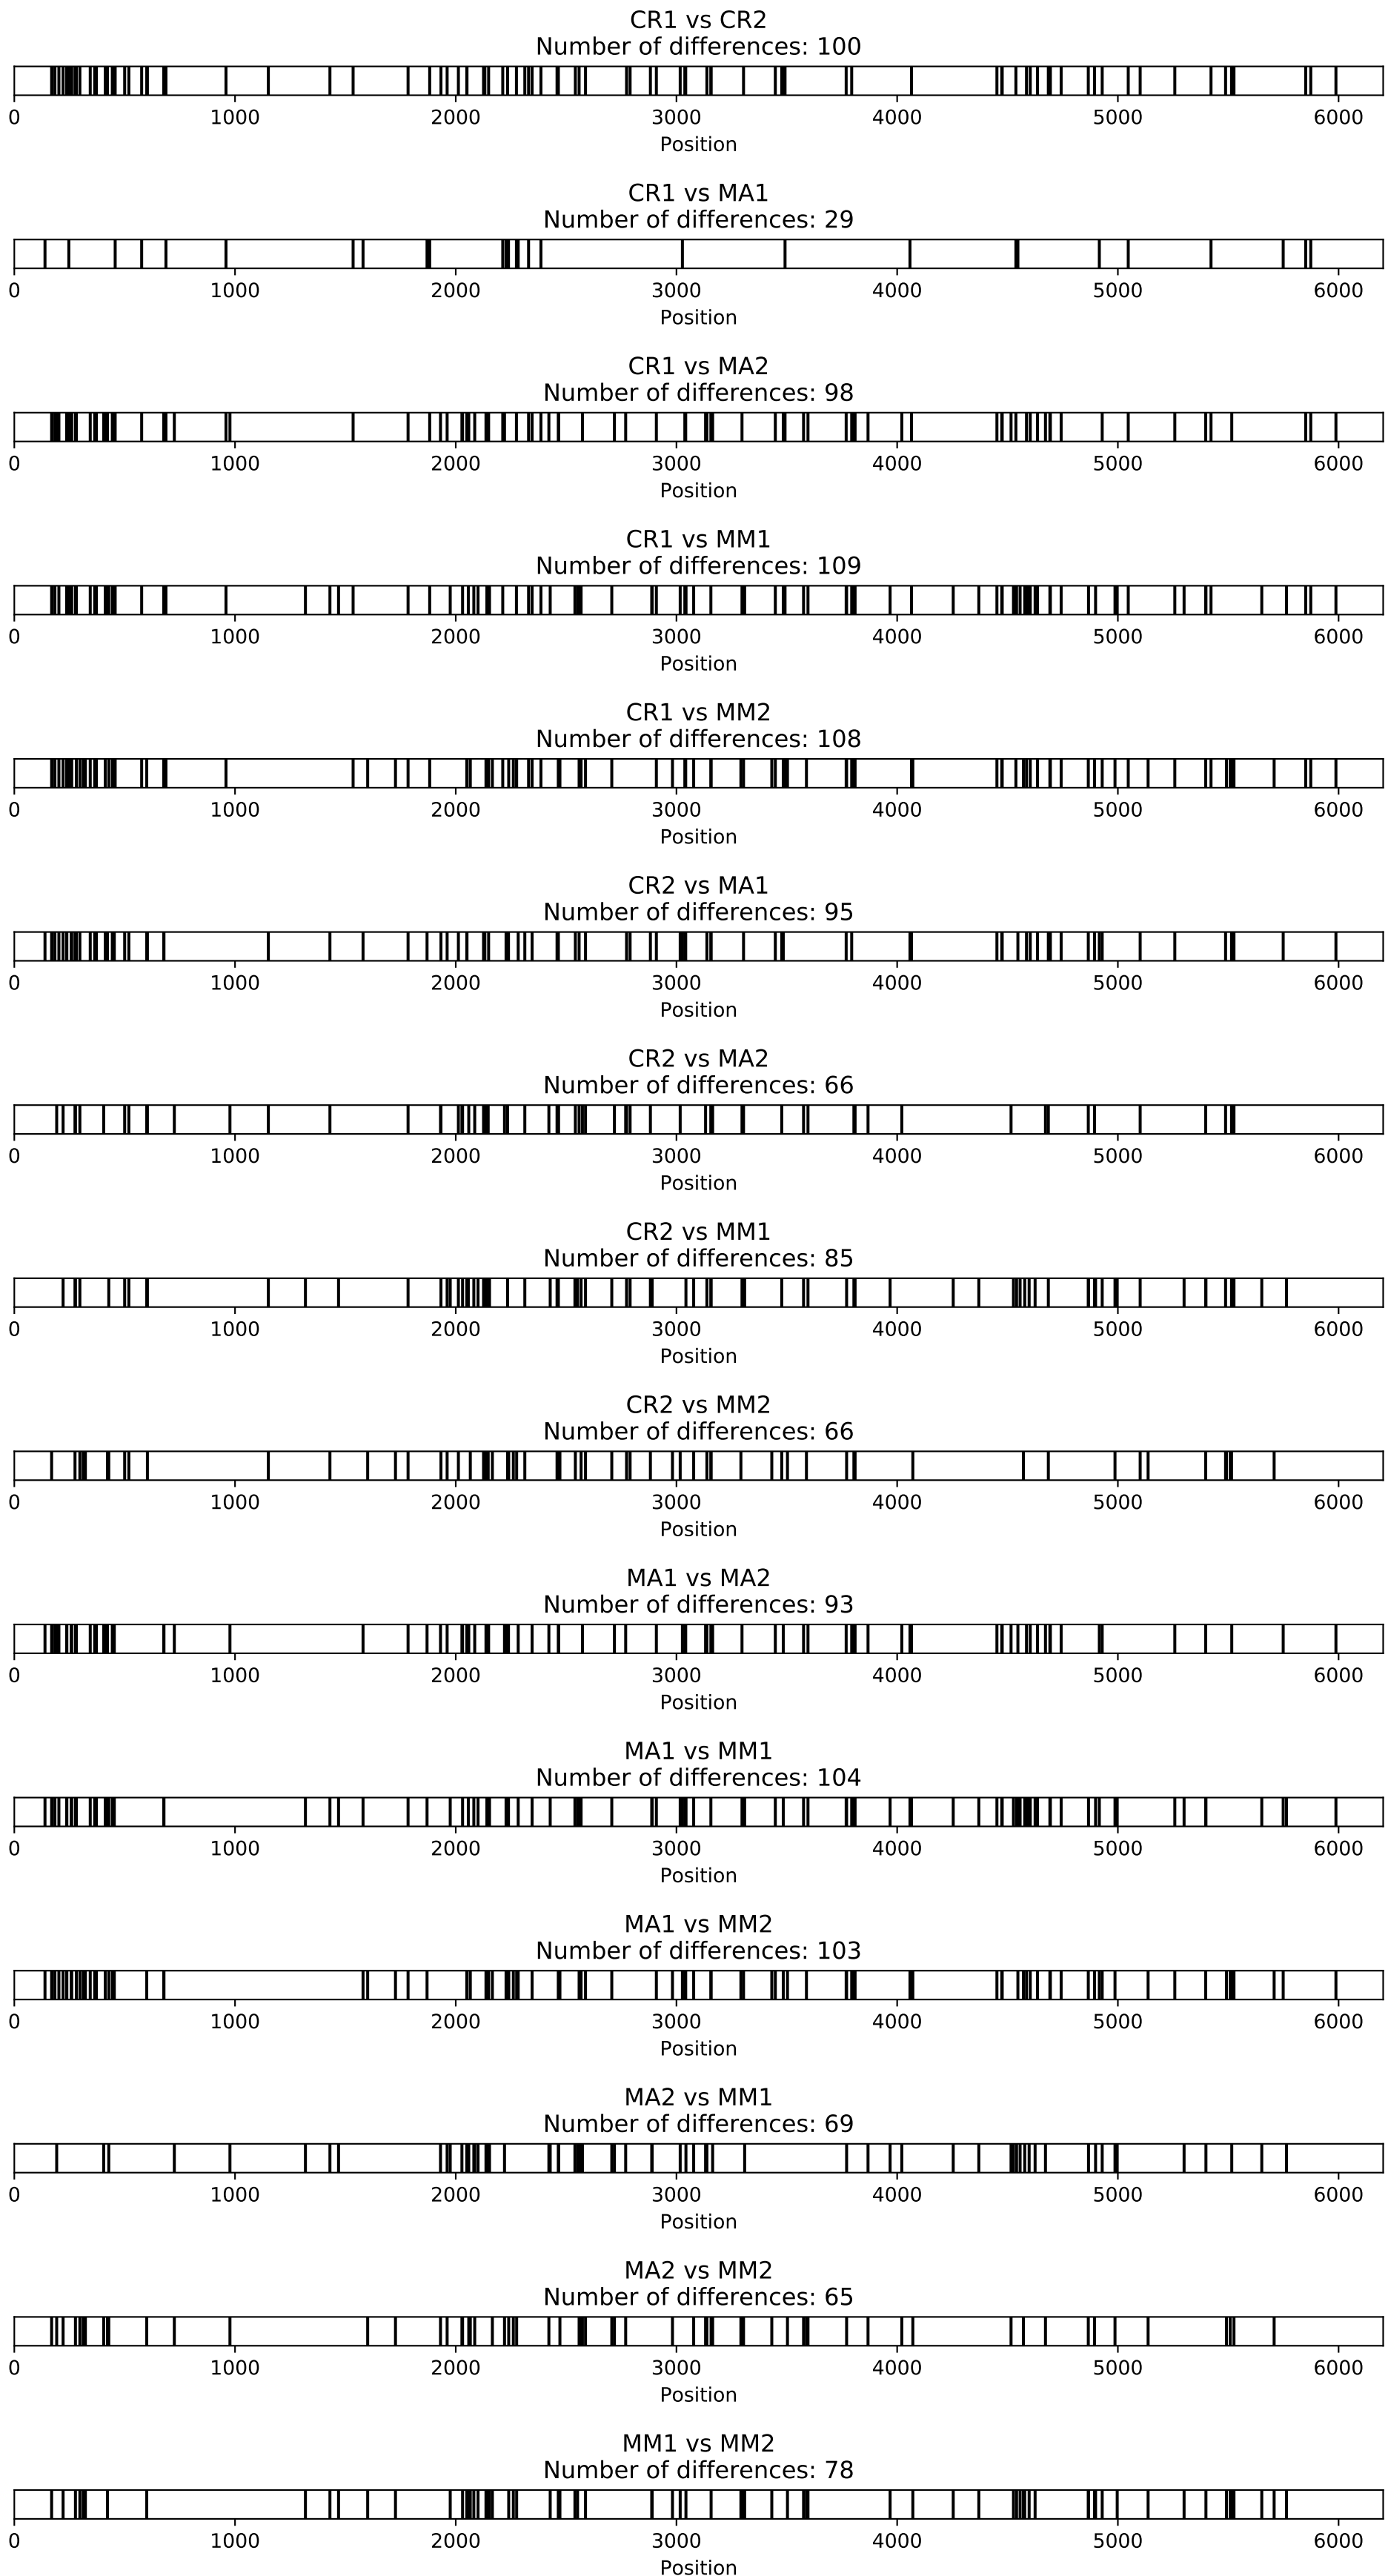



# Region: 253

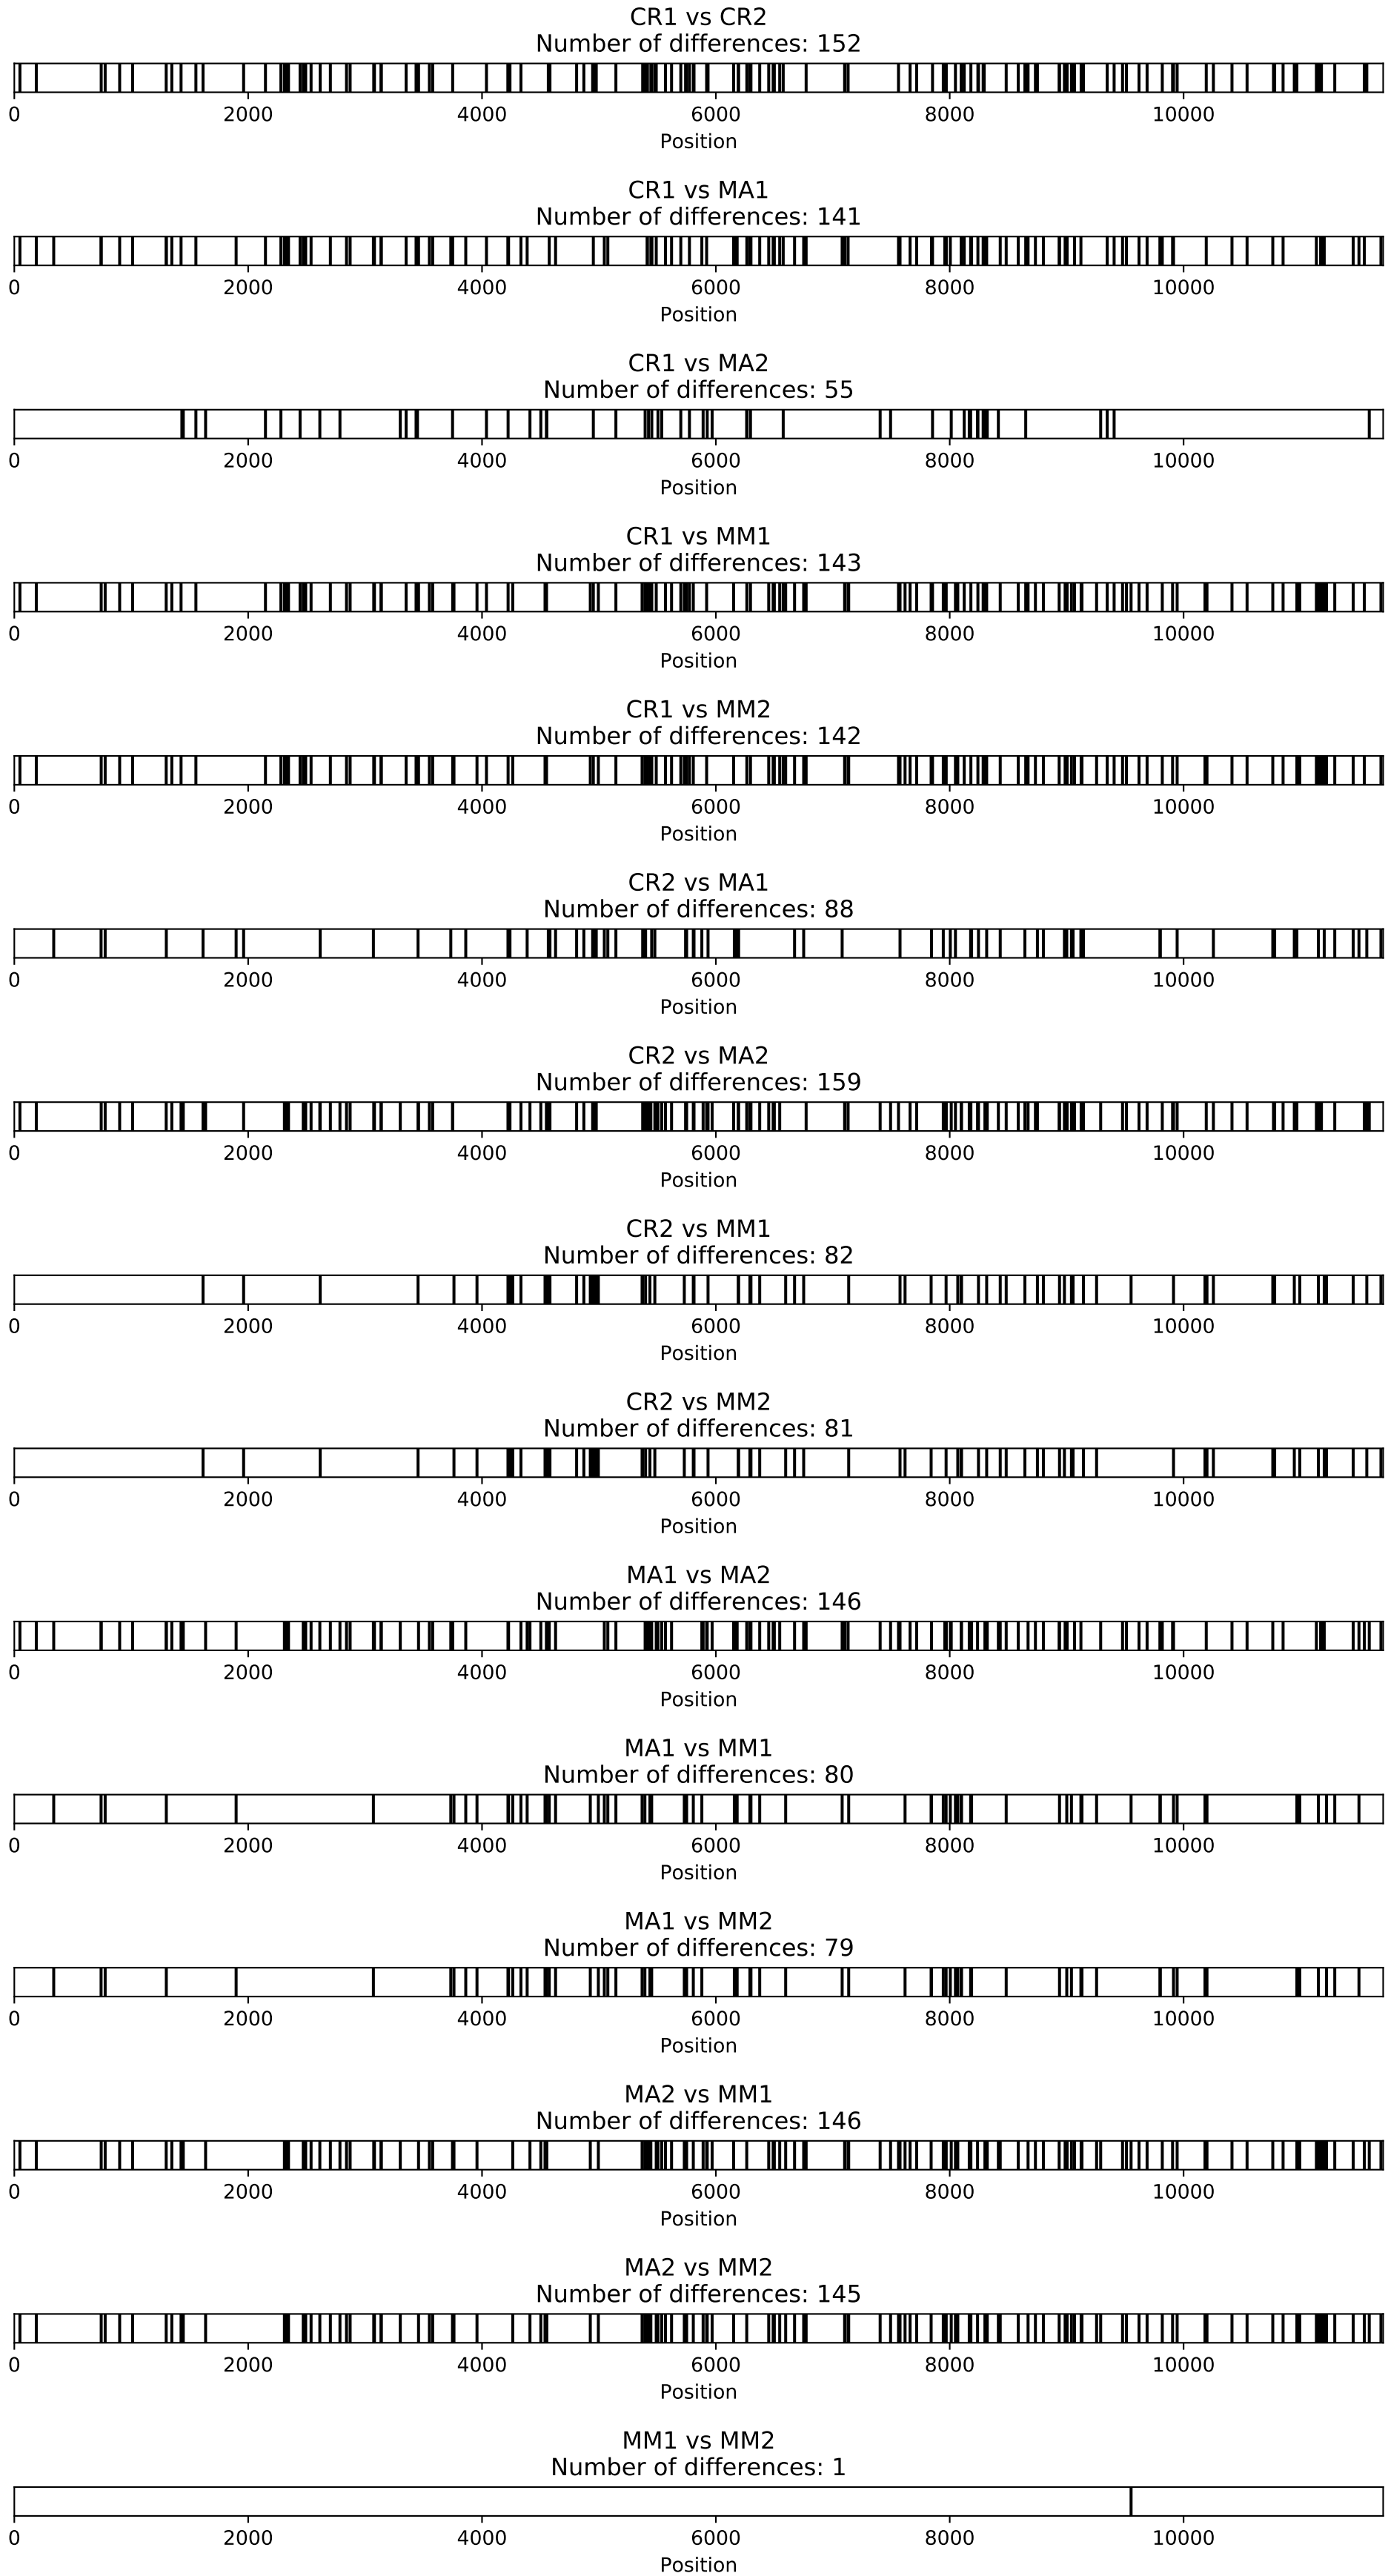

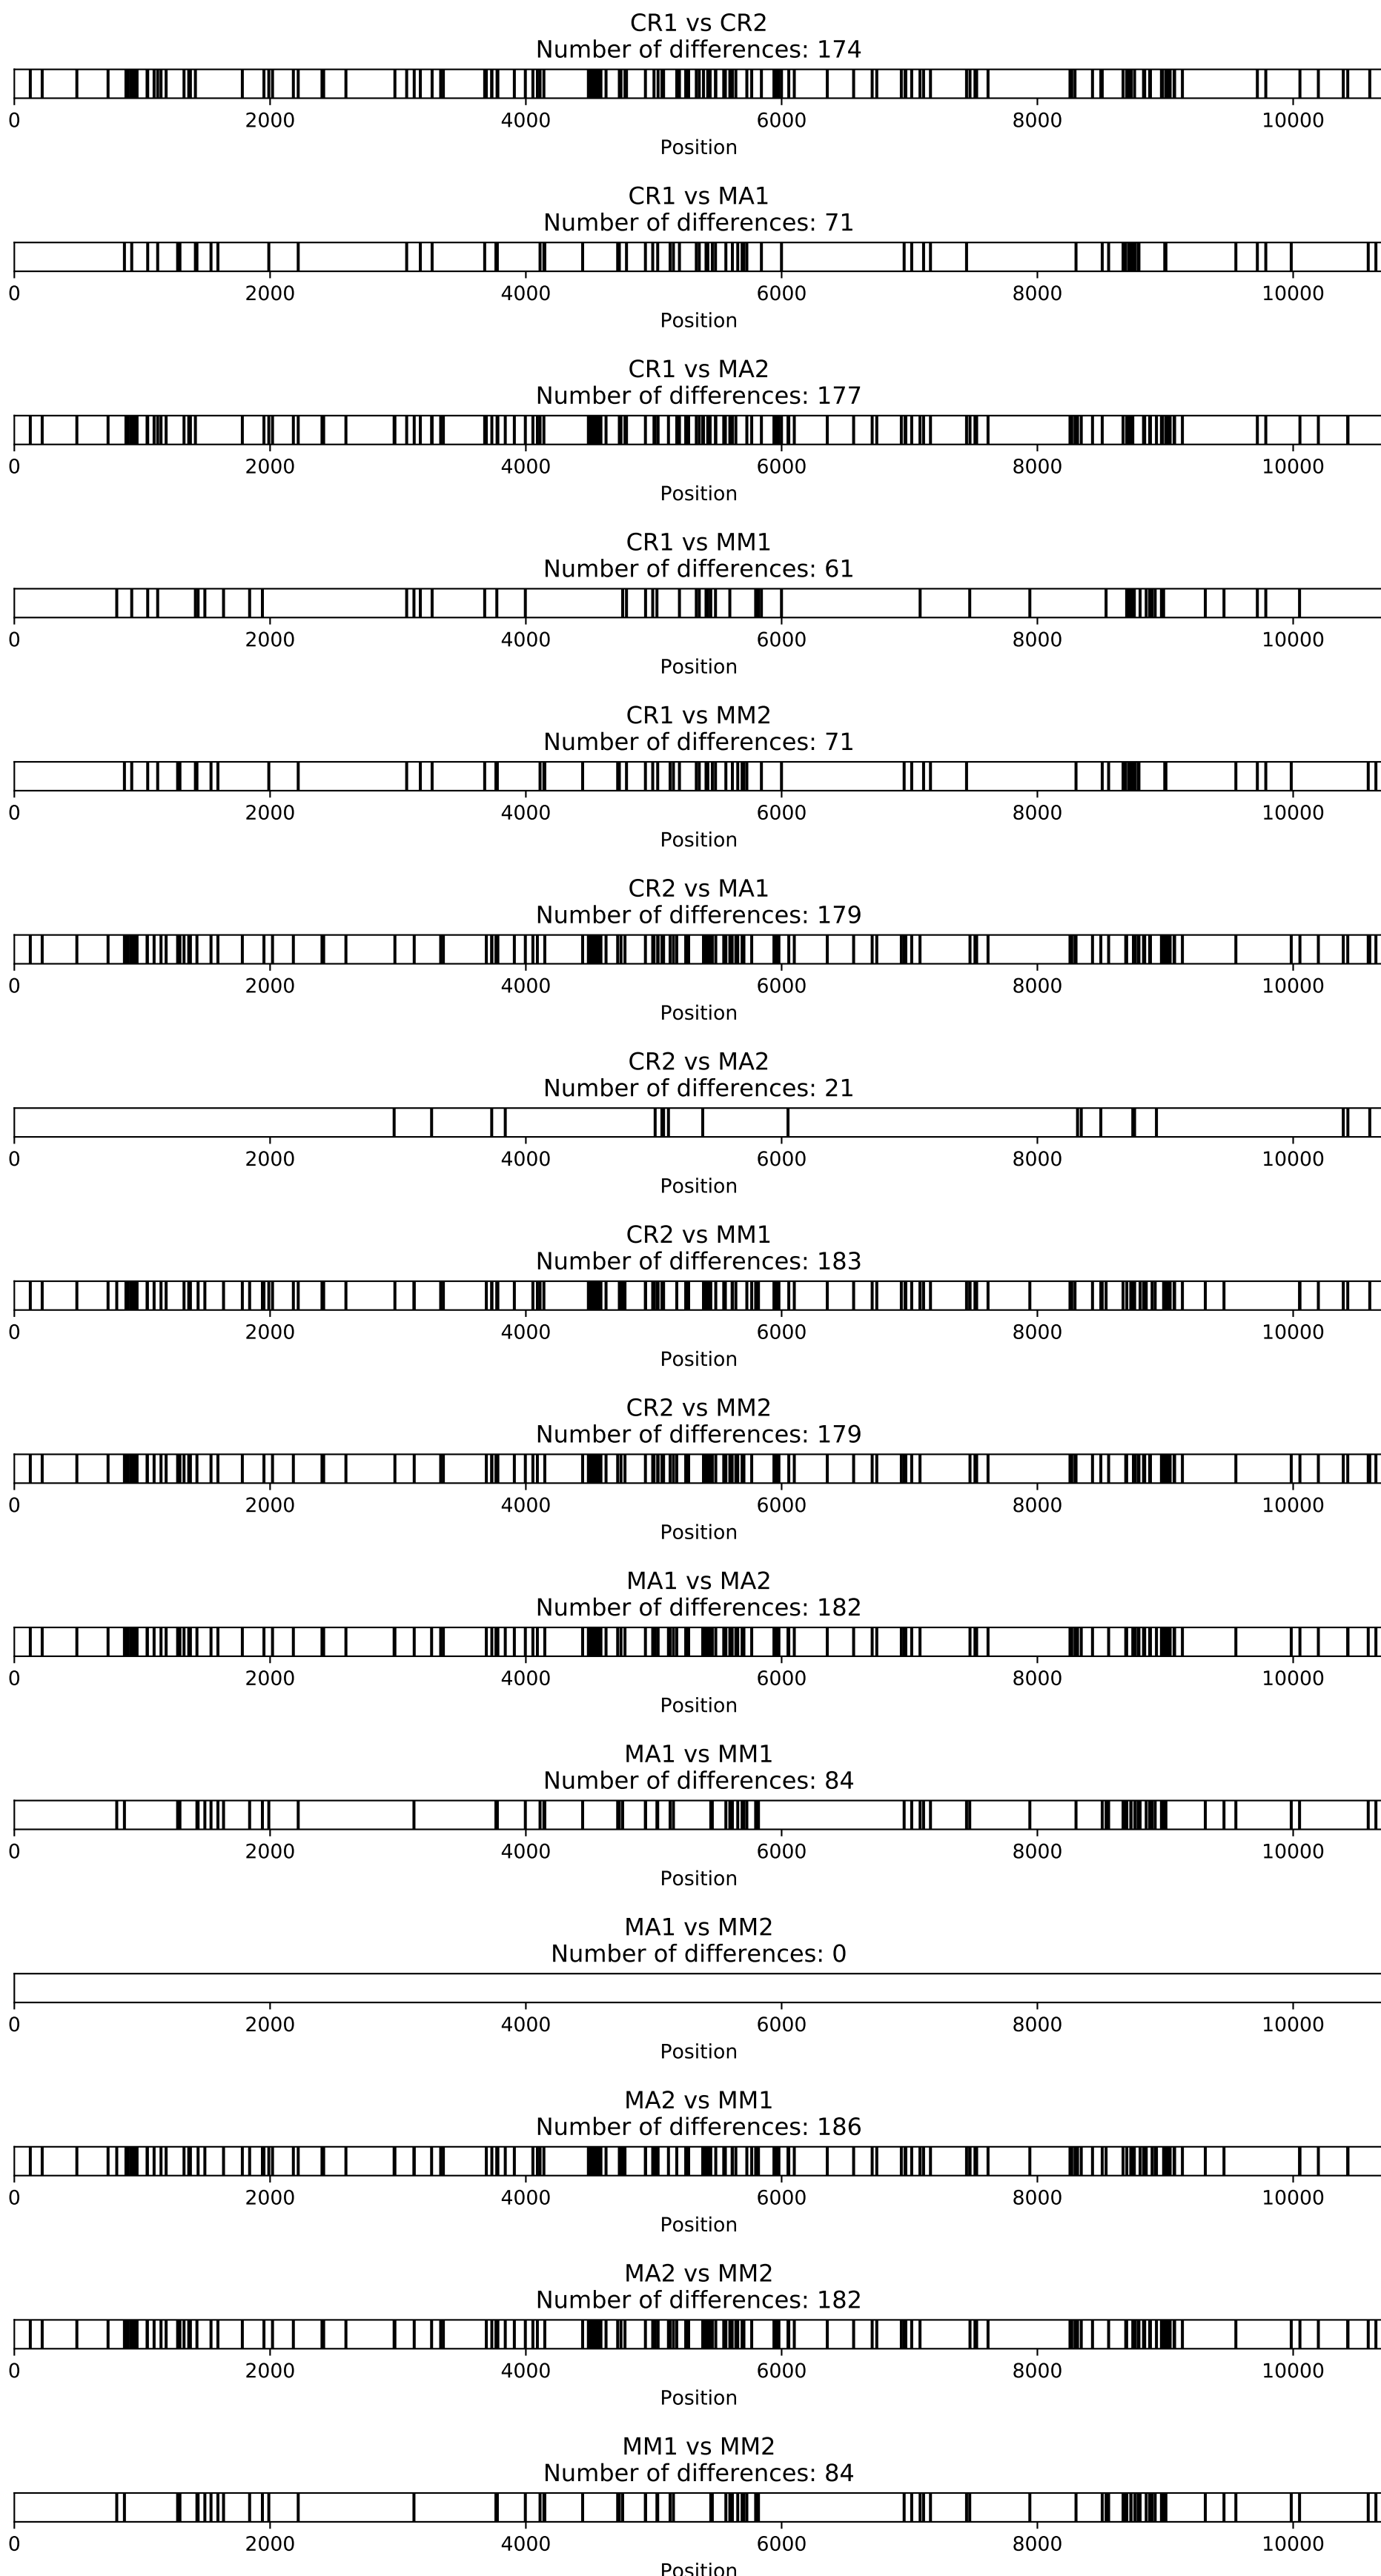

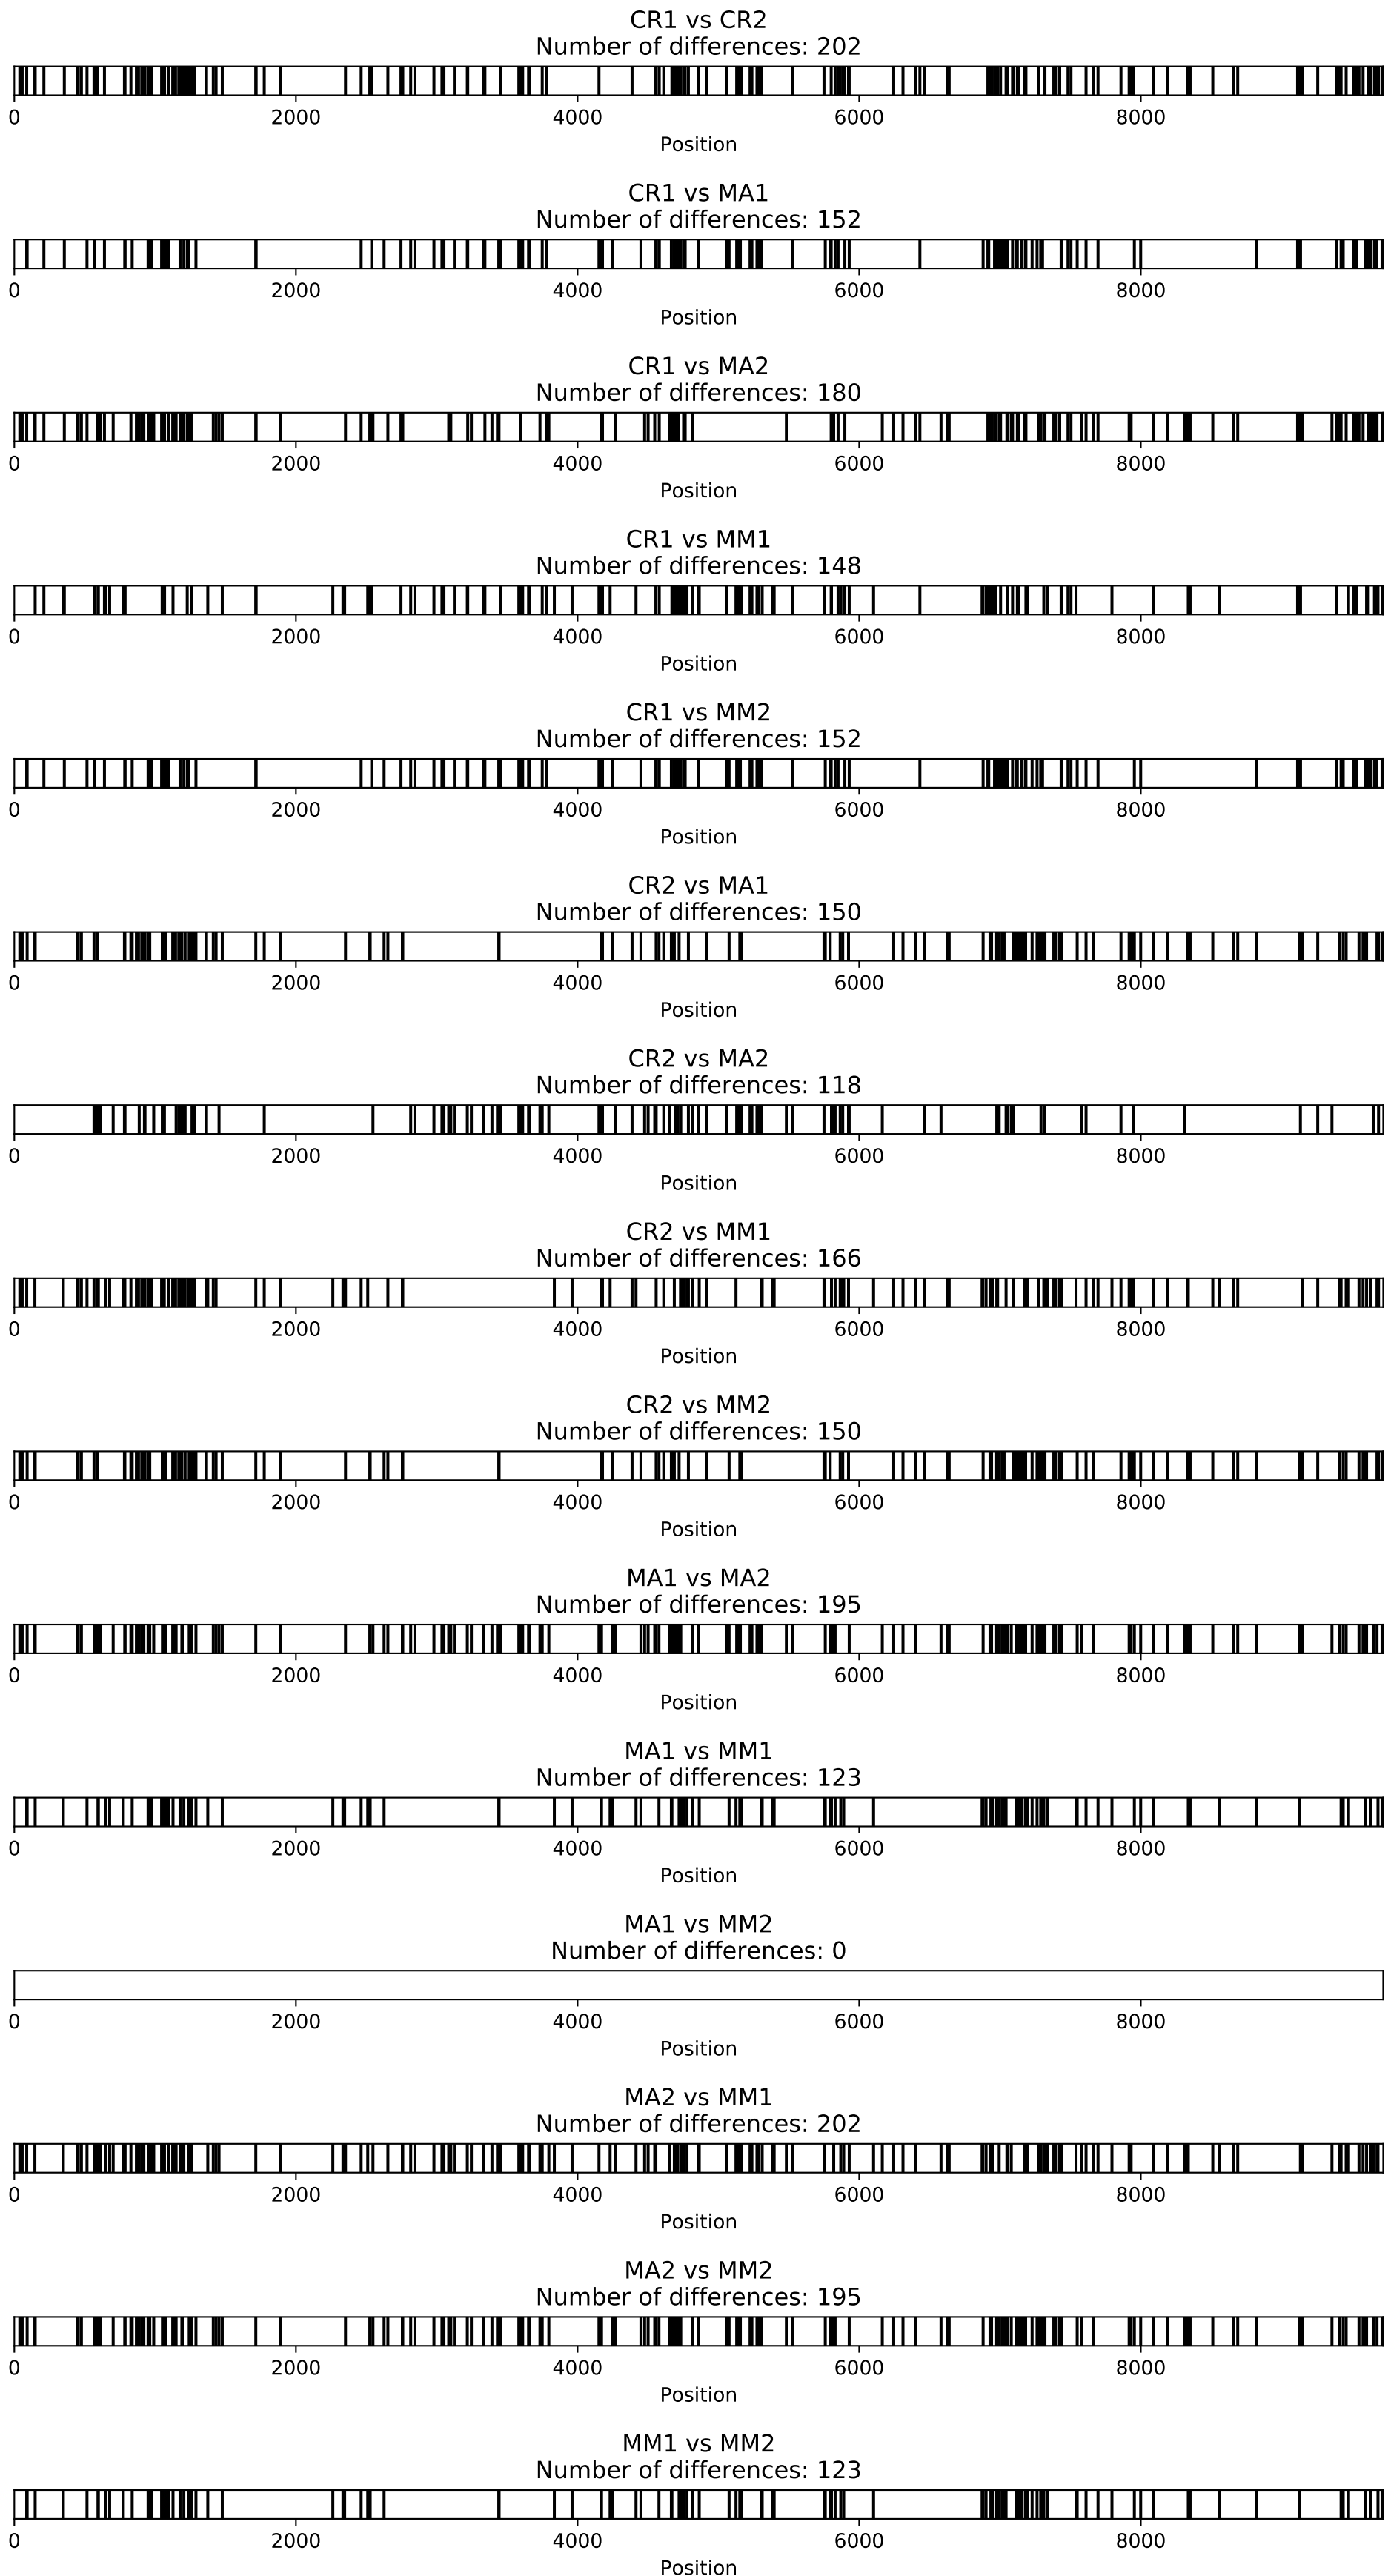

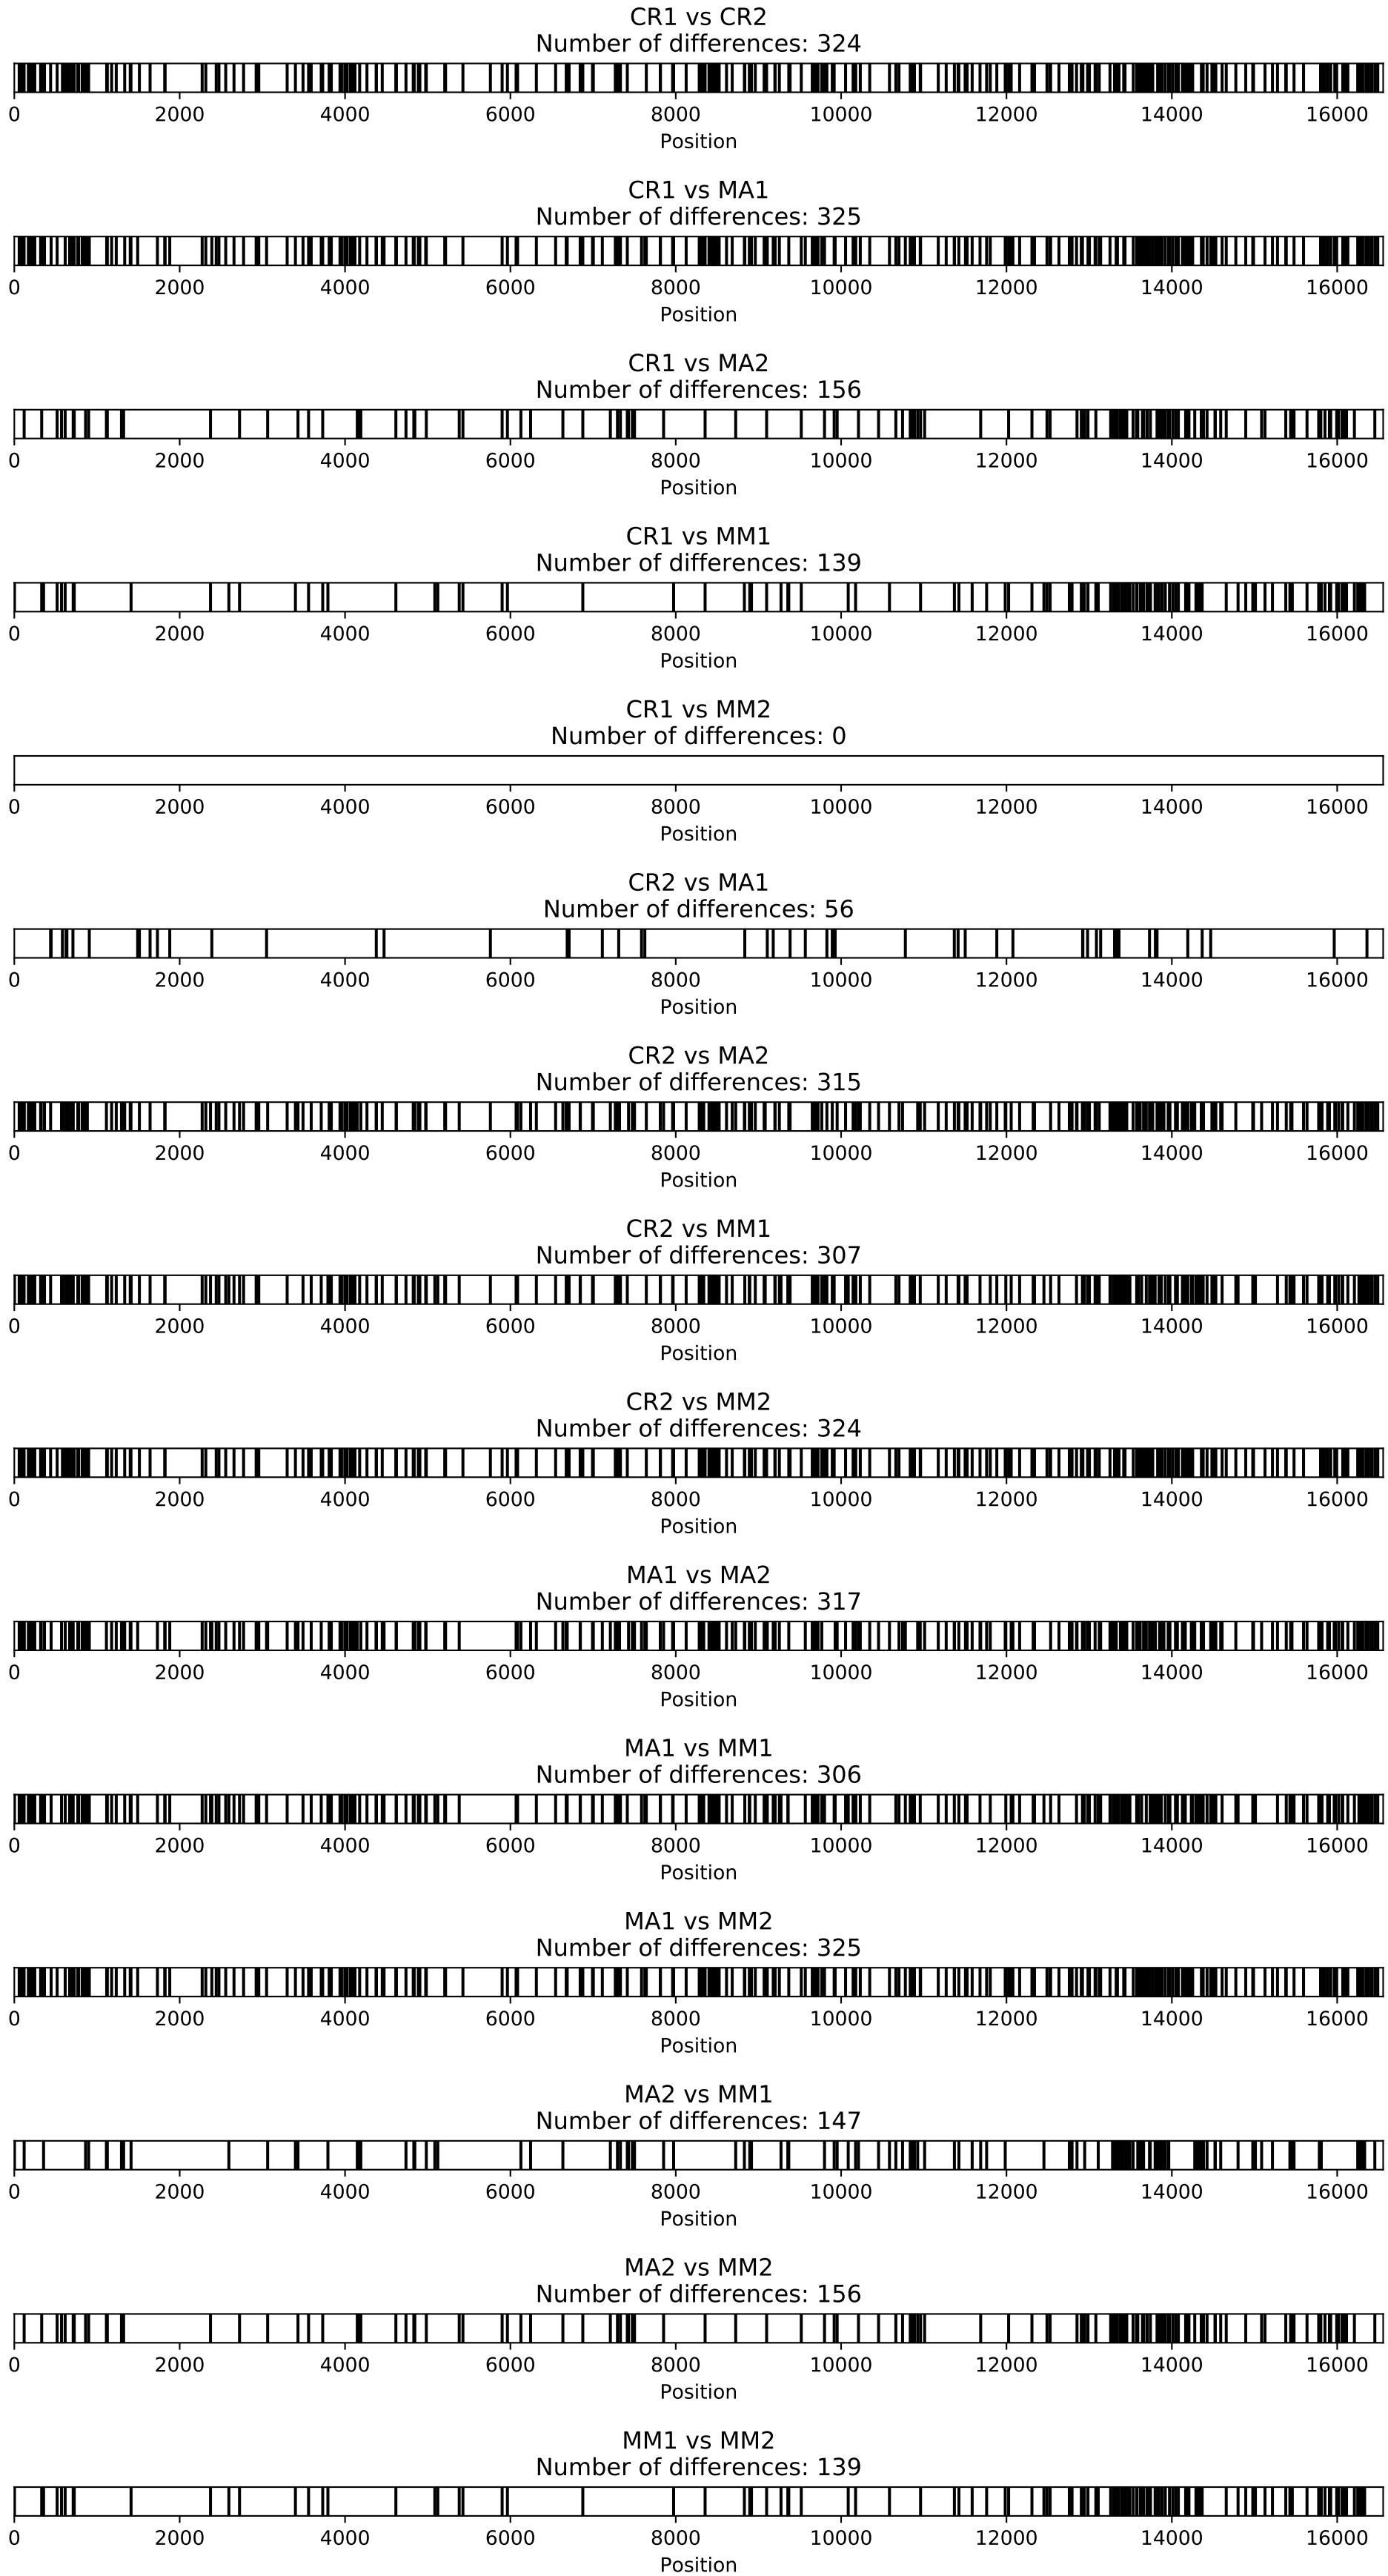

# Region: 259

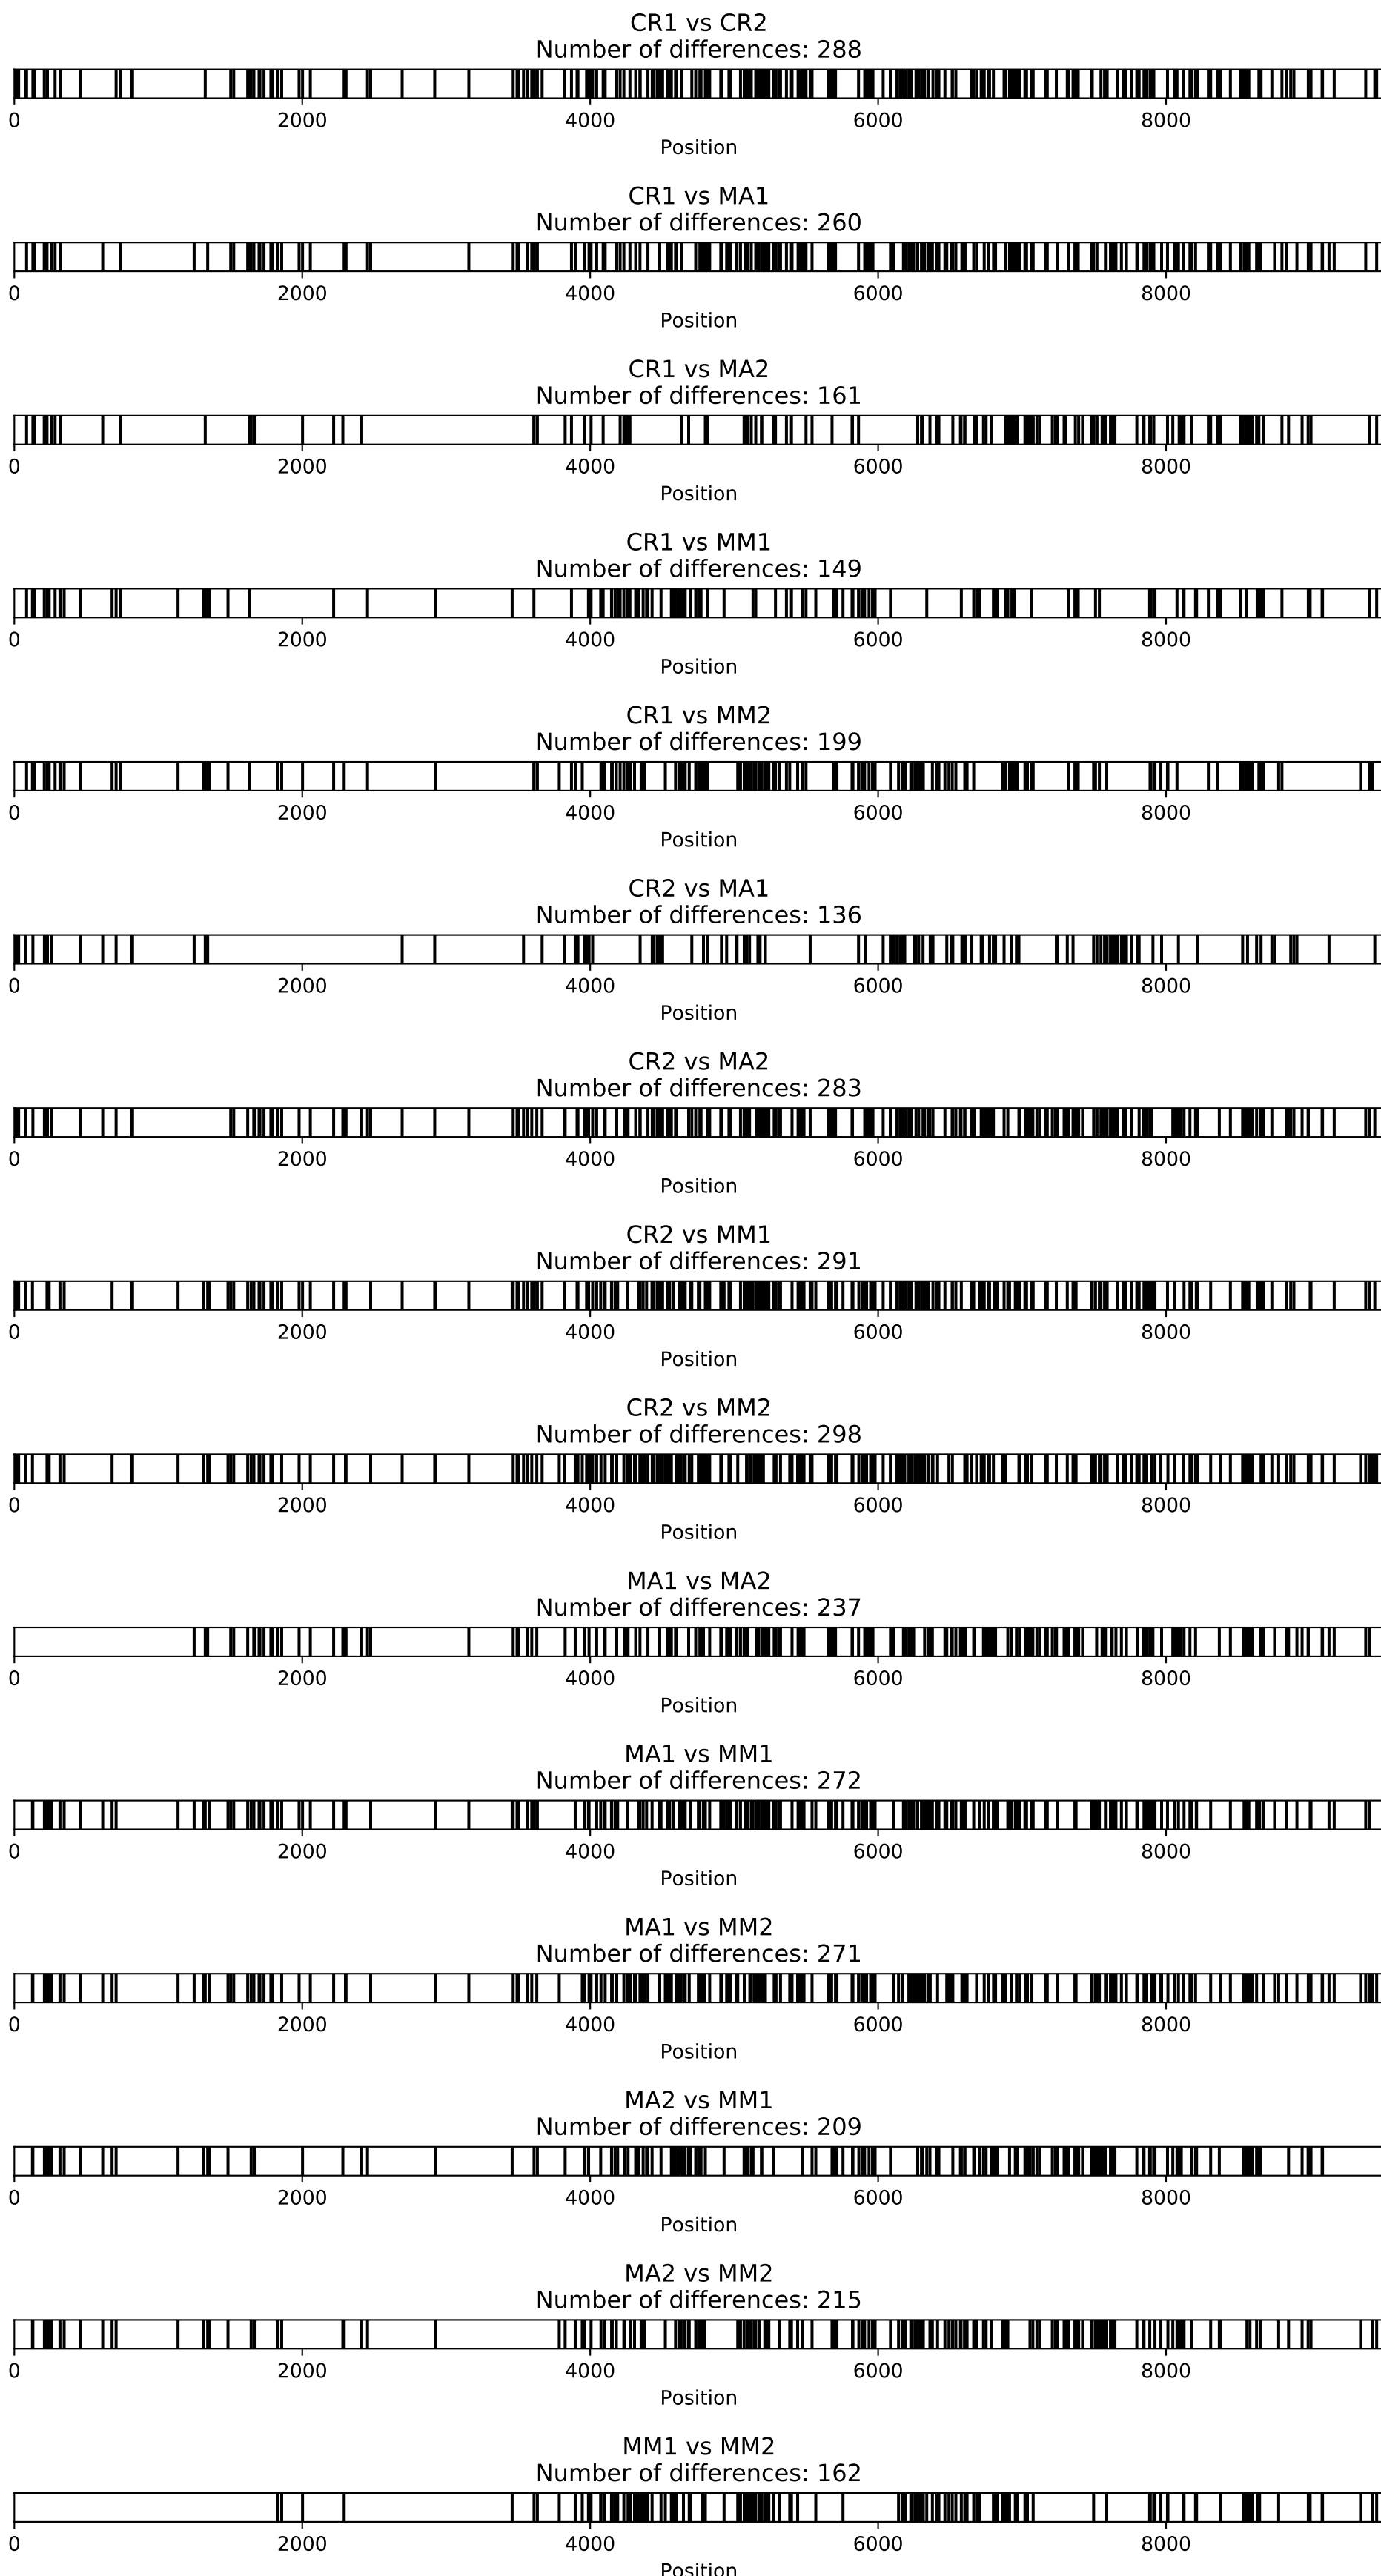

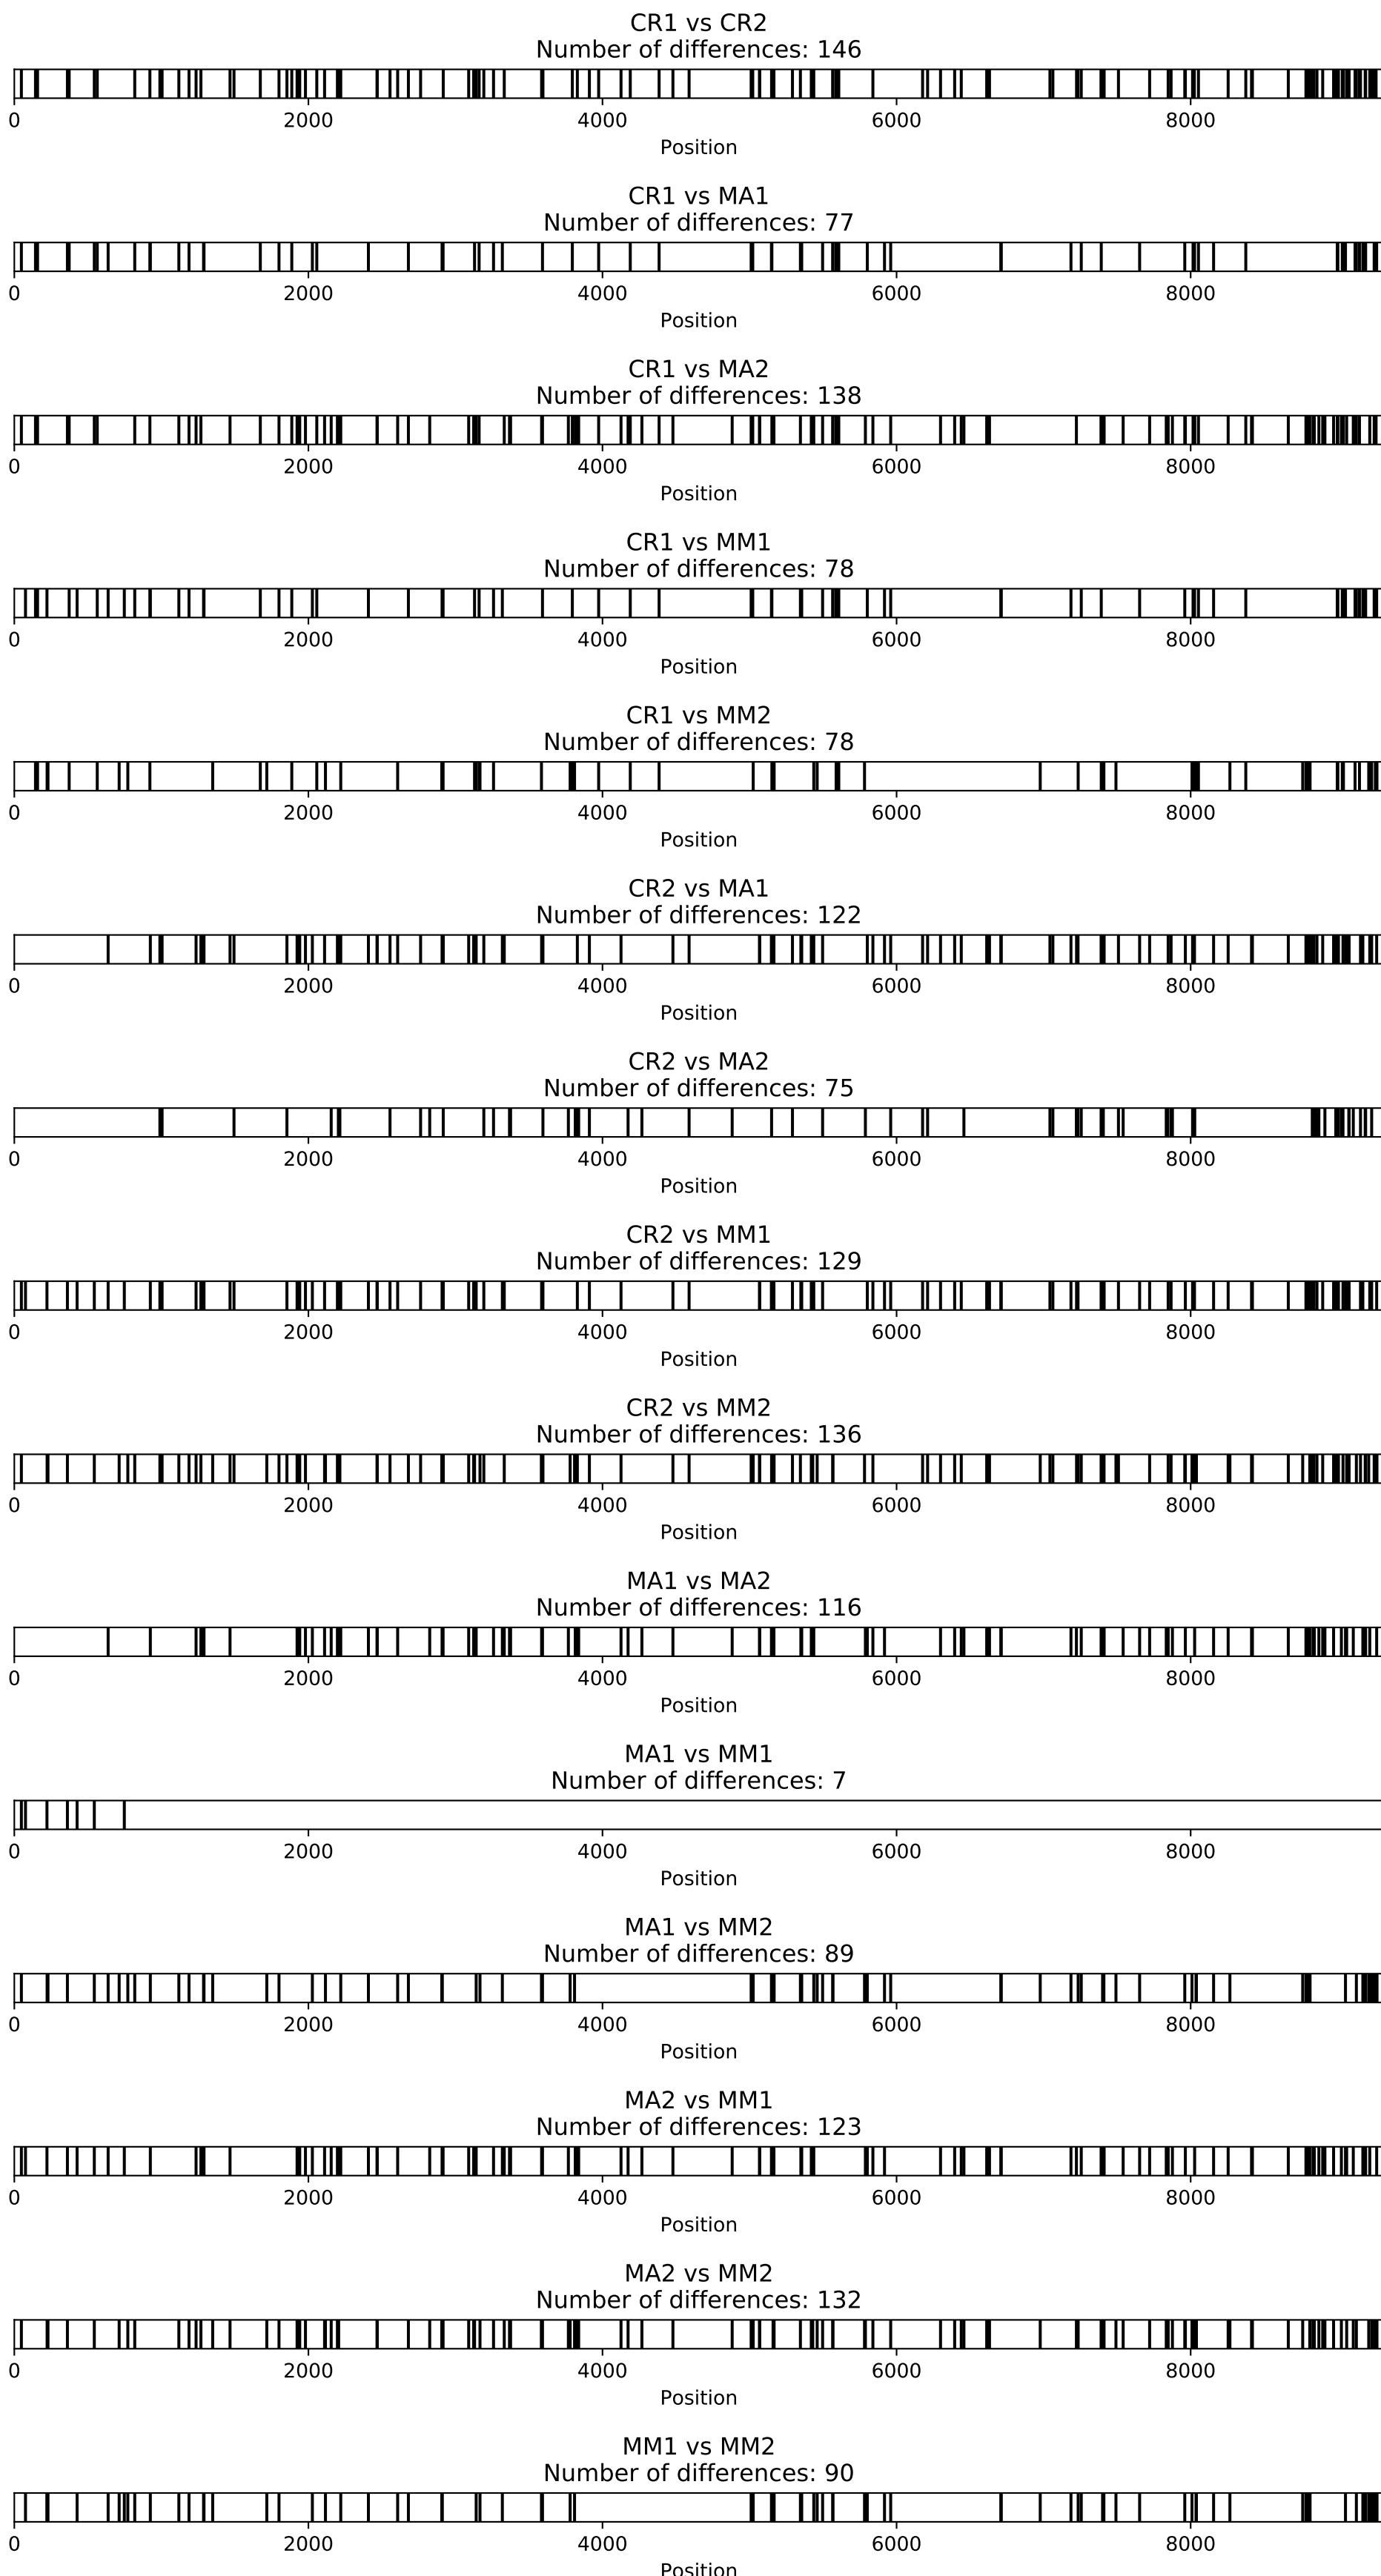

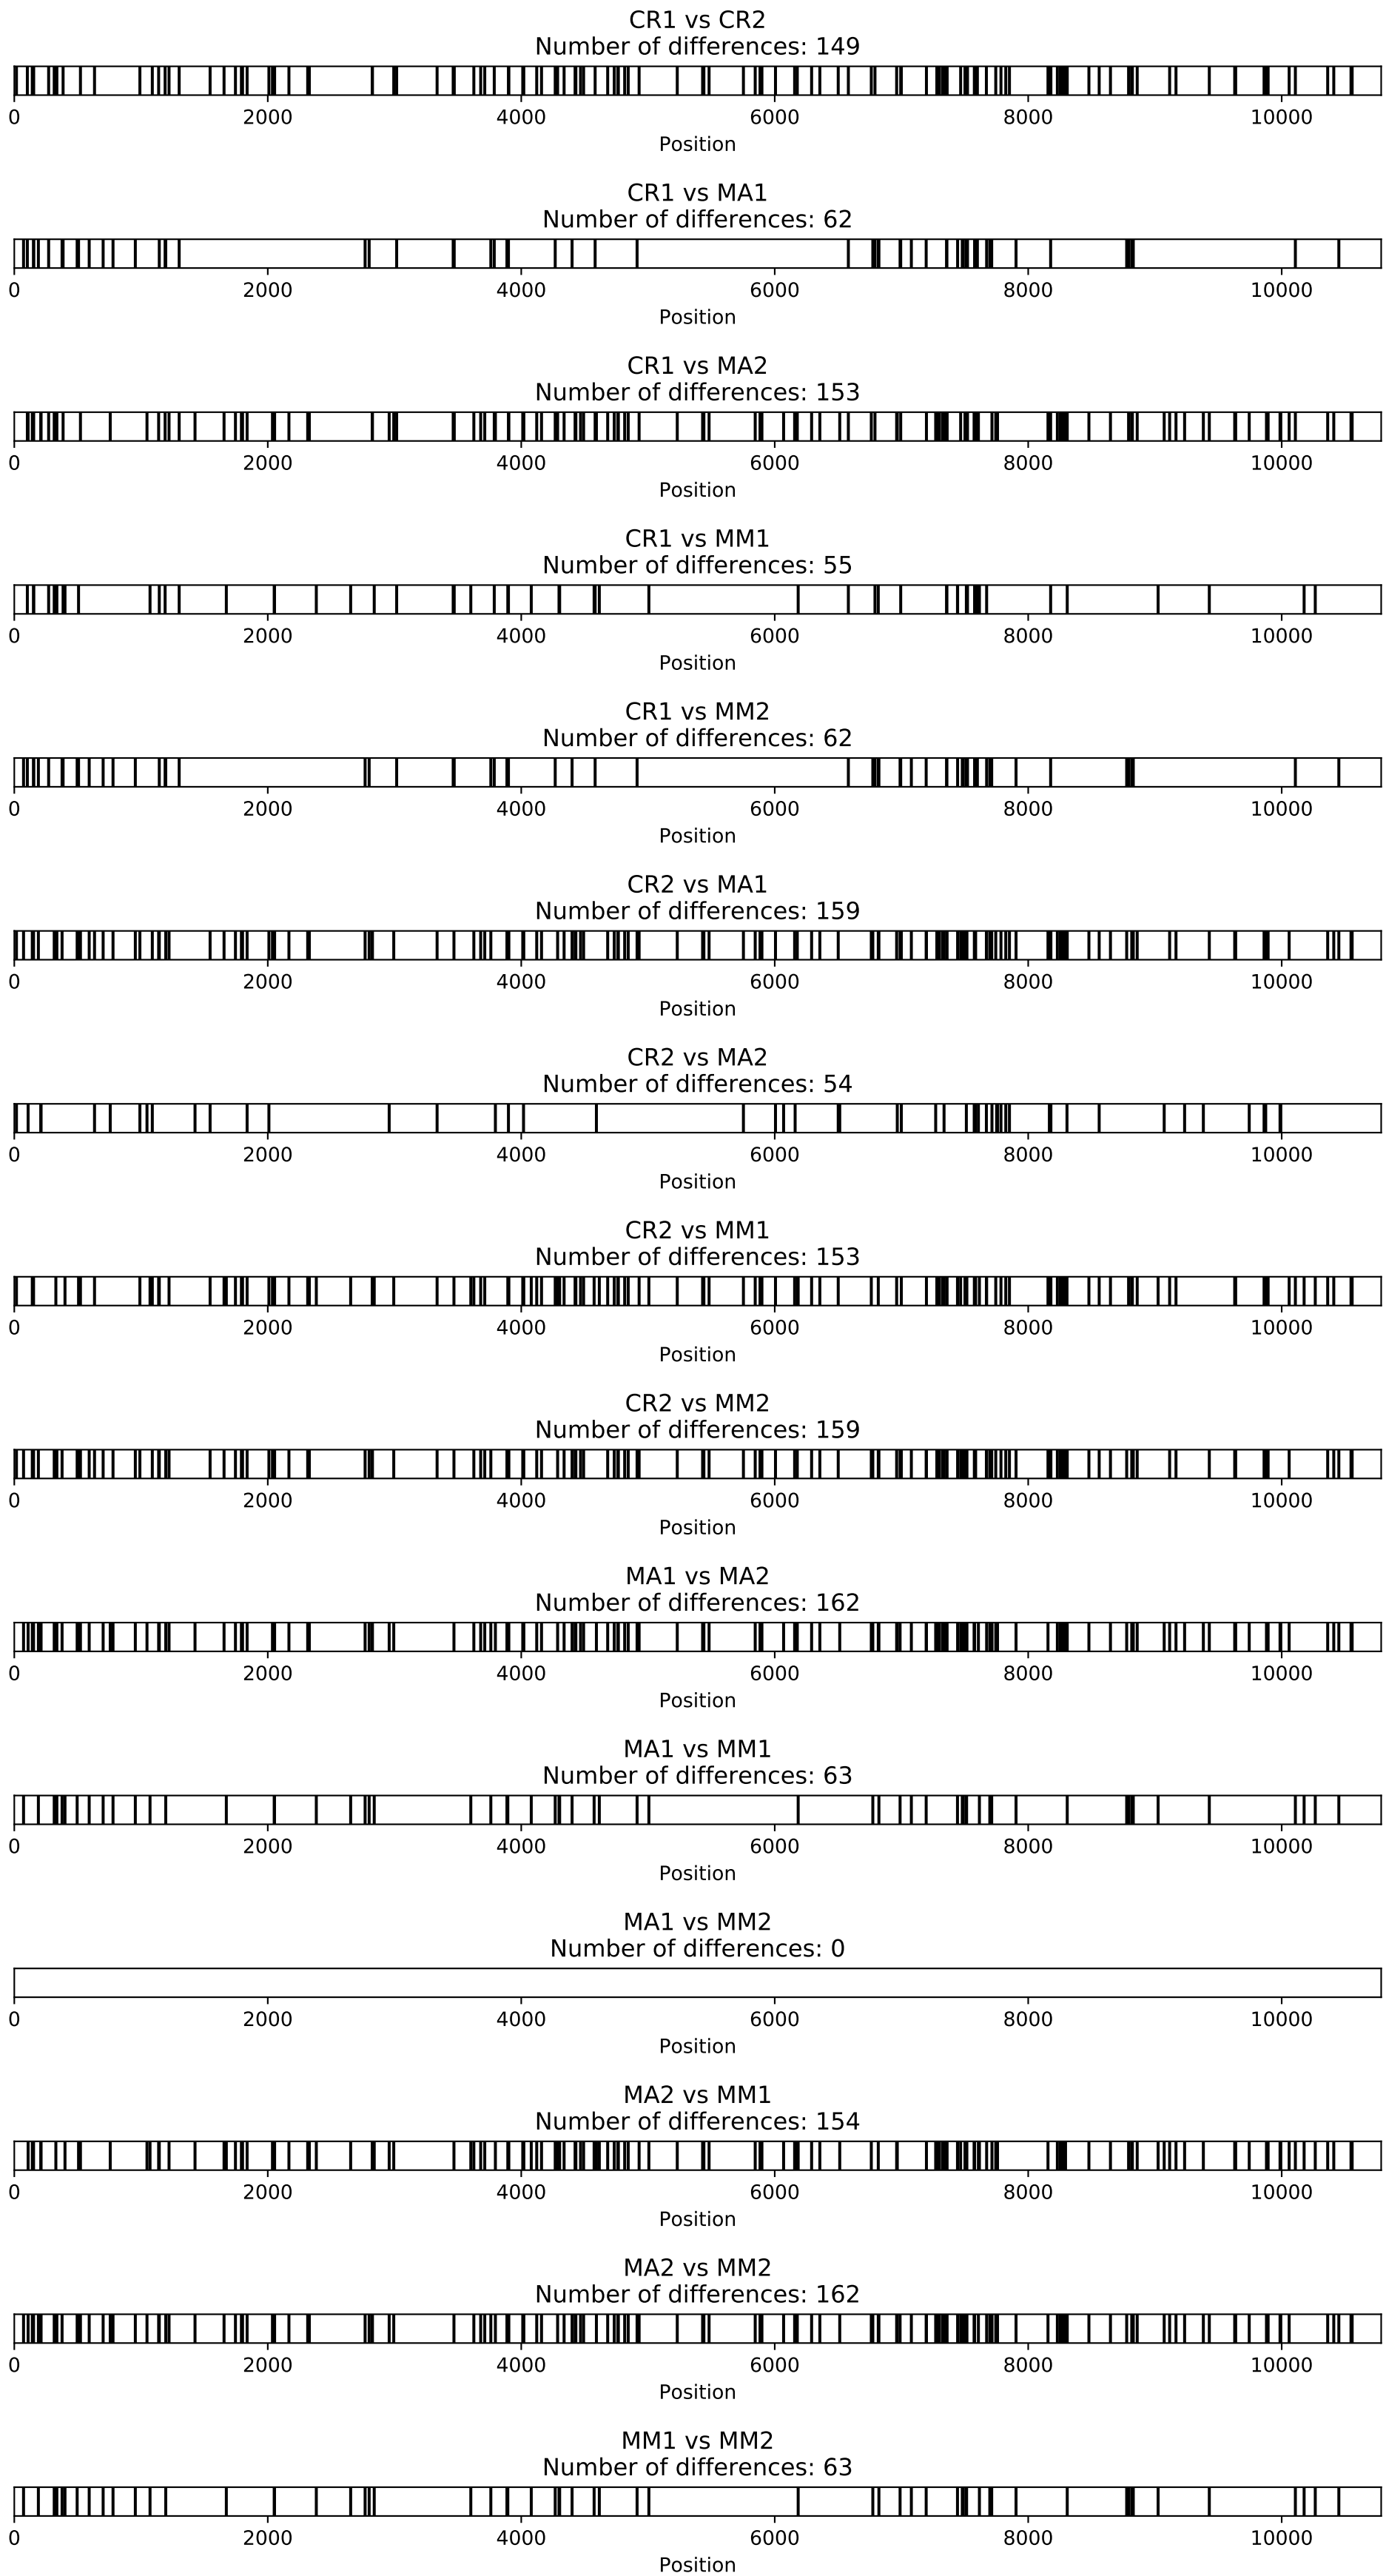

# Region: 264

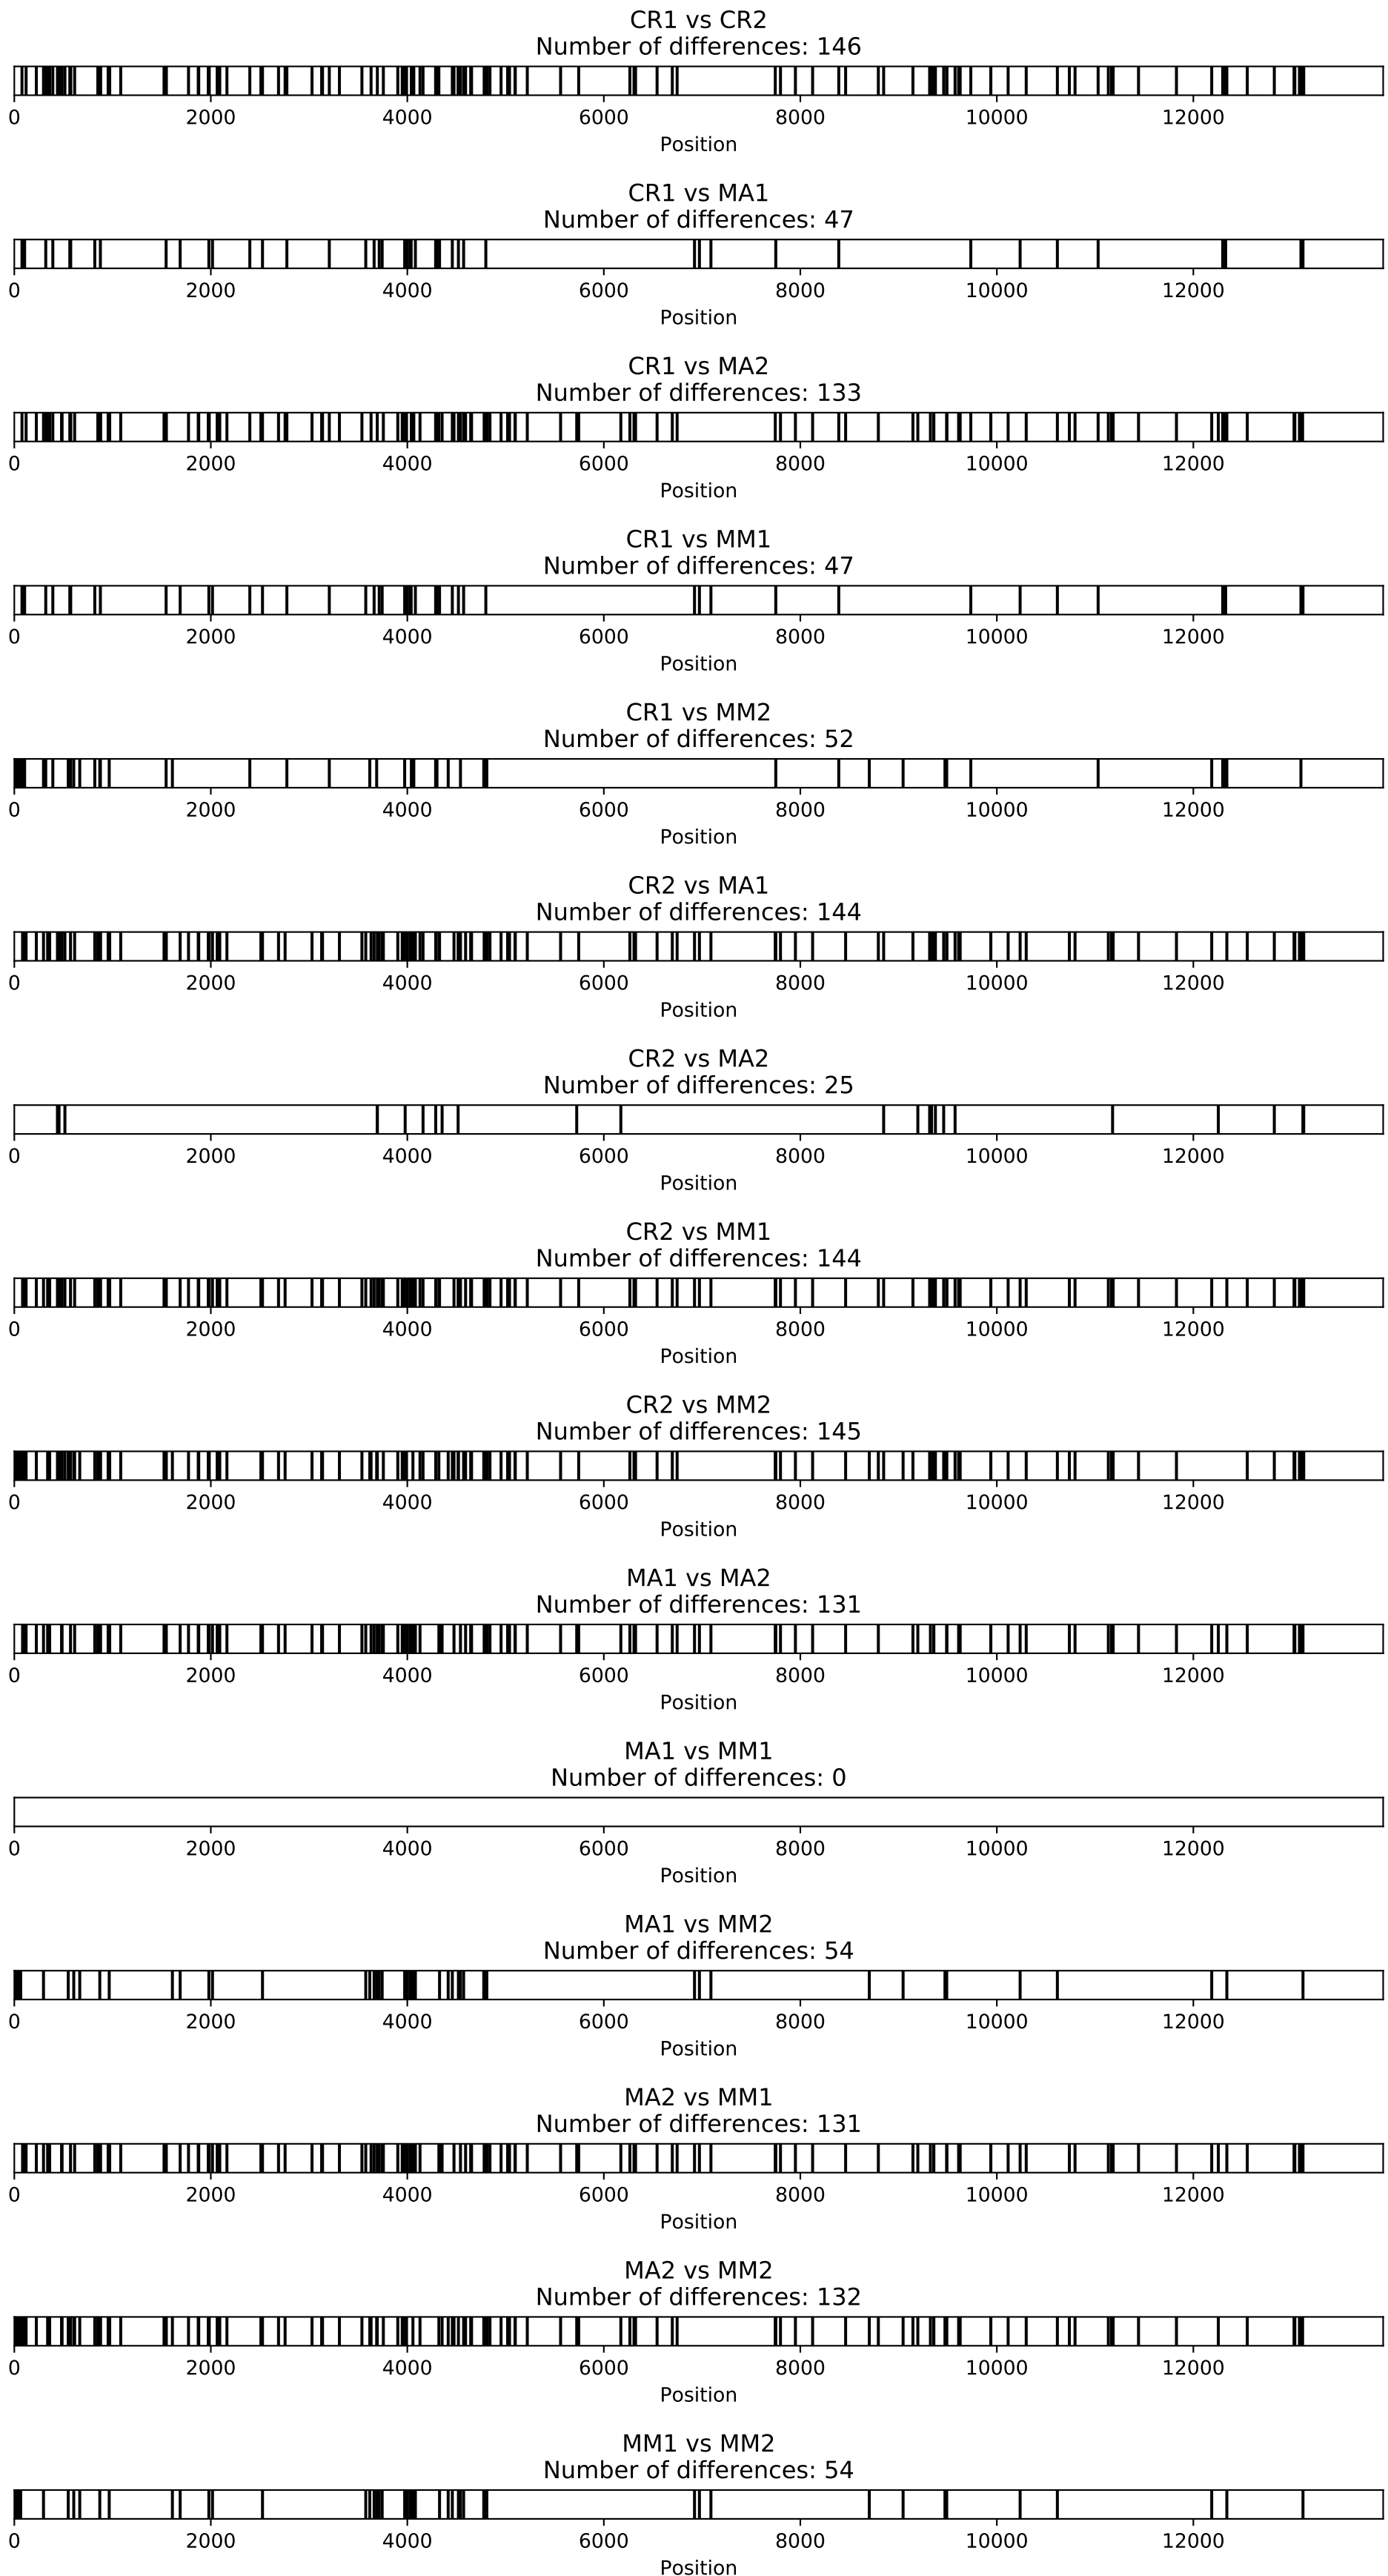



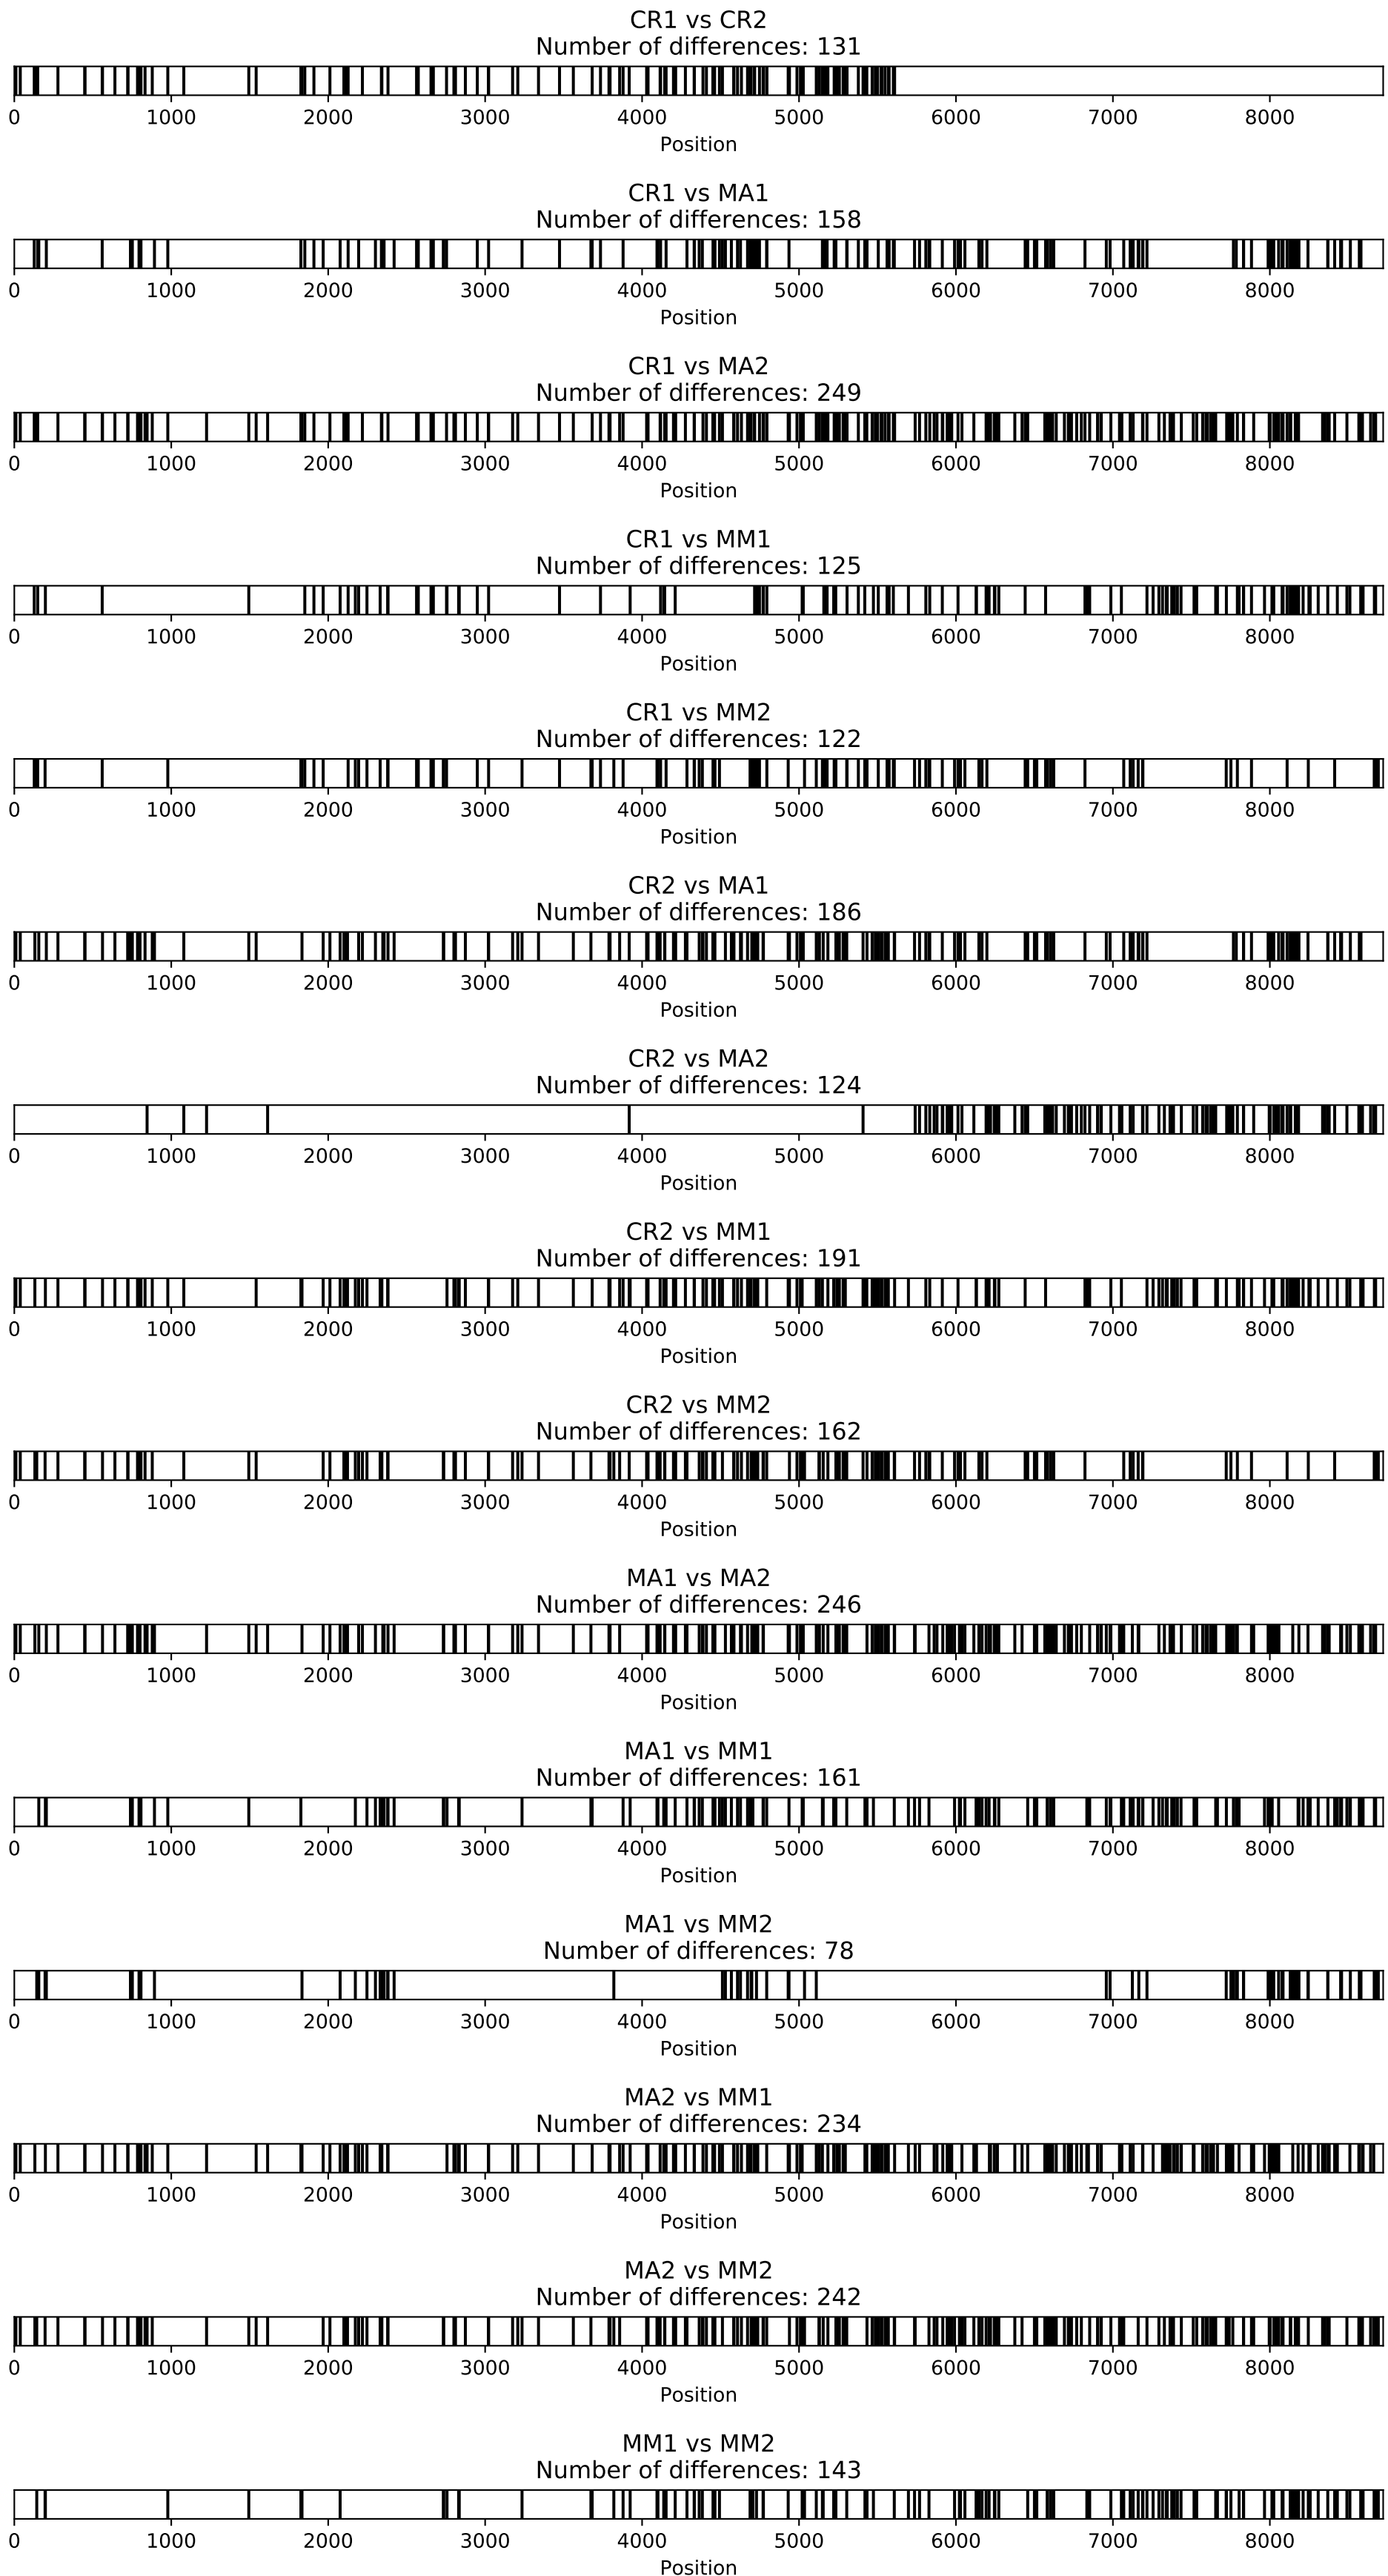

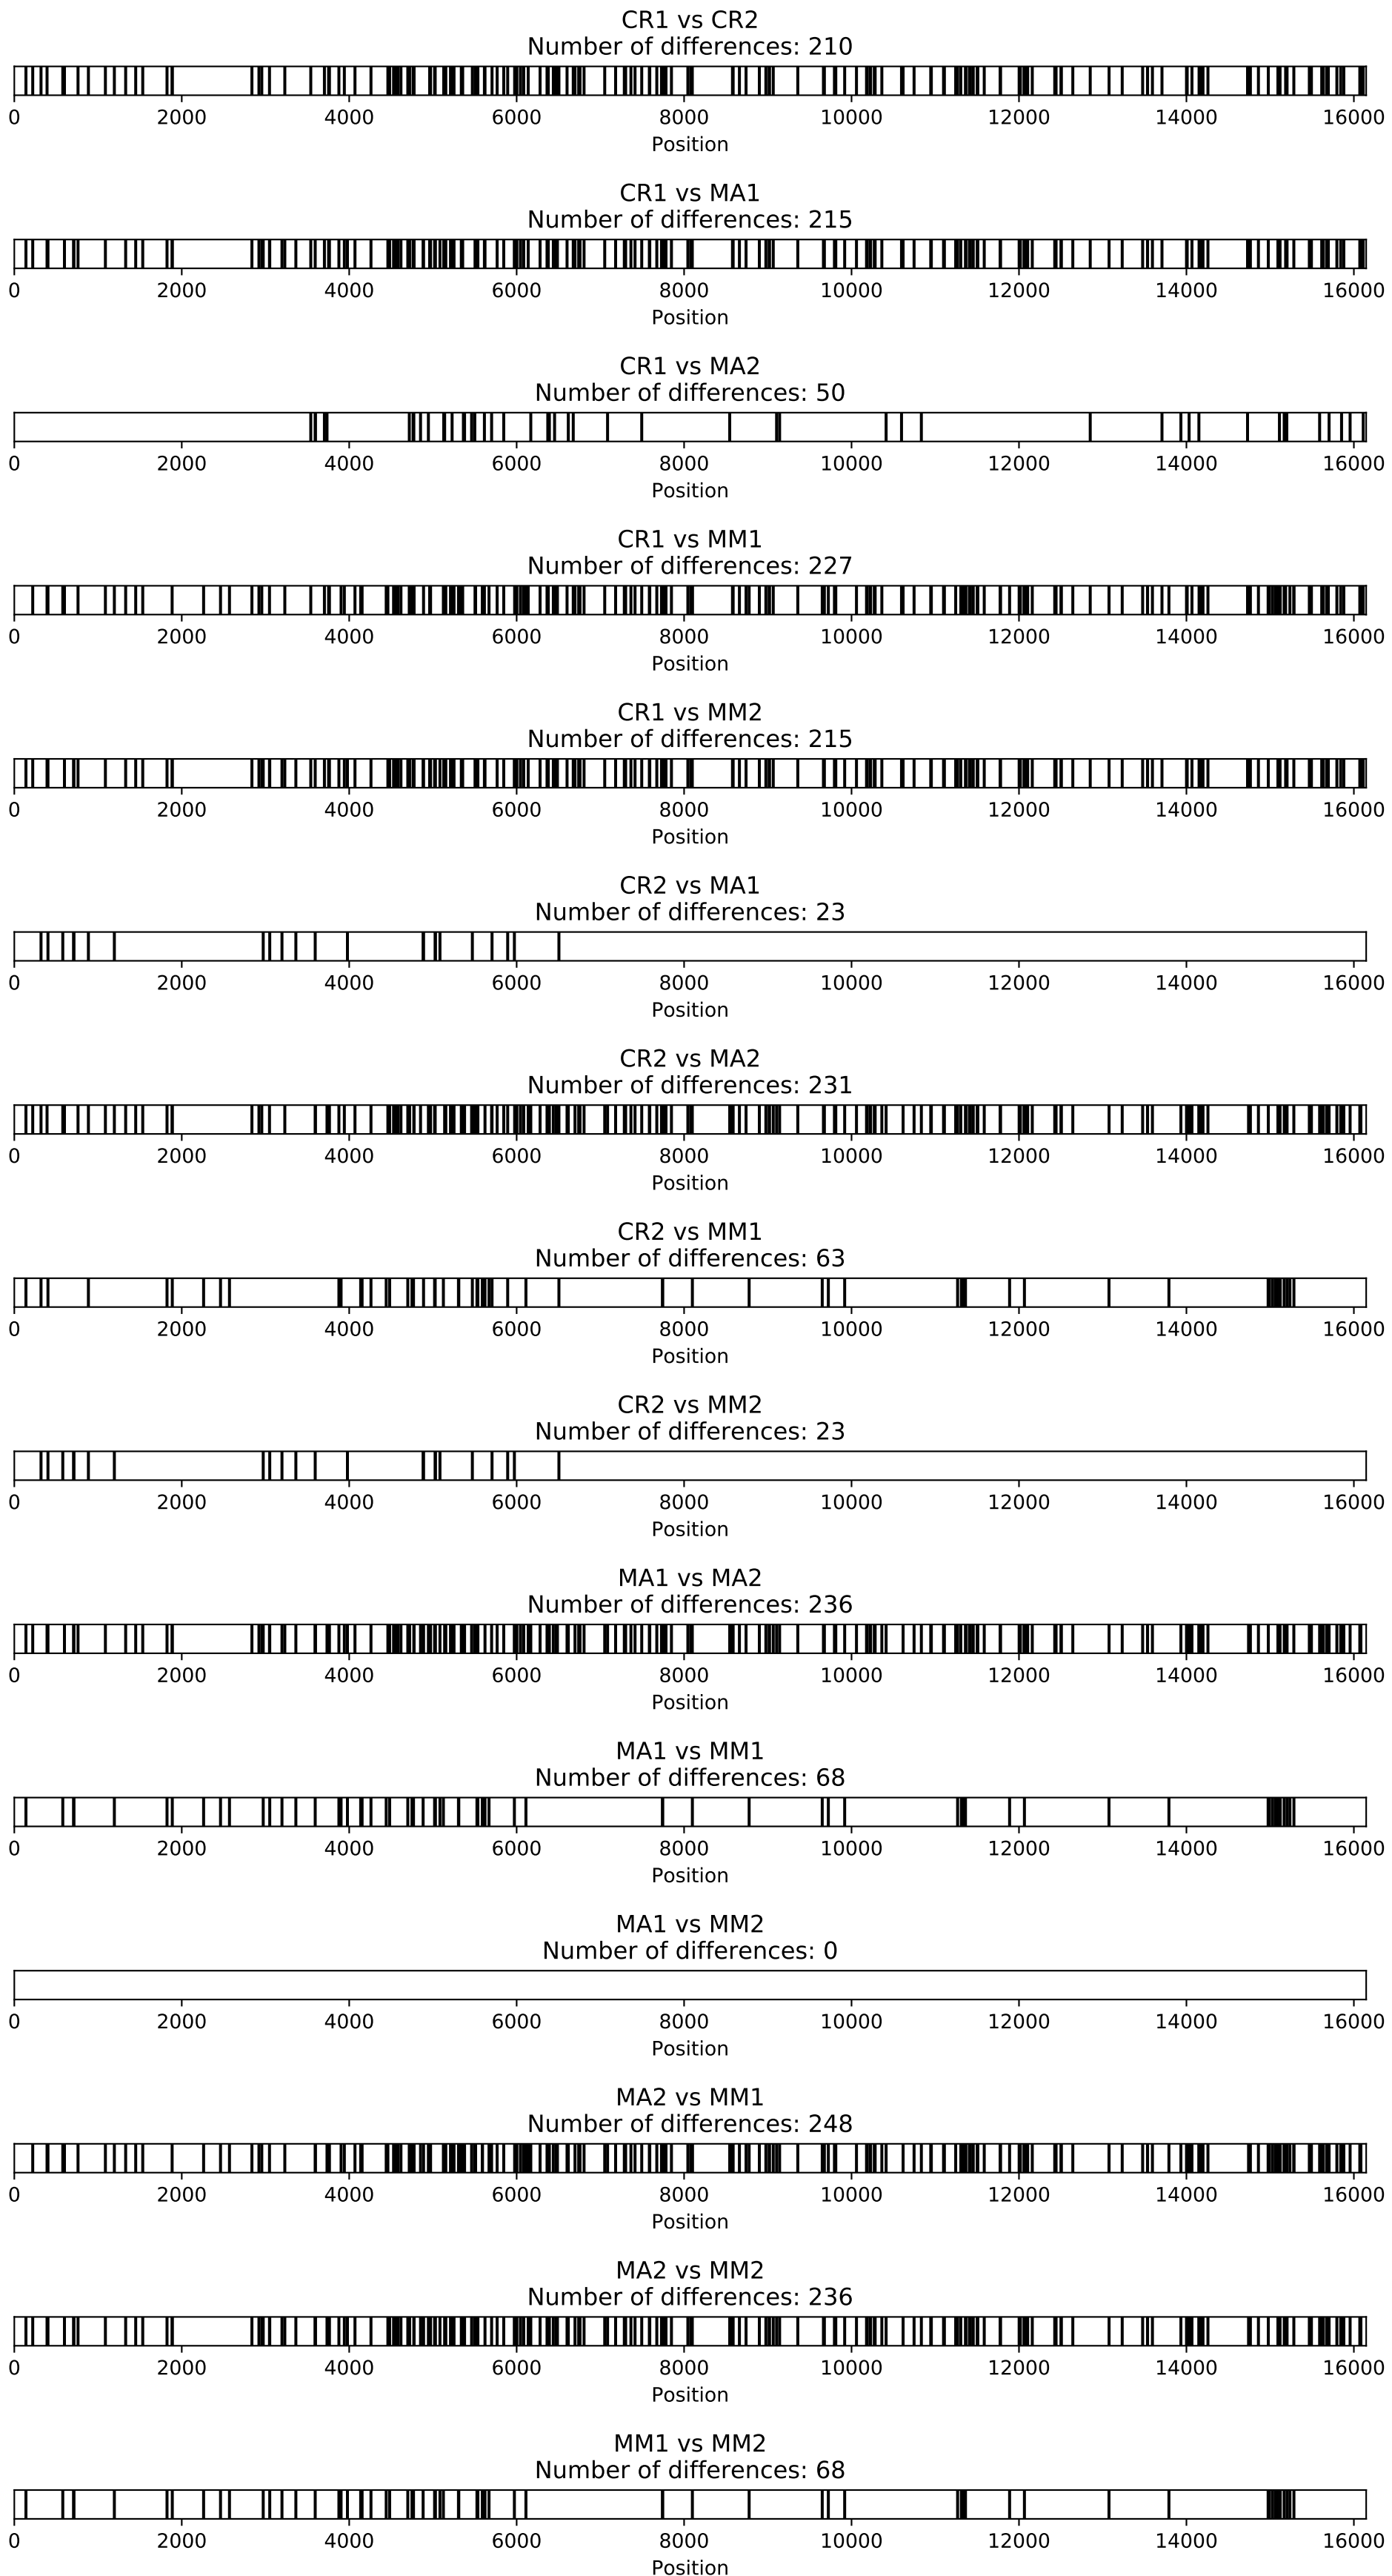

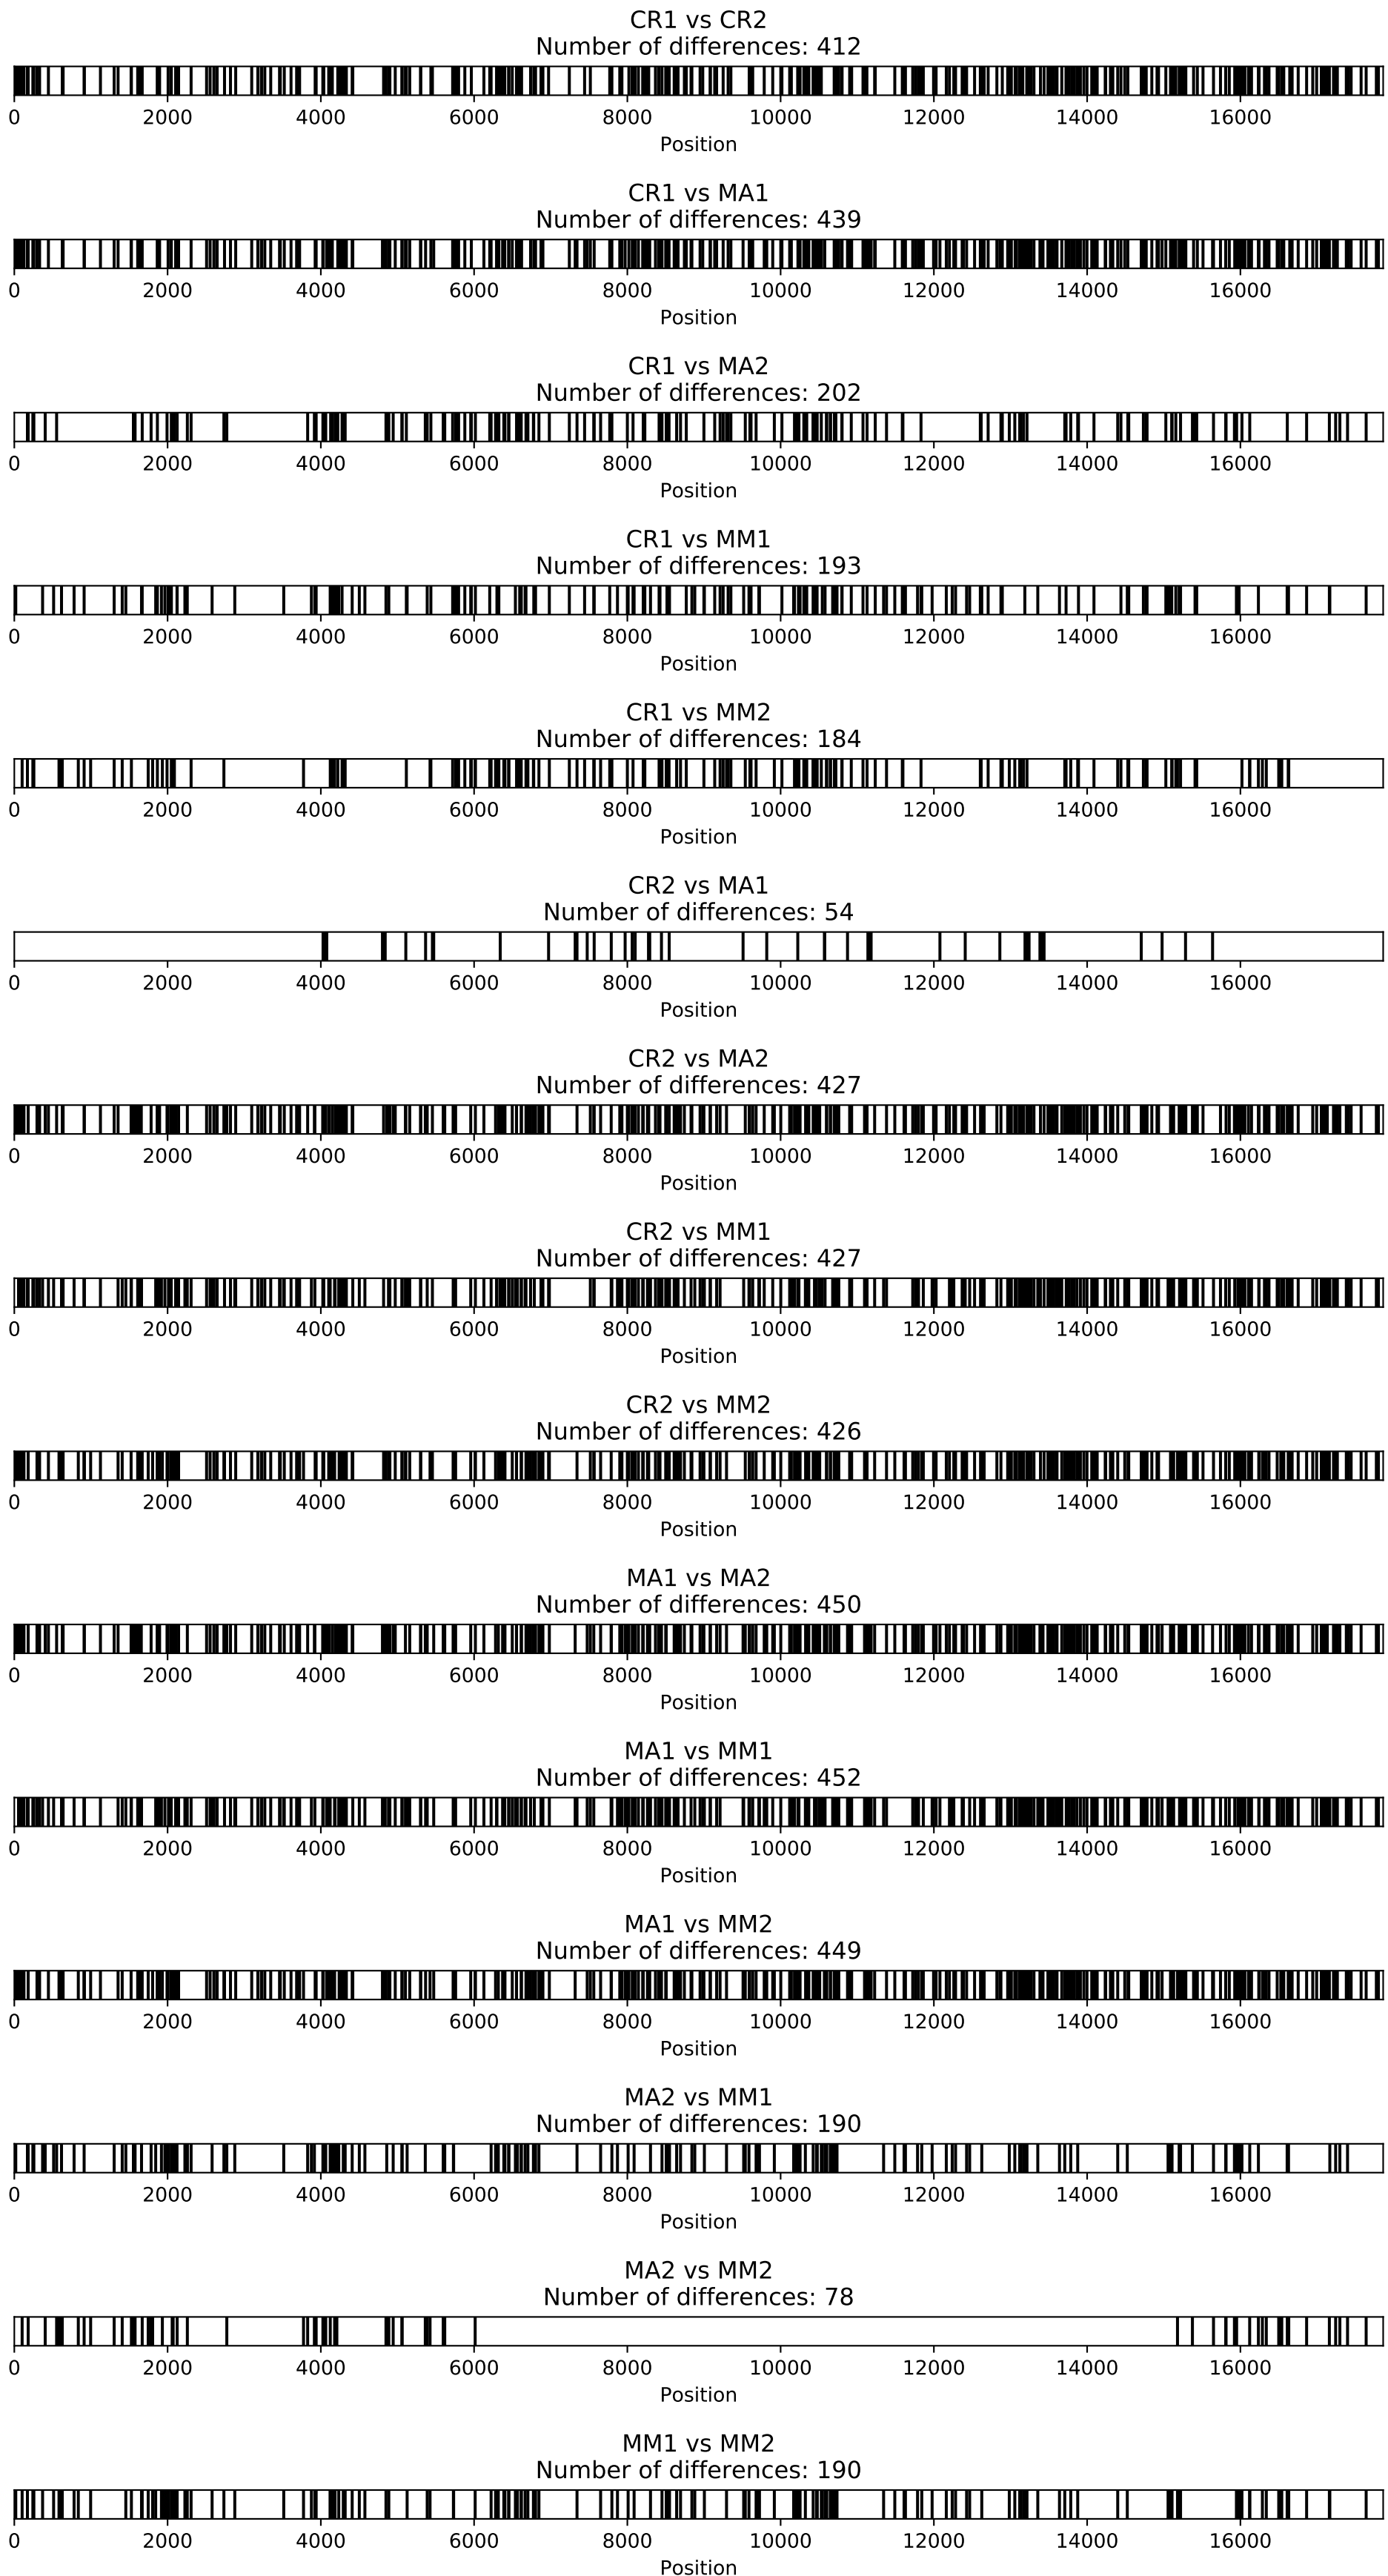

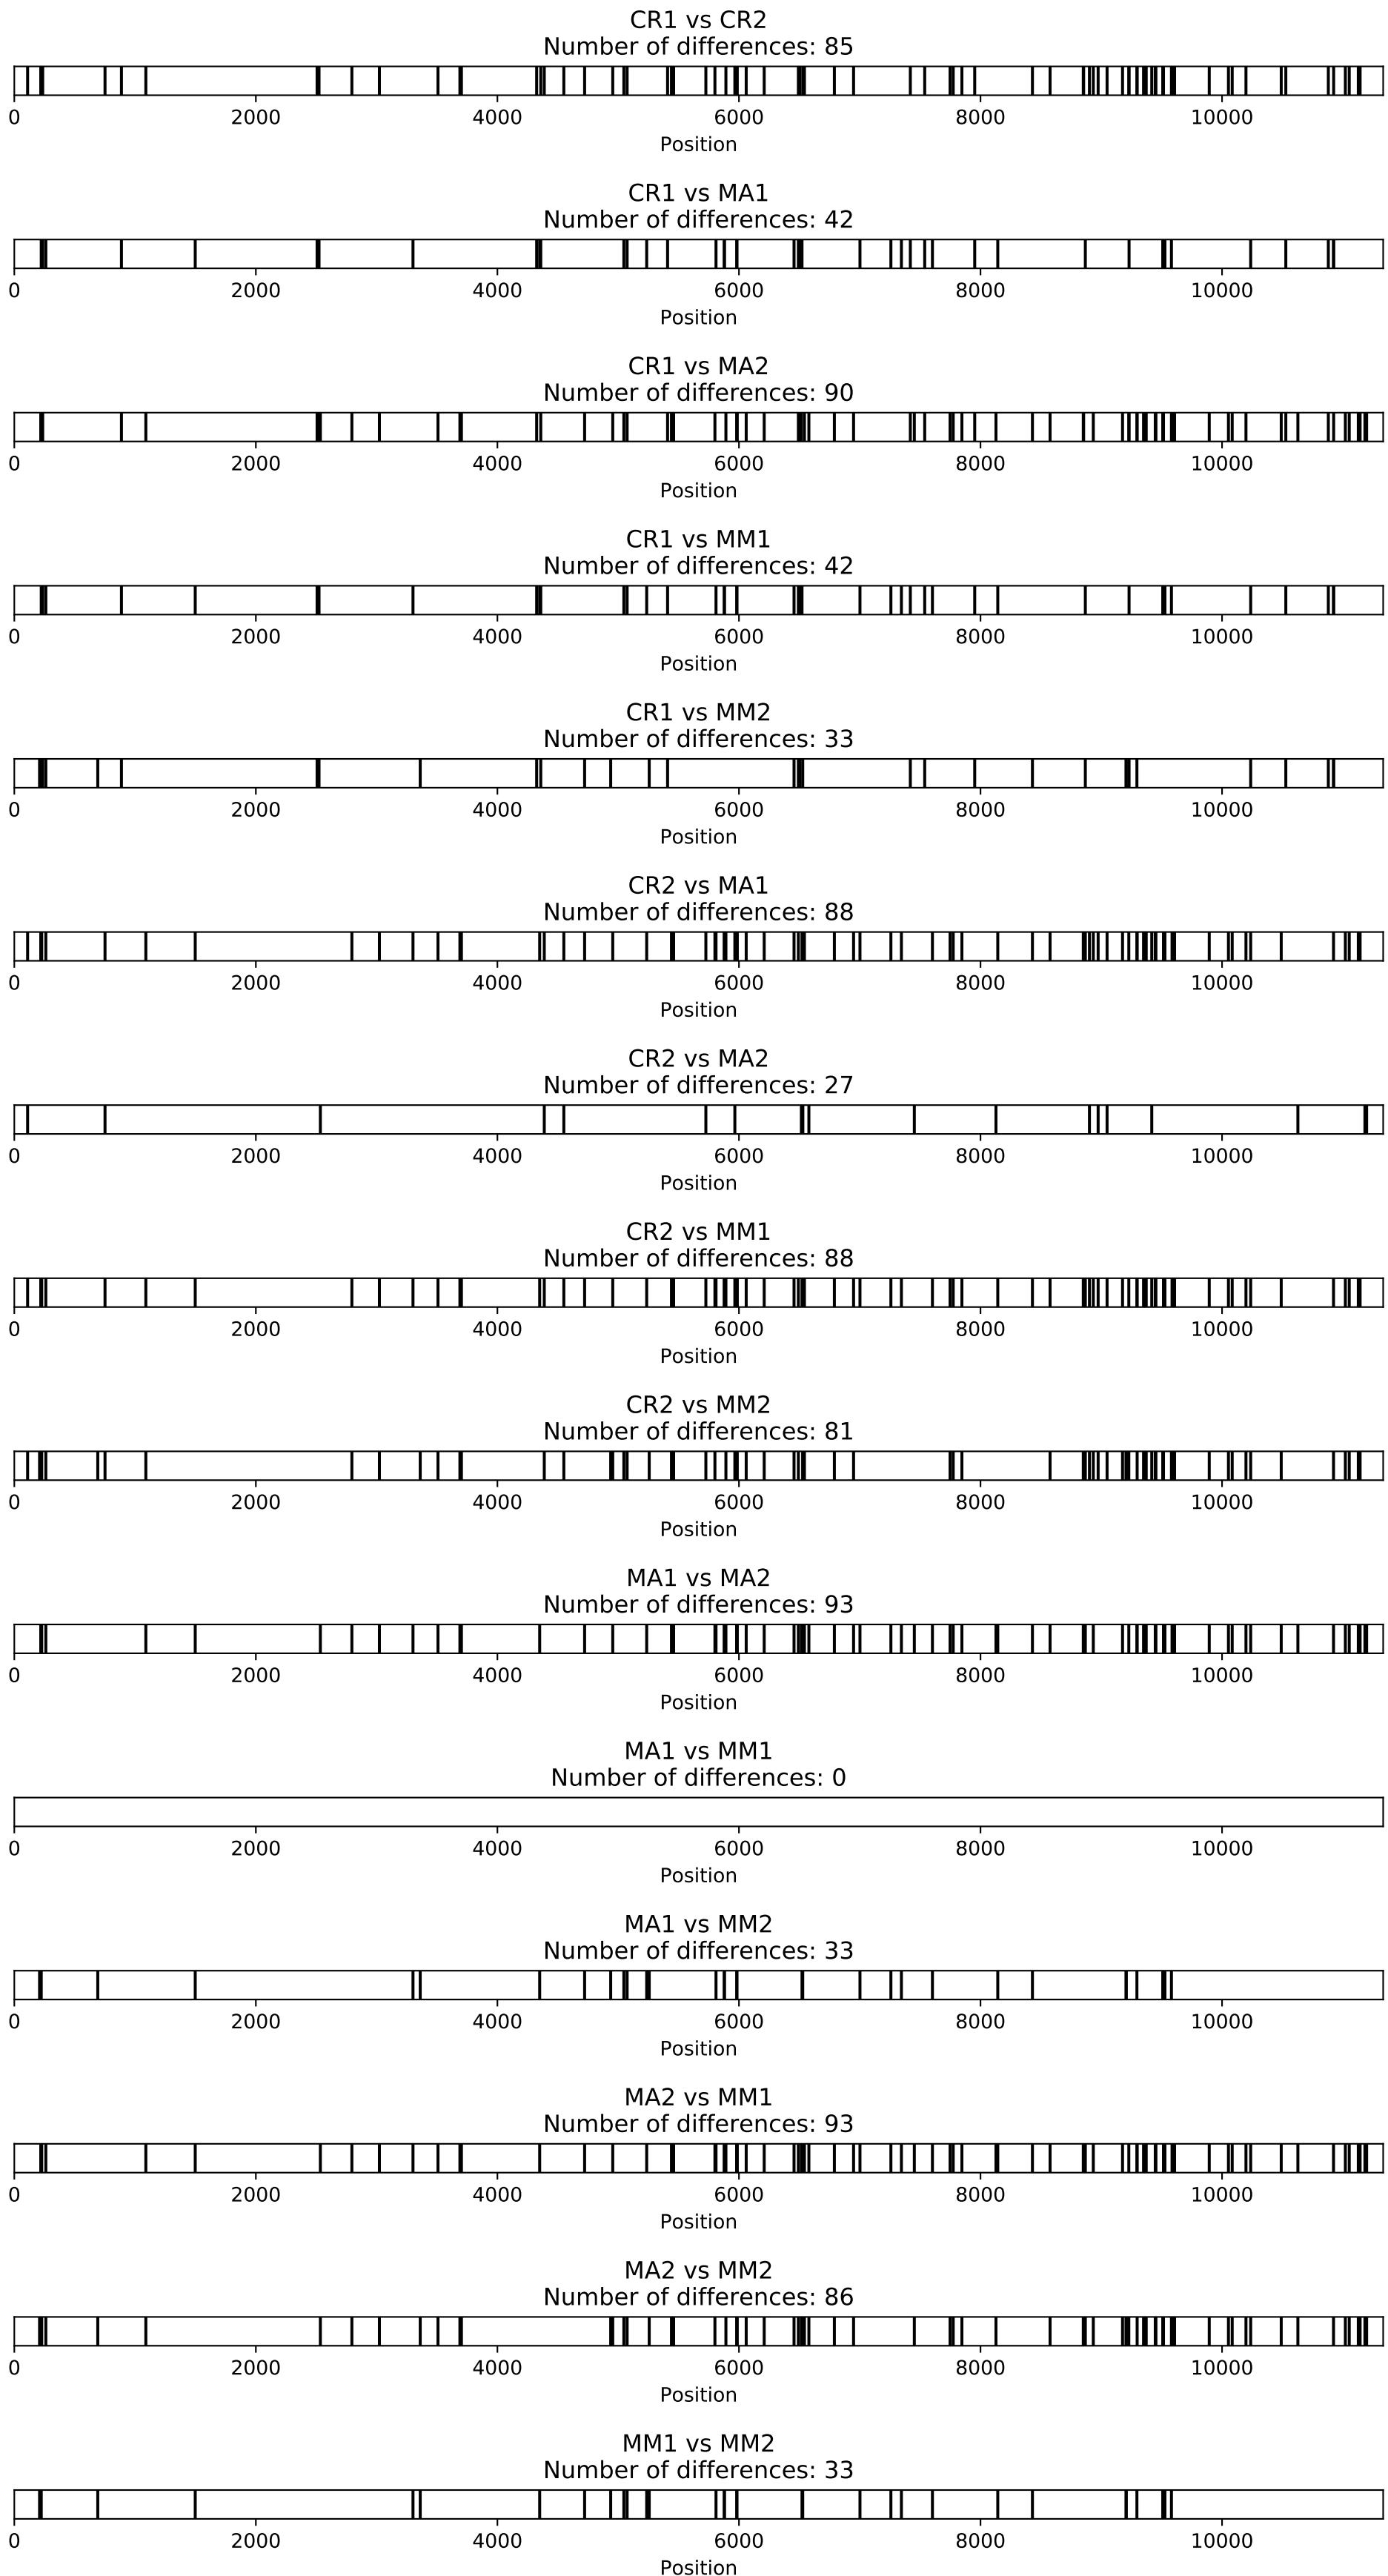

# Region: 270

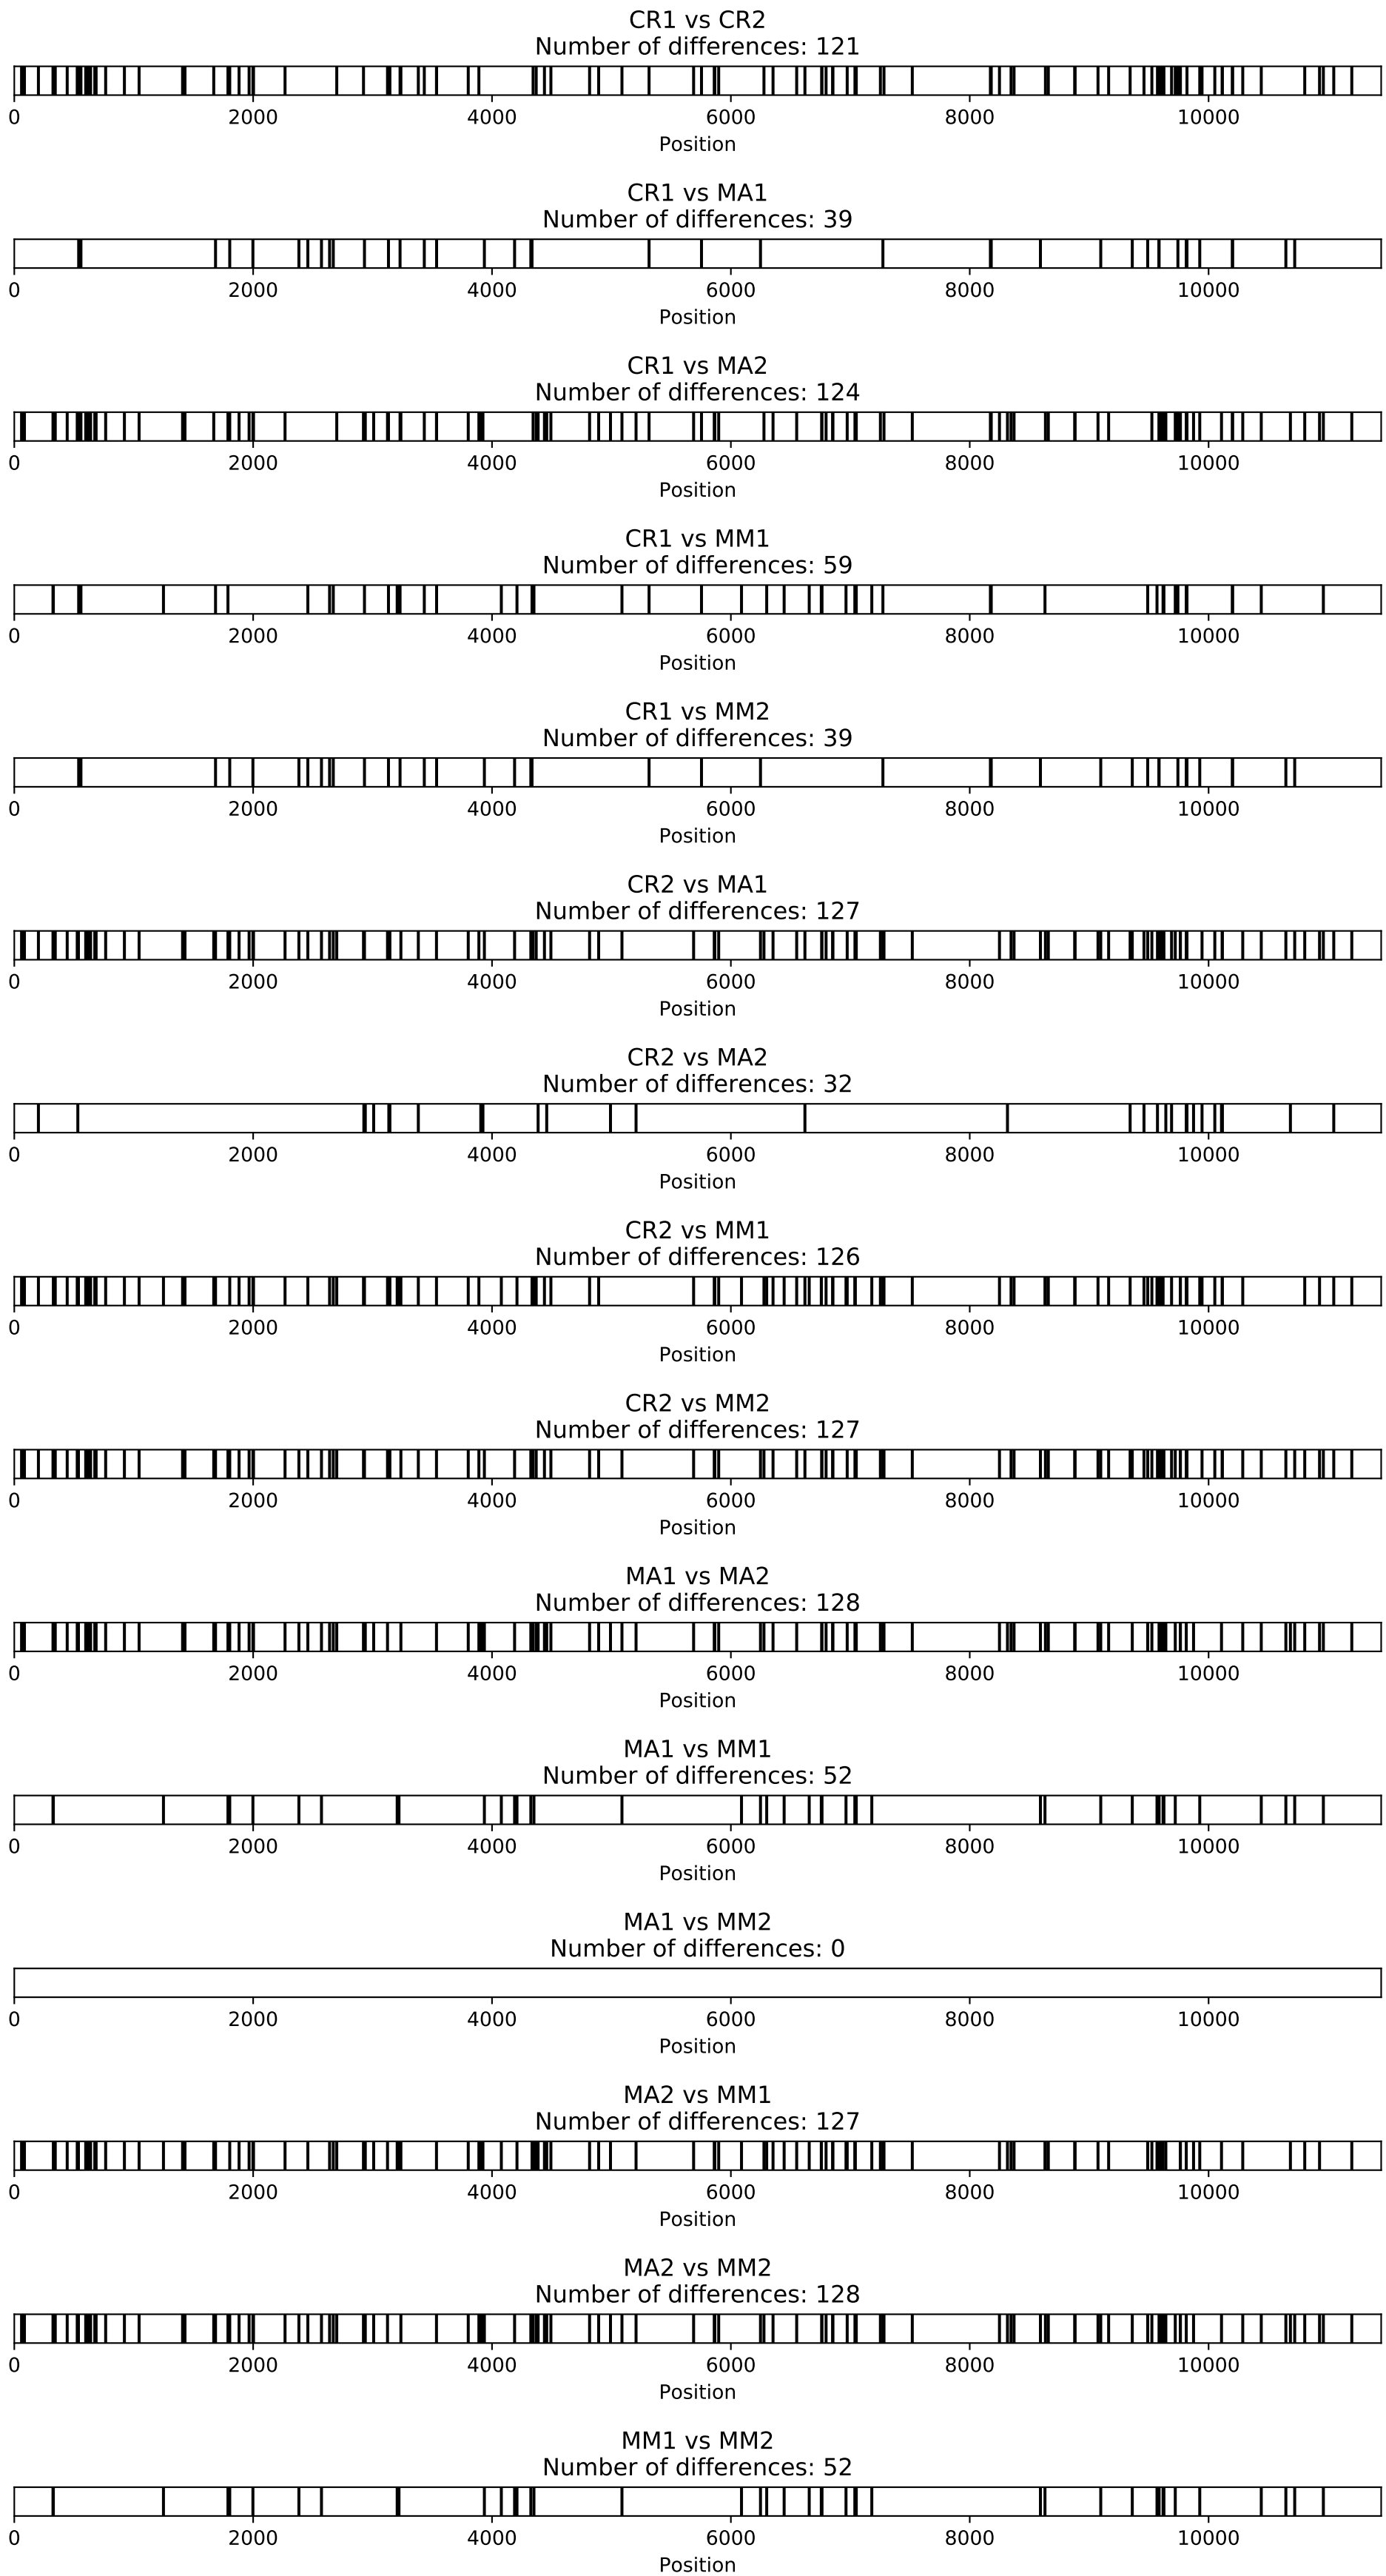

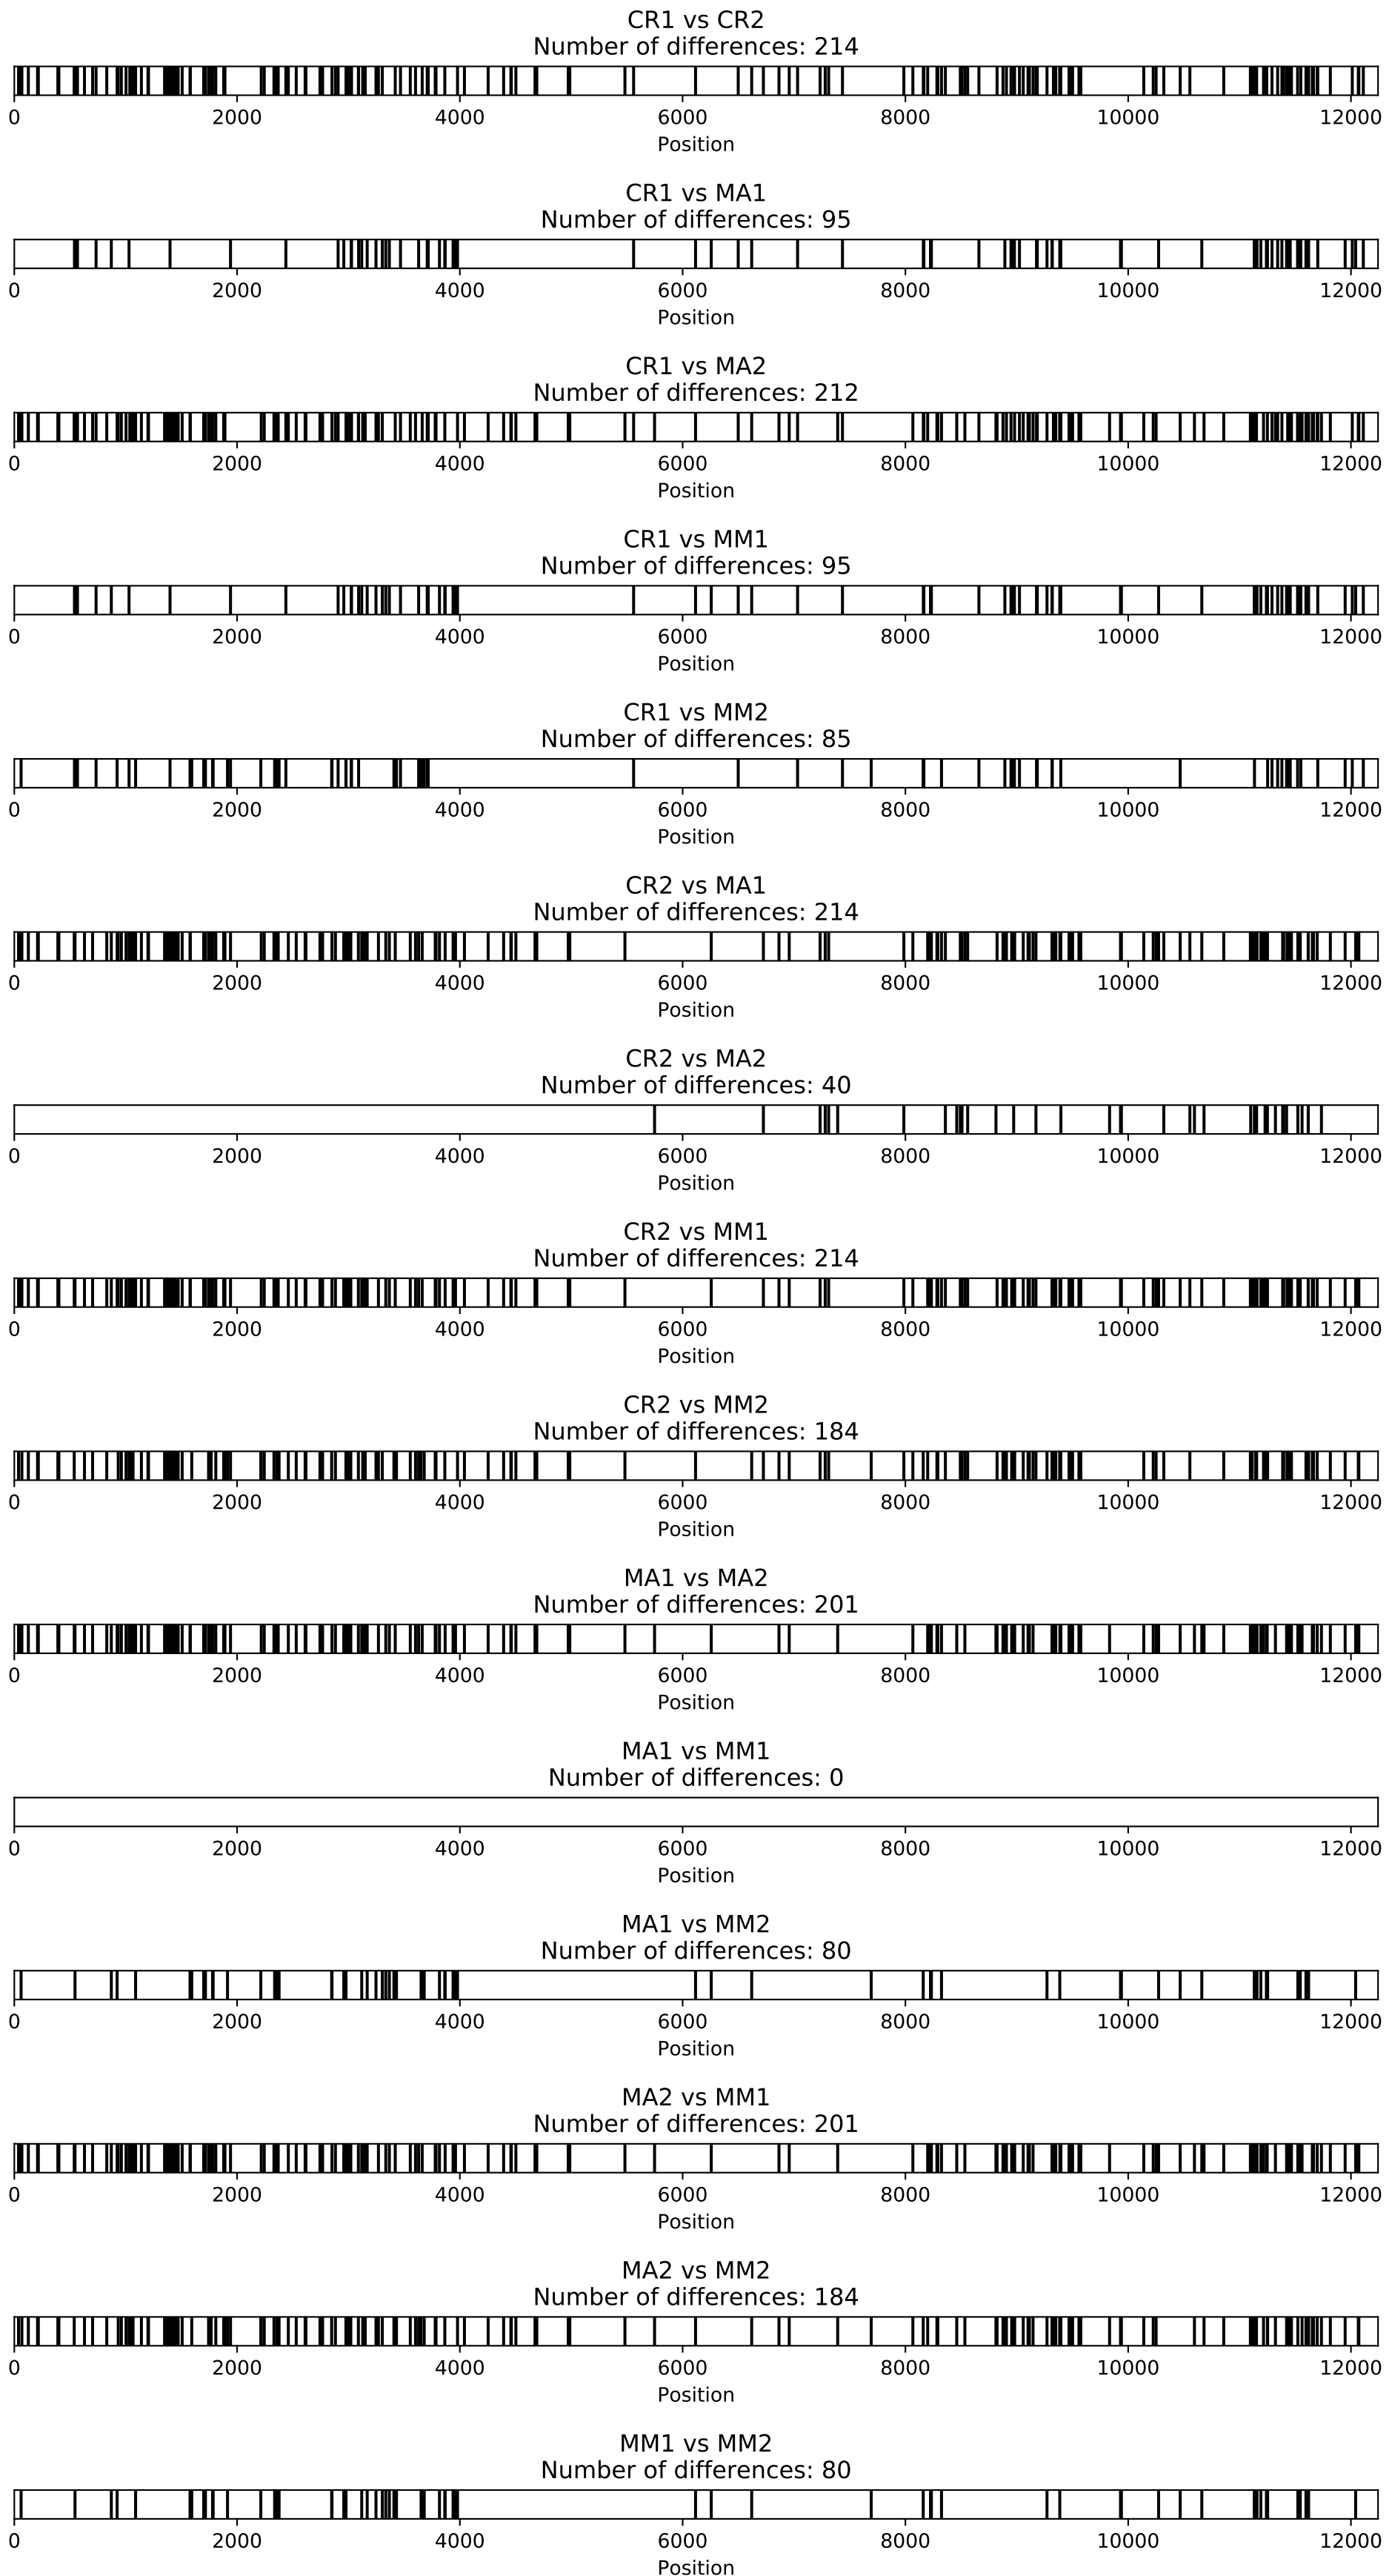

# Region: 275

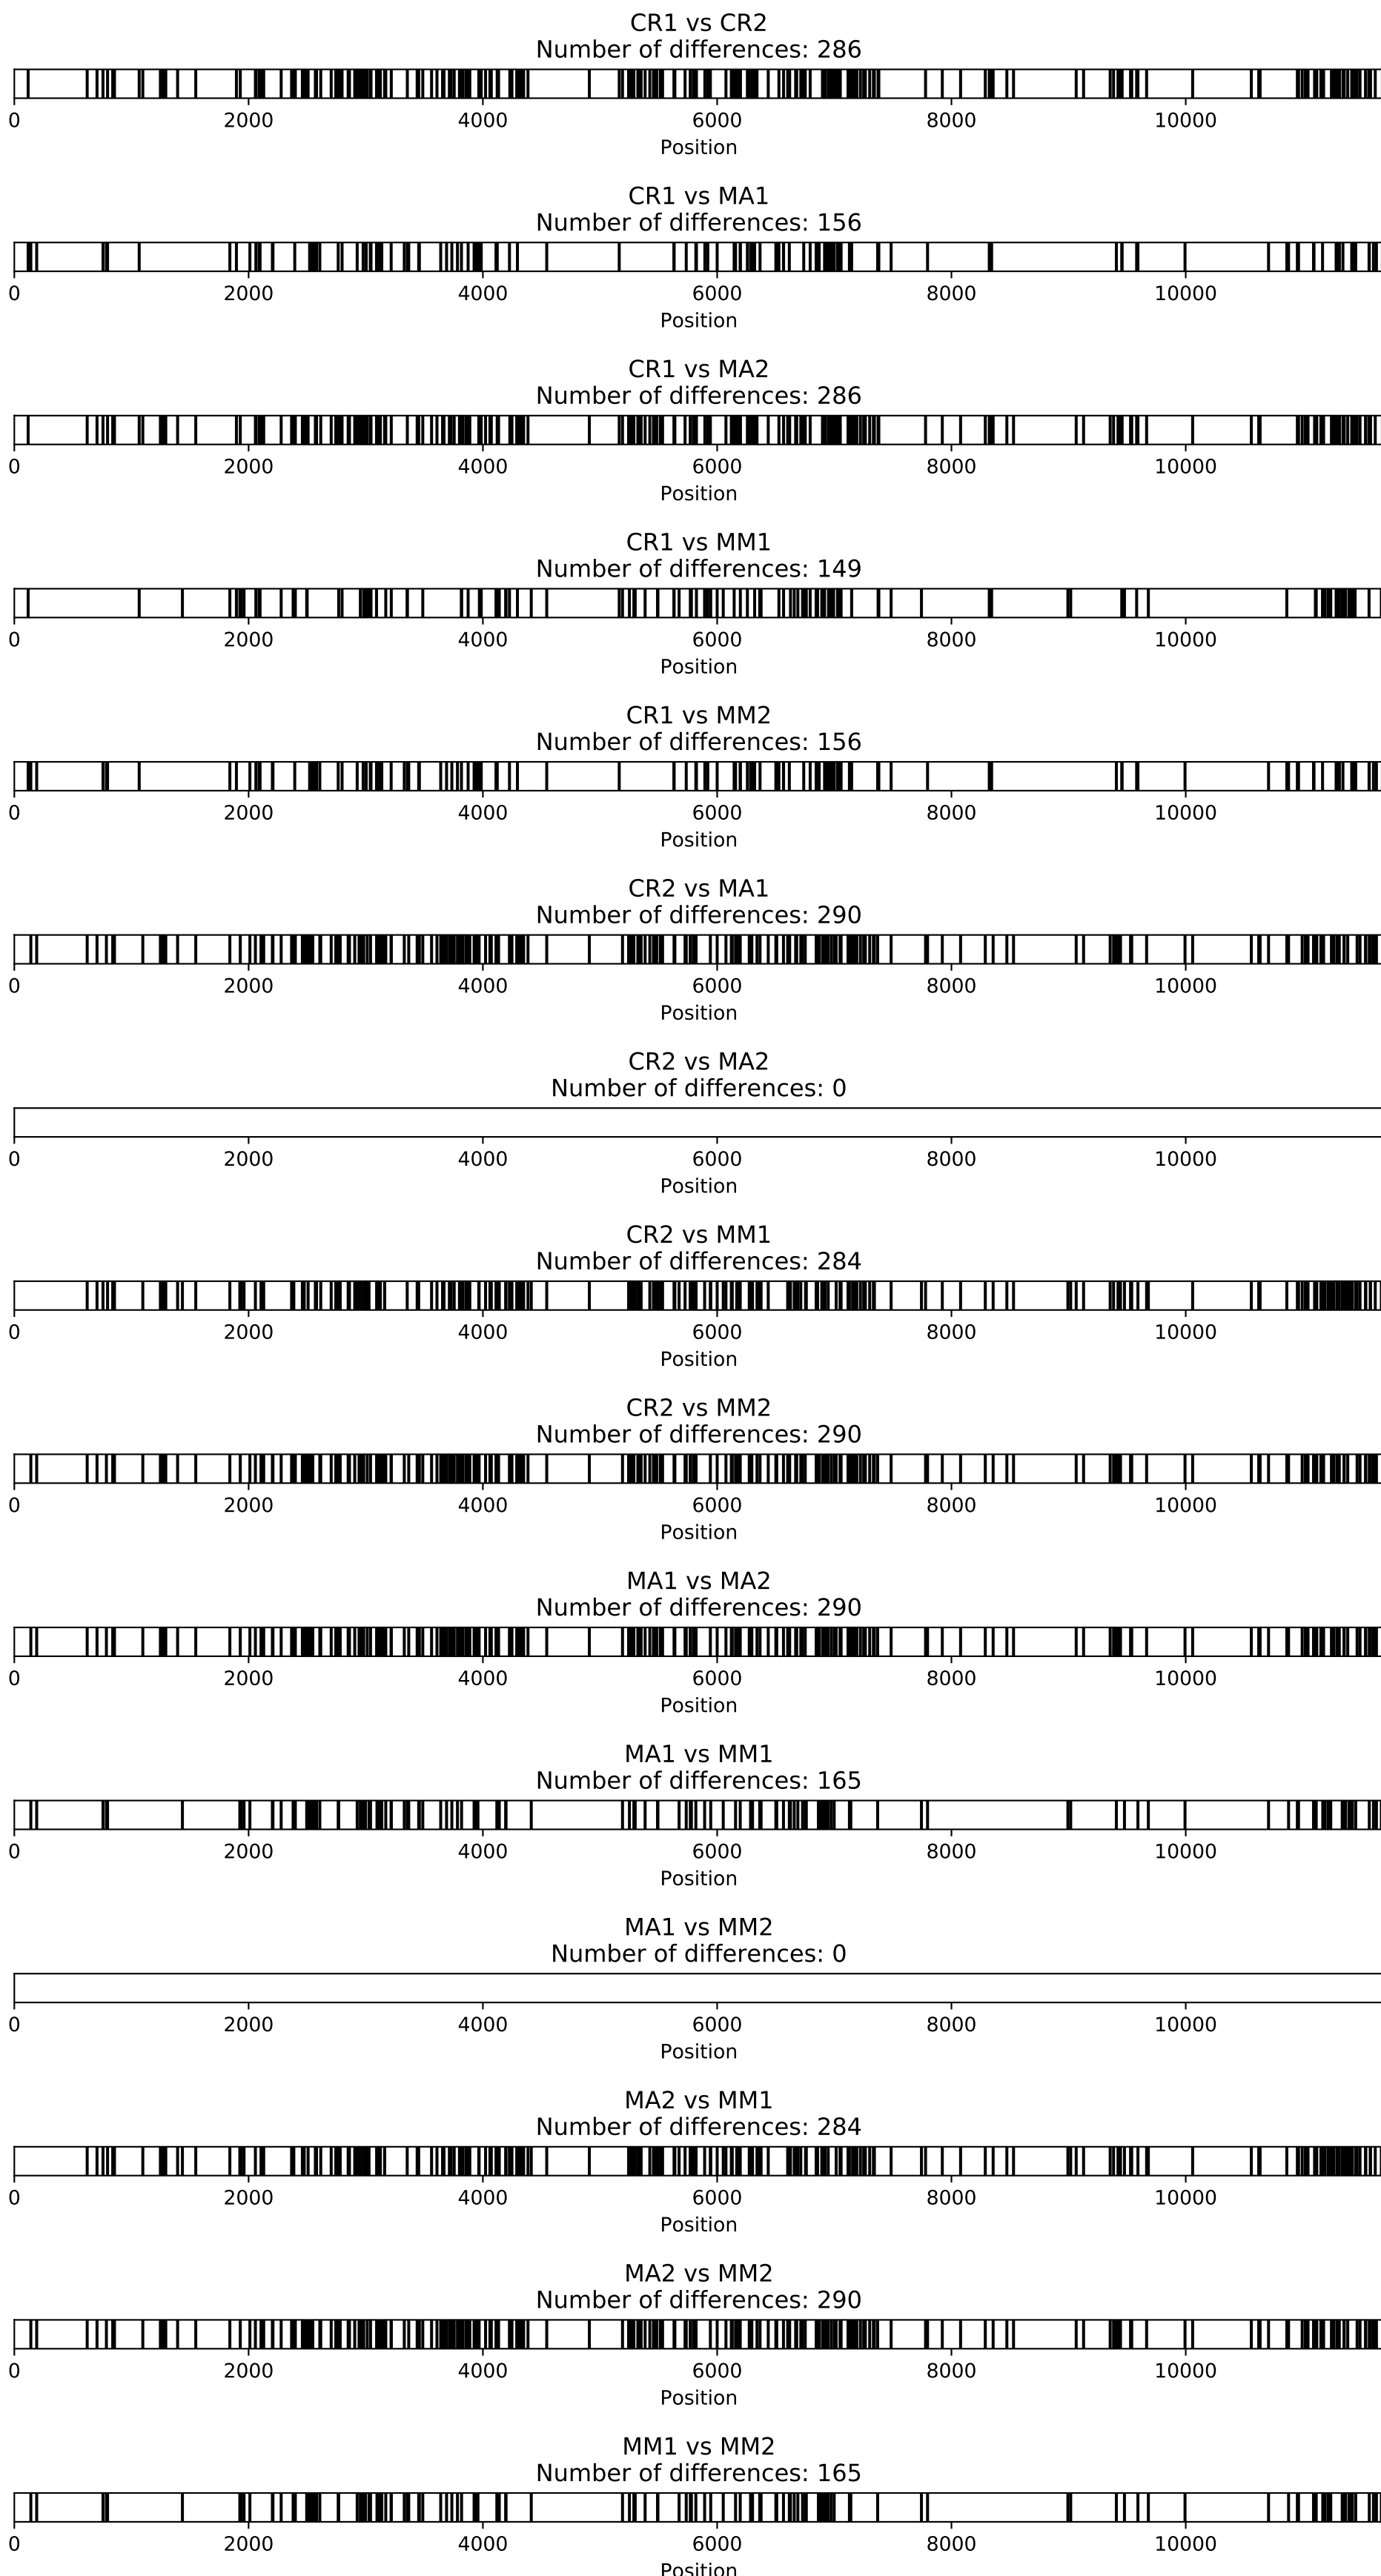

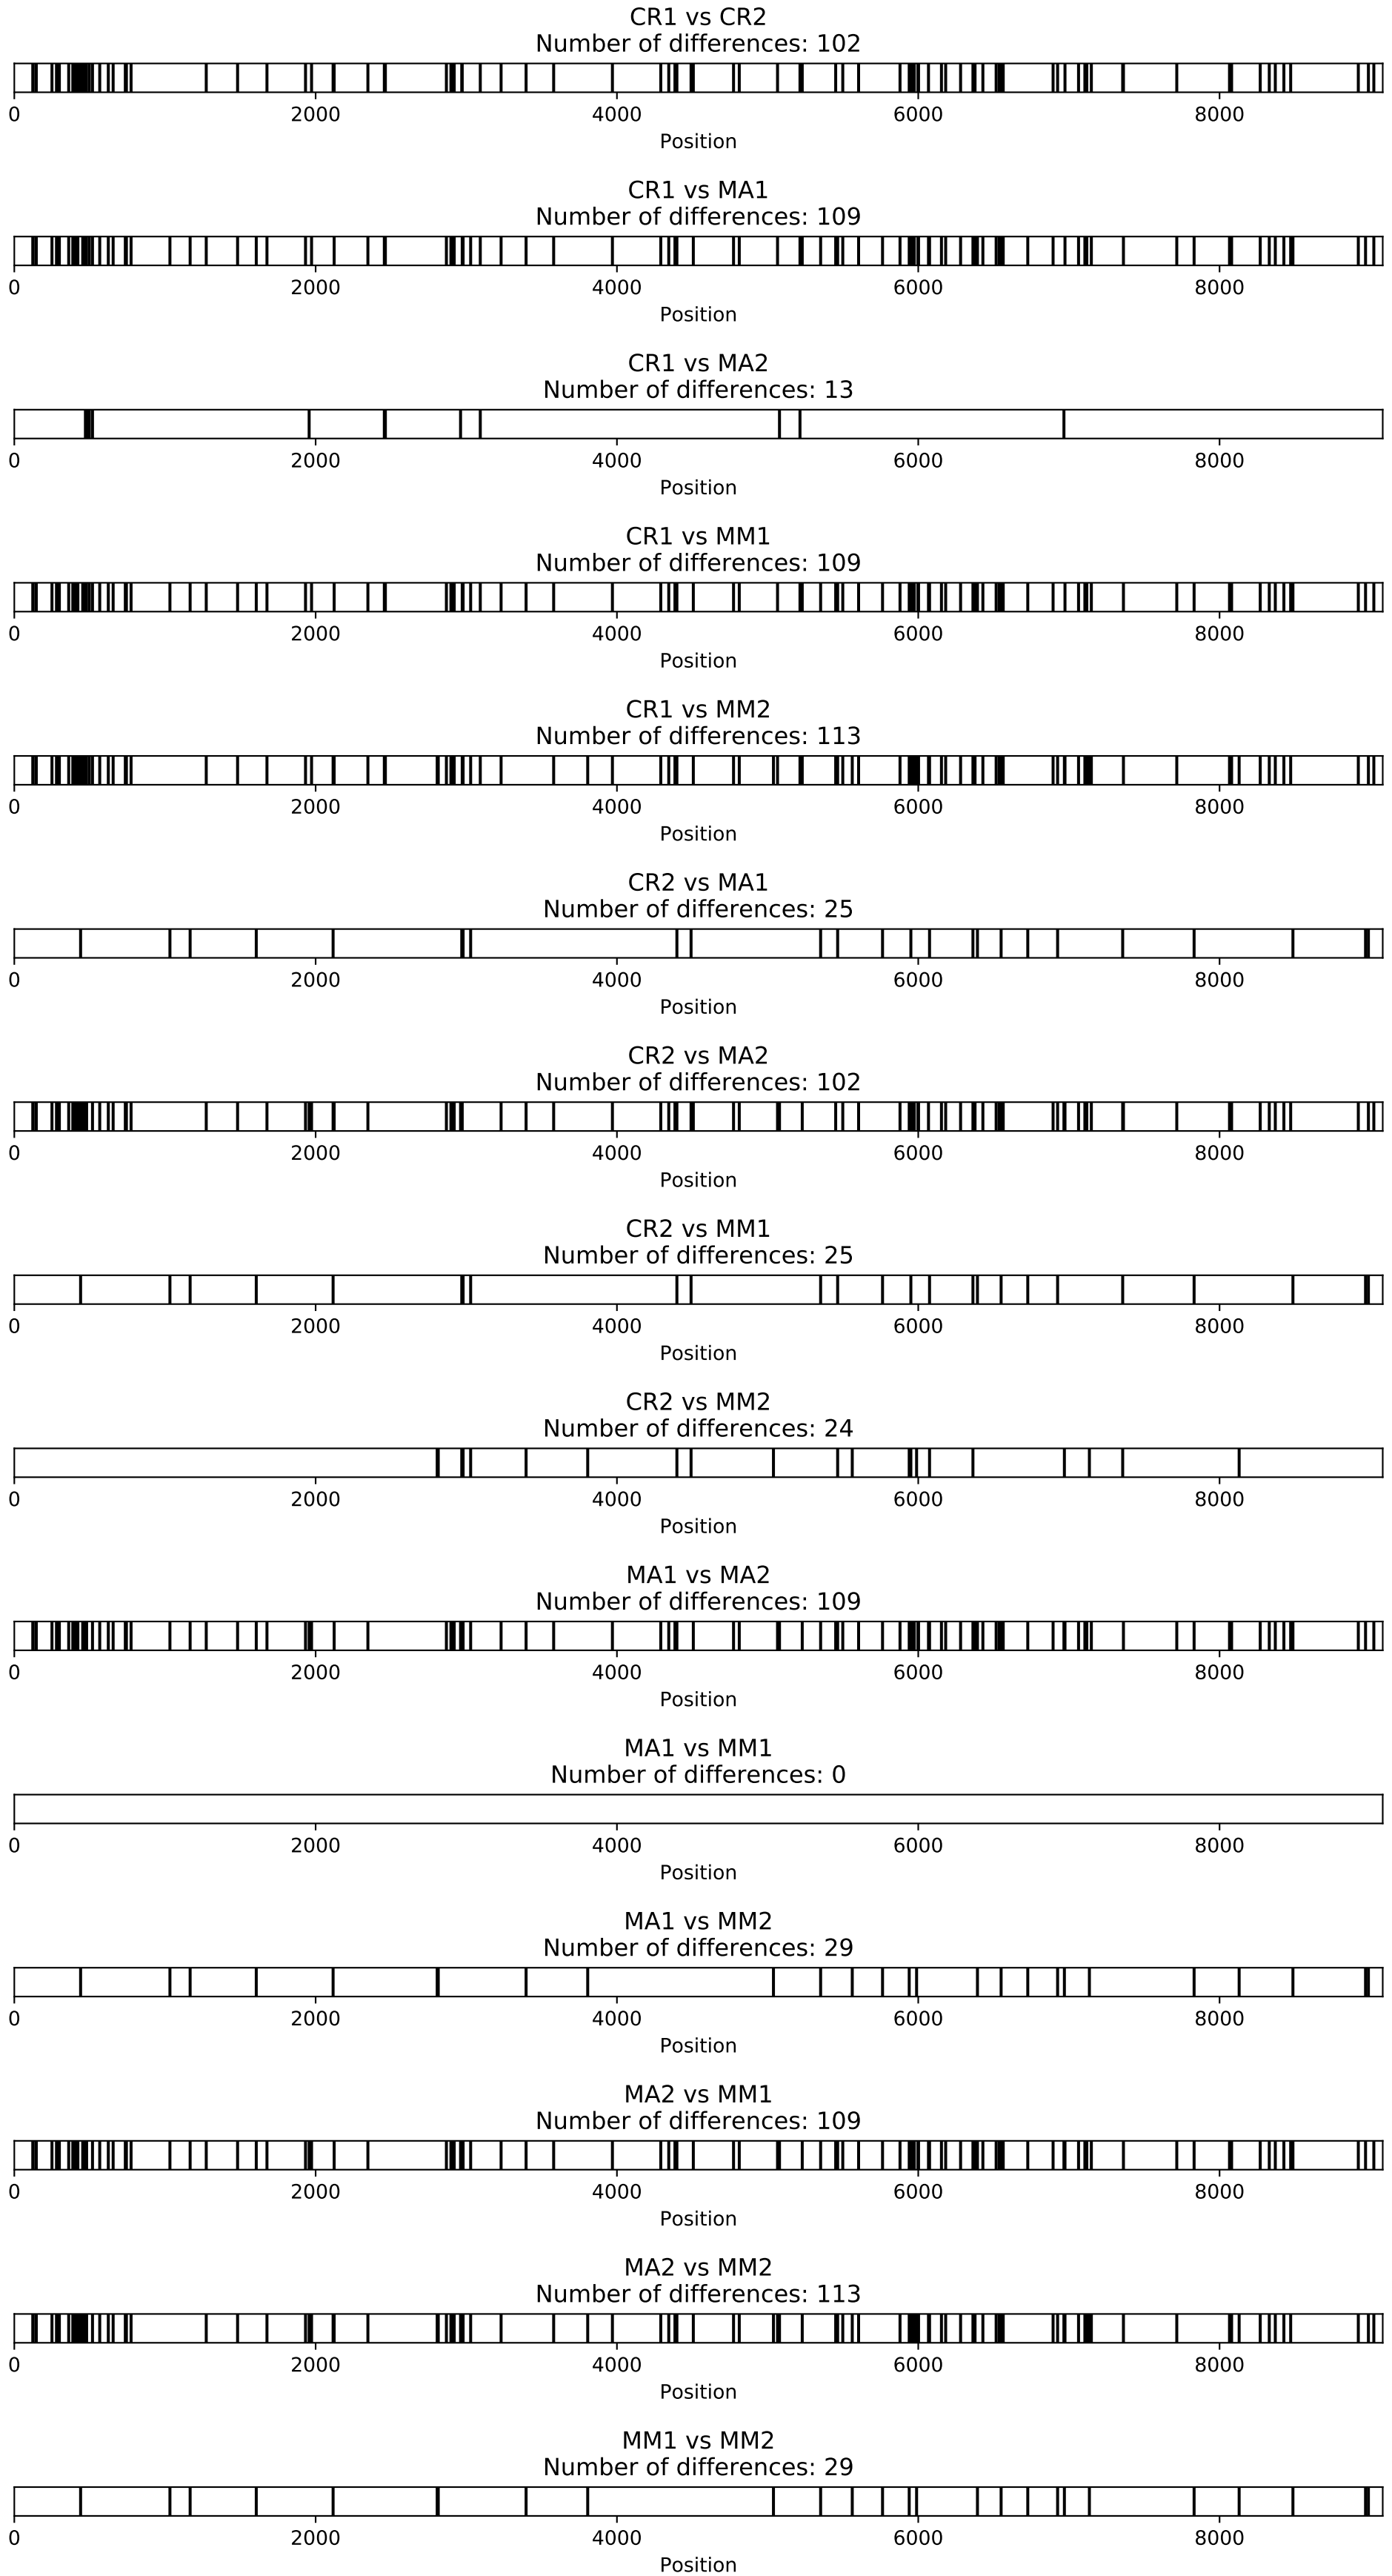



# Region: 277

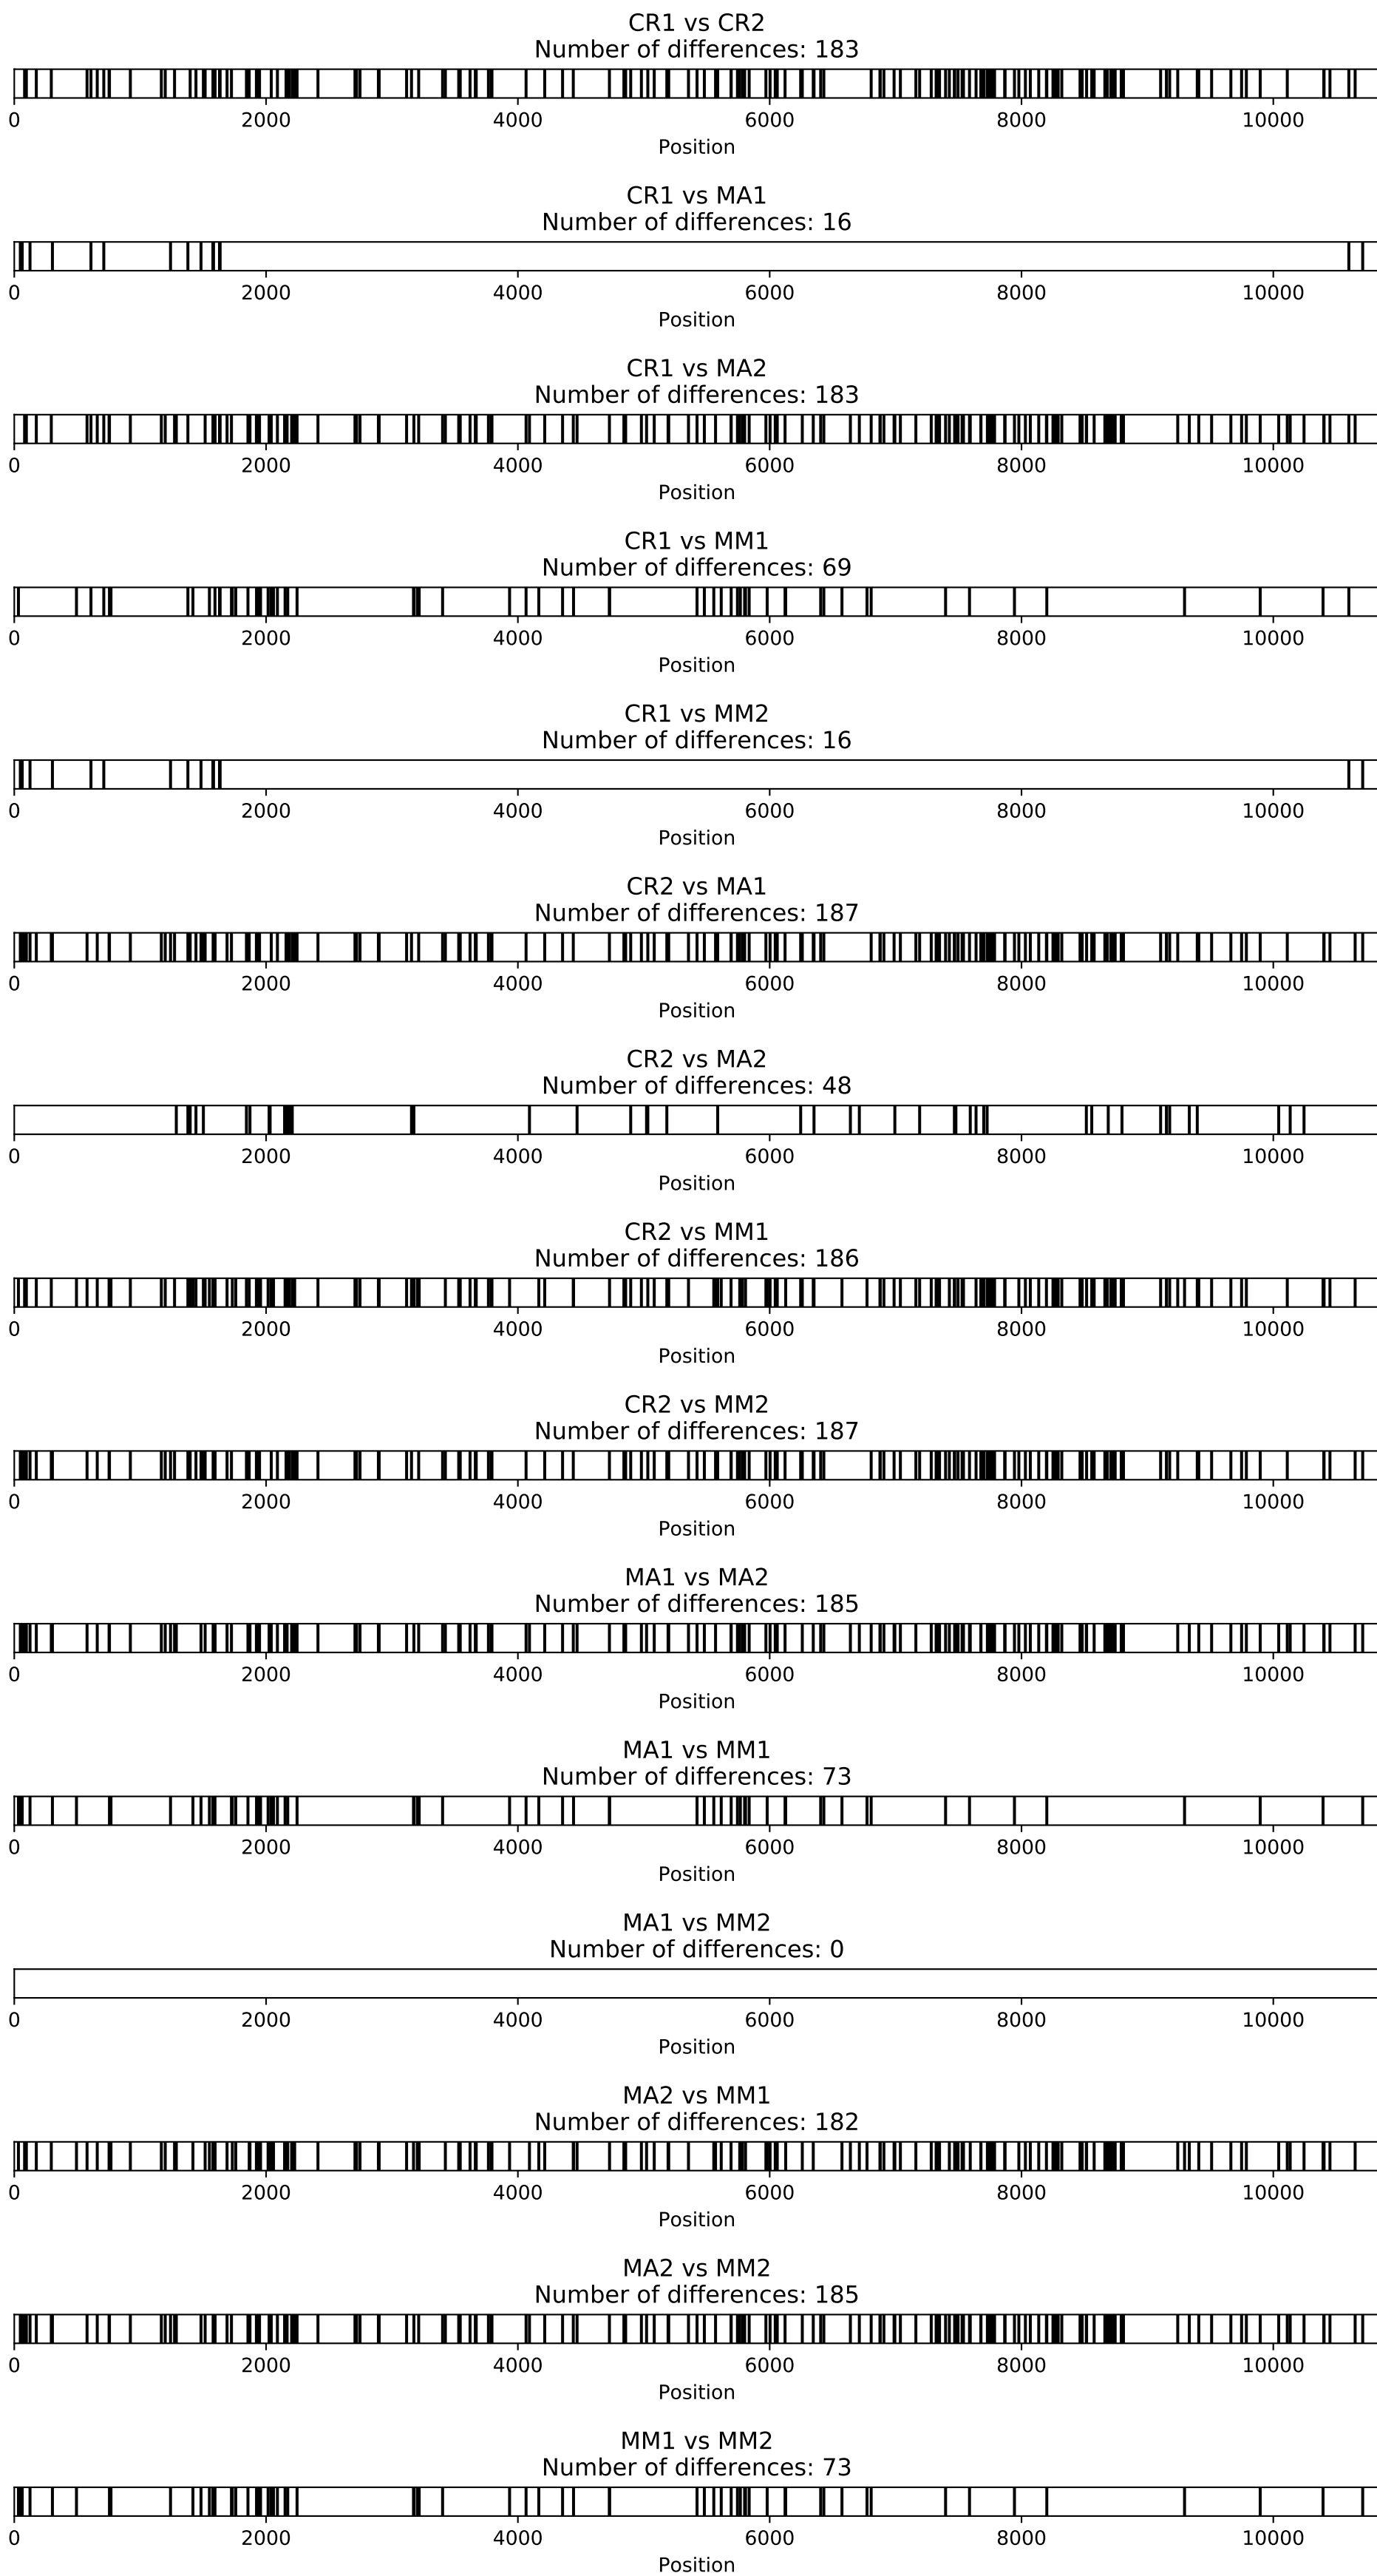

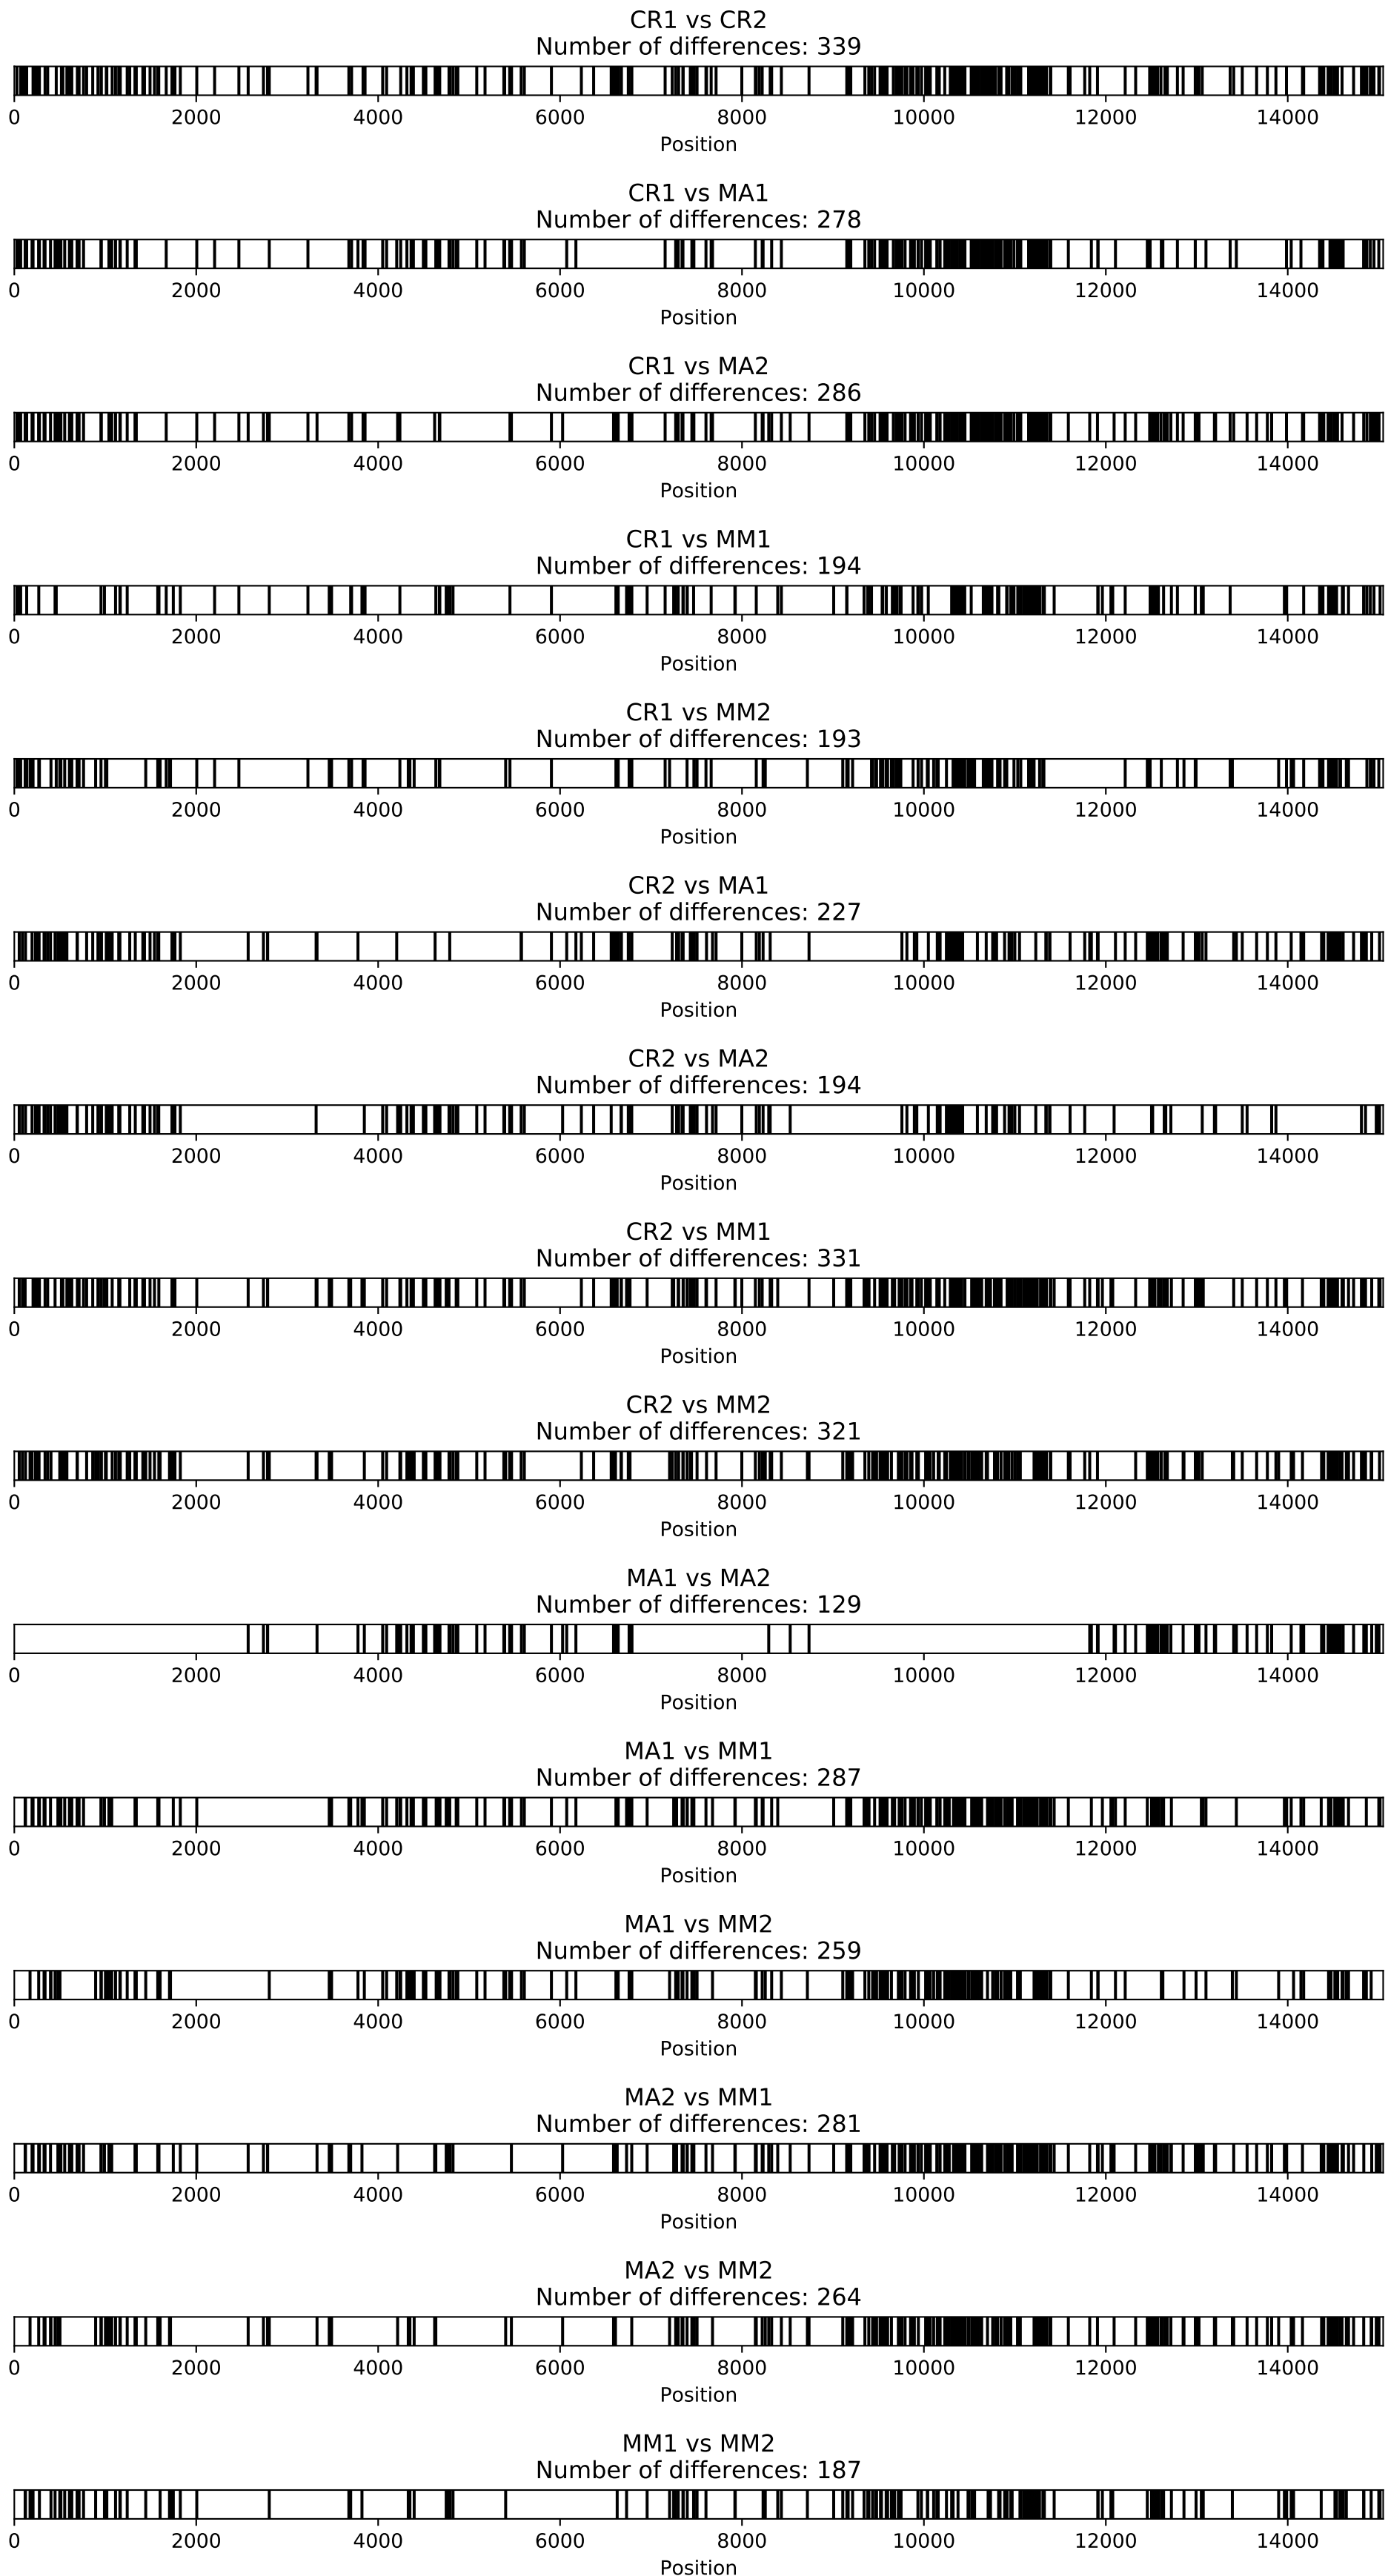

# Region: 279

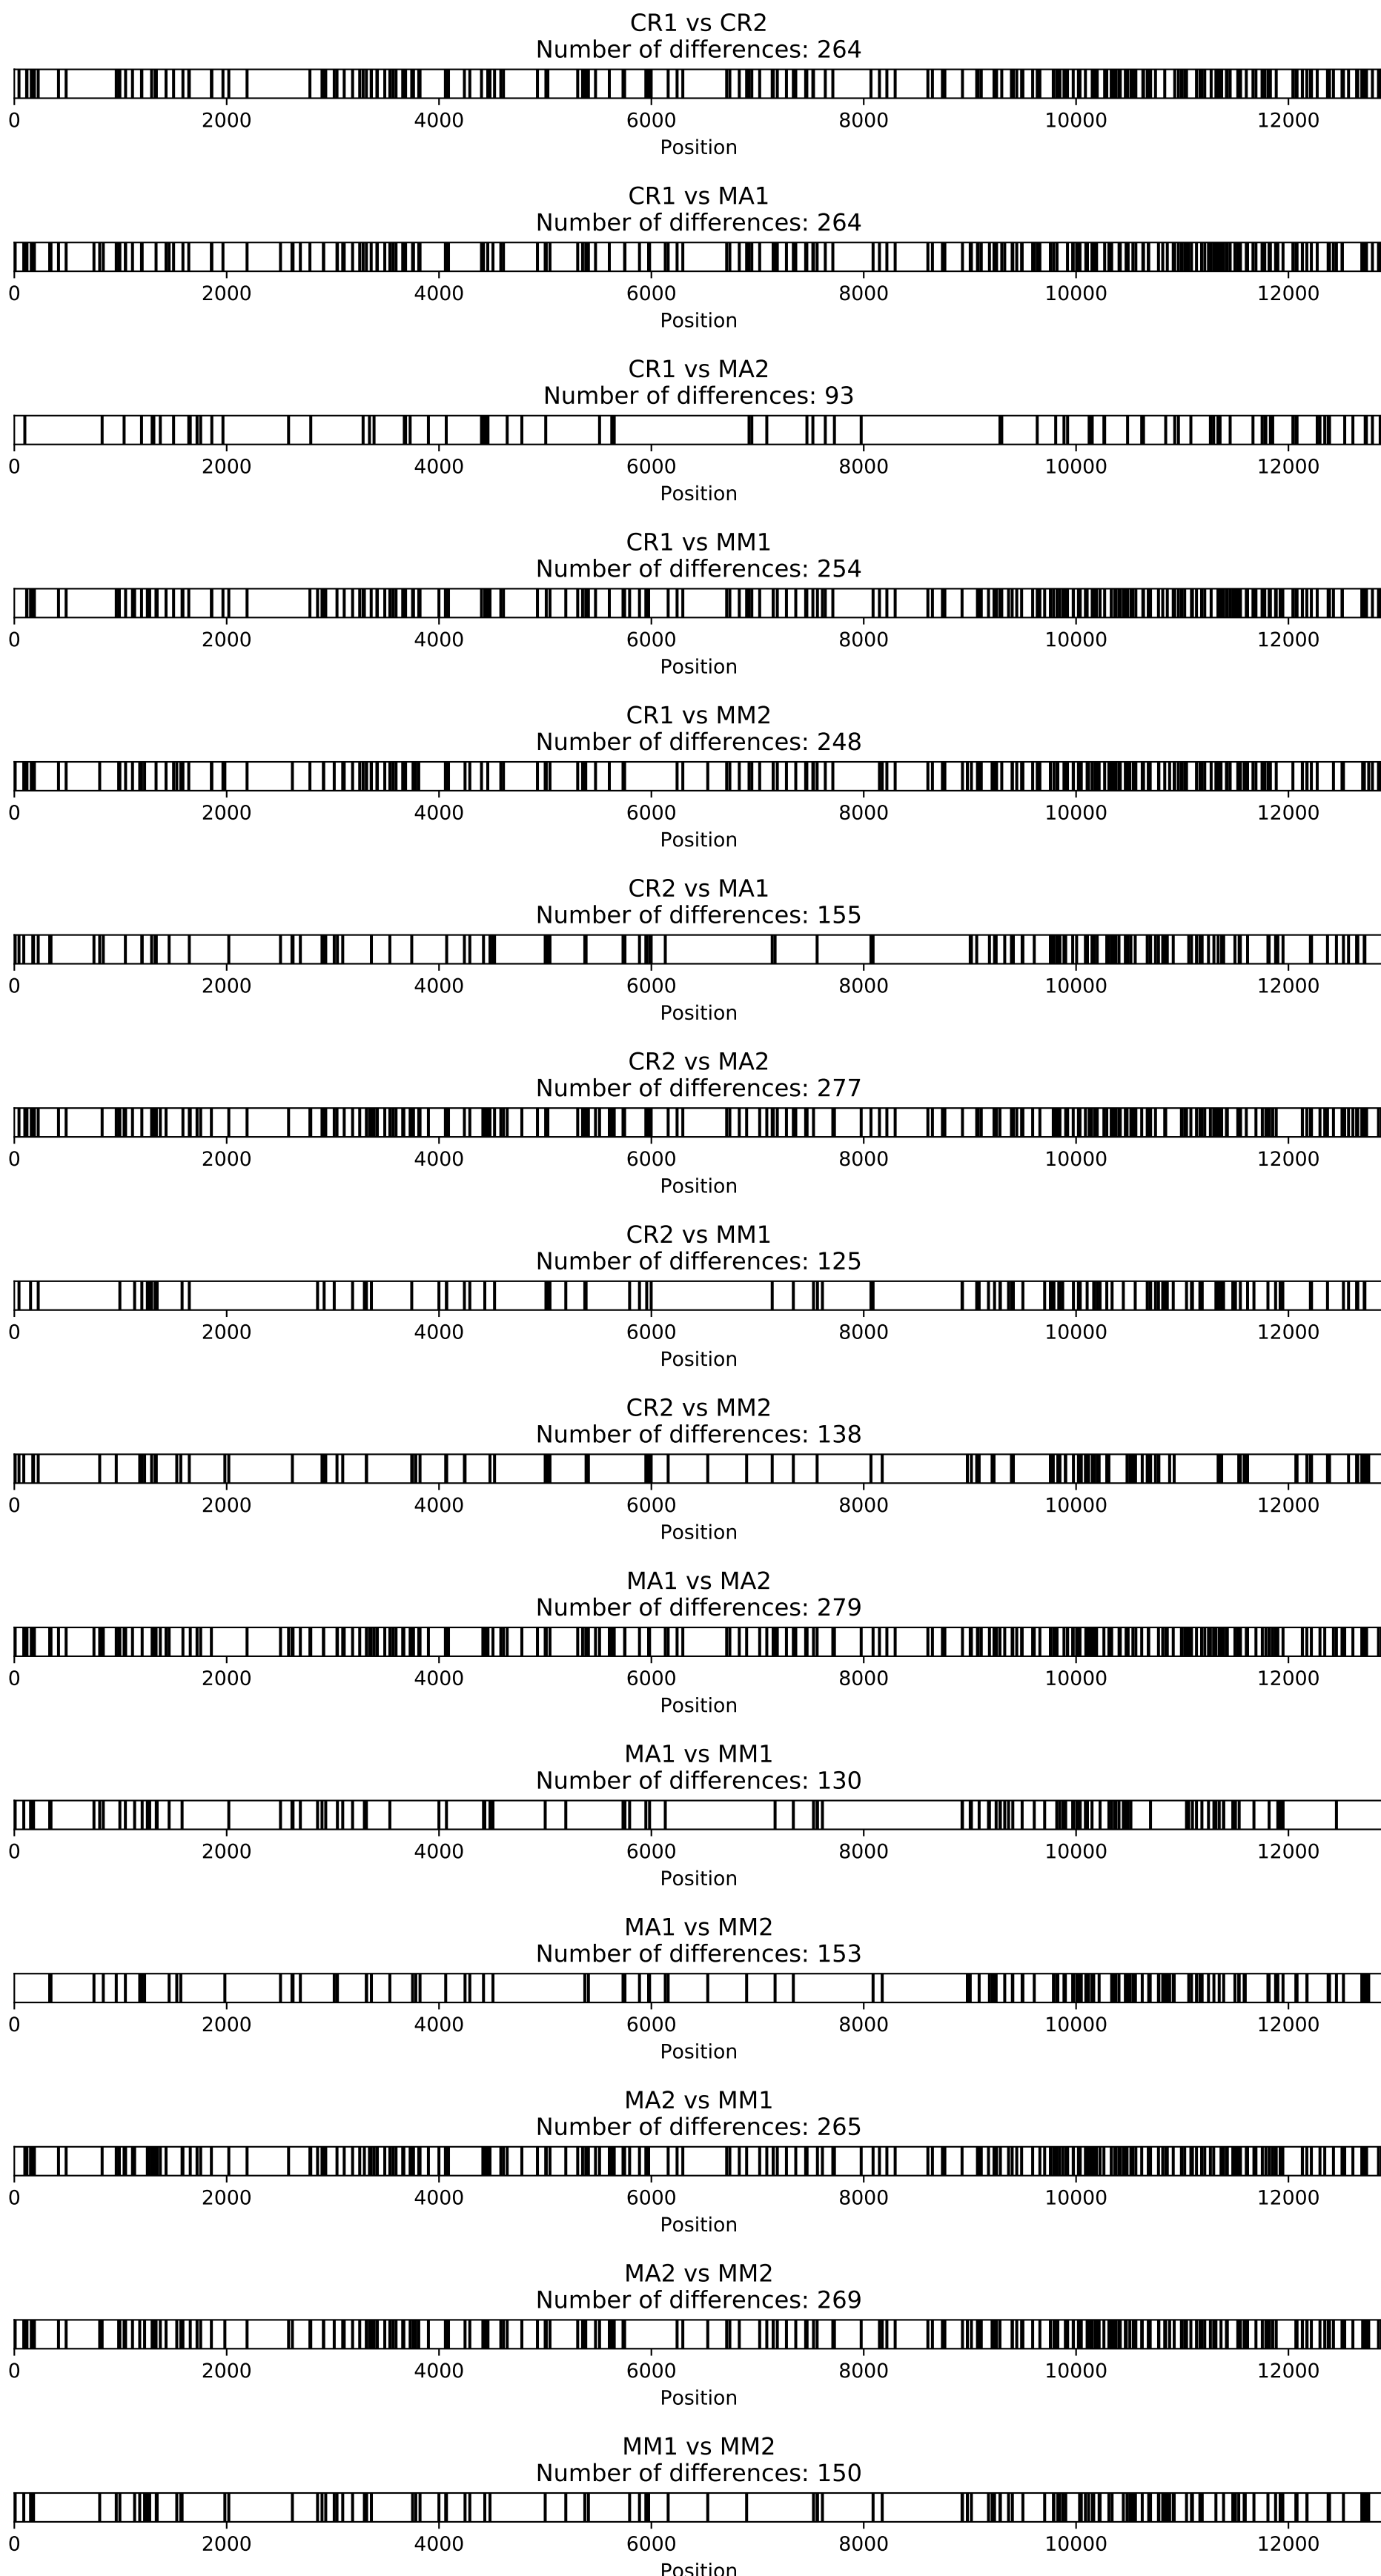

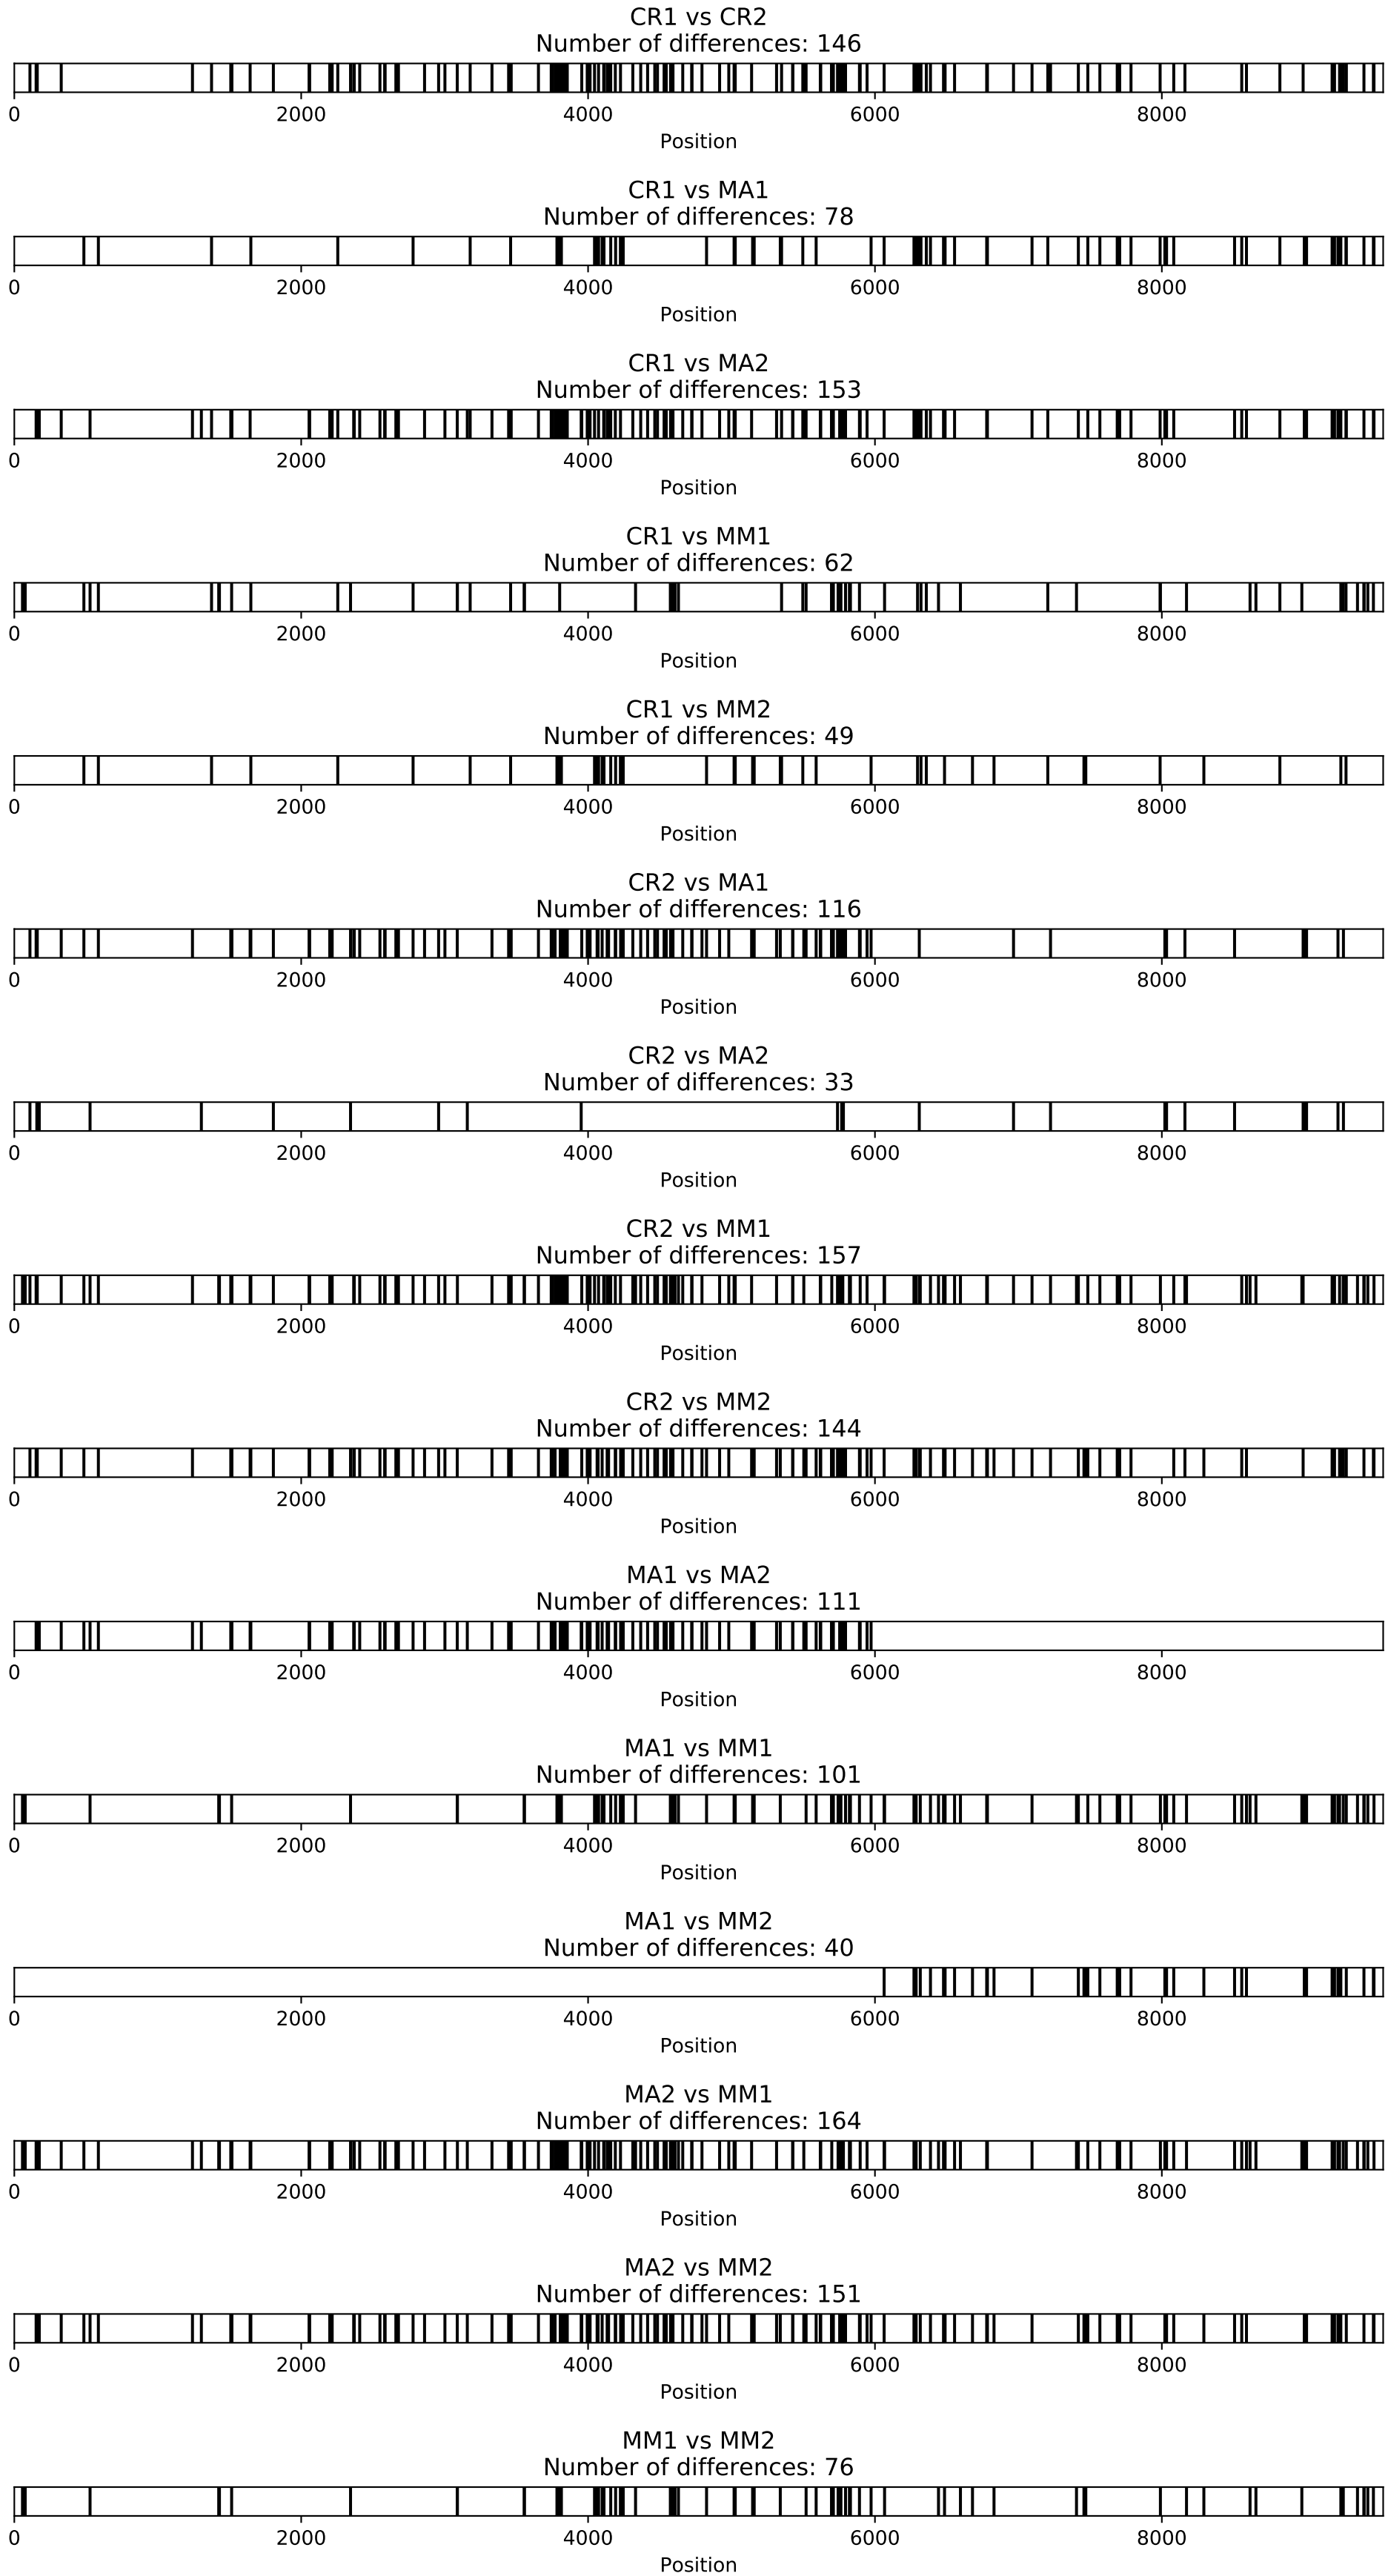

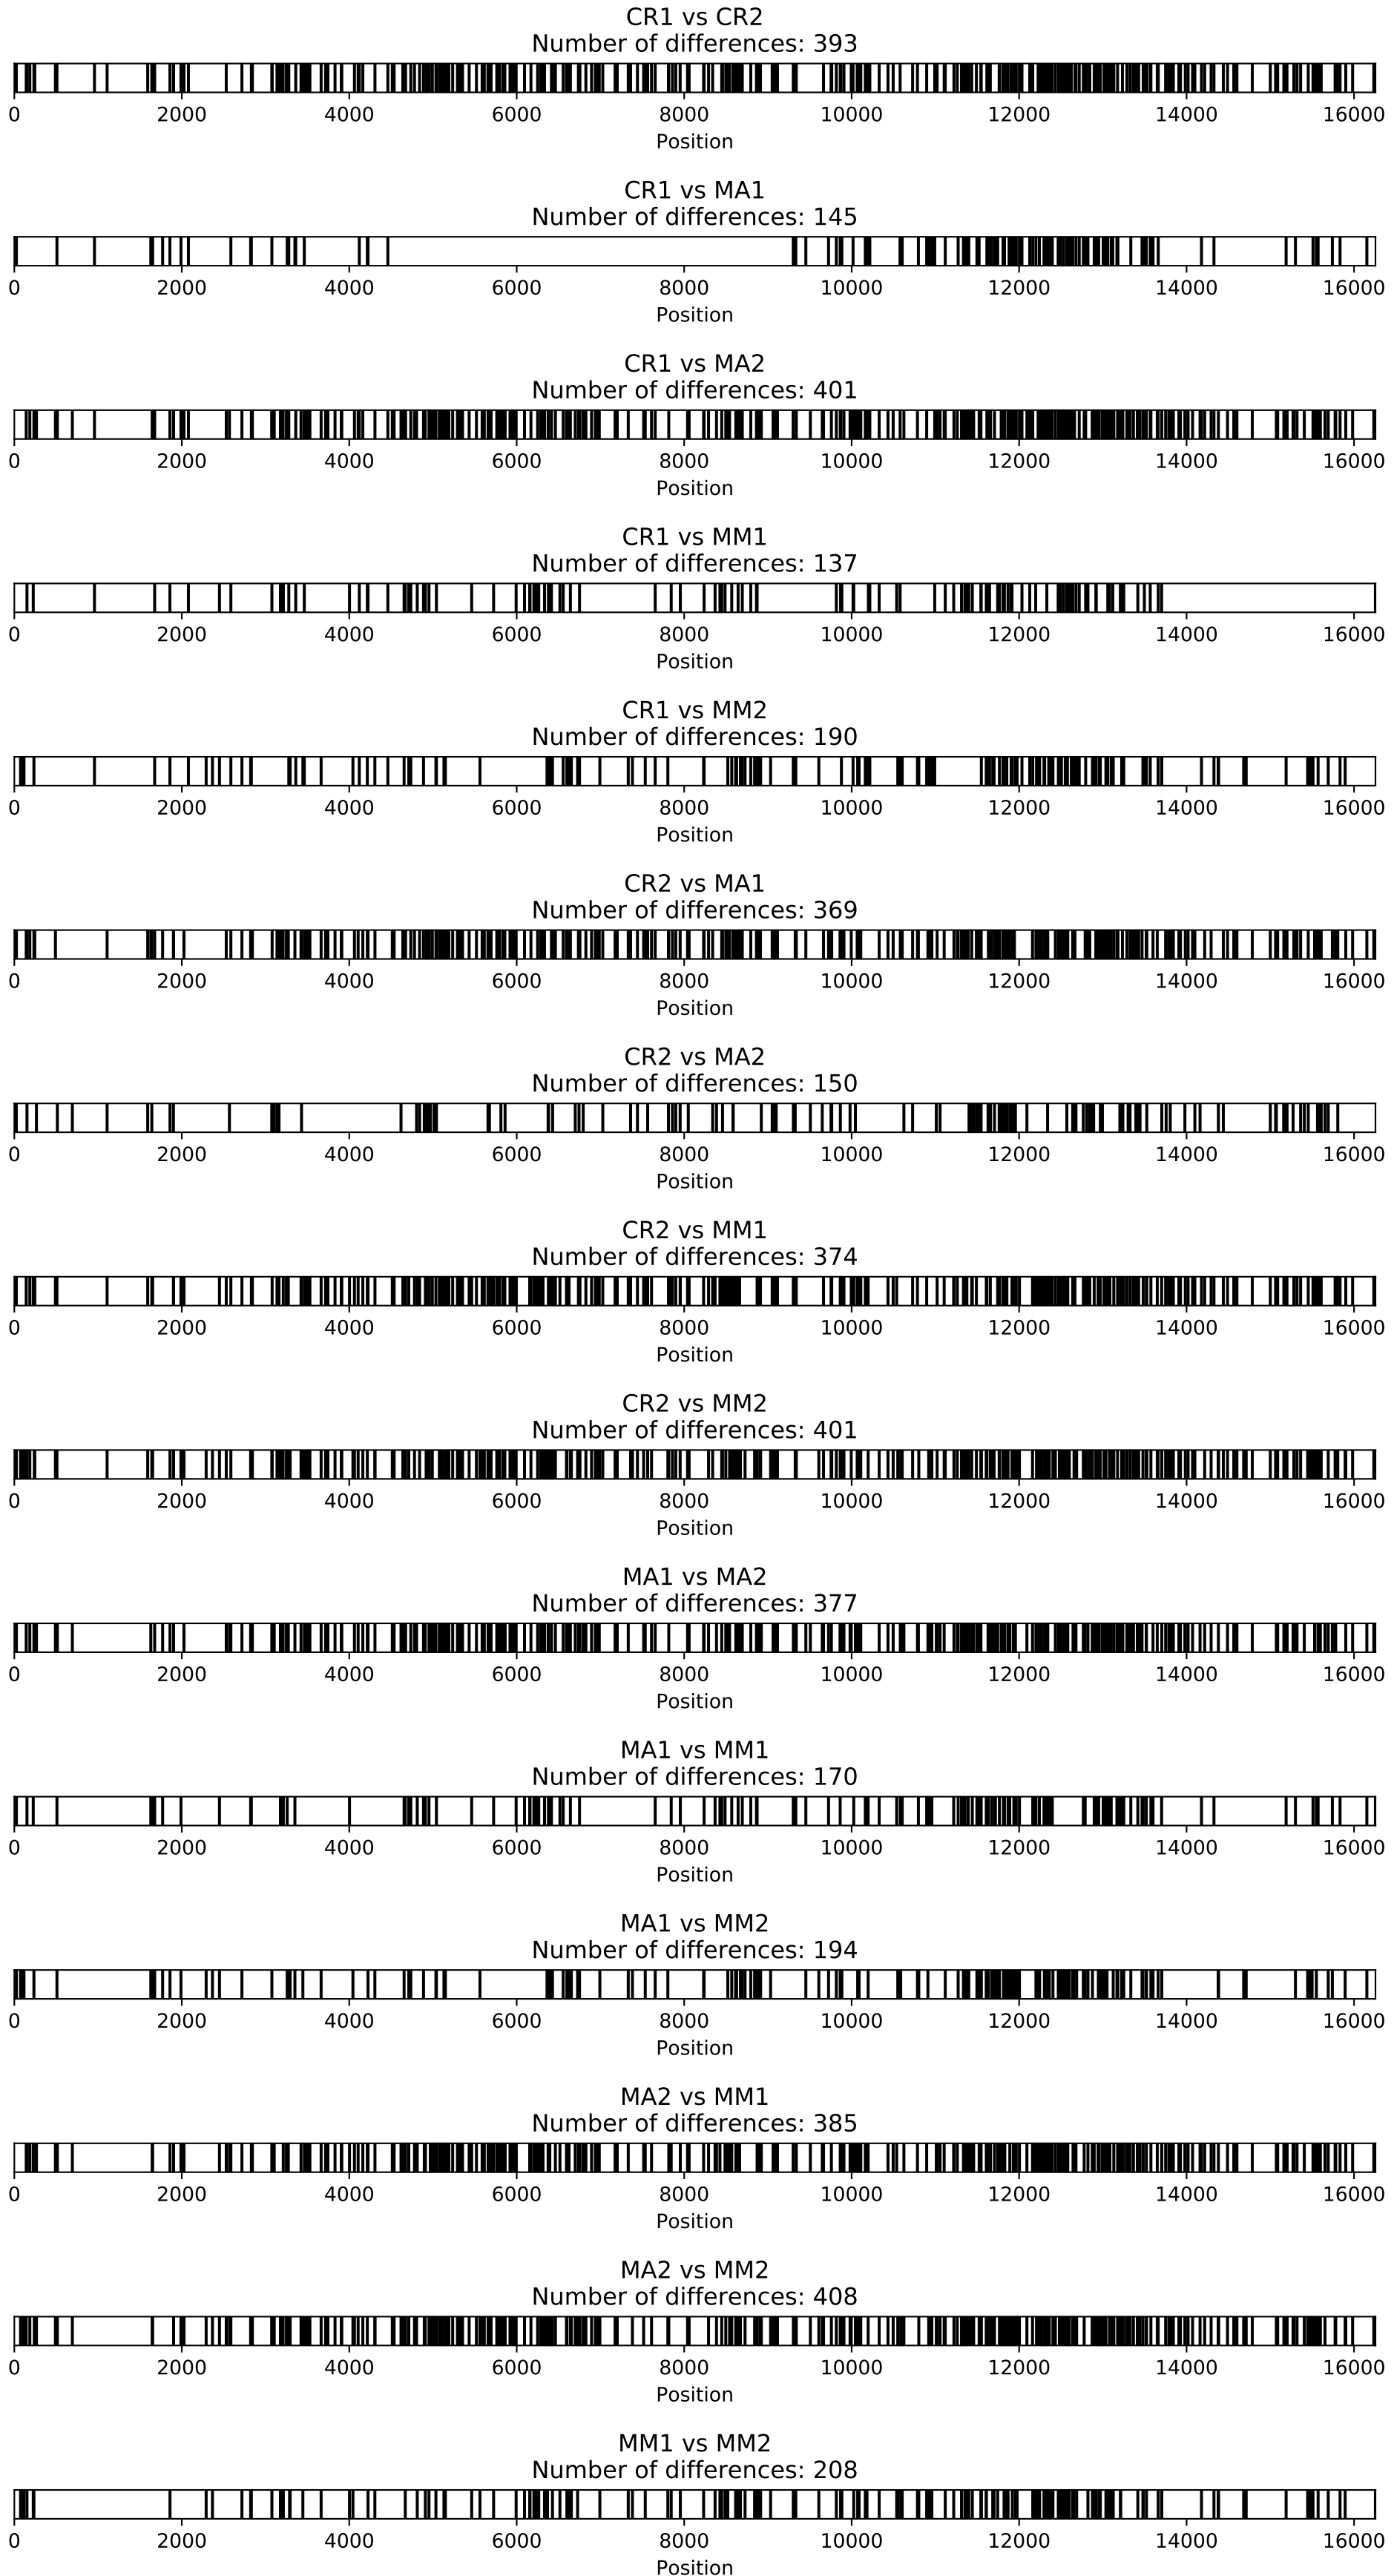

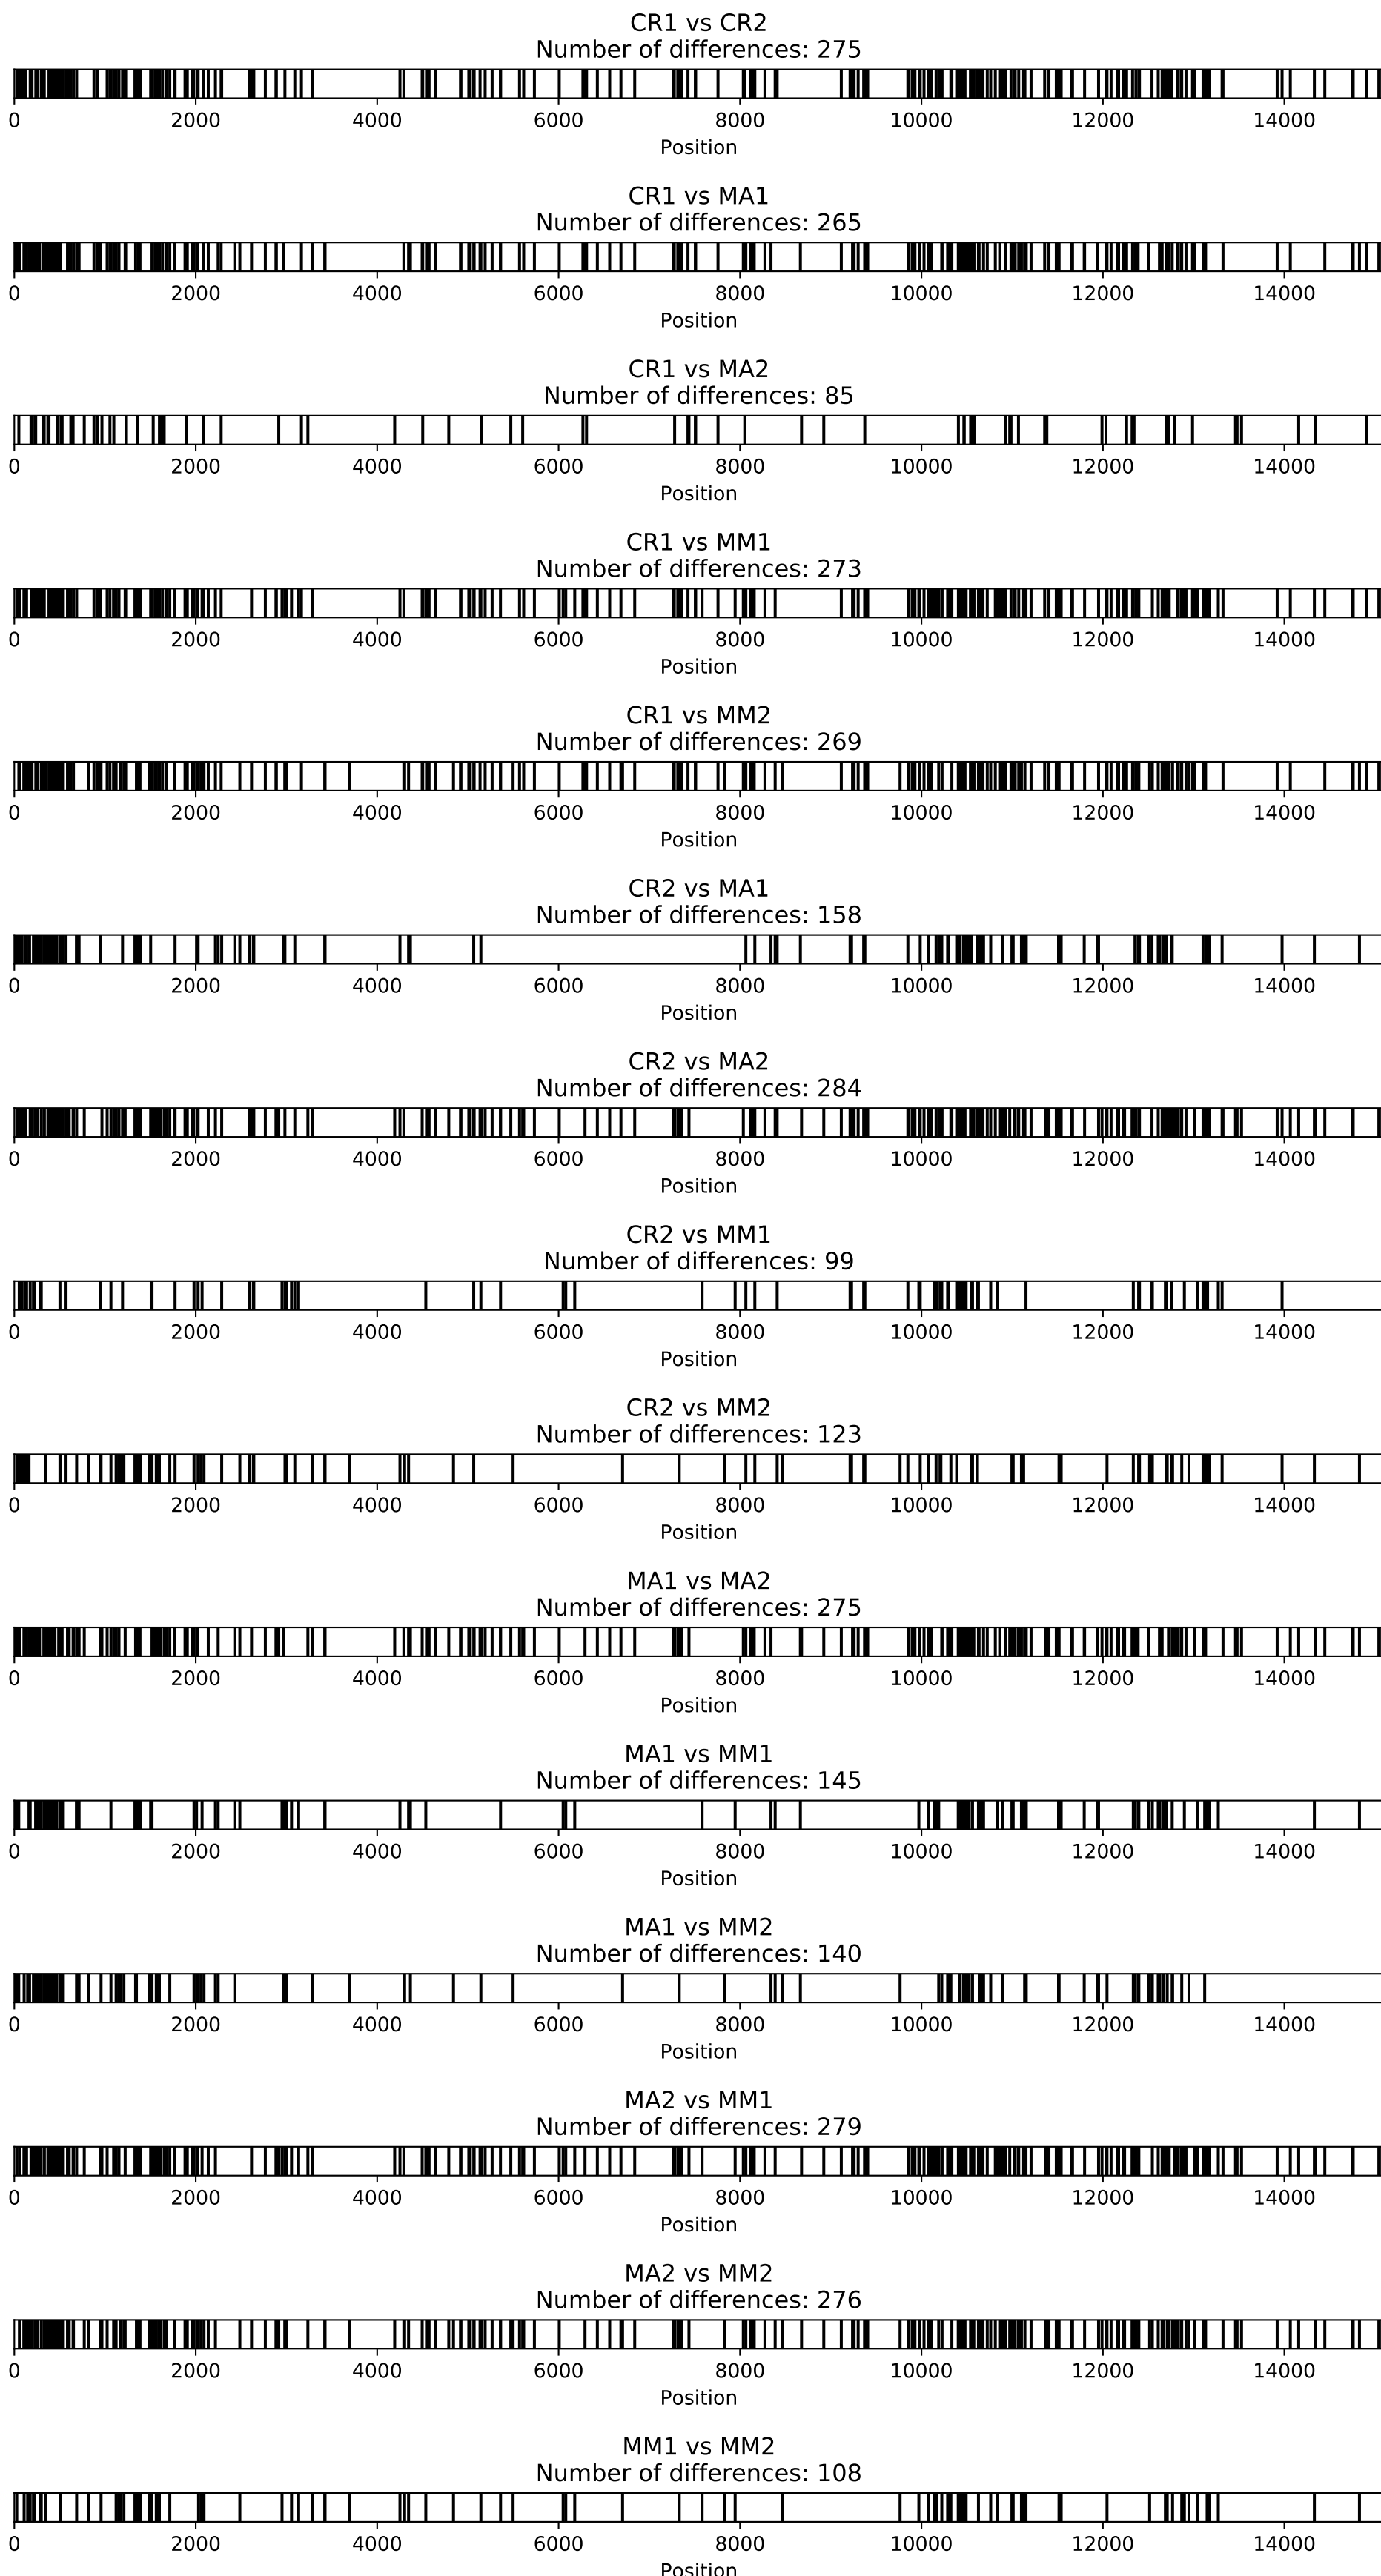

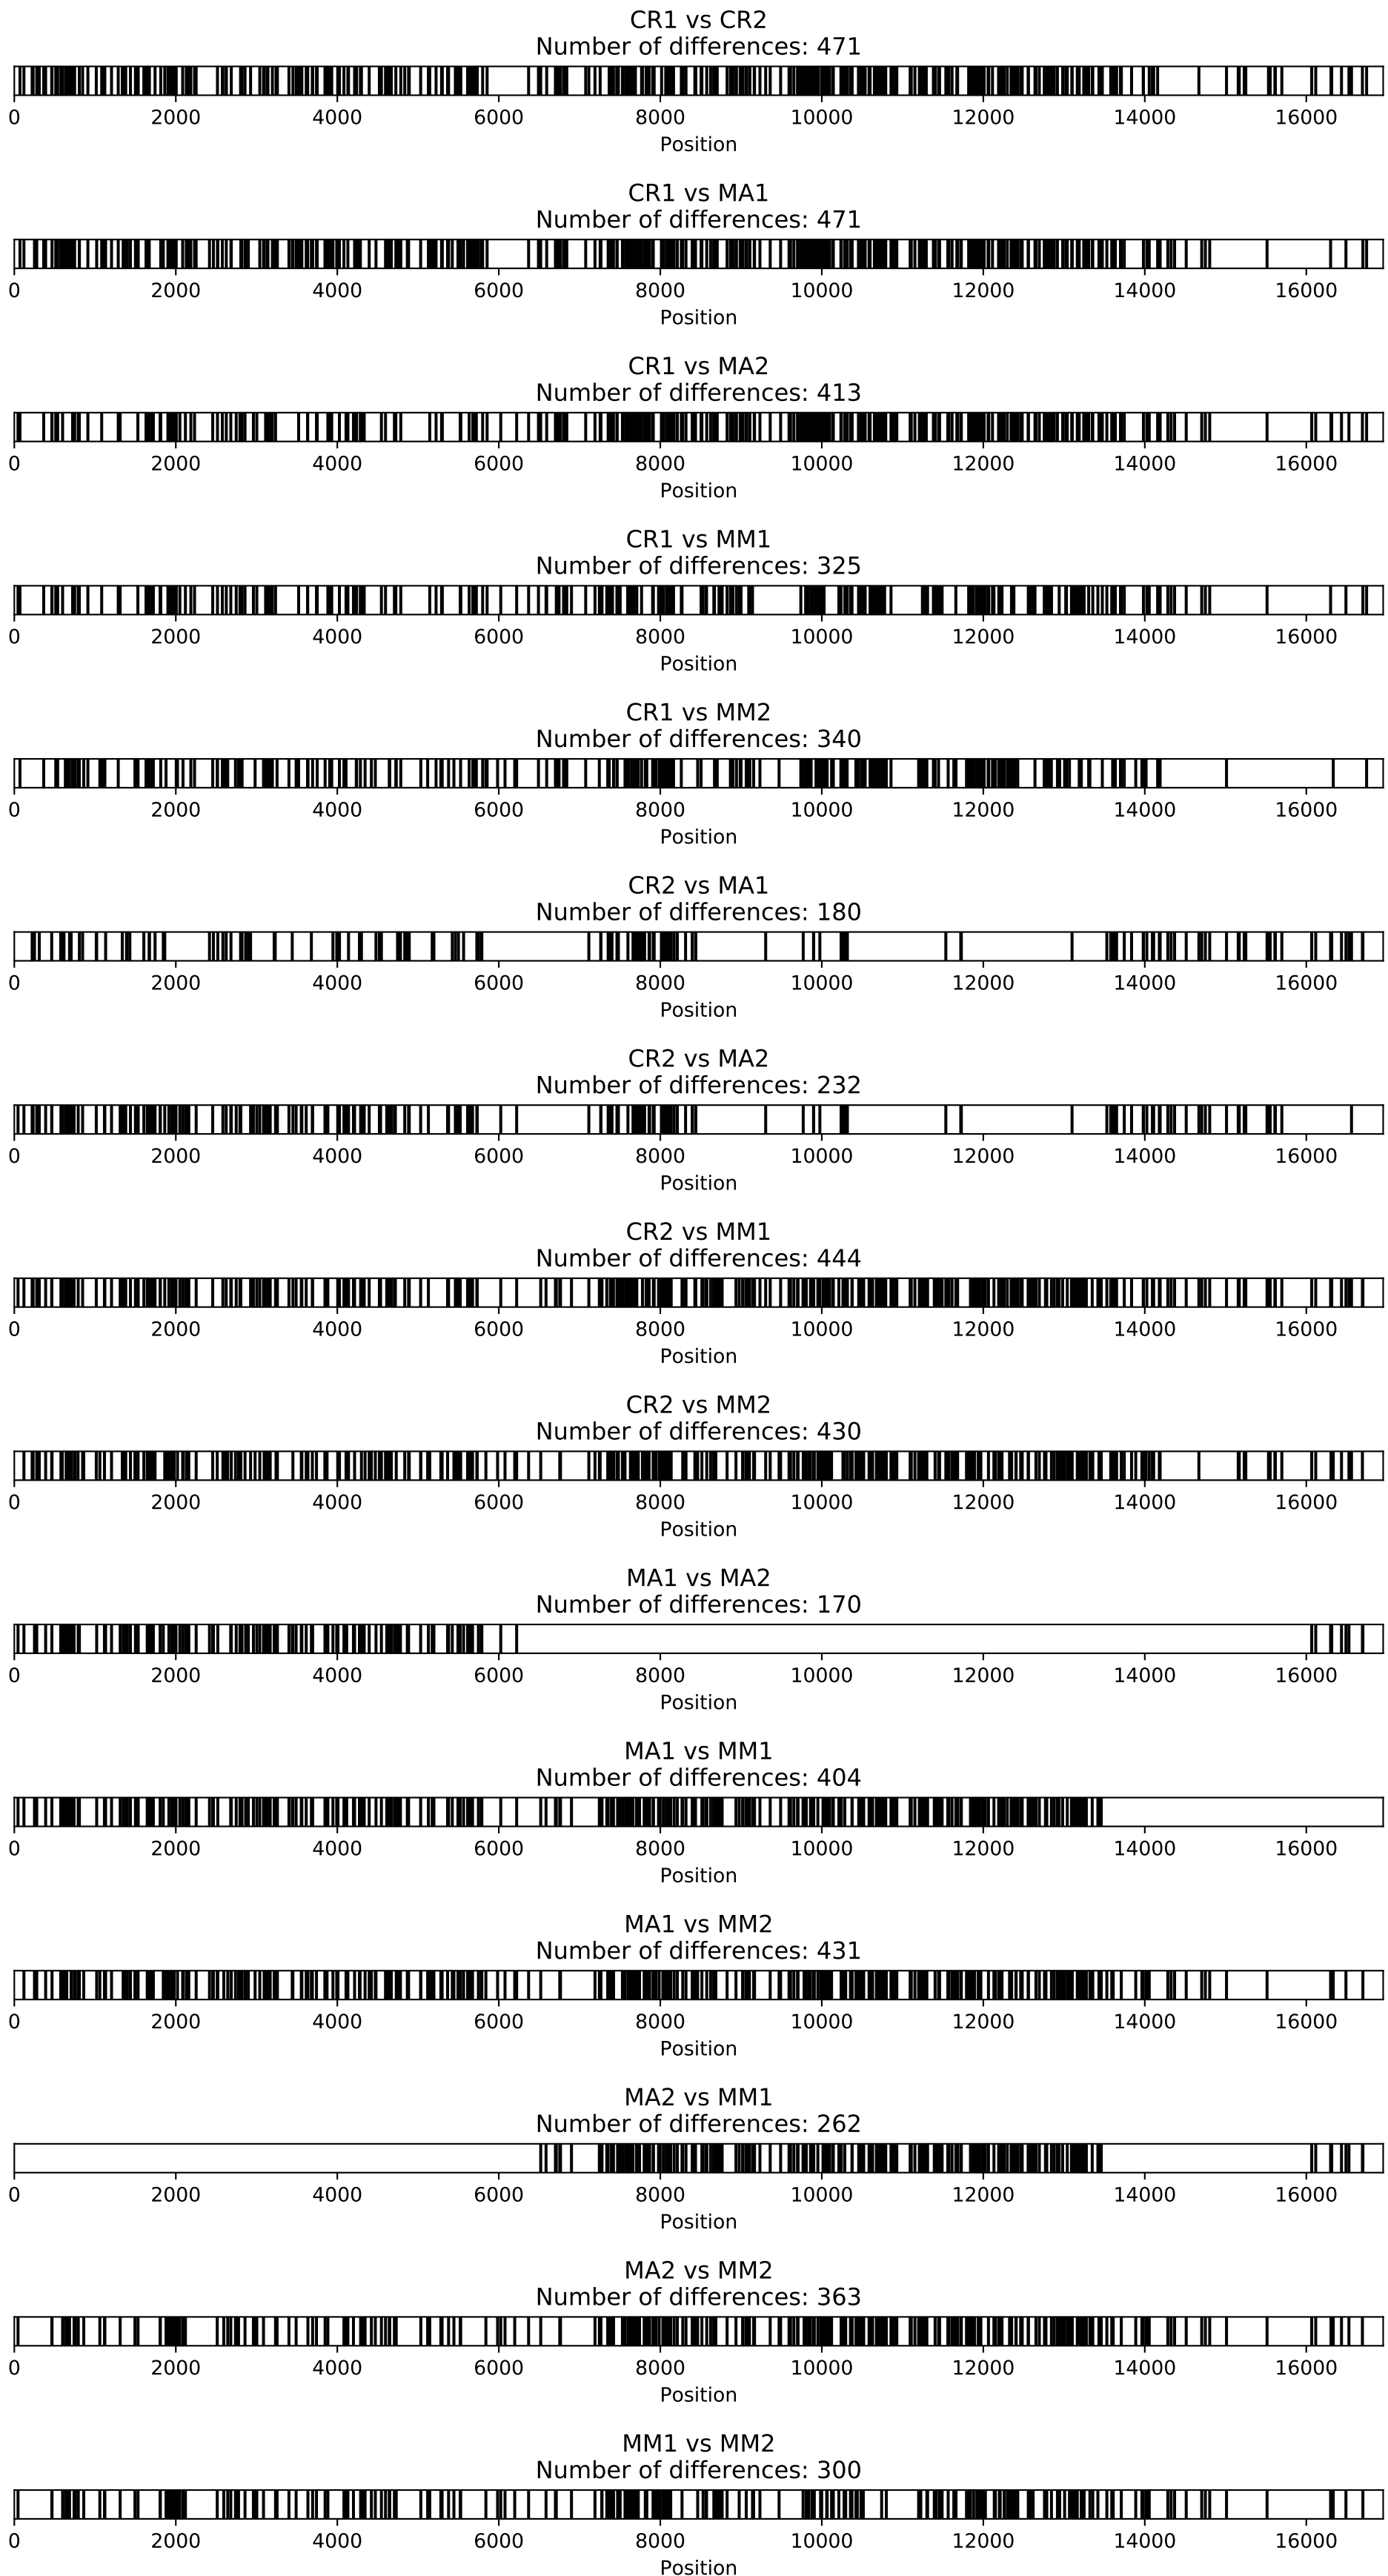

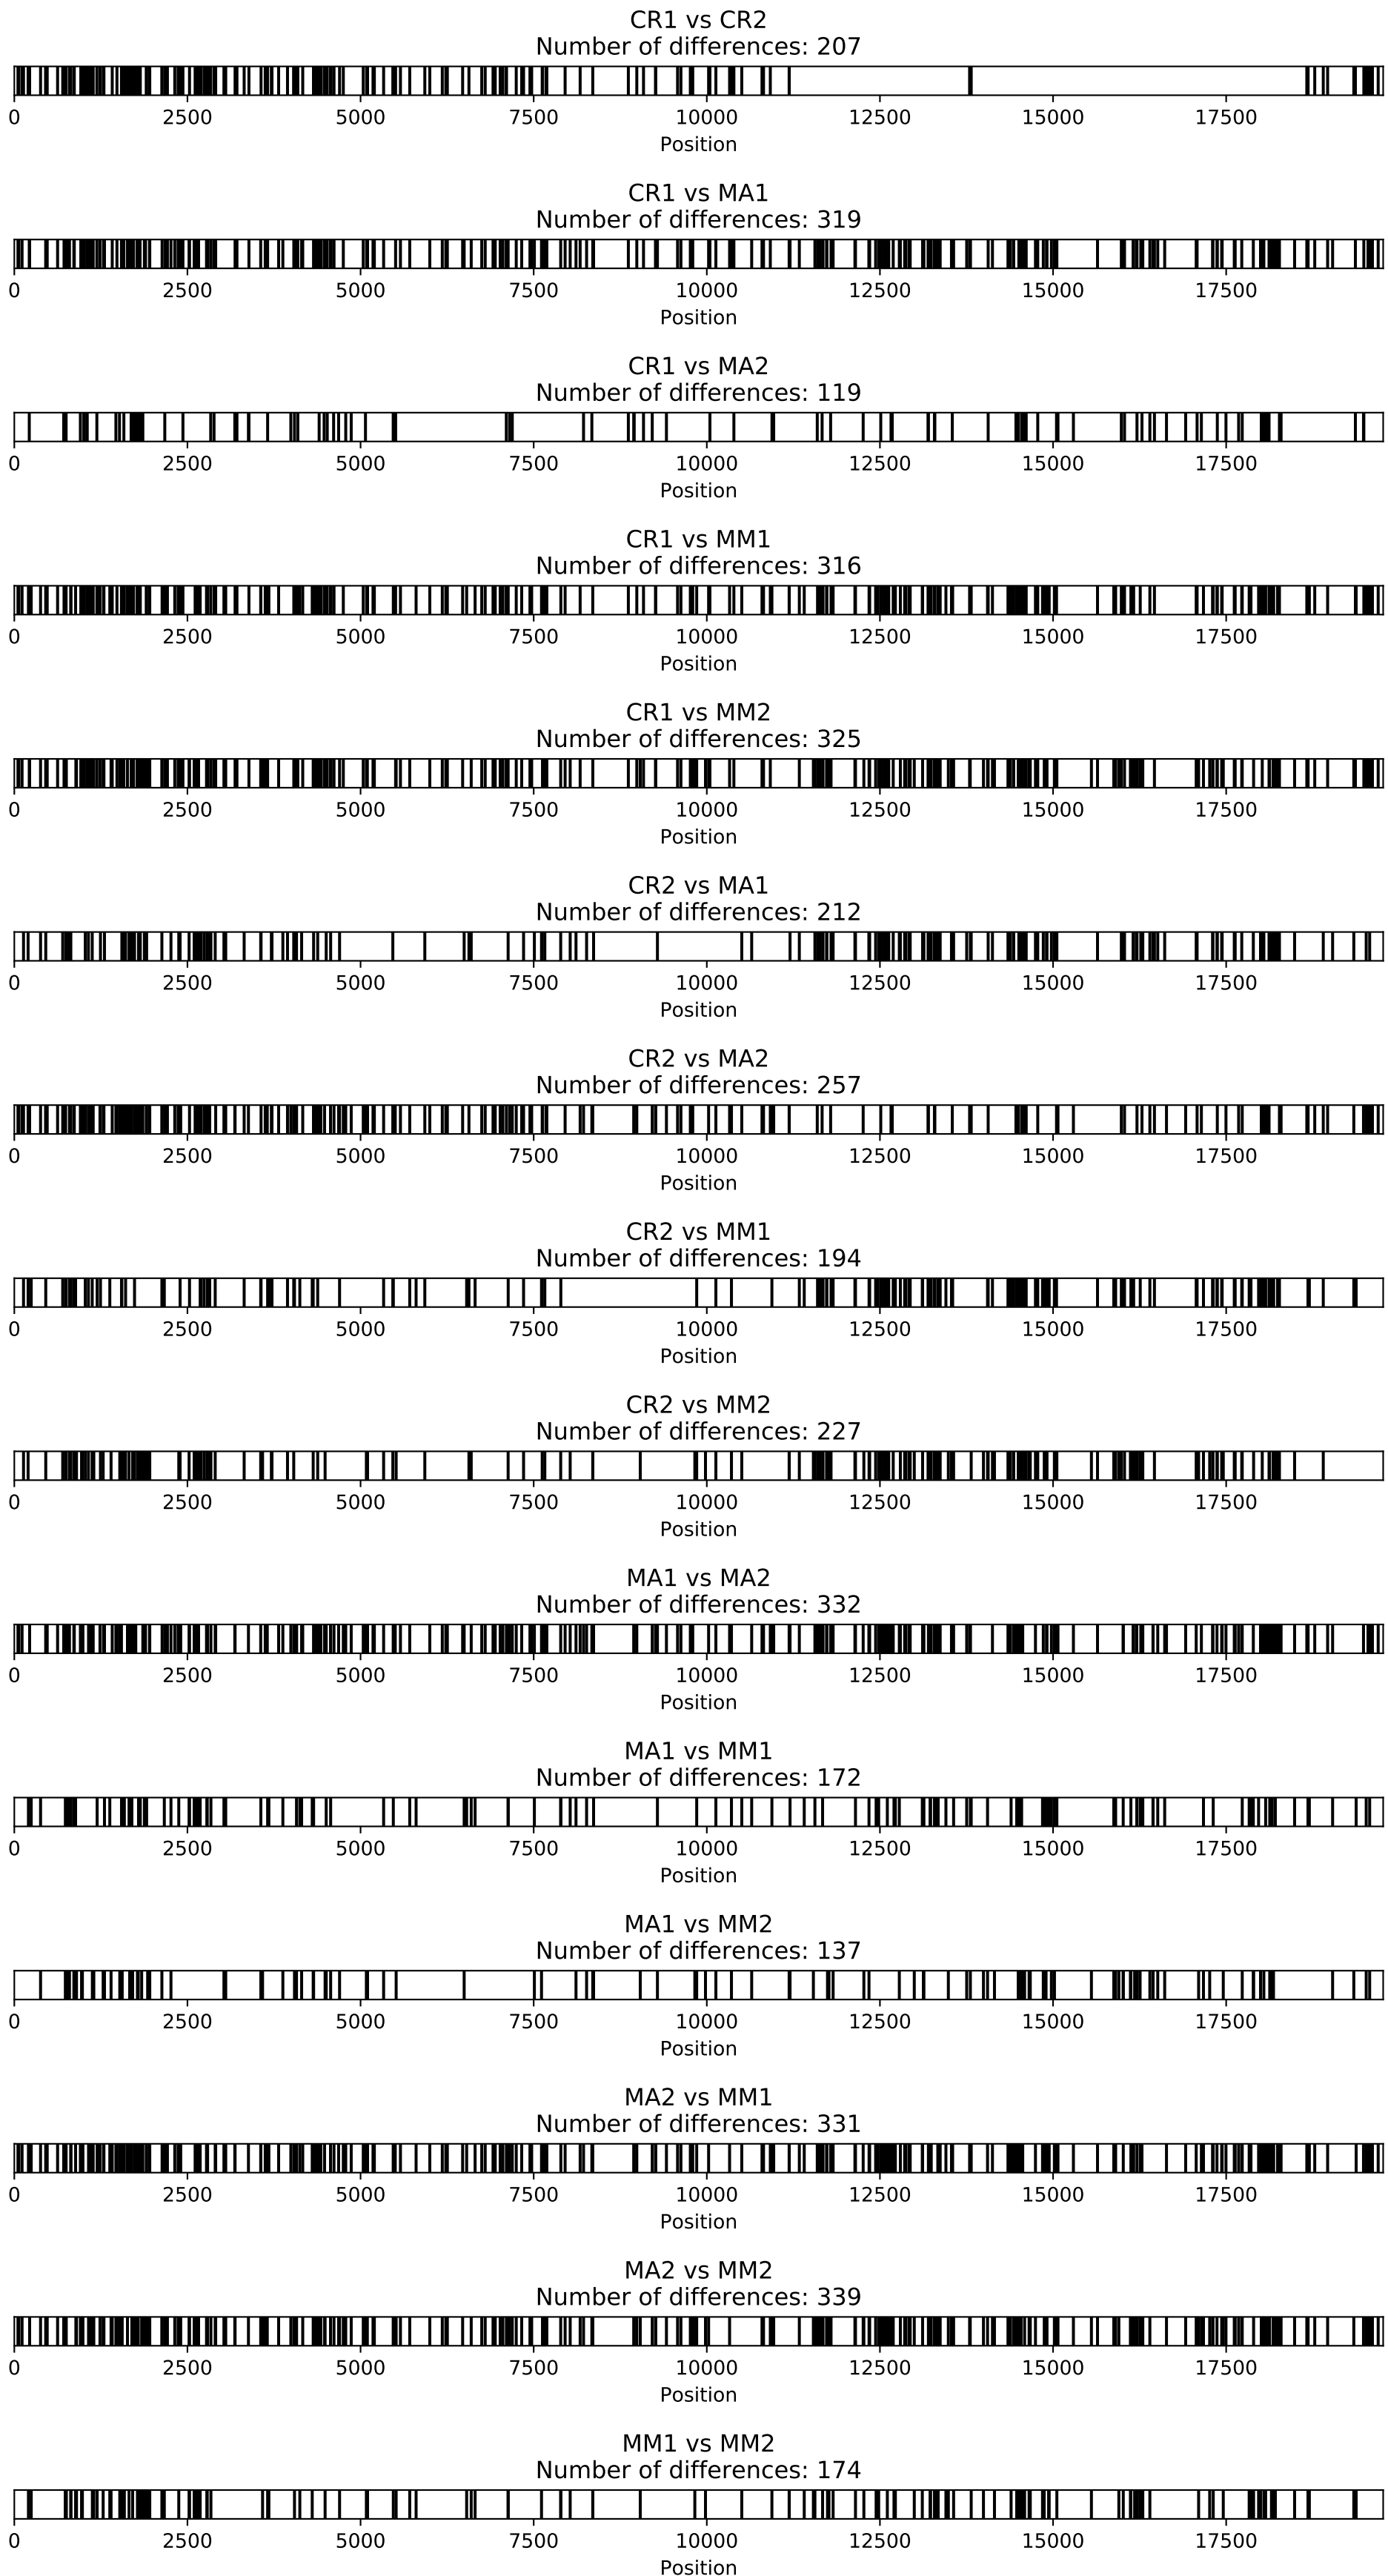



# Region: 287

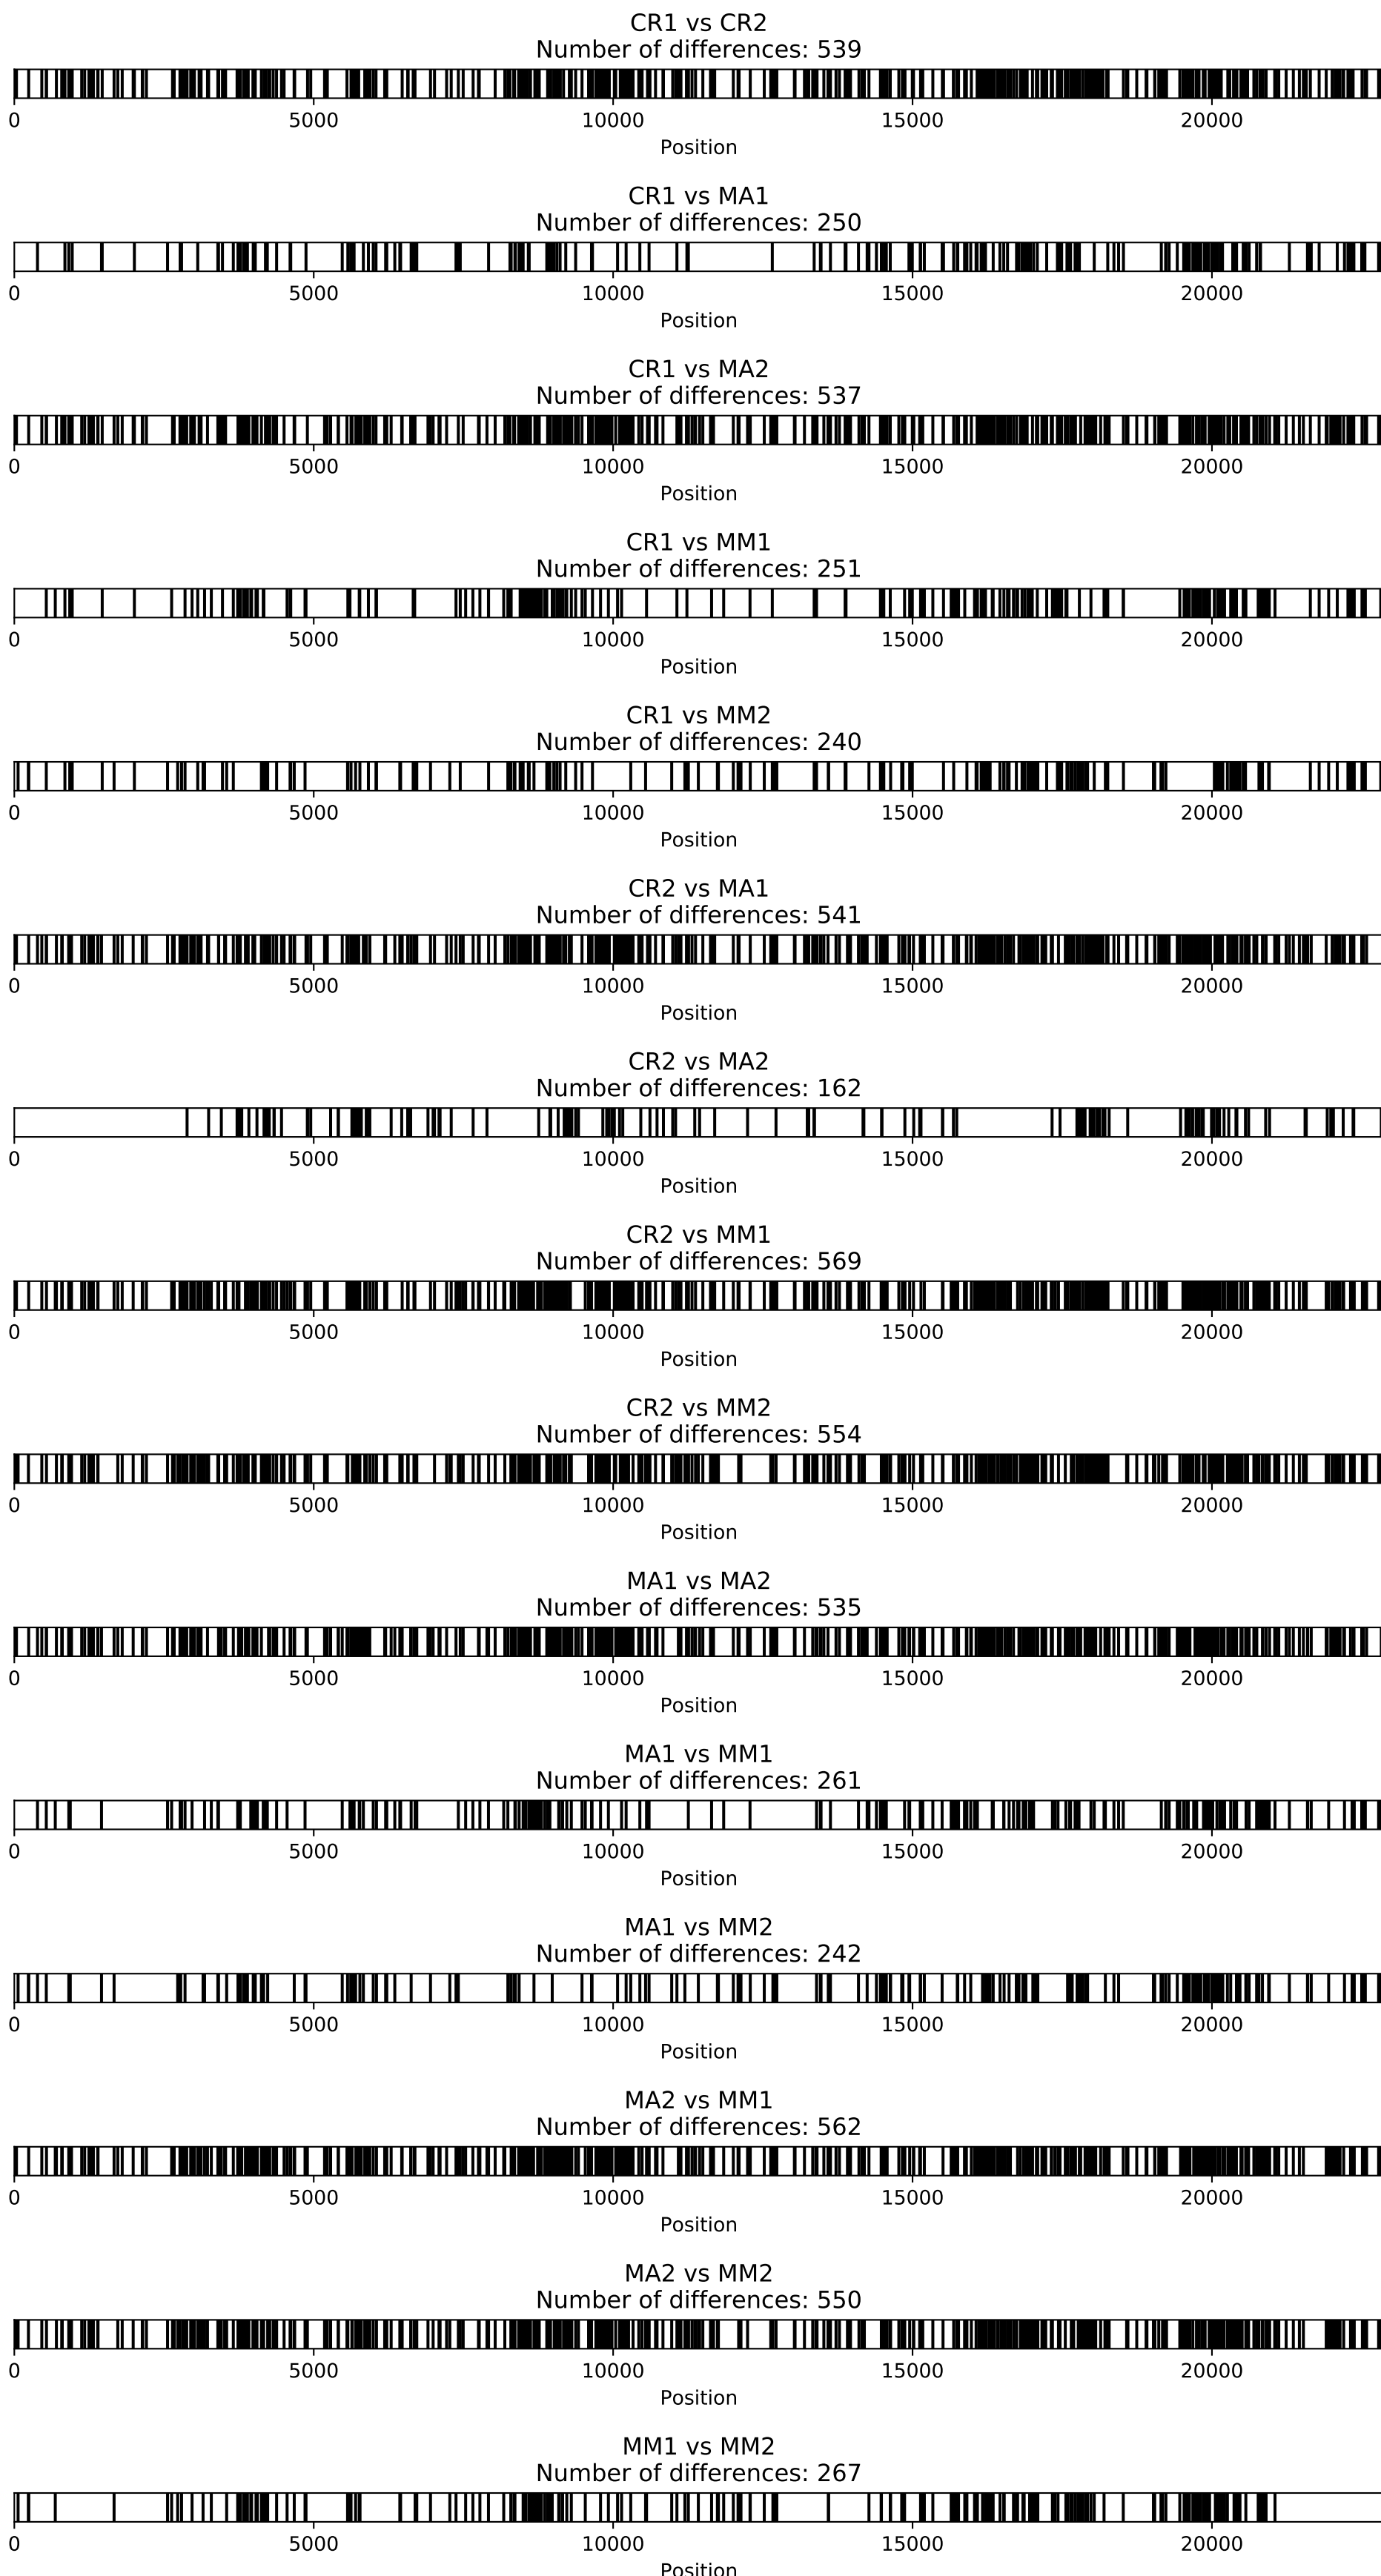

# Region: 290

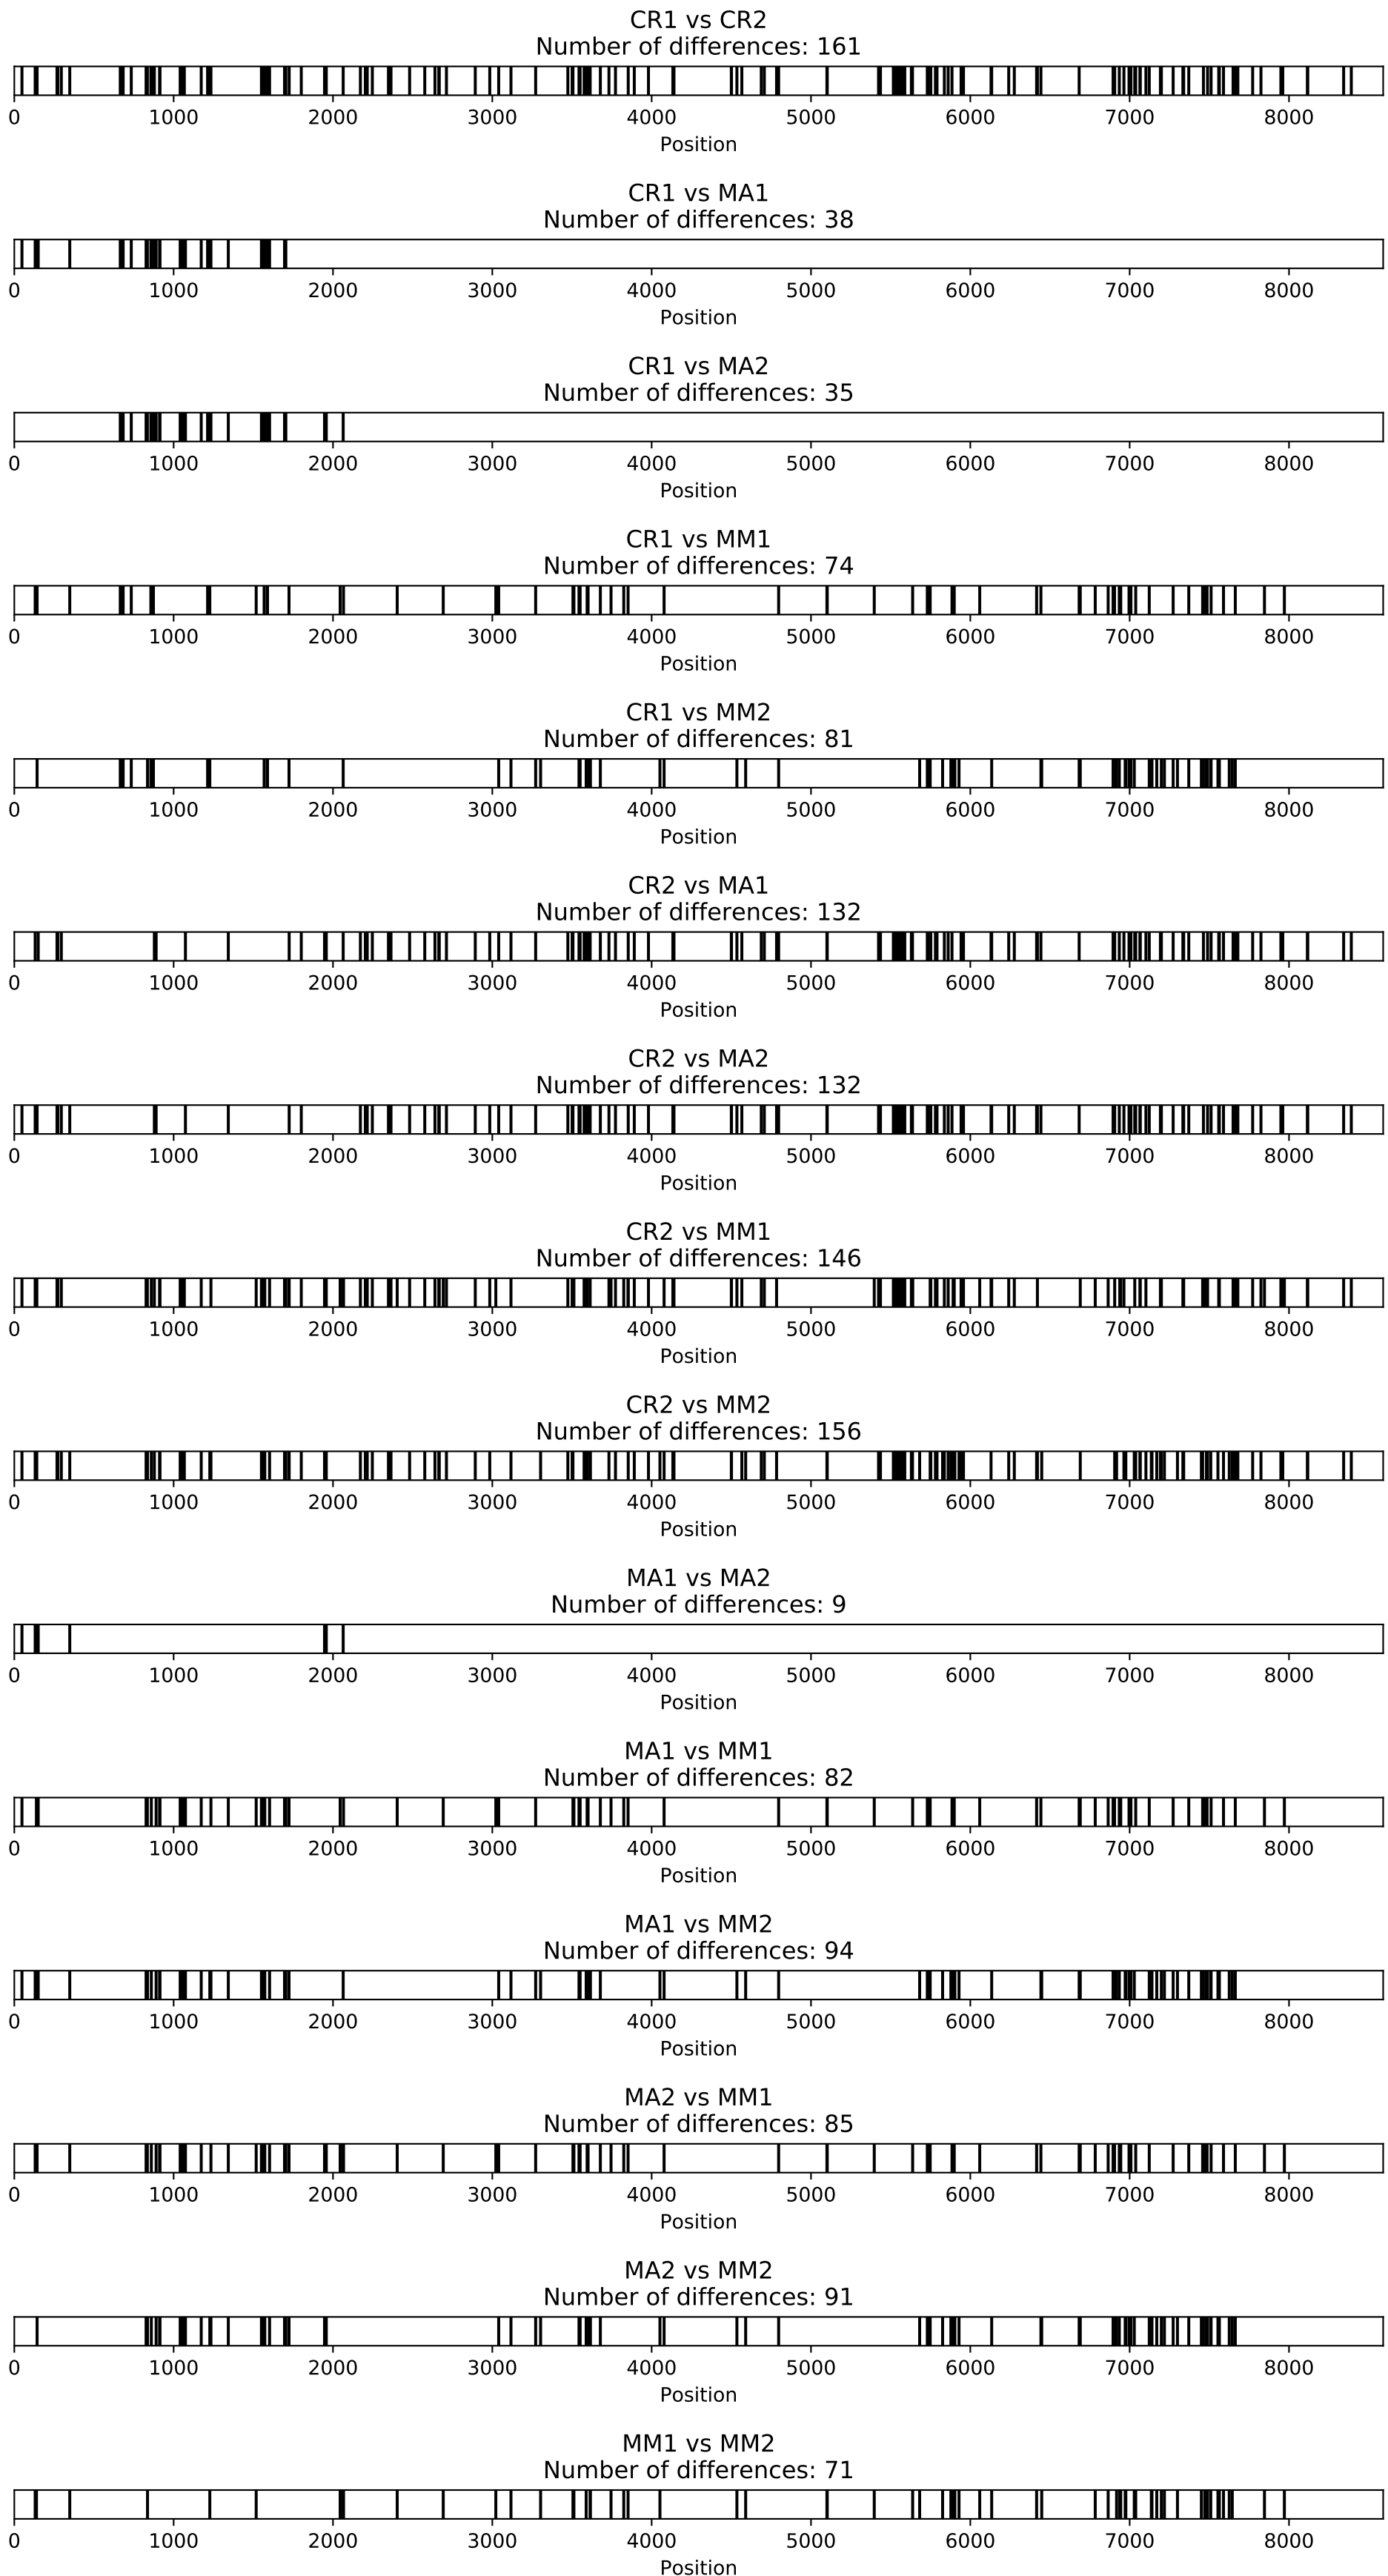

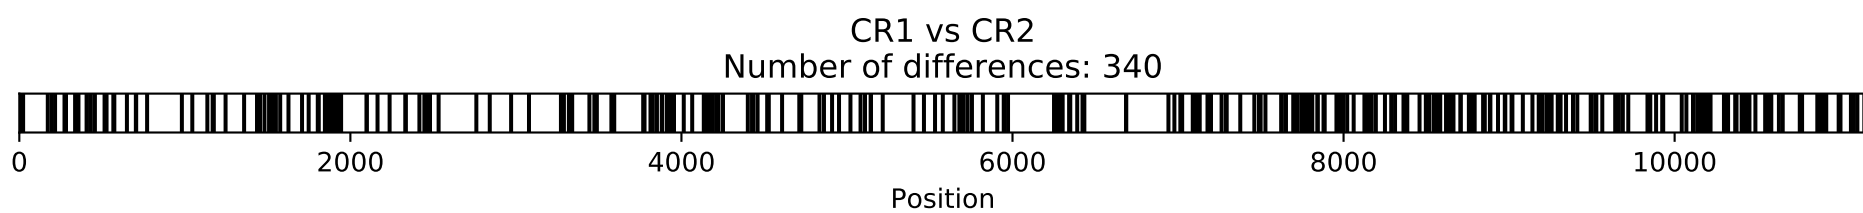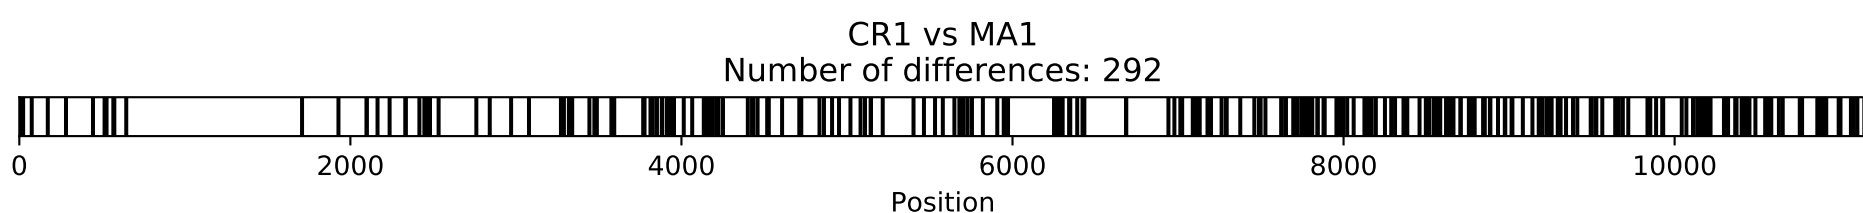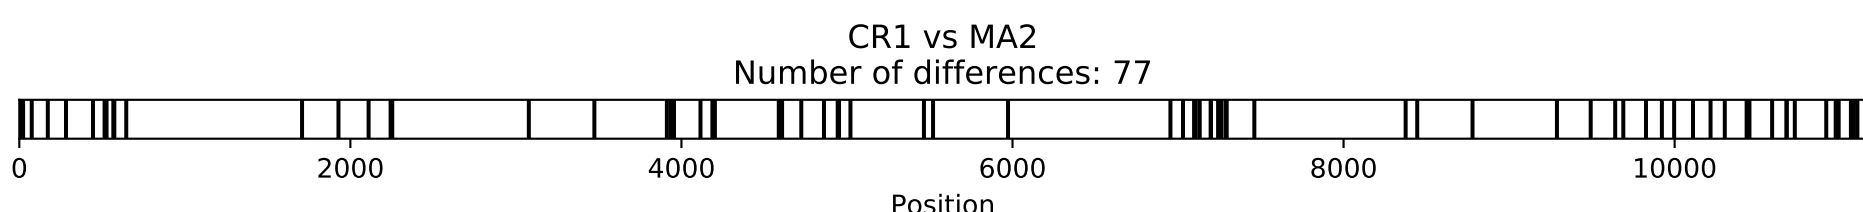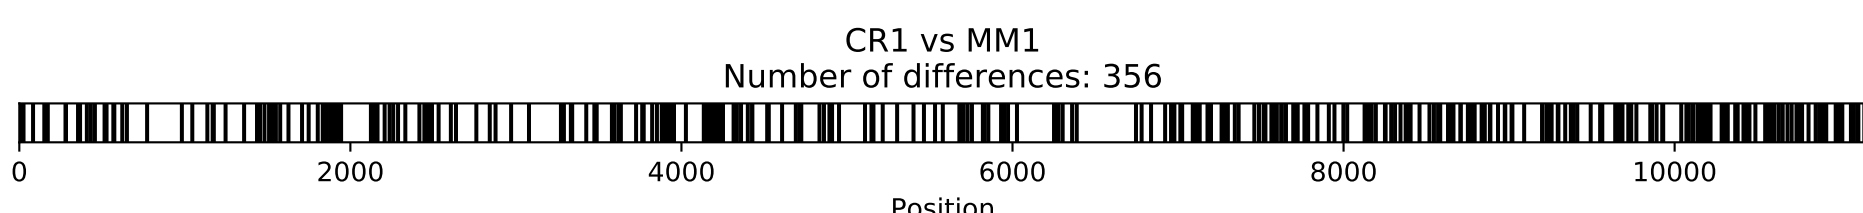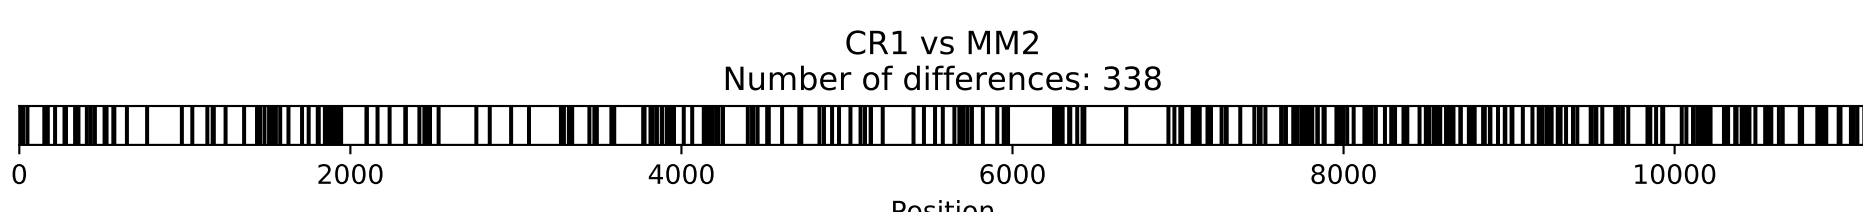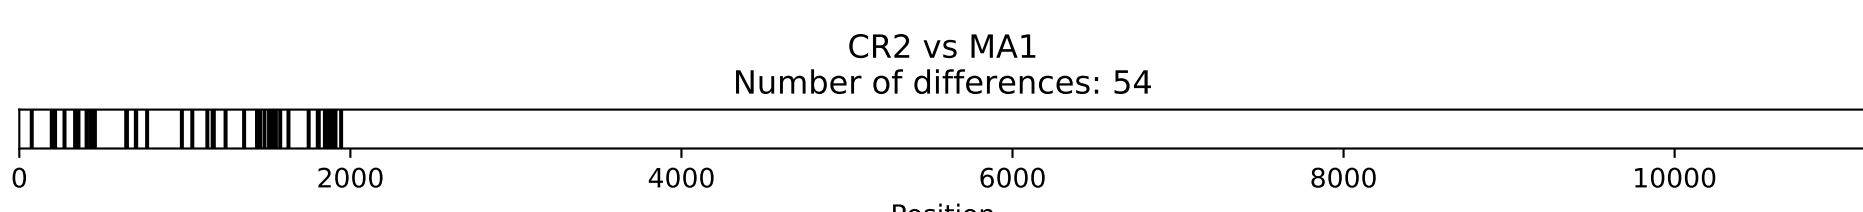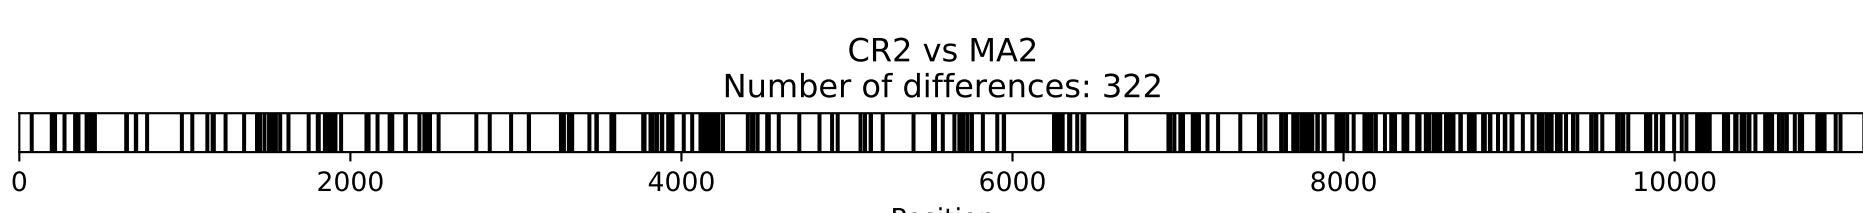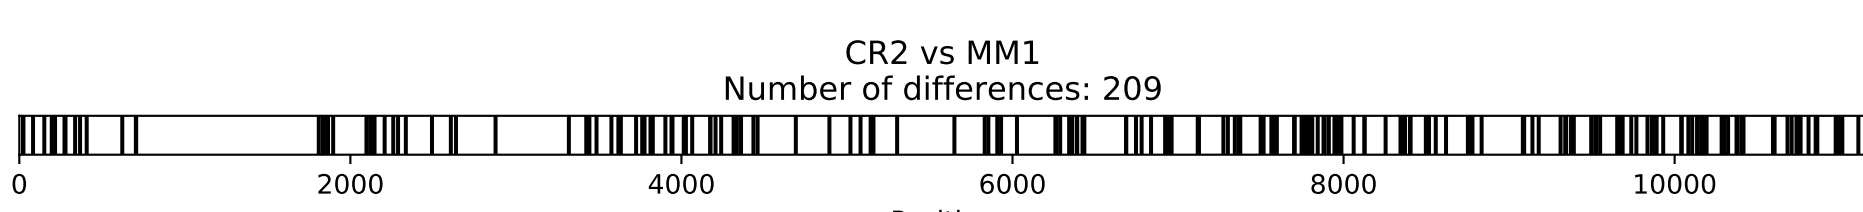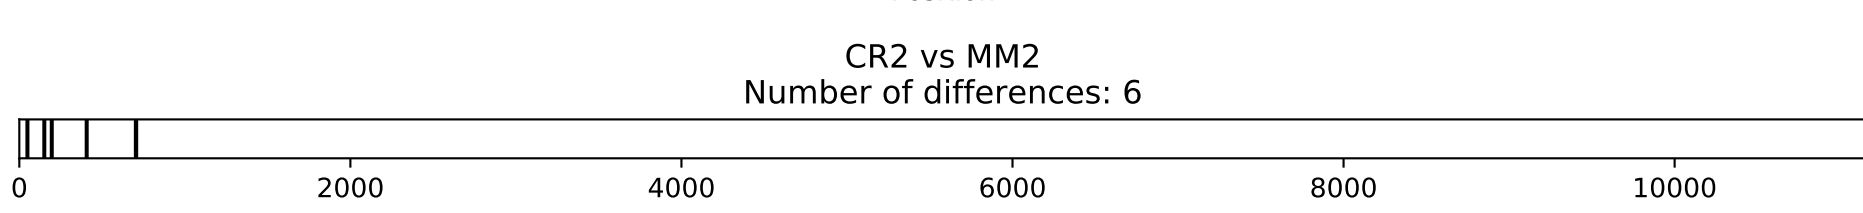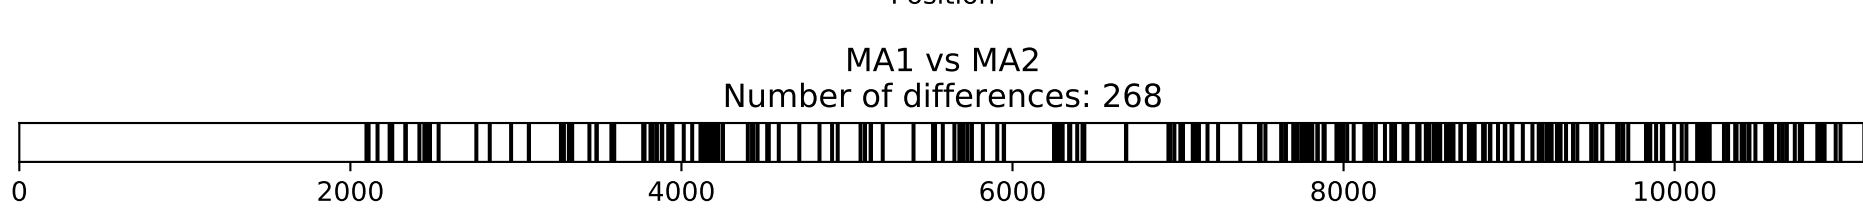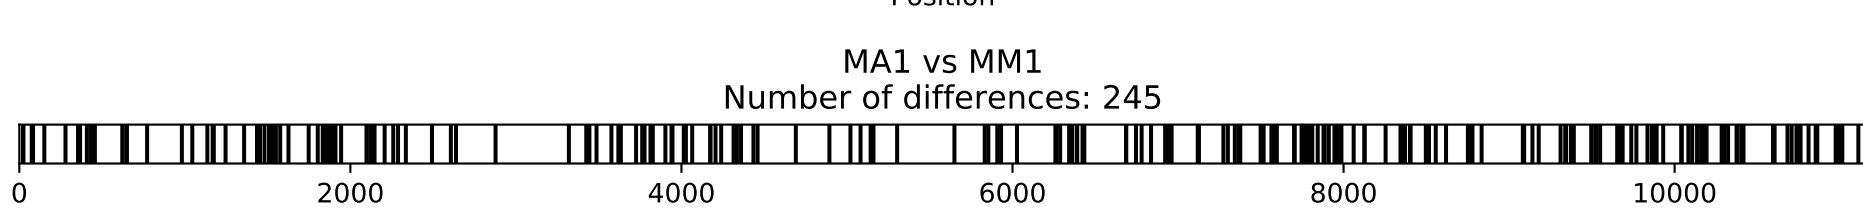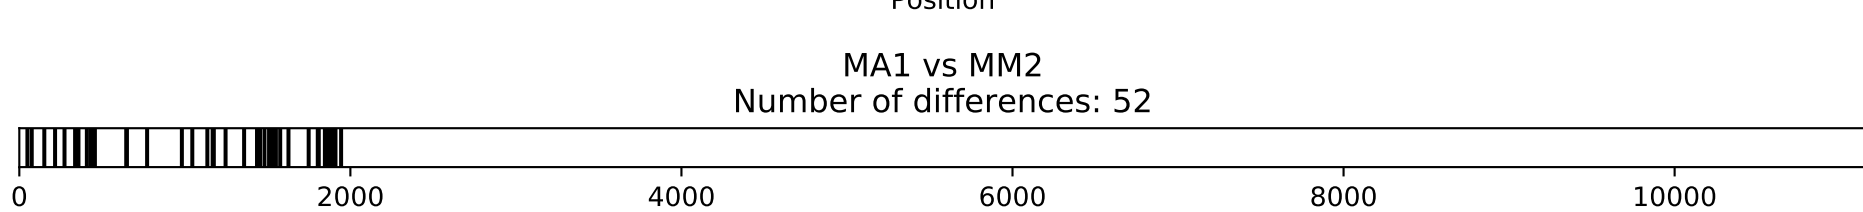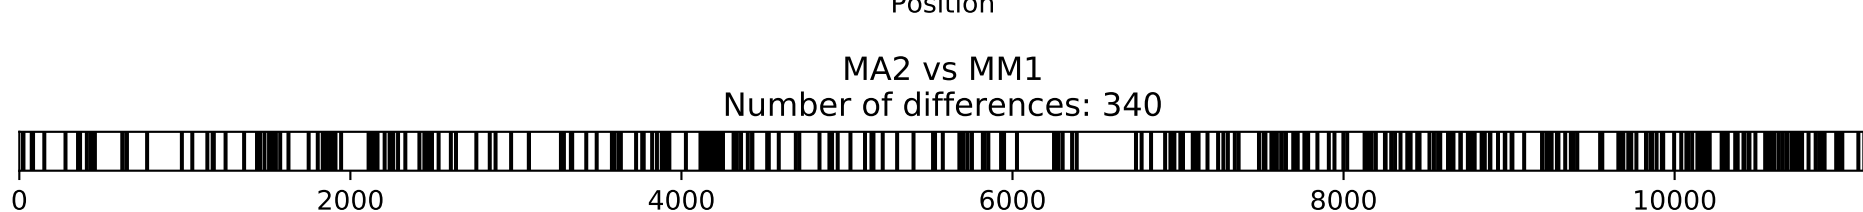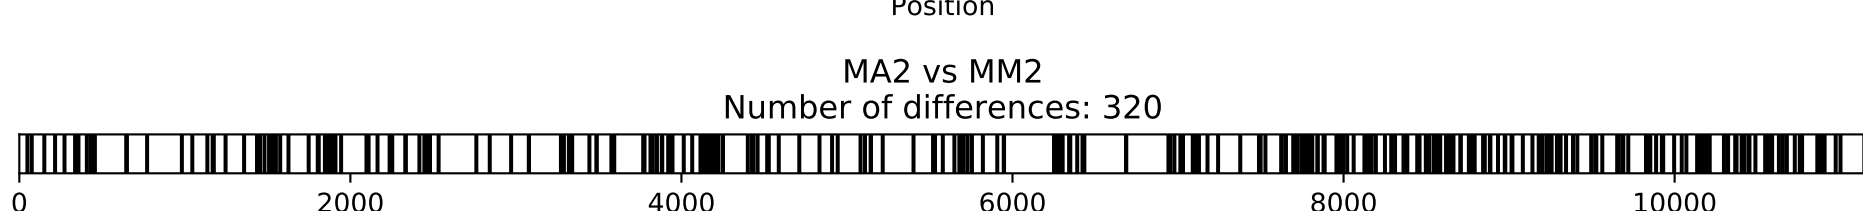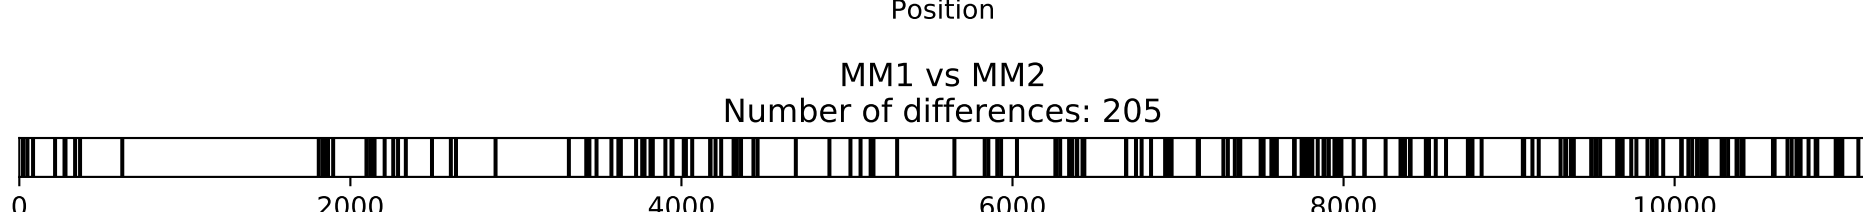

# Region: 297

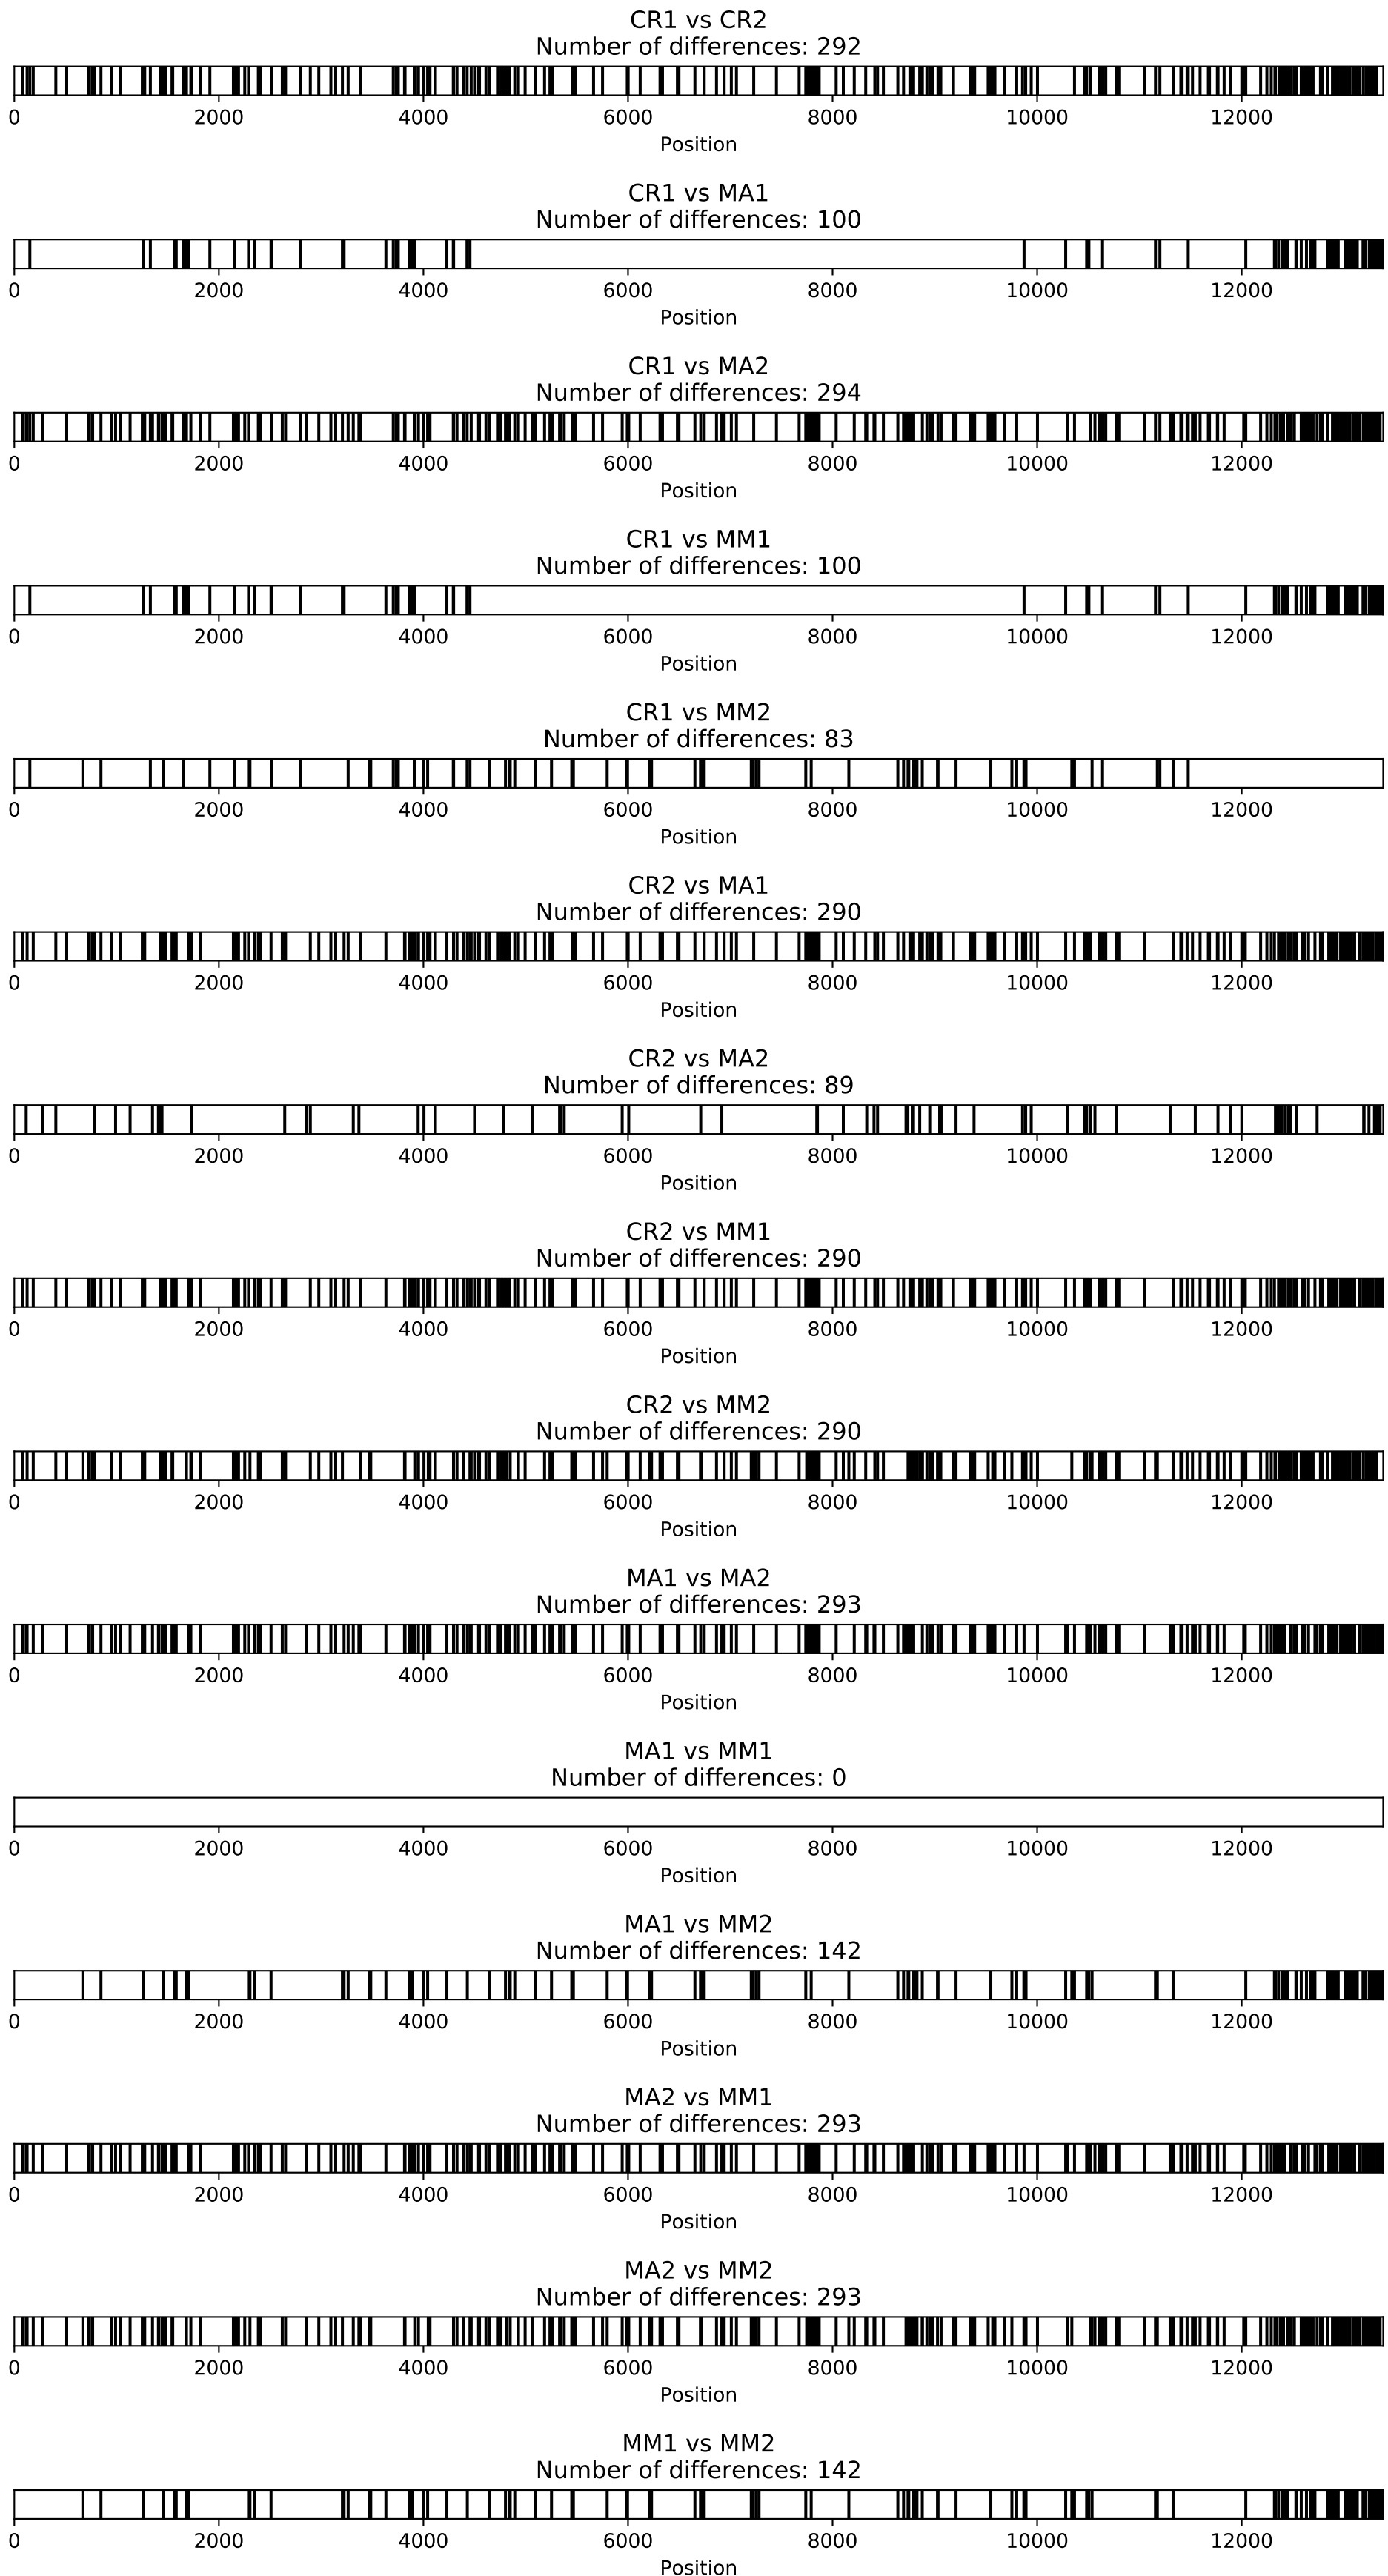

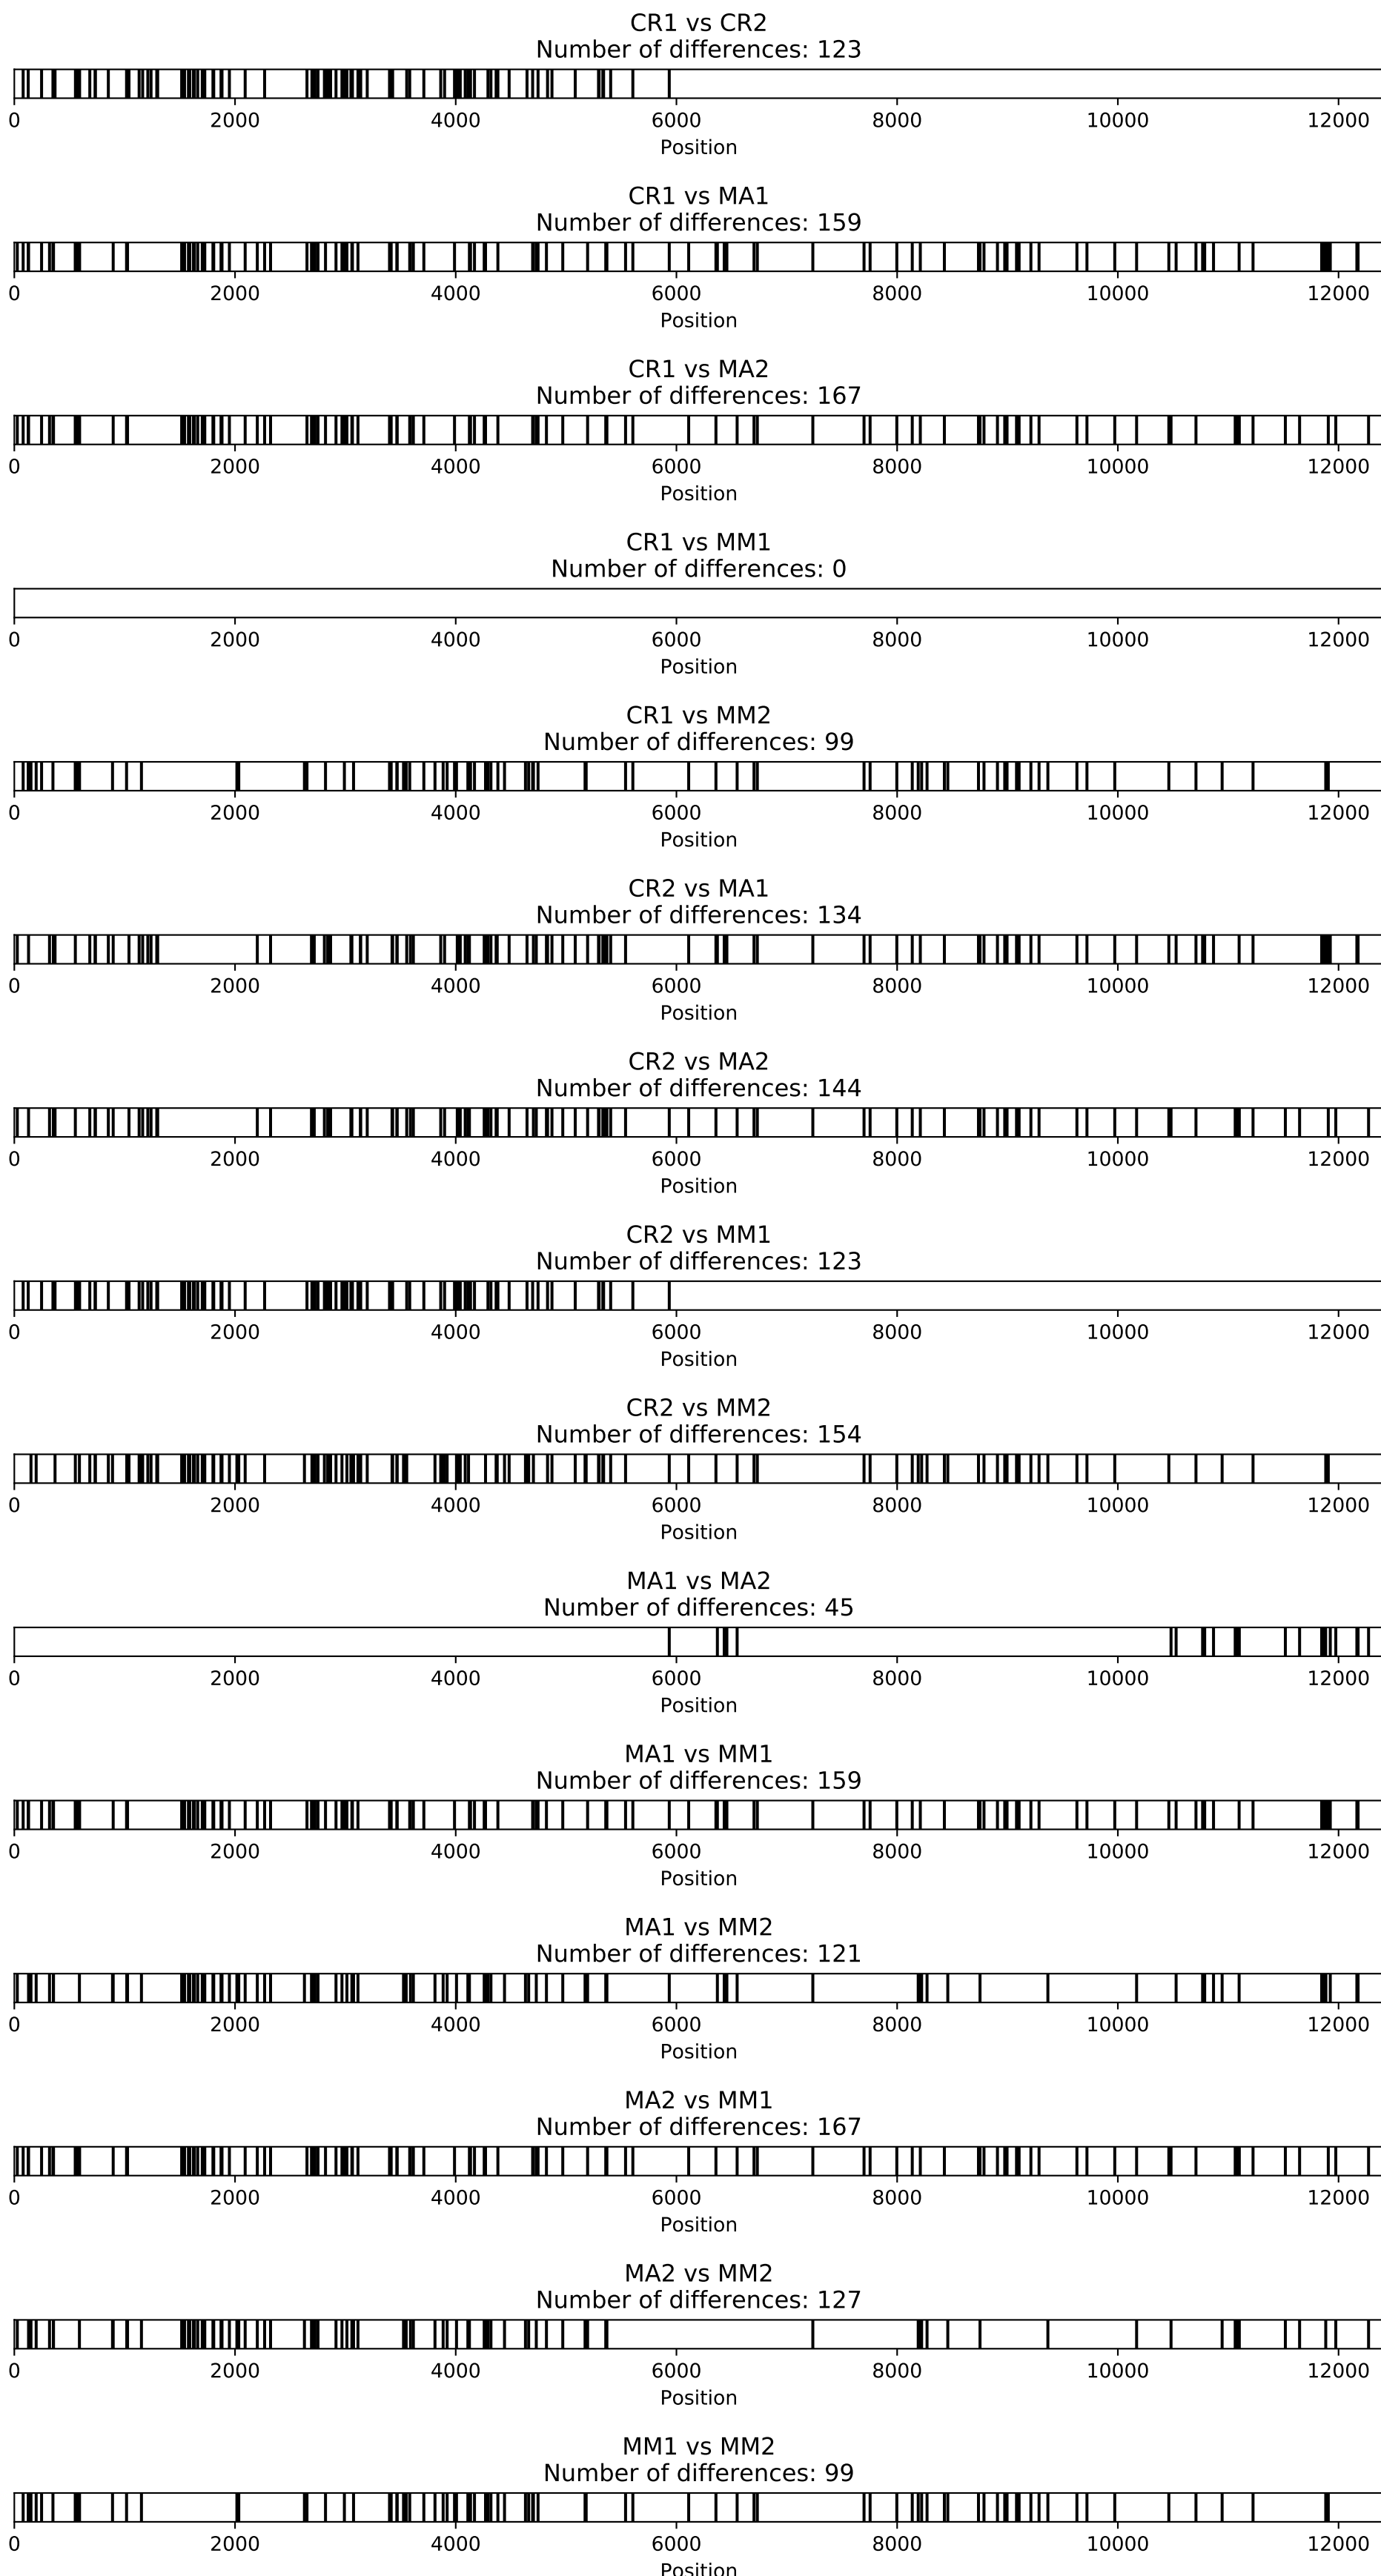

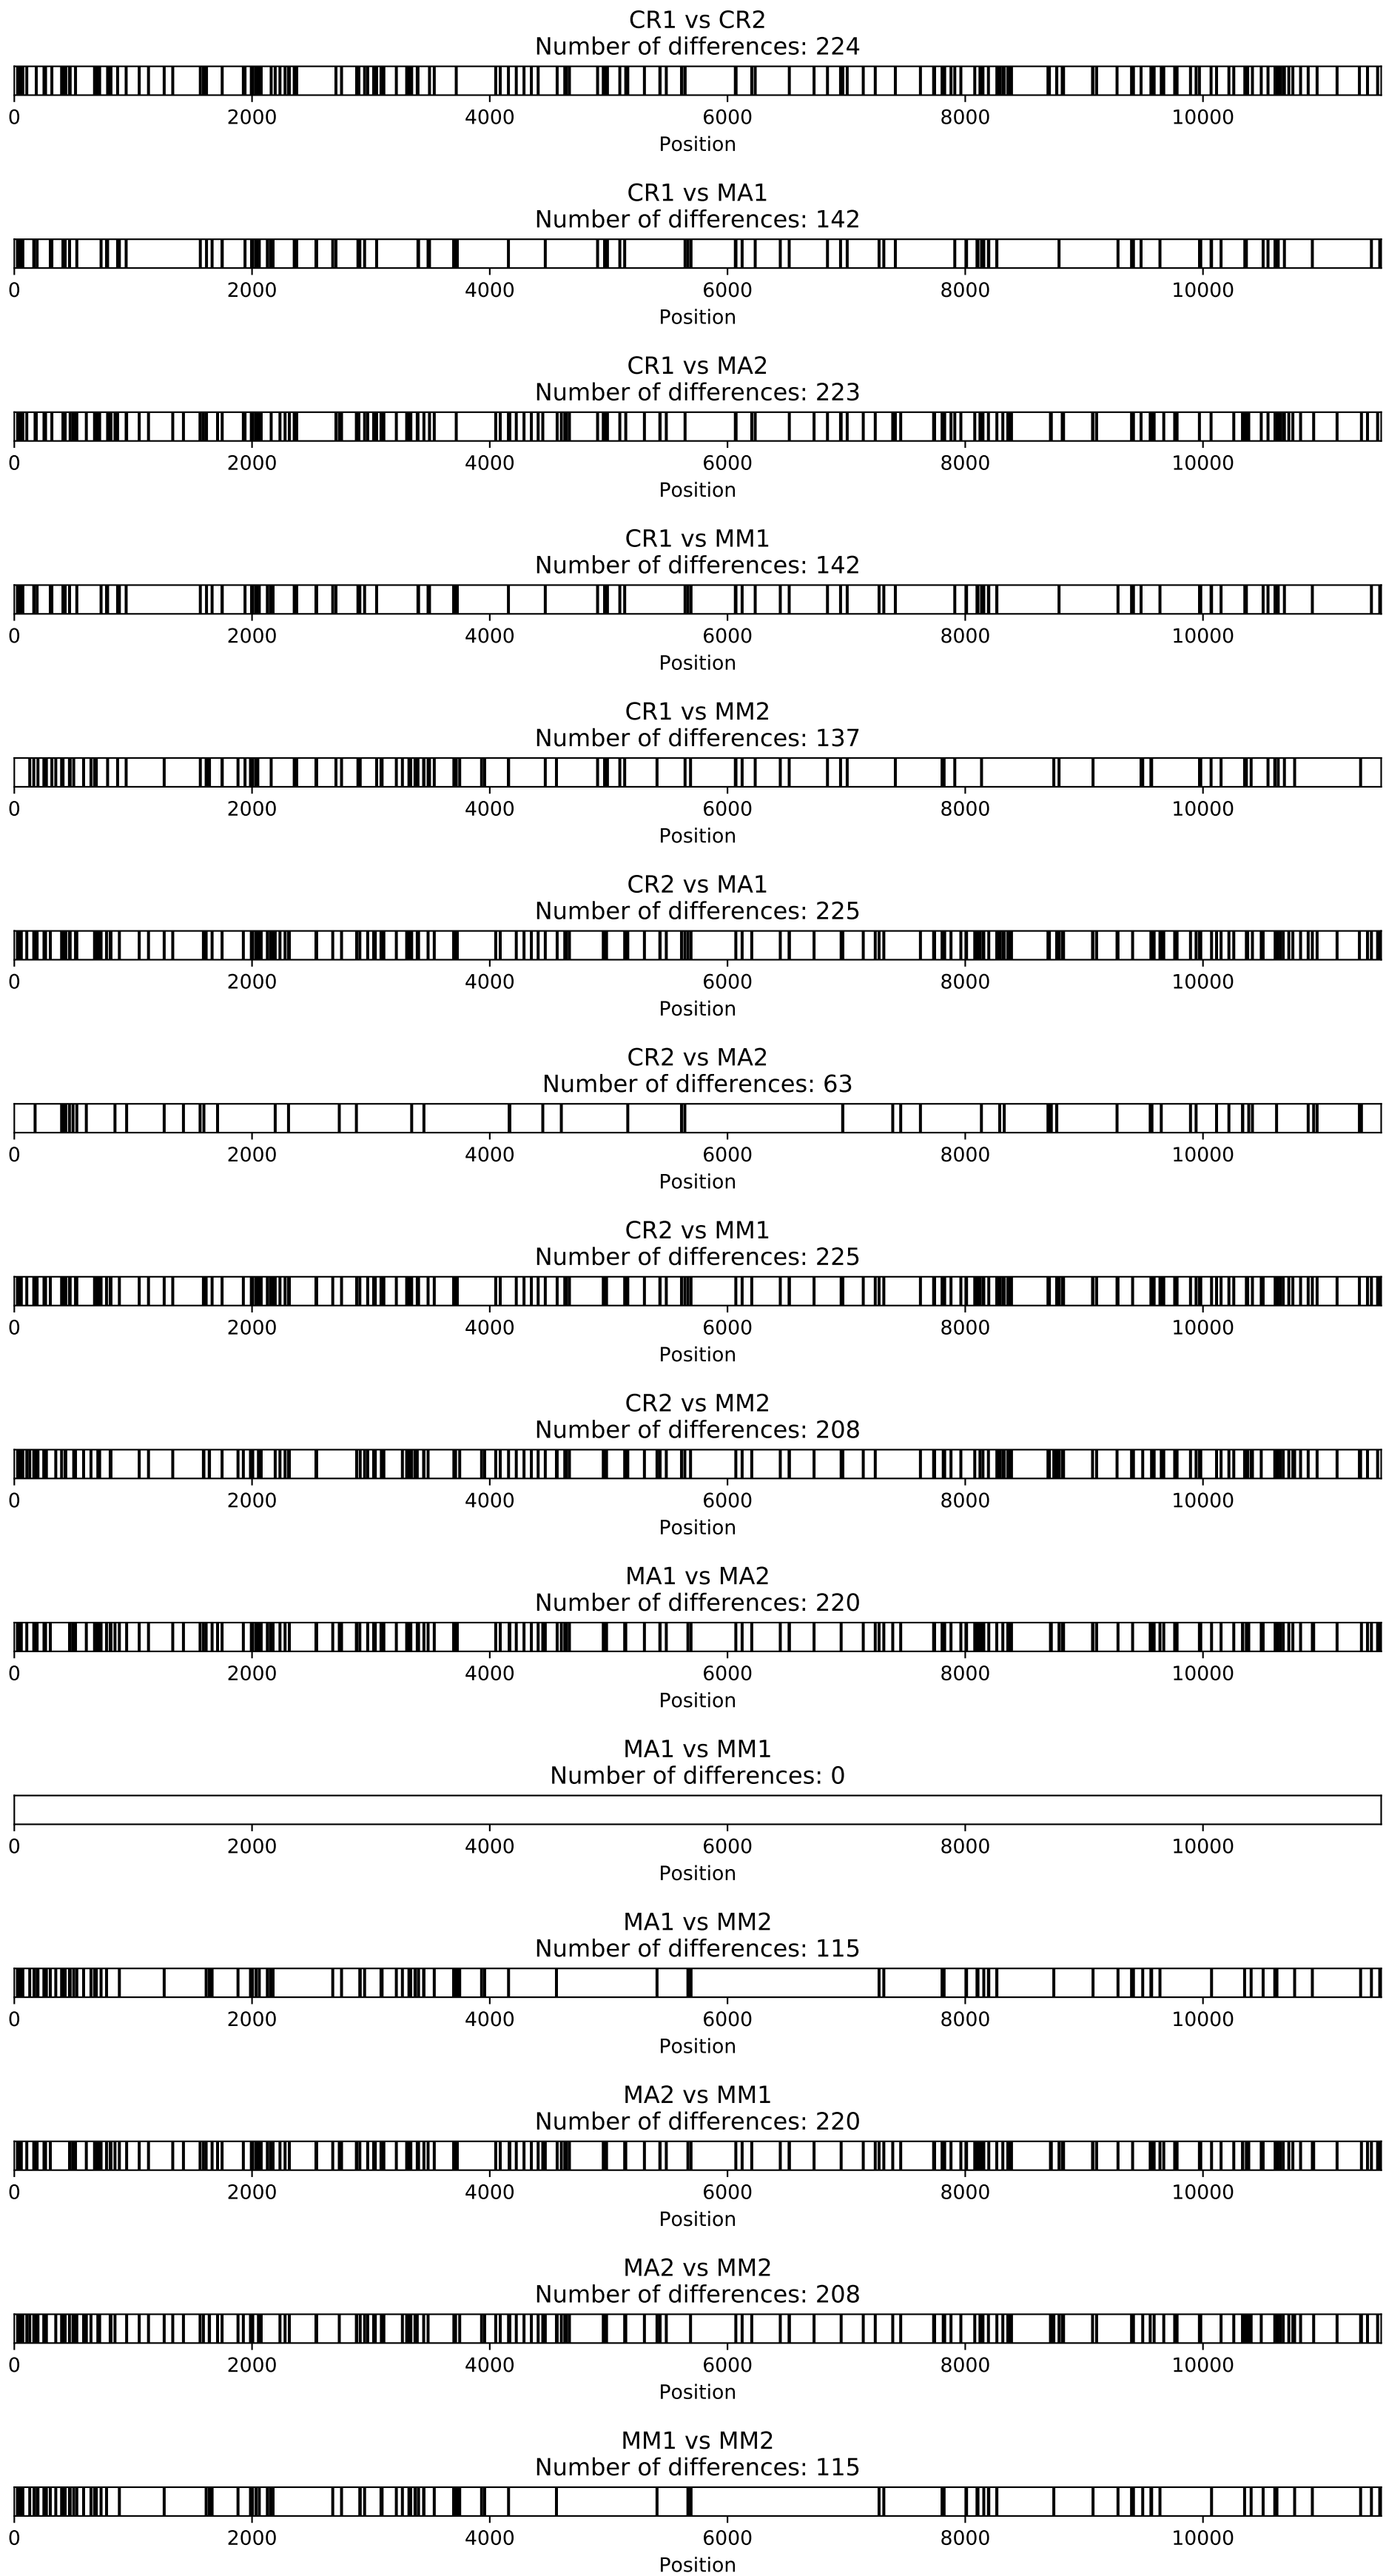

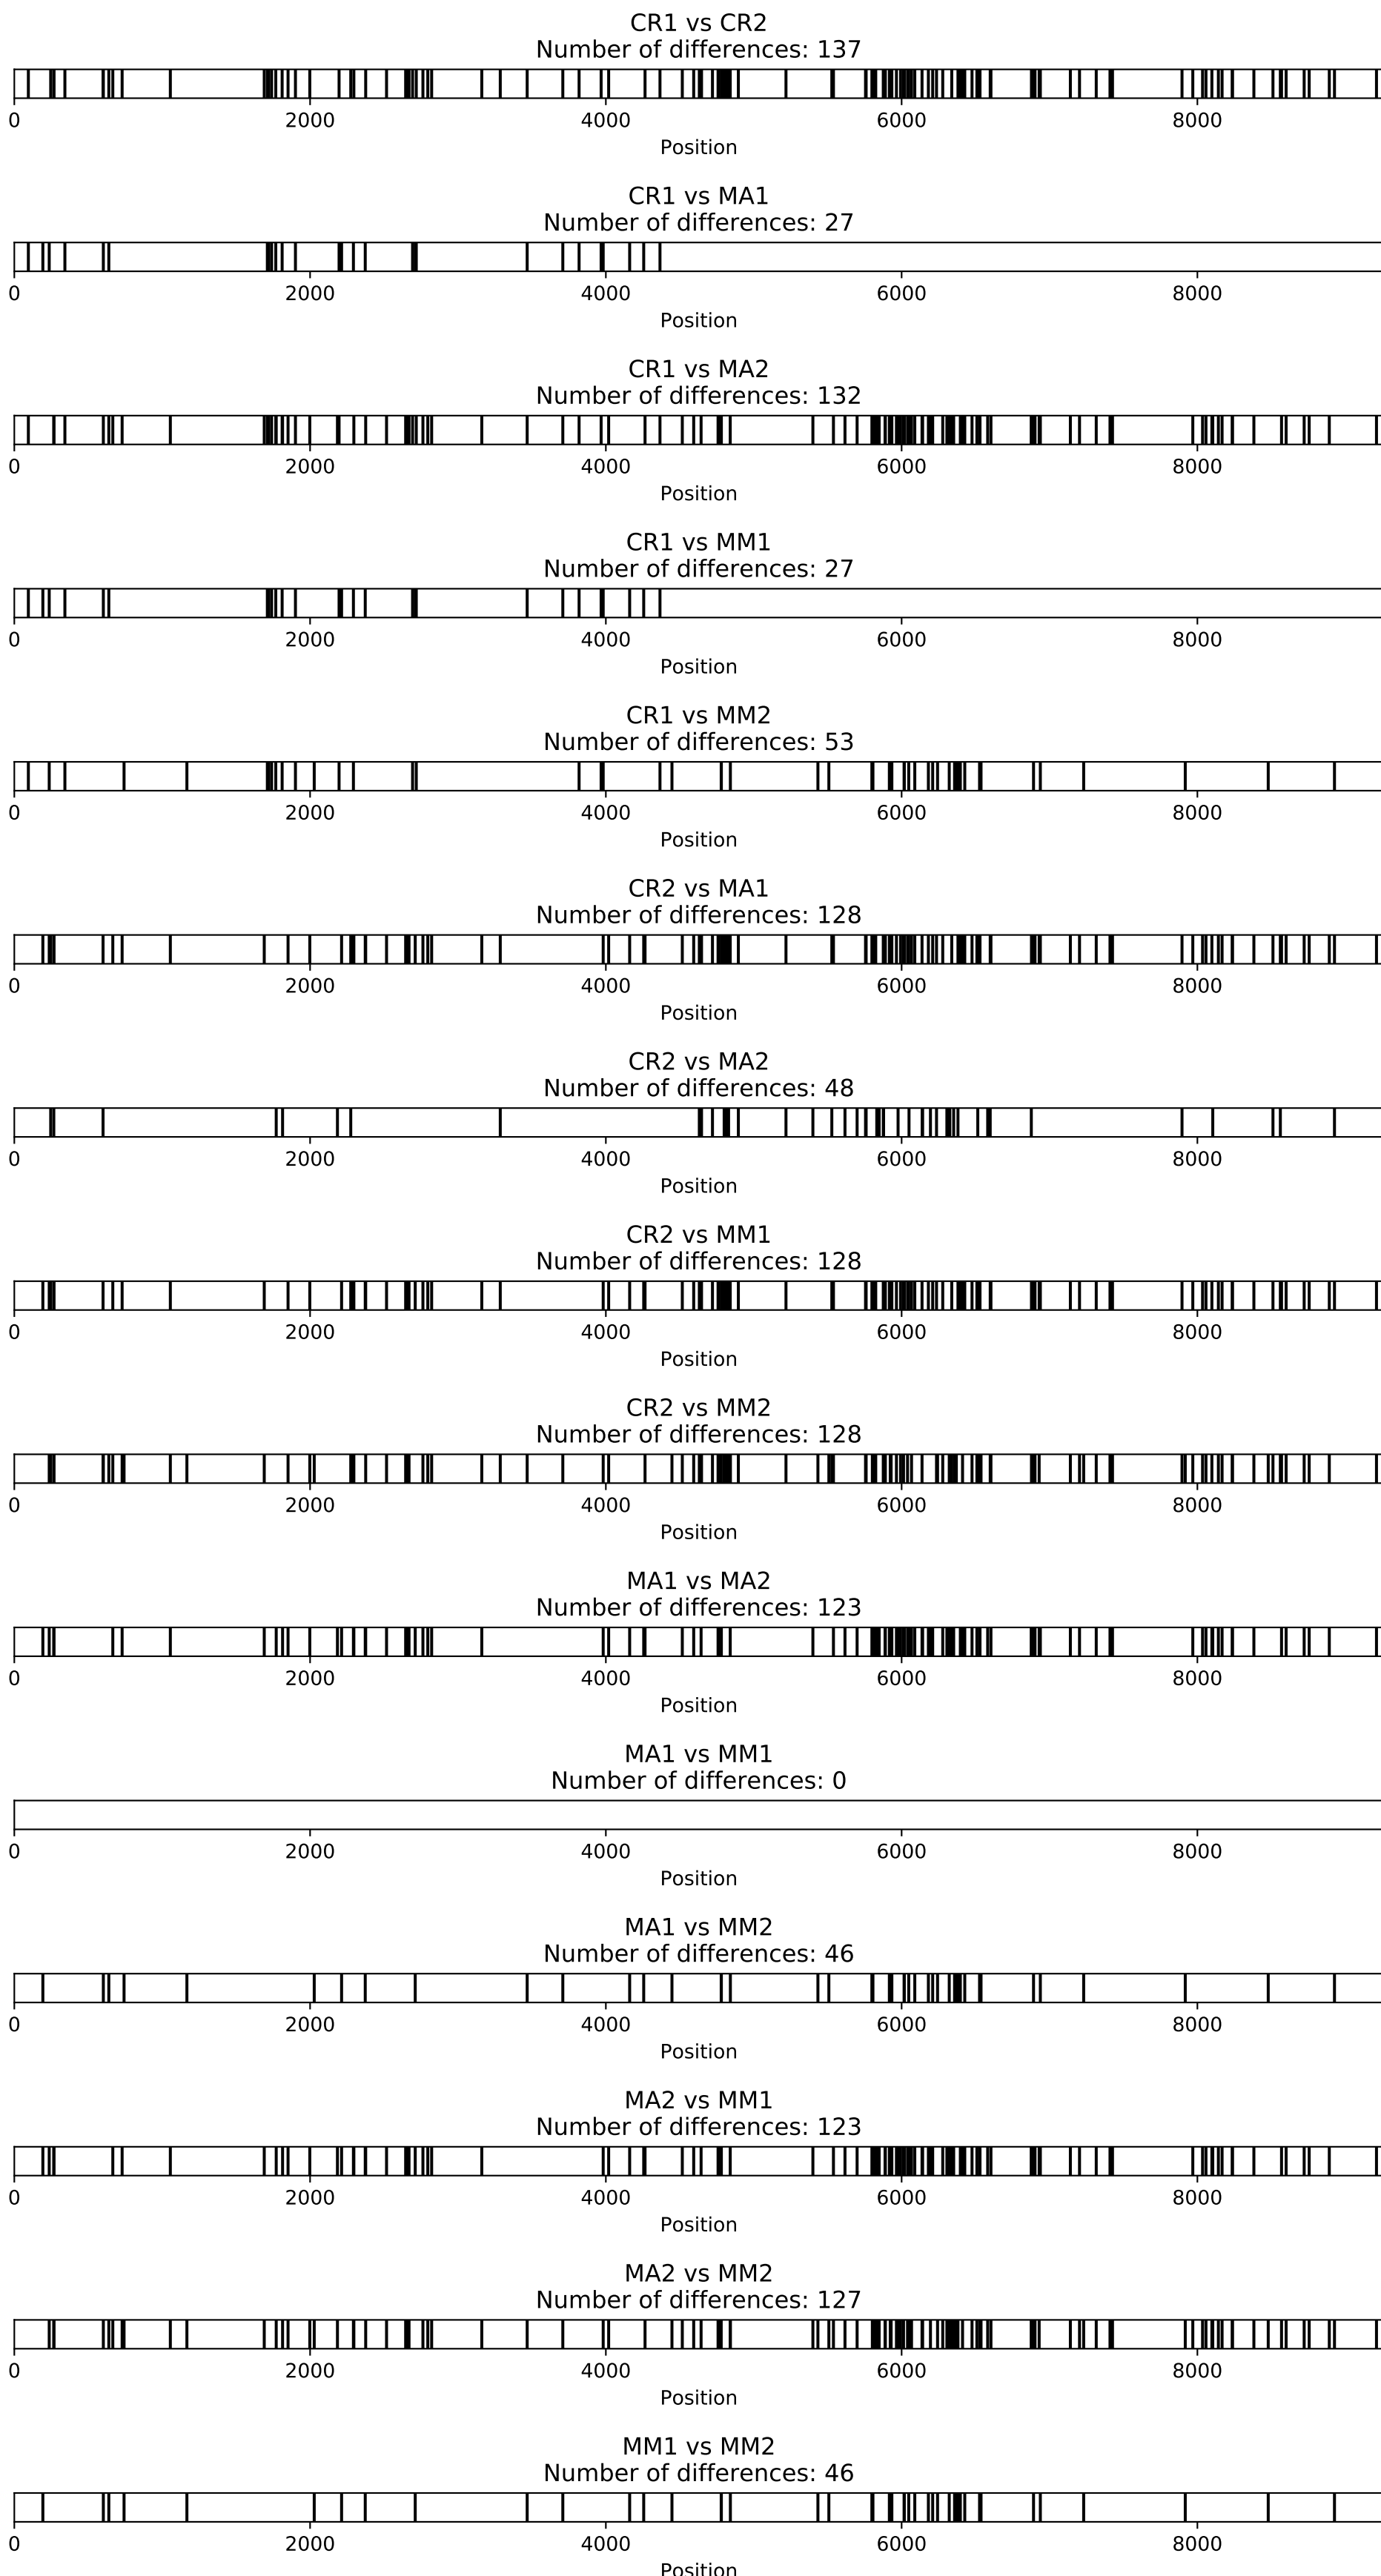

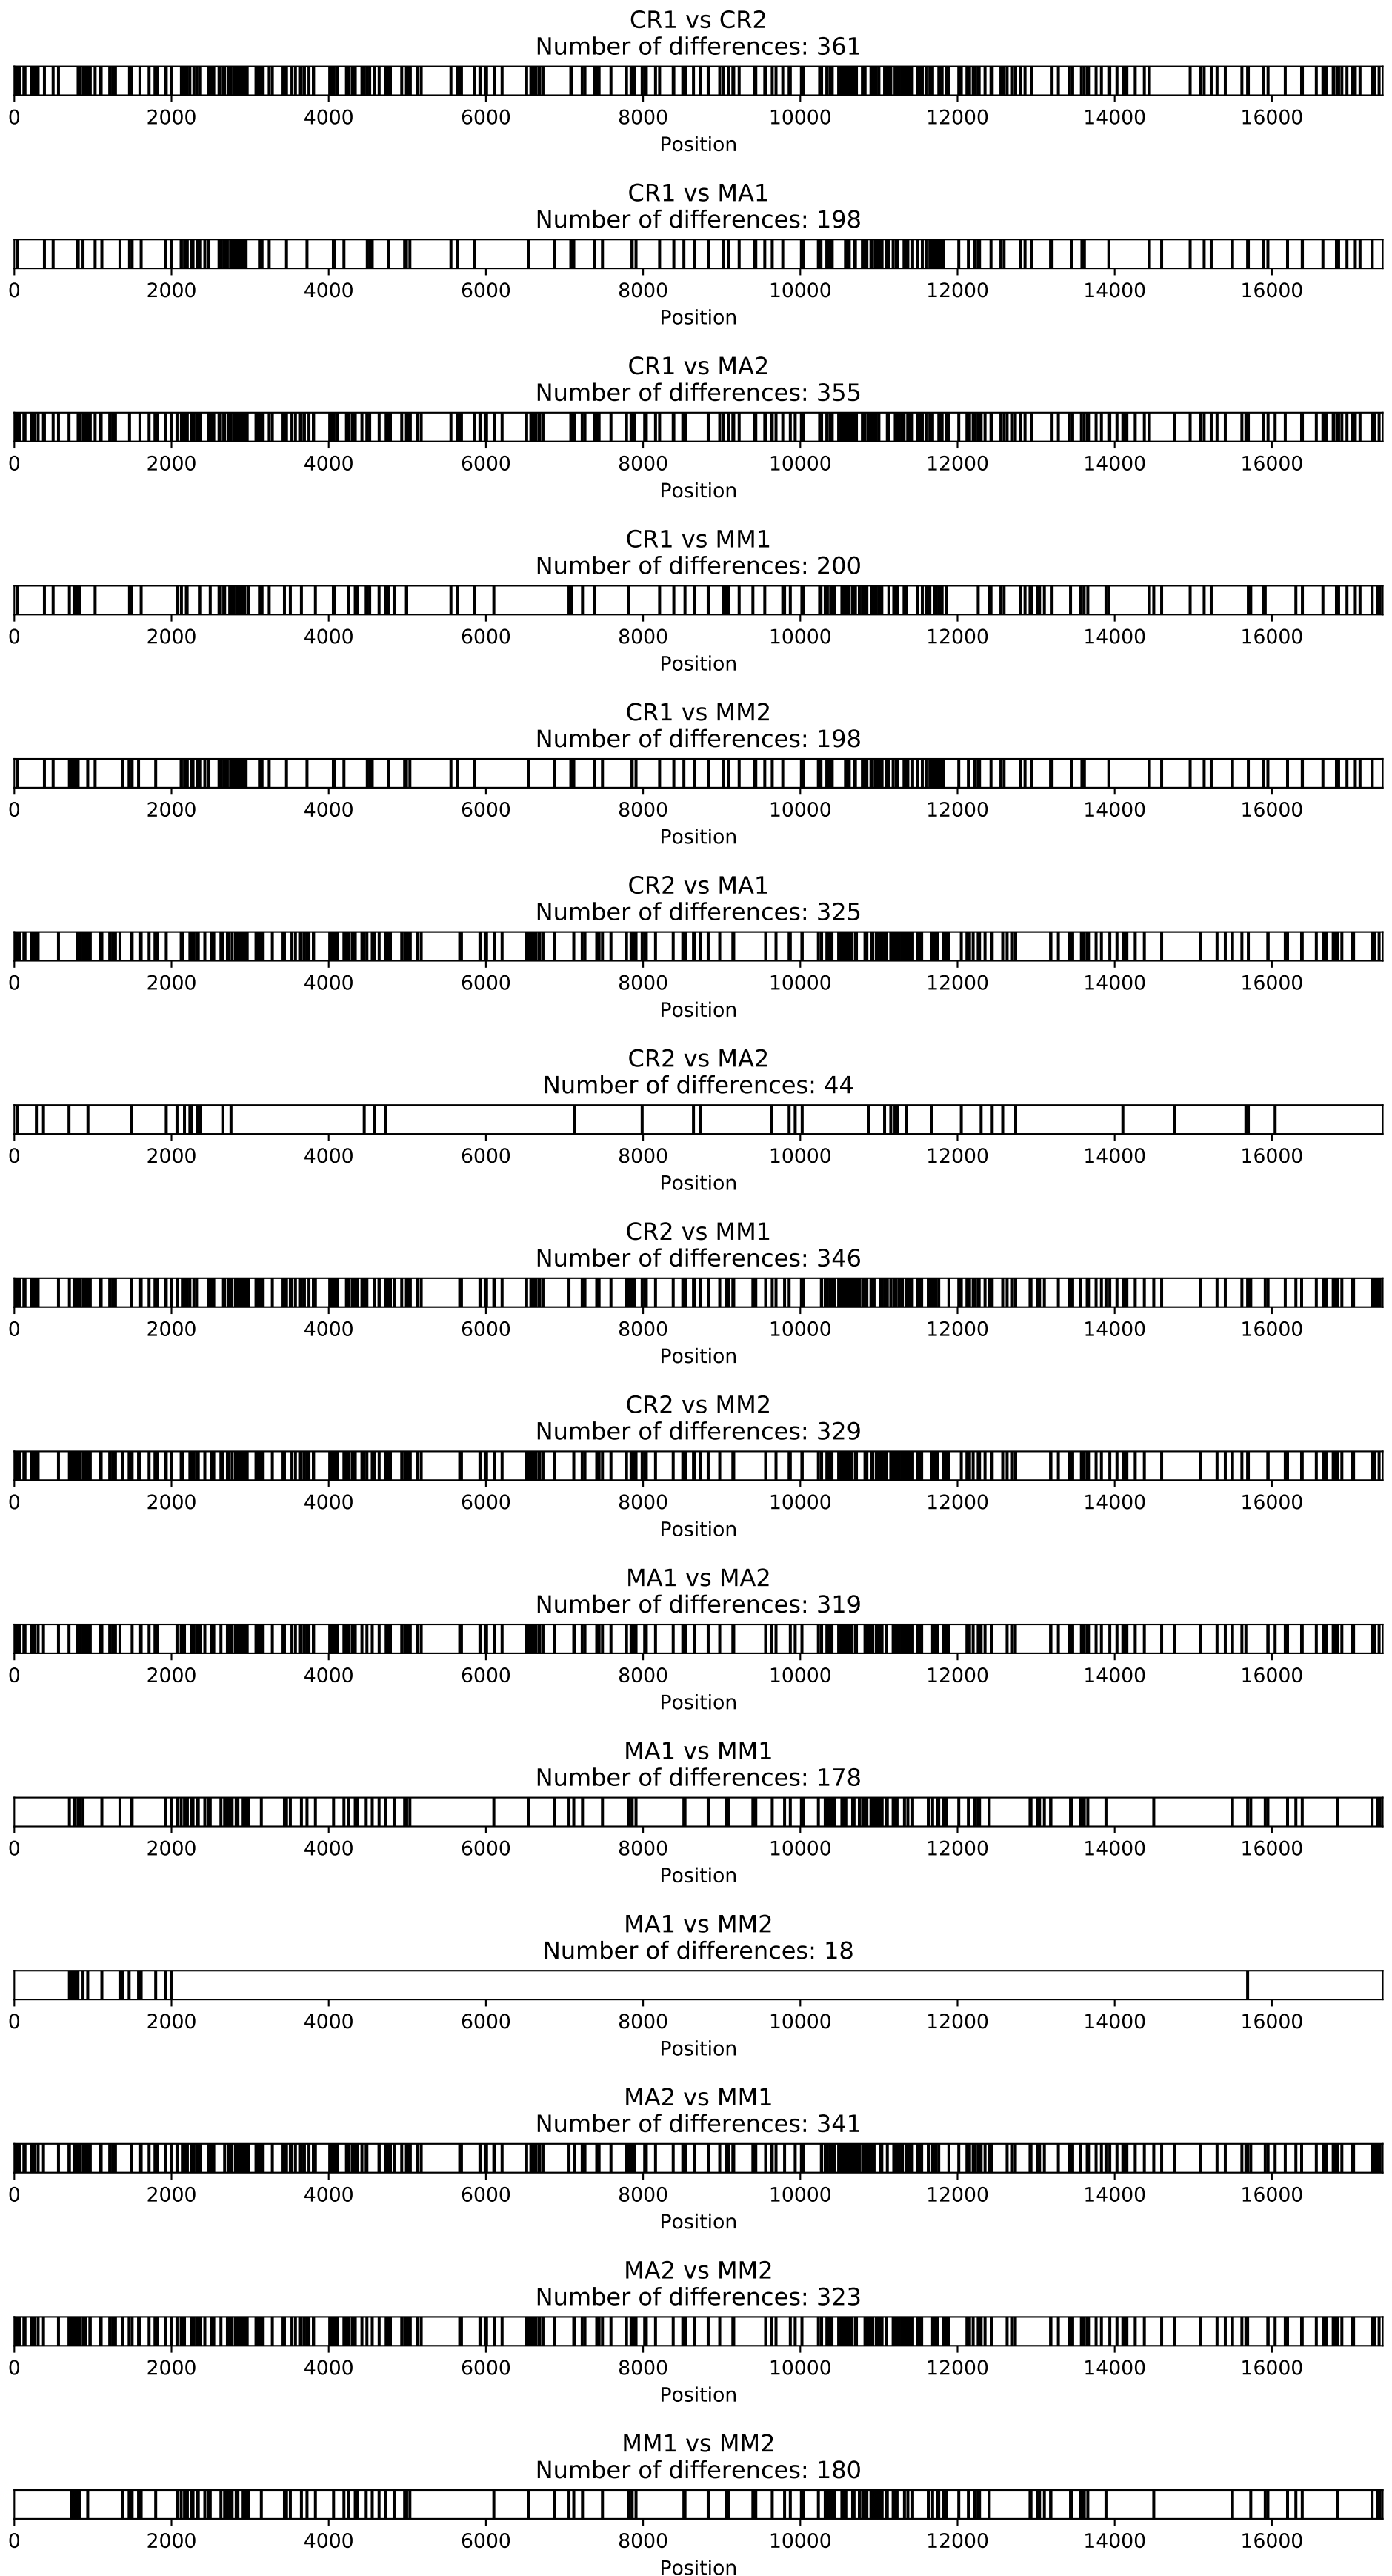



# Region: 308

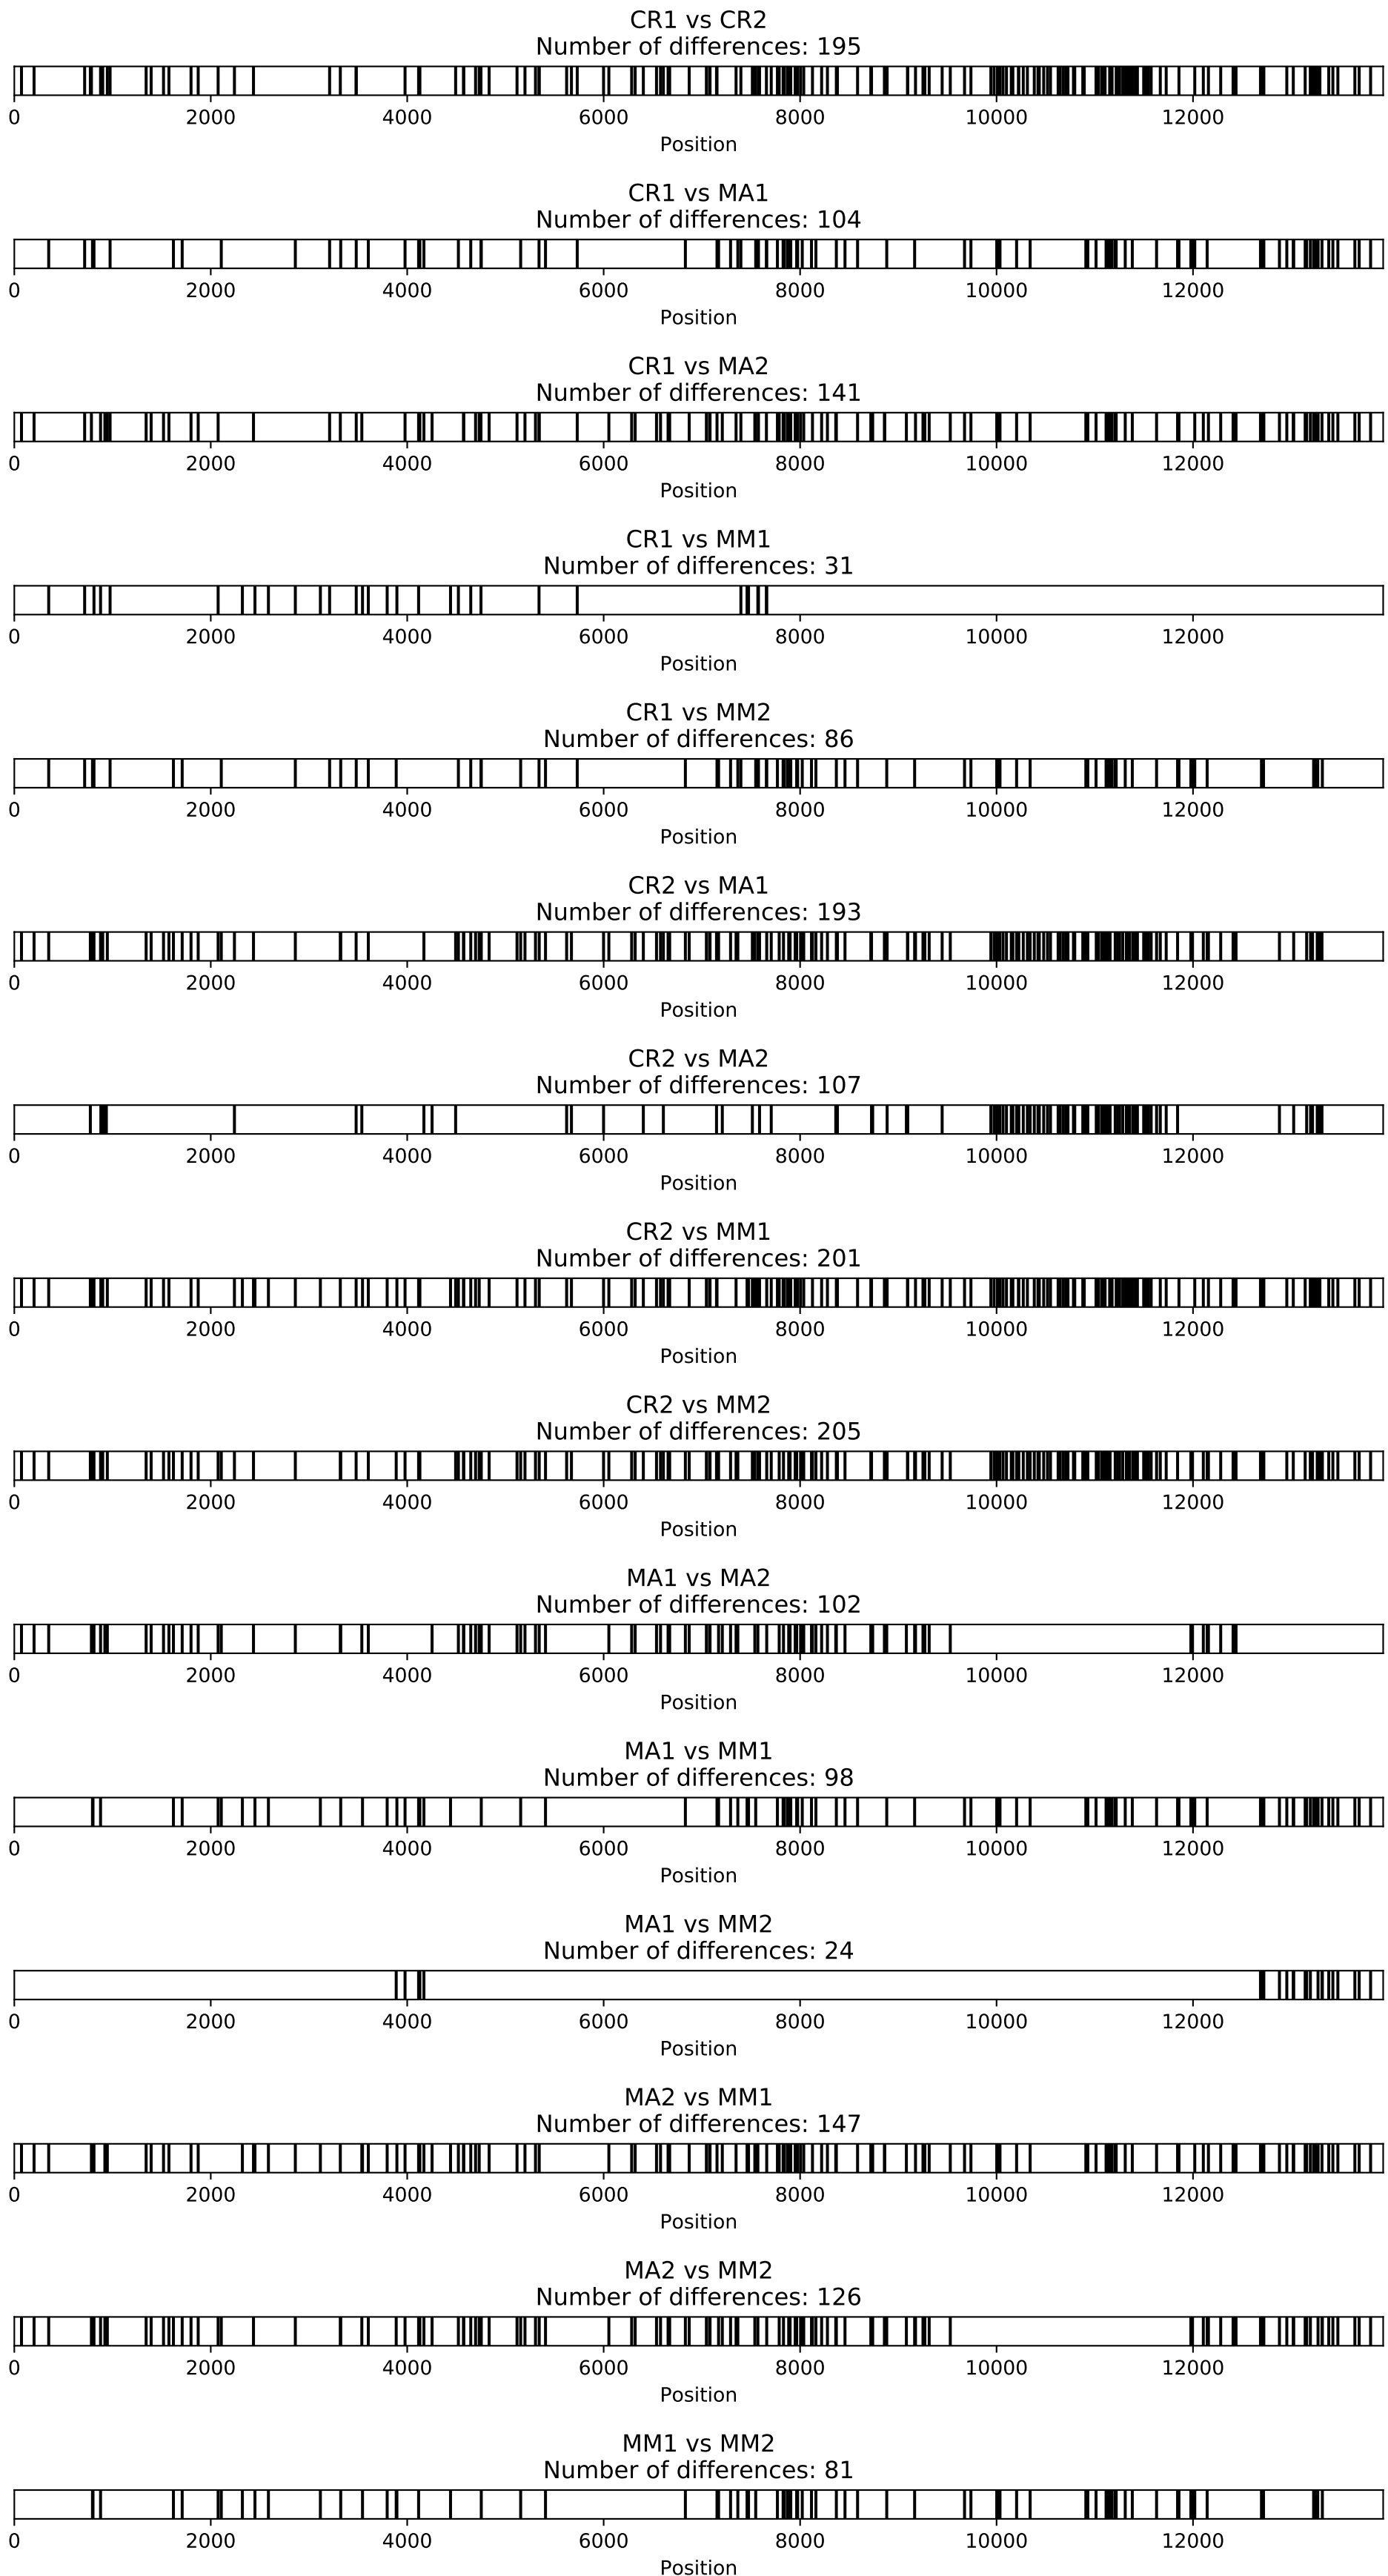

# Region: 311

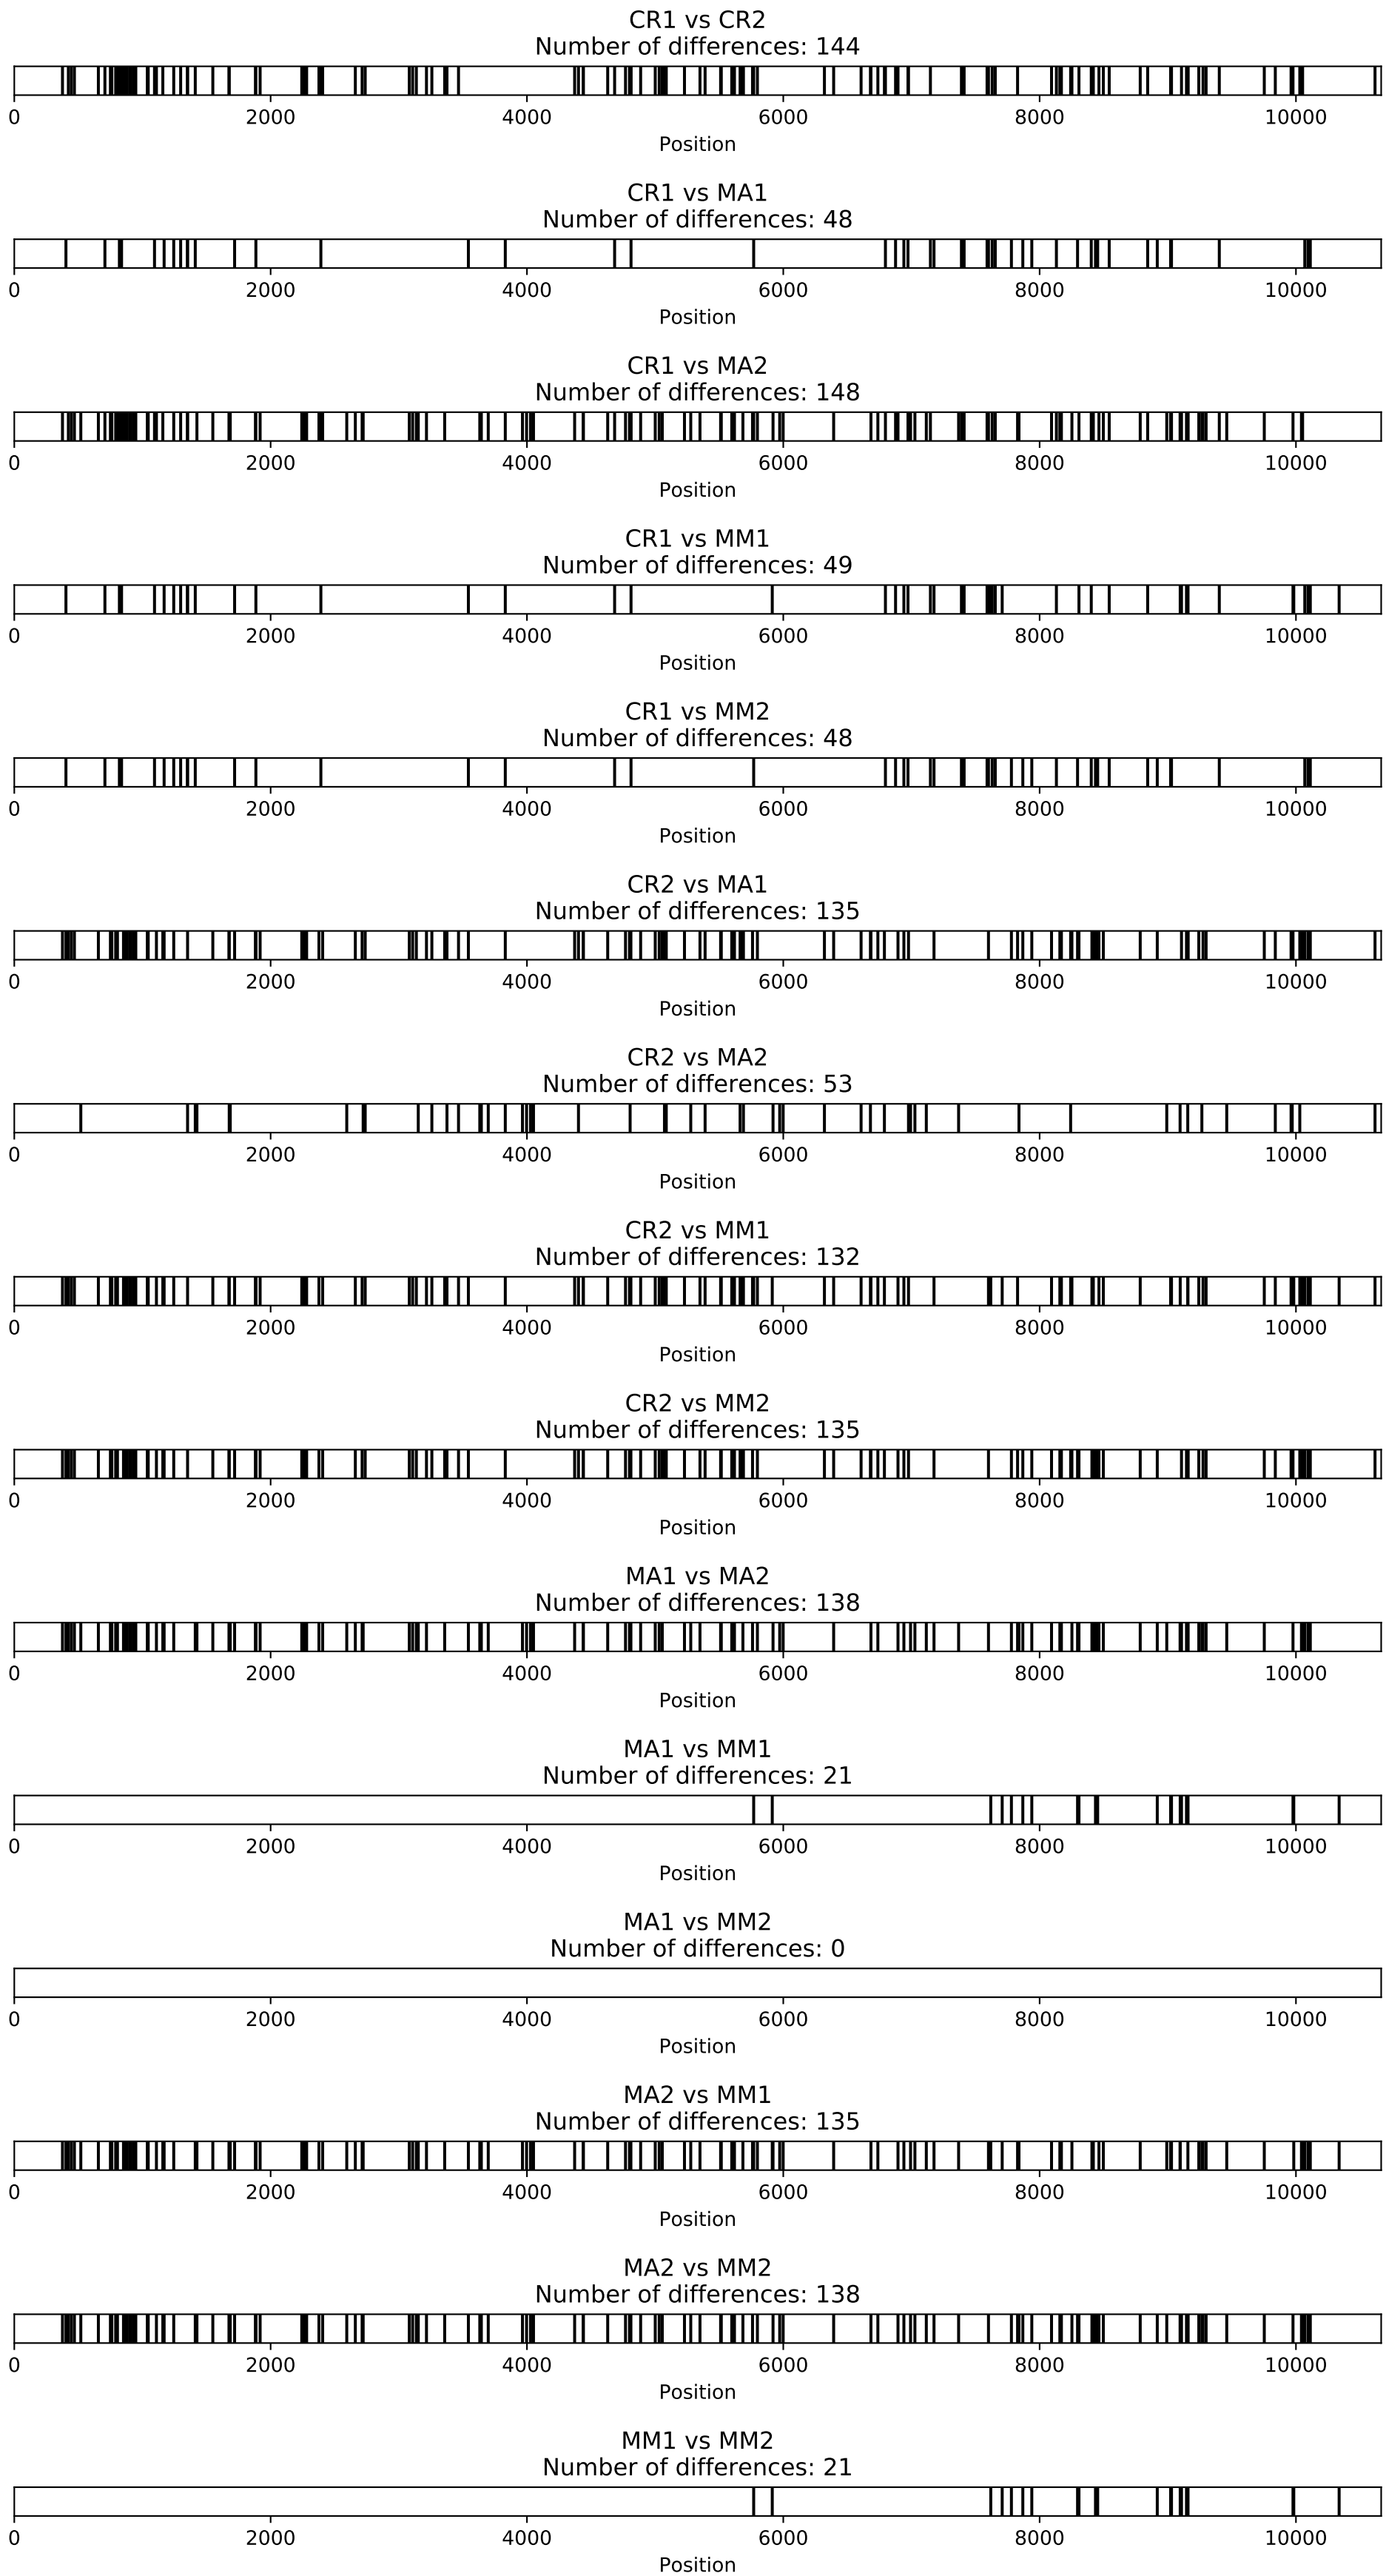

# Region: 312

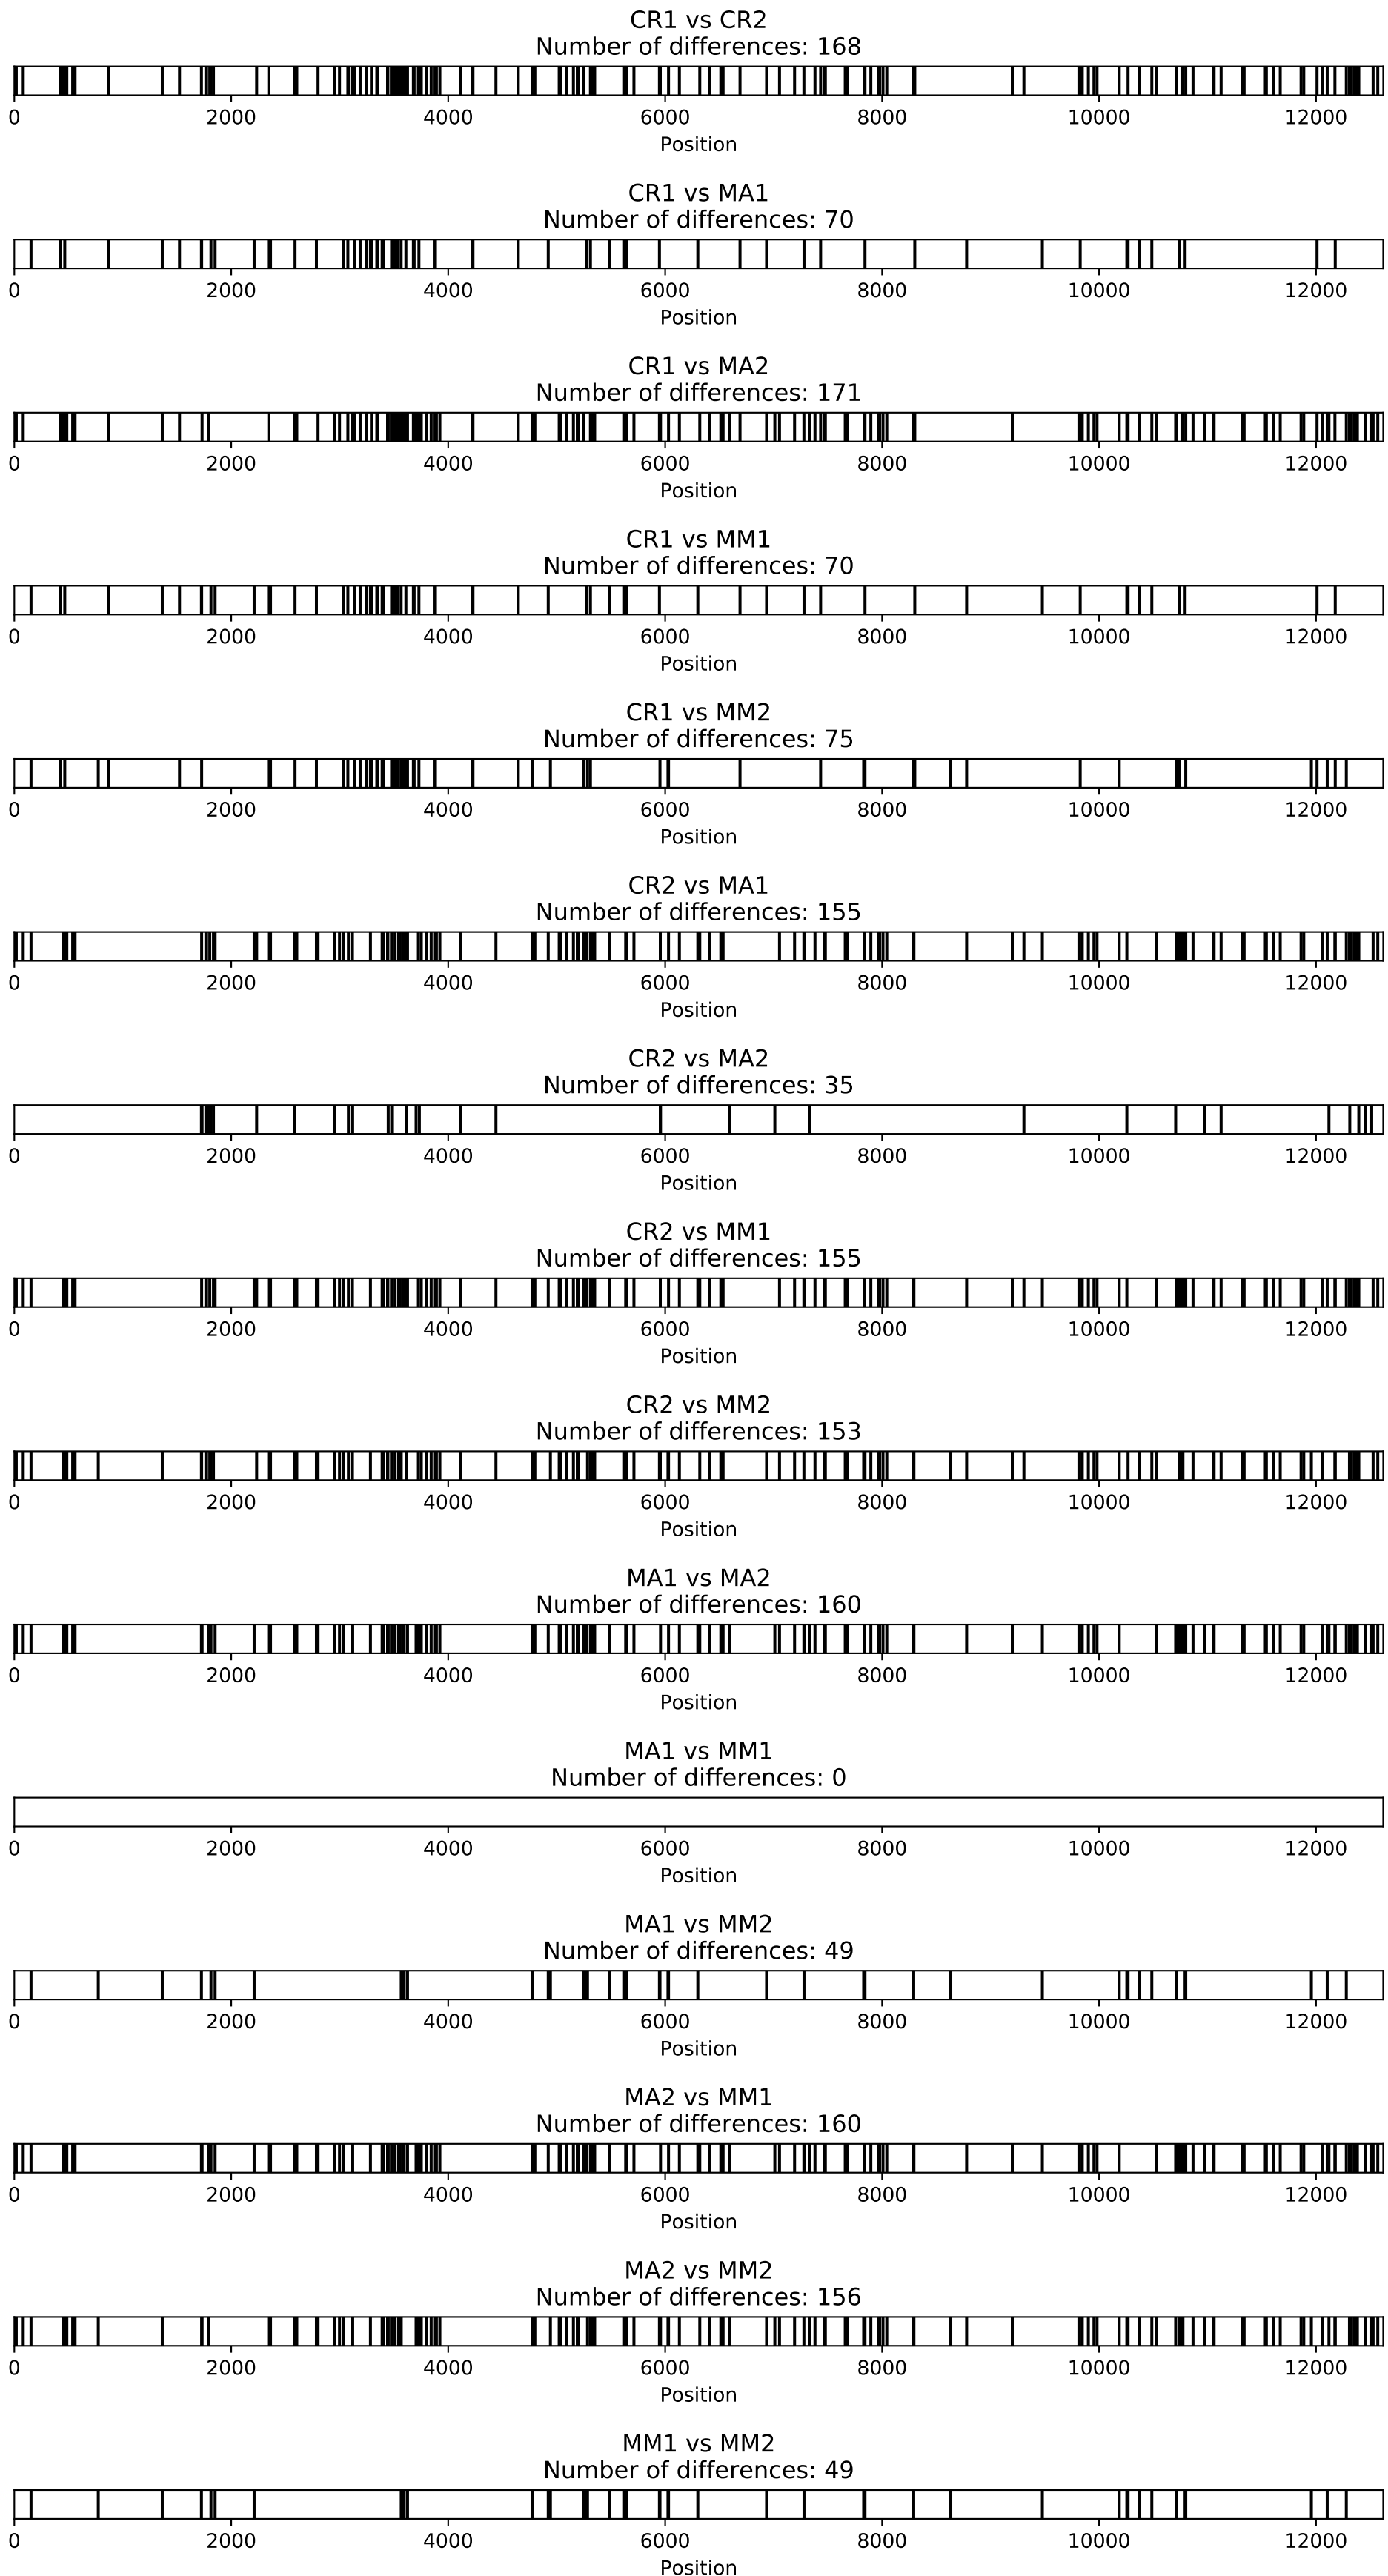

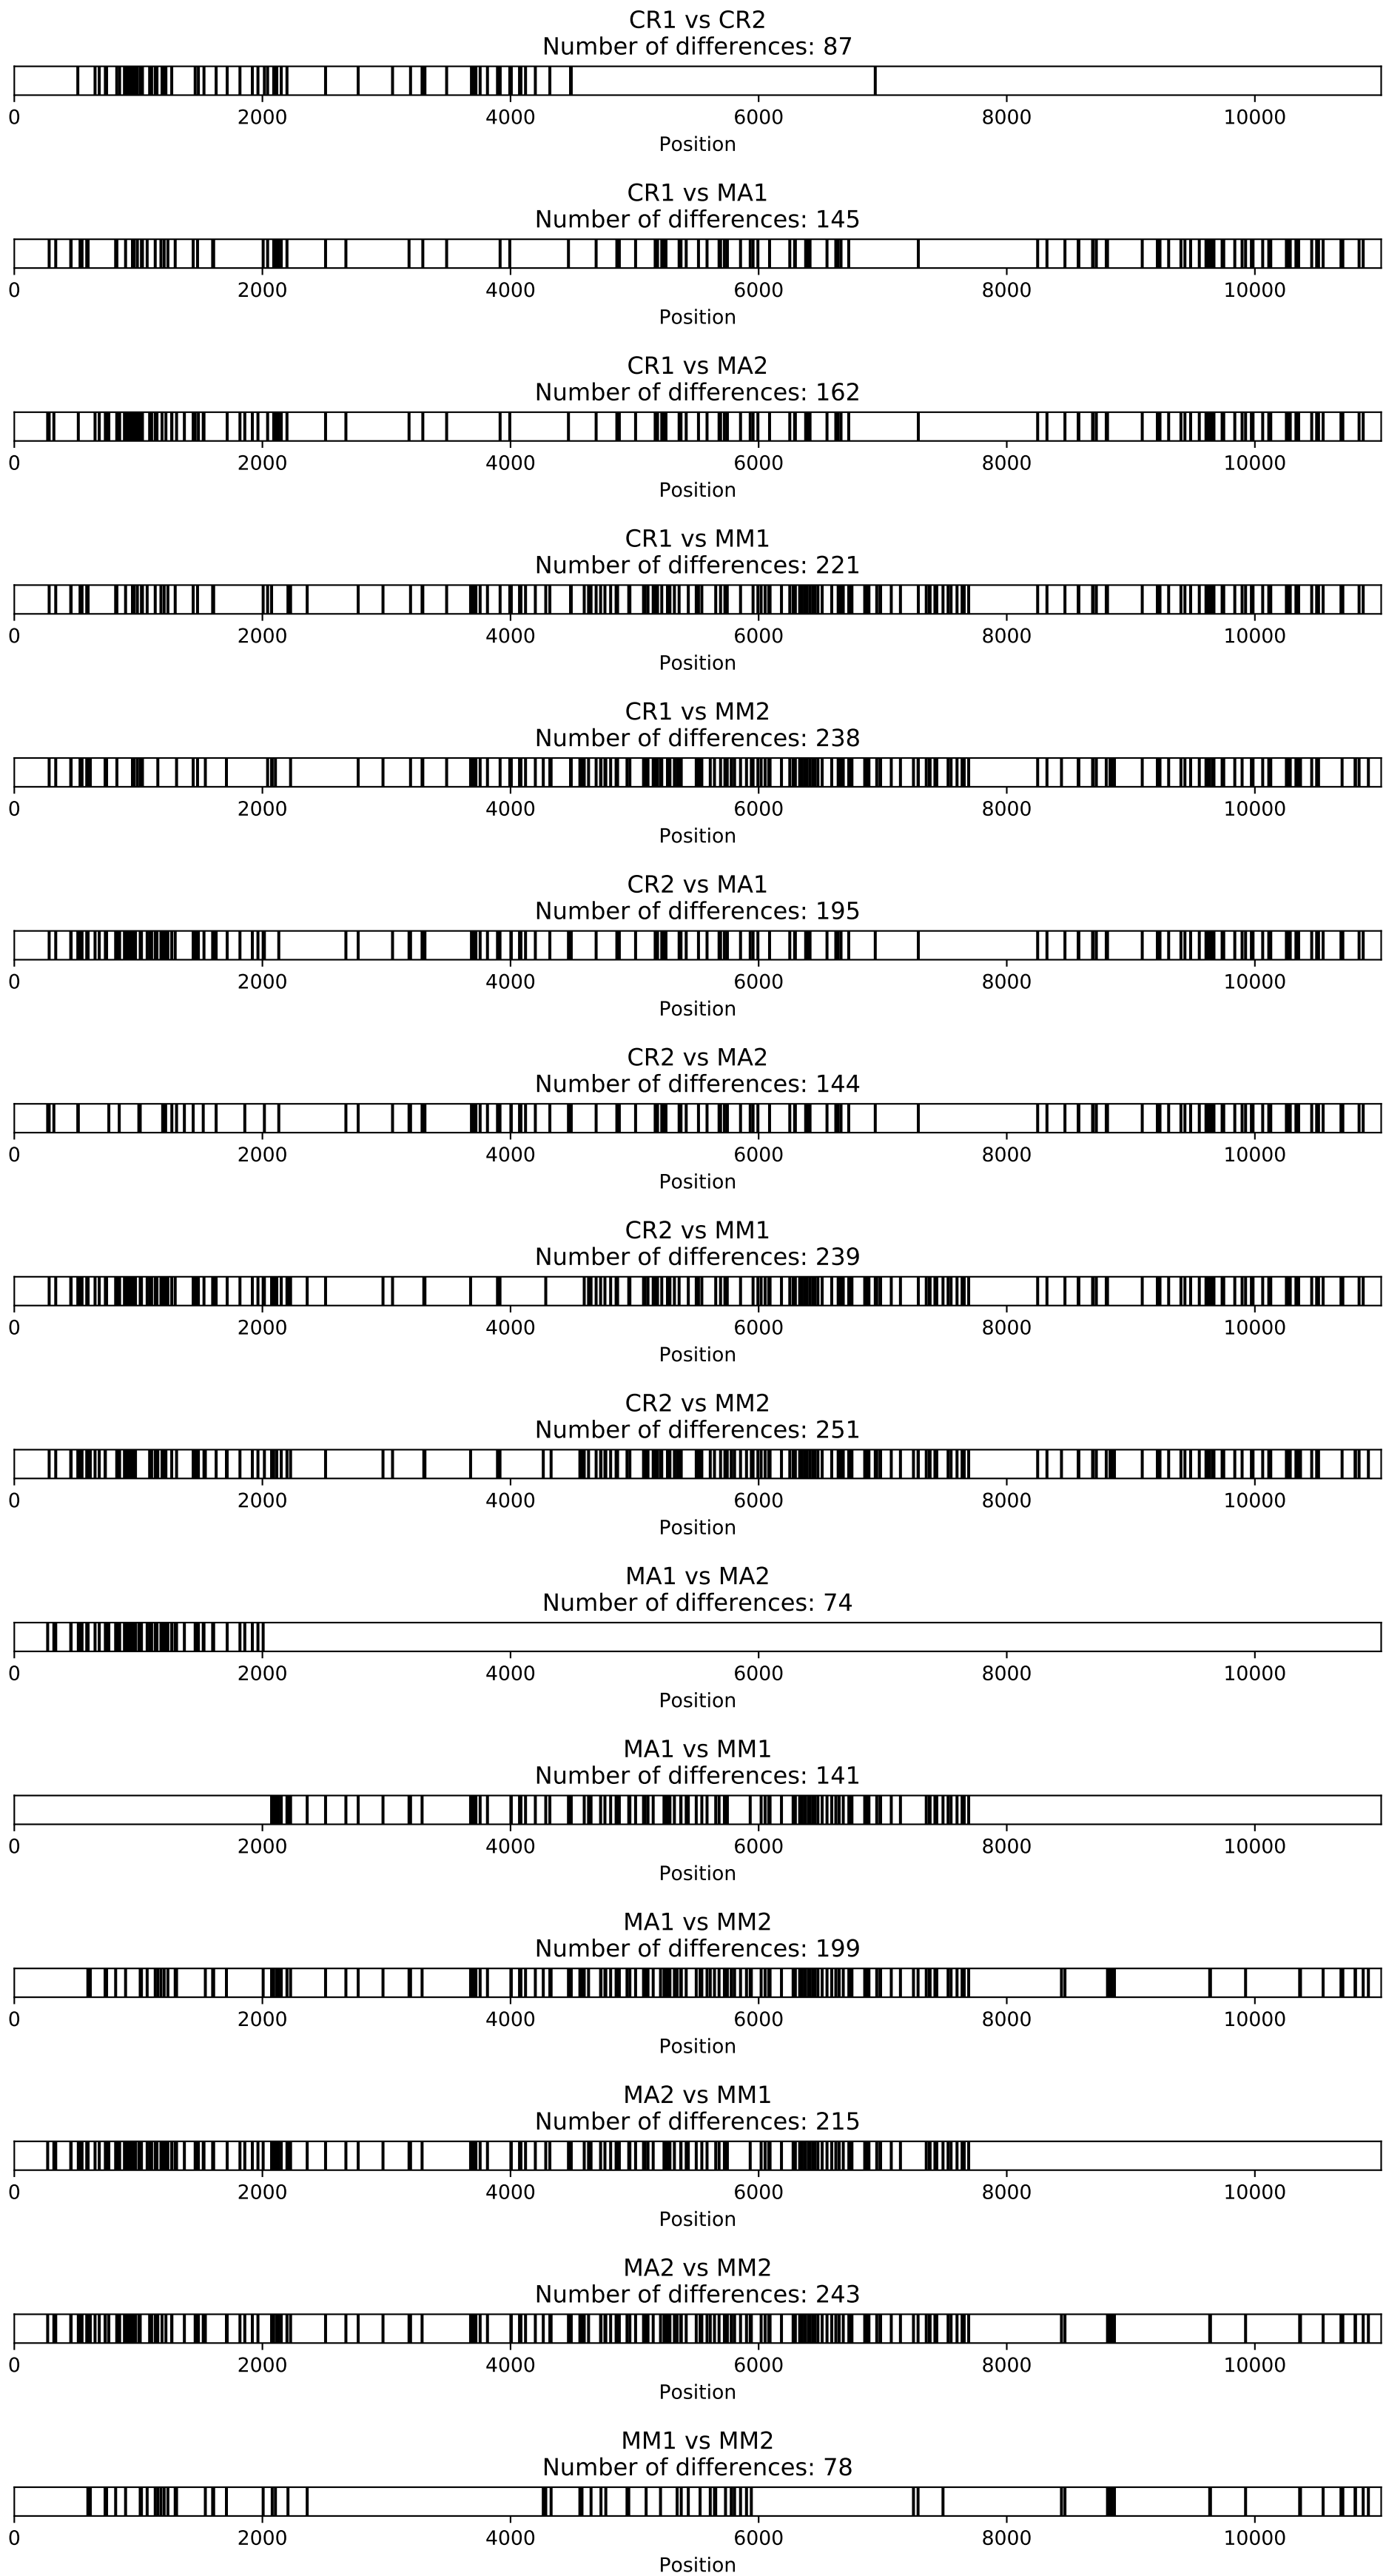

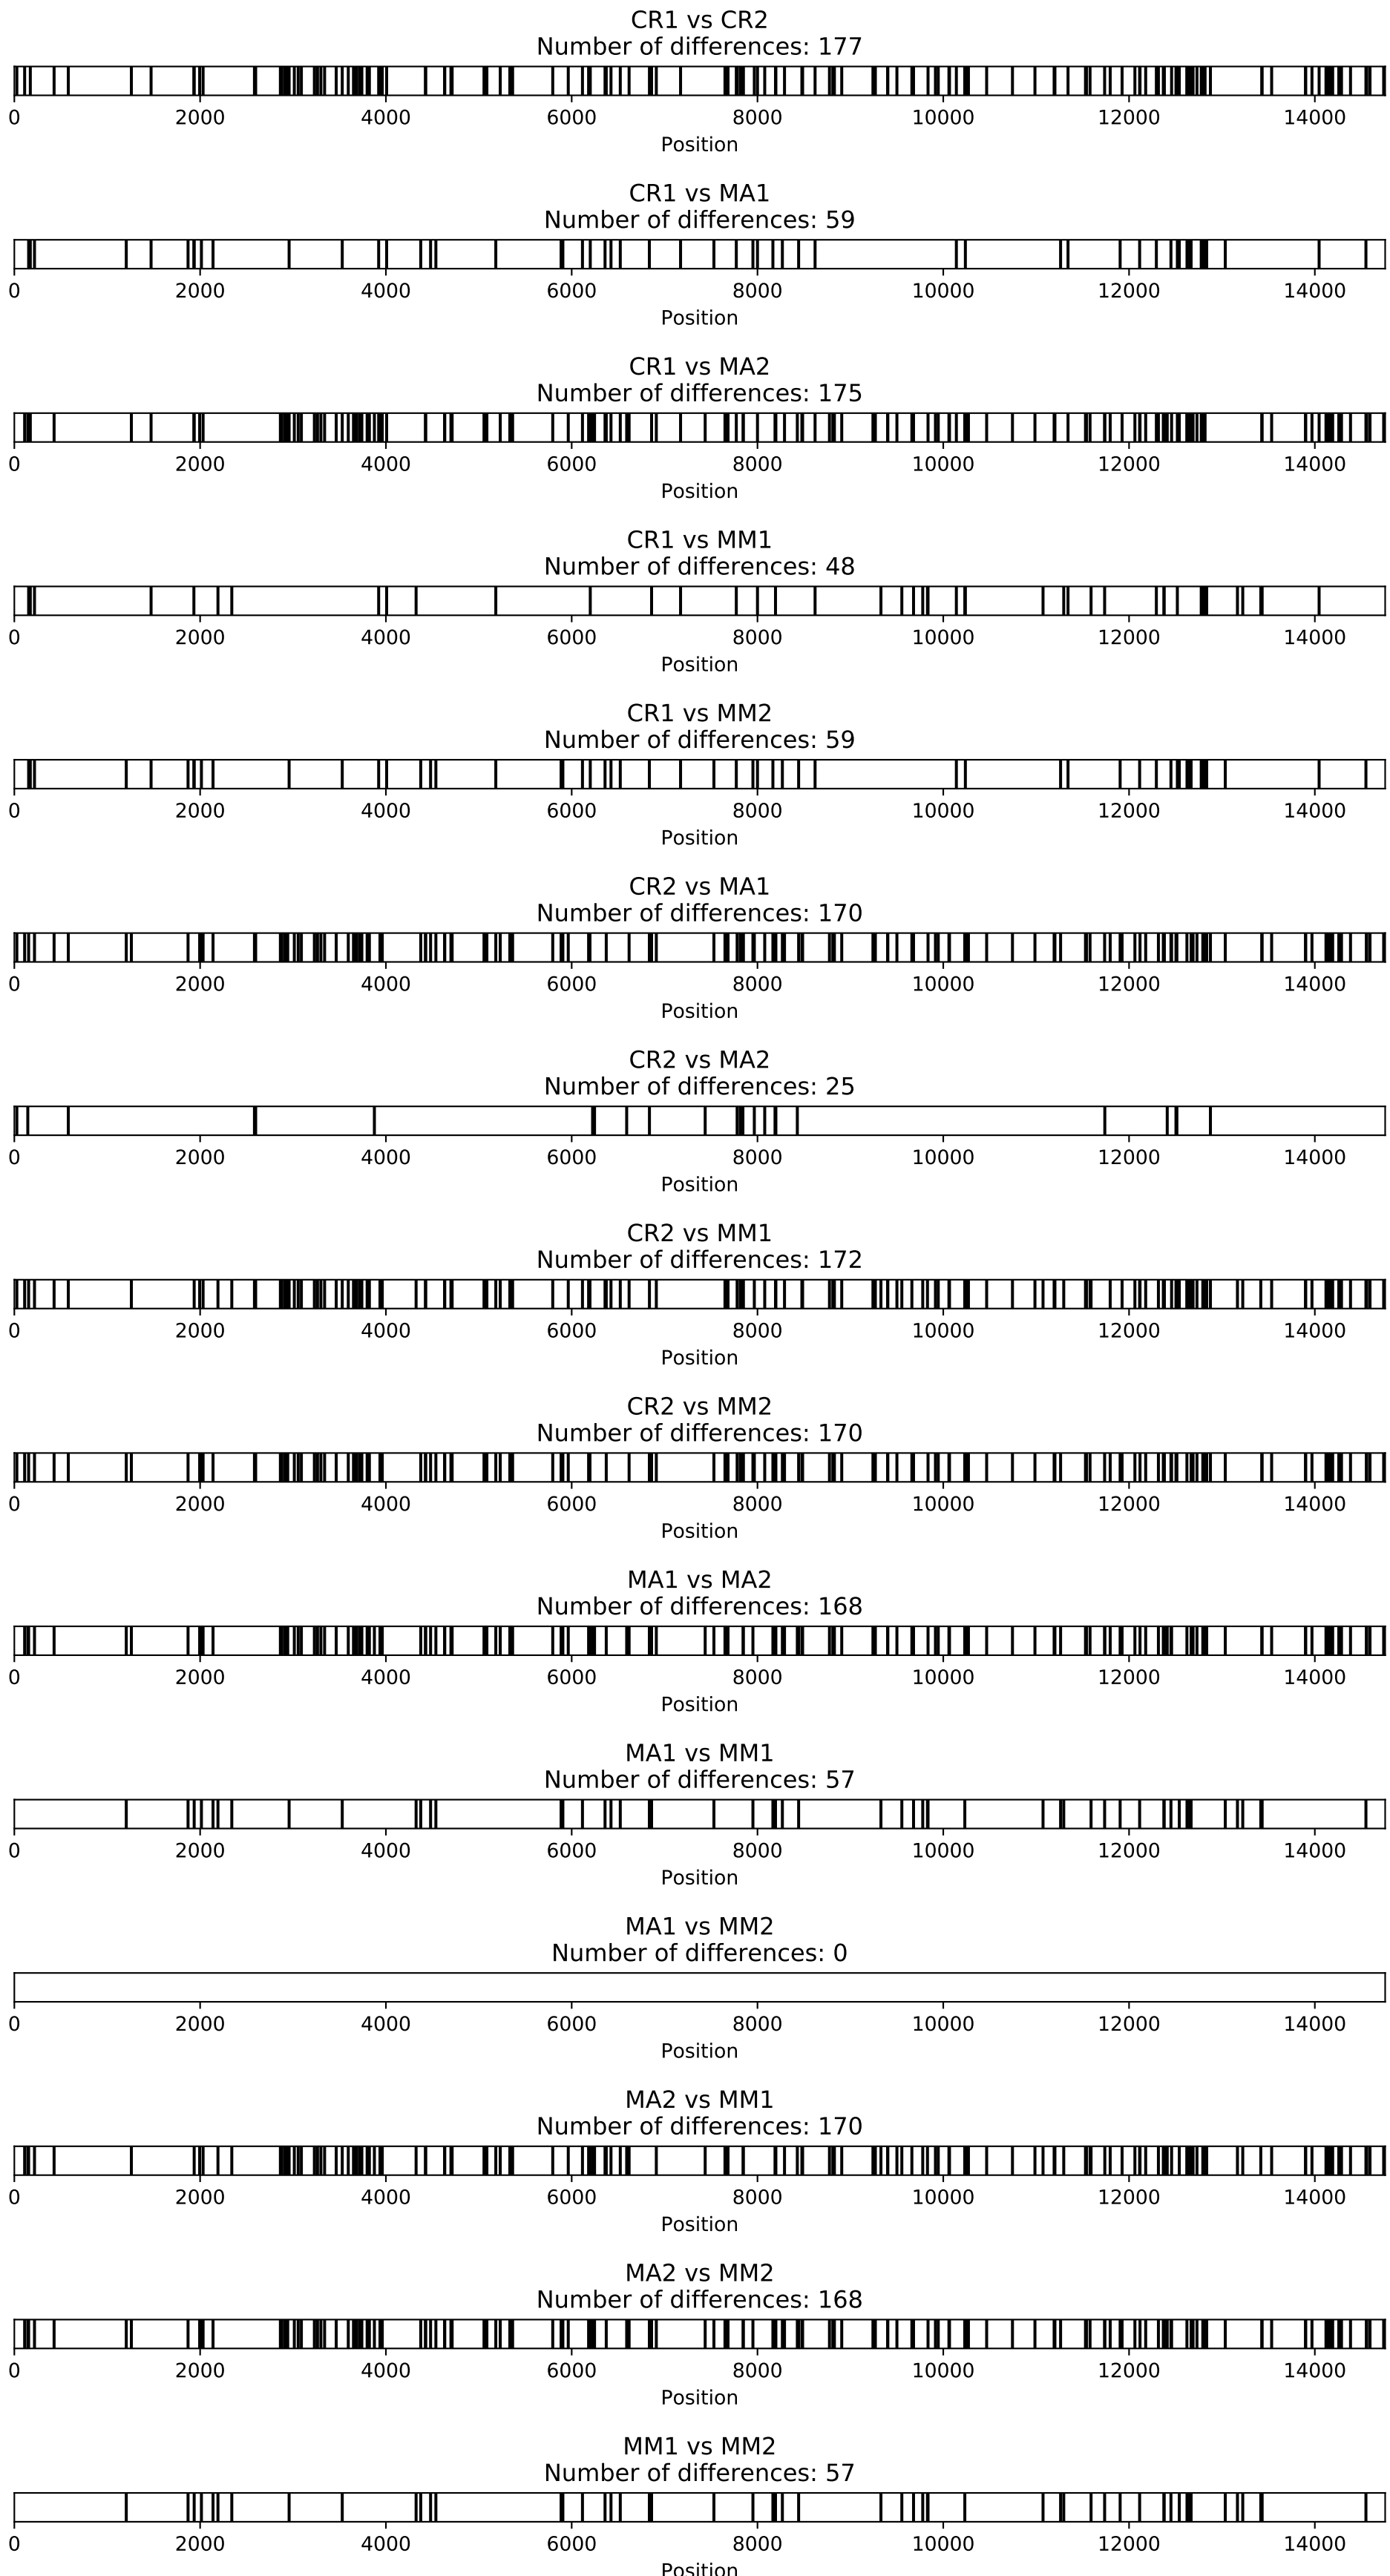

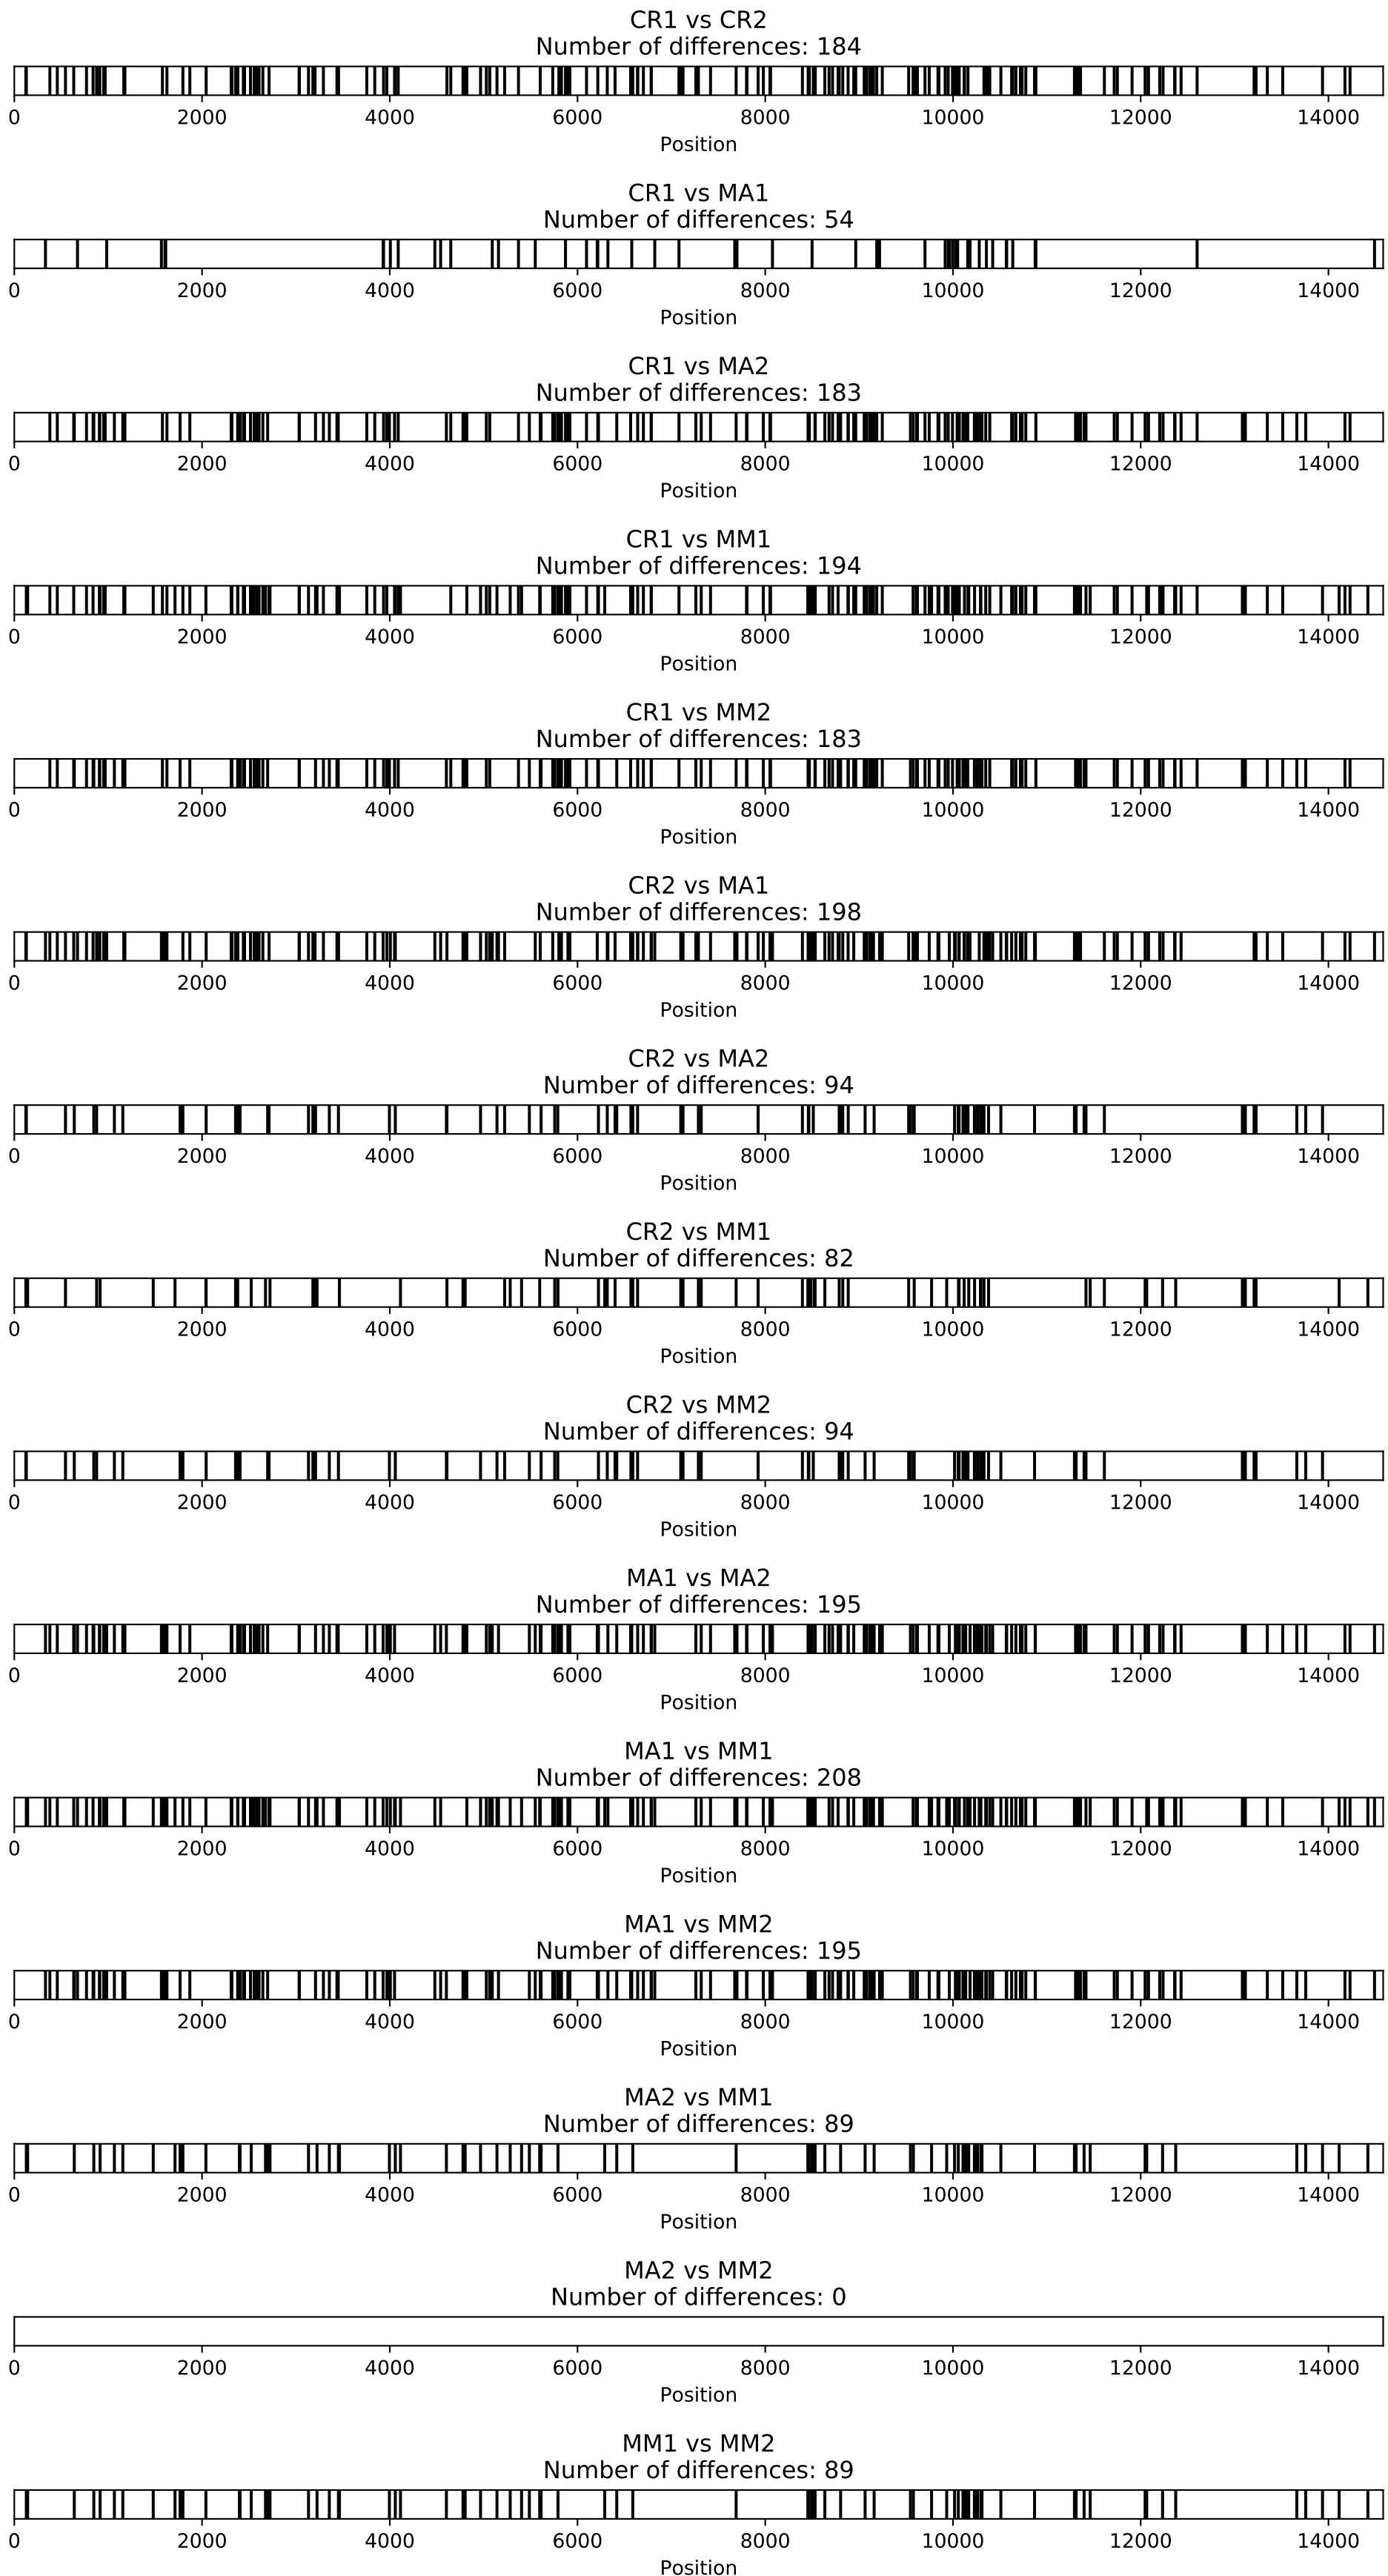

# Region: 317

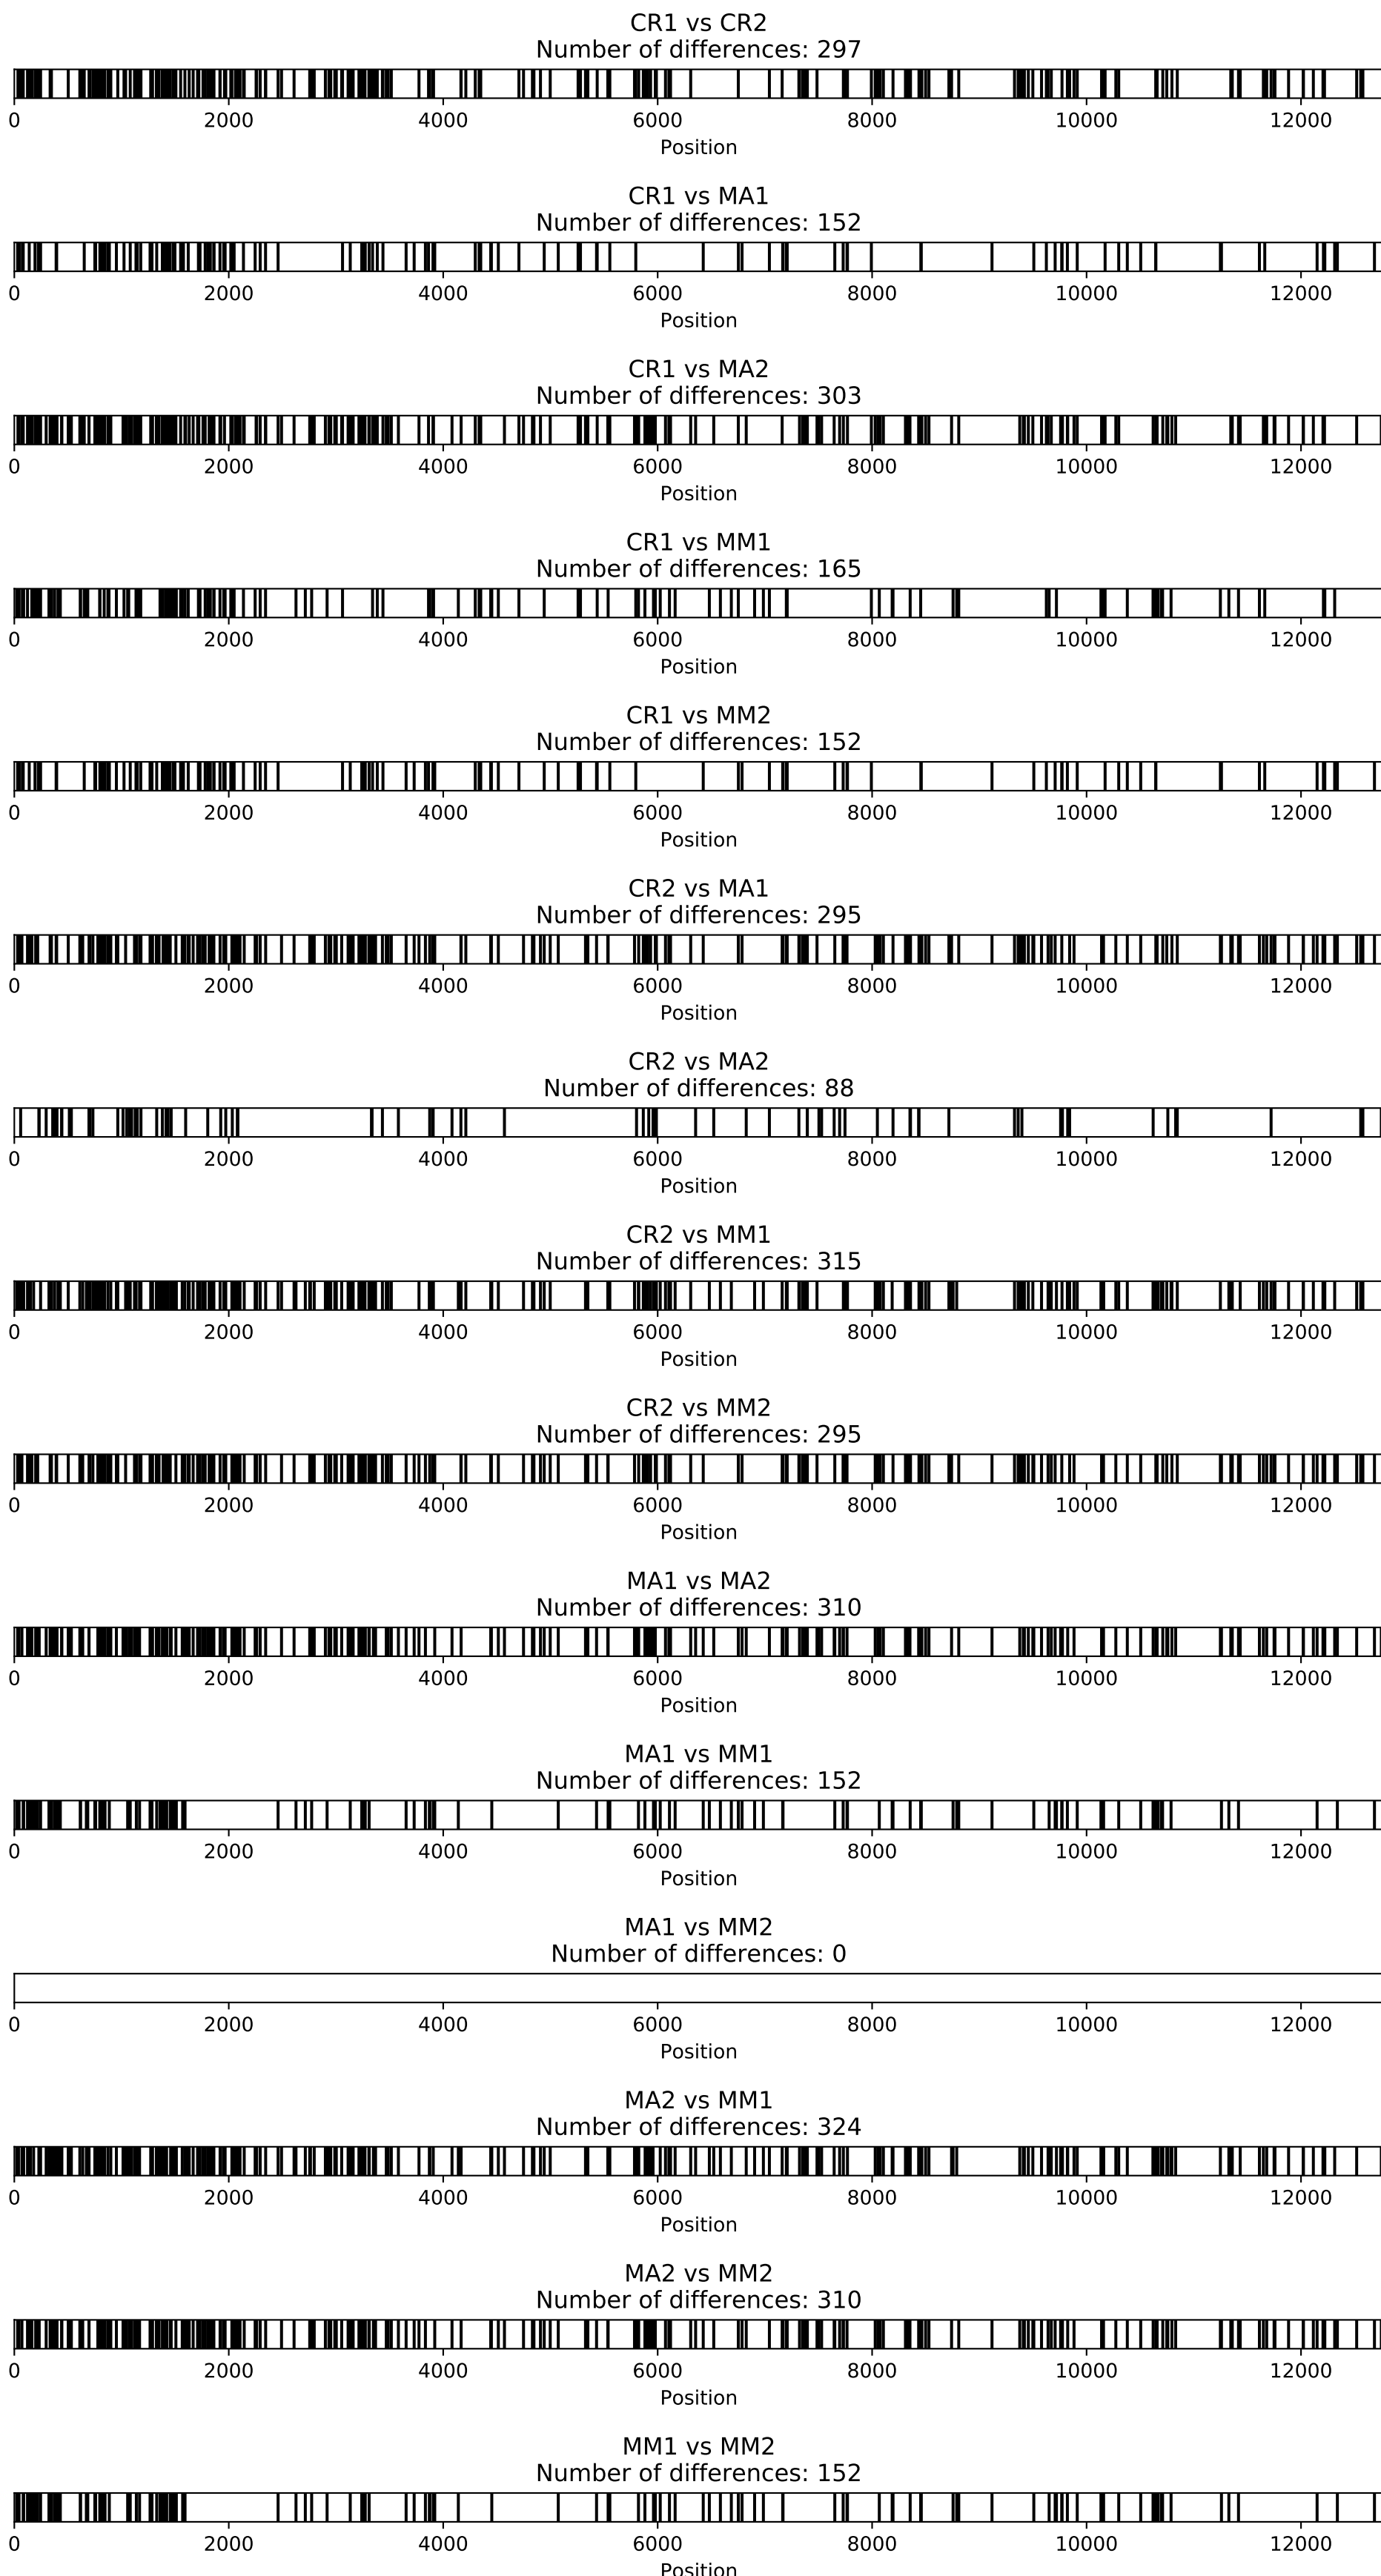

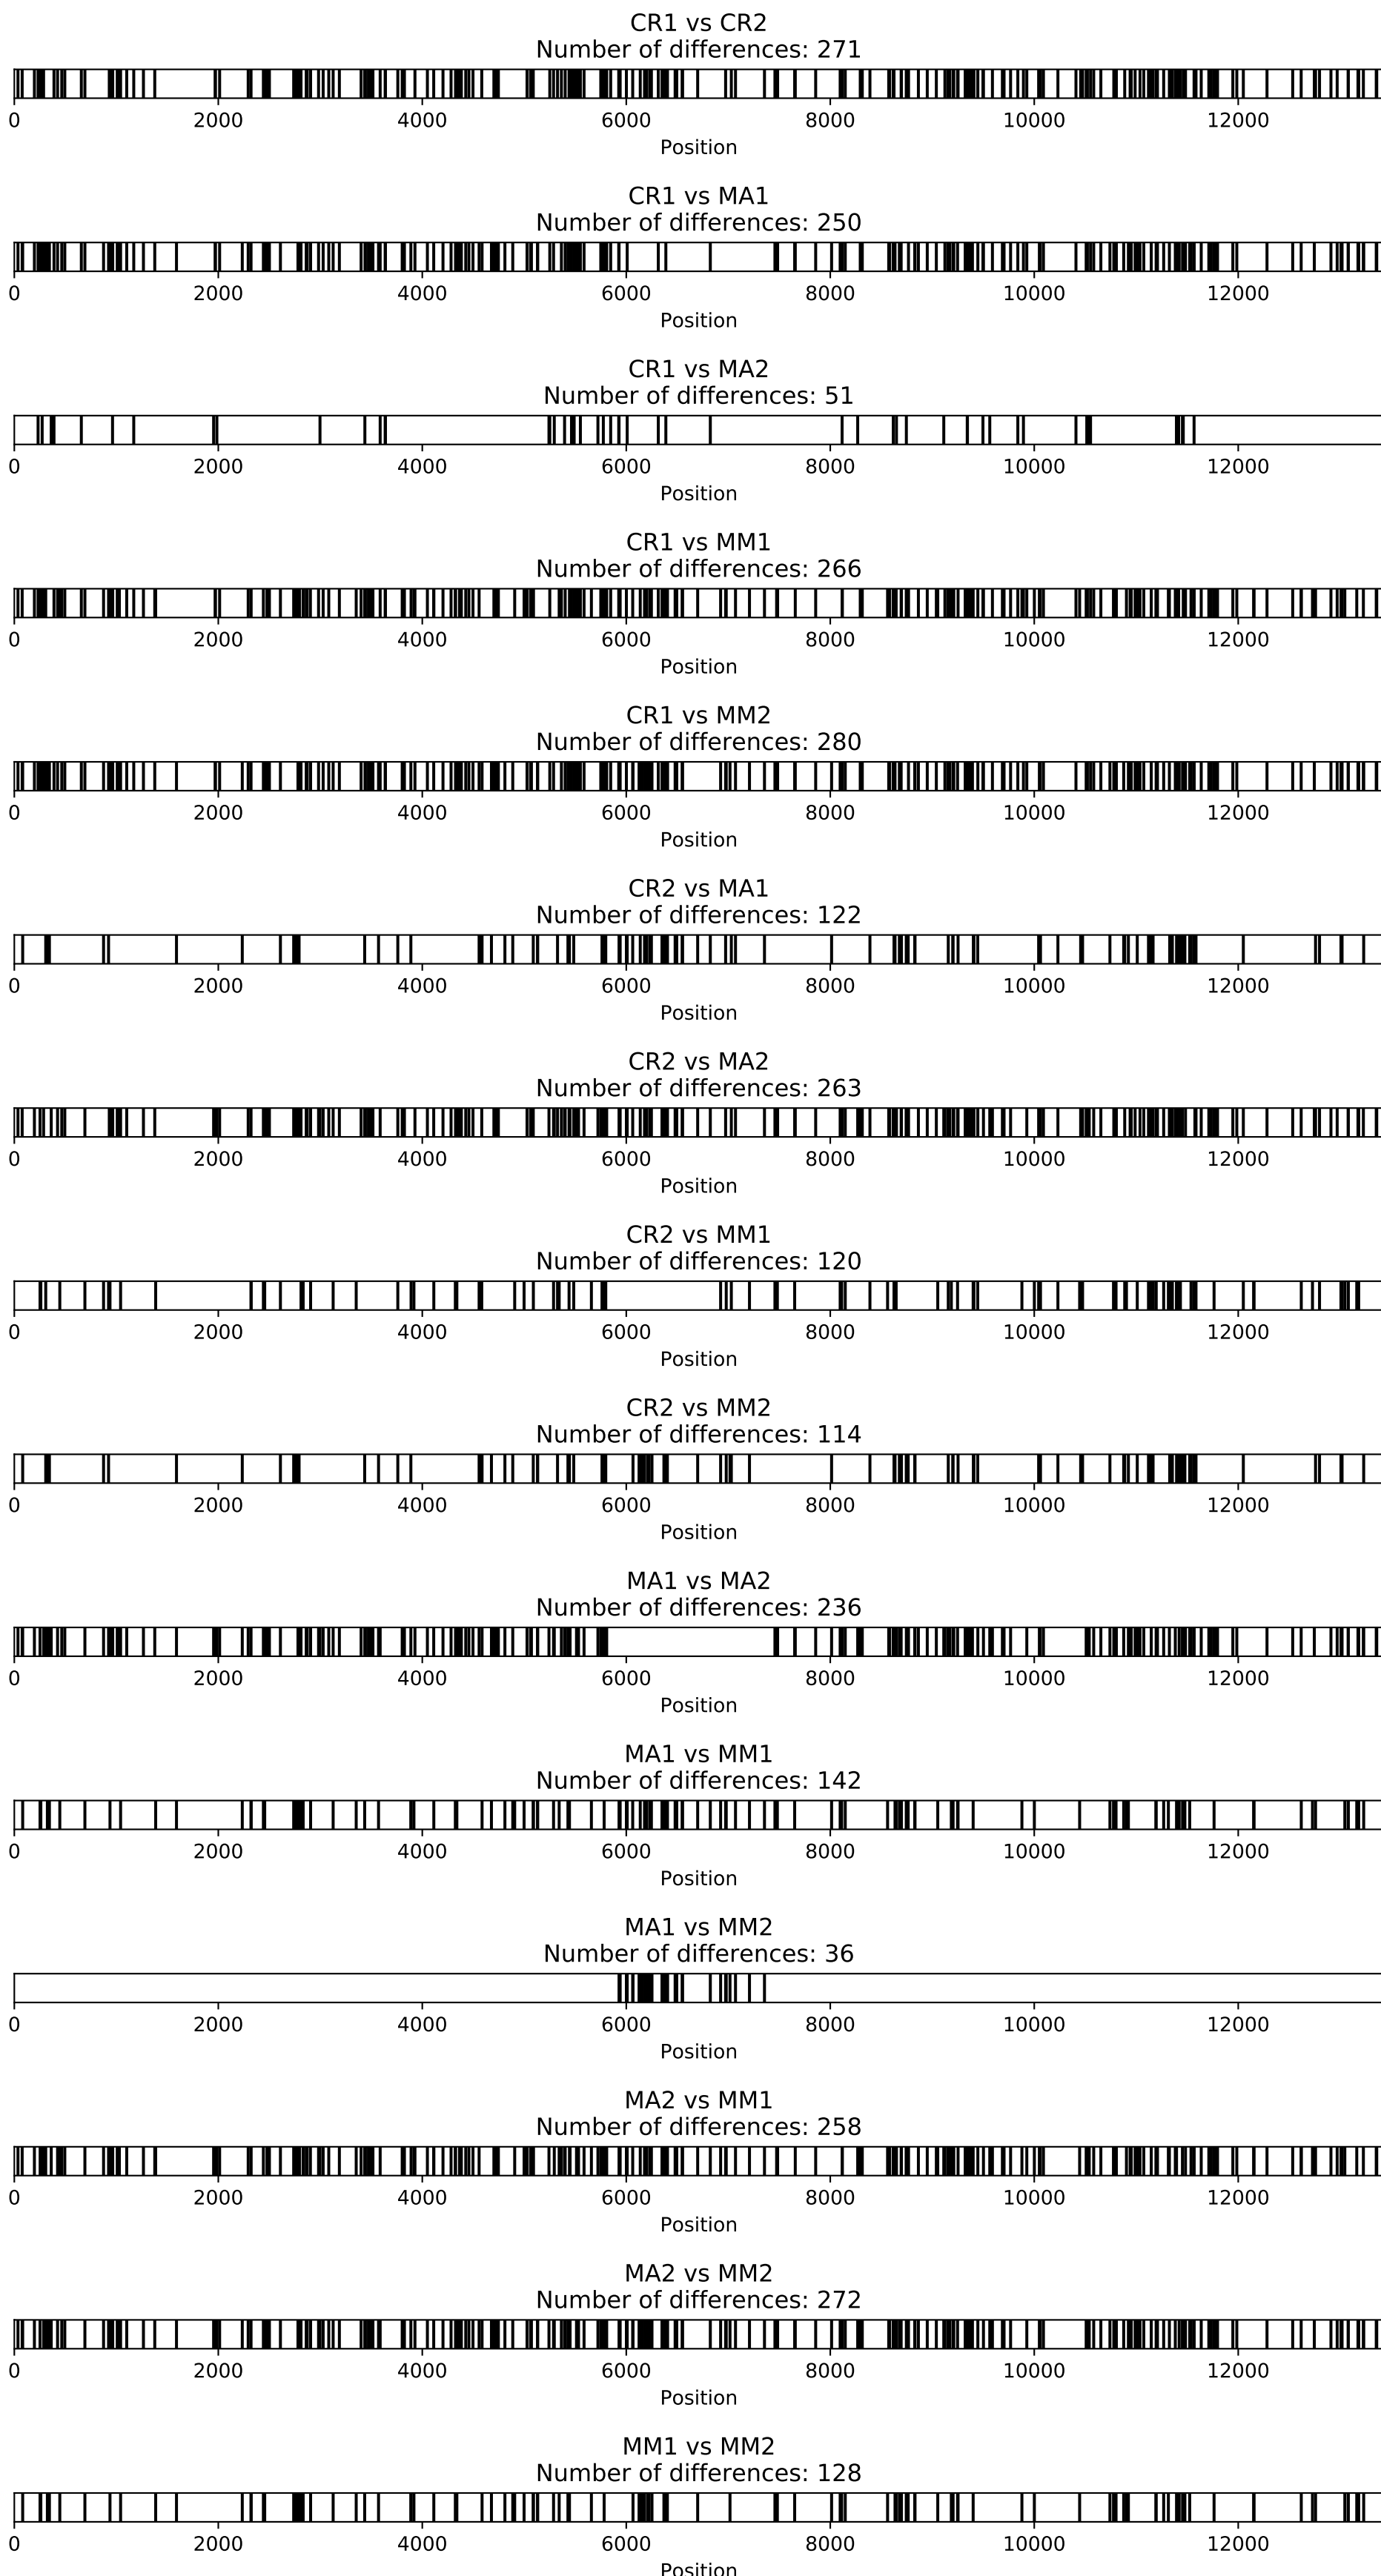



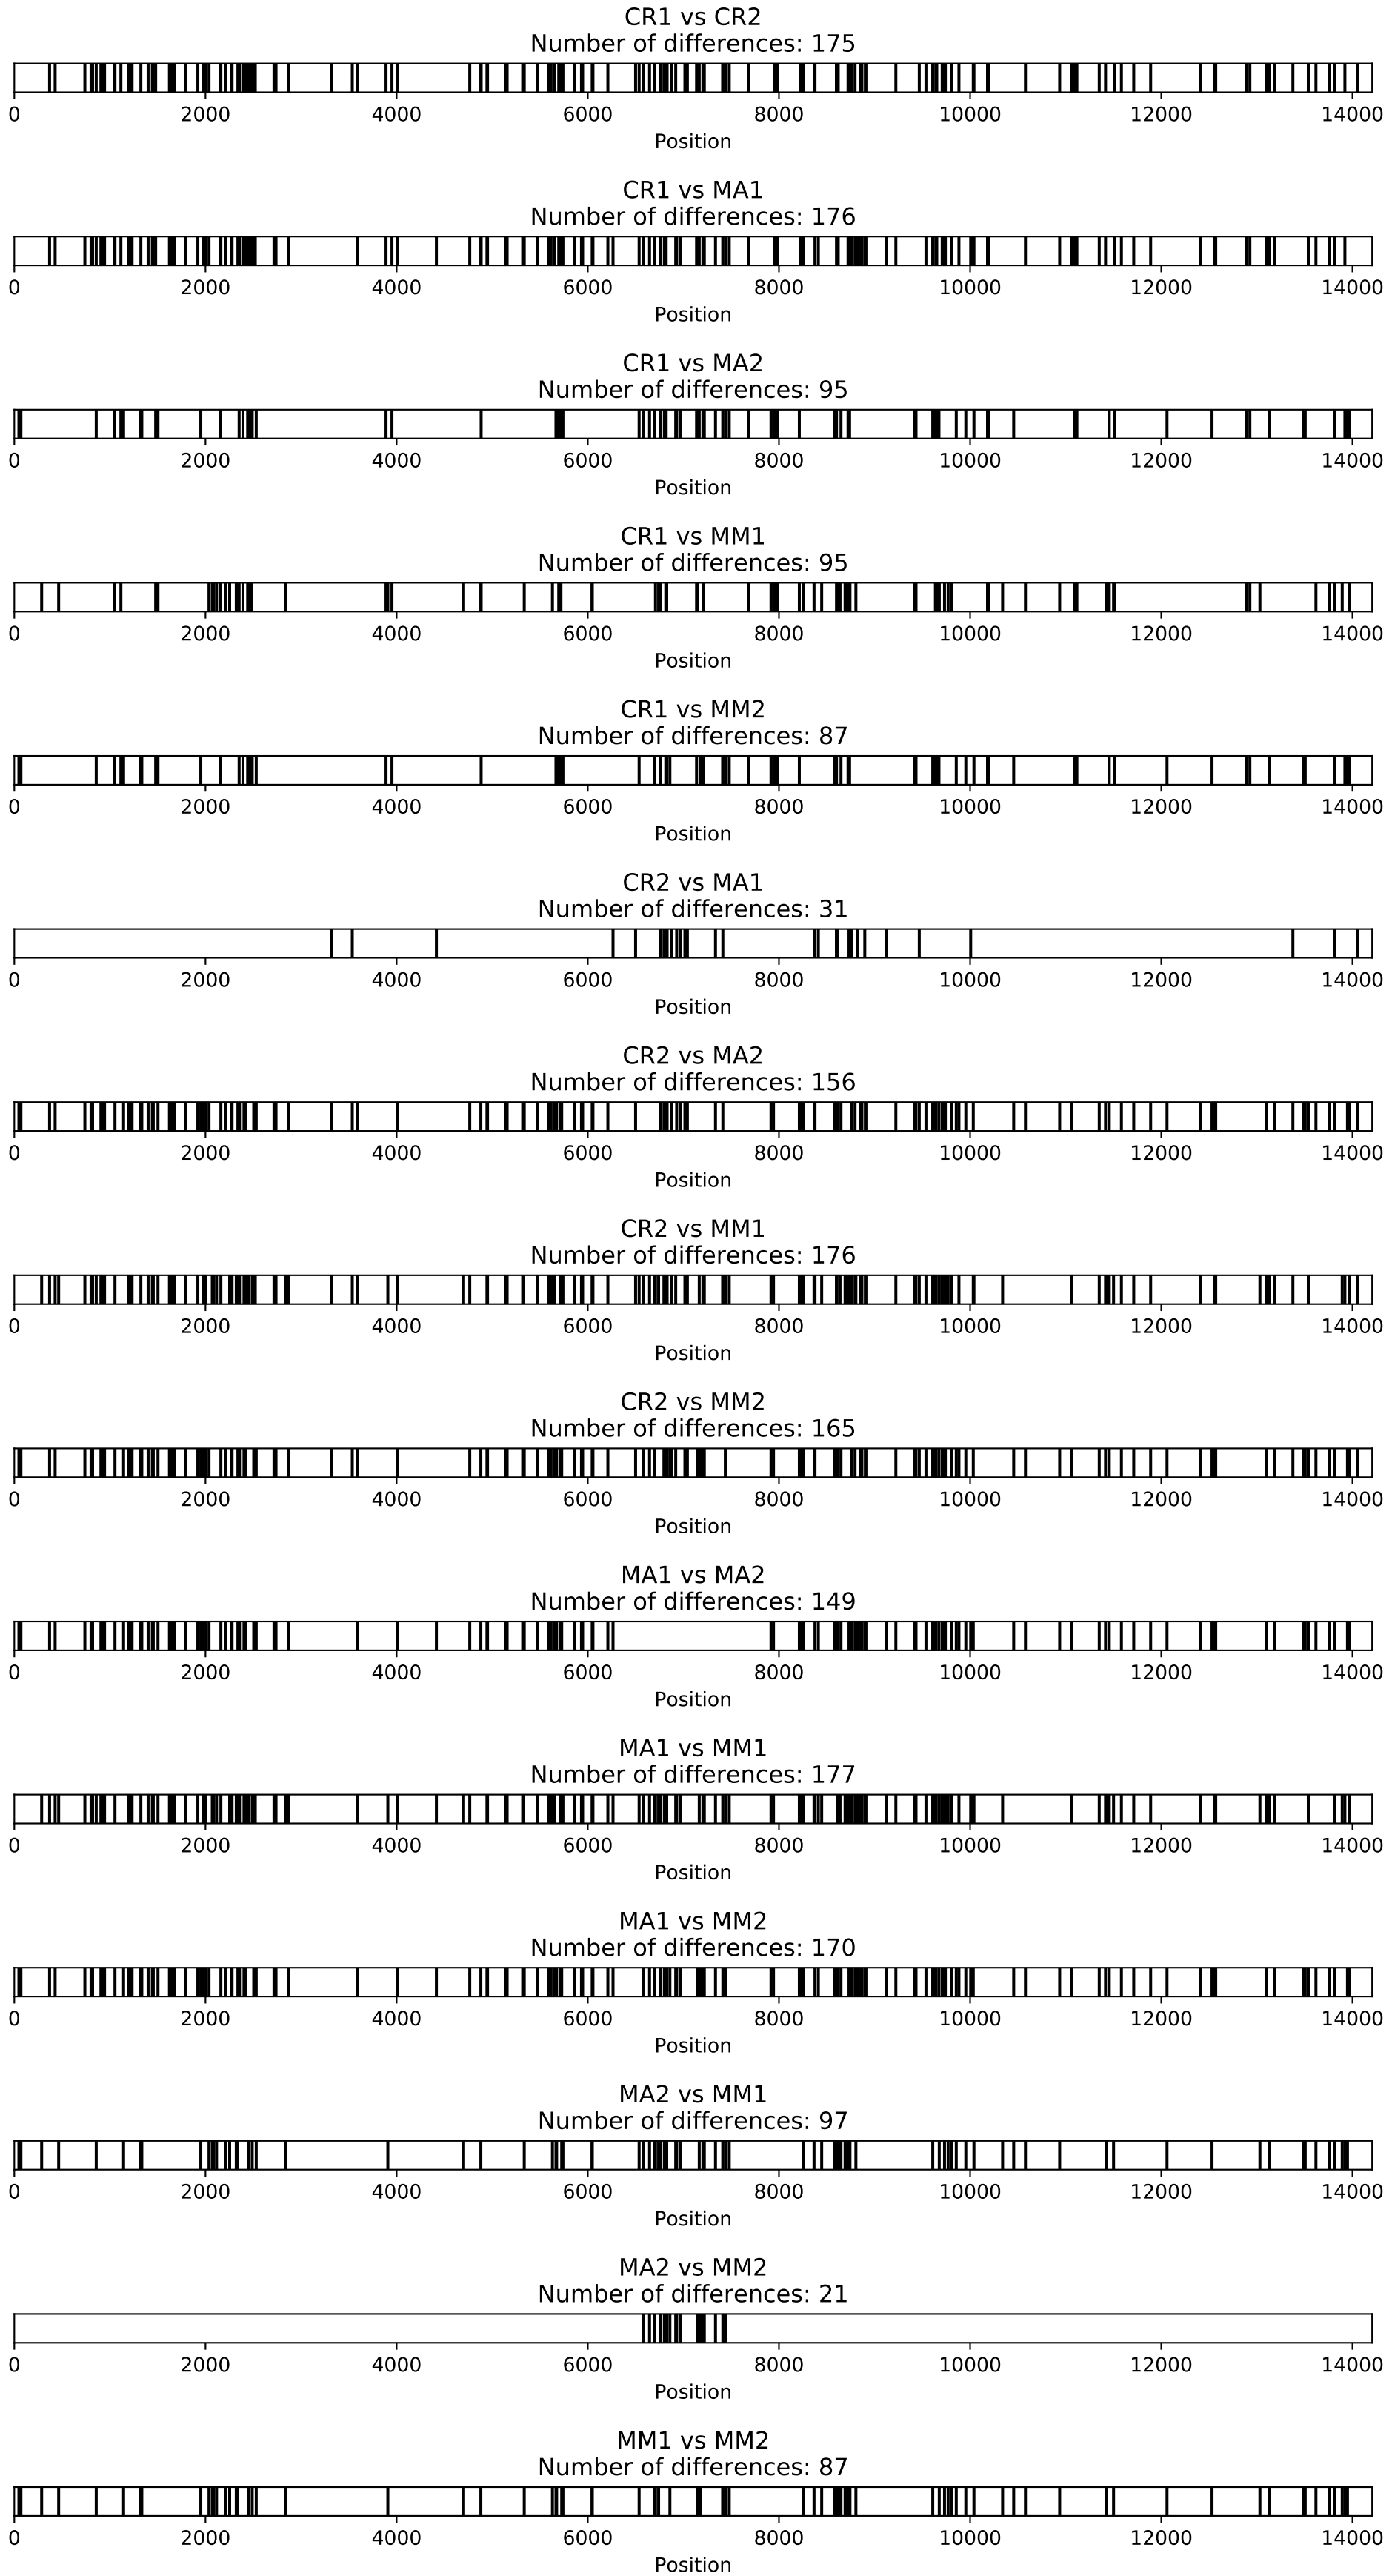

# Region: 320

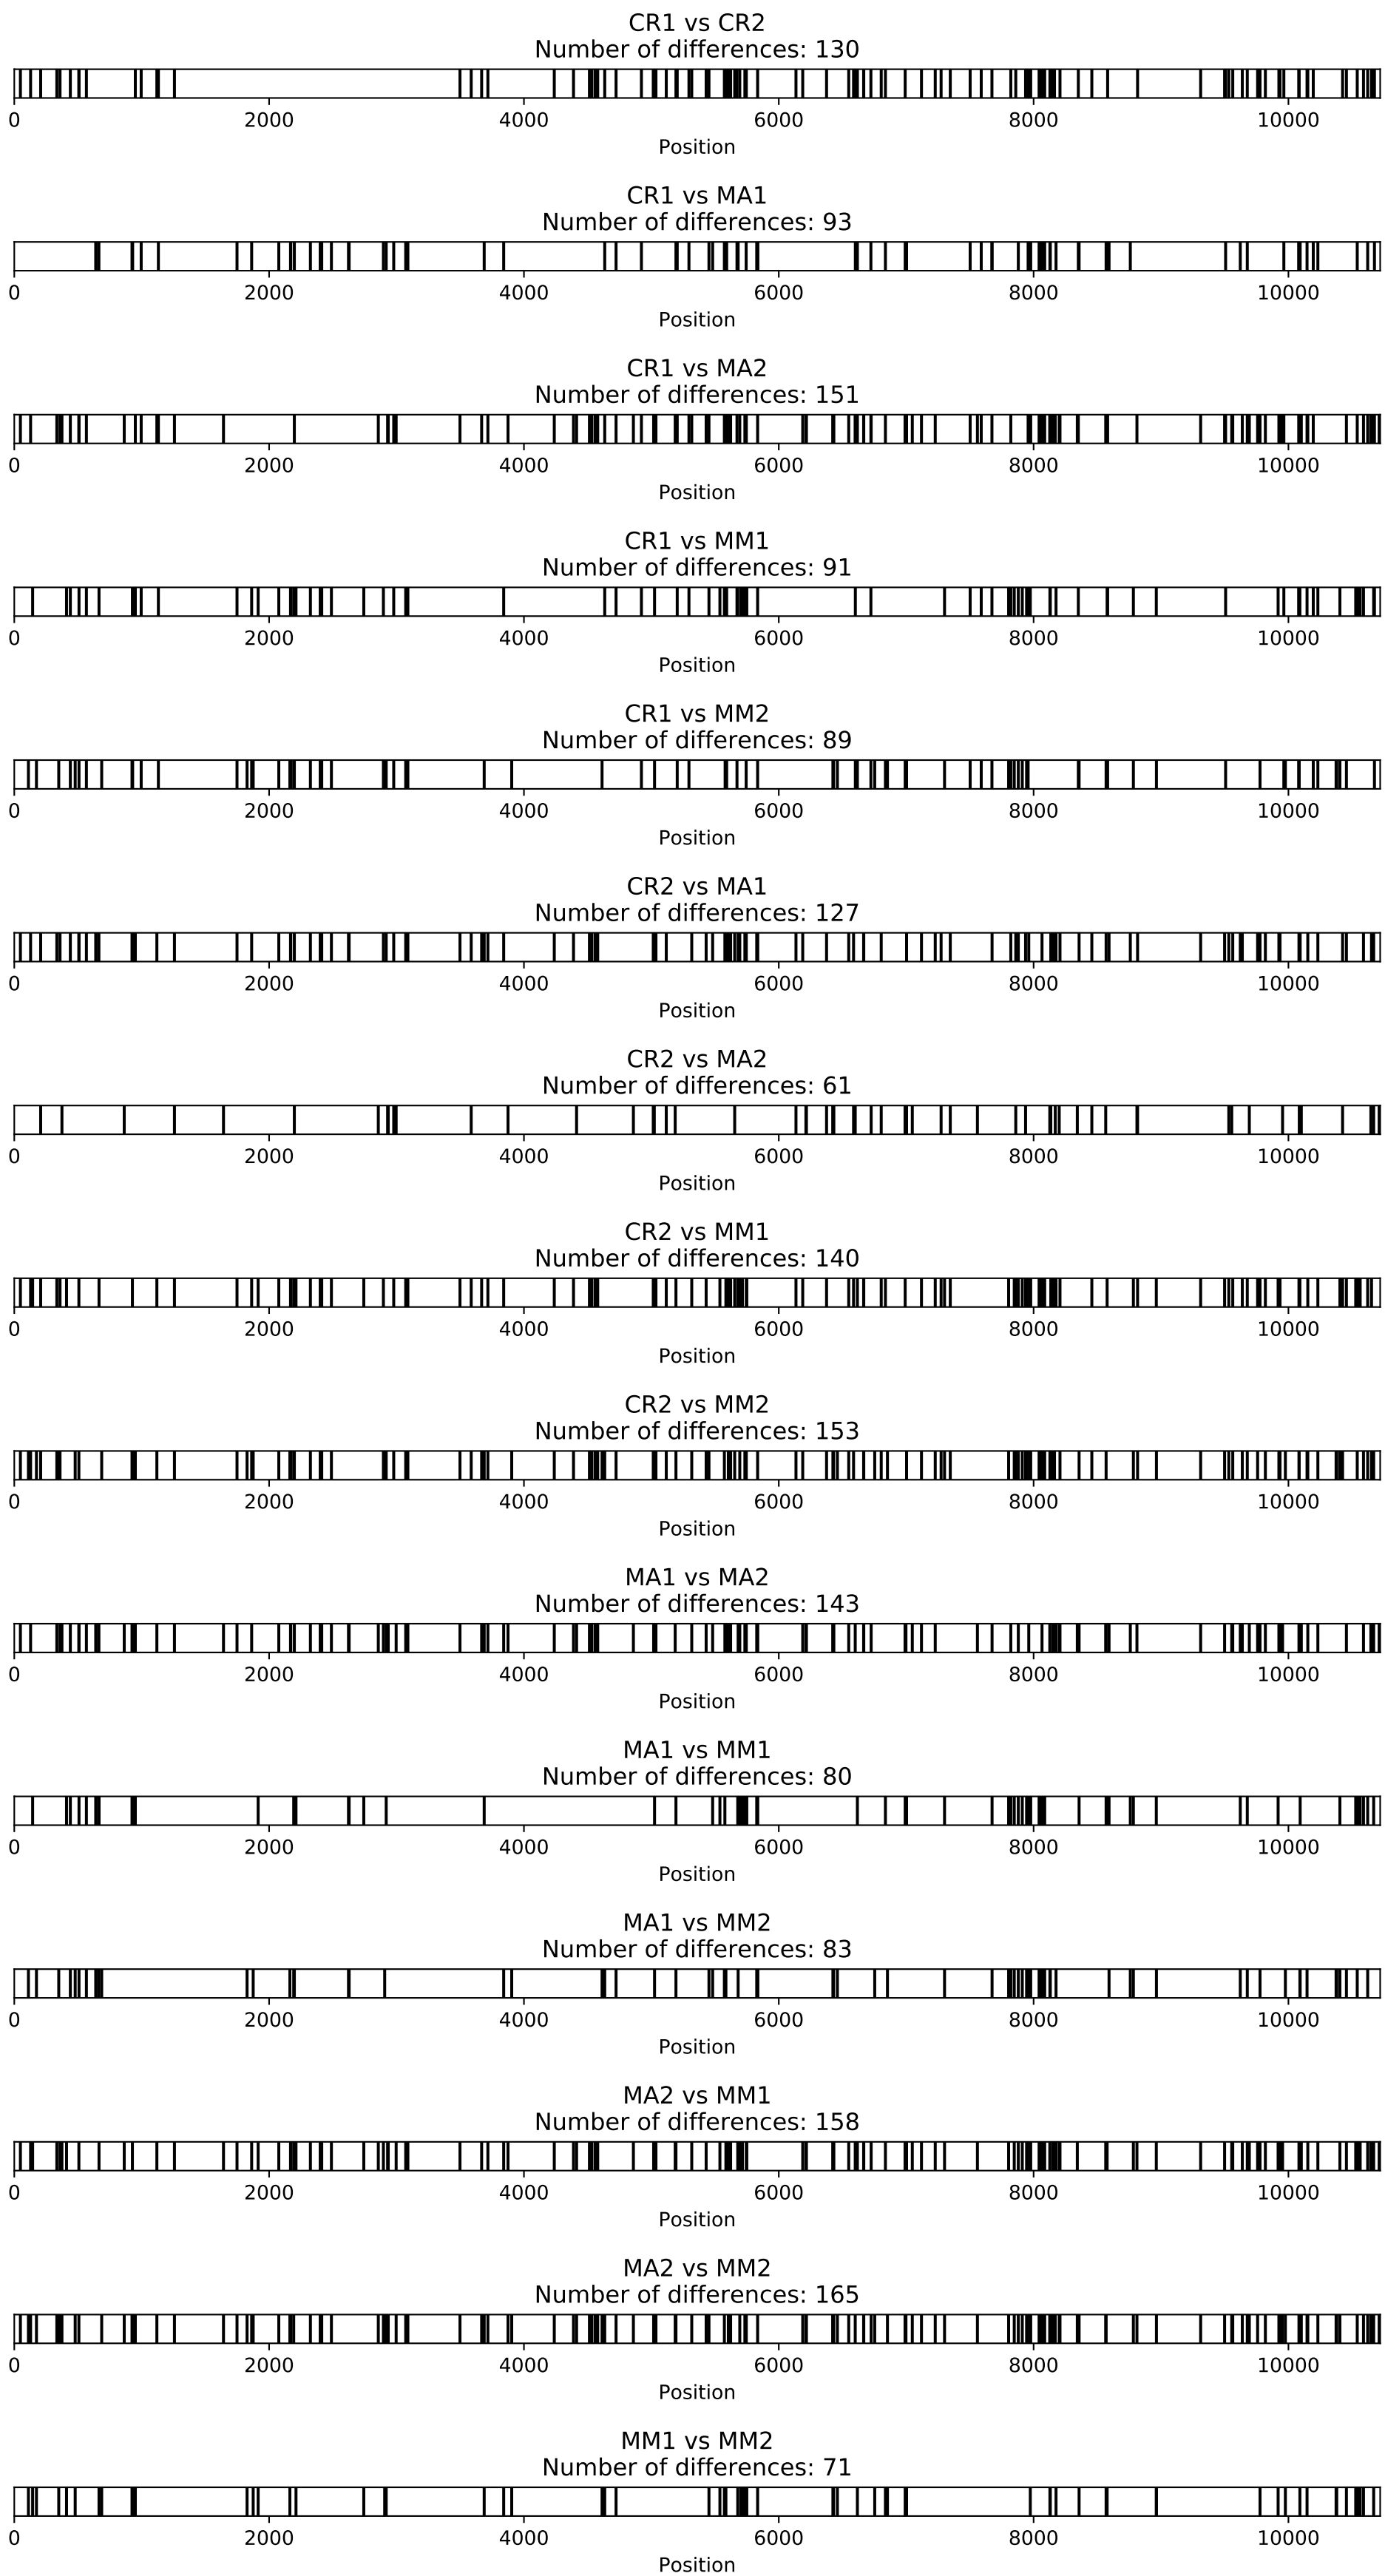

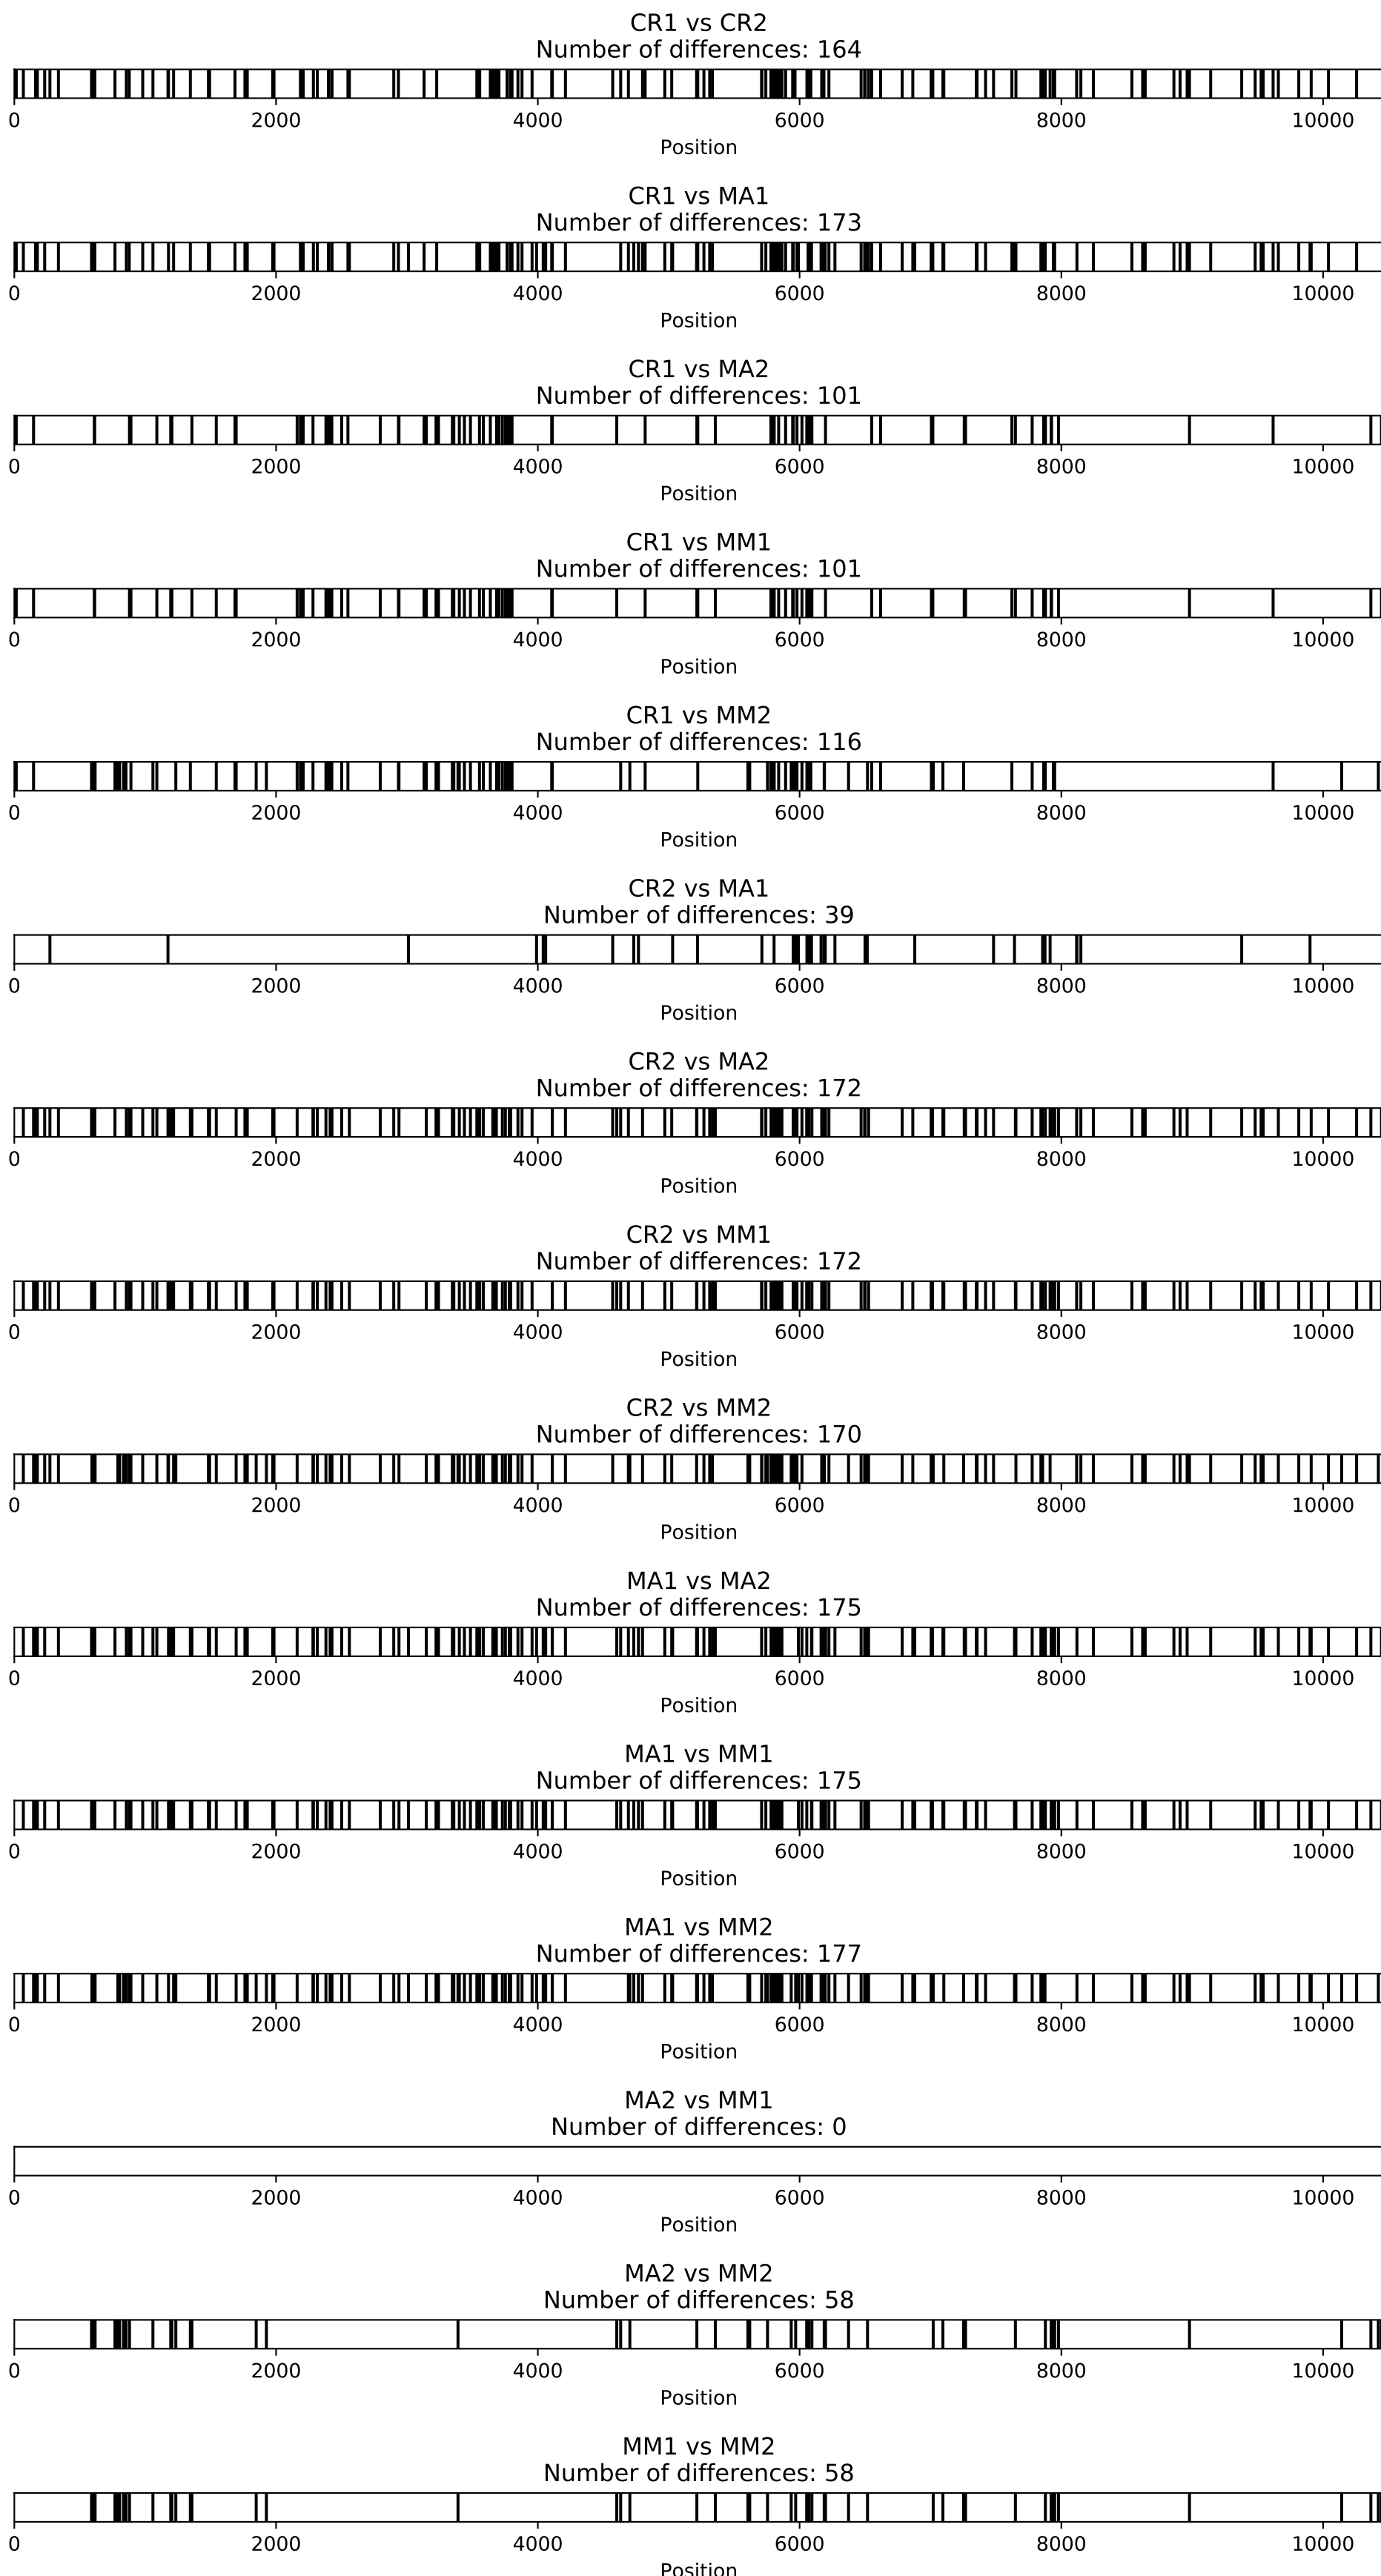

# Region: 324

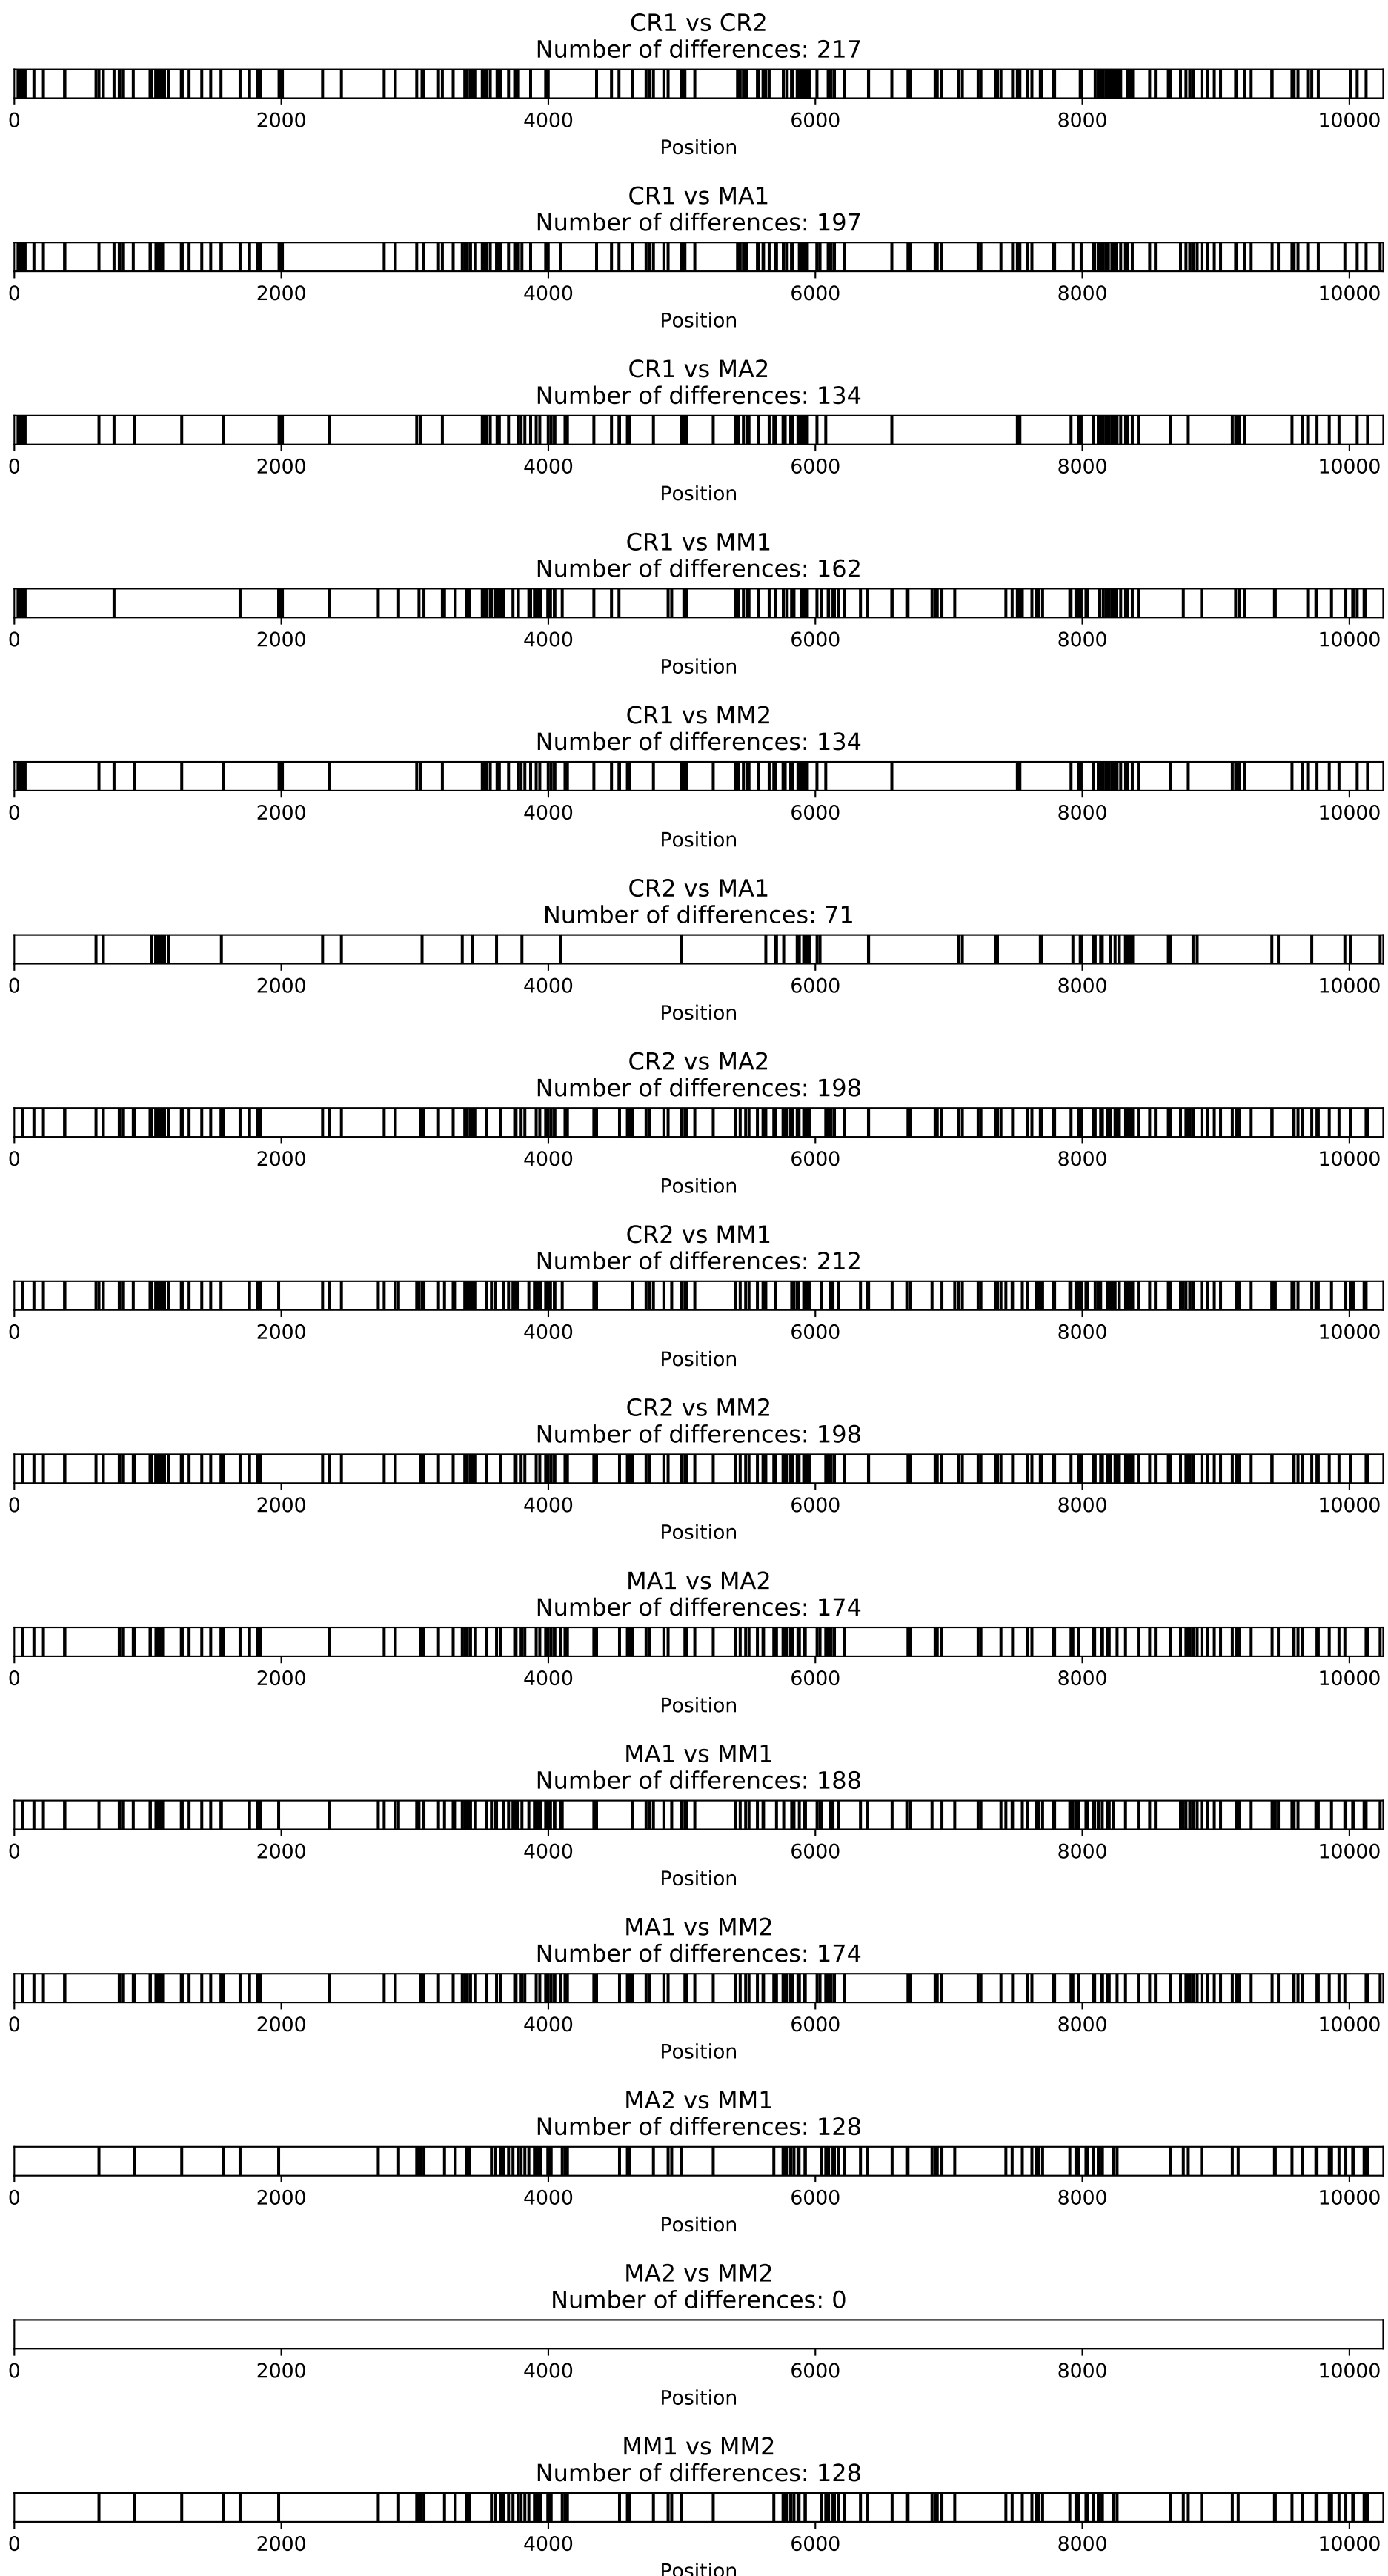

# Region: 326

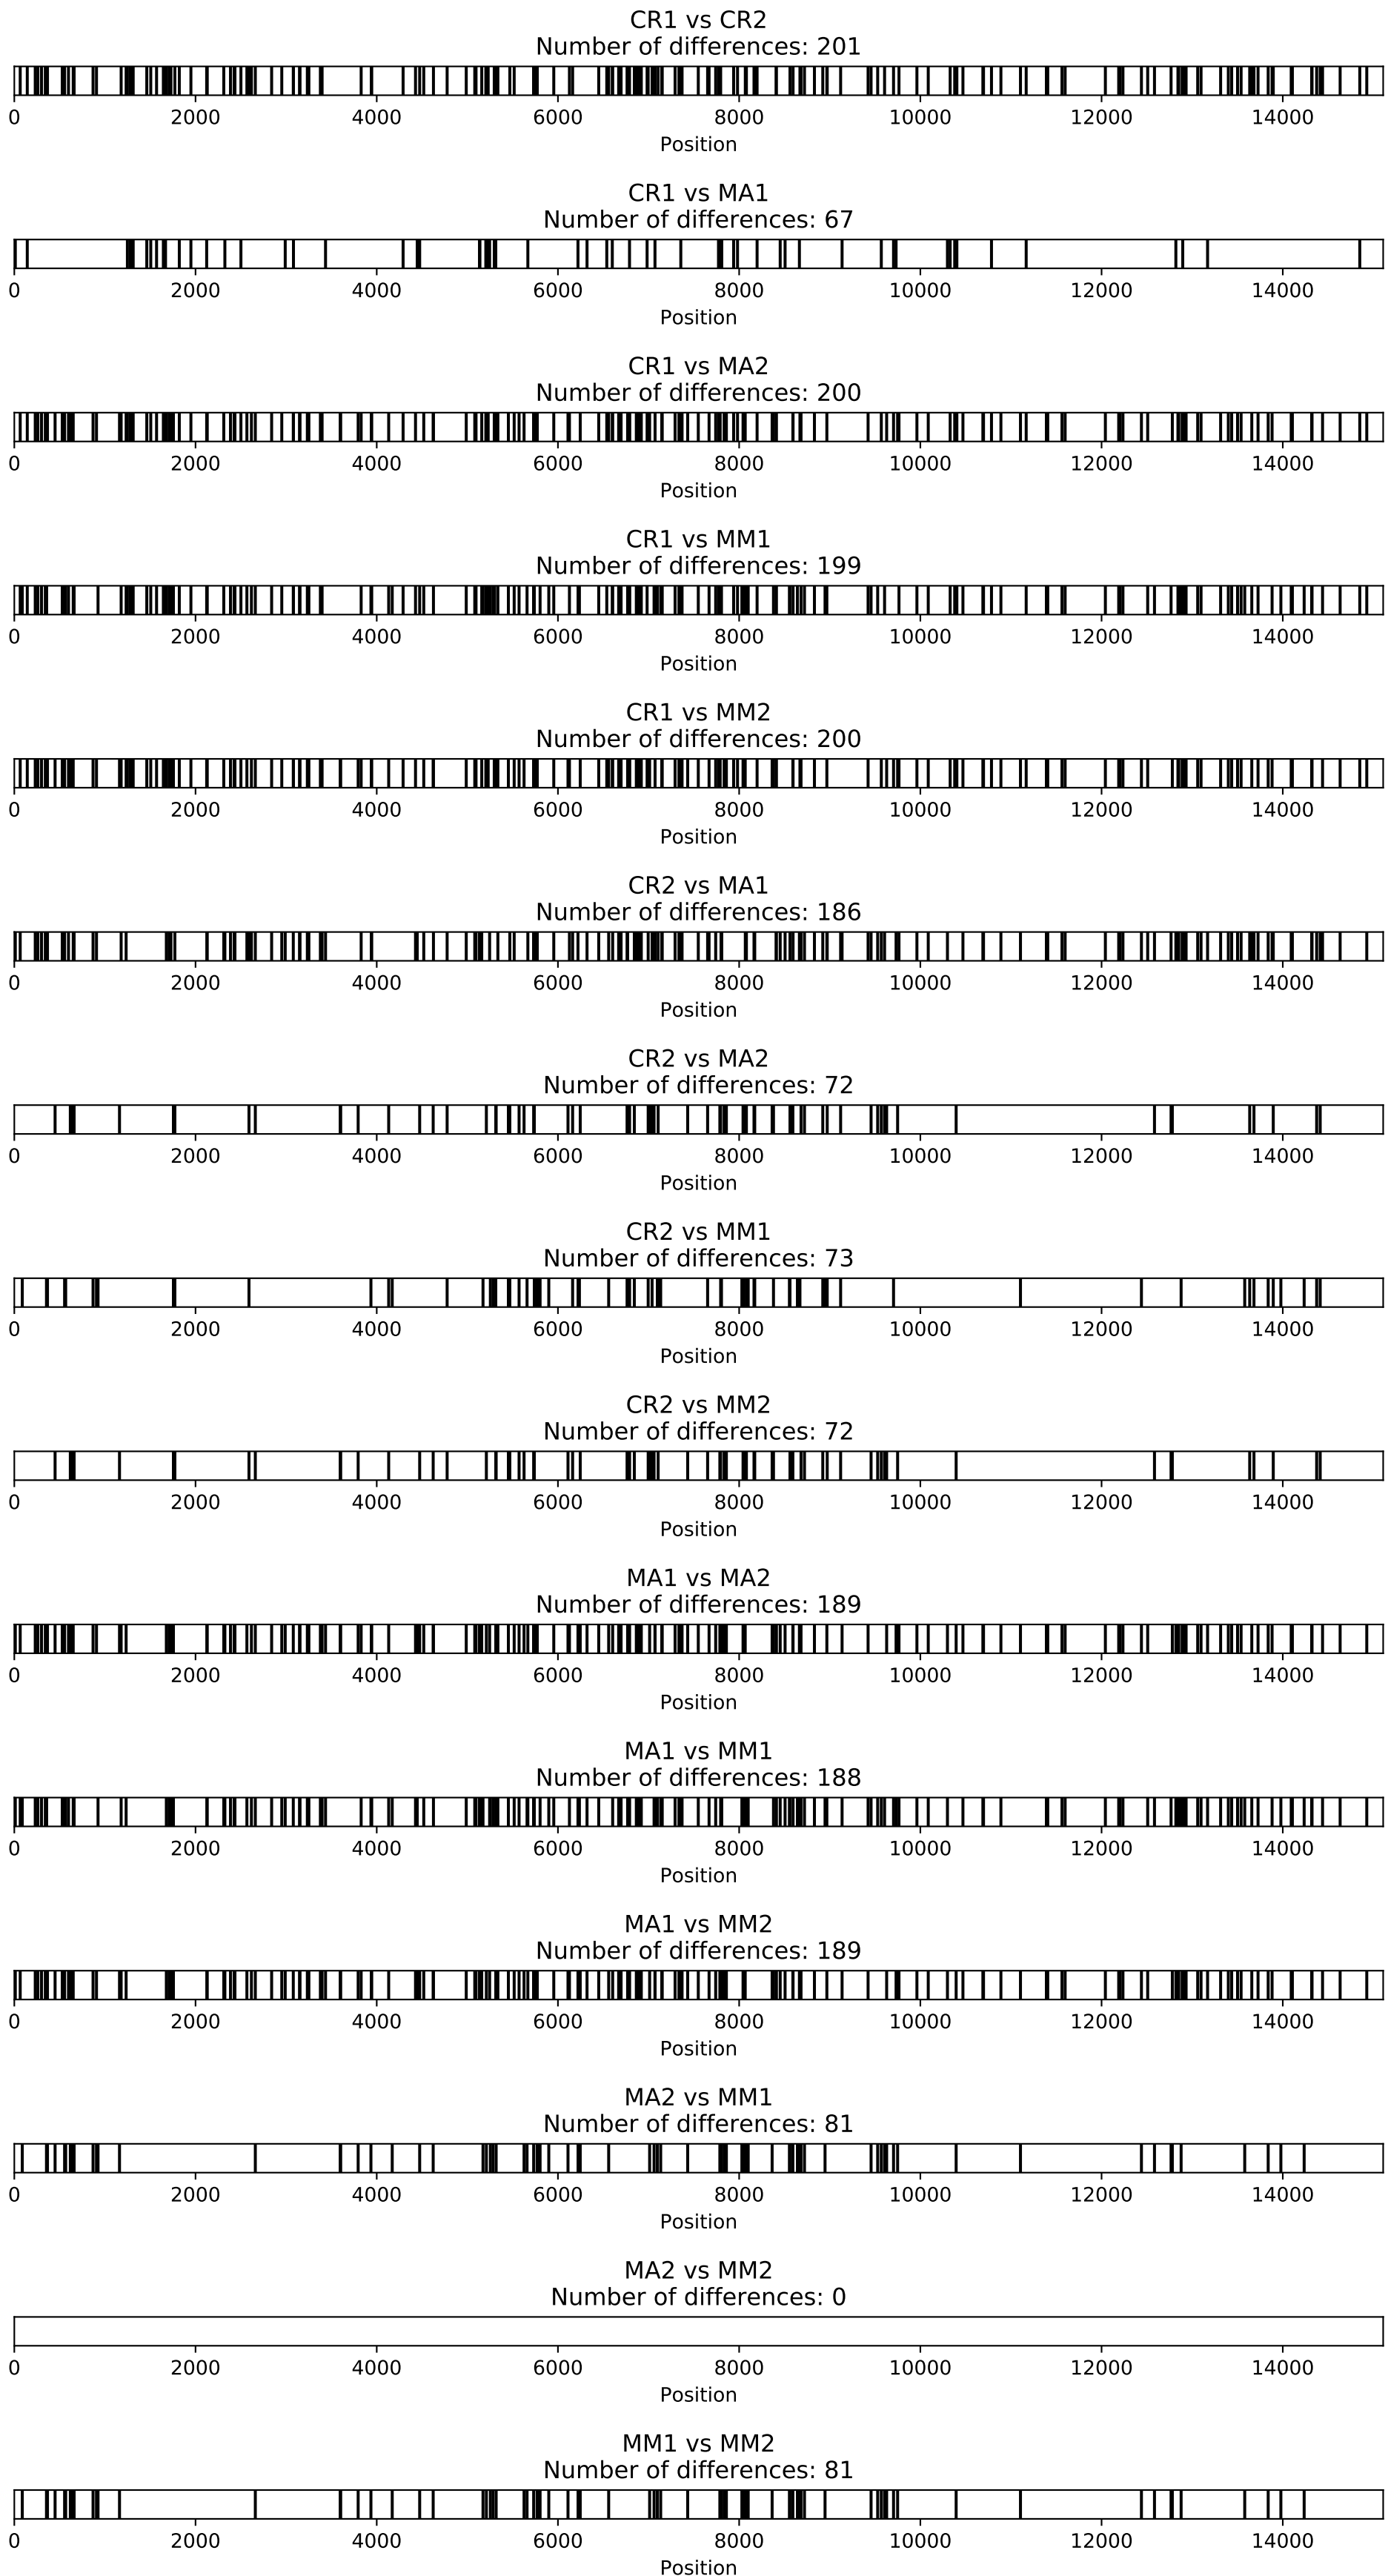

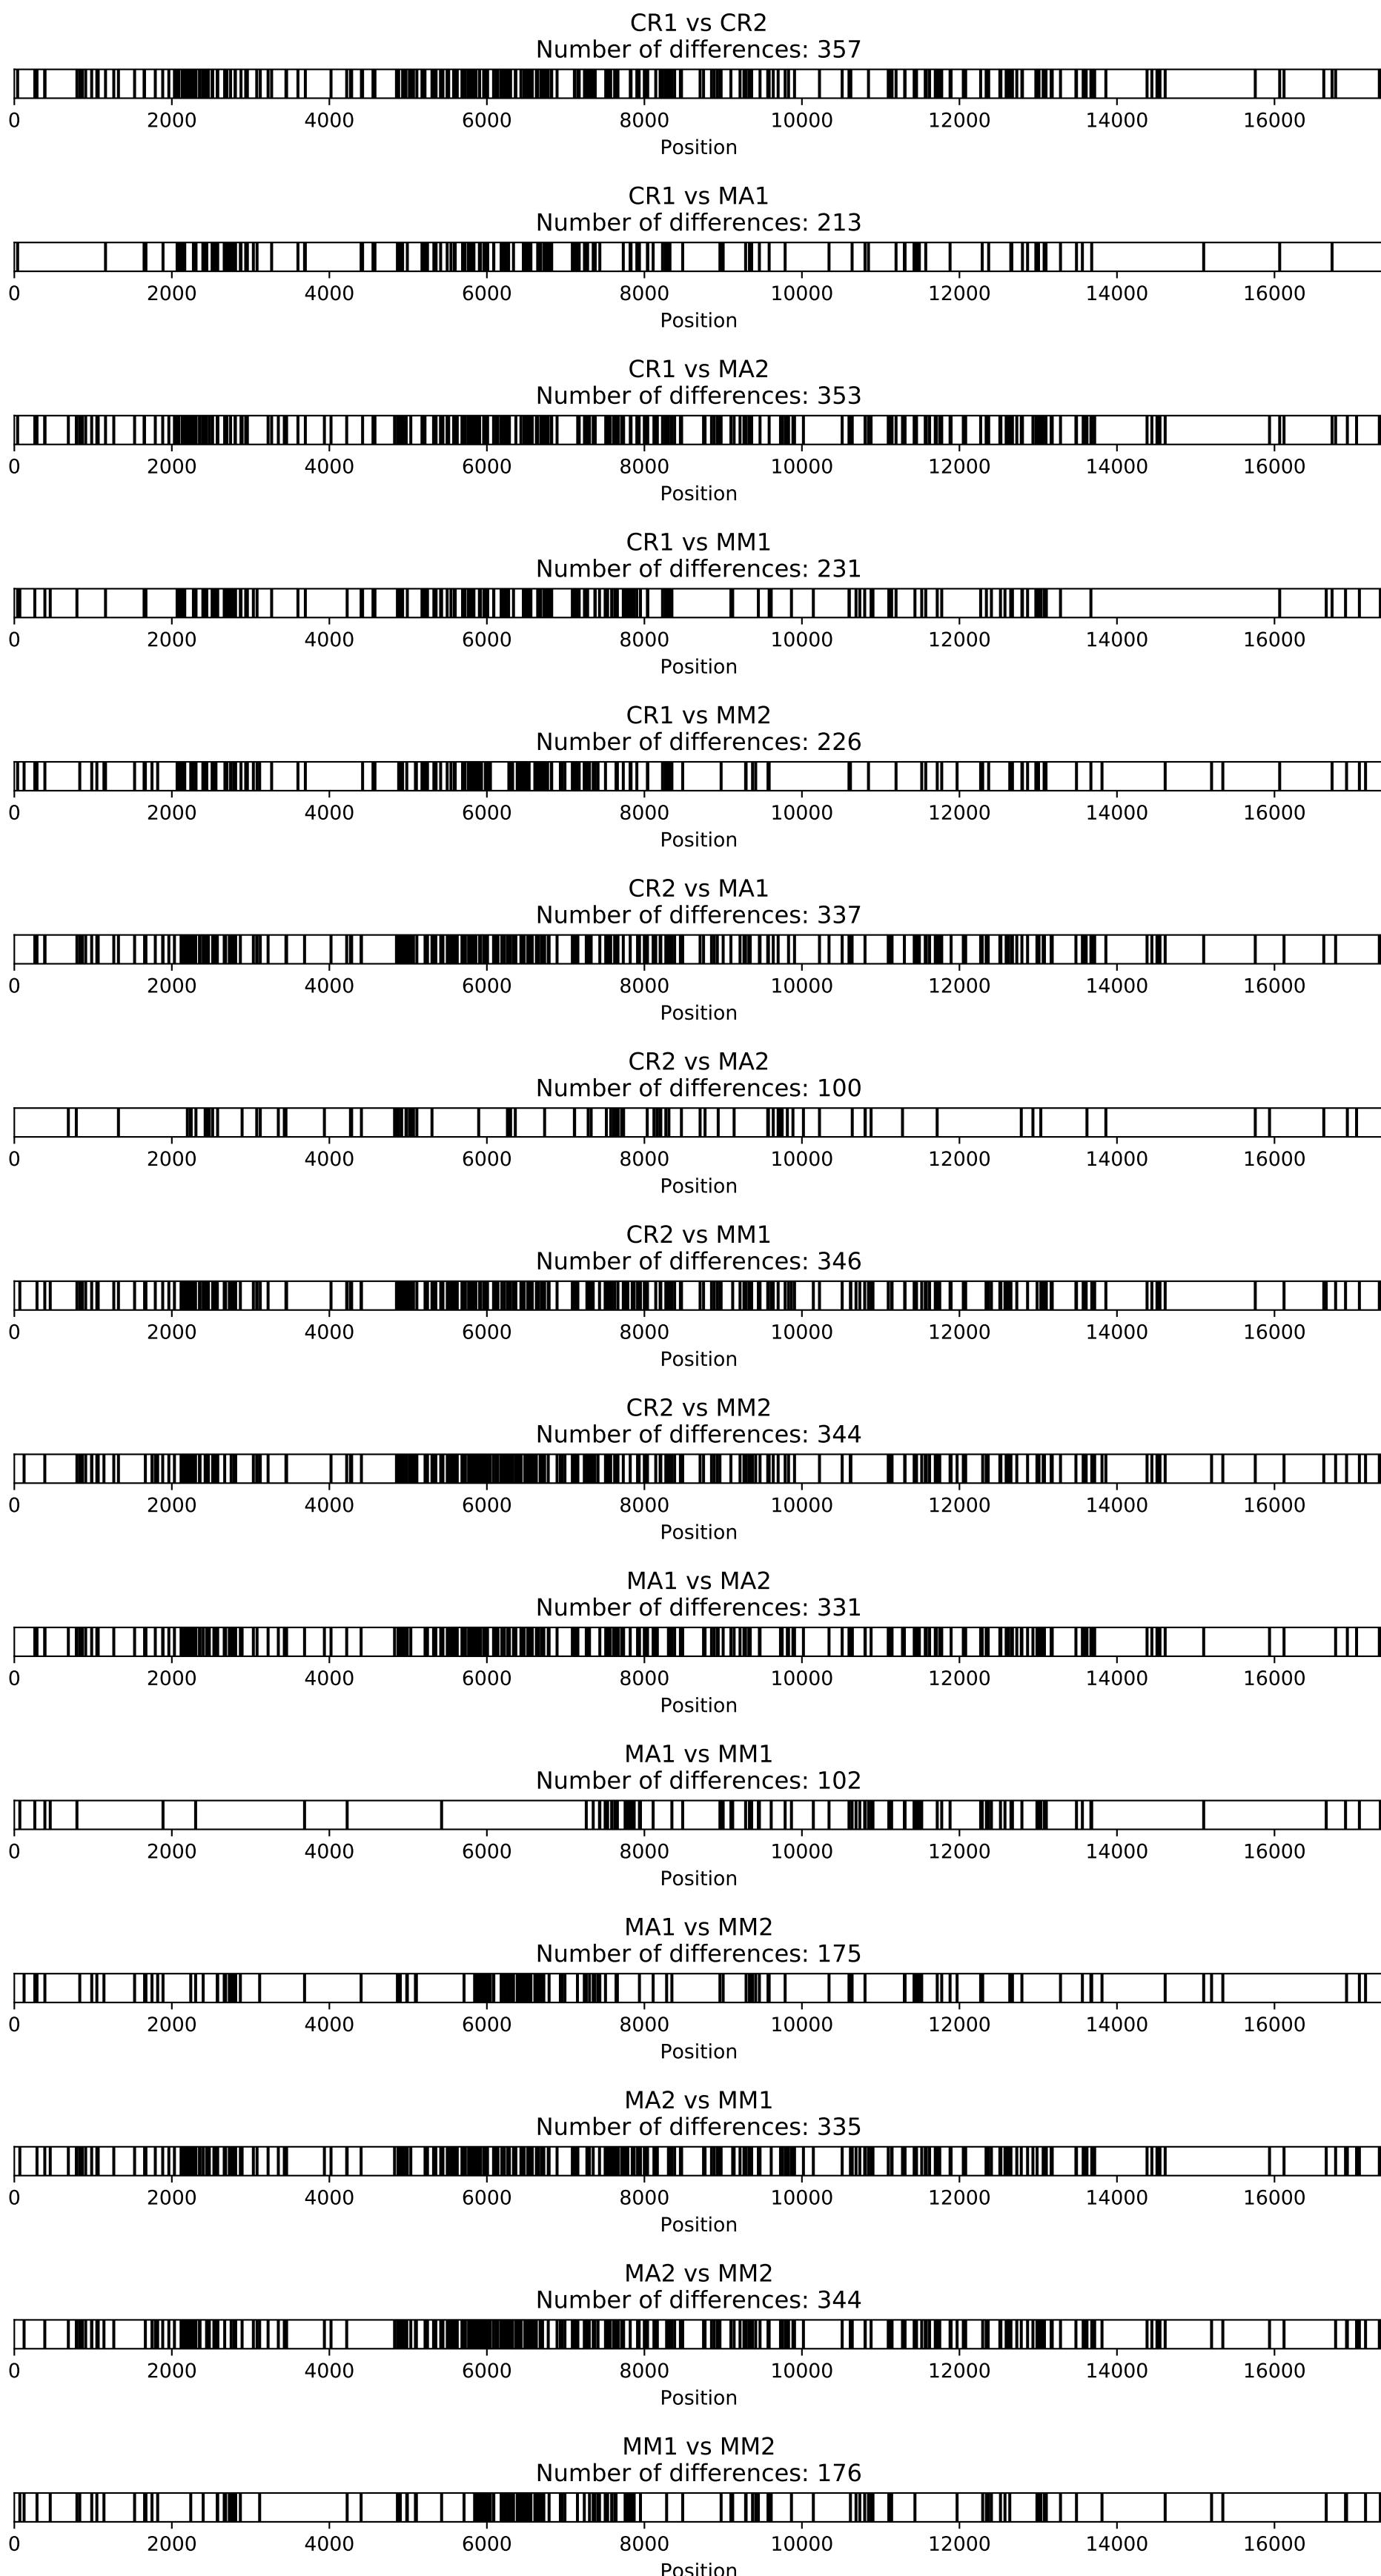

### Region: 334

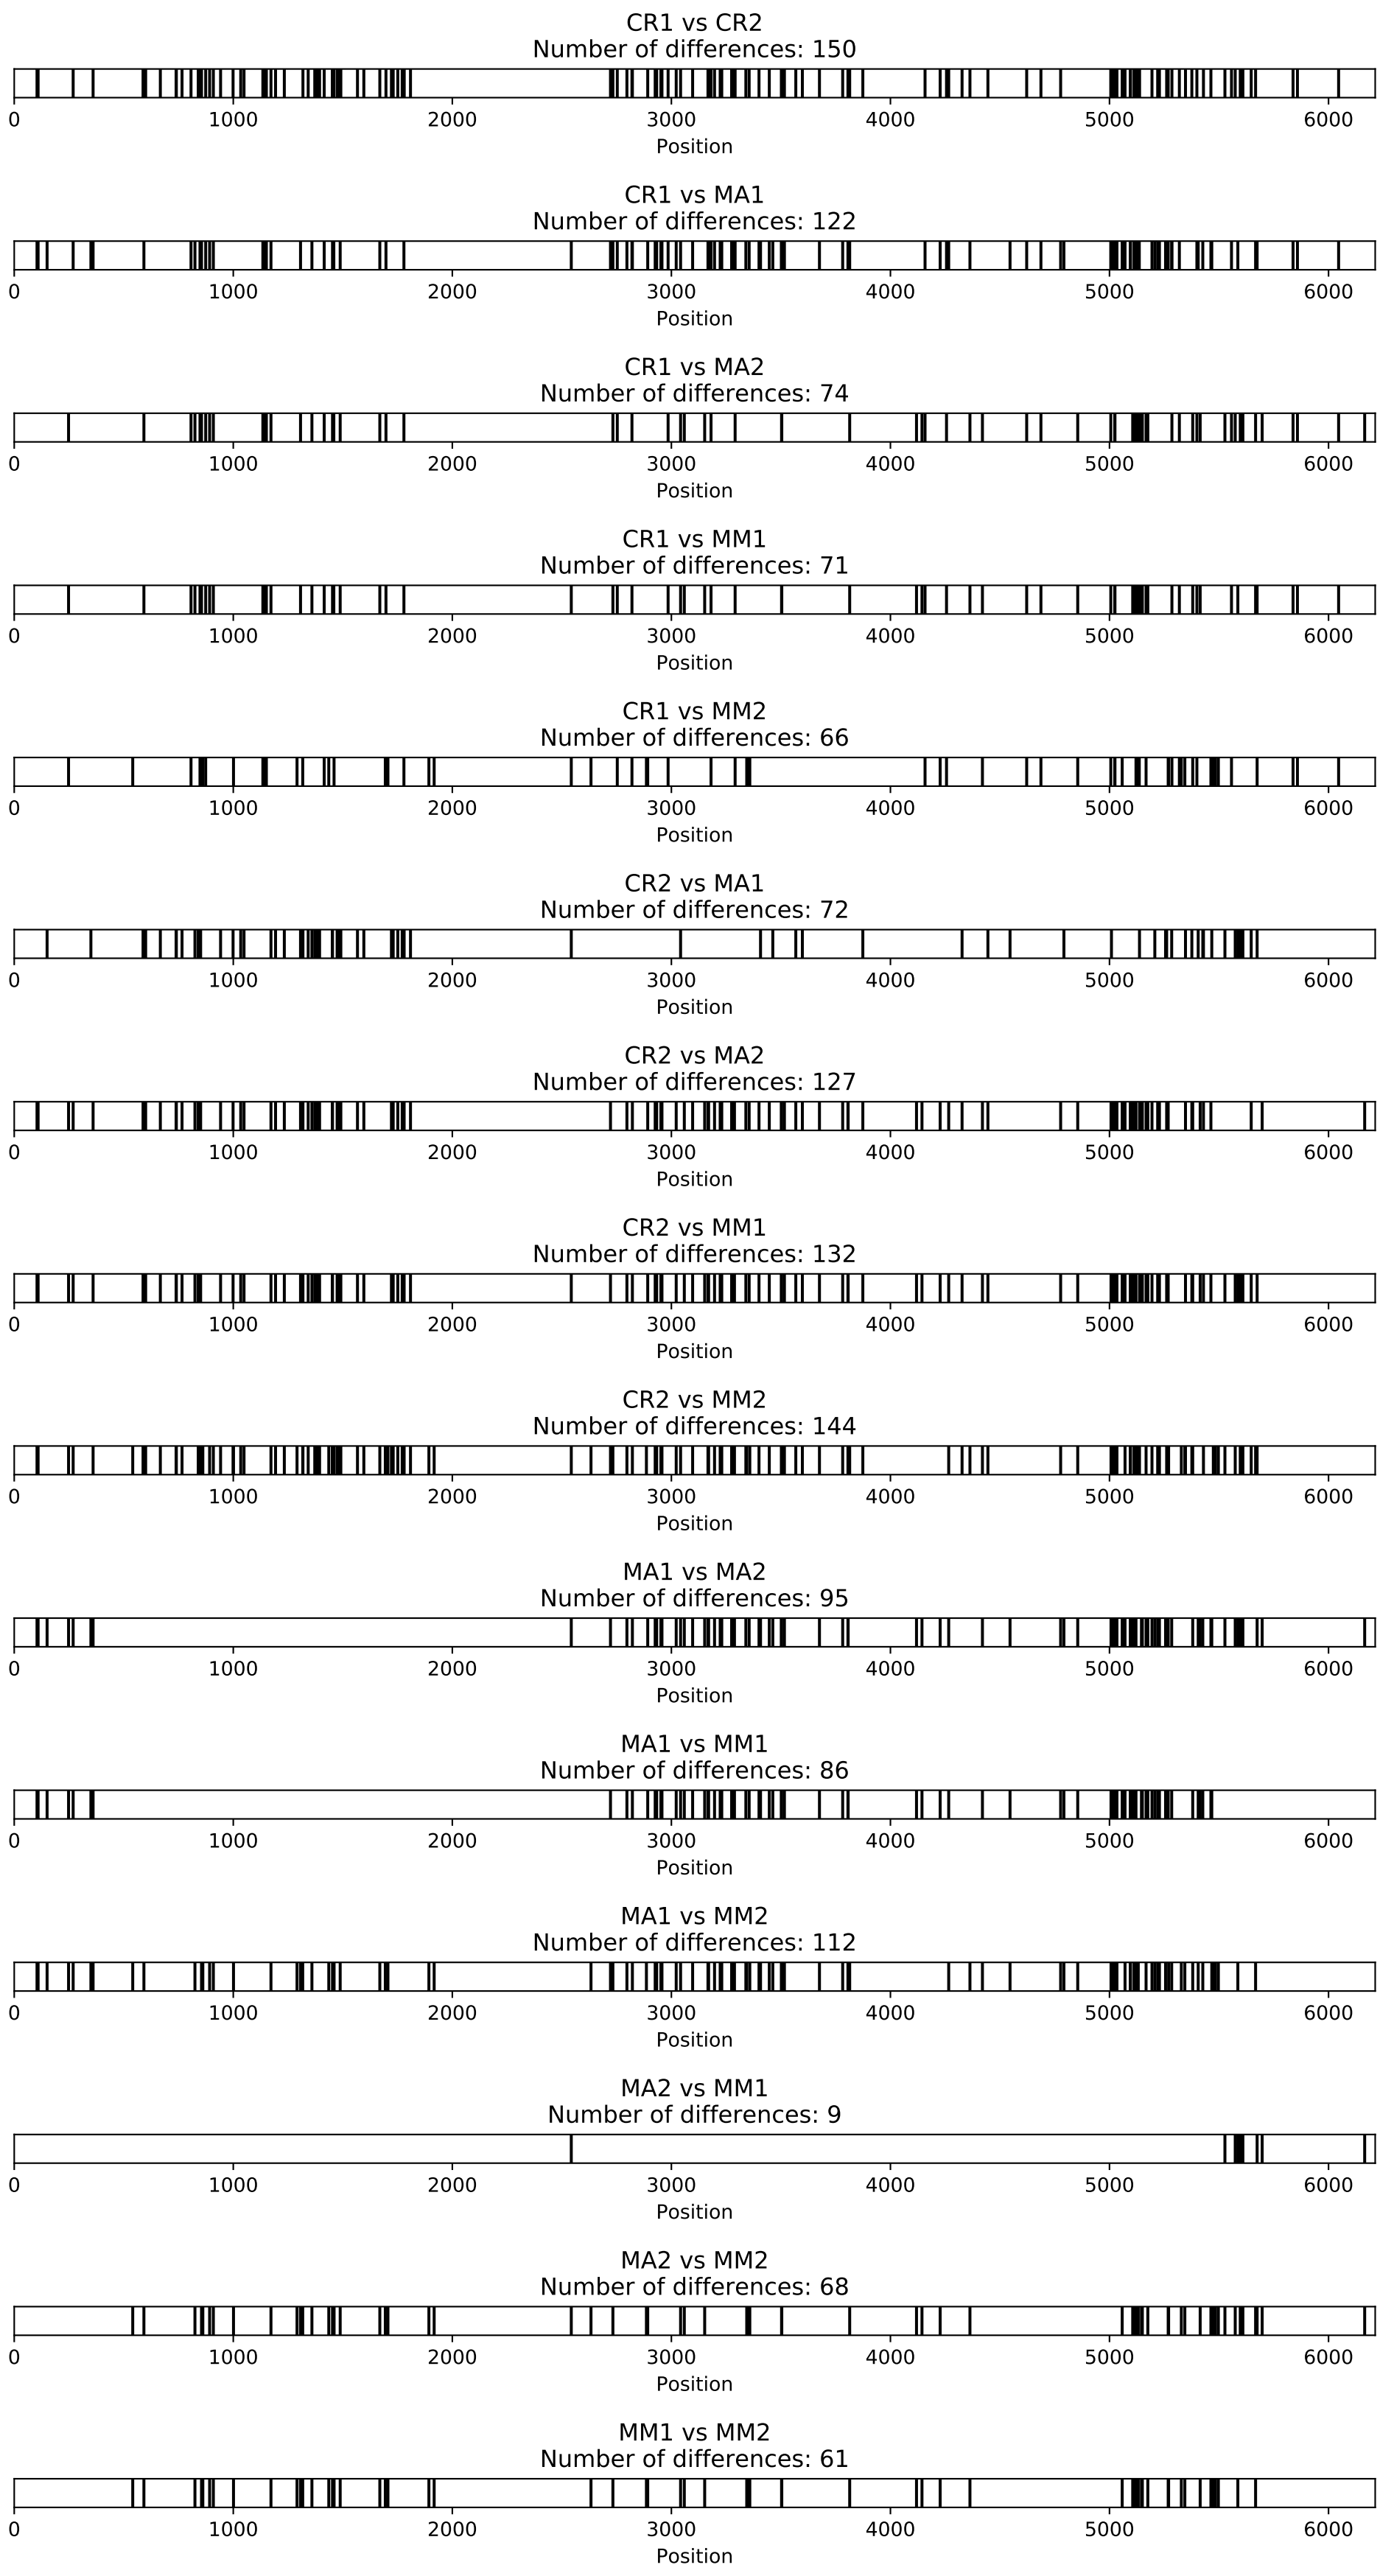

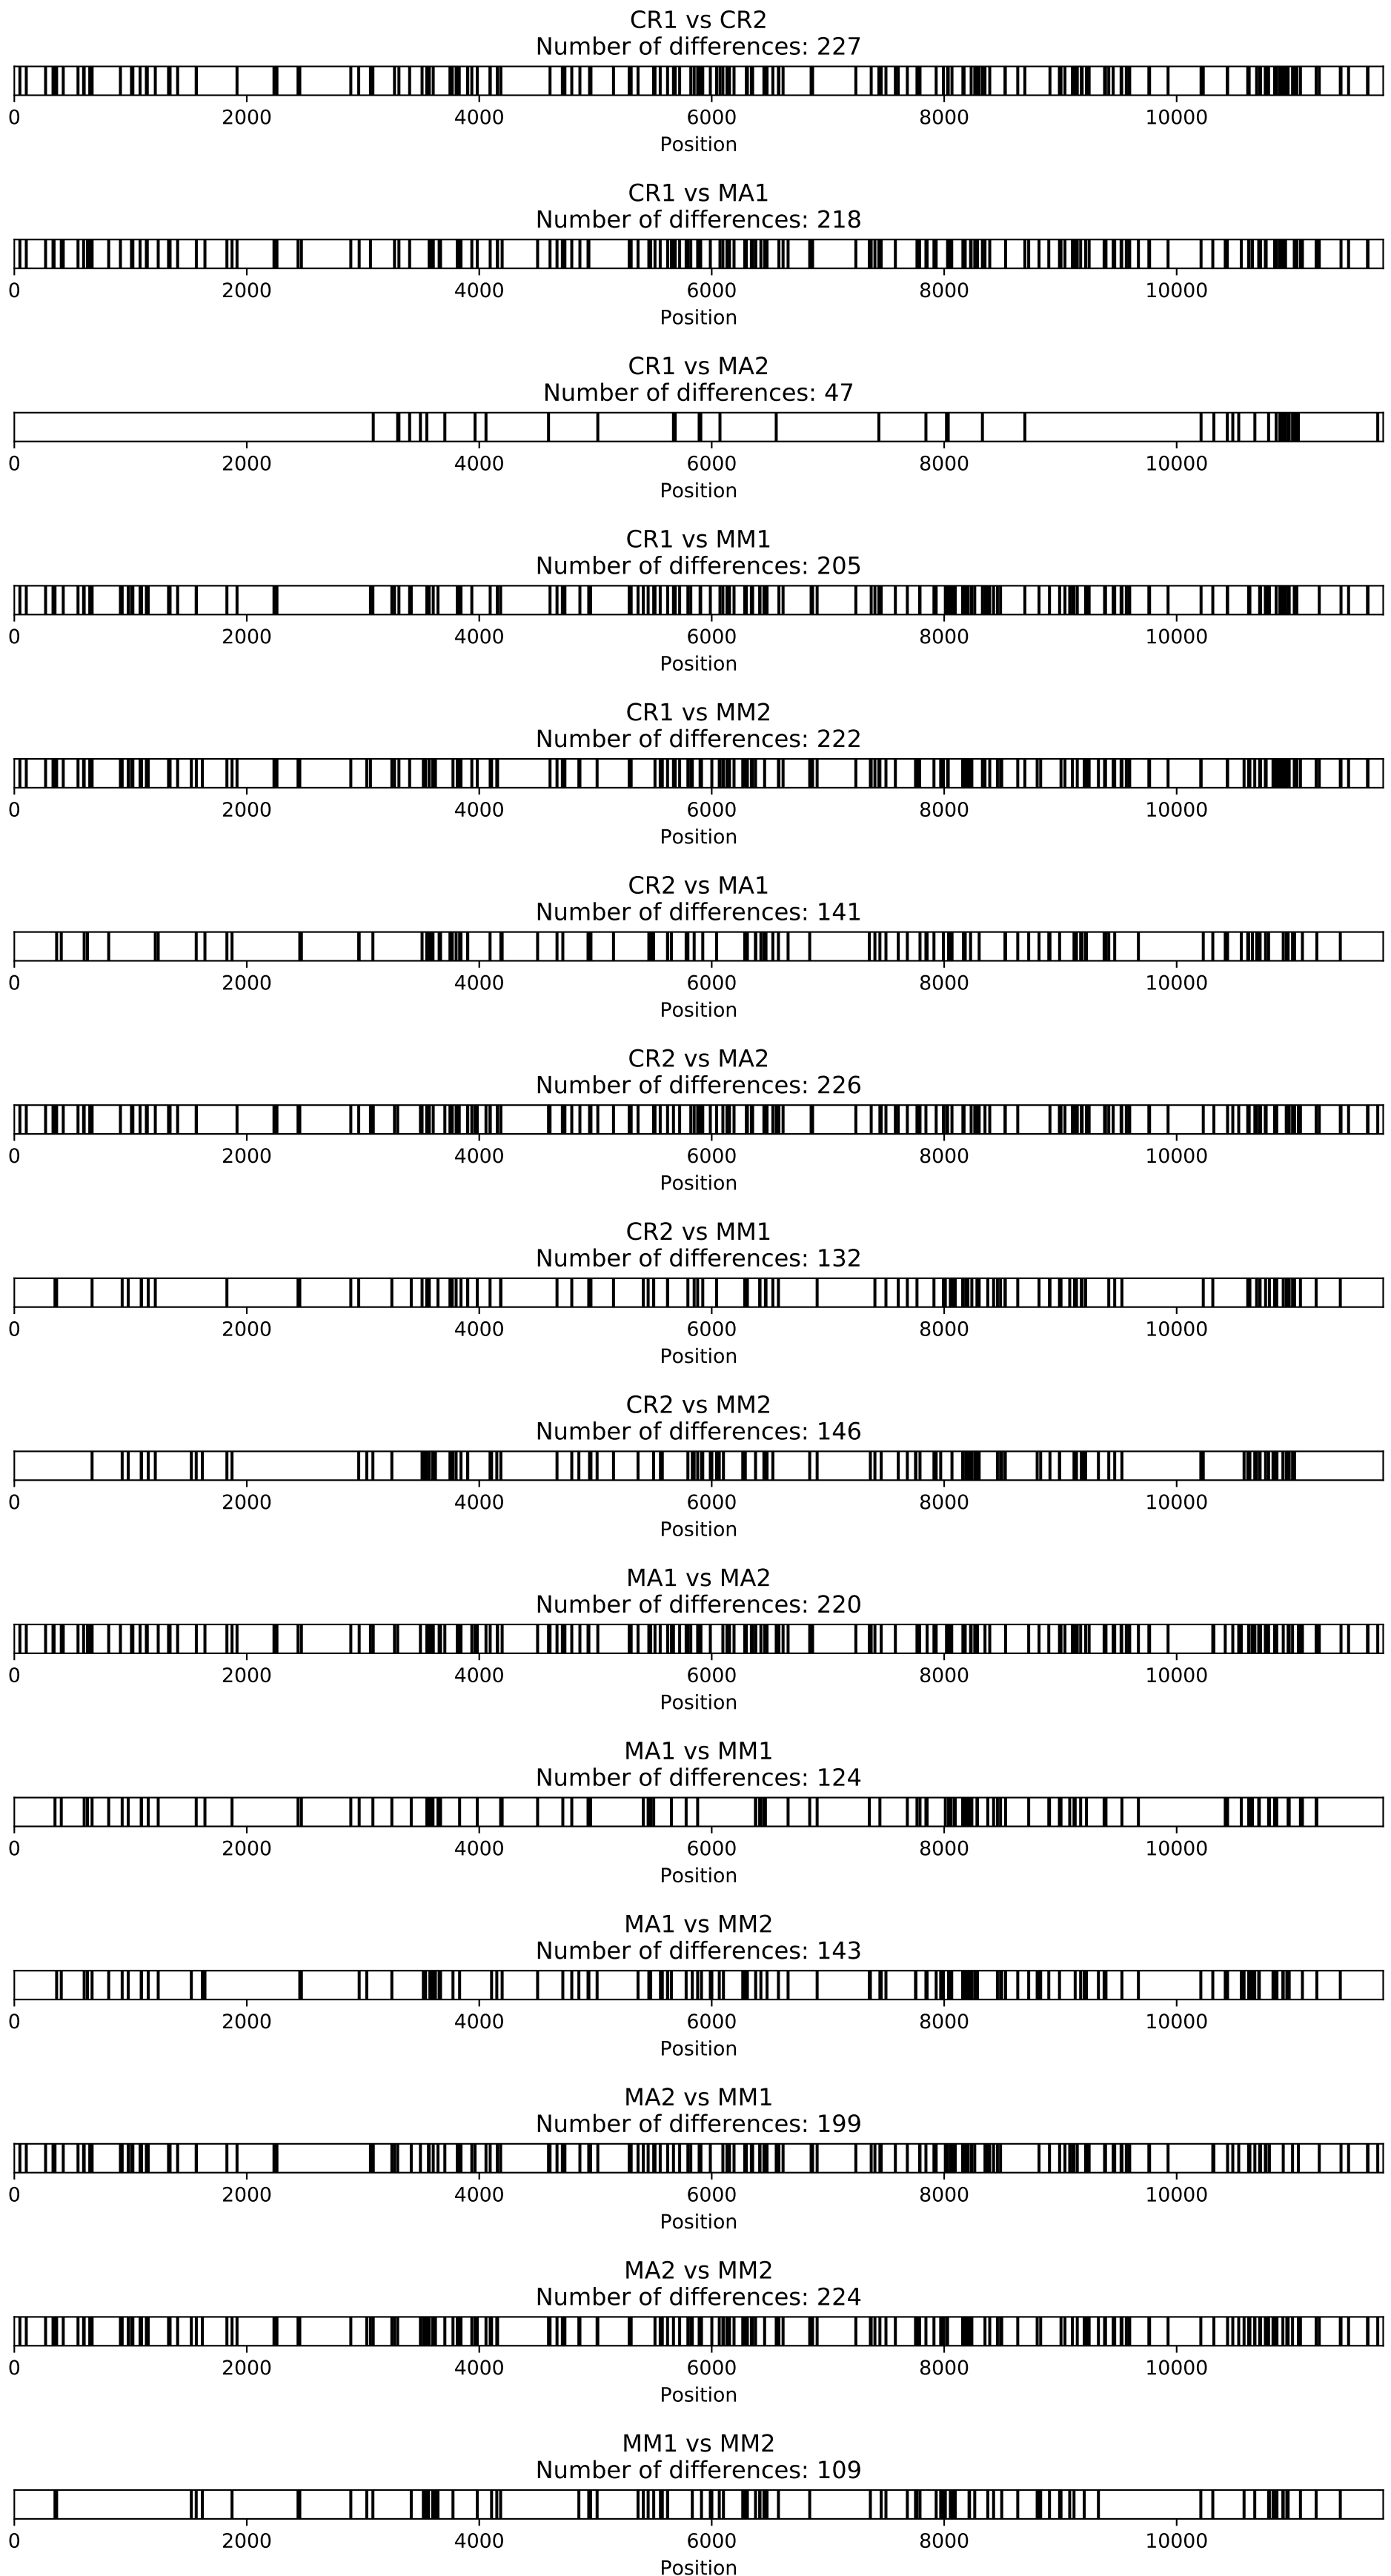



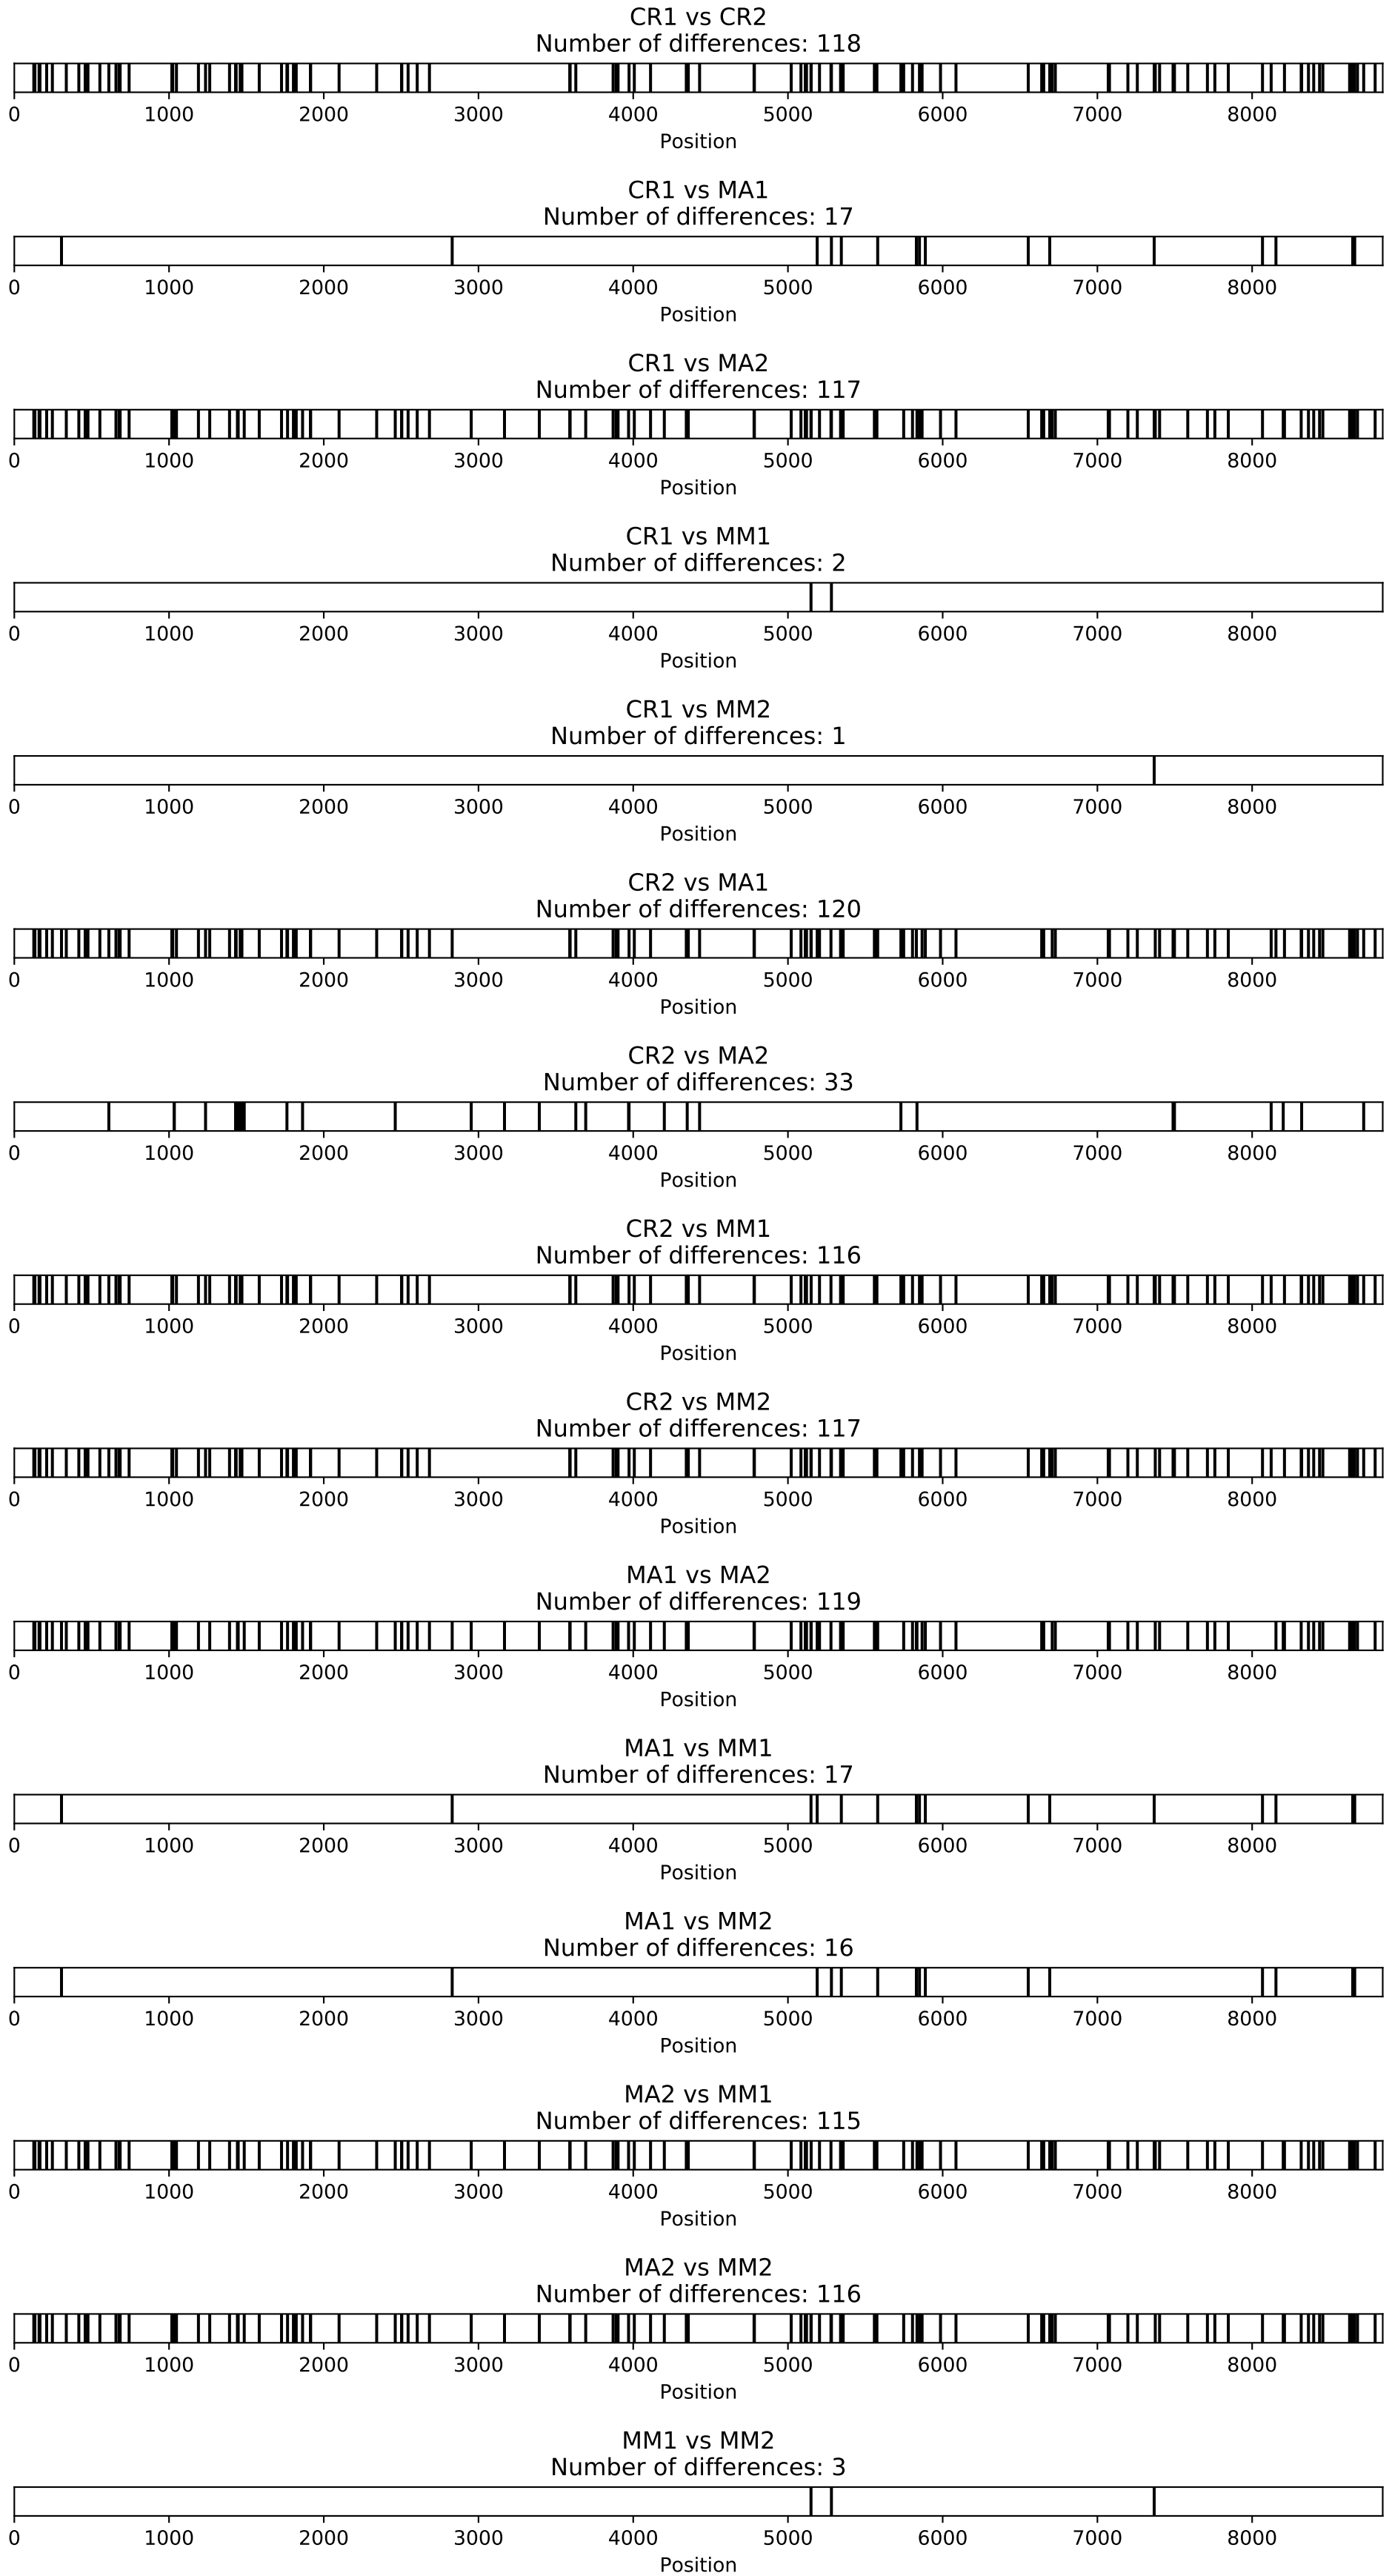

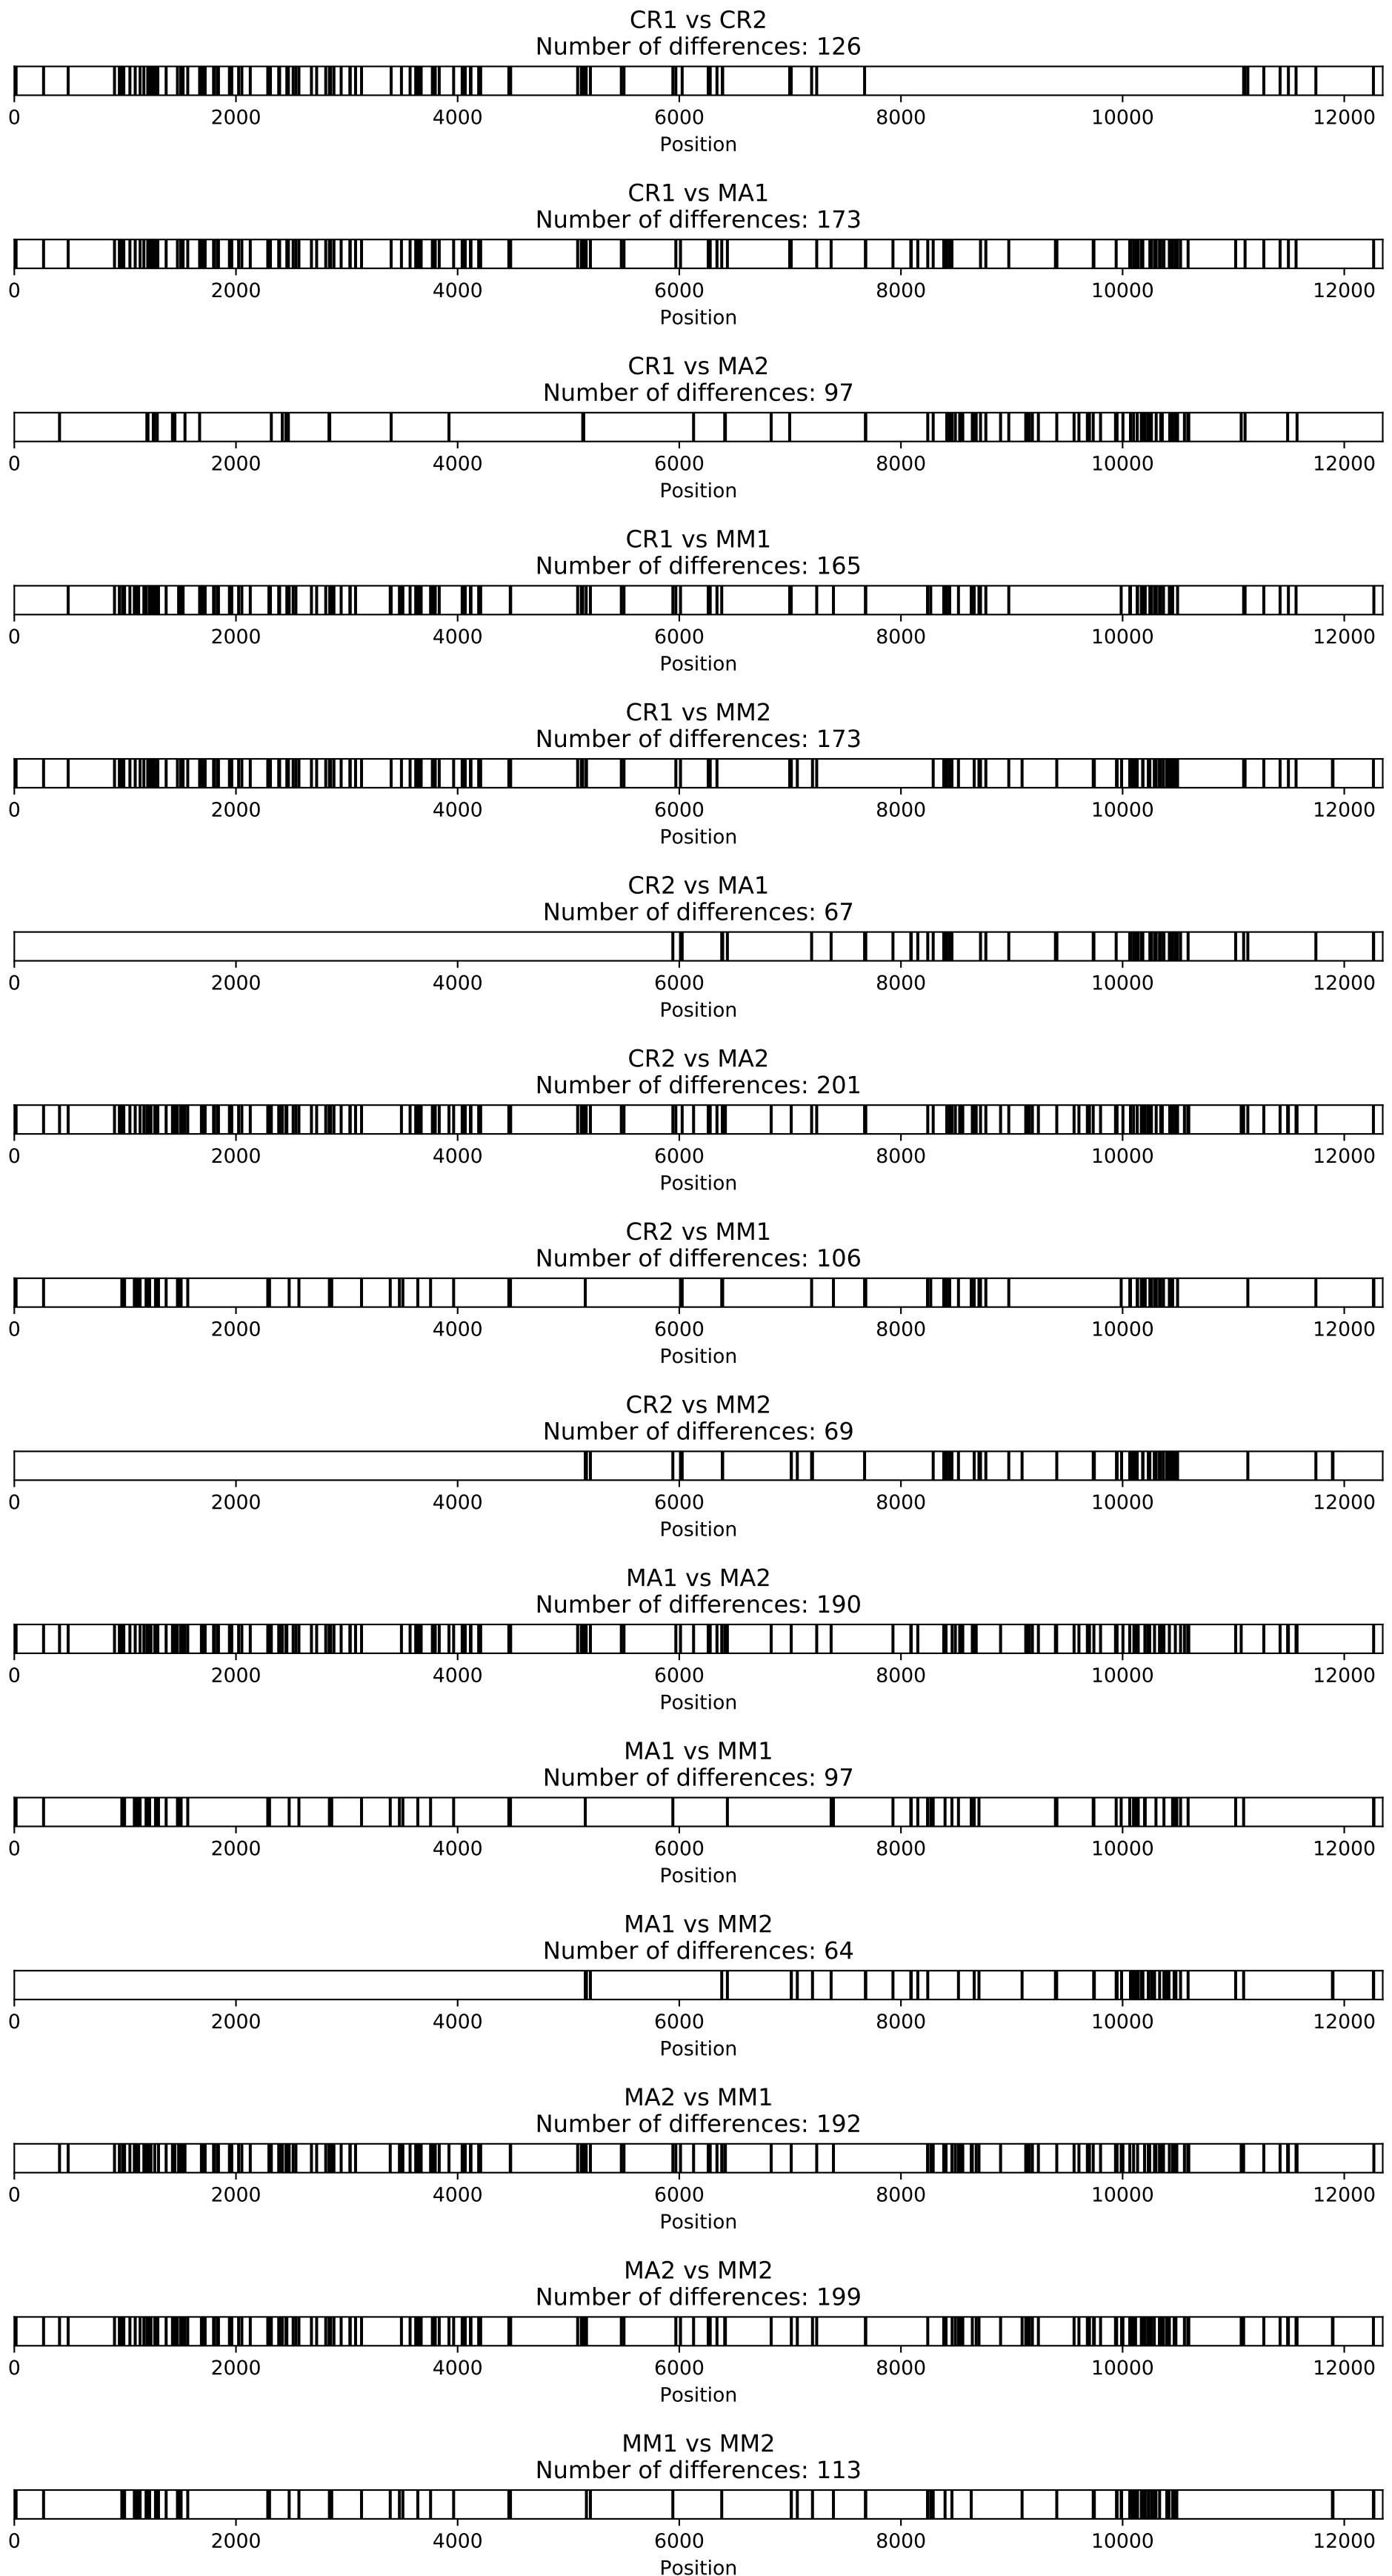

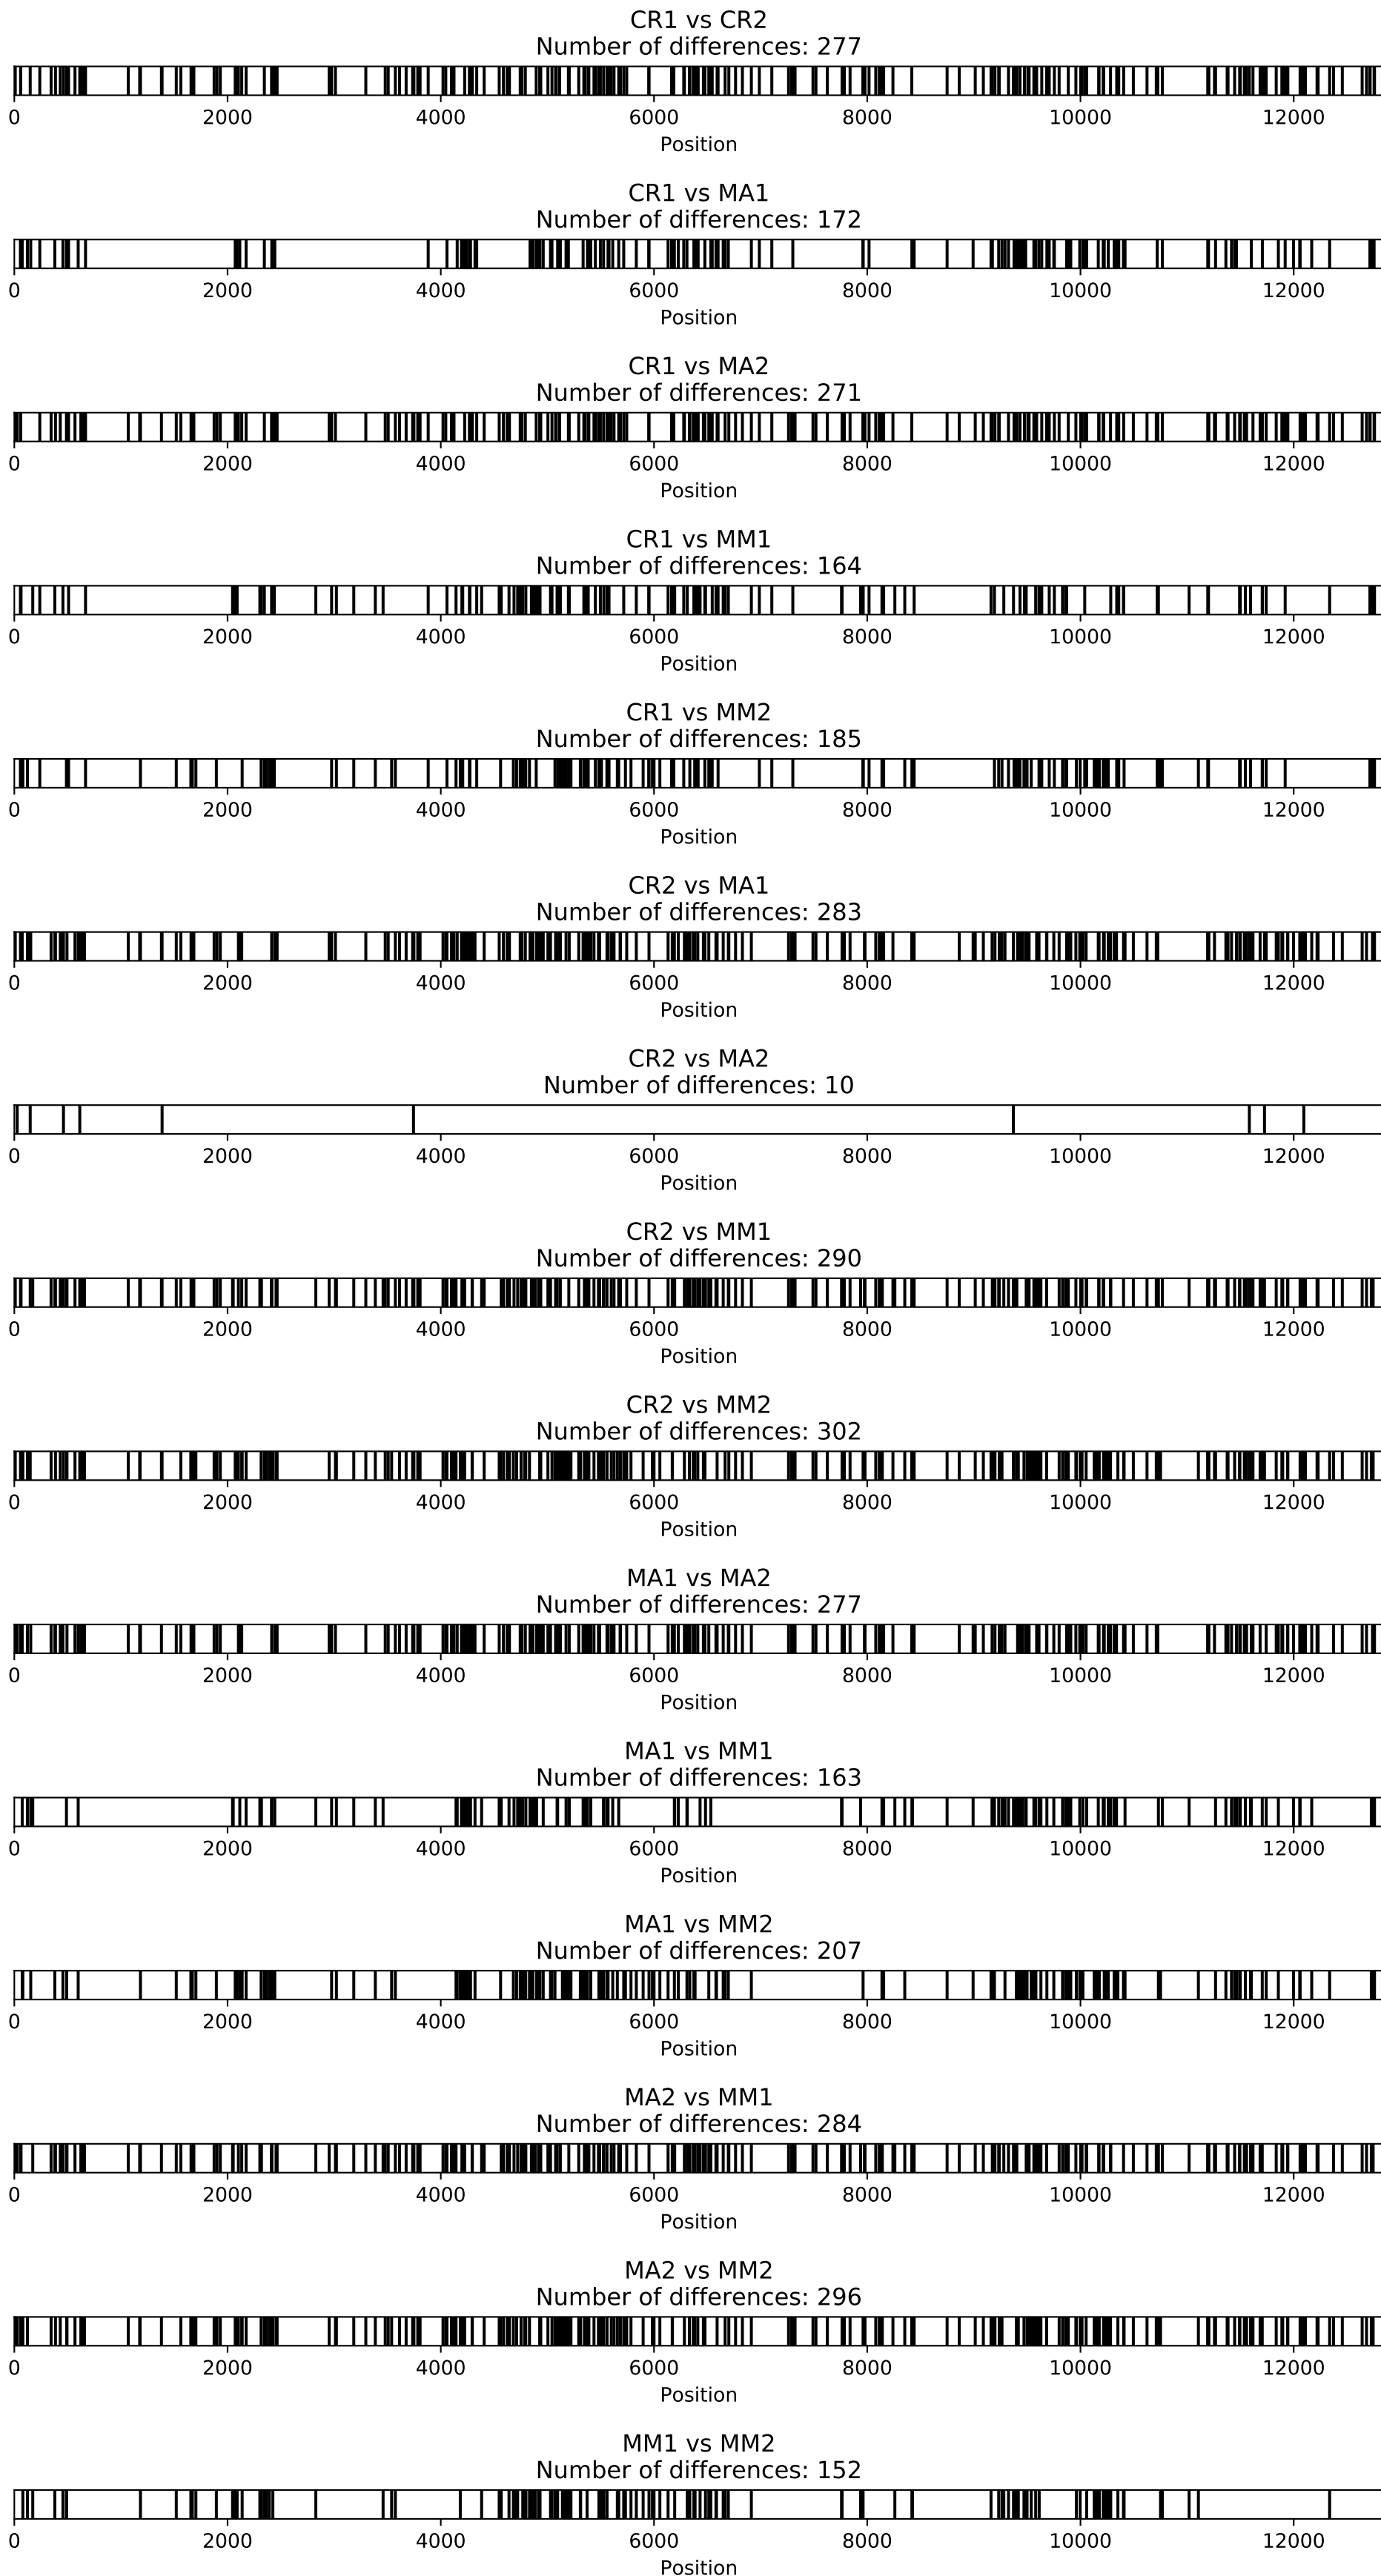

# Region: 343

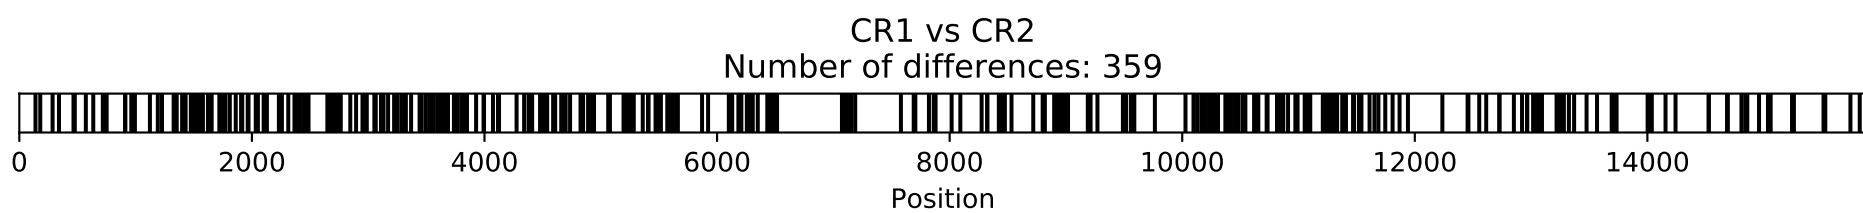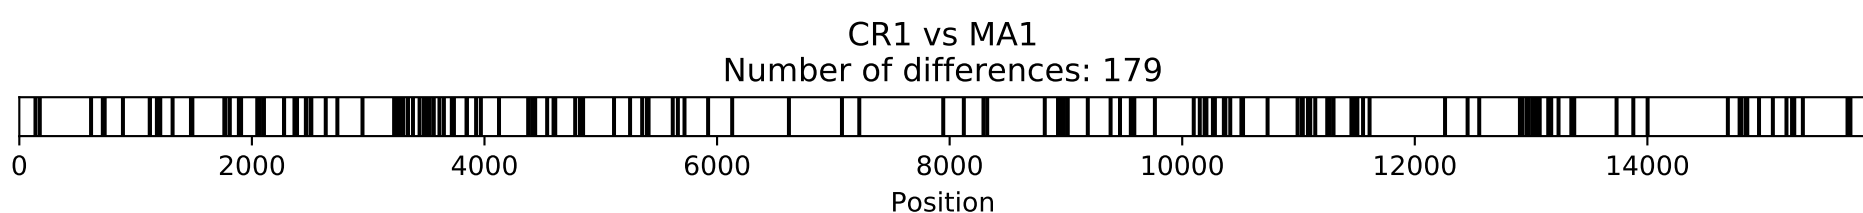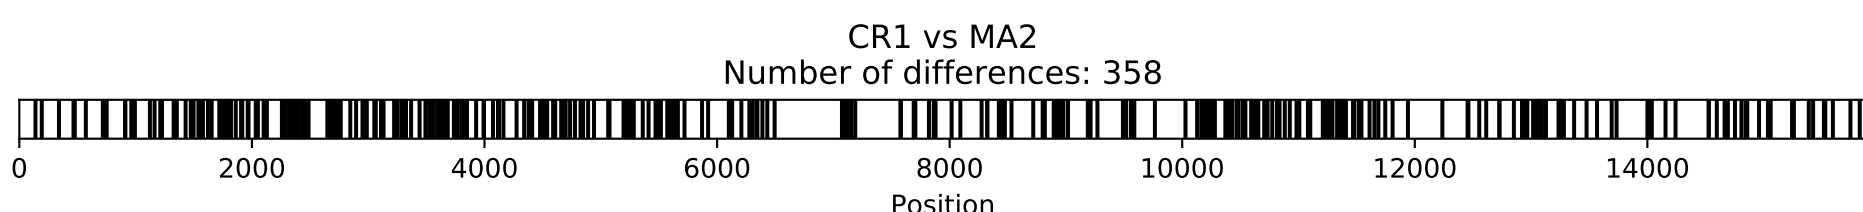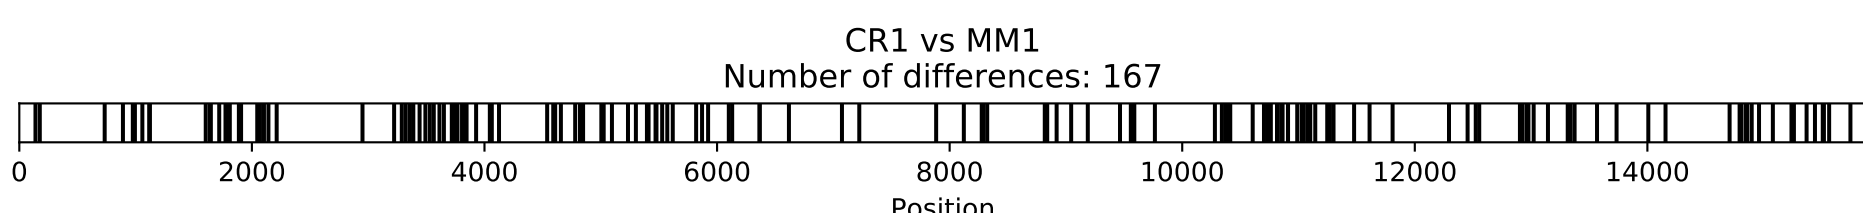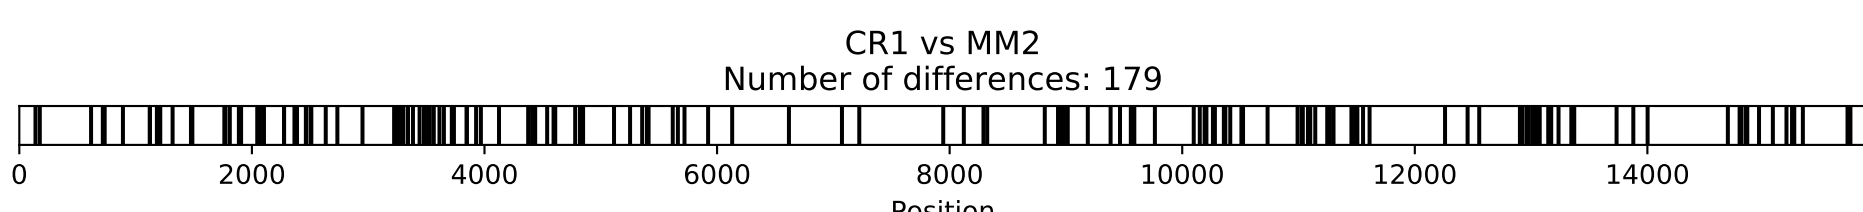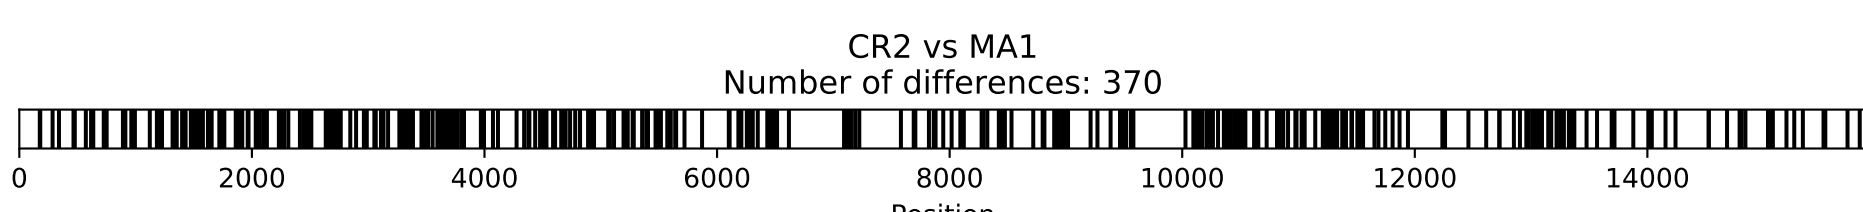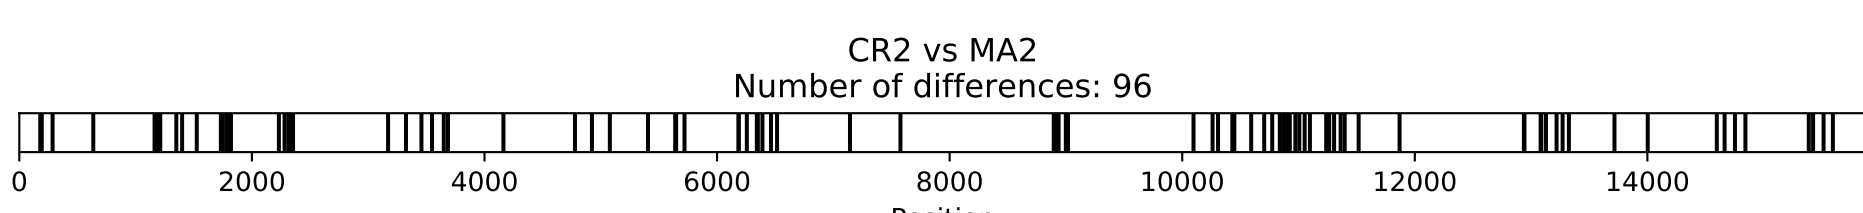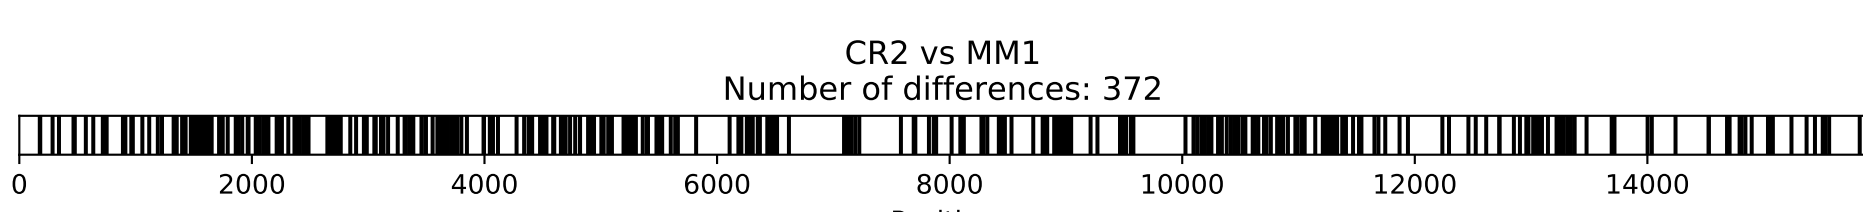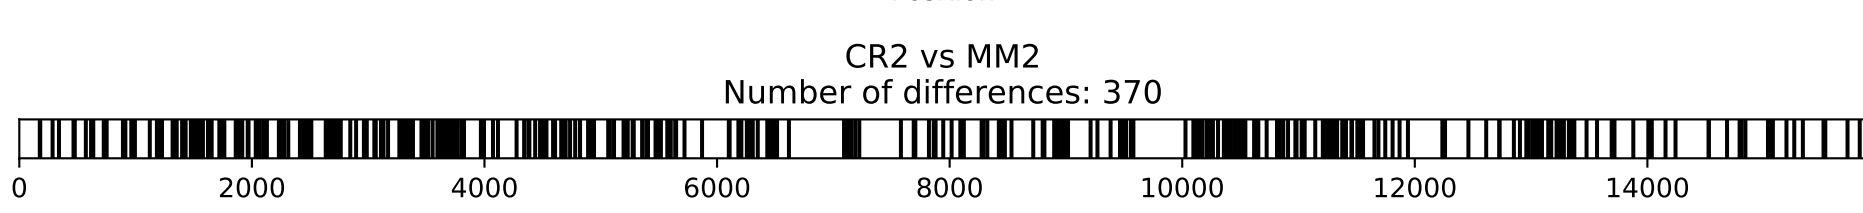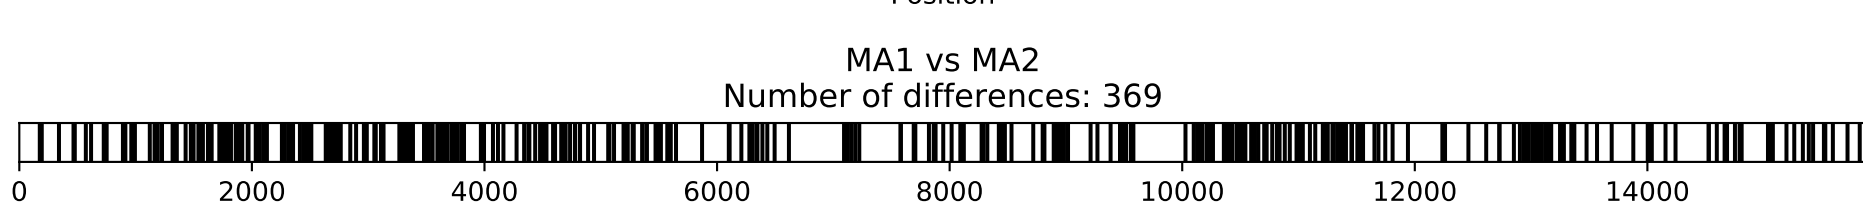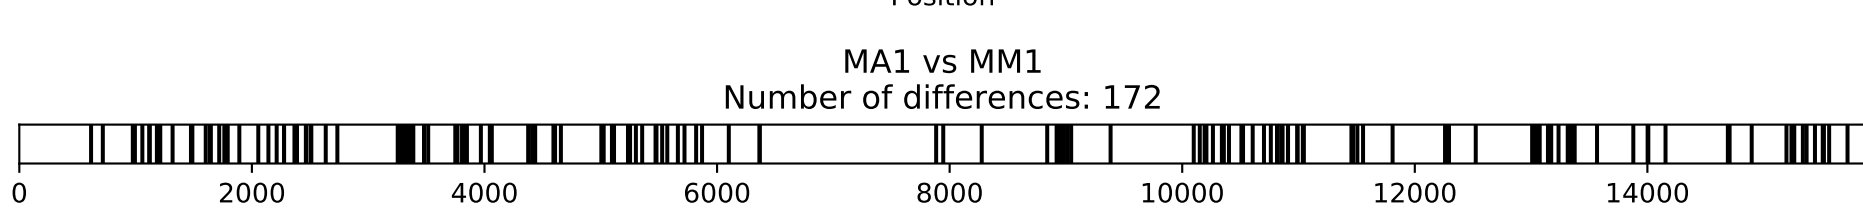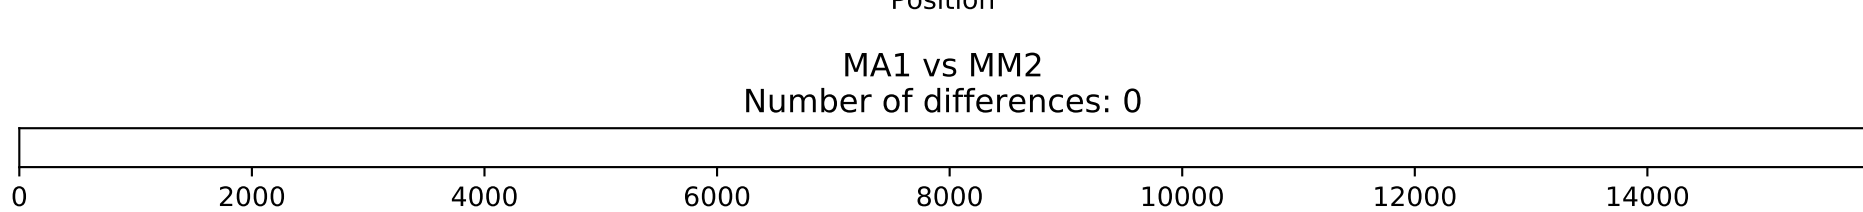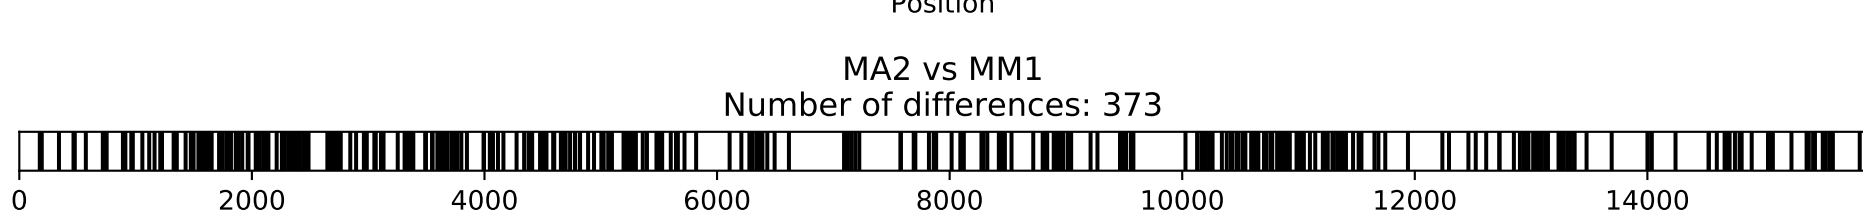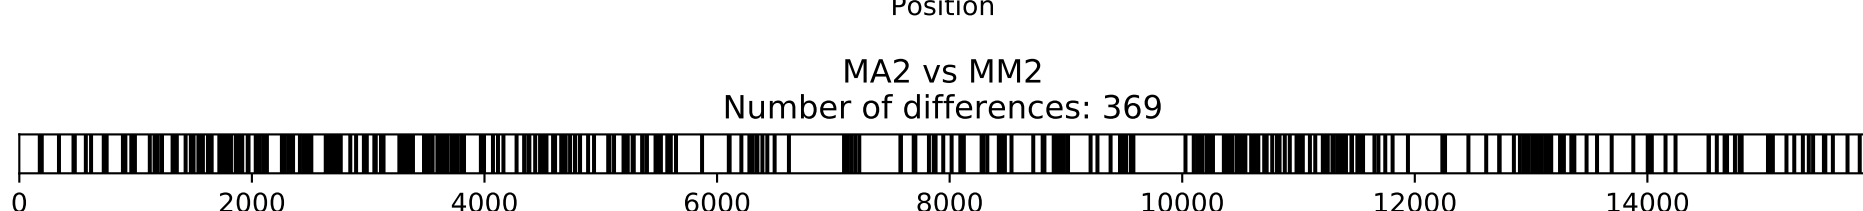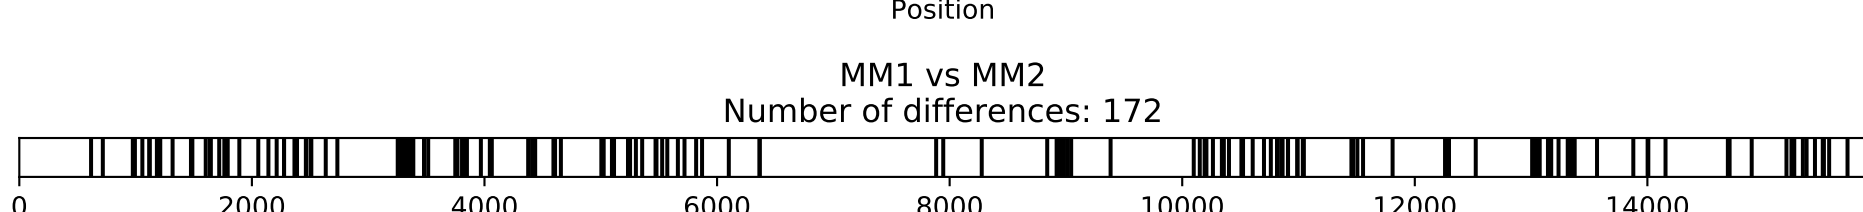

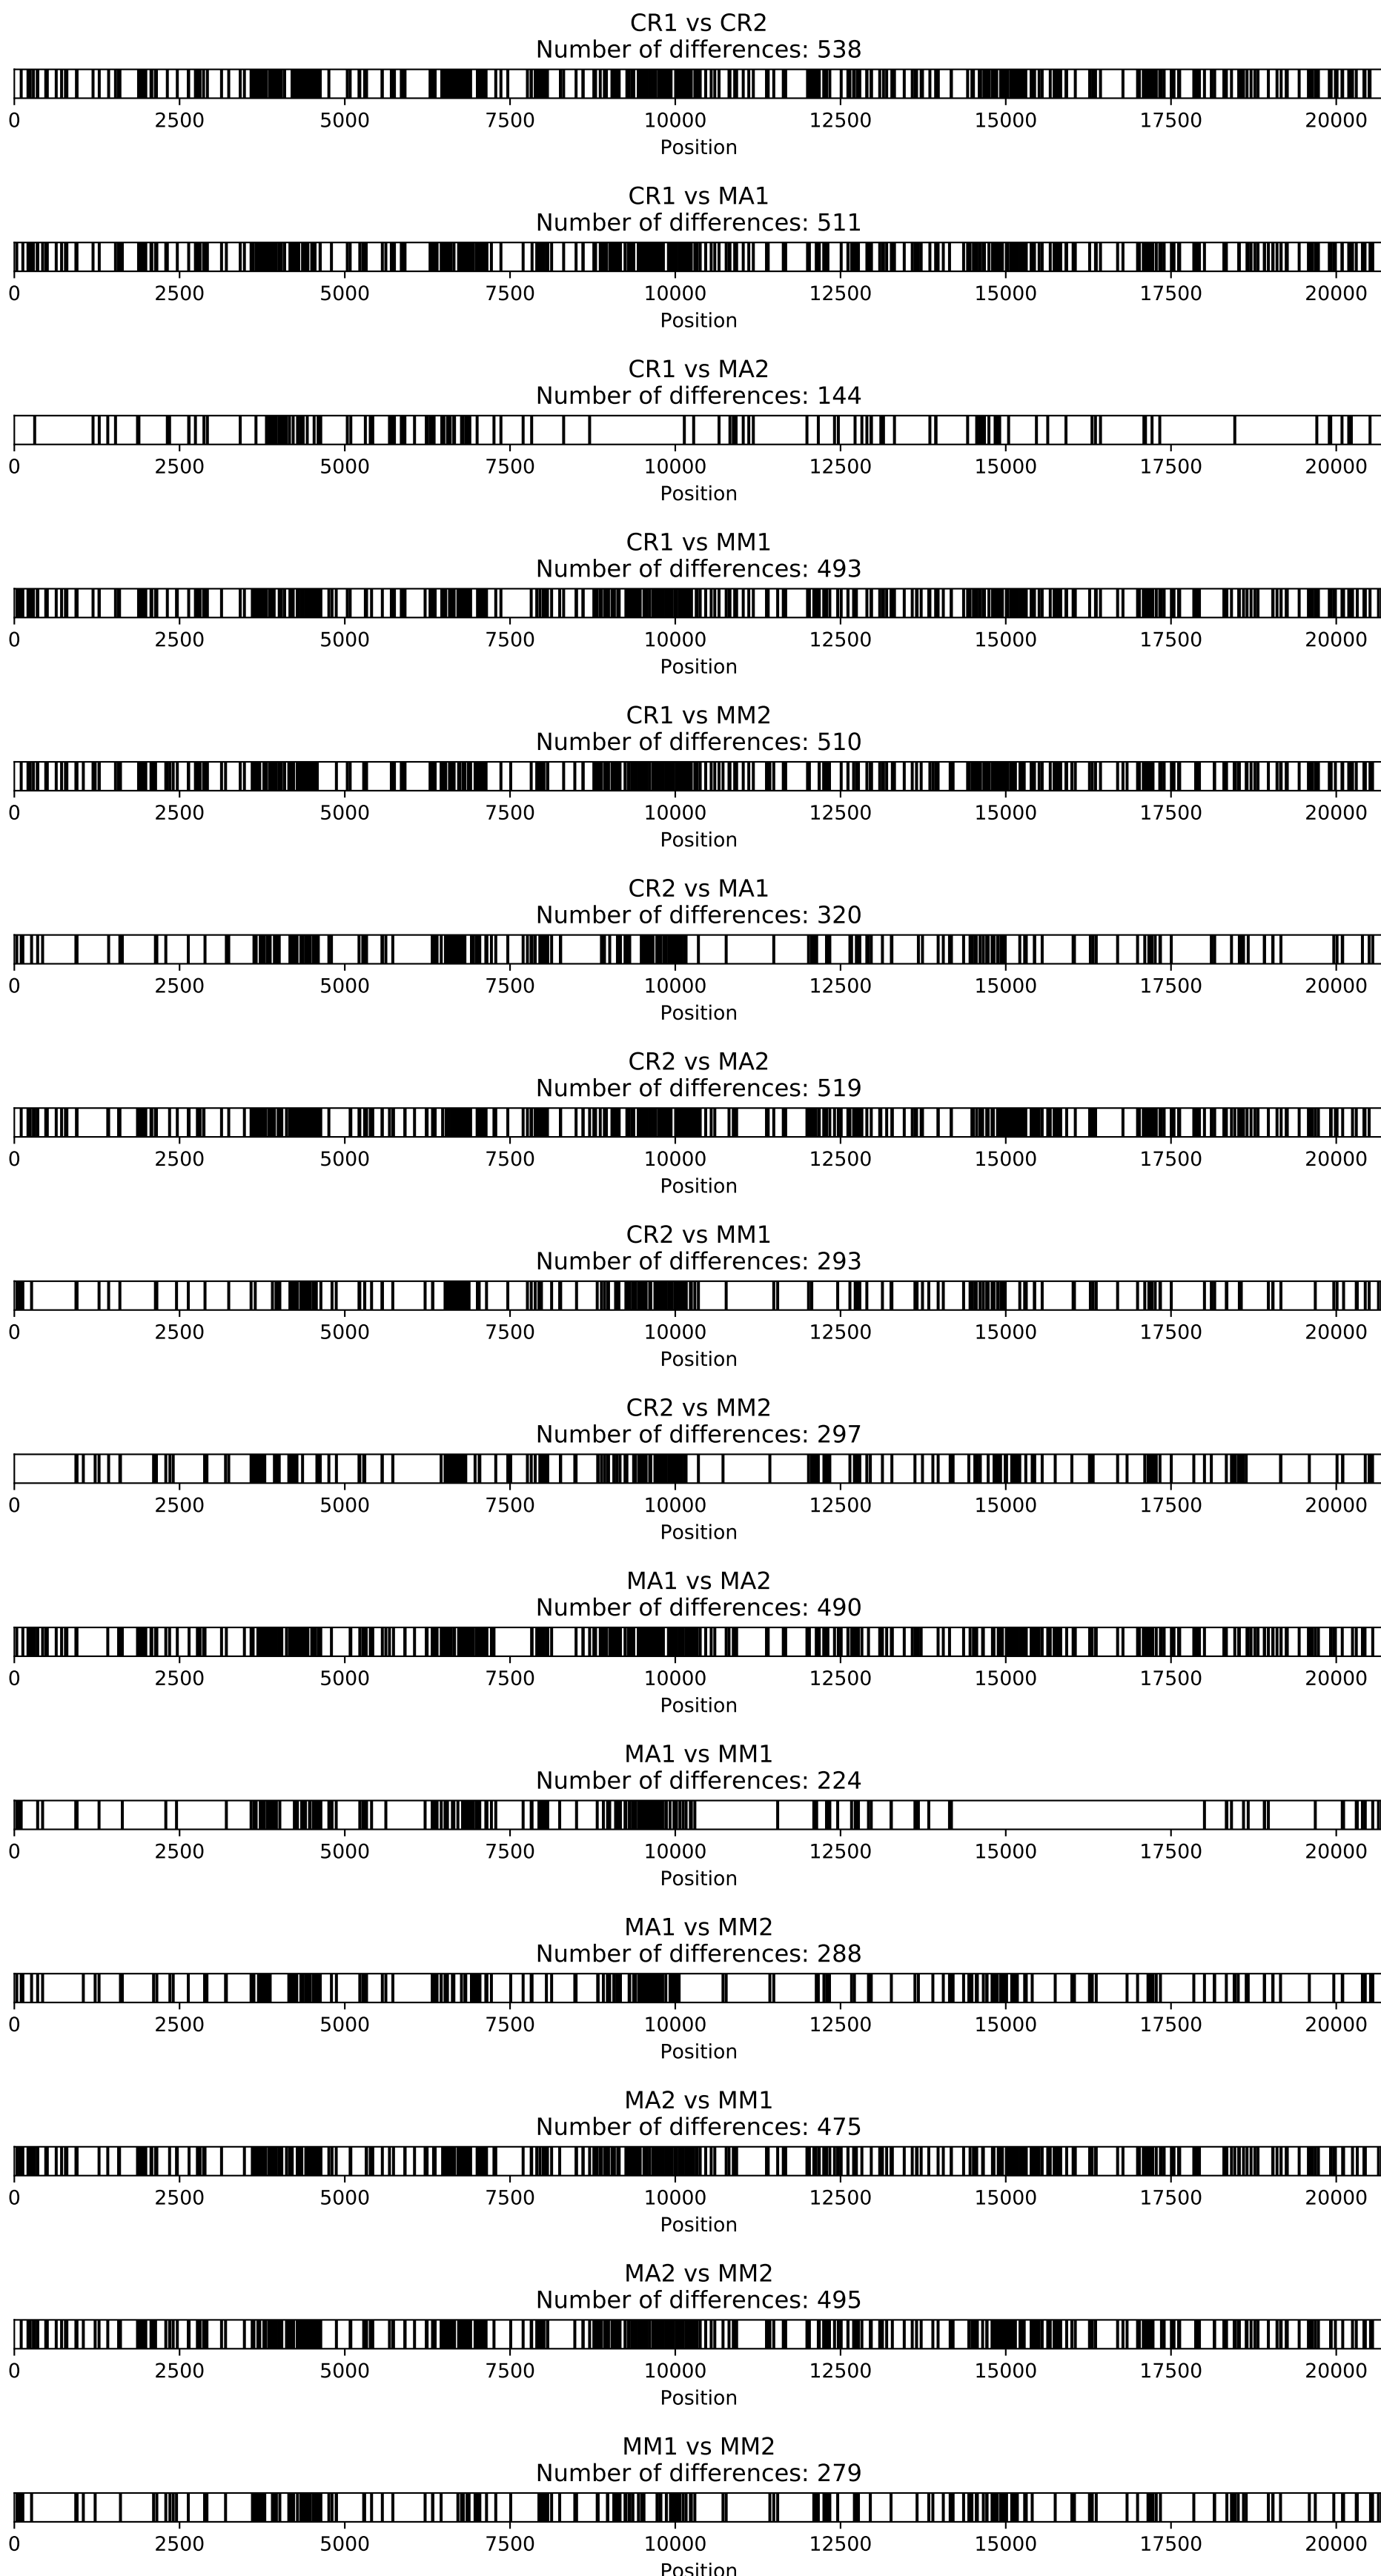

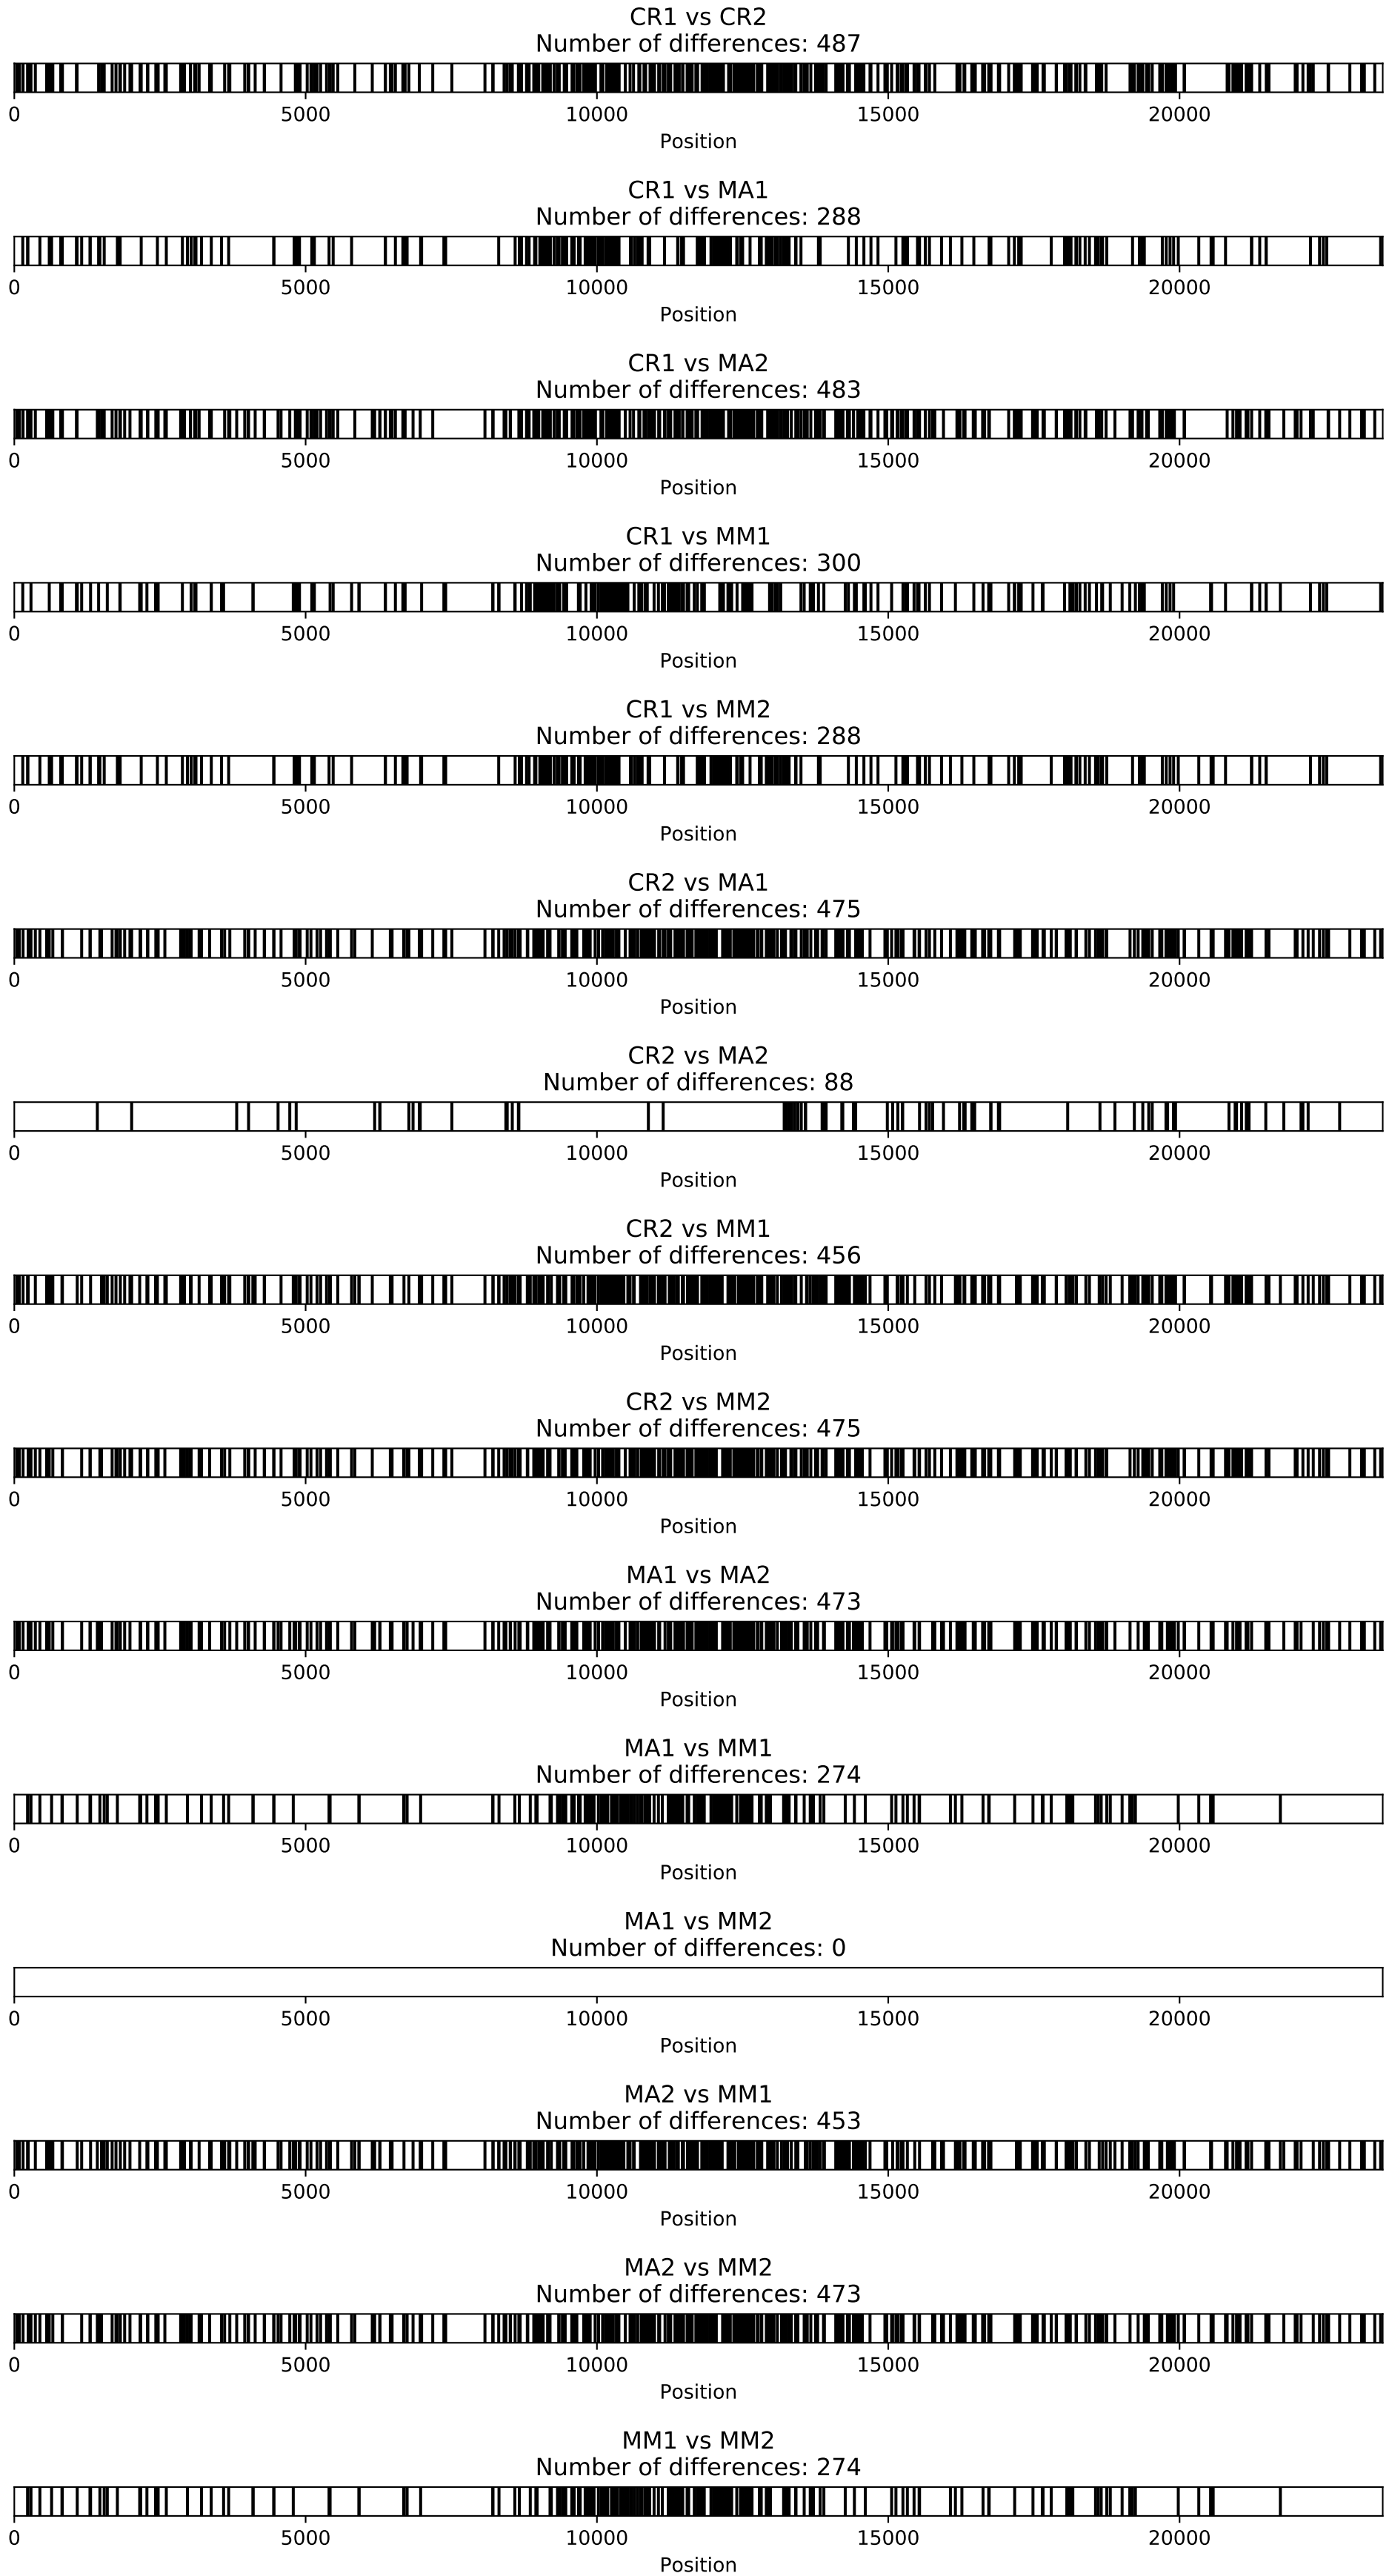

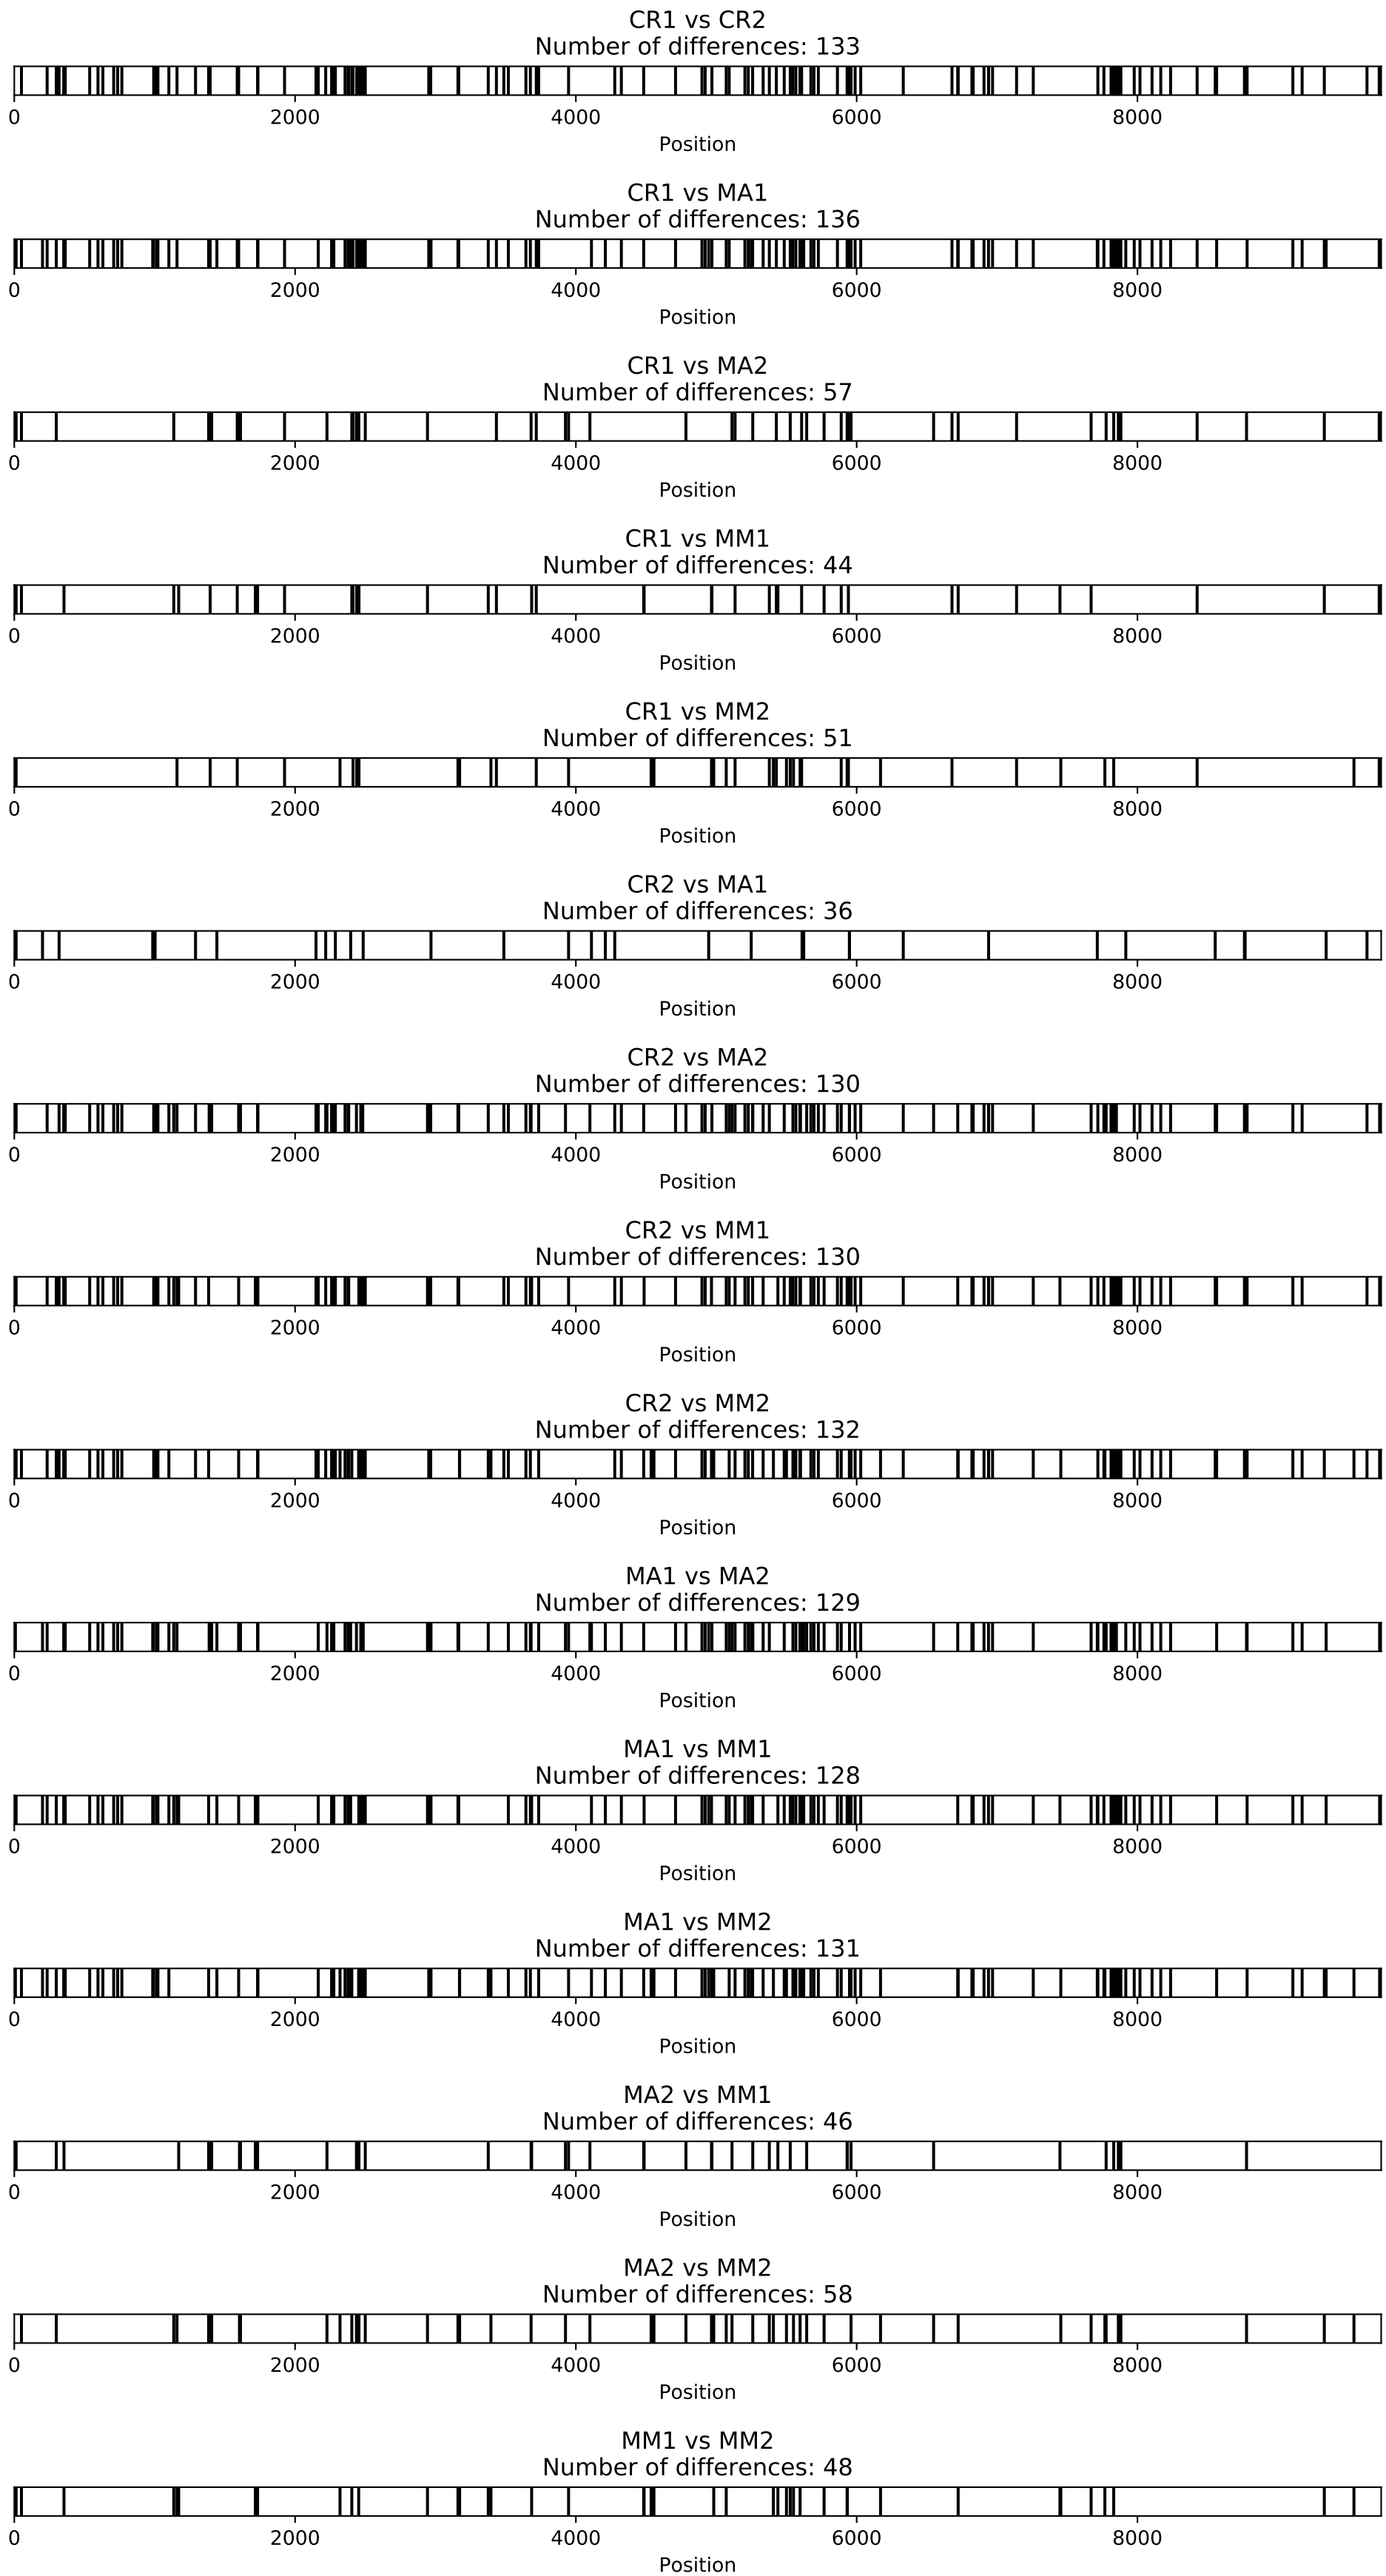

### Region: 349

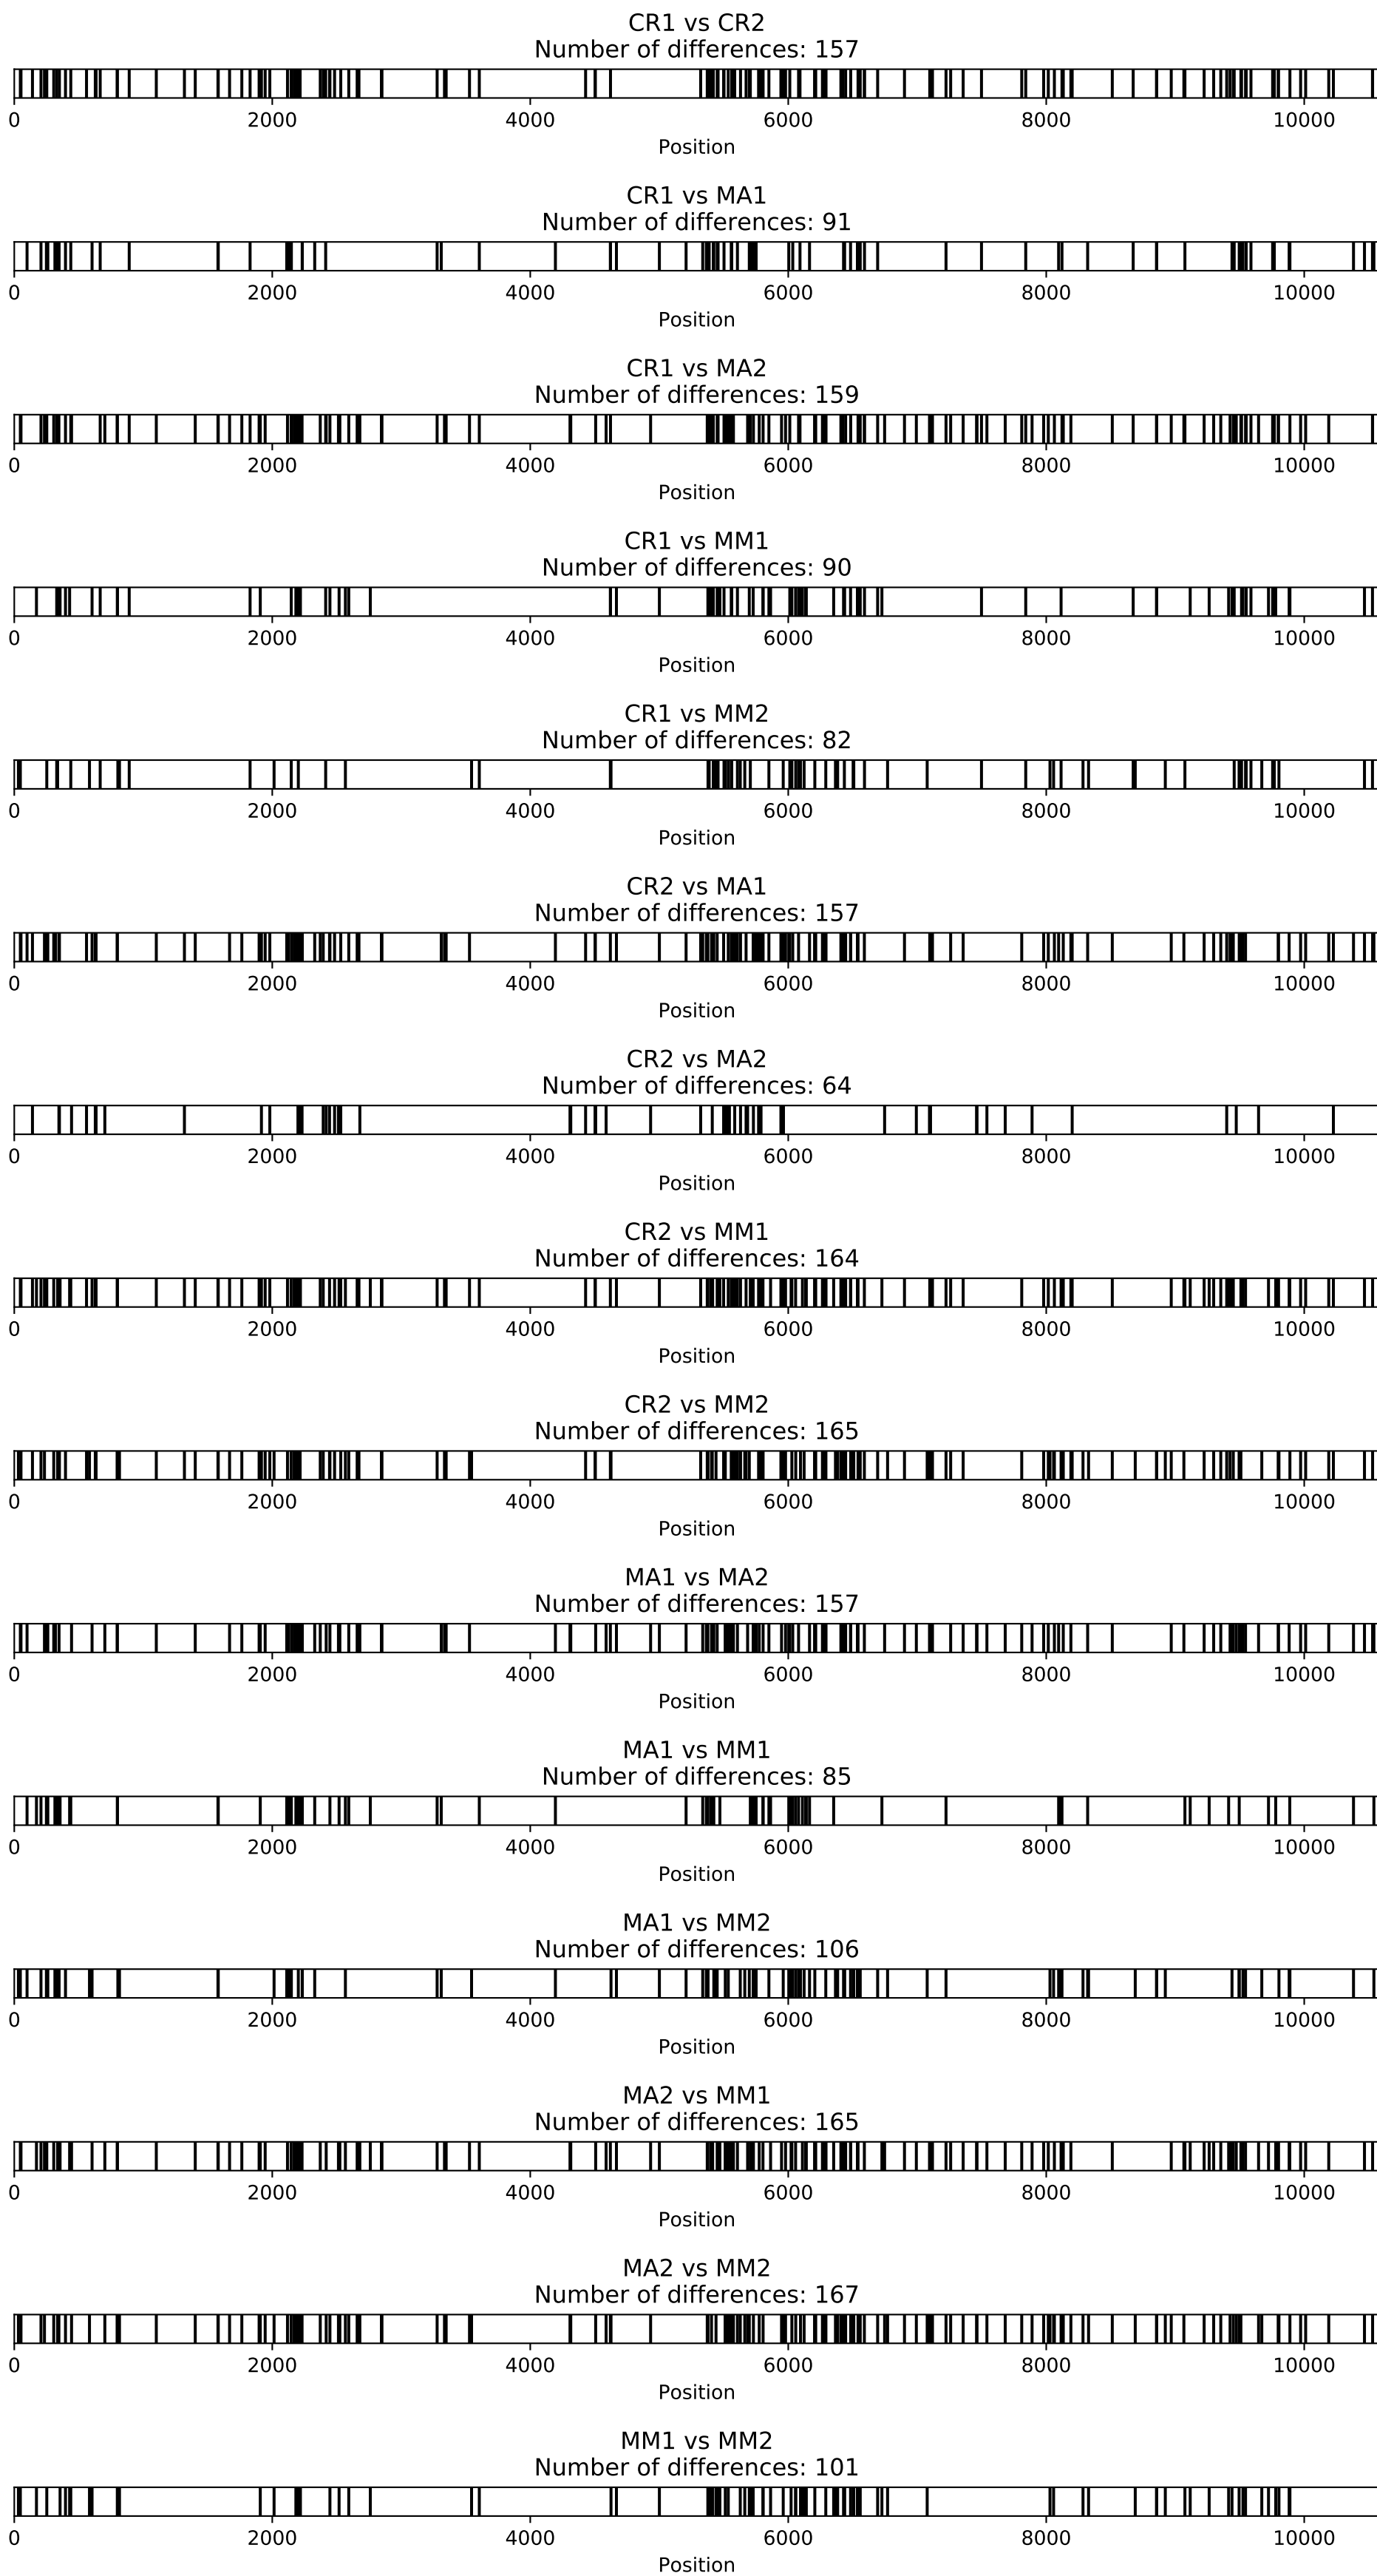



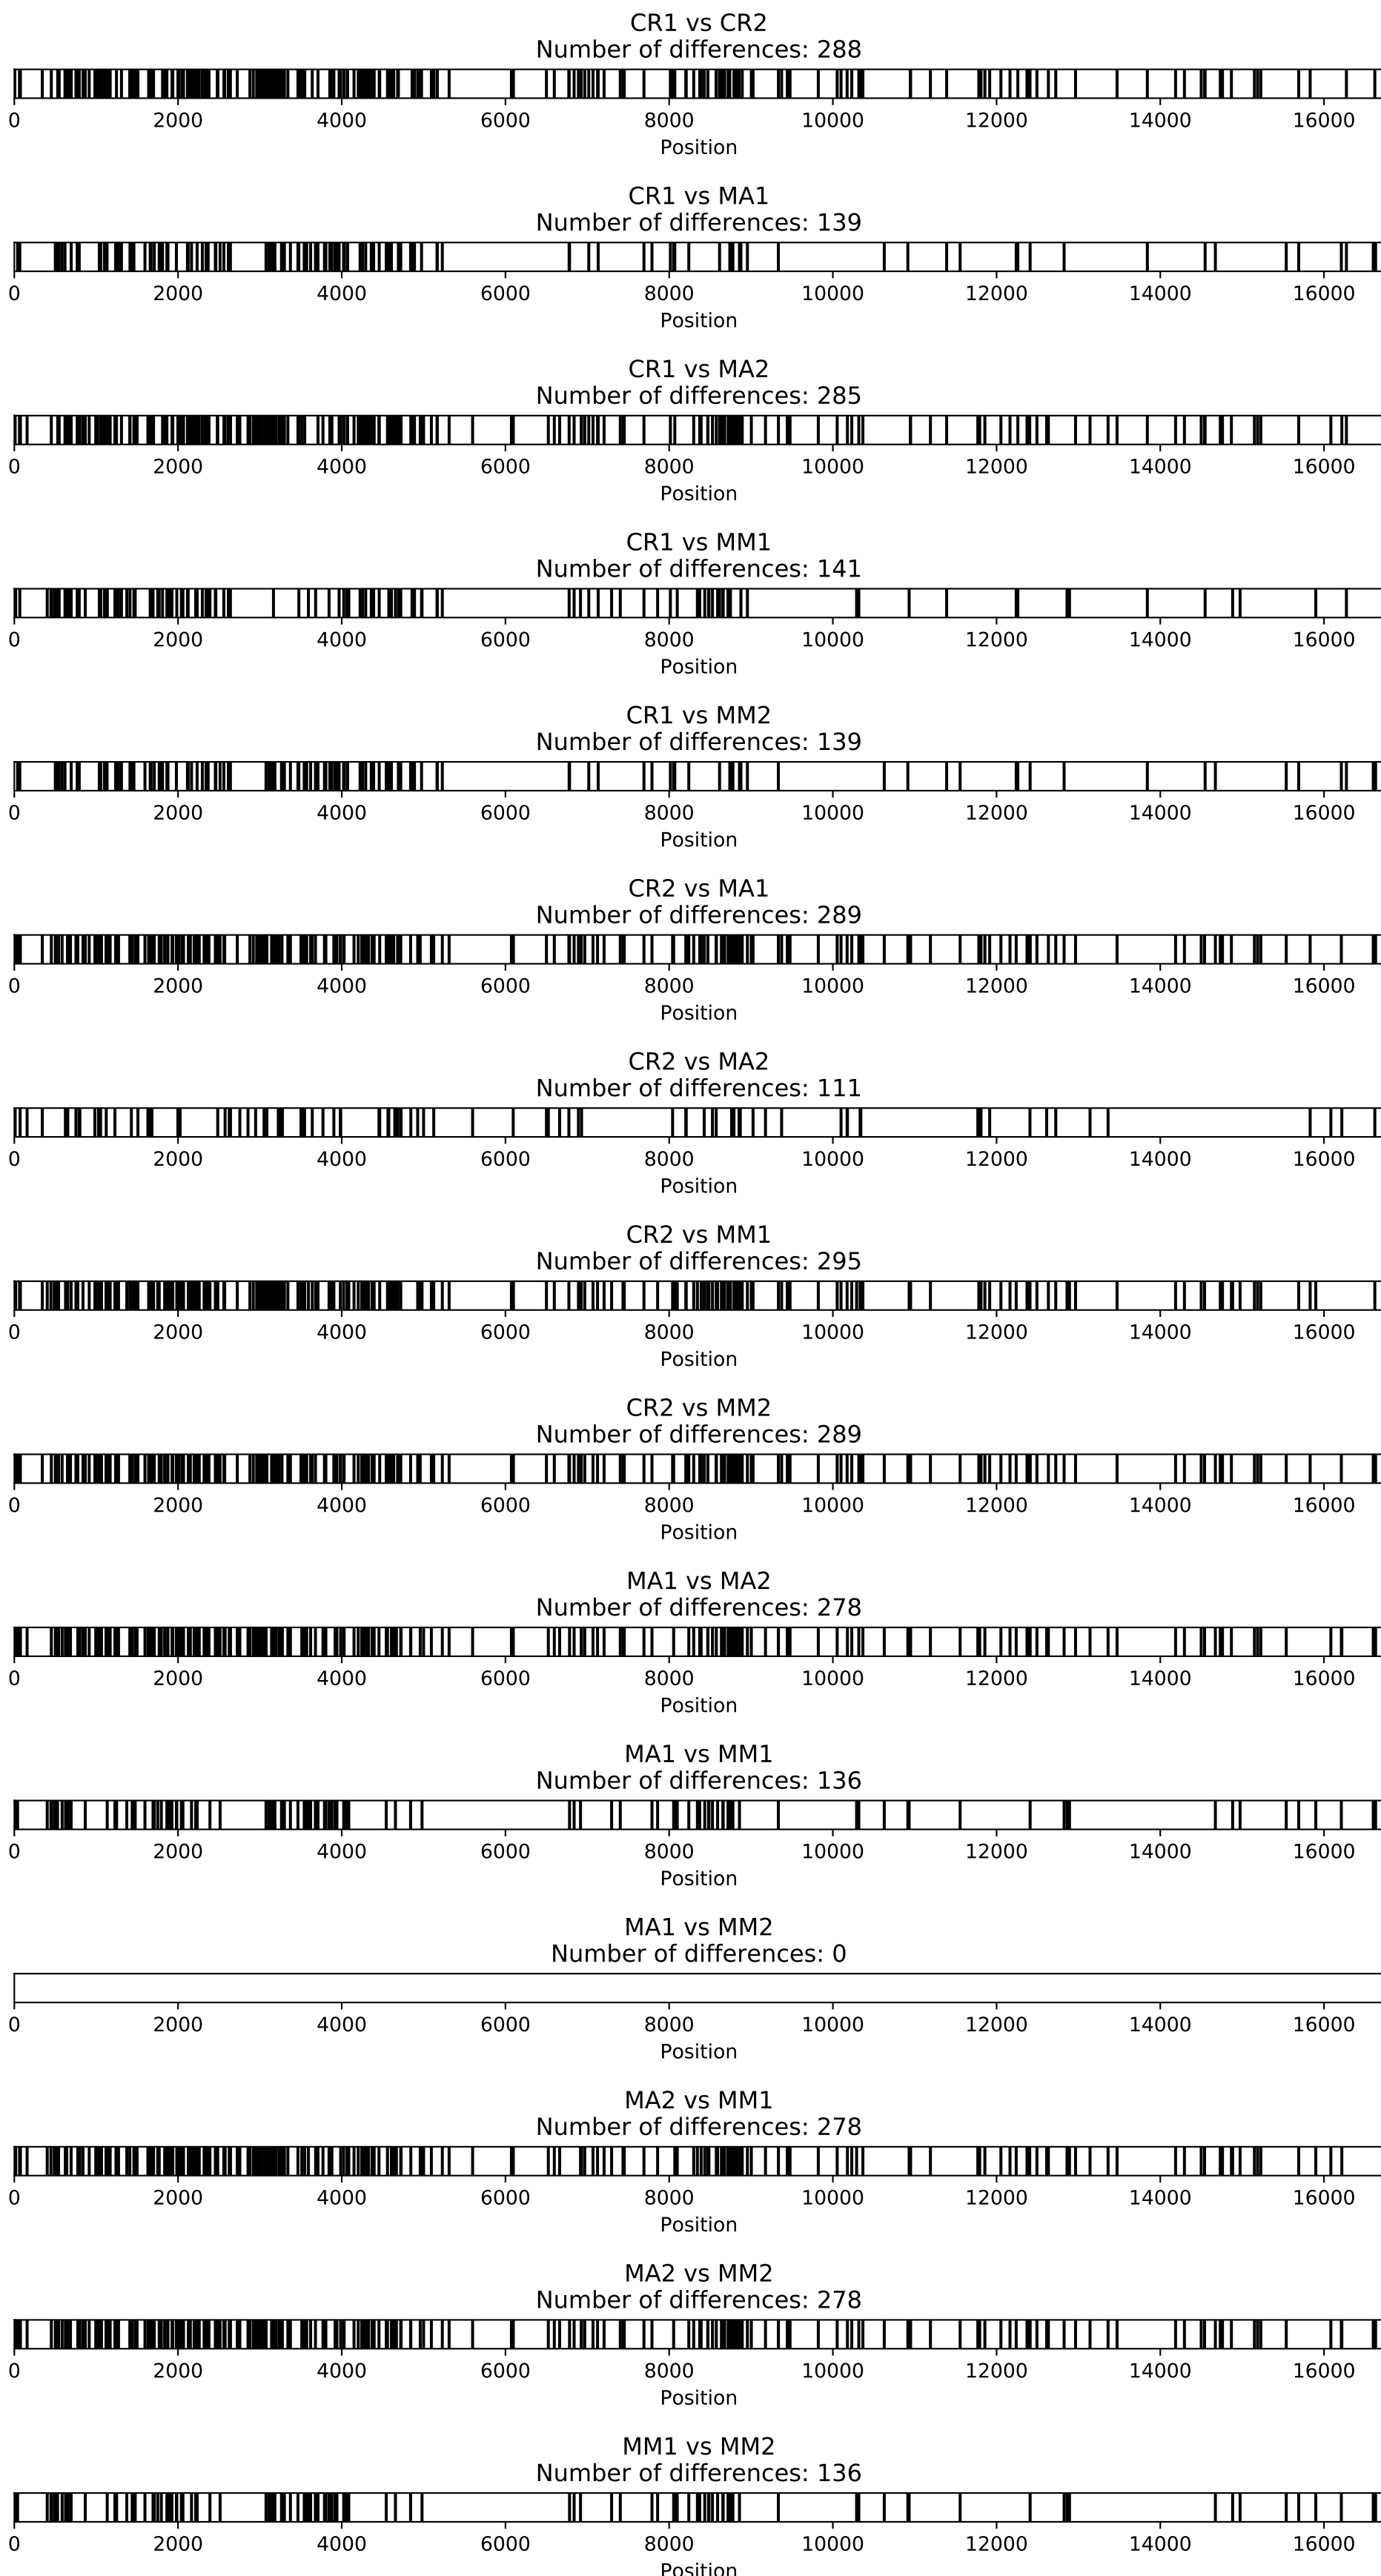

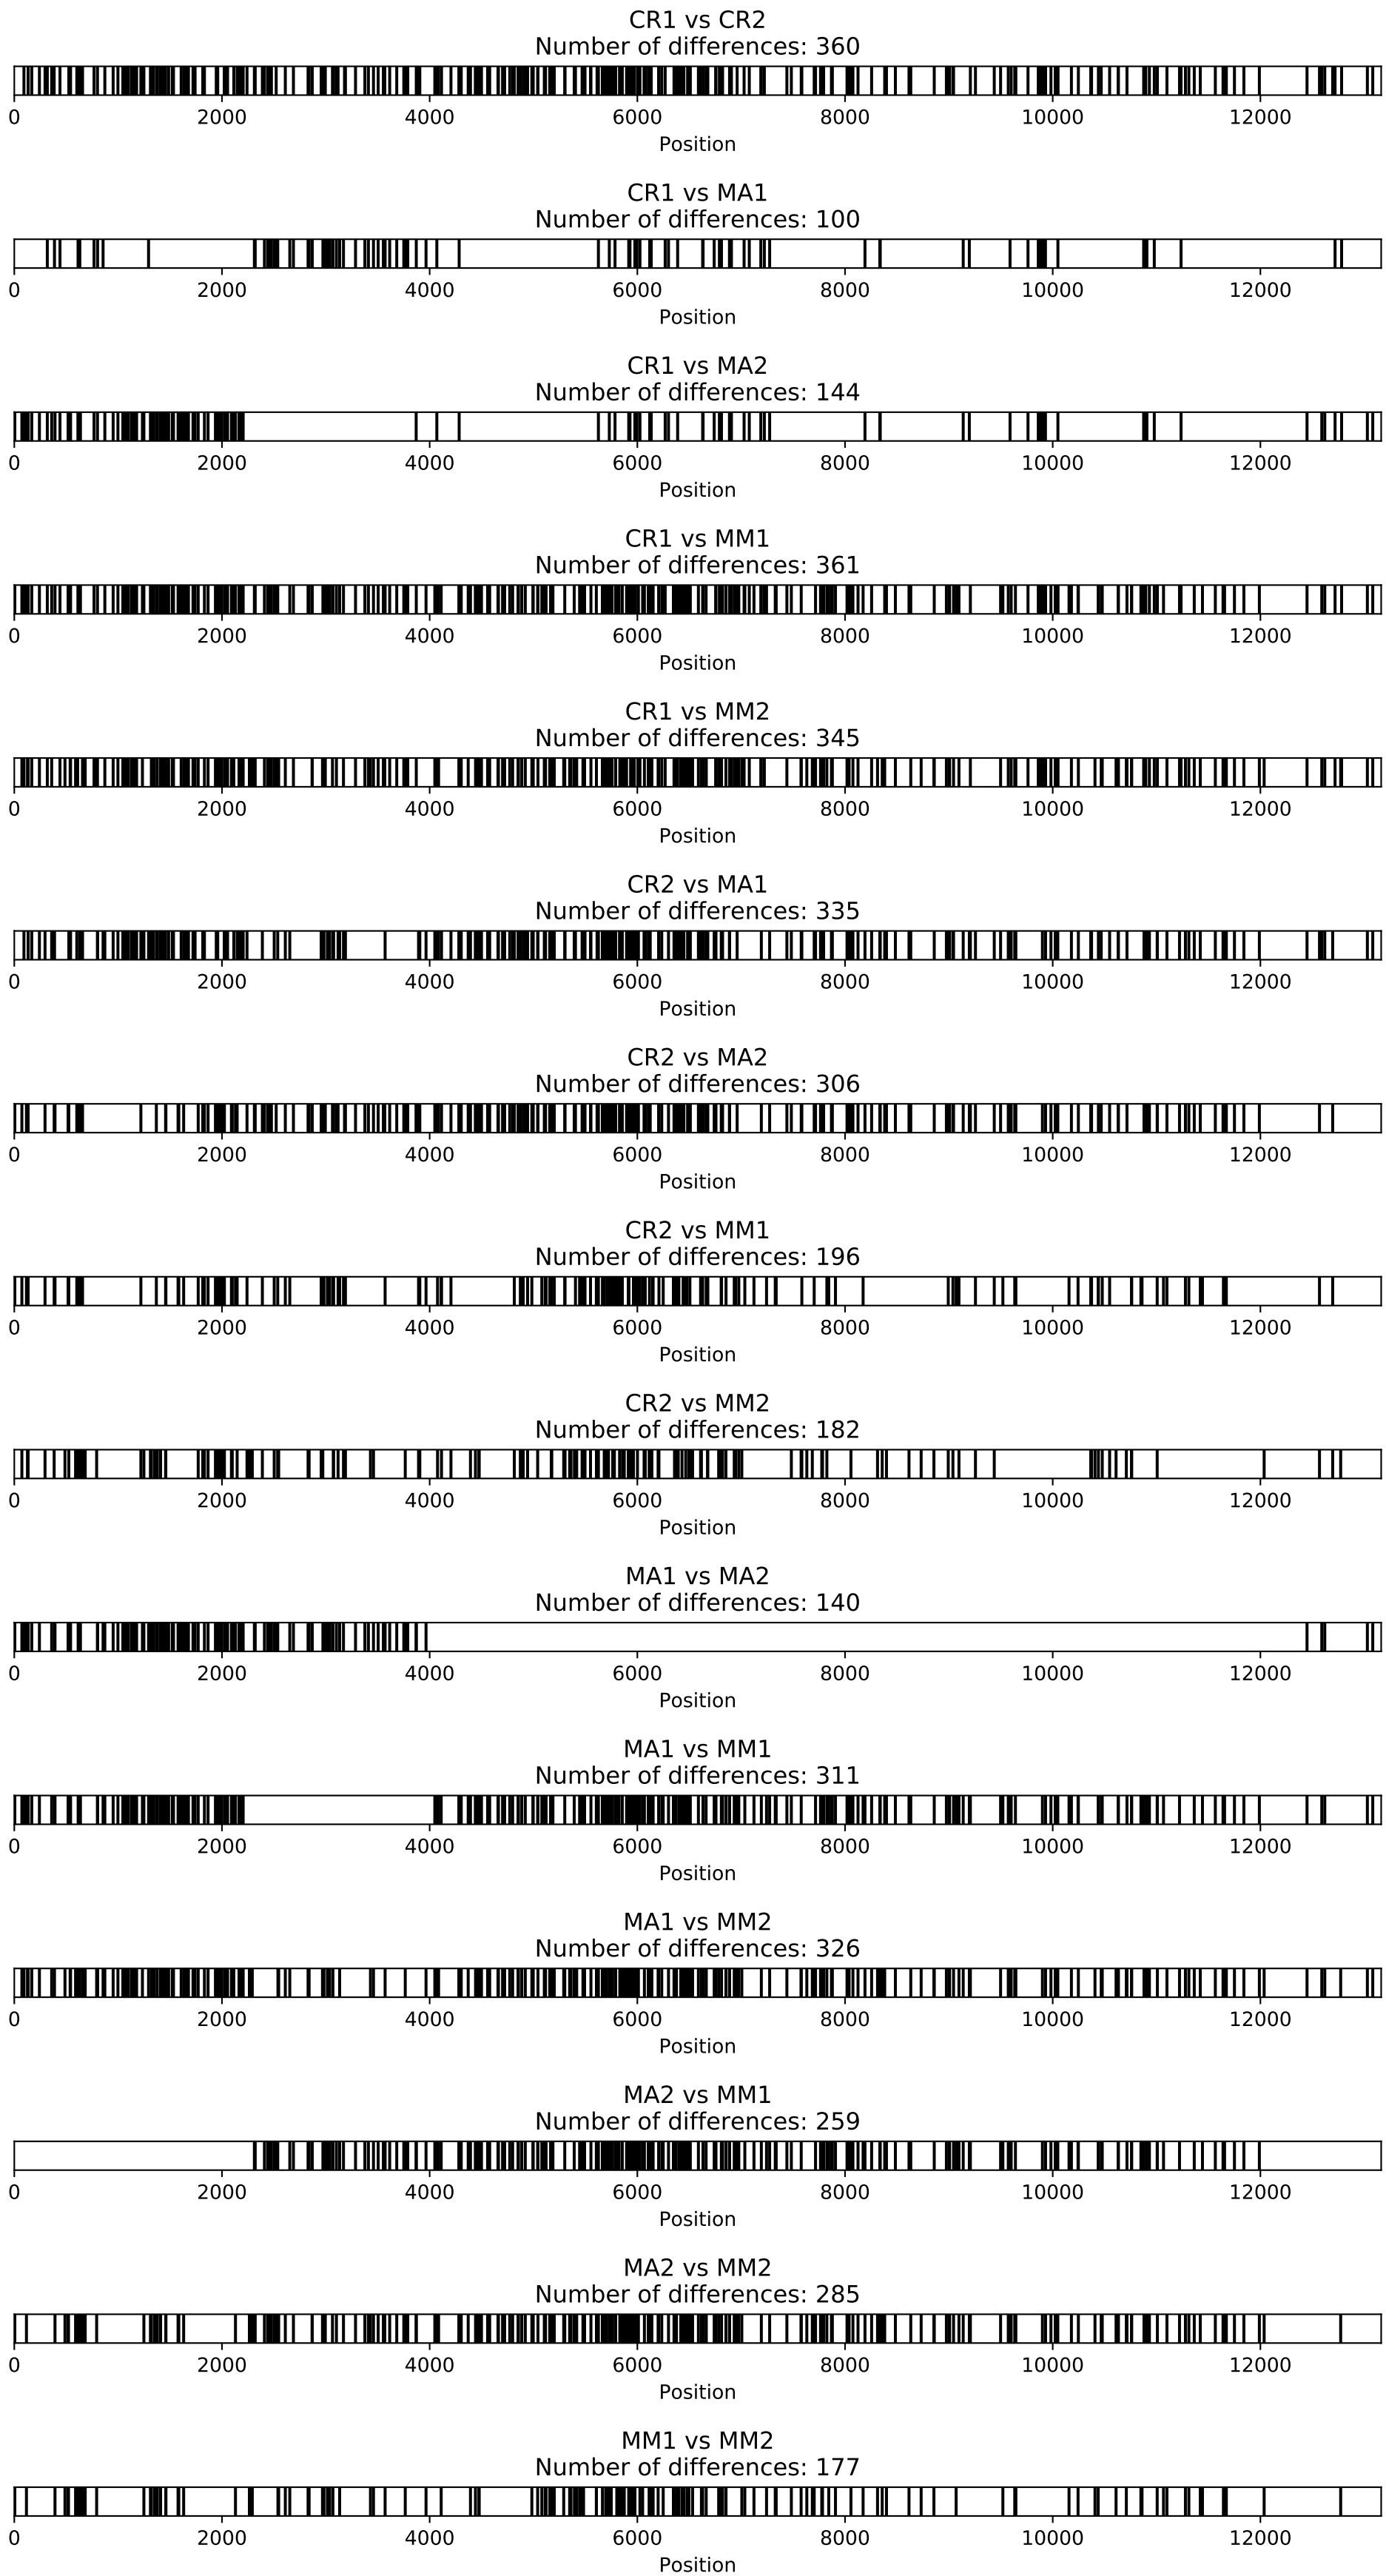

# Region: 356

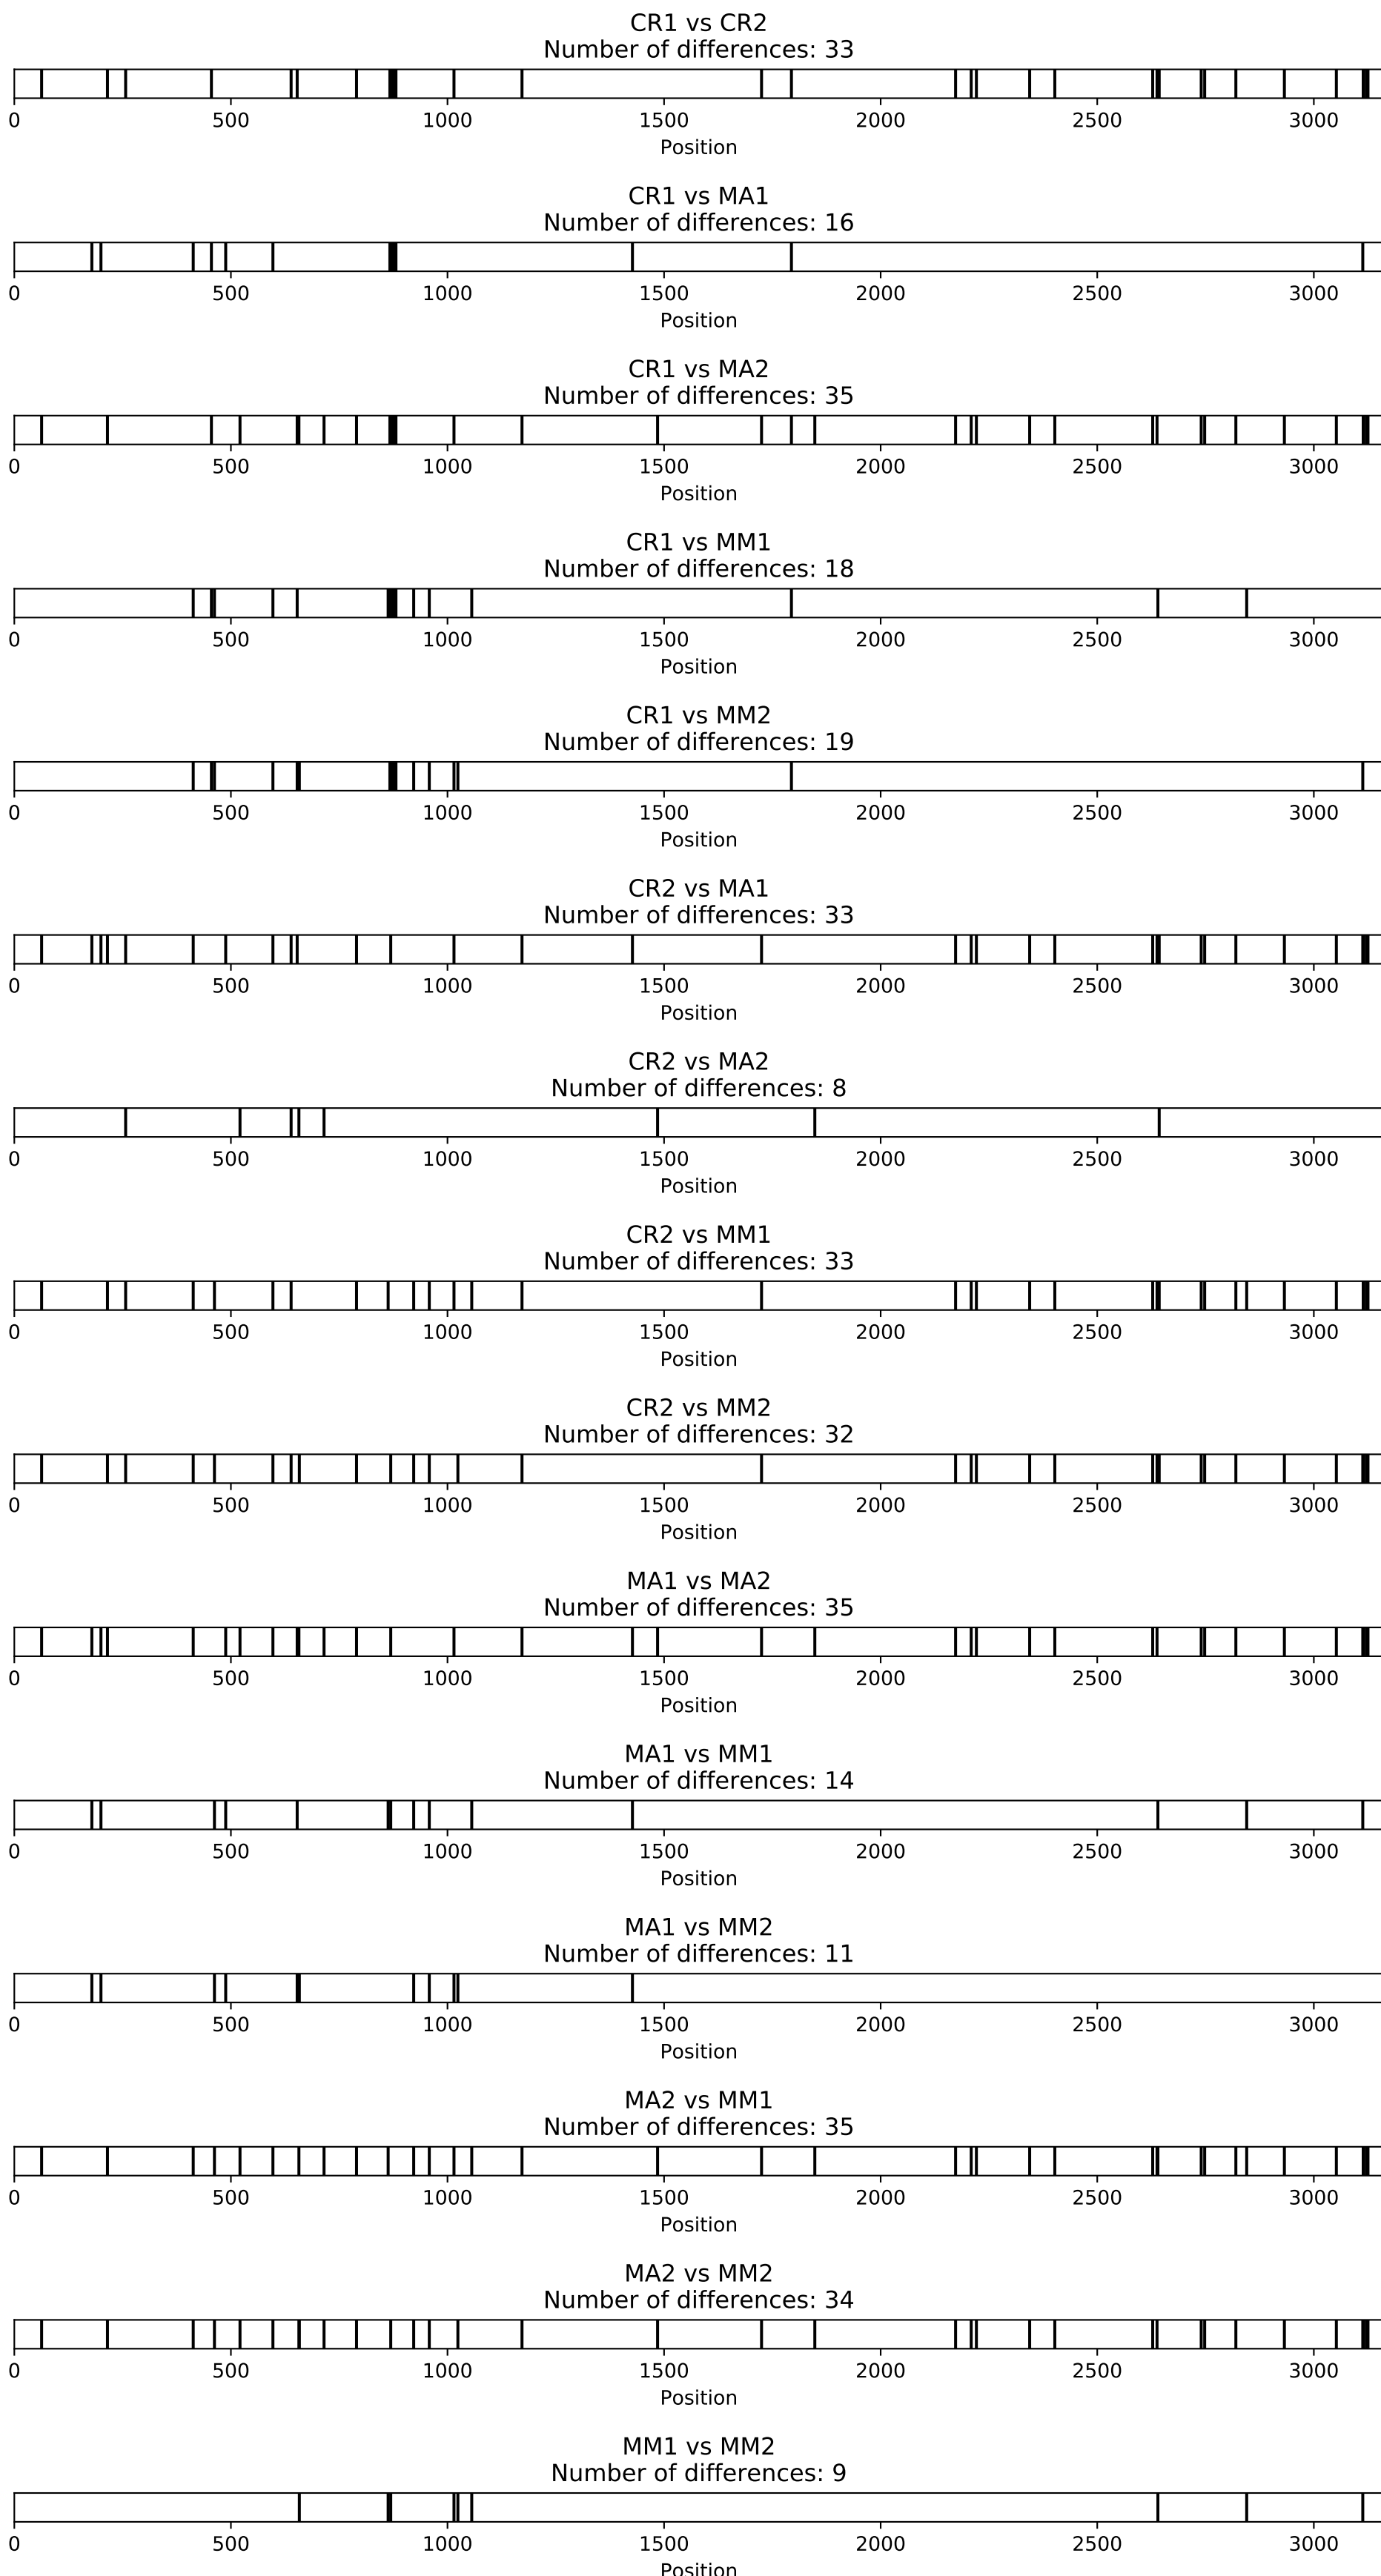

# Region: 358

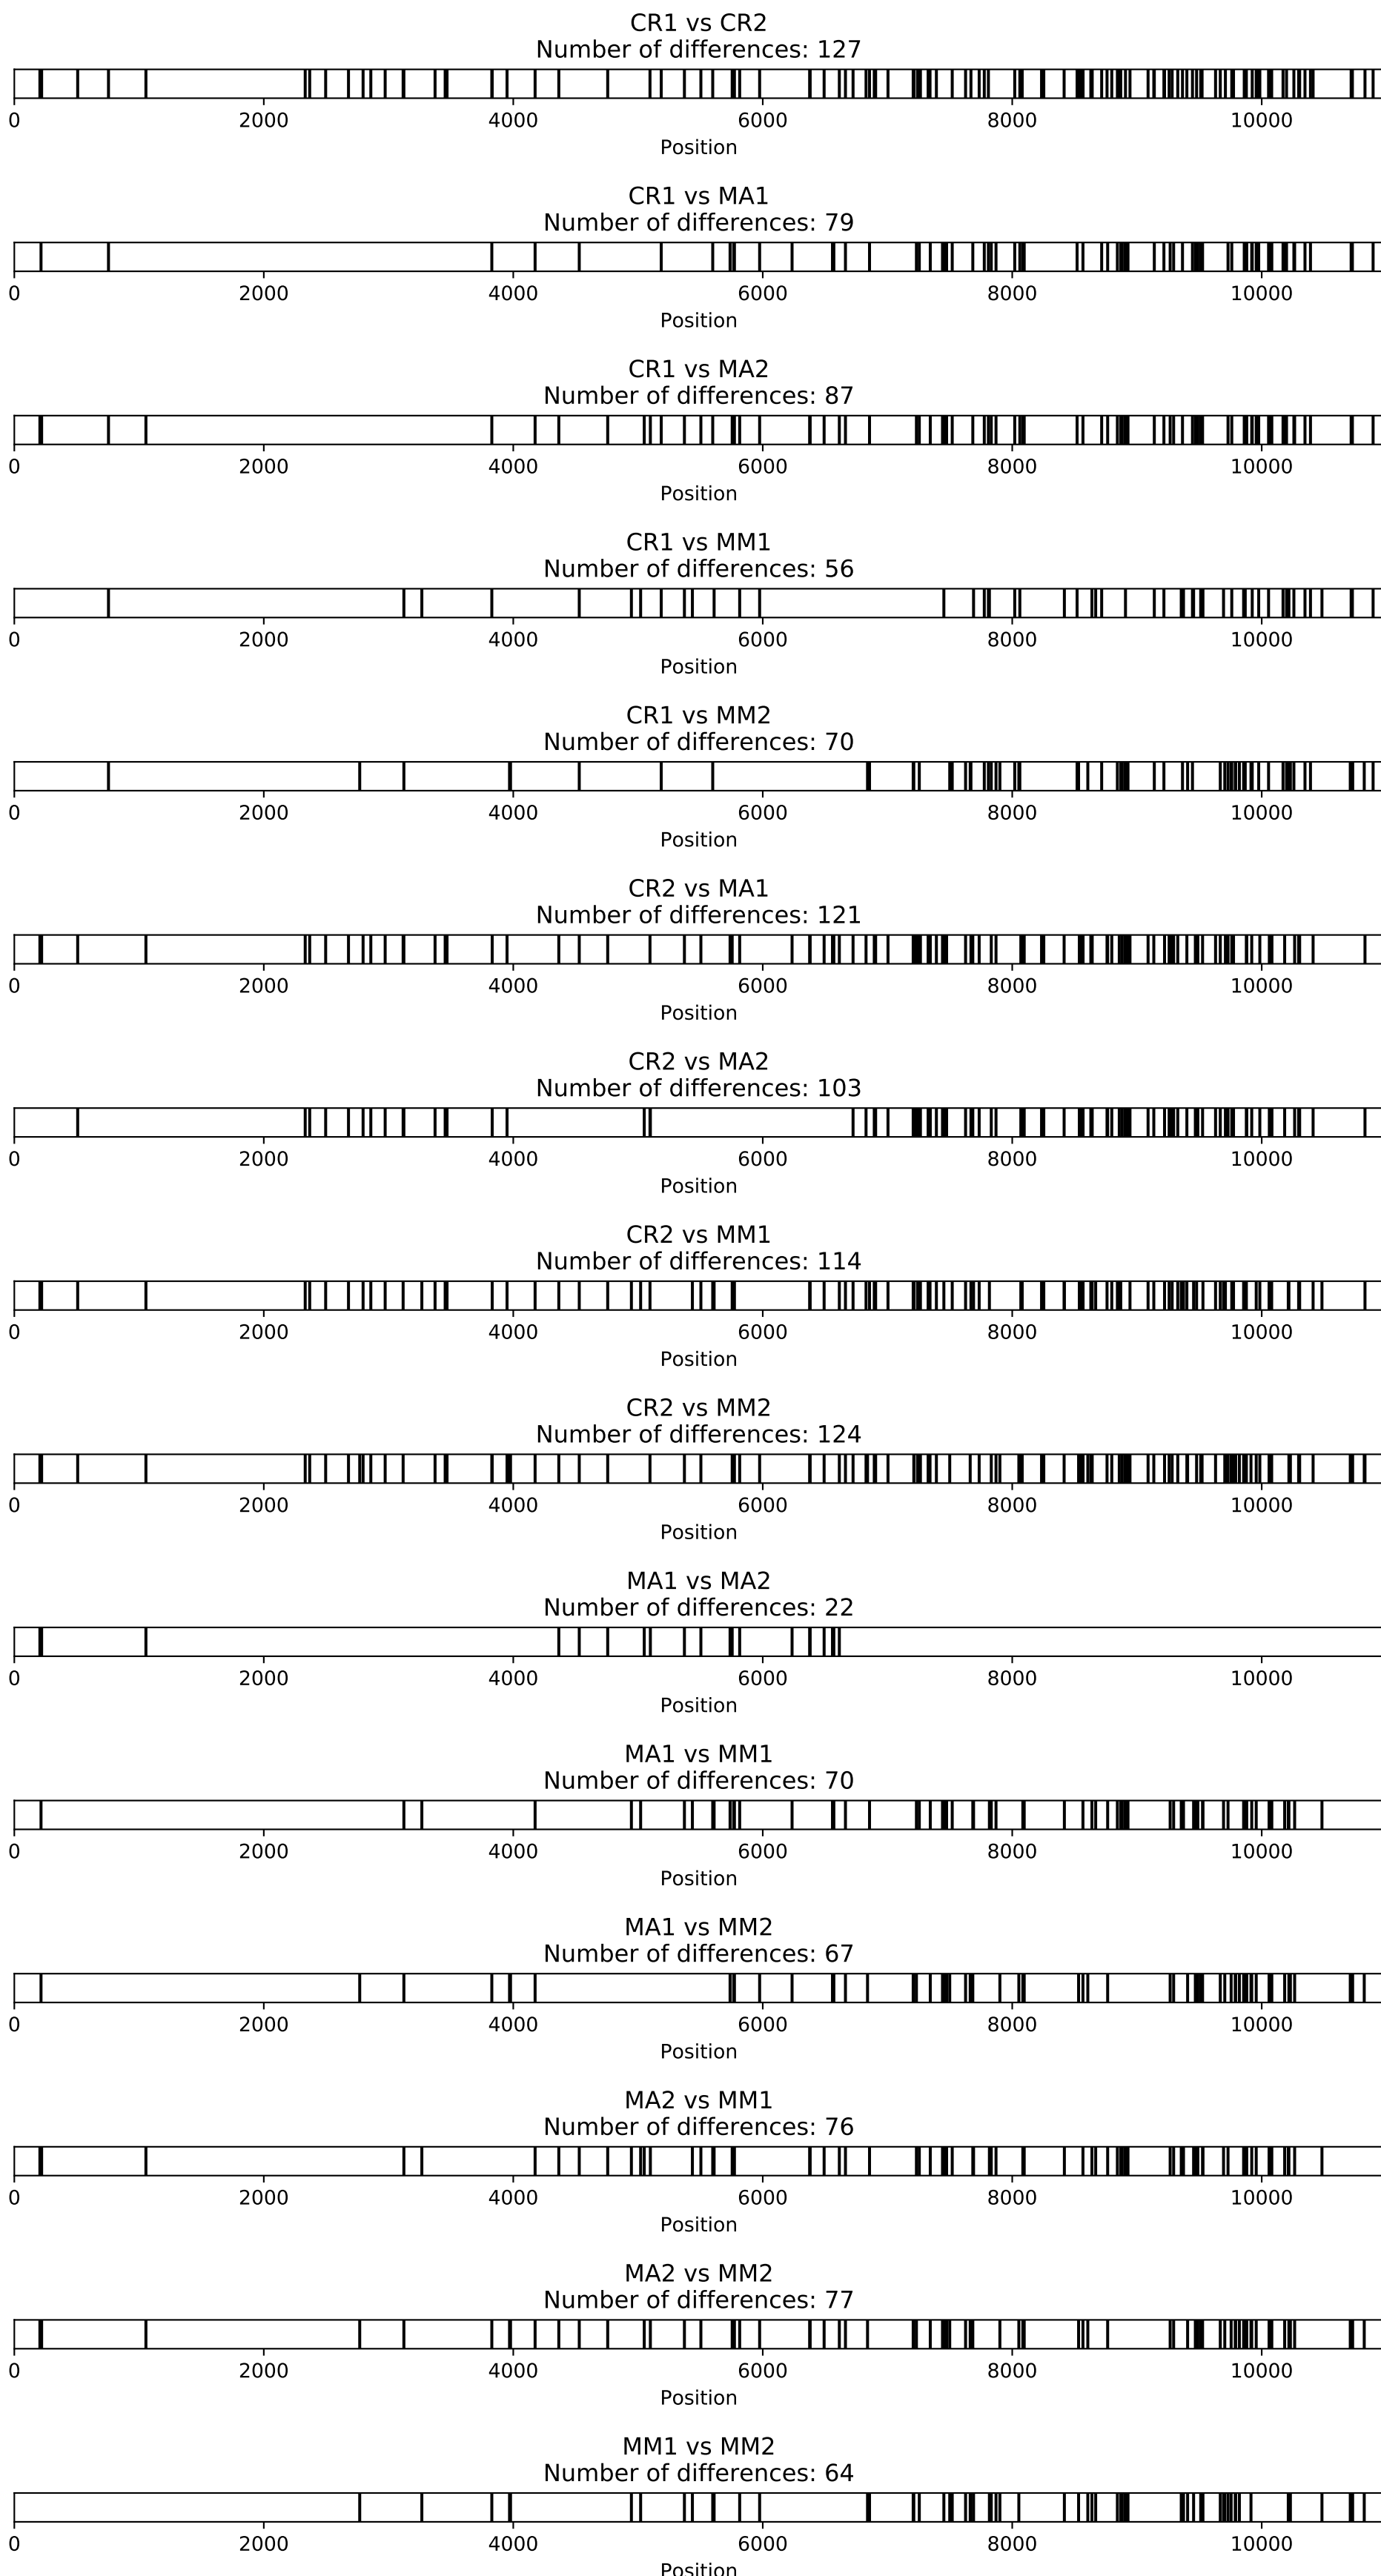

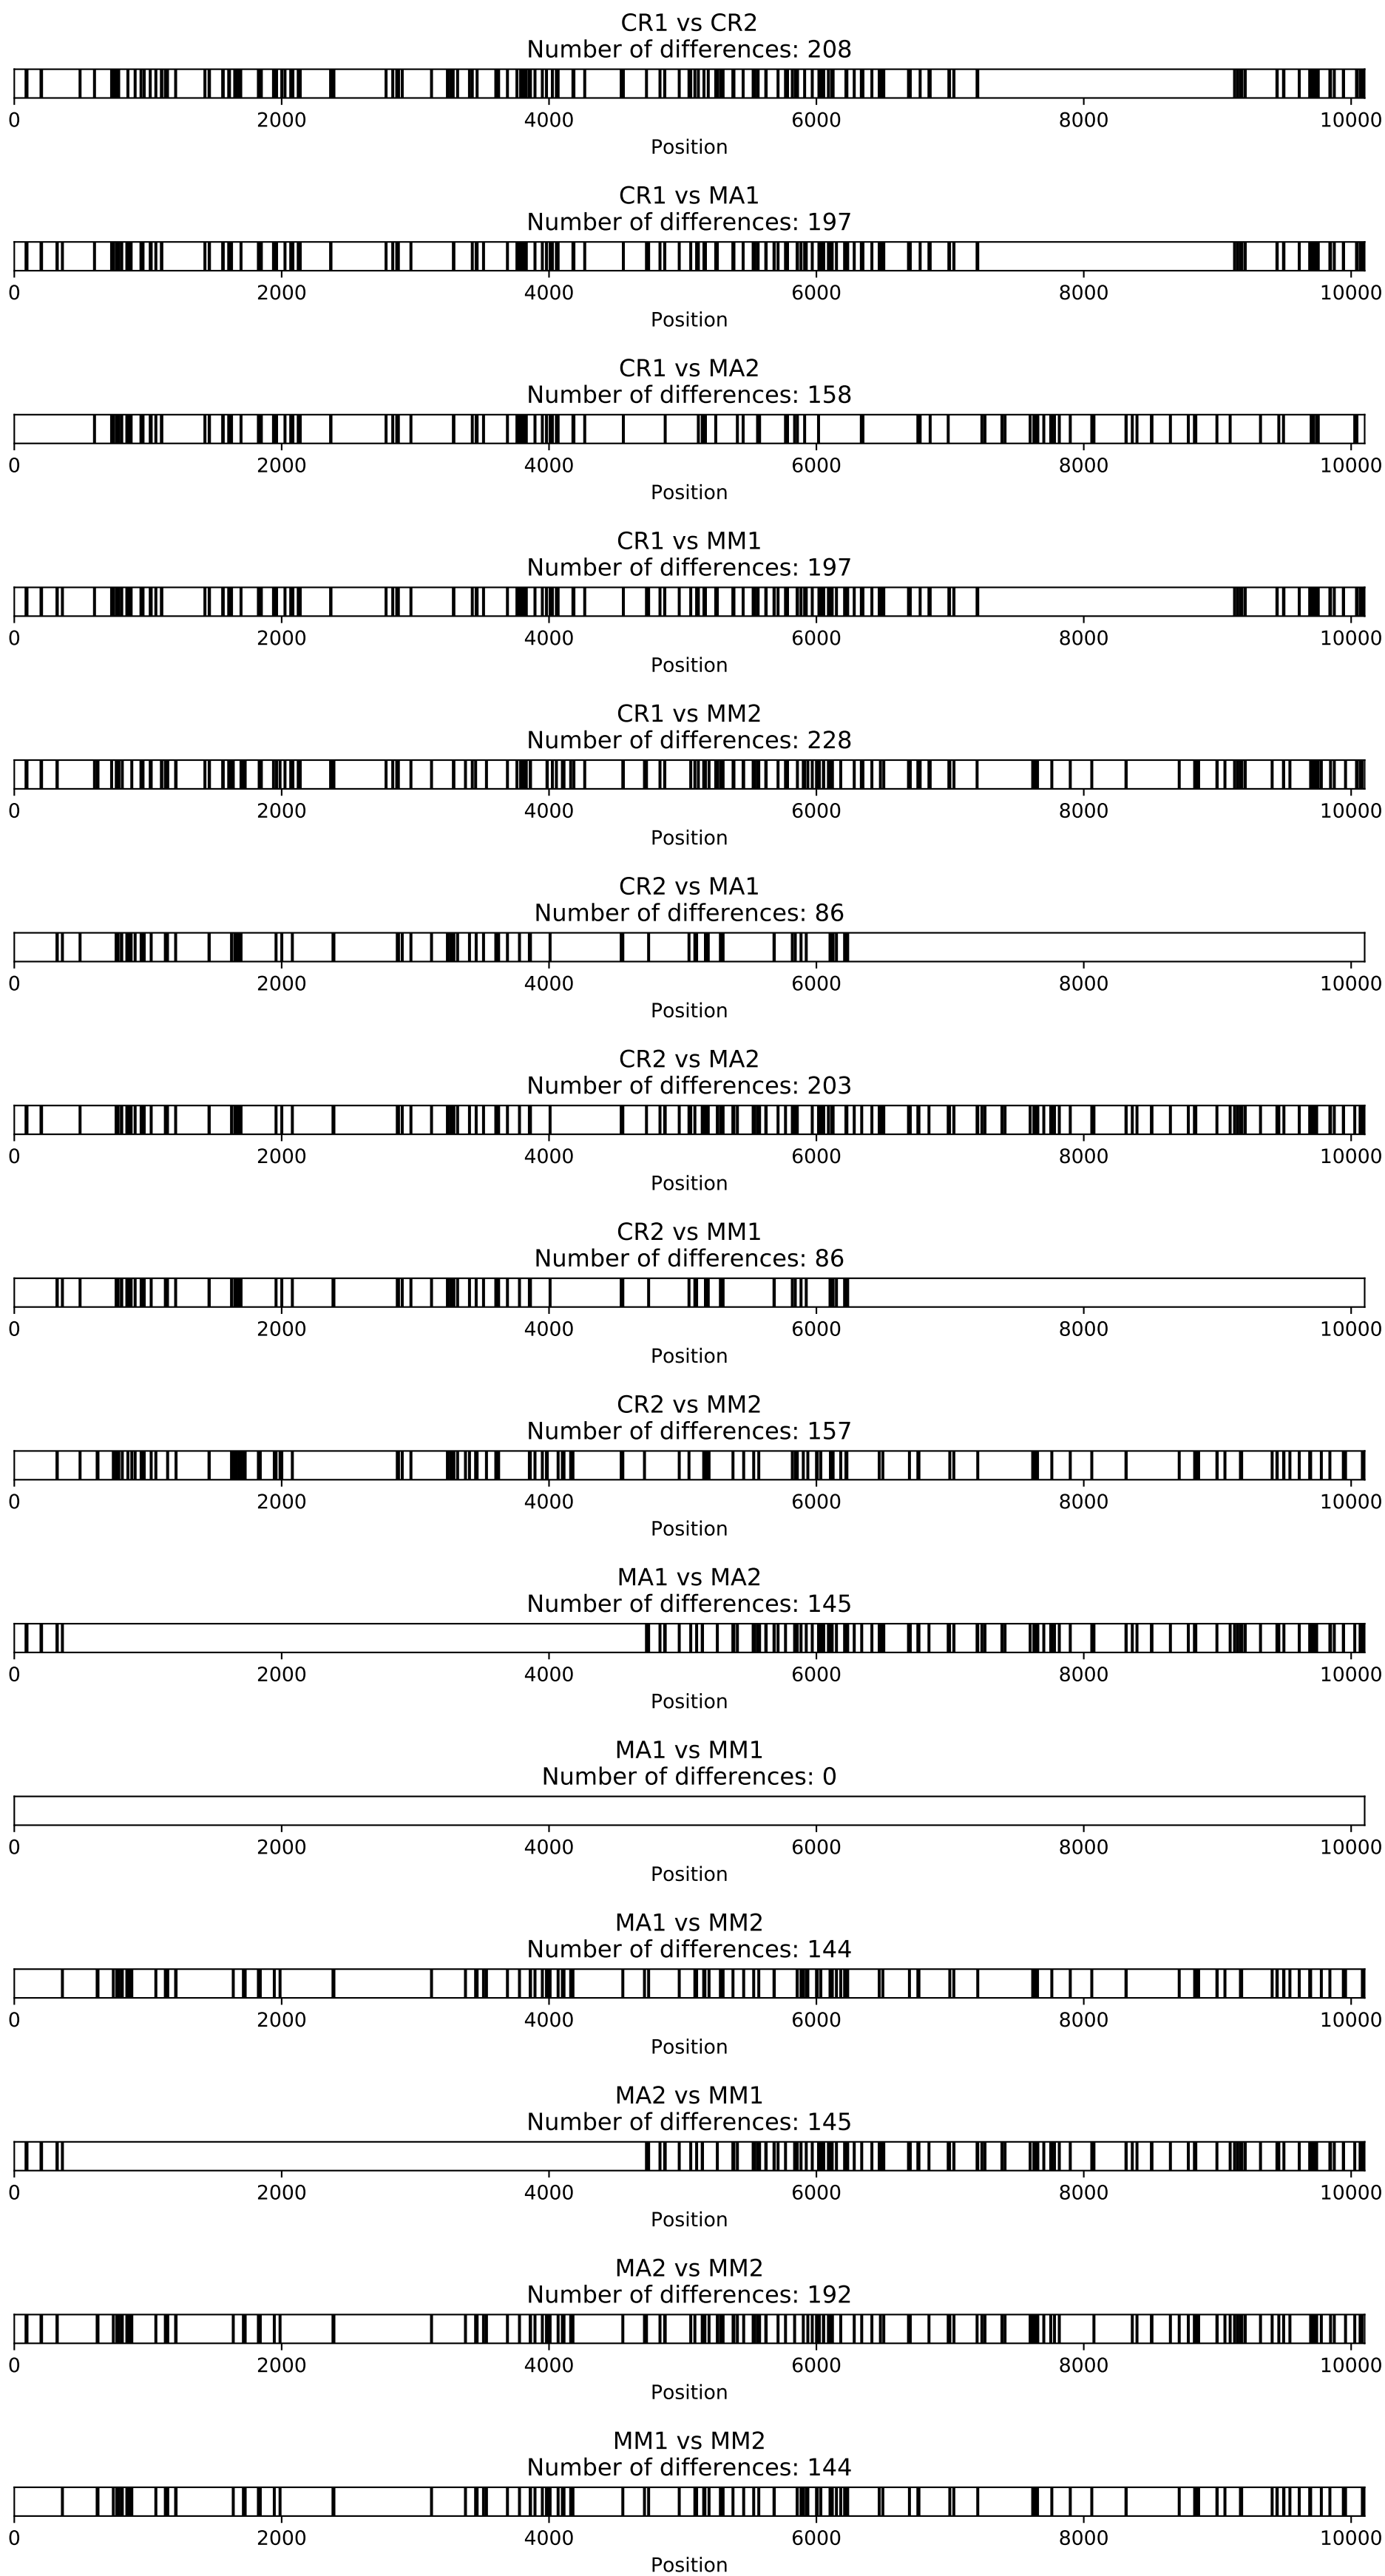

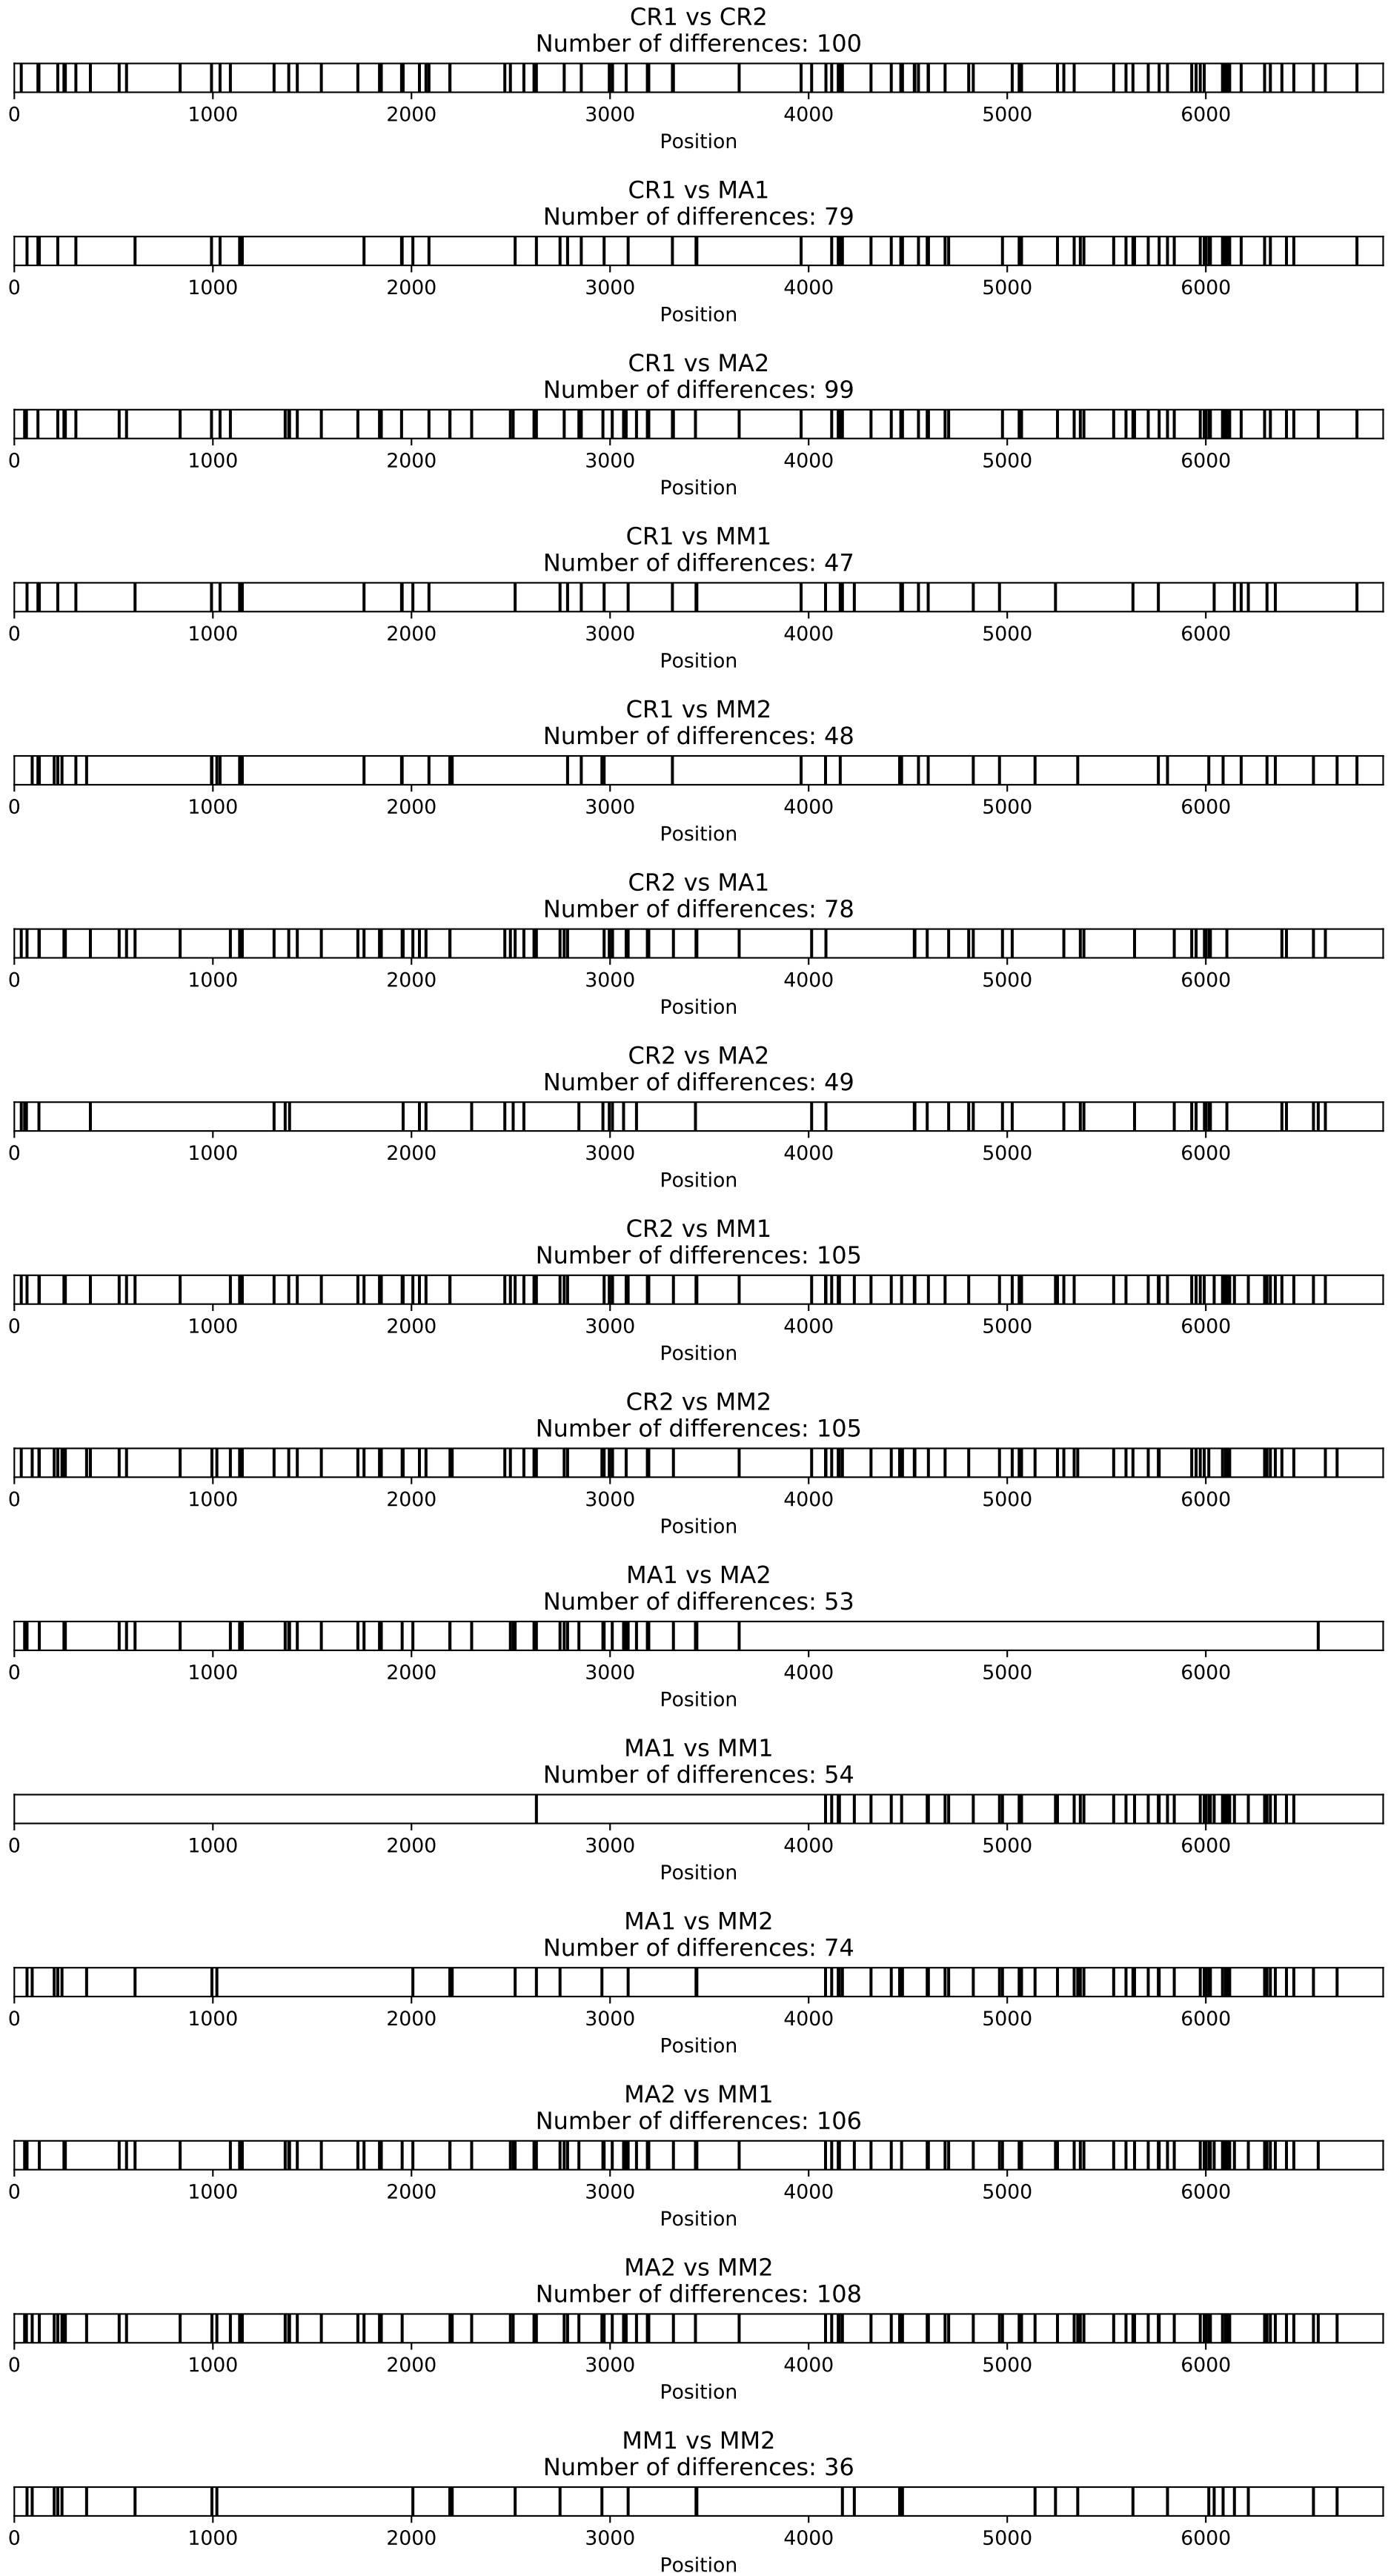

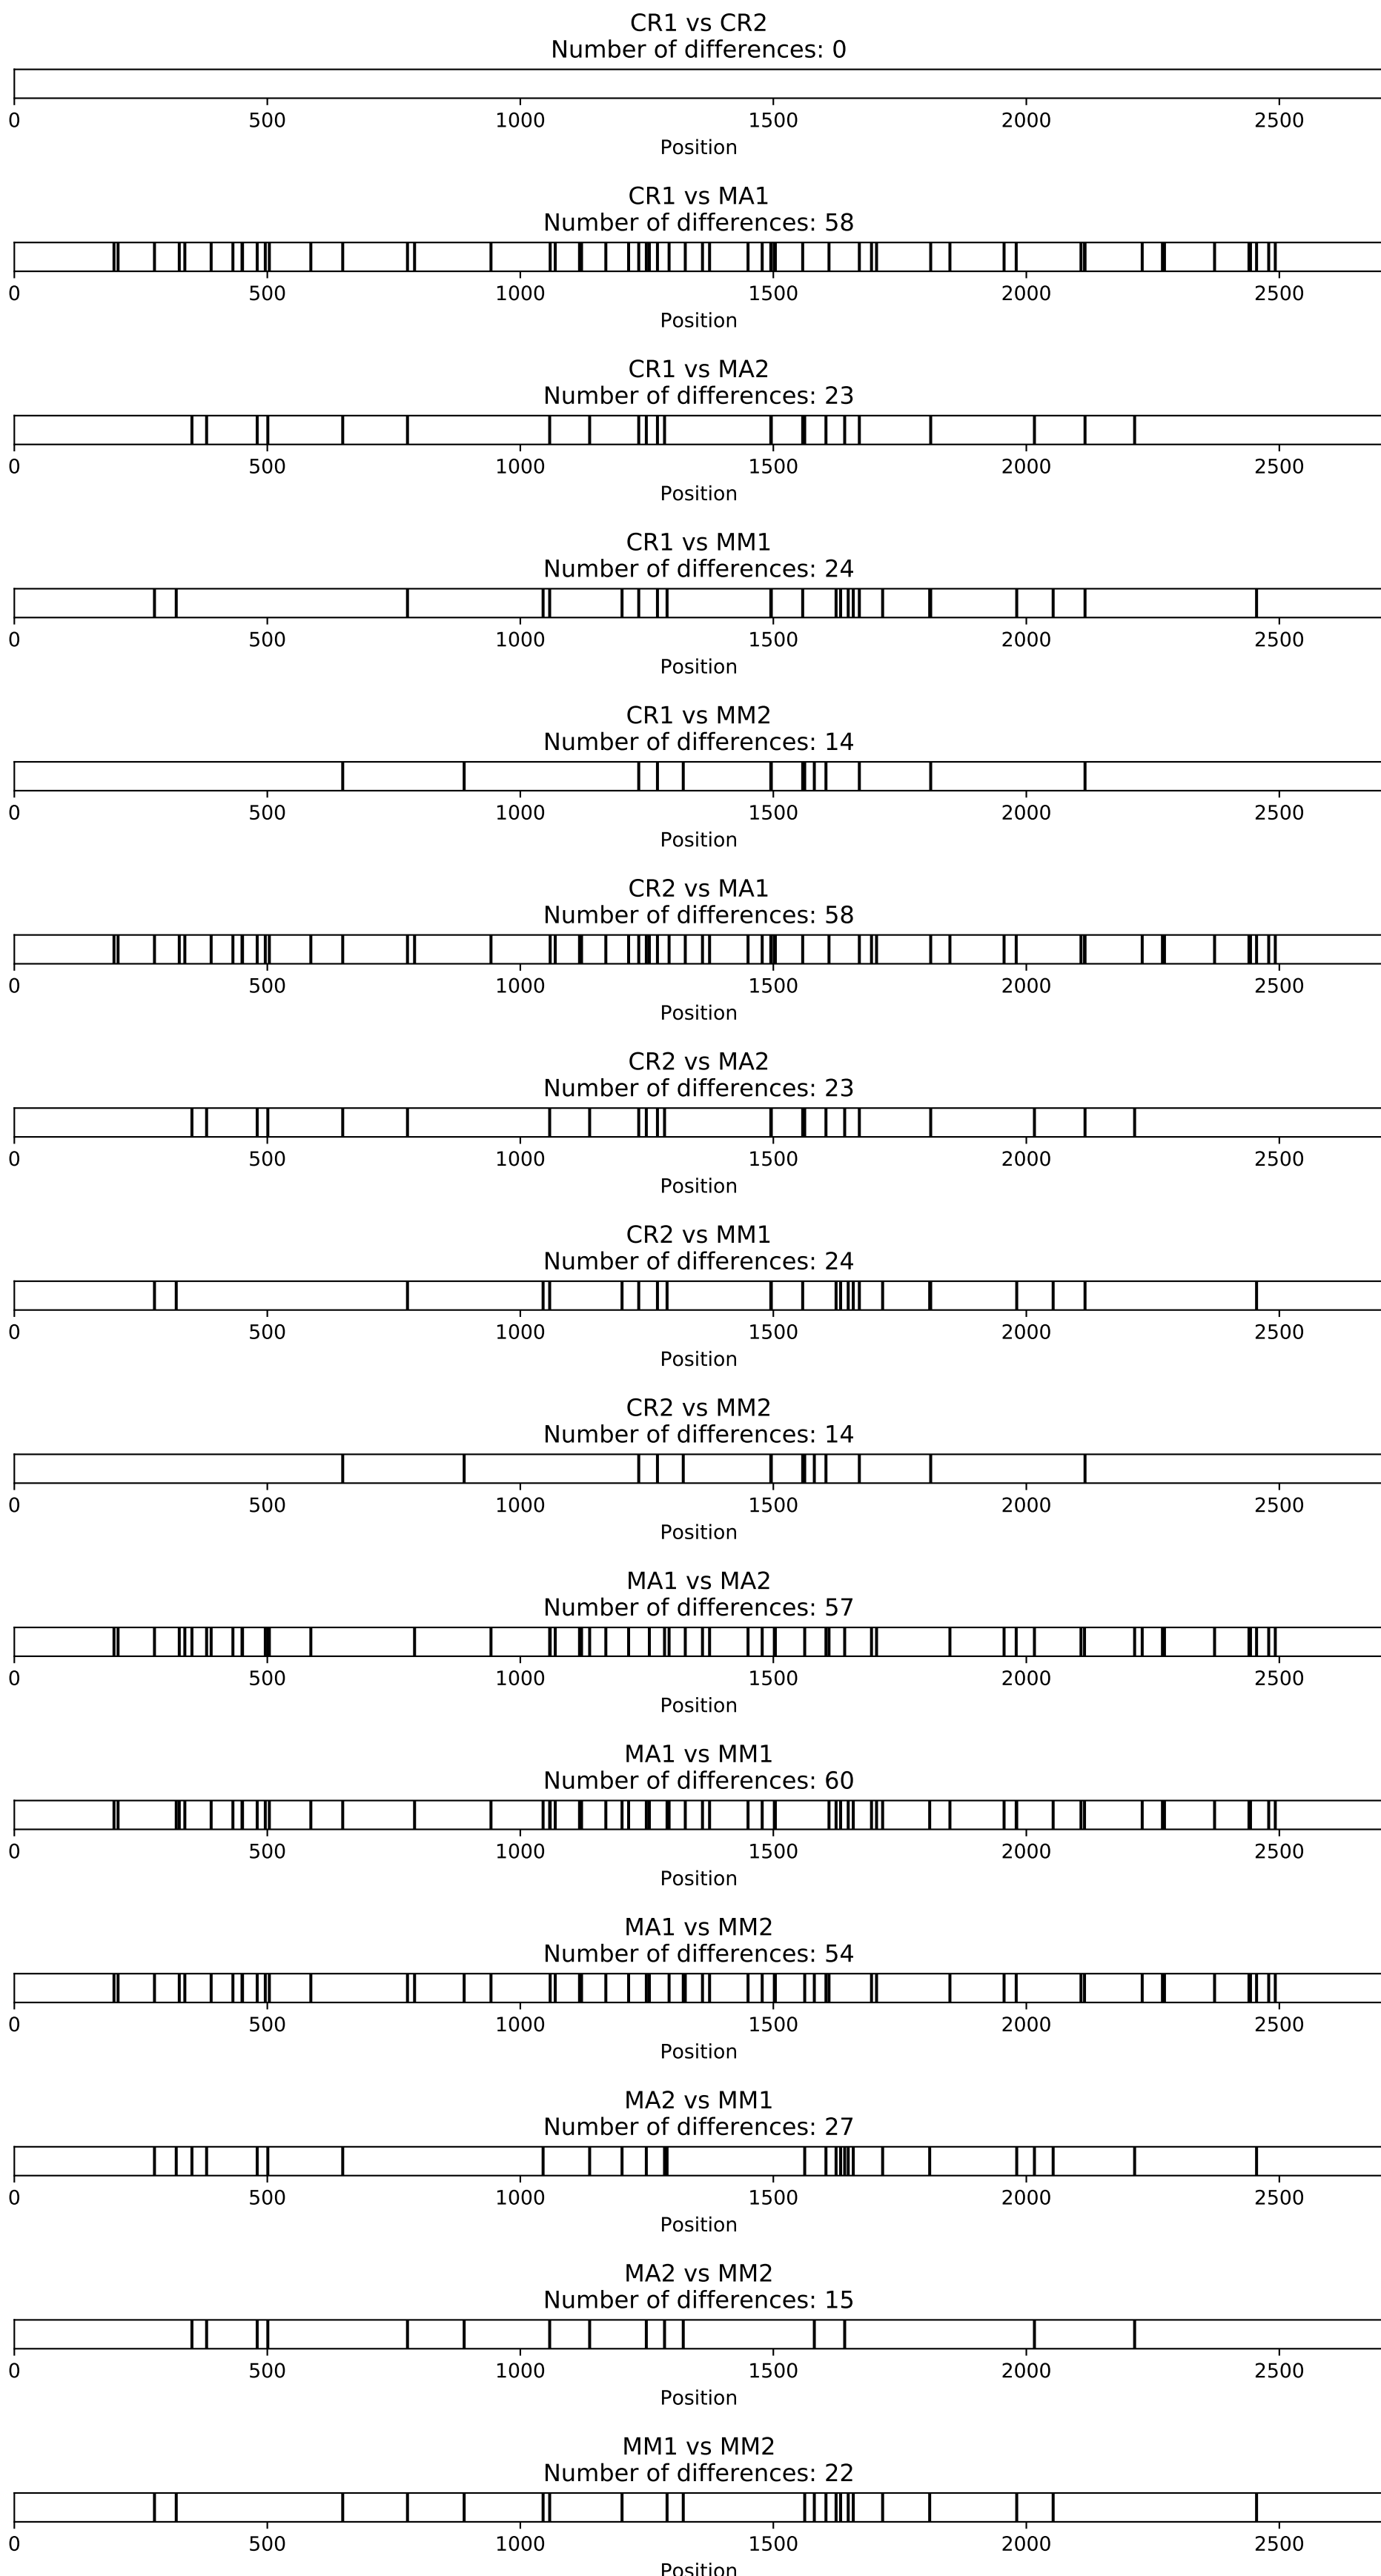

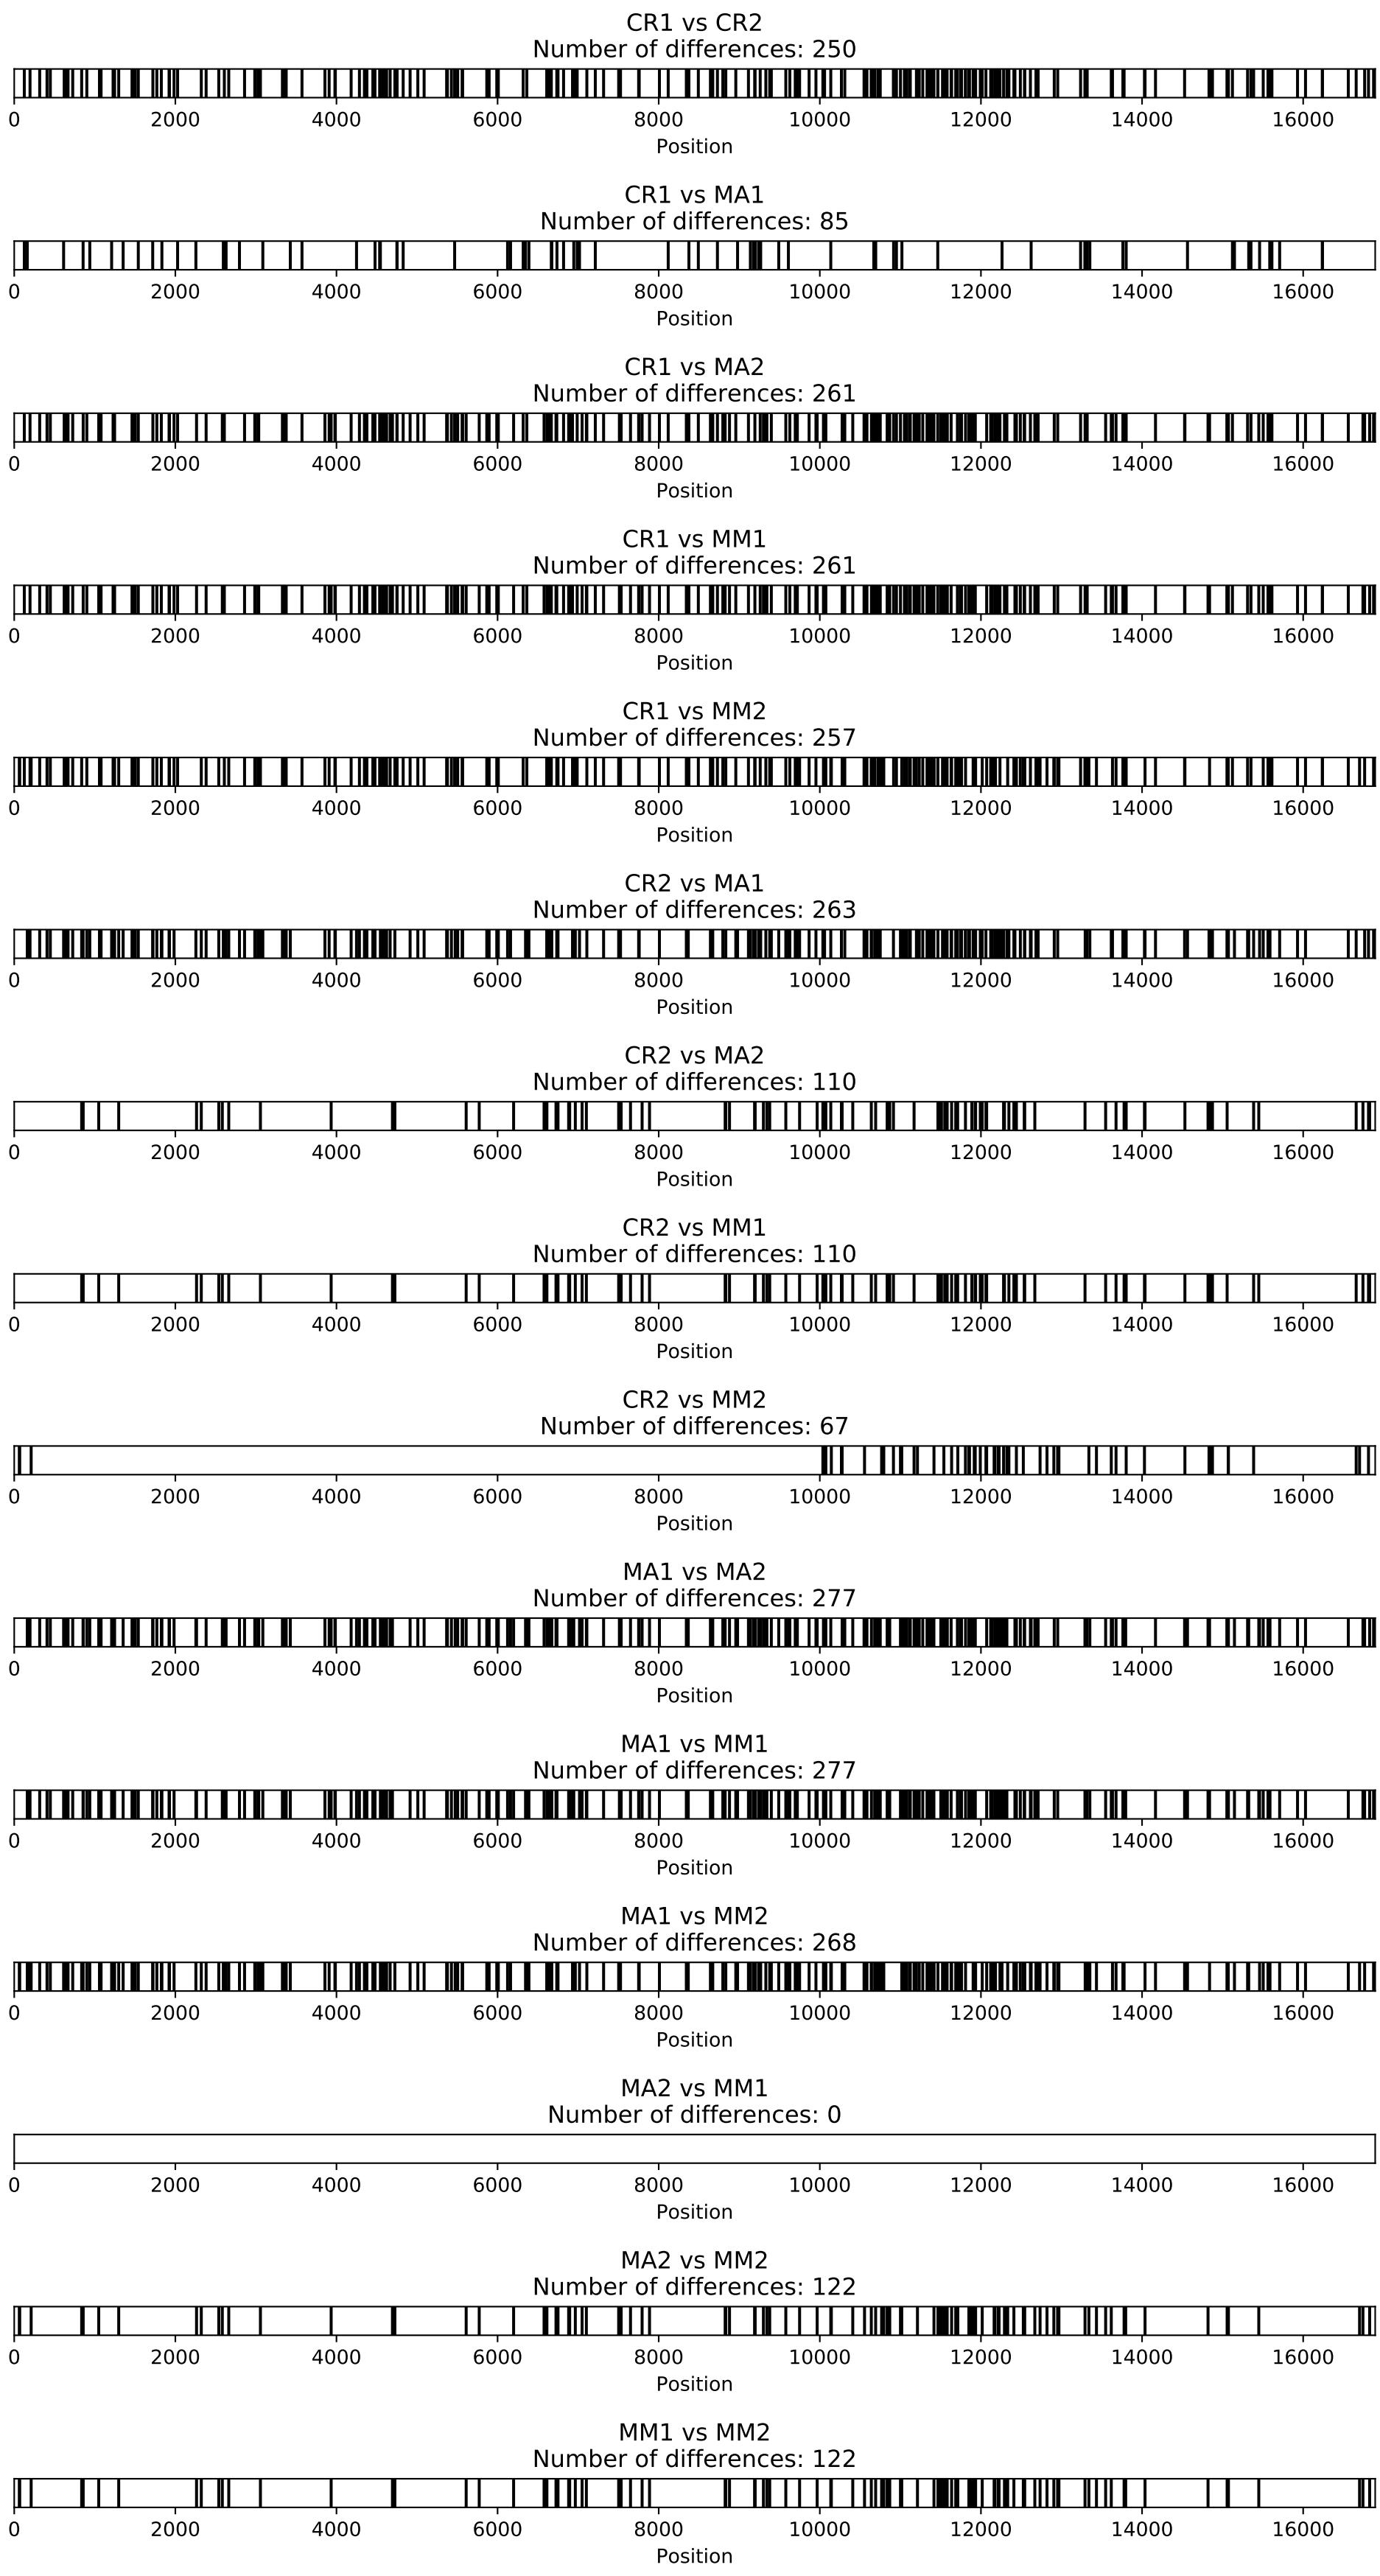



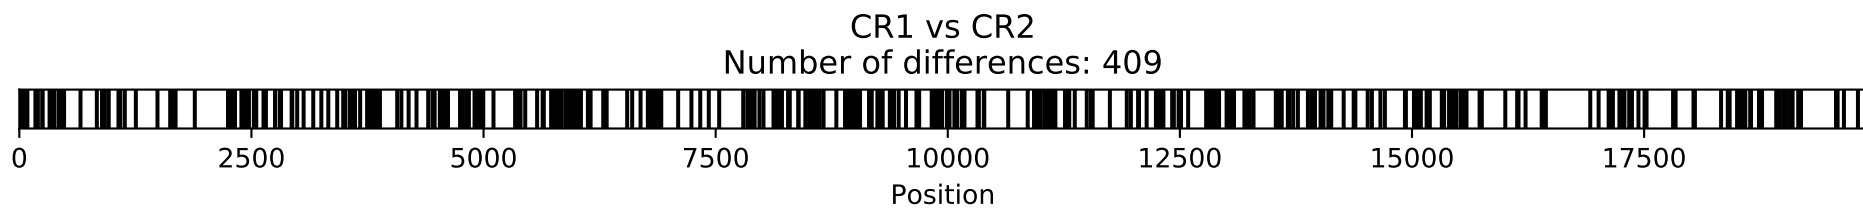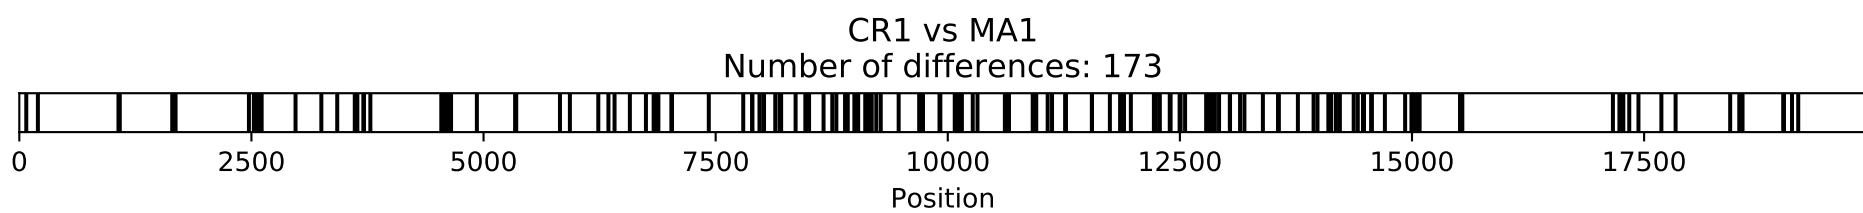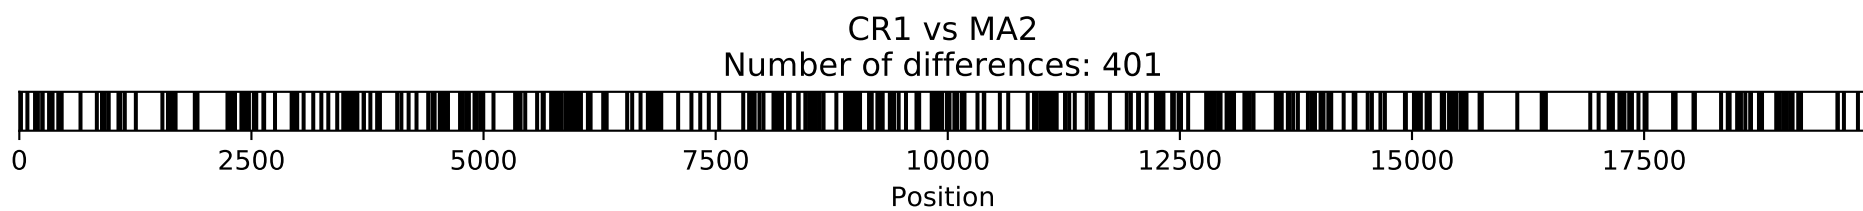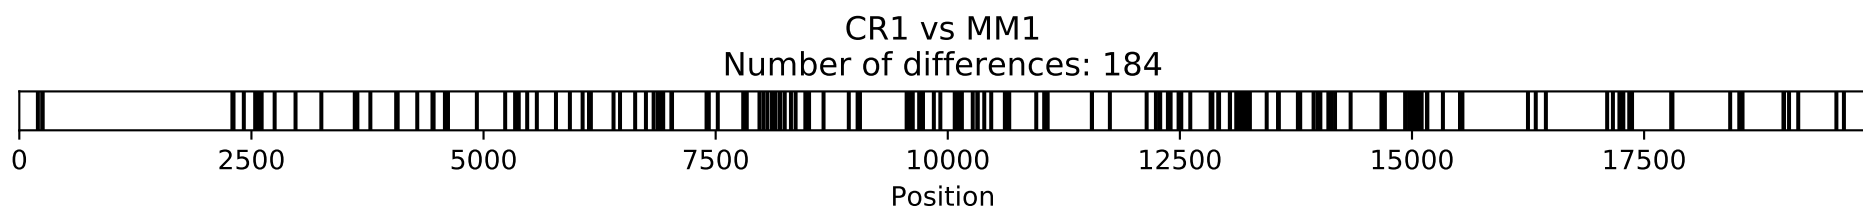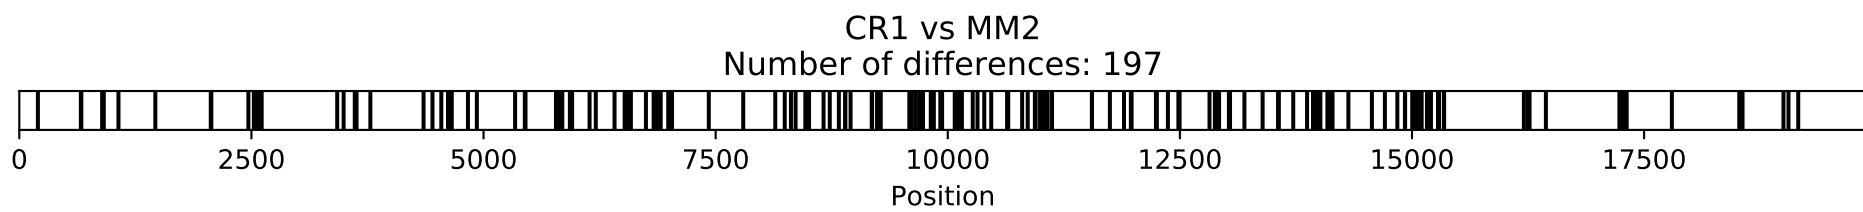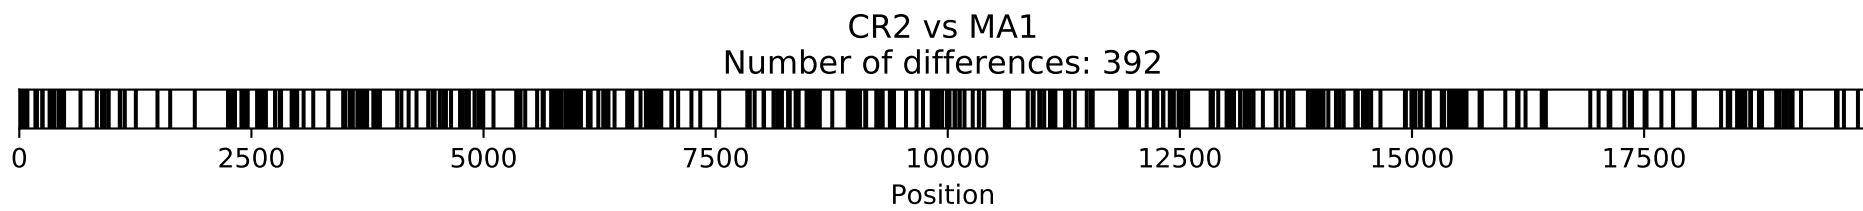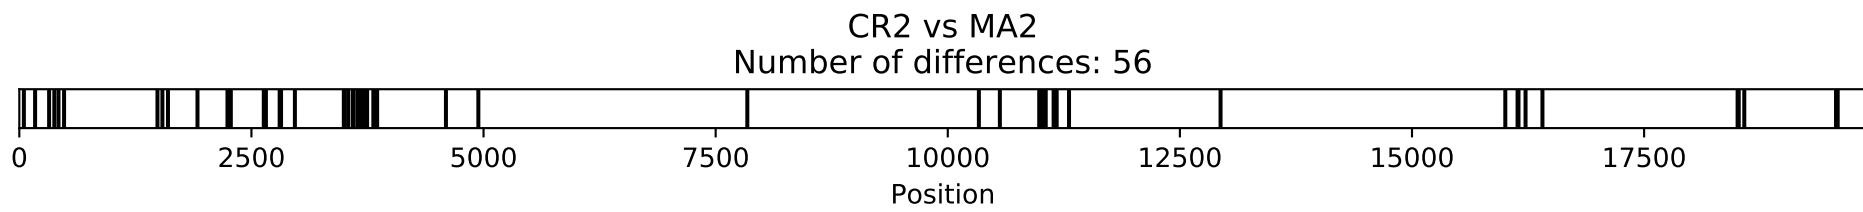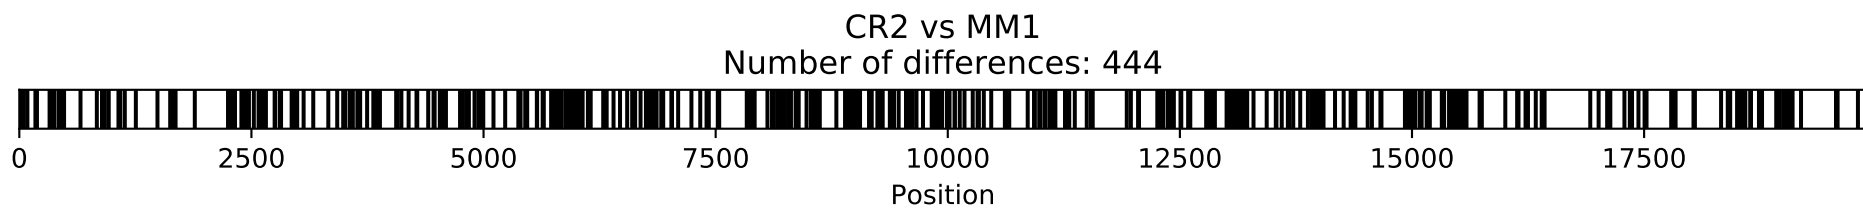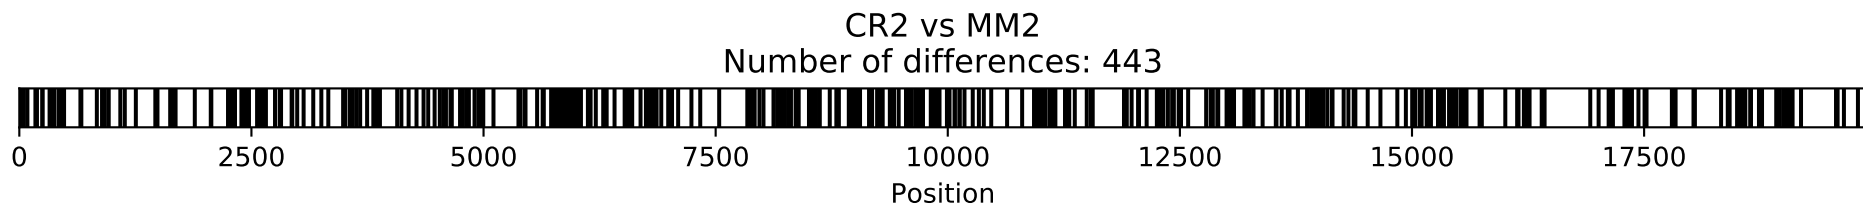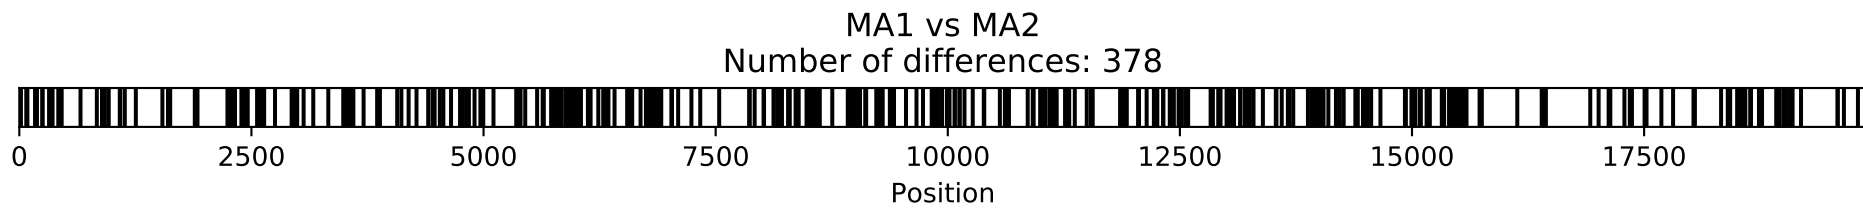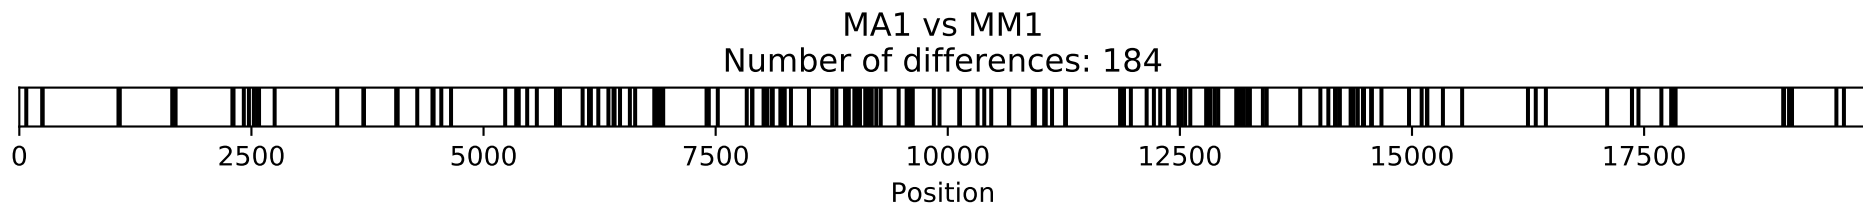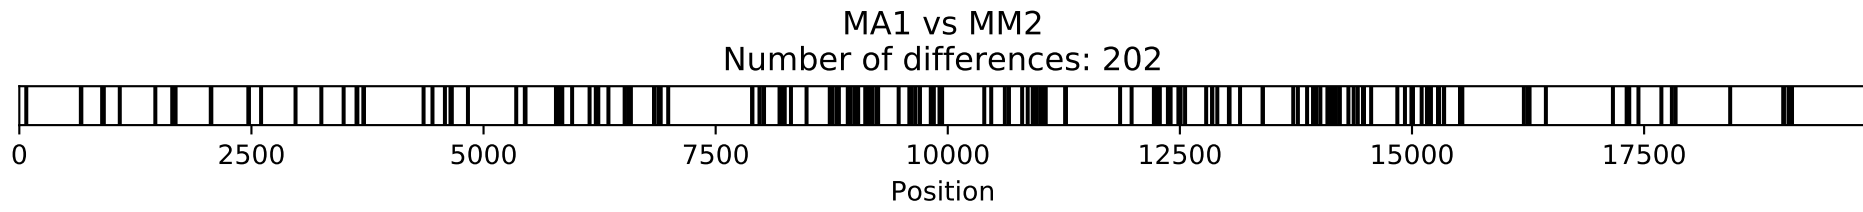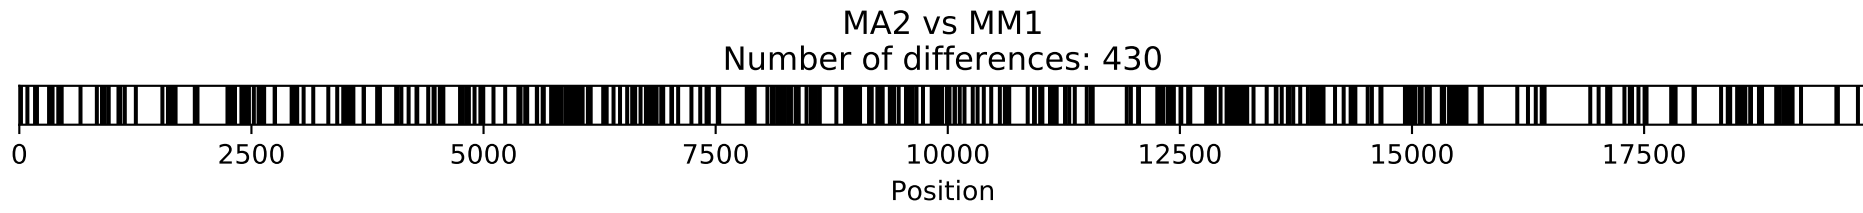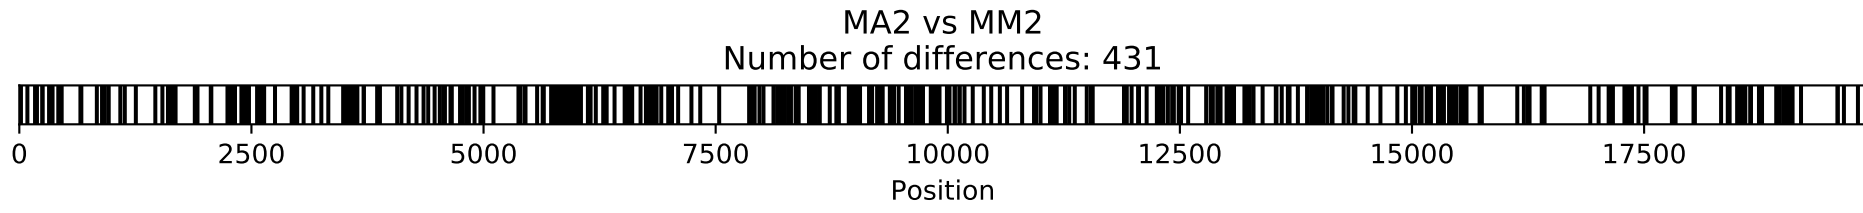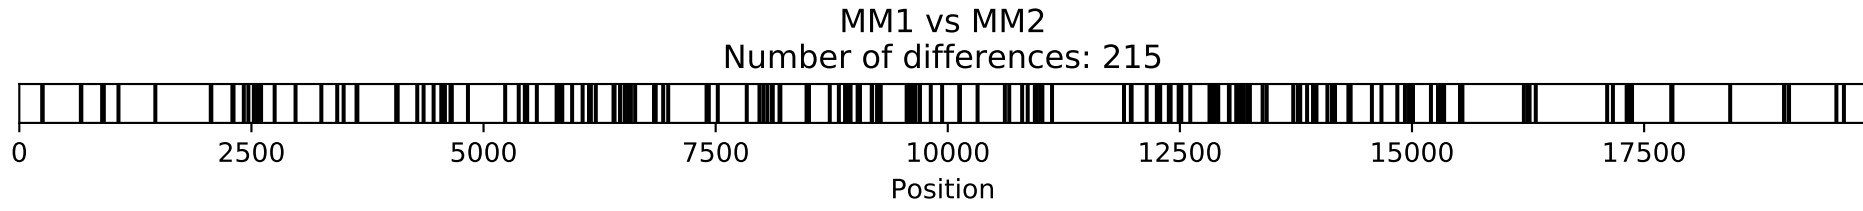

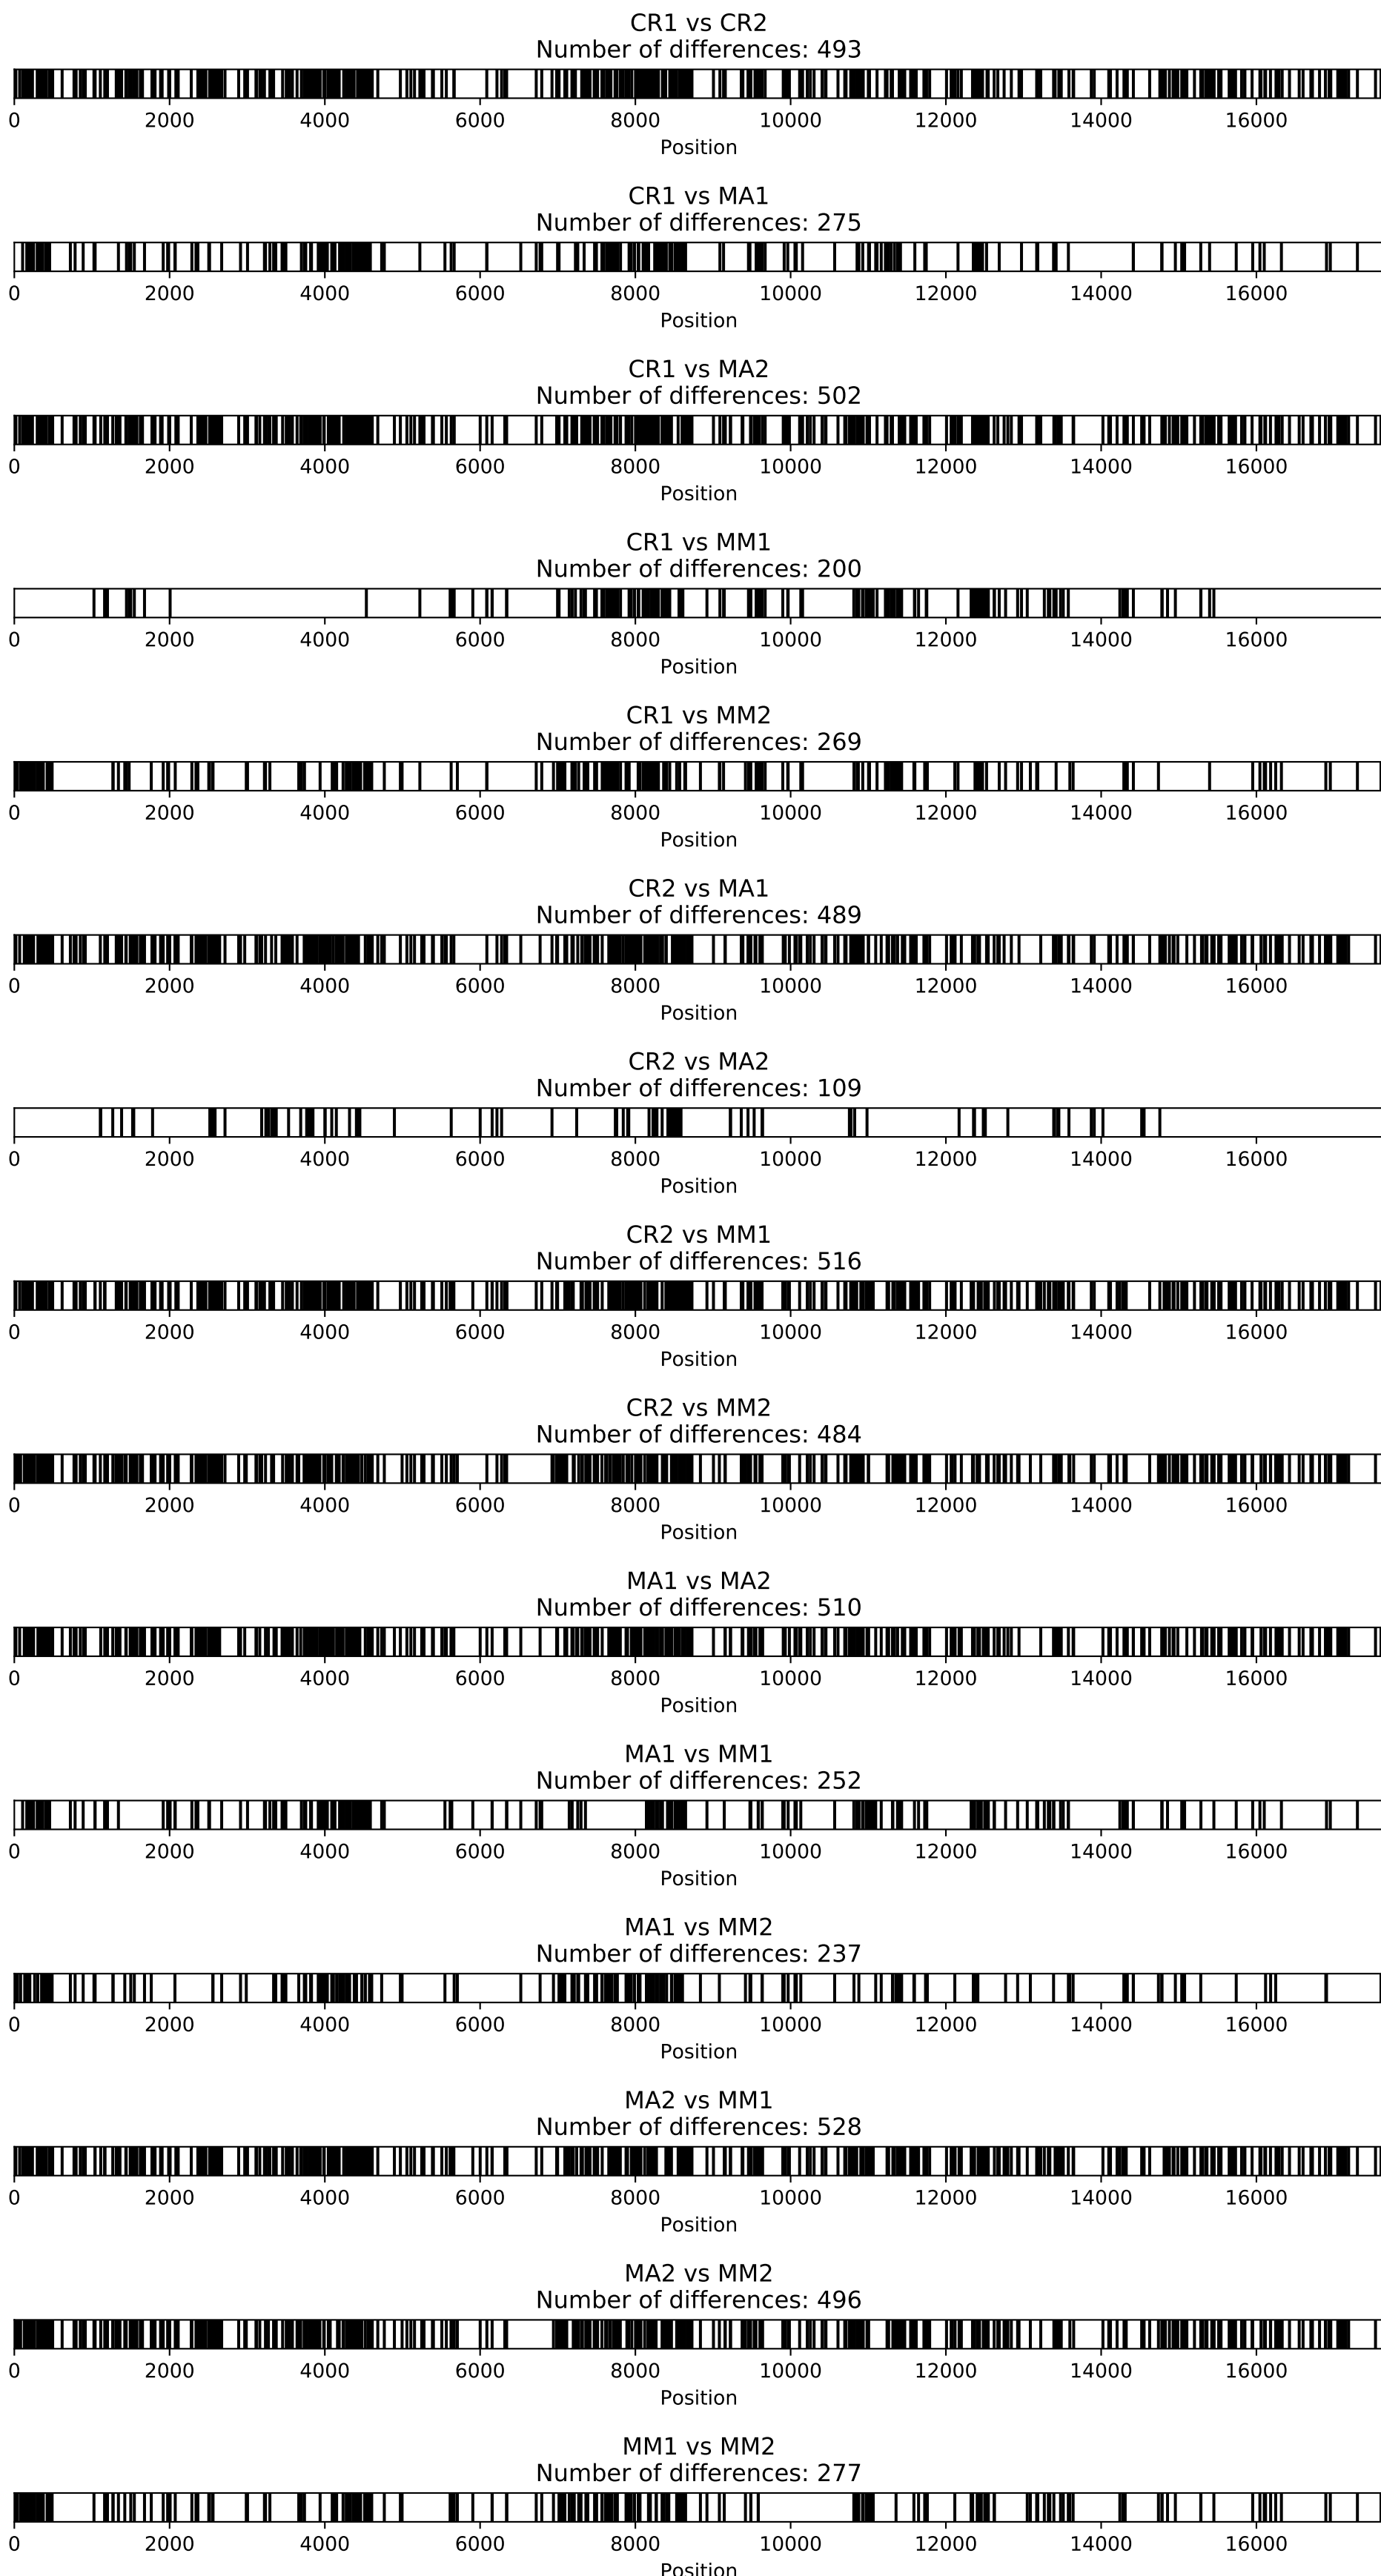

# Region: 370

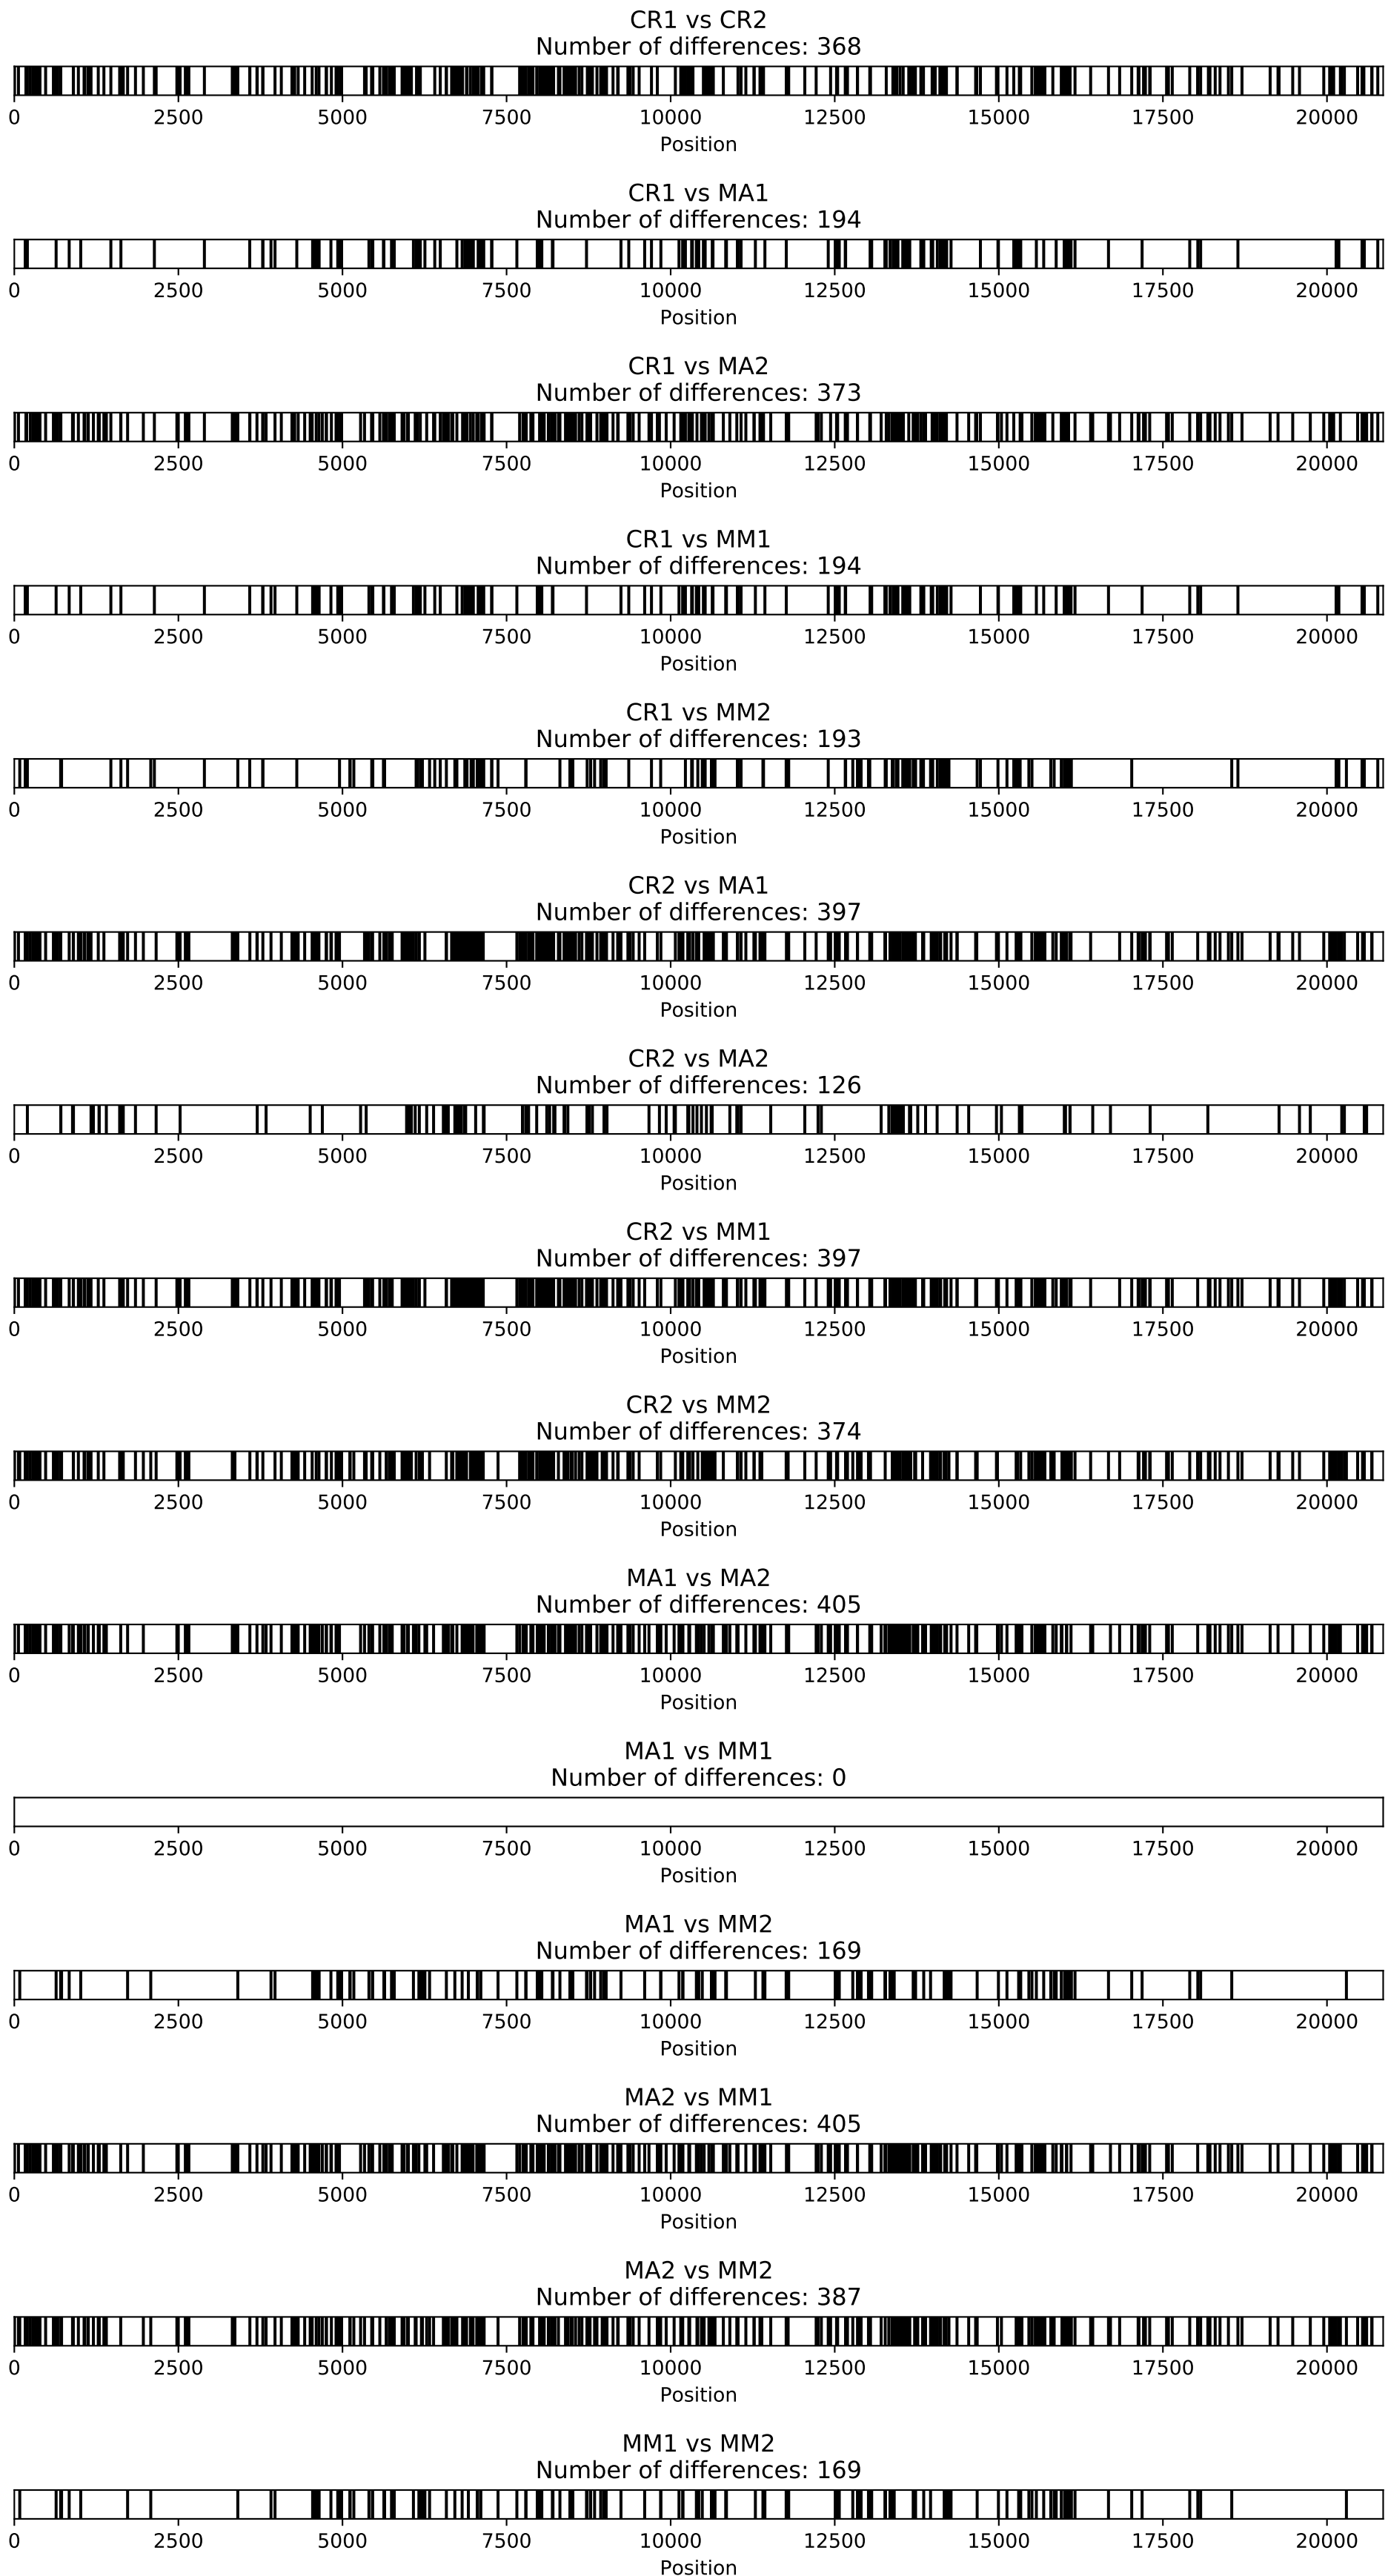

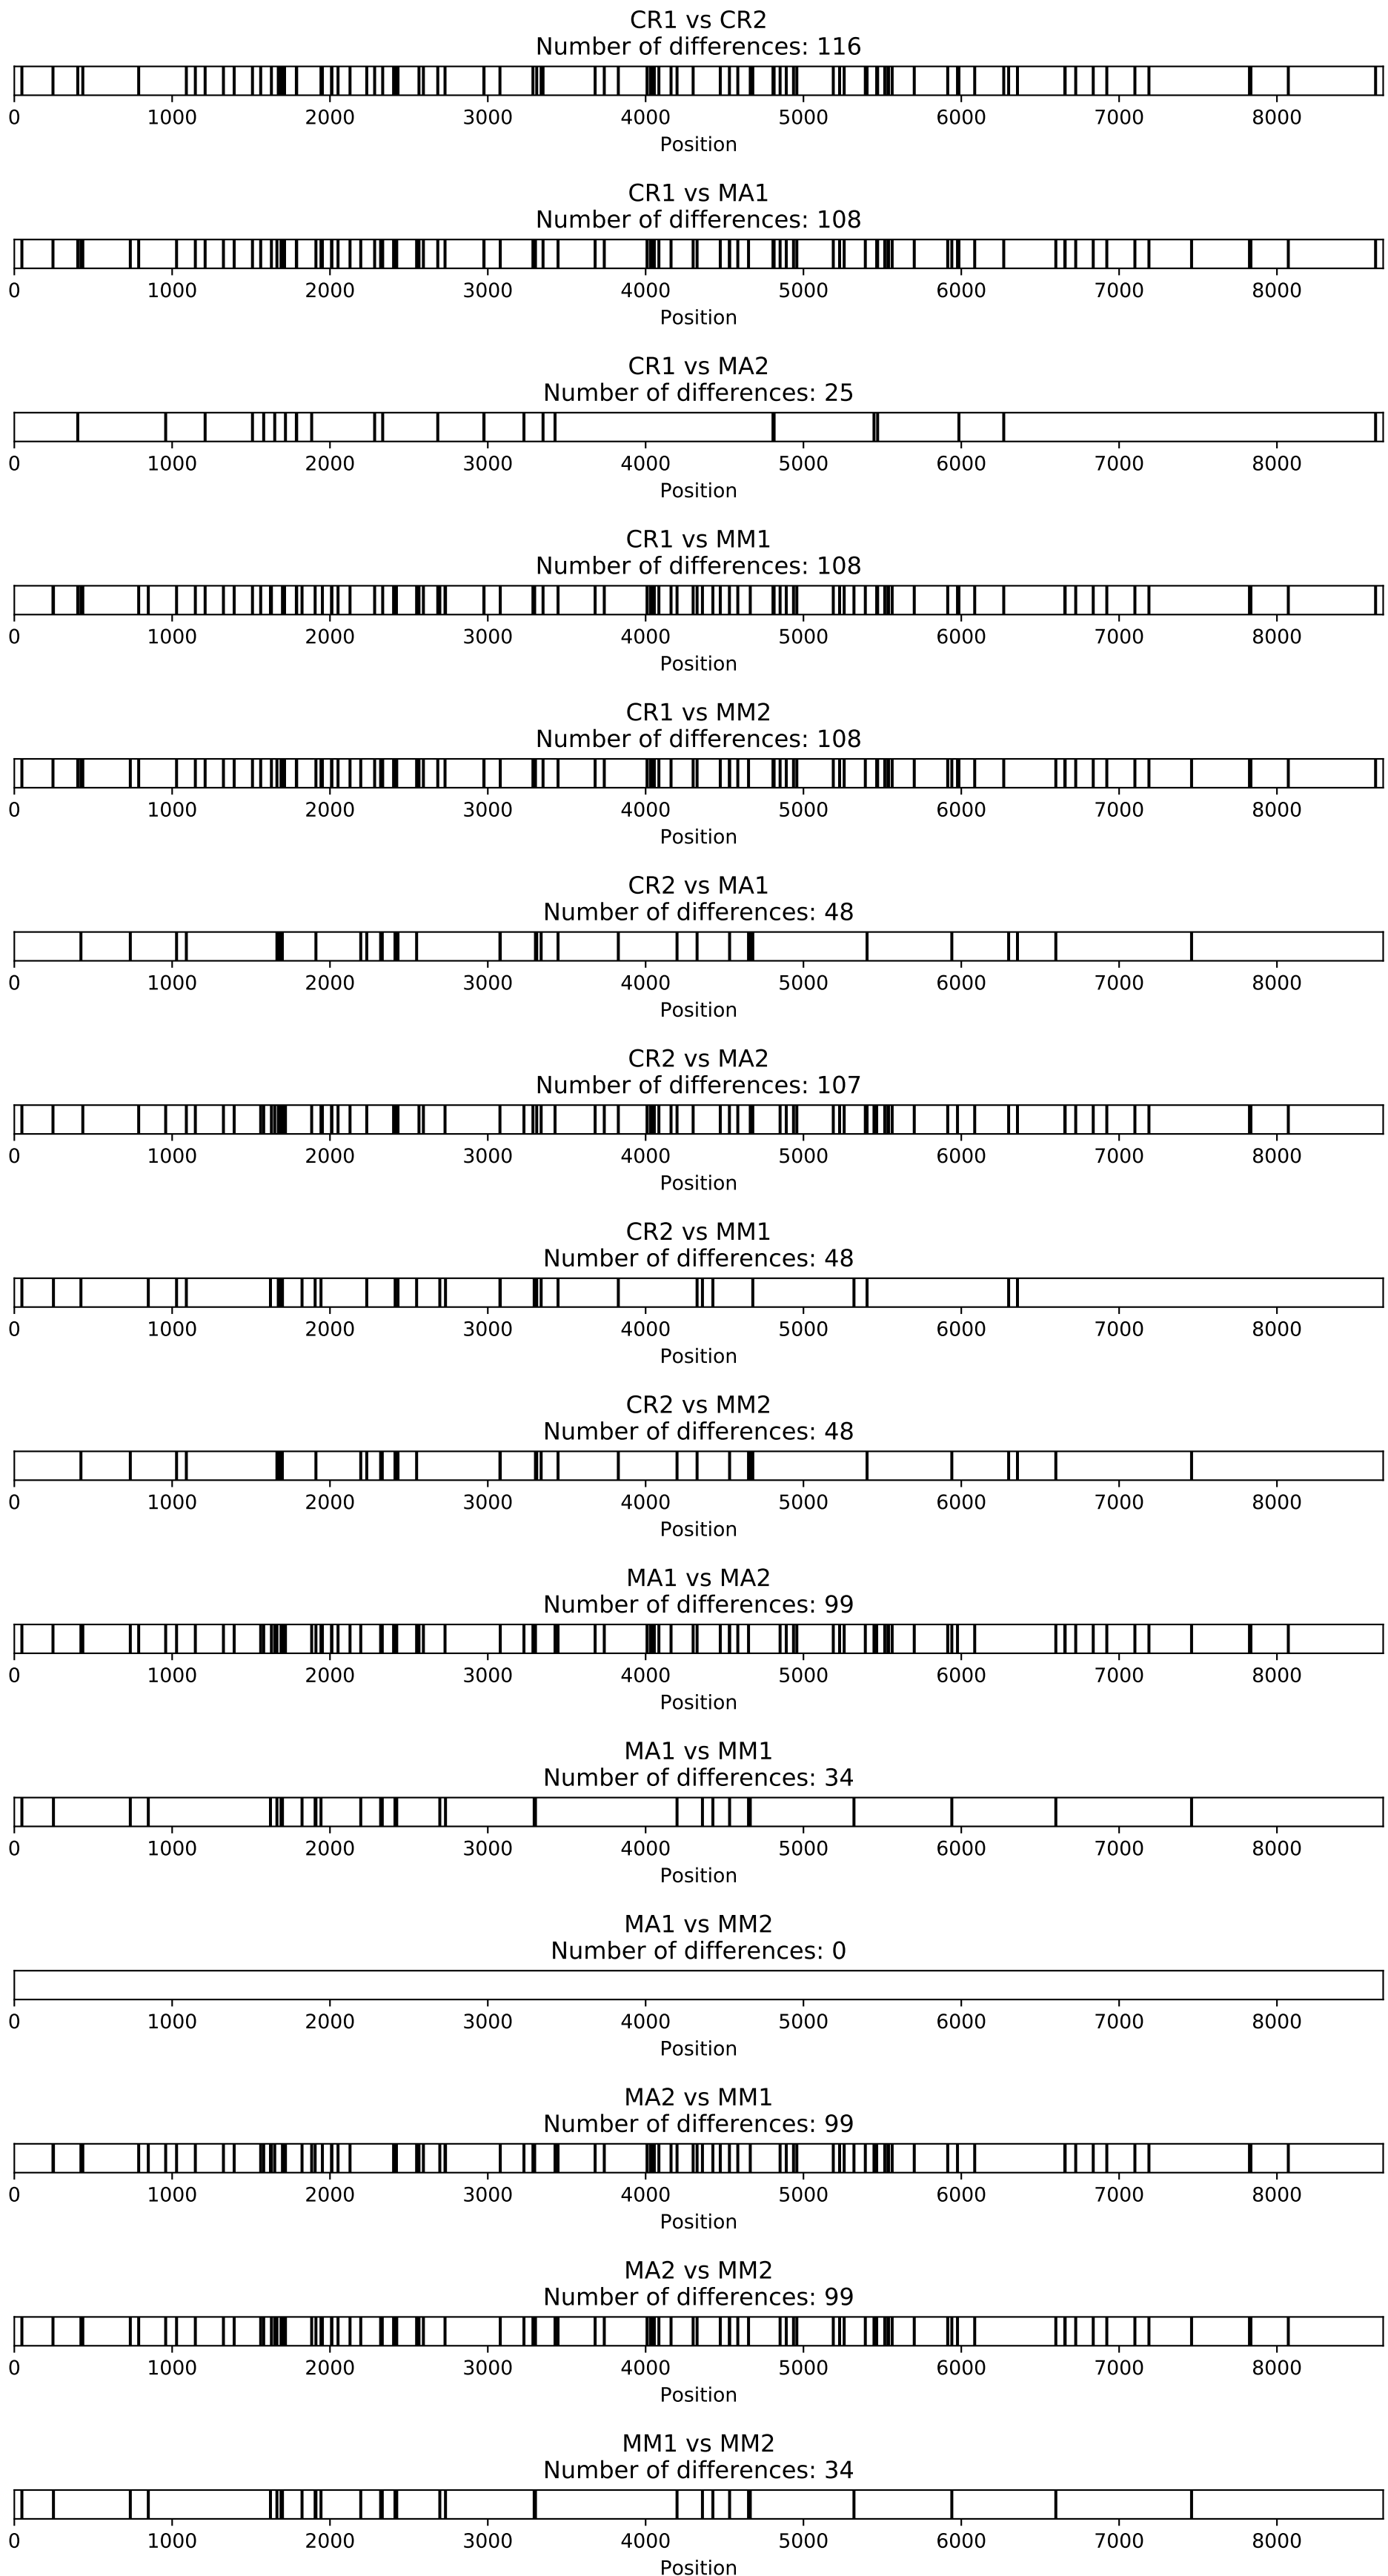

# Region: 372

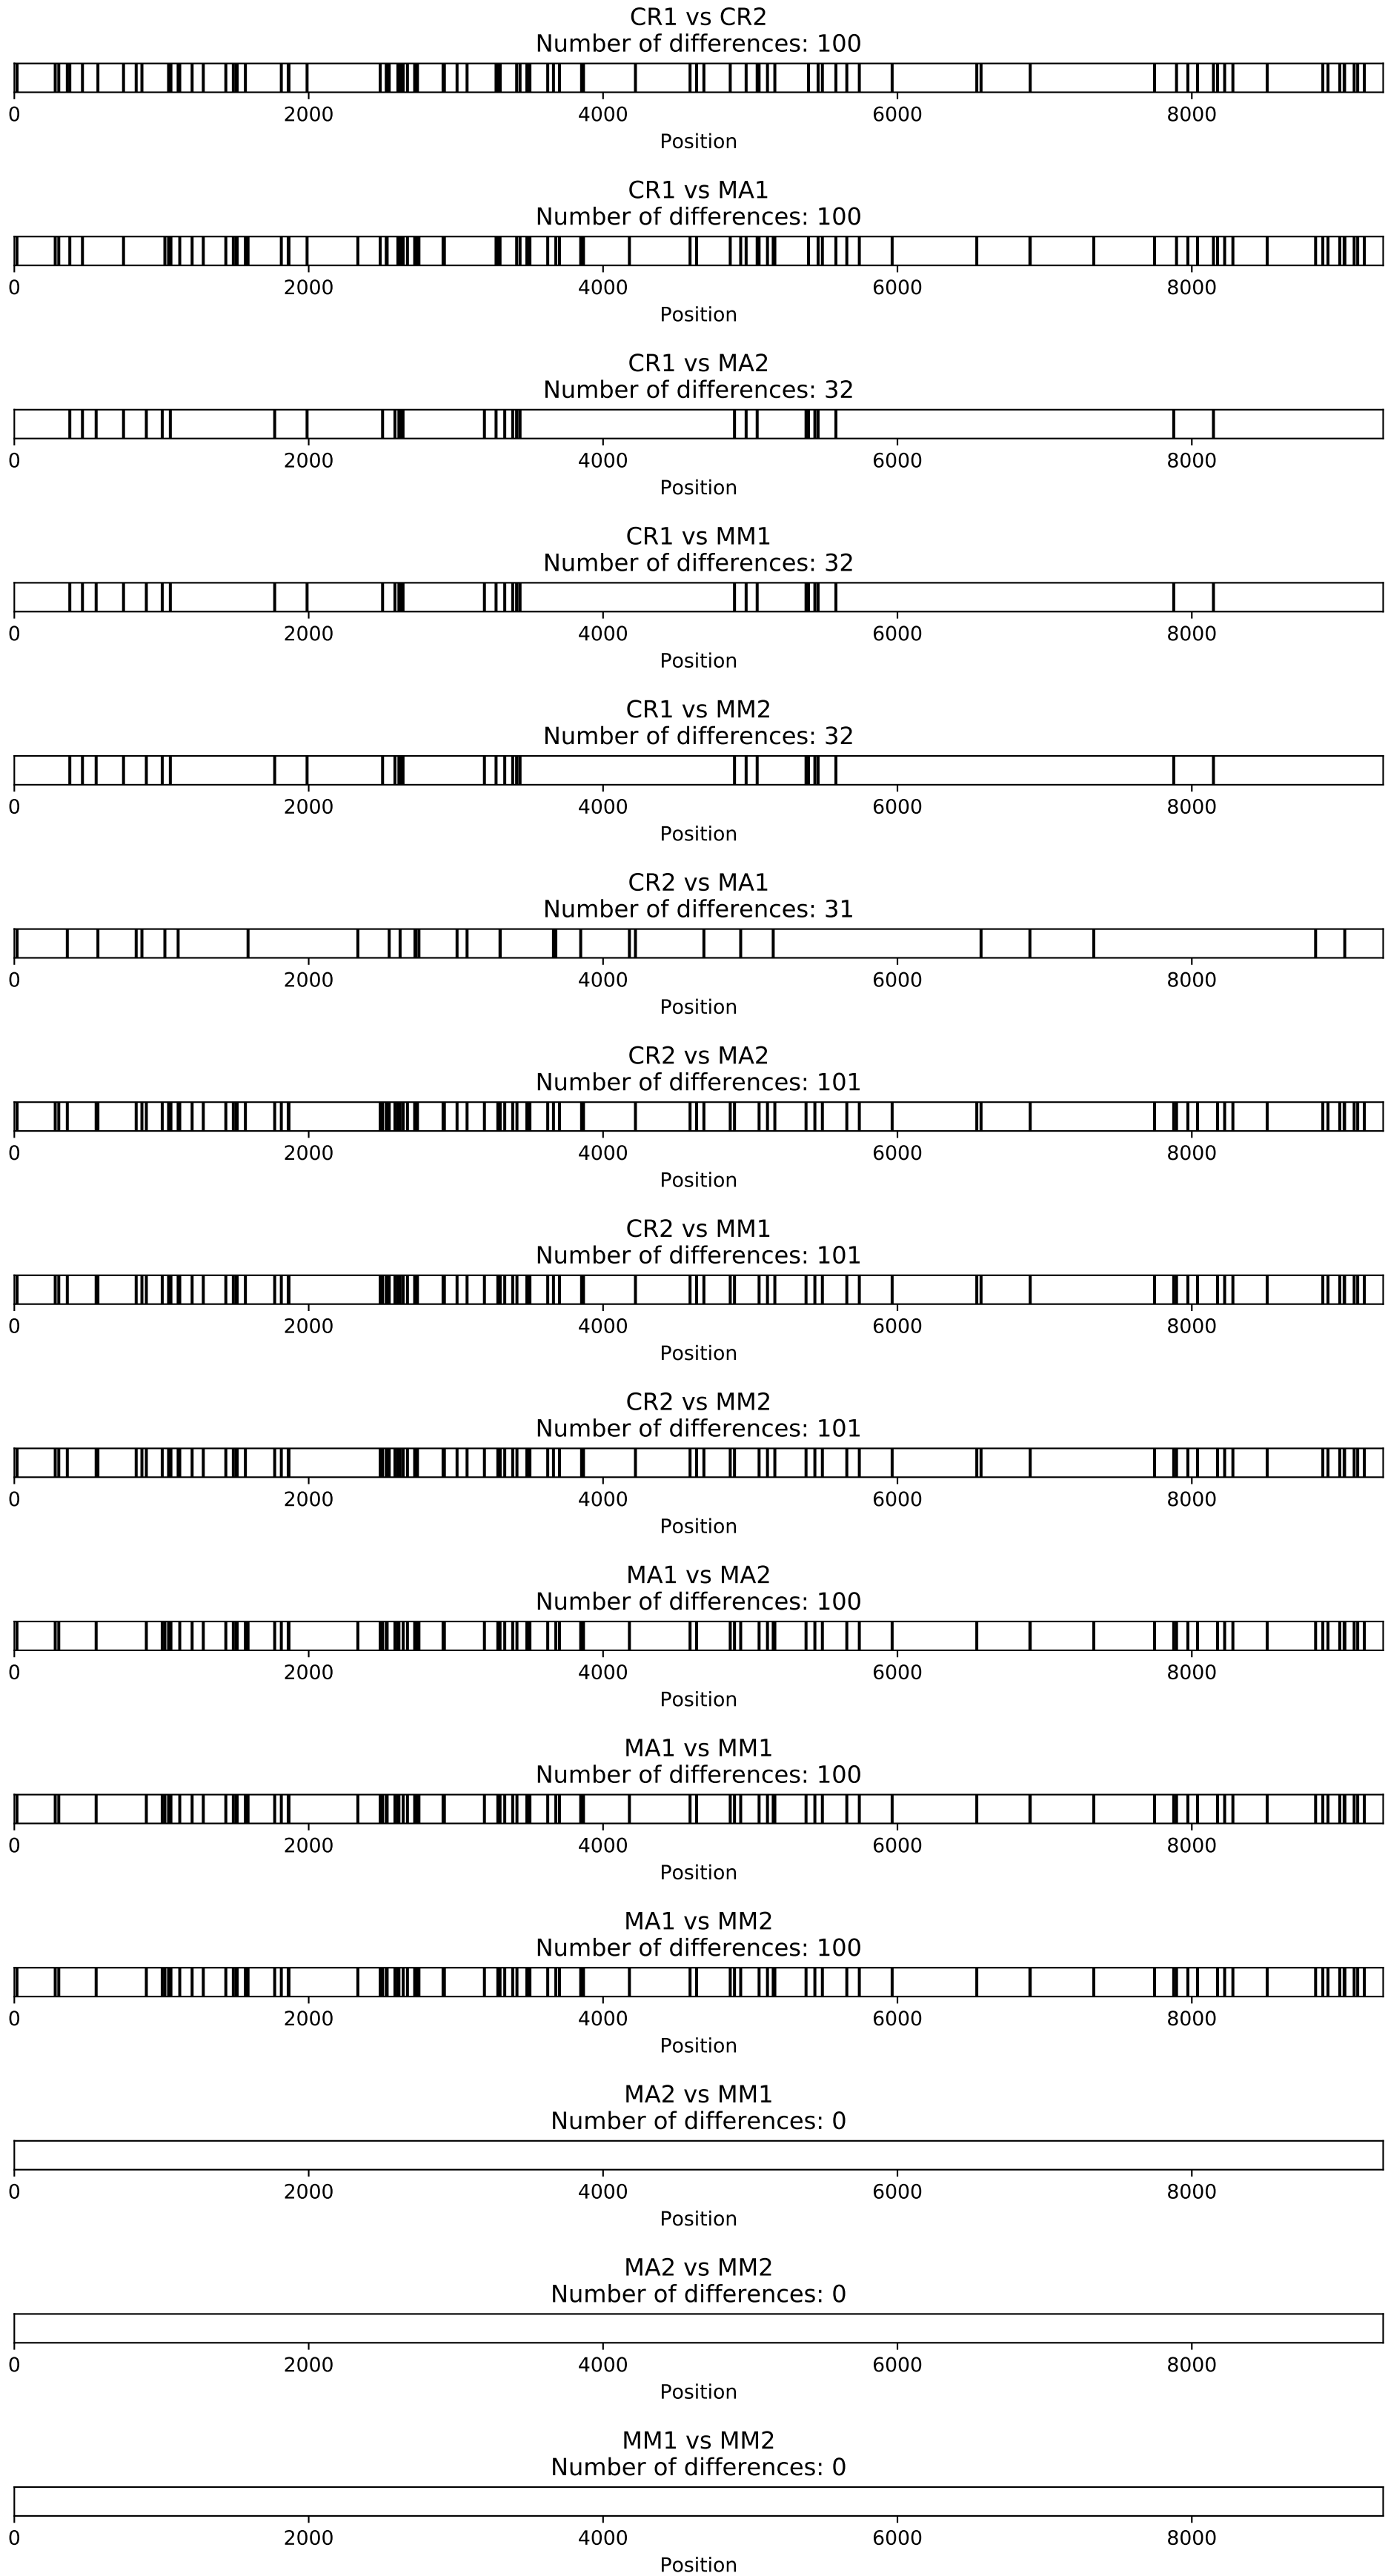

# Region: 373

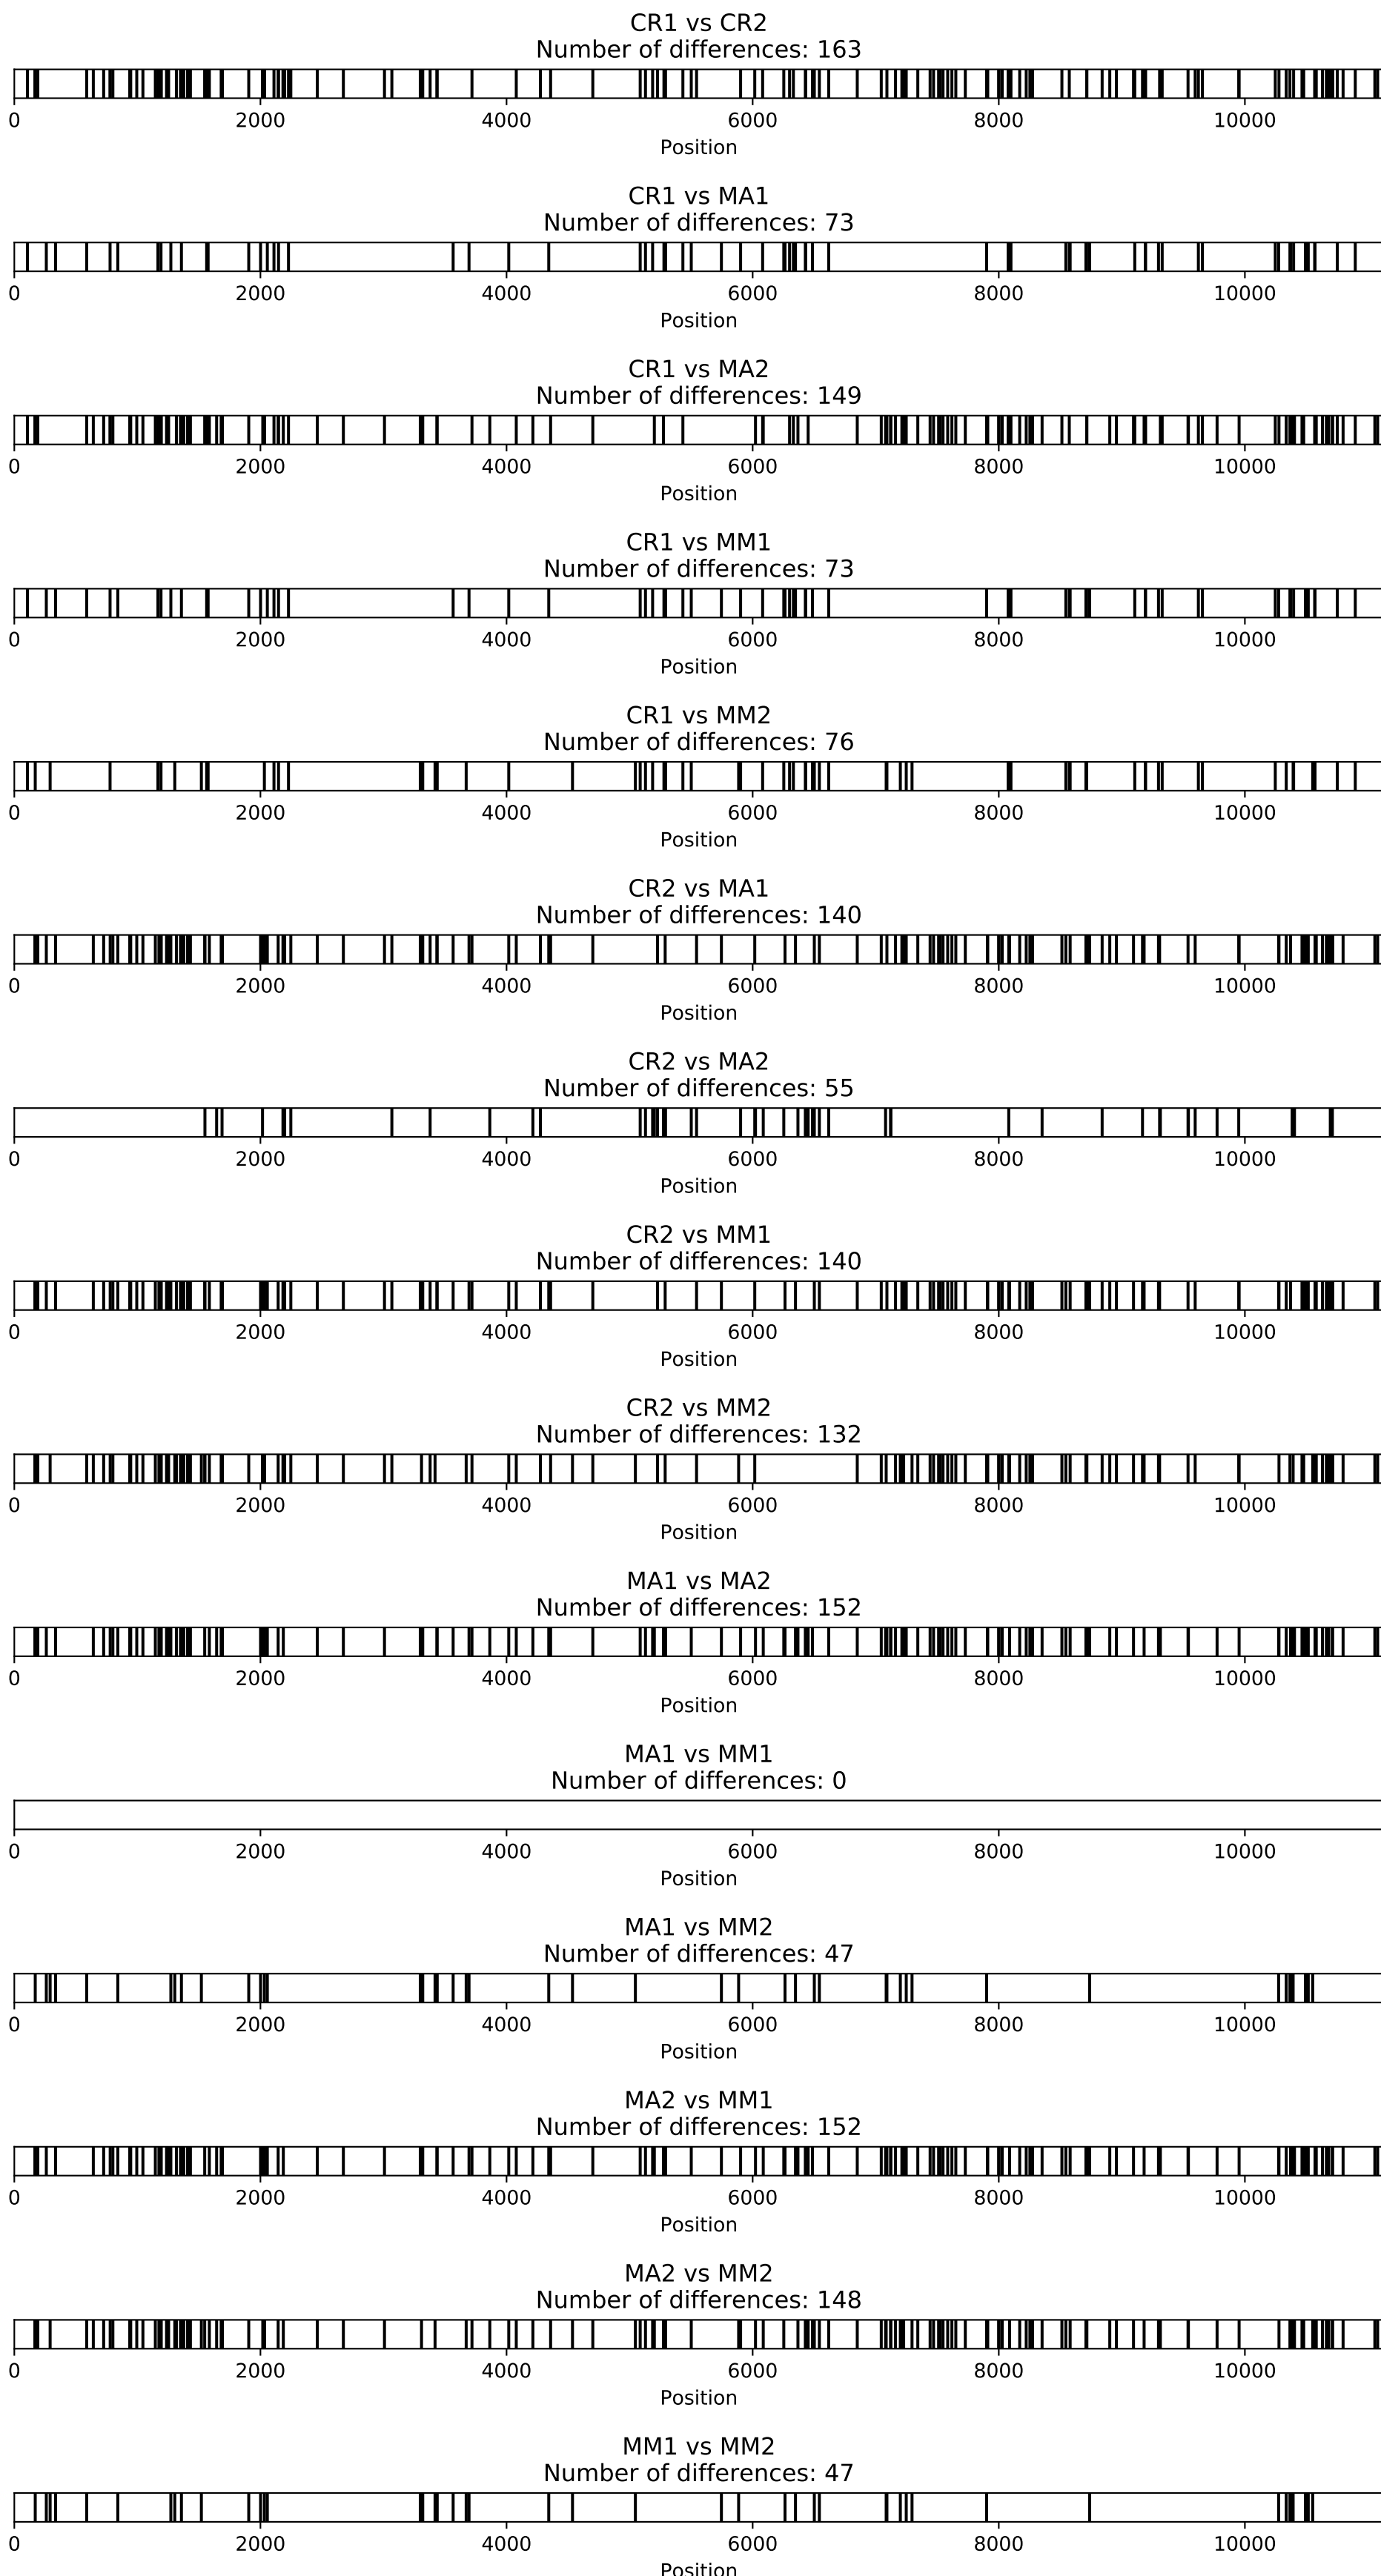

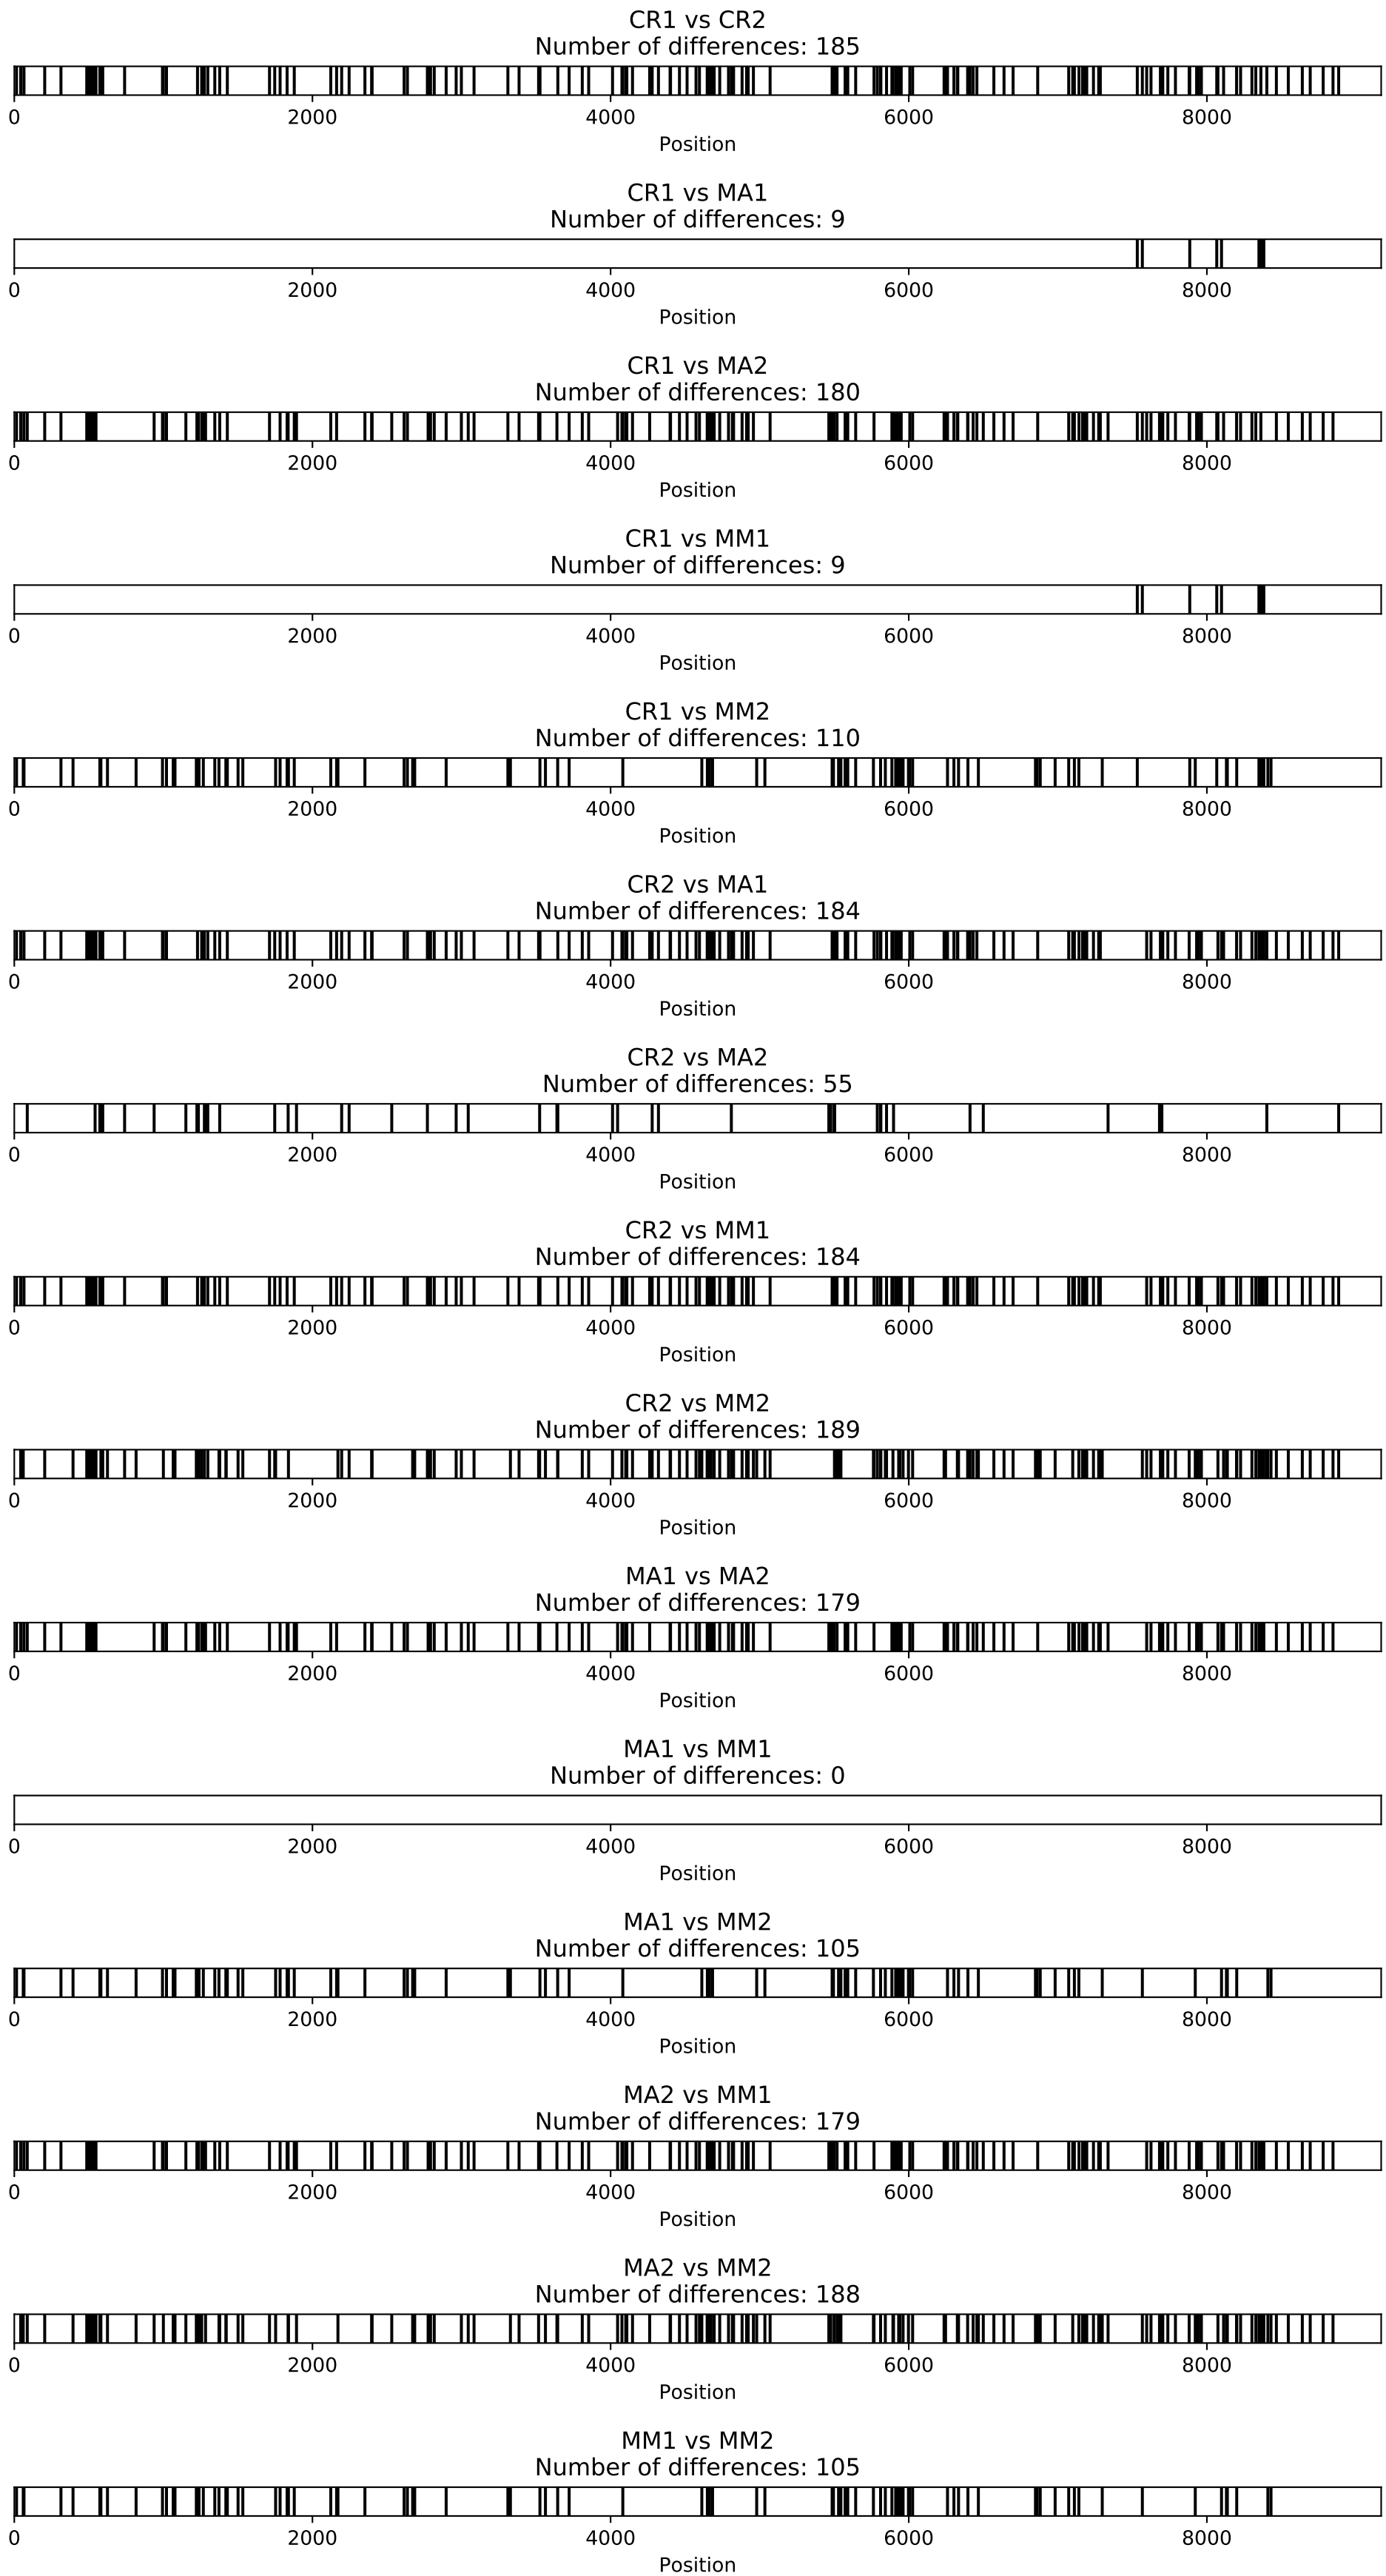

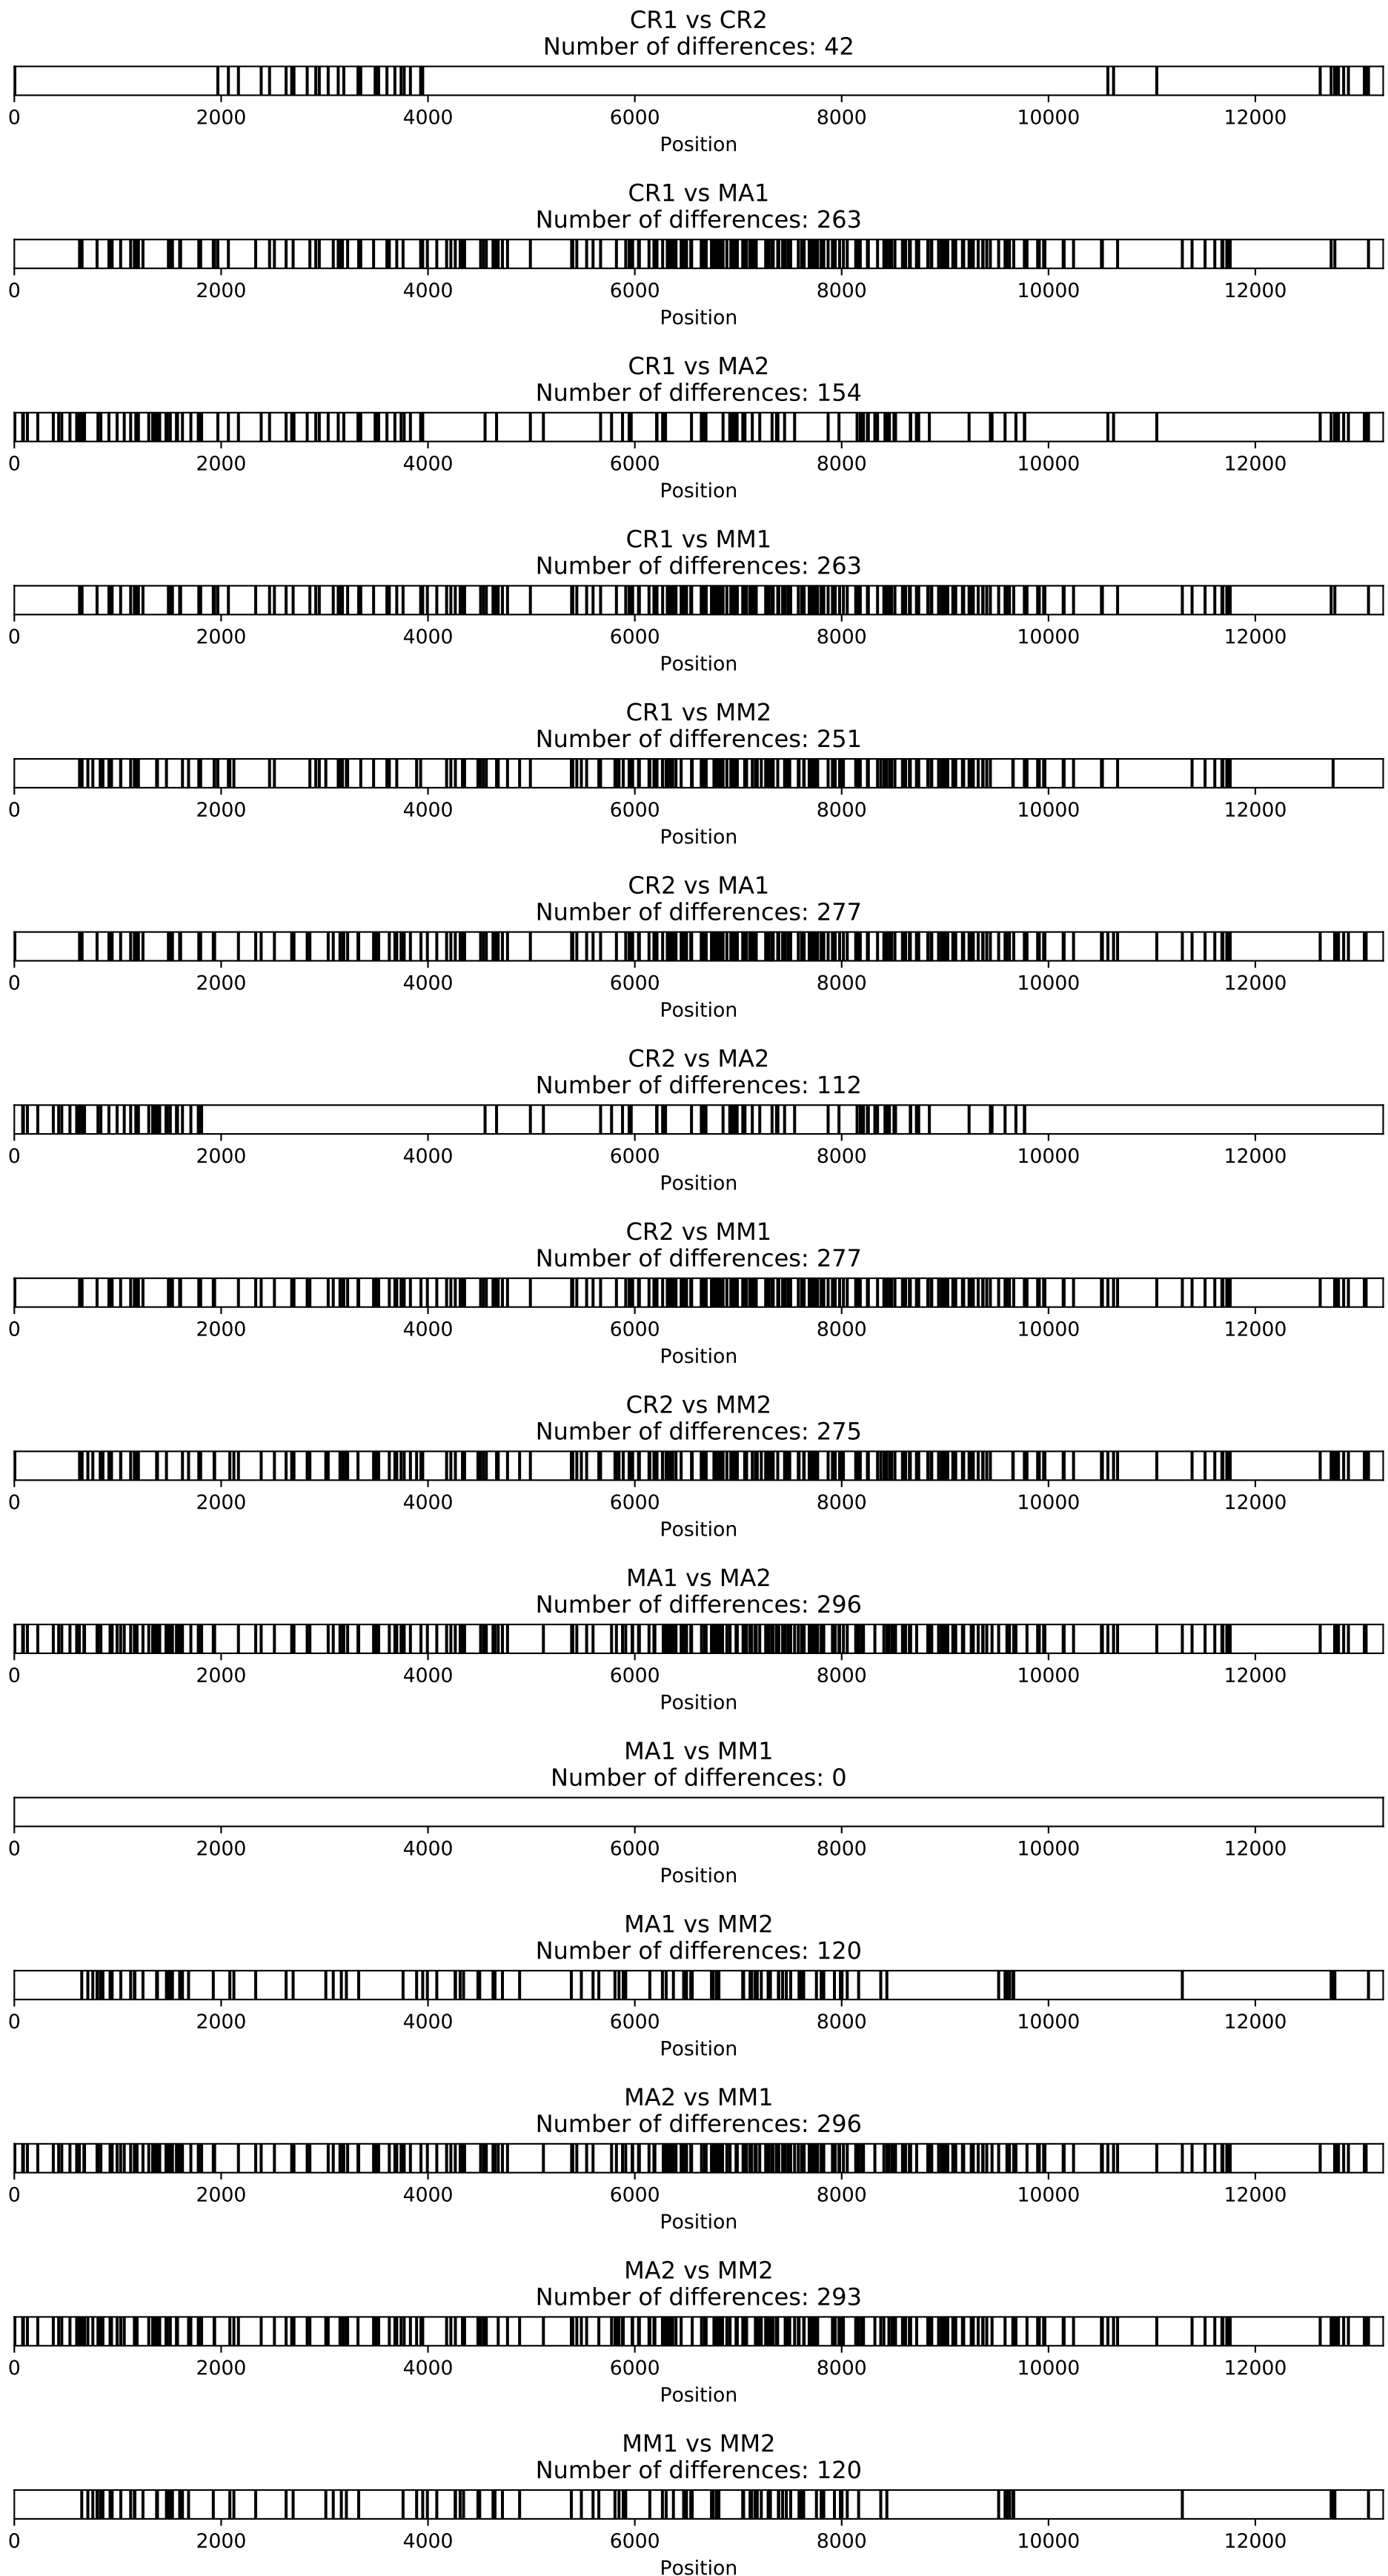



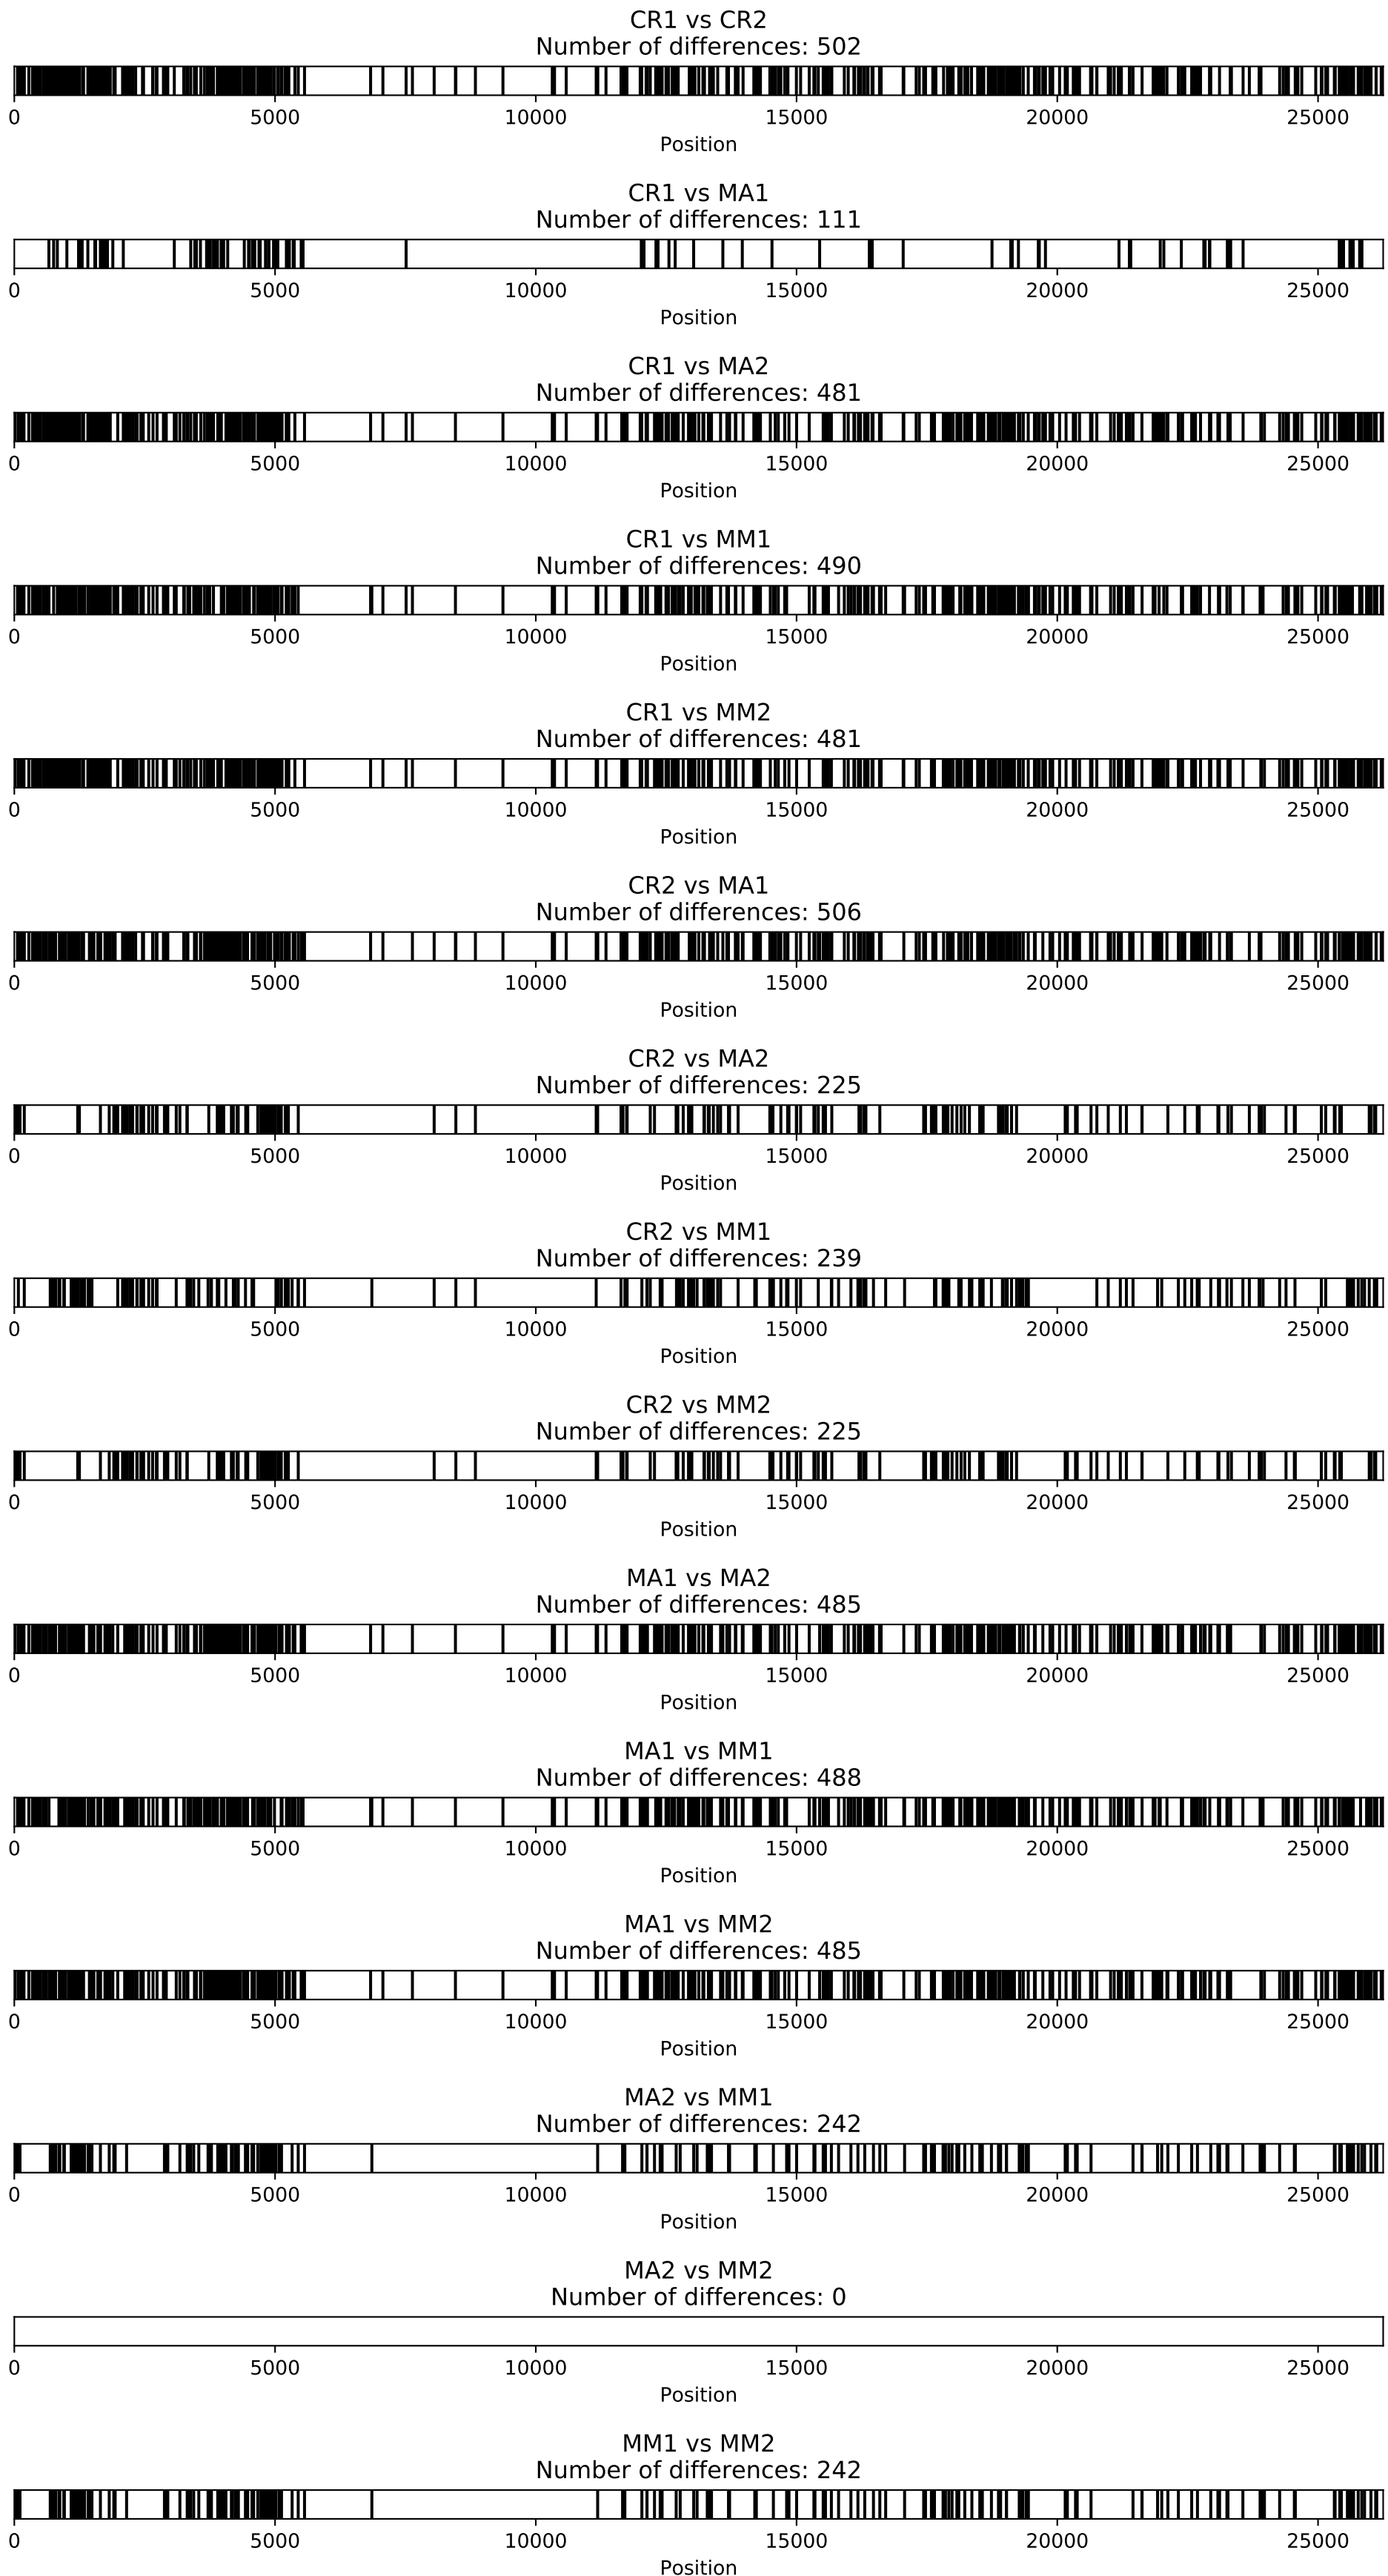

# Region: 379

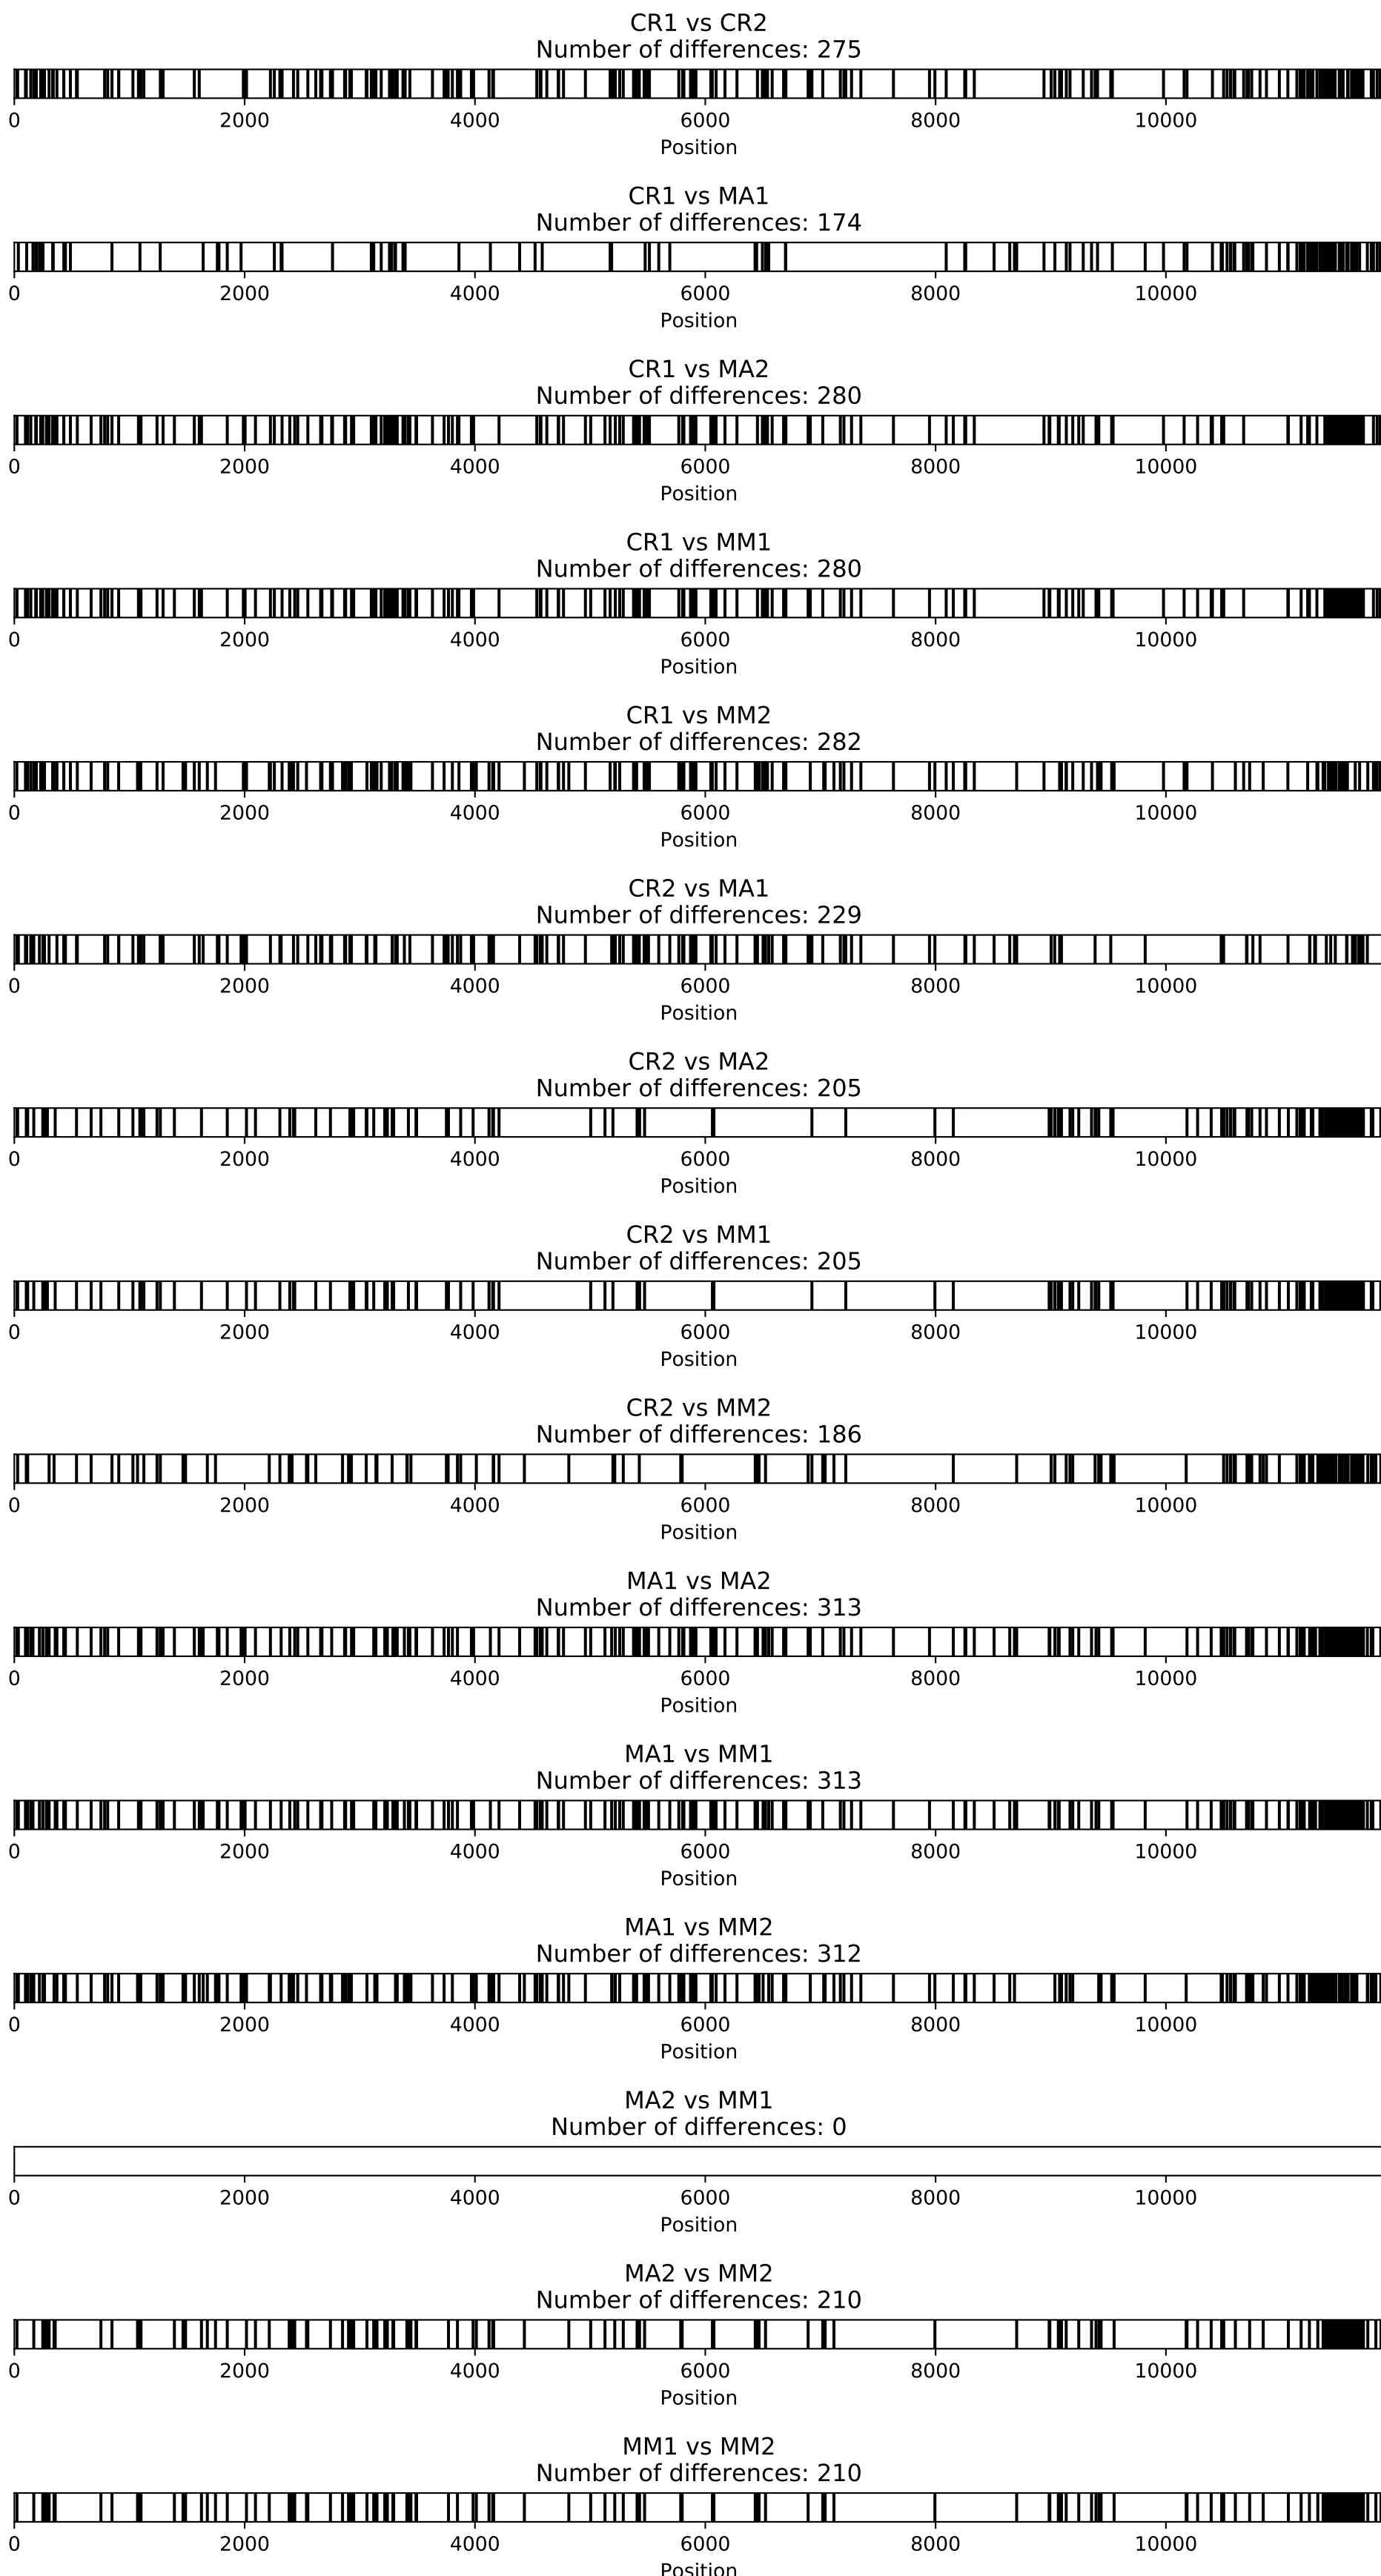

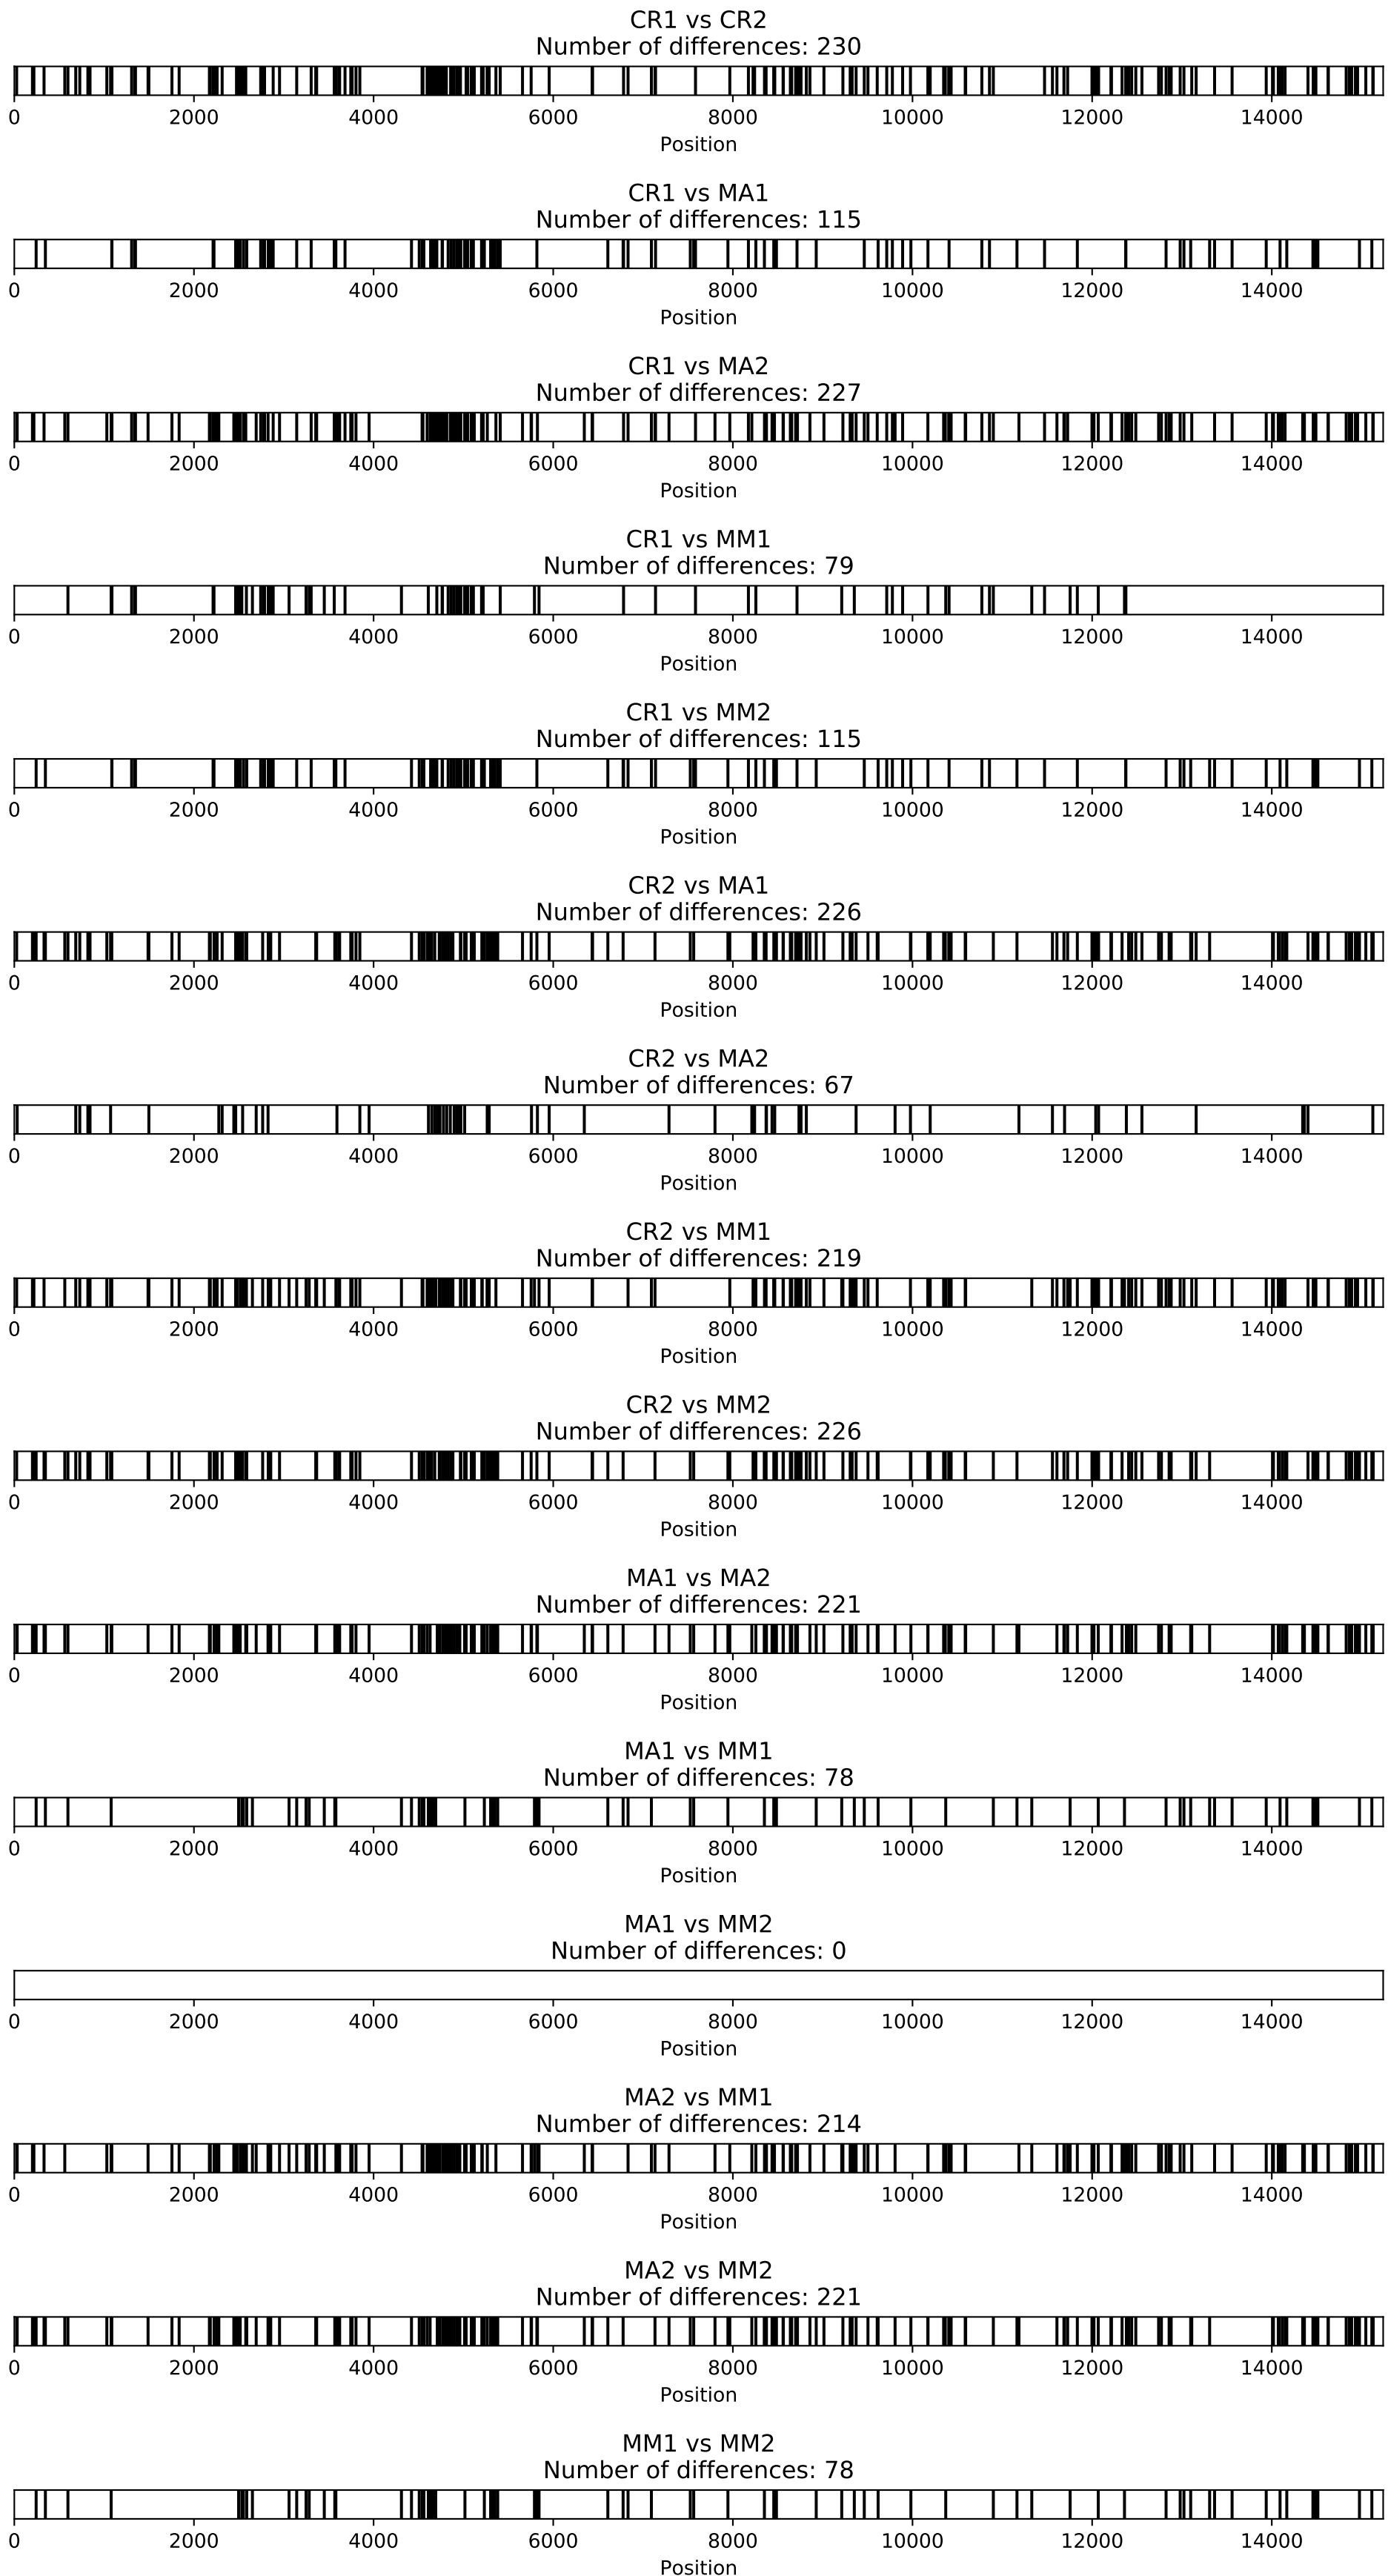

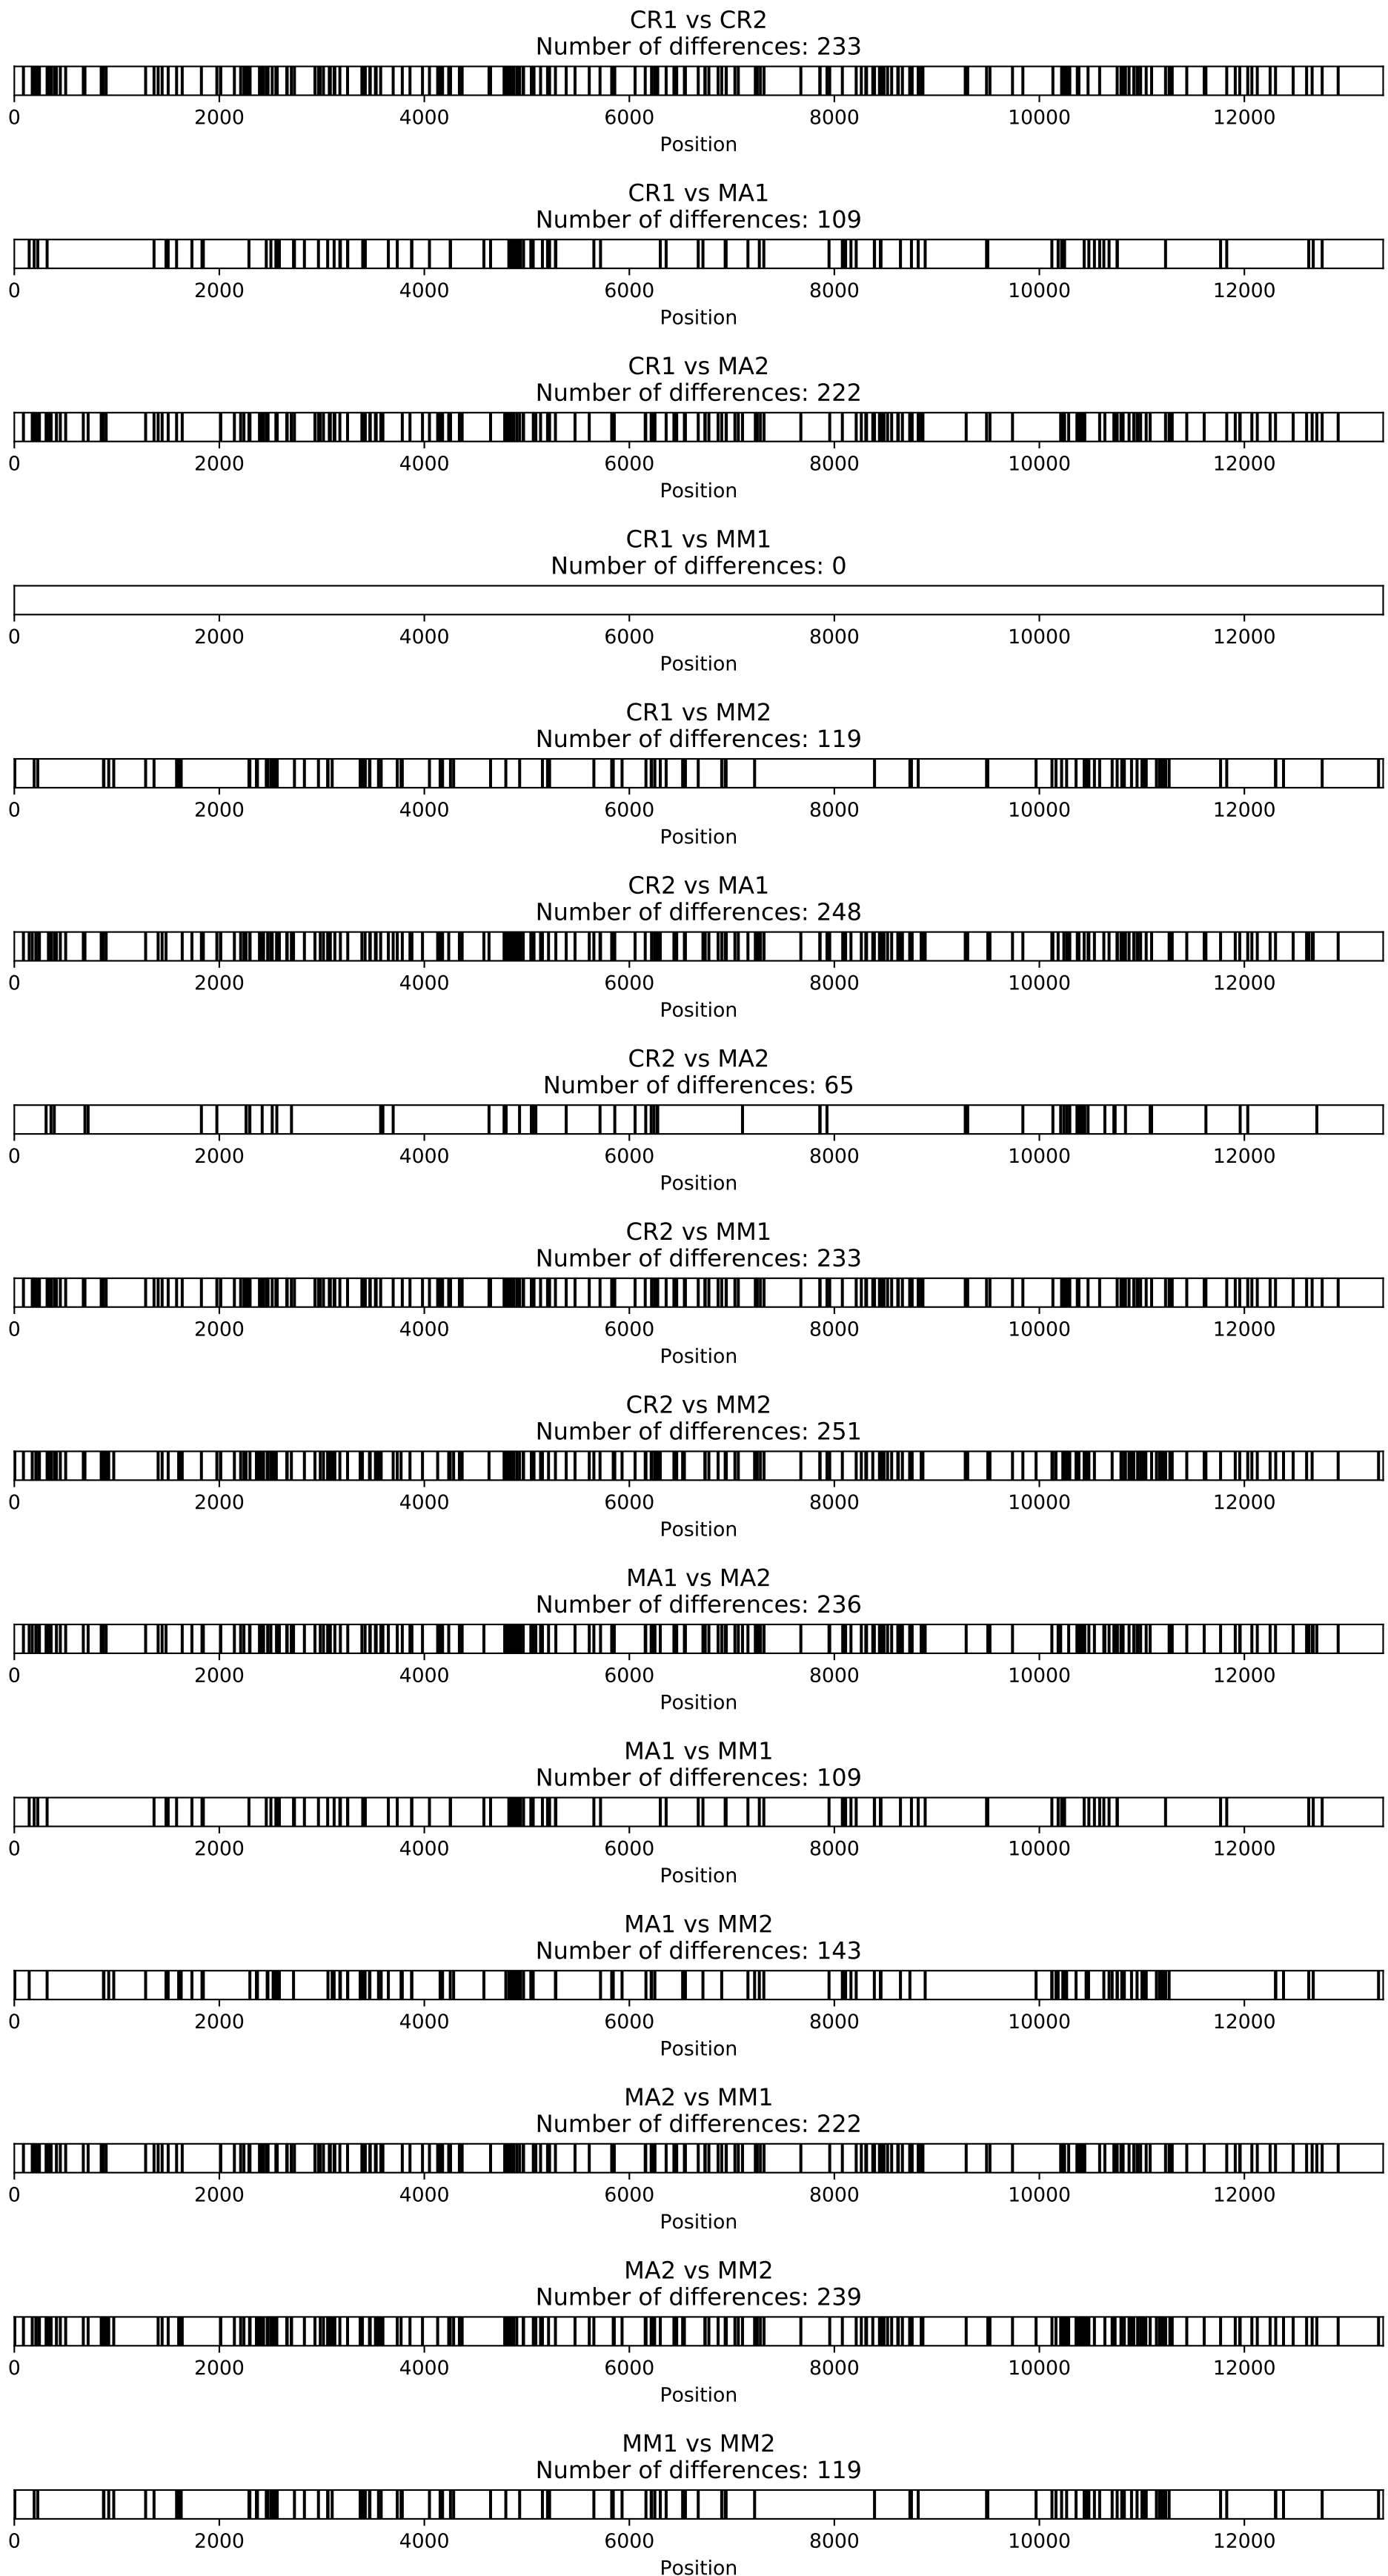

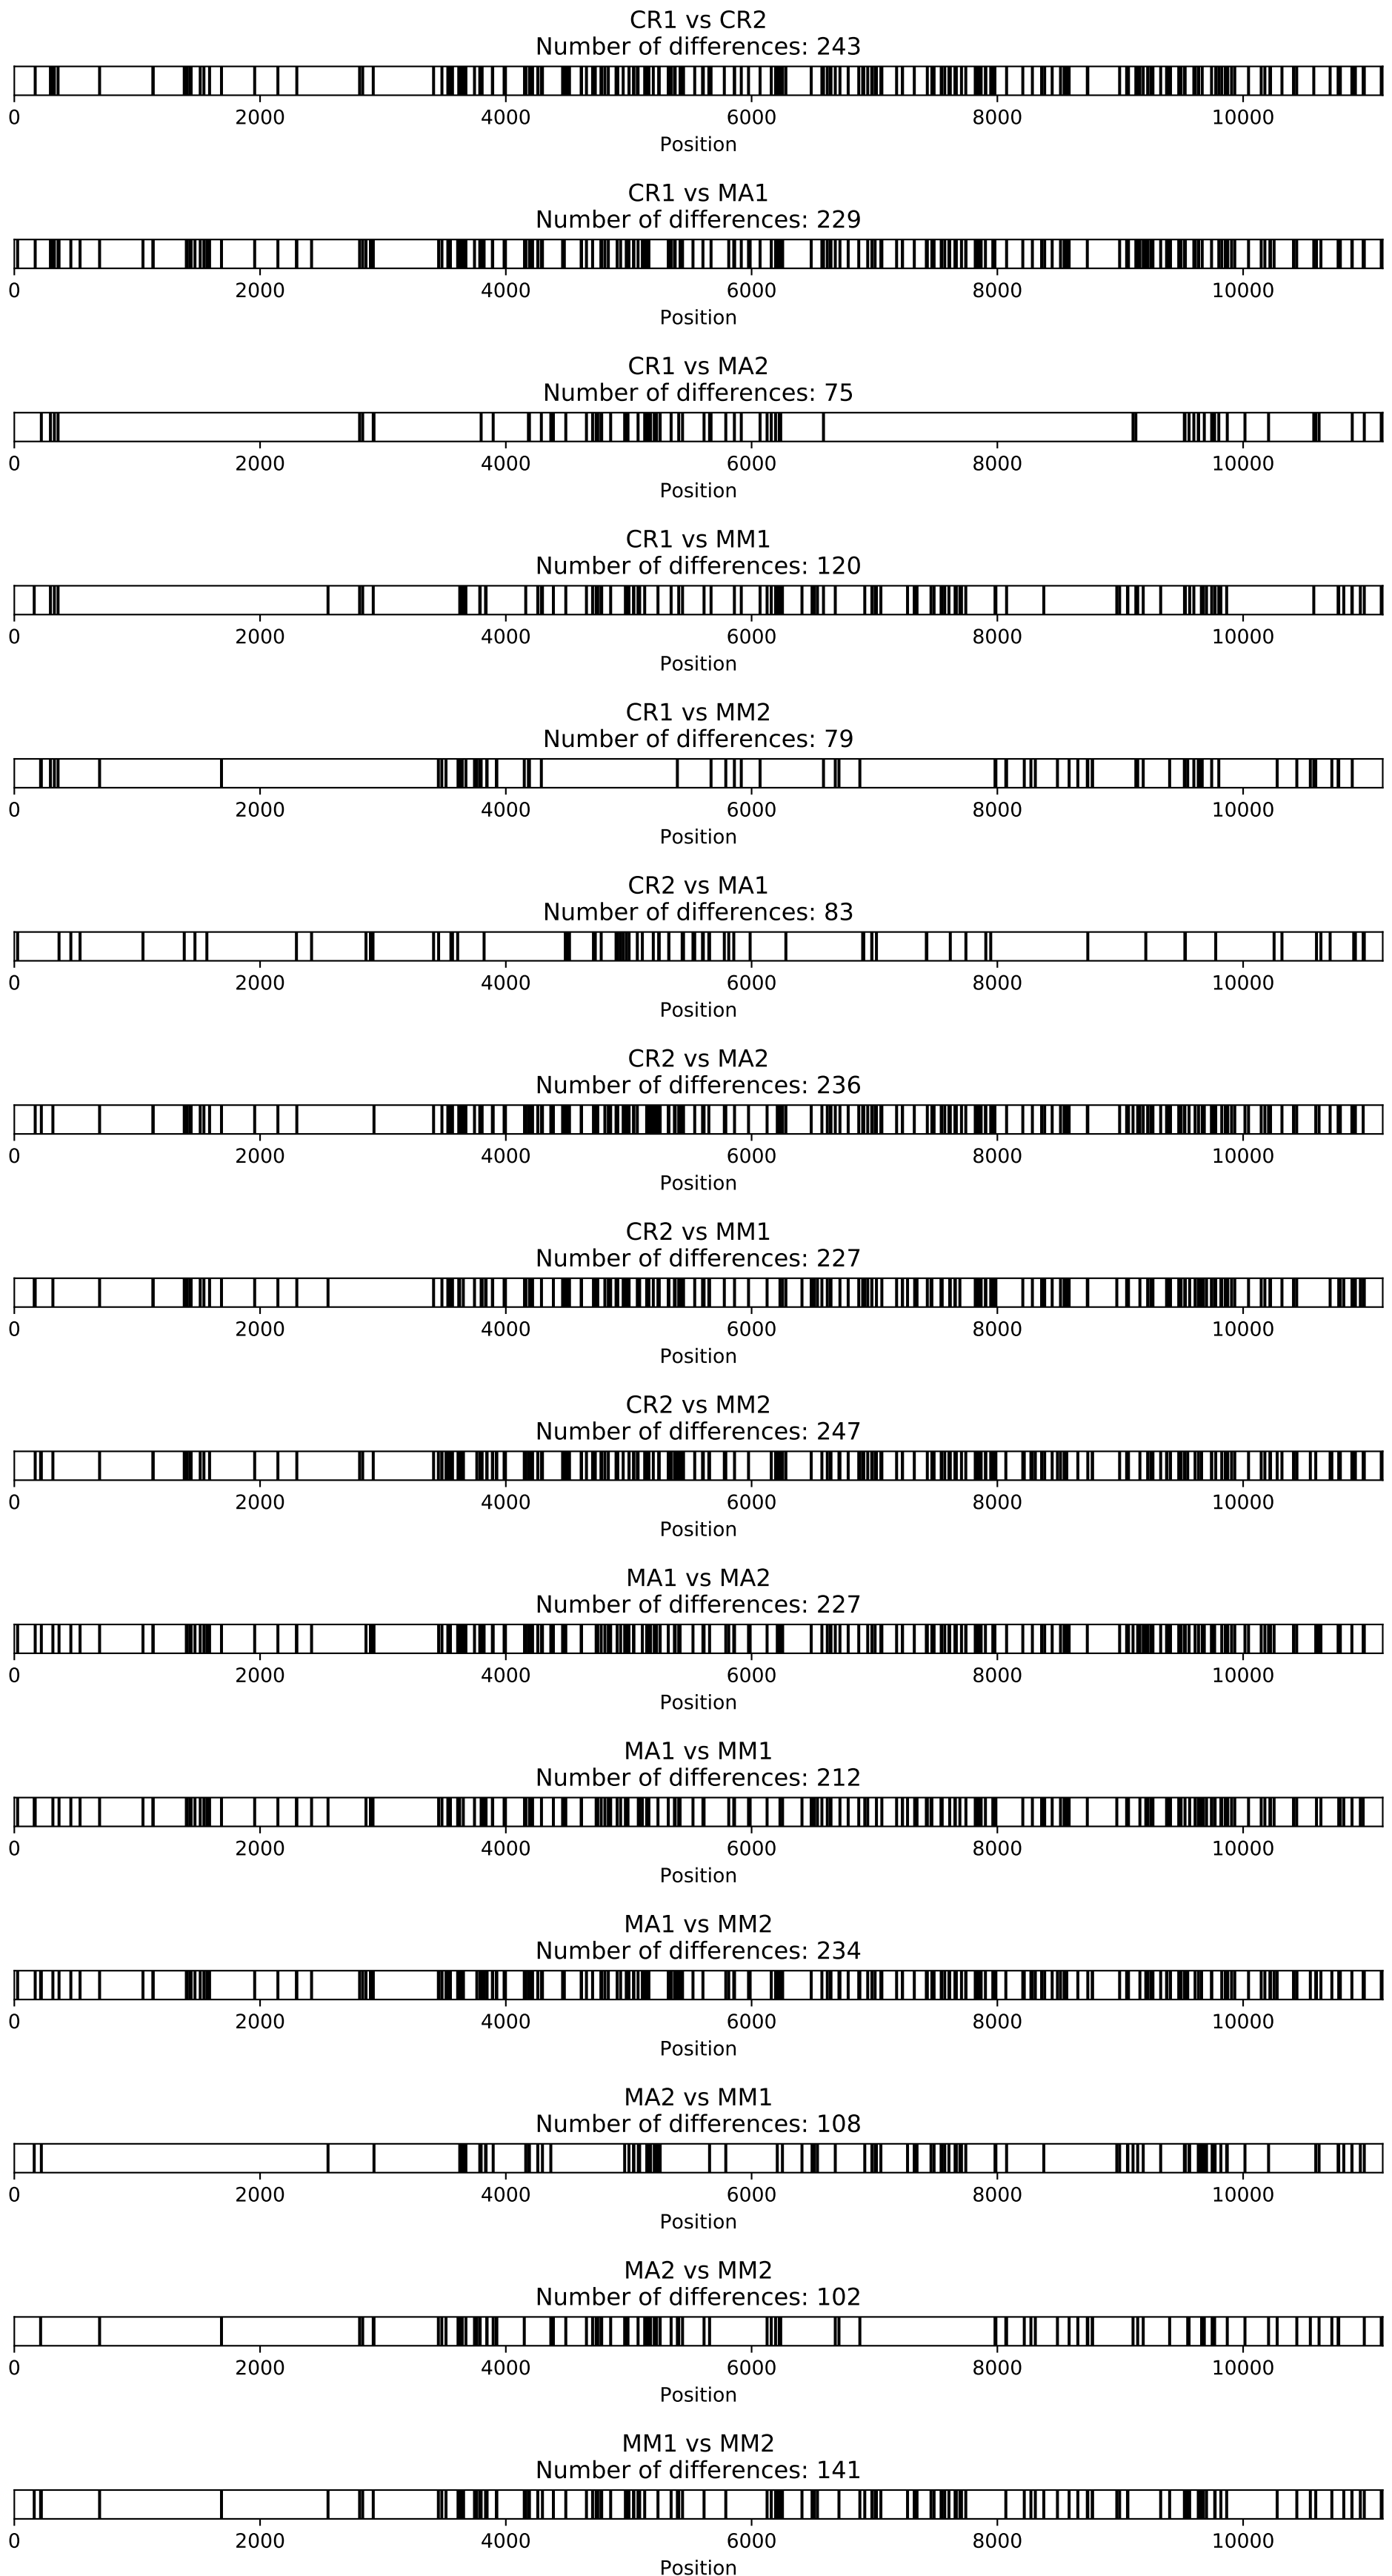

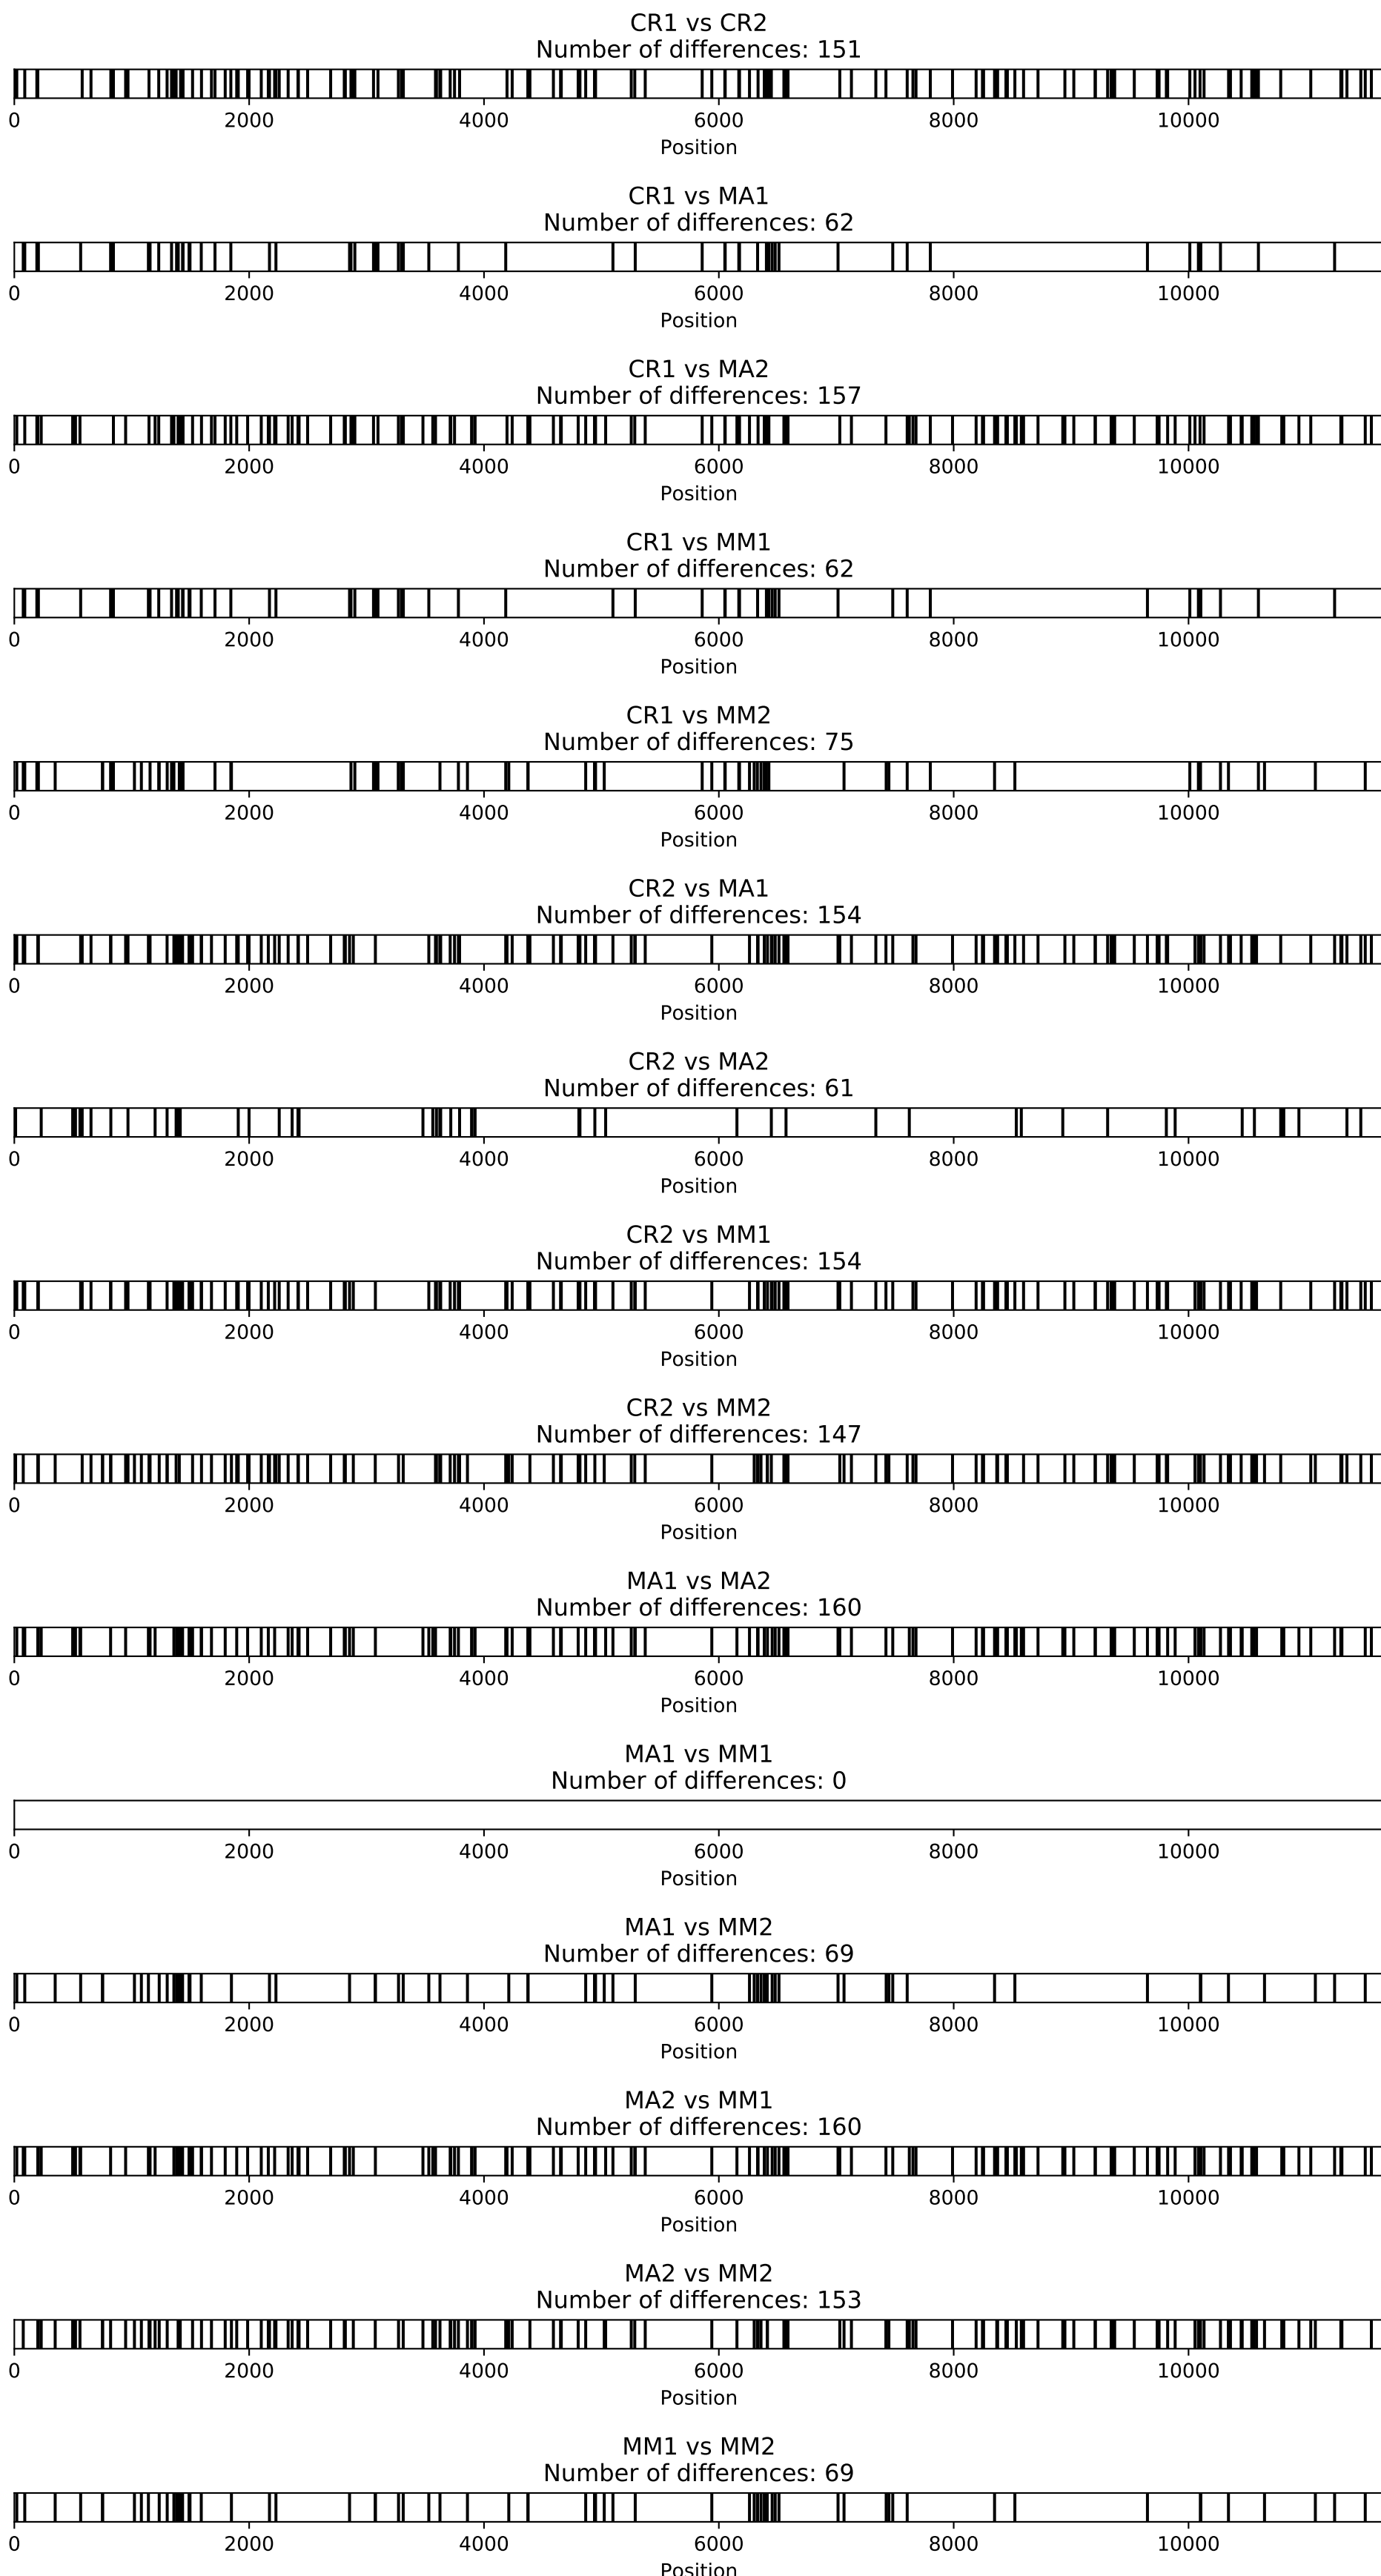

# Region: 386

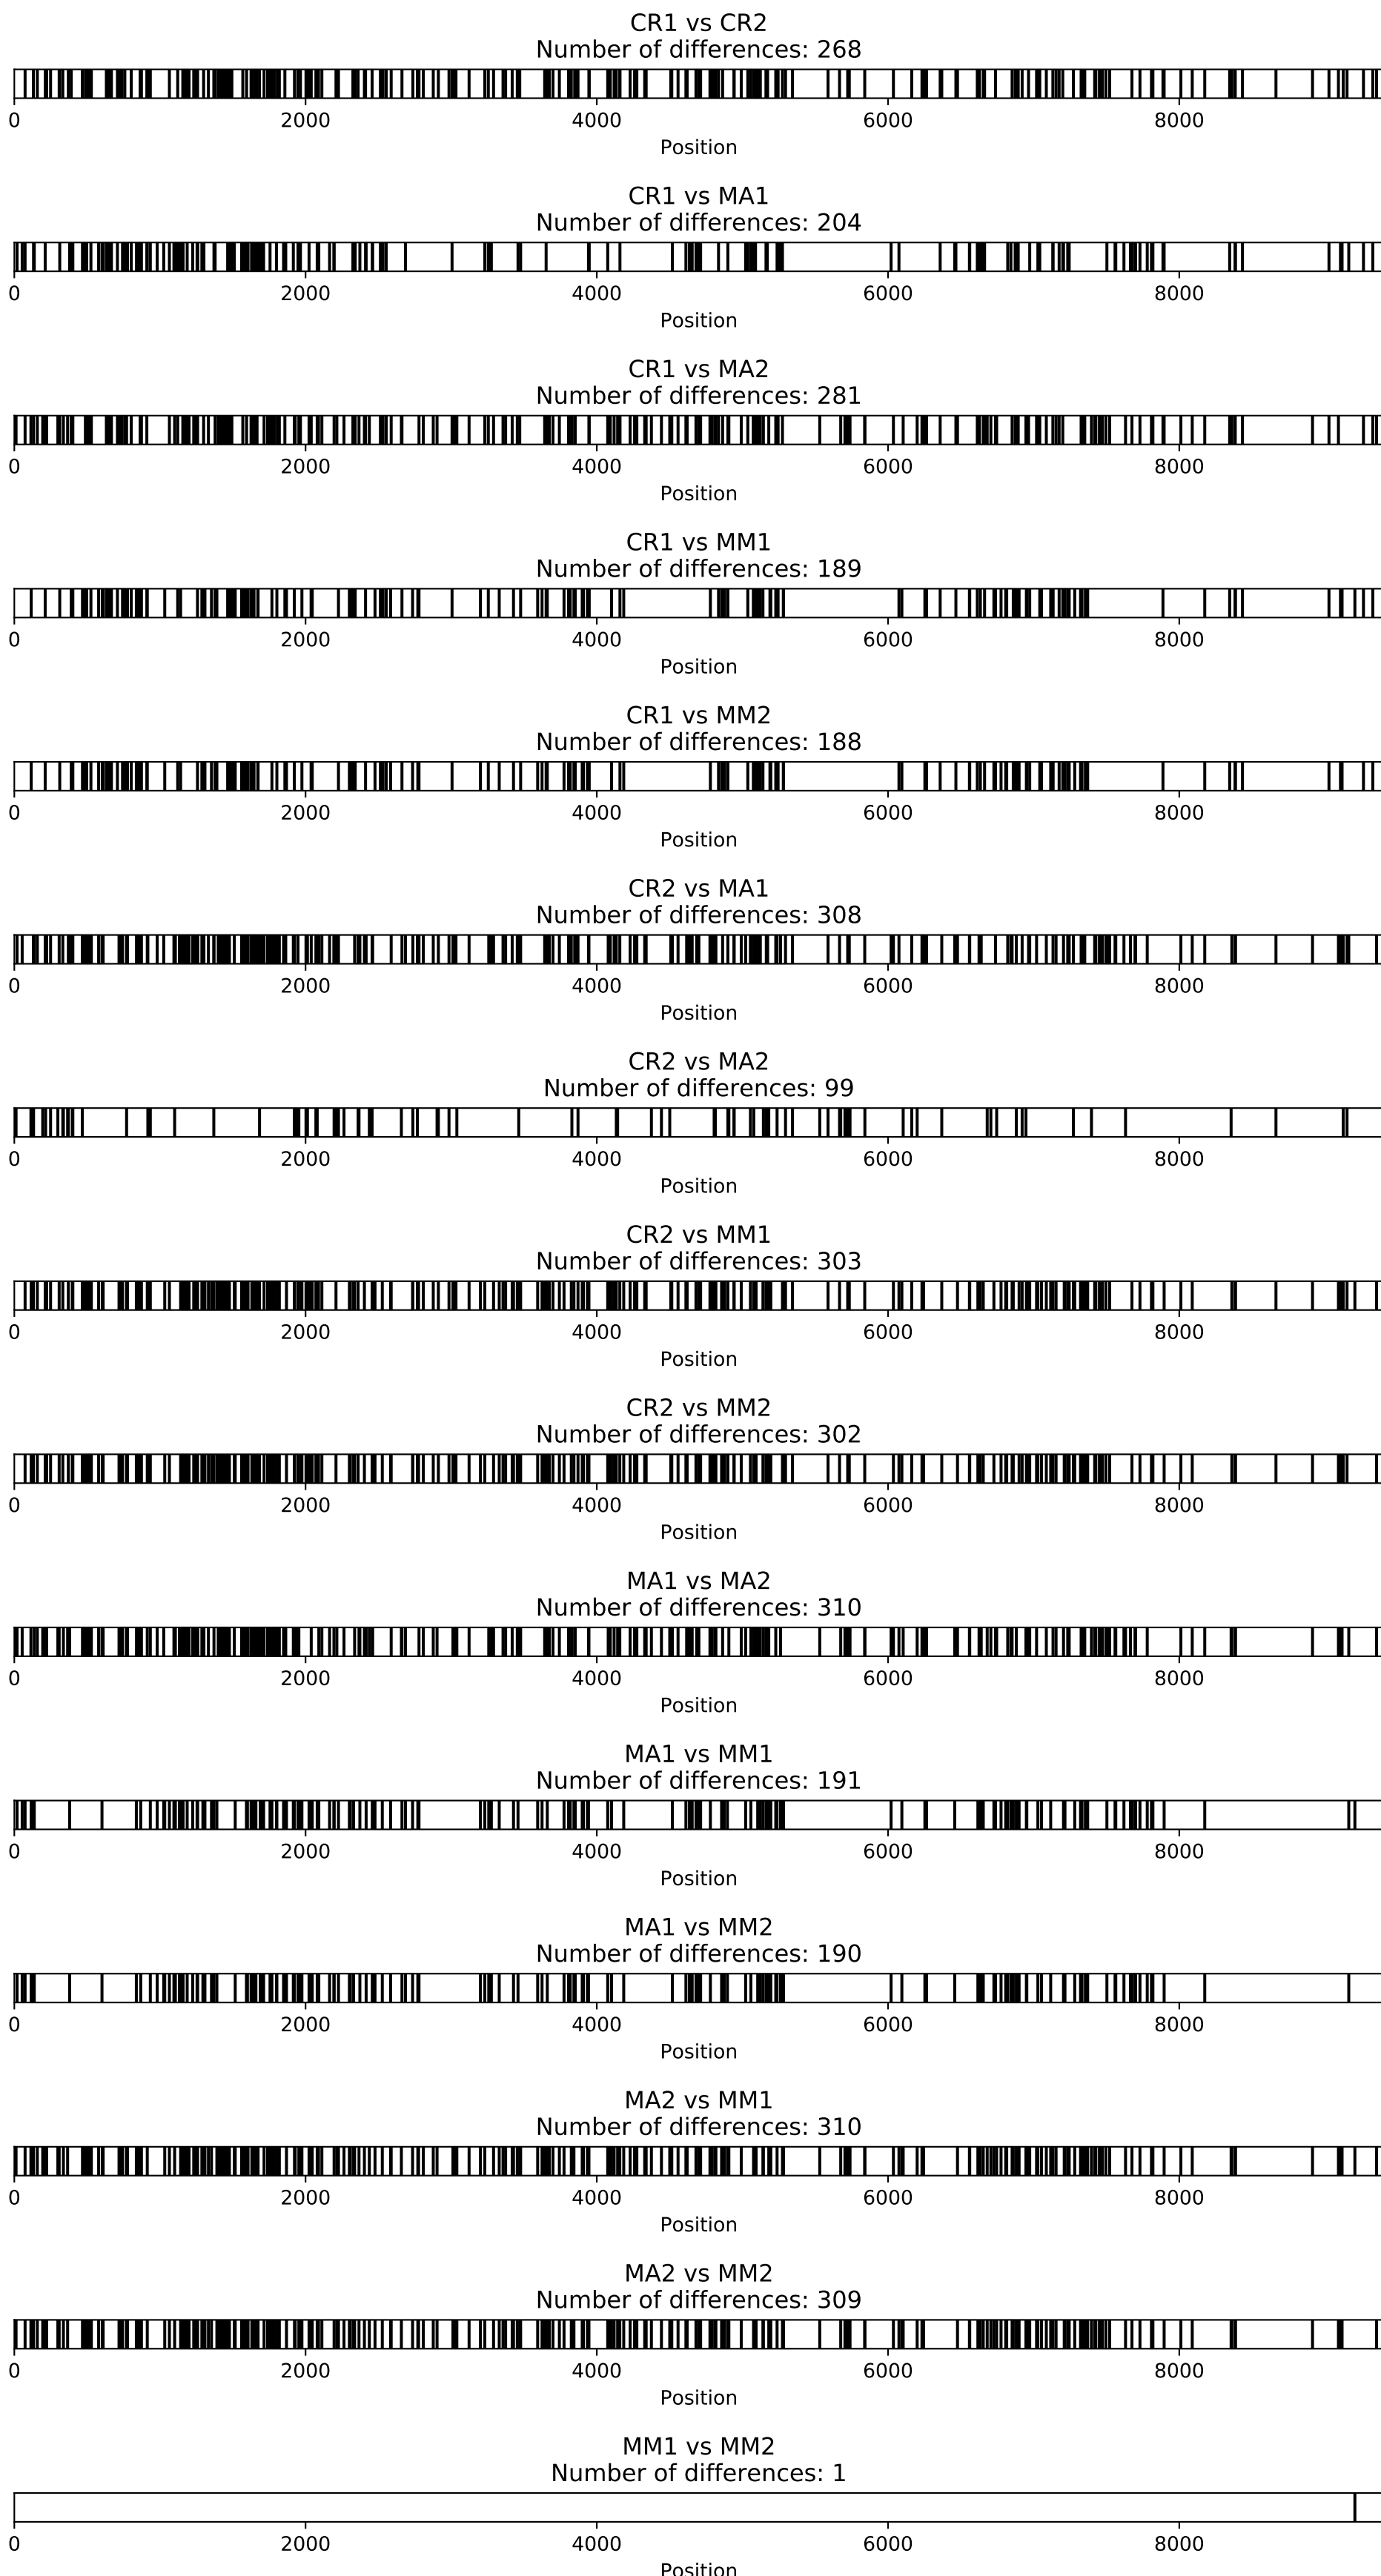

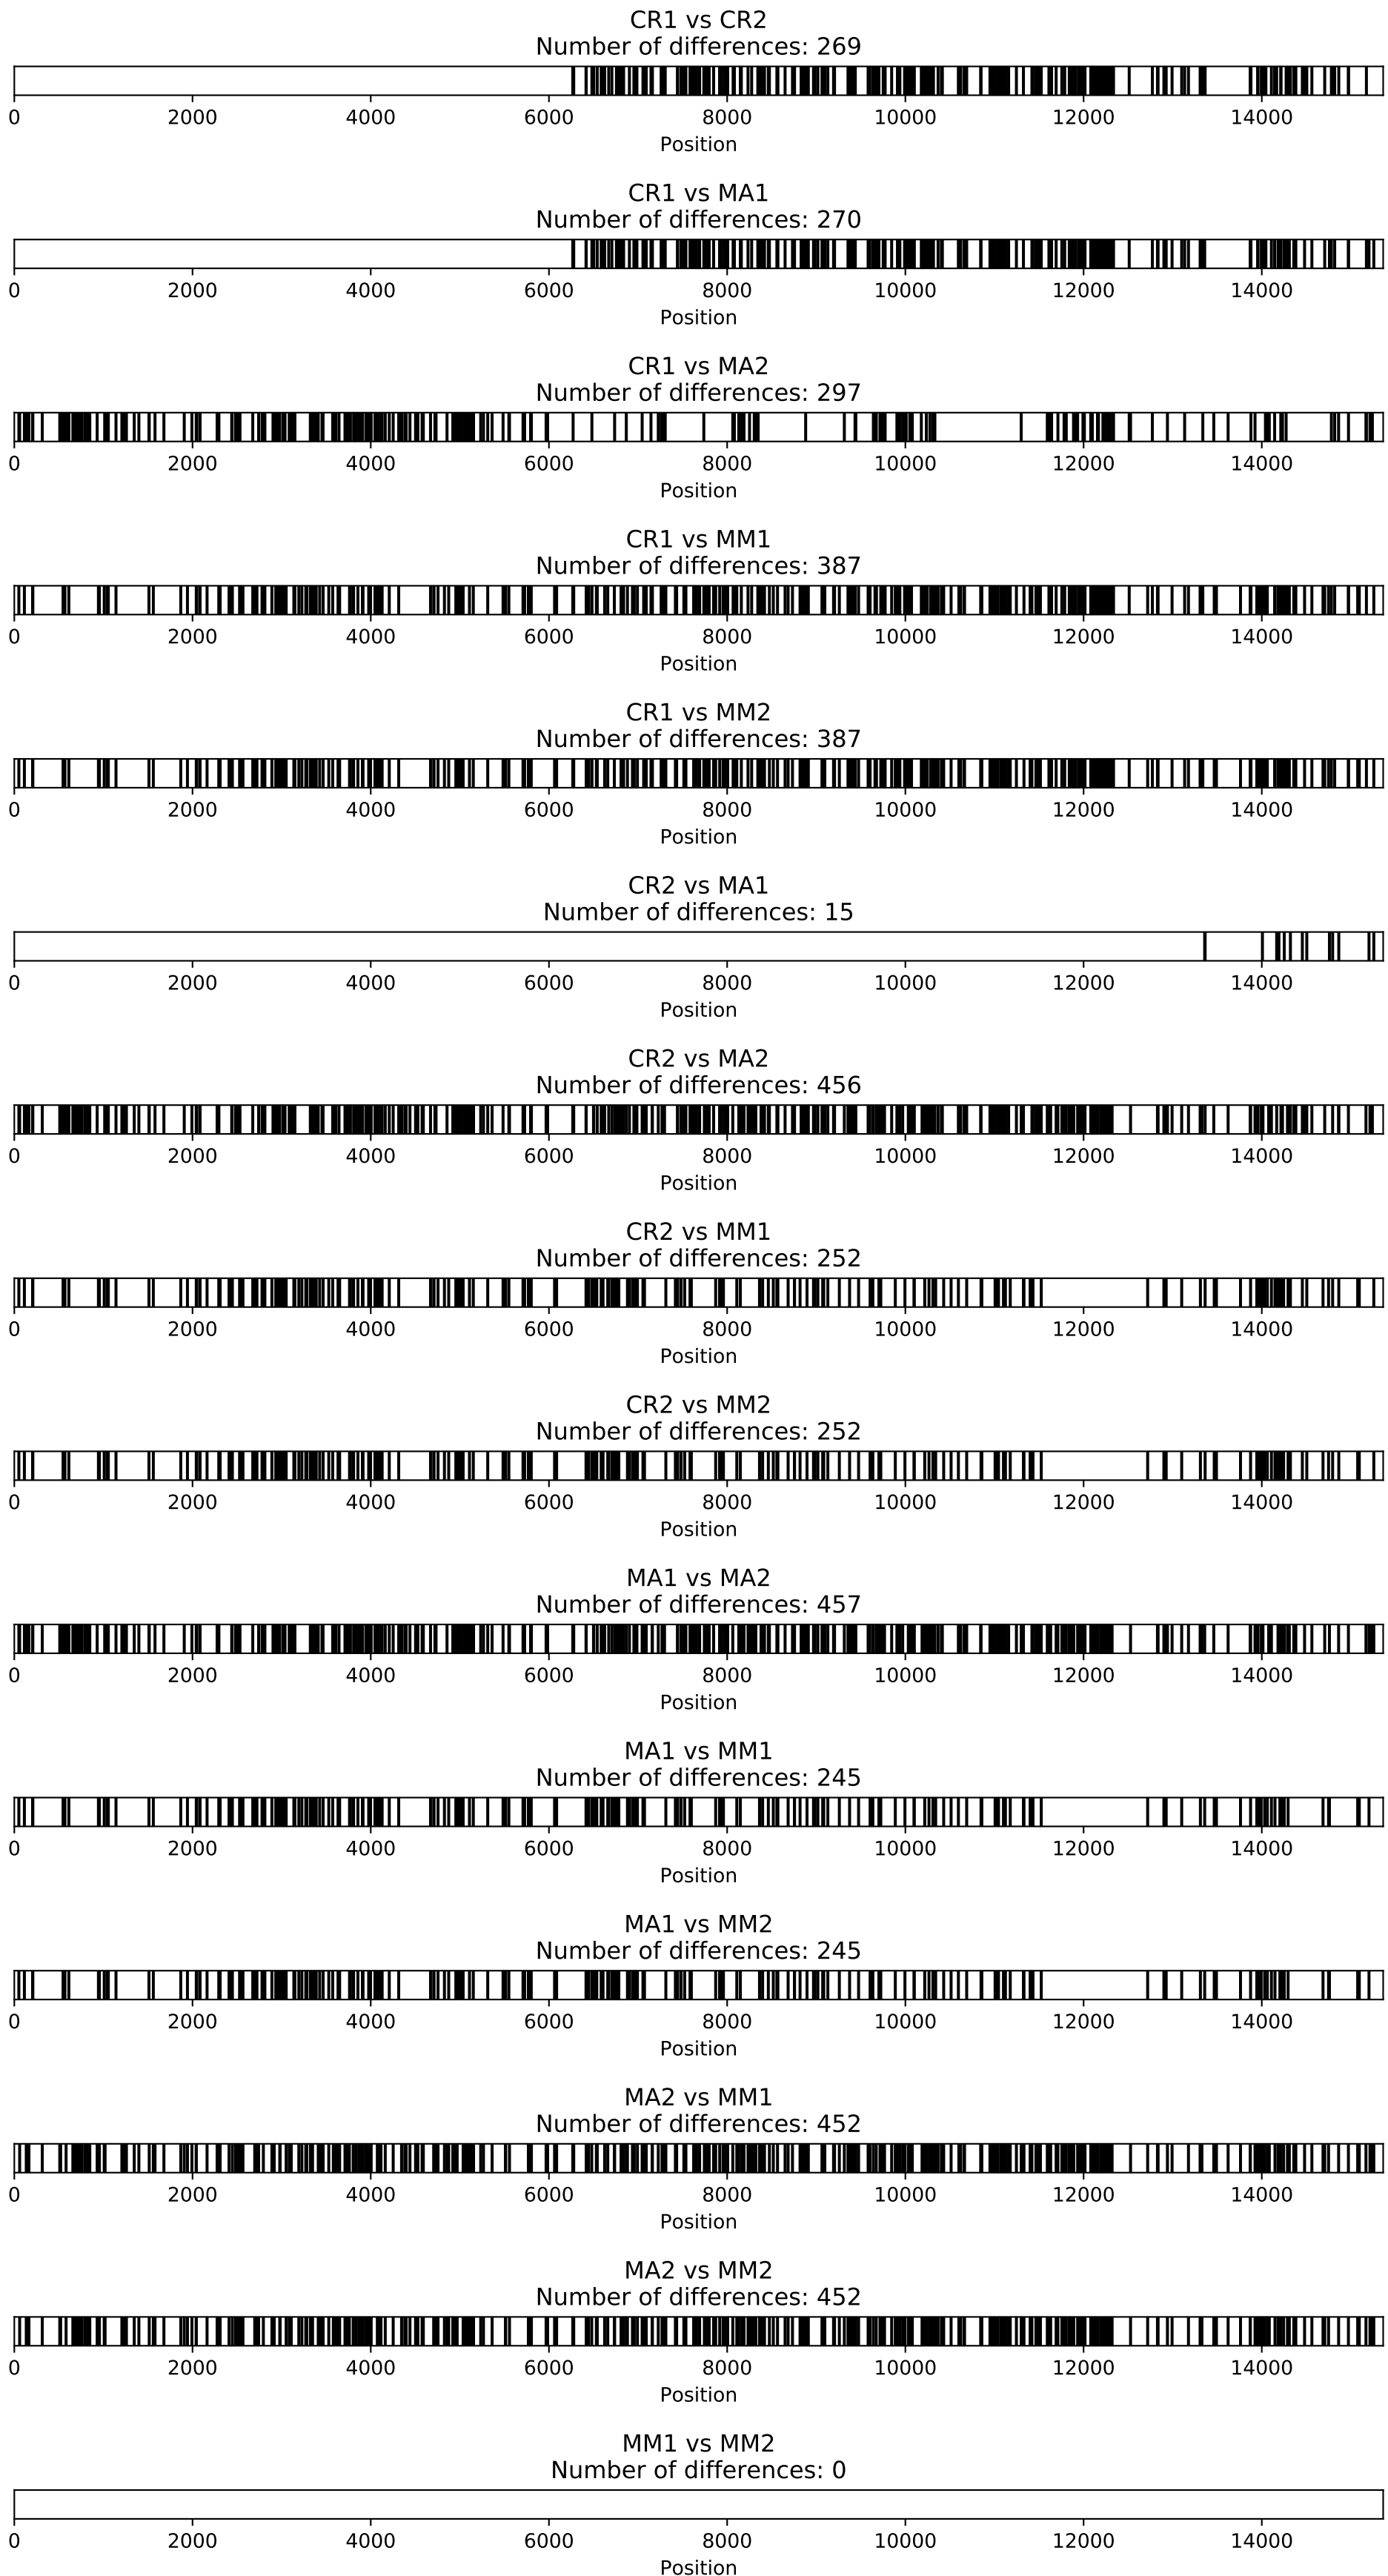



# Region: 388

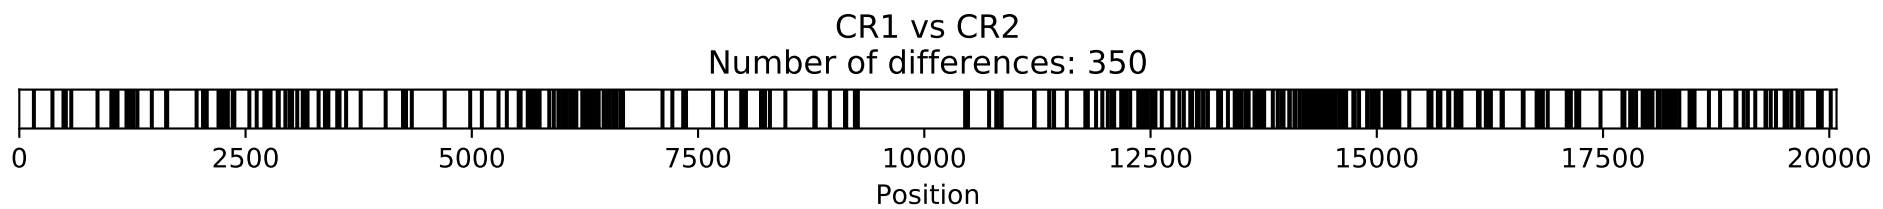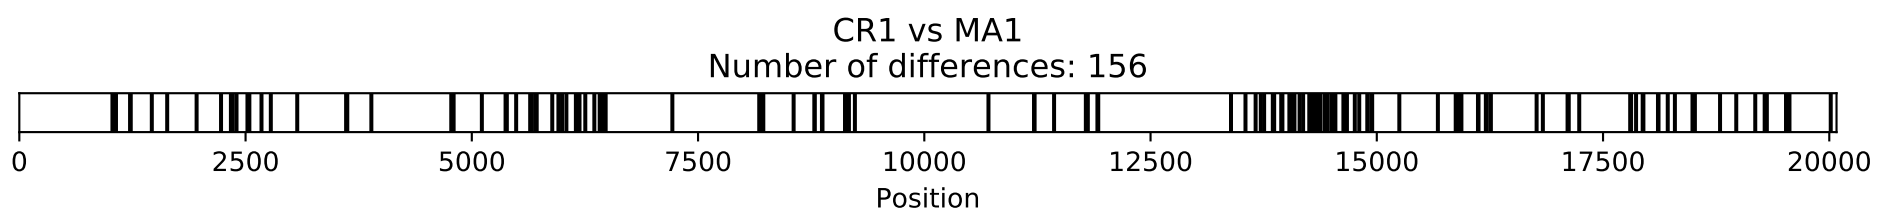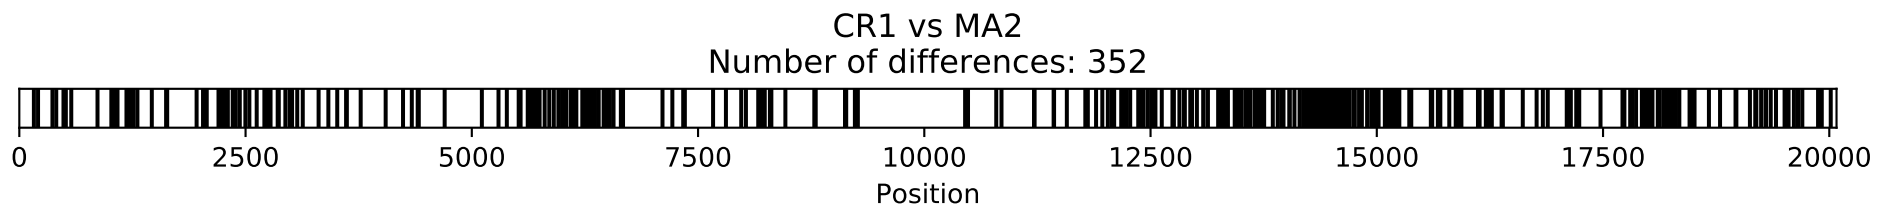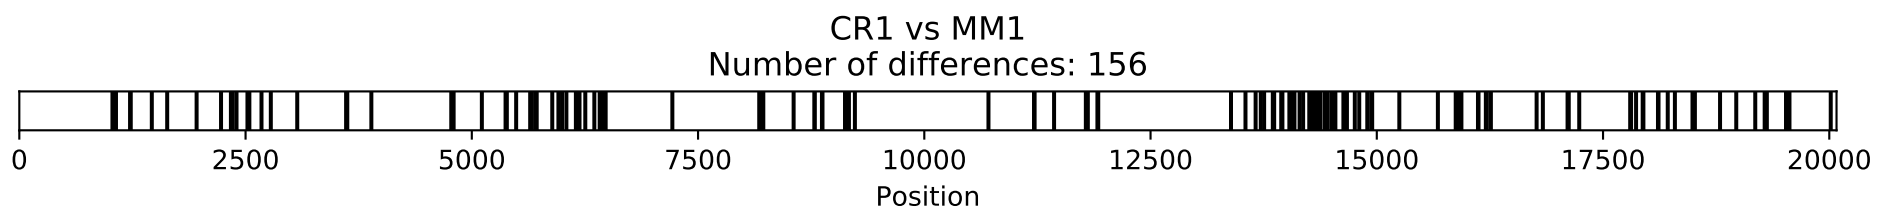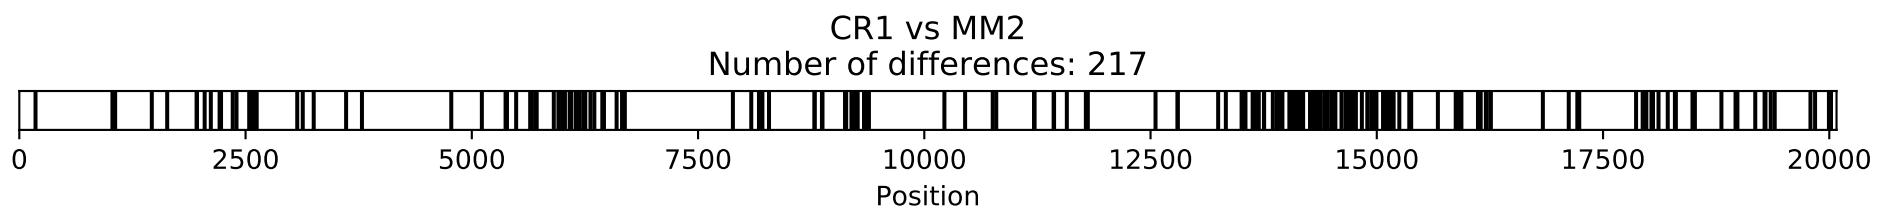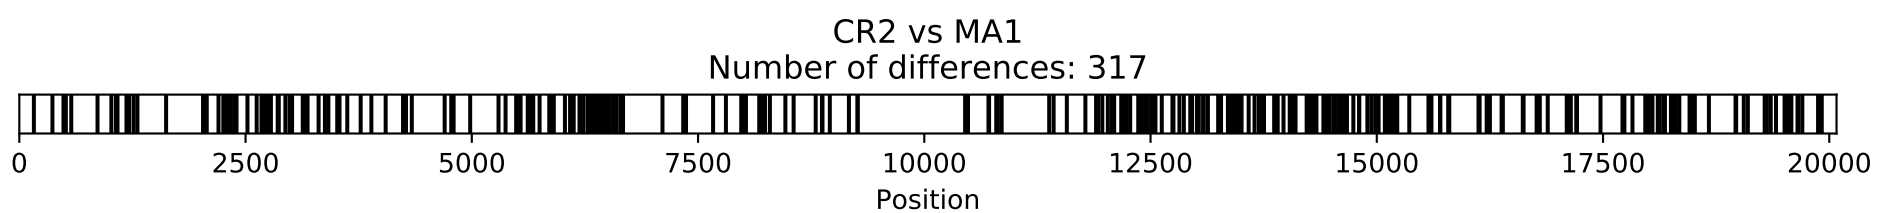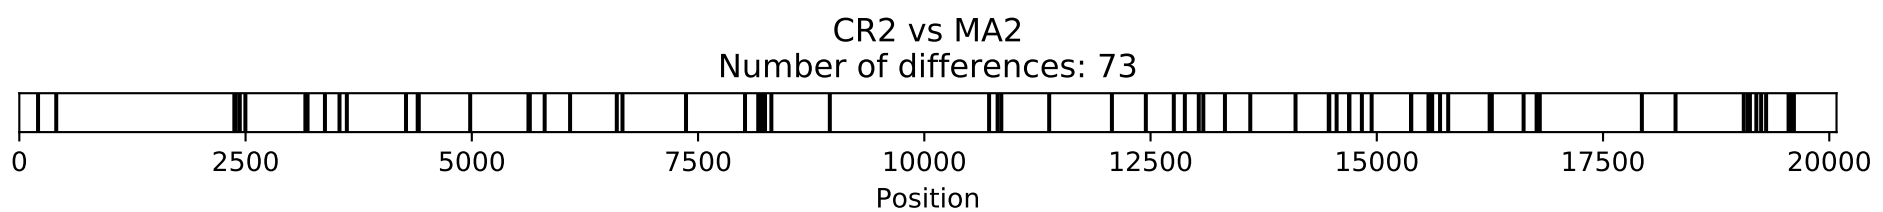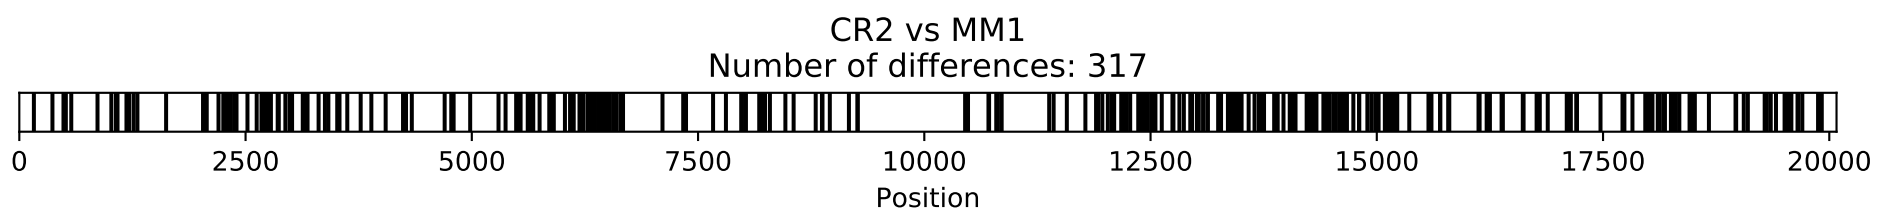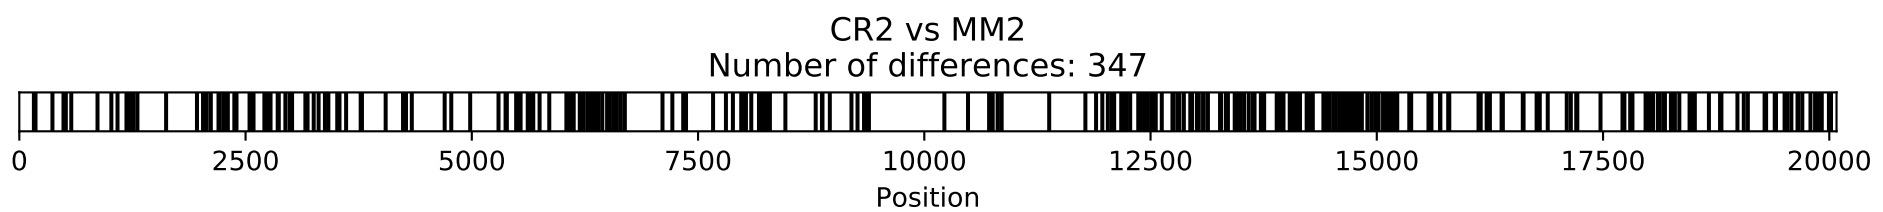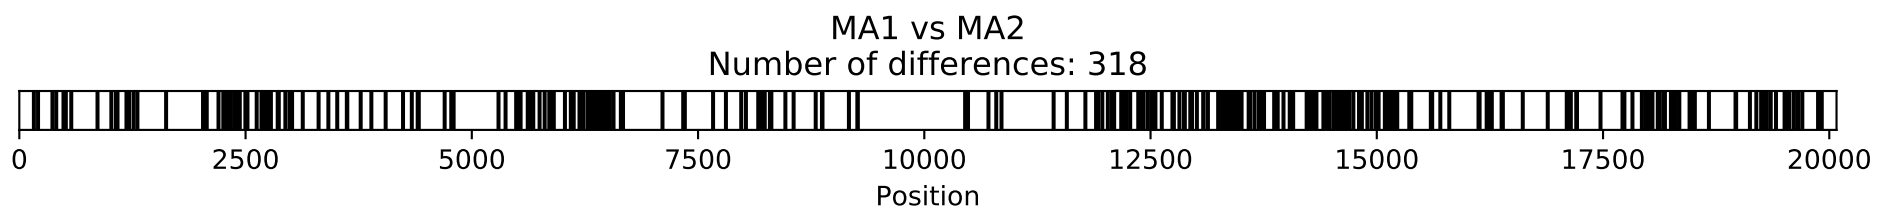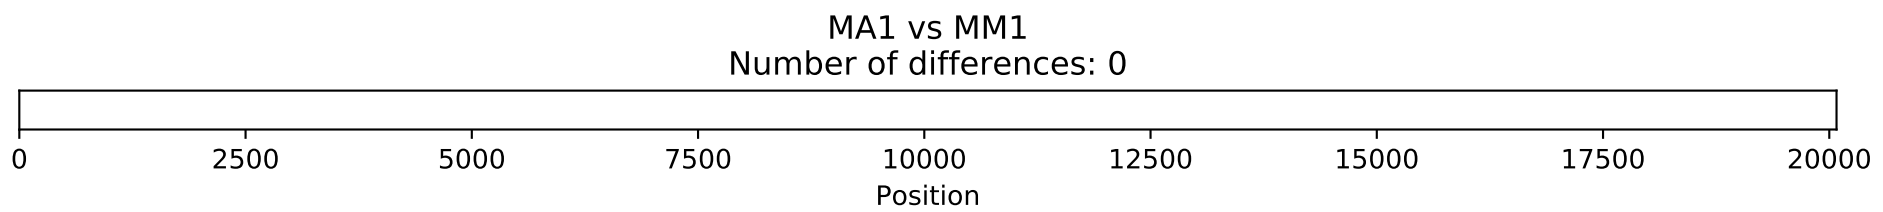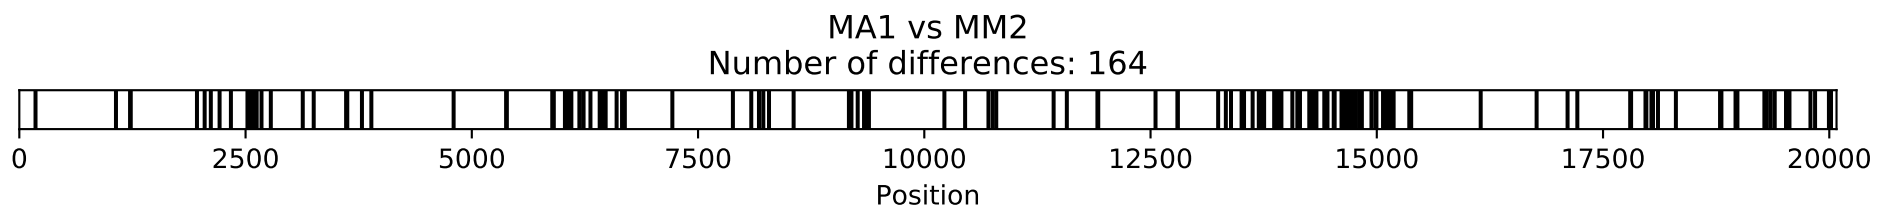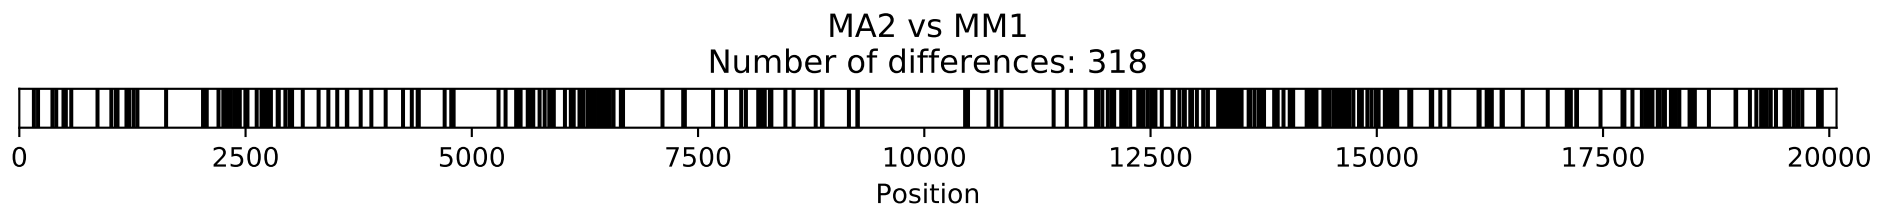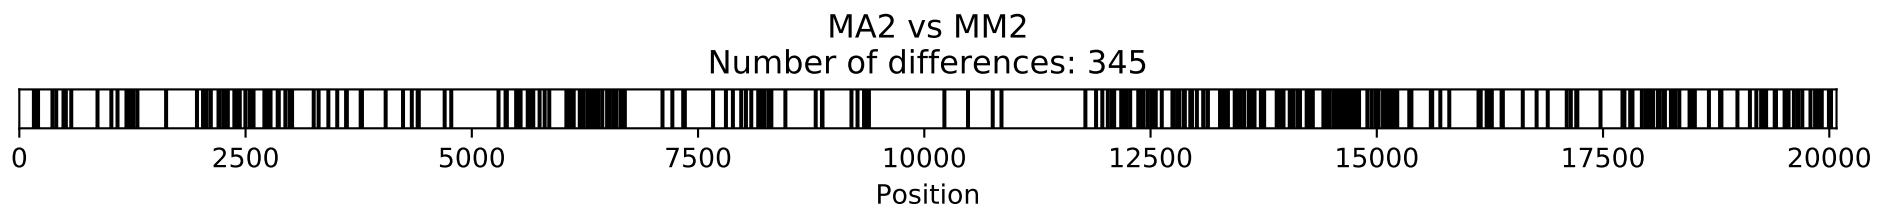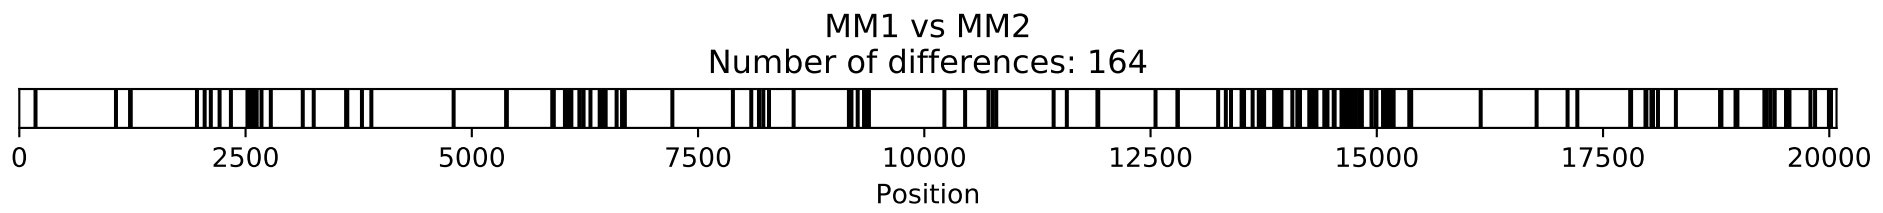

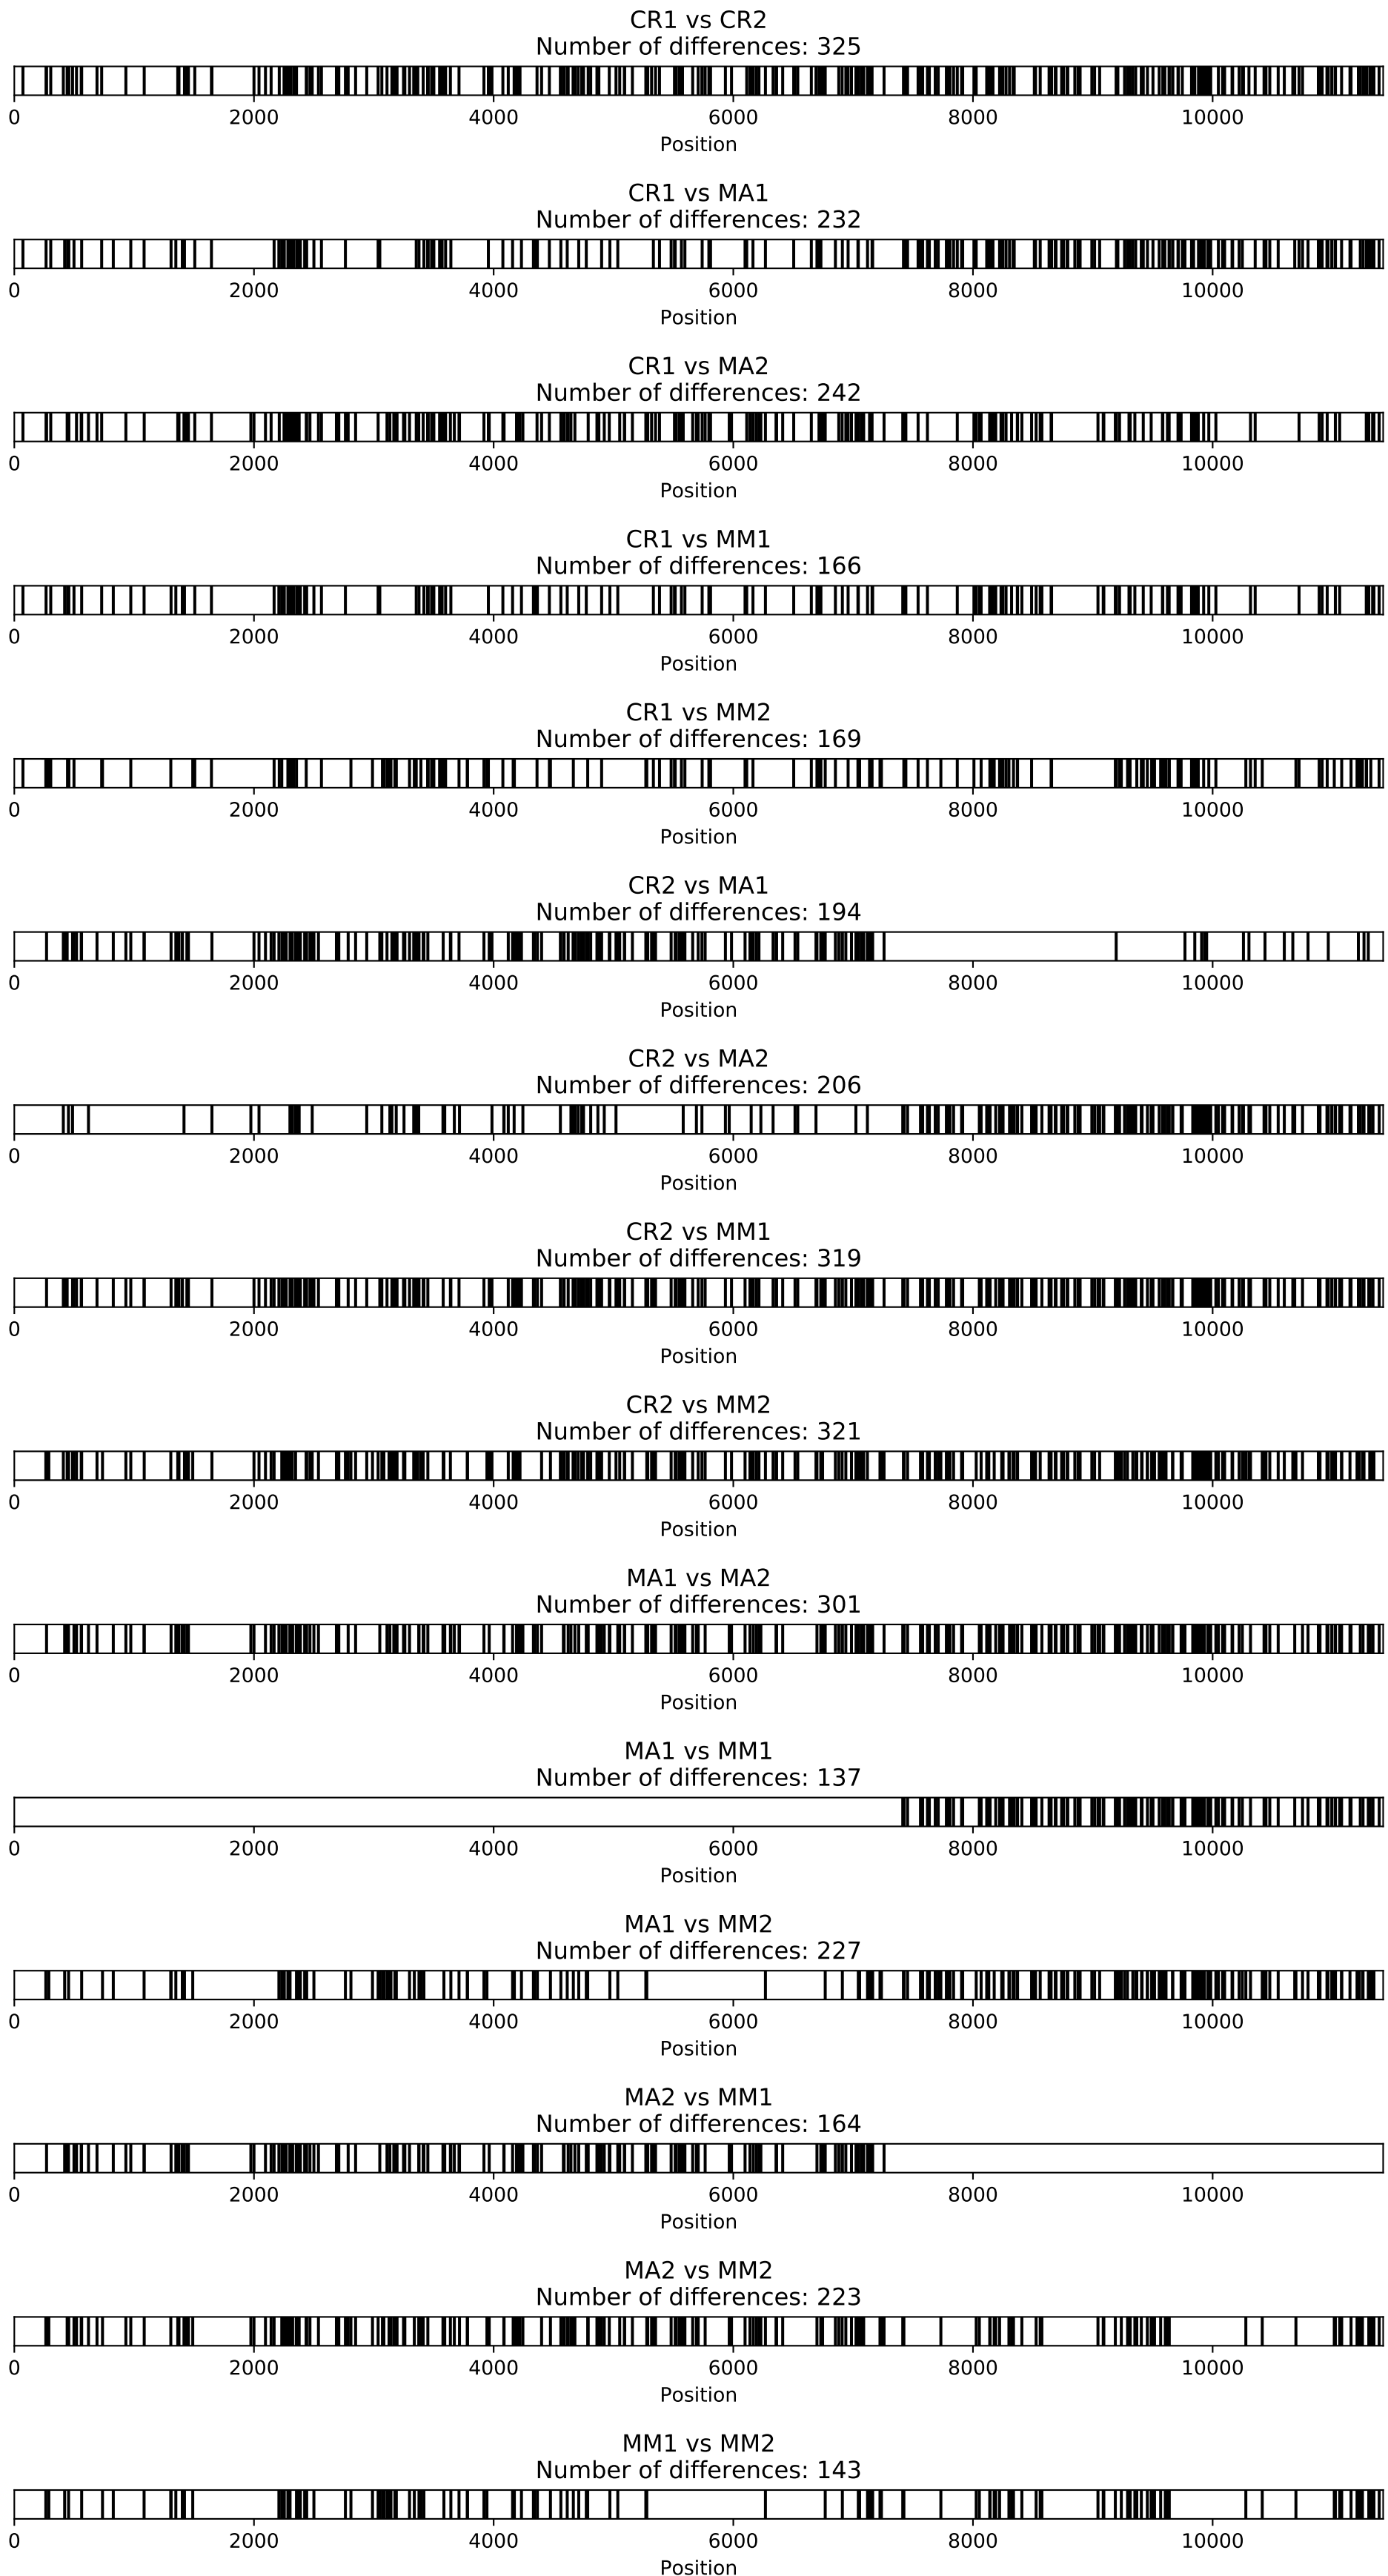

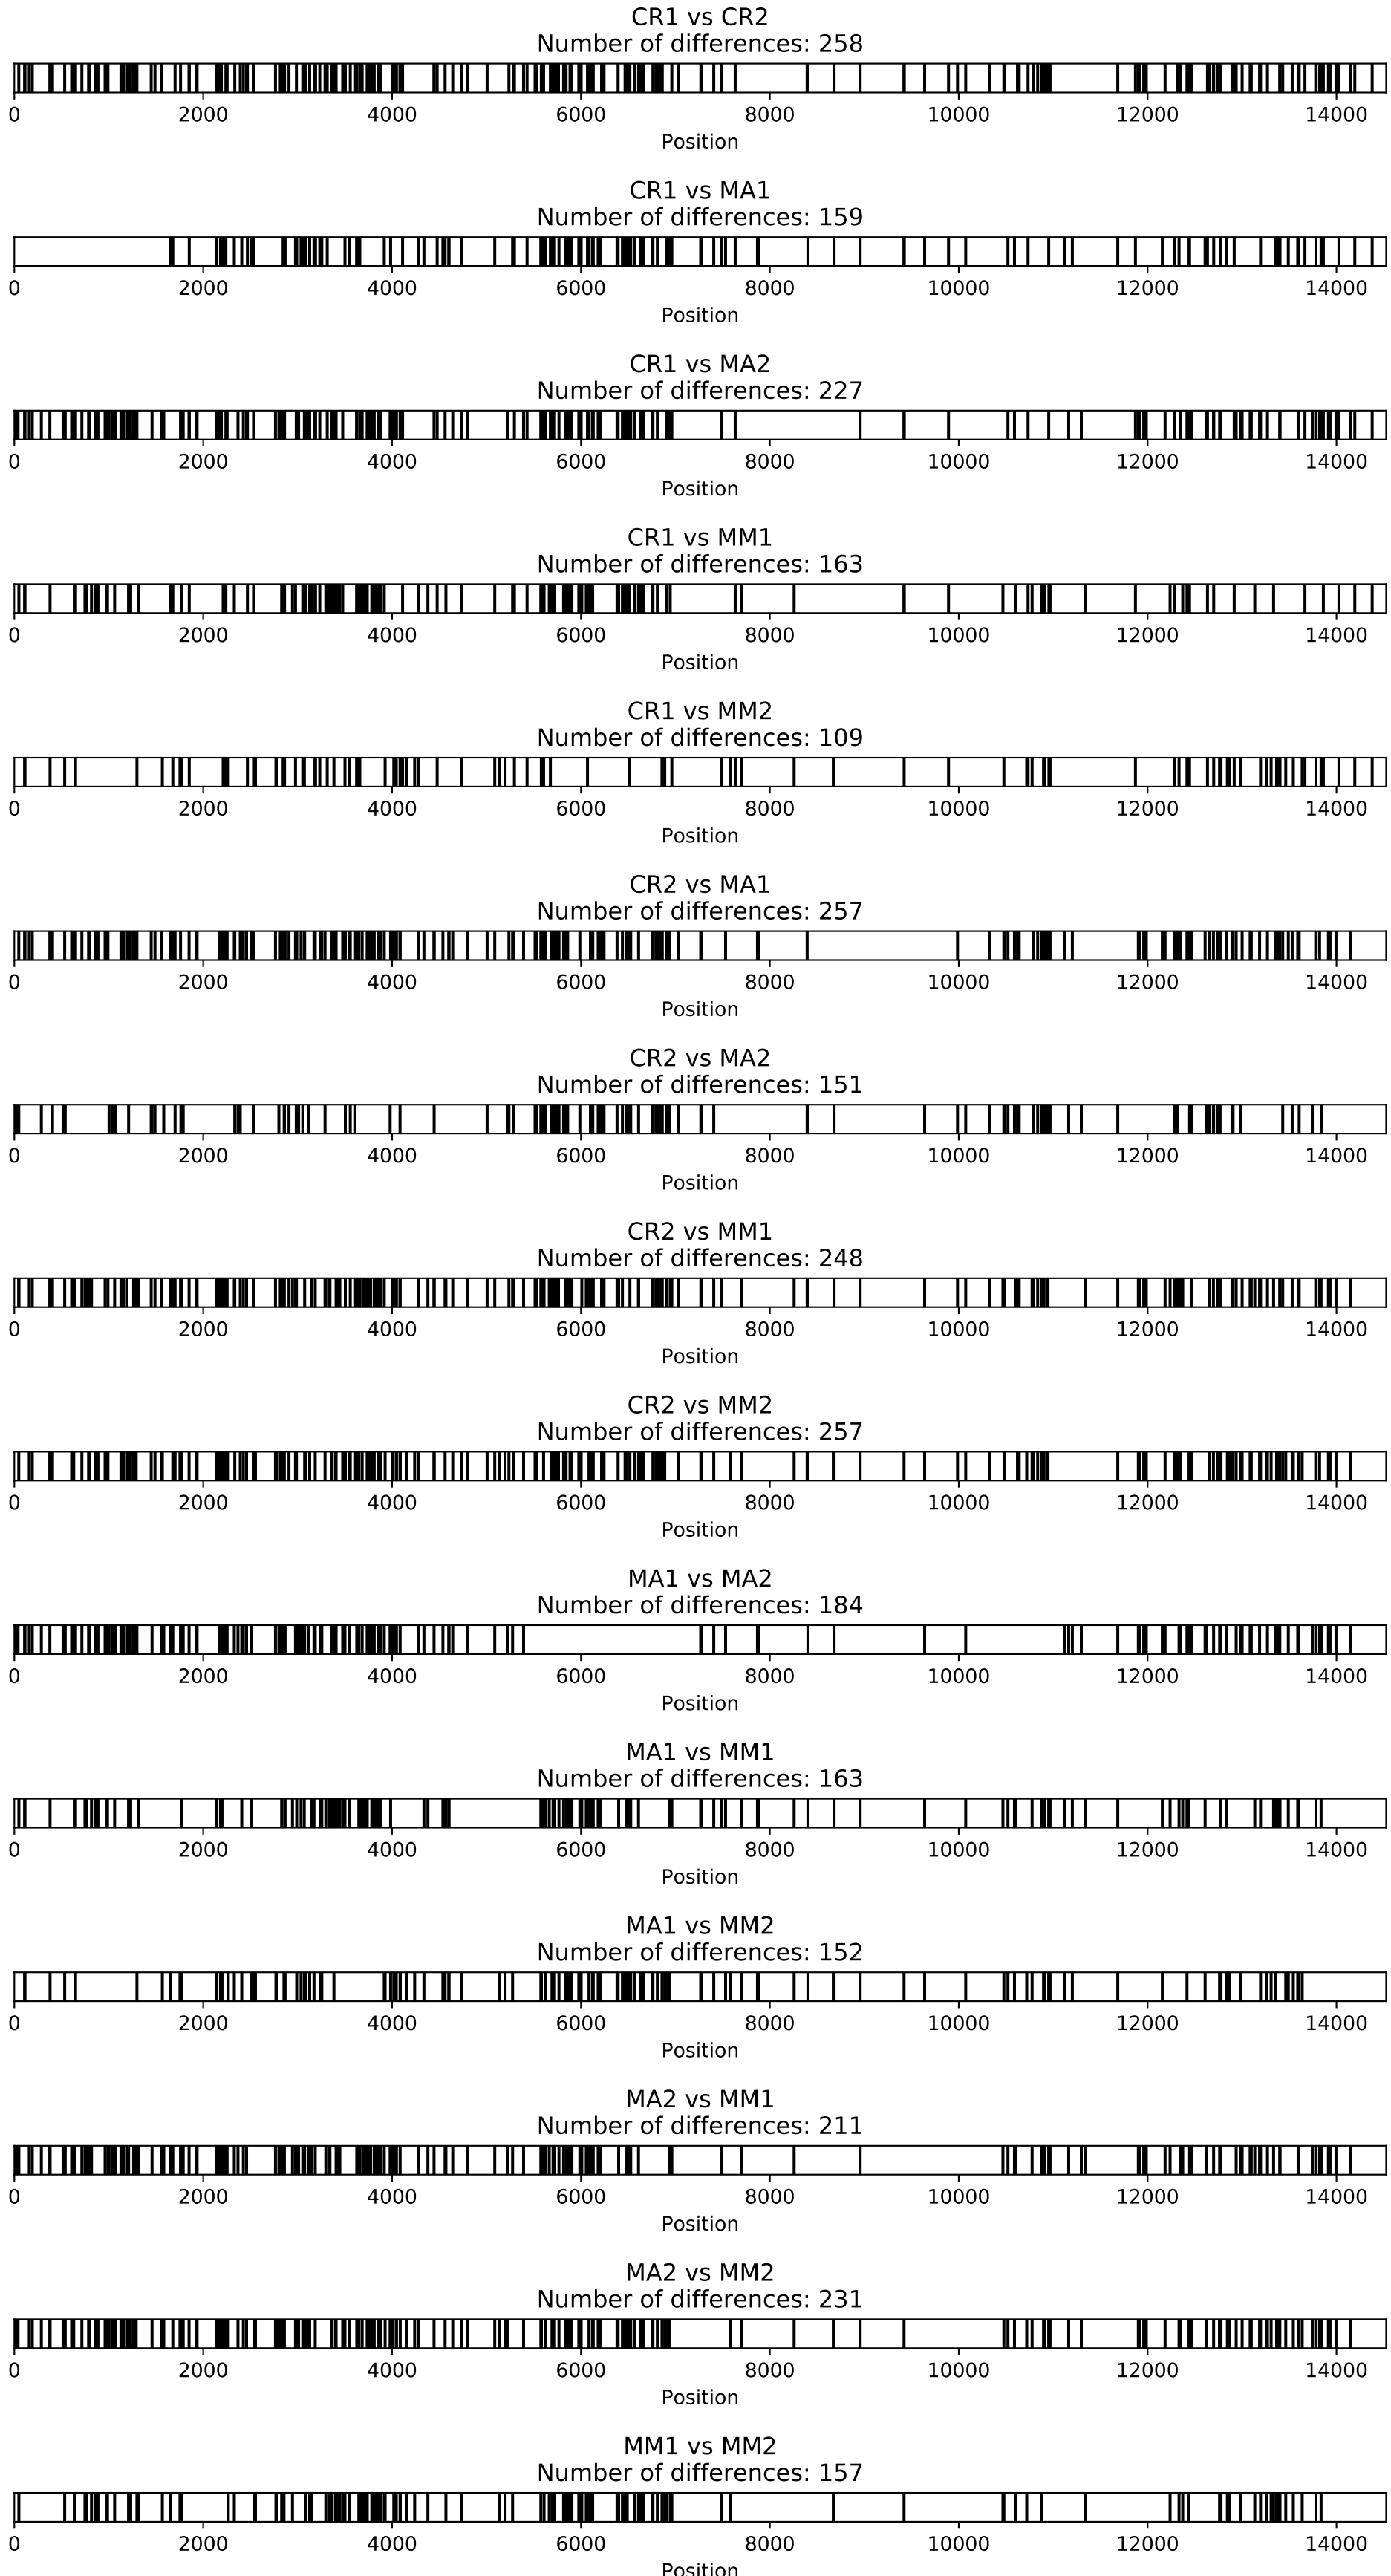

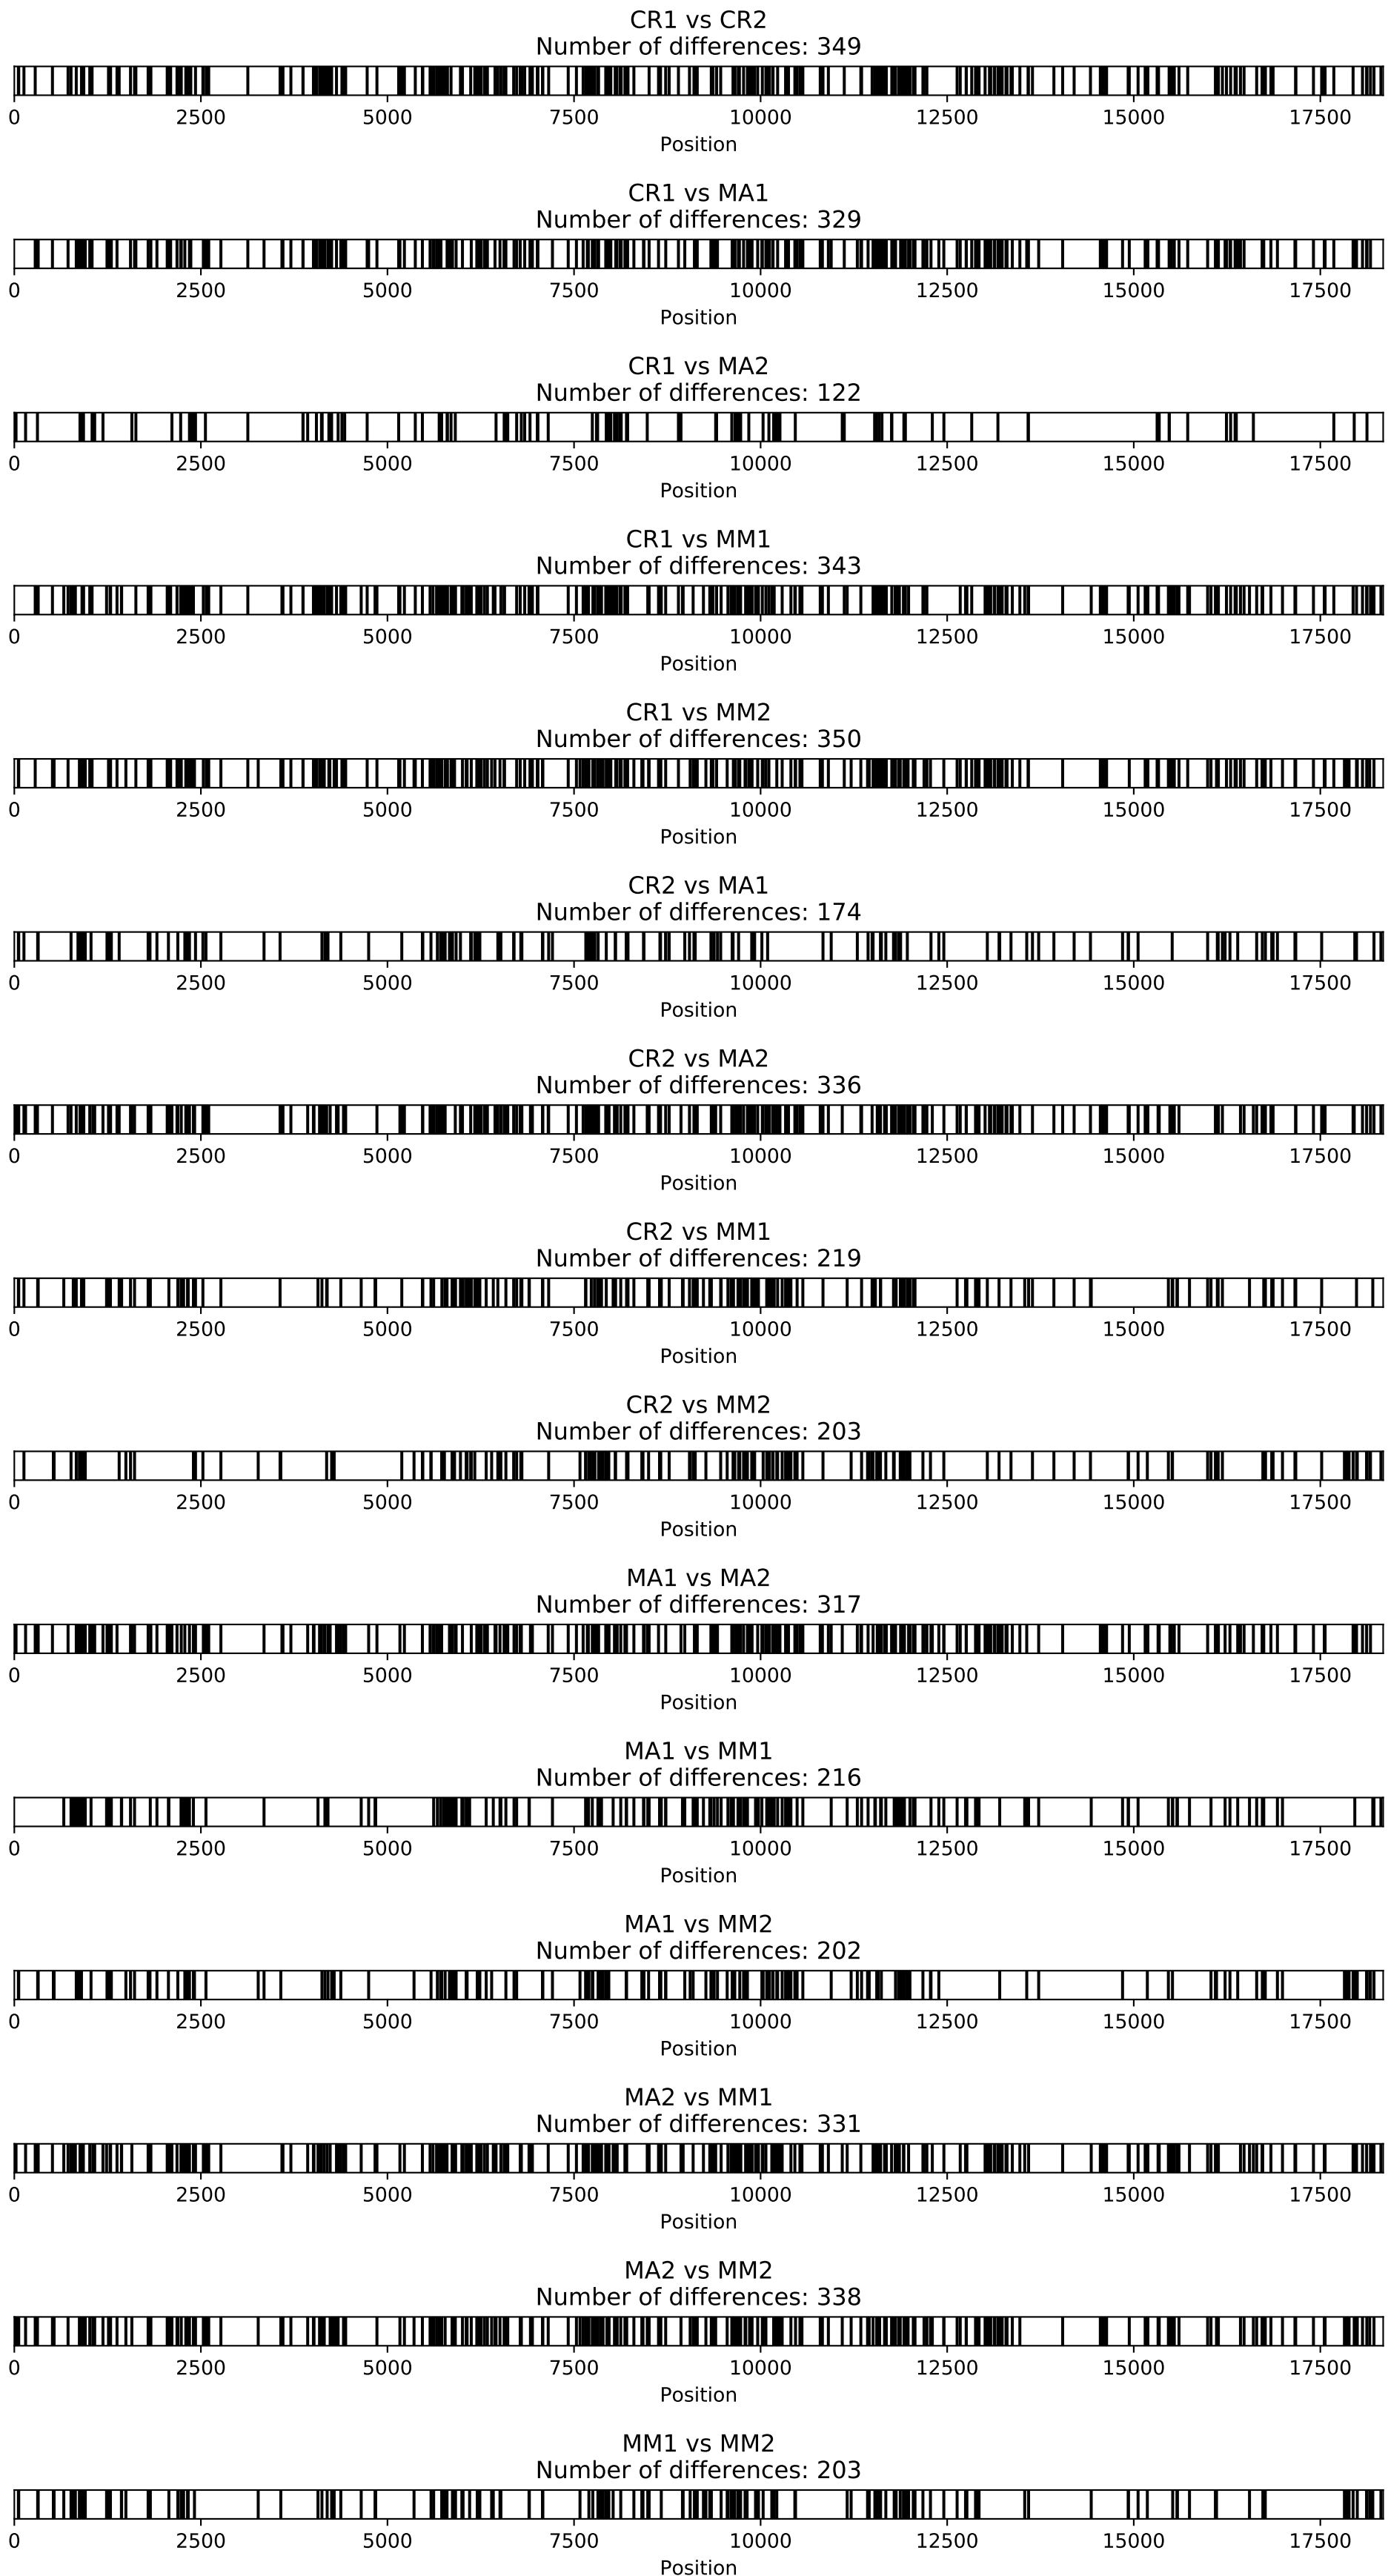

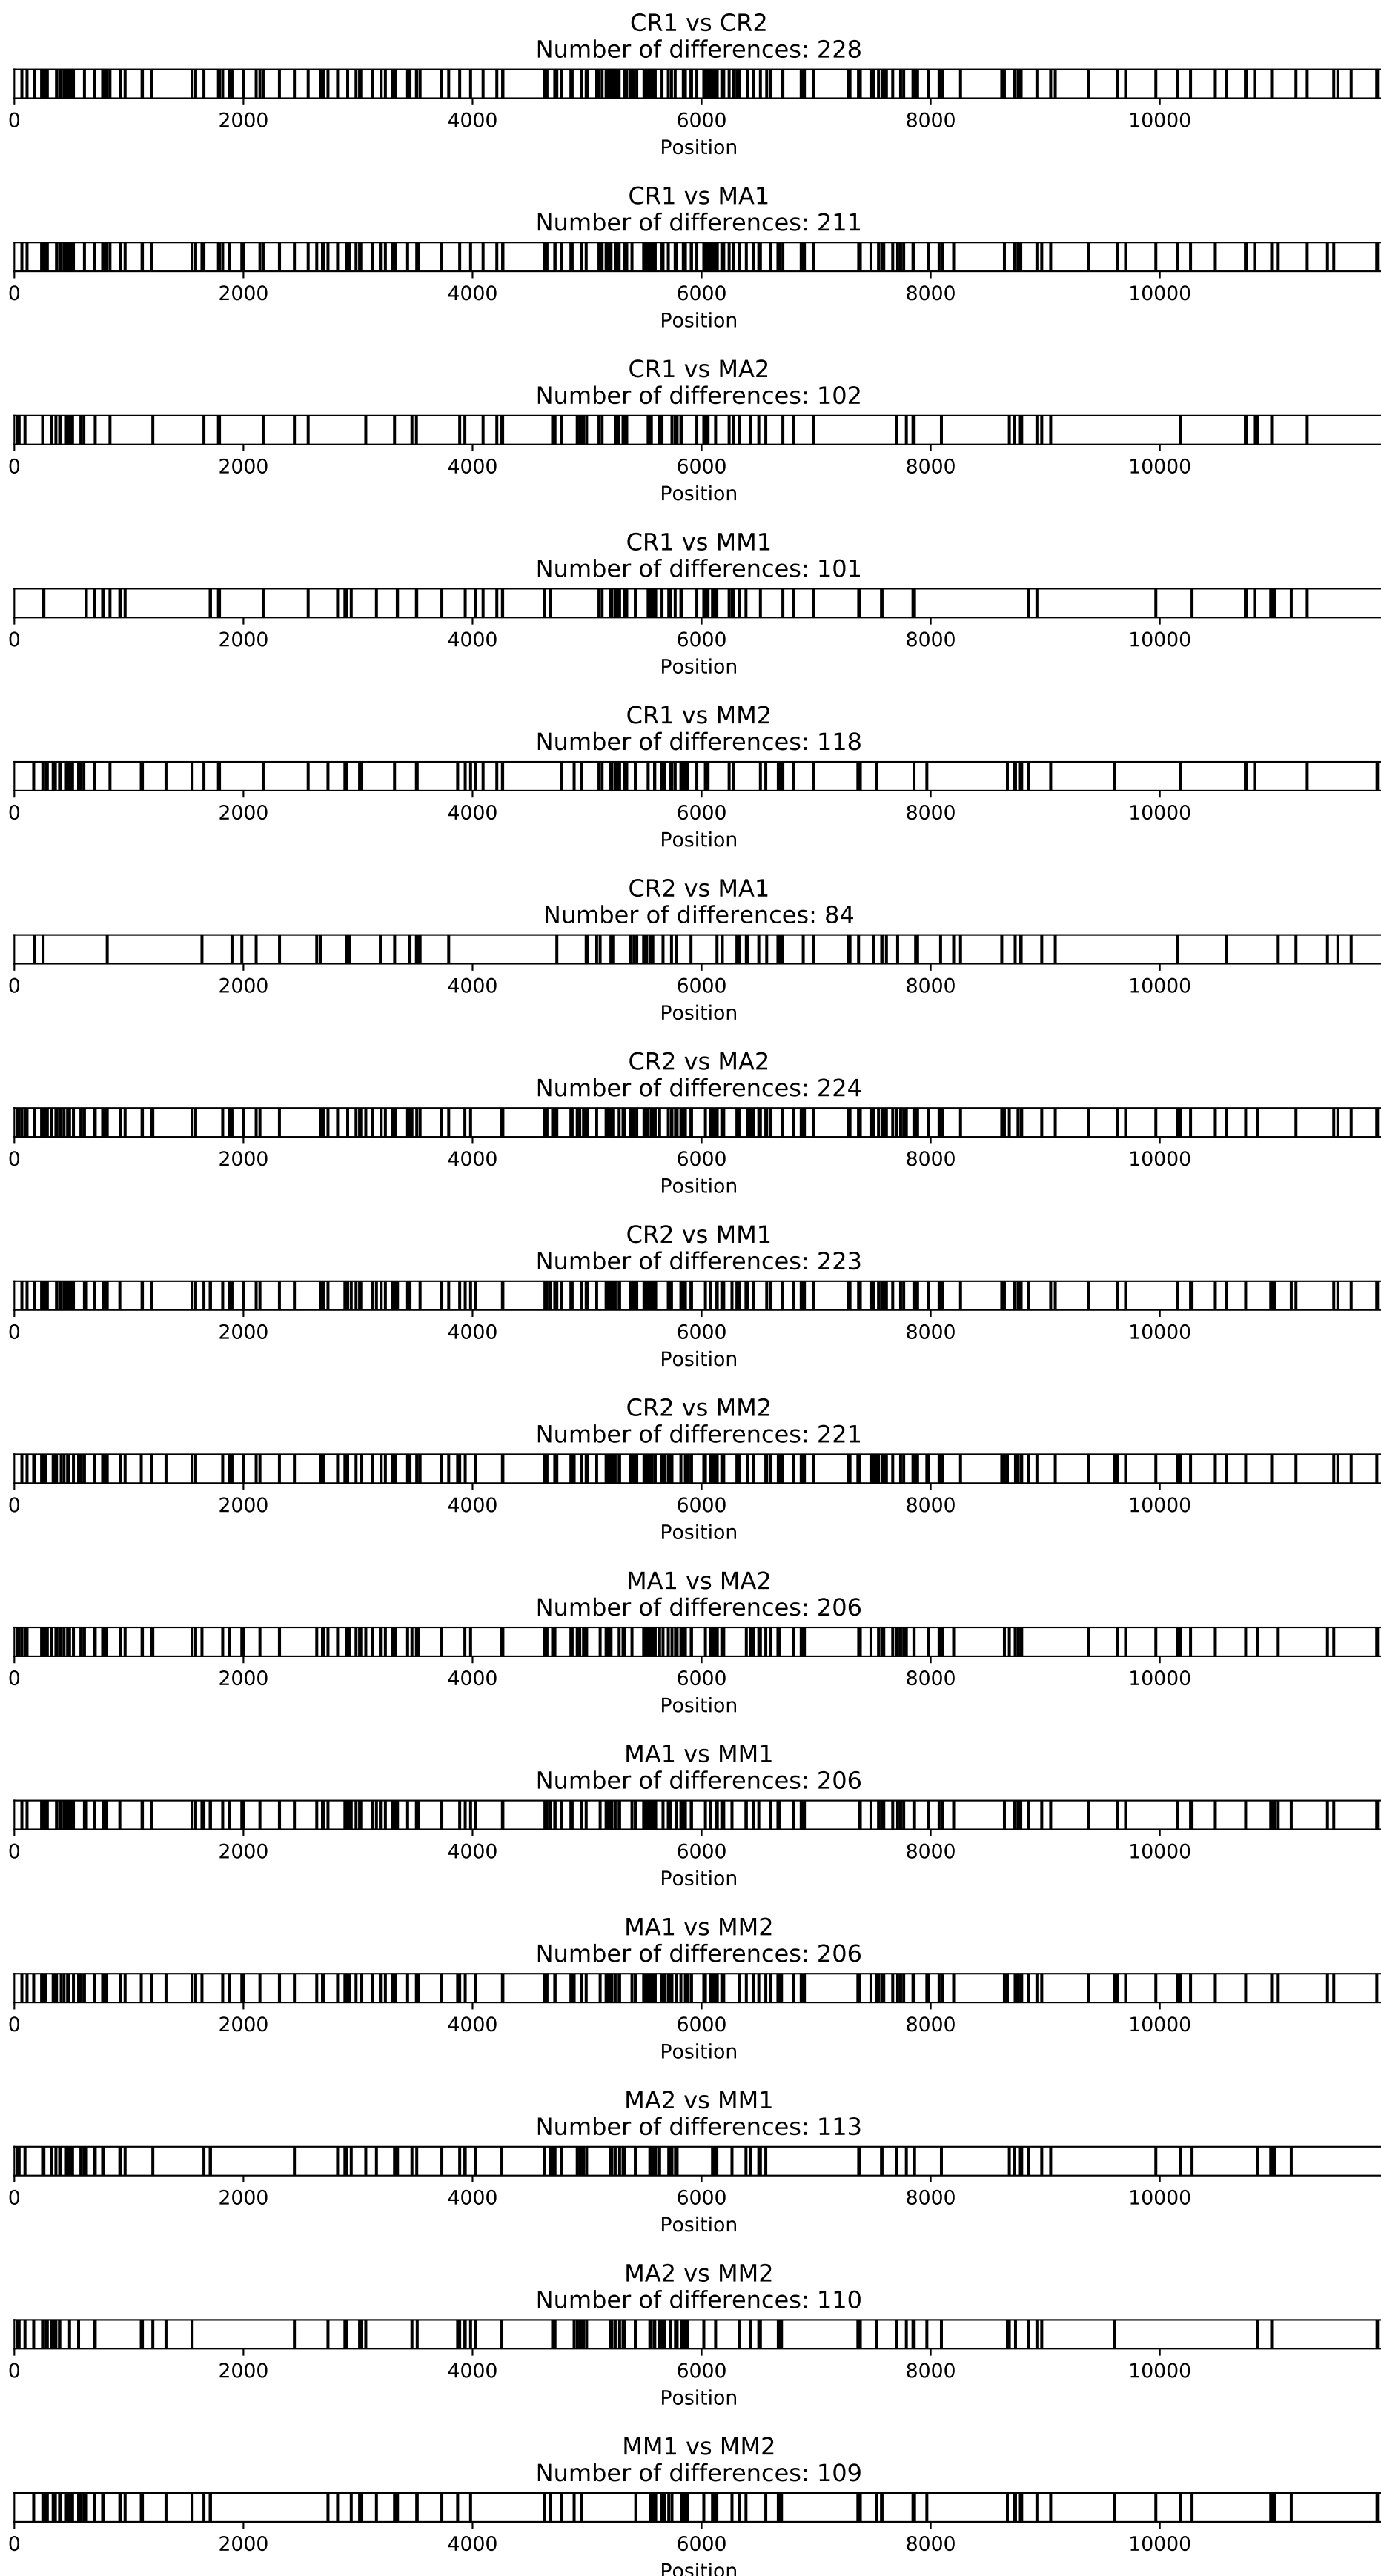

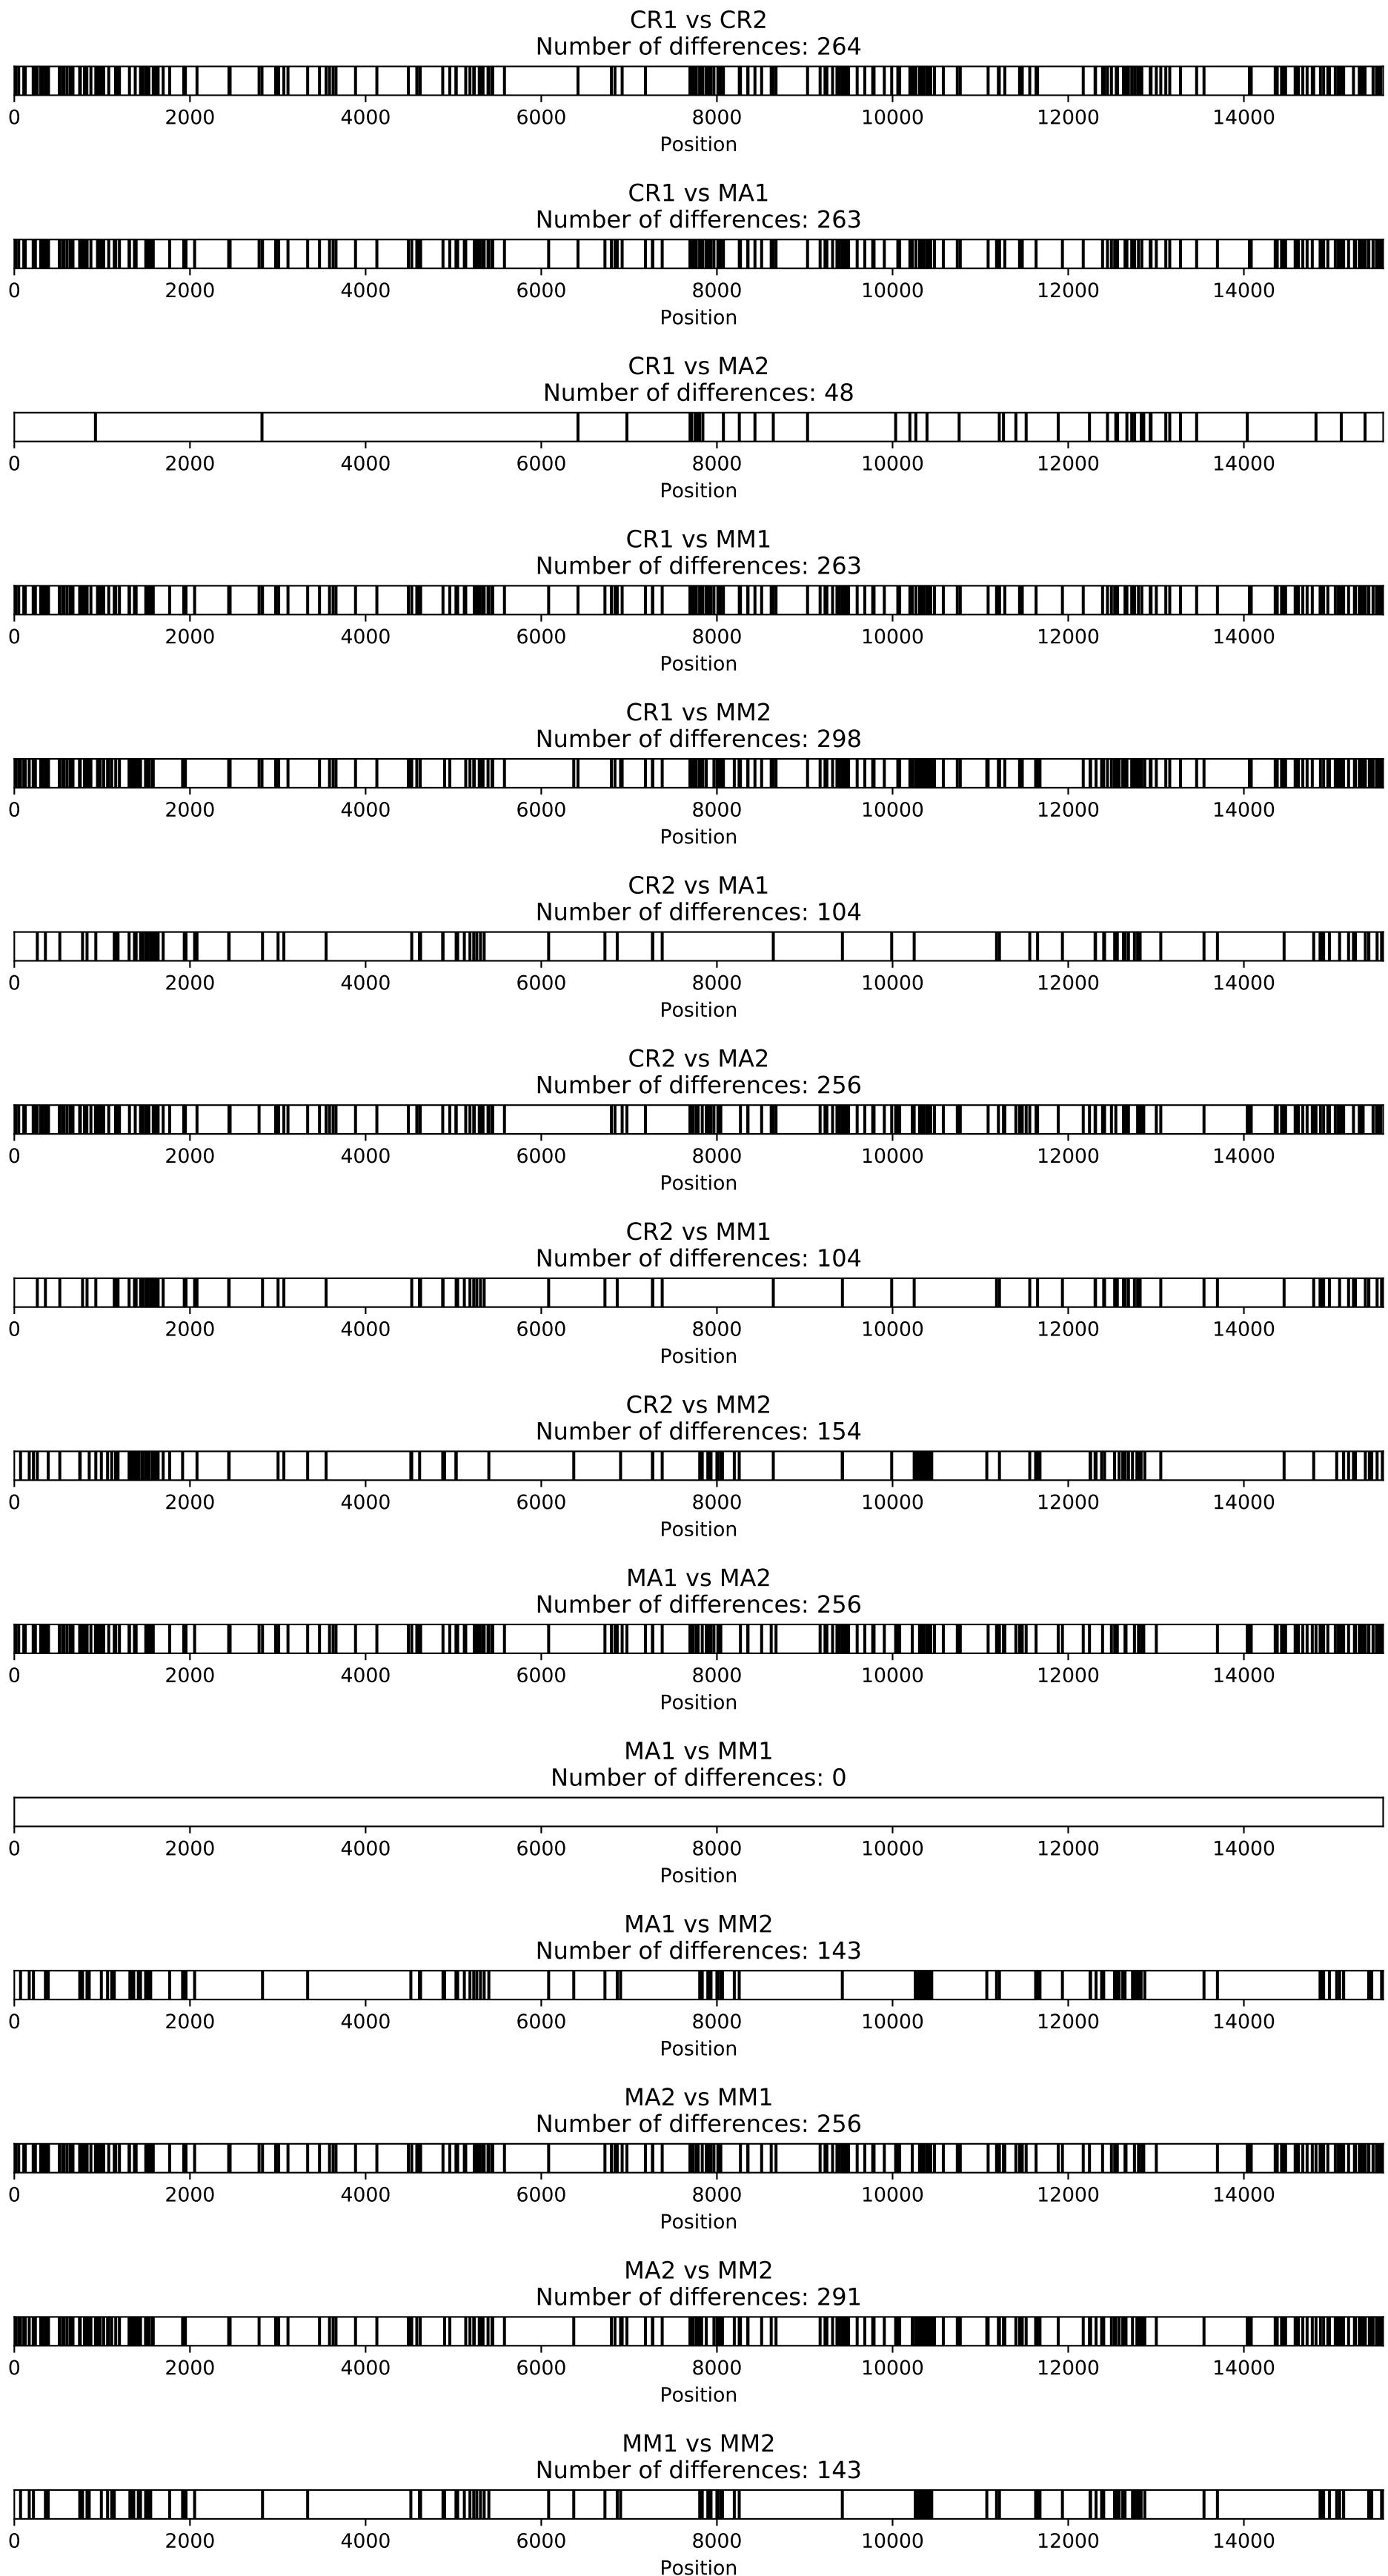

### Region: 396

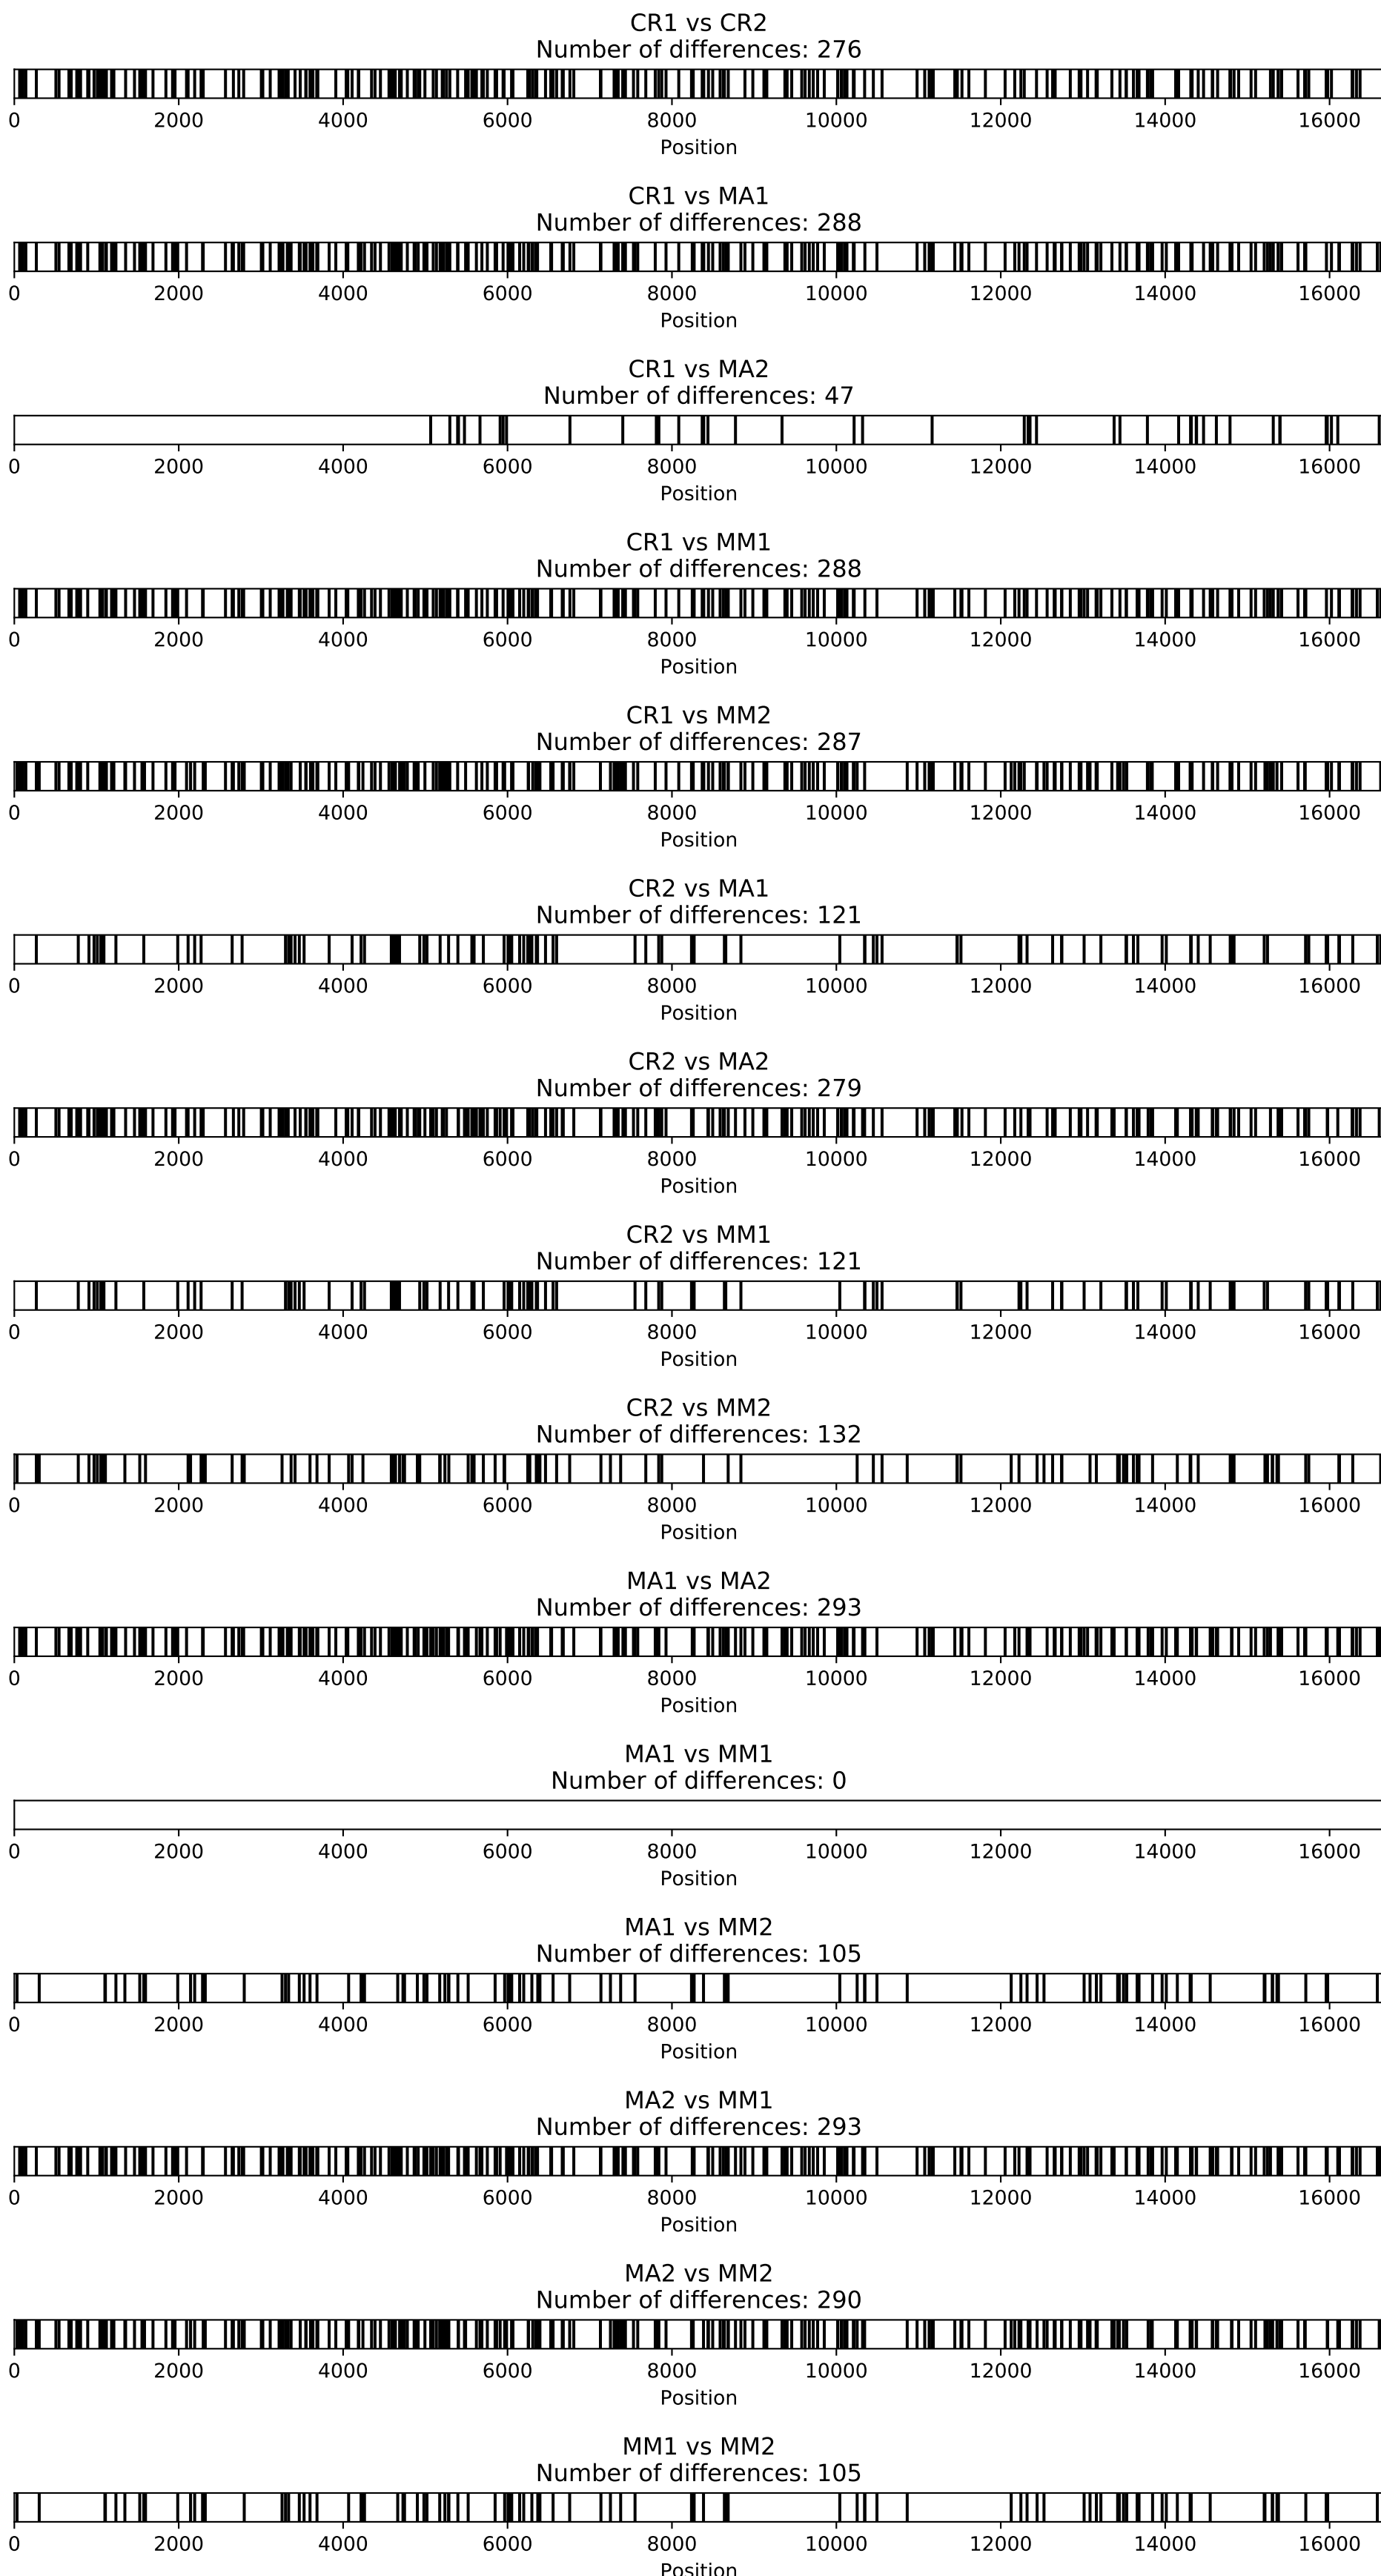

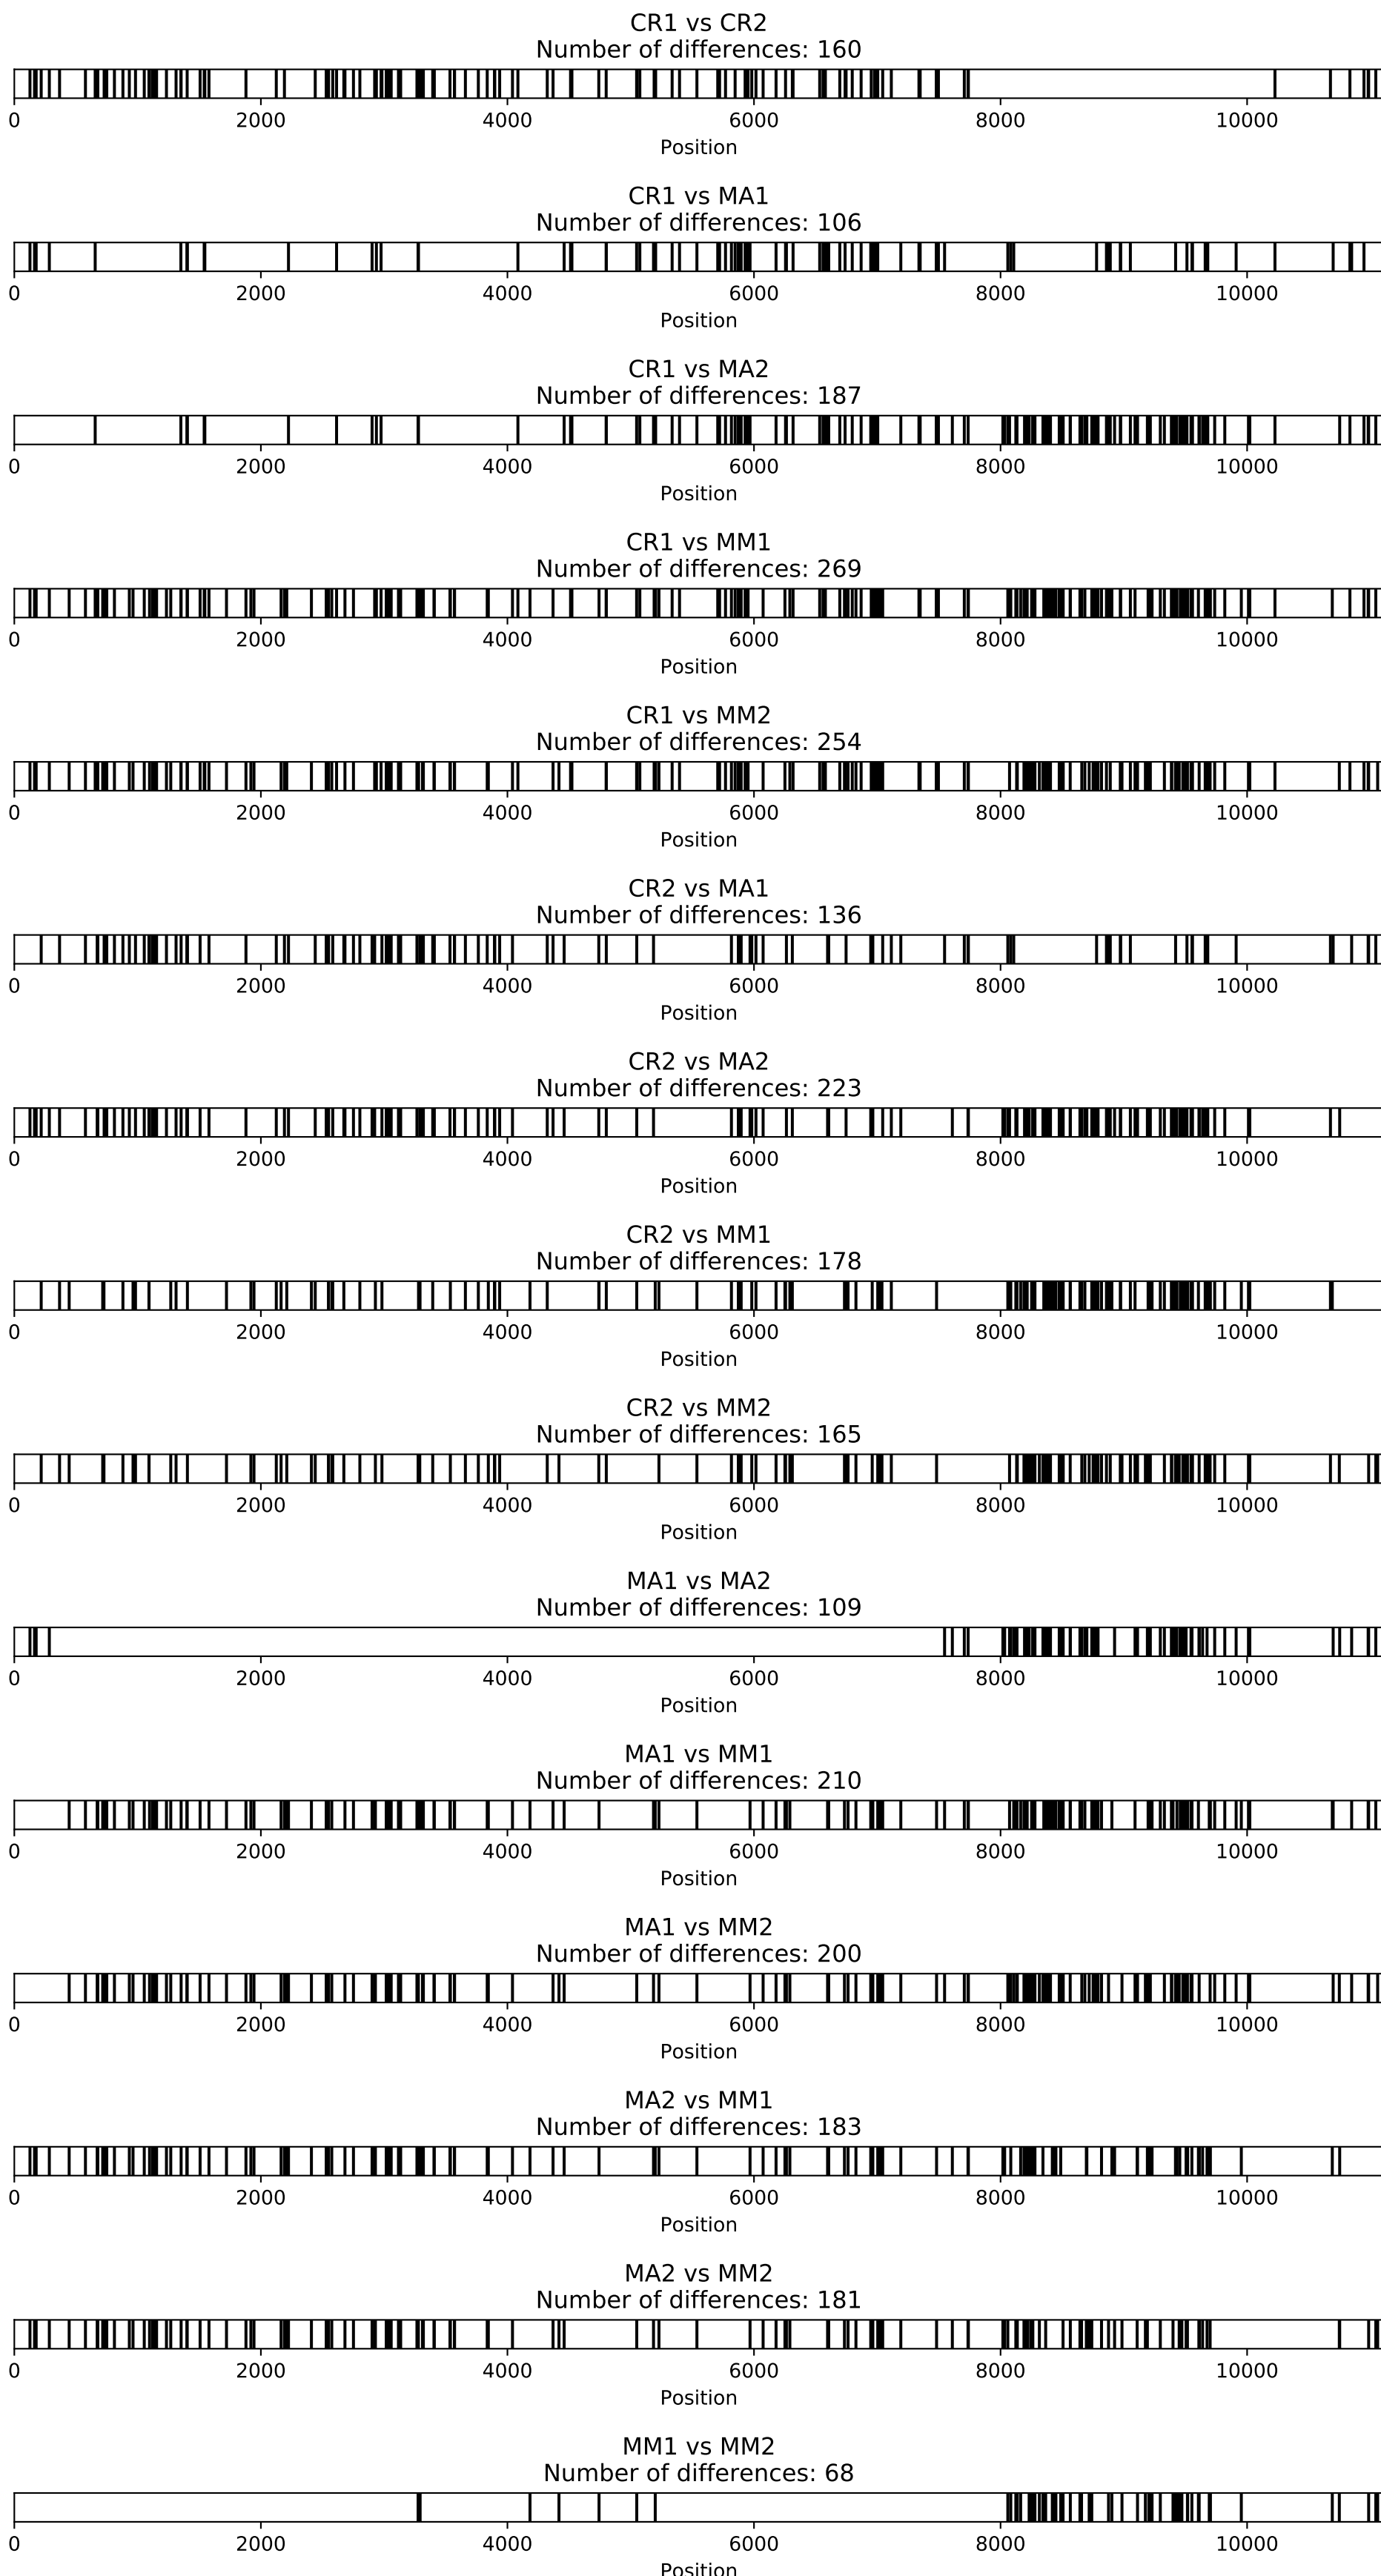



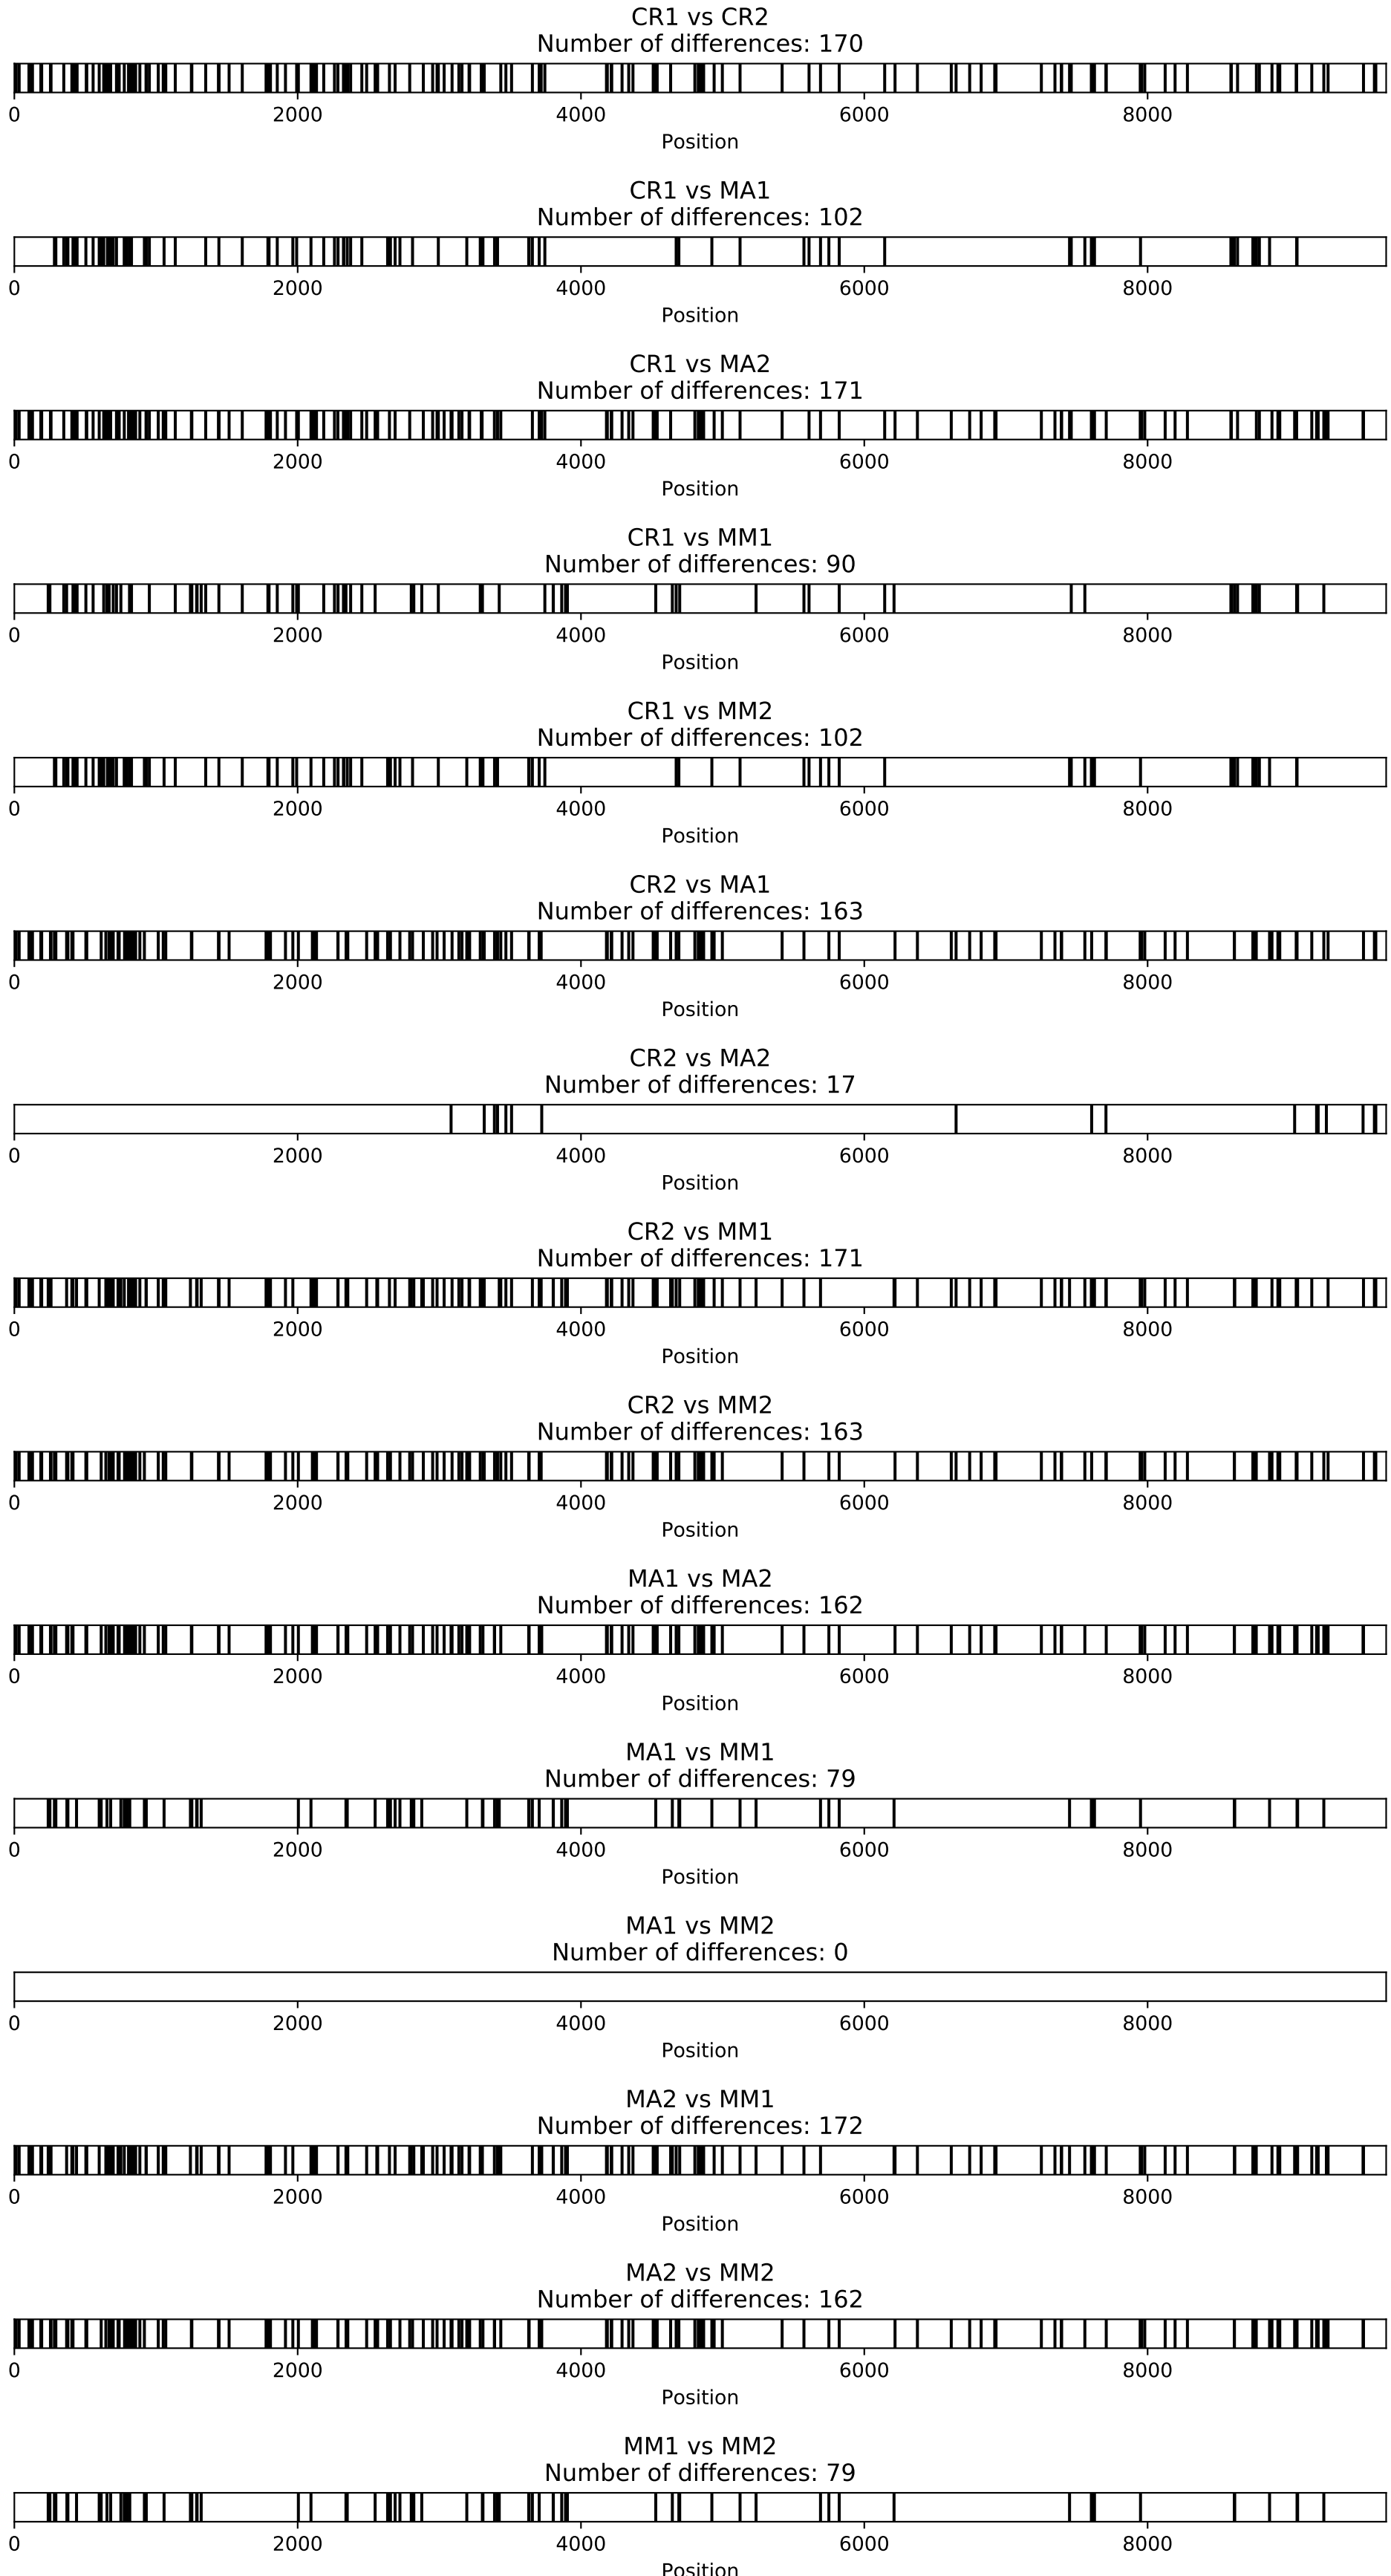

# Region: 400

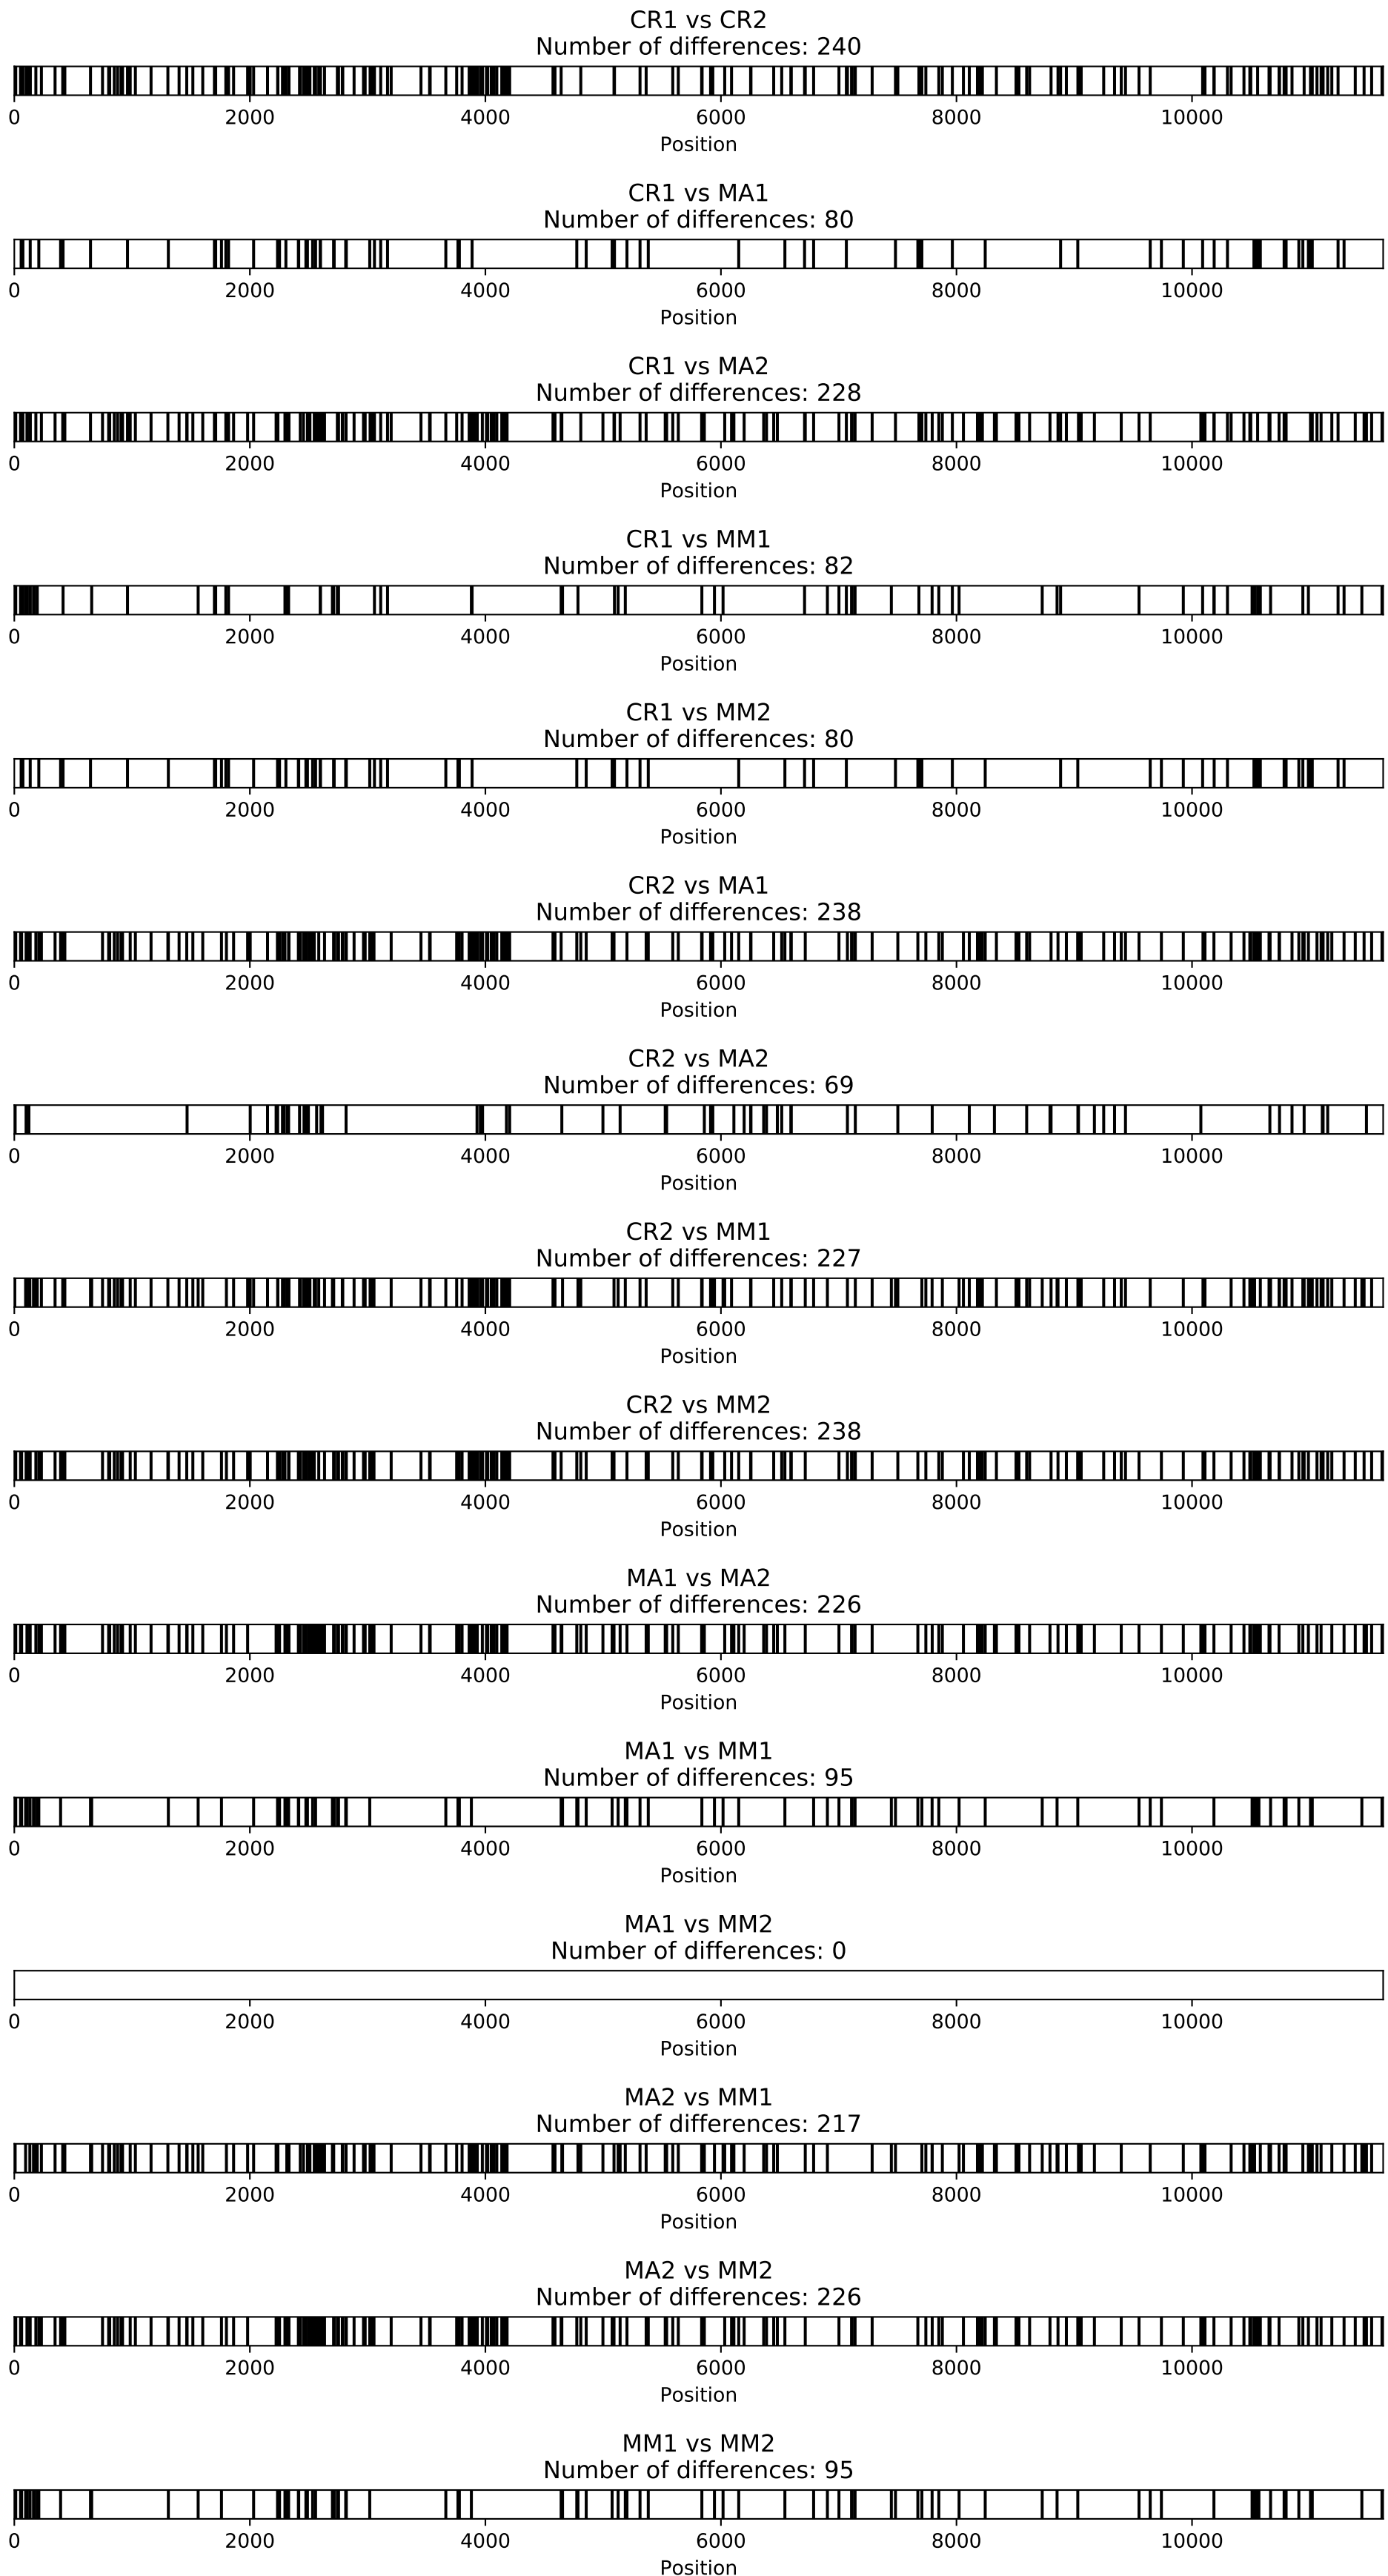

# Region: 402

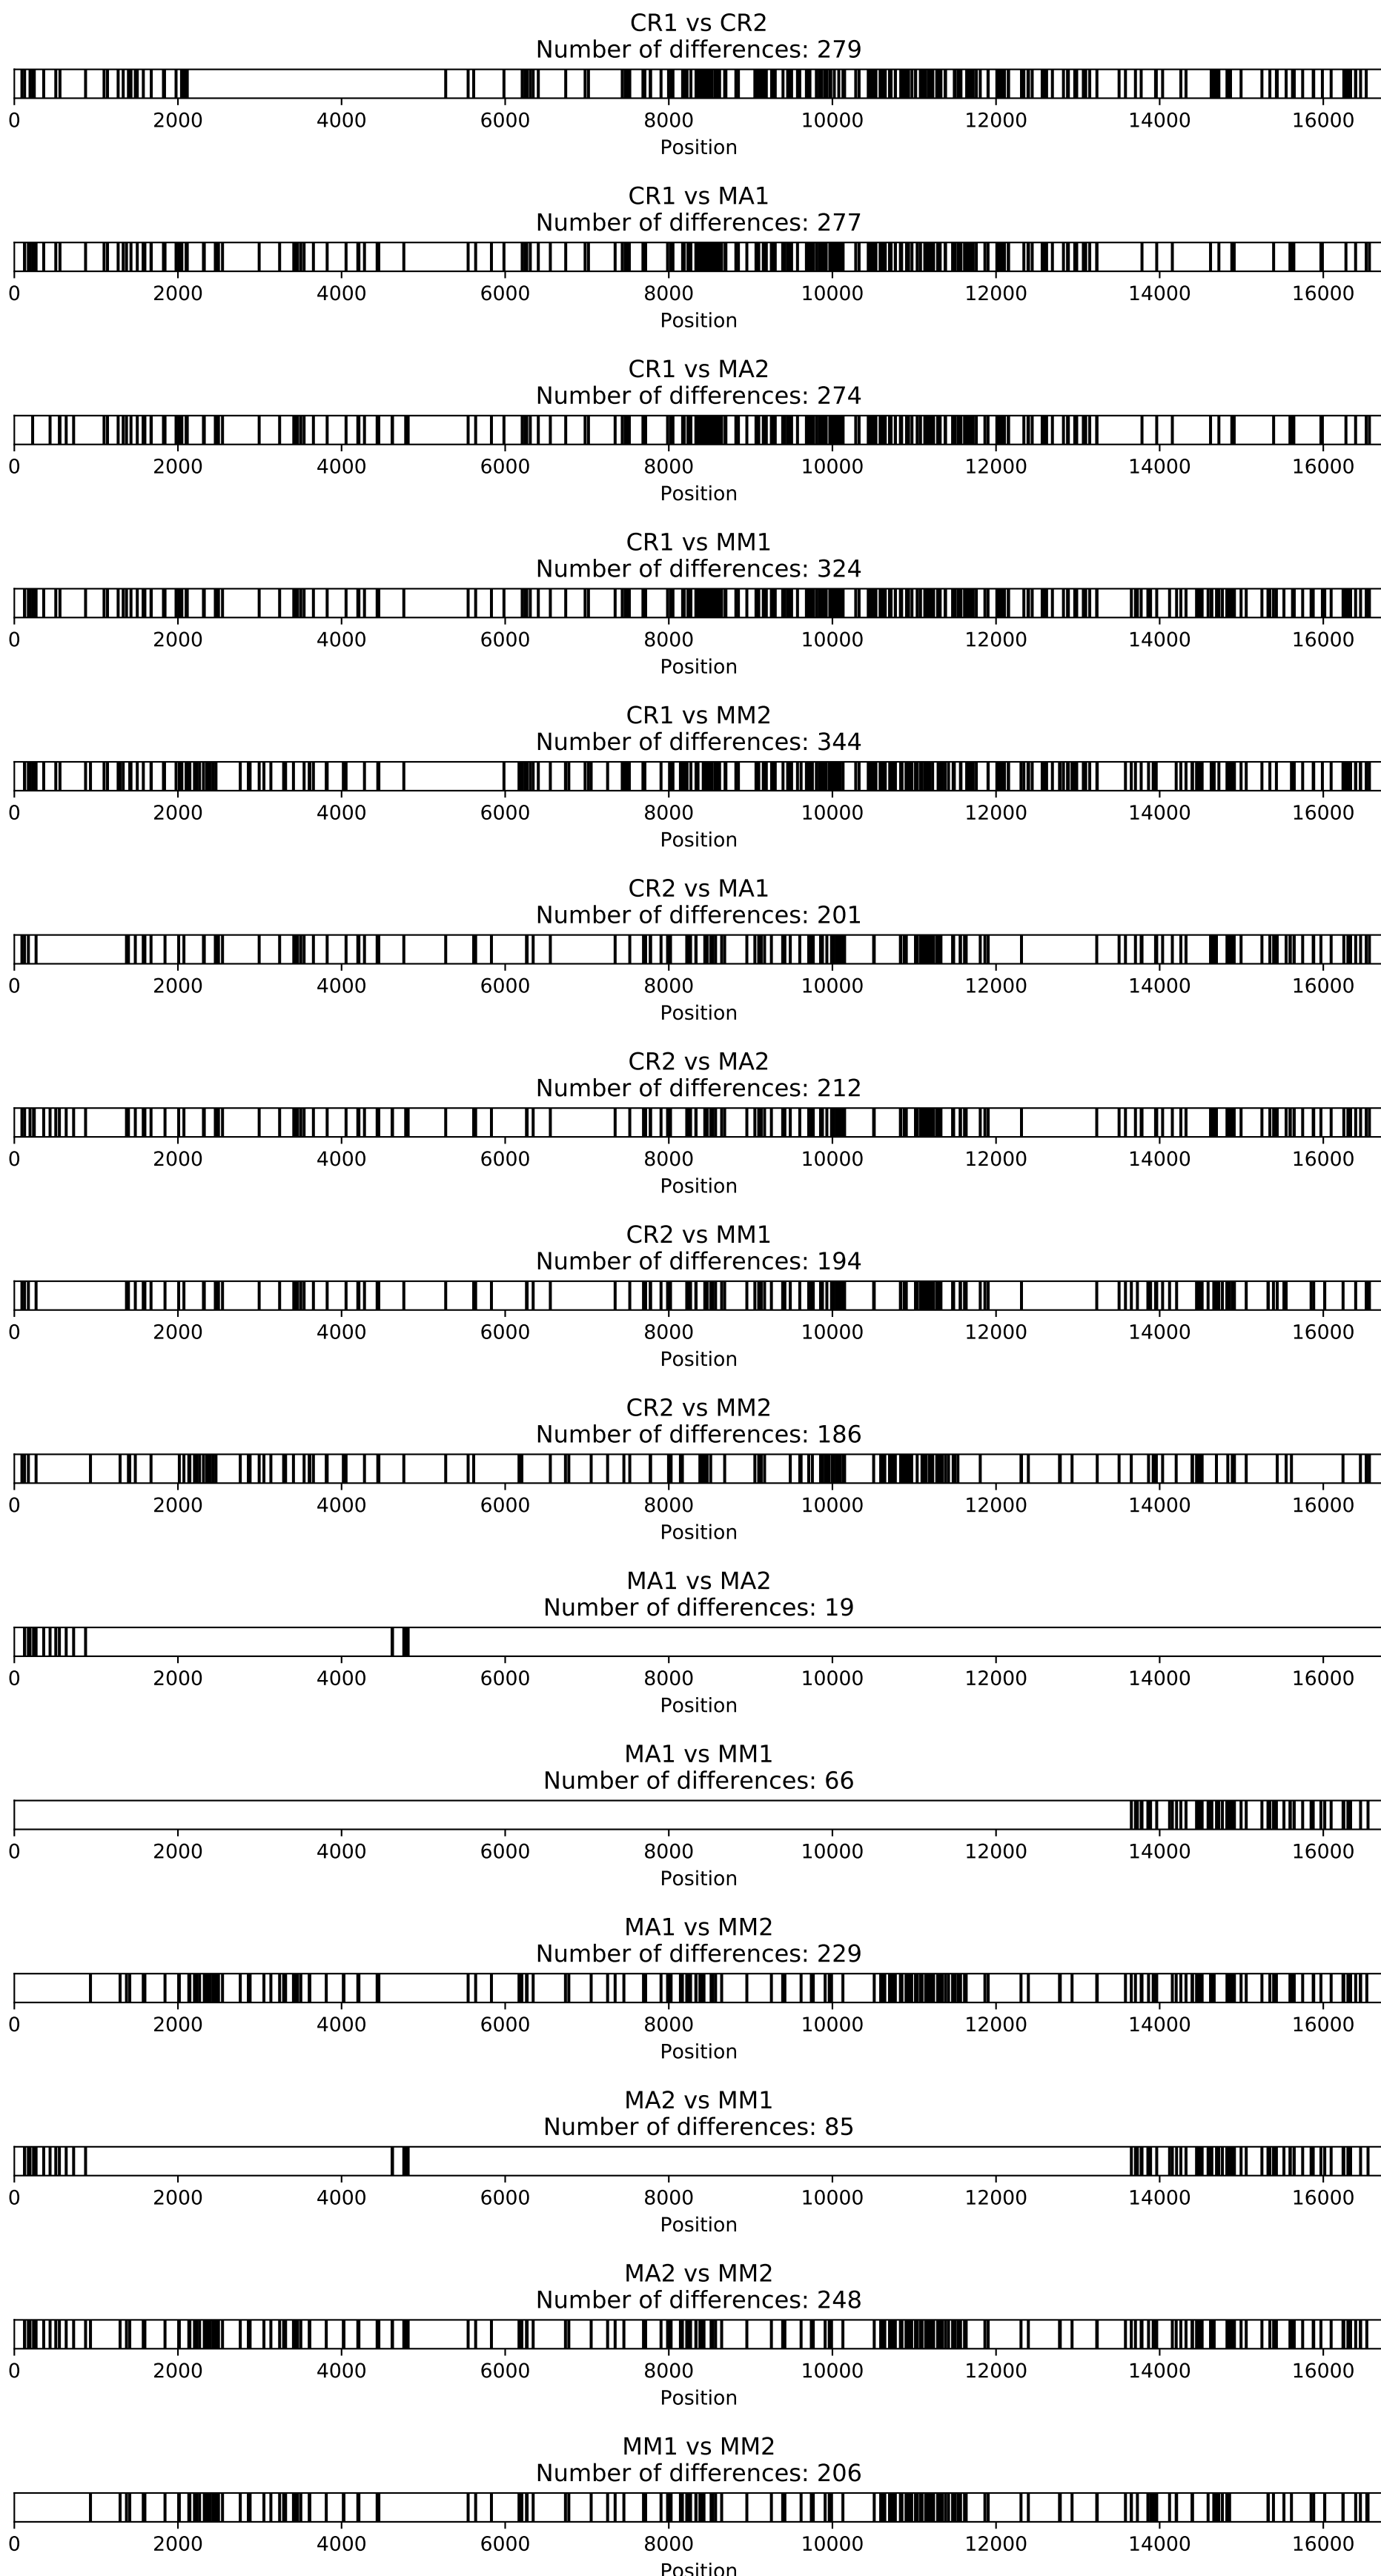

# Region: 404

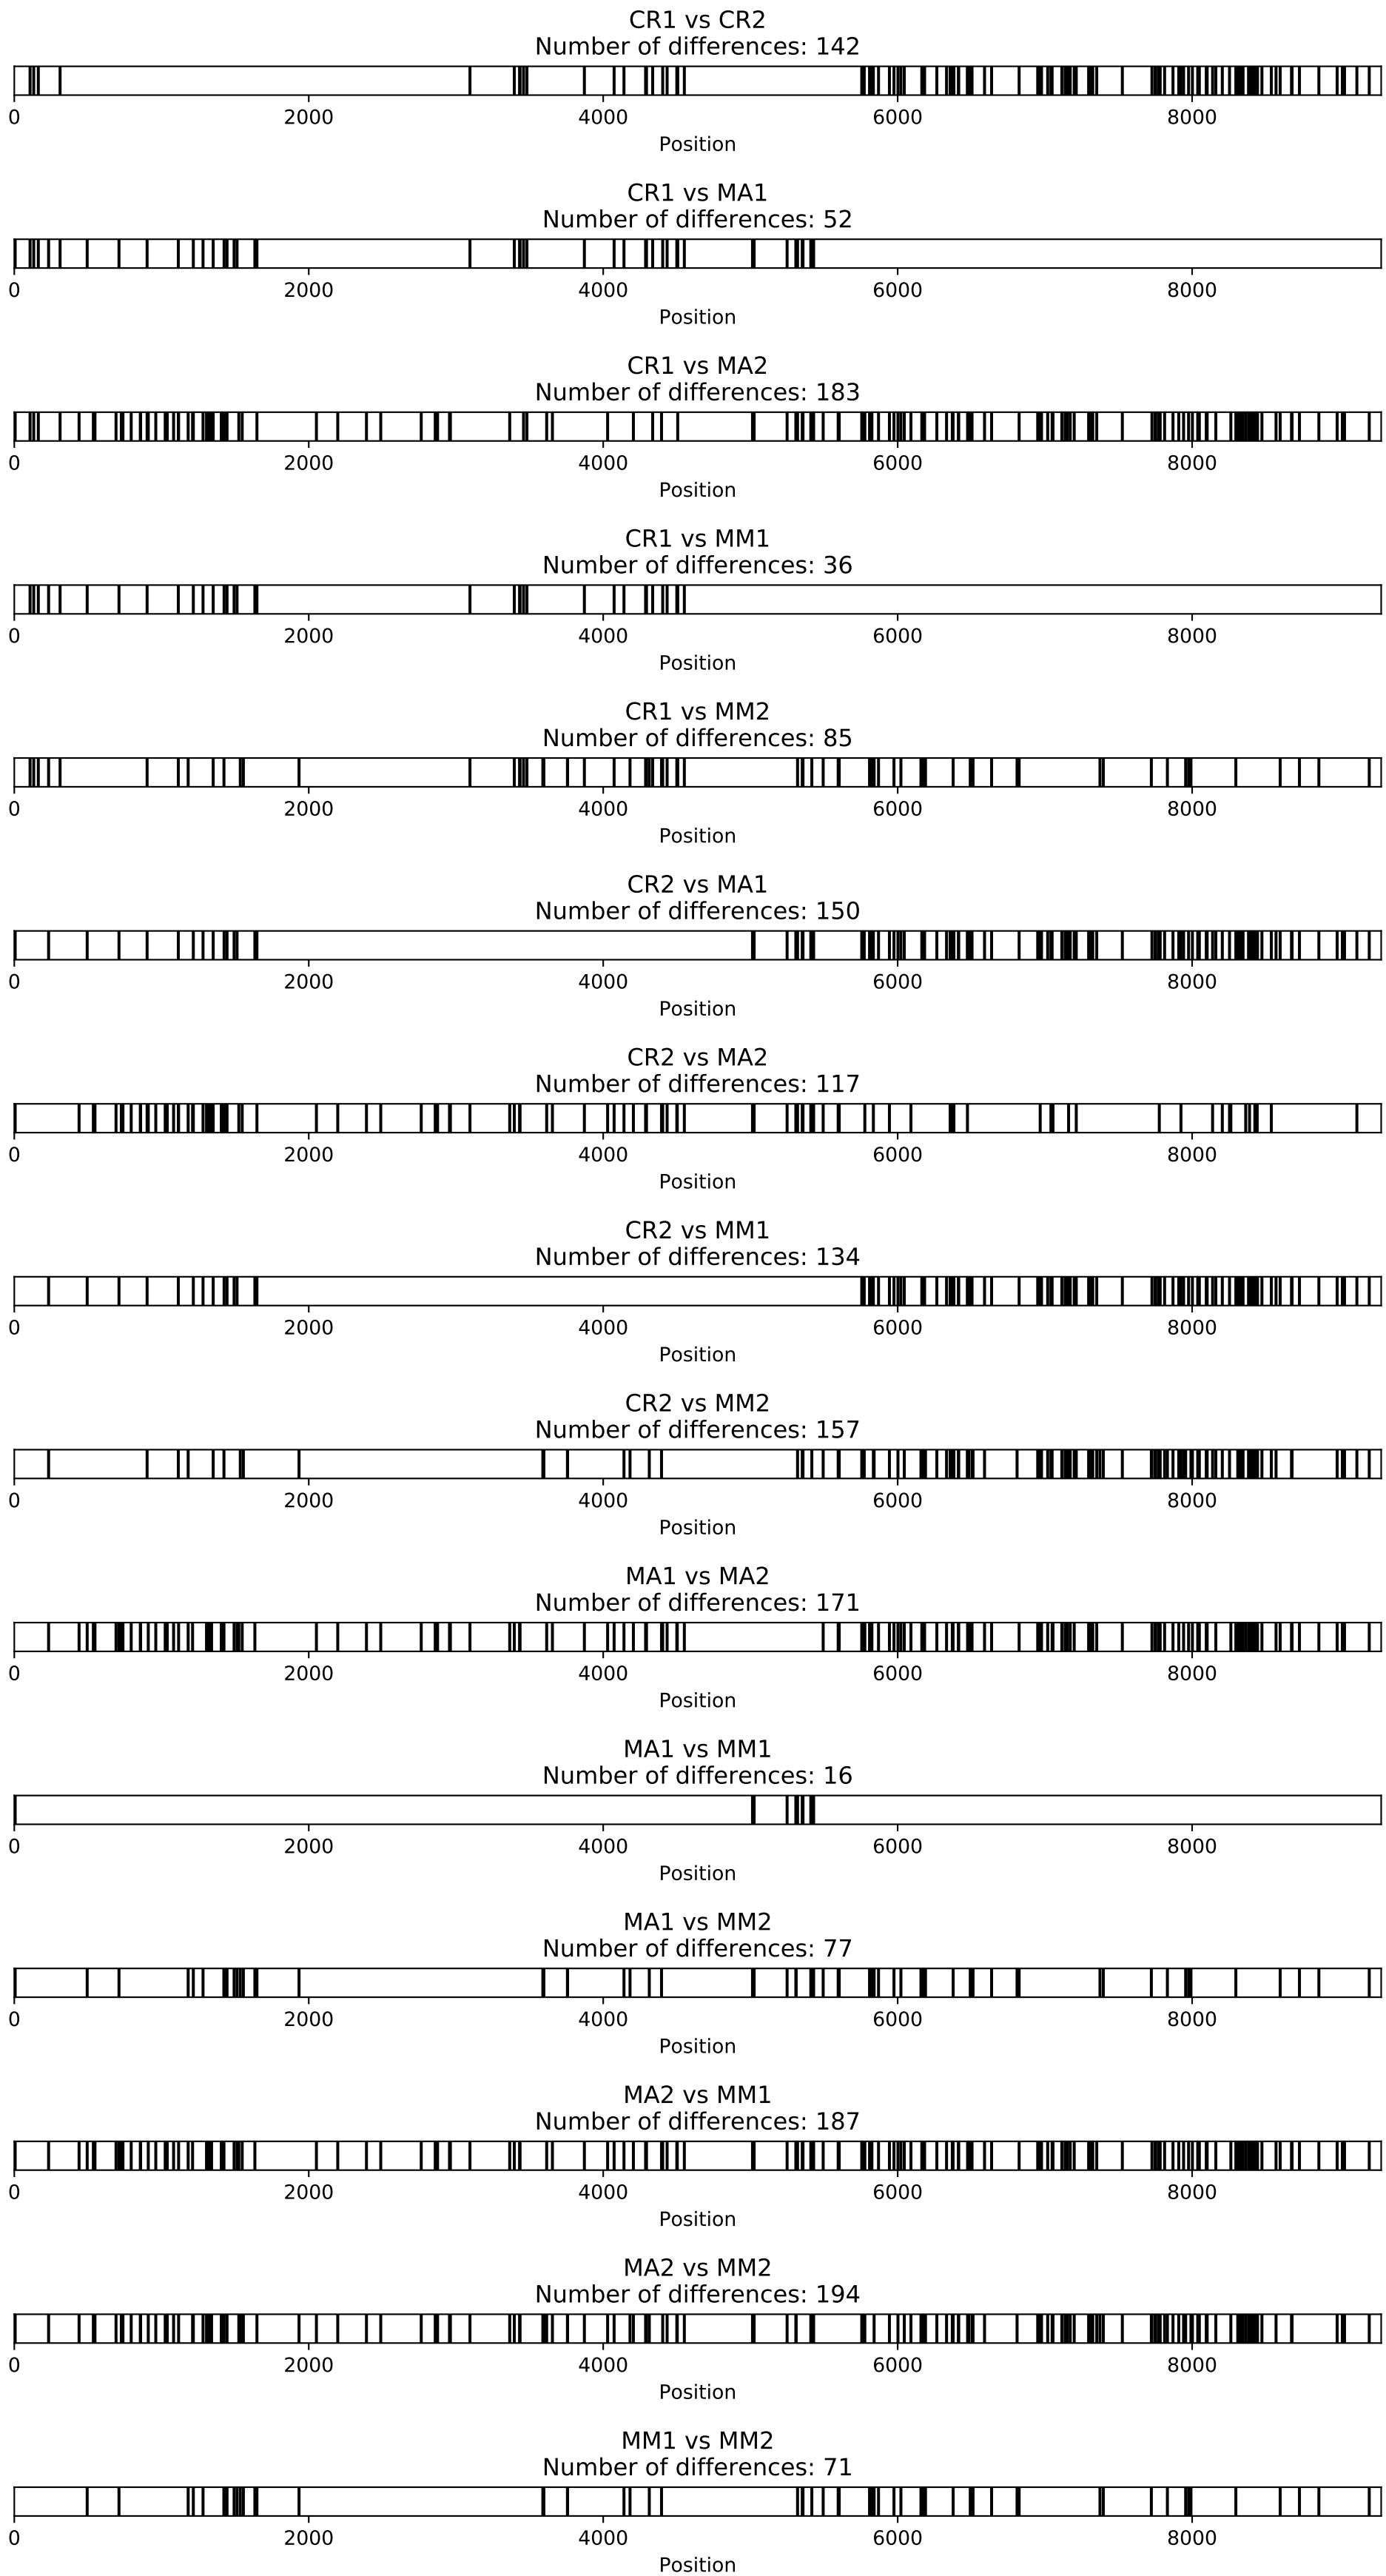

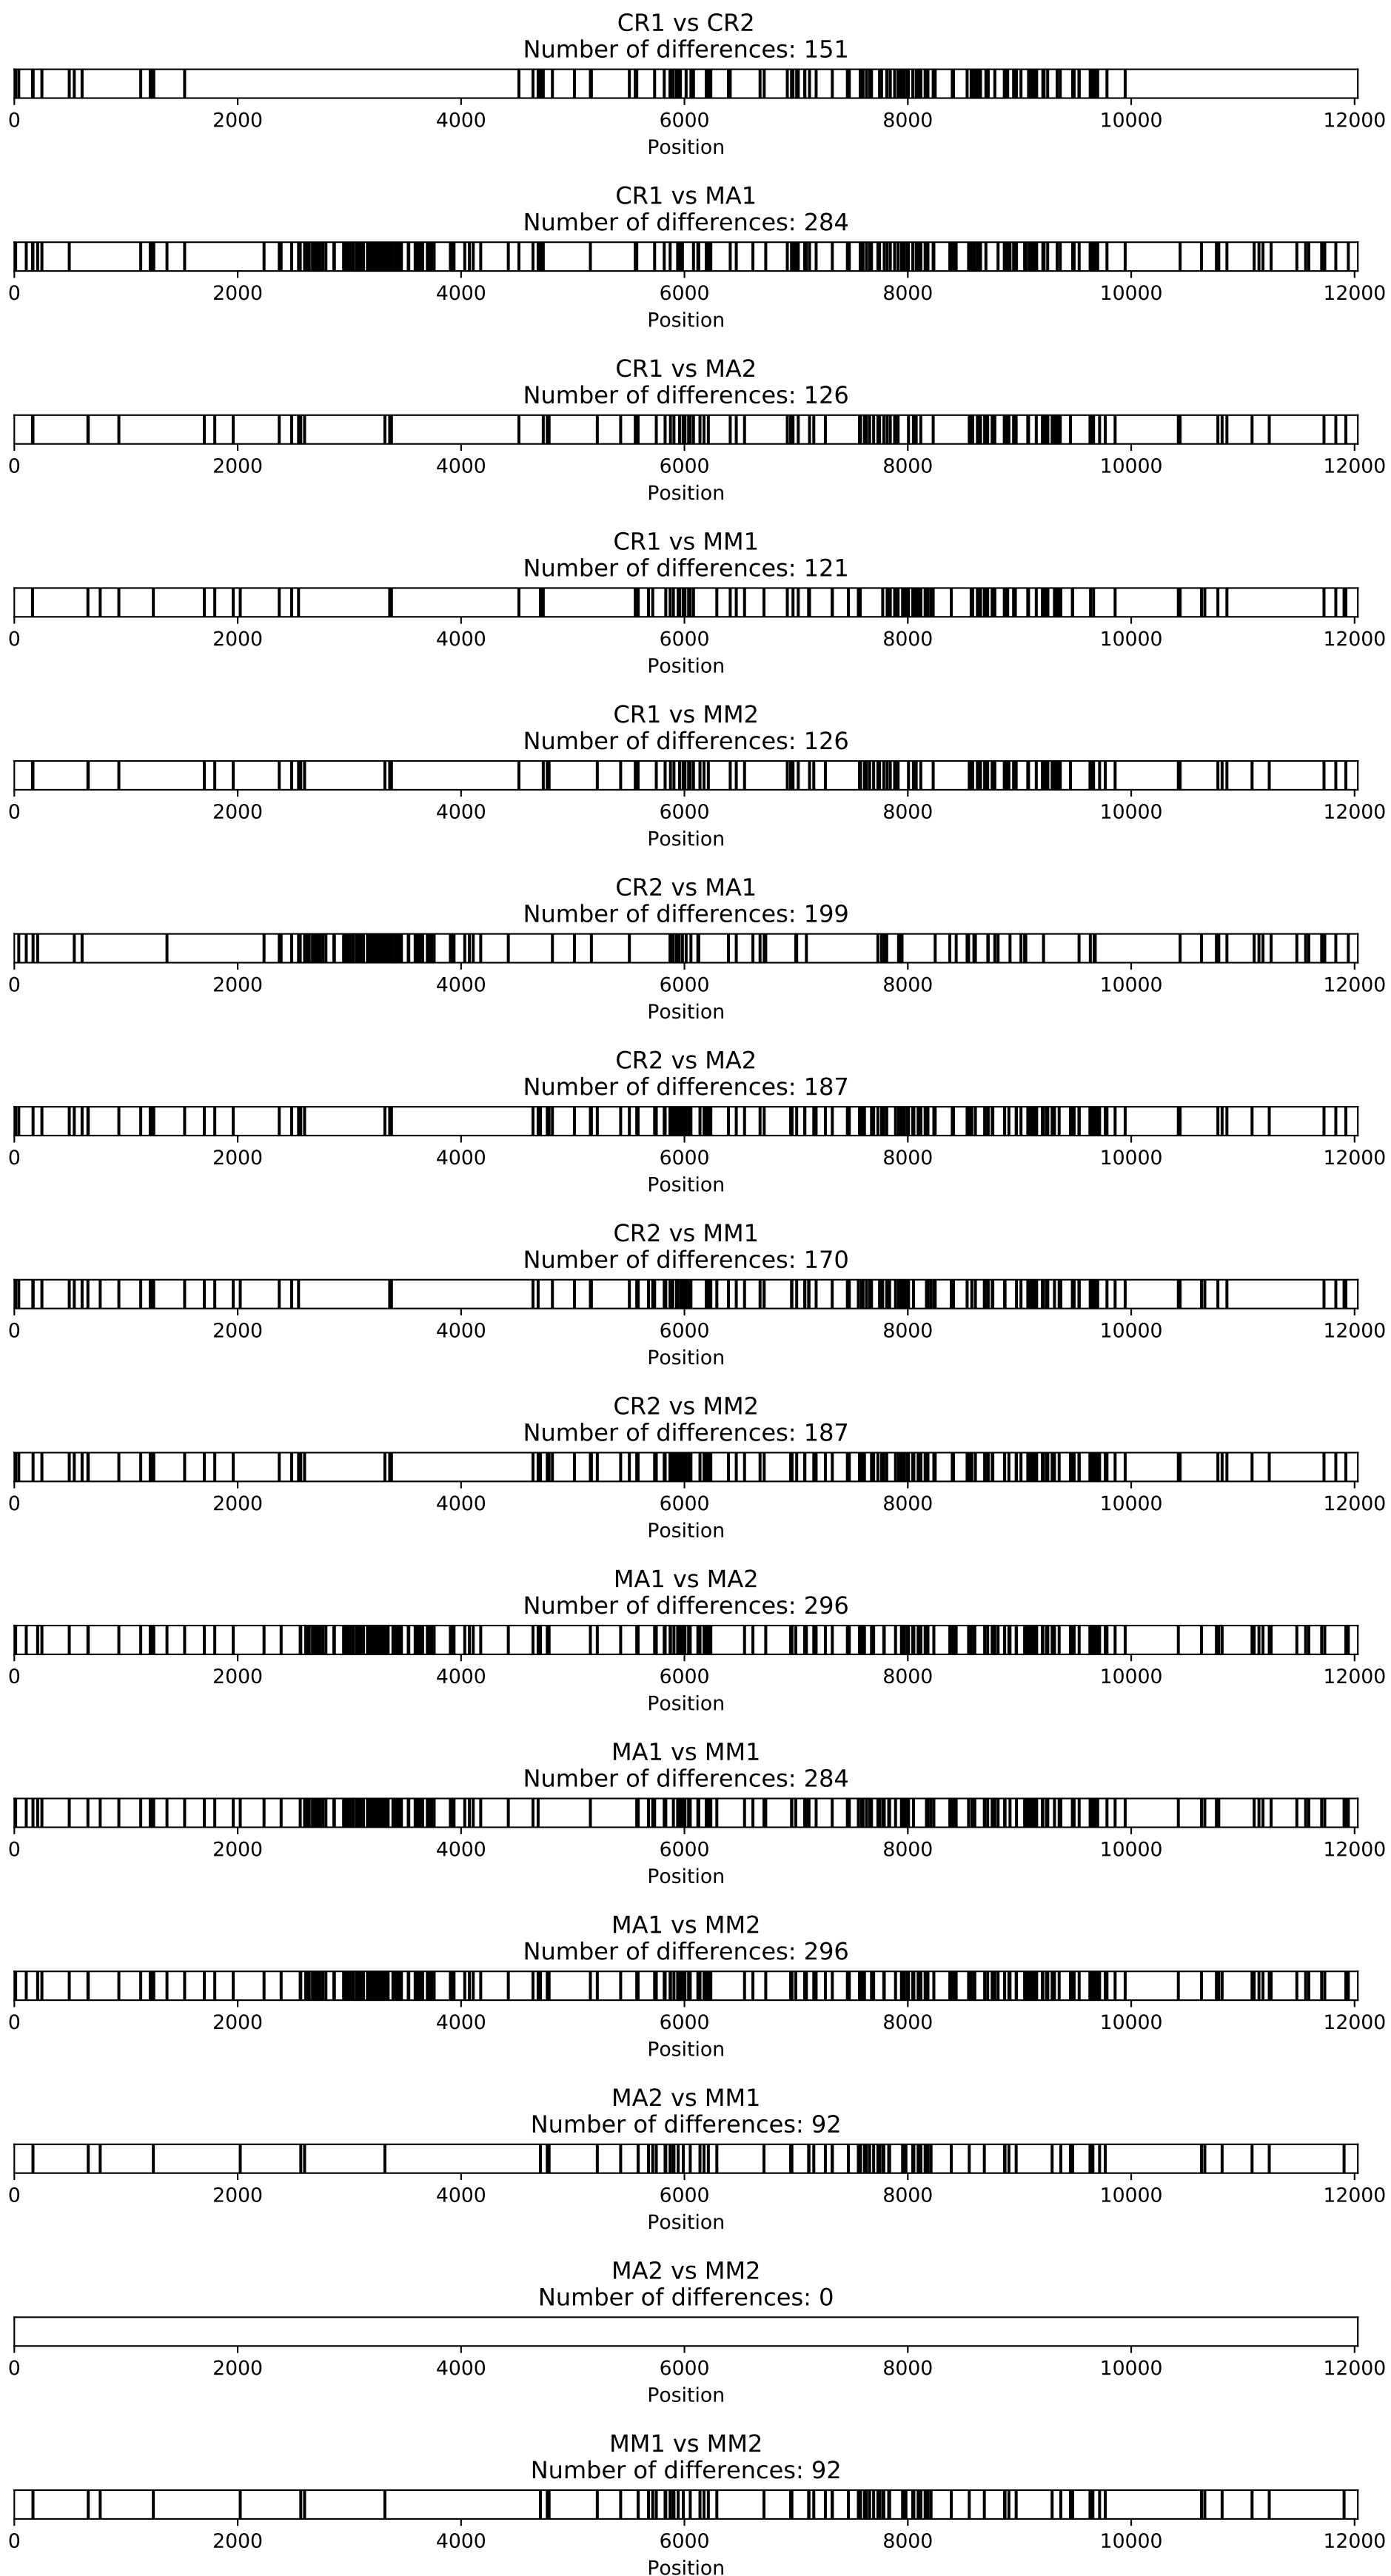

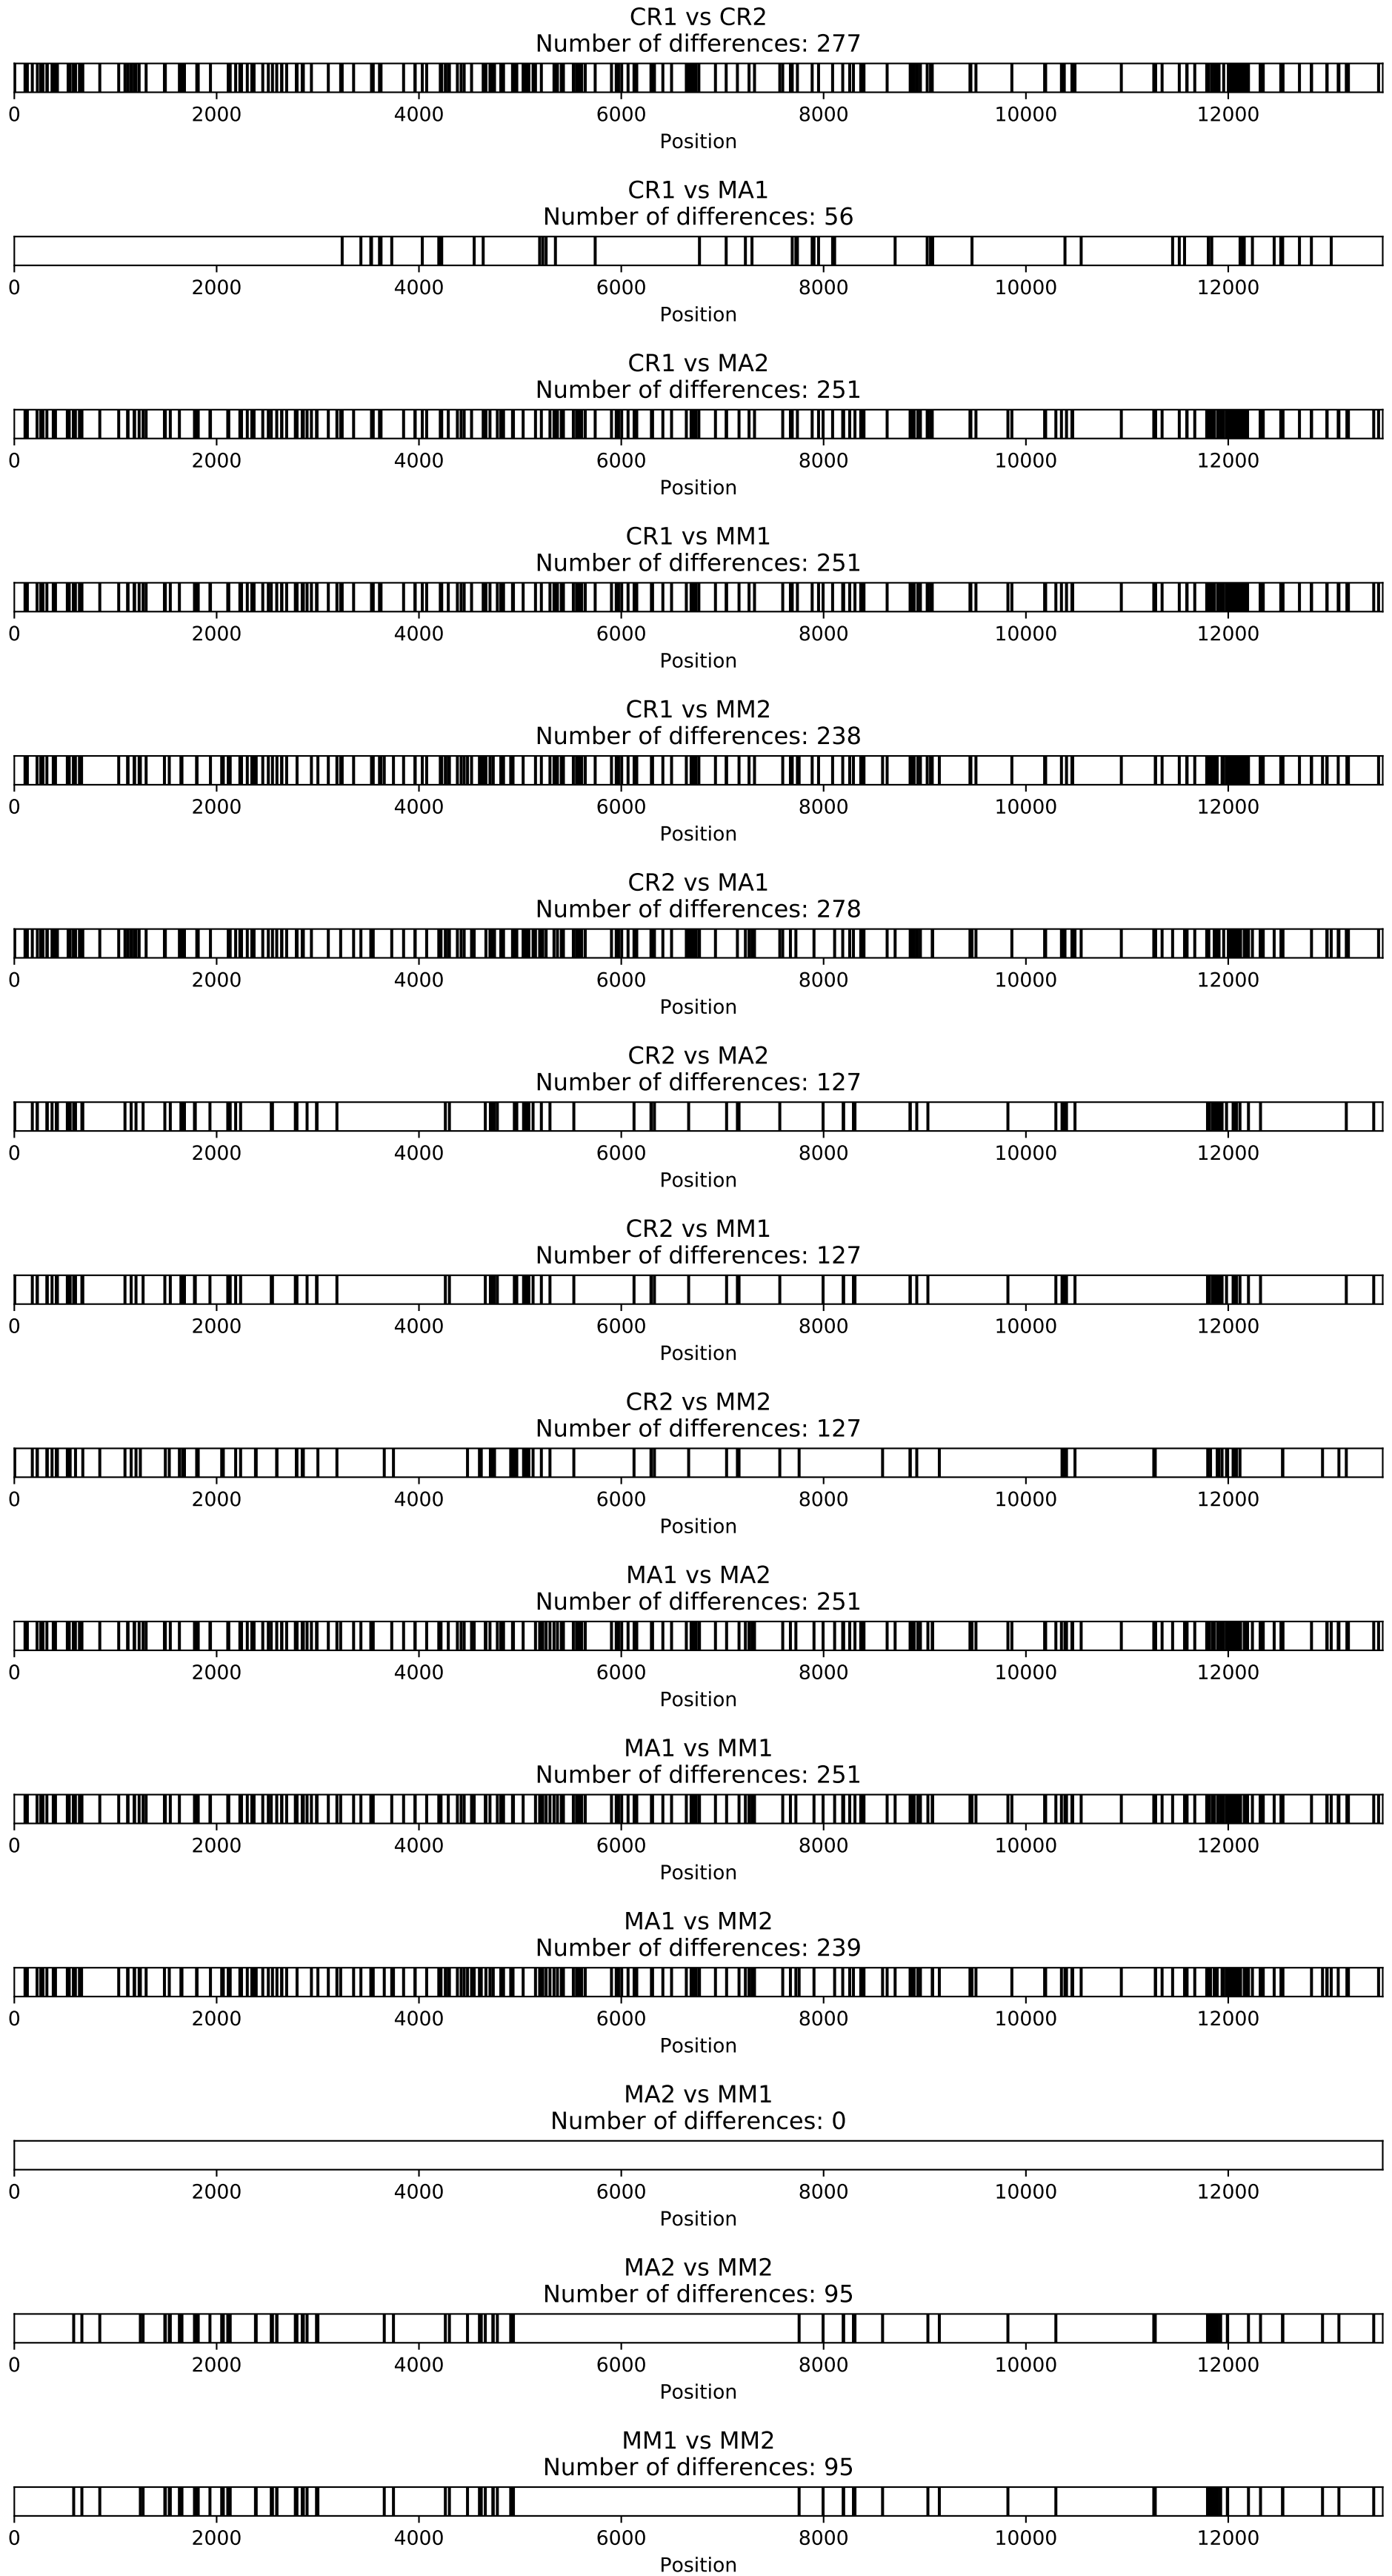

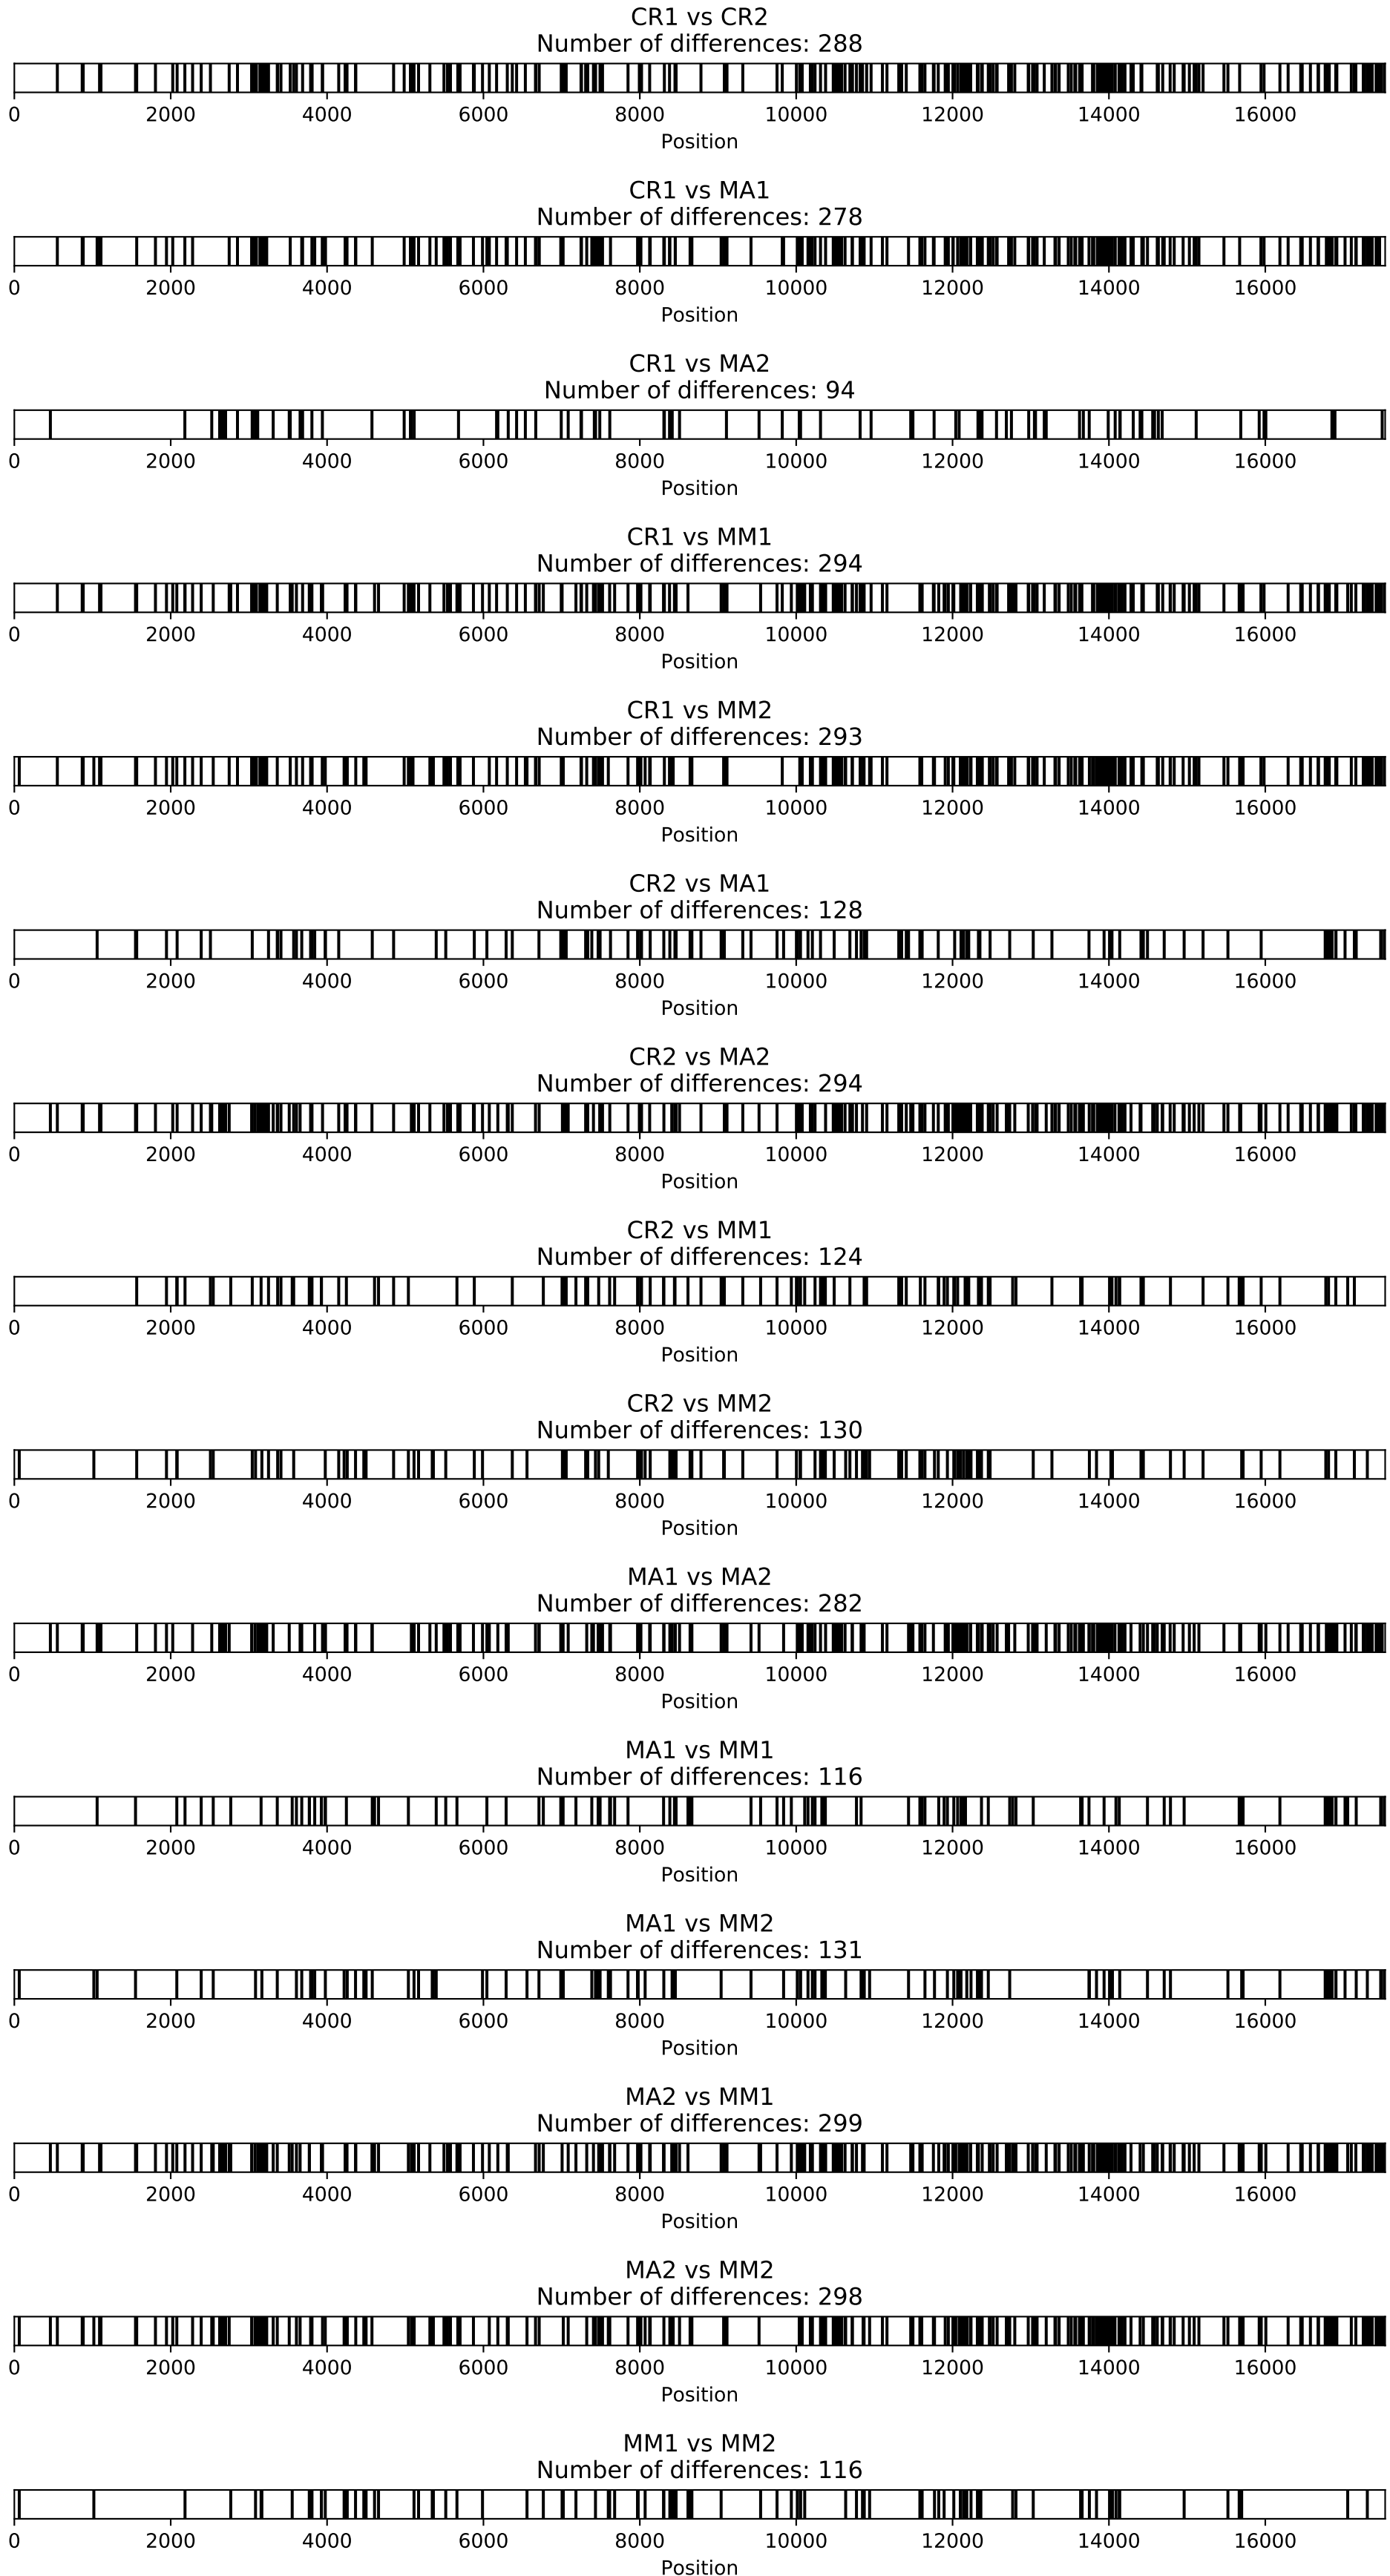

# Region: 410

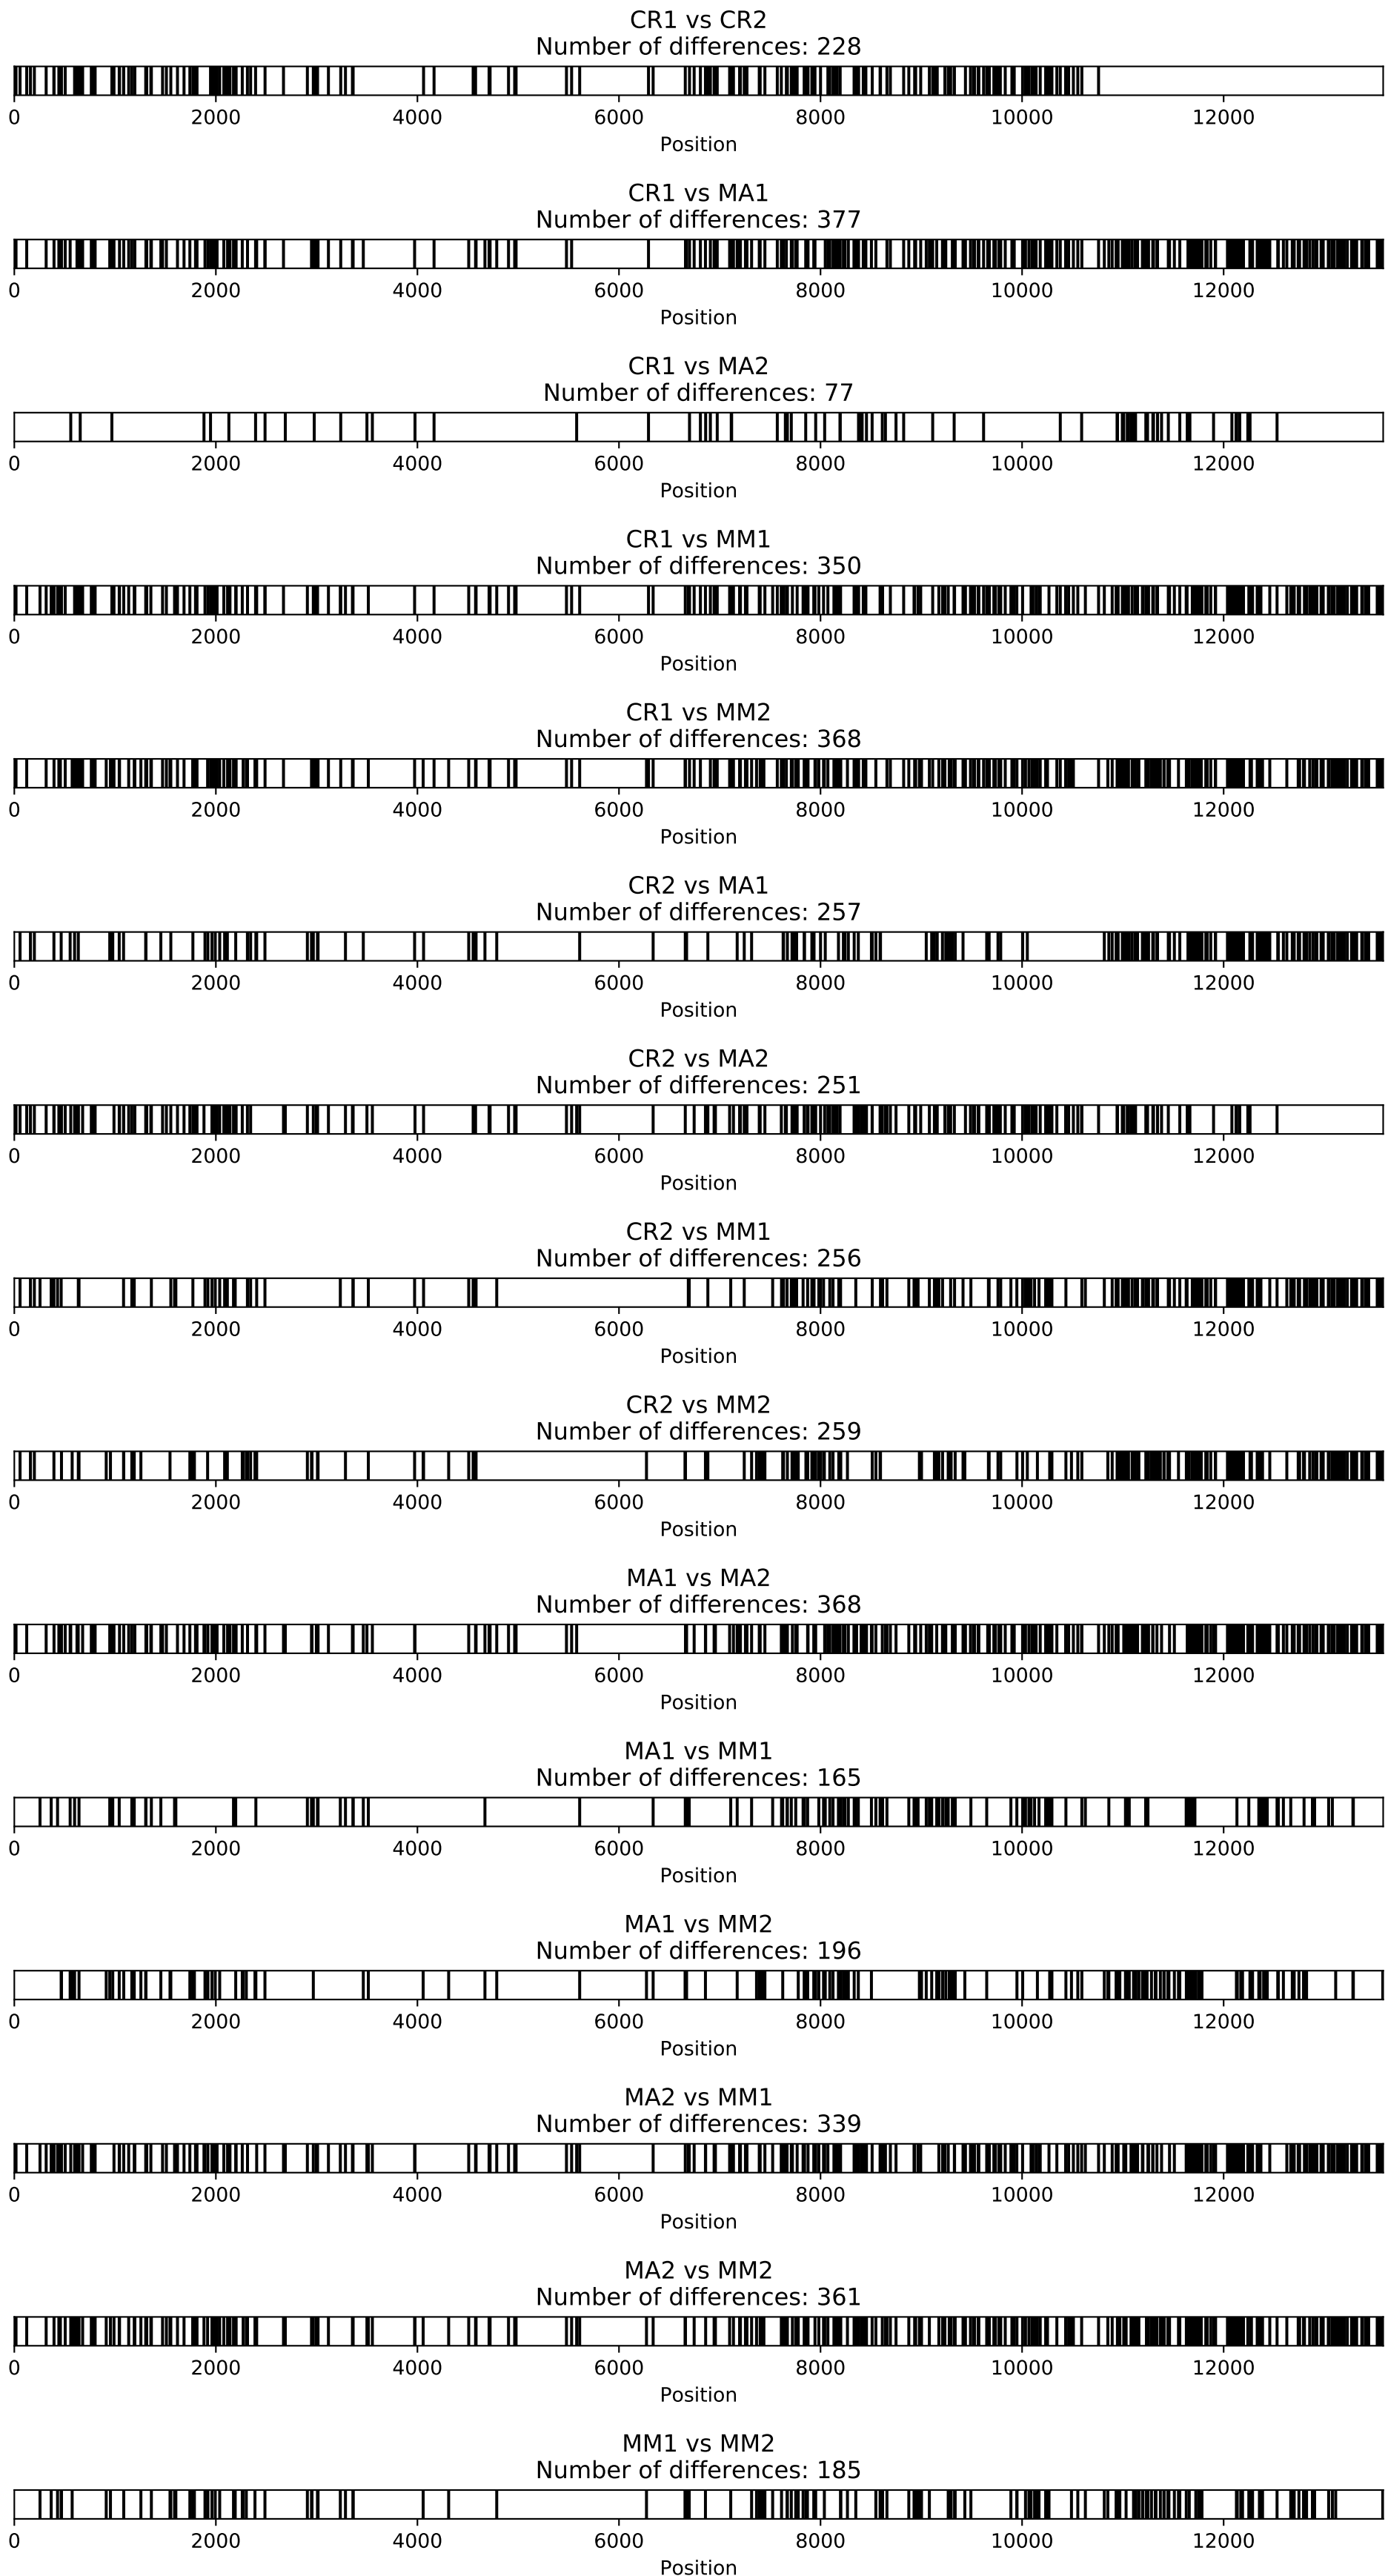



# Region: 413

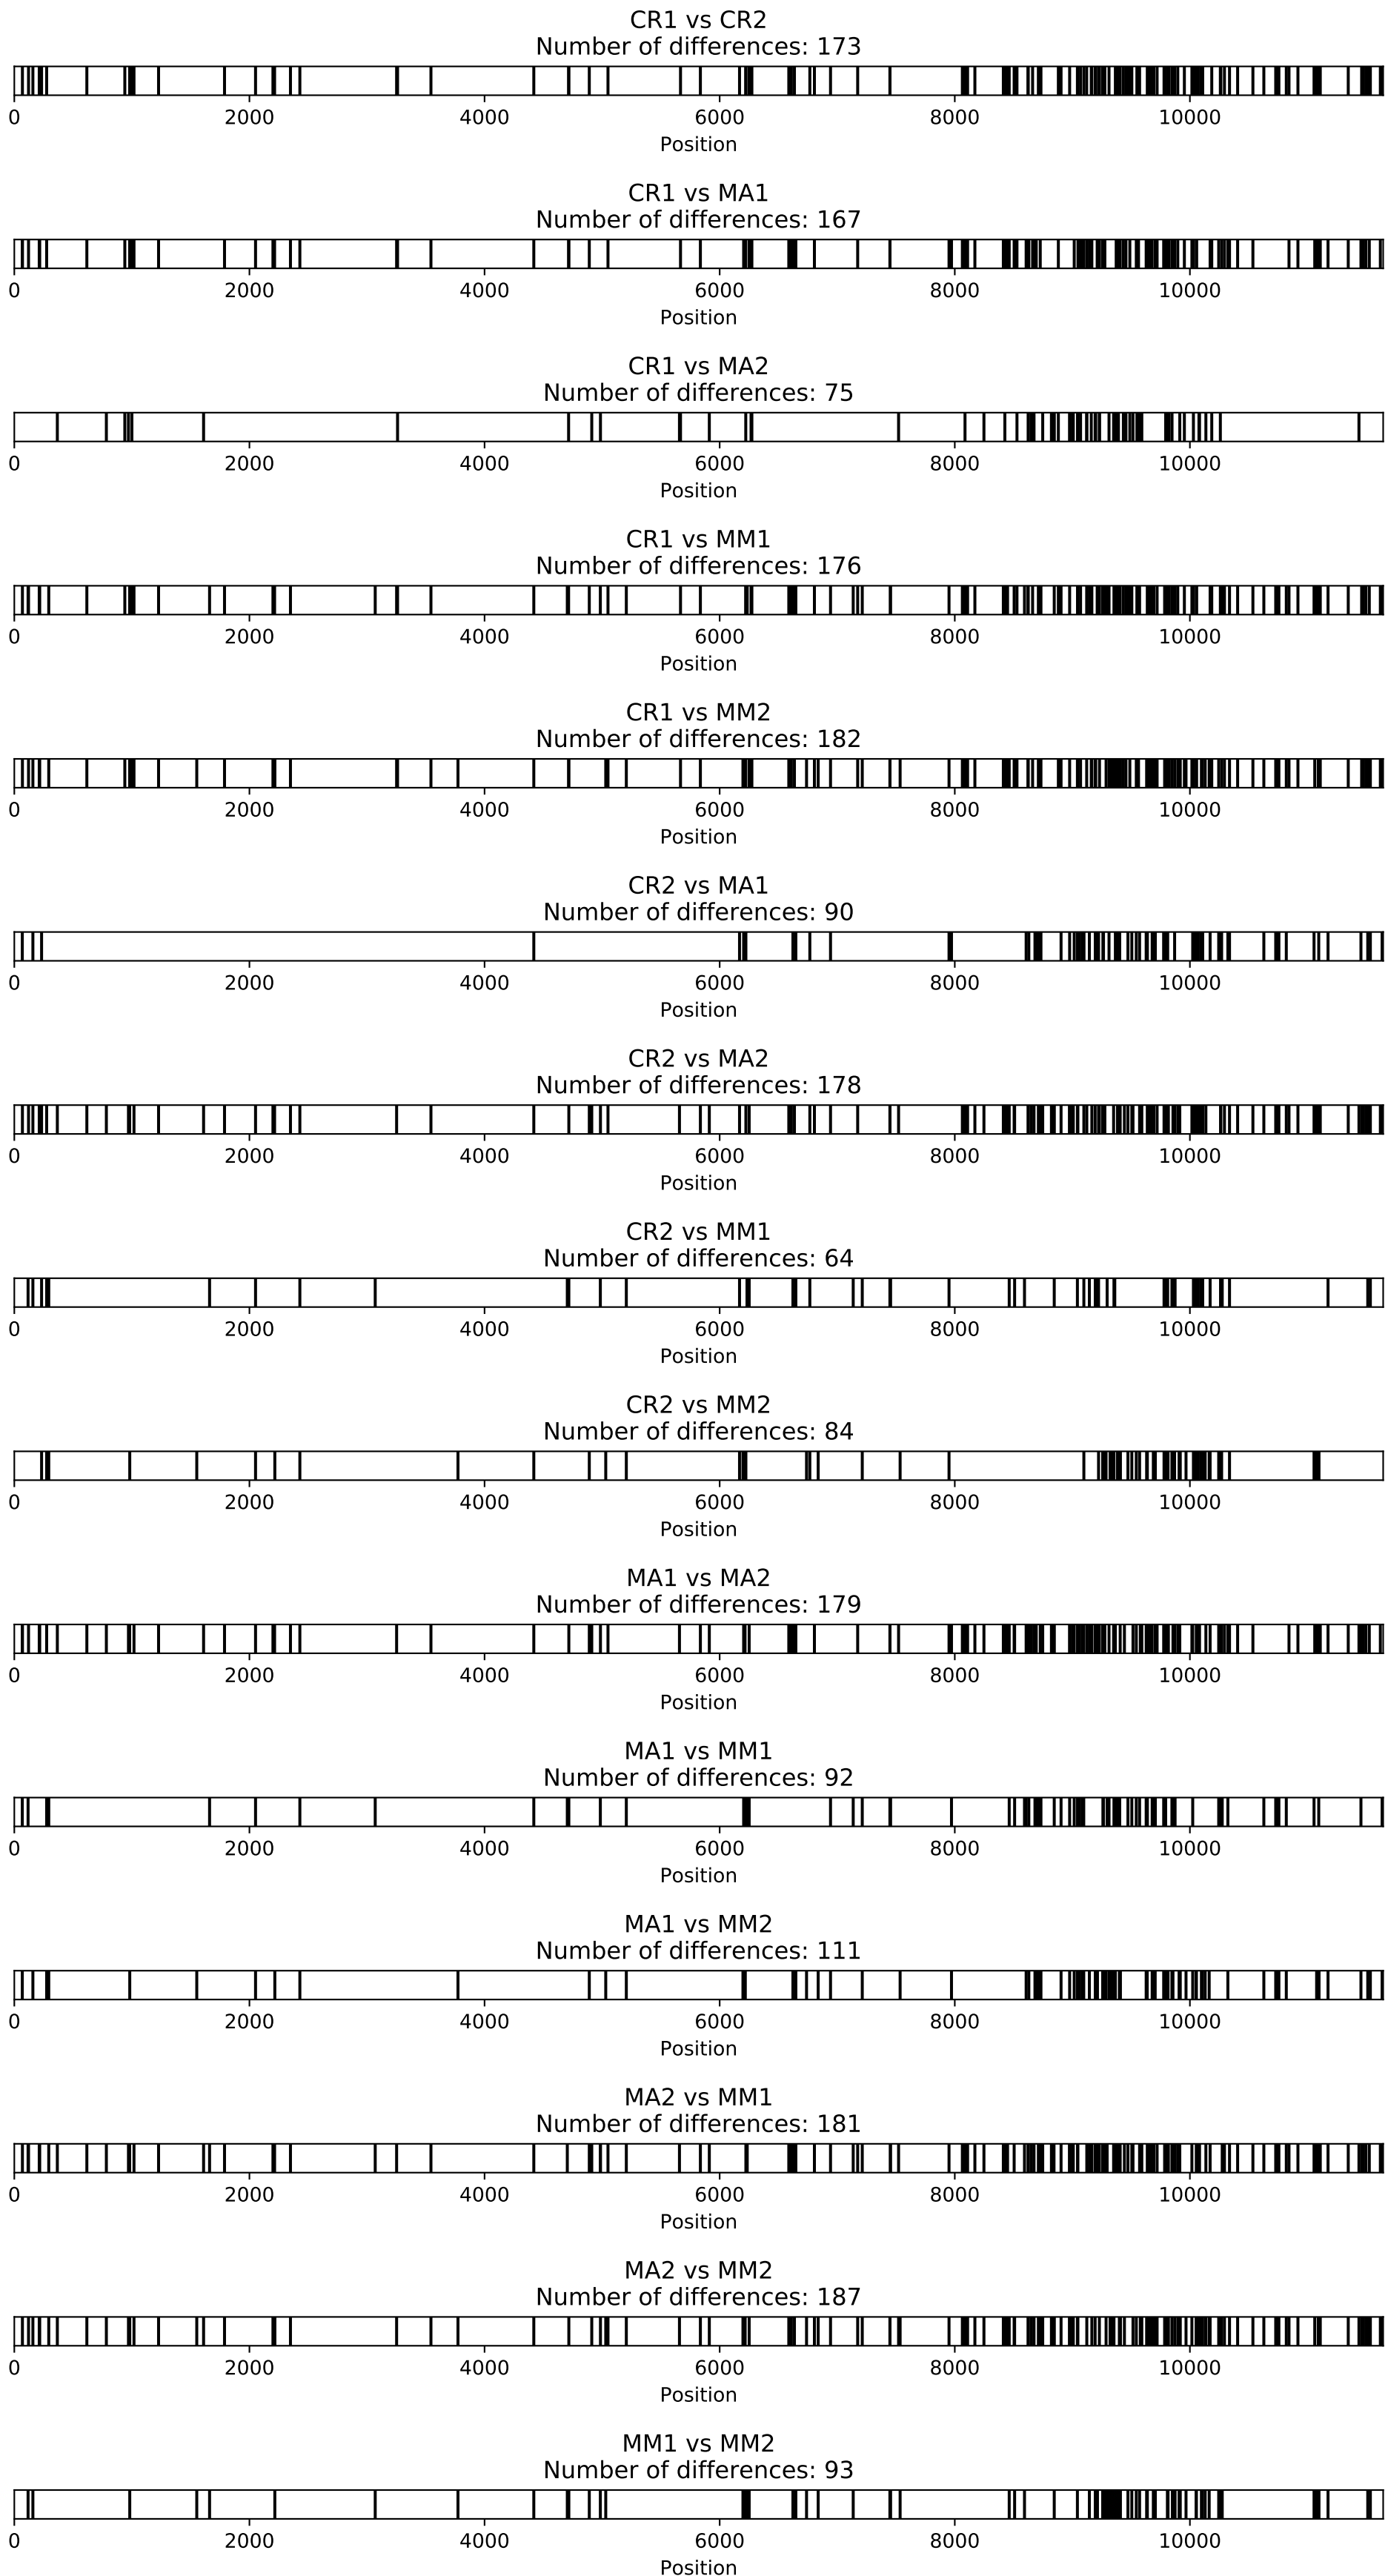

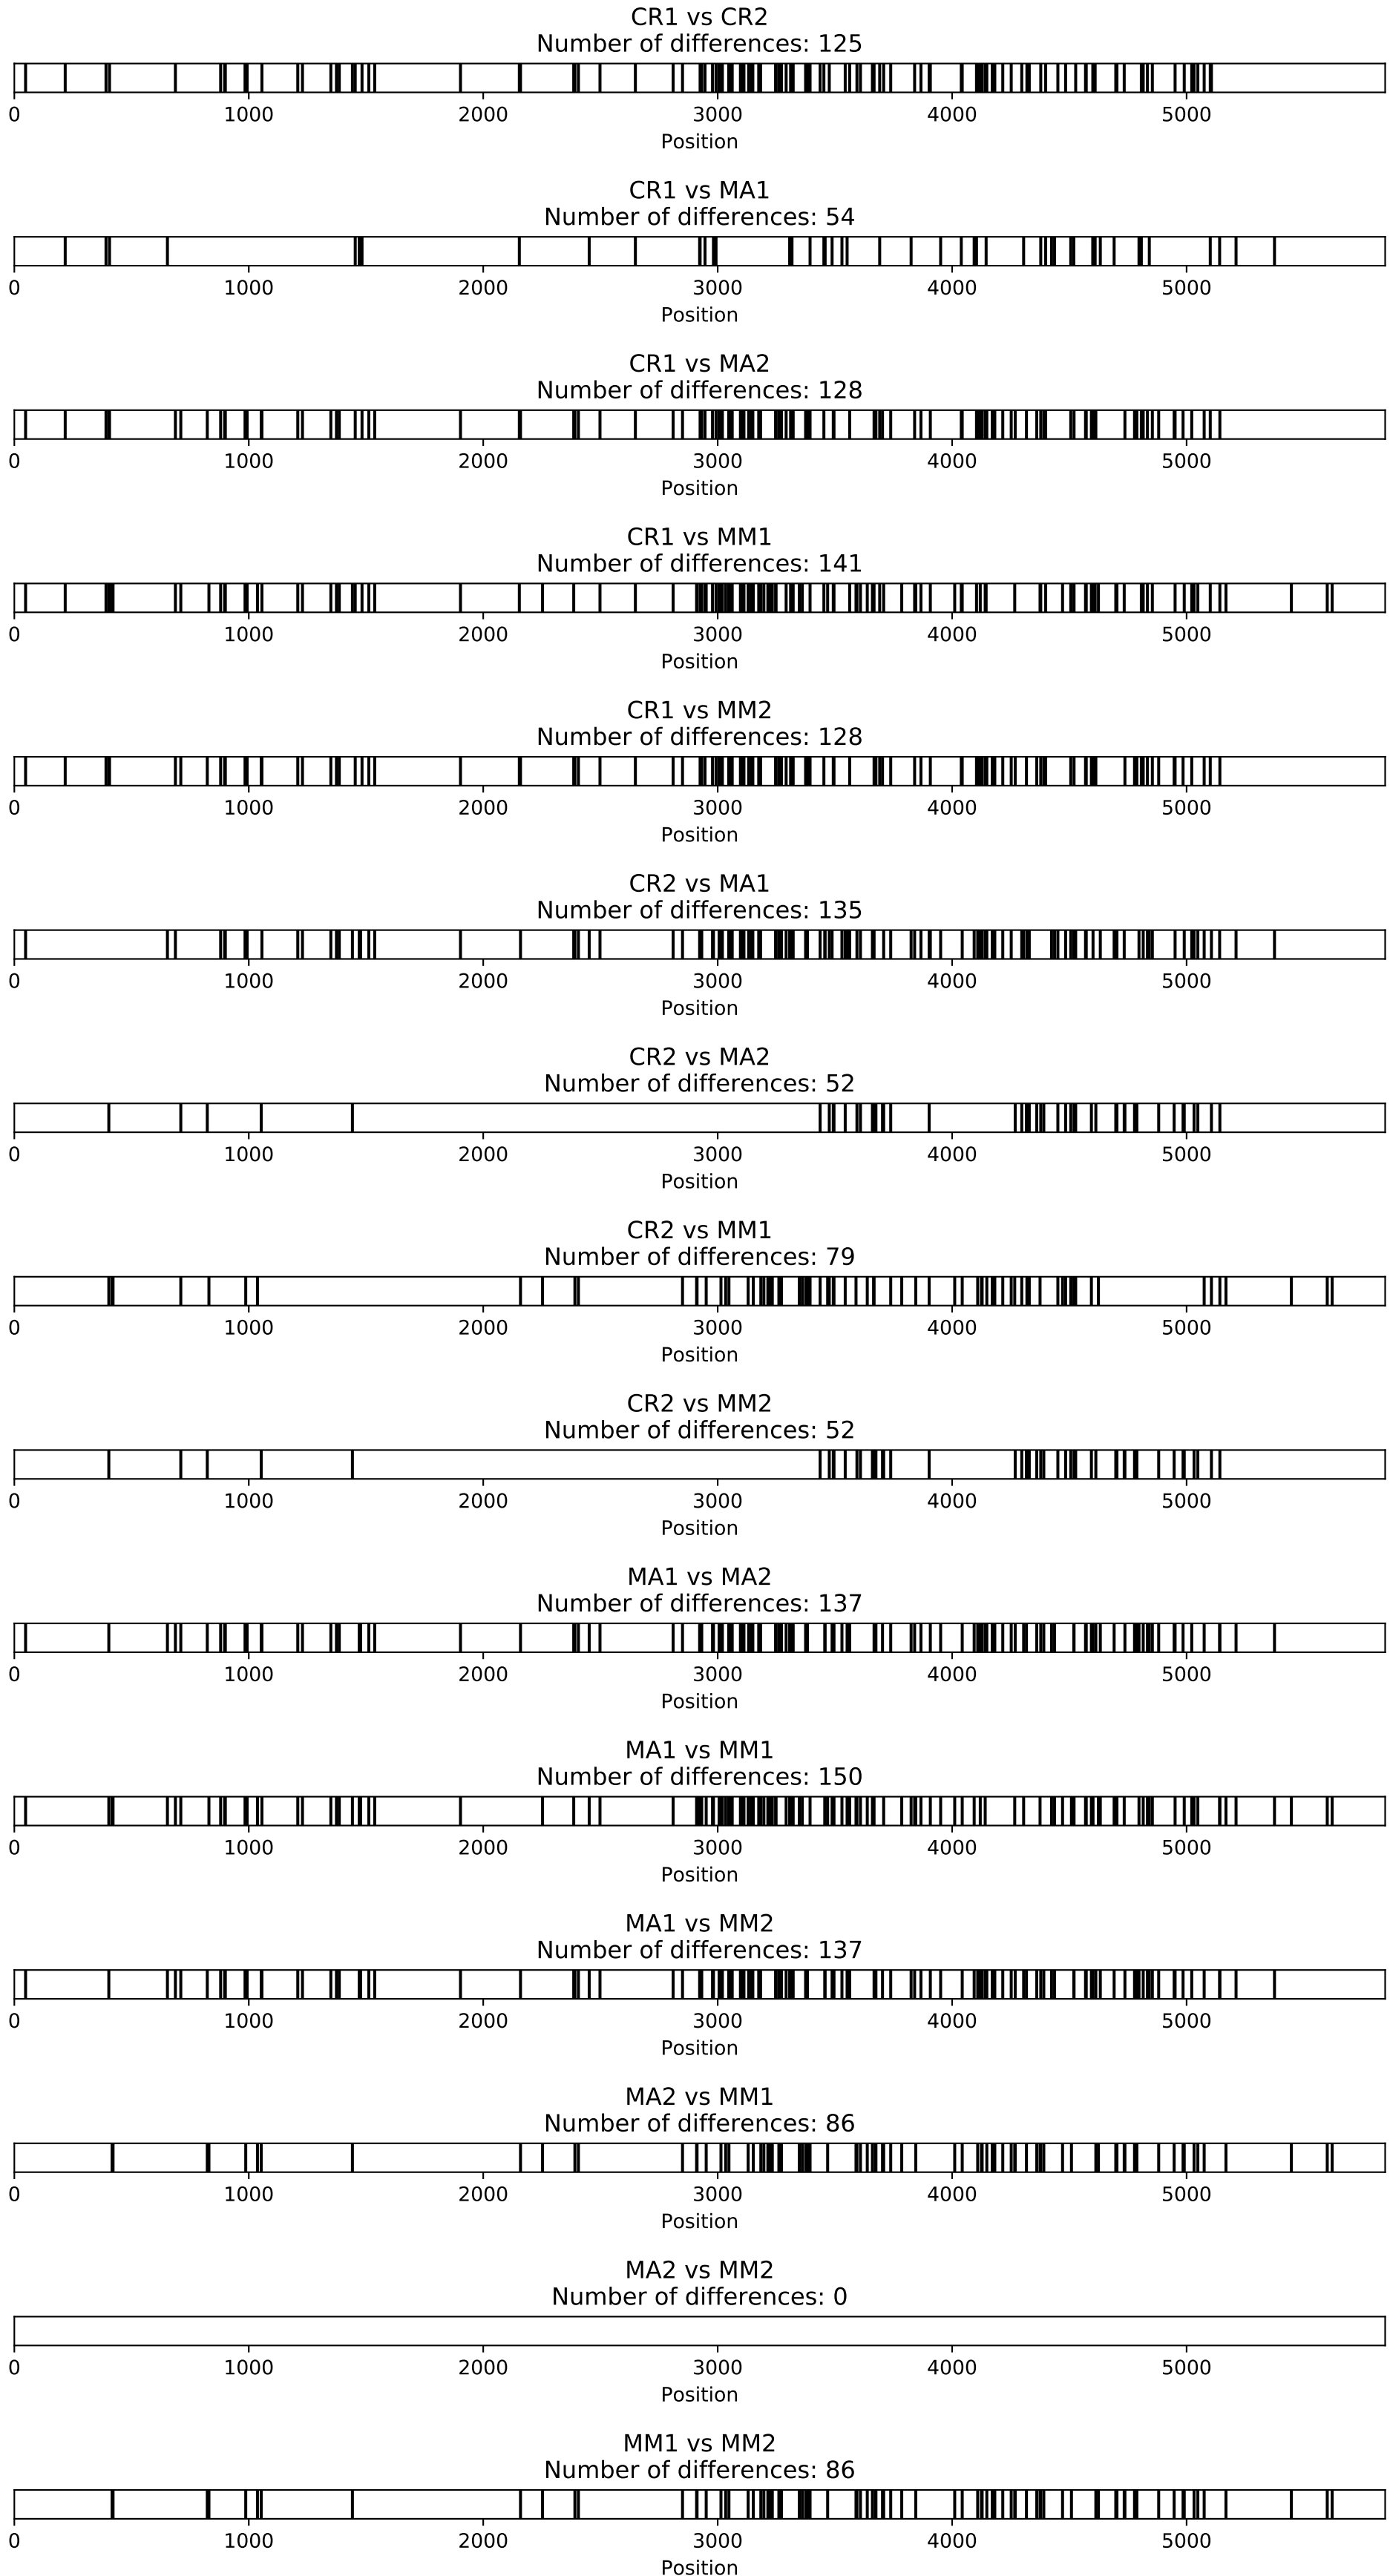

# Region: 417

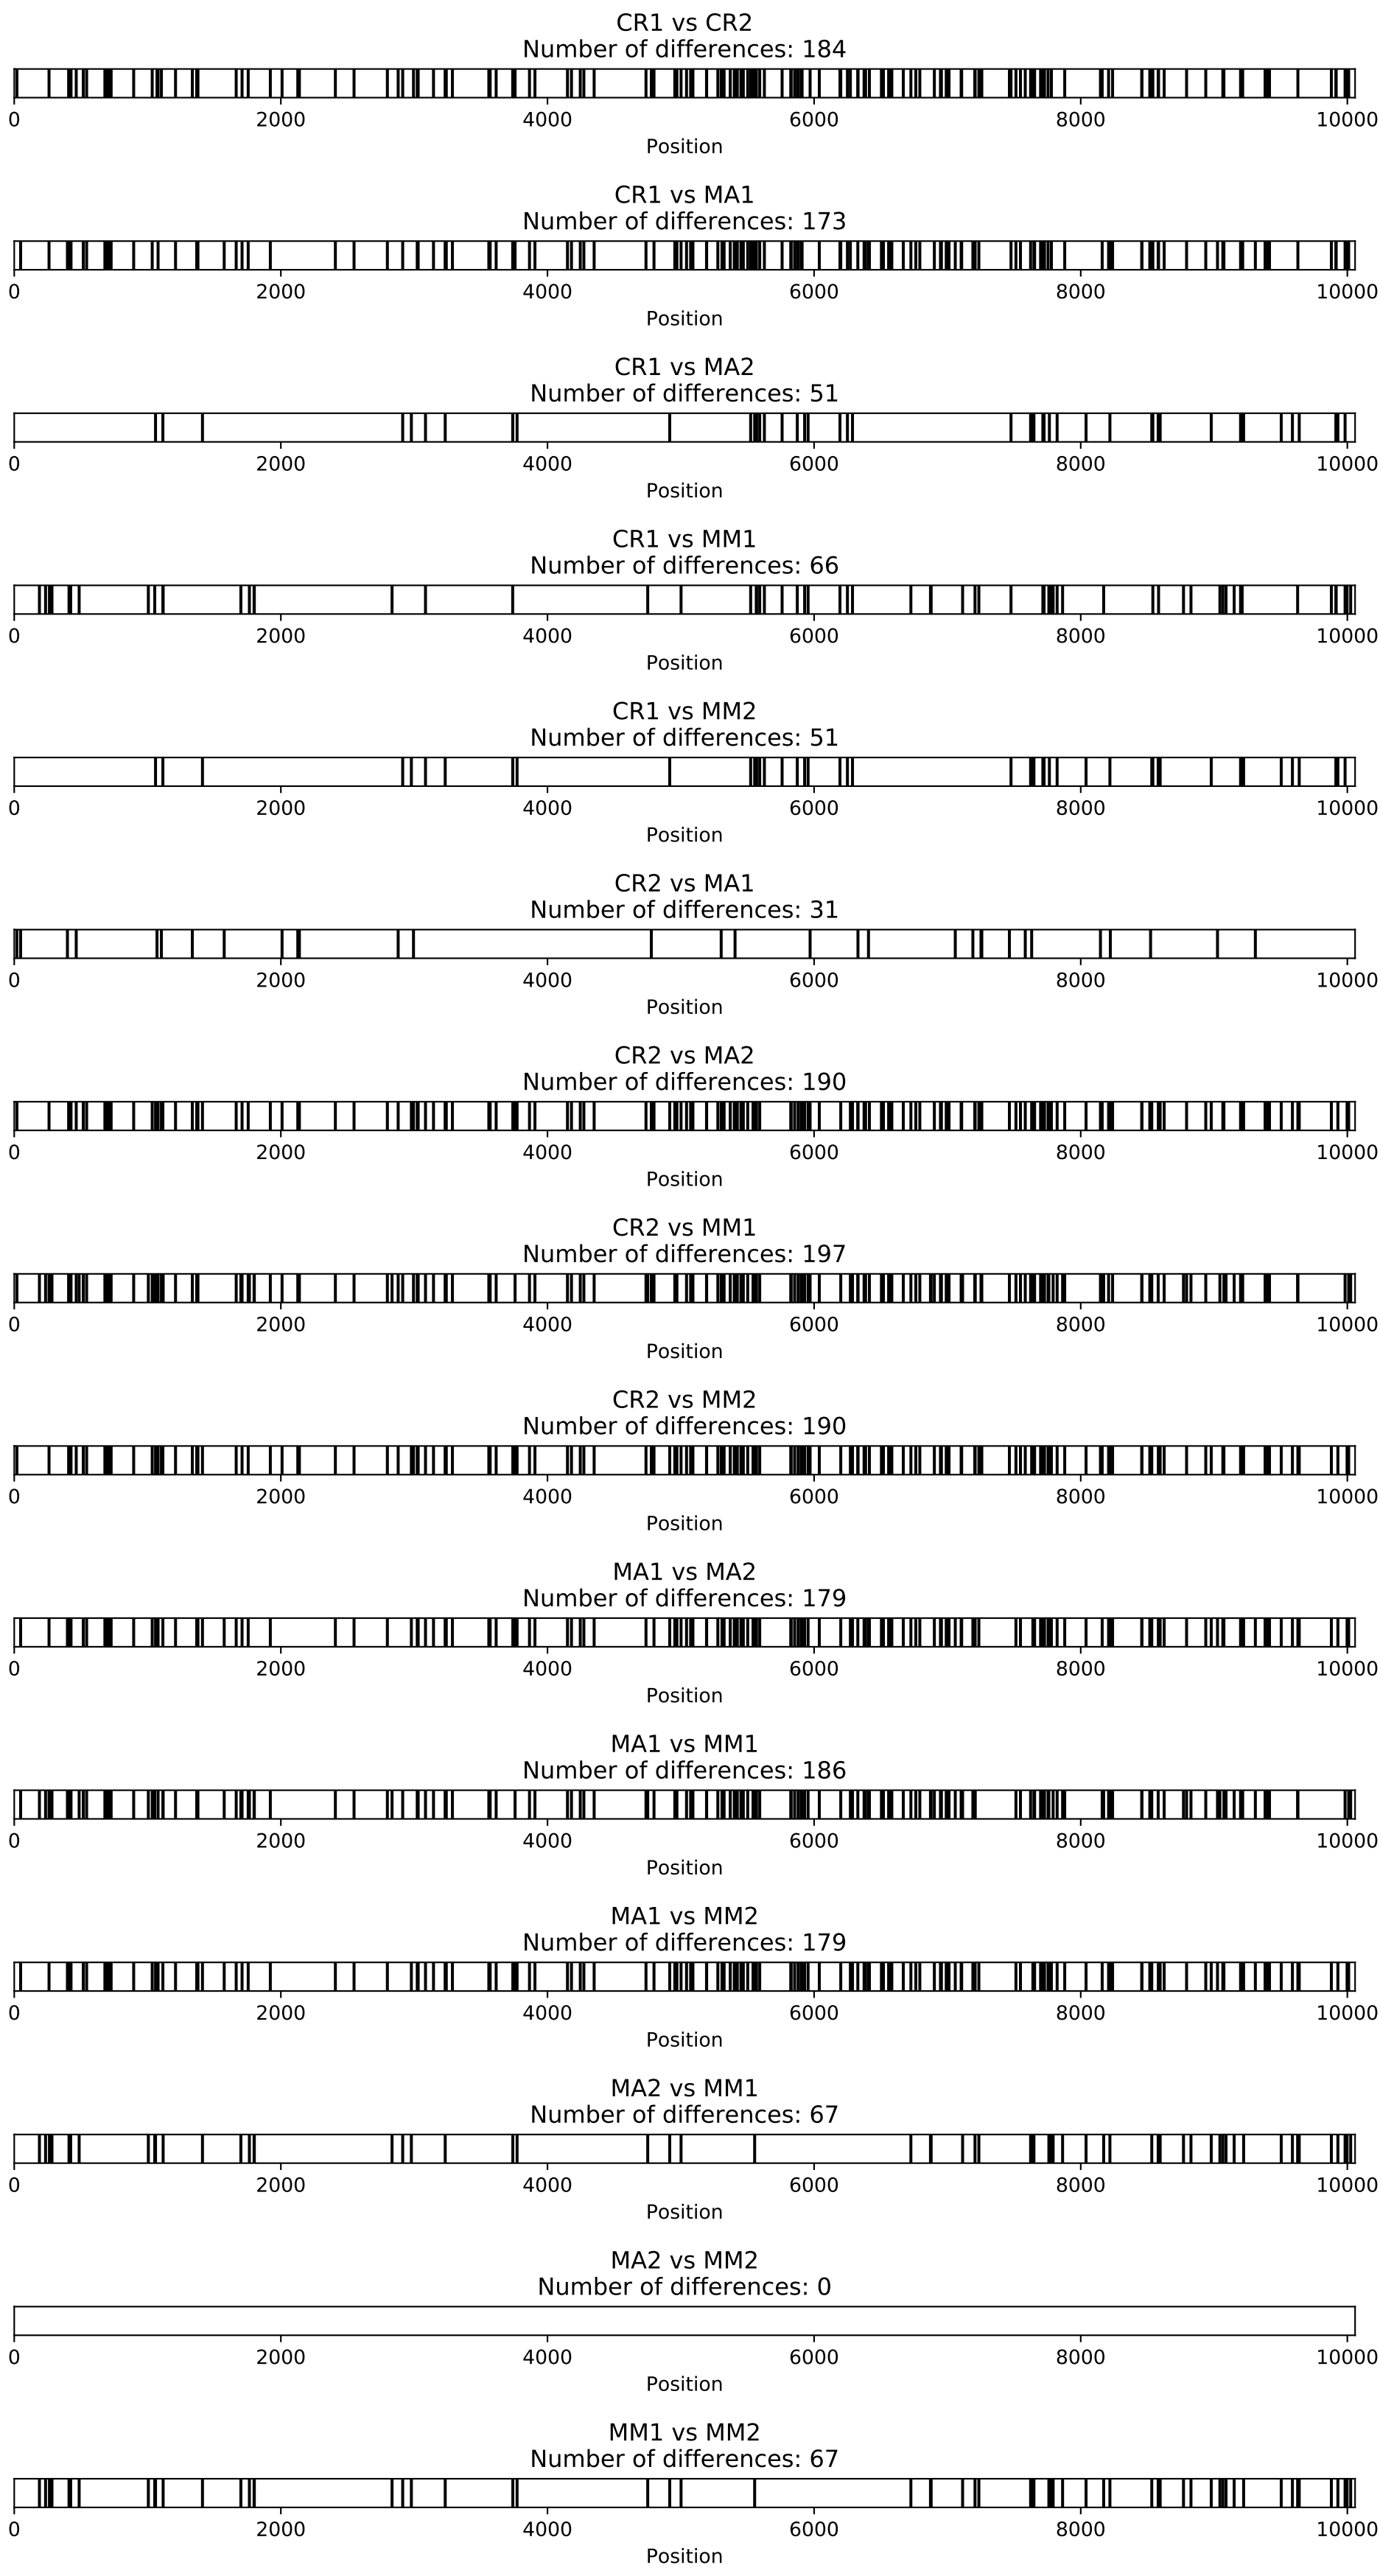

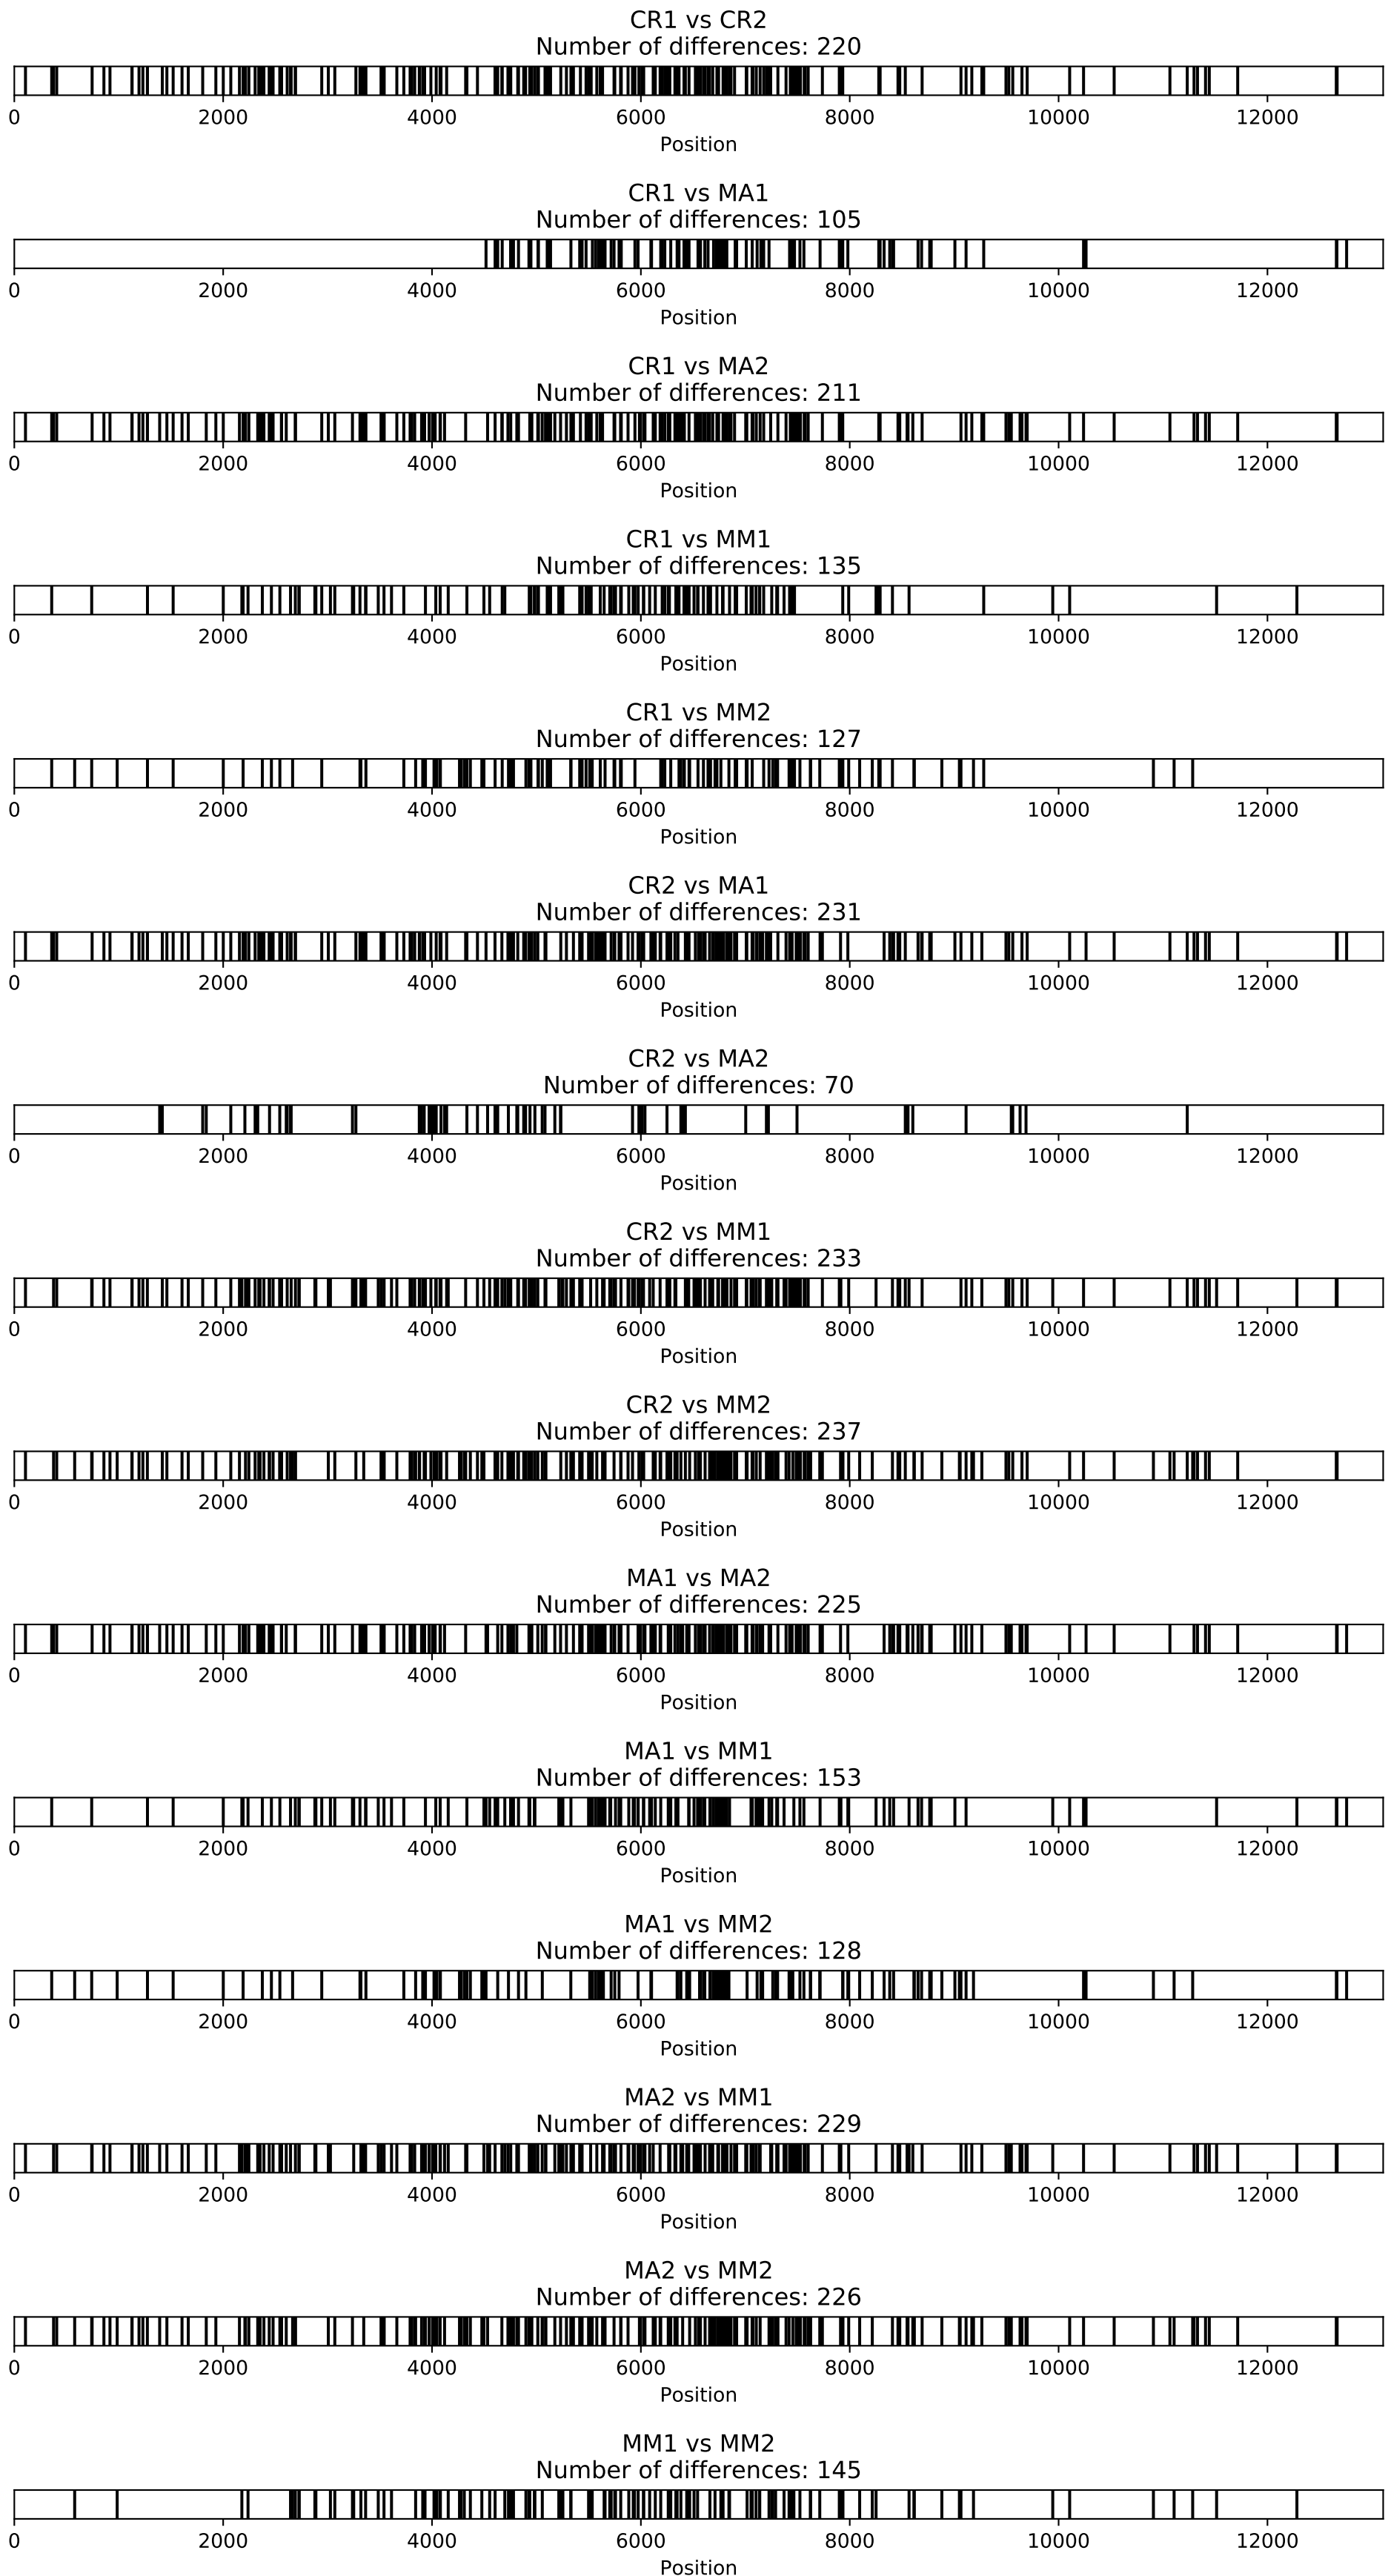

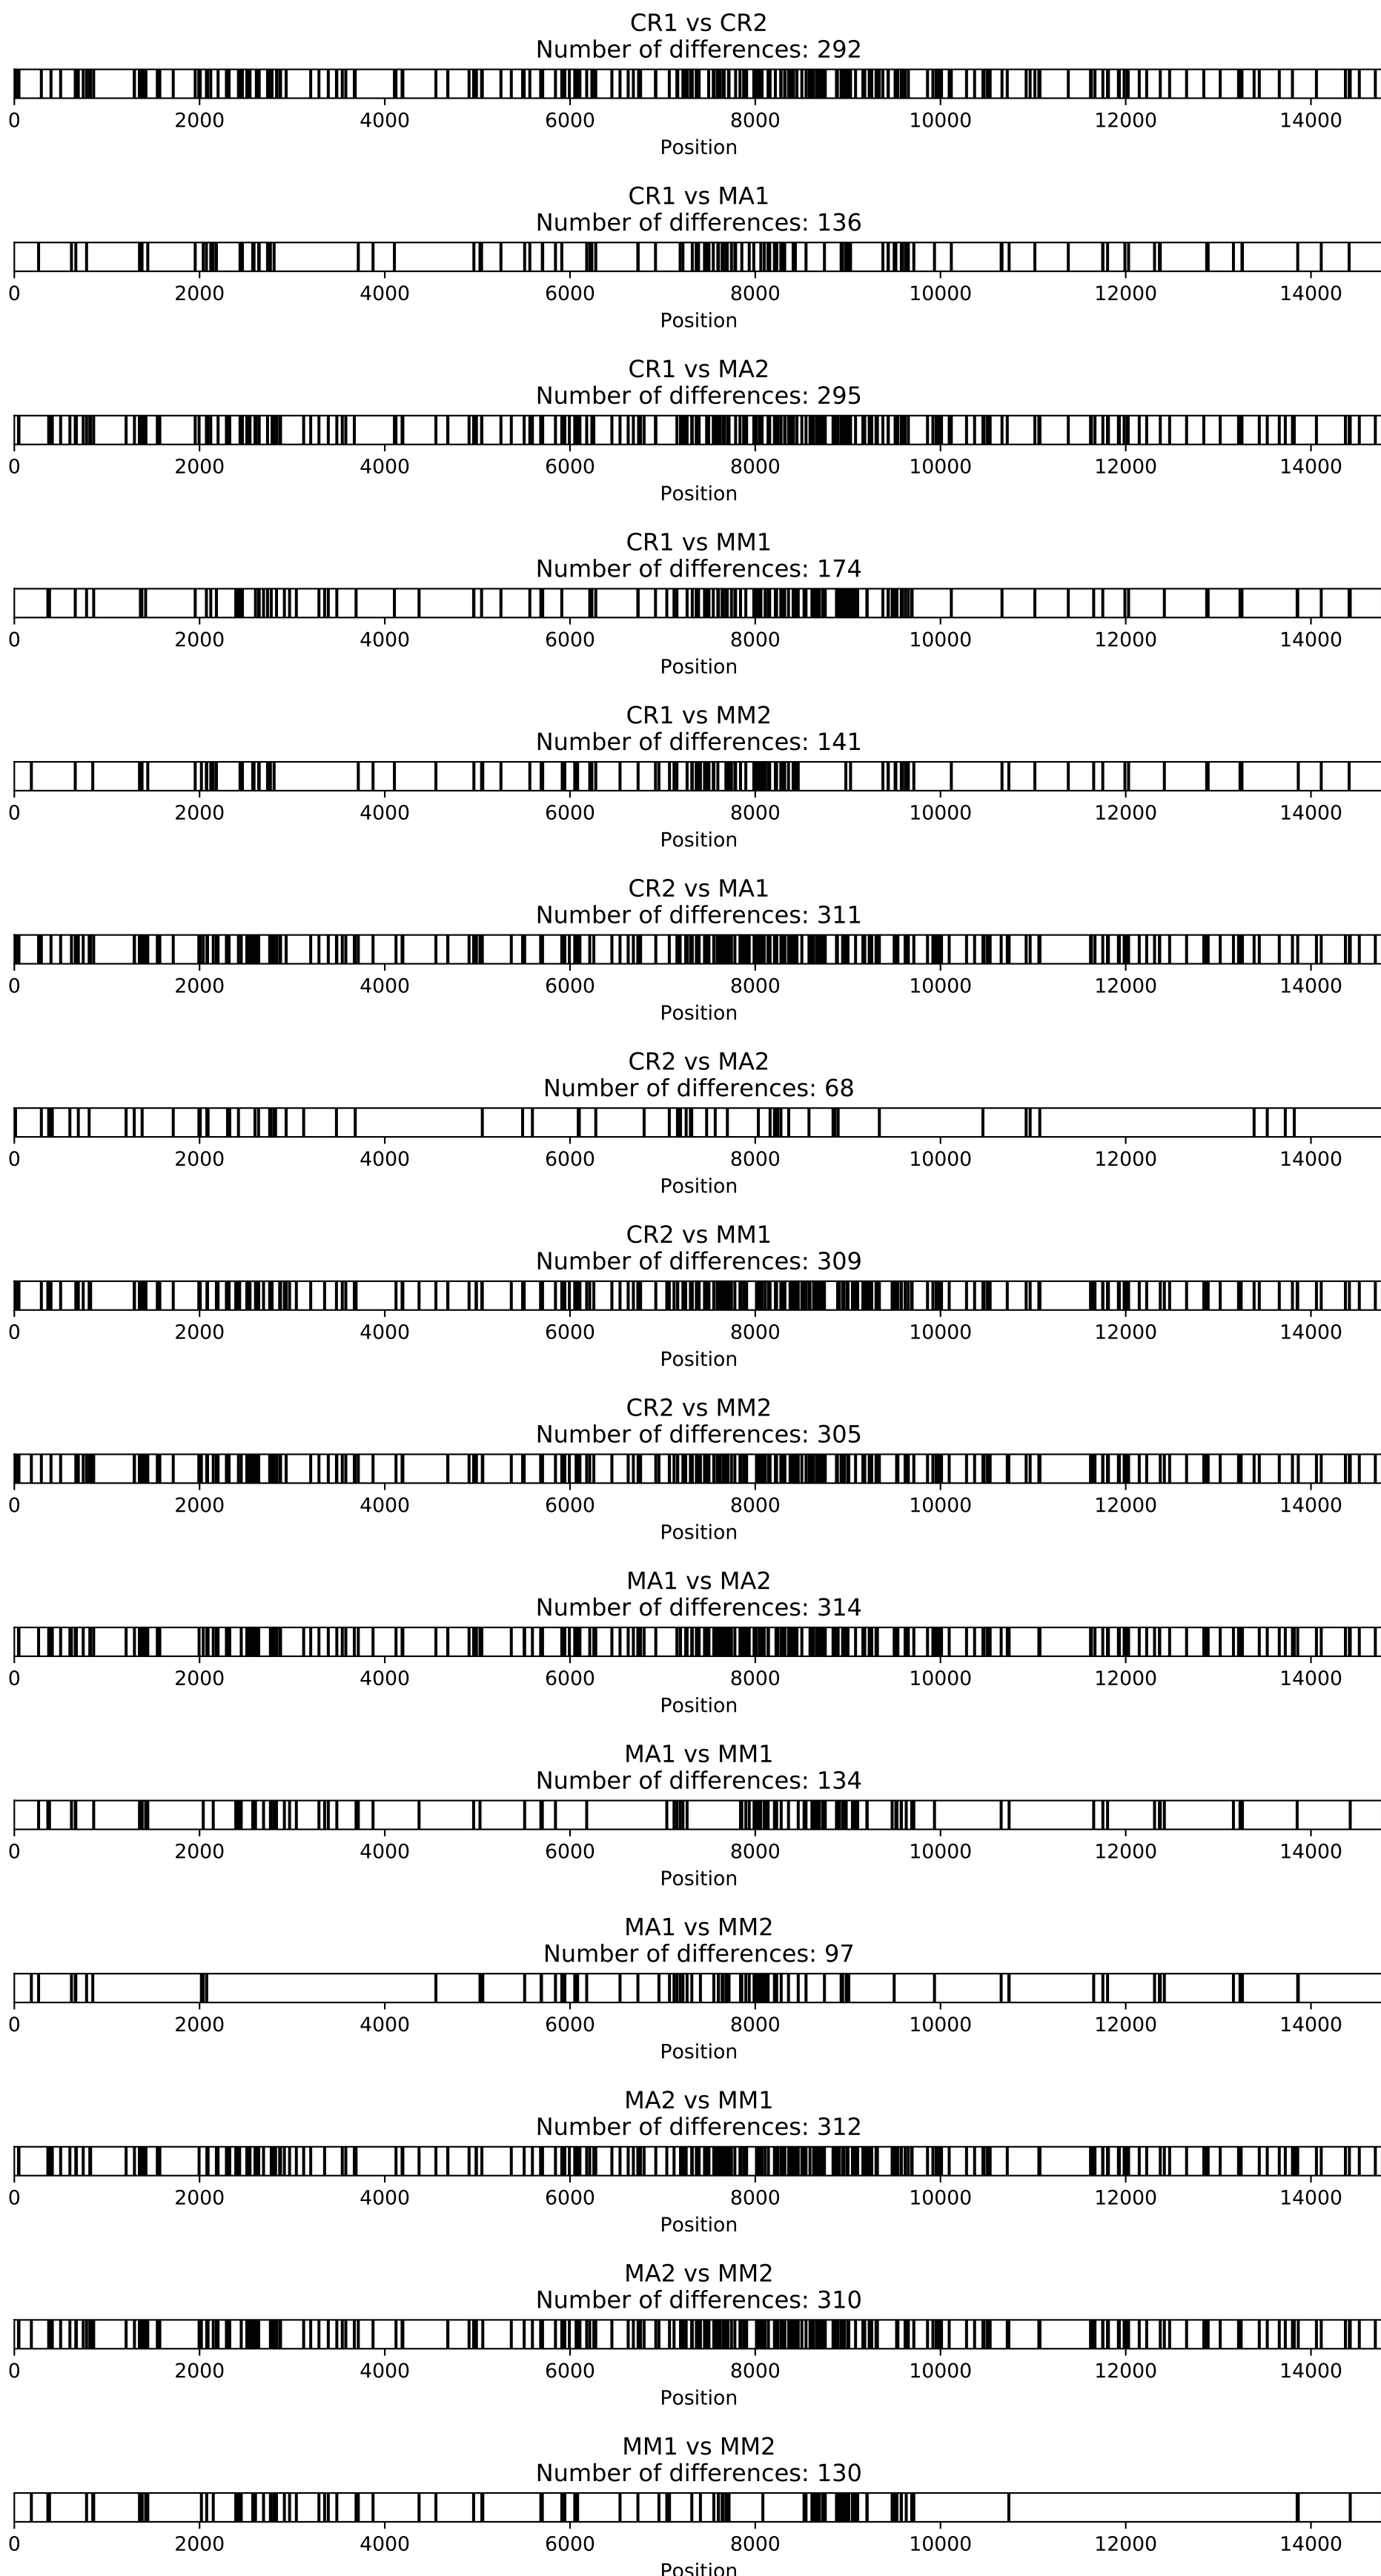

# Region: 424

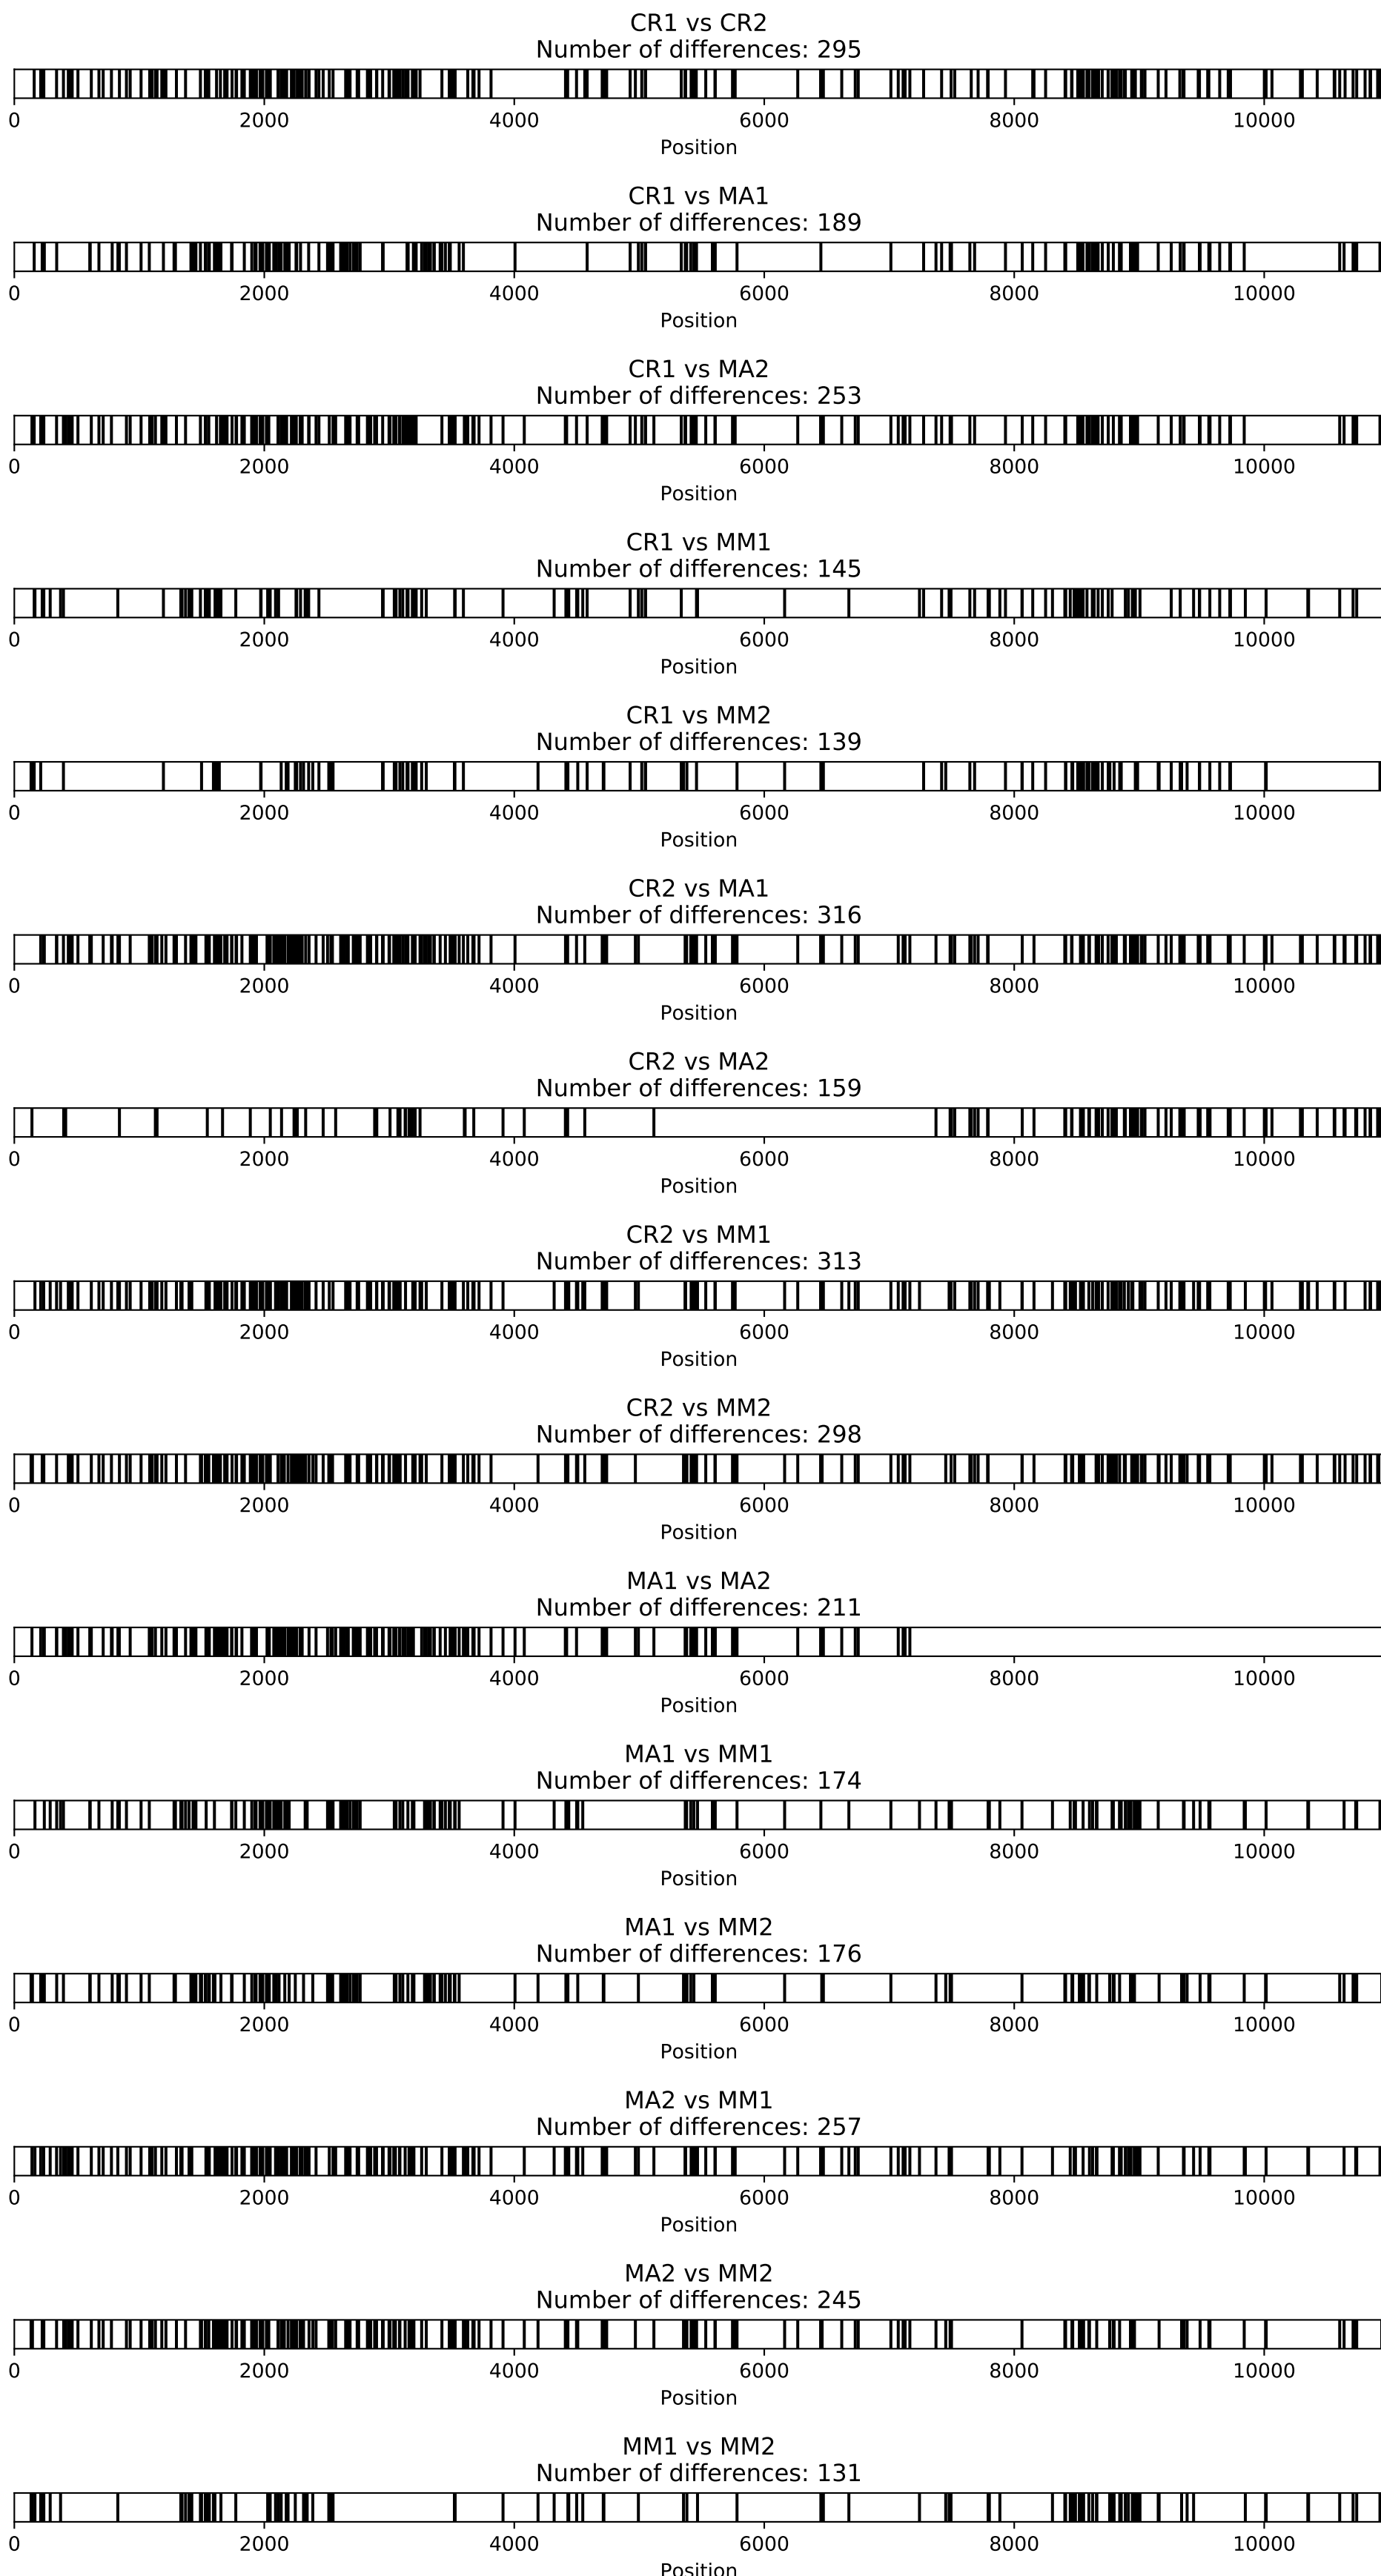

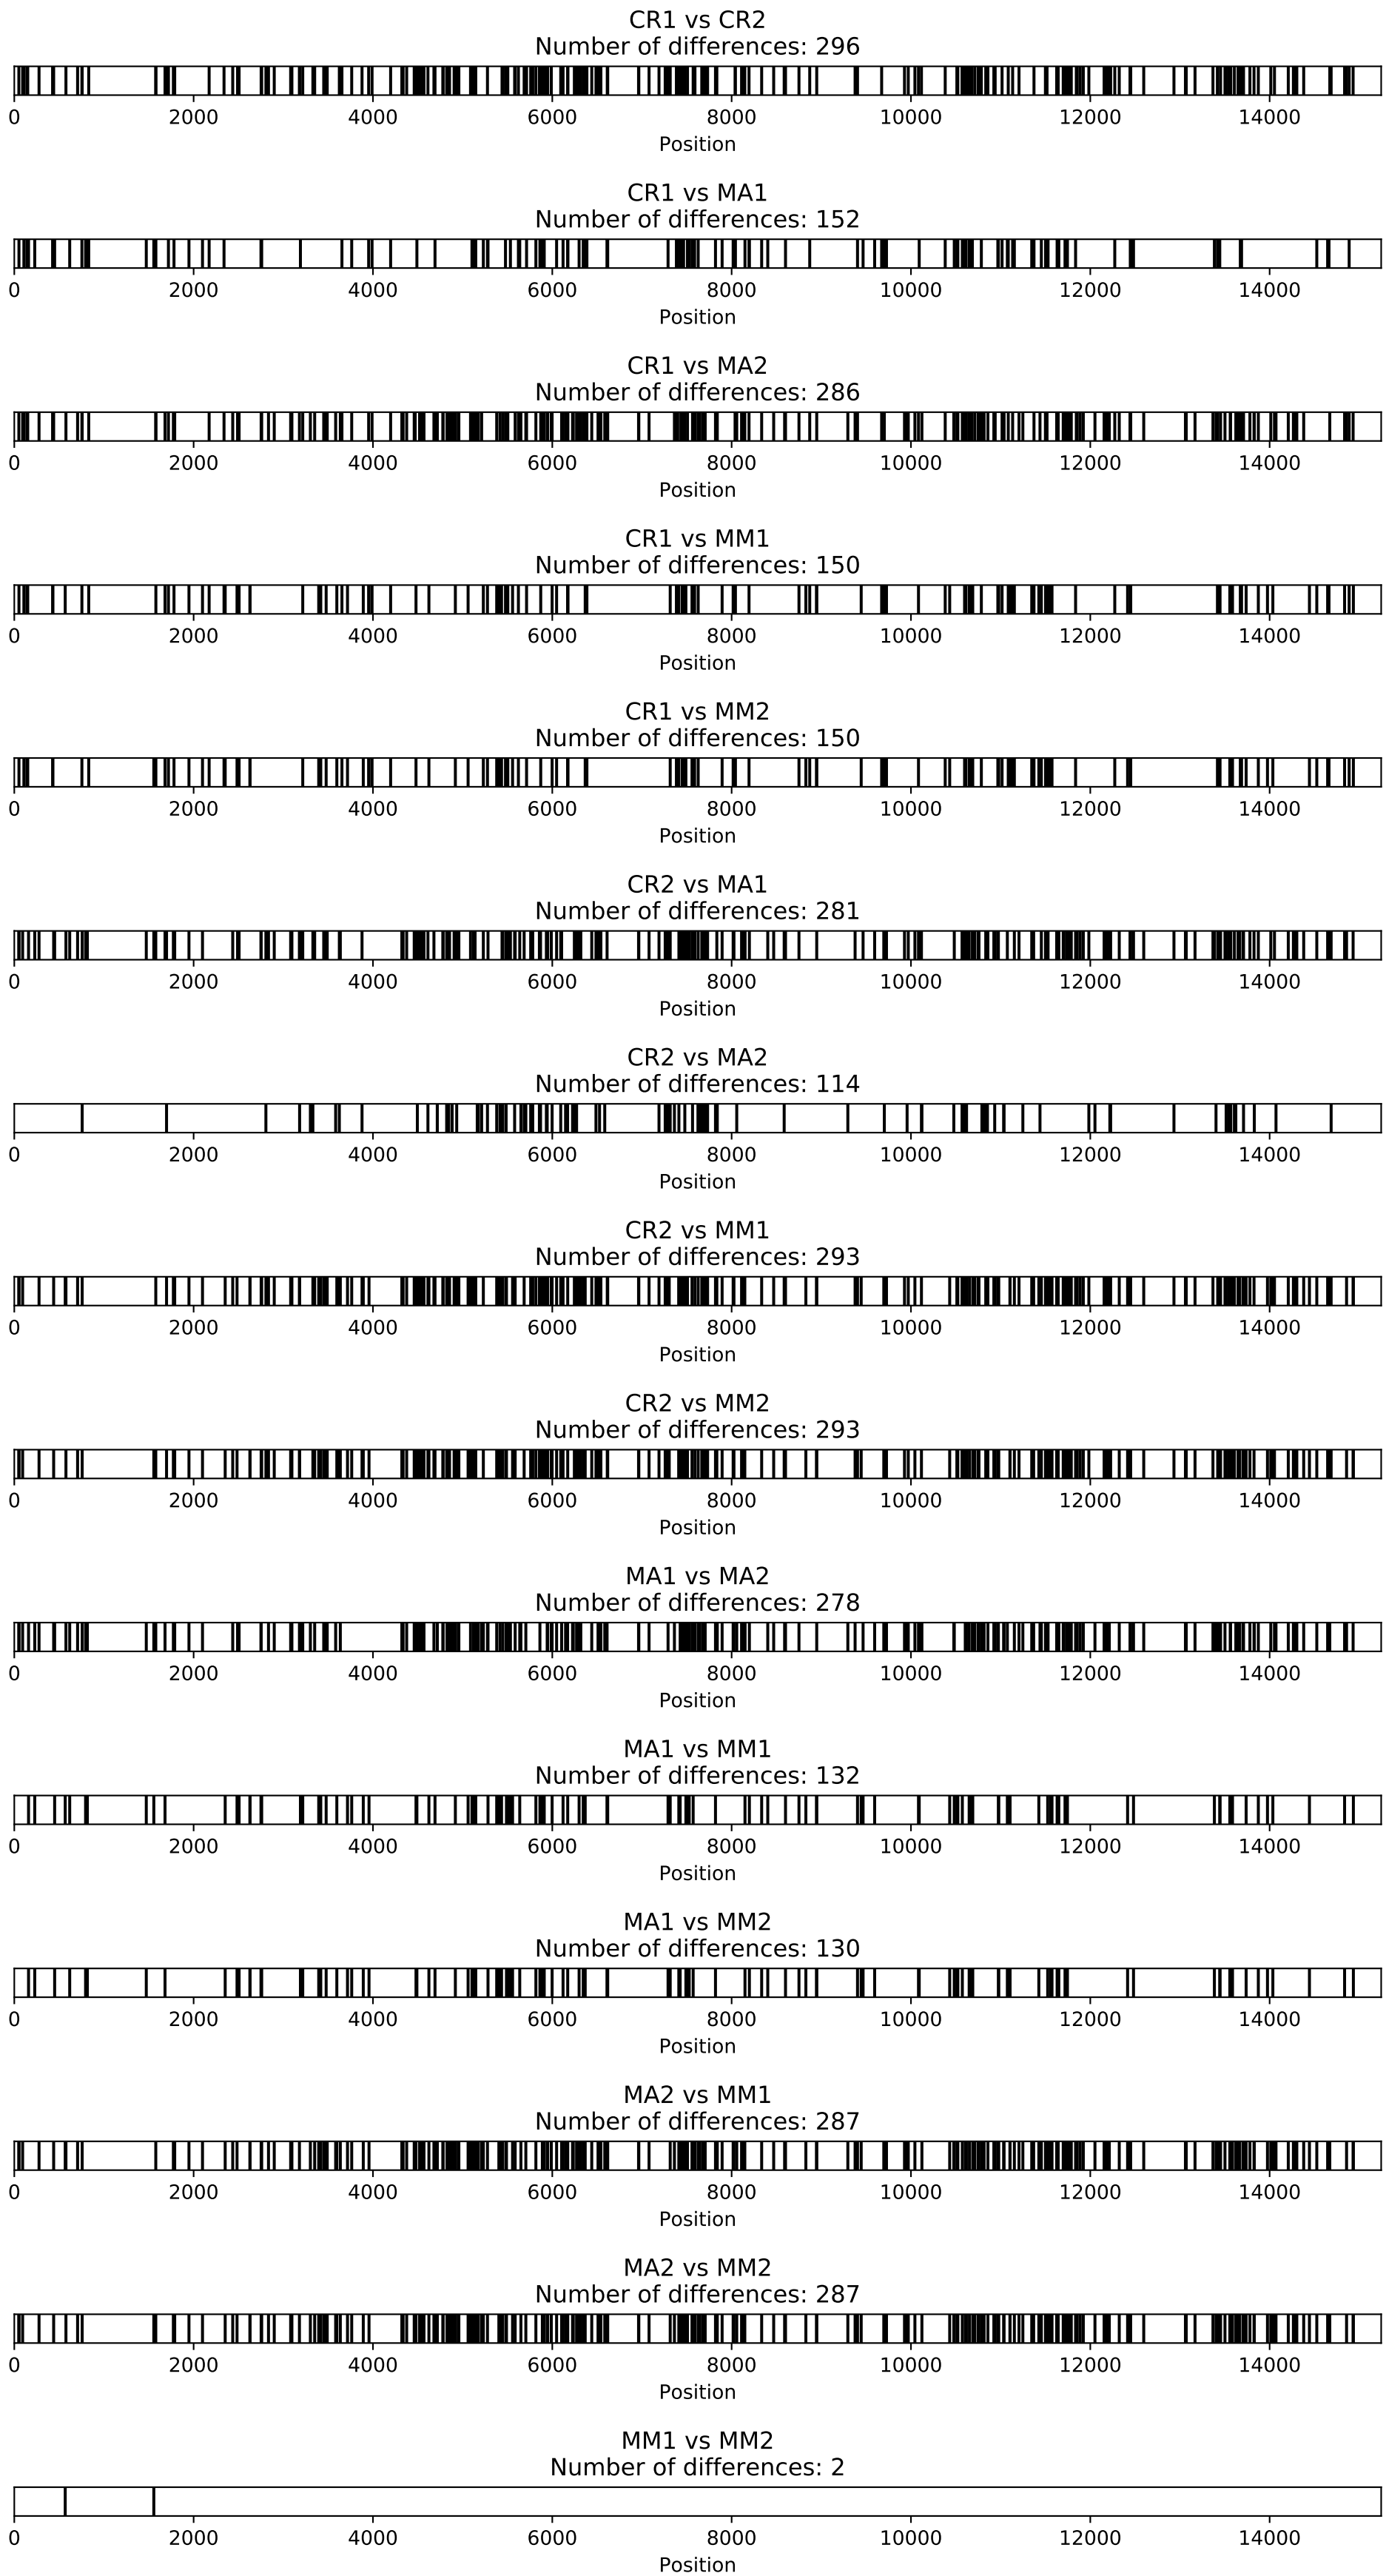

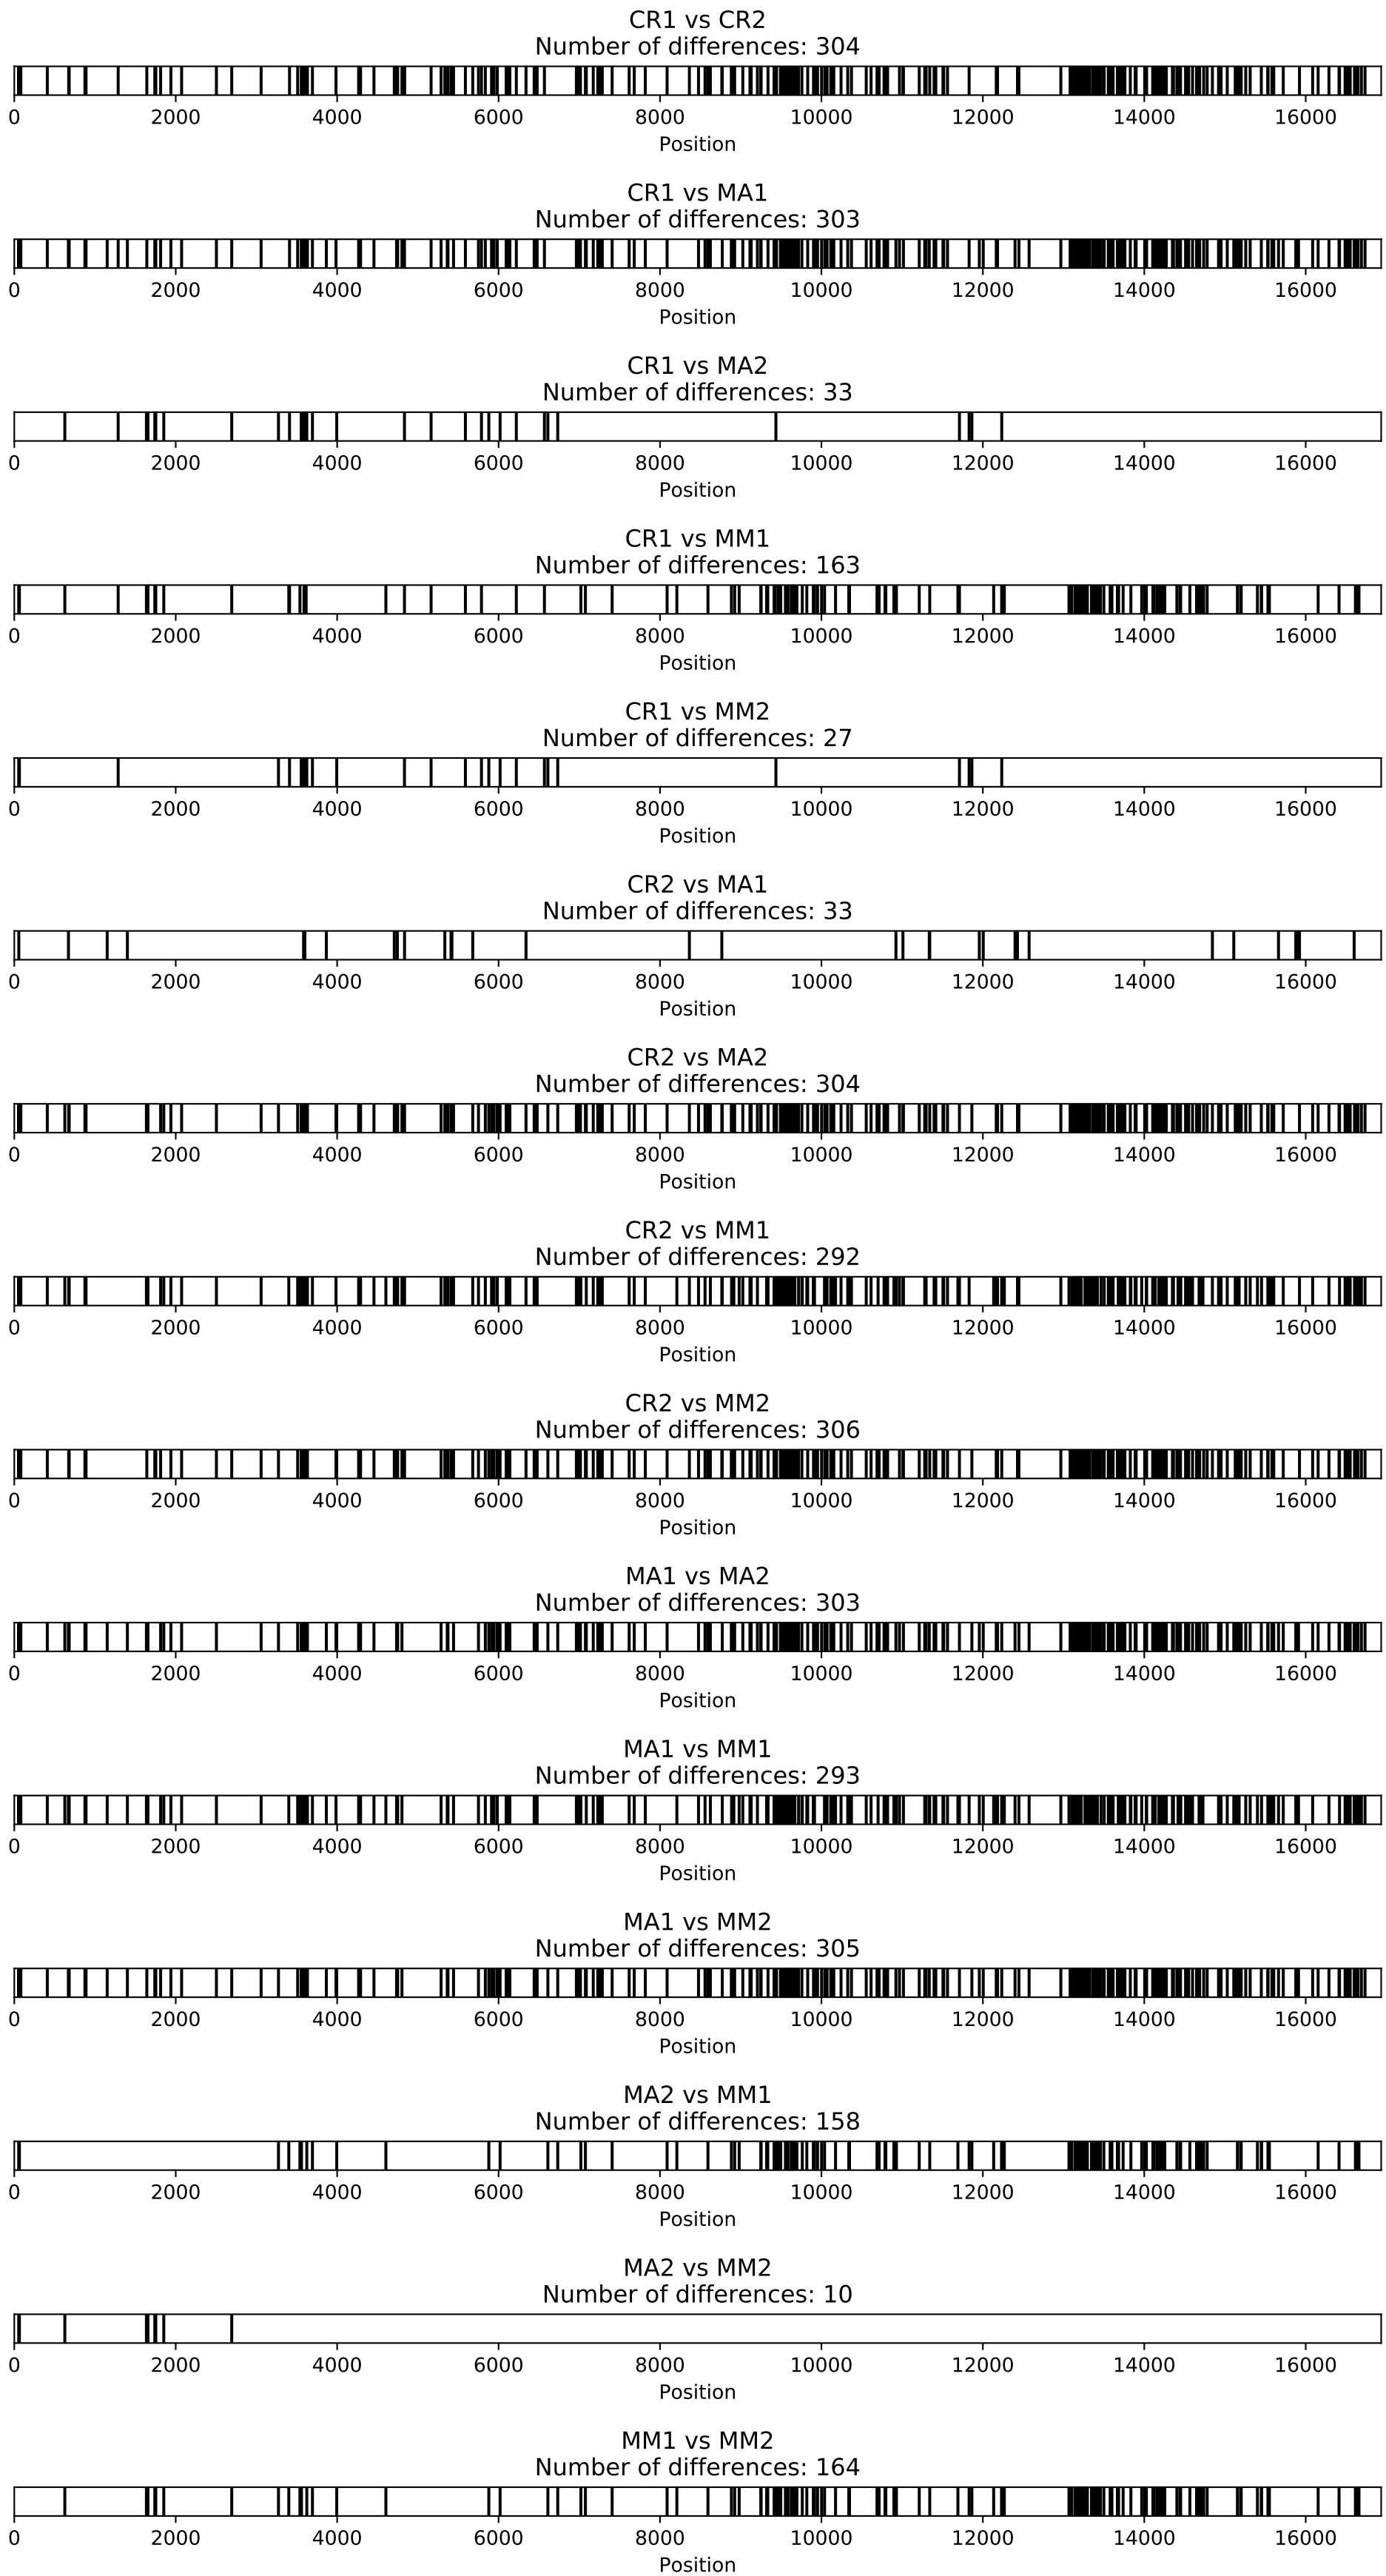



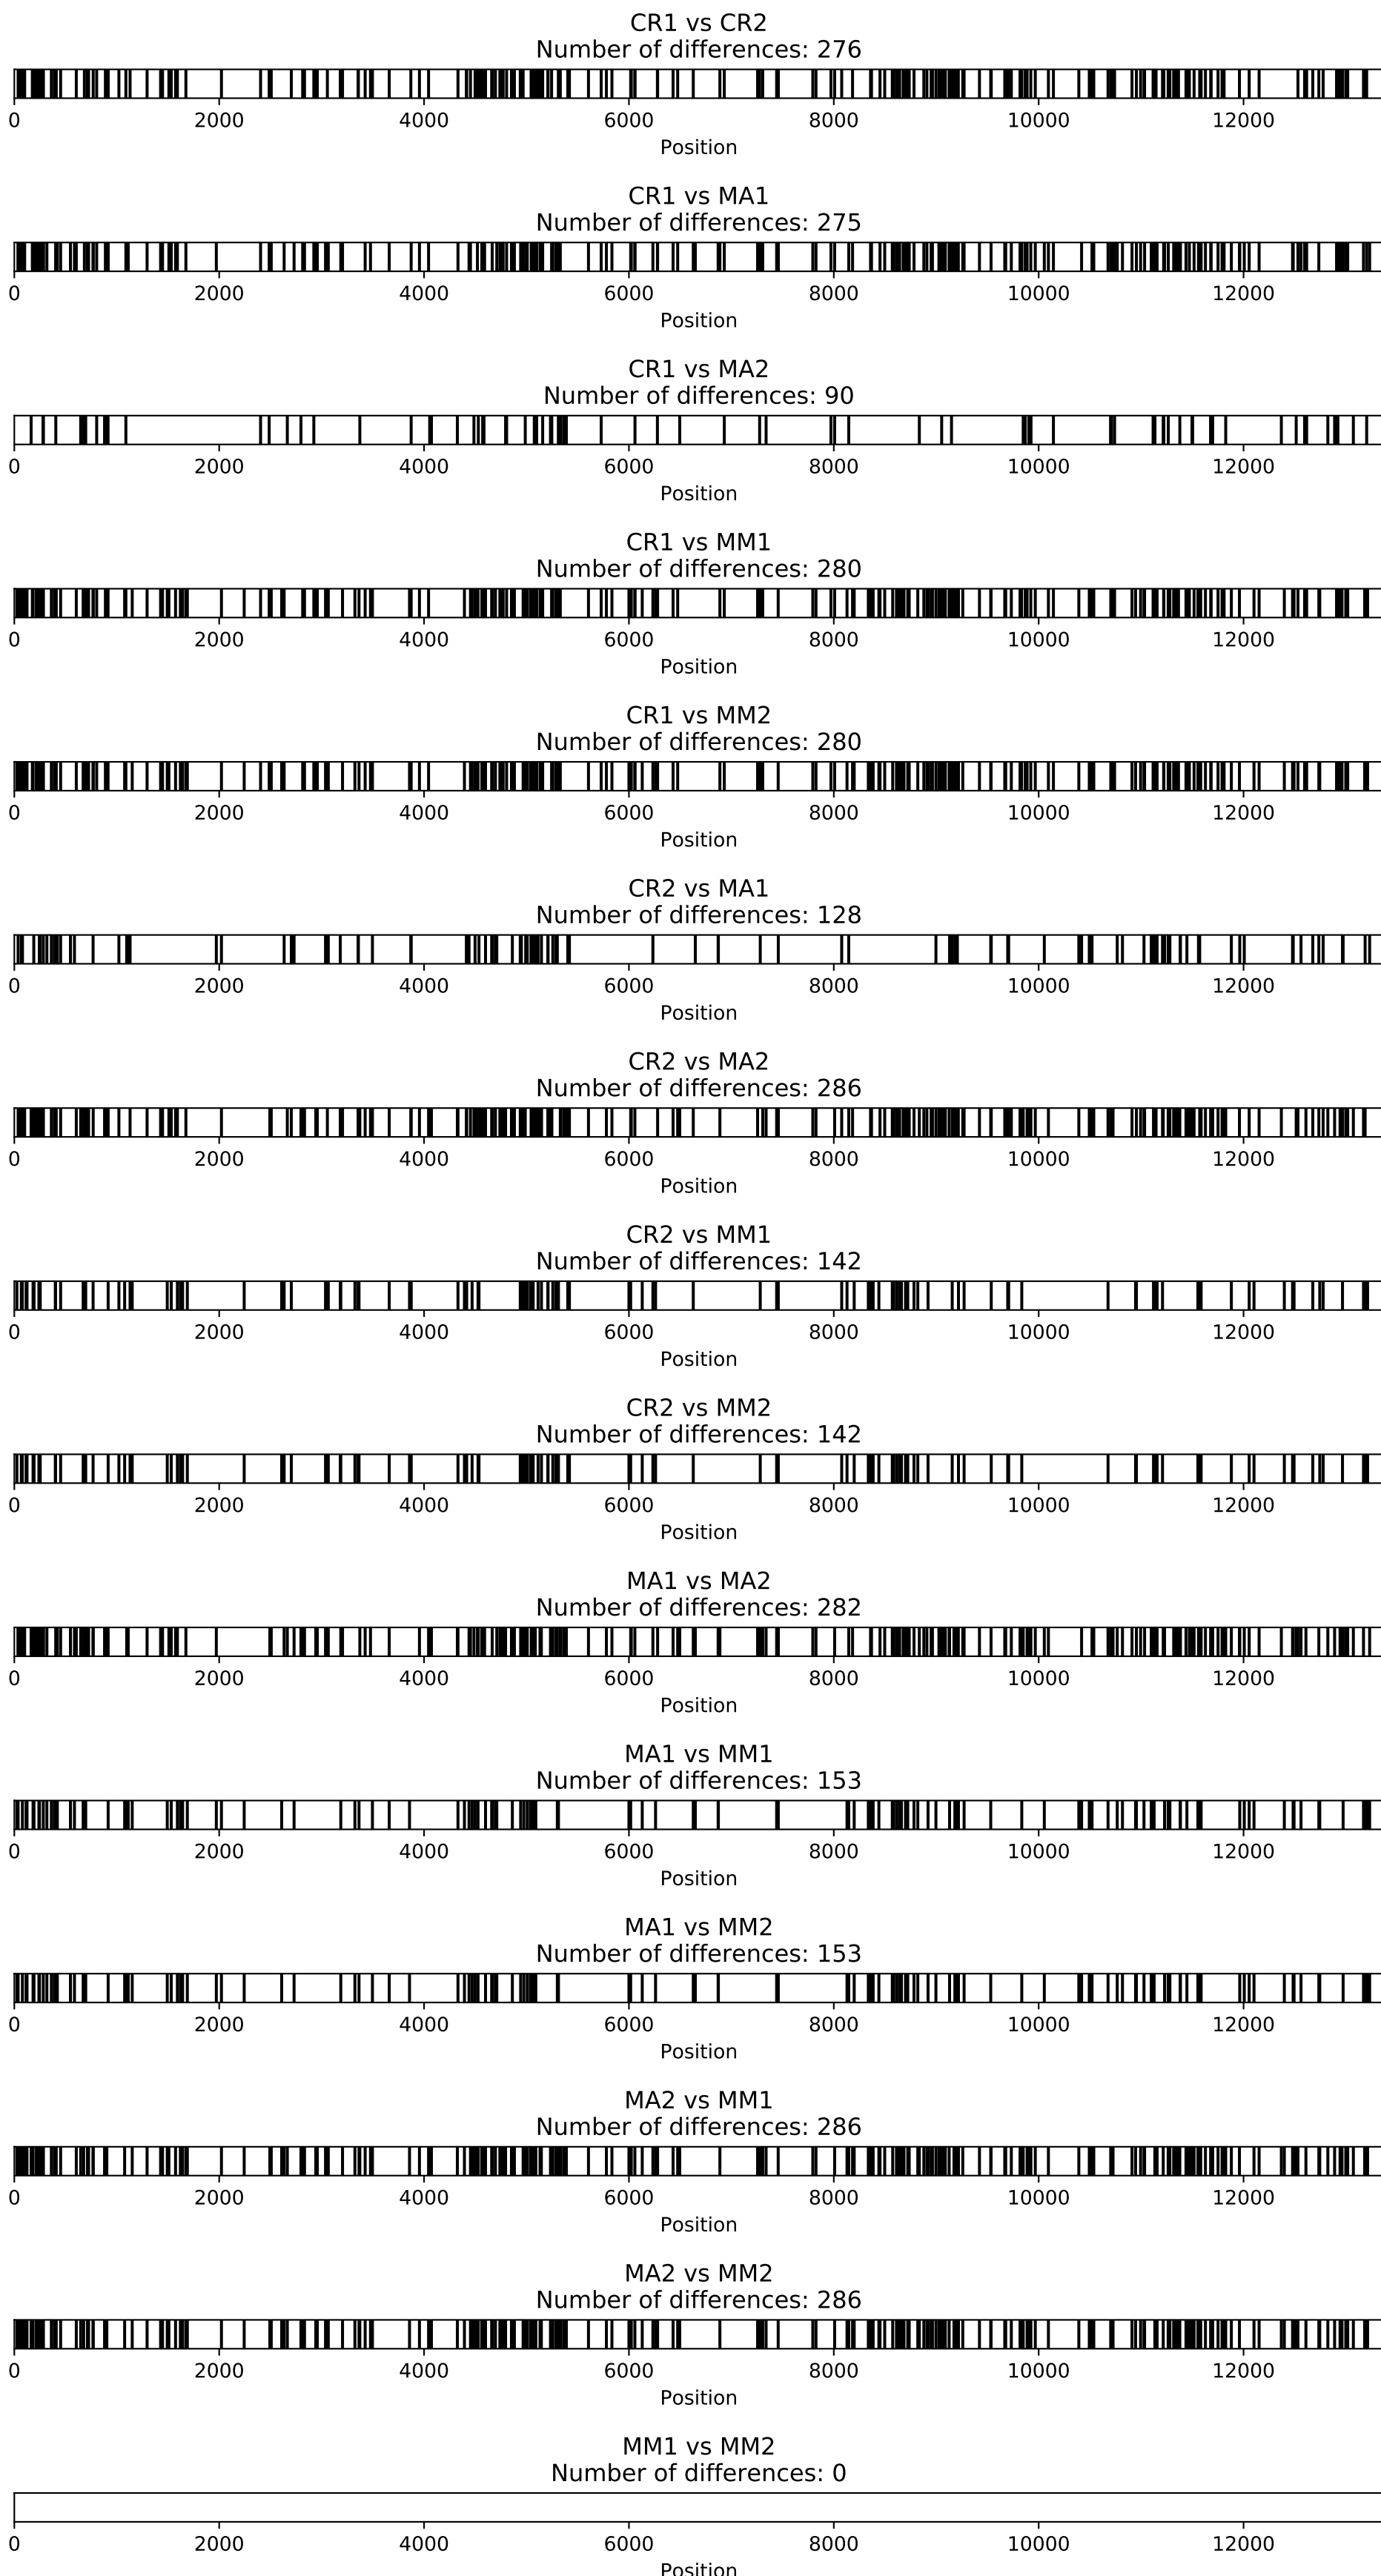

# Region: 432

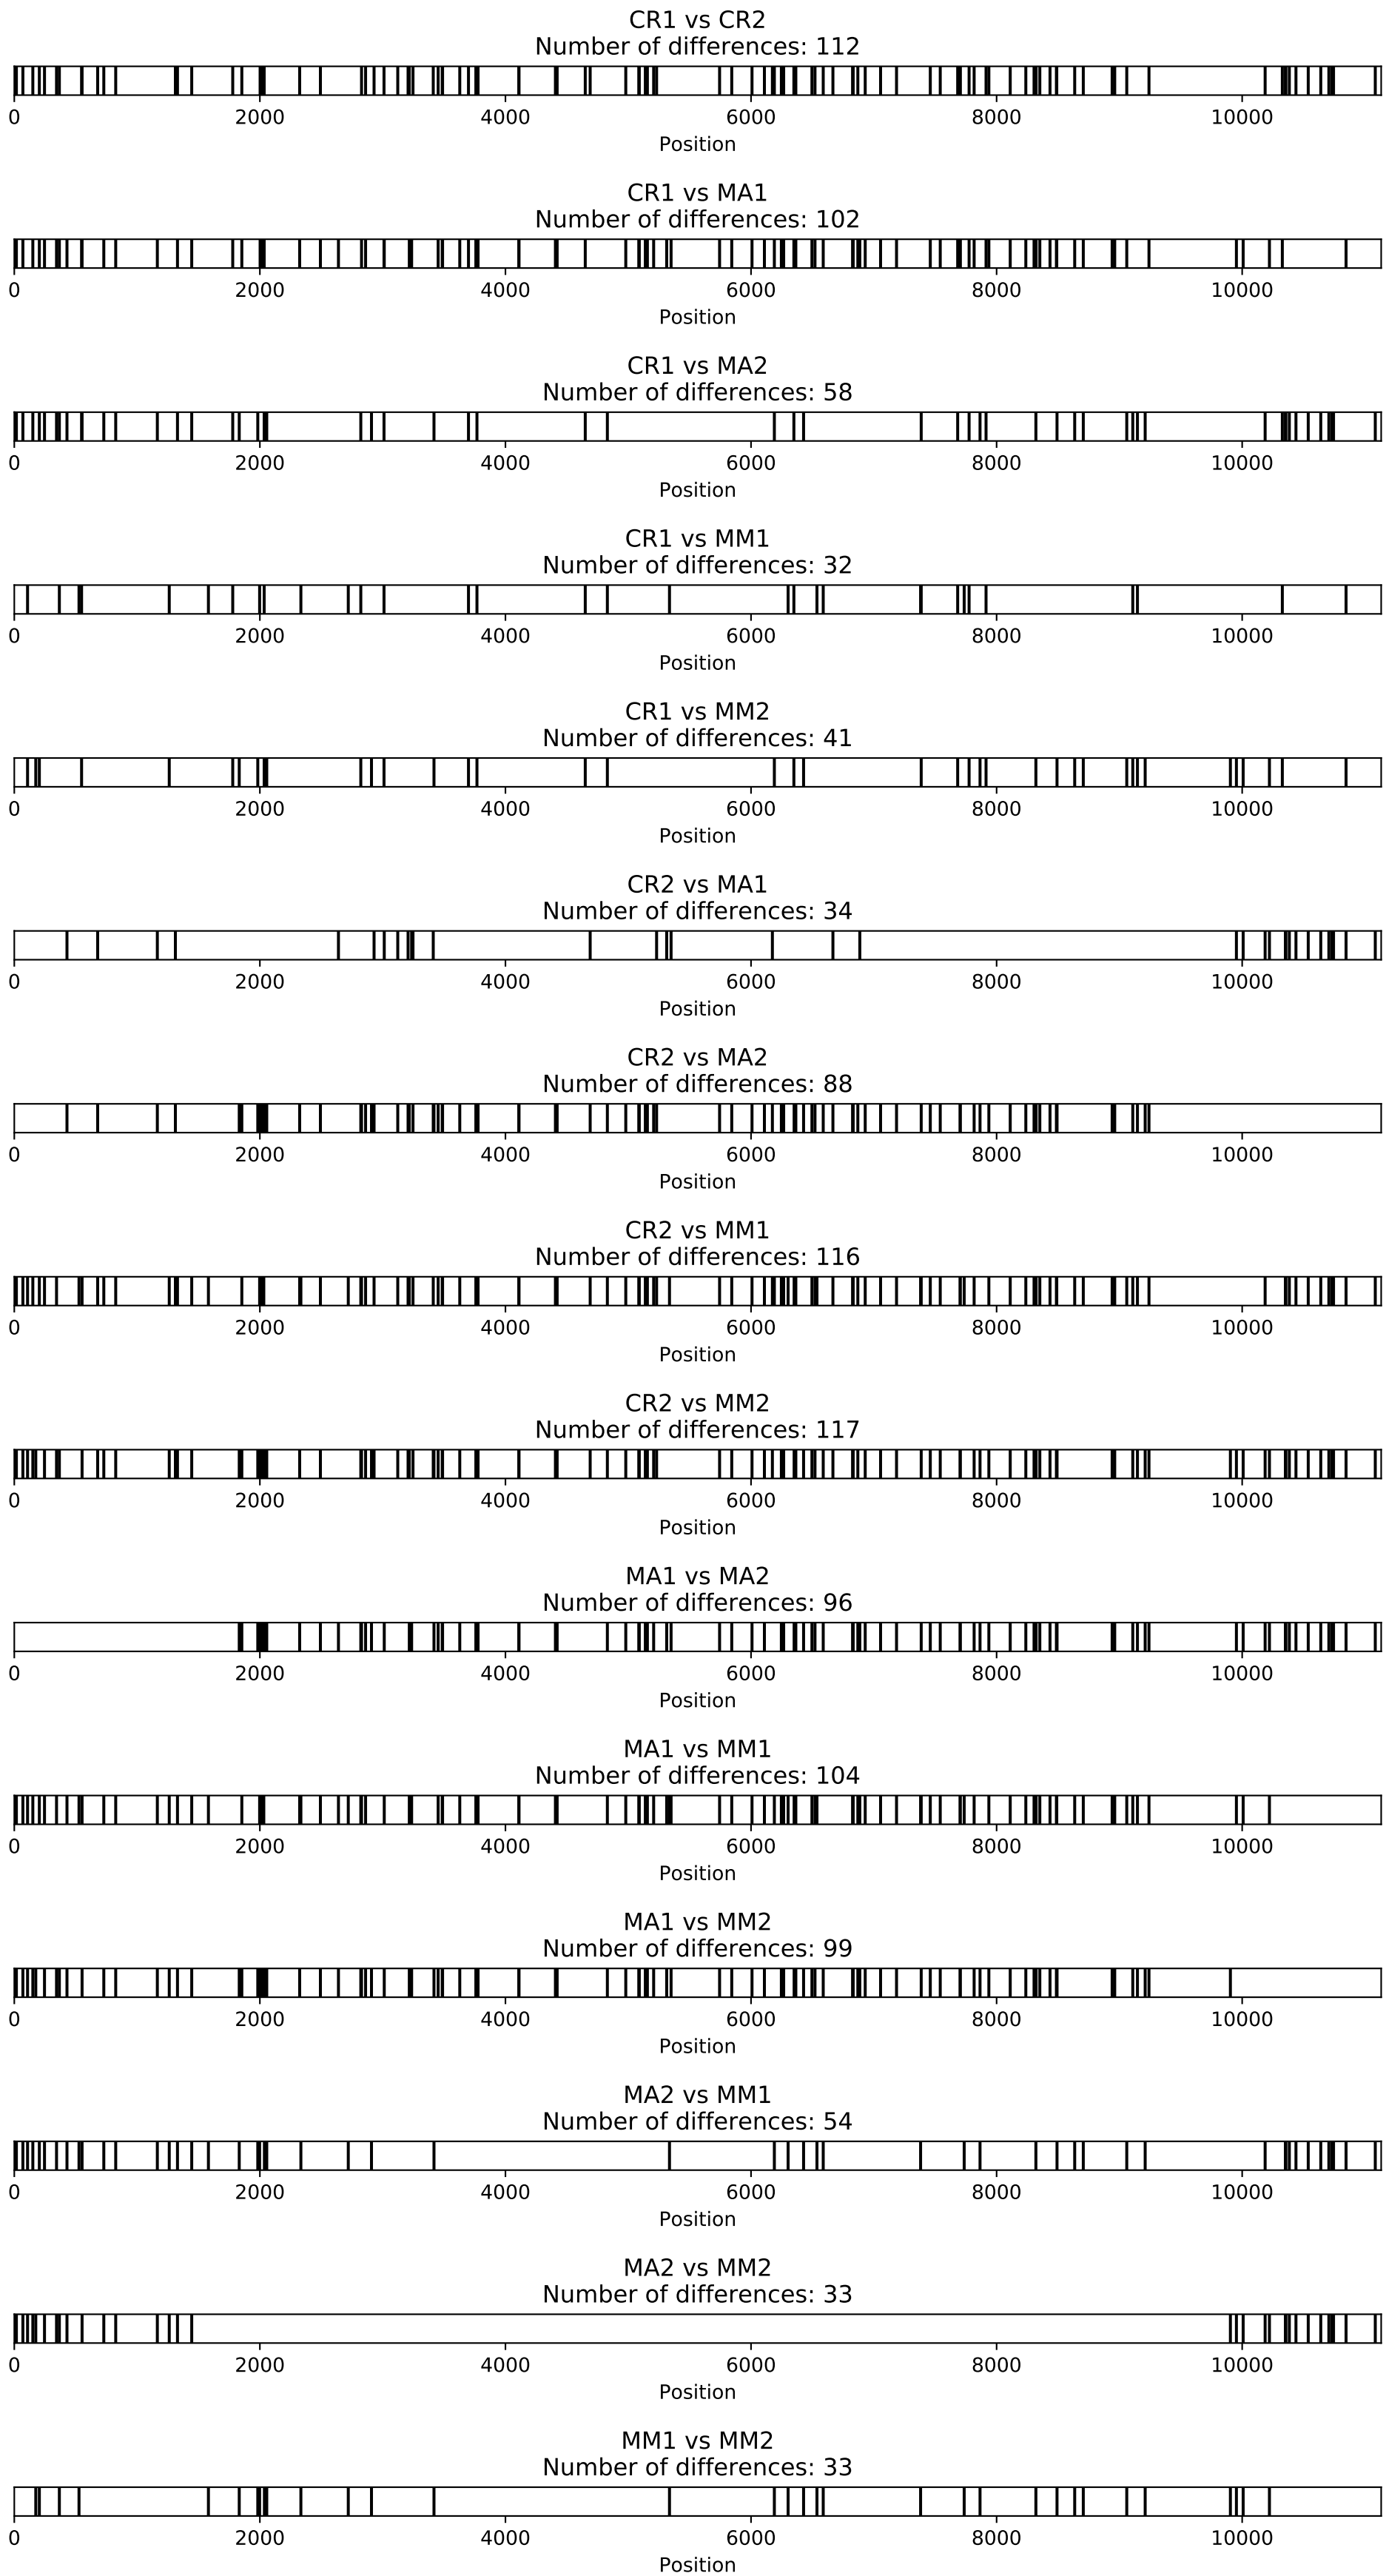

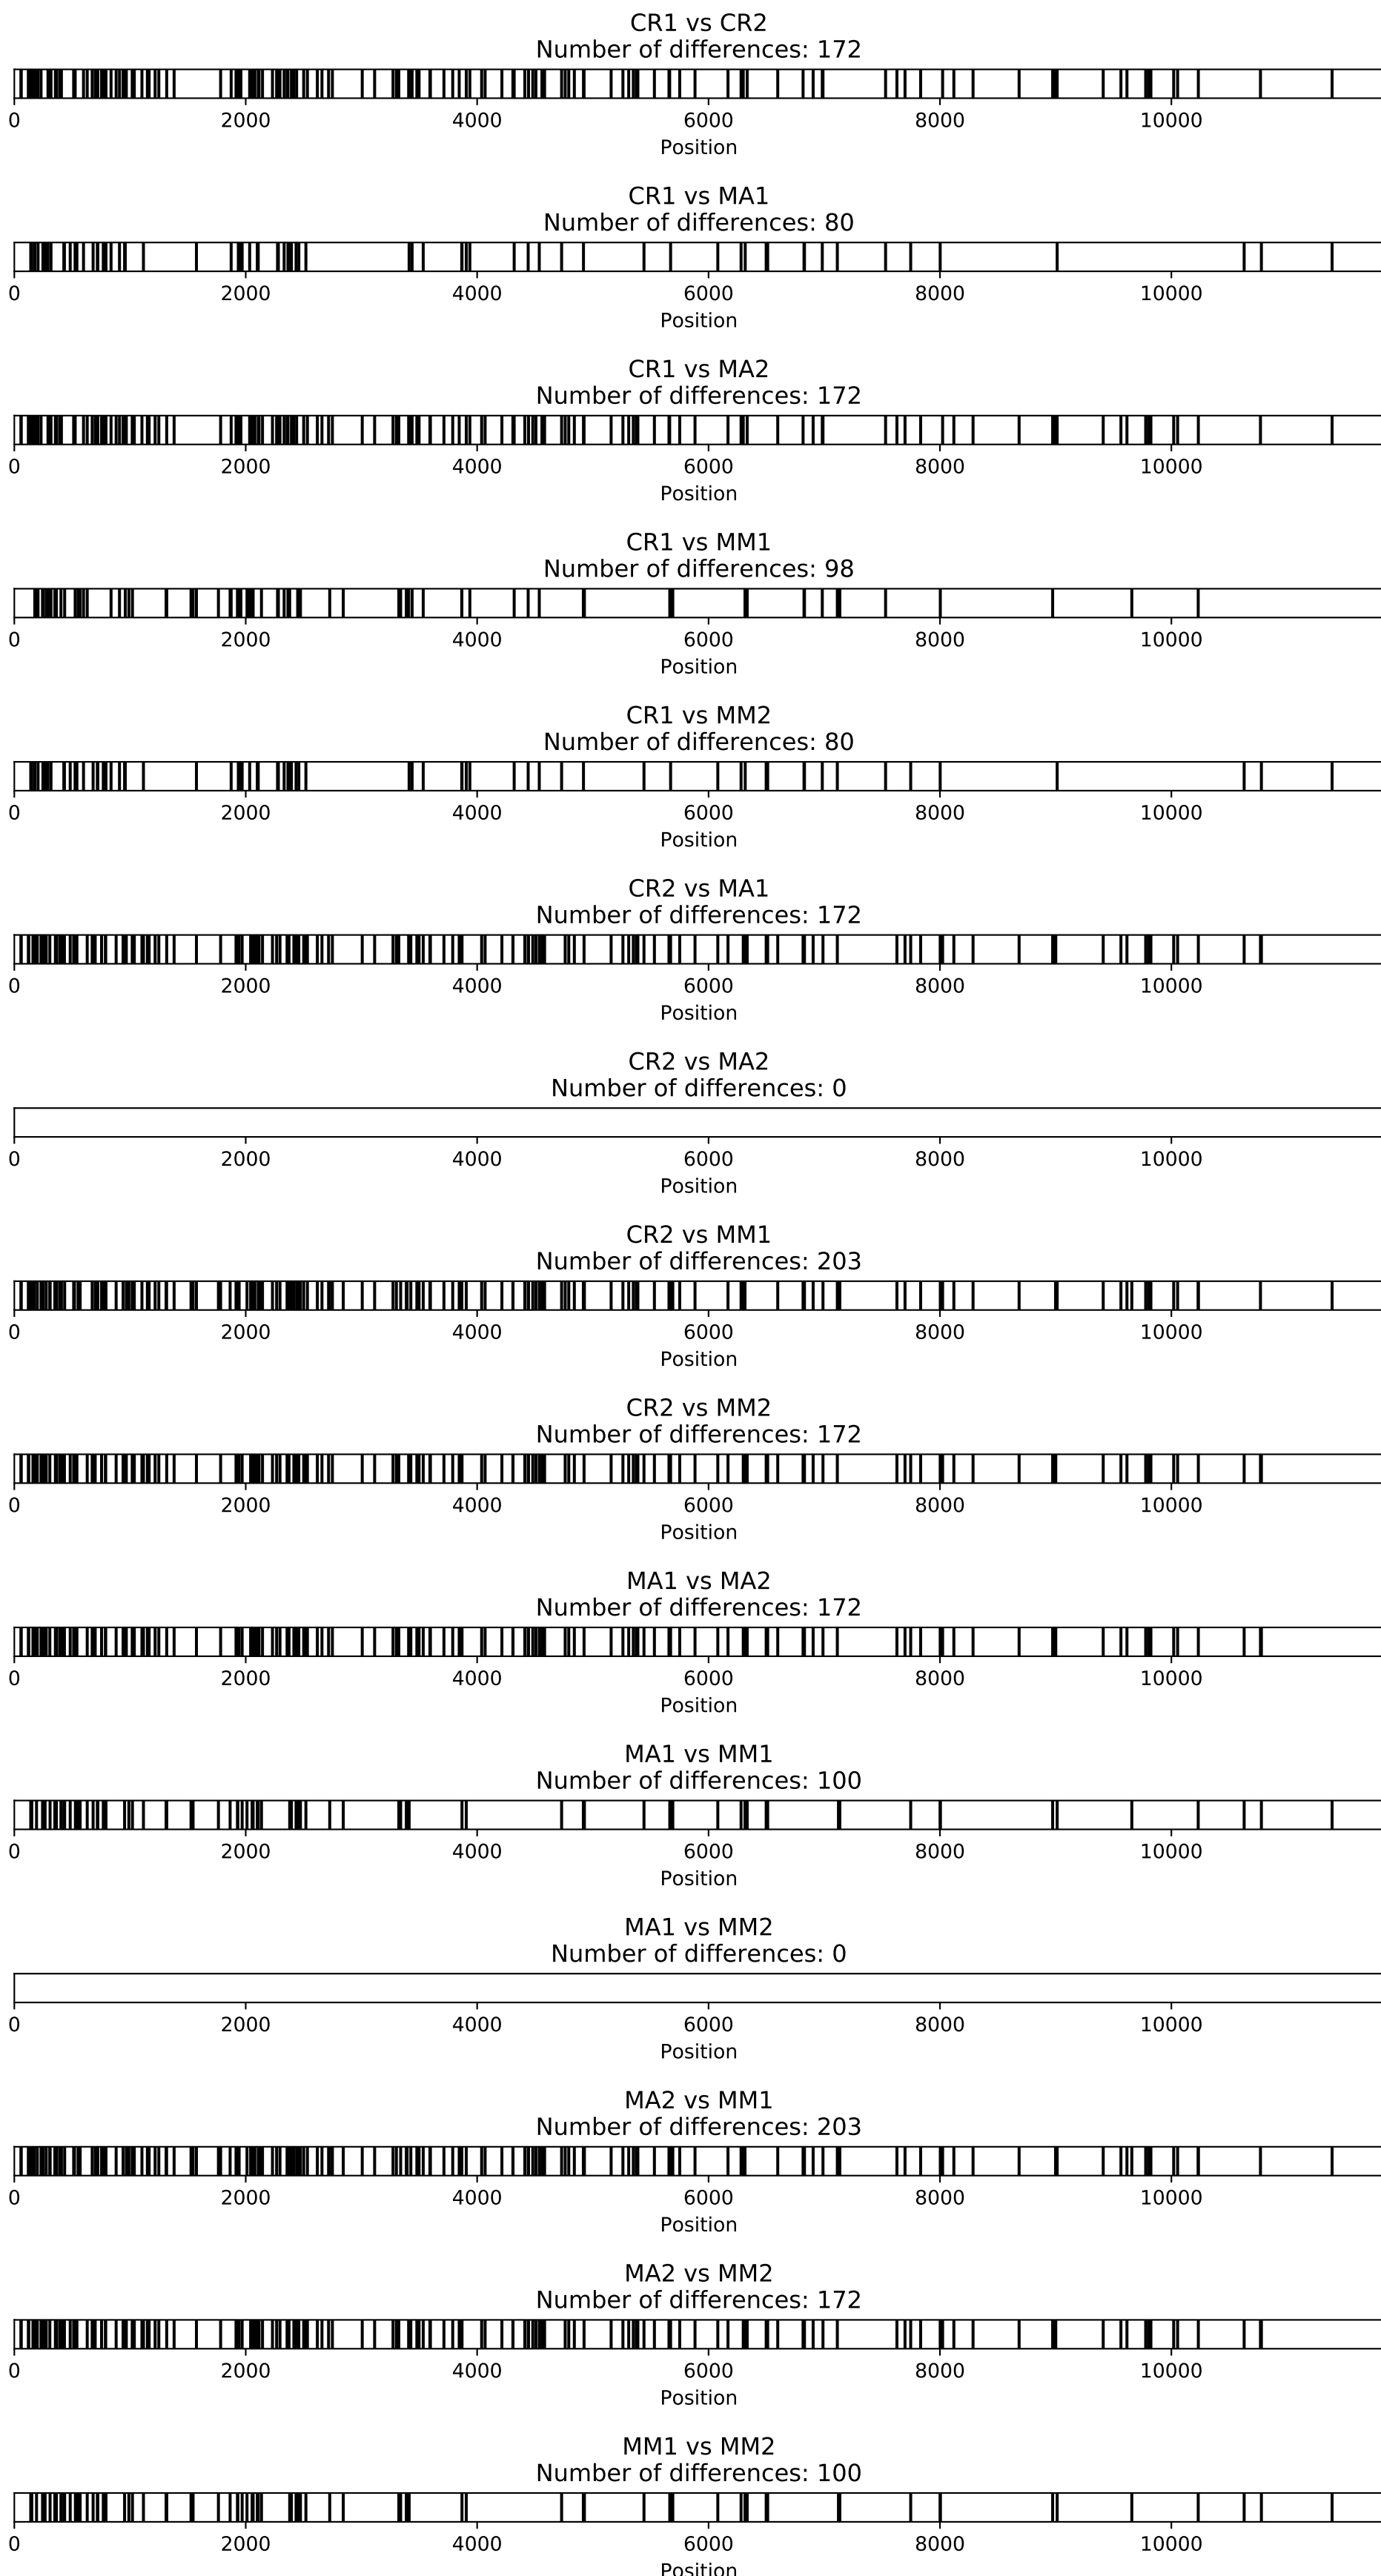

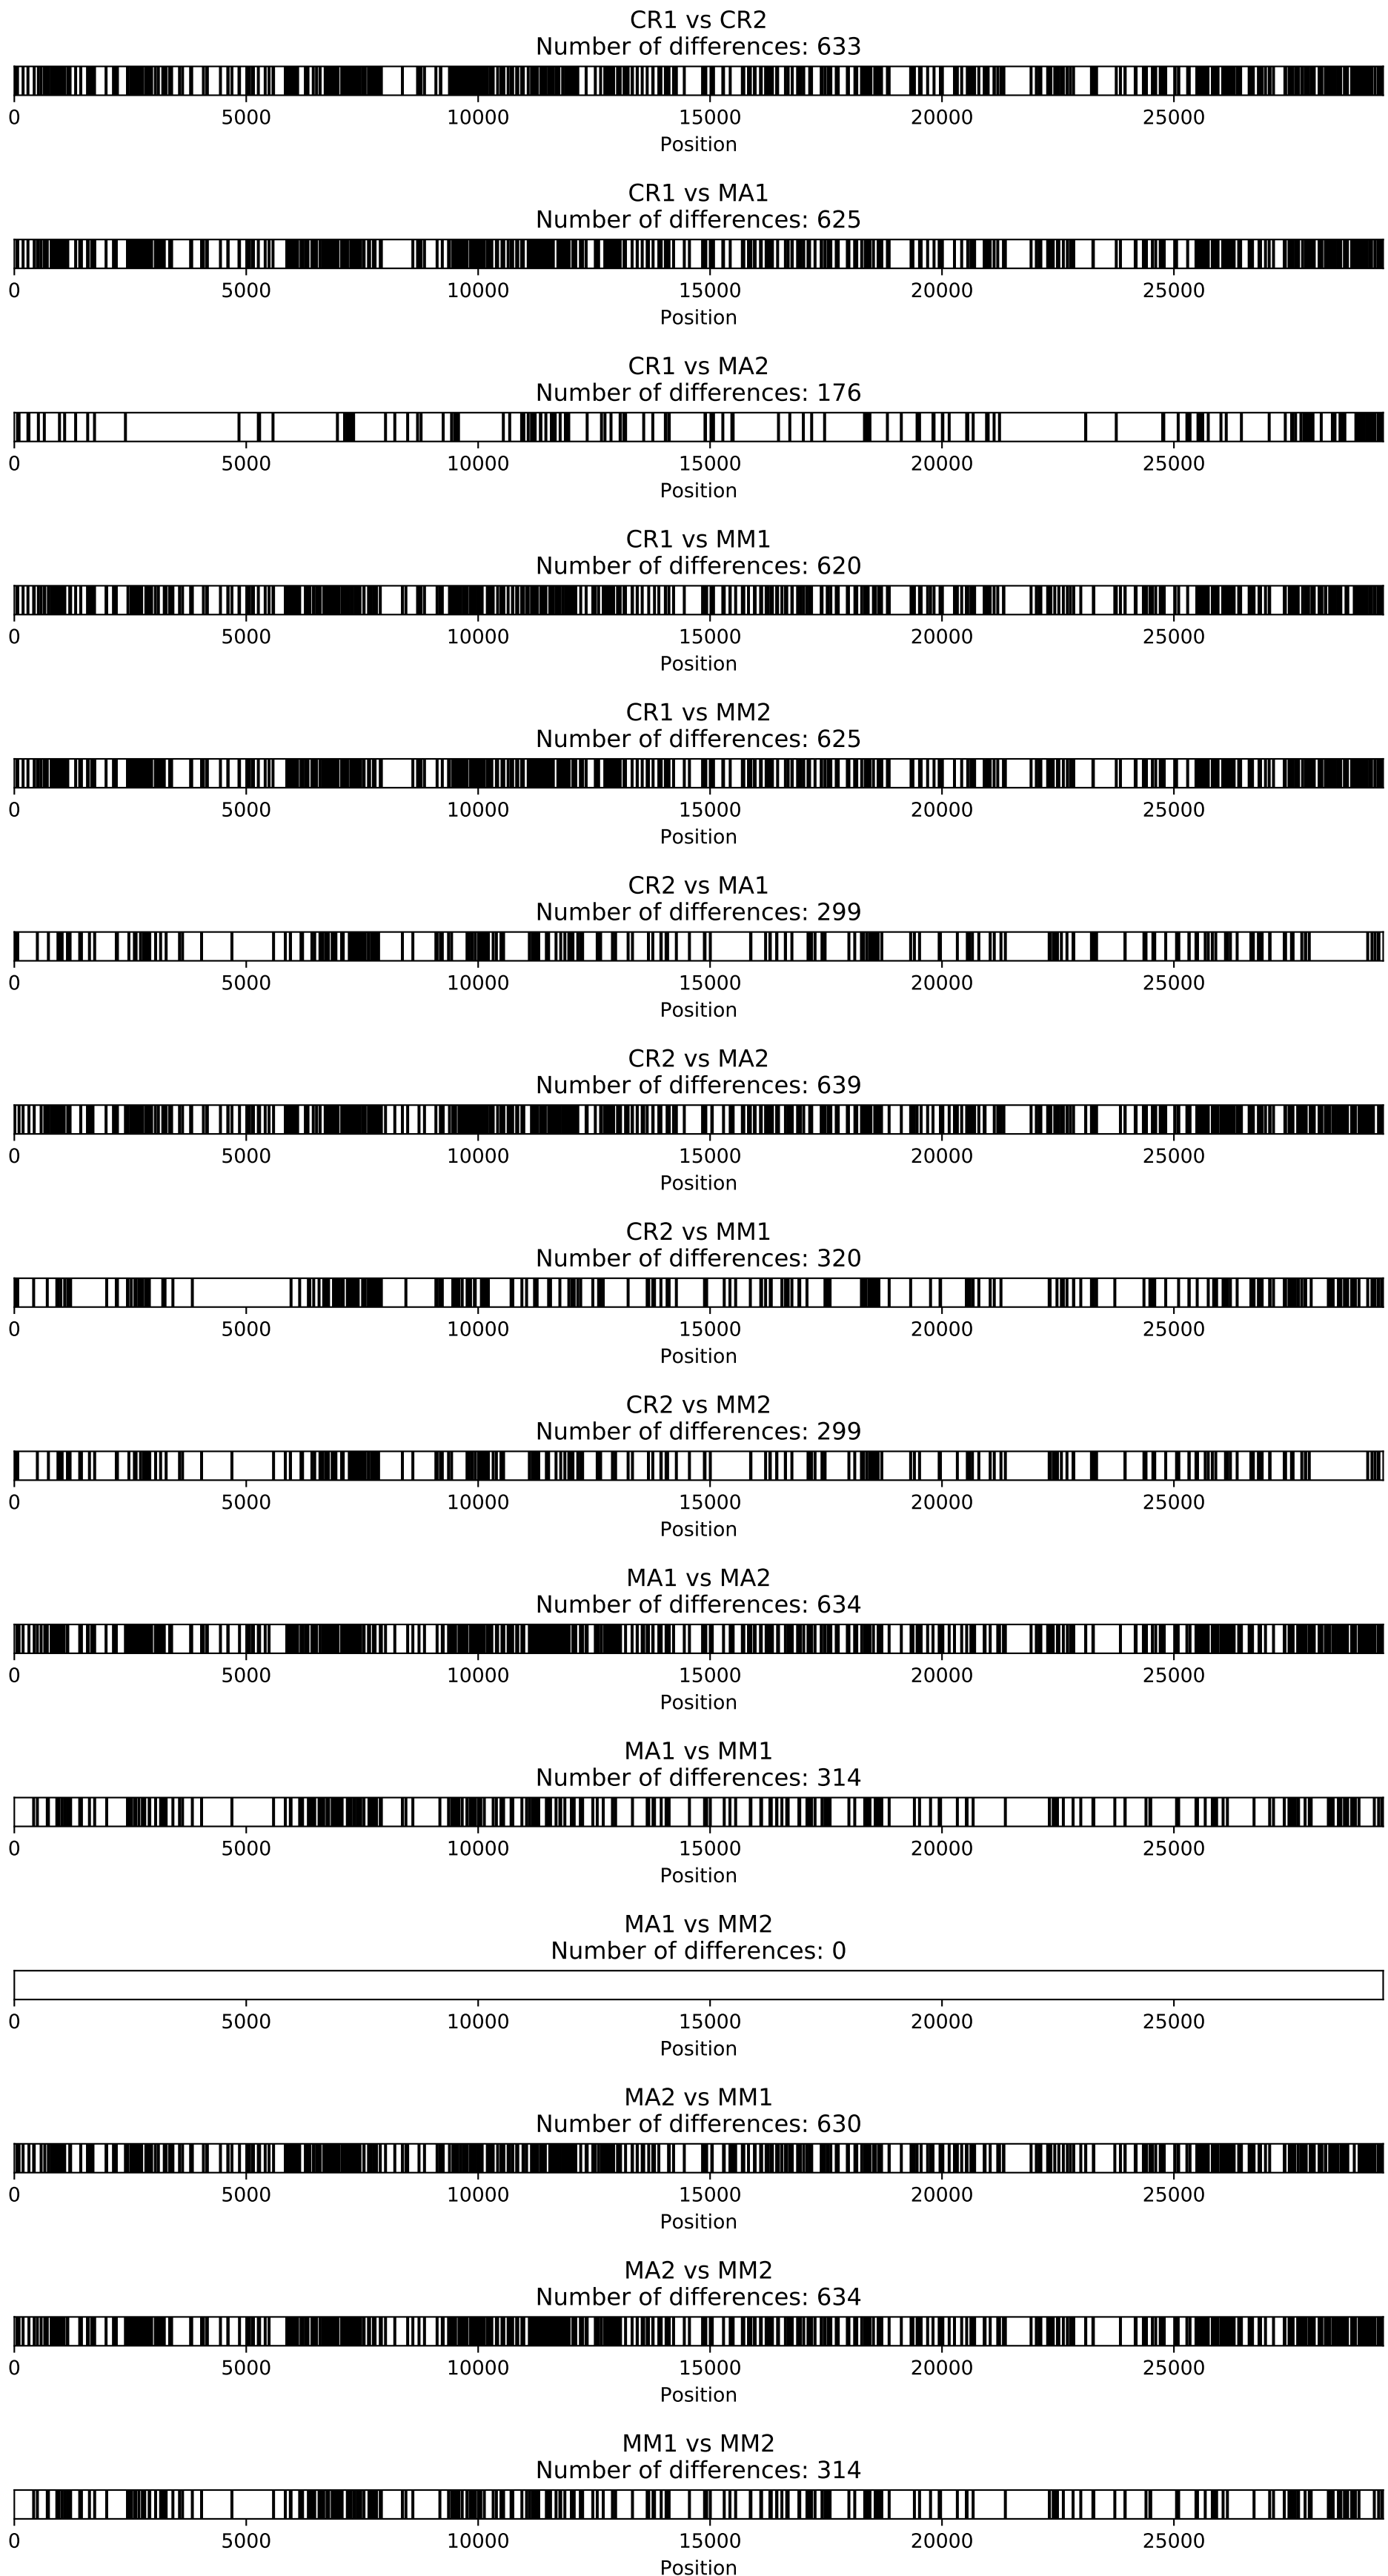

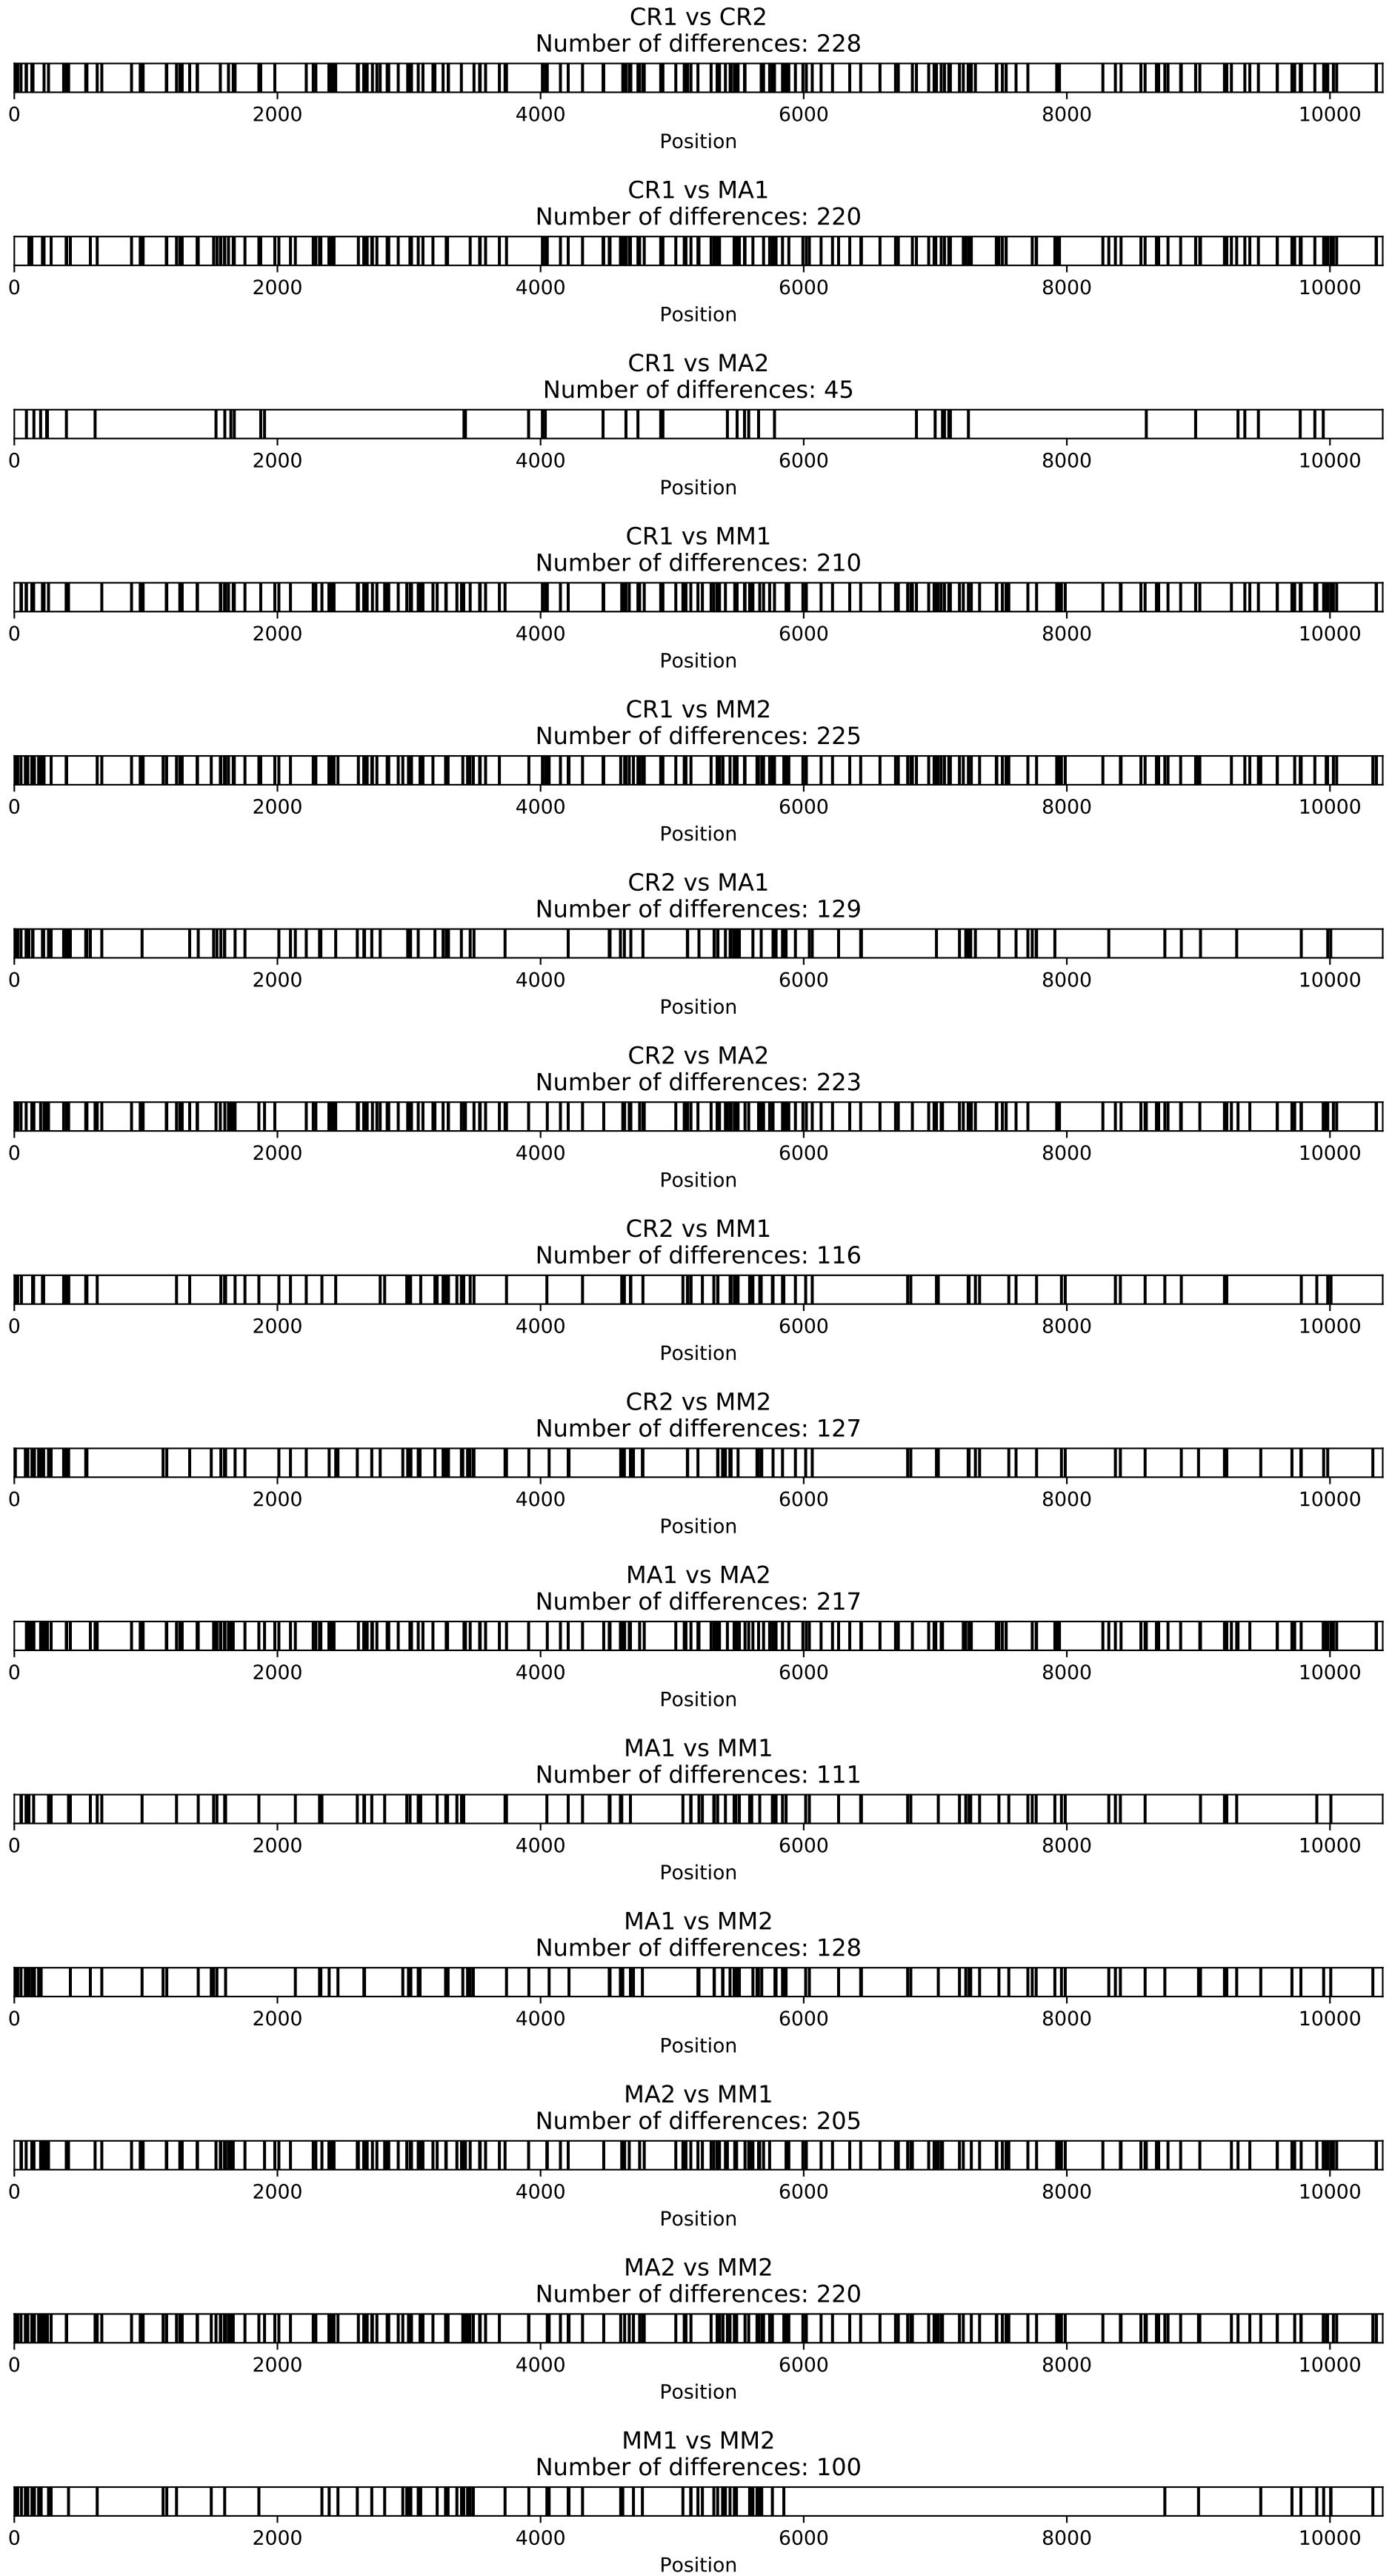

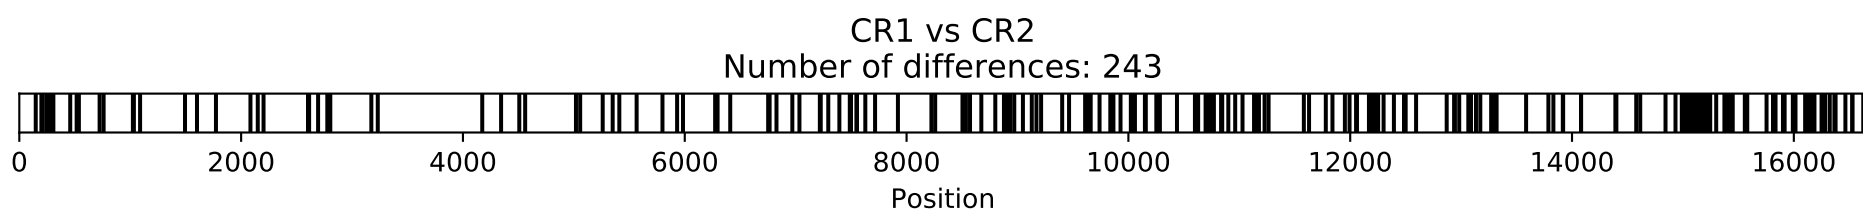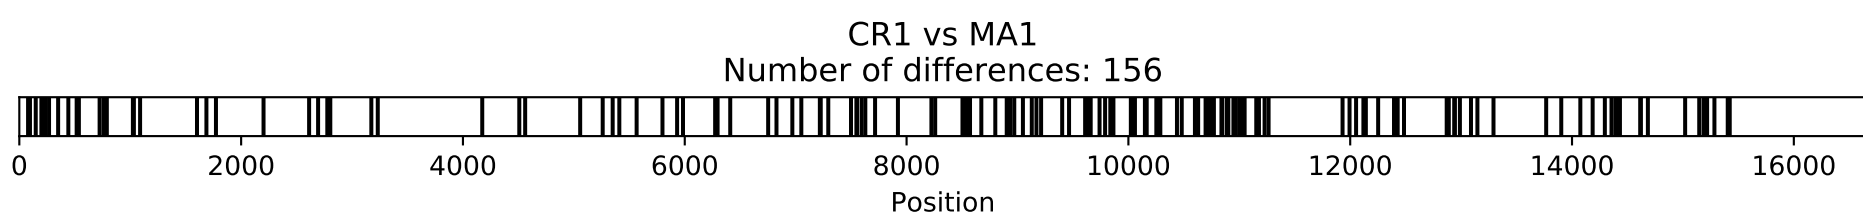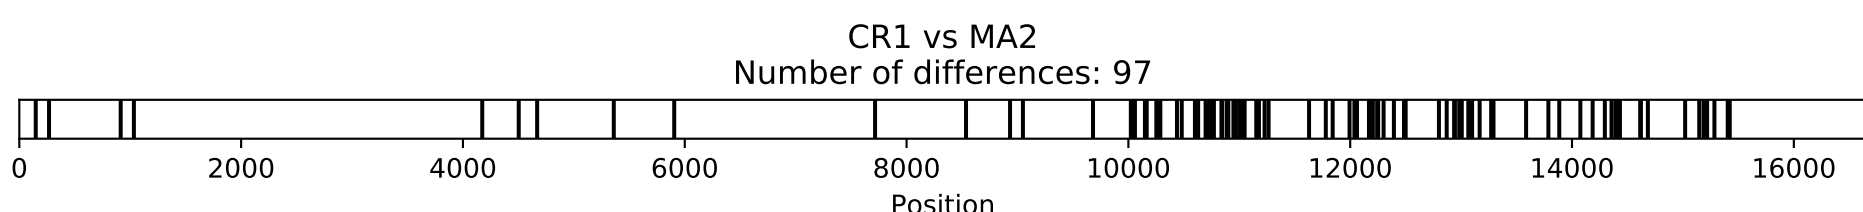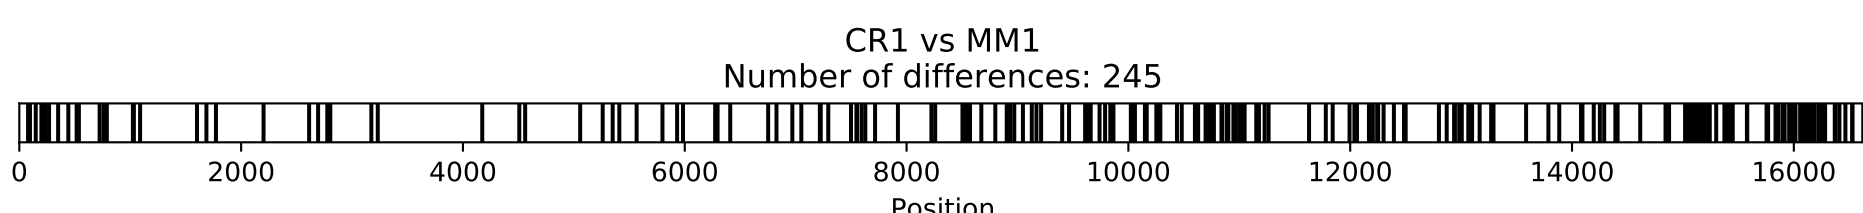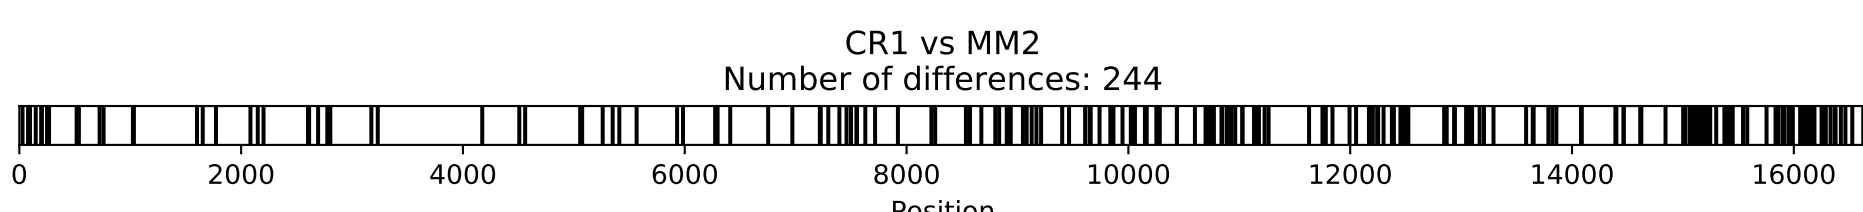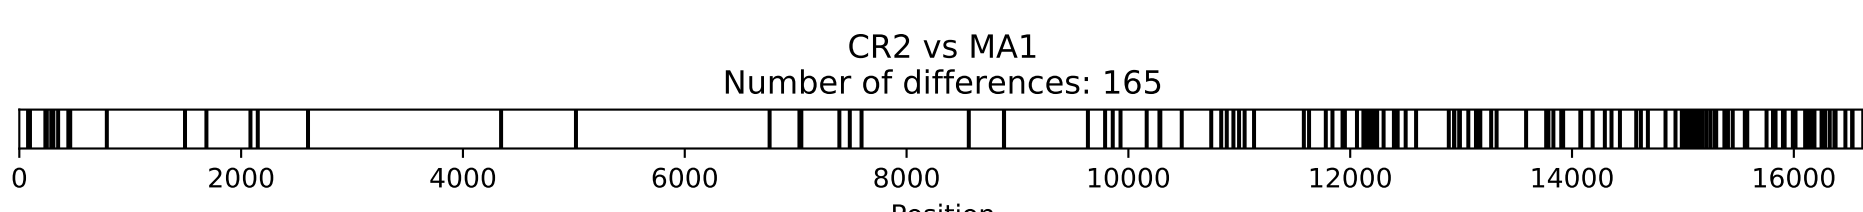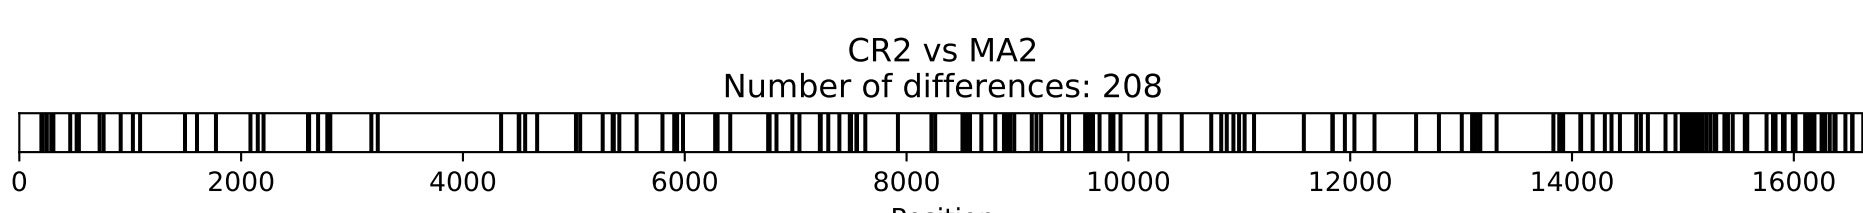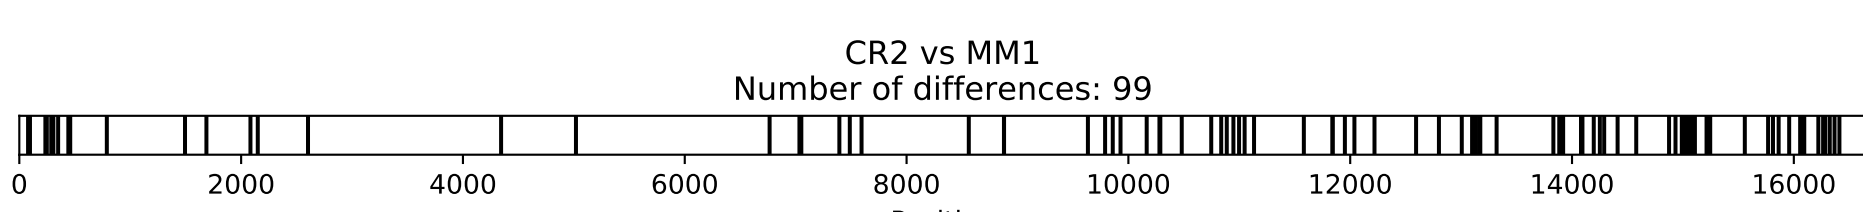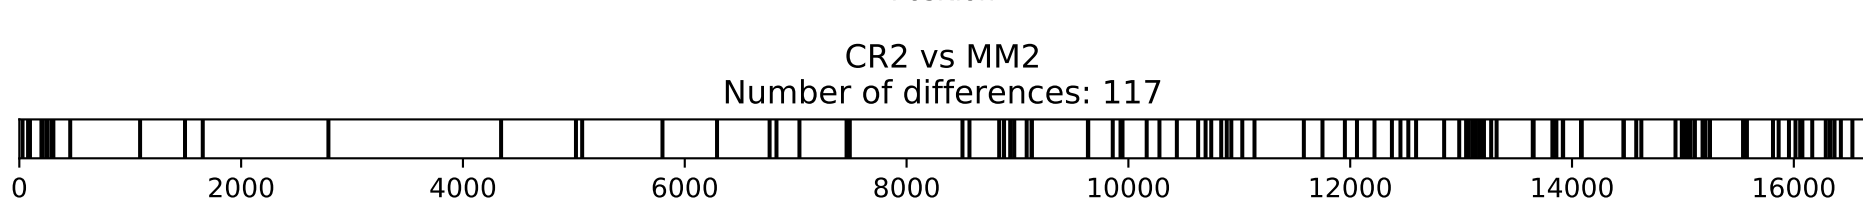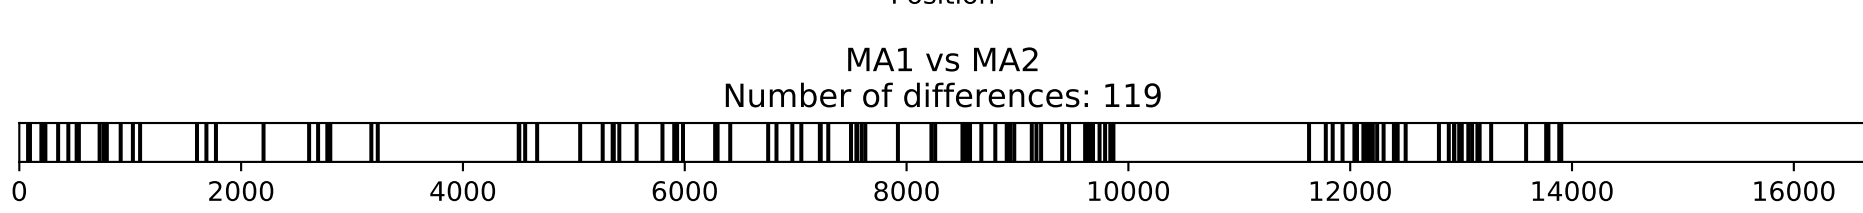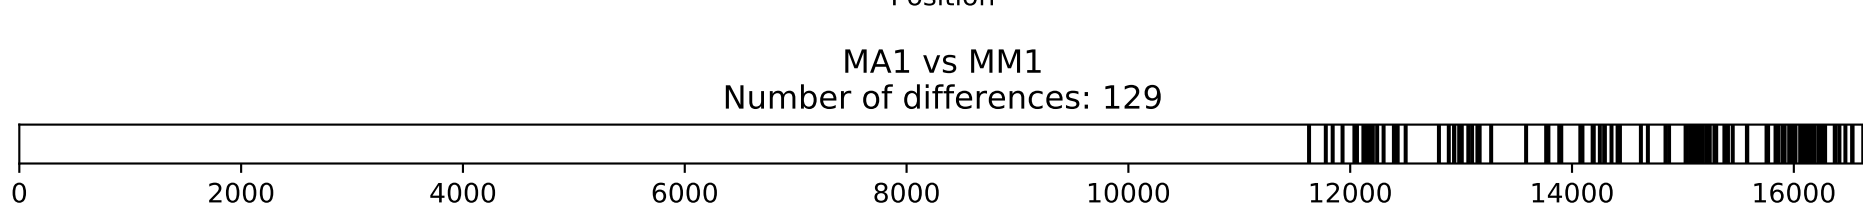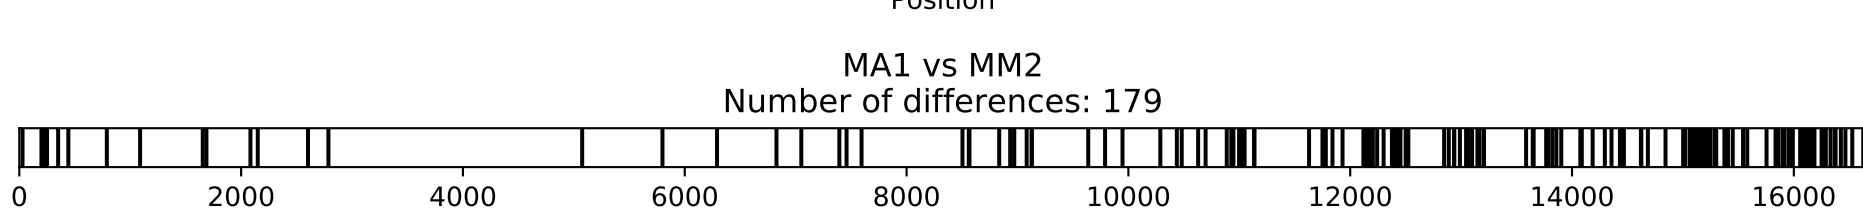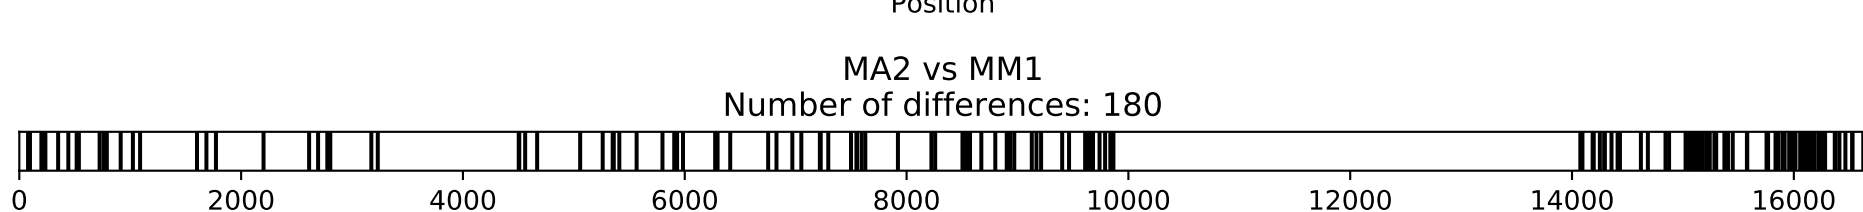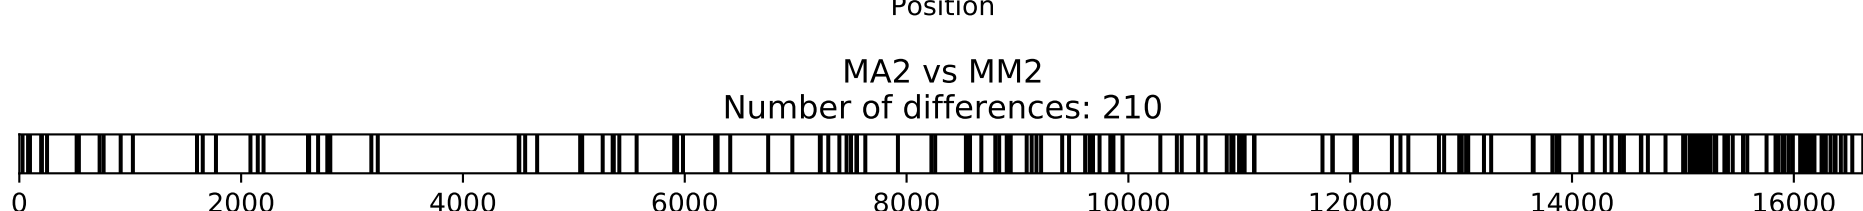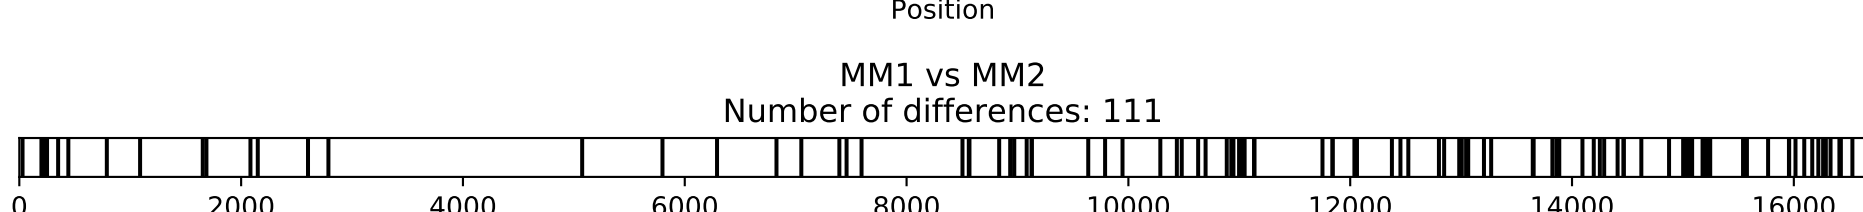

# Region: 441

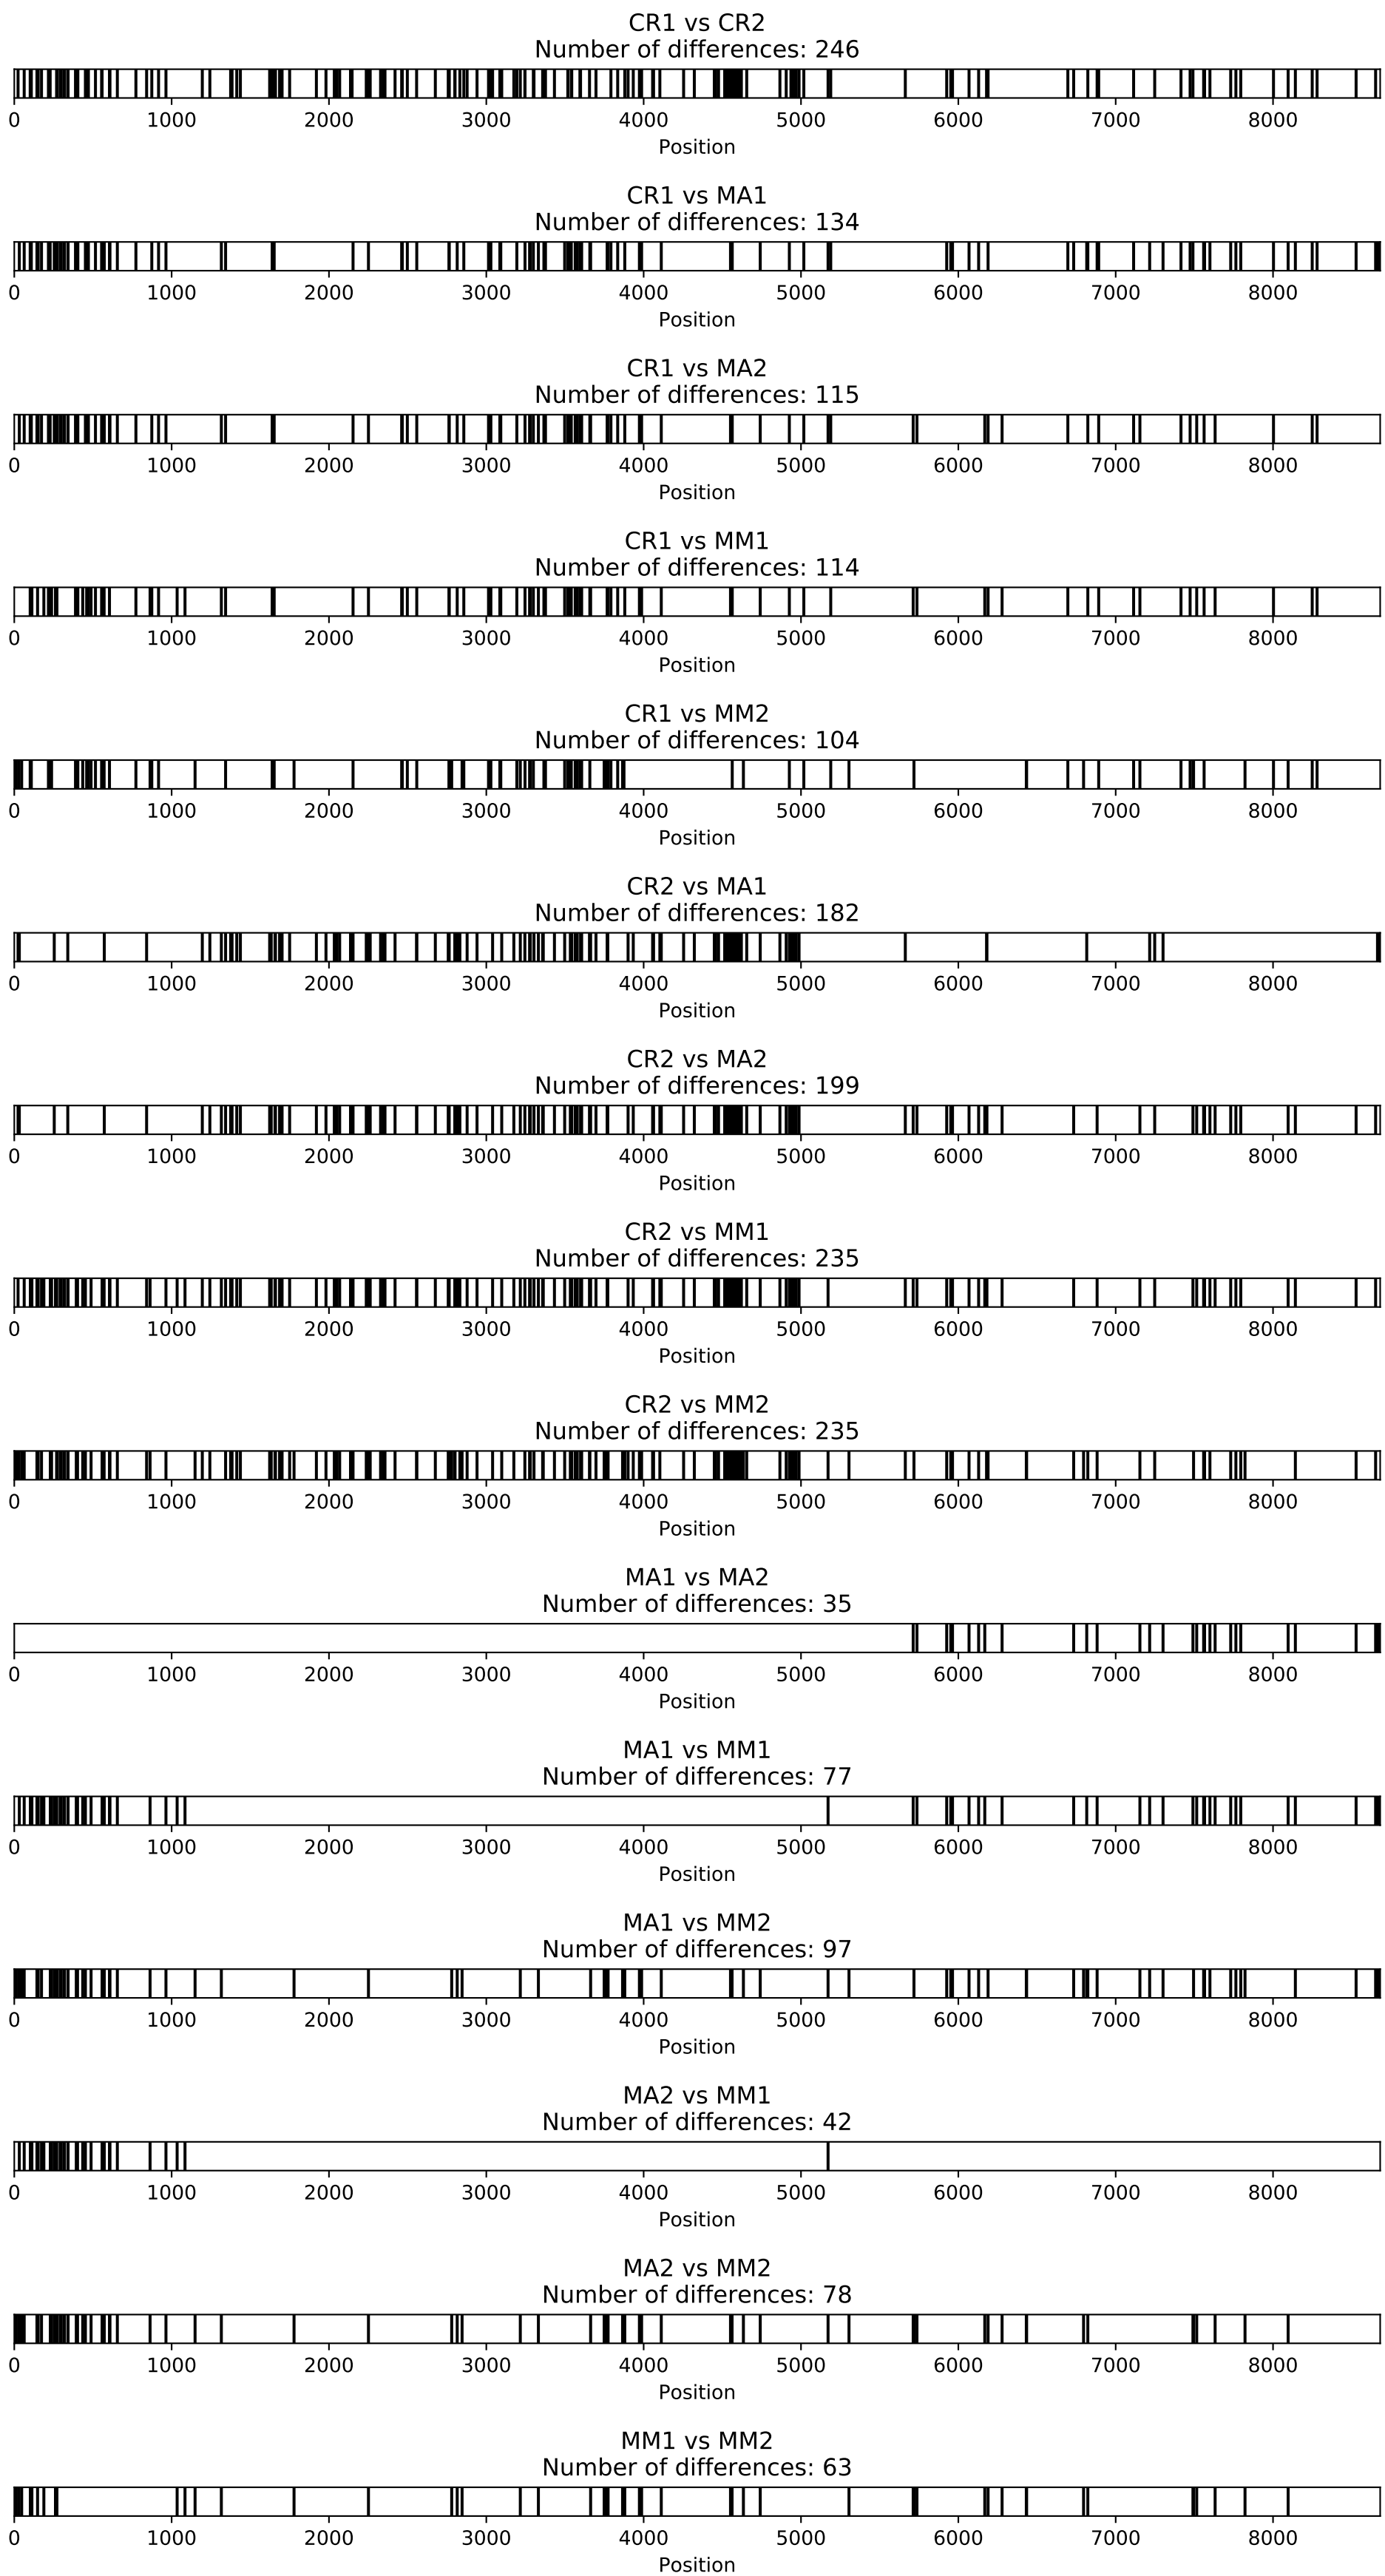

# Region: 442

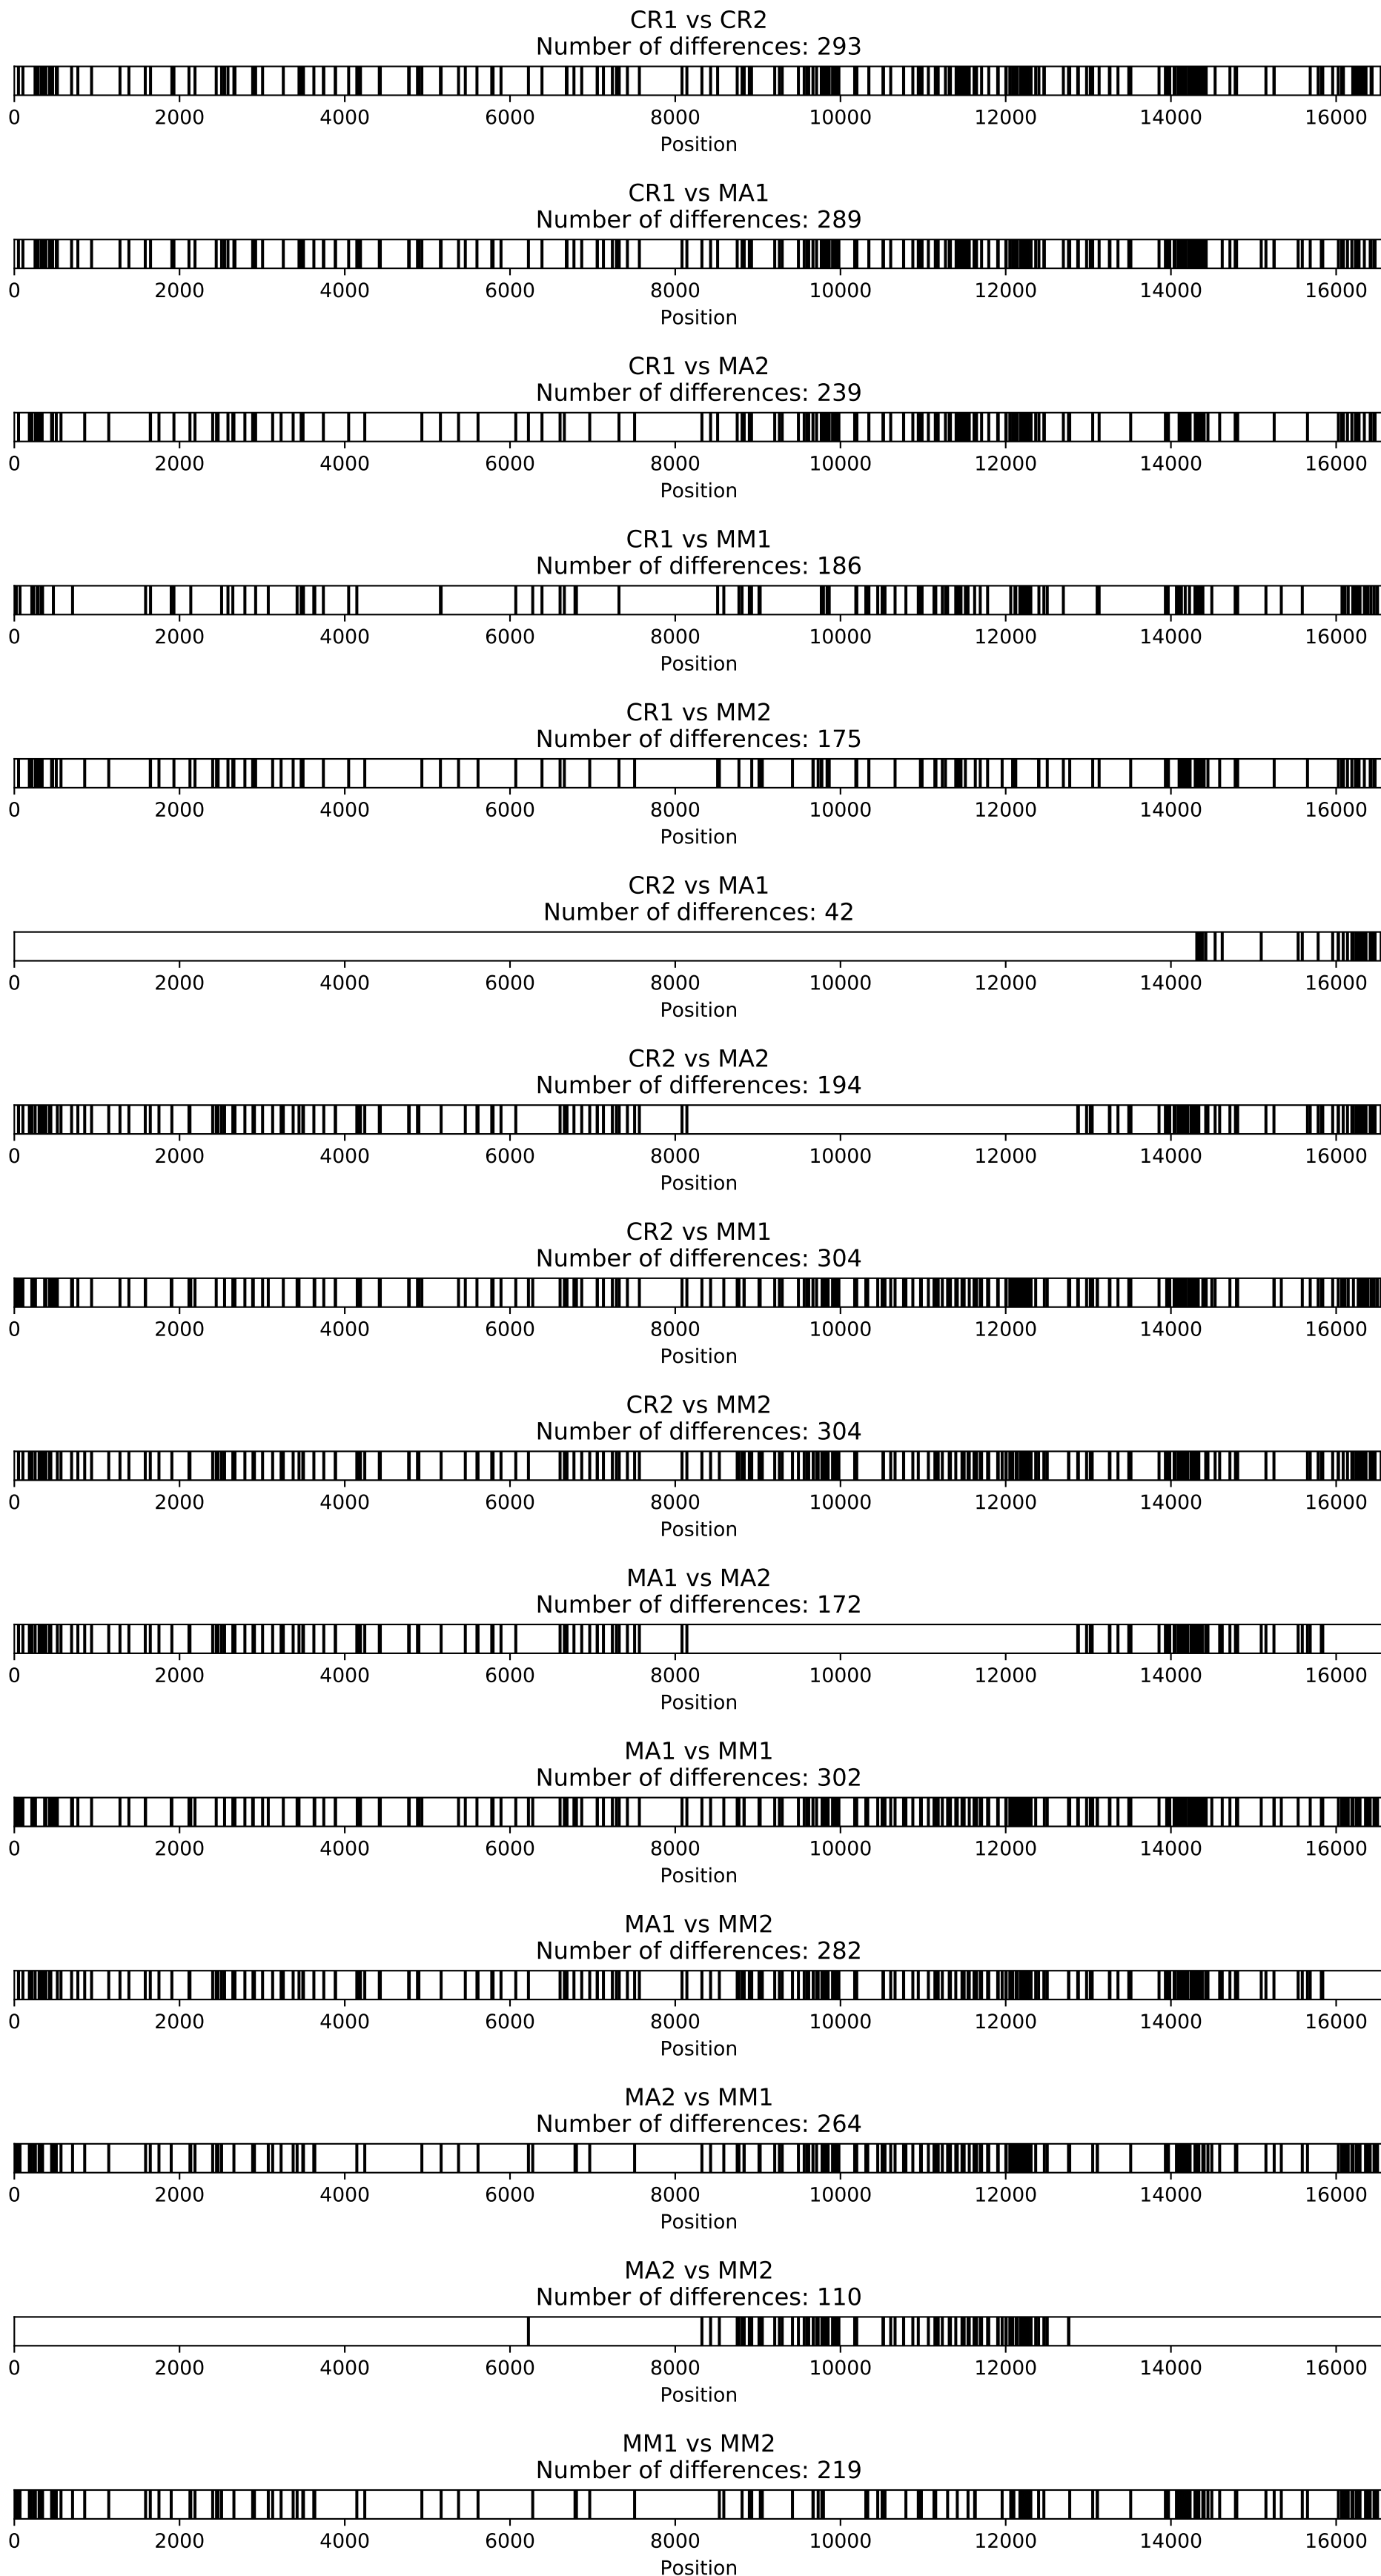



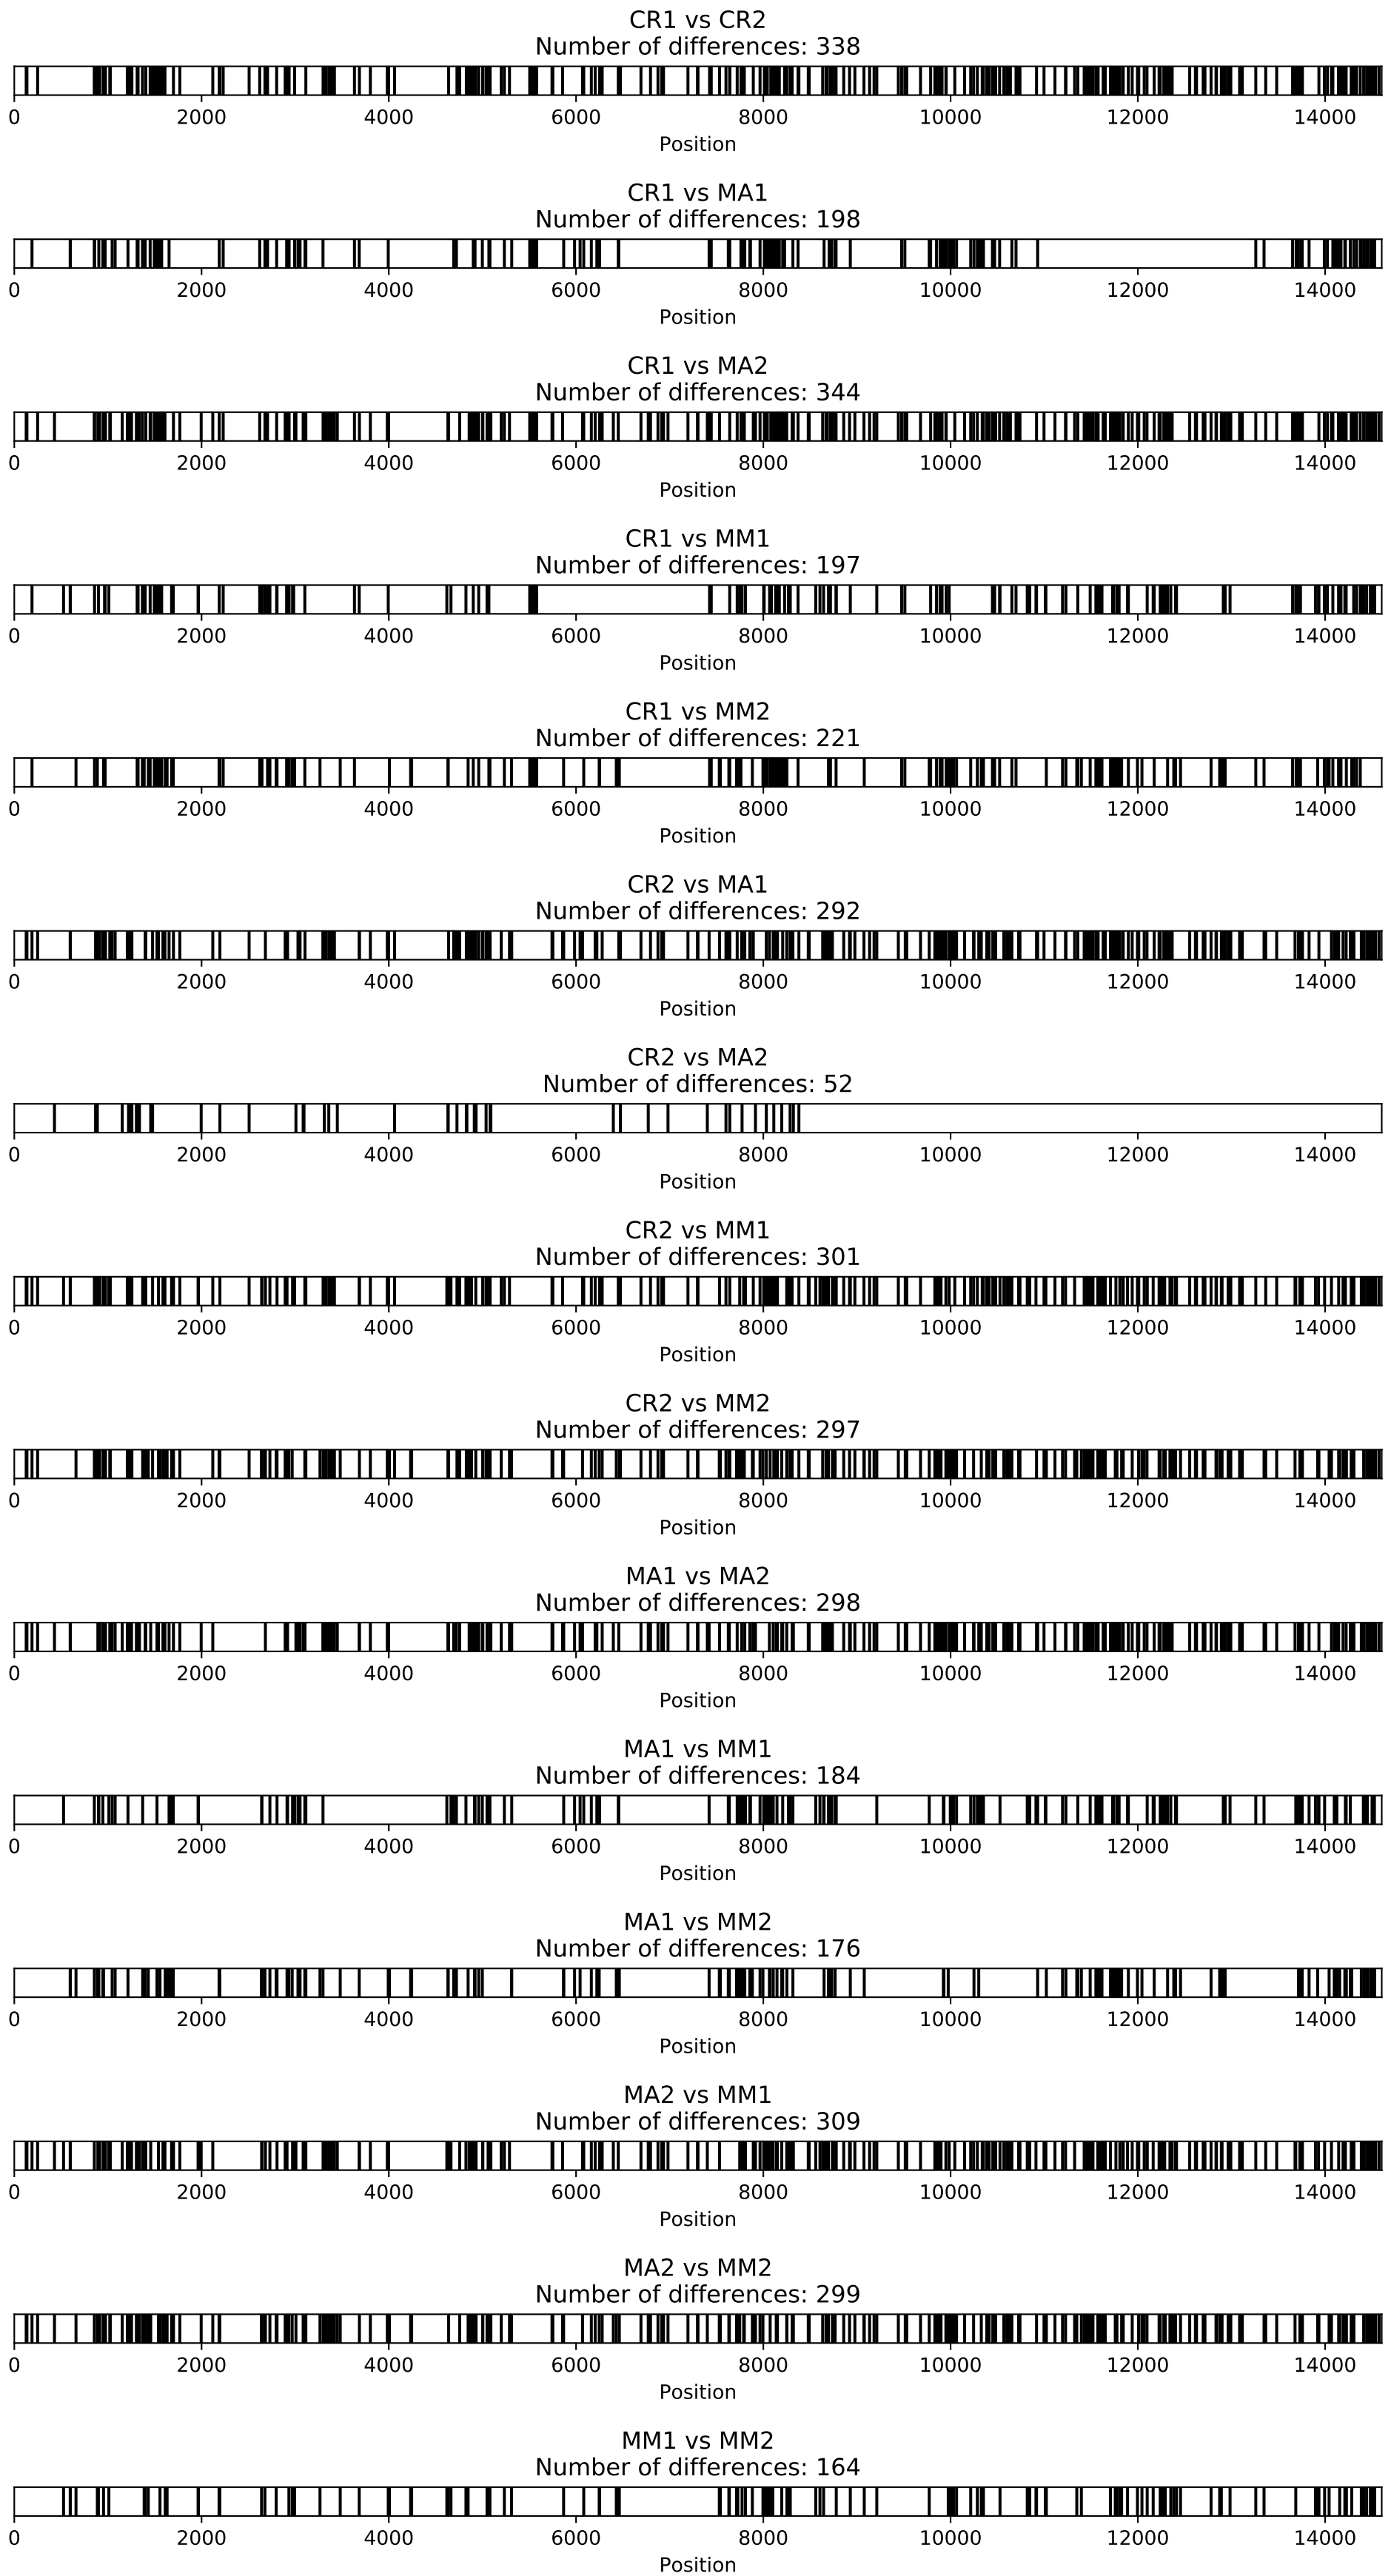

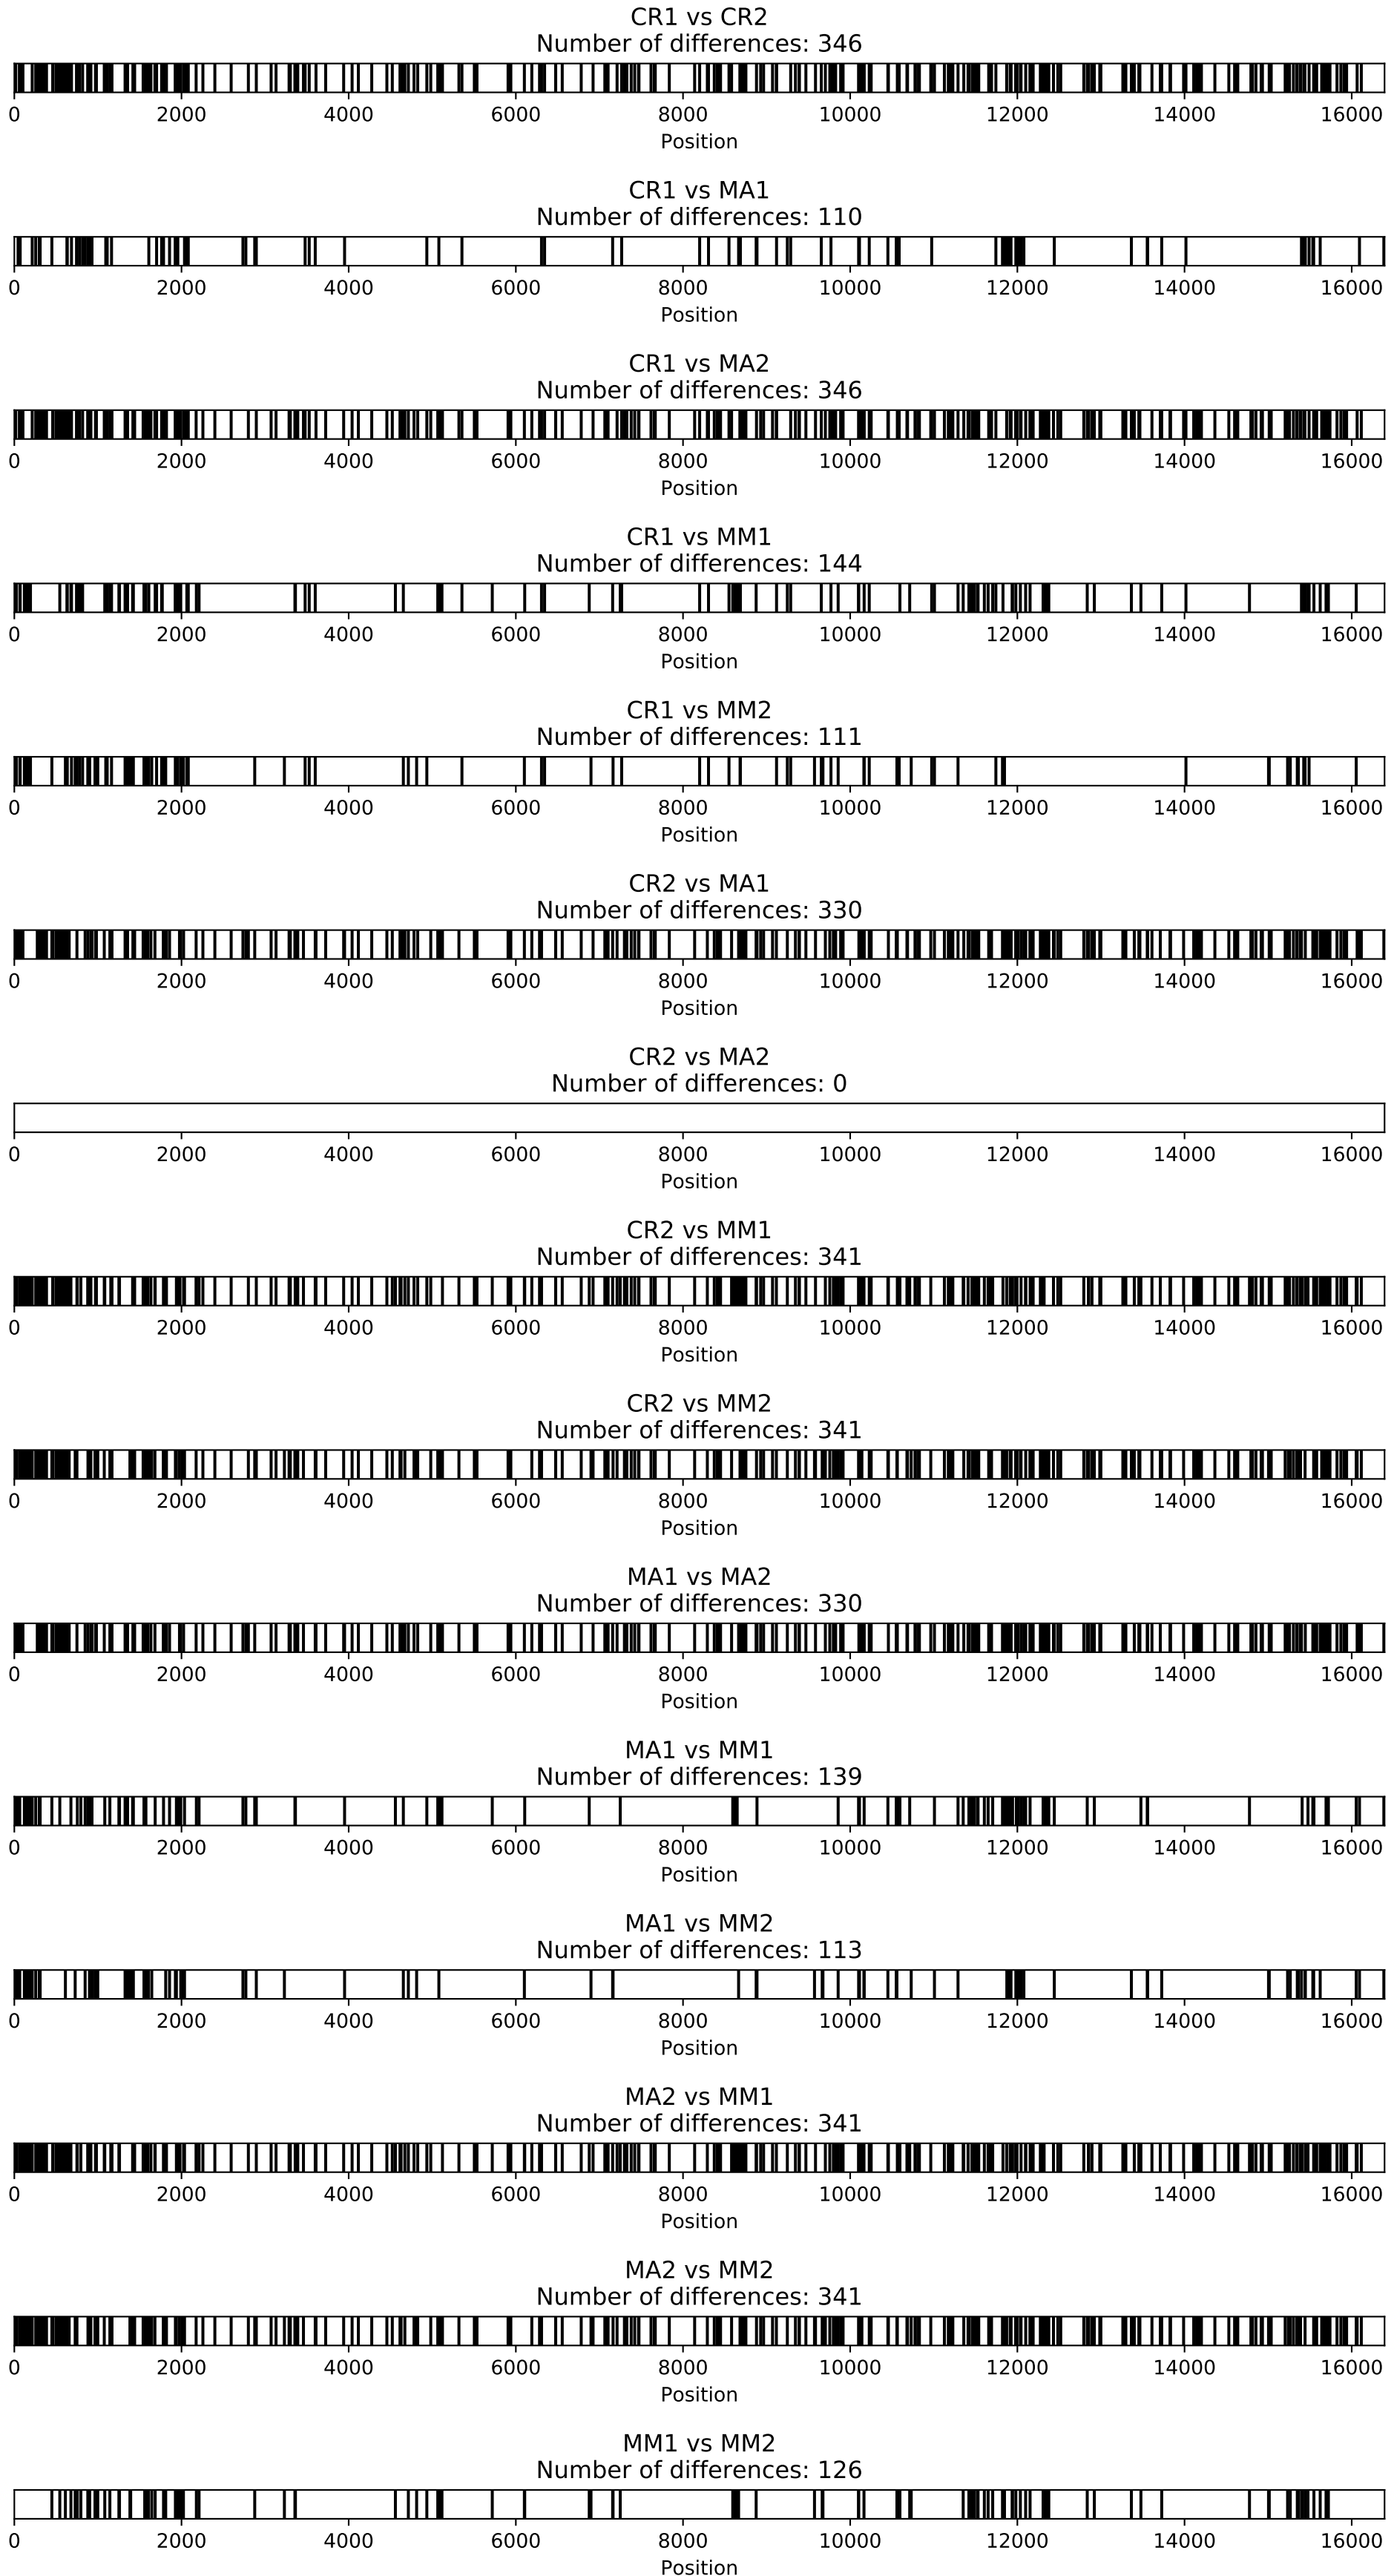

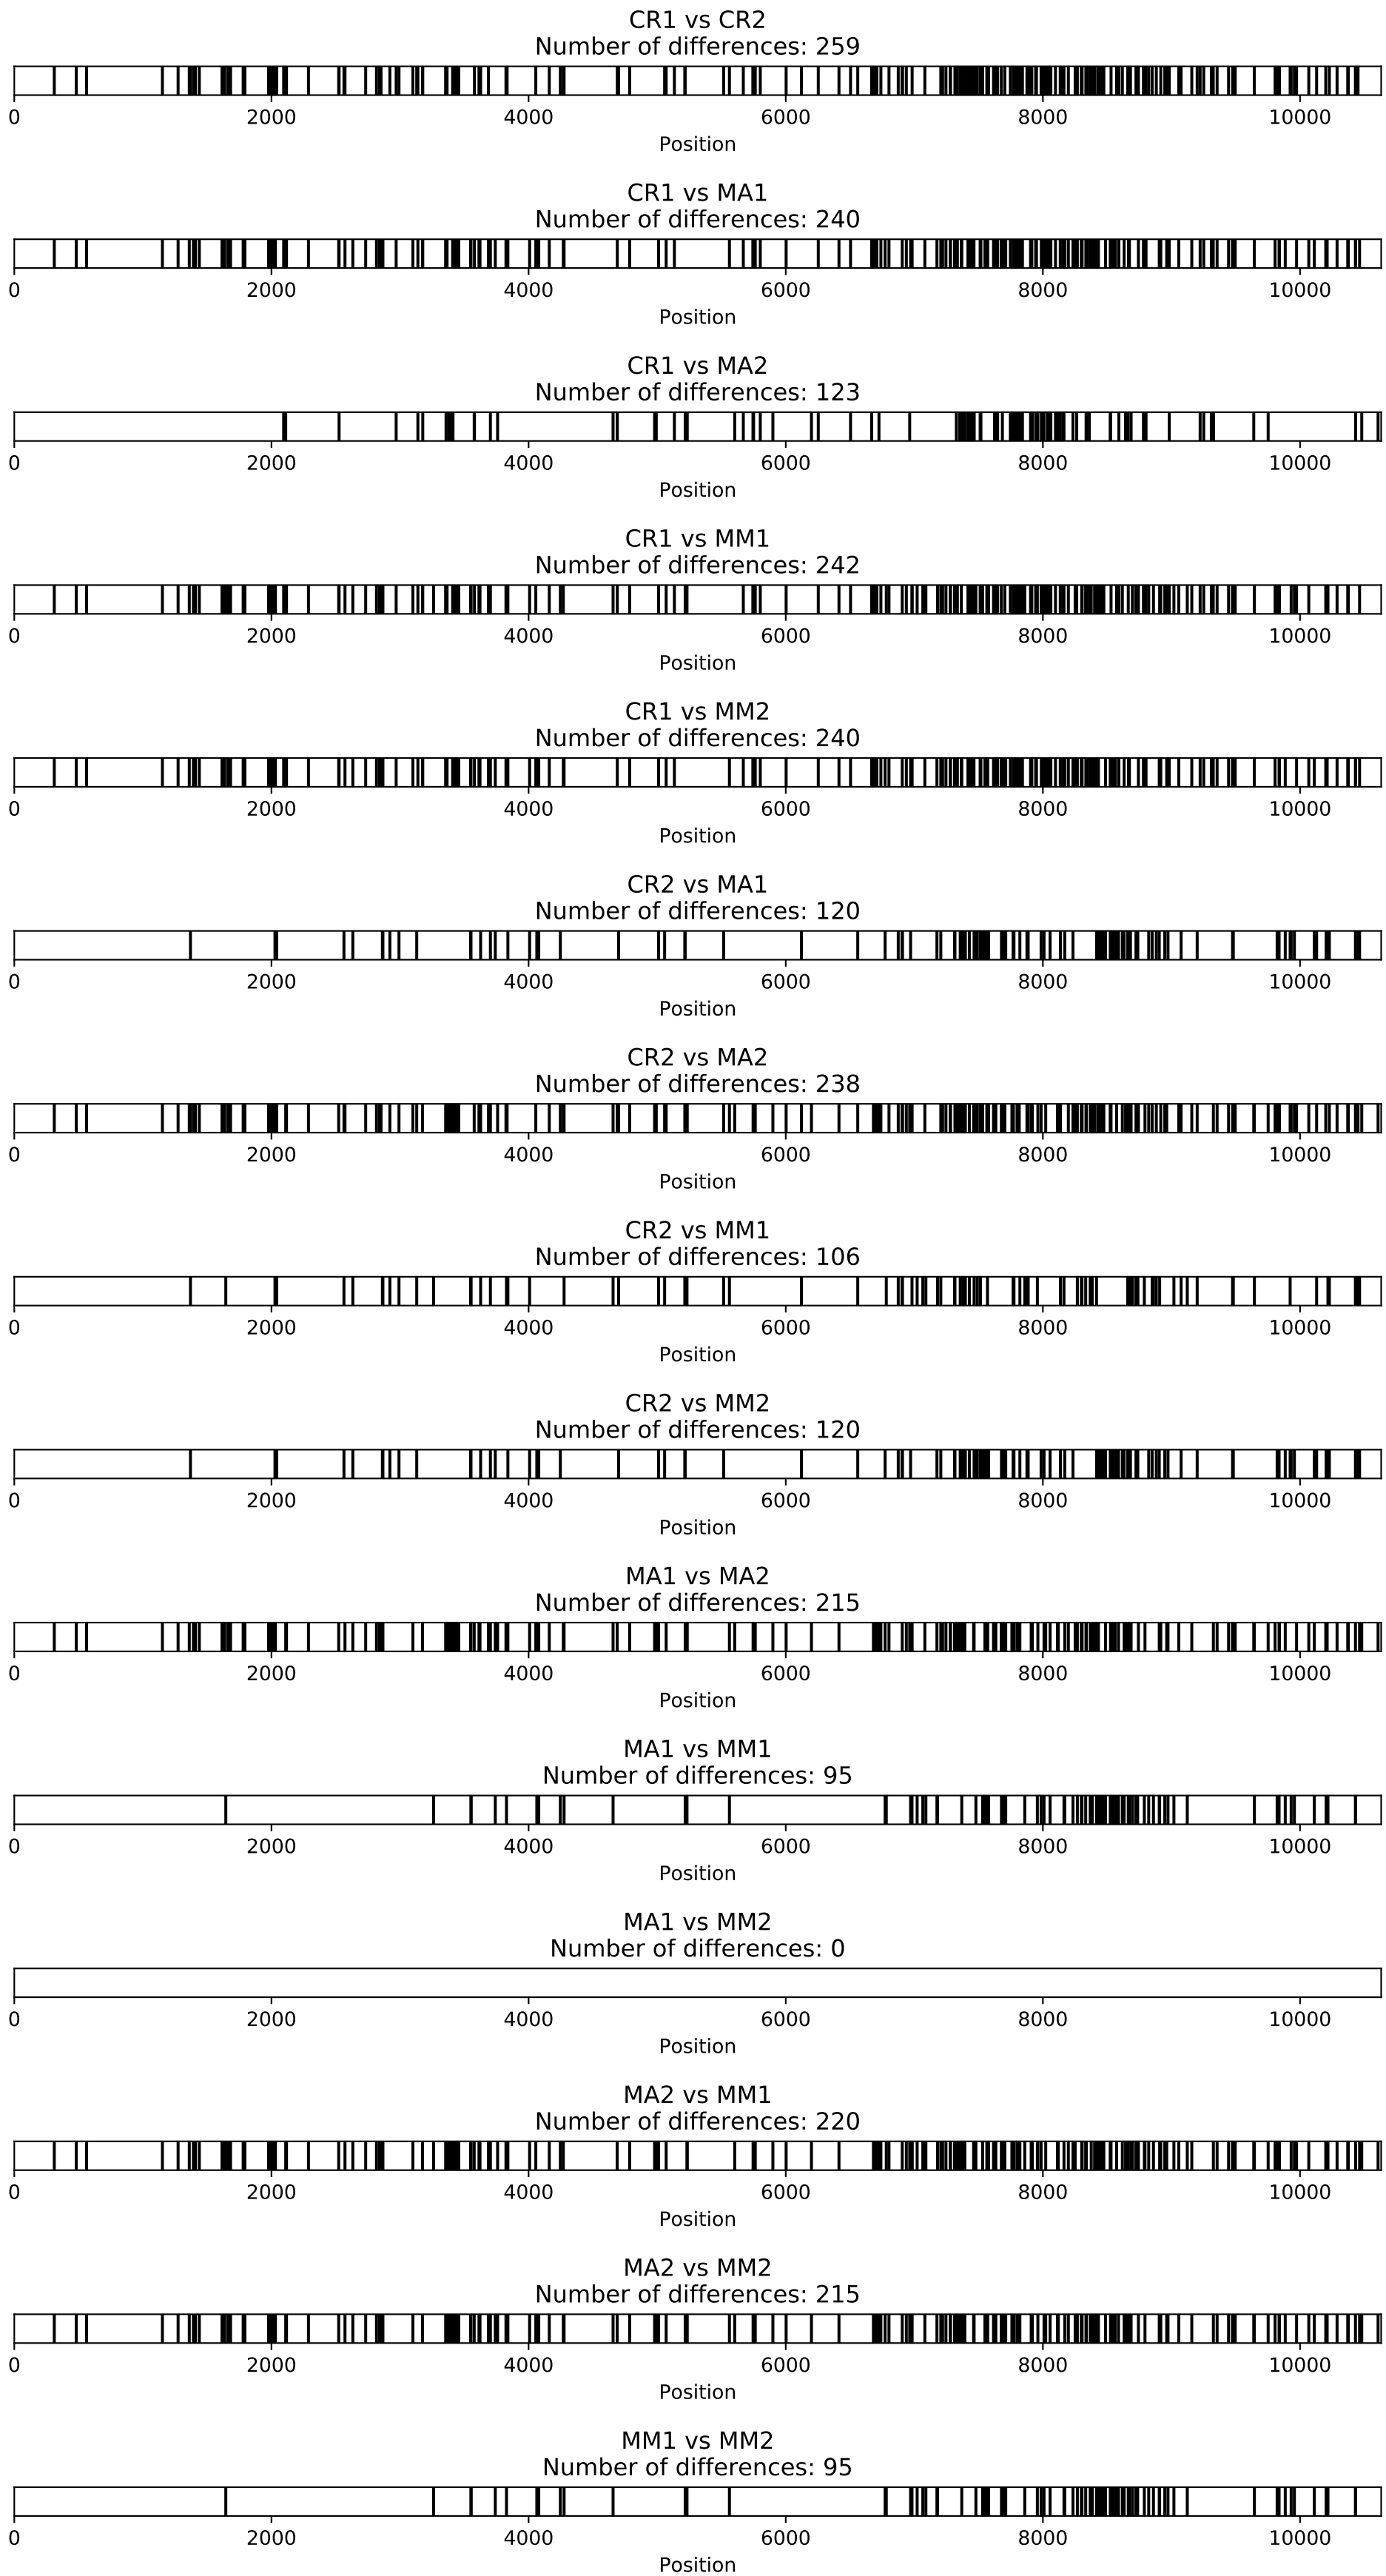

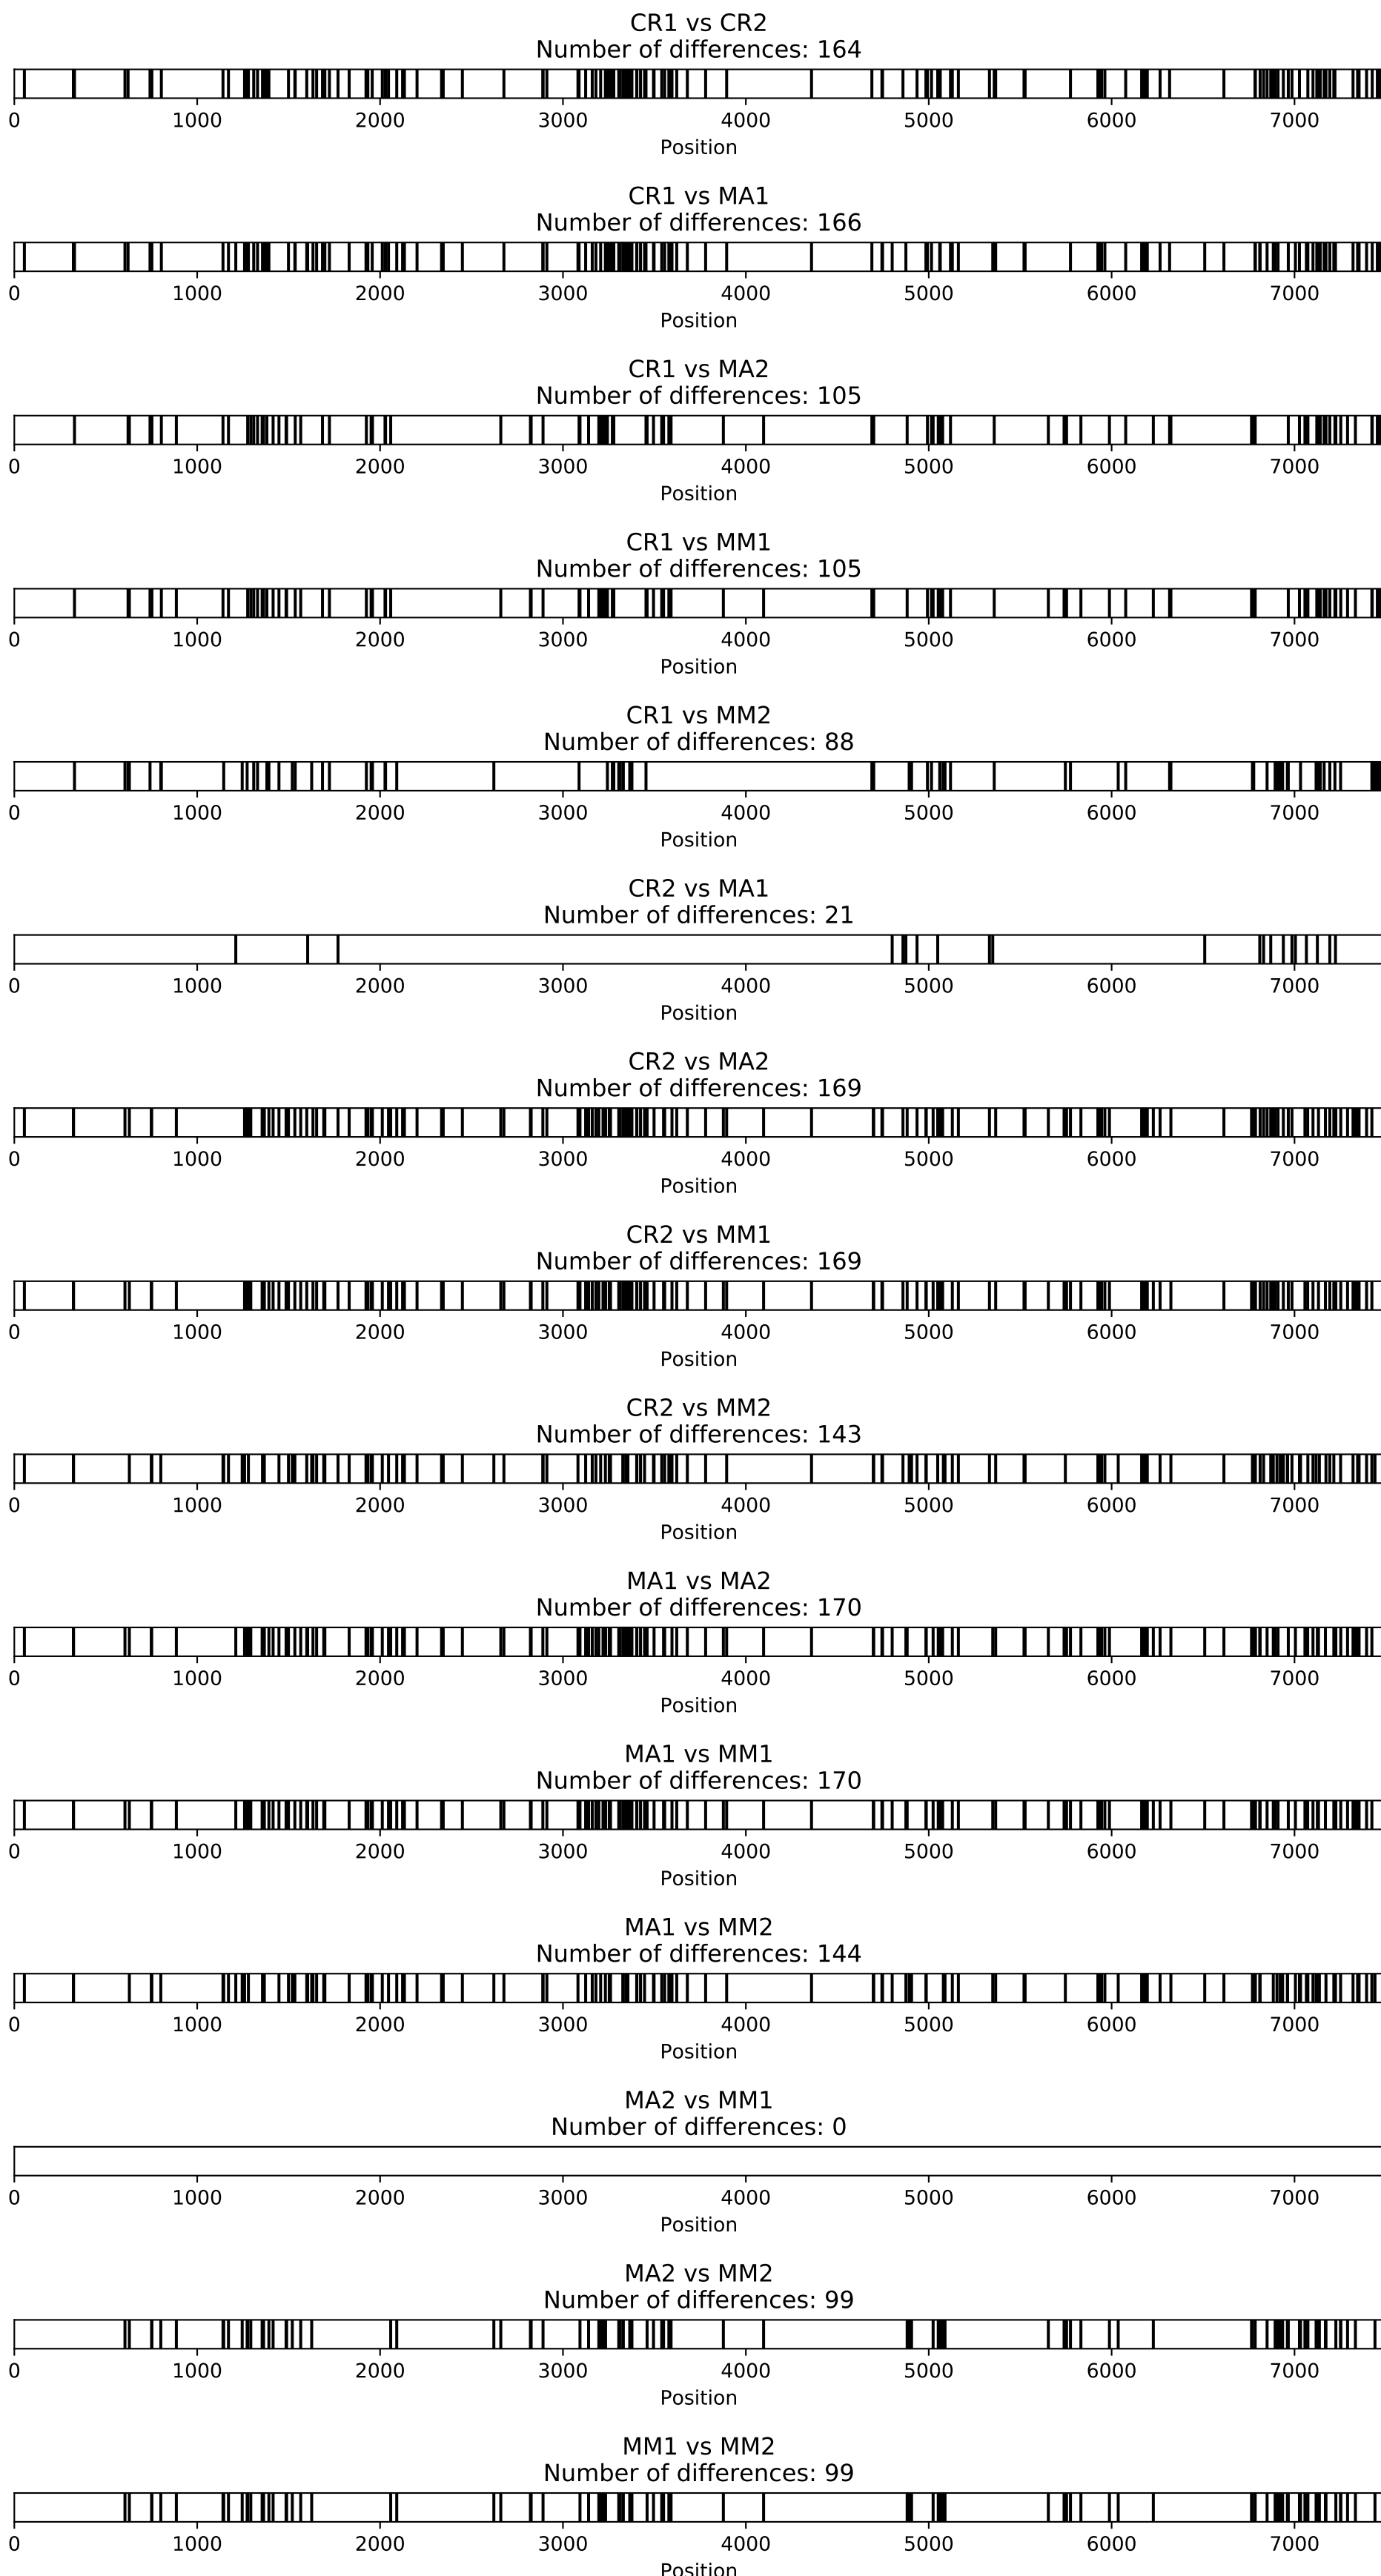

### Region: 453

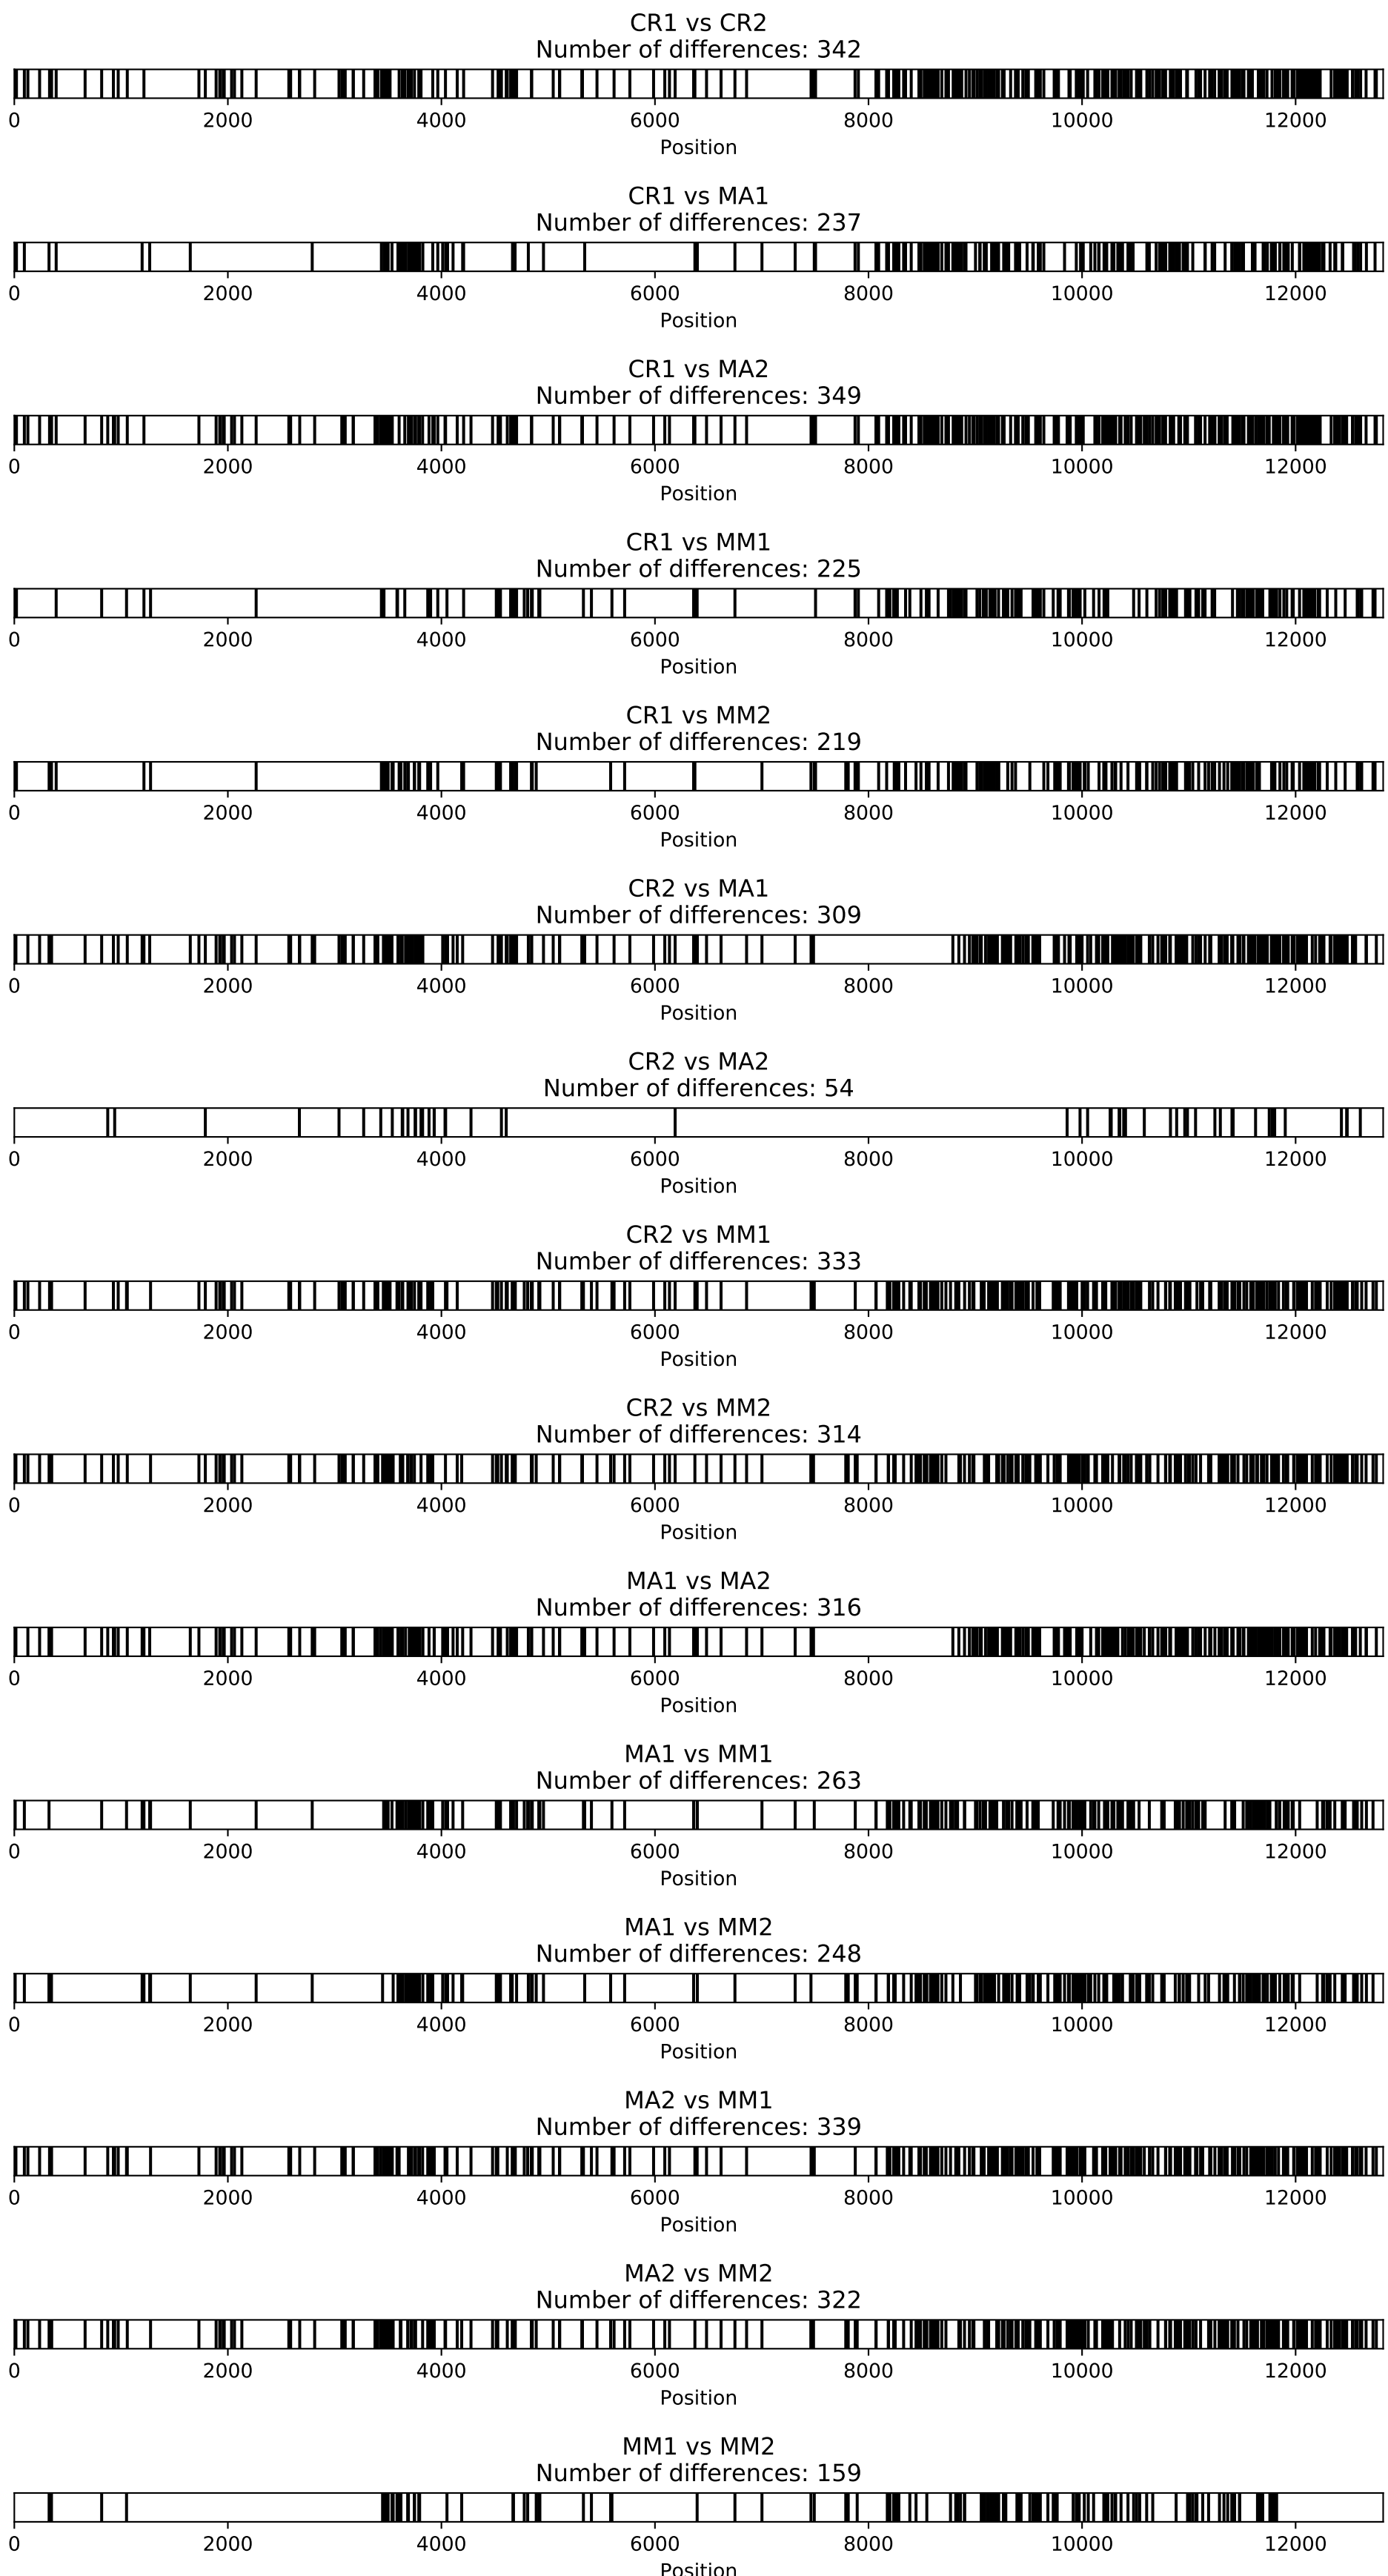

# Region: 454

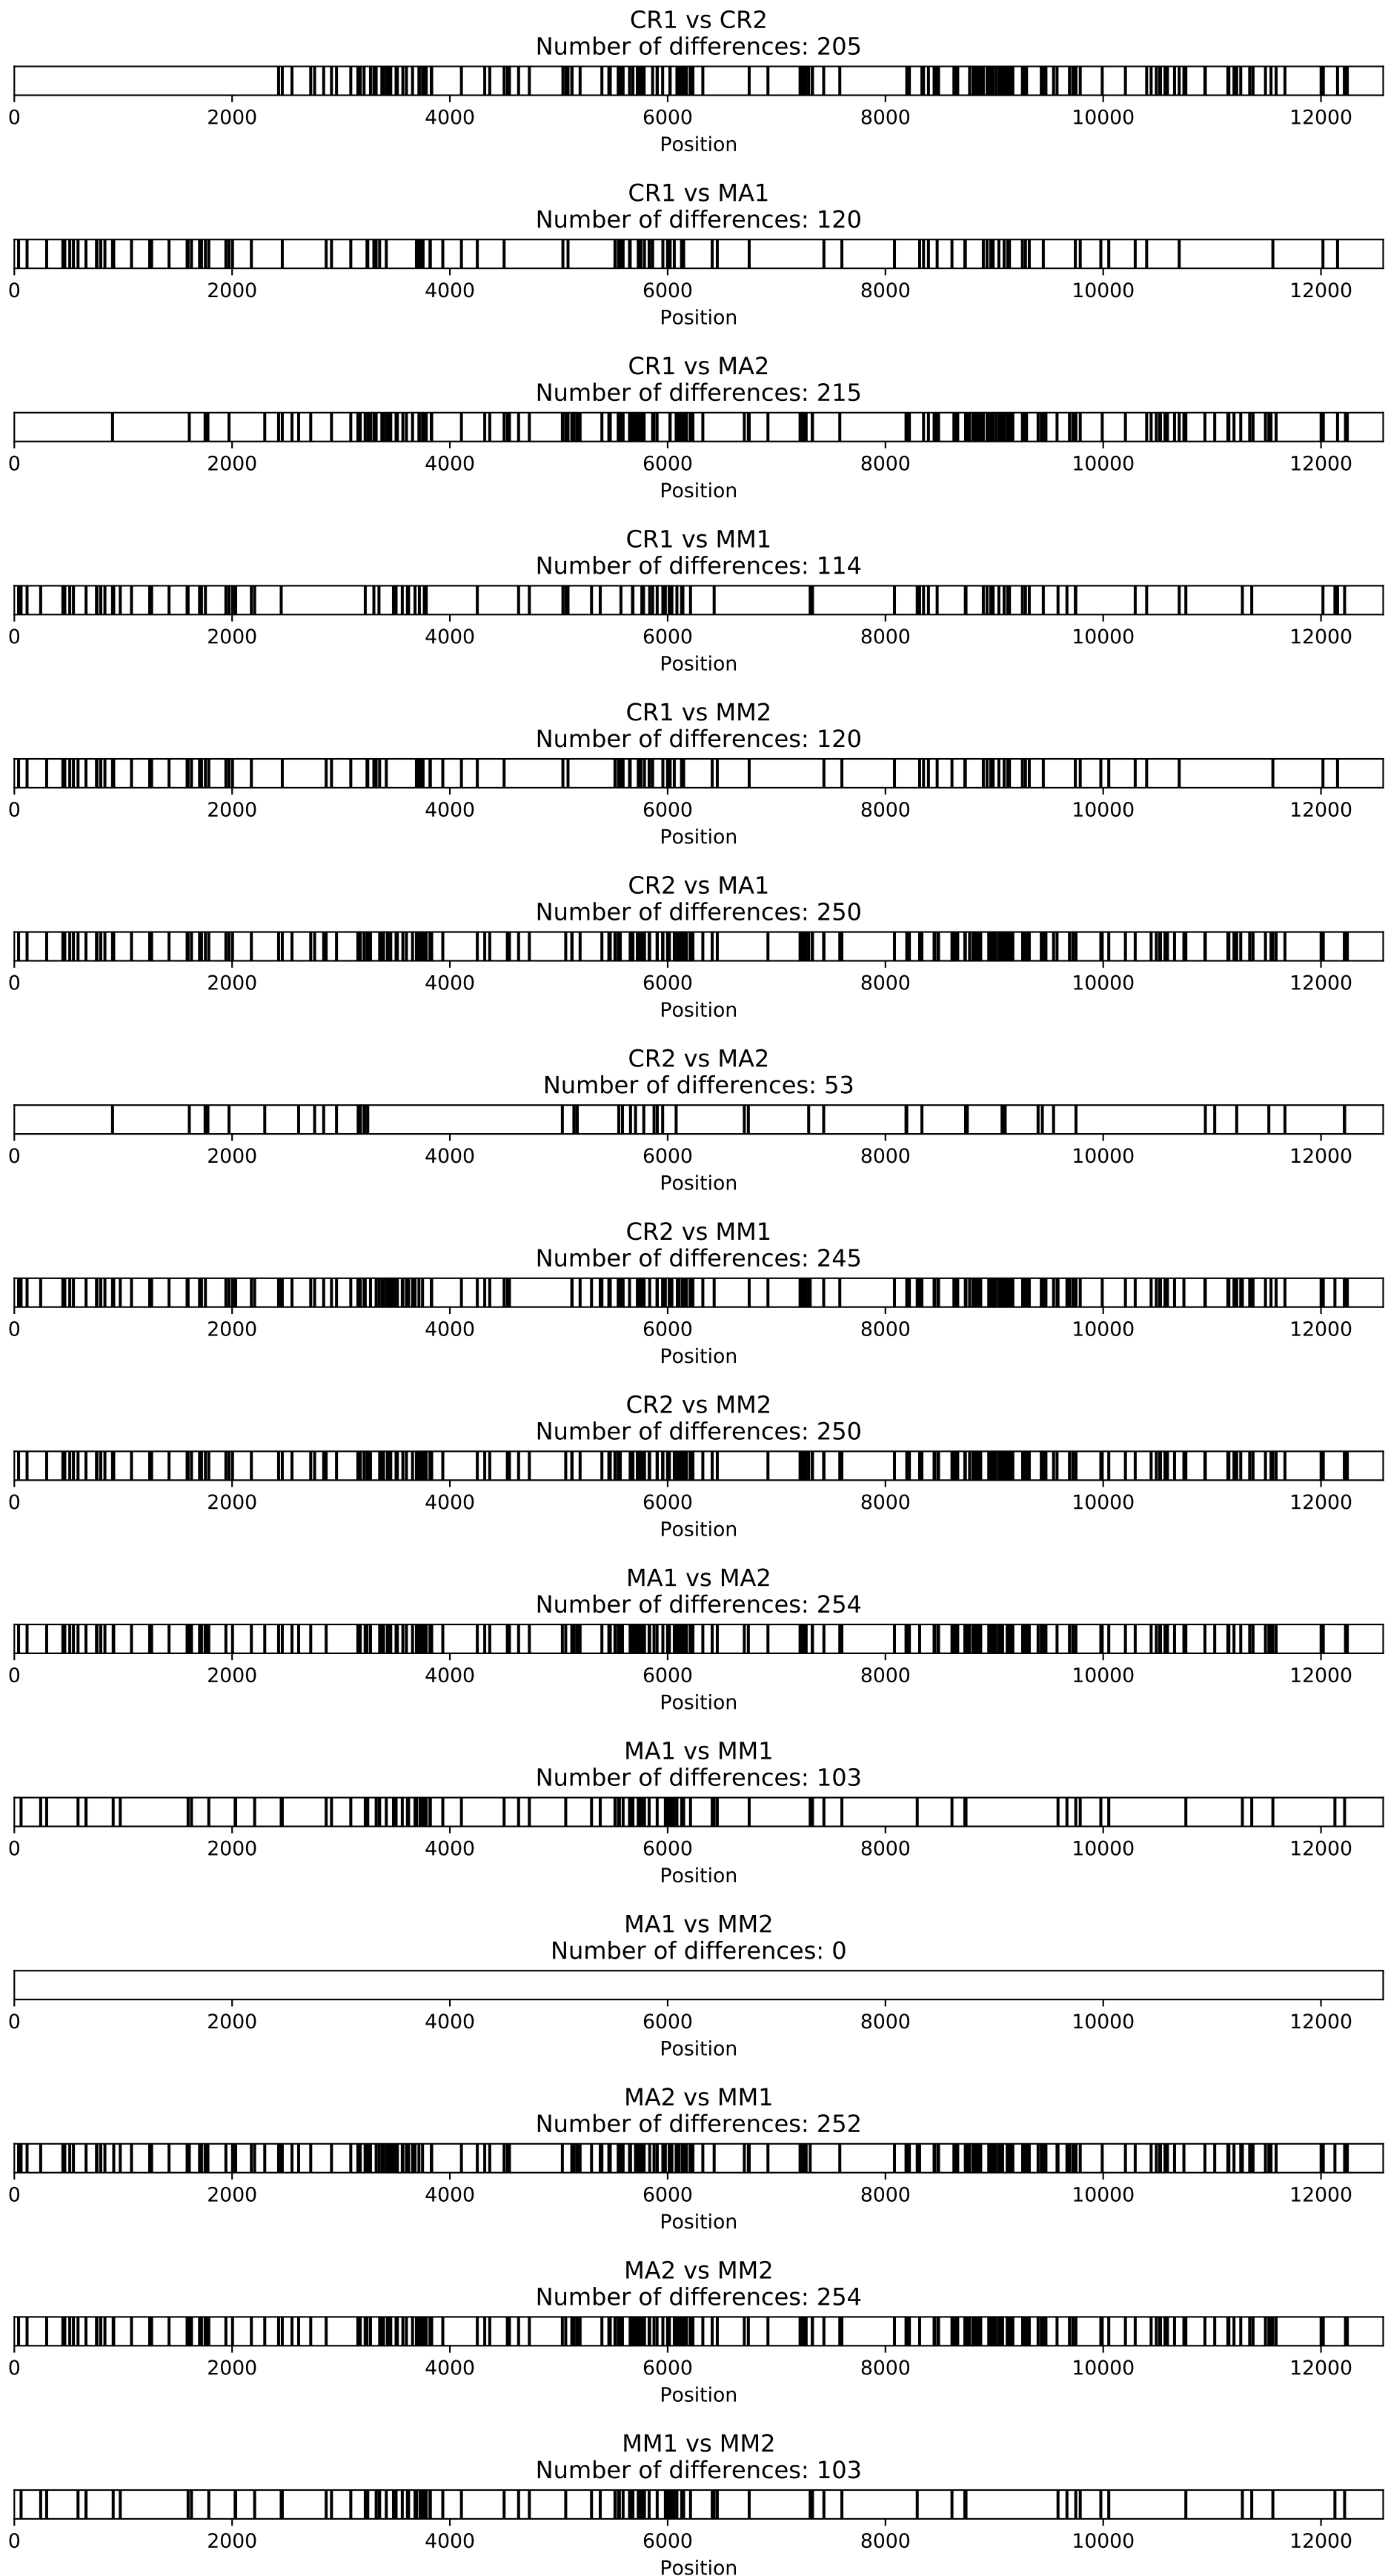

# Region: 456

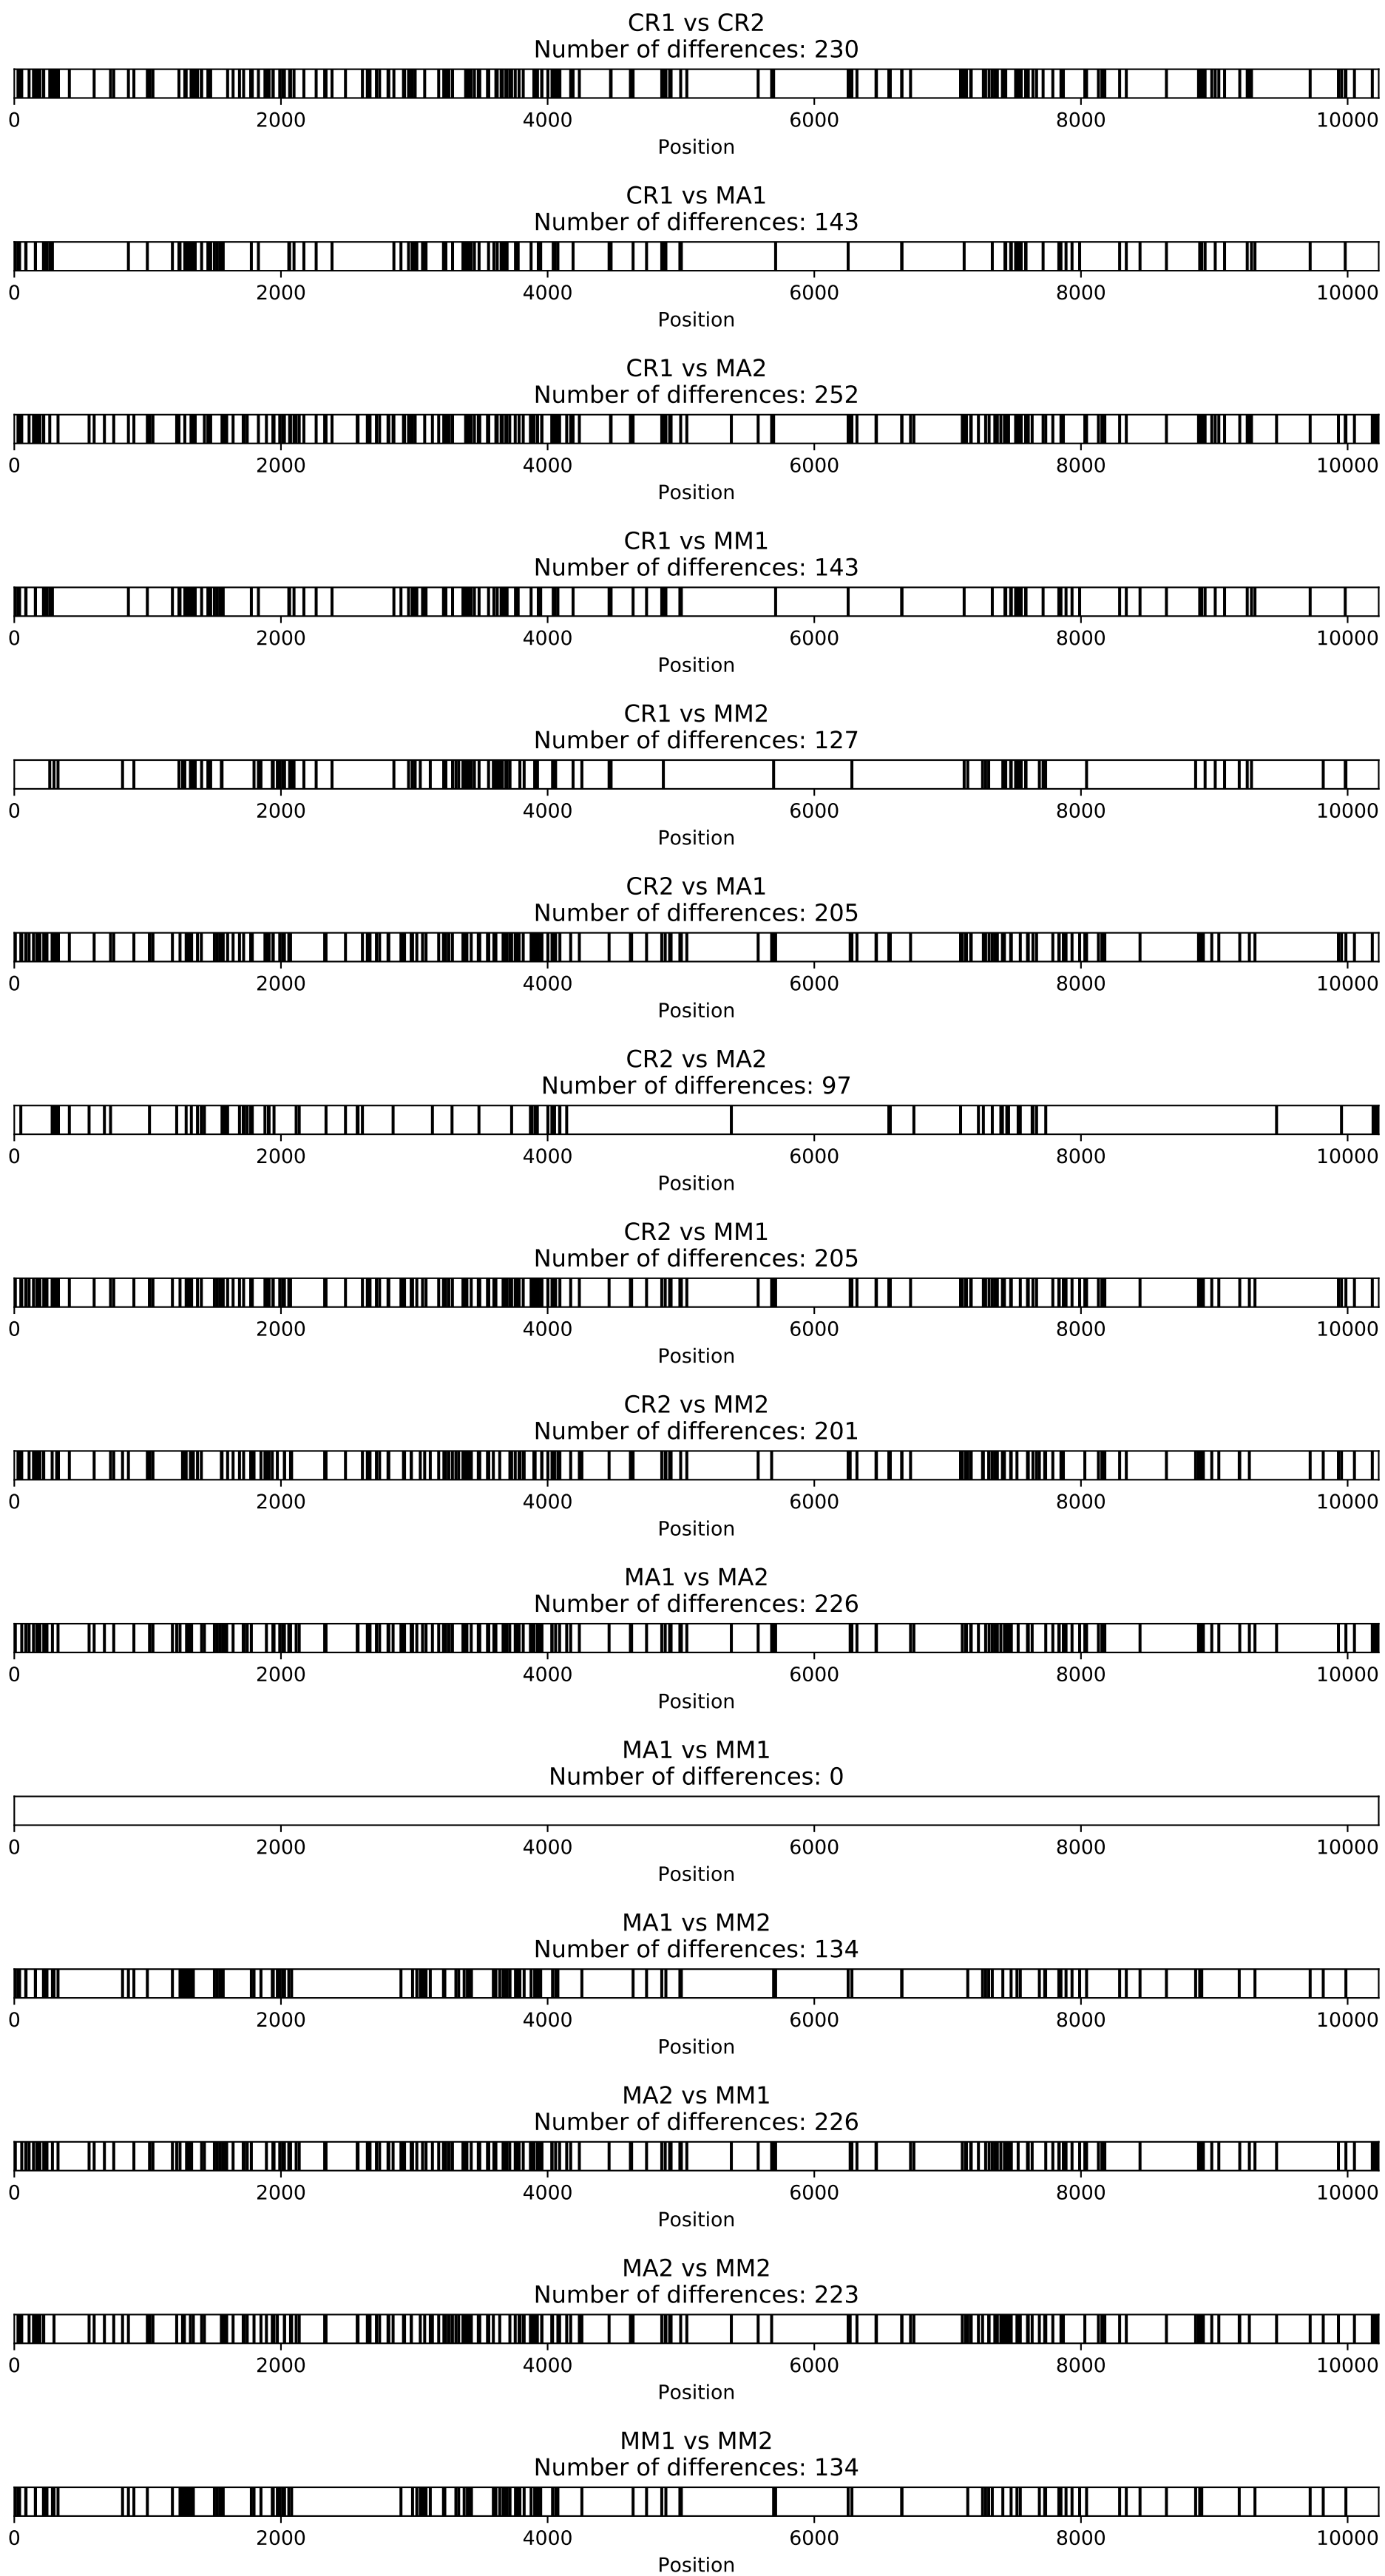

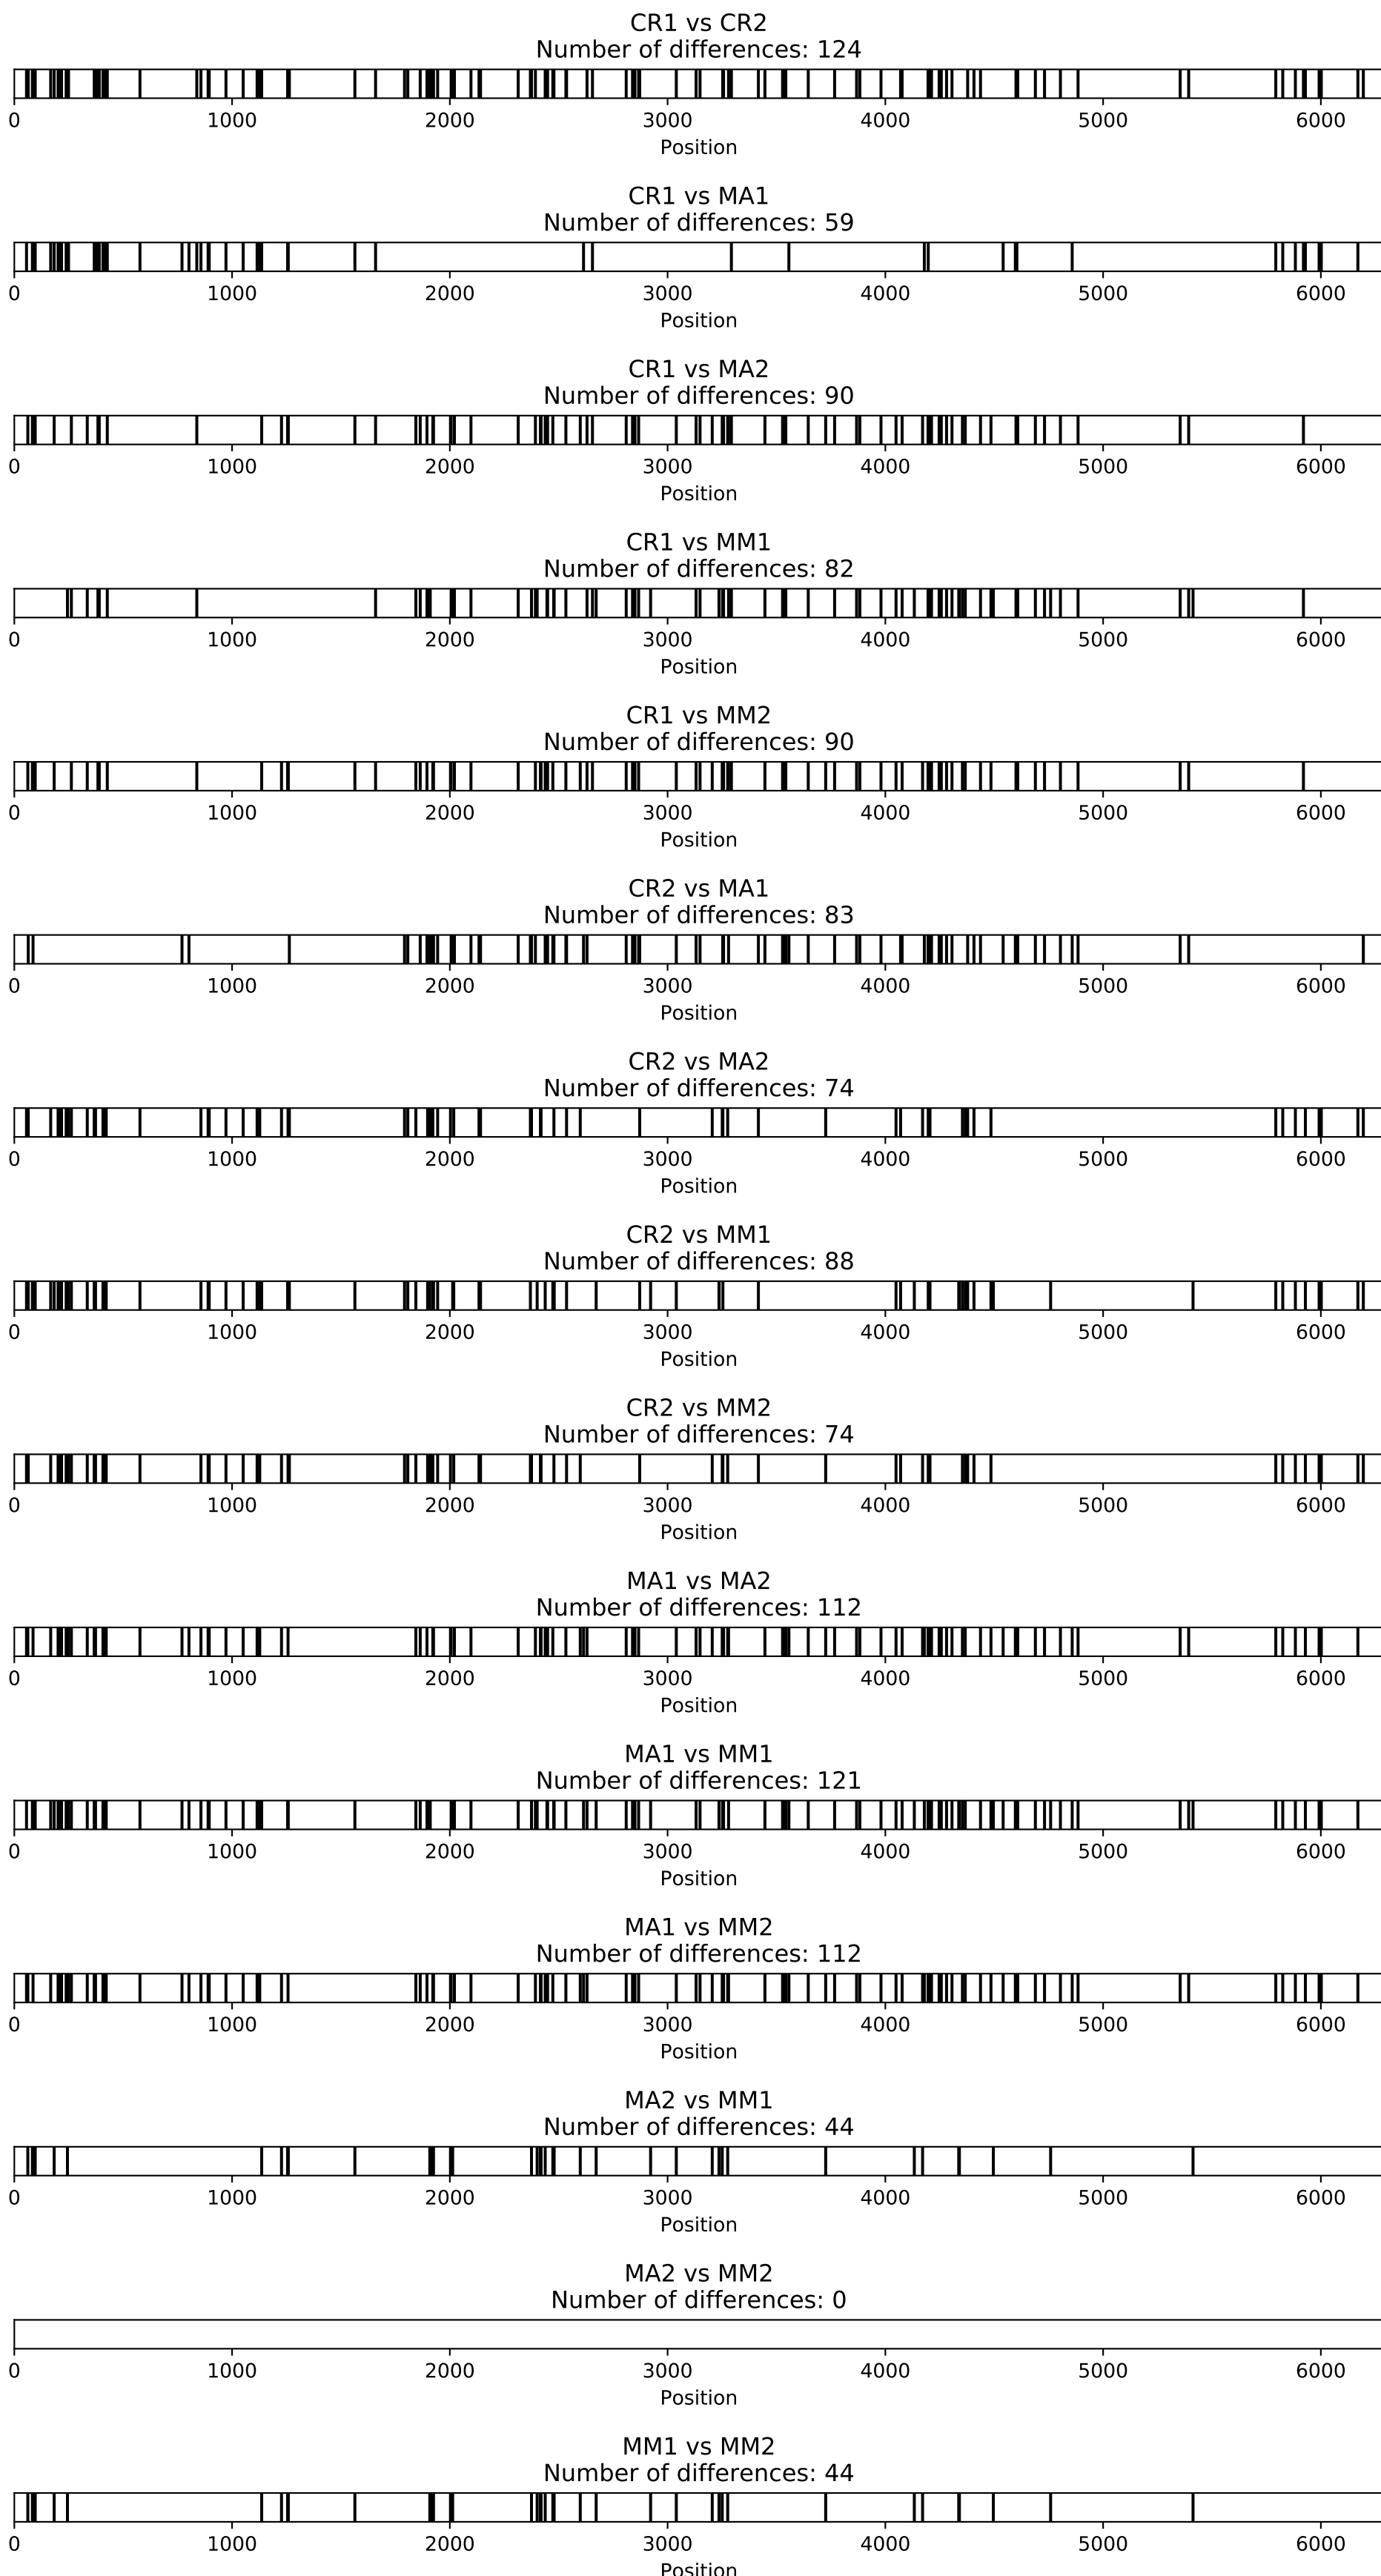



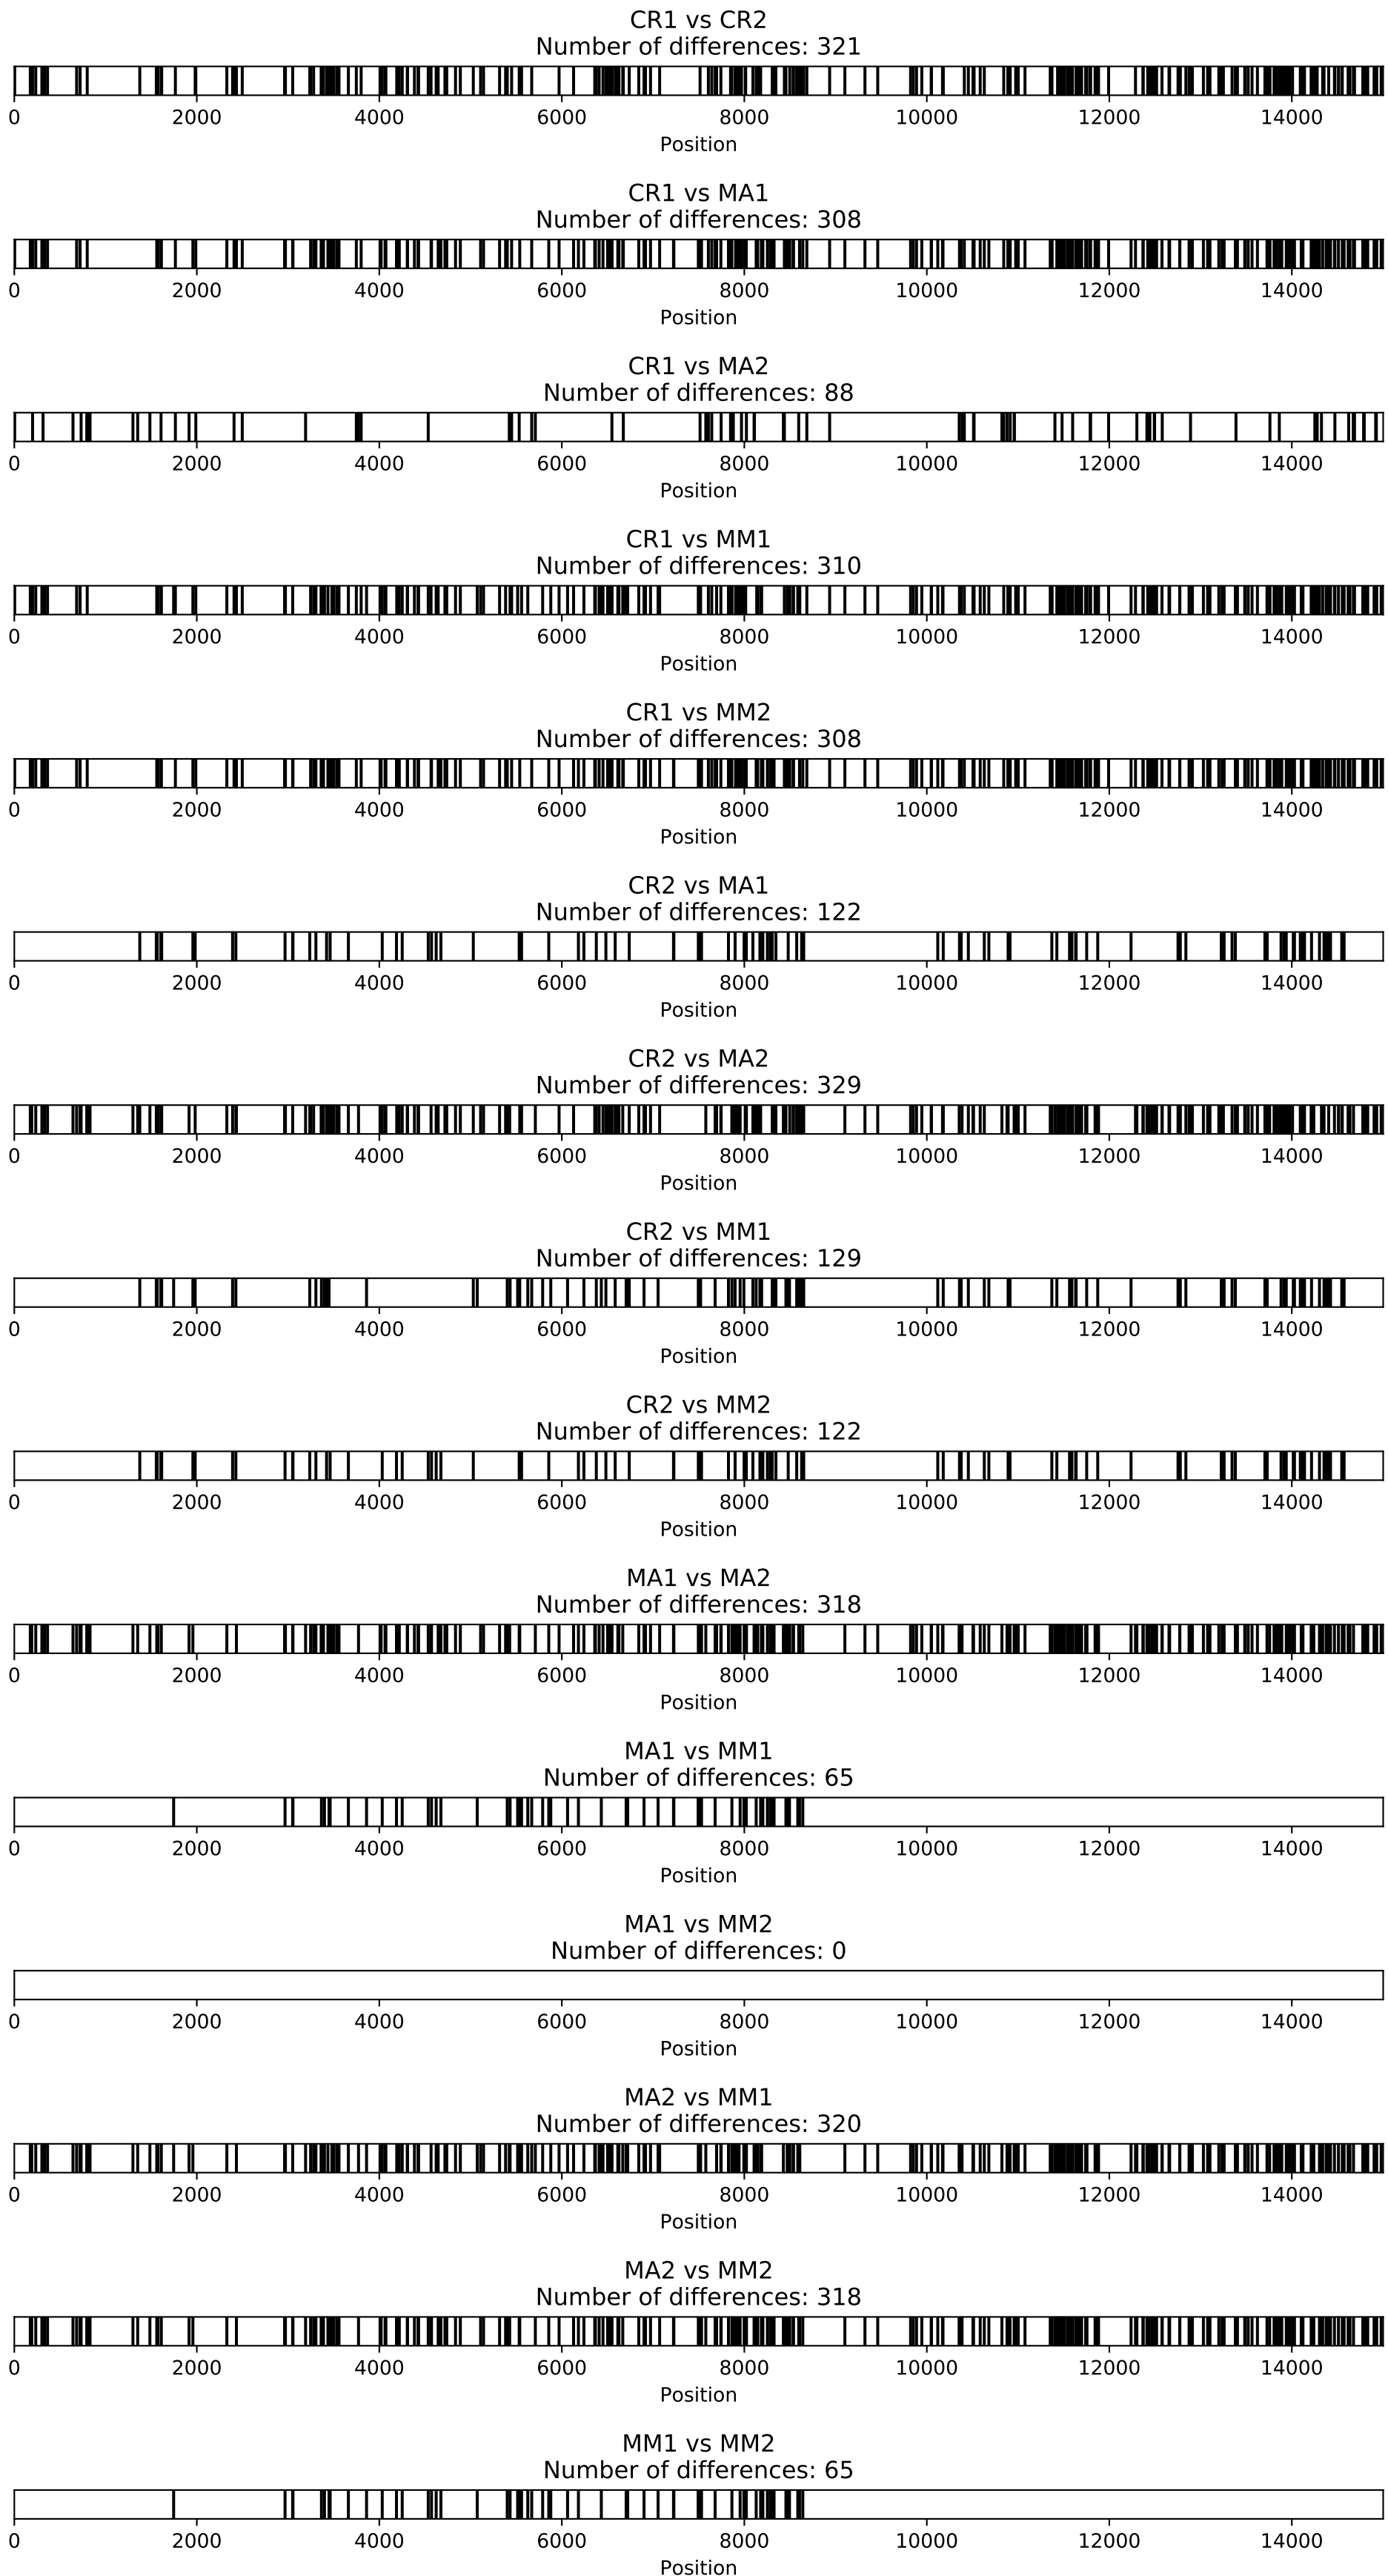

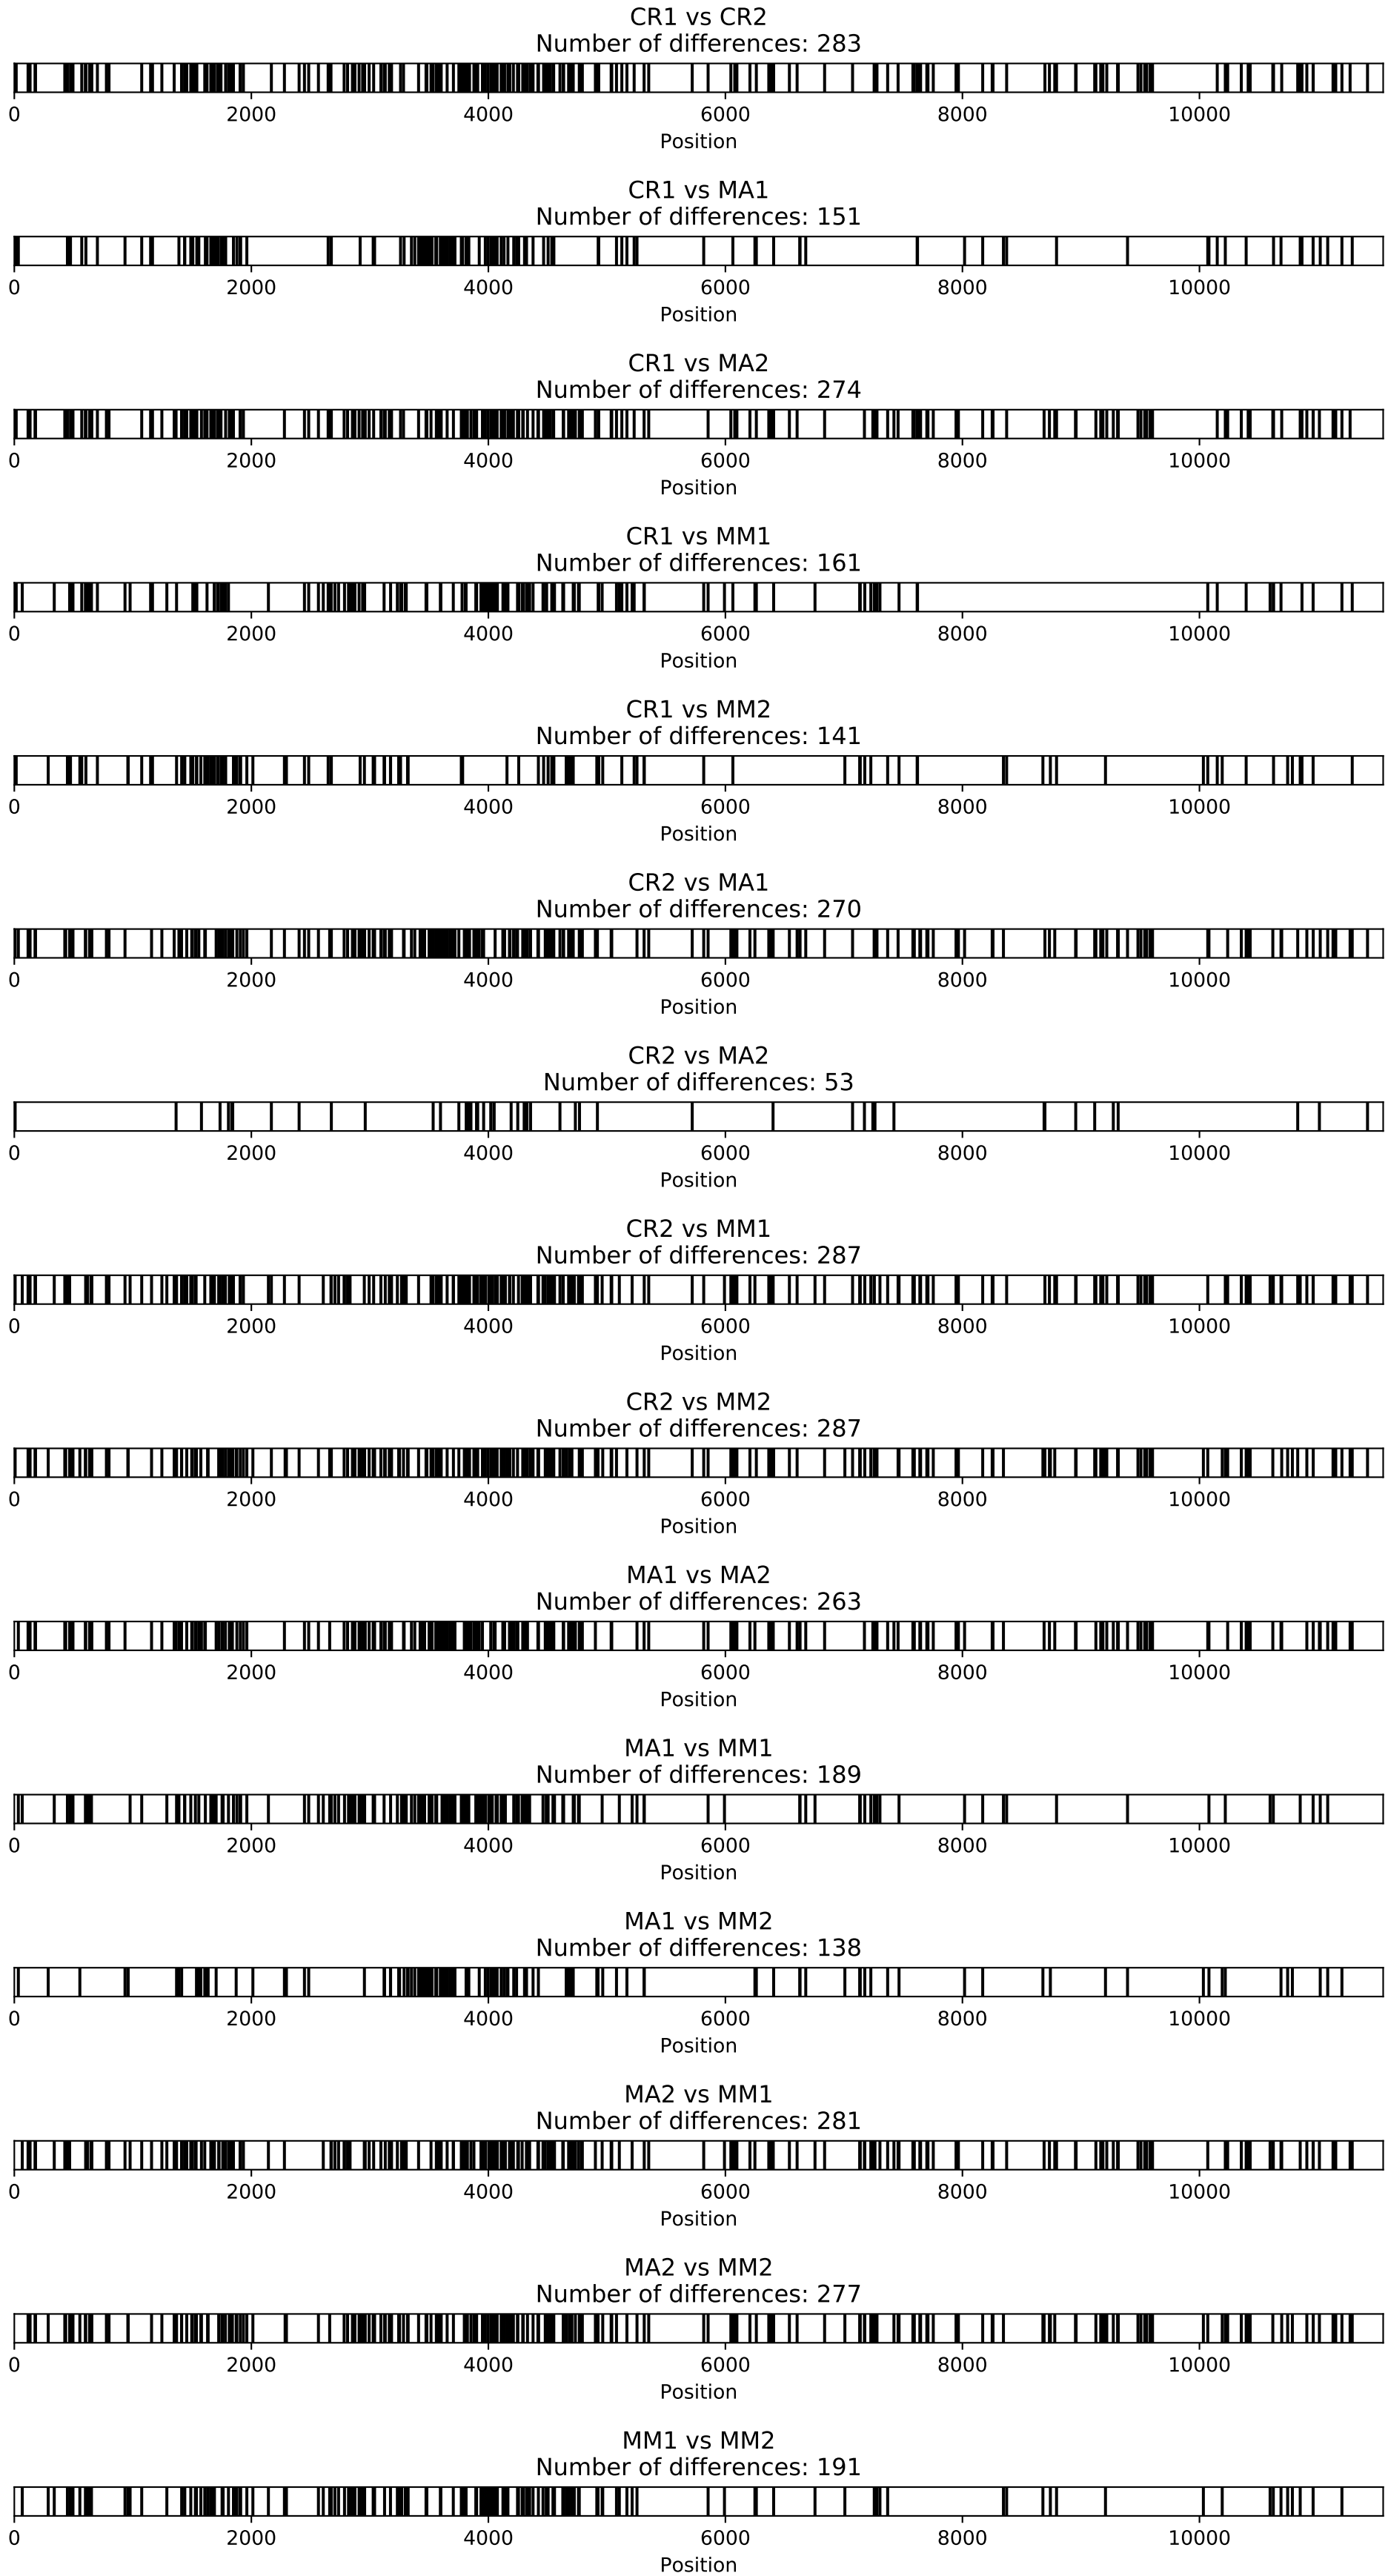

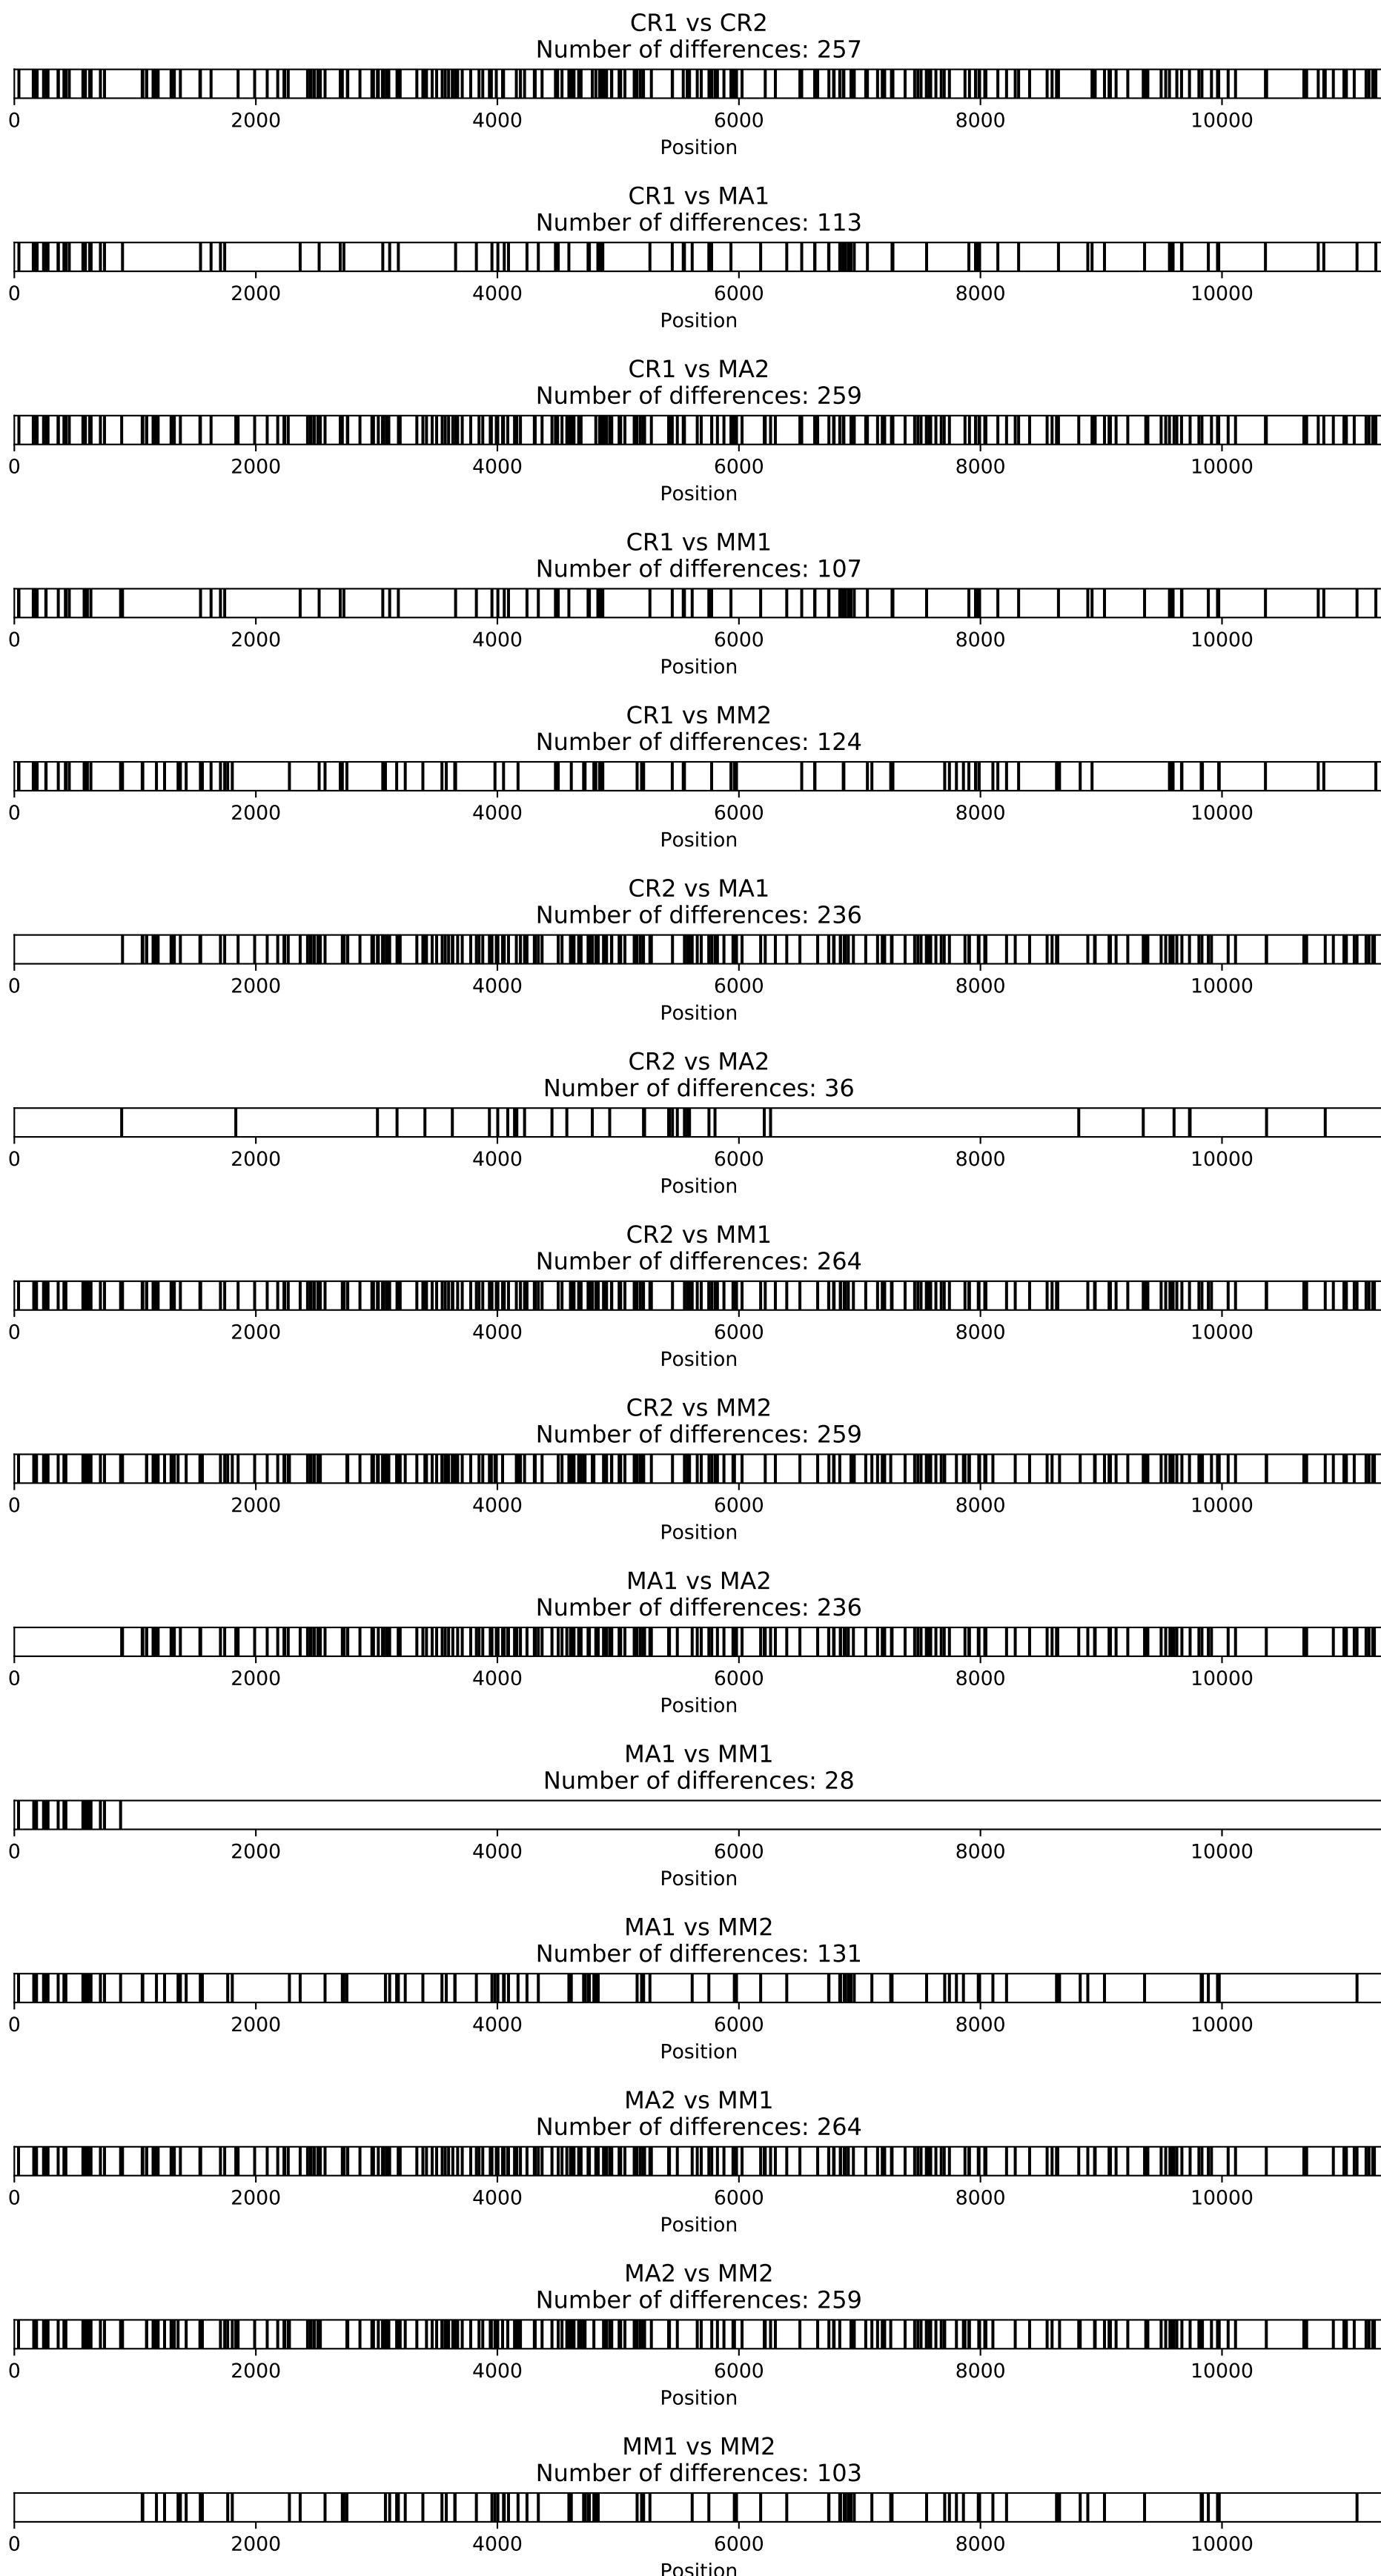

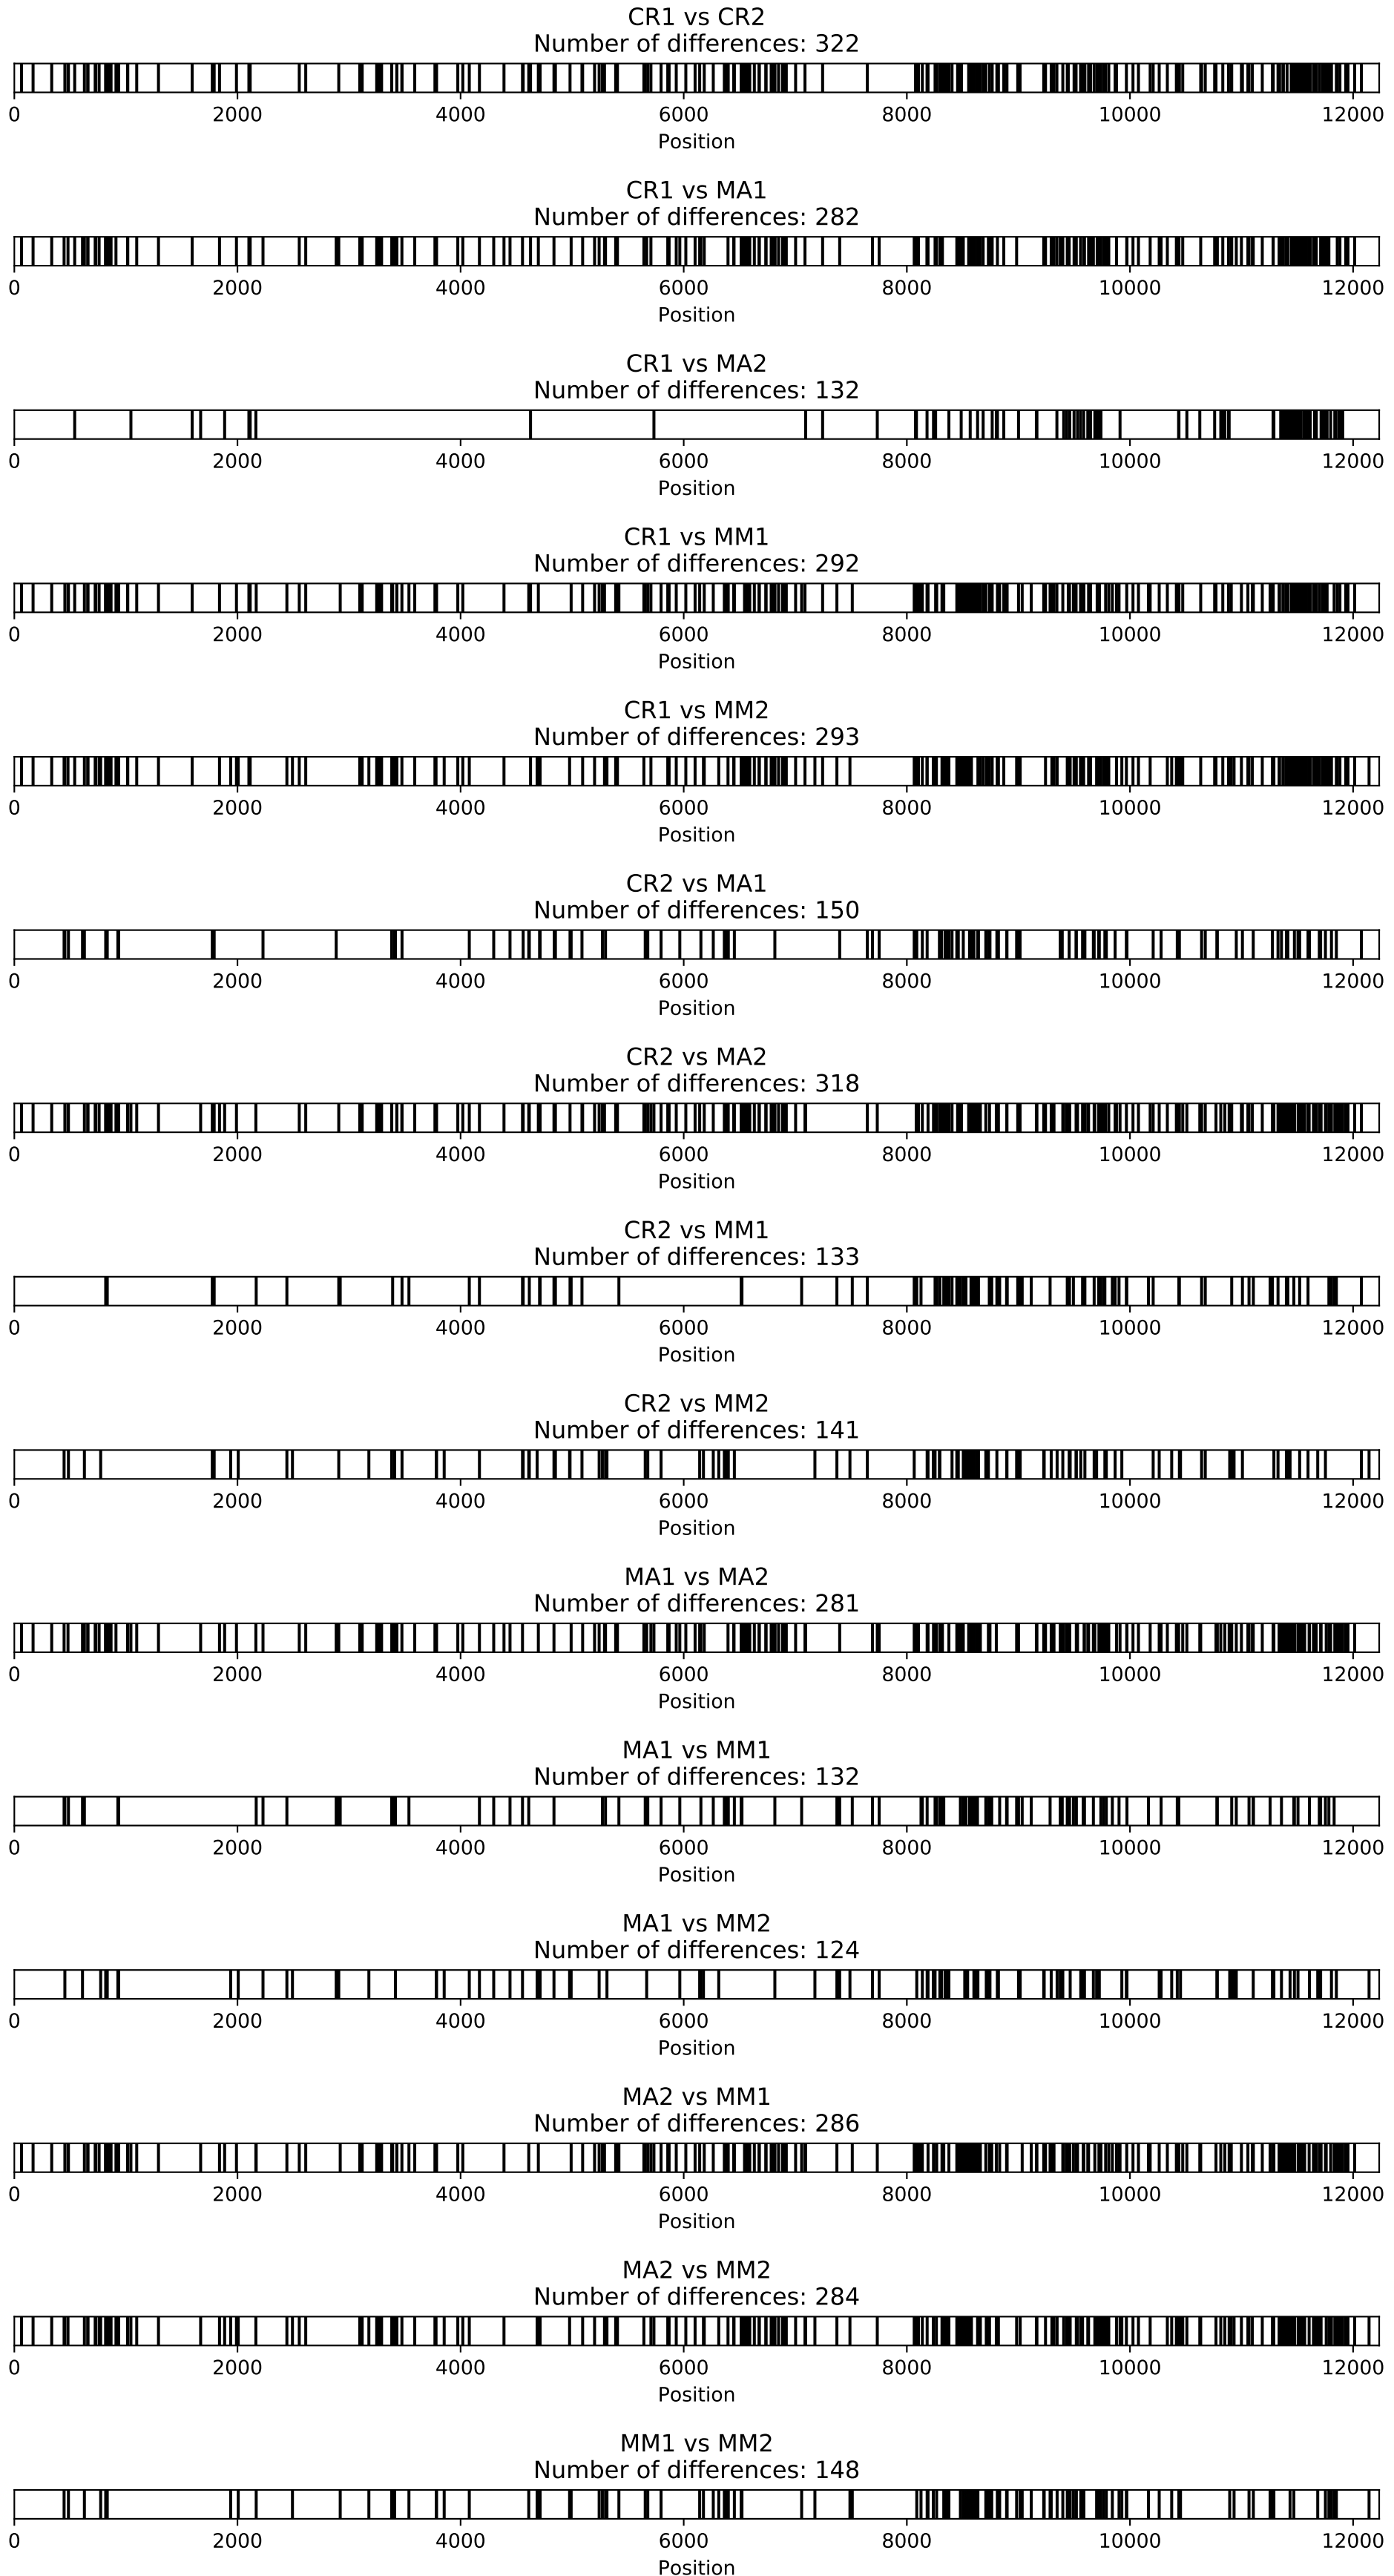

# Region: 464

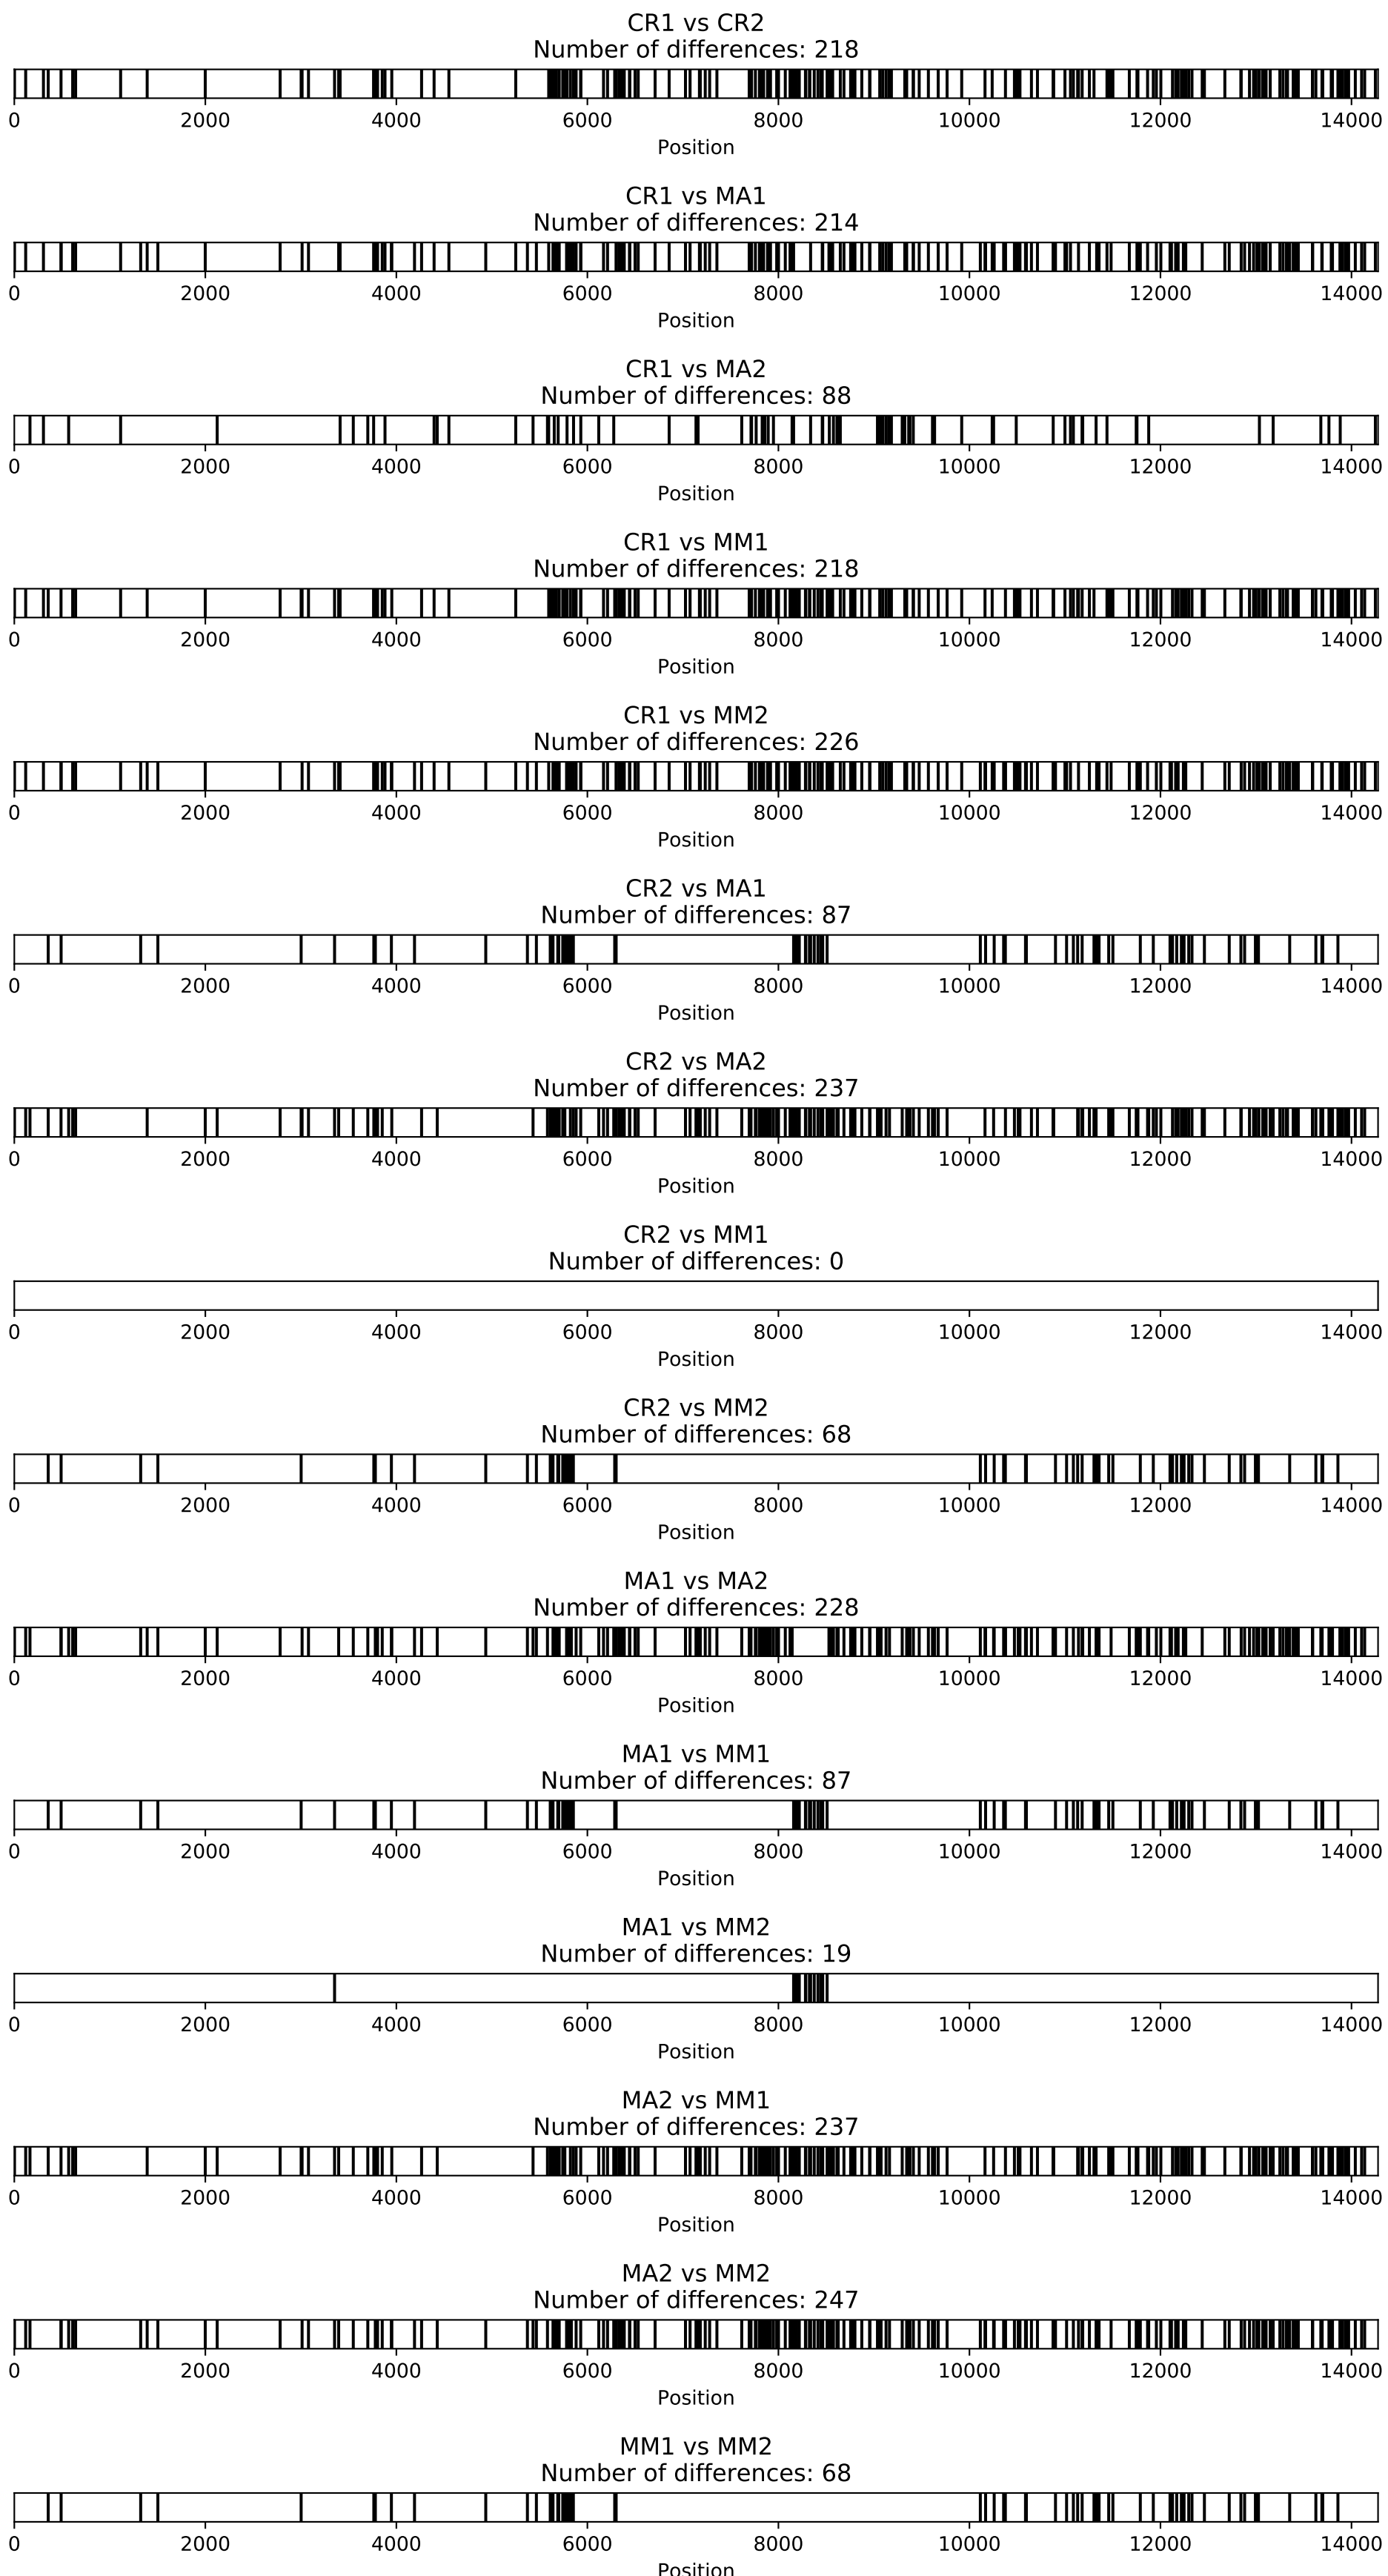

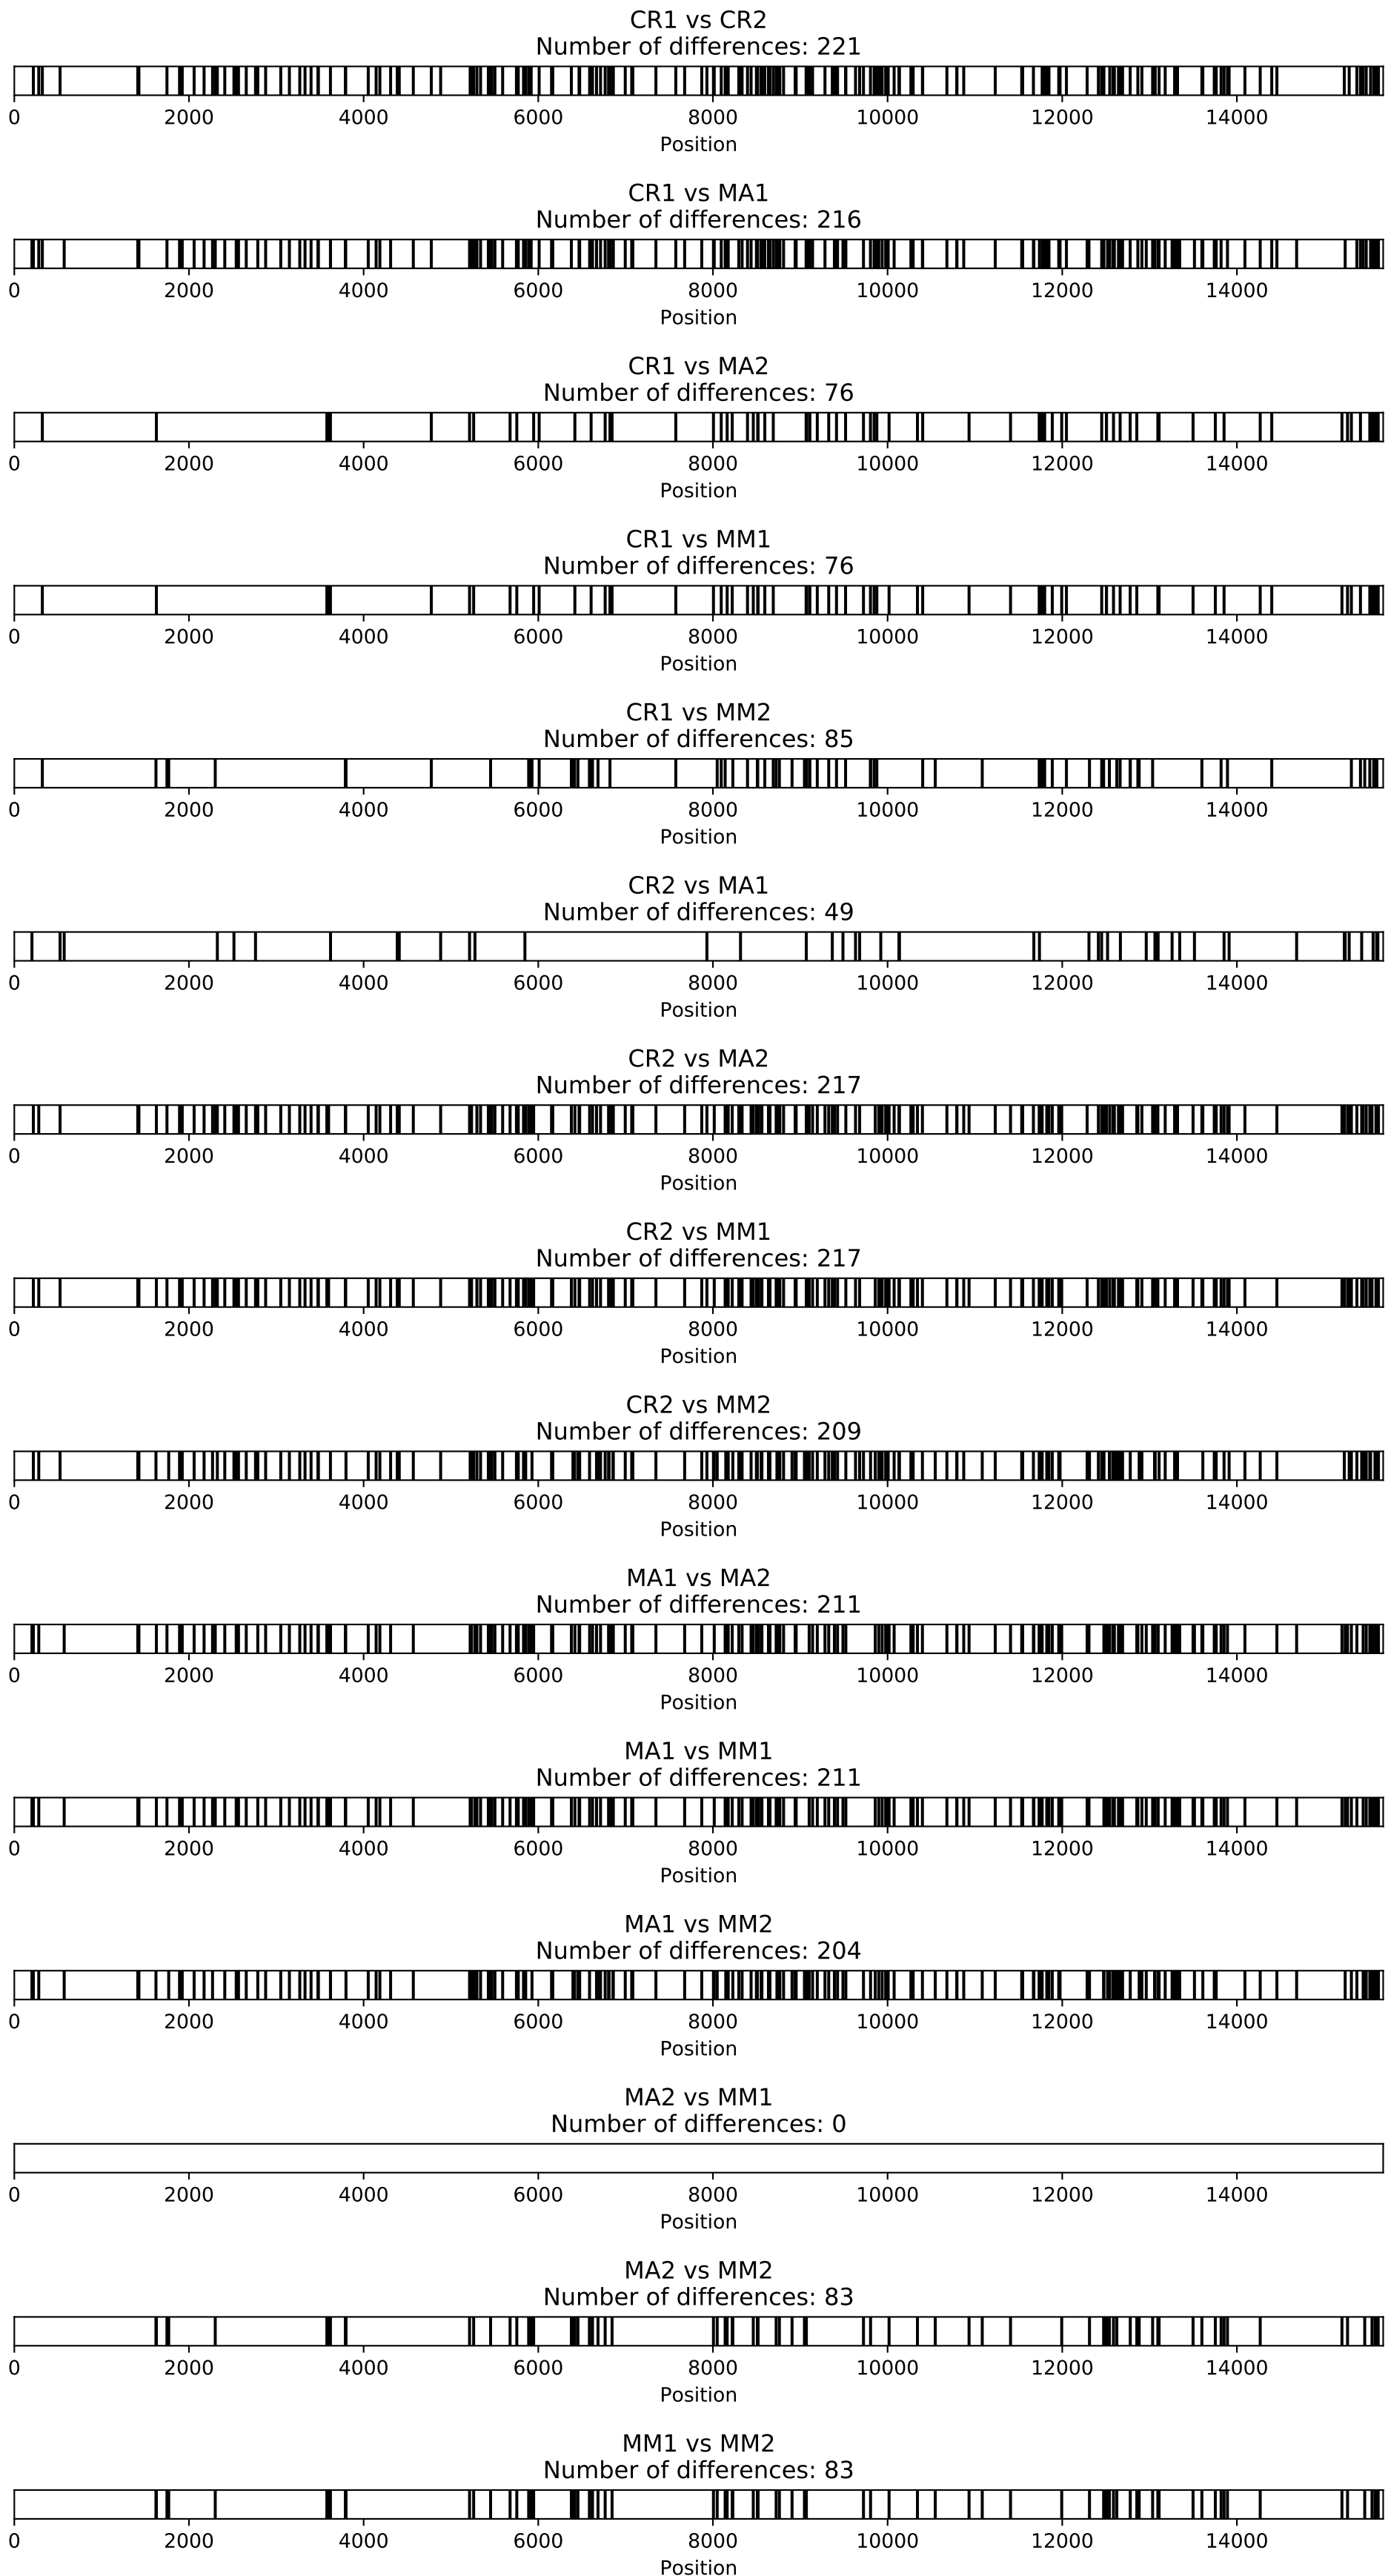

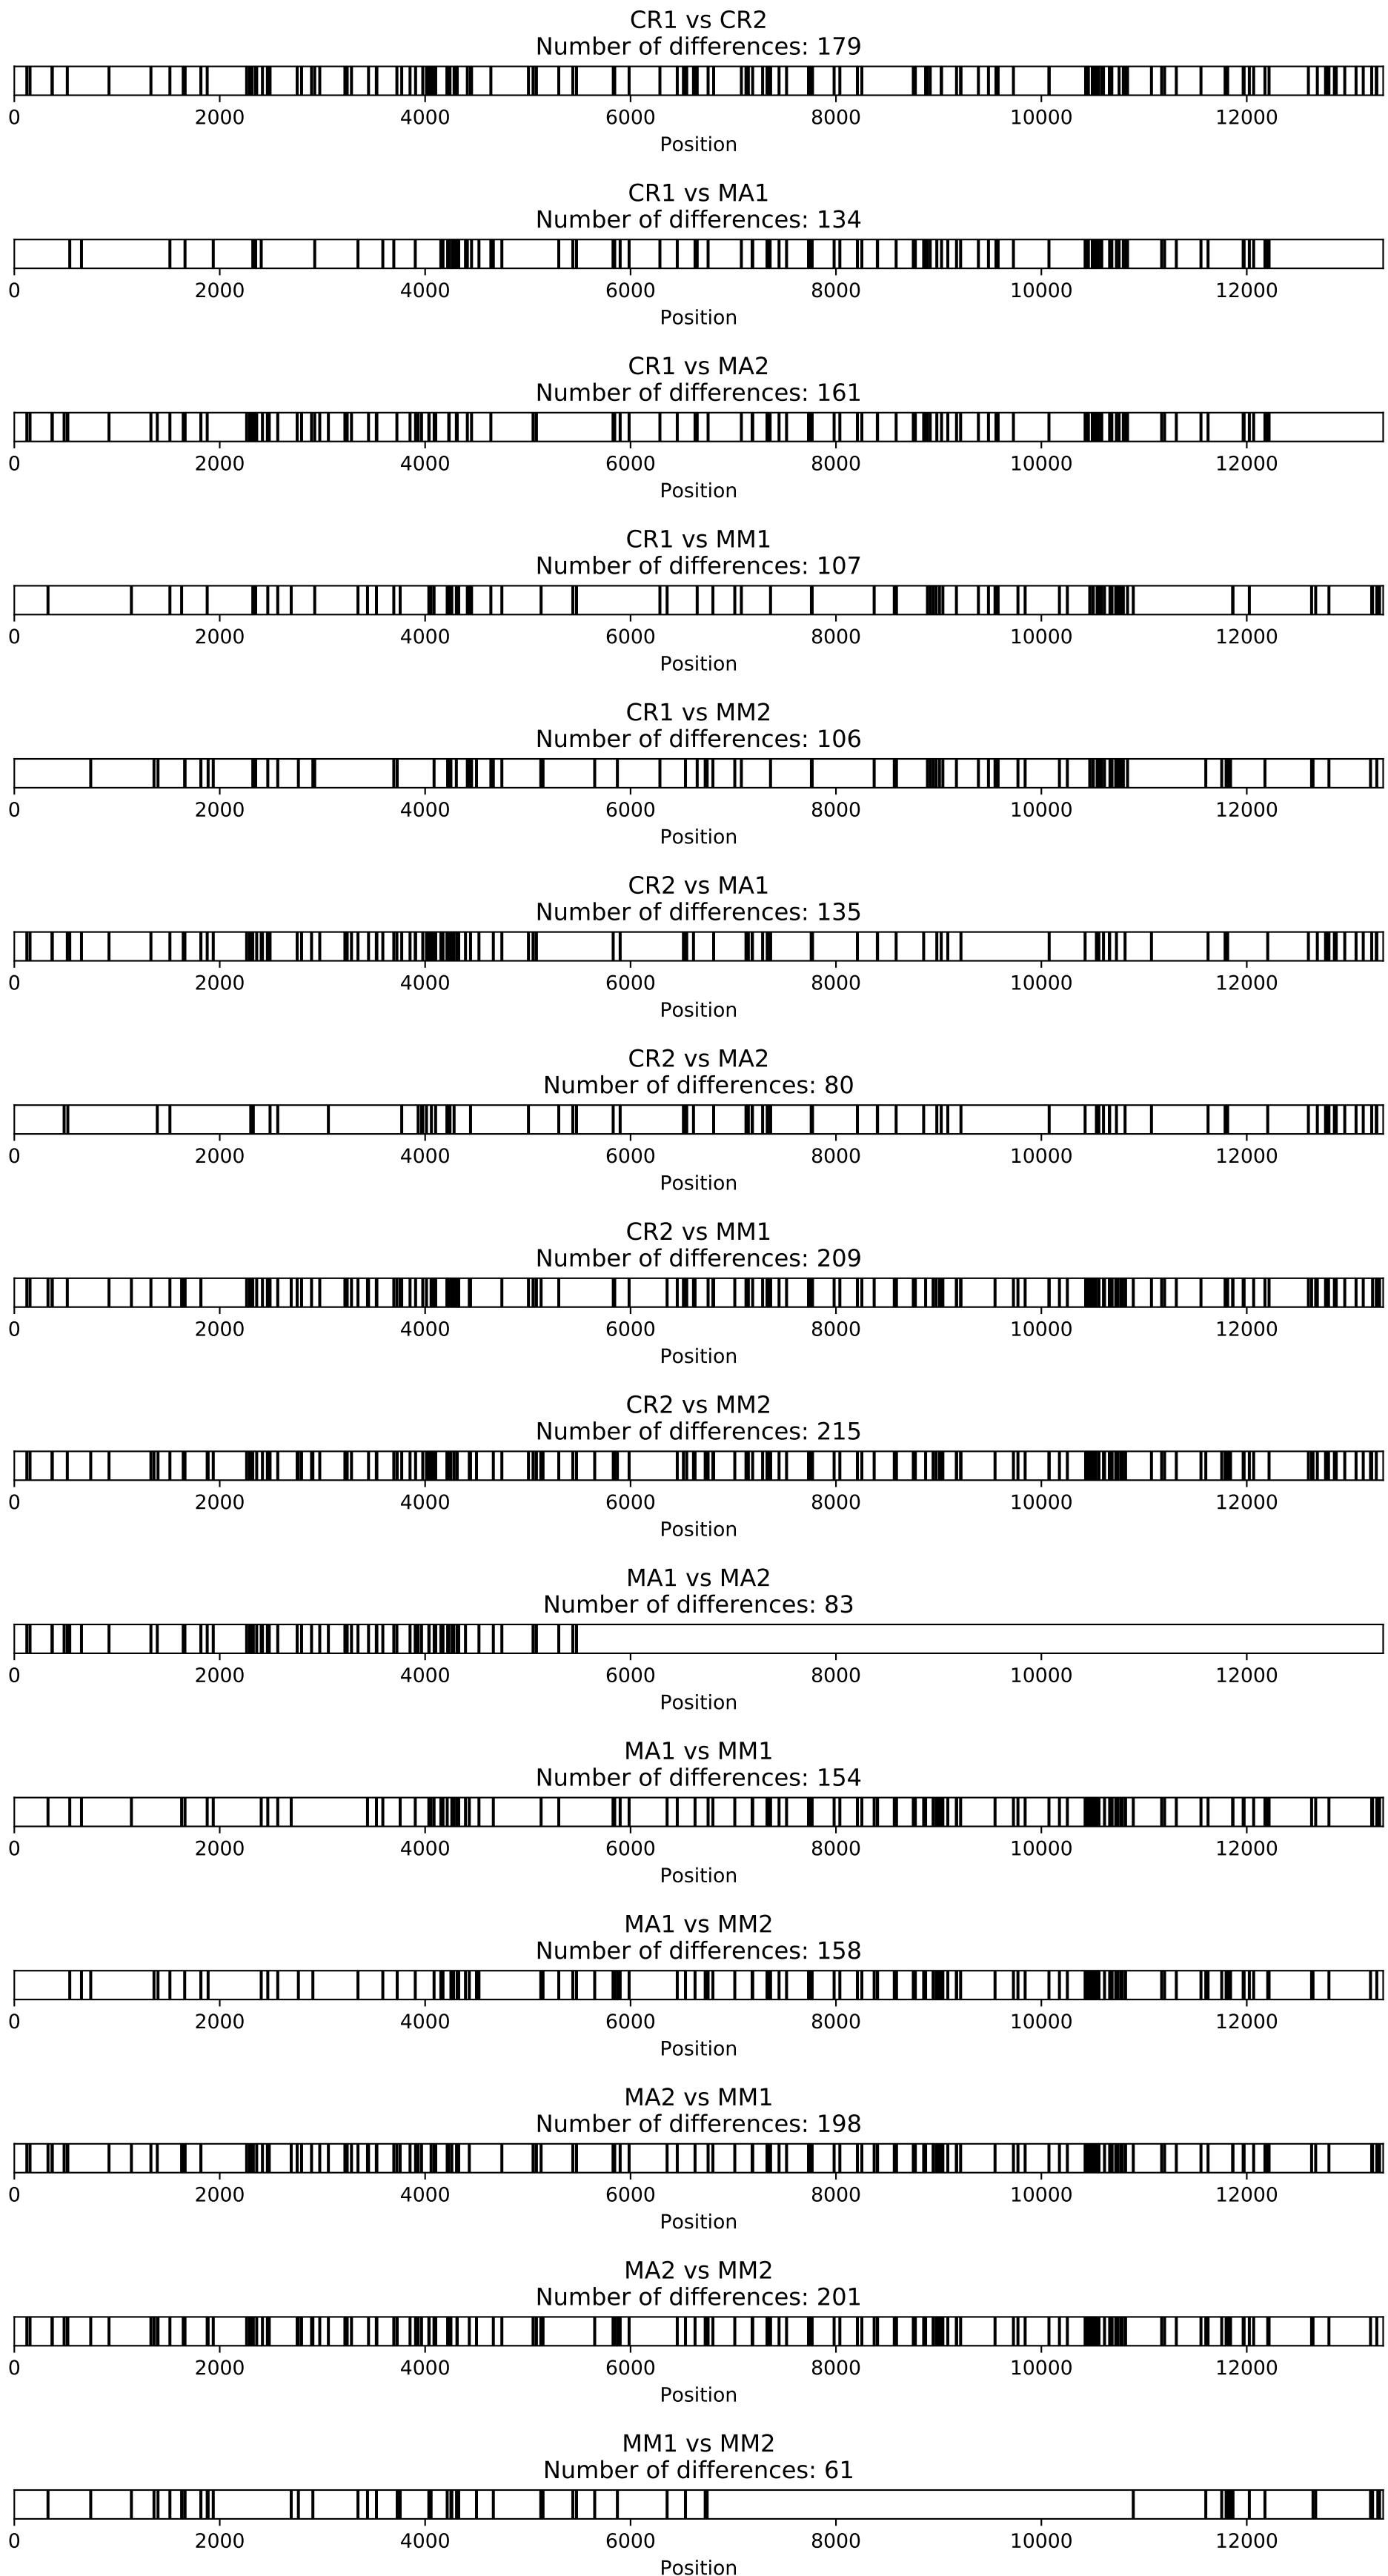

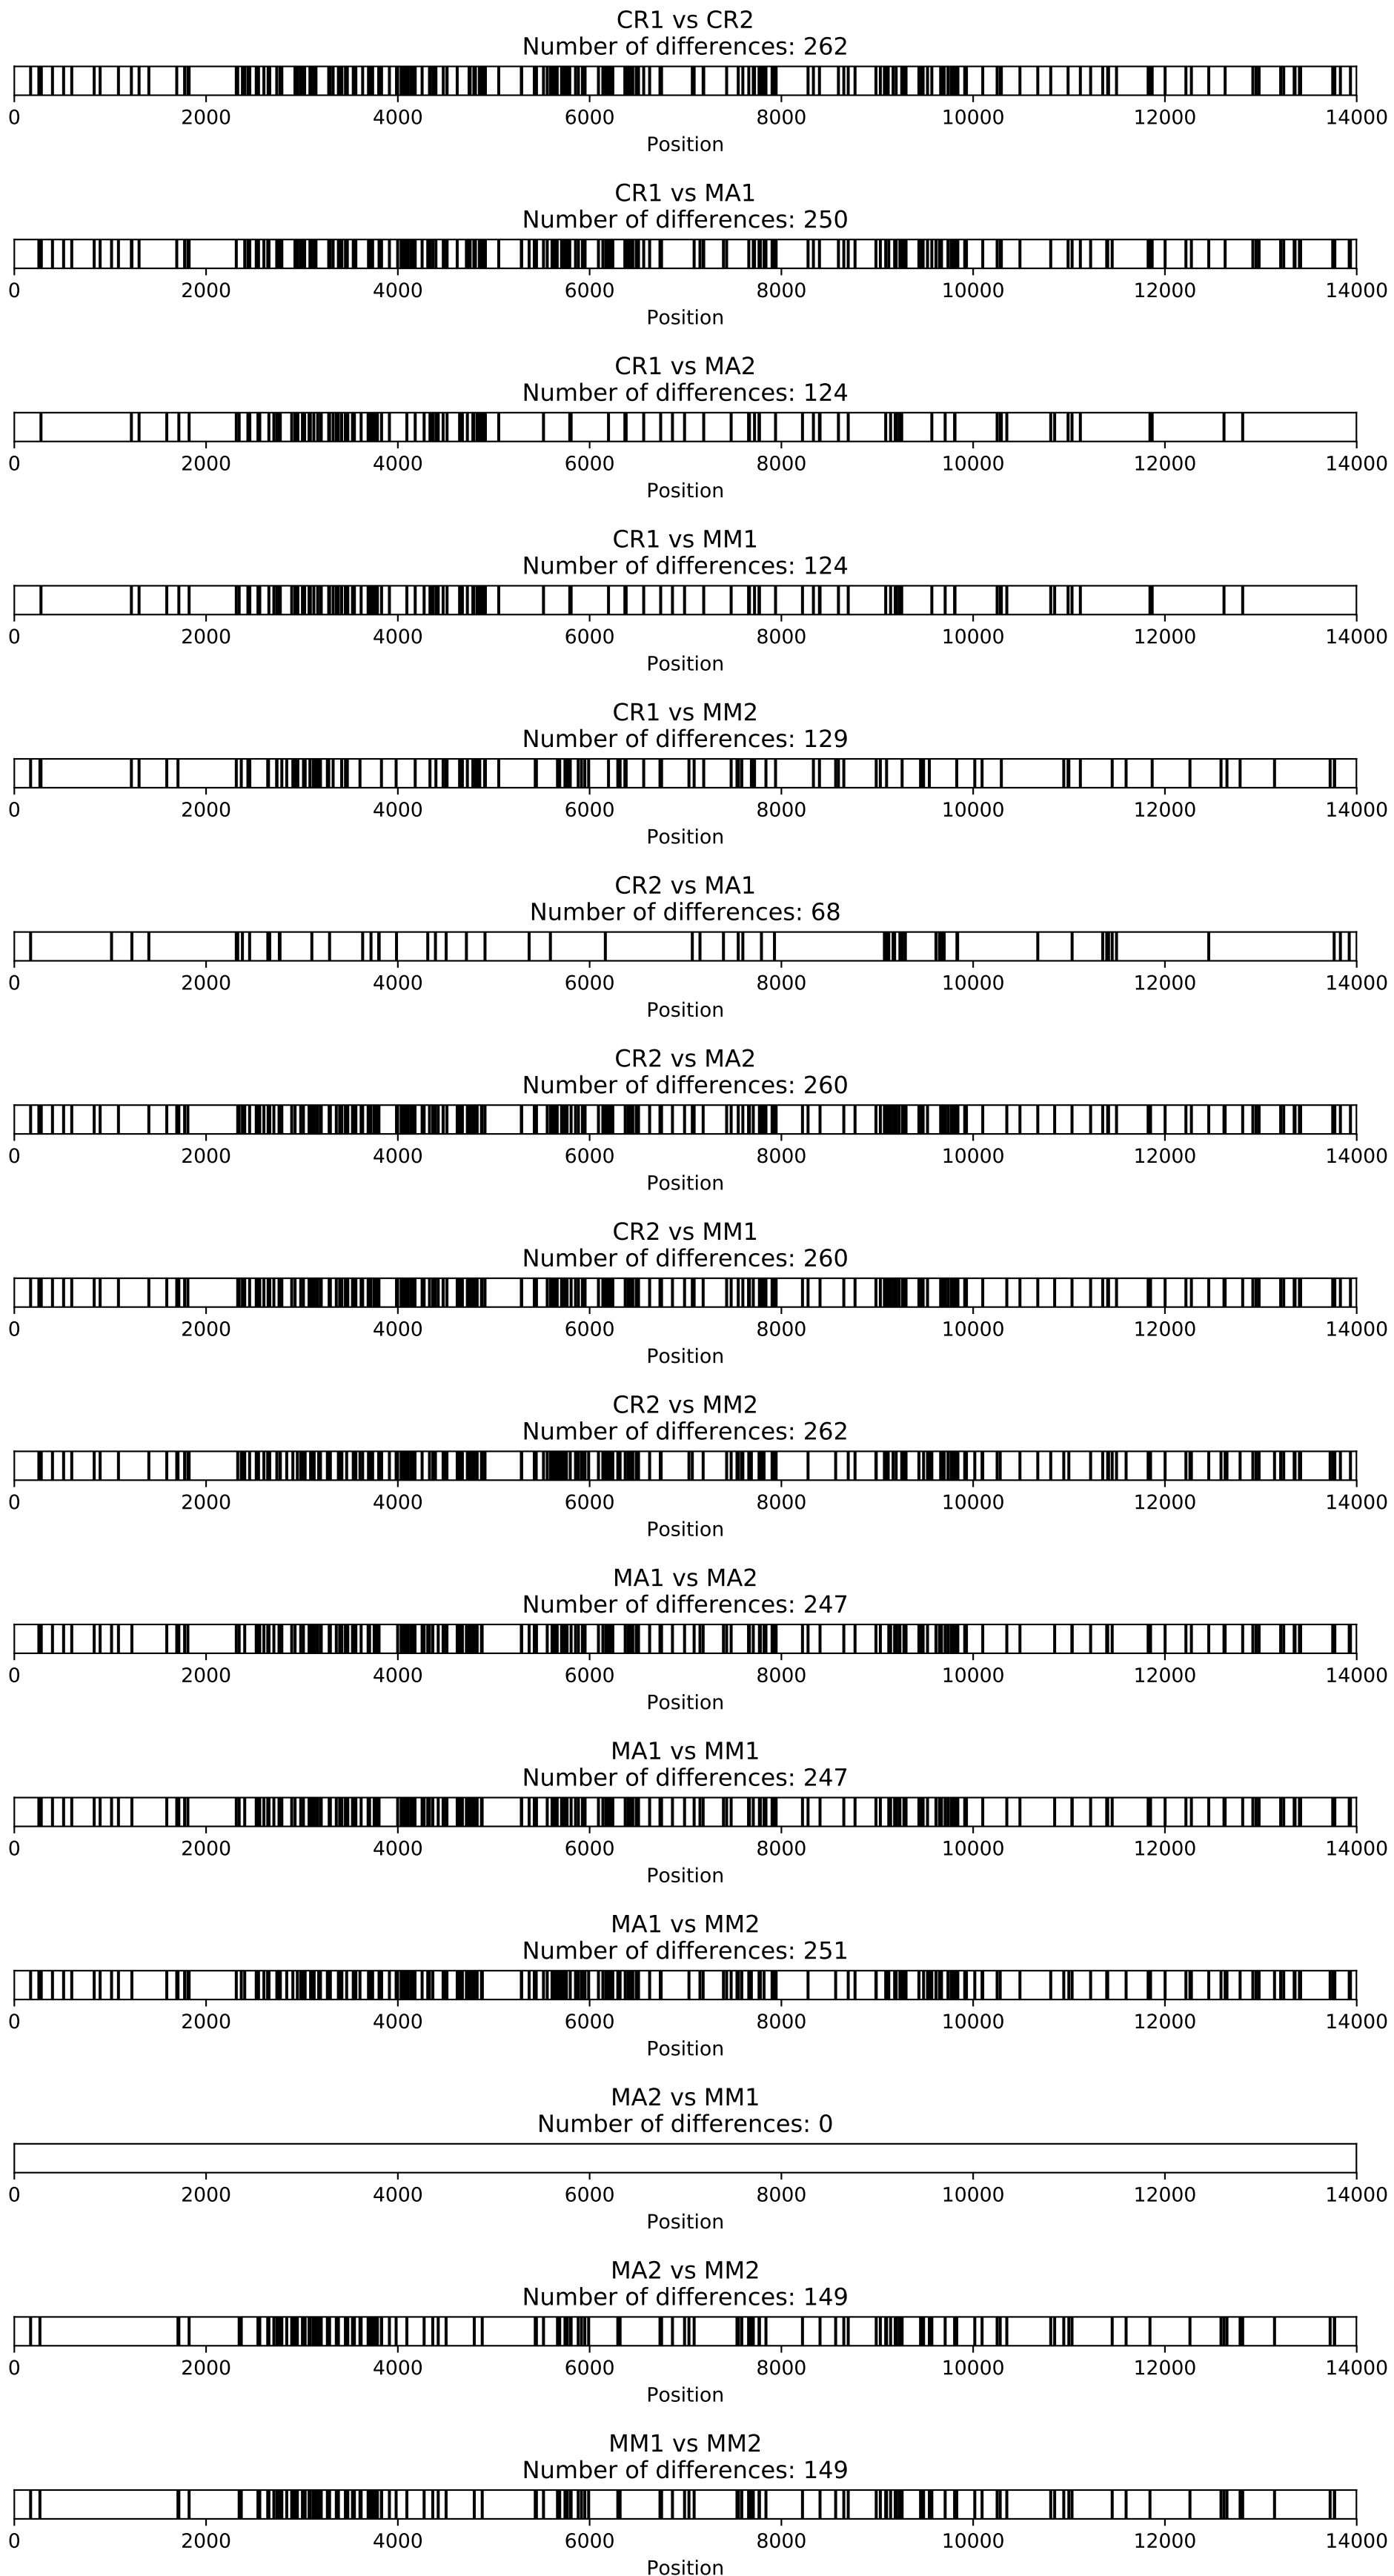



# Region: 473

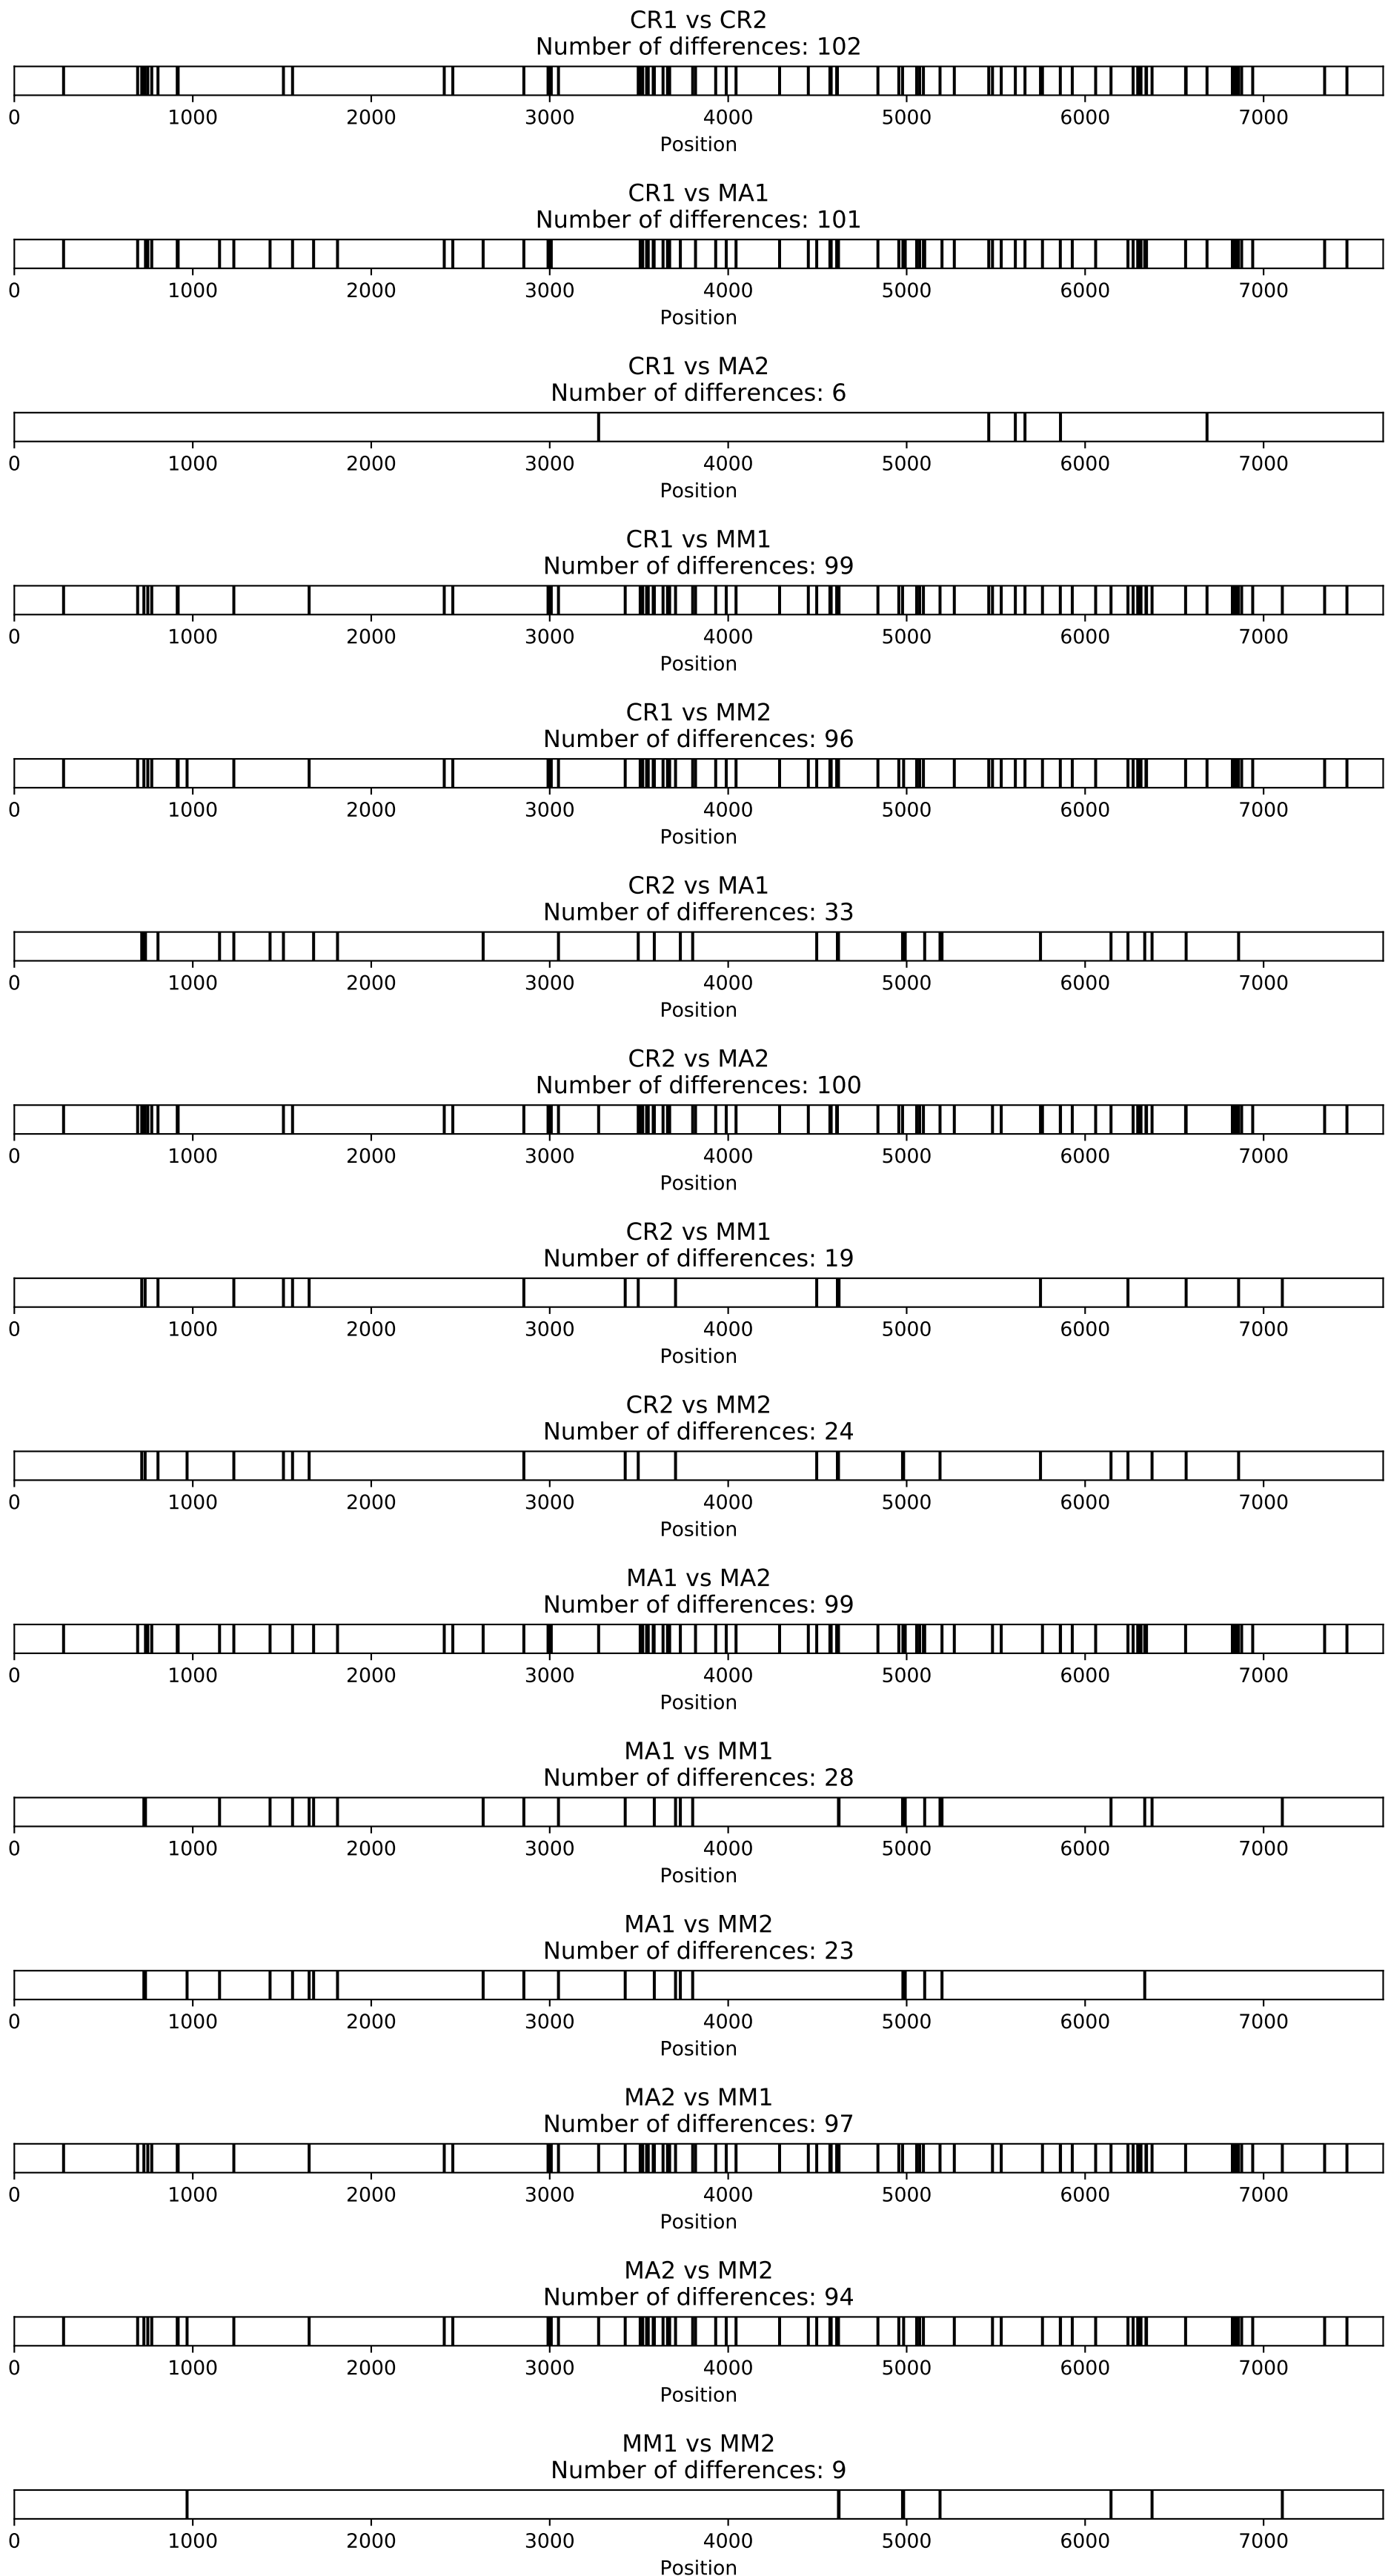

# Region: 475

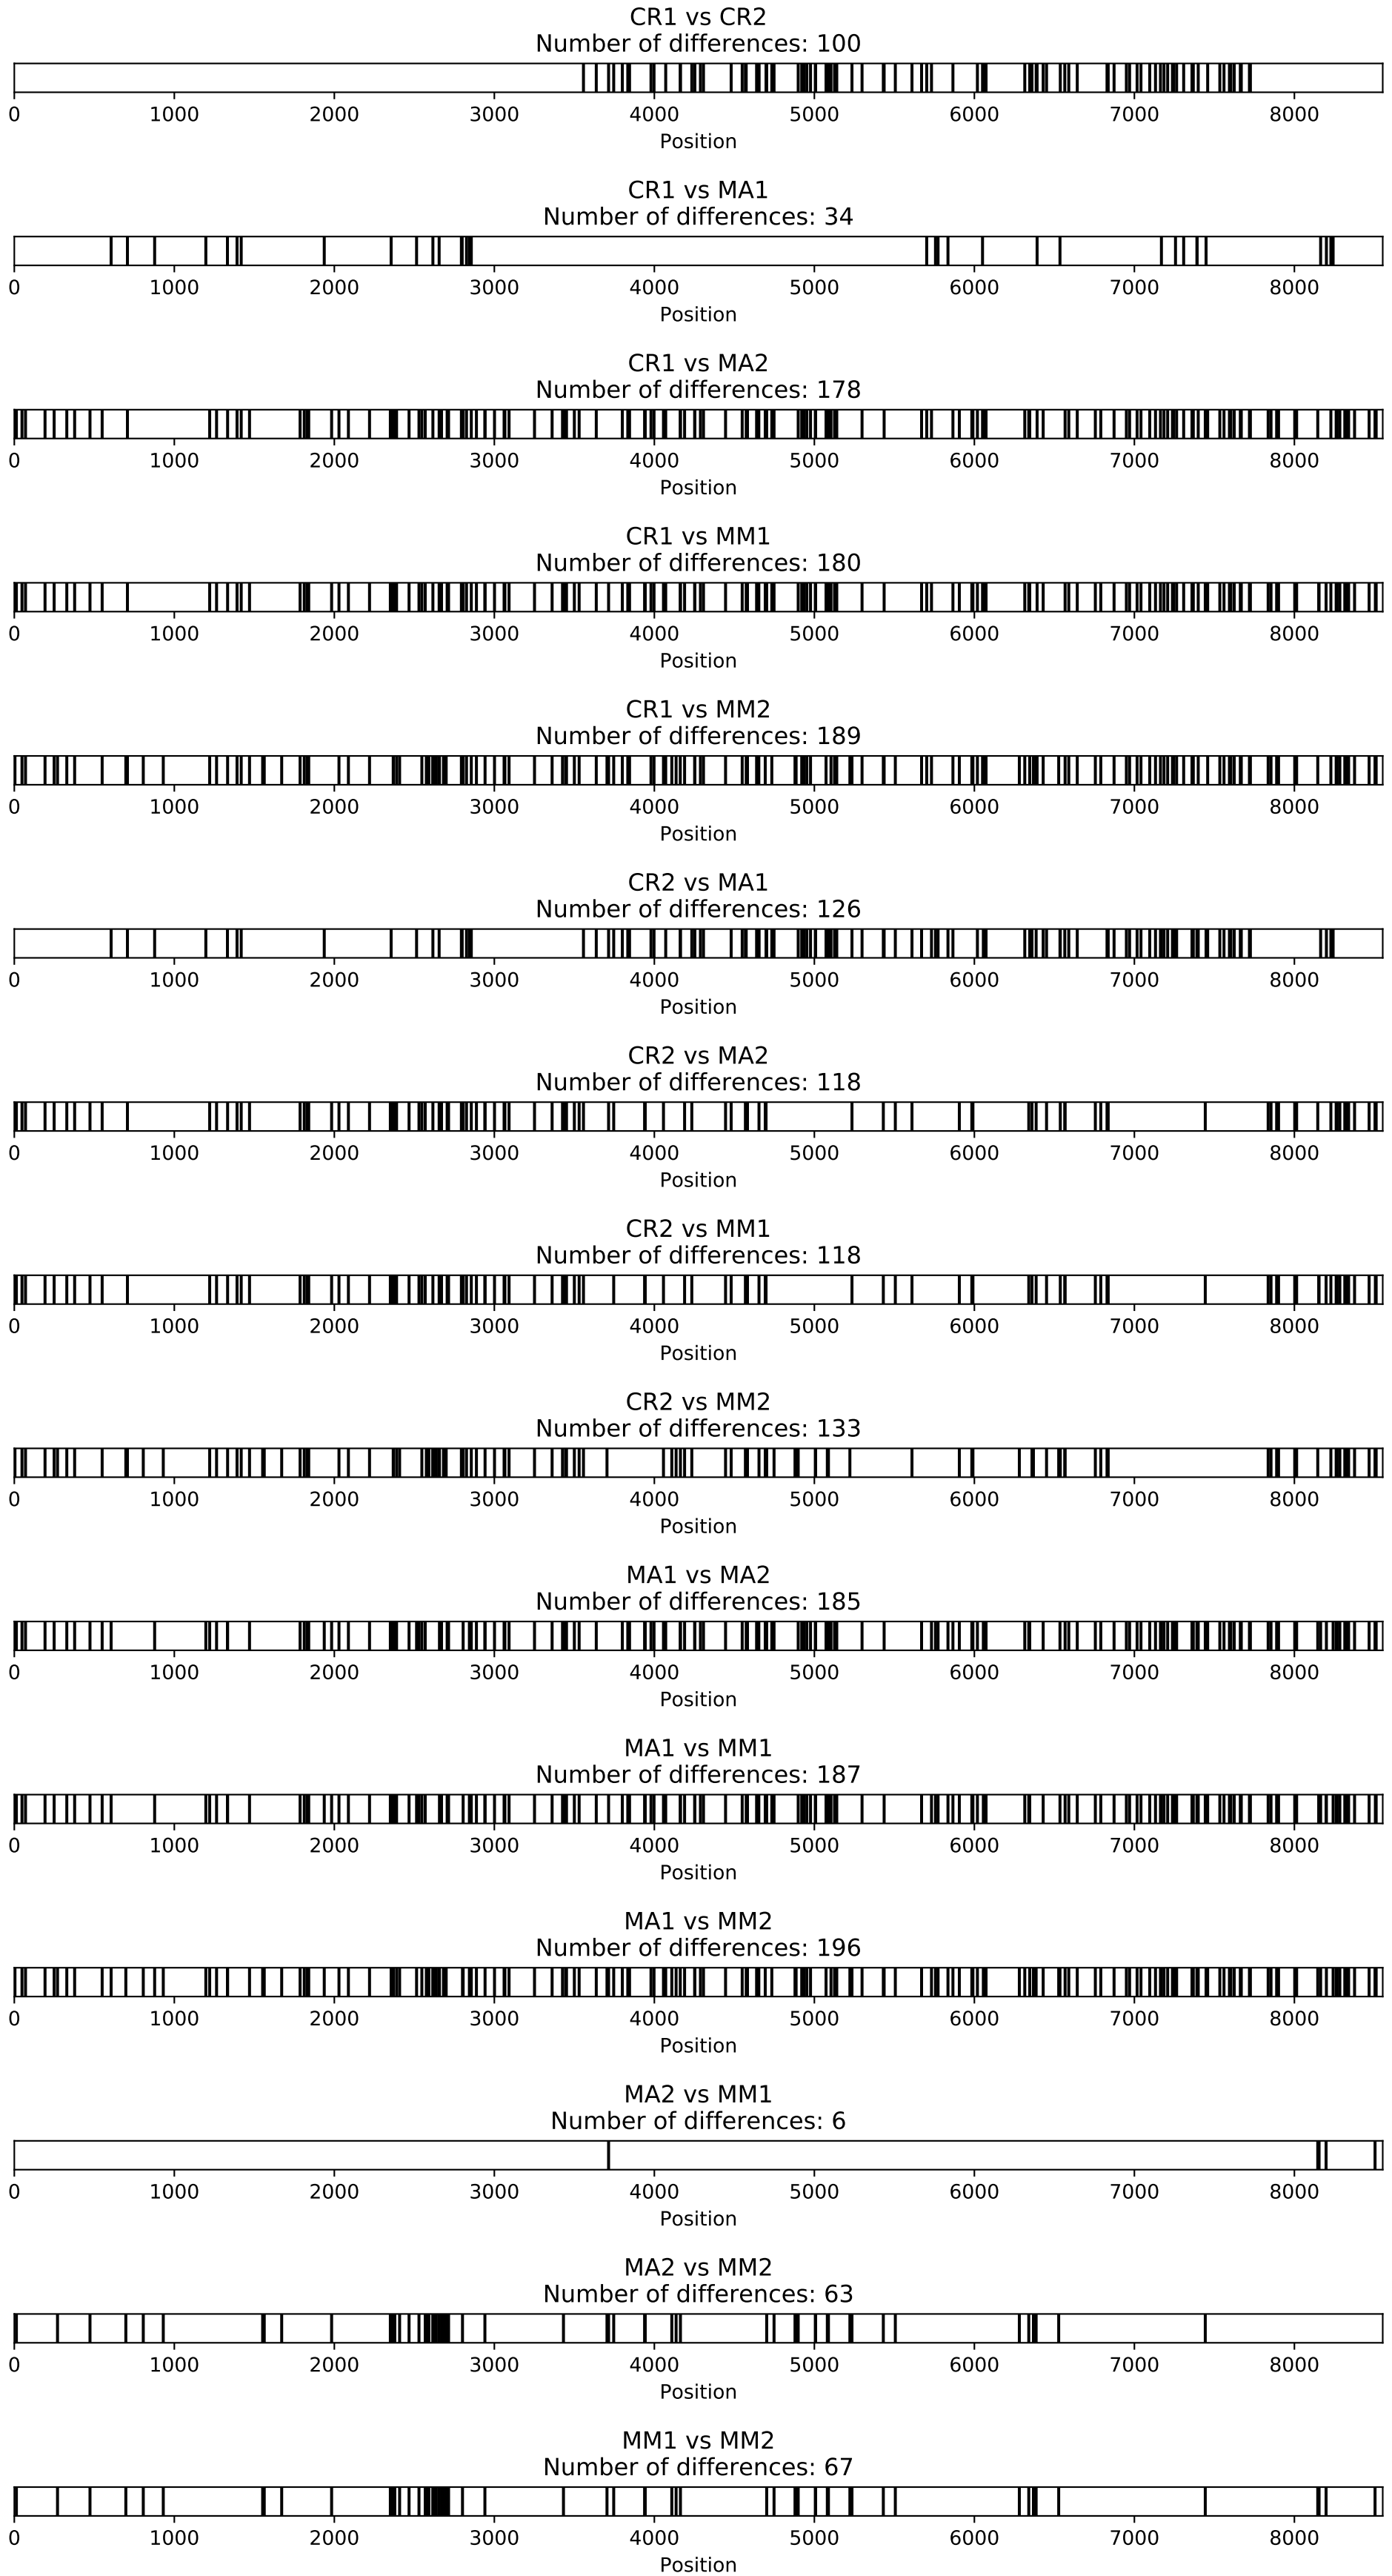

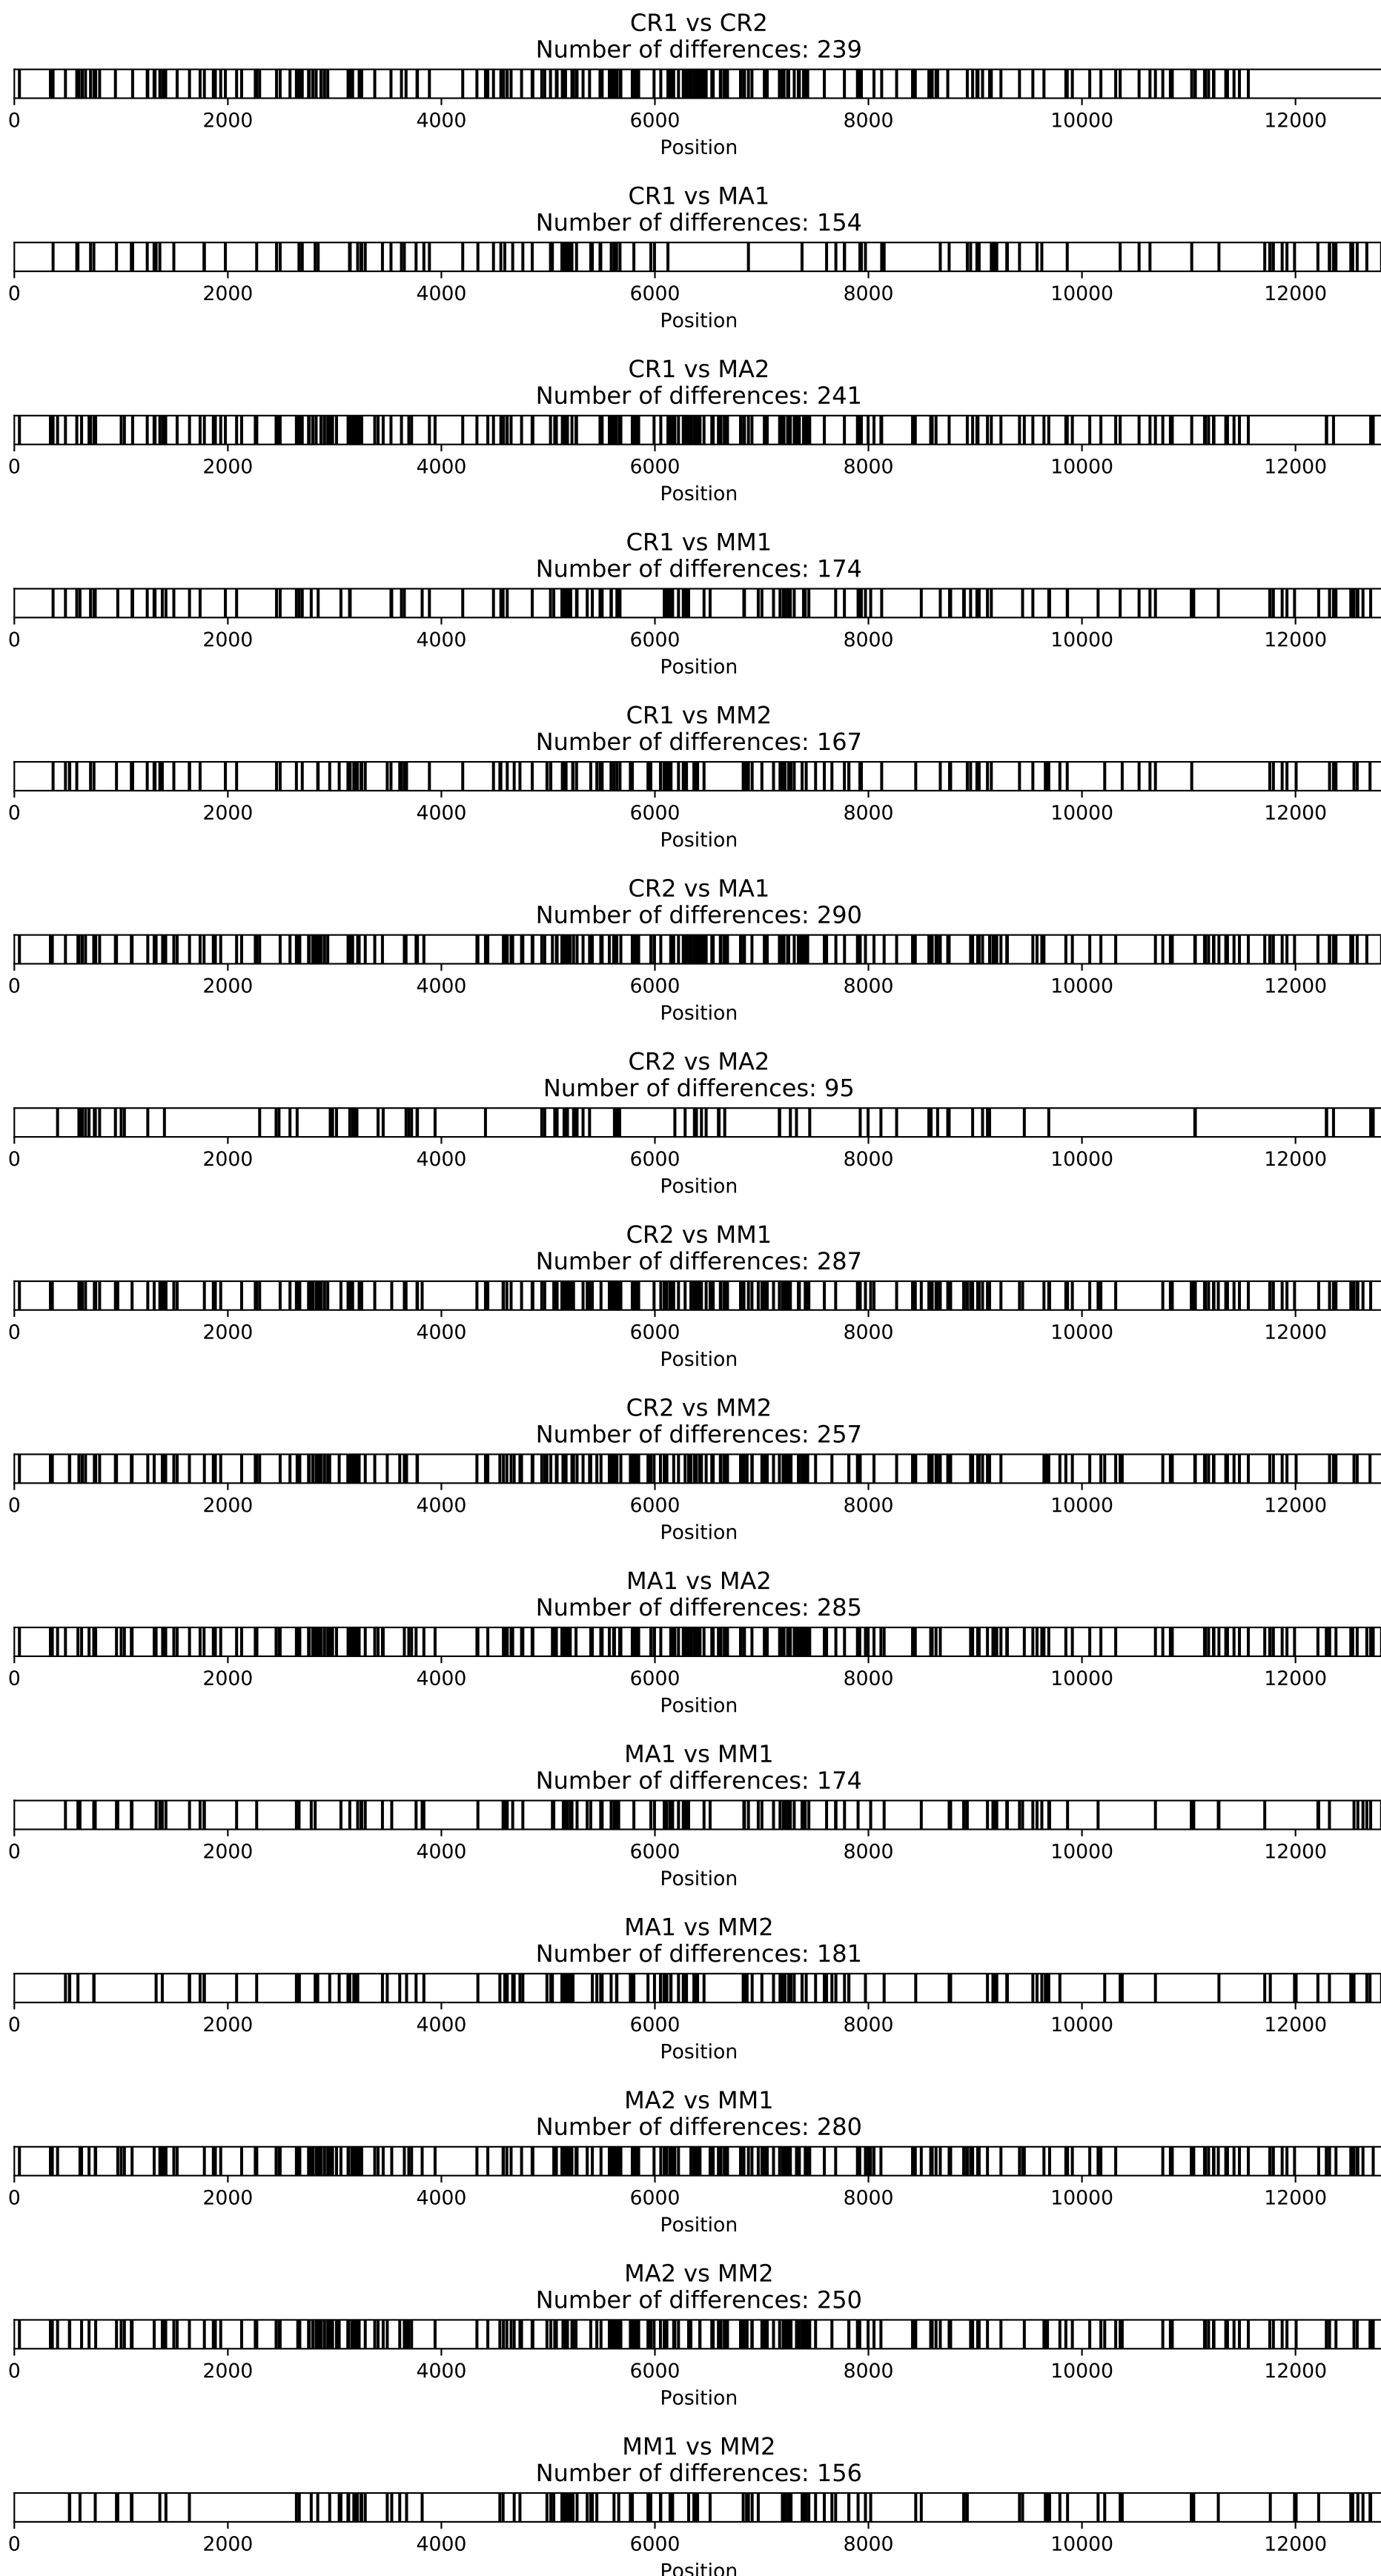

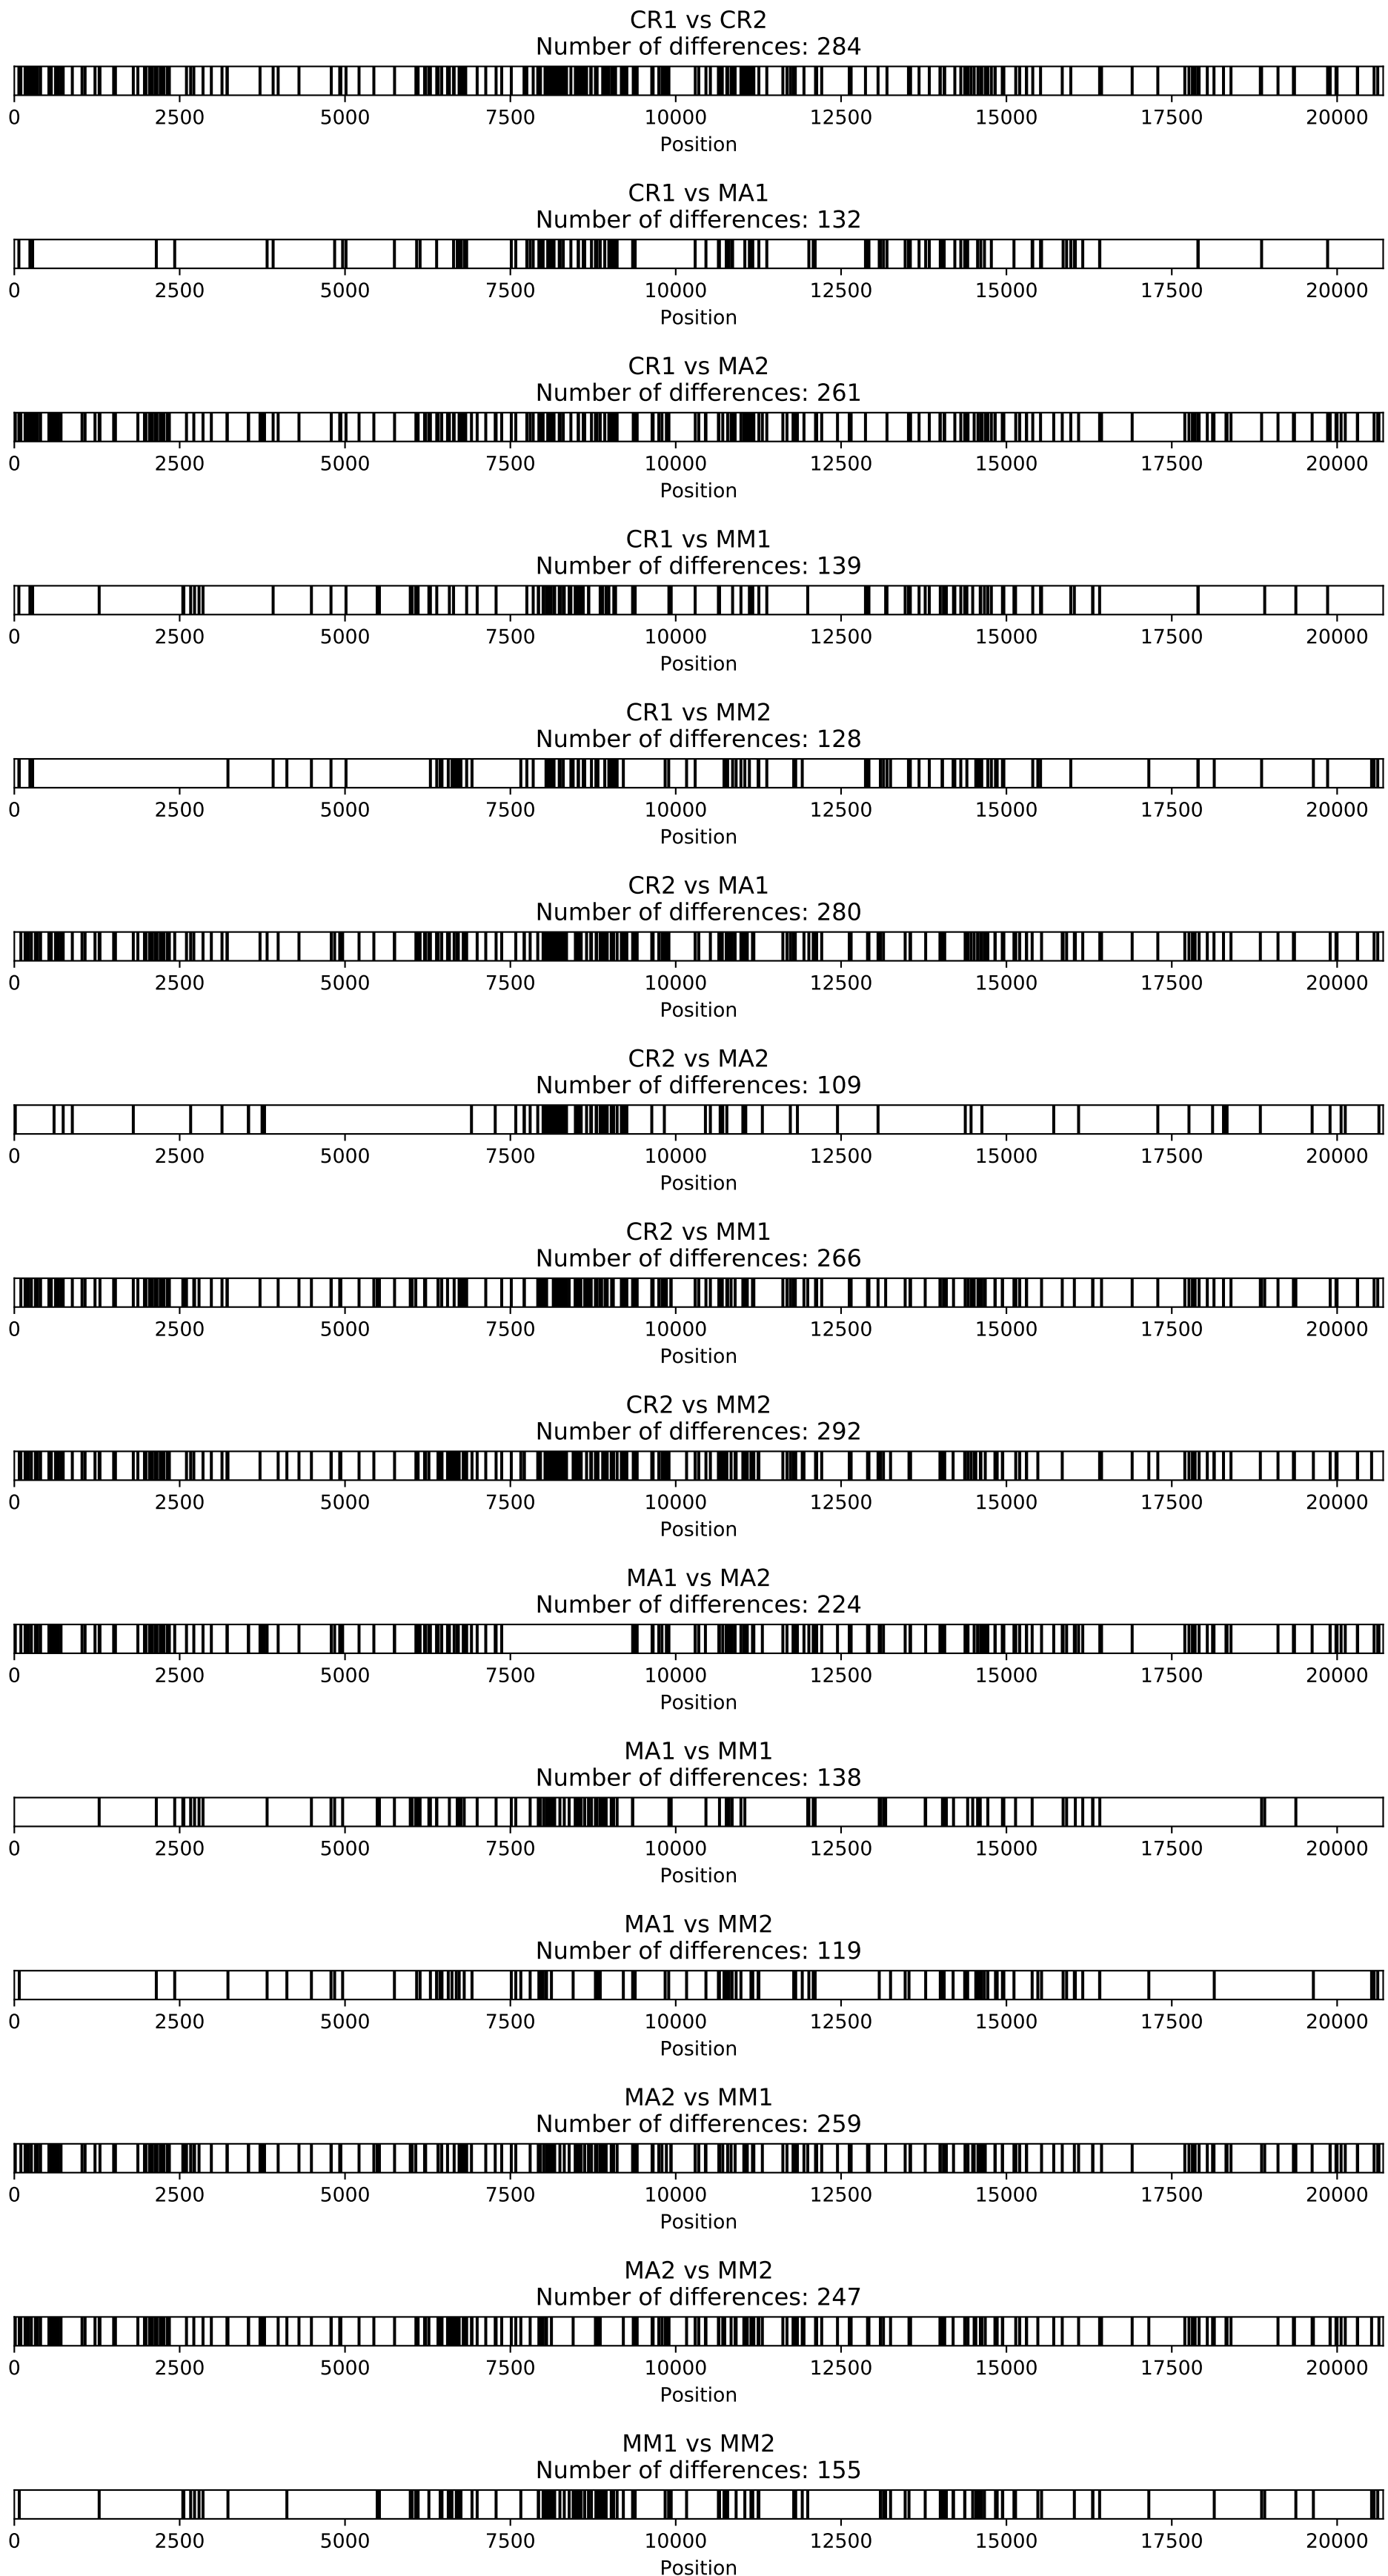

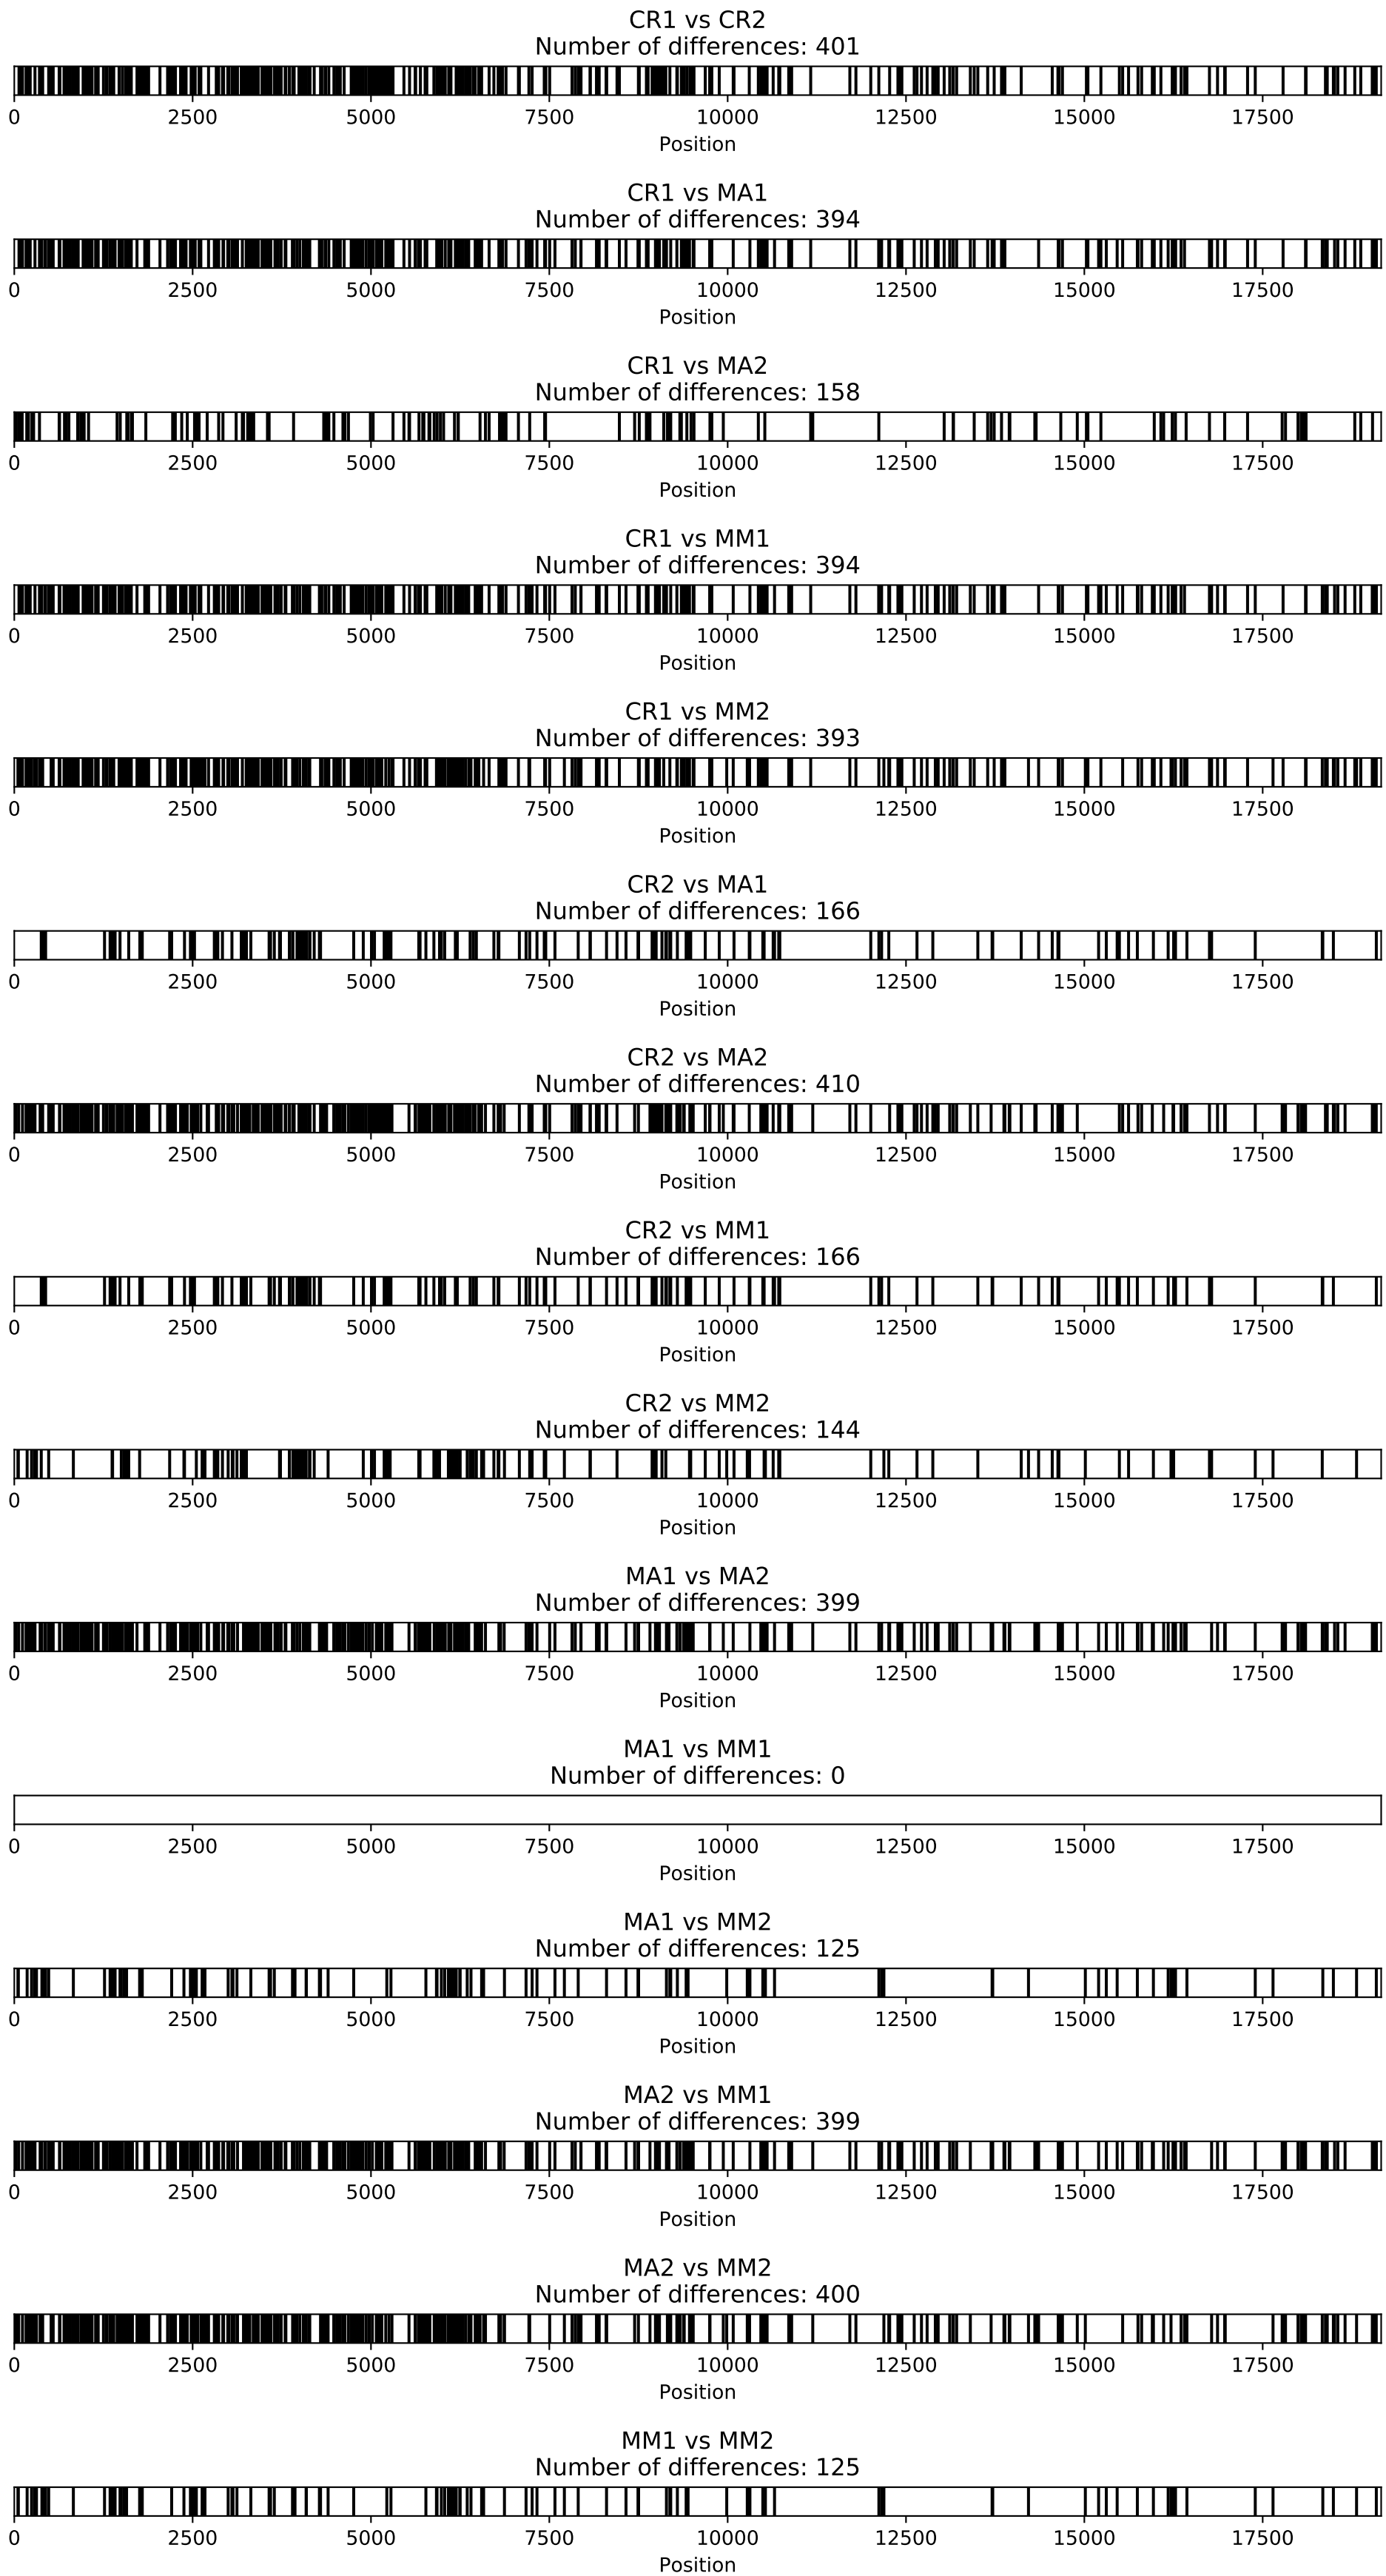

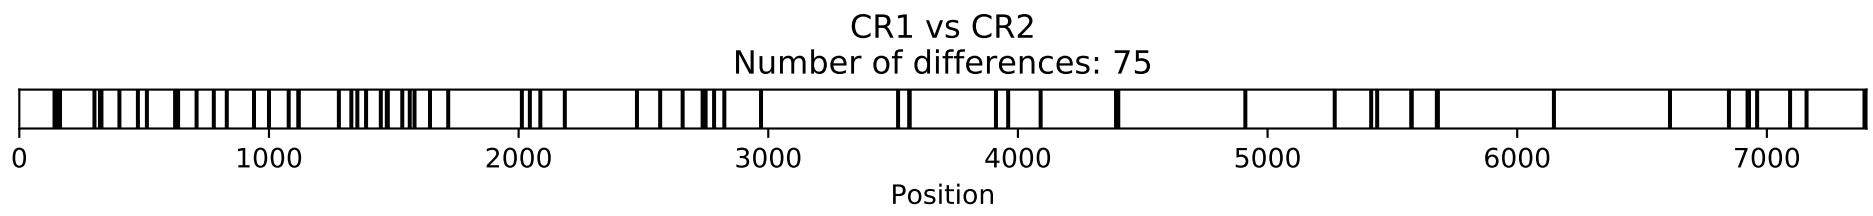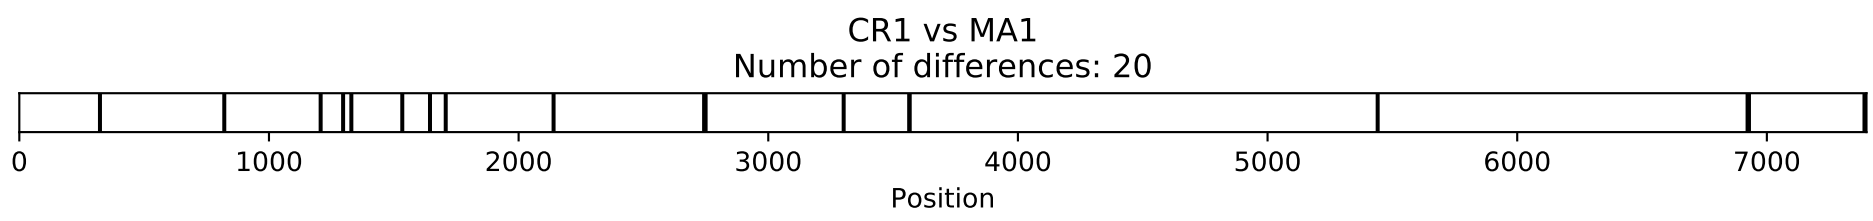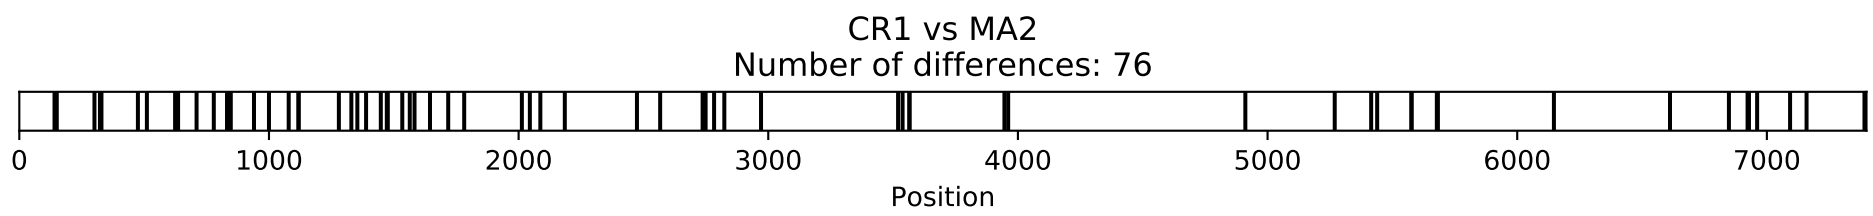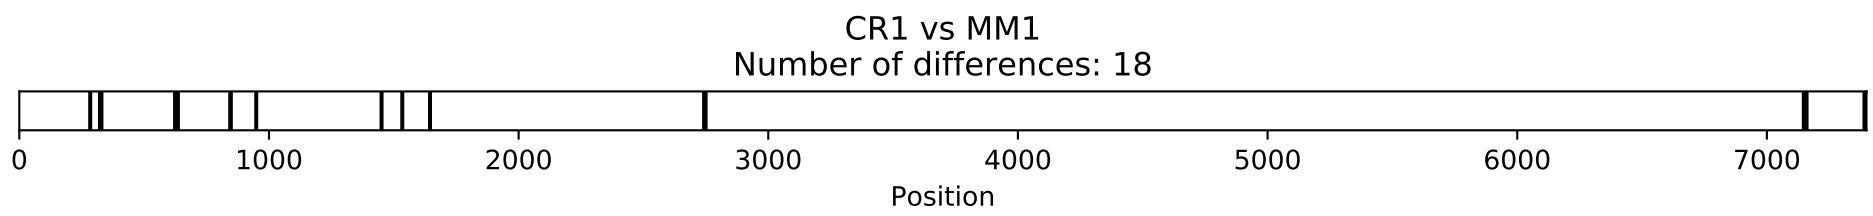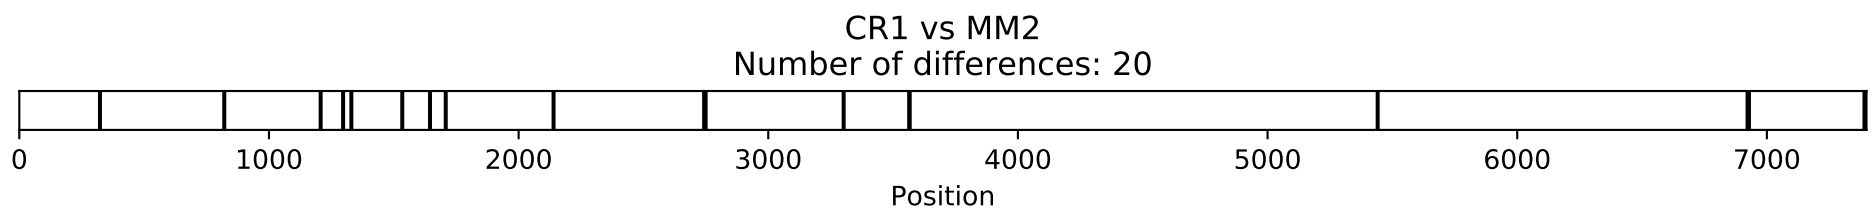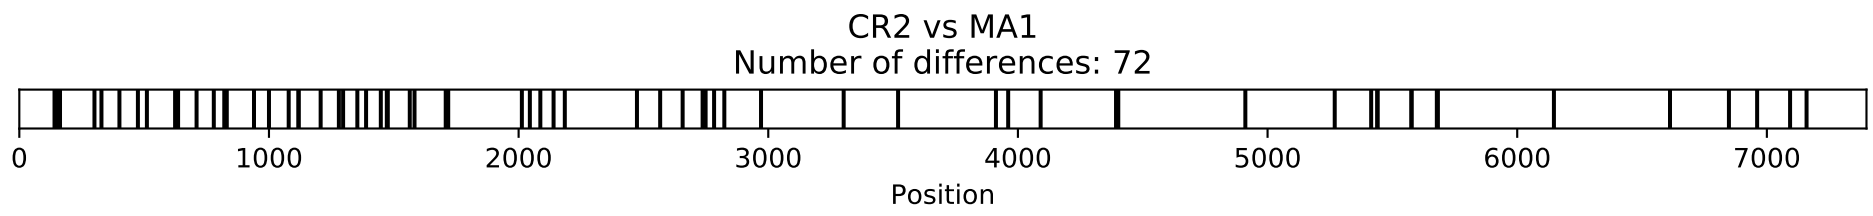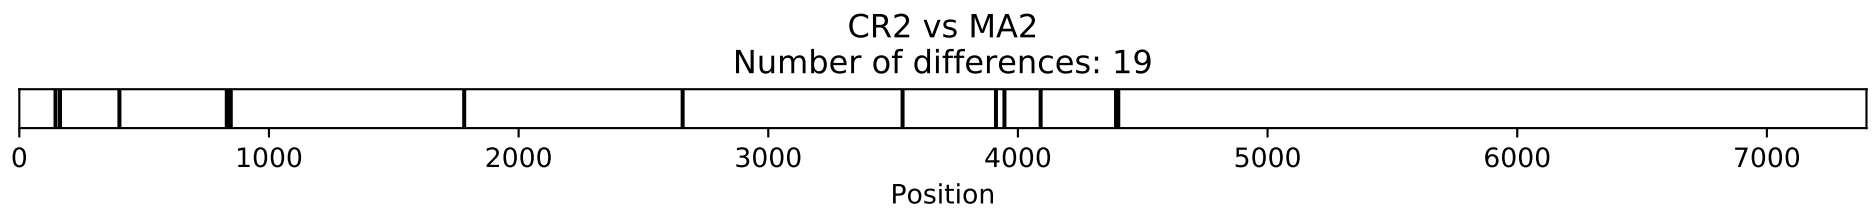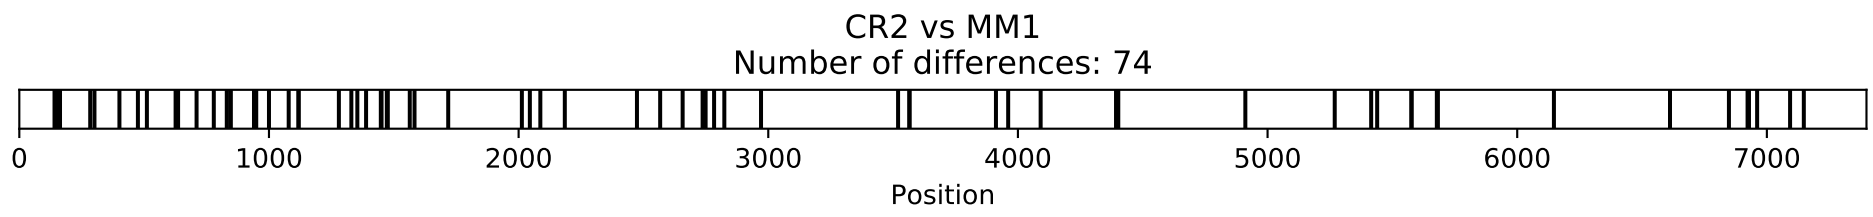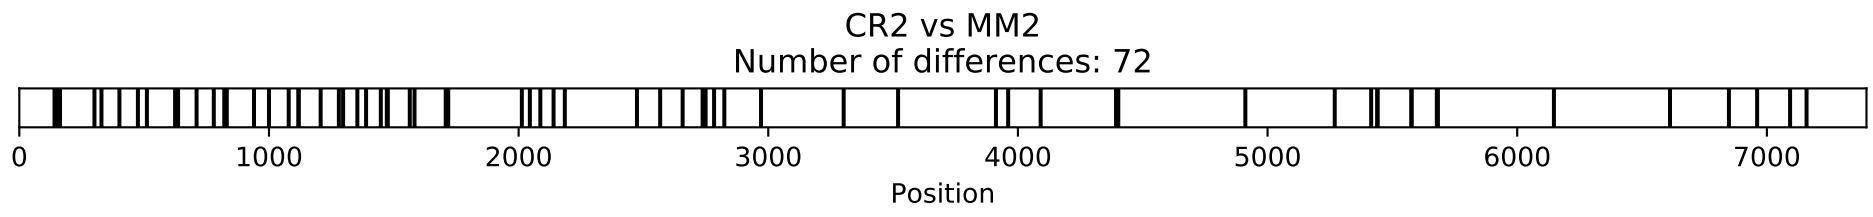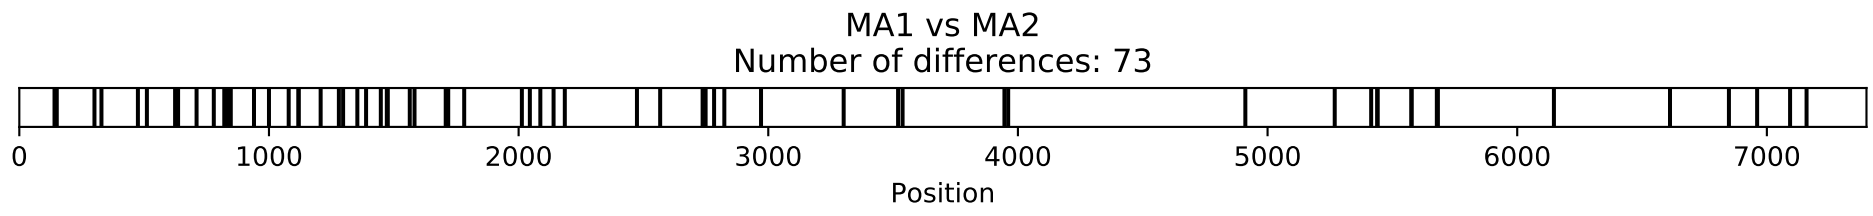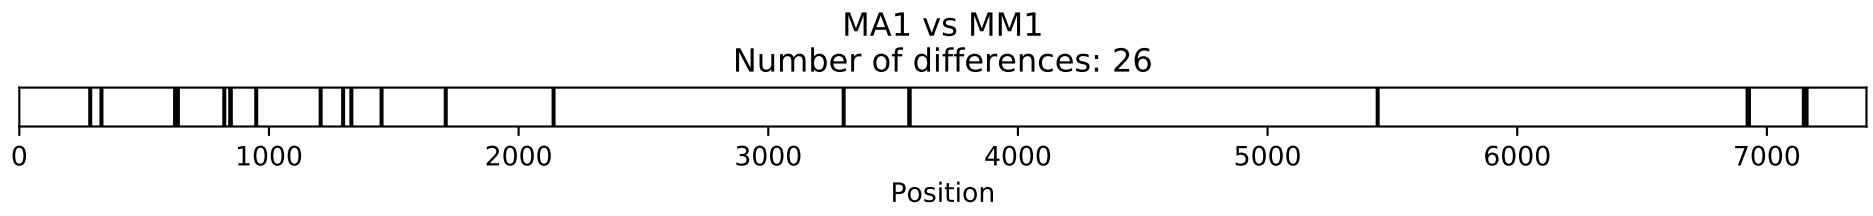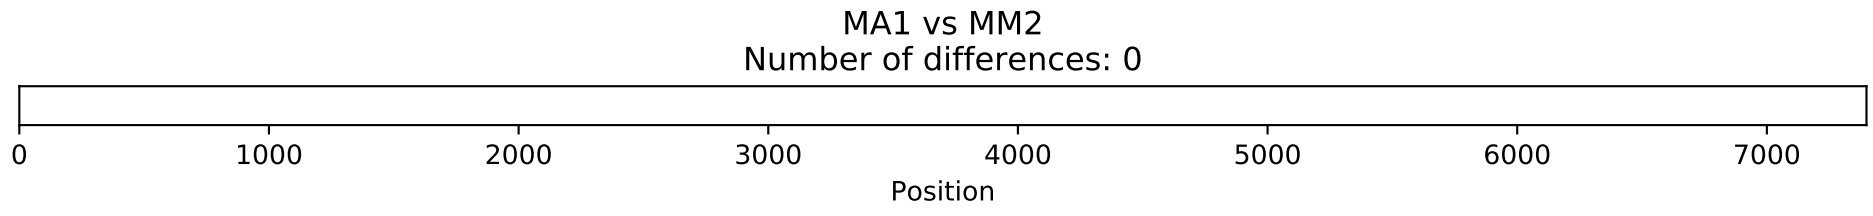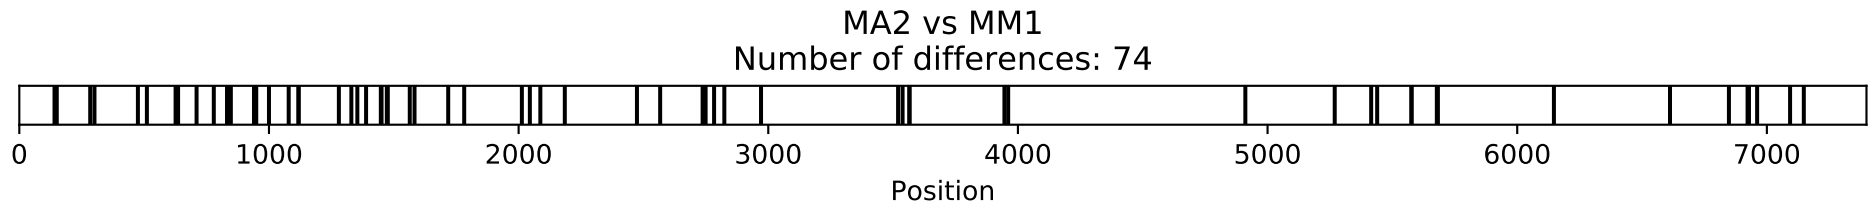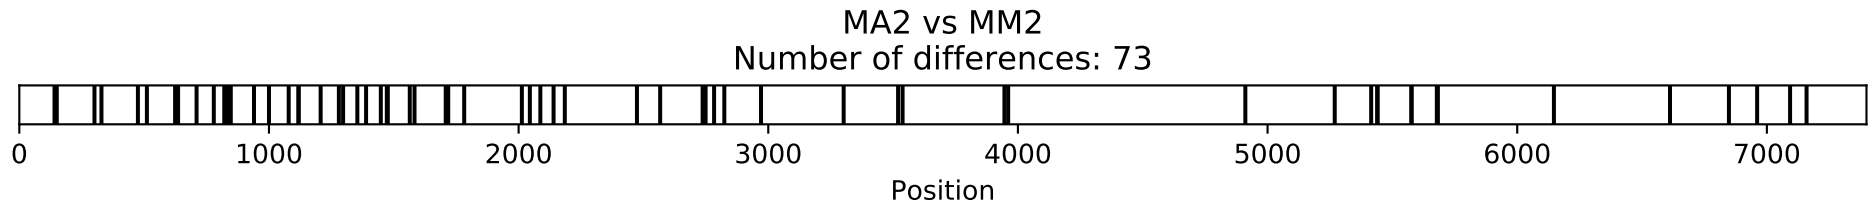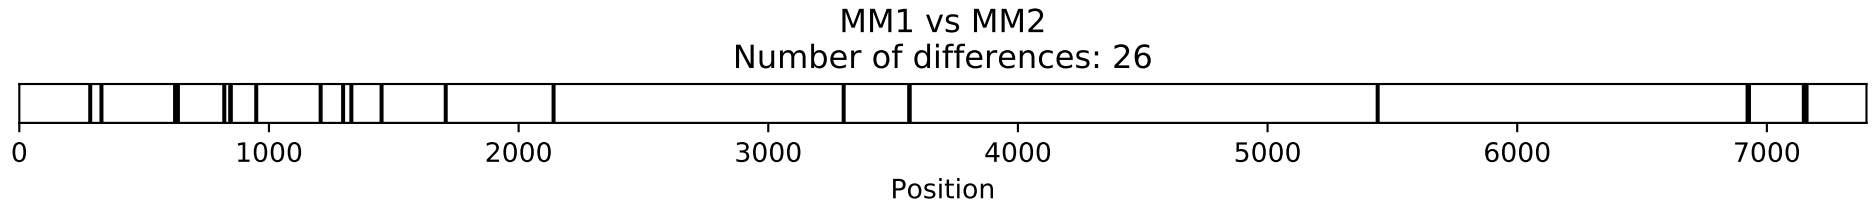

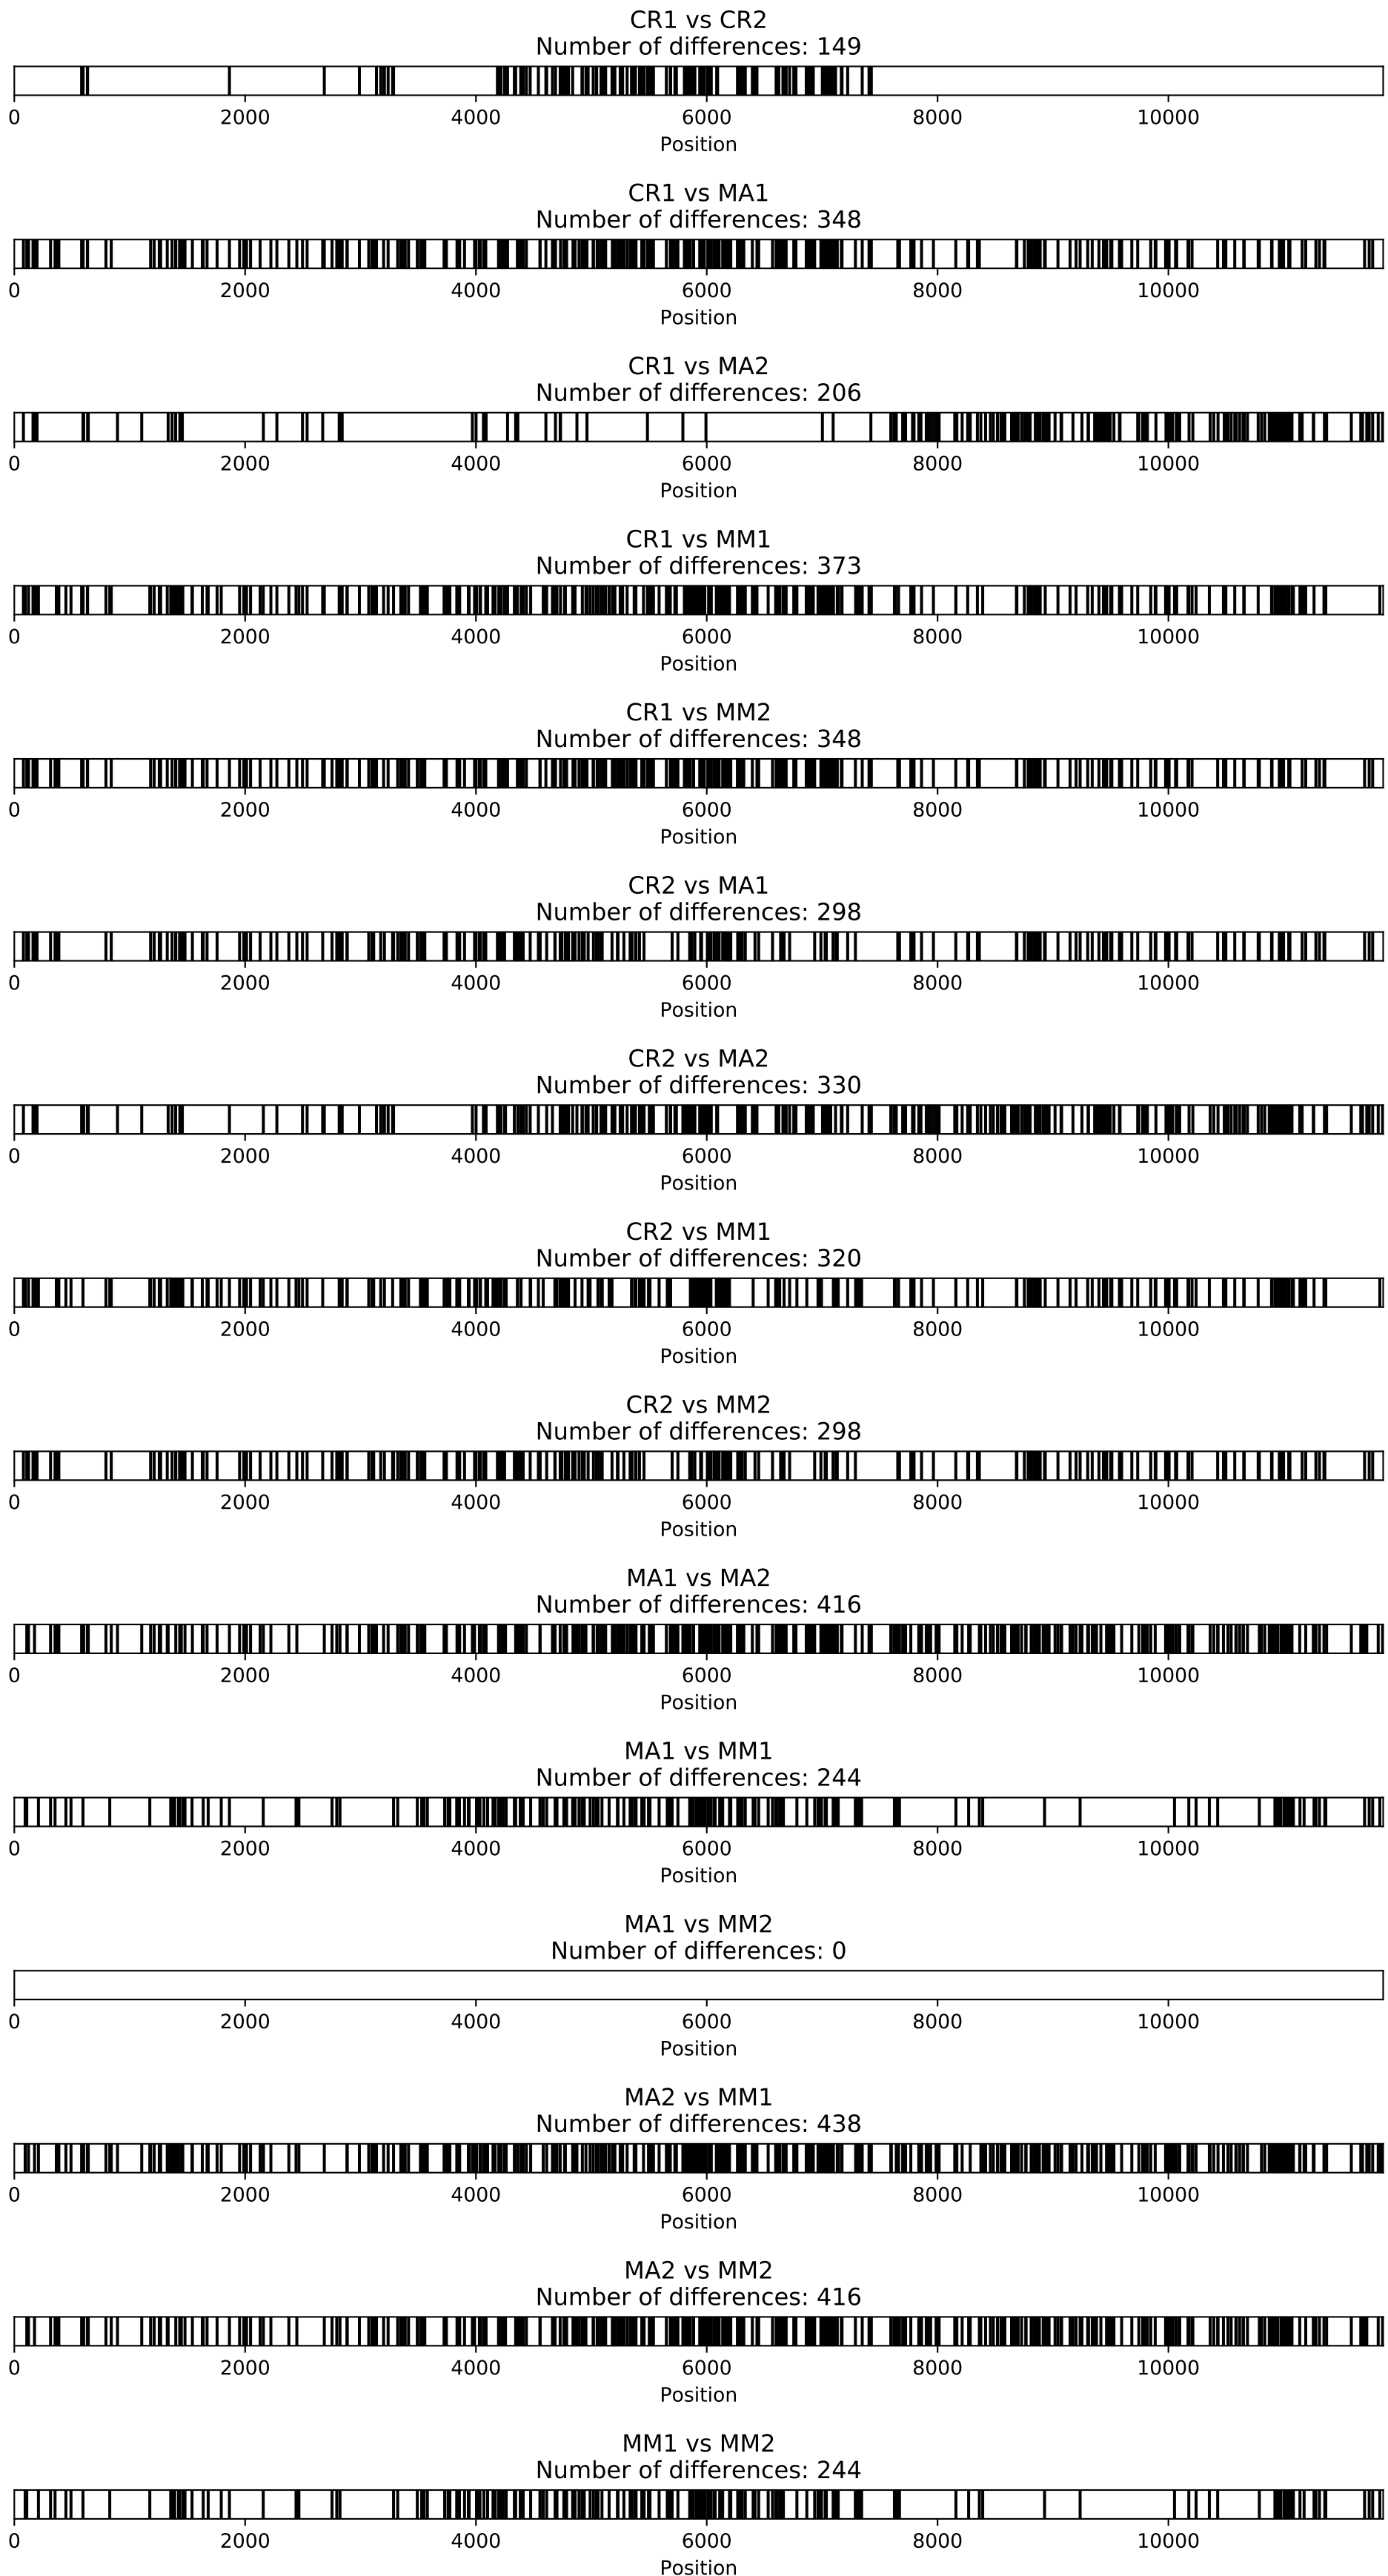

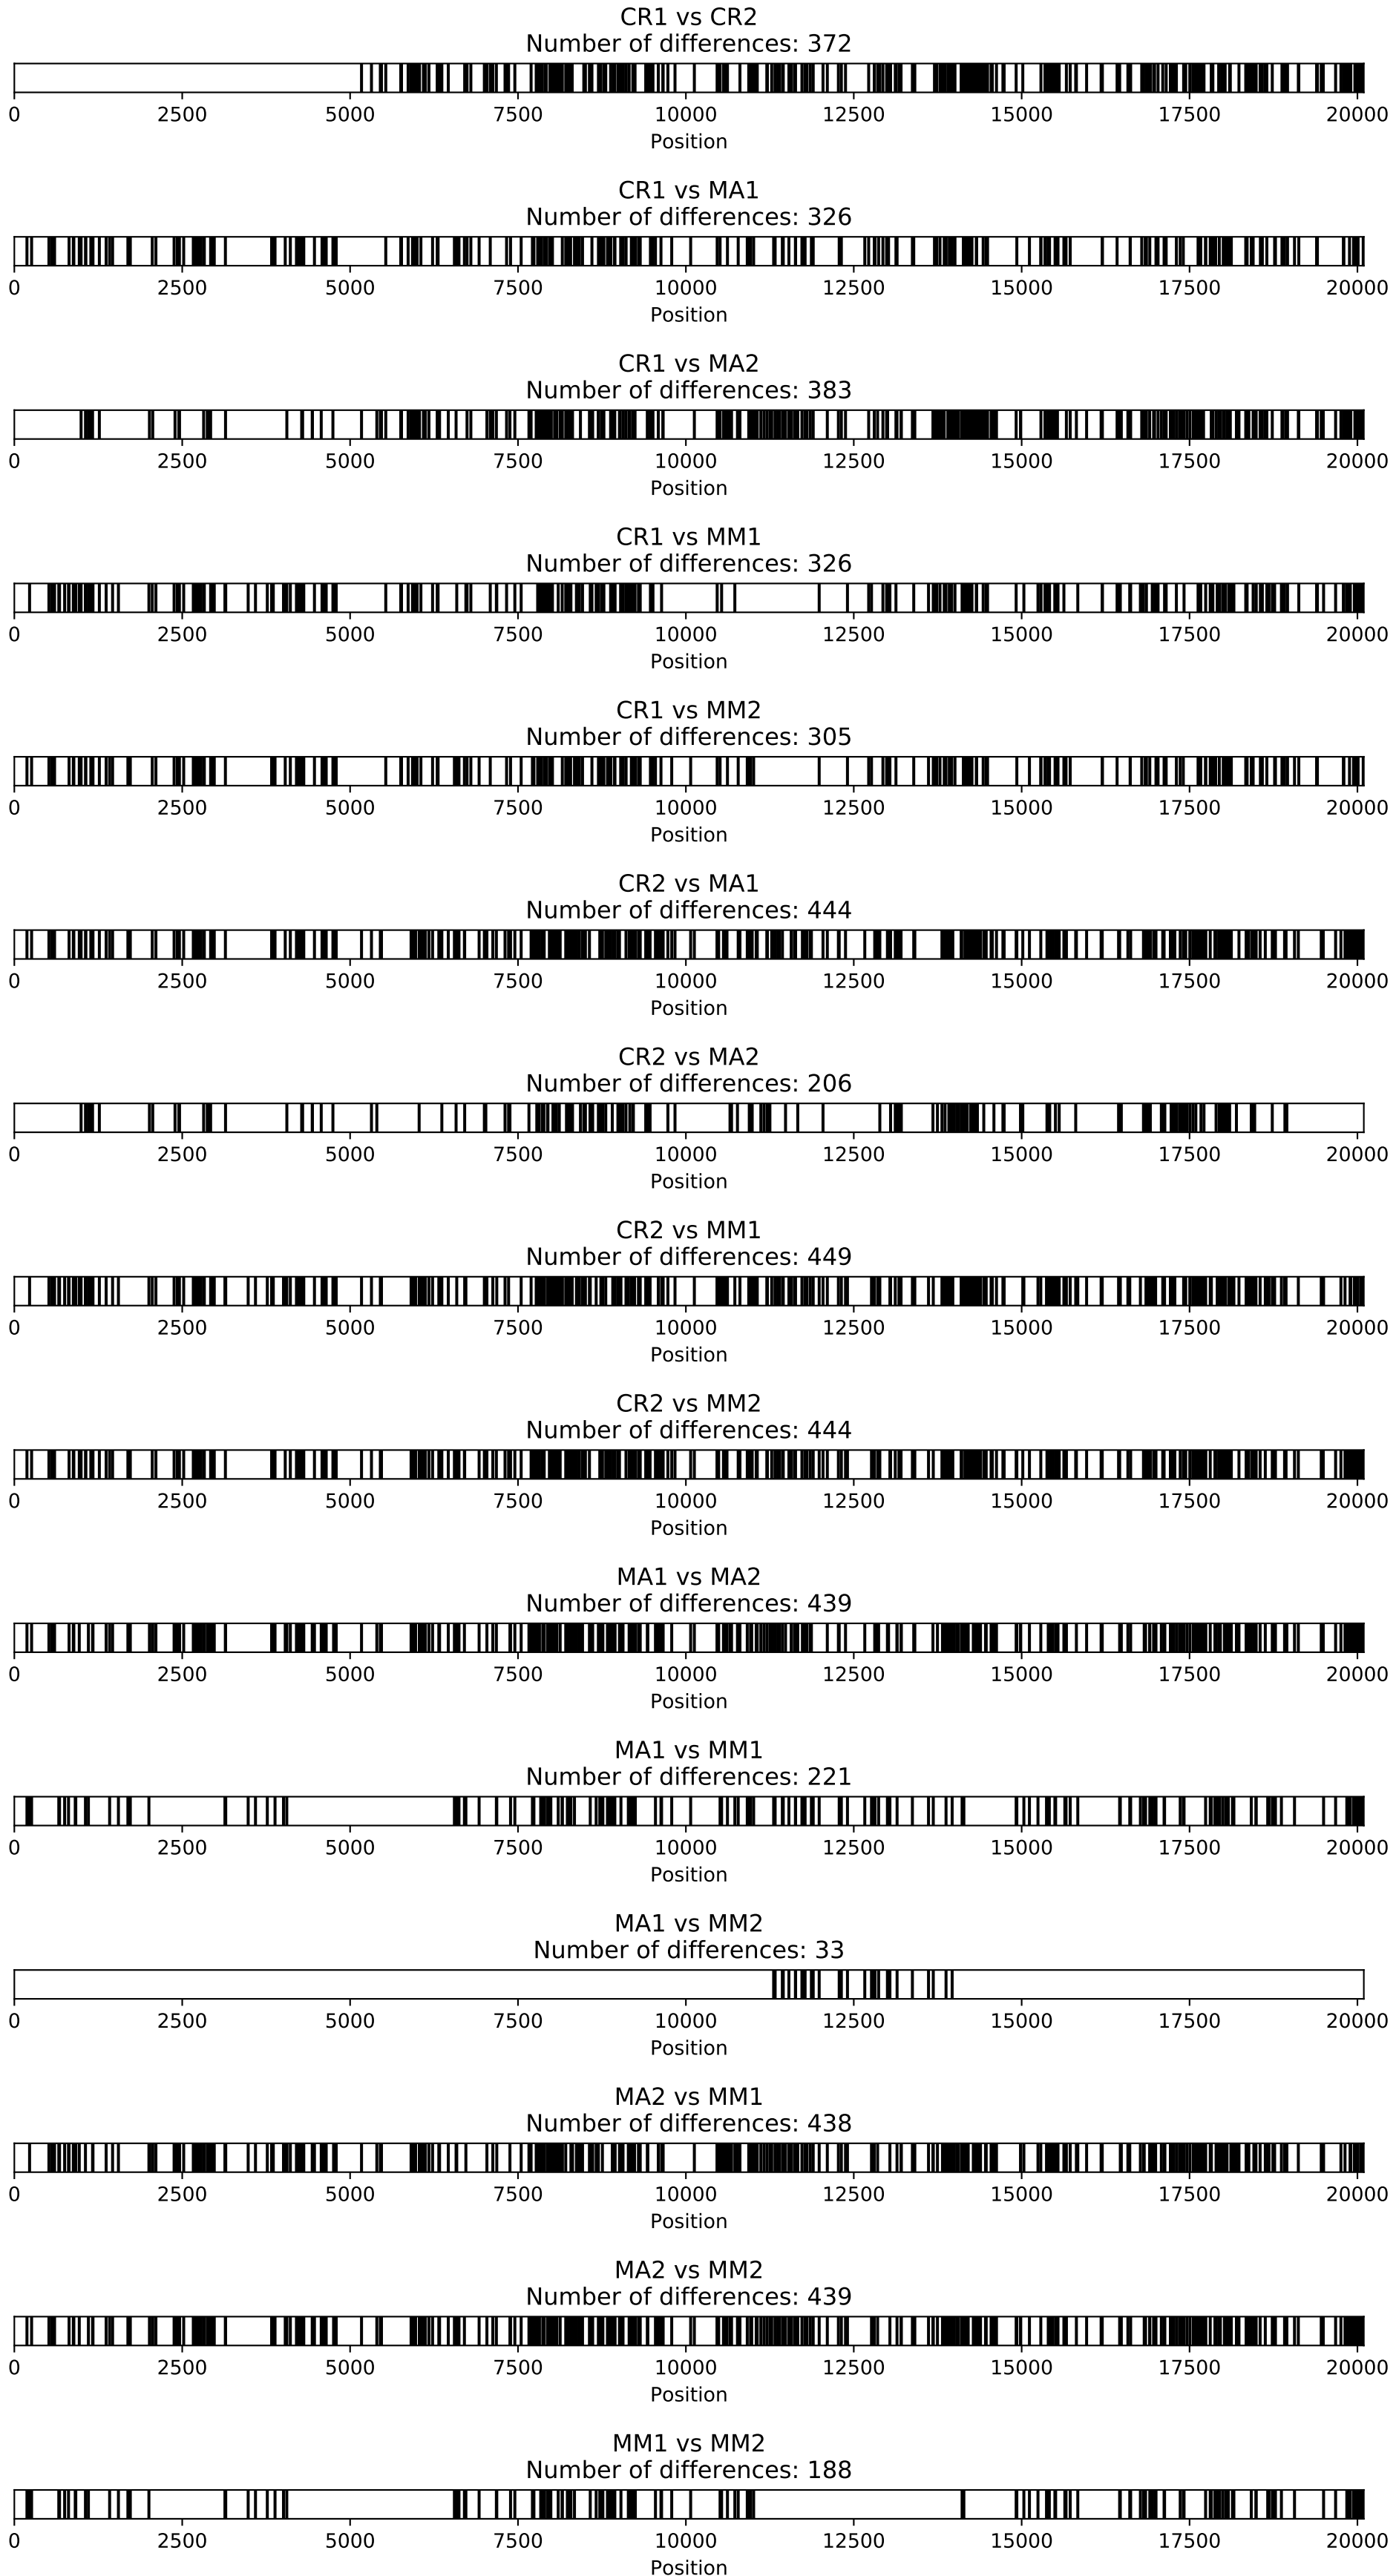



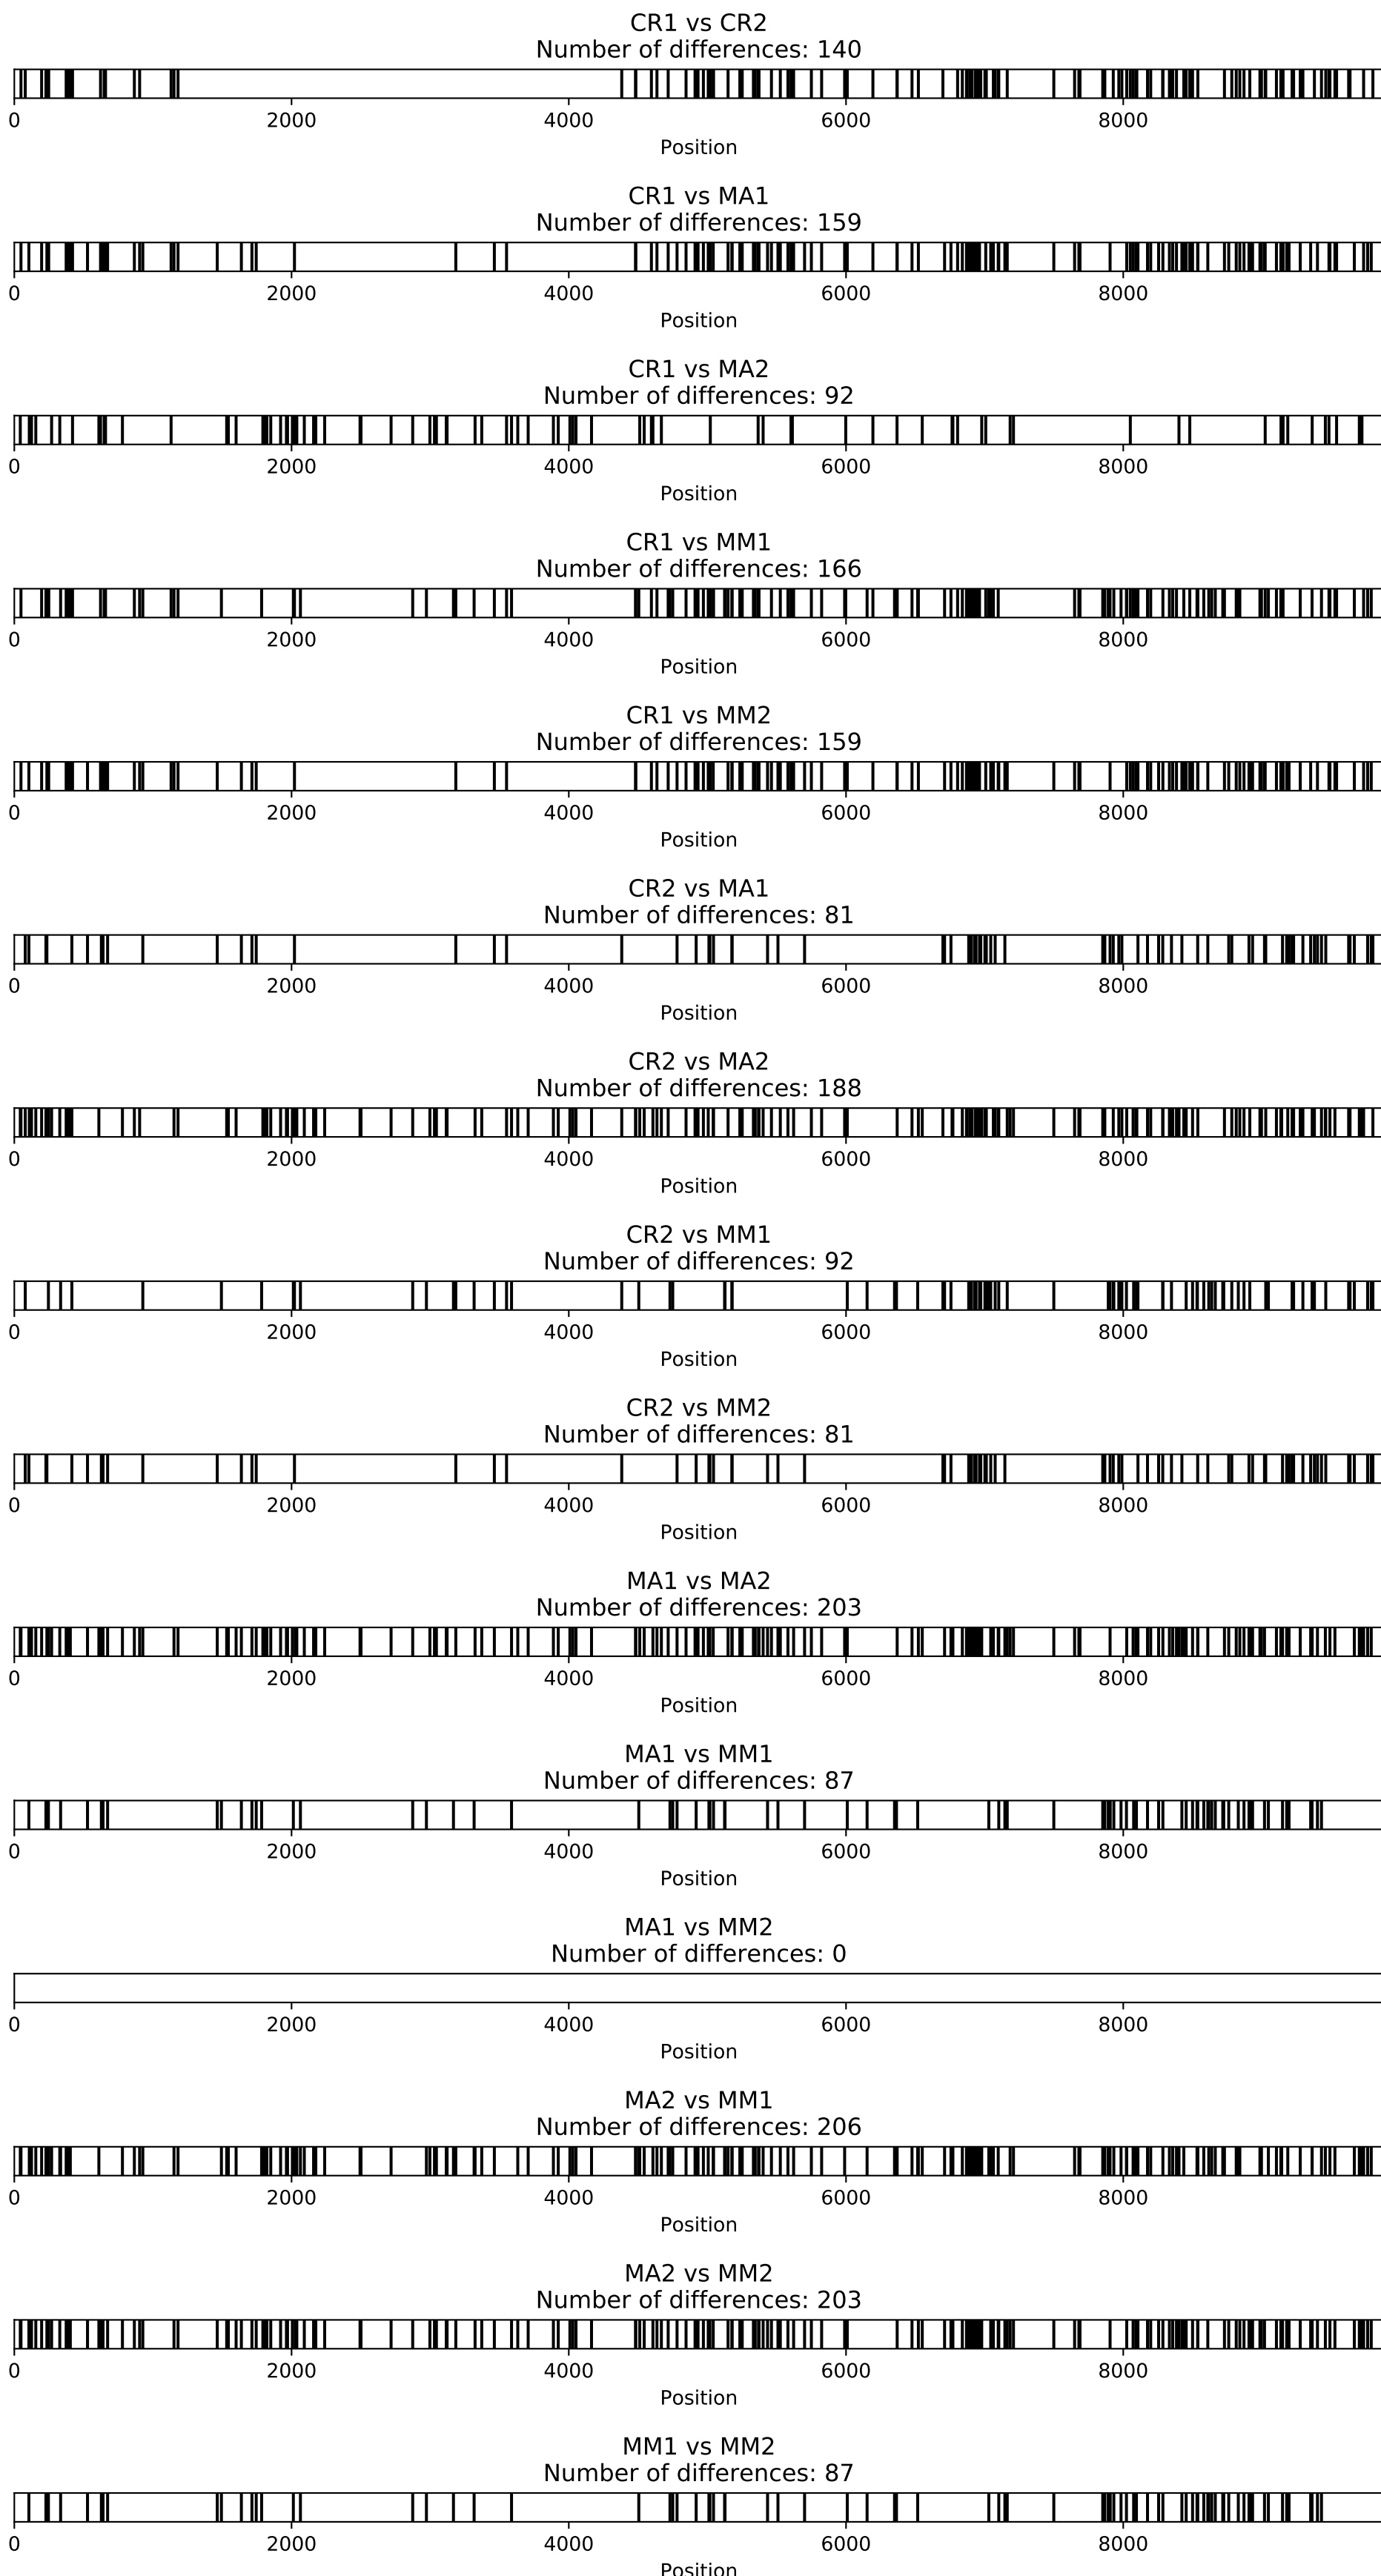

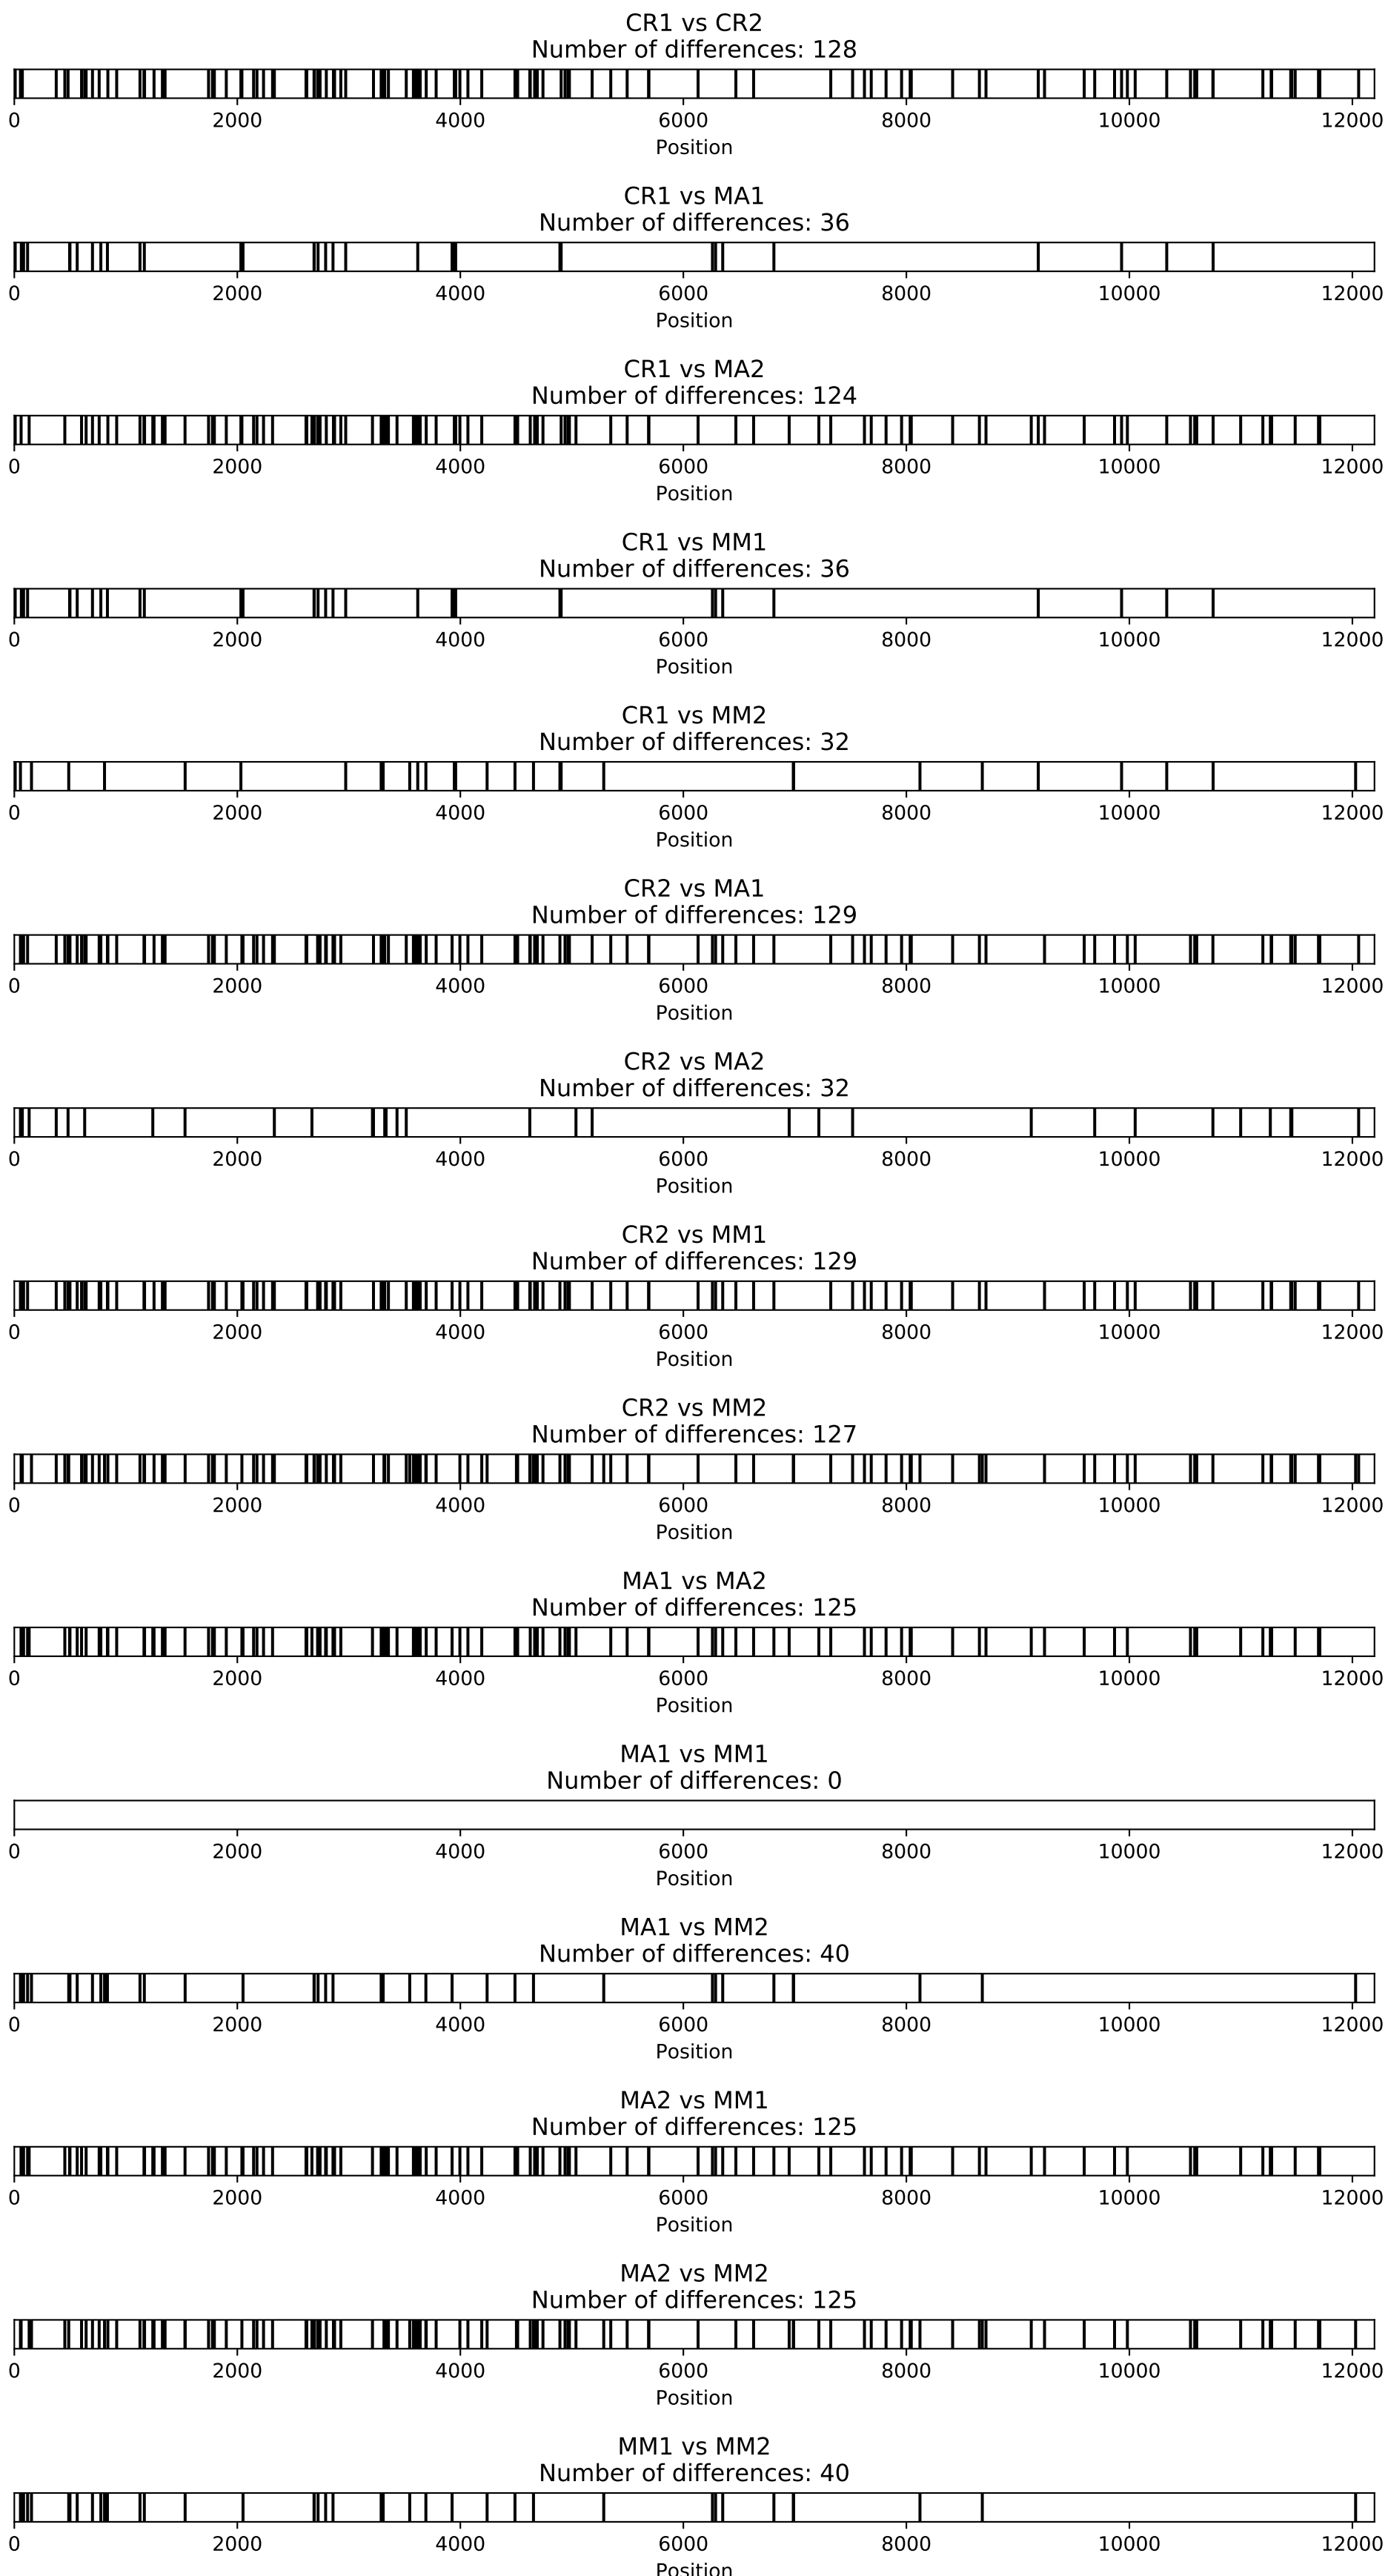

# Region: 485

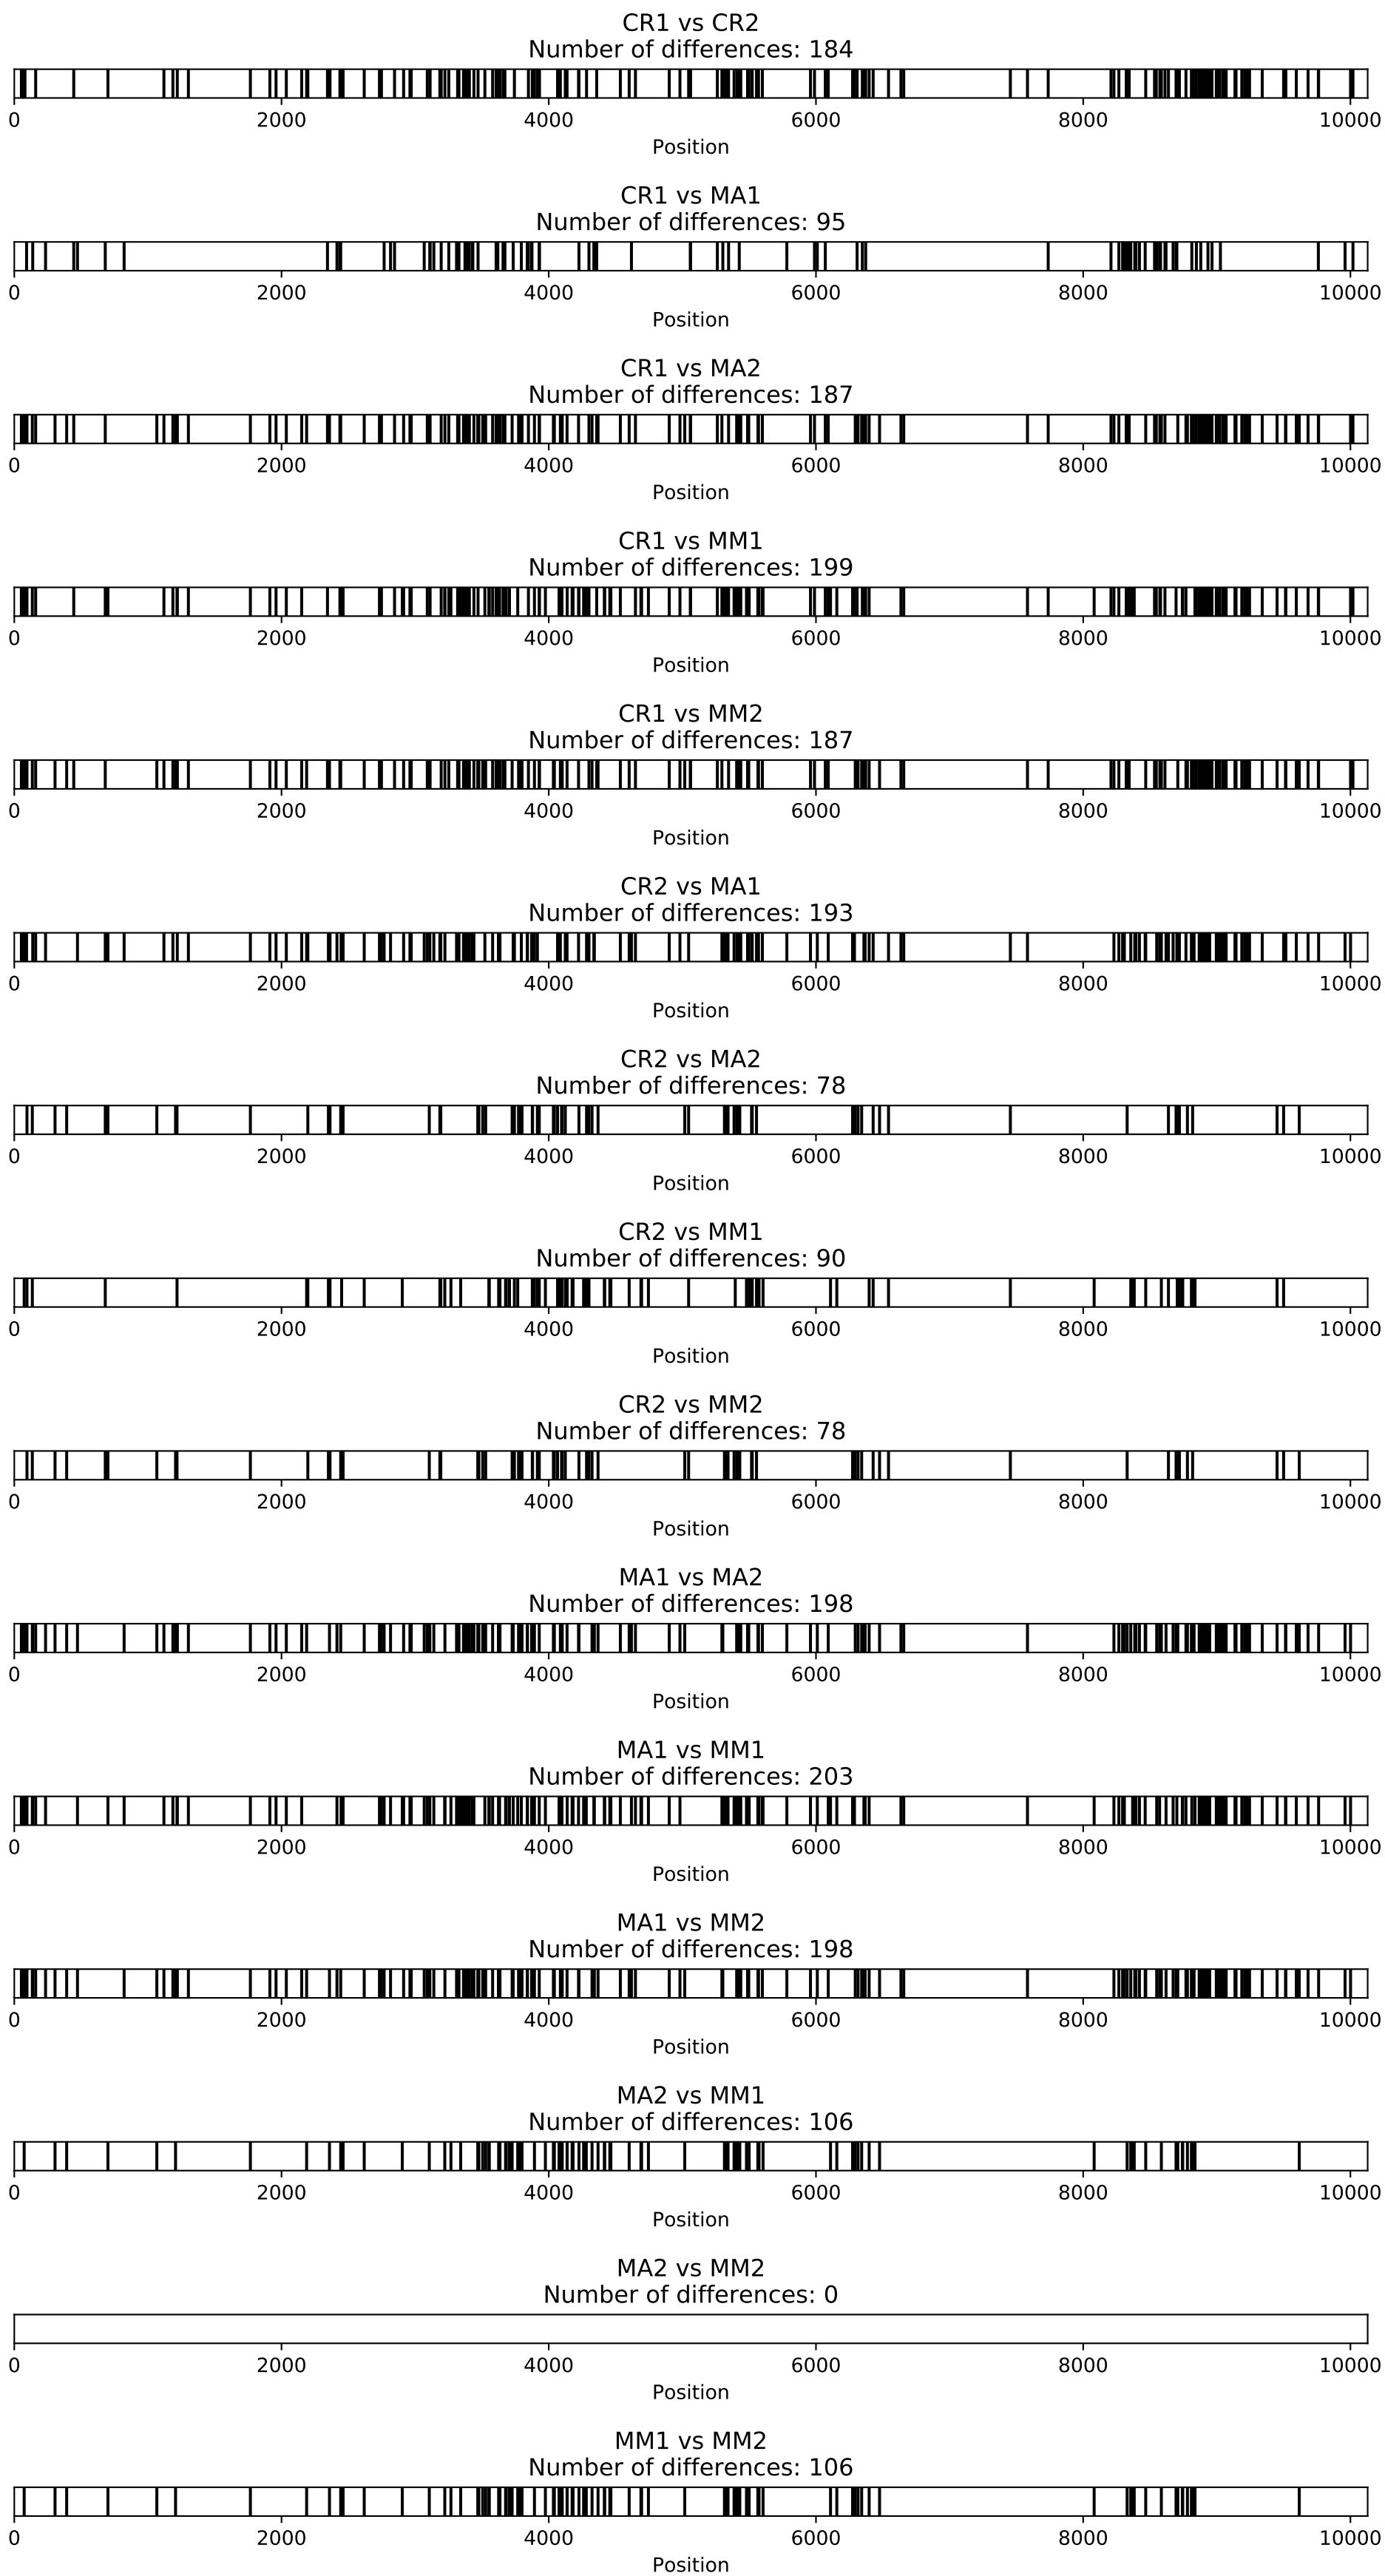

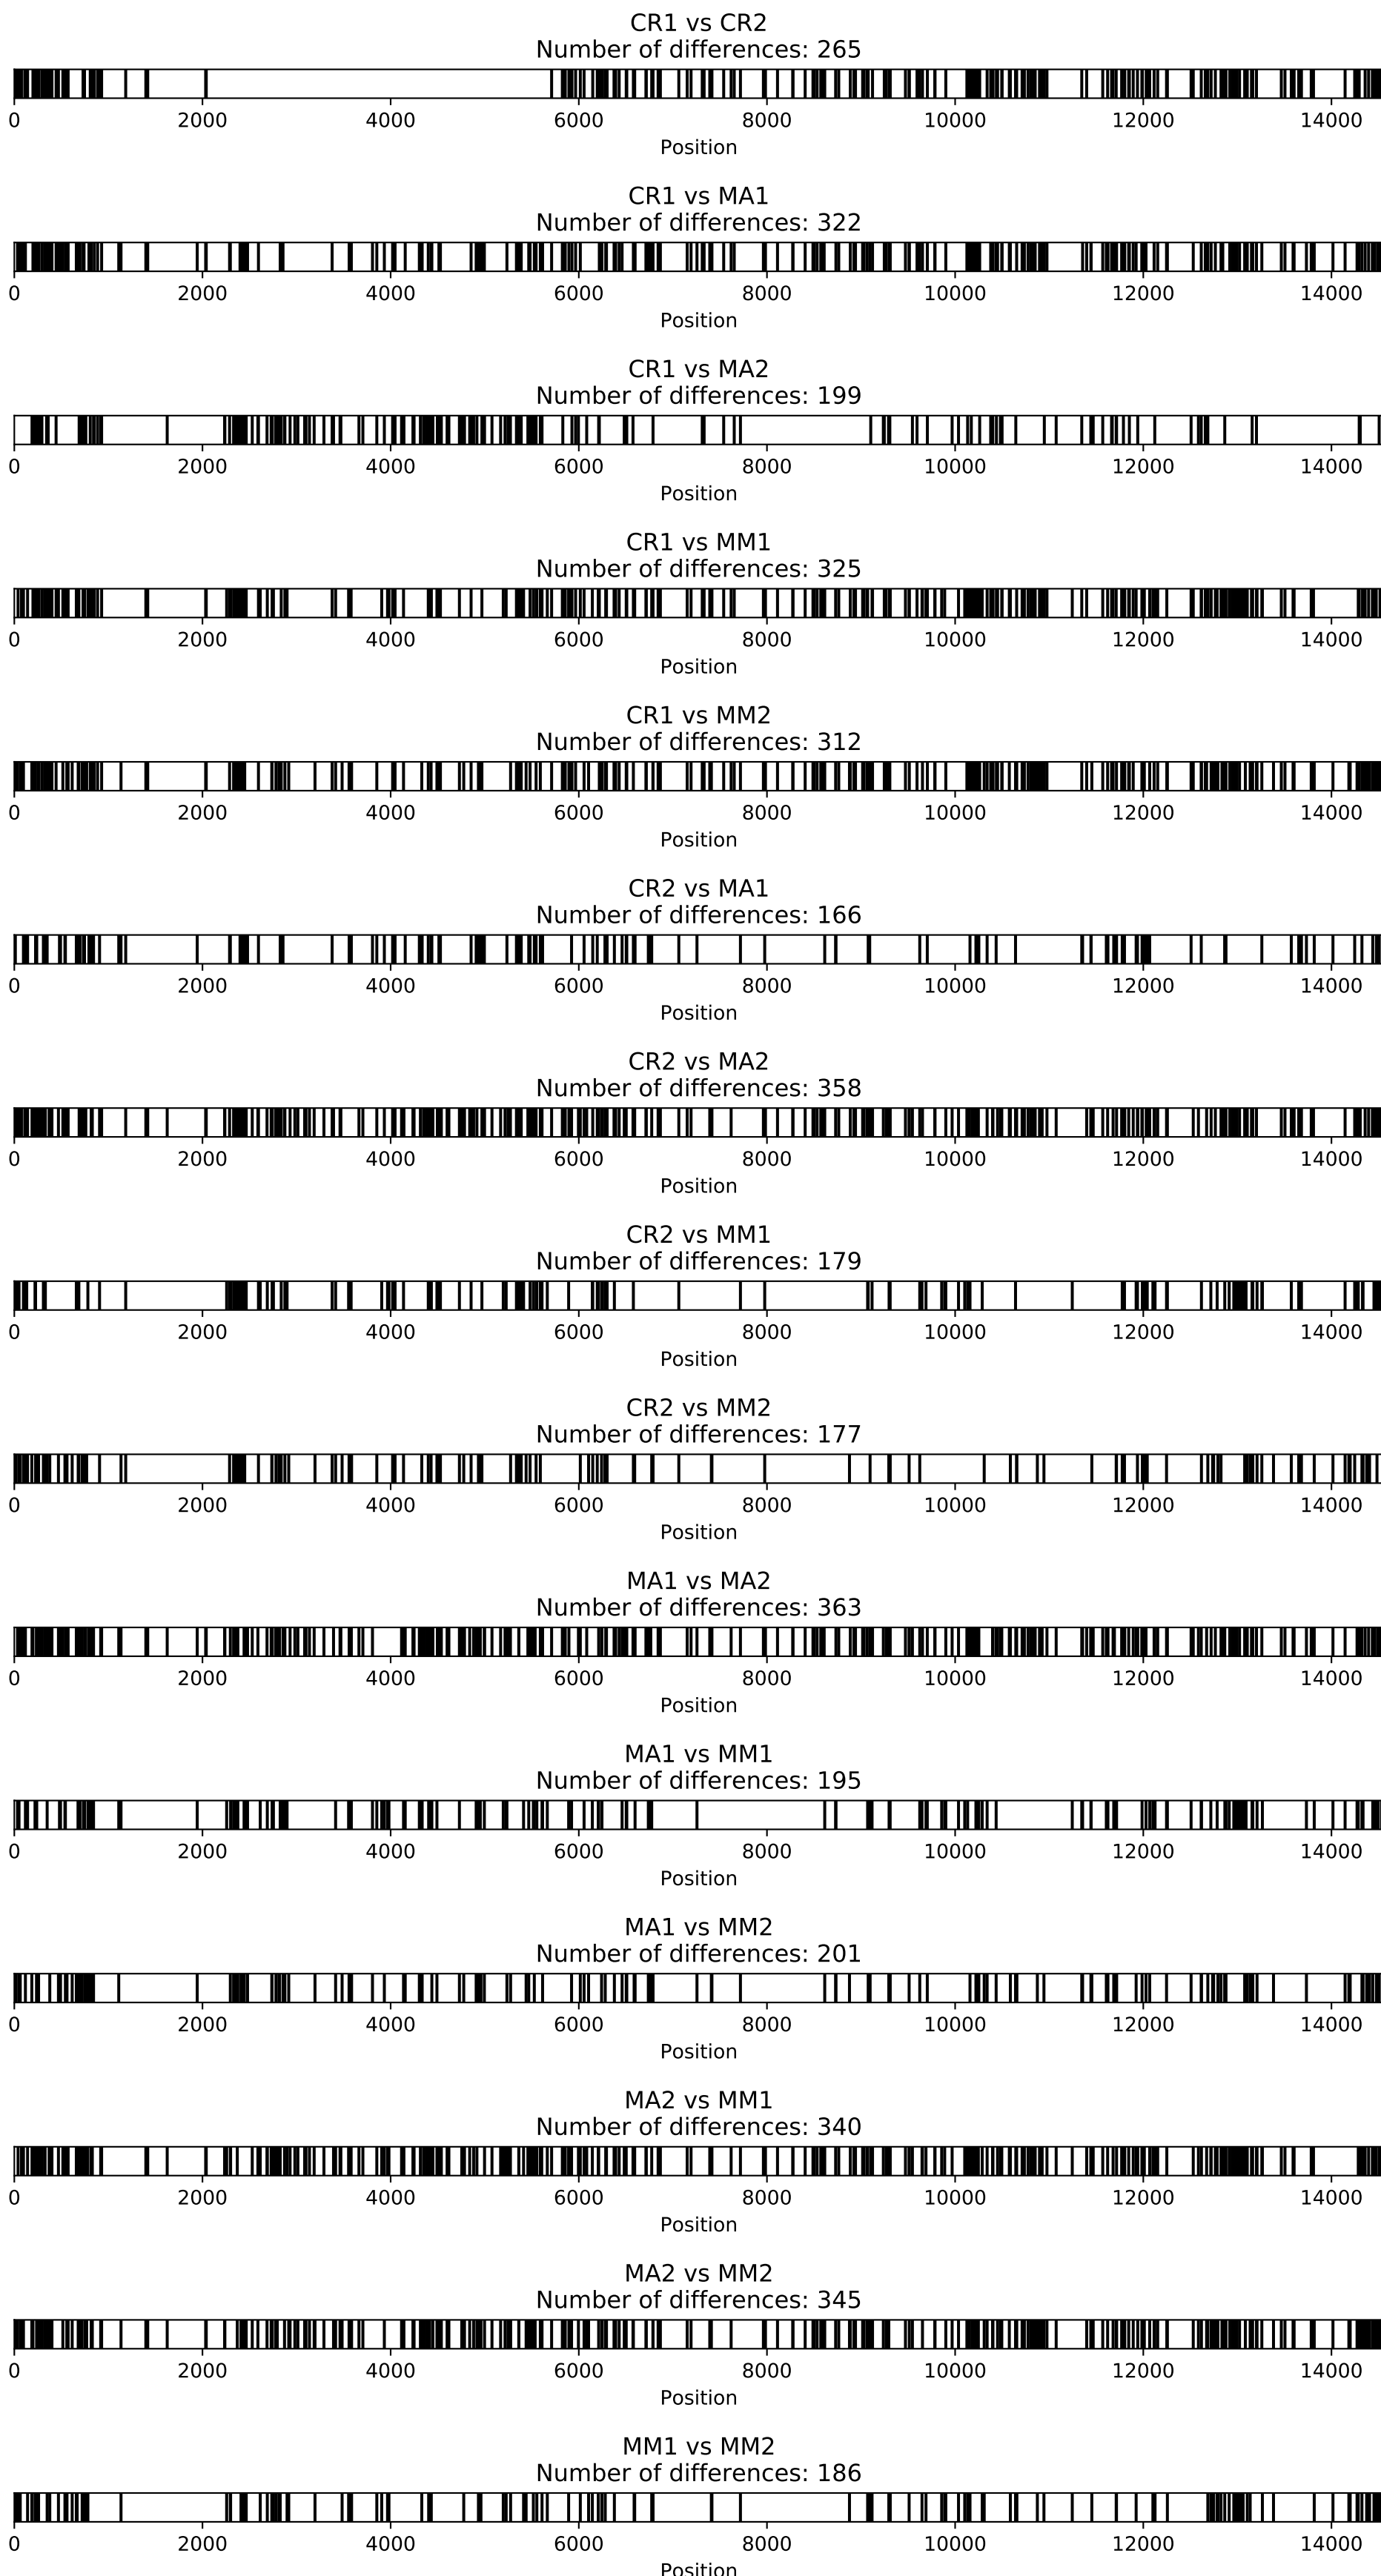

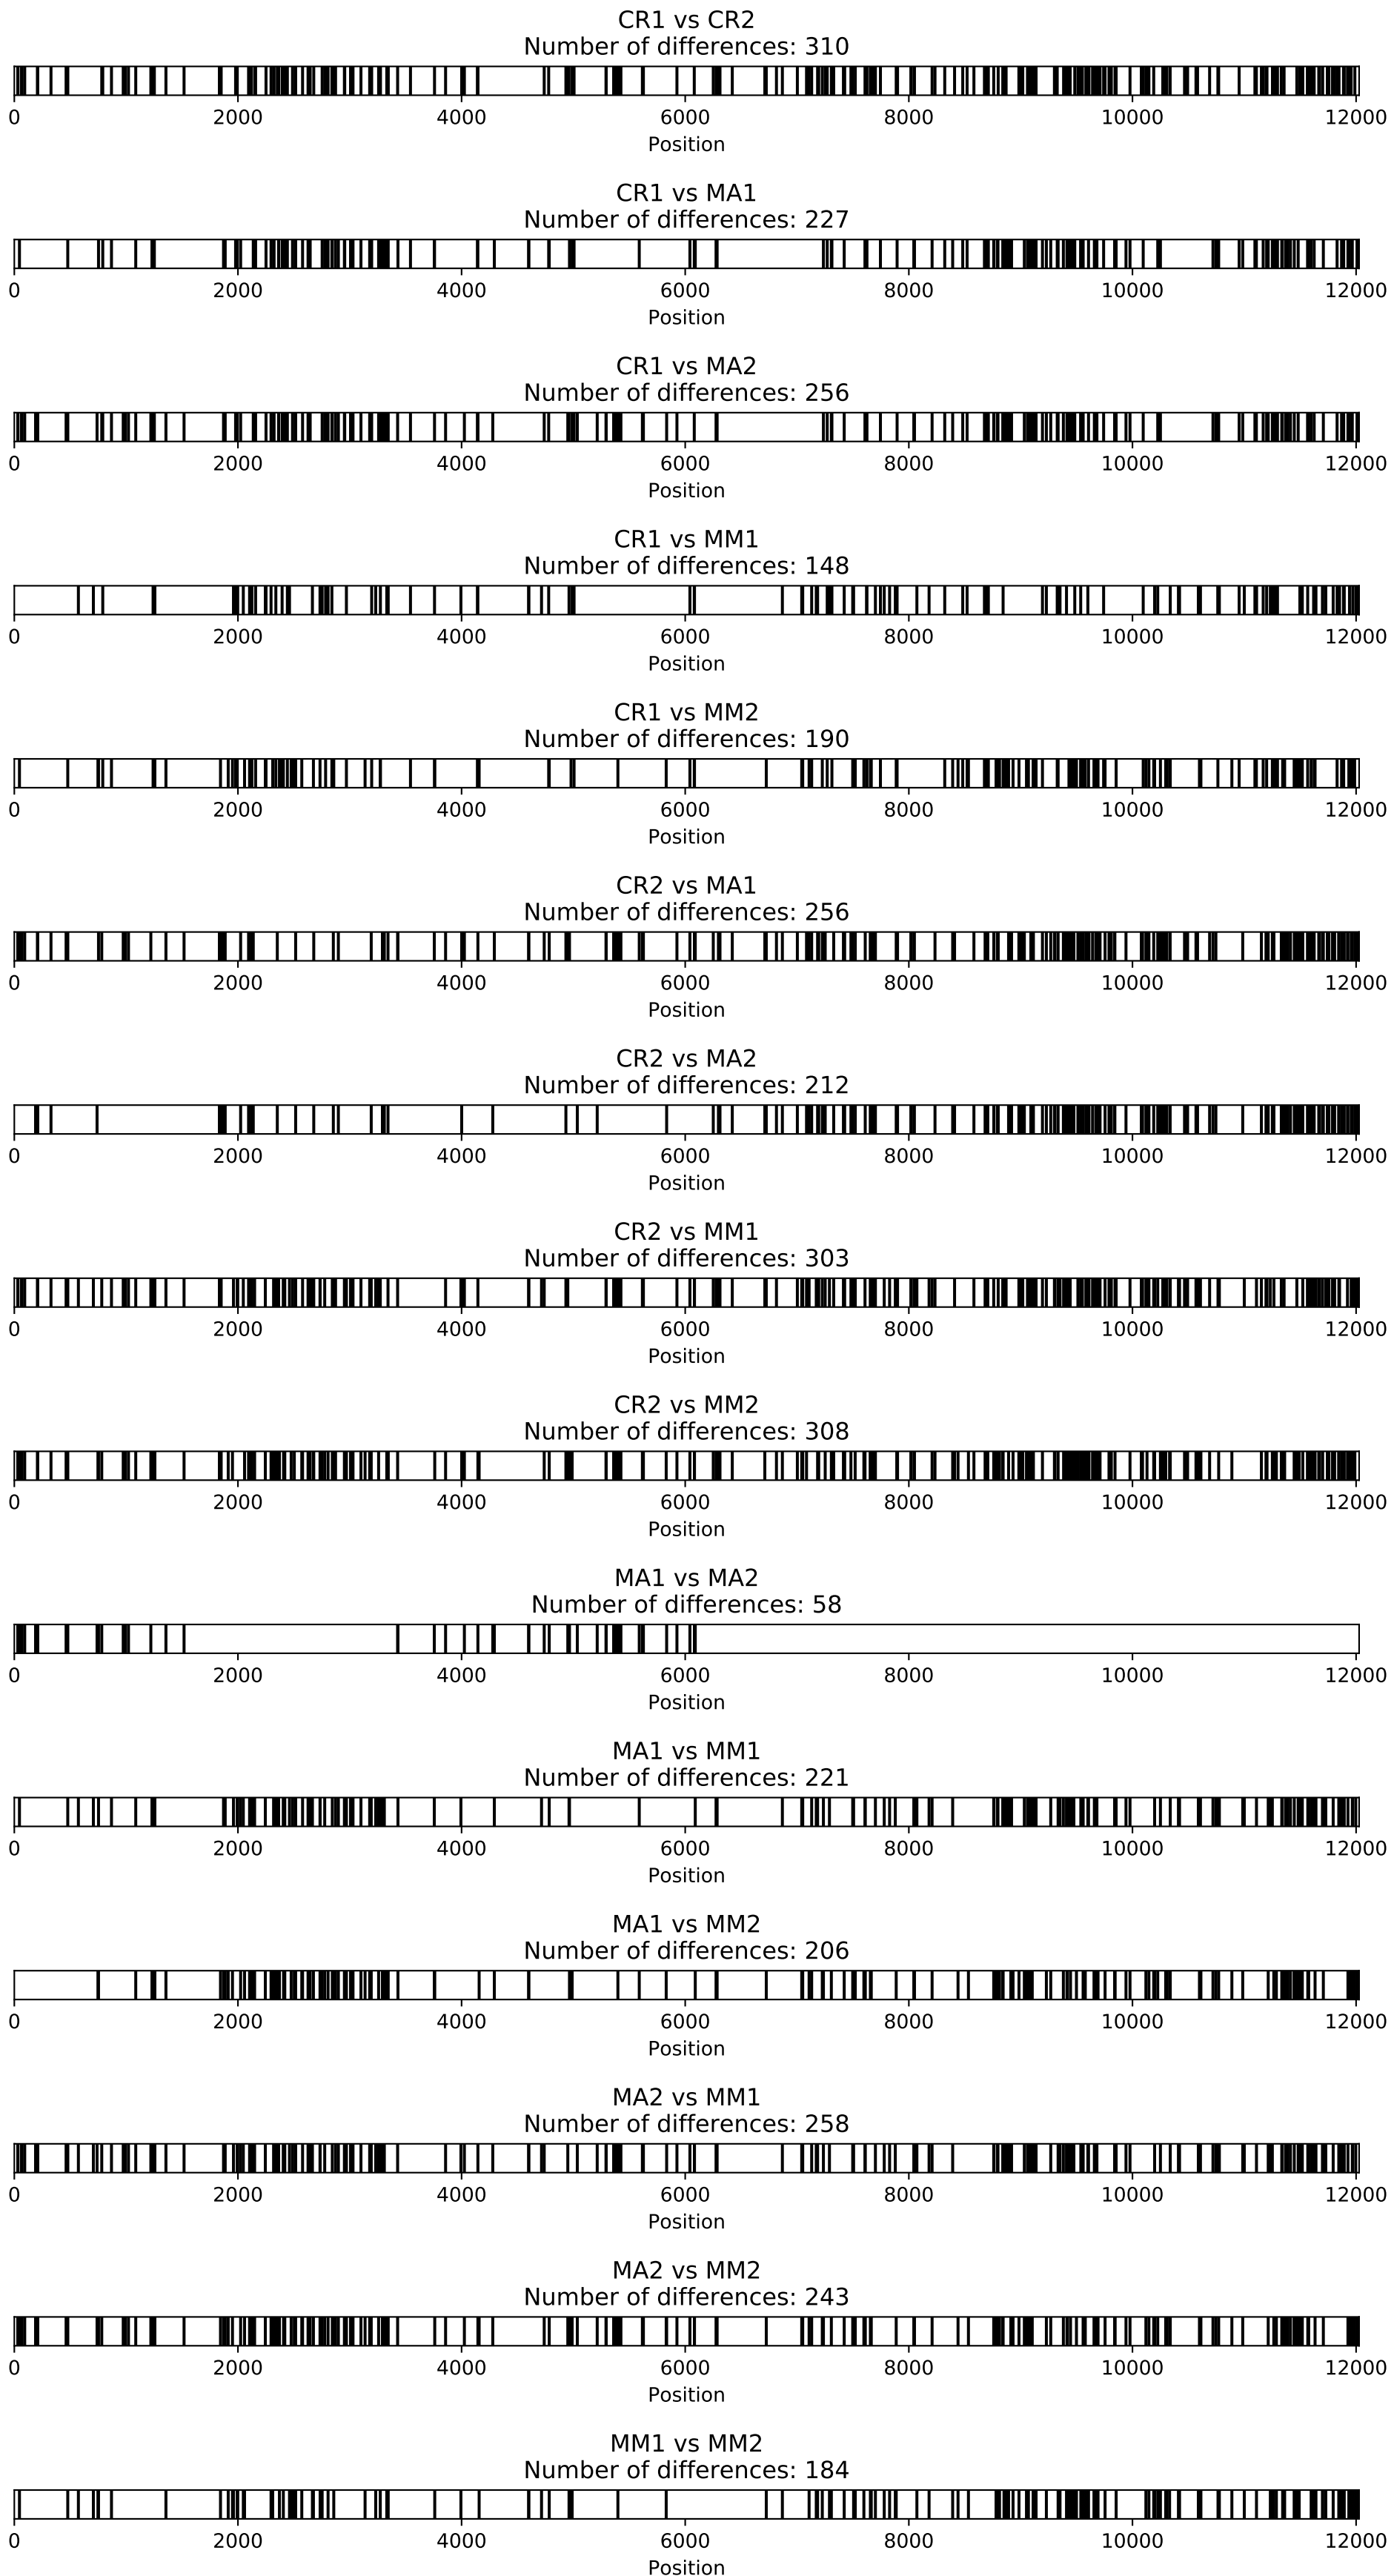

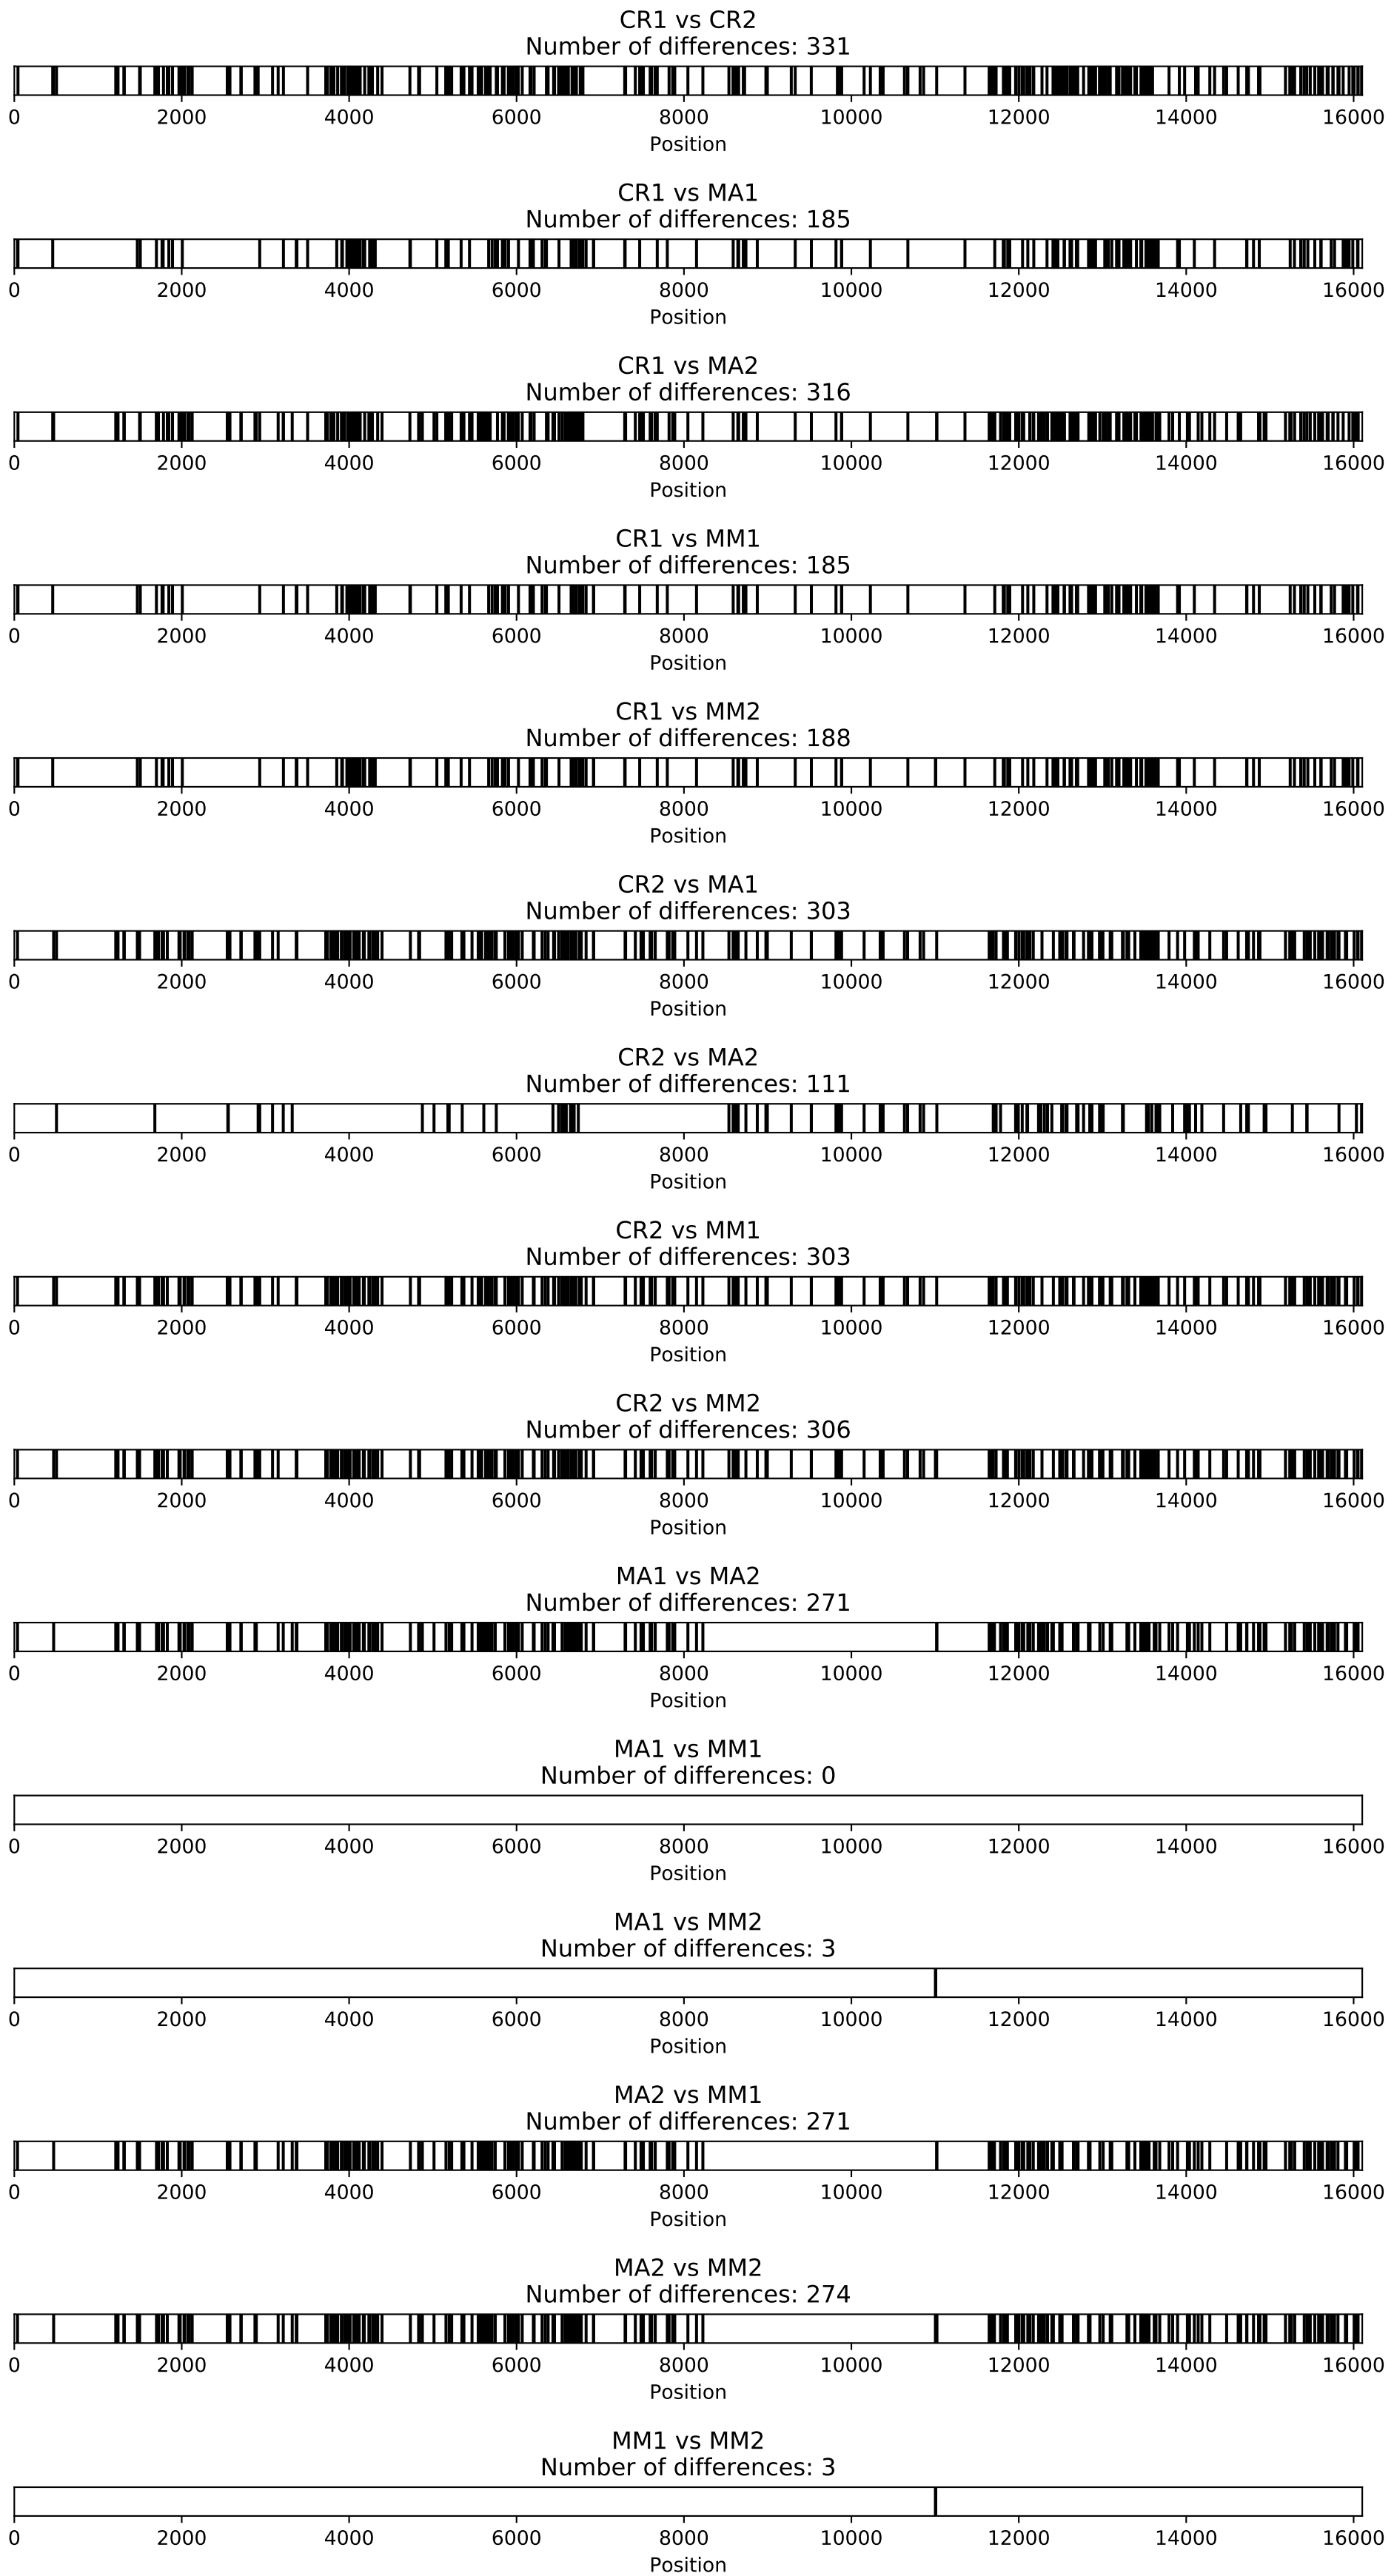

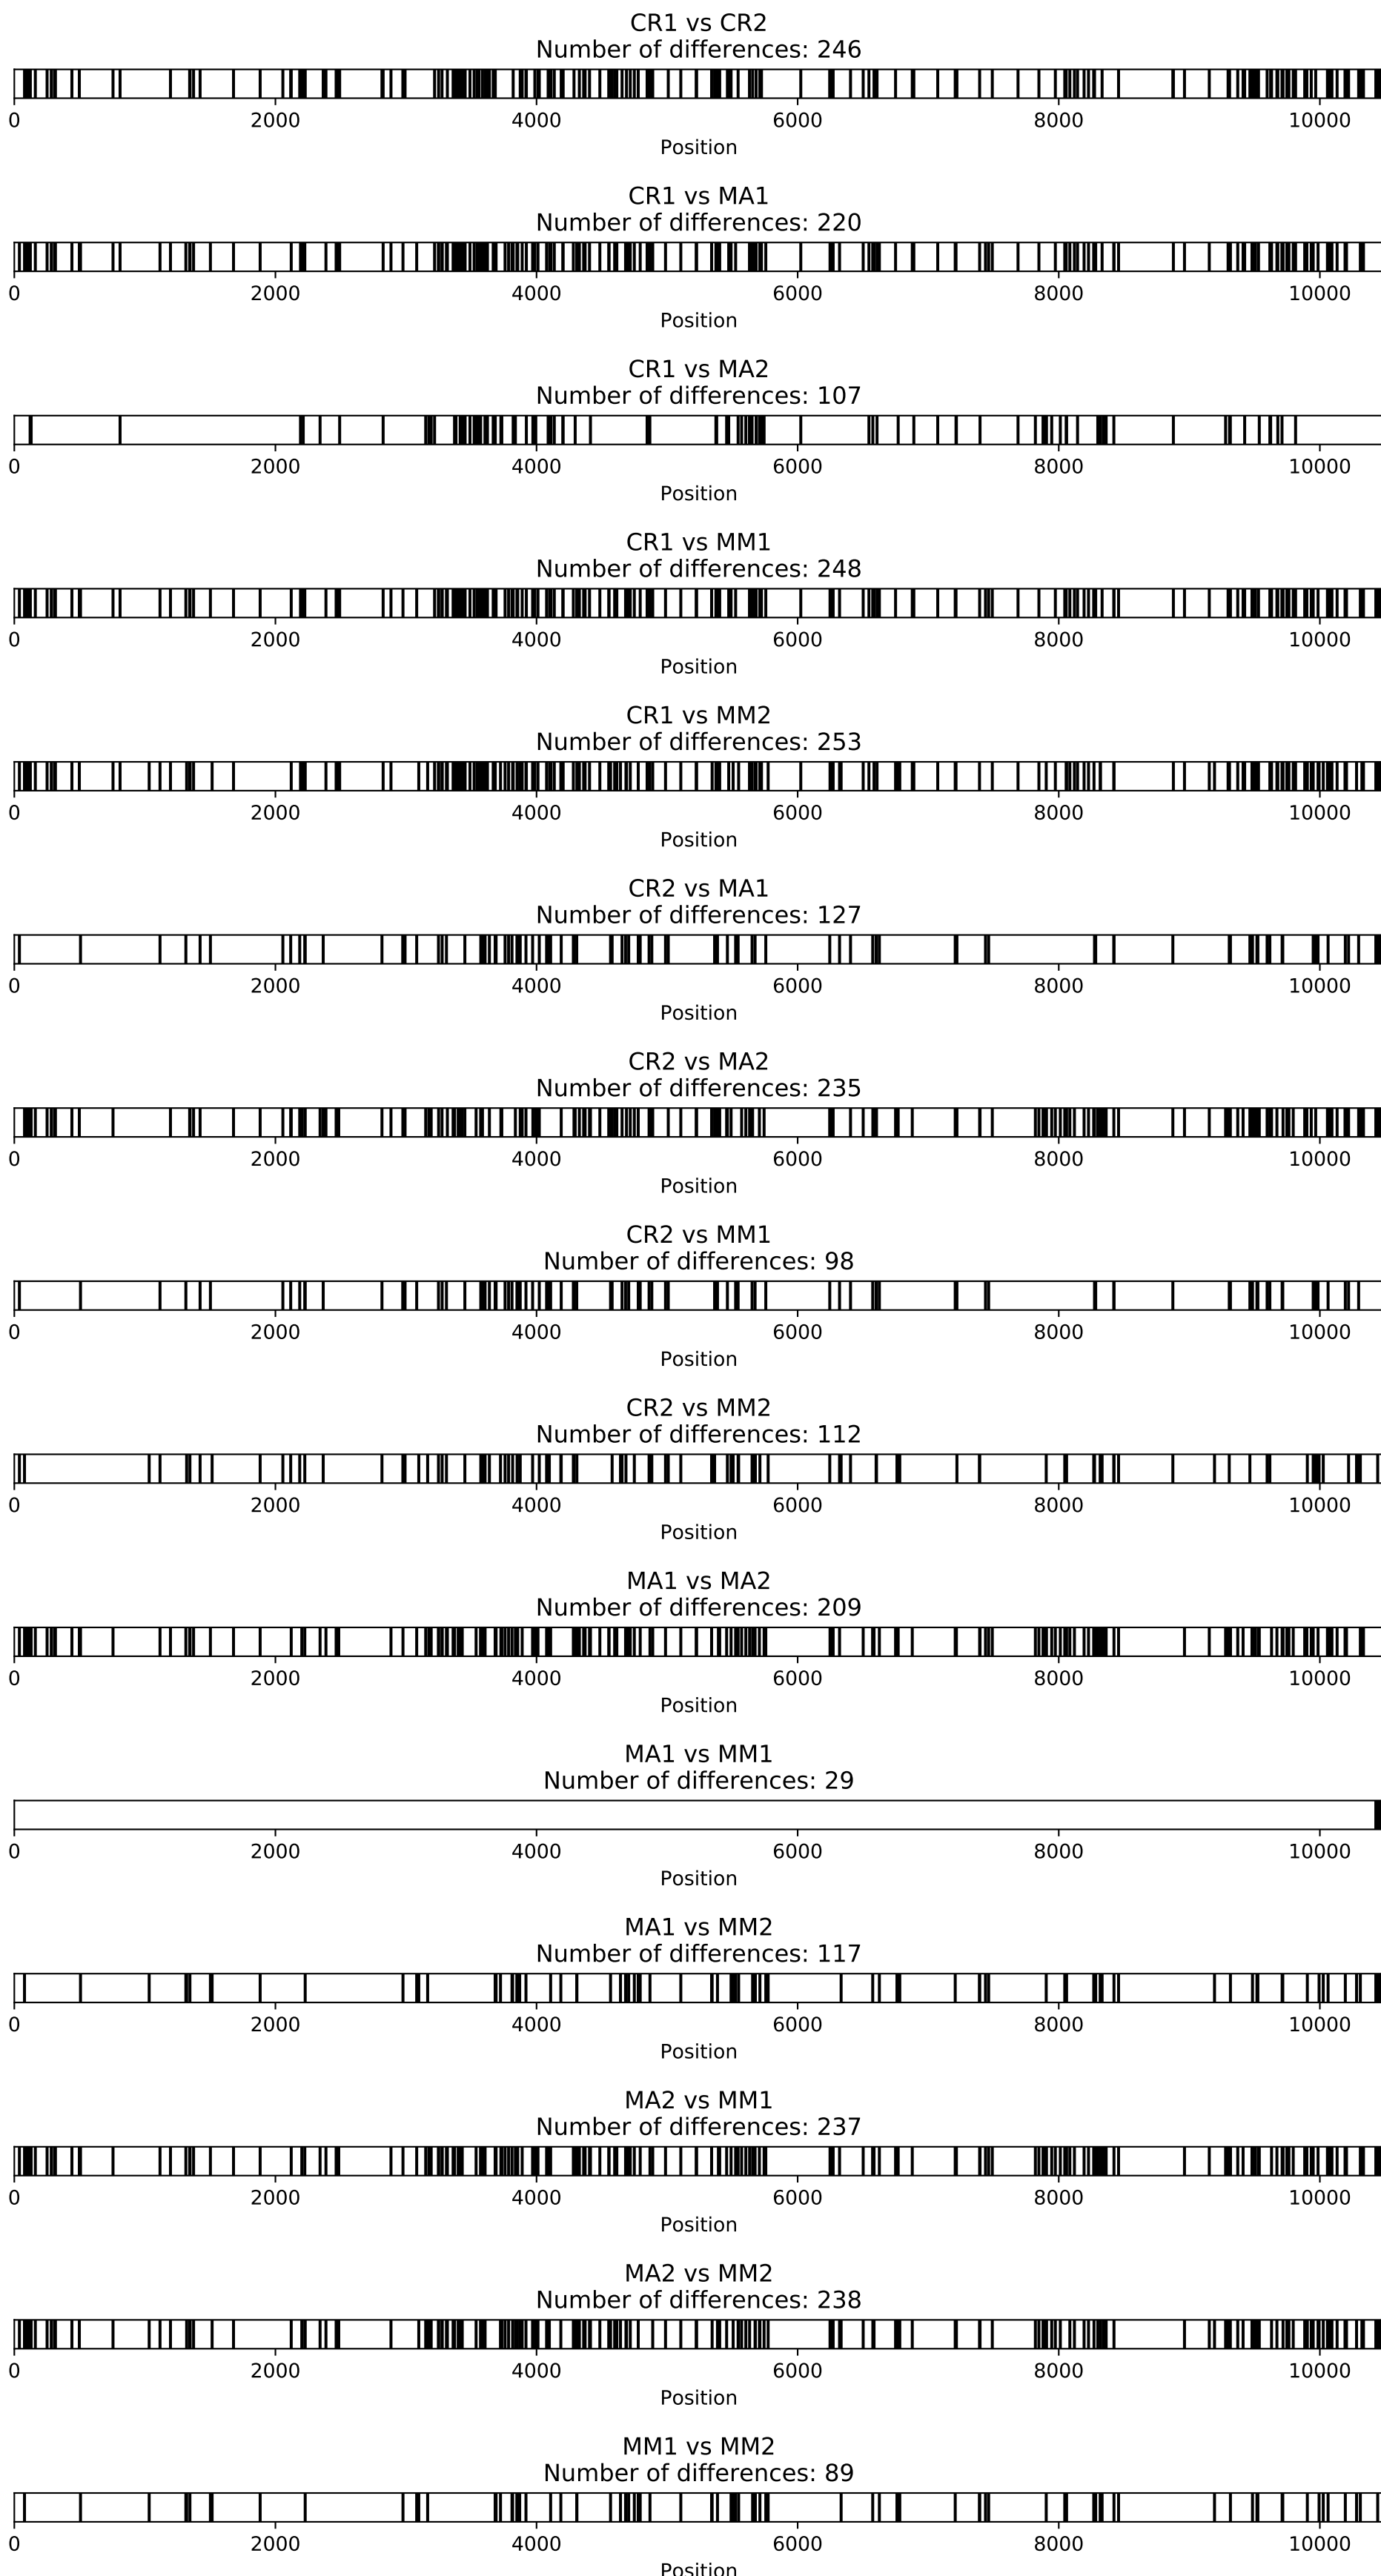

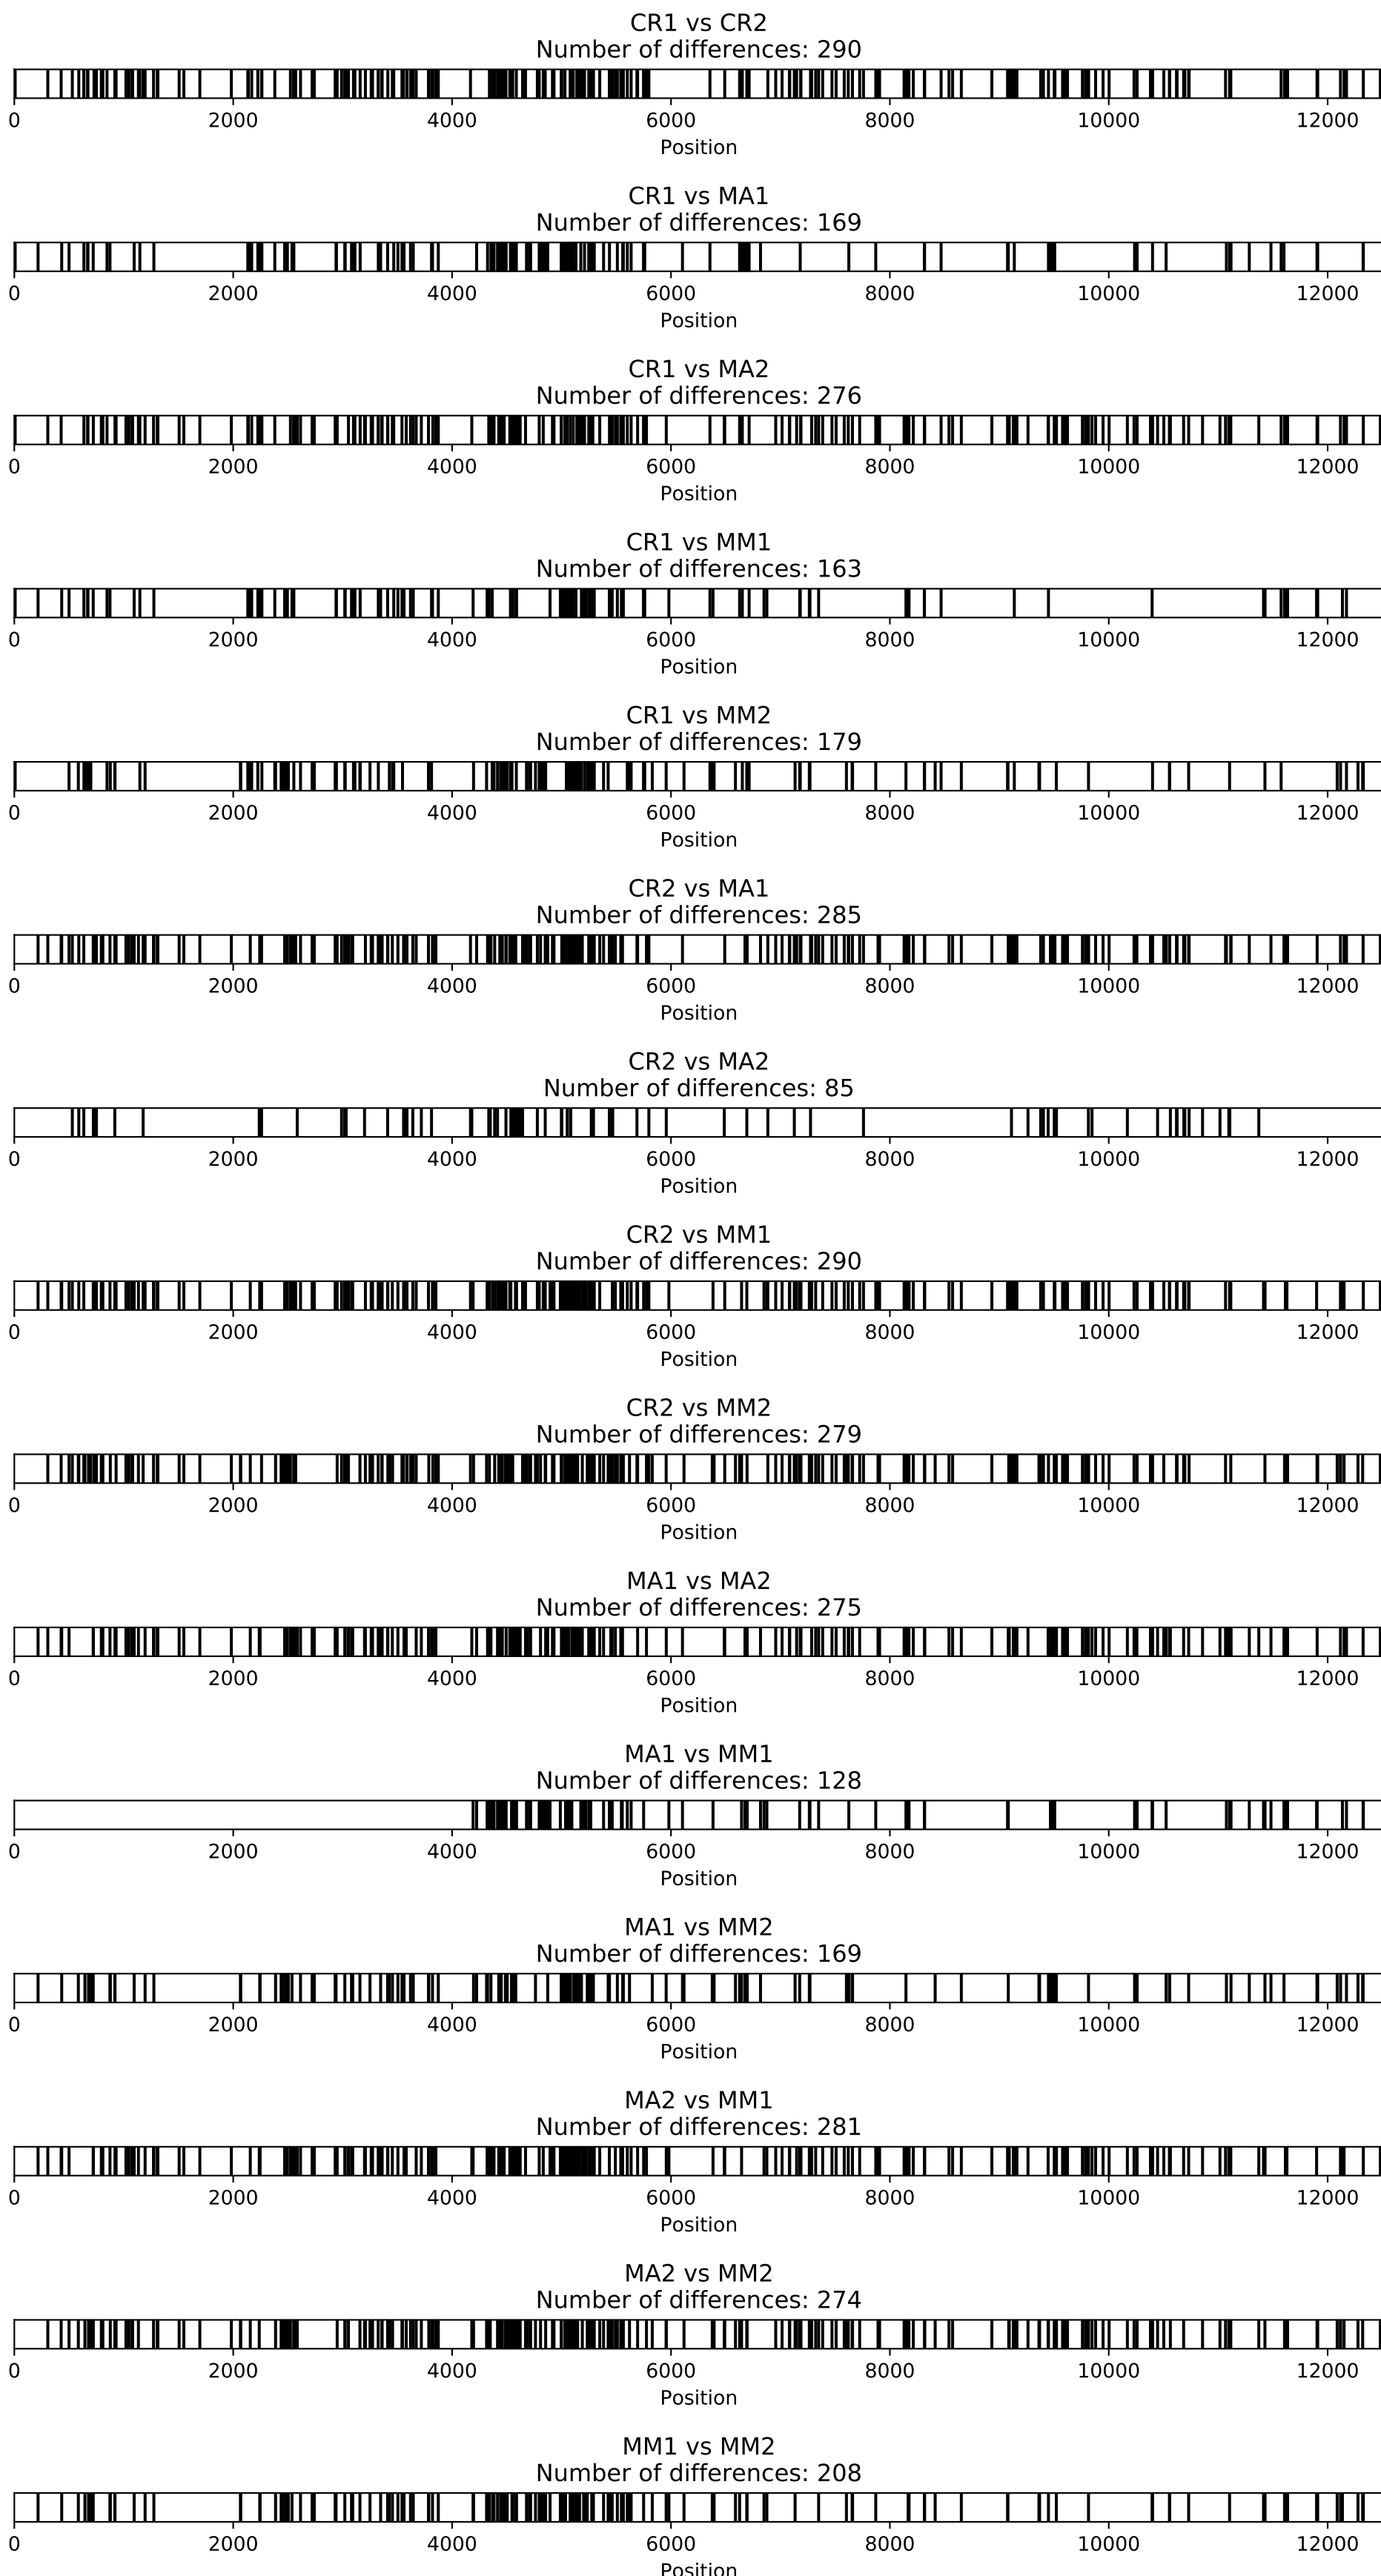



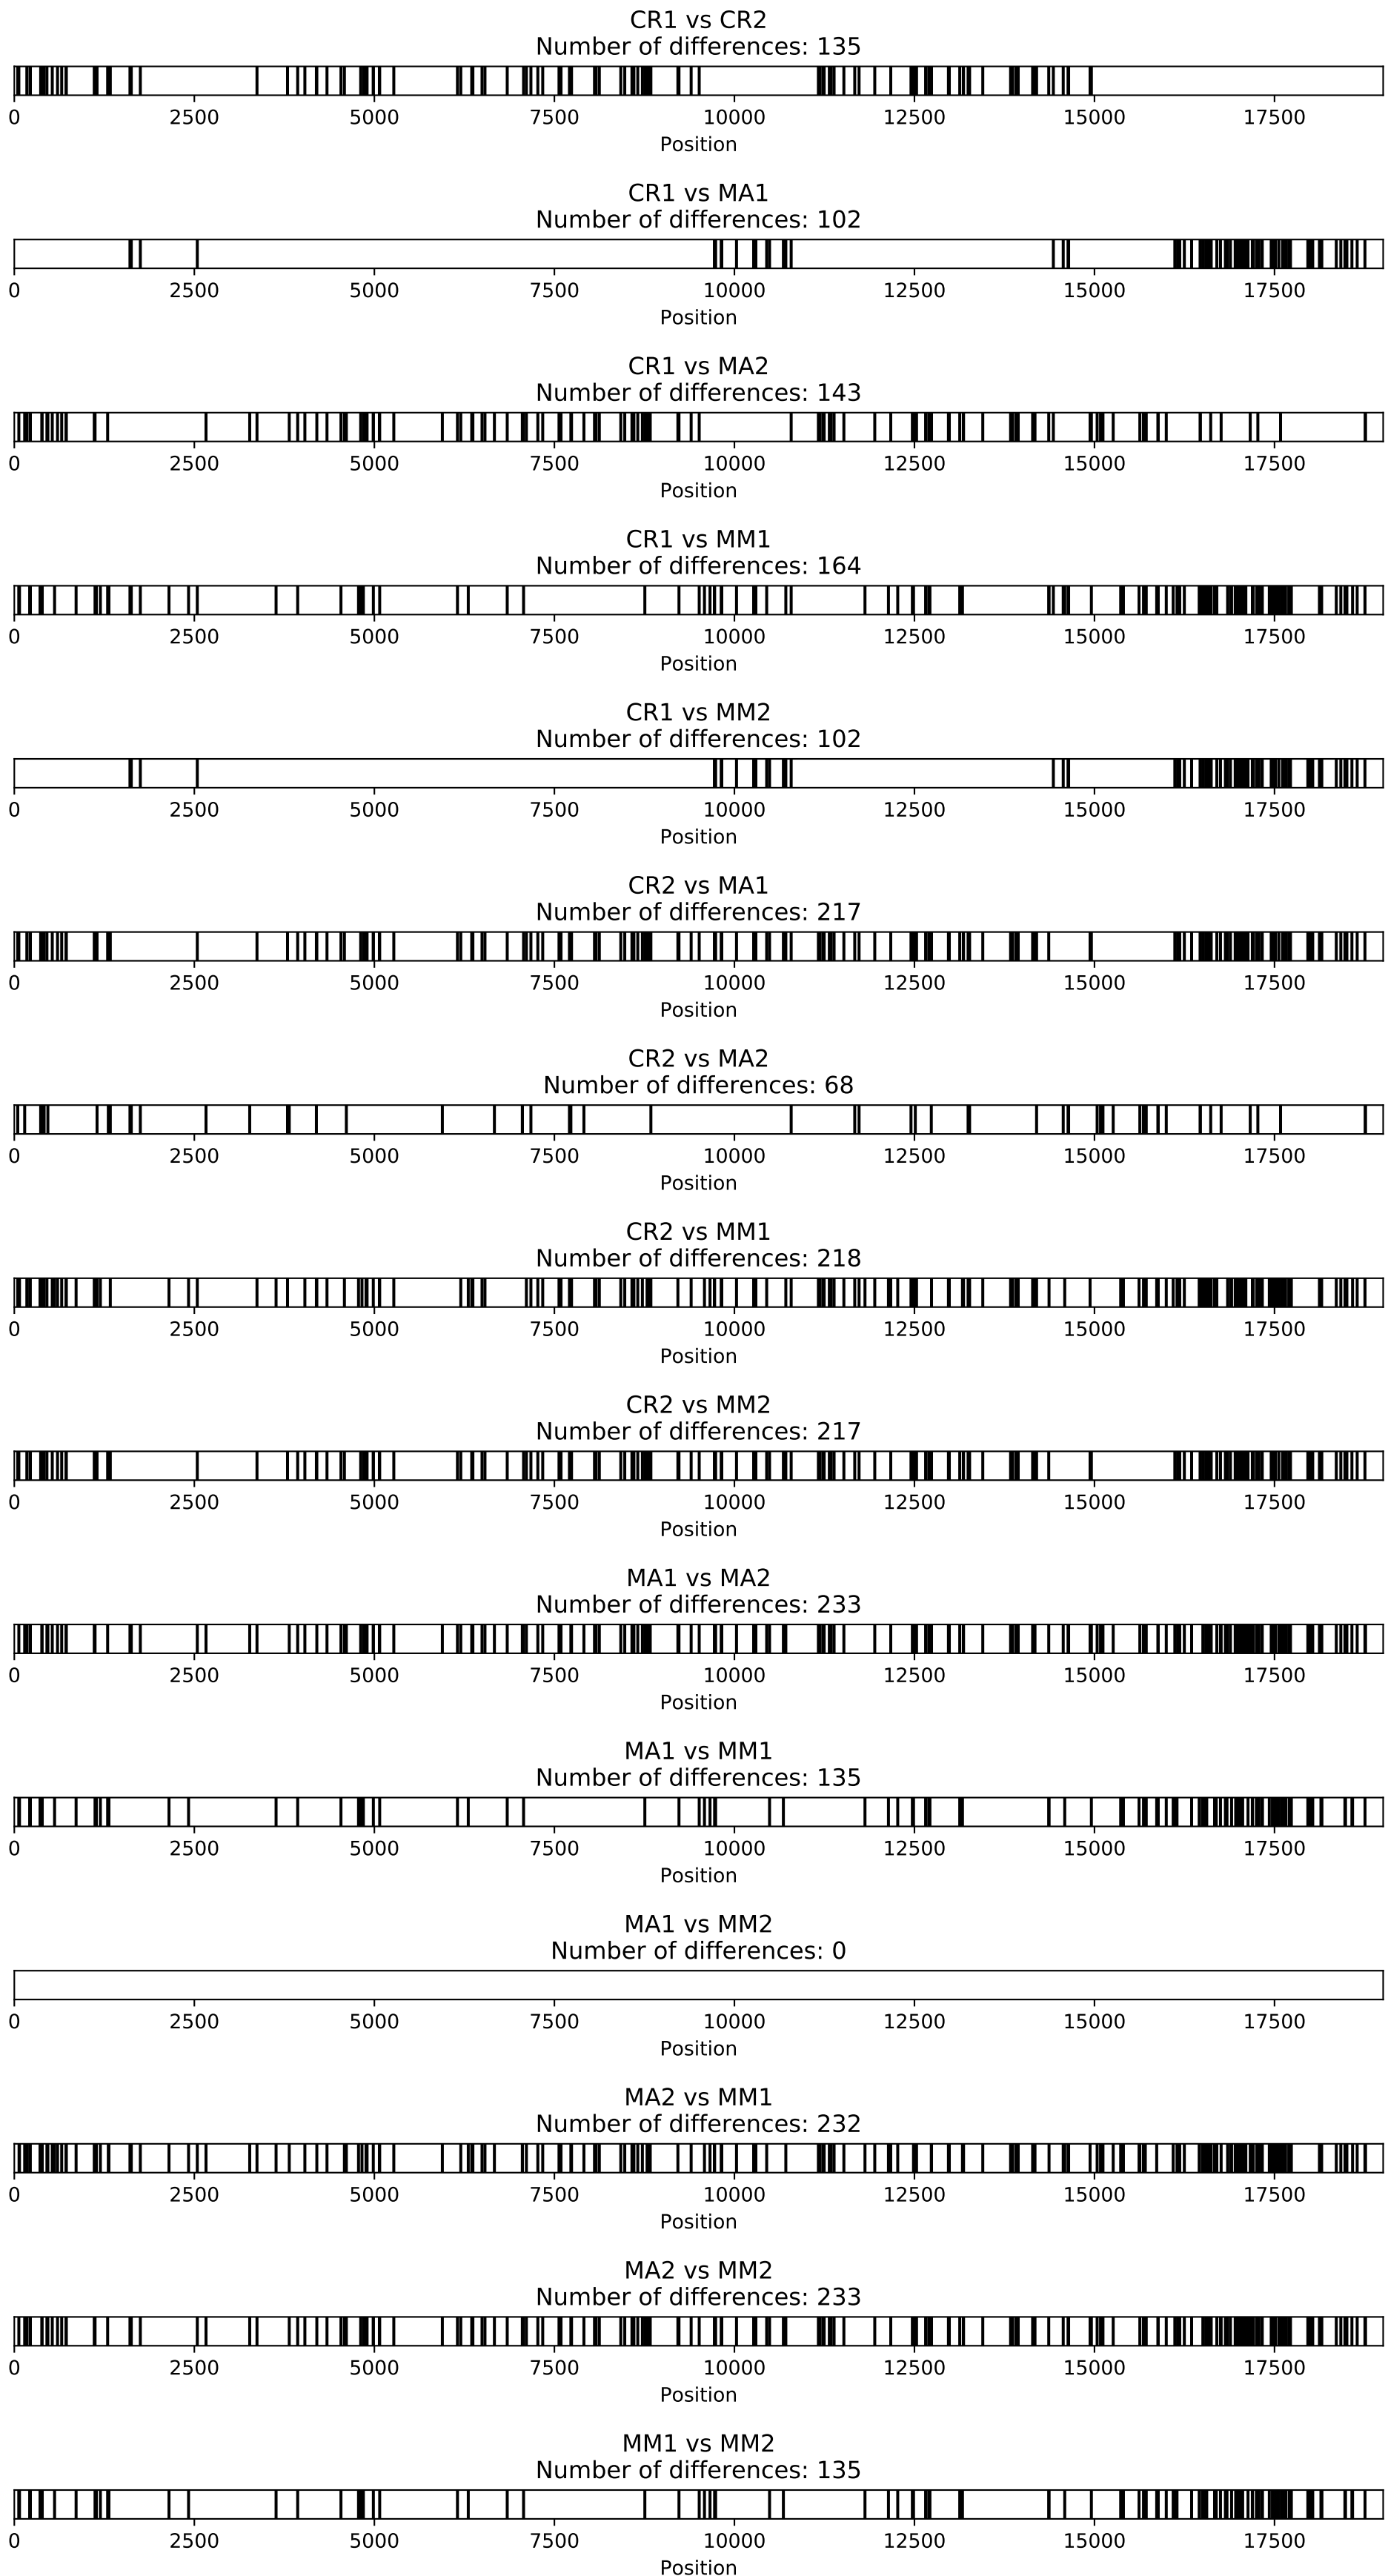

# Region: 494

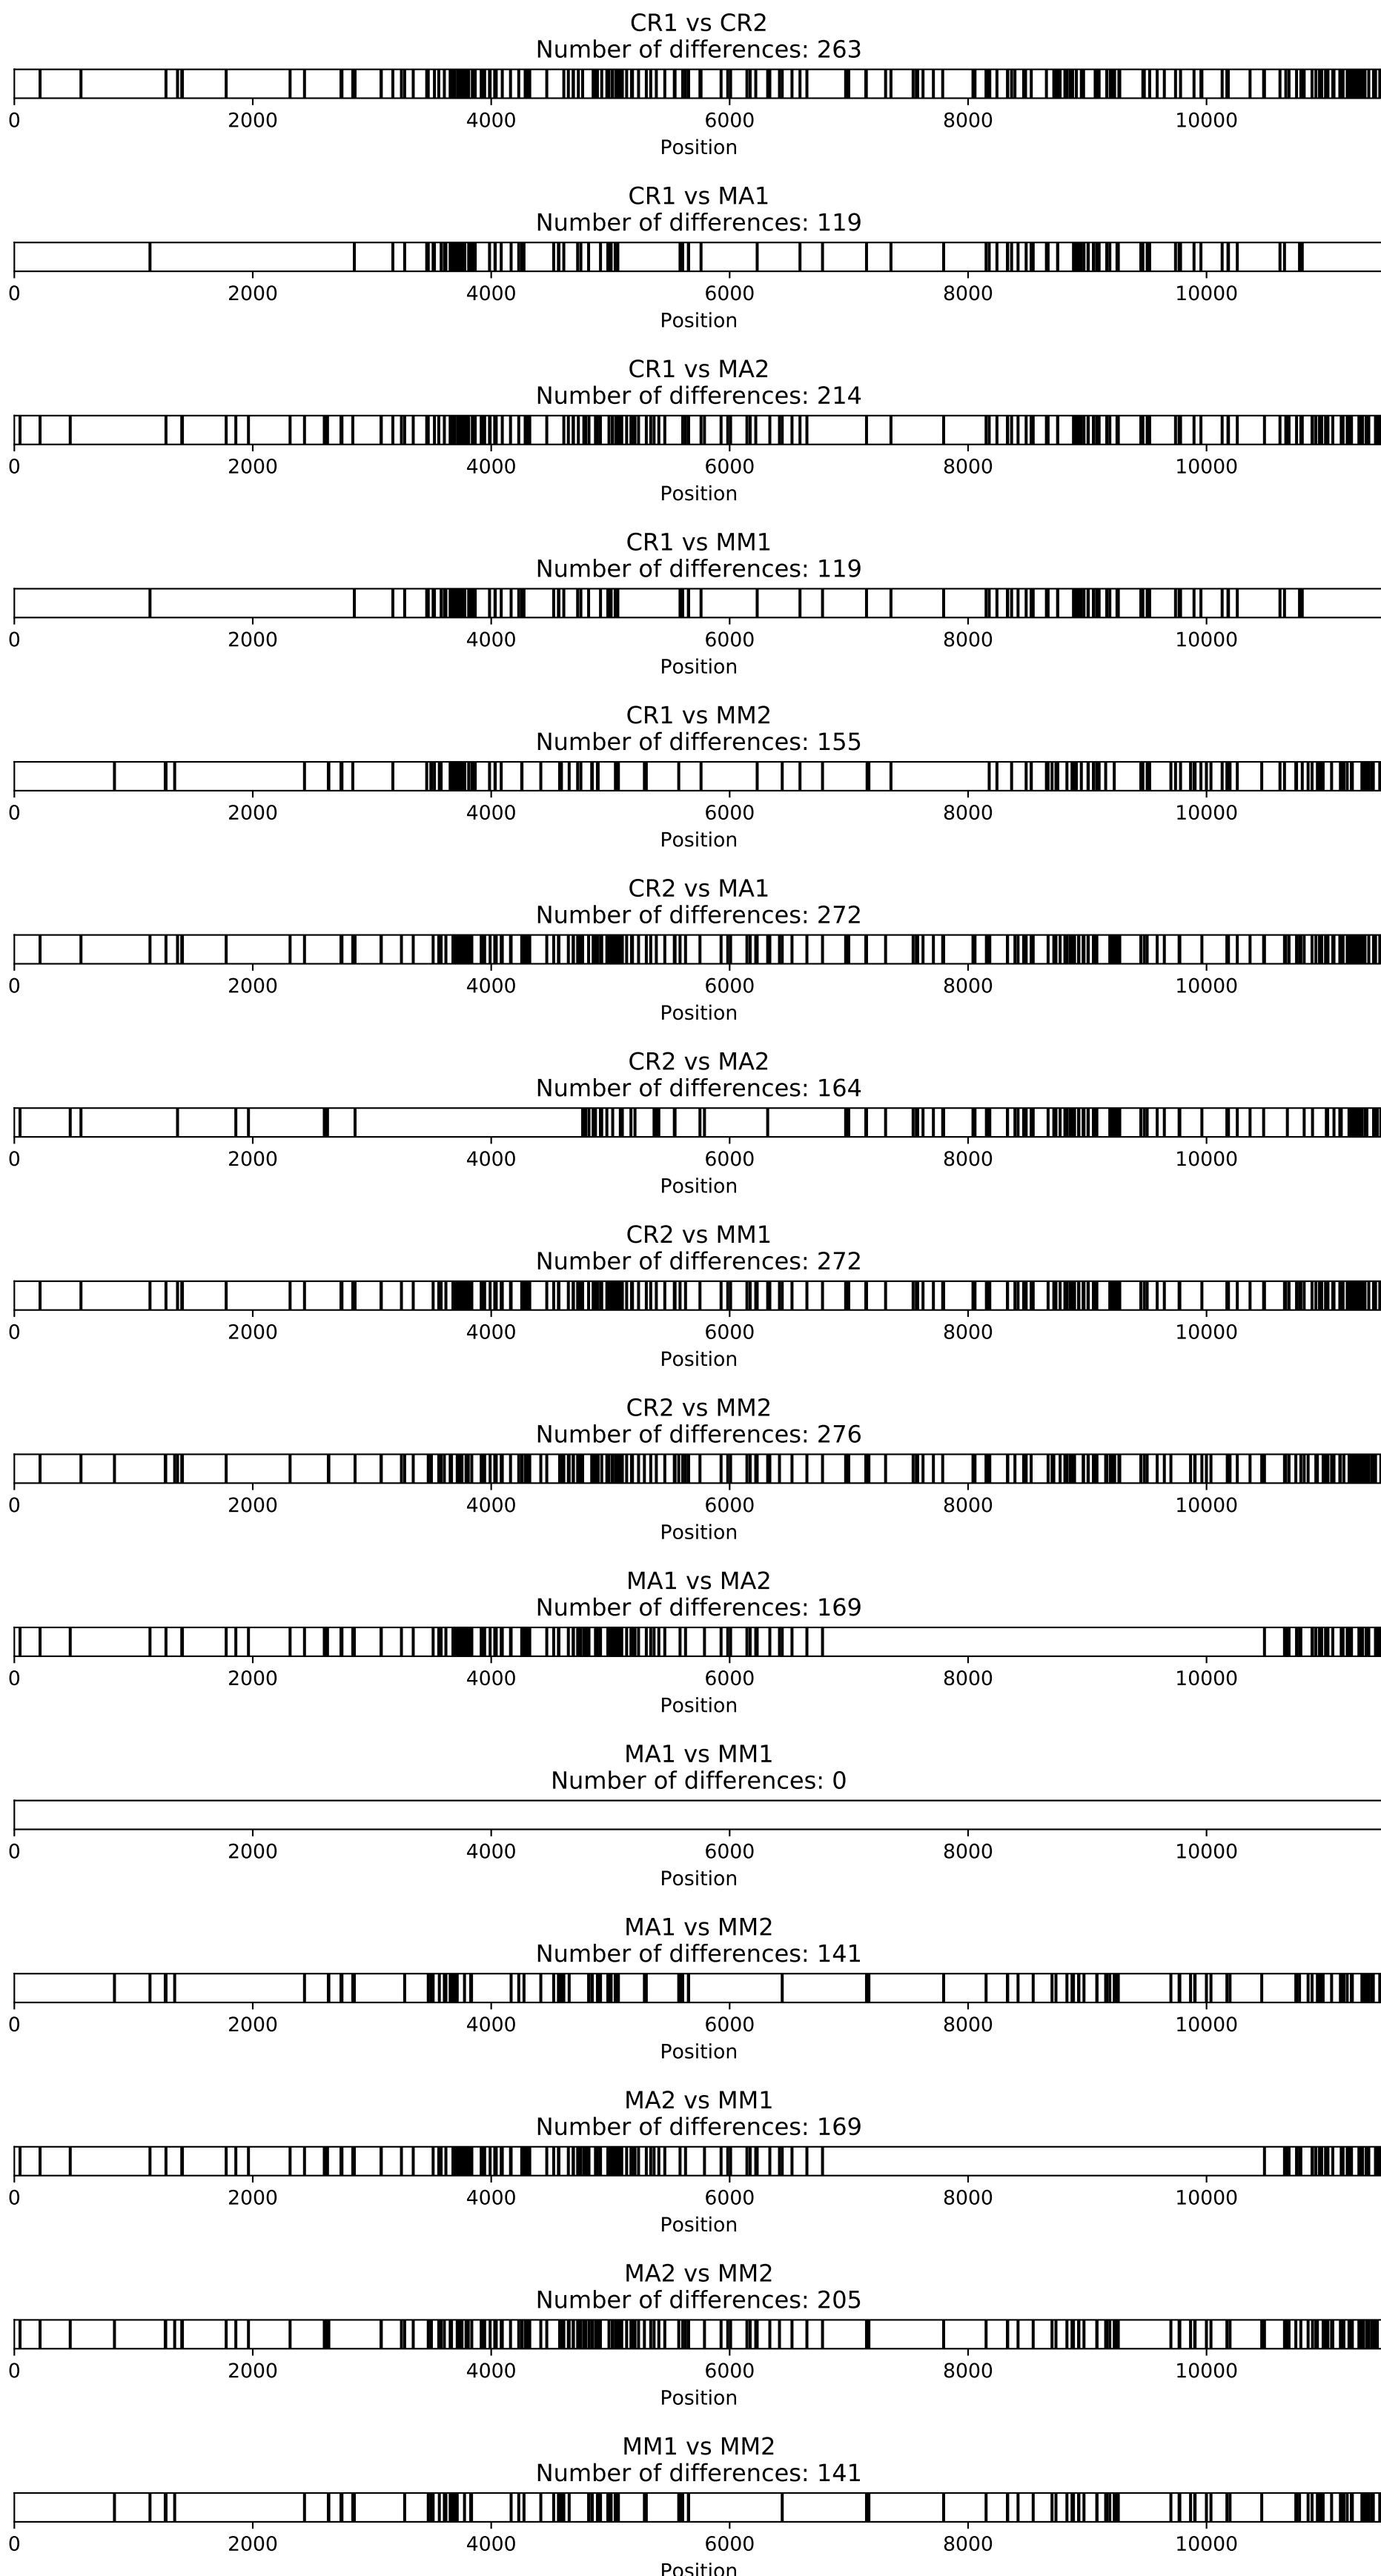

# Region: 496

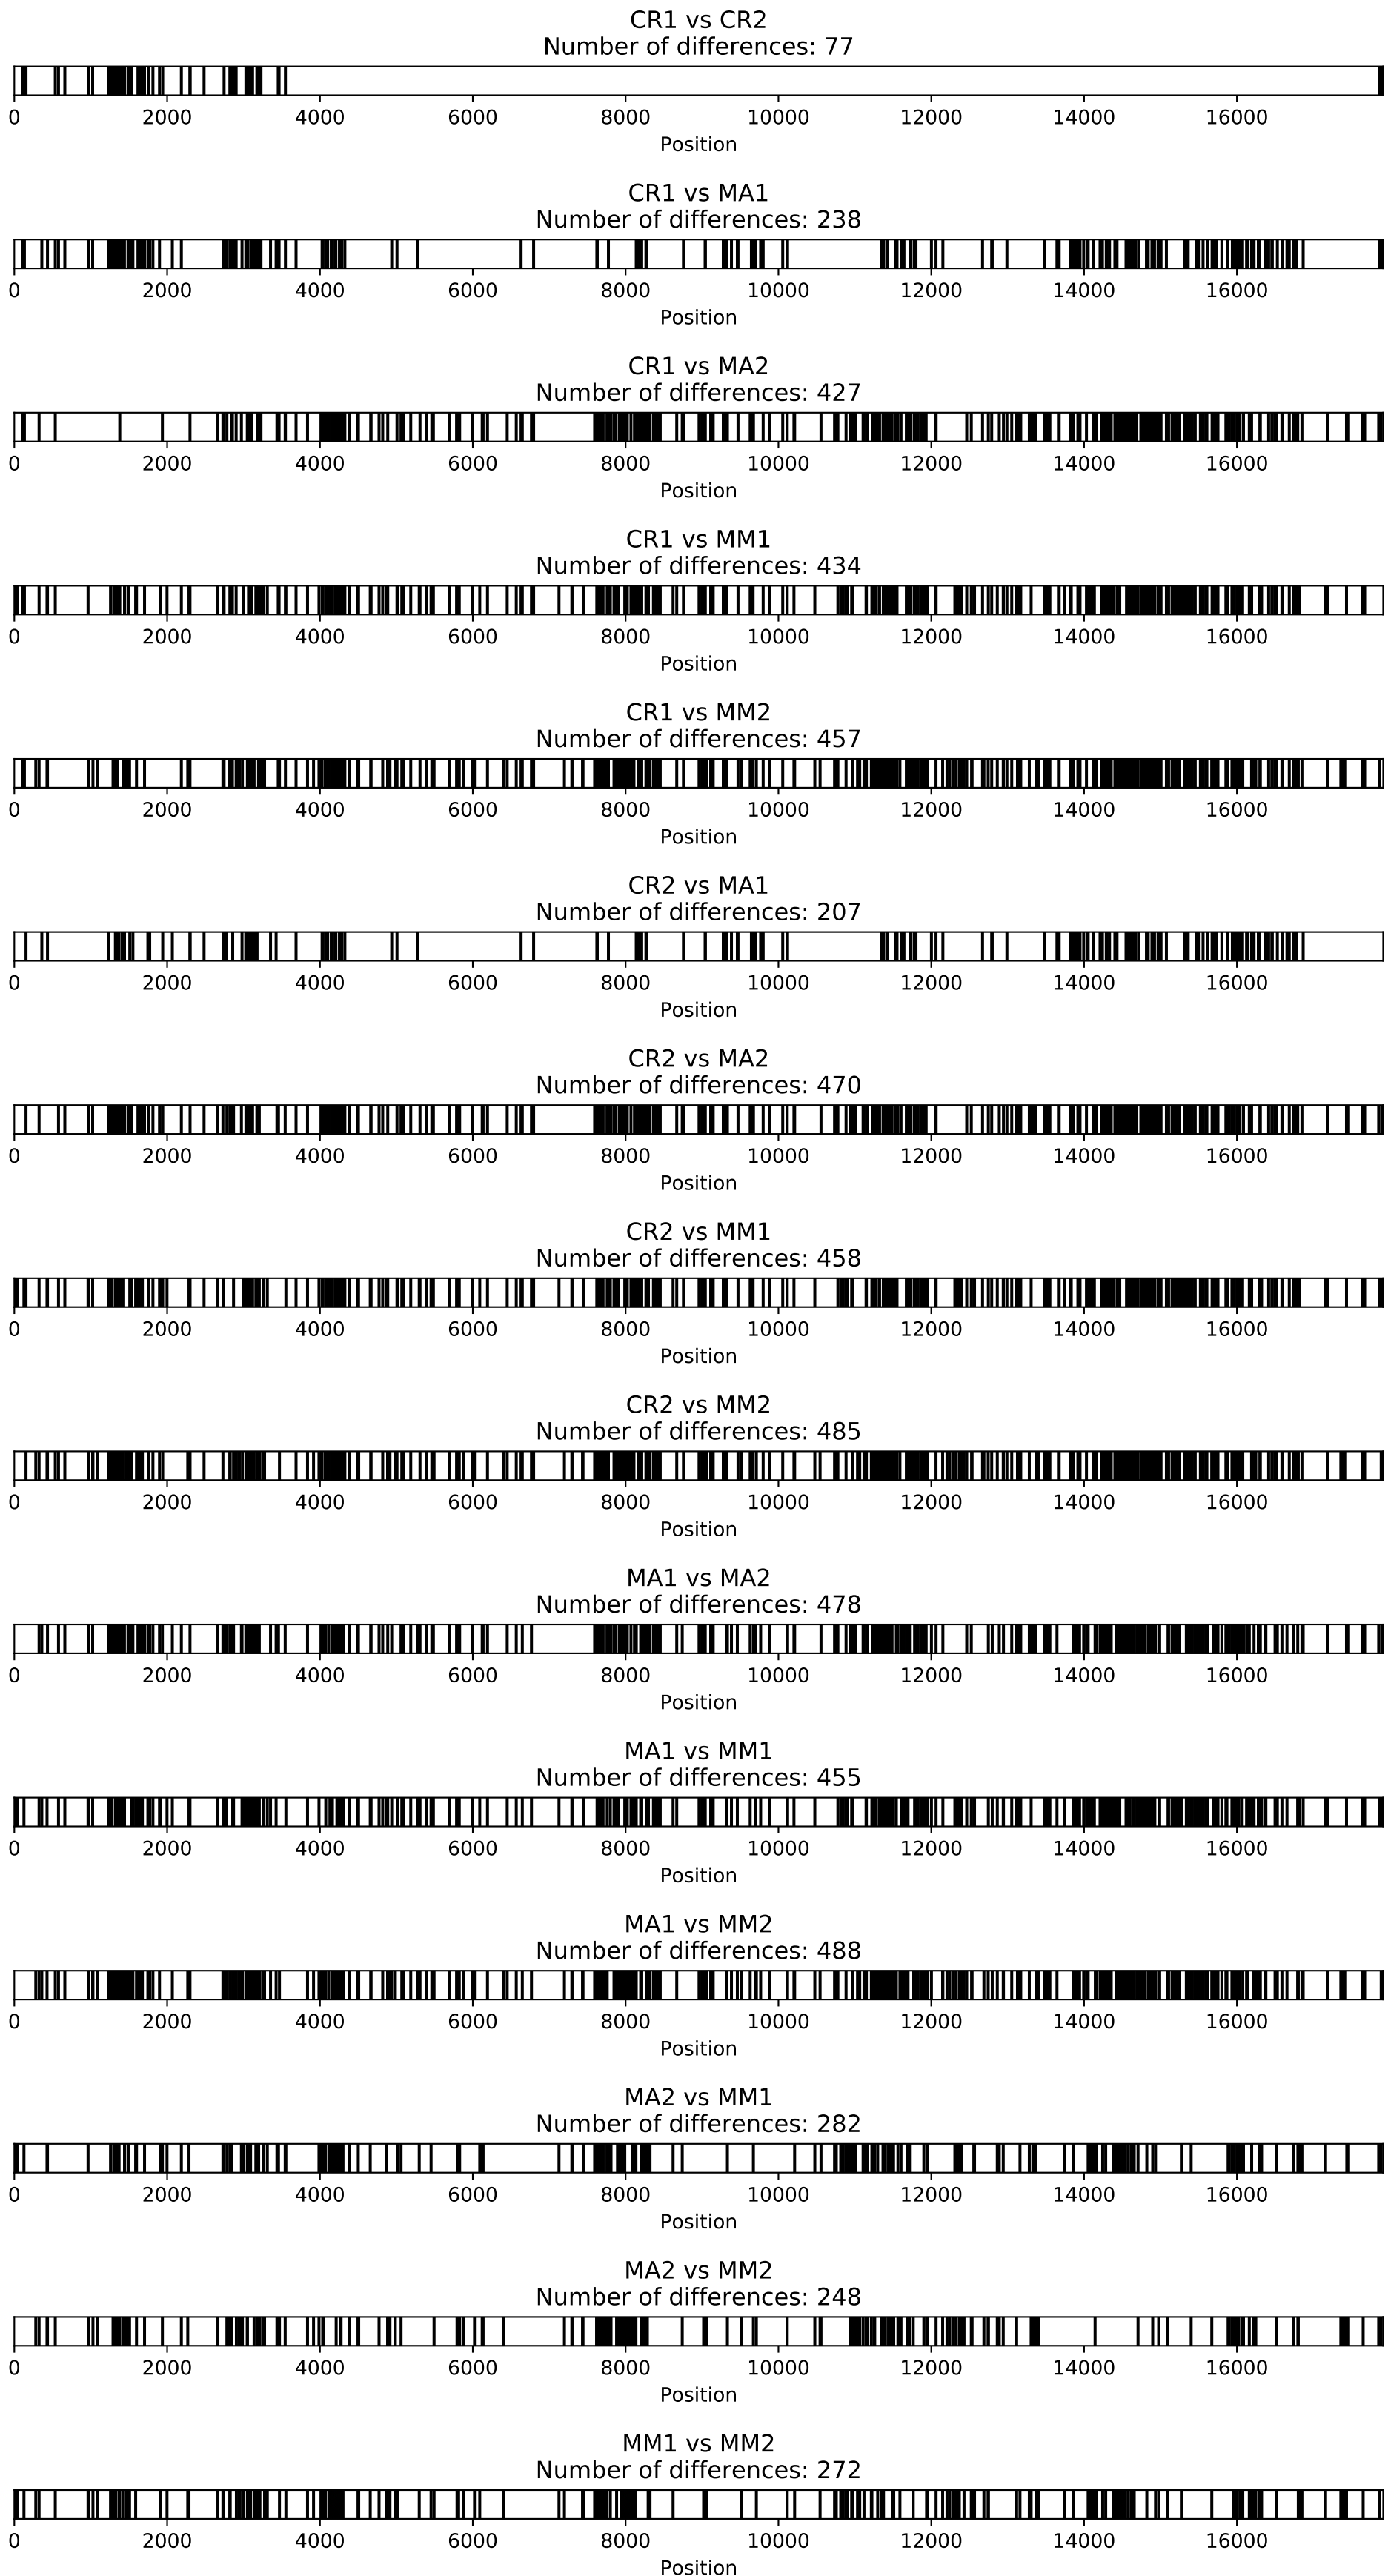

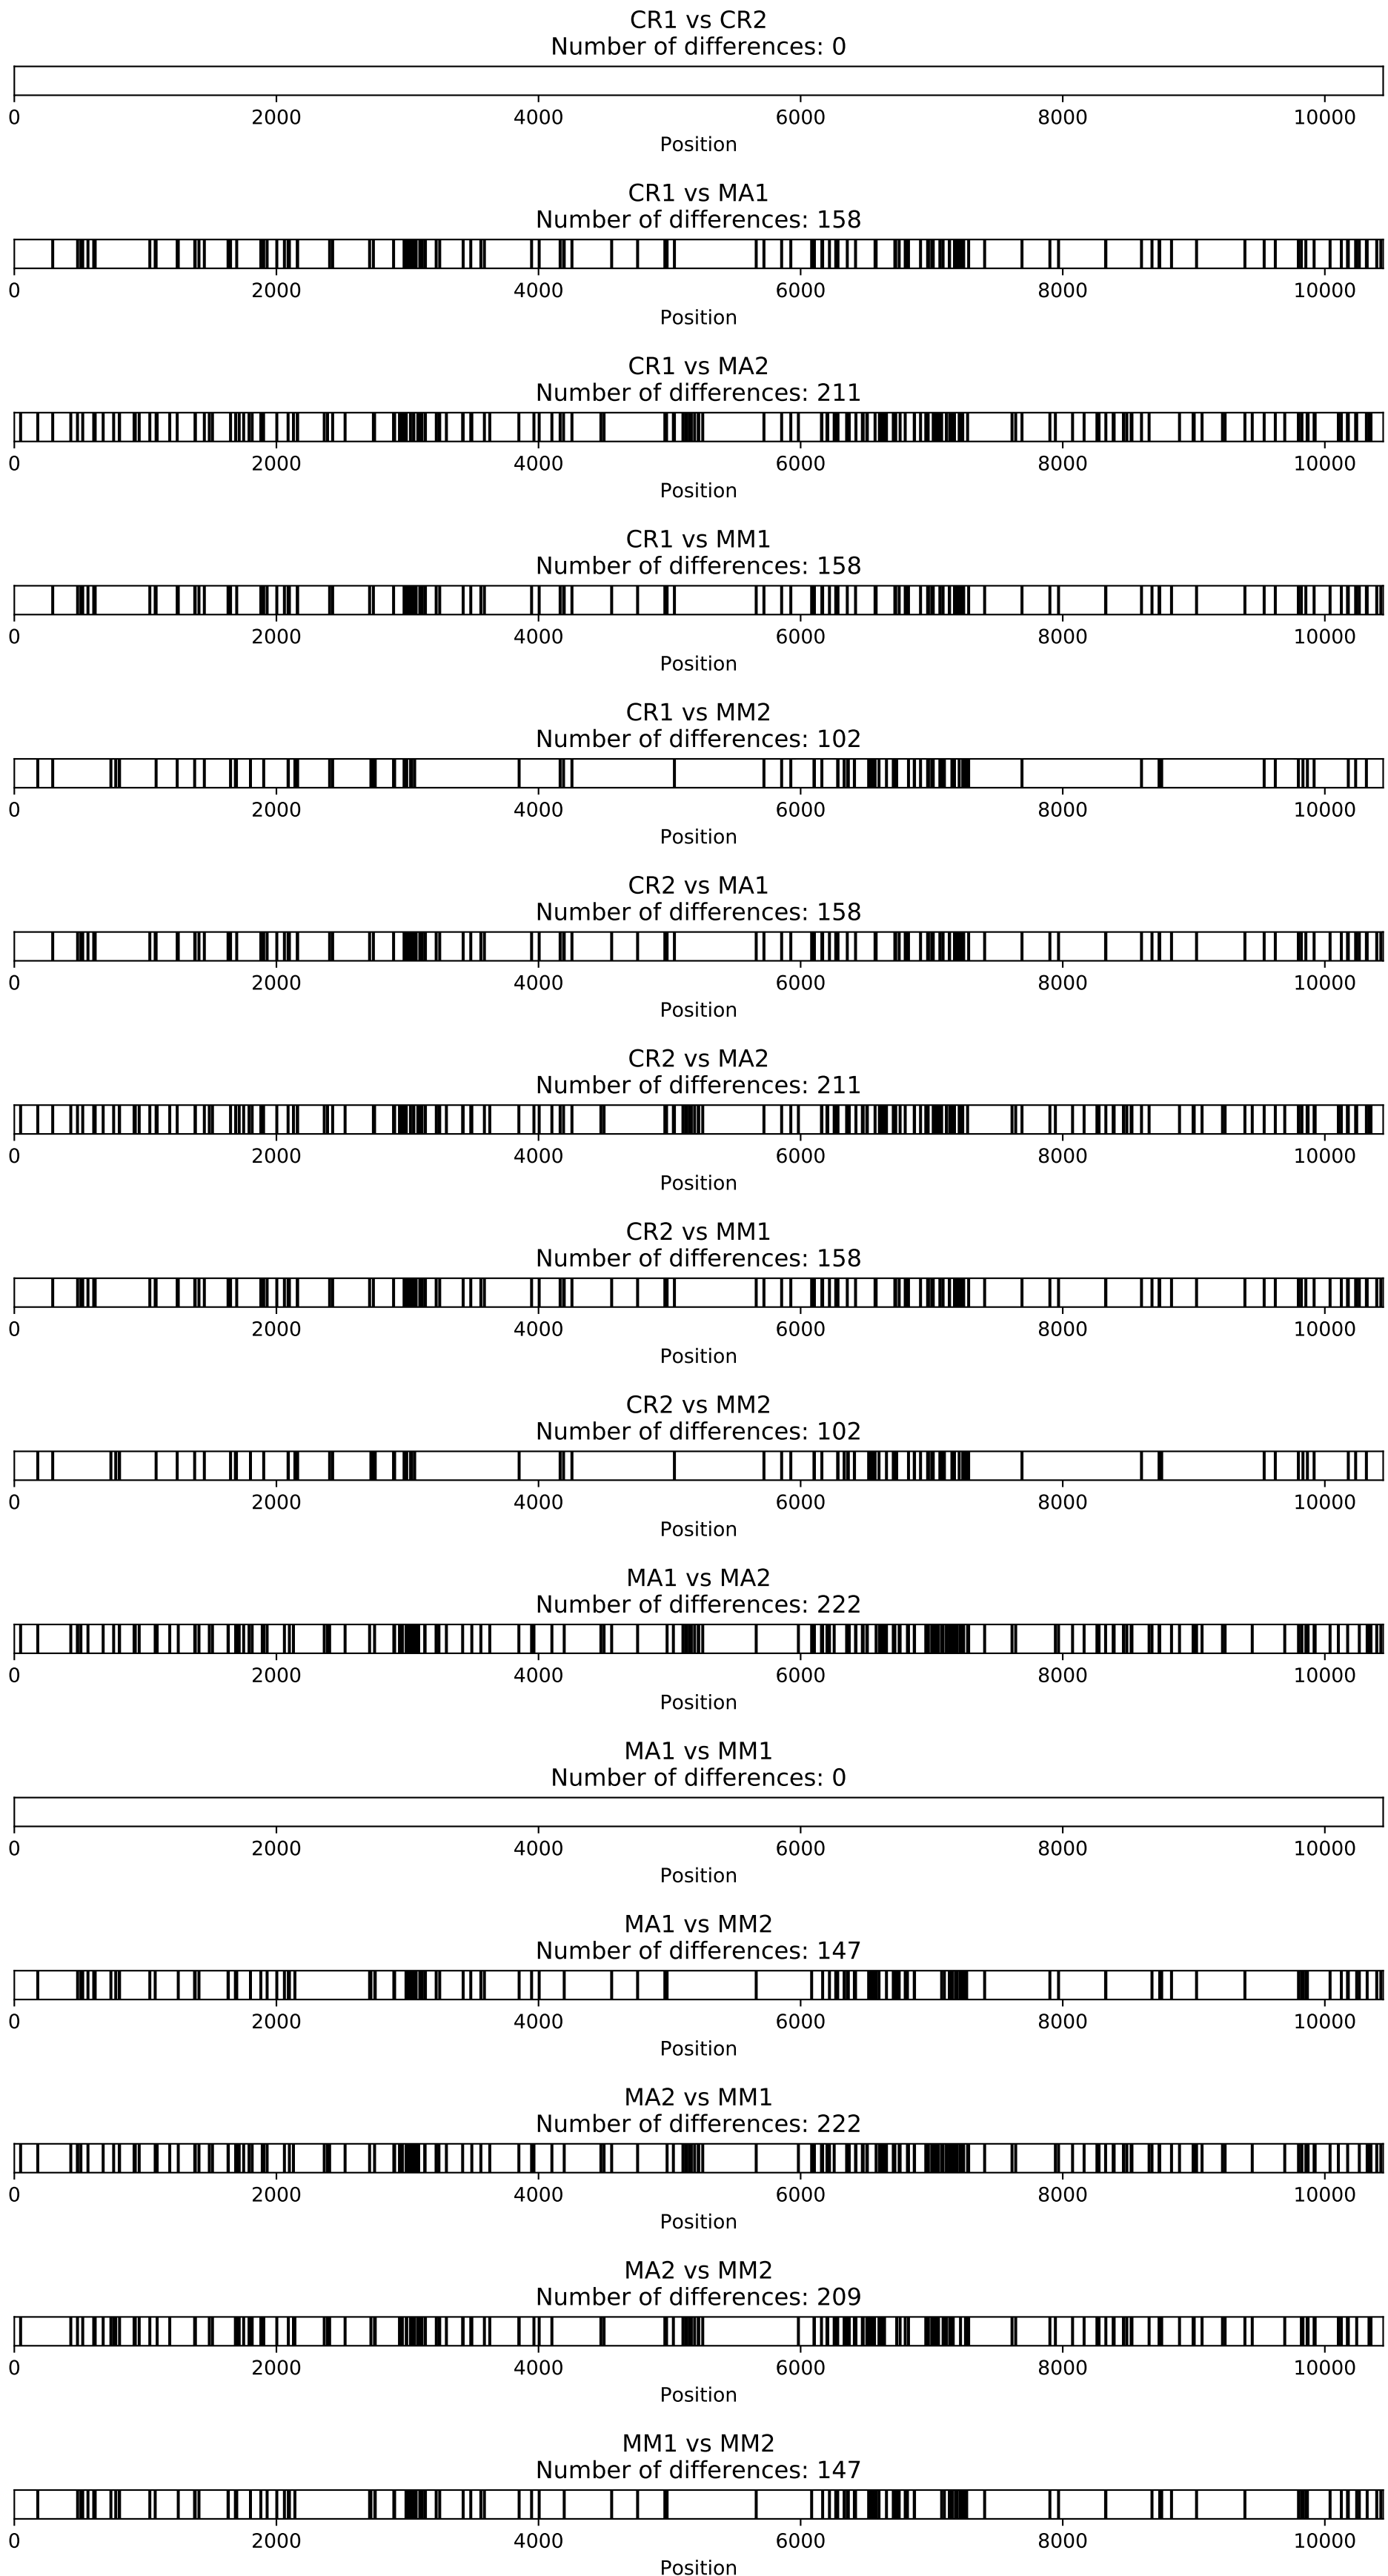

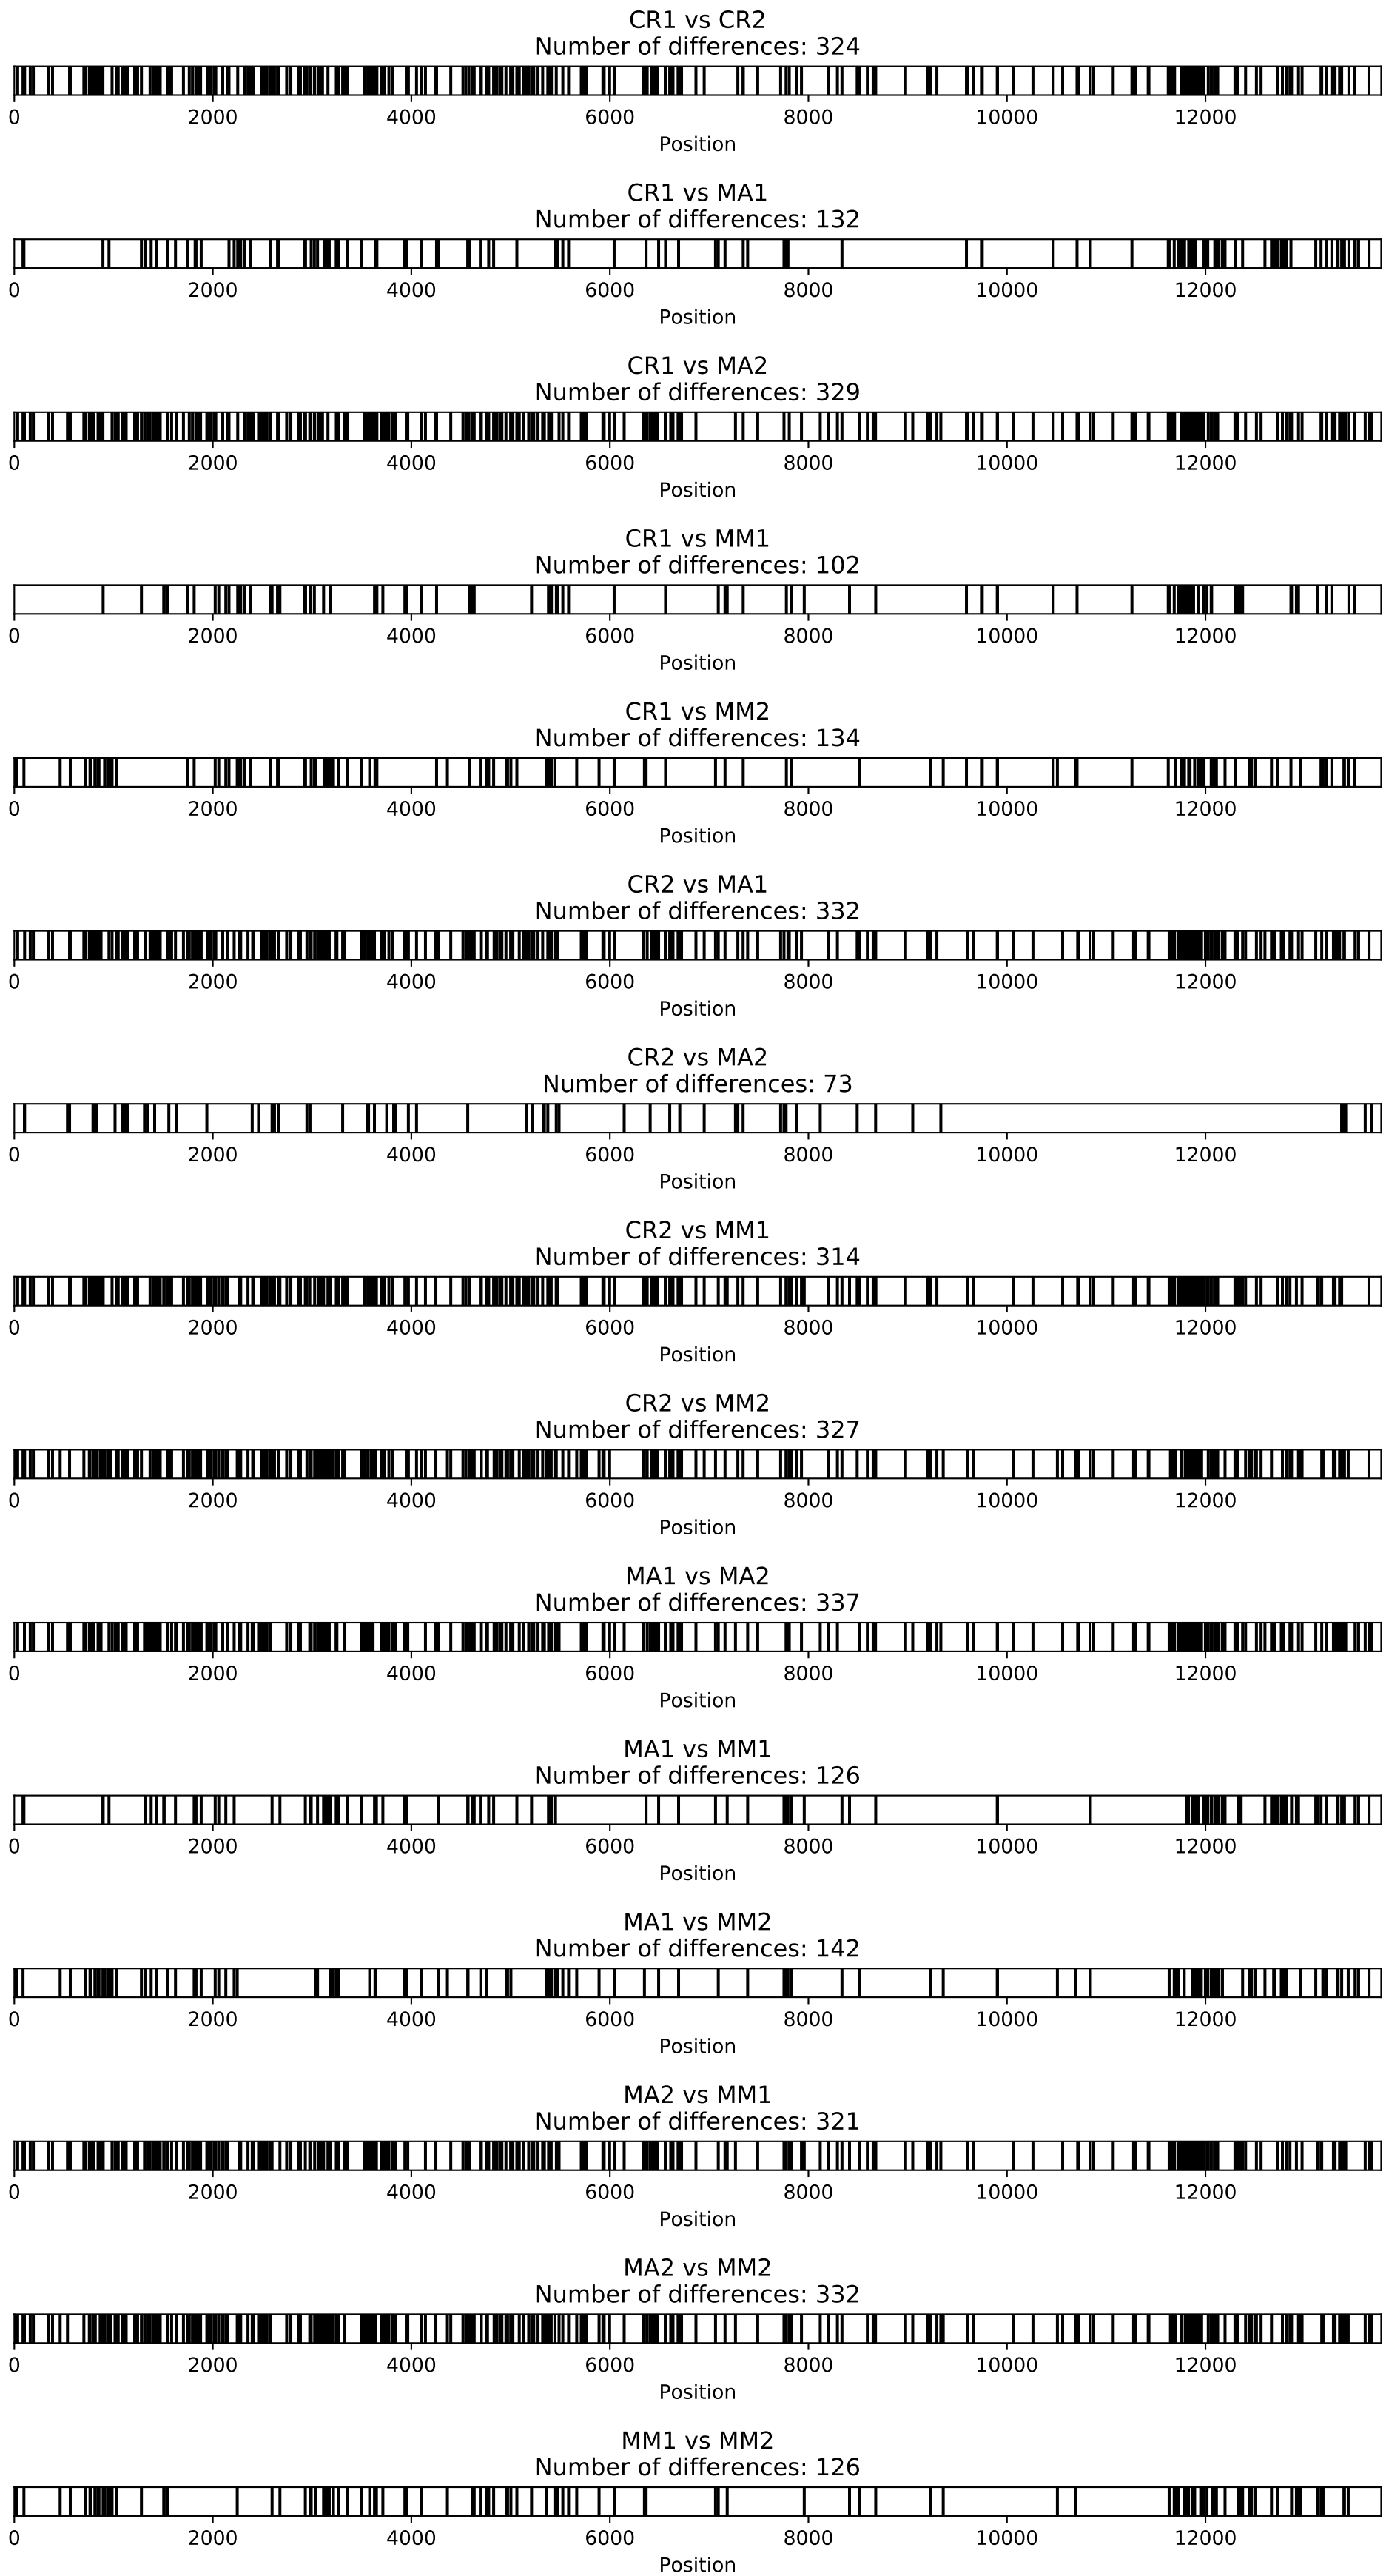

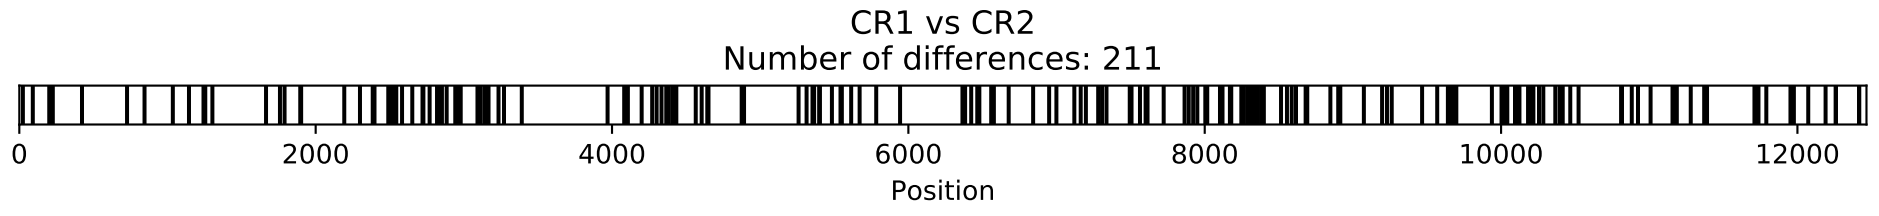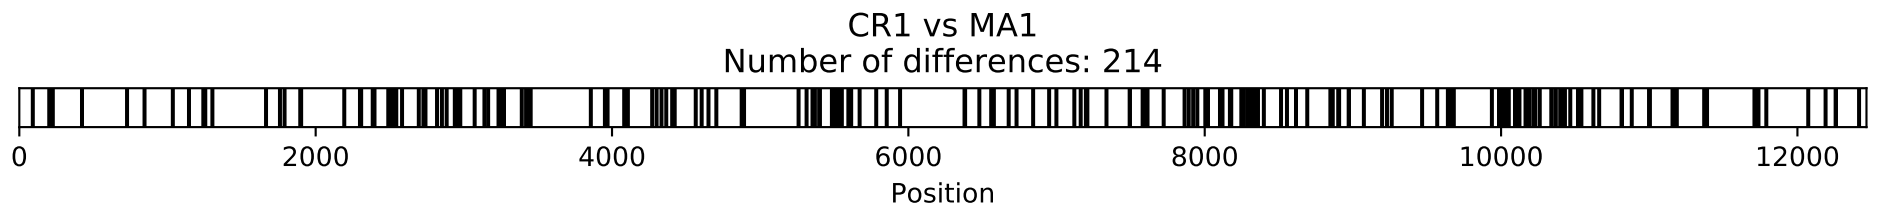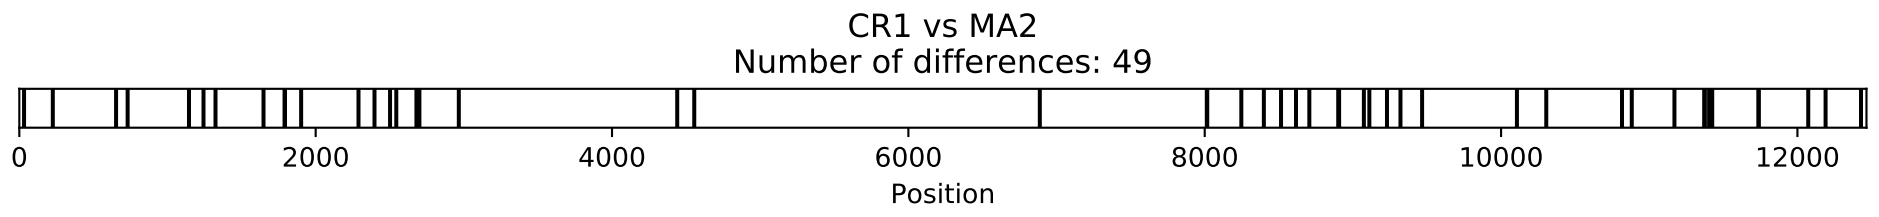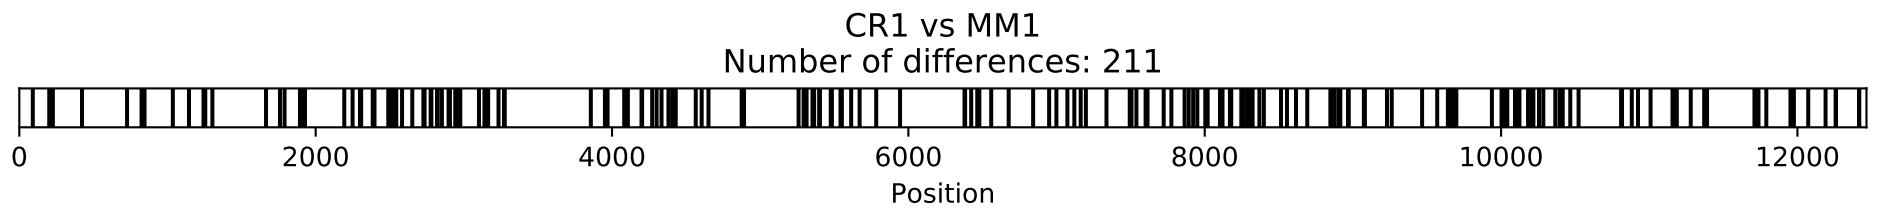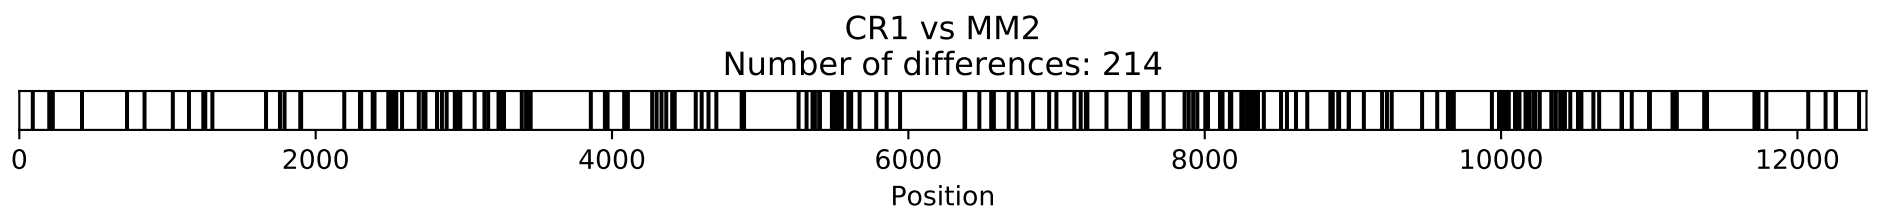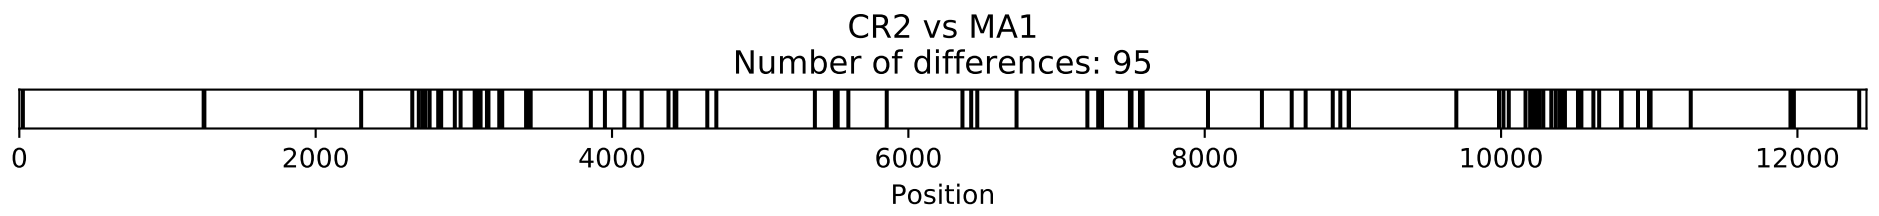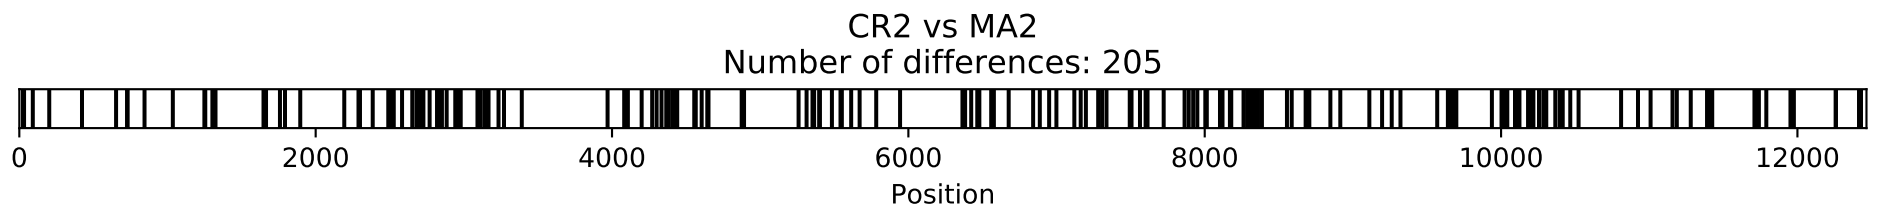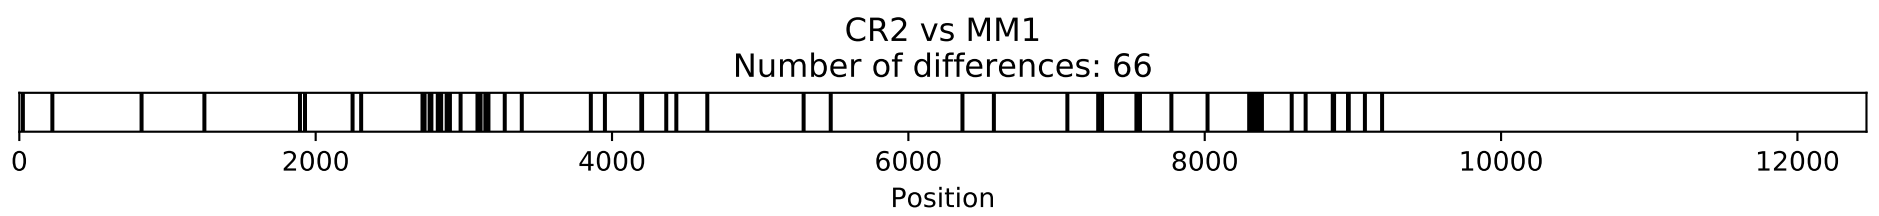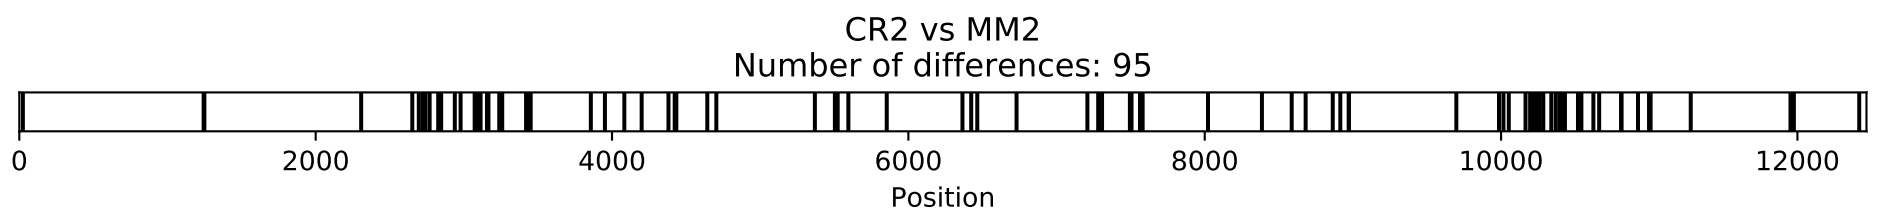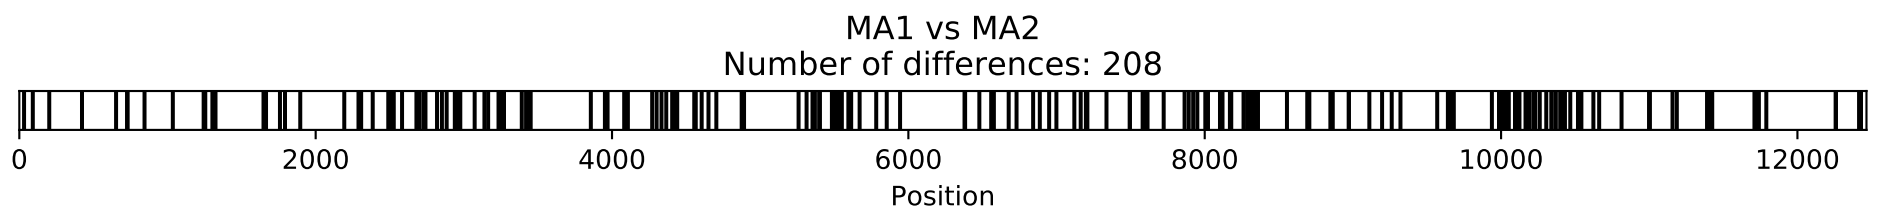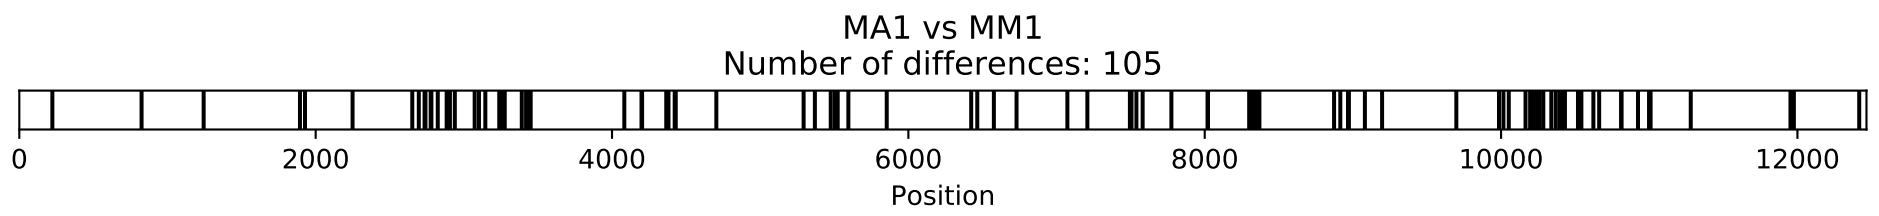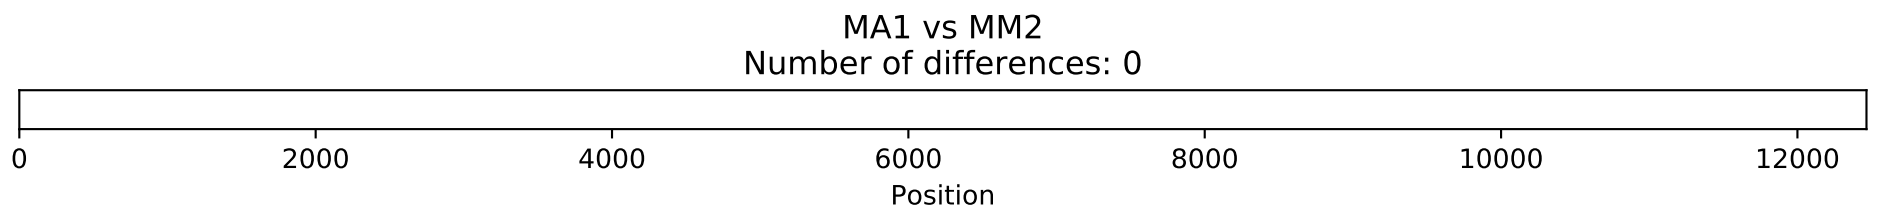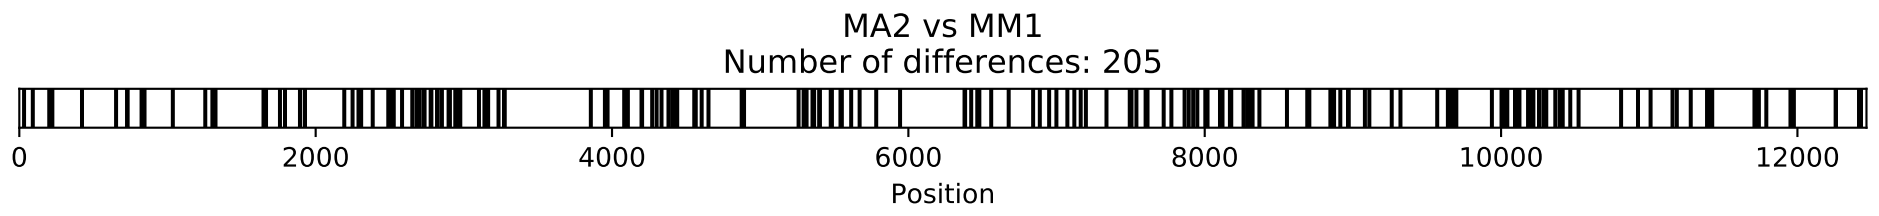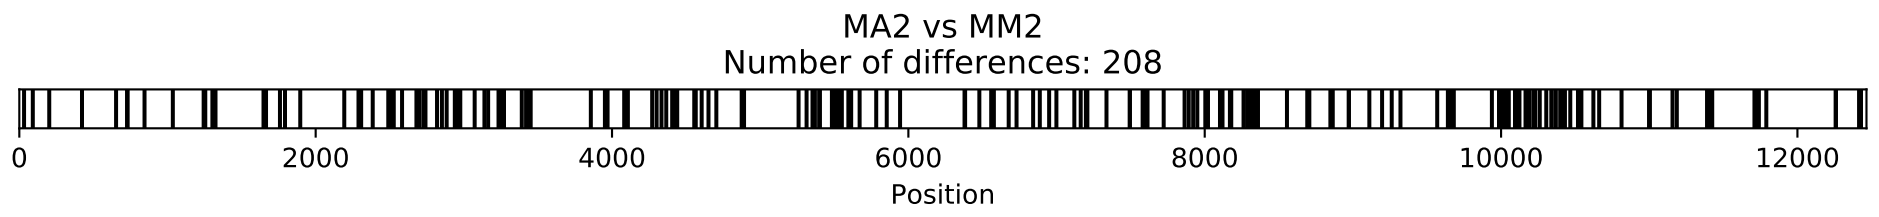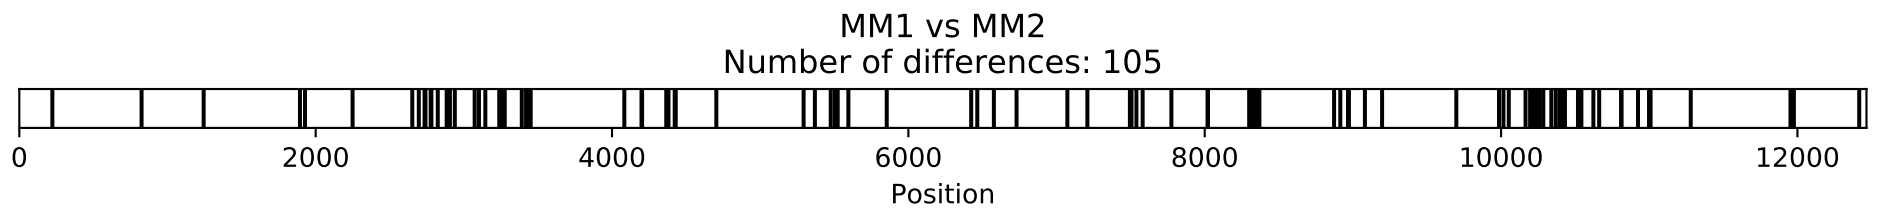

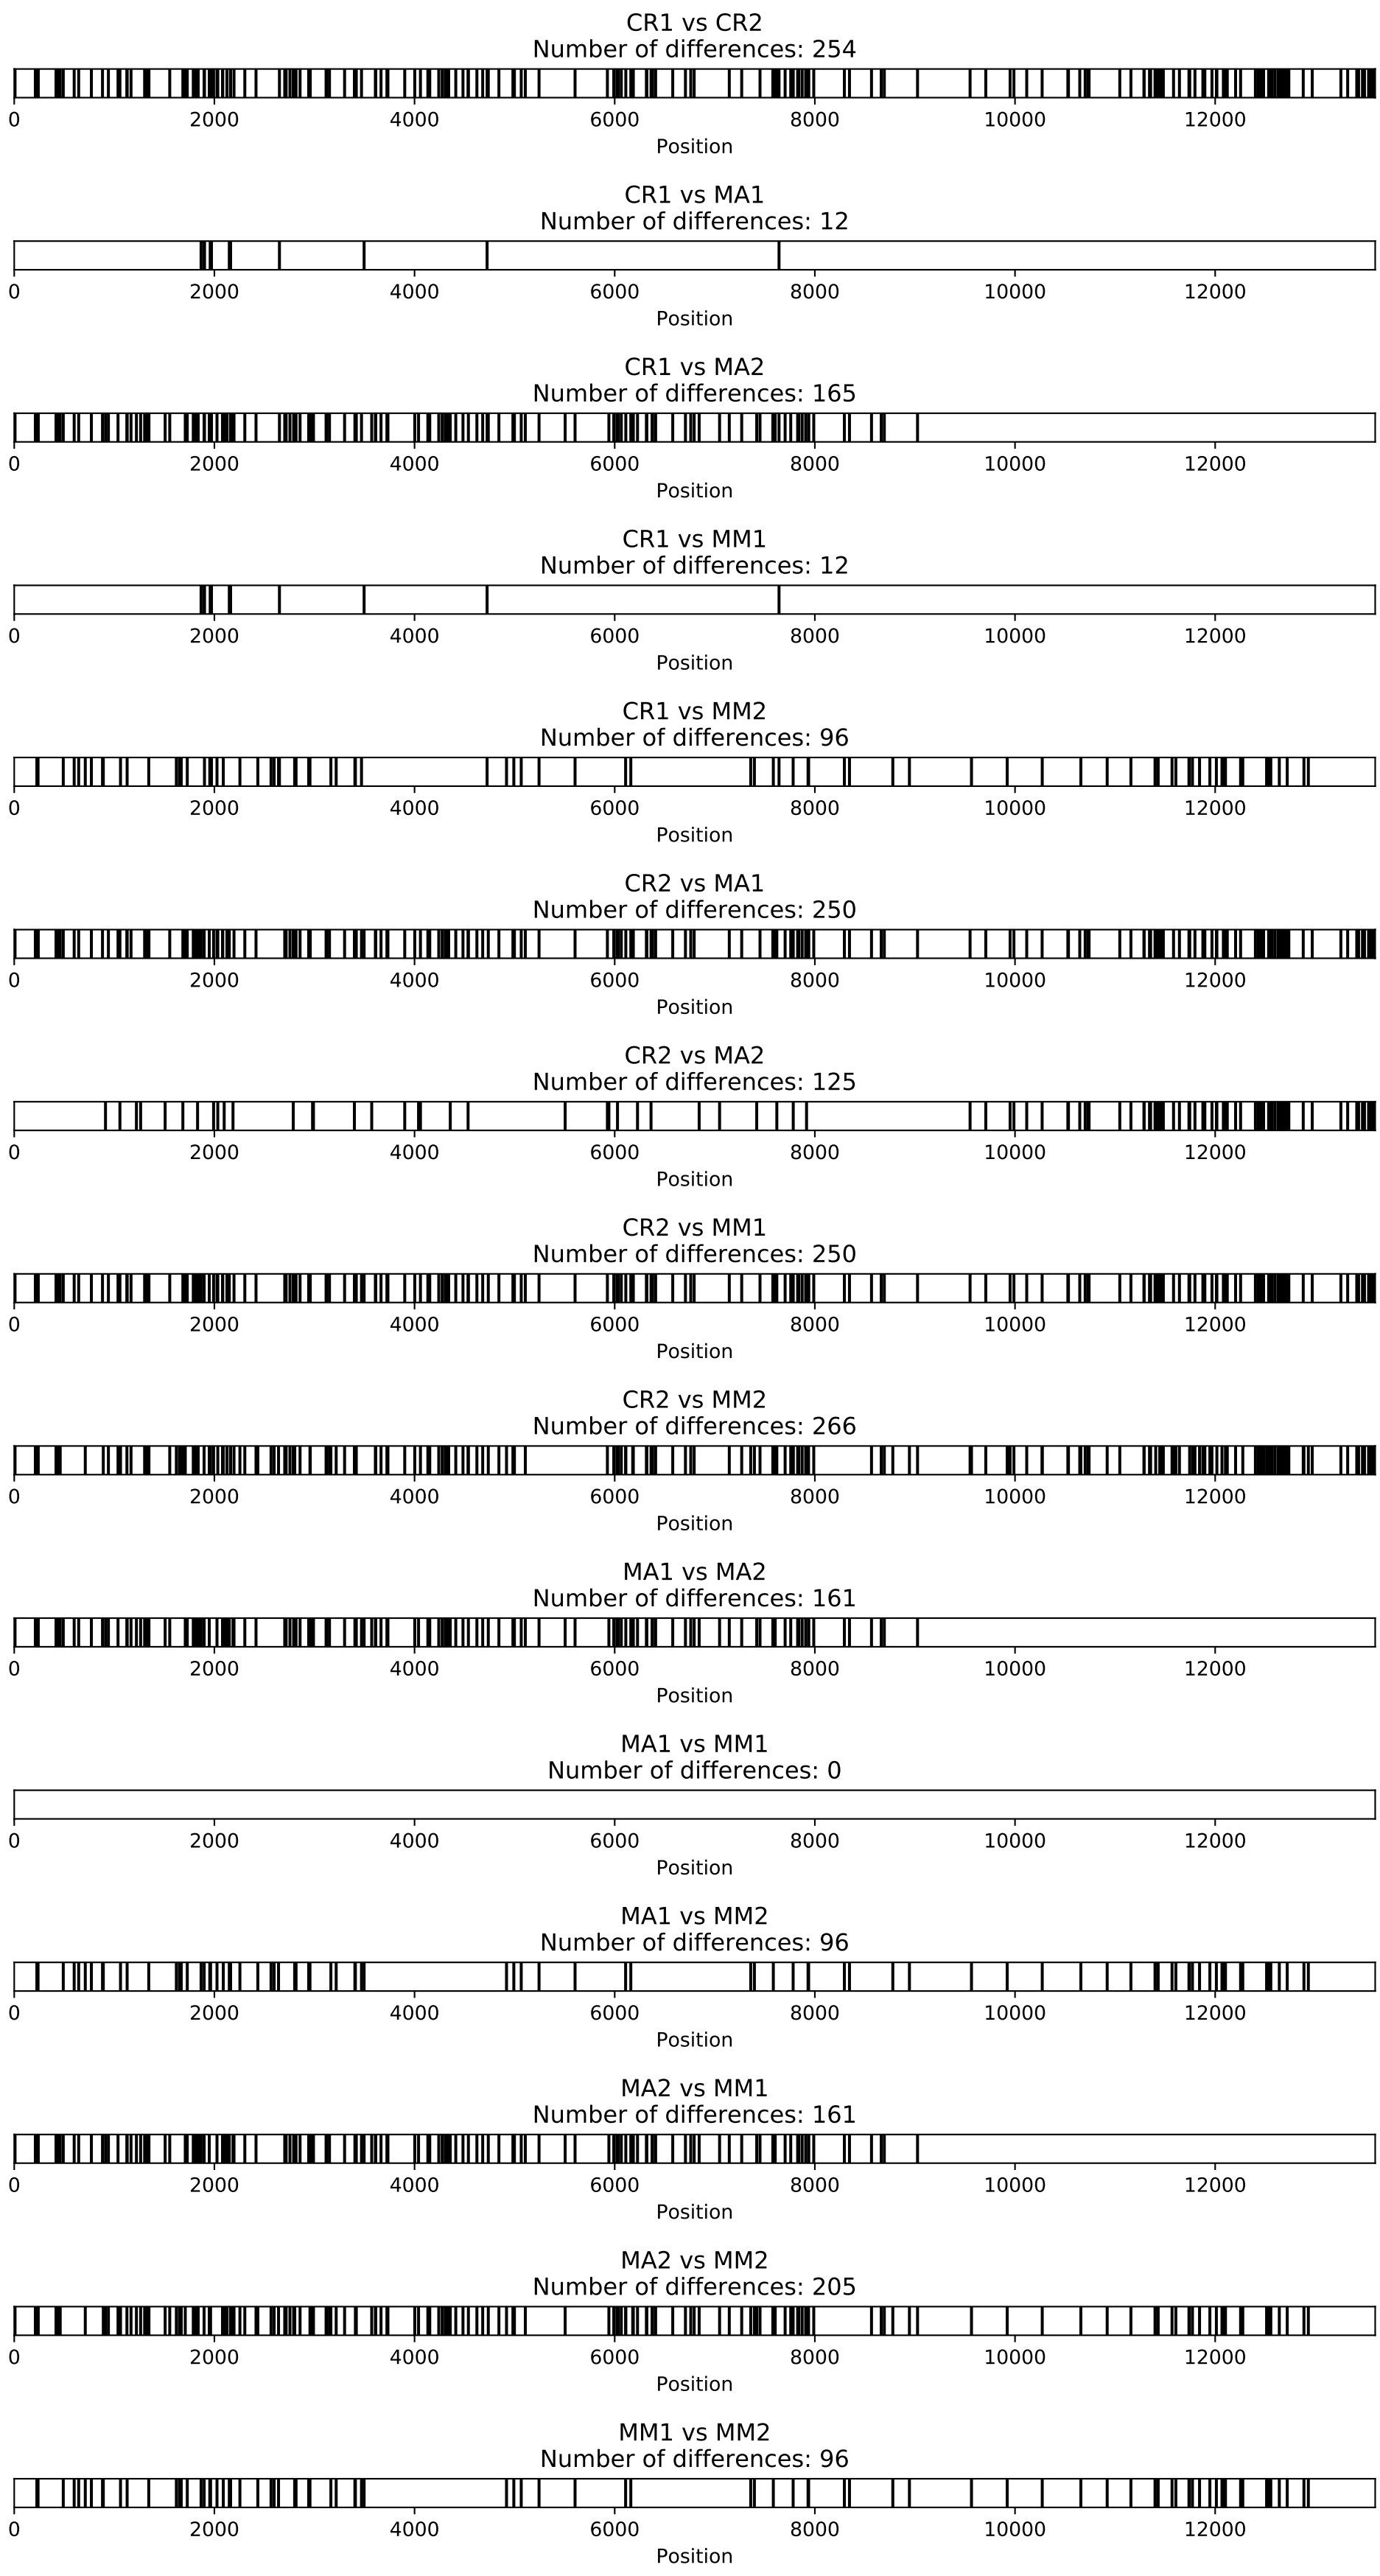

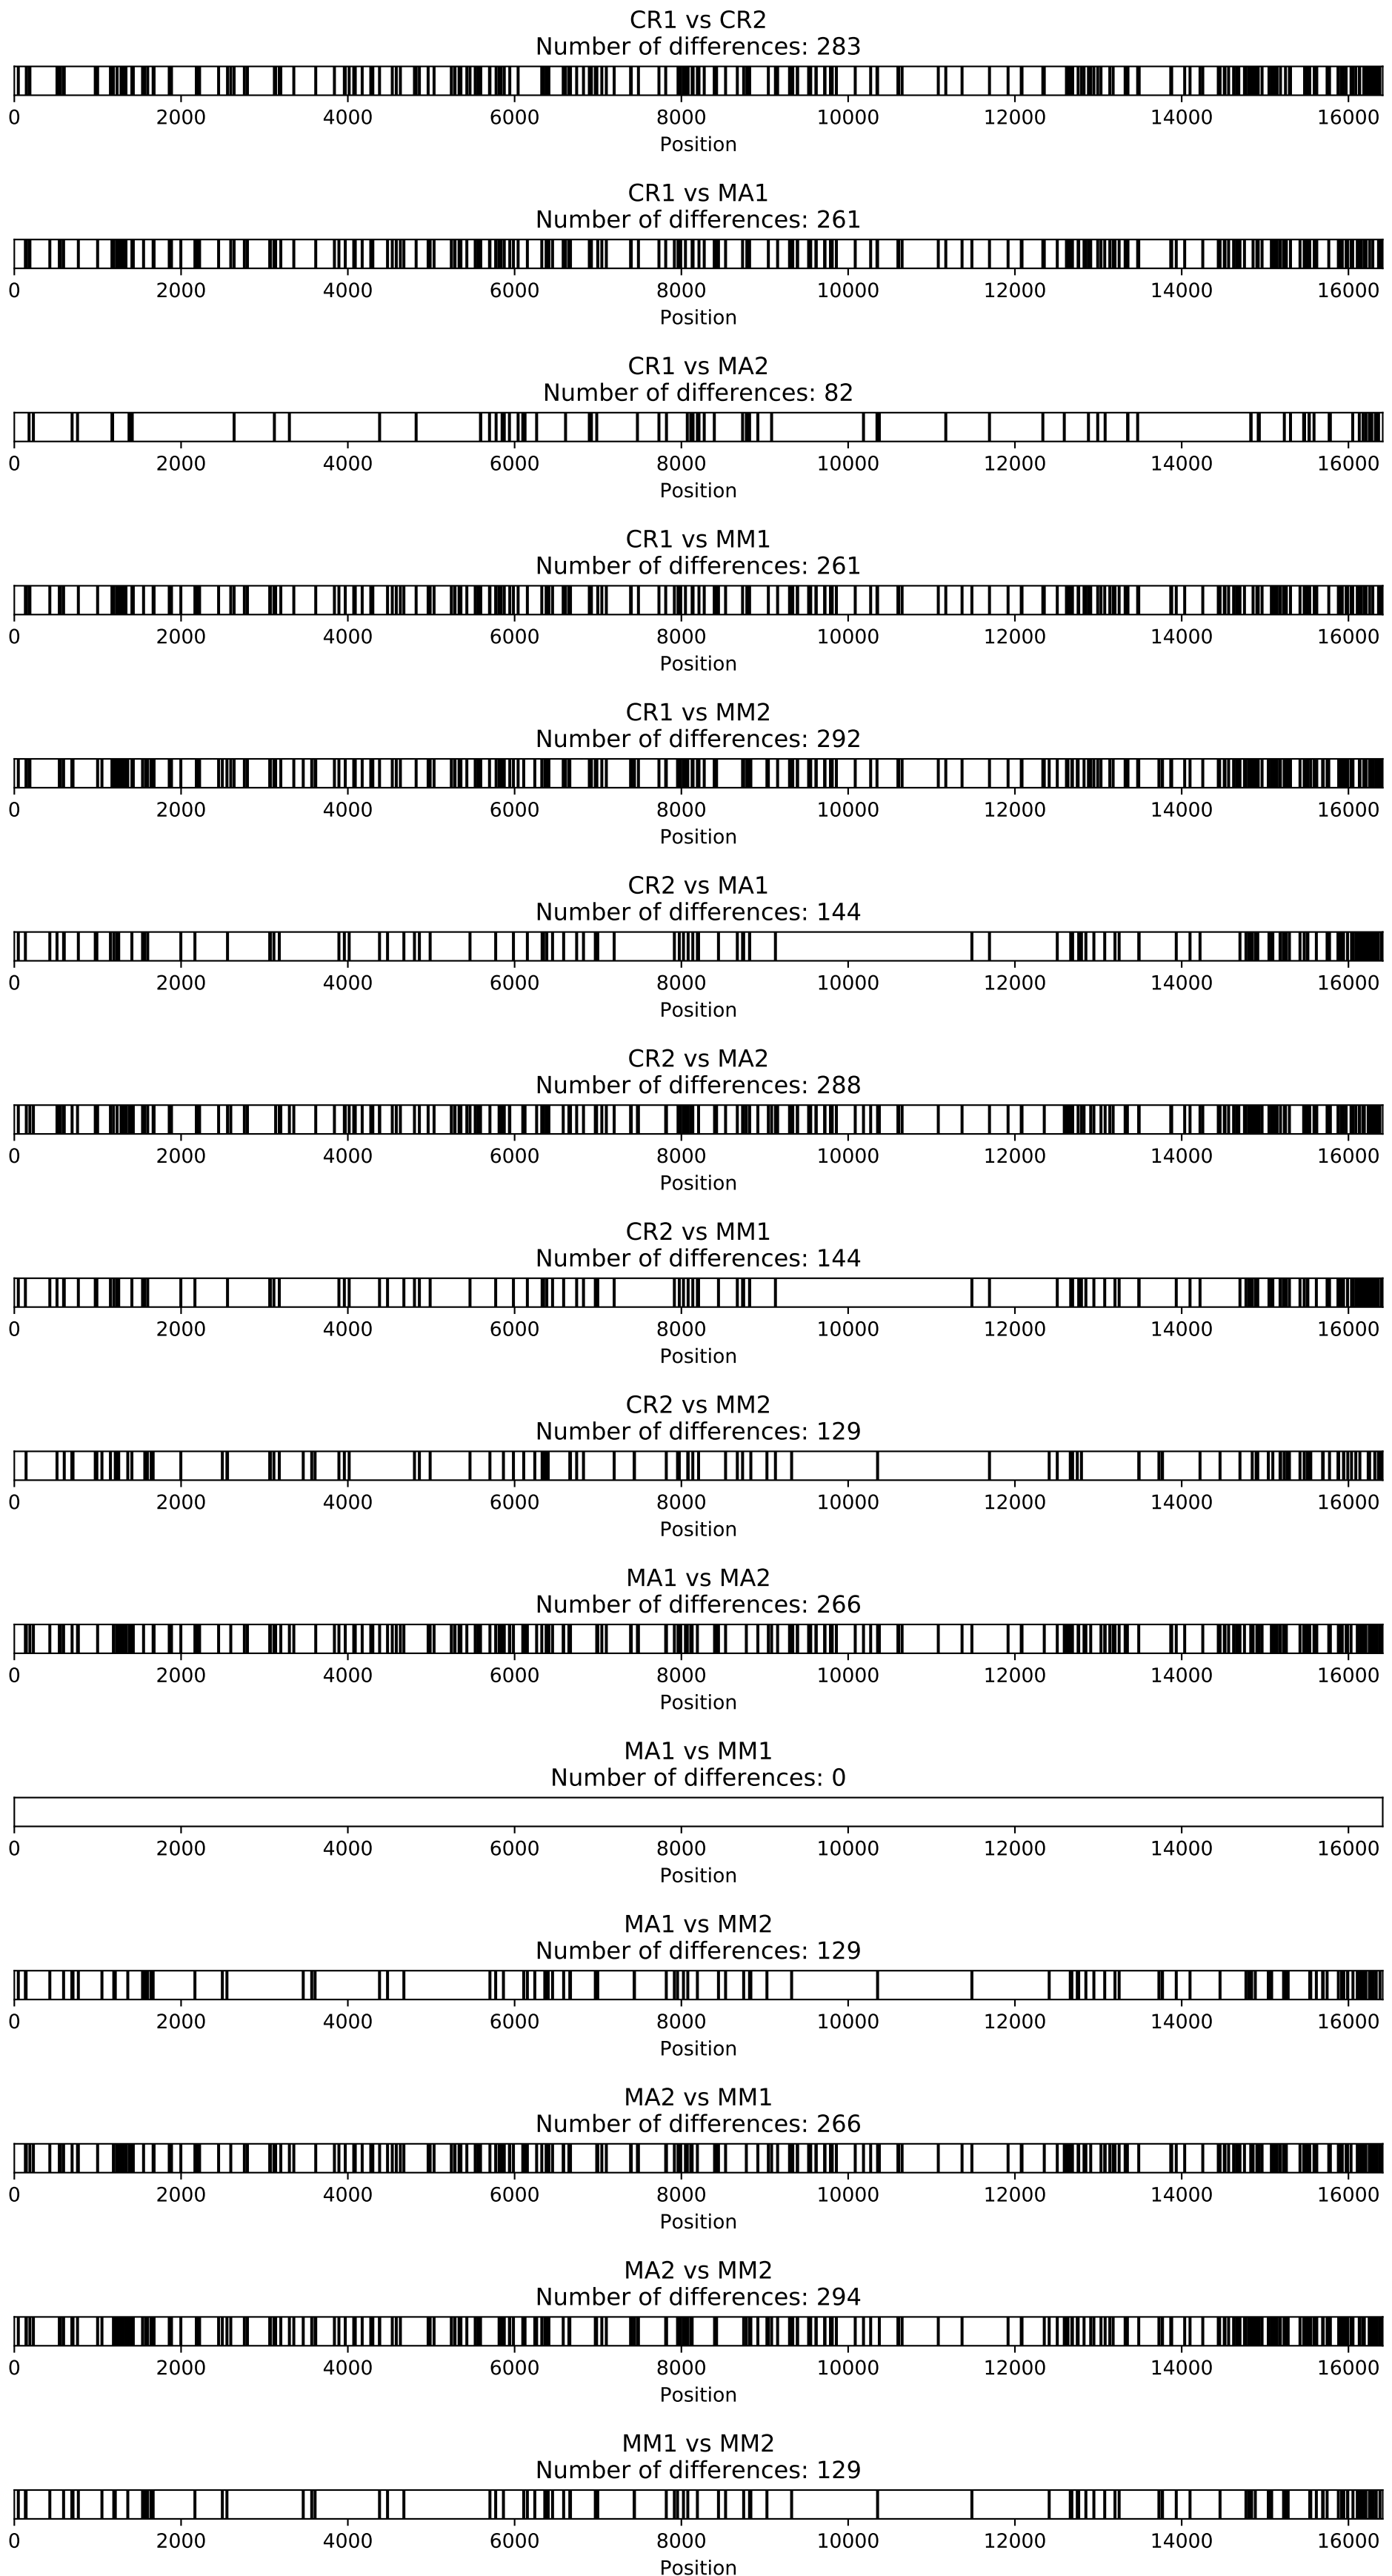



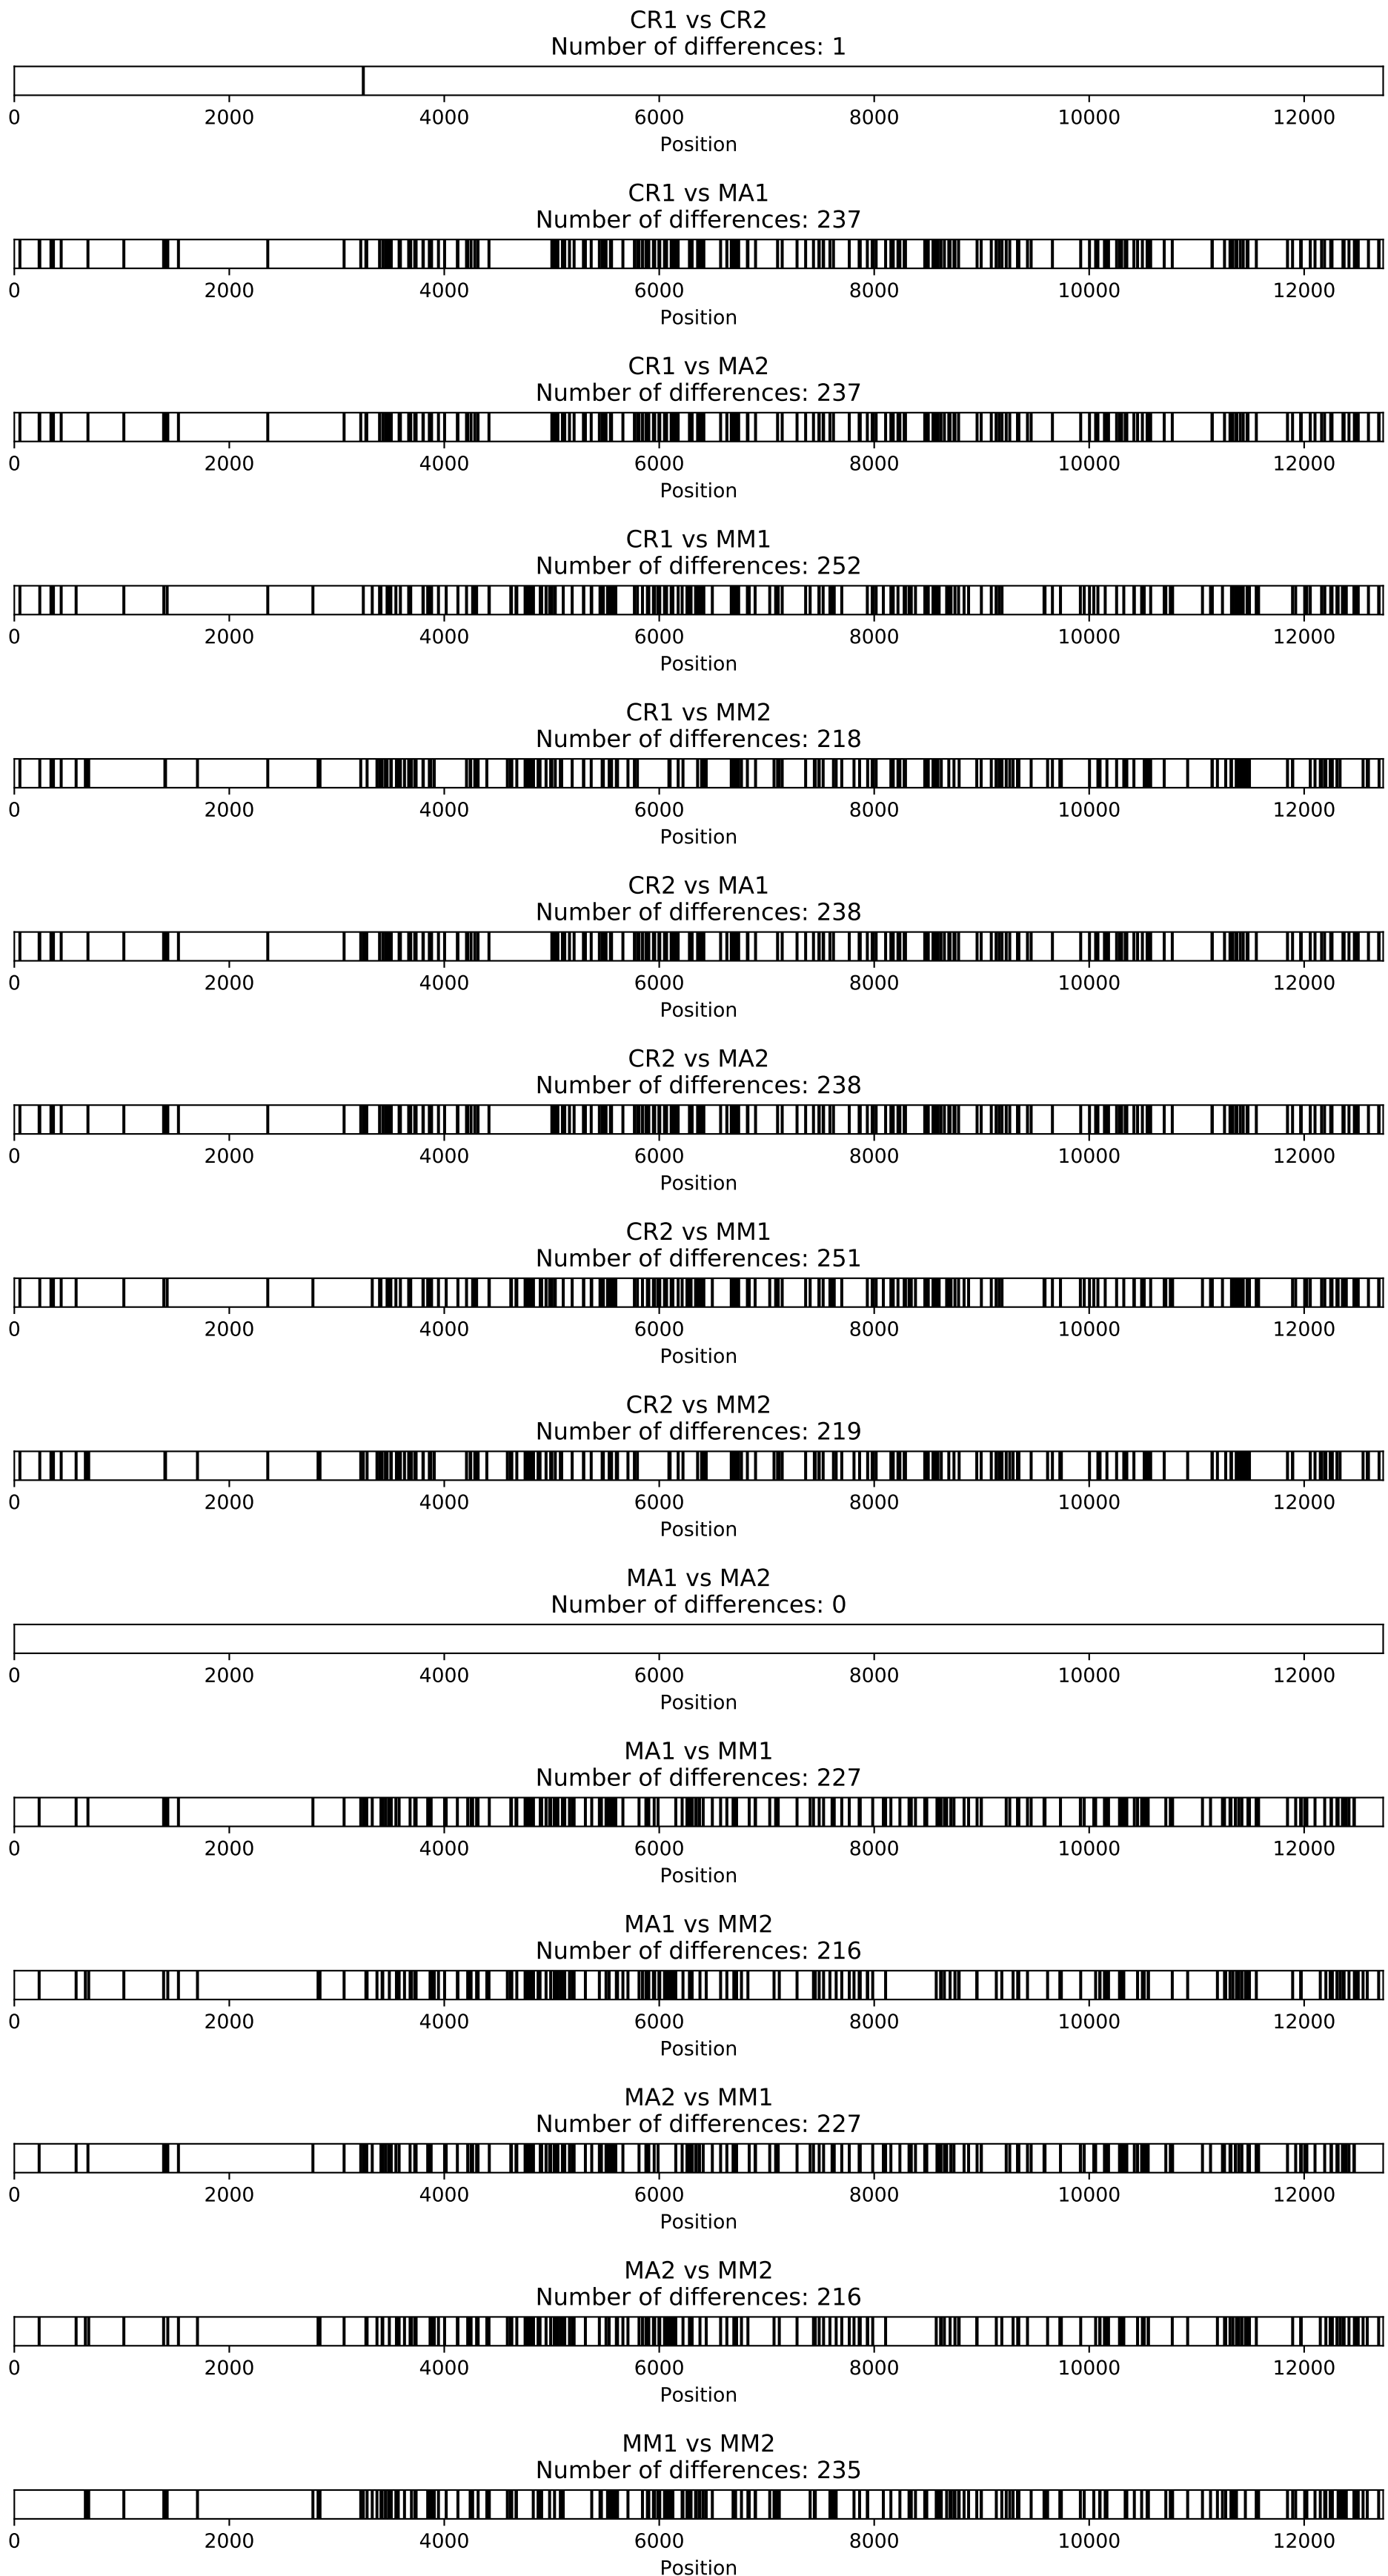

# Region: 510

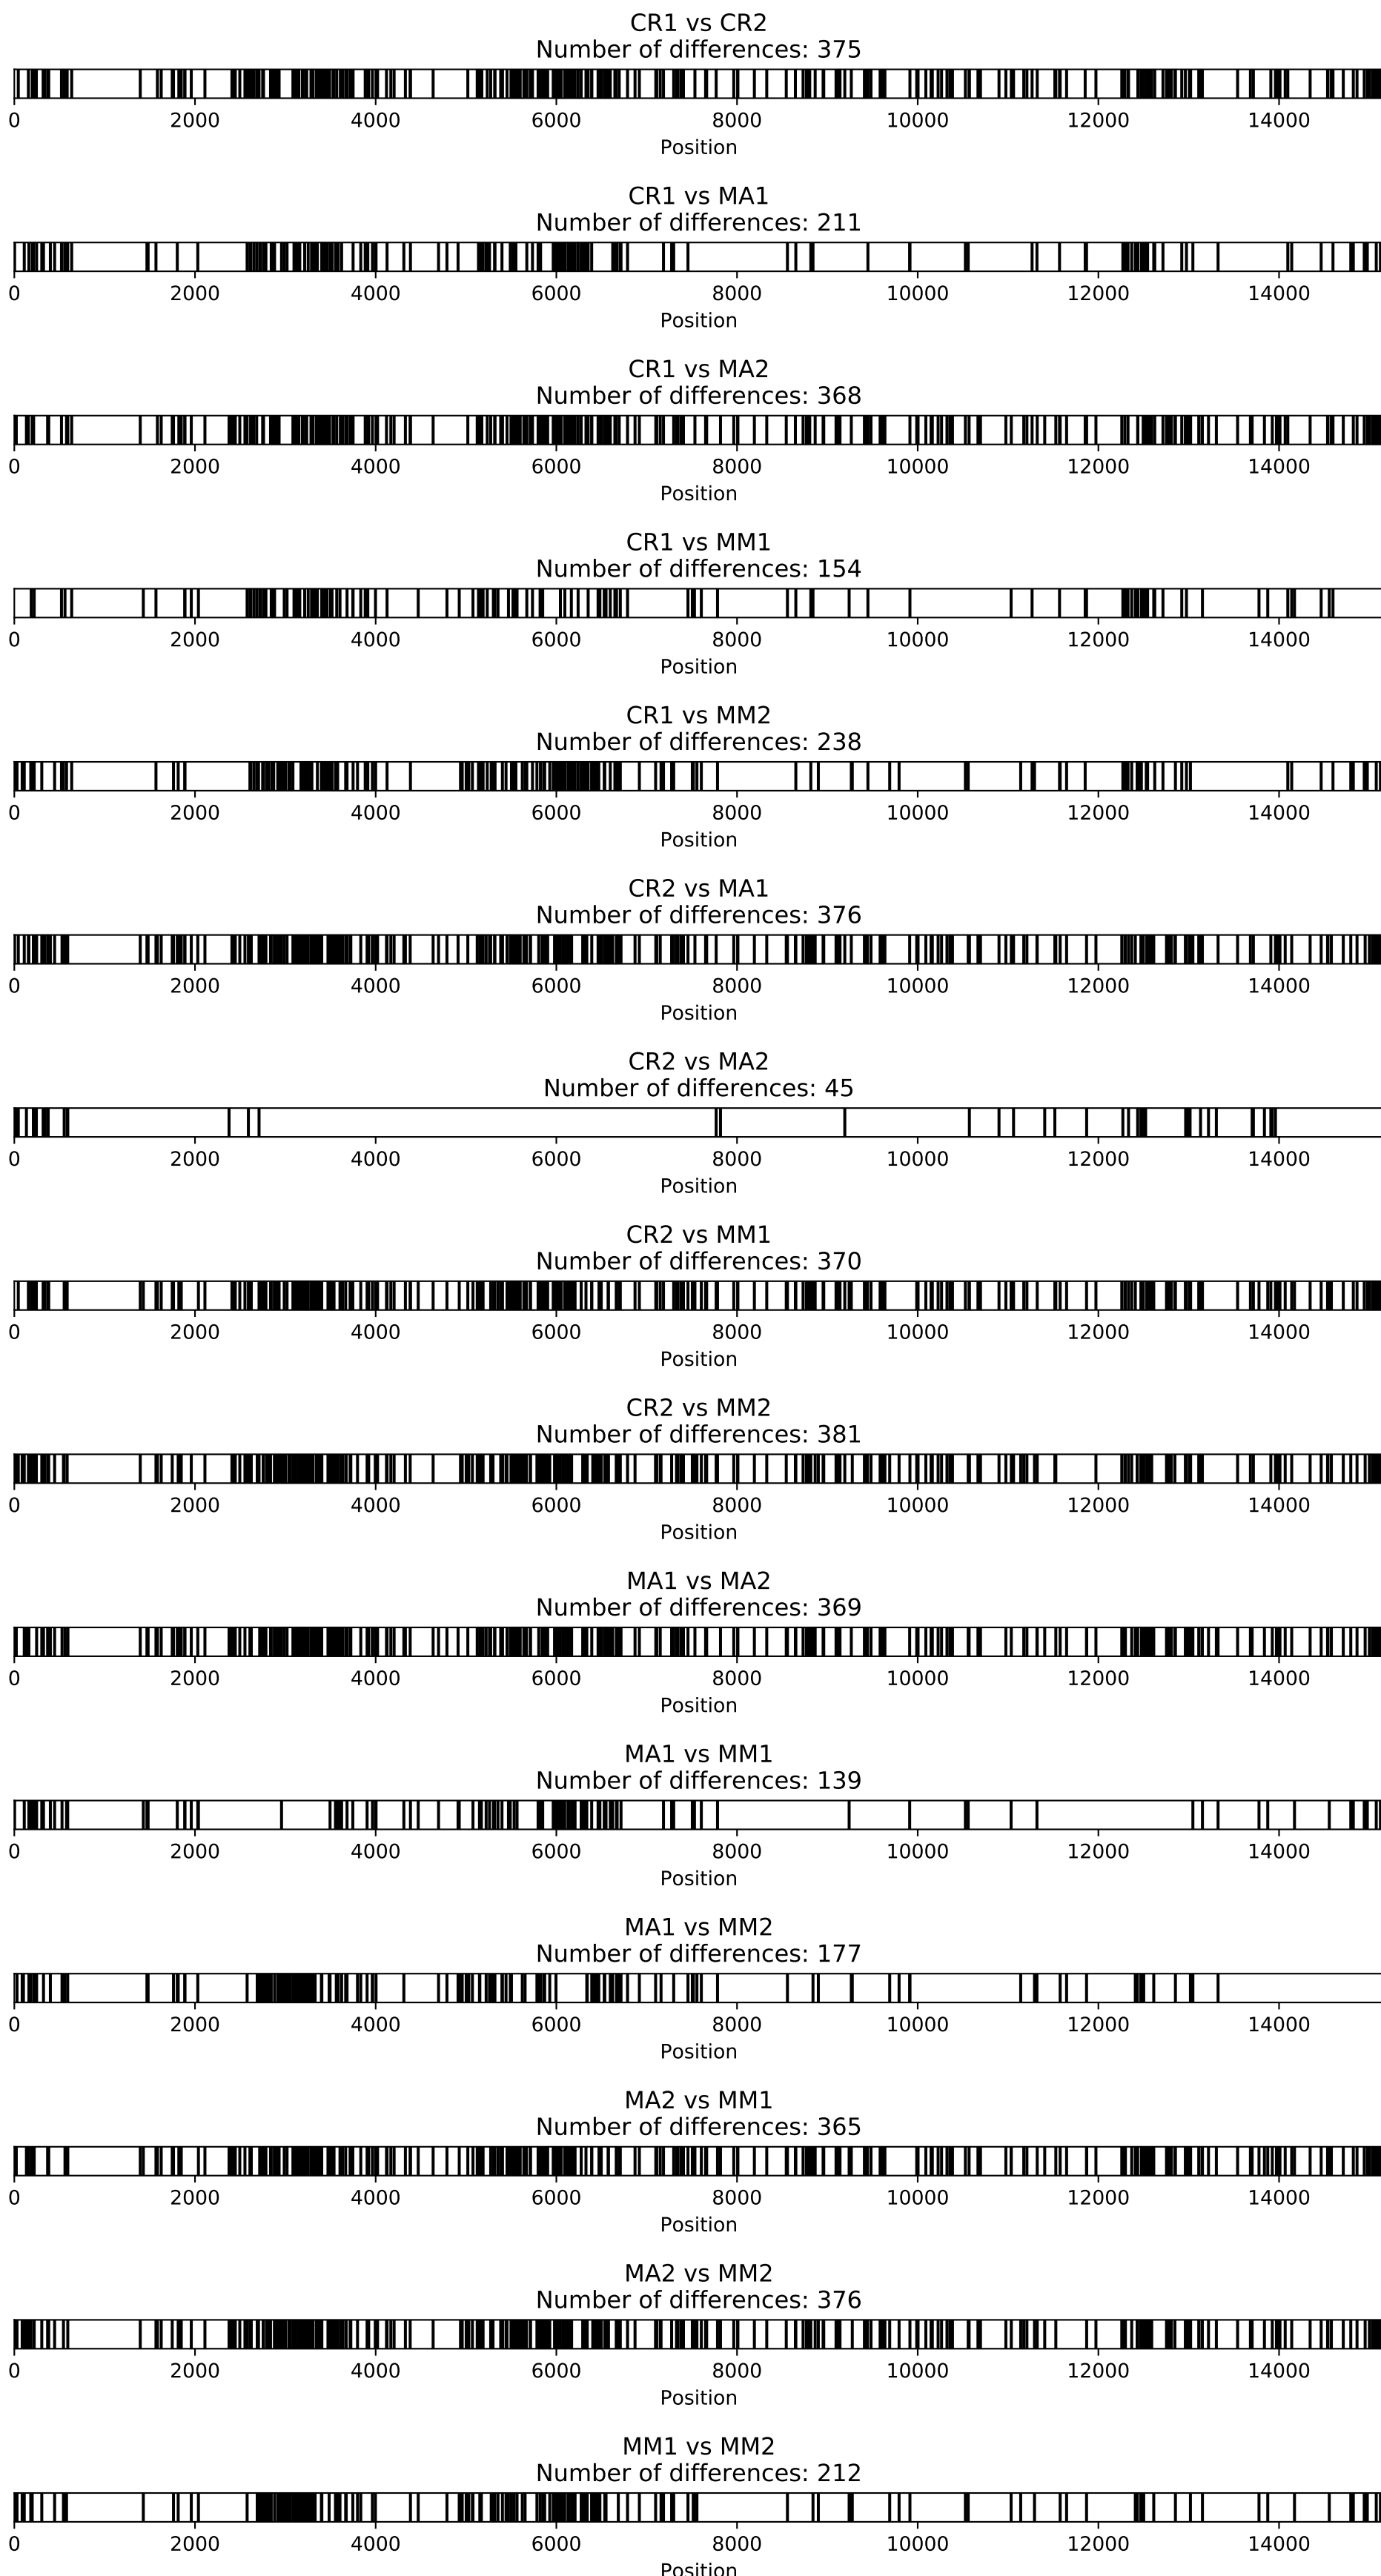

# Region: 511

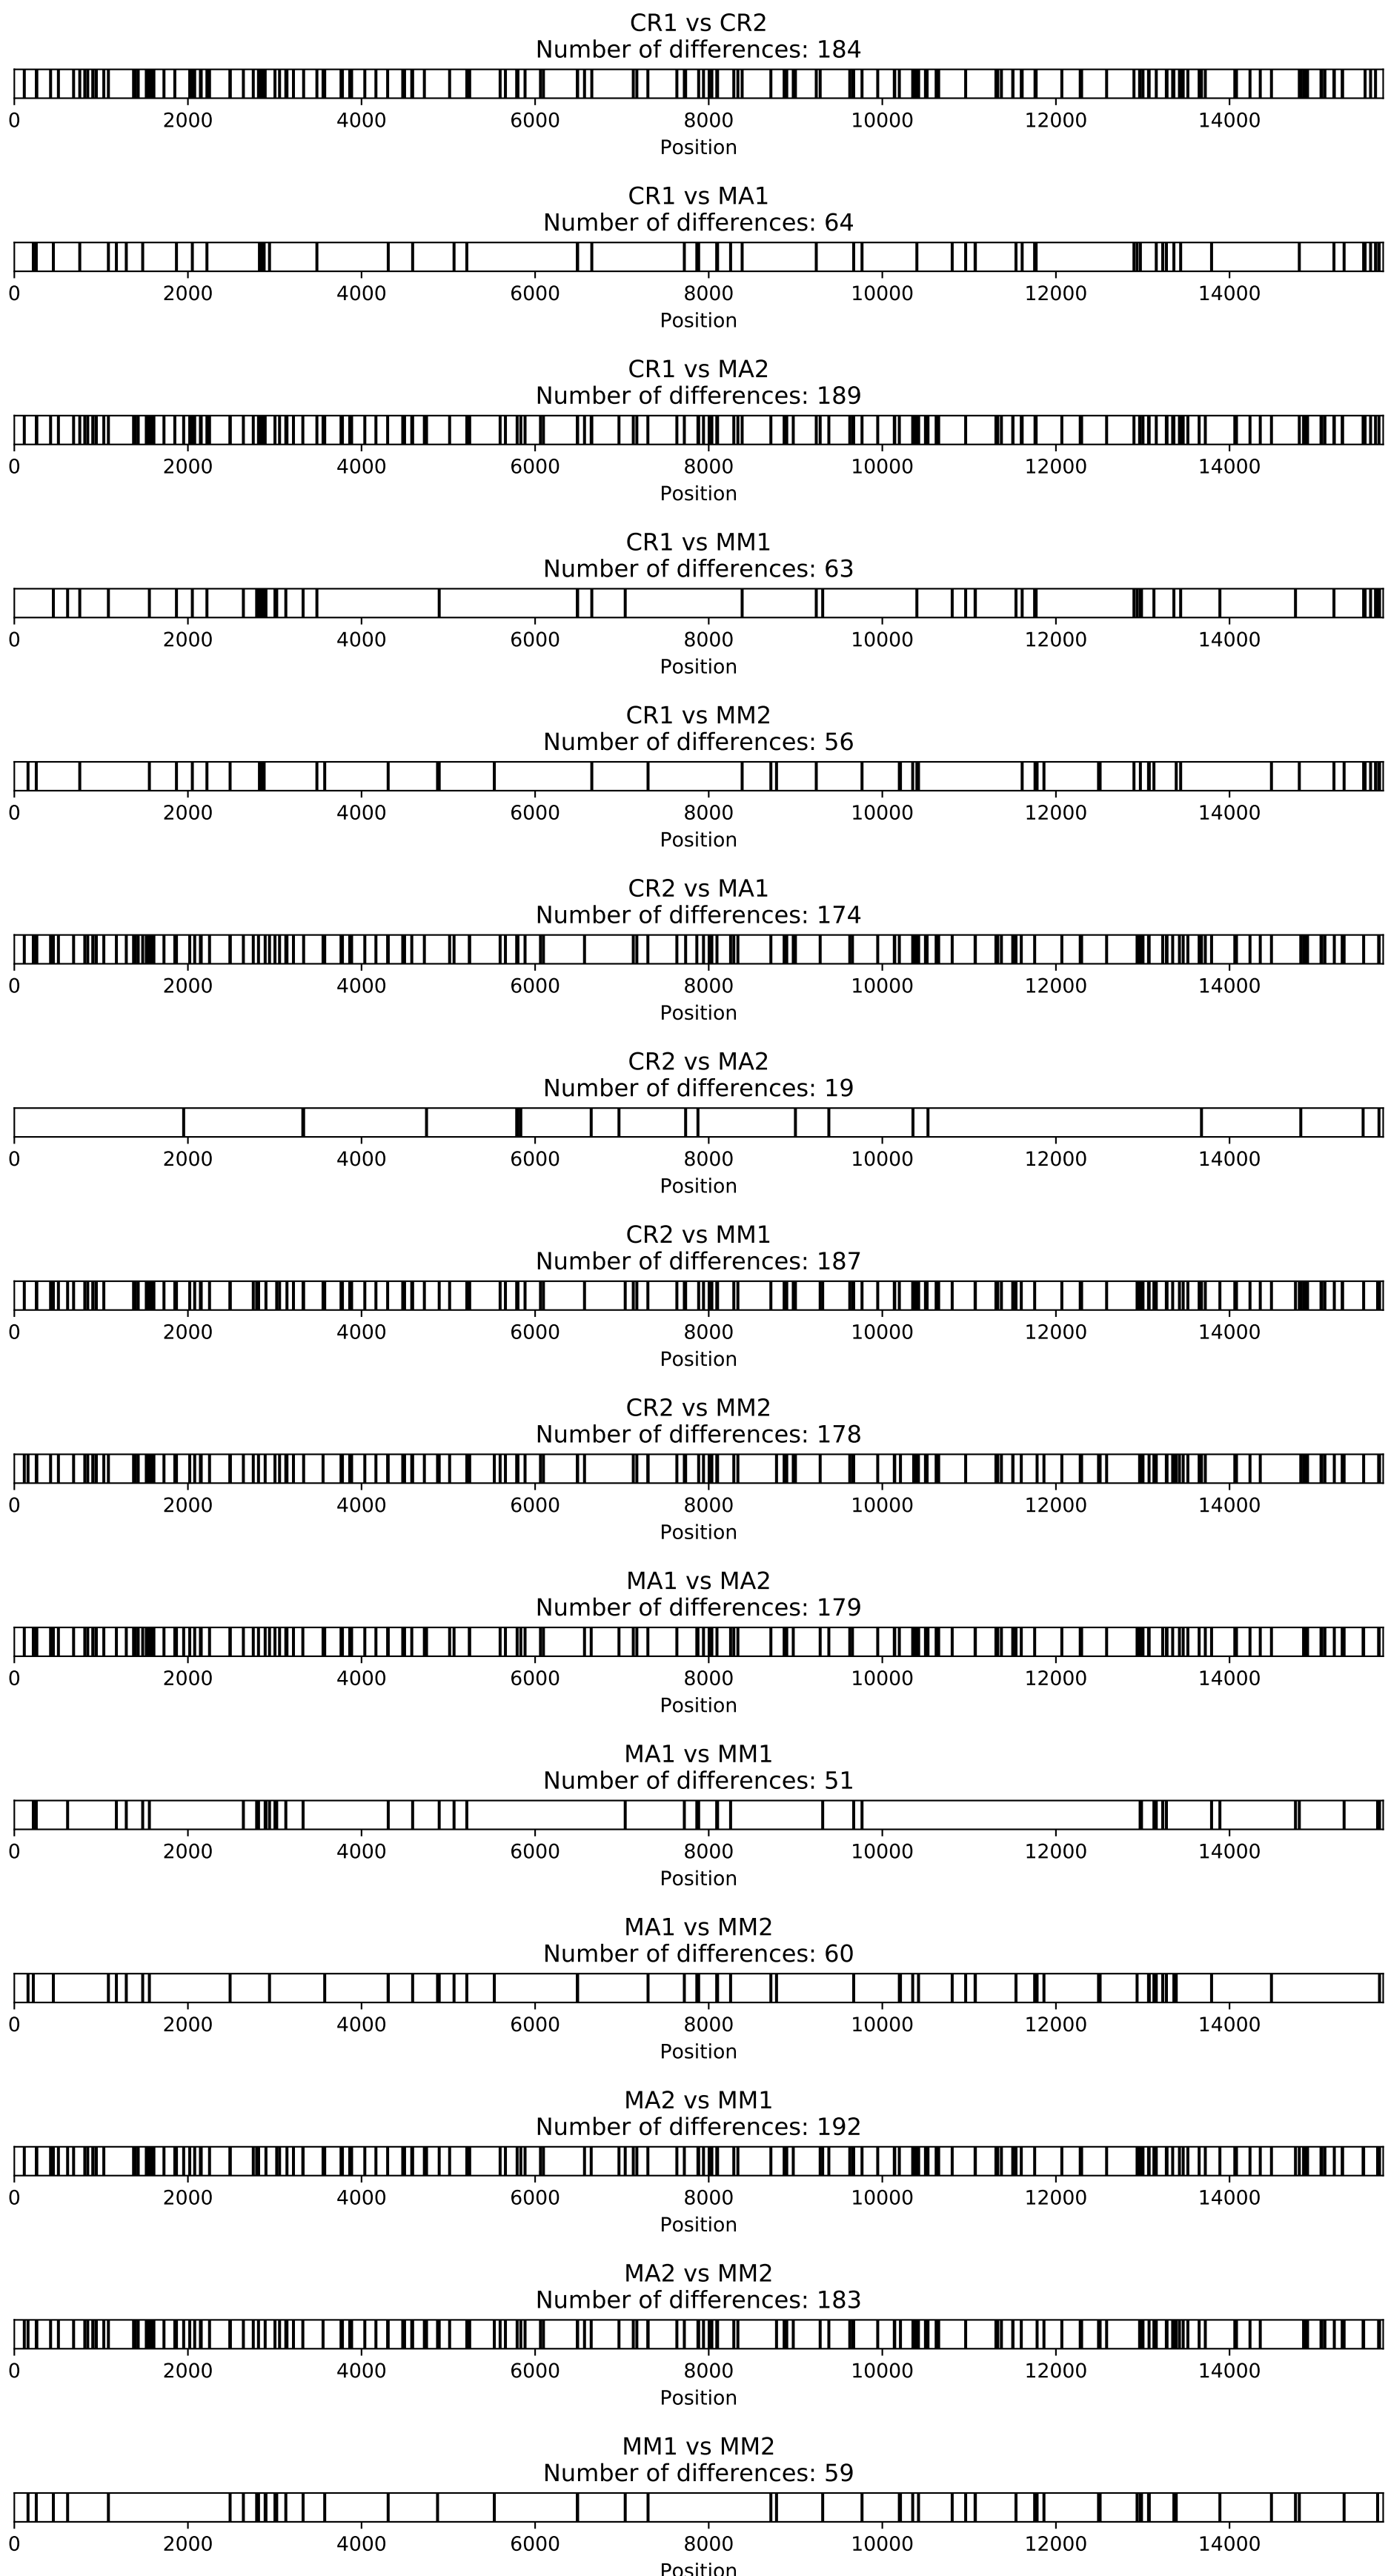

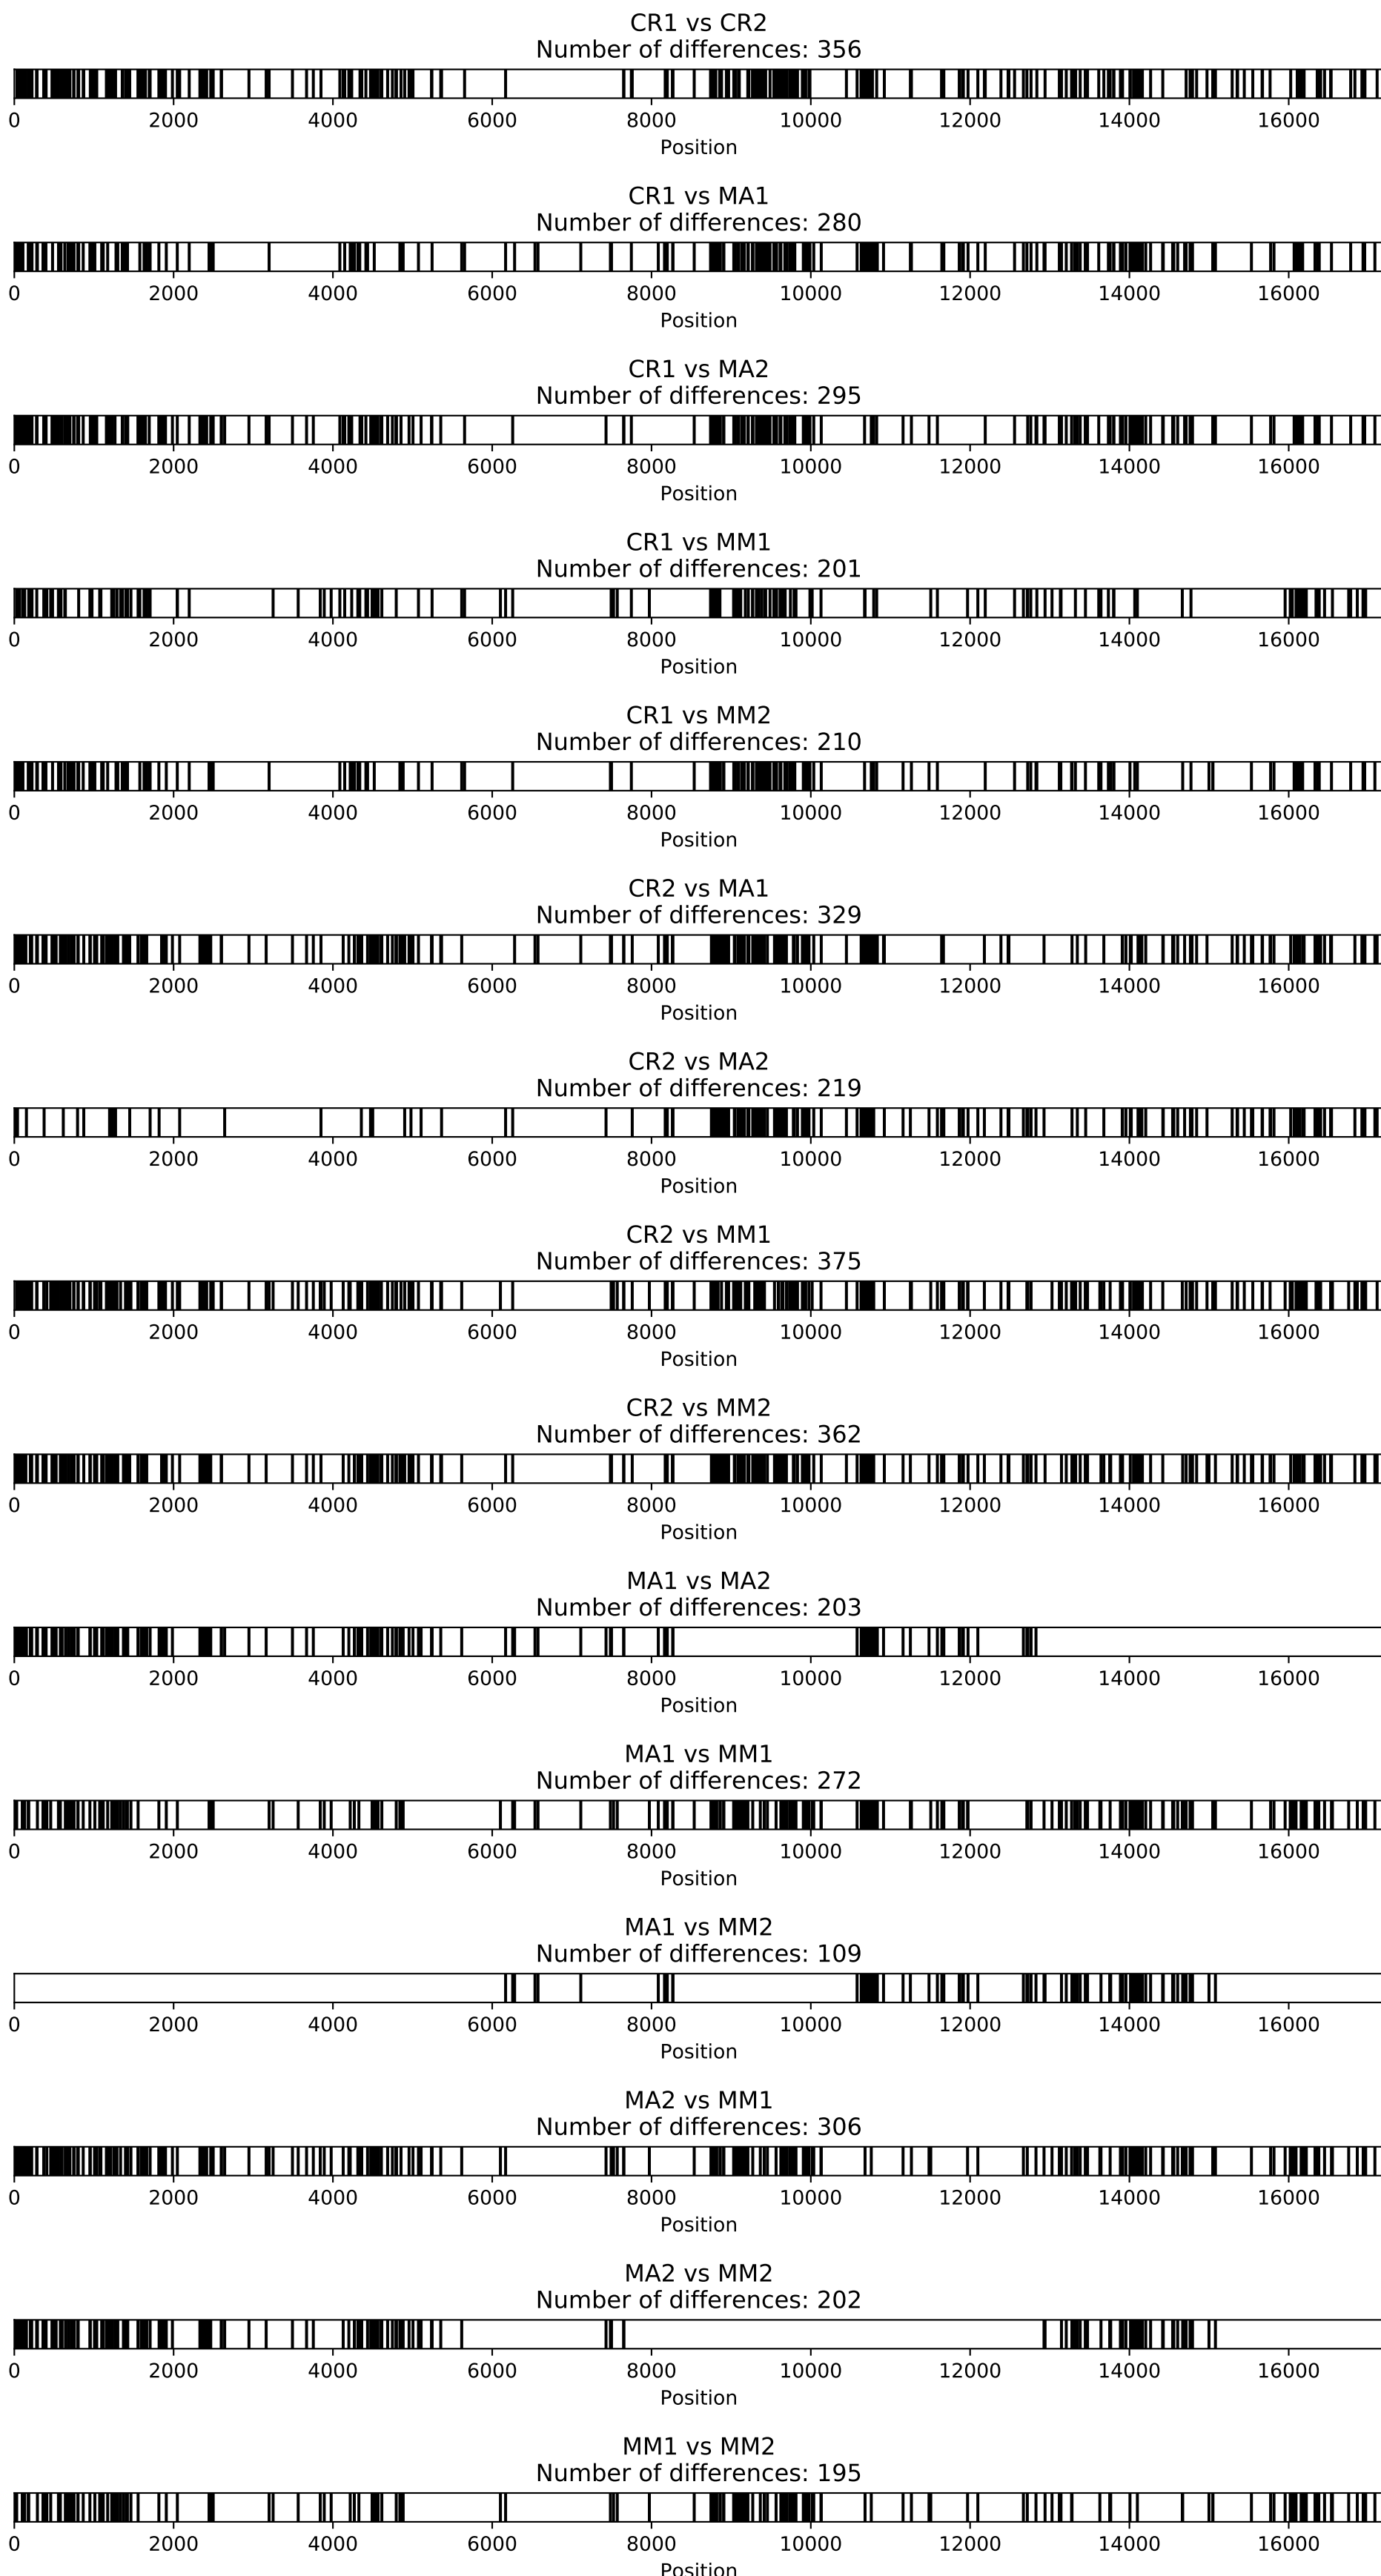

# Region: 515

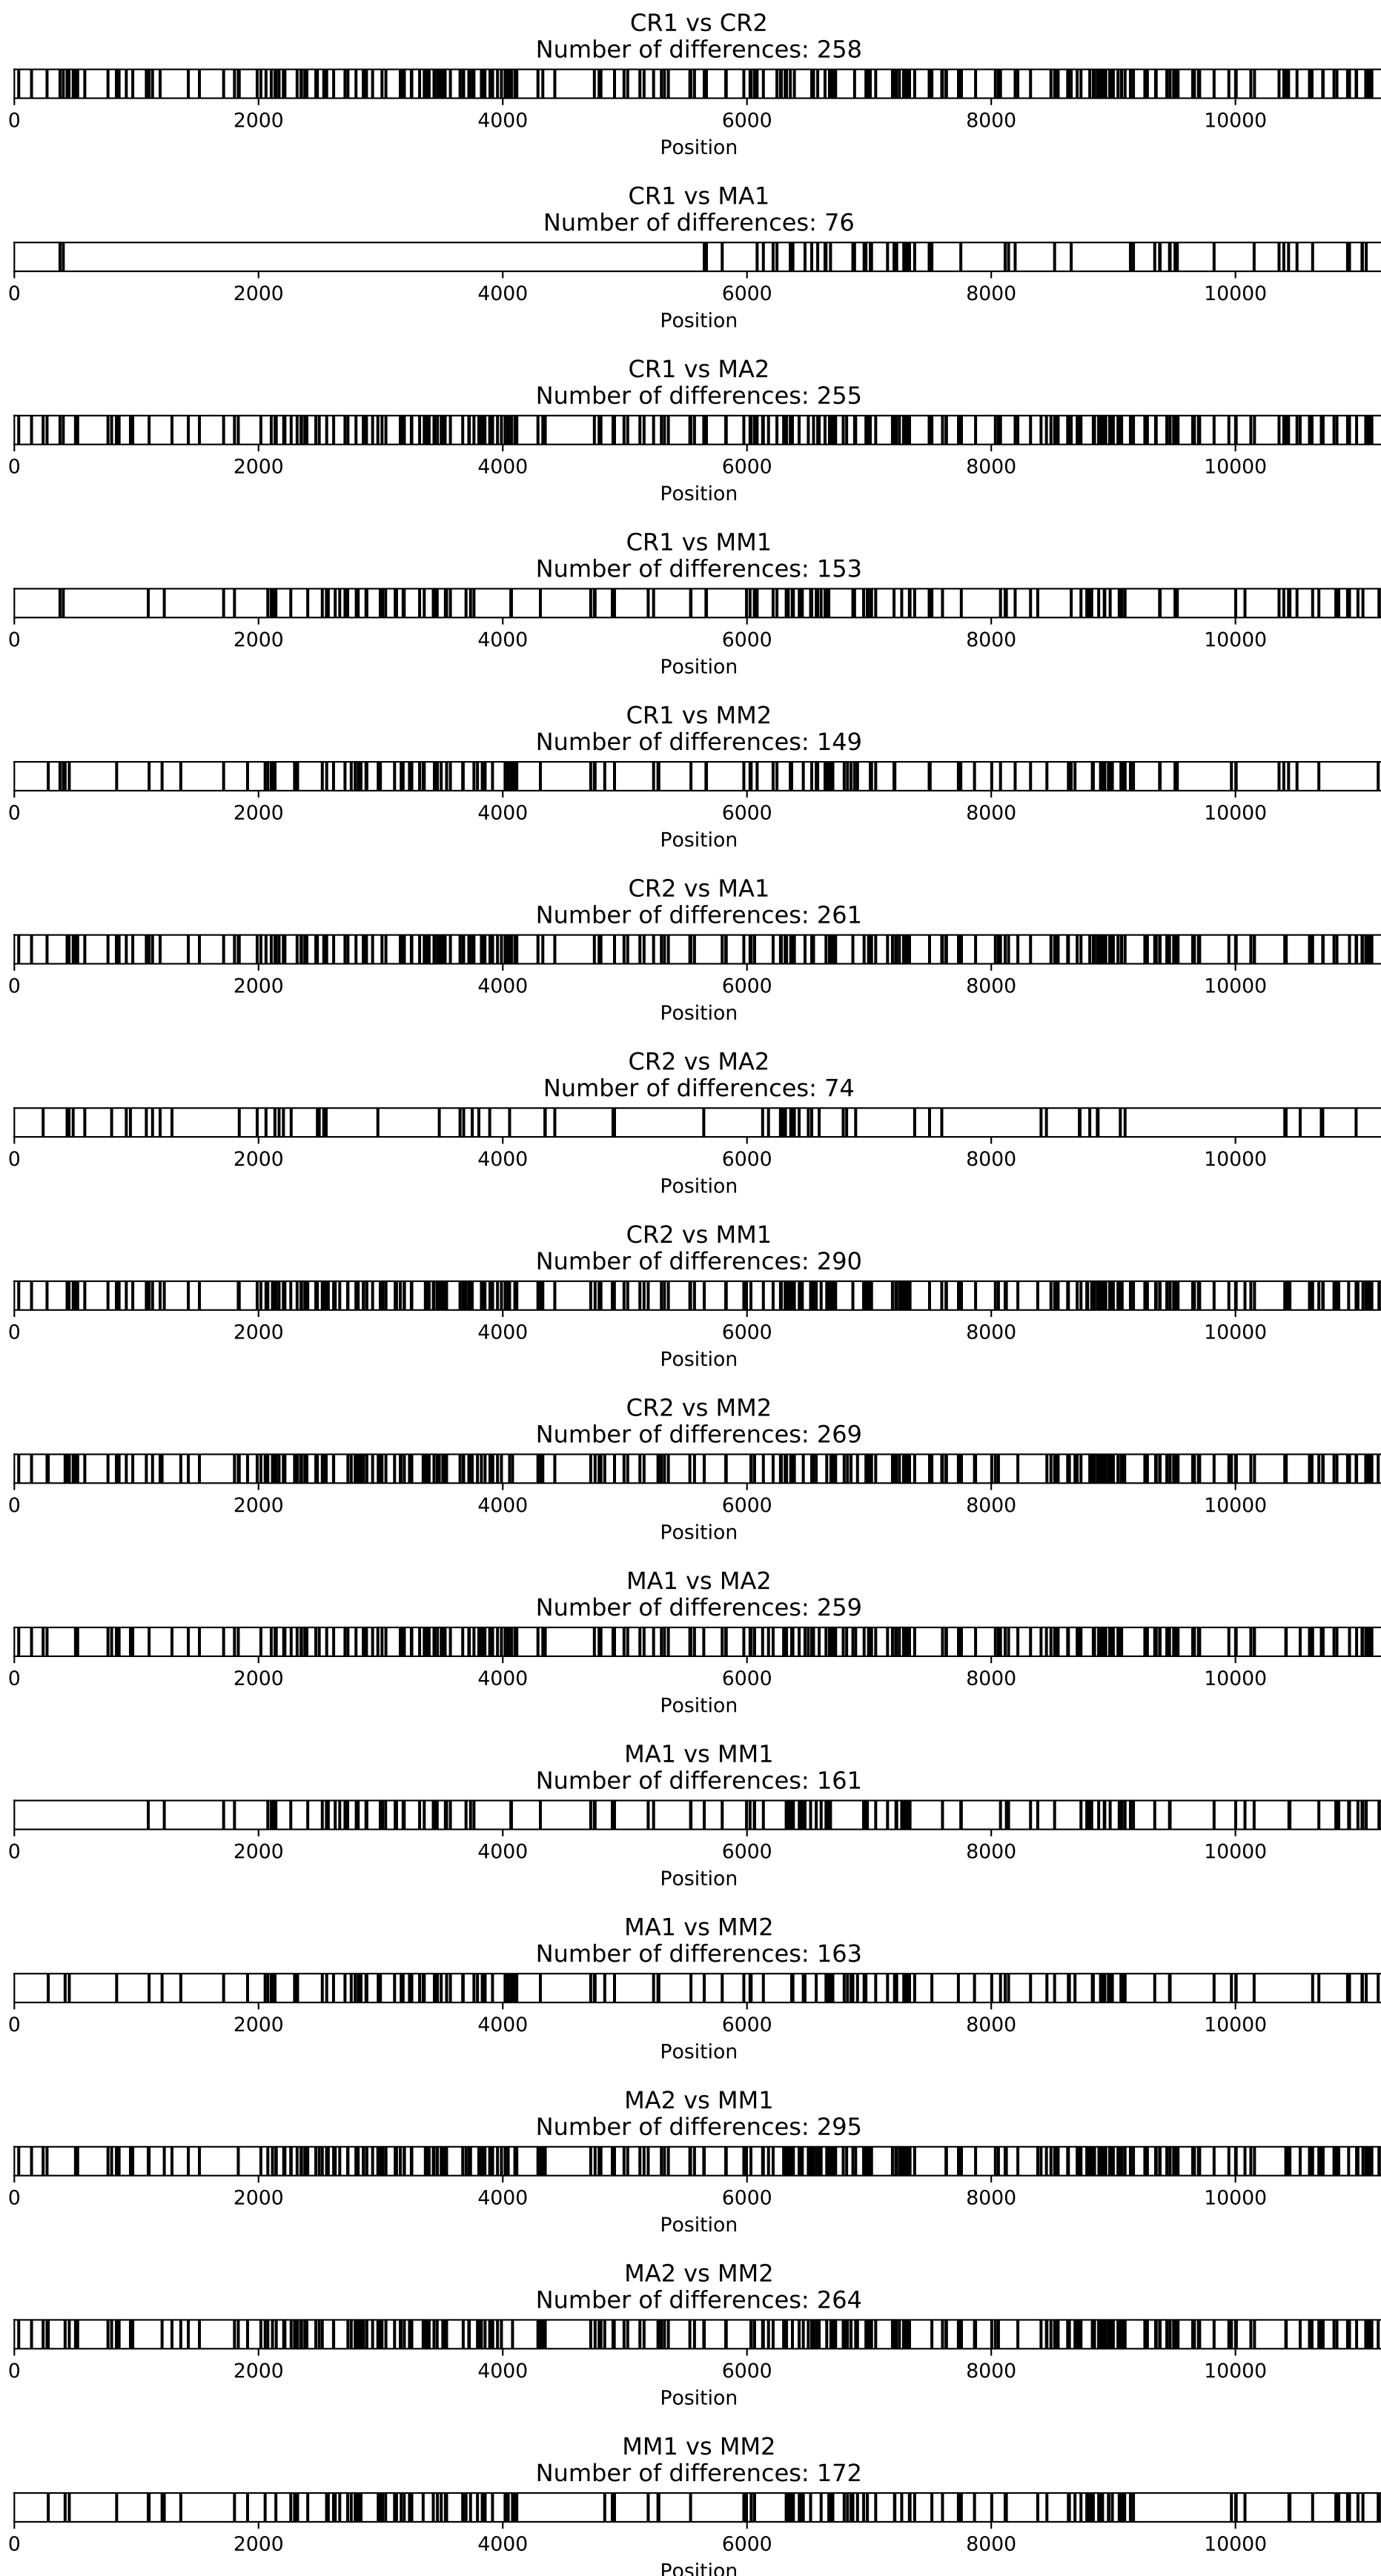

# Region: 516

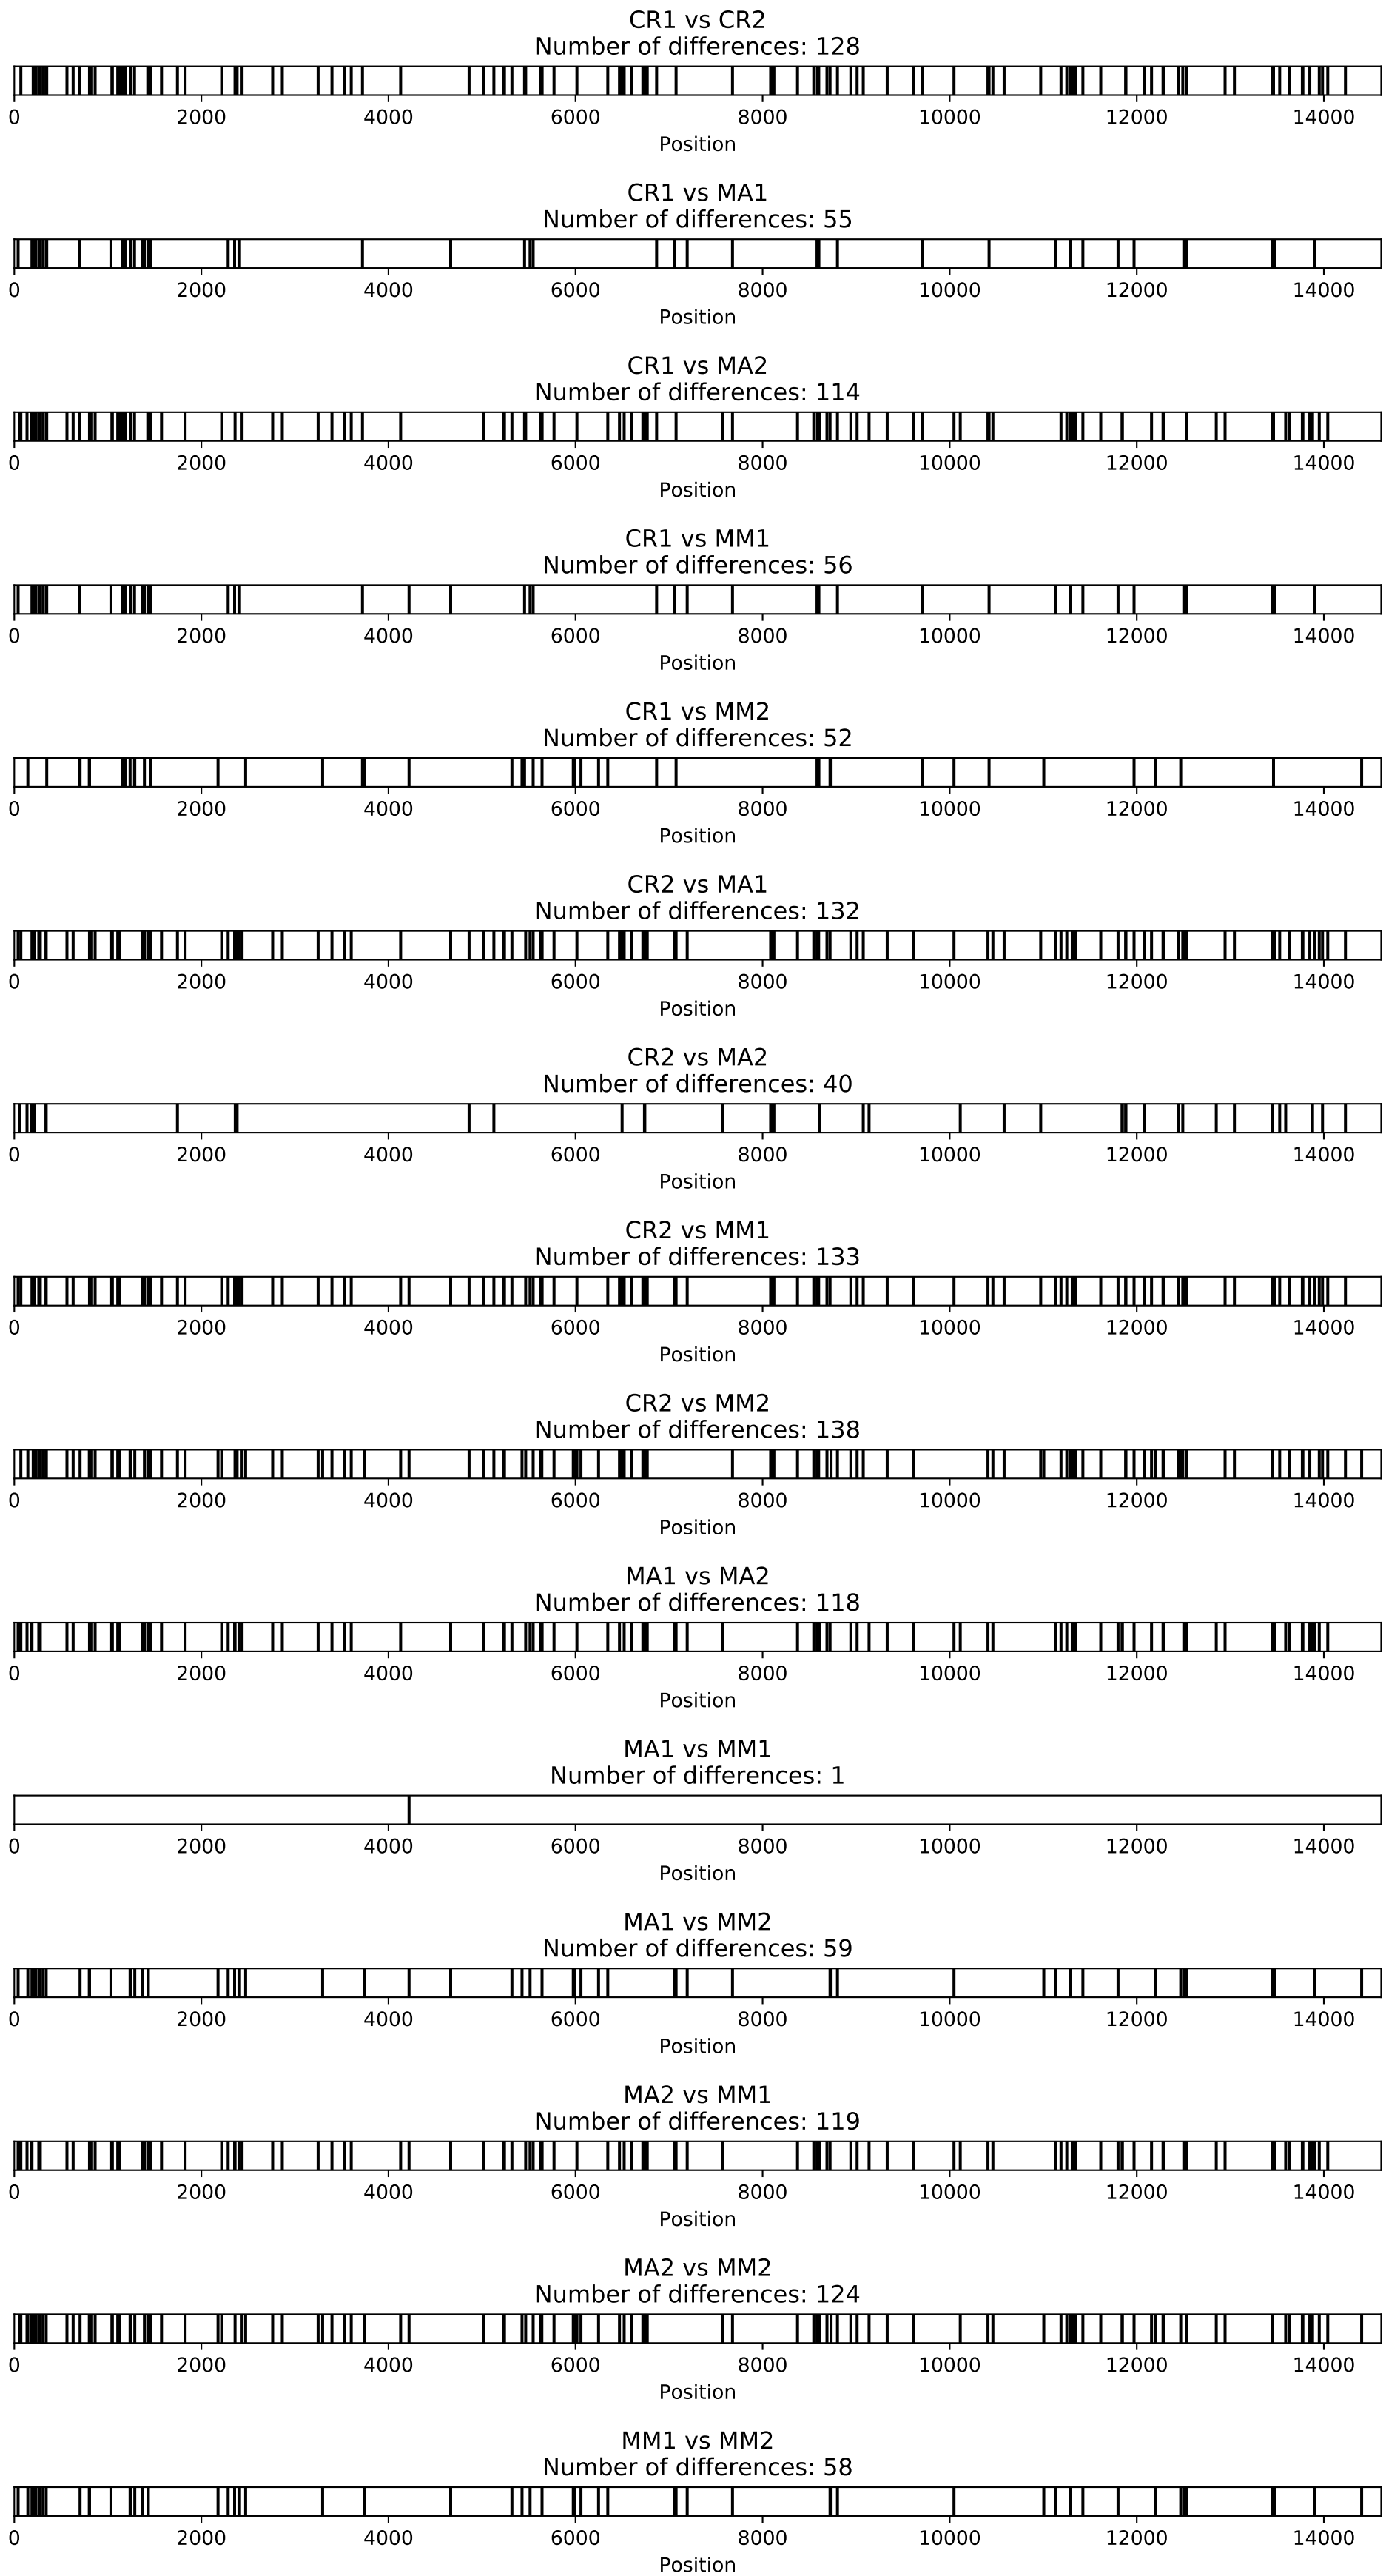

# Region: 517

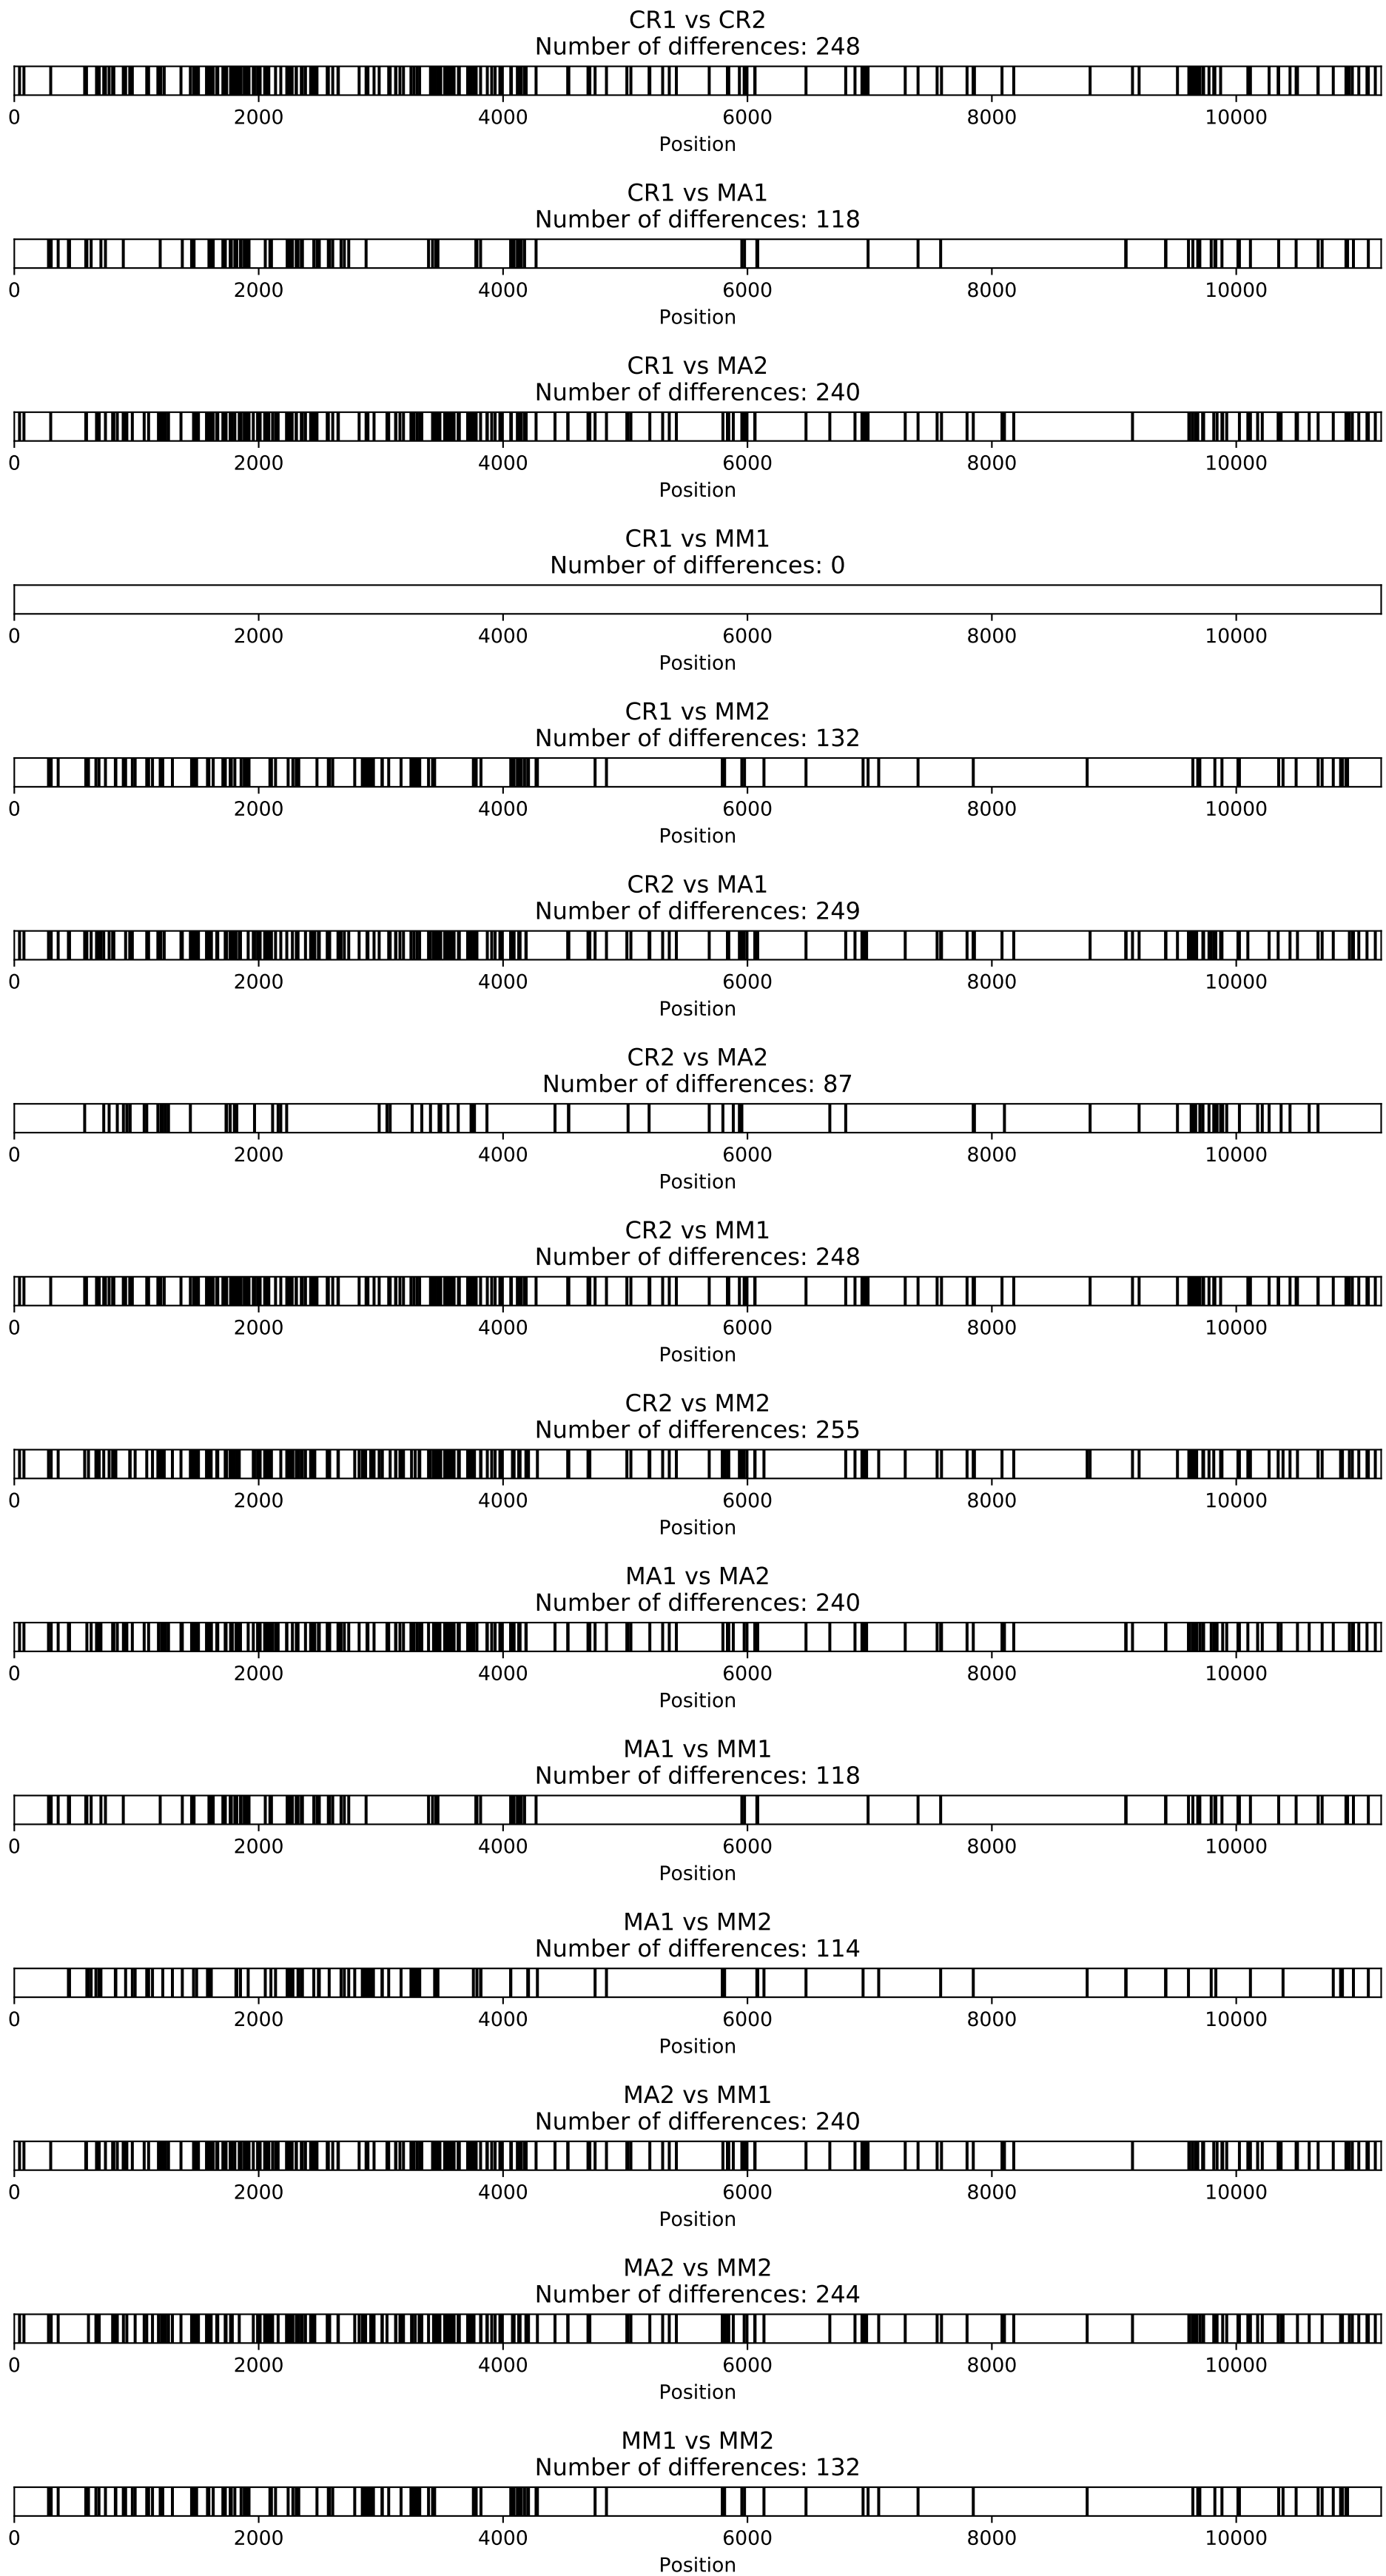

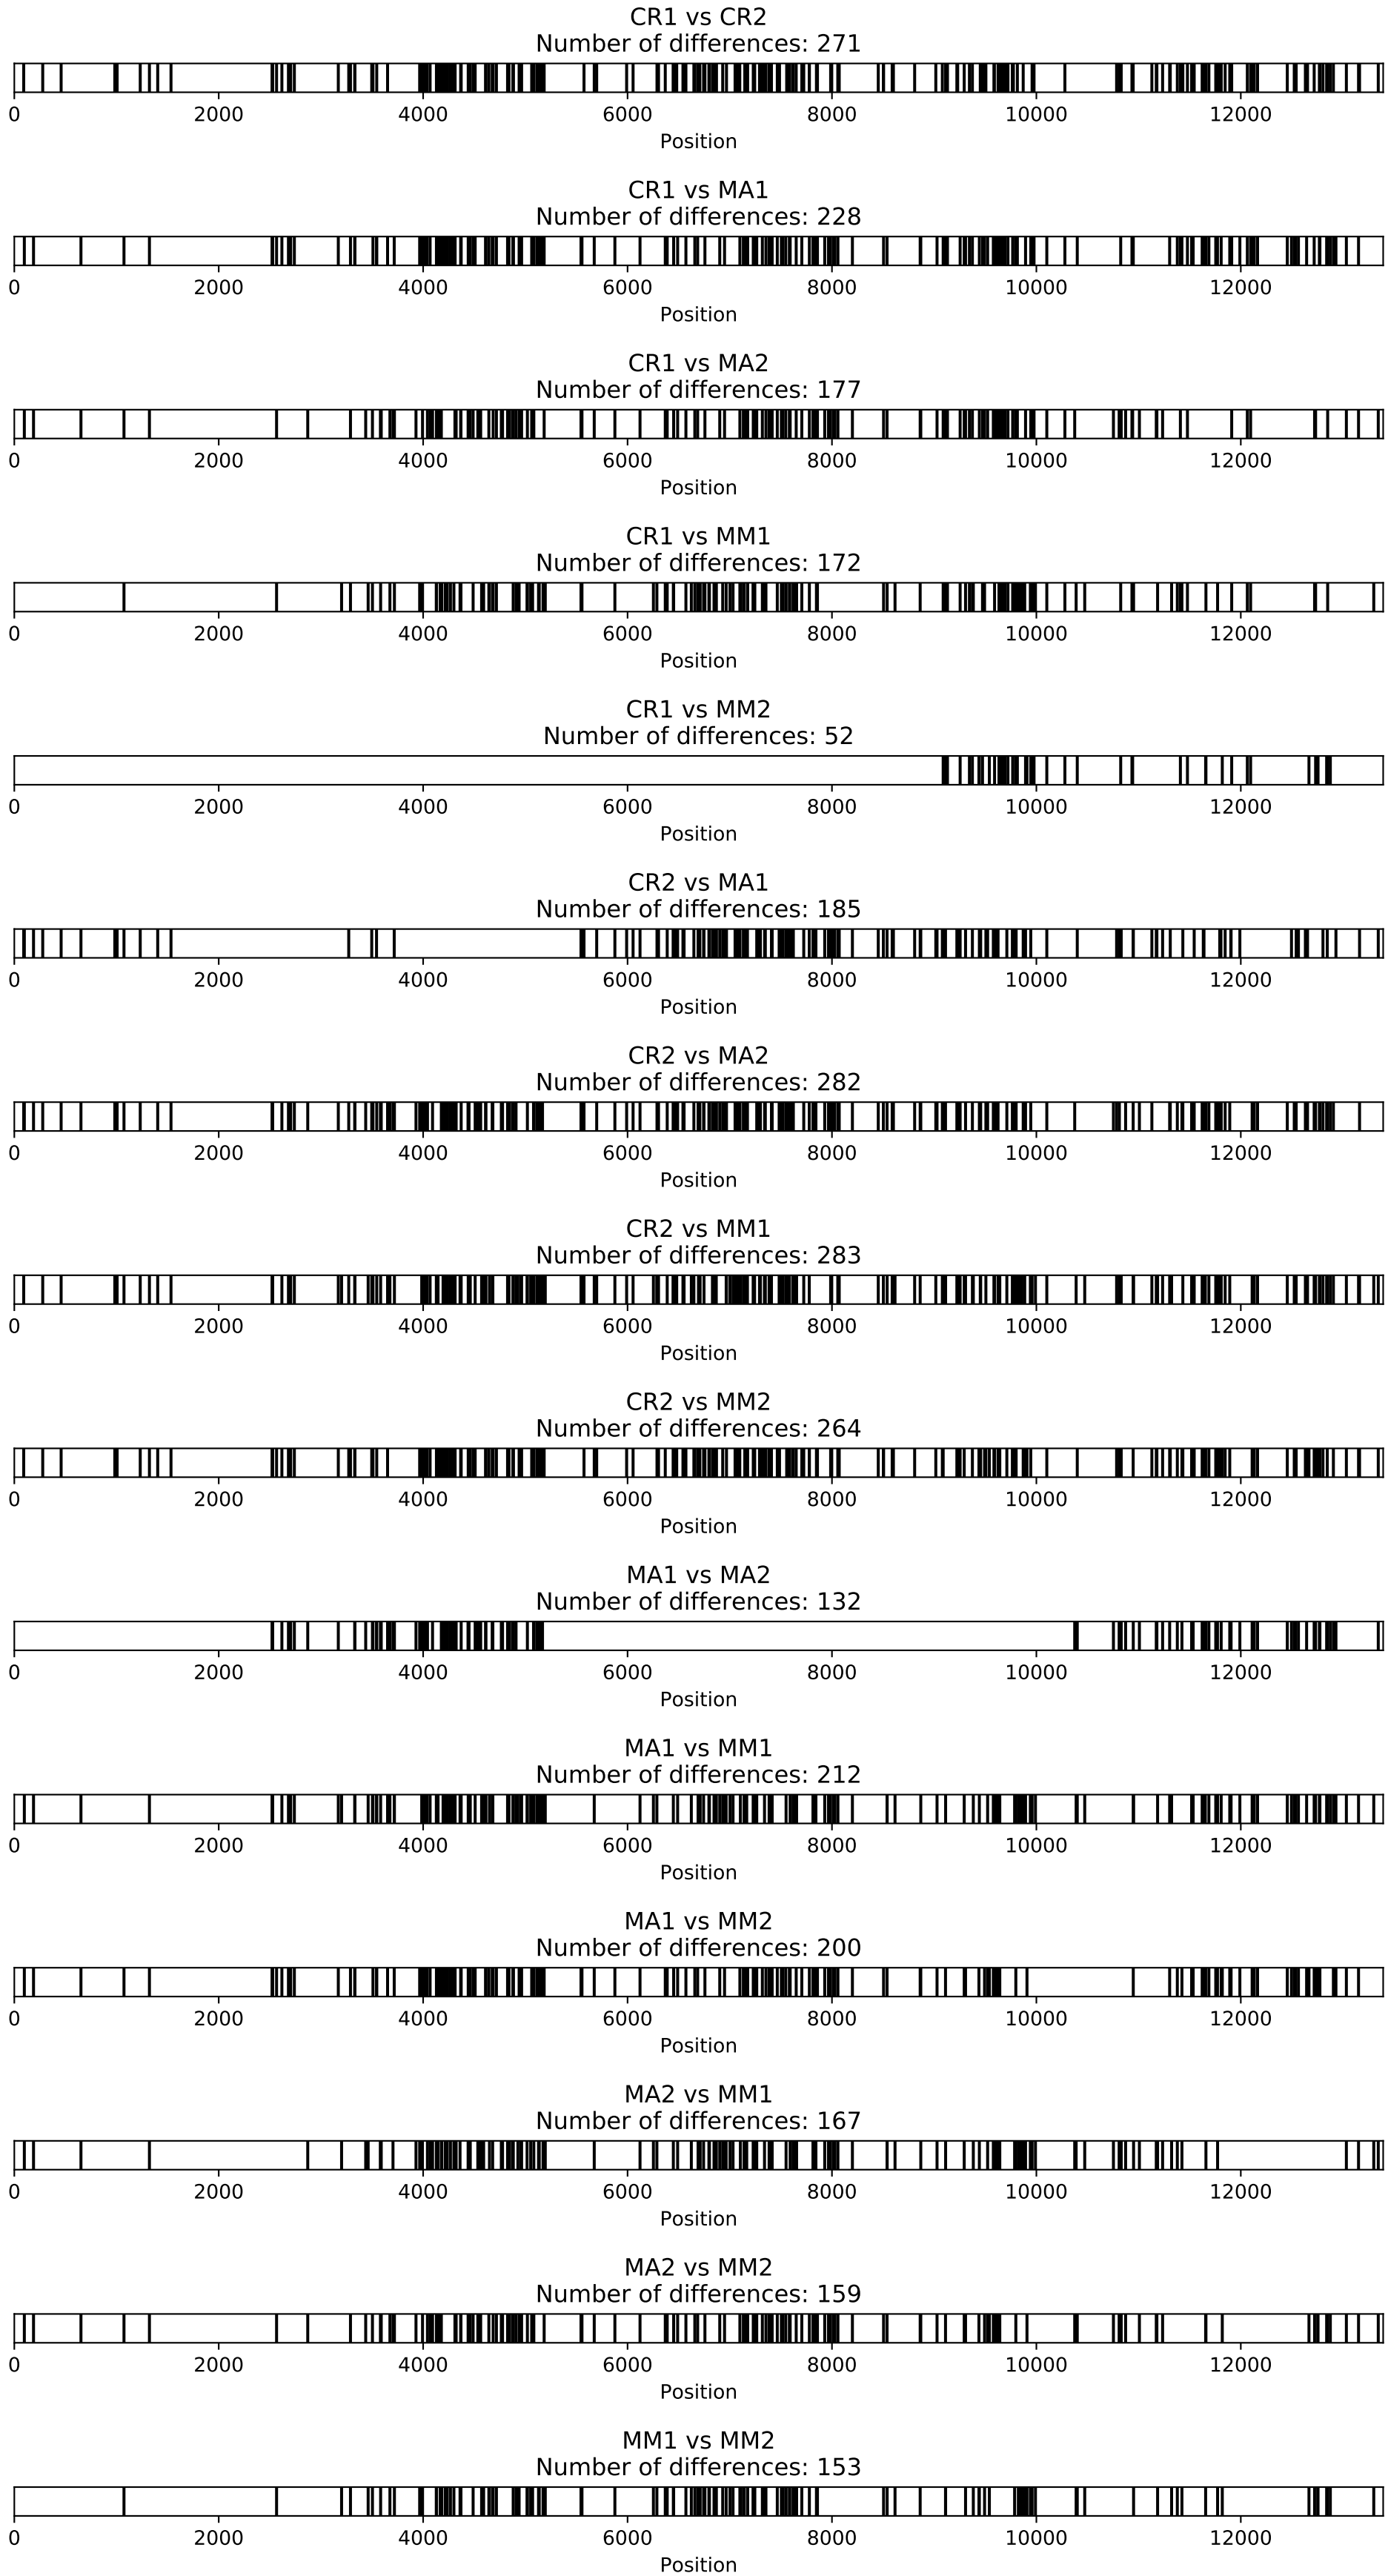



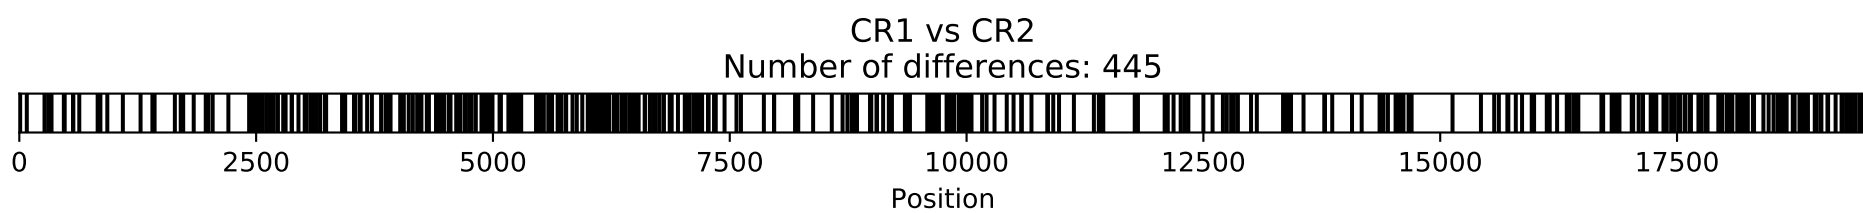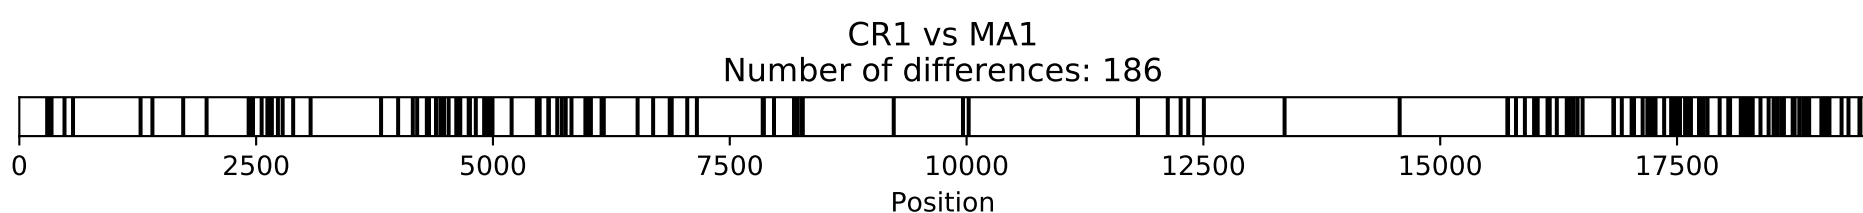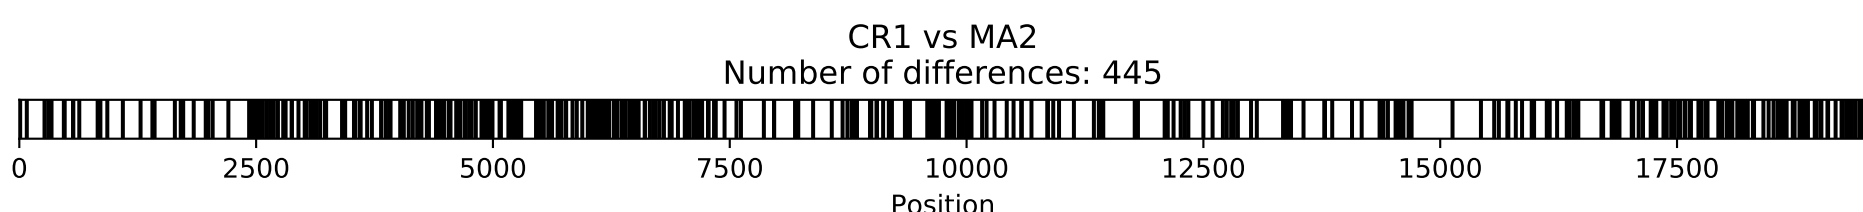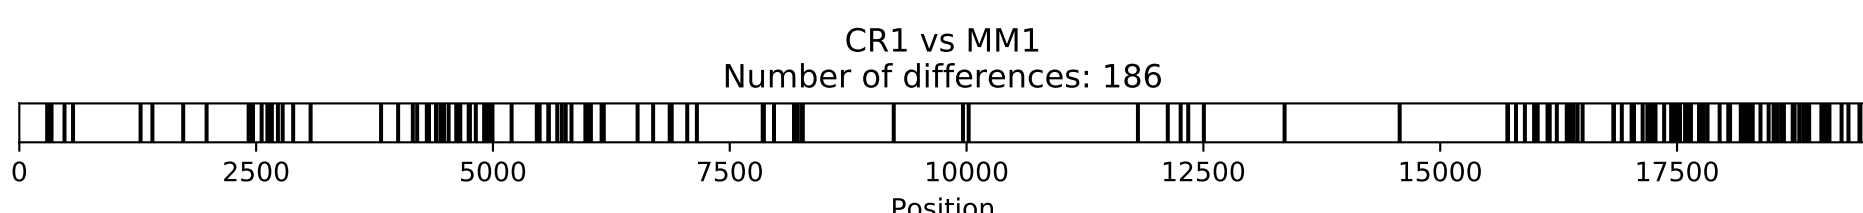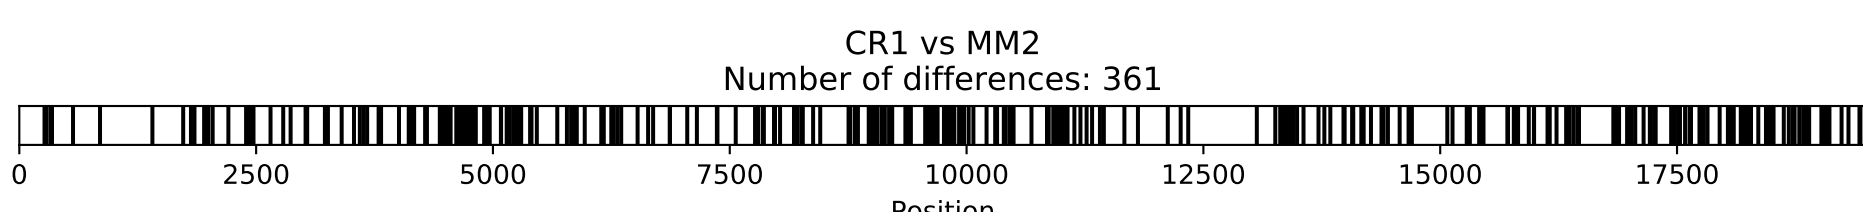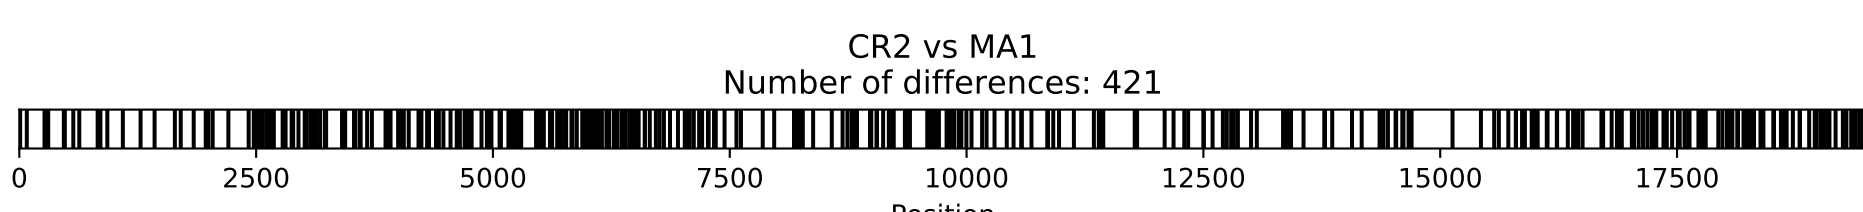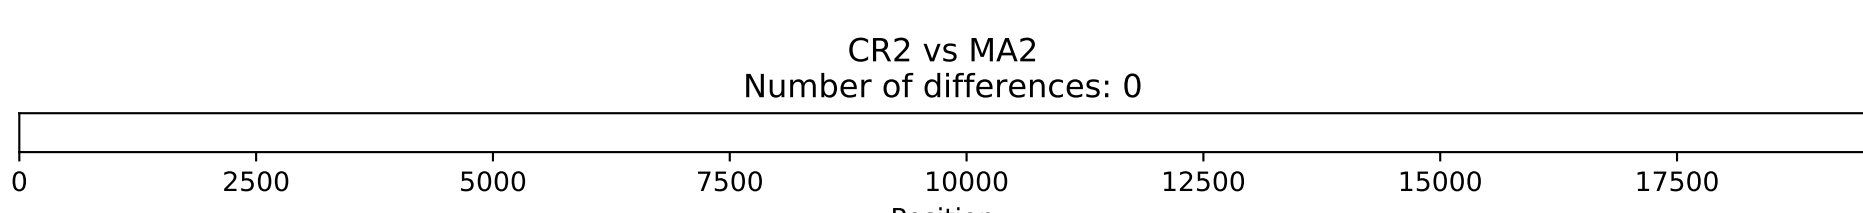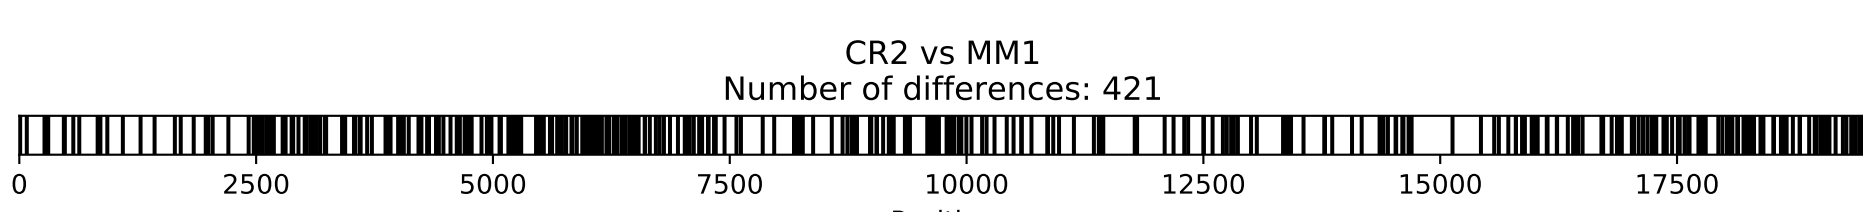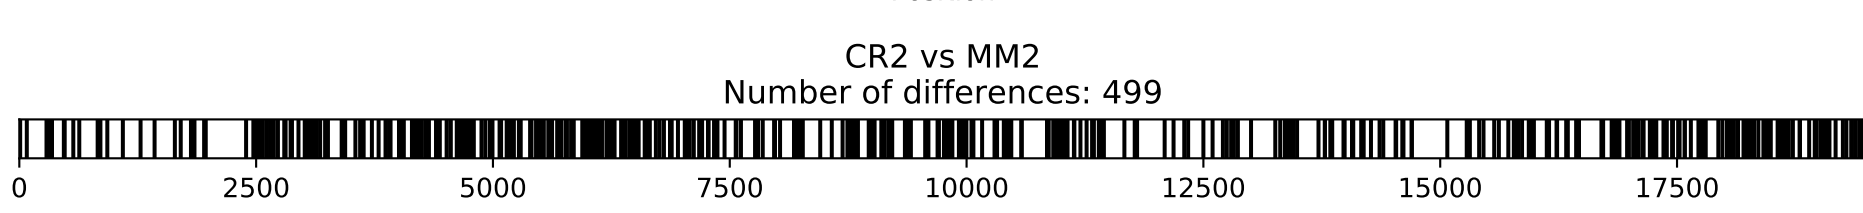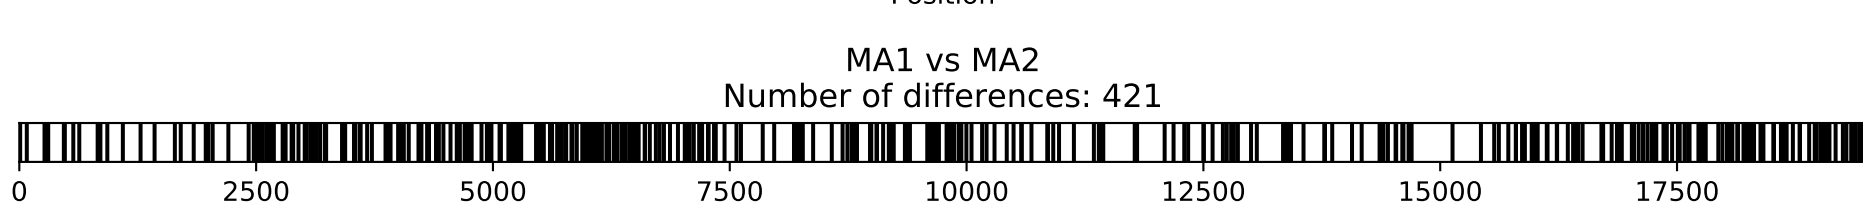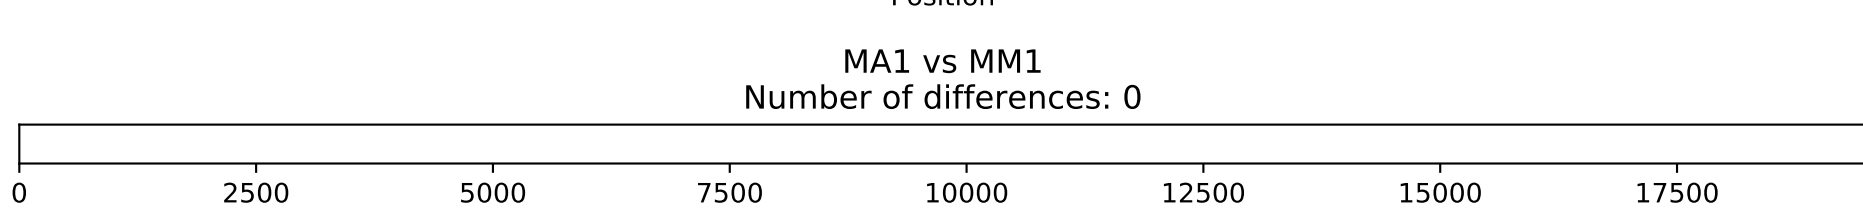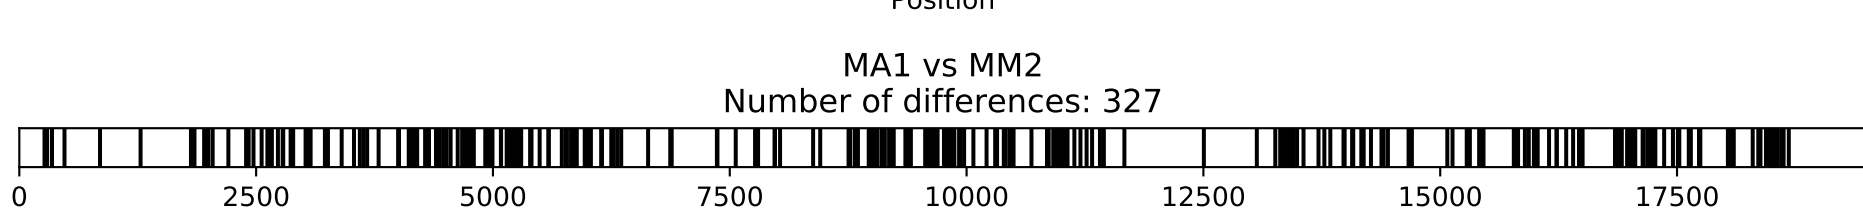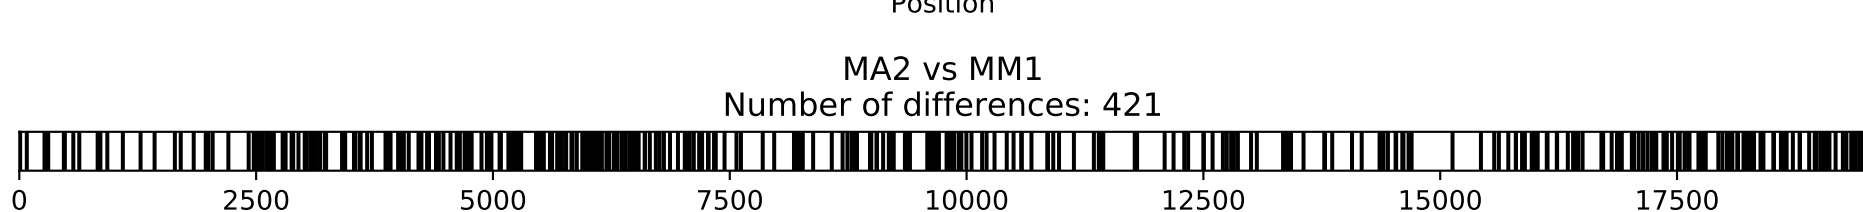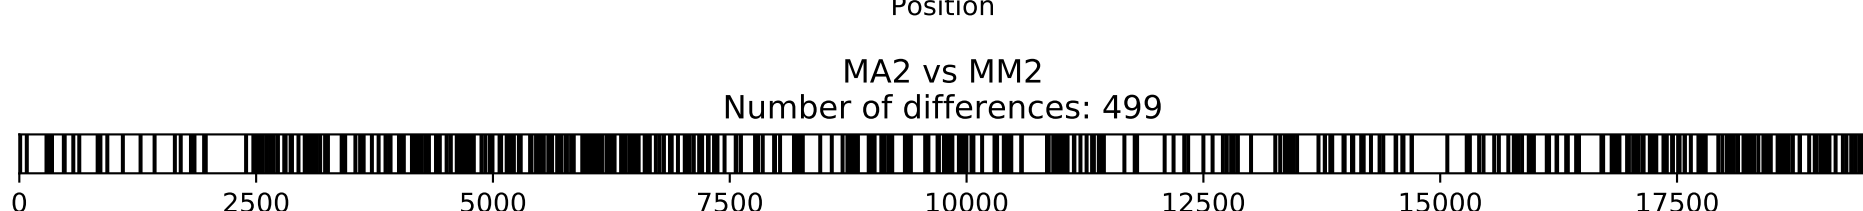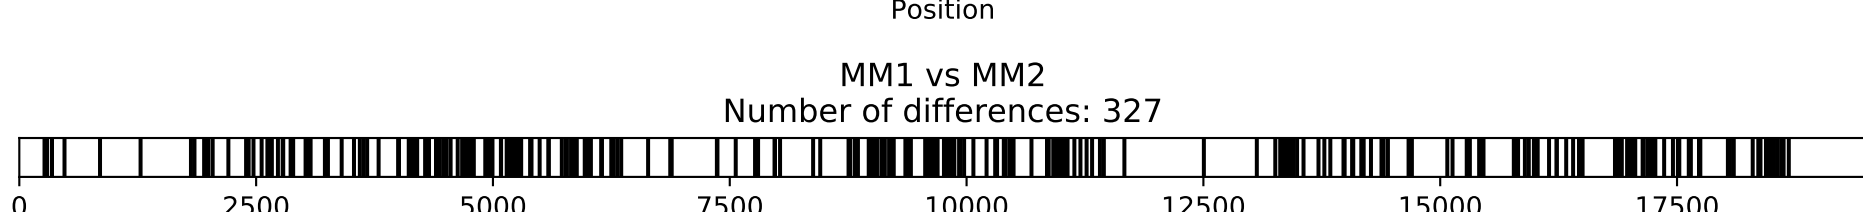

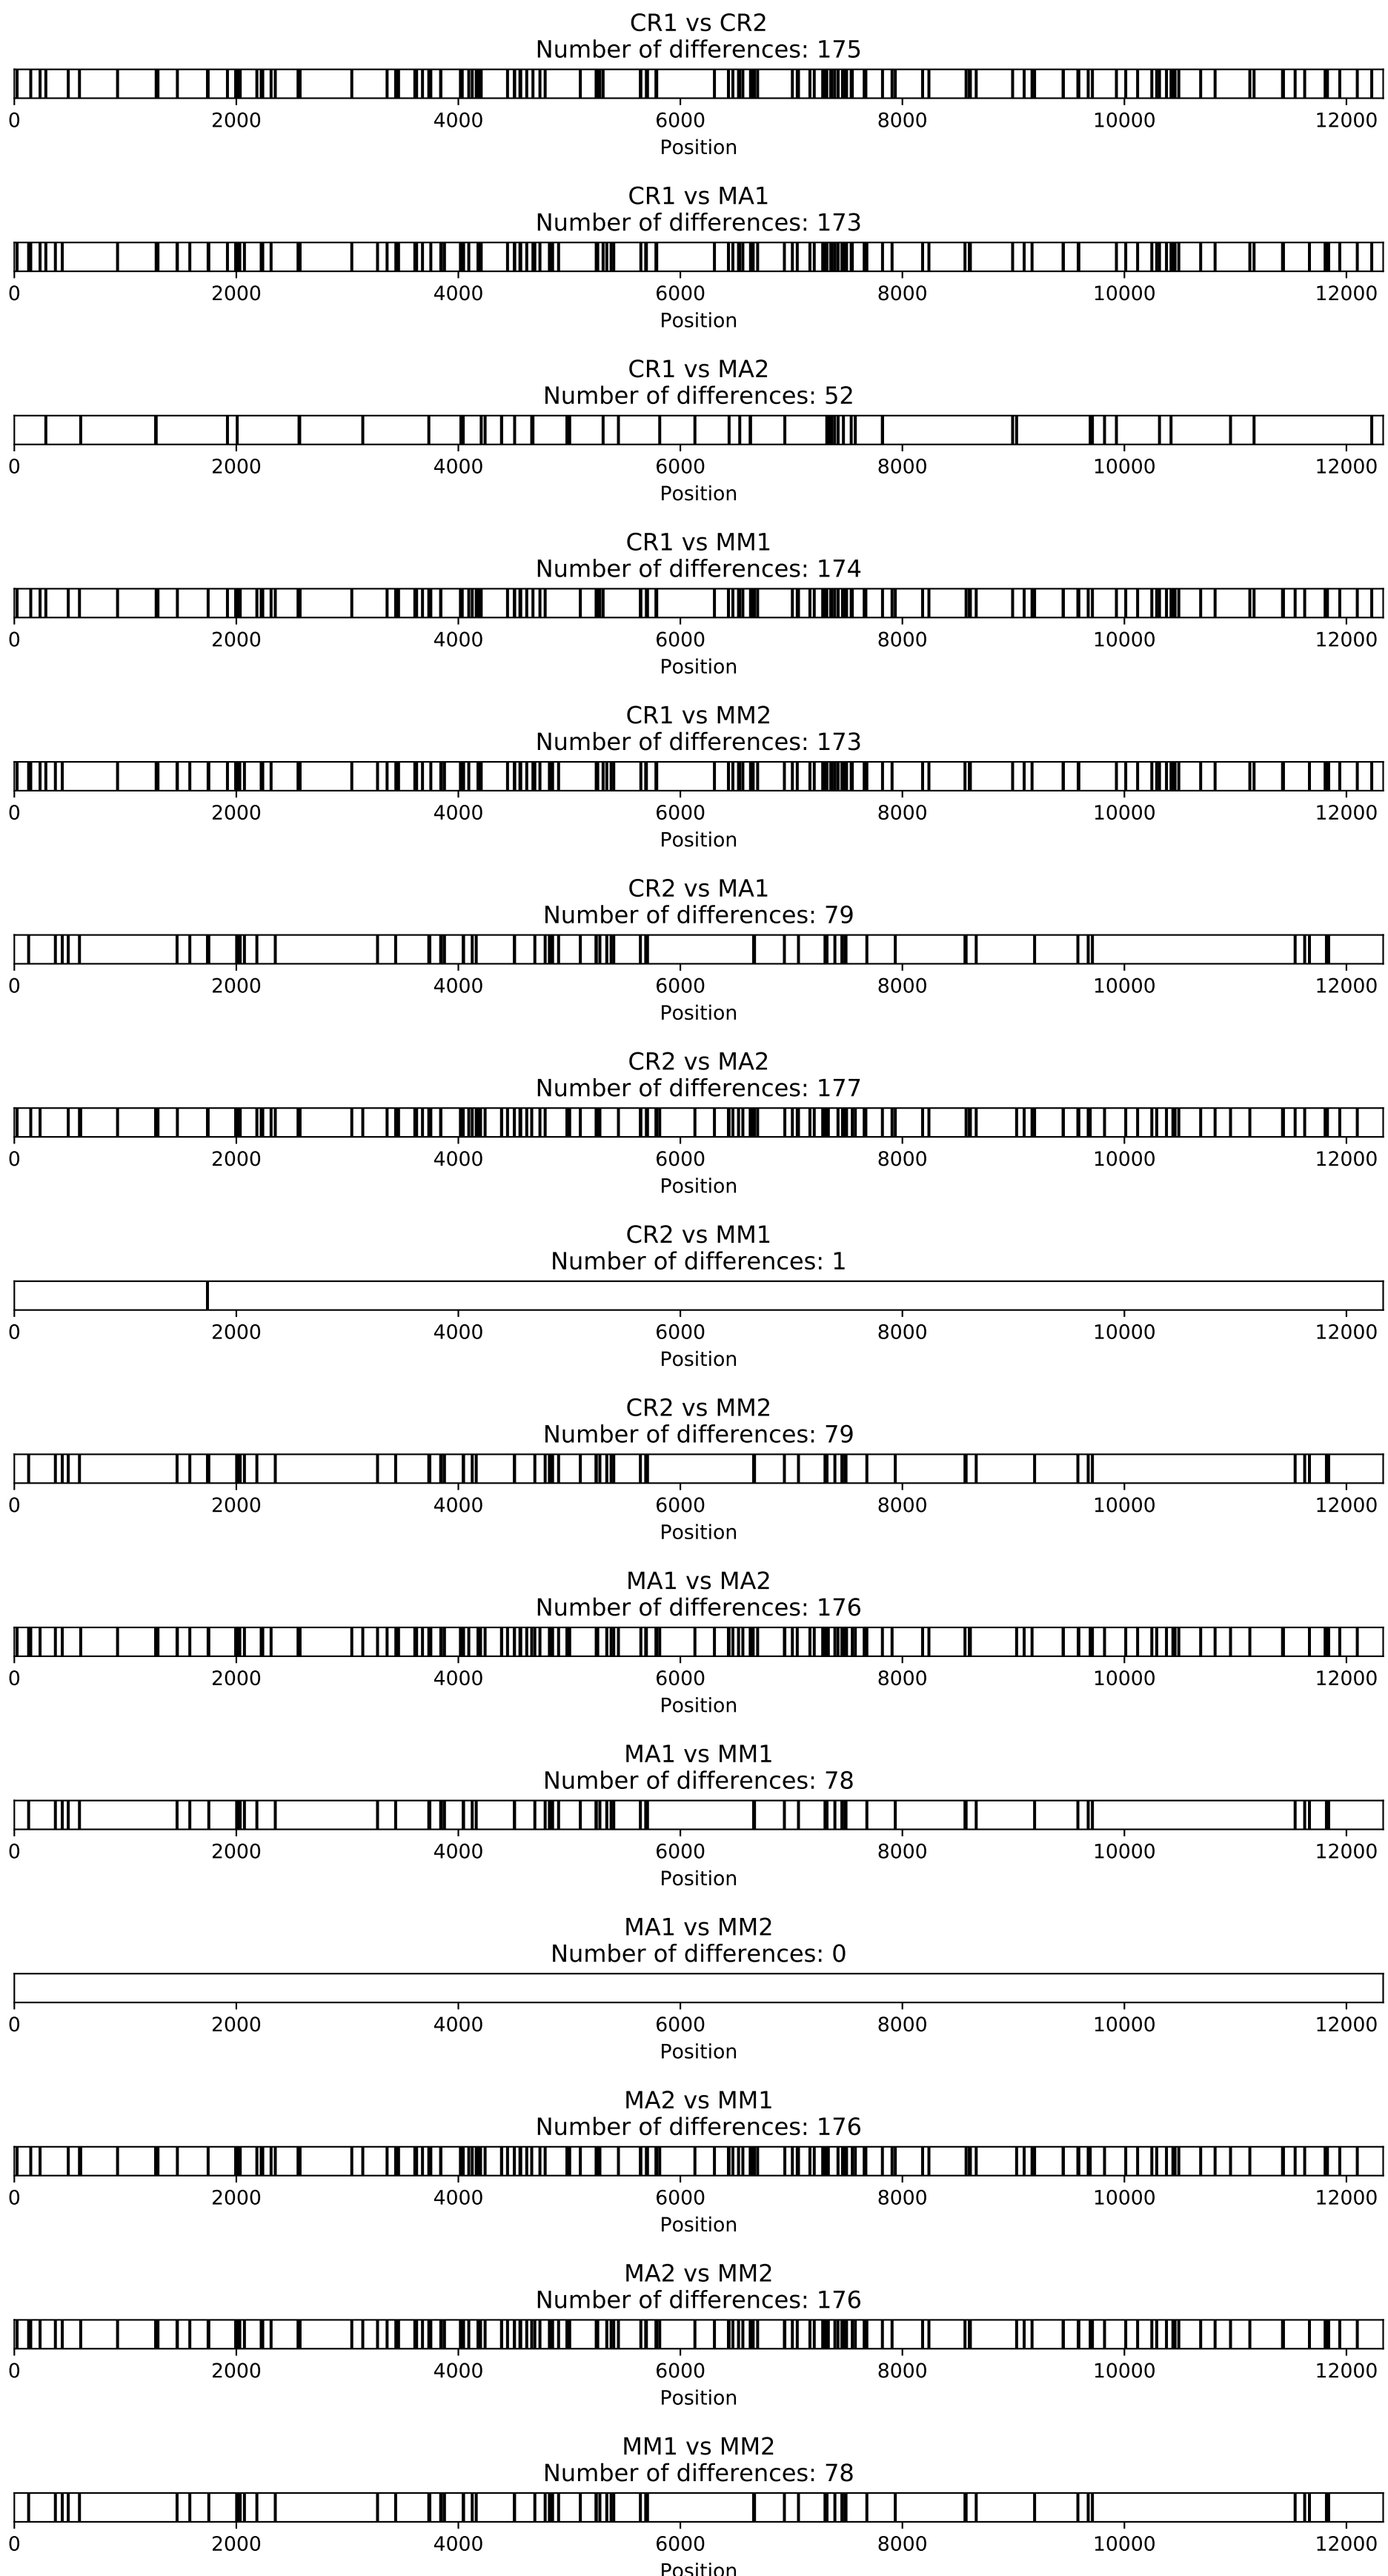

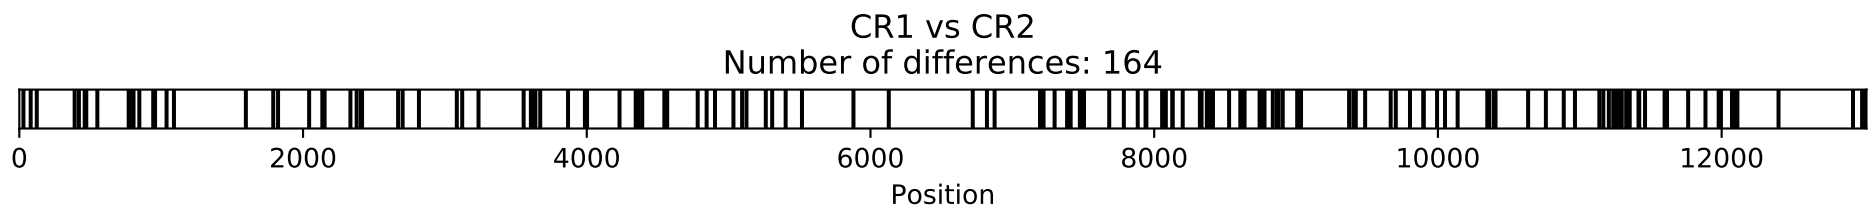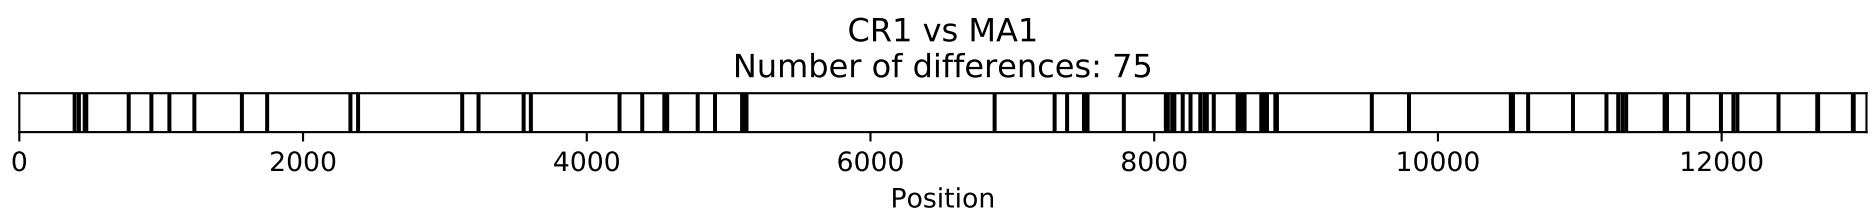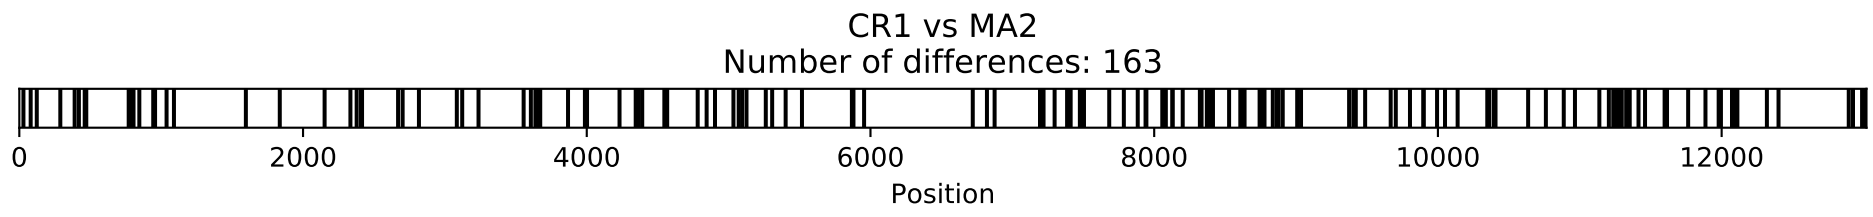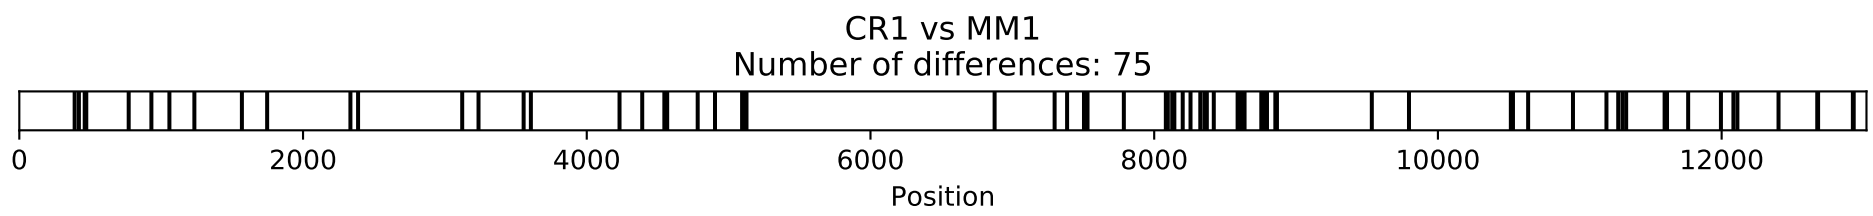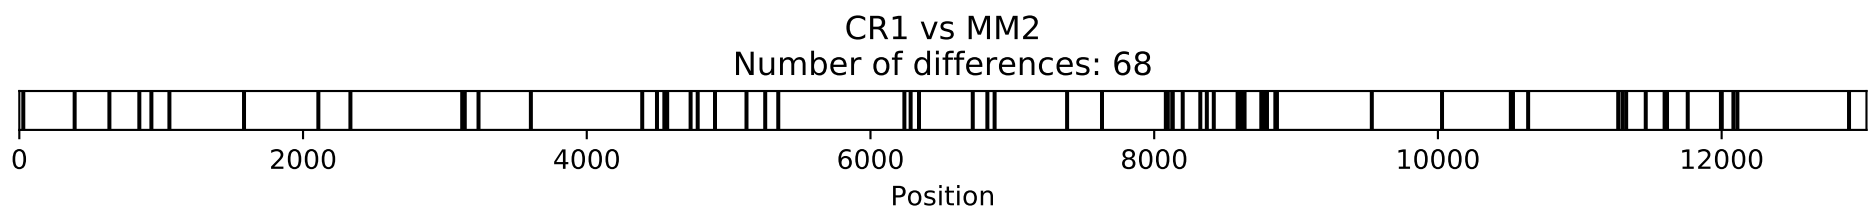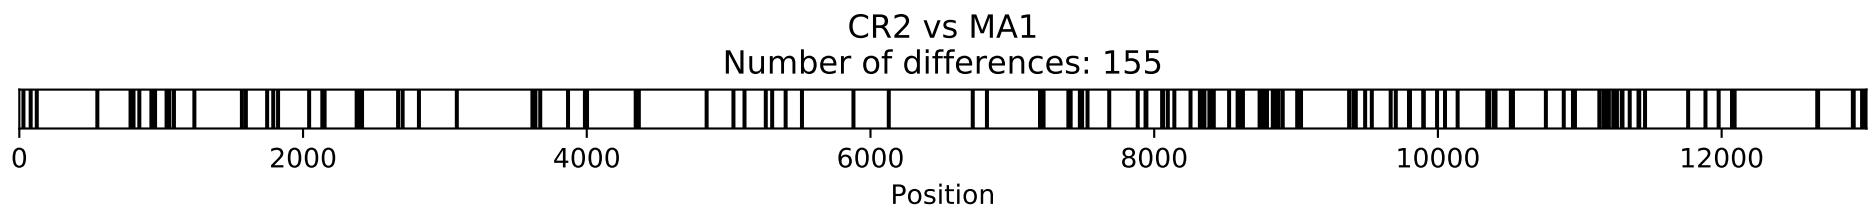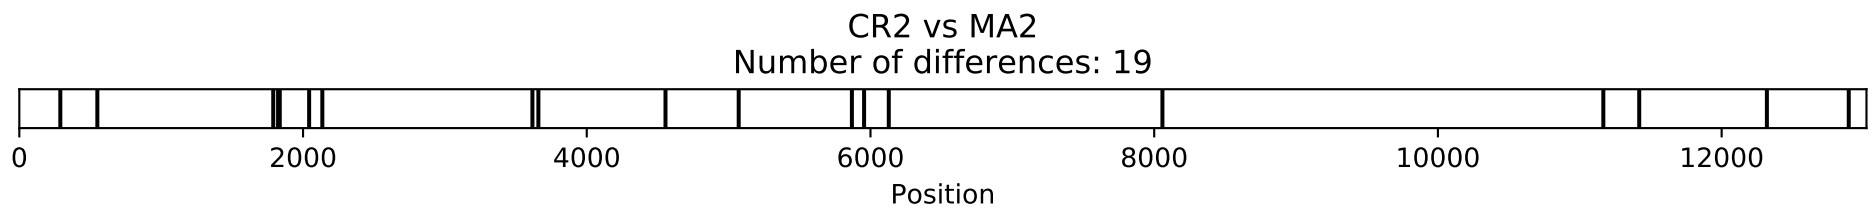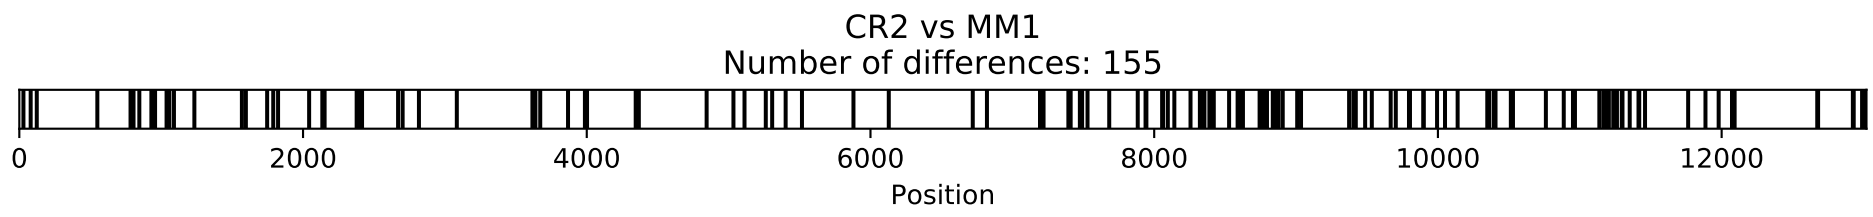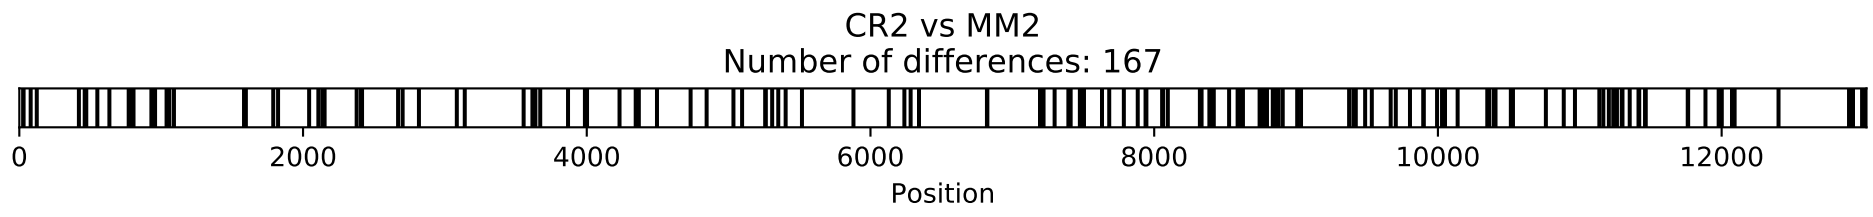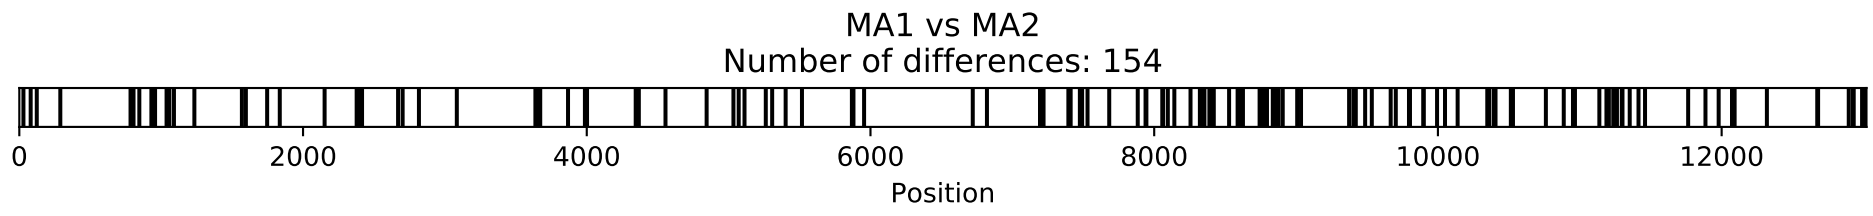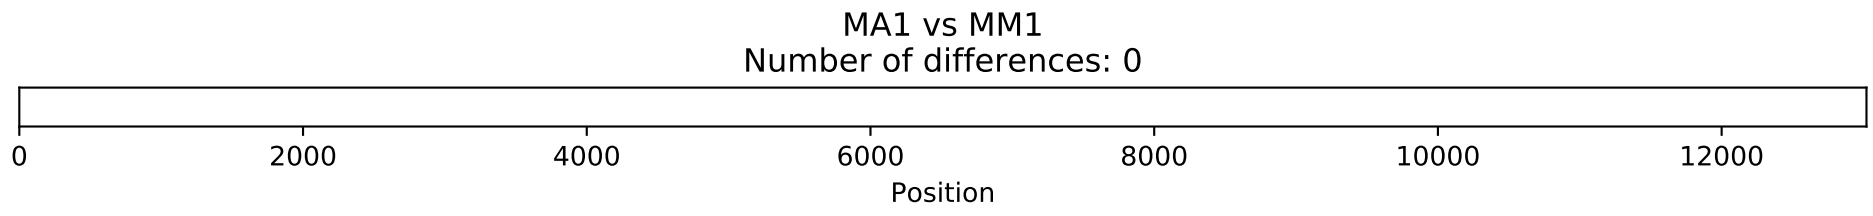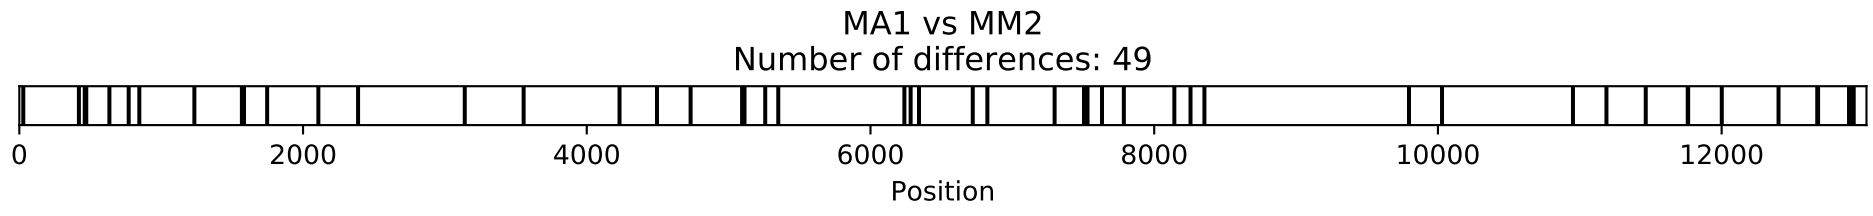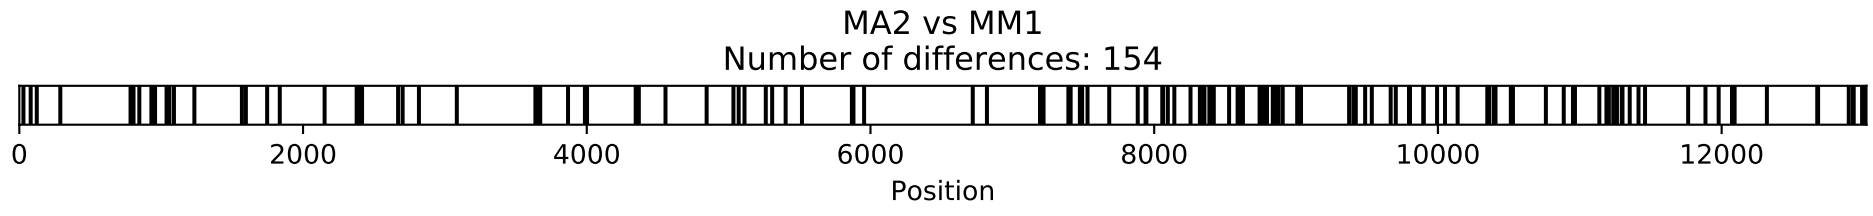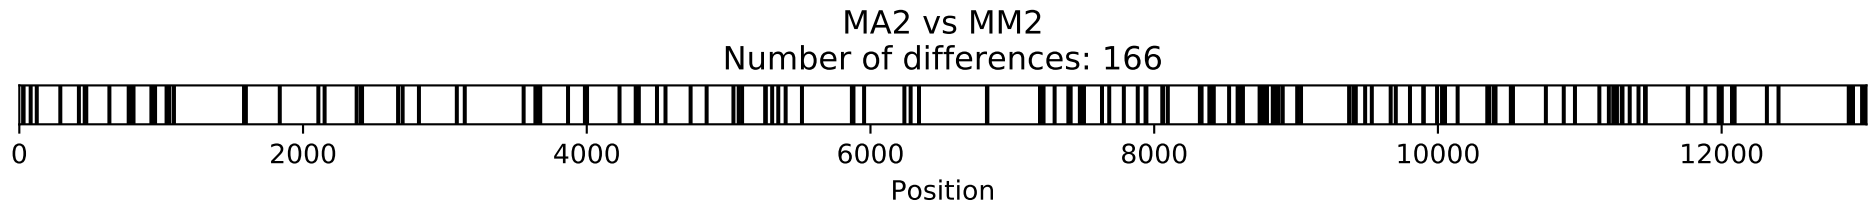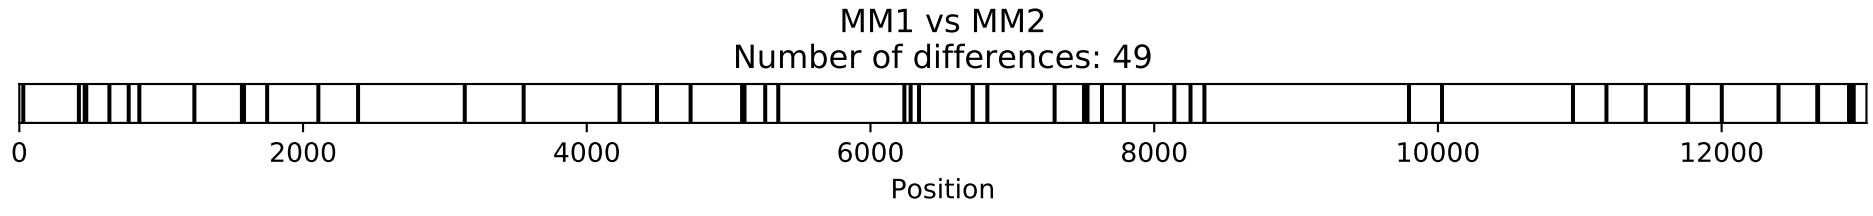

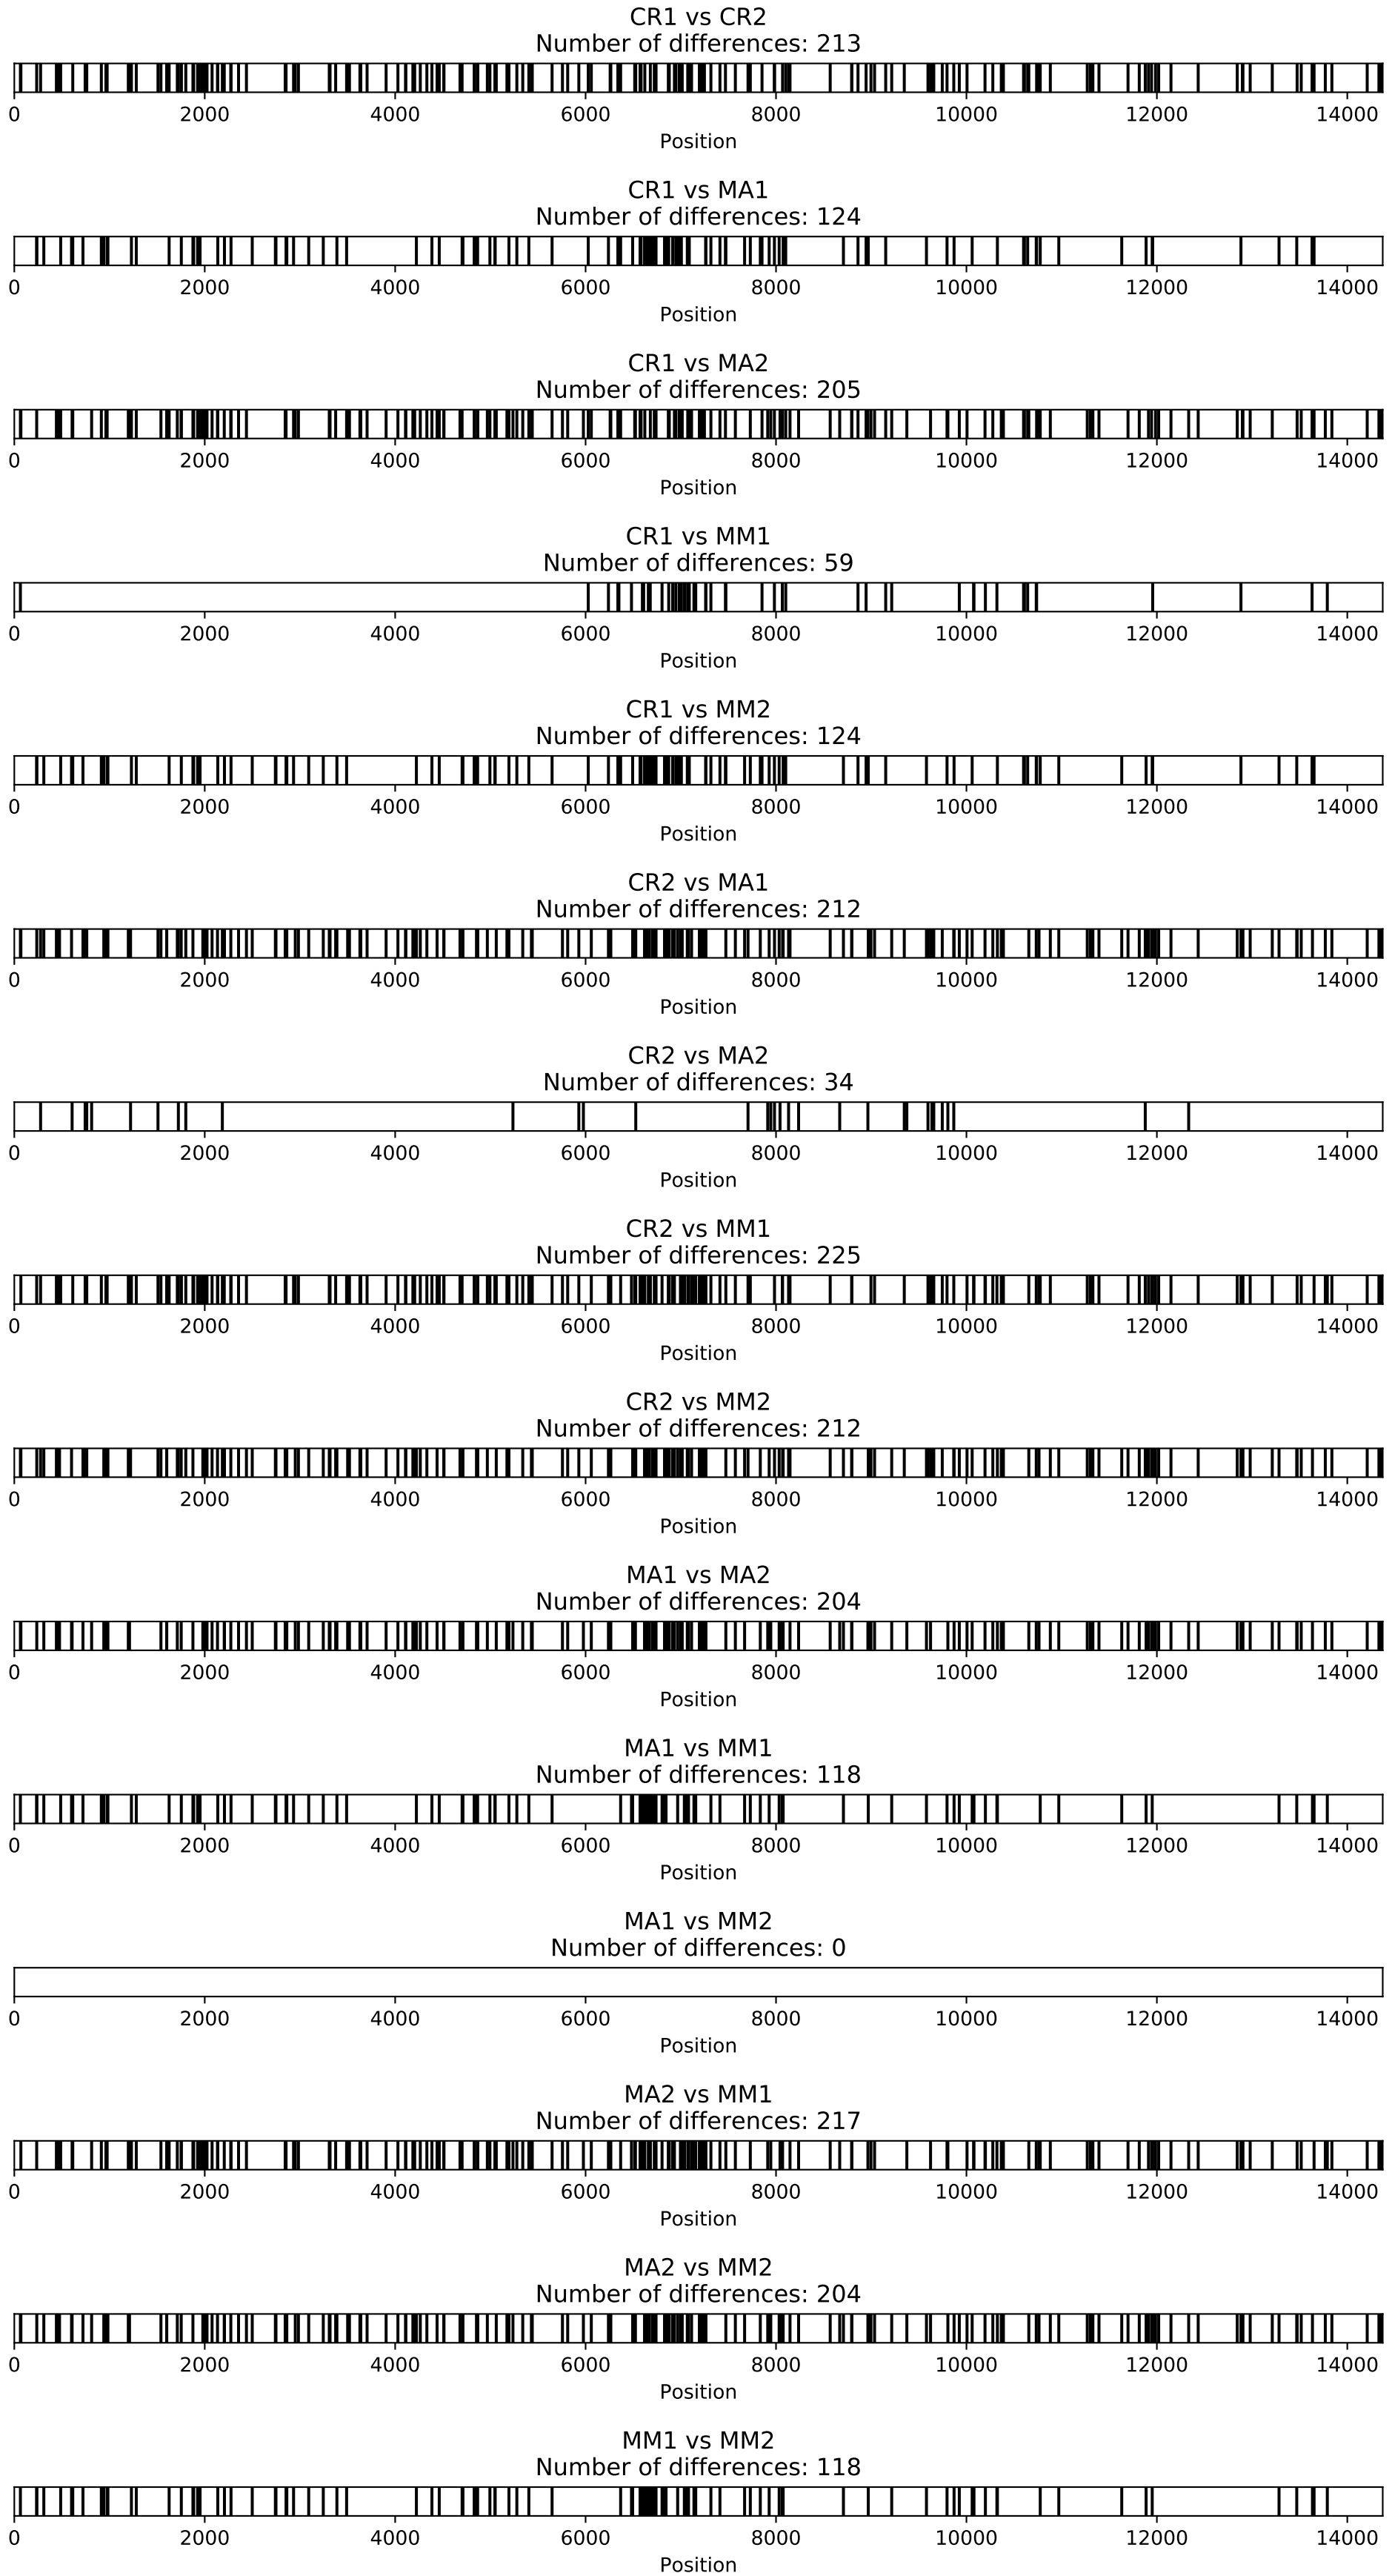

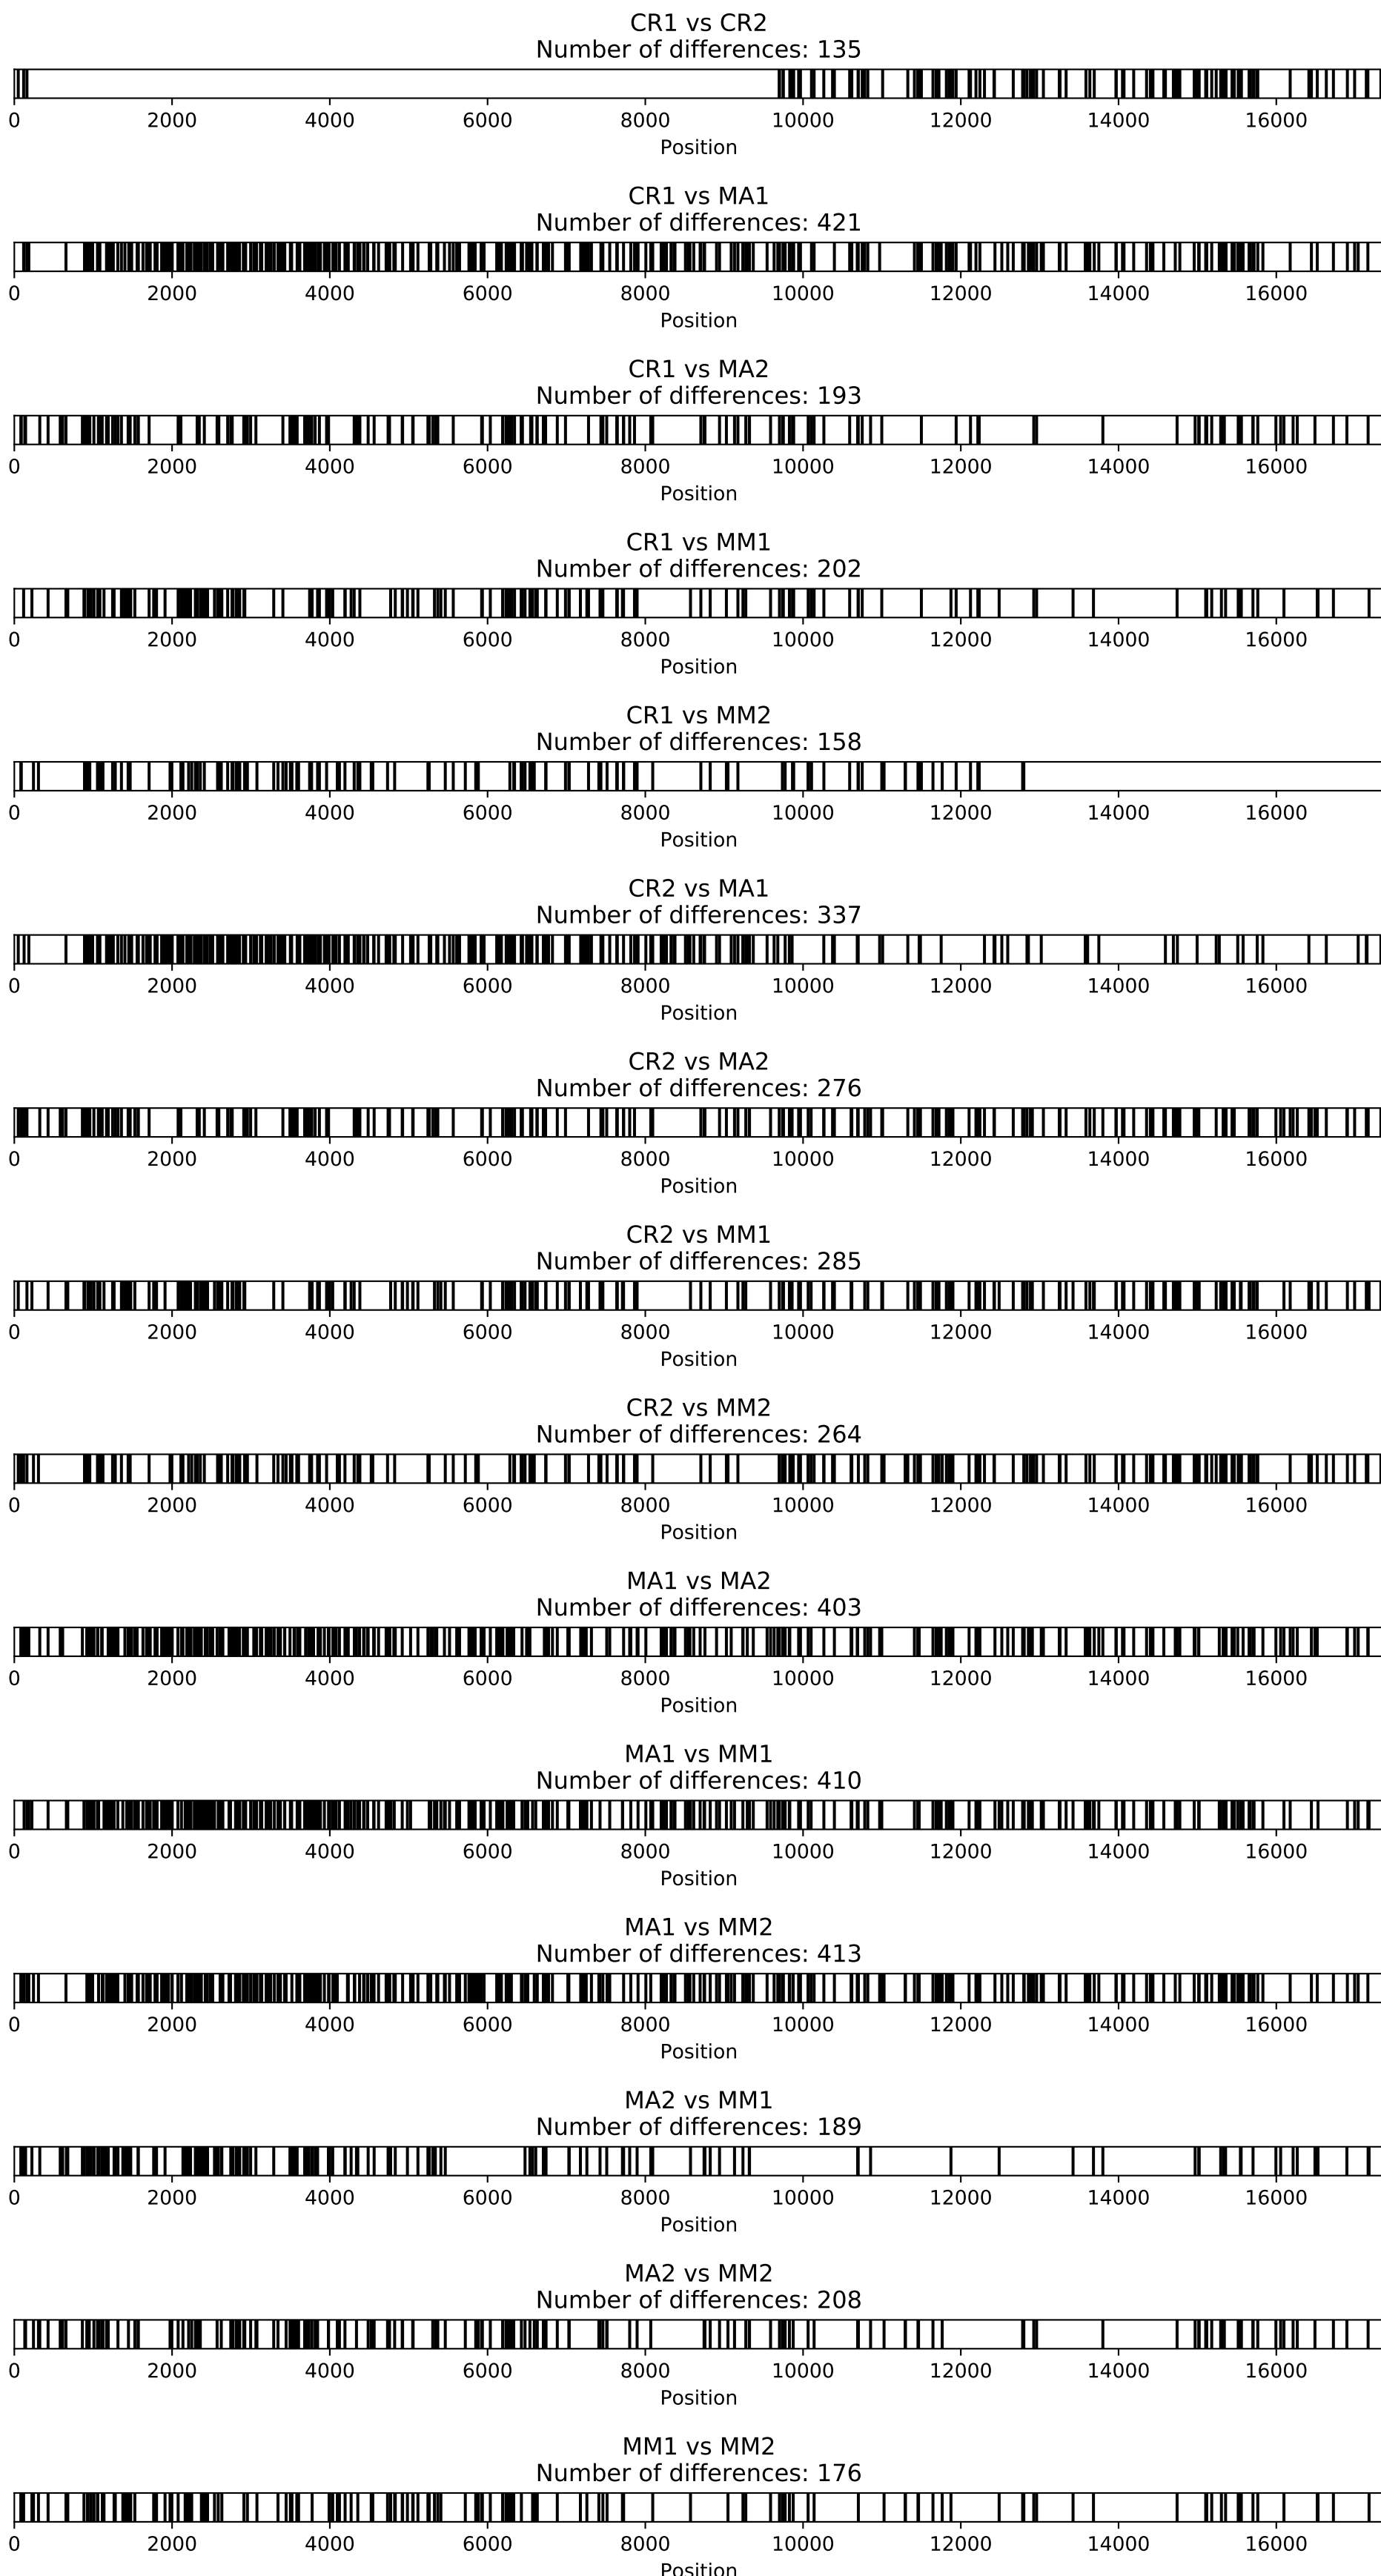

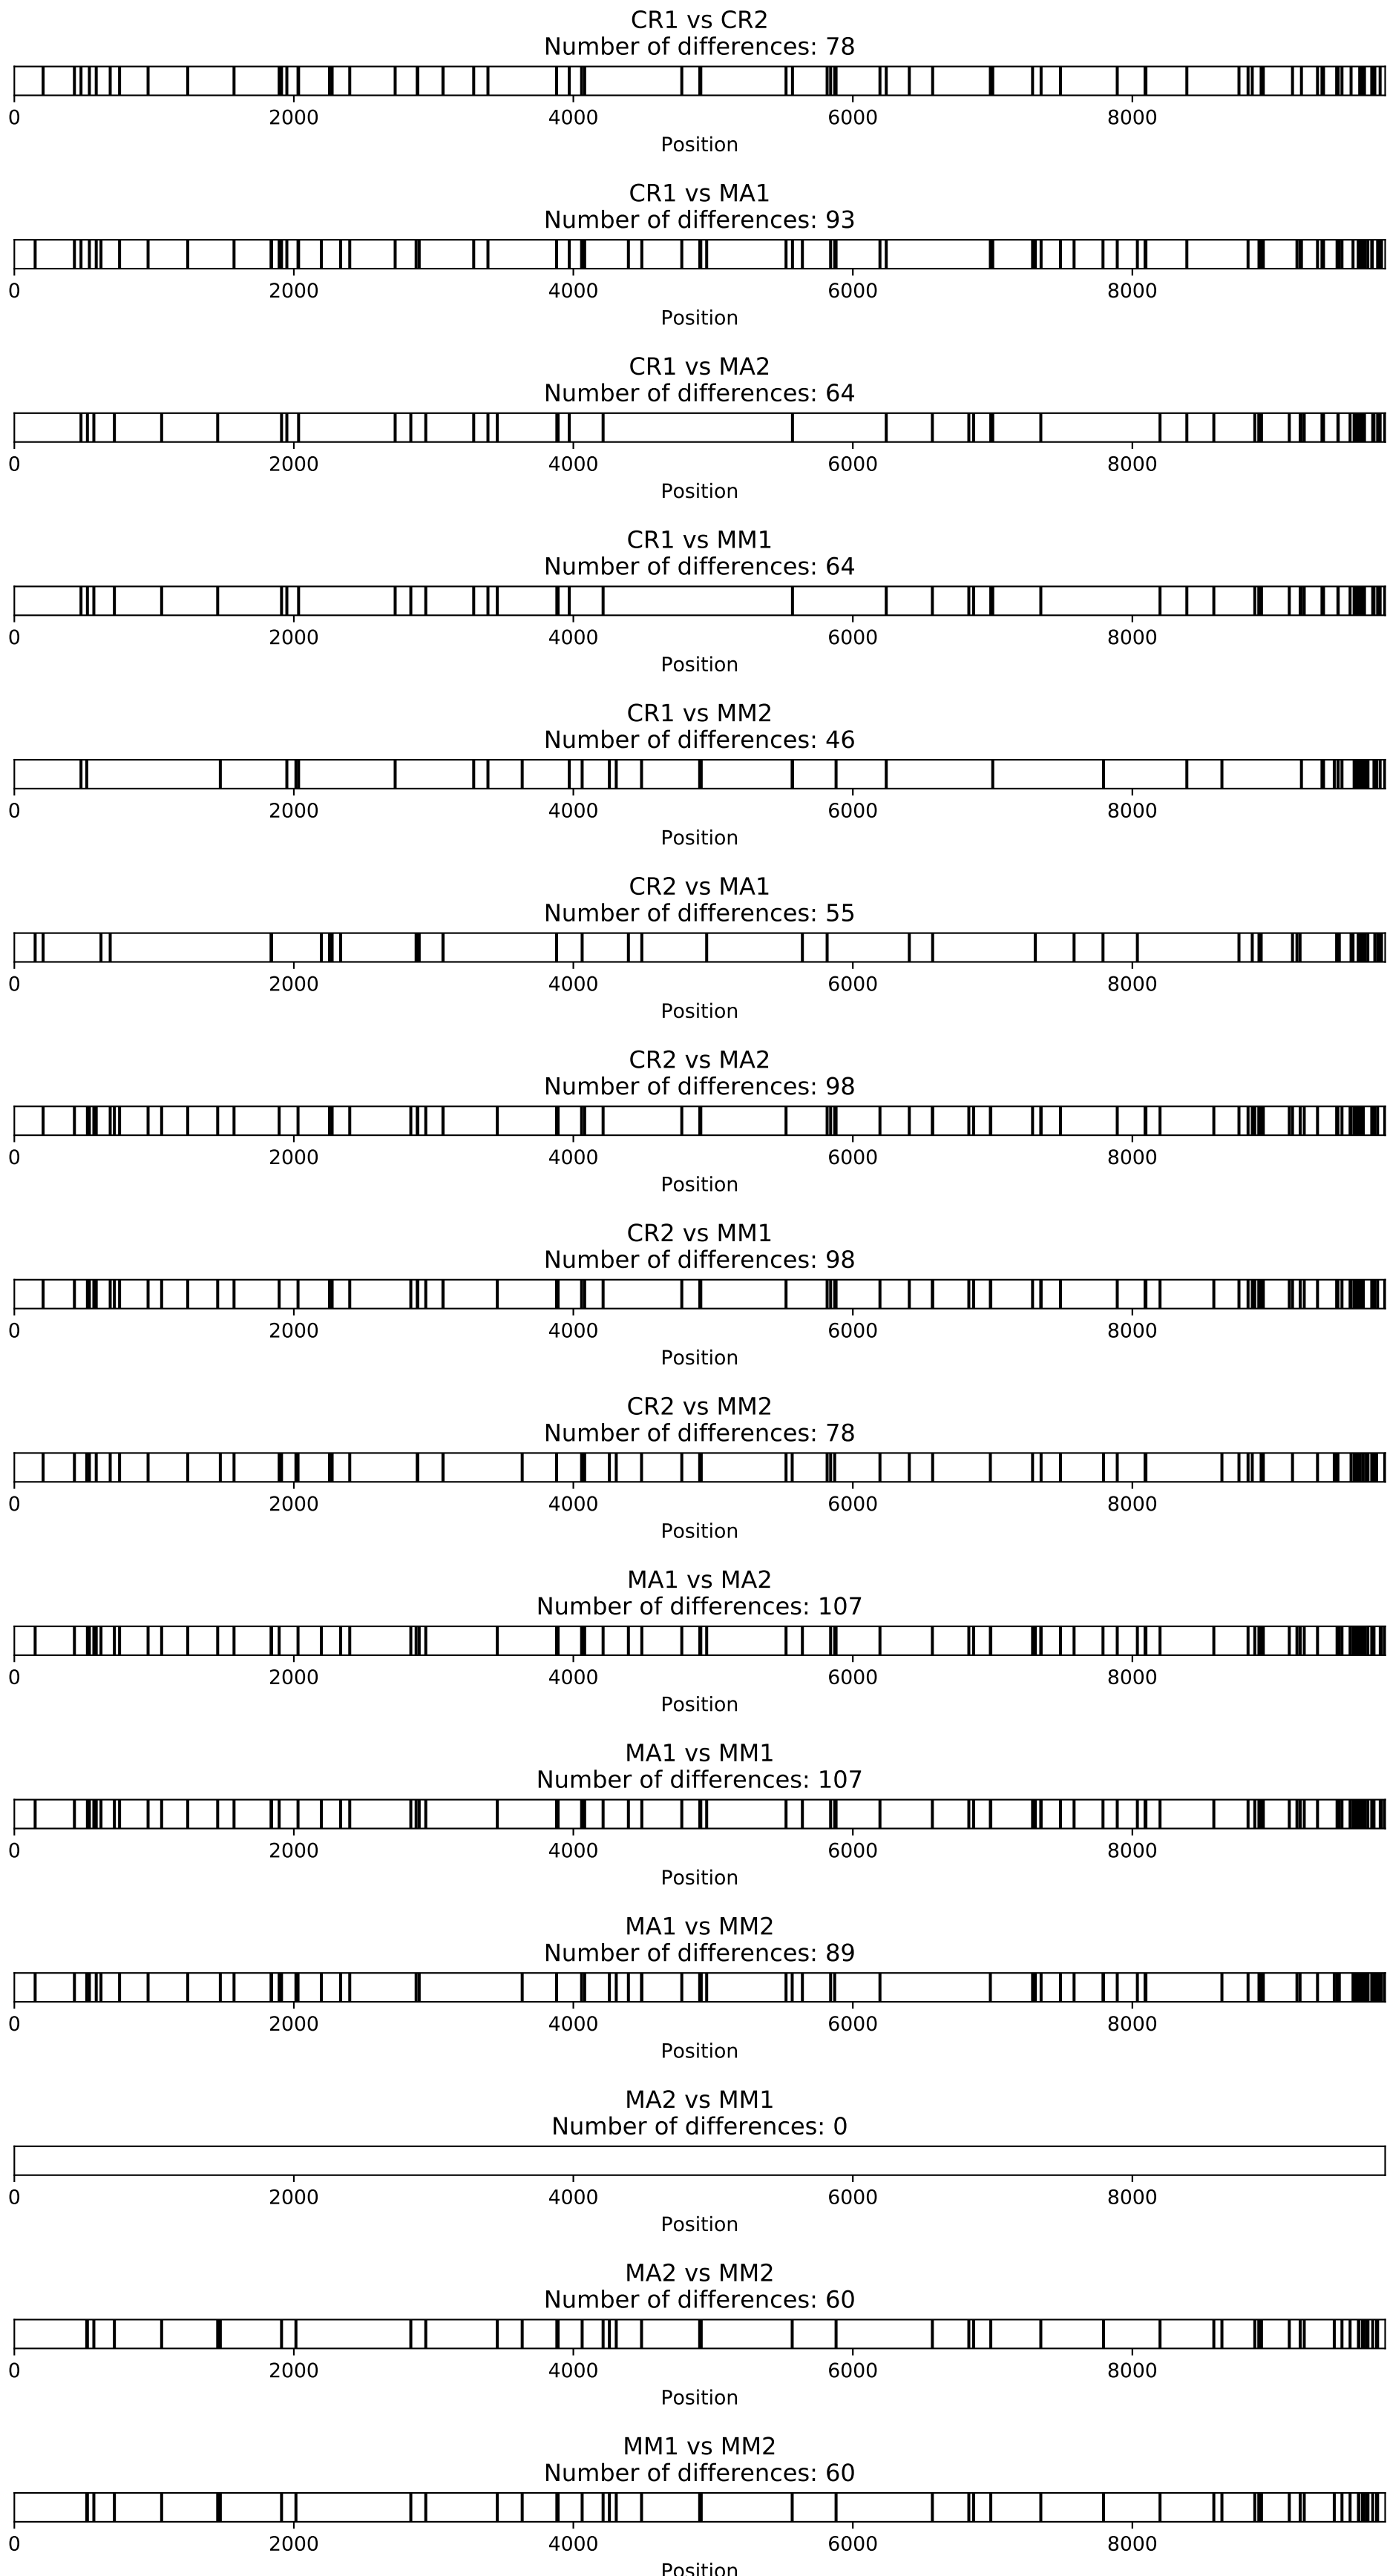

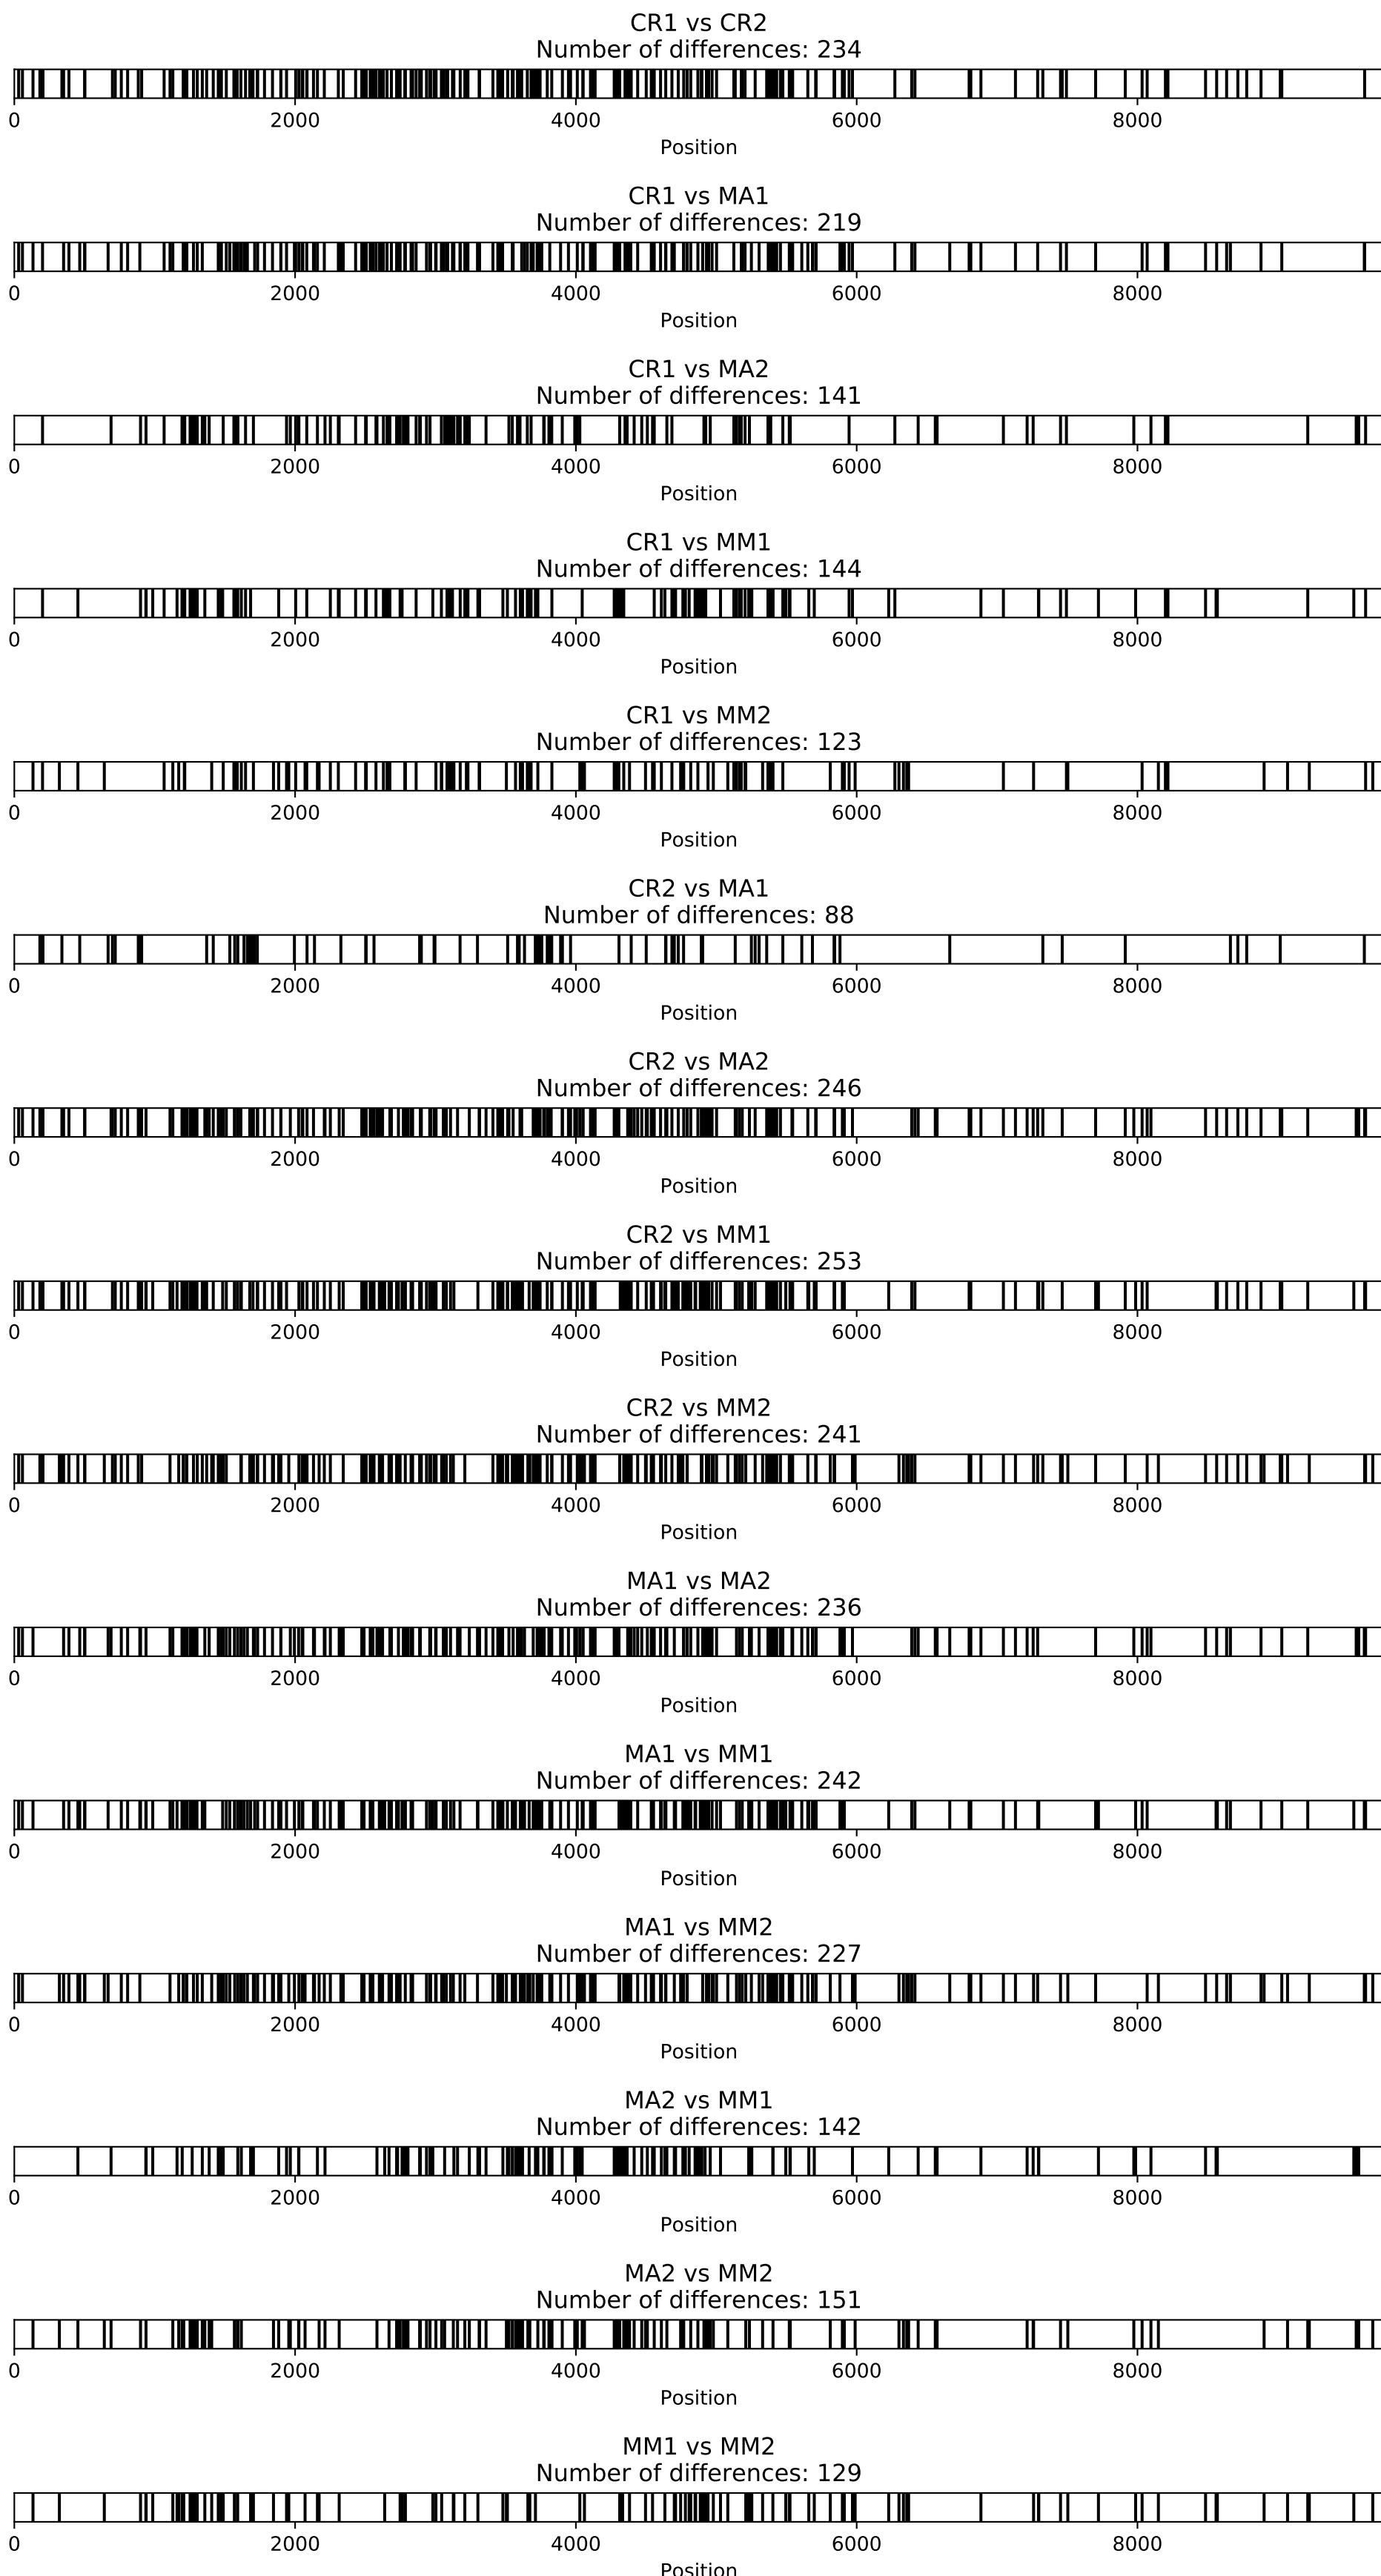

# Region: 529

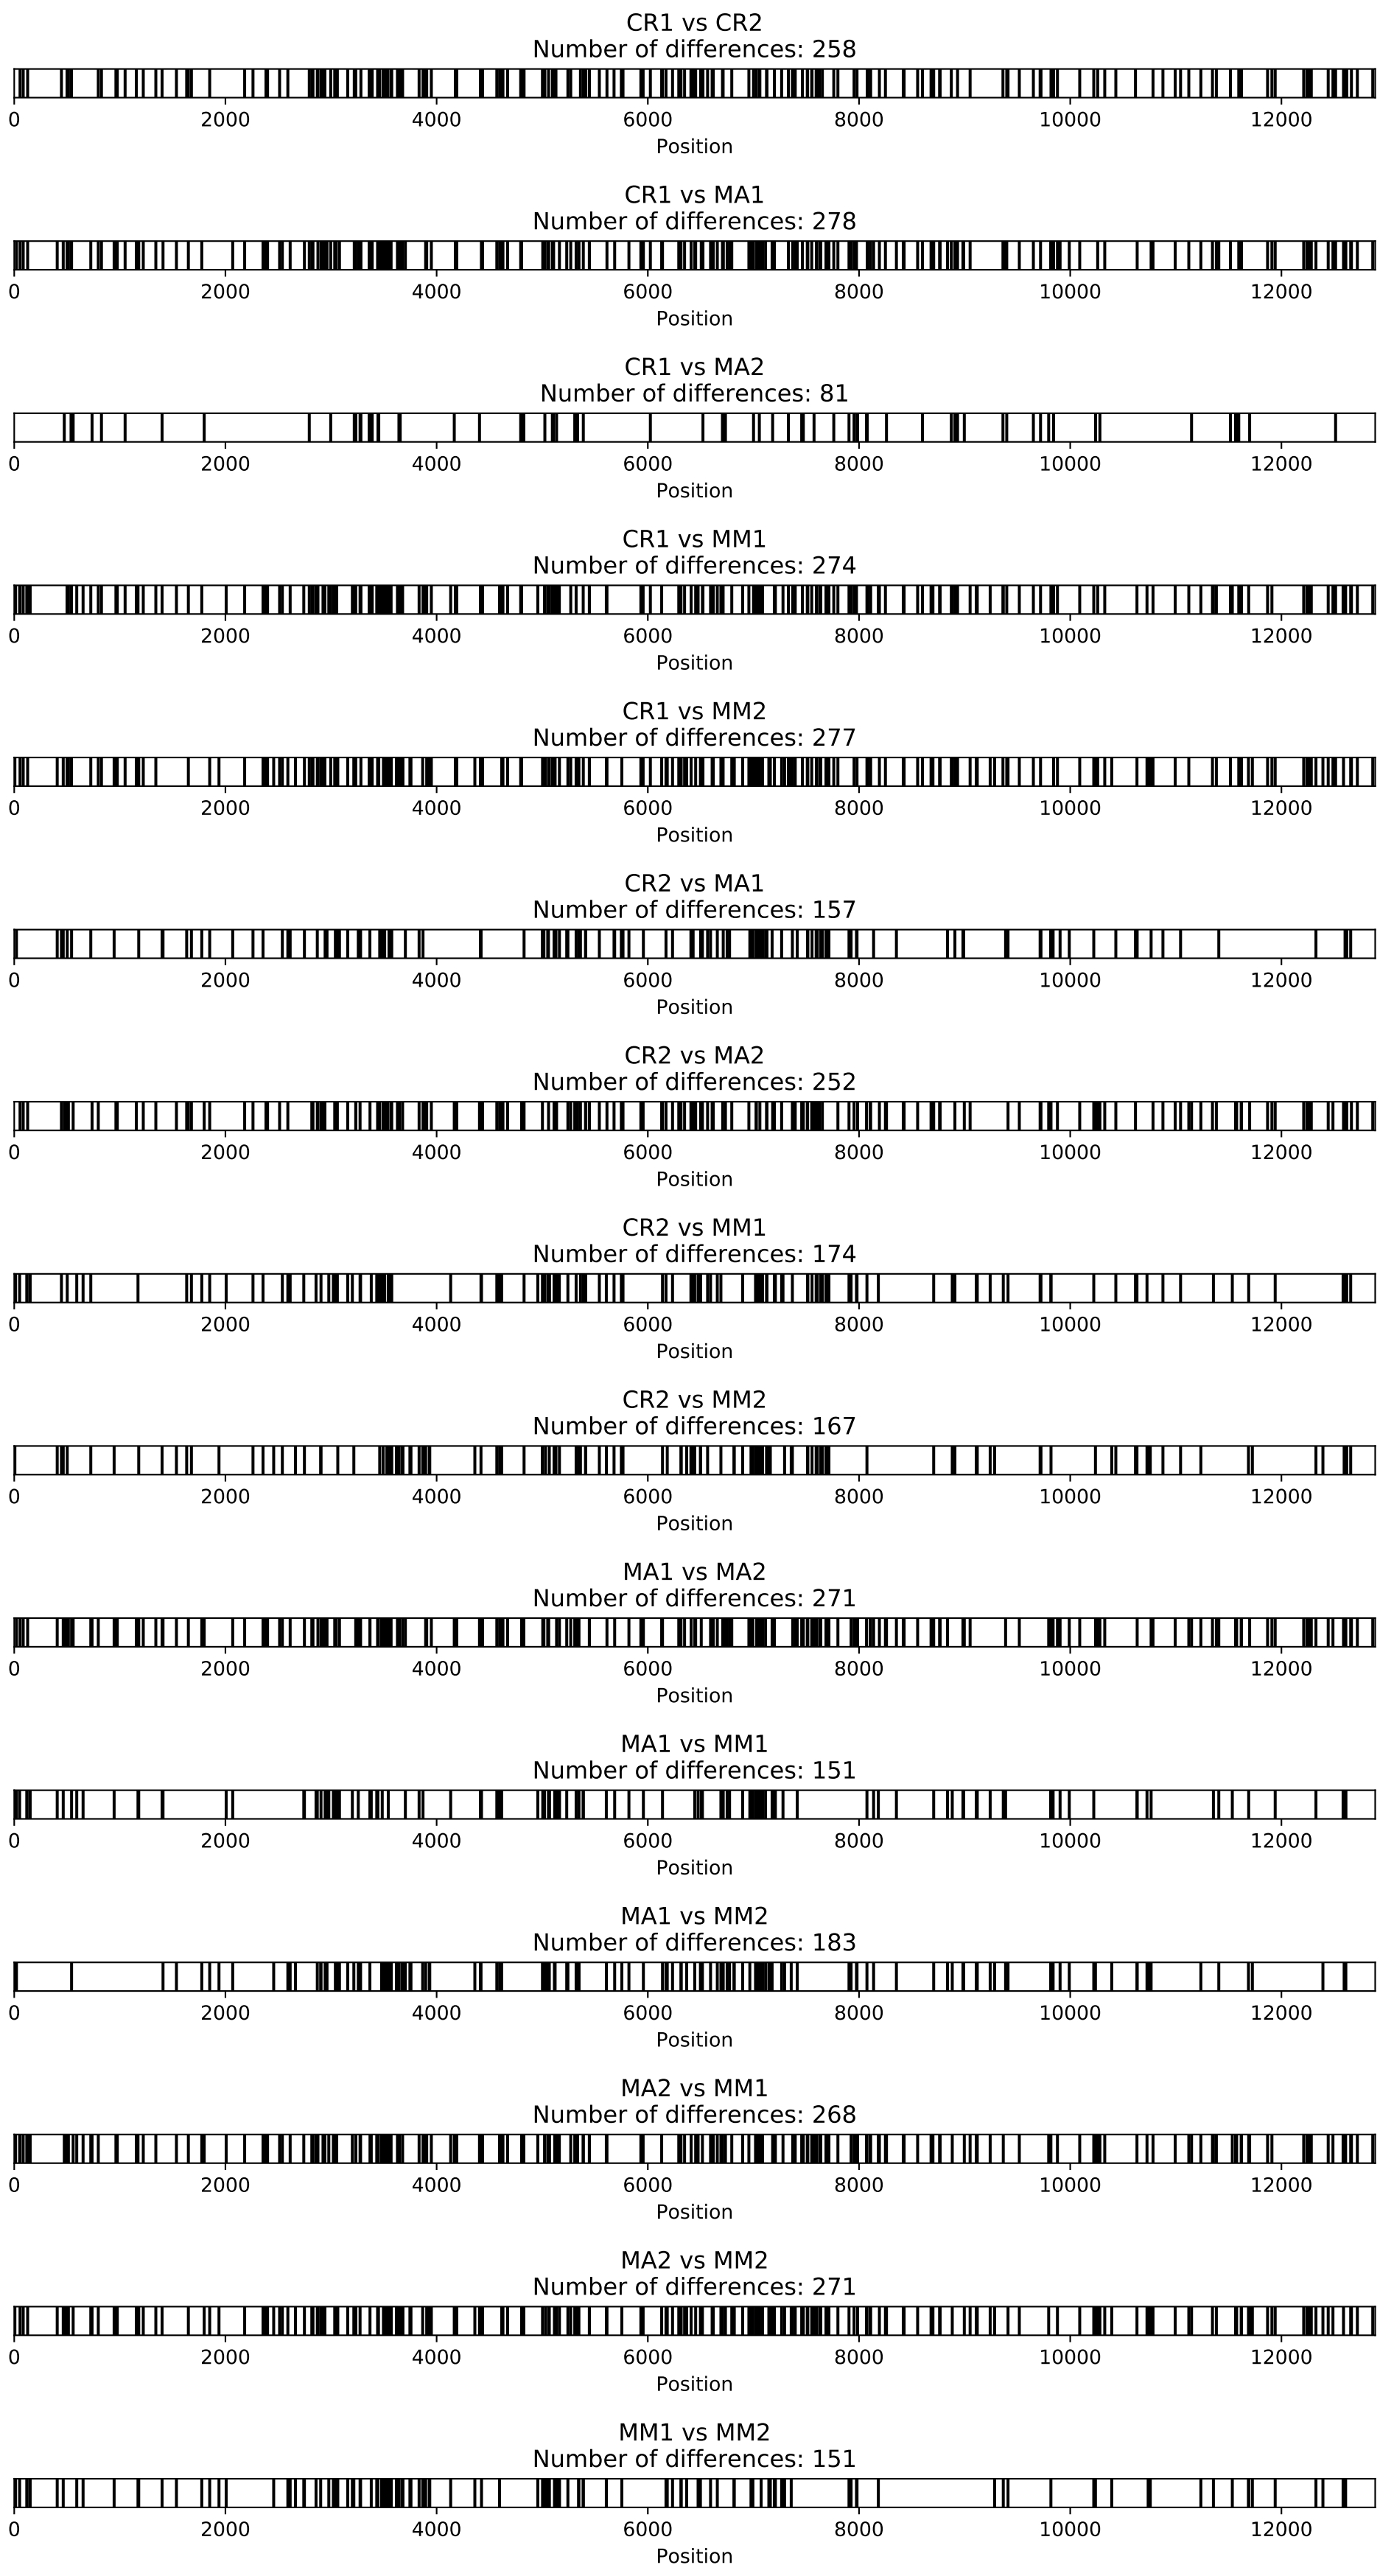



# Region: 530

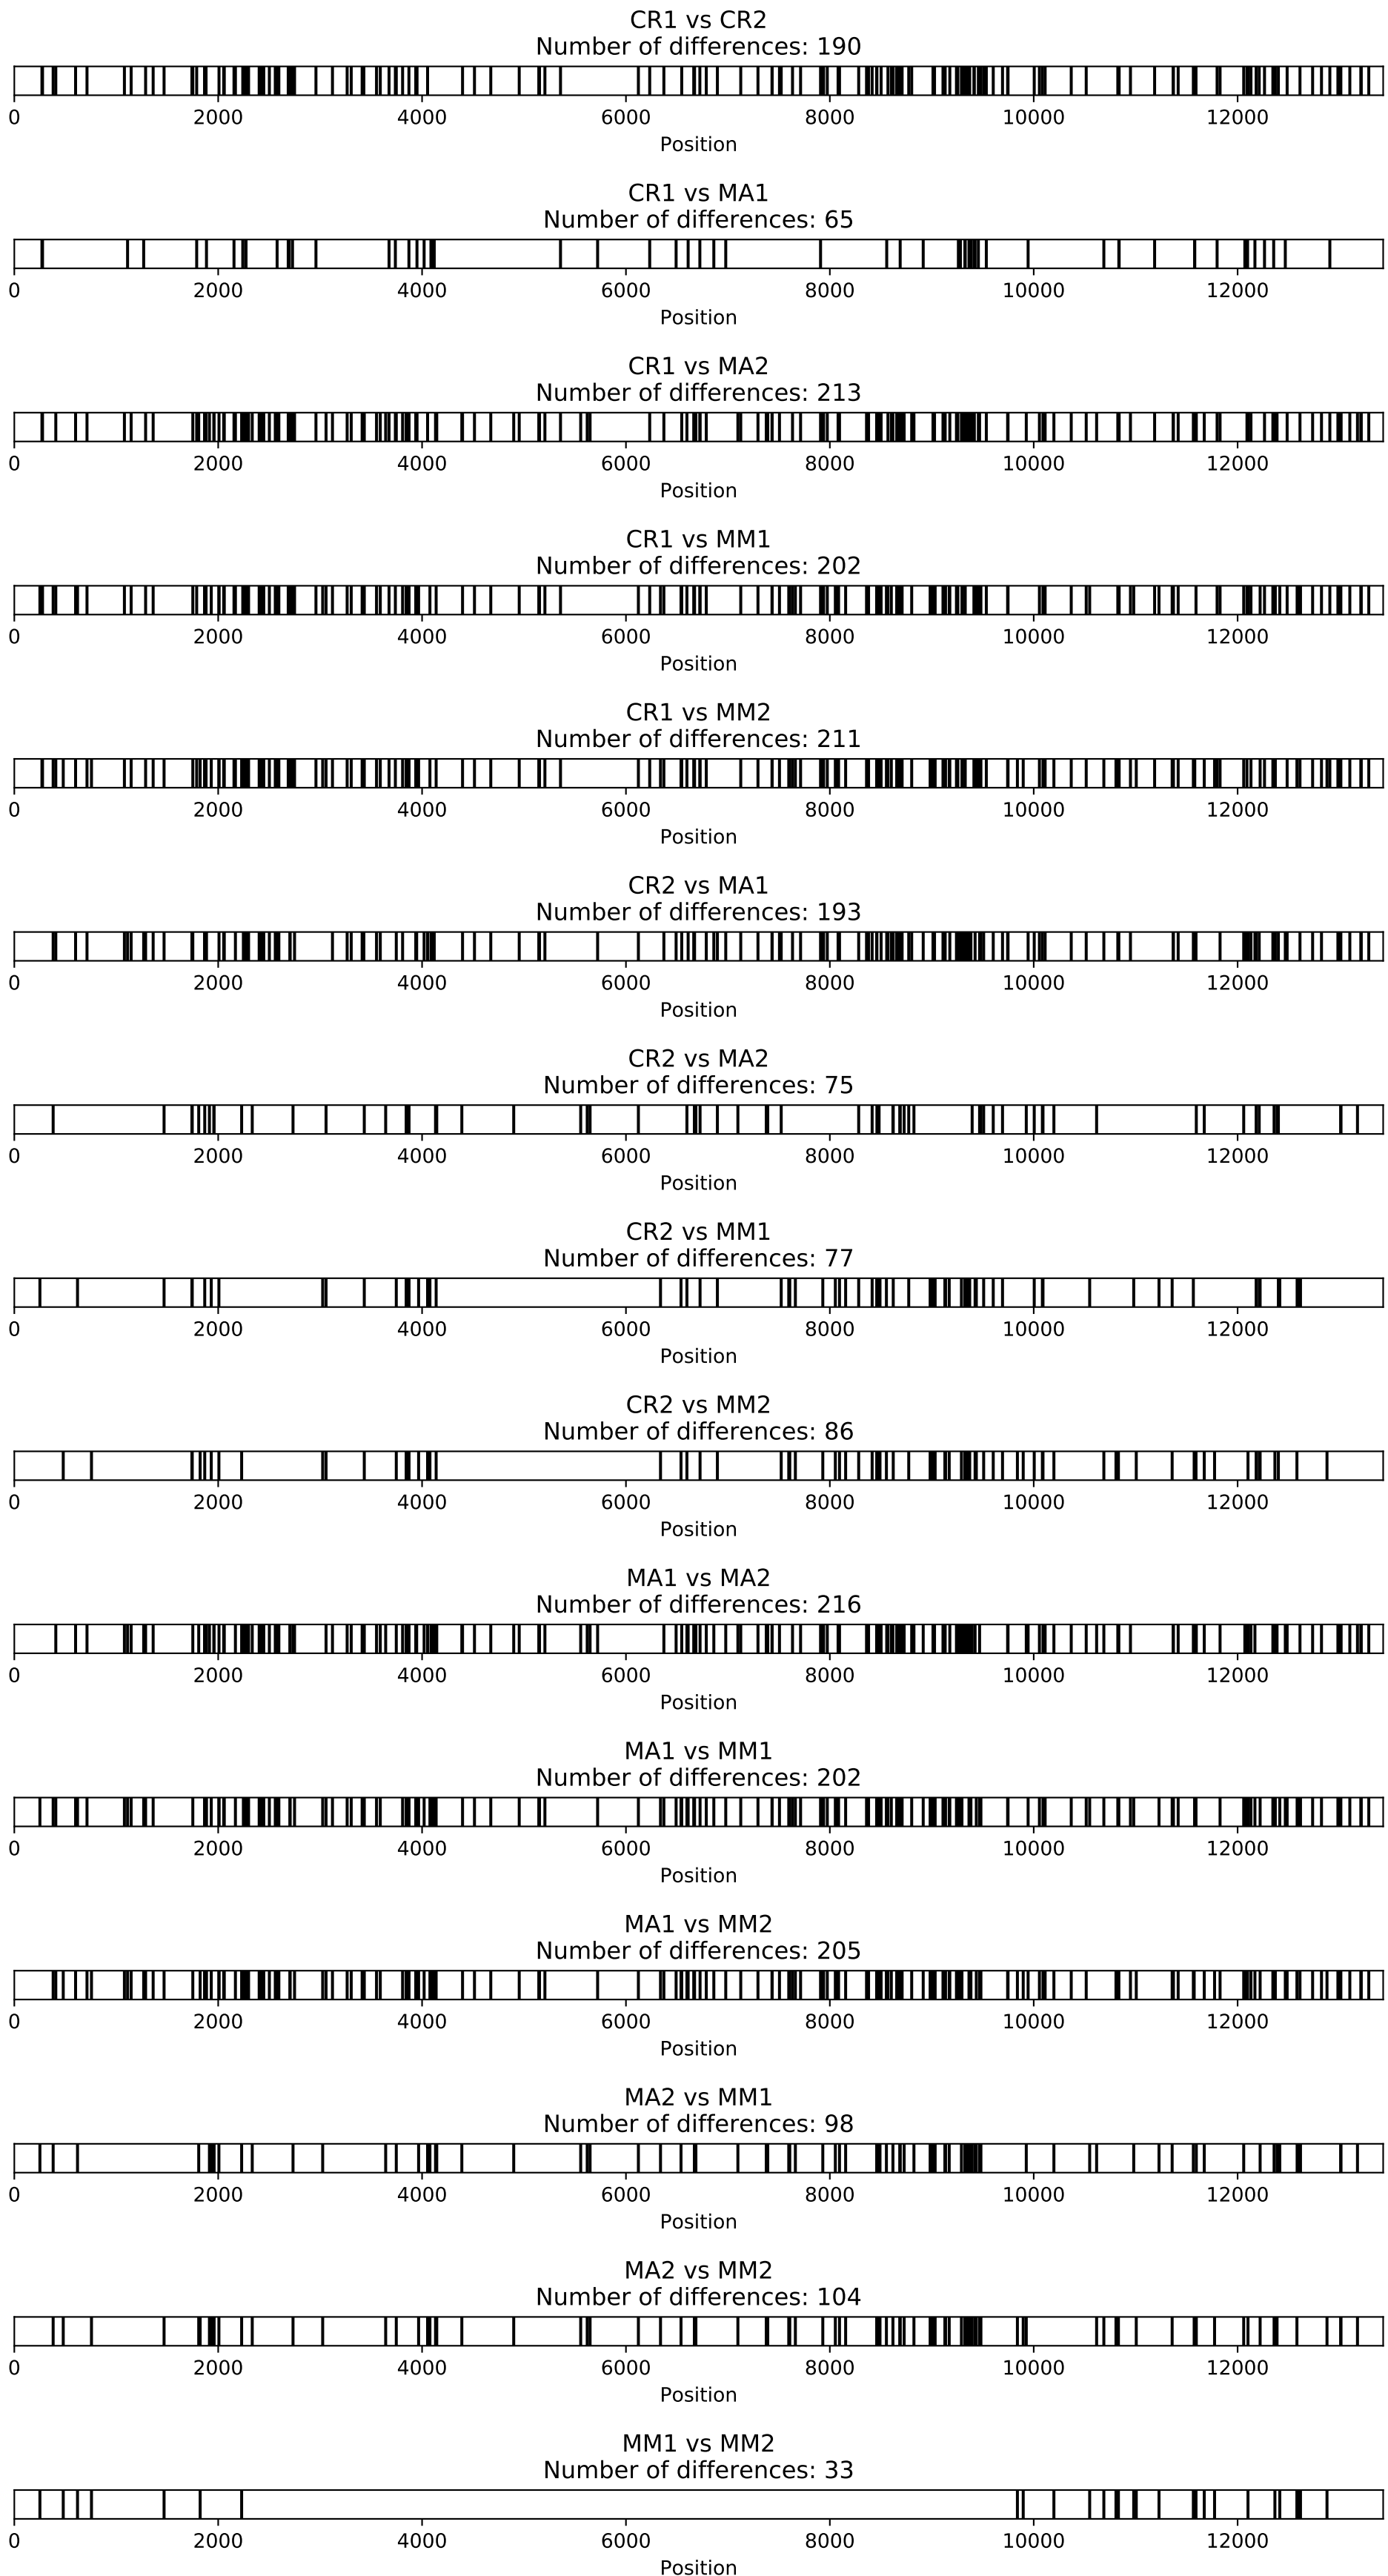

Supplement: Supplementary file [file media-1.pdf]
