# Supplementary material for: Genomic Signature of Sexual Reproduction in the Bdelloid Rotifer Macrotrachella quadricornifera
Source: bioRxiv or medRxiv preprint supplement (doi:10.1101/2020.08.06.239590), 2021-11-08
Supplement: Supplementary file [file media-3.pdf]

Table S7: Difference Matrices.

## Matrices MA-CR

Laine et al.  
Supporting Information

|     |    |        |        |        |       |
|-----|----|--------|--------|--------|-------|
|     | 15 |        |        |        | 11778 |
|     |    | CR1    | CR2    | MA1    | MA2   |
| CR1 |    | 0      | 214    | 208    | 77    |
| CR2 |    | 0.0182 | 0      | 49     | 217   |
| MA1 |    | 0.0177 | 0.0042 | 0      | 214   |
| MA2 |    | 0.0065 | 0.0184 | 0.0182 | 0     |
|     | 18 |        |        |        | 19954 |
|     |    | CR1    | CR2    | MA1    | MA2   |
| CR1 |    | 0      | 263    | 275    | 96    |
| CR2 |    | 0.0132 | 0      | 168    | 302   |
| MA1 |    | 0.0138 | 0.0084 | 0      | 295   |
| MA2 |    | 0.0048 | 0.0151 | 0.0148 | 0     |
|     | 20 |        |        |        | 8051  |
|     |    | CR1    | CR2    | MA1    | MA2   |
| CR1 |    | 0      | 143    | 143    | 96    |
| CR2 |    | 0.0178 | 0      | 0      | 146   |
| MA1 |    | 0.0178 | 0.0000 | 0      | 146   |
| MA2 |    | 0.0119 | 0.0181 | 0.0181 | 0     |
|     | 22 |        |        |        | 7638  |
|     |    | CR1    | CR2    | MA1    | MA2   |
| CR1 |    | 0      | 146    | 149    | 84    |
| CR2 |    | 0.0191 | 0      | 41     | 149   |
| MA1 |    | 0.0195 | 0.0054 | 0      | 150   |
| MA2 |    | 0.0110 | 0.0195 | 0.0196 | 0     |
|     | 29 |        |        |        | 3190  |
|     |    | CR1    | CR2    | MA1    | MA2   |
| CR1 |    | 0      | 52     | 27     | 63    |
| CR2 |    | 0.0163 | 0      | 59     | 45    |
| MA1 |    | 0.0085 | 0.0185 | 0      | 68    |
| MA2 |    | 0.0197 | 0.0141 | 0.0213 | 0     |
|     | 31 |        |        |        | 5807  |
|     |    | CR1    | CR2    | MA1    | MA2   |
| CR1 |    | 0      | 129    | 85     | 69    |
| CR2 |    | 0.0222 | 0      | 116    | 126   |
| MA1 |    | 0.0146 | 0.0200 | 0      | 24    |
| MA2 |    | 0.0119 | 0.0217 | 0.0041 | 0     |
|     | 42 |        |        |        | 11535 |
|     |    | CR1    | CR2    | MA1    | MA2   |
| CR1 |    | 0      | 238    | 69     | 237   |
| CR2 |    | 0.0206 | 0      | 223    | 25    |
| MA1 |    | 0.0060 | 0.0193 | 0      | 222   |
| MA2 |    | 0.0205 | 0.0022 | 0.0192 | 0     |

|     |    |        |        |        |       |
|-----|----|--------|--------|--------|-------|
|     | 44 |        |        |        | 13086 |
|     |    | CR1    | CR2    | MA1    | MA2   |
| CR1 |    | 0      | 162    | 221    | 102   |
| CR2 |    | 0.0124 | 0      | 105    | 192   |
| MA1 |    | 0.0169 | 0.0080 | 0      | 245   |
| MA2 |    | 0.0078 | 0.0147 | 0.0187 | 0     |
|     | 48 |        |        |        | 20424 |
|     |    | CR1    | CR2    | MA1    | MA2   |
| CR1 |    | 0      | 549    | 192    | 537   |
| CR2 |    | 0.0269 | 0      | 553    | 205   |
| MA1 |    | 0.0094 | 0.0271 | 0      | 548   |
| MA2 |    | 0.0263 | 0.0100 | 0.0268 | 0     |
|     | 49 |        |        |        | 12319 |
|     |    | CR1    | CR2    | MA1    | MA2   |
| CR1 |    | 0      | 281    | 274    | 117   |
| CR2 |    | 0.0228 | 0      | 65     | 292   |
| MA1 |    | 0.0222 | 0.0053 | 0      | 285   |
| MA2 |    | 0.0095 | 0.0237 | 0.0231 | 0     |
|     | 55 |        |        |        | 13907 |
|     |    | CR1    | CR2    | MA1    | MA2   |
| CR1 |    | 0      | 61     | 212    | 223   |
| CR2 |    | 0.0044 | 0      | 224    | 185   |
| MA1 |    | 0.0152 | 0.0161 | 0      | 266   |
| MA2 |    | 0.0160 | 0.0133 | 0.0191 | 0     |
|     | 59 |        |        |        | 12720 |
|     |    | CR1    | CR2    | MA1    | MA2   |
| CR1 |    | 0      | 144    | 48     | 152   |
| CR2 |    | 0.0113 | 0      | 145    | 62    |
| MA1 |    | 0.0038 | 0.0114 | 0      | 154   |
| MA2 |    | 0.0119 | 0.0049 | 0.0121 | 0     |
|     | 73 |        |        |        | 9604  |
|     |    | CR1    | CR2    | MA1    | MA2   |
| CR1 |    | 0      | 141    | 147    | 40    |
| CR2 |    | 0.0147 | 0      | 55     | 147   |
| MA1 |    | 0.0153 | 0.0057 | 0      | 154   |
| MA2 |    | 0.0042 | 0.0153 | 0.0160 | 0     |
|     | 84 |        |        |        | 11206 |
|     |    | CR1    | CR2    | MA1    | MA2   |
| CR1 |    | 0      | 56     | 130    | 283   |
| CR2 |    | 0.0050 | 0      | 97     | 299   |
| MA1 |    | 0.0116 | 0.0087 | 0      | 296   |
| MA2 |    | 0.0253 | 0.0267 | 0.0264 | 0     |

|     |        |        |        |     |       |
|-----|--------|--------|--------|-----|-------|
| 109 |        |        |        |     | 14720 |
|     | CR1    | CR2    | MA1    | MA2 |       |
| CR1 | 0      | 227    | 288    | 297 |       |
| CR2 | 0.0154 | 0      | 155    | 390 |       |
| MA1 | 0.0196 | 0.0105 | 0      | 388 |       |
| MA2 | 0.0202 | 0.0265 | 0.0264 | 0   |       |
| 111 |        |        |        |     | 12175 |
|     | CR1    | CR2    | MA1    | MA2 |       |
| CR1 | 0      | 212    | 165    | 133 |       |
| CR2 | 0.0174 | 0      | 134    | 203 |       |
| MA1 | 0.0136 | 0.0110 | 0      | 101 |       |
| MA2 | 0.0109 | 0.0167 | 0.0083 | 0   |       |
| 122 |        |        |        |     | 9796  |
|     | CR1    | CR2    | MA1    | MA2 |       |
| CR1 | 0      | 133    | 91     | 134 |       |
| CR2 | 0.0136 | 0      | 133    | 13  |       |
| MA1 | 0.0093 | 0.0136 | 0      | 134 |       |
| MA2 | 0.0137 | 0.0013 | 0.0137 | 0   |       |
| 127 |        |        |        |     | 7683  |
|     | CR1    | CR2    | MA1    | MA2 |       |
| CR1 | 0      | 65     | 75     | 24  |       |
| CR2 | 0.0085 | 0      | 26     | 69  |       |
| MA1 | 0.0098 | 0.0034 | 0      | 77  |       |
| MA2 | 0.0031 | 0.0090 | 0.0100 | 0   |       |
| 129 |        |        |        |     | 19591 |
|     | CR1    | CR2    | MA1    | MA2 |       |
| CR1 | 0      | 307    | 311    | 64  |       |
| CR2 | 0.0157 | 0      | 119    | 318 |       |
| MA1 | 0.0159 | 0.0061 | 0      | 320 |       |
| MA2 | 0.0033 | 0.0162 | 0.0163 | 0   |       |
| 132 |        |        |        |     | 14102 |
|     | CR1    | CR2    | MA1    | MA2 |       |
| CR1 | 0      | 81     | 246    | 128 |       |
| CR2 | 0.0057 | 0      | 302    | 126 |       |
| MA1 | 0.0174 | 0.0214 | 0      | 248 |       |
| MA2 | 0.0091 | 0.0089 | 0.0176 | 0   |       |
| 142 |        |        |        |     | 7781  |
|     | CR1    | CR2    | MA1    | MA2 |       |
| CR1 | 0      | 104    | 36     | 60  |       |
| CR2 | 0.0134 | 0      | 96     | 84  |       |
| MA1 | 0.0046 | 0.0123 | 0      | 44  |       |
| MA2 | 0.0077 | 0.0108 | 0.0057 | 0   |       |

|     |        |        |        |     |       |
|-----|--------|--------|--------|-----|-------|
| 144 |        |        |        |     | 7654  |
|     | CR1    | CR2    | MA1    | MA2 |       |
| CR1 | 0      | 104    | 65     | 105 |       |
| CR2 | 0.0136 | 0      | 53     | 6   |       |
| MA1 | 0.0085 | 0.0069 | 0      | 54  |       |
| MA2 | 0.0137 | 0.0008 | 0.0071 | 0   |       |
| 153 |        |        |        |     | 29791 |
|     | CR1    | CR2    | MA1    | MA2 |       |
| CR1 | 0      | 570    | 568    | 90  |       |
| CR2 | 0.0191 | 0      | 161    | 567 |       |
| MA1 | 0.0191 | 0.0054 | 0      | 565 |       |
| MA2 | 0.0030 | 0.0190 | 0.0190 | 0   |       |
| 161 |        |        |        |     | 7944  |
|     | CR1    | CR2    | MA1    | MA2 |       |
| CR1 | 0      | 216    | 109    | 195 |       |
| CR2 | 0.0272 | 0      | 204    | 55  |       |
| MA1 | 0.0137 | 0.0257 | 0      | 183 |       |
| MA2 | 0.0245 | 0.0069 | 0.0230 | 0   |       |
| 165 |        |        |        |     | 13822 |
|     | CR1    | CR2    | MA1    | MA2 |       |
| CR1 | 0      | 207    | 61     | 233 |       |
| CR2 | 0.0150 | 0      | 198    | 102 |       |
| MA1 | 0.0044 | 0.0143 | 0      | 226 |       |
| MA2 | 0.0169 | 0.0074 | 0.0164 | 0   |       |
| 181 |        |        |        |     | 7304  |
|     | CR1    | CR2    | MA1    | MA2 |       |
| CR1 | 0      | 162    | 133    | 112 |       |
| CR2 | 0.0222 | 0      | 135    | 172 |       |
| MA1 | 0.0182 | 0.0185 | 0      | 65  |       |
| MA2 | 0.0153 | 0.0235 | 0.0089 | 0   |       |
| 184 |        |        |        |     | 9639  |
|     | CR1    | CR2    | MA1    | MA2 |       |
| CR1 | 0      | 140    | 142    | 60  |       |
| CR2 | 0.0145 | 0      | 20     | 154 |       |
| MA1 | 0.0147 | 0.0021 | 0      | 156 |       |
| MA2 | 0.0062 | 0.0160 | 0.0162 | 0   |       |
| 185 |        |        |        |     | 16433 |
|     | CR1    | CR2    | MA1    | MA2 |       |
| CR1 | 0      | 557    | 552    | 442 |       |
| CR2 | 0.0339 | 0      | 270    | 521 |       |
| MA1 | 0.0336 | 0.0164 | 0      | 520 |       |
| MA2 | 0.0269 | 0.0317 | 0.0316 | 0   |       |

|     |        |        |        |     |       |
|-----|--------|--------|--------|-----|-------|
| 195 |        |        |        |     | 14586 |
|     | CR1    | CR2    | MA1    | MA2 |       |
| CR1 | 0      | 360    | 333    | 283 |       |
| CR2 | 0.0247 | 0      | 109    | 172 |       |
| MA1 | 0.0228 | 0.0075 | 0      | 79  |       |
| MA2 | 0.0194 | 0.0118 | 0.0054 | 0   |       |
| 205 |        |        |        |     | 8176  |
|     | CR1    | CR2    | MA1    | MA2 |       |
| CR1 | 0      | 21     | 156    | 111 |       |
| CR2 | 0.0026 | 0      | 135    | 114 |       |
| MA1 | 0.0191 | 0.0165 | 0      | 167 |       |
| MA2 | 0.0136 | 0.0139 | 0.0204 | 0   |       |
| 207 |        |        |        |     | 13994 |
|     | CR1    | CR2    | MA1    | MA2 |       |
| CR1 | 0      | 451    | 271    | 440 |       |
| CR2 | 0.0322 | 0      | 456    | 91  |       |
| MA1 | 0.0194 | 0.0326 | 0      | 450 |       |
| MA2 | 0.0314 | 0.0065 | 0.0322 | 0   |       |
| 218 |        |        |        |     | 11867 |
|     | CR1    | CR2    | MA1    | MA2 |       |
| CR1 | 0      | 103    | 196    | 190 |       |
| CR2 | 0.0087 | 0      | 196    | 225 |       |
| MA1 | 0.0165 | 0.0165 | 0      | 304 |       |
| MA2 | 0.0160 | 0.0190 | 0.0256 | 0   |       |
| 221 |        |        |        |     | 15921 |
|     | CR1    | CR2    | MA1    | MA2 |       |
| CR1 | 0      | 299    | 301    | 129 |       |
| CR2 | 0.0188 | 0      | 64     | 280 |       |
| MA1 | 0.0189 | 0.0040 | 0      | 279 |       |
| MA2 | 0.0081 | 0.0176 | 0.0175 | 0   |       |
| 225 |        |        |        |     | 7650  |
|     | CR1    | CR2    | MA1    | MA2 |       |
| CR1 | 0      | 143    | 139    | 59  |       |
| CR2 | 0.0187 | 0      | 16     | 152 |       |
| MA1 | 0.0182 | 0.0021 | 0      | 148 |       |
| MA2 | 0.0077 | 0.0199 | 0.0193 | 0   |       |
| 234 |        |        |        |     | 14603 |
|     | CR1    | CR2    | MA1    | MA2 |       |
| CR1 | 0      | 178    | 132    | 88  |       |
| CR2 | 0.0122 | 0      | 120    | 180 |       |
| MA1 | 0.0090 | 0.0082 | 0      | 118 |       |
| MA2 | 0.0060 | 0.0123 | 0.0081 | 0   |       |

|     |        |        |        |     |       |
|-----|--------|--------|--------|-----|-------|
| 240 |        |        |        |     | 18071 |
|     | CR1    | CR2    | MA1    | MA2 |       |
| CR1 | 0      | 429    | 423    | 204 |       |
| CR2 | 0.0237 | 0      | 137    | 461 |       |
| MA1 | 0.0234 | 0.0076 | 0      | 455 |       |
| MA2 | 0.0113 | 0.0255 | 0.0252 | 0   |       |
| 241 |        |        |        |     | 18876 |
|     | CR1    | CR2    | MA1    | MA2 |       |
| CR1 | 0      | 510    | 503    | 317 |       |
| CR2 | 0.0270 | 0      | 164    | 538 |       |
| MA1 | 0.0266 | 0.0087 | 0      | 526 |       |
| MA2 | 0.0168 | 0.0285 | 0.0279 | 0   |       |
| 249 |        |        |        |     | 22839 |
|     | CR1    | CR2    | MA1    | MA2 |       |
| CR1 | 0      | 319    | 328    | 98  |       |
| CR2 | 0.0140 | 0      | 89     | 317 |       |
| MA1 | 0.0144 | 0.0039 | 0      | 327 |       |
| MA2 | 0.0043 | 0.0139 | 0.0143 | 0   |       |
| 251 |        |        |        |     | 9582  |
|     | CR1    | CR2    | MA1    | MA2 |       |
| CR1 | 0      | 183    | 84     | 184 |       |
| CR2 | 0.0191 | 0      | 174    | 17  |       |
| MA1 | 0.0088 | 0.0182 | 0      | 175 |       |
| MA2 | 0.0192 | 0.0018 | 0.0183 | 0   |       |
| 263 |        |        |        |     | 13288 |
|     | CR1    | CR2    | MA1    | MA2 |       |
| CR1 | 0      | 226    | 234    | 176 |       |
| CR2 | 0.0170 | 0      | 182    | 249 |       |
| MA1 | 0.0176 | 0.0137 | 0      | 112 |       |
| MA2 | 0.0132 | 0.0187 | 0.0084 | 0   |       |
| 271 |        |        |        |     | 7680  |
|     | CR1    | CR2    | MA1    | MA2 |       |
| CR1 | 0      | 69     | 88     | 51  |       |
| CR2 | 0.0090 | 0      | 93     | 59  |       |
| MA1 | 0.0115 | 0.0121 | 0      | 105 |       |
| MA2 | 0.0066 | 0.0077 | 0.0137 | 0   |       |
| 274 |        |        |        |     | 13200 |
|     | CR1    | CR2    | MA1    | MA2 |       |
| CR1 | 0      | 331    | 351    | 122 |       |
| CR2 | 0.0251 | 0      | 144    | 311 |       |
| MA1 | 0.0266 | 0.0109 | 0      | 334 |       |
| MA2 | 0.0092 | 0.0236 | 0.0253 | 0   |       |

|     |        |        |        |     |       |
|-----|--------|--------|--------|-----|-------|
| 278 |        |        |        |     | 10142 |
|     | CR1    | CR2    | MA1    | MA2 |       |
| CR1 | 0      | 240    | 230    | 110 |       |
| CR2 | 0.0237 | 0      | 59     | 235 |       |
| MA1 | 0.0227 | 0.0058 | 0      | 227 |       |
| MA2 | 0.0108 | 0.0232 | 0.0224 | 0   |       |
| 284 |        |        |        |     | 6665  |
|     | CR1    | CR2    | MA1    | MA2 |       |
| CR1 | 0      | 150    | 166    | 226 |       |
| CR2 | 0.0225 | 0      | 198    | 132 |       |
| MA1 | 0.0249 | 0.0297 | 0      | 236 |       |
| MA2 | 0.0339 | 0.0198 | 0.0354 | 0   |       |
| 287 |        |        |        |     | 8507  |
|     | CR1    | CR2    | MA1    | MA2 |       |
| CR1 | 0      | 352    | 153    | 328 |       |
| CR2 | 0.0414 | 0      | 334    | 320 |       |
| MA1 | 0.0180 | 0.0393 | 0      | 349 |       |
| MA2 | 0.0386 | 0.0376 | 0.0410 | 0   |       |
| 290 |        |        |        |     | 9884  |
|     | CR1    | CR2    | MA1    | MA2 |       |
| CR1 | 0      | 203    | 217    | 102 |       |
| CR2 | 0.0205 | 0      | 44     | 193 |       |
| MA1 | 0.0220 | 0.0045 | 0      | 207 |       |
| MA2 | 0.0103 | 0.0195 | 0.0209 | 0   |       |
| 296 |        |        |        |     | 7069  |
|     | CR1    | CR2    | MA1    | MA2 |       |
| CR1 | 0      | 176    | 65     | 177 |       |
| CR2 | 0.0249 | 0      | 178    | 11  |       |
| MA1 | 0.0092 | 0.0252 | 0      | 181 |       |
| MA2 | 0.0250 | 0.0016 | 0.0256 | 0   |       |
| 298 |        |        |        |     | 14124 |
|     | CR1    | CR2    | MA1    | MA2 |       |
| CR1 | 0      | 322    | 248    | 232 |       |
| CR2 | 0.0228 | 0      | 323    | 336 |       |
| MA1 | 0.0176 | 0.0229 | 0      | 18  |       |
| MA2 | 0.0164 | 0.0238 | 0.0013 | 0   |       |
| 299 |        |        |        |     | 10195 |
|     | CR1    | CR2    | MA1    | MA2 |       |
| CR1 | 0      | 125    | 119    | 65  |       |
| CR2 | 0.0123 | 0      | 24     | 125 |       |
| MA1 | 0.0117 | 0.0024 | 0      | 121 |       |
| MA2 | 0.0064 | 0.0123 | 0.0119 | 0   |       |

|     |        |        |        |     |       |
|-----|--------|--------|--------|-----|-------|
| 303 |        |        |        |     | 9223  |
|     | CR1    | CR2    | MA1    | MA2 |       |
| CR1 | 0      | 185    | 178    | 105 |       |
| CR2 | 0.0201 | 0      | 72     | 187 |       |
| MA1 | 0.0193 | 0.0078 | 0      | 185 |       |
| MA2 | 0.0114 | 0.0203 | 0.0201 | 0   |       |
| 309 |        |        |        |     | 7145  |
|     | CR1    | CR2    | MA1    | MA2 |       |
| CR1 | 0      | 145    | 78     | 147 |       |
| CR2 | 0.0203 | 0      | 135    | 50  |       |
| MA1 | 0.0109 | 0.0189 | 0      | 139 |       |
| MA2 | 0.0206 | 0.0070 | 0.0195 | 0   |       |
| 312 |        |        |        |     | 8014  |
|     | CR1    | CR2    | MA1    | MA2 |       |
| CR1 | 0      | 271    | 157    | 180 |       |
| CR2 | 0.0338 | 0      | 282    | 256 |       |
| MA1 | 0.0196 | 0.0352 | 0      | 48  |       |
| MA2 | 0.0225 | 0.0319 | 0.0060 | 0   |       |
| 313 |        |        |        |     | 9547  |
|     | CR1    | CR2    | MA1    | MA2 |       |
| CR1 | 0      | 255    | 263    | 61  |       |
| CR2 | 0.0267 | 0      | 131    | 258 |       |
| MA1 | 0.0275 | 0.0137 | 0      | 266 |       |
| MA2 | 0.0064 | 0.0270 | 0.0279 | 0   |       |
| 329 |        |        |        |     | 9864  |
|     | CR1    | CR2    | MA1    | MA2 |       |
| CR1 | 0      | 184    | 28     | 197 |       |
| CR2 | 0.0187 | 0      | 186    | 129 |       |
| MA1 | 0.0028 | 0.0189 | 0      | 199 |       |
| MA2 | 0.0200 | 0.0131 | 0.0202 | 0   |       |
| 332 |        |        |        |     | 8092  |
|     | CR1    | CR2    | MA1    | MA2 |       |
| CR1 | 0      | 172    | 179    | 67  |       |
| CR2 | 0.0213 | 0      | 74     | 157 |       |
| MA1 | 0.0221 | 0.0091 | 0      | 164 |       |
| MA2 | 0.0083 | 0.0194 | 0.0203 | 0   |       |
| 334 |        |        |        |     | 13665 |
|     | CR1    | CR2    | MA1    | MA2 |       |
| CR1 | 0      | 214    | 133    | 231 |       |
| CR2 | 0.0157 | 0      | 228    | 55  |       |
| MA1 | 0.0097 | 0.0167 | 0      | 241 |       |
| MA2 | 0.0169 | 0.0040 | 0.0176 | 0   |       |



|     |        |        |        |     |       |
|-----|--------|--------|--------|-----|-------|
| 340 |        |        |        |     | 9883  |
|     | CR1    | CR2    | MA1    | MA2 |       |
| CR1 | 0      | 182    | 183    | 13  |       |
| CR2 | 0.0184 | 0      | 54     | 177 |       |
| MA1 | 0.0185 | 0.0055 | 0      | 178 |       |
| MA2 | 0.0013 | 0.0179 | 0.0180 | 0   |       |
| 341 |        |        |        |     | 10840 |
|     | CR1    | CR2    | MA1    | MA2 |       |
| CR1 | 0      | 135    | 159    | 79  |       |
| CR2 | 0.0125 | 0      | 113    | 166 |       |
| MA1 | 0.0147 | 0.0104 | 0      | 110 |       |
| MA2 | 0.0073 | 0.0153 | 0.0101 | 0   |       |
| 344 |        |        |        |     | 9263  |
|     | CR1    | CR2    | MA1    | MA2 |       |
| CR1 | 0      | 193    | 110    | 194 |       |
| CR2 | 0.0208 | 0      | 193    | 71  |       |
| MA1 | 0.0119 | 0.0208 | 0      | 195 |       |
| MA2 | 0.0209 | 0.0077 | 0.0211 | 0   |       |
| 346 |        |        |        |     | 13000 |
|     | CR1    | CR2    | MA1    | MA2 |       |
| CR1 | 0      | 247    | 100    | 243 |       |
| CR2 | 0.0190 | 0      | 243    | 90  |       |
| MA1 | 0.0077 | 0.0187 | 0      | 237 |       |
| MA2 | 0.0187 | 0.0069 | 0.0182 | 0   |       |
| 349 |        |        |        |     | 13085 |
|     | CR1    | CR2    | MA1    | MA2 |       |
| CR1 | 0      | 271    | 158    | 270 |       |
| CR2 | 0.0207 | 0      | 241    | 127 |       |
| MA1 | 0.0121 | 0.0184 | 0      | 286 |       |
| MA2 | 0.0206 | 0.0097 | 0.0219 | 0   |       |
| 353 |        |        |        |     | 11272 |
|     | CR1    | CR2    | MA1    | MA2 |       |
| CR1 | 0      | 152    | 259    | 279 |       |
| CR2 | 0.0135 | 0      | 375    | 203 |       |
| MA1 | 0.0230 | 0.0333 | 0      | 375 |       |
| MA2 | 0.0248 | 0.0180 | 0.0333 | 0   |       |
| 360 |        |        |        |     | 7794  |
|     | CR1    | CR2    | MA1    | MA2 |       |
| CR1 | 0      | 156    | 62     | 161 |       |
| CR2 | 0.0200 | 0      | 167    | 70  |       |
| MA1 | 0.0080 | 0.0214 | 0      | 172 |       |
| MA2 | 0.0207 | 0.0090 | 0.0221 | 0   |       |

|     |     |        |        |        |       |
|-----|-----|--------|--------|--------|-------|
|     | 361 |        |        |        | 12630 |
|     |     | CR1    | CR2    | MA1    | MA2   |
| CR1 |     | 0      | 130    | 194    | 156   |
| CR2 |     | 0.0103 | 0      | 240    | 102   |
| MA1 |     | 0.0154 | 0.0190 | 0      | 241   |
| MA2 |     | 0.0124 | 0.0081 | 0.0191 | 0     |
|     | 365 |        |        |        | 14018 |
|     |     | CR1    | CR2    | MA1    | MA2   |
| CR1 |     | 0      | 271    | 237    | 144   |
| CR2 |     | 0.0193 | 0      | 94     | 231   |
| MA1 |     | 0.0169 | 0.0067 | 0      | 182   |
| MA2 |     | 0.0103 | 0.0165 | 0.0130 | 0     |
|     | 366 |        |        |        | 15282 |
|     |     | CR1    | CR2    | MA1    | MA2   |
| CR1 |     | 0      | 476    | 221    | 476   |
| CR2 |     | 0.0311 | 0      | 471    | 44    |
| MA1 |     | 0.0145 | 0.0308 | 0      | 471   |
| MA2 |     | 0.0311 | 0.0029 | 0.0308 | 0     |
|     | 372 |        |        |        | 9496  |
|     |     | CR1    | CR2    | MA1    | MA2   |
| CR1 |     | 0      | 57     | 163    | 116   |
| CR2 |     | 0.0060 | 0      | 194    | 63    |
| MA1 |     | 0.0172 | 0.0204 | 0      | 189   |
| MA2 |     | 0.0122 | 0.0066 | 0.0199 | 0     |
|     | 374 |        |        |        | 10100 |
|     |     | CR1    | CR2    | MA1    | MA2   |
| CR1 |     | 0      | 142    | 107    | 62    |
| CR2 |     | 0.0141 | 0      | 84     | 114   |
| MA1 |     | 0.0106 | 0.0083 | 0      | 104   |
| MA2 |     | 0.0061 | 0.0113 | 0.0103 | 0     |
|     | 377 |        |        |        | 17247 |
|     |     | CR1    | CR2    | MA1    | MA2   |
| CR1 |     | 0      | 1      | 353    | 331   |
| CR2 |     | 0.0001 | 0      | 354    | 332   |
| MA1 |     | 0.0205 | 0.0205 | 0      | 26    |
| MA2 |     | 0.0192 | 0.0192 | 0.0015 | 0     |
|     | 389 |        |        |        | 10405 |
|     |     | CR1    | CR2    | MA1    | MA2   |
| CR1 |     | 0      | 216    | 228    | 73    |
| CR2 |     | 0.0208 | 0      | 84     | 227   |
| MA1 |     | 0.0219 | 0.0081 | 0      | 237   |
| MA2 |     | 0.0070 | 0.0218 | 0.0228 | 0     |

|     | 410    |        |        |     | 2051  |
|-----|--------|--------|--------|-----|-------|
|     | CR1    | CR2    | MA1    | MA2 |       |
| CR1 | 0      | 16     | 6      | 14  |       |
| CR2 | 0.0078 | 0      | 18     | 2   |       |
| MA1 | 0.0029 | 0.0088 | 0      | 16  |       |
| MA2 | 0.0068 | 0.0010 | 0.0078 | 0   |       |
|     | 417    |        |        |     | 13923 |
|     | CR1    | CR2    | MA1    | MA2 |       |
| CR1 | 0      | 238    | 67     | 239 |       |
| CR2 | 0.0171 | 0      | 227    | 56  |       |
| MA1 | 0.0048 | 0.0163 | 0      | 227 |       |
| MA2 | 0.0172 | 0.0040 | 0.0163 | 0   |       |
|     | 421    |        |        |     | 7773  |
|     | CR1    | CR2    | MA1    | MA2 |       |
| CR1 | 0      | 148    | 91     | 153 |       |
| CR2 | 0.0190 | 0      | 144    | 15  |       |
| MA1 | 0.0117 | 0.0185 | 0      | 149 |       |
| MA2 | 0.0197 | 0.0019 | 0.0192 | 0   |       |
|     | 422    |        |        |     | 11551 |
|     | CR1    | CR2    | MA1    | MA2 |       |
| CR1 | 0      | 84     | 145    | 73  |       |
| CR2 | 0.0073 | 0      | 125    | 141 |       |
| MA1 | 0.0126 | 0.0108 | 0      | 172 |       |
| MA2 | 0.0063 | 0.0122 | 0.0149 | 0   |       |
|     | 442    |        |        |     | 16212 |
|     | CR1    | CR2    | MA1    | MA2 |       |
| CR1 | 0      | 226    | 114    | 241 |       |
| CR2 | 0.0139 | 0      | 218    | 70  |       |
| MA1 | 0.0070 | 0.0134 | 0      | 234 |       |
| MA2 | 0.0149 | 0.0043 | 0.0144 | 0   |       |
|     | 450    |        |        |     | 24883 |
|     | CR1    | CR2    | MA1    | MA2 |       |
| CR1 | 0      | 556    | 295    | 556 |       |
| CR2 | 0.0223 | 0      | 587    | 141 |       |
| MA1 | 0.0119 | 0.0236 | 0      | 587 |       |
| MA2 | 0.0223 | 0.0057 | 0.0236 | 0   |       |
|     | 451    |        |        |     | 12893 |
|     | CR1    | CR2    | MA1    | MA2 |       |
| CR1 | 0      | 159    | 154    | 67  |       |
| CR2 | 0.0123 | 0      | 40     | 161 |       |
| MA1 | 0.0119 | 0.0031 | 0      | 156 |       |
| MA2 | 0.0052 | 0.0125 | 0.0121 | 0   |       |

|     |     |        |        |        |       |
|-----|-----|--------|--------|--------|-------|
|     | 471 |        |        |        | 20260 |
|     |     | CR1    | CR2    | MA1    | MA2   |
| CR1 |     | 0      | 96     | 474    | 426   |
| CR2 |     | 0.0047 | 0      | 437    | 486   |
| MA1 |     | 0.0234 | 0.0216 | 0      | 99    |
| MA2 |     | 0.0210 | 0.0240 | 0.0049 | 0     |
|     | 492 |        |        |        | 11301 |
|     |     | CR1    | CR2    | MA1    | MA2   |
| CR1 |     | 0      | 301    | 138    | 300   |
| CR2 |     | 0.0266 | 0      | 279    | 86    |
| MA1 |     | 0.0122 | 0.0247 | 0      | 283   |
| MA2 |     | 0.0265 | 0.0076 | 0.0250 | 0     |
|     | 494 |        |        |        | 8728  |
|     |     | CR1    | CR2    | MA1    | MA2   |
| CR1 |     | 0      | 136    | 45     | 83    |
| CR2 |     | 0.0156 | 0      | 145    | 97    |
| MA1 |     | 0.0052 | 0.0166 | 0      | 70    |
| MA2 |     | 0.0095 | 0.0111 | 0.0080 | 0     |
|     | 500 |        |        |        | 10350 |
|     |     | CR1    | CR2    | MA1    | MA2   |
| CR1 |     | 0      | 68     | 142    | 158   |
| CR2 |     | 0.0066 | 0      | 166    | 116   |
| MA1 |     | 0.0137 | 0.0160 | 0      | 74    |
| MA2 |     | 0.0153 | 0.0112 | 0.0071 | 0     |
|     | 502 |        |        |        | 10569 |
|     |     | CR1    | CR2    | MA1    | MA2   |
| CR1 |     | 0      | 166    | 77     | 166   |
| CR2 |     | 0.0157 | 0      | 180    | 48    |
| MA1 |     | 0.0073 | 0.0170 | 0      | 182   |
| MA2 |     | 0.0157 | 0.0045 | 0.0172 | 0     |
|     | 506 |        |        |        | 8597  |
|     |     | CR1    | CR2    | MA1    | MA2   |
| CR1 |     | 0      | 167    | 148    | 48    |
| CR2 |     | 0.0194 | 0      | 103    | 168   |
| MA1 |     | 0.0172 | 0.0120 | 0      | 155   |
| MA2 |     | 0.0056 | 0.0195 | 0.0180 | 0     |
|     | 511 |        |        |        | 14480 |
|     |     | CR1    | CR2    | MA1    | MA2   |
| CR1 |     | 0      | 317    | 114    | 306   |
| CR2 |     | 0.0219 | 0      | 314    | 180   |
| MA1 |     | 0.0079 | 0.0217 | 0      | 306   |
| MA2 |     | 0.0211 | 0.0124 | 0.0211 | 0     |

|     |     |        |        |        |     |       |
|-----|-----|--------|--------|--------|-----|-------|
|     | 515 |        |        |        |     | 17506 |
|     |     | CR1    | CR2    | MA1    | MA2 |       |
| CR1 |     | 0      | 82     | 251    | 441 |       |
| CR2 |     | 0.0047 | 0      | 181    | 485 |       |
| MA1 |     | 0.0143 | 0.0103 | 0      | 499 |       |
| MA2 |     | 0.0252 | 0.0277 | 0.0285 | 0   |       |
|     | 521 |        |        |        |     | 10935 |
|     |     | CR1    | CR2    | MA1    | MA2 |       |
| CR1 |     | 0      | 133    | 118    | 41  |       |
| CR2 |     | 0.0122 | 0      | 50     | 140 |       |
| MA1 |     | 0.0108 | 0.0046 | 0      | 125 |       |
| MA2 |     | 0.0037 | 0.0128 | 0.0114 | 0   |       |
|     | 527 |        |        |        |     | 17079 |
|     |     | CR1    | CR2    | MA1    | MA2 |       |
| CR1 |     | 0      | 369    | 338    | 187 |       |
| CR2 |     | 0.0216 | 0      | 119    | 370 |       |
| MA1 |     | 0.0198 | 0.0070 | 0      | 339 |       |
| MA2 |     | 0.0109 | 0.0217 | 0.0198 | 0   |       |
|     | 539 |        |        |        |     | 14831 |
|     |     | CR1    | CR2    | MA1    | MA2 |       |
| CR1 |     | 0      | 59     | 140    | 137 |       |
| CR2 |     | 0.0040 | 0      | 164    | 106 |       |
| MA1 |     | 0.0094 | 0.0111 | 0      | 74  |       |
| MA2 |     | 0.0092 | 0.0071 | 0.0050 | 0   |       |
|     | 562 |        |        |        |     | 12038 |
|     |     | CR1    | CR2    | MA1    | MA2 |       |
| CR1 |     | 0      | 213    | 64     | 216 |       |
| CR2 |     | 0.0177 | 0      | 211    | 68  |       |
| MA1 |     | 0.0053 | 0.0175 | 0      | 214 |       |
| MA2 |     | 0.0179 | 0.0056 | 0.0178 | 0   |       |
|     | 563 |        |        |        |     | 5430  |
|     |     | CR1    | CR2    | MA1    | MA2 |       |
| CR1 |     | 0      | 144    | 219    | 219 |       |
| CR2 |     | 0.0265 | 0      | 179    | 179 |       |
| MA1 |     | 0.0403 | 0.0330 | 0      | 0   |       |
| MA2 |     | 0.0403 | 0.0330 | 0.0000 | 0   |       |
|     | 566 |        |        |        |     | 7948  |
|     |     | CR1    | CR2    | MA1    | MA2 |       |
| CR1 |     | 0      | 204    | 199    | 117 |       |
| CR2 |     | 0.0257 | 0      | 63     | 196 |       |
| MA1 |     | 0.0250 | 0.0079 | 0      | 191 |       |
| MA2 |     | 0.0147 | 0.0247 | 0.0240 | 0   |       |

Table S7: Difference Matrices.

## Matrices MA-CR

Laine et al.  
Supporting Information

|     |     |        |        |        |       |
|-----|-----|--------|--------|--------|-------|
|     | 573 |        |        |        | 17006 |
|     |     | CR1    | CR2    | MA1    | MA2   |
| CR1 |     | 0      | 216    | 119    | 218   |
| CR2 |     | 0.0127 | 0      | 233    | 81    |
| MA1 |     | 0.0070 | 0.0137 | 0      | 238   |
| MA2 |     | 0.0128 | 0.0048 | 0.0140 | 0     |
|     | 590 |        |        |        | 8906  |
|     |     | CR1    | CR2    | MA1    | MA2   |
| CR1 |     | 0      | 145    | 94     | 158   |
| CR2 |     | 0.0163 | 0      | 150    | 48    |
| MA1 |     | 0.0106 | 0.0168 | 0      | 155   |
| MA2 |     | 0.0177 | 0.0054 | 0.0174 | 0     |
|     | 594 |        |        |        | 10321 |
|     |     | CR1    | CR2    | MA1    | MA2   |
| CR1 |     | 0      | 303    | 312    | 99    |
| CR2 |     | 0.0294 | 0      | 174    | 318   |
| MA1 |     | 0.0302 | 0.0169 | 0      | 329   |
| MA2 |     | 0.0096 | 0.0308 | 0.0319 | 0     |
|     | 604 |        |        |        | 13188 |
|     |     | CR1    | CR2    | MA1    | MA2   |
| CR1 |     | 0      | 392    | 408    | 173   |
| CR2 |     | 0.0297 | 0      | 254    | 392   |
| MA1 |     | 0.0309 | 0.0193 | 0      | 409   |
| MA2 |     | 0.0131 | 0.0297 | 0.0310 | 0     |
|     | 617 |        |        |        | 7367  |
|     |     | CR1    | CR2    | MA1    | MA2   |
| CR1 |     | 0      | 204    | 104    | 209   |
| CR2 |     | 0.0277 | 0      | 217    | 36    |
| MA1 |     | 0.0141 | 0.0295 | 0      | 224   |
| MA2 |     | 0.0284 | 0.0049 | 0.0304 | 0     |
|     | 620 |        |        |        | 9255  |
|     |     | CR1    | CR2    | MA1    | MA2   |
| CR1 |     | 0      | 127    | 119    | 21    |
| CR2 |     | 0.0137 | 0      | 83     | 125   |
| MA1 |     | 0.0129 | 0.0090 | 0      | 116   |
| MA2 |     | 0.0023 | 0.0135 | 0.0125 | 0     |
|     | 622 |        |        |        | 11142 |
|     |     | CR1    | CR2    | MA1    | MA2   |
| CR1 |     | 0      | 133    | 107    | 114   |
| CR2 |     | 0.0119 | 0      | 94     | 115   |
| MA1 |     | 0.0096 | 0.0084 | 0      | 80    |
| MA2 |     | 0.0102 | 0.0103 | 0.0072 | 0     |

|     |     |        |        |        |       |
|-----|-----|--------|--------|--------|-------|
|     | 636 |        |        |        | 13351 |
|     |     | CR1    | CR2    | MA1    | MA2   |
| CR1 |     | 0      | 360    | 224    | 294   |
| CR2 |     | 0.0270 | 0      | 326    | 207   |
| MA1 |     | 0.0168 | 0.0244 | 0      | 180   |
| MA2 |     | 0.0220 | 0.0155 | 0.0135 | 0     |
|     | 637 |        |        |        | 10975 |
|     |     | CR1    | CR2    | MA1    | MA2   |
| CR1 |     | 0      | 199    | 217    | 102   |
| CR2 |     | 0.0181 | 0      | 103    | 190   |
| MA1 |     | 0.0198 | 0.0094 | 0      | 196   |
| MA2 |     | 0.0093 | 0.0173 | 0.0179 | 0     |
|     | 643 |        |        |        | 14941 |
|     |     | CR1    | CR2    | MA1    | MA2   |
| CR1 |     | 0      | 289    | 72     | 279   |
| CR2 |     | 0.0193 | 0      | 282    | 162   |
| MA1 |     | 0.0048 | 0.0189 | 0      | 270   |
| MA2 |     | 0.0187 | 0.0108 | 0.0181 | 0     |
|     | 647 |        |        |        | 11881 |
|     |     | CR1    | CR2    | MA1    | MA2   |
| CR1 |     | 0      | 308    | 155    | 291   |
| CR2 |     | 0.0259 | 0      | 304    | 205   |
| MA1 |     | 0.0130 | 0.0256 | 0      | 268   |
| MA2 |     | 0.0245 | 0.0173 | 0.0226 | 0     |
|     | 653 |        |        |        | 8670  |
|     |     | CR1    | CR2    | MA1    | MA2   |
| CR1 |     | 0      | 179    | 113    | 120   |
| CR2 |     | 0.0206 | 0      | 190    | 144   |
| MA1 |     | 0.0130 | 0.0219 | 0      | 63    |
| MA2 |     | 0.0138 | 0.0166 | 0.0073 | 0     |
|     | 656 |        |        |        | 13356 |
|     |     | CR1    | CR2    | MA1    | MA2   |
| CR1 |     | 0      | 236    | 271    | 393   |
| CR2 |     | 0.0177 | 0      | 340    | 293   |
| MA1 |     | 0.0203 | 0.0255 | 0      | 435   |
| MA2 |     | 0.0294 | 0.0219 | 0.0326 | 0     |
|     | 660 |        |        |        | 7420  |
|     |     | CR1    | CR2    | MA1    | MA2   |
| CR1 |     | 0      | 118    | 96     | 122   |
| CR2 |     | 0.0159 | 0      | 137    | 44    |
| MA1 |     | 0.0129 | 0.0185 | 0      | 140   |
| MA2 |     | 0.0164 | 0.0059 | 0.0189 | 0     |

|     | 664    |        |        |     | 11284 |
|-----|--------|--------|--------|-----|-------|
|     | CR1    | CR2    | MA1    | MA2 |       |
| CR1 | 0      | 211    | 217    | 124 |       |
| CR2 | 0.0187 | 0      | 76     | 202 |       |
| MA1 | 0.0192 | 0.0067 | 0      | 210 |       |
| MA2 | 0.0110 | 0.0179 | 0.0186 | 0   |       |
|     | 665    |        |        |     | 20031 |
|     | CR1    | CR2    | MA1    | MA2 |       |
| CR1 | 0      | 289    | 43     | 294 |       |
| CR2 | 0.0144 | 0      | 276    | 128 |       |
| MA1 | 0.0021 | 0.0138 | 0      | 284 |       |
| MA2 | 0.0147 | 0.0064 | 0.0142 | 0   |       |
|     | 666    |        |        |     | 8051  |
|     | CR1    | CR2    | MA1    | MA2 |       |
| CR1 | 0      | 184    | 174    | 114 |       |
| CR2 | 0.0229 | 0      | 63     | 171 |       |
| MA1 | 0.0216 | 0.0078 | 0      | 150 |       |
| MA2 | 0.0142 | 0.0212 | 0.0186 | 0   |       |
|     | 675    |        |        |     | 11012 |
|     | CR1    | CR2    | MA1    | MA2 |       |
| CR1 | 0      | 191    | 180    | 48  |       |
| CR2 | 0.0173 | 0      | 54     | 202 |       |
| MA1 | 0.0163 | 0.0049 | 0      | 191 |       |
| MA2 | 0.0044 | 0.0183 | 0.0173 | 0   |       |
|     | 680    |        |        |     | 10411 |
|     | CR1    | CR2    | MA1    | MA2 |       |
| CR1 | 0      | 275    | 291    | 131 |       |
| CR2 | 0.0264 | 0      | 101    | 281 |       |
| MA1 | 0.0280 | 0.0097 | 0      | 293 |       |
| MA2 | 0.0126 | 0.0270 | 0.0281 | 0   |       |
|     | 683    |        |        |     | 7837  |
|     | CR1    | CR2    | MA1    | MA2 |       |
| CR1 | 0      | 116    | 91     | 29  |       |
| CR2 | 0.0148 | 0      | 53     | 111 |       |
| MA1 | 0.0116 | 0.0068 | 0      | 80  |       |
| MA2 | 0.0037 | 0.0142 | 0.0102 | 0   |       |



|     |    |        |        |        |       |
|-----|----|--------|--------|--------|-------|
|     | 5  |        |        |        | 18450 |
|     |    | MA1    | MA2    | MM1    | MM2   |
| MA1 |    | 0      | 526    | 525    | 538   |
| MA2 |    | 0.0285 | 0      | 201    | 297   |
| MM1 |    | 0.0285 | 0.0109 | 0      | 286   |
| MM2 |    | 0.0292 | 0.0161 | 0.0155 | 0     |
|     | 12 |        |        |        | 16923 |
|     |    | MA1    | MA2    | MM1    | MM2   |
| MA1 |    | 0      | 87     | 88     | 87    |
| MA2 |    | 0.0051 | 0      | 1      | 0     |
| MM1 |    | 0.0052 | 0.0001 | 0      | 1     |
| MM2 |    | 0.0051 | 0.0000 | 0.0001 | 0     |
|     | 15 |        |        |        | 12230 |
|     |    | MA1    | MA2    | MM1    | MM2   |
| MA1 |    | 0      | 192    | 0      | 80    |
| MA2 |    | 0.0157 | 0      | 192    | 191   |
| MM1 |    | 0.0000 | 0.0157 | 0      | 80    |
| MM2 |    | 0.0065 | 0.0156 | 0.0065 | 0     |
|     | 20 |        |        |        | 6921  |
|     |    | MA1    | MA2    | MM1    | MM2   |
| MA1 |    | 0      | 59     | 62     | 59    |
| MA2 |    | 0.0085 | 0      | 24     | 0     |
| MM1 |    | 0.0090 | 0.0035 | 0      | 24    |
| MM2 |    | 0.0085 | 0.0000 | 0.0035 | 0     |
|     | 22 |        |        |        | 10243 |
|     |    | MA1    | MA2    | MM1    | MM2   |
| MA1 |    | 0      | 193    | 193    | 235   |
| MA2 |    | 0.0188 | 0      | 0      | 117   |
| MM1 |    | 0.0188 | 0.0000 | 0      | 117   |
| MM2 |    | 0.0229 | 0.0114 | 0.0114 | 0     |
|     | 24 |        |        |        | 11530 |
|     |    | MA1    | MA2    | MM1    | MM2   |
| MA1 |    | 0      | 188    | 7      | 7     |
| MA2 |    | 0.0163 | 0      | 187    | 187   |
| MM1 |    | 0.0006 | 0.0162 | 0      | 0     |
| MM2 |    | 0.0006 | 0.0162 | 0.0000 | 0     |
|     | 26 |        |        |        | 9747  |
|     |    | MA1    | MA2    | MM1    | MM2   |
| MA1 |    | 0      | 96     | 232    | 153   |
| MA2 |    | 0.0098 | 0      | 286    | 249   |
| MM1 |    | 0.0238 | 0.0293 | 0      | 177   |
| MM2 |    | 0.0157 | 0.0255 | 0.0182 | 0     |

|     |        |        |        |     |       |
|-----|--------|--------|--------|-----|-------|
| 27  |        |        |        |     | 16186 |
|     | MA1    | MA2    | MM1    | MM2 |       |
| MA1 | 0      | 0      | 384    | 384 |       |
| MA2 | 0.0000 | 0      | 384    | 384 |       |
| MM1 | 0.0237 | 0.0237 | 0      | 0   |       |
| MM2 | 0.0237 | 0.0237 | 0.0000 | 0   |       |
| 31  |        |        |        |     | 15749 |
|     | MA1    | MA2    | MM1    | MM2 |       |
| MA1 | 0      | 295    | 295    | 311 |       |
| MA2 | 0.0187 | 0      | 0      | 118 |       |
| MM1 | 0.0187 | 0.0000 | 0      | 118 |       |
| MM2 | 0.0197 | 0.0075 | 0.0075 | 0   |       |
| 32  |        |        |        |     | 8159  |
|     | MA1    | MA2    | MM1    | MM2 |       |
| MA1 | 0      | 115    | 57     | 0   |       |
| MA2 | 0.0141 | 0      | 103    | 115 |       |
| MM1 | 0.0070 | 0.0126 | 0      | 57  |       |
| MM2 | 0.0000 | 0.0141 | 0.0070 | 0   |       |
| 33  |        |        |        |     | 12165 |
|     | MA1    | MA2    | MM1    | MM2 |       |
| MA1 | 0      | 222    | 233    | 245 |       |
| MA2 | 0.0182 | 0      | 112    | 102 |       |
| MM1 | 0.0192 | 0.0092 | 0      | 128 |       |
| MM2 | 0.0201 | 0.0084 | 0.0105 | 0   |       |
| 49  |        |        |        |     | 10570 |
|     | MA1    | MA2    | MM1    | MM2 |       |
| MA1 | 0      | 198    | 79     | 7   |       |
| MA2 | 0.0187 | 0      | 208    | 199 |       |
| MM1 | 0.0075 | 0.0197 | 0      | 72  |       |
| MM2 | 0.0007 | 0.0188 | 0.0068 | 0   |       |
| 50  |        |        |        |     | 10128 |
|     | MA1    | MA2    | MM1    | MM2 |       |
| MA1 | 0      | 228    | 234    | 228 |       |
| MA2 | 0.0225 | 0      | 113    | 0   |       |
| MM1 | 0.0231 | 0.0112 | 0      | 113 |       |
| MM2 | 0.0225 | 0.0000 | 0.0112 | 0   |       |
| 59  |        |        |        |     | 9328  |
|     | MA1    | MA2    | MM1    | MM2 |       |
| MA1 | 0      | 90     | 211    | 9   |       |
| MA2 | 0.0096 | 0      | 250    | 85  |       |
| MM1 | 0.0226 | 0.0268 | 0      | 210 |       |
| MM2 | 0.0010 | 0.0091 | 0.0225 | 0   |       |

|     |        |        |        |     |       |
|-----|--------|--------|--------|-----|-------|
| 61  |        |        |        |     | 17874 |
|     | MA1    | MA2    | MM1    | MM2 |       |
| MA1 | 0      | 371    | 371    | 373 |       |
| MA2 | 0.0208 | 0      | 120    | 153 |       |
| MM1 | 0.0208 | 0.0067 | 0      | 150 |       |
| MM2 | 0.0209 | 0.0086 | 0.0084 | 0   |       |
| 65  |        |        |        |     | 20700 |
|     | MA1    | MA2    | MM1    | MM2 |       |
| MA1 | 0      | 440    | 236    | 229 |       |
| MA2 | 0.0213 | 0      | 442    | 437 |       |
| MM1 | 0.0114 | 0.0214 | 0      | 27  |       |
| MM2 | 0.0111 | 0.0211 | 0.0013 | 0   |       |
| 67  |        |        |        |     | 13724 |
|     | MA1    | MA2    | MM1    | MM2 |       |
| MA1 | 0      | 162    | 154    | 163 |       |
| MA2 | 0.0118 | 0      | 60     | 62  |       |
| MM1 | 0.0112 | 0.0044 | 0      | 62  |       |
| MM2 | 0.0119 | 0.0045 | 0.0045 | 0   |       |
| 71  |        |        |        |     | 4589  |
|     | MA1    | MA2    | MM1    | MM2 |       |
| MA1 | 0      | 6      | 6      | 6   |       |
| MA2 | 0.0013 | 0      | 0      | 0   |       |
| MM1 | 0.0013 | 0.0000 | 0      | 0   |       |
| MM2 | 0.0013 | 0.0000 | 0.0000 | 0   |       |
| 72  |        |        |        |     | 10511 |
|     | MA1    | MA2    | MM1    | MM2 |       |
| MA1 | 0      | 209    | 209    | 198 |       |
| MA2 | 0.0199 | 0      | 0      | 129 |       |
| MM1 | 0.0199 | 0.0000 | 0      | 129 |       |
| MM2 | 0.0188 | 0.0123 | 0.0123 | 0   |       |
| 73  |        |        |        |     | 14785 |
|     | MA1    | MA2    | MM1    | MM2 |       |
| MA1 | 0      | 175    | 97     | 0   |       |
| MA2 | 0.0118 | 0      | 177    | 175 |       |
| MM1 | 0.0066 | 0.0120 | 0      | 97  |       |
| MM2 | 0.0000 | 0.0118 | 0.0066 | 0   |       |
| 83  |        |        |        |     | 11604 |
|     | MA1    | MA2    | MM1    | MM2 |       |
| MA1 | 0      | 279    | 271    | 279 |       |
| MA2 | 0.0240 | 0      | 93     | 0   |       |
| MM1 | 0.0234 | 0.0080 | 0      | 93  |       |
| MM2 | 0.0240 | 0.0000 | 0.0080 | 0   |       |

|     |        |        |        |     |       |
|-----|--------|--------|--------|-----|-------|
| 87  |        |        |        |     | 17781 |
|     | MA1    | MA2    | MM1    | MM2 |       |
| MA1 | 0      | 431    | 418    | 431 |       |
| MA2 | 0.0242 | 0      | 111    | 0   |       |
| MM1 | 0.0235 | 0.0062 | 0      | 111 |       |
| MM2 | 0.0242 | 0.0000 | 0.0062 | 0   |       |
| 92  |        |        |        |     | 11201 |
|     | MA1    | MA2    | MM1    | MM2 |       |
| MA1 | 0      | 191    | 193    | 191 |       |
| MA2 | 0.0171 | 0      | 68     | 0   |       |
| MM1 | 0.0172 | 0.0061 | 0      | 68  |       |
| MM2 | 0.0171 | 0.0000 | 0.0061 | 0   |       |
| 95  |        |        |        |     | 8930  |
|     | MA1    | MA2    | MM1    | MM2 |       |
| MA1 | 0      | 122    | 165    | 122 |       |
| MA2 | 0.0137 | 0      | 87     | 0   |       |
| MM1 | 0.0185 | 0.0097 | 0      | 87  |       |
| MM2 | 0.0137 | 0.0000 | 0.0097 | 0   |       |
| 101 |        |        |        |     | 12248 |
|     | MA1    | MA2    | MM1    | MM2 |       |
| MA1 | 0      | 281    | 0      | 209 |       |
| MA2 | 0.0229 | 0      | 281    | 290 |       |
| MM1 | 0.0000 | 0.0229 | 0      | 209 |       |
| MM2 | 0.0171 | 0.0237 | 0.0171 | 0   |       |
| 102 |        |        |        |     | 9338  |
|     | MA1    | MA2    | MM1    | MM2 |       |
| MA1 | 0      | 127    | 139    | 127 |       |
| MA2 | 0.0136 | 0      | 51     | 0   |       |
| MM1 | 0.0149 | 0.0055 | 0      | 51  |       |
| MM2 | 0.0136 | 0.0000 | 0.0055 | 0   |       |
| 107 |        |        |        |     | 9663  |
|     | MA1    | MA2    | MM1    | MM2 |       |
| MA1 | 0      | 236    | 118    | 122 |       |
| MA2 | 0.0244 | 0      | 236    | 253 |       |
| MM1 | 0.0122 | 0.0244 | 0      | 116 |       |
| MM2 | 0.0126 | 0.0262 | 0.0120 | 0   |       |
| 108 |        |        |        |     | 12313 |
|     | MA1    | MA2    | MM1    | MM2 |       |
| MA1 | 0      | 352    | 362    | 349 |       |
| MA2 | 0.0286 | 0      | 232    | 216 |       |
| MM1 | 0.0294 | 0.0188 | 0      | 227 |       |
| MM2 | 0.0283 | 0.0175 | 0.0184 | 0   |       |

|     |        |        |        |     |       |
|-----|--------|--------|--------|-----|-------|
| 110 |        |        |        |     | 7340  |
|     | MA1    | MA2    | MM1    | MM2 |       |
| MA1 | 0      | 111    | 0      | 52  |       |
| MA2 | 0.0151 | 0      | 111    | 120 |       |
| MM1 | 0.0000 | 0.0151 | 0      | 52  |       |
| MM2 | 0.0071 | 0.0163 | 0.0071 | 0   |       |
| 112 |        |        |        |     | 8278  |
|     | MA1    | MA2    | MM1    | MM2 |       |
| MA1 | 0      | 177    | 0      | 50  |       |
| MA2 | 0.0214 | 0      | 177    | 181 |       |
| MM1 | 0.0000 | 0.0214 | 0      | 50  |       |
| MM2 | 0.0060 | 0.0219 | 0.0060 | 0   |       |
| 121 |        |        |        |     | 2149  |
|     | MA1    | MA2    | MM1    | MM2 |       |
| MA1 | 0      | 23     | 13     | 12  |       |
| MA2 | 0.0107 | 0      | 16     | 17  |       |
| MM1 | 0.0060 | 0.0074 | 0      | 3   |       |
| MM2 | 0.0056 | 0.0079 | 0.0014 | 0   |       |
| 125 |        |        |        |     | 9061  |
|     | MA1    | MA2    | MM1    | MM2 |       |
| MA1 | 0      | 219    | 219    | 217 |       |
| MA2 | 0.0242 | 0      | 0      | 93  |       |
| MM1 | 0.0242 | 0.0000 | 0      | 93  |       |
| MM2 | 0.0239 | 0.0103 | 0.0103 | 0   |       |
| 127 |        |        |        |     | 11815 |
|     | MA1    | MA2    | MM1    | MM2 |       |
| MA1 | 0      | 250    | 127    | 95  |       |
| MA2 | 0.0212 | 0      | 238    | 228 |       |
| MM1 | 0.0107 | 0.0201 | 0      | 114 |       |
| MM2 | 0.0080 | 0.0193 | 0.0096 | 0   |       |
| 131 |        |        |        |     | 12171 |
|     | MA1    | MA2    | MM1    | MM2 |       |
| MA1 | 0      | 0      | 35     | 99  |       |
| MA2 | 0.0000 | 0      | 35     | 99  |       |
| MM1 | 0.0029 | 0.0029 | 0      | 132 |       |
| MM2 | 0.0081 | 0.0081 | 0.0108 | 0   |       |
| 133 |        |        |        |     | 8383  |
|     | MA1    | MA2    | MM1    | MM2 |       |
| MA1 | 0      | 66     | 60     | 103 |       |
| MA2 | 0.0079 | 0      | 6      | 76  |       |
| MM1 | 0.0072 | 0.0007 | 0      | 70  |       |
| MM2 | 0.0123 | 0.0091 | 0.0084 | 0   |       |

|     |        |        |        |     |       |
|-----|--------|--------|--------|-----|-------|
| 141 |        |        |        |     | 6949  |
|     | MA1    | MA2    | MM1    | MM2 |       |
| MA1 | 0      | 145    | 145    | 145 |       |
| MA2 | 0.0209 | 0      | 0      | 73  |       |
| MM1 | 0.0209 | 0.0000 | 0      | 73  |       |
| MM2 | 0.0209 | 0.0105 | 0.0105 | 0   |       |
| 146 |        |        |        |     | 21096 |
|     | MA1    | MA2    | MM1    | MM2 |       |
| MA1 | 0      | 514    | 508    | 514 |       |
| MA2 | 0.0244 | 0      | 358    | 0   |       |
| MM1 | 0.0241 | 0.0170 | 0      | 358 |       |
| MM2 | 0.0244 | 0.0000 | 0.0170 | 0   |       |
| 147 |        |        |        |     | 8173  |
|     | MA1    | MA2    | MM1    | MM2 |       |
| MA1 | 0      | 0      | 109    | 126 |       |
| MA2 | 0.0000 | 0      | 109    | 126 |       |
| MM1 | 0.0133 | 0.0133 | 0      | 60  |       |
| MM2 | 0.0154 | 0.0154 | 0.0073 | 0   |       |
| 149 |        |        |        |     | 15239 |
|     | MA1    | MA2    | MM1    | MM2 |       |
| MA1 | 0      | 346    | 0      | 174 |       |
| MA2 | 0.0227 | 0      | 346    | 352 |       |
| MM1 | 0.0000 | 0.0227 | 0      | 174 |       |
| MM2 | 0.0114 | 0.0231 | 0.0114 | 0   |       |
| 150 |        |        |        |     | 3171  |
|     | MA1    | MA2    | MM1    | MM2 |       |
| MA1 | 0      | 77     | 70     | 77  |       |
| MA2 | 0.0243 | 0      | 36     | 0   |       |
| MM1 | 0.0221 | 0.0114 | 0      | 36  |       |
| MM2 | 0.0243 | 0.0000 | 0.0114 | 0   |       |
| 153 |        |        |        |     | 7908  |
|     | MA1    | MA2    | MM1    | MM2 |       |
| MA1 | 0      | 149    | 151    | 146 |       |
| MA2 | 0.0188 | 0      | 2      | 63  |       |
| MM1 | 0.0191 | 0.0003 | 0      | 61  |       |
| MM2 | 0.0185 | 0.0080 | 0.0077 | 0   |       |
| 158 |        |        |        |     | 17511 |
|     | MA1    | MA2    | MM1    | MM2 |       |
| MA1 | 0      | 529    | 529    | 510 |       |
| MA2 | 0.0302 | 0      | 0      | 260 |       |
| MM1 | 0.0302 | 0.0000 | 0      | 260 |       |
| MM2 | 0.0291 | 0.0148 | 0.0148 | 0   |       |

|     |        |        |        |     |       |
|-----|--------|--------|--------|-----|-------|
| 165 |        |        |        |     | 6918  |
|     | MA1    | MA2    | MM1    | MM2 |       |
| MA1 | 0      | 147    | 147    | 153 |       |
| MA2 | 0.0212 | 0      | 0      | 62  |       |
| MM1 | 0.0212 | 0.0000 | 0      | 62  |       |
| MM2 | 0.0221 | 0.0090 | 0.0090 | 0   |       |
| 167 |        |        |        |     | 11542 |
|     | MA1    | MA2    | MM1    | MM2 |       |
| MA1 | 0      | 220    | 233    | 220 |       |
| MA2 | 0.0191 | 0      | 130    | 0   |       |
| MM1 | 0.0202 | 0.0113 | 0      | 130 |       |
| MM2 | 0.0191 | 0.0000 | 0.0113 | 0   |       |
| 173 |        |        |        |     | 9180  |
|     | MA1    | MA2    | MM1    | MM2 |       |
| MA1 | 0      | 191    | 191    | 191 |       |
| MA2 | 0.0208 | 0      | 68     | 0   |       |
| MM1 | 0.0208 | 0.0074 | 0      | 68  |       |
| MM2 | 0.0208 | 0.0000 | 0.0074 | 0   |       |
| 176 |        |        |        |     | 10626 |
|     | MA1    | MA2    | MM1    | MM2 |       |
| MA1 | 0      | 252    | 231    | 274 |       |
| MA2 | 0.0237 | 0      | 168    | 102 |       |
| MM1 | 0.0217 | 0.0158 | 0      | 141 |       |
| MM2 | 0.0258 | 0.0096 | 0.0133 | 0   |       |
| 178 |        |        |        |     | 7766  |
|     | MA1    | MA2    | MM1    | MM2 |       |
| MA1 | 0      | 74     | 128    | 164 |       |
| MA2 | 0.0095 | 0      | 202    | 202 |       |
| MM1 | 0.0165 | 0.0260 | 0      | 78  |       |
| MM2 | 0.0211 | 0.0260 | 0.0100 | 0   |       |
| 179 |        |        |        |     | 13073 |
|     | MA1    | MA2    | MM1    | MM2 |       |
| MA1 | 0      | 261    | 155    | 0   |       |
| MA2 | 0.0200 | 0      | 275    | 261 |       |
| MM1 | 0.0119 | 0.0210 | 0      | 155 |       |
| MM2 | 0.0000 | 0.0200 | 0.0119 | 0   |       |
| 181 |        |        |        |     | 13000 |
|     | MA1    | MA2    | MM1    | MM2 |       |
| MA1 | 0      | 225    | 140    | 0   |       |
| MA2 | 0.0173 | 0      | 223    | 225 |       |
| MM1 | 0.0108 | 0.0172 | 0      | 140 |       |
| MM2 | 0.0000 | 0.0173 | 0.0108 | 0   |       |

|     |        |        |        |     |       |
|-----|--------|--------|--------|-----|-------|
| 183 |        |        |        |     | 13698 |
|     | MA1    | MA2    | MM1    | MM2 |       |
| MA1 | 0      | 15     | 168    | 15  |       |
| MA2 | 0.0011 | 0      | 155    | 0   |       |
| MM1 | 0.0123 | 0.0113 | 0      | 155 |       |
| MM2 | 0.0011 | 0.0000 | 0.0113 | 0   |       |
| 184 |        |        |        |     | 14196 |
|     | MA1    | MA2    | MM1    | MM2 |       |
| MA1 | 0      | 296    | 296    | 293 |       |
| MA2 | 0.0209 | 0      | 0      | 168 |       |
| MM1 | 0.0209 | 0.0000 | 0      | 168 |       |
| MM2 | 0.0206 | 0.0118 | 0.0118 | 0   |       |
| 189 |        |        |        |     | 12182 |
|     | MA1    | MA2    | MM1    | MM2 |       |
| MA1 | 0      | 229    | 220    | 229 |       |
| MA2 | 0.0188 | 0      | 142    | 0   |       |
| MM1 | 0.0181 | 0.0117 | 0      | 142 |       |
| MM2 | 0.0188 | 0.0000 | 0.0117 | 0   |       |
| 191 |        |        |        |     | 10068 |
|     | MA1    | MA2    | MM1    | MM2 |       |
| MA1 | 0      | 243    | 108    | 115 |       |
| MA2 | 0.0241 | 0      | 235    | 246 |       |
| MM1 | 0.0107 | 0.0233 | 0      | 130 |       |
| MM2 | 0.0114 | 0.0244 | 0.0129 | 0   |       |
| 196 |        |        |        |     | 7081  |
|     | MA1    | MA2    | MM1    | MM2 |       |
| MA1 | 0      | 167    | 195    | 179 |       |
| MA2 | 0.0236 | 0      | 92     | 97  |       |
| MM1 | 0.0275 | 0.0130 | 0      | 106 |       |
| MM2 | 0.0253 | 0.0137 | 0.0150 | 0   |       |
| 198 |        |        |        |     | 15581 |
|     | MA1    | MA2    | MM1    | MM2 |       |
| MA1 | 0      | 403    | 411    | 403 |       |
| MA2 | 0.0259 | 0      | 270    | 0   |       |
| MM1 | 0.0264 | 0.0173 | 0      | 270 |       |
| MM2 | 0.0259 | 0.0000 | 0.0173 | 0   |       |
| 199 |        |        |        |     | 7382  |
|     | MA1    | MA2    | MM1    | MM2 |       |
| MA1 | 0      | 117    | 0      | 51  |       |
| MA2 | 0.0158 | 0      | 117    | 121 |       |
| MM1 | 0.0000 | 0.0158 | 0      | 51  |       |
| MM2 | 0.0069 | 0.0164 | 0.0069 | 0   |       |



|     |        |        |        |     |       |
|-----|--------|--------|--------|-----|-------|
| 203 |        |        |        |     | 21330 |
|     | MA1    | MA2    | MM1    | MM2 |       |
| MA1 | 0      | 445    | 244    | 241 |       |
| MA2 | 0.0209 | 0      | 471    | 461 |       |
| MM1 | 0.0114 | 0.0221 | 0      | 235 |       |
| MM2 | 0.0113 | 0.0216 | 0.0110 | 0   |       |
| 206 |        |        |        |     | 11994 |
|     | MA1    | MA2    | MM1    | MM2 |       |
| MA1 | 0      | 265    | 265    | 265 |       |
| MA2 | 0.0221 | 0      | 0      | 144 |       |
| MM1 | 0.0221 | 0.0000 | 0      | 144 |       |
| MM2 | 0.0221 | 0.0120 | 0.0120 | 0   |       |
| 212 |        |        |        |     | 13556 |
|     | MA1    | MA2    | MM1    | MM2 |       |
| MA1 | 0      | 196    | 200    | 196 |       |
| MA2 | 0.0145 | 0      | 78     | 0   |       |
| MM1 | 0.0148 | 0.0058 | 0      | 78  |       |
| MM2 | 0.0145 | 0.0000 | 0.0058 | 0   |       |
| 213 |        |        |        |     | 10560 |
|     | MA1    | MA2    | MM1    | MM2 |       |
| MA1 | 0      | 184    | 95     | 0   |       |
| MA2 | 0.0174 | 0      | 183    | 184 |       |
| MM1 | 0.0090 | 0.0173 | 0      | 95  |       |
| 215 |        |        |        |     | 26343 |
|     | MA1    | MA2    | MM1    | MM2 |       |
| MA1 | 0      | 598    | 364    | 351 |       |
| MA2 | 0.0227 | 0      | 588    | 625 |       |
| MM1 | 0.0138 | 0.0223 | 0      | 340 |       |
| MM2 | 0.0133 | 0.0237 | 0.0129 | 0   |       |
| 218 |        |        |        |     | 9450  |
|     | MA1    | MA2    | MM1    | MM2 |       |
| MA1 | 0      | 291    | 198    | 194 |       |
| MA2 | 0.0308 | 0      | 323    | 327 |       |
| MM1 | 0.0210 | 0.0342 | 0      | 56  |       |
| MM2 | 0.0205 | 0.0346 | 0.0059 | 0   |       |
| 219 |        |        |        |     | 14751 |
|     | MA1    | MA2    | MM1    | MM2 |       |
| MA1 | 0      | 0      | 734    | 734 |       |
| MA2 | 0.0000 | 0      | 734    | 734 |       |
| MM1 | 0.0498 | 0.0498 | 0      | 0   |       |
| MM2 | 0.0498 | 0.0498 | 0.0000 | 0   |       |
| 223 |        |        |        |     | 13504 |

## Matrices MA-MM

|     | MA1    | MA2    | MM1    | MM2 |       |
|-----|--------|--------|--------|-----|-------|
| MA1 | 0      | 277    | 109    | 128 |       |
| MA2 | 0.0205 | 0      | 283    | 283 |       |
| MM1 | 0.0081 | 0.0210 | 0      | 121 |       |
| MM2 | 0.0095 | 0.0210 | 0.0090 | 0   |       |
| 225 |        |        |        |     | 10566 |
|     | MA1    | MA2    | MM1    | MM2 |       |
| MA1 | 0      | 231    | 225    | 225 |       |
| MA2 | 0.0219 | 0      | 42     | 83  |       |
| MM1 | 0.0213 | 0.0040 | 0      | 81  |       |
| MM2 | 0.0213 | 0.0079 | 0.0077 | 0   |       |
| 226 |        |        |        |     | 12080 |
|     | MA1    | MA2    | MM1    | MM2 |       |
| MA1 | 0      | 0      | 117    | 259 |       |
| MA2 | 0.0000 | 0      | 117    | 259 |       |
| MM1 | 0.0097 | 0.0097 | 0      | 142 |       |
| MM2 | 0.0214 | 0.0214 | 0.0118 | 0   |       |
| 227 |        |        |        |     | 8565  |
|     | MA1    | MA2    | MM1    | MM2 |       |
| MA1 | 0      | 43     | 148    | 176 |       |
| MA2 | 0.0050 | 0      | 171    | 201 |       |
| MM1 | 0.0173 | 0.0200 | 0      | 148 |       |
| MM2 | 0.0205 | 0.0235 | 0.0173 | 0   |       |
| 228 |        |        |        |     | 12250 |
|     | MA1    | MA2    | MM1    | MM2 |       |
| MA1 | 0      | 340    | 346    | 331 |       |
| MA2 | 0.0278 | 0      | 98     | 143 |       |
| MM1 | 0.0282 | 0.0080 | 0      | 157 |       |
| MM2 | 0.0270 | 0.0117 | 0.0128 | 0   |       |
| 237 |        |        |        |     | 15897 |
|     | MA1    | MA2    | MM1    | MM2 |       |
| MA1 | 0      | 369    | 271    | 0   |       |
| MA2 | 0.0232 | 0      | 337    | 369 |       |
| MM1 | 0.0170 | 0.0212 | 0      | 271 |       |
| MM2 | 0.0000 | 0.0232 | 0.0170 | 0   |       |
| 238 |        |        |        |     | 8873  |
|     | MA1    | MA2    | MM1    | MM2 |       |
| MA1 | 0      | 210    | 0      | 112 |       |
| MA2 | 0.0237 | 0      | 210    | 215 |       |
| MM1 | 0.0000 | 0.0237 | 0      | 112 |       |
| MM2 | 0.0126 | 0.0242 | 0.0126 | 0   |       |
| 240 |        |        |        |     | 12228 |

## Matrices MA-MM

|     |        |        |        |     |       |
|-----|--------|--------|--------|-----|-------|
|     | MA1    | MA2    | MM1    | MM2 |       |
| MA1 | 0      | 271    | 130    | 0   |       |
| MA2 | 0.0222 | 0      | 275    | 271 |       |
| MM1 | 0.0106 | 0.0225 | 0      | 130 |       |
| MM2 | 0.0000 | 0.0222 | 0.0106 | 0   |       |
| 248 |        |        |        |     | 8518  |
|     | MA1    | MA2    | MM1    | MM2 |       |
| MA1 | 0      | 189    | 200    | 212 |       |
| MA2 | 0.0222 | 0      | 99     | 110 |       |
| MM1 | 0.0235 | 0.0116 | 0      | 76  |       |
| MM2 | 0.0249 | 0.0129 | 0.0089 | 0   |       |
| 251 |        |        |        |     | 15270 |
|     | MA1    | MA2    | MM1    | MM2 |       |
| MA1 | 0      | 453    | 453    | 451 |       |
| MA2 | 0.0297 | 0      | 0      | 268 |       |
| MM1 | 0.0297 | 0.0000 | 0      | 268 |       |
| MM2 | 0.0295 | 0.0176 | 0.0176 | 0   |       |
| 256 |        |        |        |     | 10867 |
|     | MA1    | MA2    | MM1    | MM2 |       |
| MA1 | 0      | 188    | 183    | 188 |       |
| MA2 | 0.0173 | 0      | 64     | 0   |       |
| MM1 | 0.0168 | 0.0059 | 0      | 64  |       |
| MM2 | 0.0173 | 0.0000 | 0.0059 | 0   |       |
| 261 |        |        |        |     | 9635  |
|     | MA1    | MA2    | MM1    | MM2 |       |
| MA1 | 0      | 226    | 218    | 226 |       |
| MA2 | 0.0235 | 0      | 92     | 0   |       |
| MM1 | 0.0226 | 0.0095 | 0      | 92  |       |
| MM2 | 0.0235 | 0.0000 | 0.0095 | 0   |       |
| 264 |        |        |        |     | 5077  |
|     | MA1    | MA2    | MM1    | MM2 |       |
| MA1 | 0      | 220    | 237    | 233 |       |
| MA2 | 0.0433 | 0      | 167    | 140 |       |
| MM1 | 0.0467 | 0.0329 | 0      | 27  |       |
| MM2 | 0.0459 | 0.0276 | 0.0053 | 0   |       |
| 267 |        |        |        |     | 12084 |
|     | MA1    | MA2    | MM1    | MM2 |       |
| MA1 | 0      | 114    | 109    | 95  |       |
| MA2 | 0.0094 | 0      | 121    | 123 |       |
| MM1 | 0.0090 | 0.0100 | 0      | 67  |       |
| MM2 | 0.0079 | 0.0102 | 0.0055 | 0   |       |
| 272 |        |        |        |     | 8749  |

## Matrices MA-MM

|     | MA1    | MA2    | MM1    | MM2 |       |
|-----|--------|--------|--------|-----|-------|
| MA1 | 0      | 164    | 169    | 164 |       |
| MA2 | 0.0187 | 0      | 75     | 0   |       |
| MM1 | 0.0193 | 0.0086 | 0      | 75  |       |
| MM2 | 0.0187 | 0.0000 | 0.0086 | 0   |       |
| 277 |        |        |        |     | 14114 |
|     | MA1    | MA2    | MM1    | MM2 |       |
| MA1 | 0      | 222    | 228    | 221 |       |
| MA2 | 0.0157 | 0      | 63     | 109 |       |
| MM1 | 0.0162 | 0.0045 | 0      | 127 |       |
| MM2 | 0.0157 | 0.0077 | 0.0090 | 0   |       |
| 280 |        |        |        |     | 6919  |
|     | MA1    | MA2    | MM1    | MM2 |       |
| MA1 | 0      | 91     | 104    | 97  |       |
| MA2 | 0.0132 | 0      | 56     | 33  |       |
| MM1 | 0.0150 | 0.0081 | 0      | 58  |       |
| MM2 | 0.0140 | 0.0048 | 0.0084 | 0   |       |
| 282 |        |        |        |     | 7450  |
|     | MA1    | MA2    | MM1    | MM2 |       |
| MA1 | 0      | 176    | 122    | 104 |       |
| MA2 | 0.0236 | 0      | 196    | 161 |       |
| MM1 | 0.0164 | 0.0263 | 0      | 107 |       |
| MM2 | 0.0140 | 0.0216 | 0.0144 | 0   |       |
| 291 |        |        |        |     | 18560 |
|     | MA1    | MA2    | MM1    | MM2 |       |
| MA1 | 0      | 367    | 386    | 371 |       |
| MA2 | 0.0198 | 0      | 171    | 193 |       |
| MM1 | 0.0208 | 0.0092 | 0      | 149 |       |
| MM2 | 0.0200 | 0.0104 | 0.0080 | 0   |       |
| 293 |        |        |        |     | 11376 |
|     | MA1    | MA2    | MM1    | MM2 |       |
| MA1 | 0      | 223    | 223    | 217 |       |
| MA2 | 0.0196 | 0      | 0      | 147 |       |
| MM1 | 0.0196 | 0.0000 | 0      | 147 |       |
| MM2 | 0.0191 | 0.0129 | 0.0129 | 0   |       |
| 295 |        |        |        |     | 27334 |
|     | MA1    | MA2    | MM1    | MM2 |       |
| MA1 | 0      | 303    | 0      | 282 |       |
| MA2 | 0.0111 | 0      | 303    | 442 |       |
| MM1 | 0.0000 | 0.0111 | 0      | 282 |       |
| MM2 | 0.0103 | 0.0162 | 0.0103 | 0   |       |
| 297 |        |        |        |     | 8864  |

|     | MA1    | MA2    | MM1    | MM2 |       |
|-----|--------|--------|--------|-----|-------|
| MA1 | 0      | 254    | 180    | 0   |       |
| MA2 | 0.0287 | 0      | 256    | 254 |       |
| MM1 | 0.0203 | 0.0289 | 0      | 180 |       |
| MM2 | 0.0000 | 0.0287 | 0.0203 | 0   |       |
| 299 |        |        |        |     | 16716 |
|     | MA1    | MA2    | MM1    | MM2 |       |
| MA1 | 0      | 348    | 333    | 344 |       |
| MA2 | 0.0208 | 0      | 202    | 205 |       |
| MM1 | 0.0199 | 0.0121 | 0      | 188 |       |
| MM2 | 0.0206 | 0.0123 | 0.0112 | 0   |       |
| 301 |        |        |        |     | 9426  |
|     | MA1    | MA2    | MM1    | MM2 |       |
| MA1 | 0      | 183    | 190    | 192 |       |
| MA2 | 0.0194 | 0      | 93     | 104 |       |
| MM1 | 0.0202 | 0.0099 | 0      | 79  |       |
| MM2 | 0.0204 | 0.0110 | 0.0084 | 0   |       |
| 304 |        |        |        |     | 27288 |
|     | MA1    | MA2    | MM1    | MM2 |       |
| MA1 | 0      | 603    | 617    | 603 |       |
| MA2 | 0.0221 | 0      | 302    | 0   |       |
| MM1 | 0.0226 | 0.0111 | 0      | 302 |       |
| MM2 | 0.0221 | 0.0000 | 0.0111 | 0   |       |
| 305 |        |        |        |     | 18319 |
|     | MA1    | MA2    | MM1    | MM2 |       |
| MA1 | 0      | 502    | 514    | 500 |       |
| MA2 | 0.0274 | 0      | 240    | 218 |       |
| MM1 | 0.0281 | 0.0131 | 0      | 171 |       |
| MM2 | 0.0273 | 0.0119 | 0.0093 | 0   |       |
| 313 |        |        |        |     | 10254 |
|     | MA1    | MA2    | MM1    | MM2 |       |
| MA1 | 0      | 253    | 0      | 99  |       |
| MA2 | 0.0247 | 0      | 253    | 265 |       |
| MM1 | 0.0000 | 0.0247 | 0      | 99  |       |
| MM2 | 0.0097 | 0.0258 | 0.0097 | 0   |       |
| 314 |        |        |        |     | 9821  |
|     | MA1    | MA2    | MM1    | MM2 |       |
| MA1 | 0      | 168    | 0      | 115 |       |
| MA2 | 0.0171 | 0      | 168    | 153 |       |
| MM1 | 0.0000 | 0.0171 | 0      | 115 |       |
| MM2 | 0.0117 | 0.0156 | 0.0117 | 0   |       |
| 315 |        |        |        |     | 10166 |

|     | MA1    | MA2    | MM1    | MM2 |       |
|-----|--------|--------|--------|-----|-------|
| MA1 | 0      | 108    | 45     | 65  |       |
| MA2 | 0.0106 | 0      | 113    | 101 |       |
| MM1 | 0.0044 | 0.0111 | 0      | 68  |       |
| MM2 | 0.0064 | 0.0099 | 0.0067 | 0   |       |
| 318 |        |        |        |     | 11241 |
|     | MA1    | MA2    | MM1    | MM2 |       |
| MA1 | 0      | 204    | 207    | 204 |       |
| MA2 | 0.0181 | 0      | 88     | 0   |       |
| MM1 | 0.0184 | 0.0078 | 0      | 88  |       |
| MM2 | 0.0181 | 0.0000 | 0.0078 | 0   |       |
| 322 |        |        |        |     | 8176  |
|     | MA1    | MA2    | MM1    | MM2 |       |
| MA1 | 0      | 112    | 108    | 118 |       |
| MA2 | 0.0137 | 0      | 37     | 40  |       |
| MM1 | 0.0132 | 0.0045 | 0      | 43  |       |
| MM2 | 0.0144 | 0.0049 | 0.0053 | 0   |       |
| 324 |        |        |        |     | 18535 |
|     | MA1    | MA2    | MM1    | MM2 |       |
| MA1 | 0      | 555    | 355    | 285 |       |
| MA2 | 0.0299 | 0      | 578    | 555 |       |
| MM1 | 0.0192 | 0.0312 | 0      | 333 |       |
| MM2 | 0.0154 | 0.0299 | 0.0180 | 0   |       |
| 325 |        |        |        |     | 12373 |
|     | MA1    | MA2    | MM1    | MM2 |       |
| MA1 | 0      | 305    | 0      | 92  |       |
| MA2 | 0.0247 | 0      | 305    | 310 |       |
| MM1 | 0.0000 | 0.0247 | 0      | 92  |       |
| MM2 | 0.0074 | 0.0251 | 0.0074 | 0   |       |
| 331 |        |        |        |     | 10557 |
|     | MA1    | MA2    | MM1    | MM2 |       |
| MA1 | 0      | 217    | 69     | 0   |       |
| MA2 | 0.0206 | 0      | 222    | 217 |       |
| MM1 | 0.0065 | 0.0210 | 0      | 69  |       |
| MM2 | 0.0000 | 0.0206 | 0.0065 | 0   |       |
| 333 |        |        |        |     | 14395 |
|     | MA1    | MA2    | MM1    | MM2 |       |
| MA1 | 0      | 339    | 340    | 337 |       |
| MA2 | 0.0235 | 0      | 3      | 124 |       |
| MM1 | 0.0236 | 0.0002 | 0      | 121 |       |
| MM2 | 0.0234 | 0.0086 | 0.0084 | 0   |       |
| 334 |        |        |        |     | 15613 |

## Matrices MA-MM

|     | MA1    | MA2    | MM1    | MM2 |       |
|-----|--------|--------|--------|-----|-------|
| MA1 | 0      | 479    | 479    | 466 |       |
| MA2 | 0.0307 | 0      | 0      | 155 |       |
| MM1 | 0.0307 | 0.0000 | 0      | 155 |       |
| MM2 | 0.0298 | 0.0099 | 0.0099 | 0   |       |
| 341 |        |        |        |     | 11160 |
|     | MA1    | MA2    | MM1    | MM2 |       |
| MA1 | 0      | 261    | 252    | 264 |       |
| MA2 | 0.0234 | 0      | 97     | 142 |       |
| MM1 | 0.0226 | 0.0087 | 0      | 149 |       |
| MM2 | 0.0237 | 0.0127 | 0.0134 | 0   |       |
| 343 |        |        |        |     | 15745 |
|     | MA1    | MA2    | MM1    | MM2 |       |
| MA1 | 0      | 280    | 0      | 100 |       |
| MA2 | 0.0178 | 0      | 280    | 305 |       |
| MM1 | 0.0000 | 0.0178 | 0      | 100 |       |
| MM2 | 0.0064 | 0.0194 | 0.0064 | 0   |       |
| 352 |        |        |        |     | 9213  |
|     | MA1    | MA2    | MM1    | MM2 |       |
| MA1 | 0      | 0      | 288    | 220 |       |
| MA2 | 0.0000 | 0      | 288    | 220 |       |
| MM1 | 0.0313 | 0.0313 | 0      | 189 |       |
| MM2 | 0.0239 | 0.0239 | 0.0205 | 0   |       |
| 353 |        |        |        |     | 10113 |
|     | MA1    | MA2    | MM1    | MM2 |       |
| MA1 | 0      | 196    | 196    | 203 |       |
| MA2 | 0.0194 | 0      | 97     | 113 |       |
| MM1 | 0.0194 | 0.0096 | 0      | 102 |       |
| MM2 | 0.0201 | 0.0112 | 0.0101 | 0   |       |
| 356 |        |        |        |     | 11976 |
|     | MA1    | MA2    | MM1    | MM2 |       |
| MA1 | 0      | 229    | 230    | 245 |       |
| MA2 | 0.0191 | 0      | 79     | 123 |       |
| MM1 | 0.0192 | 0.0066 | 0      | 90  |       |
| MM2 | 0.0205 | 0.0103 | 0.0075 | 0   |       |
| 357 |        |        |        |     | 9415  |
|     | MA1    | MA2    | MM1    | MM2 |       |
| MA1 | 0      | 214    | 120    | 120 |       |
| MA2 | 0.0227 | 0      | 216    | 217 |       |
| MM1 | 0.0127 | 0.0229 | 0      | 99  |       |
| MM2 | 0.0127 | 0.0230 | 0.0105 | 0   |       |
| 363 |        |        |        |     | 9876  |

|     | MA1    | MA2    | MM1    | MM2 |       |
|-----|--------|--------|--------|-----|-------|
| MA1 | 0      | 0      | 208    | 180 |       |
| MA2 | 0.0000 | 0      | 208    | 180 |       |
| MM1 | 0.0211 | 0.0211 | 0      | 126 |       |
| MM2 | 0.0182 | 0.0182 | 0.0128 | 0   |       |
| 365 |        |        |        |     | 10627 |
|     | MA1    | MA2    | MM1    | MM2 |       |
| MA1 | 0      | 281    | 113    | 0   |       |
| MA2 | 0.0264 | 0      | 269    | 281 |       |
| MM1 | 0.0106 | 0.0253 | 0      | 113 |       |
| MM2 | 0.0000 | 0.0264 | 0.0106 | 0   |       |
| 367 |        |        |        |     | 11533 |
|     | MA1    | MA2    | MM1    | MM2 |       |
| MA1 | 0      | 171    | 85     | 62  |       |
| MA2 | 0.0148 | 0      | 197    | 172 |       |
| MM1 | 0.0074 | 0.0171 | 0      | 92  |       |
| MM2 | 0.0054 | 0.0149 | 0.0080 | 0   |       |
| 368 |        |        |        |     | 14466 |
|     | MA1    | MA2    | MM1    | MM2 |       |
| MA1 | 0      | 318    | 130    | 0   |       |
| MA2 | 0.0220 | 0      | 323    | 318 |       |
| MM1 | 0.0090 | 0.0223 | 0      | 130 |       |
| MM2 | 0.0000 | 0.0220 | 0.0090 | 0   |       |
| 372 |        |        |        |     | 11051 |
|     | MA1    | MA2    | MM1    | MM2 |       |
| MA1 | 0      | 0      | 129    | 0   |       |
| MA2 | 0.0000 | 0      | 129    | 0   |       |
| MM1 | 0.0117 | 0.0117 | 0      | 129 |       |
| MM2 | 0.0000 | 0.0000 | 0.0117 | 0   |       |
| 373 |        |        |        |     | 7207  |
|     | MA1    | MA2    | MM1    | MM2 |       |
| MA1 | 0      | 192    | 67     | 115 |       |
| MA2 | 0.0266 | 0      | 186    | 201 |       |
| MM1 | 0.0093 | 0.0258 | 0      | 118 |       |
| MM2 | 0.0160 | 0.0279 | 0.0164 | 0   |       |
| 374 |        |        |        |     | 14227 |
|     | MA1    | MA2    | MM1    | MM2 |       |
| MA1 | 0      | 343    | 167    | 146 |       |
| MA2 | 0.0241 | 0      | 344    | 322 |       |
| MM1 | 0.0117 | 0.0242 | 0      | 182 |       |
| MM2 | 0.0103 | 0.0226 | 0.0128 | 0   |       |
| 379 |        |        |        |     | 8037  |



## Matrices MA-MM

|     |        |        |        |     |       |
|-----|--------|--------|--------|-----|-------|
|     | MA1    | MA2    | MM1    | MM2 |       |
| MA1 | 0      | 393    | 387    | 393 |       |
| MA2 | 0.0489 | 0      | 110    | 0   |       |
| MM1 | 0.0482 | 0.0137 | 0      | 110 |       |
| MM2 | 0.0489 | 0.0000 | 0.0137 | 0   |       |
| 382 |        |        |        |     | 14446 |
|     | MA1    | MA2    | MM1    | MM2 |       |
| MA1 | 0      | 334    | 280    | 334 |       |
| MA2 | 0.0231 | 0      | 196    | 0   |       |
| MM1 | 0.0194 | 0.0136 | 0      | 196 |       |
| MM2 | 0.0231 | 0.0000 | 0.0136 | 0   |       |
| 383 |        |        |        |     | 9559  |
|     | MA1    | MA2    | MM1    | MM2 |       |
| MA1 | 0      | 249    | 95     | 0   |       |
| MA2 | 0.0260 | 0      | 249    | 249 |       |
| MM1 | 0.0099 | 0.0260 | 0      | 95  |       |
| MM2 | 0.0000 | 0.0260 | 0.0099 | 0   |       |
| 386 |        |        |        |     | 14656 |
|     | MA1    | MA2    | MM1    | MM2 |       |
| MA1 | 0      | 143    | 166    | 143 |       |
| MA2 | 0.0098 | 0      | 67     | 0   |       |
| MM1 | 0.0113 | 0.0046 | 0      | 67  |       |
| MM2 | 0.0098 | 0.0000 | 0.0046 | 0   |       |
| 388 |        |        |        |     | 9821  |
|     | MA1    | MA2    | MM1    | MM2 |       |
| MA1 | 0      | 108    | 8      | 8   |       |
| MA2 | 0.0110 | 0      | 116    | 116 |       |
| MM1 | 0.0008 | 0.0118 | 0      | 0   |       |
| MM2 | 0.0008 | 0.0118 | 0.0000 | 0   |       |
| 389 |        |        |        |     | 13805 |
|     | MA1    | MA2    | MM1    | MM2 |       |
| MA1 | 0      | 288    | 288    | 269 |       |
| MA2 | 0.0209 | 0      | 0      | 110 |       |
| MM1 | 0.0209 | 0.0000 | 0      | 110 |       |
| MM2 | 0.0195 | 0.0080 | 0.0080 | 0   |       |
| 392 |        |        |        |     | 7787  |
|     | MA1    | MA2    | MM1    | MM2 |       |
| MA1 | 0      | 197    | 218    | 195 |       |
| MA2 | 0.0253 | 0      | 137    | 91  |       |
| MM1 | 0.0280 | 0.0176 | 0      | 123 |       |
| MM2 | 0.0250 | 0.0117 | 0.0158 | 0   |       |
| 393 |        |        |        |     | 19247 |

## Matrices MA-MM

|     | MA1    | MA2    | MM1    | MM2 |       |
|-----|--------|--------|--------|-----|-------|
| MA1 | 0      | 371    | 4      | 186 |       |
| MA2 | 0.0193 | 0      | 373    | 404 |       |
| MM1 | 0.0002 | 0.0194 | 0      | 190 |       |
| MM2 | 0.0097 | 0.0210 | 0.0099 | 0   |       |
| 396 |        |        |        |     | 11067 |
|     | MA1    | MA2    | MM1    | MM2 |       |
| MA1 | 0      | 3      | 259    | 241 |       |
| MA2 | 0.0003 | 0      | 260    | 242 |       |
| MM1 | 0.0234 | 0.0235 | 0      | 116 |       |
| MM2 | 0.0218 | 0.0219 | 0.0105 | 0   |       |
| 398 |        |        |        |     | 10345 |
|     | MA1    | MA2    | MM1    | MM2 |       |
| MA1 | 0      | 197    | 127    | 123 |       |
| MA2 | 0.0190 | 0      | 218    | 205 |       |
| MM1 | 0.0123 | 0.0211 | 0      | 143 |       |
| MM2 | 0.0119 | 0.0198 | 0.0138 | 0   |       |
| 404 |        |        |        |     | 18959 |
|     | MA1    | MA2    | MM1    | MM2 |       |
| MA1 | 0      | 327    | 150    | 0   |       |
| MA2 | 0.0172 | 0      | 335    | 327 |       |
| MM1 | 0.0079 | 0.0177 | 0      | 150 |       |
| MM2 | 0.0000 | 0.0172 | 0.0079 | 0   |       |
| 408 |        |        |        |     | 7635  |
|     | MA1    | MA2    | MM1    | MM2 |       |
| MA1 | 0      | 349    | 303    | 303 |       |
| MA2 | 0.0457 | 0      | 229    | 200 |       |
| MM1 | 0.0397 | 0.0300 | 0      | 29  |       |
| MM2 | 0.0397 | 0.0262 | 0.0038 | 0   |       |
| 413 |        |        |        |     | 10286 |
|     | MA1    | MA2    | MM1    | MM2 |       |
| MA1 | 0      | 105    | 113    | 105 |       |
| MA2 | 0.0102 | 0      | 76     | 0   |       |
| MM1 | 0.0110 | 0.0074 | 0      | 76  |       |
| MM2 | 0.0102 | 0.0000 | 0.0074 | 0   |       |
| 416 |        |        |        |     | 6241  |
|     | MA1    | MA2    | MM1    | MM2 |       |
| MA1 | 0      | 155    | 158    | 138 |       |
| MA2 | 0.0248 | 0      | 77     | 71  |       |
| MM1 | 0.0253 | 0.0123 | 0      | 95  |       |
| MM2 | 0.0221 | 0.0114 | 0.0152 | 0   |       |
| 420 |        |        |        |     | 7937  |

Table S7: Difference Matrices.

## Matrices MA-MM

Laine et al.  
Supporting Information

|     | MA1    | MA2    | MM1    | MM2 |       |
|-----|--------|--------|--------|-----|-------|
| MA1 | 0      | 137    | 94     | 0   |       |
| MA2 | 0.0173 | 0      | 147    | 137 |       |
| MM1 | 0.0118 | 0.0185 | 0      | 94  |       |
| MM2 | 0.0000 | 0.0173 | 0.0118 | 0   |       |
| 421 |        |        |        |     | 7167  |
|     | MA1    | MA2    | MM1    | MM2 |       |
| MA1 | 0      | 150    | 58     | 52  |       |
| MA2 | 0.0209 | 0      | 138    | 135 |       |
| MM1 | 0.0081 | 0.0193 | 0      | 52  |       |
| MM2 | 0.0073 | 0.0188 | 0.0073 | 0   |       |
| 424 |        |        |        |     | 10708 |
|     | MA1    | MA2    | MM1    | MM2 |       |
| MA1 | 0      | 237    | 255    | 237 |       |
| MA2 | 0.0221 | 0      | 131    | 0   |       |
| MM1 | 0.0238 | 0.0122 | 0      | 131 |       |
| MM2 | 0.0221 | 0.0000 | 0.0122 | 0   |       |
| 429 |        |        |        |     | 25264 |
|     | MA1    | MA2    | MM1    | MM2 |       |
| MA1 | 0      | 725    | 386    | 362 |       |
| MA2 | 0.0287 | 0      | 718    | 701 |       |
| MM1 | 0.0153 | 0.0284 | 0      | 360 |       |
| MM2 | 0.0143 | 0.0277 | 0.0142 | 0   |       |
| 430 |        |        |        |     | 6031  |
|     | MA1    | MA2    | MM1    | MM2 |       |
| MA1 | 0      | 110    | 175    | 121 |       |
| MA2 | 0.0182 | 0      | 107    | 51  |       |
| MM1 | 0.0290 | 0.0177 | 0      | 70  |       |
| MM2 | 0.0201 | 0.0085 | 0.0116 | 0   |       |
| 433 |        |        |        |     | 8284  |
|     | MA1    | MA2    | MM1    | MM2 |       |
| MA1 | 0      | 187    | 187    | 189 |       |
| MA2 | 0.0226 | 0      | 0      | 58  |       |
| MM1 | 0.0226 | 0.0000 | 0      | 58  |       |
| MM2 | 0.0228 | 0.0070 | 0.0070 | 0   |       |
| 435 |        |        |        |     | 11589 |
|     | MA1    | MA2    | MM1    | MM2 |       |
| MA1 | 0      | 184    | 184    | 177 |       |
| MA2 | 0.0159 | 0      | 0      | 48  |       |
| MM1 | 0.0159 | 0.0000 | 0      | 48  |       |
| MM2 | 0.0153 | 0.0041 | 0.0041 | 0   |       |
| 436 |        |        |        |     | 16692 |

## Matrices MA-MM

|     |        |        |        |     |       |
|-----|--------|--------|--------|-----|-------|
|     | MA1    | MA2    | MM1    | MM2 |       |
| MA1 | 0      | 353    | 355    | 349 |       |
| MA2 | 0.0211 | 0      | 196    | 208 |       |
| MM1 | 0.0213 | 0.0117 | 0      | 20  |       |
| MM2 | 0.0209 | 0.0125 | 0.0012 | 0   |       |
| 438 |        |        |        |     | 7986  |
|     | MA1    | MA2    | MM1    | MM2 |       |
| MA1 | 0      | 178    | 195    | 178 |       |
| MA2 | 0.0223 | 0      | 82     | 0   |       |
| MM1 | 0.0244 | 0.0103 | 0      | 82  |       |
| MM2 | 0.0223 | 0.0000 | 0.0103 | 0   |       |
| 439 |        |        |        |     | 25973 |
|     | MA1    | MA2    | MM1    | MM2 |       |
| MA1 | 0      | 631    | 279    | 285 |       |
| MA2 | 0.0243 | 0      | 613    | 624 |       |
| MM1 | 0.0107 | 0.0236 | 0      | 278 |       |
| MM2 | 0.0110 | 0.0240 | 0.0107 | 0   |       |
| 441 |        |        |        |     | 9595  |
|     | MA1    | MA2    | MM1    | MM2 |       |
| MA1 | 0      | 175    | 175    | 182 |       |
| MA2 | 0.0182 | 0      | 0      | 83  |       |
| MM1 | 0.0182 | 0.0000 | 0      | 83  |       |
| MM2 | 0.0190 | 0.0087 | 0.0087 | 0   |       |
| 442 |        |        |        |     | 14357 |
|     | MA1    | MA2    | MM1    | MM2 |       |
| MA1 | 0      | 269    | 260    | 269 |       |
| MA2 | 0.0187 | 0      | 126    | 0   |       |
| MM1 | 0.0181 | 0.0088 | 0      | 126 |       |
| MM2 | 0.0187 | 0.0000 | 0.0088 | 0   |       |
| 453 |        |        |        |     | 8596  |
|     | MA1    | MA2    | MM1    | MM2 |       |
| MA1 | 0      | 0      | 354    | 351 |       |
| MA2 | 0.0000 | 0      | 354    | 351 |       |
| MM1 | 0.0412 | 0.0412 | 0      | 13  |       |
| MM2 | 0.0408 | 0.0408 | 0.0015 | 0   |       |
| 456 |        |        |        |     | 7080  |
|     | MA1    | MA2    | MM1    | MM2 |       |
| MA1 | 0      | 88     | 0      | 0   |       |
| MA2 | 0.0124 | 0      | 88     | 88  |       |
| MM1 | 0.0000 | 0.0124 | 0      | 0   |       |
| MM2 | 0.0000 | 0.0124 | 0.0000 | 0   |       |
| 464 |        |        |        |     | 12034 |

|     |        |        |        |     |       |
|-----|--------|--------|--------|-----|-------|
|     | MA1    | MA2    | MM1    | MM2 |       |
| MA1 | 0      | 258    | 243    | 251 |       |
| MA2 | 0.0214 | 0      | 98     | 117 |       |
| MM1 | 0.0202 | 0.0081 | 0      | 104 |       |
| MM2 | 0.0209 | 0.0097 | 0.0086 | 0   |       |
| 469 |        |        |        |     | 10254 |
|     | MA1    | MA2    | MM1    | MM2 |       |
| MA1 | 0      | 255    | 255    | 237 |       |
| MA2 | 0.0249 | 0      | 0      | 105 |       |
| MM1 | 0.0249 | 0.0000 | 0      | 105 |       |
| MM2 | 0.0231 | 0.0102 | 0.0102 | 0   |       |
| 470 |        |        |        |     | 21569 |
|     | MA1    | MA2    | MM1    | MM2 |       |
| MA1 | 0      | 32     | 320    | 32  |       |
| MA2 | 0.0015 | 0      | 288    | 0   |       |
| MM1 | 0.0148 | 0.0134 | 0      | 288 |       |
| MM2 | 0.0015 | 0.0000 | 0.0134 | 0   |       |
| 471 |        |        |        |     | 14756 |
|     | MA1    | MA2    | MM1    | MM2 |       |
| MA1 | 0      | 148    | 72     | 0   |       |
| MA2 | 0.0100 | 0      | 149    | 148 |       |
| MM1 | 0.0049 | 0.0101 | 0      | 72  |       |
| MM2 | 0.0000 | 0.0100 | 0.0049 | 0   |       |
| 473 |        |        |        |     | 13723 |
|     | MA1    | MA2    | MM1    | MM2 |       |
| MA1 | 0      | 227    | 238    | 242 |       |
| MA2 | 0.0165 | 0      | 98     | 100 |       |
| MM1 | 0.0173 | 0.0071 | 0      | 86  |       |
| MM2 | 0.0176 | 0.0073 | 0.0063 | 0   |       |
| 480 |        |        |        |     | 10830 |
|     | MA1    | MA2    | MM1    | MM2 |       |
| MA1 | 0      | 359    | 165    | 164 |       |
| MA2 | 0.0331 | 0      | 354    | 350 |       |
| MM1 | 0.0152 | 0.0327 | 0      | 64  |       |
| MM2 | 0.0151 | 0.0323 | 0.0059 | 0   |       |
| 483 |        |        |        |     | 14603 |
|     | MA1    | MA2    | MM1    | MM2 |       |
| MA1 | 0      | 405    | 0      | 193 |       |
| MA2 | 0.0277 | 0      | 405    | 410 |       |
| MM1 | 0.0000 | 0.0277 | 0      | 193 |       |
| MM2 | 0.0132 | 0.0281 | 0.0132 | 0   |       |
| 485 |        |        |        |     | 9818  |

## Matrices MA-MM

|     |        |        |        |     |       |
|-----|--------|--------|--------|-----|-------|
|     | MA1    | MA2    | MM1    | MM2 |       |
| MA1 | 0      | 99     | 35     | 38  |       |
| MA2 | 0.0101 | 0      | 100    | 100 |       |
| MM1 | 0.0036 | 0.0102 | 0      | 15  |       |
| MM2 | 0.0039 | 0.0102 | 0.0015 | 0   |       |
| 488 |        |        |        |     | 19336 |
|     | MA1    | MA2    | MM1    | MM2 |       |
| MA1 | 0      | 65     | 315    | 65  |       |
| MA2 | 0.0034 | 0      | 282    | 0   |       |
| MM1 | 0.0163 | 0.0146 | 0      | 282 |       |
| MM2 | 0.0034 | 0.0000 | 0.0146 | 0   |       |
| 489 |        |        |        |     | 11697 |
|     | MA1    | MA2    | MM1    | MM2 |       |
| MA1 | 0      | 127    | 145    | 127 |       |
| MA2 | 0.0109 | 0      | 81     | 0   |       |
| MM1 | 0.0124 | 0.0069 | 0      | 81  |       |
| MM2 | 0.0109 | 0.0000 | 0.0069 | 0   |       |
| 491 |        |        |        |     | 12310 |
|     | MA1    | MA2    | MM1    | MM2 |       |
| MA1 | 0      | 273    | 109    | 102 |       |
| MA2 | 0.0222 | 0      | 260    | 258 |       |
| MM1 | 0.0089 | 0.0211 | 0      | 96  |       |
| MM2 | 0.0083 | 0.0210 | 0.0078 | 0   |       |
| 493 |        |        |        |     | 14885 |
|     | MA1    | MA2    | MM1    | MM2 |       |
| MA1 | 0      | 200    | 103    | 89  |       |
| MA2 | 0.0134 | 0      | 217    | 212 |       |
| MM1 | 0.0069 | 0.0146 | 0      | 91  |       |
| MM2 | 0.0060 | 0.0142 | 0.0061 | 0   |       |
| 495 |        |        |        |     | 13969 |
|     | MA1    | MA2    | MM1    | MM2 |       |
| MA1 | 0      | 308    | 296    | 308 |       |
| MA2 | 0.0220 | 0      | 141    | 0   |       |
| MM1 | 0.0212 | 0.0101 | 0      | 141 |       |
| MM2 | 0.0220 | 0.0000 | 0.0101 | 0   |       |
| 497 |        |        |        |     | 15397 |
|     | MA1    | MA2    | MM1    | MM2 |       |
| MA1 | 0      | 407    | 248    | 0   |       |
| MA2 | 0.0264 | 0      | 425    | 407 |       |
| MM1 | 0.0161 | 0.0276 | 0      | 248 |       |
| MM2 | 0.0000 | 0.0264 | 0.0161 | 0   |       |
| 499 |        |        |        |     | 7182  |

## Matrices MA-MM

|     | MA1    | MA2    | MM1    | MM2 |       |
|-----|--------|--------|--------|-----|-------|
| MA1 | 0      | 119    | 119    | 128 |       |
| MA2 | 0.0166 | 0      | 0      | 66  |       |
| MM1 | 0.0166 | 0.0000 | 0      | 66  |       |
| MM2 | 0.0178 | 0.0092 | 0.0092 | 0   |       |
| 500 |        |        |        |     | 24012 |
|     | MA1    | MA2    | MM1    | MM2 |       |
| MA1 | 0      | 384    | 280    | 0   |       |
| MA2 | 0.0160 | 0      | 505    | 384 |       |
| MM1 | 0.0117 | 0.0210 | 0      | 280 |       |
| MM2 | 0.0000 | 0.0160 | 0.0117 | 0   |       |
| 501 |        |        |        |     | 14169 |
|     | MA1    | MA2    | MM1    | MM2 |       |
| MA1 | 0      | 257    | 265    | 237 |       |
| MA2 | 0.0181 | 0      | 59     | 80  |       |
| MM1 | 0.0187 | 0.0042 | 0      | 139 |       |
| MM2 | 0.0167 | 0.0056 | 0.0098 | 0   |       |
| 503 |        |        |        |     | 10712 |
|     | MA1    | MA2    | MM1    | MM2 |       |
| MA1 | 0      | 277    | 0      | 147 |       |
| MA2 | 0.0259 | 0      | 277    | 272 |       |
| MM1 | 0.0000 | 0.0259 | 0      | 147 |       |
| MM2 | 0.0137 | 0.0254 | 0.0137 | 0   |       |
| 508 |        |        |        |     | 12746 |
|     | MA1    | MA2    | MM1    | MM2 |       |
| MA1 | 0      | 328    | 324    | 337 |       |
| MA2 | 0.0257 | 0      | 152    | 153 |       |
| MM1 | 0.0254 | 0.0119 | 0      | 192 |       |
| MM2 | 0.0264 | 0.0120 | 0.0151 | 0   |       |
| 509 |        |        |        |     | 12335 |
|     | MA1    | MA2    | MM1    | MM2 |       |
| MA1 | 0      | 210    | 89     | 102 |       |
| MA2 | 0.0170 | 0      | 200    | 195 |       |
| MM1 | 0.0072 | 0.0162 | 0      | 79  |       |
| MM2 | 0.0083 | 0.0158 | 0.0064 | 0   |       |
| 519 |        |        |        |     | 13495 |
|     | MA1    | MA2    | MM1    | MM2 |       |
| MA1 | 0      | 240    | 0      | 44  |       |
| MA2 | 0.0178 | 0      | 240    | 229 |       |
| MM1 | 0.0000 | 0.0178 | 0      | 44  |       |
| MM2 | 0.0033 | 0.0170 | 0.0033 | 0   |       |
| 520 |        |        |        |     | 7272  |

## Matrices MA-MM

|     |        |        |        |     |       |
|-----|--------|--------|--------|-----|-------|
|     | MA1    | MA2    | MM1    | MM2 |       |
| MA1 | 0      | 74     | 74     | 82  |       |
| MA2 | 0.0102 | 0      | 0      | 26  |       |
| MM1 | 0.0102 | 0.0000 | 0      | 26  |       |
| MM2 | 0.0113 | 0.0036 | 0.0036 | 0   |       |
| 521 |        |        |        |     | 9317  |
|     | MA1    | MA2    | MM1    | MM2 |       |
| MA1 | 0      | 187    | 51     | 0   |       |
| MA2 | 0.0201 | 0      | 185    | 187 |       |
| MM1 | 0.0055 | 0.0199 | 0      | 51  |       |
| MM2 | 0.0000 | 0.0201 | 0.0055 | 0   |       |
| 524 |        |        |        |     | 12858 |
|     | MA1    | MA2    | MM1    | MM2 |       |
| MA1 | 0      | 232    | 232    | 229 |       |
| MA2 | 0.0180 | 0      | 0      | 123 |       |
| MM1 | 0.0180 | 0.0000 | 0      | 123 |       |
| MM2 | 0.0178 | 0.0096 | 0.0096 | 0   |       |
| 530 |        |        |        |     | 14424 |
|     | MA1    | MA2    | MM1    | MM2 |       |
| MA1 | 0      | 153    | 153    | 151 |       |
| MA2 | 0.0106 | 0      | 0      | 50  |       |
| MM1 | 0.0106 | 0.0000 | 0      | 50  |       |
| MM2 | 0.0105 | 0.0035 | 0.0035 | 0   |       |
| 533 |        |        |        |     | 8587  |
|     | MA1    | MA2    | MM1    | MM2 |       |
| MA1 | 0      | 0      | 0      | 146 |       |
| MA2 | 0.0000 | 0      | 0      | 146 |       |
| MM1 | 0.0000 | 0.0000 | 0      | 146 |       |
| MM2 | 0.0170 | 0.0170 | 0.0170 | 0   |       |
| 535 |        |        |        |     | 12535 |
|     | MA1    | MA2    | MM1    | MM2 |       |
| MA1 | 0      | 66     | 376    | 279 |       |
| MA2 | 0.0053 | 0      | 396    | 345 |       |
| MM1 | 0.0300 | 0.0316 | 0      | 192 |       |
| MM2 | 0.0223 | 0.0275 | 0.0153 | 0   |       |
| 537 |        |        |        |     | 21065 |
|     | MA1    | MA2    | MM1    | MM2 |       |
| MA1 | 0      | 18     | 425    | 149 |       |
| MA2 | 0.0009 | 0      | 413    | 131 |       |
| MM1 | 0.0202 | 0.0196 | 0      | 337 |       |
| MM2 | 0.0071 | 0.0062 | 0.0160 | 0   |       |
| 541 |        |        |        |     | 16528 |



|     |        |        |        |     |       |
|-----|--------|--------|--------|-----|-------|
|     | MA1    | MA2    | MM1    | MM2 |       |
| MA1 | 0      | 334    | 315    | 334 |       |
| MA2 | 0.0202 | 0      | 168    | 0   |       |
| MM1 | 0.0191 | 0.0102 | 0      | 168 |       |
| MM2 | 0.0202 | 0.0000 | 0.0102 | 0   |       |
| 542 |        |        |        |     | 26787 |
|     | MA1    | MA2    | MM1    | MM2 |       |
| MA1 | 0      | 569    | 569    | 593 |       |
| MA2 | 0.0212 | 0      | 0      | 289 |       |
| MM1 | 0.0212 | 0.0000 | 0      | 289 |       |
| MM2 | 0.0221 | 0.0108 | 0.0108 | 0   |       |
| 543 |        |        |        |     | 13021 |
|     | MA1    | MA2    | MM1    | MM2 |       |
| MA1 | 0      | 302    | 137    | 0   |       |
| MA2 | 0.0232 | 0      | 319    | 302 |       |
| MM1 | 0.0105 | 0.0245 | 0      | 137 |       |
| MM2 | 0.0000 | 0.0232 | 0.0105 | 0   |       |
| 547 |        |        |        |     | 17591 |
|     | MA1    | MA2    | MM1    | MM2 |       |
| MA1 | 0      | 409    | 378    | 390 |       |
| MA2 | 0.0233 | 0      | 211    | 192 |       |
| MM1 | 0.0215 | 0.0120 | 0      | 187 |       |
| MM2 | 0.0222 | 0.0109 | 0.0106 | 0   |       |
| 548 |        |        |        |     | 9119  |
|     | MA1    | MA2    | MM1    | MM2 |       |
| MA1 | 0      | 227    | 118    | 110 |       |
| MA2 | 0.0249 | 0      | 201    | 211 |       |
| MM1 | 0.0129 | 0.0220 | 0      | 92  |       |
| MM2 | 0.0121 | 0.0231 | 0.0101 | 0   |       |
| 552 |        |        |        |     | 14204 |
|     | MA1    | MA2    | MM1    | MM2 |       |
| MA1 | 0      | 239    | 251    | 251 |       |
| MA2 | 0.0168 | 0      | 131    | 143 |       |
| MM1 | 0.0177 | 0.0092 | 0      | 118 |       |
| MM2 | 0.0177 | 0.0101 | 0.0083 | 0   |       |
| 556 |        |        |        |     | 10624 |
|     | MA1    | MA2    | MM1    | MM2 |       |
| MA1 | 0      | 22     | 138    | 0   |       |
| MA2 | 0.0021 | 0      | 154    | 22  |       |
| MM1 | 0.0130 | 0.0145 | 0      | 138 |       |
| MM2 | 0.0000 | 0.0021 | 0.0130 | 0   |       |
| 557 |        |        |        |     | 17506 |

## Matrices MA-MM

|     |        |        |        |     |       |
|-----|--------|--------|--------|-----|-------|
|     | MA1    | MA2    | MM1    | MM2 |       |
| MA1 | 0      | 296    | 256    | 246 |       |
| MA2 | 0.0169 | 0      | 413    | 394 |       |
| MM1 | 0.0146 | 0.0236 | 0      | 206 |       |
| MM2 | 0.0141 | 0.0225 | 0.0118 | 0   |       |
| 562 |        |        |        |     | 14765 |
|     | MA1    | MA2    | MM1    | MM2 |       |
| MA1 | 0      | 176    | 0      | 97  |       |
| MA2 | 0.0119 | 0      | 176    | 174 |       |
| MM1 | 0.0000 | 0.0119 | 0      | 97  |       |
| MM2 | 0.0066 | 0.0118 | 0.0066 | 0   |       |
| 566 |        |        |        |     | 13422 |
|     | MA1    | MA2    | MM1    | MM2 |       |
| MA1 | 0      | 21     | 179    | 255 |       |
| MA2 | 0.0016 | 0      | 194    | 271 |       |
| MM1 | 0.0133 | 0.0145 | 0      | 206 |       |
| MM2 | 0.0190 | 0.0202 | 0.0153 | 0   |       |
| 569 |        |        |        |     | 10205 |
|     | MA1    | MA2    | MM1    | MM2 |       |
| MA1 | 0      | 212    | 212    | 217 |       |
| MA2 | 0.0208 | 0      | 0      | 164 |       |
| MM1 | 0.0208 | 0.0000 | 0      | 164 |       |
| MM2 | 0.0213 | 0.0161 | 0.0161 | 0   |       |
| 571 |        |        |        |     | 9467  |
|     | MA1    | MA2    | MM1    | MM2 |       |
| MA1 | 0      | 201    | 205    | 201 |       |
| MA2 | 0.0212 | 0      | 94     | 0   |       |
| MM1 | 0.0217 | 0.0099 | 0      | 94  |       |
| MM2 | 0.0212 | 0.0000 | 0.0099 | 0   |       |
| 577 |        |        |        |     | 10902 |
|     | MA1    | MA2    | MM1    | MM2 |       |
| MA1 | 0      | 246    | 236    | 241 |       |
| MA2 | 0.0226 | 0      | 132    | 131 |       |
| MM1 | 0.0216 | 0.0121 | 0      | 133 |       |
| MM2 | 0.0221 | 0.0120 | 0.0122 | 0   |       |
| 578 |        |        |        |     | 17850 |
|     | MA1    | MA2    | MM1    | MM2 |       |
| MA1 | 0      | 352    | 362    | 342 |       |
| MA2 | 0.0197 | 0      | 186    | 189 |       |
| MM1 | 0.0203 | 0.0104 | 0      | 181 |       |
| MM2 | 0.0192 | 0.0106 | 0.0101 | 0   |       |
| 584 |        |        |        |     | 11545 |

|     |        |        |        |     |       |
|-----|--------|--------|--------|-----|-------|
|     | MA1    | MA2    | MM1    | MM2 |       |
| MA1 | 0      | 375    | 0      | 178 |       |
| MA2 | 0.0325 | 0      | 375    | 350 |       |
| MM1 | 0.0000 | 0.0325 | 0      | 178 |       |
| MM2 | 0.0154 | 0.0303 | 0.0154 | 0   |       |
| 585 |        |        |        |     | 16227 |
|     | MA1    | MA2    | MM1    | MM2 |       |
| MA1 | 0      | 246    | 106    | 103 |       |
| MA2 | 0.0152 | 0      | 249    | 273 |       |
| MM1 | 0.0065 | 0.0153 | 0      | 114 |       |
| MM2 | 0.0063 | 0.0168 | 0.0070 | 0   |       |
| 586 |        |        |        |     | 13337 |
|     | MA1    | MA2    | MM1    | MM2 |       |
| MA1 | 0      | 235    | 235    | 232 |       |
| MA2 | 0.0176 | 0      | 0      | 112 |       |
| MM1 | 0.0176 | 0.0000 | 0      | 112 |       |
| MM2 | 0.0174 | 0.0084 | 0.0084 | 0   |       |
| 588 |        |        |        |     | 12021 |
|     | MA1    | MA2    | MM1    | MM2 |       |
| MA1 | 0      | 337    | 0      | 194 |       |
| MA2 | 0.0280 | 0      | 337    | 358 |       |
| MM1 | 0.0000 | 0.0280 | 0      | 194 |       |
| MM2 | 0.0161 | 0.0298 | 0.0161 | 0   |       |
| 589 |        |        |        |     | 12404 |
|     | MA1    | MA2    | MM1    | MM2 |       |
| MA1 | 0      | 223    | 60     | 73  |       |
| MA2 | 0.0180 | 0      | 214    | 219 |       |
| MM1 | 0.0048 | 0.0173 | 0      | 66  |       |
| MM2 | 0.0059 | 0.0177 | 0.0053 | 0   |       |
| 592 |        |        |        |     | 8725  |
|     | MA1    | MA2    | MM1    | MM2 |       |
| MA1 | 0      | 148    | 151    | 158 |       |
| MA2 | 0.0170 | 0      | 19     | 99  |       |
| MM1 | 0.0173 | 0.0022 | 0      | 80  |       |
| MM2 | 0.0181 | 0.0113 | 0.0092 | 0   |       |
| 596 |        |        |        |     | 8342  |
|     | MA1    | MA2    | MM1    | MM2 |       |
| MA1 | 0      | 135    | 135    | 135 |       |
| MA2 | 0.0162 | 0      | 0      | 0   |       |
| MM1 | 0.0162 | 0.0000 | 0      | 0   |       |
| MM2 | 0.0162 | 0.0000 | 0.0000 | 0   |       |
| 599 |        |        |        |     | 10767 |

Table S7: Difference Matrices.

## Matrices MA-MM

Laine et al.  
Supporting Information

|     | MA1    | MA2    | MM1    | MM2 |       |
|-----|--------|--------|--------|-----|-------|
| MA1 | 0      | 178    | 172    | 162 |       |
| MA2 | 0.0165 | 0      | 86     | 88  |       |
| MM1 | 0.0160 | 0.0080 | 0      | 86  |       |
| MM2 | 0.0150 | 0.0082 | 0.0080 | 0   |       |
| 605 |        |        |        |     | 7245  |
|     | MA1    | MA2    | MM1    | MM2 |       |
| MA1 | 0      | 214    | 135    | 127 |       |
| MA2 | 0.0295 | 0      | 263    | 266 |       |
| MM1 | 0.0186 | 0.0363 | 0      | 114 |       |
| MM2 | 0.0175 | 0.0367 | 0.0157 | 0   |       |
| 608 |        |        |        |     | 10383 |
|     | MA1    | MA2    | MM1    | MM2 |       |
| MA1 | 0      | 178    | 173    | 168 |       |
| MA2 | 0.0171 | 0      | 98     | 93  |       |
| MM1 | 0.0167 | 0.0094 | 0      | 61  |       |
| MM2 | 0.0162 | 0.0090 | 0.0059 | 0   |       |
| 610 |        |        |        |     | 12622 |
|     | MA1    | MA2    | MM1    | MM2 |       |
| MA1 | 0      | 202    | 202    | 201 |       |
| MA2 | 0.0160 | 0      | 0      | 98  |       |
| MM1 | 0.0160 | 0.0000 | 0      | 98  |       |
| MM2 | 0.0159 | 0.0078 | 0.0078 | 0   |       |
| 613 |        |        |        |     | 9528  |
|     | MA1    | MA2    | MM1    | MM2 |       |
| MA1 | 0      | 120    | 177    | 120 |       |
| MA2 | 0.0126 | 0      | 107    | 0   |       |
| MM1 | 0.0186 | 0.0112 | 0      | 107 |       |
| MM2 | 0.0126 | 0.0000 | 0.0112 | 0   |       |
| 622 |        |        |        |     | 7369  |
|     | MA1    | MA2    | MM1    | MM2 |       |
| MA1 | 0      | 162    | 162    | 166 |       |
| MA2 | 0.0220 | 0      | 0      | 40  |       |
| MM1 | 0.0220 | 0.0000 | 0      | 40  |       |
| MM2 | 0.0225 | 0.0054 | 0.0054 | 0   |       |
| 626 |        |        |        |     | 7386  |
|     | MA1    | MA2    | MM1    | MM2 |       |
| MA1 | 0      | 195    | 206    | 207 |       |
| MA2 | 0.0264 | 0      | 142    | 143 |       |
| MM1 | 0.0279 | 0.0192 | 0      | 106 |       |
| MM2 | 0.0280 | 0.0194 | 0.0144 | 0   |       |
| 635 |        |        |        |     | 13178 |

|     | MA1    | MA2    | MM1    | MM2 |       |
|-----|--------|--------|--------|-----|-------|
| MA1 | 0      | 246    | 214    | 246 |       |
| MA2 | 0.0187 | 0      | 126    | 0   |       |
| MM1 | 0.0162 | 0.0096 | 0      | 126 |       |
| MM2 | 0.0187 | 0.0000 | 0.0096 | 0   |       |
| 638 |        |        |        |     | 11079 |
|     | MA1    | MA2    | MM1    | MM2 |       |
| MA1 | 0      | 267    | 268    | 272 |       |
| MA2 | 0.0241 | 0      | 144    | 152 |       |
| MM1 | 0.0242 | 0.0130 | 0      | 148 |       |
| MM2 | 0.0246 | 0.0137 | 0.0134 | 0   |       |
| 639 |        |        |        |     | 12570 |
|     | MA1    | MA2    | MM1    | MM2 |       |
| MA1 | 0      | 456    | 290    | 249 |       |
| MA2 | 0.0363 | 0      | 495    | 455 |       |
| MM1 | 0.0231 | 0.0394 | 0      | 221 |       |
| MM2 | 0.0198 | 0.0362 | 0.0176 | 0   |       |
| 649 |        |        |        |     | 14893 |
|     | MA1    | MA2    | MM1    | MM2 |       |
| MA1 | 0      | 300    | 301    | 300 |       |
| MA2 | 0.0201 | 0      | 140    | 0   |       |
| MM1 | 0.0202 | 0.0094 | 0      | 140 |       |
| MM2 | 0.0201 | 0.0000 | 0.0094 | 0   |       |
| 650 |        |        |        |     | 15188 |
|     | MA1    | MA2    | MM1    | MM2 |       |
| MA1 | 0      | 241    | 0      | 134 |       |
| MA2 | 0.0159 | 0      | 241    | 271 |       |
| MM1 | 0.0000 | 0.0159 | 0      | 134 |       |
| MM2 | 0.0088 | 0.0178 | 0.0088 | 0   |       |
| 652 |        |        |        |     | 7452  |
|     | MA1    | MA2    | MM1    | MM2 |       |
| MA1 | 0      | 162    | 98     | 19  |       |
| MA2 | 0.0217 | 0      | 177    | 165 |       |
| MM1 | 0.0132 | 0.0238 | 0      | 92  |       |
| MM2 | 0.0025 | 0.0221 | 0.0123 | 0   |       |
| 661 |        |        |        |     | 13212 |
|     | MA1    | MA2    | MM1    | MM2 |       |
| MA1 | 0      | 337    | 337    | 351 |       |
| MA2 | 0.0255 | 0      | 0      | 129 |       |
| MM1 | 0.0255 | 0.0000 | 0      | 129 |       |
| MM2 | 0.0266 | 0.0098 | 0.0098 | 0   |       |
| 662 |        |        |        |     | 11457 |

## Matrices MA-MM

|     |        |        |        |     |       |
|-----|--------|--------|--------|-----|-------|
|     | MA1    | MA2    | MM1    | MM2 |       |
| MA1 | 0      | 204    | 200    | 195 |       |
| MA2 | 0.0178 | 0      | 92     | 76  |       |
| MM1 | 0.0175 | 0.0080 | 0      | 81  |       |
| MM2 | 0.0170 | 0.0066 | 0.0071 | 0   |       |
| 665 |        |        |        |     | 12105 |
|     | MA1    | MA2    | MM1    | MM2 |       |
| MA1 | 0      | 85     | 86     | 173 |       |
| MA2 | 0.0070 | 0      | 1      | 108 |       |
| MM1 | 0.0071 | 0.0001 | 0      | 107 |       |
| MM2 | 0.0143 | 0.0089 | 0.0088 | 0   |       |
| 668 |        |        |        |     | 14222 |
|     | MA1    | MA2    | MM1    | MM2 |       |
| MA1 | 0      | 176    | 168    | 176 |       |
| MA2 | 0.0124 | 0      | 48     | 57  |       |
| MM1 | 0.0118 | 0.0034 | 0      | 39  |       |
| MM2 | 0.0124 | 0.0040 | 0.0027 | 0   |       |
| 669 |        |        |        |     | 32937 |
|     | MA1    | MA2    | MM1    | MM2 |       |
| MA1 | 0      | 775    | 249    | 404 |       |
| MA2 | 0.0235 | 0      | 783    | 782 |       |
| MM1 | 0.0076 | 0.0238 | 0      | 431 |       |
| MM2 | 0.0123 | 0.0237 | 0.0131 | 0   |       |
| 671 |        |        |        |     | 11380 |
|     | MA1    | MA2    | MM1    | MM2 |       |
| MA1 | 0      | 262    | 0      | 10  |       |
| MA2 | 0.0230 | 0      | 262    | 255 |       |
| MM1 | 0.0000 | 0.0230 | 0      | 10  |       |
| MM2 | 0.0009 | 0.0224 | 0.0009 | 0   |       |
| 672 |        |        |        |     | 9285  |
|     | MA1    | MA2    | MM1    | MM2 |       |
| MA1 | 0      | 227    | 133    | 49  |       |
| MA2 | 0.0244 | 0      | 241    | 213 |       |
| MM1 | 0.0143 | 0.0260 | 0      | 152 |       |
| MM2 | 0.0053 | 0.0229 | 0.0164 | 0   |       |
| 677 |        |        |        |     | 14185 |
|     | MA1    | MA2    | MM1    | MM2 |       |
| MA1 | 0      | 378    | 375    | 365 |       |
| MA2 | 0.0266 | 0      | 213    | 222 |       |
| MM1 | 0.0264 | 0.0150 | 0      | 213 |       |
| MM2 | 0.0257 | 0.0157 | 0.0150 | 0   |       |
| 685 |        |        |        |     | 15438 |

## Matrices MA-MM

|     |        |        |        |     |       |
|-----|--------|--------|--------|-----|-------|
|     | MA1    | MA2    | MM1    | MM2 |       |
| MA1 | 0      | 471    | 471    | 472 |       |
| MA2 | 0.0305 | 0      | 0      | 221 |       |
| MM1 | 0.0305 | 0.0000 | 0      | 221 |       |
| MM2 | 0.0306 | 0.0143 | 0.0143 | 0   |       |
| 691 |        |        |        |     | 9840  |
|     | MA1    | MA2    | MM1    | MM2 |       |
| MA1 | 0      | 63     | 256    | 265 |       |
| MA2 | 0.0064 | 0      | 222    | 202 |       |
| MM1 | 0.0260 | 0.0226 | 0      | 141 |       |
| MM2 | 0.0269 | 0.0205 | 0.0143 | 0   |       |
| 692 |        |        |        |     | 12149 |
|     | MA1    | MA2    | MM1    | MM2 |       |
| MA1 | 0      | 258    | 116    | 0   |       |
| MA2 | 0.0212 | 0      | 246    | 258 |       |
| MM1 | 0.0095 | 0.0202 | 0      | 116 |       |
| MM2 | 0.0000 | 0.0212 | 0.0095 | 0   |       |
| 693 |        |        |        |     | 12220 |
|     | MA1    | MA2    | MM1    | MM2 |       |
| MA1 | 0      | 312    | 182    | 178 |       |
| MA2 | 0.0255 | 0      | 337    | 333 |       |
| MM1 | 0.0149 | 0.0276 | 0      | 4   |       |
| MM2 | 0.0146 | 0.0273 | 0.0003 | 0   |       |
| 694 |        |        |        |     | 18952 |
|     | MA1    | MA2    | MM1    | MM2 |       |
| MA1 | 0      | 483    | 487    | 502 |       |
| MA2 | 0.0255 | 0      | 213    | 188 |       |
| MM1 | 0.0257 | 0.0112 | 0      | 202 |       |
| MM2 | 0.0265 | 0.0099 | 0.0107 | 0   |       |
| 697 |        |        |        |     | 9490  |
|     | MA1    | MA2    | MM1    | MM2 |       |
| MA1 | 0      | 210    | 210    | 210 |       |
| MA2 | 0.0221 | 0      | 96     | 0   |       |
| MM1 | 0.0221 | 0.0101 | 0      | 96  |       |
| MM2 | 0.0221 | 0.0000 | 0.0101 | 0   |       |
| 699 |        |        |        |     | 19690 |
|     | MA1    | MA2    | MM1    | MM2 |       |
| MA1 | 0      | 407    | 444    | 457 |       |
| MA2 | 0.0207 | 0      | 315    | 332 |       |
| MM1 | 0.0225 | 0.0160 | 0      | 281 |       |
| MM2 | 0.0232 | 0.0169 | 0.0143 | 0   |       |
| 700 |        |        |        |     | 11327 |

|     | MA1    | MA2    | MM1    | MM2 |       |
|-----|--------|--------|--------|-----|-------|
| MA1 | 0      | 281    | 281    | 263 |       |
| MA2 | 0.0248 | 0      | 0      | 126 |       |
| MM1 | 0.0248 | 0.0000 | 0      | 126 |       |
| MM2 | 0.0232 | 0.0111 | 0.0111 | 0   |       |
| 701 |        |        |        |     | 7632  |
|     | MA1    | MA2    | MM1    | MM2 |       |
| MA1 | 0      | 184    | 47     | 160 |       |
| MA2 | 0.0241 | 0      | 231    | 221 |       |
| MM1 | 0.0062 | 0.0303 | 0      | 113 |       |
| MM2 | 0.0210 | 0.0290 | 0.0148 | 0   |       |
| 704 |        |        |        |     | 10009 |
|     | MA1    | MA2    | MM1    | MM2 |       |
| MA1 | 0      | 71     | 284    | 261 |       |
| MA2 | 0.0071 | 0      | 289    | 275 |       |
| MM1 | 0.0284 | 0.0289 | 0      | 162 |       |
| MM2 | 0.0261 | 0.0275 | 0.0162 | 0   |       |
| 718 |        |        |        |     | 15765 |
|     | MA1    | MA2    | MM1    | MM2 |       |
| MA1 | 0      | 334    | 330    | 334 |       |
| MA2 | 0.0212 | 0      | 80     | 0   |       |
| MM1 | 0.0209 | 0.0051 | 0      | 80  |       |
| MM2 | 0.0212 | 0.0000 | 0.0051 | 0   |       |
| 719 |        |        |        |     | 10962 |
|     | MA1    | MA2    | MM1    | MM2 |       |
| MA1 | 0      | 158    | 162    | 166 |       |
| MA2 | 0.0144 | 0      | 51     | 46  |       |
| MM1 | 0.0148 | 0.0047 | 0      | 65  |       |
| MM2 | 0.0151 | 0.0042 | 0.0059 | 0   |       |
| 722 |        |        |        |     | 6616  |
|     | MA1    | MA2    | MM1    | MM2 |       |
| MA1 | 0      | 31     | 22     | 8   |       |
| MA2 | 0.0047 | 0      | 34     | 25  |       |
| MM1 | 0.0033 | 0.0051 | 0      | 18  |       |
| MM2 | 0.0012 | 0.0038 | 0.0027 | 0   |       |
| 723 |        |        |        |     | 10336 |
|     | MA1    | MA2    | MM1    | MM2 |       |
| MA1 | 0      | 214    | 214    | 214 |       |
| MA2 | 0.0207 | 0      | 64     | 0   |       |
| MM1 | 0.0207 | 0.0062 | 0      | 64  |       |
| MM2 | 0.0207 | 0.0000 | 0.0062 | 0   |       |
| 725 |        |        |        |     | 10454 |



## Matrices MA-MM

|     |        |        |        |     |       |
|-----|--------|--------|--------|-----|-------|
|     | MA1    | MA2    | MM1    | MM2 |       |
| MA1 | 0      | 306    | 264    | 215 |       |
| MA2 | 0.0293 | 0      | 233    | 93  |       |
| MM1 | 0.0253 | 0.0223 | 0      | 166 |       |
| MM2 | 0.0206 | 0.0089 | 0.0159 | 0   |       |
| 726 |        |        |        |     | 10441 |
|     | MA1    | MA2    | MM1    | MM2 |       |
| MA1 | 0      | 249    | 3      | 104 |       |
| MA2 | 0.0238 | 0      | 246    | 256 |       |
| MM1 | 0.0003 | 0.0236 | 0      | 101 |       |
| MM2 | 0.0100 | 0.0245 | 0.0097 | 0   |       |
| 732 |        |        |        |     | 9962  |
|     | MA1    | MA2    | MM1    | MM2 |       |
| MA1 | 0      | 181    | 189    | 181 |       |
| MA2 | 0.0182 | 0      | 46     | 0   |       |
| MM1 | 0.0190 | 0.0046 | 0      | 46  |       |
| MM2 | 0.0182 | 0.0000 | 0.0046 | 0   |       |
| 738 |        |        |        |     | 9735  |
|     | MA1    | MA2    | MM1    | MM2 |       |
| MA1 | 0      | 110    | 107    | 102 |       |
| MA2 | 0.0113 | 0      | 164    | 181 |       |
| MM1 | 0.0110 | 0.0168 | 0      | 77  |       |
| MM2 | 0.0105 | 0.0186 | 0.0079 | 0   |       |
| 740 |        |        |        |     | 12001 |
|     | MA1    | MA2    | MM1    | MM2 |       |
| MA1 | 0      | 193    | 0      | 112 |       |
| MA2 | 0.0161 | 0      | 193    | 179 |       |
| MM1 | 0.0000 | 0.0161 | 0      | 112 |       |
| MM2 | 0.0093 | 0.0149 | 0.0093 | 0   |       |
| 743 |        |        |        |     | 22003 |
|     | MA1    | MA2    | MM1    | MM2 |       |
| MA1 | 0      | 553    | 553    | 548 |       |
| MA2 | 0.0251 | 0      | 0      | 261 |       |
| MM1 | 0.0251 | 0.0000 | 0      | 261 |       |
| MM2 | 0.0249 | 0.0119 | 0.0119 | 0   |       |
| 746 |        |        |        |     | 10403 |
|     | MA1    | MA2    | MM1    | MM2 |       |
| MA1 | 0      | 227    | 227    | 217 |       |
| MA2 | 0.0218 | 0      | 0      | 125 |       |
| MM1 | 0.0218 | 0.0000 | 0      | 125 |       |
| MM2 | 0.0209 | 0.0120 | 0.0120 | 0   |       |
| 747 |        |        |        |     | 11830 |

|     | MA1    | MA2    | MM1    | MM2 |       |
|-----|--------|--------|--------|-----|-------|
| MA1 | 0      | 216    | 115    | 115 |       |
| MA2 | 0.0183 | 0      | 217    | 217 |       |
| MM1 | 0.0097 | 0.0183 | 0      | 0   |       |
| MM2 | 0.0097 | 0.0183 | 0.0000 | 0   |       |
| 761 |        |        |        |     | 13562 |
|     | MA1    | MA2    | MM1    | MM2 |       |
| MA1 | 0      | 245    | 245    | 227 |       |
| MA2 | 0.0181 | 0      | 0      | 136 |       |
| MM1 | 0.0181 | 0.0000 | 0      | 136 |       |
| MM2 | 0.0167 | 0.0100 | 0.0100 | 0   |       |
| 762 |        |        |        |     | 15898 |
|     | MA1    | MA2    | MM1    | MM2 |       |
| MA1 | 0      | 259    | 259    | 238 |       |
| MA2 | 0.0163 | 0      | 0      | 103 |       |
| MM1 | 0.0163 | 0.0000 | 0      | 103 |       |
| MM2 | 0.0150 | 0.0065 | 0.0065 | 0   |       |
| 769 |        |        |        |     | 9372  |
|     | MA1    | MA2    | MM1    | MM2 |       |
| MA1 | 0      | 182    | 12     | 0   |       |
| MA2 | 0.0194 | 0      | 186    | 182 |       |
| MM1 | 0.0013 | 0.0198 | 0      | 12  |       |
| MM2 | 0.0000 | 0.0194 | 0.0013 | 0   |       |
| 773 |        |        |        |     | 11866 |
|     | MA1    | MA2    | MM1    | MM2 |       |
| MA1 | 0      | 190    | 107    | 0   |       |
| MA2 | 0.0160 | 0      | 179    | 190 |       |
| MM1 | 0.0090 | 0.0151 | 0      | 107 |       |
| MM2 | 0.0000 | 0.0160 | 0.0090 | 0   |       |
| 776 |        |        |        |     | 12698 |
|     | MA1    | MA2    | MM1    | MM2 |       |
| MA1 | 0      | 110    | 165    | 129 |       |
| MA2 | 0.0087 | 0      | 129    | 103 |       |
| MM1 | 0.0130 | 0.0102 | 0      | 118 |       |
| MM2 | 0.0102 | 0.0081 | 0.0093 | 0   |       |
| 779 |        |        |        |     | 9973  |
|     | MA1    | MA2    | MM1    | MM2 |       |
| MA1 | 0      | 176    | 0      | 76  |       |
| MA2 | 0.0176 | 0      | 176    | 175 |       |
| MM1 | 0.0000 | 0.0176 | 0      | 76  |       |
| MM2 | 0.0076 | 0.0175 | 0.0076 | 0   |       |
| 780 |        |        |        |     | 11554 |

## Matrices MA-MM

|     |        |        |        |     |       |
|-----|--------|--------|--------|-----|-------|
|     | MA1    | MA2    | MM1    | MM2 |       |
| MA1 | 0      | 221    | 221    | 214 |       |
| MA2 | 0.0191 | 0      | 0      | 106 |       |
| MM1 | 0.0191 | 0.0000 | 0      | 106 |       |
| MM2 | 0.0185 | 0.0092 | 0.0092 | 0   |       |
| 794 |        |        |        |     | 9830  |
|     | MA1    | MA2    | MM1    | MM2 |       |
| MA1 | 0      | 238    | 127    | 125 |       |
| MA2 | 0.0242 | 0      | 235    | 233 |       |
| MM1 | 0.0129 | 0.0239 | 0      | 2   |       |
| MM2 | 0.0127 | 0.0237 | 0.0002 | 0   |       |
| 796 |        |        |        |     | 11370 |
|     | MA1    | MA2    | MM1    | MM2 |       |
| MA1 | 0      | 293    | 300    | 293 |       |
| MA2 | 0.0258 | 0      | 126    | 0   |       |
| MM1 | 0.0264 | 0.0111 | 0      | 126 |       |
| MM2 | 0.0258 | 0.0000 | 0.0111 | 0   |       |
| 797 |        |        |        |     | 11724 |
|     | MA1    | MA2    | MM1    | MM2 |       |
| MA1 | 0      | 325    | 159    | 0   |       |
| MA2 | 0.0277 | 0      | 305    | 325 |       |
| MM1 | 0.0136 | 0.0260 | 0      | 159 |       |
| MM2 | 0.0000 | 0.0277 | 0.0136 | 0   |       |
| 802 |        |        |        |     | 9375  |
|     | MA1    | MA2    | MM1    | MM2 |       |
| MA1 | 0      | 282    | 287    | 286 |       |
| MA2 | 0.0301 | 0      | 158    | 167 |       |
| MM1 | 0.0306 | 0.0169 | 0      | 176 |       |
| MM2 | 0.0305 | 0.0178 | 0.0188 | 0   |       |
| 808 |        |        |        |     | 13526 |
|     | MA1    | MA2    | MM1    | MM2 |       |
| MA1 | 0      | 142    | 67     | 79  |       |
| MA2 | 0.0105 | 0      | 146    | 145 |       |
| MM1 | 0.0050 | 0.0108 | 0      | 70  |       |
| MM2 | 0.0058 | 0.0107 | 0.0052 | 0   |       |
| 810 |        |        |        |     | 21178 |
|     | MA1    | MA2    | MM1    | MM2 |       |
| MA1 | 0      | 468    | 460    | 476 |       |
| MA2 | 0.0221 | 0      | 222    | 200 |       |
| MM1 | 0.0217 | 0.0105 | 0      | 254 |       |
| MM2 | 0.0225 | 0.0094 | 0.0120 | 0   |       |
| 814 |        |        |        |     | 6658  |

|     |        |        |        |     |       |
|-----|--------|--------|--------|-----|-------|
|     | MA1    | MA2    | MM1    | MM2 |       |
| MA1 | 0      | 267    | 247    | 237 |       |
| MA2 | 0.0401 | 0      | 162    | 154 |       |
| MM1 | 0.0371 | 0.0243 | 0      | 170 |       |
| MM2 | 0.0356 | 0.0231 | 0.0255 | 0   |       |
| 817 |        |        |        |     | 18542 |
|     | MA1    | MA2    | MM1    | MM2 |       |
| MA1 | 0      | 264    | 262    | 264 |       |
| MA2 | 0.0142 | 0      | 110    | 0   |       |
| MM1 | 0.0141 | 0.0059 | 0      | 110 |       |
| MM2 | 0.0142 | 0.0000 | 0.0059 | 0   |       |
| 819 |        |        |        |     | 8582  |
|     | MA1    | MA2    | MM1    | MM2 |       |
| MA1 | 0      | 172    | 172    | 164 |       |
| MA2 | 0.0200 | 0      | 0      | 34  |       |
| MM1 | 0.0200 | 0.0000 | 0      | 34  |       |
| MM2 | 0.0191 | 0.0040 | 0.0040 | 0   |       |
| 820 |        |        |        |     | 12475 |
|     | MA1    | MA2    | MM1    | MM2 |       |
| MA1 | 0      | 267    | 241    | 270 |       |
| MA2 | 0.0214 | 0      | 118    | 149 |       |
| MM1 | 0.0193 | 0.0095 | 0      | 137 |       |
| MM2 | 0.0216 | 0.0119 | 0.0110 | 0   |       |
| 826 |        |        |        |     | 11646 |
|     | MA1    | MA2    | MM1    | MM2 |       |
| MA1 | 0      | 238    | 238    | 239 |       |
| MA2 | 0.0204 | 0      | 0      | 94  |       |
| MM1 | 0.0204 | 0.0000 | 0      | 94  |       |
| MM2 | 0.0205 | 0.0081 | 0.0081 | 0   |       |
| 827 |        |        |        |     | 21803 |
|     | MA1    | MA2    | MM1    | MM2 |       |
| MA1 | 0      | 470    | 470    | 468 |       |
| MA2 | 0.0216 | 0      | 0      | 225 |       |
| MM1 | 0.0216 | 0.0000 | 0      | 225 |       |
| MM2 | 0.0215 | 0.0103 | 0.0103 | 0   |       |
| 832 |        |        |        |     | 12725 |
|     | MA1    | MA2    | MM1    | MM2 |       |
| MA1 | 0      | 47     | 177    | 158 |       |
| MA2 | 0.0037 | 0      | 195    | 170 |       |
| MM1 | 0.0139 | 0.0153 | 0      | 149 |       |
| MM2 | 0.0124 | 0.0134 | 0.0117 | 0   |       |
| 842 |        |        |        |     | 12159 |

## Matrices MA-MM

|     |        |        |        |     |       |
|-----|--------|--------|--------|-----|-------|
|     | MA1    | MA2    | MM1    | MM2 |       |
| MA1 | 0      | 0      | 195    | 215 |       |
| MA2 | 0.0000 | 0      | 195    | 215 |       |
| MM1 | 0.0160 | 0.0160 | 0      | 127 |       |
| MM2 | 0.0177 | 0.0177 | 0.0104 | 0   |       |
| 845 |        |        |        |     | 12896 |
|     | MA1    | MA2    | MM1    | MM2 |       |
| MA1 | 0      | 215    | 214    | 212 |       |
| MA2 | 0.0167 | 0      | 88     | 93  |       |
| MM1 | 0.0166 | 0.0068 | 0      | 94  |       |
| MM2 | 0.0164 | 0.0072 | 0.0073 | 0   |       |
| 852 |        |        |        |     | 16323 |
|     | MA1    | MA2    | MM1    | MM2 |       |
| MA1 | 0      | 390    | 201    | 235 |       |
| MA2 | 0.0239 | 0      | 392    | 408 |       |
| MM1 | 0.0123 | 0.0240 | 0      | 250 |       |
| MM2 | 0.0144 | 0.0250 | 0.0153 | 0   |       |
| 855 |        |        |        |     | 19179 |
|     | MA1    | MA2    | MM1    | MM2 |       |
| MA1 | 0      | 350    | 372    | 363 |       |
| MA2 | 0.0182 | 0      | 445    | 470 |       |
| MM1 | 0.0194 | 0.0232 | 0      | 278 |       |
| MM2 | 0.0189 | 0.0245 | 0.0145 | 0   |       |
| 864 |        |        |        |     | 14312 |
|     | MA1    | MA2    | MM1    | MM2 |       |
| MA1 | 0      | 268    | 0      | 139 |       |
| MA2 | 0.0187 | 0      | 268    | 264 |       |
| MM1 | 0.0000 | 0.0187 | 0      | 139 |       |
| MM2 | 0.0097 | 0.0184 | 0.0097 | 0   |       |
| 869 |        |        |        |     | 9900  |
|     | MA1    | MA2    | MM1    | MM2 |       |
| MA1 | 0      | 0      | 206    | 0   |       |
| MA2 | 0.0000 | 0      | 206    | 0   |       |
| MM1 | 0.0208 | 0.0208 | 0      | 206 |       |
| MM2 | 0.0000 | 0.0000 | 0.0208 | 0   |       |
| 880 |        |        |        |     | 10735 |
|     | MA1    | MA2    | MM1    | MM2 |       |
| MA1 | 0      | 180    | 0      | 96  |       |
| MA2 | 0.0168 | 0      | 180    | 183 |       |
| MM1 | 0.0000 | 0.0168 | 0      | 96  |       |
| MM2 | 0.0089 | 0.0170 | 0.0089 | 0   |       |
| 894 |        |        |        |     | 7418  |

## Matrices MA-MM

|     | MA1    | MA2    | MM1    | MM2 |       |
|-----|--------|--------|--------|-----|-------|
| MA1 | 0      | 102    | 75     | 81  |       |
| MA2 | 0.0138 | 0      | 144    | 167 |       |
| MM1 | 0.0101 | 0.0194 | 0      | 105 |       |
| MM2 | 0.0109 | 0.0225 | 0.0142 | 0   |       |
| 902 |        |        |        |     | 19505 |
|     | MA1    | MA2    | MM1    | MM2 |       |
| MA1 | 0      | 614    | 561    | 614 |       |
| MA2 | 0.0315 | 0      | 377    | 0   |       |
| MM1 | 0.0288 | 0.0193 | 0      | 377 |       |
| MM2 | 0.0315 | 0.0000 | 0.0193 | 0   |       |
| 905 |        |        |        |     | 19023 |
|     | MA1    | MA2    | MM1    | MM2 |       |
| MA1 | 0      | 324    | 0      | 166 |       |
| MA2 | 0.0170 | 0      | 324    | 324 |       |
| MM1 | 0.0000 | 0.0170 | 0      | 166 |       |
| MM2 | 0.0087 | 0.0170 | 0.0087 | 0   |       |
| 906 |        |        |        |     | 17557 |
|     | MA1    | MA2    | MM1    | MM2 |       |
| MA1 | 0      | 305    | 67     | 157 |       |
| MA2 | 0.0174 | 0      | 290    | 276 |       |
| MM1 | 0.0038 | 0.0165 | 0      | 136 |       |
| MM2 | 0.0089 | 0.0157 | 0.0077 | 0   |       |
| 907 |        |        |        |     | 10075 |
|     | MA1    | MA2    | MM1    | MM2 |       |
| MA1 | 0      | 159    | 104    | 0   |       |
| MA2 | 0.0158 | 0      | 181    | 159 |       |
| MM1 | 0.0103 | 0.0180 | 0      | 104 |       |
| MM2 | 0.0000 | 0.0158 | 0.0103 | 0   |       |
| 908 |        |        |        |     | 15802 |
|     | MA1    | MA2    | MM1    | MM2 |       |
| MA1 | 0      | 366    | 0      | 208 |       |
| MA2 | 0.0232 | 0      | 366    | 373 |       |
| MM1 | 0.0000 | 0.0232 | 0      | 208 |       |
| MM2 | 0.0132 | 0.0236 | 0.0132 | 0   |       |
| 917 |        |        |        |     | 6524  |
|     | MA1    | MA2    | MM1    | MM2 |       |
| MA1 | 0      | 78     | 0      | 16  |       |
| MA2 | 0.0120 | 0      | 78     | 75  |       |
| MM1 | 0.0000 | 0.0120 | 0      | 16  |       |
| MM2 | 0.0025 | 0.0115 | 0.0025 | 0   |       |
| 919 |        |        |        |     | 19987 |

## Matrices MA-MM

|     |        |        |        |     |       |
|-----|--------|--------|--------|-----|-------|
|     | MA1    | MA2    | MM1    | MM2 |       |
| MA1 | 0      | 65     | 267    | 0   |       |
| MA2 | 0.0033 | 0      | 304    | 65  |       |
| MM1 | 0.0134 | 0.0152 | 0      | 267 |       |
| MM2 | 0.0000 | 0.0033 | 0.0134 | 0   |       |
| 920 |        |        |        |     | 8976  |
|     | MA1    | MA2    | MM1    | MM2 |       |
| MA1 | 0      | 88     | 111    | 147 |       |
| MA2 | 0.0098 | 0      | 23     | 86  |       |
| MM1 | 0.0124 | 0.0026 | 0      | 76  |       |
| MM2 | 0.0164 | 0.0096 | 0.0085 | 0   |       |
| 922 |        |        |        |     | 14140 |
|     | MA1    | MA2    | MM1    | MM2 |       |
| MA1 | 0      | 364    | 248    | 196 |       |
| MA2 | 0.0257 | 0      | 392    | 386 |       |
| MM1 | 0.0175 | 0.0277 | 0      | 249 |       |
| MM2 | 0.0139 | 0.0273 | 0.0176 | 0   |       |
| 924 |        |        |        |     | 11711 |
|     | MA1    | MA2    | MM1    | MM2 |       |
| MA1 | 0      | 193    | 18     | 94  |       |
| MA2 | 0.0165 | 0      | 211    | 207 |       |
| MM1 | 0.0015 | 0.0180 | 0      | 76  |       |
| MM2 | 0.0080 | 0.0177 | 0.0065 | 0   |       |
| 926 |        |        |        |     | 12517 |
|     | MA1    | MA2    | MM1    | MM2 |       |
| MA1 | 0      | 219    | 201    | 219 |       |
| MA2 | 0.0175 | 0      | 98     | 0   |       |
| MM1 | 0.0161 | 0.0078 | 0      | 98  |       |
| MM2 | 0.0175 | 0.0000 | 0.0078 | 0   |       |
| 927 |        |        |        |     | 12300 |
|     | MA1    | MA2    | MM1    | MM2 |       |
| MA1 | 0      | 208    | 91     | 86  |       |
| MA2 | 0.0169 | 0      | 209    | 222 |       |
| MM1 | 0.0074 | 0.0170 | 0      | 61  |       |
| MM2 | 0.0070 | 0.0180 | 0.0050 | 0   |       |
| 928 |        |        |        |     | 9292  |
|     | MA1    | MA2    | MM1    | MM2 |       |
| MA1 | 0      | 137    | 137    | 124 |       |
| MA2 | 0.0147 | 0      | 70     | 68  |       |
| MM1 | 0.0147 | 0.0075 | 0      | 76  |       |
| MM2 | 0.0133 | 0.0073 | 0.0082 | 0   |       |
| 932 |        |        |        |     | 7794  |

## Matrices MA-MM

|     |        |        |        |     |       |
|-----|--------|--------|--------|-----|-------|
|     | MA1    | MA2    | MM1    | MM2 |       |
| MA1 | 0      | 174    | 104    | 0   |       |
| MA2 | 0.0223 | 0      | 178    | 174 |       |
| MM1 | 0.0133 | 0.0228 | 0      | 104 |       |
| MM2 | 0.0000 | 0.0223 | 0.0133 | 0   |       |
| 933 |        |        |        |     | 18375 |
|     | MA1    | MA2    | MM1    | MM2 |       |
| MA1 | 0      | 339    | 179    | 0   |       |
| MA2 | 0.0184 | 0      | 350    | 339 |       |
| MM1 | 0.0097 | 0.0190 | 0      | 179 |       |
| MM2 | 0.0000 | 0.0184 | 0.0097 | 0   |       |
| 937 |        |        |        |     | 12005 |
|     | MA1    | MA2    | MM1    | MM2 |       |
| MA1 | 0      | 120    | 0      | 49  |       |
| MA2 | 0.0100 | 0      | 120    | 123 |       |
| MM1 | 0.0000 | 0.0100 | 0      | 49  |       |
| MM2 | 0.0041 | 0.0102 | 0.0041 | 0   |       |
| 939 |        |        |        |     | 13370 |
|     | MA1    | MA2    | MM1    | MM2 |       |
| MA1 | 0      | 247    | 238    | 248 |       |
| MA2 | 0.0185 | 0      | 56     | 3   |       |
| MM1 | 0.0178 | 0.0042 | 0      | 53  |       |
| MM2 | 0.0185 | 0.0002 | 0.0040 | 0   |       |
| 941 |        |        |        |     | 13748 |
|     | MA1    | MA2    | MM1    | MM2 |       |
| MA1 | 0      | 81     | 269    | 294 |       |
| MA2 | 0.0059 | 0      | 188    | 247 |       |
| MM1 | 0.0196 | 0.0137 | 0      | 178 |       |
| MM2 | 0.0214 | 0.0180 | 0.0129 | 0   |       |
| 943 |        |        |        |     | 8548  |
|     | MA1    | MA2    | MM1    | MM2 |       |
| MA1 | 0      | 189    | 188    | 188 |       |
| MA2 | 0.0221 | 0      | 52     | 51  |       |
| MM1 | 0.0220 | 0.0061 | 0      | 51  |       |
| MM2 | 0.0220 | 0.0060 | 0.0060 | 0   |       |
| 945 |        |        |        |     | 10924 |
|     | MA1    | MA2    | MM1    | MM2 |       |
| MA1 | 0      | 351    | 189    | 190 |       |
| MA2 | 0.0321 | 0      | 364    | 350 |       |
| MM1 | 0.0173 | 0.0333 | 0      | 217 |       |
| MM2 | 0.0174 | 0.0320 | 0.0199 | 0   |       |
| 953 |        |        |        |     | 10594 |



## Matrices MA-MM

|     |        |        |        |     |       |
|-----|--------|--------|--------|-----|-------|
|     | MA1    | MA2    | MM1    | MM2 |       |
| MA1 | 0      | 225    | 234    | 218 |       |
| MA2 | 0.0212 | 0      | 95     | 42  |       |
| MM1 | 0.0221 | 0.0090 | 0      | 94  |       |
| MM2 | 0.0206 | 0.0040 | 0.0089 | 0   |       |
| 954 |        |        |        |     | 8375  |
|     | MA1    | MA2    | MM1    | MM2 |       |
| MA1 | 0      | 152    | 94     | 0   |       |
| MA2 | 0.0181 | 0      | 150    | 152 |       |
| MM1 | 0.0112 | 0.0179 | 0      | 94  |       |
| MM2 | 0.0000 | 0.0181 | 0.0112 | 0   |       |
| 957 |        |        |        |     | 11988 |
|     | MA1    | MA2    | MM1    | MM2 |       |
| MA1 | 0      | 241    | 209    | 114 |       |
| MA2 | 0.0201 | 0      | 261    | 257 |       |
| MM1 | 0.0174 | 0.0218 | 0      | 176 |       |
| MM2 | 0.0095 | 0.0214 | 0.0147 | 0   |       |
| 958 |        |        |        |     | 7665  |
|     | MA1    | MA2    | MM1    | MM2 |       |
| MA1 | 0      | 126    | 126    | 168 |       |
| MA2 | 0.0164 | 0      | 0      | 116 |       |
| MM1 | 0.0164 | 0.0000 | 0      | 116 |       |
| MM2 | 0.0219 | 0.0151 | 0.0151 | 0   |       |
| 964 |        |        |        |     | 15721 |
|     | MA1    | MA2    | MM1    | MM2 |       |
| MA1 | 0      | 325    | 325    | 314 |       |
| MA2 | 0.0207 | 0      | 0      | 171 |       |
| MM1 | 0.0207 | 0.0000 | 0      | 171 |       |
| MM2 | 0.0200 | 0.0109 | 0.0109 | 0   |       |
| 967 |        |        |        |     | 12529 |
|     | MA1    | MA2    | MM1    | MM2 |       |
| MA1 | 0      | 206    | 197    | 206 |       |
| MA2 | 0.0164 | 0      | 74     | 0   |       |
| MM1 | 0.0157 | 0.0059 | 0      | 74  |       |
| MM2 | 0.0164 | 0.0000 | 0.0059 | 0   |       |
| 974 |        |        |        |     | 15197 |
|     | MA1    | MA2    | MM1    | MM2 |       |
| MA1 | 0      | 391    | 407    | 414 |       |
| MA2 | 0.0257 | 0      | 217    | 209 |       |
| MM1 | 0.0268 | 0.0143 | 0      | 140 |       |
| MM2 | 0.0272 | 0.0138 | 0.0092 | 0   |       |
| 975 |        |        |        |     | 6877  |

Table S7: Difference Matrices.

## Matrices MA-MM

Laine et al.  
Supporting Information

|     |        |        |        |     |       |
|-----|--------|--------|--------|-----|-------|
|     | MA1    | MA2    | MM1    | MM2 |       |
| MA1 | 0      | 149    | 0      | 66  |       |
| MA2 | 0.0217 | 0      | 149    | 139 |       |
| MM1 | 0.0000 | 0.0217 | 0      | 66  |       |
| MM2 | 0.0096 | 0.0202 | 0.0096 | 0   |       |
| 980 |        |        |        |     | 7516  |
|     | MA1    | MA2    | MM1    | MM2 |       |
| MA1 | 0      | 183    | 211    | 216 |       |
| MA2 | 0.0243 | 0      | 137    | 145 |       |
| MM1 | 0.0281 | 0.0182 | 0      | 84  |       |
| MM2 | 0.0287 | 0.0193 | 0.0112 | 0   |       |
| 988 |        |        |        |     | 10284 |
|     | MA1    | MA2    | MM1    | MM2 |       |
| MA1 | 0      | 244    | 244    | 264 |       |
| MA2 | 0.0237 | 0      | 0      | 135 |       |
| MM1 | 0.0237 | 0.0000 | 0      | 135 |       |
| MM2 | 0.0257 | 0.0131 | 0.0131 | 0   |       |

|     |    |        |        |        |       |
|-----|----|--------|--------|--------|-------|
|     | 8  |        |        |        | 11387 |
|     |    | CR1    | CR2    | MM1    | MM2   |
| CR1 |    | 0      | 356    | 132    | 134   |
| CR2 |    | 0.0313 | 0      | 367    | 374   |
| MM1 |    | 0.0116 | 0.0322 | 0      | 88    |
| MM2 |    | 0.0118 | 0.0328 | 0.0077 | 0     |
|     | 16 |        |        |        | 10501 |
|     |    | CR1    | CR2    | MM1    | MM2   |
| CR1 |    | 0      | 333    | 129    | 159   |
| CR2 |    | 0.0317 | 0      | 319    | 322   |
| MM1 |    | 0.0123 | 0.0304 | 0      | 153   |
| MM2 |    | 0.0151 | 0.0307 | 0.0146 | 0     |
|     | 18 |        |        |        | 10068 |
|     |    | CR1    | CR2    | MM1    | MM2   |
| CR1 |    | 0      | 274    | 188    | 168   |
| CR2 |    | 0.0272 | 0      | 253    | 271   |
| MM1 |    | 0.0187 | 0.0251 | 0      | 179   |
| MM2 |    | 0.0167 | 0.0269 | 0.0178 | 0     |
|     | 20 |        |        |        | 7947  |
|     |    | CR1    | CR2    | MM1    | MM2   |
| CR1 |    | 0      | 143    | 49     | 66    |
| CR2 |    | 0.0180 | 0      | 140    | 141   |
| MM1 |    | 0.0062 | 0.0176 | 0      | 71    |
| MM2 |    | 0.0083 | 0.0177 | 0.0089 | 0     |
|     | 22 |        |        |        | 4936  |
|     |    | CR1    | CR2    | MM1    | MM2   |
| CR1 |    | 0      | 85     | 80     | 82    |
| CR2 |    | 0.0172 | 0      | 136    | 140   |
| MM1 |    | 0.0162 | 0.0276 | 0      | 47    |
| MM2 |    | 0.0166 | 0.0284 | 0.0095 | 0     |
|     | 26 |        |        |        | 12708 |
|     |    | CR1    | CR2    | MM1    | MM2   |
| CR1 |    | 0      | 307    | 141    | 186   |
| CR2 |    | 0.0242 | 0      | 311    | 308   |
| MM1 |    | 0.0111 | 0.0245 | 0      | 134   |
| MM2 |    | 0.0146 | 0.0242 | 0.0105 | 0     |
|     | 28 |        |        |        | 17759 |
|     |    | CR1    | CR2    | MM1    | MM2   |
| CR1 |    | 0      | 15     | 129    | 168   |
| CR2 |    | 0.0008 | 0      | 116    | 155   |
| MM1 |    | 0.0073 | 0.0065 | 0      | 105   |
| MM2 |    | 0.0095 | 0.0087 | 0.0059 | 0     |

|     |    |        |        |        |       |
|-----|----|--------|--------|--------|-------|
|     | 29 |        |        |        | 29571 |
|     |    | CR1    | CR2    | MM1    | MM2   |
| CR1 |    | 0      | 903    | 713    | 859   |
| CR2 |    | 0.0305 | 0      | 719    | 689   |
| MM1 |    | 0.0241 | 0.0243 | 0      | 626   |
| MM2 |    | 0.0290 | 0.0233 | 0.0212 | 0     |
|     | 32 |        |        |        | 15605 |
|     |    | CR1    | CR2    | MM1    | MM2   |
| CR1 |    | 0      | 167    | 187    | 197   |
| CR2 |    | 0.0107 | 0      | 222    | 235   |
| MM1 |    | 0.0120 | 0.0142 | 0      | 185   |
| MM2 |    | 0.0126 | 0.0151 | 0.0119 | 0     |
|     | 33 |        |        |        | 31052 |
|     |    | CR1    | CR2    | MM1    | MM2   |
| CR1 |    | 0      | 456    | 201    | 195   |
| CR2 |    | 0.0147 | 0      | 489    | 465   |
| MM1 |    | 0.0065 | 0.0157 | 0      | 187   |
| MM2 |    | 0.0063 | 0.0150 | 0.0060 | 0     |
|     | 34 |        |        |        | 15338 |
|     |    | CR1    | CR2    | MM1    | MM2   |
| CR1 |    | 0      | 357    | 228    | 238   |
| CR2 |    | 0.0233 | 0      | 340    | 326   |
| MM1 |    | 0.0149 | 0.0222 | 0      | 187   |
| MM2 |    | 0.0155 | 0.0213 | 0.0122 | 0     |
|     | 35 |        |        |        | 8520  |
|     |    | CR1    | CR2    | MM1    | MM2   |
| CR1 |    | 0      | 190    | 116    | 116   |
| CR2 |    | 0.0223 | 0      | 194    | 194   |
| MM1 |    | 0.0136 | 0.0228 | 0      | 0     |
| MM2 |    | 0.0136 | 0.0228 | 0.0000 | 0     |
|     | 36 |        |        |        | 12637 |
|     |    | CR1    | CR2    | MM1    | MM2   |
| CR1 |    | 0      | 393    | 197    | 204   |
| CR2 |    | 0.0311 | 0      | 396    | 379   |
| MM1 |    | 0.0156 | 0.0313 | 0      | 180   |
| MM2 |    | 0.0161 | 0.0300 | 0.0142 | 0     |
|     | 41 |        |        |        | 11599 |
|     |    | CR1    | CR2    | MM1    | MM2   |
| CR1 |    | 0      | 276    | 164    | 165   |
| CR2 |    | 0.0238 | 0      | 274    | 261   |
| MM1 |    | 0.0141 | 0.0236 | 0      | 156   |
| MM2 |    | 0.0142 | 0.0225 | 0.0134 | 0     |

|     |    |        |        |        |       |
|-----|----|--------|--------|--------|-------|
|     | 46 |        |        |        | 6594  |
|     |    | CR1    | CR2    | MM1    | MM2   |
| CR1 |    | 0      | 0      | 218    | 224   |
| CR2 |    | 0.0000 | 0      | 218    | 224   |
| MM1 |    | 0.0331 | 0.0331 | 0      | 104   |
| MM2 |    | 0.0340 | 0.0340 | 0.0158 | 0     |
|     | 48 |        |        |        | 9269  |
|     |    | CR1    | CR2    | MM1    | MM2   |
| CR1 |    | 0      | 142    | 223    | 232   |
| CR2 |    | 0.0153 | 0      | 297    | 308   |
| MM1 |    | 0.0241 | 0.0320 | 0      | 177   |
| MM2 |    | 0.0250 | 0.0332 | 0.0191 | 0     |
|     | 49 |        |        |        | 14350 |
|     |    | CR1    | CR2    | MM1    | MM2   |
| CR1 |    | 0      | 275    | 121    | 135   |
| CR2 |    | 0.0192 | 0      | 272    | 264   |
| MM1 |    | 0.0084 | 0.0190 | 0      | 134   |
| MM2 |    | 0.0094 | 0.0184 | 0.0093 | 0     |
|     | 52 |        |        |        | 7787  |
|     |    | CR1    | CR2    | MM1    | MM2   |
| CR1 |    | 0      | 66     | 35     | 34    |
| CR2 |    | 0.0085 | 0      | 65     | 66    |
| MM1 |    | 0.0045 | 0.0083 | 0      | 35    |
| MM2 |    | 0.0044 | 0.0085 | 0.0045 | 0     |
|     | 58 |        |        |        | 12482 |
|     |    | CR1    | CR2    | MM1    | MM2   |
| CR1 |    | 0      | 204    | 114    | 119   |
| CR2 |    | 0.0163 | 0      | 204    | 192   |
| MM1 |    | 0.0091 | 0.0163 | 0      | 136   |
| MM2 |    | 0.0095 | 0.0154 | 0.0109 | 0     |
|     | 59 |        |        |        | 14513 |
|     |    | CR1    | CR2    | MM1    | MM2   |
| CR1 |    | 0      | 273    | 110    | 140   |
| CR2 |    | 0.0188 | 0      | 258    | 286   |
| MM1 |    | 0.0076 | 0.0178 | 0      | 150   |
| MM2 |    | 0.0096 | 0.0197 | 0.0103 | 0     |
|     | 60 |        |        |        | 11751 |
|     |    | CR1    | CR2    | MM1    | MM2   |
| CR1 |    | 0      | 254    | 0      | 136   |
| CR2 |    | 0.0216 | 0      | 254    | 237   |
| MM1 |    | 0.0000 | 0.0216 | 0      | 136   |
| MM2 |    | 0.0116 | 0.0202 | 0.0116 | 0     |

|     |    |        |        |        |       |
|-----|----|--------|--------|--------|-------|
|     | 62 |        |        |        | 8232  |
|     |    | CR1    | CR2    | MM1    | MM2   |
| CR1 |    | 0      | 221    | 98     | 123   |
| CR2 |    | 0.0268 | 0      | 232    | 220   |
| MM1 |    | 0.0119 | 0.0282 | 0      | 91    |
| MM2 |    | 0.0149 | 0.0267 | 0.0111 | 0     |
|     | 63 |        |        |        | 12360 |
|     |    | CR1    | CR2    | MM1    | MM2   |
| CR1 |    | 0      | 363    | 405    | 413   |
| CR2 |    | 0.0294 | 0      | 221    | 281   |
| MM1 |    | 0.0328 | 0.0179 | 0      | 246   |
| MM2 |    | 0.0334 | 0.0227 | 0.0199 | 0     |
|     | 64 |        |        |        | 19408 |
|     |    | CR1    | CR2    | MM1    | MM2   |
| CR1 |    | 0      | 227    | 343    | 345   |
| CR2 |    | 0.0117 | 0      | 411    | 418   |
| MM1 |    | 0.0177 | 0.0212 | 0      | 228   |
| MM2 |    | 0.0178 | 0.0215 | 0.0117 | 0     |
|     | 66 |        |        |        | 12344 |
|     |    | CR1    | CR2    | MM1    | MM2   |
| CR1 |    | 0      | 239    | 208    | 218   |
| CR2 |    | 0.0194 | 0      | 324    | 300   |
| MM1 |    | 0.0169 | 0.0262 | 0      | 177   |
| MM2 |    | 0.0177 | 0.0243 | 0.0143 | 0     |
|     | 70 |        |        |        | 17461 |
|     |    | CR1    | CR2    | MM1    | MM2   |
| CR1 |    | 0      | 380    | 146    | 172   |
| CR2 |    | 0.0218 | 0      | 385    | 392   |
| MM1 |    | 0.0084 | 0.0220 | 0      | 62    |
| MM2 |    | 0.0099 | 0.0225 | 0.0036 | 0     |
|     | 71 |        |        |        | 9708  |
|     |    | CR1    | CR2    | MM1    | MM2   |
| CR1 |    | 0      | 230    | 94     | 123   |
| CR2 |    | 0.0237 | 0      | 221    | 224   |
| MM1 |    | 0.0097 | 0.0228 | 0      | 109   |
| MM2 |    | 0.0127 | 0.0231 | 0.0112 | 0     |
|     | 72 |        |        |        | 17714 |
|     |    | CR1    | CR2    | MM1    | MM2   |
| CR1 |    | 0      | 318    | 187    | 200   |
| CR2 |    | 0.0180 | 0      | 340    | 329   |
| MM1 |    | 0.0106 | 0.0192 | 0      | 206   |
| MM2 |    | 0.0113 | 0.0186 | 0.0116 | 0     |

|     |    |        |        |        |       |
|-----|----|--------|--------|--------|-------|
|     | 73 |        |        |        | 14122 |
|     |    | CR1    | CR2    | MM1    | MM2   |
| CR1 |    | 0      | 225    | 221    | 224   |
| CR2 |    | 0.0159 | 0      | 88     | 96    |
| MM1 |    | 0.0156 | 0.0062 | 0      | 93    |
| MM2 |    | 0.0159 | 0.0068 | 0.0066 | 0     |
|     | 76 |        |        |        | 8695  |
|     |    | CR1    | CR2    | MM1    | MM2   |
| CR1 |    | 0      | 185    | 204    | 211   |
| CR2 |    | 0.0213 | 0      | 95     | 123   |
| MM1 |    | 0.0235 | 0.0109 | 0      | 39    |
| MM2 |    | 0.0243 | 0.0141 | 0.0045 | 0     |
|     | 78 |        |        |        | 17831 |
|     |    | CR1    | CR2    | MM1    | MM2   |
| CR1 |    | 0      | 380    | 388    | 400   |
| CR2 |    | 0.0213 | 0      | 178    | 203   |
| MM1 |    | 0.0218 | 0.0100 | 0      | 73    |
| MM2 |    | 0.0224 | 0.0114 | 0.0041 | 0     |
|     | 80 |        |        |        | 9507  |
|     |    | CR1    | CR2    | MM1    | MM2   |
| CR1 |    | 0      | 146    | 137    | 141   |
| CR2 |    | 0.0154 | 0      | 44     | 67    |
| MM1 |    | 0.0144 | 0.0046 | 0      | 55    |
| MM2 |    | 0.0148 | 0.0070 | 0.0058 | 0     |
|     | 84 |        |        |        | 10425 |
|     |    | CR1    | CR2    | MM1    | MM2   |
| CR1 |    | 0      | 412    | 174    | 193   |
| CR2 |    | 0.0395 | 0      | 416    | 425   |
| MM1 |    | 0.0167 | 0.0399 | 0      | 150   |
| MM2 |    | 0.0185 | 0.0408 | 0.0144 | 0     |
|     | 86 |        |        |        | 9705  |
|     |    | CR1    | CR2    | MM1    | MM2   |
| CR1 |    | 0      | 330    | 217    | 217   |
| CR2 |    | 0.0340 | 0      | 307    | 307   |
| MM1 |    | 0.0224 | 0.0316 | 0      | 0     |
| MM2 |    | 0.0224 | 0.0316 | 0.0000 | 0     |
|     | 90 |        |        |        | 14644 |
|     |    | CR1    | CR2    | MM1    | MM2   |
| CR1 |    | 0      | 294    | 144    | 139   |
| CR2 |    | 0.0201 | 0      | 326    | 332   |
| MM1 |    | 0.0098 | 0.0223 | 0      | 133   |
| MM2 |    | 0.0095 | 0.0227 | 0.0091 | 0     |

|     |     |        |        |        |       |
|-----|-----|--------|--------|--------|-------|
|     | 91  |        |        |        | 7542  |
|     |     | CR1    | CR2    | MM1    | MM2   |
| CR1 |     | 0      | 43     | 150    | 151   |
| CR2 |     | 0.0057 | 0      | 176    | 179   |
| MM1 |     | 0.0199 | 0.0233 | 0      | 94    |
| MM2 |     | 0.0200 | 0.0237 | 0.0125 | 0     |
|     | 92  |        |        |        | 12811 |
|     |     | CR1    | CR2    | MM1    | MM2   |
| CR1 |     | 0      | 195    | 190    | 198   |
| CR2 |     | 0.0152 | 0      | 84     | 82    |
| MM1 |     | 0.0148 | 0.0066 | 0      | 92    |
| MM2 |     | 0.0155 | 0.0064 | 0.0072 | 0     |
|     | 93  |        |        |        | 12881 |
|     |     | CR1    | CR2    | MM1    | MM2   |
| CR1 |     | 0      | 374    | 320    | 273   |
| CR2 |     | 0.0290 | 0      | 387    | 389   |
| MM1 |     | 0.0248 | 0.0300 | 0      | 210   |
| MM2 |     | 0.0212 | 0.0302 | 0.0163 | 0     |
|     | 94  |        |        |        | 8340  |
|     |     | CR1    | CR2    | MM1    | MM2   |
| CR1 |     | 0      | 378    | 203    | 174   |
| CR2 |     | 0.0453 | 0      | 352    | 353   |
| MM1 |     | 0.0243 | 0.0422 | 0      | 216   |
| MM2 |     | 0.0209 | 0.0423 | 0.0259 | 0     |
|     | 97  |        |        |        | 9893  |
|     |     | CR1    | CR2    | MM1    | MM2   |
| CR1 |     | 0      | 114    | 187    | 236   |
| CR2 |     | 0.0115 | 0      | 261    | 282   |
| MM1 |     | 0.0189 | 0.0264 | 0      | 155   |
| MM2 |     | 0.0239 | 0.0285 | 0.0157 | 0     |
|     | 98  |        |        |        | 14044 |
|     |     | CR1    | CR2    | MM1    | MM2   |
| CR1 |     | 0      | 298    | 139    | 127   |
| CR2 |     | 0.0212 | 0      | 302    | 294   |
| MM1 |     | 0.0099 | 0.0215 | 0      | 143   |
| MM2 |     | 0.0090 | 0.0209 | 0.0102 | 0     |
|     | 101 |        |        |        | 16924 |
|     |     | CR1    | CR2    | MM1    | MM2   |
| CR1 |     | 0      | 359    | 314    | 325   |
| CR2 |     | 0.0212 | 0      | 397    | 462   |
| MM1 |     | 0.0186 | 0.0235 | 0      | 243   |
| MM2 |     | 0.0192 | 0.0273 | 0.0144 | 0     |



|     |        |        |        |     |       |
|-----|--------|--------|--------|-----|-------|
| 107 |        |        |        |     | 16111 |
|     | CR1    | CR2    | MM1    | MM2 |       |
| CR1 | 0      | 362    | 183    | 146 |       |
| CR2 | 0.0225 | 0      | 347    | 334 |       |
| MM1 | 0.0114 | 0.0215 | 0      | 163 |       |
| MM2 | 0.0091 | 0.0207 | 0.0101 | 0   |       |
| 109 |        |        |        |     | 10411 |
|     | CR1    | CR2    | MM1    | MM2 |       |
| CR1 | 0      | 337    | 105    | 201 |       |
| CR2 | 0.0324 | 0      | 316    | 291 |       |
| MM1 | 0.0101 | 0.0304 | 0      | 96  |       |
| MM2 | 0.0193 | 0.0280 | 0.0092 | 0   |       |
| 110 |        |        |        |     | 9137  |
|     | CR1    | CR2    | MM1    | MM2 |       |
| CR1 | 0      | 203    | 114    | 97  |       |
| CR2 | 0.0222 | 0      | 209    | 193 |       |
| MM1 | 0.0125 | 0.0229 | 0      | 113 |       |
| MM2 | 0.0106 | 0.0211 | 0.0124 | 0   |       |
| 113 |        |        |        |     | 10514 |
|     | CR1    | CR2    | MM1    | MM2 |       |
| CR1 | 0      | 190    | 184    | 183 |       |
| CR2 | 0.0181 | 0      | 77     | 102 |       |
| MM1 | 0.0175 | 0.0073 | 0      | 87  |       |
| MM2 | 0.0174 | 0.0097 | 0.0083 | 0   |       |
| 114 |        |        |        |     | 13380 |
|     | CR1    | CR2    | MM1    | MM2 |       |
| CR1 | 0      | 242    | 141    | 149 |       |
| CR2 | 0.0181 | 0      | 242    | 231 |       |
| MM1 | 0.0105 | 0.0181 | 0      | 134 |       |
| MM2 | 0.0111 | 0.0173 | 0.0100 | 0   |       |
| 115 |        |        |        |     | 10245 |
|     | CR1    | CR2    | MM1    | MM2 |       |
| CR1 | 0      | 199    | 97     | 85  |       |
| CR2 | 0.0194 | 0      | 205    | 192 |       |
| MM1 | 0.0095 | 0.0200 | 0      | 87  |       |
| MM2 | 0.0083 | 0.0187 | 0.0085 | 0   |       |
| 117 |        |        |        |     | 10130 |
|     | CR1    | CR2    | MM1    | MM2 |       |
| CR1 | 0      | 10     | 236    | 211 |       |
| CR2 | 0.0010 | 0      | 237    | 212 |       |
| MM1 | 0.0233 | 0.0234 | 0      | 147 |       |
| MM2 | 0.0208 | 0.0209 | 0.0145 | 0   |       |

|     |        |        |        |     |       |
|-----|--------|--------|--------|-----|-------|
| 120 |        |        |        |     | 10222 |
|     | CR1    | CR2    | MM1    | MM2 |       |
| CR1 | 0      | 240    | 182    | 152 |       |
| CR2 | 0.0235 | 0      | 229    | 236 |       |
| MM1 | 0.0178 | 0.0224 | 0      | 155 |       |
| MM2 | 0.0149 | 0.0231 | 0.0152 | 0   |       |
| 121 |        |        |        |     | 15870 |
|     | CR1    | CR2    | MM1    | MM2 |       |
| CR1 | 0      | 332    | 172    | 175 |       |
| CR2 | 0.0209 | 0      | 341    | 335 |       |
| MM1 | 0.0108 | 0.0215 | 0      | 171 |       |
| MM2 | 0.0110 | 0.0211 | 0.0108 | 0   |       |
| 124 |        |        |        |     | 11046 |
|     | CR1    | CR2    | MM1    | MM2 |       |
| CR1 | 0      | 183    | 86     | 128 |       |
| CR2 | 0.0166 | 0      | 166    | 174 |       |
| MM1 | 0.0078 | 0.0150 | 0      | 86  |       |
| MM2 | 0.0116 | 0.0158 | 0.0078 | 0   |       |
| 125 |        |        |        |     | 8100  |
|     | CR1    | CR2    | MM1    | MM2 |       |
| CR1 | 0      | 215    | 135    | 110 |       |
| CR2 | 0.0265 | 0      | 258    | 239 |       |
| MM1 | 0.0167 | 0.0319 | 0      | 93  |       |
| MM2 | 0.0136 | 0.0295 | 0.0115 | 0   |       |
| 135 |        |        |        |     | 12346 |
|     | CR1    | CR2    | MM1    | MM2 |       |
| CR1 | 0      | 0      | 307    | 320 |       |
| CR2 | 0.0000 | 0      | 307    | 320 |       |
| MM1 | 0.0249 | 0.0249 | 0      | 165 |       |
| MM2 | 0.0259 | 0.0259 | 0.0134 | 0   |       |
| 146 |        |        |        |     | 6794  |
|     | CR1    | CR2    | MM1    | MM2 |       |
| CR1 | 0      | 215    | 198    | 202 |       |
| CR2 | 0.0316 | 0      | 241    | 234 |       |
| MM1 | 0.0291 | 0.0355 | 0      | 123 |       |
| MM2 | 0.0297 | 0.0344 | 0.0181 | 0   |       |
| 150 |        |        |        |     | 9873  |
|     | CR1    | CR2    | MM1    | MM2 |       |
| CR1 | 0      | 264    | 249    | 263 |       |
| CR2 | 0.0267 | 0      | 143    | 164 |       |
| MM1 | 0.0252 | 0.0145 | 0      | 131 |       |
| MM2 | 0.0266 | 0.0166 | 0.0133 | 0   |       |

|     |        |        |        |     |       |
|-----|--------|--------|--------|-----|-------|
| 151 |        |        |        |     | 16174 |
|     | CR1    | CR2    | MM1    | MM2 |       |
| CR1 | 0      | 347    | 136    | 127 |       |
| CR2 | 0.0215 | 0      | 352    | 362 |       |
| MM1 | 0.0084 | 0.0218 | 0      | 156 |       |
| MM2 | 0.0079 | 0.0224 | 0.0096 | 0   |       |
| 152 |        |        |        |     | 11673 |
|     | CR1    | CR2    | MM1    | MM2 |       |
| CR1 | 0      | 312    | 144    | 163 |       |
| CR2 | 0.0267 | 0      | 316    | 335 |       |
| MM1 | 0.0123 | 0.0271 | 0      | 143 |       |
| MM2 | 0.0140 | 0.0287 | 0.0123 | 0   |       |
| 156 |        |        |        |     | 16144 |
|     | CR1    | CR2    | MM1    | MM2 |       |
| CR1 | 0      | 363    | 372    | 339 |       |
| CR2 | 0.0225 | 0      | 245    | 206 |       |
| MM1 | 0.0230 | 0.0152 | 0      | 189 |       |
| MM2 | 0.0210 | 0.0128 | 0.0117 | 0   |       |
| 158 |        |        |        |     | 10788 |
|     | CR1    | CR2    | MM1    | MM2 |       |
| CR1 | 0      | 232    | 74     | 14  |       |
| CR2 | 0.0215 | 0      | 244    | 236 |       |
| MM1 | 0.0069 | 0.0226 | 0      | 75  |       |
| MM2 | 0.0013 | 0.0219 | 0.0070 | 0   |       |
| 160 |        |        |        |     | 11505 |
|     | CR1    | CR2    | MM1    | MM2 |       |
| CR1 | 0      | 273    | 185    | 164 |       |
| CR2 | 0.0237 | 0      | 276    | 251 |       |
| MM1 | 0.0161 | 0.0240 | 0      | 174 |       |
| MM2 | 0.0143 | 0.0218 | 0.0151 | 0   |       |
| 164 |        |        |        |     | 14788 |
|     | CR1    | CR2    | MM1    | MM2 |       |
| CR1 | 0      | 166    | 46     | 42  |       |
| CR2 | 0.0112 | 0      | 156    | 162 |       |
| MM1 | 0.0031 | 0.0105 | 0      | 44  |       |
| MM2 | 0.0028 | 0.0110 | 0.0030 | 0   |       |
| 165 |        |        |        |     | 13463 |
|     | CR1    | CR2    | MM1    | MM2 |       |
| CR1 | 0      | 197    | 94     | 68  |       |
| CR2 | 0.0146 | 0      | 187    | 198 |       |
| MM1 | 0.0070 | 0.0139 | 0      | 94  |       |
| MM2 | 0.0051 | 0.0147 | 0.0070 | 0   |       |

|     |        |        |        |     |       |
|-----|--------|--------|--------|-----|-------|
| 166 |        |        |        |     | 21826 |
|     | CR1    | CR2    | MM1    | MM2 |       |
| CR1 | 0      | 444    | 205    | 191 |       |
| CR2 | 0.0203 | 0      | 467    | 470 |       |
| MM1 | 0.0094 | 0.0214 | 0      | 188 |       |
| MM2 | 0.0088 | 0.0215 | 0.0086 | 0   |       |
| 171 |        |        |        |     | 13029 |
|     | CR1    | CR2    | MM1    | MM2 |       |
| CR1 | 0      | 124    | 420    | 454 |       |
| CR2 | 0.0095 | 0      | 383    | 399 |       |
| MM1 | 0.0322 | 0.0294 | 0      | 258 |       |
| MM2 | 0.0348 | 0.0306 | 0.0198 | 0   |       |
| 174 |        |        |        |     | 10585 |
|     | CR1    | CR2    | MM1    | MM2 |       |
| CR1 | 0      | 278    | 228    | 207 |       |
| CR2 | 0.0263 | 0      | 316    | 299 |       |
| MM1 | 0.0215 | 0.0299 | 0      | 172 |       |
| MM2 | 0.0196 | 0.0282 | 0.0162 | 0   |       |
| 175 |        |        |        |     | 12795 |
|     | CR1    | CR2    | MM1    | MM2 |       |
| CR1 | 0      | 325    | 161    | 159 |       |
| CR2 | 0.0254 | 0      | 320    | 328 |       |
| MM1 | 0.0126 | 0.0250 | 0      | 133 |       |
| MM2 | 0.0124 | 0.0256 | 0.0104 | 0   |       |
| 179 |        |        |        |     | 13760 |
|     | CR1    | CR2    | MM1    | MM2 |       |
| CR1 | 0      | 202    | 108    | 88  |       |
| CR2 | 0.0147 | 0      | 216    | 200 |       |
| MM1 | 0.0078 | 0.0157 | 0      | 101 |       |
| MM2 | 0.0064 | 0.0145 | 0.0073 | 0   |       |
| 183 |        |        |        |     | 14148 |
|     | CR1    | CR2    | MM1    | MM2 |       |
| CR1 | 0      | 373    | 166    | 44  |       |
| CR2 | 0.0264 | 0      | 380    | 372 |       |
| MM1 | 0.0117 | 0.0269 | 0      | 154 |       |
| MM2 | 0.0031 | 0.0263 | 0.0109 | 0   |       |
| 185 |        |        |        |     | 10093 |
|     | CR1    | CR2    | MM1    | MM2 |       |
| CR1 | 0      | 270    | 161    | 168 |       |
| CR2 | 0.0268 | 0      | 251    | 262 |       |
| MM1 | 0.0160 | 0.0249 | 0      | 129 |       |
| MM2 | 0.0166 | 0.0260 | 0.0128 | 0   |       |

|     |     |        |        |        |       |
|-----|-----|--------|--------|--------|-------|
|     | 195 |        |        |        | 9895  |
|     |     | CR1    | CR2    | MM1    | MM2   |
| CR1 |     | 0      | 271    | 140    | 111   |
| CR2 |     | 0.0274 | 0      | 288    | 281   |
| MM1 |     | 0.0141 | 0.0291 | 0      | 151   |
| MM2 |     | 0.0112 | 0.0284 | 0.0153 | 0     |
|     | 196 |        |        |        | 18576 |
|     |     | CR1    | CR2    | MM1    | MM2   |
| CR1 |     | 0      | 478    | 323    | 302   |
| CR2 |     | 0.0257 | 0      | 469    | 453   |
| MM1 |     | 0.0174 | 0.0252 | 0      | 222   |
| MM2 |     | 0.0163 | 0.0244 | 0.0120 | 0     |
|     | 198 |        |        |        | 13241 |
|     |     | CR1    | CR2    | MM1    | MM2   |
| CR1 |     | 0      | 419    | 376    | 392   |
| CR2 |     | 0.0316 | 0      | 250    | 251   |
| MM1 |     | 0.0284 | 0.0189 | 0      | 202   |
| MM2 |     | 0.0296 | 0.0190 | 0.0153 | 0     |
|     | 209 |        |        |        | 10773 |
|     |     | CR1    | CR2    | MM1    | MM2   |
| CR1 |     | 0      | 239    | 152    | 156   |
| CR2 |     | 0.0222 | 0      | 233    | 241   |
| MM1 |     | 0.0141 | 0.0216 | 0      | 163   |
| MM2 |     | 0.0145 | 0.0224 | 0.0151 | 0     |
|     | 213 |        |        |        | 9557  |
|     |     | CR1    | CR2    | MM1    | MM2   |
| CR1 |     | 0      | 207    | 130    | 110   |
| CR2 |     | 0.0217 | 0      | 219    | 209   |
| MM1 |     | 0.0136 | 0.0229 | 0      | 133   |
| MM2 |     | 0.0115 | 0.0219 | 0.0139 | 0     |
|     | 214 |        |        |        | 10027 |
|     |     | CR1    | CR2    | MM1    | MM2   |
| CR1 |     | 0      | 306    | 292    | 302   |
| CR2 |     | 0.0305 | 0      | 222    | 65    |
| MM1 |     | 0.0291 | 0.0221 | 0      | 246   |
| MM2 |     | 0.0301 | 0.0065 | 0.0245 | 0     |
|     | 215 |        |        |        | 11372 |
|     |     | CR1    | CR2    | MM1    | MM2   |
| CR1 |     | 0      | 250    | 242    | 248   |
| CR2 |     | 0.0220 | 0      | 114    | 147   |
| MM1 |     | 0.0213 | 0.0100 | 0      | 166   |
| MM2 |     | 0.0218 | 0.0129 | 0.0146 | 0     |

|     |        |        |        |     |  |       |
|-----|--------|--------|--------|-----|--|-------|
| 219 |        |        |        |     |  | 9624  |
|     | CR1    | CR2    | MM1    | MM2 |  |       |
| CR1 | 0      | 159    | 122    | 132 |  |       |
| CR2 | 0.0165 | 0      | 185    | 191 |  |       |
| MM1 | 0.0127 | 0.0192 | 0      | 24  |  |       |
| MM2 | 0.0137 | 0.0198 | 0.0025 | 0   |  |       |
| 222 |        |        |        |     |  | 10036 |
|     | CR1    | CR2    | MM1    | MM2 |  |       |
| CR1 | 0      | 186    | 92     | 108 |  |       |
| CR2 | 0.0185 | 0      | 194    | 190 |  |       |
| MM1 | 0.0092 | 0.0193 | 0      | 86  |  |       |
| MM2 | 0.0108 | 0.0189 | 0.0086 | 0   |  |       |
| 223 |        |        |        |     |  | 13936 |
|     | CR1    | CR2    | MM1    | MM2 |  |       |
| CR1 | 0      | 218    | 231    | 222 |  |       |
| CR2 | 0.0156 | 0      | 118    | 109 |  |       |
| MM1 | 0.0166 | 0.0085 | 0      | 143 |  |       |
| MM2 | 0.0159 | 0.0078 | 0.0103 | 0   |  |       |
| 229 |        |        |        |     |  | 8765  |
|     | CR1    | CR2    | MM1    | MM2 |  |       |
| CR1 | 0      | 202    | 206    | 206 |  |       |
| CR2 | 0.0230 | 0      | 89     | 70  |  |       |
| MM1 | 0.0235 | 0.0102 | 0      | 91  |  |       |
| MM2 | 0.0235 | 0.0080 | 0.0104 | 0   |  |       |
| 231 |        |        |        |     |  | 7242  |
|     | CR1    | CR2    | MM1    | MM2 |  |       |
| CR1 | 0      | 130    | 113    | 105 |  |       |
| CR2 | 0.0180 | 0      | 147    | 145 |  |       |
| MM1 | 0.0156 | 0.0203 | 0      | 94  |  |       |
| MM2 | 0.0145 | 0.0200 | 0.0130 | 0   |  |       |
| 234 |        |        |        |     |  | 10953 |
|     | CR1    | CR2    | MM1    | MM2 |  |       |
| CR1 | 0      | 254    | 244    | 234 |  |       |
| CR2 | 0.0232 | 0      | 118    | 113 |  |       |
| MM1 | 0.0223 | 0.0108 | 0      | 93  |  |       |
| MM2 | 0.0214 | 0.0103 | 0.0085 | 0   |  |       |
| 239 |        |        |        |     |  | 11982 |
|     | CR1    | CR2    | MM1    | MM2 |  |       |
| CR1 | 0      | 235    | 239    | 243 |  |       |
| CR2 | 0.0196 | 0      | 129    | 95  |  |       |
| MM1 | 0.0199 | 0.0108 | 0      | 122 |  |       |
| MM2 | 0.0203 | 0.0079 | 0.0102 | 0   |  |       |

|     |     |        |        |        |       |
|-----|-----|--------|--------|--------|-------|
|     | 244 |        |        |        | 7500  |
|     |     | CR1    | CR2    | MM1    | MM2   |
| CR1 |     | 0      | 11     | 166    | 167   |
| CR2 |     | 0.0015 | 0      | 159    | 162   |
| MM1 |     | 0.0221 | 0.0212 | 0      | 69    |
| MM2 |     | 0.0223 | 0.0216 | 0.0092 | 0     |
|     | 247 |        |        |        | 10039 |
|     |     | CR1    | CR2    | MM1    | MM2   |
| CR1 |     | 0      | 228    | 214    | 217   |
| CR2 |     | 0.0227 | 0      | 84     | 89    |
| MM1 |     | 0.0213 | 0.0084 | 0      | 113   |
| MM2 |     | 0.0216 | 0.0089 | 0.0113 | 0     |
|     | 253 |        |        |        | 11114 |
|     |     | CR1    | CR2    | MM1    | MM2   |
| CR1 |     | 0      | 162    | 161    | 166   |
| CR2 |     | 0.0146 | 0      | 1      | 80    |
| MM1 |     | 0.0145 | 0.0001 | 0      | 79    |
| MM2 |     | 0.0149 | 0.0072 | 0.0071 | 0     |
|     | 254 |        |        |        | 25641 |
|     |     | CR1    | CR2    | MM1    | MM2   |
| CR1 |     | 0      | 672    | 226    | 226   |
| CR2 |     | 0.0262 | 0      | 693    | 693   |
| MM1 |     | 0.0088 | 0.0270 | 0      | 0     |
| MM2 |     | 0.0088 | 0.0270 | 0.0000 | 0     |
|     | 256 |        |        |        | 11104 |
|     |     | CR1    | CR2    | MM1    | MM2   |
| CR1 |     | 0      | 300    | 167    | 175   |
| CR2 |     | 0.0270 | 0      | 302    | 283   |
| MM1 |     | 0.0150 | 0.0272 | 0      | 154   |
| MM2 |     | 0.0158 | 0.0255 | 0.0139 | 0     |
|     | 262 |        |        |        | 7083  |
|     |     | CR1    | CR2    | MM1    | MM2   |
| CR1 |     | 0      | 6      | 25     | 37    |
| CR2 |     | 0.0008 | 0      | 29     | 41    |
| MM1 |     | 0.0035 | 0.0041 | 0      | 39    |
| MM2 |     | 0.0052 | 0.0058 | 0.0055 | 0     |
|     | 265 |        |        |        | 12005 |
|     |     | CR1    | CR2    | MM1    | MM2   |
| CR1 |     | 0      | 170    | 70     | 88    |
| CR2 |     | 0.0142 | 0      | 155    | 167   |
| MM1 |     | 0.0058 | 0.0129 | 0      | 94    |
| MM2 |     | 0.0073 | 0.0139 | 0.0078 | 0     |

|     |        |        |        |     |       |
|-----|--------|--------|--------|-----|-------|
| 270 |        |        |        |     | 10875 |
|     | CR1    | CR2    | MM1    | MM2 |       |
| CR1 | 0      | 183    | 148    | 141 |       |
| CR2 | 0.0168 | 0      | 201    | 194 |       |
| MM1 | 0.0136 | 0.0185 | 0      | 121 |       |
| MM2 | 0.0130 | 0.0178 | 0.0111 | 0   |       |
| 272 |        |        |        |     | 10338 |
|     | CR1    | CR2    | MM1    | MM2 |       |
| CR1 | 0      | 207    | 217    | 220 |       |
| CR2 | 0.0200 | 0      | 89     | 113 |       |
| MM1 | 0.0210 | 0.0086 | 0      | 105 |       |
| MM2 | 0.0213 | 0.0109 | 0.0102 | 0   |       |
| 275 |        |        |        |     | 10378 |
|     | CR1    | CR2    | MM1    | MM2 |       |
| CR1 | 0      | 176    | 109    | 88  |       |
| CR2 | 0.0170 | 0      | 178    | 179 |       |
| MM1 | 0.0105 | 0.0172 | 0      | 98  |       |
| MM2 | 0.0085 | 0.0172 | 0.0094 | 0   |       |
| 277 |        |        |        |     | 20480 |
|     | CR1    | CR2    | MM1    | MM2 |       |
| CR1 | 0      | 461    | 70     | 100 |       |
| CR2 | 0.0225 | 0      | 453    | 451 |       |
| MM1 | 0.0034 | 0.0221 | 0      | 152 |       |
| MM2 | 0.0049 | 0.0220 | 0.0074 | 0   |       |
| 281 |        |        |        |     | 11984 |
|     | CR1    | CR2    | MM1    | MM2 |       |
| CR1 | 0      | 346    | 173    | 173 |       |
| CR2 | 0.0289 | 0      | 330    | 330 |       |
| MM1 | 0.0144 | 0.0275 | 0      | 0   |       |
| MM2 | 0.0144 | 0.0275 | 0.0000 | 0   |       |
| 282 |        |        |        |     | 9731  |
|     | CR1    | CR2    | MM1    | MM2 |       |
| CR1 | 0      | 209    | 197    | 245 |       |
| CR2 | 0.0215 | 0      | 115    | 185 |       |
| MM1 | 0.0202 | 0.0118 | 0      | 178 |       |
| MM2 | 0.0252 | 0.0190 | 0.0183 | 0   |       |
| 285 |        |        |        |     | 12050 |
|     | CR1    | CR2    | MM1    | MM2 |       |
| CR1 | 0      | 22     | 95     | 108 |       |
| CR2 | 0.0018 | 0      | 87     | 98  |       |
| MM1 | 0.0079 | 0.0072 | 0      | 87  |       |
| MM2 | 0.0090 | 0.0081 | 0.0072 | 0   |       |



|     |        |        |        |     |       |
|-----|--------|--------|--------|-----|-------|
| 287 |        |        |        |     | 15768 |
|     | CR1    | CR2    | MM1    | MM2 |       |
| CR1 | 0      | 331    | 212    | 189 |       |
| CR2 | 0.0210 | 0      | 360    | 326 |       |
| MM1 | 0.0134 | 0.0228 | 0      | 219 |       |
| MM2 | 0.0120 | 0.0207 | 0.0139 | 0   |       |
| 288 |        |        |        |     | 12309 |
|     | CR1    | CR2    | MM1    | MM2 |       |
| CR1 | 0      | 228    | 135    | 142 |       |
| CR2 | 0.0185 | 0      | 222    | 225 |       |
| MM1 | 0.0110 | 0.0180 | 0      | 129 |       |
| MM2 | 0.0115 | 0.0183 | 0.0105 | 0   |       |
| 294 |        |        |        |     | 10782 |
|     | CR1    | CR2    | MM1    | MM2 |       |
| CR1 | 0      | 39     | 227    | 200 |       |
| CR2 | 0.0036 | 0      | 222    | 193 |       |
| MM1 | 0.0211 | 0.0206 | 0      | 170 |       |
| MM2 | 0.0185 | 0.0179 | 0.0158 | 0   |       |
| 295 |        |        |        |     | 6357  |
|     | CR1    | CR2    | MM1    | MM2 |       |
| CR1 | 0      | 97     | 44     | 0   |       |
| CR2 | 0.0153 | 0      | 101    | 97  |       |
| MM1 | 0.0069 | 0.0159 | 0      | 44  |       |
| MM2 | 0.0000 | 0.0153 | 0.0069 | 0   |       |
| 296 |        |        |        |     | 11939 |
|     | CR1    | CR2    | MM1    | MM2 |       |
| CR1 | 0      | 170    | 76     | 101 |       |
| CR2 | 0.0142 | 0      | 176    | 182 |       |
| MM1 | 0.0064 | 0.0147 | 0      | 82  |       |
| MM2 | 0.0085 | 0.0152 | 0.0069 | 0   |       |
| 301 |        |        |        |     | 12440 |
|     | CR1    | CR2    | MM1    | MM2 |       |
| CR1 | 0      | 1      | 203    | 167 |       |
| CR2 | 0.0001 | 0      | 202    | 166 |       |
| MM1 | 0.0163 | 0.0162 | 0      | 143 |       |
| MM2 | 0.0134 | 0.0133 | 0.0115 | 0   |       |
| 302 |        |        |        |     | 10942 |
|     | CR1    | CR2    | MM1    | MM2 |       |
| CR1 | 0      | 65     | 334    | 329 |       |
| CR2 | 0.0059 | 0      | 284    | 284 |       |
| MM1 | 0.0305 | 0.0260 | 0      | 190 |       |
| MM2 | 0.0301 | 0.0260 | 0.0174 | 0   |       |

|     |        |        |        |     |       |
|-----|--------|--------|--------|-----|-------|
| 304 |        |        |        |     | 9458  |
|     | CR1    | CR2    | MM1    | MM2 |       |
| CR1 | 0      | 52     | 235    | 230 |       |
| CR2 | 0.0055 | 0      | 233    | 226 |       |
| MM1 | 0.0248 | 0.0246 | 0      | 126 |       |
| MM2 | 0.0243 | 0.0239 | 0.0133 | 0   |       |
| 309 |        |        |        |     | 12657 |
|     | CR1    | CR2    | MM1    | MM2 |       |
| CR1 | 0      | 248    | 136    | 107 |       |
| CR2 | 0.0196 | 0      | 240    | 257 |       |
| MM1 | 0.0107 | 0.0190 | 0      | 85  |       |
| MM2 | 0.0085 | 0.0203 | 0.0067 | 0   |       |
| 322 |        |        |        |     | 9216  |
|     | CR1    | CR2    | MM1    | MM2 |       |
| CR1 | 0      | 229    | 91     | 101 |       |
| CR2 | 0.0248 | 0      | 211    | 218 |       |
| MM1 | 0.0099 | 0.0229 | 0      | 87  |       |
| MM2 | 0.0110 | 0.0237 | 0.0094 | 0   |       |
| 326 |        |        |        |     | 7360  |
|     | CR1    | CR2    | MM1    | MM2 |       |
| CR1 | 0      | 167    | 69     | 71  |       |
| CR2 | 0.0227 | 0      | 171    | 179 |       |
| MM1 | 0.0094 | 0.0232 | 0      | 84  |       |
| MM2 | 0.0096 | 0.0243 | 0.0114 | 0   |       |
| 328 |        |        |        |     | 10943 |
|     | CR1    | CR2    | MM1    | MM2 |       |
| CR1 | 0      | 273    | 94     | 99  |       |
| CR2 | 0.0249 | 0      | 285    | 268 |       |
| MM1 | 0.0086 | 0.0260 | 0      | 113 |       |
| MM2 | 0.0090 | 0.0245 | 0.0103 | 0   |       |
| 329 |        |        |        |     | 8201  |
|     | CR1    | CR2    | MM1    | MM2 |       |
| CR1 | 0      | 229    | 70     | 65  |       |
| CR2 | 0.0279 | 0      | 217    | 218 |       |
| MM1 | 0.0085 | 0.0265 | 0      | 62  |       |
| MM2 | 0.0079 | 0.0266 | 0.0076 | 0   |       |
| 330 |        |        |        |     | 7871  |
|     | CR1    | CR2    | MM1    | MM2 |       |
| CR1 | 0      | 324    | 383    | 392 |       |
| CR2 | 0.0412 | 0      | 190    | 189 |       |
| MM1 | 0.0487 | 0.0241 | 0      | 97  |       |
| MM2 | 0.0498 | 0.0240 | 0.0123 | 0   |       |

|     |     |        |        |        |       |
|-----|-----|--------|--------|--------|-------|
|     | 331 |        |        |        | 11037 |
|     |     | CR1    | CR2    | MM1    | MM2   |
| CR1 |     | 0      | 322    | 138    | 137   |
| CR2 |     | 0.0292 | 0      | 300    | 310   |
| MM1 |     | 0.0125 | 0.0272 | 0      | 138   |
| MM2 |     | 0.0124 | 0.0281 | 0.0125 | 0     |
|     | 333 |        |        |        | 9128  |
|     |     | CR1    | CR2    | MM1    | MM2   |
| CR1 |     | 0      | 156    | 80     | 85    |
| CR2 |     | 0.0171 | 0      | 159    | 156   |
| MM1 |     | 0.0088 | 0.0174 | 0      | 77    |
| MM2 |     | 0.0093 | 0.0171 | 0.0084 | 0     |
|     | 334 |        |        |        | 13655 |
|     |     | CR1    | CR2    | MM1    | MM2   |
| CR1 |     | 0      | 289    | 117    | 185   |
| CR2 |     | 0.0212 | 0      | 296    | 289   |
| MM1 |     | 0.0086 | 0.0217 | 0      | 172   |
| MM2 |     | 0.0135 | 0.0212 | 0.0126 | 0     |
|     | 338 |        |        |        | 10479 |
|     |     | CR1    | CR2    | MM1    | MM2   |
| CR1 |     | 0      | 269    | 174    | 155   |
| CR2 |     | 0.0257 | 0      | 269    | 260   |
| MM1 |     | 0.0166 | 0.0257 | 0      | 149   |
| MM2 |     | 0.0148 | 0.0248 | 0.0142 | 0     |
|     | 343 |        |        |        | 16022 |
|     |     | CR1    | CR2    | MM1    | MM2   |
| CR1 |     | 0      | 256    | 274    | 268   |
| CR2 |     | 0.0160 | 0      | 120    | 129   |
| MM1 |     | 0.0171 | 0.0075 | 0      | 115   |
| MM2 |     | 0.0167 | 0.0081 | 0.0072 | 0     |
|     | 345 |        |        |        | 11190 |
|     |     | CR1    | CR2    | MM1    | MM2   |
| CR1 |     | 0      | 271    | 104    | 127   |
| CR2 |     | 0.0242 | 0      | 280    | 274   |
| MM1 |     | 0.0093 | 0.0250 | 0      | 137   |
| MM2 |     | 0.0113 | 0.0245 | 0.0122 | 0     |
|     | 346 |        |        |        | 8088  |
|     |     | CR1    | CR2    | MM1    | MM2   |
| CR1 |     | 0      | 278    | 302    | 268   |
| CR2 |     | 0.0344 | 0      | 149    | 148   |
| MM1 |     | 0.0373 | 0.0184 | 0      | 193   |
| MM2 |     | 0.0331 | 0.0183 | 0.0239 | 0     |

|     |        |        |        |     |       |
|-----|--------|--------|--------|-----|-------|
| 348 |        |        |        |     | 11017 |
|     | CR1    | CR2    | MM1    | MM2 |       |
| CR1 | 0      | 354    | 364    | 364 |       |
| CR2 | 0.0321 | 0      | 172    | 172 |       |
| MM1 | 0.0330 | 0.0156 | 0      | 0   |       |
| MM2 | 0.0330 | 0.0156 | 0.0000 | 0   |       |
| 352 |        |        |        |     | 11430 |
|     | CR1    | CR2    | MM1    | MM2 |       |
| CR1 | 0      | 16     | 131    | 152 |       |
| CR2 | 0.0014 | 0      | 115    | 136 |       |
| MM1 | 0.0115 | 0.0101 | 0      | 73  |       |
| MM2 | 0.0133 | 0.0119 | 0.0064 | 0   |       |
| 353 |        |        |        |     | 11501 |
|     | CR1    | CR2    | MM1    | MM2 |       |
| CR1 | 0      | 0      | 347    | 347 |       |
| CR2 | 0.0000 | 0      | 347    | 347 |       |
| MM1 | 0.0302 | 0.0302 | 0      | 153 |       |
| MM2 | 0.0302 | 0.0302 | 0.0133 | 0   |       |
| 354 |        |        |        |     | 17127 |
|     | CR1    | CR2    | MM1    | MM2 |       |
| CR1 | 0      | 414    | 232    | 285 |       |
| CR2 | 0.0242 | 0      | 401    | 383 |       |
| MM1 | 0.0135 | 0.0234 | 0      | 218 |       |
| MM2 | 0.0166 | 0.0224 | 0.0127 | 0   |       |
| 355 |        |        |        |     | 20986 |
|     | CR1    | CR2    | MM1    | MM2 |       |
| CR1 | 0      | 407    | 188    | 205 |       |
| CR2 | 0.0194 | 0      | 379    | 419 |       |
| MM1 | 0.0090 | 0.0181 | 0      | 240 |       |
| MM2 | 0.0098 | 0.0200 | 0.0114 | 0   |       |
| 356 |        |        |        |     | 7532  |
|     | CR1    | CR2    | MM1    | MM2 |       |
| CR1 | 0      | 117    | 25     | 37  |       |
| CR2 | 0.0155 | 0      | 114    | 117 |       |
| MM1 | 0.0033 | 0.0151 | 0      | 26  |       |
| MM2 | 0.0049 | 0.0155 | 0.0035 | 0   |       |
| 358 |        |        |        |     | 6162  |
|     | CR1    | CR2    | MM1    | MM2 |       |
| CR1 | 0      | 140    | 69     | 86  |       |
| CR2 | 0.0227 | 0      | 135    | 142 |       |
| MM1 | 0.0112 | 0.0219 | 0      | 80  |       |
| MM2 | 0.0140 | 0.0230 | 0.0130 | 0   |       |

|     |        |        |        |     |       |
|-----|--------|--------|--------|-----|-------|
| 359 |        |        |        |     | 8294  |
|     | CR1    | CR2    | MM1    | MM2 |       |
| CR1 | 0      | 163    | 97     | 0   |       |
| CR2 | 0.0197 | 0      | 170    | 163 |       |
| MM1 | 0.0117 | 0.0205 | 0      | 97  |       |
| MM2 | 0.0000 | 0.0197 | 0.0117 | 0   |       |
| 368 |        |        |        |     | 13707 |
|     | CR1    | CR2    | MM1    | MM2 |       |
| CR1 | 0      | 255    | 273    | 250 |       |
| CR2 | 0.0186 | 0      | 115    | 130 |       |
| MM1 | 0.0199 | 0.0084 | 0      | 134 |       |
| MM2 | 0.0182 | 0.0095 | 0.0098 | 0   |       |
| 383 |        |        |        |     | 15898 |
|     | CR1    | CR2    | MM1    | MM2 |       |
| CR1 | 0      | 229    | 276    | 274 |       |
| CR2 | 0.0144 | 0      | 168    | 136 |       |
| MM1 | 0.0174 | 0.0106 | 0      | 138 |       |
| MM2 | 0.0172 | 0.0086 | 0.0087 | 0   |       |
| 387 |        |        |        |     | 19393 |
|     | CR1    | CR2    | MM1    | MM2 |       |
| CR1 | 0      | 423    | 413    | 395 |       |
| CR2 | 0.0218 | 0      | 135    | 171 |       |
| MM1 | 0.0213 | 0.0070 | 0      | 155 |       |
| MM2 | 0.0204 | 0.0088 | 0.0080 | 0   |       |
| 389 |        |        |        |     | 10214 |
|     | CR1    | CR2    | MM1    | MM2 |       |
| CR1 | 0      | 280    | 271    | 277 |       |
| CR2 | 0.0274 | 0      | 15     | 126 |       |
| MM1 | 0.0265 | 0.0015 | 0      | 123 |       |
| MM2 | 0.0271 | 0.0123 | 0.0120 | 0   |       |
| 390 |        |        |        |     | 10128 |
|     | CR1    | CR2    | MM1    | MM2 |       |
| CR1 | 0      | 254    | 138    | 127 |       |
| CR2 | 0.0251 | 0      | 228    | 256 |       |
| MM1 | 0.0136 | 0.0225 | 0      | 141 |       |
| MM2 | 0.0125 | 0.0253 | 0.0139 | 0   |       |
| 400 |        |        |        |     | 12857 |
|     | CR1    | CR2    | MM1    | MM2 |       |
| CR1 | 0      | 227    | 231    | 248 |       |
| CR2 | 0.0177 | 0      | 72     | 118 |       |
| MM1 | 0.0180 | 0.0056 | 0      | 116 |       |
| MM2 | 0.0193 | 0.0092 | 0.0090 | 0   |       |

|     |        |        |        |     |       |
|-----|--------|--------|--------|-----|-------|
| 401 |        |        |        |     | 10379 |
|     | CR1    | CR2    | MM1    | MM2 |       |
| CR1 | 0      | 178    | 197    | 189 |       |
| CR2 | 0.0172 | 0      | 90     | 69  |       |
| MM1 | 0.0190 | 0.0087 | 0      | 92  |       |
| MM2 | 0.0182 | 0.0066 | 0.0089 | 0   |       |
| 402 |        |        |        |     | 20309 |
|     | CR1    | CR2    | MM1    | MM2 |       |
| CR1 | 0      | 401    | 247    | 211 |       |
| CR2 | 0.0197 | 0      | 374    | 384 |       |
| MM1 | 0.0122 | 0.0184 | 0      | 234 |       |
| MM2 | 0.0104 | 0.0189 | 0.0115 | 0   |       |
| 403 |        |        |        |     | 13564 |
|     | CR1    | CR2    | MM1    | MM2 |       |
| CR1 | 0      | 3      | 447    | 475 |       |
| CR2 | 0.0002 | 0      | 444    | 472 |       |
| MM1 | 0.0330 | 0.0327 | 0      | 192 |       |
| MM2 | 0.0350 | 0.0348 | 0.0142 | 0   |       |
| 408 |        |        |        |     | 19578 |
|     | CR1    | CR2    | MM1    | MM2 |       |
| CR1 | 0      | 321    | 179    | 190 |       |
| CR2 | 0.0164 | 0      | 362    | 339 |       |
| MM1 | 0.0091 | 0.0185 | 0      | 194 |       |
| MM2 | 0.0097 | 0.0173 | 0.0099 | 0   |       |
| 411 |        |        |        |     | 8680  |
|     | CR1    | CR2    | MM1    | MM2 |       |
| CR1 | 0      | 37     | 191    | 194 |       |
| CR2 | 0.0043 | 0      | 218    | 221 |       |
| MM1 | 0.0220 | 0.0251 | 0      | 94  |       |
| MM2 | 0.0224 | 0.0255 | 0.0108 | 0   |       |
| 414 |        |        |        |     | 8864  |
|     | CR1    | CR2    | MM1    | MM2 |       |
| CR1 | 0      | 237    | 128    | 109 |       |
| CR2 | 0.0267 | 0      | 235    | 245 |       |
| MM1 | 0.0144 | 0.0265 | 0      | 110 |       |
| MM2 | 0.0123 | 0.0276 | 0.0124 | 0   |       |
| 418 |        |        |        |     | 7433  |
|     | CR1    | CR2    | MM1    | MM2 |       |
| CR1 | 0      | 93     | 36     | 37  |       |
| CR2 | 0.0125 | 0      | 95     | 98  |       |
| MM1 | 0.0048 | 0.0128 | 0      | 28  |       |
| MM2 | 0.0050 | 0.0132 | 0.0038 | 0   |       |

|     |        |        |        |     |       |
|-----|--------|--------|--------|-----|-------|
| 419 |        |        |        |     | 10035 |
|     | CR1    | CR2    | MM1    | MM2 |       |
| CR1 | 0      | 159    | 88     | 91  |       |
| CR2 | 0.0158 | 0      | 160    | 160 |       |
| MM1 | 0.0088 | 0.0159 | 0      | 77  |       |
| MM2 | 0.0091 | 0.0159 | 0.0077 | 0   |       |
| 420 |        |        |        |     | 17666 |
|     | CR1    | CR2    | MM1    | MM2 |       |
| CR1 | 0      | 385    | 134    | 152 |       |
| CR2 | 0.0218 | 0      | 393    | 409 |       |
| MM1 | 0.0076 | 0.0222 | 0      | 73  |       |
| MM2 | 0.0086 | 0.0232 | 0.0041 | 0   |       |
| 423 |        |        |        |     | 9879  |
|     | CR1    | CR2    | MM1    | MM2 |       |
| CR1 | 0      | 292    | 288    | 289 |       |
| CR2 | 0.0296 | 0      | 52     | 123 |       |
| MM1 | 0.0292 | 0.0053 | 0      | 97  |       |
| MM2 | 0.0293 | 0.0125 | 0.0098 | 0   |       |
| 427 |        |        |        |     | 12276 |
|     | CR1    | CR2    | MM1    | MM2 |       |
| CR1 | 0      | 253    | 165    | 167 |       |
| CR2 | 0.0206 | 0      | 284    | 279 |       |
| MM1 | 0.0134 | 0.0231 | 0      | 108 |       |
| MM2 | 0.0136 | 0.0227 | 0.0088 | 0   |       |
| 430 |        |        |        |     | 13088 |
|     | CR1    | CR2    | MM1    | MM2 |       |
| CR1 | 0      | 236    | 165    | 196 |       |
| CR2 | 0.0180 | 0      | 318    | 307 |       |
| MM1 | 0.0126 | 0.0243 | 0      | 190 |       |
| MM2 | 0.0150 | 0.0235 | 0.0145 | 0   |       |
| 431 |        |        |        |     | 13966 |
|     | CR1    | CR2    | MM1    | MM2 |       |
| CR1 | 0      | 229    | 214    | 225 |       |
| CR2 | 0.0164 | 0      | 84     | 80  |       |
| MM1 | 0.0153 | 0.0060 | 0      | 83  |       |
| MM2 | 0.0161 | 0.0057 | 0.0059 | 0   |       |
| 442 |        |        |        |     | 13390 |
|     | CR1    | CR2    | MM1    | MM2 |       |
| CR1 | 0      | 290    | 136    | 155 |       |
| CR2 | 0.0217 | 0      | 307    | 316 |       |
| MM1 | 0.0102 | 0.0229 | 0      | 174 |       |
| MM2 | 0.0116 | 0.0236 | 0.0130 | 0   |       |

|     |        |        |        |     |       |
|-----|--------|--------|--------|-----|-------|
| 443 |        |        |        |     | 8111  |
|     | CR1    | CR2    | MM1    | MM2 |       |
| CR1 | 0      | 51     | 253    | 241 |       |
| CR2 | 0.0063 | 0      | 232    | 206 |       |
| MM1 | 0.0312 | 0.0286 | 0      | 133 |       |
| MM2 | 0.0297 | 0.0254 | 0.0164 | 0   |       |
| 448 |        |        |        |     | 11735 |
|     | CR1    | CR2    | MM1    | MM2 |       |
| CR1 | 0      | 195    | 84     | 91  |       |
| CR2 | 0.0166 | 0      | 180    | 192 |       |
| MM1 | 0.0072 | 0.0153 | 0      | 70  |       |
| MM2 | 0.0078 | 0.0164 | 0.0060 | 0   |       |
| 450 |        |        |        |     | 11274 |
|     | CR1    | CR2    | MM1    | MM2 |       |
| CR1 | 0      | 111    | 42     | 48  |       |
| CR2 | 0.0098 | 0      | 113    | 119 |       |
| MM1 | 0.0037 | 0.0100 | 0      | 50  |       |
| MM2 | 0.0043 | 0.0106 | 0.0044 | 0   |       |
| 452 |        |        |        |     | 12186 |
|     | CR1    | CR2    | MM1    | MM2 |       |
| CR1 | 0      | 267    | 118    | 133 |       |
| CR2 | 0.0219 | 0      | 257    | 260 |       |
| MM1 | 0.0097 | 0.0211 | 0      | 124 |       |
| MM2 | 0.0109 | 0.0213 | 0.0102 | 0   |       |
| 454 |        |        |        |     | 8469  |
|     | CR1    | CR2    | MM1    | MM2 |       |
| CR1 | 0      | 158    | 59     | 56  |       |
| CR2 | 0.0187 | 0      | 154    | 158 |       |
| MM1 | 0.0070 | 0.0182 | 0      | 47  |       |
| MM2 | 0.0066 | 0.0187 | 0.0055 | 0   |       |
| 455 |        |        |        |     | 4511  |
|     | CR1    | CR2    | MM1    | MM2 |       |
| CR1 | 0      | 25     | 57     | 59  |       |
| CR2 | 0.0055 | 0      | 66     | 68  |       |
| MM1 | 0.0126 | 0.0146 | 0      | 48  |       |
| MM2 | 0.0131 | 0.0151 | 0.0106 | 0   |       |
| 460 |        |        |        |     | 10467 |
|     | CR1    | CR2    | MM1    | MM2 |       |
| CR1 | 0      | 149    | 30     | 15  |       |
| CR2 | 0.0142 | 0      | 153    | 149 |       |
| MM1 | 0.0029 | 0.0146 | 0      | 33  |       |
| MM2 | 0.0014 | 0.0142 | 0.0032 | 0   |       |



|     |        |        |        |     |       |
|-----|--------|--------|--------|-----|-------|
| 462 |        |        |        |     | 18890 |
|     | CR1    | CR2    | MM1    | MM2 |       |
| CR1 | 0      | 294    | 89     | 145 |       |
| CR2 | 0.0156 | 0      | 290    | 305 |       |
| MM1 | 0.0047 | 0.0154 | 0      | 128 |       |
| MM2 | 0.0077 | 0.0161 | 0.0068 | 0   |       |
| 465 |        |        |        |     | 17341 |
|     | CR1    | CR2    | MM1    | MM2 |       |
| CR1 | 0      | 349    | 366    | 383 |       |
| CR2 | 0.0201 | 0      | 195    | 192 |       |
| MM1 | 0.0211 | 0.0112 | 0      | 203 |       |
| MM2 | 0.0221 | 0.0111 | 0.0117 | 0   |       |
| 467 |        |        |        |     | 21282 |
|     | CR1    | CR2    | MM1    | MM2 |       |
| CR1 | 0      | 334    | 163    | 193 |       |
| CR2 | 0.0157 | 0      | 374    | 382 |       |
| MM1 | 0.0077 | 0.0176 | 0      | 161 |       |
| MM2 | 0.0091 | 0.0179 | 0.0076 | 0   |       |
| 471 |        |        |        |     | 13367 |
|     | CR1    | CR2    | MM1    | MM2 |       |
| CR1 | 0      | 228    | 130    | 136 |       |
| CR2 | 0.0171 | 0      | 214    | 219 |       |
| MM1 | 0.0097 | 0.0160 | 0      | 111 |       |
| MM2 | 0.0102 | 0.0164 | 0.0083 | 0   |       |
| 473 |        |        |        |     | 14424 |
|     | CR1    | CR2    | MM1    | MM2 |       |
| CR1 | 0      | 58     | 218    | 186 |       |
| CR2 | 0.0040 | 0      | 180    | 128 |       |
| MM1 | 0.0151 | 0.0125 | 0      | 168 |       |
| MM2 | 0.0129 | 0.0089 | 0.0116 | 0   |       |
| 475 |        |        |        |     | 11040 |
|     | CR1    | CR2    | MM1    | MM2 |       |
| CR1 | 0      | 279    | 156    | 156 |       |
| CR2 | 0.0253 | 0      | 255    | 255 |       |
| MM1 | 0.0141 | 0.0231 | 0      | 0   |       |
| MM2 | 0.0141 | 0.0231 | 0.0000 | 0   |       |
| 480 |        |        |        |     | 10203 |
|     | CR1    | CR2    | MM1    | MM2 |       |
| CR1 | 0      | 152    | 150    | 150 |       |
| CR2 | 0.0149 | 0      | 108    | 102 |       |
| MM1 | 0.0147 | 0.0106 | 0      | 111 |       |
| MM2 | 0.0147 | 0.0100 | 0.0109 | 0   |       |

|     |        |        |        |     |       |
|-----|--------|--------|--------|-----|-------|
| 481 |        |        |        |     | 11111 |
|     | CR1    | CR2    | MM1    | MM2 |       |
| CR1 | 0      | 272    | 175    | 177 |       |
| CR2 | 0.0245 | 0      | 286    | 286 |       |
| MM1 | 0.0158 | 0.0257 | 0      | 10  |       |
| MM2 | 0.0159 | 0.0257 | 0.0009 | 0   |       |
| 484 |        |        |        |     | 18068 |
|     | CR1    | CR2    | MM1    | MM2 |       |
| CR1 | 0      | 444    | 256    | 256 |       |
| CR2 | 0.0246 | 0      | 468    | 468 |       |
| MM1 | 0.0142 | 0.0259 | 0      | 0   |       |
| MM2 | 0.0142 | 0.0259 | 0.0000 | 0   |       |
| 485 |        |        |        |     | 10649 |
|     | CR1    | CR2    | MM1    | MM2 |       |
| CR1 | 0      | 244    | 255    | 252 |       |
| CR2 | 0.0229 | 0      | 141    | 139 |       |
| MM1 | 0.0239 | 0.0132 | 0      | 159 |       |
| MM2 | 0.0237 | 0.0131 | 0.0149 | 0   |       |
| 488 |        |        |        |     | 15140 |
|     | CR1    | CR2    | MM1    | MM2 |       |
| CR1 | 0      | 403    | 174    | 174 |       |
| CR2 | 0.0266 | 0      | 380    | 397 |       |
| MM1 | 0.0115 | 0.0251 | 0      | 193 |       |
| MM2 | 0.0115 | 0.0262 | 0.0127 | 0   |       |
| 489 |        |        |        |     | 10412 |
|     | CR1    | CR2    | MM1    | MM2 |       |
| CR1 | 0      | 255    | 267    | 254 |       |
| CR2 | 0.0245 | 0      | 96     | 127 |       |
| MM1 | 0.0256 | 0.0092 | 0      | 130 |       |
| MM2 | 0.0244 | 0.0122 | 0.0125 | 0   |       |
| 490 |        |        |        |     | 8303  |
|     | CR1    | CR2    | MM1    | MM2 |       |
| CR1 | 0      | 82     | 42     | 30  |       |
| CR2 | 0.0099 | 0      | 87     | 82  |       |
| MM1 | 0.0051 | 0.0105 | 0      | 44  |       |
| MM2 | 0.0036 | 0.0099 | 0.0053 | 0   |       |
| 491 |        |        |        |     | 12604 |
|     | CR1    | CR2    | MM1    | MM2 |       |
| CR1 | 0      | 284    | 188    | 188 |       |
| CR2 | 0.0225 | 0      | 301    | 301 |       |
| MM1 | 0.0149 | 0.0239 | 0      | 0   |       |
| MM2 | 0.0149 | 0.0239 | 0.0000 | 0   |       |

|     |        |        |        |     |       |
|-----|--------|--------|--------|-----|-------|
| 494 |        |        |        |     | 15117 |
|     | CR1    | CR2    | MM1    | MM2 |       |
| CR1 | 0      | 373    | 236    | 233 |       |
| CR2 | 0.0247 | 0      | 378    | 381 |       |
| MM1 | 0.0156 | 0.0250 | 0      | 178 |       |
| MM2 | 0.0154 | 0.0252 | 0.0118 | 0   |       |
| 497 |        |        |        |     | 12598 |
|     | CR1    | CR2    | MM1    | MM2 |       |
| CR1 | 0      | 297    | 150    | 154 |       |
| CR2 | 0.0236 | 0      | 292    | 316 |       |
| MM1 | 0.0119 | 0.0232 | 0      | 160 |       |
| MM2 | 0.0122 | 0.0251 | 0.0127 | 0   |       |
| 498 |        |        |        |     | 10360 |
|     | CR1    | CR2    | MM1    | MM2 |       |
| CR1 | 0      | 300    | 129    | 166 |       |
| CR2 | 0.0290 | 0      | 308    | 302 |       |
| MM1 | 0.0125 | 0.0297 | 0      | 139 |       |
| MM2 | 0.0160 | 0.0292 | 0.0134 | 0   |       |
| 499 |        |        |        |     | 17242 |
|     | CR1    | CR2    | MM1    | MM2 |       |
| CR1 | 0      | 164    | 138    | 123 |       |
| CR2 | 0.0095 | 0      | 234    | 240 |       |
| MM1 | 0.0080 | 0.0136 | 0      | 134 |       |
| MM2 | 0.0071 | 0.0139 | 0.0078 | 0   |       |
| 501 |        |        |        |     | 9410  |
|     | CR1    | CR2    | MM1    | MM2 |       |
| CR1 | 0      | 234    | 145    | 96  |       |
| CR2 | 0.0249 | 0      | 251    | 227 |       |
| MM1 | 0.0154 | 0.0267 | 0      | 141 |       |
| MM2 | 0.0102 | 0.0241 | 0.0150 | 0   |       |
| 502 |        |        |        |     | 22996 |
|     | CR1    | CR2    | MM1    | MM2 |       |
| CR1 | 0      | 449    | 274    | 280 |       |
| CR2 | 0.0195 | 0      | 448    | 464 |       |
| MM1 | 0.0119 | 0.0195 | 0      | 283 |       |
| MM2 | 0.0122 | 0.0202 | 0.0123 | 0   |       |
| 504 |        |        |        |     | 11864 |
|     | CR1    | CR2    | MM1    | MM2 |       |
| CR1 | 0      | 300    | 175    | 209 |       |
| CR2 | 0.0253 | 0      | 321    | 304 |       |
| MM1 | 0.0148 | 0.0271 | 0      | 208 |       |
| MM2 | 0.0176 | 0.0256 | 0.0175 | 0   |       |

|     |        |        |        |     |       |
|-----|--------|--------|--------|-----|-------|
| 505 |        |        |        |     | 8434  |
|     | CR1    | CR2    | MM1    | MM2 |       |
| CR1 | 0      | 209    | 202    | 203 |       |
| CR2 | 0.0248 | 0      | 135    | 146 |       |
| MM1 | 0.0240 | 0.0160 | 0      | 145 |       |
| MM2 | 0.0241 | 0.0173 | 0.0172 | 0   |       |
| 509 |        |        |        |     | 9248  |
|     | CR1    | CR2    | MM1    | MM2 |       |
| CR1 | 0      | 156    | 84     | 58  |       |
| CR2 | 0.0169 | 0      | 167    | 162 |       |
| MM1 | 0.0091 | 0.0181 | 0      | 79  |       |
| MM2 | 0.0063 | 0.0175 | 0.0085 | 0   |       |
| 511 |        |        |        |     | 15456 |
|     | CR1    | CR2    | MM1    | MM2 |       |
| CR1 | 0      | 280    | 141    | 158 |       |
| CR2 | 0.0181 | 0      | 283    | 290 |       |
| MM1 | 0.0091 | 0.0183 | 0      | 139 |       |
| MM2 | 0.0102 | 0.0188 | 0.0090 | 0   |       |
| 512 |        |        |        |     | 10544 |
|     | CR1    | CR2    | MM1    | MM2 |       |
| CR1 | 0      | 264    | 142    | 142 |       |
| CR2 | 0.0250 | 0      | 230    | 237 |       |
| MM1 | 0.0135 | 0.0218 | 0      | 110 |       |
| MM2 | 0.0135 | 0.0225 | 0.0104 | 0   |       |
| 517 |        |        |        |     | 15997 |
|     | CR1    | CR2    | MM1    | MM2 |       |
| CR1 | 0      | 321    | 28     | 89  |       |
| CR2 | 0.0201 | 0      | 327    | 327 |       |
| MM1 | 0.0018 | 0.0204 | 0      | 101 |       |
| MM2 | 0.0056 | 0.0204 | 0.0063 | 0   |       |
| 518 |        |        |        |     | 7783  |
|     | CR1    | CR2    | MM1    | MM2 |       |
| CR1 | 0      | 103    | 50     | 67  |       |
| CR2 | 0.0132 | 0      | 111    | 119 |       |
| MM1 | 0.0064 | 0.0143 | 0      | 53  |       |
| MM2 | 0.0086 | 0.0153 | 0.0068 | 0   |       |
| 524 |        |        |        |     | 15766 |
|     | CR1    | CR2    | MM1    | MM2 |       |
| CR1 | 0      | 332    | 28     | 3   |       |
| CR2 | 0.0211 | 0      | 336    | 331 |       |
| MM1 | 0.0018 | 0.0213 | 0      | 25  |       |
| MM2 | 0.0002 | 0.0210 | 0.0016 | 0   |       |

|     |     |        |        |        |       |
|-----|-----|--------|--------|--------|-------|
|     | 526 |        |        |        | 10699 |
|     |     | CR1    | CR2    | MM1    | MM2   |
| CR1 |     | 0      | 8      | 158    | 164   |
| CR2 |     | 0.0007 | 0      | 162    | 168   |
| MM1 |     | 0.0148 | 0.0151 | 0      | 58    |
| MM2 |     | 0.0153 | 0.0157 | 0.0054 | 0     |
|     | 527 |        |        |        | 24425 |
|     |     | CR1    | CR2    | MM1    | MM2   |
| CR1 |     | 0      | 282    | 241    | 224   |
| CR2 |     | 0.0115 | 0      | 420    | 412   |
| MM1 |     | 0.0099 | 0.0172 | 0      | 194   |
| MM2 |     | 0.0092 | 0.0169 | 0.0079 | 0     |
|     | 528 |        |        |        | 11592 |
|     |     | CR1    | CR2    | MM1    | MM2   |
| CR1 |     | 0      | 357    | 382    | 373   |
| CR2 |     | 0.0308 | 0      | 184    | 206   |
| MM1 |     | 0.0330 | 0.0159 | 0      | 228   |
| MM2 |     | 0.0322 | 0.0178 | 0.0197 | 0     |
|     | 529 |        |        |        | 8857  |
|     |     | CR1    | CR2    | MM1    | MM2   |
| CR1 |     | 0      | 242    | 104    | 119   |
| CR2 |     | 0.0273 | 0      | 240    | 233   |
| MM1 |     | 0.0117 | 0.0271 | 0      | 115   |
| MM2 |     | 0.0134 | 0.0263 | 0.0130 | 0     |
|     | 531 |        |        |        | 7832  |
|     |     | CR1    | CR2    | MM1    | MM2   |
| CR1 |     | 0      | 0      | 238    | 257   |
| CR2 |     | 0.0000 | 0      | 238    | 257   |
| MM1 |     | 0.0304 | 0.0304 | 0      | 141   |
| MM2 |     | 0.0328 | 0.0328 | 0.0180 | 0     |
|     | 532 |        |        |        | 12360 |
|     |     | CR1    | CR2    | MM1    | MM2   |
| CR1 |     | 0      | 281    | 222    | 218   |
| CR2 |     | 0.0227 | 0      | 183    | 181   |
| MM1 |     | 0.0180 | 0.0148 | 0      | 94    |
| MM2 |     | 0.0176 | 0.0146 | 0.0076 | 0     |
|     | 535 |        |        |        | 7805  |
|     |     | CR1    | CR2    | MM1    | MM2   |
| CR1 |     | 0      | 151    | 68     | 72    |
| CR2 |     | 0.0193 | 0      | 146    | 136   |
| MM1 |     | 0.0087 | 0.0187 | 0      | 60    |
| MM2 |     | 0.0092 | 0.0174 | 0.0077 | 0     |

|     |     |        |        |        |       |
|-----|-----|--------|--------|--------|-------|
|     | 537 |        |        |        | 9154  |
|     |     | CR1    | CR2    | MM1    | MM2   |
| CR1 |     | 0      | 307    | 159    | 207   |
| CR2 |     | 0.0335 | 0      | 296    | 300   |
| MM1 |     | 0.0174 | 0.0323 | 0      | 168   |
| MM2 |     | 0.0226 | 0.0328 | 0.0184 | 0     |
|     | 538 |        |        |        | 19784 |
|     |     | CR1    | CR2    | MM1    | MM2   |
| CR1 |     | 0      | 360    | 165    | 89    |
| CR2 |     | 0.0182 | 0      | 356    | 373   |
| MM1 |     | 0.0083 | 0.0180 | 0      | 162   |
| MM2 |     | 0.0045 | 0.0189 | 0.0082 | 0     |
|     | 546 |        |        |        | 17100 |
|     |     | CR1    | CR2    | MM1    | MM2   |
| CR1 |     | 0      | 491    | 340    | 240   |
| CR2 |     | 0.0287 | 0      | 477    | 475   |
| MM1 |     | 0.0199 | 0.0279 | 0      | 185   |
| MM2 |     | 0.0140 | 0.0278 | 0.0108 | 0     |
|     | 551 |        |        |        | 12174 |
|     |     | CR1    | CR2    | MM1    | MM2   |
| CR1 |     | 0      | 253    | 268    | 296   |
| CR2 |     | 0.0208 | 0      | 146    | 158   |
| MM1 |     | 0.0220 | 0.0120 | 0      | 184   |
| MM2 |     | 0.0243 | 0.0130 | 0.0151 | 0     |
|     | 552 |        |        |        | 9455  |
|     |     | CR1    | CR2    | MM1    | MM2   |
| CR1 |     | 0      | 245    | 245    | 276   |
| CR2 |     | 0.0259 | 0      | 0      | 143   |
| MM1 |     | 0.0259 | 0.0000 | 0      | 143   |
| MM2 |     | 0.0292 | 0.0151 | 0.0151 | 0     |
|     | 555 |        |        |        | 10732 |
|     |     | CR1    | CR2    | MM1    | MM2   |
| CR1 |     | 0      | 194    | 95     | 97    |
| CR2 |     | 0.0181 | 0      | 204    | 190   |
| MM1 |     | 0.0089 | 0.0190 | 0      | 115   |
| MM2 |     | 0.0090 | 0.0177 | 0.0107 | 0     |
|     | 556 |        |        |        | 10452 |
|     |     | CR1    | CR2    | MM1    | MM2   |
| CR1 |     | 0      | 300    | 112    | 128   |
| CR2 |     | 0.0287 | 0      | 298    | 305   |
| MM1 |     | 0.0107 | 0.0285 | 0      | 128   |
| MM2 |     | 0.0122 | 0.0292 | 0.0122 | 0     |

|     |     |        |        |        |       |
|-----|-----|--------|--------|--------|-------|
|     | 561 |        |        |        | 9721  |
|     |     | CR1    | CR2    | MM1    | MM2   |
| CR1 |     | 0      | 151    | 70     | 76    |
| CR2 |     | 0.0155 | 0      | 150    | 154   |
| MM1 |     | 0.0072 | 0.0154 | 0      | 64    |
| MM2 |     | 0.0078 | 0.0158 | 0.0066 | 0     |
|     | 562 |        |        |        | 8076  |
|     |     | CR1    | CR2    | MM1    | MM2   |
| CR1 |     | 0      | 191    | 59     | 60    |
| CR2 |     | 0.0237 | 0      | 184    | 203   |
| MM1 |     | 0.0073 | 0.0228 | 0      | 51    |
| MM2 |     | 0.0074 | 0.0251 | 0.0063 | 0     |
|     | 567 |        |        |        | 11206 |
|     |     | CR1    | CR2    | MM1    | MM2   |
| CR1 |     | 0      | 0      | 216    | 241   |
| CR2 |     | 0.0000 | 0      | 216    | 241   |
| MM1 |     | 0.0193 | 0.0193 | 0      | 205   |
| MM2 |     | 0.0215 | 0.0215 | 0.0183 | 0     |
|     | 572 |        |        |        | 10781 |
|     |     | CR1    | CR2    | MM1    | MM2   |
| CR1 |     | 0      | 243    | 162    | 211   |
| CR2 |     | 0.0225 | 0      | 219    | 236   |
| MM1 |     | 0.0150 | 0.0203 | 0      | 168   |
| MM2 |     | 0.0196 | 0.0219 | 0.0156 | 0     |
|     | 576 |        |        |        | 13040 |
|     |     | CR1    | CR2    | MM1    | MM2   |
| CR1 |     | 0      | 163    | 164    | 166   |
| CR2 |     | 0.0125 | 0      | 76     | 77    |
| MM1 |     | 0.0126 | 0.0058 | 0      | 33    |
| MM2 |     | 0.0127 | 0.0059 | 0.0025 | 0     |
|     | 577 |        |        |        | 7585  |
|     |     | CR1    | CR2    | MM1    | MM2   |
| CR1 |     | 0      | 0      | 232    | 256   |
| CR2 |     | 0.0000 | 0      | 232    | 256   |
| MM1 |     | 0.0306 | 0.0306 | 0      | 105   |
| MM2 |     | 0.0338 | 0.0338 | 0.0138 | 0     |
|     | 590 |        |        |        | 9830  |
|     |     | CR1    | CR2    | MM1    | MM2   |
| CR1 |     | 0      | 228    | 69     | 71    |
| CR2 |     | 0.0232 | 0      | 229    | 223   |
| MM1 |     | 0.0070 | 0.0233 | 0      | 89    |
| MM2 |     | 0.0072 | 0.0227 | 0.0091 | 0     |

|     |     |        |        |        |       |
|-----|-----|--------|--------|--------|-------|
|     | 597 |        |        |        | 9847  |
|     |     | CR1    | CR2    | MM1    | MM2   |
| CR1 |     | 0      | 171    | 231    | 226   |
| CR2 |     | 0.0174 | 0      | 311    | 316   |
| MM1 |     | 0.0235 | 0.0316 | 0      | 119   |
| MM2 |     | 0.0230 | 0.0321 | 0.0121 | 0     |
|     | 598 |        |        |        | 16051 |
|     |     | CR1    | CR2    | MM1    | MM2   |
| CR1 |     | 0      | 297    | 389    | 390   |
| CR2 |     | 0.0185 | 0      | 215    | 263   |
| MM1 |     | 0.0242 | 0.0134 | 0      | 300   |
| MM2 |     | 0.0243 | 0.0164 | 0.0187 | 0     |
|     | 600 |        |        |        | 16771 |
|     |     | CR1    | CR2    | MM1    | MM2   |
| CR1 |     | 0      | 173    | 159    | 180   |
| CR2 |     | 0.0103 | 0      | 260    | 264   |
| MM1 |     | 0.0095 | 0.0155 | 0      | 157   |
| MM2 |     | 0.0107 | 0.0157 | 0.0094 | 0     |
|     | 601 |        |        |        | 10544 |
|     |     | CR1    | CR2    | MM1    | MM2   |
| CR1 |     | 0      | 268    | 145    | 144   |
| CR2 |     | 0.0254 | 0      | 262    | 280   |
| MM1 |     | 0.0138 | 0.0248 | 0      | 97    |
| MM2 |     | 0.0137 | 0.0266 | 0.0092 | 0     |
|     | 602 |        |        |        | 11210 |
|     |     | CR1    | CR2    | MM1    | MM2   |
| CR1 |     | 0      | 115    | 33     | 36    |
| CR2 |     | 0.0103 | 0      | 126    | 122   |
| MM1 |     | 0.0029 | 0.0112 | 0      | 35    |
| MM2 |     | 0.0032 | 0.0109 | 0.0031 | 0     |
|     | 606 |        |        |        | 7019  |
|     |     | CR1    | CR2    | MM1    | MM2   |
| CR1 |     | 0      | 139    | 148    | 146   |
| CR2 |     | 0.0198 | 0      | 51     | 21    |
| MM1 |     | 0.0211 | 0.0073 | 0      | 42    |
| MM2 |     | 0.0208 | 0.0030 | 0.0060 | 0     |
|     | 608 |        |        |        | 14808 |
|     |     | CR1    | CR2    | MM1    | MM2   |
| CR1 |     | 0      | 357    | 173    | 144   |
| CR2 |     | 0.0241 | 0      | 367    | 369   |
| MM1 |     | 0.0117 | 0.0248 | 0      | 177   |
| MM2 |     | 0.0097 | 0.0249 | 0.0120 | 0     |



| 613 |        |        |        |     | 12015 |
|-----|--------|--------|--------|-----|-------|
|     | CR1    | CR2    | MM1    | MM2 |       |
| CR1 | 0      | 296    | 131    | 150 |       |
| CR2 | 0.0246 | 0      | 309    | 294 |       |
| MM1 | 0.0109 | 0.0257 | 0      | 181 |       |
| MM2 | 0.0125 | 0.0245 | 0.0151 | 0   |       |
| 614 |        |        |        |     | 8468  |
|     | CR1    | CR2    | MM1    | MM2 |       |
| CR1 | 0      | 108    | 111    | 116 |       |
| CR2 | 0.0128 | 0      | 41     | 58  |       |
| MM1 | 0.0131 | 0.0048 | 0      | 60  |       |
| MM2 | 0.0137 | 0.0068 | 0.0071 | 0   |       |
| 616 |        |        |        |     | 9424  |
|     | CR1    | CR2    | MM1    | MM2 |       |
| CR1 | 0      | 119    | 45     | 44  |       |
| CR2 | 0.0126 | 0      | 121    | 111 |       |
| MM1 | 0.0048 | 0.0128 | 0      | 37  |       |
| MM2 | 0.0047 | 0.0118 | 0.0039 | 0   |       |
| 619 |        |        |        |     | 7822  |
|     | CR1    | CR2    | MM1    | MM2 |       |
| CR1 | 0      | 205    | 203    | 194 |       |
| CR2 | 0.0262 | 0      | 48     | 86  |       |
| MM1 | 0.0260 | 0.0061 | 0      | 110 |       |
| MM2 | 0.0248 | 0.0110 | 0.0141 | 0   |       |
| 620 |        |        |        |     | 11687 |
|     | CR1    | CR2    | MM1    | MM2 |       |
| CR1 | 0      | 158    | 74     | 78  |       |
| CR2 | 0.0135 | 0      | 156    | 150 |       |
| MM1 | 0.0063 | 0.0133 | 0      | 74  |       |
| MM2 | 0.0067 | 0.0128 | 0.0063 | 0   |       |
| 621 |        |        |        |     | 12921 |
|     | CR1    | CR2    | MM1    | MM2 |       |
| CR1 | 0      | 300    | 109    | 78  |       |
| CR2 | 0.0232 | 0      | 303    | 300 |       |
| MM1 | 0.0084 | 0.0235 | 0      | 58  |       |
| MM2 | 0.0060 | 0.0232 | 0.0045 | 0   |       |
| 623 |        |        |        |     | 10995 |
|     | CR1    | CR2    | MM1    | MM2 |       |
| CR1 | 0      | 258    | 181    | 77  |       |
| CR2 | 0.0235 | 0      | 285    | 276 |       |
| MM1 | 0.0165 | 0.0259 | 0      | 164 |       |
| MM2 | 0.0070 | 0.0251 | 0.0149 | 0   |       |

|     |     |        |        |        |       |
|-----|-----|--------|--------|--------|-------|
|     | 627 |        |        |        | 10662 |
|     |     | CR1    | CR2    | MM1    | MM2   |
| CR1 |     | 0      | 204    | 86     | 83    |
| CR2 |     | 0.0191 | 0      | 200    | 193   |
| MM1 |     | 0.0081 | 0.0188 | 0      | 55    |
| MM2 |     | 0.0078 | 0.0181 | 0.0052 | 0     |
|     | 628 |        |        |        | 10148 |
|     |     | CR1    | CR2    | MM1    | MM2   |
| CR1 |     | 0      | 304    | 214    | 209   |
| CR2 |     | 0.0300 | 0      | 282    | 277   |
| MM1 |     | 0.0211 | 0.0278 | 0      | 15    |
| MM2 |     | 0.0206 | 0.0273 | 0.0015 | 0     |
|     | 629 |        |        |        | 11164 |
|     |     | CR1    | CR2    | MM1    | MM2   |
| CR1 |     | 0      | 261    | 248    | 249   |
| CR2 |     | 0.0234 | 0      | 157    | 147   |
| MM1 |     | 0.0222 | 0.0141 | 0      | 62    |
| MM2 |     | 0.0223 | 0.0132 | 0.0056 | 0     |
|     | 630 |        |        |        | 10567 |
|     |     | CR1    | CR2    | MM1    | MM2   |
| CR1 |     | 0      | 284    | 129    | 158   |
| CR2 |     | 0.0269 | 0      | 291    | 309   |
| MM1 |     | 0.0122 | 0.0275 | 0      | 130   |
| MM2 |     | 0.0150 | 0.0292 | 0.0123 | 0     |
|     | 633 |        |        |        | 21382 |
|     |     | CR1    | CR2    | MM1    | MM2   |
| CR1 |     | 0      | 491    | 216    | 195   |
| CR2 |     | 0.0230 | 0      | 512    | 498   |
| MM1 |     | 0.0101 | 0.0239 | 0      | 172   |
| MM2 |     | 0.0091 | 0.0233 | 0.0080 | 0     |
|     | 636 |        |        |        | 4631  |
|     |     | CR1    | CR2    | MM1    | MM2   |
| CR1 |     | 0      | 142    | 95     | 116   |
| CR2 |     | 0.0307 | 0      | 157    | 167   |
| MM1 |     | 0.0205 | 0.0339 | 0      | 95    |
| MM2 |     | 0.0250 | 0.0361 | 0.0205 | 0     |
|     | 637 |        |        |        | 8889  |
|     |     | CR1    | CR2    | MM1    | MM2   |
| CR1 |     | 0      | 161    | 178    | 178   |
| CR2 |     | 0.0181 | 0      | 68     | 68    |
| MM1 |     | 0.0200 | 0.0076 | 0      | 0     |
| MM2 |     | 0.0200 | 0.0076 | 0.0000 | 0     |

|     |        |        |        |     |       |
|-----|--------|--------|--------|-----|-------|
| 642 |        |        |        |     | 7163  |
|     | CR1    | CR2    | MM1    | MM2 |       |
| CR1 | 0      | 198    | 197    | 210 |       |
| CR2 | 0.0276 | 0      | 39     | 88  |       |
| MM1 | 0.0275 | 0.0054 | 0      | 73  |       |
| MM2 | 0.0293 | 0.0123 | 0.0102 | 0   |       |
| 644 |        |        |        |     | 12909 |
|     | CR1    | CR2    | MM1    | MM2 |       |
| CR1 | 0      | 261    | 254    | 232 |       |
| CR2 | 0.0202 | 0      | 153    | 99  |       |
| MM1 | 0.0197 | 0.0119 | 0      | 122 |       |
| MM2 | 0.0180 | 0.0077 | 0.0095 | 0   |       |
| 645 |        |        |        |     | 11075 |
|     | CR1    | CR2    | MM1    | MM2 |       |
| CR1 | 0      | 202    | 44     | 77  |       |
| CR2 | 0.0182 | 0      | 197    | 198 |       |
| MM1 | 0.0040 | 0.0178 | 0      | 72  |       |
| MM2 | 0.0070 | 0.0179 | 0.0065 | 0   |       |
| 647 |        |        |        |     | 10387 |
|     | CR1    | CR2    | MM1    | MM2 |       |
| CR1 | 0      | 198    | 199    | 206 |       |
| CR2 | 0.0191 | 0      | 91     | 124 |       |
| MM1 | 0.0192 | 0.0088 | 0      | 72  |       |
| MM2 | 0.0198 | 0.0119 | 0.0069 | 0   |       |
| 651 |        |        |        |     | 9782  |
|     | CR1    | CR2    | MM1    | MM2 |       |
| CR1 | 0      | 239    | 138    | 106 |       |
| CR2 | 0.0244 | 0      | 250    | 229 |       |
| MM1 | 0.0141 | 0.0256 | 0      | 136 |       |
| MM2 | 0.0108 | 0.0234 | 0.0139 | 0   |       |
| 654 |        |        |        |     | 13332 |
|     | CR1    | CR2    | MM1    | MM2 |       |
| CR1 | 0      | 271    | 175    | 140 |       |
| CR2 | 0.0203 | 0      | 270    | 274 |       |
| MM1 | 0.0131 | 0.0203 | 0      | 178 |       |
| MM2 | 0.0105 | 0.0206 | 0.0134 | 0   |       |
| 657 |        |        |        |     | 7560  |
|     | CR1    | CR2    | MM1    | MM2 |       |
| CR1 | 0      | 78     | 120    | 126 |       |
| CR2 | 0.0103 | 0      | 111    | 106 |       |
| MM1 | 0.0159 | 0.0147 | 0      | 67  |       |
| MM2 | 0.0167 | 0.0140 | 0.0089 | 0   |       |

|     |        |        |        |     |       |
|-----|--------|--------|--------|-----|-------|
| 658 |        |        |        |     | 15046 |
|     | CR1    | CR2    | MM1    | MM2 |       |
| CR1 | 0      | 377    | 146    | 134 |       |
| CR2 | 0.0251 | 0      | 361    | 384 |       |
| MM1 | 0.0097 | 0.0240 | 0      | 177 |       |
| MM2 | 0.0089 | 0.0255 | 0.0118 | 0   |       |
| 661 |        |        |        |     | 9874  |
|     | CR1    | CR2    | MM1    | MM2 |       |
| CR1 | 0      | 201    | 143    | 135 |       |
| CR2 | 0.0204 | 0      | 198    | 185 |       |
| MM1 | 0.0145 | 0.0201 | 0      | 132 |       |
| MM2 | 0.0137 | 0.0187 | 0.0134 | 0   |       |
| 662 |        |        |        |     | 8336  |
|     | CR1    | CR2    | MM1    | MM2 |       |
| CR1 | 0      | 188    | 104    | 98  |       |
| CR2 | 0.0226 | 0      | 169    | 181 |       |
| MM1 | 0.0125 | 0.0203 | 0      | 80  |       |
| MM2 | 0.0118 | 0.0217 | 0.0096 | 0   |       |
| 663 |        |        |        |     | 15787 |
|     | CR1    | CR2    | MM1    | MM2 |       |
| CR1 | 0      | 192    | 283    | 268 |       |
| CR2 | 0.0122 | 0      | 143    | 136 |       |
| MM1 | 0.0179 | 0.0091 | 0      | 156 |       |
| MM2 | 0.0170 | 0.0086 | 0.0099 | 0   |       |
| 664 |        |        |        |     | 14040 |
|     | CR1    | CR2    | MM1    | MM2 |       |
| CR1 | 0      | 402    | 174    | 186 |       |
| CR2 | 0.0286 | 0      | 382    | 405 |       |
| MM1 | 0.0124 | 0.0272 | 0      | 211 |       |
| MM2 | 0.0132 | 0.0288 | 0.0150 | 0   |       |
| 665 |        |        |        |     | 12663 |
|     | CR1    | CR2    | MM1    | MM2 |       |
| CR1 | 0      | 189    | 106    | 78  |       |
| CR2 | 0.0149 | 0      | 182    | 185 |       |
| MM1 | 0.0084 | 0.0144 | 0      | 92  |       |
| MM2 | 0.0062 | 0.0146 | 0.0073 | 0   |       |
| 669 |        |        |        |     | 12488 |
|     | CR1    | CR2    | MM1    | MM2 |       |
| CR1 | 0      | 233    | 125    | 106 |       |
| CR2 | 0.0187 | 0      | 237    | 219 |       |
| MM1 | 0.0100 | 0.0190 | 0      | 120 |       |
| MM2 | 0.0085 | 0.0175 | 0.0096 | 0   |       |

|     |        |        |        |     |       |
|-----|--------|--------|--------|-----|-------|
| 671 |        |        |        |     | 12466 |
|     | CR1    | CR2    | MM1    | MM2 |       |
| CR1 | 0      | 207    | 197    | 194 |       |
| CR2 | 0.0166 | 0      | 72     | 73  |       |
| MM1 | 0.0158 | 0.0058 | 0      | 44  |       |
| MM2 | 0.0156 | 0.0059 | 0.0035 | 0   |       |
| 672 |        |        |        |     | 10656 |
|     | CR1    | CR2    | MM1    | MM2 |       |
| CR1 | 0      | 172    | 73     | 80  |       |
| CR2 | 0.0161 | 0      | 172    | 172 |       |
| MM1 | 0.0069 | 0.0161 | 0      | 87  |       |
| MM2 | 0.0075 | 0.0161 | 0.0082 | 0   |       |
| 674 |        |        |        |     | 7711  |
|     | CR1    | CR2    | MM1    | MM2 |       |
| CR1 | 0      | 151    | 78     | 78  |       |
| CR2 | 0.0196 | 0      | 141    | 141 |       |
| MM1 | 0.0101 | 0.0183 | 0      | 0   |       |
| MM2 | 0.0101 | 0.0183 | 0.0000 | 0   |       |
| 675 |        |        |        |     | 10763 |
|     | CR1    | CR2    | MM1    | MM2 |       |
| CR1 | 0      | 203    | 62     | 72  |       |
| CR2 | 0.0189 | 0      | 213    | 218 |       |
| MM1 | 0.0058 | 0.0198 | 0      | 70  |       |
| MM2 | 0.0067 | 0.0203 | 0.0065 | 0   |       |
| 676 |        |        |        |     | 21441 |
|     | CR1    | CR2    | MM1    | MM2 |       |
| CR1 | 0      | 552    | 555    | 542 |       |
| CR2 | 0.0257 | 0      | 124    | 396 |       |
| MM1 | 0.0259 | 0.0058 | 0      | 374 |       |
| MM2 | 0.0253 | 0.0185 | 0.0174 | 0   |       |
| 678 |        |        |        |     | 9152  |
|     | CR1    | CR2    | MM1    | MM2 |       |
| CR1 | 0      | 275    | 184    | 211 |       |
| CR2 | 0.0300 | 0      | 305    | 305 |       |
| MM1 | 0.0201 | 0.0333 | 0      | 158 |       |
| MM2 | 0.0231 | 0.0333 | 0.0173 | 0   |       |
| 682 |        |        |        |     | 8363  |
|     | CR1    | CR2    | MM1    | MM2 |       |
| CR1 | 0      | 183    | 115    | 114 |       |
| CR2 | 0.0219 | 0      | 185    | 195 |       |
| MM1 | 0.0138 | 0.0221 | 0      | 124 |       |
| MM2 | 0.0136 | 0.0233 | 0.0148 | 0   |       |

|     |        |        |        |     |       |
|-----|--------|--------|--------|-----|-------|
| 686 |        |        |        |     | 13838 |
|     | CR1    | CR2    | MM1    | MM2 |       |
| CR1 | 0      | 104    | 195    | 175 |       |
| CR2 | 0.0075 | 0      | 179    | 149 |       |
| MM1 | 0.0141 | 0.0129 | 0      | 123 |       |
| MM2 | 0.0126 | 0.0108 | 0.0089 | 0   |       |
| 692 |        |        |        |     | 16302 |
|     | CR1    | CR2    | MM1    | MM2 |       |
| CR1 | 0      | 292    | 295    | 280 |       |
| CR2 | 0.0179 | 0      | 110    | 93  |       |
| MM1 | 0.0181 | 0.0067 | 0      | 103 |       |
| MM2 | 0.0172 | 0.0057 | 0.0063 | 0   |       |
| 693 |        |        |        |     | 13523 |
|     | CR1    | CR2    | MM1    | MM2 |       |
| CR1 | 0      | 324    | 310    | 318 |       |
| CR2 | 0.0240 | 0      | 145    | 105 |       |
| MM1 | 0.0229 | 0.0107 | 0      | 136 |       |
| MM2 | 0.0235 | 0.0078 | 0.0101 | 0   |       |
| 694 |        |        |        |     | 10238 |
|     | CR1    | CR2    | MM1    | MM2 |       |
| CR1 | 0      | 154    | 145    | 149 |       |
| CR2 | 0.0150 | 0      | 77     | 75  |       |
| MM1 | 0.0142 | 0.0075 | 0      | 65  |       |
| MM2 | 0.0146 | 0.0073 | 0.0063 | 0   |       |
| 695 |        |        |        |     | 10709 |
|     | CR1    | CR2    | MM1    | MM2 |       |
| CR1 | 0      | 310    | 161    | 162 |       |
| CR2 | 0.0289 | 0      | 316    | 318 |       |
| MM1 | 0.0150 | 0.0295 | 0      | 191 |       |
| MM2 | 0.0151 | 0.0297 | 0.0178 | 0   |       |
| 701 |        |        |        |     | 15104 |
|     | CR1    | CR2    | MM1    | MM2 |       |
| CR1 | 0      | 286    | 127    | 135 |       |
| CR2 | 0.0189 | 0      | 307    | 296 |       |
| MM1 | 0.0084 | 0.0203 | 0      | 172 |       |
| MM2 | 0.0089 | 0.0196 | 0.0114 | 0   |       |
| 702 |        |        |        |     | 21143 |
|     | CR1    | CR2    | MM1    | MM2 |       |
| CR1 | 0      | 369    | 359    | 370 |       |
| CR2 | 0.0175 | 0      | 185    | 166 |       |
| MM1 | 0.0170 | 0.0087 | 0      | 215 |       |
| MM2 | 0.0175 | 0.0079 | 0.0102 | 0   |       |

|     |        |        |        |     |       |
|-----|--------|--------|--------|-----|-------|
| 704 |        |        |        |     | 15102 |
|     | CR1    | CR2    | MM1    | MM2 |       |
| CR1 | 0      | 260    | 158    | 254 |       |
| CR2 | 0.0172 | 0      | 310    | 333 |       |
| MM1 | 0.0105 | 0.0205 | 0      | 180 |       |
| MM2 | 0.0168 | 0.0221 | 0.0119 | 0   |       |
| 707 |        |        |        |     | 12070 |
|     | CR1    | CR2    | MM1    | MM2 |       |
| CR1 | 0      | 260    | 259    | 252 |       |
| CR2 | 0.0215 | 0      | 116    | 133 |       |
| MM1 | 0.0215 | 0.0096 | 0      | 125 |       |
| MM2 | 0.0209 | 0.0110 | 0.0104 | 0   |       |
| 708 |        |        |        |     | 11536 |
|     | CR1    | CR2    | MM1    | MM2 |       |
| CR1 | 0      | 129    | 68     | 81  |       |
| CR2 | 0.0112 | 0      | 125    | 140 |       |
| MM1 | 0.0059 | 0.0108 | 0      | 79  |       |
| MM2 | 0.0070 | 0.0121 | 0.0068 | 0   |       |
| 712 |        |        |        |     | 10497 |
|     | CR1    | CR2    | MM1    | MM2 |       |
| CR1 | 0      | 155    | 67     | 68  |       |
| CR2 | 0.0148 | 0      | 149    | 150 |       |
| MM1 | 0.0064 | 0.0142 | 0      | 50  |       |
| MM2 | 0.0065 | 0.0143 | 0.0048 | 0   |       |
| 713 |        |        |        |     | 12310 |
|     | CR1    | CR2    | MM1    | MM2 |       |
| CR1 | 0      | 277    | 106    | 117 |       |
| CR2 | 0.0225 | 0      | 281    | 280 |       |
| MM1 | 0.0086 | 0.0228 | 0      | 146 |       |
| MM2 | 0.0095 | 0.0227 | 0.0119 | 0   |       |
| 714 |        |        |        |     | 9182  |
|     | CR1    | CR2    | MM1    | MM2 |       |
| CR1 | 0      | 133    | 141    | 141 |       |
| CR2 | 0.0145 | 0      | 61     | 59  |       |
| MM1 | 0.0154 | 0.0066 | 0      | 63  |       |
| MM2 | 0.0154 | 0.0064 | 0.0069 | 0   |       |
| 716 |        |        |        |     | 8885  |
|     | CR1    | CR2    | MM1    | MM2 |       |
| CR1 | 0      | 182    | 202    | 197 |       |
| CR2 | 0.0205 | 0      | 68     | 44  |       |
| MM1 | 0.0227 | 0.0077 | 0      | 80  |       |
| MM2 | 0.0222 | 0.0050 | 0.0090 | 0   |       |

|     |     |        |        |        |       |
|-----|-----|--------|--------|--------|-------|
|     | 719 |        |        |        | 10985 |
|     |     | CR1    | CR2    | MM1    | MM2   |
| CR1 |     | 0      | 324    | 152    | 130   |
| CR2 |     | 0.0295 | 0      | 348    | 330   |
| MM1 |     | 0.0138 | 0.0317 | 0      | 146   |
| MM2 |     | 0.0118 | 0.0300 | 0.0133 | 0     |
|     | 720 |        |        |        | 7592  |
|     |     | CR1    | CR2    | MM1    | MM2   |
| CR1 |     | 0      | 147    | 139    | 138   |
| CR2 |     | 0.0194 | 0      | 80     | 60    |
| MM1 |     | 0.0183 | 0.0105 | 0      | 61    |
| MM2 |     | 0.0182 | 0.0079 | 0.0080 | 0     |
|     | 721 |        |        |        | 11556 |
|     |     | CR1    | CR2    | MM1    | MM2   |
| CR1 |     | 0      | 225    | 112    | 148   |
| CR2 |     | 0.0195 | 0      | 222    | 200   |
| MM1 |     | 0.0097 | 0.0192 | 0      | 152   |
| MM2 |     | 0.0128 | 0.0173 | 0.0132 | 0     |
|     | 728 |        |        |        | 12618 |
|     |     | CR1    | CR2    | MM1    | MM2   |
| CR1 |     | 0      | 311    | 179    | 146   |
| CR2 |     | 0.0246 | 0      | 330    | 301   |
| MM1 |     | 0.0142 | 0.0262 | 0      | 33    |
| MM2 |     | 0.0116 | 0.0239 | 0.0026 | 0     |
|     | 733 |        |        |        | 7857  |
|     |     | CR1    | CR2    | MM1    | MM2   |
| CR1 |     | 0      | 179    | 111    | 111   |
| CR2 |     | 0.0228 | 0      | 181    | 183   |
| MM1 |     | 0.0141 | 0.0230 | 0      | 12    |
| MM2 |     | 0.0141 | 0.0233 | 0.0015 | 0     |
|     | 737 |        |        |        | 14103 |
|     |     | CR1    | CR2    | MM1    | MM2   |
| CR1 |     | 0      | 302    | 167    | 153   |
| CR2 |     | 0.0214 | 0      | 257    | 295   |
| MM1 |     | 0.0118 | 0.0182 | 0      | 156   |
| MM2 |     | 0.0108 | 0.0209 | 0.0111 | 0     |
|     | 738 |        |        |        | 13997 |
|     |     | CR1    | CR2    | MM1    | MM2   |
| CR1 |     | 0      | 370    | 184    | 160   |
| CR2 |     | 0.0264 | 0      | 371    | 377   |
| MM1 |     | 0.0131 | 0.0265 | 0      | 156   |
| MM2 |     | 0.0114 | 0.0269 | 0.0111 | 0     |



|     |        |        |        |     |       |
|-----|--------|--------|--------|-----|-------|
| 739 |        |        |        |     | 14691 |
|     | CR1    | CR2    | MM1    | MM2 |       |
| CR1 | 0      | 376    | 139    | 169 |       |
| CR2 | 0.0256 | 0      | 398    | 367 |       |
| MM1 | 0.0095 | 0.0271 | 0      | 161 |       |
| MM2 | 0.0115 | 0.0250 | 0.0110 | 0   |       |
| 740 |        |        |        |     | 11346 |
|     | CR1    | CR2    | MM1    | MM2 |       |
| CR1 | 0      | 65     | 81     | 123 |       |
| CR2 | 0.0057 | 0      | 139    | 177 |       |
| MM1 | 0.0071 | 0.0123 | 0      | 128 |       |
| MM2 | 0.0108 | 0.0156 | 0.0113 | 0   |       |
| 742 |        |        |        |     | 9985  |
|     | CR1    | CR2    | MM1    | MM2 |       |
| CR1 | 0      | 196    | 77     | 62  |       |
| CR2 | 0.0196 | 0      | 191    | 192 |       |
| MM1 | 0.0077 | 0.0191 | 0      | 80  |       |
| MM2 | 0.0062 | 0.0192 | 0.0080 | 0   |       |
| 743 |        |        |        |     | 10055 |
|     | CR1    | CR2    | MM1    | MM2 |       |
| CR1 | 0      | 192    | 160    | 147 |       |
| CR2 | 0.0191 | 0      | 223    | 222 |       |
| MM1 | 0.0159 | 0.0222 | 0      | 108 |       |
| MM2 | 0.0146 | 0.0221 | 0.0107 | 0   |       |
| 745 |        |        |        |     | 11006 |
|     | CR1    | CR2    | MM1    | MM2 |       |
| CR1 | 0      | 190    | 99     | 99  |       |
| CR2 | 0.0173 | 0      | 200    | 200 |       |
| MM1 | 0.0090 | 0.0182 | 0      | 0   |       |
| MM2 | 0.0090 | 0.0182 | 0.0000 | 0   |       |
| 746 |        |        |        |     | 11187 |
|     | CR1    | CR2    | MM1    | MM2 |       |
| CR1 | 0      | 134    | 132    | 140 |       |
| CR2 | 0.0120 | 0      | 43     | 55  |       |
| MM1 | 0.0118 | 0.0038 | 0      | 56  |       |
| MM2 | 0.0125 | 0.0049 | 0.0050 | 0   |       |
| 747 |        |        |        |     | 24512 |
|     | CR1    | CR2    | MM1    | MM2 |       |
| CR1 | 0      | 530    | 250    | 260 |       |
| CR2 | 0.0216 | 0      | 497    | 522 |       |
| MM1 | 0.0102 | 0.0203 | 0      | 217 |       |
| MM2 | 0.0106 | 0.0213 | 0.0089 | 0   |       |

|     |        |        |        |     |       |
|-----|--------|--------|--------|-----|-------|
| 750 |        |        |        |     | 15145 |
|     | CR1    | CR2    | MM1    | MM2 |       |
| CR1 | 0      | 221    | 175    | 34  |       |
| CR2 | 0.0146 | 0      | 237    | 218 |       |
| MM1 | 0.0116 | 0.0156 | 0      | 197 |       |
| MM2 | 0.0022 | 0.0144 | 0.0130 | 0   |       |
| 754 |        |        |        |     | 10027 |
|     | CR1    | CR2    | MM1    | MM2 |       |
| CR1 | 0      | 208    | 56     | 56  |       |
| CR2 | 0.0207 | 0      | 218    | 218 |       |
| MM1 | 0.0056 | 0.0217 | 0      | 0   |       |
| MM2 | 0.0056 | 0.0217 | 0.0000 | 0   |       |
| 755 |        |        |        |     | 11612 |
|     | CR1    | CR2    | MM1    | MM2 |       |
| CR1 | 0      | 167    | 76     | 70  |       |
| CR2 | 0.0144 | 0      | 171    | 166 |       |
| MM1 | 0.0065 | 0.0147 | 0      | 74  |       |
| MM2 | 0.0060 | 0.0143 | 0.0064 | 0   |       |
| 756 |        |        |        |     | 14462 |
|     | CR1    | CR2    | MM1    | MM2 |       |
| CR1 | 0      | 355    | 127    | 127 |       |
| CR2 | 0.0245 | 0      | 358    | 351 |       |
| MM1 | 0.0088 | 0.0248 | 0      | 125 |       |
| MM2 | 0.0088 | 0.0243 | 0.0086 | 0   |       |
| 763 |        |        |        |     | 12078 |
|     | CR1    | CR2    | MM1    | MM2 |       |
| CR1 | 0      | 152    | 56     | 62  |       |
| CR2 | 0.0126 | 0      | 147    | 147 |       |
| MM1 | 0.0046 | 0.0122 | 0      | 42  |       |
| MM2 | 0.0051 | 0.0122 | 0.0035 | 0   |       |
| 764 |        |        |        |     | 12008 |
|     | CR1    | CR2    | MM1    | MM2 |       |
| CR1 | 0      | 40     | 191    | 235 |       |
| CR2 | 0.0033 | 0      | 210    | 257 |       |
| MM1 | 0.0159 | 0.0175 | 0      | 202 |       |
| MM2 | 0.0196 | 0.0214 | 0.0168 | 0   |       |
| 765 |        |        |        |     | 30288 |
|     | CR1    | CR2    | MM1    | MM2 |       |
| CR1 | 0      | 710    | 252    | 289 |       |
| CR2 | 0.0234 | 0      | 739    | 684 |       |
| MM1 | 0.0083 | 0.0244 | 0      | 310 |       |
| MM2 | 0.0095 | 0.0226 | 0.0102 | 0   |       |

|     |     |        |        |        |       |
|-----|-----|--------|--------|--------|-------|
|     | 766 |        |        |        | 12364 |
|     |     | CR1    | CR2    | MM1    | MM2   |
| CR1 |     | 0      | 325    | 301    | 322   |
| CR2 |     | 0.0263 | 0      | 118    | 139   |
| MM1 |     | 0.0243 | 0.0095 | 0      | 144   |
| MM2 |     | 0.0260 | 0.0112 | 0.0116 | 0     |
|     | 768 |        |        |        | 9791  |
|     |     | CR1    | CR2    | MM1    | MM2   |
| CR1 |     | 0      | 302    | 59     | 117   |
| CR2 |     | 0.0308 | 0      | 309    | 305   |
| MM1 |     | 0.0060 | 0.0316 | 0      | 158   |
| MM2 |     | 0.0119 | 0.0312 | 0.0161 | 0     |
|     | 774 |        |        |        | 5683  |
|     |     | CR1    | CR2    | MM1    | MM2   |
| CR1 |     | 0      | 100    | 111    | 106   |
| CR2 |     | 0.0176 | 0      | 60     | 70    |
| MM1 |     | 0.0195 | 0.0106 | 0      | 61    |
| MM2 |     | 0.0187 | 0.0123 | 0.0107 | 0     |
|     | 775 |        |        |        | 14694 |
|     |     | CR1    | CR2    | MM1    | MM2   |
| CR1 |     | 0      | 283    | 283    | 275   |
| CR2 |     | 0.0193 | 0      | 0      | 140   |
| MM1 |     | 0.0193 | 0.0000 | 0      | 140   |
| MM2 |     | 0.0187 | 0.0095 | 0.0095 | 0     |
|     | 776 |        |        |        | 6549  |
|     |     | CR1    | CR2    | MM1    | MM2   |
| CR1 |     | 0      | 17     | 54     | 47    |
| CR2 |     | 0.0026 | 0      | 69     | 64    |
| MM1 |     | 0.0082 | 0.0105 | 0      | 24    |
| MM2 |     | 0.0072 | 0.0098 | 0.0037 | 0     |
|     | 779 |        |        |        | 14157 |
|     |     | CR1    | CR2    | MM1    | MM2   |
| CR1 |     | 0      | 217    | 91     | 55    |
| CR2 |     | 0.0153 | 0      | 207    | 213   |
| MM1 |     | 0.0064 | 0.0146 | 0      | 84    |
| MM2 |     | 0.0039 | 0.0150 | 0.0059 | 0     |
|     | 780 |        |        |        | 16707 |
|     |     | CR1    | CR2    | MM1    | MM2   |
| CR1 |     | 0      | 298    | 189    | 195   |
| CR2 |     | 0.0178 | 0      | 315    | 295   |
| MM1 |     | 0.0113 | 0.0189 | 0      | 197   |
| MM2 |     | 0.0117 | 0.0177 | 0.0118 | 0     |

|     |        |        |        |     |       |
|-----|--------|--------|--------|-----|-------|
| 781 |        |        |        |     | 11539 |
|     | CR1    | CR2    | MM1    | MM2 |       |
| CR1 | 0      | 197    | 194    | 199 |       |
| CR2 | 0.0171 | 0      | 91     | 89  |       |
| MM1 | 0.0168 | 0.0079 | 0      | 83  |       |
| MM2 | 0.0172 | 0.0077 | 0.0072 | 0   |       |
| 783 |        |        |        |     | 13113 |
|     | CR1    | CR2    | MM1    | MM2 |       |
| CR1 | 0      | 199    | 108    | 73  |       |
| CR2 | 0.0152 | 0      | 213    | 214 |       |
| MM1 | 0.0082 | 0.0162 | 0      | 111 |       |
| MM2 | 0.0056 | 0.0163 | 0.0085 | 0   |       |
| 785 |        |        |        |     | 11117 |
|     | CR1    | CR2    | MM1    | MM2 |       |
| CR1 | 0      | 195    | 206    | 199 |       |
| CR2 | 0.0175 | 0      | 105    | 97  |       |
| MM1 | 0.0185 | 0.0094 | 0      | 102 |       |
| MM2 | 0.0179 | 0.0087 | 0.0092 | 0   |       |
| 786 |        |        |        |     | 14148 |
|     | CR1    | CR2    | MM1    | MM2 |       |
| CR1 | 0      | 286    | 105    | 106 |       |
| CR2 | 0.0202 | 0      | 296    | 277 |       |
| MM1 | 0.0074 | 0.0209 | 0      | 101 |       |
| MM2 | 0.0075 | 0.0196 | 0.0071 | 0   |       |
| 788 |        |        |        |     | 15224 |
|     | CR1    | CR2    | MM1    | MM2 |       |
| CR1 | 0      | 200    | 207    | 207 |       |
| CR2 | 0.0131 | 0      | 110    | 116 |       |
| MM1 | 0.0136 | 0.0072 | 0      | 104 |       |
| MM2 | 0.0136 | 0.0076 | 0.0068 | 0   |       |
| 792 |        |        |        |     | 10318 |
|     | CR1    | CR2    | MM1    | MM2 |       |
| CR1 | 0      | 165    | 110    | 150 |       |
| CR2 | 0.0160 | 0      | 189    | 197 |       |
| MM1 | 0.0107 | 0.0183 | 0      | 93  |       |
| MM2 | 0.0145 | 0.0191 | 0.0090 | 0   |       |
| 795 |        |        |        |     | 9895  |
|     | CR1    | CR2    | MM1    | MM2 |       |
| CR1 | 0      | 215    | 217    | 206 |       |
| CR2 | 0.0217 | 0      | 73     | 97  |       |
| MM1 | 0.0219 | 0.0074 | 0      | 69  |       |
| MM2 | 0.0208 | 0.0098 | 0.0070 | 0   |       |

|     |        |        |        |     |       |
|-----|--------|--------|--------|-----|-------|
| 796 |        |        |        |     | 11133 |
|     | CR1    | CR2    | MM1    | MM2 |       |
| CR1 | 0      | 168    | 101    | 137 |       |
| CR2 | 0.0151 | 0      | 172    | 208 |       |
| MM1 | 0.0091 | 0.0154 | 0      | 91  |       |
| MM2 | 0.0123 | 0.0187 | 0.0082 | 0   |       |
| 801 |        |        |        |     | 10376 |
|     | CR1    | CR2    | MM1    | MM2 |       |
| CR1 | 0      | 183    | 123    | 132 |       |
| CR2 | 0.0176 | 0      | 179    | 180 |       |
| MM1 | 0.0119 | 0.0173 | 0      | 63  |       |
| MM2 | 0.0127 | 0.0173 | 0.0061 | 0   |       |
| 804 |        |        |        |     | 7456  |
|     | CR1    | CR2    | MM1    | MM2 |       |
| CR1 | 0      | 251    | 249    | 249 |       |
| CR2 | 0.0337 | 0      | 122    | 122 |       |
| MM1 | 0.0334 | 0.0164 | 0      | 0   |       |
| MM2 | 0.0334 | 0.0164 | 0.0000 | 0   |       |
| 807 |        |        |        |     | 18404 |
|     | CR1    | CR2    | MM1    | MM2 |       |
| CR1 | 0      | 228    | 276    | 259 |       |
| CR2 | 0.0124 | 0      | 286    | 297 |       |
| MM1 | 0.0150 | 0.0155 | 0      | 151 |       |
| MM2 | 0.0141 | 0.0161 | 0.0082 | 0   |       |
| 808 |        |        |        |     | 16972 |
|     | CR1    | CR2    | MM1    | MM2 |       |
| CR1 | 0      | 289    | 119    | 113 |       |
| CR2 | 0.0170 | 0      | 296    | 296 |       |
| MM1 | 0.0070 | 0.0174 | 0      | 62  |       |
| MM2 | 0.0067 | 0.0174 | 0.0037 | 0   |       |
| 813 |        |        |        |     | 9359  |
|     | CR1    | CR2    | MM1    | MM2 |       |
| CR1 | 0      | 100    | 47     | 42  |       |
| CR2 | 0.0107 | 0      | 119    | 116 |       |
| MM1 | 0.0050 | 0.0127 | 0      | 43  |       |
| MM2 | 0.0045 | 0.0124 | 0.0046 | 0   |       |
| 814 |        |        |        |     | 13356 |
|     | CR1    | CR2    | MM1    | MM2 |       |
| CR1 | 0      | 216    | 106    | 102 |       |
| CR2 | 0.0162 | 0      | 227    | 237 |       |
| MM1 | 0.0079 | 0.0170 | 0      | 106 |       |
| MM2 | 0.0076 | 0.0177 | 0.0079 | 0   |       |

|     | 815    |        |        |     | 9028  |
|-----|--------|--------|--------|-----|-------|
|     | CR1    | CR2    | MM1    | MM2 |       |
| CR1 | 0      | 55     | 183    | 182 |       |
| CR2 | 0.0061 | 0      | 151    | 150 |       |
| MM1 | 0.0203 | 0.0167 | 0      | 1   |       |
| MM2 | 0.0202 | 0.0166 | 0.0001 | 0   |       |
|     | 821    |        |        |     | 10673 |
|     | CR1    | CR2    | MM1    | MM2 |       |
| CR1 | 0      | 34     | 143    | 162 |       |
| CR2 | 0.0032 | 0      | 140    | 152 |       |
| MM1 | 0.0134 | 0.0131 | 0      | 94  |       |
| MM2 | 0.0152 | 0.0142 | 0.0088 | 0   |       |
|     | 822    |        |        |     | 11686 |
|     | CR1    | CR2    | MM1    | MM2 |       |
| CR1 | 0      | 231    | 154    | 121 |       |
| CR2 | 0.0198 | 0      | 256    | 225 |       |
| MM1 | 0.0132 | 0.0219 | 0      | 131 |       |
| MM2 | 0.0104 | 0.0193 | 0.0112 | 0   |       |
|     | 824    |        |        |     | 10830 |
|     | CR1    | CR2    | MM1    | MM2 |       |
| CR1 | 0      | 272    | 135    | 125 |       |
| CR2 | 0.0251 | 0      | 286    | 274 |       |
| MM1 | 0.0125 | 0.0264 | 0      | 134 |       |
| MM2 | 0.0115 | 0.0253 | 0.0124 | 0   |       |
|     | 826    |        |        |     | 12290 |
|     | CR1    | CR2    | MM1    | MM2 |       |
| CR1 | 0      | 325    | 172    | 193 |       |
| CR2 | 0.0264 | 0      | 312    | 324 |       |
| MM1 | 0.0140 | 0.0254 | 0      | 191 |       |
| MM2 | 0.0157 | 0.0264 | 0.0155 | 0   |       |
|     | 828    |        |        |     | 8675  |
|     | CR1    | CR2    | MM1    | MM2 |       |
| CR1 | 0      | 182    | 80     | 77  |       |
| CR2 | 0.0210 | 0      | 187    | 175 |       |
| MM1 | 0.0092 | 0.0216 | 0      | 76  |       |
| MM2 | 0.0089 | 0.0202 | 0.0088 | 0   |       |
|     | 832    |        |        |     | 11467 |
|     | CR1    | CR2    | MM1    | MM2 |       |
| CR1 | 0      | 280    | 140    | 93  |       |
| CR2 | 0.0244 | 0      | 281    | 288 |       |
| MM1 | 0.0122 | 0.0245 | 0      | 136 |       |
| MM2 | 0.0081 | 0.0251 | 0.0119 | 0   |       |

|     | 833    |        |        |     | 8710  |
|-----|--------|--------|--------|-----|-------|
|     | CR1    | CR2    | MM1    | MM2 |       |
| CR1 | 0      | 354    | 107    | 102 |       |
| CR2 | 0.0406 | 0      | 357    | 350 |       |
| MM1 | 0.0123 | 0.0410 | 0      | 103 |       |
| MM2 | 0.0117 | 0.0402 | 0.0118 | 0   |       |
|     | 834    |        |        |     | 14196 |
|     | CR1    | CR2    | MM1    | MM2 |       |
| CR1 | 0      | 152    | 47     | 7   |       |
| CR2 | 0.0107 | 0      | 159    | 151 |       |
| MM1 | 0.0033 | 0.0112 | 0      | 48  |       |
| MM2 | 0.0005 | 0.0106 | 0.0034 | 0   |       |
|     | 835    |        |        |     | 11057 |
|     | CR1    | CR2    | MM1    | MM2 |       |
| CR1 | 0      | 206    | 121    | 125 |       |
| CR2 | 0.0186 | 0      | 195    | 195 |       |
| MM1 | 0.0109 | 0.0176 | 0      | 10  |       |
| MM2 | 0.0113 | 0.0176 | 0.0009 | 0   |       |
|     | 836    |        |        |     | 8788  |
|     | CR1    | CR2    | MM1    | MM2 |       |
| CR1 | 0      | 182    | 104    | 61  |       |
| CR2 | 0.0207 | 0      | 202    | 170 |       |
| MM1 | 0.0118 | 0.0230 | 0      | 99  |       |
| MM2 | 0.0069 | 0.0193 | 0.0113 | 0   |       |
|     | 838    |        |        |     | 6367  |
|     | CR1    | CR2    | MM1    | MM2 |       |
| CR1 | 0      | 98     | 44     | 0   |       |
| CR2 | 0.0154 | 0      | 102    | 98  |       |
| MM1 | 0.0069 | 0.0160 | 0      | 44  |       |
| MM2 | 0.0000 | 0.0154 | 0.0069 | 0   |       |
|     | 839    |        |        |     | 15866 |
|     | CR1    | CR2    | MM1    | MM2 |       |
| CR1 | 0      | 177    | 92     | 135 |       |
| CR2 | 0.0112 | 0      | 243    | 252 |       |
| MM1 | 0.0058 | 0.0153 | 0      | 79  |       |
| MM2 | 0.0085 | 0.0159 | 0.0050 | 0   |       |
|     | 842    |        |        |     | 11716 |
|     | CR1    | CR2    | MM1    | MM2 |       |
| CR1 | 0      | 235    | 3      | 107 |       |
| CR2 | 0.0201 | 0      | 232    | 236 |       |
| MM1 | 0.0003 | 0.0198 | 0      | 104 |       |
| MM2 | 0.0091 | 0.0201 | 0.0089 | 0   |       |

|     |     |        |        |        |       |
|-----|-----|--------|--------|--------|-------|
|     | 843 |        |        |        | 18363 |
|     |     | CR1    | CR2    | MM1    | MM2   |
| CR1 |     | 0      | 359    | 156    | 149   |
| CR2 |     | 0.0196 | 0      | 359    | 352   |
| MM1 |     | 0.0085 | 0.0196 | 0      | 7     |
| MM2 |     | 0.0081 | 0.0192 | 0.0004 | 0     |
|     | 844 |        |        |        | 8972  |
|     |     | CR1    | CR2    | MM1    | MM2   |
| CR1 |     | 0      | 201    | 203    | 205   |
| CR2 |     | 0.0224 | 0      | 143    | 134   |
| MM1 |     | 0.0226 | 0.0159 | 0      | 133   |
| MM2 |     | 0.0228 | 0.0149 | 0.0148 | 0     |
|     | 849 |        |        |        | 7587  |
|     |     | CR1    | CR2    | MM1    | MM2   |
| CR1 |     | 0      | 157    | 6      | 67    |
| CR2 |     | 0.0207 | 0      | 155    | 173   |
| MM1 |     | 0.0008 | 0.0204 | 0      | 61    |
| MM2 |     | 0.0088 | 0.0228 | 0.0080 | 0     |
|     | 850 |        |        |        | 7914  |
|     |     | CR1    | CR2    | MM1    | MM2   |
| CR1 |     | 0      | 210    | 111    | 121   |
| CR2 |     | 0.0265 | 0      | 210    | 229   |
| MM1 |     | 0.0140 | 0.0265 | 0      | 123   |
| MM2 |     | 0.0153 | 0.0289 | 0.0155 | 0     |
|     | 851 |        |        |        | 10602 |
|     |     | CR1    | CR2    | MM1    | MM2   |
| CR1 |     | 0      | 318    | 124    | 177   |
| CR2 |     | 0.0300 | 0      | 334    | 343   |
| MM1 |     | 0.0117 | 0.0315 | 0      | 175   |
| MM2 |     | 0.0167 | 0.0324 | 0.0165 | 0     |
|     | 854 |        |        |        | 11028 |
|     |     | CR1    | CR2    | MM1    | MM2   |
| CR1 |     | 0      | 131    | 256    | 252   |
| CR2 |     | 0.0119 | 0      | 318    | 308   |
| MM1 |     | 0.0232 | 0.0288 | 0      | 174   |
| MM2 |     | 0.0229 | 0.0279 | 0.0158 | 0     |
|     | 858 |        |        |        | 11514 |
|     |     | CR1    | CR2    | MM1    | MM2   |
| CR1 |     | 0      | 251    | 191    | 189   |
| CR2 |     | 0.0218 | 0      | 286    | 284   |
| MM1 |     | 0.0166 | 0.0248 | 0      | 2     |
| MM2 |     | 0.0164 | 0.0247 | 0.0002 | 0     |



|     |     |        |        |        |       |
|-----|-----|--------|--------|--------|-------|
|     | 862 |        |        |        | 13811 |
|     |     | CR1    | CR2    | MM1    | MM2   |
| CR1 |     | 0      | 139    | 31     | 69    |
| CR2 |     | 0.0101 | 0      | 132    | 126   |
| MM1 |     | 0.0022 | 0.0096 | 0      | 72    |
| MM2 |     | 0.0050 | 0.0091 | 0.0052 | 0     |
|     | 863 |        |        |        | 18246 |
|     |     | CR1    | CR2    | MM1    | MM2   |
| CR1 |     | 0      | 408    | 188    | 169   |
| CR2 |     | 0.0224 | 0      | 410    | 398   |
| MM1 |     | 0.0103 | 0.0225 | 0      | 187   |
| MM2 |     | 0.0093 | 0.0218 | 0.0102 | 0     |
|     | 864 |        |        |        | 16829 |
|     |     | CR1    | CR2    | MM1    | MM2   |
| CR1 |     | 0      | 294    | 312    | 339   |
| CR2 |     | 0.0175 | 0      | 154    | 187   |
| MM1 |     | 0.0185 | 0.0092 | 0      | 141   |
| MM2 |     | 0.0201 | 0.0111 | 0.0084 | 0     |
|     | 866 |        |        |        | 6860  |
|     |     | CR1    | CR2    | MM1    | MM2   |
| CR1 |     | 0      | 83     | 147    | 147   |
| CR2 |     | 0.0121 | 0      | 81     | 81    |
| MM1 |     | 0.0214 | 0.0118 | 0      | 0     |
| MM2 |     | 0.0214 | 0.0118 | 0.0000 | 0     |
|     | 867 |        |        |        | 11851 |
|     |     | CR1    | CR2    | MM1    | MM2   |
| CR1 |     | 0      | 80     | 105    | 143   |
| CR2 |     | 0.0068 | 0      | 57     | 85    |
| MM1 |     | 0.0089 | 0.0048 | 0      | 76    |
| MM2 |     | 0.0121 | 0.0072 | 0.0064 | 0     |
|     | 871 |        |        |        | 10065 |
|     |     | CR1    | CR2    | MM1    | MM2   |
| CR1 |     | 0      | 92     | 193    | 193   |
| CR2 |     | 0.0091 | 0      | 153    | 141   |
| MM1 |     | 0.0192 | 0.0152 | 0      | 65    |
| MM2 |     | 0.0192 | 0.0140 | 0.0065 | 0     |
|     | 874 |        |        |        | 18254 |
|     |     | CR1    | CR2    | MM1    | MM2   |
| CR1 |     | 0      | 393    | 394    | 389   |
| CR2 |     | 0.0215 | 0      | 182    | 83    |
| MM1 |     | 0.0216 | 0.0100 | 0      | 180   |
| MM2 |     | 0.0213 | 0.0045 | 0.0099 | 0     |

|     |        |        |        |     |       |
|-----|--------|--------|--------|-----|-------|
|     | 876    |        |        |     | 6922  |
|     |        | CR1    | CR2    | MM1 | MM2   |
| CR1 |        | 0      | 137    | 97  | 98    |
| CR2 | 0.0198 |        | 0      | 162 | 161   |
| MM1 | 0.0140 | 0.0234 |        | 0   | 86    |
| MM2 | 0.0142 | 0.0233 | 0.0124 |     | 0     |
|     | 877    |        |        |     | 10017 |
|     |        | CR1    | CR2    | MM1 | MM2   |
| CR1 |        | 0      | 287    | 180 | 181   |
| CR2 | 0.0287 |        | 0      | 238 | 232   |
| MM1 | 0.0180 | 0.0238 |        | 0   | 112   |
| MM2 | 0.0181 | 0.0232 | 0.0112 |     | 0     |
|     | 878    |        |        |     | 10878 |
|     |        | CR1    | CR2    | MM1 | MM2   |
| CR1 |        | 0      | 203    | 108 | 106   |
| CR2 | 0.0187 |        | 0      | 181 | 179   |
| MM1 | 0.0099 | 0.0166 |        | 0   | 2     |
| MM2 | 0.0097 | 0.0165 | 0.0002 |     | 0     |
|     | 880    |        |        |     | 15372 |
|     |        | CR1    | CR2    | MM1 | MM2   |
| CR1 |        | 0      | 224    | 212 | 215   |
| CR2 | 0.0146 |        | 0      | 114 | 121   |
| MM1 | 0.0138 | 0.0074 |        | 0   | 57    |
| MM2 | 0.0140 | 0.0079 | 0.0037 |     | 0     |
|     | 882    |        |        |     | 23405 |
|     |        | CR1    | CR2    | MM1 | MM2   |
| CR1 |        | 0      | 509    | 524 | 510   |
| CR2 | 0.0217 |        | 0      | 223 | 232   |
| MM1 | 0.0224 | 0.0095 |        | 0   | 214   |
| MM2 | 0.0218 | 0.0099 | 0.0091 |     | 0     |
|     | 884    |        |        |     | 9076  |
|     |        | CR1    | CR2    | MM1 | MM2   |
| CR1 |        | 0      | 152    | 129 | 125   |
| CR2 | 0.0167 |        | 0      | 69  | 68    |
| MM1 | 0.0142 | 0.0076 |        | 0   | 75    |
| MM2 | 0.0138 | 0.0075 | 0.0083 |     | 0     |
|     | 885    |        |        |     | 20856 |
|     |        | CR1    | CR2    | MM1 | MM2   |
| CR1 |        | 0      | 288    | 327 | 330   |
| CR2 | 0.0138 |        | 0      | 302 | 313   |
| MM1 | 0.0157 | 0.0145 |        | 0   | 201   |
| MM2 | 0.0158 | 0.0150 | 0.0096 |     | 0     |

| 891 |        |        |        |     | 10748 |
|-----|--------|--------|--------|-----|-------|
|     | CR1    | CR2    | MM1    | MM2 |       |
| CR1 | 0      | 281    | 138    | 82  |       |
| CR2 | 0.0261 | 0      | 288    | 279 |       |
| MM1 | 0.0128 | 0.0268 | 0      | 157 |       |
| MM2 | 0.0076 | 0.0260 | 0.0146 | 0   |       |
| 892 |        |        |        |     | 9698  |
|     | CR1    | CR2    | MM1    | MM2 |       |
| CR1 | 0      | 184    | 43     | 43  |       |
| CR2 | 0.0190 | 0      | 185    | 183 |       |
| MM1 | 0.0044 | 0.0191 | 0      | 48  |       |
| MM2 | 0.0044 | 0.0189 | 0.0049 | 0   |       |
| 893 |        |        |        |     | 10108 |
|     | CR1    | CR2    | MM1    | MM2 |       |
| CR1 | 0      | 313    | 132    | 142 |       |
| CR2 | 0.0310 | 0      | 304    | 323 |       |
| MM1 | 0.0131 | 0.0301 | 0      | 85  |       |
| MM2 | 0.0140 | 0.0320 | 0.0084 | 0   |       |
| 894 |        |        |        |     | 9450  |
|     | CR1    | CR2    | MM1    | MM2 |       |
| CR1 | 0      | 208    | 90     | 76  |       |
| CR2 | 0.0220 | 0      | 198    | 210 |       |
| MM1 | 0.0095 | 0.0210 | 0      | 80  |       |
| MM2 | 0.0080 | 0.0222 | 0.0085 | 0   |       |
| 895 |        |        |        |     | 10281 |
|     | CR1    | CR2    | MM1    | MM2 |       |
| CR1 | 0      | 297    | 307    | 318 |       |
| CR2 | 0.0289 | 0      | 177    | 179 |       |
| MM1 | 0.0299 | 0.0172 | 0      | 187 |       |
| MM2 | 0.0309 | 0.0174 | 0.0182 | 0   |       |
| 896 |        |        |        |     | 9636  |
|     | CR1    | CR2    | MM1    | MM2 |       |
| CR1 | 0      | 155    | 197    | 142 |       |
| CR2 | 0.0161 | 0      | 283    | 216 |       |
| MM1 | 0.0204 | 0.0294 | 0      | 216 |       |
| MM2 | 0.0147 | 0.0224 | 0.0224 | 0   |       |
| 899 |        |        |        |     | 16575 |
|     | CR1    | CR2    | MM1    | MM2 |       |
| CR1 | 0      | 348    | 306    | 333 |       |
| CR2 | 0.0210 | 0      | 281    | 288 |       |
| MM1 | 0.0185 | 0.0170 | 0      | 204 |       |
| MM2 | 0.0201 | 0.0174 | 0.0123 | 0   |       |

|     | 900    |        |        |     | 8722  |
|-----|--------|--------|--------|-----|-------|
|     | CR1    | CR2    | MM1    | MM2 |       |
| CR1 | 0      | 159    | 169    | 169 |       |
| CR2 | 0.0182 | 0      | 243    | 243 |       |
| MM1 | 0.0194 | 0.0279 | 0      | 0   |       |
| MM2 | 0.0194 | 0.0279 | 0.0000 | 0   |       |
|     | 901    |        |        |     | 10172 |
|     | CR1    | CR2    | MM1    | MM2 |       |
| CR1 | 0      | 220    | 62     | 113 |       |
| CR2 | 0.0216 | 0      | 216    | 240 |       |
| MM1 | 0.0061 | 0.0212 | 0      | 117 |       |
| MM2 | 0.0111 | 0.0236 | 0.0115 | 0   |       |
|     | 909    |        |        |     | 9928  |
|     | CR1    | CR2    | MM1    | MM2 |       |
| CR1 | 0      | 276    | 274    | 275 |       |
| CR2 | 0.0278 | 0      | 172    | 161 |       |
| MM1 | 0.0276 | 0.0173 | 0      | 164 |       |
| MM2 | 0.0277 | 0.0162 | 0.0165 | 0   |       |
|     | 912    |        |        |     | 14310 |
|     | CR1    | CR2    | MM1    | MM2 |       |
| CR1 | 0      | 316    | 151    | 168 |       |
| CR2 | 0.0221 | 0      | 287    | 312 |       |
| MM1 | 0.0106 | 0.0201 | 0      | 137 |       |
| MM2 | 0.0117 | 0.0218 | 0.0096 | 0   |       |
|     | 913    |        |        |     | 17047 |
|     | CR1    | CR2    | MM1    | MM2 |       |
| CR1 | 0      | 387    | 224    | 60  |       |
| CR2 | 0.0227 | 0      | 391    | 385 |       |
| MM1 | 0.0131 | 0.0229 | 0      | 225 |       |
| MM2 | 0.0035 | 0.0226 | 0.0132 | 0   |       |
|     | 921    |        |        |     | 16190 |
|     | CR1    | CR2    | MM1    | MM2 |       |
| CR1 | 0      | 351    | 229    | 194 |       |
| CR2 | 0.0217 | 0      | 342    | 356 |       |
| MM1 | 0.0141 | 0.0211 | 0      | 194 |       |
| MM2 | 0.0120 | 0.0220 | 0.0120 | 0   |       |
|     | 924    |        |        |     | 14411 |
|     | CR1    | CR2    | MM1    | MM2 |       |
| CR1 | 0      | 418    | 148    | 164 |       |
| CR2 | 0.0290 | 0      | 401    | 424 |       |
| MM1 | 0.0103 | 0.0278 | 0      | 132 |       |
| MM2 | 0.0114 | 0.0294 | 0.0092 | 0   |       |

|     |     |        |        |        |       |
|-----|-----|--------|--------|--------|-------|
|     | 926 |        |        |        | 8102  |
|     |     | CR1    | CR2    | MM1    | MM2   |
| CR1 |     | 0      | 238    | 118    | 117   |
| CR2 |     | 0.0294 | 0      | 248    | 247   |
| MM1 |     | 0.0146 | 0.0306 | 0      | 1     |
| MM2 |     | 0.0144 | 0.0305 | 0.0001 | 0     |
|     | 933 |        |        |        | 11072 |
|     |     | CR1    | CR2    | MM1    | MM2   |
| CR1 |     | 0      | 324    | 217    | 198   |
| CR2 |     | 0.0293 | 0      | 335    | 342   |
| MM1 |     | 0.0196 | 0.0303 | 0      | 191   |
| MM2 |     | 0.0179 | 0.0309 | 0.0173 | 0     |
|     | 934 |        |        |        | 4543  |
|     |     | CR1    | CR2    | MM1    | MM2   |
| CR1 |     | 0      | 84     | 22     | 18    |
| CR2 |     | 0.0185 | 0      | 83     | 82    |
| MM1 |     | 0.0048 | 0.0183 | 0      | 20    |
| MM2 |     | 0.0040 | 0.0180 | 0.0044 | 0     |
|     | 939 |        |        |        | 9906  |
|     |     | CR1    | CR2    | MM1    | MM2   |
| CR1 |     | 0      | 17     | 0      | 71    |
| CR2 |     | 0.0017 | 0      | 17     | 82    |
| MM1 |     | 0.0000 | 0.0017 | 0      | 71    |
| MM2 |     | 0.0072 | 0.0083 | 0.0072 | 0     |
|     | 941 |        |        |        | 21459 |
|     |     | CR1    | CR2    | MM1    | MM2   |
| CR1 |     | 0      | 347    | 181    | 173   |
| CR2 |     | 0.0162 | 0      | 330    | 354   |
| MM1 |     | 0.0084 | 0.0154 | 0      | 160   |
| MM2 |     | 0.0081 | 0.0165 | 0.0075 | 0     |
|     | 943 |        |        |        | 10064 |
|     |     | CR1    | CR2    | MM1    | MM2   |
| CR1 |     | 0      | 228    | 123    | 114   |
| CR2 |     | 0.0227 | 0      | 213    | 209   |
| MM1 |     | 0.0122 | 0.0212 | 0      | 81    |
| MM2 |     | 0.0113 | 0.0208 | 0.0080 | 0     |
|     | 944 |        |        |        | 8050  |
|     |     | CR1    | CR2    | MM1    | MM2   |
| CR1 |     | 0      | 135    | 125    | 140   |
| CR2 |     | 0.0168 | 0      | 44     | 57    |
| MM1 |     | 0.0155 | 0.0055 | 0      | 39    |
| MM2 |     | 0.0174 | 0.0071 | 0.0048 | 0     |

|     |     |        |        |        |     |       |
|-----|-----|--------|--------|--------|-----|-------|
|     | 946 |        |        |        |     | 9314  |
|     |     | CR1    | CR2    | MM1    | MM2 |       |
| CR1 |     | 0      | 288    | 118    | 125 |       |
| CR2 |     | 0.0309 | 0      | 285    | 294 |       |
| MM1 |     | 0.0127 | 0.0306 | 0      | 87  |       |
| MM2 |     | 0.0134 | 0.0316 | 0.0093 | 0   |       |
|     | 947 |        |        |        |     | 10045 |
|     |     | CR1    | CR2    | MM1    | MM2 |       |
| CR1 |     | 0      | 331    | 162    | 145 |       |
| CR2 |     | 0.0330 | 0      | 332    | 301 |       |
| MM1 |     | 0.0161 | 0.0331 | 0      | 161 |       |
| MM2 |     | 0.0144 | 0.0300 | 0.0160 | 0   |       |
|     | 952 |        |        |        |     | 10987 |
|     |     | CR1    | CR2    | MM1    | MM2 |       |
| CR1 |     | 0      | 223    | 130    | 105 |       |
| CR2 |     | 0.0203 | 0      | 226    | 218 |       |
| MM1 |     | 0.0118 | 0.0206 | 0      | 112 |       |
| MM2 |     | 0.0096 | 0.0198 | 0.0102 | 0   |       |
|     | 953 |        |        |        |     | 9372  |
|     |     | CR1    | CR2    | MM1    | MM2 |       |
| CR1 |     | 0      | 139    | 71     | 72  |       |
| CR2 |     | 0.0148 | 0      | 121    | 118 |       |
| MM1 |     | 0.0076 | 0.0129 | 0      | 49  |       |
| MM2 |     | 0.0077 | 0.0126 | 0.0052 | 0   |       |
|     | 954 |        |        |        |     | 11406 |
|     |     | CR1    | CR2    | MM1    | MM2 |       |
| CR1 |     | 0      | 218    | 110    | 90  |       |
| CR2 |     | 0.0191 | 0      | 218    | 224 |       |
| MM1 |     | 0.0096 | 0.0191 | 0      | 96  |       |
| MM2 |     | 0.0079 | 0.0196 | 0.0084 | 0   |       |
|     | 956 |        |        |        |     | 14610 |
|     |     | CR1    | CR2    | MM1    | MM2 |       |
| CR1 |     | 0      | 293    | 309    | 295 |       |
| CR2 |     | 0.0201 | 0      | 142    | 145 |       |
| MM1 |     | 0.0211 | 0.0097 | 0      | 84  |       |
| MM2 |     | 0.0202 | 0.0099 | 0.0057 | 0   |       |
|     | 961 |        |        |        |     | 12126 |
|     |     | CR1    | CR2    | MM1    | MM2 |       |
| CR1 |     | 0      | 185    | 66     | 95  |       |
| CR2 |     | 0.0153 | 0      | 185    | 186 |       |
| MM1 |     | 0.0054 | 0.0153 | 0      | 83  |       |
| MM2 |     | 0.0078 | 0.0153 | 0.0068 | 0   |       |

|     |     |        |        |        |       |
|-----|-----|--------|--------|--------|-------|
|     | 964 |        |        |        | 12650 |
|     |     | CR1    | CR2    | MM1    | MM2   |
| CR1 |     | 0      | 0      | 361    | 378   |
| CR2 |     | 0.0000 | 0      | 361    | 378   |
| MM1 |     | 0.0285 | 0.0285 | 0      | 272   |
| MM2 |     | 0.0299 | 0.0299 | 0.0215 | 0     |
|     | 965 |        |        |        | 10207 |
|     |     | CR1    | CR2    | MM1    | MM2   |
| CR1 |     | 0      | 117    | 201    | 221   |
| CR2 |     | 0.0115 | 0      | 121    | 140   |
| MM1 |     | 0.0197 | 0.0119 | 0      | 127   |
| MM2 |     | 0.0217 | 0.0137 | 0.0124 | 0     |
|     | 966 |        |        |        | 15590 |
|     |     | CR1    | CR2    | MM1    | MM2   |
| CR1 |     | 0      | 157    | 184    | 184   |
| CR2 |     | 0.0101 | 0      | 27     | 27    |
| MM1 |     | 0.0118 | 0.0017 | 0      | 0     |
| MM2 |     | 0.0118 | 0.0017 | 0.0000 | 0     |
|     | 970 |        |        |        | 10982 |
|     |     | CR1    | CR2    | MM1    | MM2   |
| CR1 |     | 0      | 266    | 124    | 129   |
| CR2 |     | 0.0242 | 0      | 251    | 264   |
| MM1 |     | 0.0113 | 0.0229 | 0      | 136   |
| MM2 |     | 0.0117 | 0.0240 | 0.0124 | 0     |
|     | 973 |        |        |        | 13520 |
|     |     | CR1    | CR2    | MM1    | MM2   |
| CR1 |     | 0      | 275    | 47     | 126   |
| CR2 |     | 0.0203 | 0      | 277    | 275   |
| MM1 |     | 0.0035 | 0.0205 | 0      | 111   |
| MM2 |     | 0.0093 | 0.0203 | 0.0082 | 0     |
|     | 977 |        |        |        | 14044 |
|     |     | CR1    | CR2    | MM1    | MM2   |
| CR1 |     | 0      | 362    | 238    | 227   |
| CR2 |     | 0.0258 | 0      | 375    | 369   |
| MM1 |     | 0.0169 | 0.0267 | 0      | 169   |
| MM2 |     | 0.0162 | 0.0263 | 0.0120 | 0     |
|     | 978 |        |        |        | 11812 |
|     |     | CR1    | CR2    | MM1    | MM2   |
| CR1 |     | 0      | 223    | 100    | 92    |
| CR2 |     | 0.0189 | 0      | 237    | 230   |
| MM1 |     | 0.0085 | 0.0201 | 0      | 90    |
| MM2 |     | 0.0078 | 0.0195 | 0.0076 | 0     |

|     |     |        |        |        |       |
|-----|-----|--------|--------|--------|-------|
|     | 982 |        |        |        | 10775 |
|     |     | CR1    | CR2    | MM1    | MM2   |
| CR1 |     | 0      | 196    | 189    | 199   |
| CR2 |     | 0.0182 | 0      | 85     | 135   |
| MM1 |     | 0.0175 | 0.0079 | 0      | 112   |
| MM2 |     | 0.0185 | 0.0125 | 0.0104 | 0     |
|     | 983 |        |        |        | 15181 |
|     |     | CR1    | CR2    | MM1    | MM2   |
| CR1 |     | 0      | 444    | 181    | 204   |
| CR2 |     | 0.0292 | 0      | 445    | 421   |
| MM1 |     | 0.0119 | 0.0293 | 0      | 231   |
| MM2 |     | 0.0134 | 0.0277 | 0.0152 | 0     |
|     | 985 |        |        |        | 21043 |
|     |     | CR1    | CR2    | MM1    | MM2   |
| CR1 |     | 0      | 352    | 160    | 163   |
| CR2 |     | 0.0167 | 0      | 339    | 339   |
| MM1 |     | 0.0076 | 0.0161 | 0      | 158   |
| MM2 |     | 0.0077 | 0.0161 | 0.0075 | 0     |
|     | 986 |        |        |        | 9892  |
|     |     | CR1    | CR2    | MM1    | MM2   |
| CR1 |     | 0      | 224    | 150    | 164   |
| CR2 |     | 0.0226 | 0      | 222    | 239   |
| MM1 |     | 0.0152 | 0.0224 | 0      | 173   |
| MM2 |     | 0.0166 | 0.0242 | 0.0175 | 0     |
|     | 987 |        |        |        | 7699  |
|     |     | CR1    | CR2    | MM1    | MM2   |
| CR1 |     | 0      | 337    | 123    | 117   |
| CR2 |     | 0.0438 | 0      | 366    | 360   |
| MM1 |     | 0.0160 | 0.0475 | 0      | 124   |
| MM2 |     | 0.0152 | 0.0468 | 0.0161 | 0     |
|     | 990 |        |        |        | 10415 |
|     |     | CR1    | CR2    | MM1    | MM2   |
| CR1 |     | 0      | 231    | 134    | 124   |
| CR2 |     | 0.0222 | 0      | 217    | 230   |
| MM1 |     | 0.0129 | 0.0208 | 0      | 76    |
| MM2 |     | 0.0119 | 0.0221 | 0.0073 | 0     |
|     | 991 |        |        |        | 7183  |
|     |     | CR1    | CR2    | MM1    | MM2   |
| CR1 |     | 0      | 0      | 255    | 130   |
| CR2 |     | 0.0000 | 0      | 255    | 130   |
| MM1 |     | 0.0355 | 0.0355 | 0      | 190   |
| MM2 |     | 0.0181 | 0.0181 | 0.0265 | 0     |



|     |      |        |        |        |       |
|-----|------|--------|--------|--------|-------|
|     | 992  |        |        |        | 13579 |
|     |      | CR1    | CR2    | MM1    | MM2   |
| CR1 |      | 0      | 241    | 104    | 104   |
| CR2 |      | 0.0177 | 0      | 237    | 237   |
| MM1 |      | 0.0077 | 0.0175 | 0      | 0     |
| MM2 |      | 0.0077 | 0.0175 | 0.0000 | 0     |
|     | 996  |        |        |        | 20594 |
|     |      | CR1    | CR2    | MM1    | MM2   |
| CR1 |      | 0      | 465    | 274    | 320   |
| CR2 |      | 0.0226 | 0      | 501    | 495   |
| MM1 |      | 0.0133 | 0.0243 | 0      | 269   |
| MM2 |      | 0.0155 | 0.0240 | 0.0131 | 0     |
|     | 997  |        |        |        | 11806 |
|     |      | CR1    | CR2    | MM1    | MM2   |
| CR1 |      | 0      | 245    | 145    | 135   |
| CR2 |      | 0.0208 | 0      | 223    | 227   |
| MM1 |      | 0.0123 | 0.0189 | 0      | 130   |
| MM2 |      | 0.0114 | 0.0192 | 0.0110 | 0     |
|     | 1003 |        |        |        | 14569 |
|     |      | CR1    | CR2    | MM1    | MM2   |
| CR1 |      | 0      | 28     | 197    | 214   |
| CR2 |      | 0.0019 | 0      | 183    | 194   |
| MM1 |      | 0.0135 | 0.0126 | 0      | 133   |
| MM2 |      | 0.0147 | 0.0133 | 0.0091 | 0     |
|     | 1005 |        |        |        | 9883  |
|     |      | CR1    | CR2    | MM1    | MM2   |
| CR1 |      | 0      | 162    | 81     | 61    |
| CR2 |      | 0.0164 | 0      | 163    | 159   |
| MM1 |      | 0.0082 | 0.0165 | 0      | 56    |
| MM2 |      | 0.0062 | 0.0161 | 0.0057 | 0     |
|     | 1010 |        |        |        | 22736 |
|     |      | CR1    | CR2    | MM1    | MM2   |
| CR1 |      | 0      | 618    | 260    | 211   |
| CR2 |      | 0.0272 | 0      | 571    | 612   |
| MM1 |      | 0.0114 | 0.0251 | 0      | 284   |
| MM2 |      | 0.0093 | 0.0269 | 0.0125 | 0     |
|     | 1011 |        |        |        | 9234  |
|     |      | CR1    | CR2    | MM1    | MM2   |
| CR1 |      | 0      | 170    | 66     | 54    |
| CR2 |      | 0.0184 | 0      | 180    | 177   |
| MM1 |      | 0.0071 | 0.0195 | 0      | 64    |
| MM2 |      | 0.0058 | 0.0192 | 0.0069 | 0     |

|      |        |        |        |     |       |
|------|--------|--------|--------|-----|-------|
| 1015 |        |        |        |     | 23371 |
|      | CR1    | CR2    | MM1    | MM2 |       |
| CR1  | 0      | 408    | 132    | 155 |       |
| CR2  | 0.0175 | 0      | 408    | 422 |       |
| MM1  | 0.0056 | 0.0175 | 0      | 163 |       |
| MM2  | 0.0066 | 0.0181 | 0.0070 | 0   |       |
| 1022 |        |        |        |     | 9868  |
|      | CR1    | CR2    | MM1    | MM2 |       |
| CR1  | 0      | 150    | 160    | 148 |       |
| CR2  | 0.0152 | 0      | 55     | 71  |       |
| MM1  | 0.0162 | 0.0056 | 0      | 69  |       |
| MM2  | 0.0150 | 0.0072 | 0.0070 | 0   |       |
| 1024 |        |        |        |     | 10130 |
|      | CR1    | CR2    | MM1    | MM2 |       |
| CR1  | 0      | 237    | 227    | 235 |       |
| CR2  | 0.0234 | 0      | 112    | 115 |       |
| MM1  | 0.0224 | 0.0111 | 0      | 88  |       |
| MM2  | 0.0232 | 0.0114 | 0.0087 | 0   |       |
| 1028 |        |        |        |     | 8220  |
|      | CR1    | CR2    | MM1    | MM2 |       |
| CR1  | 0      | 50     | 97     | 92  |       |
| CR2  | 0.0061 | 0      | 128    | 114 |       |
| MM1  | 0.0118 | 0.0156 | 0      | 108 |       |
| MM2  | 0.0112 | 0.0139 | 0.0131 | 0   |       |
| 1029 |        |        |        |     | 10230 |
|      | CR1    | CR2    | MM1    | MM2 |       |
| CR1  | 0      | 231    | 113    | 127 |       |
| CR2  | 0.0226 | 0      | 234    | 235 |       |
| MM1  | 0.0110 | 0.0229 | 0      | 127 |       |
| MM2  | 0.0124 | 0.0230 | 0.0124 | 0   |       |
| 1030 |        |        |        |     | 9022  |
|      | CR1    | CR2    | MM1    | MM2 |       |
| CR1  | 0      | 224    | 54     | 101 |       |
| CR2  | 0.0248 | 0      | 218    | 207 |       |
| MM1  | 0.0060 | 0.0242 | 0      | 85  |       |
| MM2  | 0.0112 | 0.0229 | 0.0094 | 0   |       |
| 1031 |        |        |        |     | 28878 |
|      | CR1    | CR2    | MM1    | MM2 |       |
| CR1  | 0      | 473    | 275    | 281 |       |
| CR2  | 0.0164 | 0      | 462    | 452 |       |
| MM1  | 0.0095 | 0.0160 | 0      | 253 |       |
| MM2  | 0.0097 | 0.0157 | 0.0088 | 0   |       |

|      |        |        |        |     |       |
|------|--------|--------|--------|-----|-------|
| 1036 |        |        |        |     | 18254 |
|      | CR1    | CR2    | MM1    | MM2 |       |
| CR1  | 0      | 217    | 225    | 226 |       |
| CR2  | 0.0119 | 0      | 123    | 118 |       |
| MM1  | 0.0123 | 0.0067 | 0      | 98  |       |
| MM2  | 0.0124 | 0.0065 | 0.0054 | 0   |       |
| 1037 |        |        |        |     | 16421 |
|      | CR1    | CR2    | MM1    | MM2 |       |
| CR1  | 0      | 540    | 559    | 526 |       |
| CR2  | 0.0329 | 0      | 368    | 143 |       |
| MM1  | 0.0340 | 0.0224 | 0      | 326 |       |
| MM2  | 0.0320 | 0.0087 | 0.0199 | 0   |       |
| 1045 |        |        |        |     | 11024 |
|      | CR1    | CR2    | MM1    | MM2 |       |
| CR1  | 0      | 318    | 109    | 149 |       |
| CR2  | 0.0288 | 0      | 323    | 311 |       |
| MM1  | 0.0099 | 0.0293 | 0      | 123 |       |
| MM2  | 0.0135 | 0.0282 | 0.0112 | 0   |       |
| 1047 |        |        |        |     | 20449 |
|      | CR1    | CR2    | MM1    | MM2 |       |
| CR1  | 0      | 356    | 165    | 236 |       |
| CR2  | 0.0174 | 0      | 351    | 376 |       |
| MM1  | 0.0081 | 0.0172 | 0      | 214 |       |
| MM2  | 0.0115 | 0.0184 | 0.0105 | 0   |       |
| 1050 |        |        |        |     | 12818 |
|      | CR1    | CR2    | MM1    | MM2 |       |
| CR1  | 0      | 192    | 88     | 91  |       |
| CR2  | 0.0150 | 0      | 210    | 206 |       |
| MM1  | 0.0069 | 0.0164 | 0      | 93  |       |
| MM2  | 0.0071 | 0.0161 | 0.0073 | 0   |       |
| 1051 |        |        |        |     | 15223 |
|      | CR1    | CR2    | MM1    | MM2 |       |
| CR1  | 0      | 294    | 135    | 151 |       |
| CR2  | 0.0193 | 0      | 308    | 301 |       |
| MM1  | 0.0089 | 0.0202 | 0      | 156 |       |
| MM2  | 0.0099 | 0.0198 | 0.0102 | 0   |       |
| 1062 |        |        |        |     | 14366 |
|      | CR1    | CR2    | MM1    | MM2 |       |
| CR1  | 0      | 331    | 206    | 195 |       |
| CR2  | 0.0230 | 0      | 334    | 345 |       |
| MM1  | 0.0143 | 0.0232 | 0      | 81  |       |
| MM2  | 0.0136 | 0.0240 | 0.0056 | 0   |       |

|      |        |        |        |     |       |
|------|--------|--------|--------|-----|-------|
| 1067 |        |        |        |     | 12199 |
|      | CR1    | CR2    | MM1    | MM2 |       |
| CR1  | 0      | 146    | 224    | 218 |       |
| CR2  | 0.0120 | 0      | 282    | 295 |       |
| MM1  | 0.0184 | 0.0231 | 0      | 233 |       |
| MM2  | 0.0179 | 0.0242 | 0.0191 | 0   |       |
| 1068 |        |        |        |     | 18532 |
|      | CR1    | CR2    | MM1    | MM2 |       |
| CR1  | 0      | 79     | 490    | 517 |       |
| CR2  | 0.0043 | 0      | 454    | 477 |       |
| MM1  | 0.0264 | 0.0245 | 0      | 177 |       |
| MM2  | 0.0279 | 0.0257 | 0.0096 | 0   |       |
| 1070 |        |        |        |     | 6438  |
|      | CR1    | CR2    | MM1    | MM2 |       |
| CR1  | 0      | 180    | 184    | 180 |       |
| CR2  | 0.0280 | 0      | 90     | 111 |       |
| MM1  | 0.0286 | 0.0140 | 0      | 113 |       |
| MM2  | 0.0280 | 0.0172 | 0.0176 | 0   |       |
| 1075 |        |        |        |     | 12763 |
|      | CR1    | CR2    | MM1    | MM2 |       |
| CR1  | 0      | 337    | 387    | 347 |       |
| CR2  | 0.0264 | 0      | 195    | 118 |       |
| MM1  | 0.0303 | 0.0153 | 0      | 199 |       |
| MM2  | 0.0272 | 0.0092 | 0.0156 | 0   |       |
| 1077 |        |        |        |     | 9784  |
|      | CR1    | CR2    | MM1    | MM2 |       |
| CR1  | 0      | 0      | 95     | 125 |       |
| CR2  | 0.0000 | 0      | 95     | 125 |       |
| MM1  | 0.0097 | 0.0097 | 0      | 111 |       |
| MM2  | 0.0128 | 0.0128 | 0.0113 | 0   |       |
| 1078 |        |        |        |     | 10276 |
|      | CR1    | CR2    | MM1    | MM2 |       |
| CR1  | 0      | 205    | 85     | 108 |       |
| CR2  | 0.0199 | 0      | 222    | 218 |       |
| MM1  | 0.0083 | 0.0216 | 0      | 97  |       |
| MM2  | 0.0105 | 0.0212 | 0.0094 | 0   |       |
| 1080 |        |        |        |     | 8171  |
|      | CR1    | CR2    | MM1    | MM2 |       |
| CR1  | 0      | 230    | 64     | 52  |       |
| CR2  | 0.0281 | 0      | 220    | 228 |       |
| MM1  | 0.0078 | 0.0269 | 0      | 58  |       |
| MM2  | 0.0064 | 0.0279 | 0.0071 | 0   |       |

|      |        |        |        |     |       |
|------|--------|--------|--------|-----|-------|
| 1083 |        |        |        |     | 11112 |
|      | CR1    | CR2    | MM1    | MM2 |       |
| CR1  | 0      | 322    | 173    | 203 |       |
| CR2  | 0.0290 | 0      | 318    | 290 |       |
| MM1  | 0.0156 | 0.0286 | 0      | 189 |       |
| MM2  | 0.0183 | 0.0261 | 0.0170 | 0   |       |
| 1085 |        |        |        |     | 9735  |
|      | CR1    | CR2    | MM1    | MM2 |       |
| CR1  | 0      | 0      | 91     | 136 |       |
| CR2  | 0.0000 | 0      | 91     | 136 |       |
| MM1  | 0.0093 | 0.0093 | 0      | 129 |       |
| MM2  | 0.0140 | 0.0140 | 0.0133 | 0   |       |
| 1086 |        |        |        |     | 8424  |
|      | CR1    | CR2    | MM1    | MM2 |       |
| CR1  | 0      | 219    | 93     | 76  |       |
| CR2  | 0.0260 | 0      | 210    | 231 |       |
| MM1  | 0.0110 | 0.0249 | 0      | 112 |       |
| MM2  | 0.0090 | 0.0274 | 0.0133 | 0   |       |
| 1087 |        |        |        |     | 7465  |
|      | CR1    | CR2    | MM1    | MM2 |       |
| CR1  | 0      | 135    | 43     | 59  |       |
| CR2  | 0.0181 | 0      | 134    | 135 |       |
| MM1  | 0.0058 | 0.0180 | 0      | 57  |       |
| MM2  | 0.0079 | 0.0181 | 0.0076 | 0   |       |
| 1088 |        |        |        |     | 12529 |
|      | CR1    | CR2    | MM1    | MM2 |       |
| CR1  | 0      | 365    | 169    | 154 |       |
| CR2  | 0.0291 | 0      | 361    | 366 |       |
| MM1  | 0.0135 | 0.0288 | 0      | 159 |       |
| MM2  | 0.0123 | 0.0292 | 0.0127 | 0   |       |
| 1089 |        |        |        |     | 12057 |
|      | CR1    | CR2    | MM1    | MM2 |       |
| CR1  | 0      | 280    | 143    | 141 |       |
| CR2  | 0.0232 | 0      | 276    | 262 |       |
| MM1  | 0.0119 | 0.0229 | 0      | 123 |       |
| MM2  | 0.0117 | 0.0217 | 0.0102 | 0   |       |
| 1093 |        |        |        |     | 9117  |
|      | CR1    | CR2    | MM1    | MM2 |       |
| CR1  | 0      | 186    | 203    | 193 |       |
| CR2  | 0.0204 | 0      | 149    | 135 |       |
| MM1  | 0.0223 | 0.0163 | 0      | 116 |       |
| MM2  | 0.0212 | 0.0148 | 0.0127 | 0   |       |

| 1097 |        |        |        |     | 11537 |
|------|--------|--------|--------|-----|-------|
|      | CR1    | CR2    | MM1    | MM2 |       |
| CR1  | 0      | 324    | 178    | 151 |       |
| CR2  | 0.0281 | 0      | 323    | 334 |       |
| MM1  | 0.0154 | 0.0280 | 0      | 187 |       |
| MM2  | 0.0131 | 0.0290 | 0.0162 | 0   |       |
| 1103 |        |        |        |     | 9910  |
|      | CR1    | CR2    | MM1    | MM2 |       |
| CR1  | 0      | 239    | 123    | 73  |       |
| CR2  | 0.0241 | 0      | 244    | 235 |       |
| MM1  | 0.0124 | 0.0246 | 0      | 138 |       |
| MM2  | 0.0074 | 0.0237 | 0.0139 | 0   |       |
| 1104 |        |        |        |     | 19599 |
|      | CR1    | CR2    | MM1    | MM2 |       |
| CR1  | 0      | 439    | 221    | 222 |       |
| CR2  | 0.0224 | 0      | 421    | 422 |       |
| MM1  | 0.0113 | 0.0215 | 0      | 1   |       |
| MM2  | 0.0113 | 0.0215 | 0.0001 | 0   |       |
| 1105 |        |        |        |     | 19582 |
|      | CR1    | CR2    | MM1    | MM2 |       |
| CR1  | 0      | 450    | 441    | 424 |       |
| CR2  | 0.0230 | 0      | 217    | 292 |       |
| MM1  | 0.0225 | 0.0111 | 0      | 235 |       |
| MM2  | 0.0217 | 0.0149 | 0.0120 | 0   |       |
| 1112 |        |        |        |     | 9572  |
|      | CR1    | CR2    | MM1    | MM2 |       |
| CR1  | 0      | 203    | 108    | 88  |       |
| CR2  | 0.0212 | 0      | 178    | 194 |       |
| MM1  | 0.0113 | 0.0186 | 0      | 100 |       |
| MM2  | 0.0092 | 0.0203 | 0.0104 | 0   |       |
| 1116 |        |        |        |     | 9828  |
|      | CR1    | CR2    | MM1    | MM2 |       |
| CR1  | 0      | 237    | 117    | 102 |       |
| CR2  | 0.0241 | 0      | 246    | 229 |       |
| MM1  | 0.0119 | 0.0250 | 0      | 106 |       |
| MM2  | 0.0104 | 0.0233 | 0.0108 | 0   |       |
| 1117 |        |        |        |     | 13442 |
|      | CR1    | CR2    | MM1    | MM2 |       |
| CR1  | 0      | 367    | 193    | 180 |       |
| CR2  | 0.0273 | 0      | 386    | 365 |       |
| MM1  | 0.0144 | 0.0287 | 0      | 178 |       |
| MM2  | 0.0134 | 0.0272 | 0.0132 | 0   |       |

|     |      |        |        |        |       |
|-----|------|--------|--------|--------|-------|
|     | 1121 |        |        |        | 14393 |
|     |      | CR1    | CR2    | MM1    | MM2   |
| CR1 |      | 0      | 286    | 287    | 278   |
| CR2 |      | 0.0199 | 0      | 115    | 116   |
| MM1 |      | 0.0199 | 0.0080 | 0      | 113   |
| MM2 |      | 0.0193 | 0.0081 | 0.0079 | 0     |
|     | 1123 |        |        |        | 12864 |
|     |      | CR1    | CR2    | MM1    | MM2   |
| CR1 |      | 0      | 32     | 202    | 184   |
| CR2 |      | 0.0025 | 0      | 219    | 204   |
| MM1 |      | 0.0157 | 0.0170 | 0      | 103   |
| MM2 |      | 0.0143 | 0.0159 | 0.0080 | 0     |
|     | 1125 |        |        |        | 10221 |
|     |      | CR1    | CR2    | MM1    | MM2   |
| CR1 |      | 0      | 256    | 3      | 131   |
| CR2 |      | 0.0250 | 0      | 257    | 251   |
| MM1 |      | 0.0003 | 0.0251 | 0      | 130   |
| MM2 |      | 0.0128 | 0.0246 | 0.0127 | 0     |
|     | 1130 |        |        |        | 7425  |
|     |      | CR1    | CR2    | MM1    | MM2   |
| CR1 |      | 0      | 0      | 200    | 188   |
| CR2 |      | 0.0000 | 0      | 200    | 188   |
| MM1 |      | 0.0269 | 0.0269 | 0      | 98    |
| MM2 |      | 0.0253 | 0.0253 | 0.0132 | 0     |
|     | 1131 |        |        |        | 15676 |
|     |      | CR1    | CR2    | MM1    | MM2   |
| CR1 |      | 0      | 256    | 218    | 195   |
| CR2 |      | 0.0163 | 0      | 391    | 375   |
| MM1 |      | 0.0139 | 0.0249 | 0      | 214   |
| MM2 |      | 0.0124 | 0.0239 | 0.0137 | 0     |
|     | 1132 |        |        |        | 6200  |
|     |      | CR1    | CR2    | MM1    | MM2   |
| CR1 |      | 0      | 103    | 71     | 65    |
| CR2 |      | 0.0166 | 0      | 104    | 106   |
| MM1 |      | 0.0115 | 0.0168 | 0      | 61    |
| MM2 |      | 0.0105 | 0.0171 | 0.0098 | 0     |
|     | 1140 |        |        |        | 11680 |
|     |      | CR1    | CR2    | MM1    | MM2   |
| CR1 |      | 0      | 237    | 107    | 107   |
| CR2 |      | 0.0203 | 0      | 236    | 236   |
| MM1 |      | 0.0092 | 0.0202 | 0      | 0     |
| MM2 |      | 0.0092 | 0.0202 | 0.0000 | 0     |

| 1141 |        |        |        |     | 10272 |
|------|--------|--------|--------|-----|-------|
|      | CR1    | CR2    | MM1    | MM2 |       |
| CR1  | 0      | 3      | 179    | 197 |       |
| CR2  | 0.0003 | 0      | 176    | 194 |       |
| MM1  | 0.0174 | 0.0171 | 0      | 76  |       |
| MM2  | 0.0192 | 0.0189 | 0.0074 | 0   |       |
| 1143 |        |        |        |     | 8625  |
|      | CR1    | CR2    | MM1    | MM2 |       |
| CR1  | 0      | 190    | 101    | 96  |       |
| CR2  | 0.0220 | 0      | 183    | 181 |       |
| MM1  | 0.0117 | 0.0212 | 0      | 25  |       |
| MM2  | 0.0111 | 0.0210 | 0.0029 | 0   |       |
| 1147 |        |        |        |     | 8005  |
|      | CR1    | CR2    | MM1    | MM2 |       |
| CR1  | 0      | 170    | 66     | 79  |       |
| CR2  | 0.0212 | 0      | 179    | 177 |       |
| MM1  | 0.0082 | 0.0224 | 0      | 64  |       |
| MM2  | 0.0099 | 0.0221 | 0.0080 | 0   |       |
| 1148 |        |        |        |     | 16447 |
|      | CR1    | CR2    | MM1    | MM2 |       |
| CR1  | 0      | 382    | 164    | 147 |       |
| CR2  | 0.0232 | 0      | 369    | 364 |       |
| MM1  | 0.0100 | 0.0224 | 0      | 86  |       |
| MM2  | 0.0089 | 0.0221 | 0.0052 | 0   |       |
| 1149 |        |        |        |     | 10051 |
|      | CR1    | CR2    | MM1    | MM2 |       |
| CR1  | 0      | 231    | 212    | 203 |       |
| CR2  | 0.0230 | 0      | 104    | 100 |       |
| MM1  | 0.0211 | 0.0103 | 0      | 77  |       |
| MM2  | 0.0202 | 0.0099 | 0.0077 | 0   |       |
| 1150 |        |        |        |     | 8578  |
|      | CR1    | CR2    | MM1    | MM2 |       |
| CR1  | 0      | 257    | 257    | 241 |       |
| CR2  | 0.0300 | 0      | 111    | 113 |       |
| MM1  | 0.0300 | 0.0129 | 0      | 124 |       |
| MM2  | 0.0281 | 0.0132 | 0.0145 | 0   |       |
| 1151 |        |        |        |     | 11064 |
|      | CR1    | CR2    | MM1    | MM2 |       |
| CR1  | 0      | 247    | 111    | 131 |       |
| CR2  | 0.0223 | 0      | 244    | 253 |       |
| MM1  | 0.0100 | 0.0221 | 0      | 103 |       |
| MM2  | 0.0118 | 0.0229 | 0.0093 | 0   |       |



|      |        |        |        |     |       |
|------|--------|--------|--------|-----|-------|
| 1156 |        |        |        |     | 11945 |
|      | CR1    | CR2    | MM1    | MM2 |       |
| CR1  | 0      | 251    | 120    | 121 |       |
| CR2  | 0.0210 | 0      | 263    | 264 |       |
| MM1  | 0.0100 | 0.0220 | 0      | 139 |       |
| MM2  | 0.0101 | 0.0221 | 0.0116 | 0   |       |
| 1168 |        |        |        |     | 11757 |
|      | CR1    | CR2    | MM1    | MM2 |       |
| CR1  | 0      | 0      | 212    | 197 |       |
| CR2  | 0.0000 | 0      | 212    | 197 |       |
| MM1  | 0.0180 | 0.0180 | 0      | 114 |       |
| MM2  | 0.0168 | 0.0168 | 0.0097 | 0   |       |
| 1171 |        |        |        |     | 11283 |
|      | CR1    | CR2    | MM1    | MM2 |       |
| CR1  | 0      | 296    | 257    | 228 |       |
| CR2  | 0.0262 | 0      | 359    | 344 |       |
| MM1  | 0.0228 | 0.0318 | 0      | 244 |       |
| MM2  | 0.0202 | 0.0305 | 0.0216 | 0   |       |
| 1173 |        |        |        |     | 8351  |
|      | CR1    | CR2    | MM1    | MM2 |       |
| CR1  | 0      | 143    | 80     | 79  |       |
| CR2  | 0.0171 | 0      | 142    | 135 |       |
| MM1  | 0.0096 | 0.0170 | 0      | 7   |       |
| MM2  | 0.0095 | 0.0162 | 0.0008 | 0   |       |
| 1174 |        |        |        |     | 7156  |
|      | CR1    | CR2    | MM1    | MM2 |       |
| CR1  | 0      | 149    | 169    | 150 |       |
| CR2  | 0.0208 | 0      | 64     | 49  |       |
| MM1  | 0.0236 | 0.0089 | 0      | 69  |       |
| MM2  | 0.0210 | 0.0068 | 0.0096 | 0   |       |
| 1179 |        |        |        |     | 18420 |
|      | CR1    | CR2    | MM1    | MM2 |       |
| CR1  | 0      | 275    | 48     | 51  |       |
| CR2  | 0.0149 | 0      | 276    | 281 |       |
| MM1  | 0.0026 | 0.0150 | 0      | 59  |       |
| MM2  | 0.0028 | 0.0153 | 0.0032 | 0   |       |
| 1180 |        |        |        |     | 11669 |
|      | CR1    | CR2    | MM1    | MM2 |       |
| CR1  | 0      | 228    | 206    | 221 |       |
| CR2  | 0.0195 | 0      | 91     | 77  |       |
| MM1  | 0.0177 | 0.0078 | 0      | 80  |       |
| MM2  | 0.0189 | 0.0066 | 0.0069 | 0   |       |

|     |      |        |        |        |       |
|-----|------|--------|--------|--------|-------|
|     | 1185 |        |        |        | 8195  |
|     |      | CR1    | CR2    | MM1    | MM2   |
| CR1 |      | 0      | 124    | 45     | 24    |
| CR2 |      | 0.0151 | 0      | 118    | 120   |
| MM1 |      | 0.0055 | 0.0144 | 0      | 38    |
| MM2 |      | 0.0029 | 0.0146 | 0.0046 | 0     |
|     | 1186 |        |        |        | 21367 |
|     |      | CR1    | CR2    | MM1    | MM2   |
| CR1 |      | 0      | 520    | 230    | 259   |
| CR2 |      | 0.0243 | 0      | 492    | 513   |
| MM1 |      | 0.0108 | 0.0230 | 0      | 255   |
| MM2 |      | 0.0121 | 0.0240 | 0.0119 | 0     |
|     | 1187 |        |        |        | 7887  |
|     |      | CR1    | CR2    | MM1    | MM2   |
| CR1 |      | 0      | 181    | 71     | 55    |
| CR2 |      | 0.0229 | 0      | 188    | 192   |
| MM1 |      | 0.0090 | 0.0238 | 0      | 79    |
| MM2 |      | 0.0070 | 0.0243 | 0.0100 | 0     |
|     | 1191 |        |        |        | 11399 |
|     |      | CR1    | CR2    | MM1    | MM2   |
| CR1 |      | 0      | 318    | 205    | 246   |
| CR2 |      | 0.0279 | 0      | 307    | 309   |
| MM1 |      | 0.0180 | 0.0269 | 0      | 199   |
| MM2 |      | 0.0216 | 0.0271 | 0.0175 | 0     |

|     | Matrices MA-MM-CR |        |        |        |        |     |       |
|-----|-------------------|--------|--------|--------|--------|-----|-------|
| 6   |                   |        |        |        |        |     | 15773 |
|     | CR1               | CR2    | MA1    | MA2    | MM1    | MM2 |       |
| CR1 | 0                 | 330    | 90     | 350    | 358    | 350 |       |
| CR2 | 0.0209            | 0      | 320    | 269    | 83     | 269 |       |
| MA1 | 0.0057            | 0.0203 | 0      | 343    | 348    | 343 |       |
| MA2 | 0.0222            | 0.0171 | 0.0217 | 0      | 261    | 0   |       |
| MM1 | 0.0227            | 0.0053 | 0.0221 | 0.0165 | 0      | 261 |       |
| MM2 | 0.0222            | 0.0171 | 0.0217 | 0.0000 | 0.0165 | 0   |       |
| 7   |                   |        |        |        |        |     | 12326 |
|     | CR1               | CR2    | MA1    | MA2    | MM1    | MM2 |       |
| CR1 | 0                 | 214    | 97     | 219    | 97     | 77  |       |
| CR2 | 0.0174            | 0      | 228    | 39     | 228    | 234 |       |
| MA1 | 0.0079            | 0.0185 | 0      | 232    | 0      | 88  |       |
| MA2 | 0.0178            | 0.0032 | 0.0188 | 0      | 232    | 239 |       |
| MM1 | 0.0079            | 0.0185 | 0.0000 | 0.0188 | 0      | 88  |       |
| MM2 | 0.0062            | 0.0190 | 0.0071 | 0.0194 | 0.0071 | 0   |       |
| 8   |                   |        |        |        |        |     | 18112 |
|     | CR1               | CR2    | MA1    | MA2    | MM1    | MM2 |       |
| CR1 | 0                 | 354    | 392    | 223    | 412    | 393 |       |
| CR2 | 0.0195            | 0      | 220    | 441    | 257    | 217 |       |
| MA1 | 0.0216            | 0.0121 | 0      | 435    | 282    | 3   |       |
| MA2 | 0.0123            | 0.0243 | 0.0240 | 0      | 456    | 438 |       |
| MM1 | 0.0227            | 0.0142 | 0.0156 | 0.0252 | 0      | 280 |       |
| MM2 | 0.0217            | 0.0120 | 0.0002 | 0.0242 | 0.0155 | 0   |       |
| 10  |                   |        |        |        |        |     | 12313 |
|     | CR1               | CR2    | MA1    | MA2    | MM1    | MM2 |       |
| CR1 | 0                 | 201    | 83     | 222    | 83     | 76  |       |
| CR2 | 0.0163            | 0      | 196    | 61     | 196    | 198 |       |
| MA1 | 0.0067            | 0.0159 | 0      | 210    | 0      | 83  |       |
| MA2 | 0.0180            | 0.0050 | 0.0171 | 0      | 210    | 210 |       |
| MM1 | 0.0067            | 0.0159 | 0.0000 | 0.0171 | 0      | 83  |       |
| MM2 | 0.0062            | 0.0161 | 0.0067 | 0.0171 | 0.0067 | 0   |       |
| 12  |                   |        |        |        |        |     | 13800 |
|     | CR1               | CR2    | MA1    | MA2    | MM1    | MM2 |       |
| CR1 | 0                 | 315    | 318    | 168    | 168    | 121 |       |
| CR2 | 0.0228            | 0      | 53     | 303    | 303    | 292 |       |
| MA1 | 0.0230            | 0.0038 | 0      | 304    | 304    | 293 |       |
| MA2 | 0.0122            | 0.0220 | 0.0220 | 0      | 0      | 139 |       |
| MM1 | 0.0122            | 0.0220 | 0.0220 | 0.0000 | 0      | 139 |       |
| MM2 | 0.0088            | 0.0212 | 0.0212 | 0.0101 | 0.0101 | 0   |       |

|     | CR1    | CR2    | MA1    | MA2    | MM1    | MM2 |       |
|-----|--------|--------|--------|--------|--------|-----|-------|
| 13  |        |        |        |        |        |     | 16978 |
| CR1 | 0      | 378    | 365    | 96     | 365    | 387 |       |
| CR2 | 0.0223 | 0      | 171    | 337    | 171    | 141 |       |
| MA1 | 0.0215 | 0.0101 | 0      | 324    | 0      | 153 |       |
| MA2 | 0.0057 | 0.0198 | 0.0191 | 0      | 324    | 348 |       |
| MM1 | 0.0215 | 0.0101 | 0.0000 | 0.0191 | 0      | 153 |       |
| MM2 | 0.0228 | 0.0083 | 0.0090 | 0.0205 | 0.0090 | 0   |       |
| 14  |        |        |        |        |        |     | 15888 |
| CR1 | 0      | 283    | 102    | 280    | 102    | 158 |       |
| CR2 | 0.0178 | 0      | 265    | 94     | 265    | 279 |       |
| MA1 | 0.0064 | 0.0167 | 0      | 259    | 0      | 142 |       |
| MA2 | 0.0176 | 0.0059 | 0.0163 | 0      | 259    | 270 |       |
| MM1 | 0.0064 | 0.0167 | 0.0000 | 0.0163 | 0      | 142 |       |
| MM2 | 0.0099 | 0.0176 | 0.0089 | 0.0170 | 0.0089 | 0   |       |
| 15  |        |        |        |        |        |     | 11240 |
| CR1 | 0      | 80     | 211    | 119    | 55     | 126 |       |
| CR2 | 0.0071 | 0      | 154    | 169    | 110    | 175 |       |
| MA1 | 0.0188 | 0.0137 | 0      | 206    | 220    | 257 |       |
| MA2 | 0.0106 | 0.0150 | 0.0183 | 0      | 110    | 136 |       |
| MM1 | 0.0049 | 0.0098 | 0.0196 | 0.0098 | 0      | 108 |       |
| MM2 | 0.0112 | 0.0156 | 0.0229 | 0.0121 | 0.0096 | 0   |       |
| 18  |        |        |        |        |        |     | 13029 |
| CR1 | 0      | 228    | 87     | 233    | 96     | 87  |       |
| CR2 | 0.0175 | 0      | 236    | 85     | 243    | 236 |       |
| MA1 | 0.0067 | 0.0181 | 0      | 242    | 97     | 0   |       |
| MA2 | 0.0179 | 0.0065 | 0.0186 | 0      | 245    | 242 |       |
| MM1 | 0.0074 | 0.0187 | 0.0074 | 0.0188 | 0      | 97  |       |
| MM2 | 0.0067 | 0.0181 | 0.0000 | 0.0186 | 0.0074 | 0   |       |
| 20  |        |        |        |        |        |     | 14046 |
| CR1 | 0      | 191    | 91     | 188    | 91     | 112 |       |
| CR2 | 0.0136 | 0      | 187    | 58     | 187    | 185 |       |
| MA1 | 0.0065 | 0.0133 | 0      | 184    | 0      | 100 |       |
| MA2 | 0.0134 | 0.0041 | 0.0131 | 0      | 184    | 184 |       |
| MM1 | 0.0065 | 0.0133 | 0.0000 | 0.0131 | 0      | 100 |       |
| MM2 | 0.0080 | 0.0132 | 0.0071 | 0.0131 | 0.0071 | 0   |       |

|     | CR1    | CR2    | MA1    | MA2    | MM1    | MM2 |       |
|-----|--------|--------|--------|--------|--------|-----|-------|
| 23  |        |        |        |        |        |     | 16217 |
| CR1 | 0      | 351    | 214    | 365    | 179    | 197 |       |
| CR2 | 0.0216 | 0      | 339    | 142    | 338    | 349 |       |
| MA1 | 0.0132 | 0.0209 | 0      | 346    | 207    | 223 |       |
| MA2 | 0.0225 | 0.0088 | 0.0213 | 0      | 346    | 354 |       |
| MM1 | 0.0110 | 0.0208 | 0.0128 | 0.0213 | 0      | 210 |       |
| MM2 | 0.0121 | 0.0215 | 0.0138 | 0.0218 | 0.0129 | 0   |       |
| 25  |        |        |        |        |        |     | 20239 |
| CR1 | 0      | 0      | 118    | 412    | 425    | 412 |       |
| CR2 | 0.0000 | 0      | 118    | 412    | 425    | 412 |       |
| MA1 | 0.0058 | 0.0058 | 0      | 446    | 448    | 446 |       |
| MA2 | 0.0204 | 0.0204 | 0.0220 | 0      | 209    | 0   |       |
| MM1 | 0.0210 | 0.0210 | 0.0221 | 0.0103 | 0      | 209 |       |
| MM2 | 0.0204 | 0.0204 | 0.0220 | 0.0000 | 0.0103 | 0   |       |
| 27  |        |        |        |        |        |     | 11096 |
| CR1 | 0      | 24     | 67     | 165    | 95     | 67  |       |
| CR2 | 0.0022 | 0      | 67     | 166    | 95     | 67  |       |
| MA1 | 0.0060 | 0.0060 | 0      | 171    | 90     | 0   |       |
| MA2 | 0.0149 | 0.0150 | 0.0154 | 0      | 177    | 171 |       |
| MM1 | 0.0086 | 0.0086 | 0.0081 | 0.0160 | 0      | 90  |       |
| MM2 | 0.0060 | 0.0060 | 0.0000 | 0.0154 | 0.0081 | 0   |       |
| 28  |        |        |        |        |        |     | 12851 |
| CR1 | 0      | 256    | 253    | 137    | 129    | 41  |       |
| CR2 | 0.0199 | 0      | 105    | 259    | 258    | 267 |       |
| MA1 | 0.0197 | 0.0082 | 0      | 252    | 253    | 264 |       |
| MA2 | 0.0107 | 0.0202 | 0.0196 | 0      | 132    | 124 |       |
| MM1 | 0.0100 | 0.0201 | 0.0197 | 0.0103 | 0      | 100 |       |
| MM2 | 0.0032 | 0.0208 | 0.0205 | 0.0096 | 0.0078 | 0   |       |
| 30  |        |        |        |        |        |     | 13372 |
| CR1 | 0      | 250    | 255    | 106    | 112    | 106 |       |
| CR2 | 0.0187 | 0      | 51     | 251    | 264    | 251 |       |
| MA1 | 0.0191 | 0.0038 | 0      | 258    | 271    | 258 |       |
| MA2 | 0.0079 | 0.0188 | 0.0193 | 0      | 106    | 0   |       |
| MM1 | 0.0084 | 0.0197 | 0.0203 | 0.0079 | 0      | 106 |       |
| MM2 | 0.0079 | 0.0188 | 0.0193 | 0.0000 | 0.0079 | 0   |       |

|     | 31     |        |        |        |        |     | 9551  |
|-----|--------|--------|--------|--------|--------|-----|-------|
|     | CR1    | CR2    | MA1    | MA2    | MM1    | MM2 |       |
| CR1 | 0      | 136    | 21     | 137    | 132    | 137 |       |
| CR2 | 0.0142 | 0      | 135    | 69     | 48     | 69  |       |
| MA1 | 0.0022 | 0.0141 | 0      | 138    | 131    | 138 |       |
| MA2 | 0.0143 | 0.0072 | 0.0144 | 0      | 49     | 0   |       |
| MM1 | 0.0138 | 0.0050 | 0.0137 | 0.0051 | 0      | 49  |       |
| MM2 | 0.0143 | 0.0072 | 0.0144 | 0.0000 | 0.0051 | 0   |       |
|     | 33     |        |        |        |        |     | 14977 |
|     | CR1    | CR2    | MA1    | MA2    | MM1    | MM2 |       |
| CR1 | 0      | 133    | 339    | 95     | 91     | 95  |       |
| CR2 | 0.0089 | 0      | 236    | 220    | 216    | 220 |       |
| MA1 | 0.0226 | 0.0158 | 0      | 356    | 342    | 356 |       |
| MA2 | 0.0063 | 0.0147 | 0.0238 | 0      | 103    | 0   |       |
| MM1 | 0.0061 | 0.0144 | 0.0228 | 0.0069 | 0      | 103 |       |
| MM2 | 0.0063 | 0.0147 | 0.0238 | 0.0000 | 0.0069 | 0   |       |
|     | 34     |        |        |        |        |     | 9687  |
|     | CR1    | CR2    | MA1    | MA2    | MM1    | MM2 |       |
| CR1 | 0      | 157    | 89     | 155    | 89     | 82  |       |
| CR2 | 0.0162 | 0      | 163    | 80     | 163    | 159 |       |
| MA1 | 0.0092 | 0.0168 | 0      | 165    | 0      | 66  |       |
| MA2 | 0.0160 | 0.0083 | 0.0170 | 0      | 165    | 159 |       |
| MM1 | 0.0092 | 0.0168 | 0.0000 | 0.0170 | 0      | 66  |       |
| MM2 | 0.0085 | 0.0164 | 0.0068 | 0.0164 | 0.0068 | 0   |       |
|     | 36     |        |        |        |        |     | 12497 |
|     | CR1    | CR2    | MA1    | MA2    | MM1    | MM2 |       |
| CR1 | 0      | 126    | 188    | 187    | 221    | 207 |       |
| CR2 | 0.0101 | 0      | 263    | 95     | 265    | 261 |       |
| MA1 | 0.0150 | 0.0210 | 0      | 282    | 148    | 110 |       |
| MA2 | 0.0150 | 0.0076 | 0.0226 | 0      | 268    | 265 |       |
| MM1 | 0.0177 | 0.0212 | 0.0118 | 0.0214 | 0      | 151 |       |
| MM2 | 0.0166 | 0.0209 | 0.0088 | 0.0212 | 0.0121 | 0   |       |
|     | 37     |        |        |        |        |     | 16712 |
|     | CR1    | CR2    | MA1    | MA2    | MM1    | MM2 |       |
| CR1 | 0      | 185    | 83     | 176    | 83     | 81  |       |
| CR2 | 0.0111 | 0      | 202    | 42     | 202    | 195 |       |
| MA1 | 0.0050 | 0.0121 | 0      | 190    | 0      | 98  |       |
| MA2 | 0.0105 | 0.0025 | 0.0114 | 0      | 190    | 191 |       |
| MM1 | 0.0050 | 0.0121 | 0.0000 | 0.0114 | 0      | 98  |       |
| MM2 | 0.0048 | 0.0117 | 0.0059 | 0.0114 | 0.0059 | 0   |       |

|     | CR1    | CR2    | MA1    | MA2    | MM1    | MM2 |       |
|-----|--------|--------|--------|--------|--------|-----|-------|
| 38  |        |        |        |        |        |     | 13192 |
| CR1 | 0      | 171    | 98     | 164    | 98     | 63  |       |
| CR2 | 0.0130 | 0      | 188    | 41     | 188    | 179 |       |
| MA1 | 0.0074 | 0.0143 | 0      | 181    | 0      | 93  |       |
| MA2 | 0.0124 | 0.0031 | 0.0137 | 0      | 181    | 172 |       |
| MM1 | 0.0074 | 0.0143 | 0.0000 | 0.0137 | 0      | 93  |       |
| MM2 | 0.0048 | 0.0136 | 0.0070 | 0.0130 | 0.0070 | 0   |       |
| 39  |        |        |        |        |        |     | 11038 |
| CR1 | 0      | 258    | 90     | 252    | 90     | 108 |       |
| CR2 | 0.0234 | 0      | 258    | 67     | 258    | 263 |       |
| MA1 | 0.0082 | 0.0234 | 0      | 257    | 0      | 126 |       |
| MA2 | 0.0228 | 0.0061 | 0.0233 | 0      | 257    | 260 |       |
| MM1 | 0.0082 | 0.0234 | 0.0000 | 0.0233 | 0      | 126 |       |
| MM2 | 0.0098 | 0.0238 | 0.0114 | 0.0236 | 0.0114 | 0   |       |
| 40  |        |        |        |        |        |     | 13785 |
| CR1 | 0      | 164    | 133    | 121    | 28     | 79  |       |
| CR2 | 0.0119 | 0      | 55     | 71     | 158    | 157 |       |
| MA1 | 0.0096 | 0.0040 | 0      | 20     | 117    | 128 |       |
| MA2 | 0.0088 | 0.0052 | 0.0015 | 0      | 103    | 124 |       |
| MM1 | 0.0020 | 0.0115 | 0.0085 | 0.0075 | 0      | 79  |       |
| MM2 | 0.0057 | 0.0114 | 0.0093 | 0.0090 | 0.0057 | 0   |       |
| 42  |        |        |        |        |        |     | 17104 |
| CR1 | 0      | 239    | 167    | 173    | 95     | 98  |       |
| CR2 | 0.0140 | 0      | 150    | 194    | 234    | 243 |       |
| MA1 | 0.0098 | 0.0088 | 0      | 136    | 126    | 169 |       |
| MA2 | 0.0101 | 0.0113 | 0.0080 | 0      | 124    | 184 |       |
| MM1 | 0.0056 | 0.0137 | 0.0074 | 0.0072 | 0      | 106 |       |
| MM2 | 0.0057 | 0.0142 | 0.0099 | 0.0108 | 0.0062 | 0   |       |
| 44  |        |        |        |        |        |     | 14183 |
| CR1 | 0      | 192    | 87     | 196    | 117    | 87  |       |
| CR2 | 0.0135 | 0      | 198    | 20     | 197    | 198 |       |
| MA1 | 0.0061 | 0.0140 | 0      | 202    | 98     | 0   |       |
| MA2 | 0.0138 | 0.0014 | 0.0142 | 0      | 201    | 202 |       |
| MM1 | 0.0082 | 0.0139 | 0.0069 | 0.0142 | 0      | 98  |       |
| MM2 | 0.0061 | 0.0140 | 0.0000 | 0.0142 | 0.0069 | 0   |       |

|     | CR1    | CR2    | MA1    | MA2    | MM1    | MM2 |       |
|-----|--------|--------|--------|--------|--------|-----|-------|
| 46  |        |        |        |        |        |     | 12341 |
| CR1 | 0      | 204    | 60     | 202    | 211    | 202 |       |
| CR2 | 0.0165 | 0      | 214    | 104    | 101    | 104 |       |
| MA1 | 0.0049 | 0.0173 | 0      | 213    | 221    | 213 |       |
| MA2 | 0.0164 | 0.0084 | 0.0173 | 0      | 83     | 0   |       |
| MM1 | 0.0171 | 0.0082 | 0.0179 | 0.0067 | 0      | 83  |       |
| MM2 | 0.0164 | 0.0084 | 0.0173 | 0.0000 | 0.0067 | 0   |       |
| 47  |        |        |        |        |        |     | 15440 |
| CR1 | 0      | 266    | 275    | 151    | 80     | 151 |       |
| CR2 | 0.0172 | 0      | 82     | 290    | 272    | 290 |       |
| MA1 | 0.0178 | 0.0053 | 0      | 298    | 279    | 298 |       |
| MA2 | 0.0098 | 0.0188 | 0.0193 | 0      | 154    | 0   |       |
| MM1 | 0.0052 | 0.0176 | 0.0181 | 0.0100 | 0      | 154 |       |
| MM2 | 0.0098 | 0.0188 | 0.0193 | 0.0000 | 0.0100 | 0   |       |
| 49  |        |        |        |        |        |     | 9579  |
| CR1 | 0      | 71     | 122    | 150    | 43     | 90  |       |
| CR2 | 0.0074 | 0      | 145    | 98     | 114    | 135 |       |
| MA1 | 0.0127 | 0.0151 | 0      | 177    | 89     | 63  |       |
| MA2 | 0.0157 | 0.0102 | 0.0185 | 0      | 185    | 174 |       |
| MM1 | 0.0045 | 0.0119 | 0.0093 | 0.0193 | 0      | 65  |       |
| MM2 | 0.0094 | 0.0141 | 0.0066 | 0.0182 | 0.0068 | 0   |       |
| 50  |        |        |        |        |        |     | 21075 |
| CR1 | 0      | 607    | 627    | 300    | 658    | 628 |       |
| CR2 | 0.0288 | 0      | 366    | 589    | 393    | 382 |       |
| MA1 | 0.0298 | 0.0174 | 0      | 572    | 452    | 392 |       |
| MA2 | 0.0142 | 0.0279 | 0.0271 | 0      | 640    | 619 |       |
| MM1 | 0.0312 | 0.0186 | 0.0214 | 0.0304 | 0      | 380 |       |
| MM2 | 0.0298 | 0.0181 | 0.0186 | 0.0294 | 0.0180 | 0   |       |
| 51  |        |        |        |        |        |     | 9049  |
| CR1 | 0      | 107    | 31     | 105    | 34     | 40  |       |
| CR2 | 0.0118 | 0      | 98     | 49     | 105    | 93  |       |
| MA1 | 0.0034 | 0.0108 | 0      | 97     | 40     | 36  |       |
| MA2 | 0.0116 | 0.0054 | 0.0107 | 0      | 102    | 102 |       |
| MM1 | 0.0038 | 0.0116 | 0.0044 | 0.0113 | 0      | 44  |       |
| MM2 | 0.0044 | 0.0103 | 0.0040 | 0.0113 | 0.0049 | 0   |       |



|     | 52     |        |        |        |        |     | 7695  |
|-----|--------|--------|--------|--------|--------|-----|-------|
|     | CR1    | CR2    | MA1    | MA2    | MM1    | MM2 |       |
| CR1 | 0      | 85     | 87     | 30     | 33     | 30  |       |
| CR2 | 0.0110 | 0      | 21     | 83     | 86     | 83  |       |
| MA1 | 0.0113 | 0.0027 | 0      | 85     | 88     | 85  |       |
| MA2 | 0.0039 | 0.0108 | 0.0110 | 0      | 23     | 0   |       |
| MM1 | 0.0043 | 0.0112 | 0.0114 | 0.0030 | 0      | 23  |       |
| MM2 | 0.0039 | 0.0108 | 0.0110 | 0.0000 | 0.0030 | 0   |       |
|     | 53     |        |        |        |        |     | 11347 |
|     | CR1    | CR2    | MA1    | MA2    | MM1    | MM2 |       |
| CR1 | 0      | 368    | 174    | 384    | 173    | 136 |       |
| CR2 | 0.0324 | 0      | 372    | 81     | 333    | 365 |       |
| MA1 | 0.0153 | 0.0328 | 0      | 385    | 196    | 83  |       |
| MA2 | 0.0338 | 0.0071 | 0.0339 | 0      | 348    | 380 |       |
| MM1 | 0.0152 | 0.0293 | 0.0173 | 0.0307 | 0      | 113 |       |
| MM2 | 0.0120 | 0.0322 | 0.0073 | 0.0335 | 0.0100 | 0   |       |
|     | 54     |        |        |        |        |     | 16664 |
|     | CR1    | CR2    | MA1    | MA2    | MM1    | MM2 |       |
| CR1 | 0      | 414    | 439    | 135    | 437    | 443 |       |
| CR2 | 0.0248 | 0      | 249    | 413    | 256    | 250 |       |
| MA1 | 0.0263 | 0.0149 | 0      | 433    | 273    | 187 |       |
| MA2 | 0.0081 | 0.0248 | 0.0260 | 0      | 435    | 440 |       |
| MM1 | 0.0262 | 0.0154 | 0.0164 | 0.0261 | 0      | 260 |       |
| MM2 | 0.0266 | 0.0150 | 0.0112 | 0.0264 | 0.0156 | 0   |       |
|     | 55     |        |        |        |        |     | 13812 |
|     | CR1    | CR2    | MA1    | MA2    | MM1    | MM2 |       |
| CR1 | 0      | 174    | 75     | 167    | 62     | 55  |       |
| CR2 | 0.0126 | 0      | 177    | 53     | 175    | 160 |       |
| MA1 | 0.0054 | 0.0128 | 0      | 170    | 72     | 52  |       |
| MA2 | 0.0121 | 0.0038 | 0.0123 | 0      | 168    | 153 |       |
| MM1 | 0.0045 | 0.0127 | 0.0052 | 0.0122 | 0      | 53  |       |
| MM2 | 0.0040 | 0.0116 | 0.0038 | 0.0111 | 0.0038 | 0   |       |
|     | 57     |        |        |        |        |     | 13285 |
|     | CR1    | CR2    | MA1    | MA2    | MM1    | MM2 |       |
| CR1 | 0      | 221    | 99     | 224    | 99     | 101 |       |
| CR2 | 0.0166 | 0      | 206    | 74     | 206    | 202 |       |
| MA1 | 0.0075 | 0.0155 | 0      | 206    | 0      | 88  |       |
| MA2 | 0.0169 | 0.0056 | 0.0155 | 0      | 206    | 205 |       |
| MM1 | 0.0075 | 0.0155 | 0.0000 | 0.0155 | 0      | 88  |       |
| MM2 | 0.0076 | 0.0152 | 0.0066 | 0.0154 | 0.0066 | 0   |       |

| 64  |        |        |        |        |        |     | 11380 |
|-----|--------|--------|--------|--------|--------|-----|-------|
|     | CR1    | CR2    | MA1    | MA2    | MM1    | MM2 |       |
| CR1 | 0      | 5      | 207    | 151    | 220    | 230 |       |
| CR2 | 0.0004 | 0      | 212    | 146    | 225    | 235 |       |
| MA1 | 0.0182 | 0.0186 | 0      | 248    | 136    | 139 |       |
| MA2 | 0.0133 | 0.0128 | 0.0218 | 0      | 251    | 264 |       |
| MM1 | 0.0193 | 0.0198 | 0.0120 | 0.0221 | 0      | 128 |       |
| MM2 | 0.0202 | 0.0207 | 0.0122 | 0.0232 | 0.0112 | 0   |       |
| 65  |        |        |        |        |        |     | 19220 |
|     | CR1    | CR2    | MA1    | MA2    | MM1    | MM2 |       |
| CR1 | 0      | 319    | 228    | 328    | 186    | 197 |       |
| CR2 | 0.0166 | 0      | 316    | 140    | 318    | 321 |       |
| MA1 | 0.0119 | 0.0164 | 0      | 323    | 176    | 135 |       |
| MA2 | 0.0171 | 0.0073 | 0.0168 | 0      | 325    | 330 |       |
| MM1 | 0.0097 | 0.0165 | 0.0092 | 0.0169 | 0      | 162 |       |
| MM2 | 0.0102 | 0.0167 | 0.0070 | 0.0172 | 0.0084 | 0   |       |
| 66  |        |        |        |        |        |     | 12728 |
|     | CR1    | CR2    | MA1    | MA2    | MM1    | MM2 |       |
| CR1 | 0      | 244    | 88     | 248    | 88     | 81  |       |
| CR2 | 0.0192 | 0      | 237    | 61     | 237    | 244 |       |
| MA1 | 0.0069 | 0.0186 | 0      | 242    | 0      | 88  |       |
| MA2 | 0.0195 | 0.0048 | 0.0190 | 0      | 242    | 247 |       |
| MM1 | 0.0069 | 0.0186 | 0.0000 | 0.0190 | 0      | 88  |       |
| MM2 | 0.0064 | 0.0192 | 0.0069 | 0.0194 | 0.0069 | 0   |       |
| 68  |        |        |        |        |        |     | 18791 |
|     | CR1    | CR2    | MA1    | MA2    | MM1    | MM2 |       |
| CR1 | 0      | 274    | 265    | 74     | 259    | 265 |       |
| CR2 | 0.0146 | 0      | 88     | 265    | 82     | 88  |       |
| MA1 | 0.0141 | 0.0047 | 0      | 258    | 39     | 0   |       |
| MA2 | 0.0039 | 0.0141 | 0.0137 | 0      | 254    | 258 |       |
| MM1 | 0.0138 | 0.0044 | 0.0021 | 0.0135 | 0      | 39  |       |
| MM2 | 0.0141 | 0.0047 | 0.0000 | 0.0137 | 0.0021 | 0   |       |
| 70  |        |        |        |        |        |     | 12972 |
|     | CR1    | CR2    | MA1    | MA2    | MM1    | MM2 |       |
| CR1 | 0      | 200    | 204    | 129    | 129    | 119 |       |
| CR2 | 0.0154 | 0      | 39     | 181    | 181    | 171 |       |
| MA1 | 0.0157 | 0.0030 | 0      | 187    | 187    | 175 |       |
| MA2 | 0.0099 | 0.0140 | 0.0144 | 0      | 0      | 78  |       |
| MM1 | 0.0099 | 0.0140 | 0.0144 | 0.0000 | 0      | 78  |       |
| MM2 | 0.0092 | 0.0132 | 0.0135 | 0.0060 | 0.0060 | 0   |       |

|     | 71     |        |        |        |        |     | 18558 |
|-----|--------|--------|--------|--------|--------|-----|-------|
|     | CR1    | CR2    | MA1    | MA2    | MM1    | MM2 |       |
| CR1 | 0      | 307    | 145    | 299    | 134    | 126 |       |
| CR2 | 0.0165 | 0      | 305    | 101    | 309    | 299 |       |
| MA1 | 0.0078 | 0.0164 | 0      | 297    | 146    | 123 |       |
| MA2 | 0.0161 | 0.0054 | 0.0160 | 0      | 295    | 288 |       |
| MM1 | 0.0072 | 0.0167 | 0.0079 | 0.0159 | 0      | 127 |       |
| MM2 | 0.0068 | 0.0161 | 0.0066 | 0.0155 | 0.0068 | 0   |       |
|     | 72     |        |        |        |        |     | 11405 |
|     | CR1    | CR2    | MA1    | MA2    | MM1    | MM2 |       |
| CR1 | 0      | 292    | 273    | 139    | 79     | 139 |       |
| CR2 | 0.0256 | 0      | 84     | 313    | 307    | 313 |       |
| MA1 | 0.0239 | 0.0074 | 0      | 296    | 288    | 296 |       |
| MA2 | 0.0122 | 0.0274 | 0.0260 | 0      | 120    | 0   |       |
| MM1 | 0.0069 | 0.0269 | 0.0253 | 0.0105 | 0      | 120 |       |
| MM2 | 0.0122 | 0.0274 | 0.0260 | 0.0000 | 0.0105 | 0   |       |
|     | 73     |        |        |        |        |     | 18630 |
|     | CR1    | CR2    | MA1    | MA2    | MM1    | MM2 |       |
| CR1 | 0      | 370    | 203    | 370    | 191    | 243 |       |
| CR2 | 0.0199 | 0      | 369    | 0      | 383    | 378 |       |
| MA1 | 0.0109 | 0.0198 | 0      | 369    | 197    | 233 |       |
| MA2 | 0.0199 | 0.0000 | 0.0198 | 0      | 383    | 378 |       |
| MM1 | 0.0103 | 0.0206 | 0.0106 | 0.0206 | 0      | 245 |       |
| MM2 | 0.0130 | 0.0203 | 0.0125 | 0.0203 | 0.0132 | 0   |       |
|     | 75     |        |        |        |        |     | 9477  |
|     | CR1    | CR2    | MA1    | MA2    | MM1    | MM2 |       |
| CR1 | 0      | 203    | 47     | 199    | 199    | 182 |       |
| CR2 | 0.0214 | 0      | 200    | 75     | 75     | 74  |       |
| MA1 | 0.0050 | 0.0211 | 0      | 194    | 194    | 177 |       |
| MA2 | 0.0210 | 0.0079 | 0.0205 | 0      | 0      | 73  |       |
| MM1 | 0.0210 | 0.0079 | 0.0205 | 0.0000 | 0      | 73  |       |
| MM2 | 0.0192 | 0.0078 | 0.0187 | 0.0077 | 0.0077 | 0   |       |
|     | 76     |        |        |        |        |     | 8820  |
|     | CR1    | CR2    | MA1    | MA2    | MM1    | MM2 |       |
| CR1 | 0      | 229    | 143    | 225    | 110    | 143 |       |
| CR2 | 0.0260 | 0      | 212    | 31     | 230    | 212 |       |
| MA1 | 0.0162 | 0.0240 | 0      | 209    | 140    | 0   |       |
| MA2 | 0.0255 | 0.0035 | 0.0237 | 0      | 226    | 209 |       |
| MM1 | 0.0125 | 0.0261 | 0.0159 | 0.0256 | 0      | 140 |       |
| MM2 | 0.0162 | 0.0240 | 0.0000 | 0.0237 | 0.0159 | 0   |       |

|     | CR1    | CR2    | MA1    | MA2    | MM1    | MM2 |       |
|-----|--------|--------|--------|--------|--------|-----|-------|
| 77  |        |        |        |        |        |     | 15195 |
| CR1 | 0      | 109    | 310    | 191    | 226    | 191 |       |
| CR2 | 0.0072 | 0      | 213    | 229    | 274    | 229 |       |
| MA1 | 0.0204 | 0.0140 | 0      | 327    | 342    | 327 |       |
| MA2 | 0.0126 | 0.0151 | 0.0215 | 0      | 196    | 0   |       |
| MM1 | 0.0149 | 0.0180 | 0.0225 | 0.0129 | 0      | 196 |       |
| MM2 | 0.0126 | 0.0151 | 0.0215 | 0.0000 | 0.0129 | 0   |       |
| 78  |        |        |        |        |        |     | 13466 |
| CR1 | 0      | 367    | 191    | 326    | 191    | 220 |       |
| CR2 | 0.0273 | 0      | 373    | 102    | 373    | 400 |       |
| MA1 | 0.0142 | 0.0277 | 0      | 339    | 0      | 233 |       |
| MA2 | 0.0242 | 0.0076 | 0.0252 | 0      | 339    | 383 |       |
| MM1 | 0.0142 | 0.0277 | 0.0000 | 0.0252 | 0      | 233 |       |
| MM2 | 0.0163 | 0.0297 | 0.0173 | 0.0284 | 0.0173 | 0   |       |
| 79  |        |        |        |        |        |     | 13694 |
| CR1 | 0      | 180    | 104    | 177    | 82     | 87  |       |
| CR2 | 0.0131 | 0      | 183    | 7      | 182    | 167 |       |
| MA1 | 0.0076 | 0.0134 | 0      | 180    | 80     | 94  |       |
| MA2 | 0.0129 | 0.0005 | 0.0131 | 0      | 179    | 164 |       |
| MM1 | 0.0060 | 0.0133 | 0.0058 | 0.0131 | 0      | 91  |       |
| MM2 | 0.0064 | 0.0122 | 0.0069 | 0.0120 | 0.0066 | 0   |       |
| 81  |        |        |        |        |        |     | 17906 |
| CR1 | 0      | 338    | 184    | 375    | 184    | 152 |       |
| CR2 | 0.0189 | 0      | 364    | 71     | 364    | 368 |       |
| MA1 | 0.0103 | 0.0203 | 0      | 401    | 0      | 154 |       |
| MA2 | 0.0209 | 0.0040 | 0.0224 | 0      | 401    | 405 |       |
| MM1 | 0.0103 | 0.0203 | 0.0000 | 0.0224 | 0      | 154 |       |
| MM2 | 0.0085 | 0.0206 | 0.0086 | 0.0226 | 0.0086 | 0   |       |
| 82  |        |        |        |        |        |     | 11012 |
| CR1 | 0      | 265    | 272    | 159    | 159    | 134 |       |
| CR2 | 0.0241 | 0      | 38     | 277    | 277    | 258 |       |
| MA1 | 0.0247 | 0.0035 | 0      | 282    | 282    | 266 |       |
| MA2 | 0.0144 | 0.0252 | 0.0256 | 0      | 0      | 151 |       |
| MM1 | 0.0144 | 0.0252 | 0.0256 | 0.0000 | 0      | 151 |       |
| MM2 | 0.0122 | 0.0234 | 0.0242 | 0.0137 | 0.0137 | 0   |       |

| 86  |        |        |        |        |        |     | 12347 |
|-----|--------|--------|--------|--------|--------|-----|-------|
|     | CR1    | CR2    | MA1    | MA2    | MM1    | MM2 |       |
| CR1 | 0      | 181    | 90     | 188    | 90     | 87  |       |
| CR2 | 0.0147 | 0      | 181    | 41     | 181    | 169 |       |
| MA1 | 0.0073 | 0.0147 | 0      | 186    | 0      | 99  |       |
| MA2 | 0.0152 | 0.0033 | 0.0151 | 0      | 186    | 178 |       |
| MM1 | 0.0073 | 0.0147 | 0.0000 | 0.0151 | 0      | 99  |       |
| MM2 | 0.0070 | 0.0137 | 0.0080 | 0.0144 | 0.0080 | 0   |       |
| 87  |        |        |        |        |        |     | 13357 |
|     | CR1    | CR2    | MA1    | MA2    | MM1    | MM2 |       |
| CR1 | 0      | 264    | 137    | 255    | 132    | 137 |       |
| CR2 | 0.0198 | 0      | 287    | 41     | 257    | 287 |       |
| MA1 | 0.0103 | 0.0215 | 0      | 280    | 130    | 0   |       |
| MA2 | 0.0191 | 0.0031 | 0.0210 | 0      | 246    | 280 |       |
| MM1 | 0.0099 | 0.0192 | 0.0097 | 0.0184 | 0      | 130 |       |
| MM2 | 0.0103 | 0.0215 | 0.0000 | 0.0210 | 0.0097 | 0   |       |
| 88  |        |        |        |        |        |     | 13194 |
|     | CR1    | CR2    | MA1    | MA2    | MM1    | MM2 |       |
| CR1 | 0      | 265    | 93     | 260    | 144    | 93  |       |
| CR2 | 0.0201 | 0      | 264    | 93     | 262    | 264 |       |
| MA1 | 0.0070 | 0.0200 | 0      | 255    | 123    | 0   |       |
| MA2 | 0.0197 | 0.0070 | 0.0193 | 0      | 258    | 255 |       |
| MM1 | 0.0109 | 0.0199 | 0.0093 | 0.0196 | 0      | 123 |       |
| MM2 | 0.0070 | 0.0200 | 0.0000 | 0.0193 | 0.0093 | 0   |       |
| 90  |        |        |        |        |        |     | 15614 |
|     | CR1    | CR2    | MA1    | MA2    | MM1    | MM2 |       |
| CR1 | 0      | 351    | 168    | 351    | 146    | 161 |       |
| CR2 | 0.0225 | 0      | 336    | 72     | 345    | 349 |       |
| MA1 | 0.0108 | 0.0215 | 0      | 332    | 163    | 15  |       |
| MA2 | 0.0225 | 0.0046 | 0.0213 | 0      | 345    | 347 |       |
| MM1 | 0.0094 | 0.0221 | 0.0104 | 0.0221 | 0      | 153 |       |
| MM2 | 0.0103 | 0.0224 | 0.0010 | 0.0222 | 0.0098 | 0   |       |
| 91  |        |        |        |        |        |     | 9860  |
|     | CR1    | CR2    | MA1    | MA2    | MM1    | MM2 |       |
| CR1 | 0      | 121    | 152    | 79     | 139    | 152 |       |
| CR2 | 0.0123 | 0      | 92     | 166    | 88     | 92  |       |
| MA1 | 0.0154 | 0.0093 | 0      | 189    | 70     | 0   |       |
| MA2 | 0.0080 | 0.0168 | 0.0192 | 0      | 176    | 189 |       |
| MM1 | 0.0141 | 0.0089 | 0.0071 | 0.0178 | 0      | 70  |       |
| MM2 | 0.0154 | 0.0093 | 0.0000 | 0.0192 | 0.0071 | 0   |       |

|     | 92     |        |        |        |        |     | 11609 |
|-----|--------|--------|--------|--------|--------|-----|-------|
|     | CR1    | CR2    | MA1    | MA2    | MM1    | MM2 |       |
| CR1 | 0      | 192    | 103    | 181    | 126    | 96  |       |
| CR2 | 0.0165 | 0      | 193    | 71     | 201    | 192 |       |
| MA1 | 0.0089 | 0.0166 | 0      | 184    | 129    | 111 |       |
| MA2 | 0.0156 | 0.0061 | 0.0158 | 0      | 192    | 181 |       |
| MM1 | 0.0109 | 0.0173 | 0.0111 | 0.0165 | 0      | 121 |       |
| MM2 | 0.0083 | 0.0165 | 0.0096 | 0.0156 | 0.0104 | 0   |       |
|     | 94     |        |        |        |        |     | 8009  |
|     | CR1    | CR2    | MA1    | MA2    | MM1    | MM2 |       |
| CR1 | 0      | 119    | 78     | 118    | 78     | 83  |       |
| CR2 | 0.0149 | 0      | 112    | 11     | 112    | 116 |       |
| MA1 | 0.0097 | 0.0140 | 0      | 110    | 0      | 61  |       |
| MA2 | 0.0147 | 0.0014 | 0.0137 | 0      | 110    | 117 |       |
| MM1 | 0.0097 | 0.0140 | 0.0000 | 0.0137 | 0      | 61  |       |
| MM2 | 0.0104 | 0.0145 | 0.0076 | 0.0146 | 0.0076 | 0   |       |
|     | 96     |        |        |        |        |     | 8566  |
|     | CR1    | CR2    | MA1    | MA2    | MM1    | MM2 |       |
| CR1 | 0      | 116    | 112    | 100    | 106    | 107 |       |
| CR2 | 0.0135 | 0      | 82     | 56     | 86     | 83  |       |
| MA1 | 0.0131 | 0.0096 | 0      | 108    | 46     | 43  |       |
| MA2 | 0.0117 | 0.0065 | 0.0126 | 0      | 112    | 113 |       |
| MM1 | 0.0124 | 0.0100 | 0.0054 | 0.0131 | 0      | 23  |       |
| MM2 | 0.0125 | 0.0097 | 0.0050 | 0.0132 | 0.0027 | 0   |       |
|     | 97     |        |        |        |        |     | 24368 |
|     | CR1    | CR2    | MA1    | MA2    | MM1    | MM2 |       |
| CR1 | 0      | 468    | 238    | 237    | 209    | 212 |       |
| CR2 | 0.0192 | 0      | 420    | 419    | 456    | 478 |       |
| MA1 | 0.0098 | 0.0172 | 0      | 89     | 245    | 244 |       |
| MA2 | 0.0097 | 0.0172 | 0.0037 | 0      | 240    | 251 |       |
| MM1 | 0.0086 | 0.0187 | 0.0101 | 0.0098 | 0      | 201 |       |
| MM2 | 0.0087 | 0.0196 | 0.0100 | 0.0103 | 0.0082 | 0   |       |
|     | 98     |        |        |        |        |     | 20798 |
|     | CR1    | CR2    | MA1    | MA2    | MM1    | MM2 |       |
| CR1 | 0      | 452    | 218    | 461    | 224    | 192 |       |
| CR2 | 0.0217 | 0      | 454    | 138    | 476    | 448 |       |
| MA1 | 0.0105 | 0.0218 | 0      | 465    | 189    | 157 |       |
| MA2 | 0.0222 | 0.0066 | 0.0224 | 0      | 489    | 462 |       |
| MM1 | 0.0108 | 0.0229 | 0.0091 | 0.0235 | 0      | 32  |       |
| MM2 | 0.0092 | 0.0215 | 0.0075 | 0.0222 | 0.0015 | 0   |       |

|     | 99     |        |        |        |        |     | 22033 |
|-----|--------|--------|--------|--------|--------|-----|-------|
|     | CR1    | CR2    | MA1    | MA2    | MM1    | MM2 |       |
| CR1 | 0      | 539    | 131    | 512    | 548    | 512 |       |
| CR2 | 0.0245 | 0      | 550    | 215    | 231    | 215 |       |
| MA1 | 0.0059 | 0.0250 | 0      | 522    | 561    | 522 |       |
| MA2 | 0.0232 | 0.0098 | 0.0237 | 0      | 198    | 0   |       |
| MM1 | 0.0249 | 0.0105 | 0.0255 | 0.0090 | 0      | 198 |       |
| MM2 | 0.0232 | 0.0098 | 0.0237 | 0.0000 | 0.0090 | 0   |       |
|     | 101    |        |        |        |        |     | 8821  |
|     | CR1    | CR2    | MA1    | MA2    | MM1    | MM2 |       |
| CR1 | 0      | 86     | 95     | 4      | 91     | 90  |       |
| CR2 | 0.0097 | 0      | 44     | 88     | 41     | 36  |       |
| MA1 | 0.0108 | 0.0050 | 0      | 97     | 57     | 49  |       |
| MA2 | 0.0005 | 0.0100 | 0.0110 | 0      | 93     | 92  |       |
| MM1 | 0.0103 | 0.0046 | 0.0065 | 0.0105 | 0      | 53  |       |
| MM2 | 0.0102 | 0.0041 | 0.0056 | 0.0104 | 0.0060 | 0   |       |
|     | 102    |        |        |        |        |     | 17362 |
|     | CR1    | CR2    | MA1    | MA2    | MM1    | MM2 |       |
| CR1 | 0      | 285    | 269    | 170    | 101    | 163 |       |
| CR2 | 0.0164 | 0      | 158    | 279    | 280    | 298 |       |
| MA1 | 0.0155 | 0.0091 | 0      | 224    | 268    | 285 |       |
| MA2 | 0.0098 | 0.0161 | 0.0129 | 0      | 155    | 162 |       |
| MM1 | 0.0058 | 0.0161 | 0.0154 | 0.0089 | 0      | 158 |       |
| MM2 | 0.0094 | 0.0172 | 0.0164 | 0.0093 | 0.0091 | 0   |       |
|     | 103    |        |        |        |        |     | 10425 |
|     | CR1    | CR2    | MA1    | MA2    | MM1    | MM2 |       |
| CR1 | 0      | 222    | 223    | 175    | 128    | 120 |       |
| CR2 | 0.0213 | 0      | 101    | 170    | 220    | 233 |       |
| MA1 | 0.0214 | 0.0097 | 0      | 139    | 224    | 234 |       |
| MA2 | 0.0168 | 0.0163 | 0.0133 | 0      | 183    | 95  |       |
| MM1 | 0.0123 | 0.0211 | 0.0215 | 0.0176 | 0      | 143 |       |
| MM2 | 0.0115 | 0.0224 | 0.0224 | 0.0091 | 0.0137 | 0   |       |
|     | 104    |        |        |        |        |     | 15517 |
|     | CR1    | CR2    | MA1    | MA2    | MM1    | MM2 |       |
| CR1 | 0      | 254    | 85     | 246    | 83     | 85  |       |
| CR2 | 0.0164 | 0      | 246    | 58     | 246    | 246 |       |
| MA1 | 0.0055 | 0.0159 | 0      | 236    | 79     | 0   |       |
| MA2 | 0.0159 | 0.0037 | 0.0152 | 0      | 238    | 236 |       |
| MM1 | 0.0053 | 0.0159 | 0.0051 | 0.0153 | 0      | 79  |       |
| MM2 | 0.0055 | 0.0159 | 0.0000 | 0.0152 | 0.0051 | 0   |       |

|     | 105    |        |        |        |        |     |  | 10807 |        |        |        |        |        |     |
|-----|--------|--------|--------|--------|--------|-----|--|-------|--------|--------|--------|--------|--------|-----|
|     | CR1    | CR2    | MA1    | MA2    | MM1    | MM2 |  | CR1   | CR2    | MA1    | MA2    | MM1    | MM2    |     |
| CR1 | 0      | 159    | 37     | 150    | 165    | 150 |  | CR1   | 0      | 293    | 186    | 277    | 164    | 191 |
| CR2 | 0.0147 | 0      | 158    | 52     | 59     | 52  |  | CR2   | 0.0188 | 0      | 261    | 111    | 271    | 279 |
| MA1 | 0.0034 | 0.0146 | 0      | 147    | 162    | 147 |  | MA1   | 0.0119 | 0.0167 | 0      | 285    | 143    | 160 |
| MA2 | 0.0139 | 0.0048 | 0.0136 | 0      | 40     | 0   |  | MA2   | 0.0178 | 0.0071 | 0.0183 | 0      | 303    | 314 |
| MM1 | 0.0153 | 0.0055 | 0.0150 | 0.0037 | 0      | 40  |  | MM1   | 0.0105 | 0.0174 | 0.0092 | 0.0194 | 0      | 146 |
| MM2 | 0.0139 | 0.0048 | 0.0136 | 0.0000 | 0.0037 | 0   |  | MM2   | 0.0122 | 0.0179 | 0.0103 | 0.0201 | 0.0094 | 0   |
|     | 110    |        |        |        |        |     |  | 15592 |        |        |        |        |        |     |
|     | CR1    | CR2    | MA1    | MA2    | MM1    | MM2 |  | CR1   | CR2    | MA1    | MA2    | MM1    | MM2    |     |
| CR1 | 0      | 329    | 116    | 308    | 116    | 155 |  | CR1   | 0      | 366    | 369    | 250    | 242    | 232 |
| CR2 | 0.0284 | 0      | 323    | 74     | 323    | 330 |  | CR2   | 0.0211 | 0      | 65     | 386    | 387    | 383 |
| MA1 | 0.0100 | 0.0278 | 0      | 299    | 0      | 175 |  | MA1   | 0.0212 | 0.0037 | 0      | 387    | 391    | 387 |
| MA2 | 0.0265 | 0.0064 | 0.0258 | 0      | 299    | 308 |  | MA2   | 0.0144 | 0.0222 | 0.0223 | 0      | 245    | 247 |
| MM1 | 0.0100 | 0.0278 | 0.0000 | 0.0258 | 0      | 175 |  | MM1   | 0.0139 | 0.0223 | 0.0225 | 0.0141 | 0      | 56  |
| MM2 | 0.0134 | 0.0284 | 0.0151 | 0.0265 | 0.0151 | 0   |  | MM2   | 0.0134 | 0.0220 | 0.0223 | 0.0142 | 0.0032 | 0   |
|     | 111    |        |        |        |        |     |  | 11601 |        |        |        |        |        |     |
|     | CR1    | CR2    | MA1    | MA2    | MM1    | MM2 |  | CR1   | CR2    | MA1    | MA2    | MM1    | MM2    |     |
| CR1 | 0      | 64     | 30     | 64     | 30     | 25  |  | CR1   | 0      | 64     | 30     | 64     | 30     | 25  |
| CR2 | 0.0157 | 0      | 58     | 16     | 56     | 57  |  | CR2   | 0.0157 | 0      | 58     | 16     | 56     | 57  |
| MA1 | 0.0074 | 0.0142 | 0      | 60     | 24     | 23  |  | MA1   | 0.0074 | 0.0142 | 0      | 60     | 24     | 23  |
| MA2 | 0.0157 | 0.0039 | 0.0147 | 0      | 60     | 59  |  | MA2   | 0.0157 | 0.0039 | 0.0147 | 0      | 60     | 59  |
| MM1 | 0.0074 | 0.0138 | 0.0059 | 0.0147 | 0      | 23  |  | MM1   | 0.0074 | 0.0138 | 0.0059 | 0.0147 | 0      | 23  |
| MM2 | 0.0061 | 0.0140 | 0.0056 | 0.0145 | 0.0056 | 0   |  | MM2   | 0.0061 | 0.0140 | 0.0056 | 0.0145 | 0.0056 | 0   |
|     | 112    |        |        |        |        |     |  | 17372 |        |        |        |        |        |     |
|     | CR1    | CR2    | MA1    | MA2    | MM1    | MM2 |  | CR1   | CR2    | MA1    | MA2    | MM1    | MM2    |     |
| CR1 | 0      | 366    | 369    | 250    | 242    | 232 |  | CR1   | 0      | 366    | 369    | 250    | 242    | 232 |
| CR2 | 0.0211 | 0      | 65     | 386    | 387    | 383 |  | CR2   | 0.0211 | 0      | 65     | 386    | 387    | 383 |
| MA1 | 0.0212 | 0.0037 | 0      | 387    | 391    | 387 |  | MA1   | 0.0212 | 0.0037 | 0      | 387    | 391    | 387 |
| MA2 | 0.0144 | 0.0222 | 0.0223 | 0      | 245    | 247 |  | MA2   | 0.0144 | 0.0222 | 0.0223 | 0      | 245    | 247 |
| MM1 | 0.0139 | 0.0223 | 0.0225 | 0.0141 | 0      | 56  |  | MM1   | 0.0139 | 0.0223 | 0.0225 | 0.0141 | 0      | 56  |
| MM2 | 0.0134 | 0.0220 | 0.0223 | 0.0142 | 0.0032 | 0   |  | MM2   | 0.0134 | 0.0220 | 0.0223 | 0.0142 | 0.0032 | 0   |
|     | 114    |        |        |        |        |     |  | 4071  |        |        |        |        |        |     |
|     | CR1    | CR2    | MA1    | MA2    | MM1    | MM2 |  | CR1   | CR2    | MA1    | MA2    | MM1    | MM2    |     |
| CR1 | 0      | 64     | 30     | 64     | 30     | 25  |  | CR1   | 0      | 64     | 30     | 64     | 30     | 25  |
| CR2 | 0.0157 | 0      | 58     | 16     | 56     | 57  |  | CR2   | 0.0157 | 0      | 58     | 16     | 56     | 57  |
| MA1 | 0.0074 | 0.0142 | 0      | 60     | 24     | 23  |  | MA1   | 0.0074 | 0.0142 | 0      | 60     | 24     | 23  |
| MA2 | 0.0157 | 0.0039 | 0.0147 | 0      | 60     | 59  |  | MA2   | 0.0157 | 0.0039 | 0.0147 | 0      | 60     | 59  |
| MM1 | 0.0074 | 0.0138 | 0.0059 | 0.0147 | 0      | 23  |  | MM1   | 0.0074 | 0.0138 | 0.0059 | 0.0147 | 0      | 23  |
| MM2 | 0.0061 | 0.0140 | 0.0056 | 0.0145 | 0.0056 | 0   |  | MM2   | 0.0061 | 0.0140 | 0.0056 | 0.0145 | 0.0056 | 0   |



|     | 115    |        |        |        |        |     | 10101 |
|-----|--------|--------|--------|--------|--------|-----|-------|
|     | CR1    | CR2    | MA1    | MA2    | MM1    | MM2 |       |
| CR1 | 0      | 47     | 251    | 88     | 86     | 88  |       |
| CR2 | 0.0047 | 0      | 204    | 103    | 105    | 103 |       |
| MA1 | 0.0248 | 0.0202 | 0      | 256    | 249    | 256 |       |
| MA2 | 0.0087 | 0.0102 | 0.0253 | 0      | 74     | 0   |       |
| MM1 | 0.0085 | 0.0104 | 0.0247 | 0.0073 | 0      | 74  |       |
| MM2 | 0.0087 | 0.0102 | 0.0253 | 0.0000 | 0.0073 | 0   |       |
|     | 116    |        |        |        |        |     | 9233  |
|     | CR1    | CR2    | MA1    | MA2    | MM1    | MM2 |       |
| CR1 | 0      | 212    | 81     | 194    | 81     | 78  |       |
| CR2 | 0.0230 | 0      | 218    | 67     | 218    | 201 |       |
| MA1 | 0.0088 | 0.0236 | 0      | 200    | 0      | 85  |       |
| MA2 | 0.0210 | 0.0073 | 0.0217 | 0      | 200    | 182 |       |
| MM1 | 0.0088 | 0.0236 | 0.0000 | 0.0217 | 0      | 85  |       |
| MM2 | 0.0084 | 0.0218 | 0.0092 | 0.0197 | 0.0092 | 0   |       |
|     | 119    |        |        |        |        |     | 12521 |
|     | CR1    | CR2    | MA1    | MA2    | MM1    | MM2 |       |
| CR1 | 0      | 201    | 107    | 198    | 88     | 107 |       |
| CR2 | 0.0161 | 0      | 205    | 52     | 196    | 205 |       |
| MA1 | 0.0085 | 0.0164 | 0      | 201    | 109    | 0   |       |
| MA2 | 0.0158 | 0.0042 | 0.0161 | 0      | 197    | 201 |       |
| MM1 | 0.0070 | 0.0157 | 0.0087 | 0.0157 | 0      | 109 |       |
| MM2 | 0.0085 | 0.0164 | 0.0000 | 0.0161 | 0.0087 | 0   |       |
|     | 120    |        |        |        |        |     | 23585 |
|     | CR1    | CR2    | MA1    | MA2    | MM1    | MM2 |       |
| CR1 | 0      | 388    | 227    | 364    | 183    | 183 |       |
| CR2 | 0.0165 | 0      | 288    | 144    | 397    | 397 |       |
| MA1 | 0.0096 | 0.0122 | 0      | 218    | 165    | 165 |       |
| MA2 | 0.0154 | 0.0061 | 0.0092 | 0      | 383    | 383 |       |
| MM1 | 0.0078 | 0.0168 | 0.0070 | 0.0162 | 0      | 0   |       |
| MM2 | 0.0078 | 0.0168 | 0.0070 | 0.0162 | 0.0000 | 0   |       |
|     | 122    |        |        |        |        |     | 11133 |
|     | CR1    | CR2    | MA1    | MA2    | MM1    | MM2 |       |
| CR1 | 0      | 219    | 89     | 218    | 218    | 243 |       |
| CR2 | 0.0197 | 0      | 221    | 3      | 3      | 96  |       |
| MA1 | 0.0080 | 0.0199 | 0      | 220    | 220    | 244 |       |
| MA2 | 0.0196 | 0.0003 | 0.0198 | 0      | 0      | 93  |       |
| MM1 | 0.0196 | 0.0003 | 0.0198 | 0.0000 | 0      | 93  |       |
| MM2 | 0.0218 | 0.0086 | 0.0219 | 0.0084 | 0.0084 | 0   |       |

| 123 |  | CR1    | CR2    | MA1    | MA2    | MM1    | MM2 | 11847 |  |
|-----|--|--------|--------|--------|--------|--------|-----|-------|--|
| CR1 |  | 0      | 211    | 152    | 207    | 109    | 156 |       |  |
| CR2 |  | 0.0178 | 0      | 231    | 52     | 199    | 223 |       |  |
| MA1 |  | 0.0128 | 0.0195 | 0      | 211    | 121    | 166 |       |  |
| MA2 |  | 0.0175 | 0.0044 | 0.0178 | 0      | 187    | 209 |       |  |
| MM1 |  | 0.0092 | 0.0168 | 0.0102 | 0.0158 | 0      | 153 |       |  |
| MM2 |  | 0.0132 | 0.0188 | 0.0140 | 0.0176 | 0.0129 | 0   |       |  |
| 124 |  | CR1    | CR2    | MA1    | MA2    | MM1    | MM2 | 10246 |  |
| CR1 |  | 0      | 240    | 117    | 193    | 107    | 117 |       |  |
| CR2 |  | 0.0234 | 0      | 241    | 178    | 230    | 241 |       |  |
| MA1 |  | 0.0114 | 0.0235 | 0      | 106    | 96     | 0   |       |  |
| MA2 |  | 0.0188 | 0.0174 | 0.0103 | 0      | 166    | 106 |       |  |
| MM1 |  | 0.0104 | 0.0224 | 0.0094 | 0.0162 | 0      | 96  |       |  |
| MM2 |  | 0.0114 | 0.0235 | 0.0000 | 0.0103 | 0.0094 | 0   |       |  |
| 125 |  | CR1    | CR2    | MA1    | MA2    | MM1    | MM2 | 10022 |  |
| CR1 |  | 0      | 219    | 49     | 205    | 197    | 205 |       |  |
| CR2 |  | 0.0219 | 0      | 200    | 130    | 104    | 130 |       |  |
| MA1 |  | 0.0049 | 0.0200 | 0      | 186    | 179    | 186 |       |  |
| MA2 |  | 0.0205 | 0.0130 | 0.0186 | 0      | 98     | 0   |       |  |
| MM1 |  | 0.0197 | 0.0104 | 0.0179 | 0.0098 | 0      | 98  |       |  |
| MM2 |  | 0.0205 | 0.0130 | 0.0186 | 0.0000 | 0.0098 | 0   |       |  |
| 126 |  | CR1    | CR2    | MA1    | MA2    | MM1    | MM2 | 11187 |  |
| CR1 |  | 0      | 342    | 324    | 278    | 156    | 160 |       |  |
| CR2 |  | 0.0306 | 0      | 137    | 191    | 340    | 321 |       |  |
| MA1 |  | 0.0290 | 0.0122 | 0      | 93     | 329    | 310 |       |  |
| MA2 |  | 0.0249 | 0.0171 | 0.0083 | 0      | 285    | 217 |       |  |
| MM1 |  | 0.0139 | 0.0304 | 0.0294 | 0.0255 | 0      | 161 |       |  |
| MM2 |  | 0.0143 | 0.0287 | 0.0277 | 0.0194 | 0.0144 | 0   |       |  |
| 128 |  | CR1    | CR2    | MA1    | MA2    | MM1    | MM2 | 11016 |  |
| CR1 |  | 0      | 129    | 129    | 54     | 54     | 61  |       |  |
| CR2 |  | 0.0117 | 0      | 26     | 127    | 127    | 130 |       |  |
| MA1 |  | 0.0117 | 0.0024 | 0      | 127    | 127    | 130 |       |  |
| MA2 |  | 0.0049 | 0.0115 | 0.0115 | 0      | 0      | 63  |       |  |
| MM1 |  | 0.0049 | 0.0115 | 0.0115 | 0.0000 | 0      | 63  |       |  |
| MM2 |  | 0.0055 | 0.0118 | 0.0118 | 0.0057 | 0.0057 | 0   |       |  |

|     | CR1    | CR2    | MA1    | MA2    | MM1    | MM2 |       |
|-----|--------|--------|--------|--------|--------|-----|-------|
| 129 |        |        |        |        |        |     | 14754 |
| CR1 | 0      | 263    | 259    | 60     | 60     | 207 |       |
| CR2 | 0.0178 | 0      | 58     | 265    | 265    | 280 |       |
| MA1 | 0.0176 | 0.0039 | 0      | 262    | 262    | 280 |       |
| MA2 | 0.0041 | 0.0180 | 0.0178 | 0      | 0      | 231 |       |
| MM1 | 0.0041 | 0.0180 | 0.0178 | 0.0000 | 0      | 231 |       |
| MM2 | 0.0140 | 0.0190 | 0.0190 | 0.0157 | 0.0157 | 0   |       |
| 131 |        |        |        |        |        |     | 18310 |
| CR1 | 0      | 375    | 153    | 374    | 138    | 149 |       |
| CR2 | 0.0205 | 0      | 346    | 73     | 375    | 360 |       |
| MA1 | 0.0084 | 0.0189 | 0      | 349    | 146    | 48  |       |
| MA2 | 0.0204 | 0.0040 | 0.0191 | 0      | 370    | 365 |       |
| MM1 | 0.0075 | 0.0205 | 0.0080 | 0.0202 | 0      | 104 |       |
| MM2 | 0.0081 | 0.0197 | 0.0026 | 0.0199 | 0.0057 | 0   |       |
| 132 |        |        |        |        |        |     | 14634 |
| CR1 | 0      | 353    | 186    | 353    | 186    | 169 |       |
| CR2 | 0.0241 | 0      | 324    | 83     | 324    | 339 |       |
| MA1 | 0.0127 | 0.0221 | 0      | 333    | 0      | 184 |       |
| MA2 | 0.0241 | 0.0057 | 0.0228 | 0      | 333    | 345 |       |
| MM1 | 0.0127 | 0.0221 | 0.0000 | 0.0228 | 0      | 184 |       |
| MM2 | 0.0115 | 0.0232 | 0.0126 | 0.0236 | 0.0126 | 0   |       |
| 133 |        |        |        |        |        |     | 17959 |
| CR1 | 0      | 290    | 166    | 286    | 166    | 163 |       |
| CR2 | 0.0161 | 0      | 299    | 118    | 299    | 294 |       |
| MA1 | 0.0092 | 0.0166 | 0      | 298    | 0      | 158 |       |
| MA2 | 0.0159 | 0.0066 | 0.0166 | 0      | 298    | 290 |       |
| MM1 | 0.0092 | 0.0166 | 0.0000 | 0.0166 | 0      | 158 |       |
| MM2 | 0.0091 | 0.0164 | 0.0088 | 0.0161 | 0.0088 | 0   |       |
| 134 |        |        |        |        |        |     | 13429 |
| CR1 | 0      | 314    | 11     | 321    | 152    | 36  |       |
| CR2 | 0.0234 | 0      | 321    | 80     | 298    | 326 |       |
| MA1 | 0.0008 | 0.0239 | 0      | 328    | 149    | 27  |       |
| MA2 | 0.0239 | 0.0060 | 0.0244 | 0      | 303    | 333 |       |
| MM1 | 0.0113 | 0.0222 | 0.0111 | 0.0226 | 0      | 122 |       |
| MM2 | 0.0027 | 0.0243 | 0.0020 | 0.0248 | 0.0091 | 0   |       |

|     | CR1    | CR2    | MA1    | MA2    | MM1    | MM2 |
|-----|--------|--------|--------|--------|--------|-----|
| 137 |        |        |        |        |        |     |
| CR1 | 0      | 71     | 36     | 111    | 36     | 52  |
| CR2 | 0.0065 | 0      | 83     | 54     | 83     | 96  |
| MA1 | 0.0033 | 0.0076 | 0      | 115    | 0      | 58  |
| MA2 | 0.0102 | 0.0050 | 0.0105 | 0      | 115    | 110 |
| MM1 | 0.0033 | 0.0076 | 0.0000 | 0.0105 | 0      | 58  |
| MM2 | 0.0048 | 0.0088 | 0.0053 | 0.0101 | 0.0053 | 0   |
| 138 |        |        |        |        |        |     |
| CR1 | 0      | 292    | 150    | 298    | 298    | 298 |
| CR2 | 0.0217 | 0      | 295    | 166    | 174    | 166 |
| MA1 | 0.0111 | 0.0219 | 0      | 297    | 291    | 297 |
| MA2 | 0.0221 | 0.0123 | 0.0220 | 0      | 96     | 0   |
| MM1 | 0.0221 | 0.0129 | 0.0216 | 0.0071 | 0      | 96  |
| MM2 | 0.0221 | 0.0123 | 0.0220 | 0.0000 | 0.0071 | 0   |
| 139 |        |        |        |        |        |     |
| CR1 | 0      | 263    | 158    | 264    | 189    | 158 |
| CR2 | 0.0219 | 0      | 252    | 68     | 266    | 252 |
| MA1 | 0.0131 | 0.0210 | 0      | 254    | 216    | 0   |
| MA2 | 0.0220 | 0.0057 | 0.0211 | 0      | 263    | 254 |
| MM1 | 0.0157 | 0.0221 | 0.0180 | 0.0219 | 0      | 216 |
| MM2 | 0.0131 | 0.0210 | 0.0000 | 0.0211 | 0.0180 | 0   |
| 140 |        |        |        |        |        |     |
| CR1 | 0      | 301    | 177    | 306    | 178    | 155 |
| CR2 | 0.0229 | 0      | 300    | 146    | 302    | 304 |
| MA1 | 0.0135 | 0.0228 | 0      | 302    | 117    | 179 |
| MA2 | 0.0233 | 0.0111 | 0.0230 | 0      | 309    | 311 |
| MM1 | 0.0135 | 0.0230 | 0.0089 | 0.0235 | 0      | 127 |
| MM2 | 0.0118 | 0.0231 | 0.0136 | 0.0237 | 0.0097 | 0   |
| 141 |        |        |        |        |        |     |
| CR1 | 0      | 144    | 218    | 49     | 217    | 236 |
| CR2 | 0.0151 | 0      | 152    | 167    | 124    | 166 |
| MA1 | 0.0229 | 0.0160 | 0      | 215    | 118    | 128 |
| MA2 | 0.0052 | 0.0176 | 0.0226 | 0      | 217    | 233 |
| MM1 | 0.0228 | 0.0130 | 0.0124 | 0.0228 | 0      | 139 |
| MM2 | 0.0248 | 0.0175 | 0.0135 | 0.0245 | 0.0146 | 0   |

|     | CR1    | CR2    | MA1    | MA2    | MM1    | MM2 |       |
|-----|--------|--------|--------|--------|--------|-----|-------|
| 142 |        |        |        |        |        |     | 10087 |
| CR1 | 0      | 182    | 82     | 169    | 82     | 84  |       |
| CR2 | 0.0180 | 0      | 190    | 41     | 190    | 188 |       |
| MA1 | 0.0081 | 0.0188 | 0      | 177    | 0      | 102 |       |
| MA2 | 0.0168 | 0.0041 | 0.0175 | 0      | 177    | 173 |       |
| MM1 | 0.0081 | 0.0188 | 0.0000 | 0.0175 | 0      | 102 |       |
| MM2 | 0.0083 | 0.0186 | 0.0101 | 0.0172 | 0.0101 | 0   |       |
| 143 |        |        |        |        |        |     | 11798 |
| CR1 | 0      | 229    | 109    | 217    | 124    | 109 |       |
| CR2 | 0.0194 | 0      | 212    | 76     | 213    | 212 |       |
| MA1 | 0.0092 | 0.0180 | 0      | 204    | 100    | 0   |       |
| MA2 | 0.0184 | 0.0064 | 0.0173 | 0      | 207    | 204 |       |
| MM1 | 0.0105 | 0.0181 | 0.0085 | 0.0175 | 0      | 100 |       |
| MM2 | 0.0092 | 0.0180 | 0.0000 | 0.0173 | 0.0085 | 0   |       |
| 144 |        |        |        |        |        |     | 11897 |
| CR1 | 0      | 325    | 316    | 143    | 302    | 309 |       |
| CR2 | 0.0273 | 0      | 218    | 347    | 222    | 245 |       |
| MA1 | 0.0266 | 0.0183 | 0      | 340    | 188    | 154 |       |
| MA2 | 0.0120 | 0.0292 | 0.0286 | 0      | 318    | 329 |       |
| MM1 | 0.0254 | 0.0187 | 0.0158 | 0.0267 | 0      | 212 |       |
| MM2 | 0.0260 | 0.0206 | 0.0129 | 0.0277 | 0.0178 | 0   |       |
| 146 |        |        |        |        |        |     | 12362 |
| CR1 | 0      | 141    | 222    | 75     | 215    | 213 |       |
| CR2 | 0.0114 | 0      | 161    | 132    | 143    | 148 |       |
| MA1 | 0.0180 | 0.0130 | 0      | 229    | 95     | 95  |       |
| MA2 | 0.0061 | 0.0107 | 0.0185 | 0      | 215    | 216 |       |
| MM1 | 0.0174 | 0.0116 | 0.0077 | 0.0174 | 0      | 90  |       |
| MM2 | 0.0172 | 0.0120 | 0.0077 | 0.0175 | 0.0073 | 0   |       |
| 147 |        |        |        |        |        |     | 15270 |
| CR1 | 0      | 251    | 245    | 52     | 245    | 252 |       |
| CR2 | 0.0164 | 0      | 63     | 234    | 63     | 79  |       |
| MA1 | 0.0160 | 0.0041 | 0      | 228    | 0      | 68  |       |
| MA2 | 0.0034 | 0.0153 | 0.0149 | 0      | 228    | 233 |       |
| MM1 | 0.0160 | 0.0041 | 0.0000 | 0.0149 | 0      | 68  |       |
| MM2 | 0.0165 | 0.0052 | 0.0045 | 0.0153 | 0.0045 | 0   |       |

| 148 |  | CR1    | CR2    | MA1    | MA2    | MM1    | MM2 | 14701 |
|-----|--|--------|--------|--------|--------|--------|-----|-------|
| CR1 |  | 0      | 331    | 168    | 338    | 162    | 189 |       |
| CR2 |  | 0.0225 | 0      | 324    | 116    | 326    | 341 |       |
| MA1 |  | 0.0114 | 0.0220 | 0      | 318    | 16     | 181 |       |
| MA2 |  | 0.0230 | 0.0079 | 0.0216 | 0      | 334    | 347 |       |
| MM1 |  | 0.0110 | 0.0222 | 0.0011 | 0.0227 | 0      | 165 |       |
| MM2 |  | 0.0129 | 0.0232 | 0.0123 | 0.0236 | 0.0112 | 0   |       |
| 149 |  | CR1    | CR2    | MA1    | MA2    | MM1    | MM2 | 14413 |
| CR1 |  | 0      | 228    | 128    | 241    | 113    | 106 |       |
| CR2 |  | 0.0158 | 0      | 235    | 67     | 242    | 238 |       |
| MA1 |  | 0.0089 | 0.0163 | 0      | 212    | 134    | 120 |       |
| MA2 |  | 0.0167 | 0.0046 | 0.0147 | 0      | 252    | 246 |       |
| MM1 |  | 0.0078 | 0.0168 | 0.0093 | 0.0175 | 0      | 98  |       |
| MM2 |  | 0.0074 | 0.0165 | 0.0083 | 0.0171 | 0.0068 | 0   |       |
| 154 |  | CR1    | CR2    | MA1    | MA2    | MM1    | MM2 | 9382  |
| CR1 |  | 0      | 157    | 149    | 75     | 54     | 48  |       |
| CR2 |  | 0.0167 | 0      | 11     | 132    | 133    | 141 |       |
| MA1 |  | 0.0159 | 0.0012 | 0      | 126    | 127    | 135 |       |
| MA2 |  | 0.0080 | 0.0141 | 0.0134 | 0      | 53     | 37  |       |
| MM1 |  | 0.0058 | 0.0142 | 0.0135 | 0.0056 | 0      | 24  |       |
| MM2 |  | 0.0051 | 0.0150 | 0.0144 | 0.0039 | 0.0026 | 0   |       |
| 156 |  | CR1    | CR2    | MA1    | MA2    | MM1    | MM2 | 12178 |
| CR1 |  | 0      | 307    | 281    | 28     | 316    | 281 |       |
| CR2 |  | 0.0252 | 0      | 176    | 312    | 180    | 176 |       |
| MA1 |  | 0.0231 | 0.0145 | 0      | 286    | 170    | 0   |       |
| MA2 |  | 0.0023 | 0.0256 | 0.0235 | 0      | 321    | 286 |       |
| MM1 |  | 0.0259 | 0.0148 | 0.0140 | 0.0264 | 0      | 170 |       |
| MM2 |  | 0.0231 | 0.0145 | 0.0000 | 0.0235 | 0.0140 | 0   |       |
| 159 |  | CR1    | CR2    | MA1    | MA2    | MM1    | MM2 | 12299 |
| CR1 |  | 0      | 284    | 59     | 266    | 260    | 261 |       |
| CR2 |  | 0.0231 | 0      | 285    | 154    | 182    | 169 |       |
| MA1 |  | 0.0048 | 0.0232 | 0      | 273    | 257    | 264 |       |
| MA2 |  | 0.0216 | 0.0125 | 0.0222 | 0      | 146    | 148 |       |
| MM1 |  | 0.0211 | 0.0148 | 0.0209 | 0.0119 | 0      | 157 |       |
| MM2 |  | 0.0212 | 0.0137 | 0.0215 | 0.0120 | 0.0128 | 0   |       |

| 160 |        |        |        |        |        |     | 9854  |
|-----|--------|--------|--------|--------|--------|-----|-------|
|     | CR1    | CR2    | MA1    | MA2    | MM1    | MM2 |       |
| CR1 | 0      | 85     | 56     | 23     | 23     | 27  |       |
| CR2 | 0.0086 | 0      | 37     | 90     | 90     | 89  |       |
| MA1 | 0.0057 | 0.0038 | 0      | 61     | 61     | 63  |       |
| MA2 | 0.0023 | 0.0091 | 0.0062 | 0      | 0      | 26  |       |
| MM1 | 0.0023 | 0.0091 | 0.0062 | 0.0000 | 0      | 26  |       |
| MM2 | 0.0027 | 0.0090 | 0.0064 | 0.0026 | 0.0026 | 0   |       |
| 161 |        |        |        |        |        |     | 16370 |
|     | CR1    | CR2    | MA1    | MA2    | MM1    | MM2 |       |
| CR1 | 0      | 371    | 384    | 160    | 386    | 391 |       |
| CR2 | 0.0227 | 0      | 191    | 393    | 123    | 187 |       |
| MA1 | 0.0235 | 0.0117 | 0      | 401    | 204    | 206 |       |
| MA2 | 0.0098 | 0.0240 | 0.0245 | 0      | 409    | 415 |       |
| MM1 | 0.0236 | 0.0075 | 0.0125 | 0.0250 | 0      | 228 |       |
| MM2 | 0.0239 | 0.0114 | 0.0126 | 0.0254 | 0.0139 | 0   |       |
| 165 |        |        |        |        |        |     | 13402 |
|     | CR1    | CR2    | MA1    | MA2    | MM1    | MM2 |       |
| CR1 | 0      | 311    | 155    | 311    | 312    | 307 |       |
| CR2 | 0.0232 | 0      | 311    | 0      | 150    | 197 |       |
| MA1 | 0.0116 | 0.0232 | 0      | 311    | 307    | 322 |       |
| MA2 | 0.0232 | 0.0000 | 0.0232 | 0      | 150    | 197 |       |
| MM1 | 0.0233 | 0.0112 | 0.0229 | 0.0112 | 0      | 190 |       |
| MM2 | 0.0229 | 0.0147 | 0.0240 | 0.0147 | 0.0142 | 0   |       |
| 167 |        |        |        |        |        |     | 13120 |
|     | CR1    | CR2    | MA1    | MA2    | MM1    | MM2 |       |
| CR1 | 0      | 300    | 0      | 297    | 106    | 0   |       |
| CR2 | 0.0229 | 0      | 300    | 55     | 303    | 300 |       |
| MA1 | 0.0000 | 0.0229 | 0      | 297    | 106    | 0   |       |
| MA2 | 0.0226 | 0.0042 | 0.0226 | 0      | 300    | 297 |       |
| MM1 | 0.0081 | 0.0231 | 0.0081 | 0.0229 | 0      | 106 |       |
| MM2 | 0.0000 | 0.0229 | 0.0000 | 0.0226 | 0.0081 | 0   |       |
| 168 |        |        |        |        |        |     | 12458 |
|     | CR1    | CR2    | MA1    | MA2    | MM1    | MM2 |       |
| CR1 | 0      | 305    | 207    | 307    | 189    | 228 |       |
| CR2 | 0.0245 | 0      | 294    | 99     | 296    | 319 |       |
| MA1 | 0.0166 | 0.0236 | 0      | 297    | 207    | 203 |       |
| MA2 | 0.0246 | 0.0079 | 0.0238 | 0      | 300    | 317 |       |
| MM1 | 0.0152 | 0.0238 | 0.0166 | 0.0241 | 0      | 230 |       |
| MM2 | 0.0183 | 0.0256 | 0.0163 | 0.0254 | 0.0185 | 0   |       |

|     | CR1    | CR2    | MA1    | MA2    | MM1    | MM2 |       |
|-----|--------|--------|--------|--------|--------|-----|-------|
| 170 |        |        |        |        |        |     | 12525 |
| CR1 | 0      | 211    | 211    | 103    | 118    | 100 |       |
| CR2 | 0.0168 | 0      | 80     | 228    | 221    | 227 |       |
| MA1 | 0.0168 | 0.0064 | 0      | 224    | 218    | 221 |       |
| MA2 | 0.0082 | 0.0182 | 0.0179 | 0      | 129    | 91  |       |
| MM1 | 0.0094 | 0.0176 | 0.0174 | 0.0103 | 0      | 138 |       |
| MM2 | 0.0080 | 0.0181 | 0.0176 | 0.0073 | 0.0110 | 0   |       |
| 172 |        |        |        |        |        |     | 14980 |
| CR1 | 0      | 288    | 162    | 279    | 162    | 141 |       |
| CR2 | 0.0192 | 0      | 282    | 107    | 282    | 281 |       |
| MA1 | 0.0108 | 0.0188 | 0      | 281    | 0      | 178 |       |
| MA2 | 0.0186 | 0.0071 | 0.0188 | 0      | 281    | 276 |       |
| MM1 | 0.0108 | 0.0188 | 0.0000 | 0.0188 | 0      | 178 |       |
| MM2 | 0.0094 | 0.0188 | 0.0119 | 0.0184 | 0.0119 | 0   |       |
| 173 |        |        |        |        |        |     | 11706 |
| CR1 | 0      | 229    | 113    | 234    | 113    | 108 |       |
| CR2 | 0.0196 | 0      | 220    | 65     | 220    | 231 |       |
| MA1 | 0.0097 | 0.0188 | 0      | 223    | 0      | 103 |       |
| MA2 | 0.0200 | 0.0056 | 0.0191 | 0      | 223    | 234 |       |
| MM1 | 0.0097 | 0.0188 | 0.0000 | 0.0191 | 0      | 103 |       |
| MM2 | 0.0092 | 0.0197 | 0.0088 | 0.0200 | 0.0088 | 0   |       |
| 174 |        |        |        |        |        |     | 11701 |
| CR1 | 0      | 157    | 163    | 47     | 157    | 163 |       |
| CR2 | 0.0134 | 0      | 71     | 156    | 0      | 71  |       |
| MA1 | 0.0139 | 0.0061 | 0      | 160    | 71     | 0   |       |
| MA2 | 0.0040 | 0.0133 | 0.0137 | 0      | 156    | 160 |       |
| MM1 | 0.0134 | 0.0000 | 0.0061 | 0.0133 | 0      | 71  |       |
| MM2 | 0.0139 | 0.0061 | 0.0000 | 0.0137 | 0.0061 | 0   |       |
| 175 |        |        |        |        |        |     | 12168 |
| CR1 | 0      | 20     | 270    | 126    | 111    | 126 |       |
| CR2 | 0.0016 | 0      | 284    | 120    | 103    | 120 |       |
| MA1 | 0.0222 | 0.0233 | 0      | 271    | 287    | 271 |       |
| MA2 | 0.0104 | 0.0099 | 0.0223 | 0      | 104    | 0   |       |
| MM1 | 0.0091 | 0.0085 | 0.0236 | 0.0085 | 0      | 104 |       |
| MM2 | 0.0104 | 0.0099 | 0.0223 | 0.0000 | 0.0085 | 0   |       |



|     | 176    |        |        |        |        |     |       |
|-----|--------|--------|--------|--------|--------|-----|-------|
|     | CR1    | CR2    | MA1    | MA2    | MM1    | MM2 | 14902 |
| CR1 | 0      | 8      | 174    | 198    | 200    | 216 |       |
| CR2 | 0.0005 | 0      | 182    | 206    | 192    | 208 |       |
| MA1 | 0.0117 | 0.0122 | 0      | 243    | 247    | 263 |       |
| MA2 | 0.0133 | 0.0138 | 0.0163 | 0      | 134    | 20  |       |
| MM1 | 0.0134 | 0.0129 | 0.0166 | 0.0090 | 0      | 114 |       |
| MM2 | 0.0145 | 0.0140 | 0.0176 | 0.0013 | 0.0076 | 0   |       |
|     | 177    |        |        |        |        |     |       |
|     | CR1    | CR2    | MA1    | MA2    | MM1    | MM2 | 14045 |
| CR1 | 0      | 165    | 178    | 161    | 142    | 161 |       |
| CR2 | 0.0117 | 0      | 36     | 243    | 229    | 243 |       |
| MA1 | 0.0127 | 0.0026 | 0      | 236    | 222    | 236 |       |
| MA2 | 0.0115 | 0.0173 | 0.0168 | 0      | 116    | 0   |       |
| MM1 | 0.0101 | 0.0163 | 0.0158 | 0.0083 | 0      | 116 |       |
| MM2 | 0.0115 | 0.0173 | 0.0168 | 0.0000 | 0.0083 | 0   |       |
|     | 178    |        |        |        |        |     |       |
|     | CR1    | CR2    | MA1    | MA2    | MM1    | MM2 | 21442 |
| CR1 | 0      | 445    | 192    | 465    | 260    | 245 |       |
| CR2 | 0.0208 | 0      | 437    | 149    | 447    | 446 |       |
| MA1 | 0.0090 | 0.0204 | 0      | 463    | 282    | 311 |       |
| MA2 | 0.0217 | 0.0069 | 0.0216 | 0      | 475    | 469 |       |
| MM1 | 0.0121 | 0.0208 | 0.0132 | 0.0222 | 0      | 223 |       |
| MM2 | 0.0114 | 0.0208 | 0.0145 | 0.0219 | 0.0104 | 0   |       |
|     | 179    |        |        |        |        |     |       |
|     | CR1    | CR2    | MA1    | MA2    | MM1    | MM2 | 13479 |
| CR1 | 0      | 285    | 151    | 276    | 151    | 137 |       |
| CR2 | 0.0211 | 0      | 292    | 65     | 292    | 275 |       |
| MA1 | 0.0112 | 0.0217 | 0      | 279    | 0      | 127 |       |
| MA2 | 0.0205 | 0.0048 | 0.0207 | 0      | 279    | 266 |       |
| MM1 | 0.0112 | 0.0217 | 0.0000 | 0.0207 | 0      | 127 |       |
| MM2 | 0.0102 | 0.0204 | 0.0094 | 0.0197 | 0.0094 | 0   |       |
|     | 180    |        |        |        |        |     |       |
|     | CR1    | CR2    | MA1    | MA2    | MM1    | MM2 | 22045 |
| CR1 | 0      | 554    | 239    | 354    | 239    | 240 |       |
| CR2 | 0.0251 | 0      | 581    | 454    | 581    | 582 |       |
| MA1 | 0.0108 | 0.0264 | 0      | 167    | 0      | 1   |       |
| MA2 | 0.0161 | 0.0206 | 0.0076 | 0      | 167    | 168 |       |
| MM1 | 0.0108 | 0.0264 | 0.0000 | 0.0076 | 0      | 1   |       |
| MM2 | 0.0109 | 0.0264 | 0.0000 | 0.0076 | 0.0000 | 0   |       |

| 181 |  | CR1    | CR2    | MA1    | MA2    | MM1    | MM2 | 16863 |  |
|-----|--|--------|--------|--------|--------|--------|-----|-------|--|
| CR1 |  | 0      | 272    | 275    | 120    | 0      | 129 |       |  |
| CR2 |  | 0.0161 | 0      | 55     | 259    | 272    | 267 |       |  |
| MA1 |  | 0.0163 | 0.0033 | 0      | 261    | 275    | 267 |       |  |
| MA2 |  | 0.0071 | 0.0154 | 0.0155 | 0      | 120    | 120 |       |  |
| MM1 |  | 0.0000 | 0.0161 | 0.0163 | 0.0071 | 0      | 129 |       |  |
| MM2 |  | 0.0076 | 0.0158 | 0.0158 | 0.0071 | 0.0076 | 0   |       |  |
| 183 |  | CR1    | CR2    | MA1    | MA2    | MM1    | MM2 | 9283  |  |
| CR1 |  | 0      | 138    | 148    | 32     | 148    | 140 |       |  |
| CR2 |  | 0.0149 | 0      | 61     | 143    | 61     | 16  |       |  |
| MA1 |  | 0.0159 | 0.0066 | 0      | 153    | 0      | 57  |       |  |
| MA2 |  | 0.0034 | 0.0154 | 0.0165 | 0      | 153    | 145 |       |  |
| MM1 |  | 0.0159 | 0.0066 | 0.0000 | 0.0165 | 0      | 57  |       |  |
| MM2 |  | 0.0151 | 0.0017 | 0.0061 | 0.0156 | 0.0061 | 0   |       |  |
| 186 |  | CR1    | CR2    | MA1    | MA2    | MM1    | MM2 | 15087 |  |
| CR1 |  | 0      | 220    | 73     | 226    | 73     | 61  |       |  |
| CR2 |  | 0.0146 | 0      | 223    | 32     | 223    | 214 |       |  |
| MA1 |  | 0.0048 | 0.0148 | 0      | 229    | 0      | 66  |       |  |
| MA2 |  | 0.0150 | 0.0021 | 0.0152 | 0      | 229    | 220 |       |  |
| MM1 |  | 0.0048 | 0.0148 | 0.0000 | 0.0152 | 0      | 66  |       |  |
| MM2 |  | 0.0040 | 0.0142 | 0.0044 | 0.0146 | 0.0044 | 0   |       |  |
| 187 |  | CR1    | CR2    | MA1    | MA2    | MM1    | MM2 | 15800 |  |
| CR1 |  | 0      | 292    | 282    | 139    | 164    | 154 |       |  |
| CR2 |  | 0.0185 | 0      | 87     | 288    | 298    | 290 |       |  |
| MA1 |  | 0.0178 | 0.0055 | 0      | 278    | 288    | 276 |       |  |
| MA2 |  | 0.0088 | 0.0182 | 0.0176 | 0      | 153    | 160 |       |  |
| MM1 |  | 0.0104 | 0.0189 | 0.0182 | 0.0097 | 0      | 160 |       |  |
| MM2 |  | 0.0097 | 0.0184 | 0.0175 | 0.0101 | 0.0101 | 0   |       |  |
| 188 |  | CR1    | CR2    | MA1    | MA2    | MM1    | MM2 | 12984 |  |
| CR1 |  | 0      | 110    | 169    | 169    | 169    | 177 |       |  |
| CR2 |  | 0.0085 | 0      | 253    | 129    | 129    | 104 |       |  |
| MA1 |  | 0.0130 | 0.0195 | 0      | 241    | 241    | 270 |       |  |
| MA2 |  | 0.0130 | 0.0099 | 0.0186 | 0      | 0      | 139 |       |  |
| MM1 |  | 0.0130 | 0.0099 | 0.0186 | 0.0000 | 0      | 139 |       |  |
| MM2 |  | 0.0136 | 0.0080 | 0.0208 | 0.0107 | 0.0107 | 0   |       |  |

|     | CR1    | CR2    | MA1    | MA2    | MM1    | MM2 |       |
|-----|--------|--------|--------|--------|--------|-----|-------|
| 189 |        |        |        |        |        |     | 12533 |
| CR1 | 0      | 161    | 82     | 162    | 82     | 60  |       |
| CR2 | 0.0128 | 0      | 159    | 41     | 159    | 164 |       |
| MA1 | 0.0065 | 0.0127 | 0      | 154    | 0      | 75  |       |
| MA2 | 0.0129 | 0.0033 | 0.0123 | 0      | 154    | 165 |       |
| MM1 | 0.0065 | 0.0127 | 0.0000 | 0.0123 | 0      | 75  |       |
| MM2 | 0.0048 | 0.0131 | 0.0060 | 0.0132 | 0.0060 | 0   |       |
| 197 |        |        |        |        |        |     | 9844  |
| CR1 | 0      | 203    | 206    | 84     | 103    | 84  |       |
| CR2 | 0.0206 | 0      | 100    | 199    | 217    | 199 |       |
| MA1 | 0.0209 | 0.0102 | 0      | 198    | 215    | 198 |       |
| MA2 | 0.0085 | 0.0202 | 0.0201 | 0      | 123    | 0   |       |
| MM1 | 0.0105 | 0.0220 | 0.0218 | 0.0125 | 0      | 123 |       |
| MM2 | 0.0085 | 0.0202 | 0.0201 | 0.0000 | 0.0125 | 0   |       |
| 198 |        |        |        |        |        |     | 10951 |
| CR1 | 0      | 195    | 83     | 194    | 52     | 83  |       |
| CR2 | 0.0178 | 0      | 207    | 25     | 193    | 207 |       |
| MA1 | 0.0076 | 0.0189 | 0      | 206    | 63     | 0   |       |
| MA2 | 0.0177 | 0.0023 | 0.0188 | 0      | 194    | 206 |       |
| MM1 | 0.0047 | 0.0176 | 0.0058 | 0.0177 | 0      | 63  |       |
| MM2 | 0.0076 | 0.0189 | 0.0000 | 0.0188 | 0.0058 | 0   |       |
| 199 |        |        |        |        |        |     | 15149 |
| CR1 | 0      | 310    | 309    | 139    | 169    | 141 |       |
| CR2 | 0.0205 | 0      | 81     | 322    | 323    | 325 |       |
| MA1 | 0.0204 | 0.0053 | 0      | 319    | 320    | 324 |       |
| MA2 | 0.0092 | 0.0213 | 0.0211 | 0      | 166    | 161 |       |
| MM1 | 0.0112 | 0.0213 | 0.0211 | 0.0110 | 0      | 161 |       |
| MM2 | 0.0093 | 0.0215 | 0.0214 | 0.0106 | 0.0106 | 0   |       |
| 201 |        |        |        |        |        |     | 10462 |
| CR1 | 0      | 176    | 63     | 180    | 63     | 84  |       |
| CR2 | 0.0168 | 0      | 185    | 62     | 185    | 180 |       |
| MA1 | 0.0060 | 0.0177 | 0      | 193    | 0      | 77  |       |
| MA2 | 0.0172 | 0.0059 | 0.0184 | 0      | 193    | 186 |       |
| MM1 | 0.0060 | 0.0177 | 0.0000 | 0.0184 | 0      | 77  |       |
| MM2 | 0.0080 | 0.0172 | 0.0074 | 0.0178 | 0.0074 | 0   |       |

|     | CR1    | CR2    | MA1    | MA2    | MM1    | MM2 |       |
|-----|--------|--------|--------|--------|--------|-----|-------|
| 203 |        |        |        |        |        |     | 12277 |
| CR1 | 0      | 151    | 151    | 42     | 149    | 151 |       |
| CR2 | 0.0123 | 0      | 0      | 150    | 34     | 0   |       |
| MA1 | 0.0123 | 0.0000 | 0      | 150    | 34     | 0   |       |
| MA2 | 0.0034 | 0.0122 | 0.0122 | 0      | 149    | 150 |       |
| MM1 | 0.0121 | 0.0028 | 0.0028 | 0.0121 | 0      | 34  |       |
| MM2 | 0.0123 | 0.0000 | 0.0000 | 0.0122 | 0.0028 | 0   |       |
| 204 |        |        |        |        |        |     | 10906 |
| CR1 | 0      | 247    | 225    | 88     | 236    | 244 |       |
| CR2 | 0.0226 | 0      | 157    | 247    | 162    | 141 |       |
| MA1 | 0.0206 | 0.0144 | 0      | 232    | 140    | 150 |       |
| MA2 | 0.0081 | 0.0226 | 0.0213 | 0      | 238    | 241 |       |
| MM1 | 0.0216 | 0.0149 | 0.0128 | 0.0218 | 0      | 128 |       |
| MM2 | 0.0224 | 0.0129 | 0.0138 | 0.0221 | 0.0117 | 0   |       |
| 205 |        |        |        |        |        |     | 6020  |
| CR1 | 0      | 96     | 99     | 89     | 69     | 59  |       |
| CR2 | 0.0159 | 0      | 5      | 101    | 94     | 90  |       |
| MA1 | 0.0164 | 0.0008 | 0      | 104    | 97     | 93  |       |
| MA2 | 0.0148 | 0.0168 | 0.0173 | 0      | 50     | 46  |       |
| MM1 | 0.0115 | 0.0156 | 0.0161 | 0.0083 | 0      | 14  |       |
| MM2 | 0.0098 | 0.0150 | 0.0154 | 0.0076 | 0.0023 | 0   |       |
| 206 |        |        |        |        |        |     | 11220 |
| CR1 | 0      | 93     | 237    | 131    | 256    | 193 |       |
| CR2 | 0.0083 | 0      | 264    | 38     | 281    | 260 |       |
| MA1 | 0.0211 | 0.0235 | 0      | 270    | 136    | 121 |       |
| MA2 | 0.0117 | 0.0034 | 0.0241 | 0      | 288    | 263 |       |
| MM1 | 0.0228 | 0.0250 | 0.0121 | 0.0257 | 0      | 133 |       |
| MM2 | 0.0172 | 0.0232 | 0.0108 | 0.0234 | 0.0119 | 0   |       |
| 207 |        |        |        |        |        |     | 9591  |
| CR1 | 0      | 102    | 108    | 65     | 0      | 65  |       |
| CR2 | 0.0106 | 0      | 38     | 111    | 102    | 111 |       |
| MA1 | 0.0113 | 0.0040 | 0      | 111    | 108    | 111 |       |
| MA2 | 0.0068 | 0.0116 | 0.0116 | 0      | 65     | 0   |       |
| MM1 | 0.0000 | 0.0106 | 0.0113 | 0.0068 | 0      | 65  |       |
| MM2 | 0.0068 | 0.0116 | 0.0116 | 0.0000 | 0.0068 | 0   |       |

| 208 |  | CR1    | CR2    | MA1    | MA2    | MM1    | MM2 | 4768  |
|-----|--|--------|--------|--------|--------|--------|-----|-------|
| CR1 |  | 0      | 70     | 33     | 74     | 36     | 31  |       |
| CR2 |  | 0.0147 | 0      | 70     | 18     | 66     | 55  |       |
| MA1 |  | 0.0069 | 0.0147 | 0      | 74     | 34     | 45  |       |
| MA2 |  | 0.0155 | 0.0038 | 0.0155 | 0      | 70     | 59  |       |
| MM1 |  | 0.0076 | 0.0138 | 0.0071 | 0.0147 | 0      | 47  |       |
| MM2 |  | 0.0065 | 0.0115 | 0.0094 | 0.0124 | 0.0099 | 0   |       |
| 209 |  | CR1    | CR2    | MA1    | MA2    | MM1    | MM2 | 20956 |
| CR1 |  | 0      | 219    | 222    | 65     | 65     | 75  |       |
| CR2 |  | 0.0105 | 0      | 50     | 210    | 210    | 206 |       |
| MA1 |  | 0.0106 | 0.0024 | 0      | 213    | 213    | 209 |       |
| MA2 |  | 0.0031 | 0.0100 | 0.0102 | 0      | 0      | 80  |       |
| MM1 |  | 0.0031 | 0.0100 | 0.0102 | 0.0000 | 0      | 80  |       |
| MM2 |  | 0.0036 | 0.0098 | 0.0100 | 0.0038 | 0.0038 | 0   |       |
| 210 |  | CR1    | CR2    | MA1    | MA2    | MM1    | MM2 | 6858  |
| CR1 |  | 0      | 45     | 39     | 17     | 17     | 10  |       |
| CR2 |  | 0.0066 | 0      | 16     | 46     | 46     | 45  |       |
| MA1 |  | 0.0057 | 0.0023 | 0      | 34     | 34     | 37  |       |
| MA2 |  | 0.0025 | 0.0067 | 0.0050 | 0      | 0      | 15  |       |
| MM1 |  | 0.0025 | 0.0067 | 0.0050 | 0.0000 | 0      | 15  |       |
| MM2 |  | 0.0015 | 0.0066 | 0.0054 | 0.0022 | 0.0022 | 0   |       |
| 211 |  | CR1    | CR2    | MA1    | MA2    | MM1    | MM2 | 12335 |
| CR1 |  | 0      | 294    | 132    | 291    | 119    | 123 |       |
| CR2 |  | 0.0238 | 0      | 256    | 89     | 289    | 287 |       |
| MA1 |  | 0.0107 | 0.0208 | 0      | 233    | 142    | 130 |       |
| MA2 |  | 0.0236 | 0.0072 | 0.0189 | 0      | 288    | 284 |       |
| MM1 |  | 0.0096 | 0.0234 | 0.0115 | 0.0233 | 0      | 113 |       |
| MM2 |  | 0.0100 | 0.0233 | 0.0105 | 0.0230 | 0.0092 | 0   |       |
| 212 |  | CR1    | CR2    | MA1    | MA2    | MM1    | MM2 | 11850 |
| CR1 |  | 0      | 254    | 195    | 188    | 158    | 130 |       |
| CR2 |  | 0.0214 | 0      | 127    | 121    | 237    | 228 |       |
| MA1 |  | 0.0165 | 0.0107 | 0      | 180    | 179    | 162 |       |
| MA2 |  | 0.0159 | 0.0102 | 0.0152 | 0      | 202    | 175 |       |
| MM1 |  | 0.0133 | 0.0200 | 0.0151 | 0.0170 | 0      | 132 |       |
| MM2 |  | 0.0110 | 0.0192 | 0.0137 | 0.0148 | 0.0111 | 0   |       |

| 213 |  | CR1    | CR2    | MA1    | MA2    | MM1    | MM2 | 23936 |  |
|-----|--|--------|--------|--------|--------|--------|-----|-------|--|
| CR1 |  | 0      | 529    | 298    | 549    | 299    | 335 |       |  |
| CR2 |  | 0.0221 | 0      | 510    | 138    | 511    | 516 |       |  |
| MA1 |  | 0.0124 | 0.0213 | 0      | 520    | 1      | 320 |       |  |
| MA2 |  | 0.0229 | 0.0058 | 0.0217 | 0      | 521    | 527 |       |  |
| MM1 |  | 0.0125 | 0.0213 | 0.0000 | 0.0218 | 0      | 319 |       |  |
| MM2 |  | 0.0140 | 0.0216 | 0.0134 | 0.0220 | 0.0133 | 0   |       |  |
| 216 |  | CR1    | CR2    | MA1    | MA2    | MM1    | MM2 | 12934 |  |
| CR1 |  | 0      | 135    | 99     | 189    | 200    | 158 |       |  |
| CR2 |  | 0.0104 | 0      | 178    | 84     | 267    | 230 |       |  |
| MA1 |  | 0.0077 | 0.0138 | 0      | 133    | 204    | 147 |       |  |
| MA2 |  | 0.0146 | 0.0065 | 0.0103 | 0      | 271    | 242 |       |  |
| MM1 |  | 0.0155 | 0.0206 | 0.0158 | 0.0210 | 0      | 213 |       |  |
| MM2 |  | 0.0122 | 0.0178 | 0.0114 | 0.0187 | 0.0165 | 0   |       |  |
| 217 |  | CR1    | CR2    | MA1    | MA2    | MM1    | MM2 | 11135 |  |
| CR1 |  | 0      | 273    | 48     | 266    | 141    | 48  |       |  |
| CR2 |  | 0.0245 | 0      | 262    | 86     | 255    | 262 |       |  |
| MA1 |  | 0.0043 | 0.0235 | 0      | 259    | 138    | 0   |       |  |
| MA2 |  | 0.0239 | 0.0077 | 0.0233 | 0      | 250    | 259 |       |  |
| MM1 |  | 0.0127 | 0.0229 | 0.0124 | 0.0225 | 0      | 138 |       |  |
| MM2 |  | 0.0043 | 0.0235 | 0.0000 | 0.0233 | 0.0124 | 0   |       |  |
| 218 |  | CR1    | CR2    | MA1    | MA2    | MM1    | MM2 | 14214 |  |
| CR1 |  | 0      | 298    | 283    | 74     | 301    | 287 |       |  |
| CR2 |  | 0.0210 | 0      | 73     | 299    | 116    | 134 |       |  |
| MA1 |  | 0.0199 | 0.0051 | 0      | 276    | 127    | 131 |       |  |
| MA2 |  | 0.0052 | 0.0210 | 0.0194 | 0      | 294    | 282 |       |  |
| MM1 |  | 0.0212 | 0.0082 | 0.0089 | 0.0207 | 0      | 132 |       |  |
| MM2 |  | 0.0202 | 0.0094 | 0.0092 | 0.0198 | 0.0093 | 0   |       |  |
| 220 |  | CR1    | CR2    | MA1    | MA2    | MM1    | MM2 | 14620 |  |
| CR1 |  | 0      | 307    | 0      | 305    | 0      | 123 |       |  |
| CR2 |  | 0.0210 | 0      | 307    | 73     | 307    | 302 |       |  |
| MA1 |  | 0.0000 | 0.0210 | 0      | 305    | 0      | 123 |       |  |
| MA2 |  | 0.0209 | 0.0050 | 0.0209 | 0      | 305    | 301 |       |  |
| MM1 |  | 0.0000 | 0.0210 | 0.0000 | 0.0209 | 0      | 123 |       |  |
| MM2 |  | 0.0084 | 0.0207 | 0.0084 | 0.0206 | 0.0084 | 0   |       |  |

| 222 |        |        |        |        |        |     | 12476 |
|-----|--------|--------|--------|--------|--------|-----|-------|
|     | CR1    | CR2    | MA1    | MA2    | MM1    | MM2 |       |
| CR1 | 0      | 156    | 162    | 0      | 162    | 156 |       |
| CR2 | 0.0125 | 0      | 95     | 156    | 95     | 97  |       |
| MA1 | 0.0130 | 0.0076 | 0      | 162    | 0      | 107 |       |
| MA2 | 0.0000 | 0.0125 | 0.0130 | 0      | 162    | 156 |       |
| MM1 | 0.0130 | 0.0076 | 0.0000 | 0.0130 | 0      | 107 |       |
| MM2 | 0.0125 | 0.0078 | 0.0086 | 0.0125 | 0.0086 | 0   |       |
| 223 |        |        |        |        |        |     | 12325 |
|     | CR1    | CR2    | MA1    | MA2    | MM1    | MM2 |       |
| CR1 | 0      | 288    | 141    | 280    | 163    | 139 |       |
| CR2 | 0.0234 | 0      | 272    | 111    | 290    | 264 |       |
| MA1 | 0.0114 | 0.0221 | 0      | 266    | 156    | 113 |       |
| MA2 | 0.0227 | 0.0090 | 0.0216 | 0      | 279    | 262 |       |
| MM1 | 0.0132 | 0.0235 | 0.0127 | 0.0226 | 0      | 148 |       |
| MM2 | 0.0113 | 0.0214 | 0.0092 | 0.0213 | 0.0120 | 0   |       |
| 224 |        |        |        |        |        |     | 12473 |
|     | CR1    | CR2    | MA1    | MA2    | MM1    | MM2 |       |
| CR1 | 0      | 195    | 209    | 125    | 148    | 125 |       |
| CR2 | 0.0156 | 0      | 72     | 198    | 192    | 198 |       |
| MA1 | 0.0168 | 0.0058 | 0      | 210    | 198    | 210 |       |
| MA2 | 0.0100 | 0.0159 | 0.0168 | 0      | 159    | 0   |       |
| MM1 | 0.0119 | 0.0154 | 0.0159 | 0.0127 | 0      | 159 |       |
| MM2 | 0.0100 | 0.0159 | 0.0168 | 0.0000 | 0.0127 | 0   |       |
| 227 |        |        |        |        |        |     | 10819 |
|     | CR1    | CR2    | MA1    | MA2    | MM1    | MM2 |       |
| CR1 | 0      | 267    | 283    | 0      | 146    | 136 |       |
| CR2 | 0.0247 | 0      | 59     | 267    | 274    | 273 |       |
| MA1 | 0.0262 | 0.0055 | 0      | 283    | 291    | 289 |       |
| MA2 | 0.0000 | 0.0247 | 0.0262 | 0      | 146    | 136 |       |
| MM1 | 0.0135 | 0.0253 | 0.0269 | 0.0135 | 0      | 101 |       |
| MM2 | 0.0126 | 0.0252 | 0.0267 | 0.0126 | 0.0093 | 0   |       |
| 228 |        |        |        |        |        |     | 13188 |
|     | CR1    | CR2    | MA1    | MA2    | MM1    | MM2 |       |
| CR1 | 0      | 244    | 101    | 242    | 116    | 101 |       |
| CR2 | 0.0185 | 0      | 245    | 83     | 238    | 245 |       |
| MA1 | 0.0077 | 0.0186 | 0      | 241    | 101    | 0   |       |
| MA2 | 0.0184 | 0.0063 | 0.0183 | 0      | 236    | 241 |       |
| MM1 | 0.0088 | 0.0180 | 0.0077 | 0.0179 | 0      | 101 |       |
| MM2 | 0.0077 | 0.0186 | 0.0000 | 0.0183 | 0.0077 | 0   |       |

| 231 |  | CR1    | CR2    | MA1    | MA2    | MM1    | MM2 | 10881 |
|-----|--|--------|--------|--------|--------|--------|-----|-------|
| CR1 |  | 0      | 196    | 203    | 204    | 38     | 118 |       |
| CR2 |  | 0.0180 | 0      | 55     | 53     | 189    | 185 |       |
| MA1 |  | 0.0187 | 0.0051 | 0      | 4      | 194    | 191 |       |
| MA2 |  | 0.0187 | 0.0049 | 0.0004 | 0      | 195    | 190 |       |
| MM1 |  | 0.0035 | 0.0174 | 0.0178 | 0.0179 | 0      | 116 |       |
| MM2 |  | 0.0108 | 0.0170 | 0.0176 | 0.0175 | 0.0107 | 0   |       |
| 232 |  | CR1    | CR2    | MA1    | MA2    | MM1    | MM2 | 11762 |
| CR1 |  | 0      | 294    | 188    | 312    | 188    | 121 |       |
| CR2 |  | 0.0250 | 0      | 293    | 161    | 293    | 304 |       |
| MA1 |  | 0.0160 | 0.0249 | 0      | 303    | 0      | 169 |       |
| MA2 |  | 0.0265 | 0.0137 | 0.0258 | 0      | 303    | 312 |       |
| MM1 |  | 0.0160 | 0.0249 | 0.0000 | 0.0258 | 0      | 169 |       |
| MM2 |  | 0.0103 | 0.0258 | 0.0144 | 0.0265 | 0.0144 | 0   |       |
| 233 |  | CR1    | CR2    | MA1    | MA2    | MM1    | MM2 | 13283 |
| CR1 |  | 0      | 247    | 96     | 241    | 37     | 96  |       |
| CR2 |  | 0.0186 | 0      | 236    | 46     | 245    | 236 |       |
| MA1 |  | 0.0072 | 0.0178 | 0      | 230    | 97     | 0   |       |
| MA2 |  | 0.0181 | 0.0035 | 0.0173 | 0      | 239    | 230 |       |
| MM1 |  | 0.0028 | 0.0184 | 0.0073 | 0.0180 | 0      | 97  |       |
| MM2 |  | 0.0072 | 0.0178 | 0.0000 | 0.0173 | 0.0073 | 0   |       |
| 235 |  | CR1    | CR2    | MA1    | MA2    | MM1    | MM2 | 15877 |
| CR1 |  | 0      | 360    | 346    | 207    | 171    | 137 |       |
| CR2 |  | 0.0227 | 0      | 98     | 341    | 349    | 372 |       |
| MA1 |  | 0.0218 | 0.0062 | 0      | 340    | 338    | 360 |       |
| MA2 |  | 0.0130 | 0.0215 | 0.0214 | 0      | 210    | 224 |       |
| MM1 |  | 0.0108 | 0.0220 | 0.0213 | 0.0132 | 0      | 160 |       |
| MM2 |  | 0.0086 | 0.0234 | 0.0227 | 0.0141 | 0.0101 | 0   |       |
| 237 |  | CR1    | CR2    | MA1    | MA2    | MM1    | MM2 | 11297 |
| CR1 |  | 0      | 234    | 77     | 238    | 233    | 230 |       |
| CR2 |  | 0.0207 | 0      | 228    | 74     | 91     | 74  |       |
| MA1 |  | 0.0068 | 0.0202 | 0      | 244    | 229    | 225 |       |
| MA2 |  | 0.0211 | 0.0066 | 0.0216 | 0      | 95     | 87  |       |
| MM1 |  | 0.0206 | 0.0081 | 0.0203 | 0.0084 | 0      | 87  |       |
| MM2 |  | 0.0204 | 0.0066 | 0.0199 | 0.0077 | 0.0077 | 0   |       |



|     | CR1    | CR2    | MA1    | MA2    | MM1    | MM2 |       |
|-----|--------|--------|--------|--------|--------|-----|-------|
| 239 |        |        |        |        |        |     | 14851 |
| CR1 | 0      | 365    | 180    | 352    | 190    | 155 |       |
| CR2 | 0.0246 | 0      | 379    | 133    | 387    | 366 |       |
| MA1 | 0.0121 | 0.0255 | 0      | 365    | 191    | 169 |       |
| MA2 | 0.0237 | 0.0090 | 0.0246 | 0      | 374    | 353 |       |
| MM1 | 0.0128 | 0.0261 | 0.0129 | 0.0252 | 0      | 147 |       |
| MM2 | 0.0104 | 0.0246 | 0.0114 | 0.0238 | 0.0099 | 0   |       |
| 240 |        |        |        |        |        |     | 12500 |
| CR1 | 0      | 248    | 124    | 241    | 148    | 151 |       |
| CR2 | 0.0198 | 0      | 227    | 68     | 240    | 262 |       |
| MA1 | 0.0099 | 0.0182 | 0      | 222    | 130    | 139 |       |
| MA2 | 0.0193 | 0.0054 | 0.0178 | 0      | 234    | 259 |       |
| MM1 | 0.0118 | 0.0192 | 0.0104 | 0.0187 | 0      | 148 |       |
| MM2 | 0.0121 | 0.0210 | 0.0111 | 0.0207 | 0.0118 | 0   |       |
| 242 |        |        |        |        |        |     | 26124 |
| CR1 | 0      | 612    | 602    | 397    | 346    | 379 |       |
| CR2 | 0.0234 | 0      | 201    | 607    | 593    | 608 |       |
| MA1 | 0.0230 | 0.0077 | 0      | 617    | 600    | 613 |       |
| MA2 | 0.0152 | 0.0232 | 0.0236 | 0      | 418    | 409 |       |
| MM1 | 0.0132 | 0.0227 | 0.0230 | 0.0160 | 0      | 327 |       |
| MM2 | 0.0145 | 0.0233 | 0.0235 | 0.0157 | 0.0125 | 0   |       |
| 243 |        |        |        |        |        |     | 16373 |
| CR1 | 0      | 291    | 172    | 288    | 172    | 175 |       |
| CR2 | 0.0178 | 0      | 286    | 86     | 286    | 278 |       |
| MA1 | 0.0105 | 0.0175 | 0      | 292    | 0      | 45  |       |
| MA2 | 0.0176 | 0.0053 | 0.0178 | 0      | 292    | 284 |       |
| MM1 | 0.0105 | 0.0175 | 0.0000 | 0.0178 | 0      | 45  |       |
| MM2 | 0.0107 | 0.0170 | 0.0027 | 0.0173 | 0.0027 | 0   |       |
| 245 |        |        |        |        |        |     | 12089 |
| CR1 | 0      | 235    | 254    | 149    | 142    | 149 |       |
| CR2 | 0.0194 | 0      | 87     | 252    | 248    | 252 |       |
| MA1 | 0.0210 | 0.0072 | 0      | 257    | 263    | 257 |       |
| MA2 | 0.0123 | 0.0208 | 0.0213 | 0      | 133    | 0   |       |
| MM1 | 0.0117 | 0.0205 | 0.0218 | 0.0110 | 0      | 133 |       |
| MM2 | 0.0123 | 0.0208 | 0.0213 | 0.0000 | 0.0110 | 0   |       |

| 246 |  | CR1    | CR2    | MA1    | MA2    | MM1    | MM2 | 18758 |
|-----|--|--------|--------|--------|--------|--------|-----|-------|
| CR1 |  | 0      | 492    | 264    | 483    | 246    | 264 |       |
| CR2 |  | 0.0262 | 0      | 473    | 163    | 480    | 473 |       |
| MA1 |  | 0.0141 | 0.0252 | 0      | 422    | 306    | 0   |       |
| MA2 |  | 0.0257 | 0.0087 | 0.0225 | 0      | 500    | 422 |       |
| MM1 |  | 0.0131 | 0.0256 | 0.0163 | 0.0267 | 0      | 306 |       |
| MM2 |  | 0.0141 | 0.0252 | 0.0000 | 0.0225 | 0.0163 | 0   |       |
| 247 |  | CR1    | CR2    | MA1    | MA2    | MM1    | MM2 | 13639 |
| CR1 |  | 0      | 267    | 245    | 47     | 274    | 255 |       |
| CR2 |  | 0.0196 | 0      | 95     | 258    | 122    | 107 |       |
| MA1 |  | 0.0180 | 0.0070 | 0      | 239    | 95     | 87  |       |
| MA2 |  | 0.0034 | 0.0189 | 0.0175 | 0      | 266    | 246 |       |
| MM1 |  | 0.0201 | 0.0089 | 0.0070 | 0.0195 | 0      | 100 |       |
| MM2 |  | 0.0187 | 0.0078 | 0.0064 | 0.0180 | 0.0073 | 0   |       |
| 248 |  | CR1    | CR2    | MA1    | MA2    | MM1    | MM2 | 12426 |
| CR1 |  | 0      | 209    | 93     | 231    | 99     | 93  |       |
| CR2 |  | 0.0168 | 0      | 202    | 79     | 215    | 202 |       |
| MA1 |  | 0.0075 | 0.0163 | 0      | 229    | 84     | 0   |       |
| MA2 |  | 0.0186 | 0.0064 | 0.0184 | 0      | 238    | 229 |       |
| MM1 |  | 0.0080 | 0.0173 | 0.0068 | 0.0192 | 0      | 84  |       |
| MM2 |  | 0.0075 | 0.0163 | 0.0000 | 0.0184 | 0.0068 | 0   |       |
| 249 |  | CR1    | CR2    | MA1    | MA2    | MM1    | MM2 | 11825 |
| CR1 |  | 0      | 156    | 166    | 65     | 166    | 166 |       |
| CR2 |  | 0.0132 | 0      | 102    | 161    | 88     | 102 |       |
| MA1 |  | 0.0140 | 0.0086 | 0      | 171    | 102    | 0   |       |
| MA2 |  | 0.0055 | 0.0136 | 0.0145 | 0      | 168    | 171 |       |
| MM1 |  | 0.0140 | 0.0074 | 0.0086 | 0.0142 | 0      | 102 |       |
| MM2 |  | 0.0140 | 0.0086 | 0.0000 | 0.0145 | 0.0086 | 0   |       |
| 250 |  | CR1    | CR2    | MA1    | MA2    | MM1    | MM2 | 14740 |
| CR1 |  | 0      | 60     | 112    | 281    | 112    | 119 |       |
| CR2 |  | 0.0041 | 0      | 124    | 261    | 124    | 127 |       |
| MA1 |  | 0.0076 | 0.0084 | 0      | 283    | 18     | 103 |       |
| MA2 |  | 0.0191 | 0.0177 | 0.0192 | 0      | 283    | 291 |       |
| MM1 |  | 0.0076 | 0.0084 | 0.0012 | 0.0192 | 0      | 85  |       |
| MM2 |  | 0.0081 | 0.0086 | 0.0070 | 0.0197 | 0.0058 | 0   |       |

|     | 251    |        |        |        |        |     | 13127 |
|-----|--------|--------|--------|--------|--------|-----|-------|
|     | CR1    | CR2    | MA1    | MA2    | MM1    | MM2 |       |
| CR1 | 0      | 262    | 145    | 272    | 155    | 150 |       |
| CR2 | 0.0200 | 0      | 284    | 82     | 291    | 290 |       |
| MA1 | 0.0110 | 0.0216 | 0      | 297    | 127    | 133 |       |
| MA2 | 0.0207 | 0.0062 | 0.0226 | 0      | 304    | 304 |       |
| MM1 | 0.0118 | 0.0222 | 0.0097 | 0.0232 | 0      | 85  |       |
| MM2 | 0.0114 | 0.0221 | 0.0101 | 0.0232 | 0.0065 | 0   |       |
|     | 252    |        |        |        |        |     | 6201  |
|     | CR1    | CR2    | MA1    | MA2    | MM1    | MM2 |       |
| CR1 | 0      | 100    | 29     | 98     | 109    | 108 |       |
| CR2 | 0.0161 | 0      | 95     | 66     | 85     | 66  |       |
| MA1 | 0.0047 | 0.0153 | 0      | 93     | 104    | 103 |       |
| MA2 | 0.0158 | 0.0106 | 0.0150 | 0      | 69     | 65  |       |
| MM1 | 0.0176 | 0.0137 | 0.0168 | 0.0111 | 0      | 78  |       |
| MM2 | 0.0174 | 0.0106 | 0.0166 | 0.0105 | 0.0126 | 0   |       |
|     | 253    |        |        |        |        |     | 11706 |
|     | CR1    | CR2    | MA1    | MA2    | MM1    | MM2 |       |
| CR1 | 0      | 152    | 141    | 55     | 143    | 142 |       |
| CR2 | 0.0130 | 0      | 88     | 159    | 82     | 81  |       |
| MA1 | 0.0120 | 0.0075 | 0      | 146    | 80     | 79  |       |
| MA2 | 0.0047 | 0.0136 | 0.0125 | 0      | 146    | 145 |       |
| MM1 | 0.0122 | 0.0070 | 0.0068 | 0.0125 | 0      | 1   |       |
| MM2 | 0.0121 | 0.0069 | 0.0067 | 0.0124 | 0.0001 | 0   |       |
|     | 256    |        |        |        |        |     | 10706 |
|     | CR1    | CR2    | MA1    | MA2    | MM1    | MM2 |       |
| CR1 | 0      | 174    | 71     | 177    | 61     | 71  |       |
| CR2 | 0.0163 | 0      | 179    | 21     | 183    | 179 |       |
| MA1 | 0.0066 | 0.0167 | 0      | 182    | 84     | 0   |       |
| MA2 | 0.0165 | 0.0020 | 0.0170 | 0      | 186    | 182 |       |
| MM1 | 0.0057 | 0.0171 | 0.0078 | 0.0174 | 0      | 84  |       |
| MM2 | 0.0066 | 0.0167 | 0.0000 | 0.0170 | 0.0078 | 0   |       |
|     | 257    |        |        |        |        |     | 9720  |
|     | CR1    | CR2    | MA1    | MA2    | MM1    | MM2 |       |
| CR1 | 0      | 202    | 152    | 180    | 148    | 152 |       |
| CR2 | 0.0208 | 0      | 150    | 118    | 166    | 150 |       |
| MA1 | 0.0156 | 0.0154 | 0      | 195    | 123    | 0   |       |
| MA2 | 0.0185 | 0.0121 | 0.0201 | 0      | 202    | 195 |       |
| MM1 | 0.0152 | 0.0171 | 0.0127 | 0.0208 | 0      | 123 |       |
| MM2 | 0.0156 | 0.0154 | 0.0000 | 0.0201 | 0.0127 | 0   |       |

|     | 258    |        |        |        |        |     | 16555 |
|-----|--------|--------|--------|--------|--------|-----|-------|
|     | CR1    | CR2    | MA1    | MA2    | MM1    | MM2 |       |
| CR1 | 0      | 324    | 325    | 156    | 139    | 0   |       |
| CR2 | 0.0196 | 0      | 56     | 315    | 307    | 324 |       |
| MA1 | 0.0196 | 0.0034 | 0      | 317    | 306    | 325 |       |
| MA2 | 0.0094 | 0.0190 | 0.0191 | 0      | 147    | 156 |       |
| MM1 | 0.0084 | 0.0185 | 0.0185 | 0.0089 | 0      | 139 |       |
| MM2 | 0.0000 | 0.0196 | 0.0196 | 0.0094 | 0.0084 | 0   |       |
|     | 259    |        |        |        |        |     | 9510  |
|     | CR1    | CR2    | MA1    | MA2    | MM1    | MM2 |       |
| CR1 | 0      | 288    | 260    | 161    | 149    | 199 |       |
| CR2 | 0.0303 | 0      | 136    | 283    | 291    | 298 |       |
| MA1 | 0.0273 | 0.0143 | 0      | 237    | 272    | 271 |       |
| MA2 | 0.0169 | 0.0298 | 0.0249 | 0      | 209    | 215 |       |
| MM1 | 0.0157 | 0.0306 | 0.0286 | 0.0220 | 0      | 162 |       |
| MM2 | 0.0209 | 0.0313 | 0.0285 | 0.0226 | 0.0170 | 0   |       |
|     | 261    |        |        |        |        |     | 9311  |
|     | CR1    | CR2    | MA1    | MA2    | MM1    | MM2 |       |
| CR1 | 0      | 146    | 77     | 138    | 78     | 78  |       |
| CR2 | 0.0157 | 0      | 122    | 75     | 129    | 136 |       |
| MA1 | 0.0083 | 0.0131 | 0      | 116    | 7      | 89  |       |
| MA2 | 0.0148 | 0.0081 | 0.0125 | 0      | 123    | 132 |       |
| MM1 | 0.0084 | 0.0139 | 0.0008 | 0.0132 | 0      | 90  |       |
| MM2 | 0.0084 | 0.0146 | 0.0096 | 0.0142 | 0.0097 | 0   |       |
|     | 262    |        |        |        |        |     | 10784 |
|     | CR1    | CR2    | MA1    | MA2    | MM1    | MM2 |       |
| CR1 | 0      | 149    | 62     | 153    | 55     | 62  |       |
| CR2 | 0.0138 | 0      | 159    | 54     | 153    | 159 |       |
| MA1 | 0.0057 | 0.0147 | 0      | 162    | 63     | 0   |       |
| MA2 | 0.0142 | 0.0050 | 0.0150 | 0      | 154    | 162 |       |
| MM1 | 0.0051 | 0.0142 | 0.0058 | 0.0143 | 0      | 63  |       |
| MM2 | 0.0057 | 0.0147 | 0.0000 | 0.0150 | 0.0058 | 0   |       |
|     | 264    |        |        |        |        |     | 13931 |
|     | CR1    | CR2    | MA1    | MA2    | MM1    | MM2 |       |
| CR1 | 0      | 146    | 47     | 133    | 47     | 52  |       |
| CR2 | 0.0105 | 0      | 144    | 25     | 144    | 145 |       |
| MA1 | 0.0034 | 0.0103 | 0      | 131    | 0      | 54  |       |
| MA2 | 0.0095 | 0.0018 | 0.0094 | 0      | 131    | 132 |       |
| MM1 | 0.0034 | 0.0103 | 0.0000 | 0.0094 | 0      | 54  |       |
| MM2 | 0.0037 | 0.0104 | 0.0039 | 0.0095 | 0.0039 | 0   |       |

| 265 |  | CR1    | CR2    | MA1    | MA2    | MM1    | MM2 | 8721  |
|-----|--|--------|--------|--------|--------|--------|-----|-------|
| CR1 |  | 0      | 131    | 158    | 249    | 125    | 122 |       |
| CR2 |  | 0.0150 | 0      | 186    | 124    | 191    | 162 |       |
| MA1 |  | 0.0181 | 0.0213 | 0      | 246    | 161    | 78  |       |
| MA2 |  | 0.0286 | 0.0142 | 0.0282 | 0      | 234    | 242 |       |
| MM1 |  | 0.0143 | 0.0219 | 0.0185 | 0.0268 | 0      | 143 |       |
| MM2 |  | 0.0140 | 0.0186 | 0.0089 | 0.0277 | 0.0164 | 0   |       |
| 266 |  | CR1    | CR2    | MA1    | MA2    | MM1    | MM2 | 16146 |
| CR1 |  | 0      | 210    | 215    | 50     | 227    | 215 |       |
| CR2 |  | 0.0130 | 0      | 23     | 231    | 63     | 23  |       |
| MA1 |  | 0.0133 | 0.0014 | 0      | 236    | 68     | 0   |       |
| MA2 |  | 0.0031 | 0.0143 | 0.0146 | 0      | 248    | 236 |       |
| MM1 |  | 0.0141 | 0.0039 | 0.0042 | 0.0154 | 0      | 68  |       |
| MM2 |  | 0.0133 | 0.0014 | 0.0000 | 0.0146 | 0.0042 | 0   |       |
| 267 |  | CR1    | CR2    | MA1    | MA2    | MM1    | MM2 | 17862 |
| CR1 |  | 0      | 412    | 439    | 202    | 193    | 184 |       |
| CR2 |  | 0.0231 | 0      | 54     | 427    | 427    | 426 |       |
| MA1 |  | 0.0246 | 0.0030 | 0      | 450    | 452    | 449 |       |
| MA2 |  | 0.0113 | 0.0239 | 0.0252 | 0      | 190    | 78  |       |
| MM1 |  | 0.0108 | 0.0239 | 0.0253 | 0.0106 | 0      | 190 |       |
| MM2 |  | 0.0103 | 0.0238 | 0.0251 | 0.0044 | 0.0106 | 0   |       |
| 268 |  | CR1    | CR2    | MA1    | MA2    | MM1    | MM2 | 11333 |
| CR1 |  | 0      | 85     | 42     | 90     | 42     | 33  |       |
| CR2 |  | 0.0075 | 0      | 88     | 27     | 88     | 81  |       |
| MA1 |  | 0.0037 | 0.0078 | 0      | 93     | 0      | 33  |       |
| MA2 |  | 0.0079 | 0.0024 | 0.0082 | 0      | 93     | 86  |       |
| MM1 |  | 0.0037 | 0.0078 | 0.0000 | 0.0082 | 0      | 33  |       |
| MM2 |  | 0.0029 | 0.0071 | 0.0029 | 0.0076 | 0.0029 | 0   |       |
| 270 |  | CR1    | CR2    | MA1    | MA2    | MM1    | MM2 | 11444 |
| CR1 |  | 0      | 121    | 39     | 124    | 59     | 39  |       |
| CR2 |  | 0.0106 | 0      | 127    | 32     | 126    | 127 |       |
| MA1 |  | 0.0034 | 0.0111 | 0      | 128    | 52     | 0   |       |
| MA2 |  | 0.0108 | 0.0028 | 0.0112 | 0      | 127    | 128 |       |
| MM1 |  | 0.0052 | 0.0110 | 0.0045 | 0.0111 | 0      | 52  |       |
| MM2 |  | 0.0034 | 0.0111 | 0.0000 | 0.0112 | 0.0045 | 0   |       |

|     | CR1    | CR2    | MA1    | MA2    | MM1    | MM2 |       |
|-----|--------|--------|--------|--------|--------|-----|-------|
| 273 |        |        |        |        |        |     | 12242 |
| CR1 | 0      | 214    | 95     | 212    | 95     | 85  |       |
| CR2 | 0.0175 | 0      | 214    | 40     | 214    | 184 |       |
| MA1 | 0.0078 | 0.0175 | 0      | 201    | 0      | 80  |       |
| MA2 | 0.0173 | 0.0033 | 0.0164 | 0      | 201    | 184 |       |
| MM1 | 0.0078 | 0.0175 | 0.0000 | 0.0164 | 0      | 80  |       |
| MM2 | 0.0069 | 0.0150 | 0.0065 | 0.0150 | 0.0065 | 0   |       |
| 275 |        |        |        |        |        |     | 11688 |
| CR1 | 0      | 286    | 156    | 286    | 149    | 156 |       |
| CR2 | 0.0245 | 0      | 290    | 0      | 284    | 290 |       |
| MA1 | 0.0133 | 0.0248 | 0      | 290    | 165    | 0   |       |
| MA2 | 0.0245 | 0.0000 | 0.0248 | 0      | 284    | 290 |       |
| MM1 | 0.0127 | 0.0243 | 0.0141 | 0.0243 | 0      | 165 |       |
| MM2 | 0.0133 | 0.0248 | 0.0000 | 0.0248 | 0.0141 | 0   |       |
| 276 |        |        |        |        |        |     | 9082  |
| CR1 | 0      | 102    | 109    | 13     | 109    | 113 |       |
| CR2 | 0.0112 | 0      | 25     | 102    | 25     | 24  |       |
| MA1 | 0.0120 | 0.0028 | 0      | 109    | 0      | 29  |       |
| MA2 | 0.0014 | 0.0112 | 0.0120 | 0      | 109    | 113 |       |
| MM1 | 0.0120 | 0.0028 | 0.0000 | 0.0120 | 0      | 29  |       |
| MM2 | 0.0124 | 0.0026 | 0.0032 | 0.0124 | 0.0032 | 0   |       |
| 277 |        |        |        |        |        |     | 10843 |
| CR1 | 0      | 183    | 16     | 183    | 69     | 16  |       |
| CR2 | 0.0169 | 0      | 187    | 48     | 186    | 187 |       |
| MA1 | 0.0015 | 0.0172 | 0      | 185    | 73     | 0   |       |
| MA2 | 0.0169 | 0.0044 | 0.0171 | 0      | 182    | 185 |       |
| MM1 | 0.0064 | 0.0172 | 0.0067 | 0.0168 | 0      | 73  |       |
| MM2 | 0.0015 | 0.0172 | 0.0000 | 0.0171 | 0.0067 | 0   |       |
| 278 |        |        |        |        |        |     | 15048 |
| CR1 | 0      | 339    | 278    | 286    | 194    | 193 |       |
| CR2 | 0.0225 | 0      | 227    | 194    | 331    | 321 |       |
| MA1 | 0.0185 | 0.0151 | 0      | 129    | 287    | 259 |       |
| MA2 | 0.0190 | 0.0129 | 0.0086 | 0      | 281    | 264 |       |
| MM1 | 0.0129 | 0.0220 | 0.0191 | 0.0187 | 0      | 187 |       |
| MM2 | 0.0128 | 0.0213 | 0.0172 | 0.0175 | 0.0124 | 0   |       |

|     | CR1    | CR2    | MA1    | MA2    | MM1    | MM2 |       |
|-----|--------|--------|--------|--------|--------|-----|-------|
| 279 |        |        |        |        |        |     | 12895 |
| CR1 | 0      | 264    | 264    | 93     | 254    | 248 |       |
| CR2 | 0.0205 | 0      | 155    | 277    | 125    | 138 |       |
| MA1 | 0.0205 | 0.0120 | 0      | 279    | 130    | 153 |       |
| MA2 | 0.0072 | 0.0215 | 0.0216 | 0      | 265    | 269 |       |
| MM1 | 0.0197 | 0.0097 | 0.0101 | 0.0206 | 0      | 150 |       |
| MM2 | 0.0192 | 0.0107 | 0.0119 | 0.0209 | 0.0116 | 0   |       |
| 280 |        |        |        |        |        |     | 9542  |
| CR1 | 0      | 146    | 78     | 153    | 62     | 49  |       |
| CR2 | 0.0153 | 0      | 116    | 33     | 157    | 144 |       |
| MA1 | 0.0082 | 0.0122 | 0      | 111    | 101    | 40  |       |
| MA2 | 0.0160 | 0.0035 | 0.0116 | 0      | 164    | 151 |       |
| MM1 | 0.0065 | 0.0165 | 0.0106 | 0.0172 | 0      | 76  |       |
| MM2 | 0.0051 | 0.0151 | 0.0042 | 0.0158 | 0.0080 | 0   |       |
| 281 |        |        |        |        |        |     | 16255 |
| CR1 | 0      | 393    | 145    | 401    | 137    | 190 |       |
| CR2 | 0.0242 | 0      | 369    | 150    | 374    | 401 |       |
| MA1 | 0.0089 | 0.0227 | 0      | 377    | 170    | 194 |       |
| MA2 | 0.0247 | 0.0092 | 0.0232 | 0      | 385    | 408 |       |
| MM1 | 0.0084 | 0.0230 | 0.0105 | 0.0237 | 0      | 208 |       |
| MM2 | 0.0117 | 0.0247 | 0.0119 | 0.0251 | 0.0128 | 0   |       |
| 282 |        |        |        |        |        |     | 15093 |
| CR1 | 0      | 275    | 265    | 85     | 273    | 269 |       |
| CR2 | 0.0182 | 0      | 158    | 284    | 99     | 123 |       |
| MA1 | 0.0176 | 0.0105 | 0      | 275    | 145    | 140 |       |
| MA2 | 0.0056 | 0.0188 | 0.0182 | 0      | 279    | 276 |       |
| MM1 | 0.0181 | 0.0066 | 0.0096 | 0.0185 | 0      | 108 |       |
| MM2 | 0.0178 | 0.0081 | 0.0093 | 0.0183 | 0.0072 | 0   |       |
| 283 |        |        |        |        |        |     | 16951 |
| CR1 | 0      | 471    | 471    | 413    | 325    | 340 |       |
| CR2 | 0.0278 | 0      | 180    | 232    | 444    | 430 |       |
| MA1 | 0.0278 | 0.0106 | 0      | 170    | 404    | 431 |       |
| MA2 | 0.0244 | 0.0137 | 0.0100 | 0      | 262    | 363 |       |
| MM1 | 0.0192 | 0.0262 | 0.0238 | 0.0155 | 0      | 300 |       |
| MM2 | 0.0201 | 0.0254 | 0.0254 | 0.0214 | 0.0177 | 0   |       |

|     | 284    |        |        |        |        |     | 19766 |
|-----|--------|--------|--------|--------|--------|-----|-------|
|     | CR1    | CR2    | MA1    | MA2    | MM1    | MM2 |       |
| CR1 | 0      | 207    | 319    | 119    | 316    | 325 |       |
| CR2 | 0.0105 | 0      | 212    | 257    | 194    | 227 |       |
| MA1 | 0.0161 | 0.0107 | 0      | 332    | 172    | 137 |       |
| MA2 | 0.0060 | 0.0130 | 0.0168 | 0      | 331    | 339 |       |
| MM1 | 0.0160 | 0.0098 | 0.0087 | 0.0167 | 0      | 174 |       |
| MM2 | 0.0164 | 0.0115 | 0.0069 | 0.0172 | 0.0088 | 0   |       |
|     | 287    |        |        |        |        |     | 22865 |
|     | CR1    | CR2    | MA1    | MA2    | MM1    | MM2 |       |
| CR1 | 0      | 539    | 250    | 537    | 251    | 240 |       |
| CR2 | 0.0236 | 0      | 541    | 162    | 569    | 554 |       |
| MA1 | 0.0109 | 0.0237 | 0      | 535    | 261    | 242 |       |
| MA2 | 0.0235 | 0.0071 | 0.0234 | 0      | 562    | 550 |       |
| MM1 | 0.0110 | 0.0249 | 0.0114 | 0.0246 | 0      | 267 |       |
| MM2 | 0.0105 | 0.0242 | 0.0106 | 0.0241 | 0.0117 | 0   |       |
|     | 290    |        |        |        |        |     | 8590  |
|     | CR1    | CR2    | MA1    | MA2    | MM1    | MM2 |       |
| CR1 | 0      | 161    | 38     | 35     | 74     | 81  |       |
| CR2 | 0.0187 | 0      | 132    | 132    | 146    | 156 |       |
| MA1 | 0.0044 | 0.0154 | 0      | 9      | 82     | 94  |       |
| MA2 | 0.0041 | 0.0154 | 0.0010 | 0      | 85     | 91  |       |
| MM1 | 0.0086 | 0.0170 | 0.0095 | 0.0099 | 0      | 71  |       |
| MM2 | 0.0094 | 0.0182 | 0.0109 | 0.0106 | 0.0083 | 0   |       |
|     | 291    |        |        |        |        |     | 11158 |
|     | CR1    | CR2    | MA1    | MA2    | MM1    | MM2 |       |
| CR1 | 0      | 340    | 292    | 77     | 356    | 338 |       |
| CR2 | 0.0305 | 0      | 54     | 322    | 209    | 6   |       |
| MA1 | 0.0262 | 0.0048 | 0      | 268    | 245    | 52  |       |
| MA2 | 0.0069 | 0.0289 | 0.0240 | 0      | 340    | 320 |       |
| MM1 | 0.0319 | 0.0187 | 0.0220 | 0.0305 | 0      | 205 |       |
| MM2 | 0.0303 | 0.0005 | 0.0047 | 0.0287 | 0.0184 | 0   |       |
|     | 297    |        |        |        |        |     | 13382 |
|     | CR1    | CR2    | MA1    | MA2    | MM1    | MM2 |       |
| CR1 | 0      | 292    | 100    | 294    | 100    | 83  |       |
| CR2 | 0.0218 | 0      | 290    | 89     | 290    | 290 |       |
| MA1 | 0.0075 | 0.0217 | 0      | 293    | 0      | 142 |       |
| MA2 | 0.0220 | 0.0067 | 0.0219 | 0      | 293    | 293 |       |
| MM1 | 0.0075 | 0.0217 | 0.0000 | 0.0219 | 0      | 142 |       |
| MM2 | 0.0062 | 0.0217 | 0.0106 | 0.0219 | 0.0106 | 0   |       |



|     | CR1    | CR2    | MA1    | MA2    | MM1    | MM2 |       |
|-----|--------|--------|--------|--------|--------|-----|-------|
| 300 |        |        |        |        |        |     | 12407 |
| CR1 | 0      | 123    | 159    | 167    | 0      | 99  |       |
| CR2 | 0.0099 | 0      | 134    | 144    | 123    | 154 |       |
| MA1 | 0.0128 | 0.0108 | 0      | 45     | 159    | 121 |       |
| MA2 | 0.0135 | 0.0116 | 0.0036 | 0      | 167    | 127 |       |
| MM1 | 0.0000 | 0.0099 | 0.0128 | 0.0135 | 0      | 99  |       |
| MM2 | 0.0080 | 0.0124 | 0.0098 | 0.0102 | 0.0080 | 0   |       |
| 302 |        |        |        |        |        |     | 11498 |
| CR1 | 0      | 224    | 142    | 223    | 142    | 137 |       |
| CR2 | 0.0195 | 0      | 225    | 63     | 225    | 208 |       |
| MA1 | 0.0123 | 0.0196 | 0      | 220    | 0      | 115 |       |
| MA2 | 0.0194 | 0.0055 | 0.0191 | 0      | 220    | 208 |       |
| MM1 | 0.0123 | 0.0196 | 0.0000 | 0.0191 | 0      | 115 |       |
| MM2 | 0.0119 | 0.0181 | 0.0100 | 0.0181 | 0.0100 | 0   |       |
| 303 |        |        |        |        |        |     | 9258  |
| CR1 | 0      | 137    | 27     | 132    | 27     | 53  |       |
| CR2 | 0.0148 | 0      | 128    | 48     | 128    | 128 |       |
| MA1 | 0.0029 | 0.0138 | 0      | 123    | 0      | 46  |       |
| MA2 | 0.0143 | 0.0052 | 0.0133 | 0      | 123    | 127 |       |
| MM1 | 0.0029 | 0.0138 | 0.0000 | 0.0133 | 0      | 46  |       |
| MM2 | 0.0057 | 0.0138 | 0.0050 | 0.0137 | 0.0050 | 0   |       |
| 304 |        |        |        |        |        |     | 17409 |
| CR1 | 0      | 361    | 198    | 355    | 200    | 198 |       |
| CR2 | 0.0207 | 0      | 325    | 44     | 346    | 329 |       |
| MA1 | 0.0114 | 0.0187 | 0      | 319    | 178    | 18  |       |
| MA2 | 0.0204 | 0.0025 | 0.0183 | 0      | 341    | 323 |       |
| MM1 | 0.0115 | 0.0199 | 0.0102 | 0.0196 | 0      | 180 |       |
| MM2 | 0.0114 | 0.0189 | 0.0010 | 0.0186 | 0.0103 | 0   |       |
| 308 |        |        |        |        |        |     | 13935 |
| CR1 | 0      | 195    | 104    | 141    | 31     | 86  |       |
| CR2 | 0.0140 | 0      | 193    | 107    | 201    | 205 |       |
| MA1 | 0.0075 | 0.0139 | 0      | 102    | 98     | 24  |       |
| MA2 | 0.0101 | 0.0077 | 0.0073 | 0      | 147    | 126 |       |
| MM1 | 0.0022 | 0.0144 | 0.0070 | 0.0105 | 0      | 81  |       |
| MM2 | 0.0062 | 0.0147 | 0.0017 | 0.0090 | 0.0058 | 0   |       |

| 311 |        |        |        |        |        |     | 10664 |
|-----|--------|--------|--------|--------|--------|-----|-------|
|     | CR1    | CR2    | MA1    | MA2    | MM1    | MM2 |       |
| CR1 | 0      | 144    | 48     | 148    | 49     | 48  |       |
| CR2 | 0.0135 | 0      | 135    | 53     | 132    | 135 |       |
| MA1 | 0.0045 | 0.0127 | 0      | 138    | 21     | 0   |       |
| MA2 | 0.0139 | 0.0050 | 0.0129 | 0      | 135    | 138 |       |
| MM1 | 0.0046 | 0.0124 | 0.0020 | 0.0127 | 0      | 21  |       |
| MM2 | 0.0045 | 0.0127 | 0.0000 | 0.0129 | 0.0020 | 0   |       |
| 312 |        |        |        |        |        |     | 12618 |
|     | CR1    | CR2    | MA1    | MA2    | MM1    | MM2 |       |
| CR1 | 0      | 168    | 70     | 171    | 70     | 75  |       |
| CR2 | 0.0133 | 0      | 155    | 35     | 155    | 153 |       |
| MA1 | 0.0055 | 0.0123 | 0      | 160    | 0      | 49  |       |
| MA2 | 0.0136 | 0.0028 | 0.0127 | 0      | 160    | 156 |       |
| MM1 | 0.0055 | 0.0123 | 0.0000 | 0.0127 | 0      | 49  |       |
| MM2 | 0.0059 | 0.0121 | 0.0039 | 0.0124 | 0.0039 | 0   |       |
| 313 |        |        |        |        |        |     | 11017 |
|     | CR1    | CR2    | MA1    | MA2    | MM1    | MM2 |       |
| CR1 | 0      | 87     | 145    | 162    | 221    | 238 |       |
| CR2 | 0.0079 | 0      | 195    | 144    | 239    | 251 |       |
| MA1 | 0.0132 | 0.0177 | 0      | 74     | 141    | 199 |       |
| MA2 | 0.0147 | 0.0131 | 0.0067 | 0      | 215    | 243 |       |
| MM1 | 0.0201 | 0.0217 | 0.0128 | 0.0195 | 0      | 78  |       |
| MM2 | 0.0216 | 0.0228 | 0.0181 | 0.0221 | 0.0071 | 0   |       |
| 315 |        |        |        |        |        |     | 14756 |
|     | CR1    | CR2    | MA1    | MA2    | MM1    | MM2 |       |
| CR1 | 0      | 177    | 59     | 175    | 48     | 59  |       |
| CR2 | 0.0120 | 0      | 170    | 25     | 172    | 170 |       |
| MA1 | 0.0040 | 0.0115 | 0      | 168    | 57     | 0   |       |
| MA2 | 0.0119 | 0.0017 | 0.0114 | 0      | 170    | 168 |       |
| MM1 | 0.0033 | 0.0117 | 0.0039 | 0.0115 | 0      | 57  |       |
| MM2 | 0.0040 | 0.0115 | 0.0000 | 0.0114 | 0.0039 | 0   |       |
| 316 |        |        |        |        |        |     | 14582 |
|     | CR1    | CR2    | MA1    | MA2    | MM1    | MM2 |       |
| CR1 | 0      | 184    | 54     | 183    | 194    | 183 |       |
| CR2 | 0.0126 | 0      | 198    | 94     | 82     | 94  |       |
| MA1 | 0.0037 | 0.0136 | 0      | 195    | 208    | 195 |       |
| MA2 | 0.0125 | 0.0064 | 0.0134 | 0      | 89     | 0   |       |
| MM1 | 0.0133 | 0.0056 | 0.0143 | 0.0061 | 0      | 89  |       |
| MM2 | 0.0125 | 0.0064 | 0.0134 | 0.0000 | 0.0061 | 0   |       |

|     | CR1    | CR2    | MA1    | MA2    | MM1    | MM2 |       |
|-----|--------|--------|--------|--------|--------|-----|-------|
| 317 |        |        |        |        |        |     | 12769 |
| CR1 | 0      | 297    | 152    | 303    | 165    | 152 |       |
| CR2 | 0.0233 | 0      | 295    | 88     | 315    | 295 |       |
| MA1 | 0.0119 | 0.0231 | 0      | 310    | 152    | 0   |       |
| MA2 | 0.0237 | 0.0069 | 0.0243 | 0      | 324    | 310 |       |
| MM1 | 0.0129 | 0.0247 | 0.0119 | 0.0254 | 0      | 152 |       |
| MM2 | 0.0119 | 0.0231 | 0.0000 | 0.0243 | 0.0119 | 0   |       |
| 318 |        |        |        |        |        |     | 13424 |
| CR1 | 0      | 271    | 250    | 51     | 266    | 280 |       |
| CR2 | 0.0202 | 0      | 122    | 263    | 120    | 114 |       |
| MA1 | 0.0186 | 0.0091 | 0      | 236    | 142    | 36  |       |
| MA2 | 0.0038 | 0.0196 | 0.0176 | 0      | 258    | 272 |       |
| MM1 | 0.0198 | 0.0089 | 0.0106 | 0.0192 | 0      | 128 |       |
| MM2 | 0.0209 | 0.0085 | 0.0027 | 0.0203 | 0.0095 | 0   |       |
| 319 |        |        |        |        |        |     | 14205 |
| CR1 | 0      | 175    | 176    | 95     | 95     | 87  |       |
| CR2 | 0.0123 | 0      | 31     | 156    | 176    | 165 |       |
| MA1 | 0.0124 | 0.0022 | 0      | 149    | 177    | 170 |       |
| MA2 | 0.0067 | 0.0110 | 0.0105 | 0      | 97     | 21  |       |
| MM1 | 0.0067 | 0.0124 | 0.0125 | 0.0068 | 0      | 87  |       |
| MM2 | 0.0061 | 0.0116 | 0.0120 | 0.0015 | 0.0061 | 0   |       |
| 320 |        |        |        |        |        |     | 10719 |
| CR1 | 0      | 130    | 93     | 151    | 91     | 89  |       |
| CR2 | 0.0121 | 0      | 127    | 61     | 140    | 153 |       |
| MA1 | 0.0087 | 0.0118 | 0      | 143    | 80     | 83  |       |
| MA2 | 0.0141 | 0.0057 | 0.0133 | 0      | 158    | 165 |       |
| MM1 | 0.0085 | 0.0131 | 0.0075 | 0.0147 | 0      | 71  |       |
| MM2 | 0.0083 | 0.0143 | 0.0077 | 0.0154 | 0.0066 | 0   |       |
| 322 |        |        |        |        |        |     | 10461 |
| CR1 | 0      | 164    | 173    | 101    | 101    | 116 |       |
| CR2 | 0.0157 | 0      | 39     | 172    | 172    | 170 |       |
| MA1 | 0.0165 | 0.0037 | 0      | 175    | 175    | 177 |       |
| MA2 | 0.0097 | 0.0164 | 0.0167 | 0      | 0      | 58  |       |
| MM1 | 0.0097 | 0.0164 | 0.0167 | 0.0000 | 0      | 58  |       |
| MM2 | 0.0111 | 0.0163 | 0.0169 | 0.0055 | 0.0055 | 0   |       |

|     | CR1    | CR2    | MA1    | MA2    | MM1    | MM2 |       |
|-----|--------|--------|--------|--------|--------|-----|-------|
| 324 |        |        |        |        |        |     | 10252 |
| CR1 | 0      | 217    | 197    | 134    | 162    | 134 |       |
| CR2 | 0.0212 | 0      | 71     | 198    | 212    | 198 |       |
| MA1 | 0.0192 | 0.0069 | 0      | 174    | 188    | 174 |       |
| MA2 | 0.0131 | 0.0193 | 0.0170 | 0      | 128    | 0   |       |
| MM1 | 0.0158 | 0.0207 | 0.0183 | 0.0125 | 0      | 128 |       |
| MM2 | 0.0131 | 0.0193 | 0.0170 | 0.0000 | 0.0125 | 0   |       |
| 326 |        |        |        |        |        |     | 15107 |
| CR1 | 0      | 201    | 67     | 200    | 199    | 200 |       |
| CR2 | 0.0133 | 0      | 186    | 72     | 73     | 72  |       |
| MA1 | 0.0044 | 0.0123 | 0      | 189    | 188    | 189 |       |
| MA2 | 0.0132 | 0.0048 | 0.0125 | 0      | 81     | 0   |       |
| MM1 | 0.0132 | 0.0048 | 0.0124 | 0.0054 | 0      | 81  |       |
| MM2 | 0.0132 | 0.0048 | 0.0125 | 0.0000 | 0.0054 | 0   |       |
| 329 |        |        |        |        |        |     | 17384 |
| CR1 | 0      | 357    | 213    | 353    | 231    | 226 |       |
| CR2 | 0.0205 | 0      | 337    | 100    | 346    | 344 |       |
| MA1 | 0.0123 | 0.0194 | 0      | 331    | 102    | 175 |       |
| MA2 | 0.0203 | 0.0058 | 0.0190 | 0      | 335    | 344 |       |
| MM1 | 0.0133 | 0.0199 | 0.0059 | 0.0193 | 0      | 176 |       |
| MM2 | 0.0130 | 0.0198 | 0.0101 | 0.0198 | 0.0101 | 0   |       |
| 334 |        |        |        |        |        |     | 6212  |
| CR1 | 0      | 150    | 122    | 74     | 71     | 66  |       |
| CR2 | 0.0241 | 0      | 72     | 127    | 132    | 144 |       |
| MA1 | 0.0196 | 0.0116 | 0      | 95     | 86     | 112 |       |
| MA2 | 0.0119 | 0.0204 | 0.0153 | 0      | 9      | 68  |       |
| MM1 | 0.0114 | 0.0212 | 0.0138 | 0.0014 | 0      | 61  |       |
| MM2 | 0.0106 | 0.0232 | 0.0180 | 0.0109 | 0.0098 | 0   |       |
| 335 |        |        |        |        |        |     | 11776 |
| CR1 | 0      | 227    | 218    | 47     | 205    | 222 |       |
| CR2 | 0.0193 | 0      | 141    | 226    | 132    | 146 |       |
| MA1 | 0.0185 | 0.0120 | 0      | 220    | 124    | 143 |       |
| MA2 | 0.0040 | 0.0192 | 0.0187 | 0      | 199    | 224 |       |
| MM1 | 0.0174 | 0.0112 | 0.0105 | 0.0169 | 0      | 109 |       |
| MM2 | 0.0189 | 0.0124 | 0.0121 | 0.0190 | 0.0093 | 0   |       |

|     | 336    |        |        |        |        |     | 8843  |
|-----|--------|--------|--------|--------|--------|-----|-------|
|     | CR1    | CR2    | MA1    | MA2    | MM1    | MM2 |       |
| CR1 | 0      | 118    | 17     | 117    | 2      | 1   |       |
| CR2 | 0.0133 | 0      | 120    | 33     | 116    | 117 |       |
| MA1 | 0.0019 | 0.0136 | 0      | 119    | 17     | 16  |       |
| MA2 | 0.0132 | 0.0037 | 0.0135 | 0      | 115    | 116 |       |
| MM1 | 0.0002 | 0.0131 | 0.0019 | 0.0130 | 0      | 3   |       |
| MM2 | 0.0001 | 0.0132 | 0.0018 | 0.0131 | 0.0003 | 0   |       |
|     | 337    |        |        |        |        |     | 12346 |
|     | CR1    | CR2    | MA1    | MA2    | MM1    | MM2 |       |
| CR1 | 0      | 126    | 173    | 97     | 165    | 173 |       |
| CR2 | 0.0102 | 0      | 67     | 201    | 106    | 69  |       |
| MA1 | 0.0140 | 0.0054 | 0      | 190    | 97     | 64  |       |
| MA2 | 0.0079 | 0.0163 | 0.0154 | 0      | 192    | 199 |       |
| MM1 | 0.0134 | 0.0086 | 0.0079 | 0.0156 | 0      | 113 |       |
| MM2 | 0.0140 | 0.0056 | 0.0052 | 0.0161 | 0.0092 | 0   |       |
|     | 342    |        |        |        |        |     | 12842 |
|     | CR1    | CR2    | MA1    | MA2    | MM1    | MM2 |       |
| CR1 | 0      | 277    | 172    | 271    | 164    | 185 |       |
| CR2 | 0.0216 | 0      | 283    | 10     | 290    | 302 |       |
| MA1 | 0.0134 | 0.0220 | 0      | 277    | 163    | 207 |       |
| MA2 | 0.0211 | 0.0008 | 0.0216 | 0      | 284    | 296 |       |
| MM1 | 0.0128 | 0.0226 | 0.0127 | 0.0221 | 0      | 152 |       |
| MM2 | 0.0144 | 0.0235 | 0.0161 | 0.0230 | 0.0118 | 0   |       |
|     | 343    |        |        |        |        |     | 15883 |
|     | CR1    | CR2    | MA1    | MA2    | MM1    | MM2 |       |
| CR1 | 0      | 359    | 179    | 358    | 167    | 179 |       |
| CR2 | 0.0226 | 0      | 370    | 96     | 372    | 370 |       |
| MA1 | 0.0113 | 0.0233 | 0      | 369    | 172    | 0   |       |
| MA2 | 0.0225 | 0.0060 | 0.0232 | 0      | 373    | 369 |       |
| MM1 | 0.0105 | 0.0234 | 0.0108 | 0.0235 | 0      | 172 |       |
| MM2 | 0.0113 | 0.0233 | 0.0000 | 0.0232 | 0.0108 | 0   |       |
|     | 344    |        |        |        |        |     | 20715 |
|     | CR1    | CR2    | MA1    | MA2    | MM1    | MM2 |       |
| CR1 | 0      | 538    | 511    | 144    | 493    | 510 |       |
| CR2 | 0.0260 | 0      | 320    | 519    | 293    | 297 |       |
| MA1 | 0.0247 | 0.0154 | 0      | 490    | 224    | 288 |       |
| MA2 | 0.0070 | 0.0251 | 0.0237 | 0      | 475    | 495 |       |
| MM1 | 0.0238 | 0.0141 | 0.0108 | 0.0229 | 0      | 279 |       |
| MM2 | 0.0246 | 0.0143 | 0.0139 | 0.0239 | 0.0135 | 0   |       |

|     | CR1    | CR2    | MA1    | MA2    | MM1    | MM2 |       |
|-----|--------|--------|--------|--------|--------|-----|-------|
| 346 |        |        |        |        |        |     | 23486 |
| CR1 | 0      | 487    | 288    | 483    | 300    | 288 |       |
| CR2 | 0.0207 | 0      | 475    | 88     | 456    | 475 |       |
| MA1 | 0.0123 | 0.0202 | 0      | 473    | 274    | 0   |       |
| MA2 | 0.0206 | 0.0037 | 0.0201 | 0      | 453    | 473 |       |
| MM1 | 0.0128 | 0.0194 | 0.0117 | 0.0193 | 0      | 274 |       |
| MM2 | 0.0123 | 0.0202 | 0.0000 | 0.0201 | 0.0117 | 0   |       |
| 348 |        |        |        |        |        |     | 9735  |
| CR1 | 0      | 133    | 136    | 57     | 44     | 51  |       |
| CR2 | 0.0137 | 0      | 36     | 130    | 130    | 132 |       |
| MA1 | 0.0140 | 0.0037 | 0      | 129    | 128    | 131 |       |
| MA2 | 0.0059 | 0.0134 | 0.0133 | 0      | 46     | 58  |       |
| MM1 | 0.0045 | 0.0134 | 0.0131 | 0.0047 | 0      | 48  |       |
| MM2 | 0.0052 | 0.0136 | 0.0135 | 0.0060 | 0.0049 | 0   |       |
| 349 |        |        |        |        |        |     | 10583 |
| CR1 | 0      | 157    | 91     | 159    | 90     | 82  |       |
| CR2 | 0.0148 | 0      | 157    | 64     | 164    | 165 |       |
| MA1 | 0.0086 | 0.0148 | 0      | 157    | 85     | 106 |       |
| MA2 | 0.0150 | 0.0060 | 0.0148 | 0      | 165    | 167 |       |
| MM1 | 0.0085 | 0.0155 | 0.0080 | 0.0156 | 0      | 101 |       |
| MM2 | 0.0077 | 0.0156 | 0.0100 | 0.0158 | 0.0095 | 0   |       |
| 352 |        |        |        |        |        |     | 16727 |
| CR1 | 0      | 288    | 139    | 285    | 141    | 139 |       |
| CR2 | 0.0172 | 0      | 289    | 111    | 295    | 289 |       |
| MA1 | 0.0083 | 0.0173 | 0      | 278    | 136    | 0   |       |
| MA2 | 0.0170 | 0.0066 | 0.0166 | 0      | 278    | 278 |       |
| MM1 | 0.0084 | 0.0176 | 0.0081 | 0.0166 | 0      | 136 |       |
| MM2 | 0.0083 | 0.0173 | 0.0000 | 0.0166 | 0.0081 | 0   |       |
| 354 |        |        |        |        |        |     | 13162 |
| CR1 | 0      | 360    | 100    | 144    | 361    | 345 |       |
| CR2 | 0.0274 | 0      | 335    | 306    | 196    | 182 |       |
| MA1 | 0.0076 | 0.0255 | 0      | 140    | 311    | 326 |       |
| MA2 | 0.0109 | 0.0232 | 0.0106 | 0      | 259    | 285 |       |
| MM1 | 0.0274 | 0.0149 | 0.0236 | 0.0197 | 0      | 177 |       |
| MM2 | 0.0262 | 0.0138 | 0.0248 | 0.0217 | 0.0134 | 0   |       |

|     | 356    |        |        |        |        |     |  |
|-----|--------|--------|--------|--------|--------|-----|--|
|     | CR1    | CR2    | MA1    | MA2    | MM1    | MM2 |  |
| CR1 | 0      | 33     | 16     | 35     | 18     | 19  |  |
| CR2 | 0.0104 | 0      | 33     | 8      | 33     | 32  |  |
| MA1 | 0.0051 | 0.0104 | 0      | 35     | 14     | 11  |  |
| MA2 | 0.0111 | 0.0025 | 0.0111 | 0      | 35     | 34  |  |
| MM1 | 0.0057 | 0.0104 | 0.0044 | 0.0111 | 0      | 9   |  |
| MM2 | 0.0060 | 0.0101 | 0.0035 | 0.0108 | 0.0028 | 0   |  |
|     | 358    |        |        |        |        |     |  |
|     | CR1    | CR2    | MA1    | MA2    | MM1    | MM2 |  |
| CR1 | 0      | 127    | 79     | 87     | 56     | 70  |  |
| CR2 | 0.0116 | 0      | 121    | 103    | 114    | 124 |  |
| MA1 | 0.0072 | 0.0110 | 0      | 22     | 70     | 67  |  |
| MA2 | 0.0079 | 0.0094 | 0.0020 | 0      | 76     | 77  |  |
| MM1 | 0.0051 | 0.0104 | 0.0064 | 0.0069 | 0      | 64  |  |
| MM2 | 0.0064 | 0.0113 | 0.0061 | 0.0070 | 0.0058 | 0   |  |
|     | 361    |        |        |        |        |     |  |
|     | CR1    | CR2    | MA1    | MA2    | MM1    | MM2 |  |
| CR1 | 0      | 208    | 197    | 158    | 197    | 228 |  |
| CR2 | 0.0206 | 0      | 86     | 203    | 86     | 157 |  |
| MA1 | 0.0195 | 0.0085 | 0      | 145    | 0      | 144 |  |
| MA2 | 0.0156 | 0.0201 | 0.0144 | 0      | 145    | 192 |  |
| MM1 | 0.0195 | 0.0085 | 0.0000 | 0.0144 | 0      | 144 |  |
| MM2 | 0.0226 | 0.0155 | 0.0143 | 0.0190 | 0.0143 | 0   |  |
|     | 362    |        |        |        |        |     |  |
|     | CR1    | CR2    | MA1    | MA2    | MM1    | MM2 |  |
| CR1 | 0      | 100    | 79     | 99     | 47     | 48  |  |
| CR2 | 0.0145 | 0      | 78     | 49     | 105    | 105 |  |
| MA1 | 0.0115 | 0.0113 | 0      | 53     | 54     | 74  |  |
| MA2 | 0.0144 | 0.0071 | 0.0077 | 0      | 106    | 108 |  |
| MM1 | 0.0068 | 0.0152 | 0.0078 | 0.0154 | 0      | 36  |  |
| MM2 | 0.0070 | 0.0152 | 0.0107 | 0.0157 | 0.0052 | 0   |  |
|     | 364    |        |        |        |        |     |  |
|     | CR1    | CR2    | MA1    | MA2    | MM1    | MM2 |  |
| CR1 | 0      | 0      | 58     | 23     | 24     | 14  |  |
| CR2 | 0.0000 | 0      | 58     | 23     | 24     | 14  |  |
| MA1 | 0.0214 | 0.0214 | 0      | 57     | 60     | 54  |  |
| MA2 | 0.0085 | 0.0085 | 0.0211 | 0      | 27     | 15  |  |
| MM1 | 0.0089 | 0.0089 | 0.0222 | 0.0100 | 0      | 22  |  |
| MM2 | 0.0052 | 0.0052 | 0.0200 | 0.0055 | 0.0081 | 0   |  |

|     | 366    |        |        |        |        |     | 16893 |
|-----|--------|--------|--------|--------|--------|-----|-------|
|     | CR1    | CR2    | MA1    | MA2    | MM1    | MM2 |       |
| CR1 | 0      | 250    | 85     | 261    | 261    | 257 |       |
| CR2 | 0.0148 | 0      | 263    | 110    | 110    | 67  |       |
| MA1 | 0.0050 | 0.0156 | 0      | 277    | 277    | 268 |       |
| MA2 | 0.0155 | 0.0065 | 0.0164 | 0      | 0      | 122 |       |
| MM1 | 0.0155 | 0.0065 | 0.0164 | 0.0000 | 0      | 122 |       |
| MM2 | 0.0152 | 0.0040 | 0.0159 | 0.0072 | 0.0072 | 0   |       |
|     | 367    |        |        |        |        |     | 19894 |
|     | CR1    | CR2    | MA1    | MA2    | MM1    | MM2 |       |
| CR1 | 0      | 409    | 173    | 401    | 184    | 197 |       |
| CR2 | 0.0206 | 0      | 392    | 56     | 444    | 443 |       |
| MA1 | 0.0087 | 0.0197 | 0      | 378    | 184    | 202 |       |
| MA2 | 0.0202 | 0.0028 | 0.0190 | 0      | 430    | 431 |       |
| MM1 | 0.0092 | 0.0223 | 0.0092 | 0.0216 | 0      | 215 |       |
| MM2 | 0.0099 | 0.0223 | 0.0102 | 0.0217 | 0.0108 | 0   |       |
|     | 368    |        |        |        |        |     | 17637 |
|     | CR1    | CR2    | MA1    | MA2    | MM1    | MM2 |       |
| CR1 | 0      | 493    | 275    | 502    | 200    | 269 |       |
| CR2 | 0.0280 | 0      | 489    | 109    | 516    | 484 |       |
| MA1 | 0.0156 | 0.0277 | 0      | 510    | 252    | 237 |       |
| MA2 | 0.0285 | 0.0062 | 0.0289 | 0      | 528    | 496 |       |
| MM1 | 0.0113 | 0.0293 | 0.0143 | 0.0299 | 0      | 277 |       |
| MM2 | 0.0153 | 0.0274 | 0.0134 | 0.0281 | 0.0157 | 0   |       |
|     | 370    |        |        |        |        |     | 20855 |
|     | CR1    | CR2    | MA1    | MA2    | MM1    | MM2 |       |
| CR1 | 0      | 368    | 194    | 373    | 194    | 193 |       |
| CR2 | 0.0176 | 0      | 397    | 126    | 397    | 374 |       |
| MA1 | 0.0093 | 0.0190 | 0      | 405    | 0      | 169 |       |
| MA2 | 0.0179 | 0.0060 | 0.0194 | 0      | 405    | 387 |       |
| MM1 | 0.0093 | 0.0190 | 0.0000 | 0.0194 | 0      | 169 |       |
| MM2 | 0.0093 | 0.0179 | 0.0081 | 0.0186 | 0.0081 | 0   |       |
|     | 371    |        |        |        |        |     | 8672  |
|     | CR1    | CR2    | MA1    | MA2    | MM1    | MM2 |       |
| CR1 | 0      | 116    | 108    | 25     | 108    | 108 |       |
| CR2 | 0.0134 | 0      | 48     | 107    | 48     | 48  |       |
| MA1 | 0.0125 | 0.0055 | 0      | 99     | 34     | 0   |       |
| MA2 | 0.0029 | 0.0123 | 0.0114 | 0      | 99     | 99  |       |
| MM1 | 0.0125 | 0.0055 | 0.0039 | 0.0114 | 0      | 34  |       |
| MM2 | 0.0125 | 0.0055 | 0.0000 | 0.0114 | 0.0039 | 0   |       |



| 372 |  | CR1    | CR2    | MA1    | MA2    | MM1    | MM2 | 9299  |
|-----|--|--------|--------|--------|--------|--------|-----|-------|
| CR1 |  | 0      | 100    | 100    | 32     | 32     | 32  |       |
| CR2 |  | 0.0108 | 0      | 31     | 101    | 101    | 101 |       |
| MA1 |  | 0.0108 | 0.0033 | 0      | 100    | 100    | 100 |       |
| MA2 |  | 0.0034 | 0.0109 | 0.0108 | 0      | 0      | 0   |       |
| MM1 |  | 0.0034 | 0.0109 | 0.0108 | 0.0000 | 0      | 0   |       |
| MM2 |  | 0.0034 | 0.0109 | 0.0108 | 0.0000 | 0.0000 | 0   |       |
| 373 |  | CR1    | CR2    | MA1    | MA2    | MM1    | MM2 | 11126 |
| CR1 |  | 0      | 163    | 73     | 149    | 73     | 76  |       |
| CR2 |  | 0.0147 | 0      | 140    | 55     | 140    | 132 |       |
| MA1 |  | 0.0066 | 0.0126 | 0      | 152    | 0      | 47  |       |
| MA2 |  | 0.0134 | 0.0049 | 0.0137 | 0      | 152    | 148 |       |
| MM1 |  | 0.0066 | 0.0126 | 0.0000 | 0.0137 | 0      | 47  |       |
| MM2 |  | 0.0068 | 0.0119 | 0.0042 | 0.0133 | 0.0042 | 0   |       |
| 374 |  | CR1    | CR2    | MA1    | MA2    | MM1    | MM2 | 9168  |
| CR1 |  | 0      | 185    | 9      | 180    | 9      | 110 |       |
| CR2 |  | 0.0202 | 0      | 184    | 55     | 184    | 189 |       |
| MA1 |  | 0.0010 | 0.0201 | 0      | 179    | 0      | 105 |       |
| MA2 |  | 0.0196 | 0.0060 | 0.0195 | 0      | 179    | 188 |       |
| MM1 |  | 0.0010 | 0.0201 | 0.0000 | 0.0195 | 0      | 105 |       |
| MM2 |  | 0.0120 | 0.0206 | 0.0115 | 0.0205 | 0.0115 | 0   |       |
| 376 |  | CR1    | CR2    | MA1    | MA2    | MM1    | MM2 | 13235 |
| CR1 |  | 0      | 42     | 263    | 154    | 263    | 251 |       |
| CR2 |  | 0.0032 | 0      | 277    | 112    | 277    | 275 |       |
| MA1 |  | 0.0199 | 0.0209 | 0      | 296    | 0      | 120 |       |
| MA2 |  | 0.0116 | 0.0085 | 0.0224 | 0      | 296    | 293 |       |
| MM1 |  | 0.0199 | 0.0209 | 0.0000 | 0.0224 | 0      | 120 |       |
| MM2 |  | 0.0190 | 0.0208 | 0.0091 | 0.0221 | 0.0091 | 0   |       |
| 378 |  | CR1    | CR2    | MA1    | MA2    | MM1    | MM2 | 26248 |
| CR1 |  | 0      | 502    | 111    | 481    | 490    | 481 |       |
| CR2 |  | 0.0191 | 0      | 506    | 225    | 239    | 225 |       |
| MA1 |  | 0.0042 | 0.0193 | 0      | 485    | 488    | 485 |       |
| MA2 |  | 0.0183 | 0.0086 | 0.0185 | 0      | 242    | 0   |       |
| MM1 |  | 0.0187 | 0.0091 | 0.0186 | 0.0092 | 0      | 242 |       |
| MM2 |  | 0.0183 | 0.0086 | 0.0185 | 0.0000 | 0.0092 | 0   |       |

|     | CR1    | CR2    | MA1    | MA2    | MM1    | MM2 |       |
|-----|--------|--------|--------|--------|--------|-----|-------|
| 379 |        |        |        |        |        |     | 11889 |
| CR1 | 0      | 275    | 174    | 280    | 280    | 282 |       |
| CR2 | 0.0231 | 0      | 229    | 205    | 205    | 186 |       |
| MA1 | 0.0146 | 0.0193 | 0      | 313    | 313    | 312 |       |
| MA2 | 0.0236 | 0.0172 | 0.0263 | 0      | 0      | 210 |       |
| MM1 | 0.0236 | 0.0172 | 0.0263 | 0.0000 | 0      | 210 |       |
| MM2 | 0.0237 | 0.0156 | 0.0262 | 0.0177 | 0.0177 | 0   |       |
| 380 |        |        |        |        |        |     | 15239 |
| CR1 | 0      | 230    | 115    | 227    | 79     | 115 |       |
| CR2 | 0.0151 | 0      | 226    | 67     | 219    | 226 |       |
| MA1 | 0.0075 | 0.0148 | 0      | 221    | 78     | 0   |       |
| MA2 | 0.0149 | 0.0044 | 0.0145 | 0      | 214    | 221 |       |
| MM1 | 0.0052 | 0.0144 | 0.0051 | 0.0140 | 0      | 78  |       |
| MM2 | 0.0075 | 0.0148 | 0.0000 | 0.0145 | 0.0051 | 0   |       |
| 382 |        |        |        |        |        |     | 13353 |
| CR1 | 0      | 233    | 109    | 222    | 0      | 119 |       |
| CR2 | 0.0174 | 0      | 248    | 65     | 233    | 251 |       |
| MA1 | 0.0082 | 0.0186 | 0      | 236    | 109    | 143 |       |
| MA2 | 0.0166 | 0.0049 | 0.0177 | 0      | 222    | 239 |       |
| MM1 | 0.0000 | 0.0174 | 0.0082 | 0.0166 | 0      | 119 |       |
| MM2 | 0.0089 | 0.0188 | 0.0107 | 0.0179 | 0.0089 | 0   |       |
| 384 |        |        |        |        |        |     | 11135 |
| CR1 | 0      | 243    | 229    | 75     | 120    | 79  |       |
| CR2 | 0.0218 | 0      | 83     | 236    | 227    | 247 |       |
| MA1 | 0.0206 | 0.0075 | 0      | 227    | 212    | 234 |       |
| MA2 | 0.0067 | 0.0212 | 0.0204 | 0      | 108    | 102 |       |
| MM1 | 0.0108 | 0.0204 | 0.0190 | 0.0097 | 0      | 141 |       |
| MM2 | 0.0071 | 0.0222 | 0.0210 | 0.0092 | 0.0127 | 0   |       |
| 385 |        |        |        |        |        |     | 11660 |
| CR1 | 0      | 151    | 62     | 157    | 62     | 75  |       |
| CR2 | 0.0130 | 0      | 154    | 61     | 154    | 147 |       |
| MA1 | 0.0053 | 0.0132 | 0      | 160    | 0      | 69  |       |
| MA2 | 0.0135 | 0.0052 | 0.0137 | 0      | 160    | 153 |       |
| MM1 | 0.0053 | 0.0132 | 0.0000 | 0.0137 | 0      | 69  |       |
| MM2 | 0.0064 | 0.0126 | 0.0059 | 0.0131 | 0.0059 | 0   |       |

|     | 386    |        |        |        |        |     | 9402  |
|-----|--------|--------|--------|--------|--------|-----|-------|
|     | CR1    | CR2    | MA1    | MA2    | MM1    | MM2 |       |
| CR1 | 0      | 268    | 204    | 281    | 189    | 188 |       |
| CR2 | 0.0285 | 0      | 308    | 99     | 303    | 302 |       |
| MA1 | 0.0217 | 0.0328 | 0      | 310    | 191    | 190 |       |
| MA2 | 0.0299 | 0.0105 | 0.0330 | 0      | 310    | 309 |       |
| MM1 | 0.0201 | 0.0322 | 0.0203 | 0.0330 | 0      | 1   |       |
| MM2 | 0.0200 | 0.0321 | 0.0202 | 0.0329 | 0.0001 | 0   |       |
|     | 387    |        |        |        |        |     | 15361 |
|     | CR1    | CR2    | MA1    | MA2    | MM1    | MM2 |       |
| CR1 | 0      | 269    | 270    | 297    | 387    | 387 |       |
| CR2 | 0.0175 | 0      | 15     | 456    | 252    | 252 |       |
| MA1 | 0.0176 | 0.0010 | 0      | 457    | 245    | 245 |       |
| MA2 | 0.0193 | 0.0297 | 0.0298 | 0      | 452    | 452 |       |
| MM1 | 0.0252 | 0.0164 | 0.0159 | 0.0294 | 0      | 0   |       |
| MM2 | 0.0252 | 0.0164 | 0.0159 | 0.0294 | 0.0000 | 0   |       |
|     | 388    |        |        |        |        |     | 20079 |
|     | CR1    | CR2    | MA1    | MA2    | MM1    | MM2 |       |
| CR1 | 0      | 350    | 156    | 352    | 156    | 217 |       |
| CR2 | 0.0174 | 0      | 317    | 73     | 317    | 347 |       |
| MA1 | 0.0078 | 0.0158 | 0      | 318    | 0      | 164 |       |
| MA2 | 0.0175 | 0.0036 | 0.0158 | 0      | 318    | 345 |       |
| MM1 | 0.0078 | 0.0158 | 0.0000 | 0.0158 | 0      | 164 |       |
| MM2 | 0.0108 | 0.0173 | 0.0082 | 0.0172 | 0.0082 | 0   |       |
|     | 391    |        |        |        |        |     | 11422 |
|     | CR1    | CR2    | MA1    | MA2    | MM1    | MM2 |       |
| CR1 | 0      | 325    | 232    | 242    | 166    | 169 |       |
| CR2 | 0.0285 | 0      | 194    | 206    | 319    | 321 |       |
| MA1 | 0.0203 | 0.0170 | 0      | 301    | 137    | 227 |       |
| MA2 | 0.0212 | 0.0180 | 0.0264 | 0      | 164    | 223 |       |
| MM1 | 0.0145 | 0.0279 | 0.0120 | 0.0144 | 0      | 143 |       |
| MM2 | 0.0148 | 0.0281 | 0.0199 | 0.0195 | 0.0125 | 0   |       |
|     | 392    |        |        |        |        |     | 14525 |
|     | CR1    | CR2    | MA1    | MA2    | MM1    | MM2 |       |
| CR1 | 0      | 258    | 159    | 227    | 163    | 109 |       |
| CR2 | 0.0178 | 0      | 257    | 151    | 248    | 257 |       |
| MA1 | 0.0109 | 0.0177 | 0      | 184    | 163    | 152 |       |
| MA2 | 0.0156 | 0.0104 | 0.0127 | 0      | 211    | 231 |       |
| MM1 | 0.0112 | 0.0171 | 0.0112 | 0.0145 | 0      | 157 |       |
| MM2 | 0.0075 | 0.0177 | 0.0105 | 0.0159 | 0.0108 | 0   |       |

|     | CR1    | CR2    | MA1    | MA2    | MM1    | MM2 |       |
|-----|--------|--------|--------|--------|--------|-----|-------|
| 393 |        |        |        |        |        |     | 18341 |
| CR1 | 0      | 349    | 329    | 122    | 343    | 350 |       |
| CR2 | 0.0190 | 0      | 174    | 336    | 219    | 203 |       |
| MA1 | 0.0179 | 0.0095 | 0      | 317    | 216    | 202 |       |
| MA2 | 0.0067 | 0.0183 | 0.0173 | 0      | 331    | 338 |       |
| MM1 | 0.0187 | 0.0119 | 0.0118 | 0.0180 | 0      | 203 |       |
| MM2 | 0.0191 | 0.0111 | 0.0110 | 0.0184 | 0.0111 | 0   |       |
| 394 |        |        |        |        |        |     | 11952 |
| CR1 | 0      | 228    | 211    | 102    | 101    | 118 |       |
| CR2 | 0.0191 | 0      | 84     | 224    | 223    | 221 |       |
| MA1 | 0.0177 | 0.0070 | 0      | 206    | 206    | 206 |       |
| MA2 | 0.0085 | 0.0187 | 0.0172 | 0      | 113    | 110 |       |
| MM1 | 0.0085 | 0.0187 | 0.0172 | 0.0095 | 0      | 109 |       |
| MM2 | 0.0099 | 0.0185 | 0.0172 | 0.0092 | 0.0091 | 0   |       |
| 395 |        |        |        |        |        |     | 15585 |
| CR1 | 0      | 264    | 263    | 48     | 263    | 298 |       |
| CR2 | 0.0169 | 0      | 104    | 256    | 104    | 154 |       |
| MA1 | 0.0169 | 0.0067 | 0      | 256    | 0      | 143 |       |
| MA2 | 0.0031 | 0.0164 | 0.0164 | 0      | 256    | 291 |       |
| MM1 | 0.0169 | 0.0067 | 0.0000 | 0.0164 | 0      | 143 |       |
| MM2 | 0.0191 | 0.0099 | 0.0092 | 0.0187 | 0.0092 | 0   |       |
| 396 |        |        |        |        |        |     | 16656 |
| CR1 | 0      | 276    | 288    | 47     | 288    | 287 |       |
| CR2 | 0.0166 | 0      | 121    | 279    | 121    | 132 |       |
| MA1 | 0.0173 | 0.0073 | 0      | 293    | 0      | 105 |       |
| MA2 | 0.0028 | 0.0168 | 0.0176 | 0      | 293    | 290 |       |
| MM1 | 0.0173 | 0.0073 | 0.0000 | 0.0176 | 0      | 105 |       |
| MM2 | 0.0172 | 0.0079 | 0.0063 | 0.0174 | 0.0063 | 0   |       |
| 397 |        |        |        |        |        |     | 11106 |
| CR1 | 0      | 160    | 106    | 187    | 269    | 254 |       |
| CR2 | 0.0144 | 0      | 136    | 223    | 178    | 165 |       |
| MA1 | 0.0095 | 0.0122 | 0      | 109    | 210    | 200 |       |
| MA2 | 0.0168 | 0.0201 | 0.0098 | 0      | 183    | 181 |       |
| MM1 | 0.0242 | 0.0160 | 0.0189 | 0.0165 | 0      | 68  |       |
| MM2 | 0.0229 | 0.0149 | 0.0180 | 0.0163 | 0.0061 | 0   |       |

| 398 |  | CR1    | CR2    | MA1    | MA2    | MM1    | MM2 | 9683  |
|-----|--|--------|--------|--------|--------|--------|-----|-------|
| CR1 |  | 0      | 170    | 102    | 171    | 90     | 102 |       |
| CR2 |  | 0.0176 | 0      | 163    | 17     | 171    | 163 |       |
| MA1 |  | 0.0105 | 0.0168 | 0      | 162    | 79     | 0   |       |
| MA2 |  | 0.0177 | 0.0018 | 0.0167 | 0      | 172    | 162 |       |
| MM1 |  | 0.0093 | 0.0177 | 0.0082 | 0.0178 | 0      | 79  |       |
| MM2 |  | 0.0105 | 0.0168 | 0.0000 | 0.0167 | 0.0082 | 0   |       |
| 400 |  | CR1    | CR2    | MA1    | MA2    | MM1    | MM2 | 11622 |
| CR1 |  | 0      | 240    | 80     | 228    | 82     | 80  |       |
| CR2 |  | 0.0207 | 0      | 238    | 69     | 227    | 238 |       |
| MA1 |  | 0.0069 | 0.0205 | 0      | 226    | 95     | 0   |       |
| MA2 |  | 0.0196 | 0.0059 | 0.0194 | 0      | 217    | 226 |       |
| MM1 |  | 0.0071 | 0.0195 | 0.0082 | 0.0187 | 0      | 95  |       |
| MM2 |  | 0.0069 | 0.0205 | 0.0000 | 0.0194 | 0.0082 | 0   |       |
| 402 |  | CR1    | CR2    | MA1    | MA2    | MM1    | MM2 | 16736 |
| CR1 |  | 0      | 279    | 277    | 274    | 324    | 344 |       |
| CR2 |  | 0.0167 | 0      | 201    | 212    | 194    | 186 |       |
| MA1 |  | 0.0166 | 0.0120 | 0      | 19     | 66     | 229 |       |
| MA2 |  | 0.0164 | 0.0127 | 0.0011 | 0      | 85     | 248 |       |
| MM1 |  | 0.0194 | 0.0116 | 0.0039 | 0.0051 | 0      | 206 |       |
| MM2 |  | 0.0206 | 0.0111 | 0.0137 | 0.0148 | 0.0123 | 0   |       |
| 404 |  | CR1    | CR2    | MA1    | MA2    | MM1    | MM2 | 9283  |
| CR1 |  | 0      | 142    | 52     | 183    | 36     | 85  |       |
| CR2 |  | 0.0153 | 0      | 150    | 117    | 134    | 157 |       |
| MA1 |  | 0.0056 | 0.0162 | 0      | 171    | 16     | 77  |       |
| MA2 |  | 0.0197 | 0.0126 | 0.0184 | 0      | 187    | 194 |       |
| MM1 |  | 0.0039 | 0.0144 | 0.0017 | 0.0201 | 0      | 71  |       |
| MM2 |  | 0.0092 | 0.0169 | 0.0083 | 0.0209 | 0.0076 | 0   |       |
| 407 |  | CR1    | CR2    | MA1    | MA2    | MM1    | MM2 | 12028 |
| CR1 |  | 0      | 151    | 284    | 126    | 121    | 126 |       |
| CR2 |  | 0.0126 | 0      | 199    | 187    | 170    | 187 |       |
| MA1 |  | 0.0236 | 0.0165 | 0      | 296    | 284    | 296 |       |
| MA2 |  | 0.0105 | 0.0155 | 0.0246 | 0      | 92     | 0   |       |
| MM1 |  | 0.0101 | 0.0141 | 0.0236 | 0.0076 | 0      | 92  |       |
| MM2 |  | 0.0105 | 0.0155 | 0.0246 | 0.0000 | 0.0076 | 0   |       |

|     | CR1    | CR2    | MA1    | MA2    | MM1    | MM2 |       |
|-----|--------|--------|--------|--------|--------|-----|-------|
| 408 |        |        |        |        |        |     | 13526 |
| CR1 | 0      | 277    | 56     | 251    | 251    | 238 |       |
| CR2 | 0.0205 | 0      | 278    | 127    | 127    | 127 |       |
| MA1 | 0.0041 | 0.0206 | 0      | 251    | 251    | 239 |       |
| MA2 | 0.0186 | 0.0094 | 0.0186 | 0      | 0      | 95  |       |
| MM1 | 0.0186 | 0.0094 | 0.0186 | 0.0000 | 0      | 95  |       |
| MM2 | 0.0176 | 0.0094 | 0.0177 | 0.0070 | 0.0070 | 0   |       |
| 409 |        |        |        |        |        |     | 17532 |
| CR1 | 0      | 288    | 278    | 94     | 294    | 293 |       |
| CR2 | 0.0164 | 0      | 128    | 294    | 124    | 130 |       |
| MA1 | 0.0159 | 0.0073 | 0      | 282    | 116    | 131 |       |
| MA2 | 0.0054 | 0.0168 | 0.0161 | 0      | 299    | 298 |       |
| MM1 | 0.0168 | 0.0071 | 0.0066 | 0.0171 | 0      | 116 |       |
| MM2 | 0.0167 | 0.0074 | 0.0075 | 0.0170 | 0.0066 | 0   |       |
| 410 |        |        |        |        |        |     | 13582 |
| CR1 | 0      | 228    | 377    | 77     | 350    | 368 |       |
| CR2 | 0.0168 | 0      | 257    | 251    | 256    | 259 |       |
| MA1 | 0.0278 | 0.0189 | 0      | 368    | 165    | 196 |       |
| MA2 | 0.0057 | 0.0185 | 0.0271 | 0      | 339    | 361 |       |
| MM1 | 0.0258 | 0.0188 | 0.0121 | 0.0250 | 0      | 185 |       |
| MM2 | 0.0271 | 0.0191 | 0.0144 | 0.0266 | 0.0136 | 0   |       |
| 413 |        |        |        |        |        |     | 11643 |
| CR1 | 0      | 173    | 167    | 75     | 176    | 182 |       |
| CR2 | 0.0149 | 0      | 90     | 178    | 64     | 84  |       |
| MA1 | 0.0143 | 0.0077 | 0      | 179    | 92     | 111 |       |
| MA2 | 0.0064 | 0.0153 | 0.0154 | 0      | 181    | 187 |       |
| MM1 | 0.0151 | 0.0055 | 0.0079 | 0.0155 | 0      | 93  |       |
| MM2 | 0.0156 | 0.0072 | 0.0095 | 0.0161 | 0.0080 | 0   |       |
| 414 |        |        |        |        |        |     | 5846  |
| CR1 | 0      | 125    | 54     | 128    | 141    | 128 |       |
| CR2 | 0.0214 | 0      | 135    | 52     | 79     | 52  |       |
| MA1 | 0.0092 | 0.0231 | 0      | 137    | 150    | 137 |       |
| MA2 | 0.0219 | 0.0089 | 0.0234 | 0      | 86     | 0   |       |
| MM1 | 0.0241 | 0.0135 | 0.0257 | 0.0147 | 0      | 86  |       |
| MM2 | 0.0219 | 0.0089 | 0.0234 | 0.0000 | 0.0147 | 0   |       |

|     | CR1    | CR2    | MA1    | MA2    | MM1    | MM2 |       |
|-----|--------|--------|--------|--------|--------|-----|-------|
| 417 |        |        |        |        |        |     | 10057 |
| CR1 | 0      | 184    | 173    | 51     | 66     | 51  |       |
| CR2 | 0.0183 | 0      | 31     | 190    | 197    | 190 |       |
| MA1 | 0.0172 | 0.0031 | 0      | 179    | 186    | 179 |       |
| MA2 | 0.0051 | 0.0189 | 0.0178 | 0      | 67     | 0   |       |
| MM1 | 0.0066 | 0.0196 | 0.0185 | 0.0067 | 0      | 67  |       |
| MM2 | 0.0051 | 0.0189 | 0.0178 | 0.0000 | 0.0067 | 0   |       |
| 418 |        |        |        |        |        |     | 13107 |
| CR1 | 0      | 220    | 105    | 211    | 135    | 127 |       |
| CR2 | 0.0168 | 0      | 231    | 70     | 233    | 237 |       |
| MA1 | 0.0080 | 0.0176 | 0      | 225    | 153    | 128 |       |
| MA2 | 0.0161 | 0.0053 | 0.0172 | 0      | 229    | 226 |       |
| MM1 | 0.0103 | 0.0178 | 0.0117 | 0.0175 | 0      | 145 |       |
| MM2 | 0.0097 | 0.0181 | 0.0098 | 0.0172 | 0.0111 | 0   |       |
| 422 |        |        |        |        |        |     | 14783 |
| CR1 | 0      | 292    | 136    | 295    | 174    | 141 |       |
| CR2 | 0.0198 | 0      | 311    | 68     | 309    | 305 |       |
| MA1 | 0.0092 | 0.0210 | 0      | 314    | 134    | 97  |       |
| MA2 | 0.0200 | 0.0046 | 0.0212 | 0      | 312    | 310 |       |
| MM1 | 0.0118 | 0.0209 | 0.0091 | 0.0211 | 0      | 130 |       |
| MM2 | 0.0095 | 0.0206 | 0.0066 | 0.0210 | 0.0088 | 0   |       |
| 424 |        |        |        |        |        |     | 10954 |
| CR1 | 0      | 295    | 189    | 253    | 145    | 139 |       |
| CR2 | 0.0269 | 0      | 316    | 159    | 313    | 298 |       |
| MA1 | 0.0173 | 0.0288 | 0      | 211    | 174    | 176 |       |
| MA2 | 0.0231 | 0.0145 | 0.0193 | 0      | 257    | 245 |       |
| MM1 | 0.0132 | 0.0286 | 0.0159 | 0.0235 | 0      | 131 |       |
| MM2 | 0.0127 | 0.0272 | 0.0161 | 0.0224 | 0.0120 | 0   |       |
| 427 |        |        |        |        |        |     | 15243 |
| CR1 | 0      | 296    | 152    | 286    | 150    | 150 |       |
| CR2 | 0.0194 | 0      | 281    | 114    | 293    | 293 |       |
| MA1 | 0.0100 | 0.0184 | 0      | 278    | 132    | 130 |       |
| MA2 | 0.0188 | 0.0075 | 0.0182 | 0      | 287    | 287 |       |
| MM1 | 0.0098 | 0.0192 | 0.0087 | 0.0188 | 0      | 2   |       |
| MM2 | 0.0098 | 0.0192 | 0.0085 | 0.0188 | 0.0001 | 0   |       |

|     | CR1    | CR2    | MA1    | MA2    | MM1    | MM2 |       |
|-----|--------|--------|--------|--------|--------|-----|-------|
| 428 |        |        |        |        |        |     | 16934 |
| CR1 | 0      | 304    | 303    | 33     | 163    | 27  |       |
| CR2 | 0.0180 | 0      | 33     | 304    | 292    | 306 |       |
| MA1 | 0.0179 | 0.0019 | 0      | 303    | 293    | 305 |       |
| MA2 | 0.0019 | 0.0180 | 0.0179 | 0      | 158    | 10  |       |
| MM1 | 0.0096 | 0.0172 | 0.0173 | 0.0093 | 0      | 164 |       |
| MM2 | 0.0016 | 0.0181 | 0.0180 | 0.0006 | 0.0097 | 0   |       |
| 429 |        |        |        |        |        |     | 13366 |
| CR1 | 0      | 276    | 275    | 90     | 280    | 280 |       |
| CR2 | 0.0206 | 0      | 128    | 286    | 142    | 142 |       |
| MA1 | 0.0206 | 0.0096 | 0      | 282    | 153    | 153 |       |
| MA2 | 0.0067 | 0.0214 | 0.0211 | 0      | 286    | 286 |       |
| MM1 | 0.0209 | 0.0106 | 0.0114 | 0.0214 | 0      | 0   |       |
| MM2 | 0.0209 | 0.0106 | 0.0114 | 0.0214 | 0.0000 | 0   |       |
| 432 |        |        |        |        |        |     | 11131 |
| CR1 | 0      | 112    | 102    | 58     | 32     | 41  |       |
| CR2 | 0.0101 | 0      | 34     | 88     | 116    | 117 |       |
| MA1 | 0.0092 | 0.0031 | 0      | 96     | 104    | 99  |       |
| MA2 | 0.0052 | 0.0079 | 0.0086 | 0      | 54     | 33  |       |
| MM1 | 0.0029 | 0.0104 | 0.0093 | 0.0049 | 0      | 33  |       |
| MM2 | 0.0037 | 0.0105 | 0.0089 | 0.0030 | 0.0030 | 0   |       |
| 433 |        |        |        |        |        |     | 11833 |
| CR1 | 0      | 172    | 80     | 172    | 98     | 80  |       |
| CR2 | 0.0145 | 0      | 172    | 0      | 203    | 172 |       |
| MA1 | 0.0068 | 0.0145 | 0      | 172    | 100    | 0   |       |
| MA2 | 0.0145 | 0.0000 | 0.0145 | 0      | 203    | 172 |       |
| MM1 | 0.0083 | 0.0172 | 0.0085 | 0.0172 | 0      | 100 |       |
| MM2 | 0.0068 | 0.0145 | 0.0000 | 0.0145 | 0.0085 | 0   |       |
| 435 |        |        |        |        |        |     | 29510 |
| CR1 | 0      | 633    | 625    | 176    | 620    | 625 |       |
| CR2 | 0.0215 | 0      | 299    | 639    | 320    | 299 |       |
| MA1 | 0.0212 | 0.0101 | 0      | 634    | 314    | 0   |       |
| MA2 | 0.0060 | 0.0217 | 0.0215 | 0      | 630    | 634 |       |
| MM1 | 0.0210 | 0.0108 | 0.0106 | 0.0213 | 0      | 314 |       |
| MM2 | 0.0212 | 0.0101 | 0.0000 | 0.0215 | 0.0106 | 0   |       |



|     | 436    |        |        |        |        |     | 10400 |
|-----|--------|--------|--------|--------|--------|-----|-------|
|     | CR1    | CR2    | MA1    | MA2    | MM1    | MM2 |       |
| CR1 | 0      | 228    | 220    | 45     | 210    | 225 |       |
| CR2 | 0.0219 | 0      | 129    | 223    | 116    | 127 |       |
| MA1 | 0.0212 | 0.0124 | 0      | 217    | 111    | 128 |       |
| MA2 | 0.0043 | 0.0214 | 0.0209 | 0      | 205    | 220 |       |
| MM1 | 0.0202 | 0.0112 | 0.0107 | 0.0197 | 0      | 100 |       |
| MM2 | 0.0216 | 0.0122 | 0.0123 | 0.0212 | 0.0096 | 0   |       |
|     | 437    |        |        |        |        |     | 16654 |
|     | CR1    | CR2    | MA1    | MA2    | MM1    | MM2 |       |
| CR1 | 0      | 243    | 156    | 97     | 245    | 244 |       |
| CR2 | 0.0146 | 0      | 165    | 208    | 99     | 117 |       |
| MA1 | 0.0094 | 0.0099 | 0      | 119    | 129    | 179 |       |
| MA2 | 0.0058 | 0.0125 | 0.0071 | 0      | 180    | 210 |       |
| MM1 | 0.0147 | 0.0059 | 0.0077 | 0.0108 | 0      | 111 |       |
| MM2 | 0.0147 | 0.0070 | 0.0107 | 0.0126 | 0.0067 | 0   |       |
|     | 441    |        |        |        |        |     | 8680  |
|     | CR1    | CR2    | MA1    | MA2    | MM1    | MM2 |       |
| CR1 | 0      | 246    | 134    | 115    | 114    | 104 |       |
| CR2 | 0.0283 | 0      | 182    | 199    | 235    | 235 |       |
| MA1 | 0.0154 | 0.0210 | 0      | 35     | 77     | 97  |       |
| MA2 | 0.0132 | 0.0229 | 0.0040 | 0      | 42     | 78  |       |
| MM1 | 0.0131 | 0.0271 | 0.0089 | 0.0048 | 0      | 63  |       |
| MM2 | 0.0120 | 0.0271 | 0.0112 | 0.0090 | 0.0073 | 0   |       |
|     | 442    |        |        |        |        |     | 16573 |
|     | CR1    | CR2    | MA1    | MA2    | MM1    | MM2 |       |
| CR1 | 0      | 293    | 289    | 239    | 186    | 175 |       |
| CR2 | 0.0177 | 0      | 42     | 194    | 304    | 304 |       |
| MA1 | 0.0174 | 0.0025 | 0      | 172    | 302    | 282 |       |
| MA2 | 0.0144 | 0.0117 | 0.0104 | 0      | 264    | 110 |       |
| MM1 | 0.0112 | 0.0183 | 0.0182 | 0.0159 | 0      | 219 |       |
| MM2 | 0.0106 | 0.0183 | 0.0170 | 0.0066 | 0.0132 | 0   |       |
|     | 445    |        |        |        |        |     | 14604 |
|     | CR1    | CR2    | MA1    | MA2    | MM1    | MM2 |       |
| CR1 | 0      | 338    | 198    | 344    | 197    | 221 |       |
| CR2 | 0.0231 | 0      | 292    | 52     | 301    | 297 |       |
| MA1 | 0.0136 | 0.0200 | 0      | 298    | 184    | 176 |       |
| MA2 | 0.0236 | 0.0036 | 0.0204 | 0      | 309    | 299 |       |
| MM1 | 0.0135 | 0.0206 | 0.0126 | 0.0212 | 0      | 164 |       |
| MM2 | 0.0151 | 0.0203 | 0.0121 | 0.0205 | 0.0112 | 0   |       |

|     | CR1    | CR2    | MA1    | MA2    | MM1    | MM2 |       |
|-----|--------|--------|--------|--------|--------|-----|-------|
| 447 |        |        |        |        |        |     | 16392 |
| CR1 | 0      | 346    | 110    | 346    | 144    | 111 |       |
| CR2 | 0.0211 | 0      | 330    | 0      | 341    | 341 |       |
| MA1 | 0.0067 | 0.0201 | 0      | 330    | 139    | 113 |       |
| MA2 | 0.0211 | 0.0000 | 0.0201 | 0      | 341    | 341 |       |
| MM1 | 0.0088 | 0.0208 | 0.0085 | 0.0208 | 0      | 126 |       |
| MM2 | 0.0068 | 0.0208 | 0.0069 | 0.0208 | 0.0077 | 0   |       |
| 448 |        |        |        |        |        |     | 10630 |
| CR1 | 0      | 259    | 240    | 123    | 242    | 240 |       |
| CR2 | 0.0244 | 0      | 120    | 238    | 106    | 120 |       |
| MA1 | 0.0226 | 0.0113 | 0      | 215    | 95     | 0   |       |
| MA2 | 0.0116 | 0.0224 | 0.0202 | 0      | 220    | 215 |       |
| MM1 | 0.0228 | 0.0100 | 0.0089 | 0.0207 | 0      | 95  |       |
| MM2 | 0.0226 | 0.0113 | 0.0000 | 0.0202 | 0.0089 | 0   |       |
| 452 |        |        |        |        |        |     | 7486  |
| CR1 | 0      | 164    | 166    | 105    | 105    | 88  |       |
| CR2 | 0.0219 | 0      | 21     | 169    | 169    | 143 |       |
| MA1 | 0.0222 | 0.0028 | 0      | 170    | 170    | 144 |       |
| MA2 | 0.0140 | 0.0226 | 0.0227 | 0      | 0      | 99  |       |
| MM1 | 0.0140 | 0.0226 | 0.0227 | 0.0000 | 0      | 99  |       |
| MM2 | 0.0118 | 0.0191 | 0.0192 | 0.0132 | 0.0132 | 0   |       |
| 453 |        |        |        |        |        |     | 12819 |
| CR1 | 0      | 342    | 237    | 349    | 225    | 219 |       |
| CR2 | 0.0267 | 0      | 309    | 54     | 333    | 314 |       |
| MA1 | 0.0185 | 0.0241 | 0      | 316    | 263    | 248 |       |
| MA2 | 0.0272 | 0.0042 | 0.0247 | 0      | 339    | 322 |       |
| MM1 | 0.0176 | 0.0260 | 0.0205 | 0.0264 | 0      | 159 |       |
| MM2 | 0.0171 | 0.0245 | 0.0193 | 0.0251 | 0.0124 | 0   |       |
| 454 |        |        |        |        |        |     | 12570 |
| CR1 | 0      | 205    | 120    | 215    | 114    | 120 |       |
| CR2 | 0.0163 | 0      | 250    | 53     | 245    | 250 |       |
| MA1 | 0.0095 | 0.0199 | 0      | 254    | 103    | 0   |       |
| MA2 | 0.0171 | 0.0042 | 0.0202 | 0      | 252    | 254 |       |
| MM1 | 0.0091 | 0.0195 | 0.0082 | 0.0200 | 0      | 103 |       |
| MM2 | 0.0095 | 0.0199 | 0.0000 | 0.0202 | 0.0082 | 0   |       |

|     | Matrices MA-MM-CR |        |        |        |        |     |       |
|-----|-------------------|--------|--------|--------|--------|-----|-------|
| 456 |                   |        |        |        |        |     | 10232 |
|     | CR1               | CR2    | MA1    | MA2    | MM1    | MM2 |       |
| CR1 | 0                 | 230    | 143    | 252    | 143    | 127 |       |
| CR2 | 0.0225            | 0      | 205    | 97     | 205    | 201 |       |
| MA1 | 0.0140            | 0.0200 | 0      | 226    | 0      | 134 |       |
| MA2 | 0.0246            | 0.0095 | 0.0221 | 0      | 226    | 223 |       |
| MM1 | 0.0140            | 0.0200 | 0.0000 | 0.0221 | 0      | 134 |       |
| MM2 | 0.0124            | 0.0196 | 0.0131 | 0.0218 | 0.0131 | 0   |       |
| 457 |                   |        |        |        |        |     | 6287  |
|     | CR1               | CR2    | MA1    | MA2    | MM1    | MM2 |       |
| CR1 | 0                 | 124    | 59     | 90     | 82     | 90  |       |
| CR2 | 0.0197            | 0      | 83     | 74     | 88     | 74  |       |
| MA1 | 0.0094            | 0.0132 | 0      | 112    | 121    | 112 |       |
| MA2 | 0.0143            | 0.0118 | 0.0178 | 0      | 44     | 0   |       |
| MM1 | 0.0130            | 0.0140 | 0.0192 | 0.0070 | 0      | 44  |       |
| MM2 | 0.0143            | 0.0118 | 0.0178 | 0.0000 | 0.0070 | 0   |       |
| 458 |                   |        |        |        |        |     | 15000 |
|     | CR1               | CR2    | MA1    | MA2    | MM1    | MM2 |       |
| CR1 | 0                 | 321    | 308    | 88     | 310    | 308 |       |
| CR2 | 0.0214            | 0      | 122    | 329    | 129    | 122 |       |
| MA1 | 0.0205            | 0.0081 | 0      | 318    | 65     | 0   |       |
| MA2 | 0.0059            | 0.0219 | 0.0212 | 0      | 320    | 318 |       |
| MM1 | 0.0207            | 0.0086 | 0.0043 | 0.0213 | 0      | 65  |       |
| MM2 | 0.0205            | 0.0081 | 0.0000 | 0.0212 | 0.0043 | 0   |       |
| 459 |                   |        |        |        |        |     | 11549 |
|     | CR1               | CR2    | MA1    | MA2    | MM1    | MM2 |       |
| CR1 | 0                 | 283    | 151    | 274    | 161    | 141 |       |
| CR2 | 0.0245            | 0      | 270    | 53     | 287    | 287 |       |
| MA1 | 0.0131            | 0.0234 | 0      | 263    | 189    | 138 |       |
| MA2 | 0.0237            | 0.0046 | 0.0228 | 0      | 281    | 277 |       |
| MM1 | 0.0139            | 0.0249 | 0.0164 | 0.0243 | 0      | 191 |       |
| MM2 | 0.0122            | 0.0249 | 0.0119 | 0.0240 | 0.0165 | 0   |       |
| 461 |                   |        |        |        |        |     | 11337 |
|     | CR1               | CR2    | MA1    | MA2    | MM1    | MM2 |       |
| CR1 | 0                 | 257    | 113    | 259    | 107    | 124 |       |
| CR2 | 0.0227            | 0      | 236    | 36     | 264    | 259 |       |
| MA1 | 0.0100            | 0.0208 | 0      | 236    | 28     | 131 |       |
| MA2 | 0.0228            | 0.0032 | 0.0208 | 0      | 264    | 259 |       |
| MM1 | 0.0094            | 0.0233 | 0.0025 | 0.0233 | 0      | 103 |       |
| MM2 | 0.0109            | 0.0228 | 0.0116 | 0.0228 | 0.0091 | 0   |       |

|     | CR1    | CR2    | MA1    | MA2    | MM1    | MM2 |       |
|-----|--------|--------|--------|--------|--------|-----|-------|
| 462 |        |        |        |        |        |     | 12233 |
| CR1 | 0      | 322    | 282    | 132    | 292    | 293 |       |
| CR2 | 0.0263 | 0      | 150    | 318    | 133    | 141 |       |
| MA1 | 0.0231 | 0.0123 | 0      | 281    | 132    | 124 |       |
| MA2 | 0.0108 | 0.0260 | 0.0230 | 0      | 286    | 284 |       |
| MM1 | 0.0239 | 0.0109 | 0.0108 | 0.0234 | 0      | 148 |       |
| MM2 | 0.0240 | 0.0115 | 0.0101 | 0.0232 | 0.0121 | 0   |       |
| 464 |        |        |        |        |        |     | 14277 |
| CR1 | 0      | 218    | 214    | 88     | 218    | 226 |       |
| CR2 | 0.0153 | 0      | 87     | 237    | 0      | 68  |       |
| MA1 | 0.0150 | 0.0061 | 0      | 228    | 87     | 19  |       |
| MA2 | 0.0062 | 0.0166 | 0.0160 | 0      | 237    | 247 |       |
| MM1 | 0.0153 | 0.0000 | 0.0061 | 0.0166 | 0      | 68  |       |
| MM2 | 0.0158 | 0.0048 | 0.0013 | 0.0173 | 0.0048 | 0   |       |
| 465 |        |        |        |        |        |     | 15674 |
| CR1 | 0      | 221    | 216    | 76     | 76     | 85  |       |
| CR2 | 0.0141 | 0      | 49     | 217    | 217    | 209 |       |
| MA1 | 0.0138 | 0.0031 | 0      | 211    | 211    | 204 |       |
| MA2 | 0.0048 | 0.0138 | 0.0135 | 0      | 0      | 83  |       |
| MM1 | 0.0048 | 0.0138 | 0.0135 | 0.0000 | 0      | 83  |       |
| MM2 | 0.0054 | 0.0133 | 0.0130 | 0.0053 | 0.0053 | 0   |       |
| 467 |        |        |        |        |        |     | 13327 |
| CR1 | 0      | 179    | 134    | 161    | 107    | 106 |       |
| CR2 | 0.0134 | 0      | 135    | 80     | 209    | 215 |       |
| MA1 | 0.0101 | 0.0101 | 0      | 83     | 154    | 158 |       |
| MA2 | 0.0121 | 0.0060 | 0.0062 | 0      | 198    | 201 |       |
| MM1 | 0.0080 | 0.0157 | 0.0116 | 0.0149 | 0      | 61  |       |
| MM2 | 0.0080 | 0.0161 | 0.0119 | 0.0151 | 0.0046 | 0   |       |
| 472 |        |        |        |        |        |     | 13996 |
| CR1 | 0      | 262    | 250    | 124    | 124    | 129 |       |
| CR2 | 0.0187 | 0      | 68     | 260    | 260    | 262 |       |
| MA1 | 0.0179 | 0.0049 | 0      | 247    | 247    | 251 |       |
| MA2 | 0.0089 | 0.0186 | 0.0176 | 0      | 0      | 149 |       |
| MM1 | 0.0089 | 0.0186 | 0.0176 | 0.0000 | 0      | 149 |       |
| MM2 | 0.0092 | 0.0187 | 0.0179 | 0.0106 | 0.0106 | 0   |       |

|     | 473    |        |        |        |        |     | 7669  |
|-----|--------|--------|--------|--------|--------|-----|-------|
|     | CR1    | CR2    | MA1    | MA2    | MM1    | MM2 |       |
| CR1 | 0      | 102    | 101    | 6      | 99     | 96  |       |
| CR2 | 0.0133 | 0      | 33     | 100    | 19     | 24  |       |
| MA1 | 0.0132 | 0.0043 | 0      | 99     | 28     | 23  |       |
| MA2 | 0.0008 | 0.0130 | 0.0129 | 0      | 97     | 94  |       |
| MM1 | 0.0129 | 0.0025 | 0.0037 | 0.0126 | 0      | 9   |       |
| MM2 | 0.0125 | 0.0031 | 0.0030 | 0.0123 | 0.0012 | 0   |       |
|     | 475    |        |        |        |        |     | 8551  |
|     | CR1    | CR2    | MA1    | MA2    | MM1    | MM2 |       |
| CR1 | 0      | 100    | 34     | 178    | 180    | 189 |       |
| CR2 | 0.0117 | 0      | 126    | 118    | 118    | 133 |       |
| MA1 | 0.0040 | 0.0147 | 0      | 185    | 187    | 196 |       |
| MA2 | 0.0208 | 0.0138 | 0.0216 | 0      | 6      | 63  |       |
| MM1 | 0.0211 | 0.0138 | 0.0219 | 0.0007 | 0      | 67  |       |
| MM2 | 0.0221 | 0.0156 | 0.0229 | 0.0074 | 0.0078 | 0   |       |
|     | 476    |        |        |        |        |     | 12824 |
|     | CR1    | CR2    | MA1    | MA2    | MM1    | MM2 |       |
| CR1 | 0      | 239    | 154    | 241    | 174    | 167 |       |
| CR2 | 0.0186 | 0      | 290    | 95     | 287    | 257 |       |
| MA1 | 0.0120 | 0.0226 | 0      | 285    | 174    | 181 |       |
| MA2 | 0.0188 | 0.0074 | 0.0222 | 0      | 280    | 250 |       |
| MM1 | 0.0136 | 0.0224 | 0.0136 | 0.0218 | 0      | 156 |       |
| MM2 | 0.0130 | 0.0200 | 0.0141 | 0.0195 | 0.0122 | 0   |       |
|     | 477    |        |        |        |        |     | 20695 |
|     | CR1    | CR2    | MA1    | MA2    | MM1    | MM2 |       |
| CR1 | 0      | 284    | 132    | 261    | 139    | 128 |       |
| CR2 | 0.0137 | 0      | 280    | 109    | 266    | 292 |       |
| MA1 | 0.0064 | 0.0135 | 0      | 224    | 138    | 119 |       |
| MA2 | 0.0126 | 0.0053 | 0.0108 | 0      | 259    | 247 |       |
| MM1 | 0.0067 | 0.0129 | 0.0067 | 0.0125 | 0      | 155 |       |
| MM2 | 0.0062 | 0.0141 | 0.0058 | 0.0119 | 0.0075 | 0   |       |
|     | 478    |        |        |        |        |     | 19160 |
|     | CR1    | CR2    | MA1    | MA2    | MM1    | MM2 |       |
| CR1 | 0      | 401    | 394    | 158    | 394    | 393 |       |
| CR2 | 0.0209 | 0      | 166    | 410    | 166    | 144 |       |
| MA1 | 0.0206 | 0.0087 | 0      | 399    | 0      | 125 |       |
| MA2 | 0.0082 | 0.0214 | 0.0208 | 0      | 399    | 400 |       |
| MM1 | 0.0206 | 0.0087 | 0.0000 | 0.0208 | 0      | 125 |       |
| MM2 | 0.0205 | 0.0075 | 0.0065 | 0.0209 | 0.0065 | 0   |       |

| 480 |        |        |        |        |        |     | 7398  |
|-----|--------|--------|--------|--------|--------|-----|-------|
|     | CR1    | CR2    | MA1    | MA2    | MM1    | MM2 |       |
| CR1 | 0      | 75     | 20     | 76     | 18     | 20  |       |
| CR2 | 0.0101 | 0      | 72     | 19     | 74     | 72  |       |
| MA1 | 0.0027 | 0.0097 | 0      | 73     | 26     | 0   |       |
| MA2 | 0.0103 | 0.0026 | 0.0099 | 0      | 74     | 73  |       |
| MM1 | 0.0024 | 0.0100 | 0.0035 | 0.0100 | 0      | 26  |       |
| MM2 | 0.0027 | 0.0097 | 0.0000 | 0.0099 | 0.0035 | 0   |       |
| 481 |        |        |        |        |        |     | 11860 |
|     | CR1    | CR2    | MA1    | MA2    | MM1    | MM2 |       |
| CR1 | 0      | 149    | 348    | 206    | 373    | 348 |       |
| CR2 | 0.0126 | 0      | 298    | 330    | 320    | 298 |       |
| MA1 | 0.0293 | 0.0251 | 0      | 416    | 244    | 0   |       |
| MA2 | 0.0174 | 0.0278 | 0.0351 | 0      | 438    | 416 |       |
| MM1 | 0.0315 | 0.0270 | 0.0206 | 0.0369 | 0      | 244 |       |
| MM2 | 0.0293 | 0.0251 | 0.0000 | 0.0351 | 0.0206 | 0   |       |
| 482 |        |        |        |        |        |     | 20094 |
|     | CR1    | CR2    | MA1    | MA2    | MM1    | MM2 |       |
| CR1 | 0      | 372    | 326    | 383    | 326    | 305 |       |
| CR2 | 0.0185 | 0      | 444    | 206    | 449    | 444 |       |
| MA1 | 0.0162 | 0.0221 | 0      | 439    | 221    | 33  |       |
| MA2 | 0.0191 | 0.0103 | 0.0218 | 0      | 438    | 439 |       |
| MM1 | 0.0162 | 0.0223 | 0.0110 | 0.0218 | 0      | 188 |       |
| MM2 | 0.0152 | 0.0221 | 0.0016 | 0.0218 | 0.0094 | 0   |       |
| 483 |        |        |        |        |        |     | 9877  |
|     | CR1    | CR2    | MA1    | MA2    | MM1    | MM2 |       |
| CR1 | 0      | 140    | 159    | 92     | 166    | 159 |       |
| CR2 | 0.0142 | 0      | 81     | 188    | 92     | 81  |       |
| MA1 | 0.0161 | 0.0082 | 0      | 203    | 87     | 0   |       |
| MA2 | 0.0093 | 0.0190 | 0.0206 | 0      | 206    | 203 |       |
| MM1 | 0.0168 | 0.0093 | 0.0088 | 0.0209 | 0      | 87  |       |
| MM2 | 0.0161 | 0.0082 | 0.0000 | 0.0206 | 0.0088 | 0   |       |
| 484 |        |        |        |        |        |     | 12197 |
|     | CR1    | CR2    | MA1    | MA2    | MM1    | MM2 |       |
| CR1 | 0      | 128    | 36     | 124    | 36     | 32  |       |
| CR2 | 0.0105 | 0      | 129    | 32     | 129    | 127 |       |
| MA1 | 0.0030 | 0.0106 | 0      | 125    | 0      | 40  |       |
| MA2 | 0.0102 | 0.0026 | 0.0102 | 0      | 125    | 125 |       |
| MM1 | 0.0030 | 0.0106 | 0.0000 | 0.0102 | 0      | 40  |       |
| MM2 | 0.0026 | 0.0104 | 0.0033 | 0.0102 | 0.0033 | 0   |       |

|     | 485    |        |        |        |        |     | 10128 |
|-----|--------|--------|--------|--------|--------|-----|-------|
|     | CR1    | CR2    | MA1    | MA2    | MM1    | MM2 |       |
| CR1 | 0      | 184    | 95     | 187    | 199    | 187 |       |
| CR2 | 0.0182 | 0      | 193    | 78     | 90     | 78  |       |
| MA1 | 0.0094 | 0.0191 | 0      | 198    | 203    | 198 |       |
| MA2 | 0.0185 | 0.0077 | 0.0195 | 0      | 106    | 0   |       |
| MM1 | 0.0196 | 0.0089 | 0.0200 | 0.0105 | 0      | 106 |       |
| MM2 | 0.0185 | 0.0077 | 0.0195 | 0.0000 | 0.0105 | 0   |       |
|     | 486    |        |        |        |        |     | 14553 |
|     | CR1    | CR2    | MA1    | MA2    | MM1    | MM2 |       |
| CR1 | 0      | 265    | 322    | 199    | 325    | 312 |       |
| CR2 | 0.0182 | 0      | 166    | 358    | 179    | 177 |       |
| MA1 | 0.0221 | 0.0114 | 0      | 363    | 195    | 201 |       |
| MA2 | 0.0137 | 0.0246 | 0.0249 | 0      | 340    | 345 |       |
| MM1 | 0.0223 | 0.0123 | 0.0134 | 0.0234 | 0      | 186 |       |
| MM2 | 0.0214 | 0.0122 | 0.0138 | 0.0237 | 0.0128 | 0   |       |
|     | 487    |        |        |        |        |     | 12026 |
|     | CR1    | CR2    | MA1    | MA2    | MM1    | MM2 |       |
| CR1 | 0      | 310    | 227    | 256    | 148    | 190 |       |
| CR2 | 0.0258 | 0      | 256    | 212    | 303    | 308 |       |
| MA1 | 0.0189 | 0.0213 | 0      | 58     | 221    | 206 |       |
| MA2 | 0.0213 | 0.0176 | 0.0048 | 0      | 258    | 243 |       |
| MM1 | 0.0123 | 0.0252 | 0.0184 | 0.0215 | 0      | 184 |       |
| MM2 | 0.0158 | 0.0256 | 0.0171 | 0.0202 | 0.0153 | 0   |       |
|     | 488    |        |        |        |        |     | 16102 |
|     | CR1    | CR2    | MA1    | MA2    | MM1    | MM2 |       |
| CR1 | 0      | 331    | 185    | 316    | 185    | 188 |       |
| CR2 | 0.0206 | 0      | 303    | 111    | 303    | 306 |       |
| MA1 | 0.0115 | 0.0188 | 0      | 271    | 0      | 3   |       |
| MA2 | 0.0196 | 0.0069 | 0.0168 | 0      | 271    | 274 |       |
| MM1 | 0.0115 | 0.0188 | 0.0000 | 0.0168 | 0      | 3   |       |
| MM2 | 0.0117 | 0.0190 | 0.0002 | 0.0170 | 0.0002 | 0   |       |
|     | 491    |        |        |        |        |     | 10487 |
|     | CR1    | CR2    | MA1    | MA2    | MM1    | MM2 |       |
| CR1 | 0      | 246    | 220    | 107    | 248    | 253 |       |
| CR2 | 0.0235 | 0      | 127    | 235    | 98     | 112 |       |
| MA1 | 0.0210 | 0.0121 | 0      | 209    | 29     | 117 |       |
| MA2 | 0.0102 | 0.0224 | 0.0199 | 0      | 237    | 238 |       |
| MM1 | 0.0236 | 0.0093 | 0.0028 | 0.0226 | 0      | 89  |       |
| MM2 | 0.0241 | 0.0107 | 0.0112 | 0.0227 | 0.0085 | 0   |       |

|     | 492    |        |        |        |        |     | 12510 |
|-----|--------|--------|--------|--------|--------|-----|-------|
|     | CR1    | CR2    | MA1    | MA2    | MM1    | MM2 |       |
| CR1 | 0      | 290    | 169    | 276    | 163    | 179 |       |
| CR2 | 0.0232 | 0      | 285    | 85     | 290    | 279 |       |
| MA1 | 0.0135 | 0.0228 | 0      | 275    | 128    | 169 |       |
| MA2 | 0.0221 | 0.0068 | 0.0220 | 0      | 281    | 274 |       |
| MM1 | 0.0130 | 0.0232 | 0.0102 | 0.0225 | 0      | 208 |       |
| MM2 | 0.0143 | 0.0223 | 0.0135 | 0.0219 | 0.0166 | 0   |       |
|     | 493    |        |        |        |        |     | 19008 |
|     | CR1    | CR2    | MA1    | MA2    | MM1    | MM2 |       |
| CR1 | 0      | 135    | 102    | 143    | 164    | 102 |       |
| CR2 | 0.0071 | 0      | 217    | 68     | 218    | 217 |       |
| MA1 | 0.0054 | 0.0114 | 0      | 233    | 135    | 0   |       |
| MA2 | 0.0075 | 0.0036 | 0.0123 | 0      | 232    | 233 |       |
| MM1 | 0.0086 | 0.0115 | 0.0071 | 0.0122 | 0      | 135 |       |
| MM2 | 0.0054 | 0.0114 | 0.0000 | 0.0123 | 0.0071 | 0   |       |
|     | 494    |        |        |        |        |     | 11484 |
|     | CR1    | CR2    | MA1    | MA2    | MM1    | MM2 |       |
| CR1 | 0      | 263    | 119    | 214    | 119    | 155 |       |
| CR2 | 0.0229 | 0      | 272    | 164    | 272    | 276 |       |
| MA1 | 0.0104 | 0.0237 | 0      | 169    | 0      | 141 |       |
| MA2 | 0.0186 | 0.0143 | 0.0147 | 0      | 169    | 205 |       |
| MM1 | 0.0104 | 0.0237 | 0.0000 | 0.0147 | 0      | 141 |       |
| MM2 | 0.0135 | 0.0240 | 0.0123 | 0.0179 | 0.0123 | 0   |       |
|     | 496    |        |        |        |        |     | 17913 |
|     | CR1    | CR2    | MA1    | MA2    | MM1    | MM2 |       |
| CR1 | 0      | 77     | 238    | 427    | 434    | 457 |       |
| CR2 | 0.0043 | 0      | 207    | 470    | 458    | 485 |       |
| MA1 | 0.0133 | 0.0116 | 0      | 478    | 455    | 488 |       |
| MA2 | 0.0238 | 0.0262 | 0.0267 | 0      | 282    | 248 |       |
| MM1 | 0.0242 | 0.0256 | 0.0254 | 0.0157 | 0      | 272 |       |
| MM2 | 0.0255 | 0.0271 | 0.0272 | 0.0138 | 0.0152 | 0   |       |
|     | 500    |        |        |        |        |     | 10444 |
|     | CR1    | CR2    | MA1    | MA2    | MM1    | MM2 |       |
| CR1 | 0      | 0      | 158    | 211    | 158    | 102 |       |
| CR2 | 0.0000 | 0      | 158    | 211    | 158    | 102 |       |
| MA1 | 0.0151 | 0.0151 | 0      | 222    | 0      | 147 |       |
| MA2 | 0.0202 | 0.0202 | 0.0213 | 0      | 222    | 209 |       |
| MM1 | 0.0151 | 0.0151 | 0.0000 | 0.0213 | 0      | 147 |       |
| MM2 | 0.0098 | 0.0098 | 0.0141 | 0.0200 | 0.0141 | 0   |       |



| 501 |        |        |        |        |        |     | 13769 |
|-----|--------|--------|--------|--------|--------|-----|-------|
|     | CR1    | CR2    | MA1    | MA2    | MM1    | MM2 |       |
| CR1 | 0      | 324    | 132    | 329    | 102    | 134 |       |
| CR2 | 0.0235 | 0      | 332    | 73     | 314    | 327 |       |
| MA1 | 0.0096 | 0.0241 | 0      | 337    | 126    | 142 |       |
| MA2 | 0.0239 | 0.0053 | 0.0245 | 0      | 321    | 332 |       |
| MM1 | 0.0074 | 0.0228 | 0.0092 | 0.0233 | 0      | 126 |       |
| MM2 | 0.0097 | 0.0237 | 0.0103 | 0.0241 | 0.0092 | 0   |       |
| 502 |        |        |        |        |        |     | 12465 |
|     | CR1    | CR2    | MA1    | MA2    | MM1    | MM2 |       |
| CR1 | 0      | 211    | 214    | 49     | 211    | 214 |       |
| CR2 | 0.0169 | 0      | 95     | 205    | 66     | 95  |       |
| MA1 | 0.0172 | 0.0076 | 0      | 208    | 105    | 0   |       |
| MA2 | 0.0039 | 0.0164 | 0.0167 | 0      | 205    | 208 |       |
| MM1 | 0.0169 | 0.0053 | 0.0084 | 0.0164 | 0      | 105 |       |
| MM2 | 0.0172 | 0.0076 | 0.0000 | 0.0167 | 0.0084 | 0   |       |
| 503 |        |        |        |        |        |     | 13598 |
|     | CR1    | CR2    | MA1    | MA2    | MM1    | MM2 |       |
| CR1 | 0      | 254    | 12     | 165    | 12     | 96  |       |
| CR2 | 0.0187 | 0      | 250    | 125    | 250    | 266 |       |
| MA1 | 0.0009 | 0.0184 | 0      | 161    | 0      | 96  |       |
| MA2 | 0.0121 | 0.0092 | 0.0118 | 0      | 161    | 205 |       |
| MM1 | 0.0009 | 0.0184 | 0.0000 | 0.0118 | 0      | 96  |       |
| MM2 | 0.0071 | 0.0196 | 0.0071 | 0.0151 | 0.0071 | 0   |       |
| 505 |        |        |        |        |        |     | 16410 |
|     | CR1    | CR2    | MA1    | MA2    | MM1    | MM2 |       |
| CR1 | 0      | 283    | 261    | 82     | 261    | 292 |       |
| CR2 | 0.0172 | 0      | 144    | 288    | 144    | 129 |       |
| MA1 | 0.0159 | 0.0088 | 0      | 266    | 0      | 129 |       |
| MA2 | 0.0050 | 0.0176 | 0.0162 | 0      | 266    | 294 |       |
| MM1 | 0.0159 | 0.0088 | 0.0000 | 0.0162 | 0      | 129 |       |
| MM2 | 0.0178 | 0.0079 | 0.0079 | 0.0179 | 0.0079 | 0   |       |
| 507 |        |        |        |        |        |     | 12734 |
|     | CR1    | CR2    | MA1    | MA2    | MM1    | MM2 |       |
| CR1 | 0      | 1      | 237    | 237    | 252    | 218 |       |
| CR2 | 0.0001 | 0      | 238    | 238    | 251    | 219 |       |
| MA1 | 0.0186 | 0.0187 | 0      | 0      | 227    | 216 |       |
| MA2 | 0.0186 | 0.0187 | 0.0000 | 0      | 227    | 216 |       |
| MM1 | 0.0198 | 0.0197 | 0.0178 | 0.0178 | 0      | 235 |       |
| MM2 | 0.0171 | 0.0172 | 0.0170 | 0.0170 | 0.0185 | 0   |       |

| 510 |        |        |        |        |        |     | 15156 |
|-----|--------|--------|--------|--------|--------|-----|-------|
|     | CR1    | CR2    | MA1    | MA2    | MM1    | MM2 |       |
| CR1 | 0      | 375    | 211    | 368    | 154    | 238 |       |
| CR2 | 0.0247 | 0      | 376    | 45     | 370    | 381 |       |
| MA1 | 0.0139 | 0.0248 | 0      | 369    | 139    | 177 |       |
| MA2 | 0.0243 | 0.0030 | 0.0243 | 0      | 365    | 376 |       |
| MM1 | 0.0102 | 0.0244 | 0.0092 | 0.0241 | 0      | 212 |       |
| MM2 | 0.0157 | 0.0251 | 0.0117 | 0.0248 | 0.0140 | 0   |       |
| 511 |        |        |        |        |        |     | 15769 |
|     | CR1    | CR2    | MA1    | MA2    | MM1    | MM2 |       |
| CR1 | 0      | 184    | 64     | 189    | 63     | 56  |       |
| CR2 | 0.0117 | 0      | 174    | 19     | 187    | 178 |       |
| MA1 | 0.0041 | 0.0110 | 0      | 179    | 51     | 60  |       |
| MA2 | 0.0120 | 0.0012 | 0.0114 | 0      | 192    | 183 |       |
| MM1 | 0.0040 | 0.0119 | 0.0032 | 0.0122 | 0      | 59  |       |
| MM2 | 0.0036 | 0.0113 | 0.0038 | 0.0116 | 0.0037 | 0   |       |
| 512 |        |        |        |        |        |     | 17190 |
|     | CR1    | CR2    | MA1    | MA2    | MM1    | MM2 |       |
| CR1 | 0      | 356    | 280    | 295    | 201    | 210 |       |
| CR2 | 0.0207 | 0      | 329    | 219    | 375    | 362 |       |
| MA1 | 0.0163 | 0.0191 | 0      | 203    | 272    | 109 |       |
| MA2 | 0.0172 | 0.0127 | 0.0118 | 0      | 306    | 202 |       |
| MM1 | 0.0117 | 0.0218 | 0.0158 | 0.0178 | 0      | 195 |       |
| MM2 | 0.0122 | 0.0211 | 0.0063 | 0.0118 | 0.0113 | 0   |       |
| 515 |        |        |        |        |        |     | 11212 |
|     | CR1    | CR2    | MA1    | MA2    | MM1    | MM2 |       |
| CR1 | 0      | 258    | 76     | 255    | 153    | 149 |       |
| CR2 | 0.0230 | 0      | 261    | 74     | 290    | 269 |       |
| MA1 | 0.0068 | 0.0233 | 0      | 259    | 161    | 163 |       |
| MA2 | 0.0227 | 0.0066 | 0.0231 | 0      | 295    | 264 |       |
| MM1 | 0.0136 | 0.0259 | 0.0144 | 0.0263 | 0      | 172 |       |
| MM2 | 0.0133 | 0.0240 | 0.0145 | 0.0235 | 0.0153 | 0   |       |
| 516 |        |        |        |        |        |     | 14612 |
|     | CR1    | CR2    | MA1    | MA2    | MM1    | MM2 |       |
| CR1 | 0      | 128    | 55     | 114    | 56     | 52  |       |
| CR2 | 0.0088 | 0      | 132    | 40     | 133    | 138 |       |
| MA1 | 0.0038 | 0.0090 | 0      | 118    | 1      | 59  |       |
| MA2 | 0.0078 | 0.0027 | 0.0081 | 0      | 119    | 124 |       |
| MM1 | 0.0038 | 0.0091 | 0.0001 | 0.0081 | 0      | 58  |       |
| MM2 | 0.0036 | 0.0094 | 0.0040 | 0.0085 | 0.0040 | 0   |       |

| 517 |  | CR1    | CR2    | MA1    | MA2    | MM1    | MM2 | 11185 |
|-----|--|--------|--------|--------|--------|--------|-----|-------|
| CR1 |  | 0      | 248    | 118    | 240    | 0      | 132 |       |
| CR2 |  | 0.0222 | 0      | 249    | 87     | 248    | 255 |       |
| MA1 |  | 0.0105 | 0.0223 | 0      | 240    | 118    | 114 |       |
| MA2 |  | 0.0215 | 0.0078 | 0.0215 | 0      | 240    | 244 |       |
| MM1 |  | 0.0000 | 0.0222 | 0.0105 | 0.0215 | 0      | 132 |       |
| MM2 |  | 0.0118 | 0.0228 | 0.0102 | 0.0218 | 0.0118 | 0   |       |
| 519 |  | CR1    | CR2    | MA1    | MA2    | MM1    | MM2 | 13392 |
| CR1 |  | 0      | 271    | 228    | 177    | 172    | 52  |       |
| CR2 |  | 0.0202 | 0      | 185    | 282    | 283    | 264 |       |
| MA1 |  | 0.0170 | 0.0138 | 0      | 132    | 212    | 200 |       |
| MA2 |  | 0.0132 | 0.0211 | 0.0099 | 0      | 167    | 159 |       |
| MM1 |  | 0.0128 | 0.0211 | 0.0158 | 0.0125 | 0      | 153 |       |
| MM2 |  | 0.0039 | 0.0197 | 0.0149 | 0.0119 | 0.0114 | 0   |       |
| 520 |  | CR1    | CR2    | MA1    | MA2    | MM1    | MM2 | 19499 |
| CR1 |  | 0      | 445    | 186    | 445    | 186    | 361 |       |
| CR2 |  | 0.0228 | 0      | 421    | 0      | 421    | 499 |       |
| MA1 |  | 0.0095 | 0.0216 | 0      | 421    | 0      | 327 |       |
| MA2 |  | 0.0228 | 0.0000 | 0.0216 | 0      | 421    | 499 |       |
| MM1 |  | 0.0095 | 0.0216 | 0.0000 | 0.0216 | 0      | 327 |       |
| MM2 |  | 0.0185 | 0.0256 | 0.0168 | 0.0256 | 0.0168 | 0   |       |
| 521 |  | CR1    | CR2    | MA1    | MA2    | MM1    | MM2 | 12330 |
| CR1 |  | 0      | 175    | 173    | 52     | 174    | 173 |       |
| CR2 |  | 0.0142 | 0      | 79     | 177    | 1      | 79  |       |
| MA1 |  | 0.0140 | 0.0064 | 0      | 176    | 78     | 0   |       |
| MA2 |  | 0.0042 | 0.0144 | 0.0143 | 0      | 176    | 176 |       |
| MM1 |  | 0.0141 | 0.0001 | 0.0063 | 0.0143 | 0      | 78  |       |
| MM2 |  | 0.0140 | 0.0064 | 0.0000 | 0.0143 | 0.0063 | 0   |       |
| 522 |  | CR1    | CR2    | MA1    | MA2    | MM1    | MM2 | 13020 |
| CR1 |  | 0      | 164    | 75     | 163    | 75     | 68  |       |
| CR2 |  | 0.0126 | 0      | 155    | 19     | 155    | 167 |       |
| MA1 |  | 0.0058 | 0.0119 | 0      | 154    | 0      | 49  |       |
| MA2 |  | 0.0125 | 0.0015 | 0.0118 | 0      | 154    | 166 |       |
| MM1 |  | 0.0058 | 0.0119 | 0.0000 | 0.0118 | 0      | 49  |       |
| MM2 |  | 0.0052 | 0.0128 | 0.0038 | 0.0127 | 0.0038 | 0   |       |

| 524 |  | CR1    | CR2    | MA1    | MA2    | MM1    | MM2 | 14371 |
|-----|--|--------|--------|--------|--------|--------|-----|-------|
| CR1 |  | 0      | 213    | 124    | 205    | 59     | 124 |       |
| CR2 |  | 0.0148 | 0      | 212    | 34     | 225    | 212 |       |
| MA1 |  | 0.0086 | 0.0148 | 0      | 204    | 118    | 0   |       |
| MA2 |  | 0.0143 | 0.0024 | 0.0142 | 0      | 217    | 204 |       |
| MM1 |  | 0.0041 | 0.0157 | 0.0082 | 0.0151 | 0      | 118 |       |
| MM2 |  | 0.0086 | 0.0148 | 0.0000 | 0.0142 | 0.0082 | 0   |       |
| 525 |  | CR1    | CR2    | MA1    | MA2    | MM1    | MM2 | 17359 |
| CR1 |  | 0      | 135    | 421    | 193    | 202    | 158 |       |
| CR2 |  | 0.0078 | 0      | 337    | 276    | 285    | 264 |       |
| MA1 |  | 0.0243 | 0.0194 | 0      | 403    | 410    | 413 |       |
| MA2 |  | 0.0111 | 0.0159 | 0.0232 | 0      | 189    | 208 |       |
| MM1 |  | 0.0116 | 0.0164 | 0.0236 | 0.0109 | 0      | 176 |       |
| MM2 |  | 0.0091 | 0.0152 | 0.0238 | 0.0120 | 0.0101 | 0   |       |
| 526 |  | CR1    | CR2    | MA1    | MA2    | MM1    | MM2 | 9808  |
| CR1 |  | 0      | 78     | 93     | 64     | 64     | 46  |       |
| CR2 |  | 0.0080 | 0      | 55     | 98     | 98     | 78  |       |
| MA1 |  | 0.0095 | 0.0056 | 0      | 107    | 107    | 89  |       |
| MA2 |  | 0.0065 | 0.0100 | 0.0109 | 0      | 0      | 60  |       |
| MM1 |  | 0.0065 | 0.0100 | 0.0109 | 0.0000 | 0      | 60  |       |
| MM2 |  | 0.0047 | 0.0080 | 0.0091 | 0.0061 | 0.0061 | 0   |       |
| 527 |  | CR1    | CR2    | MA1    | MA2    | MM1    | MM2 | 9752  |
| CR1 |  | 0      | 234    | 219    | 141    | 144    | 123 |       |
| CR2 |  | 0.0240 | 0      | 88     | 246    | 253    | 241 |       |
| MA1 |  | 0.0225 | 0.0090 | 0      | 236    | 242    | 227 |       |
| MA2 |  | 0.0145 | 0.0252 | 0.0242 | 0      | 142    | 151 |       |
| MM1 |  | 0.0148 | 0.0259 | 0.0248 | 0.0146 | 0      | 129 |       |
| MM2 |  | 0.0126 | 0.0247 | 0.0233 | 0.0155 | 0.0132 | 0   |       |
| 529 |  | CR1    | CR2    | MA1    | MA2    | MM1    | MM2 | 12887 |
| CR1 |  | 0      | 258    | 278    | 81     | 274    | 277 |       |
| CR2 |  | 0.0200 | 0      | 157    | 252    | 174    | 167 |       |
| MA1 |  | 0.0216 | 0.0122 | 0      | 271    | 151    | 183 |       |
| MA2 |  | 0.0063 | 0.0196 | 0.0210 | 0      | 268    | 271 |       |
| MM1 |  | 0.0213 | 0.0135 | 0.0117 | 0.0208 | 0      | 151 |       |
| MM2 |  | 0.0215 | 0.0130 | 0.0142 | 0.0210 | 0.0117 | 0   |       |

|     | 530    |        |        |        |        |     | 13427 |
|-----|--------|--------|--------|--------|--------|-----|-------|
|     | CR1    | CR2    | MA1    | MA2    | MM1    | MM2 |       |
| CR1 | 0      | 190    | 65     | 213    | 202    | 211 |       |
| CR2 | 0.0142 | 0      | 193    | 75     | 77     | 86  |       |
| MA1 | 0.0048 | 0.0144 | 0      | 216    | 202    | 205 |       |
| MA2 | 0.0159 | 0.0056 | 0.0161 | 0      | 98     | 104 |       |
| MM1 | 0.0150 | 0.0057 | 0.0150 | 0.0073 | 0      | 33  |       |
| MM2 | 0.0157 | 0.0064 | 0.0153 | 0.0077 | 0.0025 | 0   |       |
